# Supplementary material for: Extracting the Interfacial Electrostatic Features from Experimentally Determined Antigen and/or Antibody-Related Structures inside Protein Data Bank for Machine Learning-Based Antibody Design
Source: Preprints.org preprint supplement (doi:10.20944/preprints202003.0011.v1), 2020-03-01
Supplement: Supplementary file 1 [file supplementary]

Extracting the Interfacial Electrostatic Features from  
Experimentally Determined Antigen and/or  
Antibody-Related Structures inside Protein Data Bank  
for Machine Learning-Based Antibody Design:  
Supplementary Materials

Wei Li\*

February 29, 2020

---

\*Institute of Special Environment Medicine, Nantong University, No. 9, Seyuan Road, Nantong City, Jiangsu Province, P. R. China

# List of Tables

|    |                                                                           |      |
|----|---------------------------------------------------------------------------|------|
| 1  | Salt bridging networks analysis . . . . .                                 | 896  |
| 2  | Interfacial salt bridging networks analysis . . . . .                     | 1034 |
| 3  | Counting of side chain salt bridging networks . . . . .                   | 1126 |
| 4  | Counting of interfacial side chain salt bridging networks . . . . .       | 1152 |
| 5  | Side chain and main chain hydrogen bonding analysis . . . . .             | 1509 |
| 6  | Side chain hydrogen bonding analysis . . . . .                            | 1558 |
| 7  | Interfacial side chain and main chain hydrogen bonding analysis . . . . . | 1581 |
| 8  | Interfacial side chain hydrogen bonding analysis . . . . .                | 1592 |
| 9  | 1A14-specific salt bridging networks analysis . . . . .                   | 1597 |
| 10 | 1A2Y-specific salt bridging networks analysis . . . . .                   | 1598 |
| 11 | 1A7L-specific salt bridging networks analysis . . . . .                   | 1600 |
| 12 | 1A7N-specific salt bridging networks analysis . . . . .                   | 1601 |
| 13 | 1A7O-specific salt bridging networks analysis . . . . .                   | 1602 |
| 14 | 1A7P-specific salt bridging networks analysis . . . . .                   | 1603 |
| 15 | 1A7Q-specific salt bridging networks analysis . . . . .                   | 1604 |
| 16 | 1A7R-specific salt bridging networks analysis . . . . .                   | 1605 |
| 17 | 1ADQ-specific salt bridging networks analysis . . . . .                   | 1606 |
| 18 | 1BJ1-specific salt bridging networks analysis . . . . .                   | 1608 |
| 19 | 1BLN-specific salt bridging networks analysis . . . . .                   | 1610 |
| 20 | 1BQL-specific salt bridging networks analysis . . . . .                   | 1611 |
| 21 | 1BVK-specific salt bridging networks analysis . . . . .                   | 1613 |
| 22 | 1C08-specific salt bridging networks analysis . . . . .                   | 1614 |
| 23 | 1C12-specific salt bridging networks analysis . . . . .                   | 1615 |
| 24 | 1CE1-specific salt bridging networks analysis . . . . .                   | 1616 |
| 25 | 1CFS-specific salt bridging networks analysis . . . . .                   | 1617 |
| 26 | 1CFT-specific salt bridging networks analysis . . . . .                   | 1618 |
| 27 | 1CG9-specific salt bridging networks analysis . . . . .                   | 1619 |
| 28 | 1CLO-specific salt bridging networks analysis . . . . .                   | 1620 |

|    |                                                           |      |
|----|-----------------------------------------------------------|------|
| 29 | 1CLY-specific salt bridging networks analysis . . . . .   | 1621 |
| 30 | 1CLZ-specific salt bridging networks analysis . . . . .   | 1622 |
| 31 | 1CS9-1-specific salt bridging networks analysis . . . . . | 1623 |
| 32 | 1CS9-3-specific salt bridging networks analysis . . . . . | 1624 |
| 33 | 1CS9-6-specific salt bridging networks analysis . . . . . | 1625 |
| 34 | 1CT6-1-specific salt bridging networks analysis . . . . . | 1626 |
| 35 | 1CT6-7-specific salt bridging networks analysis . . . . . | 1627 |
| 36 | 1CZ8-specific salt bridging networks analysis . . . . .   | 1629 |
| 37 | 1DBJ-specific salt bridging networks analysis . . . . .   | 1630 |
| 38 | 1DBK-specific salt bridging networks analysis . . . . .   | 1631 |
| 39 | 1DBM-specific salt bridging networks analysis . . . . .   | 1632 |
| 40 | 1DEE-specific salt bridging networks analysis . . . . .   | 1635 |
| 41 | 1DLF-specific salt bridging networks analysis . . . . .   | 1636 |
| 42 | 1DQD-specific salt bridging networks analysis . . . . .   | 1637 |
| 43 | 1DQJ-specific salt bridging networks analysis . . . . .   | 1638 |
| 44 | 1DQM-specific salt bridging networks analysis . . . . .   | 1639 |
| 45 | 1DQQ-specific salt bridging networks analysis . . . . .   | 1640 |
| 46 | 1DVF-specific salt bridging networks analysis . . . . .   | 1641 |
| 47 | 1DZB-specific salt bridging networks analysis . . . . .   | 1642 |
| 48 | 1E4W-specific salt bridging networks analysis . . . . .   | 1643 |
| 49 | 1E4X-specific salt bridging networks analysis . . . . .   | 1645 |
| 50 | 1E6J-specific salt bridging networks analysis . . . . .   | 1647 |
| 51 | 1E6O-specific salt bridging networks analysis . . . . .   | 1648 |
| 52 | 1EJO-specific salt bridging networks analysis . . . . .   | 1649 |
| 53 | 1EMT-specific salt bridging networks analysis . . . . .   | 1650 |
| 54 | 1ETZ-specific salt bridging networks analysis . . . . .   | 1652 |
| 55 | 1F11-specific salt bridging networks analysis . . . . .   | 1653 |
| 56 | 1F2X-specific salt bridging networks analysis . . . . .   | 1654 |
| 57 | 1F3R-specific salt bridging networks analysis . . . . .   | 1655 |
| 58 | 1F4W-specific salt bridging networks analysis . . . . .   | 1656 |

|    |                                                         |      |
|----|---------------------------------------------------------|------|
| 59 | 1F4X-specific salt bridging networks analysis . . . . . | 1657 |
| 60 | 1F4Y-specific salt bridging networks analysis . . . . . | 1658 |
| 61 | 1F8T-specific salt bridging networks analysis . . . . . | 1659 |
| 62 | 1F90-specific salt bridging networks analysis . . . . . | 1660 |
| 63 | 1FBI-specific salt bridging networks analysis . . . . . | 1662 |
| 64 | 1FCC-specific salt bridging networks analysis . . . . . | 1663 |
| 65 | 1FDL-specific salt bridging networks analysis . . . . . | 1664 |
| 66 | 1FJ1-specific salt bridging networks analysis . . . . . | 1666 |
| 67 | 1FRG-specific salt bridging networks analysis . . . . . | 1667 |
| 68 | 1FUJ-specific salt bridging networks analysis . . . . . | 1668 |
| 69 | 1FVC-specific salt bridging networks analysis . . . . . | 1669 |
| 70 | 1FVD-specific salt bridging networks analysis . . . . . | 1671 |
| 71 | 1FVE-specific salt bridging networks analysis . . . . . | 1673 |
| 72 | 1G6V-specific salt bridging networks analysis . . . . . | 1674 |
| 73 | 1G7H-specific salt bridging networks analysis . . . . . | 1675 |
| 74 | 1G7I-specific salt bridging networks analysis . . . . . | 1676 |
| 75 | 1G7J-specific salt bridging networks analysis . . . . . | 1677 |
| 76 | 1G7L-specific salt bridging networks analysis . . . . . | 1678 |
| 77 | 1G7M-specific salt bridging networks analysis . . . . . | 1679 |
| 78 | 1G8Q-specific salt bridging networks analysis . . . . . | 1680 |
| 79 | 1G9M-specific salt bridging networks analysis . . . . . | 1682 |
| 80 | 1G9N-specific salt bridging networks analysis . . . . . | 1684 |
| 81 | 1GC1-specific salt bridging networks analysis . . . . . | 1686 |
| 82 | 1GGB-specific salt bridging networks analysis . . . . . | 1687 |
| 83 | 1GGC-specific salt bridging networks analysis . . . . . | 1688 |
| 84 | 1GGI-specific salt bridging networks analysis . . . . . | 1690 |
| 85 | 1GPO-specific salt bridging networks analysis . . . . . | 1691 |
| 86 | 1HCV-specific salt bridging networks analysis . . . . . | 1692 |
| 87 | 1HEZ-specific salt bridging networks analysis . . . . . | 1694 |
| 88 | 1HGD-specific salt bridging networks analysis . . . . . | 1699 |



|     |                                                         |      |
|-----|---------------------------------------------------------|------|
| 89  | 1HGE-specific salt bridging networks analysis . . . . . | 1704 |
| 90  | 1HGF-specific salt bridging networks analysis . . . . . | 1708 |
| 91  | 1HGG-specific salt bridging networks analysis . . . . . | 1713 |
| 92  | 1HGH-specific salt bridging networks analysis . . . . . | 1718 |
| 93  | 1HGI-specific salt bridging networks analysis . . . . . | 1723 |
| 94  | 1HGJ-specific salt bridging networks analysis . . . . . | 1728 |
| 95  | 1HIL-specific salt bridging networks analysis . . . . . | 1730 |
| 96  | 1HIM-specific salt bridging networks analysis . . . . . | 1732 |
| 97  | 1HIN-specific salt bridging networks analysis . . . . . | 1733 |
| 98  | 1I8I-specific salt bridging networks analysis . . . . . | 1734 |
| 99  | 1I8K-specific salt bridging networks analysis . . . . . | 1735 |
| 100 | 1I8M-specific salt bridging networks analysis . . . . . | 1736 |
| 101 | 1IC4-specific salt bridging networks analysis . . . . . | 1737 |
| 102 | 1IC5-specific salt bridging networks analysis . . . . . | 1738 |
| 103 | 1IC7-specific salt bridging networks analysis . . . . . | 1739 |
| 104 | 1IFH-specific salt bridging networks analysis . . . . . | 1740 |
| 105 | 1IGF-specific salt bridging networks analysis . . . . . | 1742 |
| 106 | 1IND-specific salt bridging networks analysis . . . . . | 1743 |
| 107 | 1INE-specific salt bridging networks analysis . . . . . | 1744 |
| 108 | 1IQW-specific salt bridging networks analysis . . . . . | 1745 |
| 109 | 1IT9-specific salt bridging networks analysis . . . . . | 1746 |
| 110 | 1J05-specific salt bridging networks analysis . . . . . | 1747 |
| 111 | 1J1O-specific salt bridging networks analysis . . . . . | 1748 |
| 112 | 1J1P-specific salt bridging networks analysis . . . . . | 1749 |
| 113 | 1J1X-specific salt bridging networks analysis . . . . . | 1750 |
| 114 | 1JFQ-specific salt bridging networks analysis . . . . . | 1751 |
| 115 | 1JHL-specific salt bridging networks analysis . . . . . | 1752 |
| 116 | 1JP5-specific salt bridging networks analysis . . . . . | 1753 |
| 117 | 1JPS-specific salt bridging networks analysis . . . . . | 1754 |
| 118 | 1JPT-specific salt bridging networks analysis . . . . . | 1755 |

|     |                                                         |      |
|-----|---------------------------------------------------------|------|
| 119 | 1JRH-specific salt bridging networks analysis . . . . . | 1756 |
| 120 | 1JTO-specific salt bridging networks analysis . . . . . | 1757 |
| 121 | 1JTP-specific salt bridging networks analysis . . . . . | 1758 |
| 122 | 1JTT-specific salt bridging networks analysis . . . . . | 1759 |
| 123 | 1JV5-specific salt bridging networks analysis . . . . . | 1760 |
| 124 | 1K6Q-specific salt bridging networks analysis . . . . . | 1761 |
| 125 | 1KB5-specific salt bridging networks analysis . . . . . | 1762 |
| 126 | 1KC5-specific salt bridging networks analysis . . . . . | 1763 |
| 127 | 1KCR-specific salt bridging networks analysis . . . . . | 1764 |
| 128 | 1KCS-specific salt bridging networks analysis . . . . . | 1765 |
| 129 | 1KIP-specific salt bridging networks analysis . . . . . | 1766 |
| 130 | 1KIQ-specific salt bridging networks analysis . . . . . | 1767 |
| 131 | 1KIR-specific salt bridging networks analysis . . . . . | 1768 |
| 132 | 1KTR-specific salt bridging networks analysis . . . . . | 1769 |
| 133 | 1L7I-specific salt bridging networks analysis . . . . . | 1770 |
| 134 | 1LK3-specific salt bridging networks analysis . . . . . | 1772 |
| 135 | 1M7I-specific salt bridging networks analysis . . . . . | 1773 |
| 136 | 1M7D-specific salt bridging networks analysis . . . . . | 1774 |
| 137 | 1M7I-specific salt bridging networks analysis . . . . . | 1775 |
| 138 | 1MCO-specific salt bridging networks analysis . . . . . | 1776 |
| 139 | 1MEL-specific salt bridging networks analysis . . . . . | 1777 |
| 140 | 1MFA-specific salt bridging networks analysis . . . . . | 1778 |
| 141 | 1MFB-specific salt bridging networks analysis . . . . . | 1779 |
| 142 | 1MFC-specific salt bridging networks analysis . . . . . | 1780 |
| 143 | 1MHH-specific salt bridging networks analysis . . . . . | 1782 |
| 144 | 1MLB-specific salt bridging networks analysis . . . . . | 1783 |
| 145 | 1MLC-specific salt bridging networks analysis . . . . . | 1785 |
| 146 | 1N64-specific salt bridging networks analysis . . . . . | 1786 |
| 147 | 1NBY-specific salt bridging networks analysis . . . . . | 1787 |
| 148 | 1NBZ-specific salt bridging networks analysis . . . . . | 1788 |

|     |                                                            |      |
|-----|------------------------------------------------------------|------|
| 149 | 1NDG-specific salt bridging networks analysis . . . . .    | 1789 |
| 150 | 1NDM-specific salt bridging networks analysis . . . . .    | 1790 |
| 151 | 1NGW-specific salt bridging networks analysis . . . . .    | 1792 |
| 152 | 1NGX-specific salt bridging networks analysis . . . . .    | 1793 |
| 153 | 1NGY-specific salt bridging networks analysis . . . . .    | 1794 |
| 154 | 1NGZ-specific salt bridging networks analysis . . . . .    | 1795 |
| 155 | 1NLB-specific salt bridging networks analysis . . . . .    | 1796 |
| 156 | 1NMC-specific salt bridging networks analysis . . . . .    | 1798 |
| 157 | 1OB1-specific salt bridging networks analysis . . . . .    | 1800 |
| 158 | 1OP9-specific salt bridging networks analysis . . . . .    | 1801 |
| 159 | 1OSP-specific salt bridging networks analysis . . . . .    | 1802 |
| 160 | 1OW0-specific salt bridging networks analysis . . . . .    | 1803 |
| 161 | 1P2C-specific salt bridging networks analysis . . . . .    | 1805 |
| 162 | 1P4B-specific salt bridging networks analysis . . . . .    | 1806 |
| 163 | 1P7K-specific salt bridging networks analysis . . . . .    | 1807 |
| 164 | 1PG7-specific salt bridging networks analysis . . . . .    | 1809 |
| 165 | 1PSK-specific salt bridging networks analysis . . . . .    | 1810 |
| 166 | 1PZ5-specific salt bridging networks analysis . . . . .    | 1811 |
| 167 | 1Q9K-specific salt bridging networks analysis . . . . .    | 1812 |
| 168 | 1Q9L-specific salt bridging networks analysis . . . . .    | 1814 |
| 169 | 1Q9O-specific salt bridging networks analysis . . . . .    | 1816 |
| 170 | 1Q9W-specific salt bridging networks analysis . . . . .    | 1818 |
| 171 | 1QBL-specific salt bridging networks analysis . . . . .    | 1819 |
| 172 | 1QBM-specific salt bridging networks analysis . . . . .    | 1820 |
| 173 | 1QGC-specific salt bridging networks analysis . . . . .    | 1822 |
| 174 | 1QKZ-specific salt bridging networks analysis . . . . .    | 1823 |
| 175 | 1QOK-specific salt bridging networks analysis . . . . .    | 1824 |
| 176 | 1R21-1-specific salt bridging networks analysis . . . . .  | 1826 |
| 177 | 1R21-10-specific salt bridging networks analysis . . . . . | 1827 |
| 178 | 1R21-11-specific salt bridging networks analysis . . . . . | 1828 |

|     |                                                            |      |
|-----|------------------------------------------------------------|------|
| 179 | 1R21-12-specific salt bridging networks analysis . . . . . | 1829 |
| 180 | 1R21-13-specific salt bridging networks analysis . . . . . | 1830 |
| 181 | 1R21-14-specific salt bridging networks analysis . . . . . | 1831 |
| 182 | 1R21-15-specific salt bridging networks analysis . . . . . | 1832 |
| 183 | 1R21-16-specific salt bridging networks analysis . . . . . | 1833 |
| 184 | 1R21-17-specific salt bridging networks analysis . . . . . | 1834 |
| 185 | 1R21-18-specific salt bridging networks analysis . . . . . | 1835 |
| 186 | 1R21-19-specific salt bridging networks analysis . . . . . | 1836 |
| 187 | 1R21-2-specific salt bridging networks analysis . . . . .  | 1837 |
| 188 | 1R21-20-specific salt bridging networks analysis . . . . . | 1838 |
| 189 | 1R21-21-specific salt bridging networks analysis . . . . . | 1839 |
| 190 | 1R21-22-specific salt bridging networks analysis . . . . . | 1840 |
| 191 | 1R21-23-specific salt bridging networks analysis . . . . . | 1841 |
| 192 | 1R21-3-specific salt bridging networks analysis . . . . .  | 1842 |
| 193 | 1R21-4-specific salt bridging networks analysis . . . . .  | 1843 |
| 194 | 1R21-5-specific salt bridging networks analysis . . . . .  | 1844 |
| 195 | 1R21-6-specific salt bridging networks analysis . . . . .  | 1845 |
| 196 | 1R21-7-specific salt bridging networks analysis . . . . .  | 1846 |
| 197 | 1R21-8-specific salt bridging networks analysis . . . . .  | 1847 |
| 198 | 1R21-9-specific salt bridging networks analysis . . . . .  | 1848 |
| 199 | 1RZJ-specific salt bridging networks analysis . . . . .    | 1850 |
| 200 | 1RZK-specific salt bridging networks analysis . . . . .    | 1852 |
| 201 | 1S3K-specific salt bridging networks analysis . . . . .    | 1853 |
| 202 | 1S5I-specific salt bridging networks analysis . . . . .    | 1854 |
| 203 | 1S78-specific salt bridging networks analysis . . . . .    | 1857 |
| 204 | 1SM3-specific salt bridging networks analysis . . . . .    | 1858 |
| 205 | 1SQ2-specific salt bridging networks analysis . . . . .    | 1859 |
| 206 | 1SVZ-specific salt bridging networks analysis . . . . .    | 1860 |
| 207 | 1T2Q-specific salt bridging networks analysis . . . . .    | 1861 |
| 208 | 1T6V-specific salt bridging networks analysis . . . . .    | 1863 |

|     |                                                         |      |
|-----|---------------------------------------------------------|------|
| 209 | 1TYE-specific salt bridging networks analysis . . . . . | 1866 |
| 210 | 1TZH-specific salt bridging networks analysis . . . . . | 1868 |
| 211 | 1TZI-specific salt bridging networks analysis . . . . . | 1869 |
| 212 | 1U6A-specific salt bridging networks analysis . . . . . | 1870 |
| 213 | 1UA6-specific salt bridging networks analysis . . . . . | 1871 |
| 214 | 1UAC-specific salt bridging networks analysis . . . . . | 1872 |
| 215 | 1UCB-specific salt bridging networks analysis . . . . . | 1873 |
| 216 | 1UJ3-specific salt bridging networks analysis . . . . . | 1874 |
| 217 | 1UWX-specific salt bridging networks analysis . . . . . | 1876 |
| 218 | 1UZ6-specific salt bridging networks analysis . . . . . | 1878 |
| 219 | 1UZ8-specific salt bridging networks analysis . . . . . | 1880 |
| 220 | 1V7M-specific salt bridging networks analysis . . . . . | 1882 |
| 221 | 1V7N-specific salt bridging networks analysis . . . . . | 1885 |
| 222 | 1VER-specific salt bridging networks analysis . . . . . | 1886 |
| 223 | 1VES-specific salt bridging networks analysis . . . . . | 1887 |
| 224 | 1VFA-specific salt bridging networks analysis . . . . . | 1888 |
| 225 | 1VFB-specific salt bridging networks analysis . . . . . | 1889 |
| 226 | 1W72-specific salt bridging networks analysis . . . . . | 1892 |
| 227 | 1WEJ-specific salt bridging networks analysis . . . . . | 1893 |
| 228 | 1WZ1-specific salt bridging networks analysis . . . . . | 1894 |
| 229 | 1XF2-specific salt bridging networks analysis . . . . . | 1895 |
| 230 | 1XGY-specific salt bridging networks analysis . . . . . | 1897 |
| 231 | 1XIW-specific salt bridging networks analysis . . . . . | 1899 |
| 232 | 1YC7-specific salt bridging networks analysis . . . . . | 1900 |
| 233 | 1YC8-specific salt bridging networks analysis . . . . . | 1901 |
| 234 | 1YEI-specific salt bridging networks analysis . . . . . | 1902 |
| 235 | 1YEJ-specific salt bridging networks analysis . . . . . | 1903 |
| 236 | 1YEK-specific salt bridging networks analysis . . . . . | 1904 |
| 237 | 1YNT-specific salt bridging networks analysis . . . . . | 1906 |
| 238 | 1YQV-specific salt bridging networks analysis . . . . . | 1907 |

|     |                                                         |      |
|-----|---------------------------------------------------------|------|
| 239 | 1YYL-specific salt bridging networks analysis . . . . . | 1909 |
| 240 | 1YYM-specific salt bridging networks analysis . . . . . | 1911 |
| 241 | 1YZZ-specific salt bridging networks analysis . . . . . | 1912 |
| 242 | 1ZEA-specific salt bridging networks analysis . . . . . | 1913 |
| 243 | 1ZMY-specific salt bridging networks analysis . . . . . | 1914 |
| 244 | 2AAB-specific salt bridging networks analysis . . . . . | 1915 |
| 245 | 2ARJ-specific salt bridging networks analysis . . . . . | 1917 |
| 246 | 2B2X-specific salt bridging networks analysis . . . . . | 1919 |
| 247 | 2B4C-specific salt bridging networks analysis . . . . . | 1921 |
| 248 | 2BDN-specific salt bridging networks analysis . . . . . | 1922 |
| 249 | 2BJM-specific salt bridging networks analysis . . . . . | 1923 |
| 250 | 2BRR-specific salt bridging networks analysis . . . . . | 1925 |
| 251 | 2COQ-specific salt bridging networks analysis . . . . . | 1926 |
| 252 | 2D03-specific salt bridging networks analysis . . . . . | 1927 |
| 253 | 2DBL-specific salt bridging networks analysis . . . . . | 1928 |
| 254 | 2DLF-specific salt bridging networks analysis . . . . . | 1929 |
| 255 | 2DQC-specific salt bridging networks analysis . . . . . | 1930 |
| 256 | 2DQD-specific salt bridging networks analysis . . . . . | 1931 |
| 257 | 2DQE-specific salt bridging networks analysis . . . . . | 1932 |
| 258 | 2DQF-specific salt bridging networks analysis . . . . . | 1934 |
| 259 | 2DQG-specific salt bridging networks analysis . . . . . | 1935 |
| 260 | 2DQH-specific salt bridging networks analysis . . . . . | 1936 |
| 261 | 2DQI-specific salt bridging networks analysis . . . . . | 1937 |
| 262 | 2DQJ-specific salt bridging networks analysis . . . . . | 1938 |
| 263 | 2DQT-specific salt bridging networks analysis . . . . . | 1939 |
| 264 | 2DQU-specific salt bridging networks analysis . . . . . | 1940 |
| 265 | 2FB4-specific salt bridging networks analysis . . . . . | 1941 |
| 266 | 2FD6-specific salt bridging networks analysis . . . . . | 1943 |
| 267 | 2FR4-specific salt bridging networks analysis . . . . . | 1944 |
| 268 | 2H32-specific salt bridging networks analysis . . . . . | 1945 |

|     |                                                            |      |
|-----|------------------------------------------------------------|------|
| 269 | 2H9G-specific salt bridging networks analysis . . . . .    | 1947 |
| 270 | 2HFG-specific salt bridging networks analysis . . . . .    | 1948 |
| 271 | 2HKF-specific salt bridging networks analysis . . . . .    | 1949 |
| 272 | 2HMG-specific salt bridging networks analysis . . . . .    | 1953 |
| 273 | 2HQ6-specific salt bridging networks analysis . . . . .    | 1954 |
| 274 | 2HRP-specific salt bridging networks analysis . . . . .    | 1956 |
| 275 | 2I24-specific salt bridging networks analysis . . . . .    | 1957 |
| 276 | 2I25-specific salt bridging networks analysis . . . . .    | 1959 |
| 277 | 2I26-specific salt bridging networks analysis . . . . .    | 1961 |
| 278 | 2I27-specific salt bridging networks analysis . . . . .    | 1962 |
| 279 | 2I5Y-specific salt bridging networks analysis . . . . .    | 1964 |
| 280 | 2I60-specific salt bridging networks analysis . . . . .    | 1966 |
| 281 | 2IFF-specific salt bridging networks analysis . . . . .    | 1967 |
| 282 | 2IG2-specific salt bridging networks analysis . . . . .    | 1968 |
| 283 | 2IGF-specific salt bridging networks analysis . . . . .    | 1969 |
| 284 | 2IHL-specific salt bridging networks analysis . . . . .    | 1970 |
| 285 | 2J4W-specific salt bridging networks analysis . . . . .    | 1971 |
| 286 | 2J5L-specific salt bridging networks analysis . . . . .    | 1972 |
| 287 | 2JB6-specific salt bridging networks analysis . . . . .    | 1973 |
| 288 | 2JEL-specific salt bridging networks analysis . . . . .    | 1974 |
| 289 | 2MCP-specific salt bridging networks analysis . . . . .    | 1975 |
| 290 | 2MKL-1-specific salt bridging networks analysis . . . . .  | 1976 |
| 291 | 2MKL-10-specific salt bridging networks analysis . . . . . | 1977 |
| 292 | 2MKL-2-specific salt bridging networks analysis . . . . .  | 1978 |
| 293 | 2MKL-3-specific salt bridging networks analysis . . . . .  | 1979 |
| 294 | 2MKL-4-specific salt bridging networks analysis . . . . .  | 1980 |
| 295 | 2MKL-5-specific salt bridging networks analysis . . . . .  | 1981 |
| 296 | 2MKL-6-specific salt bridging networks analysis . . . . .  | 1982 |
| 297 | 2MKL-7-specific salt bridging networks analysis . . . . .  | 1983 |
| 298 | 2MKL-8-specific salt bridging networks analysis . . . . .  | 1984 |

|     |                                                           |      |
|-----|-----------------------------------------------------------|------|
| 299 | 2MKL-9-specific salt bridging networks analysis . . . . . | 1985 |
| 300 | 2MTW-specific salt bridging networks analysis . . . . .   | 1986 |
| 301 | 2NXY-specific salt bridging networks analysis . . . . .   | 1988 |
| 302 | 2NXZ-specific salt bridging networks analysis . . . . .   | 1990 |
| 303 | 2NY0-specific salt bridging networks analysis . . . . .   | 1992 |
| 304 | 2NY1-specific salt bridging networks analysis . . . . .   | 1994 |
| 305 | 2NY2-specific salt bridging networks analysis . . . . .   | 1996 |
| 306 | 2NY3-specific salt bridging networks analysis . . . . .   | 1998 |
| 307 | 2NY4-specific salt bridging networks analysis . . . . .   | 2000 |
| 308 | 2NY5-specific salt bridging networks analysis . . . . .   | 2002 |
| 309 | 2NY6-specific salt bridging networks analysis . . . . .   | 2004 |
| 310 | 2NY7-specific salt bridging networks analysis . . . . .   | 2005 |
| 311 | 2OR9-specific salt bridging networks analysis . . . . .   | 2007 |
| 312 | 2ORB-specific salt bridging networks analysis . . . . .   | 2009 |
| 313 | 2OSL-specific salt bridging networks analysis . . . . .   | 2010 |
| 314 | 2OTU-specific salt bridging networks analysis . . . . .   | 2012 |
| 315 | 2OTW-specific salt bridging networks analysis . . . . .   | 2013 |
| 316 | 2P8L-specific salt bridging networks analysis . . . . .   | 2014 |
| 317 | 2P8M-specific salt bridging networks analysis . . . . .   | 2015 |
| 318 | 2P8P-specific salt bridging networks analysis . . . . .   | 2017 |
| 319 | 2PR4-specific salt bridging networks analysis . . . . .   | 2018 |
| 320 | 2Q8A-specific salt bridging networks analysis . . . . .   | 2019 |
| 321 | 2Q8B-specific salt bridging networks analysis . . . . .   | 2020 |
| 322 | 2QAD-specific salt bridging networks analysis . . . . .   | 2022 |
| 323 | 2QQI-specific salt bridging networks analysis . . . . .   | 2023 |
| 324 | 2QQM-specific salt bridging networks analysis . . . . .   | 2024 |
| 325 | 2QQN-specific salt bridging networks analysis . . . . .   | 2025 |
| 326 | 2R29-specific salt bridging networks analysis . . . . .   | 2026 |
| 327 | 2R69-specific salt bridging networks analysis . . . . .   | 2027 |
| 328 | 2UYL-specific salt bridging networks analysis . . . . .   | 2029 |



|     |                                                         |      |
|-----|---------------------------------------------------------|------|
| 329 | 2VC2-specific salt bridging networks analysis . . . . . | 2031 |
| 330 | 2VDK-specific salt bridging networks analysis . . . . . | 2033 |
| 331 | 2VDL-specific salt bridging networks analysis . . . . . | 2035 |
| 332 | 2VDM-specific salt bridging networks analysis . . . . . | 2037 |
| 333 | 2VDN-specific salt bridging networks analysis . . . . . | 2039 |
| 334 | 2VDO-specific salt bridging networks analysis . . . . . | 2041 |
| 335 | 2VDP-specific salt bridging networks analysis . . . . . | 2043 |
| 336 | 2VDQ-specific salt bridging networks analysis . . . . . | 2045 |
| 337 | 2VDR-specific salt bridging networks analysis . . . . . | 2047 |
| 338 | 2VIR-specific salt bridging networks analysis . . . . . | 2048 |
| 339 | 2VIS-specific salt bridging networks analysis . . . . . | 2050 |
| 340 | 2VIT-specific salt bridging networks analysis . . . . . | 2051 |
| 341 | 2VIU-specific salt bridging networks analysis . . . . . | 2052 |
| 342 | 2VXS-specific salt bridging networks analysis . . . . . | 2054 |
| 343 | 2VXT-specific salt bridging networks analysis . . . . . | 2055 |
| 344 | 2VXU-specific salt bridging networks analysis . . . . . | 2056 |
| 345 | 2VXV-specific salt bridging networks analysis . . . . . | 2057 |
| 346 | 2XEF-specific salt bridging networks analysis . . . . . | 2059 |
| 347 | 2XEG-specific salt bridging networks analysis . . . . . | 2061 |
| 348 | 2XEI-specific salt bridging networks analysis . . . . . | 2063 |
| 349 | 2XEJ-specific salt bridging networks analysis . . . . . | 2065 |
| 350 | 2XZQ-specific salt bridging networks analysis . . . . . | 2066 |
| 351 | 2Y06-specific salt bridging networks analysis . . . . . | 2067 |
| 352 | 2Y07-specific salt bridging networks analysis . . . . . | 2068 |
| 353 | 2Y36-specific salt bridging networks analysis . . . . . | 2069 |
| 354 | 2Y7S-specific salt bridging networks analysis . . . . . | 2071 |
| 355 | 2YPV-specific salt bridging networks analysis . . . . . | 2073 |
| 356 | 2YWY-specific salt bridging networks analysis . . . . . | 2075 |
| 357 | 2YWZ-specific salt bridging networks analysis . . . . . | 2076 |
| 358 | 2ZCH-specific salt bridging networks analysis . . . . . | 2077 |

|     |                                                         |      |
|-----|---------------------------------------------------------|------|
| 359 | 2ZCK-specific salt bridging networks analysis . . . . . | 2078 |
| 360 | 2ZCL-specific salt bridging networks analysis . . . . . | 2079 |
| 361 | 2ZNW-specific salt bridging networks analysis . . . . . | 2081 |
| 362 | 2ZNX-specific salt bridging networks analysis . . . . . | 2083 |
| 363 | 2ZPK-specific salt bridging networks analysis . . . . . | 2084 |
| 364 | 32C2-specific salt bridging networks analysis . . . . . | 2085 |
| 365 | 3A67-specific salt bridging networks analysis . . . . . | 2086 |
| 366 | 3A6B-specific salt bridging networks analysis . . . . . | 2087 |
| 367 | 3A6C-specific salt bridging networks analysis . . . . . | 2088 |
| 368 | 3AUV-specific salt bridging networks analysis . . . . . | 2090 |
| 369 | 3B9K-specific salt bridging networks analysis . . . . . | 2092 |
| 370 | 3BDY-specific salt bridging networks analysis . . . . . | 2093 |
| 371 | 3BE1-specific salt bridging networks analysis . . . . . | 2095 |
| 372 | 3BGF-specific salt bridging networks analysis . . . . . | 2097 |
| 373 | 3BIK-specific salt bridging networks analysis . . . . . | 2098 |
| 374 | 3BIS-specific salt bridging networks analysis . . . . . | 2099 |
| 375 | 3BKY-specific salt bridging networks analysis . . . . . | 2100 |
| 376 | 3BO8-specific salt bridging networks analysis . . . . . | 2102 |
| 377 | 3BT2-specific salt bridging networks analysis . . . . . | 2104 |
| 378 | 3BZ4-specific salt bridging networks analysis . . . . . | 2107 |
| 379 | 3C09-specific salt bridging networks analysis . . . . . | 2108 |
| 380 | 3C5S-specific salt bridging networks analysis . . . . . | 2110 |
| 381 | 3C6S-specific salt bridging networks analysis . . . . . | 2113 |
| 382 | 3CVH-specific salt bridging networks analysis . . . . . | 2116 |
| 383 | 3CXD-specific salt bridging networks analysis . . . . . | 2117 |
| 384 | 3D0L-specific salt bridging networks analysis . . . . . | 2118 |
| 385 | 3D0V-specific salt bridging networks analysis . . . . . | 2119 |
| 386 | 3D9A-specific salt bridging networks analysis . . . . . | 2120 |
| 387 | 3DRO-specific salt bridging networks analysis . . . . . | 2121 |
| 388 | 3DRQ-specific salt bridging networks analysis . . . . . | 2122 |

|     |                                                         |      |
|-----|---------------------------------------------------------|------|
| 389 | 3DSF-specific salt bridging networks analysis . . . . . | 2123 |
| 390 | 3EBA-specific salt bridging networks analysis . . . . . | 2124 |
| 391 | 3EOA-specific salt bridging networks analysis . . . . . | 2126 |
| 392 | 3EOB-specific salt bridging networks analysis . . . . . | 2128 |
| 393 | 3ESU-specific salt bridging networks analysis . . . . . | 2129 |
| 394 | 3ESV-specific salt bridging networks analysis . . . . . | 2130 |
| 395 | 3ET9-specific salt bridging networks analysis . . . . . | 2131 |
| 396 | 3ETB-specific salt bridging networks analysis . . . . . | 2134 |
| 397 | 3EYV-specific salt bridging networks analysis . . . . . | 2136 |
| 398 | 3FMG-specific salt bridging networks analysis . . . . . | 2138 |
| 399 | 3G39-specific salt bridging networks analysis . . . . . | 2139 |
| 400 | 3G3A-specific salt bridging networks analysis . . . . . | 2141 |
| 401 | 3G3B-specific salt bridging networks analysis . . . . . | 2143 |
| 402 | 3GGW-specific salt bridging networks analysis . . . . . | 2145 |
| 403 | 3GHB-specific salt bridging networks analysis . . . . . | 2146 |
| 404 | 3GHE-specific salt bridging networks analysis . . . . . | 2147 |
| 405 | 3GJF-specific salt bridging networks analysis . . . . . | 2150 |
| 406 | 3GNM-specific salt bridging networks analysis . . . . . | 2151 |
| 407 | 3GO1-specific salt bridging networks analysis . . . . . | 2152 |
| 408 | 3HAE-specific salt bridging networks analysis . . . . . | 2157 |
| 409 | 3HFM-specific salt bridging networks analysis . . . . . | 2158 |
| 410 | 3HI6-specific salt bridging networks analysis . . . . . | 2160 |
| 411 | 3HMG-specific salt bridging networks analysis . . . . . | 2164 |
| 412 | 3HZK-specific salt bridging networks analysis . . . . . | 2165 |
| 413 | 3HZM-specific salt bridging networks analysis . . . . . | 2166 |
| 414 | 3HZV-specific salt bridging networks analysis . . . . . | 2167 |
| 415 | 3HZY-specific salt bridging networks analysis . . . . . | 2168 |
| 416 | 3I02-specific salt bridging networks analysis . . . . . | 2170 |
| 417 | 3I9G-specific salt bridging networks analysis . . . . . | 2171 |
| 418 | 3IET-specific salt bridging networks analysis . . . . . | 2173 |

|     |                                                         |      |
|-----|---------------------------------------------------------|------|
| 419 | 3IF1-specific salt bridging networks analysis . . . . . | 2175 |
| 420 | 3IJH-specific salt bridging networks analysis . . . . . | 2177 |
| 421 | 3IJS-specific salt bridging networks analysis . . . . . | 2179 |
| 422 | 3IJY-specific salt bridging networks analysis . . . . . | 2181 |
| 423 | 3IKC-specific salt bridging networks analysis . . . . . | 2183 |
| 424 | 3IU3-specific salt bridging networks analysis . . . . . | 2185 |
| 425 | 3IU4-specific salt bridging networks analysis . . . . . | 2186 |
| 426 | 3IVK-specific salt bridging networks analysis . . . . . | 2188 |
| 427 | 3J5M-specific salt bridging networks analysis . . . . . | 2191 |
| 428 | 3J70-specific salt bridging networks analysis . . . . . | 2195 |
| 429 | 3JCC-specific salt bridging networks analysis . . . . . | 2197 |
| 430 | 3KS0-specific salt bridging networks analysis . . . . . | 2199 |
| 431 | 3L7E-specific salt bridging networks analysis . . . . . | 2201 |
| 432 | 3LZF-specific salt bridging networks analysis . . . . . | 2203 |
| 433 | 3M18-specific salt bridging networks analysis . . . . . | 2204 |
| 434 | 3M19-specific salt bridging networks analysis . . . . . | 2205 |
| 435 | 3MLR-specific salt bridging networks analysis . . . . . | 2206 |
| 436 | 3MLS-specific salt bridging networks analysis . . . . . | 2209 |
| 437 | 3MLT-specific salt bridging networks analysis . . . . . | 2211 |
| 438 | 3MLU-specific salt bridging networks analysis . . . . . | 2212 |
| 439 | 3MLV-specific salt bridging networks analysis . . . . . | 2214 |
| 440 | 3MLW-specific salt bridging networks analysis . . . . . | 2216 |
| 441 | 3MLX-specific salt bridging networks analysis . . . . . | 2218 |
| 442 | 3MLY-specific salt bridging networks analysis . . . . . | 2220 |
| 443 | 3MLZ-specific salt bridging networks analysis . . . . . | 2221 |
| 444 | 3NFP-specific salt bridging networks analysis . . . . . | 2222 |
| 445 | 3NGB-specific salt bridging networks analysis . . . . . | 2226 |
| 446 | 3NH7-specific salt bridging networks analysis . . . . . | 2229 |
| 447 | 3NZ8-specific salt bridging networks analysis . . . . . | 2230 |
| 448 | 3O2D-specific salt bridging networks analysis . . . . . | 2231 |

|     |                                                         |      |
|-----|---------------------------------------------------------|------|
| 449 | 3O41-specific salt bridging networks analysis . . . . . | 2233 |
| 450 | 3O45-specific salt bridging networks analysis . . . . . | 2235 |
| 451 | 3OJD-specific salt bridging networks analysis . . . . . | 2236 |
| 452 | 3P0V-specific salt bridging networks analysis . . . . . | 2237 |
| 453 | 3P0Y-specific salt bridging networks analysis . . . . . | 2238 |
| 454 | 3P11-specific salt bridging networks analysis . . . . . | 2240 |
| 455 | 3PGF-specific salt bridging networks analysis . . . . . | 2241 |
| 456 | 3PNW-specific salt bridging networks analysis . . . . . | 2245 |
| 457 | 3PP4-specific salt bridging networks analysis . . . . . | 2246 |
| 458 | 3Q3G-specific salt bridging networks analysis . . . . . | 2250 |
| 459 | 3QA3-specific salt bridging networks analysis . . . . . | 2254 |
| 460 | 3QG6-specific salt bridging networks analysis . . . . . | 2256 |
| 461 | 3QG7-specific salt bridging networks analysis . . . . . | 2257 |
| 462 | 3QO1-specific salt bridging networks analysis . . . . . | 2258 |
| 463 | 3QUM-specific salt bridging networks analysis . . . . . | 2260 |
| 464 | 3R08-specific salt bridging networks analysis . . . . . | 2261 |
| 465 | 3SE8-specific salt bridging networks analysis . . . . . | 2263 |
| 466 | 3SE9-specific salt bridging networks analysis . . . . . | 2265 |
| 467 | 3SGD-specific salt bridging networks analysis . . . . . | 2267 |
| 468 | 3SKJ-specific salt bridging networks analysis . . . . . | 2269 |
| 469 | 3SY0-specific salt bridging networks analysis . . . . . | 2270 |
| 470 | 3T4Y-specific salt bridging networks analysis . . . . . | 2271 |
| 471 | 3T65-specific salt bridging networks analysis . . . . . | 2272 |
| 472 | 3T77-specific salt bridging networks analysis . . . . . | 2273 |
| 473 | 3THM-specific salt bridging networks analysis . . . . . | 2274 |
| 474 | 3TJE-specific salt bridging networks analysis . . . . . | 2275 |
| 475 | 3U1S-specific salt bridging networks analysis . . . . . | 2276 |
| 476 | 3U2S-specific salt bridging networks analysis . . . . . | 2278 |
| 477 | 3U36-specific salt bridging networks analysis . . . . . | 2280 |
| 478 | 3UBX-specific salt bridging networks analysis . . . . . | 2282 |

|     |                                                         |      |
|-----|---------------------------------------------------------|------|
| 479 | 3UJI-specific salt bridging networks analysis . . . . . | 2283 |
| 480 | 3UJJ-specific salt bridging networks analysis . . . . . | 2284 |
| 481 | 3UJT-specific salt bridging networks analysis . . . . . | 2285 |
| 482 | 3UO1-specific salt bridging networks analysis . . . . . | 2286 |
| 483 | 3UYR-specific salt bridging networks analysis . . . . . | 2287 |
| 484 | 3V4P-specific salt bridging networks analysis . . . . . | 2290 |
| 485 | 3V4U-specific salt bridging networks analysis . . . . . | 2291 |
| 486 | 3V4V-specific salt bridging networks analysis . . . . . | 2294 |
| 487 | 3V52-specific salt bridging networks analysis . . . . . | 2295 |
| 488 | 3V6F-specific salt bridging networks analysis . . . . . | 2297 |
| 489 | 3WIH-specific salt bridging networks analysis . . . . . | 2298 |
| 490 | 3WN5-specific salt bridging networks analysis . . . . . | 2300 |
| 491 | 3X0E-specific salt bridging networks analysis . . . . . | 2301 |
| 492 | 3X0F-specific salt bridging networks analysis . . . . . | 2302 |
| 493 | 4A6Y-specific salt bridging networks analysis . . . . . | 2303 |
| 494 | 4AG4-specific salt bridging networks analysis . . . . . | 2304 |
| 495 | 4B50-specific salt bridging networks analysis . . . . . | 2305 |
| 496 | 4BH7-specific salt bridging networks analysis . . . . . | 2306 |
| 497 | 4BH8-specific salt bridging networks analysis . . . . . | 2307 |
| 498 | 4C83-specific salt bridging networks analysis . . . . . | 2309 |
| 499 | 4CJD-specific salt bridging networks analysis . . . . . | 2310 |
| 500 | 4DAG-specific salt bridging networks analysis . . . . . | 2311 |
| 501 | 4DGV-specific salt bridging networks analysis . . . . . | 2312 |
| 502 | 4DGY-specific salt bridging networks analysis . . . . . | 2313 |
| 503 | 4E9O-specific salt bridging networks analysis . . . . . | 2314 |
| 504 | 4EBQ-specific salt bridging networks analysis . . . . . | 2315 |
| 505 | 4EDW-specific salt bridging networks analysis . . . . . | 2316 |
| 506 | 4EDX-specific salt bridging networks analysis . . . . . | 2318 |
| 507 | 4ETQ-specific salt bridging networks analysis . . . . . | 2320 |
| 508 | 4F33-specific salt bridging networks analysis . . . . . | 2323 |

|     |                                                         |      |
|-----|---------------------------------------------------------|------|
| 509 | 4F3F-specific salt bridging networks analysis . . . . . | 2324 |
| 510 | 4FFV-specific salt bridging networks analysis . . . . . | 2327 |
| 511 | 4FFW-specific salt bridging networks analysis . . . . . | 2330 |
| 512 | 4FQH-specific salt bridging networks analysis . . . . . | 2331 |
| 513 | 4FQI-specific salt bridging networks analysis . . . . . | 2333 |
| 514 | 4G6A-specific salt bridging networks analysis . . . . . | 2335 |
| 515 | 4G6F-specific salt bridging networks analysis . . . . . | 2337 |
| 516 | 4GMT-specific salt bridging networks analysis . . . . . | 2338 |
| 517 | 4GXU-specific salt bridging networks analysis . . . . . | 2345 |
| 518 | 4GXV-specific salt bridging networks analysis . . . . . | 2346 |
| 519 | 4GXX-specific salt bridging networks analysis . . . . . | 2349 |
| 520 | 4H0G-specific salt bridging networks analysis . . . . . | 2350 |
| 521 | 4H0H-specific salt bridging networks analysis . . . . . | 2351 |
| 522 | 4H0I-specific salt bridging networks analysis . . . . . | 2352 |
| 523 | 4H8W-specific salt bridging networks analysis . . . . . | 2354 |
| 524 | 4HF5-specific salt bridging networks analysis . . . . . | 2356 |
| 525 | 4HGK-specific salt bridging networks analysis . . . . . | 2359 |
| 526 | 4HH9-specific salt bridging networks analysis . . . . . | 2361 |
| 527 | 4HHA-specific salt bridging networks analysis . . . . . | 2362 |
| 528 | 4HIE-specific salt bridging networks analysis . . . . . | 2363 |
| 529 | 4HIH-specific salt bridging networks analysis . . . . . | 2365 |
| 530 | 4HII-specific salt bridging networks analysis . . . . . | 2367 |
| 531 | 4HIJ-specific salt bridging networks analysis . . . . . | 2368 |
| 532 | 4HK0-specific salt bridging networks analysis . . . . . | 2369 |
| 533 | 4HK3-specific salt bridging networks analysis . . . . . | 2370 |
| 534 | 4HKB-specific salt bridging networks analysis . . . . . | 2373 |
| 535 | 4HKX-specific salt bridging networks analysis . . . . . | 2374 |
| 536 | 4HLZ-specific salt bridging networks analysis . . . . . | 2378 |
| 537 | 4HMG-specific salt bridging networks analysis . . . . . | 2383 |
| 538 | 4HWB-specific salt bridging networks analysis . . . . . | 2384 |

|     |                                                         |      |
|-----|---------------------------------------------------------|------|
| 539 | 4HXA-specific salt bridging networks analysis . . . . . | 2385 |
| 540 | 4HXB-specific salt bridging networks analysis . . . . . | 2386 |
| 541 | 4I2X-specific salt bridging networks analysis . . . . . | 2388 |
| 542 | 4I3R-specific salt bridging networks analysis . . . . . | 2389 |
| 543 | 4I3S-specific salt bridging networks analysis . . . . . | 2390 |
| 544 | 4JAM-specific salt bridging networks analysis . . . . . | 2391 |
| 545 | 4JAN-specific salt bridging networks analysis . . . . . | 2393 |
| 546 | 4JHA-specific salt bridging networks analysis . . . . . | 2394 |
| 547 | 4JHW-specific salt bridging networks analysis . . . . . | 2396 |
| 548 | 4JO1-specific salt bridging networks analysis . . . . . | 2397 |
| 549 | 4JO2-specific salt bridging networks analysis . . . . . | 2398 |
| 550 | 4JO3-specific salt bridging networks analysis . . . . . | 2399 |
| 551 | 4JO4-specific salt bridging networks analysis . . . . . | 2400 |
| 552 | 4K24-specific salt bridging networks analysis . . . . . | 2402 |
| 553 | 4K2U-specific salt bridging networks analysis . . . . . | 2405 |
| 554 | 4KI5-specific salt bridging networks analysis . . . . . | 2407 |
| 555 | 4KJY-specific salt bridging networks analysis . . . . . | 2409 |
| 556 | 4KPH-specific salt bridging networks analysis . . . . . | 2410 |
| 557 | 4KRL-specific salt bridging networks analysis . . . . . | 2411 |
| 558 | 4KRM-specific salt bridging networks analysis . . . . . | 2415 |
| 559 | 4KRO-specific salt bridging networks analysis . . . . . | 2416 |
| 560 | 4KRP-specific salt bridging networks analysis . . . . . | 2417 |
| 561 | 4KV5-specific salt bridging networks analysis . . . . . | 2419 |
| 562 | 4KXZ-specific salt bridging networks analysis . . . . . | 2422 |
| 563 | 4LQF-specific salt bridging networks analysis . . . . . | 2423 |
| 564 | 4LSS-specific salt bridging networks analysis . . . . . | 2425 |
| 565 | 4LST-specific salt bridging networks analysis . . . . . | 2427 |
| 566 | 4LU5-specific salt bridging networks analysis . . . . . | 2429 |
| 567 | 4M1D-specific salt bridging networks analysis . . . . . | 2430 |
| 568 | 4M1G-specific salt bridging networks analysis . . . . . | 2431 |



|     |                                                         |      |
|-----|---------------------------------------------------------|------|
| 569 | 4M3J-specific salt bridging networks analysis . . . . . | 2432 |
| 570 | 4M3K-specific salt bridging networks analysis . . . . . | 2433 |
| 571 | 4M5Y-specific salt bridging networks analysis . . . . . | 2434 |
| 572 | 4M7J-specific salt bridging networks analysis . . . . . | 2435 |
| 573 | 4M7Z-specific salt bridging networks analysis . . . . . | 2437 |
| 574 | 4M93-specific salt bridging networks analysis . . . . . | 2439 |
| 575 | 4MA1-specific salt bridging networks analysis . . . . . | 2441 |
| 576 | 4N0Y-specific salt bridging networks analysis . . . . . | 2442 |
| 577 | 4N1H-specific salt bridging networks analysis . . . . . | 2444 |
| 578 | 4NBX-specific salt bridging networks analysis . . . . . | 2445 |
| 579 | 4NBY-specific salt bridging networks analysis . . . . . | 2446 |
| 580 | 4NBZ-specific salt bridging networks analysis . . . . . | 2447 |
| 581 | 4NC0-specific salt bridging networks analysis . . . . . | 2448 |
| 582 | 4NC1-specific salt bridging networks analysis . . . . . | 2450 |
| 583 | 4NC2-specific salt bridging networks analysis . . . . . | 2451 |
| 584 | 4NGH-specific salt bridging networks analysis . . . . . | 2452 |
| 585 | 4NHC-specific salt bridging networks analysis . . . . . | 2453 |
| 586 | 4NIK-specific salt bridging networks analysis . . . . . | 2454 |
| 587 | 4NZR-specific salt bridging networks analysis . . . . . | 2456 |
| 588 | 4NZT-specific salt bridging networks analysis . . . . . | 2458 |
| 589 | 4NZU-specific salt bridging networks analysis . . . . . | 2459 |
| 590 | 4O5L-specific salt bridging networks analysis . . . . . | 2460 |
| 591 | 4OLU-specific salt bridging networks analysis . . . . . | 2462 |
| 592 | 4OLV-specific salt bridging networks analysis . . . . . | 2464 |
| 593 | 4OLW-specific salt bridging networks analysis . . . . . | 2466 |
| 594 | 4OLX-specific salt bridging networks analysis . . . . . | 2468 |
| 595 | 4OLY-specific salt bridging networks analysis . . . . . | 2470 |
| 596 | 4OLZ-specific salt bridging networks analysis . . . . . | 2472 |
| 597 | 4OM0-specific salt bridging networks analysis . . . . . | 2474 |
| 598 | 4OM1-specific salt bridging networks analysis . . . . . | 2476 |

|     |                                                         |      |
|-----|---------------------------------------------------------|------|
| 599 | 4OT1-specific salt bridging networks analysis . . . . . | 2477 |
| 600 | 4OTX-specific salt bridging networks analysis . . . . . | 2478 |
| 601 | 4P49-specific salt bridging networks analysis . . . . . | 2479 |
| 602 | 4P9H-specific salt bridging networks analysis . . . . . | 2481 |
| 603 | 4PTT-specific salt bridging networks analysis . . . . . | 2482 |
| 604 | 4PTU-specific salt bridging networks analysis . . . . . | 2483 |
| 605 | 4Q6I-specific salt bridging networks analysis . . . . . | 2486 |
| 606 | 4Q97-specific salt bridging networks analysis . . . . . | 2487 |
| 607 | 4Q9B-specific salt bridging networks analysis . . . . . | 2488 |
| 608 | 4Q9C-specific salt bridging networks analysis . . . . . | 2489 |
| 609 | 4QEX-specific salt bridging networks analysis . . . . . | 2492 |
| 610 | 4QHU-specific salt bridging networks analysis . . . . . | 2494 |
| 611 | 4QTI-specific salt bridging networks analysis . . . . . | 2496 |
| 612 | 4QXG-specific salt bridging networks analysis . . . . . | 2497 |
| 613 | 4R2G-specific salt bridging networks analysis . . . . . | 2501 |
| 614 | 4R4H-specific salt bridging networks analysis . . . . . | 2503 |
| 615 | 4R7D-specific salt bridging networks analysis . . . . . | 2507 |
| 616 | 4R7N-specific salt bridging networks analysis . . . . . | 2512 |
| 617 | 4R9Y-specific salt bridging networks analysis . . . . . | 2513 |
| 618 | 4RAU-specific salt bridging networks analysis . . . . . | 2517 |
| 619 | 4RRP-specific salt bridging networks analysis . . . . . | 2521 |
| 620 | 4TRP-specific salt bridging networks analysis . . . . . | 2522 |
| 621 | 4TUJ-specific salt bridging networks analysis . . . . . | 2523 |
| 622 | 4TUK-specific salt bridging networks analysis . . . . . | 2524 |
| 623 | 4TUL-specific salt bridging networks analysis . . . . . | 2525 |
| 624 | 4TUO-specific salt bridging networks analysis . . . . . | 2527 |
| 625 | 4U0Q-specific salt bridging networks analysis . . . . . | 2529 |
| 626 | 4U3X-specific salt bridging networks analysis . . . . . | 2530 |
| 627 | 4U6G-specific salt bridging networks analysis . . . . . | 2532 |
| 628 | 4U6V-specific salt bridging networks analysis . . . . . | 2535 |

|     |                                                         |      |
|-----|---------------------------------------------------------|------|
| 629 | 4UAO-specific salt bridging networks analysis . . . . . | 2537 |
| 630 | 4UV6-specific salt bridging networks analysis . . . . . | 2539 |
| 631 | 4WEU-specific salt bridging networks analysis . . . . . | 2540 |
| 632 | 4WHT-specific salt bridging networks analysis . . . . . | 2547 |
| 633 | 4WHY-specific salt bridging networks analysis . . . . . | 2550 |
| 634 | 4WUU-specific salt bridging networks analysis . . . . . | 2552 |
| 635 | 4XVJ-specific salt bridging networks analysis . . . . . | 2553 |
| 636 | 4YHP-specific salt bridging networks analysis . . . . . | 2555 |
| 637 | 4YHY-specific salt bridging networks analysis . . . . . | 2557 |
| 638 | 4YHZ-specific salt bridging networks analysis . . . . . | 2558 |
| 639 | 4YNY-specific salt bridging networks analysis . . . . . | 2559 |
| 640 | 4YOO-specific salt bridging networks analysis . . . . . | 2560 |
| 641 | 4Z0X-specific salt bridging networks analysis . . . . . | 2561 |
| 642 | 4ZD3-specific salt bridging networks analysis . . . . . | 2562 |
| 643 | 4ZFF-specific salt bridging networks analysis . . . . . | 2564 |
| 644 | 4ZFG-specific salt bridging networks analysis . . . . . | 2565 |
| 645 | 4ZFO-specific salt bridging networks analysis . . . . . | 2567 |
| 646 | 4ZH7-specific salt bridging networks analysis . . . . . | 2568 |
| 647 | 5A2I-specific salt bridging networks analysis . . . . . | 2569 |
| 648 | 5A2J-specific salt bridging networks analysis . . . . . | 2570 |
| 649 | 5A2K-specific salt bridging networks analysis . . . . . | 2571 |
| 650 | 5A2L-specific salt bridging networks analysis . . . . . | 2572 |
| 651 | 5A7X-specific salt bridging networks analysis . . . . . | 2577 |
| 652 | 5A8H-specific salt bridging networks analysis . . . . . | 2583 |
| 653 | 5AZE-specific salt bridging networks analysis . . . . . | 2584 |
| 654 | 5BW7-specific salt bridging networks analysis . . . . . | 2586 |
| 655 | 5CMA-specific salt bridging networks analysis . . . . . | 2587 |
| 656 | 5CP3-specific salt bridging networks analysis . . . . . | 2588 |
| 657 | 5CP7-specific salt bridging networks analysis . . . . . | 2590 |
| 658 | 5DFV-specific salt bridging networks analysis . . . . . | 2592 |

|     |                                                         |      |
|-----|---------------------------------------------------------|------|
| 659 | 5DFW-specific salt bridging networks analysis . . . . . | 2593 |
| 660 | 5DMI-specific salt bridging networks analysis . . . . . | 2594 |
| 661 | 5DMJ-specific salt bridging networks analysis . . . . . | 2595 |
| 662 | 5DWU-specific salt bridging networks analysis . . . . . | 2596 |
| 663 | 5ERW-specific salt bridging networks analysis . . . . . | 2597 |
| 664 | 5EZI-specific salt bridging networks analysis . . . . . | 2598 |
| 665 | 5EZJ-specific salt bridging networks analysis . . . . . | 2599 |
| 666 | 5EZL-specific salt bridging networks analysis . . . . . | 2600 |
| 667 | 5EZN-specific salt bridging networks analysis . . . . . | 2601 |
| 668 | 5EZO-specific salt bridging networks analysis . . . . . | 2602 |
| 669 | 5GGV-specific salt bridging networks analysis . . . . . | 2603 |
| 670 | 5GKR-specific salt bridging networks analysis . . . . . | 2604 |
| 671 | 5GKS-specific salt bridging networks analysis . . . . . | 2606 |
| 672 | 5HDQ-specific salt bridging networks analysis . . . . . | 2607 |
| 673 | 5HMG-specific salt bridging networks analysis . . . . . | 2612 |
| 674 | 5I4F-specific salt bridging networks analysis . . . . . | 2613 |
| 675 | 5I76-specific salt bridging networks analysis . . . . . | 2615 |
| 676 | 5IHL-specific salt bridging networks analysis . . . . . | 2617 |
| 677 | 5ITB-specific salt bridging networks analysis . . . . . | 2618 |
| 678 | 5J3D-specific salt bridging networks analysis . . . . . | 2621 |
| 679 | 5JO5-specific salt bridging networks analysis . . . . . | 2623 |
| 680 | 5JOF-specific salt bridging networks analysis . . . . . | 2625 |
| 681 | 5JR1-specific salt bridging networks analysis . . . . . | 2626 |
| 682 | 5JUE-specific salt bridging networks analysis . . . . . | 2627 |
| 683 | 5JXA-specific salt bridging networks analysis . . . . . | 2628 |
| 684 | 5KZP-specific salt bridging networks analysis . . . . . | 2630 |
| 685 | 5LDN-specific salt bridging networks analysis . . . . . | 2632 |
| 686 | 5M2C-specific salt bridging networks analysis . . . . . | 2633 |
| 687 | 5M33-specific salt bridging networks analysis . . . . . | 2634 |
| 688 | 5M3D-specific salt bridging networks analysis . . . . . | 2635 |

|     |                                                         |      |
|-----|---------------------------------------------------------|------|
| 689 | 5M3T-specific salt bridging networks analysis . . . . . | 2636 |
| 690 | 5M4R-specific salt bridging networks analysis . . . . . | 2637 |
| 691 | 5MO9-specific salt bridging networks analysis . . . . . | 2638 |
| 692 | 5N2B-specific salt bridging networks analysis . . . . . | 2639 |
| 693 | 5N4J-specific salt bridging networks analysis . . . . . | 2640 |
| 694 | 5N7B-specific salt bridging networks analysis . . . . . | 2641 |
| 695 | 5N7W-specific salt bridging networks analysis . . . . . | 2643 |
| 696 | 5N88-specific salt bridging networks analysis . . . . . | 2644 |
| 697 | 5NPH-specific salt bridging networks analysis . . . . . | 2645 |
| 698 | 5NPI-specific salt bridging networks analysis . . . . . | 2646 |
| 699 | 5NPJ-specific salt bridging networks analysis . . . . . | 2647 |
| 700 | 5NST-specific salt bridging networks analysis . . . . . | 2649 |
| 701 | 5NUZ-specific salt bridging networks analysis . . . . . | 2651 |
| 702 | 5O14-specific salt bridging networks analysis . . . . . | 2653 |
| 703 | 5O1R-specific salt bridging networks analysis . . . . . | 2655 |
| 704 | 5OLM-specific salt bridging networks analysis . . . . . | 2656 |
| 705 | 5OPY-specific salt bridging networks analysis . . . . . | 2657 |
| 706 | 5OWP-specific salt bridging networks analysis . . . . . | 2658 |
| 707 | 5SV3-specific salt bridging networks analysis . . . . . | 2659 |
| 708 | 5SV4-specific salt bridging networks analysis . . . . . | 2660 |
| 709 | 5T6P-specific salt bridging networks analysis . . . . . | 2662 |
| 710 | 5T78-specific salt bridging networks analysis . . . . . | 2664 |
| 711 | 5TCX-specific salt bridging networks analysis . . . . . | 2665 |
| 712 | 5TIH-specific salt bridging networks analysis . . . . . | 2667 |
| 713 | 5TIK-specific salt bridging networks analysis . . . . . | 2669 |
| 714 | 5TL5-specific salt bridging networks analysis . . . . . | 2670 |
| 715 | 5TLJ-specific salt bridging networks analysis . . . . . | 2672 |
| 716 | 5TLK-specific salt bridging networks analysis . . . . . | 2675 |
| 717 | 5TRU-specific salt bridging networks analysis . . . . . | 2676 |
| 718 | 5TZ2-specific salt bridging networks analysis . . . . . | 2677 |

|     |                                                         |      |
|-----|---------------------------------------------------------|------|
| 719 | 5TZT-specific salt bridging networks analysis . . . . . | 2678 |
| 720 | 5TZU-specific salt bridging networks analysis . . . . . | 2679 |
| 721 | 5U3J-specific salt bridging networks analysis . . . . . | 2680 |
| 722 | 5U3N-specific salt bridging networks analysis . . . . . | 2681 |
| 723 | 5UCB-specific salt bridging networks analysis . . . . . | 2682 |
| 724 | 5UEA-specific salt bridging networks analysis . . . . . | 2684 |
| 725 | 5UEK-specific salt bridging networks analysis . . . . . | 2685 |
| 726 | 5UG0-specific salt bridging networks analysis . . . . . | 2687 |
| 727 | 5UJZ-specific salt bridging networks analysis . . . . . | 2690 |
| 728 | 5UK0-specific salt bridging networks analysis . . . . . | 2693 |
| 729 | 5UK1-specific salt bridging networks analysis . . . . . | 2696 |
| 730 | 5UK2-specific salt bridging networks analysis . . . . . | 2699 |
| 731 | 5UR8-specific salt bridging networks analysis . . . . . | 2700 |
| 732 | 5VF2-specific salt bridging networks analysis . . . . . | 2701 |
| 733 | 5VL3-specific salt bridging networks analysis . . . . . | 2704 |
| 734 | 5VN8-specific salt bridging networks analysis . . . . . | 2707 |
| 735 | 5VXJ-specific salt bridging networks analysis . . . . . | 2710 |
| 736 | 5VXK-specific salt bridging networks analysis . . . . . | 2711 |
| 737 | 5VXL-specific salt bridging networks analysis . . . . . | 2712 |
| 738 | 5VXM-specific salt bridging networks analysis . . . . . | 2713 |
| 739 | 5VXR-specific salt bridging networks analysis . . . . . | 2714 |
| 740 | 5VZR-specific salt bridging networks analysis . . . . . | 2716 |
| 741 | 5W2B-specific salt bridging networks analysis . . . . . | 2717 |
| 742 | 5W9H-specific salt bridging networks analysis . . . . . | 2721 |
| 743 | 5W9I-specific salt bridging networks analysis . . . . . | 2725 |
| 744 | 5W9J-specific salt bridging networks analysis . . . . . | 2728 |
| 745 | 5W9K-specific salt bridging networks analysis . . . . . | 2732 |
| 746 | 5W9L-specific salt bridging networks analysis . . . . . | 2736 |
| 747 | 5W9M-specific salt bridging networks analysis . . . . . | 2740 |
| 748 | 5W9N-specific salt bridging networks analysis . . . . . | 2743 |

|     |                                                         |      |
|-----|---------------------------------------------------------|------|
| 749 | 5W9O-specific salt bridging networks analysis . . . . . | 2747 |
| 750 | 5W9P-specific salt bridging networks analysis . . . . . | 2751 |
| 751 | 5WK4-specific salt bridging networks analysis . . . . . | 2752 |
| 752 | 5WKQ-specific salt bridging networks analysis . . . . . | 2753 |
| 753 | 5WN9-specific salt bridging networks analysis . . . . . | 2754 |
| 754 | 5WNA-specific salt bridging networks analysis . . . . . | 2756 |
| 755 | 5WNB-specific salt bridging networks analysis . . . . . | 2758 |
| 756 | 5XBM-specific salt bridging networks analysis . . . . . | 2760 |
| 757 | 5XCQ-specific salt bridging networks analysis . . . . . | 2761 |
| 758 | 5XCR-specific salt bridging networks analysis . . . . . | 2762 |
| 759 | 5XCS-specific salt bridging networks analysis . . . . . | 2763 |
| 760 | 5XCT-specific salt bridging networks analysis . . . . . | 2764 |
| 761 | 5XCU-specific salt bridging networks analysis . . . . . | 2766 |
| 762 | 5XCV-specific salt bridging networks analysis . . . . . | 2768 |
| 763 | 5XJ3-specific salt bridging networks analysis . . . . . | 2770 |
| 764 | 5XRT-specific salt bridging networks analysis . . . . . | 2774 |
| 765 | 5XWD-specific salt bridging networks analysis . . . . . | 2776 |
| 766 | 5YC5-specific salt bridging networks analysis . . . . . | 2778 |
| 767 | 5ZV3-specific salt bridging networks analysis . . . . . | 2779 |
| 768 | 6A3V-specific salt bridging networks analysis . . . . . | 2782 |
| 769 | 6A3W-specific salt bridging networks analysis . . . . . | 2784 |
| 770 | 6A76-specific salt bridging networks analysis . . . . . | 2785 |
| 771 | 6A77-specific salt bridging networks analysis . . . . . | 2786 |
| 772 | 6A78-specific salt bridging networks analysis . . . . . | 2788 |
| 773 | 6A79-specific salt bridging networks analysis . . . . . | 2790 |
| 774 | 6AL5-specific salt bridging networks analysis . . . . . | 2791 |
| 775 | 6ANA-specific salt bridging networks analysis . . . . . | 2792 |
| 776 | 6AND-specific salt bridging networks analysis . . . . . | 2793 |
| 777 | 6ANI-specific salt bridging networks analysis . . . . . | 2794 |
| 778 | 6AQ7-specific salt bridging networks analysis . . . . . | 2795 |

|     |                                                         |      |
|-----|---------------------------------------------------------|------|
| 779 | 6ATT-specific salt bridging networks analysis . . . . . | 2797 |
| 780 | 6AZZ-specific salt bridging networks analysis . . . . . | 2799 |
| 781 | 6B08-specific salt bridging networks analysis . . . . . | 2800 |
| 782 | 6B0A-specific salt bridging networks analysis . . . . . | 2801 |
| 783 | 6B0E-specific salt bridging networks analysis . . . . . | 2802 |
| 784 | 6B0G-specific salt bridging networks analysis . . . . . | 2803 |
| 785 | 6B0H-specific salt bridging networks analysis . . . . . | 2805 |
| 786 | 6BE2-specific salt bridging networks analysis . . . . . | 2806 |
| 787 | 6BE3-specific salt bridging networks analysis . . . . . | 2807 |
| 788 | 6BE4-specific salt bridging networks analysis . . . . . | 2808 |
| 789 | 6BIT-specific salt bridging networks analysis . . . . . | 2810 |
| 790 | 6BRB-specific salt bridging networks analysis . . . . . | 2811 |
| 791 | 6BXA-specific salt bridging networks analysis . . . . . | 2813 |
| 792 | 6BXC-specific salt bridging networks analysis . . . . . | 2814 |
| 793 | 6BXD-specific salt bridging networks analysis . . . . . | 2815 |
| 794 | 6BXE-specific salt bridging networks analysis . . . . . | 2816 |
| 795 | 6BZU-specific salt bridging networks analysis . . . . . | 2819 |
| 796 | 6BZV-specific salt bridging networks analysis . . . . . | 2821 |
| 797 | 6BZW-specific salt bridging networks analysis . . . . . | 2823 |
| 798 | 6BZY-specific salt bridging networks analysis . . . . . | 2824 |
| 799 | 6C5H-specific salt bridging networks analysis . . . . . | 2825 |
| 800 | 6C5I-specific salt bridging networks analysis . . . . . | 2826 |
| 801 | 6C5J-specific salt bridging networks analysis . . . . . | 2827 |
| 802 | 6C5K-specific salt bridging networks analysis . . . . . | 2829 |
| 803 | 6C6X-specific salt bridging networks analysis . . . . . | 2831 |
| 804 | 6C6Y-specific salt bridging networks analysis . . . . . | 2833 |
| 805 | 6C6Z-specific salt bridging networks analysis . . . . . | 2835 |
| 806 | 6CUJ-specific salt bridging networks analysis . . . . . | 2836 |
| 807 | 6DC3-specific salt bridging networks analysis . . . . . | 2837 |
| 808 | 6DC4-specific salt bridging networks analysis . . . . . | 2838 |



|     |                                                         |      |
|-----|---------------------------------------------------------|------|
| 809 | 6DC5-specific salt bridging networks analysis . . . . . | 2841 |
| 810 | 6DCV-specific salt bridging networks analysis . . . . . | 2843 |
| 811 | 6DCW-specific salt bridging networks analysis . . . . . | 2844 |
| 812 | 6DDM-specific salt bridging networks analysis . . . . . | 2845 |
| 813 | 6DDR-specific salt bridging networks analysis . . . . . | 2846 |
| 814 | 6DDV-specific salt bridging networks analysis . . . . . | 2847 |
| 815 | 6DFG-specific salt bridging networks analysis . . . . . | 2850 |
| 816 | 6DFH-specific salt bridging networks analysis . . . . . | 2853 |
| 817 | 6DG2-specific salt bridging networks analysis . . . . . | 2855 |
| 818 | 6E62-specific salt bridging networks analysis . . . . . | 2857 |
| 819 | 6E63-specific salt bridging networks analysis . . . . . | 2859 |
| 820 | 6E64-specific salt bridging networks analysis . . . . . | 2860 |
| 821 | 6E65-specific salt bridging networks analysis . . . . . | 2861 |
| 822 | 6E8V-specific salt bridging networks analysis . . . . . | 2864 |
| 823 | 6E9G-specific salt bridging networks analysis . . . . . | 2865 |
| 824 | 6E9H-specific salt bridging networks analysis . . . . . | 2866 |
| 825 | 6E9I-specific salt bridging networks analysis . . . . . | 2868 |
| 826 | 6E9K-specific salt bridging networks analysis . . . . . | 2869 |
| 827 | 6E9Q-specific salt bridging networks analysis . . . . . | 2871 |
| 828 | 6E9U-specific salt bridging networks analysis . . . . . | 2872 |
| 829 | 6EDU-specific salt bridging networks analysis . . . . . | 2874 |
| 830 | 6EJG-specific salt bridging networks analysis . . . . . | 2876 |
| 831 | 6EJM-specific salt bridging networks analysis . . . . . | 2877 |
| 832 | 6EK2-specific salt bridging networks analysis . . . . . | 2879 |
| 833 | 6EUN-specific salt bridging networks analysis . . . . . | 2880 |
| 834 | 6EUP-specific salt bridging networks analysis . . . . . | 2881 |
| 835 | 6EV1-specific salt bridging networks analysis . . . . . | 2884 |
| 836 | 6EV2-specific salt bridging networks analysis . . . . . | 2886 |
| 837 | 6EWB-specific salt bridging networks analysis . . . . . | 2889 |
| 838 | 6FAB-specific salt bridging networks analysis . . . . . | 2890 |

|     |                                                         |      |
|-----|---------------------------------------------------------|------|
| 839 | 6FAX-specific salt bridging networks analysis . . . . . | 2891 |
| 840 | 6FN1-specific salt bridging networks analysis . . . . . | 2893 |
| 841 | 6FN4-specific salt bridging networks analysis . . . . . | 2895 |
| 842 | 6FRJ-specific salt bridging networks analysis . . . . . | 2896 |
| 843 | 6GK7-specific salt bridging networks analysis . . . . . | 2897 |
| 844 | 6GK8-specific salt bridging networks analysis . . . . . | 2898 |
| 845 | 6H2Y-specific salt bridging networks analysis . . . . . | 2899 |
| 846 | 6I3Z-specific salt bridging networks analysis . . . . . | 2900 |
| 847 | 6I9J-specific salt bridging networks analysis . . . . . | 2901 |
| 848 | 6IAP-specific salt bridging networks analysis . . . . . | 2903 |
| 849 | 6JMQ-specific salt bridging networks analysis . . . . . | 2905 |
| 850 | 6JMR-specific salt bridging networks analysis . . . . . | 2906 |
| 851 | 6K4Z-specific salt bridging networks analysis . . . . . | 2907 |
| 852 | 6K7O-specific salt bridging networks analysis . . . . . | 2910 |
| 853 | 6KN9-specific salt bridging networks analysis . . . . . | 2912 |
| 854 | 6MH2-specific salt bridging networks analysis . . . . . | 2913 |
| 855 | 6MHR-specific salt bridging networks analysis . . . . . | 2915 |
| 856 | 6MI2-specific salt bridging networks analysis . . . . . | 2916 |
| 857 | 6MN7-specific salt bridging networks analysis . . . . . | 2920 |
| 858 | 6MPG-specific salt bridging networks analysis . . . . . | 2924 |
| 859 | 6MPH-specific salt bridging networks analysis . . . . . | 2928 |
| 860 | 6MQC-specific salt bridging networks analysis . . . . . | 2930 |
| 861 | 6MQE-specific salt bridging networks analysis . . . . . | 2932 |
| 862 | 6MQM-specific salt bridging networks analysis . . . . . | 2934 |
| 863 | 6MQR-specific salt bridging networks analysis . . . . . | 2935 |
| 864 | 6MQS-specific salt bridging networks analysis . . . . . | 2937 |
| 865 | 6N16-specific salt bridging networks analysis . . . . . | 2940 |
| 866 | 6N1V-specific salt bridging networks analysis . . . . . | 2944 |
| 867 | 6N1W-specific salt bridging networks analysis . . . . . | 2948 |
| 868 | 6N5B-specific salt bridging networks analysis . . . . . | 2949 |

|     |                                                         |      |
|-----|---------------------------------------------------------|------|
| 869 | 6N5D-specific salt bridging networks analysis . . . . . | 2951 |
| 870 | 6N5E-specific salt bridging networks analysis . . . . . | 2953 |
| 871 | 6N6B-specific salt bridging networks analysis . . . . . | 2955 |
| 872 | 6NB5-specific salt bridging networks analysis . . . . . | 2956 |
| 873 | 6NB8-specific salt bridging networks analysis . . . . . | 2957 |
| 874 | 6NC2-specific salt bridging networks analysis . . . . . | 2965 |
| 875 | 6NC3-specific salt bridging networks analysis . . . . . | 2973 |
| 876 | 6NEX-specific salt bridging networks analysis . . . . . | 2974 |
| 877 | 6NF2-specific salt bridging networks analysis . . . . . | 2978 |
| 878 | 6NF5-specific salt bridging networks analysis . . . . . | 2982 |
| 879 | 6NFC-specific salt bridging networks analysis . . . . . | 2986 |
| 880 | 6NMR-specific salt bridging networks analysis . . . . . | 2989 |
| 881 | 6NMS-specific salt bridging networks analysis . . . . . | 2991 |
| 882 | 6NMT-specific salt bridging networks analysis . . . . . | 2992 |
| 883 | 6NMU-specific salt bridging networks analysis . . . . . | 2994 |
| 884 | 6NMV-specific salt bridging networks analysis . . . . . | 2995 |
| 885 | 6O9B-specific salt bridging networks analysis . . . . . | 2996 |
| 886 | 6O9C-specific salt bridging networks analysis . . . . . | 2997 |
| 887 | 6OGX-specific salt bridging networks analysis . . . . . | 2999 |
| 888 | 6OKM-specific salt bridging networks analysis . . . . . | 3000 |
| 889 | 6OKN-specific salt bridging networks analysis . . . . . | 3002 |
| 890 | 6OOR-specific salt bridging networks analysis . . . . . | 3003 |
| 891 | 6OSY-specific salt bridging networks analysis . . . . . | 3007 |
| 892 | 6OT1-specific salt bridging networks analysis . . . . . | 3011 |
| 893 | 6P62-specific salt bridging networks analysis . . . . . | 3014 |
| 894 | 6P65-specific salt bridging networks analysis . . . . . | 3018 |
| 895 | 6PE8-specific salt bridging networks analysis . . . . . | 3020 |
| 896 | 6PE9-specific salt bridging networks analysis . . . . . | 3023 |
| 897 | 6PHB-specific salt bridging networks analysis . . . . . | 3025 |
| 898 | 6PHC-specific salt bridging networks analysis . . . . . | 3027 |

|     |                                                                     |      |
|-----|---------------------------------------------------------------------|------|
| 899 | 6PHD-specific salt bridging networks analysis . . . . .             | 3028 |
| 900 | 6PHF-specific salt bridging networks analysis . . . . .             | 3030 |
| 901 | 6PHG-specific salt bridging networks analysis . . . . .             | 3031 |
| 902 | 6PHH-specific salt bridging networks analysis . . . . .             | 3032 |
| 903 | 6PI7-specific salt bridging networks analysis . . . . .             | 3034 |
| 904 | 6PYC-specific salt bridging networks analysis . . . . .             | 3035 |
| 905 | 6PYD-specific salt bridging networks analysis . . . . .             | 3036 |
| 906 | 6PZW-specific salt bridging networks analysis . . . . .             | 3040 |
| 907 | 6RPS-specific salt bridging networks analysis . . . . .             | 3042 |
| 908 | 6S3T-specific salt bridging networks analysis . . . . .             | 3046 |
| 909 | 6U02-specific salt bridging networks analysis . . . . .             | 3050 |
| 910 | 6U1T-specific salt bridging networks analysis . . . . .             | 3051 |
| 911 | 6U59-specific salt bridging networks analysis . . . . .             | 3055 |
| 912 | 6UG7-specific salt bridging networks analysis . . . . .             | 3056 |
| 913 | 6UG8-specific salt bridging networks analysis . . . . .             | 3057 |
| 914 | 6UG9-specific salt bridging networks analysis . . . . .             | 3059 |
| 915 | 6UGA-specific salt bridging networks analysis . . . . .             | 3060 |
| 916 | Interfacial 1A14-specific salt bridging networks analysis . . . . . | 3061 |
| 917 | Interfacial 1A2Y-specific salt bridging networks analysis . . . . . | 3062 |
| 918 | Interfacial 1A7L-specific salt bridging networks analysis . . . . . | 3063 |
| 919 | Interfacial 1A7N-specific salt bridging networks analysis . . . . . | 3064 |
| 920 | Interfacial 1A7P-specific salt bridging networks analysis . . . . . | 3065 |
| 921 | Interfacial 1A7Q-specific salt bridging networks analysis . . . . . | 3066 |
| 922 | Interfacial 1A7R-specific salt bridging networks analysis . . . . . | 3067 |
| 923 | Interfacial 1ADQ-specific salt bridging networks analysis . . . . . | 3068 |
| 924 | Interfacial 1BJ1-specific salt bridging networks analysis . . . . . | 3069 |
| 925 | Interfacial 1BLN-specific salt bridging networks analysis . . . . . | 3070 |
| 926 | Interfacial 1BQL-specific salt bridging networks analysis . . . . . | 3071 |
| 927 | Interfacial 1BVK-specific salt bridging networks analysis . . . . . | 3072 |
| 928 | Interfacial 1C08-specific salt bridging networks analysis . . . . . | 3073 |

|     |                                                                     |      |
|-----|---------------------------------------------------------------------|------|
| 929 | Interfacial 1C12-specific salt bridging networks analysis . . . . . | 3074 |
| 930 | Interfacial 1CE1-specific salt bridging networks analysis . . . . . | 3075 |
| 931 | Interfacial 1CFS-specific salt bridging networks analysis . . . . . | 3076 |
| 932 | Interfacial 1CFT-specific salt bridging networks analysis . . . . . | 3077 |
| 933 | Interfacial 1CG9-specific salt bridging networks analysis . . . . . | 3078 |
| 934 | Interfacial 1CLZ-specific salt bridging networks analysis . . . . . | 3079 |
| 935 | Interfacial 1CZ8-specific salt bridging networks analysis . . . . . | 3080 |
| 936 | Interfacial 1DBJ-specific salt bridging networks analysis . . . . . | 3081 |
| 937 | Interfacial 1DBK-specific salt bridging networks analysis . . . . . | 3082 |
| 938 | Interfacial 1DBM-specific salt bridging networks analysis . . . . . | 3083 |
| 939 | Interfacial 1DEE-specific salt bridging networks analysis . . . . . | 3084 |
| 940 | Interfacial 1DQD-specific salt bridging networks analysis . . . . . | 3085 |
| 941 | Interfacial 1DQJ-specific salt bridging networks analysis . . . . . | 3086 |
| 942 | Interfacial 1DQM-specific salt bridging networks analysis . . . . . | 3087 |
| 943 | Interfacial 1DQQ-specific salt bridging networks analysis . . . . . | 3088 |
| 944 | Interfacial 1DVF-specific salt bridging networks analysis . . . . . | 3089 |
| 945 | Interfacial 1DZB-specific salt bridging networks analysis . . . . . | 3090 |
| 946 | Interfacial 1E4W-specific salt bridging networks analysis . . . . . | 3091 |
| 947 | Interfacial 1E4X-specific salt bridging networks analysis . . . . . | 3092 |
| 948 | Interfacial 1E6J-specific salt bridging networks analysis . . . . . | 3093 |
| 949 | Interfacial 1E6O-specific salt bridging networks analysis . . . . . | 3094 |
| 950 | Interfacial 1EJO-specific salt bridging networks analysis . . . . . | 3095 |
| 951 | Interfacial 1EMT-specific salt bridging networks analysis . . . . . | 3096 |
| 952 | Interfacial 1ETZ-specific salt bridging networks analysis . . . . . | 3097 |
| 953 | Interfacial 1F11-specific salt bridging networks analysis . . . . . | 3098 |
| 954 | Interfacial 1F4W-specific salt bridging networks analysis . . . . . | 3099 |
| 955 | Interfacial 1F4X-specific salt bridging networks analysis . . . . . | 3100 |
| 956 | Interfacial 1F4Y-specific salt bridging networks analysis . . . . . | 3101 |
| 957 | Interfacial 1F8T-specific salt bridging networks analysis . . . . . | 3102 |
| 958 | Interfacial 1F90-specific salt bridging networks analysis . . . . . | 3103 |

|     |                                                                     |      |
|-----|---------------------------------------------------------------------|------|
| 959 | Interfacial 1FBI-specific salt bridging networks analysis . . . . . | 3104 |
| 960 | Interfacial 1FCC-specific salt bridging networks analysis . . . . . | 3105 |
| 961 | Interfacial 1FDL-specific salt bridging networks analysis . . . . . | 3106 |
| 962 | Interfacial 1FJ1-specific salt bridging networks analysis . . . . . | 3107 |
| 963 | Interfacial 1FRG-specific salt bridging networks analysis . . . . . | 3108 |
| 964 | Interfacial 1FUJ-specific salt bridging networks analysis . . . . . | 3109 |
| 965 | Interfacial 1FVD-specific salt bridging networks analysis . . . . . | 3110 |
| 966 | Interfacial 1FVE-specific salt bridging networks analysis . . . . . | 3111 |
| 967 | Interfacial 1G6V-specific salt bridging networks analysis . . . . . | 3112 |
| 968 | Interfacial 1G7H-specific salt bridging networks analysis . . . . . | 3113 |
| 969 | Interfacial 1G7I-specific salt bridging networks analysis . . . . . | 3114 |
| 970 | Interfacial 1G7J-specific salt bridging networks analysis . . . . . | 3115 |
| 971 | Interfacial 1G7L-specific salt bridging networks analysis . . . . . | 3116 |
| 972 | Interfacial 1G7M-specific salt bridging networks analysis . . . . . | 3117 |
| 973 | Interfacial 1G9M-specific salt bridging networks analysis . . . . . | 3118 |
| 974 | Interfacial 1G9N-specific salt bridging networks analysis . . . . . | 3119 |
| 975 | Interfacial 1GC1-specific salt bridging networks analysis . . . . . | 3120 |
| 976 | Interfacial 1GGB-specific salt bridging networks analysis . . . . . | 3121 |
| 977 | Interfacial 1GGC-specific salt bridging networks analysis . . . . . | 3122 |
| 978 | Interfacial 1GGI-specific salt bridging networks analysis . . . . . | 3123 |
| 979 | Interfacial 1GPO-specific salt bridging networks analysis . . . . . | 3124 |
| 980 | Interfacial 1HEZ-specific salt bridging networks analysis . . . . . | 3125 |
| 981 | Interfacial 1HGD-specific salt bridging networks analysis . . . . . | 3128 |
| 982 | Interfacial 1HGE-specific salt bridging networks analysis . . . . . | 3131 |
| 983 | Interfacial 1HGF-specific salt bridging networks analysis . . . . . | 3133 |
| 984 | Interfacial 1HGG-specific salt bridging networks analysis . . . . . | 3136 |
| 985 | Interfacial 1HGH-specific salt bridging networks analysis . . . . . | 3139 |
| 986 | Interfacial 1HGI-specific salt bridging networks analysis . . . . . | 3142 |
| 987 | Interfacial 1HGJ-specific salt bridging networks analysis . . . . . | 3145 |
| 988 | Interfacial 1HIL-specific salt bridging networks analysis . . . . . | 3146 |

|      |                                                                     |      |
|------|---------------------------------------------------------------------|------|
| 989  | Interfacial 1HIM-specific salt bridging networks analysis . . . . . | 3147 |
| 990  | Interfacial 1HIN-specific salt bridging networks analysis . . . . . | 3148 |
| 991  | Interfacial 1I8I-specific salt bridging networks analysis . . . . . | 3149 |
| 992  | Interfacial 1I8K-specific salt bridging networks analysis . . . . . | 3150 |
| 993  | Interfacial 1I8M-specific salt bridging networks analysis . . . . . | 3151 |
| 994  | Interfacial 1IC4-specific salt bridging networks analysis . . . . . | 3152 |
| 995  | Interfacial 1IC5-specific salt bridging networks analysis . . . . . | 3153 |
| 996  | Interfacial 1IFH-specific salt bridging networks analysis . . . . . | 3154 |
| 997  | Interfacial 1IGF-specific salt bridging networks analysis . . . . . | 3155 |
| 998  | Interfacial 1IND-specific salt bridging networks analysis . . . . . | 3156 |
| 999  | Interfacial 1INE-specific salt bridging networks analysis . . . . . | 3157 |
| 1000 | Interfacial 1IQW-specific salt bridging networks analysis . . . . . | 3158 |
| 1001 | Interfacial 1IT9-specific salt bridging networks analysis . . . . . | 3159 |
| 1002 | Interfacial 1J05-specific salt bridging networks analysis . . . . . | 3160 |
| 1003 | Interfacial 1J1O-specific salt bridging networks analysis . . . . . | 3161 |
| 1004 | Interfacial 1J1P-specific salt bridging networks analysis . . . . . | 3162 |
| 1005 | Interfacial 1J1X-specific salt bridging networks analysis . . . . . | 3163 |
| 1006 | Interfacial 1JFQ-specific salt bridging networks analysis . . . . . | 3164 |
| 1007 | Interfacial 1JHL-specific salt bridging networks analysis . . . . . | 3165 |
| 1008 | Interfacial 1JPS-specific salt bridging networks analysis . . . . . | 3166 |
| 1009 | Interfacial 1JPT-specific salt bridging networks analysis . . . . . | 3167 |
| 1010 | Interfacial 1JRH-specific salt bridging networks analysis . . . . . | 3168 |
| 1011 | Interfacial 1K6Q-specific salt bridging networks analysis . . . . . | 3169 |
| 1012 | Interfacial 1KB5-specific salt bridging networks analysis . . . . . | 3170 |
| 1013 | Interfacial 1KC5-specific salt bridging networks analysis . . . . . | 3171 |
| 1014 | Interfacial 1KCS-specific salt bridging networks analysis . . . . . | 3172 |
| 1015 | Interfacial 1KIP-specific salt bridging networks analysis . . . . . | 3173 |
| 1016 | Interfacial 1KIQ-specific salt bridging networks analysis . . . . . | 3174 |
| 1017 | Interfacial 1KIR-specific salt bridging networks analysis . . . . . | 3175 |
| 1018 | Interfacial 1KTR-specific salt bridging networks analysis . . . . . | 3176 |

|      |                                                                     |      |
|------|---------------------------------------------------------------------|------|
| 1019 | Interfacial 1L7I-specific salt bridging networks analysis . . . . . | 3177 |
| 1020 | Interfacial 1LK3-specific salt bridging networks analysis . . . . . | 3178 |
| 1021 | Interfacial 1M71-specific salt bridging networks analysis . . . . . | 3179 |
| 1022 | Interfacial 1M7D-specific salt bridging networks analysis . . . . . | 3180 |
| 1023 | Interfacial 1M7I-specific salt bridging networks analysis . . . . . | 3181 |
| 1024 | Interfacial 1MFB-specific salt bridging networks analysis . . . . . | 3182 |
| 1025 | Interfacial 1MFC-specific salt bridging networks analysis . . . . . | 3183 |
| 1026 | Interfacial 1MHH-specific salt bridging networks analysis . . . . . | 3184 |
| 1027 | Interfacial 1MLB-specific salt bridging networks analysis . . . . . | 3185 |
| 1028 | Interfacial 1MLC-specific salt bridging networks analysis . . . . . | 3186 |
| 1029 | Interfacial 1N64-specific salt bridging networks analysis . . . . . | 3187 |
| 1030 | Interfacial 1NBY-specific salt bridging networks analysis . . . . . | 3188 |
| 1031 | Interfacial 1NDG-specific salt bridging networks analysis . . . . . | 3189 |
| 1032 | Interfacial 1NDM-specific salt bridging networks analysis . . . . . | 3190 |
| 1033 | Interfacial 1NGW-specific salt bridging networks analysis . . . . . | 3191 |
| 1034 | Interfacial 1NGX-specific salt bridging networks analysis . . . . . | 3192 |
| 1035 | Interfacial 1NGY-specific salt bridging networks analysis . . . . . | 3193 |
| 1036 | Interfacial 1NGZ-specific salt bridging networks analysis . . . . . | 3194 |
| 1037 | Interfacial 1NLB-specific salt bridging networks analysis . . . . . | 3195 |
| 1038 | Interfacial 1NMC-specific salt bridging networks analysis . . . . . | 3196 |
| 1039 | Interfacial 1OB1-specific salt bridging networks analysis . . . . . | 3197 |
| 1040 | Interfacial 1OP9-specific salt bridging networks analysis . . . . . | 3198 |
| 1041 | Interfacial 1OSP-specific salt bridging networks analysis . . . . . | 3199 |
| 1042 | Interfacial 1P2C-specific salt bridging networks analysis . . . . . | 3200 |
| 1043 | Interfacial 1P4B-specific salt bridging networks analysis . . . . . | 3201 |
| 1044 | Interfacial 1P7K-specific salt bridging networks analysis . . . . . | 3202 |
| 1045 | Interfacial 1PG7-specific salt bridging networks analysis . . . . . | 3203 |
| 1046 | Interfacial 1PZ5-specific salt bridging networks analysis . . . . . | 3204 |
| 1047 | Interfacial 1Q9K-specific salt bridging networks analysis . . . . . | 3205 |
| 1048 | Interfacial 1Q9L-specific salt bridging networks analysis . . . . . | 3206 |



|      |                                                                     |      |
|------|---------------------------------------------------------------------|------|
| 1049 | Interfacial 1Q9O-specific salt bridging networks analysis . . . . . | 3207 |
| 1050 | Interfacial 1Q9W-specific salt bridging networks analysis . . . . . | 3208 |
| 1051 | Interfacial 1QBL-specific salt bridging networks analysis . . . . . | 3209 |
| 1052 | Interfacial 1QBM-specific salt bridging networks analysis . . . . . | 3210 |
| 1053 | Interfacial 1QGC-specific salt bridging networks analysis . . . . . | 3211 |
| 1054 | Interfacial 1QKZ-specific salt bridging networks analysis . . . . . | 3212 |
| 1055 | Interfacial 1RZJ-specific salt bridging networks analysis . . . . . | 3213 |
| 1056 | Interfacial 1RZK-specific salt bridging networks analysis . . . . . | 3214 |
| 1057 | Interfacial 1S5I-specific salt bridging networks analysis . . . . . | 3215 |
| 1058 | Interfacial 1S78-specific salt bridging networks analysis . . . . . | 3216 |
| 1059 | Interfacial 1SM3-specific salt bridging networks analysis . . . . . | 3217 |
| 1060 | Interfacial 1SQ2-specific salt bridging networks analysis . . . . . | 3218 |
| 1061 | Interfacial 1T6V-specific salt bridging networks analysis . . . . . | 3219 |
| 1062 | Interfacial 1TYE-specific salt bridging networks analysis . . . . . | 3220 |
| 1063 | Interfacial 1TZH-specific salt bridging networks analysis . . . . . | 3221 |
| 1064 | Interfacial 1TZI-specific salt bridging networks analysis . . . . . | 3222 |
| 1065 | Interfacial 1U6A-specific salt bridging networks analysis . . . . . | 3223 |
| 1066 | Interfacial 1UA6-specific salt bridging networks analysis . . . . . | 3224 |
| 1067 | Interfacial 1UAC-specific salt bridging networks analysis . . . . . | 3225 |
| 1068 | Interfacial 1UCB-specific salt bridging networks analysis . . . . . | 3226 |
| 1069 | Interfacial 1UJ3-specific salt bridging networks analysis . . . . . | 3227 |
| 1070 | Interfacial 1UWX-specific salt bridging networks analysis . . . . . | 3228 |
| 1071 | Interfacial 1UZ6-specific salt bridging networks analysis . . . . . | 3229 |
| 1072 | Interfacial 1UZ8-specific salt bridging networks analysis . . . . . | 3230 |
| 1073 | Interfacial 1V7M-specific salt bridging networks analysis . . . . . | 3231 |
| 1074 | Interfacial 1V7N-specific salt bridging networks analysis . . . . . | 3232 |
| 1075 | Interfacial 1VES-specific salt bridging networks analysis . . . . . | 3233 |
| 1076 | Interfacial 1VFA-specific salt bridging networks analysis . . . . . | 3234 |
| 1077 | Interfacial 1VFB-specific salt bridging networks analysis . . . . . | 3235 |
| 1078 | Interfacial 1W72-specific salt bridging networks analysis . . . . . | 3236 |

|                                                                          |      |
|--------------------------------------------------------------------------|------|
| 1079 Interfacial 1WEJ-specific salt bridging networks analysis . . . . . | 3237 |
| 1080 Interfacial 1XF2-specific salt bridging networks analysis . . . . . | 3238 |
| 1081 Interfacial 1XGY-specific salt bridging networks analysis . . . . . | 3239 |
| 1082 Interfacial 1XIW-specific salt bridging networks analysis . . . . . | 3240 |
| 1083 Interfacial 1YEI-specific salt bridging networks analysis . . . . . | 3241 |
| 1084 Interfacial 1YEJ-specific salt bridging networks analysis . . . . . | 3242 |
| 1085 Interfacial 1YEK-specific salt bridging networks analysis . . . . . | 3243 |
| 1086 Interfacial 1YNT-specific salt bridging networks analysis . . . . . | 3244 |
| 1087 Interfacial 1YQV-specific salt bridging networks analysis . . . . . | 3245 |
| 1088 Interfacial 1YYL-specific salt bridging networks analysis . . . . . | 3246 |
| 1089 Interfacial 1YYM-specific salt bridging networks analysis . . . . . | 3247 |
| 1090 Interfacial 1ZEA-specific salt bridging networks analysis . . . . . | 3248 |
| 1091 Interfacial 2AAB-specific salt bridging networks analysis . . . . . | 3249 |
| 1092 Interfacial 2B2X-specific salt bridging networks analysis . . . . . | 3250 |
| 1093 Interfacial 2B4C-specific salt bridging networks analysis . . . . . | 3251 |
| 1094 Interfacial 2BDN-specific salt bridging networks analysis . . . . . | 3252 |
| 1095 Interfacial 2BRR-specific salt bridging networks analysis . . . . . | 3253 |
| 1096 Interfacial 2DBL-specific salt bridging networks analysis . . . . . | 3254 |
| 1097 Interfacial 2DQC-specific salt bridging networks analysis . . . . . | 3255 |
| 1098 Interfacial 2DQD-specific salt bridging networks analysis . . . . . | 3256 |
| 1099 Interfacial 2DQE-specific salt bridging networks analysis . . . . . | 3257 |
| 1100 Interfacial 2DQF-specific salt bridging networks analysis . . . . . | 3258 |
| 1101 Interfacial 2DQG-specific salt bridging networks analysis . . . . . | 3259 |
| 1102 Interfacial 2DQH-specific salt bridging networks analysis . . . . . | 3260 |
| 1103 Interfacial 2DQI-specific salt bridging networks analysis . . . . . | 3261 |
| 1104 Interfacial 2DQJ-specific salt bridging networks analysis . . . . . | 3262 |
| 1105 Interfacial 2DQT-specific salt bridging networks analysis . . . . . | 3263 |
| 1106 Interfacial 2DQU-specific salt bridging networks analysis . . . . . | 3264 |
| 1107 Interfacial 2FB4-specific salt bridging networks analysis . . . . . | 3265 |
| 1108 Interfacial 2FD6-specific salt bridging networks analysis . . . . . | 3266 |

|      |                                                                     |      |
|------|---------------------------------------------------------------------|------|
| 1109 | Interfacial 2FR4-specific salt bridging networks analysis . . . . . | 3267 |
| 1110 | Interfacial 2H32-specific salt bridging networks analysis . . . . . | 3268 |
| 1111 | Interfacial 2H9G-specific salt bridging networks analysis . . . . . | 3269 |
| 1112 | Interfacial 2HFG-specific salt bridging networks analysis . . . . . | 3270 |
| 1113 | Interfacial 2HKF-specific salt bridging networks analysis . . . . . | 3271 |
| 1114 | Interfacial 2HMG-specific salt bridging networks analysis . . . . . | 3273 |
| 1115 | Interfacial 2HRP-specific salt bridging networks analysis . . . . . | 3274 |
| 1116 | Interfacial 2I25-specific salt bridging networks analysis . . . . . | 3275 |
| 1117 | Interfacial 2I26-specific salt bridging networks analysis . . . . . | 3276 |
| 1118 | Interfacial 2I27-specific salt bridging networks analysis . . . . . | 3277 |
| 1119 | Interfacial 2I5Y-specific salt bridging networks analysis . . . . . | 3278 |
| 1120 | Interfacial 2I60-specific salt bridging networks analysis . . . . . | 3279 |
| 1121 | Interfacial 2IFF-specific salt bridging networks analysis . . . . . | 3280 |
| 1122 | Interfacial 2IG2-specific salt bridging networks analysis . . . . . | 3281 |
| 1123 | Interfacial 2IGF-specific salt bridging networks analysis . . . . . | 3282 |
| 1124 | Interfacial 2J4W-specific salt bridging networks analysis . . . . . | 3283 |
| 1125 | Interfacial 2J5L-specific salt bridging networks analysis . . . . . | 3284 |
| 1126 | Interfacial 2JB6-specific salt bridging networks analysis . . . . . | 3285 |
| 1127 | Interfacial 2JEL-specific salt bridging networks analysis . . . . . | 3286 |
| 1128 | Interfacial 2NXY-specific salt bridging networks analysis . . . . . | 3287 |
| 1129 | Interfacial 2NXZ-specific salt bridging networks analysis . . . . . | 3288 |
| 1130 | Interfacial 2NY0-specific salt bridging networks analysis . . . . . | 3289 |
| 1131 | Interfacial 2NY1-specific salt bridging networks analysis . . . . . | 3290 |
| 1132 | Interfacial 2NY2-specific salt bridging networks analysis . . . . . | 3291 |
| 1133 | Interfacial 2NY3-specific salt bridging networks analysis . . . . . | 3292 |
| 1134 | Interfacial 2NY4-specific salt bridging networks analysis . . . . . | 3293 |
| 1135 | Interfacial 2NY5-specific salt bridging networks analysis . . . . . | 3294 |
| 1136 | Interfacial 2NY6-specific salt bridging networks analysis . . . . . | 3295 |
| 1137 | Interfacial 2NY7-specific salt bridging networks analysis . . . . . | 3296 |
| 1138 | Interfacial 2OR9-specific salt bridging networks analysis . . . . . | 3297 |

|      |                                                                     |      |
|------|---------------------------------------------------------------------|------|
| 1139 | Interfacial 2OSL-specific salt bridging networks analysis . . . . . | 3298 |
| 1140 | Interfacial 2OTU-specific salt bridging networks analysis . . . . . | 3299 |
| 1141 | Interfacial 2OTW-specific salt bridging networks analysis . . . . . | 3300 |
| 1142 | Interfacial 2P8L-specific salt bridging networks analysis . . . . . | 3301 |
| 1143 | Interfacial 2P8M-specific salt bridging networks analysis . . . . . | 3302 |
| 1144 | Interfacial 2P8P-specific salt bridging networks analysis . . . . . | 3303 |
| 1145 | Interfacial 2PR4-specific salt bridging networks analysis . . . . . | 3304 |
| 1146 | Interfacial 2Q8A-specific salt bridging networks analysis . . . . . | 3305 |
| 1147 | Interfacial 2Q8B-specific salt bridging networks analysis . . . . . | 3306 |
| 1148 | Interfacial 2QAD-specific salt bridging networks analysis . . . . . | 3307 |
| 1149 | Interfacial 2QQN-specific salt bridging networks analysis . . . . . | 3308 |
| 1150 | Interfacial 2R29-specific salt bridging networks analysis . . . . . | 3309 |
| 1151 | Interfacial 2R69-specific salt bridging networks analysis . . . . . | 3310 |
| 1152 | Interfacial 2UYL-specific salt bridging networks analysis . . . . . | 3311 |
| 1153 | Interfacial 2VC2-specific salt bridging networks analysis . . . . . | 3312 |
| 1154 | Interfacial 2VDK-specific salt bridging networks analysis . . . . . | 3313 |
| 1155 | Interfacial 2VDL-specific salt bridging networks analysis . . . . . | 3314 |
| 1156 | Interfacial 2VDM-specific salt bridging networks analysis . . . . . | 3315 |
| 1157 | Interfacial 2VDN-specific salt bridging networks analysis . . . . . | 3316 |
| 1158 | Interfacial 2VDO-specific salt bridging networks analysis . . . . . | 3317 |
| 1159 | Interfacial 2VDP-specific salt bridging networks analysis . . . . . | 3318 |
| 1160 | Interfacial 2VDQ-specific salt bridging networks analysis . . . . . | 3319 |
| 1161 | Interfacial 2VDR-specific salt bridging networks analysis . . . . . | 3320 |
| 1162 | Interfacial 2VIR-specific salt bridging networks analysis . . . . . | 3321 |
| 1163 | Interfacial 2VIS-specific salt bridging networks analysis . . . . . | 3322 |
| 1164 | Interfacial 2VIT-specific salt bridging networks analysis . . . . . | 3323 |
| 1165 | Interfacial 2VIU-specific salt bridging networks analysis . . . . . | 3324 |
| 1166 | Interfacial 2VXS-specific salt bridging networks analysis . . . . . | 3325 |
| 1167 | Interfacial 2VXT-specific salt bridging networks analysis . . . . . | 3326 |
| 1168 | Interfacial 2VXU-specific salt bridging networks analysis . . . . . | 3327 |

|      |                                                                     |      |
|------|---------------------------------------------------------------------|------|
| 1169 | Interfacial 2VXV-specific salt bridging networks analysis . . . . . | 3328 |
| 1170 | Interfacial 2XZQ-specific salt bridging networks analysis . . . . . | 3329 |
| 1171 | Interfacial 2Y06-specific salt bridging networks analysis . . . . . | 3330 |
| 1172 | Interfacial 2Y07-specific salt bridging networks analysis . . . . . | 3331 |
| 1173 | Interfacial 2Y36-specific salt bridging networks analysis . . . . . | 3332 |
| 1174 | Interfacial 2Y7S-specific salt bridging networks analysis . . . . . | 3333 |
| 1175 | Interfacial 2YPV-specific salt bridging networks analysis . . . . . | 3334 |
| 1176 | Interfacial 2YWY-specific salt bridging networks analysis . . . . . | 3335 |
| 1177 | Interfacial 2ZCH-specific salt bridging networks analysis . . . . . | 3336 |
| 1178 | Interfacial 2ZCK-specific salt bridging networks analysis . . . . . | 3337 |
| 1179 | Interfacial 2ZCL-specific salt bridging networks analysis . . . . . | 3338 |
| 1180 | Interfacial 2ZNW-specific salt bridging networks analysis . . . . . | 3339 |
| 1181 | Interfacial 2ZNX-specific salt bridging networks analysis . . . . . | 3340 |
| 1182 | Interfacial 2ZPK-specific salt bridging networks analysis . . . . . | 3341 |
| 1183 | Interfacial 32C2-specific salt bridging networks analysis . . . . . | 3342 |
| 1184 | Interfacial 3A67-specific salt bridging networks analysis . . . . . | 3343 |
| 1185 | Interfacial 3A6B-specific salt bridging networks analysis . . . . . | 3344 |
| 1186 | Interfacial 3A6C-specific salt bridging networks analysis . . . . . | 3345 |
| 1187 | Interfacial 3B9K-specific salt bridging networks analysis . . . . . | 3346 |
| 1188 | Interfacial 3BDY-specific salt bridging networks analysis . . . . . | 3347 |
| 1189 | Interfacial 3BE1-specific salt bridging networks analysis . . . . . | 3348 |
| 1190 | Interfacial 3BGF-specific salt bridging networks analysis . . . . . | 3349 |
| 1191 | Interfacial 3BIK-specific salt bridging networks analysis . . . . . | 3350 |
| 1192 | Interfacial 3BKY-specific salt bridging networks analysis . . . . . | 3351 |
| 1193 | Interfacial 3BO8-specific salt bridging networks analysis . . . . . | 3352 |
| 1194 | Interfacial 3BT2-specific salt bridging networks analysis . . . . . | 3353 |
| 1195 | Interfacial 3BZ4-specific salt bridging networks analysis . . . . . | 3354 |
| 1196 | Interfacial 3C09-specific salt bridging networks analysis . . . . . | 3355 |
| 1197 | Interfacial 3C5S-specific salt bridging networks analysis . . . . . | 3356 |
| 1198 | Interfacial 3C6S-specific salt bridging networks analysis . . . . . | 3357 |

|      |                                                                     |      |
|------|---------------------------------------------------------------------|------|
| 1199 | Interfacial 3CVH-specific salt bridging networks analysis . . . . . | 3358 |
| 1200 | Interfacial 3CXD-specific salt bridging networks analysis . . . . . | 3359 |
| 1201 | Interfacial 3D0L-specific salt bridging networks analysis . . . . . | 3360 |
| 1202 | Interfacial 3D0V-specific salt bridging networks analysis . . . . . | 3361 |
| 1203 | Interfacial 3D9A-specific salt bridging networks analysis . . . . . | 3362 |
| 1204 | Interfacial 3DRO-specific salt bridging networks analysis . . . . . | 3363 |
| 1205 | Interfacial 3DRQ-specific salt bridging networks analysis . . . . . | 3364 |
| 1206 | Interfacial 3DSF-specific salt bridging networks analysis . . . . . | 3365 |
| 1207 | Interfacial 3EBA-specific salt bridging networks analysis . . . . . | 3366 |
| 1208 | Interfacial 3EOA-specific salt bridging networks analysis . . . . . | 3367 |
| 1209 | Interfacial 3EOB-specific salt bridging networks analysis . . . . . | 3368 |
| 1210 | Interfacial 3ESV-specific salt bridging networks analysis . . . . . | 3369 |
| 1211 | Interfacial 3ETB-specific salt bridging networks analysis . . . . . | 3371 |
| 1212 | Interfacial 3EYV-specific salt bridging networks analysis . . . . . | 3372 |
| 1213 | Interfacial 3FMG-specific salt bridging networks analysis . . . . . | 3373 |
| 1214 | Interfacial 3G3A-specific salt bridging networks analysis . . . . . | 3375 |
| 1215 | Interfacial 3G3B-specific salt bridging networks analysis . . . . . | 3376 |
| 1216 | Interfacial 3GGW-specific salt bridging networks analysis . . . . . | 3377 |
| 1217 | Interfacial 3GHB-specific salt bridging networks analysis . . . . . | 3378 |
| 1218 | Interfacial 3GHE-specific salt bridging networks analysis . . . . . | 3379 |
| 1219 | Interfacial 3GJF-specific salt bridging networks analysis . . . . . | 3380 |
| 1220 | Interfacial 3GNM-specific salt bridging networks analysis . . . . . | 3381 |
| 1221 | Interfacial 3GO1-specific salt bridging networks analysis . . . . . | 3382 |
| 1222 | Interfacial 3HAE-specific salt bridging networks analysis . . . . . | 3383 |
| 1223 | Interfacial 3HFM-specific salt bridging networks analysis . . . . . | 3384 |
| 1224 | Interfacial 3HI6-specific salt bridging networks analysis . . . . . | 3385 |
| 1225 | Interfacial 3HMG-specific salt bridging networks analysis . . . . . | 3387 |
| 1226 | Interfacial 3HZK-specific salt bridging networks analysis . . . . . | 3388 |
| 1227 | Interfacial 3HZM-specific salt bridging networks analysis . . . . . | 3389 |
| 1228 | Interfacial 3HZV-specific salt bridging networks analysis . . . . . | 3390 |

|      |                                                                     |      |
|------|---------------------------------------------------------------------|------|
| 1229 | Interfacial 3HZY-specific salt bridging networks analysis . . . . . | 3391 |
| 1230 | Interfacial 3I02-specific salt bridging networks analysis . . . . . | 3392 |
| 1231 | Interfacial 3IET-specific salt bridging networks analysis . . . . . | 3393 |
| 1232 | Interfacial 3IF1-specific salt bridging networks analysis . . . . . | 3394 |
| 1233 | Interfacial 3IJH-specific salt bridging networks analysis . . . . . | 3395 |
| 1234 | Interfacial 3IJS-specific salt bridging networks analysis . . . . . | 3396 |
| 1235 | Interfacial 3IJY-specific salt bridging networks analysis . . . . . | 3397 |
| 1236 | Interfacial 3IKC-specific salt bridging networks analysis . . . . . | 3398 |
| 1237 | Interfacial 3IU3-specific salt bridging networks analysis . . . . . | 3399 |
| 1238 | Interfacial 3J5M-specific salt bridging networks analysis . . . . . | 3400 |
| 1239 | Interfacial 3J70-specific salt bridging networks analysis . . . . . | 3401 |
| 1240 | Interfacial 3JCC-specific salt bridging networks analysis . . . . . | 3402 |
| 1241 | Interfacial 3KS0-specific salt bridging networks analysis . . . . . | 3403 |
| 1242 | Interfacial 3L7E-specific salt bridging networks analysis . . . . . | 3404 |
| 1243 | Interfacial 3LZF-specific salt bridging networks analysis . . . . . | 3405 |
| 1244 | Interfacial 3MLR-specific salt bridging networks analysis . . . . . | 3406 |
| 1245 | Interfacial 3MLS-specific salt bridging networks analysis . . . . . | 3407 |
| 1246 | Interfacial 3MLT-specific salt bridging networks analysis . . . . . | 3408 |
| 1247 | Interfacial 3MLU-specific salt bridging networks analysis . . . . . | 3409 |
| 1248 | Interfacial 3MLV-specific salt bridging networks analysis . . . . . | 3410 |
| 1249 | Interfacial 3MLW-specific salt bridging networks analysis . . . . . | 3411 |
| 1250 | Interfacial 3MLX-specific salt bridging networks analysis . . . . . | 3412 |
| 1251 | Interfacial 3MLY-specific salt bridging networks analysis . . . . . | 3413 |
| 1252 | Interfacial 3MLZ-specific salt bridging networks analysis . . . . . | 3414 |
| 1253 | Interfacial 3NFP-specific salt bridging networks analysis . . . . . | 3415 |
| 1254 | Interfacial 3NGB-specific salt bridging networks analysis . . . . . | 3416 |
| 1255 | Interfacial 3NH7-specific salt bridging networks analysis . . . . . | 3418 |
| 1256 | Interfacial 3NZ8-specific salt bridging networks analysis . . . . . | 3419 |
| 1257 | Interfacial 3O2D-specific salt bridging networks analysis . . . . . | 3420 |
| 1258 | Interfacial 3O41-specific salt bridging networks analysis . . . . . | 3421 |

|      |                                                                     |      |
|------|---------------------------------------------------------------------|------|
| 1259 | Interfacial 3O45-specific salt bridging networks analysis . . . . . | 3422 |
| 1260 | Interfacial 3OJD-specific salt bridging networks analysis . . . . . | 3423 |
| 1261 | Interfacial 3P0Y-specific salt bridging networks analysis . . . . . | 3424 |
| 1262 | Interfacial 3P11-specific salt bridging networks analysis . . . . . | 3425 |
| 1263 | Interfacial 3PGF-specific salt bridging networks analysis . . . . . | 3426 |
| 1264 | Interfacial 3PNW-specific salt bridging networks analysis . . . . . | 3427 |
| 1265 | Interfacial 3PP4-specific salt bridging networks analysis . . . . . | 3428 |
| 1266 | Interfacial 3Q3G-specific salt bridging networks analysis . . . . . | 3429 |
| 1267 | Interfacial 3QA3-specific salt bridging networks analysis . . . . . | 3431 |
| 1268 | Interfacial 3QG6-specific salt bridging networks analysis . . . . . | 3432 |
| 1269 | Interfacial 3QG7-specific salt bridging networks analysis . . . . . | 3433 |
| 1270 | Interfacial 3QO1-specific salt bridging networks analysis . . . . . | 3434 |
| 1271 | Interfacial 3QUM-specific salt bridging networks analysis . . . . . | 3435 |
| 1272 | Interfacial 3R08-specific salt bridging networks analysis . . . . . | 3436 |
| 1273 | Interfacial 3SE8-specific salt bridging networks analysis . . . . . | 3437 |
| 1274 | Interfacial 3SE9-specific salt bridging networks analysis . . . . . | 3438 |
| 1275 | Interfacial 3SGD-specific salt bridging networks analysis . . . . . | 3439 |
| 1276 | Interfacial 3SKJ-specific salt bridging networks analysis . . . . . | 3440 |
| 1277 | Interfacial 3SY0-specific salt bridging networks analysis . . . . . | 3441 |
| 1278 | Interfacial 3T4Y-specific salt bridging networks analysis . . . . . | 3442 |
| 1279 | Interfacial 3T65-specific salt bridging networks analysis . . . . . | 3443 |
| 1280 | Interfacial 3T77-specific salt bridging networks analysis . . . . . | 3444 |
| 1281 | Interfacial 3THM-specific salt bridging networks analysis . . . . . | 3445 |
| 1282 | Interfacial 3U1S-specific salt bridging networks analysis . . . . . | 3446 |
| 1283 | Interfacial 3U2S-specific salt bridging networks analysis . . . . . | 3447 |
| 1284 | Interfacial 3U36-specific salt bridging networks analysis . . . . . | 3448 |
| 1285 | Interfacial 3UBX-specific salt bridging networks analysis . . . . . | 3449 |
| 1286 | Interfacial 3UJI-specific salt bridging networks analysis . . . . . | 3450 |
| 1287 | Interfacial 3UJJ-specific salt bridging networks analysis . . . . . | 3451 |
| 1288 | Interfacial 3UJT-specific salt bridging networks analysis . . . . . | 3452 |



|      |                                                                     |      |
|------|---------------------------------------------------------------------|------|
| 1289 | Interfacial 3UO1-specific salt bridging networks analysis . . . . . | 3453 |
| 1290 | Interfacial 3UYR-specific salt bridging networks analysis . . . . . | 3454 |
| 1291 | Interfacial 3V4P-specific salt bridging networks analysis . . . . . | 3455 |
| 1292 | Interfacial 3V4U-specific salt bridging networks analysis . . . . . | 3456 |
| 1293 | Interfacial 3V4V-specific salt bridging networks analysis . . . . . | 3457 |
| 1294 | Interfacial 3V52-specific salt bridging networks analysis . . . . . | 3458 |
| 1295 | Interfacial 3V6F-specific salt bridging networks analysis . . . . . | 3459 |
| 1296 | Interfacial 3WIH-specific salt bridging networks analysis . . . . . | 3460 |
| 1297 | Interfacial 3WN5-specific salt bridging networks analysis . . . . . | 3461 |
| 1298 | Interfacial 4A6Y-specific salt bridging networks analysis . . . . . | 3462 |
| 1299 | Interfacial 4AG4-specific salt bridging networks analysis . . . . . | 3463 |
| 1300 | Interfacial 4C83-specific salt bridging networks analysis . . . . . | 3464 |
| 1301 | Interfacial 4DAG-specific salt bridging networks analysis . . . . . | 3465 |
| 1302 | Interfacial 4DGV-specific salt bridging networks analysis . . . . . | 3466 |
| 1303 | Interfacial 4DGY-specific salt bridging networks analysis . . . . . | 3467 |
| 1304 | Interfacial 4EBQ-specific salt bridging networks analysis . . . . . | 3468 |
| 1305 | Interfacial 4EDW-specific salt bridging networks analysis . . . . . | 3469 |
| 1306 | Interfacial 4EDX-specific salt bridging networks analysis . . . . . | 3470 |
| 1307 | Interfacial 4ETQ-specific salt bridging networks analysis . . . . . | 3471 |
| 1308 | Interfacial 4F33-specific salt bridging networks analysis . . . . . | 3472 |
| 1309 | Interfacial 4F3F-specific salt bridging networks analysis . . . . . | 3473 |
| 1310 | Interfacial 4FFV-specific salt bridging networks analysis . . . . . | 3474 |
| 1311 | Interfacial 4FFW-specific salt bridging networks analysis . . . . . | 3475 |
| 1312 | Interfacial 4FQH-specific salt bridging networks analysis . . . . . | 3476 |
| 1313 | Interfacial 4FQI-specific salt bridging networks analysis . . . . . | 3477 |
| 1314 | Interfacial 4G6A-specific salt bridging networks analysis . . . . . | 3478 |
| 1315 | Interfacial 4G6F-specific salt bridging networks analysis . . . . . | 3479 |
| 1316 | Interfacial 4GMT-specific salt bridging networks analysis . . . . . | 3480 |
| 1317 | Interfacial 4GXU-specific salt bridging networks analysis . . . . . | 3483 |
| 1318 | Interfacial 4GXV-specific salt bridging networks analysis . . . . . | 3484 |

|      |                                                                     |      |
|------|---------------------------------------------------------------------|------|
| 1319 | Interfacial 4GXX-specific salt bridging networks analysis . . . . . | 3486 |
| 1320 | Interfacial 4H8W-specific salt bridging networks analysis . . . . . | 3487 |
| 1321 | Interfacial 4HF5-specific salt bridging networks analysis . . . . . | 3488 |
| 1322 | Interfacial 4HGK-specific salt bridging networks analysis . . . . . | 3489 |
| 1323 | Interfacial 4HH9-specific salt bridging networks analysis . . . . . | 3490 |
| 1324 | Interfacial 4HHA-specific salt bridging networks analysis . . . . . | 3491 |
| 1325 | Interfacial 4HIE-specific salt bridging networks analysis . . . . . | 3492 |
| 1326 | Interfacial 4HIH-specific salt bridging networks analysis . . . . . | 3493 |
| 1327 | Interfacial 4HII-specific salt bridging networks analysis . . . . . | 3494 |
| 1328 | Interfacial 4HIJ-specific salt bridging networks analysis . . . . . | 3495 |
| 1329 | Interfacial 4HK0-specific salt bridging networks analysis . . . . . | 3496 |
| 1330 | Interfacial 4HK3-specific salt bridging networks analysis . . . . . | 3497 |
| 1331 | Interfacial 4HKB-specific salt bridging networks analysis . . . . . | 3498 |
| 1332 | Interfacial 4HKX-specific salt bridging networks analysis . . . . . | 3499 |
| 1333 | Interfacial 4HLZ-specific salt bridging networks analysis . . . . . | 3500 |
| 1334 | Interfacial 4HMG-specific salt bridging networks analysis . . . . . | 3502 |
| 1335 | Interfacial 4HWB-specific salt bridging networks analysis . . . . . | 3503 |
| 1336 | Interfacial 4HXA-specific salt bridging networks analysis . . . . . | 3504 |
| 1337 | Interfacial 4HXB-specific salt bridging networks analysis . . . . . | 3505 |
| 1338 | Interfacial 4I2X-specific salt bridging networks analysis . . . . . | 3506 |
| 1339 | Interfacial 4I3R-specific salt bridging networks analysis . . . . . | 3507 |
| 1340 | Interfacial 4I3S-specific salt bridging networks analysis . . . . . | 3508 |
| 1341 | Interfacial 4JAM-specific salt bridging networks analysis . . . . . | 3509 |
| 1342 | Interfacial 4JAN-specific salt bridging networks analysis . . . . . | 3510 |
| 1343 | Interfacial 4JHW-specific salt bridging networks analysis . . . . . | 3511 |
| 1344 | Interfacial 4JO1-specific salt bridging networks analysis . . . . . | 3512 |
| 1345 | Interfacial 4JO2-specific salt bridging networks analysis . . . . . | 3513 |
| 1346 | Interfacial 4JO3-specific salt bridging networks analysis . . . . . | 3514 |
| 1347 | Interfacial 4K24-specific salt bridging networks analysis . . . . . | 3515 |
| 1348 | Interfacial 4K2U-specific salt bridging networks analysis . . . . . | 3516 |

|      |                                                                     |      |
|------|---------------------------------------------------------------------|------|
| 1349 | Interfacial 4KI5-specific salt bridging networks analysis . . . . . | 3517 |
| 1350 | Interfacial 4KJY-specific salt bridging networks analysis . . . . . | 3518 |
| 1351 | Interfacial 4KPH-specific salt bridging networks analysis . . . . . | 3519 |
| 1352 | Interfacial 4KRL-specific salt bridging networks analysis . . . . . | 3520 |
| 1353 | Interfacial 4KRM-specific salt bridging networks analysis . . . . . | 3521 |
| 1354 | Interfacial 4KRO-specific salt bridging networks analysis . . . . . | 3522 |
| 1355 | Interfacial 4KRP-specific salt bridging networks analysis . . . . . | 3523 |
| 1356 | Interfacial 4KV5-specific salt bridging networks analysis . . . . . | 3524 |
| 1357 | Interfacial 4KXZ-specific salt bridging networks analysis . . . . . | 3525 |
| 1358 | Interfacial 4LQF-specific salt bridging networks analysis . . . . . | 3526 |
| 1359 | Interfacial 4LSS-specific salt bridging networks analysis . . . . . | 3527 |
| 1360 | Interfacial 4LST-specific salt bridging networks analysis . . . . . | 3528 |
| 1361 | Interfacial 4LU5-specific salt bridging networks analysis . . . . . | 3529 |
| 1362 | Interfacial 4M1D-specific salt bridging networks analysis . . . . . | 3530 |
| 1363 | Interfacial 4M1G-specific salt bridging networks analysis . . . . . | 3531 |
| 1364 | Interfacial 4M5Y-specific salt bridging networks analysis . . . . . | 3532 |
| 1365 | Interfacial 4M7J-specific salt bridging networks analysis . . . . . | 3533 |
| 1366 | Interfacial 4M7Z-specific salt bridging networks analysis . . . . . | 3534 |
| 1367 | Interfacial 4M93-specific salt bridging networks analysis . . . . . | 3535 |
| 1368 | Interfacial 4MA1-specific salt bridging networks analysis . . . . . | 3536 |
| 1369 | Interfacial 4N0Y-specific salt bridging networks analysis . . . . . | 3537 |
| 1370 | Interfacial 4N1H-specific salt bridging networks analysis . . . . . | 3538 |
| 1371 | Interfacial 4NC1-specific salt bridging networks analysis . . . . . | 3539 |
| 1372 | Interfacial 4NGH-specific salt bridging networks analysis . . . . . | 3540 |
| 1373 | Interfacial 4NIK-specific salt bridging networks analysis . . . . . | 3541 |
| 1374 | Interfacial 4NZR-specific salt bridging networks analysis . . . . . | 3542 |
| 1375 | Interfacial 4NZT-specific salt bridging networks analysis . . . . . | 3543 |
| 1376 | Interfacial 4NZU-specific salt bridging networks analysis . . . . . | 3544 |
| 1377 | Interfacial 4O5L-specific salt bridging networks analysis . . . . . | 3545 |
| 1378 | Interfacial 4OLU-specific salt bridging networks analysis . . . . . | 3546 |

|      |                                                                     |      |
|------|---------------------------------------------------------------------|------|
| 1379 | Interfacial 4OLV-specific salt bridging networks analysis . . . . . | 3547 |
| 1380 | Interfacial 4OLW-specific salt bridging networks analysis . . . . . | 3548 |
| 1381 | Interfacial 4OLX-specific salt bridging networks analysis . . . . . | 3549 |
| 1382 | Interfacial 4OLY-specific salt bridging networks analysis . . . . . | 3550 |
| 1383 | Interfacial 4OLZ-specific salt bridging networks analysis . . . . . | 3551 |
| 1384 | Interfacial 4OM0-specific salt bridging networks analysis . . . . . | 3552 |
| 1385 | Interfacial 4OM1-specific salt bridging networks analysis . . . . . | 3553 |
| 1386 | Interfacial 4OT1-specific salt bridging networks analysis . . . . . | 3554 |
| 1387 | Interfacial 4P9H-specific salt bridging networks analysis . . . . . | 3555 |
| 1388 | Interfacial 4PTT-specific salt bridging networks analysis . . . . . | 3556 |
| 1389 | Interfacial 4PTU-specific salt bridging networks analysis . . . . . | 3557 |
| 1390 | Interfacial 4Q6I-specific salt bridging networks analysis . . . . . | 3558 |
| 1391 | Interfacial 4Q9B-specific salt bridging networks analysis . . . . . | 3559 |
| 1392 | Interfacial 4QEX-specific salt bridging networks analysis . . . . . | 3560 |
| 1393 | Interfacial 4QHU-specific salt bridging networks analysis . . . . . | 3561 |
| 1394 | Interfacial 4QTI-specific salt bridging networks analysis . . . . . | 3562 |
| 1395 | Interfacial 4QXG-specific salt bridging networks analysis . . . . . | 3563 |
| 1396 | Interfacial 4R2G-specific salt bridging networks analysis . . . . . | 3564 |
| 1397 | Interfacial 4R4H-specific salt bridging networks analysis . . . . . | 3565 |
| 1398 | Interfacial 4R7D-specific salt bridging networks analysis . . . . . | 3566 |
| 1399 | Interfacial 4R7N-specific salt bridging networks analysis . . . . . | 3567 |
| 1400 | Interfacial 4R9Y-specific salt bridging networks analysis . . . . . | 3568 |
| 1401 | Interfacial 4RAU-specific salt bridging networks analysis . . . . . | 3569 |
| 1402 | Interfacial 4RRP-specific salt bridging networks analysis . . . . . | 3570 |
| 1403 | Interfacial 4TRP-specific salt bridging networks analysis . . . . . | 3571 |
| 1404 | Interfacial 4TUK-specific salt bridging networks analysis . . . . . | 3572 |
| 1405 | Interfacial 4TUL-specific salt bridging networks analysis . . . . . | 3573 |
| 1406 | Interfacial 4TUO-specific salt bridging networks analysis . . . . . | 3574 |
| 1407 | Interfacial 4U0Q-specific salt bridging networks analysis . . . . . | 3575 |
| 1408 | Interfacial 4U3X-specific salt bridging networks analysis . . . . . | 3576 |

|      |                                                                     |      |
|------|---------------------------------------------------------------------|------|
| 1409 | Interfacial 4U6G-specific salt bridging networks analysis . . . . . | 3577 |
| 1410 | Interfacial 4U6V-specific salt bridging networks analysis . . . . . | 3578 |
| 1411 | Interfacial 4UAO-specific salt bridging networks analysis . . . . . | 3579 |
| 1412 | Interfacial 4UV6-specific salt bridging networks analysis . . . . . | 3580 |
| 1413 | Interfacial 4WEU-specific salt bridging networks analysis . . . . . | 3581 |
| 1414 | Interfacial 4WHT-specific salt bridging networks analysis . . . . . | 3582 |
| 1415 | Interfacial 4WHY-specific salt bridging networks analysis . . . . . | 3583 |
| 1416 | Interfacial 4WUU-specific salt bridging networks analysis . . . . . | 3584 |
| 1417 | Interfacial 4XVJ-specific salt bridging networks analysis . . . . . | 3585 |
| 1418 | Interfacial 4YHP-specific salt bridging networks analysis . . . . . | 3586 |
| 1419 | Interfacial 4YHZ-specific salt bridging networks analysis . . . . . | 3587 |
| 1420 | Interfacial 4YNY-specific salt bridging networks analysis . . . . . | 3588 |
| 1421 | Interfacial 4YO0-specific salt bridging networks analysis . . . . . | 3589 |
| 1422 | Interfacial 4Z0X-specific salt bridging networks analysis . . . . . | 3590 |
| 1423 | Interfacial 4ZD3-specific salt bridging networks analysis . . . . . | 3591 |
| 1424 | Interfacial 4ZFF-specific salt bridging networks analysis . . . . . | 3592 |
| 1425 | Interfacial 4ZFG-specific salt bridging networks analysis . . . . . | 3593 |
| 1426 | Interfacial 4ZFO-specific salt bridging networks analysis . . . . . | 3594 |
| 1427 | Interfacial 5A7X-specific salt bridging networks analysis . . . . . | 3595 |
| 1428 | Interfacial 5A8H-specific salt bridging networks analysis . . . . . | 3597 |
| 1429 | Interfacial 5AZE-specific salt bridging networks analysis . . . . . | 3598 |
| 1430 | Interfacial 5BW7-specific salt bridging networks analysis . . . . . | 3599 |
| 1431 | Interfacial 5CMA-specific salt bridging networks analysis . . . . . | 3600 |
| 1432 | Interfacial 5CP3-specific salt bridging networks analysis . . . . . | 3601 |
| 1433 | Interfacial 5CP7-specific salt bridging networks analysis . . . . . | 3602 |
| 1434 | Interfacial 5DFV-specific salt bridging networks analysis . . . . . | 3603 |
| 1435 | Interfacial 5DFW-specific salt bridging networks analysis . . . . . | 3604 |
| 1436 | Interfacial 5DMI-specific salt bridging networks analysis . . . . . | 3605 |
| 1437 | Interfacial 5DMJ-specific salt bridging networks analysis . . . . . | 3606 |
| 1438 | Interfacial 5DWU-specific salt bridging networks analysis . . . . . | 3607 |

|      |                                                                     |      |
|------|---------------------------------------------------------------------|------|
| 1439 | Interfacial 5ERW-specific salt bridging networks analysis . . . . . | 3608 |
| 1440 | Interfacial 5EZI-specific salt bridging networks analysis . . . . . | 3609 |
| 1441 | Interfacial 5EZJ-specific salt bridging networks analysis . . . . . | 3610 |
| 1442 | Interfacial 5EZL-specific salt bridging networks analysis . . . . . | 3611 |
| 1443 | Interfacial 5EZN-specific salt bridging networks analysis . . . . . | 3612 |
| 1444 | Interfacial 5EZO-specific salt bridging networks analysis . . . . . | 3613 |
| 1445 | Interfacial 5GGV-specific salt bridging networks analysis . . . . . | 3614 |
| 1446 | Interfacial 5GKR-specific salt bridging networks analysis . . . . . | 3615 |
| 1447 | Interfacial 5GKS-specific salt bridging networks analysis . . . . . | 3616 |
| 1448 | Interfacial 5HDQ-specific salt bridging networks analysis . . . . . | 3617 |
| 1449 | Interfacial 5HMG-specific salt bridging networks analysis . . . . . | 3619 |
| 1450 | Interfacial 5I76-specific salt bridging networks analysis . . . . . | 3620 |
| 1451 | Interfacial 5ITB-specific salt bridging networks analysis . . . . . | 3621 |
| 1452 | Interfacial 5J3D-specific salt bridging networks analysis . . . . . | 3622 |
| 1453 | Interfacial 5JO5-specific salt bridging networks analysis . . . . . | 3623 |
| 1454 | Interfacial 5JOF-specific salt bridging networks analysis . . . . . | 3624 |
| 1455 | Interfacial 5JR1-specific salt bridging networks analysis . . . . . | 3625 |
| 1456 | Interfacial 5JUE-specific salt bridging networks analysis . . . . . | 3626 |
| 1457 | Interfacial 5JXA-specific salt bridging networks analysis . . . . . | 3627 |
| 1458 | Interfacial 5KZP-specific salt bridging networks analysis . . . . . | 3628 |
| 1459 | Interfacial 5LDN-specific salt bridging networks analysis . . . . . | 3629 |
| 1460 | Interfacial 5MO9-specific salt bridging networks analysis . . . . . | 3630 |
| 1461 | Interfacial 5N4J-specific salt bridging networks analysis . . . . . | 3631 |
| 1462 | Interfacial 5N7W-specific salt bridging networks analysis . . . . . | 3632 |
| 1463 | Interfacial 5NPH-specific salt bridging networks analysis . . . . . | 3633 |
| 1464 | Interfacial 5NPI-specific salt bridging networks analysis . . . . . | 3634 |
| 1465 | Interfacial 5NPJ-specific salt bridging networks analysis . . . . . | 3635 |
| 1466 | Interfacial 5NST-specific salt bridging networks analysis . . . . . | 3636 |
| 1467 | Interfacial 5NUZ-specific salt bridging networks analysis . . . . . | 3637 |
| 1468 | Interfacial 5O14-specific salt bridging networks analysis . . . . . | 3638 |

|      |                                                                     |      |
|------|---------------------------------------------------------------------|------|
| 1469 | Interfacial 5O1R-specific salt bridging networks analysis . . . . . | 3639 |
| 1470 | Interfacial 5OLM-specific salt bridging networks analysis . . . . . | 3640 |
| 1471 | Interfacial 5OPY-specific salt bridging networks analysis . . . . . | 3641 |
| 1472 | Interfacial 5T6P-specific salt bridging networks analysis . . . . . | 3642 |
| 1473 | Interfacial 5T78-specific salt bridging networks analysis . . . . . | 3643 |
| 1474 | Interfacial 5TIH-specific salt bridging networks analysis . . . . . | 3644 |
| 1475 | Interfacial 5TIK-specific salt bridging networks analysis . . . . . | 3645 |
| 1476 | Interfacial 5TL5-specific salt bridging networks analysis . . . . . | 3646 |
| 1477 | Interfacial 5TLJ-specific salt bridging networks analysis . . . . . | 3647 |
| 1478 | Interfacial 5TLK-specific salt bridging networks analysis . . . . . | 3648 |
| 1479 | Interfacial 5TRU-specific salt bridging networks analysis . . . . . | 3649 |
| 1480 | Interfacial 5TZ2-specific salt bridging networks analysis . . . . . | 3650 |
| 1481 | Interfacial 5TZT-specific salt bridging networks analysis . . . . . | 3651 |
| 1482 | Interfacial 5TZU-specific salt bridging networks analysis . . . . . | 3652 |
| 1483 | Interfacial 5U3J-specific salt bridging networks analysis . . . . . | 3653 |
| 1484 | Interfacial 5U3N-specific salt bridging networks analysis . . . . . | 3654 |
| 1485 | Interfacial 5UCB-specific salt bridging networks analysis . . . . . | 3655 |
| 1486 | Interfacial 5UEA-specific salt bridging networks analysis . . . . . | 3656 |
| 1487 | Interfacial 5UEK-specific salt bridging networks analysis . . . . . | 3657 |
| 1488 | Interfacial 5UG0-specific salt bridging networks analysis . . . . . | 3658 |
| 1489 | Interfacial 5UJZ-specific salt bridging networks analysis . . . . . | 3660 |
| 1490 | Interfacial 5UK0-specific salt bridging networks analysis . . . . . | 3662 |
| 1491 | Interfacial 5UK1-specific salt bridging networks analysis . . . . . | 3664 |
| 1492 | Interfacial 5UK2-specific salt bridging networks analysis . . . . . | 3666 |
| 1493 | Interfacial 5UR8-specific salt bridging networks analysis . . . . . | 3667 |
| 1494 | Interfacial 5VL3-specific salt bridging networks analysis . . . . . | 3668 |
| 1495 | Interfacial 5VN8-specific salt bridging networks analysis . . . . . | 3669 |
| 1496 | Interfacial 5VXJ-specific salt bridging networks analysis . . . . . | 3670 |
| 1497 | Interfacial 5VXL-specific salt bridging networks analysis . . . . . | 3671 |
| 1498 | Interfacial 5VXM-specific salt bridging networks analysis . . . . . | 3672 |

|      |                                                                     |      |
|------|---------------------------------------------------------------------|------|
| 1499 | Interfacial 5VXR-specific salt bridging networks analysis . . . . . | 3673 |
| 1500 | Interfacial 5VZR-specific salt bridging networks analysis . . . . . | 3674 |
| 1501 | Interfacial 5W9H-specific salt bridging networks analysis . . . . . | 3675 |
| 1502 | Interfacial 5W9I-specific salt bridging networks analysis . . . . . | 3676 |
| 1503 | Interfacial 5W9J-specific salt bridging networks analysis . . . . . | 3677 |
| 1504 | Interfacial 5W9K-specific salt bridging networks analysis . . . . . | 3678 |
| 1505 | Interfacial 5W9L-specific salt bridging networks analysis . . . . . | 3679 |
| 1506 | Interfacial 5W9M-specific salt bridging networks analysis . . . . . | 3680 |
| 1507 | Interfacial 5W9N-specific salt bridging networks analysis . . . . . | 3681 |
| 1508 | Interfacial 5W9O-specific salt bridging networks analysis . . . . . | 3682 |
| 1509 | Interfacial 5W9P-specific salt bridging networks analysis . . . . . | 3683 |
| 1510 | Interfacial 5WK4-specific salt bridging networks analysis . . . . . | 3684 |
| 1511 | Interfacial 5WKQ-specific salt bridging networks analysis . . . . . | 3685 |
| 1512 | Interfacial 5WNA-specific salt bridging networks analysis . . . . . | 3686 |
| 1513 | Interfacial 5WNB-specific salt bridging networks analysis . . . . . | 3687 |
| 1514 | Interfacial 5XBM-specific salt bridging networks analysis . . . . . | 3688 |
| 1515 | Interfacial 5XCQ-specific salt bridging networks analysis . . . . . | 3689 |
| 1516 | Interfacial 5XCR-specific salt bridging networks analysis . . . . . | 3690 |
| 1517 | Interfacial 5XCS-specific salt bridging networks analysis . . . . . | 3691 |
| 1518 | Interfacial 5XCT-specific salt bridging networks analysis . . . . . | 3692 |
| 1519 | Interfacial 5XCU-specific salt bridging networks analysis . . . . . | 3693 |
| 1520 | Interfacial 5XCV-specific salt bridging networks analysis . . . . . | 3694 |
| 1521 | Interfacial 5XRT-specific salt bridging networks analysis . . . . . | 3696 |
| 1522 | Interfacial 5XWD-specific salt bridging networks analysis . . . . . | 3697 |
| 1523 | Interfacial 5YC5-specific salt bridging networks analysis . . . . . | 3698 |
| 1524 | Interfacial 5ZV3-specific salt bridging networks analysis . . . . . | 3699 |
| 1525 | Interfacial 6A3V-specific salt bridging networks analysis . . . . . | 3700 |
| 1526 | Interfacial 6A3W-specific salt bridging networks analysis . . . . . | 3701 |
| 1527 | Interfacial 6A76-specific salt bridging networks analysis . . . . . | 3702 |
| 1528 | Interfacial 6A77-specific salt bridging networks analysis . . . . . | 3703 |



|      |                                                                     |      |
|------|---------------------------------------------------------------------|------|
| 1529 | Interfacial 6A78-specific salt bridging networks analysis . . . . . | 3704 |
| 1530 | Interfacial 6A79-specific salt bridging networks analysis . . . . . | 3705 |
| 1531 | Interfacial 6AL5-specific salt bridging networks analysis . . . . . | 3706 |
| 1532 | Interfacial 6AND-specific salt bridging networks analysis . . . . . | 3707 |
| 1533 | Interfacial 6ANI-specific salt bridging networks analysis . . . . . | 3708 |
| 1534 | Interfacial 6AQ7-specific salt bridging networks analysis . . . . . | 3709 |
| 1535 | Interfacial 6ATT-specific salt bridging networks analysis . . . . . | 3710 |
| 1536 | Interfacial 6AZZ-specific salt bridging networks analysis . . . . . | 3711 |
| 1537 | Interfacial 6B08-specific salt bridging networks analysis . . . . . | 3712 |
| 1538 | Interfacial 6B0E-specific salt bridging networks analysis . . . . . | 3713 |
| 1539 | Interfacial 6B0G-specific salt bridging networks analysis . . . . . | 3714 |
| 1540 | Interfacial 6BE2-specific salt bridging networks analysis . . . . . | 3715 |
| 1541 | Interfacial 6BE3-specific salt bridging networks analysis . . . . . | 3716 |
| 1542 | Interfacial 6BE4-specific salt bridging networks analysis . . . . . | 3717 |
| 1543 | Interfacial 6BIT-specific salt bridging networks analysis . . . . . | 3718 |
| 1544 | Interfacial 6BXA-specific salt bridging networks analysis . . . . . | 3719 |
| 1545 | Interfacial 6BXC-specific salt bridging networks analysis . . . . . | 3720 |
| 1546 | Interfacial 6BXE-specific salt bridging networks analysis . . . . . | 3721 |
| 1547 | Interfacial 6BZU-specific salt bridging networks analysis . . . . . | 3722 |
| 1548 | Interfacial 6BZV-specific salt bridging networks analysis . . . . . | 3723 |
| 1549 | Interfacial 6BZW-specific salt bridging networks analysis . . . . . | 3724 |
| 1550 | Interfacial 6C5H-specific salt bridging networks analysis . . . . . | 3725 |
| 1551 | Interfacial 6C5I-specific salt bridging networks analysis . . . . . | 3726 |
| 1552 | Interfacial 6C5J-specific salt bridging networks analysis . . . . . | 3727 |
| 1553 | Interfacial 6C6X-specific salt bridging networks analysis . . . . . | 3728 |
| 1554 | Interfacial 6C6Y-specific salt bridging networks analysis . . . . . | 3729 |
| 1555 | Interfacial 6C6Z-specific salt bridging networks analysis . . . . . | 3730 |
| 1556 | Interfacial 6CUJ-specific salt bridging networks analysis . . . . . | 3731 |
| 1557 | Interfacial 6DC3-specific salt bridging networks analysis . . . . . | 3732 |
| 1558 | Interfacial 6DC4-specific salt bridging networks analysis . . . . . | 3733 |

|      |                                                                     |      |
|------|---------------------------------------------------------------------|------|
| 1559 | Interfacial 6DC5-specific salt bridging networks analysis . . . . . | 3734 |
| 1560 | Interfacial 6DCV-specific salt bridging networks analysis . . . . . | 3735 |
| 1561 | Interfacial 6DCW-specific salt bridging networks analysis . . . . . | 3736 |
| 1562 | Interfacial 6DDM-specific salt bridging networks analysis . . . . . | 3737 |
| 1563 | Interfacial 6DDR-specific salt bridging networks analysis . . . . . | 3738 |
| 1564 | Interfacial 6DDV-specific salt bridging networks analysis . . . . . | 3739 |
| 1565 | Interfacial 6DFG-specific salt bridging networks analysis . . . . . | 3740 |
| 1566 | Interfacial 6DFH-specific salt bridging networks analysis . . . . . | 3741 |
| 1567 | Interfacial 6DG2-specific salt bridging networks analysis . . . . . | 3742 |
| 1568 | Interfacial 6E62-specific salt bridging networks analysis . . . . . | 3743 |
| 1569 | Interfacial 6E63-specific salt bridging networks analysis . . . . . | 3744 |
| 1570 | Interfacial 6E64-specific salt bridging networks analysis . . . . . | 3745 |
| 1571 | Interfacial 6E65-specific salt bridging networks analysis . . . . . | 3746 |
| 1572 | Interfacial 6E8V-specific salt bridging networks analysis . . . . . | 3747 |
| 1573 | Interfacial 6E9G-specific salt bridging networks analysis . . . . . | 3748 |
| 1574 | Interfacial 6E9H-specific salt bridging networks analysis . . . . . | 3749 |
| 1575 | Interfacial 6E9I-specific salt bridging networks analysis . . . . . | 3750 |
| 1576 | Interfacial 6E9K-specific salt bridging networks analysis . . . . . | 3751 |
| 1577 | Interfacial 6E9Q-specific salt bridging networks analysis . . . . . | 3752 |
| 1578 | Interfacial 6E9U-specific salt bridging networks analysis . . . . . | 3753 |
| 1579 | Interfacial 6EDU-specific salt bridging networks analysis . . . . . | 3754 |
| 1580 | Interfacial 6EJG-specific salt bridging networks analysis . . . . . | 3755 |
| 1581 | Interfacial 6EJM-specific salt bridging networks analysis . . . . . | 3756 |
| 1582 | Interfacial 6EK2-specific salt bridging networks analysis . . . . . | 3757 |
| 1583 | Interfacial 6EUN-specific salt bridging networks analysis . . . . . | 3758 |
| 1584 | Interfacial 6EUP-specific salt bridging networks analysis . . . . . | 3759 |
| 1585 | Interfacial 6EV1-specific salt bridging networks analysis . . . . . | 3760 |
| 1586 | Interfacial 6EV2-specific salt bridging networks analysis . . . . . | 3761 |
| 1587 | Interfacial 6EWB-specific salt bridging networks analysis . . . . . | 3762 |
| 1588 | Interfacial 6FAB-specific salt bridging networks analysis . . . . . | 3763 |

|      |                                                                     |      |
|------|---------------------------------------------------------------------|------|
| 1589 | Interfacial 6FAX-specific salt bridging networks analysis . . . . . | 3764 |
| 1590 | Interfacial 6FN1-specific salt bridging networks analysis . . . . . | 3765 |
| 1591 | Interfacial 6FN4-specific salt bridging networks analysis . . . . . | 3766 |
| 1592 | Interfacial 6GK7-specific salt bridging networks analysis . . . . . | 3767 |
| 1593 | Interfacial 6GK8-specific salt bridging networks analysis . . . . . | 3768 |
| 1594 | Interfacial 6H2Y-specific salt bridging networks analysis . . . . . | 3769 |
| 1595 | Interfacial 6I3Z-specific salt bridging networks analysis . . . . . | 3770 |
| 1596 | Interfacial 6IAP-specific salt bridging networks analysis . . . . . | 3771 |
| 1597 | Interfacial 6JMQ-specific salt bridging networks analysis . . . . . | 3772 |
| 1598 | Interfacial 6JMR-specific salt bridging networks analysis . . . . . | 3773 |
| 1599 | Interfacial 6K7O-specific salt bridging networks analysis . . . . . | 3774 |
| 1600 | Interfacial 6KN9-specific salt bridging networks analysis . . . . . | 3775 |
| 1601 | Interfacial 6MHR-specific salt bridging networks analysis . . . . . | 3776 |
| 1602 | Interfacial 6MI2-specific salt bridging networks analysis . . . . . | 3777 |
| 1603 | Interfacial 6MN7-specific salt bridging networks analysis . . . . . | 3778 |
| 1604 | Interfacial 6MPG-specific salt bridging networks analysis . . . . . | 3779 |
| 1605 | Interfacial 6MPH-specific salt bridging networks analysis . . . . . | 3780 |
| 1606 | Interfacial 6MQC-specific salt bridging networks analysis . . . . . | 3781 |
| 1607 | Interfacial 6MQE-specific salt bridging networks analysis . . . . . | 3782 |
| 1608 | Interfacial 6MQM-specific salt bridging networks analysis . . . . . | 3783 |
| 1609 | Interfacial 6MQR-specific salt bridging networks analysis . . . . . | 3784 |
| 1610 | Interfacial 6MQS-specific salt bridging networks analysis . . . . . | 3785 |
| 1611 | Interfacial 6N16-specific salt bridging networks analysis . . . . . | 3786 |
| 1612 | Interfacial 6N1V-specific salt bridging networks analysis . . . . . | 3787 |
| 1613 | Interfacial 6N1W-specific salt bridging networks analysis . . . . . | 3788 |
| 1614 | Interfacial 6N5B-specific salt bridging networks analysis . . . . . | 3789 |
| 1615 | Interfacial 6N5D-specific salt bridging networks analysis . . . . . | 3790 |
| 1616 | Interfacial 6N5E-specific salt bridging networks analysis . . . . . | 3791 |
| 1617 | Interfacial 6N6B-specific salt bridging networks analysis . . . . . | 3792 |
| 1618 | Interfacial 6NB5-specific salt bridging networks analysis . . . . . | 3793 |

|      |                                                                     |      |
|------|---------------------------------------------------------------------|------|
| 1619 | Interfacial 6NB8-specific salt bridging networks analysis . . . . . | 3794 |
| 1620 | Interfacial 6NC2-specific salt bridging networks analysis . . . . . | 3796 |
| 1621 | Interfacial 6NC3-specific salt bridging networks analysis . . . . . | 3798 |
| 1622 | Interfacial 6NEX-specific salt bridging networks analysis . . . . . | 3799 |
| 1623 | Interfacial 6NF2-specific salt bridging networks analysis . . . . . | 3800 |
| 1624 | Interfacial 6NF5-specific salt bridging networks analysis . . . . . | 3801 |
| 1625 | Interfacial 6NFC-specific salt bridging networks analysis . . . . . | 3802 |
| 1626 | Interfacial 6NMR-specific salt bridging networks analysis . . . . . | 3803 |
| 1627 | Interfacial 6NMS-specific salt bridging networks analysis . . . . . | 3804 |
| 1628 | Interfacial 6NMT-specific salt bridging networks analysis . . . . . | 3805 |
| 1629 | Interfacial 6NMU-specific salt bridging networks analysis . . . . . | 3806 |
| 1630 | Interfacial 6O9B-specific salt bridging networks analysis . . . . . | 3807 |
| 1631 | Interfacial 6O9C-specific salt bridging networks analysis . . . . . | 3808 |
| 1632 | Interfacial 6OGX-specific salt bridging networks analysis . . . . . | 3809 |
| 1633 | Interfacial 6OKM-specific salt bridging networks analysis . . . . . | 3810 |
| 1634 | Interfacial 6OKN-specific salt bridging networks analysis . . . . . | 3811 |
| 1635 | Interfacial 6OOR-specific salt bridging networks analysis . . . . . | 3812 |
| 1636 | Interfacial 6OSY-specific salt bridging networks analysis . . . . . | 3813 |
| 1637 | Interfacial 6OT1-specific salt bridging networks analysis . . . . . | 3814 |
| 1638 | Interfacial 6P62-specific salt bridging networks analysis . . . . . | 3815 |
| 1639 | Interfacial 6P65-specific salt bridging networks analysis . . . . . | 3816 |
| 1640 | Interfacial 6PE8-specific salt bridging networks analysis . . . . . | 3817 |
| 1641 | Interfacial 6PE9-specific salt bridging networks analysis . . . . . | 3818 |
| 1642 | Interfacial 6PHB-specific salt bridging networks analysis . . . . . | 3819 |
| 1643 | Interfacial 6PHC-specific salt bridging networks analysis . . . . . | 3820 |
| 1644 | Interfacial 6PHD-specific salt bridging networks analysis . . . . . | 3821 |
| 1645 | Interfacial 6PHF-specific salt bridging networks analysis . . . . . | 3822 |
| 1646 | Interfacial 6PHG-specific salt bridging networks analysis . . . . . | 3823 |
| 1647 | Interfacial 6PHH-specific salt bridging networks analysis . . . . . | 3824 |
| 1648 | Interfacial 6PI7-specific salt bridging networks analysis . . . . . | 3825 |

|      |                                                                             |      |
|------|-----------------------------------------------------------------------------|------|
| 1649 | Interfacial 6PYC-specific salt bridging networks analysis . . . . .         | 3826 |
| 1650 | Interfacial 6PYD-specific salt bridging networks analysis . . . . .         | 3827 |
| 1651 | Interfacial 6PZW-specific salt bridging networks analysis . . . . .         | 3828 |
| 1652 | Interfacial 6RPS-specific salt bridging networks analysis . . . . .         | 3829 |
| 1653 | Interfacial 6S3T-specific salt bridging networks analysis . . . . .         | 3830 |
| 1654 | Interfacial 6U02-specific salt bridging networks analysis . . . . .         | 3831 |
| 1655 | Interfacial 6U59-specific salt bridging networks analysis . . . . .         | 3832 |
| 1656 | Interfacial 6UG7-specific salt bridging networks analysis . . . . .         | 3833 |
| 1657 | Interfacial 6UG8-specific salt bridging networks analysis . . . . .         | 3834 |
| 1658 | Interfacial 6UG9-specific salt bridging networks analysis . . . . .         | 3835 |
| 1659 | Interfacial 6UGA-specific salt bridging networks analysis . . . . .         | 3836 |
| 1660 | 1A14-specific side chain and main chain hydrogen bonding analysis . . . . . | 3837 |
| 1661 | 1E6J-specific side chain and main chain hydrogen bonding analysis . . . . . | 3838 |
| 1662 | 1F3R-specific side chain and main chain hydrogen bonding analysis . . . . . | 3840 |
| 1663 | 1HCV-specific side chain and main chain hydrogen bonding analysis . . . . . | 3842 |
| 1664 | 1HGD-specific side chain and main chain hydrogen bonding analysis . . . . . | 3858 |
| 1665 | 1HGE-specific side chain and main chain hydrogen bonding analysis . . . . . | 3874 |
| 1666 | 1HGF-specific side chain and main chain hydrogen bonding analysis . . . . . | 3889 |
| 1667 | 1HGG-specific side chain and main chain hydrogen bonding analysis . . . . . | 3905 |
| 1668 | 1HGH-specific side chain and main chain hydrogen bonding analysis . . . . . | 3921 |
| 1669 | 1HGI-specific side chain and main chain hydrogen bonding analysis . . . . . | 3937 |
| 1670 | 1HGJ-specific side chain and main chain hydrogen bonding analysis . . . . . | 3953 |
| 1671 | 1OSP-specific side chain and main chain hydrogen bonding analysis . . . . . | 3960 |
| 1672 | 1PSK-specific side chain and main chain hydrogen bonding analysis . . . . . | 3963 |
| 1673 | 1R21-specific side chain and main chain hydrogen bonding analysis . . . . . | 3974 |
| 1674 | 1S4H-specific side chain and main chain hydrogen bonding analysis . . . . . | 3975 |
| 1675 | 1S4J-specific side chain and main chain hydrogen bonding analysis . . . . . | 3976 |
| 1676 | 1TOR-specific side chain and main chain hydrogen bonding analysis . . . . . | 3977 |
| 1677 | 1TOS-specific side chain and main chain hydrogen bonding analysis . . . . . | 3978 |
| 1678 | 1VFB-specific side chain and main chain hydrogen bonding analysis . . . . . | 3982 |

|                                                                                  |      |
|----------------------------------------------------------------------------------|------|
| 1679 2MKL-specific side chain and main chain hydrogen bonding analysis . . . . . | 3990 |
| 1680 2RLL-specific side chain and main chain hydrogen bonding analysis . . . . . | 3991 |
| 1681 3SE8-specific side chain and main chain hydrogen bonding analysis . . . . . | 3998 |
| 1682 3SE9-specific side chain and main chain hydrogen bonding analysis . . . . . | 4005 |
| 1683 3THM-specific side chain and main chain hydrogen bonding analysis . . . . . | 4010 |
| 1684 3TJE-specific side chain and main chain hydrogen bonding analysis . . . . . | 4015 |
| 1685 3U2S-specific side chain and main chain hydrogen bonding analysis . . . . . | 4024 |
| 1686 3UYR-specific side chain and main chain hydrogen bonding analysis . . . . . | 4029 |
| 1687 3X0E-specific side chain and main chain hydrogen bonding analysis . . . . . | 4031 |
| 1688 3X0F-specific side chain and main chain hydrogen bonding analysis . . . . . | 4033 |
| 1689 4F33-specific side chain and main chain hydrogen bonding analysis . . . . . | 4050 |
| 1690 4F3F-specific side chain and main chain hydrogen bonding analysis . . . . . | 4054 |
| 1691 4JAM-specific side chain and main chain hydrogen bonding analysis . . . . . | 4062 |
| 1692 4JAN-specific side chain and main chain hydrogen bonding analysis . . . . . | 4067 |
| 1693 4KRM-specific side chain and main chain hydrogen bonding analysis . . . . . | 4081 |
| 1694 4KRO-specific side chain and main chain hydrogen bonding analysis . . . . . | 4087 |
| 1695 4KRP-specific side chain and main chain hydrogen bonding analysis . . . . . | 4093 |
| 1696 4NZR-specific side chain and main chain hydrogen bonding analysis . . . . . | 4102 |
| 1697 4NZU-specific side chain and main chain hydrogen bonding analysis . . . . . | 4106 |
| 1698 4QEX-specific side chain and main chain hydrogen bonding analysis . . . . . | 4107 |
| 1699 4WUU-specific side chain and main chain hydrogen bonding analysis . . . . . | 4112 |
| 1700 4Z0X-specific side chain and main chain hydrogen bonding analysis . . . . . | 4114 |
| 1701 5I76-specific side chain and main chain hydrogen bonding analysis . . . . . | 4123 |
| 1702 5JO5-specific side chain and main chain hydrogen bonding analysis . . . . . | 4139 |
| 1703 5JR1-specific side chain and main chain hydrogen bonding analysis . . . . . | 4144 |
| 1704 5JUE-specific side chain and main chain hydrogen bonding analysis . . . . . | 4149 |
| 1705 5JXA-specific side chain and main chain hydrogen bonding analysis . . . . . | 4154 |
| 1706 5M2C-specific side chain and main chain hydrogen bonding analysis . . . . . | 4156 |
| 1707 5M33-specific side chain and main chain hydrogen bonding analysis . . . . . | 4158 |
| 1708 5M3D-specific side chain and main chain hydrogen bonding analysis . . . . . | 4162 |

|                                                                                  |      |
|----------------------------------------------------------------------------------|------|
| 1709 5M3T-specific side chain and main chain hydrogen bonding analysis . . . . . | 4164 |
| 1710 5M4R-specific side chain and main chain hydrogen bonding analysis . . . . . | 4166 |
| 1711 5T6P-specific side chain and main chain hydrogen bonding analysis . . . . . | 4173 |
| 1712 5T78-specific side chain and main chain hydrogen bonding analysis . . . . . | 4180 |
| 1713 5U3J-specific side chain and main chain hydrogen bonding analysis . . . . . | 4183 |
| 1714 5U3N-specific side chain and main chain hydrogen bonding analysis . . . . . | 4188 |
| 1715 5UCB-specific side chain and main chain hydrogen bonding analysis . . . . . | 4194 |
| 1716 5UJZ-specific side chain and main chain hydrogen bonding analysis . . . . . | 4196 |
| 1717 5UK0-specific side chain and main chain hydrogen bonding analysis . . . . . | 4200 |
| 1718 5UK1-specific side chain and main chain hydrogen bonding analysis . . . . . | 4201 |
| 1719 5UK2-specific side chain and main chain hydrogen bonding analysis . . . . . | 4202 |
| 1720 5VXJ-specific side chain and main chain hydrogen bonding analysis . . . . . | 4218 |
| 1721 5VXK-specific side chain and main chain hydrogen bonding analysis . . . . . | 4221 |
| 1722 5VXL-specific side chain and main chain hydrogen bonding analysis . . . . . | 4225 |
| 1723 5VXM-specific side chain and main chain hydrogen bonding analysis . . . . . | 4229 |
| 1724 5VXR-specific side chain and main chain hydrogen bonding analysis . . . . . | 4234 |
| 1725 5WKQ-specific side chain and main chain hydrogen bonding analysis . . . . . | 4238 |
| 1726 5WN9-specific side chain and main chain hydrogen bonding analysis . . . . . | 4241 |
| 1727 1A14-specific side chain hydrogen bonding analysis . . . . .                | 4242 |
| 1728 1E6J-specific side chain hydrogen bonding analysis . . . . .                | 4243 |
| 1729 1F3R-specific side chain hydrogen bonding analysis . . . . .                | 4244 |
| 1730 1HCV-specific side chain hydrogen bonding analysis . . . . .                | 4245 |
| 1731 1HGD-specific side chain hydrogen bonding analysis . . . . .                | 4249 |
| 1732 1HGE-specific side chain hydrogen bonding analysis . . . . .                | 4253 |
| 1733 1HGF-specific side chain hydrogen bonding analysis . . . . .                | 4257 |
| 1734 1HGG-specific side chain hydrogen bonding analysis . . . . .                | 4262 |
| 1735 1HGH-specific side chain hydrogen bonding analysis . . . . .                | 4266 |
| 1736 1HGI-specific side chain hydrogen bonding analysis . . . . .                | 4270 |
| 1737 1HGI-specific side chain hydrogen bonding analysis . . . . .                | 4274 |
| 1738 1OSP-specific side chain hydrogen bonding analysis . . . . .                | 4275 |

|                                                                   |      |
|-------------------------------------------------------------------|------|
| 1739 1PSK-specific side chain hydrogen bonding analysis . . . . . | 4276 |
| 1740 1R21-specific side chain hydrogen bonding analysis . . . . . | 4277 |
| 1741 1VFB-specific side chain hydrogen bonding analysis . . . . . | 4278 |
| 1742 2MKL-specific side chain hydrogen bonding analysis . . . . . | 4280 |
| 1743 3SE8-specific side chain hydrogen bonding analysis . . . . . | 4281 |
| 1744 3SE9-specific side chain hydrogen bonding analysis . . . . . | 4282 |
| 1745 3THM-specific side chain hydrogen bonding analysis . . . . . | 4283 |
| 1746 3TJE-specific side chain hydrogen bonding analysis . . . . . | 4284 |
| 1747 3U2S-specific side chain hydrogen bonding analysis . . . . . | 4286 |
| 1748 3UYR-specific side chain hydrogen bonding analysis . . . . . | 4287 |
| 1749 3X0E-specific side chain hydrogen bonding analysis . . . . . | 4288 |
| 1750 3X0F-specific side chain hydrogen bonding analysis . . . . . | 4289 |
| 1751 4F33-specific side chain hydrogen bonding analysis . . . . . | 4291 |
| 1752 4F3F-specific side chain hydrogen bonding analysis . . . . . | 4292 |
| 1753 4JAM-specific side chain hydrogen bonding analysis . . . . . | 4293 |
| 1754 4JAN-specific side chain hydrogen bonding analysis . . . . . | 4294 |
| 1755 4KRM-specific side chain hydrogen bonding analysis . . . . . | 4296 |
| 1756 4KRO-specific side chain hydrogen bonding analysis . . . . . | 4297 |
| 1757 4KRP-specific side chain hydrogen bonding analysis . . . . . | 4298 |
| 1758 4NZR-specific side chain hydrogen bonding analysis . . . . . | 4300 |
| 1759 4NZU-specific side chain hydrogen bonding analysis . . . . . | 4301 |
| 1760 4QEX-specific side chain hydrogen bonding analysis . . . . . | 4302 |
| 1761 4WUU-specific side chain hydrogen bonding analysis . . . . . | 4303 |
| 1762 4Z0X-specific side chain hydrogen bonding analysis . . . . . | 4304 |
| 1763 5I76-specific side chain hydrogen bonding analysis . . . . . | 4306 |
| 1764 5JO5-specific side chain hydrogen bonding analysis . . . . . | 4309 |
| 1765 5JR1-specific side chain hydrogen bonding analysis . . . . . | 4310 |
| 1766 5JUE-specific side chain hydrogen bonding analysis . . . . . | 4311 |
| 1767 5JXA-specific side chain hydrogen bonding analysis . . . . . | 4312 |
| 1768 5M2C-specific side chain hydrogen bonding analysis . . . . . | 4313 |



|                                                                                    |      |
|------------------------------------------------------------------------------------|------|
| 1769 5M33-specific side chain hydrogen bonding analysis . . . . .                  | 4314 |
| 1770 5M3D-specific side chain hydrogen bonding analysis . . . . .                  | 4315 |
| 1771 5M3T-specific side chain hydrogen bonding analysis . . . . .                  | 4316 |
| 1772 5M4R-specific side chain hydrogen bonding analysis . . . . .                  | 4317 |
| 1773 5T6P-specific side chain hydrogen bonding analysis . . . . .                  | 4318 |
| 1774 5T78-specific side chain hydrogen bonding analysis . . . . .                  | 4319 |
| 1775 5U3J-specific side chain hydrogen bonding analysis . . . . .                  | 4320 |
| 1776 5U3N-specific side chain hydrogen bonding analysis . . . . .                  | 4321 |
| 1777 5UCB-specific side chain hydrogen bonding analysis . . . . .                  | 4322 |
| 1778 5UK0-specific side chain hydrogen bonding analysis . . . . .                  | 4323 |
| 1779 5VXJ-specific side chain hydrogen bonding analysis . . . . .                  | 4325 |
| 1780 5VXK-specific side chain hydrogen bonding analysis . . . . .                  | 4326 |
| 1781 5VXL-specific side chain hydrogen bonding analysis . . . . .                  | 4327 |
| 1782 5VXM-specific side chain hydrogen bonding analysis . . . . .                  | 4328 |
| 1783 5VXR-specific side chain hydrogen bonding analysis . . . . .                  | 4329 |
| 1784 5WKQ-specific side chain hydrogen bonding analysis . . . . .                  | 4330 |
| 1785 5WN9-specific side chain hydrogen bonding analysis . . . . .                  | 4331 |
| 1786 Interfacial 1A14-specific side chain and main chain hydrogen bonding analysis | 4332 |
| 1787 Interfacial 1E6J-specific side chain and main chain hydrogen bonding analysis | 4333 |
| 1788 Interfacial 1F3R-specific side chain and main chain hydrogen bonding analysis | 4334 |
| 1789 Interfacial 1HGD-specific side chain and main chain hydrogen bonding analysis | 4337 |
| 1790 Interfacial 1HGE-specific side chain and main chain hydrogen bonding analysis | 4340 |
| 1791 Interfacial 1HGF-specific side chain and main chain hydrogen bonding analysis | 4343 |
| 1792 Interfacial 1HGG-specific side chain and main chain hydrogen bonding analysis | 4346 |
| 1793 Interfacial 1HGH-specific side chain and main chain hydrogen bonding analysis | 4349 |
| 1794 Interfacial 1HGI-specific side chain and main chain hydrogen bonding analysis | 4352 |
| 1795 Interfacial 1HGJ-specific side chain and main chain hydrogen bonding analysis | 4355 |
| 1796 Interfacial 1OSP-specific side chain and main chain hydrogen bonding analysis | 4356 |
| 1797 Interfacial 1PSK-specific side chain and main chain hydrogen bonding analysis | 4357 |
| 1798 Interfacial 1VFB-specific side chain and main chain hydrogen bonding analysis | 4358 |

|      |                                                                               |      |
|------|-------------------------------------------------------------------------------|------|
| 1799 | Interfacial 3SE8-specific side chain and main chain hydrogen bonding analysis | 4359 |
| 1800 | Interfacial 3SE9-specific side chain and main chain hydrogen bonding analysis | 4360 |
| 1801 | Interfacial 3THM-specific side chain and main chain hydrogen bonding analysis | 4361 |
| 1802 | Interfacial 3TJE-specific side chain and main chain hydrogen bonding analysis | 4362 |
| 1803 | Interfacial 3U2S-specific side chain and main chain hydrogen bonding analysis | 4363 |
| 1804 | Interfacial 3UYR-specific side chain and main chain hydrogen bonding analysis | 4364 |
| 1805 | Interfacial 4F33-specific side chain and main chain hydrogen bonding analysis | 4366 |
| 1806 | Interfacial 4F3F-specific side chain and main chain hydrogen bonding analysis | 4367 |
| 1807 | Interfacial 4JAM-specific side chain and main chain hydrogen bonding analysis | 4368 |
| 1808 | Interfacial 4JAN-specific side chain and main chain hydrogen bonding analysis | 4369 |
| 1809 | Interfacial 4KRM-specific side chain and main chain hydrogen bonding analysis | 4370 |
| 1810 | Interfacial 4KRO-specific side chain and main chain hydrogen bonding analysis | 4371 |
| 1811 | Interfacial 4KRP-specific side chain and main chain hydrogen bonding analysis | 4372 |
| 1812 | Interfacial 4NZR-specific side chain and main chain hydrogen bonding analysis | 4373 |
| 1813 | Interfacial 4NZU-specific side chain and main chain hydrogen bonding analysis | 4374 |
| 1814 | Interfacial 4WUU-specific side chain and main chain hydrogen bonding analysis | 4375 |
| 1815 | Interfacial 4Z0X-specific side chain and main chain hydrogen bonding analysis | 4376 |
| 1816 | Interfacial 5I76-specific side chain and main chain hydrogen bonding analysis | 4377 |
| 1817 | Interfacial 5JO5-specific side chain and main chain hydrogen bonding analysis | 4378 |
| 1818 | Interfacial 5JR1-specific side chain and main chain hydrogen bonding analysis | 4379 |
| 1819 | Interfacial 5JUE-specific side chain and main chain hydrogen bonding analysis | 4380 |
| 1820 | Interfacial 5JXA-specific side chain and main chain hydrogen bonding analysis | 4381 |
| 1821 | Interfacial 5M33-specific side chain and main chain hydrogen bonding analysis | 4382 |
| 1822 | Interfacial 5T6P-specific side chain and main chain hydrogen bonding analysis | 4383 |
| 1823 | Interfacial 5T78-specific side chain and main chain hydrogen bonding analysis | 4384 |
| 1824 | Interfacial 5U3J-specific side chain and main chain hydrogen bonding analysis | 4385 |
| 1825 | Interfacial 5U3N-specific side chain and main chain hydrogen bonding analysis | 4386 |
| 1826 | Interfacial 5UCB-specific side chain and main chain hydrogen bonding analysis | 4387 |
| 1827 | Interfacial 5UK0-specific side chain and main chain hydrogen bonding analysis | 4388 |
| 1828 | Interfacial 5VXJ-specific side chain and main chain hydrogen bonding analysis | 4389 |

|      |                                                                               |      |
|------|-------------------------------------------------------------------------------|------|
| 1829 | Interfacial 5VXK-specific side chain and main chain hydrogen bonding analysis | 4390 |
| 1830 | Interfacial 5VXL-specific side chain and main chain hydrogen bonding analysis | 4391 |
| 1831 | Interfacial 5VXM-specific side chain and main chain hydrogen bonding analysis | 4392 |
| 1832 | Interfacial 5VXR-specific side chain and main chain hydrogen bonding analysis | 4393 |
| 1833 | Interfacial 5WKQ-specific side chain and main chain hydrogen bonding analysis | 4394 |
| 1834 | Interfacial 5WN9-specific side chain and main chain hydrogen bonding analysis | 4395 |
| 1835 | 1A14-specific interfacial side chain hydrogen bonding analysis . . . . .      | 4396 |
| 1836 | 1E6J-specific interfacial side chain hydrogen bonding analysis . . . . .      | 4397 |
| 1837 | 1F3R-specific interfacial side chain hydrogen bonding analysis . . . . .      | 4398 |
| 1838 | 1HGD-specific interfacial side chain hydrogen bonding analysis . . . . .      | 4400 |
| 1839 | 1HGE-specific interfacial side chain hydrogen bonding analysis . . . . .      | 4402 |
| 1840 | 1HGF-specific interfacial side chain hydrogen bonding analysis . . . . .      | 4404 |
| 1841 | 1HGG-specific interfacial side chain hydrogen bonding analysis . . . . .      | 4406 |
| 1842 | 1HGH-specific interfacial side chain hydrogen bonding analysis . . . . .      | 4408 |
| 1843 | 1HGI-specific interfacial side chain hydrogen bonding analysis . . . . .      | 4410 |
| 1844 | 1HGT-specific interfacial side chain hydrogen bonding analysis . . . . .      | 4412 |
| 1845 | 1OSP-specific interfacial side chain hydrogen bonding analysis . . . . .      | 4413 |
| 1846 | 1VFB-specific interfacial side chain hydrogen bonding analysis . . . . .      | 4414 |
| 1847 | 3SE8-specific interfacial side chain hydrogen bonding analysis . . . . .      | 4415 |
| 1848 | 3SE9-specific interfacial side chain hydrogen bonding analysis . . . . .      | 4416 |
| 1849 | 3THM-specific interfacial side chain hydrogen bonding analysis . . . . .      | 4417 |
| 1850 | 3TJE-specific interfacial side chain hydrogen bonding analysis . . . . .      | 4418 |
| 1851 | 3U2S-specific interfacial side chain hydrogen bonding analysis . . . . .      | 4419 |
| 1852 | 3UYR-specific interfacial side chain hydrogen bonding analysis . . . . .      | 4420 |
| 1853 | 4F33-specific interfacial side chain hydrogen bonding analysis . . . . .      | 4421 |
| 1854 | 4F3F-specific interfacial side chain hydrogen bonding analysis . . . . .      | 4422 |
| 1855 | 4JAM-specific interfacial side chain hydrogen bonding analysis . . . . .      | 4423 |
| 1856 | 4JAN-specific interfacial side chain hydrogen bonding analysis . . . . .      | 4424 |
| 1857 | 4KRM-specific interfacial side chain hydrogen bonding analysis . . . . .      | 4425 |
| 1858 | 4KRO-specific interfacial side chain hydrogen bonding analysis . . . . .      | 4426 |

|                                                                               |      |
|-------------------------------------------------------------------------------|------|
| 1859 4KRP-specific interfacial side chain hydrogen bonding analysis . . . . . | 4427 |
| 1860 4NZR-specific interfacial side chain hydrogen bonding analysis . . . . . | 4428 |
| 1861 4WUU-specific interfacial side chain hydrogen bonding analysis . . . . . | 4429 |
| 1862 4Z0X-specific interfacial side chain hydrogen bonding analysis . . . . . | 4430 |
| 1863 5I76-specific interfacial side chain hydrogen bonding analysis . . . . . | 4431 |
| 1864 5JO5-specific interfacial side chain hydrogen bonding analysis . . . . . | 4432 |
| 1865 5JR1-specific interfacial side chain hydrogen bonding analysis . . . . . | 4433 |
| 1866 5JUE-specific interfacial side chain hydrogen bonding analysis . . . . . | 4434 |
| 1867 5JXA-specific interfacial side chain hydrogen bonding analysis . . . . . | 4435 |
| 1868 5T6P-specific interfacial side chain hydrogen bonding analysis . . . . . | 4436 |
| 1869 5T78-specific interfacial side chain hydrogen bonding analysis . . . . . | 4437 |
| 1870 5U3J-specific interfacial side chain hydrogen bonding analysis . . . . . | 4438 |
| 1871 5U3N-specific interfacial side chain hydrogen bonding analysis . . . . . | 4439 |
| 1872 5UCB-specific interfacial side chain hydrogen bonding analysis . . . . . | 4440 |
| 1873 5UK0-specific interfacial side chain hydrogen bonding analysis . . . . . | 4441 |
| 1874 5VXJ-specific interfacial side chain hydrogen bonding analysis . . . . . | 4442 |
| 1875 5VXK-specific interfacial side chain hydrogen bonding analysis . . . . . | 4443 |
| 1876 5VXL-specific interfacial side chain hydrogen bonding analysis . . . . . | 4444 |
| 1877 5VXM-specific interfacial side chain hydrogen bonding analysis . . . . . | 4445 |
| 1878 5VXR-specific interfacial side chain hydrogen bonding analysis . . . . . | 4446 |
| 1879 5WKQ-specific interfacial side chain hydrogen bonding analysis . . . . . | 4447 |
| 1880 5WN9-specific interfacial side chain hydrogen bonding analysis . . . . . | 4448 |

## Supporting Material

Overall analysis of the interfacial electrostatic features of all experimentally determined antigen-antibody-related structures

| PDB ID | Residue A | Atom A | Residue B  | Atom B | Distance (Å) |
|--------|-----------|--------|------------|--------|--------------|
| 1A14   | N_ARG_82  | NH1    | N_ASP_127  | OD2    | 3.377        |
| 1A14   | N_ARG_82  | NH2    | N_ASP_127  | OD2    | 3.103        |
| 1A14   | N_ARG_118 | NH1    | N_GLU_119  | OE2    | 3.614        |
| 1A14   | N_ARG_118 | NH2    | N_GLU_425  | OE1    | 2.718        |
| 1A14   | N_ARG_118 | NH2    | N_GLU_425  | OE2    | 3.457        |
| 1A14   | N_ARG_130 | NH1    | N_GLU_128  | OE2    | 3.346        |
| 1A14   | N_ARG_141 | NH1    | N_GLU_110  | OE2    | 2.663        |
| 1A14   | N_ARG_156 | NH1    | N_GLU_119  | OE1    | 3.576        |
| 1A14   | N_ARG_156 | NH2    | N_GLU_119  | OE1    | 3.307        |
| 1A14   | N_ARG_172 | NH1    | N_GLU_174  | OE1    | 3.579        |
| 1A14   | N_ARG_172 | NH1    | N_GLU_174  | OE2    | 2.688        |
| 1A14   | N_ARG_189 | NH1    | N_ASP_125  | OD1    | 2.993        |
| 1A14   | N_ARG_209 | NH2    | N_GLU_174  | OE1    | 2.647        |
| 1A14   | N_ARG_224 | NH1    | N_GLU_276  | OE1    | 3.468        |
| 1A14   | N_ARG_224 | NH1    | N_GLU_276  | OE2    | 2.449        |
| 1A14   | N_ARG_224 | NH2    | N_GLU_276  | OE2    | 3.362        |
| 1A14   | N_HIS_274 | ND1    | N_GLU_276  | OE2    | 3.981        |
| 1A14   | N_HIS_274 | NE2    | N_GLU_276  | OE2    | 3.658        |
| 1A14   | N_ARG_292 | NH2    | N_GLU_277  | OE1    | 3.076        |
| 1A14   | N_ARG_292 | NH2    | N_GLU_277  | OE2    | 3.834        |
| 1A14   | N_ARG_300 | NH1    | N_ASP_324  | OD1    | 3.224        |
| 1A14   | N_ARG_300 | NH2    | N_ASP_324  | OD1    | 3.465        |
| 1A14   | N_ARG_304 | NH1    | N_GLU_286  | OE2    | 3.487        |
| 1A14   | N_HIS_312 | ND1    | N_GLU_266  | OE1    | 3.839        |
| 1A14   | N_HIS_312 | ND1    | N_GLU_266  | OE2    | 2.824        |
| 1A14   | N_ARG_364 | NH1    | N_ASP_330  | OD2    | 3.955        |
| 1A14   | N_ARG_364 | NH1    | N_GLU_375  | OE2    | 2.918        |
| 1A14   | N_ARG_364 | NH2    | N_ASP_330  | OD1    | 2.939        |
| 1A14   | N_ARG_364 | NH2    | N_ASP_330  | OD2    | 2.852        |
| 1A14   | N_LYS_387 | NZ     | N_ASP_386  | OD1    | 2.949        |
| 1A14   | N_LYS_387 | NZ     | N_ASP_386  | OD2    | 3.684        |
| 1A14   | N_ARG_428 | NH1    | N_ASP_460  | OD2    | 2.670        |
| 1A14   | N_ARG_428 | NH2    | N_GLU_433  | OE1    | 3.485        |
| 1A14   | N_ARG_428 | NH2    | N_GLU_433  | OE2    | 2.572        |
| 1A14   | N_LYS_432 | NZ     | H_ASP_56   | OD1    | 3.071        |
| 1A14   | H_LYS_38  | NZ     | H_ASP_86   | OD1    | 3.927        |
| 1A14   | H_LYS_66  | NZ     | H_ASP_86   | OD1    | 3.084        |
| 1A14   | H_LYS_66  | NZ     | H_ASP_86   | OD2    | 3.096        |
| 1A14   | H_ARG_94  | NH2    | H_ASP_101  | OD2    | 2.754        |
| 1A14   | H_ARG_100 | NH1    | H_ASP_100B | OD1    | 2.852        |
| 1A14   | H_ARG_100 | NH1    | H_ASP_100B | OD2    | 3.179        |
| 1A14   | L_ARG_61  | NH1    | L_GLU_79   | OE1    | 3.189        |
| 1A14   | L_ARG_61  | NH1    | L_GLU_79   | OE2    | 3.942        |
| 1A14   | L_ARG_61  | NH2    | L_GLU_79   | OE1    | 3.107        |
| 1A14   | L_ARG_61  | NH2    | L_ASP_82   | OD1    | 2.650        |
| 1A14   | L_ARG_61  | NH2    | L_ASP_82   | OD2    | 3.122        |
| 1A2Y   | A_ARG_61  | NH2    | A_GLU_81   | OE2    | 3.299        |
| 1A2Y   | A_ARG_61  | NH2    | A_ASP_82   | OD1    | 2.783        |
| 1A2Y   | A_ARG_61  | NH2    | A_ASP_82   | OD2    | 3.405        |
| 1A2Y   | A_ARG_96  | NH1    | B_GLU_98   | OE1    | 2.846        |
| 1A2Y   | A_ARG_96  | NH1    | B_GLU_98   | OE2    | 3.664        |
| 1A2Y   | A_ARG_96  | NH2    | B_GLU_98   | OE1    | 3.545        |
| 1A2Y   | A_ARG_96  | NH2    | B_GLU_98   | OE2    | 2.882        |
| 1A2Y   | B_ARG_38  | NH1    | B_ASP_89   | OD1    | 3.030        |
| 1A2Y   | B_ARG_38  | NH2    | B_GLU_46   | OE1    | 3.122        |
| 1A2Y   | B_ARG_38  | NH2    | B_ASP_89   | OD1    | 3.828        |
| 1A2Y   | B_ARG_66  | NH1    | B_ASP_89   | OD1    | 3.898        |

|      |            |     |            |     |       |
|------|------------|-----|------------|-----|-------|
| 1A2Y | B_ARG.66   | NH1 | B_ASP.89   | OD2 | 3.063 |
| 1A2Y | B_ARG.66   | NH2 | B_ASP.89   | OD1 | 3.023 |
| 1A2Y | B_ARG.66   | NH2 | B_ASP.89   | OD2 | 3.441 |
| 1A2Y | B_ARG.97   | NH2 | B_ASP.104  | OD1 | 3.891 |
| 1A2Y | B_ARG.97   | NH2 | B_ASP.104  | OD2 | 2.921 |
| 1A2Y | B_ARG.102  | NH1 | B_ASP.100  | OD2 | 3.378 |
| 1A2Y | C_ARG.61   | NH1 | C_ASP.48   | OD1 | 2.641 |
| 1A2Y | C_ARG.68   | NH1 | C_ASP.66   | OD2 | 3.417 |
| 1A2Y | C_ARG.125  | NH1 | C_ASP.119  | OD1 | 3.449 |
| 1A2Y | C_ARG.125  | NH1 | C_ASP.119  | OD2 | 3.142 |
| 1A2Y | C_ARG.125  | NH2 | C_ASP.119  | OD2 | 3.057 |
| 1A7L | A_LYS.15   | NZ  | A_GLU.111  | OE1 | 3.415 |
| 1A7L | A_LYS.15   | NZ  | A_GLU.111  | OE2 | 2.711 |
| 1A7L | A_LYS.83   | NZ  | A_ASP.87   | OD1 | 3.030 |
| 1A7L | A_LYS.83   | NZ  | A_ASP.87   | OD2 | 3.304 |
| 1A7L | A_LYS.140  | NZ  | A_ASP.136  | OD1 | 3.902 |
| 1A7L | A_LYS.140  | NZ  | A_ASP.136  | OD2 | 2.755 |
| 1A7L | A_LYS.170  | NZ  | A_ASP.180  | OD2 | 2.887 |
| 1A7L | A_LYS.189  | NZ  | A_ASP.358  | OD2 | 2.997 |
| 1A7L | A_HIS.203  | ND1 | A_ASP.136  | OD2 | 2.891 |
| 1A7L | A_LYS.219  | NZ  | B_GLU.131  | OE1 | 3.835 |
| 1A7L | A_LYS.251  | NZ  | A_ASP.164  | OD2 | 3.413 |
| 1A7L | A_ARG.316  | NH1 | A_ASP.236  | OD2 | 3.471 |
| 1A7L | A_ARG.316  | NH2 | A_ASP.314  | OD2 | 2.893 |
| 1A7L | A_ARG.344  | NH2 | A_GLU.153  | OE1 | 2.800 |
| 1A7L | A_ARG.344  | NH2 | A_GLU.153  | OE2 | 3.001 |
| 1A7L | A_ARG.135E | NH2 | A_ASP.133E | OD1 | 3.683 |
| 1A7L | A_ARG.135E | NH2 | A_ASP.133E | OD2 | 3.429 |
| 1A7L | B_LYS.15   | NZ  | B_GLU.111  | OE1 | 3.377 |
| 1A7L | B_LYS.15   | NZ  | B_GLU.111  | OE2 | 3.759 |
| 1A7L | B_LYS.42   | NZ  | B_GLU.44   | OE2 | 3.460 |
| 1A7L | B_LYS.42   | NZ  | B_GLU.45   | OE2 | 3.115 |
| 1A7L | B_LYS.140  | NZ  | B_ASP.136  | OD2 | 3.464 |
| 1A7L | B_LYS.170  | NZ  | B_ASP.180  | OD2 | 3.114 |
| 1A7L | B_LYS.189  | NZ  | B_ASP.358  | OD2 | 3.685 |
| 1A7L | B_HIS.203  | ND1 | B_ASP.136  | OD2 | 2.601 |
| 1A7L | B_LYS.251  | NZ  | B_ASP.164  | OD2 | 3.639 |
| 1A7L | B_LYS.277  | NZ  | B_GLU.281  | OE1 | 3.203 |
| 1A7L | B_LYS.277  | NZ  | B_GLU.281  | OE2 | 2.832 |
| 1A7L | B_ARG.316  | NH1 | B_ASP.236  | OD1 | 3.944 |
| 1A7L | B_ARG.316  | NH1 | B_ASP.236  | OD2 | 3.485 |
| 1A7L | B_ARG.316  | NH2 | B_ASP.314  | OD2 | 3.346 |
| 1A7L | B_LYS.326  | NZ  | B_GLU.322  | OE2 | 3.744 |
| 1A7L | B_ARG.344  | NH2 | B_GLU.153  | OE1 | 2.942 |
| 1A7L | B_ARG.344  | NH2 | B_GLU.153  | OE2 | 3.765 |
| 1A7L | C_LYS.29   | NZ  | C_GLU.28   | OE2 | 3.650 |
| 1A7L | C_LYS.83   | NZ  | C_ASP.87   | OD1 | 3.169 |
| 1A7L | C_LYS.83   | NZ  | C_ASP.87   | OD2 | 3.327 |
| 1A7L | C_LYS.102  | NZ  | C_GLU.78   | OE1 | 3.945 |
| 1A7L | C_LYS.140  | NZ  | C_ASP.136  | OD1 | 2.897 |
| 1A7L | C_LYS.140  | NZ  | C_ASP.136  | OD2 | 3.618 |
| 1A7L | C_LYS.170  | NZ  | C_GLU.172  | OE2 | 3.002 |
| 1A7L | C_LYS.189  | NZ  | C_ASP.184  | OD1 | 3.860 |
| 1A7L | C_LYS.189  | NZ  | C_ASP.358  | OD2 | 3.399 |
| 1A7L | C_HIS.203  | ND1 | C_ASP.136  | OD1 | 2.895 |
| 1A7L | C_LYS.219  | NZ  | C_GLU.221  | OE2 | 3.817 |
| 1A7L | C_LYS.277  | NZ  | C_GLU.281  | OE1 | 3.148 |
| 1A7L | C_LYS.277  | NZ  | C_GLU.281  | OE2 | 3.283 |



|      |           |     |           |     |       |
|------|-----------|-----|-----------|-----|-------|
| 1A7L | C_LYS_295 | NZ  | C_GLU_291 | OE2 | 3.540 |
| 1A7L | C_ARG_316 | NH1 | C_ASP_236 | OD2 | 3.877 |
| 1A7L | C_ARG_316 | NH2 | C_ASP_314 | OD2 | 3.048 |
| 1A7L | C_LYS_326 | NZ  | C_GLU_322 | OE2 | 3.201 |
| 1A7L | C_ARG_344 | NH1 | C_GLU_153 | OE1 | 3.865 |
| 1A7L | C_ARG_344 | NH1 | C_GLU_153 | OE2 | 2.640 |
| 1A7L | C_ARG_344 | NH2 | C_GLU_153 | OE1 | 2.933 |
| 1A7L | C_ARG_344 | NH2 | C_GLU_153 | OE2 | 3.058 |
| 1A7L | C_LYS_362 | NZ  | C_ASP_363 | OD1 | 3.768 |
| 1A7N | L_ARG_61  | NH2 | L_ASP_81  | OD2 | 3.125 |
| 1A7N | L_ARG_61  | NH2 | L_ASP_82  | OD1 | 2.727 |
| 1A7N | L_ARG_61  | NH2 | L_ASP_82  | OD2 | 3.246 |
| 1A7N | L_ARG_96  | NH1 | H_GLU_298 | OE1 | 2.957 |
| 1A7N | L_ARG_96  | NH1 | H_GLU_298 | OE2 | 3.249 |
| 1A7N | L_ARG_96  | NH2 | H_GLU_298 | OE2 | 3.297 |
| 1A7N | L_LYS_107 | NZ  | L_GLU_17  | OE2 | 2.821 |
| 1A7N | H_ARG_238 | NH1 | H_ASP_289 | OD1 | 2.802 |
| 1A7N | H_ARG_238 | NH2 | H_GLU_246 | OE1 | 3.463 |
| 1A7N | H_ARG_238 | NH2 | H_GLU_246 | OE2 | 3.781 |
| 1A7N | H_ARG_238 | NH2 | H_ASP_289 | OD1 | 3.741 |
| 1A7N | H_ARG_266 | NH1 | H_ASP_289 | OD1 | 3.782 |
| 1A7N | H_ARG_266 | NH1 | H_ASP_289 | OD2 | 2.637 |
| 1A7N | H_ARG_266 | NH2 | H_ASP_289 | OD1 | 3.006 |
| 1A7N | H_ARG_266 | NH2 | H_ASP_289 | OD2 | 3.237 |
| 1A7N | H_LYS_275 | NZ  | H_ASP_272 | OD2 | 3.739 |
| 1A7N | H_ARG_297 | NH2 | H_ASP_304 | OD1 | 3.472 |
| 1A7N | H_ARG_297 | NH2 | H_ASP_304 | OD2 | 2.559 |
| 1A7N | H_ARG_302 | NH1 | H_ASP_300 | OD1 | 2.938 |
| 1A7O | L_ARG_61  | NH2 | L_ASP_81  | OD2 | 3.044 |
| 1A7O | L_ARG_61  | NH2 | L_ASP_82  | OD1 | 2.765 |
| 1A7O | L_ARG_61  | NH2 | L_ASP_82  | OD2 | 3.549 |
| 1A7O | L_LYS_107 | NZ  | L_GLU_17  | OE2 | 3.441 |
| 1A7O | H_ARG_238 | NH1 | H_ASP_289 | OD1 | 2.721 |
| 1A7O | H_ARG_238 | NH2 | H_GLU_246 | OE1 | 3.298 |
| 1A7O | H_ARG_238 | NH2 | H_GLU_246 | OE2 | 3.986 |
| 1A7O | H_ARG_238 | NH2 | H_ASP_289 | OD1 | 3.845 |
| 1A7O | H_ARG_266 | NH1 | H_ASP_289 | OD1 | 3.739 |
| 1A7O | H_ARG_266 | NH1 | H_ASP_289 | OD2 | 2.614 |
| 1A7O | H_ARG_266 | NH2 | H_ASP_289 | OD1 | 2.654 |
| 1A7O | H_ARG_266 | NH2 | H_ASP_289 | OD2 | 2.979 |
| 1A7O | H_ARG_297 | NH2 | H_ASP_304 | OD1 | 3.602 |
| 1A7O | H_ARG_297 | NH2 | H_ASP_304 | OD2 | 2.696 |
| 1A7P | L_ARG_61  | NH2 | L_ASP_81  | OD2 | 3.219 |
| 1A7P | L_ARG_61  | NH2 | L_ASP_82  | OD1 | 2.851 |
| 1A7P | L_ARG_61  | NH2 | L_ASP_82  | OD2 | 3.384 |
| 1A7P | L_ARG_96  | NH2 | H_GLU_298 | OE1 | 3.845 |
| 1A7P | L_ARG_96  | NH2 | H_GLU_298 | OE2 | 2.867 |
| 1A7P | L_LYS_107 | NZ  | L_GLU_17  | OE2 | 2.919 |
| 1A7P | H_ARG_238 | NH1 | H_ASP_289 | OD1 | 2.885 |
| 1A7P | H_ARG_238 | NH2 | H_GLU_246 | OE1 | 3.234 |
| 1A7P | H_ARG_238 | NH2 | H_GLU_246 | OE2 | 3.868 |
| 1A7P | H_ARG_238 | NH2 | H_ASP_289 | OD1 | 3.785 |
| 1A7P | H_ARG_266 | NH1 | H_ASP_289 | OD1 | 3.679 |
| 1A7P | H_ARG_266 | NH1 | H_ASP_289 | OD2 | 2.508 |
| 1A7P | H_ARG_266 | NH2 | H_ASP_289 | OD1 | 2.957 |
| 1A7P | H_ARG_266 | NH2 | H_ASP_289 | OD2 | 3.253 |
| 1A7P | H_ARG_297 | NH2 | H_ASP_304 | OD1 | 3.629 |
| 1A7P | H_ARG_297 | NH2 | H_ASP_304 | OD2 | 2.709 |

|      |           |     |           |     |       |
|------|-----------|-----|-----------|-----|-------|
| 1A7Q | L_ARG_96  | NH1 | H_GLU_298 | OE1 | 2.615 |
| 1A7Q | L_ARG_96  | NH1 | H_GLU_298 | OE2 | 3.239 |
| 1A7Q | L_ARG_96  | NH2 | H_GLU_298 | OE1 | 3.431 |
| 1A7Q | L_ARG_96  | NH2 | H_GLU_298 | OE2 | 2.621 |
| 1A7Q | H_ARG_238 | NH1 | H_ASP_289 | OD1 | 2.800 |
| 1A7Q | H_ARG_238 | NH2 | H_GLU_246 | OE1 | 3.193 |
| 1A7Q | H_ARG_238 | NH2 | H_GLU_246 | OE2 | 3.915 |
| 1A7Q | H_ARG_238 | NH2 | H_ASP_289 | OD1 | 3.788 |
| 1A7Q | H_ARG_266 | NH1 | H_ASP_289 | OD1 | 3.820 |
| 1A7Q | H_ARG_266 | NH1 | H_ASP_289 | OD2 | 2.595 |
| 1A7Q | H_ARG_266 | NH2 | H_ASP_289 | OD1 | 2.974 |
| 1A7Q | H_ARG_266 | NH2 | H_ASP_289 | OD2 | 3.211 |
| 1A7Q | H_ARG_297 | NH2 | H_ASP_304 | OD1 | 3.728 |
| 1A7Q | H_ARG_297 | NH2 | H_ASP_304 | OD2 | 2.870 |
| 1A7Q | H_ARG_299 | NH1 | H_ASP_304 | OD2 | 3.412 |
| 1A7Q | H_ARG_302 | NH1 | H_ASP_300 | OD2 | 3.990 |
| 1A7R | L_ARG_61  | NH2 | L_ASP_81  | OD2 | 3.198 |
| 1A7R | L_ARG_61  | NH2 | L_ASP_82  | OD1 | 2.615 |
| 1A7R | L_ARG_61  | NH2 | L_ASP_82  | OD2 | 3.098 |
| 1A7R | L_ARG_96  | NH1 | H_GLU_298 | OE1 | 2.658 |
| 1A7R | L_ARG_96  | NH1 | H_GLU_298 | OE2 | 3.535 |
| 1A7R | L_ARG_96  | NH2 | H_GLU_298 | OE1 | 3.614 |
| 1A7R | L_ARG_96  | NH2 | H_GLU_298 | OE2 | 2.905 |
| 1A7R | L_LYS_107 | NZ  | L_GLU_17  | OE2 | 3.377 |
| 1A7R | H_ARG_238 | NH1 | H_ASP_289 | OD1 | 2.846 |
| 1A7R | H_ARG_238 | NH2 | H_GLU_246 | OE1 | 3.349 |
| 1A7R | H_ARG_238 | NH2 | H_GLU_246 | OE2 | 3.834 |
| 1A7R | H_ARG_238 | NH2 | H_ASP_289 | OD1 | 3.880 |
| 1A7R | H_ARG_266 | NH1 | H_ASP_289 | OD1 | 3.623 |
| 1A7R | H_ARG_266 | NH1 | H_ASP_289 | OD2 | 2.578 |
| 1A7R | H_ARG_266 | NH2 | H_ASP_289 | OD1 | 2.893 |
| 1A7R | H_ARG_266 | NH2 | H_ASP_289 | OD2 | 3.226 |
| 1A7R | H_LYS_275 | NZ  | H_ASP_272 | OD2 | 3.976 |
| 1A7R | H_ARG_297 | NH2 | H_ASP_304 | OD1 | 3.559 |
| 1A7R | H_ARG_297 | NH2 | H_ASP_304 | OD2 | 2.633 |
| 1ADQ | A_LYS_248 | NZ  | A_GLU_380 | OE2 | 3.226 |
| 1ADQ | A_ARG_255 | NH1 | A_ASP_249 | OD1 | 3.987 |
| 1ADQ | A_ARG_255 | NH2 | H_ASP_31  | OD2 | 2.929 |
| 1ADQ | A_LYS_320 | NZ  | A_GLU_333 | OE1 | 3.855 |
| 1ADQ | A_LYS_320 | NZ  | A_GLU_333 | OE2 | 3.755 |
| 1ADQ | A_LYS_326 | NZ  | A_ASP_270 | OD1 | 3.273 |
| 1ADQ | A_LYS_326 | NZ  | A_ASP_270 | OD2 | 3.723 |
| 1ADQ | A_LYS_338 | NZ  | A_GLU_430 | OE1 | 3.031 |
| 1ADQ | A_LYS_338 | NZ  | A_GLU_430 | OE2 | 2.803 |
| 1ADQ | A_ARG_344 | NH1 | A_ASP_401 | OD2 | 3.235 |
| 1ADQ | A_ARG_416 | NH1 | A_GLU_388 | OE1 | 3.926 |
| 1ADQ | A_ARG_416 | NH1 | A_GLU_388 | OE2 | 3.113 |
| 1ADQ | A_ARG_416 | NH2 | A_GLU_388 | OE1 | 3.507 |
| 1ADQ | A_ARG_416 | NH2 | A_GLU_388 | OE2 | 2.923 |
| 1ADQ | A_HIS_433 | NE2 | L_ASP_50  | OD1 | 3.394 |
| 1ADQ | A_HIS_433 | NE2 | L_ASP_50  | OD2 | 3.883 |
| 1ADQ | L_LYS_31  | NZ  | L_ASP_92  | OD1 | 3.026 |
| 1ADQ | L_ARG_61  | NH2 | L_GLU_79  | OE1 | 3.104 |
| 1ADQ | L_ARG_61  | NH2 | L_ASP_82  | OD1 | 3.715 |
| 1ADQ | L_ARG_61  | NH2 | L_ASP_82  | OD2 | 3.959 |
| 1ADQ | L_HIS_95B | NE2 | H_ASP_61  | OD2 | 3.425 |
| 1ADQ | L_LYS_149 | NZ  | L_GLU_206 | OE1 | 3.712 |
| 1ADQ | H_ARG_38  | NH1 | H_ASP_86  | OD1 | 3.336 |

|      |           |     |           |     |       |
|------|-----------|-----|-----------|-----|-------|
| 1ADQ | H_ARG.66  | NH1 | H_ASP.86  | OD1 | 3.600 |
| 1ADQ | H_ARG.66  | NH1 | H_ASP.86  | OD2 | 2.617 |
| 1ADQ | H_ARG.66  | NH2 | H_ASP.86  | OD1 | 2.939 |
| 1ADQ | H_ARG.66  | NH2 | H_ASP.86  | OD2 | 3.254 |
| 1ADQ | H_LYS.158 | NZ  | H_GLU.220 | OE1 | 3.150 |
| 1ADQ | H_LYS.184 | NZ  | H_ASP.146 | OD2 | 3.128 |
| 1ADQ | H_LYS.221 | NZ  | H_ASP.222 | OD2 | 3.919 |
| 1BJ1 | L_ARG.61  | NH2 | L_GLU.81  | OE2 | 3.689 |
| 1BJ1 | L_ARG.61  | NH2 | L_ASP.82  | OD1 | 2.770 |
| 1BJ1 | L_ARG.61  | NH2 | L_ASP.82  | OD2 | 3.181 |
| 1BJ1 | L_LYS.103 | NZ  | L_GLU.165 | OE2 | 3.052 |
| 1BJ1 | L_ARG.142 | NH2 | L_GLU.105 | OE2 | 3.352 |
| 1BJ1 | L_LYS.188 | NZ  | L_ASP.185 | OD1 | 3.571 |
| 1BJ1 | H_ARG.38  | NH1 | H_ASP.90  | OD1 | 3.092 |
| 1BJ1 | H_ARG.38  | NH2 | H_GLU.46  | OE1 | 3.575 |
| 1BJ1 | H_ARG.38  | NH2 | H_ASP.90  | OD1 | 3.916 |
| 1BJ1 | H_ARG.67  | NH1 | H_ASP.90  | OD2 | 2.757 |
| 1BJ1 | H_ARG.67  | NH2 | H_ASP.90  | OD1 | 3.333 |
| 1BJ1 | H_ARG.67  | NH2 | H_ASP.90  | OD2 | 3.289 |
| 1BJ1 | H_ARG.87  | NH1 | H_GLU.89  | OE2 | 3.150 |
| 1BJ1 | H_LYS.153 | NZ  | H_ASP.154 | OD1 | 3.946 |
| 1BJ1 | H_LYS.219 | NZ  | L_GLU.123 | OE1 | 2.948 |
| 1BJ1 | H_LYS.220 | NZ  | H_GLU.222 | OE1 | 3.519 |
| 1BJ1 | H_LYS.224 | NZ  | L_ASP.122 | OD2 | 2.691 |
| 1BJ1 | V_ARG.23  | NH1 | W_GLU.30  | OE1 | 3.305 |
| 1BJ1 | V_ARG.56  | NH2 | V_GLU.38  | OE1 | 3.031 |
| 1BJ1 | V_ARG.82  | NH1 | V_GLU.42  | OE1 | 3.483 |
| 1BJ1 | V_ARG.82  | NH2 | V_GLU.42  | OE1 | 2.954 |
| 1BJ1 | V_HIS.99  | NE2 | V_GLU.73  | OE2 | 3.634 |
| 1BJ1 | V_LYS.107 | NZ  | V_GLU.64  | OE1 | 3.520 |
| 1BJ1 | W_ARG.23  | NH1 | V_GLU.30  | OE1 | 3.351 |
| 1BJ1 | W_ARG.56  | NH2 | W_GLU.38  | OE1 | 3.008 |
| 1BJ1 | W_ARG.82  | NH1 | W_GLU.42  | OE2 | 3.753 |
| 1BJ1 | W_ARG.82  | NH2 | W_GLU.42  | OE2 | 2.675 |
| 1BJ1 | W_HIS.99  | NE2 | W_GLU.73  | OE2 | 3.679 |
| 1BJ1 | W_ARG.105 | NH1 | W_GLU.103 | OE1 | 3.917 |
| 1BJ1 | W_ARG.105 | NH2 | W_GLU.103 | OE1 | 2.651 |
| 1BJ1 | W_LYS.107 | NZ  | W_GLU.64  | OE1 | 3.656 |
| 1BJ1 | J_ARG.61  | NH2 | J_GLU.81  | OE2 | 3.502 |
| 1BJ1 | J_ARG.61  | NH2 | J_ASP.82  | OD1 | 2.721 |
| 1BJ1 | J_ARG.61  | NH2 | J_ASP.82  | OD2 | 3.272 |
| 1BJ1 | J_LYS.103 | NZ  | J_GLU.165 | OE2 | 3.042 |
| 1BJ1 | J_LYS.126 | NZ  | J_GLU.123 | OE2 | 3.084 |
| 1BJ1 | J_LYS.145 | NZ  | J_GLU.195 | OE2 | 3.741 |
| 1BJ1 | J_LYS.188 | NZ  | J_ASP.185 | OD1 | 3.653 |
| 1BJ1 | K_ARG.38  | NH1 | K_ASP.90  | OD1 | 3.157 |
| 1BJ1 | K_ARG.38  | NH2 | K_GLU.46  | OE1 | 3.735 |
| 1BJ1 | K_ARG.38  | NH2 | K_ASP.90  | OD1 | 3.789 |
| 1BJ1 | K_ARG.67  | NH1 | K_ASP.90  | OD2 | 2.824 |
| 1BJ1 | K_ARG.67  | NH2 | K_ASP.90  | OD1 | 3.565 |
| 1BJ1 | K_ARG.67  | NH2 | K_ASP.90  | OD2 | 3.500 |
| 1BJ1 | K_ARG.87  | NH1 | K_GLU.89  | OE2 | 3.633 |
| 1BJ1 | K_LYS.127 | NZ  | K_ASP.154 | OD2 | 3.373 |
| 1BJ1 | K_LYS.220 | NZ  | K_GLU.222 | OE1 | 3.843 |
| 1BLN | A_ARG.24  | NH1 | A_ASP.70  | OD1 | 2.713 |
| 1BLN | A_LYS.39  | NZ  | A_GLU.81  | OE1 | 3.030 |
| 1BLN | A_LYS.39  | NZ  | A_GLU.81  | OE2 | 2.665 |
| 1BLN | A_ARG.54  | NH1 | A_ASP.60  | OD1 | 3.451 |

|      |           |     |           |     |       |
|------|-----------|-----|-----------|-----|-------|
| 1BLN | A_ARG_54  | NH1 | A_ASP_60  | OD2 | 2.737 |
| 1BLN | A_ARG_54  | NH2 | A_ASP_60  | OD1 | 3.686 |
| 1BLN | A_ARG_61  | NH1 | A_GLU_79  | OE1 | 3.238 |
| 1BLN | A_ARG_61  | NH1 | A_GLU_79  | OE2 | 2.929 |
| 1BLN | A_ARG_61  | NH2 | A_GLU_79  | OE1 | 2.868 |
| 1BLN | A_ARG_61  | NH2 | A_ASP_82  | OD1 | 2.719 |
| 1BLN | A_ARG_61  | NH2 | A_ASP_82  | OD2 | 2.933 |
| 1BLN | A_LYS_103 | NZ  | A_ASP_165 | OD1 | 2.680 |
| 1BLN | A_LYS_103 | NZ  | A_ASP_165 | OD2 | 2.779 |
| 1BLN | A_LYS_149 | NZ  | A_GLU_195 | OE1 | 2.904 |
| 1BLN | A_LYS_149 | NZ  | A_GLU_195 | OE2 | 2.718 |
| 1BLN | A_LYS_169 | NZ  | A_ASP_167 | OD1 | 3.151 |
| 1BLN | A_LYS_169 | NZ  | A_ASP_167 | OD2 | 2.577 |
| 1BLN | A_LYS_169 | NZ  | A_ASP_170 | OD2 | 3.534 |
| 1BLN | A_LYS_183 | NZ  | A_ASP_184 | OD1 | 3.490 |
| 1BLN | A_LYS_183 | NZ  | A_ASP_184 | OD2 | 2.917 |
| 1BLN | A_ARG_188 | NH1 | A_GLU_185 | OE2 | 2.624 |
| 1BLN | A_ARG_188 | NH2 | A_GLU_185 | OE1 | 3.741 |
| 1BLN | A_ARG_188 | NH2 | A_GLU_185 | OE2 | 2.727 |
| 1BLN | A_HIS_189 | ND1 | A_ASP_151 | OD2 | 2.822 |
| 1BLN | A_HIS_189 | NE2 | A_GLU_154 | OE1 | 3.457 |
| 1BLN | A_HIS_189 | NE2 | A_GLU_154 | OE2 | 3.510 |
| 1BLN | A_ARG_211 | NH1 | A_GLU_213 | OE2 | 3.546 |
| 1BLN | B_ARG_38  | NH1 | B_GLU_46  | OE1 | 2.899 |
| 1BLN | B_ARG_38  | NH2 | B_ASP_86  | OD1 | 2.861 |
| 1BLN | B_LYS_64  | NZ  | B_ASP_61  | OD1 | 2.441 |
| 1BLN | B_ARG_66  | NH1 | B_ASP_86  | OD1 | 3.791 |
| 1BLN | B_ARG_66  | NH1 | B_ASP_86  | OD2 | 2.687 |
| 1BLN | B_ARG_66  | NH2 | B_GLU_85  | OE2 | 2.818 |
| 1BLN | B_ARG_66  | NH2 | B_ASP_86  | OD1 | 2.906 |
| 1BLN | B_ARG_66  | NH2 | B_ASP_86  | OD2 | 3.348 |
| 1BLN | B_LYS_75  | NZ  | B_ASP_72  | OD1 | 2.753 |
| 1BLN | B_LYS_75  | NZ  | B_ASP_72  | OD2 | 2.989 |
| 1BLN | B_ARG_83  | NH2 | B_GLU_85  | OE1 | 2.930 |
| 1BLN | B_ARG_83  | NH2 | B_GLU_85  | OE2 | 2.872 |
| 1BLN | B_LYS_218 | NZ  | B_ASP_220 | OD1 | 2.783 |
| 1BLN | B_LYS_218 | NZ  | B_ASP_220 | OD2 | 2.601 |
| 1BLN | B_LYS_221 | NZ  | A_GLU_123 | OE2 | 2.688 |
| 1BLN | B_LYS_222 | NZ  | B_GLU_226 | OE1 | 2.622 |
| 1BLN | B_LYS_222 | NZ  | B_GLU_226 | OE2 | 2.602 |
| 1BLN | C_ARG_24  | NH1 | C_ASP_70  | OD1 | 3.436 |
| 1BLN | C_ARG_24  | NH1 | C_ASP_70  | OD2 | 2.560 |
| 1BLN | C_LYS_39  | NZ  | C_GLU_81  | OE1 | 2.548 |
| 1BLN | C_LYS_39  | NZ  | C_GLU_81  | OE2 | 2.754 |
| 1BLN | C_ARG_54  | NH1 | C_ASP_60  | OD2 | 3.393 |
| 1BLN | C_ARG_61  | NH1 | C_GLU_79  | OE1 | 3.333 |
| 1BLN | C_ARG_61  | NH1 | C_GLU_79  | OE2 | 2.726 |
| 1BLN | C_ARG_61  | NH2 | C_GLU_79  | OE1 | 3.200 |
| 1BLN | C_ARG_61  | NH2 | C_ASP_82  | OD1 | 2.668 |
| 1BLN | C_ARG_61  | NH2 | C_ASP_82  | OD2 | 3.423 |
| 1BLN | C_LYS_103 | NZ  | C_GLU_105 | OE2 | 2.790 |
| 1BLN | C_LYS_103 | NZ  | C_ASP_165 | OD1 | 3.363 |
| 1BLN | C_LYS_103 | NZ  | C_ASP_165 | OD2 | 3.568 |
| 1BLN | C_LYS_149 | NZ  | C_GLU_195 | OE1 | 2.899 |
| 1BLN | C_LYS_149 | NZ  | C_GLU_195 | OE2 | 2.725 |
| 1BLN | C_LYS_169 | NZ  | C_ASP_167 | OD1 | 3.137 |
| 1BLN | C_LYS_169 | NZ  | C_ASP_167 | OD2 | 2.563 |
| 1BLN | C_LYS_169 | NZ  | C_ASP_170 | OD2 | 3.533 |

|      |           |     |           |     |       |
|------|-----------|-----|-----------|-----|-------|
| 1BLN | C_LYS_183 | NZ  | C_ASP_184 | OD1 | 3.499 |
| 1BLN | C_LYS_183 | NZ  | C_ASP_184 | OD2 | 2.904 |
| 1BLN | C_ARG_188 | NH1 | C_GLU_185 | OE2 | 2.652 |
| 1BLN | C_ARG_188 | NH2 | C_GLU_185 | OE1 | 3.758 |
| 1BLN | C_ARG_188 | NH2 | C_GLU_185 | OE2 | 2.730 |
| 1BLN | C_HIS_189 | ND1 | C_ASP_151 | OD2 | 2.783 |
| 1BLN | C_HIS_189 | NE2 | C_GLU_154 | OE1 | 3.449 |
| 1BLN | C_HIS_189 | NE2 | C_GLU_154 | OE2 | 3.510 |
| 1BLN | C_ARG_211 | NH1 | C_GLU_213 | OE2 | 3.540 |
| 1BLN | D_ARG_38  | NH1 | D_ASP_86  | OD1 | 2.873 |
| 1BLN | D_ARG_38  | NH2 | D_GLU_46  | OE1 | 2.870 |
| 1BLN | D_ARG_38  | NH2 | D_ASP_86  | OD1 | 3.962 |
| 1BLN | D_LYS_64  | NZ  | D_ASP_61  | OD1 | 2.496 |
| 1BLN | D_ARG_66  | NH1 | D_ASP_86  | OD1 | 3.322 |
| 1BLN | D_ARG_66  | NH1 | D_ASP_86  | OD2 | 3.365 |
| 1BLN | D_ARG_66  | NH2 | D_ASP_86  | OD1 | 3.949 |
| 1BLN | D_ARG_66  | NH2 | D_ASP_86  | OD2 | 2.588 |
| 1BLN | D_LYS_75  | NZ  | D_ASP_72  | OD1 | 2.846 |
| 1BLN | D_LYS_75  | NZ  | D_ASP_72  | OD2 | 2.946 |
| 1BLN | D_ARG_83  | NH2 | D_GLU_85  | OE2 | 2.754 |
| 1BLN | D_LYS_218 | NZ  | D_ASP_220 | OD1 | 2.806 |
| 1BLN | D_LYS_218 | NZ  | D_ASP_220 | OD2 | 2.614 |
| 1BLN | D_LYS_221 | NZ  | C_GLU_123 | OE2 | 2.694 |
| 1BLN | D_LYS_222 | NZ  | D_GLU_226 | OE1 | 2.616 |
| 1BLN | D_LYS_222 | NZ  | D_GLU_226 | OE2 | 2.583 |
| 1BQL | L_LYS_44  | NZ  | H_ASP_104 | OD1 | 3.995 |
| 1BQL | L_ARG_45  | NH2 | H_ASP_104 | OD2 | 3.212 |
| 1BQL | L_ARG_60  | NH2 | L_ASP_81  | OD1 | 2.877 |
| 1BQL | L_ARG_106 | NH2 | L_ASP_168 | OD1 | 2.775 |
| 1BQL | L_ARG_106 | NH2 | L_ASP_168 | OD2 | 3.565 |
| 1BQL | L_LYS_147 | NZ  | L_GLU_193 | OE1 | 3.381 |
| 1BQL | L_LYS_147 | NZ  | L_GLU_193 | OE2 | 3.056 |
| 1BQL | L_LYS_167 | NZ  | L_ASP_165 | OD1 | 3.577 |
| 1BQL | L_ARG_186 | NH2 | L_ASP_182 | OD2 | 3.759 |
| 1BQL | L_HIS_187 | ND1 | L_ASP_149 | OD2 | 3.204 |
| 1BQL | H_LYS_38  | NZ  | H_GLU_46  | OE2 | 3.708 |
| 1BQL | H_LYS_67  | NZ  | H_ASP_90  | OD1 | 3.576 |
| 1BQL | H_LYS_67  | NZ  | H_ASP_90  | OD2 | 2.891 |
| 1BQL | H_LYS_208 | NZ  | H_ASP_210 | OD1 | 3.394 |
| 1BQL | H_LYS_211 | NZ  | L_GLU_121 | OE1 | 2.714 |
| 1BQL | H_LYS_211 | NZ  | L_GLU_121 | OE2 | 2.963 |
| 1BQL | Y_LYS_1   | NZ  | Y_GLU_7   | OE1 | 2.931 |
| 1BQL | Y_LYS_1   | NZ  | Y_GLU_7   | OE2 | 3.316 |
| 1BQL | Y_LYS_13  | NZ  | Y_ASP_18  | OD2 | 3.337 |
| 1BQL | Y_ARG_45  | NH1 | H_GLU_50  | OE1 | 3.800 |
| 1BQL | Y_ARG_45  | NH1 | H_GLU_50  | OE2 | 2.920 |
| 1BQL | Y_LYS_68  | NZ  | H_GLU_50  | OE1 | 3.561 |
| 1BQL | Y_LYS_97  | NZ  | Y_ASP_101 | OD1 | 2.891 |
| 1BQL | Y_ARG_125 | NH2 | Y_ASP_119 | OD2 | 2.588 |
| 1BVK | A_ARG_24  | NH1 | A_ASP_70  | OD1 | 2.987 |
| 1BVK | A_ARG_61  | NH2 | A_GLU_81  | OE1 | 3.459 |
| 1BVK | A_ARG_61  | NH2 | A_ASP_82  | OD1 | 2.453 |
| 1BVK | A_ARG_61  | NH2 | A_ASP_82  | OD2 | 3.255 |
| 1BVK | A_ARG_96  | NH2 | B_GLU_98  | OE1 | 2.978 |
| 1BVK | A_ARG_96  | NH2 | B_GLU_98  | OE2 | 2.932 |
| 1BVK | B_ARG_38  | NH1 | B_ASP_89  | OD1 | 2.858 |
| 1BVK | B_ARG_38  | NH2 | B_GLU_46  | OE1 | 3.400 |
| 1BVK | B_ARG_38  | NH2 | B_GLU_46  | OE2 | 3.917 |

|      |           |     |           |     |       |
|------|-----------|-----|-----------|-----|-------|
| 1BVK | B_ARG_38  | NH2 | B_ASP_89  | OD1 | 3.415 |
| 1BVK | B_ARG_66  | NH1 | B_ASP_89  | OD1 | 3.789 |
| 1BVK | B_ARG_66  | NH1 | B_ASP_89  | OD2 | 2.919 |
| 1BVK | B_ARG_66  | NH2 | B_ASP_89  | OD1 | 2.669 |
| 1BVK | B_ARG_66  | NH2 | B_ASP_89  | OD2 | 3.080 |
| 1BVK | B_ARG_97  | NH2 | B_ASP_104 | OD1 | 3.302 |
| 1BVK | B_ARG_97  | NH2 | B_ASP_104 | OD2 | 3.220 |
| 1BVK | B_ARG_102 | NH1 | B_ASP_100 | OD2 | 3.508 |
| 1BVK | B_ARG_102 | NH2 | B_ASP_100 | OD2 | 3.959 |
| 1BVK | C_ARG_61  | NH1 | C_ASP_48  | OD2 | 2.726 |
| 1BVK | C_ARG_68  | NH1 | C_ASP_66  | OD2 | 3.814 |
| 1BVK | C_ARG_125 | NH1 | C_ASP_119 | OD2 | 3.413 |
| 1BVK | C_ARG_125 | NH2 | C_ASP_119 | OD2 | 2.659 |
| 1BVK | D_ARG_24  | NH1 | D_ASP_70  | OD1 | 3.898 |
| 1BVK | D_ARG_24  | NH1 | D_ASP_70  | OD2 | 3.517 |
| 1BVK | D_ARG_61  | NH1 | D_GLU_81  | OE1 | 3.485 |
| 1BVK | D_ARG_61  | NH1 | D_GLU_81  | OE2 | 3.564 |
| 1BVK | D_ARG_61  | NH2 | D_GLU_81  | OE1 | 2.809 |
| 1BVK | D_ARG_61  | NH2 | D_GLU_81  | OE2 | 3.799 |
| 1BVK | D_ARG_61  | NH2 | D_ASP_82  | OD1 | 2.873 |
| 1BVK | D_ARG_61  | NH2 | D_ASP_82  | OD2 | 3.655 |
| 1BVK | D_ARG_96  | NH2 | E_GLU_98  | OE1 | 2.525 |
| 1BVK | D_ARG_96  | NH2 | E_GLU_98  | OE2 | 2.753 |
| 1BVK | E_ARG_38  | NH1 | E_ASP_89  | OD1 | 3.089 |
| 1BVK | E_ARG_38  | NH2 | E_GLU_46  | OE1 | 3.613 |
| 1BVK | E_ARG_38  | NH2 | E_GLU_46  | OE2 | 3.594 |
| 1BVK | E_ARG_38  | NH2 | E_ASP_89  | OD1 | 3.476 |
| 1BVK | E_ARG_66  | NH1 | E_ASP_89  | OD1 | 3.924 |
| 1BVK | E_ARG_66  | NH1 | E_ASP_89  | OD2 | 2.743 |
| 1BVK | E_ARG_66  | NH2 | E_ASP_89  | OD1 | 3.027 |
| 1BVK | E_ARG_66  | NH2 | E_ASP_89  | OD2 | 3.167 |
| 1BVK | E_ARG_97  | NH2 | E_ASP_104 | OD1 | 3.359 |
| 1BVK | E_ARG_97  | NH2 | E_ASP_104 | OD2 | 2.447 |
| 1BVK | E_ARG_102 | NH1 | E_ASP_100 | OD2 | 3.374 |
| 1BVK | E_ARG_102 | NH2 | E_ASP_100 | OD2 | 3.788 |
| 1BVK | F_LYS_1   | NZ  | F_GLU_7   | OE2 | 2.724 |
| 1BVK | F_LYS_13  | NZ  | F_ASP_18  | OD2 | 3.816 |
| 1BVK | F_ARG_61  | NH1 | F_ASP_48  | OD2 | 3.232 |
| 1BVK | F_ARG_125 | NH1 | F_ASP_119 | OD1 | 3.126 |
| 1BVK | F_ARG_125 | NH1 | F_ASP_119 | OD2 | 2.577 |
| 1BVK | F_ARG_125 | NH2 | F_ASP_119 | OD2 | 2.733 |
| 1C08 | A_ARG_61  | NH1 | A_GLU_79  | OE1 | 3.359 |
| 1C08 | A_ARG_61  | NH1 | A_GLU_79  | OE2 | 3.299 |
| 1C08 | A_ARG_61  | NH2 | A_GLU_79  | OE1 | 3.600 |
| 1C08 | A_ARG_61  | NH2 | A_GLU_81  | OE2 | 3.058 |
| 1C08 | A_ARG_61  | NH2 | A_ASP_82  | OD1 | 2.615 |
| 1C08 | A_ARG_61  | NH2 | A_ASP_82  | OD2 | 3.483 |
| 1C08 | A_LYS_103 | NZ  | A_GLU_105 | OE2 | 3.843 |
| 1C08 | B_ARG_38  | NH1 | B_ASP_89  | OD1 | 2.821 |
| 1C08 | B_ARG_38  | NH2 | B_GLU_46  | OE1 | 2.693 |
| 1C08 | B_ARG_38  | NH2 | B_ASP_89  | OD1 | 3.615 |
| 1C08 | B_ARG_66  | NH1 | B_ASP_89  | OD1 | 3.916 |
| 1C08 | B_ARG_66  | NH1 | B_ASP_89  | OD2 | 3.160 |
| 1C08 | B_ARG_66  | NH2 | B_ASP_89  | OD1 | 3.080 |
| 1C08 | B_ARG_66  | NH2 | B_ASP_89  | OD2 | 3.629 |
| 1C08 | B_LYS_75  | NZ  | B_ASP_72  | OD2 | 2.822 |
| 1C08 | C_LYS_1   | NZ  | C_GLU_7   | OE1 | 3.861 |
| 1C08 | C_LYS_1   | NZ  | C_GLU_7   | OE2 | 2.619 |

|      |           |     |           |     |       |
|------|-----------|-----|-----------|-----|-------|
| 1C08 | C_ARG.61  | NH1 | C_ASP_48  | OD2 | 2.684 |
| 1C08 | C_ARG.61  | NH2 | C_ASP_48  | OD2 | 3.901 |
| 1C08 | C_LYS.97  | NZ  | B_ASP_32  | OD1 | 2.620 |
| 1C08 | C_LYS.97  | NZ  | B_ASP_32  | OD2 | 3.999 |
| 1C08 | C_LYS.97  | NZ  | B_ASP_99  | OD2 | 2.365 |
| 1C08 | C_ARG_125 | NH1 | C_ASP_119 | OD2 | 3.458 |
| 1C08 | C_ARG_125 | NH2 | C_ASP_119 | OD1 | 3.749 |
| 1C08 | C_ARG_125 | NH2 | C_ASP_119 | OD2 | 3.808 |
| 1C12 | A_ARG.61  | NH1 | A_GLU_79  | OE1 | 3.872 |
| 1C12 | A_ARG.61  | NH1 | A_GLU_79  | OE2 | 3.629 |
| 1C12 | A_ARG.61  | NH1 | A_GLU_81  | OE2 | 3.588 |
| 1C12 | A_ARG.61  | NH1 | A_ASP_82  | OD1 | 3.976 |
| 1C12 | A_ARG.61  | NH2 | A_ASP_82  | OD1 | 2.627 |
| 1C12 | A_ARG.61  | NH2 | A_ASP_82  | OD2 | 3.162 |
| 1C12 | A_LYS_103 | NZ  | A_ASP_85  | OD1 | 2.711 |
| 1C12 | A_LYS_103 | NZ  | A_ASP_85  | OD2 | 3.993 |
| 1C12 | A_LYS_147 | NZ  | A_GLU_154 | OE2 | 3.218 |
| 1C12 | A_LYS_149 | NZ  | A_GLU_154 | OE1 | 3.689 |
| 1C12 | A_ARG_155 | NH1 | A_GLU_185 | OE1 | 3.418 |
| 1C12 | A_ARG_155 | NH2 | A_GLU_185 | OE1 | 3.302 |
| 1C12 | A_LYS_169 | NZ  | A_ASP_167 | OD1 | 3.892 |
| 1C12 | A_ARG_188 | NH1 | A_ASP_184 | OD1 | 3.647 |
| 1C12 | A_ARG_188 | NH1 | A_ASP_184 | OD2 | 3.352 |
| 1C12 | A_HIS_189 | ND1 | A_ASP_151 | OD2 | 3.592 |
| 1C12 | A_LYS_199 | NZ  | A_ASP_143 | OD2 | 3.366 |
| 1C12 | A_ARG_211 | NH2 | A_GLU_187 | OE2 | 3.347 |
| 1C12 | B_ARG_338 | NH1 | B_GLU_346 | OE2 | 2.575 |
| 1C12 | B_ARG_338 | NH2 | B_ASP_386 | OD1 | 2.668 |
| 1C12 | B_ARG_366 | NH1 | B_ASP_386 | OD1 | 2.858 |
| 1C12 | B_ARG_366 | NH1 | B_ASP_386 | OD2 | 3.220 |
| 1C12 | B_ARG_366 | NH2 | B_ASP_386 | OD1 | 3.966 |
| 1C12 | B_ARG_366 | NH2 | B_ASP_386 | OD2 | 2.872 |
| 1C12 | B_LYS_508 | NZ  | A_GLU_123 | OE2 | 3.314 |
| 1CE1 | L_ARG.61  | NH2 | L_GLU_81  | OE1 | 3.727 |
| 1CE1 | L_ARG.61  | NH2 | L_ASP_82  | OD1 | 2.705 |
| 1CE1 | L_ARG.61  | NH2 | L_ASP_82  | OD2 | 3.700 |
| 1CE1 | L_ARG_94  | NH2 | H_GLU_61  | OE2 | 3.979 |
| 1CE1 | L_ARG_96  | NH1 | H_GLU_101 | OE1 | 2.707 |
| 1CE1 | L_ARG_96  | NH1 | H_GLU_101 | OE2 | 3.562 |
| 1CE1 | L_ARG_96  | NH2 | H_GLU_101 | OE1 | 3.509 |
| 1CE1 | L_ARG_96  | NH2 | H_GLU_101 | OE2 | 2.787 |
| 1CE1 | L_LYS_103 | NZ  | L_GLU_105 | OE1 | 3.913 |
| 1CE1 | L_LYS_149 | NZ  | L_GLU_195 | OE2 | 3.867 |
| 1CE1 | L_LYS_188 | NZ  | L_ASP_185 | OD1 | 3.892 |
| 1CE1 | H_ARG_38  | NH1 | H_ASP_92  | OD1 | 2.855 |
| 1CE1 | H_ARG_38  | NH2 | H_GLU_46  | OE1 | 2.954 |
| 1CE1 | H_ARG_38  | NH2 | H_ASP_92  | OD1 | 3.724 |
| 1CE1 | H_ARG_52  | NH1 | H_GLU_61  | OE2 | 3.297 |
| 1CE1 | H_ARG_52  | NH2 | H_GLU_61  | OE2 | 2.740 |
| 1CE1 | H_ARG_52  | NH2 | P_ASP_7   | OD1 | 3.481 |
| 1CE1 | H_LYS_56  | NZ  | P_ASP_7   | OD2 | 2.951 |
| 1CE1 | H_ARG_69  | NH1 | H_ASP_92  | OD1 | 3.674 |
| 1CE1 | H_ARG_69  | NH1 | H_ASP_92  | OD2 | 2.964 |
| 1CE1 | H_ARG_69  | NH2 | H_ASP_92  | OD1 | 2.906 |
| 1CE1 | H_ARG_69  | NH2 | H_ASP_92  | OD2 | 3.491 |
| 1CE1 | H_ARG_100 | NH2 | H_ASP_109 | OD1 | 3.721 |
| 1CE1 | H_ARG_100 | NH2 | H_ASP_109 | OD2 | 2.688 |
| 1CE1 | H_LYS_218 | NZ  | H_GLU_220 | OE2 | 3.210 |

|      |           |     |           |     |       |
|------|-----------|-----|-----------|-----|-------|
| 1CFS | A_ARG.61  | NH1 | A_GLU_79  | OE1 | 3.782 |
| 1CFS | A_ARG.61  | NH1 | A_ASP_82  | OD1 | 2.689 |
| 1CFS | A_ARG.61  | NH1 | A_ASP_82  | OD2 | 2.385 |
| 1CFS | A_ARG.61  | NH2 | A_GLU_79  | OE1 | 3.368 |
| 1CFS | A_LYS_147 | NZ  | A_GLU_154 | OE2 | 3.751 |
| 1CFS | A_LYS_149 | NZ  | A_GLU_195 | OE1 | 3.919 |
| 1CFS | A_LYS_149 | NZ  | A_GLU_195 | OE2 | 2.427 |
| 1CFS | A_HIS_189 | ND1 | A_ASP_151 | OD2 | 3.201 |
| 1CFS | A_LYS_199 | NZ  | A_ASP_110 | OD2 | 2.468 |
| 1CFS | A_ARG.211 | NH2 | A_GLU_187 | OE2 | 3.817 |
| 1CFS | B_LYS_19  | NZ  | B_GLU_82  | OE1 | 2.420 |
| 1CFS | B_LYS_19  | NZ  | B_GLU_82  | OE2 | 3.235 |
| 1CFS | B_HIS_35  | NE2 | B_GLU_33  | OE1 | 3.092 |
| 1CFS | B_LYS_38  | NZ  | B_ASP_90  | OD1 | 3.977 |
| 1CFS | B_LYS_63  | NZ  | B_GLU_46  | OE2 | 2.435 |
| 1CFS | B_LYS_67  | NZ  | B_ASP_90  | OD2 | 3.258 |
| 1CFS | B_ARG_98  | NH1 | B_ASP_100 | OD1 | 3.172 |
| 1CFS | B_ARG_98  | NH1 | B_ASP_100 | OD2 | 2.621 |
| 1CFS | B_LYS_99  | NZ  | B_GLU_33  | OE1 | 3.391 |
| 1CFS | B_LYS_207 | NZ  | A_GLU_123 | OE1 | 3.526 |
| 1CFS | B_ARG.212 | NH2 | B_GLU_210 | OE1 | 3.742 |
| 1CFT | A_ARG.61  | NH1 | A_GLU_79  | OE1 | 3.018 |
| 1CFT | A_ARG.61  | NH1 | A_GLU_79  | OE2 | 2.933 |
| 1CFT | A_ARG.61  | NH1 | A_ASP_82  | OD1 | 3.900 |
| 1CFT | A_ARG.61  | NH1 | A_ASP_82  | OD2 | 3.509 |
| 1CFT | A_ARG.61  | NH2 | A_ASP_82  | OD1 | 3.453 |
| 1CFT | A_LYS_103 | NZ  | A_ASP_105 | OD1 | 3.879 |
| 1CFT | A_LYS_103 | NZ  | A_ASP_105 | OD2 | 3.379 |
| 1CFT | A_LYS_149 | NZ  | A_GLU_195 | OE1 | 3.740 |
| 1CFT | A_LYS_149 | NZ  | A_GLU_195 | OE2 | 2.938 |
| 1CFT | A_ARG_155 | NH1 | A_GLU_185 | OE2 | 3.873 |
| 1CFT | A_ARG_155 | NH2 | A_GLU_185 | OE1 | 3.494 |
| 1CFT | A_ARG_155 | NH2 | A_GLU_185 | OE2 | 2.450 |
| 1CFT | A_LYS_183 | NZ  | A_GLU_187 | OE1 | 3.152 |
| 1CFT | A_LYS_183 | NZ  | A_GLU_187 | OE2 | 3.103 |
| 1CFT | A_HIS_189 | ND1 | A_ASP_151 | OD2 | 2.935 |
| 1CFT | B_HIS_35  | NE2 | B_GLU_33  | OE1 | 2.890 |
| 1CFT | B_LYS_38  | NZ  | B_ASP_90  | OD1 | 3.646 |
| 1CFT | B_LYS_63  | NZ  | B_GLU_46  | OE1 | 3.173 |
| 1CFT | B_LYS_63  | NZ  | B_GLU_46  | OE2 | 3.453 |
| 1CFT | B_LYS_67  | NZ  | B_ASP_90  | OD1 | 3.866 |
| 1CFT | B_LYS_67  | NZ  | B_ASP_90  | OD2 | 2.897 |
| 1CFT | B_ARG_98  | NH2 | B_ASP_100 | OD1 | 3.436 |
| 1CFT | B_ARG_98  | NH2 | B_ASP_100 | OD2 | 2.735 |
| 1CFT | B_LYS_99  | NZ  | B_GLU_33  | OE1 | 2.555 |
| 1CFT | B_LYS_204 | NZ  | B_ASP_206 | OD2 | 3.553 |
| 1CFT | B_LYS_207 | NZ  | A_GLU_123 | OE1 | 2.550 |
| 1CFT | B_LYS_208 | NZ  | B_GLU_210 | OE2 | 2.675 |
| 1CFT | C_LYS.2   | NZ  | A_ASP_92  | OD1 | 2.682 |
| 1CG9 | A_HIS.3   | ND1 | A_ASP_29  | OD2 | 2.918 |
| 1CG9 | A_ARG.6   | NH1 | A_ASP_102 | OD1 | 3.165 |
| 1CG9 | A_ARG.6   | NH2 | A_ASP_102 | OD1 | 2.958 |
| 1CG9 | A_ARG.6   | NH2 | A_ASP_102 | OD2 | 3.809 |
| 1CG9 | A_ARG_14  | NH1 | A_ASP_39  | OD1 | 3.895 |
| 1CG9 | A_ARG_14  | NH1 | A_ASP_39  | OD2 | 3.383 |
| 1CG9 | A_ARG_14  | NH2 | A_ASP_39  | OD1 | 2.876 |
| 1CG9 | A_ARG_14  | NH2 | A_ASP_39  | OD2 | 3.696 |
| 1CG9 | A_ARG_17  | NH1 | B_ASP_35  | OD2 | 3.201 |



|      |           |     |           |     |       |
|------|-----------|-----|-----------|-----|-------|
| 1CG9 | A_ARG_17  | NH2 | B_ASP_35  | OD1 | 3.038 |
| 1CG9 | A_ARG_17  | NH2 | B_ASP_35  | OD2 | 3.401 |
| 1CG9 | A_ARG_21  | NH2 | A_ASP_37  | OD1 | 3.415 |
| 1CG9 | A_ARG_21  | NH2 | A_ASP_37  | OD2 | 2.852 |
| 1CG9 | A_ARG_35  | NH1 | A_GLU_46  | OE1 | 3.005 |
| 1CG9 | A_ARG_35  | NH1 | A_GLU_46  | OE2 | 3.637 |
| 1CG9 | A_ARG_35  | NH2 | A_ASP_37  | OD2 | 3.660 |
| 1CG9 | A_ARG_44  | NH2 | A_GLU_46  | OE2 | 3.936 |
| 1CG9 | A_ARG_48  | NH1 | A_GLU_46  | OE1 | 3.350 |
| 1CG9 | A_ARG_48  | NH2 | A_GLU_46  | OE1 | 3.509 |
| 1CG9 | A_ARG_48  | NH2 | B_ASP_54  | OD1 | 3.456 |
| 1CG9 | A_ARG_48  | NH2 | B_ASP_54  | OD2 | 3.762 |
| 1CG9 | A_ARG_82  | NH1 | A_GLU_89  | OE1 | 2.878 |
| 1CG9 | A_ARG_82  | NH1 | A_GLU_89  | OE2 | 2.767 |
| 1CG9 | A_HIS_93  | ND1 | A_ASP_119 | OD1 | 3.615 |
| 1CG9 | A_HIS_93  | ND1 | A_ASP_119 | OD2 | 2.882 |
| 1CG9 | A_ARG_111 | NH2 | A_ASP_102 | OD2 | 3.428 |
| 1CG9 | A_HIS_113 | NE2 | A_ASP_102 | OD2 | 2.935 |
| 1CG9 | A_ARG_151 | NH2 | A_GLU_154 | OE1 | 3.687 |
| 1CG9 | A_ARG_151 | NH2 | A_GLU_154 | OE2 | 3.160 |
| 1CG9 | A_ARG_169 | NH2 | A_GLU_166 | OE1 | 3.233 |
| 1CG9 | A_ARG_170 | NH2 | A_GLU_166 | OE2 | 3.714 |
| 1CG9 | A_HIS_191 | NE2 | A_GLU_254 | OE1 | 3.499 |
| 1CG9 | A_HIS_191 | NE2 | A_GLU_254 | OE2 | 3.158 |
| 1CG9 | A_HIS_192 | ND1 | B_ASP_99  | OD2 | 3.812 |
| 1CG9 | A_ARG_256 | NH1 | A_ASP_220 | OD2 | 2.755 |
| 1CG9 | A_ARG_256 | NH2 | A_GLU_253 | OE1 | 2.835 |
| 1CG9 | B_LYS_7   | NZ  | A_GLU_232 | OE1 | 3.887 |
| 1CG9 | B_ARG_46  | NH1 | B_GLU_48  | OE2 | 3.451 |
| 1CG9 | B_ARG_82  | NH2 | B_ASP_39  | OD2 | 3.296 |
| 1CLO | L_ARG_61  | NH2 | L_GLU_81  | OE2 | 3.507 |
| 1CLO | L_ARG_61  | NH2 | L_ASP_82  | OD1 | 2.686 |
| 1CLO | L_ARG_61  | NH2 | L_ASP_82  | OD2 | 3.628 |
| 1CLO | L_LYS_107 | NZ  | L_GLU_17  | OE2 | 3.193 |
| 1CLO | L_LYS_147 | NZ  | L_GLU_154 | OE1 | 2.893 |
| 1CLO | L_LYS_149 | NZ  | L_GLU_195 | OE1 | 2.730 |
| 1CLO | L_LYS_183 | NZ  | L_GLU_187 | OE1 | 3.637 |
| 1CLO | L_ARG_188 | NH2 | L_ASP_184 | OD2 | 3.790 |
| 1CLO | L_HIS_189 | ND1 | L_ASP_151 | OD2 | 3.698 |
| 1CLO | L_HIS_189 | NE2 | L_GLU_185 | OE1 | 3.878 |
| 1CLO | L_HIS_189 | NE2 | L_GLU_185 | OE2 | 3.586 |
| 1CLO | L_LYS_199 | NZ  | L_ASP_110 | OD1 | 3.988 |
| 1CLO | H_ARG_38  | NH1 | H_ASP_86  | OD1 | 2.756 |
| 1CLO | H_ARG_38  | NH2 | H_GLU_46  | OE1 | 3.383 |
| 1CLO | H_ARG_38  | NH2 | H_GLU_46  | OE2 | 3.812 |
| 1CLO | H_ARG_38  | NH2 | H_ASP_86  | OD1 | 3.644 |
| 1CLO | H_ARG_66  | NH1 | H_ASP_86  | OD1 | 3.875 |
| 1CLO | H_ARG_66  | NH1 | H_ASP_86  | OD2 | 3.046 |
| 1CLO | H_ARG_66  | NH2 | H_ASP_86  | OD1 | 2.884 |
| 1CLO | H_ARG_66  | NH2 | H_ASP_86  | OD2 | 3.391 |
| 1CLO | H_ARG_94  | NH2 | H_ASP_101 | OD1 | 3.855 |
| 1CLO | H_ARG_94  | NH2 | H_ASP_101 | OD2 | 2.771 |
| 1CLO | H_ARG_99  | NH2 | H_GLU_58  | OE1 | 2.867 |
| 1CLO | H_ARG_99  | NH2 | H_GLU_58  | OE2 | 3.927 |
| 1CLY | L_ARG_24  | NH2 | L_ASP_70  | OD1 | 3.806 |
| 1CLY | L_ARG_24  | NH2 | L_ASP_70  | OD2 | 2.805 |
| 1CLY | L_ARG_54  | NH2 | L_ASP_60  | OD1 | 3.787 |
| 1CLY | L_ARG_61  | NH1 | L_ASP_82  | OD1 | 2.802 |

|        |           |     |           |     |       |
|--------|-----------|-----|-----------|-----|-------|
| 1CLY   | L_ARG.61  | NH1 | L_ASP.82  | OD2 | 3.085 |
| 1CLY   | L_LYS.188 | NZ  | L_ASP.185 | OD1 | 3.969 |
| 1CLY   | L_HIS.189 | ND1 | L_ASP.151 | OD2 | 3.439 |
| 1CLY   | H_ARG.38  | NH1 | H_ASP.86  | OD1 | 2.869 |
| 1CLY   | H_ARG.38  | NH2 | H_GLU.46  | OE1 | 3.344 |
| 1CLY   | H_ARG.38  | NH2 | H_ASP.86  | OD1 | 3.797 |
| 1CLY   | H_LYS.64  | NZ  | H_ASP.58  | OD1 | 2.930 |
| 1CLY   | H_ARG.66  | NH1 | H_ASP.86  | OD1 | 3.905 |
| 1CLY   | H_ARG.66  | NH1 | H_ASP.86  | OD2 | 2.752 |
| 1CLY   | H_ARG.66  | NH2 | H_ASP.86  | OD1 | 2.793 |
| 1CLY   | H_ARG.66  | NH2 | H_ASP.86  | OD2 | 3.024 |
| 1CLY   | H_LYS.83  | NZ  | H_GLU.85  | OE2 | 3.267 |
| 1CLZ   | L_ARG.24  | NH1 | L_ASP.70  | OD1 | 3.101 |
| 1CLZ   | L_ARG.24  | NH1 | L_ASP.70  | OD2 | 3.153 |
| 1CLZ   | L_ARG.54  | NH2 | L_ASP.60  | OD2 | 3.723 |
| 1CLZ   | L_ARG.61  | NH1 | L_GLU.81  | OE2 | 2.935 |
| 1CLZ   | L_ARG.61  | NH1 | L_ASP.82  | OD1 | 2.614 |
| 1CLZ   | L_ARG.61  | NH1 | L_ASP.82  | OD2 | 2.847 |
| 1CLZ   | L_ARG.61  | NH2 | L_GLU.81  | OE2 | 2.838 |
| 1CLZ   | L_ARG.155 | NH1 | L_GLU.195 | OE1 | 3.513 |
| 1CLZ   | L_ARG.155 | NH1 | L_GLU.195 | OE2 | 2.873 |
| 1CLZ   | L_ARG.155 | NH2 | L_GLU.195 | OE2 | 3.852 |
| 1CLZ   | L_LYS.183 | NZ  | L_ASP.184 | OD1 | 3.131 |
| 1CLZ   | L_LYS.183 | NZ  | L_ASP.184 | OD2 | 3.972 |
| 1CLZ   | L_LYS.199 | NZ  | L_ASP.110 | OD1 | 3.811 |
| 1CLZ   | L_LYS.207 | NZ  | H_ASP.130 | OD1 | 3.119 |
| 1CLZ   | L_LYS.207 | NZ  | H_ASP.130 | OD2 | 3.445 |
| 1CLZ   | H_ARG.38  | NH1 | H_GLU.85  | OE2 | 3.982 |
| 1CLZ   | H_ARG.38  | NH1 | H_ASP.86  | OD1 | 2.887 |
| 1CLZ   | H_ARG.38  | NH2 | H_GLU.46  | OE1 | 2.799 |
| 1CLZ   | H_ARG.38  | NH2 | H_GLU.46  | OE2 | 3.386 |
| 1CLZ   | H_ARG.38  | NH2 | H_GLU.85  | OE2 | 3.329 |
| 1CLZ   | H_LYS.64  | NZ  | H_ASP.61  | OD1 | 3.149 |
| 1CLZ   | H_ARG.66  | NH1 | H_ASP.86  | OD2 | 2.828 |
| 1CLZ   | H_ARG.66  | NH2 | H_ASP.86  | OD1 | 3.003 |
| 1CLZ   | H_ARG.66  | NH2 | H_ASP.86  | OD2 | 2.860 |
| 1CLZ   | H_LYS.75  | NZ  | H_ASP.72  | OD1 | 3.567 |
| 1CLZ   | H_LYS.75  | NZ  | H_ASP.72  | OD2 | 3.842 |
| 1CLZ   | H_ARG.172 | NH1 | L_ASP.170 | OD2 | 3.885 |
| 1CLZ   | H_ARG.172 | NH2 | L_ASP.170 | OD2 | 3.384 |
| 1CLZ   | H_LYS.221 | NZ  | L_GLU.123 | OE1 | 3.750 |
| 1CLZ   | H_LYS.221 | NZ  | L_GLU.123 | OE2 | 2.509 |
| 1CS9-1 | A_ARG.5   | NH1 | A_GLU.7   | OE1 | 3.450 |
| 1CS9-1 | A_ARG.5   | NH2 | A_GLU.7   | OE1 | 3.678 |
| 1CS9-3 | A_ARG.5   | NH1 | A_GLU.7   | OE2 | 3.468 |
| 1CS9-3 | A_ARG.5   | NH2 | A_GLU.7   | OE1 | 3.563 |
| 1CS9-3 | A_ARG.5   | NH2 | A_GLU.7   | OE2 | 3.412 |
| 1CS9-6 | A_ARG.5   | NH2 | A_GLU.7   | OE1 | 3.965 |
| 1CS9-6 | A_ARG.5   | NH2 | A_GLU.7   | OE2 | 3.461 |
| 1CT6-1 | A_ARG.5   | NH2 | A_GLU.7   | OE2 | 3.406 |
| 1CT6-7 | A_ARG.5   | NH1 | A_GLU.7   | OE1 | 3.406 |
| 1CT6-7 | A_ARG.5   | NH2 | A_GLU.7   | OE1 | 3.280 |
| 1CZ8   | V_ARG.23  | NH1 | W_GLU.30  | OE1 | 3.162 |
| 1CZ8   | V_ARG.23  | NH1 | W_GLU.30  | OE2 | 3.558 |
| 1CZ8   | V_ARG.56  | NH1 | V_GLU.38  | OE1 | 2.977 |
| 1CZ8   | V_ARG.56  | NH1 | V_GLU.38  | OE2 | 3.581 |
| 1CZ8   | V_ARG.56  | NH2 | V_GLU.38  | OE1 | 3.435 |
| 1CZ8   | V_ARG.82  | NH1 | V_GLU.42  | OE1 | 3.541 |

|      |           |     |           |     |       |
|------|-----------|-----|-----------|-----|-------|
| 1CZ8 | V_ARG.82  | NH1 | V_GLU.42  | OE2 | 3.530 |
| 1CZ8 | V_ARG.82  | NH2 | V_GLU.42  | OE1 | 2.378 |
| 1CZ8 | V_ARG.82  | NH2 | V_GLU.42  | OE2 | 3.778 |
| 1CZ8 | V_LYS.84  | NZ  | V_GLU.44  | OE1 | 3.578 |
| 1CZ8 | V_HIS.99  | NE2 | V_GLU.73  | OE2 | 3.799 |
| 1CZ8 | W_ARG.23  | NH1 | V_GLU.30  | OE1 | 3.011 |
| 1CZ8 | W_ARG.23  | NH1 | V_GLU.30  | OE2 | 3.663 |
| 1CZ8 | W_ARG.56  | NH1 | W_GLU.38  | OE1 | 3.539 |
| 1CZ8 | W_ARG.56  | NH2 | W_GLU.38  | OE1 | 2.665 |
| 1CZ8 | W_ARG.82  | NH1 | W_GLU.42  | OE1 | 3.515 |
| 1CZ8 | W_ARG.82  | NH1 | W_GLU.42  | OE2 | 3.352 |
| 1CZ8 | W_ARG.82  | NH2 | W_GLU.42  | OE1 | 2.236 |
| 1CZ8 | W_ARG.82  | NH2 | W_GLU.42  | OE2 | 3.471 |
| 1CZ8 | W_LYS.84  | NZ  | W_GLU.44  | OE1 | 3.728 |
| 1CZ8 | W_HIS.99  | NE2 | W_GLU.73  | OE2 | 3.726 |
| 1CZ8 | W_ARG.105 | NH1 | W_GLU.103 | OE1 | 3.814 |
| 1CZ8 | W_ARG.105 | NH2 | W_GLU.103 | OE1 | 3.500 |
| 1CZ8 | L_ARG.61  | NH2 | L_GLU.81  | OE1 | 3.328 |
| 1CZ8 | L_ARG.61  | NH2 | L_ASP.82  | OD1 | 3.668 |
| 1CZ8 | L_ARG.61  | NH2 | L_ASP.82  | OD2 | 2.923 |
| 1CZ8 | L_LYS.103 | NZ  | L_GLU.165 | OE1 | 3.942 |
| 1CZ8 | L_LYS.103 | NZ  | L_GLU.165 | OE2 | 3.656 |
| 1CZ8 | L_ARG.142 | NH1 | L_GLU.105 | OE1 | 3.981 |
| 1CZ8 | L_ARG.142 | NH2 | L_GLU.105 | OE1 | 2.514 |
| 1CZ8 | L_LYS.188 | NZ  | L_ASP.185 | OD1 | 3.914 |
| 1CZ8 | H_HIS.31  | NE2 | H_ASP.28  | OD1 | 3.613 |
| 1CZ8 | H_HIS.31  | NE2 | H_ASP.28  | OD2 | 3.218 |
| 1CZ8 | H_ARG.38  | NH1 | H_ASP.90  | OD1 | 2.960 |
| 1CZ8 | H_ARG.38  | NH2 | H_GLU.46  | OE2 | 3.234 |
| 1CZ8 | H_ARG.67  | NH1 | H_ASP.90  | OD1 | 3.710 |
| 1CZ8 | H_ARG.67  | NH1 | H_ASP.90  | OD2 | 2.499 |
| 1CZ8 | H_ARG.67  | NH2 | H_ASP.90  | OD1 | 2.930 |
| 1CZ8 | H_ARG.67  | NH2 | H_ASP.90  | OD2 | 3.145 |
| 1CZ8 | H_ARG.87  | NH1 | H_GLU.89  | OE2 | 3.671 |
| 1CZ8 | H_LYS.98  | NZ  | H_ASP.111 | OD1 | 3.604 |
| 1CZ8 | H_LYS.153 | NZ  | H_ASP.154 | OD1 | 3.169 |
| 1CZ8 | H_LYS.153 | NZ  | H_ASP.154 | OD2 | 3.317 |
| 1CZ8 | H_LYS.219 | NZ  | L_GLU.123 | OE1 | 3.027 |
| 1CZ8 | H_LYS.224 | NZ  | L_ASP.122 | OD1 | 2.846 |
| 1CZ8 | H_LYS.224 | NZ  | L_ASP.122 | OD2 | 3.185 |
| 1CZ8 | X_ARG.61  | NH2 | X_GLU.81  | OE1 | 2.956 |
| 1CZ8 | X_ARG.61  | NH2 | X_ASP.82  | OD1 | 3.979 |
| 1CZ8 | X_ARG.61  | NH2 | X_ASP.82  | OD2 | 3.064 |
| 1CZ8 | X_LYS.103 | NZ  | X_GLU.165 | OE1 | 3.796 |
| 1CZ8 | X_LYS.103 | NZ  | X_GLU.165 | OE2 | 3.476 |
| 1CZ8 | X_LYS.183 | NZ  | X_GLU.187 | OE1 | 3.233 |
| 1CZ8 | X_HIS.189 | ND1 | X_ASP.151 | OD2 | 2.531 |
| 1CZ8 | X_ARG.211 | NH1 | X_GLU.187 | OE2 | 3.961 |
| 1CZ8 | X_ARG.211 | NH2 | X_GLU.187 | OE2 | 3.336 |
| 1CZ8 | Y_HIS.31  | NE2 | Y_ASP.28  | OD2 | 2.704 |
| 1CZ8 | Y_ARG.38  | NH1 | Y_ASP.90  | OD1 | 2.984 |
| 1CZ8 | Y_ARG.38  | NH2 | Y_GLU.46  | OE2 | 3.050 |
| 1CZ8 | Y_ARG.67  | NH1 | Y_ASP.90  | OD1 | 3.758 |
| 1CZ8 | Y_ARG.67  | NH1 | Y_ASP.90  | OD2 | 2.753 |
| 1CZ8 | Y_ARG.67  | NH2 | Y_ASP.90  | OD1 | 3.089 |
| 1CZ8 | Y_ARG.67  | NH2 | Y_ASP.90  | OD2 | 3.481 |
| 1CZ8 | Y_ARG.87  | NH1 | Y_GLU.89  | OE2 | 3.919 |
| 1CZ8 | Y_LYS.98  | NZ  | Y_ASP.111 | OD1 | 3.728 |

|      |           |     |           |     |       |
|------|-----------|-----|-----------|-----|-------|
| 1CZ8 | Y_LYS_153 | NZ  | Y_ASP_154 | OD1 | 3.924 |
| 1CZ8 | Y_LYS_219 | NZ  | X_GLU_123 | OE2 | 3.832 |
| 1DBJ | L_ARG_61  | NH1 | L_ASP_82  | OD1 | 2.891 |
| 1DBJ | L_ARG_61  | NH1 | L_ASP_82  | OD2 | 2.924 |
| 1DBJ | L_LYS_149 | NZ  | L_GLU_195 | OE2 | 2.903 |
| 1DBJ | L_ARG_155 | NH2 | L_GLU_185 | OE1 | 3.640 |
| 1DBJ | L_LYS_183 | NZ  | L_GLU_187 | OE1 | 3.039 |
| 1DBJ | L_LYS_183 | NZ  | L_GLU_187 | OE2 | 3.038 |
| 1DBJ | L_ARG_188 | NH1 | L_GLU_185 | OE1 | 2.980 |
| 1DBJ | L_ARG_188 | NH1 | L_GLU_185 | OE2 | 3.840 |
| 1DBJ | L_HIS_189 | ND1 | L_ASP_151 | OD1 | 3.098 |
| 1DBJ | L_HIS_189 | ND1 | L_ASP_151 | OD2 | 3.952 |
| 1DBJ | L_HIS_189 | NE2 | L_GLU_185 | OE2 | 3.171 |
| 1DBJ | H_LYS_13  | NZ  | H_GLU_16  | OE1 | 3.105 |
| 1DBJ | H_LYS_46  | NZ  | H_ASP_62  | OD2 | 3.771 |
| 1DBJ | H_ARG_66  | NH1 | H_ASP_86  | OD2 | 2.961 |
| 1DBJ | H_ARG_66  | NH2 | H_ASP_86  | OD1 | 3.477 |
| 1DBJ | H_ARG_66  | NH2 | H_ASP_86  | OD2 | 3.338 |
| 1DBJ | H_LYS_83  | NZ  | H_GLU_85  | OE1 | 3.571 |
| 1DBJ | H_LYS_83  | NZ  | H_GLU_85  | OE2 | 3.324 |
| 1DBJ | H_ARG_94  | NH2 | H_ASP_101 | OD1 | 3.264 |
| 1DBJ | H_ARG_94  | NH2 | H_ASP_101 | OD2 | 2.951 |
| 1DBJ | H_LYS_221 | NZ  | L_GLU_123 | OE1 | 3.386 |
| 1DBJ | H_LYS_221 | NZ  | L_GLU_123 | OE2 | 2.770 |
| 1DBK | L_LYS_39  | NZ  | L_GLU_81  | OE2 | 2.712 |
| 1DBK | L_ARG_61  | NH1 | L_ASP_82  | OD1 | 2.915 |
| 1DBK | L_ARG_61  | NH1 | L_ASP_82  | OD2 | 2.731 |
| 1DBK | L_ARG_61  | NH2 | L_GLU_79  | OE1 | 3.019 |
| 1DBK | L_ARG_61  | NH2 | L_ASP_82  | OD1 | 2.792 |
| 1DBK | L_ARG_61  | NH2 | L_ASP_82  | OD2 | 3.954 |
| 1DBK | L_LYS_149 | NZ  | L_GLU_195 | OE1 | 3.811 |
| 1DBK | L_LYS_149 | NZ  | L_GLU_195 | OE2 | 3.034 |
| 1DBK | L_ARG_155 | NH2 | L_GLU_185 | OE2 | 2.794 |
| 1DBK | L_LYS_169 | NZ  | L_ASP_167 | OD1 | 2.955 |
| 1DBK | L_LYS_169 | NZ  | L_ASP_167 | OD2 | 3.539 |
| 1DBK | L_HIS_189 | ND1 | L_ASP_151 | OD1 | 3.187 |
| 1DBK | L_HIS_189 | NE2 | L_GLU_185 | OE1 | 3.126 |
| 1DBK | L_HIS_189 | NE2 | L_GLU_185 | OE2 | 3.082 |
| 1DBK | H_LYS_12  | NZ  | H_GLU_16  | OE2 | 3.384 |
| 1DBK | H_LYS_46  | NZ  | H_ASP_62  | OD2 | 3.857 |
| 1DBK | H_ARG_66  | NH1 | H_ASP_86  | OD1 | 3.550 |
| 1DBK | H_ARG_66  | NH2 | H_ASP_86  | OD1 | 3.122 |
| 1DBK | H_ARG_66  | NH2 | H_ASP_86  | OD2 | 2.683 |
| 1DBK | H_ARG_94  | NH2 | H_ASP_101 | OD2 | 3.605 |
| 1DBK | H_HIS_172 | ND1 | L_ASP_167 | OD2 | 3.619 |
| 1DBK | H_LYS_221 | NZ  | L_GLU_123 | OE2 | 3.030 |
| 1DBM | L_ARG_61  | NH1 | L_ASP_82  | OD1 | 2.913 |
| 1DBM | L_ARG_61  | NH1 | L_ASP_82  | OD2 | 3.927 |
| 1DBM | L_LYS_103 | NZ  | L_GLU_105 | OE1 | 2.993 |
| 1DBM | L_LYS_142 | NZ  | L_GLU_105 | OE1 | 2.864 |
| 1DBM | L_LYS_147 | NZ  | L_GLU_154 | OE2 | 3.864 |
| 1DBM | L_LYS_149 | NZ  | L_GLU_195 | OE1 | 3.140 |
| 1DBM | L_LYS_149 | NZ  | L_GLU_195 | OE2 | 3.919 |
| 1DBM | L_ARG_155 | NH2 | L_GLU_185 | OE2 | 2.959 |
| 1DBM | L_LYS_183 | NZ  | L_GLU_187 | OE1 | 3.017 |
| 1DBM | L_LYS_183 | NZ  | L_GLU_187 | OE2 | 2.825 |
| 1DBM | L_HIS_189 | ND1 | L_ASP_151 | OD1 | 3.307 |
| 1DBM | L_HIS_189 | ND1 | L_ASP_151 | OD2 | 3.881 |

|      |            |     |            |     |       |
|------|------------|-----|------------|-----|-------|
| 1DBM | L_HIS_189  | NE2 | L_ASP_151  | OD1 | 3.334 |
| 1DBM | L_HIS_189  | NE2 | L_ASP_151  | OD2 | 2.747 |
| 1DBM | L_LYS_199  | NZ  | L_ASP_110  | OD1 | 3.963 |
| 1DBM | L_LYS_199  | NZ  | L_ASP_110  | OD2 | 3.388 |
| 1DBM | H_LYS_12   | NZ  | H_GLU_16   | OE1 | 3.842 |
| 1DBM | H_LYS_46   | NZ  | H_ASP_62   | OD1 | 3.760 |
| 1DBM | H_LYS_46   | NZ  | H_ASP_62   | OD2 | 2.943 |
| 1DBM | H_ARG_66   | NH2 | H_ASP_86   | OD1 | 2.873 |
| 1DBM | H_ARG_66   | NH2 | H_ASP_86   | OD2 | 2.647 |
| 1DBM | H_ARG_94   | NH1 | H_ASP_101  | OD1 | 3.264 |
| 1DBM | H_ARG_94   | NH1 | H_ASP_101  | OD2 | 2.957 |
| 1DBM | H_LYS_218  | NZ  | H_ASP_220  | OD1 | 2.773 |
| 1DBM | H_LYS_218  | NZ  | H_ASP_220  | OD2 | 3.444 |
| 1DBM | H_LYS_221  | NZ  | L_GLU_123  | OE2 | 3.277 |
| 1DEE | A_ARG_24   | NH1 | D_GLU_1555 | OE1 | 3.510 |
| 1DEE | A_ARG_24   | NH2 | A_ASP_70   | OD2 | 3.825 |
| 1DEE | A_ARG_61   | NH1 | A_GLU_81   | OE2 | 3.998 |
| 1DEE | A_ARG_61   | NH2 | A_GLU_81   | OE2 | 3.015 |
| 1DEE | A_ARG_61   | NH2 | A_ASP_82   | OD1 | 2.929 |
| 1DEE | A_ARG_61   | NH2 | A_ASP_82   | OD2 | 3.738 |
| 1DEE | A_ARG_142  | NH1 | A_GLU_105  | OE2 | 3.645 |
| 1DEE | A_ARG_142  | NH2 | A_GLU_105  | OE2 | 3.806 |
| 1DEE | A_LYS_149  | NZ  | A_GLU_195  | OE1 | 3.119 |
| 1DEE | A_LYS_183  | NZ  | A_GLU_187  | OE1 | 3.333 |
| 1DEE | A_LYS_183  | NZ  | A_GLU_187  | OE2 | 3.384 |
| 1DEE | A_HIS_189  | ND1 | A_ASP_151  | OD2 | 3.212 |
| 1DEE | B_ARG_538  | NH1 | B_ASP_590  | OD1 | 2.876 |
| 1DEE | B_ARG_538  | NH2 | B_GLU_546  | OE1 | 3.449 |
| 1DEE | B_ARG_538  | NH2 | B_ASP_590  | OD1 | 3.533 |
| 1DEE | B_ARG_567  | NH1 | B_ASP_590  | OD1 | 3.757 |
| 1DEE | B_ARG_567  | NH1 | B_ASP_590  | OD2 | 2.653 |
| 1DEE | B_ARG_567  | NH2 | B_ASP_590  | OD1 | 2.770 |
| 1DEE | B_ARG_567  | NH2 | B_ASP_590  | OD2 | 3.245 |
| 1DEE | B_ARG_587  | NH2 | B_GLU_589  | OE2 | 3.287 |
| 1DEE | B_ARG_587  | NH2 | B_ASP_590  | OD1 | 3.980 |
| 1DEE | B_LYS_598  | NZ  | B_ASP_609  | OD1 | 3.328 |
| 1DEE | B_LYS_598  | NZ  | B_ASP_609  | OD2 | 2.849 |
| 1DEE | B_LYS_663  | NZ  | B_ASP_669  | OD1 | 2.882 |
| 1DEE | B_LYS_663  | NZ  | B_ASP_669  | OD2 | 3.035 |
| 1DEE | B_LYS_665  | NZ  | B_GLU_704  | OE1 | 2.806 |
| 1DEE | B_LYS_665  | NZ  | B_GLU_704  | OE2 | 3.764 |
| 1DEE | B_ARG_674  | NH1 | A_ASP_167  | OD2 | 3.579 |
| 1DEE | B_LYS_684  | NZ  | B_ASP_652  | OD2 | 3.529 |
| 1DEE | B_HIS_705  | NE2 | B_ASP_720  | OD2 | 3.635 |
| 1DEE | B_LYS_719  | NZ  | A_GLU_123  | OE1 | 2.730 |
| 1DEE | B_LYS_719  | NZ  | A_GLU_123  | OE2 | 3.113 |
| 1DEE | C_ARG_1024 | NH1 | C_ASP_1070 | OD1 | 3.035 |
| 1DEE | C_ARG_1024 | NH1 | C_ASP_1070 | OD2 | 3.310 |
| 1DEE | C_ARG_1061 | NH2 | C_GLU_1081 | OE2 | 3.124 |
| 1DEE | C_ARG_1061 | NH2 | C_ASP_1082 | OD1 | 2.857 |
| 1DEE | C_ARG_1061 | NH2 | C_ASP_1082 | OD2 | 3.774 |
| 1DEE | C_LYS_1103 | NZ  | C_GLU_1165 | OE1 | 3.566 |
| 1DEE | C_LYS_1103 | NZ  | C_GLU_1165 | OE2 | 2.924 |
| 1DEE | C_LYS_1107 | NZ  | C_ASP_1017 | OD2 | 3.997 |
| 1DEE | C_LYS_1149 | NZ  | C_GLU_1195 | OE1 | 3.072 |
| 1DEE | C_LYS_1183 | NZ  | C_GLU_1187 | OE2 | 3.540 |
| 1DEE | C_LYS_1188 | NZ  | C_ASP_1185 | OD2 | 3.897 |
| 1DEE | C_HIS_1189 | ND1 | C_ASP_1151 | OD2 | 2.785 |

|      |            |     |            |     |       |
|------|------------|-----|------------|-----|-------|
| 1DEE | D_ARG_1519 | NH1 | G_ASP_1834 | OD1 | 3.122 |
| 1DEE | D_ARG_1519 | NH1 | G_ASP_1834 | OD2 | 3.064 |
| 1DEE | D_ARG_1519 | NH2 | G_ASP_1834 | OD1 | 3.684 |
| 1DEE | D_ARG_1519 | NH2 | G_ASP_1834 | OD2 | 2.875 |
| 1DEE | D_ARG_1538 | NH1 | D_ASP_1590 | OD1 | 2.724 |
| 1DEE | D_ARG_1538 | NH2 | D_GLU_1546 | OE1 | 3.584 |
| 1DEE | D_ARG_1538 | NH2 | D_GLU_1546 | OE2 | 3.849 |
| 1DEE | D_ARG_1538 | NH2 | D_ASP_1590 | OD1 | 3.421 |
| 1DEE | D_LYS_1565 | NZ  | D_ASP_1562 | OD1 | 2.918 |
| 1DEE | D_ARG_1567 | NH1 | D_ASP_1590 | OD1 | 3.432 |
| 1DEE | D_ARG_1567 | NH2 | D_ASP_1590 | OD1 | 2.922 |
| 1DEE | D_ARG_1567 | NH2 | D_ASP_1590 | OD2 | 2.448 |
| 1DEE | D_LYS_1576 | NZ  | D_ASP_1573 | OD2 | 3.953 |
| 1DEE | D_ARG_1587 | NH1 | D_GLU_1589 | OE2 | 3.755 |
| 1DEE | D_ARG_1587 | NH2 | D_GLU_1589 | OE2 | 2.965 |
| 1DEE | D_LYS_1598 | NZ  | D_ASP_1609 | OD1 | 3.236 |
| 1DEE | D_LYS_1598 | NZ  | D_ASP_1609 | OD2 | 3.057 |
| 1DEE | D_LYS_1663 | NZ  | D_ASP_1669 | OD1 | 3.393 |
| 1DEE | D_LYS_1663 | NZ  | D_ASP_1669 | OD2 | 3.077 |
| 1DEE | D_LYS_1665 | NZ  | D_GLU_1704 | OE1 | 2.915 |
| 1DEE | D_ARG_1674 | NH1 | C_ASP_1167 | OD2 | 3.619 |
| 1DEE | D_HIS_1705 | NE2 | D_ASP_1720 | OD2 | 3.228 |
| 1DEE | D_LYS_1719 | NZ  | C_GLU_1123 | OE1 | 3.687 |
| 1DEE | D_LYS_1719 | NZ  | C_GLU_1123 | OE2 | 2.890 |
| 1DEE | E_ARG_2024 | NH1 | E_ASP_2070 | OD1 | 3.455 |
| 1DEE | E_ARG_2024 | NH1 | E_ASP_2070 | OD2 | 3.446 |
| 1DEE | E_ARG_2024 | NH2 | E_ASP_2070 | OD2 | 3.331 |
| 1DEE | E_ARG_2061 | NH2 | E_GLU_2081 | OE2 | 3.103 |
| 1DEE | E_ARG_2061 | NH2 | E_ASP_2082 | OD1 | 3.070 |
| 1DEE | E_ARG_2061 | NH2 | E_ASP_2082 | OD2 | 3.805 |
| 1DEE | E_ARG_2142 | NH1 | E_GLU_2165 | OE2 | 3.927 |
| 1DEE | E_LYS_2149 | NZ  | E_GLU_2195 | OE1 | 2.878 |
| 1DEE | E_LYS_2149 | NZ  | E_GLU_2195 | OE2 | 3.165 |
| 1DEE | E_LYS_2183 | NZ  | E_GLU_2187 | OE1 | 2.894 |
| 1DEE | E_LYS_2183 | NZ  | E_GLU_2187 | OE2 | 3.210 |
| 1DEE | E_HIS_2189 | ND1 | E_ASP_2151 | OD2 | 3.099 |
| 1DEE | F_ARG_2519 | NH1 | H_ASP_2834 | OD1 | 3.463 |
| 1DEE | F_ARG_2519 | NH1 | H_ASP_2834 | OD2 | 2.731 |
| 1DEE | F_ARG_2519 | NH2 | H_ASP_2834 | OD1 | 3.523 |
| 1DEE | F_ARG_2519 | NH2 | H_ASP_2834 | OD2 | 3.444 |
| 1DEE | F_ARG_2538 | NH1 | F_ASP_2590 | OD1 | 2.942 |
| 1DEE | F_ARG_2538 | NH2 | F_GLU_2546 | OE1 | 3.386 |
| 1DEE | F_ARG_2538 | NH2 | F_GLU_2546 | OE2 | 3.004 |
| 1DEE | F_LYS_2565 | NZ  | F_ASP_2562 | OD1 | 3.402 |
| 1DEE | F_ARG_2567 | NH1 | F_ASP_2590 | OD1 | 3.677 |
| 1DEE | F_ARG_2567 | NH2 | F_ASP_2590 | OD1 | 2.797 |
| 1DEE | F_ARG_2567 | NH2 | F_ASP_2590 | OD2 | 2.401 |
| 1DEE | F_ARG_2587 | NH2 | F_GLU_2589 | OE2 | 3.479 |
| 1DEE | F_LYS_2598 | NZ  | F_ASP_2609 | OD1 | 3.297 |
| 1DEE | F_LYS_2598 | NZ  | F_ASP_2609 | OD2 | 2.926 |
| 1DEE | F_LYS_2663 | NZ  | F_ASP_2669 | OD1 | 3.683 |
| 1DEE | F_LYS_2663 | NZ  | F_ASP_2669 | OD2 | 2.643 |
| 1DEE | F_LYS_2665 | NZ  | F_GLU_2704 | OE1 | 3.853 |
| 1DEE | F_LYS_2665 | NZ  | F_GLU_2704 | OE2 | 3.766 |
| 1DEE | F_ARG_2674 | NH1 | E_ASP_2167 | OD2 | 3.989 |
| 1DEE | F_HIS_2705 | ND1 | F_ASP_2720 | OD2 | 3.943 |
| 1DEE | F_HIS_2705 | NE2 | F_ASP_2720 | OD2 | 2.896 |
| 1DEE | F_LYS_2719 | NZ  | E_GLU_2123 | OE1 | 2.882 |

|      |            |     |            |     |       |
|------|------------|-----|------------|-----|-------|
| 1DEE | F_LYS_2719 | NZ  | E_GLU_2123 | OE2 | 3.779 |
| 1DEE | G_LYS_1848 | NZ  | G_GLU_1845 | OE1 | 3.421 |
| 1DEE | G_LYS_1848 | NZ  | G_GLU_1845 | OE2 | 3.954 |
| 1DEE | H_ARG_2825 | NH1 | H_GLU_2822 | OE2 | 2.870 |
| 1DLF | L_ARG_61   | NH1 | L_GLU_79   | OE2 | 3.180 |
| 1DLF | L_ARG_61   | NH1 | L_GLU_81   | OE2 | 3.784 |
| 1DLF | L_ARG_61   | NH2 | L_GLU_79   | OE1 | 3.855 |
| 1DLF | L_ARG_61   | NH2 | L_GLU_79   | OE2 | 3.835 |
| 1DLF | L_ARG_61   | NH2 | L_GLU_81   | OE2 | 2.913 |
| 1DLF | L_ARG_61   | NH2 | L_ASP_82   | OD1 | 2.721 |
| 1DLF | L_ARG_61   | NH2 | L_ASP_82   | OD2 | 3.431 |
| 1DLF | L_LYS_103  | NZ  | L_GLU_105  | OE1 | 3.806 |
| 1DLF | H_ARG_38   | NH1 | H_GLU_85   | OE2 | 3.709 |
| 1DLF | H_ARG_38   | NH1 | H_ASP_86   | OD1 | 2.859 |
| 1DLF | H_ARG_38   | NH2 | H_GLU_46   | OE2 | 3.187 |
| 1DLF | H_ARG_38   | NH2 | H_GLU_85   | OE2 | 2.874 |
| 1DLF | H_ARG_38   | NH2 | H_ASP_86   | OD1 | 3.920 |
| 1DLF | H_HIS_55   | NE2 | H_ASP_73   | OD2 | 3.282 |
| 1DLF | H_ARG_66   | NH1 | H_ASP_86   | OD1 | 3.873 |
| 1DLF | H_ARG_66   | NH1 | H_ASP_86   | OD2 | 2.756 |
| 1DLF | H_ARG_66   | NH2 | H_GLU_85   | OE2 | 3.284 |
| 1DLF | H_ARG_66   | NH2 | H_ASP_86   | OD1 | 3.045 |
| 1DLF | H_ARG_66   | NH2 | H_ASP_86   | OD2 | 3.370 |
| 1DLF | H_ARG_71   | NH2 | H_ASP_73   | OD1 | 3.603 |
| 1DQD | L_ARG_60   | NH2 | L_GLU_80   | OE1 | 2.987 |
| 1DQD | L_ARG_60   | NH2 | L_ASP_81   | OD1 | 3.630 |
| 1DQD | L_ARG_60   | NH2 | L_ASP_81   | OD2 | 2.547 |
| 1DQD | L_LYS_146  | NZ  | L_GLU_153  | OE2 | 3.290 |
| 1DQD | L_LYS_148  | NZ  | L_GLU_194  | OE1 | 2.964 |
| 1DQD | L_LYS_148  | NZ  | L_GLU_194  | OE2 | 3.564 |
| 1DQD | L_ARG_154  | NH2 | L_GLU_184  | OE1 | 2.744 |
| 1DQD | L_ARG_154  | NH2 | L_GLU_184  | OE2 | 3.605 |
| 1DQD | L_ARG_187  | NH1 | L_ASP_183  | OD1 | 2.725 |
| 1DQD | L_ARG_187  | NH2 | L_ASP_183  | OD1 | 3.759 |
| 1DQD | L_HIS_188  | ND1 | L_ASP_150  | OD2 | 2.488 |
| 1DQD | L_ARG_210  | NH2 | L_GLU_186  | OE1 | 3.748 |
| 1DQD | H_ARG_38   | NH1 | H_GLU_46   | OE2 | 2.968 |
| 1DQD | H_ARG_38   | NH1 | H_ASP_89   | OD2 | 3.490 |
| 1DQD | H_ARG_38   | NH2 | H_ASP_89   | OD2 | 2.519 |
| 1DQD | H_ARG_66   | NH1 | H_ASP_89   | OD1 | 3.667 |
| 1DQD | H_ARG_66   | NH1 | H_ASP_89   | OD2 | 3.034 |
| 1DQD | H_ARG_66   | NH2 | H_ASP_89   | OD1 | 3.179 |
| 1DQD | H_ARG_66   | NH2 | H_ASP_89   | OD2 | 3.557 |
| 1DQD | H_ARG_75   | NH1 | H_ASP_72   | OD2 | 3.952 |
| 1DQD | H_LYS_217  | NZ  | L_GLU_122  | OE2 | 3.953 |
| 1DQJ | A_ARG_24   | NH2 | A_ASP_70   | OD1 | 3.733 |
| 1DQJ | A_ARG_61   | NH2 | A_GLU_81   | OE1 | 3.324 |
| 1DQJ | A_ARG_61   | NH2 | A_ASP_82   | OD1 | 2.881 |
| 1DQJ | A_ARG_61   | NH2 | A_ASP_82   | OD2 | 3.607 |
| 1DQJ | A_ARG_155  | NH1 | A_GLU_185  | OE2 | 3.740 |
| 1DQJ | A_ARG_155  | NH2 | A_GLU_185  | OE2 | 3.256 |
| 1DQJ | A_LYS_199  | NZ  | A_ASP_110  | OD2 | 3.573 |
| 1DQJ | B_ARG_38   | NH1 | B_GLU_46   | OE1 | 2.669 |
| 1DQJ | B_ARG_38   | NH1 | B_ASP_89   | OD1 | 3.653 |
| 1DQJ | B_ARG_38   | NH2 | B_ASP_89   | OD1 | 2.527 |
| 1DQJ | B_ARG_66   | NH1 | B_ASP_89   | OD1 | 3.044 |
| 1DQJ | B_ARG_66   | NH1 | B_ASP_89   | OD2 | 3.584 |
| 1DQJ | B_ARG_66   | NH2 | B_ASP_89   | OD1 | 3.713 |

|      |           |     |           |     |       |
|------|-----------|-----|-----------|-----|-------|
| 1DQJ | B_ARG_66  | NH2 | B_ASP_89  | OD2 | 2.977 |
| 1DQJ | B_LYS_216 | NZ  | B_ASP_218 | OD2 | 3.941 |
| 1DQJ | B_LYS_219 | NZ  | A_GLU_123 | OE2 | 2.598 |
| 1DQJ | C_LYS_1   | NZ  | C_GLU_7   | OE1 | 3.940 |
| 1DQJ | C_LYS_1   | NZ  | C_GLU_7   | OE2 | 2.753 |
| 1DQJ | C_LYS_97  | NZ  | B_ASP_32  | OD2 | 2.665 |
| 1DQJ | C_ARG_125 | NH2 | C_ASP_119 | OD1 | 3.333 |
| 1DQJ | C_ARG_125 | NH2 | C_ASP_119 | OD2 | 2.489 |
| 1DQM | L_ARG_61  | NH1 | L_GLU_81  | OE2 | 3.595 |
| 1DQM | L_ARG_61  | NH1 | L_ASP_82  | OD1 | 2.747 |
| 1DQM | L_ARG_61  | NH1 | L_ASP_82  | OD2 | 3.200 |
| 1DQM | L_ARG_61  | NH2 | L_GLU_81  | OE2 | 3.902 |
| 1DQM | L_LYS_147 | NZ  | L_GLU_154 | OE1 | 3.964 |
| 1DQM | L_LYS_147 | NZ  | L_GLU_195 | OE2 | 3.903 |
| 1DQM | L_LYS_149 | NZ  | L_GLU_195 | OE1 | 3.696 |
| 1DQM | L_ARG_155 | NH1 | L_GLU_185 | OE2 | 3.981 |
| 1DQM | L_ARG_188 | NH2 | L_ASP_184 | OD1 | 3.190 |
| 1DQM | L_HIS_189 | ND1 | L_ASP_151 | OD2 | 3.171 |
| 1DQM | L_LYS_199 | NZ  | L_ASP_110 | OD2 | 3.862 |
| 1DQM | L_LYS_207 | NZ  | H_ASP_130 | OD1 | 3.491 |
| 1DQM | L_LYS_207 | NZ  | H_ASP_130 | OD2 | 3.782 |
| 1DQM | H_ARG_38  | NH1 | H_GLU_46  | OE1 | 2.699 |
| 1DQM | H_ARG_38  | NH1 | H_ASP_89  | OD1 | 3.926 |
| 1DQM | H_ARG_38  | NH2 | H_ASP_89  | OD1 | 2.730 |
| 1DQM | H_ARG_66  | NH1 | H_ASP_89  | OD1 | 3.559 |
| 1DQM | H_ARG_66  | NH1 | H_ASP_89  | OD2 | 2.987 |
| 1DQM | H_ARG_66  | NH2 | H_ASP_89  | OD1 | 3.082 |
| 1DQM | H_ARG_66  | NH2 | H_ASP_89  | OD2 | 3.726 |
| 1DQQ | A_ARG_24  | NH1 | A_ASP_70  | OD2 | 3.225 |
| 1DQQ | A_LYS_49  | NZ  | B_ASP_101 | OD1 | 2.957 |
| 1DQQ | A_ARG_61  | NH1 | A_ASP_82  | OD1 | 2.631 |
| 1DQQ | A_ARG_61  | NH1 | A_ASP_82  | OD2 | 2.802 |
| 1DQQ | A_ARG_61  | NH2 | A_GLU_79  | OE1 | 3.923 |
| 1DQQ | A_ARG_61  | NH2 | A_GLU_79  | OE2 | 3.136 |
| 1DQQ | A_ARG_61  | NH2 | A_GLU_81  | OE2 | 3.324 |
| 1DQQ | A_ARG_61  | NH2 | A_ASP_82  | OD1 | 3.627 |
| 1DQQ | A_LYS_147 | NZ  | A_GLU_154 | OE1 | 3.318 |
| 1DQQ | A_LYS_147 | NZ  | A_GLU_154 | OE2 | 3.055 |
| 1DQQ | A_LYS_149 | NZ  | A_GLU_195 | OE1 | 3.522 |
| 1DQQ | A_LYS_149 | NZ  | A_GLU_195 | OE2 | 3.885 |
| 1DQQ | A_ARG_155 | NH1 | A_GLU_185 | OE2 | 3.911 |
| 1DQQ | A_ARG_155 | NH2 | A_GLU_185 | OE2 | 3.794 |
| 1DQQ | A_ARG_188 | NH2 | A_ASP_184 | OD1 | 2.977 |
| 1DQQ | A_LYS_199 | NZ  | A_ASP_110 | OD1 | 3.108 |
| 1DQQ | A_LYS_199 | NZ  | A_ASP_110 | OD2 | 3.095 |
| 1DQQ | B_ARG_38  | NH1 | B_GLU_46  | OE1 | 2.694 |
| 1DQQ | B_ARG_38  | NH1 | B_ASP_89  | OD1 | 3.867 |
| 1DQQ | B_ARG_38  | NH2 | B_ASP_89  | OD1 | 2.625 |
| 1DQQ | B_ARG_66  | NH1 | B_ASP_89  | OD1 | 3.469 |
| 1DQQ | B_ARG_66  | NH1 | B_ASP_89  | OD2 | 2.954 |
| 1DQQ | B_ARG_66  | NH2 | B_ASP_89  | OD1 | 2.959 |
| 1DQQ | B_ARG_66  | NH2 | B_ASP_89  | OD2 | 3.690 |
| 1DQQ | B_LYS_216 | NZ  | D_ASP_218 | OD1 | 2.965 |
| 1DQQ | B_LYS_219 | NZ  | A_GLU_123 | OE2 | 2.763 |
| 1DQQ | C_LYS_49  | NZ  | D_ASP_101 | OD1 | 3.456 |
| 1DQQ | C_LYS_49  | NZ  | D_ASP_101 | OD2 | 3.943 |
| 1DQQ | C_LYS_147 | NZ  | C_GLU_154 | OE2 | 3.726 |
| 1DQQ | C_LYS_149 | NZ  | C_GLU_195 | OE1 | 3.353 |



|      |           |     |           |     |       |
|------|-----------|-----|-----------|-----|-------|
| 1DQQ | C_ARG_155 | NH2 | C_GLU_185 | OE2 | 3.704 |
| 1DQQ | C_ARG_188 | NH2 | C_ASP_184 | OD1 | 2.882 |
| 1DQQ | C_ARG_188 | NH2 | C_ASP_184 | OD2 | 3.940 |
| 1DQQ | C_HIS_189 | ND1 | C_ASP_151 | OD2 | 2.642 |
| 1DQQ | C_LYS_199 | NZ  | C_ASP_110 | OD2 | 3.094 |
| 1DQQ | C_ARG_211 | NH2 | C_GLU_187 | OE2 | 2.769 |
| 1DQQ | D_ARG_38  | NH1 | D_GLU_46  | OE1 | 2.831 |
| 1DQQ | D_ARG_38  | NH1 | D_ASP_89  | OD1 | 3.780 |
| 1DQQ | D_ARG_38  | NH2 | D_ASP_89  | OD1 | 2.692 |
| 1DQQ | D_ARG_66  | NH1 | D_ASP_89  | OD1 | 3.708 |
| 1DQQ | D_ARG_66  | NH2 | D_ASP_89  | OD1 | 3.416 |
| 1DQQ | D_ARG_66  | NH2 | D_ASP_89  | OD2 | 2.649 |
| 1DQQ | D_LYS_216 | NZ  | D_ASP_218 | OD1 | 2.953 |
| 1DQQ | D_LYS_216 | NZ  | D_ASP_218 | OD2 | 2.618 |
| 1DQQ | D_LYS_219 | NZ  | C_GLU_123 | OE1 | 3.088 |
| 1DVF | A_ARG_61  | NH2 | A_GLU_81  | OE2 | 3.091 |
| 1DVF | A_ARG_61  | NH2 | A_ASP_82  | OD1 | 2.772 |
| 1DVF | A_ARG_61  | NH2 | A_ASP_82  | OD2 | 3.277 |
| 1DVF | A_ARG_96  | NH1 | B_GLU_98  | OE1 | 2.616 |
| 1DVF | A_ARG_96  | NH1 | B_GLU_98  | OE2 | 3.746 |
| 1DVF | A_ARG_96  | NH2 | B_GLU_98  | OE1 | 3.400 |
| 1DVF | A_ARG_96  | NH2 | B_GLU_98  | OE2 | 2.958 |
| 1DVF | A_LYS_103 | NZ  | A_GLU_105 | OE2 | 3.937 |
| 1DVF | B_ARG_38  | NH1 | B_ASP_89  | OD1 | 2.871 |
| 1DVF | B_ARG_38  | NH2 | B_GLU_46  | OE1 | 3.990 |
| 1DVF | B_ARG_38  | NH2 | B_GLU_46  | OE2 | 3.805 |
| 1DVF | B_ARG_38  | NH2 | B_ASP_89  | OD1 | 3.345 |
| 1DVF | B_ARG_66  | NH1 | B_ASP_89  | OD1 | 3.908 |
| 1DVF | B_ARG_66  | NH1 | B_ASP_89  | OD2 | 3.826 |
| 1DVF | B_ARG_66  | NH2 | B_ASP_89  | OD1 | 3.644 |
| 1DVF | B_ARG_66  | NH2 | B_ASP_89  | OD2 | 2.583 |
| 1DVF | B_LYS_75  | NZ  | B_ASP_72  | OD2 | 2.871 |
| 1DVF | B_HIS_86  | ND1 | B_ASP_88  | OD2 | 3.353 |
| 1DVF | B_ARG_97  | NH2 | B_ASP_104 | OD1 | 3.629 |
| 1DVF | B_ARG_97  | NH2 | B_ASP_104 | OD2 | 2.634 |
| 1DVF | B_ARG_102 | NH1 | B_ASP_100 | OD2 | 2.926 |
| 1DVF | C_ARG_61  | NH1 | C_ASP_82  | OD1 | 3.565 |
| 1DVF | C_ARG_61  | NH1 | C_ASP_82  | OD2 | 2.521 |
| 1DVF | C_ARG_61  | NH2 | C_GLU_79  | OE2 | 3.798 |
| 1DVF | C_ARG_61  | NH2 | C_GLU_81  | OE2 | 3.578 |
| 1DVF | C_ARG_61  | NH2 | C_ASP_82  | OD1 | 2.671 |
| 1DVF | C_ARG_61  | NH2 | C_ASP_82  | OD2 | 3.084 |
| 1DVF | C_LYS_103 | NZ  | C_GLU_105 | OE2 | 3.563 |
| 1DVF | D_HIS_33  | NE2 | B_ASP_100 | OD1 | 3.569 |
| 1DVF | D_HIS_33  | NE2 | B_ASP_100 | OD2 | 3.052 |
| 1DVF | D_HIS_33  | NE2 | D_ASP_52  | OD2 | 3.296 |
| 1DVF | D_LYS_62  | NZ  | D_GLU_46  | OE1 | 3.985 |
| 1DVF | D_LYS_66  | NZ  | D_ASP_86  | OD1 | 3.906 |
| 1DVF | D_LYS_66  | NZ  | D_ASP_86  | OD2 | 2.839 |
| 1DZB | A_LYS_38  | NZ  | A_ASP_90  | OD1 | 3.686 |
| 1DZB | A_ARG_40  | NH2 | A_GLU_46  | OE1 | 3.204 |
| 1DZB | A_ARG_40  | NH2 | A_GLU_46  | OE2 | 2.668 |
| 1DZB | A_LYS_63  | NZ  | B_GLU_89  | OE1 | 3.983 |
| 1DZB | A_LYS_67  | NZ  | B_ASP_90  | OD2 | 3.792 |
| 1DZB | A_ARG_234 | NH2 | A_ASP_104 | OD1 | 2.721 |
| 1DZB | A_ARG_234 | NH2 | A_ASP_104 | OD2 | 3.895 |
| 1DZB | A_ARG_261 | NH1 | A_GLU_279 | OE1 | 3.537 |
| 1DZB | B_LYS_38  | NZ  | B_ASP_90  | OD1 | 3.512 |

|      |           |     |           |     |       |
|------|-----------|-----|-----------|-----|-------|
| 1DZB | B_ARG_40  | NH2 | B_GLU_46  | OE1 | 3.754 |
| 1DZB | B_ARG_40  | NH2 | B_GLU_46  | OE2 | 3.419 |
| 1DZB | B_LYS_63  | NZ  | B_GLU_46  | OE1 | 3.854 |
| 1DZB | B_LYS_67  | NZ  | B_ASP_90  | OD1 | 3.833 |
| 1DZB | B_ARG_234 | NH2 | B_ASP_104 | OD1 | 2.732 |
| 1DZB | B_ARG_234 | NH2 | B_ASP_104 | OD2 | 3.591 |
| 1DZB | B_ARG_261 | NH1 | B_GLU_279 | OE2 | 3.580 |
| 1DZB | X_LYS_1   | NZ  | X_GLU_7   | OE1 | 3.363 |
| 1DZB | X_LYS_1   | NZ  | X_GLU_7   | OE2 | 3.292 |
| 1DZB | X_ARG_61  | NH2 | A_ASP_256 | OD2 | 3.887 |
| 1DZB | X_LYS_73  | NZ  | A_ASP_256 | OD1 | 3.412 |
| 1DZB | X_LYS_73  | NZ  | A_ASP_256 | OD2 | 3.290 |
| 1DZB | X_ARG_112 | NH2 | A_ASP_31  | OD2 | 3.878 |
| 1DZB | X_ARG_125 | NH2 | X_ASP_119 | OD2 | 3.529 |
| 1DZB | Y_LYS_73  | NZ  | B_ASP_256 | OD1 | 3.559 |
| 1E4W | H_HIS_35  | ND1 | H_GLU_50  | OE1 | 3.798 |
| 1E4W | H_HIS_35  | NE2 | H_GLU_50  | OE1 | 3.250 |
| 1E4W | H_ARG_40  | NH1 | H_GLU_85  | OE1 | 2.990 |
| 1E4W | H_ARG_40  | NH1 | H_GLU_85  | OE2 | 3.128 |
| 1E4W | H_ARG_40  | NH2 | H_GLU_85  | OE1 | 3.469 |
| 1E4W | H_LYS_62  | NZ  | H_GLU_46  | OE1 | 2.859 |
| 1E4W | H_LYS_62  | NZ  | H_GLU_46  | OE2 | 3.777 |
| 1E4W | H_LYS_64  | NZ  | H_GLU_61  | OE2 | 3.986 |
| 1E4W | H_LYS_66  | NZ  | H_ASP_86  | OD1 | 3.553 |
| 1E4W | H_LYS_66  | NZ  | H_ASP_86  | OD2 | 2.752 |
| 1E4W | H_LYS_205 | NZ  | L_GLU_123 | OE1 | 3.384 |
| 1E4W | H_LYS_205 | NZ  | L_GLU_123 | OE2 | 3.066 |
| 1E4W | L_ARG_24  | NH2 | L_ASP_70  | OD1 | 2.921 |
| 1E4W | L_ARG_24  | NH2 | L_ASP_70  | OD2 | 2.509 |
| 1E4W | L_ARG_61  | NH1 | L_GLU_79  | OE2 | 3.003 |
| 1E4W | L_ARG_61  | NH2 | L_GLU_79  | OE2 | 3.488 |
| 1E4W | L_ARG_61  | NH2 | L_GLU_81  | OE2 | 2.874 |
| 1E4W | L_ARG_61  | NH2 | L_ASP_82  | OD1 | 2.888 |
| 1E4W | L_ARG_61  | NH2 | L_ASP_82  | OD2 | 3.583 |
| 1E4W | L_LYS_103 | NZ  | L_ASP_165 | OD1 | 3.413 |
| 1E4W | L_LYS_147 | NZ  | L_GLU_154 | OE1 | 3.975 |
| 1E4W | L_LYS_149 | NZ  | L_GLU_195 | OE1 | 3.539 |
| 1E4W | L_LYS_149 | NZ  | L_GLU_195 | OE2 | 2.744 |
| 1E4W | L_ARG_155 | NH1 | L_GLU_185 | OE1 | 3.875 |
| 1E4W | L_ARG_155 | NH1 | L_GLU_185 | OE2 | 2.836 |
| 1E4W | L_ARG_155 | NH2 | L_GLU_185 | OE1 | 3.575 |
| 1E4W | L_ARG_155 | NH2 | L_GLU_185 | OE2 | 3.879 |
| 1E4W | L_LYS_183 | NZ  | L_GLU_187 | OE2 | 2.427 |
| 1E4W | P_HIS_2   | ND1 | P_GLU_5   | OE1 | 3.603 |
| 1E4W | P_HIS_2   | ND1 | P_GLU_5   | OE2 | 2.765 |
| 1E4X | H_HIS_35  | ND1 | H_GLU_50  | OE1 | 3.676 |
| 1E4X | H_HIS_35  | NE2 | H_GLU_50  | OE1 | 3.169 |
| 1E4X | H_ARG_40  | NH1 | H_GLU_85  | OE1 | 3.357 |
| 1E4X | H_LYS_62  | NZ  | H_GLU_46  | OE1 | 2.577 |
| 1E4X | H_LYS_62  | NZ  | H_GLU_46  | OE2 | 3.834 |
| 1E4X | H_LYS_64  | NZ  | H_GLU_61  | OE1 | 2.708 |
| 1E4X | H_LYS_64  | NZ  | H_GLU_61  | OE2 | 3.973 |
| 1E4X | H_LYS_66  | NZ  | H_ASP_86  | OD1 | 3.625 |
| 1E4X | H_LYS_66  | NZ  | H_ASP_86  | OD2 | 3.022 |
| 1E4X | I_HIS_35  | ND1 | I_GLU_50  | OE1 | 3.895 |
| 1E4X | I_HIS_35  | NE2 | I_GLU_50  | OE1 | 3.180 |
| 1E4X | I_ARG_40  | NH1 | I_GLU_85  | OE1 | 2.650 |
| 1E4X | I_ARG_40  | NH2 | I_GLU_46  | OE1 | 3.611 |

|      |           |     |           |     |       |
|------|-----------|-----|-----------|-----|-------|
| 1E4X | L.LYS_62  | NZ  | L.GLU_46  | OE2 | 2.935 |
| 1E4X | L.LYS_64  | NZ  | L.GLU_61  | OE1 | 2.622 |
| 1E4X | L.LYS_66  | NZ  | L.ASP_86  | OD1 | 3.395 |
| 1E4X | L.LYS_66  | NZ  | L.ASP_86  | OD2 | 2.825 |
| 1E4X | L.LYS_205 | NZ  | M.GLU_123 | OE1 | 2.874 |
| 1E4X | L.LYS_205 | NZ  | M.GLU_123 | OE2 | 3.751 |
| 1E4X | L.ARG_24  | NH1 | L.ASP_70  | OD1 | 2.619 |
| 1E4X | L.ARG_24  | NH1 | L.ASP_70  | OD2 | 3.556 |
| 1E4X | L.ARG_24  | NH2 | L.ASP_70  | OD1 | 3.060 |
| 1E4X | L.ARG_24  | NH2 | L.ASP_70  | OD2 | 2.776 |
| 1E4X | L.ARG_61  | NH2 | L.GLU_81  | OE2 | 3.067 |
| 1E4X | L.ARG_61  | NH2 | L.ASP_82  | OD1 | 2.814 |
| 1E4X | L.ARG_61  | NH2 | L.ASP_82  | OD2 | 3.641 |
| 1E4X | L.LYS_147 | NZ  | L.GLU_154 | OE1 | 3.971 |
| 1E4X | L.LYS_149 | NZ  | L.GLU_195 | OE1 | 3.274 |
| 1E4X | L.LYS_149 | NZ  | L.GLU_195 | OE2 | 2.560 |
| 1E4X | L.ARG_155 | NH1 | L.GLU_185 | OE1 | 3.930 |
| 1E4X | L.ARG_155 | NH1 | L.GLU_185 | OE2 | 2.776 |
| 1E4X | L.ARG_155 | NH2 | L.GLU_185 | OE1 | 3.867 |
| 1E4X | L.ARG_155 | NH2 | L.GLU_185 | OE2 | 3.813 |
| 1E4X | L.LYS_183 | NZ  | L.GLU_187 | OE1 | 2.722 |
| 1E4X | L.LYS_183 | NZ  | L.GLU_187 | OE2 | 2.806 |
| 1E4X | L.HIS_189 | ND1 | L.ASP_151 | OD2 | 2.526 |
| 1E4X | L.LYS_199 | NZ  | L.ASP_110 | OD1 | 3.989 |
| 1E4X | L.LYS_199 | NZ  | L.ASP_110 | OD2 | 2.510 |
| 1E4X | M.ARG_24  | NH1 | M.ASP_70  | OD1 | 2.588 |
| 1E4X | M.ARG_24  | NH1 | M.ASP_70  | OD2 | 3.544 |
| 1E4X | M.ARG_61  | NH2 | M.GLU_81  | OE2 | 2.997 |
| 1E4X | M.ARG_61  | NH2 | M.ASP_82  | OD1 | 2.719 |
| 1E4X | M.ARG_61  | NH2 | M.ASP_82  | OD2 | 3.382 |
| 1E4X | M.LYS_147 | NZ  | M.GLU_195 | OE1 | 3.439 |
| 1E4X | M.LYS_149 | NZ  | M.GLU_195 | OE1 | 3.962 |
| 1E4X | M.LYS_149 | NZ  | M.GLU_195 | OE2 | 3.421 |
| 1E4X | M.ARG_155 | NH1 | M.GLU_185 | OE1 | 3.714 |
| 1E4X | M.ARG_155 | NH1 | M.GLU_185 | OE2 | 2.851 |
| 1E4X | M.ARG_155 | NH2 | M.GLU_185 | OE1 | 3.119 |
| 1E4X | M.ARG_155 | NH2 | M.GLU_185 | OE2 | 3.643 |
| 1E4X | M.LYS_183 | NZ  | M.GLU_187 | OE1 | 3.326 |
| 1E4X | M.LYS_183 | NZ  | M.GLU_187 | OE2 | 2.734 |
| 1E4X | M.HIS_189 | ND1 | M.ASP_151 | OD2 | 2.418 |
| 1E4X | M.LYS_199 | NZ  | M.ASP_110 | OD2 | 3.890 |
| 1E4X | P.HIS_4   | ND1 | P.ASP_7   | OD1 | 3.911 |
| 1E4X | P.HIS_4   | ND1 | P.ASP_7   | OD2 | 2.895 |
| 1E4X | Q.HIS_4   | ND1 | Q.ASP_7   | OD1 | 3.489 |
| 1E4X | Q.HIS_4   | ND1 | Q.ASP_7   | OD2 | 2.725 |
| 1E4X | Q.HIS_4   | NE2 | L.ASP_98  | OD2 | 3.960 |
| 1E6J | H.LYS_38  | NZ  | H.ASP_90  | OD1 | 3.507 |
| 1E6J | H.ARG_40  | NH2 | H.GLU_89  | OE1 | 3.271 |
| 1E6J | H.LYS_63  | NZ  | H.GLU_46  | OE1 | 2.880 |
| 1E6J | H.LYS_63  | NZ  | H.GLU_46  | OE2 | 3.429 |
| 1E6J | H.LYS_67  | NZ  | H.ASP_90  | OD1 | 3.890 |
| 1E6J | H.LYS_67  | NZ  | H.ASP_90  | OD2 | 2.857 |
| 1E6J | H.ARG_102 | NH1 | H.ASP_108 | OD1 | 3.654 |
| 1E6J | H.ARG_102 | NH1 | H.ASP_108 | OD2 | 3.188 |
| 1E6J | H.ARG_102 | NH2 | H.ASP_108 | OD2 | 3.453 |
| 1E6J | H.LYS_215 | NZ  | L.GLU_121 | OE1 | 3.273 |
| 1E6J | H.LYS_215 | NZ  | L.GLU_121 | OE2 | 3.199 |
| 1E6J | L.LYS_52  | NZ  | L.GLU_49  | OE1 | 2.788 |

|      |           |     |           |     |       |
|------|-----------|-----|-----------|-----|-------|
| 1E6J | L_ARG_60  | NH1 | L_GLU_78  | OE1 | 3.448 |
| 1E6J | L_ARG_60  | NH1 | L_GLU_78  | OE2 | 3.377 |
| 1E6J | L_ARG_60  | NH2 | L_GLU_80  | OE1 | 3.435 |
| 1E6J | L_ARG_60  | NH2 | L_GLU_80  | OE2 | 3.837 |
| 1E6J | L_ARG_60  | NH2 | L_ASP_81  | OD1 | 3.036 |
| 1E6J | L_ARG_60  | NH2 | L_ASP_81  | OD2 | 3.778 |
| 1E6J | L_LYS_101 | NZ  | L_GLU_103 | OE2 | 3.191 |
| 1E6J | L_LYS_101 | NZ  | L_ASP_163 | OD1 | 3.381 |
| 1E6J | L_LYS_101 | NZ  | L_ASP_163 | OD2 | 3.618 |
| 1E6J | L_LYS_140 | NZ  | L_GLU_103 | OE1 | 3.034 |
| 1E6J | L_LYS_140 | NZ  | L_GLU_103 | OE2 | 3.715 |
| 1E6J | L_LYS_147 | NZ  | L_GLU_193 | OE1 | 3.705 |
| 1E6J | L_LYS_147 | NZ  | L_GLU_193 | OE2 | 3.642 |
| 1E6J | L_ARG_153 | NH2 | L_GLU_183 | OE2 | 3.850 |
| 1E6J | L_LYS_181 | NZ  | L_GLU_185 | OE1 | 2.925 |
| 1E6J | L_LYS_181 | NZ  | L_GLU_185 | OE2 | 3.102 |
| 1E6J | L_HIS_187 | ND1 | L_ASP_149 | OD2 | 3.110 |
| 1E6J | L_LYS_197 | NZ  | L_ASP_108 | OD1 | 3.404 |
| 1E6J | L_LYS_197 | NZ  | L_ASP_108 | OD2 | 3.535 |
| 1E6J | P_LYS_25  | NZ  | P_GLU_28  | OE1 | 3.310 |
| 1E6J | P_LYS_30  | NZ  | P_GLU_35  | OE1 | 3.279 |
| 1E6J | P_LYS_30  | NZ  | P_GLU_35  | OE2 | 3.714 |
| 1E6J | P_ARG_82  | NH2 | P_GLU_79  | OE1 | 3.880 |
| 1E6J | P_ARG_82  | NH2 | P_GLU_79  | OE2 | 2.977 |
| 1E6J | P_ARG_97  | NH1 | P_ASP_103 | OD1 | 3.867 |
| 1E6J | P_ARG_97  | NH1 | P_ASP_103 | OD2 | 2.872 |
| 1E6J | P_ARG_97  | NH2 | P_ASP_103 | OD2 | 2.992 |
| 1E6J | P_ARG_97  | NH2 | P_GLU_113 | OE1 | 3.011 |
| 1E6J | P_ARG_97  | NH2 | P_GLU_113 | OE2 | 2.907 |
| 1E6J | P_LYS_131 | NZ  | P_GLU_128 | OE2 | 3.566 |
| 1E6J | P_LYS_140 | NZ  | P_GLU_75  | OE1 | 3.007 |
| 1E6J | P_ARG_162 | NH2 | P_ASP_166 | OD1 | 2.737 |
| 1E6J | P_ARG_162 | NH2 | P_ASP_166 | OD2 | 3.737 |
| 1E6J | P_ARG_167 | NH2 | P_GLU_159 | OE1 | 3.117 |
| 1E6J | P_ARG_167 | NH2 | P_GLU_159 | OE2 | 3.307 |
| 1E6O | H_ARG_40  | NH1 | H_GLU_89  | OE1 | 3.448 |
| 1E6O | H_ARG_40  | NH2 | H_GLU_89  | OE1 | 2.779 |
| 1E6O | H_LYS_63  | NZ  | H_GLU_46  | OE1 | 3.050 |
| 1E6O | H_LYS_67  | NZ  | H_ASP_90  | OD1 | 3.728 |
| 1E6O | H_LYS_67  | NZ  | H_ASP_90  | OD2 | 2.754 |
| 1E6O | H_ARG_98  | NH2 | H_ASP_108 | OD1 | 3.003 |
| 1E6O | H_ARG_98  | NH2 | H_ASP_108 | OD2 | 3.258 |
| 1E6O | H_LYS_215 | NZ  | L_GLU_121 | OE1 | 2.731 |
| 1E6O | H_LYS_215 | NZ  | L_GLU_121 | OE2 | 3.094 |
| 1E6O | L_LYS_52  | NZ  | L_GLU_49  | OE1 | 2.480 |
| 1E6O | L_ARG_60  | NH1 | L_GLU_78  | OE1 | 3.734 |
| 1E6O | L_ARG_60  | NH1 | L_GLU_78  | OE2 | 3.517 |
| 1E6O | L_ARG_60  | NH2 | L_GLU_78  | OE1 | 3.763 |
| 1E6O | L_ARG_60  | NH2 | L_GLU_80  | OE1 | 3.787 |
| 1E6O | L_ARG_60  | NH2 | L_GLU_80  | OE2 | 3.444 |
| 1E6O | L_ARG_60  | NH2 | L_ASP_81  | OD1 | 2.714 |
| 1E6O | L_ARG_60  | NH2 | L_ASP_81  | OD2 | 3.690 |
| 1E6O | L_LYS_101 | NZ  | L_GLU_103 | OE2 | 2.711 |
| 1E6O | L_LYS_101 | NZ  | L_ASP_163 | OD1 | 2.813 |
| 1E6O | L_LYS_101 | NZ  | L_ASP_163 | OD2 | 3.565 |
| 1E6O | L_LYS_140 | NZ  | L_GLU_103 | OE1 | 2.639 |
| 1E6O | L_LYS_140 | NZ  | L_GLU_103 | OE2 | 3.651 |
| 1E6O | L_LYS_147 | NZ  | L_GLU_193 | OE1 | 3.537 |

|      |            |     |            |     |       |
|------|------------|-----|------------|-----|-------|
| 1E6O | L_LYS_147  | NZ  | L_GLU_193  | OE2 | 3.485 |
| 1E6O | L_LYS_181  | NZ  | L_GLU_185  | OE1 | 3.457 |
| 1E6O | L_LYS_181  | NZ  | L_GLU_185  | OE2 | 2.602 |
| 1E6O | L_HIS_187  | ND1 | L_ASP_149  | OD2 | 2.973 |
| 1E6O | L_LYS_197  | NZ  | L_ASP_108  | OD1 | 3.626 |
| 1E6O | L_LYS_197  | NZ  | L_ASP_108  | OD2 | 2.685 |
| 1EJO | L_HIS_2038 | NE2 | H_ASP_2603 | OD1 | 3.217 |
| 1EJO | L_ARG_2065 | NH1 | L_ASP_2085 | OD1 | 3.884 |
| 1EJO | L_ARG_2065 | NH1 | L_ASP_2085 | OD2 | 3.751 |
| 1EJO | L_ARG_2065 | NH1 | L_ASP_2086 | OD1 | 3.789 |
| 1EJO | L_ARG_2065 | NH1 | L_ASP_2086 | OD2 | 2.949 |
| 1EJO | L_ARG_2065 | NH2 | L_GLU_2083 | OE2 | 3.437 |
| 1EJO | L_LYS_2107 | NZ  | L_ASP_2169 | OD1 | 3.608 |
| 1EJO | L_LYS_2153 | NZ  | L_GLU_2199 | OE2 | 3.964 |
| 1EJO | L_ARG_2159 | NH2 | L_GLU_2189 | OE1 | 2.792 |
| 1EJO | L_ARG_2159 | NH2 | L_GLU_2189 | OE2 | 2.939 |
| 1EJO | L_LYS_2187 | NZ  | L_ASP_2188 | OD1 | 3.810 |
| 1EJO | H_ARG_2537 | NH1 | H_ASP_2589 | OD1 | 2.793 |
| 1EJO | H_ARG_2537 | NH2 | H_GLU_2545 | OE1 | 3.422 |
| 1EJO | H_ARG_2537 | NH2 | H_ASP_2589 | OD1 | 3.718 |
| 1EJO | H_ARG_2543 | NH1 | H_GLU_2545 | OE1 | 3.893 |
| 1EJO | H_ARG_2543 | NH1 | H_GLU_2545 | OE2 | 2.876 |
| 1EJO | H_ARG_2543 | NH2 | H_GLU_2541 | OE1 | 3.189 |
| 1EJO | H_ARG_2566 | NH1 | H_ASP_2589 | OD2 | 2.850 |
| 1EJO | H_ARG_2566 | NH2 | H_ASP_2589 | OD1 | 3.228 |
| 1EJO | H_ARG_2566 | NH2 | H_ASP_2589 | OD2 | 3.243 |
| 1EJO | H_ARG_2598 | NH1 | H_ASP_2603 | OD1 | 3.142 |
| 1EJO | H_ARG_2598 | NH1 | H_ASP_2603 | OD2 | 3.978 |
| 1EJO | H_ARG_2598 | NH2 | H_ASP_2603 | OD1 | 3.242 |
| 1EJO | H_ARG_2598 | NH2 | H_ASP_2603 | OD2 | 2.790 |
| 1EJO | H_ARG_2598 | NH2 | P_ASP_3143 | OD1 | 3.795 |
| 1EJO | H_ARG_2598 | NH2 | P_ASP_3143 | OD2 | 2.982 |
| 1EJO | H_LYS_2714 | NZ  | L_GLU_2127 | OE1 | 2.933 |
| 1EJO | H_LYS_2714 | NZ  | L_GLU_2127 | OE2 | 3.046 |
| 1EJO | P_ARG_3141 | NH1 | L_GLU_2027 | OE2 | 3.696 |
| 1EJO | P_ARG_3141 | NH1 | L_GLU_2097 | OE1 | 2.675 |
| 1EJO | P_ARG_3141 | NH2 | L_GLU_2027 | OE2 | 3.441 |
| 1EMT | L_LYS_39   | NZ  | L_GLU_81   | OE1 | 2.666 |
| 1EMT | L_LYS_39   | NZ  | L_GLU_81   | OE2 | 3.409 |
| 1EMT | L_ARG_61   | NH1 | L_ASP_82   | OD1 | 2.890 |
| 1EMT | L_ARG_61   | NH2 | L_ASP_82   | OD1 | 2.955 |
| 1EMT | L_ARG_61   | NH2 | L_ASP_82   | OD2 | 2.766 |
| 1EMT | L_LYS_147  | NZ  | L_GLU_154  | OE2 | 3.689 |
| 1EMT | L_LYS_149  | NZ  | L_GLU_195  | OE2 | 3.241 |
| 1EMT | L_LYS_183  | NZ  | L_GLU_187  | OE1 | 2.782 |
| 1EMT | L_LYS_183  | NZ  | L_GLU_187  | OE2 | 3.826 |
| 1EMT | L_ARG_188  | NH2 | L_GLU_185  | OE1 | 3.057 |
| 1EMT | L_ARG_188  | NH2 | L_GLU_185  | OE2 | 3.248 |
| 1EMT | L_HIS_189  | ND1 | L_GLU_185  | OE2 | 3.669 |
| 1EMT | L_HIS_189  | NE2 | L_GLU_185  | OE2 | 3.443 |
| 1EMT | H_LYS_63   | NZ  | L_ASP_1    | OD1 | 3.310 |
| 1EMT | H_LYS_67   | NZ  | H_ASP_90   | OD1 | 2.648 |
| 1EMT | H_LYS_67   | NZ  | H_ASP_90   | OD2 | 3.672 |
| 1EMT | H_LYS_211  | NZ  | L_GLU_123  | OE1 | 2.945 |
| 1EMT | H_LYS_211  | NZ  | L_GLU_123  | OE2 | 2.554 |
| 1ETZ | L_ARG_23   | NH2 | L_ASP_71   | OD2 | 3.806 |
| 1ETZ | L_ARG_63   | NH2 | L_GLU_83   | OE2 | 3.283 |
| 1ETZ | L_ARG_63   | NH2 | L_ASP_84   | OD1 | 2.986 |

|      |           |     |           |     |       |
|------|-----------|-----|-----------|-----|-------|
| 1ETZ | L_ARG_63  | NH2 | L_ASP_84  | OD2 | 3.556 |
| 1ETZ | L_LYS_113 | NZ  | L_GLU_201 | OE1 | 3.231 |
| 1ETZ | L_ARG_186 | NH1 | B_GLU_48  | OE1 | 2.771 |
| 1ETZ | L_ARG_186 | NH1 | B_GLU_48  | OE2 | 3.248 |
| 1ETZ | L_ARG_190 | NH1 | L_GLU_189 | OE2 | 3.584 |
| 1ETZ | L_ARG_190 | NH2 | L_GLU_189 | OE2 | 3.089 |
| 1ETZ | L_ARG_190 | NH2 | B_GLU_48  | OE2 | 3.331 |
| 1ETZ | H_ARG_40  | NH1 | H_ASP_91  | OD1 | 2.907 |
| 1ETZ | H_ARG_40  | NH2 | H_GLU_48  | OE1 | 3.221 |
| 1ETZ | H_ARG_40  | NH2 | H_ASP_91  | OD1 | 3.222 |
| 1ETZ | H_ARG_68  | NH2 | H_ASP_91  | OD1 | 3.774 |
| 1ETZ | H_ARG_68  | NH2 | H_ASP_91  | OD2 | 2.733 |
| 1ETZ | H_LYS_73  | NZ  | H_ASP_57  | OD1 | 3.834 |
| 1ETZ | H_ARG_99  | NH1 | H_ASP_114 | OD1 | 2.968 |
| 1ETZ | H_ARG_99  | NH1 | H_ASP_114 | OD2 | 3.185 |
| 1ETZ | H_ARG_100 | NH1 | H_ASP_52  | OD1 | 3.260 |
| 1ETZ | H_ARG_100 | NH1 | H_ASP_52  | OD2 | 2.758 |
| 1ETZ | H_LYS_156 | NZ  | L_GLU_127 | OE2 | 3.377 |
| 1ETZ | H_LYS_221 | NZ  | L_GLU_126 | OE1 | 3.184 |
| 1ETZ | A_ARG_23  | NH1 | A_ASP_71  | OD2 | 2.921 |
| 1ETZ | A_ARG_23  | NH2 | A_ASP_71  | OD2 | 2.821 |
| 1ETZ | A_ARG_63  | NH2 | A_GLU_83  | OE2 | 3.430 |
| 1ETZ | A_ARG_63  | NH2 | A_ASP_84  | OD1 | 2.842 |
| 1ETZ | A_ARG_63  | NH2 | A_ASP_84  | OD2 | 3.406 |
| 1ETZ | A_LYS_113 | NZ  | A_GLU_201 | OE1 | 2.940 |
| 1ETZ | A_ARG_186 | NH1 | H_GLU_45  | OE2 | 3.236 |
| 1ETZ | A_ARG_186 | NH2 | H_GLU_48  | OE1 | 3.518 |
| 1ETZ | B_ARG_40  | NH1 | B_ASP_91  | OD1 | 3.069 |
| 1ETZ | B_ARG_40  | NH2 | B_GLU_48  | OE1 | 3.077 |
| 1ETZ | B_ARG_40  | NH2 | B_ASP_91  | OD1 | 3.733 |
| 1ETZ | B_LYS_59  | NZ  | B_ASP_57  | OD1 | 3.243 |
| 1ETZ | B_LYS_59  | NZ  | B_ASP_57  | OD2 | 3.017 |
| 1ETZ | B_ARG_68  | NH1 | B_ASP_91  | OD1 | 3.924 |
| 1ETZ | B_ARG_68  | NH2 | B_ASP_91  | OD1 | 3.185 |
| 1ETZ | B_ARG_68  | NH2 | B_ASP_91  | OD2 | 2.598 |
| 1ETZ | B_LYS_73  | NZ  | B_ASP_57  | OD1 | 2.975 |
| 1ETZ | B_ARG_99  | NH1 | B_ASP_114 | OD1 | 2.870 |
| 1ETZ | B_ARG_99  | NH1 | B_ASP_114 | OD2 | 3.787 |
| 1ETZ | B_ARG_100 | NH1 | B_ASP_52  | OD1 | 2.947 |
| 1ETZ | B_ARG_100 | NH1 | B_ASP_52  | OD2 | 2.788 |
| 1ETZ | B_LYS_156 | NZ  | A_GLU_127 | OE2 | 2.979 |
| 1ETZ | B_LYS_221 | NZ  | A_GLU_126 | OE1 | 3.572 |
| 1ETZ | B_LYS_222 | NZ  | B_GLU_224 | OE1 | 3.556 |
| 1F11 | A_ARG_61  | NH1 | A_GLU_79  | OE2 | 3.870 |
| 1F11 | A_ARG_61  | NH1 | A_GLU_81  | OE1 | 3.780 |
| 1F11 | A_ARG_61  | NH2 | A_GLU_81  | OE1 | 3.819 |
| 1F11 | A_ARG_61  | NH2 | A_ASP_82  | OD1 | 2.589 |
| 1F11 | A_ARG_61  | NH2 | A_ASP_82  | OD2 | 2.998 |
| 1F11 | A_LYS_147 | NZ  | A_GLU_154 | OE1 | 3.554 |
| 1F11 | A_LYS_149 | NZ  | A_GLU_195 | OE1 | 2.800 |
| 1F11 | A_LYS_149 | NZ  | A_GLU_195 | OE2 | 3.495 |
| 1F11 | A_ARG_155 | NH2 | A_GLU_185 | OE2 | 3.833 |
| 1F11 | A_LYS_183 | NZ  | A_ASP_184 | OD1 | 3.227 |
| 1F11 | A_LYS_183 | NZ  | A_ASP_184 | OD2 | 3.413 |
| 1F11 | A_HIS_189 | NE2 | A_ASP_151 | OD2 | 3.960 |
| 1F11 | A_ARG_211 | NH1 | A_GLU_187 | OE1 | 3.379 |
| 1F11 | B_LYS_35  | NZ  | B_ASP_50  | OD2 | 2.899 |
| 1F11 | B_LYS_62  | NZ  | B_GLU_46  | OE1 | 3.878 |

|      |            |     |            |     |       |
|------|------------|-----|------------|-----|-------|
| 1F11 | B.LYS.62   | NZ  | B.GLU.46   | OE2 | 3.017 |
| 1F11 | B.LYS.66   | NZ  | B.ASP.86   | OD1 | 3.898 |
| 1F11 | B.LYS.66   | NZ  | B.ASP.86   | OD2 | 2.909 |
| 1F11 | B.LYS.218  | NZ  | B.ASP.220  | OD1 | 3.293 |
| 1F11 | B.LYS.221  | NZ  | A.GLU.123  | OE2 | 3.880 |
| 1F11 | C.ARG.61   | NH1 | C.GLU.79   | OE2 | 3.820 |
| 1F11 | C.ARG.61   | NH1 | C.GLU.81   | OE1 | 3.765 |
| 1F11 | C.ARG.61   | NH2 | C.GLU.81   | OE1 | 3.827 |
| 1F11 | C.ARG.61   | NH2 | C.ASP.82   | OD1 | 2.588 |
| 1F11 | C.ARG.61   | NH2 | C.ASP.82   | OD2 | 2.920 |
| 1F11 | C.LYS.147  | NZ  | C.GLU.154  | OE1 | 3.496 |
| 1F11 | C.LYS.149  | NZ  | C.GLU.195  | OE1 | 2.803 |
| 1F11 | C.LYS.149  | NZ  | C.GLU.195  | OE2 | 3.539 |
| 1F11 | C.ARG.155  | NH2 | C.GLU.185  | OE2 | 3.909 |
| 1F11 | C.LYS.183  | NZ  | C.ASP.184  | OD1 | 3.200 |
| 1F11 | C.LYS.183  | NZ  | C.ASP.184  | OD2 | 3.469 |
| 1F11 | C.ARG.211  | NH1 | C.GLU.187  | OE1 | 3.266 |
| 1F11 | D.LYS.35   | NZ  | D.ASP.50   | OD2 | 2.846 |
| 1F11 | D.LYS.62   | NZ  | D.GLU.46   | OE1 | 3.912 |
| 1F11 | D.LYS.62   | NZ  | D.GLU.46   | OE2 | 3.130 |
| 1F11 | D.LYS.66   | NZ  | D.ASP.86   | OD1 | 3.943 |
| 1F11 | D.LYS.66   | NZ  | D.ASP.86   | OD2 | 2.885 |
| 1F11 | D.LYS.218  | NZ  | D.ASP.220  | OD1 | 3.381 |
| 1F11 | D.LYS.221  | NZ  | C.GLU.123  | OE2 | 3.786 |
| 1F2X | K.ARG.838  | NH1 | K.ASP.888  | OD1 | 2.859 |
| 1F2X | K.ARG.838  | NH2 | K.GLU.846  | OE2 | 2.923 |
| 1F2X | K.ARG.865  | NH1 | K.ASP.888  | OD1 | 3.794 |
| 1F2X | K.ARG.865  | NH1 | K.ASP.888  | OD2 | 2.763 |
| 1F2X | K.ARG.865  | NH2 | K.ASP.888  | OD1 | 3.027 |
| 1F2X | K.ARG.865  | NH2 | K.ASP.888  | OD2 | 3.447 |
| 1F2X | K.LYS.874  | NZ  | K.ASP.871  | OD1 | 3.294 |
| 1F2X | K.ARG.909  | NH2 | K.ASP.912  | OD1 | 2.589 |
| 1F2X | K.ARG.909  | NH2 | K.ASP.912  | OD2 | 3.255 |
| 1F2X | L.ARG.1038 | NH1 | L.ASP.1088 | OD1 | 2.834 |
| 1F2X | L.ARG.1038 | NH2 | L.GLU.1046 | OE2 | 3.098 |
| 1F2X | L.ARG.1038 | NH2 | L.ASP.1088 | OD1 | 3.939 |
| 1F2X | L.ARG.1065 | NH1 | L.ASP.1088 | OD1 | 3.834 |
| 1F2X | L.ARG.1065 | NH1 | L.ASP.1088 | OD2 | 2.618 |
| 1F2X | L.ARG.1065 | NH2 | L.ASP.1088 | OD1 | 3.165 |
| 1F2X | L.ARG.1065 | NH2 | L.ASP.1088 | OD2 | 3.405 |
| 1F2X | L.ARG.1109 | NH2 | L.ASP.1112 | OD1 | 3.166 |
| 1F2X | L.ARG.1109 | NH2 | L.ASP.1112 | OD2 | 2.892 |
| 1F3R | B.ARG.38   | NH1 | B.ASP.89   | OD2 | 2.997 |
| 1F3R | B.ARG.38   | NH2 | B.GLU.46   | OE1 | 3.068 |
| 1F3R | B.ARG.50   | NH1 | B.ASP.98   | OD1 | 3.532 |
| 1F3R | B.ARG.66   | NH1 | B.ASP.89   | OD1 | 3.017 |
| 1F3R | B.ARG.66   | NH2 | B.ASP.89   | OD1 | 3.057 |
| 1F3R | B.ARG.97   | NH1 | B.ASP.111  | OD1 | 3.327 |
| 1F3R | B.ARG.97   | NH1 | B.ASP.111  | OD2 | 3.427 |
| 1F3R | B.ARG.97   | NH2 | B.ASP.111  | OD1 | 3.187 |
| 1F3R | B.ARG.97   | NH2 | B.ASP.111  | OD2 | 3.419 |
| 1F3R | B.LYS.177  | NZ  | B.GLU.180  | OE1 | 3.798 |
| 1F3R | B.LYS.177  | NZ  | B.GLU.180  | OE2 | 3.027 |
| 1F3R | B.ARG.199  | NH1 | B.ASP.220  | OD1 | 2.891 |
| 1F3R | B.ARG.199  | NH1 | B.ASP.220  | OD2 | 3.346 |
| 1F3R | B.ARG.199  | NH2 | B.GLU.219  | OE1 | 3.171 |
| 1F3R | B.LYS.244  | NZ  | B.GLU.242  | OE2 | 3.193 |
| 1F3R | B.LYS.249  | NZ  | B.GLU.247  | OE1 | 3.078 |

|      |           |     |           |     |       |
|------|-----------|-----|-----------|-----|-------|
| 1F4W | L_ARG.63  | NH2 | L_GLU_83  | OE2 | 3.740 |
| 1F4W | L_ARG.63  | NH2 | L_ASP_84  | OD1 | 3.103 |
| 1F4W | L_ARG.63  | NH2 | L_ASP_84  | OD2 | 3.558 |
| 1F4W | L_LYS_113 | NZ  | L_GLU_201 | OE1 | 2.889 |
| 1F4W | L_LYS_169 | NZ  | L_GLU_85  | OE2 | 3.500 |
| 1F4W | H_ARG_38  | NH1 | H_ASP_90  | OD1 | 2.942 |
| 1F4W | H_ARG_38  | NH2 | H_GLU_46  | OE1 | 2.644 |
| 1F4W | H_ARG_67  | NH1 | H_ASP_90  | OD1 | 3.871 |
| 1F4W | H_ARG_67  | NH1 | H_ASP_90  | OD2 | 2.697 |
| 1F4W | H_ARG_67  | NH2 | H_ASP_90  | OD1 | 3.052 |
| 1F4W | H_ARG_67  | NH2 | H_ASP_90  | OD2 | 3.253 |
| 1F4W | H_ARG_72  | NH2 | H_ASP_74  | OD1 | 3.561 |
| 1F4W | H_LYS_76  | NZ  | H_ASP_73  | OD2 | 3.208 |
| 1F4W | H_ARG_98  | NH1 | H_ASP_105 | OD1 | 3.445 |
| 1F4W | H_ARG_98  | NH1 | H_ASP_105 | OD2 | 2.877 |
| 1F4W | H_LYS_147 | NZ  | L_GLU_127 | OE2 | 2.611 |
| 1F4W | H_LYS_212 | NZ  | L_GLU_126 | OE1 | 2.614 |
| 1F4W | H_LYS_212 | NZ  | L_GLU_126 | OE2 | 2.379 |
| 1F4X | L_HIS_44  | ND1 | L_GLU_40  | OE2 | 3.729 |
| 1F4X | L_ARG.63  | NH2 | L_ASP_84  | OD1 | 3.061 |
| 1F4X | L_ARG.63  | NH2 | L_ASP_84  | OD2 | 3.605 |
| 1F4X | L_LYS_113 | NZ  | L_GLU_201 | OE1 | 3.012 |
| 1F4X | L_LYS_169 | NZ  | L_GLU_85  | OE2 | 3.678 |
| 1F4X | H_ARG_38  | NH1 | H_ASP_90  | OD1 | 2.949 |
| 1F4X | H_ARG_38  | NH2 | H_GLU_46  | OE1 | 2.849 |
| 1F4X | H_ARG_38  | NH2 | H_ASP_90  | OD1 | 3.913 |
| 1F4X | H_ARG_67  | NH1 | H_ASP_90  | OD1 | 3.808 |
| 1F4X | H_ARG_67  | NH1 | H_ASP_90  | OD2 | 2.538 |
| 1F4X | H_ARG_67  | NH2 | H_ASP_90  | OD1 | 3.205 |
| 1F4X | H_ARG_67  | NH2 | H_ASP_90  | OD2 | 3.358 |
| 1F4X | H_ARG_72  | NH2 | H_ASP_74  | OD1 | 3.580 |
| 1F4X | H_LYS_76  | NZ  | H_ASP_73  | OD2 | 2.862 |
| 1F4X | H_ARG_98  | NH1 | H_ASP_105 | OD1 | 3.356 |
| 1F4X | H_ARG_98  | NH1 | H_ASP_105 | OD2 | 2.740 |
| 1F4X | H_LYS_147 | NZ  | L_GLU_127 | OE2 | 2.699 |
| 1F4X | H_LYS_212 | NZ  | L_GLU_126 | OE1 | 2.421 |
| 1F4X | H_LYS_212 | NZ  | L_GLU_126 | OE2 | 2.990 |
| 1F4Y | L_ARG.63  | NH2 | L_ASP_84  | OD1 | 3.366 |
| 1F4Y | L_LYS_105 | NZ  | L_GLU_85  | OE1 | 3.158 |
| 1F4Y | H_ARG_38  | NH1 | H_ASP_90  | OD1 | 3.048 |
| 1F4Y | H_ARG_38  | NH2 | H_GLU_46  | OE1 | 2.579 |
| 1F4Y | H_LYS_65  | NZ  | H_ASP_62  | OD1 | 3.084 |
| 1F4Y | H_LYS_65  | NZ  | H_ASP_62  | OD2 | 3.693 |
| 1F4Y | H_ARG_67  | NH1 | H_ASP_90  | OD1 | 3.760 |
| 1F4Y | H_ARG_67  | NH1 | H_ASP_90  | OD2 | 2.465 |
| 1F4Y | H_ARG_67  | NH2 | H_ASP_90  | OD1 | 2.587 |
| 1F4Y | H_ARG_67  | NH2 | H_ASP_90  | OD2 | 2.864 |
| 1F4Y | H_ARG_98  | NH1 | H_ASP_105 | OD1 | 3.675 |
| 1F4Y | H_ARG_98  | NH1 | H_ASP_105 | OD2 | 3.275 |
| 1F4Y | H_LYS_212 | NZ  | L_GLU_126 | OE2 | 3.609 |
| 1F8T | L_ARG.46  | NH2 | L_ASP_55  | OD1 | 2.680 |
| 1F8T | L_ARG.46  | NH2 | L_ASP_55  | OD2 | 3.749 |
| 1F8T | L_ARG.61  | NH1 | L_GLU_79  | OE1 | 3.213 |
| 1F8T | L_ARG.61  | NH2 | L_GLU_79  | OE1 | 3.750 |
| 1F8T | L_ARG.61  | NH2 | L_ASP_82  | OD1 | 2.713 |
| 1F8T | L_ARG.61  | NH2 | L_ASP_82  | OD2 | 3.022 |
| 1F8T | L_ARG.77  | NH1 | L_GLU_79  | OE2 | 2.715 |
| 1F8T | L_ARG.77  | NH2 | L_GLU_79  | OE2 | 3.752 |



|      |           |     |           |     |       |
|------|-----------|-----|-----------|-----|-------|
| 1F8T | L_ARG_96  | NH1 | H_ASP_97  | OD1 | 3.105 |
| 1F8T | L_ARG_96  | NH1 | H_ASP_97  | OD2 | 3.586 |
| 1F8T | L_ARG_96  | NH2 | H_ASP_97  | OD1 | 3.395 |
| 1F8T | L_ARG_96  | NH2 | H_ASP_97  | OD2 | 2.424 |
| 1F8T | L_LYS_    | NZ  | L_GLU_    | OE1 | 3.476 |
| 1F8T | L_LYS_    | NZ  | L_GLU_    | OE1 | 3.068 |
| 1F8T | L_LYS_    | NZ  | L_GLU_    | OE2 | 3.947 |
| 1F8T | L_ARG_    | NH2 | L_GLU_    | OE1 | 3.027 |
| 1F8T | L_ARG_    | NH2 | L_GLU_    | OE2 | 2.531 |
| 1F8T | L_LYS_    | NZ  | L_GLU_    | OE2 | 3.307 |
| 1F8T | L_HIS_    | ND1 | L_ASP_    | OD2 | 2.855 |
| 1F8T | L_LYS_199 | NZ  | L_ASP_110 | OD2 | 3.253 |
| 1F8T | H_ARG_38  | NH1 | H_ASP_86  | OD1 | 2.940 |
| 1F8T | H_ARG_38  | NH2 | H_GLU_46  | OE1 | 2.881 |
| 1F8T | H_ARG_38  | NH2 | H_ASP_86  | OD1 | 3.828 |
| 1F8T | H_ARG_66  | NH1 | H_ASP_86  | OD1 | 3.709 |
| 1F8T | H_ARG_66  | NH1 | H_ASP_86  | OD2 | 3.187 |
| 1F8T | H_ARG_66  | NH2 | H_ASP_86  | OD1 | 2.923 |
| 1F8T | H_ARG_66  | NH2 | H_ASP_86  | OD2 | 3.622 |
| 1F8T | H_LYS_221 | NZ  | L_GLU_123 | OE1 | 3.087 |
| 1F90 | L_LYS_30  | NZ  | E_GLU_4   | OE1 | 2.620 |
| 1F90 | L_LYS_30  | NZ  | E_GLU_4   | OE2 | 2.679 |
| 1F90 | L_ARG_46  | NH2 | L_ASP_55  | OD1 | 2.495 |
| 1F90 | L_ARG_46  | NH2 | L_ASP_55  | OD2 | 3.861 |
| 1F90 | L_ARG_61  | NH1 | L_GLU_79  | OE2 | 3.045 |
| 1F90 | L_ARG_61  | NH2 | L_GLU_79  | OE2 | 3.948 |
| 1F90 | L_ARG_61  | NH2 | L_GLU_81  | OE1 | 3.955 |
| 1F90 | L_ARG_61  | NH2 | L_ASP_82  | OD1 | 2.600 |
| 1F90 | L_ARG_61  | NH2 | L_ASP_82  | OD2 | 2.843 |
| 1F90 | L_ARG_77  | NH1 | L_GLU_79  | OE1 | 2.895 |
| 1F90 | L_ARG_77  | NH1 | L_GLU_79  | OE2 | 3.695 |
| 1F90 | L_ARG_96  | NH2 | H_ASP_97  | OD1 | 2.720 |
| 1F90 | L_ARG_96  | NH2 | H_ASP_97  | OD2 | 2.722 |
| 1F90 | L_LYS_103 | NZ  | L_GLU_105 | OE1 | 3.749 |
| 1F90 | L_LYS_103 | NZ  | L_ASP_165 | OD1 | 3.843 |
| 1F90 | L_LYS_149 | NZ  | L_GLU_195 | OE1 | 3.370 |
| 1F90 | L_LYS_149 | NZ  | L_GLU_195 | OE2 | 3.504 |
| 1F90 | L_ARG_188 | NH1 | L_GLU_185 | OE2 | 2.963 |
| 1F90 | L_ARG_188 | NH2 | L_GLU_185 | OE2 | 3.164 |
| 1F90 | L_HIS_189 | ND1 | L_ASP_151 | OD2 | 3.004 |
| 1F90 | L_HIS_189 | NE2 | L_GLU_185 | OE2 | 2.903 |
| 1F90 | H_ARG_38  | NH1 | H_ASP_86  | OD1 | 3.080 |
| 1F90 | H_ARG_38  | NH2 | H_GLU_46  | OE1 | 3.030 |
| 1F90 | H_ARG_38  | NH2 | H_ASP_86  | OD1 | 3.543 |
| 1F90 | H_ARG_66  | NH1 | H_ASP_86  | OD1 | 3.378 |
| 1F90 | H_ARG_66  | NH1 | H_ASP_86  | OD2 | 3.136 |
| 1F90 | H_ARG_66  | NH2 | H_ASP_86  | OD1 | 2.890 |
| 1F90 | H_ARG_66  | NH2 | H_ASP_86  | OD2 | 3.648 |
| 1F90 | H_LYS_221 | NZ  | L_GLU_123 | OE2 | 3.675 |
| 1F90 | E_LYS_1   | NZ  | E_GLU_5   | OE1 | 3.986 |
| 1F90 | E_LYS_1   | NZ  | E_GLU_5   | OE2 | 3.901 |
| 1FBI | L_ARG_61  | NH1 | L_ASP_82  | OD1 | 3.634 |
| 1FBI | L_ARG_61  | NH1 | L_ASP_82  | OD2 | 2.723 |
| 1FBI | L_ARG_61  | NH2 | L_ASP_82  | OD1 | 3.289 |
| 1FBI | L_ARG_61  | NH2 | L_ASP_82  | OD2 | 3.818 |
| 1FBI | L_LYS_147 | NZ  | L_GLU_195 | OE2 | 3.806 |
| 1FBI | L_LYS_149 | NZ  | L_GLU_195 | OE1 | 2.895 |
| 1FBI | L_LYS_149 | NZ  | L_GLU_195 | OE2 | 3.340 |

|      |           |     |           |     |       |
|------|-----------|-----|-----------|-----|-------|
| 1FBI | L_ARG_155 | NH1 | L_GLU_185 | OE2 | 3.988 |
| 1FBI | L_ARG_155 | NH2 | L_GLU_185 | OE1 | 3.443 |
| 1FBI | L_ARG_155 | NH2 | L_GLU_185 | OE2 | 3.420 |
| 1FBI | L_LYS_183 | NZ  | L_GLU_187 | OE1 | 3.147 |
| 1FBI | L_LYS_183 | NZ  | L_GLU_187 | OE2 | 3.215 |
| 1FBI | L_HIS_189 | ND1 | L_ASP_151 | OD2 | 3.770 |
| 1FBI | L_LYS_199 | NZ  | L_ASP_110 | OD1 | 2.851 |
| 1FBI | L_LYS_199 | NZ  | L_ASP_110 | OD2 | 3.860 |
| 1FBI | H_HIS_35  | ND1 | H_GLU_50  | OE2 | 3.933 |
| 1FBI | H_HIS_35  | NE2 | H_GLU_50  | OE2 | 3.486 |
| 1FBI | H_LYS_38  | NZ  | H_ASP_90  | OD1 | 3.514 |
| 1FBI | H_LYS_38  | NZ  | H_ASP_90  | OD2 | 3.031 |
| 1FBI | H_LYS_63  | NZ  | L_ASP_1   | OD1 | 2.933 |
| 1FBI | H_LYS_63  | NZ  | L_ASP_1   | OD2 | 2.804 |
| 1FBI | H_LYS_65  | NZ  | H_GLU_62  | OE1 | 2.904 |
| 1FBI | H_LYS_67  | NZ  | H_ASP_90  | OD1 | 3.905 |
| 1FBI | H_LYS_217 | NZ  | L_GLU_123 | OE1 | 3.667 |
| 1FBI | X_LYS_1   | NZ  | X_GLU_7   | OE2 | 3.145 |
| 1FBI | X_HIS_15  | ND1 | H_ASP_55  | OD1 | 3.190 |
| 1FBI | X_HIS_15  | ND1 | H_ASP_55  | OD2 | 3.649 |
| 1FBI | X_ARG_61  | NH1 | X_ASP_48  | OD1 | 3.808 |
| 1FBI | X_ARG_61  | NH1 | X_ASP_48  | OD2 | 3.628 |
| 1FBI | X_ARG_61  | NH2 | X_ASP_48  | OD1 | 3.862 |
| 1FBI | X_LYS_96  | NZ  | H_ASP_52  | OD2 | 2.922 |
| 1FBI | X_LYS_97  | NZ  | H_GLU_50  | OE1 | 3.586 |
| 1FBI | X_LYS_97  | NZ  | H_GLU_50  | OE2 | 2.898 |
| 1FBI | X_ARG_121 | NH1 | X_ASP_119 | OD1 | 3.058 |
| 1FBI | P_ARG_24  | NH2 | P_ASP_70  | OD1 | 3.358 |
| 1FBI | P_ARG_61  | NH1 | P_GLU_79  | OE2 | 3.500 |
| 1FBI | P_ARG_61  | NH2 | P_ASP_82  | OD2 | 2.619 |
| 1FBI | P_LYS_149 | NZ  | P_GLU_195 | OE1 | 3.522 |
| 1FBI | P_LYS_149 | NZ  | P_GLU_195 | OE2 | 3.273 |
| 1FBI | P_LYS_183 | NZ  | P_GLU_187 | OE1 | 3.943 |
| 1FBI | P_HIS_189 | ND1 | P_ASP_151 | OD2 | 3.620 |
| 1FBI | P_HIS_189 | NE2 | P_GLU_185 | OE1 | 3.397 |
| 1FBI | P_HIS_189 | NE2 | P_GLU_185 | OE2 | 3.570 |
| 1FBI | P_LYS_199 | NZ  | P_ASP_110 | OD2 | 3.380 |
| 1FBI | P_ARG_211 | NH2 | P_GLU_187 | OE1 | 3.763 |
| 1FBI | Q_HIS_35  | NE2 | Q_GLU_50  | OE2 | 3.940 |
| 1FBI | Q_LYS_63  | NZ  | P_ASP_1   | OD1 | 3.020 |
| 1FBI | Q_LYS_63  | NZ  | P_ASP_1   | OD2 | 3.850 |
| 1FBI | Q_LYS_65  | NZ  | Q_GLU_62  | OE1 | 2.725 |
| 1FBI | Q_LYS_65  | NZ  | Q_GLU_62  | OE2 | 3.529 |
| 1FBI | Y_HIS_15  | ND1 | Q_ASP_55  | OD1 | 3.335 |
| 1FBI | Y_HIS_15  | ND1 | Q_ASP_55  | OD2 | 3.838 |
| 1FBI | Y_LYS_96  | NZ  | Q_ASP_52  | OD2 | 2.727 |
| 1FBI | Y_LYS_97  | NZ  | Q_GLU_50  | OE1 | 2.828 |
| 1FBI | Y_LYS_97  | NZ  | Q_GLU_50  | OE2 | 3.159 |
| 1FCC | A_LYS_248 | NZ  | A_GLU_380 | OE2 | 2.872 |
| 1FCC | A_ARG_255 | NH1 | A_ASP_249 | OD1 | 3.810 |
| 1FCC | A_LYS_317 | NZ  | A_ASP_280 | OD2 | 3.593 |
| 1FCC | A_LYS_320 | NZ  | A_GLU_333 | OE2 | 2.861 |
| 1FCC | A_LYS_322 | NZ  | A_GLU_333 | OE2 | 3.431 |
| 1FCC | A_LYS_338 | NZ  | A_GLU_430 | OE1 | 3.073 |
| 1FCC | A_LYS_338 | NZ  | A_GLU_430 | OE2 | 2.873 |
| 1FCC | A_LYS_370 | NZ  | B_GLU_357 | OE2 | 2.948 |
| 1FCC | A_LYS_409 | NZ  | B_ASP_399 | OD2 | 2.859 |
| 1FCC | A_ARG_416 | NH1 | A_GLU_388 | OE1 | 2.663 |

|      |           |     |           |     |       |
|------|-----------|-----|-----------|-----|-------|
| 1FCC | A_ARG_416 | NH1 | A_GLU_388 | OE2 | 2.822 |
| 1FCC | A_ARG_416 | NH2 | A_GLU_388 | OE1 | 3.781 |
| 1FCC | A_ARG_416 | NH2 | A_GLU_388 | OE2 | 2.901 |
| 1FCC | A_LYS_439 | NZ  | B_GLU_356 | OE1 | 3.550 |
| 1FCC | A_LYS_439 | NZ  | B_GLU_356 | OE2 | 3.522 |
| 1FCC | C_LYS_4   | NZ  | C_GLU_15  | OE1 | 3.955 |
| 1FCC | C_LYS_4   | NZ  | C_GLU_15  | OE2 | 3.020 |
| 1FCC | C_LYS_28  | NZ  | A_GLU_380 | OE1 | 2.730 |
| 1FCC | C_LYS_28  | NZ  | A_GLU_380 | OE2 | 3.982 |
| 1FCC | C_LYS_28  | NZ  | A_GLU_382 | OE1 | 3.879 |
| 1FCC | C_LYS_28  | NZ  | A_GLU_382 | OE2 | 2.866 |
| 1FCC | C_LYS_31  | NZ  | C_GLU_27  | OE2 | 2.693 |
| 1FCC | B_LYS_248 | NZ  | B_GLU_380 | OE2 | 2.873 |
| 1FCC | B_ARG_255 | NH1 | B_ASP_249 | OD1 | 3.810 |
| 1FCC | B_LYS_317 | NZ  | B_ASP_280 | OD2 | 3.592 |
| 1FCC | B_LYS_320 | NZ  | B_GLU_333 | OE2 | 2.862 |
| 1FCC | B_LYS_322 | NZ  | B_GLU_333 | OE2 | 3.430 |
| 1FCC | B_LYS_338 | NZ  | B_GLU_430 | OE1 | 3.074 |
| 1FCC | B_LYS_338 | NZ  | B_GLU_430 | OE2 | 2.873 |
| 1FCC | B_LYS_370 | NZ  | A_GLU_357 | OE2 | 2.633 |
| 1FCC | B_LYS_409 | NZ  | A_ASP_399 | OD2 | 3.360 |
| 1FCC | B_ARG_416 | NH1 | B_GLU_388 | OE1 | 2.663 |
| 1FCC | B_ARG_416 | NH1 | B_GLU_388 | OE2 | 2.823 |
| 1FCC | B_ARG_416 | NH2 | B_GLU_388 | OE1 | 3.781 |
| 1FCC | B_ARG_416 | NH2 | B_GLU_388 | OE2 | 2.902 |
| 1FCC | B_LYS_439 | NZ  | A_GLU_356 | OE1 | 3.166 |
| 1FCC | B_LYS_439 | NZ  | A_GLU_356 | OE2 | 3.295 |
| 1FCC | D_LYS_4   | NZ  | D_GLU_15  | OE1 | 3.955 |
| 1FCC | D_LYS_4   | NZ  | D_GLU_15  | OE2 | 3.020 |
| 1FCC | D_LYS_28  | NZ  | B_GLU_380 | OE1 | 2.730 |
| 1FCC | D_LYS_28  | NZ  | B_GLU_380 | OE2 | 3.982 |
| 1FCC | D_LYS_28  | NZ  | B_GLU_382 | OE1 | 3.879 |
| 1FCC | D_LYS_28  | NZ  | B_GLU_382 | OE2 | 2.865 |
| 1FCC | D_LYS_31  | NZ  | D_GLU_27  | OE2 | 2.693 |
| 1FDL | L_ARG_61  | NH1 | L_GLU_81  | OE2 | 3.900 |
| 1FDL | L_ARG_61  | NH1 | L_ASP_82  | OD1 | 2.792 |
| 1FDL | L_ARG_61  | NH1 | L_ASP_82  | OD2 | 2.681 |
| 1FDL | L_ARG_61  | NH2 | L_GLU_81  | OE2 | 3.608 |
| 1FDL | L_ARG_96  | NH1 | H_GLU_98  | OE1 | 3.307 |
| 1FDL | L_ARG_96  | NH1 | H_GLU_98  | OE2 | 2.802 |
| 1FDL | L_ARG_96  | NH2 | H_GLU_98  | OE1 | 2.754 |
| 1FDL | L_ARG_96  | NH2 | H_GLU_98  | OE2 | 3.656 |
| 1FDL | L_LYS_107 | NZ  | L_GLU_17  | OE1 | 3.380 |
| 1FDL | L_LYS_149 | NZ  | L_GLU_195 | OE1 | 3.099 |
| 1FDL | L_LYS_149 | NZ  | L_GLU_195 | OE2 | 3.490 |
| 1FDL | L_ARG_155 | NH2 | L_GLU_185 | OE1 | 3.454 |
| 1FDL | L_ARG_155 | NH2 | L_GLU_185 | OE2 | 3.567 |
| 1FDL | L_LYS_183 | NZ  | L_GLU_187 | OE1 | 2.772 |
| 1FDL | L_LYS_183 | NZ  | L_GLU_187 | OE2 | 2.921 |
| 1FDL | L_HIS_189 | ND1 | L_ASP_151 | OD2 | 3.048 |
| 1FDL | L_LYS_199 | NZ  | L_ASP_110 | OD1 | 2.959 |
| 1FDL | L_LYS_199 | NZ  | L_ASP_110 | OD2 | 3.198 |
| 1FDL | H_ARG_38  | NH1 | H_ASP_89  | OD2 | 3.284 |
| 1FDL | H_ARG_38  | NH2 | H_GLU_46  | OE1 | 3.064 |
| 1FDL | H_ARG_38  | NH2 | H_ASP_89  | OD2 | 3.961 |
| 1FDL | H_ARG_66  | NH1 | H_ASP_89  | OD2 | 3.688 |
| 1FDL | H_ARG_66  | NH2 | H_ASP_89  | OD1 | 2.978 |
| 1FDL | H_ARG_66  | NH2 | H_ASP_89  | OD2 | 3.755 |

|      |           |     |           |     |       |
|------|-----------|-----|-----------|-----|-------|
| 1FDL | H_ARG.97  | NH2 | H_ASP.104 | OD1 | 2.804 |
| 1FDL | H_ARG.97  | NH2 | H_ASP.104 | OD2 | 2.688 |
| 1FDL | H_ARG.102 | NH1 | H_ASP.100 | OD1 | 3.620 |
| 1FDL | H_LYS.211 | NZ  | L_GLU.123 | OE1 | 2.896 |
| 1FDL | H_LYS.211 | NZ  | L_GLU.123 | OE2 | 3.291 |
| 1FDL | Y_LYS.1   | NZ  | Y_GLU.7   | OE2 | 3.281 |
| 1FDL | Y_ARG.61  | NH1 | Y_ASP.48  | OD2 | 3.796 |
| 1FDL | Y_ARG.61  | NH2 | Y_ASP.48  | OD2 | 3.093 |
| 1FDL | Y_ARG.125 | NH1 | Y_ASP.119 | OD1 | 3.041 |
| 1FDL | Y_ARG.125 | NH1 | Y_ASP.119 | OD2 | 3.285 |
| 1FDL | Y_ARG.125 | NH2 | Y_ASP.119 | OD1 | 3.894 |
| 1FDL | Y_ARG.125 | NH2 | Y_ASP.119 | OD2 | 2.759 |
| 1FJ1 | A_LYS.24  | NZ  | A_ASP.70  | OD1 | 3.672 |
| 1FJ1 | A_LYS.24  | NZ  | A_ASP.70  | OD2 | 2.846 |
| 1FJ1 | A_ARG.61  | NH2 | A_ASP.82  | OD1 | 2.576 |
| 1FJ1 | A_ARG.61  | NH2 | A_ASP.82  | OD2 | 2.776 |
| 1FJ1 | A_LYS.103 | NZ  | A_GLU.105 | OE2 | 3.775 |
| 1FJ1 | A_LYS.147 | NZ  | A_GLU.154 | OE2 | 3.963 |
| 1FJ1 | A_LYS.149 | NZ  | A_GLU.195 | OE2 | 2.928 |
| 1FJ1 | A_ARG.155 | NH1 | A_GLU.185 | OE2 | 3.662 |
| 1FJ1 | A_ARG.155 | NH2 | A_GLU.185 | OE1 | 2.919 |
| 1FJ1 | A_ARG.155 | NH2 | A_GLU.185 | OE2 | 3.026 |
| 1FJ1 | A_ARG.188 | NH2 | E_GLU.196 | OE2 | 3.475 |
| 1FJ1 | A_HIS.189 | ND1 | E_GLU.196 | OE1 | 3.723 |
| 1FJ1 | A_HIS.189 | NE2 | E_GLU.196 | OE1 | 3.502 |
| 1FJ1 | A_LYS.199 | NZ  | A_ASP.110 | OD1 | 3.803 |
| 1FJ1 | A_LYS.199 | NZ  | A_ASP.110 | OD2 | 3.857 |
| 1FJ1 | B_ARG.47  | NH1 | A_ASP.1   | OD1 | 3.251 |
| 1FJ1 | B_ARG.47  | NH2 | A_ASP.1   | OD1 | 2.492 |
| 1FJ1 | B_LYS.65  | NZ  | B_ASP.62  | OD1 | 3.433 |
| 1FJ1 | B_ARG.67  | NH1 | B_ASP.90  | OD1 | 2.927 |
| 1FJ1 | B_ARG.67  | NH1 | B_ASP.90  | OD2 | 3.891 |
| 1FJ1 | B_ARG.67  | NH2 | B_ASP.90  | OD1 | 3.450 |
| 1FJ1 | B_ARG.67  | NH2 | B_ASP.90  | OD2 | 3.269 |
| 1FJ1 | B_ARG.98  | NH2 | B_ASP.101 | OD1 | 3.026 |
| 1FJ1 | B_ARG.98  | NH2 | B_ASP.101 | OD2 | 3.672 |
| 1FJ1 | B_LYS.209 | NZ  | B_GLU.211 | OE1 | 3.349 |
| 1FJ1 | B_LYS.209 | NZ  | B_GLU.211 | OE2 | 3.845 |
| 1FJ1 | C_LYS.24  | NZ  | C_ASP.70  | OD1 | 3.574 |
| 1FJ1 | C_LYS.24  | NZ  | C_ASP.70  | OD2 | 2.777 |
| 1FJ1 | C_ARG.61  | NH2 | C_ASP.82  | OD1 | 2.572 |
| 1FJ1 | C_ARG.61  | NH2 | C_ASP.82  | OD2 | 2.742 |
| 1FJ1 | C_LYS.103 | NZ  | C_GLU.105 | OE2 | 3.738 |
| 1FJ1 | C_LYS.147 | NZ  | C_GLU.154 | OE2 | 3.995 |
| 1FJ1 | C_LYS.149 | NZ  | C_GLU.195 | OE2 | 2.876 |
| 1FJ1 | C_ARG.155 | NH1 | C_GLU.185 | OE2 | 3.699 |
| 1FJ1 | C_ARG.155 | NH2 | C_GLU.185 | OE1 | 2.898 |
| 1FJ1 | C_ARG.155 | NH2 | C_GLU.185 | OE2 | 3.006 |
| 1FJ1 | C_HIS.189 | NE2 | F_GLU.196 | OE1 | 3.808 |
| 1FJ1 | C_LYS.199 | NZ  | C_ASP.110 | OD1 | 3.817 |
| 1FJ1 | C_LYS.199 | NZ  | C_ASP.110 | OD2 | 3.838 |
| 1FJ1 | D_ARG.47  | NH1 | C_ASP.1   | OD1 | 3.296 |
| 1FJ1 | D_ARG.47  | NH2 | C_ASP.1   | OD1 | 2.800 |
| 1FJ1 | D_LYS.65  | NZ  | D_ASP.62  | OD1 | 3.432 |
| 1FJ1 | D_ARG.67  | NH1 | D_ASP.90  | OD1 | 2.939 |
| 1FJ1 | D_ARG.67  | NH1 | D_ASP.90  | OD2 | 3.923 |
| 1FJ1 | D_ARG.67  | NH2 | D_ASP.90  | OD1 | 3.458 |
| 1FJ1 | D_ARG.67  | NH2 | D_ASP.90  | OD2 | 3.292 |

|      |           |     |           |     |       |
|------|-----------|-----|-----------|-----|-------|
| 1FJ1 | D_ARG_98  | NH2 | D_ASP_101 | OD1 | 3.012 |
| 1FJ1 | D_ARG_98  | NH2 | D_ASP_101 | OD2 | 3.702 |
| 1FJ1 | D_LYS_209 | NZ  | D_GLU_211 | OE1 | 3.891 |
| 1FJ1 | E_LYS_117 | NZ  | E_ASP_118 | OD1 | 3.779 |
| 1FJ1 | E_ARG_139 | NH1 | E_GLU_160 | OE2 | 3.349 |
| 1FJ1 | E_ARG_139 | NH2 | E_GLU_160 | OE2 | 3.249 |
| 1FJ1 | E_ARG_144 | NH1 | E_GLU_146 | OE2 | 2.339 |
| 1FJ1 | E_ARG_144 | NH2 | E_GLU_146 | OE2 | 3.724 |
| 1FJ1 | E_LYS_157 | NZ  | E_GLU_168 | OE2 | 3.224 |
| 1FJ1 | E_LYS_159 | NZ  | E_GLU_168 | OE2 | 3.688 |
| 1FJ1 | E_LYS_175 | NZ  | E_GLU_174 | OE1 | 3.503 |
| 1FJ1 | E_LYS_189 | NZ  | E_GLU_160 | OE1 | 2.964 |
| 1FJ1 | E_LYS_189 | NZ  | E_GLU_160 | OE2 | 3.493 |
| 1FJ1 | E_LYS_212 | NZ  | E_ASP_203 | OD2 | 3.853 |
| 1FJ1 | F_LYS_117 | NZ  | F_ASP_118 | OD1 | 3.790 |
| 1FJ1 | F_ARG_139 | NH1 | F_GLU_160 | OE2 | 3.340 |
| 1FJ1 | F_ARG_139 | NH2 | F_GLU_160 | OE2 | 3.235 |
| 1FJ1 | F_ARG_144 | NH1 | F_GLU_146 | OE2 | 2.359 |
| 1FJ1 | F_ARG_144 | NH2 | F_GLU_146 | OE2 | 3.733 |
| 1FJ1 | F_LYS_157 | NZ  | F_GLU_168 | OE2 | 3.244 |
| 1FJ1 | F_LYS_159 | NZ  | F_GLU_168 | OE2 | 3.700 |
| 1FJ1 | F_LYS_175 | NZ  | F_GLU_174 | OE1 | 3.506 |
| 1FJ1 | F_LYS_189 | NZ  | F_GLU_160 | OE1 | 2.954 |
| 1FJ1 | F_LYS_189 | NZ  | F_GLU_160 | OE2 | 3.524 |
| 1FJ1 | F_LYS_212 | NZ  | F_ASP_203 | OD2 | 3.830 |
| 1FRG | L_LYS_24  | NZ  | L_ASP_76  | OD2 | 3.234 |
| 1FRG | L_ARG_67  | NH2 | L_GLU_87  | OE2 | 3.036 |
| 1FRG | L_ARG_67  | NH2 | L_ASP_88  | OD1 | 2.765 |
| 1FRG | L_ARG_67  | NH2 | L_ASP_88  | OD2 | 3.277 |
| 1FRG | L_LYS_109 | NZ  | L_ASP_171 | OD1 | 2.782 |
| 1FRG | L_LYS_109 | NZ  | L_ASP_171 | OD2 | 3.487 |
| 1FRG | L_LYS_113 | NZ  | L_GLU_17  | OE2 | 3.158 |
| 1FRG | L_LYS_148 | NZ  | L_GLU_111 | OE2 | 3.465 |
| 1FRG | L_LYS_155 | NZ  | L_GLU_201 | OE1 | 3.359 |
| 1FRG | L_LYS_155 | NZ  | L_GLU_201 | OE2 | 3.552 |
| 1FRG | L_ARG_161 | NH2 | L_GLU_191 | OE1 | 3.188 |
| 1FRG | L_ARG_161 | NH2 | L_GLU_191 | OE2 | 2.743 |
| 1FRG | L_LYS_175 | NZ  | L_ASP_176 | OD2 | 3.335 |
| 1FRG | L_ARG_194 | NH2 | L_ASP_190 | OD2 | 3.738 |
| 1FRG | L_LYS_205 | NZ  | L_ASP_116 | OD1 | 2.961 |
| 1FRG | L_LYS_205 | NZ  | L_ASP_116 | OD2 | 3.132 |
| 1FRG | L_LYS_213 | NZ  | H_ASP_354 | OD1 | 3.324 |
| 1FRG | L_ARG_217 | NH2 | L_GLU_193 | OE1 | 3.045 |
| 1FRG | H_ARG_255 | NH1 | H_GLU_263 | OE1 | 2.874 |
| 1FRG | H_ARG_255 | NH2 | H_ASP_307 | OD1 | 2.867 |
| 1FRG | H_LYS_282 | NZ  | H_ASP_279 | OD1 | 3.750 |
| 1FRG | H_LYS_282 | NZ  | H_ASP_279 | OD2 | 3.157 |
| 1FRG | H_ARG_284 | NH1 | H_ASP_307 | OD1 | 3.863 |
| 1FRG | H_ARG_284 | NH1 | H_ASP_307 | OD2 | 2.813 |
| 1FRG | H_ARG_284 | NH2 | H_ASP_307 | OD1 | 2.826 |
| 1FRG | H_ARG_284 | NH2 | H_ASP_307 | OD2 | 3.114 |
| 1FRG | H_LYS_304 | NZ  | H_GLU_306 | OE2 | 3.614 |
| 1FRG | H_ARG_315 | NH1 | H_GLU_317 | OE1 | 2.677 |
| 1FRG | H_ARG_315 | NH1 | H_GLU_317 | OE2 | 3.312 |
| 1FRG | H_ARG_316 | NH1 | L_ASP_97  | OD1 | 2.879 |
| 1FRG | H_ARG_316 | NH2 | L_ASP_97  | OD1 | 3.078 |
| 1FRG | H_ARG_316 | NH2 | P_ASP_5   | OD2 | 2.959 |
| 1FRG | H_LYS_322 | NZ  | L_GLU_61  | OE1 | 2.861 |

|      |           |     |           |     |       |
|------|-----------|-----|-----------|-----|-------|
| 1FRG | H.LYS_322 | NZ  | L_GLU_61  | OE2 | 3.997 |
| 1FRG | H.LYS_432 | NZ  | L_GLU_129 | OE1 | 3.086 |
| 1FRG | H.LYS_432 | NZ  | L_GLU_129 | OE2 | 3.769 |
| 1FUJ | A_HIS_20  | NE2 | A_GLU_157 | OE2 | 3.467 |
| 1FUJ | A_ARG_27  | NH2 | A_GLU_157 | OE1 | 3.676 |
| 1FUJ | A_ARG_27  | NH2 | A_GLU_157 | OE2 | 3.673 |
| 1FUJ | A_HIS_57  | ND1 | A_ASP_102 | OD1 | 3.496 |
| 1FUJ | A_HIS_57  | ND1 | A_ASP_102 | OD2 | 2.542 |
| 1FUJ | A_HIS_71  | NE2 | A_GLU_21  | OE2 | 2.398 |
| 1FUJ | A_LYS_187 | NZ  | B_GLU_97  | OE1 | 3.506 |
| 1FUJ | B_ARG_27  | NH1 | B_GLU_157 | OE1 | 2.690 |
| 1FUJ | B_ARG_27  | NH1 | B_GLU_157 | OE2 | 2.783 |
| 1FUJ | B_HIS_57  | ND1 | B_ASP_102 | OD1 | 3.393 |
| 1FUJ | B_HIS_57  | ND1 | B_ASP_102 | OD2 | 2.604 |
| 1FUJ | B_HIS_71  | NE2 | B_GLU_21  | OE2 | 2.397 |
| 1FUJ | B_ARG_143 | NH1 | A_ASP_61  | OD2 | 3.455 |
| 1FUJ | B_LYS_187 | NZ  | A_GLU_97  | OE1 | 3.870 |
| 1FUJ | C_HIS_20  | ND1 | C_GLU_157 | OE2 | 3.974 |
| 1FUJ | C_HIS_20  | NE2 | C_GLU_157 | OE2 | 3.570 |
| 1FUJ | C_ARG_27  | NH2 | C_GLU_157 | OE1 | 2.756 |
| 1FUJ | C_ARG_27  | NH2 | C_GLU_157 | OE2 | 3.280 |
| 1FUJ | C_HIS_57  | ND1 | C_ASP_102 | OD1 | 3.598 |
| 1FUJ | C_HIS_57  | ND1 | C_ASP_102 | OD2 | 2.742 |
| 1FUJ | C_ARG_60  | NH2 | C_ASP_61  | OD1 | 3.164 |
| 1FUJ | C_HIS_71  | NE2 | C_GLU_21  | OE2 | 2.759 |
| 1FUJ | C_ARG_143 | NH2 | D_ASP_61  | OD1 | 3.394 |
| 1FUJ | C_ARG_143 | NH2 | D_ASP_61  | OD2 | 3.428 |
| 1FUJ | C_LYS_187 | NZ  | D_GLU_97  | OE2 | 2.917 |
| 1FUJ | D_HIS_20  | NE2 | D_GLU_157 | OE2 | 3.668 |
| 1FUJ | D_ARG_27  | NH1 | D_GLU_157 | OE1 | 2.572 |
| 1FUJ | D_ARG_27  | NH1 | D_GLU_157 | OE2 | 3.950 |
| 1FUJ | D_HIS_57  | ND1 | D_ASP_102 | OD1 | 3.325 |
| 1FUJ | D_HIS_57  | ND1 | D_ASP_102 | OD2 | 2.459 |
| 1FUJ | D_HIS_71  | NE2 | D_GLU_21  | OE2 | 2.398 |
| 1FUJ | D_HIS_147 | ND1 | C_GLU_97  | OE1 | 3.734 |
| 1FUJ | D_LYS_187 | NZ  | C_GLU_97  | OE1 | 3.930 |
| 1FVC | A_ARG_24  | NH1 | A_ASP_70  | OD1 | 3.629 |
| 1FVC | A_ARG_24  | NH1 | A_ASP_70  | OD2 | 3.125 |
| 1FVC | A_ARG_24  | NH2 | A_ASP_70  | OD2 | 3.258 |
| 1FVC | A_ARG_61  | NH2 | A_GLU_81  | OE2 | 3.238 |
| 1FVC | A_ARG_61  | NH2 | A_ASP_82  | OD1 | 2.827 |
| 1FVC | A_ARG_61  | NH2 | A_ASP_82  | OD2 | 3.397 |
| 1FVC | A_LYS_107 | NZ  | A_ASP_17  | OD2 | 3.723 |
| 1FVC | B_LYS_30  | NZ  | B_ASP_31  | OD1 | 2.864 |
| 1FVC | B_ARG_38  | NH1 | B_ASP_90  | OD1 | 3.106 |
| 1FVC | B_ARG_38  | NH2 | B_GLU_46  | OE1 | 3.355 |
| 1FVC | B_ARG_38  | NH2 | B_ASP_90  | OD1 | 3.972 |
| 1FVC | B_ARG_67  | NH1 | B_ASP_90  | OD1 | 3.826 |
| 1FVC | B_ARG_67  | NH1 | B_ASP_90  | OD2 | 2.865 |
| 1FVC | B_ARG_67  | NH2 | B_ASP_90  | OD1 | 2.815 |
| 1FVC | B_ARG_67  | NH2 | B_ASP_90  | OD2 | 3.370 |
| 1FVC | B_LYS_76  | NZ  | B_ASP_73  | OD2 | 3.296 |
| 1FVC | B_ARG_98  | NH1 | B_ASP_108 | OD1 | 3.172 |
| 1FVC | B_ARG_98  | NH1 | B_ASP_108 | OD2 | 2.880 |
| 1FVC | C_ARG_61  | NH1 | C_GLU_81  | OE2 | 3.955 |
| 1FVC | C_ARG_61  | NH2 | C_GLU_81  | OE2 | 3.336 |
| 1FVC | C_ARG_61  | NH2 | C_ASP_82  | OD1 | 2.944 |
| 1FVC | C_ARG_61  | NH2 | C_ASP_82  | OD2 | 3.489 |

|      |           |     |           |     |       |
|------|-----------|-----|-----------|-----|-------|
| 1FVC | C_ARG_66  | NH2 | C_ASP_28  | OD1 | 3.198 |
| 1FVC | D_ARG_38  | NH1 | D_ASP_90  | OD1 | 3.684 |
| 1FVC | D_ARG_38  | NH2 | D_GLU_46  | OE1 | 3.562 |
| 1FVC | D_ARG_67  | NH1 | D_ASP_90  | OD1 | 3.498 |
| 1FVC | D_ARG_67  | NH1 | D_ASP_90  | OD2 | 2.863 |
| 1FVC | D_ARG_67  | NH2 | D_ASP_90  | OD1 | 3.039 |
| 1FVC | D_ARG_67  | NH2 | D_ASP_90  | OD2 | 3.182 |
| 1FVC | D_ARG_98  | NH1 | D_ASP_108 | OD1 | 3.384 |
| 1FVC | D_ARG_98  | NH1 | D_ASP_108 | OD2 | 2.939 |
| 1FVD | A_ARG_18  | NH1 | C_ASP_70  | OD2 | 3.361 |
| 1FVD | A_ARG_24  | NH2 | A_ASP_70  | OD1 | 3.049 |
| 1FVD | A_ARG_24  | NH2 | A_ASP_70  | OD2 | 3.841 |
| 1FVD | A_ARG_61  | NH2 | A_GLU_81  | OE2 | 3.219 |
| 1FVD | A_ARG_61  | NH2 | A_ASP_82  | OD1 | 3.298 |
| 1FVD | A_ARG_61  | NH2 | A_ASP_82  | OD2 | 3.528 |
| 1FVD | A_ARG_66  | NH2 | A_ASP_28  | OD1 | 3.272 |
| 1FVD | A_LYS_103 | NZ  | A_GLU_165 | OE2 | 2.750 |
| 1FVD | A_ARG_142 | NH1 | A_GLU_105 | OE1 | 3.252 |
| 1FVD | A_ARG_142 | NH1 | A_GLU_105 | OE2 | 3.136 |
| 1FVD | A_ARG_142 | NH2 | A_GLU_105 | OE1 | 2.987 |
| 1FVD | A_ARG_142 | NH2 | A_GLU_105 | OE2 | 3.986 |
| 1FVD | A_LYS_183 | NZ  | A_GLU_187 | OE2 | 3.983 |
| 1FVD | A_LYS_188 | NZ  | A_ASP_185 | OD1 | 3.689 |
| 1FVD | B_ARG_38  | NH1 | B_ASP_90  | OD1 | 2.959 |
| 1FVD | B_ARG_38  | NH2 | B_GLU_46  | OE1 | 3.651 |
| 1FVD | B_ARG_38  | NH2 | B_ASP_90  | OD1 | 3.403 |
| 1FVD | B_LYS_65  | NZ  | B_ASP_62  | OD1 | 3.297 |
| 1FVD | B_ARG_67  | NH1 | B_ASP_90  | OD2 | 3.358 |
| 1FVD | B_ARG_67  | NH2 | B_ASP_90  | OD1 | 3.444 |
| 1FVD | B_ARG_67  | NH2 | B_ASP_90  | OD2 | 3.537 |
| 1FVD | B_LYS_76  | NZ  | B_ASP_73  | OD2 | 3.292 |
| 1FVD | B_ARG_98  | NH2 | B_ASP_108 | OD1 | 3.885 |
| 1FVD | B_ARG_98  | NH2 | B_ASP_108 | OD2 | 2.828 |
| 1FVD | B_LYS_150 | NZ  | B_ASP_151 | OD1 | 3.971 |
| 1FVD | B_LYS_150 | NZ  | B_ASP_151 | OD2 | 3.685 |
| 1FVD | B_LYS_216 | NZ  | A_GLU_123 | OE2 | 3.426 |
| 1FVD | C_ARG_18  | NH1 | A_ASP_70  | OD2 | 3.065 |
| 1FVD | C_ARG_24  | NH1 | C_ASP_70  | OD1 | 3.877 |
| 1FVD | C_ARG_24  | NH2 | C_ASP_70  | OD1 | 3.499 |
| 1FVD | C_ARG_24  | NH2 | C_ASP_70  | OD2 | 3.062 |
| 1FVD | C_ARG_61  | NH2 | C_GLU_81  | OE2 | 3.791 |
| 1FVD | C_ARG_61  | NH2 | C_ASP_82  | OD1 | 2.871 |
| 1FVD | C_ARG_61  | NH2 | C_ASP_82  | OD2 | 3.205 |
| 1FVD | C_ARG_66  | NH2 | C_ASP_28  | OD1 | 3.599 |
| 1FVD | C_LYS_103 | NZ  | C_GLU_165 | OE1 | 3.456 |
| 1FVD | C_ARG_142 | NH1 | C_GLU_105 | OE1 | 3.866 |
| 1FVD | D_ARG_38  | NH1 | D_ASP_90  | OD1 | 2.804 |
| 1FVD | D_ARG_38  | NH2 | D_GLU_46  | OE1 | 3.405 |
| 1FVD | D_ARG_38  | NH2 | D_ASP_90  | OD1 | 3.854 |
| 1FVD | D_ARG_67  | NH1 | D_ASP_90  | OD1 | 3.794 |
| 1FVD | D_ARG_67  | NH1 | D_ASP_90  | OD2 | 2.754 |
| 1FVD | D_ARG_67  | NH2 | D_ASP_90  | OD1 | 2.991 |
| 1FVD | D_ARG_67  | NH2 | D_ASP_90  | OD2 | 3.196 |
| 1FVD | D_LYS_76  | NZ  | D_ASP_73  | OD2 | 3.310 |
| 1FVD | D_ARG_87  | NH1 | D_GLU_89  | OE1 | 3.906 |
| 1FVD | D_ARG_87  | NH2 | D_GLU_89  | OE1 | 3.896 |
| 1FVD | D_ARG_87  | NH2 | D_ASP_90  | OD1 | 3.754 |
| 1FVD | D_ARG_98  | NH1 | D_ASP_108 | OD1 | 3.545 |

|      |           |     |           |     |       |
|------|-----------|-----|-----------|-----|-------|
| 1FVD | D_ARG_98  | NH1 | D_ASP_108 | OD2 | 3.091 |
| 1FVD | D_LYS_150 | NZ  | D_ASP_151 | OD1 | 3.457 |
| 1FVD | D_LYS_150 | NZ  | D_ASP_151 | OD2 | 3.794 |
| 1FVD | D_LYS_213 | NZ  | D_ASP_215 | OD1 | 2.673 |
| 1FVD | D_LYS_216 | NZ  | C_GLU_123 | OE1 | 2.737 |
| 1FVE | A_ARG_18  | NH1 | C_ASP_70  | OD1 | 3.613 |
| 1FVE | A_ARG_18  | NH1 | C_ASP_70  | OD2 | 3.316 |
| 1FVE | A_ARG_24  | NH2 | A_ASP_70  | OD1 | 3.581 |
| 1FVE | A_ARG_24  | NH2 | A_ASP_70  | OD2 | 3.679 |
| 1FVE | A_ARG_61  | NH2 | A_GLU_81  | OE2 | 3.047 |
| 1FVE | A_ARG_61  | NH2 | A_ASP_82  | OD1 | 3.215 |
| 1FVE | A_ARG_61  | NH2 | A_ASP_82  | OD2 | 3.538 |
| 1FVE | A_ARG_66  | NH2 | A_ASP_28  | OD1 | 3.900 |
| 1FVE | A_LYS_103 | NZ  | A_GLU_105 | OE1 | 3.573 |
| 1FVE | A_LYS_103 | NZ  | A_GLU_105 | OE2 | 3.185 |
| 1FVE | A_LYS_103 | NZ  | A_GLU_165 | OE1 | 2.869 |
| 1FVE | A_LYS_103 | NZ  | A_GLU_165 | OE2 | 3.988 |
| 1FVE | A_ARG_142 | NH2 | A_GLU_105 | OE1 | 3.848 |
| 1FVE | A_ARG_142 | NH2 | A_GLU_105 | OE2 | 3.667 |
| 1FVE | A_ARG_142 | NH2 | A_GLU_165 | OE2 | 3.452 |
| 1FVE | A_LYS_149 | NZ  | A_GLU_195 | OE1 | 2.902 |
| 1FVE | A_LYS_169 | NZ  | A_ASP_167 | OD2 | 3.928 |
| 1FVE | A_LYS_169 | NZ  | A_ASP_170 | OD2 | 3.977 |
| 1FVE | B_ARG_38  | NH1 | B_ASP_90  | OD1 | 3.055 |
| 1FVE | B_ARG_38  | NH2 | B_GLU_46  | OE2 | 3.767 |
| 1FVE | B_ARG_38  | NH2 | B_ASP_90  | OD1 | 3.522 |
| 1FVE | B_ARG_67  | NH1 | B_ASP_90  | OD2 | 3.077 |
| 1FVE | B_ARG_67  | NH2 | B_ASP_90  | OD1 | 3.046 |
| 1FVE | B_ARG_67  | NH2 | B_ASP_90  | OD2 | 3.273 |
| 1FVE | B_LYS_76  | NZ  | B_ASP_73  | OD2 | 3.045 |
| 1FVE | B_ARG_87  | NH1 | B_GLU_89  | OE2 | 3.292 |
| 1FVE | B_ARG_98  | NH2 | B_ASP_108 | OD2 | 3.050 |
| 1FVE | B_LYS_150 | NZ  | B_ASP_151 | OD1 | 3.911 |
| 1FVE | B_LYS_150 | NZ  | B_ASP_151 | OD2 | 3.600 |
| 1FVE | B_LYS_216 | NZ  | A_GLU_123 | OE2 | 3.328 |
| 1FVE | B_LYS_217 | NZ  | B_GLU_219 | OE1 | 3.280 |
| 1FVE | C_ARG_61  | NH2 | C_GLU_81  | OE2 | 3.092 |
| 1FVE | C_ARG_61  | NH2 | C_ASP_82  | OD1 | 2.991 |
| 1FVE | C_ARG_61  | NH2 | C_ASP_82  | OD2 | 3.500 |
| 1FVE | C_LYS_103 | NZ  | C_GLU_165 | OE1 | 3.377 |
| 1FVE | C_LYS_103 | NZ  | C_GLU_165 | OE2 | 3.755 |
| 1FVE | C_ARG_142 | NH2 | C_GLU_105 | OE1 | 3.256 |
| 1FVE | C_HIS_189 | ND1 | C_ASP_151 | OD2 | 3.275 |
| 1FVE | C_LYS_190 | NZ  | C_ASP_151 | OD1 | 3.284 |
| 1FVE | C_LYS_190 | NZ  | C_ASP_151 | OD2 | 3.663 |
| 1FVE | D_ARG_38  | NH1 | D_GLU_46  | OE1 | 3.179 |
| 1FVE | D_ARG_38  | NH1 | D_GLU_46  | OE2 | 3.488 |
| 1FVE | D_ARG_38  | NH2 | D_ASP_90  | OD1 | 2.634 |
| 1FVE | D_ARG_67  | NH1 | D_ASP_90  | OD1 | 3.960 |
| 1FVE | D_ARG_67  | NH1 | D_ASP_90  | OD2 | 2.712 |
| 1FVE | D_ARG_67  | NH2 | D_ASP_90  | OD1 | 2.924 |
| 1FVE | D_ARG_67  | NH2 | D_ASP_90  | OD2 | 3.109 |
| 1FVE | D_LYS_76  | NZ  | D_ASP_73  | OD2 | 3.266 |
| 1FVE | D_ARG_87  | NH1 | D_GLU_89  | OE2 | 3.190 |
| 1FVE | D_ARG_87  | NH2 | D_ASP_90  | OD1 | 3.371 |
| 1FVE | D_ARG_98  | NH1 | D_ASP_108 | OD1 | 3.433 |
| 1FVE | D_ARG_98  | NH1 | D_ASP_108 | OD2 | 2.999 |
| 1FVE | D_LYS_150 | NZ  | D_ASP_151 | OD1 | 3.818 |



|      |           |     |           |     |       |
|------|-----------|-----|-----------|-----|-------|
| 1FVE | D_LYS_150 | NZ  | D_ASP_151 | OD2 | 3.688 |
| 1G6V | A_HIS_4   | NE2 | A_ASP_19  | OD2 | 3.118 |
| 1G6V | A_HIS_15  | NE2 | A_GLU_14  | OE1 | 3.258 |
| 1G6V | A_ARG_58  | NH1 | A_GLU_69  | OE1 | 3.110 |
| 1G6V | A_ARG_58  | NH1 | A_GLU_69  | OE2 | 2.848 |
| 1G6V | A_LYS_76  | NZ  | A_ASP_71  | OD2 | 3.042 |
| 1G6V | A_ARG_89  | NH2 | A_ASP_75  | OD1 | 3.650 |
| 1G6V | A_ARG_89  | NH2 | A_ASP_75  | OD2 | 3.835 |
| 1G6V | A_HIS_96  | ND1 | A_GLU_106 | OE2 | 3.452 |
| 1G6V | A_HIS_96  | NE2 | A_GLU_106 | OE1 | 3.503 |
| 1G6V | A_HIS_96  | NE2 | A_GLU_106 | OE2 | 3.870 |
| 1G6V | A_HIS_107 | ND1 | A_GLU_117 | OE1 | 3.817 |
| 1G6V | A_HIS_107 | ND1 | A_GLU_117 | OE2 | 3.100 |
| 1G6V | A_HIS_119 | NE2 | A_GLU_117 | OE2 | 2.477 |
| 1G6V | A_LYS_127 | NZ  | A_ASP_139 | OD1 | 3.129 |
| 1G6V | A_LYS_168 | NZ  | A_GLU_238 | OE1 | 3.560 |
| 1G6V | A_ARG_182 | NH1 | A_ASP_180 | OD1 | 3.589 |
| 1G6V | A_ARG_182 | NH1 | A_ASP_180 | OD2 | 3.216 |
| 1G6V | A_ARG_182 | NH2 | A_ASP_180 | OD2 | 2.890 |
| 1G6V | A_LYS_225 | NZ  | A_ASP_165 | OD1 | 3.680 |
| 1G6V | A_LYS_225 | NZ  | A_ASP_165 | OD2 | 3.357 |
| 1G6V | A_ARG_227 | NH1 | A_ASP_101 | OD2 | 3.543 |
| 1G6V | A_ARG_227 | NH2 | A_ASP_101 | OD2 | 3.620 |
| 1G6V | A_LYS_228 | NZ  | A_GLU_238 | OE1 | 3.937 |
| 1G6V | A_LYS_257 | NZ  | A_ASP_41  | OD1 | 3.993 |
| 1G6V | K_ARG_838 | NH1 | K_GLU_887 | OE1 | 3.646 |
| 1G6V | K_ARG_838 | NH1 | K_ASP_888 | OD1 | 3.042 |
| 1G6V | K_ARG_838 | NH2 | K_GLU_846 | OE1 | 3.505 |
| 1G6V | K_ARG_838 | NH2 | K_GLU_846 | OE2 | 3.350 |
| 1G6V | K_ARG_838 | NH2 | K_GLU_887 | OE1 | 3.576 |
| 1G6V | K_ARG_838 | NH2 | K_GLU_887 | OE2 | 3.967 |
| 1G6V | K_ARG_865 | NH1 | K_ASP_888 | OD2 | 3.258 |
| 1G6V | K_ARG_865 | NH2 | K_ASP_888 | OD1 | 2.941 |
| 1G6V | K_ARG_865 | NH2 | K_ASP_888 | OD2 | 3.106 |
| 1G6V | K_LYS_885 | NZ  | K_GLU_887 | OE2 | 3.937 |
| 1G6V | K_ARG_907 | NH1 | A_GLU_187 | OE2 | 2.962 |
| 1G6V | K_ARG_909 | NH1 | A_GLU_187 | OE1 | 3.909 |
| 1G6V | K_ARG_909 | NH2 | A_GLU_187 | OE1 | 3.477 |
| 1G6V | K_ARG_909 | NH2 | K_ASP_912 | OD1 | 3.915 |
| 1G7H | A_ARG_61  | NH1 | A_GLU_81  | OE2 | 3.037 |
| 1G7H | A_ARG_61  | NH1 | A_ASP_82  | OD1 | 3.527 |
| 1G7H | A_ARG_61  | NH1 | A_ASP_82  | OD2 | 2.782 |
| 1G7H | A_ARG_96  | NH1 | B_GLU_98  | OE1 | 2.788 |
| 1G7H | A_ARG_96  | NH1 | B_GLU_98  | OE2 | 3.317 |
| 1G7H | A_ARG_96  | NH2 | B_GLU_98  | OE1 | 3.736 |
| 1G7H | A_ARG_96  | NH2 | B_GLU_98  | OE2 | 2.819 |
| 1G7H | A_LYS_107 | NZ  | A_GLU_17  | OE1 | 3.055 |
| 1G7H | A_LYS_107 | NZ  | A_GLU_17  | OE2 | 3.162 |
| 1G7H | B_ARG_38  | NH1 | B_GLU_46  | OE1 | 3.731 |
| 1G7H | B_ARG_38  | NH1 | B_GLU_46  | OE2 | 3.064 |
| 1G7H | B_ARG_38  | NH1 | B_ASP_89  | OD1 | 3.653 |
| 1G7H | B_ARG_38  | NH2 | B_ASP_89  | OD1 | 3.025 |
| 1G7H | B_ARG_66  | NH1 | B_ASP_89  | OD1 | 2.763 |
| 1G7H | B_ARG_66  | NH1 | B_ASP_89  | OD2 | 2.968 |
| 1G7H | B_ARG_66  | NH2 | B_ASP_89  | OD1 | 3.934 |
| 1G7H | B_ARG_66  | NH2 | B_ASP_89  | OD2 | 2.612 |
| 1G7H | B_LYS_75  | NZ  | B_ASP_72  | OD1 | 2.977 |
| 1G7H | B_ARG_97  | NH1 | B_ASP_104 | OD1 | 3.709 |

|      |           |     |           |     |       |
|------|-----------|-----|-----------|-----|-------|
| 1G7H | B_ARG_97  | NH1 | B_ASP_104 | OD2 | 2.680 |
| 1G7H | B_ARG_102 | NH2 | B_ASP_100 | OD1 | 3.012 |
| 1G7H | C_LYS_1   | NZ  | C_GLU_7   | OE1 | 3.565 |
| 1G7H | C_ARG_61  | NH2 | C_ASP_48  | OD2 | 3.173 |
| 1G7H | C_ARG_125 | NH1 | C_ASP_119 | OD2 | 2.772 |
| 1G7H | C_ARG_125 | NH2 | C_ASP_119 | OD1 | 3.386 |
| 1G7H | C_ARG_125 | NH2 | C_ASP_119 | OD2 | 3.194 |
| 1G7I | A_ARG_61  | NH1 | A_GLU_81  | OE2 | 2.718 |
| 1G7I | A_ARG_61  | NH1 | A_ASP_82  | OD1 | 3.562 |
| 1G7I | A_ARG_61  | NH1 | A_ASP_82  | OD2 | 2.822 |
| 1G7I | A_ARG_96  | NH1 | B_GLU_98  | OE1 | 2.881 |
| 1G7I | A_ARG_96  | NH1 | B_GLU_98  | OE2 | 3.589 |
| 1G7I | A_ARG_96  | NH2 | B_GLU_98  | OE1 | 3.599 |
| 1G7I | A_ARG_96  | NH2 | B_GLU_98  | OE2 | 2.841 |
| 1G7I | A_LYS_107 | NZ  | A_GLU_17  | OE1 | 2.870 |
| 1G7I | A_LYS_107 | NZ  | A_GLU_17  | OE2 | 3.799 |
| 1G7I | B_ARG_38  | NH1 | B_GLU_46  | OE2 | 3.033 |
| 1G7I | B_ARG_38  | NH1 | B_ASP_89  | OD1 | 3.781 |
| 1G7I | B_ARG_38  | NH2 | B_ASP_89  | OD1 | 3.005 |
| 1G7I | B_ARG_66  | NH1 | B_ASP_89  | OD1 | 2.745 |
| 1G7I | B_ARG_66  | NH1 | B_ASP_89  | OD2 | 3.417 |
| 1G7I | B_ARG_66  | NH2 | B_ASP_89  | OD1 | 3.758 |
| 1G7I | B_ARG_66  | NH2 | B_ASP_89  | OD2 | 2.954 |
| 1G7I | B_ARG_97  | NH1 | B_ASP_104 | OD1 | 3.710 |
| 1G7I | B_ARG_97  | NH1 | B_ASP_104 | OD2 | 2.883 |
| 1G7I | B_ARG_102 | NH2 | B_ASP_100 | OD1 | 3.310 |
| 1G7I | C_LYS_1   | NZ  | C_GLU_7   | OE1 | 3.016 |
| 1G7I | C_LYS_1   | NZ  | C_GLU_7   | OE2 | 3.596 |
| 1G7I | C_ARG_61  | NH2 | C_ASP_48  | OD1 | 3.373 |
| 1G7I | C_ARG_68  | NH2 | C_ASP_66  | OD2 | 3.145 |
| 1G7I | C_ARG_125 | NH1 | C_ASP_119 | OD2 | 2.952 |
| 1G7I | C_ARG_125 | NH2 | C_ASP_119 | OD1 | 3.392 |
| 1G7I | C_ARG_125 | NH2 | C_ASP_119 | OD2 | 2.970 |
| 1G7J | A_ARG_61  | NH1 | A_GLU_81  | OE2 | 3.122 |
| 1G7J | A_ARG_61  | NH1 | A_ASP_82  | OD1 | 3.459 |
| 1G7J | A_ARG_61  | NH1 | A_ASP_82  | OD2 | 2.826 |
| 1G7J | A_ARG_96  | NH1 | B_GLU_98  | OE1 | 2.834 |
| 1G7J | A_ARG_96  | NH1 | B_GLU_98  | OE2 | 3.535 |
| 1G7J | A_ARG_96  | NH2 | B_GLU_98  | OE1 | 3.524 |
| 1G7J | A_ARG_96  | NH2 | B_GLU_98  | OE2 | 2.694 |
| 1G7J | A_LYS_107 | NZ  | A_GLU_17  | OE1 | 3.323 |
| 1G7J | A_LYS_107 | NZ  | A_GLU_17  | OE2 | 2.601 |
| 1G7J | B_ARG_38  | NH1 | B_GLU_46  | OE1 | 3.932 |
| 1G7J | B_ARG_38  | NH1 | B_GLU_46  | OE2 | 2.970 |
| 1G7J | B_ARG_38  | NH1 | B_ASP_89  | OD1 | 3.769 |
| 1G7J | B_ARG_38  | NH2 | B_ASP_89  | OD1 | 2.824 |
| 1G7J | B_ARG_66  | NH1 | B_ASP_89  | OD1 | 2.871 |
| 1G7J | B_ARG_66  | NH1 | B_ASP_89  | OD2 | 3.276 |
| 1G7J | B_ARG_66  | NH2 | B_ASP_89  | OD1 | 3.824 |
| 1G7J | B_ARG_66  | NH2 | B_ASP_89  | OD2 | 2.793 |
| 1G7J | B_HIS_86  | NE2 | B_ASP_88  | OD1 | 3.358 |
| 1G7J | B_HIS_86  | NE2 | B_ASP_88  | OD2 | 3.564 |
| 1G7J | B_ARG_97  | NH1 | B_ASP_104 | OD1 | 3.791 |
| 1G7J | B_ARG_97  | NH1 | B_ASP_104 | OD2 | 2.737 |
| 1G7J | B_ARG_102 | NH2 | B_ASP_100 | OD1 | 3.301 |
| 1G7J | C_LYS_1   | NZ  | C_GLU_7   | OE1 | 2.740 |
| 1G7J | C_ARG_61  | NH1 | C_ASP_48  | OD2 | 3.771 |
| 1G7J | C_ARG_125 | NH1 | C_ASP_119 | OD2 | 3.004 |

|      |           |     |           |     |       |
|------|-----------|-----|-----------|-----|-------|
| 1G7J | C_ARG.125 | NH2 | C_ASP.119 | OD1 | 3.354 |
| 1G7J | C_ARG.125 | NH2 | C_ASP.119 | OD2 | 3.147 |
| 1G7L | A_ARG.61  | NH1 | A_GLU.81  | OE2 | 3.595 |
| 1G7L | A_ARG.61  | NH1 | A_ASP.82  | OD1 | 3.389 |
| 1G7L | A_ARG.61  | NH1 | A_ASP.82  | OD2 | 2.780 |
| 1G7L | A_ARG.96  | NH1 | B_GLU.98  | OE1 | 2.744 |
| 1G7L | A_ARG.96  | NH1 | B_GLU.98  | OE2 | 3.483 |
| 1G7L | A_ARG.96  | NH2 | B_GLU.98  | OE1 | 3.535 |
| 1G7L | A_ARG.96  | NH2 | B_GLU.98  | OE2 | 2.761 |
| 1G7L | A_LYS.107 | NZ  | A_GLU.17  | OE1 | 3.286 |
| 1G7L | A_LYS.107 | NZ  | A_GLU.17  | OE2 | 2.822 |
| 1G7L | B_ARG.38  | NH1 | B_GLU.46  | OE2 | 3.105 |
| 1G7L | B_ARG.38  | NH1 | B_ASP.89  | OD1 | 3.832 |
| 1G7L | B_ARG.38  | NH2 | B_ASP.89  | OD1 | 2.874 |
| 1G7L | B_ARG.66  | NH1 | B_ASP.89  | OD1 | 3.004 |
| 1G7L | B_ARG.66  | NH1 | B_ASP.89  | OD2 | 3.786 |
| 1G7L | B_ARG.66  | NH2 | B_ASP.89  | OD1 | 3.392 |
| 1G7L | B_ARG.66  | NH2 | B_ASP.89  | OD2 | 2.877 |
| 1G7L | B_ARG.97  | NH1 | B_ASP.104 | OD1 | 3.584 |
| 1G7L | B_ARG.97  | NH1 | B_ASP.104 | OD2 | 2.551 |
| 1G7L | B_ARG.102 | NH2 | B_ASP.100 | OD1 | 3.204 |
| 1G7L | C_LYS.1   | NZ  | C_GLU.7   | OE1 | 2.763 |
| 1G7L | C_HIS.15  | NE2 | C_ASP.87  | OD2 | 3.997 |
| 1G7L | C_ARG.61  | NH2 | C_ASP.48  | OD2 | 2.882 |
| 1G7L | C_ARG.125 | NH1 | C_ASP.119 | OD2 | 2.762 |
| 1G7L | C_ARG.125 | NH2 | C_ASP.119 | OD1 | 3.327 |
| 1G7L | C_ARG.125 | NH2 | C_ASP.119 | OD2 | 2.838 |
| 1G7M | A_ARG.61  | NH1 | A_GLU.81  | OE2 | 3.936 |
| 1G7M | A_ARG.61  | NH1 | A_ASP.82  | OD1 | 3.601 |
| 1G7M | A_ARG.61  | NH1 | A_ASP.82  | OD2 | 2.851 |
| 1G7M | A_ARG.96  | NH1 | B_GLU.98  | OE1 | 2.792 |
| 1G7M | A_ARG.96  | NH1 | B_GLU.98  | OE2 | 3.493 |
| 1G7M | A_ARG.96  | NH2 | B_GLU.98  | OE1 | 3.544 |
| 1G7M | A_ARG.96  | NH2 | B_GLU.98  | OE2 | 2.732 |
| 1G7M | B_ARG.38  | NH1 | B_GLU.46  | OE1 | 3.743 |
| 1G7M | B_ARG.38  | NH1 | B_GLU.46  | OE2 | 3.134 |
| 1G7M | B_ARG.38  | NH1 | B_ASP.89  | OD1 | 3.885 |
| 1G7M | B_ARG.38  | NH2 | B_ASP.89  | OD1 | 2.901 |
| 1G7M | B_ARG.66  | NH1 | B_ASP.89  | OD1 | 3.117 |
| 1G7M | B_ARG.66  | NH1 | B_ASP.89  | OD2 | 3.721 |
| 1G7M | B_ARG.66  | NH2 | B_ASP.89  | OD1 | 3.761 |
| 1G7M | B_ARG.66  | NH2 | B_ASP.89  | OD2 | 2.897 |
| 1G7M | B_LYS.75  | NZ  | B_ASP.72  | OD1 | 3.993 |
| 1G7M | B_ARG.97  | NH1 | B_ASP.104 | OD1 | 3.720 |
| 1G7M | B_ARG.97  | NH1 | B_ASP.104 | OD2 | 2.732 |
| 1G7M | B_ARG.102 | NH2 | B_ASP.100 | OD1 | 3.308 |
| 1G7M | C_LYS.1   | NZ  | C_GLU.7   | OE1 | 2.835 |
| 1G7M | C_ARG.61  | NH2 | C_ASP.48  | OD2 | 3.861 |
| 1G7M | C_ARG.125 | NH1 | C_ASP.119 | OD2 | 2.991 |
| 1G7M | C_ARG.125 | NH2 | C_ASP.119 | OD1 | 3.407 |
| 1G7M | C_ARG.125 | NH2 | C_ASP.119 | OD2 | 3.048 |
| 1G8Q | A_LYS.121 | NZ  | A_ASP.122 | OD1 | 2.599 |
| 1G8Q | A_LYS.121 | NZ  | A_ASP.122 | OD2 | 3.460 |
| 1G8Q | A_LYS.124 | NZ  | A_ASP.195 | OD1 | 3.016 |
| 1G8Q | A_LYS.124 | NZ  | A_ASP.195 | OD2 | 3.072 |
| 1G8Q | A_LYS.187 | NZ  | A_ASP.155 | OD2 | 2.795 |
| 1G8Q | A_HIS.191 | NE2 | A_ASP.128 | OD1 | 3.354 |
| 1G8Q | A_HIS.191 | NE2 | A_ASP.128 | OD2 | 2.859 |

|      |           |     |           |     |       |
|------|-----------|-----|-----------|-----|-------|
| 1G8Q | A_LYS_193 | NZ  | A_ASP_155 | OD1 | 3.991 |
| 1G8Q | B_LYS_224 | NZ  | B_ASP_295 | OD1 | 2.542 |
| 1G8Q | B_LYS_224 | NZ  | B_ASP_295 | OD2 | 3.203 |
| 1G8Q | B_HIS_291 | NE2 | B_ASP_228 | OD1 | 2.670 |
| 1G8Q | B_HIS_291 | NE2 | B_ASP_228 | OD2 | 3.342 |
| 1G8Q | B_LYS_293 | NZ  | B_GLU_288 | OE2 | 2.739 |
| 1G9M | G_LYS_207 | NZ  | G_GLU_381 | OE1 | 3.792 |
| 1G9M | G_LYS_207 | NZ  | G_GLU_381 | OE2 | 2.500 |
| 1G9M | G_LYS_231 | NZ  | G_GLU_268 | OE2 | 3.144 |
| 1G9M | G_HIS_249 | NE2 | G_GLU_482 | OE1 | 3.558 |
| 1G9M | G_HIS_249 | NE2 | G_GLU_482 | OE2 | 3.514 |
| 1G9M | G_LYS_337 | NZ  | G_GLU_293 | OE2 | 3.954 |
| 1G9M | G_LYS_348 | NZ  | G_GLU_269 | OE2 | 2.920 |
| 1G9M | G_LYS_348 | NZ  | G_GLU_351 | OE2 | 3.765 |
| 1G9M | G_LYS_357 | NZ  | G_GLU_466 | OE1 | 3.174 |
| 1G9M | G_ARG_419 | NH1 | H_GLU_103 | OE2 | 3.773 |
| 1G9M | G_ARG_419 | NH2 | H_GLU_103 | OE2 | 2.762 |
| 1G9M | G_ARG_419 | NH2 | H_GLU_108 | OE2 | 3.794 |
| 1G9M | G_ARG_456 | NH2 | G_GLU_466 | OE1 | 3.727 |
| 1G9M | G_ARG_456 | NH2 | G_GLU_466 | OE2 | 3.003 |
| 1G9M | G_ARG_469 | NH2 | G_ASP_457 | OD1 | 3.290 |
| 1G9M | G_ARG_476 | NH1 | G_ASP_474 | OD1 | 2.906 |
| 1G9M | G_ARG_480 | NH1 | G_ASP_477 | OD1 | 2.553 |
| 1G9M | G_LYS_487 | NZ  | G_GLU_91  | OE1 | 3.951 |
| 1G9M | G_LYS_487 | NZ  | G_GLU_91  | OE2 | 2.923 |
| 1G9M | C_LYS_8   | NZ  | C_GLU_119 | OE1 | 2.848 |
| 1G9M | C_HIS_27  | NE2 | C_GLU_85  | OE1 | 2.711 |
| 1G9M | C_LYS_29  | NZ  | G_ASP_279 | OD2 | 3.077 |
| 1G9M | C_LYS_29  | NZ  | C_GLU_85  | OE1 | 2.735 |
| 1G9M | C_LYS_29  | NZ  | C_GLU_85  | OE2 | 3.809 |
| 1G9M | C_LYS_46  | NZ  | C_ASP_56  | OD1 | 3.759 |
| 1G9M | C_ARG_54  | NH1 | C_ASP_78  | OD1 | 3.768 |
| 1G9M | C_ARG_54  | NH1 | C_ASP_78  | OD2 | 2.778 |
| 1G9M | C_ARG_54  | NH2 | C_ASP_78  | OD1 | 2.931 |
| 1G9M | C_ARG_54  | NH2 | C_ASP_78  | OD2 | 3.434 |
| 1G9M | C_ARG_59  | NH1 | G_ASP_368 | OD1 | 3.576 |
| 1G9M | C_ARG_59  | NH1 | G_ASP_368 | OD2 | 3.197 |
| 1G9M | C_ARG_59  | NH2 | G_ASP_368 | OD1 | 2.550 |
| 1G9M | C_ARG_59  | NH2 | G_ASP_368 | OD2 | 3.360 |
| 1G9M | C_ARG_134 | NH2 | C_ASP_153 | OD1 | 3.987 |
| 1G9M | L_ARG_24  | NH2 | L_GLU_3   | OE2 | 3.072 |
| 1G9M | L_ARG_61  | NH2 | L_GLU_81  | OE2 | 3.403 |
| 1G9M | L_ARG_61  | NH2 | L_ASP_82  | OD1 | 2.707 |
| 1G9M | L_ARG_61  | NH2 | L_ASP_82  | OD2 | 3.381 |
| 1G9M | L_LYS_151 | NZ  | L_GLU_197 | OE1 | 3.157 |
| 1G9M | L_LYS_151 | NZ  | L_GLU_197 | OE2 | 3.538 |
| 1G9M | L_HIS_191 | ND1 | L_ASP_153 | OD2 | 3.573 |
| 1G9M | H_LYS_12  | NZ  | H_GLU_10  | OE1 | 3.811 |
| 1G9M | H_LYS_19  | NZ  | H_GLU_82  | OE2 | 2.937 |
| 1G9M | H_ARG_31  | NH2 | H_GLU_103 | OE1 | 3.557 |
| 1G9M | H_ARG_31  | NH2 | H_ASP_105 | OD1 | 3.841 |
| 1G9M | H_ARG_31  | NH2 | H_ASP_105 | OD2 | 3.073 |
| 1G9M | H_ARG_38  | NH1 | H_GLU_46  | OE1 | 3.715 |
| 1G9M | H_ARG_38  | NH1 | H_GLU_46  | OE2 | 2.917 |
| 1G9M | H_ARG_38  | NH2 | H_ASP_90  | OD2 | 2.688 |
| 1G9M | H_ARG_50  | NH2 | H_GLU_101 | OE2 | 2.484 |
| 1G9M | H_HIS_63  | NE2 | H_GLU_46  | OE1 | 3.776 |
| 1G9M | H_HIS_63  | NE2 | H_GLU_46  | OE2 | 2.782 |

|      |           |     |           |     |       |
|------|-----------|-----|-----------|-----|-------|
| 1G9M | H_ARG_67  | NH1 | H_ASP_90  | OD1 | 2.916 |
| 1G9M | H_ARG_67  | NH1 | H_ASP_90  | OD2 | 3.928 |
| 1G9M | H_ARG_67  | NH2 | H_ASP_90  | OD1 | 3.114 |
| 1G9M | H_ARG_67  | NH2 | H_ASP_90  | OD2 | 2.646 |
| 1G9M | H_LYS_74  | NZ  | H_ASP_56  | OD1 | 3.247 |
| 1G9M | H_LYS_74  | NZ  | H_ASP_56  | OD2 | 3.751 |
| 1G9M | H_ARG_84  | NH2 | H_GLU_82  | OE1 | 2.803 |
| 1G9M | H_ARG_110 | NH2 | H_GLU_108 | OE1 | 3.721 |
| 1G9M | H_LYS_158 | NZ  | H_ASP_159 | OD1 | 2.791 |
| 1G9M | H_LYS_158 | NZ  | H_ASP_159 | OD2 | 2.929 |
| 1G9N | G_LYS_121 | NZ  | G_GLU_429 | OE1 | 2.598 |
| 1G9N | G_LYS_121 | NZ  | G_GLU_429 | OE2 | 3.835 |
| 1G9N | G_LYS_207 | NZ  | G_GLU_381 | OE1 | 3.761 |
| 1G9N | G_LYS_207 | NZ  | G_GLU_381 | OE2 | 3.069 |
| 1G9N | G_HIS_249 | NE2 | G_GLU_482 | OE1 | 3.588 |
| 1G9N | G_LYS_282 | NZ  | G_GLU_275 | OE1 | 3.728 |
| 1G9N | G_LYS_282 | NZ  | G_GLU_275 | OE2 | 2.699 |
| 1G9N | G_LYS_348 | NZ  | G_GLU_269 | OE2 | 3.322 |
| 1G9N | G_LYS_348 | NZ  | G_GLU_351 | OE1 | 3.879 |
| 1G9N | G_LYS_348 | NZ  | G_GLU_351 | OE2 | 3.198 |
| 1G9N | G_LYS_350 | NZ  | G_ASP_395 | OD1 | 3.491 |
| 1G9N | G_LYS_357 | NZ  | G_GLU_466 | OE1 | 3.697 |
| 1G9N | G_ARG_419 | NH1 | H_GLU_106 | OE1 | 2.930 |
| 1G9N | G_ARG_419 | NH1 | H_GLU_106 | OE2 | 3.665 |
| 1G9N | G_ARG_419 | NH2 | H_GLU_103 | OE1 | 2.300 |
| 1G9N | G_ARG_419 | NH2 | H_GLU_106 | OE2 | 3.990 |
| 1G9N | G_ARG_456 | NH2 | G_GLU_466 | OE1 | 3.622 |
| 1G9N | G_ARG_456 | NH2 | G_GLU_466 | OE2 | 3.509 |
| 1G9N | G_ARG_469 | NH2 | G_ASP_457 | OD1 | 3.668 |
| 1G9N | G_ARG_476 | NH1 | G_ASP_474 | OD1 | 3.685 |
| 1G9N | G_ARG_476 | NH2 | G_GLU_102 | OE1 | 3.192 |
| 1G9N | G_ARG_476 | NH2 | G_GLU_102 | OE2 | 2.740 |
| 1G9N | G_ARG_480 | NH1 | G_ASP_477 | OD1 | 3.994 |
| 1G9N | G_LYS_487 | NZ  | G_GLU_91  | OE2 | 3.841 |
| 1G9N | G_LYS_490 | NZ  | G_GLU_492 | OE1 | 3.571 |
| 1G9N | C_LYS_29  | NZ  | C_GLU_85  | OE1 | 3.106 |
| 1G9N | C_LYS_29  | NZ  | C_GLU_85  | OE2 | 3.864 |
| 1G9N | C_LYS_35  | NZ  | G_ASP_457 | OD2 | 3.608 |
| 1G9N | C_ARG_54  | NH1 | C_ASP_78  | OD1 | 3.979 |
| 1G9N | C_ARG_54  | NH1 | C_ASP_78  | OD2 | 2.754 |
| 1G9N | C_ARG_54  | NH2 | C_ASP_78  | OD1 | 2.744 |
| 1G9N | C_ARG_54  | NH2 | C_ASP_78  | OD2 | 3.015 |
| 1G9N | C_ARG_59  | NH1 | G_ASP_368 | OD1 | 3.032 |
| 1G9N | C_ARG_59  | NH1 | G_ASP_368 | OD2 | 3.045 |
| 1G9N | C_ARG_59  | NH2 | G_ASP_368 | OD1 | 2.609 |
| 1G9N | C_ARG_59  | NH2 | G_ASP_368 | OD2 | 3.355 |
| 1G9N | C_HIS_107 | ND1 | C_ASP_105 | OD1 | 2.754 |
| 1G9N | C_HIS_107 | ND1 | C_ASP_105 | OD2 | 3.107 |
| 1G9N | C_ARG_134 | NH2 | C_ASP_153 | OD1 | 3.650 |
| 1G9N | C_LYS_136 | NZ  | C_GLU_150 | OE2 | 3.852 |
| 1G9N | C_LYS_136 | NZ  | C_ASP_153 | OD1 | 3.794 |
| 1G9N | C_LYS_136 | NZ  | C_ASP_153 | OD2 | 2.773 |
| 1G9N | C_LYS_171 | NZ  | C_GLU_169 | OE1 | 3.972 |
| 1G9N | C_LYS_171 | NZ  | C_GLU_169 | OE2 | 2.770 |
| 1G9N | L_ARG_61  | NH2 | L_GLU_81  | OE1 | 3.113 |
| 1G9N | L_ARG_61  | NH2 | L_ASP_82  | OD1 | 3.659 |
| 1G9N | L_ARG_97  | NH2 | L_GLU_1   | OE1 | 3.685 |
| 1G9N | L_ARG_97  | NH2 | L_GLU_1   | OE2 | 2.961 |

|      |           |     |           |     |       |
|------|-----------|-----|-----------|-----|-------|
| 1G9N | L_HIS_191 | ND1 | L_ASP_153 | OD2 | 2.588 |
| 1G9N | L_HIS_191 | NE2 | L_ASP_187 | OD2 | 2.897 |
| 1G9N | L_ARG_213 | NH1 | L_GLU_189 | OE1 | 3.830 |
| 1G9N | H_ARG_31  | NH2 | H_ASP_105 | OD1 | 3.178 |
| 1G9N | H_ARG_31  | NH2 | H_ASP_105 | OD2 | 3.436 |
| 1G9N | H_ARG_38  | NH1 | H_GLU_46  | OE1 | 2.711 |
| 1G9N | H_ARG_38  | NH1 | H_GLU_46  | OE2 | 3.252 |
| 1G9N | H_ARG_38  | NH2 | H_ASP_90  | OD2 | 2.680 |
| 1G9N | H_ARG_50  | NH2 | H_GLU_101 | OE2 | 2.305 |
| 1G9N | H_ARG_67  | NH1 | H_ASP_90  | OD1 | 3.457 |
| 1G9N | H_ARG_67  | NH2 | H_ASP_90  | OD1 | 2.540 |
| 1G9N | H_ARG_67  | NH2 | H_ASP_90  | OD2 | 2.635 |
| 1G9N | H_LYS_74  | NZ  | H_ASP_56  | OD2 | 2.889 |
| 1G9N | H_ARG_84  | NH2 | H_GLU_82  | OE1 | 3.161 |
| 1G9N | H_ARG_110 | NH1 | H_GLU_108 | OE1 | 3.833 |
| 1G9N | H_ARG_110 | NH2 | H_GLU_108 | OE1 | 3.692 |
| 1G9N | H_LYS_158 | NZ  | H_ASP_159 | OD1 | 2.649 |
| 1G9N | H_LYS_158 | NZ  | H_ASP_159 | OD2 | 3.459 |
| 1G9N | H_LYS_224 | NZ  | L_GLU_125 | OE1 | 3.507 |
| 1G9N | H_LYS_224 | NZ  | L_GLU_125 | OE2 | 3.538 |
| 1G9N | H_LYS_229 | NZ  | L_ASP_124 | OD2 | 3.557 |
| 1GC1 | G_LYS_207 | NZ  | G_GLU_381 | OE1 | 3.546 |
| 1GC1 | G_LYS_207 | NZ  | G_GLU_381 | OE2 | 2.763 |
| 1GC1 | G_LYS_231 | NZ  | G_GLU_268 | OE1 | 2.870 |
| 1GC1 | G_HIS_249 | NE2 | G_GLU_482 | OE1 | 2.874 |
| 1GC1 | G_LYS_282 | NZ  | G_ASP_279 | OD2 | 2.766 |
| 1GC1 | G_ARG_335 | NH1 | G_ASP_412 | OD1 | 2.680 |
| 1GC1 | G_ARG_335 | NH1 | G_ASP_412 | OD2 | 3.973 |
| 1GC1 | G_ARG_335 | NH2 | G_ASP_412 | OD1 | 3.328 |
| 1GC1 | G_LYS_337 | NZ  | G_GLU_293 | OE1 | 2.668 |
| 1GC1 | G_LYS_357 | NZ  | G_GLU_466 | OE2 | 3.400 |
| 1GC1 | G_ARG_419 | NH1 | H_GLU_106 | OE1 | 2.761 |
| 1GC1 | G_ARG_419 | NH2 | H_GLU_106 | OE1 | 2.942 |
| 1GC1 | G_ARG_419 | NH2 | H_GLU_108 | OE1 | 3.887 |
| 1GC1 | G_ARG_419 | NH2 | H_GLU_108 | OE2 | 3.401 |
| 1GC1 | G_ARG_456 | NH2 | G_GLU_466 | OE1 | 2.736 |
| 1GC1 | G_ARG_456 | NH2 | G_GLU_466 | OE2 | 3.604 |
| 1GC1 | G_ARG_469 | NH2 | G_ASP_457 | OD1 | 3.571 |
| 1GC1 | G_ARG_469 | NH2 | G_ASP_457 | OD2 | 2.956 |
| 1GC1 | G_ARG_476 | NH1 | G_ASP_474 | OD1 | 3.210 |
| 1GC1 | G_ARG_480 | NH1 | G_ASP_477 | OD1 | 3.075 |
| 1GC1 | C_LYS_1   | NZ  | C_GLU_92  | OE1 | 2.611 |
| 1GC1 | C_LYS_7   | NZ  | C_ASP_10  | OD1 | 3.825 |
| 1GC1 | C_LYS_7   | NZ  | C_ASP_10  | OD2 | 2.811 |
| 1GC1 | C_LYS_8   | NZ  | C_GLU_119 | OE1 | 2.599 |
| 1GC1 | C_HIS_27  | ND1 | C_GLU_85  | OE1 | 2.734 |
| 1GC1 | C_LYS_29  | NZ  | G_ASP_279 | OD1 | 2.748 |
| 1GC1 | C_LYS_29  | NZ  | C_GLU_85  | OE1 | 2.817 |
| 1GC1 | C_LYS_29  | NZ  | C_GLU_85  | OE2 | 3.379 |
| 1GC1 | C_LYS_46  | NZ  | C_ASP_56  | OD2 | 2.852 |
| 1GC1 | C_LYS_50  | NZ  | C_GLU_77  | OE1 | 2.464 |
| 1GC1 | C_LYS_50  | NZ  | C_GLU_77  | OE2 | 3.327 |
| 1GC1 | C_ARG_54  | NH1 | C_ASP_78  | OD1 | 3.681 |
| 1GC1 | C_ARG_54  | NH1 | C_ASP_78  | OD2 | 2.523 |
| 1GC1 | C_ARG_54  | NH2 | C_ASP_78  | OD1 | 2.648 |
| 1GC1 | C_ARG_54  | NH2 | C_ASP_78  | OD2 | 3.132 |
| 1GC1 | C_ARG_59  | NH1 | G_ASP_368 | OD1 | 2.780 |
| 1GC1 | C_ARG_59  | NH1 | G_ASP_368 | OD2 | 3.645 |

|      |           |     |           |     |       |
|------|-----------|-----|-----------|-----|-------|
| 1GC1 | C_ARG_59  | NH2 | G_ASP_368 | OD1 | 3.062 |
| 1GC1 | C_ARG_59  | NH2 | G_ASP_368 | OD2 | 2.481 |
| 1GC1 | C_LYS_90  | NZ  | C_GLU_85  | OE2 | 3.366 |
| 1GC1 | C_ARG_134 | NH2 | C_ASP_153 | OD1 | 3.312 |
| 1GC1 | C_ARG_134 | NH2 | C_ASP_153 | OD2 | 3.071 |
| 1GC1 | C_LYS_167 | NZ  | C_GLU_169 | OE1 | 3.179 |
| 1GC1 | L_ARG_24  | NH1 | L_GLU_3   | OE1 | 2.728 |
| 1GC1 | L_ARG_24  | NH2 | L_GLU_3   | OE1 | 3.024 |
| 1GC1 | L_ARG_24  | NH2 | L_GLU_3   | OE2 | 3.874 |
| 1GC1 | L_ARG_61  | NH1 | L_GLU_81  | OE2 | 3.374 |
| 1GC1 | L_ARG_61  | NH1 | L_ASP_82  | OD1 | 2.506 |
| 1GC1 | L_ARG_61  | NH1 | L_ASP_82  | OD2 | 2.919 |
| 1GC1 | L_ARG_61  | NH2 | L_GLU_81  | OE2 | 3.159 |
| 1GC1 | L_LYS_128 | NZ  | L_ASP_124 | OD1 | 2.735 |
| 1GC1 | L_LYS_185 | NZ  | L_GLU_189 | OE1 | 3.492 |
| 1GC1 | L_LYS_185 | NZ  | L_GLU_189 | OE2 | 3.997 |
| 1GC1 | L_HIS_191 | ND1 | L_ASP_153 | OD2 | 3.341 |
| 1GC1 | L_HIS_191 | NE2 | L_ASP_187 | OD1 | 2.956 |
| 1GC1 | L_HIS_191 | NE2 | L_ASP_187 | OD2 | 3.839 |
| 1GC1 | H_LYS_12  | NZ  | H_GLU_10  | OE1 | 2.918 |
| 1GC1 | H_LYS_19  | NZ  | H_GLU_82  | OE1 | 2.992 |
| 1GC1 | H_ARG_31  | NH1 | H_GLU_106 | OE2 | 2.532 |
| 1GC1 | H_ARG_38  | NH1 | H_GLU_46  | OE2 | 2.989 |
| 1GC1 | H_ARG_38  | NH1 | H_ASP_90  | OD1 | 3.814 |
| 1GC1 | H_ARG_38  | NH2 | H_ASP_90  | OD1 | 2.619 |
| 1GC1 | H_ARG_50  | NH2 | H_GLU_101 | OE2 | 2.957 |
| 1GC1 | H_HIS_63  | NE2 | H_GLU_46  | OE1 | 3.828 |
| 1GC1 | H_HIS_63  | NE2 | H_GLU_46  | OE2 | 2.878 |
| 1GC1 | H_ARG_67  | NH1 | H_ASP_90  | OD1 | 3.587 |
| 1GC1 | H_ARG_67  | NH1 | H_ASP_90  | OD2 | 2.706 |
| 1GC1 | H_ARG_67  | NH2 | H_ASP_90  | OD1 | 2.708 |
| 1GC1 | H_ARG_67  | NH2 | H_ASP_90  | OD2 | 3.261 |
| 1GC1 | H_ARG_84  | NH2 | H_GLU_82  | OE2 | 2.925 |
| 1GC1 | H_LYS_158 | NZ  | H_ASP_159 | OD1 | 2.936 |
| 1GC1 | H_LYS_158 | NZ  | H_ASP_159 | OD2 | 3.481 |
| 1GC1 | H_LYS_224 | NZ  | L_GLU_125 | OE1 | 2.581 |
| 1GC1 | H_LYS_224 | NZ  | L_GLU_125 | OE2 | 3.963 |
| 1GGB | L_LYS_39  | NZ  | L_ASP_81  | OD1 | 3.691 |
| 1GGB | L_ARG_61  | NH2 | L_ASP_82  | OD1 | 3.069 |
| 1GGB | L_ARG_61  | NH2 | L_ASP_82  | OD2 | 3.921 |
| 1GGB | L_LYS_149 | NZ  | L_GLU_195 | OE1 | 3.055 |
| 1GGB | L_LYS_149 | NZ  | L_GLU_195 | OE2 | 3.602 |
| 1GGB | L_ARG_155 | NH1 | L_GLU_185 | OE1 | 3.649 |
| 1GGB | L_ARG_155 | NH2 | L_GLU_185 | OE1 | 2.814 |
| 1GGB | L_HIS_189 | ND1 | L_ASP_151 | OD2 | 3.149 |
| 1GGB | L_ARG_211 | NH2 | L_GLU_187 | OE2 | 3.888 |
| 1GGB | H_ARG_38  | NH1 | H_ASP_86  | OD1 | 3.008 |
| 1GGB | H_ARG_38  | NH2 | H_GLU_46  | OE1 | 3.247 |
| 1GGB | H_ARG_38  | NH2 | H_ASP_86  | OD1 | 3.365 |
| 1GGB | H_ARG_58  | NH1 | L_ASP_94  | OD1 | 3.623 |
| 1GGB | H_ARG_58  | NH2 | L_ASP_94  | OD1 | 2.873 |
| 1GGB | H_ARG_66  | NH1 | H_ASP_83  | OD1 | 3.682 |
| 1GGB | H_ARG_66  | NH1 | H_ASP_86  | OD1 | 3.167 |
| 1GGB | H_ARG_66  | NH1 | H_ASP_86  | OD2 | 3.895 |
| 1GGB | H_ARG_66  | NH2 | H_ASP_83  | OD1 | 3.328 |
| 1GGB | H_ARG_66  | NH2 | H_ASP_86  | OD1 | 3.262 |
| 1GGB | H_ARG_66  | NH2 | H_ASP_86  | OD2 | 2.539 |
| 1GGB | H_LYS_221 | NZ  | L_GLU_123 | OE1 | 2.690 |

|      |           |     |           |     |       |
|------|-----------|-----|-----------|-----|-------|
| 1GGB | H.LYS_221 | NZ  | L.GLU_123 | OE2 | 3.205 |
| 1GGB | H.LYS_222 | NZ  | H.GLU_226 | OE2 | 3.191 |
| 1GGC | L.ARG_61  | NH1 | L.GLU_79  | OE2 | 3.692 |
| 1GGC | L.ARG_61  | NH1 | L.ASP_82  | OD1 | 3.115 |
| 1GGC | L.ARG_61  | NH1 | L.ASP_82  | OD2 | 2.752 |
| 1GGC | L.ARG_61  | NH2 | L.GLU_79  | OE1 | 3.661 |
| 1GGC | L.ARG_61  | NH2 | L.GLU_79  | OE2 | 3.675 |
| 1GGC | L.ARG_61  | NH2 | L.ASP_82  | OD1 | 3.438 |
| 1GGC | L.LYS_149 | NZ  | L.GLU_195 | OE2 | 3.691 |
| 1GGC | L.ARG_155 | NH2 | L.GLU_185 | OE2 | 2.870 |
| 1GGC | L.LYS_183 | NZ  | L.GLU_187 | OE1 | 3.373 |
| 1GGC | L.LYS_183 | NZ  | L.GLU_187 | OE2 | 3.046 |
| 1GGC | L.LYS_199 | NZ  | L.ASP_110 | OD1 | 3.437 |
| 1GGC | L.LYS_199 | NZ  | L.ASP_110 | OD2 | 2.666 |
| 1GGC | H.ARG_38  | NH1 | H.ASP_86  | OD1 | 3.206 |
| 1GGC | H.ARG_38  | NH2 | H.GLU_46  | OE1 | 3.183 |
| 1GGC | H.ARG_38  | NH2 | H.ASP_86  | OD1 | 3.921 |
| 1GGC | H.ARG_58  | NH2 | L.ASP_94  | OD1 | 3.221 |
| 1GGC | H.ARG_66  | NH1 | H.ASP_86  | OD1 | 3.876 |
| 1GGC | H.ARG_66  | NH2 | H.ASP_86  | OD1 | 2.865 |
| 1GGC | H.ARG_66  | NH2 | H.ASP_86  | OD2 | 2.907 |
| 1GGC | H.LYS_218 | NZ  | H.ASP_220 | OD1 | 3.849 |
| 1GGC | H.LYS_221 | NZ  | L.GLU_123 | OE1 | 2.942 |
| 1GGI | L.LYS_39  | NZ  | L.ASP_81  | OD2 | 3.200 |
| 1GGI | L.ARG_61  | NH2 | L.ASP_82  | OD1 | 3.494 |
| 1GGI | L.ARG_61  | NH2 | L.ASP_82  | OD2 | 3.194 |
| 1GGI | L.LYS_142 | NZ  | L.GLU_105 | OE1 | 3.057 |
| 1GGI | L.LYS_149 | NZ  | L.GLU_195 | OE1 | 3.085 |
| 1GGI | L.LYS_149 | NZ  | L.GLU_195 | OE2 | 2.765 |
| 1GGI | L.ARG_155 | NH2 | L.GLU_185 | OE1 | 2.906 |
| 1GGI | L.ARG_155 | NH2 | L.GLU_185 | OE2 | 3.331 |
| 1GGI | L.LYS_183 | NZ  | L.GLU_187 | OE1 | 2.955 |
| 1GGI | L.LYS_183 | NZ  | L.GLU_187 | OE2 | 3.308 |
| 1GGI | H.ARG_38  | NH1 | H.GLU_46  | OE1 | 2.813 |
| 1GGI | H.ARG_38  | NH2 | H.ASP_86  | OD1 | 2.641 |
| 1GGI | H.HIS_50  | NE2 | H.GLU_95  | OE1 | 3.102 |
| 1GGI | H.ARG_58  | NH1 | H.ASP_56  | OD1 | 3.338 |
| 1GGI | H.ARG_58  | NH1 | H.ASP_56  | OD2 | 3.571 |
| 1GGI | H.ARG_58  | NH2 | L.ASP_94  | OD2 | 3.749 |
| 1GGI | H.ARG_66  | NH1 | H.ASP_86  | OD1 | 3.518 |
| 1GGI | H.ARG_66  | NH1 | H.ASP_86  | OD2 | 3.473 |
| 1GGI | H.ARG_66  | NH2 | H.ASP_86  | OD1 | 3.109 |
| 1GGI | H.ARG_66  | NH2 | H.ASP_86  | OD2 | 2.810 |
| 1GGI | H.LYS_221 | NZ  | L.GLU_123 | OE2 | 3.900 |
| 1GGI | P.LYS_312 | NZ  | H.ASP_54  | OD1 | 2.914 |
| 1GGI | P.LYS_312 | NZ  | H.ASP_54  | OD2 | 3.188 |
| 1GGI | P.LYS_312 | NZ  | H.ASP_56  | OD1 | 2.830 |
| 1GGI | P.LYS_312 | NZ  | H.ASP_56  | OD2 | 3.728 |
| 1GGI | M.ARG_24  | NH1 | M.ASP_70  | OD1 | 2.935 |
| 1GGI | M.ARG_24  | NH1 | M.ASP_70  | OD2 | 3.520 |
| 1GGI | M.ARG_61  | NH1 | M.ASP_82  | OD1 | 2.935 |
| 1GGI | M.ARG_61  | NH1 | M.ASP_82  | OD2 | 2.776 |
| 1GGI | M.ARG_61  | NH2 | M.ASP_82  | OD1 | 3.065 |
| 1GGI | M.LYS_142 | NZ  | M.GLU_105 | OE1 | 3.711 |
| 1GGI | M.LYS_142 | NZ  | M.GLU_105 | OE2 | 2.989 |
| 1GGI | M.ARG_155 | NH1 | M.GLU_185 | OE2 | 3.862 |
| 1GGI | M.ARG_155 | NH2 | M.GLU_185 | OE1 | 2.644 |
| 1GGI | M.ARG_155 | NH2 | M.GLU_185 | OE2 | 3.063 |



|      |           |     |           |     |       |
|------|-----------|-----|-----------|-----|-------|
| 1GGI | M.LYS_183 | NZ  | M_GLU_187 | OE1 | 3.427 |
| 1GGI | M.LYS_183 | NZ  | M_GLU_187 | OE2 | 3.848 |
| 1GGI | M.HIS_189 | ND1 | M.ASP_151 | OD2 | 3.374 |
| 1GGI | M.LYS_199 | NZ  | M.ASP_110 | OD1 | 3.172 |
| 1GGI | M.LYS_199 | NZ  | M.ASP_110 | OD2 | 3.326 |
| 1GGI | J.ARG_38  | NH1 | J.ASP_86  | OD1 | 2.716 |
| 1GGI | J.ARG_38  | NH2 | J.ASP_86  | OD1 | 3.121 |
| 1GGI | J.HIS_50  | NE2 | J_GLU_95  | OE1 | 2.732 |
| 1GGI | J.ARG_58  | NH1 | J.ASP_56  | OD2 | 2.535 |
| 1GGI | J.ARG_58  | NH2 | M.ASP_94  | OD2 | 3.966 |
| 1GGI | J.ARG_66  | NH1 | J.ASP_86  | OD1 | 3.627 |
| 1GGI | J.ARG_66  | NH2 | J.ASP_86  | OD1 | 3.502 |
| 1GGI | J.ARG_66  | NH2 | J.ASP_86  | OD2 | 2.746 |
| 1GGI | J.HIS_172 | NE2 | M.ASP_167 | OD2 | 3.287 |
| 1GGI | J.LYS_221 | NZ  | M_GLU_123 | OE1 | 3.528 |
| 1GGI | J.LYS_221 | NZ  | M_GLU_123 | OE2 | 3.781 |
| 1GGI | Q.LYS_312 | NZ  | J.ASP_54  | OD1 | 3.299 |
| 1GGI | Q.LYS_312 | NZ  | J.ASP_54  | OD2 | 2.967 |
| 1GGI | Q.LYS_312 | NZ  | J.ASP_56  | OD1 | 3.964 |
| 1GGI | Q.LYS_312 | NZ  | J.ASP_56  | OD2 | 3.120 |
| 1GPO | L.LYS_54  | NZ  | H.ASP_101 | OD1 | 2.768 |
| 1GPO | L.LYS_54  | NZ  | H.ASP_101 | OD2 | 3.525 |
| 1GPO | L.ARG_66  | NH2 | L_GLU_86  | OE2 | 3.655 |
| 1GPO | L.ARG_66  | NH2 | L.ASP_87  | OD1 | 2.651 |
| 1GPO | L.ARG_66  | NH2 | L.ASP_87  | OD2 | 3.453 |
| 1GPO | L.LYS_147 | NZ  | L.ASP_148 | OD1 | 3.371 |
| 1GPO | L.LYS_152 | NZ  | L_GLU_159 | OE2 | 2.707 |
| 1GPO | L.LYS_154 | NZ  | L_GLU_200 | OE2 | 3.219 |
| 1GPO | L.ARG_160 | NH1 | L_GLU_190 | OE2 | 3.906 |
| 1GPO | L.ARG_193 | NH2 | L.ASP_189 | OD1 | 3.683 |
| 1GPO | L.ARG_193 | NH2 | L.ASP_189 | OD2 | 2.940 |
| 1GPO | L.HIS_194 | NE2 | L_GLU_190 | OE2 | 3.215 |
| 1GPO | L.LYS_204 | NZ  | L.ASP_115 | OD1 | 3.884 |
| 1GPO | L.LYS_204 | NZ  | L.ASP_115 | OD2 | 2.884 |
| 1GPO | H.ARG_38  | NH1 | H.ASP_89  | OD1 | 3.025 |
| 1GPO | H.ARG_38  | NH2 | H_GLU_46  | OE1 | 2.836 |
| 1GPO | H.ARG_38  | NH2 | H.ASP_89  | OD1 | 3.663 |
| 1GPO | H.ARG_66  | NH1 | H.ASP_89  | OD1 | 3.859 |
| 1GPO | H.ARG_66  | NH1 | H.ASP_89  | OD2 | 3.366 |
| 1GPO | H.ARG_66  | NH2 | H.ASP_89  | OD1 | 3.032 |
| 1GPO | H.ARG_66  | NH2 | H.ASP_89  | OD2 | 3.658 |
| 1GPO | H.LYS_208 | NZ  | L_GLU_128 | OE2 | 3.848 |
| 1GPO | M.ARG_24  | NH1 | M.ASP_75  | OD1 | 3.059 |
| 1GPO | M.LYS_44  | NZ  | M_GLU_86  | OE1 | 3.993 |
| 1GPO | M.LYS_54  | NZ  | L.ASP_101 | OD1 | 3.704 |
| 1GPO | M.ARG_66  | NH2 | M_GLU_86  | OE2 | 3.739 |
| 1GPO | M.ARG_66  | NH2 | M.ASP_87  | OD1 | 2.836 |
| 1GPO | M.ARG_66  | NH2 | M.ASP_87  | OD2 | 3.679 |
| 1GPO | M.LYS_108 | NZ  | M_GLU_110 | OE1 | 2.976 |
| 1GPO | M.LYS_108 | NZ  | M_GLU_110 | OE2 | 3.953 |
| 1GPO | M.LYS_154 | NZ  | M_GLU_200 | OE1 | 3.791 |
| 1GPO | M.LYS_154 | NZ  | M_GLU_200 | OE2 | 3.297 |
| 1GPO | M.HIS_194 | ND1 | M.ASP_156 | OD2 | 3.167 |
| 1GPO | M.HIS_194 | NE2 | M_GLU_190 | OE2 | 3.816 |
| 1GPO | L.ARG_38  | NH1 | L.ASP_89  | OD1 | 2.915 |
| 1GPO | L.ARG_38  | NH2 | L_GLU_46  | OE1 | 3.130 |
| 1GPO | L.ARG_38  | NH2 | L_GLU_46  | OE2 | 3.937 |
| 1GPO | L.ARG_38  | NH2 | L.ASP_89  | OD1 | 3.560 |

|      |           |     |           |     |       |
|------|-----------|-----|-----------|-----|-------|
| 1GPO | L_ARG.66  | NH1 | L_ASP.89  | OD1 | 3.810 |
| 1GPO | L_ARG.66  | NH1 | L_ASP.89  | OD2 | 3.000 |
| 1GPO | L_ARG.66  | NH2 | L_ASP.89  | OD1 | 3.073 |
| 1GPO | L_ARG.66  | NH2 | L_ASP.89  | OD2 | 3.643 |
| 1GPO | L_LYS.208 | NZ  | M_GLU.128 | OE2 | 3.367 |
| 1HCV | A_ARG.38  | NH1 | A_ASP.86  | OD1 | 2.863 |
| 1HCV | A_ARG.38  | NH2 | A_GLU.46  | OE2 | 3.573 |
| 1HCV | A_ARG.38  | NH2 | A_ASP.86  | OD1 | 3.820 |
| 1HCV | A_ARG.66  | NH2 | A_ASP.86  | OD1 | 3.579 |
| 1HCV | A_ARG.66  | NH2 | A_ASP.86  | OD2 | 2.581 |
| 1HEZ | A_ARG.24  | NH1 | C_ASP.70  | OD1 | 3.567 |
| 1HEZ | A_ARG.24  | NH1 | C_ASP.70  | OD2 | 3.209 |
| 1HEZ | A_ARG.24  | NH2 | A_ASP.70  | OD1 | 3.267 |
| 1HEZ | A_ARG.24  | NH2 | A_ASP.70  | OD2 | 3.046 |
| 1HEZ | A_ARG.61  | NH2 | A_GLU.81  | OE1 | 2.928 |
| 1HEZ | A_ARG.61  | NH2 | A_ASP.82  | OD1 | 2.762 |
| 1HEZ | A_ARG.61  | NH2 | A_ASP.82  | OD2 | 3.538 |
| 1HEZ | A_LYS.103 | NZ  | A_GLU.165 | OE2 | 3.539 |
| 1HEZ | A_LYS.145 | NZ  | A_GLU.143 | OE1 | 3.528 |
| 1HEZ | A_LYS.145 | NZ  | A_GLU.143 | OE2 | 2.903 |
| 1HEZ | A_LYS.149 | NZ  | A_GLU.195 | OE1 | 2.775 |
| 1HEZ | B_ARG.38  | NH1 | B_ASP.90  | OD1 | 3.118 |
| 1HEZ | B_ARG.38  | NH2 | B_GLU.46  | OE1 | 2.692 |
| 1HEZ | B_ARG.38  | NH2 | B_GLU.46  | OE2 | 3.888 |
| 1HEZ | B_ARG.67  | NH1 | B_ASP.90  | OD1 | 3.575 |
| 1HEZ | B_ARG.67  | NH1 | B_ASP.90  | OD2 | 3.985 |
| 1HEZ | B_ARG.67  | NH2 | B_ASP.90  | OD1 | 3.231 |
| 1HEZ | B_ARG.67  | NH2 | B_ASP.90  | OD2 | 2.419 |
| 1HEZ | B_LYS.98  | NZ  | B_ASP.109 | OD1 | 3.274 |
| 1HEZ | B_LYS.98  | NZ  | B_ASP.109 | OD2 | 3.047 |
| 1HEZ | B_HIS.205 | NE2 | B_ASP.220 | OD2 | 3.169 |
| 1HEZ | B_LYS.219 | NZ  | A_GLU.123 | OE1 | 2.923 |
| 1HEZ | B_LYS.219 | NZ  | A_GLU.123 | OE2 | 2.722 |
| 1HEZ | C_ARG.24  | NH1 | E_ASP.855 | OD1 | 2.717 |
| 1HEZ | C_ARG.61  | NH2 | C_GLU.81  | OE1 | 3.663 |
| 1HEZ | C_ARG.61  | NH2 | C_GLU.81  | OE2 | 3.949 |
| 1HEZ | C_ARG.61  | NH2 | C_ASP.82  | OD1 | 2.937 |
| 1HEZ | C_ARG.61  | NH2 | C_ASP.82  | OD2 | 3.542 |
| 1HEZ | C_LYS.103 | NZ  | C_GLU.165 | OE1 | 2.714 |
| 1HEZ | C_LYS.107 | NZ  | E_ASP.867 | OD1 | 2.620 |
| 1HEZ | C_LYS.149 | NZ  | C_GLU.195 | OE2 | 3.147 |
| 1HEZ | C_LYS.169 | NZ  | C_ASP.167 | OD1 | 3.018 |
| 1HEZ | C_LYS.169 | NZ  | C_ASP.167 | OD2 | 3.798 |
| 1HEZ | C_LYS.183 | NZ  | C_GLU.187 | OE1 | 3.073 |
| 1HEZ | C_LYS.183 | NZ  | C_GLU.187 | OE2 | 3.001 |
| 1HEZ | C_LYS.190 | NZ  | C_GLU.213 | OE1 | 3.539 |
| 1HEZ | D_ARG.38  | NH1 | D_ASP.90  | OD1 | 2.991 |
| 1HEZ | D_ARG.38  | NH2 | D_GLU.46  | OE1 | 3.960 |
| 1HEZ | D_ARG.38  | NH2 | D_GLU.46  | OE2 | 3.492 |
| 1HEZ | D_ARG.38  | NH2 | D_ASP.90  | OD1 | 3.798 |
| 1HEZ | D_ARG.67  | NH1 | D_ASP.90  | OD1 | 3.763 |
| 1HEZ | D_ARG.67  | NH1 | D_ASP.90  | OD2 | 2.714 |
| 1HEZ | D_ARG.67  | NH2 | D_ASP.90  | OD1 | 2.942 |
| 1HEZ | D_ARG.67  | NH2 | D_ASP.90  | OD2 | 3.444 |
| 1HEZ | D_LYS.76  | NZ  | D_ASP.73  | OD1 | 3.956 |
| 1HEZ | D_LYS.76  | NZ  | D_ASP.73  | OD2 | 3.200 |
| 1HEZ | D_LYS.98  | NZ  | D_ASP.109 | OD1 | 2.982 |
| 1HEZ | D_LYS.98  | NZ  | D_ASP.109 | OD2 | 3.292 |

|      |           |     |           |     |       |
|------|-----------|-----|-----------|-----|-------|
| 1HEZ | D_LYS_163 | NZ  | D_ASP_169 | OD1 | 2.707 |
| 1HEZ | D_LYS_163 | NZ  | D_ASP_169 | OD2 | 2.741 |
| 1HEZ | D_HIS_205 | NE2 | D_ASP_220 | OD1 | 3.150 |
| 1HEZ | D_HIS_205 | NE2 | D_ASP_220 | OD2 | 3.664 |
| 1HEZ | E_ARG_852 | NH1 | E_GLU_849 | OE1 | 2.953 |
| 1HEZ | E_ARG_852 | NH1 | E_GLU_849 | OE2 | 2.803 |
| 1HEZ | E_ARG_852 | NH2 | E_GLU_849 | OE2 | 3.099 |
| 1HEZ | E_HIS_874 | NE2 | E_GLU_869 | OE2 | 3.386 |
| 1HGD | A_LYS_27  | NZ  | B_GLU_97  | OE1 | 2.787 |
| 1HGD | A_LYS_27  | NZ  | B_GLU_97  | OE2 | 2.801 |
| 1HGD | A_LYS_50  | NZ  | A_ASP_275 | OD1 | 3.503 |
| 1HGD | A_LYS_50  | NZ  | A_ASP_275 | OD2 | 2.699 |
| 1HGD | A_ARG_57  | NH2 | A_GLU_82  | OE1 | 2.541 |
| 1HGD | A_ARG_57  | NH2 | A_GLU_82  | OE2 | 3.602 |
| 1HGD | A_HIS_75  | ND1 | A_ASP_73  | OD1 | 2.825 |
| 1HGD | A_HIS_75  | ND1 | A_ASP_73  | OD2 | 3.404 |
| 1HGD | A_HIS_75  | NE2 | A_ASP_63  | OD1 | 3.503 |
| 1HGD | A_ARG_90  | NH2 | A_ASP_60  | OD1 | 3.606 |
| 1HGD | A_ARG_90  | NH2 | A_ASP_60  | OD2 | 2.804 |
| 1HGD | A_ARG_109 | NH1 | A_GLU_89  | OE1 | 2.520 |
| 1HGD | A_ARG_109 | NH1 | A_GLU_89  | OE2 | 3.261 |
| 1HGD | A_ARG_109 | NH2 | B_GLU_67  | OE1 | 3.474 |
| 1HGD | A_ARG_109 | NH2 | B_GLU_67  | OE2 | 2.826 |
| 1HGD | A_ARG_141 | NH2 | A_ASP_77  | OD1 | 2.863 |
| 1HGD | A_ARG_141 | NH2 | A_ASP_77  | OD2 | 2.743 |
| 1HGD | A_LYS_176 | NZ  | A_GLU_123 | OE2 | 2.689 |
| 1HGD | A_HIS_183 | NE2 | A_GLU_190 | OE2 | 3.734 |
| 1HGD | A_LYS_238 | NZ  | F_GLU_72  | OE1 | 2.925 |
| 1HGD | A_LYS_238 | NZ  | F_GLU_72  | OE2 | 2.815 |
| 1HGD | A_ARG_261 | NH1 | A_GLU_119 | OE2 | 2.647 |
| 1HGD | A_ARG_261 | NH2 | A_GLU_119 | OE1 | 2.879 |
| 1HGD | A_ARG_261 | NH2 | A_GLU_119 | OE2 | 2.926 |
| 1HGD | A_LYS_264 | NZ  | A_ASP_85  | OD1 | 3.573 |
| 1HGD | A_LYS_264 | NZ  | A_ASP_85  | OD2 | 2.845 |
| 1HGD | A_ARG_269 | NH1 | B_GLU_67  | OE1 | 2.758 |
| 1HGD | A_ARG_269 | NH2 | B_GLU_67  | OE1 | 3.754 |
| 1HGD | A_LYS_292 | NZ  | A_ASP_291 | OD1 | 2.852 |
| 1HGD | A_LYS_292 | NZ  | A_ASP_291 | OD2 | 2.779 |
| 1HGD | A_LYS_299 | NZ  | B_GLU_69  | OE2 | 2.769 |
| 1HGD | A_LYS_310 | NZ  | B_ASP_86  | OD1 | 2.861 |
| 1HGD | A_LYS_310 | NZ  | B_ASP_90  | OD1 | 2.569 |
| 1HGD | A_LYS_315 | NZ  | A_GLU_41  | OE1 | 2.760 |
| 1HGD | A_LYS_326 | NZ  | A_GLU_325 | OE1 | 3.012 |
| 1HGD | A_LYS_326 | NZ  | B_GLU_15  | OE1 | 3.037 |
| 1HGD | A_LYS_326 | NZ  | B_GLU_15  | OE2 | 2.743 |
| 1HGD | B_ARG_25  | NH1 | A_GLU_325 | OE2 | 3.743 |
| 1HGD | B_ARG_25  | NH2 | A_GLU_325 | OE2 | 3.016 |
| 1HGD | B_LYS_51  | NZ  | B_GLU_103 | OE1 | 2.725 |
| 1HGD | B_ARG_54  | NH1 | B_GLU_57  | OE1 | 2.860 |
| 1HGD | B_ARG_54  | NH1 | B_GLU_57  | OE2 | 2.845 |
| 1HGD | B_ARG_54  | NH1 | F_GLU_97  | OE2 | 3.275 |
| 1HGD | B_ARG_54  | NH2 | F_GLU_97  | OE2 | 2.774 |
| 1HGD | B_LYS_58  | NZ  | B_GLU_61  | OE2 | 2.905 |
| 1HGD | B_LYS_62  | NZ  | F_ASP_86  | OD1 | 2.852 |
| 1HGD | B_LYS_62  | NZ  | F_ASP_86  | OD2 | 2.612 |
| 1HGD | B_LYS_62  | NZ  | F_ASP_90  | OD1 | 3.620 |
| 1HGD | B_LYS_62  | NZ  | F_ASP_90  | OD2 | 2.727 |
| 1HGD | B_LYS_68  | NZ  | B_GLU_85  | OE1 | 3.140 |

|      |           |     |           |     |       |
|------|-----------|-----|-----------|-----|-------|
| 1HGD | B_LYS_68  | NZ  | B_GLU_85  | OE2 | 2.759 |
| 1HGD | B_ARG_76  | NH1 | D_GLU_74  | OE1 | 3.558 |
| 1HGD | B_ARG_76  | NH1 | D_GLU_74  | OE2 | 2.838 |
| 1HGD | B_ARG_76  | NH2 | D_GLU_74  | OE1 | 2.751 |
| 1HGD | B_ARG_76  | NH2 | D_GLU_74  | OE2 | 3.529 |
| 1HGD | B_ARG_76  | NH2 | D_GLU_81  | OE1 | 2.707 |
| 1HGD | B_ARG_76  | NH2 | D_GLU_81  | OE2 | 3.498 |
| 1HGD | B_LYS_117 | NZ  | B_GLU_114 | OE1 | 2.958 |
| 1HGD | B_LYS_117 | NZ  | B_GLU_114 | OE2 | 2.520 |
| 1HGD | B_ARG_123 | NH1 | B_GLU_120 | OE1 | 2.589 |
| 1HGD | B_ARG_123 | NH1 | B_GLU_120 | OE2 | 2.787 |
| 1HGD | B_ARG_123 | NH2 | F_GLU_132 | OE1 | 3.169 |
| 1HGD | B_ARG_124 | NH1 | B_GLU_120 | OE1 | 3.722 |
| 1HGD | B_ARG_124 | NH2 | F_GLU_132 | OE1 | 3.011 |
| 1HGD | B_ARG_124 | NH2 | F_GLU_132 | OE2 | 3.294 |
| 1HGD | B_ARG_127 | NH1 | F_GLU_131 | OE1 | 2.471 |
| 1HGD | B_LYS_143 | NZ  | B_ASP_145 | OD2 | 2.849 |
| 1HGD | B_ARG_153 | NH1 | B_GLU_150 | OE1 | 2.627 |
| 1HGD | B_HIS_159 | NE2 | B_ASP_160 | OD2 | 3.135 |
| 1HGD | B_ARG_163 | NH2 | F_GLU_131 | OE1 | 2.583 |
| 1HGD | B_ARG_163 | NH2 | F_GLU_131 | OE2 | 2.596 |
| 1HGD | B_ARG_170 | NH1 | B_GLU_131 | OE2 | 2.779 |
| 1HGD | B_ARG_170 | NH1 | D_GLU_128 | OE1 | 3.354 |
| 1HGD | B_ARG_170 | NH1 | D_GLU_128 | OE2 | 3.628 |
| 1HGD | B_ARG_170 | NH2 | B_GLU_128 | OE2 | 2.668 |
| 1HGD | B_LYS_174 | NZ  | D_ASP_164 | OD1 | 2.787 |
| 1HGD | B_LYS_174 | NZ  | D_ASP_164 | OD2 | 2.517 |
| 1HGD | C_LYS_27  | NZ  | D_GLU_97  | OE1 | 2.760 |
| 1HGD | C_LYS_27  | NZ  | D_GLU_97  | OE2 | 2.799 |
| 1HGD | C_LYS_50  | NZ  | C_ASP_275 | OD1 | 3.482 |
| 1HGD | C_LYS_50  | NZ  | C_ASP_275 | OD2 | 2.664 |
| 1HGD | C_ARG_57  | NH2 | C_GLU_82  | OE1 | 2.562 |
| 1HGD | C_ARG_57  | NH2 | C_GLU_82  | OE2 | 3.993 |
| 1HGD | C_HIS_75  | ND1 | C_ASP_73  | OD1 | 2.767 |
| 1HGD | C_HIS_75  | ND1 | C_ASP_73  | OD2 | 3.384 |
| 1HGD | C_HIS_75  | NE2 | C_ASP_63  | OD1 | 3.497 |
| 1HGD | C_ARG_90  | NH2 | C_ASP_60  | OD1 | 3.613 |
| 1HGD | C_ARG_90  | NH2 | C_ASP_60  | OD2 | 2.775 |
| 1HGD | C_ARG_109 | NH1 | C_GLU_89  | OE1 | 2.543 |
| 1HGD | C_ARG_109 | NH1 | C_GLU_89  | OE2 | 3.286 |
| 1HGD | C_ARG_109 | NH2 | D_GLU_67  | OE1 | 3.480 |
| 1HGD | C_ARG_109 | NH2 | D_GLU_67  | OE2 | 2.867 |
| 1HGD | C_ARG_141 | NH2 | C_ASP_77  | OD1 | 2.873 |
| 1HGD | C_ARG_141 | NH2 | C_ASP_77  | OD2 | 2.747 |
| 1HGD | C_LYS_176 | NZ  | C_GLU_123 | OE2 | 2.693 |
| 1HGD | C_HIS_183 | NE2 | C_GLU_190 | OE2 | 3.721 |
| 1HGD | C_LYS_238 | NZ  | B_GLU_72  | OE1 | 2.801 |
| 1HGD | C_LYS_238 | NZ  | B_GLU_72  | OE2 | 2.746 |
| 1HGD | C_ARG_261 | NH1 | C_GLU_119 | OE2 | 2.657 |
| 1HGD | C_ARG_261 | NH2 | C_GLU_119 | OE1 | 2.896 |
| 1HGD | C_ARG_261 | NH2 | C_GLU_119 | OE2 | 2.924 |
| 1HGD | C_LYS_264 | NZ  | C_ASP_85  | OD1 | 3.582 |
| 1HGD | C_LYS_264 | NZ  | C_ASP_85  | OD2 | 2.818 |
| 1HGD | C_ARG_269 | NH1 | D_GLU_67  | OE1 | 2.720 |
| 1HGD | C_ARG_269 | NH2 | D_GLU_67  | OE1 | 3.733 |
| 1HGD | C_LYS_292 | NZ  | C_ASP_291 | OD1 | 2.883 |
| 1HGD | C_LYS_292 | NZ  | C_ASP_291 | OD2 | 2.789 |
| 1HGD | C_LYS_299 | NZ  | D_GLU_69  | OE2 | 2.796 |

|      |           |     |           |     |       |
|------|-----------|-----|-----------|-----|-------|
| 1HGD | C_LYS_310 | NZ  | D_ASP_86  | OD1 | 2.878 |
| 1HGD | C_LYS_310 | NZ  | D_ASP_90  | OD1 | 2.526 |
| 1HGD | C_LYS_315 | NZ  | C_GLU_41  | OE1 | 2.785 |
| 1HGD | C_LYS_326 | NZ  | D_GLU_15  | OE1 | 2.784 |
| 1HGD | C_LYS_326 | NZ  | D_GLU_15  | OE2 | 3.881 |
| 1HGD | D_LYS_51  | NZ  | D_GLU_103 | OE1 | 2.736 |
| 1HGD | D_ARG_54  | NH1 | B_GLU_97  | OE2 | 3.293 |
| 1HGD | D_ARG_54  | NH1 | D_GLU_57  | OE1 | 2.846 |
| 1HGD | D_ARG_54  | NH1 | D_GLU_57  | OE2 | 2.834 |
| 1HGD | D_ARG_54  | NH2 | B_GLU_97  | OE2 | 2.793 |
| 1HGD | D_LYS_58  | NZ  | D_GLU_61  | OE2 | 2.900 |
| 1HGD | D_LYS_62  | NZ  | B_ASP_86  | OD1 | 2.884 |
| 1HGD | D_LYS_62  | NZ  | B_ASP_86  | OD2 | 2.567 |
| 1HGD | D_LYS_62  | NZ  | B_ASP_90  | OD1 | 3.576 |
| 1HGD | D_LYS_62  | NZ  | B_ASP_90  | OD2 | 2.617 |
| 1HGD | D_LYS_68  | NZ  | D_GLU_85  | OE1 | 3.140 |
| 1HGD | D_LYS_68  | NZ  | D_GLU_85  | OE2 | 2.777 |
| 1HGD | D_ARG_76  | NH1 | F_GLU_74  | OE1 | 3.379 |
| 1HGD | D_ARG_76  | NH1 | F_GLU_74  | OE2 | 2.785 |
| 1HGD | D_ARG_76  | NH2 | F_GLU_74  | OE1 | 2.687 |
| 1HGD | D_ARG_76  | NH2 | F_GLU_74  | OE2 | 3.593 |
| 1HGD | D_ARG_76  | NH2 | F_GLU_81  | OE1 | 2.649 |
| 1HGD | D_ARG_76  | NH2 | F_GLU_81  | OE2 | 3.537 |
| 1HGD | D_LYS_117 | NZ  | D_GLU_114 | OE1 | 3.015 |
| 1HGD | D_LYS_117 | NZ  | D_GLU_114 | OE2 | 2.569 |
| 1HGD | D_ARG_123 | NH1 | D_GLU_120 | OE1 | 2.582 |
| 1HGD | D_ARG_123 | NH1 | D_GLU_120 | OE2 | 2.804 |
| 1HGD | D_ARG_123 | NH2 | B_GLU_132 | OE1 | 3.120 |
| 1HGD | D_ARG_124 | NH1 | D_GLU_120 | OE1 | 3.720 |
| 1HGD | D_ARG_124 | NH2 | B_GLU_132 | OE1 | 2.998 |
| 1HGD | D_ARG_124 | NH2 | B_GLU_132 | OE2 | 3.261 |
| 1HGD | D_ARG_127 | NH1 | B_GLU_131 | OE1 | 2.513 |
| 1HGD | D_LYS_143 | NZ  | D_ASP_145 | OD2 | 2.863 |
| 1HGD | D_ARG_153 | NH1 | D_GLU_150 | OE1 | 2.616 |
| 1HGD | D_HIS_159 | NE2 | D_ASP_160 | OD2 | 3.164 |
| 1HGD | D_ARG_163 | NH2 | B_GLU_131 | OE1 | 2.583 |
| 1HGD | D_ARG_163 | NH2 | B_GLU_131 | OE2 | 2.616 |
| 1HGD | D_ARG_170 | NH1 | D_GLU_131 | OE2 | 2.771 |
| 1HGD | D_ARG_170 | NH1 | F_GLU_128 | OE1 | 3.487 |
| 1HGD | D_ARG_170 | NH1 | F_GLU_128 | OE2 | 3.741 |
| 1HGD | D_ARG_170 | NH2 | D_GLU_128 | OE2 | 2.697 |
| 1HGD | D_LYS_174 | NZ  | F_ASP_164 | OD1 | 2.806 |
| 1HGD | D_LYS_174 | NZ  | F_ASP_164 | OD2 | 2.686 |
| 1HGD | E_LYS_27  | NZ  | F_GLU_97  | OE1 | 2.794 |
| 1HGD | E_LYS_27  | NZ  | F_GLU_97  | OE2 | 2.792 |
| 1HGD | E_LYS_50  | NZ  | E_ASP_275 | OD1 | 3.496 |
| 1HGD | E_LYS_50  | NZ  | E_ASP_275 | OD2 | 2.695 |
| 1HGD | E_ARG_57  | NH2 | E_GLU_82  | OE1 | 2.588 |
| 1HGD | E_HIS_75  | ND1 | E_ASP_73  | OD1 | 2.791 |
| 1HGD | E_HIS_75  | ND1 | E_ASP_73  | OD2 | 3.377 |
| 1HGD | E_HIS_75  | NE2 | E_ASP_63  | OD1 | 3.540 |
| 1HGD | E_ARG_90  | NH2 | E_ASP_60  | OD1 | 3.606 |
| 1HGD | E_ARG_90  | NH2 | E_ASP_60  | OD2 | 2.820 |
| 1HGD | E_ARG_109 | NH1 | E_GLU_89  | OE1 | 2.520 |
| 1HGD | E_ARG_109 | NH1 | E_GLU_89  | OE2 | 3.279 |
| 1HGD | E_ARG_109 | NH2 | F_GLU_67  | OE1 | 3.474 |
| 1HGD | E_ARG_109 | NH2 | F_GLU_67  | OE2 | 2.818 |
| 1HGD | E_ARG_141 | NH2 | E_ASP_77  | OD1 | 2.875 |

|      |           |     |           |     |       |
|------|-----------|-----|-----------|-----|-------|
| 1HGD | E_ARG_141 | NH2 | E_ASP_77  | OD2 | 2.746 |
| 1HGD | E_LYS_176 | NZ  | E_GLU_123 | OE2 | 2.694 |
| 1HGD | E_HIS_183 | NE2 | E_GLU_190 | OE2 | 3.738 |
| 1HGD | E_LYS_238 | NZ  | D_GLU_72  | OE1 | 2.872 |
| 1HGD | E_LYS_238 | NZ  | D_GLU_72  | OE2 | 2.843 |
| 1HGD | E_ARG_261 | NH1 | E_GLU_119 | OE2 | 2.644 |
| 1HGD | E_ARG_261 | NH2 | E_GLU_119 | OE1 | 2.878 |
| 1HGD | E_ARG_261 | NH2 | E_GLU_119 | OE2 | 2.908 |
| 1HGD | E_LYS_264 | NZ  | E_ASP_85  | OD1 | 3.622 |
| 1HGD | E_LYS_264 | NZ  | E_ASP_85  | OD2 | 2.868 |
| 1HGD | E_ARG_269 | NH1 | F_GLU_67  | OE1 | 2.732 |
| 1HGD | E_ARG_269 | NH2 | F_GLU_67  | OE1 | 3.760 |
| 1HGD | E_LYS_292 | NZ  | E_ASP_291 | OD1 | 2.887 |
| 1HGD | E_LYS_292 | NZ  | E_ASP_291 | OD2 | 2.826 |
| 1HGD | E_LYS_299 | NZ  | F_GLU_69  | OE2 | 2.767 |
| 1HGD | E_LYS_310 | NZ  | F_ASP_86  | OD1 | 2.884 |
| 1HGD | E_LYS_310 | NZ  | F_ASP_90  | OD1 | 2.533 |
| 1HGD | E_LYS_315 | NZ  | E_GLU_41  | OE1 | 2.761 |
| 1HGD | E_LYS_326 | NZ  | F_GLU_15  | OE1 | 2.967 |
| 1HGD | E_LYS_326 | NZ  | F_GLU_15  | OE2 | 3.203 |
| 1HGD | F_LYS_51  | NZ  | F_GLU_103 | OE1 | 2.718 |
| 1HGD | F_ARG_54  | NH1 | D_GLU_97  | OE2 | 3.306 |
| 1HGD | F_ARG_54  | NH1 | F_GLU_57  | OE1 | 2.855 |
| 1HGD | F_ARG_54  | NH1 | F_GLU_57  | OE2 | 2.837 |
| 1HGD | F_ARG_54  | NH2 | D_GLU_97  | OE2 | 2.719 |
| 1HGD | F_LYS_58  | NZ  | F_GLU_61  | OE2 | 2.922 |
| 1HGD | F_LYS_62  | NZ  | D_ASP_86  | OD1 | 2.854 |
| 1HGD | F_LYS_62  | NZ  | D_ASP_86  | OD2 | 2.590 |
| 1HGD | F_LYS_62  | NZ  | D_ASP_90  | OD1 | 3.656 |
| 1HGD | F_LYS_62  | NZ  | D_ASP_90  | OD2 | 2.713 |
| 1HGD | F_HIS_64  | NE2 | D_ASP_79  | OD2 | 3.996 |
| 1HGD | F_LYS_68  | NZ  | F_GLU_85  | OE1 | 3.116 |
| 1HGD | F_LYS_68  | NZ  | F_GLU_85  | OE2 | 2.719 |
| 1HGD | F_ARG_76  | NH1 | B_GLU_74  | OE1 | 3.419 |
| 1HGD | F_ARG_76  | NH1 | B_GLU_74  | OE2 | 2.766 |
| 1HGD | F_ARG_76  | NH2 | B_GLU_74  | OE1 | 2.711 |
| 1HGD | F_ARG_76  | NH2 | B_GLU_74  | OE2 | 3.568 |
| 1HGD | F_ARG_76  | NH2 | B_GLU_81  | OE1 | 2.637 |
| 1HGD | F_ARG_76  | NH2 | B_GLU_81  | OE2 | 3.557 |
| 1HGD | F_LYS_117 | NZ  | F_GLU_114 | OE1 | 3.015 |
| 1HGD | F_LYS_117 | NZ  | F_GLU_114 | OE2 | 2.552 |
| 1HGD | F_ARG_123 | NH1 | F_GLU_120 | OE1 | 2.598 |
| 1HGD | F_ARG_123 | NH1 | F_GLU_120 | OE2 | 2.770 |
| 1HGD | F_ARG_123 | NH2 | D_GLU_132 | OE1 | 3.156 |
| 1HGD | F_ARG_124 | NH1 | F_GLU_120 | OE1 | 3.728 |
| 1HGD | F_ARG_124 | NH2 | D_GLU_132 | OE1 | 3.098 |
| 1HGD | F_ARG_124 | NH2 | D_GLU_132 | OE2 | 3.292 |
| 1HGD | F_ARG_127 | NH1 | D_GLU_131 | OE1 | 2.558 |
| 1HGD | F_LYS_143 | NZ  | F_ASP_145 | OD2 | 2.843 |
| 1HGD | F_ARG_153 | NH1 | F_GLU_150 | OE2 | 2.541 |
| 1HGD | F_HIS_159 | NE2 | F_ASP_160 | OD2 | 3.168 |
| 1HGD | F_ARG_163 | NH2 | D_GLU_131 | OE1 | 2.583 |
| 1HGD | F_ARG_163 | NH2 | D_GLU_131 | OE2 | 2.699 |
| 1HGD | F_ARG_170 | NH1 | B_GLU_128 | OE1 | 3.398 |
| 1HGD | F_ARG_170 | NH1 | B_GLU_128 | OE2 | 3.736 |
| 1HGD | F_ARG_170 | NH1 | F_GLU_131 | OE2 | 2.763 |
| 1HGD | F_ARG_170 | NH2 | F_GLU_128 | OE2 | 2.704 |
| 1HGD | F_LYS_174 | NZ  | B_ASP_164 | OD1 | 2.545 |

|      |           |     |           |     |       |
|------|-----------|-----|-----------|-----|-------|
| 1HGD | F_LYS_174 | NZ  | B_ASP_164 | OD2 | 2.838 |
| 1HGE | A_LYS_27  | NZ  | B_GLU_97  | OE1 | 2.881 |
| 1HGE | A_LYS_27  | NZ  | B_GLU_97  | OE2 | 2.803 |
| 1HGE | A_LYS_50  | NZ  | A_ASP_275 | OD1 | 3.562 |
| 1HGE | A_LYS_50  | NZ  | A_ASP_275 | OD2 | 2.748 |
| 1HGE | A_ARG_57  | NH2 | A_GLU_82  | OE1 | 2.500 |
| 1HGE | A_ARG_57  | NH2 | A_GLU_82  | OE2 | 3.546 |
| 1HGE | A_HIS_75  | ND1 | A_ASP_73  | OD1 | 2.802 |
| 1HGE | A_HIS_75  | ND1 | A_ASP_73  | OD2 | 3.532 |
| 1HGE | A_HIS_75  | NE2 | A_ASP_63  | OD1 | 3.437 |
| 1HGE | A_ARG_90  | NH2 | A_ASP_60  | OD1 | 3.553 |
| 1HGE | A_ARG_90  | NH2 | A_ASP_60  | OD2 | 2.793 |
| 1HGE | A_ARG_109 | NH1 | A_GLU_89  | OE1 | 2.487 |
| 1HGE | A_ARG_109 | NH1 | A_GLU_89  | OE2 | 3.213 |
| 1HGE | A_ARG_109 | NH2 | B_GLU_67  | OE1 | 3.666 |
| 1HGE | A_ARG_109 | NH2 | B_GLU_67  | OE2 | 2.737 |
| 1HGE | A_ARG_141 | NH2 | A_ASP_77  | OD1 | 2.893 |
| 1HGE | A_ARG_141 | NH2 | A_ASP_77  | OD2 | 2.750 |
| 1HGE | A_LYS_176 | NZ  | A_GLU_123 | OE2 | 2.715 |
| 1HGE | A_HIS_183 | NE2 | A_GLU_190 | OE2 | 3.843 |
| 1HGE | A_LYS_238 | NZ  | F_GLU_72  | OE1 | 2.915 |
| 1HGE | A_LYS_238 | NZ  | F_GLU_72  | OE2 | 2.732 |
| 1HGE | A_ARG_261 | NH1 | A_GLU_119 | OE2 | 2.640 |
| 1HGE | A_ARG_261 | NH2 | A_GLU_119 | OE1 | 2.839 |
| 1HGE | A_ARG_261 | NH2 | A_GLU_119 | OE2 | 2.928 |
| 1HGE | A_LYS_264 | NZ  | A_ASP_85  | OD1 | 3.662 |
| 1HGE | A_LYS_264 | NZ  | A_ASP_85  | OD2 | 2.767 |
| 1HGE | A_ARG_269 | NH1 | B_GLU_67  | OE1 | 2.727 |
| 1HGE | A_ARG_269 | NH2 | B_GLU_67  | OE1 | 3.813 |
| 1HGE | A_LYS_292 | NZ  | A_ASP_291 | OD1 | 2.918 |
| 1HGE | A_LYS_292 | NZ  | A_ASP_291 | OD2 | 2.823 |
| 1HGE | A_LYS_299 | NZ  | B_GLU_69  | OE2 | 2.765 |
| 1HGE | A_LYS_310 | NZ  | B_ASP_86  | OD1 | 2.860 |
| 1HGE | A_LYS_310 | NZ  | B_ASP_90  | OD1 | 2.586 |
| 1HGE | A_LYS_310 | NZ  | B_ASP_90  | OD2 | 3.982 |
| 1HGE | A_LYS_315 | NZ  | A_GLU_41  | OE1 | 2.816 |
| 1HGE | A_LYS_326 | NZ  | A_GLU_325 | OE1 | 2.847 |
| 1HGE | A_LYS_326 | NZ  | B_GLU_15  | OE1 | 3.112 |
| 1HGE | A_LYS_326 | NZ  | B_GLU_15  | OE2 | 2.788 |
| 1HGE | B_ARG_25  | NH1 | A_GLU_325 | OE2 | 3.901 |
| 1HGE | B_ARG_25  | NH2 | A_GLU_325 | OE2 | 3.058 |
| 1HGE | B_LYS_51  | NZ  | B_GLU_103 | OE1 | 2.764 |
| 1HGE | B_ARG_54  | NH1 | B_GLU_57  | OE1 | 2.831 |
| 1HGE | B_ARG_54  | NH1 | B_GLU_57  | OE2 | 2.867 |
| 1HGE | B_ARG_54  | NH1 | F_GLU_97  | OE2 | 3.352 |
| 1HGE | B_ARG_54  | NH2 | F_GLU_97  | OE2 | 2.840 |
| 1HGE | B_LYS_58  | NZ  | B_GLU_61  | OE2 | 3.128 |
| 1HGE | B_LYS_62  | NZ  | F_ASP_86  | OD1 | 2.965 |
| 1HGE | B_LYS_62  | NZ  | F_ASP_86  | OD2 | 2.602 |
| 1HGE | B_LYS_62  | NZ  | F_ASP_90  | OD1 | 3.562 |
| 1HGE | B_LYS_62  | NZ  | F_ASP_90  | OD2 | 2.691 |
| 1HGE | B_LYS_68  | NZ  | B_GLU_85  | OE1 | 3.200 |
| 1HGE | B_LYS_68  | NZ  | B_GLU_85  | OE2 | 2.780 |
| 1HGE | B_ARG_76  | NH1 | D_GLU_74  | OE1 | 3.487 |
| 1HGE | B_ARG_76  | NH1 | D_GLU_74  | OE2 | 2.838 |
| 1HGE | B_ARG_76  | NH2 | D_GLU_74  | OE1 | 2.788 |
| 1HGE | B_ARG_76  | NH2 | D_GLU_74  | OE2 | 3.585 |
| 1HGE | B_ARG_76  | NH2 | D_GLU_81  | OE1 | 2.698 |

|      |           |     |           |     |       |
|------|-----------|-----|-----------|-----|-------|
| 1HGE | B_ARG_76  | NH2 | D_GLU_81  | OE2 | 3.486 |
| 1HGE | B_LYS_117 | NZ  | B_GLU_114 | OE1 | 3.021 |
| 1HGE | B_LYS_117 | NZ  | B_GLU_114 | OE2 | 2.593 |
| 1HGE | B_ARG_123 | NH1 | B_GLU_120 | OE1 | 2.560 |
| 1HGE | B_ARG_123 | NH1 | B_GLU_120 | OE2 | 2.842 |
| 1HGE | B_ARG_123 | NH2 | F_GLU_132 | OE1 | 3.159 |
| 1HGE | B_ARG_124 | NH1 | B_GLU_120 | OE1 | 3.659 |
| 1HGE | B_ARG_124 | NH2 | F_GLU_132 | OE1 | 3.028 |
| 1HGE | B_ARG_124 | NH2 | F_GLU_132 | OE2 | 3.444 |
| 1HGE | B_ARG_127 | NH1 | F_GLU_131 | OE1 | 2.492 |
| 1HGE | B_LYS_143 | NZ  | B_ASP_145 | OD2 | 2.791 |
| 1HGE | B_ARG_153 | NH1 | B_GLU_150 | OE1 | 2.552 |
| 1HGE | B_HIS_159 | NE2 | B_ASP_160 | OD2 | 2.984 |
| 1HGE | B_ARG_163 | NH2 | F_GLU_131 | OE1 | 2.609 |
| 1HGE | B_ARG_163 | NH2 | F_GLU_131 | OE2 | 2.622 |
| 1HGE | B_ARG_170 | NH1 | B_GLU_131 | OE2 | 2.795 |
| 1HGE | B_ARG_170 | NH1 | D_GLU_128 | OE1 | 3.351 |
| 1HGE | B_ARG_170 | NH1 | D_GLU_128 | OE2 | 3.595 |
| 1HGE | B_ARG_170 | NH2 | B_GLU_128 | OE2 | 2.691 |
| 1HGE | B_LYS_174 | NZ  | D_ASP_164 | OD1 | 2.542 |
| 1HGE | B_LYS_174 | NZ  | D_ASP_164 | OD2 | 2.784 |
| 1HGE | C_LYS_27  | NZ  | D_GLU_97  | OE1 | 2.850 |
| 1HGE | C_LYS_27  | NZ  | D_GLU_97  | OE2 | 2.792 |
| 1HGE | C_LYS_50  | NZ  | C_ASP_275 | OD1 | 3.553 |
| 1HGE | C_LYS_50  | NZ  | C_ASP_275 | OD2 | 2.700 |
| 1HGE | C_ARG_57  | NH2 | C_GLU_82  | OE1 | 2.538 |
| 1HGE | C_ARG_57  | NH2 | C_GLU_82  | OE2 | 3.923 |
| 1HGE | C_HIS_75  | ND1 | C_ASP_73  | OD1 | 2.756 |
| 1HGE | C_HIS_75  | ND1 | C_ASP_73  | OD2 | 3.513 |
| 1HGE | C_HIS_75  | NE2 | C_ASP_63  | OD1 | 3.447 |
| 1HGE | C_ARG_90  | NH2 | C_ASP_60  | OD1 | 3.557 |
| 1HGE | C_ARG_90  | NH2 | C_ASP_60  | OD2 | 2.770 |
| 1HGE | C_ARG_109 | NH1 | C_GLU_89  | OE1 | 2.521 |
| 1HGE | C_ARG_109 | NH1 | C_GLU_89  | OE2 | 3.282 |
| 1HGE | C_ARG_109 | NH2 | D_GLU_67  | OE1 | 3.673 |
| 1HGE | C_ARG_109 | NH2 | D_GLU_67  | OE2 | 2.784 |
| 1HGE | C_ARG_141 | NH2 | C_ASP_77  | OD1 | 2.880 |
| 1HGE | C_ARG_141 | NH2 | C_ASP_77  | OD2 | 2.743 |
| 1HGE | C_LYS_176 | NZ  | C_GLU_123 | OE2 | 2.713 |
| 1HGE | C_HIS_183 | NE2 | C_GLU_190 | OE2 | 3.847 |
| 1HGE | C_LYS_238 | NZ  | B_GLU_72  | OE1 | 2.779 |
| 1HGE | C_LYS_238 | NZ  | B_GLU_72  | OE2 | 2.668 |
| 1HGE | C_ARG_261 | NH1 | C_GLU_119 | OE2 | 2.652 |
| 1HGE | C_ARG_261 | NH2 | C_GLU_119 | OE1 | 2.839 |
| 1HGE | C_ARG_261 | NH2 | C_GLU_119 | OE2 | 2.930 |
| 1HGE | C_LYS_264 | NZ  | C_ASP_85  | OD1 | 3.674 |
| 1HGE | C_LYS_264 | NZ  | C_ASP_85  | OD2 | 2.771 |
| 1HGE | C_ARG_269 | NH1 | D_GLU_67  | OE1 | 2.720 |
| 1HGE | C_ARG_269 | NH2 | D_GLU_67  | OE1 | 3.811 |
| 1HGE | C_LYS_292 | NZ  | C_ASP_291 | OD1 | 2.950 |
| 1HGE | C_LYS_292 | NZ  | C_ASP_291 | OD2 | 2.836 |
| 1HGE | C_LYS_299 | NZ  | D_GLU_69  | OE2 | 2.808 |
| 1HGE | C_LYS_310 | NZ  | D_ASP_86  | OD1 | 2.890 |
| 1HGE | C_LYS_310 | NZ  | D_ASP_90  | OD1 | 2.566 |
| 1HGE | C_LYS_310 | NZ  | D_ASP_90  | OD2 | 3.955 |
| 1HGE | C_LYS_315 | NZ  | C_GLU_41  | OE1 | 2.819 |
| 1HGE | C_LYS_326 | NZ  | D_GLU_15  | OE1 | 2.739 |
| 1HGE | C_LYS_326 | NZ  | D_GLU_15  | OE2 | 3.731 |



|      |           |     |           |     |       |
|------|-----------|-----|-----------|-----|-------|
| 1HGE | D_LYS_51  | NZ  | D_GLU_103 | OE1 | 2.765 |
| 1HGE | D_ARG_54  | NH1 | B_GLU_97  | OE2 | 3.383 |
| 1HGE | D_ARG_54  | NH1 | D_GLU_57  | OE1 | 2.823 |
| 1HGE | D_ARG_54  | NH1 | D_GLU_57  | OE2 | 2.877 |
| 1HGE | D_ARG_54  | NH2 | B_GLU_97  | OE2 | 2.866 |
| 1HGE | D_LYS_58  | NZ  | D_GLU_61  | OE2 | 3.115 |
| 1HGE | D_LYS_62  | NZ  | B_ASP_86  | OD1 | 3.023 |
| 1HGE | D_LYS_62  | NZ  | B_ASP_86  | OD2 | 2.550 |
| 1HGE | D_LYS_62  | NZ  | B_ASP_90  | OD1 | 3.565 |
| 1HGE | D_LYS_62  | NZ  | B_ASP_90  | OD2 | 2.627 |
| 1HGE | D_LYS_68  | NZ  | D_GLU_85  | OE1 | 3.196 |
| 1HGE | D_LYS_68  | NZ  | D_GLU_85  | OE2 | 2.796 |
| 1HGE | D_ARG_76  | NH1 | F_GLU_74  | OE1 | 3.355 |
| 1HGE | D_ARG_76  | NH1 | F_GLU_74  | OE2 | 2.783 |
| 1HGE | D_ARG_76  | NH2 | F_GLU_74  | OE1 | 2.745 |
| 1HGE | D_ARG_76  | NH2 | F_GLU_74  | OE2 | 3.636 |
| 1HGE | D_ARG_76  | NH2 | F_GLU_81  | OE1 | 2.634 |
| 1HGE | D_ARG_76  | NH2 | F_GLU_81  | OE2 | 3.497 |
| 1HGE | D_LYS_117 | NZ  | D_GLU_114 | OE1 | 3.039 |
| 1HGE | D_LYS_117 | NZ  | D_GLU_114 | OE2 | 2.617 |
| 1HGE | D_ARG_123 | NH1 | D_GLU_120 | OE1 | 2.560 |
| 1HGE | D_ARG_123 | NH1 | D_GLU_120 | OE2 | 2.826 |
| 1HGE | D_ARG_123 | NH2 | B_GLU_132 | OE1 | 3.118 |
| 1HGE | D_ARG_124 | NH1 | D_GLU_120 | OE1 | 3.700 |
| 1HGE | D_ARG_124 | NH2 | B_GLU_132 | OE1 | 3.002 |
| 1HGE | D_ARG_124 | NH2 | B_GLU_132 | OE2 | 3.417 |
| 1HGE | D_ARG_127 | NH1 | B_GLU_131 | OE1 | 2.524 |
| 1HGE | D_LYS_143 | NZ  | D_ASP_145 | OD2 | 2.817 |
| 1HGE | D_ARG_153 | NH1 | D_GLU_150 | OE2 | 2.568 |
| 1HGE | D_HIS_159 | NE2 | D_ASP_160 | OD2 | 3.004 |
| 1HGE | D_ARG_163 | NH2 | B_GLU_131 | OE1 | 2.587 |
| 1HGE | D_ARG_163 | NH2 | B_GLU_131 | OE2 | 2.600 |
| 1HGE | D_ARG_170 | NH1 | D_GLU_131 | OE2 | 2.790 |
| 1HGE | D_ARG_170 | NH1 | F_GLU_128 | OE1 | 3.477 |
| 1HGE | D_ARG_170 | NH1 | F_GLU_128 | OE2 | 3.701 |
| 1HGE | D_ARG_170 | NH2 | D_GLU_128 | OE2 | 2.719 |
| 1HGE | D_LYS_174 | NZ  | F_ASP_164 | OD1 | 2.678 |
| 1HGE | D_LYS_174 | NZ  | F_ASP_164 | OD2 | 2.785 |
| 1HGE | E_LYS_27  | NZ  | F_GLU_97  | OE1 | 2.844 |
| 1HGE | E_LYS_27  | NZ  | F_GLU_97  | OE2 | 2.791 |
| 1HGE | E_LYS_50  | NZ  | E_ASP_275 | OD1 | 3.556 |
| 1HGE | E_LYS_50  | NZ  | E_ASP_275 | OD2 | 2.730 |
| 1HGE | E_ARG_57  | NH2 | E_GLU_82  | OE1 | 2.607 |
| 1HGE | E_ARG_57  | NH2 | E_GLU_82  | OE2 | 3.970 |
| 1HGE | E_HIS_75  | ND1 | E_ASP_73  | OD1 | 2.770 |
| 1HGE | E_HIS_75  | ND1 | E_ASP_73  | OD2 | 3.474 |
| 1HGE | E_HIS_75  | NE2 | E_ASP_63  | OD1 | 3.473 |
| 1HGE | E_ARG_90  | NH2 | E_ASP_60  | OD1 | 3.571 |
| 1HGE | E_ARG_90  | NH2 | E_ASP_60  | OD2 | 2.802 |
| 1HGE | E_ARG_109 | NH1 | E_GLU_89  | OE1 | 2.498 |
| 1HGE | E_ARG_109 | NH1 | E_GLU_89  | OE2 | 3.250 |
| 1HGE | E_ARG_109 | NH2 | F_GLU_67  | OE1 | 3.658 |
| 1HGE | E_ARG_109 | NH2 | F_GLU_67  | OE2 | 2.776 |
| 1HGE | E_ARG_141 | NH2 | E_ASP_77  | OD1 | 2.913 |
| 1HGE | E_ARG_141 | NH2 | E_ASP_77  | OD2 | 2.749 |
| 1HGE | E_LYS_176 | NZ  | E_GLU_123 | OE2 | 2.730 |
| 1HGE | E_HIS_183 | NE2 | E_GLU_190 | OE2 | 3.836 |
| 1HGE | E_LYS_238 | NZ  | D_GLU_72  | OE1 | 2.851 |

|      |           |     |           |     |       |
|------|-----------|-----|-----------|-----|-------|
| 1HGE | E_LYS_238 | NZ  | D_GLU_72  | OE2 | 2.740 |
| 1HGE | E_ARG_261 | NH1 | E_GLU_119 | OE2 | 2.647 |
| 1HGE | E_ARG_261 | NH2 | E_GLU_119 | OE1 | 2.833 |
| 1HGE | E_ARG_261 | NH2 | E_GLU_119 | OE2 | 2.933 |
| 1HGE | E_LYS_264 | NZ  | E_ASP_85  | OD1 | 3.706 |
| 1HGE | E_LYS_264 | NZ  | E_ASP_85  | OD2 | 2.812 |
| 1HGE | E_ARG_269 | NH1 | F_GLU_67  | OE1 | 2.696 |
| 1HGE | E_ARG_269 | NH2 | F_GLU_67  | OE1 | 3.784 |
| 1HGE | E_LYS_292 | NZ  | E_ASP_291 | OD1 | 2.975 |
| 1HGE | E_LYS_292 | NZ  | E_ASP_291 | OD2 | 2.845 |
| 1HGE | E_LYS_299 | NZ  | F_GLU_69  | OE2 | 2.768 |
| 1HGE | E_LYS_310 | NZ  | F_ASP_86  | OD1 | 2.863 |
| 1HGE | E_LYS_310 | NZ  | F_ASP_90  | OD1 | 2.577 |
| 1HGE | E_LYS_310 | NZ  | F_ASP_90  | OD2 | 3.952 |
| 1HGE | E_LYS_315 | NZ  | E_GLU_41  | OE1 | 2.801 |
| 1HGE | E_LYS_326 | NZ  | F_GLU_15  | OE1 | 2.987 |
| 1HGE | E_LYS_326 | NZ  | F_GLU_15  | OE2 | 3.095 |
| 1HGE | F_LYS_51  | NZ  | F_GLU_103 | OE1 | 2.773 |
| 1HGE | F_ARG_54  | NH1 | D_GLU_97  | OE2 | 3.384 |
| 1HGE | F_ARG_54  | NH1 | F_GLU_57  | OE1 | 2.822 |
| 1HGE | F_ARG_54  | NH1 | F_GLU_57  | OE2 | 2.866 |
| 1HGE | F_ARG_54  | NH2 | D_GLU_97  | OE2 | 2.800 |
| 1HGE | F_LYS_58  | NZ  | F_GLU_61  | OE2 | 3.128 |
| 1HGE | F_LYS_62  | NZ  | D_ASP_86  | OD1 | 2.945 |
| 1HGE | F_LYS_62  | NZ  | D_ASP_86  | OD2 | 2.535 |
| 1HGE | F_LYS_62  | NZ  | D_ASP_90  | OD1 | 3.592 |
| 1HGE | F_LYS_62  | NZ  | D_ASP_90  | OD2 | 2.671 |
| 1HGE | F_LYS_68  | NZ  | F_GLU_85  | OE1 | 3.151 |
| 1HGE | F_LYS_68  | NZ  | F_GLU_85  | OE2 | 2.745 |
| 1HGE | F_ARG_76  | NH1 | B_GLU_74  | OE1 | 3.326 |
| 1HGE | F_ARG_76  | NH1 | B_GLU_74  | OE2 | 2.732 |
| 1HGE | F_ARG_76  | NH2 | B_GLU_74  | OE1 | 2.705 |
| 1HGE | F_ARG_76  | NH2 | B_GLU_74  | OE2 | 3.590 |
| 1HGE | F_ARG_76  | NH2 | B_GLU_81  | OE1 | 2.650 |
| 1HGE | F_ARG_76  | NH2 | B_GLU_81  | OE2 | 3.592 |
| 1HGE | F_LYS_117 | NZ  | F_GLU_114 | OE1 | 3.064 |
| 1HGE | F_LYS_117 | NZ  | F_GLU_114 | OE2 | 2.613 |
| 1HGE | F_ARG_123 | NH1 | F_GLU_120 | OE1 | 2.576 |
| 1HGE | F_ARG_123 | NH1 | F_GLU_120 | OE2 | 2.810 |
| 1HGE | F_ARG_123 | NH2 | D_GLU_132 | OE1 | 3.161 |
| 1HGE | F_ARG_124 | NH1 | F_GLU_120 | OE1 | 3.667 |
| 1HGE | F_ARG_124 | NH2 | D_GLU_132 | OE1 | 3.085 |
| 1HGE | F_ARG_124 | NH2 | D_GLU_132 | OE2 | 3.468 |
| 1HGE | F_ARG_127 | NH1 | D_GLU_131 | OE1 | 2.578 |
| 1HGE | F_LYS_143 | NZ  | F_ASP_145 | OD2 | 2.798 |
| 1HGE | F_ARG_153 | NH1 | F_GLU_150 | OE2 | 2.492 |
| 1HGE | F_HIS_159 | NE2 | F_ASP_160 | OD2 | 3.030 |
| 1HGE | F_ARG_163 | NH2 | D_GLU_131 | OE1 | 2.628 |
| 1HGE | F_ARG_163 | NH2 | D_GLU_131 | OE2 | 2.698 |
| 1HGE | F_ARG_170 | NH1 | B_GLU_128 | OE1 | 3.389 |
| 1HGE | F_ARG_170 | NH1 | B_GLU_128 | OE2 | 3.679 |
| 1HGE | F_ARG_170 | NH1 | F_GLU_131 | OE2 | 2.783 |
| 1HGE | F_ARG_170 | NH2 | F_GLU_128 | OE2 | 2.721 |
| 1HGE | F_LYS_174 | NZ  | B_ASP_164 | OD1 | 2.537 |
| 1HGE | F_LYS_174 | NZ  | B_ASP_164 | OD2 | 2.796 |
| 1HGF | A_LYS_27  | NZ  | B_GLU_97  | OE1 | 2.809 |
| 1HGF | A_LYS_27  | NZ  | B_GLU_97  | OE2 | 2.791 |
| 1HGF | A_LYS_50  | NZ  | A_ASP_275 | OD2 | 2.912 |

|      |           |     |           |     |       |
|------|-----------|-----|-----------|-----|-------|
| 1HGF | A_ARG.57  | NH2 | A_GLU.82  | OE1 | 2.650 |
| 1HGF | A_ARG.57  | NH2 | A_GLU.82  | OE2 | 3.590 |
| 1HGF | A_HIS.75  | ND1 | A_ASP.73  | OD1 | 2.838 |
| 1HGF | A_HIS.75  | ND1 | A_ASP.73  | OD2 | 3.347 |
| 1HGF | A_HIS.75  | NE2 | A_ASP.63  | OD1 | 3.455 |
| 1HGF | A_ARG.90  | NH2 | A_ASP.60  | OD1 | 3.473 |
| 1HGF | A_ARG.90  | NH2 | A_ASP.60  | OD2 | 2.841 |
| 1HGF | A_ARG.109 | NH1 | A_GLU.89  | OE1 | 2.536 |
| 1HGF | A_ARG.109 | NH1 | A_GLU.89  | OE2 | 2.889 |
| 1HGF | A_ARG.109 | NH2 | B_GLU.67  | OE1 | 3.699 |
| 1HGF | A_ARG.109 | NH2 | B_GLU.67  | OE2 | 2.917 |
| 1HGF | A_ARG.141 | NH2 | A_ASP.77  | OD1 | 2.837 |
| 1HGF | A_ARG.141 | NH2 | A_ASP.77  | OD2 | 2.783 |
| 1HGF | A_LYS.176 | NZ  | A_GLU.123 | OE2 | 2.716 |
| 1HGF | A_LYS.176 | NZ  | A_ASP.172 | OD1 | 3.709 |
| 1HGF | A_HIS.183 | NE2 | A_GLU.190 | OE2 | 3.660 |
| 1HGF | A_LYS.238 | NZ  | F_GLU.72  | OE1 | 2.852 |
| 1HGF | A_LYS.238 | NZ  | F_GLU.72  | OE2 | 2.778 |
| 1HGF | A_ARG.261 | NH1 | A_GLU.119 | OE1 | 3.779 |
| 1HGF | A_ARG.261 | NH1 | A_GLU.119 | OE2 | 2.603 |
| 1HGF | A_ARG.261 | NH2 | A_GLU.119 | OE1 | 2.742 |
| 1HGF | A_ARG.261 | NH2 | A_GLU.119 | OE2 | 3.168 |
| 1HGF | A_LYS.264 | NZ  | A_ASP.85  | OD2 | 3.310 |
| 1HGF | A_ARG.269 | NH1 | B_GLU.67  | OE1 | 2.939 |
| 1HGF | A_LYS.292 | NZ  | A_ASP.291 | OD1 | 2.863 |
| 1HGF | A_LYS.292 | NZ  | A_ASP.291 | OD2 | 3.511 |
| 1HGF | A_LYS.299 | NZ  | B_GLU.69  | OE2 | 3.681 |
| 1HGF | A_LYS.310 | NZ  | B_ASP.86  | OD1 | 2.820 |
| 1HGF | A_LYS.310 | NZ  | B_ASP.90  | OD1 | 2.555 |
| 1HGF | A_LYS.310 | NZ  | B_ASP.90  | OD2 | 3.978 |
| 1HGF | A_LYS.315 | NZ  | A_GLU.41  | OE1 | 3.740 |
| 1HGF | A_LYS.326 | NZ  | A_GLU.325 | OE1 | 2.712 |
| 1HGF | A_LYS.326 | NZ  | B_GLU.15  | OE1 | 3.851 |
| 1HGF | A_LYS.326 | NZ  | B_GLU.15  | OE2 | 3.863 |
| 1HGF | B_ARG.25  | NH1 | A_GLU.325 | OE2 | 3.563 |
| 1HGF | B_ARG.25  | NH2 | A_GLU.325 | OE2 | 2.989 |
| 1HGF | B_LYS.51  | NZ  | B_GLU.103 | OE1 | 2.735 |
| 1HGF | B_ARG.54  | NH1 | B_GLU.57  | OE1 | 3.296 |
| 1HGF | B_ARG.54  | NH1 | F_GLU.97  | OE2 | 3.282 |
| 1HGF | B_ARG.54  | NH2 | F_GLU.97  | OE2 | 2.831 |
| 1HGF | B_LYS.62  | NZ  | F_ASP.86  | OD1 | 3.116 |
| 1HGF | B_LYS.62  | NZ  | F_ASP.86  | OD2 | 2.708 |
| 1HGF | B_LYS.62  | NZ  | F_ASP.90  | OD1 | 3.733 |
| 1HGF | B_LYS.62  | NZ  | F_ASP.90  | OD2 | 2.767 |
| 1HGF | B_LYS.68  | NZ  | B_GLU.85  | OE1 | 3.045 |
| 1HGF | B_LYS.68  | NZ  | B_GLU.85  | OE2 | 2.673 |
| 1HGF | B_ARG.76  | NH1 | D_GLU.74  | OE1 | 2.859 |
| 1HGF | B_ARG.76  | NH1 | D_GLU.74  | OE2 | 3.561 |
| 1HGF | B_ARG.76  | NH2 | D_GLU.74  | OE1 | 3.524 |
| 1HGF | B_ARG.76  | NH2 | D_GLU.74  | OE2 | 2.746 |
| 1HGF | B_ARG.76  | NH2 | D_GLU.81  | OE1 | 2.726 |
| 1HGF | B_ARG.76  | NH2 | D_GLU.81  | OE2 | 3.662 |
| 1HGF | B_LYS.117 | NZ  | B_GLU.114 | OE1 | 3.311 |
| 1HGF | B_LYS.117 | NZ  | B_GLU.114 | OE2 | 2.558 |
| 1HGF | B_ARG.123 | NH1 | B_GLU.120 | OE1 | 2.618 |
| 1HGF | B_ARG.123 | NH1 | B_GLU.120 | OE2 | 2.780 |
| 1HGF | B_ARG.123 | NH2 | F_GLU.132 | OE1 | 3.495 |
| 1HGF | B_ARG.124 | NH2 | F_GLU.132 | OE1 | 3.111 |

|      |           |     |           |     |       |
|------|-----------|-----|-----------|-----|-------|
| 1HGF | B_ARG_124 | NH2 | F_GLU_132 | OE2 | 3.495 |
| 1HGF | B_ARG_127 | NH1 | F_GLU_131 | OE1 | 2.468 |
| 1HGF | B_ARG_153 | NH1 | B_GLU_150 | OE1 | 2.531 |
| 1HGF | B_HIS_159 | NE2 | B_ASP_160 | OD2 | 3.002 |
| 1HGF | B_ARG_163 | NH2 | F_GLU_131 | OE1 | 2.740 |
| 1HGF | B_ARG_163 | NH2 | F_GLU_131 | OE2 | 2.533 |
| 1HGF | B_ARG_170 | NH1 | B_GLU_131 | OE2 | 2.840 |
| 1HGF | B_ARG_170 | NH1 | D_GLU_128 | OE1 | 3.455 |
| 1HGF | B_ARG_170 | NH1 | D_GLU_128 | OE2 | 3.294 |
| 1HGF | B_ARG_170 | NH2 | B_GLU_128 | OE2 | 2.821 |
| 1HGF | B_LYS_174 | NZ  | D_ASP_164 | OD2 | 3.813 |
| 1HGF | C_LYS_27  | NZ  | D_GLU_97  | OE1 | 2.824 |
| 1HGF | C_LYS_27  | NZ  | D_GLU_97  | OE2 | 2.808 |
| 1HGF | C_LYS_50  | NZ  | C_ASP_275 | OD2 | 2.881 |
| 1HGF | C_ARG_57  | NH2 | C_GLU_82  | OE1 | 2.589 |
| 1HGF | C_ARG_57  | NH2 | C_GLU_82  | OE2 | 3.890 |
| 1HGF | C_HIS_75  | ND1 | C_ASP_73  | OD1 | 2.839 |
| 1HGF | C_HIS_75  | ND1 | C_ASP_73  | OD2 | 3.334 |
| 1HGF | C_HIS_75  | NE2 | C_ASP_63  | OD1 | 3.432 |
| 1HGF | C_ARG_90  | NH2 | C_ASP_60  | OD1 | 3.494 |
| 1HGF | C_ARG_90  | NH2 | C_ASP_60  | OD2 | 2.843 |
| 1HGF | C_ARG_109 | NH1 | C_GLU_89  | OE1 | 2.579 |
| 1HGF | C_ARG_109 | NH1 | C_GLU_89  | OE2 | 2.919 |
| 1HGF | C_ARG_109 | NH2 | D_GLU_67  | OE1 | 3.698 |
| 1HGF | C_ARG_109 | NH2 | D_GLU_67  | OE2 | 2.914 |
| 1HGF | C_ARG_141 | NH2 | C_ASP_77  | OD1 | 2.838 |
| 1HGF | C_ARG_141 | NH2 | C_ASP_77  | OD2 | 2.786 |
| 1HGF | C_LYS_176 | NZ  | C_GLU_123 | OE2 | 2.724 |
| 1HGF | C_LYS_176 | NZ  | C_ASP_172 | OD1 | 3.678 |
| 1HGF | C_HIS_183 | NE2 | C_GLU_190 | OE2 | 3.665 |
| 1HGF | C_LYS_238 | NZ  | B_GLU_72  | OE1 | 2.746 |
| 1HGF | C_LYS_238 | NZ  | B_GLU_72  | OE2 | 2.727 |
| 1HGF | C_ARG_261 | NH1 | C_GLU_119 | OE1 | 3.774 |
| 1HGF | C_ARG_261 | NH1 | C_GLU_119 | OE2 | 2.592 |
| 1HGF | C_ARG_261 | NH2 | C_GLU_119 | OE1 | 2.721 |
| 1HGF | C_ARG_261 | NH2 | C_GLU_119 | OE2 | 3.119 |
| 1HGF | C_LYS_264 | NZ  | C_ASP_85  | OD2 | 3.303 |
| 1HGF | C_ARG_269 | NH1 | D_GLU_67  | OE1 | 2.900 |
| 1HGF | C_LYS_292 | NZ  | C_ASP_291 | OD1 | 2.883 |
| 1HGF | C_LYS_292 | NZ  | C_ASP_291 | OD2 | 3.545 |
| 1HGF | C_LYS_299 | NZ  | D_GLU_69  | OE2 | 3.732 |
| 1HGF | C_LYS_310 | NZ  | D_ASP_86  | OD1 | 2.839 |
| 1HGF | C_LYS_310 | NZ  | D_ASP_90  | OD1 | 2.507 |
| 1HGF | C_LYS_310 | NZ  | D_ASP_90  | OD2 | 3.941 |
| 1HGF | C_LYS_315 | NZ  | C_GLU_41  | OE1 | 3.725 |
| 1HGF | C_LYS_326 | NZ  | D_GLU_15  | OE1 | 3.713 |
| 1HGF | D_LYS_51  | NZ  | D_GLU_103 | OE1 | 2.742 |
| 1HGF | D_ARG_54  | NH1 | B_GLU_97  | OE2 | 3.314 |
| 1HGF | D_ARG_54  | NH1 | D_GLU_57  | OE1 | 3.296 |
| 1HGF | D_ARG_54  | NH2 | B_GLU_97  | OE2 | 2.840 |
| 1HGF | D_LYS_62  | NZ  | B_ASP_86  | OD1 | 3.122 |
| 1HGF | D_LYS_62  | NZ  | B_ASP_86  | OD2 | 2.686 |
| 1HGF | D_LYS_62  | NZ  | B_ASP_90  | OD1 | 3.703 |
| 1HGF | D_LYS_62  | NZ  | B_ASP_90  | OD2 | 2.682 |
| 1HGF | D_LYS_68  | NZ  | D_GLU_85  | OE1 | 3.023 |
| 1HGF | D_LYS_68  | NZ  | D_GLU_85  | OE2 | 2.732 |
| 1HGF | D_ARG_76  | NH1 | F_GLU_74  | OE1 | 2.790 |
| 1HGF | D_ARG_76  | NH1 | F_GLU_74  | OE2 | 3.379 |

|      |           |     |           |     |       |
|------|-----------|-----|-----------|-----|-------|
| 1HGF | D_ARG_76  | NH2 | F_GLU_74  | OE1 | 3.594 |
| 1HGF | D_ARG_76  | NH2 | F_GLU_74  | OE2 | 2.697 |
| 1HGF | D_ARG_76  | NH2 | F_GLU_81  | OE1 | 2.644 |
| 1HGF | D_ARG_76  | NH2 | F_GLU_81  | OE2 | 3.691 |
| 1HGF | D_LYS_117 | NZ  | D_GLU_114 | OE1 | 3.303 |
| 1HGF | D_LYS_117 | NZ  | D_GLU_114 | OE2 | 2.574 |
| 1HGF | D_ARG_123 | NH1 | D_GLU_120 | OE1 | 2.580 |
| 1HGF | D_ARG_123 | NH1 | D_GLU_120 | OE2 | 2.788 |
| 1HGF | D_ARG_123 | NH2 | B_GLU_132 | OE1 | 3.407 |
| 1HGF | D_ARG_124 | NH2 | B_GLU_132 | OE1 | 3.100 |
| 1HGF | D_ARG_124 | NH2 | B_GLU_132 | OE2 | 3.442 |
| 1HGF | D_ARG_127 | NH1 | B_GLU_131 | OE1 | 2.516 |
| 1HGF | D_ARG_153 | NH1 | D_GLU_150 | OE1 | 2.657 |
| 1HGF | D_HIS_159 | NE2 | D_ASP_160 | OD2 | 3.002 |
| 1HGF | D_ARG_163 | NH2 | B_GLU_131 | OE1 | 2.704 |
| 1HGF | D_ARG_163 | NH2 | B_GLU_131 | OE2 | 2.556 |
| 1HGF | D_ARG_170 | NH1 | D_GLU_131 | OE2 | 2.839 |
| 1HGF | D_ARG_170 | NH1 | F_GLU_128 | OE1 | 3.604 |
| 1HGF | D_ARG_170 | NH1 | F_GLU_128 | OE2 | 3.428 |
| 1HGF | D_ARG_170 | NH2 | D_GLU_128 | OE2 | 2.843 |
| 1HGF | E_LYS_27  | NZ  | F_GLU_97  | OE1 | 2.793 |
| 1HGF | E_LYS_27  | NZ  | F_GLU_97  | OE2 | 2.754 |
| 1HGF | E_LYS_50  | NZ  | E_ASP_275 | OD2 | 2.903 |
| 1HGF | E_ARG_57  | NH2 | E_GLU_82  | OE1 | 2.780 |
| 1HGF | E_HIS_75  | ND1 | E_ASP_73  | OD1 | 2.855 |
| 1HGF | E_HIS_75  | ND1 | E_ASP_73  | OD2 | 3.339 |
| 1HGF | E_HIS_75  | NE2 | E_ASP_63  | OD1 | 3.444 |
| 1HGF | E_ARG_90  | NH2 | E_ASP_60  | OD1 | 3.506 |
| 1HGF | E_ARG_90  | NH2 | E_ASP_60  | OD2 | 2.882 |
| 1HGF | E_ARG_109 | NH1 | E_GLU_89  | OE1 | 2.522 |
| 1HGF | E_ARG_109 | NH1 | E_GLU_89  | OE2 | 2.887 |
| 1HGF | E_ARG_109 | NH2 | F_GLU_67  | OE1 | 3.694 |
| 1HGF | E_ARG_109 | NH2 | F_GLU_67  | OE2 | 2.878 |
| 1HGF | E_ARG_141 | NH2 | E_ASP_77  | OD1 | 2.834 |
| 1HGF | E_ARG_141 | NH2 | E_ASP_77  | OD2 | 2.773 |
| 1HGF | E_LYS_176 | NZ  | E_GLU_123 | OE2 | 2.761 |
| 1HGF | E_LYS_176 | NZ  | E_ASP_172 | OD1 | 3.700 |
| 1HGF | E_HIS_183 | NE2 | E_GLU_190 | OE2 | 3.673 |
| 1HGF | E_LYS_238 | NZ  | D_GLU_72  | OE1 | 2.831 |
| 1HGF | E_LYS_238 | NZ  | D_GLU_72  | OE2 | 2.834 |
| 1HGF | E_ARG_261 | NH1 | E_GLU_119 | OE1 | 3.764 |
| 1HGF | E_ARG_261 | NH1 | E_GLU_119 | OE2 | 2.590 |
| 1HGF | E_ARG_261 | NH2 | E_GLU_119 | OE1 | 2.729 |
| 1HGF | E_ARG_261 | NH2 | E_GLU_119 | OE2 | 3.139 |
| 1HGF | E_LYS_264 | NZ  | E_ASP_85  | OD2 | 3.295 |
| 1HGF | E_ARG_269 | NH1 | F_GLU_67  | OE1 | 2.906 |
| 1HGF | E_LYS_292 | NZ  | E_ASP_291 | OD1 | 2.871 |
| 1HGF | E_LYS_292 | NZ  | E_ASP_291 | OD2 | 3.523 |
| 1HGF | E_LYS_299 | NZ  | F_GLU_69  | OE2 | 3.655 |
| 1HGF | E_LYS_310 | NZ  | F_ASP_86  | OD1 | 2.832 |
| 1HGF | E_LYS_310 | NZ  | F_ASP_90  | OD1 | 2.514 |
| 1HGF | E_LYS_310 | NZ  | F_ASP_90  | OD2 | 3.973 |
| 1HGF | E_LYS_315 | NZ  | E_GLU_41  | OE1 | 3.726 |
| 1HGF | E_LYS_326 | NZ  | F_GLU_15  | OE1 | 3.652 |
| 1HGF | E_LYS_326 | NZ  | F_GLU_15  | OE2 | 3.771 |
| 1HGF | F_LYS_51  | NZ  | F_GLU_103 | OE1 | 2.723 |
| 1HGF | F_ARG_54  | NH1 | D_GLU_97  | OE2 | 3.368 |
| 1HGF | F_ARG_54  | NH1 | F_GLU_57  | OE1 | 3.280 |

|      |           |     |           |     |       |
|------|-----------|-----|-----------|-----|-------|
| 1HGF | F_ARG_54  | NH2 | D_GLU_97  | OE2 | 2.791 |
| 1HGF | F_LYS_62  | NZ  | D_ASP_86  | OD1 | 3.076 |
| 1HGF | F_LYS_62  | NZ  | D_ASP_86  | OD2 | 2.672 |
| 1HGF | F_LYS_62  | NZ  | D_ASP_90  | OD1 | 3.773 |
| 1HGF | F_LYS_62  | NZ  | D_ASP_90  | OD2 | 2.752 |
| 1HGF | F_LYS_68  | NZ  | F_GLU_85  | OE1 | 3.011 |
| 1HGF | F_LYS_68  | NZ  | F_GLU_85  | OE2 | 2.638 |
| 1HGF | F_ARG_76  | NH1 | B_GLU_74  | OE1 | 2.779 |
| 1HGF | F_ARG_76  | NH1 | B_GLU_74  | OE2 | 3.420 |
| 1HGF | F_ARG_76  | NH2 | B_GLU_74  | OE1 | 3.542 |
| 1HGF | F_ARG_76  | NH2 | B_GLU_74  | OE2 | 2.707 |
| 1HGF | F_ARG_76  | NH2 | B_GLU_81  | OE1 | 2.689 |
| 1HGF | F_ARG_76  | NH2 | B_GLU_81  | OE2 | 3.716 |
| 1HGF | F_LYS_117 | NZ  | F_GLU_114 | OE1 | 3.348 |
| 1HGF | F_LYS_117 | NZ  | F_GLU_114 | OE2 | 2.589 |
| 1HGF | F_ARG_123 | NH1 | F_GLU_120 | OE1 | 2.596 |
| 1HGF | F_ARG_123 | NH1 | F_GLU_120 | OE2 | 2.789 |
| 1HGF | F_ARG_123 | NH2 | D_GLU_132 | OE1 | 3.469 |
| 1HGF | F_ARG_124 | NH2 | D_GLU_132 | OE1 | 3.198 |
| 1HGF | F_ARG_124 | NH2 | D_GLU_132 | OE2 | 3.522 |
| 1HGF | F_ARG_127 | NH1 | D_GLU_131 | OE1 | 2.568 |
| 1HGF | F_HIS_159 | NE2 | F_ASP_160 | OD2 | 3.032 |
| 1HGF | F_ARG_163 | NH2 | D_GLU_131 | OE1 | 2.689 |
| 1HGF | F_ARG_163 | NH2 | D_GLU_131 | OE2 | 2.644 |
| 1HGF | F_ARG_170 | NH1 | B_GLU_128 | OE1 | 3.432 |
| 1HGF | F_ARG_170 | NH1 | B_GLU_128 | OE2 | 3.366 |
| 1HGF | F_ARG_170 | NH1 | F_GLU_131 | OE2 | 2.852 |
| 1HGF | F_ARG_170 | NH2 | F_GLU_128 | OE2 | 2.847 |
| 1HGF | F_LYS_174 | NZ  | B_ASP_164 | OD2 | 3.837 |
| 1HGG | A_LYS_27  | NZ  | B_GLU_97  | OE1 | 2.679 |
| 1HGG | A_LYS_27  | NZ  | B_GLU_97  | OE2 | 2.904 |
| 1HGG | A_LYS_50  | NZ  | A_ASP_275 | OD1 | 3.658 |
| 1HGG | A_LYS_50  | NZ  | A_ASP_275 | OD2 | 2.711 |
| 1HGG | A_ARG_57  | NH2 | A_GLU_82  | OE1 | 2.519 |
| 1HGG | A_ARG_57  | NH2 | A_GLU_82  | OE2 | 3.336 |
| 1HGG | A_HIS_75  | ND1 | A_ASP_73  | OD1 | 2.772 |
| 1HGG | A_HIS_75  | ND1 | A_ASP_73  | OD2 | 3.336 |
| 1HGG | A_HIS_75  | NE2 | A_ASP_63  | OD1 | 3.694 |
| 1HGG | A_ARG_90  | NH2 | A_ASP_60  | OD1 | 3.622 |
| 1HGG | A_ARG_90  | NH2 | A_ASP_60  | OD2 | 2.794 |
| 1HGG | A_ARG_109 | NH1 | A_GLU_89  | OE1 | 2.517 |
| 1HGG | A_ARG_109 | NH1 | A_GLU_89  | OE2 | 3.003 |
| 1HGG | A_ARG_109 | NH2 | B_GLU_67  | OE1 | 3.854 |
| 1HGG | A_ARG_109 | NH2 | B_GLU_67  | OE2 | 2.838 |
| 1HGG | A_ARG_141 | NH2 | A_ASP_77  | OD1 | 2.758 |
| 1HGG | A_ARG_141 | NH2 | A_ASP_77  | OD2 | 2.757 |
| 1HGG | A_LYS_176 | NZ  | A_GLU_123 | OE2 | 2.648 |
| 1HGG | A_HIS_183 | NE2 | A_GLU_190 | OE2 | 3.990 |
| 1HGG | A_LYS_238 | NZ  | F_GLU_72  | OE1 | 2.931 |
| 1HGG | A_LYS_238 | NZ  | F_GLU_72  | OE2 | 2.744 |
| 1HGG | A_ARG_261 | NH1 | A_GLU_119 | OE1 | 3.988 |
| 1HGG | A_ARG_261 | NH1 | A_GLU_119 | OE2 | 2.685 |
| 1HGG | A_ARG_261 | NH2 | A_GLU_119 | OE1 | 2.738 |
| 1HGG | A_ARG_261 | NH2 | A_GLU_119 | OE2 | 2.969 |
| 1HGG | A_LYS_264 | NZ  | A_ASP_85  | OD1 | 3.326 |
| 1HGG | A_LYS_264 | NZ  | A_ASP_85  | OD2 | 2.834 |
| 1HGG | A_ARG_269 | NH1 | B_GLU_67  | OE1 | 2.694 |
| 1HGG | A_ARG_269 | NH2 | B_GLU_67  | OE1 | 3.814 |

|      |           |     |           |     |       |
|------|-----------|-----|-----------|-----|-------|
| 1HGG | A_LYS_292 | NZ  | A_ASP_291 | OD1 | 2.980 |
| 1HGG | A_LYS_292 | NZ  | A_ASP_291 | OD2 | 2.773 |
| 1HGG | A_LYS_299 | NZ  | B_GLU_69  | OE2 | 2.915 |
| 1HGG | A_LYS_310 | NZ  | B_ASP_86  | OD1 | 2.852 |
| 1HGG | A_LYS_310 | NZ  | B_ASP_90  | OD1 | 2.700 |
| 1HGG | A_LYS_310 | NZ  | B_ASP_90  | OD2 | 3.923 |
| 1HGG | A_LYS_315 | NZ  | A_GLU_41  | OE1 | 2.731 |
| 1HGG | A_LYS_326 | NZ  | A_GLU_325 | OE1 | 2.817 |
| 1HGG | A_LYS_326 | NZ  | B_GLU_15  | OE1 | 3.039 |
| 1HGG | A_LYS_326 | NZ  | B_GLU_15  | OE2 | 2.830 |
| 1HGG | B_ARG_25  | NH1 | A_GLU_325 | OE2 | 3.770 |
| 1HGG | B_ARG_25  | NH2 | A_GLU_325 | OE2 | 2.944 |
| 1HGG | B_LYS_51  | NZ  | B_GLU_103 | OE1 | 2.759 |
| 1HGG | B_ARG_54  | NH1 | B_GLU_57  | OE1 | 2.857 |
| 1HGG | B_ARG_54  | NH1 | B_GLU_57  | OE2 | 2.882 |
| 1HGG | B_ARG_54  | NH1 | F_GLU_97  | OE2 | 3.410 |
| 1HGG | B_ARG_54  | NH2 | F_GLU_97  | OE2 | 2.750 |
| 1HGG | B_LYS_58  | NZ  | B_GLU_61  | OE2 | 2.938 |
| 1HGG | B_LYS_62  | NZ  | F_ASP_86  | OD1 | 2.889 |
| 1HGG | B_LYS_62  | NZ  | F_ASP_86  | OD2 | 2.639 |
| 1HGG | B_LYS_62  | NZ  | F_ASP_90  | OD1 | 3.716 |
| 1HGG | B_LYS_62  | NZ  | F_ASP_90  | OD2 | 2.650 |
| 1HGG | B_LYS_68  | NZ  | B_GLU_85  | OE1 | 3.149 |
| 1HGG | B_LYS_68  | NZ  | B_GLU_85  | OE2 | 2.746 |
| 1HGG | B_ARG_76  | NH1 | D_GLU_74  | OE1 | 2.882 |
| 1HGG | B_ARG_76  | NH1 | D_GLU_74  | OE2 | 3.580 |
| 1HGG | B_ARG_76  | NH2 | D_GLU_74  | OE1 | 3.459 |
| 1HGG | B_ARG_76  | NH2 | D_GLU_74  | OE2 | 2.820 |
| 1HGG | B_ARG_76  | NH2 | D_GLU_81  | OE1 | 2.731 |
| 1HGG | B_ARG_76  | NH2 | D_GLU_81  | OE2 | 3.473 |
| 1HGG | B_LYS_117 | NZ  | B_GLU_114 | OE1 | 3.037 |
| 1HGG | B_LYS_117 | NZ  | B_GLU_114 | OE2 | 2.573 |
| 1HGG | B_ARG_123 | NH1 | B_GLU_120 | OE1 | 2.615 |
| 1HGG | B_ARG_123 | NH1 | B_GLU_120 | OE2 | 2.734 |
| 1HGG | B_ARG_123 | NH2 | F_GLU_132 | OE1 | 2.827 |
| 1HGG | B_ARG_124 | NH1 | B_GLU_120 | OE1 | 3.704 |
| 1HGG | B_ARG_124 | NH2 | F_GLU_132 | OE1 | 3.221 |
| 1HGG | B_ARG_124 | NH2 | F_GLU_132 | OE2 | 3.297 |
| 1HGG | B_ARG_127 | NH1 | F_GLU_131 | OE1 | 2.465 |
| 1HGG | B_LYS_143 | NZ  | B_ASP_145 | OD2 | 2.940 |
| 1HGG | B_ARG_153 | NH1 | B_GLU_150 | OE1 | 2.632 |
| 1HGG | B_HIS_159 | NE2 | B_ASP_160 | OD2 | 3.121 |
| 1HGG | B_ARG_163 | NH2 | B_GLU_128 | OE1 | 3.737 |
| 1HGG | B_ARG_163 | NH2 | F_GLU_131 | OE1 | 2.594 |
| 1HGG | B_ARG_163 | NH2 | F_GLU_131 | OE2 | 2.562 |
| 1HGG | B_ARG_170 | NH1 | B_GLU_131 | OE2 | 2.846 |
| 1HGG | B_ARG_170 | NH1 | D_GLU_128 | OE1 | 3.236 |
| 1HGG | B_ARG_170 | NH1 | D_GLU_128 | OE2 | 3.289 |
| 1HGG | B_ARG_170 | NH2 | B_GLU_128 | OE2 | 2.890 |
| 1HGG | B_LYS_174 | NZ  | D_ASP_164 | OD1 | 2.736 |
| 1HGG | B_LYS_174 | NZ  | D_ASP_164 | OD2 | 2.575 |
| 1HGG | C_LYS_27  | NZ  | D_GLU_97  | OE1 | 2.683 |
| 1HGG | C_LYS_27  | NZ  | D_GLU_97  | OE2 | 2.941 |
| 1HGG | C_LYS_50  | NZ  | C_ASP_275 | OD1 | 3.663 |
| 1HGG | C_LYS_50  | NZ  | C_ASP_275 | OD2 | 2.681 |
| 1HGG | C_ARG_57  | NH2 | C_GLU_82  | OE1 | 2.593 |
| 1HGG | C_ARG_57  | NH2 | C_GLU_82  | OE2 | 3.431 |
| 1HGG | C_HIS_75  | ND1 | C_ASP_73  | OD1 | 2.715 |

|      |           |     |           |     |       |
|------|-----------|-----|-----------|-----|-------|
| 1HGG | C_HIS_75  | ND1 | C_ASP_73  | OD2 | 3.305 |
| 1HGG | C_HIS_75  | NE2 | C_ASP_63  | OD1 | 3.698 |
| 1HGG | C_ARG_90  | NH2 | C_ASP_60  | OD1 | 3.640 |
| 1HGG | C_ARG_90  | NH2 | C_ASP_60  | OD2 | 2.792 |
| 1HGG | C_ARG_109 | NH1 | C_GLU_89  | OE1 | 2.511 |
| 1HGG | C_ARG_109 | NH1 | C_GLU_89  | OE2 | 3.012 |
| 1HGG | C_ARG_109 | NH2 | D_GLU_67  | OE1 | 3.869 |
| 1HGG | C_ARG_109 | NH2 | D_GLU_67  | OE2 | 2.853 |
| 1HGG | C_ARG_141 | NH2 | C_ASP_77  | OD1 | 2.758 |
| 1HGG | C_ARG_141 | NH2 | C_ASP_77  | OD2 | 2.737 |
| 1HGG | C_LYS_176 | NZ  | C_GLU_123 | OE2 | 2.629 |
| 1HGG | C_HIS_183 | NE2 | C_GLU_190 | OE2 | 3.969 |
| 1HGG | C_LYS_238 | NZ  | B_GLU_72  | OE1 | 2.830 |
| 1HGG | C_LYS_238 | NZ  | B_GLU_72  | OE2 | 2.699 |
| 1HGG | C_ARG_261 | NH1 | C_GLU_119 | OE1 | 3.989 |
| 1HGG | C_ARG_261 | NH1 | C_GLU_119 | OE2 | 2.670 |
| 1HGG | C_ARG_261 | NH2 | C_GLU_119 | OE1 | 2.730 |
| 1HGG | C_ARG_261 | NH2 | C_GLU_119 | OE2 | 2.933 |
| 1HGG | C_LYS_264 | NZ  | C_ASP_85  | OD1 | 3.356 |
| 1HGG | C_LYS_264 | NZ  | C_ASP_85  | OD2 | 2.849 |
| 1HGG | C_ARG_269 | NH1 | D_GLU_67  | OE1 | 2.688 |
| 1HGG | C_ARG_269 | NH2 | D_GLU_67  | OE1 | 3.820 |
| 1HGG | C_LYS_292 | NZ  | C_ASP_291 | OD1 | 3.021 |
| 1HGG | C_LYS_292 | NZ  | C_ASP_291 | OD2 | 2.777 |
| 1HGG | C_LYS_299 | NZ  | D_GLU_69  | OE2 | 2.932 |
| 1HGG | C_LYS_310 | NZ  | D_ASP_86  | OD1 | 2.859 |
| 1HGG | C_LYS_310 | NZ  | D_ASP_90  | OD1 | 2.651 |
| 1HGG | C_LYS_310 | NZ  | D_ASP_90  | OD2 | 3.858 |
| 1HGG | C_LYS_315 | NZ  | C_GLU_41  | OE1 | 2.732 |
| 1HGG | C_LYS_326 | NZ  | D_GLU_15  | OE1 | 2.591 |
| 1HGG | C_LYS_326 | NZ  | D_GLU_15  | OE2 | 3.450 |
| 1HGG | D_LYS_51  | NZ  | D_GLU_103 | OE1 | 2.765 |
| 1HGG | D_ARG_54  | NH1 | B_GLU_97  | OE2 | 3.442 |
| 1HGG | D_ARG_54  | NH1 | D_GLU_57  | OE1 | 2.855 |
| 1HGG | D_ARG_54  | NH1 | D_GLU_57  | OE2 | 2.880 |
| 1HGG | D_ARG_54  | NH2 | B_GLU_97  | OE2 | 2.764 |
| 1HGG | D_LYS_58  | NZ  | D_GLU_61  | OE2 | 2.913 |
| 1HGG | D_LYS_62  | NZ  | B_ASP_86  | OD1 | 2.924 |
| 1HGG | D_LYS_62  | NZ  | B_ASP_86  | OD2 | 2.567 |
| 1HGG | D_LYS_62  | NZ  | B_ASP_90  | OD1 | 3.695 |
| 1HGG | D_LYS_62  | NZ  | B_ASP_90  | OD2 | 2.575 |
| 1HGG | D_LYS_68  | NZ  | D_GLU_85  | OE1 | 3.169 |
| 1HGG | D_LYS_68  | NZ  | D_GLU_85  | OE2 | 2.772 |
| 1HGG | D_ARG_76  | NH1 | F_GLU_74  | OE1 | 2.783 |
| 1HGG | D_ARG_76  | NH1 | F_GLU_74  | OE2 | 3.379 |
| 1HGG | D_ARG_76  | NH2 | F_GLU_74  | OE1 | 3.480 |
| 1HGG | D_ARG_76  | NH2 | F_GLU_74  | OE2 | 2.737 |
| 1HGG | D_ARG_76  | NH2 | F_GLU_81  | OE1 | 2.674 |
| 1HGG | D_ARG_76  | NH2 | F_GLU_81  | OE2 | 3.521 |
| 1HGG | D_LYS_117 | NZ  | D_GLU_114 | OE1 | 3.041 |
| 1HGG | D_LYS_117 | NZ  | D_GLU_114 | OE2 | 2.574 |
| 1HGG | D_ARG_123 | NH1 | D_GLU_120 | OE1 | 2.613 |
| 1HGG | D_ARG_123 | NH1 | D_GLU_120 | OE2 | 2.730 |
| 1HGG | D_ARG_123 | NH2 | B_GLU_132 | OE1 | 2.793 |
| 1HGG | D_ARG_124 | NH1 | D_GLU_120 | OE1 | 3.717 |
| 1HGG | D_ARG_124 | NH2 | B_GLU_132 | OE1 | 3.241 |
| 1HGG | D_ARG_124 | NH2 | B_GLU_132 | OE2 | 3.297 |
| 1HGG | D_ARG_127 | NH1 | B_GLU_131 | OE1 | 2.475 |



|      |           |     |           |     |       |
|------|-----------|-----|-----------|-----|-------|
| 1HGG | D_LYS_143 | NZ  | D_ASP_145 | OD2 | 2.930 |
| 1HGG | D_ARG_153 | NH1 | D_GLU_150 | OE1 | 2.636 |
| 1HGG | D_HIS_159 | NE2 | D_ASP_160 | OD2 | 3.127 |
| 1HGG | D_ARG_163 | NH2 | B_GLU_131 | OE1 | 2.580 |
| 1HGG | D_ARG_163 | NH2 | B_GLU_131 | OE2 | 2.598 |
| 1HGG | D_ARG_163 | NH2 | D_GLU_128 | OE1 | 3.766 |
| 1HGG | D_ARG_170 | NH1 | D_GLU_131 | OE2 | 2.855 |
| 1HGG | D_ARG_170 | NH1 | F_GLU_128 | OE1 | 3.365 |
| 1HGG | D_ARG_170 | NH1 | F_GLU_128 | OE2 | 3.390 |
| 1HGG | D_ARG_170 | NH2 | D_GLU_128 | OE2 | 2.921 |
| 1HGG | D_LYS_174 | NZ  | F_ASP_164 | OD1 | 2.763 |
| 1HGG | D_LYS_174 | NZ  | F_ASP_164 | OD2 | 2.711 |
| 1HGG | E_LYS_27  | NZ  | F_GLU_97  | OE1 | 2.689 |
| 1HGG | E_LYS_27  | NZ  | F_GLU_97  | OE2 | 2.909 |
| 1HGG | E_LYS_50  | NZ  | E_ASP_275 | OD1 | 3.653 |
| 1HGG | E_LYS_50  | NZ  | E_ASP_275 | OD2 | 2.678 |
| 1HGG | E_ARG_57  | NH2 | E_GLU_82  | OE1 | 2.569 |
| 1HGG | E_ARG_57  | NH2 | E_GLU_82  | OE2 | 3.845 |
| 1HGG | E_HIS_75  | ND1 | E_ASP_73  | OD1 | 2.755 |
| 1HGG | E_HIS_75  | ND1 | E_ASP_73  | OD2 | 3.285 |
| 1HGG | E_HIS_75  | NE2 | E_ASP_63  | OD1 | 3.700 |
| 1HGG | E_ARG_90  | NH2 | E_ASP_60  | OD1 | 3.616 |
| 1HGG | E_ARG_90  | NH2 | E_ASP_60  | OD2 | 2.834 |
| 1HGG | E_ARG_109 | NH1 | E_GLU_89  | OE1 | 2.488 |
| 1HGG | E_ARG_109 | NH1 | E_GLU_89  | OE2 | 2.947 |
| 1HGG | E_ARG_109 | NH2 | F_GLU_67  | OE1 | 3.891 |
| 1HGG | E_ARG_109 | NH2 | F_GLU_67  | OE2 | 2.876 |
| 1HGG | E_ARG_141 | NH2 | E_ASP_77  | OD1 | 2.801 |
| 1HGG | E_ARG_141 | NH2 | E_ASP_77  | OD2 | 2.744 |
| 1HGG | E_LYS_176 | NZ  | E_GLU_123 | OE2 | 2.653 |
| 1HGG | E_HIS_183 | NE2 | E_GLU_190 | OE2 | 3.980 |
| 1HGG | E_LYS_238 | NZ  | D_GLU_72  | OE1 | 2.893 |
| 1HGG | E_LYS_238 | NZ  | D_GLU_72  | OE2 | 2.782 |
| 1HGG | E_ARG_261 | NH1 | E_GLU_119 | OE1 | 3.984 |
| 1HGG | E_ARG_261 | NH1 | E_GLU_119 | OE2 | 2.694 |
| 1HGG | E_ARG_261 | NH2 | E_GLU_119 | OE1 | 2.738 |
| 1HGG | E_ARG_261 | NH2 | E_GLU_119 | OE2 | 2.981 |
| 1HGG | E_LYS_264 | NZ  | E_ASP_85  | OD1 | 3.369 |
| 1HGG | E_LYS_264 | NZ  | E_ASP_85  | OD2 | 2.847 |
| 1HGG | E_ARG_269 | NH1 | F_GLU_67  | OE1 | 2.691 |
| 1HGG | E_ARG_269 | NH2 | F_GLU_67  | OE1 | 3.830 |
| 1HGG | E_LYS_292 | NZ  | E_ASP_291 | OD1 | 2.996 |
| 1HGG | E_LYS_292 | NZ  | E_ASP_291 | OD2 | 2.759 |
| 1HGG | E_LYS_299 | NZ  | F_GLU_69  | OE2 | 2.920 |
| 1HGG | E_LYS_310 | NZ  | F_ASP_86  | OD1 | 2.871 |
| 1HGG | E_LYS_310 | NZ  | F_ASP_90  | OD1 | 2.639 |
| 1HGG | E_LYS_310 | NZ  | F_ASP_90  | OD2 | 3.900 |
| 1HGG | E_LYS_315 | NZ  | E_GLU_41  | OE1 | 2.684 |
| 1HGG | E_LYS_326 | NZ  | F_GLU_15  | OE1 | 2.975 |
| 1HGG | E_LYS_326 | NZ  | F_GLU_15  | OE2 | 3.000 |
| 1HGG | F_LYS_51  | NZ  | F_GLU_103 | OE1 | 2.794 |
| 1HGG | F_ARG_54  | NH1 | D_GLU_97  | OE2 | 3.483 |
| 1HGG | F_ARG_54  | NH1 | F_GLU_57  | OE1 | 2.848 |
| 1HGG | F_ARG_54  | NH1 | F_GLU_57  | OE2 | 2.863 |
| 1HGG | F_ARG_54  | NH2 | D_GLU_97  | OE2 | 2.727 |
| 1HGG | F_LYS_58  | NZ  | F_GLU_61  | OE2 | 2.938 |
| 1HGG | F_LYS_62  | NZ  | D_ASP_86  | OD1 | 2.904 |
| 1HGG | F_LYS_62  | NZ  | D_ASP_86  | OD2 | 2.582 |

|      |           |     |           |     |       |
|------|-----------|-----|-----------|-----|-------|
| 1HGG | F_LYS_62  | NZ  | D_ASP_90  | OD1 | 3.752 |
| 1HGG | F_LYS_62  | NZ  | D_ASP_90  | OD2 | 2.595 |
| 1HGG | F_LYS_68  | NZ  | F_GLU_85  | OE1 | 3.147 |
| 1HGG | F_LYS_68  | NZ  | F_GLU_85  | OE2 | 2.755 |
| 1HGG | F_ARG_76  | NH1 | B_GLU_74  | OE1 | 2.750 |
| 1HGG | F_ARG_76  | NH1 | B_GLU_74  | OE2 | 3.432 |
| 1HGG | F_ARG_76  | NH2 | B_GLU_74  | OE1 | 3.456 |
| 1HGG | F_ARG_76  | NH2 | B_GLU_74  | OE2 | 2.786 |
| 1HGG | F_ARG_76  | NH2 | B_GLU_81  | OE1 | 2.674 |
| 1HGG | F_ARG_76  | NH2 | B_GLU_81  | OE2 | 3.545 |
| 1HGG | F_LYS_117 | NZ  | F_GLU_114 | OE1 | 3.063 |
| 1HGG | F_LYS_117 | NZ  | F_GLU_114 | OE2 | 2.581 |
| 1HGG | F_ARG_123 | NH1 | F_GLU_120 | OE1 | 2.640 |
| 1HGG | F_ARG_123 | NH1 | F_GLU_120 | OE2 | 2.718 |
| 1HGG | F_ARG_123 | NH2 | D_GLU_132 | OE1 | 2.843 |
| 1HGG | F_ARG_124 | NH1 | F_GLU_120 | OE1 | 3.721 |
| 1HGG | F_ARG_124 | NH2 | D_GLU_132 | OE1 | 3.317 |
| 1HGG | F_ARG_124 | NH2 | D_GLU_132 | OE2 | 3.342 |
| 1HGG | F_ARG_127 | NH1 | D_GLU_131 | OE1 | 2.523 |
| 1HGG | F_LYS_143 | NZ  | F_ASP_145 | OD2 | 2.914 |
| 1HGG | F_ARG_153 | NH1 | F_GLU_150 | OE2 | 2.532 |
| 1HGG | F_HIS_159 | NE2 | F_ASP_160 | OD2 | 3.162 |
| 1HGG | F_ARG_163 | NH2 | D_GLU_131 | OE1 | 2.589 |
| 1HGG | F_ARG_163 | NH2 | D_GLU_131 | OE2 | 2.640 |
| 1HGG | F_ARG_163 | NH2 | F_GLU_128 | OE1 | 3.754 |
| 1HGG | F_ARG_170 | NH1 | B_GLU_128 | OE1 | 3.237 |
| 1HGG | F_ARG_170 | NH1 | B_GLU_128 | OE2 | 3.354 |
| 1HGG | F_ARG_170 | NH1 | F_GLU_131 | OE2 | 2.835 |
| 1HGG | F_ARG_170 | NH2 | F_GLU_128 | OE2 | 2.924 |
| 1HGG | F_LYS_174 | NZ  | B_ASP_164 | OD1 | 2.757 |
| 1HGG | F_LYS_174 | NZ  | B_ASP_164 | OD2 | 2.547 |
| 1HGH | A_LYS_27  | NZ  | B_GLU_97  | OE1 | 2.856 |
| 1HGH | A_LYS_27  | NZ  | B_GLU_97  | OE2 | 2.781 |
| 1HGH | A_LYS_50  | NZ  | A_ASP_275 | OD1 | 3.680 |
| 1HGH | A_LYS_50  | NZ  | A_ASP_275 | OD2 | 2.788 |
| 1HGH | A_ARG_57  | NH2 | A_GLU_82  | OE1 | 2.548 |
| 1HGH | A_ARG_57  | NH2 | A_GLU_82  | OE2 | 3.398 |
| 1HGH | A_HIS_75  | ND1 | A_ASP_73  | OD1 | 2.741 |
| 1HGH | A_HIS_75  | ND1 | A_ASP_73  | OD2 | 3.401 |
| 1HGH | A_HIS_75  | NE2 | A_ASP_63  | OD1 | 3.595 |
| 1HGH | A_ARG_90  | NH2 | A_ASP_60  | OD1 | 3.580 |
| 1HGH | A_ARG_90  | NH2 | A_ASP_60  | OD2 | 2.788 |
| 1HGH | A_ARG_109 | NH1 | A_GLU_89  | OE1 | 2.475 |
| 1HGH | A_ARG_109 | NH1 | A_GLU_89  | OE2 | 3.343 |
| 1HGH | A_ARG_109 | NH2 | B_GLU_67  | OE1 | 3.697 |
| 1HGH | A_ARG_109 | NH2 | B_GLU_67  | OE2 | 2.864 |
| 1HGH | A_ARG_141 | NH2 | A_ASP_77  | OD1 | 2.863 |
| 1HGH | A_ARG_141 | NH2 | A_ASP_77  | OD2 | 2.744 |
| 1HGH | A_LYS_176 | NZ  | A_GLU_123 | OE2 | 2.684 |
| 1HGH | A_HIS_183 | NE2 | A_GLU_190 | OE2 | 3.803 |
| 1HGH | A_LYS_238 | NZ  | F_GLU_72  | OE1 | 2.921 |
| 1HGH | A_LYS_238 | NZ  | F_GLU_72  | OE2 | 2.736 |
| 1HGH | A_ARG_261 | NH1 | A_GLU_119 | OE2 | 2.623 |
| 1HGH | A_ARG_261 | NH2 | A_GLU_119 | OE1 | 2.866 |
| 1HGH | A_ARG_261 | NH2 | A_GLU_119 | OE2 | 2.801 |
| 1HGH | A_LYS_264 | NZ  | A_ASP_85  | OD1 | 3.600 |
| 1HGH | A_LYS_264 | NZ  | A_ASP_85  | OD2 | 2.814 |
| 1HGH | A_ARG_269 | NH1 | B_GLU_67  | OE1 | 2.720 |

|      |           |     |           |     |       |
|------|-----------|-----|-----------|-----|-------|
| 1HGH | A_ARG_269 | NH2 | B_GLU_67  | OE1 | 3.718 |
| 1HGH | A_LYS_292 | NZ  | A_ASP_291 | OD1 | 3.015 |
| 1HGH | A_LYS_292 | NZ  | A_ASP_291 | OD2 | 2.819 |
| 1HGH | A_LYS_299 | NZ  | B_GLU_69  | OE2 | 2.918 |
| 1HGH | A_LYS_310 | NZ  | B_ASP_86  | OD1 | 2.712 |
| 1HGH | A_LYS_310 | NZ  | B_ASP_90  | OD1 | 2.578 |
| 1HGH | A_LYS_310 | NZ  | B_ASP_90  | OD2 | 3.975 |
| 1HGH | A_LYS_315 | NZ  | A_GLU_41  | OE1 | 2.869 |
| 1HGH | A_LYS_326 | NZ  | A_GLU_325 | OE1 | 2.838 |
| 1HGH | A_LYS_326 | NZ  | B_GLU_15  | OE1 | 3.092 |
| 1HGH | A_LYS_326 | NZ  | B_GLU_15  | OE2 | 2.707 |
| 1HGH | B_ARG_25  | NH1 | A_GLU_325 | OE2 | 3.971 |
| 1HGH | B_ARG_25  | NH2 | A_GLU_325 | OE2 | 3.017 |
| 1HGH | B_LYS_51  | NZ  | B_GLU_103 | OE1 | 2.789 |
| 1HGH | B_ARG_54  | NH1 | B_GLU_57  | OE1 | 2.865 |
| 1HGH | B_ARG_54  | NH1 | B_GLU_57  | OE2 | 2.969 |
| 1HGH | B_ARG_54  | NH1 | F_GLU_97  | OE2 | 3.285 |
| 1HGH | B_ARG_54  | NH2 | F_GLU_97  | OE2 | 2.823 |
| 1HGH | B_LYS_58  | NZ  | B_GLU_61  | OE2 | 3.237 |
| 1HGH | B_LYS_62  | NZ  | F_ASP_86  | OD1 | 3.064 |
| 1HGH | B_LYS_62  | NZ  | F_ASP_86  | OD2 | 2.661 |
| 1HGH | B_LYS_62  | NZ  | F_ASP_90  | OD1 | 3.547 |
| 1HGH | B_LYS_62  | NZ  | F_ASP_90  | OD2 | 2.683 |
| 1HGH | B_LYS_68  | NZ  | B_GLU_85  | OE1 | 3.132 |
| 1HGH | B_LYS_68  | NZ  | B_GLU_85  | OE2 | 2.734 |
| 1HGH | B_ARG_76  | NH1 | D_GLU_74  | OE1 | 3.707 |
| 1HGH | B_ARG_76  | NH1 | D_GLU_74  | OE2 | 2.912 |
| 1HGH | B_ARG_76  | NH2 | D_GLU_74  | OE1 | 2.889 |
| 1HGH | B_ARG_76  | NH2 | D_GLU_74  | OE2 | 3.526 |
| 1HGH | B_ARG_76  | NH2 | D_GLU_81  | OE1 | 2.765 |
| 1HGH | B_ARG_76  | NH2 | D_GLU_81  | OE2 | 3.411 |
| 1HGH | B_LYS_117 | NZ  | B_GLU_114 | OE1 | 3.139 |
| 1HGH | B_LYS_117 | NZ  | B_GLU_114 | OE2 | 2.561 |
| 1HGH | B_ARG_123 | NH1 | B_GLU_120 | OE1 | 2.569 |
| 1HGH | B_ARG_123 | NH1 | B_GLU_120 | OE2 | 2.742 |
| 1HGH | B_ARG_123 | NH2 | F_GLU_132 | OE1 | 3.134 |
| 1HGH | B_ARG_124 | NH1 | B_GLU_120 | OE1 | 3.740 |
| 1HGH | B_ARG_124 | NH2 | F_GLU_132 | OE1 | 3.005 |
| 1HGH | B_ARG_124 | NH2 | F_GLU_132 | OE2 | 3.302 |
| 1HGH | B_ARG_127 | NH1 | F_GLU_131 | OE1 | 2.524 |
| 1HGH | B_LYS_143 | NZ  | B_ASP_145 | OD2 | 2.787 |
| 1HGH | B_ARG_153 | NH1 | B_GLU_150 | OE1 | 2.556 |
| 1HGH | B_HIS_159 | NE2 | B_ASP_160 | OD2 | 3.003 |
| 1HGH | B_ARG_163 | NH2 | F_GLU_131 | OE1 | 2.607 |
| 1HGH | B_ARG_163 | NH2 | F_GLU_131 | OE2 | 2.538 |
| 1HGH | B_ARG_170 | NH1 | B_GLU_131 | OE2 | 2.832 |
| 1HGH | B_ARG_170 | NH1 | D_GLU_128 | OE1 | 3.253 |
| 1HGH | B_ARG_170 | NH1 | D_GLU_128 | OE2 | 3.577 |
| 1HGH | B_ARG_170 | NH2 | B_GLU_128 | OE2 | 2.706 |
| 1HGH | B_LYS_174 | NZ  | D_ASP_164 | OD1 | 2.767 |
| 1HGH | B_LYS_174 | NZ  | D_ASP_164 | OD2 | 2.573 |
| 1HGH | C_LYS_27  | NZ  | D_GLU_97  | OE1 | 2.897 |
| 1HGH | C_LYS_27  | NZ  | D_GLU_97  | OE2 | 2.815 |
| 1HGH | C_LYS_50  | NZ  | C_ASP_275 | OD1 | 3.681 |
| 1HGH | C_LYS_50  | NZ  | C_ASP_275 | OD2 | 2.765 |
| 1HGH | C_ARG_57  | NH2 | C_GLU_82  | OE1 | 2.537 |
| 1HGH | C_ARG_57  | NH2 | C_GLU_82  | OE2 | 3.720 |
| 1HGH | C_HIS_75  | ND1 | C_ASP_73  | OD1 | 2.705 |

|      |           |     |           |     |       |
|------|-----------|-----|-----------|-----|-------|
| 1HGH | C_HIS_75  | ND1 | C_ASP_73  | OD2 | 3.403 |
| 1HGH | C_HIS_75  | NE2 | C_ASP_63  | OD1 | 3.580 |
| 1HGH | C_ARG_90  | NH2 | C_ASP_60  | OD1 | 3.561 |
| 1HGH | C_ARG_90  | NH2 | C_ASP_60  | OD2 | 2.760 |
| 1HGH | C_ARG_109 | NH1 | C_GLU_89  | OE1 | 2.510 |
| 1HGH | C_ARG_109 | NH1 | C_GLU_89  | OE2 | 3.378 |
| 1HGH | C_ARG_109 | NH2 | D_GLU_67  | OE1 | 3.686 |
| 1HGH | C_ARG_109 | NH2 | D_GLU_67  | OE2 | 2.856 |
| 1HGH | C_ARG_141 | NH2 | C_ASP_77  | OD1 | 2.881 |
| 1HGH | C_ARG_141 | NH2 | C_ASP_77  | OD2 | 2.750 |
| 1HGH | C_LYS_176 | NZ  | C_GLU_123 | OE2 | 2.654 |
| 1HGH | C_HIS_183 | NE2 | C_GLU_190 | OE2 | 3.784 |
| 1HGH | C_LYS_238 | NZ  | B_GLU_72  | OE1 | 2.713 |
| 1HGH | C_LYS_238 | NZ  | B_GLU_72  | OE2 | 2.597 |
| 1HGH | C_ARG_261 | NH1 | C_GLU_119 | OE2 | 2.638 |
| 1HGH | C_ARG_261 | NH2 | C_GLU_119 | OE1 | 2.853 |
| 1HGH | C_ARG_261 | NH2 | C_GLU_119 | OE2 | 2.786 |
| 1HGH | C_LYS_264 | NZ  | C_ASP_85  | OD1 | 3.599 |
| 1HGH | C_LYS_264 | NZ  | C_ASP_85  | OD2 | 2.793 |
| 1HGH | C_ARG_269 | NH1 | D_GLU_67  | OE1 | 2.732 |
| 1HGH | C_ARG_269 | NH2 | D_GLU_67  | OE1 | 3.725 |
| 1HGH | C_LYS_292 | NZ  | C_ASP_291 | OD1 | 3.012 |
| 1HGH | C_LYS_292 | NZ  | C_ASP_291 | OD2 | 2.815 |
| 1HGH | C_LYS_299 | NZ  | D_GLU_69  | OE2 | 2.939 |
| 1HGH | C_LYS_310 | NZ  | D_ASP_86  | OD1 | 2.734 |
| 1HGH | C_LYS_310 | NZ  | D_ASP_90  | OD1 | 2.551 |
| 1HGH | C_LYS_310 | NZ  | D_ASP_90  | OD2 | 3.913 |
| 1HGH | C_LYS_315 | NZ  | C_GLU_41  | OE1 | 2.867 |
| 1HGH | C_LYS_326 | NZ  | D_GLU_15  | OE1 | 2.774 |
| 1HGH | C_LYS_326 | NZ  | D_GLU_15  | OE2 | 3.676 |
| 1HGH | D_LYS_51  | NZ  | D_GLU_103 | OE1 | 2.742 |
| 1HGH | D_ARG_54  | NH1 | B_GLU_97  | OE2 | 3.277 |
| 1HGH | D_ARG_54  | NH1 | D_GLU_57  | OE1 | 2.856 |
| 1HGH | D_ARG_54  | NH1 | D_GLU_57  | OE2 | 2.958 |
| 1HGH | D_ARG_54  | NH2 | B_GLU_97  | OE2 | 2.797 |
| 1HGH | D_LYS_58  | NZ  | D_GLU_61  | OE2 | 3.225 |
| 1HGH | D_LYS_62  | NZ  | B_ASP_86  | OD1 | 3.011 |
| 1HGH | D_LYS_62  | NZ  | B_ASP_86  | OD2 | 2.510 |
| 1HGH | D_LYS_62  | NZ  | B_ASP_90  | OD1 | 3.543 |
| 1HGH | D_LYS_62  | NZ  | B_ASP_90  | OD2 | 2.589 |
| 1HGH | D_LYS_68  | NZ  | D_GLU_85  | OE1 | 3.123 |
| 1HGH | D_LYS_68  | NZ  | D_GLU_85  | OE2 | 2.750 |
| 1HGH | D_ARG_76  | NH1 | F_GLU_74  | OE1 | 3.430 |
| 1HGH | D_ARG_76  | NH1 | F_GLU_74  | OE2 | 2.765 |
| 1HGH | D_ARG_76  | NH2 | F_GLU_74  | OE1 | 2.747 |
| 1HGH | D_ARG_76  | NH2 | F_GLU_74  | OE2 | 3.553 |
| 1HGH | D_ARG_76  | NH2 | F_GLU_81  | OE1 | 2.698 |
| 1HGH | D_ARG_76  | NH2 | F_GLU_81  | OE2 | 3.487 |
| 1HGH | D_LYS_117 | NZ  | D_GLU_114 | OE1 | 3.179 |
| 1HGH | D_LYS_117 | NZ  | D_GLU_114 | OE2 | 2.579 |
| 1HGH | D_ARG_123 | NH1 | D_GLU_120 | OE1 | 2.573 |
| 1HGH | D_ARG_123 | NH1 | D_GLU_120 | OE2 | 2.771 |
| 1HGH | D_ARG_123 | NH2 | B_GLU_132 | OE1 | 3.141 |
| 1HGH | D_ARG_124 | NH1 | D_GLU_120 | OE1 | 3.722 |
| 1HGH | D_ARG_124 | NH2 | B_GLU_132 | OE1 | 3.050 |
| 1HGH | D_ARG_124 | NH2 | B_GLU_132 | OE2 | 3.354 |
| 1HGH | D_ARG_127 | NH1 | B_GLU_131 | OE1 | 2.536 |
| 1HGH | D_LYS_143 | NZ  | D_ASP_145 | OD2 | 2.793 |

|      |           |     |           |     |       |
|------|-----------|-----|-----------|-----|-------|
| 1HGH | D_ARG_153 | NH1 | D_GLU_150 | OE2 | 2.554 |
| 1HGH | D_HIS_159 | NE2 | D_ASP_160 | OD2 | 3.042 |
| 1HGH | D_ARG_163 | NH2 | B_GLU_131 | OE1 | 2.609 |
| 1HGH | D_ARG_163 | NH2 | B_GLU_131 | OE2 | 2.570 |
| 1HGH | D_ARG_170 | NH1 | D_GLU_131 | OE2 | 2.834 |
| 1HGH | D_ARG_170 | NH1 | F_GLU_128 | OE1 | 3.352 |
| 1HGH | D_ARG_170 | NH1 | F_GLU_128 | OE2 | 3.641 |
| 1HGH | D_ARG_170 | NH2 | D_GLU_128 | OE2 | 2.742 |
| 1HGH | D_LYS_174 | NZ  | F_ASP_164 | OD1 | 2.863 |
| 1HGH | D_LYS_174 | NZ  | F_ASP_164 | OD2 | 2.724 |
| 1HGH | E_LYS_27  | NZ  | F_GLU_97  | OE1 | 2.917 |
| 1HGH | E_LYS_27  | NZ  | F_GLU_97  | OE2 | 2.767 |
| 1HGH | E_LYS_50  | NZ  | E_ASP_275 | OD1 | 3.706 |
| 1HGH | E_LYS_50  | NZ  | E_ASP_275 | OD2 | 2.783 |
| 1HGH | E_ARG_57  | NH2 | E_GLU_82  | OE1 | 2.543 |
| 1HGH | E_ARG_57  | NH2 | E_GLU_82  | OE2 | 3.770 |
| 1HGH | E_HIS_75  | ND1 | E_ASP_73  | OD1 | 2.703 |
| 1HGH | E_HIS_75  | ND1 | E_ASP_73  | OD2 | 3.377 |
| 1HGH | E_HIS_75  | NE2 | E_ASP_63  | OD1 | 3.572 |
| 1HGH | E_ARG_90  | NH2 | E_ASP_60  | OD1 | 3.573 |
| 1HGH | E_ARG_90  | NH2 | E_ASP_60  | OD2 | 2.816 |
| 1HGH | E_ARG_109 | NH1 | E_GLU_89  | OE1 | 2.463 |
| 1HGH | E_ARG_109 | NH1 | E_GLU_89  | OE2 | 3.357 |
| 1HGH | E_ARG_109 | NH2 | F_GLU_67  | OE1 | 3.698 |
| 1HGH | E_ARG_109 | NH2 | F_GLU_67  | OE2 | 2.878 |
| 1HGH | E_ARG_141 | NH2 | E_ASP_77  | OD1 | 2.892 |
| 1HGH | E_ARG_141 | NH2 | E_ASP_77  | OD2 | 2.736 |
| 1HGH | E_LYS_176 | NZ  | E_GLU_123 | OE2 | 2.692 |
| 1HGH | E_HIS_183 | NE2 | E_GLU_190 | OE2 | 3.780 |
| 1HGH | E_LYS_238 | NZ  | D_GLU_72  | OE1 | 2.870 |
| 1HGH | E_LYS_238 | NZ  | D_GLU_72  | OE2 | 2.766 |
| 1HGH | E_ARG_261 | NH1 | E_GLU_119 | OE2 | 2.629 |
| 1HGH | E_ARG_261 | NH2 | E_GLU_119 | OE1 | 2.852 |
| 1HGH | E_ARG_261 | NH2 | E_GLU_119 | OE2 | 2.789 |
| 1HGH | E_LYS_264 | NZ  | E_ASP_85  | OD1 | 3.620 |
| 1HGH | E_LYS_264 | NZ  | E_ASP_85  | OD2 | 2.815 |
| 1HGH | E_ARG_269 | NH1 | F_GLU_67  | OE1 | 2.705 |
| 1HGH | E_ARG_269 | NH2 | F_GLU_67  | OE1 | 3.715 |
| 1HGH | E_LYS_292 | NZ  | E_ASP_291 | OD1 | 3.036 |
| 1HGH | E_LYS_292 | NZ  | E_ASP_291 | OD2 | 2.839 |
| 1HGH | E_LYS_299 | NZ  | F_GLU_69  | OE2 | 2.896 |
| 1HGH | E_LYS_310 | NZ  | F_ASP_86  | OD1 | 2.740 |
| 1HGH | E_LYS_310 | NZ  | F_ASP_90  | OD1 | 2.571 |
| 1HGH | E_LYS_310 | NZ  | F_ASP_90  | OD2 | 3.948 |
| 1HGH | E_LYS_315 | NZ  | E_GLU_41  | OE1 | 2.853 |
| 1HGH | E_LYS_326 | NZ  | F_GLU_15  | OE1 | 2.900 |
| 1HGH | E_LYS_326 | NZ  | F_GLU_15  | OE2 | 3.072 |
| 1HGH | F_LYS_51  | NZ  | F_GLU_103 | OE1 | 2.753 |
| 1HGH | F_ARG_54  | NH1 | D_GLU_97  | OE2 | 3.293 |
| 1HGH | F_ARG_54  | NH1 | F_GLU_57  | OE1 | 2.877 |
| 1HGH | F_ARG_54  | NH1 | F_GLU_57  | OE2 | 2.968 |
| 1HGH | F_ARG_54  | NH2 | D_GLU_97  | OE2 | 2.723 |
| 1HGH | F_LYS_58  | NZ  | F_GLU_61  | OE2 | 3.244 |
| 1HGH | F_LYS_62  | NZ  | D_ASP_86  | OD1 | 3.012 |
| 1HGH | F_LYS_62  | NZ  | D_ASP_86  | OD2 | 2.546 |
| 1HGH | F_LYS_62  | NZ  | D_ASP_90  | OD1 | 3.612 |
| 1HGH | F_LYS_62  | NZ  | D_ASP_90  | OD2 | 2.682 |
| 1HGH | F_LYS_68  | NZ  | F_GLU_85  | OE1 | 3.145 |

|      |           |     |           |     |       |
|------|-----------|-----|-----------|-----|-------|
| 1HGH | F_LYS_68  | NZ  | F_GLU_85  | OE2 | 2.728 |
| 1HGH | F_ARG_76  | NH1 | B_GLU_74  | OE1 | 3.509 |
| 1HGH | F_ARG_76  | NH1 | B_GLU_74  | OE2 | 2.732 |
| 1HGH | F_ARG_76  | NH2 | B_GLU_74  | OE1 | 2.780 |
| 1HGH | F_ARG_76  | NH2 | B_GLU_74  | OE2 | 3.488 |
| 1HGH | F_ARG_76  | NH2 | B_GLU_81  | OE1 | 2.709 |
| 1HGH | F_ARG_76  | NH2 | B_GLU_81  | OE2 | 3.513 |
| 1HGH | F_LYS_117 | NZ  | F_GLU_114 | OE1 | 3.171 |
| 1HGH | F_LYS_117 | NZ  | F_GLU_114 | OE2 | 2.578 |
| 1HGH | F_ARG_123 | NH1 | F_GLU_120 | OE1 | 2.557 |
| 1HGH | F_ARG_123 | NH1 | F_GLU_120 | OE2 | 2.739 |
| 1HGH | F_ARG_123 | NH2 | D_GLU_132 | OE1 | 3.148 |
| 1HGH | F_ARG_124 | NH1 | F_GLU_120 | OE1 | 3.713 |
| 1HGH | F_ARG_124 | NH2 | D_GLU_132 | OE1 | 3.099 |
| 1HGH | F_ARG_124 | NH2 | D_GLU_132 | OE2 | 3.356 |
| 1HGH | F_ARG_127 | NH1 | D_GLU_131 | OE1 | 2.577 |
| 1HGH | F_LYS_143 | NZ  | F_ASP_145 | OD2 | 2.769 |
| 1HGH | F_ARG_153 | NH1 | F_GLU_150 | OE2 | 2.536 |
| 1HGH | F_HIS_159 | NE2 | F_ASP_160 | OD2 | 3.043 |
| 1HGH | F_ARG_163 | NH2 | D_GLU_131 | OE1 | 2.600 |
| 1HGH | F_ARG_163 | NH2 | D_GLU_131 | OE2 | 2.611 |
| 1HGH | F_ARG_170 | NH1 | B_GLU_128 | OE1 | 3.225 |
| 1HGH | F_ARG_170 | NH1 | B_GLU_128 | OE2 | 3.576 |
| 1HGH | F_ARG_170 | NH1 | F_GLU_131 | OE2 | 2.843 |
| 1HGH | F_ARG_170 | NH2 | F_GLU_128 | OE2 | 2.737 |
| 1HGH | F_LYS_174 | NZ  | B_ASP_164 | OD1 | 2.776 |
| 1HGH | F_LYS_174 | NZ  | B_ASP_164 | OD2 | 2.495 |
| 1HGI | A_LYS_27  | NZ  | B_GLU_97  | OE1 | 2.940 |
| 1HGI | A_LYS_27  | NZ  | B_GLU_97  | OE2 | 2.900 |
| 1HGI | A_LYS_50  | NZ  | A_ASP_275 | OD1 | 3.608 |
| 1HGI | A_LYS_50  | NZ  | A_ASP_275 | OD2 | 2.707 |
| 1HGI | A_ARG_57  | NH2 | A_GLU_82  | OE1 | 2.526 |
| 1HGI | A_ARG_57  | NH2 | A_GLU_82  | OE2 | 3.433 |
| 1HGI | A_HIS_75  | ND1 | A_ASP_73  | OD1 | 2.896 |
| 1HGI | A_HIS_75  | ND1 | A_ASP_73  | OD2 | 3.177 |
| 1HGI | A_HIS_75  | NE2 | A_ASP_63  | OD1 | 3.557 |
| 1HGI | A_ARG_90  | NH2 | A_ASP_60  | OD1 | 3.597 |
| 1HGI | A_ARG_90  | NH2 | A_ASP_60  | OD2 | 2.834 |
| 1HGI | A_ARG_109 | NH1 | A_GLU_89  | OE1 | 2.511 |
| 1HGI | A_ARG_109 | NH1 | A_GLU_89  | OE2 | 3.252 |
| 1HGI | A_ARG_109 | NH2 | B_GLU_67  | OE1 | 3.638 |
| 1HGI | A_ARG_109 | NH2 | B_GLU_67  | OE2 | 2.797 |
| 1HGI | A_ARG_141 | NH2 | A_ASP_77  | OD1 | 2.933 |
| 1HGI | A_ARG_141 | NH2 | A_ASP_77  | OD2 | 2.691 |
| 1HGI | A_LYS_176 | NZ  | A_GLU_123 | OE2 | 2.677 |
| 1HGI | A_LYS_238 | NZ  | F_GLU_72  | OE1 | 2.849 |
| 1HGI | A_LYS_238 | NZ  | F_GLU_72  | OE2 | 2.839 |
| 1HGI | A_ARG_261 | NH1 | A_GLU_119 | OE2 | 2.655 |
| 1HGI | A_ARG_261 | NH2 | A_GLU_119 | OE1 | 2.852 |
| 1HGI | A_ARG_261 | NH2 | A_GLU_119 | OE2 | 2.888 |
| 1HGI | A_LYS_264 | NZ  | A_ASP_85  | OD1 | 3.460 |
| 1HGI | A_LYS_264 | NZ  | A_ASP_85  | OD2 | 2.825 |
| 1HGI | A_ARG_269 | NH1 | B_GLU_67  | OE1 | 2.748 |
| 1HGI | A_ARG_269 | NH2 | B_GLU_67  | OE1 | 3.823 |
| 1HGI | A_LYS_292 | NZ  | A_ASP_291 | OD1 | 2.954 |
| 1HGI | A_LYS_292 | NZ  | A_ASP_291 | OD2 | 2.810 |
| 1HGI | A_LYS_299 | NZ  | B_GLU_69  | OE2 | 2.728 |
| 1HGI | A_LYS_310 | NZ  | B_ASP_86  | OD1 | 2.759 |

|      |           |     |           |     |       |
|------|-----------|-----|-----------|-----|-------|
| 1HGI | A_LYS_310 | NZ  | B_ASP_90  | OD1 | 2.527 |
| 1HGI | A_LYS_315 | NZ  | A_GLU_41  | OE1 | 2.774 |
| 1HGI | A_LYS_326 | NZ  | A_GLU_325 | OE1 | 2.913 |
| 1HGI | A_LYS_326 | NZ  | B_GLU_15  | OE1 | 3.374 |
| 1HGI | A_LYS_326 | NZ  | B_GLU_15  | OE2 | 2.794 |
| 1HGI | B_ARG_25  | NH1 | A_GLU_325 | OE2 | 3.734 |
| 1HGI | B_ARG_25  | NH2 | A_GLU_325 | OE2 | 2.929 |
| 1HGI | B_LYS_51  | NZ  | B_GLU_103 | OE1 | 2.815 |
| 1HGI | B_ARG_54  | NH1 | B_GLU_57  | OE1 | 2.860 |
| 1HGI | B_ARG_54  | NH1 | B_GLU_57  | OE2 | 2.893 |
| 1HGI | B_ARG_54  | NH1 | F_GLU_97  | OE2 | 3.222 |
| 1HGI | B_ARG_54  | NH2 | F_GLU_97  | OE2 | 2.806 |
| 1HGI | B_LYS_58  | NZ  | B_GLU_61  | OE2 | 3.021 |
| 1HGI | B_LYS_62  | NZ  | F_ASP_86  | OD1 | 2.942 |
| 1HGI | B_LYS_62  | NZ  | F_ASP_86  | OD2 | 2.668 |
| 1HGI | B_LYS_62  | NZ  | F_ASP_90  | OD1 | 3.332 |
| 1HGI | B_LYS_62  | NZ  | F_ASP_90  | OD2 | 2.667 |
| 1HGI | B_LYS_68  | NZ  | B_GLU_85  | OE1 | 3.269 |
| 1HGI | B_LYS_68  | NZ  | B_GLU_85  | OE2 | 2.791 |
| 1HGI | B_ARG_76  | NH1 | D_GLU_74  | OE1 | 3.625 |
| 1HGI | B_ARG_76  | NH1 | D_GLU_74  | OE2 | 2.918 |
| 1HGI | B_ARG_76  | NH2 | D_GLU_74  | OE1 | 2.861 |
| 1HGI | B_ARG_76  | NH2 | D_GLU_74  | OE2 | 3.621 |
| 1HGI | B_ARG_76  | NH2 | D_GLU_81  | OE1 | 2.708 |
| 1HGI | B_ARG_76  | NH2 | D_GLU_81  | OE2 | 3.474 |
| 1HGI | B_LYS_117 | NZ  | B_GLU_114 | OE1 | 3.138 |
| 1HGI | B_LYS_117 | NZ  | B_GLU_114 | OE2 | 2.563 |
| 1HGI | B_ARG_123 | NH1 | B_GLU_120 | OE1 | 2.571 |
| 1HGI | B_ARG_123 | NH1 | B_GLU_120 | OE2 | 2.840 |
| 1HGI | B_ARG_123 | NH2 | F_GLU_132 | OE1 | 3.105 |
| 1HGI | B_ARG_124 | NH1 | B_GLU_120 | OE1 | 3.733 |
| 1HGI | B_ARG_124 | NH2 | F_GLU_132 | OE1 | 3.081 |
| 1HGI | B_ARG_124 | NH2 | F_GLU_132 | OE2 | 3.356 |
| 1HGI | B_ARG_127 | NH1 | F_GLU_131 | OE1 | 2.493 |
| 1HGI | B_LYS_143 | NZ  | B_ASP_145 | OD2 | 2.749 |
| 1HGI | B_ARG_153 | NH1 | B_GLU_150 | OE1 | 2.584 |
| 1HGI | B_HIS_159 | NE2 | B_ASP_160 | OD2 | 3.012 |
| 1HGI | B_ARG_163 | NH2 | B_GLU_128 | OE1 | 3.957 |
| 1HGI | B_ARG_163 | NH2 | F_GLU_131 | OE1 | 2.586 |
| 1HGI | B_ARG_163 | NH2 | F_GLU_131 | OE2 | 2.598 |
| 1HGI | B_ARG_170 | NH1 | B_GLU_131 | OE2 | 2.767 |
| 1HGI | B_ARG_170 | NH1 | D_GLU_128 | OE1 | 3.640 |
| 1HGI | B_ARG_170 | NH1 | D_GLU_128 | OE2 | 3.301 |
| 1HGI | B_ARG_170 | NH2 | B_GLU_128 | OE2 | 2.947 |
| 1HGI | B_LYS_174 | NZ  | D_ASP_164 | OD1 | 2.745 |
| 1HGI | B_LYS_174 | NZ  | D_ASP_164 | OD2 | 2.560 |
| 1HGI | C_LYS_27  | NZ  | D_GLU_97  | OE1 | 2.951 |
| 1HGI | C_LYS_27  | NZ  | D_GLU_97  | OE2 | 2.876 |
| 1HGI | C_LYS_50  | NZ  | C_ASP_275 | OD1 | 3.635 |
| 1HGI | C_LYS_50  | NZ  | C_ASP_275 | OD2 | 2.676 |
| 1HGI | C_ARG_57  | NH2 | C_GLU_82  | OE1 | 2.525 |
| 1HGI | C_ARG_57  | NH2 | C_GLU_82  | OE2 | 3.836 |
| 1HGI | C_HIS_75  | ND1 | C_ASP_73  | OD1 | 2.875 |
| 1HGI | C_HIS_75  | ND1 | C_ASP_73  | OD2 | 3.155 |
| 1HGI | C_HIS_75  | NE2 | C_ASP_63  | OD1 | 3.544 |
| 1HGI | C_ARG_90  | NH2 | C_ASP_60  | OD1 | 3.575 |
| 1HGI | C_ARG_90  | NH2 | C_ASP_60  | OD2 | 2.774 |
| 1HGI | C_ARG_109 | NH1 | C_GLU_89  | OE1 | 2.522 |

|      |           |     |           |     |       |
|------|-----------|-----|-----------|-----|-------|
| 1HGI | C_ARG_109 | NH1 | C_GLU_89  | OE2 | 3.270 |
| 1HGI | C_ARG_109 | NH2 | D_GLU_67  | OE1 | 3.637 |
| 1HGI | C_ARG_109 | NH2 | D_GLU_67  | OE2 | 2.819 |
| 1HGI | C_ARG_141 | NH2 | C_ASP_77  | OD1 | 2.934 |
| 1HGI | C_ARG_141 | NH2 | C_ASP_77  | OD2 | 2.703 |
| 1HGI | C_LYS_176 | NZ  | C_GLU_123 | OE2 | 2.678 |
| 1HGI | C_LYS_238 | NZ  | B_GLU_72  | OE1 | 2.671 |
| 1HGI | C_LYS_238 | NZ  | B_GLU_72  | OE2 | 2.721 |
| 1HGI | C_ARG_261 | NH1 | C_GLU_119 | OE2 | 2.664 |
| 1HGI | C_ARG_261 | NH2 | C_GLU_119 | OE1 | 2.844 |
| 1HGI | C_ARG_261 | NH2 | C_GLU_119 | OE2 | 2.850 |
| 1HGI | C_LYS_264 | NZ  | C_ASP_85  | OD1 | 3.489 |
| 1HGI | C_LYS_264 | NZ  | C_ASP_85  | OD2 | 2.832 |
| 1HGI | C_ARG_269 | NH1 | D_GLU_67  | OE1 | 2.753 |
| 1HGI | C_ARG_269 | NH2 | D_GLU_67  | OE1 | 3.850 |
| 1HGI | C_LYS_292 | NZ  | C_ASP_291 | OD1 | 2.977 |
| 1HGI | C_LYS_292 | NZ  | C_ASP_291 | OD2 | 2.816 |
| 1HGI | C_LYS_299 | NZ  | D_GLU_69  | OE2 | 2.739 |
| 1HGI | C_LYS_310 | NZ  | D_ASP_86  | OD1 | 2.772 |
| 1HGI | C_LYS_310 | NZ  | D_ASP_90  | OD1 | 2.525 |
| 1HGI | C_LYS_315 | NZ  | C_GLU_41  | OE1 | 2.748 |
| 1HGI | C_LYS_326 | NZ  | D_GLU_15  | OE1 | 2.825 |
| 1HGI | C_LYS_326 | NZ  | D_GLU_15  | OE2 | 3.570 |
| 1HGI | D_LYS_51  | NZ  | D_GLU_103 | OE1 | 2.810 |
| 1HGI | D_ARG_54  | NH1 | B_GLU_97  | OE2 | 3.254 |
| 1HGI | D_ARG_54  | NH1 | D_GLU_57  | OE1 | 2.846 |
| 1HGI | D_ARG_54  | NH1 | D_GLU_57  | OE2 | 2.899 |
| 1HGI | D_ARG_54  | NH2 | B_GLU_97  | OE2 | 2.808 |
| 1HGI | D_LYS_58  | NZ  | D_GLU_61  | OE2 | 2.998 |
| 1HGI | D_LYS_62  | NZ  | B_ASP_86  | OD1 | 2.962 |
| 1HGI | D_LYS_62  | NZ  | B_ASP_86  | OD2 | 2.570 |
| 1HGI | D_LYS_62  | NZ  | B_ASP_90  | OD1 | 3.335 |
| 1HGI | D_LYS_62  | NZ  | B_ASP_90  | OD2 | 2.541 |
| 1HGI | D_LYS_68  | NZ  | D_GLU_85  | OE1 | 3.268 |
| 1HGI | D_LYS_68  | NZ  | D_GLU_85  | OE2 | 2.807 |
| 1HGI | D_ARG_76  | NH1 | F_GLU_74  | OE1 | 3.375 |
| 1HGI | D_ARG_76  | NH1 | F_GLU_74  | OE2 | 2.776 |
| 1HGI | D_ARG_76  | NH2 | F_GLU_74  | OE1 | 2.760 |
| 1HGI | D_ARG_76  | NH2 | F_GLU_74  | OE2 | 3.657 |
| 1HGI | D_ARG_76  | NH2 | F_GLU_81  | OE1 | 2.608 |
| 1HGI | D_ARG_76  | NH2 | F_GLU_81  | OE2 | 3.506 |
| 1HGI | D_LYS_117 | NZ  | D_GLU_114 | OE1 | 3.195 |
| 1HGI | D_LYS_117 | NZ  | D_GLU_114 | OE2 | 2.582 |
| 1HGI | D_ARG_123 | NH1 | D_GLU_120 | OE1 | 2.549 |
| 1HGI | D_ARG_123 | NH1 | D_GLU_120 | OE2 | 2.835 |
| 1HGI | D_ARG_123 | NH2 | B_GLU_132 | OE1 | 3.093 |
| 1HGI | D_ARG_124 | NH1 | D_GLU_120 | OE1 | 3.750 |
| 1HGI | D_ARG_124 | NH2 | B_GLU_132 | OE1 | 3.096 |
| 1HGI | D_ARG_124 | NH2 | B_GLU_132 | OE2 | 3.377 |
| 1HGI | D_ARG_127 | NH1 | B_GLU_131 | OE1 | 2.513 |
| 1HGI | D_LYS_143 | NZ  | D_ASP_145 | OD2 | 2.778 |
| 1HGI | D_ARG_153 | NH1 | D_GLU_150 | OE2 | 2.550 |
| 1HGI | D_HIS_159 | NE2 | D_ASP_160 | OD2 | 3.012 |
| 1HGI | D_ARG_163 | NH2 | B_GLU_131 | OE1 | 2.590 |
| 1HGI | D_ARG_163 | NH2 | B_GLU_131 | OE2 | 2.616 |
| 1HGI | D_ARG_163 | NH2 | D_GLU_128 | OE1 | 3.999 |
| 1HGI | D_ARG_170 | NH1 | D_GLU_131 | OE2 | 2.771 |
| 1HGI | D_ARG_170 | NH1 | F_GLU_128 | OE1 | 3.797 |



|      |           |     |           |     |       |
|------|-----------|-----|-----------|-----|-------|
| 1HGI | D_ARG.170 | NH1 | F_GLU.128 | OE2 | 3.417 |
| 1HGI | D_ARG.170 | NH2 | D_GLU.128 | OE2 | 2.974 |
| 1HGI | D_LYS.174 | NZ  | F_ASP.164 | OD1 | 2.814 |
| 1HGI | D_LYS.174 | NZ  | F_ASP.164 | OD2 | 2.727 |
| 1HGI | E_LYS.27  | NZ  | F_GLU.97  | OE1 | 2.961 |
| 1HGI | E_LYS.27  | NZ  | F_GLU.97  | OE2 | 2.862 |
| 1HGI | E_LYS.50  | NZ  | E_ASP.275 | OD1 | 3.624 |
| 1HGI | E_LYS.50  | NZ  | E_ASP.275 | OD2 | 2.698 |
| 1HGI | E_ARG.57  | NH2 | E_GLU.82  | OE1 | 2.652 |
| 1HGI | E_ARG.57  | NH2 | E_GLU.82  | OE2 | 3.886 |
| 1HGI | E_HIS.75  | ND1 | E_ASP.73  | OD1 | 2.868 |
| 1HGI | E_HIS.75  | ND1 | E_ASP.73  | OD2 | 3.142 |
| 1HGI | E_HIS.75  | NE2 | E_ASP.63  | OD1 | 3.556 |
| 1HGI | E_ARG.90  | NH2 | E_ASP.60  | OD1 | 3.607 |
| 1HGI | E_ARG.90  | NH2 | E_ASP.60  | OD2 | 2.841 |
| 1HGI | E_ARG.109 | NH1 | E_GLU.89  | OE1 | 2.478 |
| 1HGI | E_ARG.109 | NH1 | E_GLU.89  | OE2 | 3.260 |
| 1HGI | E_ARG.109 | NH2 | F_GLU.67  | OE1 | 3.649 |
| 1HGI | E_ARG.109 | NH2 | F_GLU.67  | OE2 | 2.781 |
| 1HGI | E_ARG.141 | NH2 | E_ASP.77  | OD1 | 2.937 |
| 1HGI | E_ARG.141 | NH2 | E_ASP.77  | OD2 | 2.703 |
| 1HGI | E_LYS.176 | NZ  | E_GLU.123 | OE2 | 2.685 |
| 1HGI | E_LYS.238 | NZ  | D_GLU.72  | OE1 | 2.803 |
| 1HGI | E_LYS.238 | NZ  | D_GLU.72  | OE2 | 2.859 |
| 1HGI | E_ARG.261 | NH1 | E_GLU.119 | OE2 | 2.651 |
| 1HGI | E_ARG.261 | NH2 | E_GLU.119 | OE1 | 2.844 |
| 1HGI | E_ARG.261 | NH2 | E_GLU.119 | OE2 | 2.870 |
| 1HGI | E_LYS.264 | NZ  | E_ASP.85  | OD1 | 3.485 |
| 1HGI | E_LYS.264 | NZ  | E_ASP.85  | OD2 | 2.858 |
| 1HGI | E_ARG.269 | NH1 | F_GLU.67  | OE1 | 2.720 |
| 1HGI | E_ARG.269 | NH2 | F_GLU.67  | OE1 | 3.815 |
| 1HGI | E_LYS.292 | NZ  | E_ASP.291 | OD1 | 2.984 |
| 1HGI | E_LYS.292 | NZ  | E_ASP.291 | OD2 | 2.865 |
| 1HGI | E_LYS.299 | NZ  | F_GLU.69  | OE2 | 2.715 |
| 1HGI | E_LYS.310 | NZ  | F_ASP.86  | OD1 | 2.757 |
| 1HGI | E_LYS.310 | NZ  | F_ASP.90  | OD1 | 2.523 |
| 1HGI | E_LYS.315 | NZ  | E_GLU.41  | OE1 | 2.741 |
| 1HGI | E_LYS.326 | NZ  | F_GLU.15  | OE1 | 2.882 |
| 1HGI | E_LYS.326 | NZ  | F_GLU.15  | OE2 | 3.090 |
| 1HGI | F_LYS.51  | NZ  | F_GLU.103 | OE1 | 2.800 |
| 1HGI | F_ARG.54  | NH1 | D_GLU.97  | OE2 | 3.254 |
| 1HGI | F_ARG.54  | NH1 | F_GLU.57  | OE1 | 2.835 |
| 1HGI | F_ARG.54  | NH1 | F_GLU.57  | OE2 | 2.892 |
| 1HGI | F_ARG.54  | NH2 | D_GLU.97  | OE2 | 2.750 |
| 1HGI | F_LYS.58  | NZ  | F_GLU.61  | OE2 | 3.021 |
| 1HGI | F_LYS.62  | NZ  | D_ASP.86  | OD1 | 2.884 |
| 1HGI | F_LYS.62  | NZ  | D_ASP.86  | OD2 | 2.563 |
| 1HGI | F_LYS.62  | NZ  | D_ASP.90  | OD1 | 3.358 |
| 1HGI | F_LYS.62  | NZ  | D_ASP.90  | OD2 | 2.609 |
| 1HGI | F_LYS.68  | NZ  | F_GLU.85  | OE1 | 3.264 |
| 1HGI | F_LYS.68  | NZ  | F_GLU.85  | OE2 | 2.739 |
| 1HGI | F_ARG.76  | NH1 | B_GLU.74  | OE1 | 3.420 |
| 1HGI | F_ARG.76  | NH1 | B_GLU.74  | OE2 | 2.771 |
| 1HGI | F_ARG.76  | NH2 | B_GLU.74  | OE1 | 2.763 |
| 1HGI | F_ARG.76  | NH2 | B_GLU.74  | OE2 | 3.604 |
| 1HGI | F_ARG.76  | NH2 | B_GLU.81  | OE1 | 2.645 |
| 1HGI | F_ARG.76  | NH2 | B_GLU.81  | OE2 | 3.592 |
| 1HGI | F_LYS.117 | NZ  | F_GLU.114 | OE1 | 3.182 |

|      |           |     |           |     |       |
|------|-----------|-----|-----------|-----|-------|
| 1HGI | F_LYS_117 | NZ  | F_GLU_114 | OE2 | 2.543 |
| 1HGI | F_ARG_123 | NH1 | F_GLU_120 | OE1 | 2.586 |
| 1HGI | F_ARG_123 | NH1 | F_GLU_120 | OE2 | 2.812 |
| 1HGI | F_ARG_123 | NH2 | D_GLU_132 | OE1 | 3.144 |
| 1HGI | F_ARG_124 | NH1 | F_GLU_120 | OE1 | 3.763 |
| 1HGI | F_ARG_124 | NH2 | D_GLU_132 | OE1 | 3.185 |
| 1HGI | F_ARG_124 | NH2 | D_GLU_132 | OE2 | 3.386 |
| 1HGI | F_ARG_127 | NH1 | D_GLU_131 | OE1 | 2.561 |
| 1HGI | F_LYS_143 | NZ  | F_ASP_145 | OD2 | 2.731 |
| 1HGI | F_ARG_153 | NH1 | F_GLU_150 | OE2 | 2.577 |
| 1HGI | F_HIS_159 | NE2 | F_ASP_160 | OD2 | 3.055 |
| 1HGI | F_ARG_163 | NH2 | D_GLU_131 | OE1 | 2.567 |
| 1HGI | F_ARG_163 | NH2 | D_GLU_131 | OE2 | 2.692 |
| 1HGI | F_ARG_163 | NH2 | F_GLU_128 | OE1 | 3.975 |
| 1HGI | F_ARG_170 | NH1 | B_GLU_128 | OE1 | 3.621 |
| 1HGI | F_ARG_170 | NH1 | B_GLU_128 | OE2 | 3.345 |
| 1HGI | F_ARG_170 | NH1 | F_GLU_131 | OE2 | 2.754 |
| 1HGI | F_ARG_170 | NH2 | F_GLU_128 | OE2 | 2.972 |
| 1HGI | F_LYS_174 | NZ  | B_ASP_164 | OD1 | 2.789 |
| 1HGI | F_LYS_174 | NZ  | B_ASP_164 | OD2 | 2.521 |
| 1HGJ | A_LYS_27  | NZ  | B_GLU_97  | OE1 | 2.775 |
| 1HGJ | A_LYS_27  | NZ  | B_GLU_97  | OE2 | 2.807 |
| 1HGJ | A_LYS_50  | NZ  | A_ASP_275 | OD1 | 3.487 |
| 1HGJ | A_LYS_50  | NZ  | A_ASP_275 | OD2 | 2.742 |
| 1HGJ | A_ARG_57  | NH2 | A_GLU_82  | OE1 | 2.521 |
| 1HGJ | A_ARG_57  | NH2 | A_GLU_82  | OE2 | 3.796 |
| 1HGJ | A_HIS_75  | ND1 | A_ASP_73  | OD1 | 2.831 |
| 1HGJ | A_HIS_75  | ND1 | A_ASP_73  | OD2 | 3.407 |
| 1HGJ | A_HIS_75  | NE2 | A_ASP_63  | OD1 | 3.353 |
| 1HGJ | A_ARG_90  | NH2 | A_ASP_60  | OD1 | 3.662 |
| 1HGJ | A_ARG_90  | NH2 | A_ASP_60  | OD2 | 2.811 |
| 1HGJ | A_ARG_109 | NH1 | A_GLU_89  | OE1 | 2.528 |
| 1HGJ | A_ARG_109 | NH1 | A_GLU_89  | OE2 | 3.223 |
| 1HGJ | A_ARG_109 | NH2 | B_GLU_67  | OE1 | 3.648 |
| 1HGJ | A_ARG_109 | NH2 | B_GLU_67  | OE2 | 2.748 |
| 1HGJ | A_ARG_141 | NH2 | A_ASP_77  | OD1 | 2.818 |
| 1HGJ | A_ARG_141 | NH2 | A_ASP_77  | OD2 | 2.748 |
| 1HGJ | A_LYS_176 | NZ  | A_GLU_123 | OE2 | 2.680 |
| 1HGJ | A_HIS_183 | NE2 | A_GLU_190 | OE2 | 3.316 |
| 1HGJ | A_LYS_238 | NZ  | F_GLU_72  | OE1 | 2.903 |
| 1HGJ | A_LYS_238 | NZ  | F_GLU_72  | OE2 | 2.788 |
| 1HGJ | A_ARG_261 | NH1 | A_GLU_119 | OE2 | 2.647 |
| 1HGJ | A_ARG_261 | NH2 | A_GLU_119 | OE1 | 2.898 |
| 1HGJ | A_ARG_261 | NH2 | A_GLU_119 | OE2 | 2.927 |
| 1HGJ | A_LYS_264 | NZ  | A_ASP_85  | OD1 | 3.715 |
| 1HGJ | A_LYS_264 | NZ  | A_ASP_85  | OD2 | 2.840 |
| 1HGJ | A_ARG_269 | NH1 | B_GLU_67  | OE1 | 2.736 |
| 1HGJ | A_ARG_269 | NH2 | B_GLU_67  | OE1 | 3.791 |
| 1HGJ | A_LYS_292 | NZ  | A_ASP_291 | OD1 | 2.856 |
| 1HGJ | A_LYS_292 | NZ  | A_ASP_291 | OD2 | 2.799 |
| 1HGJ | A_LYS_299 | NZ  | B_GLU_69  | OE2 | 2.821 |
| 1HGJ | A_LYS_310 | NZ  | B_ASP_86  | OD1 | 2.922 |
| 1HGJ | A_LYS_310 | NZ  | B_ASP_90  | OD1 | 2.569 |
| 1HGJ | A_LYS_315 | NZ  | A_GLU_41  | OE1 | 2.855 |
| 1HGJ | A_LYS_326 | NZ  | A_GLU_325 | OE1 | 2.919 |
| 1HGJ | A_LYS_326 | NZ  | B_GLU_15  | OE1 | 3.187 |
| 1HGJ | A_LYS_326 | NZ  | B_GLU_15  | OE2 | 2.826 |
| 1HGJ | B_ARG_25  | NH1 | A_GLU_325 | OE2 | 3.775 |

|      |           |     |           |     |       |
|------|-----------|-----|-----------|-----|-------|
| 1HGJ | B_ARG_25  | NH2 | A_GLU_325 | OE2 | 2.974 |
| 1HGJ | B_LYS_51  | NZ  | B_GLU_103 | OE1 | 2.778 |
| 1HGJ | B_ARG_54  | NH1 | B_GLU_57  | OE1 | 2.874 |
| 1HGJ | B_ARG_54  | NH1 | B_GLU_57  | OE2 | 2.925 |
| 1HGJ | B_ARG_54  | NH1 | F_GLU_97  | OE2 | 3.272 |
| 1HGJ | B_ARG_54  | NH2 | F_GLU_97  | OE2 | 2.774 |
| 1HGJ | B_LYS_58  | NZ  | B_GLU_61  | OE2 | 3.374 |
| 1HGJ | B_LYS_62  | NZ  | F_ASP_86  | OD1 | 2.863 |
| 1HGJ | B_LYS_62  | NZ  | F_ASP_86  | OD2 | 2.651 |
| 1HGJ | B_LYS_62  | NZ  | F_ASP_90  | OD1 | 3.453 |
| 1HGJ | B_LYS_62  | NZ  | F_ASP_90  | OD2 | 2.738 |
| 1HGJ | B_LYS_68  | NZ  | B_GLU_85  | OE1 | 3.167 |
| 1HGJ | B_LYS_68  | NZ  | B_GLU_85  | OE2 | 2.782 |
| 1HGJ | B_ARG_76  | NH1 | D_GLU_74  | OE1 | 3.648 |
| 1HGJ | B_ARG_76  | NH1 | D_GLU_74  | OE2 | 2.885 |
| 1HGJ | B_ARG_76  | NH2 | D_GLU_74  | OE1 | 2.846 |
| 1HGJ | B_ARG_76  | NH2 | D_GLU_74  | OE2 | 3.547 |
| 1HGJ | B_ARG_76  | NH2 | D_GLU_81  | OE1 | 2.721 |
| 1HGJ | B_ARG_76  | NH2 | D_GLU_81  | OE2 | 3.500 |
| 1HGJ | B_LYS_117 | NZ  | B_GLU_114 | OE1 | 3.054 |
| 1HGJ | B_LYS_117 | NZ  | B_GLU_114 | OE2 | 2.578 |
| 1HGJ | B_ARG_123 | NH1 | B_GLU_120 | OE1 | 2.614 |
| 1HGJ | B_ARG_123 | NH1 | B_GLU_120 | OE2 | 2.737 |
| 1HGJ | B_ARG_123 | NH2 | F_GLU_132 | OE1 | 3.120 |
| 1HGJ | B_ARG_124 | NH1 | B_GLU_120 | OE1 | 3.704 |
| 1HGJ | B_ARG_124 | NH2 | F_GLU_132 | OE1 | 3.095 |
| 1HGJ | B_ARG_124 | NH2 | F_GLU_132 | OE2 | 3.375 |
| 1HGJ | B_ARG_127 | NH1 | F_GLU_131 | OE1 | 2.484 |
| 1HGJ | B_LYS_143 | NZ  | B_ASP_145 | OD2 | 2.863 |
| 1HGJ | B_ARG_153 | NH1 | B_GLU_150 | OE1 | 2.677 |
| 1HGJ | B_HIS_159 | NE2 | B_ASP_160 | OD2 | 3.106 |
| 1HGJ | B_ARG_163 | NH2 | F_GLU_131 | OE1 | 2.591 |
| 1HGJ | B_ARG_163 | NH2 | F_GLU_131 | OE2 | 2.571 |
| 1HGJ | B_ARG_170 | NH1 | B_GLU_131 | OE2 | 2.795 |
| 1HGJ | B_ARG_170 | NH1 | D_GLU_128 | OE1 | 3.291 |
| 1HGJ | B_ARG_170 | NH1 | D_GLU_128 | OE2 | 3.706 |
| 1HGJ | B_ARG_170 | NH2 | B_GLU_128 | OE2 | 2.712 |
| 1HGJ | B_LYS_174 | NZ  | D_ASP_164 | OD1 | 2.810 |
| 1HGJ | B_LYS_174 | NZ  | D_ASP_164 | OD2 | 2.550 |
| 1HGJ | C_LYS_27  | NZ  | D_GLU_97  | OE1 | 2.755 |
| 1HGJ | C_LYS_27  | NZ  | D_GLU_97  | OE2 | 2.824 |
| 1HGJ | C_LYS_50  | NZ  | C_ASP_275 | OD1 | 3.494 |
| 1HGJ | C_LYS_50  | NZ  | C_ASP_275 | OD2 | 2.741 |
| 1HGJ | C_ARG_57  | NH2 | C_GLU_82  | OE1 | 2.545 |
| 1HGJ | C_ARG_57  | NH2 | C_GLU_82  | OE2 | 3.939 |
| 1HGJ | C_HIS_75  | ND1 | C_ASP_73  | OD1 | 2.800 |
| 1HGJ | C_HIS_75  | ND1 | C_ASP_73  | OD2 | 3.368 |
| 1HGJ | C_HIS_75  | NE2 | C_ASP_63  | OD1 | 3.332 |
| 1HGJ | C_ARG_90  | NH2 | C_ASP_60  | OD1 | 3.676 |
| 1HGJ | C_ARG_90  | NH2 | C_ASP_60  | OD2 | 2.784 |
| 1HGJ | C_ARG_109 | NH1 | C_GLU_89  | OE1 | 2.558 |
| 1HGJ | C_ARG_109 | NH1 | C_GLU_89  | OE2 | 3.226 |
| 1HGJ | C_ARG_109 | NH2 | D_GLU_67  | OE1 | 3.638 |
| 1HGJ | C_ARG_109 | NH2 | D_GLU_67  | OE2 | 2.758 |
| 1HGJ | C_ARG_141 | NH2 | C_ASP_77  | OD1 | 2.808 |
| 1HGJ | C_ARG_141 | NH2 | C_ASP_77  | OD2 | 2.737 |
| 1HGJ | C_LYS_176 | NZ  | C_GLU_123 | OE2 | 2.691 |
| 1HGJ | C_HIS_183 | NE2 | C_GLU_190 | OE2 | 3.331 |

|      |           |     |           |     |       |
|------|-----------|-----|-----------|-----|-------|
| 1HGJ | C_LYS_238 | NZ  | B_GLU_72  | OE1 | 2.749 |
| 1HGJ | C_LYS_238 | NZ  | B_GLU_72  | OE2 | 2.713 |
| 1HGJ | C_ARG_261 | NH1 | C_GLU_119 | OE2 | 2.654 |
| 1HGJ | C_ARG_261 | NH2 | C_GLU_119 | OE1 | 2.921 |
| 1HGJ | C_ARG_261 | NH2 | C_GLU_119 | OE2 | 2.914 |
| 1HGJ | C_LYS_264 | NZ  | C_ASP_85  | OD1 | 3.727 |
| 1HGJ | C_LYS_264 | NZ  | C_ASP_85  | OD2 | 2.825 |
| 1HGJ | C_ARG_269 | NH1 | D_GLU_67  | OE1 | 2.708 |
| 1HGJ | C_ARG_269 | NH2 | D_GLU_67  | OE1 | 3.781 |
| 1HGJ | C_LYS_292 | NZ  | C_ASP_291 | OD1 | 2.908 |
| 1HGJ | C_LYS_292 | NZ  | C_ASP_291 | OD2 | 2.818 |
| 1HGJ | C_LYS_299 | NZ  | D_GLU_69  | OE2 | 2.827 |
| 1HGJ | C_LYS_310 | NZ  | D_ASP_86  | OD1 | 2.943 |
| 1HGJ | C_LYS_310 | NZ  | D_ASP_90  | OD1 | 2.532 |
| 1HGJ | C_LYS_315 | NZ  | C_GLU_41  | OE1 | 2.864 |
| 1HGJ | C_LYS_326 | NZ  | D_GLU_15  | OE1 | 2.911 |
| 1HGJ | C_LYS_326 | NZ  | D_GLU_15  | OE2 | 3.904 |
| 1HGJ | D_LYS_51  | NZ  | D_GLU_103 | OE1 | 2.796 |
| 1HGJ | D_ARG_54  | NH1 | B_GLU_97  | OE2 | 3.338 |
| 1HGJ | D_ARG_54  | NH1 | D_GLU_57  | OE1 | 2.865 |
| 1HGJ | D_ARG_54  | NH1 | D_GLU_57  | OE2 | 2.909 |
| 1HGJ | D_ARG_54  | NH2 | B_GLU_97  | OE2 | 2.835 |
| 1HGJ | D_LYS_58  | NZ  | D_GLU_61  | OE2 | 3.356 |
| 1HGJ | D_LYS_62  | NZ  | B_ASP_86  | OD1 | 2.910 |
| 1HGJ | D_LYS_62  | NZ  | B_ASP_86  | OD2 | 2.574 |
| 1HGJ | D_LYS_62  | NZ  | B_ASP_90  | OD1 | 3.419 |
| 1HGJ | D_LYS_62  | NZ  | B_ASP_90  | OD2 | 2.622 |
| 1HGJ | D_LYS_68  | NZ  | D_GLU_85  | OE1 | 3.144 |
| 1HGJ | D_LYS_68  | NZ  | D_GLU_85  | OE2 | 2.820 |
| 1HGJ | D_ARG_76  | NH1 | F_GLU_74  | OE1 | 3.424 |
| 1HGJ | D_ARG_76  | NH1 | F_GLU_74  | OE2 | 2.763 |
| 1HGJ | D_ARG_76  | NH2 | F_GLU_74  | OE1 | 2.714 |
| 1HGJ | D_ARG_76  | NH2 | F_GLU_74  | OE2 | 3.550 |
| 1HGJ | D_ARG_76  | NH2 | F_GLU_81  | OE1 | 2.684 |
| 1HGJ | D_ARG_76  | NH2 | F_GLU_81  | OE2 | 3.574 |
| 1HGJ | D_LYS_117 | NZ  | D_GLU_114 | OE1 | 3.086 |
| 1HGJ | D_LYS_117 | NZ  | D_GLU_114 | OE2 | 2.611 |
| 1HGJ | D_ARG_123 | NH1 | D_GLU_120 | OE1 | 2.598 |
| 1HGJ | D_ARG_123 | NH1 | D_GLU_120 | OE2 | 2.741 |
| 1HGJ | D_ARG_123 | NH2 | B_GLU_132 | OE1 | 3.075 |
| 1HGJ | D_ARG_124 | NH1 | D_GLU_120 | OE1 | 3.708 |
| 1HGJ | D_ARG_124 | NH2 | B_GLU_132 | OE1 | 3.055 |
| 1HGJ | D_ARG_124 | NH2 | B_GLU_132 | OE2 | 3.342 |
| 1HGJ | D_ARG_127 | NH1 | B_GLU_131 | OE1 | 2.514 |
| 1HGJ | D_LYS_143 | NZ  | D_ASP_145 | OD2 | 2.897 |
| 1HGJ | D_ARG_153 | NH1 | D_GLU_150 | OE1 | 2.604 |
| 1HGJ | D_HIS_159 | NE2 | D_ASP_160 | OD2 | 3.102 |
| 1HGJ | D_ARG_163 | NH2 | B_GLU_131 | OE1 | 2.599 |
| 1HGJ | D_ARG_163 | NH2 | B_GLU_131 | OE2 | 2.594 |
| 1HGJ | D_ARG_170 | NH1 | D_GLU_131 | OE2 | 2.793 |
| 1HGJ | D_ARG_170 | NH1 | F_GLU_128 | OE1 | 3.405 |
| 1HGJ | D_ARG_170 | NH1 | F_GLU_128 | OE2 | 3.769 |
| 1HGJ | D_ARG_170 | NH2 | D_GLU_128 | OE2 | 2.726 |
| 1HGJ | D_LYS_174 | NZ  | F_ASP_164 | OD1 | 2.824 |
| 1HGJ | D_LYS_174 | NZ  | F_ASP_164 | OD2 | 2.673 |
| 1HGJ | E_LYS_27  | NZ  | F_GLU_97  | OE1 | 2.779 |
| 1HGJ | E_LYS_27  | NZ  | F_GLU_97  | OE2 | 2.813 |
| 1HGJ | E_LYS_50  | NZ  | E_ASP_275 | OD1 | 3.506 |

|      |           |     |           |     |       |
|------|-----------|-----|-----------|-----|-------|
| 1HGJ | E_LYS_50  | NZ  | E_ASP_275 | OD2 | 2.739 |
| 1HGJ | E_ARG_57  | NH2 | E_GLU_82  | OE1 | 2.663 |
| 1HGJ | E_HIS_75  | ND1 | E_ASP_73  | OD1 | 2.798 |
| 1HGJ | E_HIS_75  | ND1 | E_ASP_73  | OD2 | 3.347 |
| 1HGJ | E_HIS_75  | NE2 | E_ASP_63  | OD1 | 3.371 |
| 1HGJ | E_ARG_90  | NH2 | E_ASP_60  | OD1 | 3.683 |
| 1HGJ | E_ARG_90  | NH2 | E_ASP_60  | OD2 | 2.826 |
| 1HGJ | E_ARG_109 | NH1 | E_GLU_89  | OE1 | 2.541 |
| 1HGJ | E_ARG_109 | NH1 | E_GLU_89  | OE2 | 3.205 |
| 1HGJ | E_ARG_109 | NH2 | F_GLU_67  | OE1 | 3.635 |
| 1HGJ | E_ARG_109 | NH2 | F_GLU_67  | OE2 | 2.759 |
| 1HGJ | E_ARG_141 | NH2 | E_ASP_77  | OD1 | 2.840 |
| 1HGJ | E_ARG_141 | NH2 | E_ASP_77  | OD2 | 2.747 |
| 1HGJ | E_LYS_176 | NZ  | E_GLU_123 | OE2 | 2.685 |
| 1HGJ | E_HIS_183 | NE2 | E_GLU_190 | OE2 | 3.333 |
| 1HGJ | E_LYS_238 | NZ  | D_GLU_72  | OE1 | 2.865 |
| 1HGJ | E_LYS_238 | NZ  | D_GLU_72  | OE2 | 2.804 |
| 1HGJ | E_ARG_261 | NH1 | E_GLU_119 | OE2 | 2.651 |
| 1HGJ | E_ARG_261 | NH2 | E_GLU_119 | OE1 | 2.905 |
| 1HGJ | E_ARG_261 | NH2 | E_GLU_119 | OE2 | 2.913 |
| 1HGJ | E_LYS_264 | NZ  | E_ASP_85  | OD1 | 3.746 |
| 1HGJ | E_LYS_264 | NZ  | E_ASP_85  | OD2 | 2.856 |
| 1HGJ | E_ARG_269 | NH1 | F_GLU_67  | OE1 | 2.691 |
| 1HGJ | E_ARG_269 | NH2 | F_GLU_67  | OE1 | 3.759 |
| 1HGJ | E_LYS_292 | NZ  | E_ASP_291 | OD1 | 2.893 |
| 1HGJ | E_LYS_292 | NZ  | E_ASP_291 | OD2 | 2.833 |
| 1HGJ | E_LYS_299 | NZ  | F_GLU_69  | OE2 | 2.806 |
| 1HGJ | E_LYS_310 | NZ  | F_ASP_86  | OD1 | 2.930 |
| 1HGJ | E_LYS_310 | NZ  | F_ASP_90  | OD1 | 2.553 |
| 1HGJ | E_LYS_315 | NZ  | E_GLU_41  | OE1 | 2.860 |
| 1HGJ | E_LYS_326 | NZ  | F_GLU_15  | OE1 | 2.874 |
| 1HGJ | E_LYS_326 | NZ  | F_GLU_15  | OE2 | 3.254 |
| 1HGJ | F_LYS_51  | NZ  | F_GLU_103 | OE1 | 2.791 |
| 1HGJ | F_ARG_54  | NH1 | D_GLU_97  | OE2 | 3.349 |
| 1HGJ | F_ARG_54  | NH1 | F_GLU_57  | OE1 | 2.862 |
| 1HGJ | F_ARG_54  | NH1 | F_GLU_57  | OE2 | 2.926 |
| 1HGJ | F_ARG_54  | NH2 | D_GLU_97  | OE2 | 2.771 |
| 1HGJ | F_LYS_58  | NZ  | F_GLU_61  | OE2 | 3.370 |
| 1HGJ | F_LYS_62  | NZ  | D_ASP_86  | OD1 | 2.846 |
| 1HGJ | F_LYS_62  | NZ  | D_ASP_86  | OD2 | 2.568 |
| 1HGJ | F_LYS_62  | NZ  | D_ASP_90  | OD1 | 3.467 |
| 1HGJ | F_LYS_62  | NZ  | D_ASP_90  | OD2 | 2.658 |
| 1HGJ | F_LYS_68  | NZ  | F_GLU_85  | OE1 | 3.136 |
| 1HGJ | F_LYS_68  | NZ  | F_GLU_85  | OE2 | 2.737 |
| 1HGJ | F_ARG_76  | NH1 | B_GLU_74  | OE1 | 3.383 |
| 1HGJ | F_ARG_76  | NH1 | B_GLU_74  | OE2 | 2.704 |
| 1HGJ | F_ARG_76  | NH2 | B_GLU_74  | OE1 | 2.715 |
| 1HGJ | F_ARG_76  | NH2 | B_GLU_74  | OE2 | 3.551 |
| 1HGJ | F_ARG_76  | NH2 | B_GLU_81  | OE1 | 2.654 |
| 1HGJ | F_ARG_76  | NH2 | B_GLU_81  | OE2 | 3.611 |
| 1HGJ | F_LYS_117 | NZ  | F_GLU_114 | OE1 | 3.106 |
| 1HGJ | F_LYS_117 | NZ  | F_GLU_114 | OE2 | 2.590 |
| 1HGJ | F_ARG_123 | NH1 | F_GLU_120 | OE1 | 2.625 |
| 1HGJ | F_ARG_123 | NH1 | F_GLU_120 | OE2 | 2.732 |
| 1HGJ | F_ARG_123 | NH2 | D_GLU_132 | OE1 | 3.110 |
| 1HGJ | F_ARG_124 | NH1 | F_GLU_120 | OE1 | 3.711 |
| 1HGJ | F_ARG_124 | NH2 | D_GLU_132 | OE1 | 3.125 |
| 1HGJ | F_ARG_124 | NH2 | D_GLU_132 | OE2 | 3.360 |

|      |           |     |           |     |       |
|------|-----------|-----|-----------|-----|-------|
| 1HGJ | F_ARG_127 | NH1 | D_GLU_131 | OE1 | 2.554 |
| 1HGJ | F_LYS_143 | NZ  | F_ASP_145 | OD2 | 2.873 |
| 1HGJ | F_ARG_153 | NH1 | F_GLU_150 | OE2 | 2.597 |
| 1HGJ | F_HIS_159 | NE2 | F_ASP_160 | OD2 | 3.139 |
| 1HGJ | F_ARG_163 | NH2 | D_GLU_131 | OE1 | 2.636 |
| 1HGJ | F_ARG_163 | NH2 | D_GLU_131 | OE2 | 2.696 |
| 1HGJ | F_ARG_170 | NH1 | B_GLU_128 | OE1 | 3.311 |
| 1HGJ | F_ARG_170 | NH1 | B_GLU_128 | OE2 | 3.766 |
| 1HGJ | F_ARG_170 | NH1 | F_GLU_131 | OE2 | 2.790 |
| 1HGJ | F_ARG_170 | NH2 | F_GLU_128 | OE2 | 2.737 |
| 1HGJ | F_LYS_174 | NZ  | B_ASP_164 | OD1 | 2.859 |
| 1HGJ | F_LYS_174 | NZ  | B_ASP_164 | OD2 | 2.554 |
| 1HIL | A_LYS_28  | NZ  | B_ASP_99  | OD1 | 3.388 |
| 1HIL | A_LYS_28  | NZ  | B_ASP_99  | OD2 | 3.371 |
| 1HIL | A_LYS_30  | NZ  | B_ASP_99  | OD2 | 3.991 |
| 1HIL | A_ARG_61  | NH2 | A_GLU_81  | OE2 | 3.453 |
| 1HIL | A_ARG_61  | NH2 | A_ASP_82  | OD1 | 2.803 |
| 1HIL | A_ARG_61  | NH2 | A_ASP_82  | OD2 | 3.572 |
| 1HIL | A_LYS_142 | NZ  | A_GLU_105 | OE1 | 3.449 |
| 1HIL | A_LYS_147 | NZ  | A_GLU_154 | OE1 | 3.856 |
| 1HIL | A_LYS_147 | NZ  | A_GLU_154 | OE2 | 3.602 |
| 1HIL | A_LYS_149 | NZ  | A_GLU_195 | OE2 | 3.175 |
| 1HIL | A_ARG_155 | NH2 | A_GLU_185 | OE1 | 3.376 |
| 1HIL | A_ARG_155 | NH2 | A_GLU_185 | OE2 | 2.897 |
| 1HIL | A_LYS_169 | NZ  | A_ASP_170 | OD2 | 2.962 |
| 1HIL | A_LYS_183 | NZ  | A_GLU_187 | OE1 | 2.919 |
| 1HIL | A_LYS_183 | NZ  | A_GLU_187 | OE2 | 3.001 |
| 1HIL | A_ARG_188 | NH1 | A_ASP_184 | OD1 | 2.997 |
| 1HIL | A_ARG_188 | NH2 | A_ASP_184 | OD1 | 2.719 |
| 1HIL | A_HIS_189 | ND1 | A_ASP_151 | OD2 | 2.887 |
| 1HIL | A_HIS_189 | NE2 | A_GLU_185 | OE2 | 3.281 |
| 1HIL | A_LYS_199 | NZ  | A_ASP_110 | OD1 | 3.849 |
| 1HIL | A_LYS_199 | NZ  | A_ASP_110 | OD2 | 2.611 |
| 1HIL | B_ARG_38  | NH1 | B_ASP_86  | OD1 | 2.872 |
| 1HIL | B_ARG_38  | NH2 | B_GLU_46  | OE1 | 2.814 |
| 1HIL | B_ARG_38  | NH2 | B_ASP_86  | OD1 | 3.831 |
| 1HIL | B_ARG_44  | NH1 | B_ASP_42  | OD2 | 3.962 |
| 1HIL | B_ARG_44  | NH2 | B_ASP_42  | OD2 | 2.795 |
| 1HIL | B_ARG_66  | NH1 | B_ASP_86  | OD1 | 3.878 |
| 1HIL | B_ARG_66  | NH1 | B_ASP_86  | OD2 | 2.766 |
| 1HIL | B_ARG_66  | NH2 | B_ASP_86  | OD1 | 2.971 |
| 1HIL | B_ARG_66  | NH2 | B_ASP_86  | OD2 | 3.323 |
| 1HIL | B_ARG_94  | NH2 | B_GLU_96  | OE1 | 2.937 |
| 1HIL | B_ARG_94  | NH2 | B_GLU_96  | OE2 | 3.442 |
| 1HIL | B_ARG_95  | NH1 | A_ASP_91  | OD1 | 2.828 |
| 1HIL | B_ARG_95  | NH1 | A_ASP_91  | OD2 | 3.804 |
| 1HIL | B_ARG_95  | NH2 | A_ASP_91  | OD1 | 3.160 |
| 1HIL | B_ARG_95  | NH2 | A_ASP_91  | OD2 | 3.904 |
| 1HIL | B_HIS_172 | NE2 | A_ASP_167 | OD2 | 3.701 |
| 1HIL | B_LYS_221 | NZ  | A_GLU_123 | OE1 | 2.980 |
| 1HIL | B_LYS_222 | NZ  | B_GLU_226 | OE2 | 3.471 |
| 1HIL | C_LYS_28  | NZ  | D_ASP_99  | OD1 | 3.565 |
| 1HIL | C_LYS_28  | NZ  | D_ASP_99  | OD2 | 3.509 |
| 1HIL | C_ARG_61  | NH2 | C_GLU_81  | OE1 | 3.959 |
| 1HIL | C_ARG_61  | NH2 | C_GLU_81  | OE2 | 3.333 |
| 1HIL | C_ARG_61  | NH2 | C_ASP_82  | OD1 | 2.824 |
| 1HIL | C_ARG_61  | NH2 | C_ASP_82  | OD2 | 3.820 |
| 1HIL | C_LYS_149 | NZ  | C_GLU_195 | OE1 | 2.867 |

|      |           |     |           |     |       |
|------|-----------|-----|-----------|-----|-------|
| 1HIL | C_LYS_149 | NZ  | C_GLU_195 | OE2 | 3.545 |
| 1HIL | C_ARG_155 | NH1 | C_GLU_185 | OE2 | 3.376 |
| 1HIL | C_LYS_183 | NZ  | C_GLU_187 | OE1 | 2.913 |
| 1HIL | C_LYS_183 | NZ  | C_GLU_187 | OE2 | 2.922 |
| 1HIL | C_ARG_188 | NH2 | C_ASP_184 | OD2 | 3.681 |
| 1HIL | C_HIS_189 | ND1 | C_ASP_151 | OD2 | 2.657 |
| 1HIL | C_LYS_199 | NZ  | C_ASP_110 | OD1 | 3.869 |
| 1HIL | C_LYS_199 | NZ  | C_ASP_110 | OD2 | 3.718 |
| 1HIL | D_ARG_38  | NH1 | D_GLU_85  | OE2 | 3.765 |
| 1HIL | D_ARG_38  | NH1 | D_ASP_86  | OD1 | 2.811 |
| 1HIL | D_ARG_38  | NH2 | D_GLU_46  | OE1 | 2.914 |
| 1HIL | D_ARG_38  | NH2 | D_GLU_85  | OE1 | 3.376 |
| 1HIL | D_ARG_38  | NH2 | D_GLU_85  | OE2 | 2.939 |
| 1HIL | D_ARG_38  | NH2 | D_ASP_86  | OD1 | 3.843 |
| 1HIL | D_LYS_64  | NZ  | D_ASP_61  | OD1 | 3.347 |
| 1HIL | D_ARG_66  | NH1 | D_ASP_86  | OD2 | 2.825 |
| 1HIL | D_ARG_66  | NH2 | D_GLU_85  | OE2 | 3.393 |
| 1HIL | D_ARG_66  | NH2 | D_ASP_86  | OD1 | 3.008 |
| 1HIL | D_ARG_66  | NH2 | D_ASP_86  | OD2 | 3.234 |
| 1HIL | D_ARG_94  | NH2 | D_GLU_96  | OE1 | 3.117 |
| 1HIL | D_ARG_94  | NH2 | D_GLU_96  | OE2 | 3.597 |
| 1HIL | D_ARG_95  | NH1 | C_ASP_91  | OD1 | 2.906 |
| 1HIL | D_ARG_95  | NH1 | C_ASP_91  | OD2 | 3.993 |
| 1HIL | D_ARG_95  | NH2 | C_ASP_91  | OD1 | 3.045 |
| 1HIL | D_ARG_95  | NH2 | C_ASP_91  | OD2 | 3.822 |
| 1HIL | D_LYS_221 | NZ  | C_GLU_123 | OE1 | 2.896 |
| 1HIL | D_LYS_221 | NZ  | C_GLU_123 | OE2 | 3.091 |
| 1HIM | H_ARG_54  | NH1 | H_ASP_60  | OD1 | 3.270 |
| 1HIM | H_ARG_61  | NH1 | H_ASP_82  | OD1 | 2.766 |
| 1HIM | H_ARG_61  | NH1 | H_ASP_82  | OD2 | 2.580 |
| 1HIM | H_ARG_61  | NH2 | H_GLU_81  | OE1 | 3.629 |
| 1HIM | H_ARG_61  | NH2 | H_GLU_81  | OE2 | 3.486 |
| 1HIM | H_LYS_103 | NZ  | H_GLU_105 | OE1 | 2.947 |
| 1HIM | H_LYS_103 | NZ  | H_GLU_105 | OE2 | 3.074 |
| 1HIM | H_LYS_103 | NZ  | H_ASP_165 | OD1 | 2.840 |
| 1HIM | H_LYS_103 | NZ  | H_ASP_165 | OD2 | 2.960 |
| 1HIM | H_ARG_108 | NH2 | H_ASP_170 | OD1 | 3.527 |
| 1HIM | H_LYS_142 | NZ  | H_GLU_105 | OE2 | 3.186 |
| 1HIM | H_LYS_149 | NZ  | H_GLU_195 | OE1 | 3.565 |
| 1HIM | H_ARG_155 | NH1 | H_GLU_185 | OE1 | 3.606 |
| 1HIM | H_ARG_155 | NH2 | H_GLU_185 | OE1 | 3.185 |
| 1HIM | H_LYS_183 | NZ  | H_GLU_187 | OE1 | 3.388 |
| 1HIM | H_ARG_188 | NH1 | H_ASP_184 | OD2 | 3.229 |
| 1HIM | H_ARG_188 | NH2 | H_ASP_184 | OD2 | 3.788 |
| 1HIM | H_ARG_188 | NH2 | H_GLU_185 | OE2 | 3.216 |
| 1HIM | H_HIS_189 | ND1 | H_ASP_151 | OD2 | 3.238 |
| 1HIM | H_HIS_189 | NE2 | H_GLU_185 | OE1 | 3.139 |
| 1HIM | H_HIS_189 | NE2 | H_GLU_185 | OE2 | 2.919 |
| 1HIM | H_LYS_199 | NZ  | H_ASP_110 | OD1 | 3.999 |
| 1HIM | H_LYS_199 | NZ  | H_ASP_110 | OD2 | 3.600 |
| 1HIM | H_ARG_211 | NH2 | H_GLU_187 | OE2 | 3.728 |
| 1HIM | L_ARG_38  | NH1 | L_GLU_46  | OE1 | 2.537 |
| 1HIM | L_ARG_38  | NH2 | L_ASP_86  | OD1 | 2.913 |
| 1HIM | L_ARG_44  | NH1 | L_ASP_42  | OD2 | 3.518 |
| 1HIM | L_ARG_44  | NH2 | L_ASP_42  | OD2 | 2.772 |
| 1HIM | L_LYS_64  | NZ  | L_ASP_61  | OD1 | 3.754 |
| 1HIM | L_ARG_66  | NH2 | L_ASP_86  | OD1 | 3.439 |
| 1HIM | L_ARG_66  | NH2 | L_ASP_86  | OD2 | 2.636 |

|      |           |     |           |     |       |
|------|-----------|-----|-----------|-----|-------|
| 1HIM | L_ARG_94  | NH2 | L_GLU_96  | OE1 | 2.855 |
| 1HIM | L_ARG_94  | NH2 | L_GLU_96  | OE2 | 2.784 |
| 1HIM | L_ARG_95  | NH1 | H_ASP_91  | OD1 | 3.100 |
| 1HIM | L_ARG_95  | NH2 | H_ASP_91  | OD1 | 3.427 |
| 1HIM | L_ARG_95  | NH2 | P_ASP_104 | OD1 | 3.909 |
| 1HIM | L_ARG_95  | NH2 | P_ASP_104 | OD2 | 3.079 |
| 1HIM | L_LYS_218 | NZ  | L_ASP_220 | OD1 | 2.947 |
| 1HIM | L_LYS_218 | NZ  | L_ASP_220 | OD2 | 3.790 |
| 1HIM | L_LYS_221 | NZ  | H_GLU_123 | OE1 | 3.486 |
| 1HIM | L_LYS_221 | NZ  | H_GLU_123 | OE2 | 2.924 |
| 1HIM | L_LYS_222 | NZ  | L_GLU_226 | OE1 | 3.594 |
| 1HIM | L_LYS_222 | NZ  | L_GLU_226 | OE2 | 3.507 |
| 1HIM | J_LYS_28  | NZ  | M_GLU_100 | OE1 | 3.991 |
| 1HIM | J_LYS_28  | NZ  | M_GLU_100 | OE2 | 3.433 |
| 1HIM | J_ARG_54  | NH1 | J_ASP_60  | OD1 | 3.053 |
| 1HIM | J_ARG_61  | NH1 | J_GLU_81  | OE1 | 2.794 |
| 1HIM | J_ARG_61  | NH1 | J_ASP_82  | OD1 | 2.566 |
| 1HIM | J_ARG_61  | NH1 | J_ASP_82  | OD2 | 2.940 |
| 1HIM | J_ARG_61  | NH2 | J_GLU_81  | OE1 | 2.977 |
| 1HIM | J_ARG_61  | NH2 | J_GLU_81  | OE2 | 3.767 |
| 1HIM | J_LYS_103 | NZ  | J_GLU_105 | OE1 | 3.363 |
| 1HIM | J_LYS_103 | NZ  | J_GLU_105 | OE2 | 3.574 |
| 1HIM | J_LYS_103 | NZ  | J_ASP_165 | OD1 | 2.834 |
| 1HIM | J_LYS_103 | NZ  | J_ASP_165 | OD2 | 3.265 |
| 1HIM | J_ARG_108 | NH1 | J_ASP_170 | OD2 | 3.737 |
| 1HIM | J_LYS_142 | NZ  | J_GLU_105 | OE2 | 3.350 |
| 1HIM | J_LYS_147 | NZ  | J_GLU_154 | OE1 | 3.824 |
| 1HIM | J_LYS_149 | NZ  | J_GLU_195 | OE1 | 2.922 |
| 1HIM | J_ARG_155 | NH1 | J_GLU_185 | OE2 | 2.780 |
| 1HIM | J_ARG_155 | NH2 | J_GLU_185 | OE2 | 2.860 |
| 1HIM | J_LYS_183 | NZ  | J_GLU_187 | OE1 | 3.132 |
| 1HIM | J_LYS_183 | NZ  | J_GLU_187 | OE2 | 3.144 |
| 1HIM | J_ARG_188 | NH1 | J_GLU_185 | OE1 | 3.001 |
| 1HIM | J_ARG_188 | NH2 | J_GLU_185 | OE1 | 3.202 |
| 1HIM | J_HIS_189 | ND1 | J_ASP_151 | OD2 | 3.228 |
| 1HIM | J_HIS_189 | NE2 | J_GLU_185 | OE1 | 3.040 |
| 1HIM | J_HIS_189 | NE2 | J_GLU_185 | OE2 | 3.204 |
| 1HIM | J_LYS_199 | NZ  | J_ASP_110 | OD1 | 2.949 |
| 1HIM | J_LYS_199 | NZ  | J_ASP_110 | OD2 | 3.017 |
| 1HIM | M_ARG_38  | NH1 | M_ASP_86  | OD1 | 2.851 |
| 1HIM | M_ARG_38  | NH2 | M_GLU_46  | OE1 | 3.834 |
| 1HIM | M_ARG_38  | NH2 | M_ASP_86  | OD1 | 3.546 |
| 1HIM | M_LYS_64  | NZ  | M_ASP_61  | OD1 | 3.375 |
| 1HIM | M_LYS_64  | NZ  | M_ASP_61  | OD2 | 3.721 |
| 1HIM | M_ARG_66  | NH1 | M_ASP_86  | OD2 | 2.851 |
| 1HIM | M_ARG_66  | NH2 | M_ASP_86  | OD1 | 3.649 |
| 1HIM | M_ARG_66  | NH2 | M_ASP_86  | OD2 | 3.020 |
| 1HIM | M_LYS_75  | NZ  | M_ASP_72  | OD2 | 3.415 |
| 1HIM | M_LYS_83  | NZ  | M_GLU_85  | OE2 | 3.803 |
| 1HIM | M_LYS_83  | NZ  | M_ASP_86  | OD1 | 2.818 |
| 1HIM | M_LYS_83  | NZ  | M_ASP_86  | OD2 | 3.385 |
| 1HIM | M_ARG_94  | NH2 | M_GLU_96  | OE1 | 2.883 |
| 1HIM | M_ARG_94  | NH2 | M_GLU_96  | OE2 | 2.984 |
| 1HIM | M_ARG_95  | NH1 | J_ASP_91  | OD1 | 2.854 |
| 1HIM | M_ARG_95  | NH2 | J_ASP_91  | OD1 | 3.712 |
| 1HIM | M_ARG_95  | NH2 | R_ASP_104 | OD1 | 2.834 |
| 1HIM | M_ARG_95  | NH2 | R_ASP_104 | OD2 | 3.540 |
| 1HIM | M_LYS_222 | NZ  | M_GLU_226 | OE2 | 2.900 |



|      |           |     |           |     |       |
|------|-----------|-----|-----------|-----|-------|
| 1HIN | L_LYS_28  | NZ  | H_GLU_100 | OE2 | 2.975 |
| 1HIN | L_ARG_54  | NH1 | L_ASP_60  | OD1 | 2.976 |
| 1HIN | L_ARG_54  | NH2 | L_ASP_60  | OD1 | 3.006 |
| 1HIN | L_ARG_61  | NH2 | L_ASP_82  | OD1 | 3.350 |
| 1HIN | L_LYS_103 | NZ  | L_GLU_105 | OE1 | 3.163 |
| 1HIN | L_LYS_103 | NZ  | L_GLU_105 | OE2 | 2.963 |
| 1HIN | L_LYS_103 | NZ  | L_ASP_165 | OD1 | 3.325 |
| 1HIN | L_LYS_107 | NZ  | L_GLU_17  | OE1 | 3.860 |
| 1HIN | L_LYS_147 | NZ  | L_GLU_195 | OE2 | 3.604 |
| 1HIN | L_LYS_183 | NZ  | L_GLU_187 | OE1 | 3.063 |
| 1HIN | L_LYS_183 | NZ  | L_GLU_187 | OE2 | 2.809 |
| 1HIN | L_ARG_188 | NH1 | L_GLU_185 | OE1 | 3.655 |
| 1HIN | L_HIS_189 | ND1 | L_ASP_151 | OD2 | 2.920 |
| 1HIN | L_HIS_189 | NE2 | L_GLU_185 | OE2 | 2.966 |
| 1HIN | H_ARG_38  | NH1 | H_ASP_86  | OD1 | 2.756 |
| 1HIN | H_ARG_38  | NH2 | H_GLU_46  | OE2 | 3.346 |
| 1HIN | H_ARG_38  | NH2 | H_ASP_86  | OD1 | 3.928 |
| 1HIN | H_ARG_44  | NH1 | H_ASP_42  | OD1 | 3.927 |
| 1HIN | H_ARG_44  | NH1 | H_ASP_42  | OD2 | 3.226 |
| 1HIN | H_ARG_44  | NH2 | H_ASP_42  | OD1 | 3.335 |
| 1HIN | H_ARG_66  | NH1 | H_ASP_86  | OD1 | 3.830 |
| 1HIN | H_ARG_66  | NH1 | H_ASP_86  | OD2 | 3.068 |
| 1HIN | H_ARG_66  | NH2 | H_ASP_86  | OD1 | 3.938 |
| 1HIN | H_LYS_83  | NZ  | H_ASP_86  | OD1 | 3.978 |
| 1HIN | H_ARG_94  | NH2 | H_GLU_96  | OE1 | 2.995 |
| 1HIN | H_ARG_94  | NH2 | H_GLU_96  | OE2 | 3.965 |
| 1HIN | H_ARG_95  | NH1 | L_ASP_91  | OD1 | 3.169 |
| 1HIN | H_ARG_95  | NH1 | P_ASP_104 | OD1 | 3.889 |
| 1HIN | H_ARG_95  | NH2 | L_ASP_91  | OD1 | 2.746 |
| 1I8I | A_ARG_22  | NH2 | A_ASP_70  | OD2 | 3.152 |
| 1I8I | A_ARG_61  | NH1 | A_GLU_81  | OE1 | 3.598 |
| 1I8I | A_ARG_61  | NH2 | A_GLU_81  | OE1 | 2.756 |
| 1I8I | A_ARG_61  | NH2 | A_ASP_82  | OD1 | 2.774 |
| 1I8I | B_ARG_338 | NH1 | B_ASP_390 | OD1 | 3.395 |
| 1I8I | B_ARG_338 | NH2 | B_GLU_346 | OE1 | 3.519 |
| 1I8I | B_ARG_338 | NH2 | B_GLU_346 | OE2 | 3.077 |
| 1I8I | B_LYS_343 | NZ  | A_ASP_85  | OD1 | 3.777 |
| 1I8I | B_ARG_367 | NH1 | B_ASP_390 | OD1 | 3.777 |
| 1I8I | B_ARG_367 | NH1 | B_ASP_390 | OD2 | 2.803 |
| 1I8I | B_ARG_367 | NH2 | B_ASP_390 | OD1 | 2.832 |
| 1I8I | B_ARG_367 | NH2 | B_ASP_390 | OD2 | 3.335 |
| 1I8I | B_ARG_398 | NH1 | B_ASP_408 | OD1 | 2.704 |
| 1I8I | B_ARG_398 | NH1 | B_ASP_408 | OD2 | 3.295 |
| 1I8I | C_LYS_502 | NZ  | A_GLU_50  | OE1 | 3.673 |
| 1I8I | C_LYS_502 | NZ  | A_GLU_50  | OE2 | 3.232 |
| 1I8K | A_ARG_61  | NH1 | A_GLU_81  | OE1 | 3.901 |
| 1I8K | A_ARG_61  | NH2 | A_GLU_81  | OE1 | 2.704 |
| 1I8K | A_ARG_61  | NH2 | A_ASP_82  | OD1 | 2.775 |
| 1I8K | A_ARG_61  | NH2 | A_ASP_82  | OD2 | 3.582 |
| 1I8K | A_LYS_103 | NZ  | A_GLU_105 | OE1 | 3.849 |
| 1I8K | A_LYS_103 | NZ  | A_GLU_105 | OE2 | 3.265 |
| 1I8K | B_ARG_338 | NH1 | B_ASP_390 | OD1 | 2.955 |
| 1I8K | B_ARG_338 | NH2 | B_GLU_346 | OE2 | 2.897 |
| 1I8K | B_LYS_343 | NZ  | A_ASP_85  | OD1 | 3.688 |
| 1I8K | B_LYS_343 | NZ  | A_ASP_85  | OD2 | 2.833 |
| 1I8K | B_LYS_365 | NZ  | B_ASP_362 | OD1 | 3.025 |
| 1I8K | B_ARG_367 | NH1 | B_ASP_390 | OD1 | 3.793 |
| 1I8K | B_ARG_367 | NH1 | B_ASP_390 | OD2 | 2.806 |

|      |           |     |           |     |       |
|------|-----------|-----|-----------|-----|-------|
| 118K | B_ARG_367 | NH2 | B_ASP_390 | OD1 | 2.921 |
| 118K | B_ARG_367 | NH2 | B_ASP_390 | OD2 | 3.420 |
| 118K | B_ARG_398 | NH1 | B_ASP_408 | OD1 | 3.548 |
| 118K | B_ARG_398 | NH1 | B_ASP_408 | OD2 | 2.958 |
| 118K | C_LYS_502 | NZ  | A_GLU_50  | OE1 | 3.381 |
| 118K | C_LYS_502 | NZ  | A_GLU_50  | OE2 | 3.653 |
| 118M | L_ARG_61  | NH2 | L_GLU_81  | OE2 | 3.348 |
| 118M | L_ARG_61  | NH2 | L_ASP_82  | OD1 | 2.791 |
| 118M | L_ARG_61  | NH2 | L_ASP_82  | OD2 | 3.473 |
| 118M | L_LYS_149 | NZ  | L_GLU_195 | OE1 | 2.669 |
| 118M | L_ARG_155 | NH1 | L_GLU_185 | OE1 | 3.608 |
| 118M | L_ARG_155 | NH1 | L_GLU_185 | OE2 | 3.044 |
| 118M | L_ARG_155 | NH2 | L_GLU_185 | OE1 | 2.570 |
| 118M | L_ARG_155 | NH2 | L_GLU_185 | OE2 | 3.578 |
| 118M | L_ARG_188 | NH1 | L_GLU_185 | OE1 | 3.999 |
| 118M | L_HIS_189 | ND1 | L_ASP_151 | OD2 | 2.965 |
| 118M | L_HIS_189 | NE2 | L_GLU_185 | OE1 | 3.384 |
| 118M | L_ARG_211 | NH1 | L_GLU_187 | OE1 | 3.084 |
| 118M | H_LYS_62  | NZ  | H_GLU_46  | OE2 | 2.992 |
| 118M | H_LYS_66  | NZ  | H_ASP_86  | OD1 | 2.668 |
| 118M | H_LYS_66  | NZ  | H_ASP_86  | OD2 | 3.680 |
| 118M | H_ARG_94  | NH2 | H_ASP_101 | OD1 | 3.336 |
| 118M | H_ARG_94  | NH2 | H_ASP_101 | OD2 | 3.003 |
| 118M | H_LYS_208 | NZ  | L_GLU_123 | OE1 | 2.918 |
| 118M | A_ARG_61  | NH1 | A_GLU_81  | OE2 | 3.331 |
| 118M | A_ARG_61  | NH1 | A_ASP_82  | OD1 | 2.710 |
| 118M | A_ARG_61  | NH1 | A_ASP_82  | OD2 | 3.466 |
| 118M | A_LYS_147 | NZ  | A_GLU_195 | OE1 | 3.288 |
| 118M | A_LYS_149 | NZ  | A_GLU_195 | OE1 | 3.797 |
| 118M | A_LYS_149 | NZ  | A_GLU_195 | OE2 | 2.770 |
| 118M | A_ARG_155 | NH1 | A_GLU_185 | OE1 | 2.722 |
| 118M | A_ARG_155 | NH2 | A_GLU_185 | OE1 | 3.688 |
| 118M | A_LYS_183 | NZ  | A_GLU_187 | OE1 | 3.381 |
| 118M | A_HIS_189 | ND1 | A_ASP_151 | OD2 | 2.740 |
| 118M | A_LYS_199 | NZ  | A_ASP_110 | OD2 | 3.951 |
| 118M | A_ARG_211 | NH1 | A_GLU_187 | OE2 | 3.834 |
| 118M | B_LYS_66  | NZ  | B_ASP_86  | OD1 | 2.796 |
| 118M | B_LYS_66  | NZ  | B_ASP_86  | OD2 | 3.783 |
| 118M | B_ARG_94  | NH2 | B_ASP_101 | OD1 | 3.715 |
| 118M | B_ARG_94  | NH2 | B_ASP_101 | OD2 | 2.888 |
| 118M | B_LYS_208 | NZ  | A_GLU_123 | OE2 | 2.887 |
| 11C4 | L_ARG_61  | NH1 | L_GLU_81  | OE1 | 2.751 |
| 11C4 | L_ARG_61  | NH1 | L_ASP_82  | OD1 | 2.563 |
| 11C4 | L_ARG_61  | NH1 | L_ASP_82  | OD2 | 3.173 |
| 11C4 | L_ARG_61  | NH2 | L_GLU_79  | OE1 | 3.626 |
| 11C4 | L_ARG_61  | NH2 | L_GLU_81  | OE1 | 3.608 |
| 11C4 | H_ARG_38  | NH1 | H_ASP_89  | OD1 | 2.935 |
| 11C4 | H_ARG_38  | NH2 | H_GLU_46  | OE1 | 2.745 |
| 11C4 | H_ARG_38  | NH2 | H_ASP_89  | OD1 | 3.350 |
| 11C4 | H_ARG_66  | NH1 | H_ASP_89  | OD2 | 3.087 |
| 11C4 | H_ARG_66  | NH2 | H_ASP_89  | OD1 | 3.196 |
| 11C4 | H_ARG_66  | NH2 | H_ASP_89  | OD2 | 3.495 |
| 11C4 | H_LYS_75  | NZ  | H_ASP_72  | OD2 | 2.682 |
| 11C4 | Y_LYS_1   | NZ  | Y_GLU_7   | OE1 | 3.619 |
| 11C4 | Y_LYS_1   | NZ  | Y_GLU_7   | OE2 | 2.535 |
| 11C4 | Y_LYS_13  | NZ  | Y_ASP_18  | OD2 | 3.711 |
| 11C4 | Y_ARG_61  | NH2 | Y_ASP_48  | OD1 | 3.871 |
| 11C4 | Y_ARG_68  | NH2 | Y_ASP_66  | OD2 | 2.848 |

|      |           |     |           |     |       |
|------|-----------|-----|-----------|-----|-------|
| 1IC4 | Y_LYS.97  | NZ  | H_ASP.99  | OD1 | 2.657 |
| 1IC4 | Y_LYS.97  | NZ  | H_ASP.99  | OD2 | 3.938 |
| 1IC4 | Y_ARG.125 | NH1 | Y_ASP.119 | OD1 | 3.300 |
| 1IC4 | Y_ARG.125 | NH1 | Y_ASP.119 | OD2 | 3.023 |
| 1IC4 | Y_ARG.125 | NH2 | Y_ASP.119 | OD2 | 3.490 |
| 1IC5 | L_LYS.39  | NZ  | L_GLU.42  | OE1 | 3.119 |
| 1IC5 | L_ARG.61  | NH1 | L_GLU.79  | OE1 | 3.450 |
| 1IC5 | L_ARG.61  | NH1 | L_GLU.81  | OE1 | 2.953 |
| 1IC5 | L_ARG.61  | NH1 | L_ASP.82  | OD1 | 2.717 |
| 1IC5 | L_ARG.61  | NH1 | L_ASP.82  | OD2 | 3.546 |
| 1IC5 | L_ARG.61  | NH2 | L_GLU.79  | OE1 | 3.079 |
| 1IC5 | L_ARG.61  | NH2 | L_GLU.79  | OE2 | 3.755 |
| 1IC5 | L_LYS.103 | NZ  | L_GLU.105 | OE2 | 3.954 |
| 1IC5 | H_ARG.38  | NH1 | H_ASP.89  | OD1 | 2.839 |
| 1IC5 | H_ARG.38  | NH2 | H_GLU.46  | OE1 | 2.758 |
| 1IC5 | H_ARG.38  | NH2 | H_ASP.89  | OD1 | 3.693 |
| 1IC5 | H_ARG.66  | NH1 | H_ASP.89  | OD1 | 3.998 |
| 1IC5 | H_ARG.66  | NH1 | H_ASP.89  | OD2 | 3.250 |
| 1IC5 | H_ARG.66  | NH2 | H_ASP.89  | OD1 | 3.110 |
| 1IC5 | H_ARG.66  | NH2 | H_ASP.89  | OD2 | 3.644 |
| 1IC5 | H_LYS.75  | NZ  | H_ASP.72  | OD2 | 3.897 |
| 1IC5 | Y_LYS.1   | NZ  | Y_GLU.7   | OE1 | 3.768 |
| 1IC5 | Y_LYS.1   | NZ  | Y_GLU.7   | OE2 | 2.582 |
| 1IC5 | Y_ARG.61  | NH2 | Y_ASP.48  | OD1 | 3.930 |
| 1IC5 | Y_LYS.97  | NZ  | H_ASP.32  | OD1 | 2.694 |
| 1IC5 | Y_ARG.125 | NH1 | Y_ASP.119 | OD1 | 3.569 |
| 1IC5 | Y_ARG.125 | NH1 | Y_ASP.119 | OD2 | 3.500 |
| 1IC5 | Y_ARG.125 | NH2 | Y_ASP.119 | OD1 | 3.857 |
| 1IC5 | Y_ARG.125 | NH2 | Y_ASP.119 | OD2 | 2.635 |
| 1IC7 | L_ARG.45  | NH2 | L_GLU.42  | OE1 | 3.451 |
| 1IC7 | L_ARG.61  | NH1 | L_GLU.79  | OE1 | 3.604 |
| 1IC7 | L_ARG.61  | NH1 | L_GLU.81  | OE2 | 3.867 |
| 1IC7 | L_ARG.61  | NH2 | L_GLU.81  | OE2 | 2.625 |
| 1IC7 | L_ARG.61  | NH2 | L_ASP.82  | OD1 | 2.810 |
| 1IC7 | L_ARG.61  | NH2 | L_ASP.82  | OD2 | 3.484 |
| 1IC7 | L_LYS.103 | NZ  | L_GLU.105 | OE2 | 2.664 |
| 1IC7 | H_ARG.38  | NH1 | H_ASP.89  | OD1 | 2.659 |
| 1IC7 | H_ARG.38  | NH2 | H_GLU.46  | OE1 | 2.814 |
| 1IC7 | H_ARG.38  | NH2 | H_ASP.89  | OD1 | 3.507 |
| 1IC7 | H_ARG.66  | NH1 | H_ASP.89  | OD1 | 3.777 |
| 1IC7 | H_ARG.66  | NH1 | H_ASP.89  | OD2 | 2.821 |
| 1IC7 | H_ARG.66  | NH2 | H_ASP.89  | OD1 | 3.054 |
| 1IC7 | H_ARG.66  | NH2 | H_ASP.89  | OD2 | 3.478 |
| 1IC7 | Y_LYS.1   | NZ  | Y_GLU.7   | OE1 | 3.641 |
| 1IC7 | Y_LYS.1   | NZ  | Y_GLU.7   | OE2 | 2.660 |
| 1IC7 | Y_ARG.125 | NH2 | Y_ASP.119 | OD1 | 3.644 |
| 1IC7 | Y_ARG.125 | NH2 | Y_ASP.119 | OD2 | 2.585 |
| 1IFH | L_ARG.54  | NH1 | L_ASP.60  | OD1 | 3.414 |
| 1IFH | L_ARG.54  | NH1 | L_ASP.60  | OD2 | 3.205 |
| 1IFH | L_ARG.61  | NH1 | L_ASP.82  | OD1 | 2.658 |
| 1IFH | L_ARG.61  | NH1 | L_ASP.82  | OD2 | 3.079 |
| 1IFH | L_ARG.61  | NH2 | L_GLU.81  | OE2 | 3.987 |
| 1IFH | L_LYS.149 | NZ  | L_GLU.195 | OE1 | 3.474 |
| 1IFH | L_LYS.149 | NZ  | L_GLU.195 | OE2 | 3.400 |
| 1IFH | L_ARG.155 | NH1 | L_GLU.185 | OE1 | 3.273 |
| 1IFH | L_ARG.155 | NH2 | L_GLU.185 | OE2 | 3.721 |
| 1IFH | L_ARG.188 | NH1 | L_ASP.184 | OD1 | 3.900 |
| 1IFH | L_ARG.188 | NH2 | L_ASP.184 | OD1 | 3.145 |

|      |           |     |           |     |       |
|------|-----------|-----|-----------|-----|-------|
| 1IFH | L_HIS_189 | ND1 | L_ASP_151 | OD2 | 3.236 |
| 1IFH | L_LYS_199 | NZ  | L_ASP_110 | OD1 | 3.492 |
| 1IFH | L_LYS_199 | NZ  | L_ASP_110 | OD2 | 3.178 |
| 1IFH | H_ARG_38  | NH1 | H_ASP_86  | OD1 | 3.355 |
| 1IFH | H_ARG_38  | NH2 | H_GLU_46  | OE1 | 3.340 |
| 1IFH | H_ARG_38  | NH2 | H_ASP_86  | OD1 | 3.860 |
| 1IFH | H_ARG_66  | NH1 | H_ASP_86  | OD1 | 3.538 |
| 1IFH | H_ARG_66  | NH2 | H_ASP_86  | OD1 | 3.023 |
| 1IFH | H_ARG_66  | NH2 | H_ASP_86  | OD2 | 2.605 |
| 1IFH | H_ARG_94  | NH2 | H_GLU_96  | OE1 | 2.733 |
| 1IFH | H_ARG_95  | NH1 | L_ASP_91  | OD1 | 2.782 |
| 1IFH | H_ARG_95  | NH2 | P_ASP_104 | OD1 | 2.974 |
| 1IFH | H_ARG_95  | NH2 | P_ASP_104 | OD2 | 2.813 |
| 1IFH | H_LYS_221 | NZ  | L_GLU_123 | OE1 | 3.267 |
| 1IFH | H_LYS_221 | NZ  | L_GLU_123 | OE2 | 2.926 |
| 1IFH | H_LYS_222 | NZ  | H_GLU_226 | OE2 | 3.617 |
| 1IGF | L_LYS_50  | NZ  | H_ASP_98  | OD2 | 3.036 |
| 1IGF | L_ARG_61  | NH1 | L_GLU_79  | OE1 | 3.608 |
| 1IGF | L_ARG_61  | NH1 | L_GLU_79  | OE2 | 3.209 |
| 1IGF | L_ARG_61  | NH2 | L_ASP_82  | OD1 | 2.804 |
| 1IGF | L_ARG_61  | NH2 | L_ASP_82  | OD2 | 2.709 |
| 1IGF | L_LYS_142 | NZ  | L_ASP_143 | OD1 | 3.847 |
| 1IGF | L_LYS_142 | NZ  | L_ASP_143 | OD2 | 3.953 |
| 1IGF | L_LYS_149 | NZ  | L_GLU_195 | OE1 | 3.005 |
| 1IGF | L_HIS_189 | ND1 | L_GLU_185 | OE1 | 3.423 |
| 1IGF | L_HIS_189 | ND1 | L_GLU_185 | OE2 | 3.814 |
| 1IGF | L_HIS_189 | NE2 | L_GLU_154 | OE1 | 3.930 |
| 1IGF | L_HIS_189 | NE2 | L_GLU_154 | OE2 | 2.963 |
| 1IGF | L_HIS_189 | NE2 | L_GLU_185 | OE1 | 3.959 |
| 1IGF | L_LYS_199 | NZ  | L_ASP_110 | OD1 | 2.851 |
| 1IGF | L_LYS_199 | NZ  | L_ASP_110 | OD2 | 3.161 |
| 1IGF | H_ARG_38  | NH1 | H_GLU_46  | OE1 | 2.875 |
| 1IGF | H_ARG_38  | NH1 | H_GLU_46  | OE2 | 3.277 |
| 1IGF | H_ARG_38  | NH2 | H_ASP_86  | OD1 | 2.708 |
| 1IGF | H_LYS_64  | NZ  | H_ASP_61  | OD1 | 3.360 |
| 1IGF | H_ARG_66  | NH1 | H_ASP_86  | OD1 | 3.532 |
| 1IGF | H_ARG_66  | NH1 | H_ASP_86  | OD2 | 2.901 |
| 1IGF | H_ARG_66  | NH2 | H_ASP_86  | OD1 | 3.011 |
| 1IGF | H_ARG_66  | NH2 | H_ASP_86  | OD2 | 3.582 |
| 1IGF | H_ARG_83  | NH2 | H_GLU_85  | OE2 | 3.398 |
| 1IGF | H_ARG_94  | NH1 | H_ASP_101 | OD1 | 2.803 |
| 1IGF | H_ARG_94  | NH1 | H_ASP_101 | OD2 | 2.950 |
| 1IGF | H_LYS_221 | NZ  | L_GLU_123 | OE1 | 3.549 |
| 1IGF | M_ARG_61  | NH1 | M_ASP_82  | OD1 | 3.656 |
| 1IGF | M_ARG_61  | NH2 | M_GLU_79  | OE1 | 3.684 |
| 1IGF | M_ARG_61  | NH2 | M_GLU_79  | OE2 | 3.861 |
| 1IGF | M_ARG_61  | NH2 | M_ASP_82  | OD1 | 3.256 |
| 1IGF | M_ARG_61  | NH2 | M_ASP_82  | OD2 | 2.603 |
| 1IGF | M_LYS_149 | NZ  | M_GLU_195 | OE1 | 3.495 |
| 1IGF | M_LYS_183 | NZ  | M_GLU_187 | OE2 | 2.898 |
| 1IGF | M_LYS_199 | NZ  | M_ASP_110 | OD2 | 3.163 |
| 1IGF | J_ARG_38  | NH1 | J_ASP_86  | OD1 | 3.058 |
| 1IGF | J_ARG_38  | NH2 | J_GLU_46  | OE1 | 2.898 |
| 1IGF | J_ARG_38  | NH2 | J_GLU_85  | OE2 | 3.952 |
| 1IGF | J_LYS_64  | NZ  | J_ASP_61  | OD1 | 3.146 |
| 1IGF | J_LYS_64  | NZ  | J_ASP_61  | OD2 | 3.948 |
| 1IGF | J_ARG_66  | NH1 | J_GLU_85  | OE2 | 3.586 |
| 1IGF | J_ARG_66  | NH1 | J_ASP_86  | OD1 | 3.108 |

|      |           |     |           |     |       |
|------|-----------|-----|-----------|-----|-------|
| 1IGF | J_ARG.66  | NH1 | J_ASP.86  | OD2 | 3.486 |
| 1IGF | J_ARG.66  | NH2 | J_ASP.86  | OD1 | 3.509 |
| 1IGF | J_ARG.66  | NH2 | J_ASP.86  | OD2 | 2.722 |
| 1IGF | J_ARG.83  | NH1 | J_GLU.85  | OE1 | 3.819 |
| 1IGF | J_ARG.83  | NH2 | J_GLU.85  | OE1 | 3.702 |
| 1IGF | J_ARG.83  | NH2 | J_GLU.85  | OE2 | 3.508 |
| 1IGF | J_ARG.94  | NH2 | J_ASP.101 | OD1 | 2.994 |
| 1IGF | J_ARG.94  | NH2 | J_ASP.101 | OD2 | 2.766 |
| 1IGF | J_LYS.218 | NZ  | J_ASP.220 | OD1 | 3.151 |
| 1IGF | J_LYS.221 | NZ  | M_GLU.123 | OE1 | 3.800 |
| 1IGF | J_LYS.221 | NZ  | M_GLU.123 | OE2 | 3.750 |
| 1IND | L_LYS.41  | NZ  | L_GLU.83  | OE1 | 3.721 |
| 1IND | L_ARG.63  | NH2 | L_GLU.83  | OE2 | 3.365 |
| 1IND | L_ARG.63  | NH2 | L_ASP.84  | OD1 | 2.728 |
| 1IND | L_ARG.63  | NH2 | L_ASP.84  | OD2 | 3.765 |
| 1IND | L_LYS.72  | NZ  | L_ASP.71  | OD1 | 3.764 |
| 1IND | L_LYS.113 | NZ  | L_GLU.201 | OE1 | 3.425 |
| 1IND | L_ARG.186 | NH2 | L_GLU.189 | OE1 | 2.887 |
| 1IND | L_ARG.186 | NH2 | L_GLU.189 | OE2 | 2.679 |
| 1IND | L_HIS.191 | ND1 | L_ASP.154 | OD2 | 3.038 |
| 1IND | H_ARG.38  | NH1 | H_GLU.46  | OE1 | 3.013 |
| 1IND | H_ARG.38  | NH2 | H_ASP.90  | OD1 | 2.950 |
| 1IND | H_ARG.67  | NH1 | H_ASP.90  | OD1 | 3.223 |
| 1IND | H_ARG.67  | NH2 | H_ASP.90  | OD1 | 3.035 |
| 1IND | H_ARG.67  | NH2 | H_ASP.90  | OD2 | 2.402 |
| 1IND | H_ARG.87  | NH2 | H_GLU.89  | OE1 | 2.860 |
| 1IND | H_HIS.106 | ND1 | H_GLU.6   | OE1 | 3.067 |
| 1IND | H_LYS.143 | NZ  | L_GLU.127 | OE2 | 2.765 |
| 1IND | H_HIS.164 | NE2 | L_ASP.141 | OD1 | 3.891 |
| 1INE | L_ARG.63  | NH1 | L_ASP.84  | OD1 | 3.522 |
| 1INE | L_ARG.63  | NH1 | L_ASP.84  | OD2 | 3.841 |
| 1INE | L_LYS.113 | NZ  | L_GLU.201 | OE1 | 3.453 |
| 1INE | L_LYS.152 | NZ  | L_GLU.206 | OE1 | 3.945 |
| 1INE | L_ARG.186 | NH2 | L_GLU.189 | OE1 | 3.738 |
| 1INE | L_ARG.186 | NH2 | L_GLU.189 | OE2 | 2.847 |
| 1INE | L_HIS.191 | ND1 | L_ASP.154 | OD2 | 2.790 |
| 1INE | H_ARG.38  | NH1 | H_GLU.46  | OE1 | 3.495 |
| 1INE | H_ARG.38  | NH1 | H_GLU.46  | OE2 | 3.232 |
| 1INE | H_ARG.38  | NH2 | H_ASP.90  | OD1 | 2.602 |
| 1INE | H_ARG.67  | NH2 | H_ASP.90  | OD1 | 3.249 |
| 1INE | H_ARG.67  | NH2 | H_ASP.90  | OD2 | 2.823 |
| 1INE | H_ARG.87  | NH2 | H_GLU.89  | OE1 | 2.822 |
| 1INE | H_LYS.143 | NZ  | L_GLU.127 | OE2 | 2.920 |
| 1INE | H_HIS.164 | NE2 | L_ASP.141 | OD2 | 3.817 |
| 1IQW | L_LYS.24  | NZ  | L_ASP.74  | OD1 | 3.077 |
| 1IQW | L_LYS.24  | NZ  | L_ASP.74  | OD2 | 3.598 |
| 1IQW | L_ARG.65  | NH1 | L_GLU.83  | OE2 | 3.811 |
| 1IQW | L_ARG.65  | NH1 | L_GLU.85  | OE2 | 3.948 |
| 1IQW | L_ARG.65  | NH2 | L_GLU.85  | OE2 | 2.881 |
| 1IQW | L_ARG.65  | NH2 | L_ASP.86  | OD1 | 2.853 |
| 1IQW | L_ARG.65  | NH2 | L_ASP.86  | OD2 | 3.630 |
| 1IQW | L_ARG.100 | NH1 | L_ASP.98  | OD2 | 3.926 |
| 1IQW | L_ARG.100 | NH2 | L_ASP.98  | OD2 | 3.900 |
| 1IQW | L_ARG.100 | NH2 | H_GLU.50  | OE1 | 2.572 |
| 1IQW | L_ARG.100 | NH2 | H_GLU.50  | OE2 | 2.799 |
| 1IQW | L_ARG.112 | NH1 | L_ASP.174 | OD1 | 3.939 |
| 1IQW | L_LYS.146 | NZ  | L_GLU.109 | OE1 | 3.307 |
| 1IQW | L_LYS.151 | NZ  | L_GLU.158 | OE1 | 3.903 |

|      |           |     |           |     |       |
|------|-----------|-----|-----------|-----|-------|
| 1IQW | L_LYS_151 | NZ  | L_GLU_158 | OE2 | 3.426 |
| 1IQW | L_LYS_153 | NZ  | L_GLU_199 | OE1 | 2.679 |
| 1IQW | L_LYS_153 | NZ  | L_GLU_199 | OE2 | 3.687 |
| 1IQW | L_ARG_159 | NH1 | L_GLU_189 | OE1 | 2.786 |
| 1IQW | L_ARG_159 | NH2 | L_GLU_189 | OE1 | 3.653 |
| 1IQW | L_LYS_187 | NZ  | L_GLU_191 | OE1 | 3.905 |
| 1IQW | L_HIS_193 | ND1 | L_ASP_155 | OD2 | 3.111 |
| 1IQW | L_LYS_203 | NZ  | L_ASP_114 | OD1 | 2.895 |
| 1IQW | L_LYS_203 | NZ  | L_ASP_114 | OD2 | 3.727 |
| 1IQW | H_LYS_67  | NZ  | H_ASP_90  | OD1 | 3.551 |
| 1IQW | H_ARG_98  | NH2 | H_ASP_109 | OD1 | 2.686 |
| 1IQW | H_ARG_98  | NH2 | H_ASP_109 | OD2 | 3.835 |
| 1IQW | H_ARG_100 | NH1 | H_ASP_109 | OD1 | 3.614 |
| 1IQW | H_HIS_172 | NE2 | L_ASP_171 | OD1 | 3.594 |
| 1IT9 | L_ARG_65  | NH1 | L_GLU_85  | OE1 | 3.637 |
| 1IT9 | L_ARG_65  | NH2 | L_GLU_85  | OE1 | 2.628 |
| 1IT9 | L_ARG_65  | NH2 | L_ASP_86  | OD1 | 2.793 |
| 1IT9 | L_ARG_65  | NH2 | L_ASP_86  | OD2 | 3.255 |
| 1IT9 | L_ARG_100 | NH1 | L_ASP_98  | OD2 | 3.522 |
| 1IT9 | L_ARG_100 | NH2 | L_ASP_98  | OD2 | 3.953 |
| 1IT9 | L_ARG_100 | NH2 | H_GLU_50  | OE2 | 3.105 |
| 1IT9 | L_LYS_153 | NZ  | L_GLU_199 | OE1 | 3.686 |
| 1IT9 | L_LYS_187 | NZ  | L_GLU_191 | OE2 | 3.697 |
| 1IT9 | L_LYS_192 | NZ  | L_ASP_189 | OD1 | 3.604 |
| 1IT9 | H_LYS_63  | NZ  | H_GLU_46  | OE1 | 3.197 |
| 1IT9 | H_LYS_67  | NZ  | H_ASP_90  | OD1 | 3.421 |
| 1IT9 | H_LYS_67  | NZ  | H_ASP_90  | OD2 | 2.822 |
| 1IT9 | H_ARG_98  | NH1 | H_ASP_109 | OD1 | 3.442 |
| 1IT9 | H_ARG_98  | NH1 | H_ASP_109 | OD2 | 2.634 |
| 1IT9 | H_LYS_217 | NZ  | L_GLU_127 | OE1 | 3.545 |
| 1IT9 | H_LYS_217 | NZ  | L_GLU_127 | OE2 | 3.302 |
| 1J05 | L_ARG_18  | NH1 | L_ASP_76  | OD2 | 2.833 |
| 1J05 | L_LYS_103 | NZ  | L_GLU_105 | OE2 | 3.967 |
| 1J05 | H_ARG_40  | NH1 | H_GLU_85  | OE1 | 3.148 |
| 1J05 | H_ARG_40  | NH2 | H_GLU_85  | OE1 | 2.682 |
| 1J05 | H_LYS_58  | NZ  | L_ASP_94  | OD2 | 2.663 |
| 1J05 | H_LYS_62  | NZ  | H_GLU_46  | OE2 | 2.498 |
| 1J05 | H_LYS_66  | NZ  | H_ASP_86  | OD1 | 3.951 |
| 1J05 | H_LYS_66  | NZ  | H_ASP_86  | OD2 | 2.776 |
| 1J05 | A_ARG_18  | NH2 | A_ASP_76  | OD2 | 3.093 |
| 1J05 | A_ARG_61  | NH2 | A_ASP_81  | OD1 | 3.469 |
| 1J05 | A_ARG_61  | NH2 | A_ASP_82  | OD1 | 2.736 |
| 1J05 | A_ARG_61  | NH2 | A_ASP_82  | OD2 | 3.685 |
| 1J05 | B_LYS_58  | NZ  | A_ASP_94  | OD2 | 2.870 |
| 1J05 | B_LYS_62  | NZ  | B_GLU_46  | OE1 | 3.609 |
| 1J05 | B_LYS_66  | NZ  | B_ASP_86  | OD1 | 3.619 |
| 1J05 | B_LYS_66  | NZ  | B_ASP_86  | OD2 | 2.721 |
| 1J1O | L_ARG_61  | NH2 | L_ASP_82  | OD1 | 2.910 |
| 1J1O | L_ARG_61  | NH2 | L_ASP_82  | OD2 | 3.568 |
| 1J1O | L_LYS_103 | NZ  | L_GLU_105 | OE2 | 3.101 |
| 1J1O | H_ARG_38  | NH1 | H_ASP_89  | OD1 | 2.830 |
| 1J1O | H_ARG_38  | NH2 | H_GLU_46  | OE1 | 2.878 |
| 1J1O | H_ARG_38  | NH2 | H_ASP_89  | OD1 | 3.468 |
| 1J1O | H_ARG_66  | NH1 | H_ASP_89  | OD1 | 3.734 |
| 1J1O | H_ARG_66  | NH1 | H_ASP_89  | OD2 | 3.001 |
| 1J1O | H_ARG_66  | NH2 | H_ASP_89  | OD1 | 3.010 |
| 1J1O | H_ARG_66  | NH2 | H_ASP_89  | OD2 | 3.624 |
| 1J1O | H_LYS_75  | NZ  | H_ASP_72  | OD1 | 3.670 |

|      |           |     |           |     |       |
|------|-----------|-----|-----------|-----|-------|
| 1J1O | H_LYS.75  | NZ  | H_ASP.72  | OD2 | 2.565 |
| 1J1O | Y_LYS.1   | NZ  | Y_GLU.7   | OE2 | 2.858 |
| 1J1O | Y_LYS.13  | NZ  | Y_ASP.18  | OD1 | 3.427 |
| 1J1O | Y_LYS.13  | NZ  | Y_ASP.18  | OD2 | 3.311 |
| 1J1O | Y_ARG.61  | NH1 | Y_ASP.48  | OD2 | 2.936 |
| 1J1O | Y_ARG.61  | NH2 | Y_ASP.48  | OD2 | 3.586 |
| 1J1O | Y_ARG.68  | NH2 | Y_ASP.66  | OD2 | 3.730 |
| 1J1O | Y_LYS.97  | NZ  | H_ASP.32  | OD1 | 2.636 |
| 1J1O | Y_LYS.97  | NZ  | H_ASP.32  | OD2 | 3.985 |
| 1J1O | Y_LYS.97  | NZ  | H_ASP.99  | OD1 | 3.590 |
| 1J1O | Y_LYS.97  | NZ  | H_ASP.99  | OD2 | 2.896 |
| 1J1O | Y_ARG.125 | NH1 | Y_ASP.119 | OD2 | 3.446 |
| 1J1O | Y_ARG.125 | NH2 | Y_ASP.119 | OD1 | 3.689 |
| 1J1O | Y_ARG.125 | NH2 | Y_ASP.119 | OD2 | 3.547 |
| 1J1P | L_ARG.61  | NH2 | L_ASP.82  | OD1 | 2.811 |
| 1J1P | L_ARG.61  | NH2 | L_ASP.82  | OD2 | 3.464 |
| 1J1P | L_LYS.103 | NZ  | L_GLU.105 | OE2 | 2.960 |
| 1J1P | H_ARG.38  | NH1 | H_ASP.89  | OD1 | 2.854 |
| 1J1P | H_ARG.38  | NH2 | H_GLU.46  | OE1 | 2.924 |
| 1J1P | H_ARG.38  | NH2 | H_ASP.89  | OD1 | 3.457 |
| 1J1P | H_ARG.66  | NH1 | H_ASP.89  | OD1 | 3.754 |
| 1J1P | H_ARG.66  | NH1 | H_ASP.89  | OD2 | 3.009 |
| 1J1P | H_ARG.66  | NH2 | H_ASP.89  | OD1 | 2.987 |
| 1J1P | H_ARG.66  | NH2 | H_ASP.89  | OD2 | 3.600 |
| 1J1P | H_LYS.75  | NZ  | H_ASP.72  | OD1 | 3.943 |
| 1J1P | H_LYS.75  | NZ  | H_ASP.72  | OD2 | 2.743 |
| 1J1P | Y_LYS.1   | NZ  | Y_GLU.7   | OE2 | 2.945 |
| 1J1P | Y_ARG.61  | NH1 | Y_ASP.48  | OD1 | 3.659 |
| 1J1P | Y_ARG.61  | NH1 | Y_ASP.48  | OD2 | 2.763 |
| 1J1P | Y_ARG.61  | NH2 | Y_ASP.48  | OD2 | 3.923 |
| 1J1P | Y_ARG.68  | NH2 | Y_ASP.66  | OD2 | 3.805 |
| 1J1P | Y_LYS.97  | NZ  | H_ASP.32  | OD1 | 2.700 |
| 1J1P | Y_LYS.97  | NZ  | H_ASP.99  | OD1 | 3.721 |
| 1J1P | Y_LYS.97  | NZ  | H_ASP.99  | OD2 | 2.595 |
| 1J1P | Y_ARG.125 | NH1 | Y_ASP.119 | OD1 | 3.879 |
| 1J1P | Y_ARG.125 | NH1 | Y_ASP.119 | OD2 | 2.802 |
| 1J1P | Y_ARG.125 | NH2 | Y_ASP.119 | OD1 | 3.068 |
| 1J1P | Y_ARG.125 | NH2 | Y_ASP.119 | OD2 | 3.059 |
| 1J1X | L_ARG.61  | NH1 | L_GLU.81  | OE2 | 3.955 |
| 1J1X | L_ARG.61  | NH2 | L_GLU.81  | OE2 | 2.869 |
| 1J1X | L_ARG.61  | NH2 | L_ASP.82  | OD1 | 2.807 |
| 1J1X | L_ARG.61  | NH2 | L_ASP.82  | OD2 | 3.443 |
| 1J1X | L_LYS.103 | NZ  | L_GLU.105 | OE2 | 3.635 |
| 1J1X | H_ARG.38  | NH1 | H_ASP.89  | OD1 | 2.839 |
| 1J1X | H_ARG.38  | NH2 | H_GLU.46  | OE1 | 2.984 |
| 1J1X | H_ARG.38  | NH2 | H_ASP.89  | OD1 | 3.410 |
| 1J1X | H_ARG.66  | NH1 | H_ASP.89  | OD1 | 3.723 |
| 1J1X | H_ARG.66  | NH1 | H_ASP.89  | OD2 | 3.043 |
| 1J1X | H_ARG.66  | NH2 | H_ASP.89  | OD1 | 3.064 |
| 1J1X | H_ARG.66  | NH2 | H_ASP.89  | OD2 | 3.686 |
| 1J1X | Y_LYS.1   | NZ  | Y_GLU.7   | OE2 | 2.973 |
| 1J1X | Y_ARG.61  | NH1 | Y_ASP.48  | OD2 | 2.934 |
| 1J1X | Y_ARG.68  | NH2 | Y_ASP.66  | OD2 | 3.707 |
| 1J1X | Y_LYS.97  | NZ  | H_ASP.32  | OD1 | 2.655 |
| 1J1X | Y_LYS.97  | NZ  | H_ASP.32  | OD2 | 3.935 |
| 1J1X | Y_LYS.97  | NZ  | H_ASP.99  | OD1 | 3.479 |
| 1J1X | Y_LYS.97  | NZ  | H_ASP.99  | OD2 | 2.956 |
| 1J1X | Y_ARG.125 | NH1 | Y_ASP.119 | OD1 | 3.927 |

|      |           |     |           |     |       |
|------|-----------|-----|-----------|-----|-------|
| 1J1X | Y_ARG_125 | NH1 | Y_ASP_119 | OD2 | 3.825 |
| 1J1X | Y_ARG_125 | NH2 | Y_ASP_119 | OD2 | 2.717 |
| 1JFQ | L_ARG_61  | NH2 | L_GLU_81  | OE2 | 3.034 |
| 1JFQ | L_ARG_61  | NH2 | L_ASP_82  | OD1 | 2.626 |
| 1JFQ | L_ARG_61  | NH2 | L_ASP_82  | OD2 | 3.469 |
| 1JFQ | L_LYS_147 | NZ  | L_GLU_154 | OE2 | 3.134 |
| 1JFQ | L_LYS_149 | NZ  | L_GLU_195 | OE1 | 3.635 |
| 1JFQ | L_LYS_149 | NZ  | L_GLU_195 | OE2 | 2.808 |
| 1JFQ | L_LYS_169 | NZ  | L_ASP_167 | OD1 | 3.763 |
| 1JFQ | L_LYS_169 | NZ  | L_ASP_167 | OD2 | 3.427 |
| 1JFQ | L_LYS_183 | NZ  | L_GLU_187 | OE2 | 3.965 |
| 1JFQ | L_ARG_188 | NH1 | L_ASP_184 | OD1 | 2.482 |
| 1JFQ | L_ARG_188 | NH1 | L_ASP_184 | OD2 | 3.747 |
| 1JFQ | L_ARG_188 | NH2 | L_GLU_185 | OE2 | 3.747 |
| 1JFQ | L_HIS_189 | NE2 | L_GLU_185 | OE2 | 3.915 |
| 1JFQ | L_LYS_199 | NZ  | L_ASP_110 | OD1 | 3.726 |
| 1JFQ | L_LYS_199 | NZ  | L_ASP_110 | OD2 | 2.782 |
| 1JFQ | H_LYS_363 | NZ  | H_GLU_346 | OE1 | 2.893 |
| 1JFQ | H_LYS_367 | NZ  | H_ASP_390 | OD2 | 3.164 |
| 1JFQ | H_ARG_398 | NH2 | H_ASP_409 | OD1 | 3.741 |
| 1JFQ | H_ARG_398 | NH2 | H_ASP_409 | OD2 | 2.842 |
| 1JFQ | H_LYS_516 | NZ  | L_GLU_123 | OE1 | 3.003 |
| 1JFQ | H_LYS_516 | NZ  | L_GLU_123 | OE2 | 3.095 |
| 1JHL | L_ARG_61  | NH2 | L_ASP_82  | OD2 | 2.857 |
| 1JHL | L_LYS_107 | NZ  | L_GLU_17  | OE1 | 3.758 |
| 1JHL | H_LYS_63  | NZ  | H_GLU_46  | OE1 | 2.911 |
| 1JHL | H_LYS_63  | NZ  | H_GLU_46  | OE2 | 3.457 |
| 1JHL | H_ARG_98  | NH1 | H_ASP_106 | OD1 | 3.193 |
| 1JHL | H_ARG_98  | NH1 | H_ASP_106 | OD2 | 2.879 |
| 1JHL | A_LYS_1   | NZ  | A_GLU_7   | OE2 | 2.890 |
| 1JHL | A_ARG_112 | NH1 | H_ASP_55  | OD1 | 3.828 |
| 1JHL | A_ARG_112 | NH1 | H_ASP_55  | OD2 | 3.112 |
| 1JHL | A_LYS_116 | NZ  | H_ASP_99  | OD1 | 3.763 |
| 1JHL | A_LYS_116 | NZ  | H_ASP_99  | OD2 | 3.232 |
| 1JHL | A_ARG_125 | NH2 | A_ASP_119 | OD2 | 3.005 |
| 1JP5 | A_ARG_24  | NH1 | A_ASP_75  | OD1 | 3.622 |
| 1JP5 | A_ARG_24  | NH1 | A_ASP_75  | OD2 | 2.930 |
| 1JP5 | A_ARG_24  | NH2 | A_ASP_75  | OD1 | 2.789 |
| 1JP5 | A_ARG_24  | NH2 | A_ASP_75  | OD2 | 3.224 |
| 1JP5 | A_ARG_66  | NH1 | A_GLU_84  | OE2 | 3.961 |
| 1JP5 | A_ARG_66  | NH2 | A_GLU_86  | OE1 | 3.649 |
| 1JP5 | A_ARG_66  | NH2 | A_ASP_87  | OD1 | 2.642 |
| 1JP5 | A_ARG_66  | NH2 | A_ASP_87  | OD2 | 2.495 |
| 1JP5 | A_ARG_82  | NH1 | A_GLU_84  | OE2 | 3.359 |
| 1JP5 | A_HIS_162 | NE2 | A_ASP_226 | OD1 | 3.329 |
| 1JP5 | A_HIS_162 | NE2 | A_ASP_226 | OD2 | 3.666 |
| 1JP5 | A_LYS_173 | NZ  | A_ASP_190 | OD2 | 2.916 |
| 1JP5 | A_LYS_192 | NZ  | A_ASP_189 | OD1 | 2.549 |
| 1JP5 | A_ARG_194 | NH1 | A_GLU_216 | OE2 | 3.691 |
| 1JP5 | A_ARG_194 | NH1 | A_ASP_217 | OD1 | 3.483 |
| 1JP5 | A_ARG_194 | NH1 | A_ASP_217 | OD2 | 3.993 |
| 1JP5 | A_ARG_194 | NH2 | A_ASP_217 | OD1 | 3.125 |
| 1JP5 | A_ARG_194 | NH2 | A_ASP_217 | OD2 | 2.288 |
| 1JP5 | A_ARG_227 | NH1 | A_GLU_232 | OE1 | 3.878 |
| 1JP5 | A_ARG_227 | NH1 | A_GLU_232 | OE2 | 3.876 |
| 1JP5 | A_HIS_228 | ND1 | A_ASP_226 | OD1 | 3.183 |
| 1JP5 | A_HIS_228 | ND1 | A_ASP_226 | OD2 | 3.924 |
| 1JP5 | B_ARG_24  | NH1 | B_ASP_75  | OD1 | 3.589 |



|      |           |     |           |     |       |
|------|-----------|-----|-----------|-----|-------|
| 1JP5 | B_ARG_24  | NH1 | B_ASP_75  | OD2 | 2.884 |
| 1JP5 | B_ARG_24  | NH2 | B_ASP_75  | OD1 | 2.786 |
| 1JP5 | B_ARG_24  | NH2 | B_ASP_75  | OD2 | 3.283 |
| 1JP5 | B_ARG_66  | NH2 | B_GLU_86  | OE1 | 3.667 |
| 1JP5 | B_ARG_66  | NH2 | B_ASP_87  | OD1 | 2.594 |
| 1JP5 | B_ARG_66  | NH2 | B_ASP_87  | OD2 | 2.543 |
| 1JP5 | B_ARG_82  | NH1 | B_GLU_84  | OE2 | 3.388 |
| 1JP5 | B_LYS_139 | NZ  | B_GLU_137 | OE1 | 3.932 |
| 1JP5 | B_HIS_162 | NE2 | B_ASP_226 | OD1 | 3.248 |
| 1JP5 | B_HIS_162 | NE2 | B_ASP_226 | OD2 | 3.774 |
| 1JP5 | B_LYS_173 | NZ  | B_ASP_190 | OD2 | 3.014 |
| 1JP5 | B_LYS_192 | NZ  | B_ASP_189 | OD1 | 2.617 |
| 1JP5 | B_ARG_194 | NH1 | B_GLU_216 | OE2 | 3.383 |
| 1JP5 | B_ARG_194 | NH1 | B_ASP_217 | OD1 | 2.811 |
| 1JP5 | B_ARG_194 | NH1 | B_ASP_217 | OD2 | 3.494 |
| 1JP5 | B_ARG_194 | NH2 | B_ASP_217 | OD1 | 3.744 |
| 1JP5 | B_ARG_194 | NH2 | B_ASP_217 | OD2 | 2.928 |
| 1JP5 | B_ARG_227 | NH1 | B_GLU_232 | OE1 | 3.968 |
| 1JP5 | B_ARG_227 | NH1 | B_GLU_232 | OE2 | 3.830 |
| 1JP5 | B_HIS_228 | ND1 | B_ASP_226 | OD1 | 3.260 |
| 1JP5 | B_HIS_228 | ND1 | B_ASP_226 | OD2 | 3.862 |
| 1JPS | L_ARG_24  | NH1 | L_ASP_70  | OD2 | 3.616 |
| 1JPS | L_ARG_27  | NH2 | L_GLU_93  | OE1 | 3.147 |
| 1JPS | L_ARG_61  | NH2 | L_GLU_81  | OE2 | 3.693 |
| 1JPS | L_ARG_61  | NH2 | L_ASP_82  | OD1 | 2.870 |
| 1JPS | L_ARG_61  | NH2 | L_ASP_82  | OD2 | 3.637 |
| 1JPS | L_LYS_103 | NZ  | L_GLU_165 | OE1 | 2.915 |
| 1JPS | L_LYS_126 | NZ  | L_GLU_123 | OE1 | 3.492 |
| 1JPS | L_ARG_142 | NH2 | L_GLU_105 | OE2 | 3.364 |
| 1JPS | L_LYS_149 | NZ  | L_GLU_195 | OE2 | 3.272 |
| 1JPS | L_LYS_188 | NZ  | L_ASP_185 | OD1 | 3.281 |
| 1JPS | H_LYS_30  | NZ  | H_GLU_54  | OE1 | 3.726 |
| 1JPS | H_HIS_35  | NE2 | H_ASP_99  | OD2 | 2.904 |
| 1JPS | H_ARG_38  | NH1 | H_ASP_90  | OD1 | 2.795 |
| 1JPS | H_ARG_38  | NH2 | H_GLU_46  | OE2 | 3.099 |
| 1JPS | H_ARG_38  | NH2 | H_ASP_90  | OD1 | 3.661 |
| 1JPS | H_LYS_63  | NZ  | H_ASP_61  | OD1 | 2.512 |
| 1JPS | H_LYS_63  | NZ  | H_ASP_61  | OD2 | 3.231 |
| 1JPS | H_ARG_67  | NH1 | H_ASP_90  | OD1 | 3.087 |
| 1JPS | H_ARG_67  | NH1 | H_ASP_90  | OD2 | 3.639 |
| 1JPS | H_ARG_67  | NH2 | H_ASP_90  | OD1 | 3.450 |
| 1JPS | H_ARG_67  | NH2 | H_ASP_90  | OD2 | 2.676 |
| 1JPS | H_ARG_98  | NH2 | H_ASP_105 | OD1 | 3.651 |
| 1JPS | H_ARG_98  | NH2 | H_ASP_105 | OD2 | 2.801 |
| 1JPS | H_LYS_147 | NZ  | H_ASP_148 | OD1 | 3.289 |
| 1JPS | H_LYS_214 | NZ  | H_GLU_216 | OE2 | 3.681 |
| 1JPS | T_LYS_15  | NZ  | T_GLU_24  | OE2 | 3.265 |
| 1JPS | T_LYS_20  | NZ  | T_ASP_58  | OD2 | 3.975 |
| 1JPS | T_LYS_46  | NZ  | T_GLU_62  | OE2 | 3.654 |
| 1JPS | T_LYS_48  | NZ  | T_GLU_62  | OE2 | 2.510 |
| 1JPS | T_LYS_65  | NZ  | T_GLU_62  | OE1 | 3.161 |
| 1JPS | T_LYS_65  | NZ  | T_GLU_62  | OE2 | 3.595 |
| 1JPS | T_LYS_122 | NZ  | T_ASP_178 | OD1 | 2.673 |
| 1JPS | T_LYS_122 | NZ  | T_ASP_178 | OD2 | 3.856 |
| 1JPS | T_LYS_159 | NZ  | T_ASP_180 | OD2 | 2.746 |
| 1JPS | T_LYS_201 | NZ  | H_ASP_52  | OD1 | 2.781 |
| 1JPT | L_ARG_24  | NH2 | L_ASP_70  | OD1 | 3.381 |
| 1JPT | L_ARG_24  | NH2 | L_ASP_70  | OD2 | 2.823 |

|      |           |     |           |     |       |
|------|-----------|-----|-----------|-----|-------|
| 1JPT | L_ARG_27  | NH2 | L_GLU_93  | OE1 | 2.552 |
| 1JPT | L_ARG_61  | NH2 | L_GLU_81  | OE2 | 3.592 |
| 1JPT | L_ARG_61  | NH2 | L_ASP_82  | OD1 | 2.733 |
| 1JPT | L_ARG_61  | NH2 | L_ASP_82  | OD2 | 3.583 |
| 1JPT | L_LYS_149 | NZ  | L_GLU_195 | OE1 | 3.445 |
| 1JPT | L_HIS_189 | ND1 | L_ASP_151 | OD2 | 2.609 |
| 1JPT | L_ARG_211 | NH1 | L_GLU_187 | OE1 | 3.952 |
| 1JPT | H_LYS_30  | NZ  | H_GLU_54  | OE1 | 3.750 |
| 1JPT | H_HIS_35  | NE2 | H_ASP_99  | OD2 | 2.901 |
| 1JPT | H_ARG_38  | NH1 | H_ASP_90  | OD1 | 2.806 |
| 1JPT | H_ARG_38  | NH2 | H_GLU_46  | OE2 | 3.279 |
| 1JPT | H_ARG_38  | NH2 | H_ASP_90  | OD1 | 3.559 |
| 1JPT | H_LYS_63  | NZ  | H_GLU_46  | OE1 | 2.705 |
| 1JPT | H_LYS_63  | NZ  | H_ASP_61  | OD1 | 3.701 |
| 1JPT | H_ARG_67  | NH1 | H_ASP_90  | OD1 | 3.340 |
| 1JPT | H_ARG_67  | NH1 | H_ASP_90  | OD2 | 3.607 |
| 1JPT | H_ARG_67  | NH2 | H_ASP_90  | OD1 | 3.600 |
| 1JPT | H_ARG_67  | NH2 | H_ASP_90  | OD2 | 2.497 |
| 1JPT | H_ARG_87  | NH2 | H_GLU_89  | OE1 | 3.851 |
| 1JPT | H_ARG_98  | NH2 | H_ASP_105 | OD1 | 3.572 |
| 1JPT | H_ARG_98  | NH2 | H_ASP_105 | OD2 | 2.539 |
| 1JPT | H_LYS_147 | NZ  | H_ASP_148 | OD1 | 3.107 |
| 1JPT | H_LYS_147 | NZ  | H_ASP_148 | OD2 | 3.168 |
| 1JPT | H_LYS_213 | NZ  | L_GLU_123 | OE1 | 3.226 |
| 1JPT | H_LYS_213 | NZ  | L_GLU_123 | OE2 | 3.740 |
| 1JRH | L_ARG_61  | NH2 | L_ASP_82  | OD1 | 3.229 |
| 1JRH | L_ARG_61  | NH2 | L_ASP_82  | OD2 | 3.948 |
| 1JRH | L_LYS_103 | NZ  | L_ASP_165 | OD2 | 3.995 |
| 1JRH | H_ARG_38  | NH1 | H_GLU_46  | OE1 | 2.881 |
| 1JRH | H_ARG_38  | NH1 | H_GLU_46  | OE2 | 3.879 |
| 1JRH | H_ARG_38  | NH2 | H_ASP_86  | OD2 | 3.530 |
| 1JRH | H_LYS_57  | NZ  | H_ASP_55  | OD2 | 3.070 |
| 1JRH | H_ARG_66  | NH1 | H_ASP_86  | OD1 | 3.819 |
| 1JRH | H_ARG_66  | NH1 | H_ASP_86  | OD2 | 3.178 |
| 1JRH | H_ARG_66  | NH2 | H_ASP_86  | OD1 | 3.486 |
| 1JRH | H_ARG_66  | NH2 | H_ASP_86  | OD2 | 2.963 |
| 1JRH | H_LYS_71  | NZ  | H_ASP_55  | OD1 | 3.729 |
| 1JRH | H_ARG_75  | NH2 | H_ASP_72  | OD2 | 2.739 |
| 1JRH | H_ARG_94  | NH2 | H_ASP_101 | OD2 | 2.863 |
| 1JRH | L_LYS_52  | NZ  | H_ASP_54  | OD1 | 3.471 |
| 1JRH | L_LYS_52  | NZ  | H_ASP_54  | OD2 | 2.819 |
| 1JRH | L_LYS_52  | NZ  | H_ASP_56  | OD2 | 2.824 |
| 1JRH | L_HIS_73  | NE2 | L_ASP_72  | OD1 | 3.994 |
| 1JRH | L_HIS_73  | NE2 | L_ASP_72  | OD2 | 3.992 |
| 1JRH | L_ARG_84  | NH1 | L_GLU_45  | OE1 | 2.869 |
| 1JRH | L_ARG_84  | NH1 | L_GLU_45  | OE2 | 3.093 |
| 1JRH | L_ARG_84  | NH2 | L_GLU_27  | OE1 | 3.652 |
| 1JRH | L_ARG_84  | NH2 | L_GLU_27  | OE2 | 3.984 |
| 1JRH | L_LYS_86  | NZ  | L_GLU_93  | OE1 | 3.237 |
| 1JRH | L_LYS_86  | NZ  | L_GLU_93  | OE2 | 3.629 |
| 1JTO | A_ARG_38  | NH1 | A_ASP_90  | OD2 | 2.989 |
| 1JTO | A_ARG_38  | NH2 | A_GLU_46  | OE1 | 3.765 |
| 1JTO | A_ARG_38  | NH2 | A_GLU_46  | OE2 | 3.163 |
| 1JTO | A_ARG_38  | NH2 | A_ASP_90  | OD2 | 3.961 |
| 1JTO | A_ARG_67  | NH1 | A_ASP_90  | OD1 | 2.656 |
| 1JTO | A_ARG_67  | NH1 | A_ASP_90  | OD2 | 3.690 |
| 1JTO | A_ARG_67  | NH2 | A_ASP_90  | OD1 | 3.432 |
| 1JTO | A_ARG_67  | NH2 | A_ASP_90  | OD2 | 2.929 |

|      |           |     |           |     |       |
|------|-----------|-----|-----------|-----|-------|
| 1JTO | B_ARG_38  | NH1 | B_ASP_90  | OD2 | 2.804 |
| 1JTO | B_ARG_38  | NH2 | B_GLU_46  | OE1 | 3.744 |
| 1JTO | B_ARG_38  | NH2 | B_ASP_90  | OD2 | 3.904 |
| 1JTO | B_LYS_65  | NZ  | B_ASP_62  | OD1 | 3.988 |
| 1JTO | B_ARG_67  | NH1 | B_ASP_90  | OD1 | 2.582 |
| 1JTO | B_ARG_67  | NH1 | B_ASP_90  | OD2 | 4.000 |
| 1JTO | B_ARG_67  | NH2 | B_ASP_90  | OD1 | 3.081 |
| 1JTO | B_ARG_67  | NH2 | B_ASP_90  | OD2 | 2.986 |
| 1JTO | L_LYS_1   | NZ  | L_GLU_7   | OE2 | 3.834 |
| 1JTO | L_LYS_13  | NZ  | L_ASP_18  | OD2 | 2.997 |
| 1JTO | L_ARG_61  | NH2 | L_ASP_48  | OD1 | 3.510 |
| 1JTO | L_LYS_97  | NZ  | L_ASP_101 | OD1 | 2.937 |
| 1JTO | L_ARG_125 | NH1 | L_ASP_119 | OD2 | 3.230 |
| 1JTO | L_ARG_125 | NH2 | L_ASP_119 | OD1 | 3.769 |
| 1JTO | L_ARG_125 | NH2 | L_ASP_119 | OD2 | 3.012 |
| 1JTO | M_LYS_1   | NZ  | M_GLU_7   | OE1 | 3.717 |
| 1JTO | M_LYS_1   | NZ  | M_GLU_7   | OE2 | 2.519 |
| 1JTO | M_ARG_61  | NH2 | M_ASP_48  | OD1 | 3.874 |
| 1JTO | M_ARG_125 | NH1 | M_ASP_119 | OD2 | 2.938 |
| 1JTO | M_ARG_125 | NH2 | M_ASP_119 | OD1 | 3.078 |
| 1JTO | M_ARG_125 | NH2 | M_ASP_119 | OD2 | 3.152 |
| 1JTP | A_ARG_38  | NH1 | A_ASP_90  | OD1 | 2.844 |
| 1JTP | A_ARG_38  | NH2 | A_GLU_46  | OE1 | 2.990 |
| 1JTP | A_ARG_38  | NH2 | A_ASP_90  | OD1 | 3.872 |
| 1JTP | A_LYS_65  | NZ  | A_ASP_62  | OD1 | 3.073 |
| 1JTP | A_ARG_67  | NH1 | A_GLU_87  | OE1 | 3.833 |
| 1JTP | A_ARG_67  | NH1 | A_ASP_90  | OD1 | 3.796 |
| 1JTP | A_ARG_67  | NH1 | A_ASP_90  | OD2 | 2.836 |
| 1JTP | A_ARG_67  | NH2 | A_GLU_87  | OE2 | 3.971 |
| 1JTP | A_ARG_67  | NH2 | A_ASP_90  | OD1 | 3.167 |
| 1JTP | A_ARG_67  | NH2 | A_ASP_90  | OD2 | 3.669 |
| 1JTP | B_ARG_38  | NH1 | B_ASP_90  | OD1 | 3.088 |
| 1JTP | B_ARG_38  | NH2 | B_GLU_46  | OE1 | 3.231 |
| 1JTP | B_ARG_38  | NH2 | B_GLU_46  | OE2 | 3.901 |
| 1JTP | B_LYS_65  | NZ  | B_ASP_62  | OD1 | 2.767 |
| 1JTP | B_ARG_67  | NH1 | B_ASP_90  | OD1 | 3.639 |
| 1JTP | B_ARG_67  | NH1 | B_ASP_90  | OD2 | 2.730 |
| 1JTP | B_ARG_67  | NH2 | B_ASP_90  | OD1 | 2.941 |
| 1JTP | B_ARG_67  | NH2 | B_ASP_90  | OD2 | 3.599 |
| 1JTP | L_LYS_1   | NZ  | L_GLU_7   | OE1 | 3.651 |
| 1JTP | L_LYS_1   | NZ  | L_GLU_7   | OE2 | 2.871 |
| 1JTP | L_LYS_13  | NZ  | L_ASP_18  | OD2 | 2.822 |
| 1JTP | L_ARG_61  | NH2 | L_ASP_48  | OD2 | 3.676 |
| 1JTP | L_ARG_125 | NH2 | L_ASP_119 | OD2 | 3.456 |
| 1JTP | M_LYS_1   | NZ  | M_GLU_7   | OE1 | 3.807 |
| 1JTP | M_LYS_1   | NZ  | M_GLU_7   | OE2 | 2.795 |
| 1JTP | M_LYS_13  | NZ  | M_ASP_18  | OD2 | 3.184 |
| 1JTP | M_ARG_61  | NH2 | M_ASP_48  | OD2 | 3.928 |
| 1JTP | M_ARG_125 | NH1 | M_ASP_119 | OD1 | 3.405 |
| 1JTP | M_ARG_125 | NH1 | M_ASP_119 | OD2 | 2.529 |
| 1JTP | M_ARG_125 | NH2 | M_ASP_119 | OD1 | 2.657 |
| 1JTP | M_ARG_125 | NH2 | M_ASP_119 | OD2 | 3.292 |
| 1JTT | A_ARG_38  | NH1 | A_ASP_90  | OD1 | 2.882 |
| 1JTT | A_ARG_38  | NH2 | A_GLU_46  | OE2 | 2.917 |
| 1JTT | A_LYS_65  | NZ  | A_ASP_62  | OD2 | 2.806 |
| 1JTT | A_ARG_67  | NH1 | A_ASP_90  | OD1 | 3.707 |
| 1JTT | A_ARG_67  | NH1 | A_ASP_90  | OD2 | 2.718 |
| 1JTT | A_ARG_67  | NH2 | A_ASP_90  | OD1 | 3.006 |

|      |           |     |           |     |       |
|------|-----------|-----|-----------|-----|-------|
| 1JTT | A_ARG.67  | NH2 | A_ASP.90  | OD2 | 3.559 |
| 1JTT | L_LYS.1   | NZ  | L_GLU.7   | OE2 | 2.871 |
| 1JTT | L_ARG.61  | NH2 | L_ASP.48  | OD2 | 3.382 |
| 1JTT | L_ARG.125 | NH1 | L_ASP.119 | OD1 | 3.528 |
| 1JTT | L_ARG.125 | NH1 | L_ASP.119 | OD2 | 3.412 |
| 1JTT | L_ARG.125 | NH2 | L_ASP.119 | OD1 | 3.866 |
| 1JTT | L_ARG.125 | NH2 | L_ASP.119 | OD2 | 2.346 |
| 1JV5 | A_ARG.61  | NH1 | A_GLU.81  | OE1 | 3.715 |
| 1JV5 | A_ARG.61  | NH1 | A_ASP.82  | OD1 | 3.734 |
| 1JV5 | A_ARG.61  | NH2 | A_ASP.82  | OD1 | 2.672 |
| 1JV5 | A_ARG.61  | NH2 | A_ASP.82  | OD2 | 3.335 |
| 1JV5 | B_LYS.363 | NZ  | B_GLU.346 | OE1 | 3.710 |
| 1JV5 | B_LYS.367 | NZ  | B_ASP.390 | OD1 | 2.564 |
| 1JV5 | B_LYS.367 | NZ  | B_ASP.390 | OD2 | 3.314 |
| 1K6Q | L_LYS.3   | NZ  | L_ASP.1   | OD1 | 3.247 |
| 1K6Q | L_LYS.3   | NZ  | L_ASP.1   | OD2 | 3.989 |
| 1K6Q | L_ARG.27  | NH1 | L_GLU.93  | OE1 | 3.087 |
| 1K6Q | L_ARG.27  | NH2 | L_GLU.93  | OE1 | 3.061 |
| 1K6Q | L_ARG.27  | NH2 | L_GLU.93  | OE2 | 3.535 |
| 1K6Q | L_ARG.61  | NH1 | L_GLU.79  | OE2 | 3.467 |
| 1K6Q | L_ARG.61  | NH2 | L_GLU.79  | OE1 | 3.569 |
| 1K6Q | L_ARG.61  | NH2 | L_GLU.79  | OE2 | 3.481 |
| 1K6Q | L_ARG.61  | NH2 | L_ASP.81  | OD1 | 3.557 |
| 1K6Q | L_ARG.61  | NH2 | L_ASP.82  | OD1 | 2.902 |
| 1K6Q | L_ARG.61  | NH2 | L_ASP.82  | OD2 | 3.306 |
| 1K6Q | L_LYS.149 | NZ  | L_GLU.195 | OE1 | 3.892 |
| 1K6Q | L_LYS.149 | NZ  | L_GLU.195 | OE2 | 2.797 |
| 1K6Q | L_ARG.188 | NH1 | L_GLU.185 | OE1 | 3.503 |
| 1K6Q | L_ARG.188 | NH2 | L_GLU.185 | OE1 | 2.593 |
| 1K6Q | L_ARG.188 | NH2 | L_GLU.185 | OE2 | 3.878 |
| 1K6Q | L_HIS.189 | ND1 | L_ASP.151 | OD2 | 2.798 |
| 1K6Q | H_LYS.30  | NZ  | H_GLU.54  | OE1 | 3.652 |
| 1K6Q | H_HIS.35  | NE2 | H_ASP.99  | OD2 | 3.337 |
| 1K6Q | H_ARG.40  | NH1 | H_GLU.89  | OE2 | 2.763 |
| 1K6Q | H_ARG.40  | NH2 | H_GLU.89  | OE2 | 2.831 |
| 1K6Q | H_LYS.63  | NZ  | H_GLU.46  | OE1 | 3.998 |
| 1K6Q | H_LYS.67  | NZ  | H_ASP.90  | OD1 | 3.649 |
| 1K6Q | H_LYS.67  | NZ  | H_ASP.90  | OD2 | 3.070 |
| 1K6Q | H_ARG.98  | NH2 | H_ASP.105 | OD1 | 3.693 |
| 1K6Q | H_ARG.98  | NH2 | H_ASP.105 | OD2 | 2.580 |
| 1K6Q | H_HIS.168 | NE2 | L_ASP.167 | OD1 | 3.896 |
| 1KB5 | A_ARG.4   | NH1 | A_GLU.25  | OE1 | 3.756 |
| 1KB5 | A_ARG.4   | NH1 | A_GLU.25  | OE2 | 3.640 |
| 1KB5 | A_ARG.4   | NH2 | A_GLU.25  | OE1 | 2.650 |
| 1KB5 | A_ARG.4   | NH2 | A_GLU.25  | OE2 | 3.717 |
| 1KB5 | A_ARG.61  | NH1 | A_ASP.84  | OD1 | 3.434 |
| 1KB5 | A_ARG.61  | NH1 | A_ASP.84  | OD2 | 2.899 |
| 1KB5 | A_ARG.61  | NH2 | A_ASP.84  | OD1 | 2.515 |
| 1KB5 | A_ARG.61  | NH2 | A_ASP.84  | OD2 | 3.185 |
| 1KB5 | A_LYS.72  | NZ  | A_GLU.70  | OE1 | 3.823 |
| 1KB5 | A_ARG.93  | NH1 | B_GLU.105 | OE1 | 2.975 |
| 1KB5 | A_ARG.93  | NH1 | B_GLU.105 | OE2 | 3.412 |
| 1KB5 | A_ARG.101 | NH2 | H_ASP.98  | OD1 | 2.690 |
| 1KB5 | B_ARG.22  | NH2 | B_GLU.74  | OE2 | 3.622 |
| 1KB5 | B_LYS.26  | NZ  | B_GLU.5   | OE1 | 2.619 |
| 1KB5 | B_ARG.50  | NH2 | B_ASP.72  | OD1 | 3.832 |
| 1KB5 | L_LYS.27  | NZ  | B_ASP.54  | OD1 | 3.460 |
| 1KB5 | L_ARG.61  | NH1 | L_ASP.82  | OD1 | 3.130 |

|      |           |     |           |     |       |
|------|-----------|-----|-----------|-----|-------|
| 1KB5 | L_ARG_61  | NH1 | L_ASP_82  | OD2 | 2.318 |
| 1KB5 | L_ARG_61  | NH2 | L_GLU_81  | OE2 | 3.530 |
| 1KB5 | L_ARG_61  | NH2 | L_ASP_82  | OD1 | 2.659 |
| 1KB5 | L_ARG_61  | NH2 | L_ASP_82  | OD2 | 3.409 |
| 1KB5 | L_LYS_149 | NZ  | L_GLU_195 | OE1 | 3.078 |
| 1KB5 | L_ARG_155 | NH2 | L_GLU_185 | OE1 | 2.951 |
| 1KB5 | L_ARG_155 | NH2 | L_GLU_185 | OE2 | 3.151 |
| 1KB5 | L_ARG_188 | NH1 | L_GLU_185 | OE2 | 3.844 |
| 1KB5 | L_ARG_188 | NH2 | L_ASP_184 | OD1 | 3.621 |
| 1KB5 | L_HIS_189 | NE2 | L_ASP_151 | OD2 | 3.476 |
| 1KB5 | H_LYS_62  | NZ  | H_GLU_46  | OE2 | 3.773 |
| 1KB5 | H_ARG_66  | NH1 | H_ASP_86  | OD2 | 3.354 |
| 1KB5 | H_ARG_94  | NH1 | H_ASP_101 | OD1 | 3.952 |
| 1KB5 | H_ARG_94  | NH1 | H_ASP_101 | OD2 | 2.472 |
| 1KB5 | H_ARG_94  | NH2 | H_ASP_101 | OD2 | 2.694 |
| 1KB5 | H_ARG_96  | NH1 | A_ASP_26  | OD1 | 2.599 |
| 1KB5 | H_ARG_96  | NH1 | A_ASP_26  | OD2 | 2.834 |
| 1KB5 | H_ARG_96  | NH2 | L_GLU_56  | OE2 | 2.981 |
| 1KB5 | H_ARG_96  | NH2 | H_ASP_101 | OD1 | 3.517 |
| 1KB5 | H_ARG_96  | NH2 | H_ASP_101 | OD2 | 3.239 |
| 1KB5 | H_LYS_209 | NZ  | H_GLU_211 | OE1 | 3.539 |
| 1KB5 | H_LYS_209 | NZ  | H_GLU_211 | OE2 | 3.472 |
| 1KC5 | L_ARG_54  | NH1 | L_ASP_60  | OD1 | 2.682 |
| 1KC5 | L_ARG_61  | NH1 | L_ASP_82  | OD1 | 2.395 |
| 1KC5 | L_ARG_61  | NH1 | L_ASP_82  | OD2 | 2.703 |
| 1KC5 | L_ARG_61  | NH2 | L_ASP_82  | OD1 | 3.920 |
| 1KC5 | L_LYS_107 | NZ  | L_GLU_17  | OE2 | 3.192 |
| 1KC5 | L_LYS_142 | NZ  | L_GLU_105 | OE2 | 3.861 |
| 1KC5 | L_LYS_147 | NZ  | L_GLU_154 | OE1 | 3.049 |
| 1KC5 | L_LYS_147 | NZ  | L_GLU_154 | OE2 | 3.591 |
| 1KC5 | L_LYS_149 | NZ  | L_GLU_195 | OE1 | 2.716 |
| 1KC5 | L_LYS_149 | NZ  | L_GLU_195 | OE2 | 3.100 |
| 1KC5 | L_ARG_155 | NH1 | L_GLU_185 | OE1 | 3.442 |
| 1KC5 | L_LYS_169 | NZ  | L_ASP_167 | OD1 | 3.457 |
| 1KC5 | L_LYS_169 | NZ  | L_ASP_167 | OD2 | 3.411 |
| 1KC5 | L_ARG_188 | NH1 | L_GLU_185 | OE2 | 3.469 |
| 1KC5 | L_HIS_189 | ND1 | L_ASP_151 | OD2 | 3.918 |
| 1KC5 | L_HIS_189 | NE2 | L_GLU_185 | OE1 | 3.880 |
| 1KC5 | L_LYS_199 | NZ  | L_ASP_110 | OD2 | 2.858 |
| 1KC5 | H_ARG_39  | NH1 | H_ASP_90  | OD1 | 3.033 |
| 1KC5 | H_ARG_39  | NH2 | H_GLU_47  | OE1 | 2.994 |
| 1KC5 | H_ARG_67  | NH2 | H_ASP_90  | OD1 | 3.361 |
| 1KC5 | H_ARG_67  | NH2 | H_ASP_90  | OD2 | 2.772 |
| 1KC5 | H_ARG_98  | NH1 | H_ASP_104 | OD2 | 2.421 |
| 1KC5 | H_LYS_211 | NZ  | L_GLU_123 | OE2 | 2.759 |
| 1KCR | L_ARG_61  | NH1 | L_ASP_82  | OD1 | 3.167 |
| 1KCR | L_ARG_61  | NH1 | L_ASP_82  | OD2 | 3.442 |
| 1KCR | L_LYS_146 | NZ  | L_GLU_153 | OE1 | 3.602 |
| 1KCR | L_LYS_146 | NZ  | L_GLU_153 | OE2 | 3.503 |
| 1KCR | L_LYS_148 | NZ  | L_GLU_194 | OE1 | 3.325 |
| 1KCR | L_ARG_154 | NH2 | L_GLU_184 | OE1 | 3.047 |
| 1KCR | L_ARG_154 | NH2 | L_GLU_184 | OE2 | 3.767 |
| 1KCR | L_HIS_188 | ND1 | L_ASP_150 | OD2 | 3.289 |
| 1KCR | H_ARG_39  | NH1 | H_ASP_90  | OD1 | 2.787 |
| 1KCR | H_ARG_39  | NH2 | H_GLU_47  | OE1 | 3.186 |
| 1KCR | H_ARG_39  | NH2 | H_ASP_90  | OD1 | 2.864 |
| 1KCR | H_ARG_67  | NH1 | H_ASP_90  | OD1 | 3.439 |
| 1KCR | H_ARG_67  | NH1 | H_ASP_90  | OD2 | 3.339 |

|      |           |     |           |     |       |
|------|-----------|-----|-----------|-----|-------|
| 1KCR | H_ARG.67  | NH2 | H_ASP_90  | OD1 | 3.781 |
| 1KCR | H_ARG.67  | NH2 | H_ASP_90  | OD2 | 2.578 |
| 1KCR | H_LYS.76  | NZ  | H_ASP_73  | OD2 | 3.906 |
| 1KCS | L_LYS.24  | NZ  | L_ASP_70  | OD1 | 3.278 |
| 1KCS | L_ARG.54  | NH1 | L_ASP_60  | OD1 | 3.351 |
| 1KCS | L_ARG.61  | NH1 | L_ASP_82  | OD1 | 3.132 |
| 1KCS | L_ARG.61  | NH1 | L_ASP_82  | OD2 | 3.710 |
| 1KCS | L_LYS_103 | NZ  | L_ASP_85  | OD2 | 3.830 |
| 1KCS | L_LYS_149 | NZ  | L_GLU_195 | OE1 | 3.249 |
| 1KCS | L_LYS_149 | NZ  | L_GLU_195 | OE2 | 3.257 |
| 1KCS | L_HIS_189 | ND1 | L_ASP_151 | OD2 | 2.813 |
| 1KCS | L_LYS_199 | NZ  | L_ASP_110 | OD1 | 3.476 |
| 1KCS | L_LYS_199 | NZ  | L_ASP_110 | OD2 | 3.643 |
| 1KCS | H_ARG.39  | NH1 | H_ASP_90  | OD1 | 2.811 |
| 1KCS | H_ARG.39  | NH2 | H_GLU_47  | OE1 | 2.833 |
| 1KCS | H_ARG.39  | NH2 | H_ASP_90  | OD1 | 3.463 |
| 1KCS | H_ARG.67  | NH1 | H_ASP_90  | OD1 | 3.415 |
| 1KCS | H_ARG.67  | NH1 | H_ASP_90  | OD2 | 3.871 |
| 1KCS | H_ARG.67  | NH2 | H_ASP_90  | OD1 | 2.423 |
| 1KCS | H_ARG.67  | NH2 | H_ASP_90  | OD2 | 2.528 |
| 1KCS | H_LYS_211 | NZ  | L_GLU_123 | OE1 | 3.340 |
| 1KCS | H_LYS_211 | NZ  | L_GLU_123 | OE2 | 2.904 |
| 1KCS | H_LYS_212 | NZ  | H_GLU_214 | OE2 | 2.957 |
| 1KIP | A_ARG.61  | NH2 | A_GLU_81  | OE2 | 3.479 |
| 1KIP | A_ARG.61  | NH2 | A_ASP_82  | OD1 | 2.597 |
| 1KIP | A_ARG.61  | NH2 | A_ASP_82  | OD2 | 3.338 |
| 1KIP | A_ARG.96  | NH1 | B_GLU_98  | OE1 | 2.773 |
| 1KIP | A_ARG.96  | NH1 | B_GLU_98  | OE2 | 3.817 |
| 1KIP | A_ARG.96  | NH2 | B_GLU_98  | OE1 | 3.280 |
| 1KIP | A_ARG.96  | NH2 | B_GLU_98  | OE2 | 2.802 |
| 1KIP | A_LYS_107 | NZ  | A_GLU_17  | OE1 | 3.197 |
| 1KIP | A_LYS_107 | NZ  | A_GLU_17  | OE2 | 2.849 |
| 1KIP | B_ARG.38  | NH1 | B_ASP_89  | OD1 | 3.191 |
| 1KIP | B_ARG.38  | NH2 | B_GLU_46  | OE1 | 3.093 |
| 1KIP | B_ARG.38  | NH2 | B_GLU_46  | OE2 | 3.933 |
| 1KIP | B_ARG.38  | NH2 | B_ASP_89  | OD1 | 3.743 |
| 1KIP | B_ARG.66  | NH1 | B_ASP_89  | OD1 | 3.854 |
| 1KIP | B_ARG.66  | NH1 | B_ASP_89  | OD2 | 2.776 |
| 1KIP | B_ARG.66  | NH2 | B_ASP_89  | OD1 | 2.725 |
| 1KIP | B_ARG.66  | NH2 | B_ASP_89  | OD2 | 3.126 |
| 1KIP | B_ARG.97  | NH2 | B_ASP_104 | OD1 | 3.837 |
| 1KIP | B_ARG.97  | NH2 | B_ASP_104 | OD2 | 2.804 |
| 1KIP | B_ARG_102 | NH1 | B_ASP_100 | OD2 | 3.276 |
| 1KIP | C_LYS.1   | NZ  | C_GLU.7   | OE2 | 3.468 |
| 1KIP | C_ARG.61  | NH1 | C_ASP_48  | OD1 | 3.721 |
| 1KIP | C_ARG.125 | NH1 | C_ASP_119 | OD1 | 3.514 |
| 1KIP | C_ARG.125 | NH1 | C_ASP_119 | OD2 | 3.062 |
| 1KIP | C_ARG.125 | NH2 | C_ASP_119 | OD2 | 3.245 |
| 1KIQ | A_ARG.61  | NH2 | A_GLU_81  | OE2 | 3.197 |
| 1KIQ | A_ARG.61  | NH2 | A_ASP_82  | OD1 | 2.691 |
| 1KIQ | A_ARG.61  | NH2 | A_ASP_82  | OD2 | 3.415 |
| 1KIQ | A_ARG.96  | NH1 | B_GLU_98  | OE1 | 2.812 |
| 1KIQ | A_ARG.96  | NH1 | B_GLU_98  | OE2 | 3.589 |
| 1KIQ | A_ARG.96  | NH2 | B_GLU_98  | OE1 | 3.677 |
| 1KIQ | A_ARG.96  | NH2 | B_GLU_98  | OE2 | 2.919 |
| 1KIQ | A_LYS_103 | NZ  | A_GLU_105 | OE1 | 2.805 |
| 1KIQ | A_LYS_103 | NZ  | A_GLU_105 | OE2 | 3.912 |
| 1KIQ | A_LYS_107 | NZ  | A_GLU_17  | OE1 | 3.881 |

|      |           |     |           |     |       |
|------|-----------|-----|-----------|-----|-------|
| 1KIQ | A_LYS_107 | NZ  | A_GLU_17  | OE2 | 2.784 |
| 1KIQ | B_ARG_38  | NH1 | B_ASP_89  | OD1 | 2.893 |
| 1KIQ | B_ARG_38  | NH2 | B_GLU_46  | OE1 | 3.199 |
| 1KIQ | B_ARG_38  | NH2 | B_GLU_46  | OE2 | 3.778 |
| 1KIQ | B_ARG_38  | NH2 | B_ASP_89  | OD1 | 3.733 |
| 1KIQ | B_ARG_66  | NH1 | B_ASP_89  | OD1 | 3.789 |
| 1KIQ | B_ARG_66  | NH1 | B_ASP_89  | OD2 | 2.815 |
| 1KIQ | B_ARG_66  | NH2 | B_ASP_89  | OD1 | 2.856 |
| 1KIQ | B_ARG_66  | NH2 | B_ASP_89  | OD2 | 3.346 |
| 1KIQ | B_LYS_75  | NZ  | B_ASP_72  | OD2 | 3.652 |
| 1KIQ | B_ARG_97  | NH2 | B_ASP_104 | OD1 | 3.671 |
| 1KIQ | B_ARG_97  | NH2 | B_ASP_104 | OD2 | 2.756 |
| 1KIQ | B_ARG_102 | NH1 | B_ASP_100 | OD2 | 3.299 |
| 1KIQ | C_LYS_1   | NZ  | C_GLU_7   | OE1 | 3.271 |
| 1KIQ | C_LYS_1   | NZ  | C_GLU_7   | OE2 | 3.227 |
| 1KIQ | C_LYS_13  | NZ  | C_ASP_18  | OD2 | 3.514 |
| 1KIQ | C_ARG_68  | NH1 | C_ASP_66  | OD2 | 2.812 |
| 1KIQ | C_ARG_125 | NH1 | C_ASP_119 | OD1 | 3.267 |
| 1KIQ | C_ARG_125 | NH1 | C_ASP_119 | OD2 | 3.095 |
| 1KIQ | C_ARG_125 | NH2 | C_ASP_119 | OD2 | 3.062 |
| 1KIR | A_ARG_61  | NH2 | A_GLU_81  | OE2 | 3.612 |
| 1KIR | A_ARG_61  | NH2 | A_ASP_82  | OD1 | 2.646 |
| 1KIR | A_ARG_61  | NH2 | A_ASP_82  | OD2 | 3.502 |
| 1KIR | A_ARG_96  | NH1 | B_GLU_98  | OE1 | 2.757 |
| 1KIR | A_ARG_96  | NH1 | B_GLU_98  | OE2 | 3.582 |
| 1KIR | A_ARG_96  | NH2 | B_GLU_98  | OE1 | 3.625 |
| 1KIR | A_ARG_96  | NH2 | B_GLU_98  | OE2 | 2.980 |
| 1KIR | A_LYS_107 | NZ  | A_GLU_17  | OE2 | 2.685 |
| 1KIR | B_ARG_38  | NH1 | B_ASP_89  | OD1 | 3.082 |
| 1KIR | B_ARG_38  | NH2 | B_GLU_46  | OE1 | 3.138 |
| 1KIR | B_ARG_38  | NH2 | B_GLU_46  | OE2 | 3.860 |
| 1KIR | B_ARG_38  | NH2 | B_ASP_89  | OD1 | 3.771 |
| 1KIR | B_ARG_66  | NH1 | B_ASP_89  | OD2 | 2.949 |
| 1KIR | B_ARG_66  | NH2 | B_ASP_89  | OD1 | 2.669 |
| 1KIR | B_ARG_66  | NH2 | B_ASP_89  | OD2 | 2.955 |
| 1KIR | B_LYS_75  | NZ  | B_ASP_72  | OD2 | 3.972 |
| 1KIR | B_ARG_97  | NH2 | B_ASP_104 | OD1 | 3.914 |
| 1KIR | B_ARG_97  | NH2 | B_ASP_104 | OD2 | 2.816 |
| 1KIR | B_ARG_102 | NH1 | B_ASP_100 | OD2 | 3.339 |
| 1KIR | C_LYS_1   | NZ  | C_GLU_7   | OE1 | 3.936 |
| 1KIR | C_LYS_1   | NZ  | C_GLU_7   | OE2 | 3.274 |
| 1KIR | C_ARG_68  | NH1 | C_ASP_66  | OD2 | 3.347 |
| 1KIR | C_ARG_125 | NH1 | C_ASP_119 | OD1 | 3.220 |
| 1KIR | C_ARG_125 | NH1 | C_ASP_119 | OD2 | 2.967 |
| 1KIR | C_ARG_125 | NH2 | C_ASP_119 | OD2 | 3.129 |
| 1KTR | L_ARG_24  | NH2 | L_ASP_75  | OD1 | 3.305 |
| 1KTR | L_ARG_24  | NH2 | L_ASP_75  | OD2 | 3.234 |
| 1KTR | L_ARG_66  | NH1 | L_ASP_87  | OD1 | 3.908 |
| 1KTR | L_ARG_66  | NH1 | L_ASP_87  | OD2 | 2.898 |
| 1KTR | L_ARG_66  | NH2 | L_GLU_84  | OE1 | 3.858 |
| 1KTR | L_ARG_66  | NH2 | L_GLU_84  | OE2 | 3.876 |
| 1KTR | L_ARG_66  | NH2 | L_ASP_87  | OD1 | 2.818 |
| 1KTR | L_ARG_66  | NH2 | L_ASP_87  | OD2 | 3.123 |
| 1KTR | L_LYS_108 | NZ  | L_GLU_110 | OE2 | 3.290 |
| 1KTR | L_ARG_200 | NH1 | L_ASP_223 | OD1 | 3.461 |
| 1KTR | L_ARG_200 | NH1 | L_ASP_223 | OD2 | 3.017 |
| 1KTR | L_ARG_200 | NH2 | L_ASP_223 | OD1 | 2.813 |
| 1KTR | L_ARG_200 | NH2 | L_ASP_223 | OD2 | 3.629 |

|      |           |     |           |     |       |
|------|-----------|-----|-----------|-----|-------|
| 1KTR | P_HIS_4   | NE2 | L_ASP_183 | OD1 | 3.445 |
| 1KTR | P_HIS_4   | NE2 | L_ASP_183 | OD2 | 2.673 |
| 1KTR | P_HIS_6   | ND1 | L_GLU_39  | OE1 | 3.223 |
| 1KTR | P_HIS_6   | ND1 | L_GLU_39  | OE2 | 2.811 |
| 1KTR | P_HIS_6   | NE2 | L_GLU_230 | OE1 | 3.040 |
| 1KTR | P_HIS_6   | NE2 | L_GLU_230 | OE2 | 3.199 |
| 1L7I | L_LYS_24  | NZ  | L_ASP_70  | OD1 | 3.450 |
| 1L7I | L_LYS_24  | NZ  | L_ASP_70  | OD2 | 2.756 |
| 1L7I | L_ARG_61  | NH2 | L_GLU_81  | OE1 | 3.159 |
| 1L7I | L_ARG_61  | NH2 | L_ASP_82  | OD1 | 2.832 |
| 1L7I | L_ARG_61  | NH2 | L_ASP_82  | OD2 | 3.810 |
| 1L7I | L_LYS_149 | NZ  | L_GLU_195 | OE1 | 3.108 |
| 1L7I | L_LYS_149 | NZ  | L_GLU_195 | OE2 | 3.606 |
| 1L7I | L_HIS_189 | ND1 | L_ASP_151 | OD2 | 3.427 |
| 1L7I | H_ARG_38  | NH1 | H_ASP_86  | OD1 | 2.914 |
| 1L7I | H_ARG_38  | NH2 | H_GLU_46  | OE1 | 3.005 |
| 1L7I | H_ARG_62  | NH2 | H_GLU_46  | OE1 | 3.101 |
| 1L7I | H_ARG_62  | NH2 | H_GLU_46  | OE2 | 2.791 |
| 1L7I | H_ARG_66  | NH1 | H_ASP_86  | OD1 | 2.927 |
| 1L7I | H_ARG_66  | NH1 | H_ASP_86  | OD2 | 3.600 |
| 1L7I | H_ARG_94  | NH2 | H_ASP_101 | OD1 | 3.112 |
| 1L7I | H_LYS_143 | NZ  | H_ASP_144 | OD1 | 3.173 |
| 1L7I | H_LYS_143 | NZ  | H_ASP_144 | OD2 | 3.234 |
| 1L7I | H_LYS_209 | NZ  | L_GLU_123 | OE1 | 2.718 |
| 1L7I | H_LYS_210 | NZ  | H_GLU_212 | OE2 | 3.013 |
| 1LK3 | A_ARG_27  | NH1 | A_GLU_151 | OE1 | 3.162 |
| 1LK3 | A_ARG_27  | NH1 | A_GLU_151 | OE2 | 3.248 |
| 1LK3 | A_ARG_27  | NH2 | A_GLU_151 | OE2 | 2.810 |
| 1LK3 | A_LYS_99  | NZ  | A_GLU_96  | OE2 | 3.379 |
| 1LK3 | A_LYS_125 | NZ  | A_GLU_122 | OE2 | 3.974 |
| 1LK3 | A_LYS_130 | NZ  | L_ASP_1   | OD1 | 2.906 |
| 1LK3 | L_ARG_31  | NH1 | A_GLU_133 | OE1 | 2.703 |
| 1LK3 | L_ARG_60  | NH1 | L_GLU_78  | OE1 | 3.757 |
| 1LK3 | L_ARG_60  | NH1 | L_ASP_81  | OD1 | 3.577 |
| 1LK3 | L_ARG_60  | NH1 | L_ASP_81  | OD2 | 2.703 |
| 1LK3 | L_ARG_60  | NH2 | L_GLU_78  | OE1 | 3.450 |
| 1LK3 | L_ARG_60  | NH2 | L_GLU_78  | OE2 | 3.792 |
| 1LK3 | L_ARG_60  | NH2 | L_ASP_81  | OD1 | 2.902 |
| 1LK3 | L_ARG_60  | NH2 | L_ASP_81  | OD2 | 3.590 |
| 1LK3 | L_LYS_146 | NZ  | L_GLU_153 | OE2 | 2.870 |
| 1LK3 | L_LYS_148 | NZ  | L_GLU_194 | OE1 | 2.968 |
| 1LK3 | L_LYS_148 | NZ  | L_GLU_194 | OE2 | 3.177 |
| 1LK3 | L_ARG_154 | NH1 | L_ASP_184 | OD1 | 3.134 |
| 1LK3 | L_ARG_154 | NH1 | L_ASP_184 | OD2 | 3.607 |
| 1LK3 | L_ARG_154 | NH2 | L_ASP_184 | OD1 | 3.715 |
| 1LK3 | L_ARG_154 | NH2 | L_ASP_184 | OD2 | 2.806 |
| 1LK3 | L_ARG_155 | NH1 | L_GLU_153 | OE2 | 2.979 |
| 1LK3 | L_LYS_182 | NZ  | L_GLU_186 | OE2 | 3.604 |
| 1LK3 | L_HIS_188 | ND1 | L_ASP_150 | OD2 | 3.740 |
| 1LK3 | L_HIS_188 | NE2 | L_ASP_184 | OD1 | 3.222 |
| 1LK3 | H_LYS_13  | NZ  | H_GLU_121 | OE2 | 2.581 |
| 1LK3 | H_LYS_23  | NZ  | L_GLU_121 | OE2 | 2.800 |
| 1LK3 | H_LYS_65  | NZ  | H_GLU_62  | OE1 | 3.360 |
| 1LK3 | H_LYS_67  | NZ  | H_ASP_90  | OD1 | 3.589 |
| 1LK3 | H_LYS_67  | NZ  | H_ASP_90  | OD2 | 2.874 |
| 1LK3 | H_LYS_214 | NZ  | L_GLU_122 | OE1 | 2.517 |
| 1LK3 | B_ARG_27  | NH1 | B_GLU_151 | OE1 | 2.917 |
| 1LK3 | B_ARG_27  | NH2 | B_GLU_151 | OE1 | 3.090 |



|      |           |     |           |     |       |
|------|-----------|-----|-----------|-----|-------|
| 1LK3 | B_ARG_27  | NH2 | B_GLU_151 | OE2 | 3.902 |
| 1LK3 | B_LYS_88  | NZ  | B_GLU_81  | OE2 | 3.290 |
| 1LK3 | B_LYS_99  | NZ  | B_GLU_96  | OE1 | 3.193 |
| 1LK3 | B_LYS_99  | NZ  | B_GLU_96  | OE2 | 3.913 |
| 1LK3 | B_LYS_125 | NZ  | B_GLU_122 | OE2 | 3.816 |
| 1LK3 | B_LYS_130 | NZ  | M_ASP_1   | OD1 | 2.851 |
| 1LK3 | M_LYS_23  | NZ  | M_ASP_69  | OD1 | 2.916 |
| 1LK3 | M_LYS_23  | NZ  | M_ASP_69  | OD2 | 3.739 |
| 1LK3 | M_ARG_31  | NH1 | B_GLU_133 | OE1 | 2.693 |
| 1LK3 | M_LYS_38  | NZ  | M_ASP_80  | OD1 | 3.251 |
| 1LK3 | M_LYS_38  | NZ  | M_ASP_80  | OD2 | 3.163 |
| 1LK3 | M_ARG_60  | NH1 | M_ASP_81  | OD1 | 3.524 |
| 1LK3 | M_ARG_60  | NH1 | M_ASP_81  | OD2 | 2.748 |
| 1LK3 | M_ARG_60  | NH2 | M_GLU_78  | OE1 | 3.446 |
| 1LK3 | M_ARG_60  | NH2 | M_GLU_78  | OE2 | 3.705 |
| 1LK3 | M_ARG_60  | NH2 | M_ASP_81  | OD1 | 2.992 |
| 1LK3 | M_ARG_60  | NH2 | M_ASP_81  | OD2 | 3.699 |
| 1LK3 | M_LYS_148 | NZ  | M_GLU_194 | OE1 | 3.154 |
| 1LK3 | M_LYS_148 | NZ  | M_GLU_194 | OE2 | 2.891 |
| 1LK3 | M_ARG_154 | NH1 | M_ASP_184 | OD1 | 3.102 |
| 1LK3 | M_ARG_154 | NH1 | M_ASP_184 | OD2 | 3.559 |
| 1LK3 | M_ARG_154 | NH2 | M_ASP_184 | OD1 | 3.772 |
| 1LK3 | M_ARG_154 | NH2 | M_ASP_184 | OD2 | 2.866 |
| 1LK3 | M_ARG_155 | NH1 | M_GLU_153 | OE2 | 2.799 |
| 1LK3 | M_LYS_182 | NZ  | M_GLU_186 | OE1 | 2.894 |
| 1LK3 | M_LYS_182 | NZ  | M_GLU_186 | OE2 | 3.921 |
| 1LK3 | M_HIS_188 | ND1 | M_ASP_150 | OD2 | 3.800 |
| 1LK3 | M_HIS_188 | NE2 | M_ASP_184 | OD1 | 3.004 |
| 1LK3 | M_LYS_198 | NZ  | M_ASP_109 | OD1 | 3.702 |
| 1LK3 | M_LYS_198 | NZ  | M_ASP_109 | OD2 | 3.602 |
| 1LK3 | I_LYS_13  | NZ  | I_GLU_121 | OE1 | 2.774 |
| 1LK3 | I_LYS_63  | NZ  | M_ASP_1   | OD2 | 3.881 |
| 1LK3 | I_LYS_67  | NZ  | I_ASP_90  | OD1 | 3.913 |
| 1LK3 | I_LYS_67  | NZ  | I_ASP_90  | OD2 | 2.939 |
| 1LK3 | I_LYS_214 | NZ  | M_GLU_122 | OE2 | 2.753 |
| 1M71 | A_ARG_14  | NH1 | A_ASP_17  | OD1 | 3.710 |
| 1M71 | A_HIS_27D | ND1 | A_ASP_28  | OD1 | 3.392 |
| 1M71 | A_HIS_27D | ND1 | A_ASP_28  | OD2 | 2.865 |
| 1M71 | A_LYS_39  | NZ  | A_GLU_81  | OE1 | 2.866 |
| 1M71 | A_ARG_61  | NH1 | A_GLU_79  | OE1 | 3.543 |
| 1M71 | A_ARG_61  | NH2 | A_ASP_82  | OD1 | 2.481 |
| 1M71 | A_ARG_61  | NH2 | A_ASP_82  | OD2 | 2.894 |
| 1M71 | A_LYS_149 | NZ  | A_GLU_195 | OE2 | 3.376 |
| 1M71 | A_LYS_183 | NZ  | A_GLU_187 | OE1 | 2.685 |
| 1M71 | A_ARG_188 | NH1 | A_GLU_185 | OE1 | 3.609 |
| 1M71 | A_ARG_188 | NH2 | A_ASP_184 | OD1 | 3.517 |
| 1M71 | A_HIS_189 | ND1 | A_ASP_151 | OD1 | 3.287 |
| 1M71 | A_LYS_199 | NZ  | A_ASP_110 | OD1 | 2.781 |
| 1M71 | A_LYS_199 | NZ  | A_ASP_110 | OD2 | 3.508 |
| 1M71 | B_ARG_38  | NH1 | B_GLU_46  | OE1 | 2.911 |
| 1M71 | B_ARG_38  | NH1 | B_GLU_46  | OE2 | 3.780 |
| 1M71 | B_ARG_38  | NH2 | B_ASP_86  | OD1 | 3.068 |
| 1M71 | B_ARG_52  | NH1 | B_GLU_50  | OE2 | 2.697 |
| 1M71 | B_HIS_58  | ND1 | B_GLU_50  | OE2 | 3.091 |
| 1M71 | B_ARG_66  | NH1 | B_ASP_86  | OD1 | 3.230 |
| 1M71 | B_ARG_66  | NH1 | B_ASP_86  | OD2 | 3.124 |
| 1M71 | B_ARG_66  | NH2 | B_ASP_86  | OD1 | 3.143 |
| 1M71 | B_ARG_66  | NH2 | B_ASP_86  | OD2 | 3.298 |

|      |           |     |           |     |       |
|------|-----------|-----|-----------|-----|-------|
| 1M7I | B_ARG_71  | NH1 | B_ASP_73  | OD2 | 3.433 |
| 1M7I | B_LYS_75  | NZ  | B_ASP_72  | OD2 | 3.881 |
| 1M7I | B_ARG_83  | NH1 | B_GLU_85  | OE2 | 3.022 |
| 1M7I | B_ARG_83  | NH2 | B_GLU_85  | OE2 | 2.413 |
| 1M7I | B_ARG_94  | NH1 | B_ASP_101 | OD1 | 3.346 |
| 1M7I | B_ARG_94  | NH1 | B_ASP_101 | OD2 | 3.346 |
| 1M7I | B_ARG_164 | NH1 | A_ASP_167 | OD2 | 3.246 |
| 1M7I | B_ARG_164 | NH1 | A_ASP_170 | OD1 | 3.912 |
| 1M7I | B_ARG_164 | NH2 | A_ASP_167 | OD2 | 2.886 |
| 1M7I | B_LYS_208 | NZ  | A_GLU_123 | OE1 | 2.546 |
| 1M7I | B_LYS_208 | NZ  | A_GLU_123 | OE2 | 3.594 |
| 1M7D | A_ARG_24  | NH1 | A_ASP_70  | OD1 | 3.427 |
| 1M7D | A_HIS_27D | ND1 | A_ASP_28  | OD1 | 3.488 |
| 1M7D | A_HIS_27D | ND1 | A_ASP_28  | OD2 | 3.058 |
| 1M7D | A_LYS_39  | NZ  | A_GLU_81  | OE1 | 2.802 |
| 1M7D | A_ARG_61  | NH1 | A_ASP_82  | OD1 | 2.789 |
| 1M7D | A_ARG_61  | NH1 | A_ASP_82  | OD2 | 3.838 |
| 1M7D | A_ARG_61  | NH2 | A_ASP_82  | OD1 | 3.397 |
| 1M7D | A_ARG_61  | NH2 | A_ASP_82  | OD2 | 2.952 |
| 1M7D | A_LYS_103 | NZ  | A_ASP_165 | OD1 | 3.651 |
| 1M7D | A_LYS_149 | NZ  | A_GLU_195 | OE1 | 2.888 |
| 1M7D | A_LYS_149 | NZ  | A_GLU_195 | OE2 | 3.877 |
| 1M7D | A_ARG_188 | NH1 | A_GLU_185 | OE1 | 2.963 |
| 1M7D | A_ARG_188 | NH2 | A_ASP_184 | OD1 | 3.464 |
| 1M7D | A_HIS_189 | ND1 | A_ASP_151 | OD1 | 2.856 |
| 1M7D | A_HIS_189 | NE2 | A_GLU_185 | OE2 | 2.728 |
| 1M7D | A_LYS_199 | NZ  | A_ASP_110 | OD1 | 3.424 |
| 1M7D | B_ARG_38  | NH1 | B_GLU_46  | OE1 | 3.681 |
| 1M7D | B_ARG_38  | NH1 | B_GLU_46  | OE2 | 3.270 |
| 1M7D | B_ARG_38  | NH2 | B_ASP_86  | OD1 | 3.018 |
| 1M7D | B_ARG_52  | NH1 | B_GLU_50  | OE2 | 3.410 |
| 1M7D | B_HIS_58  | ND1 | B_GLU_50  | OE2 | 3.864 |
| 1M7D | B_ARG_66  | NH1 | B_ASP_86  | OD1 | 3.193 |
| 1M7D | B_ARG_66  | NH1 | B_ASP_86  | OD2 | 3.613 |
| 1M7D | B_ARG_66  | NH2 | B_ASP_86  | OD1 | 3.775 |
| 1M7D | B_ARG_66  | NH2 | B_ASP_86  | OD2 | 2.708 |
| 1M7D | B_ARG_71  | NH1 | B_ASP_73  | OD2 | 2.991 |
| 1M7D | B_LYS_75  | NZ  | B_ASP_72  | OD1 | 3.686 |
| 1M7D | B_ARG_94  | NH1 | B_ASP_101 | OD1 | 3.533 |
| 1M7D | B_ARG_94  | NH1 | B_ASP_101 | OD2 | 2.689 |
| 1M7D | B_ARG_164 | NH1 | A_ASP_167 | OD2 | 3.313 |
| 1M7D | B_ARG_164 | NH1 | A_ASP_170 | OD1 | 3.795 |
| 1M7D | B_ARG_164 | NH2 | A_ASP_167 | OD2 | 3.482 |
| 1M7D | B_LYS_208 | NZ  | A_GLU_123 | OE1 | 2.586 |
| 1M7D | B_LYS_208 | NZ  | A_GLU_123 | OE2 | 3.420 |
| 1M7I | A_ARG_14  | NH1 | A_ASP_17  | OD1 | 3.105 |
| 1M7I | A_ARG_14  | NH1 | A_ASP_17  | OD2 | 3.058 |
| 1M7I | A_ARG_24  | NH1 | A_ASP_70  | OD1 | 3.369 |
| 1M7I | A_ARG_24  | NH1 | A_ASP_70  | OD2 | 3.708 |
| 1M7I | A_HIS_27D | ND1 | A_ASP_28  | OD1 | 3.271 |
| 1M7I | A_HIS_27D | ND1 | A_ASP_28  | OD2 | 2.955 |
| 1M7I | A_LYS_39  | NZ  | A_GLU_81  | OE1 | 3.102 |
| 1M7I | A_ARG_61  | NH1 | A_ASP_82  | OD1 | 2.522 |
| 1M7I | A_ARG_61  | NH1 | A_ASP_82  | OD2 | 3.863 |
| 1M7I | A_ARG_61  | NH2 | A_GLU_79  | OE2 | 3.752 |
| 1M7I | A_ARG_61  | NH2 | A_ASP_82  | OD1 | 2.961 |
| 1M7I | A_ARG_61  | NH2 | A_ASP_82  | OD2 | 2.695 |
| 1M7I | A_LYS_103 | NZ  | A_ASP_165 | OD1 | 3.427 |

|      |           |     |           |     |       |
|------|-----------|-----|-----------|-----|-------|
| 1M7I | A_LYS_147 | NZ  | A_GLU_154 | OE1 | 3.983 |
| 1M7I | A_LYS_149 | NZ  | A_GLU_195 | OE1 | 2.955 |
| 1M7I | A_LYS_183 | NZ  | A_GLU_187 | OE1 | 3.069 |
| 1M7I | A_LYS_183 | NZ  | A_GLU_187 | OE2 | 2.718 |
| 1M7I | A_ARG_188 | NH1 | A_GLU_185 | OE1 | 2.765 |
| 1M7I | A_ARG_188 | NH1 | A_GLU_185 | OE2 | 3.812 |
| 1M7I | A_ARG_188 | NH2 | A_ASP_184 | OD1 | 3.546 |
| 1M7I | A_HIS_189 | ND1 | A_ASP_151 | OD1 | 2.633 |
| 1M7I | A_HIS_189 | NE2 | A_GLU_185 | OE2 | 3.470 |
| 1M7I | A_LYS_199 | NZ  | A_ASP_110 | OD1 | 3.401 |
| 1M7I | A_LYS_199 | NZ  | A_ASP_110 | OD2 | 3.942 |
| 1M7I | B_LYS_3   | NZ  | B_GLU_5   | OE1 | 3.875 |
| 1M7I | B_ARG_38  | NH1 | B_GLU_46  | OE1 | 3.661 |
| 1M7I | B_ARG_38  | NH1 | B_GLU_46  | OE2 | 3.487 |
| 1M7I | B_ARG_38  | NH2 | B_ASP_86  | OD1 | 2.988 |
| 1M7I | B_ARG_52  | NH1 | B_GLU_50  | OE2 | 3.454 |
| 1M7I | B_LYS_64  | NZ  | B_GLU_61  | OE1 | 3.621 |
| 1M7I | B_ARG_66  | NH1 | B_ASP_86  | OD1 | 3.442 |
| 1M7I | B_ARG_66  | NH2 | B_ASP_86  | OD1 | 3.524 |
| 1M7I | B_ARG_66  | NH2 | B_ASP_86  | OD2 | 3.046 |
| 1M7I | B_ARG_71  | NH1 | B_ASP_73  | OD2 | 3.013 |
| 1M7I | B_ARG_83  | NH2 | B_GLU_85  | OE2 | 3.534 |
| 1M7I | B_ARG_94  | NH1 | B_ASP_101 | OD1 | 3.458 |
| 1M7I | B_ARG_94  | NH1 | B_ASP_101 | OD2 | 2.750 |
| 1M7I | B_ARG_164 | NH1 | A_ASP_167 | OD2 | 3.340 |
| 1M7I | B_ARG_164 | NH1 | A_ASP_170 | OD1 | 3.884 |
| 1M7I | B_ARG_164 | NH2 | A_ASP_167 | OD2 | 3.473 |
| 1M7I | B_LYS_208 | NZ  | A_GLU_123 | OE1 | 3.031 |
| 1M7I | B_LYS_208 | NZ  | A_GLU_123 | OE2 | 3.016 |
| 1MCO | L_LYS_55  | NZ  | L_GLU_52  | OE1 | 3.257 |
| 1MCO | L_LYS_55  | NZ  | L_GLU_52  | OE2 | 2.994 |
| 1MCO | L_ARG_63  | NH1 | L_GLU_83  | OE1 | 3.878 |
| 1MCO | L_ARG_63  | NH1 | L_ASP_84  | OD1 | 3.777 |
| 1MCO | L_ARG_63  | NH1 | L_ASP_84  | OD2 | 3.204 |
| 1MCO | L_ARG_63  | NH2 | L_GLU_83  | OE1 | 2.986 |
| 1MCO | L_LYS_153 | NZ  | L_GLU_207 | OE1 | 3.930 |
| 1MCO | L_HIS_192 | ND1 | L_ASP_155 | OD1 | 3.857 |
| 1MCO | L_HIS_192 | ND1 | L_ASP_155 | OD2 | 3.328 |
| 1MCO | H_ARG_40  | NH1 | H_ASP_91  | OD2 | 3.601 |
| 1MCO | H_ARG_40  | NH2 | H_GLU_48  | OE1 | 3.700 |
| 1MCO | H_ARG_68  | NH1 | H_ASP_91  | OD2 | 3.621 |
| 1MCO | H_ARG_68  | NH2 | H_ASP_91  | OD2 | 3.951 |
| 1MCO | H_ARG_99  | NH1 | H_ASP_27  | OD1 | 3.647 |
| 1MCO | H_ARG_99  | NH1 | H_ASP_27  | OD2 | 2.797 |
| 1MCO | H_LYS_302 | NZ  | H_ASP_265 | OD1 | 3.759 |
| 1MCO | H_LYS_302 | NZ  | H_ASP_265 | OD2 | 3.098 |
| 1MCO | H_LYS_305 | NZ  | H_GLU_318 | OE1 | 3.587 |
| 1MCO | H_LYS_305 | NZ  | H_GLU_318 | OE2 | 3.377 |
| 1MCO | H_ARG_329 | NH1 | H_ASP_386 | OD1 | 3.691 |
| 1MCO | H_ARG_401 | NH1 | H_GLU_373 | OE1 | 3.230 |
| 1MCO | H_ARG_401 | NH1 | H_GLU_373 | OE2 | 3.498 |
| 1MCO | H_ARG_401 | NH2 | H_GLU_373 | OE1 | 3.949 |
| 1MCO | H_ARG_401 | NH2 | H_GLU_373 | OE2 | 3.117 |
| 1MEL | A_ARG_38  | NH1 | A_ASP_90  | OD1 | 3.059 |
| 1MEL | A_ARG_38  | NH2 | A_GLU_46  | OE1 | 3.526 |
| 1MEL | A_ARG_38  | NH2 | A_GLU_46  | OE2 | 3.673 |
| 1MEL | A_ARG_38  | NH2 | A_ASP_90  | OD1 | 3.839 |
| 1MEL | A_ARG_67  | NH1 | A_ASP_90  | OD1 | 3.797 |

|      |           |     |           |     |       |
|------|-----------|-----|-----------|-----|-------|
| 1MEL | A_ARG_67  | NH1 | A_ASP_90  | OD2 | 2.991 |
| 1MEL | A_ARG_67  | NH2 | A_ASP_90  | OD1 | 2.893 |
| 1MEL | A_ARG_67  | NH2 | A_ASP_90  | OD2 | 3.367 |
| 1MEL | B_ARG_38  | NH1 | B_ASP_90  | OD1 | 3.033 |
| 1MEL | B_ARG_38  | NH2 | B_GLU_46  | OE2 | 2.855 |
| 1MEL | B_ARG_38  | NH2 | B_ASP_90  | OD1 | 3.939 |
| 1MEL | B_LYS_65  | NZ  | B_ASP_62  | OD1 | 3.615 |
| 1MEL | B_ARG_67  | NH1 | B_ASP_90  | OD2 | 2.997 |
| 1MEL | B_ARG_67  | NH2 | B_ASP_90  | OD1 | 2.985 |
| 1MEL | B_ARG_67  | NH2 | B_ASP_90  | OD2 | 2.943 |
| 1MEL | B_HIS_111 | NE2 | B_GLU_108 | OE1 | 3.372 |
| 1MEL | L_LYS_1   | NZ  | L_GLU_7   | OE1 | 3.475 |
| 1MEL | L_LYS_1   | NZ  | L_GLU_7   | OE2 | 3.097 |
| 1MEL | L_HIS_15  | NE2 | L_ASP_87  | OD1 | 3.885 |
| 1MEL | L_ARG_61  | NH2 | L_ASP_48  | OD2 | 3.045 |
| 1MEL | L_LYS_97  | NZ  | L_ASP_101 | OD2 | 2.722 |
| 1MEL | L_ARG_125 | NH2 | L_ASP_119 | OD1 | 3.620 |
| 1MEL | L_ARG_125 | NH2 | L_ASP_119 | OD2 | 2.816 |
| 1MEL | M_LYS_1   | NZ  | M_GLU_7   | OE1 | 3.630 |
| 1MEL | M_LYS_1   | NZ  | M_GLU_7   | OE2 | 2.907 |
| 1MEL | M_ARG_61  | NH2 | M_ASP_48  | OD2 | 3.828 |
| 1MEL | M_ARG_125 | NH1 | M_ASP_119 | OD2 | 3.053 |
| 1MEL | M_ARG_125 | NH2 | M_ASP_119 | OD1 | 3.215 |
| 1MEL | M_ARG_125 | NH2 | M_ASP_119 | OD2 | 3.106 |
| 1MFA | L_HIS_34  | ND1 | L_ASP_52  | OD1 | 2.763 |
| 1MFA | L_ARG_63  | NH2 | L_ASP_84  | OD1 | 2.796 |
| 1MFA | L_ARG_63  | NH2 | L_ASP_84  | OD2 | 3.671 |
| 1MFA | H_LYS_313 | NZ  | H_GLU_296 | OE1 | 3.001 |
| 1MFA | H_LYS_313 | NZ  | H_GLU_296 | OE2 | 3.675 |
| 1MFA | H_LYS_317 | NZ  | H_ASP_340 | OD1 | 3.252 |
| 1MFA | H_LYS_317 | NZ  | H_ASP_340 | OD2 | 2.782 |
| 1MFA | H_ARG_348 | NH2 | H_ASP_356 | OD1 | 3.621 |
| 1MFA | H_ARG_348 | NH2 | H_ASP_356 | OD2 | 2.864 |
| 1MFB | L_HIS_34  | ND1 | L_ASP_52  | OD1 | 2.852 |
| 1MFB | L_HIS_44  | ND1 | L_GLU_40  | OE2 | 3.943 |
| 1MFB | L_ARG_63  | NH2 | L_GLU_83  | OE2 | 3.681 |
| 1MFB | L_ARG_63  | NH2 | L_ASP_84  | OD1 | 2.962 |
| 1MFB | L_ARG_63  | NH2 | L_ASP_84  | OD2 | 3.489 |
| 1MFB | L_LYS_113 | NZ  | L_GLU_201 | OE1 | 3.004 |
| 1MFB | L_LYS_169 | NZ  | L_GLU_85  | OE2 | 3.323 |
| 1MFB | L_HIS_191 | ND1 | L_ASP_154 | OD2 | 3.623 |
| 1MFB | H_LYS_313 | NZ  | H_GLU_296 | OE1 | 3.225 |
| 1MFB | H_LYS_313 | NZ  | H_GLU_296 | OE2 | 3.887 |
| 1MFB | H_LYS_317 | NZ  | H_ASP_340 | OD1 | 3.570 |
| 1MFB | H_LYS_317 | NZ  | H_ASP_340 | OD2 | 2.807 |
| 1MFB | H_ARG_348 | NH1 | H_ASP_356 | OD1 | 3.475 |
| 1MFB | H_ARG_348 | NH1 | H_ASP_356 | OD2 | 3.034 |
| 1MFB | H_LYS_398 | NZ  | L_GLU_127 | OE2 | 2.924 |
| 1MFB | H_LYS_463 | NZ  | L_GLU_126 | OE1 | 3.780 |
| 1MFC | L_HIS_34  | ND1 | L_ASP_52  | OD1 | 2.788 |
| 1MFC | L_ARG_63  | NH2 | L_GLU_83  | OE2 | 3.733 |
| 1MFC | L_ARG_63  | NH2 | L_ASP_84  | OD1 | 2.943 |
| 1MFC | L_ARG_63  | NH2 | L_ASP_84  | OD2 | 3.639 |
| 1MFC | L_LYS_72  | NZ  | L_ASP_71  | OD1 | 3.757 |
| 1MFC | L_LYS_113 | NZ  | L_GLU_201 | OE1 | 2.885 |
| 1MFC | L_LYS_169 | NZ  | L_GLU_85  | OE2 | 2.931 |
| 1MFC | L_HIS_191 | ND1 | L_ASP_154 | OD2 | 3.170 |
| 1MFC | H_LYS_313 | NZ  | H_GLU_296 | OE1 | 3.268 |

|      |           |     |           |     |       |
|------|-----------|-----|-----------|-----|-------|
| 1MFC | H.LYS_313 | NZ  | H.GLU_296 | OE2 | 3.847 |
| 1MFC | H.LYS_317 | NZ  | H.ASP_340 | OD1 | 3.122 |
| 1MFC | H.LYS_317 | NZ  | H.ASP_340 | OD2 | 2.805 |
| 1MFC | H.ARG_348 | NH1 | H.ASP_356 | OD1 | 3.435 |
| 1MFC | H.ARG_348 | NH1 | H.ASP_356 | OD2 | 2.938 |
| 1MFC | H.LYS_398 | NZ  | L.GLU_127 | OE2 | 2.815 |
| 1MFC | H.LYS_463 | NZ  | L.GLU_126 | OE1 | 3.807 |
| 1MHH | A.ARG_61  | NH1 | A.GLU_81  | OE1 | 3.842 |
| 1MHH | A.ARG_61  | NH2 | A.GLU_81  | OE1 | 2.895 |
| 1MHH | A.ARG_61  | NH2 | A.ASP_82  | OD1 | 2.685 |
| 1MHH | A.ARG_61  | NH2 | A.ASP_82  | OD2 | 3.421 |
| 1MHH | A.LYS_103 | NZ  | A.GLU_105 | OE1 | 3.375 |
| 1MHH | A.LYS_103 | NZ  | A.GLU_105 | OE2 | 3.766 |
| 1MHH | A.LYS_142 | NZ  | A.GLU_105 | OE1 | 3.319 |
| 1MHH | A.LYS_142 | NZ  | A.GLU_105 | OE2 | 2.969 |
| 1MHH | A.LYS_147 | NZ  | A.GLU_195 | OE2 | 3.944 |
| 1MHH | A.LYS_149 | NZ  | A.GLU_195 | OE1 | 2.919 |
| 1MHH | A.LYS_149 | NZ  | A.GLU_195 | OE2 | 3.626 |
| 1MHH | A.ARG_155 | NH2 | A.GLU_185 | OE2 | 3.327 |
| 1MHH | A.LYS_183 | NZ  | A.GLU_187 | OE1 | 2.817 |
| 1MHH | A.LYS_183 | NZ  | A.GLU_187 | OE2 | 3.387 |
| 1MHH | A.HIS_189 | ND1 | A.ASP_151 | OD2 | 2.738 |
| 1MHH | A.LYS_199 | NZ  | A.ASP_110 | OD2 | 3.962 |
| 1MHH | B.LYS_64  | NZ  | B.ASP_61  | OD1 | 3.336 |
| 1MHH | B.ARG_66  | NH1 | B.ASP_86  | OD1 | 3.761 |
| 1MHH | B.ARG_66  | NH1 | B.ASP_86  | OD2 | 2.813 |
| 1MHH | B.ARG_66  | NH2 | B.ASP_86  | OD1 | 3.094 |
| 1MHH | B.ARG_66  | NH2 | B.ASP_86  | OD2 | 3.485 |
| 1MHH | B.ARG_94  | NH2 | B.ASP_101 | OD1 | 2.684 |
| 1MHH | B.ARG_94  | NH2 | B.ASP_101 | OD2 | 3.615 |
| 1MHH | B.LYS_208 | NZ  | A.GLU_123 | OE2 | 3.019 |
| 1MHH | C.LYS_24  | NZ  | C.ASP_70  | OD1 | 3.911 |
| 1MHH | C.ARG_61  | NH1 | C.GLU_81  | OE2 | 3.375 |
| 1MHH | C.ARG_61  | NH1 | C.ASP_82  | OD1 | 2.924 |
| 1MHH | C.ARG_61  | NH1 | C.ASP_82  | OD2 | 3.294 |
| 1MHH | C.ARG_61  | NH2 | C.ASP_82  | OD1 | 3.459 |
| 1MHH | C.ARG_61  | NH2 | C.ASP_82  | OD2 | 2.571 |
| 1MHH | C.LYS_147 | NZ  | C.GLU_195 | OE1 | 3.060 |
| 1MHH | C.LYS_149 | NZ  | C.GLU_195 | OE2 | 3.143 |
| 1MHH | C.ARG_155 | NH1 | C.GLU_185 | OE1 | 3.912 |
| 1MHH | C.ARG_155 | NH1 | C.GLU_185 | OE2 | 3.653 |
| 1MHH | C.ARG_155 | NH2 | C.GLU_185 | OE1 | 2.731 |
| 1MHH | C.ARG_155 | NH2 | C.GLU_185 | OE2 | 3.507 |
| 1MHH | C.LYS_183 | NZ  | C.GLU_187 | OE1 | 2.713 |
| 1MHH | C.ARG_188 | NH1 | E.ASP_831 | OD2 | 3.196 |
| 1MHH | C.ARG_188 | NH2 | E.ASP_831 | OD2 | 3.360 |
| 1MHH | C.HIS_189 | ND1 | C.ASP_151 | OD1 | 2.633 |
| 1MHH | C.LYS_199 | NZ  | C.ASP_110 | OD2 | 2.558 |
| 1MHH | D.ARG_66  | NH1 | D.ASP_86  | OD1 | 3.829 |
| 1MHH | D.ARG_66  | NH1 | D.ASP_86  | OD2 | 2.884 |
| 1MHH | D.ARG_66  | NH2 | D.ASP_86  | OD1 | 2.828 |
| 1MHH | D.ARG_66  | NH2 | D.ASP_86  | OD2 | 3.264 |
| 1MHH | D.ARG_94  | NH2 | D.ASP_101 | OD1 | 3.655 |
| 1MHH | D.ARG_94  | NH2 | D.ASP_101 | OD2 | 2.611 |
| 1MHH | E.LYS_833 | NZ  | C.GLU_185 | OE2 | 2.489 |
| 1MHH | E.LYS_840 | NZ  | E.GLU_838 | OE1 | 3.866 |
| 1MHH | E.HIS_874 | NE2 | E.GLU_869 | OE2 | 3.707 |
| 1MHH | E.LYS_878 | NZ  | E.ASP_867 | OD2 | 2.644 |

|      |            |     |           |     |       |
|------|------------|-----|-----------|-----|-------|
| 1MHH | F_LYS_1833 | NZ  | C_GLU_17  | OE1 | 3.798 |
| 1MLB | A_ARG_61   | NH1 | A_ASP_82  | OD1 | 2.159 |
| 1MLB | A_ARG_61   | NH1 | A_ASP_82  | OD2 | 2.329 |
| 1MLB | A_ARG_61   | NH2 | A_GLU_79  | OE1 | 3.872 |
| 1MLB | A_ARG_61   | NH2 | A_GLU_81  | OE2 | 3.099 |
| 1MLB | A_LYS_147  | NZ  | A_GLU_154 | OE1 | 3.634 |
| 1MLB | A_LYS_147  | NZ  | A_GLU_154 | OE2 | 2.438 |
| 1MLB | A_LYS_149  | NZ  | A_GLU_195 | OE1 | 3.556 |
| 1MLB | A_LYS_149  | NZ  | A_GLU_195 | OE2 | 3.786 |
| 1MLB | A_ARG_155  | NH1 | A_GLU_185 | OE2 | 2.511 |
| 1MLB | A_ARG_155  | NH2 | A_GLU_185 | OE1 | 3.793 |
| 1MLB | A_ARG_155  | NH2 | A_GLU_185 | OE2 | 2.918 |
| 1MLB | A_HIS_189  | ND1 | A_ASP_151 | OD2 | 2.937 |
| 1MLB | A_LYS_199  | NZ  | A_ASP_110 | OD2 | 2.869 |
| 1MLB | B_ARG_40   | NH1 | B_GLU_89  | OE2 | 3.375 |
| 1MLB | B_ARG_40   | NH2 | B_GLU_89  | OE2 | 3.648 |
| 1MLB | B_LYS_63   | NZ  | B_GLU_46  | OE1 | 3.279 |
| 1MLB | B_LYS_67   | NZ  | B_ASP_90  | OD1 | 2.983 |
| 1MLB | B_LYS_67   | NZ  | B_ASP_90  | OD2 | 2.383 |
| 1MLB | B_ARG_98   | NH2 | B_ASP_100 | OD1 | 3.092 |
| 1MLB | B_ARG_98   | NH2 | B_ASP_100 | OD2 | 2.647 |
| 1MLB | B_LYS_211  | NZ  | A_GLU_123 | OE1 | 3.556 |
| 1MLC | A_ARG_61   | NH1 | A_ASP_82  | OD1 | 2.951 |
| 1MLC | A_ARG_61   | NH1 | A_ASP_82  | OD2 | 2.608 |
| 1MLC | A_LYS_149  | NZ  | A_GLU_195 | OE1 | 3.271 |
| 1MLC | A_LYS_149  | NZ  | A_GLU_195 | OE2 | 2.595 |
| 1MLC | A_ARG_155  | NH2 | A_GLU_185 | OE1 | 2.706 |
| 1MLC | A_ARG_155  | NH2 | A_GLU_185 | OE2 | 3.006 |
| 1MLC | A_LYS_183  | NZ  | A_GLU_187 | OE1 | 2.465 |
| 1MLC | A_LYS_183  | NZ  | A_GLU_187 | OE2 | 2.957 |
| 1MLC | A_HIS_189  | ND1 | A_ASP_151 | OD2 | 3.264 |
| 1MLC | A_HIS_189  | NE2 | A_GLU_185 | OE2 | 3.846 |
| 1MLC | A_LYS_199  | NZ  | A_ASP_110 | OD1 | 3.804 |
| 1MLC | A_LYS_199  | NZ  | A_ASP_110 | OD2 | 2.246 |
| 1MLC | B_LYS_38   | NZ  | B_ASP_90  | OD1 | 3.791 |
| 1MLC | B_ARG_40   | NH2 | B_GLU_89  | OE1 | 3.285 |
| 1MLC | B_LYS_63   | NZ  | B_GLU_46  | OE2 | 3.505 |
| 1MLC | B_LYS_67   | NZ  | B_ASP_90  | OD1 | 3.662 |
| 1MLC | B_LYS_67   | NZ  | B_ASP_90  | OD2 | 2.412 |
| 1MLC | B_ARG_98   | NH2 | B_ASP_100 | OD1 | 2.914 |
| 1MLC | B_ARG_98   | NH2 | B_ASP_100 | OD2 | 3.525 |
| 1MLC | C_ARG_61   | NH1 | C_ASP_82  | OD1 | 3.434 |
| 1MLC | C_ARG_61   | NH1 | C_ASP_82  | OD2 | 2.291 |
| 1MLC | C_ARG_61   | NH2 | C_ASP_82  | OD1 | 2.696 |
| 1MLC | C_ARG_61   | NH2 | C_ASP_82  | OD2 | 3.196 |
| 1MLC | C_ARG_155  | NH2 | C_GLU_185 | OE2 | 3.214 |
| 1MLC | C_LYS_183  | NZ  | C_GLU_187 | OE1 | 2.976 |
| 1MLC | C_LYS_183  | NZ  | C_GLU_187 | OE2 | 3.623 |
| 1MLC | C_ARG_188  | NH1 | C_GLU_185 | OE1 | 3.888 |
| 1MLC | C_HIS_189  | ND1 | C_ASP_151 | OD2 | 3.300 |
| 1MLC | C_HIS_189  | NE2 | C_GLU_185 | OE1 | 2.956 |
| 1MLC | C_LYS_199  | NZ  | C_ASP_110 | OD2 | 3.357 |
| 1MLC | D_LYS_63   | NZ  | D_GLU_46  | OE2 | 2.938 |
| 1MLC | D_LYS_67   | NZ  | D_ASP_90  | OD1 | 3.041 |
| 1MLC | D_LYS_67   | NZ  | D_ASP_90  | OD2 | 2.752 |
| 1MLC | D_ARG_98   | NH2 | D_ASP_100 | OD1 | 3.684 |
| 1MLC | D_ARG_98   | NH2 | D_ASP_100 | OD2 | 2.571 |
| 1MLC | E_LYS_1    | NZ  | E_GLU_7   | OE2 | 3.616 |

|      |           |     |           |     |       |
|------|-----------|-----|-----------|-----|-------|
| 1MLC | E_ARG_45  | NH2 | B_GLU_50  | OE2 | 3.032 |
| 1MLC | E_ARG_68  | NH1 | B_GLU_50  | OE2 | 3.781 |
| 1MLC | E_ARG_68  | NH2 | B_GLU_35  | OE2 | 2.927 |
| 1MLC | E_ARG_68  | NH2 | B_GLU_50  | OE1 | 2.510 |
| 1MLC | E_ARG_68  | NH2 | B_GLU_50  | OE2 | 3.189 |
| 1MLC | F_LYS_1   | NZ  | F_GLU_7   | OE2 | 3.323 |
| 1MLC | F_ARG_45  | NH2 | D_GLU_50  | OE2 | 2.431 |
| 1MLC | F_ARG_68  | NH2 | D_GLU_35  | OE2 | 3.266 |
| 1MLC | F_ARG_68  | NH2 | D_GLU_50  | OE1 | 2.710 |
| 1MLC | F_ARG_68  | NH2 | D_GLU_50  | OE2 | 3.606 |
| 1MLC | F_ARG_125 | NH1 | F_ASP_119 | OD2 | 3.464 |
| 1MLC | F_ARG_125 | NH2 | F_ASP_119 | OD2 | 2.213 |
| 1N64 | L_LYS_24  | NZ  | L_ASP_70  | OD2 | 3.651 |
| 1N64 | L_ARG_54  | NH2 | L_ASP_60  | OD2 | 3.449 |
| 1N64 | L_ARG_61  | NH1 | L_GLU_81  | OE1 | 3.429 |
| 1N64 | L_ARG_61  | NH1 | L_ASP_82  | OD1 | 2.971 |
| 1N64 | L_ARG_61  | NH1 | L_ASP_82  | OD2 | 2.992 |
| 1N64 | L_LYS_142 | NZ  | L_GLU_105 | OE2 | 3.590 |
| 1N64 | L_LYS_149 | NZ  | L_GLU_195 | OE1 | 3.534 |
| 1N64 | L_ARG_155 | NH2 | L_GLU_185 | OE2 | 3.243 |
| 1N64 | L_LYS_183 | NZ  | L_GLU_187 | OE2 | 2.697 |
| 1N64 | L_HIS_189 | ND1 | L_ASP_151 | OD2 | 3.116 |
| 1N64 | L_ARG_211 | NH2 | L_GLU_187 | OE1 | 3.018 |
| 1N64 | H_LYS_12  | NZ  | H_GLU_16  | OE1 | 3.976 |
| 1N64 | H_LYS_64  | NZ  | H_ASP_61  | OD1 | 2.775 |
| 1N64 | H_ARG_66  | NH1 | H_ASP_86  | OD1 | 3.467 |
| 1N64 | H_ARG_66  | NH1 | H_ASP_86  | OD2 | 3.004 |
| 1N64 | H_ARG_66  | NH2 | H_ASP_86  | OD1 | 2.824 |
| 1N64 | H_ARG_66  | NH2 | H_ASP_86  | OD2 | 3.196 |
| 1N64 | H_ARG_94  | NH1 | H_ASP_101 | OD1 | 2.581 |
| 1N64 | H_ARG_94  | NH1 | H_ASP_101 | OD2 | 3.313 |
| 1N64 | H_LYS_208 | NZ  | L_GLU_123 | OE1 | 3.752 |
| 1NBY | A_ARG_61  | NH2 | A_GLU_81  | OE1 | 3.423 |
| 1NBY | A_ARG_61  | NH2 | A_ASP_82  | OD1 | 2.821 |
| 1NBY | A_ARG_61  | NH2 | A_ASP_82  | OD2 | 3.549 |
| 1NBY | A_LYS_103 | NZ  | A_GLU_105 | OE2 | 3.768 |
| 1NBY | A_LYS_147 | NZ  | A_GLU_154 | OE2 | 3.844 |
| 1NBY | A_LYS_149 | NZ  | A_GLU_195 | OE1 | 3.898 |
| 1NBY | A_LYS_149 | NZ  | A_GLU_195 | OE2 | 3.414 |
| 1NBY | A_ARG_155 | NH2 | A_GLU_185 | OE2 | 3.438 |
| 1NBY | A_LYS_169 | NZ  | A_ASP_167 | OD1 | 3.633 |
| 1NBY | A_LYS_169 | NZ  | A_ASP_167 | OD2 | 2.995 |
| 1NBY | B_ARG_338 | NH1 | B_ASP_389 | OD1 | 2.811 |
| 1NBY | B_ARG_338 | NH2 | B_GLU_346 | OE1 | 2.861 |
| 1NBY | B_ARG_338 | NH2 | B_ASP_389 | OD1 | 3.519 |
| 1NBY | B_ARG_366 | NH1 | B_ASP_389 | OD1 | 3.031 |
| 1NBY | B_ARG_366 | NH1 | B_ASP_389 | OD2 | 3.595 |
| 1NBY | B_ARG_366 | NH2 | B_ASP_389 | OD1 | 3.673 |
| 1NBY | B_ARG_366 | NH2 | B_ASP_389 | OD2 | 2.895 |
| 1NBY | B_LYS_508 | NZ  | A_GLU_123 | OE1 | 2.458 |
| 1NBY | B_LYS_508 | NZ  | A_GLU_123 | OE2 | 3.274 |
| 1NBY | C_LYS_601 | NZ  | C_GLU_607 | OE2 | 2.838 |
| 1NBY | C_LYS_613 | NZ  | C_ASP_618 | OD1 | 3.678 |
| 1NBY | C_LYS_697 | NZ  | B_ASP_332 | OD1 | 3.949 |
| 1NBY | C_LYS_697 | NZ  | B_ASP_332 | OD2 | 2.515 |
| 1NBY | C_ARG_725 | NH1 | C_ASP_719 | OD1 | 3.590 |
| 1NBY | C_ARG_725 | NH1 | C_ASP_719 | OD2 | 3.913 |
| 1NBY | C_ARG_725 | NH2 | C_ASP_719 | OD1 | 3.444 |

|      |           |     |            |     |       |
|------|-----------|-----|------------|-----|-------|
| 1NBY | C_ARG_725 | NH2 | C_ASP_719  | OD2 | 3.368 |
| 1NBZ | A_ARG_24  | NH2 | A_ASP_70   | OD1 | 2.834 |
| 1NBZ | A_ARG_61  | NH1 | A_GLU_79   | OE2 | 3.336 |
| 1NBZ | A_ARG_61  | NH2 | A_GLU_79   | OE2 | 3.126 |
| 1NBZ | A_ARG_61  | NH2 | A_GLU_81   | OE1 | 3.673 |
| 1NBZ | A_ARG_61  | NH2 | A_ASP_82   | OD1 | 2.933 |
| 1NBZ | A_ARG_61  | NH2 | A_ASP_82   | OD2 | 3.530 |
| 1NBZ | A_LYS_147 | NZ  | A_GLU_154  | OE1 | 3.461 |
| 1NBZ | A_LYS_149 | NZ  | A_GLU_195B | OE1 | 3.640 |
| 1NBZ | A_ARG_155 | NH1 | A_GLU_185  | OE2 | 3.835 |
| 1NBZ | A_ARG_155 | NH2 | A_GLU_185  | OE2 | 3.081 |
| 1NBZ | B_ARG_338 | NH1 | B_GLU_346  | OE1 | 2.666 |
| 1NBZ | B_ARG_338 | NH1 | B_ASP_389  | OD1 | 3.713 |
| 1NBZ | B_ARG_338 | NH2 | B_ASP_389  | OD1 | 2.601 |
| 1NBZ | B_ARG_366 | NH1 | B_ASP_389  | OD1 | 3.099 |
| 1NBZ | B_ARG_366 | NH1 | B_ASP_389  | OD2 | 3.734 |
| 1NBZ | B_ARG_366 | NH2 | B_ASP_389  | OD1 | 3.577 |
| 1NBZ | B_ARG_366 | NH2 | B_ASP_389  | OD2 | 2.894 |
| 1NBZ | C_LYS_601 | NZ  | C_GLU_607  | OE2 | 3.226 |
| 1NBZ | C_ARG_661 | NH1 | C_ASP_648  | OD1 | 3.578 |
| 1NBZ | C_ARG_661 | NH1 | C_ASP_648  | OD2 | 3.756 |
| 1NDG | A_ARG_61  | NH2 | A_GLU_81   | OE1 | 3.007 |
| 1NDG | A_ARG_61  | NH2 | A_ASP_82   | OD1 | 2.723 |
| 1NDG | A_ARG_61  | NH2 | A_ASP_82   | OD2 | 3.409 |
| 1NDG | A_LYS_147 | NZ  | A_GLU_154  | OE1 | 3.627 |
| 1NDG | A_LYS_149 | NZ  | A_GLU_195  | OE1 | 3.917 |
| 1NDG | A_LYS_149 | NZ  | A_GLU_195  | OE2 | 3.737 |
| 1NDG | A_ARG_155 | NH2 | A_GLU_185  | OE2 | 3.269 |
| 1NDG | A_LYS_199 | NZ  | A_ASP_110  | OD2 | 3.863 |
| 1NDG | B_ARG_338 | NH1 | B_GLU_346  | OE1 | 2.782 |
| 1NDG | B_ARG_338 | NH1 | B_ASP_389  | OD1 | 3.738 |
| 1NDG | B_ARG_338 | NH2 | B_ASP_389  | OD1 | 2.639 |
| 1NDG | B_HIS_360 | NE2 | A_ASP_1    | OD2 | 3.716 |
| 1NDG | B_ARG_366 | NH1 | B_ASP_389  | OD1 | 3.027 |
| 1NDG | B_ARG_366 | NH1 | B_ASP_389  | OD2 | 3.618 |
| 1NDG | B_ARG_366 | NH2 | B_ASP_389  | OD1 | 3.672 |
| 1NDG | B_ARG_366 | NH2 | B_ASP_389  | OD2 | 2.903 |
| 1NDG | B_LYS_519 | NZ  | A_GLU_123  | OE2 | 2.645 |
| 1NDG | C_LYS_601 | NZ  | C_GLU_607  | OE1 | 3.948 |
| 1NDG | C_LYS_601 | NZ  | C_GLU_607  | OE2 | 3.018 |
| 1NDG | C_LYS_613 | NZ  | C_ASP_618  | OD2 | 3.695 |
| 1NDG | C_ARG_668 | NH1 | C_ASP_666  | OD2 | 3.998 |
| 1NDG | C_LYS_697 | NZ  | B_ASP_332  | OD1 | 3.996 |
| 1NDG | C_LYS_697 | NZ  | B_ASP_332  | OD2 | 2.706 |
| 1NDG | C_LYS_697 | NZ  | B_ASP_399  | OD1 | 2.922 |
| 1NDG | C_LYS_697 | NZ  | B_ASP_399  | OD2 | 3.579 |
| 1NDG | C_ARG_725 | NH2 | C_ASP_719  | OD1 | 3.484 |
| 1NDG | C_ARG_725 | NH2 | C_ASP_719  | OD2 | 2.665 |
| 1NDM | A_ARG_24  | NH2 | A_ASP_70   | OD1 | 3.107 |
| 1NDM | A_ARG_61  | NH1 | A_GLU_79   | OE1 | 3.684 |
| 1NDM | A_ARG_61  | NH1 | A_GLU_79   | OE2 | 2.866 |
| 1NDM | A_ARG_61  | NH2 | A_GLU_79   | OE1 | 3.477 |
| 1NDM | A_ARG_61  | NH2 | A_GLU_79   | OE2 | 3.744 |
| 1NDM | A_ARG_61  | NH2 | A_GLU_81   | OE1 | 3.172 |
| 1NDM | A_ARG_61  | NH2 | A_ASP_82   | OD1 | 2.876 |
| 1NDM | A_ARG_61  | NH2 | A_ASP_82   | OD2 | 3.578 |
| 1NDM | A_LYS_149 | NZ  | A_GLU_195  | OE1 | 3.953 |
| 1NDM | A_LYS_149 | NZ  | A_GLU_195  | OE2 | 3.016 |



|      |           |     |           |     |       |
|------|-----------|-----|-----------|-----|-------|
| 1NDM | A_ARG_155 | NH1 | A_GLU_185 | OE1 | 3.939 |
| 1NDM | A_ARG_155 | NH2 | A_GLU_185 | OE1 | 3.970 |
| 1NDM | A_ARG_188 | NH2 | A_ASP_184 | OD1 | 3.023 |
| 1NDM | A_LYS_199 | NZ  | A_ASP_110 | OD2 | 3.562 |
| 1NDM | B_ARG_338 | NH1 | B_GLU_346 | OE1 | 2.753 |
| 1NDM | B_ARG_338 | NH1 | B_ASP_389 | OD1 | 3.746 |
| 1NDM | B_ARG_338 | NH2 | B_ASP_389 | OD1 | 2.687 |
| 1NDM | B_ARG_366 | NH1 | B_ASP_389 | OD1 | 3.863 |
| 1NDM | B_ARG_366 | NH2 | B_ASP_389 | OD1 | 3.499 |
| 1NDM | B_ARG_366 | NH2 | B_ASP_389 | OD2 | 2.806 |
| 1NDM | B_ARG_397 | NH1 | B_ASP_332 | OD1 | 3.700 |
| 1NDM | B_ARG_397 | NH2 | B_ASP_401 | OD1 | 2.798 |
| 1NDM | B_ARG_397 | NH2 | B_ASP_401 | OD2 | 3.696 |
| 1NDM | B_LYS_519 | NZ  | A_GLU_123 | OE1 | 3.184 |
| 1NDM | C_LYS_601 | NZ  | C_GLU_607 | OE1 | 3.751 |
| 1NDM | C_LYS_601 | NZ  | C_GLU_607 | OE2 | 2.713 |
| 1NDM | C_ARG_668 | NH1 | C_ASP_666 | OD2 | 3.599 |
| 1NDM | C_LYS_697 | NZ  | B_ASP_332 | OD1 | 3.954 |
| 1NDM | C_LYS_697 | NZ  | B_ASP_332 | OD2 | 2.468 |
| 1NDM | C_LYS_697 | NZ  | B_GLU_399 | OE1 | 2.743 |
| 1NGW | L_LYS_24  | NZ  | L_ASP_70  | OD1 | 3.381 |
| 1NGW | L_ARG_61  | NH1 | L_ASP_82  | OD1 | 2.889 |
| 1NGW | L_ARG_61  | NH1 | L_ASP_82  | OD2 | 3.061 |
| 1NGW | L_LYS_103 | NZ  | L_GLU_165 | OE1 | 3.834 |
| 1NGW | L_LYS_103 | NZ  | L_GLU_165 | OE2 | 3.110 |
| 1NGW | L_LYS_149 | NZ  | L_GLU_195 | OE1 | 2.871 |
| 1NGW | L_LYS_183 | NZ  | L_GLU_187 | OE1 | 3.850 |
| 1NGW | L_LYS_183 | NZ  | L_GLU_187 | OE2 | 2.603 |
| 1NGW | L_LYS_188 | NZ  | L_ASP_185 | OD1 | 3.745 |
| 1NGW | H_LYS_38  | NZ  | H_GLU_89  | OE1 | 3.916 |
| 1NGW | H_LYS_38  | NZ  | H_GLU_89  | OE2 | 3.046 |
| 1NGW | H_ARG_40  | NH1 | H_GLU_89  | OE2 | 3.692 |
| 1NGW | H_LYS_63  | NZ  | H_GLU_46  | OE1 | 3.487 |
| 1NGW | H_LYS_67  | NZ  | H_GLU_89  | OE1 | 3.643 |
| 1NGW | H_LYS_67  | NZ  | H_ASP_90  | OD1 | 2.985 |
| 1NGW | H_LYS_67  | NZ  | H_ASP_90  | OD2 | 3.338 |
| 1NGW | H_ARG_98  | NH1 | H_ASP_102 | OD1 | 3.333 |
| 1NGW | H_ARG_99  | NH2 | H_ASP_100 | OD1 | 3.884 |
| 1NGW | H_ARG_99  | NH2 | H_ASP_100 | OD2 | 3.152 |
| 1NGW | H_LYS_144 | NZ  | H_ASP_145 | OD1 | 3.933 |
| 1NGW | H_LYS_144 | NZ  | H_ASP_145 | OD2 | 3.556 |
| 1NGW | H_HIS_165 | NE2 | L_ASP_167 | OD1 | 3.771 |
| 1NGW | H_LYS_210 | NZ  | L_GLU_123 | OE1 | 3.544 |
| 1NGW | H_LYS_210 | NZ  | L_GLU_123 | OE2 | 3.092 |
| 1NGW | A_LYS_24  | NZ  | A_ASP_70  | OD1 | 3.412 |
| 1NGW | A_ARG_61  | NH1 | A_ASP_82  | OD1 | 2.833 |
| 1NGW | A_ARG_61  | NH1 | A_ASP_82  | OD2 | 3.020 |
| 1NGW | A_LYS_103 | NZ  | A_GLU_165 | OE2 | 3.226 |
| 1NGW | A_LYS_149 | NZ  | A_GLU_195 | OE1 | 2.874 |
| 1NGW | A_LYS_183 | NZ  | A_GLU_187 | OE1 | 3.842 |
| 1NGW | A_LYS_183 | NZ  | A_GLU_187 | OE2 | 2.592 |
| 1NGW | A_LYS_188 | NZ  | A_ASP_185 | OD1 | 3.777 |
| 1NGW | B_LYS_38  | NZ  | B_GLU_89  | OE1 | 3.908 |
| 1NGW | B_LYS_38  | NZ  | B_GLU_89  | OE2 | 3.066 |
| 1NGW | B_ARG_40  | NH1 | B_GLU_89  | OE2 | 3.715 |
| 1NGW | B_LYS_63  | NZ  | B_GLU_46  | OE1 | 3.549 |
| 1NGW | B_LYS_67  | NZ  | B_GLU_89  | OE1 | 3.643 |
| 1NGW | B_LYS_67  | NZ  | B_ASP_90  | OD1 | 2.988 |

|      |           |     |           |     |       |
|------|-----------|-----|-----------|-----|-------|
| 1NGW | B.LYS.67  | NZ  | B.ASP.90  | OD2 | 3.345 |
| 1NGW | B.ARG.98  | NH1 | B.ASP.102 | OD1 | 3.321 |
| 1NGW | B.ARG.99  | NH2 | B.ASP.100 | OD1 | 3.865 |
| 1NGW | B.ARG.99  | NH2 | B.ASP.100 | OD2 | 3.174 |
| 1NGW | B.LYS.144 | NZ  | B.ASP.145 | OD1 | 3.893 |
| 1NGW | B.LYS.144 | NZ  | B.ASP.145 | OD2 | 3.494 |
| 1NGW | B.HIS.165 | NE2 | A.ASP.167 | OD1 | 3.804 |
| 1NGW | B.LYS.210 | NZ  | A.GLU.123 | OE1 | 3.662 |
| 1NGW | B.LYS.210 | NZ  | A.GLU.123 | OE2 | 3.240 |
| 1NGX | A.LYS.24  | NZ  | A.ASP.70  | OD1 | 3.081 |
| 1NGX | A.LYS.24  | NZ  | A.ASP.70  | OD2 | 3.994 |
| 1NGX | A.ARG.61  | NH2 | A.ASP.82  | OD1 | 2.985 |
| 1NGX | A.ARG.61  | NH2 | A.ASP.82  | OD2 | 2.969 |
| 1NGX | A.LYS.149 | NZ  | A.GLU.195 | OE1 | 3.396 |
| 1NGX | A.LYS.149 | NZ  | A.GLU.195 | OE2 | 3.345 |
| 1NGX | A.LYS.188 | NZ  | A.ASP.185 | OD2 | 3.626 |
| 1NGX | B.ARG.40  | NH1 | B.GLU.46  | OE2 | 3.949 |
| 1NGX | B.ARG.40  | NH2 | B.GLU.89  | OE1 | 3.668 |
| 1NGX | B.ARG.40  | NH2 | B.GLU.89  | OE2 | 3.900 |
| 1NGX | B.LYS.65  | NZ  | B.GLU.62  | OE1 | 3.589 |
| 1NGX | B.LYS.65  | NZ  | B.GLU.62  | OE2 | 2.814 |
| 1NGX | B.ARG.98  | NH1 | B.GLU.6   | OE1 | 3.105 |
| 1NGX | B.ARG.98  | NH1 | B.GLU.6   | OE2 | 3.939 |
| 1NGX | B.ARG.98  | NH2 | B.GLU.6   | OE1 | 3.343 |
| 1NGX | B.ARG.98  | NH2 | B.GLU.6   | OE2 | 2.833 |
| 1NGX | B.LYS.210 | NZ  | A.GLU.123 | OE1 | 3.994 |
| 1NGX | L.LYS.24  | NZ  | L.ASP.70  | OD1 | 3.096 |
| 1NGX | L.LYS.24  | NZ  | L.ASP.70  | OD2 | 3.994 |
| 1NGX | L.LYS.45  | NZ  | H.ASP.102 | OD2 | 3.800 |
| 1NGX | L.ARG.61  | NH2 | L.ASP.82  | OD1 | 2.986 |
| 1NGX | L.ARG.61  | NH2 | L.ASP.82  | OD2 | 2.973 |
| 1NGX | L.LYS.149 | NZ  | L.GLU.195 | OE1 | 3.398 |
| 1NGX | L.LYS.149 | NZ  | L.GLU.195 | OE2 | 3.336 |
| 1NGX | L.LYS.188 | NZ  | L.ASP.185 | OD2 | 3.617 |
| 1NGX | H.ARG.40  | NH1 | H.GLU.46  | OE2 | 3.939 |
| 1NGX | H.ARG.40  | NH2 | H.GLU.89  | OE1 | 3.665 |
| 1NGX | H.ARG.40  | NH2 | H.GLU.89  | OE2 | 3.888 |
| 1NGX | H.LYS.65  | NZ  | H.GLU.62  | OE1 | 3.585 |
| 1NGX | H.LYS.65  | NZ  | H.GLU.62  | OE2 | 2.810 |
| 1NGX | H.ARG.98  | NH1 | H.GLU.6   | OE1 | 3.117 |
| 1NGX | H.ARG.98  | NH1 | H.GLU.6   | OE2 | 3.962 |
| 1NGX | H.ARG.98  | NH2 | H.GLU.6   | OE1 | 3.326 |
| 1NGX | H.ARG.98  | NH2 | H.GLU.6   | OE2 | 2.854 |
| 1NGX | H.LYS.210 | NZ  | L.GLU.123 | OE1 | 3.804 |
| 1NGY | A.ARG.18  | NH1 | A.ASP.17  | OD2 | 3.594 |
| 1NGY | A.LYS.24  | NZ  | A.ASP.70  | OD2 | 3.919 |
| 1NGY | A.ARG.61  | NH2 | A.ASP.82  | OD1 | 2.968 |
| 1NGY | A.ARG.61  | NH2 | A.ASP.82  | OD2 | 3.529 |
| 1NGY | A.LYS.103 | NZ  | A.ASP.85  | OD1 | 3.853 |
| 1NGY | A.LYS.103 | NZ  | A.ASP.85  | OD2 | 3.272 |
| 1NGY | A.LYS.188 | NZ  | A.ASP.185 | OD2 | 2.771 |
| 1NGY | A.HIS.189 | ND1 | A.ASP.151 | OD1 | 3.054 |
| 1NGY | B.LYS.67  | NZ  | B.ASP.90  | OD1 | 3.731 |
| 1NGY | B.LYS.67  | NZ  | B.ASP.90  | OD2 | 2.958 |
| 1NGY | B.ARG.98  | NH1 | B.ASP.102 | OD1 | 3.607 |
| 1NGY | B.ARG.98  | NH1 | B.ASP.102 | OD2 | 3.510 |
| 1NGY | B.ARG.99  | NH2 | B.ASP.100 | OD2 | 3.858 |
| 1NGY | B.LYS.144 | NZ  | B.ASP.145 | OD1 | 3.371 |

|      |           |     |           |     |       |
|------|-----------|-----|-----------|-----|-------|
| 1NGY | B_LYS_144 | NZ  | B_ASP_145 | OD2 | 3.636 |
| 1NGY | B_LYS_211 | NZ  | B_GLU_213 | OE2 | 3.805 |
| 1NGY | B_LYS_215 | NZ  | A_ASP_122 | OD1 | 3.713 |
| 1NGY | B_LYS_215 | NZ  | A_ASP_122 | OD2 | 3.325 |
| 1NGZ | A_ARG_    | NH1 | A_ASP_    | OD1 | 3.637 |
| 1NGZ | A_ARG_    | NH1 | A_ASP_    | OD2 | 2.596 |
| 1NGZ | A_ARG_    | NH2 | A_GLU_    | OE1 | 3.959 |
| 1NGZ | A_ARG_    | NH2 | A_ASP_    | OD1 | 3.037 |
| 1NGZ | A_ARG_    | NH2 | A_ASP_    | OD2 | 3.356 |
| 1NGZ | A_LYS_    | NZ  | A_GLU_    | OE1 | 2.828 |
| 1NGZ | A_LYS_    | NZ  | A_GLU_    | OE2 | 3.489 |
| 1NGZ | A_LYS_    | NZ  | A_GLU_    | OE1 | 3.044 |
| 1NGZ | A_LYS_    | NZ  | A_GLU_    | OE1 | 3.604 |
| 1NGZ | A_HIS_    | ND1 | A_ASP_    | OD1 | 3.223 |
| 1NGZ | B_LYS_    | NZ  | B_GLU_    | OE1 | 2.735 |
| 1NGZ | B_ARG_    | NH2 | B_ASP_    | OD2 | 3.084 |
| 1NGZ | B_LYS_    | NZ  | B_ASP_    | OD1 | 3.293 |
| 1NGZ | B_LYS_    | NZ  | A_GLU_    | OE2 | 3.517 |
| 1NGZ | B_LYS_    | NZ  | B_GLU_    | OE2 | 3.319 |
| 1NLB | L_ARG_61  | NH1 | L_GLU_81  | OE1 | 3.945 |
| 1NLB | L_ARG_61  | NH1 | L_ASP_82  | OD1 | 3.512 |
| 1NLB | L_ARG_61  | NH1 | L_ASP_82  | OD2 | 2.842 |
| 1NLB | L_ARG_61  | NH2 | L_ASP_82  | OD1 | 2.825 |
| 1NLB | L_ARG_61  | NH2 | L_ASP_82  | OD2 | 3.519 |
| 1NLB | L_LYS_103 | NZ  | L_GLU_105 | OE1 | 2.975 |
| 1NLB | L_LYS_149 | NZ  | L_GLU_195 | OE1 | 2.997 |
| 1NLB | L_LYS_149 | NZ  | L_GLU_195 | OE2 | 3.428 |
| 1NLB | L_ARG_155 | NH1 | L_GLU_185 | OE1 | 3.426 |
| 1NLB | L_ARG_155 | NH1 | L_GLU_185 | OE2 | 3.047 |
| 1NLB | L_HIS_189 | ND1 | L_ASP_151 | OD2 | 2.936 |
| 1NLB | L_LYS_199 | NZ  | L_ASP_110 | OD1 | 3.501 |
| 1NLB | H_LYS_64  | NZ  | H_ASP_61  | OD2 | 2.732 |
| 1NLB | H_ARG_66  | NH1 | H_ASP_86  | OD1 | 3.711 |
| 1NLB | H_ARG_66  | NH1 | H_ASP_86  | OD2 | 2.788 |
| 1NLB | H_ARG_66  | NH2 | H_ASP_86  | OD1 | 2.985 |
| 1NLB | H_ARG_66  | NH2 | H_ASP_86  | OD2 | 3.410 |
| 1NLB | H_ARG_94  | NH1 | H_ASP_101 | OD1 | 2.645 |
| 1NLB | H_ARG_94  | NH1 | H_ASP_101 | OD2 | 3.679 |
| 1NLB | H_LYS_115 | NZ  | H_ASP_173 | OD2 | 3.346 |
| 1NLB | H_LYS_205 | NZ  | H_ASP_207 | OD1 | 3.946 |
| 1NLB | H_LYS_205 | NZ  | H_ASP_207 | OD2 | 2.901 |
| 1NLB | H_LYS_208 | NZ  | L_GLU_123 | OE1 | 3.572 |
| 1NMC | N_ARG_118 | NH1 | N_GLU_119 | OE2 | 3.499 |
| 1NMC | N_ARG_118 | NH2 | N_GLU_119 | OE2 | 3.987 |
| 1NMC | N_ARG_118 | NH2 | N_GLU_425 | OE1 | 2.873 |
| 1NMC | N_ARG_118 | NH2 | N_GLU_425 | OE2 | 3.183 |
| 1NMC | N_ARG_130 | NH1 | N_GLU_128 | OE1 | 3.693 |
| 1NMC | N_ARG_130 | NH1 | N_GLU_128 | OE2 | 3.810 |
| 1NMC | N_ARG_141 | NH1 | N_GLU_110 | OE2 | 2.793 |
| 1NMC | N_ARG_152 | NH2 | N_ASP_151 | OD1 | 3.884 |
| 1NMC | N_ARG_156 | NH1 | N_GLU_119 | OE1 | 3.978 |
| 1NMC | N_ARG_156 | NH2 | N_GLU_119 | OE1 | 3.322 |
| 1NMC | N_ARG_172 | NH1 | N_GLU_174 | OE2 | 2.630 |
| 1NMC | N_ARG_189 | NH2 | N_ASP_125 | OD1 | 2.838 |
| 1NMC | N_ARG_209 | NH1 | N_GLU_174 | OE1 | 3.221 |
| 1NMC | N_ARG_209 | NH1 | N_GLU_174 | OE2 | 3.350 |
| 1NMC | N_ARG_209 | NH2 | N_GLU_174 | OE1 | 3.641 |
| 1NMC | N_ARG_209 | NH2 | N_GLU_174 | OE2 | 3.567 |

|      |           |     |            |     |       |
|------|-----------|-----|------------|-----|-------|
| 1NMC | N_ARG_224 | NH2 | N_GLU_276  | OE1 | 3.973 |
| 1NMC | N_ARG_224 | NH2 | N_GLU_276  | OE2 | 2.790 |
| 1NMC | N_LYS_264 | NZ  | N_GLU_266  | OE1 | 3.220 |
| 1NMC | N_LYS_273 | NZ  | N_ASP_339  | OD1 | 3.418 |
| 1NMC | N_HIS_274 | NE2 | N_GLU_276  | OE2 | 3.907 |
| 1NMC | N_ARG_292 | NH1 | N_GLU_277  | OE1 | 2.656 |
| 1NMC | N_ARG_292 | NH1 | N_GLU_277  | OE2 | 3.466 |
| 1NMC | N_ARG_300 | NH1 | N_ASP_324  | OD2 | 3.693 |
| 1NMC | N_ARG_300 | NH2 | N_ASP_324  | OD1 | 3.980 |
| 1NMC | N_ARG_304 | NH1 | N_GLU_286  | OE2 | 2.662 |
| 1NMC | N_HIS_312 | ND1 | N_GLU_266  | OE2 | 2.860 |
| 1NMC | N_ARG_364 | NH1 | N_GLU_375  | OE2 | 2.972 |
| 1NMC | N_ARG_364 | NH2 | N_ASP_330  | OD1 | 3.061 |
| 1NMC | N_ARG_364 | NH2 | N_ASP_330  | OD2 | 2.772 |
| 1NMC | N_ARG_428 | NH1 | N_ASP_460  | OD2 | 2.607 |
| 1NMC | N_ARG_428 | NH2 | N_GLU_433  | OE1 | 3.420 |
| 1NMC | N_ARG_428 | NH2 | N_GLU_433  | OE2 | 2.884 |
| 1NMC | N_LYS_432 | NZ  | H_ASP_56   | OD1 | 2.750 |
| 1NMC | H_LYS_62  | NZ  | H_GLU_46   | OE1 | 2.874 |
| 1NMC | H_LYS_62  | NZ  | H_GLU_46   | OE2 | 3.520 |
| 1NMC | H_LYS_66  | NZ  | H_ASP_86   | OD2 | 3.403 |
| 1NMC | H_ARG_94  | NH2 | H_ASP_101  | OD1 | 3.582 |
| 1NMC | H_ARG_94  | NH2 | H_ASP_101  | OD2 | 2.789 |
| 1NMC | H_ARG_100 | NH1 | H_ASP_100B | OD1 | 2.808 |
| 1NMC | H_ARG_100 | NH1 | H_ASP_100B | OD2 | 2.674 |
| 1NMC | H_ARG_100 | NH2 | H_ASP_100B | OD1 | 3.142 |
| 1NMC | L_ARG_61  | NH1 | L_GLU_79   | OE1 | 3.308 |
| 1NMC | L_ARG_61  | NH2 | L_GLU_79   | OE1 | 3.314 |
| 1NMC | L_ARG_61  | NH2 | L_ASP_82   | OD1 | 2.650 |
| 1NMC | L_ARG_61  | NH2 | L_ASP_82   | OD2 | 3.093 |
| 1NMC | L_ARG_107 | NH2 | L_ASP_108  | OD2 | 3.871 |
| 1NMC | A_ARG_118 | NH1 | A_GLU_119  | OE2 | 3.500 |
| 1NMC | A_ARG_118 | NH2 | A_GLU_119  | OE2 | 3.987 |
| 1NMC | A_ARG_118 | NH2 | A_GLU_425  | OE1 | 2.872 |
| 1NMC | A_ARG_118 | NH2 | A_GLU_425  | OE2 | 3.182 |
| 1NMC | A_ARG_130 | NH1 | A_GLU_128  | OE1 | 3.693 |
| 1NMC | A_ARG_130 | NH1 | A_GLU_128  | OE2 | 3.809 |
| 1NMC | A_ARG_141 | NH1 | A_GLU_110  | OE2 | 2.794 |
| 1NMC | A_ARG_152 | NH2 | A_ASP_151  | OD1 | 3.884 |
| 1NMC | A_ARG_156 | NH1 | A_GLU_119  | OE1 | 3.979 |
| 1NMC | A_ARG_156 | NH2 | A_GLU_119  | OE1 | 3.323 |
| 1NMC | A_ARG_172 | NH1 | A_GLU_174  | OE2 | 2.630 |
| 1NMC | A_ARG_189 | NH2 | A_ASP_125  | OD1 | 2.839 |
| 1NMC | A_ARG_209 | NH1 | A_GLU_174  | OE1 | 3.221 |
| 1NMC | A_ARG_209 | NH1 | A_GLU_174  | OE2 | 3.350 |
| 1NMC | A_ARG_209 | NH2 | A_GLU_174  | OE1 | 3.641 |
| 1NMC | A_ARG_209 | NH2 | A_GLU_174  | OE2 | 3.567 |
| 1NMC | A_ARG_224 | NH2 | A_GLU_276  | OE1 | 3.973 |
| 1NMC | A_ARG_224 | NH2 | A_GLU_276  | OE2 | 2.791 |
| 1NMC | A_LYS_264 | NZ  | A_GLU_266  | OE1 | 3.220 |
| 1NMC | A_LYS_273 | NZ  | A_ASP_339  | OD1 | 3.419 |
| 1NMC | A_HIS_274 | NE2 | A_GLU_276  | OE2 | 3.907 |
| 1NMC | A_ARG_292 | NH1 | A_GLU_277  | OE1 | 2.655 |
| 1NMC | A_ARG_292 | NH1 | A_GLU_277  | OE2 | 3.465 |
| 1NMC | A_ARG_300 | NH1 | A_ASP_324  | OD2 | 3.694 |
| 1NMC | A_ARG_300 | NH2 | A_ASP_324  | OD1 | 3.980 |
| 1NMC | A_ARG_304 | NH1 | A_GLU_286  | OE2 | 2.663 |
| 1NMC | A_HIS_312 | ND1 | A_GLU_266  | OE2 | 2.860 |

|      |           |     |            |     |       |
|------|-----------|-----|------------|-----|-------|
| 1NMC | A_ARG_364 | NH1 | A_GLU_375  | OE2 | 2.972 |
| 1NMC | A_ARG_364 | NH2 | A_ASP_330  | OD1 | 3.062 |
| 1NMC | A_ARG_364 | NH2 | A_ASP_330  | OD2 | 2.772 |
| 1NMC | A_ARG_428 | NH1 | A_ASP_460  | OD2 | 2.606 |
| 1NMC | A_ARG_428 | NH2 | A_GLU_433  | OE1 | 3.421 |
| 1NMC | A_ARG_428 | NH2 | A_GLU_433  | OE2 | 2.883 |
| 1NMC | A_LYS_432 | NZ  | B_ASP_56   | OD1 | 2.750 |
| 1NMC | B_LYS_62  | NZ  | B_GLU_46   | OE1 | 2.874 |
| 1NMC | B_LYS_62  | NZ  | B_GLU_46   | OE2 | 3.520 |
| 1NMC | B_LYS_66  | NZ  | B_ASP_86   | OD2 | 3.404 |
| 1NMC | B_ARG_94  | NH2 | B_ASP_101  | OD1 | 3.582 |
| 1NMC | B_ARG_94  | NH2 | B_ASP_101  | OD2 | 2.789 |
| 1NMC | B_ARG_100 | NH1 | B_ASP_100B | OD1 | 2.808 |
| 1NMC | B_ARG_100 | NH1 | B_ASP_100B | OD2 | 2.675 |
| 1NMC | B_ARG_100 | NH2 | B_ASP_100B | OD1 | 3.142 |
| 1NMC | C_ARG_61  | NH1 | C_GLU_79   | OE1 | 3.308 |
| 1NMC | C_ARG_61  | NH2 | C_GLU_79   | OE1 | 3.313 |
| 1NMC | C_ARG_61  | NH2 | C_ASP_82   | OD1 | 2.649 |
| 1NMC | C_ARG_61  | NH2 | C_ASP_82   | OD2 | 3.094 |
| 1NMC | C_ARG_107 | NH2 | C_ASP_108  | OD2 | 3.871 |
| 1OB1 | A_ARG_61  | NH1 | A_GLU_81   | OE2 | 3.808 |
| 1OB1 | A_ARG_61  | NH1 | A_ASP_82   | OD1 | 2.619 |
| 1OB1 | A_ARG_61  | NH1 | A_ASP_82   | OD2 | 2.877 |
| 1OB1 | A_ARG_61  | NH2 | A_GLU_81   | OE2 | 3.763 |
| 1OB1 | A_ARG_61  | NH2 | F_ASP_59   | OD1 | 3.421 |
| 1OB1 | A_ARG_61  | NH2 | F_ASP_59   | OD2 | 2.223 |
| 1OB1 | A_LYS_103 | NZ  | A_GLU_105  | OE1 | 3.763 |
| 1OB1 | A_ARG_154 | NH2 | A_GLU_184  | OE2 | 2.981 |
| 1OB1 | A_LYS_182 | NZ  | A_ASP_183  | OD1 | 3.727 |
| 1OB1 | A_LYS_182 | NZ  | A_GLU_186  | OE1 | 3.077 |
| 1OB1 | A_HIS_188 | NE2 | A_GLU_184  | OE2 | 3.652 |
| 1OB1 | A_ARG_210 | NH2 | A_GLU_186  | OE2 | 3.268 |
| 1OB1 | B_LYS_13  | NZ  | B_GLU_16   | OE2 | 3.100 |
| 1OB1 | B_ARG_66  | NH1 | B_ASP_86   | OD1 | 3.867 |
| 1OB1 | B_ARG_66  | NH2 | B_ASP_86   | OD1 | 2.818 |
| 1OB1 | B_ARG_66  | NH2 | B_ASP_86   | OD2 | 3.197 |
| 1OB1 | B_ARG_94  | NH1 | B_ASP_101  | OD1 | 3.340 |
| 1OB1 | B_ARG_94  | NH1 | B_ASP_101  | OD2 | 2.759 |
| 1OB1 | B_HIS_164 | NE2 | A_ASP_166  | OD2 | 3.671 |
| 1OB1 | B_LYS_205 | NZ  | B_ASP_207  | OD1 | 3.102 |
| 1OB1 | B_LYS_205 | NZ  | B_ASP_207  | OD2 | 2.900 |
| 1OB1 | B_LYS_209 | NZ  | B_GLU_211  | OE1 | 3.918 |
| 1OB1 | B_LYS_209 | NZ  | B_GLU_211  | OE2 | 3.120 |
| 1OB1 | C_LYS_9   | NZ  | C_GLU_24   | OE2 | 3.557 |
| 1OB1 | C_LYS_9   | NZ  | C_GLU_26   | OE2 | 3.148 |
| 1OB1 | C_LYS_10  | NZ  | B_ASP_100  | OD1 | 2.437 |
| 1OB1 | C_ARG_20  | NH1 | C_GLU_24   | OE1 | 3.737 |
| 1OB1 | C_ARG_20  | NH2 | C_GLU_24   | OE1 | 2.454 |
| 1OB1 | C_ARG_20  | NH2 | C_GLU_24   | OE2 | 3.232 |
| 1OB1 | C_HIS_21  | NE2 | C_GLU_27   | OE2 | 2.879 |
| 1OB1 | C_LYS_80  | NZ  | D_GLU_79   | OE1 | 3.373 |
| 1OB1 | C_LYS_80  | NZ  | D_GLU_81   | OE1 | 3.553 |
| 1OB1 | C_LYS_80  | NZ  | D_GLU_81   | OE2 | 2.714 |
| 1OB1 | D_ARG_61  | NH1 | D_GLU_81   | OE2 | 3.991 |
| 1OB1 | D_ARG_61  | NH1 | D_ASP_82   | OD1 | 2.474 |
| 1OB1 | D_ARG_61  | NH1 | D_ASP_82   | OD2 | 2.804 |
| 1OB1 | D_ARG_61  | NH2 | C_ASP_59   | OD1 | 3.599 |
| 1OB1 | D_ARG_61  | NH2 | C_ASP_59   | OD2 | 2.460 |

|      |           |     |           |     |       |
|------|-----------|-----|-----------|-----|-------|
| 1OB1 | D_ARG_61  | NH2 | D_GLU_81  | OE2 | 3.779 |
| 1OB1 | D_LYS_103 | NZ  | D_GLU_105 | OE1 | 3.861 |
| 1OB1 | D_ARG_154 | NH2 | D_GLU_184 | OE2 | 2.971 |
| 1OB1 | D_LYS_182 | NZ  | D_ASP_183 | OD1 | 3.753 |
| 1OB1 | D_LYS_182 | NZ  | D_GLU_186 | OE1 | 3.086 |
| 1OB1 | D_HIS_188 | NE2 | D_GLU_184 | OE2 | 3.651 |
| 1OB1 | D_ARG_210 | NH2 | D_GLU_186 | OE2 | 3.229 |
| 1OB1 | E_LYS_13  | NZ  | E_GLU_16  | OE2 | 3.102 |
| 1OB1 | E_LYS_46  | NZ  | E_ASP_44  | OD2 | 3.971 |
| 1OB1 | E_ARG_66  | NH1 | E_ASP_86  | OD1 | 3.843 |
| 1OB1 | E_ARG_66  | NH2 | E_ASP_86  | OD1 | 2.795 |
| 1OB1 | E_ARG_66  | NH2 | E_ASP_86  | OD2 | 3.186 |
| 1OB1 | E_ARG_94  | NH1 | E_ASP_101 | OD1 | 3.270 |
| 1OB1 | E_ARG_94  | NH1 | E_ASP_101 | OD2 | 2.697 |
| 1OB1 | E_ARG_98  | NH1 | F_ASP_39  | OD1 | 2.706 |
| 1OB1 | E_HIS_164 | NE2 | D_ASP_166 | OD2 | 3.790 |
| 1OB1 | E_LYS_205 | NZ  | E_ASP_207 | OD1 | 3.032 |
| 1OB1 | E_LYS_205 | NZ  | E_ASP_207 | OD2 | 2.849 |
| 1OB1 | E_LYS_209 | NZ  | E_GLU_211 | OE1 | 3.962 |
| 1OB1 | E_LYS_209 | NZ  | E_GLU_211 | OE2 | 3.194 |
| 1OB1 | F_LYS_9   | NZ  | F_GLU_24  | OE2 | 3.571 |
| 1OB1 | F_LYS_9   | NZ  | F_GLU_26  | OE2 | 3.085 |
| 1OB1 | F_LYS_10  | NZ  | E_ASP_100 | OD1 | 2.524 |
| 1OB1 | F_ARG_20  | NH1 | F_GLU_24  | OE1 | 3.734 |
| 1OB1 | F_ARG_20  | NH2 | F_GLU_24  | OE1 | 2.432 |
| 1OB1 | F_ARG_20  | NH2 | F_GLU_24  | OE2 | 3.245 |
| 1OB1 | F_HIS_21  | NE2 | F_GLU_27  | OE2 | 2.859 |
| 1OB1 | F_LYS_80  | NZ  | A_GLU_79  | OE1 | 3.743 |
| 1OB1 | F_LYS_80  | NZ  | A_GLU_81  | OE1 | 3.454 |
| 1OB1 | F_LYS_80  | NZ  | A_GLU_81  | OE2 | 2.796 |
| 1OB1 | F_HIS_96  | NE2 | A_GLU_79  | OE1 | 3.773 |
| 1OP9 | A_ARG_35  | NH1 | A_ASP_87  | OD1 | 2.983 |
| 1OP9 | A_ARG_35  | NH2 | A_GLU_43  | OE2 | 2.955 |
| 1OP9 | A_ARG_49  | NH1 | A_ASP_52  | OD1 | 2.941 |
| 1OP9 | A_ARG_49  | NH1 | A_ASP_52  | OD2 | 3.907 |
| 1OP9 | A_ARG_64  | NH1 | A_ASP_87  | OD1 | 3.965 |
| 1OP9 | A_ARG_64  | NH1 | A_ASP_87  | OD2 | 2.867 |
| 1OP9 | A_ARG_64  | NH2 | A_ASP_87  | OD1 | 3.040 |
| 1OP9 | A_ARG_64  | NH2 | A_ASP_87  | OD2 | 3.424 |
| 1OP9 | B_LYS_1   | NZ  | B_GLU_7   | OE2 | 2.875 |
| 1OP9 | B_LYS_97  | NZ  | A_GLU_97  | OE1 | 2.570 |
| 1OP9 | B_ARG_98  | NH1 | B_ASP_102 | OD1 | 2.828 |
| 1OP9 | B_ARG_98  | NH1 | B_ASP_102 | OD2 | 3.807 |
| 1OP9 | B_ARG_101 | NH1 | A_ASP_109 | OD1 | 3.213 |
| 1OP9 | B_ARG_101 | NH1 | A_ASP_109 | OD2 | 2.829 |
| 1OP9 | B_ARG_101 | NH2 | A_ASP_109 | OD1 | 2.793 |
| 1OP9 | B_ARG_101 | NH2 | A_ASP_109 | OD2 | 3.765 |
| 1OP9 | B_ARG_122 | NH1 | B_ASP_120 | OD1 | 3.408 |
| 1OSP | L_ARG_61  | NH1 | L_GLU_81  | OE2 | 3.794 |
| 1OSP | L_ARG_61  | NH1 | L_ASP_82  | OD1 | 2.742 |
| 1OSP | L_ARG_61  | NH1 | L_ASP_82  | OD2 | 3.281 |
| 1OSP | L_LYS_69  | NZ  | L_ASP_70  | OD2 | 3.957 |
| 1OSP | L_LYS_147 | NZ  | L_GLU_154 | OE1 | 3.795 |
| 1OSP | L_LYS_149 | NZ  | L_GLU_195 | OE1 | 3.168 |
| 1OSP | L_LYS_149 | NZ  | L_GLU_195 | OE2 | 3.070 |
| 1OSP | L_ARG_155 | NH2 | L_GLU_185 | OE1 | 3.054 |
| 1OSP | L_ARG_155 | NH2 | L_GLU_185 | OE2 | 3.470 |
| 1OSP | L_ARG_188 | NH2 | L_GLU_185 | OE2 | 3.854 |

|      |           |     |           |     |       |
|------|-----------|-----|-----------|-----|-------|
| 1OSP | L_LYS_199 | NZ  | L_ASP_110 | OD1 | 3.945 |
| 1OSP | L_LYS_199 | NZ  | L_ASP_110 | OD2 | 2.639 |
| 1OSP | L_ARG_211 | NH1 | L_GLU_187 | OE2 | 3.387 |
| 1OSP | L_ARG_211 | NH2 | L_GLU_187 | OE2 | 3.391 |
| 1OSP | H_ARG_38  | NH1 | H_GLU_46  | OE1 | 2.774 |
| 1OSP | H_ARG_38  | NH2 | H_ASP_89  | OD1 | 2.825 |
| 1OSP | H_ARG_97  | NH2 | H_GLU_27  | OE1 | 3.273 |
| 1OSP | H_ARG_99  | NH1 | L_GLU_55  | OE1 | 3.970 |
| 1OSP | H_ARG_99  | NH1 | L_GLU_55  | OE2 | 2.686 |
| 1OSP | H_ARG_99  | NH2 | O_ASP_92  | OD1 | 3.355 |
| 1OSP | H_ARG_99  | NH2 | O_ASP_92  | OD2 | 2.514 |
| 1OSP | H_LYS_215 | NZ  | L_GLU_123 | OE1 | 2.783 |
| 1OSP | H_LYS_215 | NZ  | L_GLU_123 | OE2 | 3.079 |
| 1OSP | O_LYS_39  | NZ  | O_ASP_33  | OD1 | 2.809 |
| 1OSP | O_LYS_46  | NZ  | L_ASP_66  | OD2 | 3.087 |
| 1OSP | O_LYS_69  | NZ  | O_ASP_92  | OD1 | 3.769 |
| 1OSP | O_LYS_103 | NZ  | O_GLU_128 | OE2 | 3.115 |
| 1OSP | O_LYS_113 | NZ  | O_GLU_123 | OE1 | 3.755 |
| 1OSP | O_LYS_129 | NZ  | O_GLU_131 | OE1 | 3.327 |
| 1OSP | O_ARG_139 | NH1 | O_GLU_160 | OE2 | 3.268 |
| 1OSP | O_ARG_139 | NH2 | O_GLU_160 | OE2 | 2.962 |
| 1OSP | O_ARG_144 | NH1 | O_GLU_146 | OE1 | 3.930 |
| 1OSP | O_ARG_144 | NH1 | O_GLU_146 | OE2 | 2.637 |
| 1OSP | O_LYS_159 | NZ  | O_GLU_168 | OE2 | 3.915 |
| 1OSP | O_LYS_175 | NZ  | O_GLU_174 | OE2 | 3.895 |
| 1OSP | O_LYS_189 | NZ  | O_GLU_160 | OE1 | 2.949 |
| 1OSP | O_LYS_189 | NZ  | O_GLU_160 | OE2 | 3.302 |
| 1OW0 | A_ARG_250 | NH1 | A_ASP_378 | OD1 | 2.566 |
| 1OW0 | A_ARG_250 | NH1 | A_ASP_378 | OD2 | 3.422 |
| 1OW0 | A_ARG_250 | NH1 | A_GLU_437 | OE1 | 2.982 |
| 1OW0 | A_ARG_250 | NH2 | A_ASP_378 | OD1 | 3.947 |
| 1OW0 | A_ARG_250 | NH2 | A_GLU_437 | OE1 | 2.644 |
| 1OW0 | A_ARG_372 | NH1 | A_GLU_403 | OE1 | 2.406 |
| 1OW0 | A_ARG_372 | NH1 | A_GLU_403 | OE2 | 2.605 |
| 1OW0 | A_ARG_372 | NH2 | A_GLU_403 | OE1 | 3.805 |
| 1OW0 | B_ARG_250 | NH1 | B_ASP_378 | OD1 | 2.587 |
| 1OW0 | B_ARG_250 | NH1 | B_ASP_378 | OD2 | 3.428 |
| 1OW0 | B_ARG_250 | NH1 | B_GLU_437 | OE1 | 2.993 |
| 1OW0 | B_ARG_250 | NH2 | B_ASP_378 | OD1 | 3.931 |
| 1OW0 | B_ARG_250 | NH2 | B_GLU_437 | OE1 | 2.615 |
| 1OW0 | B_ARG_372 | NH1 | B_GLU_403 | OE1 | 2.384 |
| 1OW0 | B_ARG_372 | NH1 | B_GLU_403 | OE2 | 2.617 |
| 1OW0 | B_ARG_372 | NH2 | B_GLU_403 | OE1 | 3.789 |
| 1OW0 | C_LYS_13  | NZ  | C_GLU_63  | OE2 | 3.686 |
| 1OW0 | C_ARG_52  | NH2 | C_GLU_49  | OE1 | 2.995 |
| 1OW0 | C_ARG_52  | NH2 | C_GLU_49  | OE2 | 3.667 |
| 1OW0 | C_LYS_55  | NZ  | C_GLU_59  | OE1 | 3.649 |
| 1OW0 | C_LYS_55  | NZ  | C_GLU_59  | OE2 | 3.759 |
| 1OW0 | C_HIS_68  | ND1 | C_ASP_21  | OD2 | 3.825 |
| 1OW0 | C_HIS_68  | NE2 | C_ASP_21  | OD2 | 3.915 |
| 1OW0 | C_LYS_139 | NZ  | C_GLU_142 | OE2 | 3.692 |
| 1OW0 | C_ARG_171 | NH1 | C_GLU_140 | OE2 | 3.418 |
| 1OW0 | C_ARG_171 | NH2 | C_GLU_140 | OE2 | 3.168 |
| 1OW0 | D_LYS_13  | NZ  | D_GLU_63  | OE2 | 3.662 |
| 1OW0 | D_ARG_52  | NH2 | D_GLU_49  | OE1 | 3.006 |
| 1OW0 | D_ARG_52  | NH2 | D_GLU_49  | OE2 | 3.670 |
| 1OW0 | D_LYS_55  | NZ  | D_GLU_59  | OE1 | 3.602 |
| 1OW0 | D_LYS_55  | NZ  | D_GLU_59  | OE2 | 3.741 |

|      |            |     |            |     |       |
|------|------------|-----|------------|-----|-------|
| 1OW0 | D_HIS_68   | ND1 | D_ASP_21   | OD2 | 3.833 |
| 1OW0 | D_HIS_68   | NE2 | D_ASP_21   | OD2 | 3.920 |
| 1OW0 | D_LYS_139  | NZ  | D_GLU_142  | OE2 | 3.692 |
| 1OW0 | D_ARG_171  | NH1 | D_GLU_140  | OE2 | 3.423 |
| 1OW0 | D_ARG_171  | NH2 | D_GLU_140  | OE2 | 3.181 |
| 1P2C | A_ARG_24   | NH2 | A_ASP_70   | OD1 | 3.561 |
| 1P2C | A_ARG_24   | NH2 | A_ASP_70   | OD2 | 3.968 |
| 1P2C | A_ARG_61   | NH1 | A_GLU_79   | OE1 | 3.212 |
| 1P2C | A_ARG_61   | NH1 | A_ASP_82   | OD1 | 3.355 |
| 1P2C | A_ARG_61   | NH1 | A_ASP_82   | OD2 | 2.848 |
| 1P2C | A_ARG_61   | NH2 | A_GLU_79   | OE1 | 2.589 |
| 1P2C | A_ARG_61   | NH2 | A_GLU_79   | OE2 | 3.654 |
| 1P2C | A_LYS_149  | NZ  | A_GLU_195  | OE1 | 3.222 |
| 1P2C | A_LYS_149  | NZ  | A_GLU_195  | OE2 | 3.909 |
| 1P2C | A_ARG_155  | NH1 | A_GLU_185  | OE1 | 3.712 |
| 1P2C | A_ARG_155  | NH1 | A_GLU_185  | OE2 | 3.813 |
| 1P2C | A_ARG_155  | NH2 | A_GLU_185  | OE1 | 3.966 |
| 1P2C | A_ARG_155  | NH2 | A_GLU_185  | OE2 | 2.811 |
| 1P2C | A_LYS_183  | NZ  | A_GLU_187  | OE2 | 2.959 |
| 1P2C | A_ARG_188  | NH2 | F_ASP_1518 | OD1 | 2.778 |
| 1P2C | A_HIS_189  | ND1 | A_ASP_151  | OD2 | 2.583 |
| 1P2C | A_LYS_199  | NZ  | A_ASP_110  | OD1 | 2.789 |
| 1P2C | B_ARG_340  | NH1 | B_GLU_389  | OE1 | 3.429 |
| 1P2C | B_LYS_363  | NZ  | B_GLU_346  | OE1 | 3.861 |
| 1P2C | B_LYS_367  | NZ  | B_ASP_390  | OD1 | 2.706 |
| 1P2C | B_LYS_367  | NZ  | B_ASP_390  | OD2 | 3.064 |
| 1P2C | B_ARG_398  | NH2 | B_ASP_400  | OD1 | 2.942 |
| 1P2C | B_ARG_398  | NH2 | B_ASP_400  | OD2 | 3.446 |
| 1P2C | B_LYS_511  | NZ  | A_GLU_123  | OE1 | 3.498 |
| 1P2C | C_LYS_601  | NZ  | C_GLU_607  | OE1 | 2.618 |
| 1P2C | C_ARG_645  | NH2 | B_GLU_350  | OE1 | 2.980 |
| 1P2C | C_ARG_668  | NH1 | B_GLU_350  | OE1 | 3.355 |
| 1P2C | C_ARG_668  | NH1 | B_GLU_350  | OE2 | 3.681 |
| 1P2C | C_ARG_668  | NH2 | B_GLU_335  | OE2 | 3.090 |
| 1P2C | C_ARG_668  | NH2 | B_GLU_350  | OE1 | 3.316 |
| 1P2C | C_ARG_668  | NH2 | B_GLU_350  | OE2 | 2.404 |
| 1P2C | C_ARG_725  | NH2 | C_ASP_719  | OD1 | 2.463 |
| 1P2C | C_ARG_725  | NH2 | C_ASP_719  | OD2 | 3.674 |
| 1P2C | D_ARG_924  | NH2 | D_ASP_970  | OD2 | 3.311 |
| 1P2C | D_ARG_961  | NH1 | D_GLU_981  | OE2 | 3.455 |
| 1P2C | D_ARG_961  | NH1 | D_ASP_982  | OD1 | 3.476 |
| 1P2C | D_ARG_961  | NH1 | D_ASP_982  | OD2 | 3.040 |
| 1P2C | D_LYS_1049 | NZ  | D_GLU_1095 | OE1 | 3.108 |
| 1P2C | D_ARG_1055 | NH1 | D_GLU_1085 | OE1 | 3.789 |
| 1P2C | D_ARG_1055 | NH1 | D_GLU_1085 | OE2 | 2.663 |
| 1P2C | D_ARG_1055 | NH2 | D_GLU_1085 | OE2 | 2.728 |
| 1P2C | D_HIS_1089 | ND1 | D_ASP_1051 | OD1 | 2.579 |
| 1P2C | D_LYS_1099 | NZ  | D_ASP_1010 | OD2 | 2.865 |
| 1P2C | D_ARG_1111 | NH1 | D_GLU_1087 | OE2 | 3.738 |
| 1P2C | E_LYS_1263 | NZ  | E_GLU_1246 | OE2 | 3.563 |
| 1P2C | E_LYS_1267 | NZ  | E_ASP_1290 | OD2 | 2.785 |
| 1P2C | E_ARG_1298 | NH2 | E_ASP_1300 | OD1 | 2.640 |
| 1P2C | E_ARG_1298 | NH2 | E_ASP_1300 | OD2 | 3.489 |
| 1P2C | E_LYS_1411 | NZ  | D_GLU_1023 | OE1 | 3.897 |
| 1P2C | F_LYS_1501 | NZ  | F_GLU_1507 | OE1 | 2.851 |
| 1P2C | F_ARG_1545 | NH2 | E_GLU_1250 | OE1 | 2.861 |
| 1P2C | F_ARG_1561 | NH1 | F_ASP_1548 | OD2 | 3.292 |
| 1P2C | F_ARG_1568 | NH1 | E_GLU_1250 | OE1 | 3.580 |



|      |            |     |            |     |       |
|------|------------|-----|------------|-----|-------|
| 1P2C | F_ARG_1568 | NH1 | E_GLU_1250 | OE2 | 3.708 |
| 1P2C | F_ARG_1568 | NH2 | E_GLU_1235 | OE2 | 2.833 |
| 1P2C | F_ARG_1568 | NH2 | E_GLU_1250 | OE1 | 3.551 |
| 1P2C | F_ARG_1568 | NH2 | E_GLU_1250 | OE2 | 2.418 |
| 1P2C | F_ARG_1625 | NH2 | F_ASP_1619 | OD1 | 3.266 |
| 1P2C | F_ARG_1625 | NH2 | F_ASP_1619 | OD2 | 3.611 |
| 1P4B | L_ARG_77   | NH2 | L_GLU_99   | OE2 | 3.709 |
| 1P4B | L_ARG_77   | NH2 | L_ASP_100  | OD1 | 2.914 |
| 1P4B | L_ARG_77   | NH2 | L_ASP_100  | OD2 | 3.654 |
| 1P4B | H_ARG_45   | NH1 | H_ASP_100  | OD1 | 2.724 |
| 1P4B | H_ARG_45   | NH2 | H_GLU_53   | OE1 | 3.936 |
| 1P4B | H_ARG_45   | NH2 | H_GLU_53   | OE2 | 3.140 |
| 1P4B | H_ARG_45   | NH2 | H_ASP_100  | OD1 | 3.840 |
| 1P4B | H_ARG_77   | NH1 | H_ASP_100  | OD1 | 3.338 |
| 1P4B | H_ARG_77   | NH1 | H_ASP_100  | OD2 | 2.557 |
| 1P4B | H_ARG_77   | NH2 | H_ASP_100  | OD1 | 3.920 |
| 1P4B | H_LYS_86   | NZ  | H_ASP_83   | OD1 | 3.623 |
| 1P4B | P_HIS_2    | NE2 | H_ASP_65   | OD1 | 3.248 |
| 1P4B | P_HIS_2    | NE2 | H_ASP_65   | OD2 | 3.747 |
| 1P4B | P_ARG_9    | NH1 | H_ASP_137  | OD1 | 2.804 |
| 1P4B | P_ARG_9    | NH1 | H_ASP_137  | OD2 | 3.838 |
| 1P4B | P_ARG_9    | NH2 | H_ASP_137  | OD1 | 3.399 |
| 1P4B | P_ARG_9    | NH2 | H_ASP_137  | OD2 | 3.080 |
| 1P4B | P_ARG_9    | NH2 | P_GLU_6    | OE1 | 3.138 |
| 1P7K | L_ARG_61   | NH2 | L_GLU_81   | OE2 | 2.946 |
| 1P7K | L_ARG_61   | NH2 | L_ASP_82   | OD1 | 2.757 |
| 1P7K | L_ARG_61   | NH2 | L_ASP_82   | OD2 | 3.505 |
| 1P7K | L_LYS_149  | NZ  | L_GLU_195  | OE1 | 3.555 |
| 1P7K | L_LYS_149  | NZ  | L_GLU_195  | OE2 | 3.346 |
| 1P7K | L_ARG_155  | NH1 | L_GLU_185  | OE2 | 3.215 |
| 1P7K | L_ARG_155  | NH2 | L_GLU_185  | OE2 | 2.646 |
| 1P7K | H_LYS_40   | NZ  | H_GLU_85   | OE1 | 3.931 |
| 1P7K | H_LYS_62   | NZ  | L_GLU_1    | OE2 | 3.723 |
| 1P7K | H_LYS_66   | NZ  | H_ASP_86   | OD1 | 2.877 |
| 1P7K | H_LYS_66   | NZ  | H_ASP_86   | OD2 | 3.789 |
| 1P7K | H_ARG_94   | NH2 | H_ASP_101  | OD1 | 3.280 |
| 1P7K | H_ARG_94   | NH2 | H_ASP_101  | OD2 | 3.021 |
| 1P7K | H_LYS_208  | NZ  | L_GLU_123  | OE1 | 3.517 |
| 1P7K | H_LYS_208  | NZ  | L_GLU_123  | OE2 | 2.802 |
| 1P7K | A_ARG_61   | NH2 | A_ASP_82   | OD1 | 2.829 |
| 1P7K | A_ARG_61   | NH2 | A_ASP_82   | OD2 | 3.548 |
| 1P7K | A_LYS_103  | NZ  | A_ASP_165  | OD1 | 3.013 |
| 1P7K | A_LYS_103  | NZ  | A_ASP_165  | OD2 | 3.850 |
| 1P7K | A_LYS_149  | NZ  | A_GLU_195  | OE2 | 3.766 |
| 1P7K | A_ARG_155  | NH1 | A_GLU_185  | OE2 | 3.343 |
| 1P7K | A_ARG_155  | NH2 | A_GLU_185  | OE2 | 3.044 |
| 1P7K | A_HIS_189  | ND1 | A_ASP_151  | OD2 | 3.542 |
| 1P7K | A_LYS_199  | NZ  | A_ASP_110  | OD1 | 3.716 |
| 1P7K | A_LYS_199  | NZ  | A_ASP_110  | OD2 | 2.490 |
| 1P7K | B_LYS_62   | NZ  | A_GLU_1    | OE2 | 2.848 |
| 1P7K | B_LYS_66   | NZ  | B_ASP_86   | OD1 | 2.903 |
| 1P7K | B_LYS_66   | NZ  | B_ASP_86   | OD2 | 3.739 |
| 1P7K | B_ARG_94   | NH2 | B_ASP_101  | OD1 | 3.555 |
| 1P7K | B_ARG_94   | NH2 | B_ASP_101  | OD2 | 2.792 |
| 1PG7 | H_HIS_35   | NE2 | H_ASP_95   | OD2 | 2.988 |
| 1PG7 | H_ARG_38   | NH1 | H_ASP_86   | OD1 | 2.891 |
| 1PG7 | H_ARG_38   | NH2 | H_GLU_46   | OE1 | 2.886 |
| 1PG7 | H_ARG_38   | NH2 | H_GLU_46   | OE2 | 3.488 |

|      |           |     |           |     |       |
|------|-----------|-----|-----------|-----|-------|
| 1PG7 | H_ARG_38  | NH2 | H_ASP_86  | OD1 | 3.755 |
| 1PG7 | H_LYS_62  | NZ  | H_GLU_46  | OE1 | 3.013 |
| 1PG7 | H_LYS_62  | NZ  | H_ASP_60  | OD2 | 3.697 |
| 1PG7 | H_ARG_66  | NH2 | H_ASP_86  | OD1 | 3.366 |
| 1PG7 | H_ARG_66  | NH2 | H_ASP_86  | OD2 | 2.811 |
| 1PG7 | H_ARG_83  | NH1 | H_GLU_85  | OE2 | 3.159 |
| 1PG7 | H_ARG_94  | NH2 | H_ASP_101 | OD1 | 3.671 |
| 1PG7 | H_ARG_94  | NH2 | H_ASP_101 | OD2 | 2.700 |
| 1PG7 | H_LYS_143 | NZ  | H_ASP_144 | OD1 | 3.667 |
| 1PG7 | H_LYS_209 | NZ  | L_GLU_123 | OE1 | 2.828 |
| 1PG7 | H_LYS_209 | NZ  | L_GLU_123 | OE2 | 3.697 |
| 1PG7 | I_HIS_35  | NE2 | I_ASP_95  | OD2 | 2.860 |
| 1PG7 | I_ARG_38  | NH1 | I_ASP_86  | OD1 | 3.016 |
| 1PG7 | I_ARG_38  | NH2 | I_GLU_46  | OE1 | 3.146 |
| 1PG7 | I_ARG_38  | NH2 | I_GLU_46  | OE2 | 3.649 |
| 1PG7 | I_ARG_38  | NH2 | I_GLU_85  | OE2 | 3.601 |
| 1PG7 | I_ARG_38  | NH2 | I_ASP_86  | OD1 | 3.900 |
| 1PG7 | I_ARG_66  | NH2 | I_ASP_86  | OD1 | 3.391 |
| 1PG7 | I_ARG_66  | NH2 | I_ASP_86  | OD2 | 2.626 |
| 1PG7 | I_ARG_83  | NH2 | I_GLU_85  | OE1 | 3.938 |
| 1PG7 | I_ARG_94  | NH2 | I_ASP_101 | OD1 | 3.654 |
| 1PG7 | I_ARG_94  | NH2 | I_ASP_101 | OD2 | 2.818 |
| 1PG7 | I_LYS_143 | NZ  | I_ASP_144 | OD1 | 3.370 |
| 1PG7 | I_LYS_209 | NZ  | M_GLU_123 | OE1 | 2.829 |
| 1PG7 | I_LYS_209 | NZ  | M_GLU_123 | OE2 | 3.963 |
| 1PG7 | I_LYS_210 | NZ  | I_GLU_212 | OE1 | 3.335 |
| 1PG7 | I_LYS_210 | NZ  | I_GLU_212 | OE2 | 3.997 |
| 1PG7 | L_LYS_30  | NZ  | X_GLU_95  | OE1 | 3.476 |
| 1PG7 | L_LYS_30  | NZ  | X_GLU_95  | OE2 | 2.795 |
| 1PG7 | L_ARG_61  | NH2 | L_ASP_82  | OD1 | 3.019 |
| 1PG7 | L_ARG_61  | NH2 | L_ASP_82  | OD2 | 3.567 |
| 1PG7 | L_LYS_149 | NZ  | L_GLU_195 | OE1 | 3.477 |
| 1PG7 | L_LYS_149 | NZ  | L_GLU_195 | OE2 | 3.023 |
| 1PG7 | L_LYS_183 | NZ  | L_GLU_187 | OE2 | 2.996 |
| 1PG7 | L_HIS_189 | ND1 | L_ASP_151 | OD2 | 3.757 |
| 1PG7 | M_ARG_24  | NH2 | M_ASP_70  | OD1 | 3.617 |
| 1PG7 | M_ARG_24  | NH2 | M_ASP_70  | OD2 | 2.951 |
| 1PG7 | M_ARG_27  | NH1 | M_GLU_93  | OE2 | 3.544 |
| 1PG7 | M_LYS_30  | NZ  | Z_GLU_95  | OE2 | 3.166 |
| 1PG7 | M_ARG_61  | NH2 | M_GLU_81  | OE2 | 3.691 |
| 1PG7 | M_ARG_61  | NH2 | M_ASP_82  | OD1 | 3.010 |
| 1PG7 | M_ARG_61  | NH2 | M_ASP_82  | OD2 | 3.569 |
| 1PG7 | M_LYS_149 | NZ  | M_GLU_195 | OE1 | 2.679 |
| 1PG7 | M_LYS_183 | NZ  | M_GLU_187 | OE1 | 3.114 |
| 1PG7 | M_LYS_183 | NZ  | M_GLU_187 | OE2 | 2.640 |
| 1PG7 | M_LYS_188 | NZ  | M_ASP_185 | OD1 | 3.378 |
| 1PG7 | M_HIS_189 | ND1 | M_ASP_151 | OD2 | 3.163 |
| 1PG7 | W_ARG_24  | NH2 | W_ASP_69  | OD1 | 2.965 |
| 1PG7 | W_HIS_42  | ND1 | W_GLU_38  | OE2 | 3.572 |
| 1PG7 | W_ARG_61  | NH2 | W_ASP_82  | OD1 | 2.800 |
| 1PG7 | W_ARG_61  | NH2 | W_ASP_82  | OD2 | 3.379 |
| 1PG7 | W_LYS_111 | NZ  | W_GLU_197 | OE1 | 3.487 |
| 1PG7 | W_LYS_111 | NZ  | W_GLU_197 | OE2 | 3.605 |
| 1PG7 | W_LYS_150 | NZ  | W_GLU_202 | OE1 | 3.697 |
| 1PG7 | W_LYS_150 | NZ  | W_GLU_202 | OE2 | 2.961 |
| 1PG7 | W_HIS_193 | NE2 | W_GLU_202 | OE1 | 2.915 |
| 1PG7 | W_HIS_193 | NE2 | W_GLU_202 | OE2 | 3.635 |
| 1PG7 | X_HIS_32  | NE2 | X_ASP_96  | OD1 | 3.692 |

|      |           |     |           |     |       |
|------|-----------|-----|-----------|-----|-------|
| 1PG7 | X.LYS.62  | NZ  | X.GLU.46  | OE2 | 3.660 |
| 1PG7 | X.LYS.64  | NZ  | X.ASP.65  | OD2 | 3.444 |
| 1PG7 | X.LYS.66  | NZ  | X.ASP.86  | OD1 | 2.694 |
| 1PG7 | X.LYS.66  | NZ  | X.ASP.86  | OD2 | 3.927 |
| 1PG7 | X_ARG.94  | NH1 | H.GLU.53  | OE1 | 3.386 |
| 1PG7 | X_ARG.94  | NH1 | H.GLU.53  | OE2 | 3.321 |
| 1PG7 | X_ARG.94  | NH2 | H.GLU.53  | OE1 | 3.937 |
| 1PG7 | X_ARG.94  | NH2 | H.GLU.53  | OE2 | 2.866 |
| 1PG7 | X_ARG.94  | NH2 | X.ASP.101 | OD1 | 3.743 |
| 1PG7 | X_ARG.94  | NH2 | X.ASP.101 | OD2 | 2.609 |
| 1PG7 | X_ARG.98  | NH2 | H.ASP.95  | OD1 | 2.990 |
| 1PG7 | X_ARG.98  | NH2 | H.ASP.95  | OD2 | 3.561 |
| 1PG7 | X.HIS.100 | NE2 | X.ASP.96  | OD1 | 3.548 |
| 1PG7 | X.HIS.100 | NE2 | X.ASP.96  | OD2 | 3.817 |
| 1PG7 | X.LYS.143 | NZ  | W.GLU.125 | OE2 | 2.675 |
| 1PG7 | X.HIS.164 | NE2 | W.GLU.139 | OE2 | 3.801 |
| 1PG7 | X.LYS.208 | NZ  | W.GLU.124 | OE2 | 2.927 |
| 1PG7 | Y_ARG.24  | NH1 | Y.ASP.69  | OD2 | 3.633 |
| 1PG7 | Y.HIS.42  | ND1 | Y.GLU.38  | OE2 | 2.936 |
| 1PG7 | Y_ARG.61  | NH2 | Y.GLU.81  | OE1 | 3.193 |
| 1PG7 | Y_ARG.61  | NH2 | Y.ASP.82  | OD1 | 2.746 |
| 1PG7 | Y_ARG.61  | NH2 | Y.ASP.82  | OD2 | 3.675 |
| 1PG7 | Y.LYS.111 | NZ  | Y.GLU.197 | OE1 | 3.272 |
| 1PG7 | Y.LYS.111 | NZ  | Y.GLU.197 | OE2 | 2.744 |
| 1PG7 | Y.LYS.150 | NZ  | Y.GLU.202 | OE2 | 3.486 |
| 1PG7 | Y.LYS.170 | NZ  | Y.GLU.139 | OE1 | 3.781 |
| 1PG7 | Y.HIS.193 | NE2 | Y.GLU.202 | OE1 | 3.285 |
| 1PG7 | Y.HIS.193 | NE2 | Y.GLU.202 | OE2 | 3.532 |
| 1PG7 | Z.LYS.66  | NZ  | Z.ASP.86  | OD2 | 2.953 |
| 1PG7 | Z_ARG.94  | NH1 | I.GLU.53  | OE1 | 3.259 |
| 1PG7 | Z_ARG.94  | NH1 | I.GLU.53  | OE2 | 3.931 |
| 1PG7 | Z_ARG.94  | NH1 | Z.ASP.101 | OD1 | 3.771 |
| 1PG7 | Z_ARG.94  | NH1 | Z.ASP.101 | OD2 | 2.810 |
| 1PG7 | Z_ARG.94  | NH2 | I.GLU.53  | OE1 | 2.918 |
| 1PG7 | Z_ARG.94  | NH2 | I.GLU.53  | OE2 | 2.525 |
| 1PG7 | Z_ARG.98  | NH2 | L.ASP.95  | OD1 | 3.168 |
| 1PG7 | Z_ARG.98  | NH2 | L.ASP.95  | OD2 | 3.781 |
| 1PG7 | Z.HIS.100 | NE2 | Z.ASP.96  | OD1 | 3.911 |
| 1PG7 | Z.HIS.100 | NE2 | Z.ASP.96  | OD2 | 3.774 |
| 1PG7 | Z.LYS.143 | NZ  | Y.GLU.125 | OE2 | 2.901 |
| 1PG7 | Z.LYS.208 | NZ  | Y.GLU.124 | OE2 | 3.302 |
| 1PSK | L_ARG.60  | NH1 | L.GLU.80  | OE1 | 3.760 |
| 1PSK | L_ARG.60  | NH1 | L.GLU.80  | OE2 | 3.891 |
| 1PSK | L_ARG.60  | NH1 | L.ASP.81  | OD2 | 3.537 |
| 1PSK | L_ARG.60  | NH2 | L.GLU.80  | OE1 | 3.568 |
| 1PSK | L_ARG.60  | NH2 | L.GLU.80  | OE2 | 3.225 |
| 1PSK | L_ARG.60  | NH2 | L.ASP.81  | OD1 | 3.069 |
| 1PSK | L_ARG.60  | NH2 | L.ASP.81  | OD2 | 3.788 |
| 1PSK | L.LYS.141 | NZ  | L.ASP.142 | OD2 | 3.990 |
| 1PSK | L.LYS.148 | NZ  | L.GLU.194 | OE2 | 2.802 |
| 1PSK | L_ARG.154 | NH2 | L.GLU.184 | OE1 | 3.691 |
| 1PSK | L.HIS.188 | ND1 | L.ASP.150 | OD2 | 2.717 |
| 1PSK | L.LYS.198 | NZ  | L.ASP.142 | OD2 | 3.973 |
| 1PSK | H.LYS.38  | NZ  | H.ASP.90  | OD1 | 3.879 |
| 1PSK | H_ARG.84  | NH1 | H.GLU.82  | OE1 | 3.149 |
| 1PSK | H_ARG.84  | NH2 | H.GLU.82  | OE1 | 3.059 |
| 1PSK | H_ARG.84  | NH2 | H.GLU.82  | OE2 | 3.244 |
| 1PSK | H.LYS.99  | NZ  | H.ASP.102 | OD2 | 3.135 |

|      |           |     |           |     |       |
|------|-----------|-----|-----------|-----|-------|
| 1PZ5 | A_ARG_24  | NH1 | A_ASP_70  | OD1 | 3.050 |
| 1PZ5 | A_ARG_24  | NH1 | A_ASP_70  | OD2 | 3.589 |
| 1PZ5 | A_HIS_27D | ND1 | A_ASP_28  | OD1 | 3.297 |
| 1PZ5 | A_HIS_27D | ND1 | A_ASP_28  | OD2 | 3.192 |
| 1PZ5 | A_HIS_27D | NE2 | C_ASP_2   | OD1 | 2.720 |
| 1PZ5 | A_LYS_39  | NZ  | A_GLU_81  | OE1 | 3.469 |
| 1PZ5 | A_ARG_61  | NH1 | A_ASP_82  | OD1 | 2.720 |
| 1PZ5 | A_ARG_61  | NH1 | A_ASP_82  | OD2 | 3.796 |
| 1PZ5 | A_ARG_61  | NH2 | A_GLU_79  | OE1 | 3.814 |
| 1PZ5 | A_ARG_61  | NH2 | A_GLU_79  | OE2 | 3.855 |
| 1PZ5 | A_ARG_61  | NH2 | A_ASP_82  | OD1 | 3.374 |
| 1PZ5 | A_ARG_61  | NH2 | A_ASP_82  | OD2 | 2.955 |
| 1PZ5 | A_ARG_77  | NH1 | A_ASP_60  | OD2 | 3.886 |
| 1PZ5 | A_LYS_147 | NZ  | A_GLU_154 | OE1 | 3.998 |
| 1PZ5 | A_LYS_149 | NZ  | A_GLU_195 | OE1 | 2.953 |
| 1PZ5 | A_LYS_149 | NZ  | A_GLU_195 | OE2 | 3.630 |
| 1PZ5 | A_LYS_183 | NZ  | A_GLU_187 | OE1 | 2.839 |
| 1PZ5 | A_LYS_183 | NZ  | A_GLU_187 | OE2 | 2.663 |
| 1PZ5 | A_ARG_188 | NH1 | A_ASP_184 | OD1 | 3.586 |
| 1PZ5 | A_ARG_188 | NH1 | A_GLU_185 | OE1 | 3.143 |
| 1PZ5 | A_ARG_188 | NH2 | A_ASP_184 | OD1 | 2.987 |
| 1PZ5 | A_HIS_189 | ND1 | A_ASP_151 | OD1 | 3.048 |
| 1PZ5 | A_HIS_189 | NE2 | A_GLU_185 | OE2 | 2.825 |
| 1PZ5 | A_LYS_199 | NZ  | A_ASP_110 | OD1 | 3.069 |
| 1PZ5 | A_LYS_199 | NZ  | A_ASP_110 | OD2 | 3.840 |
| 1PZ5 | B_ARG_38  | NH1 | B_GLU_46  | OE2 | 2.914 |
| 1PZ5 | B_ARG_38  | NH1 | B_ASP_86  | OD1 | 3.910 |
| 1PZ5 | B_ARG_38  | NH2 | B_ASP_86  | OD1 | 2.823 |
| 1PZ5 | B_ARG_52  | NH1 | B_GLU_50  | OE2 | 2.848 |
| 1PZ5 | B_HIS_58  | ND1 | B_GLU_50  | OE2 | 3.633 |
| 1PZ5 | B_ARG_66  | NH1 | B_ASP_86  | OD1 | 3.057 |
| 1PZ5 | B_ARG_66  | NH1 | B_ASP_86  | OD2 | 3.525 |
| 1PZ5 | B_ARG_66  | NH2 | B_ASP_86  | OD1 | 3.778 |
| 1PZ5 | B_ARG_66  | NH2 | B_ASP_86  | OD2 | 2.847 |
| 1PZ5 | B_ARG_71  | NH1 | B_ASP_73  | OD2 | 3.288 |
| 1PZ5 | B_ARG_94  | NH1 | B_ASP_101 | OD1 | 3.495 |
| 1PZ5 | B_ARG_94  | NH1 | B_ASP_101 | OD2 | 2.627 |
| 1PZ5 | B_ARG_164 | NH1 | A_ASP_167 | OD2 | 3.218 |
| 1PZ5 | B_ARG_164 | NH2 | A_ASP_167 | OD2 | 3.712 |
| 1PZ5 | B_LYS_208 | NZ  | A_GLU_123 | OE1 | 2.648 |
| 1PZ5 | B_LYS_208 | NZ  | A_GLU_123 | OE2 | 3.713 |
| 1Q9K | A_ARG_54  | NH2 | A_ASP_60  | OD2 | 3.319 |
| 1Q9K | A_ARG_61  | NH1 | A_ASP_82  | OD1 | 2.801 |
| 1Q9K | A_ARG_61  | NH1 | A_ASP_82  | OD2 | 3.363 |
| 1Q9K | A_ARG_61  | NH2 | A_GLU_81  | OE1 | 3.964 |
| 1Q9K | A_ARG_95  | NH2 | B_ASP_95  | OD1 | 3.932 |
| 1Q9K | A_ARG_95  | NH2 | B_ASP_95  | OD2 | 3.226 |
| 1Q9K | A_LYS_146 | NZ  | A_GLU_153 | OE1 | 3.709 |
| 1Q9K | A_LYS_148 | NZ  | A_GLU_194 | OE1 | 3.150 |
| 1Q9K | A_LYS_148 | NZ  | A_GLU_194 | OE2 | 3.820 |
| 1Q9K | A_LYS_168 | NZ  | A_ASP_166 | OD1 | 2.237 |
| 1Q9K | A_LYS_168 | NZ  | A_ASP_166 | OD2 | 3.163 |
| 1Q9K | A_HIS_188 | ND1 | A_ASP_150 | OD2 | 2.831 |
| 1Q9K | A_LYS_198 | NZ  | A_ASP_109 | OD1 | 3.804 |
| 1Q9K | A_LYS_198 | NZ  | A_ASP_109 | OD2 | 3.067 |
| 1Q9K | B_ARG_38  | NH1 | B_ASP_86  | OD2 | 2.774 |
| 1Q9K | B_ARG_38  | NH2 | B_GLU_46  | OE1 | 3.263 |
| 1Q9K | B_ARG_38  | NH2 | B_ASP_86  | OD2 | 3.827 |

|      |            |     |           |     |       |
|------|------------|-----|-----------|-----|-------|
| 1Q9K | B_ARG_52   | NH1 | B_GLU_56  | OE2 | 3.179 |
| 1Q9K | B_ARG_52   | NH2 | B_GLU_56  | OE2 | 2.529 |
| 1Q9K | B_ARG_64   | NH1 | B_ASP_86  | OD1 | 2.817 |
| 1Q9K | B_ARG_64   | NH1 | B_ASP_86  | OD2 | 3.706 |
| 1Q9K | B_ARG_64   | NH2 | B_ASP_86  | OD1 | 3.623 |
| 1Q9K | B_ARG_64   | NH2 | B_ASP_86  | OD2 | 3.040 |
| 1Q9K | B_HIS_162  | NE2 | A_ASP_166 | OD1 | 3.847 |
| 1Q9L | B_ARG_38   | NH1 | B_ASP_86  | OD2 | 2.938 |
| 1Q9L | B_ARG_38   | NH2 | B_GLU_46  | OE1 | 3.214 |
| 1Q9L | B_ARG_38   | NH2 | B_GLU_46  | OE2 | 3.981 |
| 1Q9L | B_ARG_38   | NH2 | B_ASP_86  | OD2 | 3.814 |
| 1Q9L | B_ARG_52   | NH1 | B_GLU_56  | OE2 | 3.639 |
| 1Q9L | B_ARG_52   | NH2 | B_GLU_56  | OE2 | 2.657 |
| 1Q9L | B_ARG_64   | NH1 | B_ASP_86  | OD1 | 2.799 |
| 1Q9L | B_ARG_64   | NH2 | B_ASP_86  | OD1 | 3.122 |
| 1Q9L | B_ARG_64   | NH2 | B_ASP_86  | OD2 | 2.942 |
| 1Q9L | B_HIS_96   | ND1 | B_ASP_97  | OD2 | 2.998 |
| 1Q9L | B_LYS_113  | NZ  | B_ASP_171 | OD2 | 3.940 |
| 1Q9L | B_LYS_206  | NZ  | A_GLU_122 | OE2 | 3.242 |
| 1Q9L | D_ARG_38   | NH1 | D_ASP_86  | OD2 | 3.041 |
| 1Q9L | D_ARG_38   | NH2 | D_GLU_46  | OE1 | 2.944 |
| 1Q9L | D_ARG_38   | NH2 | D_GLU_46  | OE2 | 3.965 |
| 1Q9L | D_ARG_52   | NH1 | D_GLU_56  | OE2 | 3.147 |
| 1Q9L | D_ARG_52   | NH2 | D_GLU_56  | OE2 | 2.760 |
| 1Q9L | D_ARG_64   | NH1 | D_ASP_86  | OD1 | 2.602 |
| 1Q9L | D_ARG_64   | NH1 | D_ASP_86  | OD2 | 3.534 |
| 1Q9L | D_ARG_64   | NH2 | D_ASP_86  | OD1 | 3.533 |
| 1Q9L | D_ARG_64   | NH2 | D_ASP_86  | OD2 | 2.877 |
| 1Q9L | D_HIS_96   | ND1 | D_ASP_97  | OD2 | 3.015 |
| 1Q9L | D_HIS_96   | NE2 | D_ASP_97  | OD2 | 3.962 |
| 1Q9L | D_ARG_100B | NH1 | B_GLU_85  | OE1 | 3.618 |
| 1Q9L | D_ARG_100B | NH1 | B_GLU_85  | OE2 | 3.115 |
| 1Q9L | D_HIS_162  | NE2 | C_ASP_166 | OD1 | 3.172 |
| 1Q9L | A_LYS_24   | NZ  | A_ASP_70  | OD2 | 3.888 |
| 1Q9L | A_LYS_39   | NZ  | A_GLU_81  | OE2 | 3.778 |
| 1Q9L | A_ARG_54   | NH2 | A_ASP_60  | OD2 | 3.464 |
| 1Q9L | A_ARG_61   | NH1 | A_ASP_82  | OD1 | 3.170 |
| 1Q9L | A_ARG_61   | NH1 | A_ASP_82  | OD2 | 2.681 |
| 1Q9L | A_ARG_61   | NH2 | A_GLU_81  | OE1 | 3.824 |
| 1Q9L | A_ARG_95   | NH2 | B_ASP_95  | OD2 | 3.284 |
| 1Q9L | A_LYS_102  | NZ  | A_GLU_104 | OE2 | 2.656 |
| 1Q9L | A_LYS_146  | NZ  | A_GLU_194 | OE2 | 3.634 |
| 1Q9L | A_LYS_148  | NZ  | A_GLU_194 | OE1 | 3.229 |
| 1Q9L | A_LYS_148  | NZ  | A_GLU_194 | OE2 | 3.316 |
| 1Q9L | A_ARG_154  | NH2 | A_GLU_184 | OE1 | 2.873 |
| 1Q9L | A_LYS_168  | NZ  | A_ASP_166 | OD1 | 3.711 |
| 1Q9L | A_LYS_168  | NZ  | A_ASP_166 | OD2 | 3.118 |
| 1Q9L | A_ARG_187  | NH1 | A_GLU_184 | OE2 | 2.612 |
| 1Q9L | A_HIS_188  | ND1 | A_ASP_150 | OD2 | 2.879 |
| 1Q9L | A_HIS_188  | NE2 | A_GLU_184 | OE1 | 3.087 |
| 1Q9L | A_HIS_188  | NE2 | A_GLU_184 | OE2 | 3.294 |
| 1Q9L | A_LYS_198  | NZ  | A_ASP_109 | OD2 | 3.680 |
| 1Q9L | C_LYS_39   | NZ  | C_GLU_81  | OE1 | 3.843 |
| 1Q9L | C_ARG_54   | NH2 | C_ASP_60  | OD2 | 2.952 |
| 1Q9L | C_ARG_61   | NH1 | C_ASP_82  | OD1 | 2.562 |
| 1Q9L | C_ARG_61   | NH1 | C_ASP_82  | OD2 | 2.760 |
| 1Q9L | C_ARG_95   | NH2 | D_ASP_95  | OD2 | 3.309 |
| 1Q9L | C_LYS_102  | NZ  | C_GLU_104 | OE2 | 3.348 |

|      |           |     |            |     |       |
|------|-----------|-----|------------|-----|-------|
| 1Q9L | C_LYS_148 | NZ  | C_GLU_194  | OE1 | 2.541 |
| 1Q9L | C_LYS_148 | NZ  | C_GLU_194  | OE2 | 3.918 |
| 1Q9L | C_ARG_154 | NH1 | C_GLU_184  | OE1 | 3.911 |
| 1Q9L | C_LYS_168 | NZ  | C_ASP_166  | OD1 | 2.581 |
| 1Q9L | C_LYS_168 | NZ  | C_ASP_166  | OD2 | 2.492 |
| 1Q9L | C_ARG_187 | NH1 | C_GLU_184  | OE2 | 2.720 |
| 1Q9L | C_HIS_188 | ND1 | C_ASP_150  | OD2 | 2.739 |
| 1Q9L | C_HIS_188 | NE2 | C_GLU_184  | OE1 | 3.004 |
| 1Q9L | C_HIS_188 | NE2 | C_GLU_184  | OE2 | 3.759 |
| 1Q9O | B_ARG_38  | NH1 | B_GLU_46   | OE1 | 3.016 |
| 1Q9O | B_ARG_38  | NH1 | B_GLU_46   | OE2 | 3.916 |
| 1Q9O | B_ARG_38  | NH1 | B_ASP_86   | OD2 | 3.956 |
| 1Q9O | B_ARG_38  | NH2 | B_ASP_86   | OD2 | 2.860 |
| 1Q9O | B_ARG_52  | NH1 | B_GLU_56   | OE2 | 2.831 |
| 1Q9O | B_ARG_52  | NH2 | B_GLU_56   | OE2 | 3.407 |
| 1Q9O | B_ARG_64  | NH1 | B_ASP_86   | OD1 | 3.248 |
| 1Q9O | B_ARG_64  | NH1 | B_ASP_86   | OD2 | 2.899 |
| 1Q9O | B_ARG_64  | NH2 | B_ASP_86   | OD1 | 2.692 |
| 1Q9O | B_ARG_64  | NH2 | B_ASP_86   | OD2 | 3.771 |
| 1Q9O | B_ARG_83  | NH2 | B_GLU_85   | OE1 | 2.612 |
| 1Q9O | B_ARG_94  | NH1 | B_ASP_100D | OD1 | 3.613 |
| 1Q9O | B_ARG_94  | NH1 | B_ASP_100D | OD2 | 2.755 |
| 1Q9O | B_ARG_100 | NH1 | A_GLU_55   | OE1 | 3.447 |
| 1Q9O | B_ARG_100 | NH1 | A_GLU_55   | OE2 | 3.466 |
| 1Q9O | B_ARG_100 | NH2 | A_GLU_55   | OE1 | 3.378 |
| 1Q9O | B_ARG_100 | NH2 | A_GLU_55   | OE2 | 2.999 |
| 1Q9O | B_LYS_206 | NZ  | A_GLU_122  | OE2 | 3.964 |
| 1Q9O | D_ARG_38  | NH1 | D_ASP_86   | OD2 | 2.888 |
| 1Q9O | D_ARG_38  | NH2 | D_GLU_46   | OE1 | 3.098 |
| 1Q9O | D_ARG_38  | NH2 | D_ASP_86   | OD2 | 3.945 |
| 1Q9O | D_ARG_52  | NH1 | D_GLU_56   | OE2 | 3.504 |
| 1Q9O | D_ARG_52  | NH2 | D_GLU_56   | OE2 | 3.047 |
| 1Q9O | D_ARG_64  | NH1 | D_ASP_86   | OD1 | 2.898 |
| 1Q9O | D_ARG_64  | NH1 | D_ASP_86   | OD2 | 3.621 |
| 1Q9O | D_ARG_64  | NH2 | D_ASP_86   | OD1 | 3.767 |
| 1Q9O | D_ARG_64  | NH2 | D_ASP_86   | OD2 | 3.117 |
| 1Q9O | D_ARG_83  | NH2 | D_GLU_85   | OE1 | 3.293 |
| 1Q9O | D_ARG_83  | NH2 | D_GLU_85   | OE2 | 3.082 |
| 1Q9O | D_ARG_94  | NH2 | D_ASP_100D | OD1 | 2.763 |
| 1Q9O | D_ARG_94  | NH2 | D_ASP_100D | OD2 | 3.701 |
| 1Q9O | D_ARG_100 | NH1 | C_GLU_55   | OE1 | 3.493 |
| 1Q9O | D_ARG_100 | NH1 | C_GLU_55   | OE2 | 3.040 |
| 1Q9O | D_ARG_100 | NH2 | C_GLU_55   | OE1 | 3.391 |
| 1Q9O | D_ARG_100 | NH2 | C_GLU_55   | OE2 | 3.047 |
| 1Q9O | A_ARG_54  | NH1 | A_ASP_60   | OD2 | 3.439 |
| 1Q9O | A_ARG_61  | NH1 | A_ASP_82   | OD1 | 3.512 |
| 1Q9O | A_ARG_61  | NH1 | A_ASP_82   | OD2 | 2.892 |
| 1Q9O | A_ARG_61  | NH2 | A_GLU_81   | OE1 | 3.882 |
| 1Q9O | A_ARG_61  | NH2 | A_ASP_82   | OD1 | 2.949 |
| 1Q9O | A_ARG_61  | NH2 | A_ASP_82   | OD2 | 3.770 |
| 1Q9O | A_ARG_95  | NH2 | B_ASP_95   | OD1 | 2.958 |
| 1Q9O | A_ARG_95  | NH2 | B_ASP_95   | OD2 | 3.717 |
| 1Q9O | A_LYS_102 | NZ  | A_GLU_104  | OE1 | 2.779 |
| 1Q9O | A_LYS_146 | NZ  | A_GLU_194  | OE2 | 2.676 |
| 1Q9O | A_LYS_148 | NZ  | A_GLU_194  | OE1 | 3.510 |
| 1Q9O | A_LYS_182 | NZ  | A_GLU_186  | OE1 | 2.761 |
| 1Q9O | A_LYS_182 | NZ  | A_GLU_186  | OE2 | 3.253 |
| 1Q9O | A_HIS_188 | ND1 | A_ASP_150  | OD2 | 2.674 |

|      |           |     |            |     |       |
|------|-----------|-----|------------|-----|-------|
| 1Q9O | A_LYS_198 | NZ  | A_ASP_109  | OD1 | 3.691 |
| 1Q9O | A_LYS_198 | NZ  | A_ASP_109  | OD2 | 3.683 |
| 1Q9O | C_ARG_61  | NH1 | C_ASP_82   | OD1 | 2.516 |
| 1Q9O | C_ARG_61  | NH1 | C_ASP_82   | OD2 | 3.228 |
| 1Q9O | C_ARG_61  | NH2 | C_GLU_81   | OE2 | 3.883 |
| 1Q9O | C_ARG_95  | NH2 | D_ASP_95   | OD1 | 3.672 |
| 1Q9O | C_ARG_95  | NH2 | D_ASP_95   | OD2 | 2.974 |
| 1Q9O | C_LYS_102 | NZ  | C_GLU_104  | OE1 | 3.839 |
| 1Q9O | C_LYS_148 | NZ  | C_GLU_194  | OE1 | 2.914 |
| 1Q9O | C_LYS_148 | NZ  | C_GLU_194  | OE2 | 3.816 |
| 1Q9W | A_ARG_61  | NH2 | A_ASP_82   | OD1 | 2.327 |
| 1Q9W | A_ARG_61  | NH2 | A_ASP_82   | OD2 | 2.627 |
| 1Q9W | A_ARG_95  | NH2 | B_ASP_95   | OD1 | 2.949 |
| 1Q9W | A_ARG_95  | NH2 | B_ASP_95   | OD2 | 3.845 |
| 1Q9W | A_LYS_102 | NZ  | A_GLU_104  | OE1 | 3.845 |
| 1Q9W | A_LYS_146 | NZ  | A_GLU_153  | OE2 | 3.713 |
| 1Q9W | A_LYS_148 | NZ  | A_GLU_194  | OE1 | 2.859 |
| 1Q9W | A_ARG_154 | NH1 | A_GLU_184  | OE1 | 3.813 |
| 1Q9W | A_ARG_154 | NH2 | A_GLU_184  | OE1 | 3.493 |
| 1Q9W | A_ARG_154 | NH2 | A_GLU_184  | OE2 | 2.753 |
| 1Q9W | A_ARG_187 | NH1 | A_GLU_184  | OE2 | 3.961 |
| 1Q9W | A_ARG_187 | NH2 | A_GLU_184  | OE2 | 2.743 |
| 1Q9W | A_HIS_188 | ND1 | A_ASP_150  | OD2 | 2.924 |
| 1Q9W | B_ARG_38  | NH1 | B_ASP_86   | OD2 | 2.826 |
| 1Q9W | B_ARG_38  | NH2 | B_GLU_46   | OE1 | 3.067 |
| 1Q9W | B_ARG_38  | NH2 | B_ASP_86   | OD2 | 3.866 |
| 1Q9W | B_ARG_52  | NH1 | B_GLU_56   | OE2 | 3.024 |
| 1Q9W | B_ARG_52  | NH2 | B_GLU_56   | OE2 | 3.531 |
| 1Q9W | B_ARG_64  | NH1 | B_ASP_86   | OD1 | 2.680 |
| 1Q9W | B_ARG_64  | NH1 | B_ASP_86   | OD2 | 3.618 |
| 1Q9W | B_ARG_64  | NH2 | B_ASP_86   | OD1 | 3.562 |
| 1Q9W | B_ARG_64  | NH2 | B_ASP_86   | OD2 | 3.048 |
| 1Q9W | B_ARG_83  | NH2 | B_GLU_85   | OE1 | 3.148 |
| 1Q9W | B_ARG_83  | NH2 | B_GLU_85   | OE2 | 3.088 |
| 1Q9W | B_ARG_94  | NH2 | B_ASP_100D | OD1 | 2.686 |
| 1Q9W | B_ARG_94  | NH2 | B_ASP_100D | OD2 | 3.453 |
| 1Q9W | B_ARG_100 | NH1 | A_GLU_55   | OE1 | 2.615 |
| 1Q9W | B_ARG_100 | NH1 | A_GLU_55   | OE2 | 3.657 |
| 1Q9W | B_ARG_100 | NH2 | A_GLU_55   | OE1 | 2.891 |
| 1Q9W | B_ARG_100 | NH2 | A_GLU_55   | OE2 | 3.820 |
| 1Q9W | C_LYS_24  | NZ  | C_ASP_70   | OD1 | 3.583 |
| 1Q9W | C_ARG_61  | NH2 | C_ASP_82   | OD1 | 2.769 |
| 1Q9W | C_ARG_61  | NH2 | C_ASP_82   | OD2 | 3.531 |
| 1Q9W | C_ARG_95  | NH2 | D_ASP_95   | OD1 | 2.929 |
| 1Q9W | C_ARG_95  | NH2 | D_ASP_95   | OD2 | 3.831 |
| 1Q9W | C_LYS_106 | NZ  | C_GLU_17   | OE1 | 2.879 |
| 1Q9W | C_LYS_148 | NZ  | C_GLU_194  | OE1 | 2.881 |
| 1Q9W | C_LYS_148 | NZ  | C_GLU_194  | OE2 | 3.569 |
| 1Q9W | C_ARG_154 | NH2 | C_GLU_184  | OE1 | 2.757 |
| 1Q9W | C_LYS_168 | NZ  | C_ASP_166  | OD1 | 3.032 |
| 1Q9W | C_LYS_168 | NZ  | C_ASP_166  | OD2 | 2.758 |
| 1Q9W | C_ARG_187 | NH1 | C_GLU_184  | OE2 | 2.691 |
| 1Q9W | C_ARG_187 | NH2 | C_GLU_184  | OE2 | 2.833 |
| 1Q9W | D_ARG_38  | NH1 | D_ASP_86   | OD2 | 2.855 |
| 1Q9W | D_ARG_38  | NH2 | D_GLU_46   | OE1 | 3.105 |
| 1Q9W | D_ARG_38  | NH2 | D_ASP_86   | OD2 | 3.747 |
| 1Q9W | D_ARG_52  | NH1 | D_GLU_56   | OE2 | 3.012 |
| 1Q9W | D_ARG_52  | NH2 | D_GLU_56   | OE2 | 3.725 |

|      |           |     |            |     |       |
|------|-----------|-----|------------|-----|-------|
| 1Q9W | D_ARG_64  | NH1 | D_ASP_86   | OD1 | 3.569 |
| 1Q9W | D_ARG_64  | NH1 | D_ASP_86   | OD2 | 3.180 |
| 1Q9W | D_ARG_94  | NH2 | D_ASP_100D | OD1 | 2.639 |
| 1Q9W | D_ARG_94  | NH2 | D_ASP_100D | OD2 | 3.620 |
| 1Q9W | D_ARG_100 | NH1 | C_GLU_55   | OE1 | 3.356 |
| 1Q9W | D_ARG_100 | NH1 | C_GLU_55   | OE2 | 3.002 |
| 1Q9W | D_ARG_100 | NH2 | C_GLU_55   | OE1 | 3.373 |
| 1Q9W | D_ARG_100 | NH2 | C_GLU_55   | OE2 | 3.045 |
| 1QBL | L_ARG_61  | NH2 | L_ASP_82   | OD1 | 2.786 |
| 1QBL | L_ARG_61  | NH2 | L_ASP_82   | OD2 | 3.721 |
| 1QBL | L_LYS_147 | NZ  | L_GLU_154  | OE1 | 3.338 |
| 1QBL | L_LYS_149 | NZ  | L_GLU_195  | OE1 | 3.827 |
| 1QBL | L_LYS_149 | NZ  | L_GLU_195  | OE2 | 2.952 |
| 1QBL | L_ARG_155 | NH1 | L_GLU_185  | OE1 | 3.191 |
| 1QBL | L_ARG_155 | NH1 | L_GLU_185  | OE2 | 3.323 |
| 1QBL | L_ARG_155 | NH2 | L_GLU_185  | OE1 | 3.979 |
| 1QBL | L_ARG_155 | NH2 | L_GLU_185  | OE2 | 2.777 |
| 1QBL | L_HIS_189 | ND1 | L_ASP_151  | OD2 | 2.720 |
| 1QBL | L_HIS_189 | NE2 | L_GLU_185  | OE2 | 3.448 |
| 1QBL | L_LYS_199 | NZ  | L_ASP_110  | OD2 | 3.257 |
| 1QBL | H_LYS_63  | NZ  | H_GLU_46   | OE1 | 3.796 |
| 1QBL | H_LYS_67  | NZ  | H_ASP_90   | OD2 | 3.852 |
| 1QBL | H_LYS_212 | NZ  | L_GLU_123  | OE1 | 3.581 |
| 1QBM | L_ARG_61  | NH2 | L_GLU_81   | OE2 | 2.739 |
| 1QBM | L_ARG_61  | NH2 | L_ASP_82   | OD1 | 2.797 |
| 1QBM | L_ARG_61  | NH2 | L_ASP_82   | OD2 | 3.689 |
| 1QBM | L_LYS_107 | NZ  | L_GLU_17   | OE1 | 3.352 |
| 1QBM | L_LYS_107 | NZ  | L_GLU_17   | OE2 | 3.277 |
| 1QBM | L_LYS_142 | NZ  | L_ASP_143  | OD1 | 3.711 |
| 1QBM | L_LYS_147 | NZ  | L_GLU_154  | OE2 | 2.702 |
| 1QBM | L_LYS_149 | NZ  | L_GLU_195  | OE1 | 3.463 |
| 1QBM | L_LYS_149 | NZ  | L_GLU_195  | OE2 | 3.031 |
| 1QBM | L_ARG_155 | NH1 | L_GLU_185  | OE1 | 3.258 |
| 1QBM | L_ARG_155 | NH1 | L_GLU_185  | OE2 | 2.899 |
| 1QBM | L_ARG_155 | NH2 | L_GLU_185  | OE2 | 2.603 |
| 1QBM | L_HIS_189 | ND1 | L_ASP_151  | OD2 | 2.710 |
| 1QBM | H_LYS_63  | NZ  | H_GLU_46   | OE1 | 3.520 |
| 1QBM | H_LYS_67  | NZ  | H_ASP_90   | OD1 | 3.236 |
| 1QBM | H_LYS_67  | NZ  | H_ASP_90   | OD2 | 3.485 |
| 1QBM | H_LYS_212 | NZ  | L_GLU_123  | OE1 | 2.762 |
| 1QBM | H_LYS_212 | NZ  | L_GLU_123  | OE2 | 3.773 |
| 1QGC | 1_LYS_41  | NZ  | 1_GLU_175  | OE2 | 3.394 |
| 1QGC | 1_HIS_57  | NE2 | 1_ASP_59   | OD2 | 3.737 |
| 1QGC | 1_ARG_114 | NH2 | 1_GLU_77   | OE2 | 2.895 |
| 1QGC | 1_ARG_124 | NH1 | 2_ASP_41   | OD1 | 3.642 |
| 1QGC | 1_ARG_124 | NH1 | 2_ASP_41   | OD2 | 2.877 |
| 1QGC | 1_ARG_124 | NH2 | 2_ASP_41   | OD1 | 3.740 |
| 1QGC | 1_ARG_179 | NH1 | 1_ASP_37   | OD1 | 3.088 |
| 1QGC | 1_ARG_179 | NH2 | 1_ASP_37   | OD1 | 3.997 |
| 1QGC | 1_ARG_179 | NH2 | 1_GLU_77   | OE2 | 3.665 |
| 1QGC | 1_LYS_181 | NZ  | 1_ASP_37   | OD1 | 3.047 |
| 1QGC | 1_LYS_181 | NZ  | 1_ASP_37   | OD2 | 3.465 |
| 1QGC | 1_LYS_181 | NZ  | 1_GLU_77   | OE2 | 3.717 |
| 1QGC | 2_ARG_54  | NH1 | 2_GLU_59   | OE1 | 3.984 |
| 1QGC | 2_ARG_54  | NH1 | 2_GLU_59   | OE2 | 3.432 |
| 1QGC | 2_ARG_54  | NH2 | 2_GLU_59   | OE1 | 3.031 |
| 1QGC | 2_ARG_54  | NH2 | 2_GLU_59   | OE2 | 3.842 |
| 1QGC | 2_LYS_88  | NZ  | 2_GLU_86   | OE1 | 3.903 |



|      |           |     |           |     |       |
|------|-----------|-----|-----------|-----|-------|
| 1QGC | 2_ARG_102 | NH1 | 2_GLU_40  | OE1 | 2.629 |
| 1QGC | 2_ARG_102 | NH2 | 2_ASP_41  | OD1 | 2.799 |
| 1QGC | 2_ARG_102 | NH2 | 2_ASP_41  | OD2 | 3.402 |
| 1QGC | 2_HIS_157 | NE2 | 2_ASP_106 | OD1 | 2.653 |
| 1QGC | 2_HIS_157 | NE2 | 2_ASP_106 | OD2 | 3.740 |
| 1QGC | 2_ARG_167 | NH2 | 3_ASP_166 | OD1 | 2.757 |
| 1QGC | 2_ARG_167 | NH2 | 3_ASP_166 | OD2 | 2.777 |
| 1QGC | 2_HIS_174 | ND1 | 2_ASP_169 | OD1 | 3.562 |
| 1QGC | 2_HIS_174 | ND1 | 2_ASP_169 | OD2 | 2.877 |
| 1QGC | 2_HIS_174 | NE2 | 2_GLU_128 | OE1 | 2.739 |
| 1QGC | 2_HIS_174 | NE2 | 2_GLU_128 | OE2 | 3.273 |
| 1QGC | 2_LYS_198 | NZ  | 2_ASP_68  | OD1 | 3.053 |
| 1QGC | 2_LYS_198 | NZ  | 2_ASP_68  | OD2 | 3.315 |
| 1QGC | 3_LYS_20  | NZ  | 3_ASP_18  | OD2 | 2.699 |
| 1QGC | 3_ARG_120 | NH1 | 3_GLU_146 | OE2 | 2.906 |
| 1QGC | 3_ARG_120 | NH2 | 3_ASP_148 | OD2 | 2.596 |
| 1QGC | 3_LYS_193 | NZ  | 3_ASP_116 | OD2 | 3.610 |
| 1QGC | 3_LYS_207 | NZ  | 3_GLU_49  | OE1 | 3.193 |
| 1QGC | 4_ARG_18  | NH1 | 4_ASP_80  | OD2 | 2.980 |
| 1QGC | 4_ARG_18  | NH2 | 4_ASP_80  | OD2 | 3.279 |
| 1QGC | 4_ARG_24  | NH1 | 4_ASP_74  | OD2 | 3.755 |
| 1QGC | 4_ARG_24  | NH2 | 4_ASP_74  | OD1 | 3.361 |
| 1QGC | 4_ARG_24  | NH2 | 4_ASP_74  | OD2 | 2.753 |
| 1QGC | 4_ARG_65  | NH1 | 4_ASP_86  | OD1 | 3.995 |
| 1QGC | 4_ARG_65  | NH1 | 4_ASP_86  | OD2 | 2.787 |
| 1QGC | 4_ARG_65  | NH2 | 4_ASP_85  | OD2 | 3.117 |
| 1QGC | 4_ARG_65  | NH2 | 4_ASP_86  | OD1 | 3.250 |
| 1QGC | 4_ARG_65  | NH2 | 4_ASP_86  | OD2 | 3.419 |
| 1QGC | 4_LYS_107 | NZ  | 4_ASP_109 | OD1 | 3.987 |
| 1QGC | 4_LYS_107 | NZ  | 4_ASP_169 | OD1 | 3.205 |
| 1QGC | 4_LYS_153 | NZ  | 4_GLU_199 | OE1 | 3.327 |
| 1QGC | 4_ARG_159 | NH1 | 4_GLU_189 | OE1 | 3.473 |
| 1QGC | 4_LYS_173 | NZ  | 4_ASP_171 | OD1 | 3.263 |
| 1QGC | 4_LYS_173 | NZ  | 4_ASP_171 | OD2 | 3.461 |
| 1QGC | 4_LYS_187 | NZ  | 4_GLU_191 | OE1 | 2.654 |
| 1QGC | 4_LYS_203 | NZ  | 4_ASP_114 | OD1 | 3.911 |
| 1QGC | 4_LYS_203 | NZ  | 4_ASP_114 | OD2 | 3.518 |
| 1QGC | A_ARG_38  | NH1 | A_ASP_90  | OD1 | 3.118 |
| 1QGC | A_ARG_38  | NH2 | A_GLU_46  | OE1 | 3.211 |
| 1QGC | A_ARG_38  | NH2 | A_ASP_90  | OD1 | 3.660 |
| 1QGC | A_ARG_67  | NH1 | A_ASP_90  | OD1 | 3.761 |
| 1QGC | A_ARG_67  | NH1 | A_ASP_90  | OD2 | 2.866 |
| 1QGC | A_ARG_67  | NH2 | A_ASP_90  | OD1 | 3.418 |
| 1QGC | A_ARG_67  | NH2 | A_ASP_90  | OD2 | 3.559 |
| 1QGC | A_ARG_98  | NH1 | A_ASP_101 | OD1 | 3.353 |
| 1QGC | A_ARG_98  | NH1 | A_ASP_101 | OD2 | 3.278 |
| 1QGC | A_ARG_98  | NH2 | A_ASP_101 | OD1 | 3.317 |
| 1QGC | A_ARG_98  | NH2 | A_ASP_101 | OD2 | 3.911 |
| 1QGC | A_ARG_99  | NH1 | A_ASP_104 | OD1 | 2.799 |
| 1QGC | A_ARG_99  | NH2 | A_ASP_104 | OD1 | 2.841 |
| 1QGC | A_ARG_99  | NH2 | A_ASP_104 | OD2 | 3.281 |
| 1QGC | A_ARG_99  | NH2 | 5_ASP_143 | OD1 | 3.483 |
| 1QGC | A_LYS_215 | NZ  | 4_GLU_127 | OE2 | 3.716 |
| 1QKZ | A_LYS_15  | NZ  | A_GLU_61  | OE1 | 3.616 |
| 1QKZ | A_LYS_36  | NZ  | A_GLU_32  | OE2 | 3.573 |
| 1QKZ | H_ARG_38  | NH1 | H_ASP_86  | OD1 | 2.872 |
| 1QKZ | H_ARG_38  | NH2 | H_GLU_46  | OE1 | 2.843 |
| 1QKZ | H_ARG_38  | NH2 | H_GLU_46  | OE2 | 3.701 |

|         |           |     |           |     |       |
|---------|-----------|-----|-----------|-----|-------|
| 1QKZ    | H_ARG_38  | NH2 | H_ASP_86  | OD1 | 3.867 |
| 1QKZ    | H_LYS_64  | NZ  | H_ASP_61  | OD1 | 2.866 |
| 1QKZ    | H_ARG_66  | NH2 | H_ASP_86  | OD1 | 3.410 |
| 1QKZ    | H_ARG_66  | NH2 | H_ASP_86  | OD2 | 2.614 |
| 1QKZ    | H_LYS_83  | NZ  | H_GLU_85  | OE1 | 3.867 |
| 1QKZ    | H_ARG_94  | NH2 | H_ASP_101 | OD1 | 3.649 |
| 1QKZ    | H_ARG_94  | NH2 | H_ASP_101 | OD2 | 2.613 |
| 1QKZ    | H_LYS_208 | NZ  | L_GLU_123 | OE2 | 2.582 |
| 1QKZ    | L_ARG_61  | NH1 | L_ASP_82  | OD1 | 3.436 |
| 1QKZ    | L_ARG_61  | NH1 | L_ASP_82  | OD2 | 2.498 |
| 1QKZ    | L_ARG_61  | NH2 | L_GLU_79  | OE1 | 3.597 |
| 1QKZ    | L_ARG_61  | NH2 | L_ASP_82  | OD1 | 2.782 |
| 1QKZ    | L_ARG_61  | NH2 | L_ASP_82  | OD2 | 3.478 |
| 1QKZ    | L_ARG_77  | NH2 | L_GLU_79  | OE2 | 3.903 |
| 1QKZ    | L_LYS_103 | NZ  | L_GLU_105 | OE1 | 3.233 |
| 1QKZ    | L_LYS_147 | NZ  | L_GLU_154 | OE1 | 3.920 |
| 1QKZ    | L_LYS_147 | NZ  | L_GLU_154 | OE2 | 2.870 |
| 1QKZ    | L_LYS_149 | NZ  | L_GLU_195 | OE1 | 2.933 |
| 1QKZ    | L_LYS_149 | NZ  | L_GLU_195 | OE2 | 3.912 |
| 1QKZ    | L_ARG_155 | NH1 | L_GLU_185 | OE1 | 3.847 |
| 1QKZ    | L_ARG_155 | NH1 | L_GLU_185 | OE2 | 2.779 |
| 1QKZ    | L_ARG_155 | NH2 | L_GLU_185 | OE2 | 3.332 |
| 1QKZ    | L_LYS_183 | NZ  | L_GLU_187 | OE1 | 3.886 |
| 1QKZ    | L_LYS_183 | NZ  | L_GLU_187 | OE2 | 2.674 |
| 1QKZ    | L_HIS_189 | ND1 | L_ASP_151 | OD2 | 2.784 |
| 1QKZ    | L_LYS_199 | NZ  | L_ASP_110 | OD2 | 2.613 |
| 1QOK    | A_ARG_64  | NH1 | A_GLU_72  | OE2 | 2.857 |
| 1QOK    | A_ARG_64  | NH2 | A_ASP_116 | OD1 | 2.731 |
| 1QOK    | A_LYS_89  | NZ  | A_GLU_72  | OE1 | 3.015 |
| 1QOK    | A_LYS_89  | NZ  | A_GLU_72  | OE2 | 3.466 |
| 1QOK    | A_LYS_93  | NZ  | A_ASP_116 | OD1 | 3.171 |
| 1QOK    | A_LYS_93  | NZ  | A_ASP_116 | OD2 | 2.764 |
| 1QOK    | A_ARG_221 | NH2 | A_GLU_241 | OE1 | 3.500 |
| 1QOK    | A_ARG_221 | NH2 | A_GLU_241 | OE2 | 3.768 |
| 1QOK    | A_ARG_221 | NH2 | A_ASP_242 | OD1 | 2.782 |
| 1QOK    | A_ARG_221 | NH2 | A_ASP_242 | OD2 | 3.516 |
| 1QOK    | A_LYS_263 | NZ  | A_GLU_265 | OE2 | 3.711 |
| 1QOK    | A_LYS_267 | NZ  | A_GLU_178 | OE1 | 3.144 |
| 1QOK    | A_LYS_267 | NZ  | A_GLU_178 | OE2 | 3.767 |
| 1R21-1  | A_HIS_54  | NE2 | A_GLU_52  | OE2 | 3.592 |
| 1R21-1  | A_HIS_61  | NE2 | A_GLU_52  | OE1 | 3.344 |
| 1R21-1  | A_ARG_96  | NH1 | A_ASP_16  | OD1 | 3.366 |
| 1R21-1  | A_ARG_96  | NH2 | A_GLU_98  | OE2 | 3.736 |
| 1R21-10 | A_HIS_54  | NE2 | A_GLU_52  | OE1 | 3.820 |
| 1R21-10 | A_HIS_54  | NE2 | A_GLU_52  | OE2 | 3.819 |
| 1R21-10 | A_HIS_61  | NE2 | A_GLU_52  | OE1 | 3.243 |
| 1R21-11 | A_LYS_50  | NZ  | A_GLU_52  | OE1 | 3.980 |
| 1R21-11 | A_HIS_54  | NE2 | A_GLU_52  | OE1 | 3.682 |
| 1R21-11 | A_HIS_54  | NE2 | A_GLU_52  | OE2 | 3.726 |
| 1R21-11 | A_HIS_61  | NE2 | A_GLU_52  | OE1 | 3.099 |
| 1R21-11 | A_ARG_81  | NH2 | A_GLU_57  | OE1 | 3.622 |
| 1R21-11 | A_ARG_81  | NH2 | A_GLU_57  | OE2 | 3.877 |
| 1R21-12 | A_ARG_6   | NH2 | A_GLU_98  | OE2 | 3.220 |
| 1R21-12 | A_LYS_50  | NZ  | A_GLU_52  | OE2 | 3.513 |
| 1R21-12 | A_HIS_54  | ND1 | A_GLU_55  | OE1 | 3.706 |
| 1R21-12 | A_HIS_61  | NE2 | A_GLU_52  | OE1 | 3.484 |
| 1R21-12 | A_HIS_61  | NE2 | A_GLU_52  | OE2 | 3.957 |
| 1R21-12 | A_LYS_83  | NZ  | A_ASP_86  | OD1 | 3.921 |

|         |          |     |           |     |       |
|---------|----------|-----|-----------|-----|-------|
| 1R21-12 | A_ARG_96 | NH1 | A_ASP_16  | OD1 | 2.338 |
| 1R21-12 | A_ARG_96 | NH2 | A_ASP_16  | OD1 | 3.435 |
| 1R21-13 | A_LYS_50 | NZ  | A_GLU_52  | OE2 | 3.811 |
| 1R21-13 | A_HIS_61 | NE2 | A_GLU_52  | OE1 | 3.018 |
| 1R21-13 | A_HIS_61 | NE2 | A_GLU_52  | OE2 | 3.663 |
| 1R21-13 | A_ARG_96 | NH1 | A_ASP_16  | OD1 | 2.697 |
| 1R21-13 | A_ARG_96 | NH2 | A_GLU_98  | OE2 | 3.649 |
| 1R21-14 | A_HIS_61 | ND1 | A_GLU_52  | OE2 | 3.472 |
| 1R21-14 | A_HIS_61 | NE2 | A_GLU_52  | OE1 | 2.859 |
| 1R21-14 | A_HIS_61 | NE2 | A_GLU_52  | OE2 | 3.106 |
| 1R21-14 | A_ARG_81 | NH2 | A_GLU_57  | OE1 | 3.503 |
| 1R21-14 | A_ARG_81 | NH2 | A_GLU_57  | OE2 | 2.460 |
| 1R21-14 | A_ARG_96 | NH2 | A_GLU_98  | OE2 | 2.878 |
| 1R21-15 | A_ARG_6  | NH2 | A_GLU_100 | OE1 | 2.871 |
| 1R21-15 | A_ARG_6  | NH2 | A_GLU_100 | OE2 | 3.726 |
| 1R21-15 | A_HIS_54 | NE2 | A_GLU_52  | OE1 | 3.410 |
| 1R21-15 | A_HIS_54 | NE2 | A_GLU_52  | OE2 | 3.502 |
| 1R21-15 | A_HIS_61 | NE2 | A_GLU_52  | OE1 | 3.119 |
| 1R21-15 | A_ARG_81 | NH2 | A_GLU_57  | OE1 | 3.147 |
| 1R21-16 | A_HIS_54 | NE2 | A_GLU_52  | OE1 | 3.412 |
| 1R21-16 | A_HIS_54 | NE2 | A_GLU_52  | OE2 | 3.663 |
| 1R21-16 | A_HIS_61 | NE2 | A_GLU_52  | OE1 | 2.774 |
| 1R21-16 | A_ARG_81 | NH2 | A_GLU_57  | OE1 | 2.662 |
| 1R21-16 | A_ARG_81 | NH2 | A_GLU_57  | OE2 | 3.500 |
| 1R21-16 | A_ARG_96 | NH2 | A_GLU_98  | OE2 | 3.655 |
| 1R21-17 | A_HIS_19 | NE2 | A_ASP_16  | OD1 | 2.979 |
| 1R21-17 | A_LYS_50 | NZ  | A_GLU_52  | OE1 | 3.597 |
| 1R21-17 | A_HIS_54 | NE2 | A_GLU_52  | OE1 | 3.729 |
| 1R21-17 | A_HIS_54 | NE2 | A_GLU_52  | OE2 | 3.299 |
| 1R21-17 | A_HIS_61 | NE2 | A_GLU_52  | OE1 | 3.150 |
| 1R21-17 | A_ARG_96 | NH1 | A_ASP_16  | OD1 | 3.990 |
| 1R21-17 | A_ARG_96 | NH1 | A_ASP_16  | OD2 | 3.847 |
| 1R21-18 | A_HIS_54 | NE2 | A_GLU_52  | OE2 | 3.726 |
| 1R21-18 | A_HIS_61 | NE2 | A_GLU_52  | OE1 | 3.370 |
| 1R21-18 | A_HIS_84 | NE2 | A_GLU_100 | OE2 | 2.435 |
| 1R21-18 | A_ARG_96 | NH2 | A_GLU_98  | OE2 | 3.170 |
| 1R21-19 | A_HIS_54 | NE2 | A_GLU_52  | OE2 | 3.585 |
| 1R21-19 | A_HIS_61 | NE2 | A_GLU_52  | OE1 | 3.355 |
| 1R21-19 | A_ARG_96 | NH2 | A_GLU_98  | OE2 | 2.978 |
| 1R21-2  | A_HIS_54 | NE2 | A_GLU_52  | OE1 | 3.826 |
| 1R21-2  | A_HIS_54 | NE2 | A_GLU_52  | OE2 | 2.948 |
| 1R21-2  | A_HIS_61 | NE2 | A_GLU_52  | OE1 | 3.312 |
| 1R21-2  | A_ARG_96 | NH1 | A_ASP_16  | OD1 | 2.740 |
| 1R21-2  | A_ARG_96 | NH1 | A_ASP_16  | OD2 | 2.714 |
| 1R21-2  | A_ARG_96 | NH2 | A_ASP_16  | OD1 | 3.323 |
| 1R21-20 | A_HIS_54 | NE2 | A_GLU_52  | OE2 | 3.415 |
| 1R21-20 | A_HIS_61 | NE2 | A_GLU_52  | OE1 | 3.170 |
| 1R21-20 | A_HIS_84 | NE2 | A_GLU_100 | OE2 | 3.227 |
| 1R21-20 | A_ARG_96 | NH1 | A_ASP_16  | OD1 | 3.434 |
| 1R21-20 | A_ARG_96 | NH1 | A_ASP_16  | OD2 | 3.592 |
| 1R21-21 | A_ARG_6  | NH2 | A_GLU_98  | OE1 | 3.967 |
| 1R21-21 | A_HIS_19 | NE2 | A_ASP_16  | OD2 | 3.709 |
| 1R21-21 | A_HIS_61 | NE2 | A_GLU_52  | OE1 | 3.030 |
| 1R21-22 | A_HIS_54 | NE2 | A_GLU_52  | OE1 | 3.543 |
| 1R21-22 | A_HIS_54 | NE2 | A_GLU_52  | OE2 | 3.368 |
| 1R21-22 | A_HIS_61 | NE2 | A_GLU_52  | OE1 | 3.436 |
| 1R21-22 | A_ARG_96 | NH1 | A_ASP_16  | OD1 | 3.702 |
| 1R21-22 | A_ARG_96 | NH1 | A_ASP_16  | OD2 | 3.090 |

|         |           |     |           |     |       |
|---------|-----------|-----|-----------|-----|-------|
| 1R21-23 | A_ARG_6   | NH1 | A_GLU_98  | OE1 | 2.790 |
| 1R21-23 | A_HIS_61  | NE2 | A_GLU_52  | OE1 | 3.027 |
| 1R21-23 | A_ARG_81  | NH2 | A_GLU_57  | OE1 | 3.135 |
| 1R21-23 | A_ARG_96  | NH1 | A_ASP_16  | OD1 | 2.357 |
| 1R21-23 | A_ARG_96  | NH1 | A_ASP_16  | OD2 | 3.412 |
| 1R21-23 | A_ARG_96  | NH2 | A_GLU_98  | OE2 | 3.160 |
| 1R21-3  | A_HIS_19  | NE2 | A_ASP_16  | OD1 | 2.708 |
| 1R21-3  | A_HIS_19  | NE2 | A_ASP_16  | OD2 | 3.092 |
| 1R21-3  | A_LYS_50  | NZ  | A_GLU_52  | OE2 | 3.328 |
| 1R21-3  | A_HIS_61  | NE2 | A_GLU_52  | OE1 | 3.178 |
| 1R21-3  | A_HIS_61  | NE2 | A_GLU_52  | OE2 | 3.637 |
| 1R21-3  | A_ARG_81  | NH2 | A_GLU_57  | OE1 | 3.507 |
| 1R21-3  | A_ARG_81  | NH2 | A_GLU_57  | OE2 | 2.346 |
| 1R21-3  | A_ARG_96  | NH1 | A_GLU_98  | OE1 | 3.034 |
| 1R21-3  | A_ARG_96  | NH2 | A_GLU_98  | OE1 | 3.009 |
| 1R21-4  | A_HIS_61  | ND1 | A_GLU_52  | OE2 | 3.789 |
| 1R21-4  | A_HIS_61  | NE2 | A_GLU_52  | OE1 | 2.749 |
| 1R21-4  | A_HIS_61  | NE2 | A_GLU_52  | OE2 | 3.111 |
| 1R21-4  | A_ARG_81  | NH2 | A_GLU_57  | OE1 | 2.933 |
| 1R21-4  | A_ARG_96  | NH1 | A_GLU_98  | OE1 | 3.705 |
| 1R21-4  | A_ARG_96  | NH1 | A_GLU_98  | OE2 | 3.277 |
| 1R21-4  | A_ARG_96  | NH2 | A_GLU_98  | OE2 | 2.612 |
| 1R21-5  | A_ARG_6   | NH1 | A_GLU_100 | OE2 | 3.869 |
| 1R21-5  | A_ARG_6   | NH2 | A_GLU_100 | OE2 | 2.476 |
| 1R21-5  | A_HIS_54  | NE2 | A_GLU_52  | OE1 | 3.312 |
| 1R21-5  | A_HIS_54  | NE2 | A_GLU_52  | OE2 | 3.040 |
| 1R21-5  | A_HIS_61  | NE2 | A_GLU_52  | OE1 | 2.875 |
| 1R21-5  | A_ARG_96  | NH2 | A_GLU_98  | OE2 | 3.021 |
| 1R21-6  | A_HIS_19  | NE2 | A_ASP_16  | OD2 | 3.980 |
| 1R21-6  | A_HIS_54  | NE2 | A_GLU_52  | OE1 | 3.369 |
| 1R21-6  | A_HIS_54  | NE2 | A_GLU_52  | OE2 | 3.405 |
| 1R21-6  | A_HIS_61  | NE2 | A_GLU_52  | OE1 | 3.317 |
| 1R21-7  | A_HIS_19  | NE2 | A_ASP_16  | OD1 | 3.586 |
| 1R21-7  | A_HIS_19  | NE2 | A_ASP_16  | OD2 | 3.080 |
| 1R21-7  | A_HIS_61  | NE2 | A_GLU_52  | OE1 | 3.436 |
| 1R21-7  | A_ARG_81  | NH2 | A_GLU_57  | OE2 | 3.637 |
| 1R21-8  | A_ARG_6   | NH2 | A_GLU_98  | OE1 | 3.720 |
| 1R21-8  | A_HIS_54  | NE2 | A_GLU_52  | OE1 | 3.655 |
| 1R21-8  | A_HIS_54  | NE2 | A_GLU_52  | OE2 | 3.218 |
| 1R21-8  | A_HIS_61  | NE2 | A_GLU_52  | OE1 | 3.063 |
| 1R21-8  | A_ARG_96  | NH2 | A_GLU_98  | OE2 | 3.712 |
| 1R21-9  | A_HIS_54  | ND1 | A_GLU_55  | OE1 | 2.611 |
| 1R21-9  | A_HIS_61  | NE2 | A_GLU_52  | OE1 | 3.068 |
| 1R21-9  | A_ARG_96  | NH2 | A_GLU_98  | OE2 | 3.654 |
| 1RZJ    | G_LYS_207 | NZ  | G_GLU_381 | OE1 | 3.995 |
| 1RZJ    | G_LYS_207 | NZ  | G_GLU_381 | OE2 | 2.764 |
| 1RZJ    | G_LYS_231 | NZ  | G_GLU_268 | OE2 | 3.358 |
| 1RZJ    | G_HIS_249 | NE2 | G_GLU_482 | OE1 | 3.036 |
| 1RZJ    | G_LYS_348 | NZ  | G_GLU_269 | OE2 | 2.716 |
| 1RZJ    | G_LYS_357 | NZ  | G_GLU_466 | OE1 | 3.793 |
| 1RZJ    | G_ARG_419 | NH2 | H_GLU_99  | OE2 | 2.591 |
| 1RZJ    | G_ARG_456 | NH2 | G_GLU_466 | OE1 | 3.427 |
| 1RZJ    | G_ARG_456 | NH2 | G_GLU_466 | OE2 | 2.814 |
| 1RZJ    | G_ARG_469 | NH2 | G_ASP_457 | OD1 | 2.972 |
| 1RZJ    | G_ARG_476 | NH1 | G_ASP_474 | OD1 | 2.853 |
| 1RZJ    | G_ARG_480 | NH1 | G_ASP_477 | OD1 | 2.656 |
| 1RZJ    | G_LYS_487 | NZ  | G_GLU_91  | OE1 | 3.654 |
| 1RZJ    | G_LYS_487 | NZ  | G_GLU_91  | OE2 | 2.711 |

|      |           |     |            |     |       |
|------|-----------|-----|------------|-----|-------|
| 1RZJ | C_LYS_8   | NZ  | C_GLU_119  | OE1 | 2.627 |
| 1RZJ | C_LYS_8   | NZ  | C_GLU_119  | OE2 | 3.972 |
| 1RZJ | C_HIS_27  | NE2 | C_GLU_85   | OE1 | 2.626 |
| 1RZJ | C_LYS_29  | NZ  | G_ASP_279  | OD2 | 3.209 |
| 1RZJ | C_LYS_29  | NZ  | C_GLU_85   | OE1 | 3.520 |
| 1RZJ | C_LYS_35  | NZ  | G_ASP_457  | OD2 | 3.838 |
| 1RZJ | C_LYS_46  | NZ  | C_ASP_56   | OD1 | 3.928 |
| 1RZJ | C_ARG_54  | NH1 | C_ASP_78   | OD2 | 3.656 |
| 1RZJ | C_ARG_54  | NH2 | C_ASP_78   | OD1 | 2.906 |
| 1RZJ | C_ARG_54  | NH2 | C_ASP_78   | OD2 | 3.632 |
| 1RZJ | C_ARG_58  | NH1 | C_GLU_13   | OE1 | 2.664 |
| 1RZJ | C_ARG_59  | NH1 | G_ASP_368  | OD1 | 3.788 |
| 1RZJ | C_ARG_59  | NH1 | G_ASP_368  | OD2 | 3.342 |
| 1RZJ | C_ARG_59  | NH2 | G_ASP_368  | OD1 | 2.531 |
| 1RZJ | C_ARG_59  | NH2 | G_ASP_368  | OD2 | 3.174 |
| 1RZJ | C_LYS_90  | NZ  | C_GLU_85   | OE2 | 3.877 |
| 1RZJ | C_LYS_171 | NZ  | C_GLU_169  | OE1 | 3.508 |
| 1RZJ | L_ARG_61  | NH2 | L_GLU_81   | OE2 | 3.350 |
| 1RZJ | L_ARG_61  | NH2 | L_ASP_82   | OD1 | 2.670 |
| 1RZJ | L_ARG_61  | NH2 | L_ASP_82   | OD2 | 3.090 |
| 1RZJ | L_LYS_149 | NZ  | L_GLU_195  | OE1 | 2.951 |
| 1RZJ | L_LYS_149 | NZ  | L_GLU_195  | OE2 | 3.523 |
| 1RZJ | L_HIS_189 | ND1 | L_ASP_151  | OD2 | 3.250 |
| 1RZJ | H_LYS_12  | NZ  | H_GLU_10   | OE1 | 3.962 |
| 1RZJ | H_LYS_19  | NZ  | H_GLU_81   | OE2 | 3.444 |
| 1RZJ | H_ARG_31  | NH2 | H_ASP_100A | OD1 | 3.714 |
| 1RZJ | H_ARG_31  | NH2 | H_ASP_100A | OD2 | 2.889 |
| 1RZJ | H_ARG_38  | NH1 | H_GLU_46   | OE1 | 3.693 |
| 1RZJ | H_ARG_38  | NH1 | H_GLU_46   | OE2 | 2.534 |
| 1RZJ | H_ARG_38  | NH2 | H_ASP_86   | OD2 | 2.669 |
| 1RZJ | H_ARG_50  | NH2 | H_GLU_97   | OE2 | 2.721 |
| 1RZJ | H_HIS_62  | NE2 | H_GLU_46   | OE1 | 3.941 |
| 1RZJ | H_HIS_62  | NE2 | H_GLU_46   | OE2 | 3.006 |
| 1RZJ | H_ARG_66  | NH1 | H_ASP_86   | OD1 | 2.823 |
| 1RZJ | H_ARG_66  | NH1 | H_ASP_86   | OD2 | 3.878 |
| 1RZJ | H_ARG_66  | NH2 | H_ASP_86   | OD1 | 3.045 |
| 1RZJ | H_ARG_66  | NH2 | H_ASP_86   | OD2 | 2.664 |
| 1RZJ | H_ARG_82A | NH1 | H_GLU_81   | OE1 | 2.688 |
| 1RZJ | H_LYS_101 | NZ  | H_GLU_1    | OE1 | 3.982 |
| 1RZJ | H_HIS_102 | NE2 | H_GLU_1    | OE1 | 3.443 |
| 1RZJ | H_LYS_143 | NZ  | H_ASP_144  | OD1 | 3.134 |
| 1RZJ | H_LYS_143 | NZ  | H_ASP_144  | OD2 | 3.259 |
| 1RZJ | H_LYS_209 | NZ  | L_GLU_123  | OE1 | 3.812 |
| 1RZK | G_LYS_121 | NZ  | G_GLU_429  | OE1 | 2.734 |
| 1RZK | G_LYS_121 | NZ  | G_GLU_429  | OE2 | 3.567 |
| 1RZK | G_LYS_207 | NZ  | G_GLU_381  | OE1 | 3.945 |
| 1RZK | G_LYS_207 | NZ  | G_GLU_381  | OE2 | 3.126 |
| 1RZK | G_LYS_232 | NZ  | G_GLU_351  | OE1 | 3.994 |
| 1RZK | G_HIS_249 | NE2 | G_GLU_482  | OE1 | 3.525 |
| 1RZK | G_LYS_282 | NZ  | G_GLU_275  | OE1 | 3.953 |
| 1RZK | G_LYS_282 | NZ  | G_GLU_275  | OE2 | 2.642 |
| 1RZK | G_LYS_348 | NZ  | G_GLU_269  | OE2 | 3.206 |
| 1RZK | G_LYS_348 | NZ  | G_GLU_351  | OE1 | 3.941 |
| 1RZK | G_LYS_348 | NZ  | G_GLU_351  | OE2 | 3.259 |
| 1RZK | G_LYS_350 | NZ  | G_ASP_395  | OD1 | 3.580 |
| 1RZK | G_LYS_357 | NZ  | G_GLU_466  | OE1 | 3.719 |
| 1RZK | G_ARG_419 | NH1 | H_GLU_100B | OE1 | 2.999 |
| 1RZK | G_ARG_419 | NH1 | H_GLU_100B | OE2 | 3.674 |

|      |           |     |            |     |       |
|------|-----------|-----|------------|-----|-------|
| 1RZK | G_ARG_419 | NH2 | H_GLU_99   | OE1 | 2.292 |
| 1RZK | G_ARG_419 | NH2 | H_GLU_100B | OE2 | 3.969 |
| 1RZK | G_ARG_456 | NH2 | G_GLU_466  | OE1 | 3.468 |
| 1RZK | G_ARG_456 | NH2 | G_GLU_466  | OE2 | 3.536 |
| 1RZK | G_ARG_469 | NH2 | G_ASP_457  | OD1 | 3.234 |
| 1RZK | G_ARG_476 | NH1 | G_ASP_474  | OD1 | 3.441 |
| 1RZK | G_ARG_476 | NH2 | G_GLU_102  | OE1 | 3.296 |
| 1RZK | G_ARG_476 | NH2 | G_GLU_102  | OE2 | 3.010 |
| 1RZK | G_LYS_487 | NZ  | G_GLU_91   | OE2 | 3.524 |
| 1RZK | G_LYS_490 | NZ  | G_GLU_492  | OE1 | 3.300 |
| 1RZK | C_LYS_29  | NZ  | C_GLU_85   | OE1 | 2.833 |
| 1RZK | C_LYS_29  | NZ  | C_GLU_85   | OE2 | 3.848 |
| 1RZK | C_LYS_35  | NZ  | G_ASP_457  | OD2 | 3.741 |
| 1RZK | C_ARG_54  | NH1 | C_ASP_78   | OD1 | 3.987 |
| 1RZK | C_ARG_54  | NH1 | C_ASP_78   | OD2 | 2.755 |
| 1RZK | C_ARG_54  | NH2 | C_ASP_78   | OD1 | 2.666 |
| 1RZK | C_ARG_54  | NH2 | C_ASP_78   | OD2 | 2.988 |
| 1RZK | C_ARG_59  | NH1 | G_ASP_368  | OD1 | 3.343 |
| 1RZK | C_ARG_59  | NH1 | G_ASP_368  | OD2 | 3.154 |
| 1RZK | C_ARG_59  | NH2 | G_ASP_368  | OD1 | 2.433 |
| 1RZK | C_ARG_59  | NH2 | G_ASP_368  | OD2 | 2.977 |
| 1RZK | C_HIS_107 | ND1 | C_ASP_105  | OD1 | 2.891 |
| 1RZK | C_HIS_107 | ND1 | C_ASP_105  | OD2 | 3.166 |
| 1RZK | C_ARG_134 | NH2 | C_ASP_153  | OD1 | 3.766 |
| 1RZK | C_LYS_136 | NZ  | C_GLU_150  | OE2 | 3.884 |
| 1RZK | C_LYS_136 | NZ  | C_ASP_153  | OD1 | 3.936 |
| 1RZK | C_LYS_136 | NZ  | C_ASP_153  | OD2 | 2.987 |
| 1RZK | C_LYS_171 | NZ  | C_GLU_169  | OE2 | 2.874 |
| 1RZK | L_ARG_61  | NH2 | L_GLU_81   | OE1 | 3.127 |
| 1RZK | L_ARG_61  | NH2 | L_ASP_82   | OD1 | 3.576 |
| 1RZK | L_ARG_95B | NH2 | L_ASP_1    | OD2 | 2.985 |
| 1RZK | L_HIS_189 | ND1 | L_ASP_151  | OD2 | 2.585 |
| 1RZK | L_HIS_189 | NE2 | L_ASP_185  | OD1 | 3.599 |
| 1RZK | L_HIS_189 | NE2 | L_ASP_185  | OD2 | 2.802 |
| 1RZK | L_ARG_211 | NH1 | L_GLU_187  | OE1 | 3.851 |
| 1RZK | H_ARG_31  | NH2 | H_ASP_100A | OD1 | 3.070 |
| 1RZK | H_ARG_31  | NH2 | H_ASP_100A | OD2 | 3.614 |
| 1RZK | H_ARG_38  | NH1 | H_GLU_46   | OE1 | 2.779 |
| 1RZK | H_ARG_38  | NH1 | H_GLU_46   | OE2 | 3.342 |
| 1RZK | H_ARG_38  | NH2 | H_ASP_86   | OD2 | 2.684 |
| 1RZK | H_ARG_50  | NH2 | H_GLU_97   | OE2 | 2.332 |
| 1RZK | H_ARG_66  | NH1 | H_ASP_86   | OD1 | 3.598 |
| 1RZK | H_ARG_66  | NH2 | H_ASP_86   | OD1 | 2.415 |
| 1RZK | H_ARG_66  | NH2 | H_ASP_86   | OD2 | 2.739 |
| 1RZK | H_LYS_73  | NZ  | H_ASP_55   | OD2 | 2.968 |
| 1RZK | H_ARG_82A | NH2 | H_GLU_81   | OE1 | 3.271 |
| 1RZK | H_LYS_143 | NZ  | H_ASP_144  | OD1 | 2.615 |
| 1RZK | H_LYS_143 | NZ  | H_ASP_144  | OD2 | 3.235 |
| 1RZK | H_HIS_164 | NE2 | L_ASP_167  | OD1 | 3.880 |
| 1RZK | H_HIS_164 | NE2 | L_ASP_167  | OD2 | 2.505 |
| 1RZK | H_LYS_206 | NZ  | H_ASP_208  | OD2 | 3.965 |
| 1RZK | H_LYS_209 | NZ  | L_GLU_123  | OE1 | 3.513 |
| 1RZK | H_LYS_209 | NZ  | L_GLU_123  | OE2 | 3.584 |
| 1S3K | L_ARG_66  | NH2 | L_GLU_86   | OE2 | 3.884 |
| 1S3K | L_ARG_66  | NH2 | L_ASP_87   | OD1 | 2.838 |
| 1S3K | L_ARG_66  | NH2 | L_ASP_87   | OD2 | 3.885 |
| 1S3K | L_LYS_108 | NZ  | L_GLU_170  | OE2 | 3.919 |
| 1S3K | L_HIS_194 | ND1 | L_ASP_156  | OD2 | 2.733 |

|      |           |     |           |     |       |
|------|-----------|-----|-----------|-----|-------|
| 1S3K | H_ARG_38  | NH1 | H_ASP_90  | OD1 | 2.899 |
| 1S3K | H_ARG_38  | NH2 | H_GLU_46  | OE2 | 3.185 |
| 1S3K | H_ARG_38  | NH2 | H_ASP_90  | OD1 | 3.935 |
| 1S3K | H_LYS_65  | NZ  | H_ASP_59  | OD1 | 3.006 |
| 1S3K | H_ARG_67  | NH1 | H_ASP_90  | OD1 | 3.672 |
| 1S3K | H_ARG_67  | NH1 | H_ASP_90  | OD2 | 2.699 |
| 1S3K | H_ARG_67  | NH2 | H_ASP_90  | OD1 | 2.977 |
| 1S3K | H_ARG_67  | NH2 | H_ASP_90  | OD2 | 3.482 |
| 1S3K | H_ARG_101 | NH1 | H_ASP_31  | OD2 | 3.352 |
| 1S3K | H_LYS_149 | NZ  | H_ASP_150 | OD1 | 3.589 |
| 1S5I | L_ARG_46  | NH2 | L_ASP_55  | OD1 | 2.460 |
| 1S5I | L_ARG_46  | NH2 | L_ASP_55  | OD2 | 3.856 |
| 1S5I | L_ARG_61  | NH1 | L_GLU_79  | OE1 | 3.126 |
| 1S5I | L_ARG_61  | NH1 | L_GLU_81  | OE2 | 3.788 |
| 1S5I | L_ARG_61  | NH2 | L_GLU_79  | OE1 | 3.704 |
| 1S5I | L_ARG_61  | NH2 | L_ASP_82  | OD1 | 2.499 |
| 1S5I | L_ARG_61  | NH2 | L_ASP_82  | OD2 | 2.521 |
| 1S5I | L_ARG_77  | NH1 | L_GLU_79  | OE2 | 3.348 |
| 1S5I | L_ARG_96  | NH1 | H_ASP_97  | OD1 | 3.601 |
| 1S5I | L_ARG_96  | NH2 | H_ASP_97  | OD1 | 2.496 |
| 1S5I | L_ARG_96  | NH2 | H_ASP_97  | OD2 | 2.511 |
| 1S5I | L_LYS_147 | NZ  | L_GLU_154 | OE1 | 3.415 |
| 1S5I | L_LYS_149 | NZ  | L_GLU_195 | OE1 | 2.811 |
| 1S5I | L_LYS_149 | NZ  | L_GLU_195 | OE2 | 3.034 |
| 1S5I | L_ARG_155 | NH1 | L_GLU_185 | OE1 | 2.637 |
| 1S5I | L_ARG_155 | NH2 | L_GLU_185 | OE1 | 3.738 |
| 1S5I | L_ARG_188 | NH2 | L_GLU_185 | OE2 | 2.926 |
| 1S5I | L_HIS_189 | ND1 | L_ASP_151 | OD2 | 2.858 |
| 1S5I | L_HIS_189 | NE2 | L_GLU_185 | OE1 | 2.459 |
| 1S5I | L_HIS_189 | NE2 | L_GLU_185 | OE2 | 3.318 |
| 1S5I | H_ARG_38  | NH1 | H_ASP_86  | OD1 | 2.668 |
| 1S5I | H_ARG_38  | NH2 | H_GLU_46  | OE1 | 2.890 |
| 1S5I | H_ARG_38  | NH2 | H_ASP_86  | OD1 | 3.667 |
| 1S5I | H_ARG_66  | NH1 | H_ASP_86  | OD1 | 3.962 |
| 1S5I | H_ARG_66  | NH1 | H_ASP_86  | OD2 | 3.293 |
| 1S5I | H_ARG_66  | NH2 | H_ASP_86  | OD1 | 3.251 |
| 1S5I | H_ARG_66  | NH2 | H_ASP_86  | OD2 | 3.537 |
| 1S5I | H_LYS_75  | NZ  | H_ASP_72  | OD1 | 3.618 |
| 1S5I | H_LYS_75  | NZ  | H_ASP_72  | OD2 | 2.868 |
| 1S5I | H_HIS_172 | NE2 | L_ASP_167 | OD2 | 3.741 |
| 1S5I | H_LYS_218 | NZ  | H_ASP_220 | OD1 | 3.717 |
| 1S5I | H_LYS_221 | NZ  | L_GLU_123 | OE2 | 3.213 |
| 1S78 | A_ARG_25  | NH2 | A_ASP_22  | OD2 | 3.377 |
| 1S78 | A_HIS_26  | NE2 | A_ASP_22  | OD1 | 3.860 |
| 1S78 | A_HIS_26  | NE2 | A_ASP_22  | OD2 | 3.677 |
| 1S78 | A_ARG_76  | NH1 | A_ASP_54  | OD1 | 3.940 |
| 1S78 | A_ARG_81  | NH2 | A_GLU_57  | OE1 | 3.403 |
| 1S78 | A_ARG_81  | NH2 | A_GLU_57  | OE2 | 3.079 |
| 1S78 | A_ARG_121 | NH1 | A_GLU_188 | OE1 | 2.989 |
| 1S78 | A_ARG_121 | NH2 | A_GLU_188 | OE1 | 3.618 |
| 1S78 | A_ARG_121 | NH2 | A_ASP_189 | OD1 | 3.441 |
| 1S78 | A_ARG_121 | NH2 | A_ASP_189 | OD2 | 3.303 |
| 1S78 | A_ARG_135 | NH2 | A_ASP_96  | OD1 | 3.677 |
| 1S78 | A_ARG_135 | NH2 | A_ASP_96  | OD2 | 3.036 |
| 1S78 | A_HIS_152 | NE2 | A_GLU_125 | OE1 | 3.976 |
| 1S78 | A_ARG_166 | NH2 | A_ASP_143 | OD1 | 3.122 |
| 1S78 | A_ARG_204 | NH1 | A_ASP_149 | OD1 | 3.810 |
| 1S78 | A_ARG_204 | NH2 | A_GLU_125 | OE2 | 2.685 |

|      |           |     |           |     |       |
|------|-----------|-----|-----------|-----|-------|
| 1S78 | A_LYS_206 | NZ  | A_ASP_212 | OD2 | 3.591 |
| 1S78 | A_HIS_238 | ND1 | A_GLU_243 | OE1 | 3.574 |
| 1S78 | A_HIS_238 | ND1 | A_GLU_243 | OE2 | 2.921 |
| 1S78 | A_ARG_308 | NH2 | A_GLU_310 | OE2 | 3.285 |
| 1S78 | A_LYS_311 | NZ  | A_ASP_285 | OD2 | 3.743 |
| 1S78 | A_HIS_327 | NE2 | A_GLU_341 | OE1 | 2.783 |
| 1S78 | A_HIS_327 | NE2 | A_GLU_341 | OE2 | 2.983 |
| 1S78 | A_ARG_332 | NH1 | A_GLU_357 | OE2 | 3.575 |
| 1S78 | A_ARG_332 | NH2 | A_GLU_357 | OE1 | 3.867 |
| 1S78 | A_ARG_332 | NH2 | A_GLU_357 | OE2 | 2.955 |
| 1S78 | A_LYS_347 | NZ  | A_GLU_299 | OE2 | 2.643 |
| 1S78 | A_LYS_347 | NZ  | A_GLU_383 | OE1 | 3.238 |
| 1S78 | A_ARG_410 | NH2 | A_GLU_383 | OE1 | 3.550 |
| 1S78 | A_ARG_410 | NH2 | A_GLU_383 | OE2 | 3.659 |
| 1S78 | A_ARG_412 | NH1 | A_GLU_299 | OE1 | 3.168 |
| 1S78 | A_ARG_412 | NH1 | A_GLU_299 | OE2 | 3.462 |
| 1S78 | A_ARG_412 | NH2 | A_GLU_299 | OE2 | 3.187 |
| 1S78 | A_ARG_437 | NH1 | A_GLU_438 | OE1 | 3.837 |
| 1S78 | A_ARG_465 | NH1 | A_GLU_438 | OE1 | 2.796 |
| 1S78 | A_ARG_465 | NH1 | A_GLU_438 | OE2 | 3.955 |
| 1S78 | A_ARG_477 | NH1 | A_GLU_485 | OE1 | 2.683 |
| 1S78 | A_ARG_477 | NH2 | A_GLU_481 | OE2 | 3.214 |
| 1S78 | A_ARG_477 | NH2 | A_GLU_485 | OE1 | 3.223 |
| 1S78 | A_ARG_514 | NH1 | A_GLU_531 | OE2 | 2.772 |
| 1S78 | A_ARG_523 | NH1 | A_GLU_531 | OE1 | 3.483 |
| 1S78 | A_ARG_523 | NH1 | A_GLU_531 | OE2 | 3.476 |
| 1S78 | B_ARG_25  | NH2 | B_ASP_22  | OD2 | 3.334 |
| 1S78 | B_HIS_26  | NE2 | B_ASP_22  | OD1 | 3.990 |
| 1S78 | B_HIS_26  | NE2 | B_ASP_22  | OD2 | 3.840 |
| 1S78 | B_ARG_76  | NH1 | B_ASP_54  | OD1 | 3.948 |
| 1S78 | B_ARG_81  | NH2 | B_GLU_57  | OE1 | 3.380 |
| 1S78 | B_ARG_81  | NH2 | B_GLU_57  | OE2 | 3.017 |
| 1S78 | B_ARG_121 | NH1 | B_GLU_188 | OE1 | 2.787 |
| 1S78 | B_ARG_121 | NH2 | B_GLU_188 | OE1 | 3.424 |
| 1S78 | B_ARG_121 | NH2 | B_ASP_189 | OD1 | 3.468 |
| 1S78 | B_ARG_121 | NH2 | B_ASP_189 | OD2 | 3.329 |
| 1S78 | B_ARG_135 | NH2 | B_ASP_96  | OD1 | 3.610 |
| 1S78 | B_ARG_135 | NH2 | B_ASP_96  | OD2 | 2.916 |
| 1S78 | B_HIS_152 | NE2 | B_GLU_125 | OE1 | 3.902 |
| 1S78 | B_ARG_166 | NH2 | B_ASP_143 | OD1 | 3.128 |
| 1S78 | B_ARG_204 | NH1 | B_ASP_149 | OD1 | 3.952 |
| 1S78 | B_ARG_204 | NH2 | B_GLU_125 | OE2 | 2.608 |
| 1S78 | B_LYS_206 | NZ  | B_ASP_212 | OD2 | 3.574 |
| 1S78 | B_HIS_238 | ND1 | B_GLU_243 | OE1 | 3.602 |
| 1S78 | B_HIS_238 | ND1 | B_GLU_243 | OE2 | 2.978 |
| 1S78 | B_ARG_308 | NH2 | B_GLU_310 | OE2 | 3.284 |
| 1S78 | B_LYS_311 | NZ  | B_ASP_285 | OD2 | 3.757 |
| 1S78 | B_HIS_327 | NE2 | B_GLU_341 | OE1 | 2.772 |
| 1S78 | B_HIS_327 | NE2 | B_GLU_341 | OE2 | 2.972 |
| 1S78 | B_ARG_332 | NH1 | B_GLU_357 | OE2 | 3.726 |
| 1S78 | B_ARG_332 | NH2 | B_GLU_357 | OE1 | 3.938 |
| 1S78 | B_ARG_332 | NH2 | B_GLU_357 | OE2 | 2.990 |
| 1S78 | B_LYS_347 | NZ  | B_GLU_299 | OE2 | 2.672 |
| 1S78 | B_LYS_347 | NZ  | B_GLU_383 | OE1 | 3.084 |
| 1S78 | B_LYS_347 | NZ  | B_GLU_383 | OE2 | 3.934 |
| 1S78 | B_ARG_410 | NH2 | B_GLU_383 | OE1 | 3.602 |
| 1S78 | B_ARG_410 | NH2 | B_GLU_383 | OE2 | 3.759 |
| 1S78 | B_ARG_412 | NH1 | B_GLU_299 | OE1 | 3.217 |



|      |           |     |           |     |       |
|------|-----------|-----|-----------|-----|-------|
| 1S78 | B_ARG_412 | NH1 | B_GLU_299 | OE2 | 3.556 |
| 1S78 | B_ARG_412 | NH2 | B_GLU_299 | OE2 | 3.170 |
| 1S78 | B_ARG_465 | NH1 | B_GLU_438 | OE1 | 2.881 |
| 1S78 | B_ARG_477 | NH1 | B_GLU_485 | OE1 | 2.617 |
| 1S78 | B_ARG_477 | NH1 | B_GLU_485 | OE2 | 3.941 |
| 1S78 | B_ARG_477 | NH2 | B_GLU_481 | OE2 | 3.169 |
| 1S78 | B_ARG_477 | NH2 | B_GLU_485 | OE1 | 3.166 |
| 1S78 | B_ARG_514 | NH1 | B_GLU_531 | OE1 | 3.612 |
| 1S78 | B_ARG_514 | NH1 | B_GLU_531 | OE2 | 2.336 |
| 1S78 | B_ARG_523 | NH1 | B_GLU_531 | OE1 | 3.374 |
| 1S78 | B_ARG_523 | NH1 | B_GLU_531 | OE2 | 3.242 |
| 1S78 | B_HIS_567 | ND1 | B_GLU_544 | OE1 | 3.248 |
| 1S78 | B_HIS_567 | ND1 | B_GLU_544 | OE2 | 3.019 |
| 1S78 | C_LYS_24  | NZ  | C_ASP_70  | OD1 | 3.323 |
| 1S78 | C_ARG_61  | NH2 | C_ASP_82  | OD1 | 2.646 |
| 1S78 | C_ARG_61  | NH2 | C_ASP_82  | OD2 | 3.273 |
| 1S78 | C_LYS_103 | NZ  | C_GLU_165 | OE1 | 3.918 |
| 1S78 | C_LYS_103 | NZ  | C_GLU_165 | OE2 | 2.759 |
| 1S78 | C_LYS_149 | NZ  | C_GLU_195 | OE2 | 3.249 |
| 1S78 | C_HIS_189 | ND1 | C_ASP_151 | OD2 | 3.312 |
| 1S78 | C_ARG_211 | NH1 | C_GLU_187 | OE2 | 3.367 |
| 1S78 | D_ARG_38  | NH1 | D_ASP_86  | OD1 | 3.229 |
| 1S78 | D_ARG_38  | NH2 | D_GLU_46  | OE1 | 2.855 |
| 1S78 | D_ARG_62  | NH1 | D_GLU_85  | OE1 | 3.019 |
| 1S78 | D_ARG_62  | NH2 | D_GLU_46  | OE1 | 3.024 |
| 1S78 | D_ARG_62  | NH2 | D_GLU_46  | OE2 | 3.448 |
| 1S78 | D_ARG_66  | NH1 | D_ASP_86  | OD1 | 3.283 |
| 1S78 | D_ARG_66  | NH1 | D_ASP_86  | OD2 | 2.439 |
| 1S78 | D_ARG_66  | NH2 | D_ASP_86  | OD1 | 3.573 |
| 1S78 | D_ARG_94  | NH2 | D_ASP_101 | OD1 | 3.501 |
| 1S78 | D_ARG_94  | NH2 | D_ASP_101 | OD2 | 2.662 |
| 1S78 | D_LYS_143 | NZ  | D_ASP_144 | OD2 | 3.814 |
| 1S78 | D_HIS_164 | NE2 | C_ASP_167 | OD1 | 3.839 |
| 1S78 | D_LYS_209 | NZ  | C_GLU_123 | OE1 | 3.290 |
| 1S78 | D_LYS_214 | NZ  | C_ASP_122 | OD1 | 3.484 |
| 1S78 | E_LYS_24  | NZ  | E_ASP_70  | OD1 | 3.695 |
| 1S78 | E_LYS_24  | NZ  | E_ASP_70  | OD2 | 3.318 |
| 1S78 | E_ARG_61  | NH2 | E_GLU_81  | OE1 | 3.985 |
| 1S78 | E_ARG_61  | NH2 | E_GLU_81  | OE2 | 3.655 |
| 1S78 | E_ARG_61  | NH2 | E_ASP_82  | OD1 | 2.822 |
| 1S78 | E_ARG_61  | NH2 | E_ASP_82  | OD2 | 3.506 |
| 1S78 | E_LYS_103 | NZ  | E_GLU_165 | OE1 | 2.948 |
| 1S78 | E_LYS_103 | NZ  | E_GLU_165 | OE2 | 3.258 |
| 1S78 | E_HIS_189 | ND1 | E_ASP_151 | OD2 | 2.704 |
| 1S78 | F_ARG_38  | NH1 | F_ASP_86  | OD1 | 3.191 |
| 1S78 | F_ARG_38  | NH2 | F_GLU_46  | OE1 | 2.976 |
| 1S78 | F_ARG_38  | NH2 | F_ASP_86  | OD1 | 3.546 |
| 1S78 | F_ARG_66  | NH1 | F_ASP_86  | OD1 | 2.849 |
| 1S78 | F_ARG_66  | NH1 | F_ASP_86  | OD2 | 2.628 |
| 1S78 | F_ARG_83  | NH1 | F_GLU_85  | OE1 | 3.280 |
| 1S78 | F_ARG_83  | NH1 | F_GLU_85  | OE2 | 3.676 |
| 1S78 | F_ARG_94  | NH2 | F_ASP_101 | OD1 | 3.456 |
| 1S78 | F_ARG_94  | NH2 | F_ASP_101 | OD2 | 2.584 |
| 1SM3 | L_HIS_42  | ND1 | L_GLU_38  | OE2 | 3.552 |
| 1SM3 | L_ARG_61  | NH2 | L_GLU_81  | OE2 | 2.761 |
| 1SM3 | L_ARG_61  | NH2 | L_ASP_82  | OD1 | 2.739 |
| 1SM3 | L_ARG_61  | NH2 | L_ASP_82  | OD2 | 3.626 |
| 1SM3 | L_LYS_110 | NZ  | L_GLU_198 | OE2 | 2.701 |

|      |           |     |           |     |       |
|------|-----------|-----|-----------|-----|-------|
| 1SM3 | L_HIS_188 | ND1 | L_ASP_151 | OD2 | 2.837 |
| 1SM3 | H_ARG_38  | NH1 | H_ASP_86  | OD1 | 2.991 |
| 1SM3 | H_ARG_38  | NH2 | H_GLU_46  | OE1 | 3.308 |
| 1SM3 | H_ARG_38  | NH2 | H_GLU_46  | OE2 | 3.468 |
| 1SM3 | H_ARG_38  | NH2 | H_ASP_86  | OD1 | 3.893 |
| 1SM3 | H_LYS_43  | NZ  | H_GLU_46  | OE1 | 3.090 |
| 1SM3 | H_ARG_52  | NH1 | H_GLU_50  | OE2 | 2.647 |
| 1SM3 | H_HIS_58  | ND1 | H_GLU_50  | OE2 | 2.597 |
| 1SM3 | H_ARG_66  | NH1 | H_ASP_86  | OD1 | 3.622 |
| 1SM3 | H_ARG_66  | NH2 | H_ASP_86  | OD1 | 3.305 |
| 1SM3 | H_ARG_66  | NH2 | H_ASP_86  | OD2 | 2.417 |
| 1SM3 | H_ARG_71  | NH2 | H_ASP_73  | OD1 | 3.453 |
| 1SM3 | H_LYS_143 | NZ  | L_GLU_124 | OE2 | 2.757 |
| 1SQ2 | L_LYS_1   | NZ  | L_GLU_7   | OE1 | 3.597 |
| 1SQ2 | L_LYS_1   | NZ  | L_GLU_7   | OE2 | 2.720 |
| 1SQ2 | L_ARG_61  | NH1 | L_ASP_48  | OD2 | 3.006 |
| 1SQ2 | L_ARG_73  | NH2 | N_ASP_93  | OD1 | 3.549 |
| 1SQ2 | L_ARG_73  | NH2 | N_ASP_93  | OD2 | 3.002 |
| 1SQ2 | L_ARG_125 | NH1 | L_ASP_119 | OD2 | 3.203 |
| 1SQ2 | L_ARG_125 | NH2 | L_ASP_119 | OD1 | 3.605 |
| 1SQ2 | L_ARG_125 | NH2 | L_ASP_119 | OD2 | 2.909 |
| 1SQ2 | N_ARG_2   | NH1 | N_ASP_26  | OD2 | 3.782 |
| 1SQ2 | N_ARG_2   | NH2 | N_ASP_4   | OD1 | 3.667 |
| 1SQ2 | N_ARG_2   | NH2 | N_ASP_4   | OD2 | 3.350 |
| 1SQ2 | N_ARG_8   | NH1 | N_ASP_106 | OD1 | 3.394 |
| 1SQ2 | N_ARG_38  | NH1 | N_ASP_77  | OD1 | 3.866 |
| 1SQ2 | N_LYS_39  | NZ  | N_GLU_46  | OE1 | 3.723 |
| 1SQ2 | N_LYS_51  | NZ  | N_GLU_57  | OE1 | 2.817 |
| 1SQ2 | N_LYS_51  | NZ  | N_GLU_57  | OE2 | 3.620 |
| 1SQ2 | N_ARG_54  | NH1 | N_ASP_77  | OD1 | 3.089 |
| 1SQ2 | N_ARG_54  | NH1 | N_ASP_77  | OD2 | 3.597 |
| 1SQ2 | N_ARG_54  | NH2 | N_ASP_77  | OD1 | 3.562 |
| 1SQ2 | N_ARG_54  | NH2 | N_ASP_77  | OD2 | 2.591 |
| 1SQ2 | N_ARG_82  | NH1 | N_GLU_46  | OE2 | 3.823 |
| 1SQ2 | N_ARG_100 | NH1 | L_ASP_52  | OD1 | 3.032 |
| 1SQ2 | N_ARG_100 | NH1 | L_ASP_52  | OD2 | 3.454 |
| 1SQ2 | N_ARG_100 | NH2 | L_ASP_52  | OD1 | 3.561 |
| 1SQ2 | N_ARG_100 | NH2 | L_ASP_52  | OD2 | 3.218 |
| 1SVZ | A_ARG_24  | NH2 | A_ASP_75  | OD1 | 2.929 |
| 1SVZ | A_ARG_66  | NH1 | A_ASP_87  | OD1 | 3.870 |
| 1SVZ | A_ARG_66  | NH1 | A_ASP_87  | OD2 | 2.678 |
| 1SVZ | A_ARG_66  | NH2 | A_GLU_84  | OE1 | 3.931 |
| 1SVZ | A_ARG_66  | NH2 | A_GLU_86  | OE2 | 3.128 |
| 1SVZ | A_ARG_66  | NH2 | A_ASP_87  | OD1 | 3.084 |
| 1SVZ | A_ARG_66  | NH2 | A_ASP_87  | OD2 | 3.325 |
| 1SVZ | A_LYS_139 | NZ  | A_GLU_137 | OE1 | 3.533 |
| 1SVZ | A_HIS_162 | NE2 | A_ASP_226 | OD2 | 2.871 |
| 1SVZ | A_LYS_173 | NZ  | A_ASP_190 | OD2 | 3.311 |
| 1SVZ | A_LYS_192 | NZ  | A_ASP_189 | OD1 | 2.477 |
| 1SVZ | A_ARG_194 | NH1 | A_ASP_217 | OD1 | 3.731 |
| 1SVZ | A_ARG_194 | NH1 | A_ASP_217 | OD2 | 2.724 |
| 1SVZ | A_ARG_194 | NH2 | A_ASP_217 | OD1 | 2.551 |
| 1SVZ | A_ARG_194 | NH2 | A_ASP_217 | OD2 | 2.852 |
| 1SVZ | A_ARG_227 | NH2 | A_GLU_232 | OE1 | 3.187 |
| 1SVZ | A_ARG_227 | NH2 | A_GLU_232 | OE2 | 2.728 |
| 1SVZ | A_HIS_228 | ND1 | A_ASP_226 | OD1 | 2.644 |
| 1SVZ | B_ARG_24  | NH2 | B_ASP_75  | OD1 | 3.400 |
| 1SVZ | B_ARG_24  | NH2 | B_ASP_75  | OD2 | 3.186 |

|      |           |     |           |     |       |
|------|-----------|-----|-----------|-----|-------|
| 1SVZ | B_ARG.66  | NH1 | B_GLU_84  | OE2 | 3.553 |
| 1SVZ | B_ARG.66  | NH2 | B_GLU_86  | OE2 | 2.747 |
| 1SVZ | B_ARG.66  | NH2 | B_ASP_87  | OD1 | 3.046 |
| 1SVZ | B_ARG.66  | NH2 | B_ASP_87  | OD2 | 3.702 |
| 1SVZ | B_LYS_139 | NZ  | B_GLU_143 | OE1 | 3.577 |
| 1SVZ | B_HIS_162 | NE2 | B_ASP_226 | OD2 | 2.989 |
| 1SVZ | B_LYS_165 | NZ  | B_GLU_216 | OE2 | 2.834 |
| 1SVZ | B_LYS_173 | NZ  | B_ASP_190 | OD1 | 3.857 |
| 1SVZ | B_LYS_173 | NZ  | B_ASP_190 | OD2 | 3.237 |
| 1SVZ | B_LYS_192 | NZ  | B_ASP_189 | OD1 | 3.974 |
| 1SVZ | B_ARG_194 | NH2 | B_ASP_217 | OD1 | 3.693 |
| 1SVZ | B_ARG_194 | NH2 | B_ASP_217 | OD2 | 2.595 |
| 1SVZ | B_ARG_227 | NH1 | B_GLU_232 | OE1 | 3.056 |
| 1SVZ | B_ARG_227 | NH1 | B_GLU_232 | OE2 | 3.538 |
| 1SVZ | B_HIS_228 | ND1 | B_ASP_226 | OD1 | 2.570 |
| 1SVZ | B_HIS_228 | ND1 | B_ASP_226 | OD2 | 3.901 |
| 1T2Q | L_ARG.25  | NH2 | L_ASP_76  | OD1 | 3.792 |
| 1T2Q | L_ARG.60  | NH2 | L_ASP_66  | OD1 | 3.739 |
| 1T2Q | L_ARG.67  | NH1 | L_GLU_85  | OE1 | 3.406 |
| 1T2Q | L_ARG.67  | NH2 | L_GLU_85  | OE1 | 3.629 |
| 1T2Q | L_ARG.67  | NH2 | L_GLU_87  | OE2 | 3.632 |
| 1T2Q | L_ARG.67  | NH2 | L_ASP_88  | OD1 | 2.658 |
| 1T2Q | L_ARG.67  | NH2 | L_ASP_88  | OD2 | 3.450 |
| 1T2Q | L_LYS_109 | NZ  | L_ASP_171 | OD1 | 3.845 |
| 1T2Q | L_LYS_148 | NZ  | L_GLU_111 | OE2 | 3.401 |
| 1T2Q | L_LYS_155 | NZ  | L_GLU_201 | OE1 | 3.097 |
| 1T2Q | L_LYS_155 | NZ  | L_GLU_201 | OE2 | 2.790 |
| 1T2Q | L_ARG_194 | NH2 | L_ASP_190 | OD2 | 2.982 |
| 1T2Q | L_HIS_195 | ND1 | L_ASP_157 | OD2 | 2.589 |
| 1T2Q | H_ARG.39  | NH1 | H_ASP_90  | OD1 | 2.798 |
| 1T2Q | H_ARG.39  | NH2 | H_GLU_47  | OE1 | 2.910 |
| 1T2Q | H_ARG.39  | NH2 | H_GLU_47  | OE2 | 3.823 |
| 1T2Q | H_ARG.39  | NH2 | H_ASP_90  | OD1 | 3.822 |
| 1T2Q | H_LYS.44  | NZ  | H_ASP_89  | OD2 | 3.291 |
| 1T2Q | H_ARG.67  | NH1 | H_ASP_90  | OD1 | 3.874 |
| 1T2Q | H_ARG.67  | NH1 | H_ASP_90  | OD2 | 2.949 |
| 1T2Q | H_ARG.67  | NH2 | H_ASP_90  | OD1 | 2.874 |
| 1T2Q | H_ARG.67  | NH2 | H_ASP_90  | OD2 | 3.246 |
| 1T2Q | H_LYS.76  | NZ  | H_ASP_73  | OD2 | 3.621 |
| 1T2Q | H_ARG.98  | NH2 | H_ASP_107 | OD1 | 3.528 |
| 1T2Q | H_ARG.98  | NH2 | H_ASP_107 | OD2 | 2.637 |
| 1T6V | L_LYS.1   | NZ  | L_GLU_7   | OE1 | 3.814 |
| 1T6V | L_LYS.1   | NZ  | L_GLU_7   | OE2 | 2.661 |
| 1T6V | L_ARG.61  | NH1 | L_ASP_48  | OD2 | 3.269 |
| 1T6V | L_ARG.73  | NH1 | N_ASP_93  | OD2 | 3.564 |
| 1T6V | L_ARG.73  | NH2 | N_ASP_93  | OD1 | 3.874 |
| 1T6V | L_ARG.73  | NH2 | N_ASP_93  | OD2 | 2.603 |
| 1T6V | L_ARG_125 | NH1 | L_ASP_119 | OD2 | 3.001 |
| 1T6V | L_ARG_125 | NH2 | L_ASP_119 | OD1 | 3.584 |
| 1T6V | L_ARG_125 | NH2 | L_ASP_119 | OD2 | 2.767 |
| 1T6V | N_ARG.2   | NH2 | N_ASP.4   | OD1 | 3.696 |
| 1T6V | N_ARG.2   | NH2 | N_ASP.4   | OD2 | 3.005 |
| 1T6V | N_ARG.25  | NH1 | N_ASP.4   | OD2 | 2.946 |
| 1T6V | N_ARG.38  | NH2 | N_GLU_47  | OE1 | 3.551 |
| 1T6V | N_LYS.40  | NZ  | N_GLU_76  | OE1 | 3.049 |
| 1T6V | N_LYS.51  | NZ  | N_GLU_57  | OE1 | 2.788 |
| 1T6V | N_LYS.51  | NZ  | N_GLU_57  | OE2 | 3.528 |
| 1T6V | N_ARG.54  | NH1 | N_ASP_77  | OD1 | 2.809 |

|      |           |     |           |     |       |
|------|-----------|-----|-----------|-----|-------|
| 1T6V | N_ARG_54  | NH1 | N_ASP_77  | OD2 | 3.785 |
| 1T6V | N_ARG_54  | NH2 | N_ASP_77  | OD1 | 3.326 |
| 1T6V | N_ARG_54  | NH2 | N_ASP_77  | OD2 | 2.873 |
| 1T6V | N_ARG_100 | NH1 | L_ASP_52  | OD1 | 2.973 |
| 1T6V | N_ARG_100 | NH1 | L_ASP_52  | OD2 | 3.510 |
| 1T6V | N_ARG_100 | NH2 | L_ASP_52  | OD1 | 3.501 |
| 1T6V | N_ARG_100 | NH2 | L_ASP_52  | OD2 | 3.094 |
| 1T6V | M_LYS_1   | NZ  | M_GLU_7   | OE1 | 3.728 |
| 1T6V | M_LYS_1   | NZ  | M_GLU_7   | OE2 | 2.757 |
| 1T6V | M_ARG_61  | NH1 | M_ASP_48  | OD1 | 3.656 |
| 1T6V | M_ARG_61  | NH1 | M_ASP_48  | OD2 | 3.383 |
| 1T6V | M_ARG_73  | NH2 | O_ASP_93  | OD1 | 3.734 |
| 1T6V | M_ARG_73  | NH2 | O_ASP_93  | OD2 | 2.904 |
| 1T6V | M_LYS_97  | NZ  | N_ASP_106 | OD1 | 3.749 |
| 1T6V | M_LYS_97  | NZ  | N_ASP_106 | OD2 | 2.853 |
| 1T6V | M_ARG_125 | NH1 | M_ASP_119 | OD2 | 2.764 |
| 1T6V | M_ARG_125 | NH2 | M_ASP_119 | OD1 | 3.456 |
| 1T6V | M_ARG_125 | NH2 | M_ASP_119 | OD2 | 3.061 |
| 1T6V | O_ARG_2   | NH1 | O_ASP_26  | OD2 | 3.626 |
| 1T6V | O_ARG_2   | NH2 | O_ASP_4   | OD1 | 3.686 |
| 1T6V | O_ARG_2   | NH2 | O_ASP_4   | OD2 | 2.970 |
| 1T6V | O_ARG_8   | NH1 | O_ASP_106 | OD1 | 3.002 |
| 1T6V | O_ARG_8   | NH2 | O_ASP_106 | OD1 | 3.850 |
| 1T6V | O_LYS_51  | NZ  | O_GLU_57  | OE1 | 2.819 |
| 1T6V | O_LYS_51  | NZ  | O_GLU_57  | OE2 | 3.551 |
| 1T6V | O_ARG_54  | NH1 | O_ASP_77  | OD1 | 3.107 |
| 1T6V | O_ARG_54  | NH1 | O_ASP_77  | OD2 | 3.912 |
| 1T6V | O_ARG_54  | NH2 | O_ASP_77  | OD1 | 3.448 |
| 1T6V | O_ARG_54  | NH2 | O_ASP_77  | OD2 | 2.988 |
| 1T6V | O_ARG_82  | NH1 | O_GLU_46  | OE1 | 3.614 |
| 1T6V | O_ARG_82  | NH1 | O_GLU_46  | OE2 | 3.761 |
| 1T6V | O_ARG_100 | NH1 | M_ASP_52  | OD1 | 3.232 |
| 1T6V | O_ARG_100 | NH1 | M_ASP_52  | OD2 | 2.872 |
| 1T6V | O_ARG_100 | NH2 | M_ASP_52  | OD1 | 3.920 |
| 1T6V | O_ARG_100 | NH2 | M_ASP_52  | OD2 | 2.990 |
| 1TYE | A_HIS_30  | ND1 | A_GLU_136 | OE2 | 3.797 |
| 1TYE | A_HIS_30  | ND1 | E_ASP_429 | OD2 | 3.896 |
| 1TYE | A_HIS_30  | NE2 | A_GLU_136 | OE2 | 3.547 |
| 1TYE | A_ARG_32  | NH1 | E_ASP_429 | OD1 | 3.657 |
| 1TYE | A_ARG_32  | NH1 | E_ASP_429 | OD2 | 2.825 |
| 1TYE | A_ARG_73  | NH1 | C_ASP_71  | OD1 | 3.528 |
| 1TYE | A_ARG_73  | NH1 | C_ASP_71  | OD2 | 3.396 |
| 1TYE | A_ARG_73  | NH2 | A_ASP_71  | OD1 | 3.946 |
| 1TYE | A_ARG_73  | NH2 | A_ASP_71  | OD2 | 3.781 |
| 1TYE | A_ARG_73  | NH2 | C_ASP_71  | OD2 | 2.714 |
| 1TYE | A_ARG_73  | NH2 | C_GLU_75  | OE1 | 3.907 |
| 1TYE | A_LYS_88  | NZ  | A_ASP_71  | OD1 | 3.924 |
| 1TYE | A_LYS_88  | NZ  | A_GLU_75  | OE1 | 3.696 |
| 1TYE | A_ARG_90  | NH2 | A_GLU_49  | OE1 | 3.556 |
| 1TYE | A_ARG_147 | NH1 | A_GLU_142 | OE2 | 3.894 |
| 1TYE | A_ARG_147 | NH2 | A_GLU_142 | OE2 | 3.182 |
| 1TYE | A_ARG_153 | NH1 | A_GLU_157 | OE2 | 3.772 |
| 1TYE | A_ARG_153 | NH2 | A_GLU_120 | OE1 | 3.065 |
| 1TYE | A_ARG_153 | NH2 | A_GLU_120 | OE2 | 3.052 |
| 1TYE | A_ARG_165 | NH1 | A_ASP_163 | OD1 | 2.964 |
| 1TYE | A_ARG_165 | NH1 | A_ASP_163 | OD2 | 2.782 |
| 1TYE | A_ARG_165 | NH2 | A_GLU_123 | OE1 | 2.740 |
| 1TYE | A_ARG_165 | NH2 | A_GLU_123 | OE2 | 3.080 |

|      |           |     |           |     |       |
|------|-----------|-----|-----------|-----|-------|
| 1TYE | A_ARG_279 | NH2 | A_GLU_268 | OE2 | 3.715 |
| 1TYE | A_ARG_327 | NH1 | A_GLU_283 | OE1 | 2.906 |
| 1TYE | A_ARG_335 | NH1 | A_ASP_301 | OD1 | 3.950 |
| 1TYE | A_ARG_335 | NH1 | A_ASP_301 | OD2 | 2.979 |
| 1TYE | A_ARG_335 | NH2 | A_ASP_301 | OD1 | 3.045 |
| 1TYE | A_ARG_335 | NH2 | A_ASP_301 | OD2 | 3.119 |
| 1TYE | A_ARG_422 | NH1 | A_ASP_24  | OD1 | 3.230 |
| 1TYE | B_ARG_91  | NH1 | B_GLU_60  | OE1 | 3.253 |
| 1TYE | B_ARG_91  | NH2 | B_ASP_432 | OD2 | 3.964 |
| 1TYE | B_ARG_105 | NH1 | B_ASP_71  | OD1 | 3.549 |
| 1TYE | B_LYS_159 | NZ  | B_ASP_224 | OD1 | 3.816 |
| 1TYE | B_LYS_159 | NZ  | B_ASP_224 | OD2 | 2.677 |
| 1TYE | B_LYS_209 | NZ  | B_GLU_206 | OE1 | 3.537 |
| 1TYE | B_LYS_209 | NZ  | B_GLU_206 | OE2 | 3.891 |
| 1TYE | B_ARG_216 | NH1 | A_GLU_123 | OE1 | 2.702 |
| 1TYE | B_ARG_239 | NH1 | B_ASP_113 | OD1 | 2.627 |
| 1TYE | B_LYS_253 | NZ  | A_ASP_232 | OD2 | 3.290 |
| 1TYE | B_HIS_255 | ND1 | B_ASP_259 | OD2 | 3.030 |
| 1TYE | B_HIS_255 | NE2 | B_ASP_158 | OD2 | 3.791 |
| 1TYE | B_HIS_255 | NE2 | B_ASP_217 | OD1 | 3.796 |
| 1TYE | B_HIS_255 | NE2 | B_ASP_217 | OD2 | 2.660 |
| 1TYE | B_HIS_274 | NE2 | B_ASP_270 | OD1 | 3.163 |
| 1TYE | B_HIS_274 | NE2 | B_ASP_270 | OD2 | 2.921 |
| 1TYE | B_HIS_280 | ND1 | B_ASP_278 | OD2 | 3.747 |
| 1TYE | B_LYS_298 | NZ  | B_GLU_297 | OE2 | 3.673 |
| 1TYE | B_LYS_302 | NZ  | B_ASP_233 | OD1 | 3.013 |
| 1TYE | B_LYS_302 | NZ  | B_ASP_233 | OD2 | 3.373 |
| 1TYE | B_LYS_354 | NZ  | B_GLU_356 | OE1 | 3.389 |
| 1TYE | B_LYS_390 | NZ  | B_ASP_393 | OD2 | 3.994 |
| 1TYE | B_ARG_404 | NH2 | B_GLU_364 | OE2 | 2.885 |
| 1TYE | B_LYS_410 | NZ  | B_ASP_434 | OD1 | 3.437 |
| 1TYE | C_ARG_73  | NH1 | A_ASP_71  | OD1 | 3.491 |
| 1TYE | C_ARG_73  | NH2 | A_ASP_71  | OD1 | 3.688 |
| 1TYE | C_ARG_73  | NH2 | A_ASP_71  | OD2 | 3.197 |
| 1TYE | C_ARG_73  | NH2 | C_ASP_71  | OD1 | 3.681 |
| 1TYE | C_ARG_73  | NH2 | C_ASP_71  | OD2 | 3.705 |
| 1TYE | C_LYS_88  | NZ  | C_ASP_71  | OD1 | 3.778 |
| 1TYE | C_LYS_88  | NZ  | C_GLU_75  | OE2 | 3.812 |
| 1TYE | C_ARG_90  | NH1 | C_GLU_49  | OE1 | 2.673 |
| 1TYE | C_ARG_90  | NH1 | C_GLU_49  | OE2 | 3.918 |
| 1TYE | C_LYS_118 | NZ  | C_GLU_117 | OE2 | 3.898 |
| 1TYE | C_ARG_147 | NH1 | C_GLU_142 | OE2 | 3.614 |
| 1TYE | C_ARG_147 | NH2 | C_GLU_142 | OE2 | 3.566 |
| 1TYE | C_ARG_153 | NH2 | C_GLU_120 | OE1 | 3.220 |
| 1TYE | C_ARG_153 | NH2 | C_GLU_120 | OE2 | 3.597 |
| 1TYE | C_ARG_165 | NH1 | C_ASP_163 | OD1 | 3.313 |
| 1TYE | C_ARG_165 | NH1 | C_ASP_163 | OD2 | 2.716 |
| 1TYE | C_ARG_165 | NH2 | C_GLU_123 | OE1 | 3.193 |
| 1TYE | C_ARG_165 | NH2 | C_GLU_123 | OE2 | 3.129 |
| 1TYE | C_ARG_279 | NH2 | C_GLU_268 | OE2 | 3.615 |
| 1TYE | C_ARG_281 | NH2 | C_GLU_229 | OE2 | 3.746 |
| 1TYE | C_ARG_327 | NH1 | C_GLU_283 | OE2 | 2.647 |
| 1TYE | C_ARG_422 | NH1 | C_ASP_24  | OD1 | 2.911 |
| 1TYE | C_ARG_422 | NH1 | C_ASP_24  | OD2 | 3.921 |
| 1TYE | D_LYS_46  | NZ  | D_ASP_47  | OD2 | 3.909 |
| 1TYE | D_ARG_62  | NH2 | D_GLU_60  | OE1 | 3.320 |
| 1TYE | D_ARG_91  | NH1 | D_ASP_432 | OD2 | 3.976 |
| 1TYE | D_ARG_91  | NH2 | D_ASP_432 | OD1 | 3.669 |

|      |           |     |           |     |       |
|------|-----------|-----|-----------|-----|-------|
| 1TYE | D_ARG_91  | NH2 | D_ASP_432 | OD2 | 3.225 |
| 1TYE | D_ARG_105 | NH1 | D_ASP_71  | OD1 | 3.673 |
| 1TYE | D_LYS_159 | NZ  | D_ASP_224 | OD1 | 3.999 |
| 1TYE | D_LYS_159 | NZ  | D_ASP_224 | OD2 | 2.881 |
| 1TYE | D_LYS_209 | NZ  | D_GLU_206 | OE2 | 3.266 |
| 1TYE | D_ARG_216 | NH1 | C_GLU_123 | OE1 | 2.914 |
| 1TYE | D_ARG_216 | NH1 | C_GLU_123 | OE2 | 3.969 |
| 1TYE | D_ARG_239 | NH1 | D_ASP_113 | OD1 | 2.677 |
| 1TYE | D_HIS_244 | NE2 | D_ASP_113 | OD2 | 3.772 |
| 1TYE | D_LYS_253 | NZ  | C_ASP_232 | OD2 | 3.400 |
| 1TYE | D_HIS_255 | ND1 | D_ASP_259 | OD2 | 2.788 |
| 1TYE | D_HIS_255 | NE2 | D_ASP_158 | OD2 | 3.582 |
| 1TYE | D_HIS_255 | NE2 | D_ASP_217 | OD1 | 3.881 |
| 1TYE | D_HIS_255 | NE2 | D_ASP_217 | OD2 | 2.918 |
| 1TYE | D_HIS_274 | NE2 | D_ASP_270 | OD1 | 3.141 |
| 1TYE | D_HIS_274 | NE2 | D_ASP_270 | OD2 | 2.980 |
| 1TYE | D_HIS_280 | ND1 | D_ASP_278 | OD2 | 3.600 |
| 1TYE | D_LYS_298 | NZ  | D_GLU_297 | OE2 | 3.766 |
| 1TYE | D_LYS_302 | NZ  | D_ASP_233 | OD1 | 3.683 |
| 1TYE | D_LYS_302 | NZ  | D_ASP_233 | OD2 | 3.005 |
| 1TYE | D_LYS_354 | NZ  | D_GLU_356 | OE1 | 3.054 |
| 1TYE | D_LYS_354 | NZ  | D_GLU_356 | OE2 | 3.182 |
| 1TYE | D_ARG_360 | NH1 | D_GLU_358 | OE2 | 2.869 |
| 1TYE | E_HIS_30  | NE2 | E_GLU_136 | OE2 | 3.296 |
| 1TYE | E_ARG_32  | NH2 | E_ASP_28  | OD2 | 3.193 |
| 1TYE | E_ARG_73  | NH2 | E_ASP_71  | OD2 | 3.212 |
| 1TYE | E_LYS_88  | NZ  | E_GLU_75  | OE1 | 3.717 |
| 1TYE | E_ARG_90  | NH1 | E_GLU_49  | OE1 | 3.580 |
| 1TYE | E_ARG_153 | NH1 | E_GLU_157 | OE2 | 3.995 |
| 1TYE | E_ARG_153 | NH2 | E_GLU_120 | OE1 | 3.767 |
| 1TYE | E_ARG_165 | NH1 | E_ASP_163 | OD1 | 3.534 |
| 1TYE | E_ARG_165 | NH1 | E_ASP_163 | OD2 | 2.834 |
| 1TYE | E_ARG_165 | NH2 | E_GLU_123 | OE1 | 2.970 |
| 1TYE | E_ARG_165 | NH2 | E_GLU_123 | OE2 | 3.167 |
| 1TYE | E_ARG_279 | NH2 | E_GLU_268 | OE2 | 3.525 |
| 1TYE | E_ARG_281 | NH2 | E_GLU_229 | OE2 | 3.697 |
| 1TYE | E_ARG_327 | NH1 | E_GLU_283 | OE2 | 2.691 |
| 1TYE | E_ARG_355 | NH1 | E_GLU_324 | OE2 | 3.503 |
| 1TYE | E_ARG_368 | NH2 | A_ASP_429 | OD2 | 3.921 |
| 1TYE | E_ARG_422 | NH1 | E_ASP_24  | OD1 | 3.604 |
| 1TYE | E_ARG_422 | NH1 | E_ASP_24  | OD2 | 3.672 |
| 1TYE | F_ARG_67  | NH2 | F_GLU_65  | OE1 | 3.259 |
| 1TYE | F_ARG_91  | NH1 | F_GLU_60  | OE2 | 2.911 |
| 1TYE | F_ARG_91  | NH2 | F_ASP_432 | OD2 | 2.722 |
| 1TYE | F_LYS_159 | NZ  | F_ASP_224 | OD2 | 2.976 |
| 1TYE | F_LYS_209 | NZ  | F_GLU_206 | OE1 | 3.424 |
| 1TYE | F_ARG_214 | NH2 | F_ASP_179 | OD2 | 2.925 |
| 1TYE | F_ARG_216 | NH1 | E_GLU_123 | OE1 | 2.938 |
| 1TYE | F_ARG_216 | NH1 | E_GLU_123 | OE2 | 3.244 |
| 1TYE | F_ARG_239 | NH1 | F_ASP_113 | OD1 | 2.831 |
| 1TYE | F_ARG_239 | NH1 | F_ASP_113 | OD2 | 3.398 |
| 1TYE | F_HIS_244 | NE2 | F_ASP_113 | OD2 | 3.408 |
| 1TYE | F_LYS_253 | NZ  | E_ASP_232 | OD2 | 3.394 |
| 1TYE | F_HIS_255 | ND1 | F_ASP_259 | OD2 | 2.813 |
| 1TYE | F_HIS_255 | NE2 | F_ASP_158 | OD2 | 3.756 |
| 1TYE | F_HIS_255 | NE2 | F_ASP_217 | OD1 | 3.834 |
| 1TYE | F_HIS_255 | NE2 | F_ASP_217 | OD2 | 2.822 |
| 1TYE | F_HIS_274 | NE2 | F_ASP_270 | OD1 | 3.189 |

|      |           |     |           |     |       |
|------|-----------|-----|-----------|-----|-------|
| 1TYE | F_HIS_274 | NE2 | F_ASP_270 | OD2 | 2.810 |
| 1TYE | F_HIS_280 | ND1 | F_ASP_278 | OD2 | 3.328 |
| 1TYE | F_LYS_298 | NZ  | F_GLU_297 | OE2 | 3.779 |
| 1TYE | F_LYS_302 | NZ  | F_ASP_233 | OD2 | 2.915 |
| 1TYE | F_LYS_354 | NZ  | F_GLU_356 | OE2 | 3.665 |
| 1TYE | F_ARG_360 | NH1 | F_GLU_358 | OE2 | 2.965 |
| 1TZH | V_ARG_23  | NH1 | W_GLU_30  | OE2 | 3.100 |
| 1TZH | V_ARG_56  | NH1 | V_GLU_38  | OE2 | 3.313 |
| 1TZH | V_ARG_56  | NH2 | V_GLU_38  | OE1 | 3.086 |
| 1TZH | V_ARG_56  | NH2 | V_GLU_38  | OE2 | 3.428 |
| 1TZH | V_ARG_82  | NH2 | V_GLU_42  | OE1 | 2.933 |
| 1TZH | V_LYS_84  | NZ  | V_GLU_44  | OE2 | 3.642 |
| 1TZH | V_HIS_90  | NE2 | H_ASP_33  | OD1 | 2.826 |
| 1TZH | V_HIS_90  | NE2 | H_ASP_33  | OD2 | 2.524 |
| 1TZH | V_ARG_105 | NH2 | V_GLU_103 | OE1 | 3.855 |
| 1TZH | W_ARG_23  | NH1 | V_GLU_30  | OE1 | 3.346 |
| 1TZH | W_ARG_56  | NH1 | W_GLU_38  | OE2 | 3.335 |
| 1TZH | W_ARG_56  | NH2 | W_GLU_38  | OE1 | 3.077 |
| 1TZH | W_ARG_56  | NH2 | W_GLU_38  | OE2 | 3.382 |
| 1TZH | W_ARG_82  | NH2 | W_GLU_42  | OE2 | 2.977 |
| 1TZH | W_HIS_90  | NE2 | B_ASP_33  | OD1 | 3.121 |
| 1TZH | W_HIS_90  | NE2 | B_ASP_33  | OD2 | 2.585 |
| 1TZH | W_HIS_99  | NE2 | W_GLU_73  | OE2 | 3.842 |
| 1TZH | W_ARG_105 | NH2 | W_GLU_103 | OE1 | 3.129 |
| 1TZH | W_LYS_107 | NZ  | W_GLU_67  | OE1 | 3.188 |
| 1TZH | W_LYS_107 | NZ  | W_GLU_67  | OE2 | 3.161 |
| 1TZH | A_ARG_24  | NH1 | A_ASP_70  | OD2 | 3.886 |
| 1TZH | A_ARG_61  | NH2 | A_GLU_81  | OE1 | 3.363 |
| 1TZH | A_ARG_61  | NH2 | A_ASP_82  | OD1 | 3.162 |
| 1TZH | A_ARG_61  | NH2 | A_ASP_82  | OD2 | 3.912 |
| 1TZH | A_LYS_103 | NZ  | A_GLU_165 | OE1 | 2.800 |
| 1TZH | A_LYS_103 | NZ  | A_GLU_165 | OE2 | 3.540 |
| 1TZH | A_LYS_149 | NZ  | A_GLU_195 | OE1 | 3.634 |
| 1TZH | A_LYS_149 | NZ  | A_GLU_195 | OE2 | 2.910 |
| 1TZH | A_LYS_183 | NZ  | A_GLU_187 | OE1 | 3.287 |
| 1TZH | A_LYS_183 | NZ  | A_GLU_187 | OE2 | 2.651 |
| 1TZH | A_LYS_188 | NZ  | A_ASP_185 | OD1 | 3.831 |
| 1TZH | A_HIS_189 | ND1 | A_ASP_151 | OD2 | 2.992 |
| 1TZH | B_ARG_38  | NH1 | B_ASP_86  | OD1 | 3.008 |
| 1TZH | B_ARG_38  | NH2 | B_GLU_46  | OE1 | 3.146 |
| 1TZH | B_ARG_38  | NH2 | B_GLU_46  | OE2 | 3.677 |
| 1TZH | B_ARG_38  | NH2 | B_ASP_86  | OD1 | 3.681 |
| 1TZH | B_ARG_66  | NH1 | B_ASP_86  | OD1 | 3.515 |
| 1TZH | B_ARG_66  | NH1 | B_ASP_86  | OD2 | 2.745 |
| 1TZH | B_ARG_66  | NH2 | B_ASP_86  | OD1 | 3.270 |
| 1TZH | B_ARG_66  | NH2 | B_ASP_86  | OD2 | 3.900 |
| 1TZH | B_ARG_94  | NH2 | B_ASP_32  | OD1 | 3.304 |
| 1TZH | B_ARG_94  | NH2 | B_ASP_32  | OD2 | 3.875 |
| 1TZH | B_LYS_143 | NZ  | B_ASP_144 | OD1 | 2.731 |
| 1TZH | B_LYS_143 | NZ  | B_ASP_144 | OD2 | 3.209 |
| 1TZH | B_LYS_209 | NZ  | A_GLU_123 | OE2 | 3.903 |
| 1TZH | L_ARG_24  | NH2 | L_ASP_70  | OD2 | 3.428 |
| 1TZH | L_ARG_61  | NH2 | L_GLU_81  | OE1 | 3.330 |
| 1TZH | L_ARG_61  | NH2 | L_ASP_82  | OD1 | 3.040 |
| 1TZH | L_ARG_61  | NH2 | L_ASP_82  | OD2 | 3.443 |
| 1TZH | L_LYS_103 | NZ  | L_GLU_105 | OE2 | 3.246 |
| 1TZH | L_LYS_103 | NZ  | L_GLU_165 | OE1 | 3.341 |
| 1TZH | L_LYS_103 | NZ  | L_GLU_165 | OE2 | 3.547 |

|      |           |     |           |     |       |
|------|-----------|-----|-----------|-----|-------|
| 1TZH | L_ARG_142 | NH2 | L_GLU_165 | OE1 | 3.821 |
| 1TZH | L_LYS_183 | NZ  | L_GLU_187 | OE2 | 3.055 |
| 1TZH | L_ARG_211 | NH2 | L_GLU_187 | OE1 | 3.313 |
| 1TZH | H_ARG_38  | NH1 | H_ASP_86  | OD1 | 3.223 |
| 1TZH | H_ARG_38  | NH2 | H_GLU_46  | OE1 | 3.456 |
| 1TZH | H_ARG_38  | NH2 | H_ASP_86  | OD1 | 3.593 |
| 1TZH | H_ARG_66  | NH1 | H_ASP_86  | OD2 | 3.197 |
| 1TZH | H_ARG_66  | NH2 | H_ASP_86  | OD1 | 2.884 |
| 1TZH | H_ARG_66  | NH2 | H_ASP_86  | OD2 | 3.307 |
| 1TZH | H_ARG_94  | NH2 | H_ASP_32  | OD1 | 3.594 |
| 1TZH | H_ARG_94  | NH2 | H_ASP_32  | OD2 | 2.870 |
| 1TZH | H_LYS_143 | NZ  | H_ASP_144 | OD1 | 3.985 |
| 1TZH | H_LYS_143 | NZ  | H_ASP_144 | OD2 | 3.661 |
| 1TZH | H_HIS_164 | NE2 | L_ASP_167 | OD1 | 3.495 |
| 1TZH | H_LYS_209 | NZ  | L_GLU_123 | OE1 | 2.754 |
| 1TZH | H_LYS_209 | NZ  | L_GLU_123 | OE2 | 3.404 |
| 1TZI | A_ARG_24  | NH1 | A_ASP_70  | OD1 | 3.345 |
| 1TZI | A_ARG_61  | NH2 | A_GLU_81  | OE2 | 3.484 |
| 1TZI | A_ARG_61  | NH2 | A_ASP_82  | OD1 | 3.184 |
| 1TZI | A_LYS_103 | NZ  | A_GLU_165 | OE2 | 3.341 |
| 1TZI | A_LYS_149 | NZ  | A_GLU_195 | OE2 | 3.678 |
| 1TZI | B_HIS_35  | NE2 | B_ASP_33  | OD1 | 3.655 |
| 1TZI | B_HIS_35  | NE2 | B_ASP_33  | OD2 | 3.046 |
| 1TZI | B_HIS_35  | NE2 | B_ASP_50  | OD2 | 3.907 |
| 1TZI | B_ARG_38  | NH1 | B_ASP_86  | OD1 | 3.155 |
| 1TZI | B_ARG_38  | NH2 | B_GLU_46  | OE1 | 3.042 |
| 1TZI | B_ARG_38  | NH2 | B_GLU_46  | OE2 | 3.847 |
| 1TZI | B_ARG_38  | NH2 | B_ASP_86  | OD1 | 3.843 |
| 1TZI | B_LYS_64  | NZ  | B_ASP_61  | OD1 | 3.600 |
| 1TZI | B_LYS_64  | NZ  | B_ASP_61  | OD2 | 3.744 |
| 1TZI | B_ARG_66  | NH1 | B_ASP_86  | OD2 | 3.093 |
| 1TZI | B_ARG_66  | NH2 | B_ASP_86  | OD1 | 3.082 |
| 1TZI | B_ARG_66  | NH2 | B_ASP_86  | OD2 | 3.244 |
| 1TZI | B_ARG_94  | NH2 | B_ASP_101 | OD1 | 3.674 |
| 1TZI | B_ARG_94  | NH2 | B_ASP_101 | OD2 | 2.631 |
| 1TZI | B_LYS_143 | NZ  | B_ASP_144 | OD1 | 3.643 |
| 1TZI | B_LYS_143 | NZ  | B_ASP_144 | OD2 | 3.293 |
| 1TZI | B_LYS_209 | NZ  | A_GLU_123 | OE2 | 3.786 |
| 1TZI | V_ARG_56  | NH1 | V_GLU_38  | OE1 | 3.287 |
| 1TZI | V_ARG_56  | NH1 | V_GLU_38  | OE2 | 3.396 |
| 1TZI | V_ARG_56  | NH2 | V_GLU_38  | OE2 | 3.863 |
| 1TZI | V_HIS_99  | NE2 | V_GLU_73  | OE2 | 3.539 |
| 1U6A | L_ARG_24  | NH2 | L_ASP_70  | OD2 | 3.902 |
| 1U6A | L_ARG_61  | NH1 | L_GLU_79  | OE2 | 3.901 |
| 1U6A | L_ARG_61  | NH2 | L_GLU_81  | OE2 | 3.590 |
| 1U6A | L_ARG_61  | NH2 | L_ASP_82  | OD1 | 2.937 |
| 1U6A | L_ARG_61  | NH2 | L_ASP_82  | OD2 | 3.603 |
| 1U6A | L_LYS_149 | NZ  | L_GLU_195 | OE1 | 2.946 |
| 1U6A | L_LYS_149 | NZ  | L_GLU_195 | OE2 | 3.367 |
| 1U6A | L_LYS_188 | NZ  | L_ASP_185 | OD1 | 3.941 |
| 1U6A | L_HIS_189 | ND1 | L_ASP_151 | OD2 | 2.371 |
| 1U6A | L_ARG_211 | NH1 | L_GLU_187 | OE1 | 2.862 |
| 1U6A | H_ARG_38  | NH1 | H_ASP_86  | OD1 | 2.883 |
| 1U6A | H_ARG_38  | NH2 | H_ASP_86  | OD1 | 3.710 |
| 1U6A | H_ARG_66  | NH1 | H_ASP_86  | OD1 | 3.475 |
| 1U6A | H_ARG_66  | NH1 | H_ASP_86  | OD2 | 2.761 |
| 1U6A | H_ARG_66  | NH2 | H_ASP_86  | OD1 | 2.683 |
| 1U6A | H_ARG_66  | NH2 | H_ASP_86  | OD2 | 3.375 |



|      |           |     |           |     |       |
|------|-----------|-----|-----------|-----|-------|
| 1U6A | H.LYS_143 | NZ  | H.ASP_144 | OD1 | 3.705 |
| 1U6A | H.LYS_143 | NZ  | H.ASP_144 | OD2 | 3.600 |
| 1U6A | H.HIS_164 | NE2 | L.ASP_167 | OD1 | 3.994 |
| 1U6A | H.LYS_210 | NZ  | H.GLU_212 | OE2 | 3.157 |
| 1UA6 | L.ARG_61  | NH1 | L.GLU_81  | OE2 | 3.789 |
| 1UA6 | L.ARG_61  | NH2 | L.GLU_81  | OE2 | 2.779 |
| 1UA6 | L.ARG_61  | NH2 | L.ASP_82  | OD1 | 2.629 |
| 1UA6 | L.ARG_61  | NH2 | L.ASP_82  | OD2 | 3.362 |
| 1UA6 | L.LYS_103 | NZ  | L.GLU_105 | OE2 | 3.651 |
| 1UA6 | H.ARG_38  | NH1 | H.ASP_89  | OD2 | 2.881 |
| 1UA6 | H.ARG_38  | NH2 | H.GLU_46  | OE1 | 2.829 |
| 1UA6 | H.ARG_38  | NH2 | H.ASP_89  | OD2 | 3.526 |
| 1UA6 | H.ARG_66  | NH1 | H.ASP_89  | OD1 | 3.005 |
| 1UA6 | H.ARG_66  | NH1 | H.ASP_89  | OD2 | 3.836 |
| 1UA6 | H.ARG_66  | NH2 | H.ASP_89  | OD1 | 3.531 |
| 1UA6 | H.ARG_66  | NH2 | H.ASP_89  | OD2 | 2.947 |
| 1UA6 | Y.LYS_1   | NZ  | Y.GLU_7   | OE2 | 3.070 |
| 1UA6 | Y.LYS_13  | NZ  | Y.ASP_18  | OD2 | 2.985 |
| 1UA6 | Y.LYS_97  | NZ  | H.ASP_32  | OD1 | 2.722 |
| 1UA6 | Y.LYS_97  | NZ  | H.ASP_99  | OD2 | 2.674 |
| 1UA6 | Y.ARG_125 | NH1 | Y.ASP_119 | OD1 | 3.848 |
| 1UA6 | Y.ARG_125 | NH1 | Y.ASP_119 | OD2 | 3.662 |
| 1UA6 | Y.ARG_125 | NH2 | Y.ASP_119 | OD2 | 2.731 |
| 1UAC | L.ARG_45  | NH2 | L.GLU_42  | OE1 | 3.506 |
| 1UAC | L.ARG_61  | NH1 | L.GLU_79  | OE1 | 3.446 |
| 1UAC | L.ARG_61  | NH1 | L.GLU_79  | OE2 | 3.988 |
| 1UAC | L.ARG_61  | NH2 | L.GLU_79  | OE1 | 3.597 |
| 1UAC | L.ARG_61  | NH2 | L.GLU_81  | OE2 | 2.939 |
| 1UAC | L.ARG_61  | NH2 | L.ASP_82  | OD1 | 3.382 |
| 1UAC | L.ARG_61  | NH2 | L.ASP_82  | OD2 | 3.786 |
| 1UAC | H.ARG_38  | NH1 | H.ASP_89  | OD1 | 2.495 |
| 1UAC | H.ARG_38  | NH2 | H.GLU_46  | OE1 | 2.848 |
| 1UAC | H.ARG_38  | NH2 | H.ASP_89  | OD1 | 3.590 |
| 1UAC | H.ARG_66  | NH1 | H.ASP_89  | OD1 | 3.633 |
| 1UAC | H.ARG_66  | NH1 | H.ASP_89  | OD2 | 2.604 |
| 1UAC | H.ARG_66  | NH2 | H.ASP_89  | OD1 | 3.226 |
| 1UAC | H.ARG_66  | NH2 | H.ASP_89  | OD2 | 3.547 |
| 1UAC | Y.LYS_1   | NZ  | Y.GLU_7   | OE2 | 3.056 |
| 1UAC | Y.LYS_13  | NZ  | Y.ASP_18  | OD2 | 3.156 |
| 1UAC | Y.LYS_97  | NZ  | H.ASP_32  | OD1 | 2.750 |
| 1UAC | Y.LYS_97  | NZ  | H.ASP_32  | OD2 | 3.845 |
| 1UAC | Y.LYS_97  | NZ  | H.ASP_99  | OD2 | 2.749 |
| 1UAC | Y.HIS_121 | ND1 | Y.ASP_119 | OD1 | 3.781 |
| 1UAC | Y.HIS_121 | NE2 | Y.ASP_119 | OD1 | 3.474 |
| 1UAC | Y.ARG_125 | NH1 | Y.ASP_119 | OD1 | 3.237 |
| 1UAC | Y.ARG_125 | NH1 | Y.ASP_119 | OD2 | 3.553 |
| 1UAC | Y.ARG_125 | NH2 | Y.ASP_119 | OD1 | 3.403 |
| 1UAC | Y.ARG_125 | NH2 | Y.ASP_119 | OD2 | 2.499 |
| 1UCB | L.ARG_24  | NH1 | L.ASP_70  | OD1 | 3.292 |
| 1UCB | L.ARG_24  | NH1 | L.ASP_70  | OD2 | 3.887 |
| 1UCB | L.ARG_24  | NH2 | L.ASP_70  | OD1 | 3.839 |
| 1UCB | L.ARG_24  | NH2 | L.ASP_70  | OD2 | 3.203 |
| 1UCB | L.LYS_50  | NZ  | H.ASP_98  | OD1 | 3.160 |
| 1UCB | L.ARG_61  | NH1 | L.ASP_82  | OD2 | 2.752 |
| 1UCB | L.ARG_61  | NH2 | L.GLU_81  | OE2 | 3.557 |
| 1UCB | L.ARG_61  | NH2 | L.ASP_82  | OD1 | 2.863 |
| 1UCB | L.ARG_61  | NH2 | L.ASP_82  | OD2 | 2.961 |
| 1UCB | L.ARG_77  | NH2 | L.GLU_79  | OE1 | 3.741 |

|      |           |     |           |     |       |
|------|-----------|-----|-----------|-----|-------|
| 1UCB | L_ARG_77  | NH2 | L_GLU_79  | OE2 | 2.900 |
| 1UCB | L_LYS_103 | NZ  | L_GLU_165 | OE1 | 3.505 |
| 1UCB | L_LYS_103 | NZ  | L_GLU_165 | OE2 | 3.935 |
| 1UCB | L_ARG_142 | NH2 | L_GLU_165 | OE1 | 3.407 |
| 1UCB | L_LYS_188 | NZ  | L_ASP_185 | OD2 | 3.372 |
| 1UCB | L_HIS_189 | ND1 | L_ASP_151 | OD2 | 3.021 |
| 1UCB | L_ARG_211 | NH2 | L_GLU_187 | OE1 | 3.809 |
| 1UCB | H_ARG_38  | NH1 | H_ASP_86  | OD1 | 2.991 |
| 1UCB | H_ARG_38  | NH2 | H_GLU_46  | OE1 | 3.160 |
| 1UCB | H_LYS_64  | NZ  | H_ASP_61  | OD1 | 2.788 |
| 1UCB | H_LYS_64  | NZ  | H_ASP_61  | OD2 | 3.139 |
| 1UCB | H_ARG_66  | NH1 | H_ASP_86  | OD1 | 3.656 |
| 1UCB | H_ARG_66  | NH1 | H_ASP_86  | OD2 | 2.889 |
| 1UCB | H_ARG_66  | NH2 | H_ASP_86  | OD1 | 3.058 |
| 1UCB | H_ARG_66  | NH2 | H_ASP_86  | OD2 | 3.202 |
| 1UCB | H_LYS_75  | NZ  | H_ASP_72  | OD2 | 3.809 |
| 1UCB | H_LYS_221 | NZ  | L_GLU_123 | OE1 | 3.128 |
| 1UCB | H_ARG_222 | NH1 | H_GLU_226 | OE1 | 3.921 |
| 1UCB | H_ARG_222 | NH1 | H_GLU_226 | OE2 | 3.794 |
| 1UCB | H_ARG_222 | NH2 | H_GLU_226 | OE2 | 3.739 |
| 1UJ3 | A_ARG_61  | NH2 | A_GLU_81  | OE2 | 3.553 |
| 1UJ3 | A_ARG_61  | NH2 | A_ASP_82  | OD1 | 2.902 |
| 1UJ3 | A_ARG_61  | NH2 | A_ASP_82  | OD2 | 3.527 |
| 1UJ3 | A_HIS_91  | NE2 | B_ASP_399 | OD1 | 3.708 |
| 1UJ3 | A_HIS_91  | NE2 | B_ASP_399 | OD2 | 2.884 |
| 1UJ3 | A_LYS_103 | NZ  | A_GLU_165 | OE1 | 3.612 |
| 1UJ3 | A_LYS_103 | NZ  | A_GLU_165 | OE2 | 3.641 |
| 1UJ3 | A_LYS_107 | NZ  | A_ASP_17  | OD2 | 3.650 |
| 1UJ3 | A_LYS_149 | NZ  | A_GLU_195 | OE1 | 2.640 |
| 1UJ3 | A_LYS_149 | NZ  | A_GLU_195 | OE2 | 3.439 |
| 1UJ3 | A_LYS_183 | NZ  | A_GLU_187 | OE1 | 3.625 |
| 1UJ3 | A_LYS_183 | NZ  | A_GLU_187 | OE2 | 3.082 |
| 1UJ3 | A_LYS_188 | NZ  | A_ASP_185 | OD1 | 3.389 |
| 1UJ3 | B_HIS_335 | NE2 | B_ASP_399 | OD1 | 3.715 |
| 1UJ3 | B_LYS_363 | NZ  | B_ASP_361 | OD1 | 2.797 |
| 1UJ3 | B_LYS_363 | NZ  | B_ASP_361 | OD2 | 3.526 |
| 1UJ3 | B_ARG_367 | NH1 | B_ASP_390 | OD1 | 3.568 |
| 1UJ3 | B_ARG_367 | NH1 | B_ASP_390 | OD2 | 2.817 |
| 1UJ3 | B_ARG_367 | NH2 | B_ASP_390 | OD1 | 2.726 |
| 1UJ3 | B_ARG_367 | NH2 | B_ASP_390 | OD2 | 3.364 |
| 1UJ3 | B_ARG_398 | NH2 | B_ASP_405 | OD1 | 3.535 |
| 1UJ3 | B_ARG_398 | NH2 | B_ASP_405 | OD2 | 2.642 |
| 1UJ3 | B_ARG_433 | NH2 | B_GLU_516 | OE2 | 3.825 |
| 1UJ3 | B_LYS_447 | NZ  | B_ASP_448 | OD1 | 3.091 |
| 1UJ3 | B_LYS_447 | NZ  | B_ASP_448 | OD2 | 2.878 |
| 1UJ3 | B_LYS_513 | NZ  | A_GLU_123 | OE1 | 3.554 |
| 1UJ3 | B_LYS_513 | NZ  | A_GLU_123 | OE2 | 3.075 |
| 1UJ3 | B_ARG_514 | NH2 | B_GLU_516 | OE1 | 3.640 |
| 1UJ3 | C_LYS_615 | NZ  | C_GLU_624 | OE1 | 2.927 |
| 1UJ3 | C_LYS_646 | NZ  | C_GLU_662 | OE2 | 3.280 |
| 1UJ3 | C_LYS_648 | NZ  | C_GLU_662 | OE2 | 3.204 |
| 1UJ3 | C_LYS_665 | NZ  | C_GLU_662 | OE1 | 3.069 |
| 1UJ3 | C_LYS_665 | NZ  | C_GLU_662 | OE2 | 3.168 |
| 1UJ3 | C_LYS_722 | NZ  | C_ASP_778 | OD1 | 2.825 |
| 1UJ3 | C_LYS_722 | NZ  | C_ASP_778 | OD2 | 3.467 |
| 1UJ3 | C_LYS_759 | NZ  | C_ASP_780 | OD2 | 2.414 |
| 1UJ3 | C_LYS_766 | NZ  | A_ASP_1   | OD1 | 3.997 |
| 1UJ3 | C_LYS_769 | NZ  | B_ASP_399 | OD1 | 2.791 |

|      |           |     |           |     |       |
|------|-----------|-----|-----------|-----|-------|
| 1UJ3 | C.LYS_769 | NZ  | B.ASP_399 | OD2 | 3.372 |
| 1UJ3 | C.LYS_801 | NZ  | B.ASP_352 | OD1 | 2.774 |
| 1UJ3 | C.LYS_801 | NZ  | B.ASP_352 | OD2 | 3.632 |
| 1UWX | A.LYS_36  | NZ  | A.GLU_32  | OE1 | 2.824 |
| 1UWX | B.LYS_36  | NZ  | B.GLU_32  | OE2 | 2.807 |
| 1UWX | H.LYS_12  | NZ  | H.GLU_10  | OE1 | 3.100 |
| 1UWX | H.LYS_64  | NZ  | H.ASP_61  | OD1 | 3.798 |
| 1UWX | H.ARG_66  | NH1 | H.ASP_86  | OD1 | 2.454 |
| 1UWX | H.ARG_66  | NH1 | H.ASP_86  | OD2 | 2.896 |
| 1UWX | H.ARG_94  | NH2 | H.ASP_101 | OD1 | 2.904 |
| 1UWX | H.ARG_94  | NH2 | H.ASP_101 | OD2 | 3.891 |
| 1UWX | H.HIS_164 | NE2 | L.ASP_168 | OD2 | 3.899 |
| 1UWX | H.LYS_208 | NZ  | L.GLU_124 | OE2 | 2.744 |
| 1UWX | H.LYS_209 | NZ  | H.GLU_211 | OE2 | 3.816 |
| 1UWX | K.ARG_63  | NH1 | K.ASP_84  | OD1 | 3.154 |
| 1UWX | K.ARG_63  | NH1 | K.ASP_84  | OD2 | 2.158 |
| 1UWX | K.ARG_63  | NH2 | K.ASP_84  | OD1 | 3.226 |
| 1UWX | K.ARG_63  | NH2 | K.ASP_84  | OD2 | 3.623 |
| 1UWX | K.LYS_150 | NZ  | K.GLU_196 | OE1 | 3.737 |
| 1UWX | K.LYS_150 | NZ  | K.GLU_196 | OE2 | 3.159 |
| 1UWX | K.ARG_156 | NH1 | K.GLU_186 | OE1 | 2.610 |
| 1UWX | K.ARG_156 | NH1 | K.GLU_186 | OE2 | 3.937 |
| 1UWX | K.ARG_156 | NH2 | K.GLU_186 | OE1 | 3.178 |
| 1UWX | K.ARG_156 | NH2 | K.GLU_186 | OE2 | 2.975 |
| 1UWX | K.LYS_184 | NZ  | K.GLU_188 | OE1 | 3.993 |
| 1UWX | K.HIS_190 | ND1 | K.ASP_152 | OD2 | 2.933 |
| 1UWX | K.LYS_200 | NZ  | K.ASP_111 | OD2 | 3.114 |
| 1UWX | K.ARG_212 | NH1 | K.GLU_188 | OE2 | 3.245 |
| 1UWX | L.ARG_63  | NH1 | L.ASP_84  | OD1 | 3.321 |
| 1UWX | L.ARG_63  | NH1 | L.ASP_84  | OD2 | 2.266 |
| 1UWX | L.ARG_63  | NH2 | L.ASP_84  | OD1 | 3.278 |
| 1UWX | L.ARG_63  | NH2 | L.ASP_84  | OD2 | 3.625 |
| 1UWX | L.LYS_150 | NZ  | L.GLU_196 | OE1 | 3.639 |
| 1UWX | L.LYS_150 | NZ  | L.GLU_196 | OE2 | 3.224 |
| 1UWX | L.ARG_156 | NH1 | L.GLU_186 | OE1 | 2.635 |
| 1UWX | L.ARG_156 | NH1 | L.GLU_186 | OE2 | 3.963 |
| 1UWX | L.ARG_156 | NH2 | L.GLU_186 | OE1 | 3.120 |
| 1UWX | L.ARG_156 | NH2 | L.GLU_186 | OE2 | 2.947 |
| 1UWX | L.LYS_184 | NZ  | L.GLU_188 | OE1 | 3.917 |
| 1UWX | L.HIS_190 | ND1 | L.ASP_152 | OD2 | 2.931 |
| 1UWX | L.LYS_200 | NZ  | L.ASP_111 | OD2 | 3.029 |
| 1UWX | L.ARG_212 | NH1 | L.GLU_188 | OE2 | 3.191 |
| 1UWX | M.LYS_12  | NZ  | M.GLU_10  | OE1 | 3.235 |
| 1UWX | M.LYS_64  | NZ  | M.ASP_61  | OD1 | 3.798 |
| 1UWX | M.ARG_66  | NH1 | M.ASP_86  | OD1 | 2.526 |
| 1UWX | M.ARG_66  | NH1 | M.ASP_86  | OD2 | 2.861 |
| 1UWX | M.ARG_94  | NH2 | M.ASP_101 | OD1 | 2.895 |
| 1UWX | M.ARG_94  | NH2 | M.ASP_101 | OD2 | 3.832 |
| 1UWX | M.LYS_208 | NZ  | K.GLU_124 | OE2 | 2.705 |
| 1UWX | M.LYS_209 | NZ  | M.GLU_211 | OE1 | 3.750 |
| 1UZ6 | E.ARG_24  | NH1 | E.ASP_70  | OD2 | 3.187 |
| 1UZ6 | E.LYS_39  | NZ  | E.GLU_81  | OE1 | 3.464 |
| 1UZ6 | E.ARG_61  | NH1 | E.ASP_82  | OD1 | 3.736 |
| 1UZ6 | E.ARG_61  | NH1 | E.ASP_82  | OD2 | 2.887 |
| 1UZ6 | E.ARG_61  | NH2 | E.GLU_79  | OE1 | 3.920 |
| 1UZ6 | E.ARG_61  | NH2 | E.GLU_79  | OE2 | 3.989 |
| 1UZ6 | E.ARG_61  | NH2 | E.ASP_82  | OD1 | 3.165 |
| 1UZ6 | E.ARG_61  | NH2 | E.ASP_82  | OD2 | 3.643 |

|      |           |     |           |     |       |
|------|-----------|-----|-----------|-----|-------|
| 1UZ6 | E_LYS_103 | NZ  | E_ASP_164 | OD1 | 3.599 |
| 1UZ6 | E_ARG_154 | NH2 | E_GLU_184 | OE1 | 3.820 |
| 1UZ6 | E_ARG_154 | NH2 | E_GLU_184 | OE2 | 3.327 |
| 1UZ6 | E_LYS_182 | NZ  | E_ASP_183 | OD1 | 3.722 |
| 1UZ6 | E_ARG_210 | NH1 | E_GLU_186 | OE1 | 3.231 |
| 1UZ6 | F_ARG_38  | NH1 | F_ASP_86  | OD1 | 2.903 |
| 1UZ6 | F_ARG_38  | NH2 | F_GLU_46  | OE1 | 2.942 |
| 1UZ6 | F_ARG_38  | NH2 | F_ASP_86  | OD1 | 3.966 |
| 1UZ6 | F_LYS_66  | NZ  | F_ASP_86  | OD1 | 3.610 |
| 1UZ6 | F_LYS_66  | NZ  | F_ASP_86  | OD2 | 2.606 |
| 1UZ6 | F_ARG_164 | NH1 | E_ASP_166 | OD1 | 3.662 |
| 1UZ6 | F_ARG_164 | NH2 | E_ASP_166 | OD1 | 3.708 |
| 1UZ6 | F_ARG_164 | NH2 | E_ASP_169 | OD2 | 3.554 |
| 1UZ6 | F_LYS_208 | NZ  | E_GLU_122 | OE1 | 3.883 |
| 1UZ6 | F_ARG_209 | NH1 | E_GLU_122 | OE2 | 3.531 |
| 1UZ6 | H_ARG_38  | NH1 | H_ASP_86  | OD1 | 2.872 |
| 1UZ6 | H_ARG_38  | NH2 | H_GLU_46  | OE1 | 3.043 |
| 1UZ6 | H_ARG_38  | NH2 | H_ASP_86  | OD1 | 3.674 |
| 1UZ6 | H_LYS_66  | NZ  | H_GLU_85  | OE2 | 3.660 |
| 1UZ6 | H_LYS_66  | NZ  | H_ASP_86  | OD1 | 3.366 |
| 1UZ6 | H_LYS_66  | NZ  | H_ASP_86  | OD2 | 2.666 |
| 1UZ6 | H_ARG_164 | NH1 | L_ASP_166 | OD1 | 3.603 |
| 1UZ6 | H_ARG_164 | NH2 | L_ASP_166 | OD1 | 3.557 |
| 1UZ6 | H_ARG_164 | NH2 | L_ASP_169 | OD2 | 3.746 |
| 1UZ6 | H_LYS_208 | NZ  | L_GLU_122 | OE1 | 3.795 |
| 1UZ6 | H_ARG_209 | NH1 | L_GLU_122 | OE2 | 3.180 |
| 1UZ6 | L_ARG_24  | NH1 | L_ASP_70  | OD2 | 3.991 |
| 1UZ6 | L_LYS_27  | NZ  | L_GLU_93  | OE1 | 3.534 |
| 1UZ6 | L_LYS_27  | NZ  | L_GLU_93  | OE2 | 2.676 |
| 1UZ6 | L_ARG_61  | NH1 | L_ASP_82  | OD1 | 3.953 |
| 1UZ6 | L_ARG_61  | NH1 | L_ASP_82  | OD2 | 2.962 |
| 1UZ6 | L_ARG_61  | NH2 | L_GLU_79  | OE1 | 3.473 |
| 1UZ6 | L_ARG_61  | NH2 | L_GLU_79  | OE2 | 3.740 |
| 1UZ6 | L_ARG_61  | NH2 | L_ASP_82  | OD1 | 3.090 |
| 1UZ6 | L_ARG_61  | NH2 | L_ASP_82  | OD2 | 3.270 |
| 1UZ6 | L_LYS_103 | NZ  | L_ASP_164 | OD1 | 3.480 |
| 1UZ6 | L_LYS_146 | NZ  | L_GLU_194 | OE1 | 3.535 |
| 1UZ6 | L_LYS_148 | NZ  | L_GLU_194 | OE1 | 3.899 |
| 1UZ6 | L_ARG_154 | NH2 | L_GLU_184 | OE2 | 3.580 |
| 1UZ6 | L_LYS_182 | NZ  | L_ASP_183 | OD1 | 3.739 |
| 1UZ6 | L_HIS_188 | ND1 | L_ASP_150 | OD2 | 3.153 |
| 1UZ6 | L_ARG_210 | NH1 | L_GLU_186 | OE1 | 3.084 |
| 1UZ6 | M_ARG_61  | NH1 | M_ASP_82  | OD1 | 3.933 |
| 1UZ6 | M_ARG_61  | NH1 | M_ASP_82  | OD2 | 3.129 |
| 1UZ6 | M_ARG_61  | NH2 | M_GLU_79  | OE1 | 3.335 |
| 1UZ6 | M_ARG_61  | NH2 | M_GLU_79  | OE2 | 3.866 |
| 1UZ6 | M_ARG_61  | NH2 | M_ASP_82  | OD1 | 3.049 |
| 1UZ6 | M_ARG_61  | NH2 | M_ASP_82  | OD2 | 3.623 |
| 1UZ6 | M_LYS_148 | NZ  | M_GLU_194 | OE2 | 3.095 |
| 1UZ6 | M_ARG_187 | NH2 | M_ASP_183 | OD2 | 3.819 |
| 1UZ6 | M_ARG_210 | NH1 | M_GLU_186 | OE1 | 3.314 |
| 1UZ6 | P_ARG_38  | NH1 | P_ASP_86  | OD1 | 3.091 |
| 1UZ6 | P_ARG_38  | NH2 | P_GLU_46  | OE1 | 3.209 |
| 1UZ6 | P_LYS_66  | NZ  | P_GLU_85  | OE2 | 3.456 |
| 1UZ6 | P_LYS_66  | NZ  | P_ASP_86  | OD1 | 3.180 |
| 1UZ6 | P_LYS_66  | NZ  | P_ASP_86  | OD2 | 2.816 |
| 1UZ6 | P_ARG_164 | NH1 | M_ASP_166 | OD1 | 3.636 |
| 1UZ6 | P_ARG_164 | NH2 | M_ASP_166 | OD1 | 3.666 |

|      |           |     |           |     |       |
|------|-----------|-----|-----------|-----|-------|
| 1UZ6 | P_ARG_164 | NH2 | M_ASP_166 | OD2 | 3.901 |
| 1UZ6 | P_ARG_164 | NH2 | M_ASP_169 | OD2 | 3.942 |
| 1UZ6 | P_LYS_208 | NZ  | M_GLU_122 | OE1 | 3.361 |
| 1UZ6 | V_ARG_24  | NH1 | V_ASP_70  | OD1 | 3.878 |
| 1UZ6 | V_ARG_61  | NH1 | V_GLU_79  | OE2 | 3.911 |
| 1UZ6 | V_ARG_61  | NH1 | V_ASP_82  | OD1 | 3.899 |
| 1UZ6 | V_ARG_61  | NH1 | V_ASP_82  | OD2 | 2.935 |
| 1UZ6 | V_ARG_61  | NH2 | V_GLU_79  | OE1 | 3.307 |
| 1UZ6 | V_ARG_61  | NH2 | V_GLU_79  | OE2 | 3.400 |
| 1UZ6 | V_ARG_61  | NH2 | V_ASP_82  | OD1 | 3.022 |
| 1UZ6 | V_ARG_61  | NH2 | V_ASP_82  | OD2 | 3.415 |
| 1UZ6 | V_ARG_210 | NH1 | V_GLU_186 | OE1 | 3.469 |
| 1UZ6 | W_ARG_38  | NH1 | W_ASP_86  | OD1 | 2.995 |
| 1UZ6 | W_ARG_38  | NH2 | W_GLU_46  | OE1 | 3.152 |
| 1UZ6 | W_ARG_38  | NH2 | W_ASP_86  | OD1 | 3.942 |
| 1UZ6 | W_LYS_66  | NZ  | W_ASP_86  | OD1 | 3.438 |
| 1UZ6 | W_LYS_66  | NZ  | W_ASP_86  | OD2 | 2.729 |
| 1UZ6 | W_ARG_164 | NH2 | V_ASP_166 | OD1 | 3.892 |
| 1UZ6 | W_LYS_208 | NZ  | V_GLU_122 | OE1 | 3.069 |
| 1UZ8 | A_LYS_27  | NZ  | A_GLU_93  | OE1 | 3.391 |
| 1UZ8 | A_LYS_27  | NZ  | A_GLU_93  | OE2 | 2.682 |
| 1UZ8 | A_ARG_61  | NH1 | A_ASP_82  | OD1 | 3.976 |
| 1UZ8 | A_ARG_61  | NH1 | A_ASP_82  | OD2 | 2.909 |
| 1UZ8 | A_ARG_61  | NH2 | A_GLU_79  | OE1 | 3.289 |
| 1UZ8 | A_ARG_61  | NH2 | A_GLU_79  | OE2 | 3.601 |
| 1UZ8 | A_ARG_61  | NH2 | A_ASP_82  | OD1 | 3.343 |
| 1UZ8 | A_ARG_61  | NH2 | A_ASP_82  | OD2 | 3.539 |
| 1UZ8 | A_LYS_146 | NZ  | A_GLU_153 | OE1 | 3.641 |
| 1UZ8 | A_LYS_148 | NZ  | A_GLU_194 | OE1 | 3.715 |
| 1UZ8 | A_LYS_148 | NZ  | A_GLU_194 | OE2 | 3.109 |
| 1UZ8 | A_ARG_154 | NH2 | A_GLU_184 | OE2 | 3.405 |
| 1UZ8 | A_LYS_198 | NZ  | A_ASP_109 | OD2 | 3.179 |
| 1UZ8 | B_ARG_38  | NH1 | B_ASP_86  | OD1 | 2.828 |
| 1UZ8 | B_ARG_38  | NH2 | B_GLU_46  | OE1 | 2.788 |
| 1UZ8 | B_ARG_38  | NH2 | B_ASP_86  | OD1 | 3.820 |
| 1UZ8 | B_ARG_164 | NH1 | A_ASP_166 | OD1 | 3.299 |
| 1UZ8 | B_ARG_164 | NH2 | A_ASP_166 | OD1 | 3.745 |
| 1UZ8 | B_ARG_164 | NH2 | A_ASP_169 | OD2 | 3.660 |
| 1UZ8 | H_ARG_38  | NH1 | H_ASP_86  | OD1 | 2.763 |
| 1UZ8 | H_ARG_38  | NH2 | H_GLU_46  | OE1 | 2.922 |
| 1UZ8 | H_ARG_38  | NH2 | H_GLU_46  | OE2 | 3.999 |
| 1UZ8 | H_ARG_38  | NH2 | H_ASP_86  | OD1 | 3.765 |
| 1UZ8 | H_LYS_66  | NZ  | H_ASP_86  | OD1 | 3.706 |
| 1UZ8 | H_LYS_66  | NZ  | H_ASP_86  | OD2 | 2.911 |
| 1UZ8 | H_ARG_83  | NH1 | H_GLU_85  | OE1 | 3.092 |
| 1UZ8 | H_ARG_164 | NH1 | L_ASP_166 | OD1 | 3.385 |
| 1UZ8 | H_ARG_164 | NH2 | L_ASP_166 | OD1 | 3.573 |
| 1UZ8 | H_ARG_164 | NH2 | L_ASP_169 | OD2 | 3.234 |
| 1UZ8 | H_ARG_209 | NH1 | H_GLU_211 | OE2 | 3.154 |
| 1UZ8 | L_ARG_24  | NH1 | L_ASP_70  | OD1 | 2.826 |
| 1UZ8 | L_ARG_24  | NH1 | L_ASP_70  | OD2 | 3.113 |
| 1UZ8 | L_ARG_24  | NH2 | L_ASP_70  | OD1 | 3.329 |
| 1UZ8 | L_LYS_27  | NZ  | L_GLU_93  | OE2 | 2.774 |
| 1UZ8 | L_ARG_61  | NH1 | L_ASP_82  | OD1 | 3.829 |
| 1UZ8 | L_ARG_61  | NH1 | L_ASP_82  | OD2 | 2.912 |
| 1UZ8 | L_ARG_61  | NH2 | L_GLU_79  | OE1 | 3.480 |
| 1UZ8 | L_ARG_61  | NH2 | L_GLU_79  | OE2 | 3.414 |
| 1UZ8 | L_ARG_61  | NH2 | L_ASP_82  | OD1 | 3.012 |

|      |           |     |           |     |       |
|------|-----------|-----|-----------|-----|-------|
| 1UZ8 | L_ARG_61  | NH2 | L_ASP_82  | OD2 | 3.357 |
| 1UZ8 | L_LYS_148 | NZ  | L_GLU_194 | OE1 | 3.195 |
| 1UZ8 | L_LYS_148 | NZ  | L_GLU_194 | OE2 | 2.816 |
| 1UZ8 | L_LYS_168 | NZ  | L_ASP_169 | OD2 | 3.822 |
| 1UZ8 | L_ARG_187 | NH1 | L_ASP_183 | OD1 | 2.762 |
| 1UZ8 | L_ARG_187 | NH1 | L_ASP_183 | OD2 | 3.197 |
| 1UZ8 | L_ARG_187 | NH2 | L_ASP_183 | OD2 | 3.876 |
| 1UZ8 | L_HIS_188 | ND1 | L_ASP_150 | OD2 | 3.610 |
| 1UZ8 | L_LYS_198 | NZ  | L_ASP_109 | OD2 | 3.897 |
| 1V7M | L_ARG_60  | NH1 | L_GLU_80  | OE2 | 3.088 |
| 1V7M | L_ARG_60  | NH1 | L_ASP_81  | OD1 | 3.052 |
| 1V7M | L_ARG_60  | NH1 | L_ASP_81  | OD2 | 3.141 |
| 1V7M | L_ARG_60  | NH2 | L_GLU_80  | OE2 | 3.221 |
| 1V7M | L_ARG_95  | NH1 | H_GLU_50  | OE1 | 3.532 |
| 1V7M | L_LYS_106 | NZ  | L_GLU_17  | OE1 | 3.130 |
| 1V7M | L_LYS_106 | NZ  | L_GLU_17  | OE2 | 3.699 |
| 1V7M | L_LYS_148 | NZ  | L_GLU_194 | OE2 | 3.477 |
| 1V7M | L_ARG_154 | NH1 | L_GLU_184 | OE1 | 3.773 |
| 1V7M | L_HIS_188 | ND1 | L_ASP_150 | OD2 | 2.800 |
| 1V7M | H_ARG_38  | NH1 | H_GLU_46  | OE1 | 2.783 |
| 1V7M | H_ARG_38  | NH1 | H_GLU_46  | OE2 | 2.898 |
| 1V7M | H_ARG_38  | NH2 | H_ASP_92  | OD1 | 2.675 |
| 1V7M | H_ARG_52  | NH1 | H_GLU_50  | OE2 | 3.445 |
| 1V7M | H_LYS_54  | NZ  | H_ASP_76  | OD2 | 3.910 |
| 1V7M | H_HIS_58  | NE2 | H_ASP_76  | OD2 | 3.340 |
| 1V7M | H_LYS_67  | NZ  | H_GLU_64  | OE2 | 3.635 |
| 1V7M | H_ARG_69  | NH1 | H_ASP_92  | OD1 | 3.860 |
| 1V7M | H_ARG_69  | NH2 | H_ASP_92  | OD1 | 3.348 |
| 1V7M | H_ARG_69  | NH2 | H_ASP_92  | OD2 | 2.369 |
| 1V7M | H_ARG_74  | NH2 | H_ASP_76  | OD1 | 3.636 |
| 1V7M | V_LYS_14  | NZ  | V_ASP_18  | OD1 | 3.648 |
| 1V7M | V_ARG_98  | NH2 | H_ASP_31  | OD1 | 3.697 |
| 1V7M | M_ARG_60  | NH1 | M_GLU_80  | OE2 | 3.752 |
| 1V7M | M_ARG_60  | NH1 | M_ASP_81  | OD1 | 2.835 |
| 1V7M | M_ARG_60  | NH1 | M_ASP_81  | OD2 | 3.333 |
| 1V7M | M_ARG_60  | NH2 | M_GLU_80  | OE2 | 3.575 |
| 1V7M | M_ARG_95  | NH1 | L_GLU_50  | OE1 | 3.801 |
| 1V7M | M_LYS_102 | NZ  | M_GLU_104 | OE1 | 2.649 |
| 1V7M | M_LYS_106 | NZ  | M_GLU_17  | OE1 | 2.876 |
| 1V7M | M_LYS_148 | NZ  | M_GLU_194 | OE2 | 3.647 |
| 1V7M | M_ARG_154 | NH1 | M_GLU_184 | OE1 | 3.586 |
| 1V7M | M_ARG_154 | NH1 | M_GLU_184 | OE2 | 3.164 |
| 1V7M | M_LYS_182 | NZ  | M_GLU_186 | OE1 | 2.598 |
| 1V7M | M_LYS_182 | NZ  | M_GLU_186 | OE2 | 3.298 |
| 1V7M | M_ARG_187 | NH2 | M_ASP_183 | OD1 | 3.583 |
| 1V7M | M_HIS_188 | ND1 | M_ASP_150 | OD2 | 3.144 |
| 1V7M | M_HIS_188 | NE2 | M_GLU_184 | OE1 | 3.787 |
| 1V7M | I_LYS_3   | NZ  | I_GLU_1   | OE1 | 3.725 |
| 1V7M | I_LYS_3   | NZ  | I_GLU_1   | OE2 | 3.237 |
| 1V7M | I_ARG_38  | NH1 | I_GLU_46  | OE1 | 2.802 |
| 1V7M | I_ARG_38  | NH1 | I_GLU_46  | OE2 | 3.233 |
| 1V7M | I_ARG_38  | NH2 | I_ASP_92  | OD1 | 2.882 |
| 1V7M | I_ARG_52  | NH1 | I_GLU_50  | OE2 | 3.907 |
| 1V7M | I_HIS_58  | NE2 | I_ASP_76  | OD2 | 3.052 |
| 1V7M | I_LYS_67  | NZ  | I_GLU_64  | OE2 | 3.990 |
| 1V7M | I_ARG_69  | NH1 | I_ASP_92  | OD1 | 3.419 |
| 1V7M | I_ARG_69  | NH2 | I_ASP_92  | OD1 | 2.654 |
| 1V7M | I_ARG_69  | NH2 | I_ASP_92  | OD2 | 2.603 |

|      |           |     |           |     |       |
|------|-----------|-----|-----------|-----|-------|
| 1V7M | L_ARG_74  | NH2 | L_ASP_76  | OD1 | 3.380 |
| 1V7M | X_LYS_14  | NZ  | X_ASP_18  | OD1 | 3.674 |
| 1V7M | X_HIS_33  | ND1 | X_GLU_31  | OE2 | 3.284 |
| 1V7M | X_LYS_59  | NZ  | X_GLU_56  | OE2 | 3.569 |
| 1V7M | X_ARG_98  | NH2 | L_ASP_31  | OD1 | 3.214 |
| 1V7M | X_ARG_117 | NH1 | X_ASP_45  | OD1 | 3.802 |
| 1V7M | X_ARG_117 | NH1 | X_ASP_45  | OD2 | 3.906 |
| 1V7N | L_ARG_60  | NH1 | L_ASP_81  | OD1 | 2.332 |
| 1V7N | L_ARG_60  | NH1 | L_ASP_81  | OD2 | 3.010 |
| 1V7N | L_ARG_60  | NH2 | L_GLU_80  | OE2 | 2.836 |
| 1V7N | L_ARG_95  | NH1 | H_GLU_50  | OE1 | 3.194 |
| 1V7N | L_LYS_102 | NZ  | L_ASP_164 | OD1 | 2.653 |
| 1V7N | L_ARG_107 | NH1 | L_ASP_169 | OD2 | 2.613 |
| 1V7N | L_ARG_107 | NH1 | O_GLU_78  | OE2 | 3.587 |
| 1V7N | L_ARG_107 | NH2 | O_GLU_78  | OE1 | 3.844 |
| 1V7N | L_ARG_107 | NH2 | O_GLU_78  | OE2 | 2.214 |
| 1V7N | L_LYS_148 | NZ  | L_GLU_194 | OE2 | 3.869 |
| 1V7N | L_ARG_154 | NH2 | L_GLU_184 | OE1 | 2.591 |
| 1V7N | L_ARG_154 | NH2 | L_GLU_184 | OE2 | 3.206 |
| 1V7N | L_LYS_182 | NZ  | L_GLU_186 | OE2 | 3.250 |
| 1V7N | L_HIS_188 | ND1 | L_ASP_150 | OD2 | 2.542 |
| 1V7N | L_LYS_198 | NZ  | L_ASP_109 | OD2 | 2.675 |
| 1V7N | H_LYS_3   | NZ  | H_GLU_5   | OE1 | 3.106 |
| 1V7N | H_ARG_38  | NH1 | H_GLU_46  | OE1 | 2.776 |
| 1V7N | H_ARG_38  | NH1 | H_GLU_46  | OE2 | 3.676 |
| 1V7N | H_ARG_38  | NH1 | H_ASP_92  | OD1 | 3.973 |
| 1V7N | H_ARG_38  | NH2 | H_ASP_92  | OD1 | 3.183 |
| 1V7N | H_LYS_43  | NZ  | H_GLU_46  | OE2 | 3.925 |
| 1V7N | H_LYS_54  | NZ  | H_ASP_76  | OD2 | 3.243 |
| 1V7N | H_HIS_58  | NE2 | H_ASP_76  | OD1 | 3.889 |
| 1V7N | H_HIS_58  | NE2 | H_ASP_76  | OD2 | 2.715 |
| 1V7N | H_LYS_67  | NZ  | H_GLU_64  | OE2 | 2.803 |
| 1V7N | H_ARG_69  | NH1 | H_ASP_92  | OD1 | 3.102 |
| 1V7N | H_ARG_69  | NH1 | H_ASP_92  | OD2 | 3.339 |
| 1V7N | H_ARG_69  | NH2 | H_ASP_92  | OD1 | 3.121 |
| 1V7N | H_ARG_69  | NH2 | H_ASP_92  | OD2 | 2.212 |
| 1V7N | H_ARG_74  | NH2 | H_ASP_76  | OD1 | 3.408 |
| 1V7N | H_LYS_78  | NZ  | H_ASP_75  | OD2 | 3.016 |
| 1V7N | H_ARG_216 | NH1 | H_ASP_217 | OD2 | 3.146 |
| 1V7N | H_ARG_216 | NH2 | Z_ASP_123 | OD2 | 3.997 |
| 1V7N | M_ARG_60  | NH1 | M_ASP_81  | OD1 | 2.547 |
| 1V7N | M_ARG_60  | NH1 | M_ASP_81  | OD2 | 2.256 |
| 1V7N | M_ARG_60  | NH2 | M_GLU_80  | OE2 | 3.293 |
| 1V7N | M_ARG_60  | NH2 | M_ASP_81  | OD1 | 3.559 |
| 1V7N | M_ARG_95  | NH1 | L_GLU_50  | OE1 | 2.984 |
| 1V7N | M_LYS_102 | NZ  | M_ASP_164 | OD1 | 3.198 |
| 1V7N | M_ARG_107 | NH1 | M_ASP_169 | OD2 | 3.983 |
| 1V7N | M_ARG_107 | NH1 | N_GLU_78  | OE2 | 3.960 |
| 1V7N | M_ARG_107 | NH2 | N_GLU_78  | OE1 | 3.607 |
| 1V7N | M_ARG_107 | NH2 | N_GLU_78  | OE2 | 2.132 |
| 1V7N | M_ARG_154 | NH1 | M_GLU_184 | OE1 | 3.775 |
| 1V7N | M_ARG_154 | NH1 | M_GLU_184 | OE2 | 3.880 |
| 1V7N | M_ARG_154 | NH2 | M_GLU_184 | OE1 | 2.821 |
| 1V7N | M_HIS_188 | ND1 | M_ASP_150 | OD2 | 2.789 |
| 1V7N | M_LYS_198 | NZ  | M_ASP_109 | OD1 | 2.627 |
| 1V7N | M_LYS_198 | NZ  | M_ASP_109 | OD2 | 3.022 |
| 1V7N | L_LYS_3   | NZ  | L_GLU_5   | OE1 | 2.717 |
| 1V7N | L_ARG_38  | NH1 | L_GLU_46  | OE1 | 2.490 |

|      |           |     |           |     |       |
|------|-----------|-----|-----------|-----|-------|
| 1V7N | L_ARG_38  | NH1 | L_GLU_46  | OE2 | 3.766 |
| 1V7N | L_ARG_38  | NH2 | L_ASP_92  | OD1 | 2.898 |
| 1V7N | L_ARG_52  | NH1 | L_GLU_50  | OE2 | 3.407 |
| 1V7N | L_LYS_54  | NZ  | L_ASP_76  | OD2 | 3.877 |
| 1V7N | L_HIS_58  | NE2 | L_ASP_76  | OD2 | 3.223 |
| 1V7N | L_LYS_67  | NZ  | L_GLU_64  | OE2 | 2.515 |
| 1V7N | L_ARG_69  | NH1 | L_ASP_92  | OD1 | 3.853 |
| 1V7N | L_ARG_69  | NH1 | L_ASP_92  | OD2 | 3.813 |
| 1V7N | L_ARG_69  | NH2 | L_ASP_92  | OD1 | 3.126 |
| 1V7N | L_ARG_69  | NH2 | L_ASP_92  | OD2 | 2.285 |
| 1V7N | L_ARG_74  | NH2 | L_ASP_76  | OD1 | 3.069 |
| 1V7N | L_LYS_78  | NZ  | L_ASP_75  | OD2 | 3.595 |
| 1V7N | L_ARG_216 | NH1 | L_ASP_217 | OD1 | 3.402 |
| 1V7N | N_ARG_60  | NH1 | N_GLU_80  | OE2 | 3.770 |
| 1V7N | N_ARG_60  | NH1 | N_ASP_81  | OD1 | 3.278 |
| 1V7N | N_ARG_60  | NH1 | N_ASP_81  | OD2 | 2.829 |
| 1V7N | N_ARG_60  | NH2 | N_GLU_80  | OE2 | 3.679 |
| 1V7N | N_ARG_95  | NH1 | J_GLU_50  | OE1 | 3.631 |
| 1V7N | N_LYS_102 | NZ  | N_GLU_104 | OE1 | 3.217 |
| 1V7N | N_LYS_102 | NZ  | N_ASP_164 | OD1 | 2.603 |
| 1V7N | N_ARG_107 | NH1 | N_ASP_169 | OD2 | 2.506 |
| 1V7N | N_ARG_107 | NH2 | M_GLU_78  | OE1 | 2.980 |
| 1V7N | N_ARG_107 | NH2 | M_GLU_78  | OE2 | 2.369 |
| 1V7N | N_LYS_148 | NZ  | N_GLU_194 | OE1 | 3.525 |
| 1V7N | N_LYS_148 | NZ  | N_GLU_194 | OE2 | 3.387 |
| 1V7N | N_ARG_154 | NH1 | N_GLU_184 | OE1 | 3.587 |
| 1V7N | N_ARG_154 | NH2 | N_GLU_184 | OE1 | 2.367 |
| 1V7N | N_HIS_188 | ND1 | N_ASP_150 | OD2 | 2.601 |
| 1V7N | N_LYS_198 | NZ  | N_ASP_109 | OD1 | 3.661 |
| 1V7N | N_LYS_198 | NZ  | N_ASP_109 | OD2 | 2.822 |
| 1V7N | J_LYS_3   | NZ  | J_GLU_5   | OE1 | 2.975 |
| 1V7N | J_LYS_3   | NZ  | J_GLU_5   | OE2 | 2.953 |
| 1V7N | J_ARG_38  | NH1 | J_GLU_46  | OE1 | 2.786 |
| 1V7N | J_ARG_38  | NH2 | J_ASP_92  | OD1 | 2.704 |
| 1V7N | J_LYS_43  | NZ  | J_GLU_46  | OE1 | 2.811 |
| 1V7N | J_ARG_52  | NH1 | J_GLU_50  | OE2 | 3.959 |
| 1V7N | J_HIS_61  | NE2 | J_GLU_50  | OE2 | 3.467 |
| 1V7N | J_LYS_67  | NZ  | J_GLU_64  | OE2 | 2.606 |
| 1V7N | J_ARG_69  | NH2 | J_ASP_92  | OD1 | 2.762 |
| 1V7N | J_ARG_69  | NH2 | J_ASP_92  | OD2 | 3.189 |
| 1V7N | J_ARG_74  | NH2 | J_ASP_76  | OD1 | 2.889 |
| 1V7N | J_LYS_78  | NZ  | J_ASP_75  | OD2 | 3.061 |
| 1V7N | J_ARG_216 | NH2 | J_ASP_217 | OD1 | 3.973 |
| 1V7N | J_ARG_216 | NH2 | X_ASP_123 | OD2 | 3.982 |
| 1V7N | O_ARG_60  | NH1 | O_ASP_81  | OD1 | 2.582 |
| 1V7N | O_ARG_60  | NH1 | O_ASP_81  | OD2 | 2.736 |
| 1V7N | O_ARG_95  | NH1 | K_GLU_50  | OE1 | 2.735 |
| 1V7N | O_LYS_102 | NZ  | O_ASP_164 | OD1 | 3.384 |
| 1V7N | O_ARG_107 | NH1 | L_GLU_78  | OE1 | 3.650 |
| 1V7N | O_ARG_107 | NH1 | L_GLU_78  | OE2 | 3.114 |
| 1V7N | O_ARG_107 | NH1 | O_ASP_169 | OD2 | 3.206 |
| 1V7N | O_ARG_107 | NH2 | L_GLU_78  | OE2 | 2.402 |
| 1V7N | O_ARG_154 | NH1 | O_GLU_184 | OE1 | 2.811 |
| 1V7N | O_ARG_154 | NH1 | O_GLU_184 | OE2 | 2.989 |
| 1V7N | O_ARG_154 | NH2 | O_GLU_184 | OE1 | 2.352 |
| 1V7N | O_ARG_154 | NH2 | O_GLU_184 | OE2 | 3.668 |
| 1V7N | O_HIS_188 | ND1 | O_ASP_150 | OD2 | 2.853 |
| 1V7N | O_LYS_198 | NZ  | O_ASP_109 | OD1 | 3.907 |



|      |           |     |           |     |       |
|------|-----------|-----|-----------|-----|-------|
| 1V7N | O_LYS_198 | NZ  | O_ASP_109 | OD2 | 2.580 |
| 1V7N | K_LYS_3   | NZ  | K_GLU_5   | OE1 | 3.714 |
| 1V7N | K_LYS_3   | NZ  | K_GLU_5   | OE2 | 3.152 |
| 1V7N | K_ARG_38  | NH1 | K_GLU_46  | OE1 | 2.302 |
| 1V7N | K_ARG_38  | NH1 | K_GLU_46  | OE2 | 3.483 |
| 1V7N | K_ARG_38  | NH2 | K_ASP_92  | OD1 | 3.795 |
| 1V7N | K_ARG_38  | NH2 | K_ASP_92  | OD2 | 3.370 |
| 1V7N | K_LYS_43  | NZ  | K_GLU_46  | OE2 | 2.793 |
| 1V7N | K_ARG_52  | NH1 | K_GLU_50  | OE2 | 3.501 |
| 1V7N | K_HIS_58  | NE2 | K_ASP_76  | OD2 | 3.479 |
| 1V7N | K_ARG_69  | NH1 | K_ASP_92  | OD2 | 3.967 |
| 1V7N | K_ARG_69  | NH2 | K_ASP_92  | OD1 | 3.583 |
| 1V7N | K_ARG_69  | NH2 | K_ASP_92  | OD2 | 2.311 |
| 1V7N | K_ARG_74  | NH2 | K_ASP_76  | OD1 | 3.141 |
| 1V7N | K_ARG_74  | NH2 | K_ASP_76  | OD2 | 3.766 |
| 1V7N | K_LYS_78  | NZ  | K_ASP_75  | OD2 | 2.815 |
| 1V7N | K_ARG_216 | NH1 | K_ASP_217 | OD1 | 2.786 |
| 1V7N | V_LYS_59  | NZ  | V_GLU_56  | OE2 | 3.100 |
| 1V7N | V_ARG_98  | NH2 | H_ASP_31  | OD1 | 3.580 |
| 1V7N | V_LYS_138 | NZ  | V_ASP_62  | OD2 | 2.822 |
| 1V7N | X_LYS_59  | NZ  | X_GLU_56  | OE2 | 2.913 |
| 1V7N | X_ARG_98  | NH2 | L_ASP_31  | OD1 | 3.389 |
| 1V7N | X_ARG_117 | NH2 | X_ASP_45  | OD1 | 3.524 |
| 1V7N | X_HIS_121 | ND1 | J_ASP_217 | OD1 | 2.619 |
| 1V7N | X_HIS_121 | NE2 | J_ASP_217 | OD1 | 3.422 |
| 1V7N | X_LYS_138 | NZ  | X_ASP_62  | OD2 | 3.394 |
| 1V7N | Y_HIS_20  | ND1 | H_ASP_217 | OD1 | 3.368 |
| 1V7N | Y_HIS_20  | ND1 | H_ASP_217 | OD2 | 3.116 |
| 1V7N | Y_HIS_20  | NE2 | H_ASP_217 | OD1 | 3.862 |
| 1V7N | Y_HIS_33  | NE2 | Y_GLU_31  | OE1 | 3.707 |
| 1V7N | Y_LYS_59  | NZ  | Y_GLU_56  | OE1 | 3.270 |
| 1V7N | Y_LYS_59  | NZ  | Y_GLU_56  | OE2 | 2.783 |
| 1V7N | Y_HIS_121 | ND1 | L_ASP_217 | OD1 | 3.108 |
| 1V7N | Y_HIS_133 | ND1 | Y_ASP_45  | OD1 | 3.752 |
| 1V7N | Y_LYS_138 | NZ  | Y_ASP_45  | OD2 | 3.882 |
| 1V7N | Z_HIS_33  | ND1 | Z_GLU_31  | OE1 | 3.839 |
| 1V7N | Z_HIS_33  | NE2 | Z_GLU_31  | OE1 | 3.105 |
| 1V7N | Z_LYS_59  | NZ  | Z_GLU_56  | OE1 | 3.900 |
| 1V7N | Z_LYS_59  | NZ  | Z_GLU_56  | OE2 | 3.150 |
| 1V7N | Z_ARG_98  | NH2 | K_ASP_31  | OD1 | 3.622 |
| 1V7N | Z_HIS_133 | NE2 | Z_ASP_45  | OD2 | 3.937 |
| 1V7N | Z_LYS_138 | NZ  | Z_ASP_45  | OD1 | 2.983 |
| 1V7N | Z_ARG_140 | NH2 | M_GLU_212 | OE1 | 3.768 |
| 1VER | A_ARG_25  | NH1 | A_ASP_4   | OD1 | 3.368 |
| 1VER | A_LYS_40  | NZ  | A_GLU_76  | OE2 | 2.714 |
| 1VER | A_ARG_54  | NH1 | A_ASP_77  | OD2 | 3.441 |
| 1VER | A_ARG_54  | NH2 | A_ASP_77  | OD1 | 3.240 |
| 1VER | A_ARG_54  | NH2 | A_ASP_77  | OD2 | 3.161 |
| 1VER | A_ARG_74  | NH1 | A_ASP_72  | OD2 | 2.935 |
| 1VER | A_LYS_102 | NZ  | A_GLU_46  | OE1 | 3.941 |
| 1VER | A_LYS_102 | NZ  | A_GLU_46  | OE2 | 3.470 |
| 1VES | A_ARG_25  | NH1 | A_ASP_4   | OD2 | 3.079 |
| 1VES | A_ARG_25  | NH1 | B_ASP_4   | OD1 | 3.636 |
| 1VES | A_ARG_25  | NH1 | B_ASP_4   | OD2 | 2.836 |
| 1VES | A_ARG_25  | NH2 | B_ASP_4   | OD1 | 2.879 |
| 1VES | A_ARG_25  | NH2 | B_ASP_4   | OD2 | 3.552 |
| 1VES | A_LYS_32  | NZ  | A_GLU_30  | OE2 | 2.725 |
| 1VES | A_ARG_38  | NH2 | A_ASP_77  | OD1 | 3.118 |

|      |           |     |           |     |       |
|------|-----------|-----|-----------|-----|-------|
| 1VES | A_ARG_54  | NH1 | A_ASP_77  | OD1 | 3.920 |
| 1VES | A_ARG_54  | NH1 | A_ASP_77  | OD2 | 2.727 |
| 1VES | A_ARG_54  | NH2 | A_ASP_77  | OD1 | 3.109 |
| 1VES | A_ARG_54  | NH2 | A_ASP_77  | OD2 | 3.297 |
| 1VES | A_ARG_74  | NH1 | A_GLU_76  | OE2 | 3.745 |
| 1VES | A_LYS_104 | NZ  | A_GLU_46  | OE1 | 2.629 |
| 1VES | A_LYS_104 | NZ  | A_GLU_46  | OE2 | 3.276 |
| 1VES | B_ARG_25  | NH1 | A_ASP_4   | OD1 | 3.762 |
| 1VES | B_ARG_25  | NH1 | A_ASP_4   | OD2 | 2.782 |
| 1VES | B_ARG_25  | NH1 | B_ASP_4   | OD2 | 3.050 |
| 1VES | B_ARG_25  | NH2 | A_ASP_4   | OD1 | 3.070 |
| 1VES | B_ARG_25  | NH2 | A_ASP_4   | OD2 | 3.548 |
| 1VES | B_ARG_38  | NH2 | B_ASP_77  | OD1 | 3.081 |
| 1VES | B_ARG_54  | NH1 | B_ASP_77  | OD2 | 2.889 |
| 1VES | B_ARG_54  | NH2 | B_ASP_77  | OD1 | 3.186 |
| 1VES | B_ARG_54  | NH2 | B_ASP_77  | OD2 | 3.405 |
| 1VES | B_ARG_74  | NH1 | B_GLU_76  | OE1 | 3.458 |
| 1VES | B_ARG_74  | NH2 | B_GLU_76  | OE1 | 3.401 |
| 1VES | B_LYS_104 | NZ  | B_GLU_46  | OE1 | 2.701 |
| 1VES | B_LYS_104 | NZ  | B_GLU_46  | OE2 | 2.906 |
| 1VFA | A_ARG_61  | NH2 | A_GLU_81  | OE2 | 3.353 |
| 1VFA | A_ARG_61  | NH2 | A_ASP_82  | OD1 | 2.725 |
| 1VFA | A_ARG_61  | NH2 | A_ASP_82  | OD2 | 3.247 |
| 1VFA | A_ARG_96  | NH1 | B_GLU_98  | OE1 | 2.794 |
| 1VFA | A_ARG_96  | NH1 | B_GLU_98  | OE2 | 3.600 |
| 1VFA | A_ARG_96  | NH2 | B_GLU_98  | OE1 | 3.537 |
| 1VFA | A_ARG_96  | NH2 | B_GLU_98  | OE2 | 2.928 |
| 1VFA | A_LYS_103 | NZ  | A_GLU_105 | OE1 | 2.845 |
| 1VFA | B_ARG_38  | NH1 | B_ASP_89  | OD1 | 2.914 |
| 1VFA | B_ARG_38  | NH2 | B_GLU_46  | OE1 | 2.995 |
| 1VFA | B_ARG_38  | NH2 | B_GLU_46  | OE2 | 3.956 |
| 1VFA | B_ARG_38  | NH2 | B_ASP_89  | OD1 | 3.945 |
| 1VFA | B_ARG_66  | NH1 | B_ASP_89  | OD1 | 3.137 |
| 1VFA | B_ARG_66  | NH1 | B_ASP_89  | OD2 | 3.571 |
| 1VFA | B_ARG_66  | NH2 | B_ASP_89  | OD1 | 3.559 |
| 1VFA | B_ARG_66  | NH2 | B_ASP_89  | OD2 | 2.619 |
| 1VFA | B_ARG_97  | NH2 | B_ASP_104 | OD1 | 3.679 |
| 1VFA | B_ARG_97  | NH2 | B_ASP_104 | OD2 | 2.862 |
| 1VFA | B_ARG_99  | NH1 | B_ASP_104 | OD2 | 3.881 |
| 1VFA | B_ARG_99  | NH2 | B_ASP_100 | OD2 | 3.016 |
| 1VFB | A_ARG_61  | NH2 | A_GLU_81  | OE2 | 3.736 |
| 1VFB | A_ARG_61  | NH2 | A_ASP_82  | OD1 | 2.846 |
| 1VFB | A_ARG_61  | NH2 | A_ASP_82  | OD2 | 3.553 |
| 1VFB | A_ARG_96  | NH1 | B_GLU_98  | OE1 | 2.821 |
| 1VFB | A_ARG_96  | NH1 | B_GLU_98  | OE2 | 3.695 |
| 1VFB | A_ARG_96  | NH2 | B_GLU_98  | OE1 | 3.393 |
| 1VFB | A_ARG_96  | NH2 | B_GLU_98  | OE2 | 2.813 |
| 1VFB | A_LYS_107 | NZ  | A_GLU_17  | OE2 | 3.099 |
| 1VFB | B_ARG_38  | NH1 | B_ASP_89  | OD1 | 3.000 |
| 1VFB | B_ARG_38  | NH2 | B_GLU_46  | OE1 | 3.296 |
| 1VFB | B_ARG_38  | NH2 | B_GLU_46  | OE2 | 3.076 |
| 1VFB | B_ARG_38  | NH2 | B_ASP_89  | OD1 | 3.911 |
| 1VFB | B_ARG_66  | NH1 | B_ASP_89  | OD1 | 3.700 |
| 1VFB | B_ARG_66  | NH1 | B_ASP_89  | OD2 | 2.886 |
| 1VFB | B_ARG_66  | NH2 | B_ASP_89  | OD1 | 2.927 |
| 1VFB | B_ARG_66  | NH2 | B_ASP_89  | OD2 | 3.546 |
| 1VFB | B_LYS_75  | NZ  | B_ASP_72  | OD2 | 3.347 |
| 1VFB | B_ARG_97  | NH2 | B_ASP_104 | OD1 | 3.680 |

|      |           |     |           |     |       |
|------|-----------|-----|-----------|-----|-------|
| 1VFB | B_ARG_97  | NH2 | B_ASP_104 | OD2 | 2.861 |
| 1VFB | B_ARG_102 | NH1 | B_ASP_100 | OD2 | 3.203 |
| 1VFB | C_LYS_1   | NZ  | C_GLU_7   | OE2 | 3.235 |
| 1VFB | C_ARG_61  | NH1 | C_ASP_48  | OD2 | 3.212 |
| 1VFB | C_ARG_125 | NH1 | C_ASP_119 | OD1 | 3.267 |
| 1VFB | C_ARG_125 | NH1 | C_ASP_119 | OD2 | 3.059 |
| 1VFB | C_ARG_125 | NH2 | C_ASP_119 | OD2 | 3.016 |
| 1W72 | A_HIS_3   | ND1 | A_ASP_29  | OD1 | 3.652 |
| 1W72 | A_HIS_3   | ND1 | A_ASP_29  | OD2 | 2.584 |
| 1W72 | A_ARG_6   | NH1 | A_ASP_102 | OD1 | 2.915 |
| 1W72 | A_ARG_6   | NH2 | A_ASP_102 | OD1 | 2.976 |
| 1W72 | A_ARG_6   | NH2 | A_ASP_102 | OD2 | 3.593 |
| 1W72 | A_ARG_14  | NH1 | A_ASP_39  | OD1 | 3.691 |
| 1W72 | A_ARG_14  | NH1 | A_ASP_39  | OD2 | 2.979 |
| 1W72 | A_ARG_14  | NH2 | A_ASP_39  | OD1 | 3.402 |
| 1W72 | A_ARG_21  | NH1 | A_ASP_37  | OD1 | 3.986 |
| 1W72 | A_ARG_21  | NH2 | A_ASP_37  | OD1 | 3.181 |
| 1W72 | A_ARG_21  | NH2 | A_ASP_37  | OD2 | 2.787 |
| 1W72 | A_ARG_35  | NH1 | B_ASP_53  | OD1 | 2.945 |
| 1W72 | A_ARG_35  | NH2 | A_GLU_46  | OE2 | 3.408 |
| 1W72 | A_LYS_44  | NZ  | A_ASP_61  | OD1 | 3.998 |
| 1W72 | A_ARG_48  | NH1 | B_ASP_53  | OD2 | 3.978 |
| 1W72 | A_ARG_48  | NH2 | B_ASP_53  | OD1 | 3.455 |
| 1W72 | A_ARG_48  | NH2 | B_ASP_53  | OD2 | 2.916 |
| 1W72 | A_ARG_65  | NH1 | H_ASP_30  | OD1 | 3.409 |
| 1W72 | A_ARG_65  | NH1 | H_ASP_31  | OD1 | 2.977 |
| 1W72 | A_HIS_70  | NE2 | A_ASP_74  | OD1 | 3.569 |
| 1W72 | A_HIS_70  | NE2 | A_ASP_74  | OD2 | 2.953 |
| 1W72 | A_ARG_75  | NH1 | A_GLU_19  | OE1 | 3.767 |
| 1W72 | A_HIS_93  | ND1 | A_ASP_119 | OD1 | 3.369 |
| 1W72 | A_HIS_93  | ND1 | A_ASP_119 | OD2 | 2.599 |
| 1W72 | A_ARG_114 | NH1 | C_ASP_3   | OD2 | 3.999 |
| 1W72 | A_LYS_144 | NZ  | A_GLU_148 | OE1 | 3.900 |
| 1W72 | A_LYS_144 | NZ  | A_GLU_148 | OE2 | 2.626 |
| 1W72 | A_LYS_146 | NZ  | L_ASP_95A | OD1 | 3.112 |
| 1W72 | A_LYS_146 | NZ  | L_ASP_95A | OD2 | 3.996 |
| 1W72 | A_ARG_156 | NH1 | C_ASP_3   | OD1 | 3.704 |
| 1W72 | A_ARG_156 | NH1 | C_ASP_3   | OD2 | 2.953 |
| 1W72 | A_ARG_163 | NH1 | C_GLU_1   | OE1 | 3.400 |
| 1W72 | A_ARG_163 | NH2 | C_GLU_1   | OE1 | 3.293 |
| 1W72 | A_ARG_163 | NH2 | C_GLU_1   | OE2 | 3.482 |
| 1W72 | A_ARG_170 | NH1 | C_GLU_1   | OE2 | 3.205 |
| 1W72 | A_ARG_170 | NH2 | A_GLU_55  | OE1 | 3.864 |
| 1W72 | A_ARG_170 | NH2 | A_GLU_55  | OE2 | 3.639 |
| 1W72 | A_ARG_170 | NH2 | C_GLU_1   | OE2 | 2.677 |
| 1W72 | A_LYS_176 | NZ  | A_GLU_173 | OE2 | 3.940 |
| 1W72 | A_HIS_191 | NE2 | A_GLU_254 | OE2 | 3.120 |
| 1W72 | A_HIS_192 | NE2 | B_ASP_98  | OD1 | 3.224 |
| 1W72 | A_HIS_192 | NE2 | B_ASP_98  | OD2 | 2.823 |
| 1W72 | A_ARG_202 | NH2 | A_GLU_229 | OE1 | 3.772 |
| 1W72 | A_ARG_219 | NH1 | A_ASP_220 | OD2 | 3.707 |
| 1W72 | A_ARG_256 | NH1 | A_GLU_253 | OE1 | 3.148 |
| 1W72 | A_ARG_256 | NH2 | A_ASP_220 | OD1 | 3.691 |
| 1W72 | A_ARG_256 | NH2 | A_ASP_220 | OD2 | 2.725 |
| 1W72 | B_LYS_6   | NZ  | A_GLU_232 | OE1 | 3.881 |
| 1W72 | B_LYS_41  | NZ  | B_ASP_76  | OD1 | 3.260 |
| 1W72 | B_LYS_41  | NZ  | B_ASP_76  | OD2 | 2.923 |
| 1W72 | B_ARG_45  | NH1 | B_GLU_47  | OE1 | 3.217 |

|      |           |     |           |     |       |
|------|-----------|-----|-----------|-----|-------|
| 1W72 | B_ARG_45  | NH2 | B_ASP_38  | OD1 | 3.659 |
| 1W72 | B_HIS_51  | ND1 | B_GLU_50  | OE2 | 3.875 |
| 1W72 | B_ARG_81  | NH2 | B_ASP_38  | OD2 | 3.262 |
| 1W72 | D_HIS_3   | ND1 | D_ASP_29  | OD1 | 3.695 |
| 1W72 | D_HIS_3   | ND1 | D_ASP_29  | OD2 | 2.674 |
| 1W72 | D_ARG_6   | NH1 | D_ASP_102 | OD1 | 2.917 |
| 1W72 | D_ARG_6   | NH2 | D_ASP_102 | OD1 | 2.831 |
| 1W72 | D_ARG_6   | NH2 | D_ASP_102 | OD2 | 3.484 |
| 1W72 | D_ARG_14  | NH1 | D_ASP_39  | OD1 | 3.609 |
| 1W72 | D_ARG_14  | NH1 | D_ASP_39  | OD2 | 3.105 |
| 1W72 | D_ARG_14  | NH2 | D_ASP_39  | OD1 | 3.305 |
| 1W72 | D_ARG_21  | NH1 | D_ASP_39  | OD2 | 3.364 |
| 1W72 | D_ARG_21  | NH2 | D_ASP_37  | OD1 | 3.519 |
| 1W72 | D_ARG_21  | NH2 | D_ASP_37  | OD2 | 2.786 |
| 1W72 | D_ARG_35  | NH1 | D_GLU_46  | OE1 | 3.132 |
| 1W72 | D_ARG_35  | NH2 | D_ASP_37  | OD2 | 3.650 |
| 1W72 | D_ARG_35  | NH2 | E_ASP_53  | OD1 | 3.761 |
| 1W72 | D_ARG_48  | NH1 | D_GLU_46  | OE2 | 3.543 |
| 1W72 | D_ARG_65  | NH1 | L_ASP_30  | OD1 | 2.970 |
| 1W72 | D_ARG_65  | NH1 | L_ASP_31  | OD1 | 3.035 |
| 1W72 | D_HIS_70  | NE2 | D_ASP_74  | OD1 | 3.533 |
| 1W72 | D_HIS_70  | NE2 | D_ASP_74  | OD2 | 3.234 |
| 1W72 | D_ARG_75  | NH1 | D_GLU_19  | OE1 | 3.532 |
| 1W72 | D_ARG_75  | NH2 | D_GLU_19  | OE1 | 3.186 |
| 1W72 | D_HIS_93  | ND1 | D_ASP_119 | OD1 | 3.233 |
| 1W72 | D_HIS_93  | ND1 | D_ASP_119 | OD2 | 2.484 |
| 1W72 | D_LYS_144 | NZ  | D_GLU_148 | OE2 | 2.839 |
| 1W72 | D_LYS_146 | NZ  | M_ASP_95A | OD2 | 3.397 |
| 1W72 | D_ARG_156 | NH1 | F_ASP_3   | OD1 | 3.644 |
| 1W72 | D_ARG_156 | NH1 | F_ASP_3   | OD2 | 3.082 |
| 1W72 | D_ARG_157 | NH2 | D_GLU_154 | OE2 | 3.289 |
| 1W72 | D_ARG_163 | NH1 | F_GLU_1   | OE1 | 3.609 |
| 1W72 | D_ARG_163 | NH1 | F_GLU_1   | OE2 | 3.022 |
| 1W72 | D_ARG_163 | NH2 | D_ASP_166 | OD2 | 3.278 |
| 1W72 | D_ARG_170 | NH2 | D_GLU_55  | OE1 | 3.599 |
| 1W72 | D_ARG_170 | NH2 | D_GLU_55  | OE2 | 3.371 |
| 1W72 | D_HIS_191 | NE2 | D_GLU_254 | OE2 | 2.873 |
| 1W72 | D_HIS_192 | NE2 | E_ASP_98  | OD2 | 3.123 |
| 1W72 | D_ARG_219 | NH1 | D_ASP_220 | OD2 | 3.836 |
| 1W72 | D_ARG_256 | NH1 | D_ASP_220 | OD2 | 3.881 |
| 1W72 | D_ARG_256 | NH2 | D_GLU_253 | OE1 | 3.311 |
| 1W72 | E_LYS_6   | NZ  | D_GLU_232 | OE2 | 2.863 |
| 1W72 | E_LYS_41  | NZ  | E_ASP_76  | OD1 | 3.809 |
| 1W72 | E_LYS_41  | NZ  | E_ASP_76  | OD2 | 3.639 |
| 1W72 | E_ARG_45  | NH1 | E_ASP_38  | OD1 | 3.708 |
| 1W72 | E_ARG_81  | NH1 | E_ASP_38  | OD2 | 3.844 |
| 1W72 | H_ARG_38  | NH1 | H_ASP_86  | OD1 | 3.015 |
| 1W72 | H_ARG_38  | NH2 | H_GLU_46  | OE1 | 3.060 |
| 1W72 | H_ARG_38  | NH2 | H_GLU_46  | OE2 | 3.921 |
| 1W72 | H_ARG_38  | NH2 | H_ASP_86  | OD1 | 3.932 |
| 1W72 | H_ARG_66  | NH1 | H_ASP_86  | OD1 | 3.676 |
| 1W72 | H_ARG_66  | NH1 | H_ASP_86  | OD2 | 2.720 |
| 1W72 | H_ARG_66  | NH2 | H_ASP_86  | OD1 | 3.173 |
| 1W72 | H_ARG_66  | NH2 | H_ASP_86  | OD2 | 3.657 |
| 1W72 | H_ARG_83  | NH1 | H_GLU_85  | OE1 | 3.964 |
| 1W72 | H_ARG_94  | NH2 | H_ASP_101 | OD1 | 3.551 |
| 1W72 | H_ARG_94  | NH2 | H_ASP_101 | OD2 | 2.836 |
| 1W72 | H_LYS_145 | NZ  | L_GLU_124 | OE2 | 2.720 |

|      |           |     |           |     |       |
|------|-----------|-----|-----------|-----|-------|
| 1W72 | H.LYS_221 | NZ  | L_GLU_123 | OE1 | 2.737 |
| 1W72 | H.LYS_221 | NZ  | L_GLU_123 | OE2 | 3.946 |
| 1W72 | H.LYS_222 | NZ  | H_GLU_226 | OE2 | 2.721 |
| 1W72 | L_ARG_38  | NH1 | L ASP_86  | OD1 | 3.126 |
| 1W72 | L_ARG_38  | NH2 | L_GLU_46  | OE1 | 3.128 |
| 1W72 | L_ARG_38  | NH2 | L_GLU_46  | OE2 | 3.763 |
| 1W72 | L_ARG_38  | NH2 | L ASP_86  | OD1 | 3.826 |
| 1W72 | L.LYS_64  | NZ  | L ASP_61  | OD1 | 2.896 |
| 1W72 | L_ARG_66  | NH1 | L ASP_86  | OD1 | 3.873 |
| 1W72 | L_ARG_66  | NH1 | L ASP_86  | OD2 | 2.731 |
| 1W72 | L_ARG_66  | NH2 | L ASP_86  | OD1 | 3.149 |
| 1W72 | L_ARG_66  | NH2 | L ASP_86  | OD2 | 3.465 |
| 1W72 | L_ARG_94  | NH2 | L ASP_101 | OD1 | 3.478 |
| 1W72 | L_ARG_94  | NH2 | L ASP_101 | OD2 | 2.930 |
| 1W72 | L_ARG_96  | NH1 | L ASP_101 | OD2 | 3.483 |
| 1W72 | L.LYS_145 | NZ  | M_GLU_124 | OE2 | 2.470 |
| 1W72 | L.LYS_222 | NZ  | L_GLU_226 | OE2 | 3.445 |
| 1W72 | L.LYS_228 | NZ  | M_GLU_123 | OE2 | 3.514 |
| 1W72 | L_ARG_31  | NH2 | L ASP_92  | OD2 | 2.894 |
| 1W72 | L_ARG_61  | NH1 | L ASP_82  | OD1 | 3.611 |
| 1W72 | L_ARG_61  | NH1 | L ASP_82  | OD2 | 2.785 |
| 1W72 | L_ARG_61  | NH2 | L_GLU_79  | OE1 | 2.992 |
| 1W72 | L_ARG_61  | NH2 | L ASP_82  | OD1 | 3.068 |
| 1W72 | L_ARG_61  | NH2 | L ASP_82  | OD2 | 3.602 |
| 1W72 | L.LYS_166 | NZ  | L_GLU_83  | OE2 | 2.718 |
| 1W72 | L.HIS_189 | ND1 | L ASP_151 | OD2 | 2.787 |
| 1W72 | M_ARG_31  | NH2 | M ASP_92  | OD2 | 3.047 |
| 1W72 | M_ARG_61  | NH1 | M ASP_82  | OD1 | 3.754 |
| 1W72 | M_ARG_61  | NH1 | M ASP_82  | OD2 | 2.671 |
| 1W72 | M_ARG_61  | NH2 | M_GLU_79  | OE1 | 3.828 |
| 1W72 | M_ARG_61  | NH2 | M_GLU_79  | OE2 | 3.741 |
| 1W72 | M_ARG_61  | NH2 | M ASP_82  | OD1 | 2.860 |
| 1W72 | M_ARG_61  | NH2 | M ASP_82  | OD2 | 3.245 |
| 1W72 | M.HIS_95B | NE2 | L ASP_61  | OD2 | 3.924 |
| 1W72 | M.LYS_166 | NZ  | M_GLU_83  | OE2 | 2.783 |
| 1W72 | M.HIS_189 | ND1 | M ASP_151 | OD2 | 2.728 |
| 1WEJ | L.HIS_30  | ND1 | F_GLU_104 | OE1 | 2.984 |
| 1WEJ | L.HIS_30  | ND1 | F_GLU_104 | OE2 | 2.758 |
| 1WEJ | L_ARG_61  | NH2 | L_GLU_81  | OE2 | 3.867 |
| 1WEJ | L_ARG_61  | NH2 | L ASP_82  | OD1 | 2.963 |
| 1WEJ | L_ARG_61  | NH2 | L ASP_82  | OD2 | 3.742 |
| 1WEJ | L.LYS_142 | NZ  | L ASP_143 | OD1 | 3.329 |
| 1WEJ | L.LYS_147 | NZ  | L_GLU_154 | OE1 | 2.866 |
| 1WEJ | L.LYS_149 | NZ  | L_GLU_195 | OE1 | 3.636 |
| 1WEJ | L.LYS_149 | NZ  | L_GLU_195 | OE2 | 3.035 |
| 1WEJ | L_ARG_155 | NH1 | L_GLU_185 | OE1 | 3.455 |
| 1WEJ | L_ARG_155 | NH1 | L_GLU_185 | OE2 | 3.112 |
| 1WEJ | L_ARG_155 | NH2 | L_GLU_185 | OE2 | 2.727 |
| 1WEJ | L.HIS_189 | ND1 | L ASP_151 | OD2 | 3.628 |
| 1WEJ | L.HIS_189 | NE2 | L_GLU_185 | OE2 | 3.295 |
| 1WEJ | L.LYS_199 | NZ  | L ASP_110 | OD2 | 3.451 |
| 1WEJ | H_ARG_40  | NH2 | H_GLU_89  | OE2 | 3.626 |
| 1WEJ | H_ARG_50  | NH1 | F_GLU_62  | OE2 | 3.319 |
| 1WEJ | H_ARG_50  | NH2 | F_GLU_62  | OE2 | 2.823 |
| 1WEJ | H.LYS_67  | NZ  | H ASP_90  | OD1 | 3.685 |
| 1WEJ | H.LYS_67  | NZ  | H ASP_90  | OD2 | 2.798 |
| 1WEJ | H.LYS_212 | NZ  | L_GLU_123 | OE2 | 3.963 |
| 1WEJ | F.LYS_60  | NZ  | H ASP_100 | OD2 | 3.322 |

|      |           |     |           |     |       |
|------|-----------|-----|-----------|-----|-------|
| 1WEJ | F_LYS.87  | NZ  | F_GLU_90  | OE2 | 3.504 |
| 1WEJ | F_LYS.88  | NZ  | F_GLU_92  | OE2 | 3.066 |
| 1WEJ | F_LYS.99  | NZ  | F_GLU_61  | OE2 | 2.733 |
| 1WZ1 | L_ARG.24  | NH1 | L_ASP_75  | OD2 | 3.952 |
| 1WZ1 | L_ARG.66  | NH1 | L_GLU_84  | OE1 | 3.457 |
| 1WZ1 | L_ARG.66  | NH1 | L_GLU_84  | OE2 | 3.613 |
| 1WZ1 | L_ARG.66  | NH2 | L_GLU_84  | OE2 | 3.590 |
| 1WZ1 | L_ARG.66  | NH2 | L_GLU_86  | OE2 | 2.822 |
| 1WZ1 | L_ARG.66  | NH2 | L_ASP_87  | OD1 | 2.607 |
| 1WZ1 | L_ARG.66  | NH2 | L_ASP_87  | OD2 | 3.494 |
| 1WZ1 | H_ARG.38  | NH1 | H_GLU_46  | OE1 | 3.212 |
| 1WZ1 | H_ARG.38  | NH1 | H_GLU_46  | OE2 | 3.069 |
| 1WZ1 | H_ARG.38  | NH2 | H_ASP_92  | OD2 | 2.708 |
| 1WZ1 | H_ARG.52  | NH1 | H_GLU_50  | OE2 | 3.191 |
| 1WZ1 | H_HIS.58  | NE2 | H_ASP_76  | OD2 | 3.006 |
| 1WZ1 | H_ARG.69  | NH1 | H_ASP_92  | OD1 | 3.703 |
| 1WZ1 | H_ARG.69  | NH1 | H_ASP_92  | OD2 | 3.712 |
| 1WZ1 | H_ARG.69  | NH2 | H_ASP_92  | OD1 | 2.195 |
| 1WZ1 | H_ARG.69  | NH2 | H_ASP_92  | OD2 | 3.555 |
| 1WZ1 | H_ARG.74  | NH2 | H_ASP_76  | OD1 | 3.331 |
| 1XF2 | L_ARG.61  | NH2 | L_GLU_81  | OE2 | 3.419 |
| 1XF2 | L_ARG.61  | NH2 | L_ASP_82  | OD1 | 3.006 |
| 1XF2 | L_ARG.61  | NH2 | L_ASP_82  | OD2 | 3.455 |
| 1XF2 | L_LYS.149 | NZ  | L_GLU_195 | OE1 | 3.344 |
| 1XF2 | L_ARG.155 | NH1 | L_GLU_185 | OE2 | 3.754 |
| 1XF2 | L_ARG.155 | NH2 | L_GLU_185 | OE2 | 2.954 |
| 1XF2 | L_ARG.188 | NH1 | L_GLU_185 | OE1 | 2.837 |
| 1XF2 | L_HIS.189 | ND1 | L_ASP_151 | OD2 | 3.000 |
| 1XF2 | L_HIS.189 | NE2 | L_GLU_185 | OE2 | 3.246 |
| 1XF2 | L_ARG.211 | NH1 | L_GLU_187 | OE1 | 3.085 |
| 1XF2 | H_LYS.66  | NZ  | H_ASP_86  | OD1 | 2.700 |
| 1XF2 | H_LYS.66  | NZ  | H_ASP_86  | OD2 | 3.586 |
| 1XF2 | H_ARG.94  | NH2 | H_ASP_101 | OD1 | 3.923 |
| 1XF2 | H_ARG.94  | NH2 | H_ASP_101 | OD2 | 3.252 |
| 1XF2 | H_LYS.208 | NZ  | L_GLU_123 | OE1 | 3.369 |
| 1XF2 | H_LYS.208 | NZ  | L_GLU_123 | OE2 | 2.577 |
| 1XF2 | A_ARG.61  | NH1 | A_GLU_81  | OE2 | 3.119 |
| 1XF2 | A_ARG.61  | NH1 | A_ASP_82  | OD1 | 2.988 |
| 1XF2 | A_ARG.61  | NH1 | A_ASP_82  | OD2 | 3.665 |
| 1XF2 | A_LYS.149 | NZ  | A_GLU_195 | OE2 | 3.121 |
| 1XF2 | A_ARG.155 | NH1 | A_GLU_185 | OE1 | 3.880 |
| 1XF2 | A_ARG.155 | NH1 | A_GLU_185 | OE2 | 2.861 |
| 1XF2 | A_ARG.155 | NH2 | A_GLU_185 | OE2 | 2.971 |
| 1XF2 | A_ARG.188 | NH2 | A_GLU_185 | OE1 | 3.702 |
| 1XF2 | A_HIS.189 | ND1 | A_ASP_151 | OD2 | 2.794 |
| 1XF2 | A_LYS.199 | NZ  | A_ASP_110 | OD2 | 3.768 |
| 1XF2 | A_ARG.211 | NH1 | A_GLU_187 | OE2 | 3.554 |
| 1XF2 | B_LYS.66  | NZ  | B_ASP_86  | OD1 | 2.668 |
| 1XF2 | B_LYS.66  | NZ  | B_ASP_86  | OD2 | 3.588 |
| 1XF2 | B_ARG.94  | NH2 | B_ASP_101 | OD1 | 3.898 |
| 1XF2 | B_ARG.94  | NH2 | B_ASP_101 | OD2 | 2.974 |
| 1XF2 | B_LYS.208 | NZ  | A_GLU_123 | OE2 | 2.913 |
| 1XGY | L_LYS.27  | NZ  | L_GLU_93  | OE1 | 3.138 |
| 1XGY | L_LYS.27  | NZ  | L_GLU_93  | OE2 | 3.725 |
| 1XGY | L_ARG.50  | NH2 | P_GLU_6   | OE1 | 2.621 |
| 1XGY | L_ARG.61  | NH1 | L_ASP_82  | OD1 | 2.794 |
| 1XGY | L_ARG.61  | NH1 | L_ASP_82  | OD2 | 2.267 |
| 1XGY | L_ARG.61  | NH2 | L_GLU_79  | OE1 | 3.265 |

|      |           |     |           |     |       |
|------|-----------|-----|-----------|-----|-------|
| 1XGY | L_ARG.61  | NH2 | L_GLU_79  | OE2 | 3.639 |
| 1XGY | L_ARG.61  | NH2 | L_GLU_81  | OE2 | 3.975 |
| 1XGY | L_ARG.61  | NH2 | L_ASP_82  | OD1 | 3.476 |
| 1XGY | L_ARG.61  | NH2 | L_ASP_82  | OD2 | 3.700 |
| 1XGY | L_LYS_142 | NZ  | L_GLU_105 | OE1 | 3.607 |
| 1XGY | L_LYS_147 | NZ  | L_GLU_195 | OE1 | 2.404 |
| 1XGY | L_LYS_149 | NZ  | L_GLU_195 | OE1 | 3.987 |
| 1XGY | L_LYS_149 | NZ  | L_GLU_195 | OE2 | 2.719 |
| 1XGY | L_ARG.155 | NH1 | L_GLU_185 | OE2 | 3.616 |
| 1XGY | L_ARG.155 | NH2 | L_GLU_185 | OE2 | 2.613 |
| 1XGY | L_HIS_189 | ND1 | L_ASP_151 | OD2 | 3.191 |
| 1XGY | L_LYS_199 | NZ  | L_ASP_110 | OD1 | 2.374 |
| 1XGY | L_LYS_199 | NZ  | L_ASP_110 | OD2 | 2.995 |
| 1XGY | H_ARG.40  | NH1 | H_GLU_85  | OE1 | 3.102 |
| 1XGY | H_LYS.66  | NZ  | H_ASP_86  | OD1 | 3.962 |
| 1XGY | H_LYS.66  | NZ  | H_ASP_86  | OD2 | 2.962 |
| 1XGY | H_LYS_205 | NZ  | H_ASP_207 | OD1 | 3.695 |
| 1XGY | H_LYS_208 | NZ  | L_GLU_123 | OE2 | 3.768 |
| 1XGY | M_LYS.27  | NZ  | M_GLU_93  | OE1 | 2.941 |
| 1XGY | M_LYS.27  | NZ  | M_GLU_93  | OE2 | 3.832 |
| 1XGY | M_ARG.50  | NH2 | Q_GLU_6   | OE1 | 3.022 |
| 1XGY | M_ARG.61  | NH1 | M_ASP_82  | OD1 | 3.884 |
| 1XGY | M_ARG.61  | NH1 | M_ASP_82  | OD2 | 2.768 |
| 1XGY | M_ARG.61  | NH2 | M_GLU_79  | OE1 | 3.581 |
| 1XGY | M_ARG.61  | NH2 | M_GLU_79  | OE2 | 3.865 |
| 1XGY | M_ARG.61  | NH2 | M_ASP_82  | OD1 | 3.106 |
| 1XGY | M_ARG.61  | NH2 | M_ASP_82  | OD2 | 3.415 |
| 1XGY | M_ARG.77  | NH1 | M_GLU_79  | OE2 | 3.806 |
| 1XGY | M_LYS_142 | NZ  | M_GLU_105 | OE1 | 2.680 |
| 1XGY | M_LYS_147 | NZ  | M_GLU_154 | OE1 | 3.126 |
| 1XGY | M_LYS_147 | NZ  | M_GLU_154 | OE2 | 3.008 |
| 1XGY | M_LYS_149 | NZ  | M_GLU_195 | OE1 | 3.612 |
| 1XGY | M_LYS_149 | NZ  | M_GLU_195 | OE2 | 2.488 |
| 1XGY | M_ARG.155 | NH1 | M_GLU_185 | OE2 | 3.086 |
| 1XGY | M_ARG.155 | NH2 | M_GLU_185 | OE1 | 3.630 |
| 1XGY | M_ARG.155 | NH2 | M_GLU_185 | OE2 | 2.772 |
| 1XGY | M_HIS_189 | ND1 | M_ASP_151 | OD2 | 3.229 |
| 1XGY | M_LYS_199 | NZ  | M_ASP_110 | OD1 | 2.140 |
| 1XGY | M_LYS_199 | NZ  | M_ASP_110 | OD2 | 2.774 |
| 1XGY | I_ARG.40  | NH1 | I_GLU_85  | OE2 | 3.888 |
| 1XGY | I_LYS.66  | NZ  | I_ASP_86  | OD1 | 3.839 |
| 1XGY | I_LYS.66  | NZ  | I_ASP_86  | OD2 | 2.661 |
| 1XGY | I_LYS_205 | NZ  | I_ASP_207 | OD1 | 3.293 |
| 1XGY | I_LYS_208 | NZ  | M_GLU_123 | OE2 | 3.551 |
| 1XIW | A_LYS.52  | NZ  | A_ASP_48  | OD1 | 3.395 |
| 1XIW | A_HIS.60  | ND1 | A_ASP_59  | OD1 | 3.757 |
| 1XIW | A_HIS.60  | NE2 | A_ASP_59  | OD1 | 3.245 |
| 1XIW | A_ARG.80  | NH1 | D_ASP_106 | OD2 | 2.879 |
| 1XIW | A_ARG.80  | NH2 | A_GLU_35  | OE1 | 3.061 |
| 1XIW | A_ARG.80  | NH2 | A_GLU_35  | OE2 | 3.325 |
| 1XIW | A_ARG.94  | NH1 | A_GLU_68  | OE2 | 2.956 |
| 1XIW | A_ARG.94  | NH2 | A_GLU_68  | OE2 | 3.474 |
| 1XIW | A_ARG.94  | NH2 | B_GLU_7   | OE1 | 3.648 |
| 1XIW | A_ARG.94  | NH2 | B_GLU_7   | OE2 | 2.974 |
| 1XIW | B_LYS.2   | NZ  | A_ASP_42  | OD1 | 3.017 |
| 1XIW | B_LYS.2   | NZ  | A_ASP_42  | OD2 | 2.678 |
| 1XIW | B_ARG.11  | NH1 | B_ASP_38  | OD1 | 3.352 |
| 1XIW | B_ARG.11  | NH1 | B_ASP_38  | OD2 | 3.240 |

|      |          |     |           |     |       |
|------|----------|-----|-----------|-----|-------|
| 1XIW | B_ARG_36 | NH2 | B_GLU_6   | OE1 | 3.782 |
| 1XIW | B_ARG_36 | NH2 | B_GLU_6   | OE2 | 2.940 |
| 1XIW | B_ARG_42 | NH1 | B_GLU_7   | OE2 | 2.789 |
| 1XIW | B_ARG_47 | NH2 | B_ASP_45  | OD2 | 3.150 |
| 1XIW | C_ARG_25 | NH1 | C_ASP_71  | OD1 | 2.681 |
| 1XIW | C_ARG_25 | NH1 | C_ASP_71  | OD2 | 3.457 |
| 1XIW | C_ARG_31 | NH1 | A_ASP_86  | OD1 | 2.919 |
| 1XIW | C_ARG_31 | NH1 | A_ASP_86  | OD2 | 3.491 |
| 1XIW | C_ARG_31 | NH2 | A_ASP_86  | OD1 | 3.709 |
| 1XIW | C_ARG_31 | NH2 | A_ASP_86  | OD2 | 2.755 |
| 1XIW | C_ARG_54 | NH1 | F_GLU_6   | OE1 | 2.951 |
| 1XIW | C_ARG_54 | NH2 | F_GLU_6   | OE1 | 3.193 |
| 1XIW | C_ARG_54 | NH2 | F_GLU_6   | OE2 | 3.073 |
| 1XIW | C_HIS_56 | ND1 | F_GLU_9   | OE1 | 3.139 |
| 1XIW | C_HIS_56 | ND1 | F_GLU_9   | OE2 | 2.963 |
| 1XIW | C_LYS_62 | NZ  | C_GLU_80  | OE1 | 2.741 |
| 1XIW | C_LYS_62 | NZ  | C_ASP_83  | OD1 | 3.773 |
| 1XIW | C_LYS_62 | NZ  | C_ASP_83  | OD2 | 2.726 |
| 1XIW | D_LYS_55 | NZ  | A_ASP_57  | OD1 | 3.690 |
| 1XIW | D_LYS_63 | NZ  | D_GLU_46  | OE1 | 2.923 |
| 1XIW | D_LYS_63 | NZ  | D_GLU_46  | OE2 | 3.778 |
| 1XIW | D_LYS_67 | NZ  | D_ASP_90  | OD1 | 3.837 |
| 1XIW | D_LYS_67 | NZ  | D_ASP_90  | OD2 | 2.934 |
| 1XIW | D_ARG_98 | NH2 | D_ASP_110 | OD1 | 3.519 |
| 1XIW | D_ARG_98 | NH2 | D_ASP_110 | OD2 | 2.851 |
| 1XIW | E_HIS_60 | ND1 | E_ASP_59  | OD1 | 3.485 |
| 1XIW | E_HIS_60 | NE2 | E_ASP_59  | OD1 | 2.909 |
| 1XIW | E_ARG_80 | NH1 | H_ASP_106 | OD2 | 2.741 |
| 1XIW | E_ARG_80 | NH2 | E_GLU_35  | OE1 | 3.223 |
| 1XIW | E_ARG_80 | NH2 | E_GLU_35  | OE2 | 2.970 |
| 1XIW | E_ARG_94 | NH1 | E_GLU_68  | OE2 | 3.220 |
| 1XIW | E_ARG_94 | NH2 | E_GLU_68  | OE2 | 2.578 |
| 1XIW | E_ARG_94 | NH2 | F_GLU_7   | OE2 | 3.577 |
| 1XIW | F_LYS_2  | NZ  | E_ASP_42  | OD1 | 3.079 |
| 1XIW | F_LYS_2  | NZ  | E_ASP_42  | OD2 | 3.491 |
| 1XIW | F_ARG_11 | NH1 | F_ASP_38  | OD1 | 3.262 |
| 1XIW | F_ARG_11 | NH1 | F_ASP_38  | OD2 | 3.138 |
| 1XIW | F_ARG_36 | NH2 | F_GLU_6   | OE1 | 3.809 |
| 1XIW | F_ARG_36 | NH2 | F_GLU_6   | OE2 | 2.975 |
| 1XIW | F_ARG_42 | NH2 | F_GLU_7   | OE2 | 3.760 |
| 1XIW | F_ARG_47 | NH2 | F_ASP_45  | OD2 | 3.702 |
| 1XIW | G_ARG_31 | NH1 | E_ASP_86  | OD1 | 3.076 |
| 1XIW | G_ARG_31 | NH1 | E_ASP_86  | OD2 | 3.219 |
| 1XIW | G_ARG_31 | NH2 | E_ASP_86  | OD2 | 2.817 |
| 1XIW | G_ARG_54 | NH1 | B_GLU_6   | OE1 | 2.839 |
| 1XIW | G_ARG_54 | NH2 | B_GLU_6   | OE1 | 3.146 |
| 1XIW | G_ARG_54 | NH2 | B_GLU_6   | OE2 | 3.222 |
| 1XIW | G_HIS_56 | ND1 | B_GLU_9   | OE1 | 2.509 |
| 1XIW | G_HIS_56 | ND1 | B_GLU_9   | OE2 | 3.961 |
| 1XIW | G_LYS_62 | NZ  | G_GLU_80  | OE1 | 2.856 |
| 1XIW | G_LYS_62 | NZ  | G_ASP_83  | OD1 | 3.394 |
| 1XIW | G_LYS_62 | NZ  | G_ASP_83  | OD2 | 2.415 |
| 1XIW | H_LYS_67 | NZ  | H_ASP_90  | OD1 | 3.722 |
| 1XIW | H_LYS_67 | NZ  | H_ASP_90  | OD2 | 3.068 |
| 1XIW | H_ARG_98 | NH2 | H_ASP_110 | OD1 | 3.520 |
| 1XIW | H_ARG_98 | NH2 | H_ASP_110 | OD2 | 2.683 |
| 1YC7 | A_ARG_38 | NH1 | A_ASP_89  | OD1 | 2.902 |
| 1YC7 | A_ARG_38 | NH2 | A_GLU_46  | OE2 | 3.097 |



|      |           |     |            |     |       |
|------|-----------|-----|------------|-----|-------|
| 1YC7 | A_ARG.38  | NH2 | A_ASP.89   | OD1 | 3.949 |
| 1YC7 | A_LYS.64  | NZ  | A_ASP.61   | OD1 | 2.723 |
| 1YC7 | A_LYS.64  | NZ  | A_ASP.61   | OD2 | 3.957 |
| 1YC7 | A_ARG.66  | NH1 | A_ASP.89   | OD1 | 2.987 |
| 1YC7 | A_ARG.66  | NH1 | A_ASP.89   | OD2 | 3.524 |
| 1YC7 | A_ARG.66  | NH2 | A_ASP.89   | OD1 | 3.641 |
| 1YC7 | A_ARG.66  | NH2 | A_ASP.89   | OD2 | 2.704 |
| 1YC7 | B_ARG.38  | NH1 | B_ASP.89   | OD1 | 2.874 |
| 1YC7 | B_ARG.38  | NH2 | B_GLU.46   | OE2 | 3.356 |
| 1YC7 | B_ARG.38  | NH2 | B_ASP.89   | OD1 | 3.943 |
| 1YC7 | B_ARG.66  | NH1 | B_ASP.89   | OD1 | 3.049 |
| 1YC7 | B_ARG.66  | NH1 | B_ASP.89   | OD2 | 3.521 |
| 1YC7 | B_ARG.66  | NH2 | B_ASP.89   | OD1 | 3.788 |
| 1YC7 | B_ARG.66  | NH2 | B_ASP.89   | OD2 | 2.754 |
| 1YC8 | A_ARG.38  | NH1 | A_ASP.89   | OD1 | 2.913 |
| 1YC8 | A_ARG.38  | NH2 | A_GLU.46   | OE1 | 3.560 |
| 1YC8 | A_ARG.38  | NH2 | A_GLU.46   | OE2 | 3.758 |
| 1YC8 | A_LYS.64  | NZ  | A_ASP.61   | OD1 | 3.092 |
| 1YC8 | A_ARG.66  | NH1 | A_ASP.89   | OD1 | 2.701 |
| 1YC8 | A_ARG.66  | NH1 | A_ASP.89   | OD2 | 3.515 |
| 1YC8 | A_ARG.66  | NH2 | A_ASP.89   | OD1 | 3.553 |
| 1YC8 | A_ARG.66  | NH2 | A_ASP.89   | OD2 | 2.766 |
| 1YC8 | B_ARG.38  | NH1 | B_ASP.89   | OD1 | 2.947 |
| 1YC8 | B_ARG.38  | NH2 | B_GLU.46   | OE1 | 3.738 |
| 1YC8 | B_ARG.38  | NH2 | B_GLU.46   | OE2 | 3.326 |
| 1YC8 | B_ARG.38  | NH2 | B_ASP.89   | OD1 | 3.942 |
| 1YC8 | B_LYS.64  | NZ  | B_ASP.61   | OD1 | 2.743 |
| 1YC8 | B_ARG.66  | NH1 | B_ASP.89   | OD1 | 2.596 |
| 1YC8 | B_ARG.66  | NH1 | B_ASP.89   | OD2 | 2.980 |
| 1YC8 | B_ARG.66  | NH2 | B_ASP.89   | OD1 | 3.764 |
| 1YC8 | B_ARG.66  | NH2 | B_ASP.89   | OD2 | 2.564 |
| 1YEI | L_LYS.24  | NZ  | L_ASP.70   | OD1 | 3.938 |
| 1YEI | L_LYS.30  | NZ  | H_GLU.100B | OE1 | 2.979 |
| 1YEI | L_LYS.45  | NZ  | H_ASP.101  | OD1 | 2.746 |
| 1YEI | L_LYS.45  | NZ  | H_ASP.101  | OD2 | 3.891 |
| 1YEI | L_ARG.46  | NH2 | L_ASP.55   | OD1 | 3.728 |
| 1YEI | L_ARG.46  | NH2 | L_ASP.55   | OD2 | 2.823 |
| 1YEI | L_ARG.46  | NH2 | H_ASP.101  | OD1 | 3.707 |
| 1YEI | L_HIS.49  | ND1 | L_ASP.55   | OD1 | 2.748 |
| 1YEI | L_HIS.49  | ND1 | L_ASP.55   | OD2 | 3.813 |
| 1YEI | L_HIS.49  | NE2 | H_ASP.100C | OD1 | 3.542 |
| 1YEI | L_ARG.61  | NH1 | L_ASP.82   | OD1 | 3.376 |
| 1YEI | L_ARG.61  | NH1 | L_ASP.82   | OD2 | 2.794 |
| 1YEI | L_ARG.61  | NH2 | L_ASP.82   | OD1 | 3.026 |
| 1YEI | L_ARG.61  | NH2 | L_ASP.82   | OD2 | 3.859 |
| 1YEI | L_ARG.77  | NH1 | L_GLU.79   | OE2 | 2.773 |
| 1YEI | L_LYS.103 | NZ  | L_ASP.165  | OD1 | 3.211 |
| 1YEI | L_LYS.149 | NZ  | L_GLU.195  | OE1 | 3.290 |
| 1YEI | L_LYS.149 | NZ  | L_GLU.195  | OE2 | 3.378 |
| 1YEI | L_ARG.155 | NH1 | L_GLU.185  | OE1 | 3.467 |
| 1YEI | L_ARG.155 | NH1 | L_GLU.185  | OE2 | 2.801 |
| 1YEI | L_ARG.155 | NH2 | L_GLU.185  | OE1 | 2.921 |
| 1YEI | L_ARG.155 | NH2 | L_GLU.185  | OE2 | 3.794 |
| 1YEI | L_LYS.183 | NZ  | L_GLU.187  | OE1 | 2.856 |
| 1YEI | L_LYS.183 | NZ  | L_GLU.187  | OE2 | 3.649 |
| 1YEI | L_HIS.189 | ND1 | L_ASP.151  | OD2 | 3.711 |
| 1YEI | L_HIS.189 | NE2 | L_GLU.185  | OE2 | 2.707 |
| 1YEI | L_LYS.199 | NZ  | L_ASP.110  | OD1 | 3.088 |

|      |           |     |            |     |       |
|------|-----------|-----|------------|-----|-------|
| 1YEI | L_LYS_199 | NZ  | L_ASP_110  | OD2 | 3.565 |
| 1YEI | H_LYS_62  | NZ  | H_GLU_46   | OE1 | 2.847 |
| 1YEI | H_LYS_62  | NZ  | H_GLU_46   | OE2 | 3.937 |
| 1YEI | H_LYS_64  | NZ  | H_GLU_61   | OE1 | 2.773 |
| 1YEI | H_LYS_66  | NZ  | H_ASP_86   | OD1 | 3.924 |
| 1YEI | H_LYS_66  | NZ  | H_ASP_86   | OD2 | 2.870 |
| 1YEI | H_LYS_216 | NZ  | H_ASP_218  | OD1 | 3.297 |
| 1YEI | H_LYS_216 | NZ  | H_ASP_218  | OD2 | 3.256 |
| 1YEJ | L_LYS_24  | NZ  | L_ASP_70   | OD1 | 3.770 |
| 1YEJ | L_LYS_45  | NZ  | H_ASP_101  | OD1 | 2.790 |
| 1YEJ | L_LYS_45  | NZ  | H_ASP_101  | OD2 | 3.988 |
| 1YEJ | L_ARG_46  | NH2 | L_ASP_55   | OD1 | 3.922 |
| 1YEJ | L_ARG_46  | NH2 | L_ASP_55   | OD2 | 2.854 |
| 1YEJ | L_ARG_46  | NH2 | H_ASP_101  | OD1 | 3.745 |
| 1YEJ | L_HIS_49  | ND1 | L_ASP_55   | OD1 | 2.776 |
| 1YEJ | L_HIS_49  | ND1 | L_ASP_55   | OD2 | 3.660 |
| 1YEJ | L_HIS_49  | NE2 | H_ASP_100C | OD1 | 3.536 |
| 1YEJ | L_LYS_53  | NZ  | H_ASP_100C | OD1 | 3.377 |
| 1YEJ | L_LYS_53  | NZ  | H_ASP_100C | OD2 | 3.298 |
| 1YEJ | L_ARG_61  | NH1 | L_ASP_82   | OD1 | 3.561 |
| 1YEJ | L_ARG_61  | NH1 | L_ASP_82   | OD2 | 2.867 |
| 1YEJ | L_ARG_61  | NH2 | L_ASP_82   | OD1 | 3.034 |
| 1YEJ | L_ARG_61  | NH2 | L_ASP_82   | OD2 | 3.799 |
| 1YEJ | L_ARG_77  | NH1 | L_GLU_79   | OE2 | 2.713 |
| 1YEJ | L_LYS_103 | NZ  | L_ASP_165  | OD1 | 3.615 |
| 1YEJ | L_LYS_149 | NZ  | L_GLU_195  | OE1 | 3.131 |
| 1YEJ | L_LYS_149 | NZ  | L_GLU_195  | OE2 | 3.063 |
| 1YEJ | L_ARG_155 | NH1 | L_GLU_185  | OE1 | 3.833 |
| 1YEJ | L_ARG_155 | NH1 | L_GLU_185  | OE2 | 2.788 |
| 1YEJ | L_ARG_155 | NH2 | L_GLU_185  | OE1 | 2.959 |
| 1YEJ | L_ARG_155 | NH2 | L_GLU_185  | OE2 | 3.459 |
| 1YEJ | L_LYS_183 | NZ  | L_ASP_184  | OD1 | 3.622 |
| 1YEJ | L_LYS_183 | NZ  | L_GLU_187  | OE1 | 2.703 |
| 1YEJ | L_LYS_183 | NZ  | L_GLU_187  | OE2 | 3.871 |
| 1YEJ | L_HIS_189 | ND1 | L_ASP_151  | OD2 | 3.584 |
| 1YEJ | L_HIS_189 | NE2 | L_GLU_185  | OE2 | 2.940 |
| 1YEJ | L_LYS_199 | NZ  | L_ASP_110  | OD1 | 3.252 |
| 1YEJ | L_LYS_199 | NZ  | L_ASP_110  | OD2 | 3.582 |
| 1YEJ | L_ARG_211 | NH2 | L_GLU_213  | OE2 | 3.445 |
| 1YEJ | H_LYS_62  | NZ  | H_GLU_46   | OE1 | 3.693 |
| 1YEJ | H_LYS_62  | NZ  | H_GLU_46   | OE2 | 2.771 |
| 1YEJ | H_LYS_64  | NZ  | H_GLU_61   | OE1 | 2.970 |
| 1YEJ | H_LYS_66  | NZ  | H_ASP_86   | OD1 | 3.807 |
| 1YEJ | H_LYS_66  | NZ  | H_ASP_86   | OD2 | 2.899 |
| 1YEJ | H_LYS_220 | NZ  | H_GLU_222  | OE2 | 3.507 |
| 1YEK | L_LYS_30  | NZ  | H_GLU_100B | OE1 | 2.464 |
| 1YEK | L_LYS_45  | NZ  | H_ASP_101  | OD1 | 2.830 |
| 1YEK | L_ARG_46  | NH2 | L_ASP_55   | OD1 | 3.853 |
| 1YEK | L_ARG_46  | NH2 | L_ASP_55   | OD2 | 2.868 |
| 1YEK | L_ARG_46  | NH2 | H_ASP_101  | OD1 | 3.853 |
| 1YEK | L_HIS_49  | ND1 | L_ASP_55   | OD1 | 2.761 |
| 1YEK | L_HIS_49  | ND1 | L_ASP_55   | OD2 | 3.901 |
| 1YEK | L_HIS_49  | NE2 | H_ASP_100C | OD1 | 3.610 |
| 1YEK | L_ARG_61  | NH1 | L_ASP_82   | OD1 | 3.781 |
| 1YEK | L_ARG_61  | NH1 | L_ASP_82   | OD2 | 2.826 |
| 1YEK | L_ARG_61  | NH2 | L_ASP_82   | OD1 | 2.807 |
| 1YEK | L_ARG_61  | NH2 | L_ASP_82   | OD2 | 3.333 |
| 1YEK | L_ARG_77  | NH1 | L_GLU_79   | OE1 | 3.282 |

|      |            |     |            |     |       |
|------|------------|-----|------------|-----|-------|
| 1YEK | L_ARG_77   | NH1 | L_GLU_79   | OE2 | 3.016 |
| 1YEK | L_LYS_103  | NZ  | L_ASP_165  | OD1 | 3.840 |
| 1YEK | L_LYS_149  | NZ  | L_GLU_195  | OE1 | 3.270 |
| 1YEK | L_LYS_149  | NZ  | L_GLU_195  | OE2 | 3.257 |
| 1YEK | L_ARG_155  | NH1 | L_GLU_185  | OE1 | 3.905 |
| 1YEK | L_ARG_155  | NH1 | L_GLU_185  | OE2 | 2.816 |
| 1YEK | L_ARG_155  | NH2 | L_GLU_185  | OE1 | 3.007 |
| 1YEK | L_ARG_155  | NH2 | L_GLU_185  | OE2 | 3.425 |
| 1YEK | L_LYS_169  | NZ  | L_ASP_167  | OD1 | 3.838 |
| 1YEK | L_LYS_183  | NZ  | L_ASP_184  | OD1 | 3.851 |
| 1YEK | L_LYS_183  | NZ  | L_GLU_187  | OE1 | 2.883 |
| 1YEK | L_HIS_189  | ND1 | L_ASP_151  | OD2 | 3.477 |
| 1YEK | L_HIS_189  | NE2 | L_GLU_185  | OE2 | 2.892 |
| 1YEK | L_LYS_199  | NZ  | L_ASP_110  | OD1 | 3.770 |
| 1YEK | L_LYS_199  | NZ  | L_ASP_110  | OD2 | 3.854 |
| 1YEK | L_ARG_211  | NH2 | L_GLU_213  | OE1 | 3.144 |
| 1YEK | L_ARG_211  | NH2 | L_GLU_213  | OE2 | 3.561 |
| 1YEK | H_LYS_62   | NZ  | H_GLU_46   | OE1 | 3.791 |
| 1YEK | H_LYS_62   | NZ  | H_GLU_46   | OE2 | 2.855 |
| 1YEK | H_LYS_64   | NZ  | H_GLU_61   | OE1 | 2.862 |
| 1YEK | H_LYS_66   | NZ  | H_ASP_86   | OD1 | 3.789 |
| 1YEK | H_LYS_66   | NZ  | H_ASP_86   | OD2 | 2.810 |
| 1YEK | H_LYS_216  | NZ  | H_ASP_218  | OD1 | 2.879 |
| 1YEK | H_LYS_216  | NZ  | H_ASP_218  | OD2 | 3.161 |
| 1YEK | H_LYS_220  | NZ  | H_GLU_222  | OE1 | 3.196 |
| 1YEK | H_LYS_220  | NZ  | H_GLU_222  | OE2 | 3.085 |
| 1YNT | A_ARG_24   | NH1 | A_ASP_70   | OD1 | 3.062 |
| 1YNT | A_ARG_24   | NH1 | C_ASP_1070 | OD2 | 3.114 |
| 1YNT | A_ARG_24   | NH2 | C_ASP_1070 | OD2 | 3.728 |
| 1YNT | A_ARG_61   | NH1 | A_ASP_82   | OD1 | 3.482 |
| 1YNT | A_ARG_61   | NH1 | A_ASP_82   | OD2 | 2.608 |
| 1YNT | A_ARG_61   | NH2 | A_ASP_82   | OD1 | 2.789 |
| 1YNT | A_ARG_61   | NH2 | A_ASP_82   | OD2 | 2.940 |
| 1YNT | A_LYS_142  | NZ  | A_GLU_105  | OE1 | 3.414 |
| 1YNT | A_LYS_142  | NZ  | A_GLU_105  | OE2 | 3.809 |
| 1YNT | A_LYS_149  | NZ  | A_GLU_195  | OE1 | 3.930 |
| 1YNT | A_LYS_149  | NZ  | A_GLU_195  | OE2 | 3.328 |
| 1YNT | A_ARG_155  | NH1 | A_GLU_185  | OE1 | 3.418 |
| 1YNT | A_ARG_155  | NH2 | A_GLU_185  | OE1 | 2.764 |
| 1YNT | A_ARG_155  | NH2 | A_GLU_185  | OE2 | 3.917 |
| 1YNT | A_LYS_183  | NZ  | A_GLU_187  | OE1 | 3.129 |
| 1YNT | A_LYS_183  | NZ  | A_GLU_187  | OE2 | 2.879 |
| 1YNT | A_LYS_199  | NZ  | A_ASP_110  | OD1 | 3.520 |
| 1YNT | A_LYS_199  | NZ  | A_ASP_110  | OD2 | 2.749 |
| 1YNT | B_LYS_538  | NZ  | B_ASP_590  | OD1 | 3.512 |
| 1YNT | B_LYS_563  | NZ  | A_ASP_1    | OD1 | 2.935 |
| 1YNT | B_LYS_563  | NZ  | A_ASP_1    | OD2 | 3.384 |
| 1YNT | B_ARG_598  | NH1 | B_ASP_606  | OD1 | 3.368 |
| 1YNT | B_ARG_598  | NH1 | B_ASP_606  | OD2 | 3.829 |
| 1YNT | B_LYS_713  | NZ  | A_GLU_123  | OE1 | 3.645 |
| 1YNT | B_LYS_714  | NZ  | B_GLU_716  | OE1 | 2.761 |
| 1YNT | B_LYS_714  | NZ  | B_GLU_716  | OE2 | 3.569 |
| 1YNT | C_ARG_1024 | NH1 | A_ASP_70   | OD2 | 3.173 |
| 1YNT | C_ARG_1024 | NH1 | C_ASP_1070 | OD1 | 3.033 |
| 1YNT | C_ARG_1024 | NH2 | A_ASP_70   | OD2 | 3.802 |
| 1YNT | C_ARG_1061 | NH1 | C_ASP_1082 | OD1 | 3.503 |
| 1YNT | C_ARG_1061 | NH1 | C_ASP_1082 | OD2 | 2.533 |
| 1YNT | C_ARG_1061 | NH2 | C_ASP_1082 | OD1 | 2.790 |

|      |            |     |            |     |       |
|------|------------|-----|------------|-----|-------|
| 1YNT | C_ARG_1061 | NH2 | C_ASP_1082 | OD2 | 2.886 |
| 1YNT | C_LYS_1107 | NZ  | E_GLU_869  | OE1 | 3.719 |
| 1YNT | C_LYS_1142 | NZ  | C_GLU_1105 | OE1 | 3.297 |
| 1YNT | C_LYS_1142 | NZ  | C_GLU_1105 | OE2 | 3.821 |
| 1YNT | C_LYS_1149 | NZ  | C_GLU_1195 | OE2 | 3.387 |
| 1YNT | C_ARG_1155 | NH1 | C_GLU_1185 | OE1 | 3.385 |
| 1YNT | C_ARG_1155 | NH2 | C_GLU_1185 | OE1 | 2.679 |
| 1YNT | C_ARG_1155 | NH2 | C_GLU_1185 | OE2 | 3.830 |
| 1YNT | C_LYS_1183 | NZ  | C_GLU_1187 | OE1 | 3.084 |
| 1YNT | C_LYS_1183 | NZ  | C_GLU_1187 | OE2 | 2.801 |
| 1YNT | C_LYS_1199 | NZ  | C_ASP_1110 | OD1 | 3.564 |
| 1YNT | C_LYS_1199 | NZ  | C_ASP_1110 | OD2 | 2.804 |
| 1YNT | D_LYS_1538 | NZ  | D_ASP_1590 | OD1 | 3.573 |
| 1YNT | D_LYS_1563 | NZ  | C_ASP_1001 | OD1 | 2.913 |
| 1YNT | D_LYS_1563 | NZ  | C_ASP_1001 | OD2 | 3.385 |
| 1YNT | D_ARG_1598 | NH1 | D_ASP_1606 | OD1 | 3.332 |
| 1YNT | D_ARG_1598 | NH1 | D_ASP_1606 | OD2 | 3.789 |
| 1YNT | D_LYS_1713 | NZ  | C_GLU_1123 | OE1 | 3.557 |
| 1YNT | D_LYS_1714 | NZ  | D_GLU_1716 | OE1 | 2.757 |
| 1YNT | D_LYS_1714 | NZ  | D_GLU_1716 | OE2 | 3.550 |
| 1YNT | E_LYS_824  | NZ  | A_ASP_143  | OD1 | 3.012 |
| 1YNT | E_LYS_824  | NZ  | A_ASP_143  | OD2 | 3.238 |
| 1YNT | E_LYS_833  | NZ  | A_ASP_17   | OD2 | 3.941 |
| 1YNT | E_ARG_852  | NH1 | E_GLU_845  | OE1 | 3.602 |
| 1YNT | E_ARG_852  | NH1 | E_GLU_849  | OE2 | 3.768 |
| 1YNT | E_LYS_878  | NZ  | E_ASP_867  | OD2 | 2.972 |
| 1YNT | F_LYS_2036 | NZ  | F_ASP_2089 | OD2 | 3.981 |
| 1YNT | F_ARG_2051 | NH1 | F_ASP_2078 | OD1 | 3.866 |
| 1YNT | F_LYS_2115 | NZ  | F_ASP_2014 | OD1 | 3.292 |
| 1YNT | F_ARG_2141 | NH2 | F_GLU_2100 | OE2 | 3.866 |
| 1YNT | F_LYS_2154 | NZ  | F_GLU_2252 | OE1 | 3.701 |
| 1YNT | F_LYS_2154 | NZ  | F_GLU_2252 | OE2 | 3.571 |
| 1YNT | F_LYS_2169 | NZ  | F_ASP_2214 | OD1 | 3.970 |
| 1YNT | F_LYS_2231 | NZ  | F_GLU_2229 | OE2 | 3.851 |
| 1YNT | F_HIS_2245 | NE2 | F_GLU_2243 | OE2 | 3.227 |
| 1YNT | F_HIS_2246 | ND1 | F_ASP_2147 | OD1 | 3.500 |
| 1YNT | G_ARG_3051 | NH1 | G_ASP_3078 | OD1 | 3.903 |
| 1YNT | G_LYS_3115 | NZ  | G_ASP_3014 | OD1 | 3.279 |
| 1YNT | G_ARG_3141 | NH2 | G_GLU_3100 | OE2 | 3.839 |
| 1YNT | G_LYS_3169 | NZ  | G_ASP_3214 | OD1 | 3.964 |
| 1YNT | G_LYS_3231 | NZ  | G_GLU_3229 | OE2 | 3.832 |
| 1YNT | G_HIS_3245 | NE2 | G_GLU_3243 | OE2 | 3.216 |
| 1YNT | G_HIS_3246 | ND1 | G_ASP_3147 | OD1 | 3.543 |
| 1YQV | L_ARG_46   | NH2 | H_ASP_101  | OD2 | 3.072 |
| 1YQV | L_ARG_61   | NH2 | L_GLU_81   | OE2 | 3.786 |
| 1YQV | L_ARG_61   | NH2 | L_ASP_82   | OD1 | 2.822 |
| 1YQV | L_ARG_61   | NH2 | L_ASP_82   | OD2 | 3.604 |
| 1YQV | L_LYS_103  | NZ  | L_GLU_105  | OE2 | 2.814 |
| 1YQV | L_LYS_147  | NZ  | L_GLU_154  | OE1 | 3.872 |
| 1YQV | L_LYS_149  | NZ  | L_GLU_195  | OE1 | 3.292 |
| 1YQV | L_LYS_149  | NZ  | L_GLU_195  | OE2 | 3.231 |
| 1YQV | L_ARG_155  | NH1 | L_GLU_185  | OE2 | 3.246 |
| 1YQV | L_ARG_155  | NH2 | L_GLU_185  | OE1 | 3.852 |
| 1YQV | L_ARG_155  | NH2 | L_GLU_185  | OE2 | 3.444 |
| 1YQV | L_LYS_183  | NZ  | L_GLU_187  | OE1 | 3.191 |
| 1YQV | L_LYS_183  | NZ  | L_GLU_187  | OE2 | 2.706 |
| 1YQV | L_ARG_188  | NH2 | L_ASP_184  | OD2 | 3.511 |
| 1YQV | L_HIS_189  | ND1 | L_ASP_151  | OD2 | 2.829 |

|      |           |     |            |     |       |
|------|-----------|-----|------------|-----|-------|
| 1YQV | L_LYS_199 | NZ  | L_ASP_110  | OD2 | 3.414 |
| 1YQV | H_ARG_40  | NH1 | H_GLU_85   | OE1 | 3.131 |
| 1YQV | H_ARG_40  | NH2 | H_GLU_46   | OE1 | 3.444 |
| 1YQV | H_ARG_62  | NH1 | H_GLU_46   | OE2 | 2.704 |
| 1YQV | H_ARG_62  | NH2 | H_GLU_46   | OE1 | 3.964 |
| 1YQV | H_ARG_62  | NH2 | H_GLU_46   | OE2 | 2.670 |
| 1YQV | H_LYS_66  | NZ  | H_ASP_86   | OD1 | 3.613 |
| 1YQV | H_LYS_66  | NZ  | H_ASP_86   | OD2 | 2.967 |
| 1YQV | H_LYS_221 | NZ  | L_GLU_123  | OE1 | 3.123 |
| 1YQV | H_LYS_221 | NZ  | L_GLU_123  | OE2 | 2.724 |
| 1YQV | Y_LYS_1   | NZ  | Y_GLU_7    | OE1 | 3.896 |
| 1YQV | Y_LYS_1   | NZ  | Y_GLU_7    | OE2 | 2.890 |
| 1YQV | Y_LYS_13  | NZ  | Y_ASP_18   | OD2 | 3.870 |
| 1YQV | Y_ARG_45  | NH1 | H_GLU_50   | OE1 | 3.514 |
| 1YQV | Y_ARG_45  | NH1 | H_GLU_50   | OE2 | 2.957 |
| 1YQV | Y_ARG_68  | NH1 | H_GLU_50   | OE1 | 2.746 |
| 1YQV | Y_ARG_68  | NH1 | H_GLU_50   | OE2 | 3.759 |
| 1YQV | Y_ARG_68  | NH2 | H_GLU_50   | OE1 | 3.492 |
| 1YQV | Y_ARG_68  | NH2 | H_GLU_50   | OE2 | 2.963 |
| 1YQV | Y_ARG_125 | NH1 | Y_ASP_119  | OD2 | 3.693 |
| 1YQV | Y_ARG_125 | NH2 | Y_ASP_119  | OD1 | 3.830 |
| 1YQV | Y_ARG_125 | NH2 | Y_ASP_119  | OD2 | 2.874 |
| 1YYL | G_LYS_121 | NZ  | G_GLU_429  | OE2 | 3.711 |
| 1YYL | G_HIS_249 | NE2 | G_GLU_482  | OE1 | 2.847 |
| 1YYL | G_LYS_282 | NZ  | G_GLU_275  | OE1 | 2.882 |
| 1YYL | G_LYS_348 | NZ  | G_GLU_269  | OE1 | 2.580 |
| 1YYL | G_LYS_357 | NZ  | G_GLU_466  | OE2 | 3.616 |
| 1YYL | G_ARG_419 | NH1 | H_GLU_100D | OE2 | 3.749 |
| 1YYL | G_ARG_419 | NH2 | H_GLU_99   | OE2 | 2.852 |
| 1YYL | G_ARG_419 | NH2 | H_GLU_100D | OE1 | 3.510 |
| 1YYL | G_ARG_419 | NH2 | H_GLU_100D | OE2 | 2.773 |
| 1YYL | G_ARG_456 | NH1 | G_GLU_466  | OE1 | 3.131 |
| 1YYL | G_ARG_469 | NH2 | G_ASP_457  | OD1 | 3.629 |
| 1YYL | G_ARG_469 | NH2 | G_ASP_457  | OD2 | 3.271 |
| 1YYL | G_ARG_476 | NH1 | G_GLU_102  | OE1 | 3.069 |
| 1YYL | G_ARG_476 | NH1 | G_GLU_102  | OE2 | 3.149 |
| 1YYL | G_ARG_476 | NH2 | G_ASP_474  | OD1 | 3.673 |
| 1YYL | G_ARG_476 | NH2 | G_ASP_474  | OD2 | 3.290 |
| 1YYL | G_ARG_480 | NH1 | G_ASP_477  | OD1 | 2.475 |
| 1YYL | L_ARG_24  | NH1 | L_GLU_70   | OE2 | 3.902 |
| 1YYL | L_ARG_24  | NH2 | L_GLU_70   | OE2 | 2.664 |
| 1YYL | L_ARG_61  | NH2 | L_GLU_81   | OE1 | 2.377 |
| 1YYL | L_ARG_61  | NH2 | L_ASP_82   | OD1 | 2.888 |
| 1YYL | L_ARG_61  | NH2 | L_ASP_82   | OD2 | 3.800 |
| 1YYL | L_LYS_149 | NZ  | L_GLU_195  | OE1 | 3.064 |
| 1YYL | L_HIS_189 | ND1 | L_ASP_151  | OD2 | 2.706 |
| 1YYL | H_ARG_31  | NH2 | H_ASP_100A | OD1 | 2.948 |
| 1YYL | H_ARG_31  | NH2 | H_ASP_100A | OD2 | 3.167 |
| 1YYL | H_ARG_38  | NH1 | H_GLU_46   | OE1 | 3.897 |
| 1YYL | H_ARG_38  | NH1 | H_GLU_46   | OE2 | 2.772 |
| 1YYL | H_ARG_38  | NH2 | H_ASP_86   | OD2 | 3.486 |
| 1YYL | H_ARG_50  | NH2 | H_GLU_97   | OE1 | 3.557 |
| 1YYL | H_ARG_50  | NH2 | H_GLU_97   | OE2 | 2.825 |
| 1YYL | H_ARG_66  | NH1 | H_ASP_86   | OD1 | 3.071 |
| 1YYL | H_ARG_66  | NH2 | H_ASP_86   | OD1 | 3.527 |
| 1YYL | H_ARG_66  | NH2 | H_ASP_86   | OD2 | 3.411 |
| 1YYL | H_ARG_82A | NH2 | H_GLU_81   | OE1 | 2.703 |
| 1YYL | H_ARG_83  | NH2 | H_ASP_85   | OD1 | 3.539 |

|      |             |     |             |     |       |
|------|-------------|-----|-------------|-----|-------|
| 1YYL | H_ARG_83    | NH2 | H_ASP_85    | OD2 | 3.994 |
| 1YYL | H_LYS_143   | NZ  | H_ASP_144   | OD1 | 3.315 |
| 1YYL | H_LYS_209   | NZ  | L_GLU_123   | OE1 | 2.745 |
| 1YYL | H_LYS_209   | NZ  | L_GLU_123   | OE2 | 3.202 |
| 1YYL | H_LYS_210   | NZ  | H_GLU_212   | OE2 | 3.491 |
| 1YYL | P_LYS_1121  | NZ  | P_GLU_1429  | OE1 | 3.348 |
| 1YYL | P_LYS_1207  | NZ  | P_GLU_1381  | OE1 | 3.416 |
| 1YYL | P_LYS_1207  | NZ  | P_GLU_1381  | OE2 | 2.566 |
| 1YYL | P_LYS_1232  | NZ  | P_GLU_1351  | OE2 | 3.532 |
| 1YYL | P_HIS_1249  | NE2 | P_GLU_1482  | OE1 | 3.004 |
| 1YYL | P_LYS_1282  | NZ  | P_GLU_1275  | OE1 | 2.887 |
| 1YYL | P_LYS_1348  | NZ  | P_GLU_1269  | OE1 | 3.461 |
| 1YYL | P_LYS_1348  | NZ  | P_GLU_1351  | OE1 | 3.495 |
| 1YYL | P_LYS_1357  | NZ  | P_GLU_1466  | OE1 | 3.122 |
| 1YYL | P_ARG_1419  | NH1 | R_GLU_1100B | OE1 | 3.247 |
| 1YYL | P_ARG_1419  | NH2 | R_GLU_1099  | OE1 | 2.456 |
| 1YYL | P_ARG_1419  | NH2 | R_GLU_1100D | OE1 | 3.853 |
| 1YYL | P_ARG_1456  | NH1 | P_GLU_1466  | OE1 | 3.752 |
| 1YYL | P_ARG_1456  | NH1 | P_GLU_1466  | OE2 | 3.112 |
| 1YYL | P_ARG_1469  | NH2 | P_ASP_1457  | OD1 | 3.096 |
| 1YYL | P_ARG_1476  | NH1 | P_GLU_1102  | OE2 | 2.557 |
| 1YYL | P_ARG_1476  | NH2 | P_ASP_1474  | OD2 | 3.225 |
| 1YYL | P_LYS_1487  | NZ  | P_GLU_1091  | OE2 | 3.909 |
| 1YYL | Q_ARG_1061  | NH2 | Q_GLU_1081  | OE1 | 3.180 |
| 1YYL | Q_ARG_1061  | NH2 | Q_ASP_1082  | OD1 | 3.173 |
| 1YYL | Q_ARG_1061  | NH2 | Q_ASP_1082  | OD2 | 3.802 |
| 1YYL | Q_ARG_1095B | NH2 | Q_ASP_1001  | OD1 | 3.399 |
| 1YYL | Q_ARG_1095B | NH2 | Q_ASP_1001  | OD2 | 3.231 |
| 1YYL | Q_LYS_1149  | NZ  | Q_GLU_1195  | OE1 | 2.952 |
| 1YYL | Q_LYS_1183  | NZ  | Q_GLU_1187  | OE1 | 3.809 |
| 1YYL | Q_LYS_1183  | NZ  | Q_GLU_1187  | OE2 | 3.019 |
| 1YYL | Q_HIS_1189  | ND1 | Q_ASP_1151  | OD2 | 3.098 |
| 1YYL | R_ARG_1031  | NH1 | R_GLU_1099  | OE2 | 3.928 |
| 1YYL | R_ARG_1031  | NH2 | R_GLU_1099  | OE2 | 3.597 |
| 1YYL | R_ARG_1031  | NH2 | R_ASP_1100A | OD1 | 3.501 |
| 1YYL | R_ARG_1038  | NH1 | R_GLU_1046  | OE2 | 3.535 |
| 1YYL | R_ARG_1038  | NH1 | R_ASP_1086  | OD2 | 3.751 |
| 1YYL | R_ARG_1038  | NH2 | R_ASP_1086  | OD2 | 2.896 |
| 1YYL | R_ARG_1050  | NH2 | R_GLU_1097  | OE2 | 3.268 |
| 1YYL | R_ARG_1066  | NH1 | R_ASP_1086  | OD1 | 3.056 |
| 1YYL | R_ARG_1066  | NH2 | R_ASP_1086  | OD1 | 3.383 |
| 1YYL | R_ARG_1066  | NH2 | R_ASP_1086  | OD2 | 3.344 |
| 1YYL | R_ARG_1082A | NH2 | R_GLU_1081  | OE1 | 2.841 |
| 1YYL | R_ARG_1083  | NH2 | R_ASP_1085  | OD1 | 3.521 |
| 1YYL | R_ARG_1083  | NH2 | R_ASP_1085  | OD2 | 3.389 |
| 1YYL | R_LYS_1143  | NZ  | R_ASP_1144  | OD2 | 3.941 |
| 1YYL | R_LYS_1201  | NZ  | H_GLU_10    | OE1 | 3.633 |
| 1YYL | R_LYS_1209  | NZ  | Q_GLU_1123  | OE2 | 3.934 |
| 1YYL | R_LYS_1210  | NZ  | R_GLU_1212  | OE2 | 3.311 |
| 1YYL | S_ARG_1009  | NH1 | P_ASP_1368  | OD2 | 3.204 |
| 1YYL | S_ARG_1009  | NH2 | P_ASP_1368  | OD2 | 2.930 |
| 1YYM | G_LYS_207   | NZ  | G_GLU_381   | OE2 | 3.762 |
| 1YYM | G_HIS_249   | NE2 | G_GLU_482   | OE1 | 2.851 |
| 1YYM | G_LYS_282   | NZ  | G_GLU_275   | OE1 | 2.507 |
| 1YYM | G_LYS_348   | NZ  | G_GLU_269   | OE1 | 2.728 |
| 1YYM | G_LYS_348   | NZ  | G_GLU_351   | OE1 | 3.554 |
| 1YYM | G_LYS_348   | NZ  | G_GLU_351   | OE2 | 3.474 |
| 1YYM | G_LYS_350   | NZ  | G_ASP_395   | OD2 | 3.297 |

|      |             |     |             |     |       |
|------|-------------|-----|-------------|-----|-------|
| 1YYM | G_ARG.419   | NH2 | H_GLU_99    | OE2 | 2.868 |
| 1YYM | G_ARG.419   | NH2 | H_GLU_100D  | OE1 | 3.511 |
| 1YYM | G_ARG.456   | NH1 | G_GLU_466   | OE1 | 3.106 |
| 1YYM | G_ARG.469   | NH2 | G_ASP_457   | OD2 | 3.063 |
| 1YYM | G_ARG.476   | NH1 | G_GLU_102   | OE1 | 3.223 |
| 1YYM | G_ARG.476   | NH1 | G_GLU_102   | OE2 | 3.388 |
| 1YYM | G_ARG.476   | NH2 | G_ASP_474   | OD1 | 3.743 |
| 1YYM | G_ARG.476   | NH2 | G_ASP_474   | OD2 | 2.651 |
| 1YYM | G_ARG.480   | NH1 | G_ASP_477   | OD1 | 2.715 |
| 1YYM | L_ARG.61    | NH2 | L_GLU_81    | OE1 | 2.791 |
| 1YYM | L_ARG.61    | NH2 | L_ASP_82    | OD1 | 3.065 |
| 1YYM | L_ARG.61    | NH2 | L_ASP_82    | OD2 | 3.869 |
| 1YYM | L_LYS_183   | NZ  | L_GLU_187   | OE1 | 3.511 |
| 1YYM | L_HIS_189   | ND1 | L_ASP_151   | OD2 | 2.884 |
| 1YYM | H_LYS_12    | NZ  | H_GLU_10    | OE1 | 3.907 |
| 1YYM | H_ARG.31    | NH2 | H_ASP_100A  | OD1 | 3.488 |
| 1YYM | H_ARG.31    | NH2 | H_ASP_100A  | OD2 | 3.551 |
| 1YYM | H_ARG.38    | NH1 | H_GLU_46    | OE2 | 3.168 |
| 1YYM | H_ARG.38    | NH2 | H_ASP_86    | OD2 | 3.293 |
| 1YYM | H_ARG.50    | NH2 | H_GLU_97    | OE2 | 2.832 |
| 1YYM | H_ARG.66    | NH1 | H_ASP_86    | OD1 | 3.105 |
| 1YYM | H_ARG.66    | NH1 | H_ASP_86    | OD2 | 3.982 |
| 1YYM | H_ARG.66    | NH2 | H_ASP_86    | OD1 | 3.852 |
| 1YYM | H_ARG.66    | NH2 | H_ASP_86    | OD2 | 3.349 |
| 1YYM | H_ARG.82A   | NH2 | H_GLU_81    | OE1 | 3.100 |
| 1YYM | H_ARG.83    | NH2 | H_ASP_85    | OD1 | 3.328 |
| 1YYM | H_ARG.83    | NH2 | H_ASP_85    | OD2 | 3.453 |
| 1YYM | H_LYS_143   | NZ  | H_ASP_144   | OD1 | 3.488 |
| 1YYM | H_LYS_143   | NZ  | H_ASP_144   | OD2 | 3.824 |
| 1YYM | H_LYS_209   | NZ  | L_GLU_123   | OE1 | 2.715 |
| 1YYM | H_LYS_209   | NZ  | L_GLU_123   | OE2 | 2.976 |
| 1YYM | H_LYS_210   | NZ  | H_GLU_212   | OE2 | 3.803 |
| 1YYM | P_LYS_1097  | NZ  | P_GLU_1275  | OE2 | 3.820 |
| 1YYM | P_LYS_1207  | NZ  | P_GLU_1381  | OE1 | 3.711 |
| 1YYM | P_LYS_1207  | NZ  | P_GLU_1381  | OE2 | 2.708 |
| 1YYM | P_HIS_1249  | NE2 | P_GLU_1482  | OE1 | 3.026 |
| 1YYM | P_LYS_1282  | NZ  | P_GLU_1275  | OE1 | 3.159 |
| 1YYM | P_LYS_1348  | NZ  | P_GLU_1269  | OE1 | 3.365 |
| 1YYM | P_LYS_1348  | NZ  | P_GLU_1351  | OE1 | 3.721 |
| 1YYM | P_LYS_1357  | NZ  | P_GLU_1466  | OE1 | 3.358 |
| 1YYM | P_ARG.1419  | NH1 | R_GLU_1100B | OE1 | 2.635 |
| 1YYM | P_ARG.1419  | NH2 | R_GLU_1099  | OE1 | 3.192 |
| 1YYM | P_ARG.1456  | NH1 | P_GLU_1466  | OE2 | 3.024 |
| 1YYM | P_ARG.1469  | NH2 | P_ASP_1457  | OD1 | 3.346 |
| 1YYM | P_ARG.1476  | NH1 | P_GLU_1102  | OE2 | 3.088 |
| 1YYM | P_ARG.1476  | NH2 | P_ASP_1474  | OD1 | 3.920 |
| 1YYM | P_ARG.1476  | NH2 | P_ASP_1474  | OD2 | 3.018 |
| 1YYM | P_ARG.1480  | NH1 | P_ASP_1477  | OD1 | 3.891 |
| 1YYM | Q_ARG.1061  | NH2 | Q_GLU_1081  | OE1 | 3.918 |
| 1YYM | Q_ARG.1061  | NH2 | Q_ASP_1082  | OD1 | 2.770 |
| 1YYM | Q_ARG.1061  | NH2 | Q_ASP_1082  | OD2 | 3.285 |
| 1YYM | Q_ARG.1095B | NH2 | Q_ASP_1001  | OD1 | 3.276 |
| 1YYM | Q_ARG.1095B | NH2 | Q_ASP_1001  | OD2 | 3.393 |
| 1YYM | Q_LYS_1149  | NZ  | Q_GLU_1195  | OE1 | 3.456 |
| 1YYM | Q_LYS_1183  | NZ  | Q_GLU_1187  | OE1 | 3.987 |
| 1YYM | Q_LYS_1183  | NZ  | Q_GLU_1187  | OE2 | 2.753 |
| 1YYM | Q_HIS_1189  | ND1 | Q_ASP_1151  | OD2 | 2.971 |
| 1YYM | R_ARG.1031  | NH2 | R_GLU_1099  | OE2 | 2.952 |

|      |             |     |             |     |       |
|------|-------------|-----|-------------|-----|-------|
| 1YYM | R_ARG_1031  | NH2 | R_ASP_1100A | OD1 | 3.903 |
| 1YYM | R_ARG_1038  | NH1 | R_GLU_1046  | OE2 | 3.211 |
| 1YYM | R_ARG_1038  | NH2 | R_ASP_1086  | OD2 | 2.820 |
| 1YYM | R_ARG_1050  | NH2 | R_GLU_1097  | OE2 | 2.957 |
| 1YYM | R_ARG_1066  | NH1 | R_ASP_1086  | OD1 | 2.623 |
| 1YYM | R_ARG_1066  | NH1 | R_ASP_1086  | OD2 | 3.373 |
| 1YYM | R_ARG_1066  | NH2 | R_ASP_1086  | OD1 | 3.663 |
| 1YYM | R_ARG_1066  | NH2 | R_ASP_1086  | OD2 | 2.872 |
| 1YYM | R_ARG_1082A | NH2 | R_GLU_1081  | OE1 | 2.831 |
| 1YYM | R_ARG_1083  | NH1 | R_ASP_1085  | OD1 | 3.896 |
| 1YYM | R_ARG_1083  | NH1 | R_ASP_1085  | OD2 | 3.741 |
| 1YYM | R_ARG_1083  | NH2 | R_ASP_1085  | OD1 | 3.214 |
| 1YYM | R_ARG_1083  | NH2 | R_ASP_1085  | OD2 | 2.624 |
| 1YYM | R_LYS_1210  | NZ  | R_GLU_1212  | OE2 | 3.428 |
| 1YYM | S_ARG_1009  | NH1 | P_ASP_1368  | OD2 | 3.572 |
| 1YYM | S_ARG_1009  | NH2 | P_ASP_1368  | OD2 | 2.725 |
| 1YZZ | A_ARG_38    | NH1 | A_ASP_89    | OD1 | 2.737 |
| 1YZZ | A_ARG_38    | NH2 | A_GLU_46    | OE2 | 3.110 |
| 1YZZ | A_ARG_38    | NH2 | A_ASP_89    | OD1 | 3.687 |
| 1YZZ | A_ARG_66    | NH1 | A_ASP_89    | OD1 | 3.398 |
| 1YZZ | A_ARG_66    | NH1 | A_ASP_89    | OD2 | 3.558 |
| 1YZZ | A_ARG_66    | NH2 | A_ASP_89    | OD2 | 2.939 |
| 1YZZ | B_ARG_38    | NH1 | B_ASP_89    | OD1 | 2.975 |
| 1YZZ | B_ARG_38    | NH2 | B_GLU_46    | OE2 | 3.058 |
| 1YZZ | B_LYS_64    | NZ  | B_ASP_61    | OD1 | 2.623 |
| 1YZZ | B_ARG_66    | NH1 | B_ASP_89    | OD1 | 2.532 |
| 1YZZ | B_ARG_66    | NH1 | B_ASP_89    | OD2 | 3.353 |
| 1YZZ | B_ARG_66    | NH2 | B_ASP_89    | OD1 | 3.279 |
| 1YZZ | B_ARG_66    | NH2 | B_ASP_89    | OD2 | 2.407 |
| 1ZEA | L_LYS_24    | NZ  | L_ASP_70    | OD1 | 2.669 |
| 1ZEA | L_LYS_24    | NZ  | L_ASP_70    | OD2 | 2.887 |
| 1ZEA | L_LYS_39    | NZ  | L_GLU_81    | OE1 | 3.641 |
| 1ZEA | L_ARG_61    | NH1 | L_ASP_82    | OD1 | 3.651 |
| 1ZEA | L_ARG_61    | NH1 | L_ASP_82    | OD2 | 2.744 |
| 1ZEA | L_ARG_61    | NH2 | L_GLU_79    | OE1 | 3.732 |
| 1ZEA | L_ARG_61    | NH2 | L_ASP_82    | OD1 | 3.003 |
| 1ZEA | L_ARG_61    | NH2 | L_ASP_82    | OD2 | 3.574 |
| 1ZEA | L_ARG_77    | NH2 | L_ASP_60    | OD2 | 3.436 |
| 1ZEA | L_LYS_149   | NZ  | L_GLU_195   | OE1 | 2.851 |
| 1ZEA | L_LYS_149   | NZ  | L_GLU_195   | OE2 | 3.548 |
| 1ZEA | L_LYS_169   | NZ  | L_GLU_81    | OE2 | 3.652 |
| 1ZEA | L_ARG_188   | NH2 | L_ASP_184   | OD1 | 2.975 |
| 1ZEA | L_HIS_189   | ND1 | L_ASP_151   | OD2 | 2.735 |
| 1ZEA | L_LYS_199   | NZ  | L_ASP_110   | OD2 | 3.834 |
| 1ZEA | H_LYS_46    | NZ  | H_ASP_62    | OD2 | 2.871 |
| 1ZEA | H_LYS_64    | NZ  | H_ASP_61    | OD1 | 3.284 |
| 1ZEA | H_ARG_66    | NH1 | H_ASP_86    | OD1 | 3.918 |
| 1ZEA | H_ARG_66    | NH1 | H_ASP_86    | OD2 | 2.875 |
| 1ZEA | H_ARG_66    | NH2 | H_ASP_86    | OD1 | 2.957 |
| 1ZEA | H_ARG_66    | NH2 | H_ASP_86    | OD2 | 3.243 |
| 1ZEA | H_ARG_94    | NH2 | H_ASP_101   | OD1 | 3.691 |
| 1ZEA | H_ARG_94    | NH2 | H_ASP_101   | OD2 | 2.853 |
| 1ZEA | H_ARG_95    | NH1 | L_GLU_34    | OE1 | 2.842 |
| 1ZEA | H_ARG_95    | NH1 | L_GLU_34    | OE2 | 3.642 |
| 1ZEA | H_ARG_95    | NH2 | L_GLU_34    | OE1 | 3.613 |
| 1ZEA | H_ARG_95    | NH2 | L_GLU_34    | OE2 | 2.859 |
| 1ZEA | H_LYS_143   | NZ  | H_ASP_173   | OD2 | 3.046 |
| 1ZEA | H_LYS_205   | NZ  | H_ASP_207   | OD1 | 2.729 |



|      |           |     |           |     |       |
|------|-----------|-----|-----------|-----|-------|
| 1ZEA | H.LYS_205 | NZ  | H.ASP_207 | OD2 | 3.512 |
| 1ZEA | H.LYS_208 | NZ  | L.GLU_123 | OE2 | 2.817 |
| 1ZMY | A.ARG_38  | NH1 | A.ASP_90  | OD2 | 2.840 |
| 1ZMY | A.ARG_38  | NH2 | A.GLU_46  | OE2 | 3.583 |
| 1ZMY | A.ARG_38  | NH2 | A.ASP_90  | OD2 | 3.677 |
| 1ZMY | A.LYS_65  | NZ  | A.ASP_62  | OD1 | 3.540 |
| 1ZMY | A.ARG_67  | NH1 | A.ASP_90  | OD1 | 2.500 |
| 1ZMY | A.ARG_67  | NH1 | A.ASP_90  | OD2 | 3.775 |
| 1ZMY | A.ARG_67  | NH2 | A.ASP_90  | OD1 | 3.202 |
| 1ZMY | A.ARG_67  | NH2 | A.ASP_90  | OD2 | 3.068 |
| 1ZMY | L.LYS_1   | NZ  | L.GLU_7   | OE2 | 2.765 |
| 1ZMY | L.LYS_13  | NZ  | L.ASP_18  | OD2 | 3.088 |
| 1ZMY | L.ARG_61  | NH2 | L.ASP_48  | OD2 | 3.432 |
| 1ZMY | M.LYS_1   | NZ  | M.GLU_7   | OE1 | 3.919 |
| 1ZMY | M.LYS_1   | NZ  | M.GLU_7   | OE2 | 2.657 |
| 1ZMY | M.LYS_13  | NZ  | M.ASP_18  | OD2 | 3.984 |
| 2AAB | L.ARG_24  | NH1 | L.ASP_70  | OD1 | 3.378 |
| 2AAB | L.ARG_24  | NH1 | L.ASP_70  | OD2 | 3.076 |
| 2AAB | L.ARG_61  | NH1 | L.GLU_79  | OE1 | 3.401 |
| 2AAB | L.ARG_61  | NH1 | L.ASP_82  | OD1 | 2.799 |
| 2AAB | L.ARG_61  | NH1 | L.ASP_82  | OD2 | 3.081 |
| 2AAB | L.ARG_61  | NH2 | L.GLU_79  | OE1 | 3.087 |
| 2AAB | L.LYS_93  | NZ  | L.GLU_27  | OE1 | 2.856 |
| 2AAB | L.LYS_103 | NZ  | L.GLU_105 | OE2 | 3.933 |
| 2AAB | L.LYS_149 | NZ  | L.GLU_195 | OE1 | 2.658 |
| 2AAB | L.LYS_149 | NZ  | L.GLU_195 | OE2 | 3.769 |
| 2AAB | L.ARG_155 | NH1 | L.GLU_185 | OE1 | 3.205 |
| 2AAB | L.ARG_155 | NH2 | L.GLU_185 | OE1 | 3.657 |
| 2AAB | L.ARG_155 | NH2 | L.GLU_185 | OE2 | 3.891 |
| 2AAB | L.HIS_189 | ND1 | L.ASP_151 | OD2 | 2.588 |
| 2AAB | H.ARG_38  | NH1 | H.ASP_86  | OD1 | 2.796 |
| 2AAB | H.ARG_38  | NH2 | H.GLU_46  | OE1 | 2.650 |
| 2AAB | H.ARG_38  | NH2 | H.GLU_46  | OE2 | 3.853 |
| 2AAB | H.ARG_38  | NH2 | H.ASP_86  | OD1 | 3.953 |
| 2AAB | H.LYS_64  | NZ  | H.ASP_61  | OD2 | 3.741 |
| 2AAB | H.ARG_66  | NH1 | H.ASP_86  | OD1 | 3.938 |
| 2AAB | H.ARG_66  | NH1 | H.ASP_86  | OD2 | 2.836 |
| 2AAB | H.ARG_66  | NH2 | H.ASP_86  | OD1 | 3.107 |
| 2AAB | H.ARG_66  | NH2 | H.ASP_86  | OD2 | 3.400 |
| 2AAB | H.ARG_83  | NH1 | H.GLU_85  | OE1 | 3.354 |
| 2AAB | H.ARG_83  | NH2 | H.GLU_85  | OE1 | 3.065 |
| 2AAB | H.ARG_94  | NH2 | H.ASP_101 | OD1 | 3.332 |
| 2AAB | H.ARG_94  | NH2 | H.ASP_101 | OD2 | 3.671 |
| 2AAB | H.LYS_208 | NZ  | L.GLU_123 | OE1 | 3.545 |
| 2ARJ | L.ARG_61  | NH1 | L.ASP_82  | OD1 | 2.599 |
| 2ARJ | L.ARG_61  | NH1 | L.ASP_82  | OD2 | 2.529 |
| 2ARJ | L.LYS_103 | NZ  | L.GLU_105 | OE2 | 2.787 |
| 2ARJ | L.LYS_147 | NZ  | L.GLU_154 | OE1 | 3.563 |
| 2ARJ | L.LYS_147 | NZ  | L.GLU_154 | OE2 | 3.021 |
| 2ARJ | L.LYS_149 | NZ  | L.GLU_195 | OE1 | 3.558 |
| 2ARJ | L.ARG_156 | NH1 | L.GLU_154 | OE1 | 3.520 |
| 2ARJ | L.ARG_156 | NH1 | L.GLU_154 | OE2 | 3.250 |
| 2ARJ | L.LYS_183 | NZ  | L.GLU_187 | OE1 | 3.507 |
| 2ARJ | L.HIS_189 | ND1 | L.ASP_151 | OD2 | 3.253 |
| 2ARJ | L.HIS_189 | NE2 | L.GLU_185 | OE2 | 2.888 |
| 2ARJ | L.LYS_199 | NZ  | L.ASP_110 | OD1 | 3.590 |
| 2ARJ | L.LYS_199 | NZ  | L.ASP_110 | OD2 | 2.881 |
| 2ARJ | H.ARG_38  | NH1 | H.ASP_86  | OD1 | 2.915 |

|      |           |     |           |     |       |
|------|-----------|-----|-----------|-----|-------|
| 2ARJ | H_ARG_38  | NH2 | H_GLU_46  | OE2 | 3.238 |
| 2ARJ | H_ARG_38  | NH2 | H_ASP_86  | OD1 | 3.950 |
| 2ARJ | H_ARG_66  | NH1 | H_ASP_86  | OD2 | 3.425 |
| 2ARJ | H_ARG_66  | NH2 | H_ASP_86  | OD1 | 2.734 |
| 2ARJ | H_ARG_66  | NH2 | H_ASP_86  | OD2 | 2.913 |
| 2ARJ | H_HIS_172 | NE2 | H_ASP_169 | OD1 | 3.945 |
| 2ARJ | A_ARG_61  | NH1 | A_ASP_82  | OD1 | 2.811 |
| 2ARJ | A_ARG_61  | NH1 | A_ASP_82  | OD2 | 2.467 |
| 2ARJ | A_ARG_61  | NH2 | A_ASP_81  | OD2 | 3.853 |
| 2ARJ | A_LYS_103 | NZ  | A_GLU_105 | OE2 | 3.414 |
| 2ARJ | A_LYS_147 | NZ  | A_GLU_154 | OE2 | 2.780 |
| 2ARJ | A_LYS_149 | NZ  | A_GLU_195 | OE1 | 3.948 |
| 2ARJ | A_LYS_149 | NZ  | A_GLU_195 | OE2 | 3.695 |
| 2ARJ | A_ARG_156 | NH1 | A_GLU_154 | OE1 | 2.977 |
| 2ARJ | A_ARG_156 | NH1 | A_GLU_154 | OE2 | 3.024 |
| 2ARJ | A_ARG_156 | NH2 | A_GLU_154 | OE1 | 3.339 |
| 2ARJ | A_LYS_183 | NZ  | A_GLU_187 | OE1 | 3.790 |
| 2ARJ | A_HIS_189 | ND1 | A_ASP_151 | OD2 | 3.869 |
| 2ARJ | A_HIS_189 | NE2 | A_GLU_185 | OE2 | 2.726 |
| 2ARJ | A_LYS_199 | NZ  | A_ASP_110 | OD1 | 3.226 |
| 2ARJ | A_LYS_199 | NZ  | A_ASP_110 | OD2 | 2.734 |
| 2ARJ | B_ARG_38  | NH1 | B_ASP_86  | OD1 | 2.957 |
| 2ARJ | B_ARG_38  | NH2 | B_GLU_46  | OE1 | 3.840 |
| 2ARJ | B_ARG_38  | NH2 | B_GLU_46  | OE2 | 3.335 |
| 2ARJ | B_ARG_38  | NH2 | B_ASP_86  | OD1 | 3.960 |
| 2ARJ | B_ARG_66  | NH1 | B_ASP_86  | OD2 | 3.486 |
| 2ARJ | B_ARG_66  | NH2 | B_ASP_86  | OD1 | 2.770 |
| 2ARJ | B_ARG_66  | NH2 | B_ASP_86  | OD2 | 2.899 |
| 2ARJ | R_LYS_21  | NZ  | R_ASP_23  | OD2 | 3.940 |
| 2ARJ | R_LYS_68  | NZ  | R_ASP_66  | OD2 | 3.453 |
| 2ARJ | Q_LYS_21  | NZ  | Q_ASP_23  | OD1 | 3.938 |
| 2ARJ | Q_LYS_21  | NZ  | Q_ASP_23  | OD2 | 3.026 |
| 2ARJ | Q_LYS_68  | NZ  | Q_ASP_66  | OD2 | 2.542 |
| 2ARJ | Q_LYS_121 | NZ  | Q_GLU_17  | OE1 | 3.957 |
| 2ARJ | Q_LYS_121 | NZ  | Q_GLU_17  | OE2 | 3.774 |
| 2B2X | A_LYS_174 | NZ  | A_ASP_171 | OD1 | 3.646 |
| 2B2X | A_ARG_175 | NH1 | A_ASP_171 | OD1 | 2.653 |
| 2B2X | A_ARG_175 | NH2 | A_ASP_171 | OD1 | 3.756 |
| 2B2X | A_HIS_196 | NE2 | A_GLU_236 | OE1 | 2.662 |
| 2B2X | A_ARG_219 | NH2 | A_GLU_197 | OE2 | 3.539 |
| 2B2X | A_ARG_222 | NH2 | A_GLU_192 | OE1 | 3.578 |
| 2B2X | A_ARG_222 | NH2 | A_GLU_192 | OE2 | 3.205 |
| 2B2X | A_ARG_234 | NH1 | A_ASP_231 | OD1 | 2.877 |
| 2B2X | A_ARG_234 | NH2 | A_ASP_231 | OD1 | 3.527 |
| 2B2X | A_ARG_234 | NH2 | A_ASP_272 | OD1 | 3.389 |
| 2B2X | A_LYS_235 | NZ  | A_ASP_231 | OD2 | 2.623 |
| 2B2X | A_ARG_242 | NH2 | A_GLU_236 | OE1 | 3.815 |
| 2B2X | A_ARG_245 | NH2 | A_ASP_148 | OD2 | 2.857 |
| 2B2X | A_ARG_246 | NH2 | A_GLU_240 | OE1 | 3.473 |
| 2B2X | A_LYS_250 | NZ  | A_GLU_276 | OE2 | 3.894 |
| 2B2X | A_HIS_261 | NE2 | H_ASP_101 | OD2 | 3.121 |
| 2B2X | A_ARG_265 | NH2 | A_ASP_231 | OD2 | 3.021 |
| 2B2X | A_ARG_280 | NH1 | A_GLU_274 | OE1 | 3.434 |
| 2B2X | A_ARG_280 | NH2 | A_GLU_274 | OE1 | 2.884 |
| 2B2X | A_HIS_288 | NE2 | A_ASP_257 | OD2 | 3.303 |
| 2B2X | A_LYS_329 | NZ  | A_GLU_333 | OE1 | 2.878 |
| 2B2X | A_LYS_329 | NZ  | A_GLU_333 | OE2 | 3.222 |
| 2B2X | H_ARG_38  | NH1 | H_GLU_46  | OE1 | 2.704 |

|      |           |     |           |     |       |
|------|-----------|-----|-----------|-----|-------|
| 2B2X | H_ARG_38  | NH2 | H_ASP_89  | OD2 | 2.877 |
| 2B2X | H_ARG_66  | NH1 | H_ASP_89  | OD1 | 2.835 |
| 2B2X | H_ARG_66  | NH1 | H_ASP_89  | OD2 | 3.848 |
| 2B2X | H_ARG_66  | NH2 | H_ASP_89  | OD1 | 3.615 |
| 2B2X | H_ARG_66  | NH2 | H_ASP_89  | OD2 | 3.196 |
| 2B2X | H_ARG_97  | NH2 | H_ASP_106 | OD1 | 3.043 |
| 2B2X | H_ARG_97  | NH2 | H_ASP_106 | OD2 | 3.052 |
| 2B2X | H_HIS_169 | NE2 | L_ASP_171 | OD2 | 3.832 |
| 2B2X | H_LYS_213 | NZ  | L_GLU_127 | OE1 | 2.709 |
| 2B2X | H_LYS_213 | NZ  | L_GLU_127 | OE2 | 3.416 |
| 2B2X | L_HIS_31  | NE2 | A_GLU_259 | OE2 | 3.821 |
| 2B2X | L_ARG_60  | NH2 | L_ASP_81  | OD1 | 2.811 |
| 2B2X | L_ARG_60  | NH2 | L_ASP_81  | OD2 | 3.437 |
| 2B2X | L_LYS_102 | NZ  | L_ASP_169 | OD1 | 3.045 |
| 2B2X | L_LYS_153 | NZ  | L_GLU_199 | OE2 | 2.862 |
| 2B2X | L_ARG_159 | NH2 | L_GLU_189 | OE1 | 3.544 |
| 2B2X | L_LYS_187 | NZ  | L_GLU_191 | OE1 | 3.187 |
| 2B2X | L_LYS_187 | NZ  | L_GLU_191 | OE2 | 3.179 |
| 2B2X | L_HIS_193 | ND1 | L_ASP_155 | OD2 | 3.401 |
| 2B2X | B_LYS_174 | NZ  | B_ASP_171 | OD1 | 3.653 |
| 2B2X | B_LYS_174 | NZ  | B_ASP_171 | OD2 | 3.858 |
| 2B2X | B_HIS_196 | NE2 | B_GLU_236 | OE1 | 2.785 |
| 2B2X | B_ARG_219 | NH1 | B_GLU_197 | OE1 | 3.424 |
| 2B2X | B_ARG_219 | NH1 | B_GLU_197 | OE2 | 2.578 |
| 2B2X | B_ARG_222 | NH2 | B_GLU_192 | OE1 | 3.396 |
| 2B2X | B_ARG_222 | NH2 | B_GLU_192 | OE2 | 3.088 |
| 2B2X | B_ARG_234 | NH1 | B_ASP_231 | OD1 | 2.739 |
| 2B2X | B_ARG_234 | NH1 | B_ASP_231 | OD2 | 3.550 |
| 2B2X | B_ARG_234 | NH2 | B_ASP_231 | OD1 | 3.736 |
| 2B2X | B_ARG_234 | NH2 | B_ASP_272 | OD1 | 3.791 |
| 2B2X | B_LYS_235 | NZ  | B_ASP_231 | OD2 | 2.860 |
| 2B2X | B_ARG_245 | NH2 | B_ASP_148 | OD1 | 3.373 |
| 2B2X | B_HIS_261 | NE2 | L_ASP_101 | OD2 | 3.107 |
| 2B2X | B_ARG_280 | NH1 | B_GLU_274 | OE1 | 3.062 |
| 2B2X | B_ARG_280 | NH1 | B_GLU_274 | OE2 | 3.945 |
| 2B2X | B_ARG_280 | NH2 | B_GLU_274 | OE1 | 3.114 |
| 2B2X | B_HIS_288 | ND1 | B_ASP_257 | OD2 | 3.336 |
| 2B2X | B_LYS_329 | NZ  | B_GLU_333 | OE1 | 3.450 |
| 2B2X | B_LYS_329 | NZ  | B_GLU_333 | OE2 | 3.053 |
| 2B2X | L_ARG_38  | NH1 | L_GLU_46  | OE1 | 2.780 |
| 2B2X | L_ARG_38  | NH2 | L_ASP_89  | OD2 | 2.859 |
| 2B2X | L_ARG_66  | NH1 | L_ASP_89  | OD1 | 2.954 |
| 2B2X | L_ARG_66  | NH1 | L_ASP_89  | OD2 | 3.737 |
| 2B2X | L_ARG_66  | NH2 | L_ASP_89  | OD1 | 3.772 |
| 2B2X | L_ARG_66  | NH2 | L_ASP_89  | OD2 | 3.121 |
| 2B2X | L_ARG_97  | NH2 | L_ASP_106 | OD1 | 3.823 |
| 2B2X | L_ARG_97  | NH2 | L_ASP_106 | OD2 | 2.979 |
| 2B2X | L_HIS_169 | NE2 | M_ASP_171 | OD2 | 3.874 |
| 2B2X | L_LYS_213 | NZ  | M_GLU_127 | OE2 | 3.245 |
| 2B2X | M_HIS_31  | NE2 | B_GLU_259 | OE2 | 3.848 |
| 2B2X | M_ARG_60  | NH2 | M_GLU_80  | OE2 | 3.305 |
| 2B2X | M_ARG_60  | NH2 | M_ASP_81  | OD1 | 2.985 |
| 2B2X | M_ARG_60  | NH2 | M_ASP_81  | OD2 | 3.811 |
| 2B2X | M_LYS_102 | NZ  | M_ASP_169 | OD1 | 3.157 |
| 2B2X | M_LYS_146 | NZ  | M_GLU_104 | OE1 | 3.183 |
| 2B2X | M_LYS_151 | NZ  | M_GLU_158 | OE1 | 3.453 |
| 2B2X | M_LYS_187 | NZ  | M_GLU_191 | OE1 | 2.648 |
| 2B2X | M_LYS_187 | NZ  | M_GLU_191 | OE2 | 3.145 |

|      |           |     |           |     |       |
|------|-----------|-----|-----------|-----|-------|
| 2B2X | M_HIS_193 | ND1 | M_ASP_155 | OD2 | 3.516 |
| 2B4C | G_LYS_    | NZ  | G_ASP_    | OD1 | 3.338 |
| 2B4C | G_LYS_    | NZ  | G_ASP_    | OD1 | 3.491 |
| 2B4C | G_ARG_    | NH1 | H_ASP_    | OD2 | 3.237 |
| 2B4C | G_ARG_    | NH2 | H_ASP_    | OD2 | 2.859 |
| 2B4C | G_LYS_    | NZ  | G_GLU_    | OE2 | 3.048 |
| 2B4C | G_LYS_    | NZ  | G_GLU_    | OE1 | 3.552 |
| 2B4C | G_LYS_    | NZ  | G_GLU_    | OE2 | 3.954 |
| 2B4C | G_ARG_    | NH2 | G_GLU_    | OE1 | 3.957 |
| 2B4C | G_LYS_    | NZ  | G_GLU_    | OE1 | 3.503 |
| 2B4C | G_ARG_    | NH1 | G_ASP_    | OD1 | 3.623 |
| 2B4C | G_LYS_    | NZ  | H_ASP_    | OD2 | 2.598 |
| 2B4C | G_ARG_    | NH1 | G_GLU_    | OE2 | 3.070 |
| 2B4C | G_ARG_    | NH1 | G_ASP_    | OD1 | 3.468 |
| 2B4C | G_ARG_    | NH2 | G_GLU_    | OE2 | 3.385 |
| 2B4C | C_LYS_    | NZ  | C_GLU_    | OE1 | 3.632 |
| 2B4C | C_LYS_    | NZ  | C_GLU_    | OE1 | 3.382 |
| 2B4C | C_LYS_    | NZ  | C_GLU_    | OE2 | 3.763 |
| 2B4C | C_LYS_    | NZ  | C_ASP_    | OD1 | 3.946 |
| 2B4C | C_ARG_    | NH1 | C_ASP_    | OD2 | 3.370 |
| 2B4C | C_ARG_    | NH2 | C_ASP_    | OD1 | 2.876 |
| 2B4C | C_ARG_    | NH2 | C_ASP_    | OD2 | 3.161 |
| 2B4C | C_ARG_    | NH1 | H_GLU_    | OE2 | 3.957 |
| 2B4C | C_ARG_    | NH2 | H_GLU_    | OE2 | 3.405 |
| 2B4C | C_ARG_    | NH1 | G_ASP_    | OD1 | 2.937 |
| 2B4C | C_ARG_    | NH1 | G_ASP_    | OD2 | 3.245 |
| 2B4C | L_LYS_39  | NZ  | L_GLU_81  | OE1 | 3.785 |
| 2B4C | L_LYS_39  | NZ  | L_GLU_81  | OE2 | 3.605 |
| 2B4C | L_ARG_61  | NH1 | L_GLU_79  | OE1 | 2.769 |
| 2B4C | L_ARG_61  | NH1 | L_ASP_82  | OD1 | 3.180 |
| 2B4C | L_ARG_61  | NH2 | L_GLU_79  | OE1 | 3.620 |
| 2B4C | L_ARG_61  | NH2 | L_ASP_82  | OD1 | 3.064 |
| 2B4C | L_ARG_61  | NH2 | L_ASP_82  | OD2 | 2.938 |
| 2B4C | L_LYS_103 | NZ  | L_GLU_165 | OE1 | 3.532 |
| 2B4C | L_LYS_103 | NZ  | L_GLU_165 | OE2 | 3.078 |
| 2B4C | L_LYS_149 | NZ  | L_GLU_195 | OE1 | 2.786 |
| 2B4C | L_LYS_149 | NZ  | L_GLU_195 | OE2 | 3.526 |
| 2B4C | L_ARG_169 | NH2 | L_ASP_170 | OD2 | 3.503 |
| 2B4C | L_HIS_189 | ND1 | L_ASP_151 | OD1 | 3.907 |
| 2B4C | L_HIS_189 | NE2 | L_ASP_185 | OD2 | 3.165 |
| 2B4C | L_ARG_211 | NH1 | L_GLU_187 | OE1 | 3.570 |
| 2B4C | H_ARG_    | NH1 | H_ASP_    | OD2 | 3.124 |
| 2B4C | H_ARG_    | NH2 | H_GLU_    | OE2 | 3.384 |
| 2B4C | H_LYS_    | NZ  | L_GLU_    | OE1 | 3.365 |
| 2B4C | H_ARG_    | NH1 | H_ASP_    | OD1 | 2.883 |
| 2B4C | H_ARG_    | NH1 | H_ASP_    | OD2 | 3.887 |
| 2B4C | H_ARG_    | NH2 | H_ASP_    | OD1 | 3.707 |
| 2B4C | H_ARG_    | NH2 | H_ASP_    | OD2 | 3.345 |
| 2B4C | H_ARG_    | NH1 | H_ASP_    | OD2 | 3.458 |
| 2B4C | H_ARG_    | NH2 | H_ASP_    | OD2 | 2.912 |
| 2B4C | H_LYS_143 | NZ  | H_ASP_144 | OD2 | 3.642 |
| 2B4C | H_LYS_209 | NZ  | L_GLU_123 | OE2 | 3.837 |
| 2B4C | H_LYS_210 | NZ  | H_GLU_212 | OE2 | 3.952 |
| 2BDN | A_ARG_29  | NH2 | A_GLU_50  | OE1 | 2.816 |
| 2BDN | A_LYS_56  | NZ  | H_ASP_52  | OD1 | 2.539 |
| 2BDN | A_LYS_56  | NZ  | H_ASP_52  | OD2 | 3.792 |
| 2BDN | A_LYS_58  | NZ  | A_ASP_62  | OD1 | 3.823 |
| 2BDN | A_LYS_58  | NZ  | A_ASP_62  | OD2 | 3.097 |

|      |           |     |           |     |       |
|------|-----------|-----|-----------|-----|-------|
| 2BDN | L_LYS_24  | NZ  | L_ASP_70  | OD1 | 2.861 |
| 2BDN | L_ARG_32  | NH1 | A_ASP_65  | OD1 | 3.196 |
| 2BDN | L_ARG_32  | NH1 | A_ASP_68  | OD1 | 2.578 |
| 2BDN | L_ARG_32  | NH2 | A_ASP_65  | OD1 | 2.774 |
| 2BDN | L_ARG_61  | NH2 | L_GLU_81  | OE2 | 3.319 |
| 2BDN | L_ARG_61  | NH2 | L_ASP_82  | OD1 | 2.963 |
| 2BDN | L_ARG_61  | NH2 | L_ASP_82  | OD2 | 3.256 |
| 2BDN | L_LYS_147 | NZ  | L_GLU_154 | OE1 | 3.710 |
| 2BDN | L_LYS_147 | NZ  | L_GLU_154 | OE2 | 3.490 |
| 2BDN | L_LYS_149 | NZ  | L_GLU_195 | OE1 | 3.088 |
| 2BDN | L_LYS_149 | NZ  | L_GLU_195 | OE2 | 3.458 |
| 2BDN | L_ARG_155 | NH1 | L_GLU_185 | OE2 | 3.304 |
| 2BDN | L_ARG_155 | NH2 | L_GLU_185 | OE2 | 3.205 |
| 2BDN | L_LYS_183 | NZ  | L_GLU_187 | OE1 | 3.602 |
| 2BDN | L_LYS_183 | NZ  | L_GLU_187 | OE2 | 3.004 |
| 2BDN | L_ARG_188 | NH1 | L_GLU_185 | OE1 | 3.733 |
| 2BDN | L_HIS_189 | ND1 | L_GLU_185 | OE1 | 3.536 |
| 2BDN | L_LYS_199 | NZ  | L_ASP_110 | OD1 | 2.836 |
| 2BDN | L_LYS_199 | NZ  | L_ASP_110 | OD2 | 3.459 |
| 2BDN | H_ARG_40  | NH1 | H_GLU_89  | OE1 | 3.907 |
| 2BDN | H_ARG_40  | NH2 | H_GLU_46  | OE2 | 3.172 |
| 2BDN | H_LYS_67  | NZ  | H_ASP_90  | OD1 | 3.376 |
| 2BDN | H_LYS_67  | NZ  | H_ASP_90  | OD2 | 2.583 |
| 2BDN | H_ARG_98  | NH1 | A_GLU_39  | OE2 | 3.155 |
| 2BDN | H_ARG_98  | NH2 | H_ASP_105 | OD1 | 2.453 |
| 2BDN | H_ARG_98  | NH2 | H_ASP_105 | OD2 | 3.385 |
| 2BDN | H_LYS_212 | NZ  | L_GLU_123 | OE2 | 3.177 |
| 2BJM | H_LYS_67  | NZ  | H_ASP_90  | OD2 | 3.645 |
| 2BJM | L_ARG_63  | NH2 | L_ASP_84  | OD1 | 2.452 |
| 2BJM | L_ARG_63  | NH2 | L_ASP_84  | OD2 | 2.754 |
| 2BRR | H_LYS_46  | NZ  | H_ASP_62  | OD2 | 2.761 |
| 2BRR | H_LYS_64  | NZ  | H_ASP_61  | OD1 | 3.587 |
| 2BRR | H_ARG_66  | NH1 | H_ASP_86  | OD1 | 3.672 |
| 2BRR | H_ARG_66  | NH1 | H_ASP_86  | OD2 | 2.665 |
| 2BRR | H_ARG_66  | NH2 | H_ASP_86  | OD1 | 2.817 |
| 2BRR | H_ARG_66  | NH2 | H_ASP_86  | OD2 | 3.203 |
| 2BRR | H_ARG_94  | NH2 | H_ASP_101 | OD1 | 3.717 |
| 2BRR | H_ARG_94  | NH2 | H_ASP_101 | OD2 | 2.794 |
| 2BRR | H_ARG_213 | NH1 | L_GLU_123 | OE1 | 2.600 |
| 2BRR | H_ARG_213 | NH1 | L_GLU_123 | OE2 | 3.932 |
| 2BRR | H_ARG_213 | NH2 | L_GLU_123 | OE1 | 3.110 |
| 2BRR | H_ARG_213 | NH2 | L_GLU_123 | OE2 | 3.029 |
| 2BRR | L_ARG_61  | NH1 | L_GLU_79  | OE1 | 3.644 |
| 2BRR | L_ARG_61  | NH1 | L_GLU_79  | OE2 | 3.599 |
| 2BRR | L_ARG_61  | NH1 | L_GLU_81  | OE2 | 3.861 |
| 2BRR | L_ARG_61  | NH2 | L_GLU_79  | OE1 | 3.852 |
| 2BRR | L_ARG_61  | NH2 | L_GLU_81  | OE2 | 2.730 |
| 2BRR | L_ARG_61  | NH2 | L_ASP_82  | OD1 | 2.665 |
| 2BRR | L_ARG_61  | NH2 | L_ASP_82  | OD2 | 3.473 |
| 2BRR | L_LYS_149 | NZ  | L_GLU_195 | OE1 | 3.904 |
| 2BRR | L_LYS_149 | NZ  | L_GLU_195 | OE2 | 3.270 |
| 2BRR | L_ARG_155 | NH2 | L_GLU_185 | OE1 | 3.742 |
| 2BRR | L_LYS_183 | NZ  | L_ASP_184 | OD1 | 3.014 |
| 2BRR | L_HIS_189 | ND1 | L_ASP_151 | OD2 | 2.911 |
| 2BRR | L_ARG_211 | NH2 | L_GLU_187 | OE1 | 3.989 |
| 2BRR | P_LYS_7   | NZ  | H_ASP_95  | OD1 | 3.067 |
| 2BRR | P_LYS_7   | NZ  | H_ASP_95  | OD2 | 2.549 |
| 2BRR | P_HIS_11  | ND1 | Y_ASP_95  | OD2 | 2.841 |

|      |           |     |           |     |       |
|------|-----------|-----|-----------|-----|-------|
| 2BRR | X_ARG.61  | NH1 | X_GLU_79  | OE1 | 3.351 |
| 2BRR | X_ARG.61  | NH1 | X_GLU_79  | OE2 | 3.765 |
| 2BRR | X_ARG.61  | NH1 | X_GLU_81  | OE2 | 3.529 |
| 2BRR | X_ARG.61  | NH2 | X_GLU_79  | OE1 | 3.617 |
| 2BRR | X_ARG.61  | NH2 | X_GLU_81  | OE2 | 2.522 |
| 2BRR | X_ARG.61  | NH2 | X_ASP_82  | OD1 | 2.621 |
| 2BRR | X_ARG.61  | NH2 | X_ASP_82  | OD2 | 3.589 |
| 2BRR | X_LYS_103 | NZ  | X_GLU_105 | OE2 | 3.852 |
| 2BRR | X_LYS_149 | NZ  | X_GLU_195 | OE1 | 3.717 |
| 2BRR | X_LYS_149 | NZ  | X_GLU_195 | OE2 | 3.215 |
| 2BRR | X_ARG_155 | NH1 | X_GLU_185 | OE2 | 2.695 |
| 2BRR | X_ARG_155 | NH2 | X_GLU_185 | OE2 | 3.654 |
| 2BRR | X_LYS_183 | NZ  | X_ASP_184 | OD1 | 3.269 |
| 2BRR | Y_LYS_46  | NZ  | Y_ASP_62  | OD2 | 3.113 |
| 2BRR | Y_LYS_64  | NZ  | Y_ASP_61  | OD1 | 3.329 |
| 2BRR | Y_ARG_66  | NH1 | Y_ASP_86  | OD1 | 3.748 |
| 2BRR | Y_ARG_66  | NH1 | Y_ASP_86  | OD2 | 2.611 |
| 2BRR | Y_ARG_66  | NH2 | Y_GLU_85  | OE2 | 3.661 |
| 2BRR | Y_ARG_66  | NH2 | Y_ASP_86  | OD1 | 2.891 |
| 2BRR | Y_ARG_66  | NH2 | Y_ASP_86  | OD2 | 3.154 |
| 2BRR | Y_ARG_94  | NH2 | Y_ASP_101 | OD1 | 3.703 |
| 2BRR | Y_ARG_94  | NH2 | Y_ASP_101 | OD2 | 2.789 |
| 2BRR | Y_LYS_208 | NZ  | X_GLU_123 | OE2 | 3.359 |
| 2BRR | Y_ARG_213 | NH1 | X_GLU_123 | OE1 | 2.523 |
| 2BRR | Y_ARG_213 | NH1 | X_GLU_123 | OE2 | 3.327 |
| 2BRR | Y_ARG_213 | NH2 | X_GLU_123 | OE1 | 3.468 |
| 2BRR | Y_ARG_213 | NH2 | X_GLU_123 | OE2 | 2.546 |
| 2COQ | A_ARG_25  | NH1 | A_ASP_4   | OD1 | 2.687 |
| 2COQ | A_ARG_25  | NH1 | A_ASP_4   | OD2 | 3.796 |
| 2COQ | A_ARG_25  | NH2 | A_ASP_4   | OD1 | 3.959 |
| 2COQ | A_ARG_54  | NH1 | A_ASP_77  | OD1 | 2.737 |
| 2COQ | A_ARG_54  | NH1 | A_ASP_77  | OD2 | 3.255 |
| 2COQ | A_ARG_54  | NH2 | A_ASP_77  | OD1 | 3.769 |
| 2COQ | A_ARG_54  | NH2 | A_ASP_77  | OD2 | 2.959 |
| 2COQ | A_ARG_74  | NH1 | A_ASP_72  | OD2 | 2.997 |
| 2COQ | A_LYS_84  | NZ  | A_GLU_99  | OE1 | 2.795 |
| 2D03 | L_ARG_67  | NH1 | L_GLU_85  | OE1 | 3.502 |
| 2D03 | L_ARG_67  | NH2 | L_GLU_85  | OE1 | 3.293 |
| 2D03 | L_ARG_67  | NH2 | L_ASP_88  | OD1 | 2.725 |
| 2D03 | L_ARG_67  | NH2 | L_ASP_88  | OD2 | 3.706 |
| 2D03 | L_LYS_148 | NZ  | L_GLU_111 | OE2 | 3.675 |
| 2D03 | L_LYS_155 | NZ  | L_GLU_201 | OE1 | 3.930 |
| 2D03 | L_LYS_155 | NZ  | L_GLU_201 | OE2 | 2.490 |
| 2D03 | L_ARG_194 | NH1 | L_ASP_190 | OD2 | 3.257 |
| 2D03 | L_HIS_195 | ND1 | L_ASP_157 | OD2 | 2.581 |
| 2D03 | L_ARG_217 | NH1 | L_GLU_193 | OE2 | 3.351 |
| 2D03 | H_ARG_39  | NH1 | H_ASP_90  | OD1 | 2.887 |
| 2D03 | H_ARG_39  | NH2 | H_GLU_47  | OE1 | 3.007 |
| 2D03 | H_ARG_39  | NH2 | H_ASP_90  | OD1 | 3.668 |
| 2D03 | H_LYS_44  | NZ  | H_ASP_89  | OD2 | 2.726 |
| 2D03 | H_ARG_67  | NH1 | H_ASP_90  | OD1 | 3.817 |
| 2D03 | H_ARG_67  | NH1 | H_ASP_90  | OD2 | 2.856 |
| 2D03 | H_ARG_67  | NH2 | H_ASP_90  | OD1 | 2.855 |
| 2D03 | H_ARG_67  | NH2 | H_ASP_90  | OD2 | 3.320 |
| 2D03 | H_ARG_98  | NH2 | H_ASP_107 | OD1 | 3.817 |
| 2D03 | H_ARG_98  | NH2 | H_ASP_107 | OD2 | 2.632 |
| 2D03 | H_ARG_100 | NH1 | H_ASP_107 | OD2 | 3.028 |
| 2DBL | L_ARG_24  | NH1 | L_ASP_70  | OD1 | 3.462 |

|      |           |     |           |     |       |
|------|-----------|-----|-----------|-----|-------|
| 2DBL | L_ARG.61  | NH1 | L_ASP_82  | OD1 | 3.576 |
| 2DBL | L_ARG.61  | NH1 | L_ASP_82  | OD2 | 3.889 |
| 2DBL | L_ARG.61  | NH2 | L_GLU_81  | OE2 | 3.218 |
| 2DBL | L_ARG.61  | NH2 | L_ASP_82  | OD1 | 2.842 |
| 2DBL | L_ARG.61  | NH2 | L_ASP_82  | OD2 | 3.577 |
| 2DBL | L_LYS_149 | NZ  | L_GLU_195 | OE1 | 3.270 |
| 2DBL | L_LYS_149 | NZ  | L_GLU_195 | OE2 | 2.656 |
| 2DBL | L_LYS_169 | NZ  | L_ASP_167 | OD1 | 3.936 |
| 2DBL | L_LYS_183 | NZ  | L_GLU_187 | OE2 | 3.658 |
| 2DBL | L_ARG_188 | NH1 | L_GLU_185 | OE1 | 3.115 |
| 2DBL | L_ARG_188 | NH1 | L_GLU_185 | OE2 | 3.486 |
| 2DBL | L_ARG_188 | NH2 | L_GLU_185 | OE1 | 3.398 |
| 2DBL | L_HIS_189 | ND1 | L_ASP_151 | OD2 | 2.678 |
| 2DBL | L_HIS_189 | NE2 | L_GLU_185 | OE2 | 3.450 |
| 2DBL | L_LYS_199 | NZ  | L_ASP_110 | OD2 | 2.951 |
| 2DBL | H_LYS_12  | NZ  | H_GLU_16  | OE1 | 3.932 |
| 2DBL | H_LYS_46  | NZ  | H_ASP_62  | OD2 | 3.919 |
| 2DBL | H_ARG.66  | NH2 | H_ASP_86  | OD1 | 2.889 |
| 2DBL | H_ARG.66  | NH2 | H_ASP_86  | OD2 | 2.859 |
| 2DBL | H_ARG.94  | NH1 | H_ASP_101 | OD1 | 3.455 |
| 2DBL | H_ARG.94  | NH1 | H_ASP_101 | OD2 | 2.558 |
| 2DBL | H_LYS_221 | NZ  | L_GLU_123 | OE2 | 3.660 |
| 2DLF | L_ARG.24  | NH1 | L_ASP_70  | OD1 | 2.656 |
| 2DLF | L_ARG.24  | NH2 | L_ASP_70  | OD1 | 3.467 |
| 2DLF | L_ARG.61  | NH1 | L_ASP_82  | OD1 | 3.387 |
| 2DLF | L_ARG.61  | NH1 | L_ASP_82  | OD2 | 2.663 |
| 2DLF | L_ARG.61  | NH2 | L_GLU_79  | OE1 | 3.785 |
| 2DLF | L_ARG.61  | NH2 | L_GLU_79  | OE2 | 3.705 |
| 2DLF | L_ARG.61  | NH2 | L_ASP_82  | OD1 | 2.886 |
| 2DLF | L_ARG.61  | NH2 | L_ASP_82  | OD2 | 3.503 |
| 2DLF | H_ARG.38  | NH1 | H_ASP_86  | OD2 | 2.865 |
| 2DLF | H_ARG.38  | NH2 | H_GLU_46  | OE2 | 3.124 |
| 2DLF | H_ARG.38  | NH2 | H_ASP_86  | OD2 | 3.931 |
| 2DLF | H_HIS_55  | NE2 | H_ASP_73  | OD1 | 3.901 |
| 2DLF | H_HIS_55  | NE2 | H_ASP_73  | OD2 | 3.007 |
| 2DLF | H_ARG.66  | NH1 | H_ASP_86  | OD1 | 2.819 |
| 2DLF | H_ARG.66  | NH1 | H_ASP_86  | OD2 | 3.911 |
| 2DLF | H_ARG.66  | NH2 | H_ASP_86  | OD1 | 3.370 |
| 2DLF | H_ARG.66  | NH2 | H_ASP_86  | OD2 | 3.052 |
| 2DLF | H_ARG.71  | NH2 | H_ASP_73  | OD1 | 3.380 |
| 2DLF | H_LYS_75  | NZ  | H_ASP_72  | OD1 | 3.168 |
| 2DQC | L_ARG.61  | NH2 | L_GLU_81  | OE2 | 2.947 |
| 2DQC | L_ARG.61  | NH2 | L_ASP_82  | OD1 | 2.824 |
| 2DQC | L_ARG.61  | NH2 | L_ASP_82  | OD2 | 3.557 |
| 2DQC | L_LYS_103 | NZ  | L_GLU_105 | OE1 | 3.912 |
| 2DQC | H_ARG.38  | NH1 | H_ASP_89  | OD1 | 2.829 |
| 2DQC | H_ARG.38  | NH2 | H_GLU_46  | OE1 | 2.957 |
| 2DQC | H_ARG.38  | NH2 | H_ASP_89  | OD1 | 3.436 |
| 2DQC | H_ARG.66  | NH1 | H_ASP_89  | OD1 | 3.729 |
| 2DQC | H_ARG.66  | NH1 | H_ASP_89  | OD2 | 3.006 |
| 2DQC | H_ARG.66  | NH2 | H_ASP_89  | OD1 | 3.000 |
| 2DQC | H_ARG.66  | NH2 | H_ASP_89  | OD2 | 3.596 |
| 2DQC | H_LYS_75  | NZ  | H_ASP_72  | OD1 | 3.870 |
| 2DQC | H_LYS_75  | NZ  | H_ASP_72  | OD2 | 2.592 |
| 2DQC | Y_LYS_1   | NZ  | Y_GLU_7   | OE1 | 3.856 |
| 2DQC | Y_LYS_1   | NZ  | Y_GLU_7   | OE2 | 2.924 |
| 2DQC | Y_LYS_13  | NZ  | Y_ASP_18  | OD2 | 3.571 |
| 2DQC | Y_ARG.61  | NH1 | Y_ASP_48  | OD2 | 2.731 |

|      |           |     |           |     |       |
|------|-----------|-----|-----------|-----|-------|
| 2DQC | Y_ARG.61  | NH2 | Y_ASP_48  | OD2 | 3.603 |
| 2DQC | Y_ARG.68  | NH2 | Y_ASP_66  | OD2 | 3.942 |
| 2DQC | Y_LYS.97  | NZ  | H_ASP_32  | OD1 | 2.612 |
| 2DQC | Y_LYS.97  | NZ  | H_ASP_32  | OD2 | 3.998 |
| 2DQC | Y_LYS.97  | NZ  | H_ASP_99  | OD1 | 3.500 |
| 2DQC | Y_LYS.97  | NZ  | H_ASP_99  | OD2 | 2.637 |
| 2DQC | Y_ARG.125 | NH1 | Y_ASP_119 | OD2 | 3.978 |
| 2DQC | Y_ARG.125 | NH2 | Y_ASP_119 | OD1 | 3.933 |
| 2DQC | Y_ARG.125 | NH2 | Y_ASP_119 | OD2 | 2.677 |
| 2DQD | L_ARG.61  | NH1 | L_GLU_79  | OE1 | 3.706 |
| 2DQD | L_ARG.61  | NH1 | L_GLU_79  | OE2 | 2.828 |
| 2DQD | L_ARG.61  | NH1 | L_GLU_81  | OE2 | 3.927 |
| 2DQD | L_ARG.61  | NH2 | L_GLU_79  | OE1 | 3.771 |
| 2DQD | L_ARG.61  | NH2 | L_GLU_79  | OE2 | 3.992 |
| 2DQD | L_ARG.61  | NH2 | L_GLU_81  | OE2 | 2.897 |
| 2DQD | L_ARG.61  | NH2 | L_ASP_82  | OD1 | 2.786 |
| 2DQD | L_ARG.61  | NH2 | L_ASP_82  | OD2 | 3.531 |
| 2DQD | H_ARG.38  | NH1 | H_ASP_89  | OD1 | 2.878 |
| 2DQD | H_ARG.38  | NH2 | H_GLU_46  | OE1 | 2.790 |
| 2DQD | H_ARG.38  | NH2 | H_ASP_89  | OD1 | 3.572 |
| 2DQD | H_ARG.66  | NH1 | H_ASP_89  | OD1 | 3.626 |
| 2DQD | H_ARG.66  | NH1 | H_ASP_89  | OD2 | 2.940 |
| 2DQD | H_ARG.66  | NH2 | H_ASP_89  | OD1 | 2.871 |
| 2DQD | H_ARG.66  | NH2 | H_ASP_89  | OD2 | 3.563 |
| 2DQD | H_LYS.75  | NZ  | H_ASP_72  | OD1 | 3.653 |
| 2DQD | H_LYS.75  | NZ  | H_ASP_72  | OD2 | 2.566 |
| 2DQD | Y_LYS.1   | NZ  | Y_GLU_7   | OE1 | 3.745 |
| 2DQD | Y_LYS.1   | NZ  | Y_GLU_7   | OE2 | 2.721 |
| 2DQD | Y_ARG.61  | NH2 | Y_ASP_48  | OD2 | 3.731 |
| 2DQD | Y_LYS.97  | NZ  | H_ASP_32  | OD1 | 2.767 |
| 2DQD | Y_LYS.97  | NZ  | H_ASP_32  | OD2 | 3.965 |
| 2DQD | Y_LYS.97  | NZ  | H_ASP_99  | OD1 | 3.334 |
| 2DQD | Y_LYS.97  | NZ  | H_ASP_99  | OD2 | 3.048 |
| 2DQD | Y_ARG.125 | NH1 | Y_ASP_119 | OD2 | 3.233 |
| 2DQD | Y_ARG.125 | NH2 | Y_ASP_119 | OD1 | 3.581 |
| 2DQD | Y_ARG.125 | NH2 | Y_ASP_119 | OD2 | 3.417 |
| 2DQE | L_ARG.61  | NH2 | L_GLU_81  | OE2 | 2.959 |
| 2DQE | L_ARG.61  | NH2 | L_ASP_82  | OD1 | 2.845 |
| 2DQE | L_ARG.61  | NH2 | L_ASP_82  | OD2 | 3.487 |
| 2DQE | L_LYS.103 | NZ  | L_GLU_105 | OE2 | 3.264 |
| 2DQE | H_ARG.38  | NH1 | H_ASP_89  | OD1 | 2.861 |
| 2DQE | H_ARG.38  | NH2 | H_GLU_46  | OE1 | 2.782 |
| 2DQE | H_ARG.38  | NH2 | H_ASP_89  | OD1 | 3.510 |
| 2DQE | H_ARG.66  | NH1 | H_ASP_89  | OD1 | 3.735 |
| 2DQE | H_ARG.66  | NH1 | H_ASP_89  | OD2 | 2.920 |
| 2DQE | H_ARG.66  | NH2 | H_ASP_89  | OD1 | 2.982 |
| 2DQE | H_ARG.66  | NH2 | H_ASP_89  | OD2 | 3.570 |
| 2DQE | Y_LYS.1   | NZ  | Y_GLU_7   | OE2 | 2.773 |
| 2DQE | Y_ARG.61  | NH1 | Y_ASP_48  | OD2 | 3.262 |
| 2DQE | Y_ARG.61  | NH2 | Y_ASP_48  | OD2 | 3.792 |
| 2DQE | Y_LYS.97  | NZ  | H_ASP_32  | OD1 | 2.650 |
| 2DQE | Y_LYS.97  | NZ  | H_ASP_99  | OD1 | 3.314 |
| 2DQE | Y_LYS.97  | NZ  | H_ASP_99  | OD2 | 2.899 |
| 2DQE | Y_ARG.125 | NH1 | Y_ASP_119 | OD2 | 3.515 |
| 2DQE | Y_ARG.125 | NH2 | Y_ASP_119 | OD1 | 3.565 |
| 2DQE | Y_ARG.125 | NH2 | Y_ASP_119 | OD2 | 3.316 |
| 2DQF | A_ARG.24  | NH1 | A_ASP_70  | OD1 | 2.550 |
| 2DQF | A_ARG.24  | NH1 | A_ASP_70  | OD2 | 3.744 |



|      |           |     |           |     |       |
|------|-----------|-----|-----------|-----|-------|
| 2DQF | A_LYS_39  | NZ  | A_GLU_81  | OE2 | 2.959 |
| 2DQF | A_ARG_45  | NH1 | E_ASP_1   | OD2 | 3.511 |
| 2DQF | A_LYS_49  | NZ  | B_ASP_99  | OD1 | 3.470 |
| 2DQF | A_ARG_61  | NH1 | A_GLU_79  | OE1 | 3.872 |
| 2DQF | A_ARG_61  | NH1 | A_GLU_79  | OE2 | 2.799 |
| 2DQF | A_ARG_61  | NH1 | E_ASP_27  | OD1 | 3.814 |
| 2DQF | A_ARG_61  | NH2 | A_GLU_79  | OE1 | 3.614 |
| 2DQF | A_ARG_61  | NH2 | A_GLU_79  | OE2 | 3.760 |
| 2DQF | A_ARG_61  | NH2 | A_ASP_82  | OD1 | 2.799 |
| 2DQF | A_ARG_61  | NH2 | A_ASP_82  | OD2 | 3.265 |
| 2DQF | A_LYS_103 | NZ  | A_GLU_105 | OE2 | 3.654 |
| 2DQF | B_ARG_38  | NH1 | B_ASP_89  | OD1 | 2.770 |
| 2DQF | B_ARG_38  | NH2 | B_GLU_46  | OE1 | 2.742 |
| 2DQF | B_ARG_38  | NH2 | B_ASP_89  | OD1 | 3.406 |
| 2DQF | B_ARG_66  | NH1 | B_ASP_89  | OD1 | 3.473 |
| 2DQF | B_ARG_66  | NH1 | B_ASP_89  | OD2 | 2.668 |
| 2DQF | B_ARG_66  | NH2 | B_ASP_89  | OD1 | 2.704 |
| 2DQF | B_ARG_66  | NH2 | B_ASP_89  | OD2 | 3.223 |
| 2DQF | C_LYS_1   | NZ  | C_GLU_7   | OE1 | 3.699 |
| 2DQF | C_LYS_1   | NZ  | C_GLU_7   | OE2 | 2.773 |
| 2DQF | C_LYS_97  | NZ  | B_ASP_99  | OD1 | 3.543 |
| 2DQF | C_LYS_97  | NZ  | B_ASP_99  | OD2 | 2.851 |
| 2DQF | C_ARG_125 | NH1 | C_ASP_119 | OD2 | 3.803 |
| 2DQF | C_ARG_125 | NH2 | C_ASP_119 | OD1 | 3.819 |
| 2DQF | C_ARG_125 | NH2 | C_ASP_119 | OD2 | 3.276 |
| 2DQF | D_LYS_39  | NZ  | B_ASP_1   | OD1 | 3.005 |
| 2DQF | D_LYS_39  | NZ  | D_GLU_42  | OE2 | 3.387 |
| 2DQF | D_LYS_39  | NZ  | D_GLU_81  | OE2 | 3.094 |
| 2DQF | D_ARG_61  | NH1 | B_ASP_27  | OD1 | 3.581 |
| 2DQF | D_ARG_61  | NH1 | D_GLU_79  | OE1 | 3.632 |
| 2DQF | D_ARG_61  | NH1 | D_GLU_79  | OE2 | 2.878 |
| 2DQF | D_ARG_61  | NH2 | D_GLU_79  | OE1 | 3.547 |
| 2DQF | D_ARG_61  | NH2 | D_GLU_79  | OE2 | 3.942 |
| 2DQF | D_ARG_61  | NH2 | D_ASP_82  | OD1 | 2.591 |
| 2DQF | D_ARG_61  | NH2 | D_ASP_82  | OD2 | 3.479 |
| 2DQF | E_ARG_38  | NH1 | E_ASP_89  | OD1 | 2.707 |
| 2DQF | E_ARG_38  | NH2 | E_GLU_46  | OE1 | 2.703 |
| 2DQF | E_ARG_38  | NH2 | E_ASP_89  | OD1 | 3.576 |
| 2DQF | E_ARG_66  | NH1 | E_ASP_89  | OD1 | 3.354 |
| 2DQF | E_ARG_66  | NH1 | E_ASP_89  | OD2 | 2.779 |
| 2DQF | E_ARG_66  | NH2 | E_ASP_89  | OD1 | 2.920 |
| 2DQF | E_ARG_66  | NH2 | E_ASP_89  | OD2 | 3.732 |
| 2DQF | E_LYS_75  | NZ  | E_ASP_72  | OD1 | 3.480 |
| 2DQF | E_LYS_75  | NZ  | E_ASP_72  | OD2 | 3.040 |
| 2DQF | F_LYS_1   | NZ  | F_GLU_7   | OE1 | 3.776 |
| 2DQF | F_LYS_1   | NZ  | F_GLU_7   | OE2 | 2.553 |
| 2DQF | F_ARG_61  | NH1 | F_ASP_48  | OD1 | 3.965 |
| 2DQF | F_ARG_61  | NH1 | F_ASP_48  | OD2 | 3.568 |
| 2DQF | F_LYS_97  | NZ  | E_ASP_99  | OD2 | 3.165 |
| 2DQF | F_ARG_125 | NH2 | F_ASP_119 | OD2 | 3.151 |
| 2DQG | L_ARG_24  | NH1 | L_ASP_70  | OD2 | 2.455 |
| 2DQG | L_ARG_24  | NH2 | L_ASP_70  | OD2 | 2.946 |
| 2DQG | L_ARG_61  | NH1 | L_GLU_81  | OE1 | 3.776 |
| 2DQG | L_ARG_61  | NH1 | L_GLU_81  | OE2 | 3.040 |
| 2DQG | L_ARG_61  | NH1 | L_ASP_82  | OD1 | 2.735 |
| 2DQG | L_ARG_61  | NH1 | L_ASP_82  | OD2 | 3.392 |
| 2DQG | L_ARG_61  | NH2 | L_GLU_81  | OE2 | 3.998 |
| 2DQG | H_ARG_38  | NH1 | H_ASP_89  | OD1 | 2.997 |

|      |           |     |           |     |       |
|------|-----------|-----|-----------|-----|-------|
| 2DQG | H_ARG_38  | NH2 | H_GLU_46  | OE1 | 2.883 |
| 2DQG | H_ARG_38  | NH2 | H_ASP_89  | OD1 | 3.559 |
| 2DQG | H_ARG_66  | NH1 | H_ASP_89  | OD1 | 3.739 |
| 2DQG | H_ARG_66  | NH1 | H_ASP_89  | OD2 | 2.946 |
| 2DQG | H_ARG_66  | NH2 | H_ASP_89  | OD1 | 2.769 |
| 2DQG | H_ARG_66  | NH2 | H_ASP_89  | OD2 | 3.415 |
| 2DQG | Y_LYS_1   | NZ  | Y_GLU_7   | OE1 | 2.718 |
| 2DQG | Y_ARG_61  | NH1 | Y_ASP_48  | OD1 | 3.819 |
| 2DQG | Y_ARG_61  | NH2 | Y_ASP_48  | OD1 | 3.754 |
| 2DQG | Y_LYS_97  | NZ  | H_ASP_32  | OD1 | 3.992 |
| 2DQG | Y_LYS_97  | NZ  | H_ASP_32  | OD2 | 2.695 |
| 2DQG | Y_LYS_97  | NZ  | H_ASP_99  | OD1 | 3.156 |
| 2DQG | Y_LYS_97  | NZ  | H_ASP_99  | OD2 | 3.019 |
| 2DQG | Y_ARG_125 | NH2 | Y_ASP_119 | OD1 | 3.345 |
| 2DQG | Y_ARG_125 | NH2 | Y_ASP_119 | OD2 | 2.899 |
| 2DQH | L_ARG_61  | NH1 | L_GLU_81  | OE2 | 3.943 |
| 2DQH | L_ARG_61  | NH2 | L_GLU_81  | OE2 | 2.998 |
| 2DQH | L_ARG_61  | NH2 | L_ASP_82  | OD1 | 2.603 |
| 2DQH | L_ARG_61  | NH2 | L_ASP_82  | OD2 | 3.284 |
| 2DQH | L_LYS_103 | NZ  | L_GLU_105 | OE2 | 3.440 |
| 2DQH | H_ARG_38  | NH1 | H_ASP_89  | OD1 | 3.065 |
| 2DQH | H_ARG_38  | NH2 | H_GLU_46  | OE1 | 2.818 |
| 2DQH | H_ARG_38  | NH2 | H_ASP_89  | OD1 | 3.616 |
| 2DQH | H_ARG_66  | NH1 | H_ASP_89  | OD1 | 3.542 |
| 2DQH | H_ARG_66  | NH1 | H_ASP_89  | OD2 | 2.882 |
| 2DQH | H_ARG_66  | NH2 | H_ASP_89  | OD1 | 2.810 |
| 2DQH | H_ARG_66  | NH2 | H_ASP_89  | OD2 | 3.639 |
| 2DQH | Y_LYS_1   | NZ  | Y_GLU_7   | OE1 | 3.804 |
| 2DQH | Y_LYS_1   | NZ  | Y_GLU_7   | OE2 | 2.722 |
| 2DQH | Y_LYS_13  | NZ  | Y_ASP_18  | OD1 | 3.180 |
| 2DQH | Y_ARG_61  | NH1 | Y_ASP_48  | OD2 | 3.913 |
| 2DQH | Y_ARG_68  | NH2 | Y_ASP_66  | OD2 | 3.732 |
| 2DQH | Y_LYS_97  | NZ  | H_ASP_32  | OD1 | 2.777 |
| 2DQH | Y_LYS_97  | NZ  | H_ASP_99  | OD1 | 3.694 |
| 2DQH | Y_LYS_97  | NZ  | H_ASP_99  | OD2 | 2.635 |
| 2DQH | Y_ARG_125 | NH1 | Y_ASP_119 | OD2 | 3.546 |
| 2DQH | Y_ARG_125 | NH2 | Y_ASP_119 | OD1 | 3.902 |
| 2DQH | Y_ARG_125 | NH2 | Y_ASP_119 | OD2 | 3.500 |
| 2DQI | L_LYS_49  | NZ  | H_ASP_99  | OD1 | 2.843 |
| 2DQI | L_LYS_49  | NZ  | H_ASP_101 | OD1 | 3.541 |
| 2DQI | L_LYS_49  | NZ  | H_ASP_101 | OD2 | 3.285 |
| 2DQI | L_ARG_61  | NH2 | L_GLU_81  | OE2 | 2.840 |
| 2DQI | L_ARG_61  | NH2 | L_ASP_82  | OD1 | 2.897 |
| 2DQI | L_ARG_61  | NH2 | L_ASP_82  | OD2 | 3.427 |
| 2DQI | L_LYS_103 | NZ  | L_GLU_105 | OE2 | 3.837 |
| 2DQI | H_ARG_38  | NH1 | H_ASP_89  | OD1 | 2.893 |
| 2DQI | H_ARG_38  | NH2 | H_GLU_46  | OE1 | 2.861 |
| 2DQI | H_ARG_38  | NH2 | H_ASP_89  | OD1 | 3.612 |
| 2DQI | H_ARG_66  | NH1 | H_ASP_89  | OD1 | 3.831 |
| 2DQI | H_ARG_66  | NH1 | H_ASP_89  | OD2 | 3.064 |
| 2DQI | H_ARG_66  | NH2 | H_ASP_89  | OD1 | 3.099 |
| 2DQI | H_ARG_66  | NH2 | H_ASP_89  | OD2 | 3.699 |
| 2DQI | H_LYS_75  | NZ  | H_ASP_72  | OD2 | 2.738 |
| 2DQI | Y_LYS_1   | NZ  | Y_GLU_7   | OE2 | 3.385 |
| 2DQI | Y_LYS_97  | NZ  | H_ASP_32  | OD1 | 2.729 |
| 2DQI | Y_ARG_125 | NH1 | Y_ASP_119 | OD2 | 3.366 |
| 2DQI | Y_ARG_125 | NH2 | Y_ASP_119 | OD1 | 3.841 |
| 2DQI | Y_ARG_125 | NH2 | Y_ASP_119 | OD2 | 3.842 |

|      |            |     |            |     |       |
|------|------------|-----|------------|-----|-------|
| 2DQJ | L_ARG.61   | NH2 | L_GLU_81   | OE2 | 2.931 |
| 2DQJ | L_ARG.61   | NH2 | L_ASP_82   | OD1 | 2.808 |
| 2DQJ | L_ARG.61   | NH2 | L_ASP_82   | OD2 | 3.434 |
| 2DQJ | L_LYS_103  | NZ  | L_GLU_105  | OE2 | 3.227 |
| 2DQJ | H_ARG_38   | NH1 | H_ASP_89   | OD1 | 2.842 |
| 2DQJ | H_ARG_38   | NH2 | H_GLU_46   | OE1 | 2.847 |
| 2DQJ | H_ARG_38   | NH2 | H_ASP_89   | OD1 | 3.505 |
| 2DQJ | H_ARG_66   | NH1 | H_ASP_89   | OD1 | 3.735 |
| 2DQJ | H_ARG_66   | NH1 | H_ASP_89   | OD2 | 3.036 |
| 2DQJ | H_ARG_66   | NH2 | H_ASP_89   | OD1 | 3.031 |
| 2DQJ | H_ARG_66   | NH2 | H_ASP_89   | OD2 | 3.659 |
| 2DQJ | Y_LYS_1    | NZ  | Y_GLU_7    | OE2 | 2.929 |
| 2DQJ | Y_ARG.61   | NH1 | Y_ASP_48   | OD2 | 3.313 |
| 2DQJ | Y_ARG.61   | NH2 | Y_ASP_48   | OD2 | 3.891 |
| 2DQJ | Y_ARG.68   | NH2 | Y_ASP_66   | OD2 | 3.769 |
| 2DQJ | Y_LYS_97   | NZ  | H_ASP_32   | OD1 | 2.638 |
| 2DQJ | Y_LYS_97   | NZ  | H_ASP_32   | OD2 | 3.939 |
| 2DQJ | Y_LYS_97   | NZ  | H_ASP_99   | OD1 | 3.482 |
| 2DQJ | Y_LYS_97   | NZ  | H_ASP_99   | OD2 | 2.865 |
| 2DQJ | Y_ARG.125  | NH1 | Y_ASP_119  | OD2 | 3.846 |
| 2DQJ | Y_ARG.125  | NH2 | Y_ASP_119  | OD1 | 3.702 |
| 2DQJ | Y_ARG.125  | NH2 | Y_ASP_119  | OD2 | 3.192 |
| 2DQT | L_LYS_50   | NZ  | L_ASP_30   | OD2 | 2.780 |
| 2DQT | L_LYS_50   | NZ  | H_ASP_100C | OD1 | 3.056 |
| 2DQT | L_ARG.61   | NH1 | L_GLU_79   | OE1 | 3.616 |
| 2DQT | L_ARG.61   | NH2 | L_GLU_81   | OE1 | 3.572 |
| 2DQT | L_ARG.61   | NH2 | L_ASP_82   | OD1 | 2.662 |
| 2DQT | L_ARG.61   | NH2 | L_ASP_82   | OD2 | 3.115 |
| 2DQT | L_ARG.77   | NH1 | L_GLU_79   | OE2 | 3.435 |
| 2DQT | L_LYS_103  | NZ  | L_GLU_105  | OE2 | 3.442 |
| 2DQT | L_LYS_149  | NZ  | L_GLU_195  | OE1 | 3.095 |
| 2DQT | L_LYS_149  | NZ  | L_GLU_195  | OE2 | 3.166 |
| 2DQT | L_ARG.155  | NH1 | L_GLU_185  | OE1 | 3.261 |
| 2DQT | L_ARG.155  | NH1 | L_GLU_185  | OE2 | 3.888 |
| 2DQT | L_ARG.155  | NH2 | L_GLU_185  | OE1 | 3.596 |
| 2DQT | L_ARG.155  | NH2 | L_GLU_185  | OE2 | 2.765 |
| 2DQT | L_LYS_183  | NZ  | L_GLU_187  | OE1 | 3.433 |
| 2DQT | L_LYS_183  | NZ  | L_GLU_187  | OE2 | 2.630 |
| 2DQT | L_ARG.188  | NH1 | L_ASP_184  | OD2 | 2.854 |
| 2DQT | L_HIS_189  | ND1 | L_ASP_151  | OD2 | 2.914 |
| 2DQT | L_HIS_189  | NE2 | L_GLU_185  | OE2 | 3.113 |
| 2DQT | L_LYS_199  | NZ  | L_ASP_110  | OD2 | 3.558 |
| 2DQT | H_ARG_38   | NH1 | H_GLU_46   | OE1 | 2.794 |
| 2DQT | H_ARG_38   | NH2 | H_ASP_86   | OD1 | 2.704 |
| 2DQT | H_LYS_64   | NZ  | H_ASP_61   | OD1 | 2.620 |
| 2DQT | H_ARG.66   | NH1 | H_ASP_86   | OD1 | 3.819 |
| 2DQT | H_ARG.66   | NH1 | H_ASP_86   | OD2 | 2.700 |
| 2DQT | H_ARG.66   | NH2 | H_ASP_86   | OD1 | 2.983 |
| 2DQT | H_ARG.66   | NH2 | H_ASP_86   | OD2 | 3.389 |
| 2DQT | H_ARG.83   | NH2 | H_GLU_85   | OE1 | 3.980 |
| 2DQT | H_ARG.83   | NH2 | H_GLU_85   | OE2 | 3.275 |
| 2DQT | H_ARG.94   | NH2 | H_ASP_101  | OD1 | 3.570 |
| 2DQT | H_ARG.94   | NH2 | H_ASP_101  | OD2 | 2.733 |
| 2DQT | H_ARG_100B | NH2 | L_ASP_30   | OD1 | 3.486 |
| 2DQT | H_ARG_100B | NH2 | L_ASP_30   | OD2 | 3.745 |
| 2DQU | L_ARG.24   | NH1 | L_ASP_70   | OD1 | 3.427 |
| 2DQU | L_LYS_50   | NZ  | H_ASP_100C | OD1 | 2.628 |
| 2DQU | L_LYS_50   | NZ  | H_ASP_100C | OD2 | 3.616 |

|      |            |     |           |     |       |
|------|------------|-----|-----------|-----|-------|
| 2DQU | L_ARG_61   | NH2 | L_GLU_79  | OE1 | 2.958 |
| 2DQU | L_LYS_147  | NZ  | L_GLU_154 | OE1 | 3.676 |
| 2DQU | L_LYS_147  | NZ  | L_GLU_154 | OE2 | 2.961 |
| 2DQU | L_LYS_147  | NZ  | L_GLU_195 | OE2 | 3.938 |
| 2DQU | L_LYS_149  | NZ  | L_GLU_195 | OE1 | 2.875 |
| 2DQU | L_LYS_149  | NZ  | L_GLU_195 | OE2 | 3.568 |
| 2DQU | L_LYS_183  | NZ  | L_GLU_187 | OE2 | 3.122 |
| 2DQU | L_HIS_189  | ND1 | L_ASP_151 | OD2 | 3.386 |
| 2DQU | L_HIS_189  | NE2 | L_GLU_185 | OE2 | 2.712 |
| 2DQU | L_LYS_199  | NZ  | L_ASP_110 | OD2 | 3.230 |
| 2DQU | H_ARG_38   | NH1 | H_GLU_46  | OE1 | 2.604 |
| 2DQU | H_ARG_38   | NH1 | H_ASP_86  | OD1 | 3.950 |
| 2DQU | H_ARG_38   | NH2 | H_ASP_86  | OD1 | 2.687 |
| 2DQU | H_ARG_44   | NH2 | H_GLU_46  | OE1 | 2.549 |
| 2DQU | H_ARG_44   | NH2 | H_GLU_46  | OE2 | 2.851 |
| 2DQU | H_ARG_66   | NH1 | H_ASP_86  | OD1 | 3.787 |
| 2DQU | H_ARG_66   | NH1 | H_ASP_86  | OD2 | 2.695 |
| 2DQU | H_ARG_66   | NH2 | H_ASP_86  | OD1 | 2.995 |
| 2DQU | H_ARG_66   | NH2 | H_ASP_86  | OD2 | 3.363 |
| 2DQU | H_ARG_94   | NH2 | H_ASP_101 | OD1 | 3.556 |
| 2DQU | H_ARG_94   | NH2 | H_ASP_101 | OD2 | 2.729 |
| 2DQU | H_ARG_100B | NH2 | L_ASP_30  | OD2 | 2.721 |
| 2DQU | H_LYS_208  | NZ  | L_GLU_123 | OE2 | 2.915 |
| 2DQU | H_ARG_213  | NH1 | L_GLU_123 | OE1 | 3.471 |
| 2FB4 | L_ARG_53   | NH1 | L_ASP_59  | OD2 | 3.714 |
| 2FB4 | L_ARG_53   | NH2 | L_ASP_59  | OD1 | 3.808 |
| 2FB4 | L_ARG_60   | NH1 | L_GLU_80  | OE2 | 3.376 |
| 2FB4 | L_ARG_60   | NH2 | L_GLU_80  | OE2 | 2.766 |
| 2FB4 | L_ARG_60   | NH2 | L_ASP_81  | OD1 | 3.071 |
| 2FB4 | L_ARG_60   | NH2 | L_ASP_81  | OD2 | 2.621 |
| 2FB4 | L_LYS_104  | NZ  | L_ASP_84  | OD1 | 3.495 |
| 2FB4 | L_LYS_104  | NZ  | L_ASP_84  | OD2 | 2.981 |
| 2FB4 | L_HIS_190  | ND1 | L_ASP_153 | OD1 | 2.983 |
| 2FB4 | H_ARG_38   | NH1 | H_ASP_90  | OD1 | 2.997 |
| 2FB4 | H_ARG_38   | NH2 | H_GLU_46  | OE1 | 3.277 |
| 2FB4 | H_ARG_38   | NH2 | H_GLU_46  | OE2 | 3.164 |
| 2FB4 | H_ARG_38   | NH2 | H_ASP_90  | OD1 | 3.798 |
| 2FB4 | H_HIS_59   | NE2 | H_ASP_57  | OD1 | 3.817 |
| 2FB4 | H_ARG_67   | NH1 | H_ASP_90  | OD1 | 3.916 |
| 2FB4 | H_ARG_67   | NH1 | H_ASP_90  | OD2 | 2.836 |
| 2FB4 | H_ARG_67   | NH2 | H_ASP_90  | OD1 | 2.913 |
| 2FB4 | H_ARG_67   | NH2 | H_ASP_90  | OD2 | 3.297 |
| 2FB4 | H_ARG_72   | NH2 | H_ASP_74  | OD2 | 3.188 |
| 2FB4 | H_ARG_98   | NH2 | H_ASP_106 | OD1 | 2.760 |
| 2FB4 | H_ARG_98   | NH2 | H_ASP_106 | OD2 | 3.392 |
| 2FB4 | H_LYS_148  | NZ  | L_GLU_126 | OE2 | 2.805 |
| 2FB4 | H_LYS_214  | NZ  | L_GLU_125 | OE1 | 3.053 |
| 2FB4 | H_LYS_214  | NZ  | L_GLU_125 | OE2 | 2.759 |
| 2FD6 | A_HIS_29   | NE2 | A_ASP_12  | OD1 | 3.017 |
| 2FD6 | A_HIS_29   | NE2 | A_ASP_12  | OD2 | 3.253 |
| 2FD6 | A_HIS_41   | NE2 | A_ASP_12  | OD1 | 2.670 |
| 2FD6 | A_HIS_41   | NE2 | A_ASP_12  | OD2 | 3.732 |
| 2FD6 | A_ARG_69   | NH2 | A_ASP_65  | OD2 | 2.800 |
| 2FD6 | A_HIS_87   | ND1 | U_ASP_11  | OD2 | 3.705 |
| 2FD6 | A_ARG_88   | NH1 | A_ASP_90  | OD1 | 3.269 |
| 2FD6 | A_ARG_88   | NH1 | A_ASP_90  | OD2 | 2.893 |
| 2FD6 | L_LYS_53   | NZ  | L_GLU_50  | OE1 | 2.800 |
| 2FD6 | L_ARG_61   | NH1 | L_GLU_79  | OE1 | 3.611 |

|      |           |     |           |     |       |
|------|-----------|-----|-----------|-----|-------|
| 2FD6 | L_ARG_61  | NH1 | L_GLU_79  | OE2 | 3.439 |
| 2FD6 | L_ARG_61  | NH2 | L_GLU_79  | OE1 | 3.617 |
| 2FD6 | L_ARG_61  | NH2 | L_GLU_81  | OE2 | 2.650 |
| 2FD6 | L_ARG_61  | NH2 | L_ASP_82  | OD1 | 2.824 |
| 2FD6 | L_ARG_61  | NH2 | L_ASP_82  | OD2 | 3.518 |
| 2FD6 | L_LYS_103 | NZ  | L_ASP_164 | OD1 | 3.838 |
| 2FD6 | L_LYS_146 | NZ  | L_GLU_153 | OE1 | 3.751 |
| 2FD6 | L_LYS_148 | NZ  | L_GLU_194 | OE1 | 2.730 |
| 2FD6 | L_LYS_148 | NZ  | L_GLU_194 | OE2 | 2.883 |
| 2FD6 | L_ARG_154 | NH1 | L_GLU_184 | OE1 | 3.569 |
| 2FD6 | L_ARG_154 | NH1 | L_GLU_184 | OE2 | 3.359 |
| 2FD6 | L_ARG_154 | NH2 | L_GLU_184 | OE1 | 2.421 |
| 2FD6 | L_ARG_154 | NH2 | L_GLU_184 | OE2 | 3.540 |
| 2FD6 | L_ARG_187 | NH1 | L_ASP_183 | OD1 | 3.359 |
| 2FD6 | L_HIS_188 | ND1 | L_ASP_150 | OD2 | 2.696 |
| 2FD6 | H_ARG_40  | NH1 | H_GLU_85  | OE1 | 2.850 |
| 2FD6 | H_ARG_40  | NH2 | H_GLU_85  | OE1 | 3.358 |
| 2FD6 | H_LYS_64  | NZ  | H_GLU_61  | OE1 | 3.156 |
| 2FD6 | H_LYS_66  | NZ  | H_ASP_86  | OD1 | 3.700 |
| 2FD6 | H_LYS_66  | NZ  | H_ASP_86  | OD2 | 2.976 |
| 2FD6 | H_ARG_94  | NH2 | H_ASP_101 | OD1 | 3.603 |
| 2FD6 | H_ARG_94  | NH2 | H_ASP_101 | OD2 | 2.621 |
| 2FD6 | H_HIS_98  | ND1 | L_GLU_50  | OE1 | 3.050 |
| 2FD6 | H_HIS_98  | ND1 | L_GLU_50  | OE2 | 3.997 |
| 2FD6 | H_LYS_203 | NZ  | L_GLU_122 | OE2 | 2.585 |
| 2FD6 | U_ARG_2   | NH2 | U_ASP_74  | OD1 | 3.037 |
| 2FD6 | U_ARG_2   | NH2 | U_ASP_74  | OD2 | 3.628 |
| 2FD6 | U_ARG_25  | NH1 | U_GLU_42  | OE2 | 3.105 |
| 2FD6 | U_ARG_25  | NH2 | U_GLU_42  | OE2 | 2.986 |
| 2FD6 | U_ARG_30  | NH2 | U_GLU_39  | OE1 | 3.610 |
| 2FD6 | U_LYS_50  | NZ  | U_ASP_254 | OD1 | 3.179 |
| 2FD6 | U_ARG_53  | NH1 | U_ASP_254 | OD1 | 3.463 |
| 2FD6 | U_ARG_53  | NH1 | U_ASP_254 | OD2 | 2.584 |
| 2FD6 | U_ARG_53  | NH2 | U_ASP_254 | OD2 | 3.352 |
| 2FD6 | U_HIS_128 | NE2 | U_GLU_183 | OE1 | 2.860 |
| 2FD6 | U_HIS_143 | NE2 | U_GLU_183 | OE1 | 3.388 |
| 2FD6 | U_HIS_143 | NE2 | U_GLU_183 | OE2 | 2.574 |
| 2FD6 | U_ARG_145 | NH2 | U_ASP_124 | OD2 | 3.333 |
| 2FD6 | U_LYS_175 | NZ  | U_GLU_94  | OE2 | 3.307 |
| 2FD6 | U_ARG_192 | NH1 | H_GLU_58  | OE2 | 2.359 |
| 2FD6 | U_ARG_192 | NH2 | H_GLU_58  | OE2 | 3.898 |
| 2FD6 | U_HIS_260 | NE2 | U_ASP_262 | OD1 | 3.106 |
| 2FD6 | U_HIS_260 | NE2 | U_ASP_262 | OD2 | 3.788 |
| 2FR4 | L_ARG_61  | NH2 | L_ASP_82  | OD1 | 2.807 |
| 2FR4 | L_ARG_61  | NH2 | L_ASP_82  | OD2 | 3.787 |
| 2FR4 | L_LYS_142 | NZ  | L_GLU_105 | OE1 | 2.764 |
| 2FR4 | L_LYS_142 | NZ  | L_GLU_105 | OE2 | 3.125 |
| 2FR4 | L_ARG_155 | NH2 | L_GLU_185 | OE1 | 3.754 |
| 2FR4 | L_ARG_155 | NH2 | L_GLU_185 | OE2 | 3.022 |
| 2FR4 | L_LYS_183 | NZ  | L_GLU_187 | OE1 | 3.253 |
| 2FR4 | L_LYS_183 | NZ  | L_GLU_187 | OE2 | 3.697 |
| 2FR4 | L_HIS_189 | ND1 | L_ASP_151 | OD2 | 3.437 |
| 2FR4 | L_HIS_189 | NE2 | L_GLU_185 | OE1 | 3.779 |
| 2FR4 | H_LYS_38  | NZ  | H_GLU_85  | OE1 | 3.892 |
| 2FR4 | H_LYS_64  | NZ  | H_GLU_61  | OE1 | 2.978 |
| 2FR4 | H_LYS_66  | NZ  | H_ASP_86  | OD1 | 2.719 |
| 2FR4 | H_LYS_66  | NZ  | H_ASP_86  | OD2 | 3.742 |
| 2FR4 | H_ARG_94  | NH2 | H_ASP_101 | OD1 | 3.962 |

|      |           |     |           |     |       |
|------|-----------|-----|-----------|-----|-------|
| 2FR4 | H_ARG_94  | NH2 | H_ASP_101 | OD2 | 2.959 |
| 2FR4 | H_LYS_208 | NZ  | L_GLU_123 | OE2 | 3.199 |
| 2FR4 | A_ARG_61  | NH2 | A_ASP_82  | OD1 | 3.363 |
| 2FR4 | A_LYS_142 | NZ  | A_ASP_143 | OD1 | 3.736 |
| 2FR4 | A_LYS_142 | NZ  | A_ASP_143 | OD2 | 3.296 |
| 2FR4 | A_LYS_169 | NZ  | A_ASP_167 | OD1 | 3.777 |
| 2FR4 | A_LYS_183 | NZ  | A_GLU_187 | OE1 | 2.836 |
| 2FR4 | A_LYS_183 | NZ  | A_GLU_187 | OE2 | 3.027 |
| 2FR4 | A_HIS_189 | ND1 | A_ASP_151 | OD2 | 3.087 |
| 2FR4 | B_LYS_40  | NZ  | B_GLU_85  | OE1 | 3.845 |
| 2FR4 | B_LYS_62  | NZ  | B_GLU_46  | OE2 | 3.403 |
| 2FR4 | B_LYS_64  | NZ  | B_GLU_61  | OE2 | 2.733 |
| 2FR4 | B_LYS_66  | NZ  | B_ASP_86  | OD1 | 2.762 |
| 2FR4 | B_LYS_66  | NZ  | B_ASP_86  | OD2 | 3.704 |
| 2FR4 | B_ARG_94  | NH2 | B_ASP_101 | OD1 | 3.630 |
| 2FR4 | B_ARG_94  | NH2 | B_ASP_101 | OD2 | 2.755 |
| 2FR4 | B_LYS_208 | NZ  | A_GLU_123 | OE1 | 2.539 |
| 2H32 | A_ARG_25  | NH2 | A_ASP_27  | OD1 | 3.505 |
| 2H32 | A_ARG_25  | NH2 | A_ASP_27  | OD2 | 3.293 |
| 2H32 | A_HIS_28  | NE2 | A_ASP_27  | OD2 | 3.559 |
| 2H32 | A_ARG_51  | NH1 | A_ASP_57  | OD1 | 3.175 |
| 2H32 | A_ARG_51  | NH2 | A_ASP_57  | OD1 | 2.596 |
| 2H32 | A_ARG_67  | NH1 | A_ASP_90  | OD1 | 3.374 |
| 2H32 | A_ARG_67  | NH1 | A_ASP_90  | OD2 | 2.396 |
| 2H32 | A_ARG_67  | NH2 | A_ASP_90  | OD1 | 2.457 |
| 2H32 | A_ARG_67  | NH2 | A_ASP_90  | OD2 | 3.234 |
| 2H32 | A_ARG_110 | NH2 | A_GLU_109 | OE1 | 3.763 |
| 2H32 | B_ARG_153 | NH1 | B_ASP_115 | OD1 | 3.775 |
| 2H32 | H_LYS_12  | NZ  | H_GLU_16  | OE1 | 3.609 |
| 2H32 | H_LYS_13  | NZ  | H_GLU_16  | OE2 | 3.581 |
| 2H32 | H_ARG_38  | NH1 | H_GLU_46  | OE1 | 3.487 |
| 2H32 | H_ARG_38  | NH1 | H_GLU_46  | OE2 | 2.617 |
| 2H32 | H_ARG_59  | NH1 | A_GLU_106 | OE1 | 3.937 |
| 2H32 | H_ARG_59  | NH1 | A_GLU_106 | OE2 | 3.372 |
| 2H32 | H_ARG_59  | NH2 | A_GLU_106 | OE2 | 3.412 |
| 2H32 | H_ARG_98  | NH1 | H_ASP_107 | OD1 | 3.509 |
| 2H32 | H_ARG_98  | NH1 | H_ASP_107 | OD2 | 3.182 |
| 2H32 | H_LYS_162 | NZ  | H_ASP_168 | OD1 | 2.915 |
| 2H32 | H_LYS_162 | NZ  | H_ASP_168 | OD2 | 3.888 |
| 2H32 | H_LYS_183 | NZ  | H_ASP_151 | OD1 | 3.157 |
| 2H32 | H_LYS_183 | NZ  | H_ASP_151 | OD2 | 3.441 |
| 2H32 | H_HIS_204 | ND1 | H_GLU_203 | OE1 | 3.406 |
| 2H32 | H_HIS_204 | ND1 | H_GLU_203 | OE2 | 2.840 |
| 2H9G | A_ARG_24  | NH1 | A_ASP_70  | OD1 | 3.267 |
| 2H9G | A_ARG_61  | NH2 | A_GLU_81  | OE1 | 3.875 |
| 2H9G | A_ARG_61  | NH2 | A_ASP_82  | OD1 | 3.215 |
| 2H9G | A_ARG_61  | NH2 | A_ASP_82  | OD2 | 3.850 |
| 2H9G | A_LYS_103 | NZ  | A_GLU_105 | OE2 | 3.674 |
| 2H9G | A_LYS_103 | NZ  | A_GLU_165 | OE1 | 2.740 |
| 2H9G | A_LYS_103 | NZ  | A_GLU_165 | OE2 | 3.762 |
| 2H9G | A_ARG_142 | NH1 | A_GLU_105 | OE1 | 3.505 |
| 2H9G | A_ARG_142 | NH2 | A_GLU_105 | OE1 | 3.340 |
| 2H9G | A_ARG_142 | NH2 | A_GLU_105 | OE2 | 3.102 |
| 2H9G | A_LYS_149 | NZ  | A_GLU_195 | OE2 | 3.684 |
| 2H9G | A_LYS_183 | NZ  | A_GLU_187 | OE1 | 2.832 |
| 2H9G | A_LYS_183 | NZ  | A_GLU_187 | OE2 | 3.382 |
| 2H9G | B_ARG_38  | NH1 | B_ASP_86  | OD1 | 2.752 |
| 2H9G | B_ARG_38  | NH2 | B_GLU_46  | OE1 | 3.198 |

|      |           |     |           |     |       |
|------|-----------|-----|-----------|-----|-------|
| 2H9G | B_ARG_38  | NH2 | B_GLU_46  | OE2 | 3.634 |
| 2H9G | B_ARG_38  | NH2 | B_ASP_86  | OD1 | 3.743 |
| 2H9G | B_HIS_53  | ND1 | R_GLU_36  | OE2 | 3.471 |
| 2H9G | B_ARG_66  | NH1 | B_ASP_86  | OD2 | 2.729 |
| 2H9G | B_ARG_66  | NH2 | B_ASP_86  | OD1 | 3.172 |
| 2H9G | B_ARG_66  | NH2 | B_ASP_86  | OD2 | 3.302 |
| 2H9G | B_ARG_94  | NH2 | B_ASP_101 | OD2 | 3.035 |
| 2H9G | B_LYS_143 | NZ  | B_ASP_144 | OD1 | 3.273 |
| 2H9G | B_LYS_143 | NZ  | B_ASP_144 | OD2 | 3.261 |
| 2H9G | B_LYS_209 | NZ  | A_GLU_123 | OE1 | 2.713 |
| 2H9G | R_ARG_39  | NH2 | R_ASP_37  | OD2 | 2.798 |
| 2H9G | R_ARG_104 | NH1 | R_ASP_122 | OD2 | 3.726 |
| 2H9G | L_ARG_24  | NH1 | L_ASP_70  | OD1 | 2.993 |
| 2H9G | L_ARG_24  | NH2 | L_ASP_70  | OD1 | 3.108 |
| 2H9G | L_ARG_24  | NH2 | L_ASP_70  | OD2 | 3.776 |
| 2H9G | L_ARG_61  | NH2 | L_GLU_81  | OE1 | 3.703 |
| 2H9G | L_ARG_61  | NH2 | L_ASP_82  | OD1 | 3.174 |
| 2H9G | L_ARG_61  | NH2 | L_ASP_82  | OD2 | 3.885 |
| 2H9G | L_LYS_103 | NZ  | L_GLU_165 | OE1 | 2.850 |
| 2H9G | L_LYS_103 | NZ  | L_GLU_165 | OE2 | 3.736 |
| 2H9G | L_LYS_149 | NZ  | L_GLU_195 | OE2 | 3.720 |
| 2H9G | L_LYS_183 | NZ  | L_GLU_187 | OE1 | 2.899 |
| 2H9G | L_LYS_183 | NZ  | L_GLU_187 | OE2 | 2.665 |
| 2H9G | H_ARG_38  | NH1 | H_ASP_86  | OD1 | 2.962 |
| 2H9G | H_ARG_38  | NH2 | H_GLU_46  | OE1 | 3.123 |
| 2H9G | H_ARG_38  | NH2 | H_GLU_46  | OE2 | 3.981 |
| 2H9G | H_ARG_38  | NH2 | H_ASP_86  | OD1 | 3.869 |
| 2H9G | H_LYS_64  | NZ  | H_ASP_61  | OD1 | 3.096 |
| 2H9G | H_ARG_66  | NH1 | H_ASP_86  | OD1 | 3.877 |
| 2H9G | H_ARG_66  | NH1 | H_ASP_86  | OD2 | 2.818 |
| 2H9G | H_ARG_66  | NH2 | H_ASP_86  | OD1 | 3.235 |
| 2H9G | H_ARG_66  | NH2 | H_ASP_86  | OD2 | 3.633 |
| 2H9G | H_ARG_94  | NH2 | H_ASP_101 | OD2 | 3.129 |
| 2H9G | H_LYS_143 | NZ  | H_ASP_144 | OD1 | 3.284 |
| 2H9G | H_LYS_143 | NZ  | H_ASP_144 | OD2 | 3.199 |
| 2H9G | H_LYS_209 | NZ  | L_GLU_123 | OE1 | 2.570 |
| 2HFG | L_ARG_61  | NH2 | L_GLU_81  | OE2 | 3.934 |
| 2HFG | L_ARG_61  | NH2 | L_ASP_82  | OD1 | 2.654 |
| 2HFG | L_ARG_61  | NH2 | L_ASP_82  | OD2 | 3.306 |
| 2HFG | L_LYS_148 | NZ  | L_GLU_194 | OE2 | 2.762 |
| 2HFG | L_LYS_168 | NZ  | L_ASP_166 | OD1 | 2.951 |
| 2HFG | L_LYS_168 | NZ  | L_ASP_166 | OD2 | 3.686 |
| 2HFG | L_LYS_182 | NZ  | L_GLU_186 | OE1 | 3.789 |
| 2HFG | H_ARG_38  | NH1 | H_ASP_86  | OD1 | 3.062 |
| 2HFG | H_ARG_38  | NH2 | H_GLU_46  | OE1 | 2.864 |
| 2HFG | H_ARG_38  | NH2 | H_GLU_46  | OE2 | 3.710 |
| 2HFG | H_LYS_64  | NZ  | H_ASP_61  | OD1 | 3.871 |
| 2HFG | H_ARG_66  | NH1 | H_ASP_86  | OD1 | 3.665 |
| 2HFG | H_ARG_66  | NH1 | H_ASP_86  | OD2 | 2.735 |
| 2HFG | H_ARG_66  | NH2 | H_ASP_86  | OD1 | 3.183 |
| 2HFG | H_ARG_66  | NH2 | H_ASP_86  | OD2 | 3.738 |
| 2HFG | H_ARG_83  | NH1 | H_GLU_85  | OE2 | 3.672 |
| 2HFG | H_ARG_94  | NH2 | H_ASP_101 | OD1 | 3.612 |
| 2HFG | H_ARG_94  | NH2 | H_ASP_101 | OD2 | 2.745 |
| 2HFG | H_ARG_95  | NH2 | R_ASP_26  | OD1 | 2.783 |
| 2HFG | H_ARG_95  | NH2 | R_ASP_26  | OD2 | 3.667 |
| 2HFG | H_LYS_143 | NZ  | H_ASP_144 | OD1 | 3.062 |
| 2HFG | H_LYS_143 | NZ  | H_ASP_144 | OD2 | 2.650 |

|      |           |     |           |     |       |
|------|-----------|-----|-----------|-----|-------|
| 2HFG | H.LYS_209 | NZ  | L.GLU_122 | OE1 | 3.336 |
| 2HFG | H.LYS_209 | NZ  | L.GLU_122 | OE2 | 2.886 |
| 2HKF | L.ARG_24  | NH2 | L.ASP_75  | OD2 | 3.672 |
| 2HKF | L.LYS_44  | NZ  | L.GLU_86  | OE2 | 3.798 |
| 2HKF | L.LYS_55  | NZ  | P.ASP_6   | OD1 | 2.651 |
| 2HKF | L.ARG_66  | NH1 | L.GLU_84  | OE1 | 2.688 |
| 2HKF | L.ARG_66  | NH1 | L.GLU_84  | OE2 | 3.893 |
| 2HKF | L.ARG_66  | NH2 | L.GLU_84  | OE1 | 3.861 |
| 2HKF | L.ARG_66  | NH2 | L.GLU_84  | OE2 | 3.865 |
| 2HKF | L.ARG_66  | NH2 | L.GLU_86  | OE1 | 3.229 |
| 2HKF | L.ARG_66  | NH2 | L.ASP_87  | OD1 | 2.449 |
| 2HKF | L.ARG_66  | NH2 | L.ASP_87  | OD2 | 3.580 |
| 2HKF | L.LYS_152 | NZ  | L.GLU_159 | OE1 | 3.074 |
| 2HKF | L.LYS_152 | NZ  | L.GLU_159 | OE2 | 3.333 |
| 2HKF | L.LYS_154 | NZ  | L.GLU_200 | OE1 | 3.172 |
| 2HKF | L.LYS_154 | NZ  | L.GLU_200 | OE2 | 3.401 |
| 2HKF | L.ARG_160 | NH1 | L.GLU_190 | OE1 | 2.551 |
| 2HKF | L.ARG_160 | NH2 | L.GLU_190 | OE1 | 2.732 |
| 2HKF | L.ARG_160 | NH2 | L.GLU_190 | OE2 | 3.200 |
| 2HKF | L.ARG_193 | NH1 | L.ASP_189 | OD1 | 2.634 |
| 2HKF | L.ARG_193 | NH1 | L.ASP_189 | OD2 | 3.330 |
| 2HKF | L.ARG_193 | NH2 | L.ASP_189 | OD1 | 3.591 |
| 2HKF | L.LYS_204 | NZ  | L.ASP_115 | OD2 | 3.829 |
| 2HKF | H.ARG_38  | NH1 | H.ASP_92  | OD1 | 2.875 |
| 2HKF | H.ARG_38  | NH2 | H.GLU_46  | OE1 | 3.030 |
| 2HKF | H.ARG_38  | NH2 | H.GLU_46  | OE2 | 3.901 |
| 2HKF | H.ARG_38  | NH2 | H.ASP_92  | OD1 | 3.900 |
| 2HKF | H.ARG_50  | NH2 | P.GLU_5   | OE1 | 3.869 |
| 2HKF | H.ARG_50  | NH2 | P.GLU_5   | OE2 | 2.886 |
| 2HKF | H.ARG_52  | NH2 | P.GLU_5   | OE1 | 3.116 |
| 2HKF | H.ARG_69  | NH1 | H.ASP_92  | OD1 | 3.597 |
| 2HKF | H.ARG_69  | NH1 | H.ASP_92  | OD2 | 2.654 |
| 2HKF | H.ARG_69  | NH2 | H.ASP_92  | OD1 | 2.988 |
| 2HKF | H.ARG_69  | NH2 | H.ASP_92  | OD2 | 3.598 |
| 2HKF | H.ARG_74  | NH1 | H.ASP_76  | OD1 | 3.578 |
| 2HKF | H.LYS_214 | NZ  | L.GLU_128 | OE2 | 2.891 |
| 2HMG | A.LYS_27  | NZ  | B.GLU_97  | OE1 | 2.762 |
| 2HMG | A.LYS_27  | NZ  | B.GLU_97  | OE2 | 3.001 |
| 2HMG | A.ARG_57  | NH1 | A.GLU_82  | OE1 | 2.651 |
| 2HMG | A.ARG_57  | NH1 | A.GLU_82  | OE2 | 3.908 |
| 2HMG | A.HIS_75  | ND1 | A.ASP_73  | OD1 | 3.346 |
| 2HMG | A.HIS_75  | ND1 | A.ASP_73  | OD2 | 2.800 |
| 2HMG | A.HIS_75  | NE2 | A.ASP_63  | OD1 | 3.583 |
| 2HMG | A.ARG_90  | NH1 | A.ASP_60  | OD1 | 2.824 |
| 2HMG | A.ARG_90  | NH1 | A.ASP_60  | OD2 | 3.456 |
| 2HMG | A.ARG_109 | NH1 | B.GLU_67  | OE1 | 3.634 |
| 2HMG | A.ARG_109 | NH1 | B.GLU_67  | OE2 | 2.959 |
| 2HMG | A.ARG_109 | NH2 | A.GLU_89  | OE1 | 3.190 |
| 2HMG | A.ARG_109 | NH2 | A.GLU_89  | OE2 | 2.530 |
| 2HMG | A.ARG_141 | NH1 | A.ASP_77  | OD1 | 3.112 |
| 2HMG | A.ARG_141 | NH1 | A.ASP_77  | OD2 | 2.766 |
| 2HMG | A.ARG_141 | NH2 | A.ASP_146 | OD1 | 2.729 |
| 2HMG | A.LYS_176 | NZ  | A.GLU_123 | OE1 | 2.634 |
| 2HMG | A.LYS_176 | NZ  | A.GLU_123 | OE2 | 3.933 |
| 2HMG | A.HIS_183 | NE2 | A.GLU_190 | OE1 | 3.669 |
| 2HMG | A.ARG_208 | NH2 | A.ASP_241 | OD2 | 2.864 |
| 2HMG | A.ARG_261 | NH1 | A.GLU_119 | OE1 | 2.807 |
| 2HMG | A.ARG_261 | NH1 | A.GLU_119 | OE2 | 2.727 |



|      |           |     |           |     |       |
|------|-----------|-----|-----------|-----|-------|
| 2HMG | A_ARG_261 | NH2 | A_GLU_119 | OE1 | 2.881 |
| 2HMG | A_LYS_264 | NZ  | A_ASP_85  | OD1 | 3.585 |
| 2HMG | A_LYS_264 | NZ  | A_ASP_85  | OD2 | 2.732 |
| 2HMG | A_ARG_269 | NH2 | B_GLU_67  | OE1 | 2.999 |
| 2HMG | A_LYS_292 | NZ  | A_ASP_291 | OD1 | 3.659 |
| 2HMG | A_LYS_299 | NZ  | B_GLU_69  | OE1 | 3.169 |
| 2HMG | B_LYS_51  | NZ  | B_GLU_103 | OE2 | 3.601 |
| 2HMG | B_ARG_54  | NH1 | F_GLU_97  | OE1 | 2.721 |
| 2HMG | B_ARG_54  | NH2 | B_GLU_57  | OE1 | 2.859 |
| 2HMG | B_ARG_54  | NH2 | B_GLU_57  | OE2 | 3.200 |
| 2HMG | B_ARG_54  | NH2 | F_GLU_97  | OE1 | 3.280 |
| 2HMG | B_LYS_62  | NZ  | F_ASP_86  | OD1 | 3.023 |
| 2HMG | B_LYS_62  | NZ  | F_ASP_86  | OD2 | 2.718 |
| 2HMG | B_LYS_62  | NZ  | F_ASP_90  | OD1 | 3.256 |
| 2HMG | B_LYS_62  | NZ  | F_ASP_90  | OD2 | 2.780 |
| 2HMG | B_HIS_64  | NE2 | F_ASP_79  | OD2 | 3.863 |
| 2HMG | B_LYS_68  | NZ  | B_GLU_85  | OE1 | 3.214 |
| 2HMG | B_LYS_68  | NZ  | B_GLU_85  | OE2 | 2.698 |
| 2HMG | B_ARG_76  | NH1 | D_GLU_74  | OE1 | 3.508 |
| 2HMG | B_ARG_76  | NH1 | D_GLU_74  | OE2 | 2.816 |
| 2HMG | B_ARG_76  | NH1 | D_GLU_81  | OE1 | 2.774 |
| 2HMG | B_ARG_76  | NH1 | D_GLU_81  | OE2 | 3.655 |
| 2HMG | B_ARG_76  | NH2 | D_GLU_74  | OE1 | 2.915 |
| 2HMG | B_ARG_76  | NH2 | D_GLU_74  | OE2 | 3.598 |
| 2HMG | B_LYS_88  | NZ  | B_GLU_85  | OE1 | 3.844 |
| 2HMG | B_LYS_117 | NZ  | B_GLU_114 | OE1 | 2.609 |
| 2HMG | B_LYS_117 | NZ  | B_GLU_114 | OE2 | 3.322 |
| 2HMG | B_ARG_123 | NH1 | F_GLU_132 | OE2 | 3.122 |
| 2HMG | B_ARG_123 | NH2 | B_GLU_120 | OE1 | 2.604 |
| 2HMG | B_ARG_123 | NH2 | B_GLU_120 | OE2 | 2.778 |
| 2HMG | B_ARG_124 | NH1 | F_GLU_132 | OE1 | 3.544 |
| 2HMG | B_ARG_124 | NH1 | F_GLU_132 | OE2 | 3.040 |
| 2HMG | B_ARG_127 | NH2 | F_GLU_131 | OE1 | 2.502 |
| 2HMG | B_ARG_153 | NH2 | B_GLU_150 | OE2 | 2.575 |
| 2HMG | B_HIS_159 | NE2 | B_ASP_160 | OD1 | 3.987 |
| 2HMG | B_HIS_159 | NE2 | B_ASP_160 | OD2 | 3.070 |
| 2HMG | B_ARG_163 | NH1 | F_GLU_131 | OE1 | 2.668 |
| 2HMG | B_ARG_163 | NH1 | F_GLU_131 | OE2 | 2.605 |
| 2HMG | B_ARG_170 | NH1 | B_GLU_128 | OE1 | 3.667 |
| 2HMG | B_ARG_170 | NH1 | D_GLU_128 | OE1 | 3.860 |
| 2HMG | B_ARG_170 | NH2 | B_GLU_131 | OE2 | 2.770 |
| 2HMG | B_ARG_170 | NH2 | D_GLU_128 | OE1 | 2.750 |
| 2HMG | B_ARG_170 | NH2 | D_GLU_128 | OE2 | 3.837 |
| 2HMG | C_LYS_27  | NZ  | D_GLU_97  | OE1 | 2.819 |
| 2HMG | C_LYS_27  | NZ  | D_GLU_97  | OE2 | 3.060 |
| 2HMG | C_ARG_57  | NH1 | C_GLU_82  | OE1 | 2.635 |
| 2HMG | C_ARG_57  | NH1 | C_GLU_82  | OE2 | 3.911 |
| 2HMG | C_HIS_75  | ND1 | C_ASP_73  | OD1 | 3.326 |
| 2HMG | C_HIS_75  | ND1 | C_ASP_73  | OD2 | 2.769 |
| 2HMG | C_HIS_75  | NE2 | C_ASP_63  | OD1 | 3.558 |
| 2HMG | C_ARG_90  | NH1 | C_ASP_60  | OD1 | 2.831 |
| 2HMG | C_ARG_90  | NH1 | C_ASP_60  | OD2 | 3.485 |
| 2HMG | C_ARG_109 | NH1 | D_GLU_67  | OE1 | 3.653 |
| 2HMG | C_ARG_109 | NH1 | D_GLU_67  | OE2 | 2.947 |
| 2HMG | C_ARG_109 | NH2 | C_GLU_89  | OE1 | 3.184 |
| 2HMG | C_ARG_109 | NH2 | C_GLU_89  | OE2 | 2.523 |
| 2HMG | C_ARG_141 | NH1 | C_ASP_77  | OD1 | 3.115 |
| 2HMG | C_ARG_141 | NH1 | C_ASP_77  | OD2 | 2.775 |

|      |           |     |           |     |       |
|------|-----------|-----|-----------|-----|-------|
| 2HMG | C_ARG_141 | NH2 | C_ASP_146 | OD1 | 2.729 |
| 2HMG | C_LYS_176 | NZ  | C_GLU_123 | OE1 | 2.643 |
| 2HMG | C_LYS_176 | NZ  | C_GLU_123 | OE2 | 3.924 |
| 2HMG | C_HIS_183 | NE2 | C_GLU_190 | OE1 | 3.657 |
| 2HMG | C_ARG_208 | NH2 | C_ASP_241 | OD2 | 2.844 |
| 2HMG | C_ARG_261 | NH1 | C_GLU_119 | OE1 | 2.785 |
| 2HMG | C_ARG_261 | NH1 | C_GLU_119 | OE2 | 2.729 |
| 2HMG | C_ARG_261 | NH2 | C_GLU_119 | OE1 | 2.874 |
| 2HMG | C_LYS_264 | NZ  | C_ASP_85  | OD1 | 3.649 |
| 2HMG | C_LYS_264 | NZ  | C_ASP_85  | OD2 | 2.789 |
| 2HMG | C_ARG_269 | NH2 | D_GLU_67  | OE1 | 2.972 |
| 2HMG | C_LYS_292 | NZ  | C_ASP_291 | OD1 | 3.718 |
| 2HMG | C_LYS_299 | NZ  | D_GLU_69  | OE1 | 3.147 |
| 2HMG | D_LYS_51  | NZ  | D_GLU_103 | OE2 | 3.620 |
| 2HMG | D_ARG_54  | NH1 | B_GLU_97  | OE1 | 2.735 |
| 2HMG | D_ARG_54  | NH2 | B_GLU_97  | OE1 | 3.312 |
| 2HMG | D_ARG_54  | NH2 | D_GLU_57  | OE1 | 2.829 |
| 2HMG | D_ARG_54  | NH2 | D_GLU_57  | OE2 | 3.186 |
| 2HMG | D_LYS_62  | NZ  | B_ASP_86  | OD1 | 3.037 |
| 2HMG | D_LYS_62  | NZ  | B_ASP_86  | OD2 | 2.683 |
| 2HMG | D_LYS_62  | NZ  | B_ASP_90  | OD1 | 3.222 |
| 2HMG | D_LYS_62  | NZ  | B_ASP_90  | OD2 | 2.673 |
| 2HMG | D_HIS_64  | NE2 | B_ASP_79  | OD2 | 3.737 |
| 2HMG | D_LYS_68  | NZ  | D_GLU_85  | OE1 | 3.177 |
| 2HMG | D_LYS_68  | NZ  | D_GLU_85  | OE2 | 2.694 |
| 2HMG | D_ARG_76  | NH1 | F_GLU_74  | OE1 | 3.549 |
| 2HMG | D_ARG_76  | NH1 | F_GLU_74  | OE2 | 2.731 |
| 2HMG | D_ARG_76  | NH1 | F_GLU_81  | OE1 | 2.698 |
| 2HMG | D_ARG_76  | NH1 | F_GLU_81  | OE2 | 3.690 |
| 2HMG | D_ARG_76  | NH2 | F_GLU_74  | OE1 | 2.828 |
| 2HMG | D_ARG_76  | NH2 | F_GLU_74  | OE2 | 3.390 |
| 2HMG | D_LYS_88  | NZ  | D_GLU_85  | OE1 | 3.822 |
| 2HMG | D_LYS_117 | NZ  | D_GLU_114 | OE1 | 2.665 |
| 2HMG | D_LYS_117 | NZ  | D_GLU_114 | OE2 | 3.347 |
| 2HMG | D_ARG_123 | NH1 | B_GLU_132 | OE2 | 3.058 |
| 2HMG | D_ARG_123 | NH2 | D_GLU_120 | OE1 | 2.590 |
| 2HMG | D_ARG_123 | NH2 | D_GLU_120 | OE2 | 2.762 |
| 2HMG | D_ARG_124 | NH1 | B_GLU_132 | OE1 | 3.508 |
| 2HMG | D_ARG_124 | NH1 | B_GLU_132 | OE2 | 3.040 |
| 2HMG | D_ARG_127 | NH2 | B_GLU_131 | OE1 | 2.517 |
| 2HMG | D_ARG_153 | NH2 | D_GLU_150 | OE1 | 2.574 |
| 2HMG | D_HIS_159 | NE2 | D_ASP_160 | OD2 | 3.088 |
| 2HMG | D_ARG_163 | NH1 | B_GLU_131 | OE1 | 2.667 |
| 2HMG | D_ARG_163 | NH1 | B_GLU_131 | OE2 | 2.648 |
| 2HMG | D_ARG_170 | NH1 | D_GLU_128 | OE1 | 3.661 |
| 2HMG | D_ARG_170 | NH1 | F_GLU_128 | OE1 | 3.974 |
| 2HMG | D_ARG_170 | NH2 | D_GLU_131 | OE2 | 2.792 |
| 2HMG | D_ARG_170 | NH2 | F_GLU_128 | OE1 | 2.843 |
| 2HMG | E_LYS_27  | NZ  | F_GLU_97  | OE1 | 2.743 |
| 2HMG | E_LYS_27  | NZ  | F_GLU_97  | OE2 | 3.029 |
| 2HMG | E_ARG_57  | NH1 | E_GLU_82  | OE1 | 2.650 |
| 2HMG | E_ARG_57  | NH1 | E_GLU_82  | OE2 | 3.908 |
| 2HMG | E_HIS_75  | ND1 | E_ASP_73  | OD1 | 3.328 |
| 2HMG | E_HIS_75  | ND1 | E_ASP_73  | OD2 | 2.787 |
| 2HMG | E_HIS_75  | NE2 | E_ASP_63  | OD1 | 3.573 |
| 2HMG | E_ARG_90  | NH1 | E_ASP_60  | OD1 | 2.857 |
| 2HMG | E_ARG_90  | NH1 | E_ASP_60  | OD2 | 3.460 |
| 2HMG | E_ARG_109 | NH1 | F_GLU_67  | OE1 | 3.629 |

|      |           |     |           |     |       |
|------|-----------|-----|-----------|-----|-------|
| 2HMG | E_ARG_109 | NH1 | F_GLU_67  | OE2 | 2.891 |
| 2HMG | E_ARG_109 | NH2 | E_GLU_89  | OE1 | 3.184 |
| 2HMG | E_ARG_109 | NH2 | E_GLU_89  | OE2 | 2.485 |
| 2HMG | E_ARG_141 | NH1 | E_ASP_77  | OD1 | 3.113 |
| 2HMG | E_ARG_141 | NH1 | E_ASP_77  | OD2 | 2.782 |
| 2HMG | E_ARG_141 | NH2 | E_ASP_146 | OD1 | 2.726 |
| 2HMG | E_LYS_176 | NZ  | E_GLU_123 | OE1 | 2.651 |
| 2HMG | E_LYS_176 | NZ  | E_GLU_123 | OE2 | 3.954 |
| 2HMG | E_HIS_183 | NE2 | E_GLU_190 | OE1 | 3.654 |
| 2HMG | E_ARG_208 | NH2 | E_ASP_241 | OD2 | 2.863 |
| 2HMG | E_ARG_261 | NH1 | E_GLU_119 | OE1 | 2.815 |
| 2HMG | E_ARG_261 | NH1 | E_GLU_119 | OE2 | 2.721 |
| 2HMG | E_ARG_261 | NH2 | E_GLU_119 | OE1 | 2.908 |
| 2HMG | E_LYS_264 | NZ  | E_ASP_85  | OD1 | 3.640 |
| 2HMG | E_LYS_264 | NZ  | E_ASP_85  | OD2 | 2.756 |
| 2HMG | E_ARG_269 | NH2 | F_GLU_67  | OE1 | 2.967 |
| 2HMG | E_LYS_292 | NZ  | E_ASP_291 | OD1 | 3.670 |
| 2HMG | E_LYS_299 | NZ  | F_GLU_69  | OE1 | 3.127 |
| 2HMG | F_LYS_51  | NZ  | F_GLU_103 | OE2 | 3.629 |
| 2HMG | F_ARG_54  | NH1 | D_GLU_97  | OE1 | 2.701 |
| 2HMG | F_ARG_54  | NH2 | D_GLU_97  | OE1 | 3.310 |
| 2HMG | F_ARG_54  | NH2 | F_GLU_57  | OE1 | 2.831 |
| 2HMG | F_ARG_54  | NH2 | F_GLU_57  | OE2 | 3.190 |
| 2HMG | F_LYS_62  | NZ  | D_ASP_86  | OD1 | 2.945 |
| 2HMG | F_LYS_62  | NZ  | D_ASP_86  | OD2 | 2.624 |
| 2HMG | F_LYS_62  | NZ  | D_ASP_90  | OD1 | 3.290 |
| 2HMG | F_LYS_62  | NZ  | D_ASP_90  | OD2 | 2.741 |
| 2HMG | F_HIS_64  | NE2 | D_ASP_79  | OD2 | 3.679 |
| 2HMG | F_LYS_68  | NZ  | F_GLU_85  | OE1 | 3.184 |
| 2HMG | F_LYS_68  | NZ  | F_GLU_85  | OE2 | 2.666 |
| 2HMG | F_ARG_76  | NH1 | B_GLU_74  | OE1 | 3.499 |
| 2HMG | F_ARG_76  | NH1 | B_GLU_74  | OE2 | 2.732 |
| 2HMG | F_ARG_76  | NH1 | B_GLU_81  | OE1 | 2.710 |
| 2HMG | F_ARG_76  | NH1 | B_GLU_81  | OE2 | 3.754 |
| 2HMG | F_ARG_76  | NH2 | B_GLU_74  | OE1 | 2.743 |
| 2HMG | F_ARG_76  | NH2 | B_GLU_74  | OE2 | 3.373 |
| 2HMG | F_LYS_88  | NZ  | F_GLU_85  | OE1 | 3.793 |
| 2HMG | F_LYS_117 | NZ  | F_GLU_114 | OE1 | 2.621 |
| 2HMG | F_LYS_117 | NZ  | F_GLU_114 | OE2 | 3.345 |
| 2HMG | F_ARG_123 | NH1 | D_GLU_132 | OE2 | 3.112 |
| 2HMG | F_ARG_123 | NH2 | F_GLU_120 | OE1 | 2.606 |
| 2HMG | F_ARG_123 | NH2 | F_GLU_120 | OE2 | 2.778 |
| 2HMG | F_ARG_124 | NH1 | D_GLU_132 | OE1 | 3.531 |
| 2HMG | F_ARG_124 | NH1 | D_GLU_132 | OE2 | 3.090 |
| 2HMG | F_ARG_127 | NH2 | D_GLU_131 | OE1 | 2.569 |
| 2HMG | F_HIS_159 | NE2 | F_ASP_160 | OD2 | 3.079 |
| 2HMG | F_ARG_163 | NH1 | D_GLU_131 | OE1 | 2.672 |
| 2HMG | F_ARG_163 | NH1 | D_GLU_131 | OE2 | 2.717 |
| 2HMG | F_ARG_170 | NH1 | B_GLU_128 | OE1 | 3.849 |
| 2HMG | F_ARG_170 | NH1 | F_GLU_128 | OE1 | 3.672 |
| 2HMG | F_ARG_170 | NH2 | B_GLU_128 | OE1 | 2.798 |
| 2HMG | F_ARG_170 | NH2 | B_GLU_128 | OE2 | 3.855 |
| 2HMG | F_ARG_170 | NH2 | F_GLU_131 | OE2 | 2.792 |
| 2HQ6 | A_LYS_14  | NZ  | A_ASP_25  | OD1 | 2.679 |
| 2HQ6 | A_LYS_14  | NZ  | A_ASP_25  | OD2 | 3.183 |
| 2HQ6 | A_LYS_14  | NZ  | A_GLU_27  | OE2 | 3.336 |
| 2HQ6 | A_LYS_18  | NZ  | A_GLU_165 | OE1 | 3.585 |
| 2HQ6 | A_ARG_56  | NH2 | A_GLU_153 | OE1 | 3.553 |

|      |           |     |            |     |       |
|------|-----------|-----|------------|-----|-------|
| 2HQ6 | A_ARG_95  | NH2 | A_GLU_8    | OE1 | 3.484 |
| 2HQ6 | A_ARG_95  | NH2 | A_GLU_8    | OE2 | 3.029 |
| 2HQ6 | A_HIS_107 | ND1 | A_ASP_85   | OD2 | 3.517 |
| 2HQ6 | A_ARG_119 | NH2 | A_ASP_121  | OD1 | 2.931 |
| 2HQ6 | A_ARG_119 | NH2 | A_ASP_121  | OD2 | 3.815 |
| 2HQ6 | A_LYS_132 | NZ  | A_GLU_27   | OE1 | 3.975 |
| 2HRP | L_ARG_24  | NH1 | L_ASP_70   | OD1 | 2.572 |
| 2HRP | L_ARG_24  | NH1 | L_ASP_70   | OD2 | 3.000 |
| 2HRP | L_ARG_24  | NH2 | L_ASP_70   | OD1 | 3.375 |
| 2HRP | L_ARG_24  | NH2 | L_ASP_70   | OD2 | 3.315 |
| 2HRP | L_LYS_30  | NZ  | H_ASP_100B | OD2 | 3.323 |
| 2HRP | L_ARG_61  | NH1 | L_GLU_79   | OE1 | 3.245 |
| 2HRP | L_ARG_61  | NH1 | L_GLU_79   | OE2 | 3.462 |
| 2HRP | L_ARG_61  | NH1 | M_GLU_79   | OE1 | 2.692 |
| 2HRP | L_ARG_61  | NH1 | M_GLU_79   | OE2 | 2.607 |
| 2HRP | L_ARG_61  | NH2 | L_ASP_82   | OD1 | 2.560 |
| 2HRP | L_ARG_61  | NH2 | L_ASP_82   | OD2 | 3.088 |
| 2HRP | L_ARG_108 | NH1 | N_ASP_1    | OD1 | 3.613 |
| 2HRP | L_ARG_108 | NH1 | N_ASP_1    | OD2 | 2.869 |
| 2HRP | L_ARG_108 | NH2 | N_ASP_1    | OD1 | 3.306 |
| 2HRP | L_ARG_108 | NH2 | N_ASP_1    | OD2 | 3.988 |
| 2HRP | L_LYS_149 | NZ  | L_GLU_195  | OE1 | 3.493 |
| 2HRP | L_ARG_155 | NH1 | L_GLU_185  | OE2 | 3.630 |
| 2HRP | L_LYS_183 | NZ  | L_ASP_184  | OD1 | 3.230 |
| 2HRP | L_LYS_183 | NZ  | L_GLU_187  | OE1 | 3.035 |
| 2HRP | L_LYS_183 | NZ  | L_GLU_187  | OE2 | 3.729 |
| 2HRP | L_ARG_188 | NH1 | L_GLU_185  | OE1 | 2.934 |
| 2HRP | L_HIS_189 | ND1 | L_GLU_185  | OE1 | 3.671 |
| 2HRP | L_HIS_189 | ND1 | L_GLU_185  | OE2 | 3.948 |
| 2HRP | L_HIS_189 | NE2 | L_GLU_185  | OE1 | 3.865 |
| 2HRP | L_LYS_199 | NZ  | L_ASP_110  | OD2 | 2.970 |
| 2HRP | H_ARG_38  | NH1 | H_ASP_86   | OD1 | 2.821 |
| 2HRP | H_ARG_38  | NH2 | H_GLU_46   | OE1 | 3.156 |
| 2HRP | H_ARG_38  | NH2 | H_ASP_86   | OD1 | 3.790 |
| 2HRP | H_ARG_66  | NH1 | H_ASP_86   | OD1 | 3.830 |
| 2HRP | H_ARG_66  | NH1 | H_ASP_86   | OD2 | 2.641 |
| 2HRP | H_ARG_66  | NH2 | H_ASP_86   | OD1 | 2.914 |
| 2HRP | H_ARG_66  | NH2 | H_ASP_86   | OD2 | 3.262 |
| 2HRP | H_ARG_83  | NH1 | H_GLU_85   | OE1 | 2.871 |
| 2HRP | H_ARG_83  | NH1 | H_GLU_85   | OE2 | 3.696 |
| 2HRP | H_ARG_94  | NH1 | H_ASP_101  | OD1 | 3.338 |
| 2HRP | H_ARG_94  | NH1 | H_ASP_101  | OD2 | 2.708 |
| 2HRP | H_ARG_100 | NH1 | H_ASP_100B | OD1 | 2.631 |
| 2HRP | H_ARG_100 | NH1 | H_ASP_100B | OD2 | 2.982 |
| 2HRP | H_LYS_205 | NZ  | N_ASP_207  | OD2 | 3.339 |
| 2HRP | H_LYS_208 | NZ  | L_GLU_123  | OE1 | 2.834 |
| 2HRP | M_ARG_24  | NH1 | M_ASP_70   | OD2 | 3.391 |
| 2HRP | M_ARG_24  | NH2 | M_ASP_70   | OD2 | 3.532 |
| 2HRP | M_LYS_30  | NZ  | N_ASP_100B | OD2 | 3.922 |
| 2HRP | M_ARG_61  | NH1 | L_GLU_79   | OE1 | 2.827 |
| 2HRP | M_ARG_61  | NH1 | L_GLU_79   | OE2 | 2.489 |
| 2HRP | M_ARG_61  | NH1 | M_GLU_79   | OE1 | 3.762 |
| 2HRP | M_ARG_61  | NH1 | M_GLU_79   | OE2 | 3.462 |
| 2HRP | M_ARG_61  | NH2 | L_GLU_79   | OE1 | 3.658 |
| 2HRP | M_ARG_61  | NH2 | M_GLU_79   | OE1 | 3.939 |
| 2HRP | M_ARG_61  | NH2 | M_ASP_82   | OD1 | 2.828 |
| 2HRP | M_ARG_61  | NH2 | M_ASP_82   | OD2 | 3.440 |
| 2HRP | M_LYS_92  | NZ  | M_GLU_93   | OE2 | 2.546 |

|      |           |     |           |     |       |
|------|-----------|-----|-----------|-----|-------|
| 2HRP | M_ARG.108 | NH1 | H_ASP.1   | OD2 | 3.449 |
| 2HRP | M_ARG.108 | NH1 | M_ASP.170 | OD2 | 3.998 |
| 2HRP | M_LYS.149 | NZ  | M_GLU.195 | OE1 | 3.803 |
| 2HRP | M_LYS.149 | NZ  | M_GLU.195 | OE2 | 2.914 |
| 2HRP | M_ARG.155 | NH2 | M_GLU.185 | OE1 | 2.687 |
| 2HRP | M_ARG.155 | NH2 | M_GLU.185 | OE2 | 3.383 |
| 2HRP | N_ARG.38  | NH1 | N_ASP.86  | OD1 | 2.969 |
| 2HRP | N_ARG.38  | NH2 | N_GLU.46  | OE1 | 3.031 |
| 2HRP | N_ARG.38  | NH2 | N_ASP.86  | OD1 | 3.858 |
| 2HRP | N_LYS.43  | NZ  | N_GLU.46  | OE1 | 3.283 |
| 2HRP | N_LYS.64  | NZ  | N_ASP.61  | OD1 | 3.922 |
| 2HRP | N_ARG.66  | NH1 | N_ASP.86  | OD1 | 3.805 |
| 2HRP | N_ARG.66  | NH1 | N_ASP.86  | OD2 | 2.812 |
| 2HRP | N_ARG.66  | NH2 | N_ASP.86  | OD1 | 2.794 |
| 2HRP | N_ARG.66  | NH2 | N_ASP.86  | OD2 | 3.248 |
| 2HRP | N_ARG.83  | NH1 | N_GLU.85  | OE2 | 3.361 |
| 2HRP | N_ARG.94  | NH2 | N_ASP.101 | OD1 | 3.720 |
| 2HRP | N_ARG.94  | NH2 | N_ASP.101 | OD2 | 2.978 |
| 2HRP | N_LYS.208 | NZ  | M_GLU.123 | OE1 | 2.875 |
| 2HRP | N_LYS.208 | NZ  | M_GLU.123 | OE2 | 3.117 |
| 2I24 | N_ARG.2   | NH1 | N_ASP.26  | OD2 | 2.648 |
| 2I24 | N_ARG.2   | NH2 | N_ASP.4   | OD1 | 3.932 |
| 2I24 | N_ARG.2   | NH2 | N_ASP.4   | OD2 | 2.968 |
| 2I24 | N_ARG.28  | NH2 | N_ASP.93  | OD1 | 2.817 |
| 2I24 | N_ARG.28  | NH2 | N_ASP.93  | OD2 | 3.512 |
| 2I24 | N_ARG.54  | NH1 | N_ASP.77  | OD1 | 3.458 |
| 2I24 | N_ARG.54  | NH1 | N_ASP.77  | OD2 | 2.886 |
| 2I24 | N_ARG.54  | NH2 | N_ASP.77  | OD1 | 2.870 |
| 2I24 | N_ARG.54  | NH2 | N_ASP.77  | OD2 | 3.606 |
| 2I24 | N_ARG.82  | NH2 | N_GLU.46  | OE1 | 2.871 |
| 2I24 | N_ARG.82  | NH2 | N_GLU.46  | OE2 | 3.583 |
| 2I25 | N_ARG.2   | NH2 | N_ASP.4   | OD1 | 2.643 |
| 2I25 | N_ARG.2   | NH2 | N_ASP.4   | OD2 | 3.217 |
| 2I25 | N_ARG.25  | NH1 | O_ASP.101 | OD1 | 3.459 |
| 2I25 | N_ARG.25  | NH1 | O_ASP.101 | OD2 | 3.204 |
| 2I25 | N_ARG.25  | NH2 | N_ASP.4   | OD2 | 2.988 |
| 2I25 | N_ARG.25  | NH2 | O_ASP.101 | OD1 | 2.762 |
| 2I25 | N_ARG.25  | NH2 | O_ASP.101 | OD2 | 3.967 |
| 2I25 | N_ARG.28  | NH2 | N_ASP.26  | OD1 | 2.978 |
| 2I25 | N_ARG.54  | NH1 | N_ASP.77  | OD1 | 3.557 |
| 2I25 | N_ARG.54  | NH1 | N_ASP.77  | OD2 | 2.836 |
| 2I25 | N_ARG.54  | NH2 | N_ASP.77  | OD1 | 2.859 |
| 2I25 | N_ARG.54  | NH2 | N_ASP.77  | OD2 | 3.514 |
| 2I25 | N_ARG.82  | NH2 | N_GLU.46  | OE1 | 3.665 |
| 2I25 | N_ARG.82  | NH2 | N_GLU.46  | OE2 | 2.763 |
| 2I25 | N_ARG.88  | NH1 | N_GLU.86  | OE2 | 2.745 |
| 2I25 | N_ARG.88  | NH2 | L_ASP.101 | OD1 | 2.875 |
| 2I25 | N_ARG.88  | NH2 | L_ASP.101 | OD2 | 3.303 |
| 2I25 | L_LYS.1   | NZ  | L_GLU.7   | OE2 | 3.014 |
| 2I25 | L_ARG.61  | NH1 | L_ASP.48  | OD2 | 3.041 |
| 2I25 | L_ARG.61  | NH2 | N_ASP.101 | OD2 | 3.227 |
| 2I25 | L_ARG.73  | NH1 | N_GLU.86  | OE1 | 3.764 |
| 2I25 | L_ARG.73  | NH1 | N_GLU.86  | OE2 | 2.771 |
| 2I25 | L_ARG.112 | NH2 | N_ASP.93  | OD1 | 2.693 |
| 2I25 | O_ARG.25  | NH1 | O_ASP.4   | OD2 | 2.746 |
| 2I25 | O_ARG.28  | NH2 | O_ASP.26  | OD1 | 3.729 |
| 2I25 | O_ARG.28  | NH2 | O_ASP.26  | OD2 | 3.922 |
| 2I25 | O_ARG.44  | NH2 | N_GLU.57  | OE1 | 3.011 |

|      |           |     |           |     |       |
|------|-----------|-----|-----------|-----|-------|
| 2I25 | O_ARG_54  | NH1 | O_ASP_77  | OD1 | 3.402 |
| 2I25 | O_ARG_54  | NH1 | O_ASP_77  | OD2 | 2.888 |
| 2I25 | O_ARG_54  | NH2 | O_ASP_77  | OD1 | 2.865 |
| 2I25 | O_ARG_54  | NH2 | O_ASP_77  | OD2 | 3.679 |
| 2I25 | O_ARG_82  | NH2 | O_GLU_46  | OE1 | 3.734 |
| 2I25 | O_ARG_82  | NH2 | O_GLU_46  | OE2 | 2.820 |
| 2I25 | O_ARG_88  | NH1 | O_GLU_86  | OE2 | 2.786 |
| 2I25 | O_ARG_88  | NH2 | M_ASP_101 | OD1 | 2.850 |
| 2I25 | O_ARG_88  | NH2 | M_ASP_101 | OD2 | 3.440 |
| 2I25 | M_LYS_1   | NZ  | M_GLU_7   | OE1 | 3.922 |
| 2I25 | M_LYS_1   | NZ  | M_GLU_7   | OE2 | 2.669 |
| 2I25 | M_ARG_61  | NH1 | M_ASP_48  | OD2 | 3.015 |
| 2I25 | M_ARG_61  | NH2 | O_ASP_101 | OD2 | 2.975 |
| 2I25 | M_ARG_73  | NH1 | O_GLU_86  | OE1 | 3.850 |
| 2I25 | M_ARG_73  | NH1 | O_GLU_86  | OE2 | 2.851 |
| 2I25 | M_ARG_112 | NH1 | O_ASP_93  | OD1 | 3.660 |
| 2I25 | M_ARG_112 | NH2 | O_ASP_93  | OD1 | 3.176 |
| 2I25 | M_ARG_125 | NH1 | M_ASP_119 | OD1 | 3.683 |
| 2I25 | M_ARG_125 | NH1 | M_ASP_119 | OD2 | 2.977 |
| 2I25 | M_ARG_125 | NH2 | M_ASP_119 | OD1 | 3.282 |
| 2I25 | M_ARG_125 | NH2 | M_ASP_119 | OD2 | 3.843 |
| 2I26 | N_ARG_2   | NH1 | N_ASP_4   | OD2 | 3.516 |
| 2I26 | N_ARG_2   | NH2 | N_ASP_4   | OD1 | 3.612 |
| 2I26 | N_ARG_2   | NH2 | N_ASP_4   | OD2 | 3.274 |
| 2I26 | N_ARG_38  | NH2 | N_GLU_47  | OE2 | 3.790 |
| 2I26 | N_LYS_51  | NZ  | N_GLU_57  | OE1 | 3.254 |
| 2I26 | N_LYS_51  | NZ  | N_GLU_57  | OE2 | 3.781 |
| 2I26 | N_ARG_54  | NH1 | N_ASP_77  | OD1 | 3.540 |
| 2I26 | N_ARG_54  | NH1 | N_ASP_77  | OD2 | 3.097 |
| 2I26 | N_ARG_54  | NH2 | N_ASP_77  | OD1 | 2.953 |
| 2I26 | N_ARG_54  | NH2 | N_ASP_77  | OD2 | 3.934 |
| 2I26 | N_ARG_82  | NH2 | N_GLU_46  | OE1 | 3.207 |
| 2I26 | N_ARG_82  | NH2 | N_GLU_46  | OE2 | 3.809 |
| 2I26 | N_ARG_88  | NH1 | N_GLU_86  | OE2 | 2.847 |
| 2I26 | N_ARG_88  | NH2 | L_ASP_101 | OD1 | 3.268 |
| 2I26 | N_ARG_88  | NH2 | L_ASP_101 | OD2 | 3.652 |
| 2I26 | L_LYS_1   | NZ  | L_GLU_7   | OE2 | 3.495 |
| 2I26 | L_ARG_73  | NH1 | N_GLU_86  | OE2 | 3.511 |
| 2I26 | L_ARG_73  | NH2 | N_GLU_86  | OE1 | 3.590 |
| 2I26 | L_ARG_73  | NH2 | N_GLU_86  | OE2 | 3.542 |
| 2I26 | L_ARG_112 | NH1 | N_ASP_93  | OD2 | 3.838 |
| 2I26 | L_ARG_112 | NH2 | N_ASP_93  | OD2 | 3.391 |
| 2I26 | O_LYS_12  | NZ  | O_GLU_16  | OE1 | 2.500 |
| 2I26 | O_LYS_12  | NZ  | O_GLU_16  | OE2 | 3.336 |
| 2I26 | O_ARG_25  | NH2 | O_ASP_4   | OD1 | 3.978 |
| 2I26 | O_ARG_38  | NH1 | O_ASP_77  | OD1 | 3.853 |
| 2I26 | O_LYS_51  | NZ  | O_GLU_57  | OE1 | 2.746 |
| 2I26 | O_LYS_51  | NZ  | O_GLU_57  | OE2 | 3.677 |
| 2I26 | O_ARG_54  | NH1 | O_ASP_77  | OD1 | 3.513 |
| 2I26 | O_ARG_54  | NH1 | O_ASP_77  | OD2 | 3.061 |
| 2I26 | O_ARG_54  | NH2 | O_ASP_77  | OD1 | 3.014 |
| 2I26 | O_ARG_82  | NH2 | O_GLU_46  | OE1 | 3.607 |
| 2I26 | O_ARG_82  | NH2 | O_GLU_46  | OE2 | 2.938 |
| 2I26 | O_ARG_88  | NH1 | M_ASP_101 | OD1 | 2.648 |
| 2I26 | O_ARG_88  | NH1 | M_ASP_101 | OD2 | 2.840 |
| 2I26 | O_ARG_88  | NH2 | O_GLU_86  | OE2 | 3.407 |
| 2I26 | M_LYS_1   | NZ  | M_GLU_7   | OE2 | 2.378 |
| 2I26 | M_ARG_61  | NH1 | M_ASP_48  | OD2 | 3.000 |

|      |           |     |           |     |       |
|------|-----------|-----|-----------|-----|-------|
| 2I26 | M_ARG.73  | NH1 | O_GLU.86  | OE1 | 2.832 |
| 2I26 | M_ARG.73  | NH1 | O_GLU.86  | OE2 | 3.677 |
| 2I26 | M_ARG.112 | NH1 | O_ASP.93  | OD2 | 3.127 |
| 2I26 | M_ARG.112 | NH2 | O_ASP.93  | OD2 | 3.198 |
| 2I26 | P_ARG.2   | NH1 | P_ASP.4   | OD2 | 3.455 |
| 2I26 | P_ARG.25  | NH1 | P_ASP.4   | OD2 | 3.288 |
| 2I26 | P_ARG.38  | NH1 | P_ASP.77  | OD1 | 3.296 |
| 2I26 | P_ARG.38  | NH2 | P_GLU.47  | OE2 | 3.357 |
| 2I26 | P_LYS.51  | NZ  | P_GLU.57  | OE1 | 2.842 |
| 2I26 | P_LYS.51  | NZ  | P_GLU.57  | OE2 | 3.265 |
| 2I26 | P_ARG.54  | NH1 | P_ASP.77  | OD1 | 3.557 |
| 2I26 | P_ARG.54  | NH1 | P_ASP.77  | OD2 | 3.011 |
| 2I26 | P_ARG.54  | NH2 | P_ASP.77  | OD1 | 2.936 |
| 2I26 | P_ARG.54  | NH2 | P_ASP.77  | OD2 | 3.842 |
| 2I26 | P_ARG.82  | NH2 | P_GLU.46  | OE1 | 3.185 |
| 2I26 | P_ARG.82  | NH2 | P_GLU.46  | OE2 | 3.977 |
| 2I26 | P_ARG.88  | NH1 | Q_ASP.101 | OD1 | 3.139 |
| 2I26 | P_ARG.88  | NH1 | Q_ASP.101 | OD2 | 3.016 |
| 2I26 | P_ARG.88  | NH2 | P_GLU.86  | OE2 | 3.489 |
| 2I26 | Q_LYS.1   | NZ  | Q_GLU.7   | OE1 | 3.316 |
| 2I26 | Q_LYS.1   | NZ  | Q_GLU.7   | OE2 | 2.614 |
| 2I26 | Q_ARG.61  | NH1 | Q_ASP.48  | OD2 | 2.954 |
| 2I26 | Q_ARG.61  | NH2 | P_ASP.101 | OD2 | 3.115 |
| 2I26 | Q_ARG.73  | NH1 | P_GLU.86  | OE2 | 2.623 |
| 2I26 | Q_ARG.112 | NH1 | P_ASP.93  | OD2 | 3.805 |
| 2I26 | Q_ARG.112 | NH2 | P_ASP.93  | OD2 | 3.685 |
| 2I27 | N_ARG.2   | NH1 | N_ASP.26  | OD2 | 2.576 |
| 2I27 | N_ARG.2   | NH2 | N_ASP.4   | OD1 | 3.448 |
| 2I27 | N_ARG.2   | NH2 | N_ASP.4   | OD2 | 2.863 |
| 2I27 | N_ARG.2   | NH2 | N_ASP.26  | OD2 | 3.218 |
| 2I27 | N_ARG.25  | NH1 | N_ASP.4   | OD2 | 2.953 |
| 2I27 | N_ARG.25  | NH2 | O_GLU.46  | OE2 | 3.350 |
| 2I27 | N_ARG.38  | NH1 | N_ASP.77  | OD1 | 3.382 |
| 2I27 | N_ARG.38  | NH2 | N_GLU.47  | OE2 | 3.845 |
| 2I27 | N_LYS.40  | NZ  | N_GLU.47  | OE1 | 3.628 |
| 2I27 | N_LYS.40  | NZ  | N_GLU.47  | OE2 | 3.547 |
| 2I27 | N_LYS.51  | NZ  | N_GLU.57  | OE1 | 2.697 |
| 2I27 | N_LYS.51  | NZ  | N_GLU.57  | OE2 | 3.720 |
| 2I27 | N_ARG.54  | NH1 | N_ASP.77  | OD2 | 3.203 |
| 2I27 | N_ARG.54  | NH2 | N_ASP.77  | OD1 | 3.149 |
| 2I27 | N_ARG.54  | NH2 | N_ASP.77  | OD2 | 3.554 |
| 2I27 | N_ARG.82  | NH2 | N_GLU.46  | OE1 | 3.563 |
| 2I27 | N_ARG.82  | NH2 | N_GLU.46  | OE2 | 3.008 |
| 2I27 | N_LYS.84  | NZ  | N_GLU.86  | OE2 | 3.122 |
| 2I27 | O_ARG.2   | NH1 | O_ASP.4   | OD1 | 3.181 |
| 2I27 | O_ARG.2   | NH1 | O_ASP.4   | OD2 | 2.592 |
| 2I27 | O_ARG.2   | NH1 | O_ASP.26  | OD1 | 3.779 |
| 2I27 | O_ARG.25  | NH1 | O_ASP.4   | OD2 | 2.830 |
| 2I27 | O_ARG.38  | NH1 | O_ASP.77  | OD1 | 3.942 |
| 2I27 | O_ARG.38  | NH2 | O_GLU.47  | OE1 | 3.232 |
| 2I27 | O_LYS.51  | NZ  | O_GLU.57  | OE1 | 2.589 |
| 2I27 | O_LYS.51  | NZ  | O_GLU.57  | OE2 | 3.473 |
| 2I27 | O_ARG.54  | NH1 | O_ASP.77  | OD1 | 3.892 |
| 2I27 | O_ARG.54  | NH1 | O_ASP.77  | OD2 | 2.920 |
| 2I27 | O_ARG.54  | NH2 | O_ASP.77  | OD1 | 2.998 |
| 2I27 | O_ARG.54  | NH2 | O_ASP.77  | OD2 | 3.435 |
| 2I27 | O_ARG.82  | NH2 | O_GLU.46  | OE1 | 3.189 |
| 2I27 | O_ARG.82  | NH2 | O_GLU.46  | OE2 | 3.126 |

|      |           |     |            |     |       |
|------|-----------|-----|------------|-----|-------|
| 2I27 | O_LYS_84  | NZ  | O_GLU_86   | OE2 | 2.951 |
| 2I5Y | G_LYS_121 | NZ  | G_GLU_429  | OE2 | 3.126 |
| 2I5Y | G_LYS_207 | NZ  | G_GLU_381  | OE2 | 3.637 |
| 2I5Y | G_HIS_249 | NE2 | G_GLU_482  | OE1 | 2.873 |
| 2I5Y | G_LYS_282 | NZ  | G_GLU_275  | OE1 | 2.722 |
| 2I5Y | G_LYS_348 | NZ  | G_GLU_269  | OE1 | 2.750 |
| 2I5Y | G_LYS_348 | NZ  | G_GLU_351  | OE1 | 3.311 |
| 2I5Y | G_LYS_348 | NZ  | G_GLU_351  | OE2 | 3.874 |
| 2I5Y | G_ARG_419 | NH1 | H_GLU_100B | OE1 | 3.248 |
| 2I5Y | G_ARG_419 | NH2 | H_GLU_99   | OE2 | 3.146 |
| 2I5Y | G_ARG_419 | NH2 | H_GLU_100D | OE2 | 2.601 |
| 2I5Y | G_ARG_456 | NH1 | G_GLU_466  | OE1 | 2.646 |
| 2I5Y | G_ARG_469 | NH2 | G_ASP_457  | OD1 | 3.980 |
| 2I5Y | G_ARG_469 | NH2 | G_ASP_457  | OD2 | 2.626 |
| 2I5Y | G_ARG_476 | NH1 | G_GLU_102  | OE2 | 2.957 |
| 2I5Y | G_ARG_476 | NH2 | G_ASP_474  | OD1 | 3.611 |
| 2I5Y | G_ARG_476 | NH2 | G_ASP_474  | OD2 | 2.800 |
| 2I5Y | G_ARG_480 | NH2 | G_ASP_477  | OD1 | 3.599 |
| 2I5Y | L_ARG_24  | NH1 | L_GLU_70   | OE1 | 3.407 |
| 2I5Y | L_ARG_24  | NH2 | L_GLU_70   | OE1 | 3.609 |
| 2I5Y | L_ARG_24  | NH2 | L_GLU_70   | OE2 | 2.932 |
| 2I5Y | L_ARG_61  | NH2 | L_GLU_81   | OE2 | 2.667 |
| 2I5Y | L_ARG_61  | NH2 | L_ASP_82   | OD1 | 2.958 |
| 2I5Y | L_ARG_61  | NH2 | L_ASP_82   | OD2 | 3.675 |
| 2I5Y | L_LYS_149 | NZ  | L_GLU_195  | OE1 | 3.958 |
| 2I5Y | L_LYS_183 | NZ  | L_GLU_187  | OE1 | 2.546 |
| 2I5Y | L_HIS_189 | ND1 | L_ASP_151  | OD2 | 2.886 |
| 2I5Y | H_ARG_31  | NH2 | H_ASP_100A | OD1 | 3.028 |
| 2I5Y | H_ARG_31  | NH2 | H_ASP_100A | OD2 | 3.251 |
| 2I5Y | H_ARG_38  | NH2 | H_ASP_86   | OD2 | 3.623 |
| 2I5Y | H_ARG_50  | NH2 | H_GLU_97   | OE1 | 2.885 |
| 2I5Y | H_ARG_66  | NH1 | H_ASP_86   | OD1 | 2.818 |
| 2I5Y | H_ARG_66  | NH1 | H_ASP_86   | OD2 | 3.645 |
| 2I5Y | H_ARG_66  | NH2 | H_ASP_86   | OD1 | 3.819 |
| 2I5Y | H_ARG_66  | NH2 | H_ASP_86   | OD2 | 3.195 |
| 2I5Y | H_LYS_73  | NZ  | H_ASP_55   | OD2 | 3.789 |
| 2I5Y | H_ARG_82A | NH2 | H_GLU_81   | OE1 | 3.762 |
| 2I5Y | H_ARG_83  | NH2 | H_ASP_85   | OD1 | 3.770 |
| 2I5Y | H_ARG_83  | NH2 | H_ASP_85   | OD2 | 3.930 |
| 2I5Y | H_LYS_143 | NZ  | H_ASP_144  | OD1 | 3.144 |
| 2I5Y | H_LYS_143 | NZ  | H_ASP_144  | OD2 | 3.616 |
| 2I5Y | H_LYS_201 | NZ  | R_GLU_10   | OE2 | 3.615 |
| 2I5Y | H_LYS_209 | NZ  | L_GLU_123  | OE1 | 2.531 |
| 2I5Y | H_LYS_209 | NZ  | L_GLU_123  | OE2 | 3.403 |
| 2I5Y | H_LYS_210 | NZ  | H_GLU_212  | OE2 | 3.232 |
| 2I5Y | P_LYS_117 | NZ  | P_ASP_113  | OD2 | 3.200 |
| 2I5Y | P_LYS_121 | NZ  | P_GLU_429  | OE1 | 3.512 |
| 2I5Y | P_LYS_207 | NZ  | P_GLU_381  | OE1 | 3.955 |
| 2I5Y | P_LYS_207 | NZ  | P_GLU_381  | OE2 | 2.682 |
| 2I5Y | P_LYS_231 | NZ  | P_GLU_268  | OE2 | 3.227 |
| 2I5Y | P_LYS_232 | NZ  | P_GLU_269  | OE2 | 3.441 |
| 2I5Y | P_HIS_249 | NE2 | P_GLU_482  | OE1 | 2.831 |
| 2I5Y | P_LYS_282 | NZ  | P_GLU_275  | OE1 | 2.851 |
| 2I5Y | P_LYS_348 | NZ  | P_GLU_269  | OE2 | 2.858 |
| 2I5Y | P_LYS_357 | NZ  | P_GLU_466  | OE1 | 3.584 |
| 2I5Y | P_ARG_419 | NH1 | R_GLU_99   | OE2 | 3.800 |
| 2I5Y | P_ARG_419 | NH1 | R_GLU_100D | OE1 | 2.563 |
| 2I5Y | P_ARG_419 | NH1 | R_GLU_100D | OE2 | 3.898 |



|      |           |     |            |     |       |
|------|-----------|-----|------------|-----|-------|
| 2I5Y | P_ARG_456 | NH1 | P_GLU_466  | OE1 | 3.726 |
| 2I5Y | P_ARG_456 | NH1 | P_GLU_466  | OE2 | 3.233 |
| 2I5Y | P_ARG_469 | NH2 | P_ASP_457  | OD1 | 3.175 |
| 2I5Y | P_ARG_476 | NH1 | P_ASP_474  | OD1 | 3.001 |
| 2I5Y | P_ARG_480 | NH1 | P_ASP_477  | OD1 | 3.430 |
| 2I5Y | P_LYS_487 | NZ  | P_GLU_91   | OE2 | 3.288 |
| 2I5Y | Q_ARG_24  | NH1 | Q_GLU_70   | OE2 | 3.564 |
| 2I5Y | Q_ARG_61  | NH2 | Q_GLU_81   | OE1 | 2.900 |
| 2I5Y | Q_ARG_61  | NH2 | Q_ASP_82   | OD1 | 2.991 |
| 2I5Y | Q_ARG_61  | NH2 | Q_ASP_82   | OD2 | 3.633 |
| 2I5Y | Q_ARG_95B | NH2 | Q_ASP_1    | OD2 | 3.695 |
| 2I5Y | Q_LYS_149 | NZ  | Q_GLU_195  | OE1 | 3.615 |
| 2I5Y | Q_LYS_149 | NZ  | Q_GLU_195  | OE2 | 3.356 |
| 2I5Y | Q_LYS_183 | NZ  | Q_GLU_187  | OE1 | 3.007 |
| 2I5Y | Q_LYS_183 | NZ  | Q_GLU_187  | OE2 | 3.247 |
| 2I5Y | Q_HIS_189 | ND1 | Q_ASP_151  | OD1 | 2.992 |
| 2I5Y | R_LYS_12  | NZ  | R_GLU_10   | OE2 | 3.536 |
| 2I5Y | R_ARG_31  | NH2 | R_ASP_100A | OD1 | 3.101 |
| 2I5Y | R_ARG_38  | NH1 | R_GLU_46   | OE2 | 3.641 |
| 2I5Y | R_ARG_38  | NH2 | R_ASP_86   | OD2 | 2.978 |
| 2I5Y | R_ARG_50  | NH2 | R_GLU_97   | OE2 | 2.640 |
| 2I5Y | R_ARG_66  | NH1 | R_ASP_86   | OD1 | 3.507 |
| 2I5Y | R_ARG_66  | NH2 | R_ASP_86   | OD1 | 3.587 |
| 2I5Y | R_ARG_66  | NH2 | R_ASP_86   | OD2 | 3.055 |
| 2I5Y | R_ARG_83  | NH2 | R_ASP_85   | OD1 | 3.357 |
| 2I5Y | R_ARG_83  | NH2 | R_ASP_85   | OD2 | 2.690 |
| 2I5Y | R_LYS_209 | NZ  | Q_GLU_123  | OE2 | 3.373 |
| 2I5Y | R_LYS_210 | NZ  | R_GLU_212  | OE1 | 3.854 |
| 2I5Y | S_ARG_9   | NH1 | P_ASP_368  | OD2 | 2.853 |
| 2I5Y | S_ARG_9   | NH2 | P_ASP_368  | OD2 | 3.453 |
| 2I60 | G_LYS_85  | NZ  | G_GLU_87   | OE1 | 2.991 |
| 2I60 | G_LYS_97  | NZ  | G_GLU_275  | OE2 | 3.907 |
| 2I60 | G_LYS_121 | NZ  | G_GLU_429  | OE2 | 3.453 |
| 2I60 | G_LYS_207 | NZ  | G_GLU_381  | OE2 | 3.877 |
| 2I60 | G_LYS_231 | NZ  | G_GLU_268  | OE1 | 3.768 |
| 2I60 | G_HIS_249 | NE2 | G_GLU_482  | OE1 | 2.855 |
| 2I60 | G_LYS_282 | NZ  | G_GLU_275  | OE1 | 2.727 |
| 2I60 | G_LYS_348 | NZ  | G_GLU_269  | OE1 | 3.168 |
| 2I60 | G_LYS_350 | NZ  | G_ASP_395  | OD2 | 3.640 |
| 2I60 | G_ARG_419 | NH2 | H_GLU_99   | OE1 | 3.736 |
| 2I60 | G_ARG_419 | NH2 | H_GLU_99   | OE2 | 2.767 |
| 2I60 | G_ARG_419 | NH2 | H_GLU_100D | OE2 | 3.611 |
| 2I60 | G_ARG_456 | NH1 | G_GLU_466  | OE1 | 2.710 |
| 2I60 | G_ARG_456 | NH1 | G_GLU_466  | OE2 | 3.759 |
| 2I60 | G_ARG_469 | NH2 | G_ASP_457  | OD1 | 2.579 |
| 2I60 | G_ARG_469 | NH2 | G_ASP_457  | OD2 | 3.789 |
| 2I60 | G_ARG_476 | NH1 | G_GLU_102  | OE1 | 3.422 |
| 2I60 | G_ARG_476 | NH2 | G_ASP_474  | OD1 | 3.929 |
| 2I60 | G_ARG_476 | NH2 | G_ASP_474  | OD2 | 2.677 |
| 2I60 | G_ARG_480 | NH1 | G_ASP_477  | OD1 | 3.717 |
| 2I60 | L_ARG_24  | NH1 | L_GLU_70   | OE2 | 3.278 |
| 2I60 | L_ARG_24  | NH2 | L_GLU_70   | OE2 | 2.910 |
| 2I60 | L_ARG_61  | NH2 | L_GLU_81   | OE2 | 2.838 |
| 2I60 | L_ARG_61  | NH2 | L_ASP_82   | OD1 | 2.837 |
| 2I60 | L_ARG_61  | NH2 | L_ASP_82   | OD2 | 3.354 |
| 2I60 | L_LYS_149 | NZ  | L_GLU_195  | OE1 | 3.670 |
| 2I60 | H_ARG_31  | NH2 | H_ASP_100A | OD1 | 3.164 |
| 2I60 | H_ARG_31  | NH2 | H_ASP_100A | OD2 | 3.397 |

|      |           |     |            |     |       |
|------|-----------|-----|------------|-----|-------|
| 2I60 | H_ARG_38  | NH1 | H_GLU_46   | OE2 | 3.054 |
| 2I60 | H_ARG_38  | NH2 | H_ASP_86   | OD2 | 3.336 |
| 2I60 | H_ARG_50  | NH2 | H_GLU_97   | OE2 | 3.134 |
| 2I60 | H_ARG_66  | NH1 | H_ASP_86   | OD1 | 3.041 |
| 2I60 | H_ARG_66  | NH1 | H_ASP_86   | OD2 | 3.960 |
| 2I60 | H_ARG_66  | NH2 | H_ASP_86   | OD1 | 3.627 |
| 2I60 | H_ARG_66  | NH2 | H_ASP_86   | OD2 | 3.212 |
| 2I60 | H_ARG_82A | NH2 | H_GLU_81   | OE2 | 3.855 |
| 2I60 | H_ARG_83  | NH1 | H_ASP_85   | OD1 | 3.248 |
| 2I60 | H_ARG_83  | NH1 | H_ASP_85   | OD2 | 3.416 |
| 2I60 | H_LYS_143 | NZ  | H_ASP_144  | OD1 | 3.384 |
| 2I60 | H_LYS_209 | NZ  | L_GLU_123  | OE1 | 3.997 |
| 2I60 | H_LYS_210 | NZ  | H_GLU_212  | OE2 | 3.501 |
| 2I60 | P_LYS_121 | NZ  | P_GLU_429  | OE1 | 3.897 |
| 2I60 | P_LYS_207 | NZ  | P_GLU_381  | OE1 | 3.463 |
| 2I60 | P_LYS_207 | NZ  | P_GLU_381  | OE2 | 2.996 |
| 2I60 | P_HIS_249 | NE2 | P_GLU_482  | OE1 | 2.831 |
| 2I60 | P_LYS_282 | NZ  | P_GLU_275  | OE1 | 2.805 |
| 2I60 | P_LYS_348 | NZ  | P_GLU_269  | OE1 | 2.586 |
| 2I60 | P_LYS_357 | NZ  | P_GLU_466  | OE2 | 3.512 |
| 2I60 | P_ARG_419 | NH1 | R_GLU_100B | OE1 | 3.610 |
| 2I60 | P_ARG_419 | NH2 | R_GLU_99   | OE1 | 3.892 |
| 2I60 | P_ARG_456 | NH1 | P_GLU_466  | OE1 | 2.943 |
| 2I60 | P_ARG_456 | NH1 | P_GLU_466  | OE2 | 3.500 |
| 2I60 | P_ARG_469 | NH2 | P_ASP_457  | OD1 | 3.419 |
| 2I60 | P_ARG_476 | NH1 | P_GLU_102  | OE1 | 3.696 |
| 2I60 | P_ARG_476 | NH1 | P_GLU_102  | OE2 | 2.989 |
| 2I60 | P_ARG_476 | NH2 | P_ASP_474  | OD2 | 3.307 |
| 2I60 | P_ARG_480 | NH1 | P_ASP_477  | OD1 | 3.241 |
| 2I60 | Q_ARG_24  | NH1 | Q_GLU_70   | OE2 | 3.297 |
| 2I60 | Q_ARG_61  | NH2 | Q_GLU_81   | OE1 | 3.836 |
| 2I60 | Q_ARG_61  | NH2 | Q_ASP_82   | OD1 | 3.255 |
| 2I60 | Q_ARG_61  | NH2 | Q_ASP_82   | OD2 | 3.646 |
| 2I60 | Q_LYS_183 | NZ  | Q_GLU_187  | OE1 | 3.479 |
| 2I60 | Q_LYS_183 | NZ  | Q_GLU_187  | OE2 | 3.280 |
| 2I60 | Q_HIS_189 | ND1 | Q_ASP_151  | OD1 | 3.866 |
| 2I60 | R_ARG_31  | NH2 | R_ASP_100A | OD1 | 3.967 |
| 2I60 | R_ARG_31  | NH2 | R_ASP_100A | OD2 | 2.823 |
| 2I60 | R_ARG_38  | NH1 | R_GLU_46   | OE2 | 2.939 |
| 2I60 | R_ARG_38  | NH2 | R_ASP_86   | OD2 | 3.162 |
| 2I60 | R_ARG_50  | NH2 | R_GLU_97   | OE2 | 2.924 |
| 2I60 | R_ARG_66  | NH1 | R_ASP_86   | OD1 | 3.520 |
| 2I60 | R_ARG_66  | NH1 | R_ASP_86   | OD2 | 3.317 |
| 2I60 | R_ARG_66  | NH2 | R_ASP_86   | OD1 | 3.743 |
| 2I60 | R_ARG_66  | NH2 | R_ASP_86   | OD2 | 3.021 |
| 2I60 | R_ARG_82A | NH2 | R_GLU_81   | OE1 | 3.453 |
| 2I60 | R_ARG_83  | NH2 | R_ASP_85   | OD1 | 3.280 |
| 2I60 | R_LYS_143 | NZ  | R_ASP_144  | OD1 | 3.244 |
| 2I60 | R_LYS_143 | NZ  | R_ASP_144  | OD2 | 3.755 |
| 2I60 | R_LYS_209 | NZ  | Q_GLU_123  | OE2 | 3.485 |
| 2I60 | S_ARG_9   | NH1 | P_ASP_368  | OD2 | 3.268 |
| 2I60 | S_ARG_9   | NH2 | P_ASP_368  | OD1 | 3.938 |
| 2I60 | S_ARG_9   | NH2 | P_ASP_368  | OD2 | 2.664 |
| 2IFF | L_LYS_44  | NZ  | H_ASP_104  | OD1 | 2.935 |
| 2IFF | L_ARG_45  | NH2 | H_ASP_104  | OD2 | 3.348 |
| 2IFF | L_ARG_60  | NH2 | L_ASP_81   | OD1 | 2.794 |
| 2IFF | L_ARG_60  | NH2 | L_ASP_81   | OD2 | 3.163 |
| 2IFF | L_LYS_101 | NZ  | L_ASP_163  | OD1 | 3.641 |

|      |           |     |           |     |       |
|------|-----------|-----|-----------|-----|-------|
| 2IFF | L_LYS_105 | NZ  | L_GLU_17  | OE1 | 3.700 |
| 2IFF | L_LYS_105 | NZ  | L_GLU_17  | OE2 | 3.218 |
| 2IFF | L_ARG_106 | NH2 | L_ASP_168 | OD1 | 2.967 |
| 2IFF | L_ARG_106 | NH2 | L_ASP_168 | OD2 | 3.027 |
| 2IFF | L_LYS_147 | NZ  | L_GLU_193 | OE1 | 3.478 |
| 2IFF | L_LYS_147 | NZ  | L_GLU_193 | OE2 | 3.002 |
| 2IFF | L_LYS_181 | NZ  | L_GLU_185 | OE1 | 2.942 |
| 2IFF | L_LYS_181 | NZ  | L_GLU_185 | OE2 | 3.794 |
| 2IFF | L_ARG_186 | NH2 | L_ASP_182 | OD2 | 3.027 |
| 2IFF | L_HIS_187 | ND1 | L_ASP_149 | OD2 | 3.188 |
| 2IFF | L_HIS_196 | ND1 | L_ASP_141 | OD1 | 3.647 |
| 2IFF | H_HIS_43  | ND1 | H_GLU_46  | OE1 | 3.306 |
| 2IFF | H_HIS_43  | ND1 | H_GLU_46  | OE2 | 3.465 |
| 2IFF | H_HIS_43  | NE2 | H_GLU_46  | OE2 | 3.940 |
| 2IFF | H_LYS_65  | NZ  | H_GLU_62  | OE2 | 3.927 |
| 2IFF | H_LYS_67  | NZ  | H_ASP_90  | OD1 | 3.416 |
| 2IFF | H_LYS_67  | NZ  | H_ASP_90  | OD2 | 3.000 |
| 2IFF | H_LYS_208 | NZ  | H_ASP_210 | OD1 | 3.142 |
| 2IFF | H_LYS_208 | NZ  | H_ASP_210 | OD2 | 3.455 |
| 2IFF | H_LYS_211 | NZ  | L_GLU_121 | OE1 | 3.040 |
| 2IFF | H_LYS_211 | NZ  | L_GLU_121 | OE2 | 2.921 |
| 2IFF | Y_LYS_1   | NZ  | Y_GLU_7   | OE1 | 2.914 |
| 2IFF | Y_LYS_1   | NZ  | Y_GLU_7   | OE2 | 3.893 |
| 2IFF | Y_LYS_13  | NZ  | Y_ASP_18  | OD2 | 3.220 |
| 2IFF | Y_ARG_45  | NH1 | H_GLU_50  | OE1 | 3.425 |
| 2IFF | Y_ARG_45  | NH1 | H_GLU_50  | OE2 | 2.959 |
| 2IFF | Y_LYS_97  | NZ  | Y_ASP_101 | OD1 | 2.879 |
| 2IFF | Y_ARG_125 | NH1 | Y_ASP_119 | OD2 | 3.485 |
| 2IFF | Y_ARG_125 | NH2 | Y_ASP_119 | OD1 | 3.655 |
| 2IFF | Y_ARG_125 | NH2 | Y_ASP_119 | OD2 | 2.761 |
| 2IG2 | L_ARG_60  | NH1 | L_GLU_80  | OE1 | 3.431 |
| 2IG2 | L_ARG_60  | NH2 | L_GLU_80  | OE1 | 2.806 |
| 2IG2 | L_ARG_60  | NH2 | L_ASP_81  | OD1 | 3.509 |
| 2IG2 | L_ARG_60  | NH2 | L_ASP_81  | OD2 | 2.584 |
| 2IG2 | L_LYS_104 | NZ  | L_ASP_84  | OD1 | 3.314 |
| 2IG2 | L_LYS_104 | NZ  | L_ASP_84  | OD2 | 2.687 |
| 2IG2 | L_LYS_112 | NZ  | L_GLU_200 | OE2 | 3.492 |
| 2IG2 | H_ARG_38  | NH1 | H_ASP_90  | OD2 | 3.025 |
| 2IG2 | H_ARG_38  | NH2 | H_GLU_46  | OE1 | 3.194 |
| 2IG2 | H_ARG_38  | NH2 | H_GLU_46  | OE2 | 3.026 |
| 2IG2 | H_ARG_67  | NH1 | H_ASP_90  | OD1 | 2.773 |
| 2IG2 | H_ARG_67  | NH2 | H_ASP_90  | OD1 | 2.946 |
| 2IG2 | H_ARG_67  | NH2 | H_ASP_90  | OD2 | 2.843 |
| 2IG2 | H_ARG_72  | NH1 | H_ASP_74  | OD2 | 3.016 |
| 2IG2 | H_ARG_98  | NH2 | H_ASP_106 | OD1 | 2.603 |
| 2IG2 | H_ARG_98  | NH2 | H_ASP_106 | OD2 | 3.320 |
| 2IG2 | H_LYS_148 | NZ  | L_GLU_126 | OE2 | 2.854 |
| 2IG2 | H_LYS_214 | NZ  | L_GLU_125 | OE1 | 3.816 |
| 2IG2 | H_LYS_214 | NZ  | L_GLU_125 | OE2 | 2.866 |
| 2IG2 | H_ARG_215 | NH1 | H_GLU_217 | OE1 | 2.857 |
| 2IG2 | H_ARG_215 | NH1 | H_GLU_217 | OE2 | 3.431 |
| 2IG2 | H_HIS_225 | ND1 | H_ASP_222 | OD1 | 2.822 |
| 2IG2 | H_HIS_225 | ND1 | H_ASP_222 | OD2 | 3.302 |
| 2IGF | L_LYS_50  | NZ  | L_ASP_30  | OD1 | 3.055 |
| 2IGF | L_LYS_50  | NZ  | L_ASP_30  | OD2 | 3.465 |
| 2IGF | L_ARG_61  | NH1 | L_GLU_79  | OE2 | 3.565 |
| 2IGF | L_ARG_61  | NH2 | L_ASP_82  | OD1 | 2.974 |
| 2IGF | L_ARG_61  | NH2 | L_ASP_82  | OD2 | 2.588 |

|      |           |     |           |     |       |
|------|-----------|-----|-----------|-----|-------|
| 2IGF | L_LYS_149 | NZ  | L_GLU_195 | OE2 | 3.389 |
| 2IGF | L_HIS_189 | ND1 | L_ASP_151 | OD2 | 3.248 |
| 2IGF | L_ARG_211 | NH1 | L_GLU_187 | OE1 | 2.780 |
| 2IGF | H_ARG_38  | NH1 | H_GLU_46  | OE1 | 3.128 |
| 2IGF | H_ARG_38  | NH1 | H_GLU_46  | OE2 | 2.803 |
| 2IGF | H_ARG_38  | NH2 | H_GLU_46  | OE2 | 3.695 |
| 2IGF | H_ARG_38  | NH2 | H_ASP_86  | OD1 | 3.966 |
| 2IGF | H_ARG_44  | NH1 | H_GLU_46  | OE1 | 3.519 |
| 2IGF | H_ARG_44  | NH2 | H_GLU_46  | OE1 | 3.195 |
| 2IGF | H_ARG_66  | NH1 | H_ASP_86  | OD2 | 3.364 |
| 2IGF | H_ARG_66  | NH2 | H_ASP_86  | OD1 | 2.723 |
| 2IGF | H_ARG_66  | NH2 | H_ASP_86  | OD2 | 3.057 |
| 2IGF | H_ARG_94  | NH1 | H_ASP_101 | OD1 | 2.615 |
| 2IGF | H_ARG_94  | NH1 | H_ASP_101 | OD2 | 2.615 |
| 2IGF | H_LYS_221 | NZ  | L_GLU_123 | OE1 | 3.203 |
| 2IGF | P_LYS_75  | NZ  | L_ASP_28  | OD1 | 3.253 |
| 2IGF | P_LYS_75  | NZ  | L_ASP_28  | OD2 | 2.849 |
| 2IGF | P_LYS_75  | NZ  | L_ASP_30  | OD2 | 3.458 |
| 2IHL | A_LYS_1   | NZ  | A_GLU_7   | OE1 | 3.817 |
| 2IHL | A_LYS_1   | NZ  | A_GLU_7   | OE2 | 2.767 |
| 2IHL | A_LYS_19  | NZ  | A_ASP_18  | OD2 | 3.871 |
| 2IHL | A_ARG_125 | NH1 | A_ASP_119 | OD2 | 2.708 |
| 2IHL | A_ARG_125 | NH2 | A_ASP_119 | OD1 | 3.281 |
| 2IHL | A_ARG_125 | NH2 | A_ASP_119 | OD2 | 2.935 |
| 2J4W | D_LYS_427 | NZ  | D_GLU_435 | OE2 | 3.034 |
| 2J4W | D_LYS_427 | NZ  | H_ASP_52A | OD1 | 3.478 |
| 2J4W | D_LYS_427 | NZ  | H_ASP_52A | OD2 | 2.864 |
| 2J4W | H_ARG_38  | NH1 | H_ASP_86  | OD1 | 2.975 |
| 2J4W | H_ARG_38  | NH2 | H_GLU_46  | OE1 | 3.139 |
| 2J4W | H_LYS_64  | NZ  | H_ASP_61  | OD1 | 3.371 |
| 2J4W | H_ARG_66  | NH1 | H_ASP_86  | OD1 | 3.417 |
| 2J4W | H_ARG_66  | NH1 | H_ASP_86  | OD2 | 3.943 |
| 2J4W | H_ARG_66  | NH2 | H_ASP_86  | OD1 | 3.210 |
| 2J4W | H_ARG_66  | NH2 | H_ASP_86  | OD2 | 2.467 |
| 2J4W | H_LYS_221 | NZ  | L_GLU_123 | OE1 | 3.280 |
| 2J4W | H_LYS_221 | NZ  | L_GLU_123 | OE2 | 3.313 |
| 2J4W | L_ARG_61  | NH1 | L_GLU_79  | OE1 | 3.729 |
| 2J4W | L_ARG_61  | NH1 | L_GLU_79  | OE2 | 3.488 |
| 2J4W | L_ARG_61  | NH2 | L_GLU_79  | OE1 | 3.516 |
| 2J4W | L_ARG_61  | NH2 | L_GLU_81  | OE1 | 2.766 |
| 2J4W | L_ARG_61  | NH2 | L_ASP_82  | OD1 | 2.774 |
| 2J4W | L_ARG_61  | NH2 | L_ASP_82  | OD2 | 3.759 |
| 2J4W | L_LYS_142 | NZ  | L_GLU_105 | OE1 | 3.490 |
| 2J4W | L_LYS_142 | NZ  | L_GLU_105 | OE2 | 3.345 |
| 2J4W | L_LYS_149 | NZ  | L_GLU_195 | OE1 | 3.192 |
| 2J4W | L_LYS_149 | NZ  | L_GLU_195 | OE2 | 3.504 |
| 2J4W | L_LYS_183 | NZ  | L_GLU_187 | OE1 | 3.405 |
| 2J4W | L_HIS_189 | ND1 | L_ASP_151 | OD2 | 3.005 |
| 2J4W | L_LYS_199 | NZ  | L_ASP_110 | OD1 | 3.337 |
| 2J4W | L_LYS_199 | NZ  | L_ASP_110 | OD2 | 2.705 |
| 2J5L | A_LYS_485 | NZ  | A_ASP_493 | OD2 | 3.126 |
| 2J5L | A_LYS_485 | NZ  | C_ASP_52A | OD1 | 3.476 |
| 2J5L | A_LYS_485 | NZ  | C_ASP_52A | OD2 | 3.193 |
| 2J5L | B_ARG_61  | NH1 | B_GLU_79  | OE1 | 3.650 |
| 2J5L | B_ARG_61  | NH1 | B_GLU_81  | OE1 | 3.873 |
| 2J5L | B_ARG_61  | NH2 | B_GLU_79  | OE1 | 3.530 |
| 2J5L | B_ARG_61  | NH2 | B_GLU_81  | OE1 | 2.133 |
| 2J5L | B_ARG_61  | NH2 | B_ASP_82  | OD1 | 3.268 |

|      |           |     |           |     |       |
|------|-----------|-----|-----------|-----|-------|
| 2J5L | B_ARG_61  | NH2 | B_ASP_82  | OD2 | 3.063 |
| 2J5L | B_LYS_107 | NZ  | B_GLU_17  | OE1 | 3.863 |
| 2J5L | B_LYS_142 | NZ  | B_GLU_105 | OE2 | 3.802 |
| 2J5L | B_LYS_149 | NZ  | B_GLU_195 | OE1 | 3.695 |
| 2J5L | B_LYS_149 | NZ  | B_GLU_195 | OE2 | 3.425 |
| 2J5L | B_LYS_183 | NZ  | B_GLU_187 | OE1 | 3.637 |
| 2J5L | B_HIS_    | ND1 | B_ASP_    | OD1 | 3.873 |
| 2J5L | B_HIS_    | ND1 | B_ASP_    | OD2 | 2.683 |
| 2J5L | B_LYS_199 | NZ  | B_ASP_110 | OD1 | 3.371 |
| 2J5L | B_LYS_199 | NZ  | B_ASP_110 | OD2 | 3.451 |
| 2J5L | B_ARG_    | NH2 | B_GLU_187 | OE2 | 3.792 |
| 2J5L | C_LYS_13  | NZ  | C_GLU_113 | OE2 | 3.785 |
| 2J5L | C_ARG_38  | NH1 | C_ASP_86  | OD1 | 3.392 |
| 2J5L | C_ARG_38  | NH2 | C_GLU_46  | OE1 | 3.226 |
| 2J5L | C_ARG_38  | NH2 | C_ASP_86  | OD1 | 3.787 |
| 2J5L | C_LYS_64  | NZ  | C_ASP_61  | OD1 | 2.837 |
| 2J5L | C_ARG_66  | NH2 | C_ASP_86  | OD1 | 3.420 |
| 2J5L | C_ARG_66  | NH2 | C_ASP_86  | OD2 | 2.859 |
| 2JB6 | A_ARG_63  | NH1 | A_ASP_84  | OD1 | 3.533 |
| 2JB6 | A_ARG_63  | NH1 | A_ASP_84  | OD2 | 2.728 |
| 2JB6 | A_ARG_63  | NH2 | A_GLU_83  | OE2 | 3.226 |
| 2JB6 | A_ARG_63  | NH2 | A_ASP_84  | OD1 | 2.862 |
| 2JB6 | A_ARG_63  | NH2 | A_ASP_84  | OD2 | 3.549 |
| 2JB6 | A_LYS_115 | NZ  | A_GLU_203 | OE1 | 3.724 |
| 2JB6 | A_LYS_115 | NZ  | A_GLU_203 | OE2 | 2.595 |
| 2JB6 | A_LYS_171 | NZ  | A_GLU_85  | OE2 | 2.779 |
| 2JB6 | A_LYS_176 | NZ  | A_ASP_143 | OD2 | 3.821 |
| 2JB6 | B_ARG_38  | NH1 | B_GLU_46  | OE2 | 3.287 |
| 2JB6 | B_ARG_38  | NH2 | B_ASP_90  | OD1 | 2.735 |
| 2JB6 | B_LYS_63  | NZ  | B_GLU_46  | OE1 | 3.460 |
| 2JB6 | B_LYS_63  | NZ  | B_GLU_46  | OE2 | 2.655 |
| 2JB6 | B_ARG_67  | NH1 | B_ASP_90  | OD1 | 2.699 |
| 2JB6 | B_ARG_67  | NH1 | B_ASP_90  | OD2 | 3.291 |
| 2JB6 | B_ARG_67  | NH2 | B_ASP_90  | OD2 | 3.389 |
| 2JB6 | B_ARG_87  | NH2 | B_ASP_90  | OD1 | 3.736 |
| 2JB6 | B_LYS_150 | NZ  | B_ASP_151 | OD2 | 3.447 |
| 2JB6 | B_LYS_216 | NZ  | A_GLU_128 | OE2 | 3.078 |
| 2JB6 | H_LYS_19  | NZ  | H_GLU_82  | OE2 | 3.873 |
| 2JB6 | H_ARG_38  | NH1 | H_ASP_90  | OD1 | 3.271 |
| 2JB6 | H_ARG_38  | NH2 | H_GLU_46  | OE2 | 3.202 |
| 2JB6 | H_LYS_63  | NZ  | H_GLU_46  | OE1 | 3.407 |
| 2JB6 | H_LYS_63  | NZ  | H_GLU_46  | OE2 | 3.102 |
| 2JB6 | H_ARG_67  | NH1 | H_ASP_90  | OD1 | 2.780 |
| 2JB6 | H_ARG_67  | NH1 | H_ASP_90  | OD2 | 2.831 |
| 2JB6 | H_ARG_67  | NH2 | H_ASP_90  | OD1 | 3.259 |
| 2JB6 | H_LYS_150 | NZ  | H_ASP_151 | OD1 | 3.864 |
| 2JB6 | L_ARG_63  | NH1 | L_ASP_84  | OD1 | 3.793 |
| 2JB6 | L_ARG_63  | NH1 | L_ASP_84  | OD2 | 2.807 |
| 2JB6 | L_ARG_63  | NH2 | L_ASP_84  | OD1 | 2.677 |
| 2JB6 | L_ARG_63  | NH2 | L_ASP_84  | OD2 | 3.231 |
| 2JB6 | L_LYS_115 | NZ  | L_GLU_203 | OE2 | 3.325 |
| 2JB6 | L_LYS_154 | NZ  | L_GLU_208 | OE2 | 3.249 |
| 2JB6 | L_LYS_171 | NZ  | L_GLU_85  | OE2 | 2.744 |
| 2JEL | L_ARG_24  | NH2 | L_ASP_70  | OD1 | 3.600 |
| 2JEL | L_ARG_24  | NH2 | L_ASP_70  | OD2 | 3.545 |
| 2JEL | L_LYS_50  | NZ  | H_GLU_98  | OE1 | 2.874 |
| 2JEL | L_LYS_50  | NZ  | P_GLU_66  | OE1 | 3.050 |
| 2JEL | L_LYS_50  | NZ  | P_GLU_66  | OE2 | 3.051 |

|         |           |     |           |     |       |
|---------|-----------|-----|-----------|-----|-------|
| 2JEL    | L_ARG_54  | NH2 | L_ASP_60  | OD1 | 2.887 |
| 2JEL    | L_ARG_61  | NH1 | L_ASP_82  | OD1 | 3.350 |
| 2JEL    | L_ARG_61  | NH1 | L_ASP_82  | OD2 | 2.775 |
| 2JEL    | L_ARG_61  | NH2 | L_GLU_81  | OE2 | 3.253 |
| 2JEL    | L_ARG_61  | NH2 | L_ASP_82  | OD1 | 3.113 |
| 2JEL    | L_ARG_61  | NH2 | L_ASP_82  | OD2 | 3.996 |
| 2JEL    | L_ARG_77  | NH1 | L_GLU_79  | OE2 | 3.110 |
| 2JEL    | L_LYS_103 | NZ  | L_ASP_165 | OD1 | 2.863 |
| 2JEL    | L_LYS_142 | NZ  | L_ASP_143 | OD1 | 3.795 |
| 2JEL    | L_LYS_142 | NZ  | L_ASP_143 | OD2 | 3.573 |
| 2JEL    | L_LYS_149 | NZ  | L_GLU_195 | OE1 | 3.417 |
| 2JEL    | L_LYS_149 | NZ  | L_GLU_195 | OE2 | 3.269 |
| 2JEL    | L_HIS_189 | ND1 | L_ASP_152 | OD1 | 3.014 |
| 2JEL    | L_LYS_199 | NZ  | L_ASP_110 | OD2 | 2.782 |
| 2JEL    | H_LYS_62  | NZ  | H_GLU_46  | OE1 | 3.175 |
| 2JEL    | H_LYS_62  | NZ  | H_GLU_46  | OE2 | 3.429 |
| 2JEL    | H_LYS_66  | NZ  | H_ASP_86  | OD1 | 3.906 |
| 2JEL    | H_LYS_66  | NZ  | H_ASP_86  | OD2 | 2.853 |
| 2JEL    | H_ARG_94  | NH2 | H_ASP_101 | OD2 | 2.854 |
| 2JEL    | H_LYS_218 | NZ  | H_ASP_220 | OD1 | 3.234 |
| 2JEL    | P_LYS_79  | NZ  | P_GLU_75  | OE2 | 2.896 |
| 2MCP    | L_ARG_67  | NH1 | L_ASP_88  | OD1 | 3.540 |
| 2MCP    | L_ARG_67  | NH1 | L_ASP_88  | OD2 | 2.647 |
| 2MCP    | L_ARG_67  | NH2 | L_GLU_87  | OE1 | 3.416 |
| 2MCP    | L_ARG_67  | NH2 | L_ASP_88  | OD1 | 2.658 |
| 2MCP    | L_ARG_67  | NH2 | L_ASP_88  | OD2 | 3.318 |
| 2MCP    | L_LYS_109 | NZ  | L_ASP_171 | OD1 | 3.858 |
| 2MCP    | L_LYS_148 | NZ  | L_ASP_149 | OD1 | 3.270 |
| 2MCP    | L_LYS_148 | NZ  | L_ASP_149 | OD2 | 2.997 |
| 2MCP    | L_LYS_155 | NZ  | L_GLU_201 | OE2 | 2.618 |
| 2MCP    | L_ARG_194 | NH1 | L_GLU_191 | OE2 | 3.915 |
| 2MCP    | L_HIS_195 | ND1 | L_ASP_157 | OD1 | 3.712 |
| 2MCP    | L_LYS_205 | NZ  | L_ASP_116 | OD2 | 3.742 |
| 2MCP    | H_ARG_38  | NH1 | H_ASP_92  | OD2 | 3.060 |
| 2MCP    | H_ARG_38  | NH2 | H_GLU_46  | OE1 | 3.610 |
| 2MCP    | H_ARG_38  | NH2 | H_GLU_46  | OE2 | 2.688 |
| 2MCP    | H_ARG_52  | NH2 | H_GLU_61  | OE1 | 2.754 |
| 2MCP    | H_ARG_69  | NH1 | H_ASP_92  | OD2 | 3.561 |
| 2MCP    | H_ARG_69  | NH2 | H_ASP_92  | OD1 | 2.431 |
| 2MCP    | H_ARG_69  | NH2 | H_ASP_92  | OD2 | 2.824 |
| 2MCP    | H_ARG_89  | NH2 | H_GLU_91  | OE1 | 3.538 |
| 2MCP    | H_ARG_89  | NH2 | H_GLU_91  | OE2 | 3.717 |
| 2MCP    | H_ARG_100 | NH1 | H_ASP_110 | OD1 | 2.497 |
| 2MCP    | H_ARG_100 | NH1 | H_ASP_110 | OD2 | 2.947 |
| 2MCP    | H_ARG_126 | NH1 | H_ASP_152 | OD2 | 3.242 |
| 2MCP    | H_ARG_184 | NH1 | H_ASP_152 | OD1 | 2.420 |
| 2MCP    | H_ARG_184 | NH1 | H_ASP_152 | OD2 | 2.976 |
| 2MCP    | H_LYS_205 | NZ  | H_ASP_219 | OD1 | 3.027 |
| 2MCP    | H_LYS_205 | NZ  | H_ASP_219 | OD2 | 3.236 |
| 2MKL-1  | C_ARG_50  | NH1 | C_GLU_49  | OE2 | 3.937 |
| 2MKL-1  | C_ARG_50  | NH2 | C_GLU_49  | OE2 | 3.687 |
| 2MKL-1  | C_LYS_52  | NZ  | C_GLU_55  | OE1 | 2.974 |
| 2MKL-1  | C_LYS_104 | NZ  | C_ASP_80  | OD1 | 2.719 |
| 2MKL-10 | C_LYS_40  | NZ  | C_GLU_90  | OE1 | 3.590 |
| 2MKL-10 | C_LYS_40  | NZ  | C_GLU_90  | OE2 | 2.585 |
| 2MKL-10 | C_ARG_50  | NH2 | C_GLU_49  | OE2 | 3.606 |
| 2MKL-10 | C_LYS_65  | NZ  | C_ASP_6   | OD1 | 3.508 |
| 2MKL-10 | C_LYS_71  | NZ  | C_GLU_55  | OE2 | 3.851 |

|         |           |     |            |     |       |
|---------|-----------|-----|------------|-----|-------|
| 2MKL-10 | C_LYS_104 | NZ  | C_ASP_80   | OD1 | 3.644 |
| 2MKL-2  | C_ARG_50  | NH1 | C_GLU_78   | OE1 | 3.157 |
| 2MKL-2  | C_ARG_50  | NH1 | C_GLU_78   | OE2 | 2.728 |
| 2MKL-2  | C_LYS_65  | NZ  | C_ASP_6    | OD2 | 3.453 |
| 2MKL-2  | C_LYS_71  | NZ  | C_GLU_55   | OE1 | 2.717 |
| 2MKL-2  | C_LYS_104 | NZ  | C_ASP_80   | OD1 | 3.607 |
| 2MKL-3  | C_ARG_3   | NH1 | C_GLU_93   | OE1 | 2.682 |
| 2MKL-3  | C_ARG_3   | NH2 | C_GLU_93   | OE1 | 3.724 |
| 2MKL-3  | C_LYS_65  | NZ  | C_ASP_6    | OD2 | 3.268 |
| 2MKL-3  | C_LYS_71  | NZ  | C_GLU_55   | OE2 | 2.641 |
| 2MKL-3  | C_LYS_104 | NZ  | C_ASP_80   | OD1 | 2.606 |
| 2MKL-4  | C_ARG_50  | NH2 | C_GLU_78   | OE1 | 2.697 |
| 2MKL-4  | C_ARG_50  | NH2 | C_GLU_78   | OE2 | 3.554 |
| 2MKL-4  | C_LYS_71  | NZ  | C_GLU_55   | OE2 | 2.650 |
| 2MKL-5  | C_ARG_50  | NH1 | C_GLU_78   | OE1 | 3.904 |
| 2MKL-5  | C_ARG_50  | NH2 | C_GLU_78   | OE1 | 2.759 |
| 2MKL-5  | C_LYS_65  | NZ  | C_ASP_6    | OD2 | 2.680 |
| 2MKL-5  | C_LYS_104 | NZ  | C_ASP_80   | OD1 | 2.921 |
| 2MKL-6  | C_LYS_13  | NZ  | C_GLU_17   | OE1 | 3.559 |
| 2MKL-6  | C_LYS_13  | NZ  | C_GLU_17   | OE2 | 2.627 |
| 2MKL-6  | C_ARG_50  | NH1 | C_GLU_78   | OE2 | 3.662 |
| 2MKL-6  | C_ARG_50  | NH2 | C_GLU_78   | OE2 | 2.716 |
| 2MKL-6  | C_LYS_65  | NZ  | C_ASP_6    | OD2 | 2.594 |
| 2MKL-6  | C_LYS_71  | NZ  | C_GLU_55   | OE2 | 2.698 |
| 2MKL-6  | C_LYS_104 | NZ  | C_ASP_80   | OD1 | 2.644 |
| 2MKL-7  | C_ARG_3   | NH2 | C_ASP_6    | OD1 | 3.888 |
| 2MKL-7  | C_ARG_3   | NH2 | C_ASP_6    | OD2 | 2.720 |
| 2MKL-7  | C_LYS_52  | NZ  | C_GLU_55   | OE1 | 3.242 |
| 2MKL-7  | C_LYS_52  | NZ  | C_GLU_55   | OE2 | 2.760 |
| 2MKL-7  | C_LYS_65  | NZ  | C_ASP_6    | OD1 | 2.615 |
| 2MKL-8  | C_ARG_50  | NH1 | C_GLU_78   | OE1 | 3.617 |
| 2MKL-8  | C_ARG_50  | NH1 | C_GLU_78   | OE2 | 2.634 |
| 2MKL-8  | C_ARG_50  | NH2 | C_GLU_78   | OE1 | 3.131 |
| 2MKL-8  | C_ARG_50  | NH2 | C_GLU_78   | OE2 | 3.571 |
| 2MKL-8  | C_LYS_65  | NZ  | C_ASP_6    | OD1 | 3.884 |
| 2MKL-8  | C_LYS_65  | NZ  | C_ASP_6    | OD2 | 2.638 |
| 2MKL-8  | C_LYS_104 | NZ  | C_ASP_80   | OD1 | 2.614 |
| 2MKL-9  | C_ARG_50  | NH1 | C_GLU_78   | OE2 | 3.771 |
| 2MKL-9  | C_ARG_50  | NH2 | C_GLU_78   | OE2 | 2.683 |
| 2MKL-9  | C_LYS_65  | NZ  | C_ASP_6    | OD1 | 2.835 |
| 2MKL-9  | C_LYS_65  | NZ  | C_ASP_6    | OD2 | 2.746 |
| 2MTW    | A_LYS_16  | NZ  | A_ASP_13   | OD2 | 3.436 |
| 2NXY    | A_LYS_207 | NZ  | A_GLU_381  | OE1 | 3.502 |
| 2NXY    | A_LYS_207 | NZ  | A_GLU_381  | OE2 | 2.666 |
| 2NXY    | A_LYS_231 | NZ  | A_GLU_267  | OE1 | 3.733 |
| 2NXY    | A_HIS_249 | NE2 | A_GLU_482  | OE1 | 2.788 |
| 2NXY    | A_LYS_348 | NZ  | A_GLU_269  | OE2 | 2.765 |
| 2NXY    | A_LYS_348 | NZ  | A_GLU_351  | OE1 | 3.417 |
| 2NXY    | A_LYS_348 | NZ  | A_GLU_351  | OE2 | 3.879 |
| 2NXY    | A_LYS_357 | NZ  | A_GLU_464  | OE1 | 3.655 |
| 2NXY    | A_LYS_357 | NZ  | A_GLU_464  | OE2 | 2.914 |
| 2NXY    | A_ARG_419 | NH1 | D_GLU_3103 | OE2 | 3.305 |
| 2NXY    | A_ARG_419 | NH2 | D_GLU_3103 | OE2 | 2.288 |
| 2NXY    | A_ARG_456 | NH2 | A_GLU_466  | OE1 | 3.797 |
| 2NXY    | A_ARG_456 | NH2 | A_GLU_466  | OE2 | 3.132 |
| 2NXY    | A_ARG_469 | NH2 | A_ASP_457  | OD1 | 2.896 |
| 2NXY    | A_ARG_469 | NH2 | A_ASP_457  | OD2 | 3.967 |
| 2NXY    | A_ARG_476 | NH1 | A_ASP_474  | OD1 | 2.903 |

|      |            |     |            |     |       |
|------|------------|-----|------------|-----|-------|
| 2NXY | A_ARG_476  | NH1 | A_ASP_474  | OD2 | 3.603 |
| 2NXY | A_ARG_480  | NH1 | A_ASP_477  | OD1 | 2.733 |
| 2NXY | A_LYS_487  | NZ  | A_GLU_91   | OE2 | 2.870 |
| 2NXY | B_LYS_1008 | NZ  | B_GLU_1119 | OE1 | 3.058 |
| 2NXY | B_LYS_1029 | NZ  | A_ASP_279  | OD2 | 2.892 |
| 2NXY | B_LYS_1029 | NZ  | B_GLU_1085 | OE1 | 3.597 |
| 2NXY | B_LYS_1029 | NZ  | B_GLU_1085 | OE2 | 3.802 |
| 2NXY | B_ARG_1054 | NH1 | B_ASP_1078 | OD1 | 3.769 |
| 2NXY | B_ARG_1054 | NH1 | B_ASP_1078 | OD2 | 2.694 |
| 2NXY | B_ARG_1054 | NH2 | B_ASP_1078 | OD1 | 2.766 |
| 2NXY | B_ARG_1054 | NH2 | B_ASP_1078 | OD2 | 3.269 |
| 2NXY | B_ARG_1058 | NH1 | B_GLU_1013 | OE1 | 3.012 |
| 2NXY | B_ARG_1058 | NH1 | B_GLU_1013 | OE2 | 3.108 |
| 2NXY | B_ARG_1058 | NH2 | B_GLU_1013 | OE2 | 2.848 |
| 2NXY | B_ARG_1059 | NH1 | A_ASP_368  | OD1 | 3.350 |
| 2NXY | B_ARG_1059 | NH1 | A_ASP_368  | OD2 | 2.835 |
| 2NXY | B_ARG_1059 | NH2 | A_ASP_368  | OD1 | 2.856 |
| 2NXY | B_ARG_1059 | NH2 | A_ASP_368  | OD2 | 3.647 |
| 2NXY | B_LYS_1171 | NZ  | B_GLU_1169 | OE1 | 3.367 |
| 2NXY | C_ARG_2061 | NH2 | C_GLU_2081 | OE2 | 3.328 |
| 2NXY | C_ARG_2061 | NH2 | C_ASP_2082 | OD1 | 2.675 |
| 2NXY | C_ARG_2061 | NH2 | C_ASP_2082 | OD2 | 3.402 |
| 2NXY | C_LYS_2185 | NZ  | C_GLU_2189 | OE2 | 3.692 |
| 2NXY | C_LYS_2190 | NZ  | C_ASP_2187 | OD1 | 3.154 |
| 2NXY | C_HIS_2191 | ND1 | C_ASP_2153 | OD2 | 3.374 |
| 2NXY | D_ARG_3031 | NH2 | D_GLU_3103 | OE1 | 3.976 |
| 2NXY | D_ARG_3031 | NH2 | D_ASP_3105 | OD1 | 3.526 |
| 2NXY | D_ARG_3031 | NH2 | D_ASP_3105 | OD2 | 3.213 |
| 2NXY | D_ARG_3038 | NH1 | D_ASP_3090 | OD2 | 2.829 |
| 2NXY | D_ARG_3038 | NH2 | D_GLU_3046 | OE2 | 2.946 |
| 2NXY | D_ARG_3038 | NH2 | D_ASP_3090 | OD2 | 3.771 |
| 2NXY | D_ARG_3050 | NH2 | D_GLU_3101 | OE2 | 2.808 |
| 2NXY | D_HIS_3063 | NE2 | D_GLU_3046 | OE1 | 3.857 |
| 2NXY | D_HIS_3063 | NE2 | D_GLU_3046 | OE2 | 2.872 |
| 2NXY | D_ARG_3067 | NH1 | D_ASP_3090 | OD1 | 2.854 |
| 2NXY | D_ARG_3067 | NH1 | D_ASP_3090 | OD2 | 3.874 |
| 2NXY | D_ARG_3067 | NH2 | D_ASP_3090 | OD1 | 3.263 |
| 2NXY | D_ARG_3067 | NH2 | D_ASP_3090 | OD2 | 2.885 |
| 2NXY | D_ARG_3084 | NH1 | D_GLU_3082 | OE1 | 2.798 |
| 2NXY | D_LYS_3158 | NZ  | D_ASP_3159 | OD1 | 3.389 |
| 2NXY | D_LYS_3158 | NZ  | D_ASP_3159 | OD2 | 3.068 |
| 2NXY | D_LYS_3224 | NZ  | C_GLU_2125 | OE2 | 3.113 |
| 2NXY | D_LYS_3225 | NZ  | D_GLU_3227 | OE2 | 3.652 |
| 2NXZ | A_LYS_207  | NZ  | A_GLU_381  | OE1 | 3.614 |
| 2NXZ | A_LYS_207  | NZ  | A_GLU_381  | OE2 | 2.716 |
| 2NXZ | A_HIS_249  | NE2 | A_GLU_482  | OE1 | 3.015 |
| 2NXZ | A_LYS_348  | NZ  | A_GLU_269  | OE2 | 2.534 |
| 2NXZ | A_LYS_348  | NZ  | A_GLU_351  | OE2 | 3.687 |
| 2NXZ | A_ARG_419  | NH1 | D_GLU_3103 | OE2 | 3.647 |
| 2NXZ | A_ARG_419  | NH2 | D_GLU_3103 | OE2 | 2.536 |
| 2NXZ | A_ARG_456  | NH2 | A_GLU_466  | OE1 | 3.919 |
| 2NXZ | A_ARG_456  | NH2 | A_GLU_466  | OE2 | 3.186 |
| 2NXZ | A_ARG_469  | NH2 | A_ASP_457  | OD1 | 2.972 |
| 2NXZ | A_ARG_469  | NH2 | A_ASP_457  | OD2 | 3.979 |
| 2NXZ | A_ARG_476  | NH1 | A_ASP_474  | OD1 | 2.887 |
| 2NXZ | A_ARG_476  | NH1 | A_ASP_474  | OD2 | 3.798 |
| 2NXZ | A_ARG_480  | NH1 | A_ASP_477  | OD1 | 2.702 |
| 2NXZ | A_LYS_487  | NZ  | A_GLU_91   | OE2 | 2.923 |



|      |            |     |            |     |       |
|------|------------|-----|------------|-----|-------|
| 2NXZ | B_LYS_1008 | NZ  | B_GLU_1119 | OE1 | 2.808 |
| 2NXZ | B_LYS_1029 | NZ  | A_ASP_279  | OD2 | 3.046 |
| 2NXZ | B_LYS_1029 | NZ  | B_GLU_1085 | OE1 | 3.780 |
| 2NXZ | B_ARG_1054 | NH1 | B_ASP_1078 | OD1 | 3.891 |
| 2NXZ | B_ARG_1054 | NH1 | B_ASP_1078 | OD2 | 2.802 |
| 2NXZ | B_ARG_1054 | NH2 | B_ASP_1078 | OD1 | 2.919 |
| 2NXZ | B_ARG_1054 | NH2 | B_ASP_1078 | OD2 | 3.323 |
| 2NXZ | B_ARG_1058 | NH1 | B_GLU_1013 | OE1 | 3.851 |
| 2NXZ | B_ARG_1058 | NH1 | B_GLU_1013 | OE2 | 3.822 |
| 2NXZ | B_ARG_1058 | NH2 | B_GLU_1013 | OE1 | 3.720 |
| 2NXZ | B_ARG_1058 | NH2 | B_GLU_1013 | OE2 | 2.745 |
| 2NXZ | B_ARG_1059 | NH1 | A_ASP_368  | OD1 | 3.623 |
| 2NXZ | B_ARG_1059 | NH1 | A_ASP_368  | OD2 | 3.029 |
| 2NXZ | B_ARG_1059 | NH2 | A_ASP_368  | OD1 | 2.916 |
| 2NXZ | B_ARG_1059 | NH2 | A_ASP_368  | OD2 | 3.612 |
| 2NXZ | B_LYS_1171 | NZ  | B_GLU_1169 | OE1 | 2.773 |
| 2NXZ | C_ARG_2024 | NH2 | C_GLU_2070 | OE2 | 3.227 |
| 2NXZ | C_ARG_2061 | NH2 | C_GLU_2081 | OE2 | 3.424 |
| 2NXZ | C_ARG_2061 | NH2 | C_ASP_2082 | OD1 | 2.628 |
| 2NXZ | C_ARG_2061 | NH2 | C_ASP_2082 | OD2 | 3.308 |
| 2NXZ | C_LYS_2185 | NZ  | C_GLU_2189 | OE2 | 3.904 |
| 2NXZ | C_LYS_2190 | NZ  | C_ASP_2187 | OD1 | 3.130 |
| 2NXZ | C_HIS_2191 | ND1 | C_ASP_2153 | OD2 | 3.486 |
| 2NXZ | D_ARG_3031 | NH2 | D_GLU_3103 | OE1 | 3.879 |
| 2NXZ | D_ARG_3031 | NH2 | D_ASP_3105 | OD1 | 3.392 |
| 2NXZ | D_ARG_3031 | NH2 | D_ASP_3105 | OD2 | 3.171 |
| 2NXZ | D_ARG_3038 | NH1 | D_ASP_3090 | OD2 | 2.879 |
| 2NXZ | D_ARG_3038 | NH2 | D_GLU_3046 | OE1 | 3.581 |
| 2NXZ | D_ARG_3038 | NH2 | D_GLU_3046 | OE2 | 3.314 |
| 2NXZ | D_ARG_3038 | NH2 | D_ASP_3090 | OD2 | 3.776 |
| 2NXZ | D_ARG_3050 | NH2 | D_GLU_3101 | OE2 | 2.731 |
| 2NXZ | D_ARG_3067 | NH1 | D_ASP_3090 | OD1 | 2.950 |
| 2NXZ | D_ARG_3067 | NH1 | D_ASP_3090 | OD2 | 3.870 |
| 2NXZ | D_ARG_3067 | NH2 | D_ASP_3090 | OD1 | 3.342 |
| 2NXZ | D_ARG_3067 | NH2 | D_ASP_3090 | OD2 | 2.876 |
| 2NXZ | D_ARG_3084 | NH1 | D_GLU_3082 | OE1 | 2.896 |
| 2NXZ | D_ARG_3087 | NH2 | D_ASP_3089 | OD2 | 3.888 |
| 2NXZ | D_HIS_3117 | NE2 | D_GLU_3001 | OE1 | 3.258 |
| 2NXZ | D_LYS_3158 | NZ  | D_ASP_3159 | OD1 | 3.552 |
| 2NXZ | D_LYS_3158 | NZ  | D_ASP_3159 | OD2 | 3.527 |
| 2NXZ | D_HIS_3179 | NE2 | C_ASP_2169 | OD2 | 3.986 |
| 2NXZ | D_LYS_3224 | NZ  | C_GLU_2125 | OE1 | 3.503 |
| 2NXZ | D_LYS_3224 | NZ  | C_GLU_2125 | OE2 | 2.801 |
| 2NXZ | D_LYS_3225 | NZ  | D_GLU_3227 | OE2 | 3.804 |
| 2NY0 | A_LYS_207  | NZ  | A_GLU_381  | OE1 | 3.809 |
| 2NY0 | A_LYS_207  | NZ  | A_GLU_381  | OE2 | 2.857 |
| 2NY0 | A_HIS_249  | NE2 | A_GLU_482  | OE1 | 2.815 |
| 2NY0 | A_LYS_337  | NZ  | A_GLU_293  | OE1 | 3.033 |
| 2NY0 | A_LYS_337  | NZ  | A_GLU_293  | OE2 | 3.370 |
| 2NY0 | A_LYS_348  | NZ  | A_GLU_269  | OE2 | 2.803 |
| 2NY0 | A_LYS_348  | NZ  | A_GLU_351  | OE1 | 3.817 |
| 2NY0 | A_LYS_348  | NZ  | A_GLU_351  | OE2 | 3.477 |
| 2NY0 | A_ARG_419  | NH1 | D_GLU_3103 | OE2 | 3.320 |
| 2NY0 | A_ARG_419  | NH2 | D_GLU_3103 | OE2 | 2.328 |
| 2NY0 | A_ARG_456  | NH2 | A_GLU_466  | OE1 | 3.843 |
| 2NY0 | A_ARG_456  | NH2 | A_GLU_466  | OE2 | 3.172 |
| 2NY0 | A_ARG_469  | NH2 | A_ASP_457  | OD1 | 3.138 |
| 2NY0 | A_ARG_469  | NH2 | A_ASP_457  | OD2 | 3.931 |

|      |            |     |            |     |       |
|------|------------|-----|------------|-----|-------|
| 2NY0 | A_ARG_476  | NH1 | A_ASP_474  | OD1 | 3.150 |
| 2NY0 | A_ARG_476  | NH1 | A_ASP_474  | OD2 | 3.157 |
| 2NY0 | A_ARG_480  | NH1 | A_ASP_477  | OD1 | 2.991 |
| 2NY0 | A_LYS_487  | NZ  | A_GLU_91   | OE2 | 3.787 |
| 2NY0 | B_LYS_1008 | NZ  | B_GLU_1119 | OE1 | 2.749 |
| 2NY0 | B_LYS_1029 | NZ  | A_ASP_279  | OD2 | 2.858 |
| 2NY0 | B_LYS_1029 | NZ  | B_GLU_1085 | OE1 | 3.146 |
| 2NY0 | B_LYS_1029 | NZ  | B_GLU_1085 | OE2 | 3.532 |
| 2NY0 | B_ARG_1054 | NH1 | B_ASP_1078 | OD1 | 3.780 |
| 2NY0 | B_ARG_1054 | NH1 | B_ASP_1078 | OD2 | 2.599 |
| 2NY0 | B_ARG_1054 | NH2 | B_ASP_1078 | OD1 | 2.962 |
| 2NY0 | B_ARG_1054 | NH2 | B_ASP_1078 | OD2 | 3.339 |
| 2NY0 | B_ARG_1058 | NH1 | B_GLU_1013 | OE1 | 3.138 |
| 2NY0 | B_ARG_1058 | NH1 | B_GLU_1013 | OE2 | 3.075 |
| 2NY0 | B_ARG_1058 | NH2 | B_GLU_1013 | OE2 | 3.481 |
| 2NY0 | B_ARG_1059 | NH1 | A_ASP_368  | OD1 | 3.389 |
| 2NY0 | B_ARG_1059 | NH1 | A_ASP_368  | OD2 | 2.874 |
| 2NY0 | B_ARG_1059 | NH2 | A_ASP_368  | OD1 | 2.859 |
| 2NY0 | B_ARG_1059 | NH2 | A_ASP_368  | OD2 | 3.661 |
| 2NY0 | B_LYS_1171 | NZ  | B_GLU_1169 | OE1 | 3.740 |
| 2NY0 | C_ARG_2024 | NH2 | C_GLU_2070 | OE2 | 3.845 |
| 2NY0 | C_ARG_2061 | NH2 | C_GLU_2081 | OE2 | 3.765 |
| 2NY0 | C_ARG_2061 | NH2 | C_ASP_2082 | OD1 | 2.698 |
| 2NY0 | C_ARG_2061 | NH2 | C_ASP_2082 | OD2 | 3.430 |
| 2NY0 | C_LYS_2151 | NZ  | C_GLU_2197 | OE1 | 3.031 |
| 2NY0 | C_HIS_2191 | ND1 | C_ASP_2153 | OD2 | 3.524 |
| 2NY0 | D_LYS_3012 | NZ  | D_GLU_3010 | OE1 | 3.853 |
| 2NY0 | D_ARG_3031 | NH2 | D_ASP_3105 | OD1 | 3.446 |
| 2NY0 | D_ARG_3031 | NH2 | D_ASP_3105 | OD2 | 3.463 |
| 2NY0 | D_ARG_3038 | NH1 | D_ASP_3090 | OD2 | 2.827 |
| 2NY0 | D_ARG_3038 | NH2 | D_GLU_3046 | OE2 | 2.883 |
| 2NY0 | D_ARG_3038 | NH2 | D_ASP_3090 | OD2 | 3.849 |
| 2NY0 | D_ARG_3050 | NH2 | D_GLU_3101 | OE2 | 2.918 |
| 2NY0 | D_HIS_3063 | NE2 | D_GLU_3046 | OE2 | 3.738 |
| 2NY0 | D_ARG_3067 | NH1 | D_ASP_3090 | OD1 | 2.827 |
| 2NY0 | D_ARG_3067 | NH1 | D_ASP_3090 | OD2 | 3.838 |
| 2NY0 | D_ARG_3067 | NH2 | D_ASP_3090 | OD1 | 3.421 |
| 2NY0 | D_ARG_3067 | NH2 | D_ASP_3090 | OD2 | 3.091 |
| 2NY0 | D_ARG_3084 | NH1 | D_GLU_3082 | OE1 | 2.595 |
| 2NY0 | D_ARG_3087 | NH2 | D_ASP_3089 | OD2 | 3.920 |
| 2NY0 | D_HIS_3117 | NE2 | D_GLU_3001 | OE1 | 3.721 |
| 2NY0 | D_HIS_3117 | NE2 | D_GLU_3001 | OE2 | 3.707 |
| 2NY0 | D_LYS_3158 | NZ  | D_ASP_3159 | OD1 | 3.309 |
| 2NY0 | D_LYS_3158 | NZ  | D_ASP_3159 | OD2 | 2.901 |
| 2NY0 | D_LYS_3224 | NZ  | C_GLU_2125 | OE2 | 3.518 |
| 2NY0 | D_LYS_3225 | NZ  | D_GLU_3227 | OE2 | 3.771 |
| 2NY1 | A_LYS_207  | NZ  | A_GLU_381  | OE1 | 3.601 |
| 2NY1 | A_LYS_207  | NZ  | A_GLU_381  | OE2 | 2.693 |
| 2NY1 | A_LYS_231  | NZ  | A_GLU_268  | OE2 | 3.557 |
| 2NY1 | A_HIS_249  | NE2 | A_GLU_482  | OE1 | 2.972 |
| 2NY1 | A_LYS_348  | NZ  | A_GLU_269  | OE2 | 2.629 |
| 2NY1 | A_LYS_348  | NZ  | A_GLU_351  | OE1 | 3.454 |
| 2NY1 | A_LYS_348  | NZ  | A_GLU_351  | OE2 | 3.942 |
| 2NY1 | A_LYS_357  | NZ  | A_GLU_466  | OE1 | 2.761 |
| 2NY1 | A_ARG_419  | NH1 | D_GLU_3103 | OE2 | 3.396 |
| 2NY1 | A_ARG_419  | NH2 | D_GLU_3103 | OE1 | 3.789 |
| 2NY1 | A_ARG_419  | NH2 | D_GLU_3103 | OE2 | 2.363 |
| 2NY1 | A_ARG_456  | NH2 | A_GLU_466  | OE2 | 3.471 |

|      |            |     |            |     |       |
|------|------------|-----|------------|-----|-------|
| 2NY1 | A_ARG_469  | NH2 | A_ASP_457  | OD1 | 3.038 |
| 2NY1 | A_ARG_476  | NH1 | A_ASP_474  | OD1 | 2.963 |
| 2NY1 | A_ARG_476  | NH1 | A_ASP_474  | OD2 | 3.170 |
| 2NY1 | A_LYS_487  | NZ  | A_GLU_91   | OE1 | 2.543 |
| 2NY1 | B_LYS_1007 | NZ  | B_ASP_1010 | OD2 | 3.969 |
| 2NY1 | B_LYS_1008 | NZ  | B_GLU_1119 | OE1 | 3.276 |
| 2NY1 | B_LYS_1029 | NZ  | A_ASP_279  | OD2 | 3.031 |
| 2NY1 | B_LYS_1029 | NZ  | B_GLU_1085 | OE1 | 3.492 |
| 2NY1 | B_LYS_1029 | NZ  | B_GLU_1085 | OE2 | 3.928 |
| 2NY1 | B_ARG_1054 | NH1 | B_ASP_1078 | OD1 | 3.747 |
| 2NY1 | B_ARG_1054 | NH1 | B_ASP_1078 | OD2 | 2.698 |
| 2NY1 | B_ARG_1054 | NH2 | B_ASP_1078 | OD1 | 2.961 |
| 2NY1 | B_ARG_1054 | NH2 | B_ASP_1078 | OD2 | 3.434 |
| 2NY1 | B_ARG_1058 | NH1 | B_GLU_1013 | OE1 | 3.860 |
| 2NY1 | B_ARG_1058 | NH1 | B_GLU_1013 | OE2 | 3.051 |
| 2NY1 | B_ARG_1058 | NH2 | B_GLU_1013 | OE2 | 3.952 |
| 2NY1 | B_ARG_1059 | NH1 | A_ASP_368  | OD1 | 3.481 |
| 2NY1 | B_ARG_1059 | NH1 | A_ASP_368  | OD2 | 3.131 |
| 2NY1 | B_ARG_1059 | NH2 | A_ASP_368  | OD1 | 2.526 |
| 2NY1 | B_ARG_1059 | NH2 | A_ASP_368  | OD2 | 3.458 |
| 2NY1 | B_LYS_1171 | NZ  | B_GLU_1169 | OE1 | 2.799 |
| 2NY1 | C_ARG_2024 | NH1 | C_GLU_2070 | OE1 | 3.232 |
| 2NY1 | C_ARG_2061 | NH2 | C_GLU_2081 | OE2 | 3.250 |
| 2NY1 | C_ARG_2061 | NH2 | C_ASP_2082 | OD1 | 2.692 |
| 2NY1 | C_ARG_2061 | NH2 | C_ASP_2082 | OD2 | 3.384 |
| 2NY1 | C_LYS_2190 | NZ  | C_ASP_2187 | OD1 | 3.137 |
| 2NY1 | C_HIS_2191 | ND1 | C_ASP_2153 | OD2 | 3.008 |
| 2NY1 | D_ARG_3031 | NH2 | D_GLU_3103 | OE1 | 3.623 |
| 2NY1 | D_ARG_3031 | NH2 | D_ASP_3105 | OD1 | 3.228 |
| 2NY1 | D_ARG_3031 | NH2 | D_ASP_3105 | OD2 | 3.278 |
| 2NY1 | D_ARG_3038 | NH1 | D_GLU_3046 | OE1 | 3.615 |
| 2NY1 | D_ARG_3038 | NH1 | D_GLU_3046 | OE2 | 3.409 |
| 2NY1 | D_ARG_3038 | NH1 | D_ASP_3090 | OD2 | 3.757 |
| 2NY1 | D_ARG_3038 | NH2 | D_ASP_3090 | OD2 | 2.650 |
| 2NY1 | D_ARG_3050 | NH2 | D_GLU_3101 | OE2 | 2.827 |
| 2NY1 | D_HIS_3063 | ND1 | D_GLU_3046 | OE2 | 3.810 |
| 2NY1 | D_HIS_3063 | NE2 | D_GLU_3046 | OE2 | 2.146 |
| 2NY1 | D_ARG_3067 | NH1 | D_ASP_3090 | OD1 | 2.855 |
| 2NY1 | D_ARG_3067 | NH1 | D_ASP_3090 | OD2 | 3.809 |
| 2NY1 | D_ARG_3067 | NH2 | D_ASP_3090 | OD1 | 3.381 |
| 2NY1 | D_ARG_3067 | NH2 | D_ASP_3090 | OD2 | 3.002 |
| 2NY1 | D_ARG_3084 | NH1 | D_GLU_3082 | OE1 | 2.758 |
| 2NY1 | D_HIS_3117 | NE2 | D_GLU_3001 | OE1 | 3.822 |
| 2NY1 | D_LYS_3158 | NZ  | D_ASP_3159 | OD1 | 3.295 |
| 2NY1 | D_LYS_3158 | NZ  | D_ASP_3159 | OD2 | 2.966 |
| 2NY1 | D_LYS_3224 | NZ  | C_GLU_2125 | OE1 | 3.100 |
| 2NY1 | D_LYS_3224 | NZ  | C_GLU_2125 | OE2 | 3.945 |
| 2NY2 | A_LYS_207  | NZ  | A_GLU_381  | OE1 | 3.598 |
| 2NY2 | A_LYS_207  | NZ  | A_GLU_381  | OE2 | 2.704 |
| 2NY2 | A_HIS_249  | NE2 | A_GLU_482  | OE1 | 3.019 |
| 2NY2 | A_LYS_337  | NZ  | A_GLU_293  | OE1 | 2.850 |
| 2NY2 | A_LYS_337  | NZ  | A_GLU_293  | OE2 | 3.461 |
| 2NY2 | A_LYS_348  | NZ  | A_GLU_269  | OE2 | 2.783 |
| 2NY2 | A_LYS_348  | NZ  | A_GLU_351  | OE1 | 3.652 |
| 2NY2 | A_LYS_348  | NZ  | A_GLU_351  | OE2 | 3.603 |
| 2NY2 | A_LYS_357  | NZ  | A_GLU_466  | OE1 | 3.351 |
| 2NY2 | A_ARG_419  | NH1 | D_GLU_3103 | OE2 | 2.325 |
| 2NY2 | A_ARG_419  | NH2 | D_GLU_3103 | OE2 | 3.124 |

|      |            |     |            |     |       |
|------|------------|-----|------------|-----|-------|
| 2NY2 | A_ARG_456  | NH2 | A_GLU_466  | OE1 | 3.779 |
| 2NY2 | A_ARG_456  | NH2 | A_GLU_466  | OE2 | 3.231 |
| 2NY2 | A_ARG_469  | NH2 | A_ASP_457  | OD1 | 2.829 |
| 2NY2 | A_ARG_469  | NH2 | A_ASP_457  | OD2 | 3.887 |
| 2NY2 | A_ARG_476  | NH2 | A_ASP_474  | OD1 | 3.619 |
| 2NY2 | A_ARG_476  | NH2 | A_ASP_474  | OD2 | 3.356 |
| 2NY2 | A_ARG_480  | NH2 | A_ASP_477  | OD1 | 3.946 |
| 2NY2 | A_LYS_487  | NZ  | A_GLU_91   | OE2 | 3.417 |
| 2NY2 | B_LYS_1008 | NZ  | B_GLU_1119 | OE1 | 3.204 |
| 2NY2 | B_LYS_1029 | NZ  | A_ASP_279  | OD2 | 2.981 |
| 2NY2 | B_LYS_1029 | NZ  | B_GLU_1085 | OE1 | 3.198 |
| 2NY2 | B_LYS_1029 | NZ  | B_GLU_1085 | OE2 | 3.665 |
| 2NY2 | B_ARG_1054 | NH1 | B_ASP_1078 | OD1 | 3.894 |
| 2NY2 | B_ARG_1054 | NH1 | B_ASP_1078 | OD2 | 2.718 |
| 2NY2 | B_ARG_1054 | NH2 | B_ASP_1078 | OD1 | 2.960 |
| 2NY2 | B_ARG_1054 | NH2 | B_ASP_1078 | OD2 | 3.298 |
| 2NY2 | B_ARG_1058 | NH1 | B_GLU_1013 | OE1 | 3.281 |
| 2NY2 | B_ARG_1058 | NH1 | B_GLU_1013 | OE2 | 2.757 |
| 2NY2 | B_ARG_1058 | NH2 | B_GLU_1013 | OE2 | 3.611 |
| 2NY2 | B_ARG_1059 | NH1 | A_ASP_368  | OD1 | 3.464 |
| 2NY2 | B_ARG_1059 | NH1 | A_ASP_368  | OD2 | 2.895 |
| 2NY2 | B_ARG_1059 | NH2 | A_ASP_368  | OD1 | 2.934 |
| 2NY2 | B_ARG_1059 | NH2 | A_ASP_368  | OD2 | 3.638 |
| 2NY2 | B_LYS_1171 | NZ  | B_GLU_1169 | OE1 | 3.055 |
| 2NY2 | C_ARG_2024 | NH1 | C_GLU_2070 | OE2 | 3.499 |
| 2NY2 | C_ARG_2061 | NH2 | C_GLU_2081 | OE2 | 3.670 |
| 2NY2 | C_ARG_2061 | NH2 | C_ASP_2082 | OD1 | 2.785 |
| 2NY2 | C_ARG_2061 | NH2 | C_ASP_2082 | OD2 | 3.417 |
| 2NY2 | C_LYS_2151 | NZ  | C_GLU_2197 | OE1 | 3.471 |
| 2NY2 | C_LYS_2185 | NZ  | C_GLU_2189 | OE2 | 3.651 |
| 2NY2 | C_LYS_2190 | NZ  | C_ASP_2187 | OD1 | 3.182 |
| 2NY2 | C_HIS_2191 | ND1 | C_ASP_2153 | OD2 | 3.206 |
| 2NY2 | D_ARG_3031 | NH2 | D_GLU_3103 | OE1 | 3.751 |
| 2NY2 | D_ARG_3031 | NH2 | D_ASP_3105 | OD1 | 3.389 |
| 2NY2 | D_ARG_3031 | NH2 | D_ASP_3105 | OD2 | 3.283 |
| 2NY2 | D_ARG_3038 | NH1 | D_ASP_3090 | OD2 | 2.806 |
| 2NY2 | D_ARG_3038 | NH2 | D_GLU_3046 | OE1 | 3.191 |
| 2NY2 | D_ARG_3038 | NH2 | D_GLU_3046 | OE2 | 3.670 |
| 2NY2 | D_ARG_3038 | NH2 | D_ASP_3090 | OD2 | 3.755 |
| 2NY2 | D_ARG_3050 | NH2 | D_GLU_3101 | OE1 | 3.994 |
| 2NY2 | D_ARG_3050 | NH2 | D_GLU_3101 | OE2 | 2.680 |
| 2NY2 | D_ARG_3067 | NH1 | D_ASP_3090 | OD1 | 2.784 |
| 2NY2 | D_ARG_3067 | NH1 | D_ASP_3090 | OD2 | 3.789 |
| 2NY2 | D_ARG_3067 | NH2 | D_ASP_3090 | OD1 | 3.313 |
| 2NY2 | D_ARG_3067 | NH2 | D_ASP_3090 | OD2 | 2.881 |
| 2NY2 | D_ARG_3084 | NH1 | D_GLU_3082 | OE1 | 2.941 |
| 2NY2 | D_LYS_3158 | NZ  | D_ASP_3159 | OD1 | 3.305 |
| 2NY2 | D_LYS_3158 | NZ  | D_ASP_3159 | OD2 | 3.053 |
| 2NY2 | D_LYS_3224 | NZ  | C_GLU_2125 | OE2 | 2.721 |
| 2NY2 | D_LYS_3225 | NZ  | D_GLU_3227 | OE2 | 3.413 |
| 2NY3 | A_LYS_207  | NZ  | A_GLU_381  | OE1 | 3.708 |
| 2NY3 | A_LYS_207  | NZ  | A_GLU_381  | OE2 | 2.801 |
| 2NY3 | A_HIS_249  | NE2 | A_GLU_482  | OE1 | 3.056 |
| 2NY3 | A_LYS_348  | NZ  | A_GLU_269  | OE2 | 2.607 |
| 2NY3 | A_LYS_348  | NZ  | A_GLU_351  | OE2 | 3.538 |
| 2NY3 | A_LYS_357  | NZ  | A_GLU_466  | OE1 | 3.160 |
| 2NY3 | A_ARG_419  | NH1 | D_GLU_3103 | OE2 | 3.671 |
| 2NY3 | A_ARG_419  | NH2 | D_GLU_3103 | OE1 | 3.681 |

|      |            |     |            |     |       |
|------|------------|-----|------------|-----|-------|
| 2NY3 | A_ARG_419  | NH2 | D_GLU_3103 | OE2 | 2.058 |
| 2NY3 | A_ARG_456  | NH2 | A_GLU_466  | OE1 | 3.768 |
| 2NY3 | A_ARG_456  | NH2 | A_GLU_466  | OE2 | 3.134 |
| 2NY3 | A_ARG_469  | NH2 | A_ASP_457  | OD1 | 2.972 |
| 2NY3 | A_ARG_476  | NH1 | A_ASP_474  | OD1 | 2.845 |
| 2NY3 | A_ARG_476  | NH1 | A_ASP_474  | OD2 | 3.451 |
| 2NY3 | A_ARG_480  | NH1 | A_ASP_477  | OD1 | 2.886 |
| 2NY3 | A_LYS_487  | NZ  | A_GLU_91   | OE2 | 3.142 |
| 2NY3 | B_LYS_1008 | NZ  | B_GLU_1119 | OE1 | 3.194 |
| 2NY3 | B_LYS_1029 | NZ  | A_ASP_279  | OD2 | 3.124 |
| 2NY3 | B_LYS_1029 | NZ  | B_GLU_1085 | OE1 | 3.294 |
| 2NY3 | B_LYS_1029 | NZ  | B_GLU_1085 | OE2 | 3.406 |
| 2NY3 | B_ARG_1054 | NH1 | B_ASP_1078 | OD1 | 3.826 |
| 2NY3 | B_ARG_1054 | NH1 | B_ASP_1078 | OD2 | 2.678 |
| 2NY3 | B_ARG_1054 | NH2 | B_ASP_1078 | OD1 | 2.943 |
| 2NY3 | B_ARG_1054 | NH2 | B_ASP_1078 | OD2 | 3.308 |
| 2NY3 | B_ARG_1058 | NH1 | B_GLU_1013 | OE1 | 3.406 |
| 2NY3 | B_ARG_1058 | NH1 | B_GLU_1013 | OE2 | 3.310 |
| 2NY3 | B_ARG_1059 | NH1 | A_ASP_368  | OD1 | 2.775 |
| 2NY3 | B_ARG_1059 | NH1 | A_ASP_368  | OD2 | 3.550 |
| 2NY3 | B_ARG_1059 | NH2 | A_ASP_368  | OD1 | 3.449 |
| 2NY3 | B_ARG_1059 | NH2 | A_ASP_368  | OD2 | 2.862 |
| 2NY3 | B_LYS_1171 | NZ  | B_GLU_1169 | OE1 | 2.751 |
| 2NY3 | B_LYS_1171 | NZ  | B_GLU_1169 | OE2 | 3.911 |
| 2NY3 | C_ARG_2024 | NH1 | C_GLU_2070 | OE2 | 3.678 |
| 2NY3 | C_ARG_2061 | NH2 | C_GLU_2081 | OE2 | 3.396 |
| 2NY3 | C_ARG_2061 | NH2 | C_ASP_2082 | OD1 | 2.625 |
| 2NY3 | C_ARG_2061 | NH2 | C_ASP_2082 | OD2 | 3.244 |
| 2NY3 | C_ARG_2097 | NH1 | C_ASP_2001 | OD1 | 3.924 |
| 2NY3 | C_ARG_2097 | NH1 | C_ASP_2001 | OD2 | 3.626 |
| 2NY3 | C_LYS_2185 | NZ  | C_GLU_2189 | OE2 | 3.801 |
| 2NY3 | C_LYS_2190 | NZ  | C_ASP_2187 | OD1 | 3.285 |
| 2NY3 | C_HIS_2191 | ND1 | C_ASP_2153 | OD2 | 3.220 |
| 2NY3 | D_ARG_3031 | NH2 | D_GLU_3103 | OE1 | 3.899 |
| 2NY3 | D_ARG_3031 | NH2 | D_ASP_3105 | OD1 | 3.267 |
| 2NY3 | D_ARG_3031 | NH2 | D_ASP_3105 | OD2 | 3.028 |
| 2NY3 | D_ARG_3038 | NH1 | D_GLU_3046 | OE1 | 3.243 |
| 2NY3 | D_ARG_3038 | NH1 | D_GLU_3046 | OE2 | 3.575 |
| 2NY3 | D_ARG_3038 | NH1 | D_ASP_3090 | OD2 | 3.960 |
| 2NY3 | D_ARG_3038 | NH2 | D_ASP_3090 | OD2 | 2.751 |
| 2NY3 | D_ARG_3050 | NH2 | D_GLU_3101 | OE2 | 2.844 |
| 2NY3 | D_ARG_3067 | NH1 | D_ASP_3090 | OD1 | 2.783 |
| 2NY3 | D_ARG_3067 | NH1 | D_ASP_3090 | OD2 | 3.729 |
| 2NY3 | D_ARG_3067 | NH2 | D_ASP_3090 | OD1 | 3.344 |
| 2NY3 | D_ARG_3067 | NH2 | D_ASP_3090 | OD2 | 2.833 |
| 2NY3 | D_ARG_3084 | NH1 | D_GLU_3082 | OE1 | 2.996 |
| 2NY3 | D_HIS_3117 | NE2 | D_GLU_3001 | OE1 | 3.405 |
| 2NY3 | D_LYS_3158 | NZ  | D_ASP_3159 | OD1 | 3.506 |
| 2NY3 | D_LYS_3158 | NZ  | D_ASP_3159 | OD2 | 3.209 |
| 2NY3 | D_LYS_3224 | NZ  | C_GLU_2125 | OE1 | 3.624 |
| 2NY3 | D_LYS_3224 | NZ  | C_GLU_2125 | OE2 | 2.832 |
| 2NY3 | D_LYS_3225 | NZ  | D_GLU_3227 | OE2 | 3.573 |
| 2NY4 | A_LYS_207  | NZ  | A_GLU_381  | OE1 | 3.731 |
| 2NY4 | A_LYS_207  | NZ  | A_GLU_381  | OE2 | 2.708 |
| 2NY4 | A_HIS_249  | NE2 | A_GLU_482  | OE1 | 2.936 |
| 2NY4 | A_LYS_348  | NZ  | A_GLU_269  | OE2 | 2.582 |
| 2NY4 | A_LYS_348  | NZ  | A_GLU_351  | OE2 | 3.483 |
| 2NY4 | A_ARG_419  | NH1 | D_GLU_3103 | OE2 | 3.167 |

|      |            |     |            |     |       |
|------|------------|-----|------------|-----|-------|
| 2NY4 | A_ARG_419  | NH2 | D_GLU_3103 | OE2 | 2.562 |
| 2NY4 | A_ARG_456  | NH2 | A_GLU_466  | OE1 | 3.845 |
| 2NY4 | A_ARG_456  | NH2 | A_GLU_466  | OE2 | 3.077 |
| 2NY4 | A_ARG_469  | NH2 | A_ASP_457  | OD1 | 2.967 |
| 2NY4 | A_ARG_476  | NH1 | A_ASP_474  | OD1 | 3.082 |
| 2NY4 | A_ARG_476  | NH1 | A_ASP_474  | OD2 | 3.721 |
| 2NY4 | A_ARG_480  | NH2 | A_ASP_477  | OD1 | 3.706 |
| 2NY4 | A_LYS_487  | NZ  | A_GLU_91   | OE2 | 2.555 |
| 2NY4 | B_LYS_1008 | NZ  | B_GLU_1119 | OE1 | 3.022 |
| 2NY4 | B_LYS_1029 | NZ  | A_ASP_279  | OD2 | 3.126 |
| 2NY4 | B_LYS_1029 | NZ  | B_GLU_1085 | OE2 | 3.736 |
| 2NY4 | B_ARG_1054 | NH1 | B_ASP_1078 | OD1 | 3.885 |
| 2NY4 | B_ARG_1054 | NH1 | B_ASP_1078 | OD2 | 2.724 |
| 2NY4 | B_ARG_1054 | NH2 | B_ASP_1078 | OD1 | 2.927 |
| 2NY4 | B_ARG_1054 | NH2 | B_ASP_1078 | OD2 | 3.270 |
| 2NY4 | B_ARG_1058 | NH2 | B_GLU_1013 | OE1 | 3.510 |
| 2NY4 | B_ARG_1058 | NH2 | B_GLU_1013 | OE2 | 2.959 |
| 2NY4 | B_ARG_1059 | NH1 | A_ASP_368  | OD1 | 3.376 |
| 2NY4 | B_ARG_1059 | NH1 | A_ASP_368  | OD2 | 2.816 |
| 2NY4 | B_ARG_1059 | NH2 | A_ASP_368  | OD1 | 2.784 |
| 2NY4 | B_ARG_1059 | NH2 | A_ASP_368  | OD2 | 3.537 |
| 2NY4 | B_LYS_1171 | NZ  | B_GLU_1169 | OE1 | 2.831 |
| 2NY4 | C_ARG_2024 | NH2 | C_GLU_2070 | OE2 | 3.822 |
| 2NY4 | C_ARG_2061 | NH2 | C_GLU_2081 | OE2 | 3.356 |
| 2NY4 | C_ARG_2061 | NH2 | C_ASP_2082 | OD1 | 2.733 |
| 2NY4 | C_ARG_2061 | NH2 | C_ASP_2082 | OD2 | 3.375 |
| 2NY4 | C_LYS_2151 | NZ  | C_GLU_2197 | OE1 | 3.803 |
| 2NY4 | C_LYS_2190 | NZ  | C_ASP_2187 | OD1 | 3.227 |
| 2NY4 | C_HIS_2191 | ND1 | C_ASP_2153 | OD2 | 3.008 |
| 2NY4 | D_ARG_3031 | NH2 | D_ASP_3105 | OD1 | 3.479 |
| 2NY4 | D_ARG_3031 | NH2 | D_ASP_3105 | OD2 | 2.910 |
| 2NY4 | D_ARG_3038 | NH1 | D_ASP_3090 | OD2 | 2.802 |
| 2NY4 | D_ARG_3038 | NH2 | D_GLU_3046 | OE1 | 3.197 |
| 2NY4 | D_ARG_3038 | NH2 | D_GLU_3046 | OE2 | 3.685 |
| 2NY4 | D_ARG_3038 | NH2 | D_ASP_3090 | OD2 | 3.711 |
| 2NY4 | D_ARG_3050 | NH2 | D_GLU_3101 | OE2 | 2.802 |
| 2NY4 | D_HIS_3063 | ND1 | D_GLU_3046 | OE2 | 2.743 |
| 2NY4 | D_HIS_3063 | NE2 | D_GLU_3046 | OE2 | 3.513 |
| 2NY4 | D_ARG_3067 | NH1 | D_ASP_3090 | OD1 | 2.775 |
| 2NY4 | D_ARG_3067 | NH1 | D_ASP_3090 | OD2 | 3.804 |
| 2NY4 | D_ARG_3067 | NH2 | D_ASP_3090 | OD1 | 3.309 |
| 2NY4 | D_ARG_3067 | NH2 | D_ASP_3090 | OD2 | 2.883 |
| 2NY4 | D_ARG_3084 | NH1 | D_GLU_3082 | OE1 | 3.001 |
| 2NY4 | D_HIS_3117 | NE2 | D_GLU_3001 | OE2 | 3.655 |
| 2NY4 | D_LYS_3158 | NZ  | D_ASP_3159 | OD1 | 3.252 |
| 2NY4 | D_LYS_3158 | NZ  | D_ASP_3159 | OD2 | 2.781 |
| 2NY4 | D_LYS_3224 | NZ  | C_GLU_2125 | OE1 | 3.625 |
| 2NY4 | D_LYS_3224 | NZ  | C_GLU_2125 | OE2 | 3.179 |
| 2NY4 | D_LYS_3225 | NZ  | D_GLU_3227 | OE2 | 3.815 |
| 2NY5 | G_LYS_207  | NZ  | G_GLU_381  | OE1 | 3.510 |
| 2NY5 | G_LYS_207  | NZ  | G_GLU_381  | OE2 | 2.865 |
| 2NY5 | G_HIS_249  | NE2 | G_GLU_482  | OE1 | 2.564 |
| 2NY5 | G_LYS_348  | NZ  | G_GLU_269  | OE2 | 2.724 |
| 2NY5 | G_LYS_348  | NZ  | G_GLU_351  | OE1 | 3.888 |
| 2NY5 | G_LYS_357  | NZ  | G_GLU_466  | OE1 | 3.541 |
| 2NY5 | G_ARG_419  | NH2 | H_GLU_3103 | OE2 | 3.818 |
| 2NY5 | G_ARG_456  | NH2 | G_GLU_466  | OE2 | 3.080 |
| 2NY5 | G_ARG_469  | NH2 | G_ASP_457  | OD1 | 3.091 |

|      |            |     |            |     |       |
|------|------------|-----|------------|-----|-------|
| 2NY5 | G_ARG_469  | NH2 | G_ASP_457  | OD2 | 3.726 |
| 2NY5 | G_ARG_476  | NH1 | G_ASP_474  | OD1 | 2.768 |
| 2NY5 | G_ARG_476  | NH1 | G_ASP_474  | OD2 | 3.024 |
| 2NY5 | G_ARG_480  | NH2 | G_ASP_477  | OD1 | 2.981 |
| 2NY5 | G_LYS_487  | NZ  | G_GLU_91   | OE2 | 2.768 |
| 2NY5 | C_LYS_1008 | NZ  | C_GLU_1119 | OE1 | 3.207 |
| 2NY5 | C_LYS_1029 | NZ  | G_ASP_279  | OD2 | 3.358 |
| 2NY5 | C_LYS_1029 | NZ  | C_GLU_1085 | OE1 | 3.759 |
| 2NY5 | C_ARG_1054 | NH1 | C_ASP_1078 | OD1 | 3.454 |
| 2NY5 | C_ARG_1054 | NH1 | C_ASP_1078 | OD2 | 3.024 |
| 2NY5 | C_ARG_1054 | NH2 | C_ASP_1078 | OD1 | 2.904 |
| 2NY5 | C_ARG_1054 | NH2 | C_ASP_1078 | OD2 | 3.790 |
| 2NY5 | C_ARG_1058 | NH1 | C_GLU_1013 | OE1 | 2.971 |
| 2NY5 | C_ARG_1058 | NH1 | C_GLU_1013 | OE2 | 3.085 |
| 2NY5 | C_ARG_1058 | NH2 | C_GLU_1013 | OE2 | 3.977 |
| 2NY5 | C_ARG_1059 | NH1 | G_ASP_368  | OD1 | 3.253 |
| 2NY5 | C_ARG_1059 | NH1 | G_ASP_368  | OD2 | 2.656 |
| 2NY5 | C_ARG_1059 | NH2 | G_ASP_368  | OD1 | 2.825 |
| 2NY5 | C_ARG_1059 | NH2 | G_ASP_368  | OD2 | 3.554 |
| 2NY5 | L_ARG_2024 | NH1 | L_GLU_2070 | OE2 | 3.011 |
| 2NY5 | L_ARG_2061 | NH2 | L_ASP_2082 | OD1 | 2.513 |
| 2NY5 | L_ARG_2061 | NH2 | L_ASP_2082 | OD2 | 3.250 |
| 2NY5 | L_LYS_2151 | NZ  | L_GLU_2197 | OE1 | 3.120 |
| 2NY5 | L_LYS_2151 | NZ  | L_GLU_2197 | OE2 | 3.898 |
| 2NY5 | L_LYS_2185 | NZ  | L_GLU_2189 | OE2 | 3.201 |
| 2NY5 | L_LYS_2190 | NZ  | L_ASP_2187 | OD1 | 3.698 |
| 2NY5 | L_HIS_2191 | ND1 | L_ASP_2153 | OD2 | 3.806 |
| 2NY5 | H_LYS_3012 | NZ  | H_GLU_3010 | OE1 | 3.934 |
| 2NY5 | H_LYS_3019 | NZ  | H_GLU_3082 | OE2 | 3.776 |
| 2NY5 | H_ARG_3031 | NH2 | H_ASP_3105 | OD1 | 3.319 |
| 2NY5 | H_ARG_3031 | NH2 | H_ASP_3105 | OD2 | 3.589 |
| 2NY5 | H_ARG_3038 | NH1 | H_ASP_3090 | OD2 | 2.958 |
| 2NY5 | H_ARG_3038 | NH2 | H_GLU_3046 | OE1 | 3.774 |
| 2NY5 | H_ARG_3038 | NH2 | H_GLU_3046 | OE2 | 3.269 |
| 2NY5 | H_ARG_3038 | NH2 | H_ASP_3090 | OD2 | 3.880 |
| 2NY5 | H_ARG_3050 | NH2 | H_GLU_3101 | OE2 | 2.904 |
| 2NY5 | H_HIS_3063 | NE2 | H_GLU_3046 | OE2 | 2.714 |
| 2NY5 | H_ARG_3067 | NH1 | H_ASP_3090 | OD1 | 2.954 |
| 2NY5 | H_ARG_3067 | NH1 | H_ASP_3090 | OD2 | 3.690 |
| 2NY5 | H_ARG_3067 | NH2 | H_ASP_3090 | OD1 | 3.799 |
| 2NY5 | H_ARG_3067 | NH2 | H_ASP_3090 | OD2 | 3.231 |
| 2NY5 | H_ARG_3084 | NH1 | H_GLU_3082 | OE1 | 2.806 |
| 2NY5 | H_ARG_3087 | NH2 | H_ASP_3089 | OD2 | 3.608 |
| 2NY5 | H_HIS_3117 | NE2 | H_GLU_3001 | OE2 | 3.918 |
| 2NY5 | H_LYS_3158 | NZ  | H_ASP_3159 | OD1 | 3.923 |
| 2NY5 | H_LYS_3158 | NZ  | H_ASP_3159 | OD2 | 3.240 |
| 2NY5 | H_LYS_3224 | NZ  | L_GLU_2125 | OE1 | 3.285 |
| 2NY5 | H_LYS_3224 | NZ  | L_GLU_2125 | OE2 | 3.364 |
| 2NY6 | A_LYS_207  | NZ  | A_GLU_381  | OE1 | 3.730 |
| 2NY6 | A_LYS_207  | NZ  | A_GLU_381  | OE2 | 2.822 |
| 2NY6 | A_HIS_249  | NE2 | A_GLU_482  | OE2 | 3.456 |
| 2NY6 | A_LYS_337  | NZ  | A_GLU_293  | OE1 | 3.079 |
| 2NY6 | A_LYS_337  | NZ  | A_GLU_293  | OE2 | 3.670 |
| 2NY6 | A_LYS_348  | NZ  | A_GLU_269  | OE2 | 3.288 |
| 2NY6 | A_LYS_357  | NZ  | A_GLU_466  | OE1 | 2.793 |
| 2NY6 | A_ARG_419  | NH2 | D_GLU_3103 | OE1 | 3.563 |
| 2NY6 | A_ARG_419  | NH2 | D_GLU_3103 | OE2 | 2.589 |
| 2NY6 | A_ARG_456  | NH2 | A_GLU_466  | OE1 | 3.680 |

|      |            |     |            |     |       |
|------|------------|-----|------------|-----|-------|
| 2NY6 | A_ARG_456  | NH2 | A_GLU_466  | OE2 | 3.058 |
| 2NY6 | A_ARG_469  | NH2 | A_ASP_457  | OD1 | 2.900 |
| 2NY6 | A_ARG_469  | NH2 | A_ASP_457  | OD2 | 3.561 |
| 2NY6 | A_ARG_476  | NH1 | A_ASP_474  | OD1 | 2.511 |
| 2NY6 | A_ARG_476  | NH1 | A_ASP_474  | OD2 | 2.768 |
| 2NY6 | A_ARG_480  | NH2 | A_ASP_477  | OD1 | 2.891 |
| 2NY6 | A_LYS_487  | NZ  | A_GLU_91   | OE2 | 3.003 |
| 2NY6 | B_LYS_1008 | NZ  | B_GLU_1119 | OE1 | 2.791 |
| 2NY6 | B_LYS_1029 | NZ  | A_ASP_279  | OD2 | 3.061 |
| 2NY6 | B_LYS_1029 | NZ  | B_GLU_1085 | OE1 | 3.222 |
| 2NY6 | B_ARG_1054 | NH1 | B_ASP_1078 | OD1 | 3.684 |
| 2NY6 | B_ARG_1054 | NH1 | B_ASP_1078 | OD2 | 3.346 |
| 2NY6 | B_ARG_1054 | NH2 | B_ASP_1078 | OD1 | 2.747 |
| 2NY6 | B_ARG_1054 | NH2 | B_ASP_1078 | OD2 | 3.402 |
| 2NY6 | B_ARG_1058 | NH1 | B_GLU_1013 | OE1 | 3.563 |
| 2NY6 | B_ARG_1058 | NH2 | B_GLU_1013 | OE1 | 2.875 |
| 2NY6 | B_ARG_1058 | NH2 | B_GLU_1013 | OE2 | 2.875 |
| 2NY6 | B_ARG_1059 | NH1 | A_ASP_368  | OD1 | 2.945 |
| 2NY6 | B_ARG_1059 | NH1 | A_ASP_368  | OD2 | 2.767 |
| 2NY6 | B_ARG_1059 | NH2 | A_ASP_368  | OD1 | 3.097 |
| 2NY6 | B_LYS_1090 | NZ  | B_GLU_1085 | OE2 | 3.439 |
| 2NY6 | B_LYS_1171 | NZ  | B_GLU_1169 | OE1 | 3.858 |
| 2NY6 | C_ARG_2024 | NH1 | C_GLU_2070 | OE2 | 3.729 |
| 2NY6 | C_ARG_2061 | NH2 | C_GLU_2081 | OE2 | 3.042 |
| 2NY6 | C_ARG_2061 | NH2 | C_ASP_2082 | OD1 | 2.719 |
| 2NY6 | C_ARG_2061 | NH2 | C_ASP_2082 | OD2 | 3.011 |
| 2NY6 | C_ARG_2105 | NH1 | C_GLU_2107 | OE2 | 3.132 |
| 2NY6 | C_LYS_2151 | NZ  | C_GLU_2197 | OE1 | 3.256 |
| 2NY6 | C_LYS_2151 | NZ  | C_GLU_2197 | OE2 | 3.632 |
| 2NY6 | C_LYS_2185 | NZ  | C_GLU_2189 | OE2 | 3.738 |
| 2NY6 | C_LYS_2190 | NZ  | C_ASP_2187 | OD1 | 3.524 |
| 2NY6 | D_LYS_3012 | NZ  | D_GLU_3010 | OE1 | 3.730 |
| 2NY6 | D_ARG_3031 | NH2 | D_ASP_3105 | OD1 | 3.047 |
| 2NY6 | D_ARG_3031 | NH2 | D_ASP_3105 | OD2 | 3.789 |
| 2NY6 | D_ARG_3038 | NH1 | D_ASP_3090 | OD2 | 3.061 |
| 2NY6 | D_ARG_3038 | NH2 | D_GLU_3046 | OE2 | 3.246 |
| 2NY6 | D_ARG_3038 | NH2 | D_ASP_3090 | OD2 | 3.492 |
| 2NY6 | D_ARG_3050 | NH2 | D_GLU_3101 | OE2 | 2.217 |
| 2NY6 | D_HIS_3063 | ND1 | D_GLU_3046 | OE1 | 3.616 |
| 2NY6 | D_HIS_3063 | NE2 | D_GLU_3046 | OE1 | 2.623 |
| 2NY6 | D_ARG_3067 | NH1 | D_ASP_3090 | OD1 | 2.710 |
| 2NY6 | D_ARG_3067 | NH2 | D_ASP_3090 | OD1 | 3.291 |
| 2NY6 | D_ARG_3067 | NH2 | D_ASP_3090 | OD2 | 3.292 |
| 2NY6 | D_LYS_3074 | NZ  | D_ASP_3056 | OD2 | 3.513 |
| 2NY6 | D_ARG_3084 | NH1 | D_GLU_3082 | OE1 | 2.898 |
| 2NY6 | D_ARG_3087 | NH2 | D_ASP_3089 | OD2 | 3.510 |
| 2NY6 | D_HIS_3117 | ND1 | D_GLU_3001 | OE1 | 3.967 |
| 2NY6 | D_HIS_3117 | NE2 | D_GLU_3001 | OE1 | 3.266 |
| 2NY6 | D_LYS_3158 | NZ  | D_ASP_3159 | OD1 | 3.626 |
| 2NY6 | D_LYS_3158 | NZ  | D_ASP_3159 | OD2 | 2.711 |
| 2NY6 | D_LYS_3224 | NZ  | C_GLU_2125 | OE1 | 3.158 |
| 2NY6 | D_LYS_3224 | NZ  | C_GLU_2125 | OE2 | 2.701 |
| 2NY7 | G_LYS_117  | NZ  | G_GLU_211  | OE1 | 2.565 |
| 2NY7 | G_LYS_117  | NZ  | G_GLU_211  | OE2 | 3.261 |
| 2NY7 | G_LYS_231  | NZ  | G_GLU_267  | OE1 | 3.791 |
| 2NY7 | G_LYS_231  | NZ  | G_GLU_267  | OE2 | 3.613 |
| 2NY7 | G_HIS_249  | NE2 | G_GLU_482  | OE2 | 3.021 |
| 2NY7 | G_LYS_337  | NZ  | G_GLU_293  | OE1 | 3.715 |



|      |           |     |            |     |       |
|------|-----------|-----|------------|-----|-------|
| 2NY7 | G_LYS_348 | NZ  | G_GLU_269  | OE1 | 3.162 |
| 2NY7 | G_LYS_348 | NZ  | G_GLU_269  | OE2 | 3.975 |
| 2NY7 | G_LYS_348 | NZ  | G_GLU_351  | OE1 | 3.003 |
| 2NY7 | G_LYS_357 | NZ  | G_GLU_466  | OE1 | 2.755 |
| 2NY7 | G_ARG_456 | NH1 | G_GLU_466  | OE1 | 3.969 |
| 2NY7 | G_ARG_456 | NH1 | G_GLU_466  | OE2 | 3.127 |
| 2NY7 | G_ARG_469 | NH2 | G_ASP_457  | OD2 | 2.950 |
| 2NY7 | G_ARG_480 | NH1 | G_ASP_99   | OD2 | 3.193 |
| 2NY7 | G_ARG_480 | NH1 | G_ASP_474  | OD1 | 3.425 |
| 2NY7 | G_ARG_480 | NH2 | G_ASP_474  | OD1 | 2.783 |
| 2NY7 | G_ARG_480 | NH2 | G_ASP_477  | OD2 | 2.839 |
| 2NY7 | G_LYS_487 | NZ  | G_GLU_91   | OE2 | 2.858 |
| 2NY7 | H_ARG_38  | NH1 | H_GLU_46   | OE1 | 2.977 |
| 2NY7 | H_ARG_38  | NH2 | H_ASP_86   | OD1 | 2.526 |
| 2NY7 | H_ARG_66  | NH1 | H_ASP_86   | OD1 | 3.144 |
| 2NY7 | H_ARG_66  | NH1 | H_ASP_86   | OD2 | 3.436 |
| 2NY7 | H_ARG_66  | NH2 | H_ASP_86   | OD1 | 3.533 |
| 2NY7 | H_ARG_66  | NH2 | H_ASP_86   | OD2 | 2.282 |
| 2NY7 | H_ARG_94  | NH2 | H_ASP_101  | OD2 | 2.976 |
| 2NY7 | H_LYS_145 | NZ  | H_ASP_146  | OD1 | 3.590 |
| 2NY7 | H_LYS_145 | NZ  | H_ASP_146  | OD2 | 3.675 |
| 2NY7 | H_LYS_221 | NZ  | L_GLU_123  | OE1 | 3.153 |
| 2NY7 | L_ARG_32  | NH1 | H_ASP_100F | OD2 | 2.962 |
| 2NY7 | L_ARG_61  | NH1 | L_ASP_82   | OD1 | 3.480 |
| 2NY7 | L_ARG_61  | NH1 | L_ASP_82   | OD2 | 2.630 |
| 2NY7 | L_ARG_61  | NH2 | L_GLU_81   | OE2 | 3.843 |
| 2NY7 | L_ARG_61  | NH2 | L_ASP_82   | OD1 | 3.037 |
| 2NY7 | L_ARG_61  | NH2 | L_ASP_82   | OD2 | 3.695 |
| 2NY7 | L_ARG_77  | NH1 | L_GLU_79   | OE2 | 3.409 |
| 2NY7 | L_LYS_149 | NZ  | L_GLU_195  | OE2 | 2.771 |
| 2OR9 | L_LYS_39  | NZ  | L_ASP_81   | OD1 | 2.675 |
| 2OR9 | L_LYS_39  | NZ  | L_ASP_81   | OD2 | 2.850 |
| 2OR9 | L_ARG_61  | NH1 | L_GLU_79   | OE1 | 3.065 |
| 2OR9 | L_ARG_61  | NH1 | L_ASP_82   | OD1 | 3.876 |
| 2OR9 | L_ARG_61  | NH2 | L_GLU_79   | OE1 | 3.933 |
| 2OR9 | L_ARG_61  | NH2 | L_ASP_82   | OD1 | 2.452 |
| 2OR9 | L_ARG_61  | NH2 | L_ASP_82   | OD2 | 2.431 |
| 2OR9 | L_LYS_103 | NZ  | L_ASP_165  | OD1 | 3.314 |
| 2OR9 | L_LYS_147 | NZ  | L_GLU_154  | OE1 | 3.105 |
| 2OR9 | L_LYS_149 | NZ  | L_GLU_195  | OE1 | 2.901 |
| 2OR9 | L_LYS_149 | NZ  | L_GLU_195  | OE2 | 3.775 |
| 2OR9 | L_ARG_155 | NH2 | L_GLU_185  | OE1 | 2.944 |
| 2OR9 | L_HIS_189 | ND1 | L_ASP_151  | OD2 | 3.316 |
| 2OR9 | L_LYS_199 | NZ  | L_ASP_110  | OD2 | 2.936 |
| 2OR9 | H_ARG_38  | NH1 | H_ASP_86   | OD1 | 2.712 |
| 2OR9 | H_ARG_38  | NH2 | H_GLU_46   | OE1 | 2.757 |
| 2OR9 | H_ARG_38  | NH2 | H_ASP_86   | OD1 | 3.623 |
| 2OR9 | H_ARG_53  | NH2 | P_GLU_8    | OE2 | 3.967 |
| 2OR9 | H_ARG_66  | NH2 | H_ASP_86   | OD1 | 2.780 |
| 2OR9 | H_ARG_66  | NH2 | H_ASP_86   | OD2 | 2.470 |
| 2OR9 | H_ARG_94  | NH2 | H_ASP_101  | OD1 | 3.716 |
| 2OR9 | H_ARG_94  | NH2 | H_ASP_101  | OD2 | 2.813 |
| 2OR9 | H_ARG_95  | NH2 | H_GLU_97   | OE1 | 3.064 |
| 2OR9 | H_ARG_95  | NH2 | H_GLU_97   | OE2 | 2.977 |
| 2OR9 | M_LYS_39  | NZ  | M_ASP_81   | OD1 | 2.510 |
| 2OR9 | M_LYS_39  | NZ  | M_ASP_81   | OD2 | 2.625 |
| 2OR9 | M_ARG_61  | NH1 | M_GLU_79   | OE1 | 3.146 |
| 2OR9 | M_ARG_61  | NH1 | M_ASP_82   | OD1 | 3.834 |

|      |           |     |           |     |       |
|------|-----------|-----|-----------|-----|-------|
| 2OR9 | M_ARG_61  | NH2 | M_GLU_79  | OE1 | 3.978 |
| 2OR9 | M_ARG_61  | NH2 | M_ASP_82  | OD1 | 2.403 |
| 2OR9 | M_ARG_61  | NH2 | M_ASP_82  | OD2 | 2.459 |
| 2OR9 | M_LYS_92  | NZ  | M_GLU_93  | OE2 | 3.399 |
| 2OR9 | M_LYS_147 | NZ  | M_GLU_154 | OE1 | 3.668 |
| 2OR9 | M_LYS_149 | NZ  | M_GLU_195 | OE1 | 3.660 |
| 2OR9 | M_LYS_149 | NZ  | M_GLU_195 | OE2 | 3.945 |
| 2OR9 | M_ARG_155 | NH2 | M_GLU_185 | OE1 | 2.980 |
| 2OR9 | M_HIS_189 | ND1 | M_ASP_151 | OD2 | 2.969 |
| 2OR9 | M_LYS_199 | NZ  | M_ASP_110 | OD2 | 2.911 |
| 2OR9 | I_HIS_3   | NE2 | I_GLU_1   | OE1 | 2.704 |
| 2OR9 | I_HIS_3   | NE2 | I_GLU_1   | OE2 | 3.924 |
| 2OR9 | I_ARG_38  | NH1 | I_ASP_86  | OD1 | 2.804 |
| 2OR9 | I_ARG_38  | NH2 | I_GLU_46  | OE1 | 2.738 |
| 2OR9 | I_ARG_38  | NH2 | I_ASP_86  | OD1 | 3.727 |
| 2OR9 | I_ARG_66  | NH2 | I_ASP_86  | OD1 | 2.548 |
| 2OR9 | I_ARG_66  | NH2 | I_ASP_86  | OD2 | 2.491 |
| 2OR9 | I_ARG_94  | NH2 | I_ASP_101 | OD1 | 3.025 |
| 2OR9 | I_ARG_94  | NH2 | I_ASP_101 | OD2 | 2.934 |
| 2OR9 | I_ARG_95  | NH2 | I_GLU_97  | OE1 | 3.211 |
| 2OR9 | I_LYS_208 | NZ  | M_GLU_123 | OE2 | 3.803 |
| 2ORB | L_LYS_39  | NZ  | L_ASP_81  | OD1 | 3.102 |
| 2ORB | L_LYS_39  | NZ  | L_ASP_81  | OD2 | 2.922 |
| 2ORB | L_ARG_61  | NH1 | L_GLU_79  | OE1 | 3.405 |
| 2ORB | L_ARG_61  | NH1 | L_GLU_79  | OE2 | 3.954 |
| 2ORB | L_ARG_61  | NH2 | L_GLU_79  | OE1 | 3.851 |
| 2ORB | L_ARG_61  | NH2 | L_ASP_82  | OD1 | 2.602 |
| 2ORB | L_ARG_61  | NH2 | L_ASP_82  | OD2 | 3.319 |
| 2ORB | L_LYS_92  | NZ  | L_GLU_93  | OE2 | 2.584 |
| 2ORB | L_LYS_103 | NZ  | L_ASP_165 | OD1 | 3.225 |
| 2ORB | L_LYS_149 | NZ  | L_GLU_195 | OE1 | 3.600 |
| 2ORB | L_ARG_155 | NH1 | L_GLU_185 | OE1 | 3.207 |
| 2ORB | L_ARG_155 | NH2 | L_GLU_185 | OE1 | 2.465 |
| 2ORB | L_ARG_155 | NH2 | L_GLU_185 | OE2 | 3.749 |
| 2ORB | L_LYS_183 | NZ  | L_ASP_184 | OD2 | 3.348 |
| 2ORB | L_ARG_211 | NH1 | L_GLU_187 | OE1 | 3.744 |
| 2ORB | H_HIS_3   | ND1 | H_GLU_1   | OE1 | 3.990 |
| 2ORB | H_HIS_3   | NE2 | H_GLU_1   | OE1 | 3.016 |
| 2ORB | H_ARG_38  | NH1 | H_GLU_46  | OE1 | 3.421 |
| 2ORB | H_ARG_38  | NH1 | H_GLU_46  | OE2 | 2.892 |
| 2ORB | H_ARG_38  | NH2 | H_ASP_86  | OD1 | 2.745 |
| 2ORB | H_LYS_64  | NZ  | H_ASP_61  | OD1 | 2.825 |
| 2ORB | H_ARG_66  | NH1 | H_ASP_86  | OD2 | 2.863 |
| 2ORB | H_ARG_66  | NH2 | H_ASP_86  | OD1 | 3.152 |
| 2ORB | H_ARG_66  | NH2 | H_ASP_86  | OD2 | 3.464 |
| 2ORB | H_ARG_94  | NH2 | H_ASP_101 | OD2 | 2.967 |
| 2ORB | M_LYS_39  | NZ  | M_ASP_81  | OD1 | 3.035 |
| 2ORB | M_LYS_39  | NZ  | M_ASP_81  | OD2 | 2.955 |
| 2ORB | M_ARG_61  | NH1 | M_GLU_79  | OE1 | 3.351 |
| 2ORB | M_ARG_61  | NH1 | M_GLU_79  | OE2 | 3.951 |
| 2ORB | M_ARG_61  | NH2 | M_GLU_79  | OE1 | 3.841 |
| 2ORB | M_ARG_61  | NH2 | M_ASP_82  | OD1 | 2.637 |
| 2ORB | M_ARG_61  | NH2 | M_ASP_82  | OD2 | 3.364 |
| 2ORB | M_LYS_103 | NZ  | M_ASP_165 | OD1 | 3.221 |
| 2ORB | M_LYS_149 | NZ  | M_GLU_195 | OE1 | 3.434 |
| 2ORB | M_ARG_155 | NH1 | M_GLU_185 | OE1 | 3.183 |
| 2ORB | M_ARG_155 | NH2 | M_GLU_185 | OE1 | 2.497 |
| 2ORB | M_ARG_155 | NH2 | M_GLU_185 | OE2 | 3.779 |

|      |           |     |           |     |       |
|------|-----------|-----|-----------|-----|-------|
| 2ORB | M.LYS_183 | NZ  | M.ASP_184 | OD2 | 3.320 |
| 2ORB | M.ARG_211 | NH1 | M.GLU_187 | OE1 | 3.810 |
| 2ORB | L.HIS_3   | NE2 | L.GLU_1   | OE1 | 2.997 |
| 2ORB | L.ARG_38  | NH1 | L.GLU_46  | OE1 | 3.408 |
| 2ORB | L.ARG_38  | NH1 | L.GLU_46  | OE2 | 2.958 |
| 2ORB | L.ARG_38  | NH2 | L.ASP_86  | OD1 | 2.616 |
| 2ORB | L.LYS_64  | NZ  | L.ASP_61  | OD1 | 2.889 |
| 2ORB | L.ARG_66  | NH1 | L.ASP_86  | OD1 | 3.960 |
| 2ORB | L.ARG_66  | NH1 | L.ASP_86  | OD2 | 2.821 |
| 2ORB | L.ARG_66  | NH2 | L.ASP_86  | OD1 | 2.981 |
| 2ORB | L.ARG_66  | NH2 | L.ASP_86  | OD2 | 3.330 |
| 2ORB | L.ARG_94  | NH2 | L.ASP_101 | OD1 | 3.695 |
| 2ORB | L.ARG_94  | NH2 | L.ASP_101 | OD2 | 3.090 |
| 2OSL | L.HIS_33  | NE2 | H.ASP_105 | OD1 | 3.260 |
| 2OSL | L.HIS_33  | NE2 | H.ASP_105 | OD2 | 2.885 |
| 2OSL | L.ARG_60  | NH1 | L.GLU_78  | OE2 | 2.907 |
| 2OSL | L.ARG_60  | NH2 | L.ASP_81  | OD1 | 2.573 |
| 2OSL | L.ARG_60  | NH2 | L.ASP_81  | OD2 | 2.599 |
| 2OSL | L.LYS_102 | NZ  | L.GLU_164 | OE1 | 3.278 |
| 2OSL | L.LYS_102 | NZ  | L.GLU_164 | OE2 | 3.140 |
| 2OSL | L.ARG_107 | NH2 | B.GLU_194 | OE2 | 3.976 |
| 2OSL | L.LYS_187 | NZ  | L.ASP_184 | OD1 | 2.734 |
| 2OSL | L.LYS_187 | NZ  | L.ASP_184 | OD2 | 3.949 |
| 2OSL | L.HIS_188 | ND1 | L.ASP_150 | OD2 | 2.901 |
| 2OSL | H.LYS_63  | NZ  | H.GLU_46  | OE1 | 3.906 |
| 2OSL | H.LYS_63  | NZ  | H.GLU_46  | OE2 | 2.831 |
| 2OSL | H.LYS_67  | NZ  | H.ASP_90  | OD1 | 3.942 |
| 2OSL | H.LYS_67  | NZ  | H.ASP_90  | OD2 | 2.944 |
| 2OSL | H.LYS_151 | NZ  | H.ASP_152 | OD1 | 3.605 |
| 2OSL | H.LYS_151 | NZ  | H.ASP_152 | OD2 | 2.970 |
| 2OSL | B.HIS_33  | ND1 | A.ASP_105 | OD2 | 3.615 |
| 2OSL | B.HIS_33  | NE2 | A.ASP_105 | OD2 | 3.957 |
| 2OSL | B.ARG_60  | NH1 | B.GLU_78  | OE1 | 3.239 |
| 2OSL | B.ARG_60  | NH1 | B.GLU_78  | OE2 | 3.966 |
| 2OSL | B.ARG_60  | NH2 | B.ASP_81  | OD1 | 2.569 |
| 2OSL | B.ARG_60  | NH2 | B.ASP_81  | OD2 | 3.261 |
| 2OSL | B.ARG_76  | NH2 | B.GLU_78  | OE1 | 3.595 |
| 2OSL | B.LYS_102 | NZ  | B.GLU_104 | OE1 | 3.425 |
| 2OSL | B.ARG_141 | NH2 | B.GLU_160 | OE1 | 3.816 |
| 2OSL | B.HIS_188 | ND1 | B.ASP_150 | OD2 | 3.233 |
| 2OSL | A.LYS_63  | NZ  | A.GLU_46  | OE1 | 2.696 |
| 2OSL | A.LYS_67  | NZ  | A.ASP_90  | OD1 | 2.936 |
| 2OSL | A.LYS_67  | NZ  | A.ASP_90  | OD2 | 2.944 |
| 2OSL | A.LYS_151 | NZ  | A.ASP_152 | OD1 | 3.042 |
| 2OSL | A.LYS_151 | NZ  | A.ASP_152 | OD2 | 3.081 |
| 2OSL | A.LYS_217 | NZ  | B.GLU_122 | OE1 | 2.793 |
| 2OTU | A.ARG_65  | NH1 | A.ASP_86  | OD1 | 3.180 |
| 2OTU | A.ARG_65  | NH1 | A.ASP_86  | OD2 | 2.487 |
| 2OTU | A.ARG_65  | NH2 | A.ASP_86  | OD1 | 3.397 |
| 2OTU | A.ARG_65  | NH2 | A.ASP_86  | OD2 | 3.745 |
| 2OTU | B.ARG_38  | NH1 | B.ASP_90  | OD1 | 2.946 |
| 2OTU | B.ARG_38  | NH2 | B.GLU_46  | OE1 | 2.919 |
| 2OTU | B.LYS_65  | NZ  | B.ASP_62  | OD1 | 3.442 |
| 2OTU | B.ARG_67  | NH1 | B.ASP_90  | OD1 | 3.744 |
| 2OTU | B.ARG_67  | NH1 | B.ASP_90  | OD2 | 2.752 |
| 2OTU | B.ARG_67  | NH2 | B.ASP_90  | OD1 | 2.959 |
| 2OTU | B.ARG_67  | NH2 | B.ASP_90  | OD2 | 3.506 |
| 2OTU | B.LYS_87  | NZ  | F.ASP_31  | OD1 | 3.793 |

|      |           |     |          |     |       |
|------|-----------|-----|----------|-----|-------|
| 2OTU | B.LYS.87  | NZ  | F.ASP.31 | OD2 | 2.711 |
| 2OTU | C.ARG.65  | NH1 | C.ASP.86 | OD1 | 3.191 |
| 2OTU | C.ARG.65  | NH1 | C.ASP.86 | OD2 | 2.444 |
| 2OTU | C.ARG.65  | NH2 | C.GLU.85 | OE1 | 3.930 |
| 2OTU | C.ARG.65  | NH2 | C.ASP.86 | OD1 | 3.938 |
| 2OTU | C.ARG.65  | NH2 | C.ASP.86 | OD2 | 3.948 |
| 2OTU | D.ARG.38  | NH1 | D.ASP.90 | OD1 | 2.961 |
| 2OTU | D.ARG.38  | NH2 | D.GLU.46 | OE1 | 2.890 |
| 2OTU | D.ARG.38  | NH2 | D.GLU.46 | OE2 | 3.975 |
| 2OTU | D.ARG.38  | NH2 | D.ASP.90 | OD1 | 3.915 |
| 2OTU | D.ARG.67  | NH1 | D.ASP.90 | OD1 | 3.940 |
| 2OTU | D.ARG.67  | NH1 | D.ASP.90 | OD2 | 2.837 |
| 2OTU | D.ARG.67  | NH2 | D.ASP.90 | OD1 | 2.974 |
| 2OTU | D.ARG.67  | NH2 | D.ASP.90 | OD2 | 3.349 |
| 2OTU | E.ARG.65  | NH1 | E.ASP.86 | OD1 | 3.707 |
| 2OTU | E.ARG.65  | NH1 | E.ASP.86 | OD2 | 2.736 |
| 2OTU | E.ARG.65  | NH2 | E.ASP.86 | OD1 | 3.658 |
| 2OTU | E.ARG.65  | NH2 | E.ASP.86 | OD2 | 3.976 |
| 2OTU | F.ARG.38  | NH1 | F.ASP.90 | OD1 | 2.925 |
| 2OTU | F.ARG.38  | NH2 | F.GLU.46 | OE1 | 2.898 |
| 2OTU | F.ARG.38  | NH2 | F.ASP.90 | OD1 | 3.956 |
| 2OTU | F.LYS.65  | NZ  | F.ASP.62 | OD1 | 3.608 |
| 2OTU | F.ARG.67  | NH1 | F.ASP.90 | OD1 | 3.636 |
| 2OTU | F.ARG.67  | NH1 | F.ASP.90 | OD2 | 2.694 |
| 2OTU | F.ARG.67  | NH2 | F.ASP.90 | OD1 | 2.962 |
| 2OTU | F.ARG.67  | NH2 | F.ASP.90 | OD2 | 3.544 |
| 2OTU | F.LYS.76  | NZ  | F.ASP.73 | OD1 | 3.979 |
| 2OTU | F.ARG.100 | NH1 | E.ASP.60 | OD1 | 3.255 |
| 2OTU | F.ARG.100 | NH1 | E.ASP.60 | OD2 | 3.915 |
| 2OTU | G.ARG.65  | NH1 | G.ASP.86 | OD1 | 3.029 |
| 2OTU | G.ARG.65  | NH1 | G.ASP.86 | OD2 | 2.451 |
| 2OTU | G.ARG.65  | NH2 | G.GLU.85 | OE2 | 3.992 |
| 2OTU | G.ARG.65  | NH2 | G.ASP.86 | OD1 | 2.757 |
| 2OTU | G.ARG.65  | NH2 | G.ASP.86 | OD2 | 3.075 |
| 2OTU | H.ARG.38  | NH1 | H.ASP.90 | OD1 | 2.927 |
| 2OTU | H.ARG.38  | NH2 | H.GLU.46 | OE2 | 3.512 |
| 2OTU | H.ARG.44  | NH1 | C.ASP.60 | OD1 | 3.017 |
| 2OTU | H.ARG.44  | NH1 | C.ASP.60 | OD2 | 3.518 |
| 2OTU | H.ARG.44  | NH2 | C.ASP.60 | OD1 | 3.945 |
| 2OTU | H.ARG.44  | NH2 | C.ASP.60 | OD2 | 3.013 |
| 2OTU | H.ARG.67  | NH1 | H.ASP.90 | OD1 | 3.843 |
| 2OTU | H.ARG.67  | NH1 | H.ASP.90 | OD2 | 2.748 |
| 2OTU | H.ARG.67  | NH2 | H.ASP.90 | OD1 | 3.051 |
| 2OTU | H.ARG.67  | NH2 | H.ASP.90 | OD2 | 3.464 |
| 2OTU | H.LYS.87  | NZ  | D.ASP.31 | OD1 | 3.910 |
| 2OTU | H.LYS.87  | NZ  | D.ASP.31 | OD2 | 2.759 |
| 2OTW | A.ARG.65  | NH1 | A.ASP.86 | OD1 | 2.815 |
| 2OTW | A.ARG.65  | NH1 | A.ASP.86 | OD2 | 2.356 |
| 2OTW | A.ARG.65  | NH2 | A.GLU.85 | OE2 | 3.711 |
| 2OTW | A.ARG.65  | NH2 | A.ASP.86 | OD1 | 2.988 |
| 2OTW | A.ARG.65  | NH2 | A.ASP.86 | OD2 | 3.514 |
| 2OTW | B.ARG.38  | NH1 | B.ASP.90 | OD1 | 3.114 |
| 2OTW | B.ARG.38  | NH2 | B.GLU.46 | OE1 | 3.177 |
| 2OTW | B.ARG.38  | NH2 | B.GLU.46 | OE2 | 3.352 |
| 2OTW | B.LYS.65  | NZ  | B.ASP.62 | OD1 | 3.341 |
| 2OTW | B.ARG.67  | NH1 | B.ASP.90 | OD1 | 3.557 |
| 2OTW | B.ARG.67  | NH1 | B.ASP.90 | OD2 | 2.723 |
| 2OTW | B.ARG.67  | NH2 | B.ASP.90 | OD1 | 3.013 |

|      |           |     |           |     |       |
|------|-----------|-----|-----------|-----|-------|
| 2OTW | B_ARG.67  | NH2 | B_ASP_90  | OD2 | 3.717 |
| 2OTW | B_LYS.87  | NZ  | D_ASP_31  | OD1 | 3.659 |
| 2OTW | B_LYS.87  | NZ  | D_ASP_31  | OD2 | 2.671 |
| 2OTW | B_ARG.100 | NH1 | A_ASP_60  | OD1 | 3.223 |
| 2OTW | B_ARG.100 | NH1 | A_ASP_60  | OD2 | 3.943 |
| 2OTW | C_ARG.65  | NH1 | C_ASP_86  | OD1 | 2.692 |
| 2OTW | C_ARG.65  | NH1 | C_ASP_86  | OD2 | 2.598 |
| 2OTW | D_ARG.38  | NH1 | D_ASP_90  | OD1 | 2.989 |
| 2OTW | D_ARG.38  | NH2 | D_GLU_46  | OE1 | 2.871 |
| 2OTW | D_ARG.38  | NH2 | D_GLU_46  | OE2 | 3.541 |
| 2OTW | D_ARG.44  | NH2 | D_GLU_42  | OE1 | 3.918 |
| 2OTW | D_ARG.67  | NH1 | D_ASP_90  | OD1 | 3.886 |
| 2OTW | D_ARG.67  | NH1 | D_ASP_90  | OD2 | 2.722 |
| 2OTW | D_ARG.67  | NH2 | D_ASP_90  | OD1 | 2.979 |
| 2OTW | D_ARG.67  | NH2 | D_ASP_90  | OD2 | 3.322 |
| 2OTW | D_ARG.100 | NH1 | C_ASP_60  | OD1 | 3.882 |
| 2OTW | D_ARG.100 | NH1 | C_ASP_60  | OD2 | 3.653 |
| 2P8L | A_ARG.24  | NH2 | A_GLU_70  | OE2 | 3.694 |
| 2P8L | A_ARG.37  | NH1 | A_ASP_82  | OD1 | 2.662 |
| 2P8L | A_ARG.61  | NH2 | A_ASP_82  | OD1 | 3.178 |
| 2P8L | A_ARG.61  | NH2 | A_ASP_82  | OD2 | 3.399 |
| 2P8L | A_HIS.96  | NE2 | C_ASP_5   | OD1 | 2.766 |
| 2P8L | A_LYS.149 | NZ  | A_GLU_195 | OE1 | 3.348 |
| 2P8L | A_LYS.149 | NZ  | A_GLU_195 | OE2 | 2.911 |
| 2P8L | A_LYS.183 | NZ  | A_GLU_187 | OE1 | 3.209 |
| 2P8L | A_LYS.183 | NZ  | A_GLU_187 | OE2 | 3.403 |
| 2P8L | B_ARG.38  | NH1 | B_GLU_46  | OE1 | 2.804 |
| 2P8L | B_ARG.38  | NH1 | B_GLU_46  | OE2 | 3.681 |
| 2P8L | B_ARG.38  | NH2 | B_ASP_86  | OD1 | 2.496 |
| 2P8L | B_LYS.57  | NZ  | B_ASP_55  | OD2 | 3.457 |
| 2P8L | B_ARG.58  | NH1 | C_GLU_3   | OE1 | 1.911 |
| 2P8L | B_ARG.58  | NH1 | C_GLU_3   | OE2 | 3.223 |
| 2P8L | B_ARG.58  | NH2 | B_ASP_56  | OD1 | 3.758 |
| 2P8L | B_ARG.58  | NH2 | B_ASP_56  | OD2 | 3.029 |
| 2P8L | B_ARG.58  | NH2 | C_GLU_3   | OE1 | 3.943 |
| 2P8L | B_ARG.66  | NH1 | B_ASP_86  | OD1 | 3.620 |
| 2P8L | B_ARG.66  | NH1 | B_ASP_86  | OD2 | 3.879 |
| 2P8L | B_ARG.66  | NH2 | B_ASP_86  | OD1 | 3.123 |
| 2P8L | B_ARG.66  | NH2 | B_ASP_86  | OD2 | 2.431 |
| 2P8L | B_LYS.71  | NZ  | B_ASP_55  | OD1 | 3.582 |
| 2P8L | B_HIS.94  | ND1 | B_ASP_101 | OD1 | 2.660 |
| 2P8L | B_HIS.94  | ND1 | B_ASP_101 | OD2 | 3.511 |
| 2P8L | B_ARG.95  | NH1 | C_ASP_5   | OD1 | 2.951 |
| 2P8L | B_ARG.95  | NH1 | C_ASP_5   | OD2 | 3.619 |
| 2P8L | B_ARG.95  | NH2 | C_ASP_5   | OD1 | 3.420 |
| 2P8L | B_ARG.95  | NH2 | C_ASP_5   | OD2 | 2.971 |
| 2P8L | B_ARG.96  | NH1 | A_GLU_55  | OE1 | 3.236 |
| 2P8L | B_ARG.96  | NH1 | A_GLU_55  | OE2 | 3.320 |
| 2P8L | B_ARG.96  | NH1 | B_ASP_101 | OD2 | 3.133 |
| 2P8L | B_ARG.96  | NH2 | A_GLU_55  | OE1 | 3.018 |
| 2P8L | B_LYS.143 | NZ  | B_ASP_144 | OD1 | 3.794 |
| 2P8L | B_LYS.209 | NZ  | A_GLU_123 | OE1 | 3.743 |
| 2P8L | B_ARG.210 | NH1 | B_GLU_212 | OE1 | 2.518 |
| 2P8L | B_ARG.210 | NH1 | B_GLU_212 | OE2 | 2.702 |
| 2P8L | B_ARG.210 | NH2 | B_GLU_212 | OE1 | 2.760 |
| 2P8L | C_LYS.6   | NZ  | B_ASP_54  | OD1 | 3.641 |
| 2P8L | C_LYS.6   | NZ  | B_ASP_54  | OD2 | 3.025 |
| 2P8L | C_LYS.6   | NZ  | B_ASP_56  | OD1 | 2.878 |

|      |           |     |           |     |       |
|------|-----------|-----|-----------|-----|-------|
| 2P8M | A_ARG_37  | NH1 | A_ASP_82  | OD1 | 2.839 |
| 2P8M | A_ARG_61  | NH2 | A_ASP_82  | OD1 | 2.944 |
| 2P8M | A_ARG_61  | NH2 | A_ASP_82  | OD2 | 3.371 |
| 2P8M | A_HIS_96  | NE2 | C_ASP_3   | OD2 | 2.613 |
| 2P8M | A_LYS_149 | NZ  | A_GLU_193 | OE1 | 3.222 |
| 2P8M | A_LYS_149 | NZ  | A_GLU_195 | OE1 | 3.752 |
| 2P8M | A_LYS_183 | NZ  | A_GLU_187 | OE2 | 2.931 |
| 2P8M | A_LYS_190 | NZ  | A_GLU_213 | OE2 | 3.479 |
| 2P8M | B_ARG_1   | NH2 | A_GLU_55  | OE2 | 3.915 |
| 2P8M | B_ARG_38  | NH1 | B_GLU_46  | OE1 | 2.460 |
| 2P8M | B_ARG_38  | NH1 | B_GLU_46  | OE2 | 3.000 |
| 2P8M | B_ARG_38  | NH2 | B_ASP_86  | OD1 | 2.567 |
| 2P8M | B_LYS_57  | NZ  | B_ASP_55  | OD1 | 3.800 |
| 2P8M | B_LYS_57  | NZ  | B_ASP_55  | OD2 | 3.375 |
| 2P8M | B_ARG_58  | NH1 | B_ASP_56  | OD1 | 2.812 |
| 2P8M | B_ARG_58  | NH2 | C_GLU_1   | OE1 | 2.510 |
| 2P8M | B_ARG_66  | NH1 | B_ASP_86  | OD1 | 3.550 |
| 2P8M | B_ARG_66  | NH2 | B_ASP_86  | OD1 | 3.137 |
| 2P8M | B_ARG_66  | NH2 | B_ASP_86  | OD2 | 2.617 |
| 2P8M | B_HIS_94  | ND1 | B_ASP_101 | OD1 | 2.569 |
| 2P8M | B_HIS_94  | ND1 | B_ASP_101 | OD2 | 3.296 |
| 2P8M | B_ARG_95  | NH1 | C_ASP_3   | OD1 | 2.973 |
| 2P8M | B_ARG_95  | NH1 | C_ASP_3   | OD2 | 3.042 |
| 2P8M | B_ARG_95  | NH2 | C_ASP_3   | OD1 | 3.169 |
| 2P8M | B_ARG_96  | NH1 | A_GLU_55  | OE1 | 3.351 |
| 2P8M | B_ARG_96  | NH1 | A_GLU_55  | OE2 | 3.448 |
| 2P8M | B_ARG_96  | NH1 | B_ASP_101 | OD2 | 3.545 |
| 2P8M | B_ARG_96  | NH2 | A_GLU_55  | OE1 | 3.393 |
| 2P8M | B_LYS_143 | NZ  | B_ASP_144 | OD1 | 3.820 |
| 2P8M | B_LYS_143 | NZ  | B_ASP_144 | OD2 | 3.945 |
| 2P8M | B_LYS_209 | NZ  | A_GLU_123 | OE1 | 3.649 |
| 2P8M | B_ARG_210 | NH2 | B_GLU_212 | OE1 | 2.714 |
| 2P8M | B_ARG_210 | NH2 | B_GLU_212 | OE2 | 3.508 |
| 2P8M | C_LYS_4   | NZ  | B_ASP_54  | OD1 | 2.903 |
| 2P8M | C_LYS_4   | NZ  | B_ASP_54  | OD2 | 2.371 |
| 2P8M | C_LYS_4   | NZ  | B_ASP_56  | OD2 | 3.183 |
| 2P8P | A_ARG_24  | NH1 | A_GLU_70  | OE2 | 3.886 |
| 2P8P | A_ARG_24  | NH2 | A_GLU_70  | OE2 | 2.623 |
| 2P8P | A_ARG_37  | NH1 | A_GLU_81  | OE1 | 3.668 |
| 2P8P | A_ARG_37  | NH1 | A_GLU_81  | OE2 | 3.049 |
| 2P8P | A_ARG_37  | NH1 | A_ASP_82  | OD1 | 3.193 |
| 2P8P | A_ARG_37  | NH2 | A_GLU_81  | OE1 | 3.421 |
| 2P8P | A_LYS_39  | NZ  | A_GLU_81  | OE1 | 3.598 |
| 2P8P | A_ARG_61  | NH2 | A_GLU_81  | OE2 | 2.595 |
| 2P8P | A_ARG_61  | NH2 | A_ASP_82  | OD1 | 3.431 |
| 2P8P | A_HIS_96  | NE2 | C_ASP_3   | OD1 | 3.214 |
| 2P8P | A_LYS_149 | NZ  | A_GLU_195 | OE1 | 3.534 |
| 2P8P | A_LYS_183 | NZ  | A_GLU_187 | OE1 | 2.848 |
| 2P8P | A_LYS_183 | NZ  | A_GLU_187 | OE2 | 3.221 |
| 2P8P | A_LYS_188 | NZ  | A_ASP_185 | OD1 | 2.922 |
| 2P8P | B_ARG_38  | NH1 | B_ASP_86  | OD1 | 2.794 |
| 2P8P | B_ARG_38  | NH2 | B_GLU_46  | OE1 | 3.420 |
| 2P8P | B_ARG_38  | NH2 | B_GLU_46  | OE2 | 3.340 |
| 2P8P | B_ARG_38  | NH2 | B_ASP_86  | OD1 | 3.738 |
| 2P8P | B_LYS_57  | NZ  | B_ASP_55  | OD1 | 3.547 |
| 2P8P | B_LYS_57  | NZ  | B_ASP_55  | OD2 | 2.954 |
| 2P8P | B_ARG_58  | NH1 | B_ASP_56  | OD1 | 2.448 |
| 2P8P | B_ARG_58  | NH1 | B_ASP_56  | OD2 | 3.762 |

|      |           |     |           |     |       |
|------|-----------|-----|-----------|-----|-------|
| 2P8P | B_ARG_58  | NH2 | B_ASP_56  | OD1 | 3.457 |
| 2P8P | B_ARG_58  | NH2 | B_ASP_56  | OD2 | 3.922 |
| 2P8P | B_ARG_58  | NH2 | C_GLU_1   | OE2 | 3.147 |
| 2P8P | B_ARG_66  | NH1 | B_ASP_86  | OD1 | 3.503 |
| 2P8P | B_ARG_66  | NH1 | B_ASP_86  | OD2 | 3.962 |
| 2P8P | B_ARG_66  | NH2 | B_ASP_86  | OD1 | 3.025 |
| 2P8P | B_ARG_66  | NH2 | B_ASP_86  | OD2 | 2.685 |
| 2P8P | B_LYS_71  | NZ  | B_ASP_55  | OD1 | 3.926 |
| 2P8P | B_HIS_94  | ND1 | B_ASP_101 | OD1 | 2.554 |
| 2P8P | B_HIS_94  | ND1 | B_ASP_101 | OD2 | 3.579 |
| 2P8P | B_ARG_95  | NH1 | C_ASP_3   | OD1 | 2.805 |
| 2P8P | B_ARG_95  | NH1 | C_ASP_3   | OD2 | 3.510 |
| 2P8P | B_ARG_95  | NH2 | C_ASP_3   | OD1 | 3.459 |
| 2P8P | B_ARG_95  | NH2 | C_ASP_3   | OD2 | 2.629 |
| 2P8P | B_ARG_96  | NH1 | A_GLU_55  | OE1 | 3.239 |
| 2P8P | B_ARG_96  | NH1 | A_GLU_55  | OE2 | 3.518 |
| 2P8P | B_ARG_96  | NH1 | B_ASP_101 | OD2 | 2.782 |
| 2P8P | B_ARG_96  | NH2 | A_GLU_55  | OE1 | 3.128 |
| 2P8P | B_LYS_144 | NZ  | B_ASP_145 | OD1 | 3.635 |
| 2P8P | B_LYS_144 | NZ  | B_ASP_145 | OD2 | 3.553 |
| 2P8P | B_LYS_210 | NZ  | A_GLU_123 | OE1 | 3.349 |
| 2P8P | B_LYS_210 | NZ  | A_GLU_123 | OE2 | 3.192 |
| 2P8P | B_ARG_211 | NH1 | B_GLU_213 | OE1 | 3.506 |
| 2P8P | B_ARG_211 | NH1 | B_GLU_213 | OE2 | 3.532 |
| 2P8P | B_ARG_211 | NH2 | B_GLU_213 | OE1 | 2.609 |
| 2P8P | B_ARG_211 | NH2 | B_GLU_213 | OE2 | 3.996 |
| 2P8P | C_LYS_4   | NZ  | B_ASP_54  | OD1 | 3.623 |
| 2P8P | C_LYS_4   | NZ  | B_ASP_54  | OD2 | 3.010 |
| 2P8P | C_LYS_4   | NZ  | B_ASP_56  | OD2 | 2.836 |
| 2PR4 | L_ARG_37  | NH1 | L_ASP_82  | OD1 | 3.024 |
| 2PR4 | L_ARG_61  | NH2 | L_ASP_82  | OD1 | 2.716 |
| 2PR4 | L_ARG_61  | NH2 | L_ASP_82  | OD2 | 3.445 |
| 2PR4 | L_ARG_108 | NH1 | L_ASP_170 | OD1 | 3.583 |
| 2PR4 | L_LYS_149 | NZ  | L_GLU_195 | OE1 | 3.734 |
| 2PR4 | L_LYS_183 | NZ  | L_GLU_187 | OE2 | 2.711 |
| 2PR4 | L_LYS_190 | NZ  | L_ASP_151 | OD1 | 3.274 |
| 2PR4 | H_ARG_40  | NH1 | H_GLU_48  | OE1 | 3.002 |
| 2PR4 | H_ARG_40  | NH1 | H_ASP_91  | OD1 | 3.704 |
| 2PR4 | H_ARG_40  | NH2 | H_ASP_91  | OD1 | 2.605 |
| 2PR4 | H_ARG_60  | NH1 | H_ASP_58  | OD1 | 3.465 |
| 2PR4 | H_ARG_60  | NH1 | H_ASP_58  | OD2 | 3.213 |
| 2PR4 | H_ARG_68  | NH1 | H_ASP_91  | OD1 | 3.656 |
| 2PR4 | H_ARG_68  | NH1 | H_ASP_91  | OD2 | 3.886 |
| 2PR4 | H_ARG_68  | NH2 | H_ASP_91  | OD1 | 3.393 |
| 2PR4 | H_ARG_68  | NH2 | H_ASP_91  | OD2 | 2.646 |
| 2PR4 | H_HIS_99  | ND1 | H_ASP_120 | OD1 | 2.785 |
| 2PR4 | H_HIS_99  | ND1 | H_ASP_120 | OD2 | 3.650 |
| 2PR4 | H_ARG_101 | NH1 | L_GLU_55  | OE1 | 3.296 |
| 2PR4 | H_ARG_101 | NH1 | L_GLU_55  | OE2 | 3.376 |
| 2PR4 | H_ARG_101 | NH1 | H_ASP_120 | OD2 | 3.802 |
| 2PR4 | H_ARG_101 | NH2 | L_GLU_55  | OE1 | 3.286 |
| 2PR4 | H_LYS_162 | NZ  | H_ASP_163 | OD1 | 3.519 |
| 2PR4 | H_LYS_228 | NZ  | L_GLU_123 | OE1 | 3.151 |
| 2PR4 | H_ARG_229 | NH1 | H_GLU_231 | OE2 | 3.222 |
| 2PR4 | H_ARG_229 | NH2 | H_GLU_231 | OE1 | 3.609 |
| 2PR4 | H_ARG_229 | NH2 | H_GLU_231 | OE2 | 2.833 |
| 2Q8A | A_ARG_128 | NH1 | A_GLU_343 | OE2 | 2.727 |
| 2Q8A | A_ARG_128 | NH2 | A_GLU_256 | OE1 | 2.979 |

|      |           |     |           |     |       |
|------|-----------|-----|-----------|-----|-------|
| 2Q8A | A_ARG_128 | NH2 | A_GLU_256 | OE2 | 2.971 |
| 2Q8A | A_LYS_203 | NZ  | L_ASP_32  | OD1 | 3.044 |
| 2Q8A | A_LYS_203 | NZ  | L_ASP_32  | OD2 | 2.513 |
| 2Q8A | A_LYS_245 | NZ  | A_GLU_213 | OE2 | 3.921 |
| 2Q8A | A_LYS_245 | NZ  | A_ASP_242 | OD1 | 3.383 |
| 2Q8A | A_LYS_245 | NZ  | A_ASP_242 | OD2 | 2.933 |
| 2Q8A | A_ARG_270 | NH1 | A_ASP_178 | OD1 | 2.638 |
| 2Q8A | A_ARG_270 | NH1 | A_ASP_178 | OD2 | 3.624 |
| 2Q8A | A_LYS_292 | NZ  | A_GLU_133 | OE2 | 2.672 |
| 2Q8A | A_ARG_304 | NH1 | A_GLU_436 | OE1 | 3.883 |
| 2Q8A | A_ARG_304 | NH1 | A_GLU_436 | OE2 | 2.055 |
| 2Q8A | A_ARG_304 | NH2 | A_GLU_436 | OE1 | 3.764 |
| 2Q8A | A_ARG_304 | NH2 | A_GLU_436 | OE2 | 3.204 |
| 2Q8A | A_LYS_311 | NZ  | A_ASP_322 | OD1 | 2.775 |
| 2Q8A | A_LYS_311 | NZ  | A_ASP_322 | OD2 | 3.906 |
| 2Q8A | A_LYS_339 | NZ  | A_GLU_336 | OE1 | 3.158 |
| 2Q8A | A_LYS_339 | NZ  | A_GLU_336 | OE2 | 3.923 |
| 2Q8A | A_LYS_364 | NZ  | A_GLU_361 | OE1 | 3.383 |
| 2Q8A | A_LYS_364 | NZ  | A_GLU_361 | OE2 | 3.258 |
| 2Q8A | A_LYS_368 | NZ  | A_ASP_227 | OD1 | 2.672 |
| 2Q8A | A_LYS_368 | NZ  | A_ASP_227 | OD2 | 3.440 |
| 2Q8A | A_LYS_391 | NZ  | A_ASP_134 | OD2 | 2.727 |
| 2Q8A | A_HIS_433 | NE2 | A_GLU_436 | OE1 | 3.631 |
| 2Q8A | L_ARG_54  | NH1 | L_ASP_60  | OD1 | 3.683 |
| 2Q8A | L_ARG_61  | NH1 | L_ASP_82  | OD1 | 2.388 |
| 2Q8A | L_ARG_61  | NH1 | L_ASP_82  | OD2 | 3.063 |
| 2Q8A | L_ARG_61  | NH2 | L_GLU_81  | OE2 | 3.801 |
| 2Q8A | L_ARG_96  | NH1 | A_ASP_204 | OD1 | 2.971 |
| 2Q8A | L_ARG_96  | NH1 | A_ASP_204 | OD2 | 2.580 |
| 2Q8A | L_ARG_96  | NH2 | A_ASP_204 | OD1 | 2.882 |
| 2Q8A | L_ARG_96  | NH2 | A_ASP_204 | OD2 | 3.927 |
| 2Q8A | L_ARG_96  | NH2 | H_GLU_59  | OE2 | 3.755 |
| 2Q8A | L_LYS_103 | NZ  | L_ASP_165 | OD1 | 3.929 |
| 2Q8A | L_HIS_189 | ND1 | L_ASP_151 | OD2 | 2.903 |
| 2Q8A | L_LYS_199 | NZ  | L_ASP_110 | OD2 | 2.695 |
| 2Q8A | H_HIS_35  | NE2 | A_ASP_204 | OD2 | 3.930 |
| 2Q8A | H_ARG_50  | NH1 | H_ASP_52  | OD2 | 3.087 |
| 2Q8A | H_ARG_50  | NH2 | H_GLU_59  | OE2 | 3.157 |
| 2Q8A | H_LYS_63  | NZ  | H_GLU_46  | OE1 | 3.799 |
| 2Q8A | H_LYS_67  | NZ  | H_ASP_90  | OD1 | 3.906 |
| 2Q8A | H_LYS_67  | NZ  | H_ASP_90  | OD2 | 3.028 |
| 2Q8B | A_ARG_128 | NH1 | A_GLU_256 | OE1 | 3.040 |
| 2Q8B | A_ARG_128 | NH1 | A_GLU_256 | OE2 | 3.000 |
| 2Q8B | A_ARG_128 | NH2 | A_GLU_256 | OE1 | 3.059 |
| 2Q8B | A_LYS_203 | NZ  | L_ASP_32  | OD1 | 3.779 |
| 2Q8B | A_LYS_203 | NZ  | L_ASP_32  | OD2 | 2.847 |
| 2Q8B | A_LYS_245 | NZ  | A_GLU_213 | OE2 | 2.777 |
| 2Q8B | A_LYS_245 | NZ  | A_ASP_242 | OD2 | 3.887 |
| 2Q8B | A_LYS_292 | NZ  | A_GLU_133 | OE1 | 3.902 |
| 2Q8B | A_LYS_292 | NZ  | A_GLU_133 | OE2 | 2.733 |
| 2Q8B | A_ARG_304 | NH1 | A_GLU_436 | OE1 | 3.770 |
| 2Q8B | A_ARG_304 | NH1 | A_GLU_436 | OE2 | 2.007 |
| 2Q8B | A_ARG_304 | NH2 | A_GLU_436 | OE2 | 3.545 |
| 2Q8B | A_LYS_311 | NZ  | A_ASP_322 | OD1 | 2.853 |
| 2Q8B | A_LYS_311 | NZ  | A_ASP_322 | OD2 | 3.778 |
| 2Q8B | A_LYS_339 | NZ  | A_GLU_336 | OE1 | 2.983 |
| 2Q8B | A_LYS_339 | NZ  | A_GLU_336 | OE2 | 3.511 |
| 2Q8B | A_LYS_351 | NZ  | A_GLU_343 | OE2 | 2.663 |



|      |           |     |            |     |       |
|------|-----------|-----|------------|-----|-------|
| 2Q8B | A_LYS_391 | NZ  | A_ASP_134  | OD1 | 3.749 |
| 2Q8B | A_LYS_391 | NZ  | A_ASP_134  | OD2 | 2.808 |
| 2Q8B | A_LYS_391 | NZ  | A_ASP_388  | OD1 | 3.545 |
| 2Q8B | A_HIS_433 | NE2 | A_GLU_436  | OE1 | 3.672 |
| 2Q8B | L_LYS_24  | NZ  | L_ASP_70   | OD1 | 3.418 |
| 2Q8B | L_LYS_24  | NZ  | L_ASP_70   | OD2 | 3.406 |
| 2Q8B | L_ARG_61  | NH1 | L_ASP_82   | OD1 | 2.518 |
| 2Q8B | L_ARG_61  | NH1 | L_ASP_82   | OD2 | 3.346 |
| 2Q8B | L_ARG_96  | NH1 | A_ASP_204  | OD1 | 3.458 |
| 2Q8B | L_ARG_96  | NH1 | A_ASP_204  | OD2 | 2.952 |
| 2Q8B | L_ARG_96  | NH2 | A_ASP_204  | OD1 | 2.667 |
| 2Q8B | L_ARG_96  | NH2 | A_ASP_204  | OD2 | 3.462 |
| 2Q8B | L_ARG_188 | NH1 | L_GLU_185  | OE1 | 3.851 |
| 2Q8B | L_ARG_188 | NH1 | L_GLU_185  | OE2 | 2.847 |
| 2Q8B | L_ARG_188 | NH2 | L_GLU_185  | OE2 | 3.891 |
| 2Q8B | L_HIS_189 | ND1 | L_GLU_185  | OE2 | 3.560 |
| 2Q8B | L_LYS_199 | NZ  | L_ASP_110  | OD2 | 3.181 |
| 2Q8B | H_ARG_40  | NH1 | H_GLU_89   | OE2 | 2.969 |
| 2Q8B | H_ARG_40  | NH2 | H_GLU_89   | OE2 | 3.558 |
| 2Q8B | H_ARG_50  | NH2 | H_GLU_59   | OE2 | 2.874 |
| 2Q8B | H_LYS_63  | NZ  | H_GLU_46   | OE1 | 2.715 |
| 2Q8B | H_LYS_67  | NZ  | H_ASP_90   | OD1 | 3.762 |
| 2Q8B | H_LYS_67  | NZ  | H_ASP_90   | OD2 | 3.011 |
| 2QAD | A_LYS_207 | NZ  | A_GLU_381  | OE1 | 3.156 |
| 2QAD | A_LYS_207 | NZ  | A_GLU_381  | OE2 | 2.751 |
| 2QAD | A_LYS_231 | NZ  | A_GLU_268  | OE2 | 3.310 |
| 2QAD | A_LYS_232 | NZ  | A_GLU_269  | OE2 | 3.594 |
| 2QAD | A_LYS_282 | NZ  | A_GLU_275  | OE2 | 3.989 |
| 2QAD | A_LYS_348 | NZ  | A_GLU_269  | OE1 | 3.722 |
| 2QAD | A_LYS_348 | NZ  | A_GLU_269  | OE2 | 3.126 |
| 2QAD | A_ARG_419 | NH1 | A_ASP_325  | OD2 | 2.671 |
| 2QAD | A_ARG_419 | NH2 | A_ASP_325  | OD2 | 3.673 |
| 2QAD | A_ARG_456 | NH2 | A_GLU_466  | OE2 | 3.254 |
| 2QAD | A_ARG_469 | NH2 | A_ASP_457  | OD2 | 3.733 |
| 2QAD | A_ARG_476 | NH1 | A_ASP_474  | OD1 | 2.798 |
| 2QAD | A_ARG_476 | NH2 | A_GLU_102  | OE2 | 3.950 |
| 2QAD | A_ARG_480 | NH2 | A_ASP_477  | OD1 | 3.412 |
| 2QAD | A_LYS_487 | NZ  | A_GLU_91   | OE1 | 3.356 |
| 2QAD | A_LYS_487 | NZ  | A_GLU_91   | OE2 | 3.914 |
| 2QAD | A_LYS_490 | NZ  | A_GLU_492  | OE2 | 3.426 |
| 2QAD | B_ARG_54  | NH1 | B_ASP_78   | OD2 | 3.526 |
| 2QAD | B_ARG_54  | NH2 | B_GLU_77   | OE2 | 3.474 |
| 2QAD | B_ARG_54  | NH2 | B_ASP_78   | OD2 | 3.454 |
| 2QAD | B_ARG_59  | NH1 | A_ASP_368  | OD1 | 3.394 |
| 2QAD | B_ARG_59  | NH1 | A_ASP_368  | OD2 | 2.749 |
| 2QAD | B_ARG_59  | NH2 | A_ASP_368  | OD1 | 3.764 |
| 2QAD | B_LYS_72  | NZ  | B_ASP_56   | OD2 | 3.172 |
| 2QAD | B_HIS_107 | ND1 | B_ASP_105  | OD2 | 3.915 |
| 2QAD | C_LYS_39  | NZ  | C_ASP_81   | OD1 | 3.751 |
| 2QAD | C_LYS_50  | NZ  | D_GLU_100F | OE2 | 2.989 |
| 2QAD | C_LYS_55  | NZ  | D_ASP_101  | OD1 | 3.312 |
| 2QAD | C_LYS_55  | NZ  | D_ASP_101  | OD2 | 3.736 |
| 2QAD | C_ARG_61  | NH2 | C_ASP_82   | OD1 | 3.983 |
| 2QAD | C_ARG_61  | NH2 | C_ASP_82   | OD2 | 3.945 |
| 2QAD | C_LYS_103 | NZ  | C_GLU_165  | OE1 | 3.299 |
| 2QAD | C_LYS_103 | NZ  | C_GLU_165  | OE2 | 3.201 |
| 2QAD | C_LYS_183 | NZ  | C_GLU_187  | OE2 | 3.769 |
| 2QAD | C_LYS_188 | NZ  | C_ASP_185  | OD1 | 3.463 |

|      |           |     |            |     |       |
|------|-----------|-----|------------|-----|-------|
| 2QAD | C_HIS_189 | ND1 | C_ASP_151  | OD1 | 3.214 |
| 2QAD | C_HIS_189 | ND1 | C_ASP_151  | OD2 | 3.260 |
| 2QAD | D_ARG_38  | NH1 | D_GLU_46   | OE1 | 3.492 |
| 2QAD | D_ARG_38  | NH1 | D_GLU_46   | OE2 | 3.474 |
| 2QAD | D_ARG_62  | NH1 | D_GLU_46   | OE1 | 2.887 |
| 2QAD | D_ARG_62  | NH1 | D_GLU_46   | OE2 | 2.924 |
| 2QAD | D_ARG_62  | NH2 | D_GLU_46   | OE2 | 3.357 |
| 2QAD | D_LYS_143 | NZ  | D_ASP_144  | OD1 | 2.885 |
| 2QAD | D_LYS_143 | NZ  | D_ASP_144  | OD2 | 3.634 |
| 2QAD | D_LYS_206 | NZ  | D_ASP_208  | OD1 | 3.117 |
| 2QAD | D_LYS_209 | NZ  | D_GLU_212  | OE1 | 3.727 |
| 2QAD | D_LYS_210 | NZ  | D_GLU_212  | OE2 | 3.492 |
| 2QAD | E_LYS_207 | NZ  | E_GLU_381  | OE1 | 3.059 |
| 2QAD | E_LYS_207 | NZ  | E_GLU_381  | OE2 | 2.916 |
| 2QAD | E_LYS_231 | NZ  | E_GLU_268  | OE2 | 3.647 |
| 2QAD | E_LYS_282 | NZ  | E_GLU_275  | OE1 | 3.736 |
| 2QAD | E_LYS_282 | NZ  | E_GLU_275  | OE2 | 3.761 |
| 2QAD | E_LYS_348 | NZ  | E_GLU_269  | OE1 | 3.968 |
| 2QAD | E_LYS_348 | NZ  | E_GLU_269  | OE2 | 3.504 |
| 2QAD | E_ARG_419 | NH1 | E_ASP_325  | OD2 | 2.690 |
| 2QAD | E_ARG_419 | NH2 | E_ASP_325  | OD2 | 3.727 |
| 2QAD | E_ARG_456 | NH2 | E_GLU_466  | OE2 | 3.894 |
| 2QAD | E_ARG_476 | NH1 | E_ASP_474  | OD1 | 3.116 |
| 2QAD | E_ARG_476 | NH2 | E_GLU_102  | OE1 | 3.845 |
| 2QAD | E_ARG_476 | NH2 | E_GLU_102  | OE2 | 3.739 |
| 2QAD | E_ARG_480 | NH2 | E_ASP_477  | OD1 | 3.576 |
| 2QAD | E_LYS_487 | NZ  | E_GLU_91   | OE1 | 3.899 |
| 2QAD | E_LYS_487 | NZ  | E_GLU_91   | OE2 | 3.462 |
| 2QAD | E_LYS_490 | NZ  | E_GLU_492  | OE2 | 3.971 |
| 2QAD | F_LYS_1   | NZ  | F_GLU_92   | OE1 | 3.829 |
| 2QAD | F_LYS_29  | NZ  | F_GLU_85   | OE1 | 3.902 |
| 2QAD | F_ARG_54  | NH1 | F_ASP_78   | OD2 | 3.625 |
| 2QAD | F_ARG_54  | NH2 | F_GLU_77   | OE2 | 3.363 |
| 2QAD | F_ARG_54  | NH2 | F_ASP_78   | OD2 | 3.440 |
| 2QAD | F_ARG_59  | NH1 | E_ASP_368  | OD1 | 2.855 |
| 2QAD | F_ARG_59  | NH1 | E_ASP_368  | OD2 | 2.624 |
| 2QAD | F_ARG_59  | NH2 | E_ASP_368  | OD1 | 3.681 |
| 2QAD | F_LYS_72  | NZ  | F_ASP_56   | OD2 | 3.168 |
| 2QAD | F_LYS_90  | NZ  | F_GLU_85   | OE2 | 3.437 |
| 2QAD | F_ARG_134 | NH1 | F_GLU_150  | OE1 | 3.188 |
| 2QAD | F_ARG_134 | NH2 | F_GLU_150  | OE1 | 2.761 |
| 2QAD | F_ARG_134 | NH2 | F_ASP_153  | OD1 | 2.906 |
| 2QAD | G_LYS_39  | NZ  | G_ASP_81   | OD1 | 3.605 |
| 2QAD | G_LYS_50  | NZ  | H_GLU_100F | OE2 | 3.151 |
| 2QAD | G_LYS_55  | NZ  | H_ASP_101  | OD1 | 3.191 |
| 2QAD | G_LYS_55  | NZ  | H_ASP_101  | OD2 | 3.496 |
| 2QAD | G_ARG_61  | NH2 | G_ASP_82   | OD1 | 3.464 |
| 2QAD | G_ARG_61  | NH2 | G_ASP_82   | OD2 | 3.576 |
| 2QAD | G_LYS_103 | NZ  | G_GLU_165  | OE1 | 3.223 |
| 2QAD | G_LYS_103 | NZ  | G_GLU_165  | OE2 | 3.176 |
| 2QAD | G_LYS_183 | NZ  | G_GLU_187  | OE2 | 2.926 |
| 2QAD | G_LYS_188 | NZ  | G_ASP_185  | OD1 | 3.437 |
| 2QAD | G_HIS_189 | ND1 | G_ASP_151  | OD1 | 3.455 |
| 2QAD | G_HIS_189 | ND1 | G_ASP_151  | OD2 | 2.830 |
| 2QAD | H_ARG_62  | NH1 | H_GLU_46   | OE1 | 2.833 |
| 2QAD | H_ARG_62  | NH1 | H_GLU_46   | OE2 | 2.981 |
| 2QAD | H_ARG_62  | NH2 | H_GLU_46   | OE1 | 3.733 |
| 2QAD | H_ARG_62  | NH2 | H_GLU_46   | OE2 | 3.274 |

|      |           |     |           |     |       |
|------|-----------|-----|-----------|-----|-------|
| 2QAD | H_ARG_83  | NH2 | H_ASP_86  | OD1 | 3.458 |
| 2QAD | H_ARG_83  | NH2 | H_ASP_86  | OD2 | 2.513 |
| 2QAD | H_LYS_143 | NZ  | H_ASP_144 | OD1 | 2.852 |
| 2QAD | H_LYS_143 | NZ  | H_ASP_144 | OD2 | 3.707 |
| 2QAD | H_LYS_206 | NZ  | H_ASP_208 | OD1 | 2.954 |
| 2QAD | H_LYS_209 | NZ  | H_GLU_212 | OE1 | 3.668 |
| 2QQI | A_ARG_305 | NH1 | A_GLU_312 | OE2 | 3.025 |
| 2QQI | A_ARG_305 | NH2 | A_GLU_312 | OE2 | 3.597 |
| 2QQI | A_LYS_347 | NZ  | A_GLU_312 | OE1 | 3.337 |
| 2QQI | A_ARG_402 | NH2 | A_ASP_329 | OD1 | 3.538 |
| 2QQI | A_ARG_402 | NH2 | A_ASP_329 | OD2 | 2.925 |
| 2QQI | A_LYS_407 | NZ  | A_ASP_361 | OD1 | 3.110 |
| 2QQI | A_LYS_407 | NZ  | A_ASP_361 | OD2 | 2.901 |
| 2QQI | A_ARG_463 | NH2 | A_ASP_444 | OD1 | 2.807 |
| 2QQI | A_ARG_513 | NH2 | A_GLU_483 | OE1 | 3.254 |
| 2QQI | A_LYS_527 | NZ  | A_ASP_525 | OD1 | 2.652 |
| 2QQI | A_LYS_527 | NZ  | A_ASP_525 | OD2 | 3.292 |
| 2QQI | A_ARG_552 | NH1 | A_GLU_550 | OE1 | 3.271 |
| 2QQI | A_ARG_552 | NH2 | A_GLU_550 | OE1 | 2.899 |
| 2QQI | A_ARG_560 | NH2 | A_ASP_488 | OD1 | 3.697 |
| 2QQI | A_ARG_560 | NH2 | A_ASP_488 | OD2 | 3.358 |
| 2QQM | A_ARG_207 | NH2 | A_ASP_197 | OD1 | 2.822 |
| 2QQM | A_ARG_207 | NH2 | A_ASP_197 | OD2 | 3.844 |
| 2QQM | A_HIS_223 | NE2 | A_GLU_212 | OE1 | 2.681 |
| 2QQM | A_ARG_236 | NH2 | A_GLU_212 | OE2 | 3.329 |
| 2QQM | A_ARG_235 | NH2 | A_GLU_188 | OE2 | 3.062 |
| 2QQM | A_ARG_237 | NH1 | A_GLU_285 | OE2 | 2.734 |
| 2QQM | A_ARG_237 | NH2 | A_GLU_184 | OE2 | 3.025 |
| 2QQM | A_ARG_237 | NH2 | A_GLU_285 | OE2 | 3.428 |
| 2QQM | A_HIS_287 | ND1 | A_ASP_289 | OD1 | 3.807 |
| 2QQM | A_HIS_287 | ND1 | A_ASP_289 | OD2 | 3.593 |
| 2QQM | A_ARG_305 | NH1 | A_GLU_312 | OE1 | 2.993 |
| 2QQM | A_ARG_305 | NH2 | A_GLU_312 | OE1 | 3.753 |
| 2QQM | A_ARG_334 | NH1 | A_GLU_184 | OE1 | 2.860 |
| 2QQM | A_ARG_334 | NH2 | A_GLU_184 | OE1 | 3.414 |
| 2QQM | A_ARG_334 | NH2 | A_GLU_184 | OE2 | 3.144 |
| 2QQM | A_LYS_347 | NZ  | A_GLU_312 | OE2 | 3.827 |
| 2QQM | A_LYS_356 | NZ  | A_GLU_412 | OE1 | 3.925 |
| 2QQM | A_ARG_402 | NH2 | A_ASP_329 | OD1 | 3.702 |
| 2QQM | A_ARG_402 | NH2 | A_ASP_329 | OD2 | 3.069 |
| 2QQM | A_LYS_407 | NZ  | A_ASP_361 | OD1 | 2.925 |
| 2QQM | A_LYS_407 | NZ  | A_ASP_361 | OD2 | 3.013 |
| 2QQM | A_ARG_463 | NH2 | A_ASP_444 | OD1 | 2.977 |
| 2QQM | A_LYS_504 | NZ  | A_ASP_368 | OD2 | 3.089 |
| 2QQM | A_ARG_513 | NH1 | A_GLU_541 | OE1 | 3.868 |
| 2QQM | A_ARG_513 | NH2 | A_GLU_541 | OE1 | 3.920 |
| 2QQM | A_LYS_514 | NZ  | A_GLU_541 | OE1 | 3.415 |
| 2QQM | A_LYS_514 | NZ  | A_GLU_541 | OE2 | 3.311 |
| 2QQM | A_LYS_536 | NZ  | A_ASP_531 | OD2 | 3.748 |
| 2QQM | A_ARG_552 | NH1 | A_GLU_550 | OE1 | 3.256 |
| 2QQM | A_ARG_552 | NH2 | A_GLU_550 | OE1 | 3.455 |
| 2QQM | A_ARG_560 | NH2 | A_ASP_488 | OD1 | 3.975 |
| 2QQM | A_ARG_560 | NH2 | A_ASP_488 | OD2 | 3.187 |
| 2QQN | A_ARG_305 | NH1 | A_GLU_312 | OE1 | 3.596 |
| 2QQN | A_LYS_347 | NZ  | A_GLU_312 | OE1 | 3.909 |
| 2QQN | A_LYS_356 | NZ  | A_GLU_412 | OE1 | 3.215 |
| 2QQN | A_ARG_402 | NH2 | A_ASP_329 | OD1 | 3.587 |
| 2QQN | A_ARG_402 | NH2 | A_ASP_329 | OD2 | 3.150 |

|      |           |     |           |     |       |
|------|-----------|-----|-----------|-----|-------|
| 2QQN | A.LYS_407 | NZ  | A_ASP_361 | OD1 | 3.212 |
| 2QQN | A.LYS_407 | NZ  | A_ASP_361 | OD2 | 2.958 |
| 2QQN | H_ARG_38  | NH1 | H_ASP_86  | OD1 | 2.933 |
| 2QQN | H_ARG_38  | NH2 | H_GLU_46  | OE1 | 3.167 |
| 2QQN | H_ARG_38  | NH2 | H_ASP_86  | OD1 | 3.865 |
| 2QQN | H_ARG_66  | NH1 | H_ASP_86  | OD1 | 3.782 |
| 2QQN | H_ARG_66  | NH1 | H_ASP_86  | OD2 | 2.772 |
| 2QQN | H_ARG_66  | NH2 | H_ASP_86  | OD1 | 3.232 |
| 2QQN | H_ARG_66  | NH2 | H_ASP_86  | OD2 | 3.638 |
| 2QQN | H.LYS_75  | NZ  | H_ASP_72  | OD2 | 3.885 |
| 2QQN | H_ARG_94  | NH2 | H_ASP_101 | OD1 | 3.705 |
| 2QQN | H_ARG_94  | NH2 | H_ASP_101 | OD2 | 2.999 |
| 2QQN | H.LYS_143 | NZ  | H_ASP_144 | OD1 | 3.148 |
| 2QQN | H.LYS_143 | NZ  | H_ASP_144 | OD2 | 2.751 |
| 2QQN | H.LYS_206 | NZ  | H_ASP_208 | OD1 | 3.934 |
| 2QQN | H.LYS_209 | NZ  | L_GLU_123 | OE1 | 2.782 |
| 2QQN | H.LYS_209 | NZ  | L_GLU_123 | OE2 | 3.506 |
| 2QQN | H.LYS_210 | NZ  | H_GLU_212 | OE1 | 3.071 |
| 2QQN | H.LYS_210 | NZ  | H_GLU_212 | OE2 | 3.673 |
| 2QQN | H.LYS_214 | NZ  | L_ASP_122 | OD1 | 3.854 |
| 2QQN | L_ARG_61  | NH2 | L_GLU_81  | OE2 | 3.892 |
| 2QQN | L_ARG_61  | NH2 | L_ASP_82  | OD1 | 2.963 |
| 2QQN | L_ARG_61  | NH2 | L_ASP_82  | OD2 | 3.635 |
| 2QQN | L.LYS_103 | NZ  | L_GLU_105 | OE2 | 3.304 |
| 2QQN | L.LYS_103 | NZ  | L_GLU_165 | OE1 | 2.460 |
| 2QQN | L.LYS_103 | NZ  | L_GLU_165 | OE2 | 3.133 |
| 2QQN | L_ARG_142 | NH1 | L_GLU_105 | OE2 | 2.892 |
| 2QQN | L_ARG_142 | NH2 | L_GLU_165 | OE2 | 3.206 |
| 2QQN | L.LYS_149 | NZ  | L_GLU_195 | OE1 | 2.720 |
| 2QQN | L.LYS_183 | NZ  | L_GLU_187 | OE1 | 3.367 |
| 2QQN | L.LYS_183 | NZ  | L_GLU_187 | OE2 | 3.373 |
| 2QQN | L.LYS_188 | NZ  | L_ASP_185 | OD1 | 3.017 |
| 2R29 | A.LYS_307 | NZ  | A_GLU_327 | OE2 | 3.953 |
| 2R29 | A.LYS_307 | NZ  | H_ASP_99  | OD1 | 2.956 |
| 2R29 | A.LYS_307 | NZ  | L_GLU_59  | OE1 | 3.335 |
| 2R29 | A.LYS_310 | NZ  | H_ASP_52  | OD1 | 3.449 |
| 2R29 | A.LYS_310 | NZ  | H_ASP_52  | OD2 | 2.764 |
| 2R29 | A_ARG_323 | NH2 | A_GLU_311 | OE2 | 3.982 |
| 2R29 | A_ARG_350 | NH1 | A_GLU_370 | OE1 | 2.411 |
| 2R29 | H_ARG_40  | NH2 | H_GLU_46  | OE2 | 3.642 |
| 2R29 | H.LYS_59  | NZ  | L_ASP_98  | OD2 | 3.485 |
| 2R29 | H.LYS_67  | NZ  | H_ASP_90  | OD1 | 3.208 |
| 2R29 | H.LYS_67  | NZ  | H_ASP_90  | OD2 | 3.049 |
| 2R29 | L_ARG_54  | NH2 | H_GLU_101 | OE1 | 3.814 |
| 2R29 | L_ARG_54  | NH2 | H_GLU_101 | OE2 | 3.270 |
| 2R29 | L.LYS_107 | NZ  | H_GLU_42  | OE1 | 3.937 |
| 2R29 | L.LYS_151 | NZ  | L_GLU_199 | OE1 | 2.854 |
| 2R29 | L.LYS_151 | NZ  | L_GLU_199 | OE2 | 3.268 |
| 2R29 | L_ARG_159 | NH2 | L_GLU_189 | OE1 | 3.854 |
| 2R29 | L.HIS_193 | ND1 | L_ASP_155 | OD2 | 2.763 |
| 2R29 | L.HIS_193 | NE2 | L_GLU_189 | OE1 | 3.126 |
| 2R69 | A.LYS_307 | NZ  | H_ASP_99  | OD2 | 3.631 |
| 2R69 | A_HIS_317 | NE2 | A_GLU_368 | OE2 | 3.012 |
| 2R69 | A.LYS_344 | NZ  | A_GLU_338 | OE1 | 3.172 |
| 2R69 | A_ARG_345 | NH1 | A_ASP_341 | OD2 | 3.802 |
| 2R69 | H.LYS_38  | NZ  | H_ASP_90  | OD1 | 2.910 |
| 2R69 | H.LYS_38  | NZ  | H_ASP_90  | OD2 | 2.994 |
| 2R69 | H_ARG_40  | NH2 | H_GLU_46  | OE2 | 3.388 |

|      |           |     |           |     |       |
|------|-----------|-----|-----------|-----|-------|
| 2R69 | H.LYS.59  | NZ  | L.ASP.98  | OD2 | 3.723 |
| 2R69 | H.LYS.67  | NZ  | H.ASP.90  | OD1 | 3.247 |
| 2R69 | H.LYS.67  | NZ  | H.ASP.90  | OD2 | 3.994 |
| 2R69 | H.LYS.211 | NZ  | L.GLU.127 | OE1 | 3.695 |
| 2R69 | H.LYS.211 | NZ  | L.GLU.127 | OE2 | 3.159 |
| 2R69 | L.ARG.31  | NH2 | A.GLU.311 | OE2 | 3.151 |
| 2R69 | L.LYS.43  | NZ  | L.ASP.85  | OD1 | 2.285 |
| 2R69 | L.LYS.43  | NZ  | L.ASP.85  | OD2 | 3.990 |
| 2R69 | L.ARG.54  | NH2 | H.GLU.101 | OE1 | 2.992 |
| 2R69 | L.ARG.54  | NH2 | H.GLU.101 | OE2 | 2.911 |
| 2R69 | L.ARG.72  | NH2 | L.ASP.74  | OD2 | 3.950 |
| 2R69 | L.ARG.112 | NH2 | L.ASP.174 | OD1 | 3.901 |
| 2R69 | L.LYS.151 | NZ  | L.GLU.158 | OE1 | 2.692 |
| 2R69 | L.LYS.151 | NZ  | L.GLU.158 | OE2 | 3.692 |
| 2R69 | L.LYS.153 | NZ  | L.GLU.199 | OE1 | 2.500 |
| 2R69 | L.LYS.153 | NZ  | L.GLU.199 | OE2 | 3.634 |
| 2R69 | L.ARG.159 | NH2 | L.GLU.189 | OE1 | 3.888 |
| 2R69 | L.ARG.159 | NH2 | L.GLU.189 | OE2 | 3.776 |
| 2R69 | L.HIS.193 | NE2 | L.GLU.189 | OE1 | 3.028 |
| 2UYL | A.ARG.24  | NH2 | A.ASP.75  | OD2 | 3.541 |
| 2UYL | A.LYS.44  | NZ  | A.GLU.86  | OE1 | 3.928 |
| 2UYL | A.LYS.55  | NZ  | A.ASP.35  | OD1 | 3.890 |
| 2UYL | A.ARG.66  | NH1 | A.GLU.84  | OE2 | 3.593 |
| 2UYL | A.ARG.66  | NH2 | A.GLU.84  | OE2 | 3.108 |
| 2UYL | A.ARG.66  | NH2 | A.GLU.86  | OE2 | 3.573 |
| 2UYL | A.ARG.66  | NH2 | A.ASP.87  | OD1 | 2.859 |
| 2UYL | A.ARG.66  | NH2 | A.ASP.87  | OD2 | 3.807 |
| 2UYL | A.ARG.101 | NH1 | B.GLU.99  | OE1 | 3.183 |
| 2UYL | A.ARG.101 | NH1 | B.GLU.99  | OE2 | 3.530 |
| 2UYL | A.ARG.101 | NH2 | B.GLU.99  | OE2 | 3.803 |
| 2UYL | A.LYS.152 | NZ  | A.GLU.159 | OE2 | 3.364 |
| 2UYL | A.LYS.154 | NZ  | A.GLU.200 | OE1 | 3.299 |
| 2UYL | A.ARG.160 | NH2 | A.GLU.190 | OE1 | 2.667 |
| 2UYL | A.ARG.160 | NH2 | A.GLU.190 | OE2 | 3.767 |
| 2UYL | A.LYS.188 | NZ  | A.GLU.192 | OE1 | 3.100 |
| 2UYL | A.HIS.194 | ND1 | A.ASP.156 | OD2 | 3.217 |
| 2UYL | B.ARG.40  | NH1 | B.GLU.46  | OE2 | 3.963 |
| 2UYL | B.ARG.40  | NH2 | B.ASP.89  | OD1 | 3.905 |
| 2UYL | B.LYS.63  | NZ  | B.GLU.46  | OE1 | 2.751 |
| 2UYL | B.LYS.63  | NZ  | B.GLU.46  | OE2 | 3.738 |
| 2UYL | B.LYS.67  | NZ  | B.ASP.90  | OD1 | 2.822 |
| 2UYL | B.LYS.67  | NZ  | B.ASP.90  | OD2 | 3.465 |
| 2UYL | B.ARG.98  | NH2 | B.GLU.100 | OE2 | 3.144 |
| 2UYL | M.ARG.24  | NH1 | M.ASP.75  | OD1 | 3.039 |
| 2UYL | M.ARG.24  | NH1 | M.ASP.75  | OD2 | 2.784 |
| 2UYL | M.ARG.24  | NH2 | M.ASP.75  | OD2 | 3.872 |
| 2UYL | M.ARG.66  | NH1 | M.GLU.84  | OE1 | 3.248 |
| 2UYL | M.ARG.66  | NH1 | M.GLU.84  | OE2 | 3.722 |
| 2UYL | M.ARG.66  | NH2 | M.GLU.84  | OE2 | 3.790 |
| 2UYL | M.ARG.66  | NH2 | M.GLU.86  | OE1 | 3.569 |
| 2UYL | M.ARG.66  | NH2 | M.GLU.86  | OE2 | 3.070 |
| 2UYL | M.ARG.66  | NH2 | M.ASP.87  | OD1 | 3.037 |
| 2UYL | M.ARG.66  | NH2 | M.ASP.87  | OD2 | 3.967 |
| 2UYL | M.ARG.101 | NH1 | N.GLU.99  | OE1 | 3.058 |
| 2UYL | M.ARG.101 | NH1 | N.GLU.99  | OE2 | 3.775 |
| 2UYL | M.ARG.101 | NH2 | N.GLU.99  | OE2 | 3.923 |
| 2UYL | M.LYS.108 | NZ  | M.GLU.110 | OE1 | 3.809 |
| 2UYL | M.LYS.152 | NZ  | M.GLU.159 | OE2 | 3.798 |

|      |           |     |           |     |       |
|------|-----------|-----|-----------|-----|-------|
| 2UYL | M_LYS_154 | NZ  | M_GLU_200 | OE1 | 2.830 |
| 2UYL | M_ARG_160 | NH1 | M_GLU_190 | OE1 | 3.456 |
| 2UYL | M_ARG_160 | NH2 | M_GLU_190 | OE1 | 2.573 |
| 2UYL | M_ARG_160 | NH2 | M_GLU_190 | OE2 | 3.199 |
| 2UYL | M_LYS_188 | NZ  | M_GLU_192 | OE2 | 3.865 |
| 2UYL | M_HIS_194 | ND1 | M_ASP_156 | OD2 | 2.773 |
| 2UYL | N_LYS_63  | NZ  | N_GLU_46  | OE1 | 2.897 |
| 2UYL | N_LYS_67  | NZ  | N_ASP_90  | OD1 | 2.827 |
| 2UYL | N_LYS_67  | NZ  | N_ASP_90  | OD2 | 3.442 |
| 2UYL | N_ARG_98  | NH2 | N_GLU_100 | OE1 | 2.786 |
| 2UYL | N_ARG_98  | NH2 | N_GLU_100 | OE2 | 3.617 |
| 2UYL | N_HIS_170 | NE2 | M_ASP_172 | OD1 | 3.811 |
| 2UYL | V_ARG_24  | NH1 | V_ASP_75  | OD1 | 3.803 |
| 2UYL | V_ARG_24  | NH2 | V_ASP_75  | OD1 | 2.930 |
| 2UYL | V_ARG_24  | NH2 | V_ASP_75  | OD2 | 3.669 |
| 2UYL | V_LYS_44  | NZ  | V_GLU_86  | OE1 | 2.905 |
| 2UYL | V_LYS_55  | NZ  | V_ASP_35  | OD2 | 3.201 |
| 2UYL | V_ARG_66  | NH1 | V_GLU_84  | OE1 | 3.900 |
| 2UYL | V_ARG_66  | NH2 | V_GLU_84  | OE2 | 3.992 |
| 2UYL | V_ARG_66  | NH2 | V_GLU_86  | OE2 | 3.799 |
| 2UYL | V_ARG_66  | NH2 | V_ASP_87  | OD1 | 2.834 |
| 2UYL | V_ARG_66  | NH2 | V_ASP_87  | OD2 | 3.258 |
| 2UYL | V_ARG_101 | NH1 | W_GLU_99  | OE1 | 2.958 |
| 2UYL | V_ARG_101 | NH1 | W_GLU_99  | OE2 | 3.417 |
| 2UYL | V_ARG_101 | NH2 | W_GLU_99  | OE2 | 3.369 |
| 2UYL | V_LYS_108 | NZ  | V_ASP_170 | OD1 | 3.736 |
| 2UYL | V_LYS_154 | NZ  | V_GLU_200 | OE1 | 2.621 |
| 2UYL | V_LYS_154 | NZ  | V_GLU_200 | OE2 | 3.889 |
| 2UYL | V_ARG_160 | NH1 | V_GLU_190 | OE1 | 3.166 |
| 2UYL | V_ARG_160 | NH2 | V_GLU_190 | OE1 | 3.294 |
| 2UYL | V_ARG_160 | NH2 | V_GLU_190 | OE2 | 3.839 |
| 2UYL | V_HIS_194 | ND1 | V_ASP_156 | OD2 | 2.891 |
| 2UYL | V_LYS_204 | NZ  | V_ASP_115 | OD1 | 3.190 |
| 2UYL | W_LYS_63  | NZ  | W_GLU_46  | OE1 | 2.810 |
| 2UYL | W_LYS_63  | NZ  | W_GLU_46  | OE2 | 3.935 |
| 2UYL | W_LYS_67  | NZ  | W_ASP_90  | OD1 | 3.006 |
| 2UYL | W_LYS_67  | NZ  | W_ASP_90  | OD2 | 3.683 |
| 2UYL | W_ARG_98  | NH2 | W_GLU_100 | OE2 | 3.033 |
| 2UYL | X_ARG_24  | NH1 | X_ASP_75  | OD1 | 3.584 |
| 2UYL | X_ARG_24  | NH2 | X_ASP_75  | OD1 | 3.267 |
| 2UYL | X_LYS_55  | NZ  | X_ASP_35  | OD2 | 3.064 |
| 2UYL | X_ARG_66  | NH1 | X_GLU_84  | OE1 | 3.245 |
| 2UYL | X_ARG_66  | NH1 | X_GLU_84  | OE2 | 3.798 |
| 2UYL | X_ARG_66  | NH2 | X_GLU_84  | OE1 | 3.726 |
| 2UYL | X_ARG_66  | NH2 | X_GLU_84  | OE2 | 3.244 |
| 2UYL | X_ARG_66  | NH2 | X_GLU_86  | OE1 | 3.815 |
| 2UYL | X_ARG_66  | NH2 | X_GLU_86  | OE2 | 2.779 |
| 2UYL | X_ARG_101 | NH1 | Y_GLU_99  | OE1 | 2.789 |
| 2UYL | X_ARG_101 | NH1 | Y_GLU_99  | OE2 | 3.483 |
| 2UYL | X_ARG_101 | NH2 | Y_GLU_99  | OE2 | 3.405 |
| 2UYL | X_LYS_152 | NZ  | X_GLU_200 | OE2 | 3.544 |
| 2UYL | X_LYS_154 | NZ  | X_GLU_200 | OE1 | 3.293 |
| 2UYL | X_LYS_188 | NZ  | X_GLU_192 | OE1 | 3.104 |
| 2UYL | X_LYS_188 | NZ  | X_GLU_192 | OE2 | 3.213 |
| 2UYL | X_HIS_194 | ND1 | X_ASP_156 | OD2 | 3.029 |
| 2UYL | X_LYS_204 | NZ  | X_ASP_115 | OD1 | 2.823 |
| 2UYL | X_LYS_204 | NZ  | X_ASP_115 | OD2 | 3.875 |
| 2UYL | Y_LYS_63  | NZ  | Y_GLU_46  | OE1 | 3.237 |

|      |           |     |           |     |       |
|------|-----------|-----|-----------|-----|-------|
| 2UYL | Y_LYS_63  | NZ  | Y_GLU_46  | OE2 | 3.539 |
| 2UYL | Y_LYS_67  | NZ  | Y_ASP_90  | OD1 | 2.881 |
| 2UYL | Y_LYS_67  | NZ  | Y_ASP_90  | OD2 | 3.582 |
| 2UYL | Y_ARG_98  | NH2 | Y_GLU_100 | OE1 | 2.856 |
| 2UYL | Y_ARG_98  | NH2 | Y_GLU_100 | OE2 | 3.603 |
| 2VC2 | A_HIS_30  | ND1 | A_GLU_136 | OE1 | 3.993 |
| 2VC2 | A_ARG_77  | NH1 | H_ASP_102 | OD1 | 3.536 |
| 2VC2 | A_ARG_77  | NH1 | H_ASP_102 | OD2 | 3.007 |
| 2VC2 | A_ARG_77  | NH2 | H_ASP_102 | OD1 | 2.794 |
| 2VC2 | A_ARG_77  | NH2 | H_ASP_102 | OD2 | 3.630 |
| 2VC2 | A_LYS_88  | NZ  | A_ASP_71  | OD2 | 3.044 |
| 2VC2 | A_LYS_88  | NZ  | A_GLU_75  | OE2 | 3.709 |
| 2VC2 | A_ARG_153 | NH1 | A_GLU_157 | OE1 | 3.976 |
| 2VC2 | A_ARG_153 | NH1 | A_GLU_157 | OE2 | 3.374 |
| 2VC2 | A_ARG_153 | NH2 | A_GLU_120 | OE1 | 3.288 |
| 2VC2 | A_ARG_153 | NH2 | A_GLU_120 | OE2 | 3.798 |
| 2VC2 | A_ARG_165 | NH1 | A_GLU_123 | OE2 | 3.067 |
| 2VC2 | A_ARG_165 | NH2 | A_ASP_163 | OD1 | 2.956 |
| 2VC2 | A_ARG_165 | NH2 | A_ASP_163 | OD2 | 3.881 |
| 2VC2 | A_ARG_279 | NH2 | A_GLU_268 | OE2 | 3.656 |
| 2VC2 | A_ARG_303 | NH2 | A_ASP_301 | OD2 | 3.119 |
| 2VC2 | A_ARG_327 | NH1 | A_GLU_283 | OE1 | 3.141 |
| 2VC2 | A_ARG_327 | NH1 | A_GLU_283 | OE2 | 3.525 |
| 2VC2 | A_ARG_422 | NH1 | A_ASP_24  | OD1 | 2.995 |
| 2VC2 | A_ARG_422 | NH1 | A_ASP_24  | OD2 | 3.442 |
| 2VC2 | B_ARG_67  | NH1 | B_GLU_65  | OE1 | 3.348 |
| 2VC2 | B_LYS_72  | NZ  | B_ASP_109 | OD1 | 2.615 |
| 2VC2 | B_LYS_72  | NZ  | B_ASP_109 | OD2 | 3.592 |
| 2VC2 | B_ARG_87  | NH2 | B_GLU_65  | OE2 | 3.439 |
| 2VC2 | B_ARG_105 | NH1 | B_ASP_71  | OD1 | 3.409 |
| 2VC2 | B_LYS_159 | NZ  | B_ASP_224 | OD1 | 3.836 |
| 2VC2 | B_LYS_159 | NZ  | B_ASP_224 | OD2 | 2.792 |
| 2VC2 | B_LYS_209 | NZ  | B_GLU_206 | OE2 | 3.718 |
| 2VC2 | B_ARG_214 | NH1 | B_ASP_179 | OD1 | 3.968 |
| 2VC2 | B_ARG_214 | NH1 | B_ASP_179 | OD2 | 2.988 |
| 2VC2 | B_ARG_214 | NH2 | B_ASP_179 | OD1 | 3.866 |
| 2VC2 | B_ARG_214 | NH2 | B_ASP_179 | OD2 | 3.629 |
| 2VC2 | B_ARG_216 | NH2 | A_GLU_123 | OE2 | 3.081 |
| 2VC2 | B_ARG_239 | NH2 | B_ASP_113 | OD2 | 3.274 |
| 2VC2 | B_HIS_244 | NE2 | B_ASP_113 | OD1 | 3.820 |
| 2VC2 | B_LYS_253 | NZ  | A_ASP_232 | OD2 | 2.805 |
| 2VC2 | B_HIS_255 | ND1 | B_ASP_259 | OD2 | 2.957 |
| 2VC2 | B_HIS_255 | NE2 | B_ASP_158 | OD2 | 3.335 |
| 2VC2 | B_HIS_255 | NE2 | B_ASP_217 | OD1 | 3.717 |
| 2VC2 | B_HIS_255 | NE2 | B_ASP_217 | OD2 | 2.761 |
| 2VC2 | B_HIS_274 | NE2 | B_ASP_270 | OD1 | 2.976 |
| 2VC2 | B_HIS_274 | NE2 | B_ASP_270 | OD2 | 2.687 |
| 2VC2 | B_LYS_298 | NZ  | B_GLU_297 | OE2 | 3.182 |
| 2VC2 | B_LYS_302 | NZ  | B_ASP_233 | OD1 | 3.549 |
| 2VC2 | B_LYS_302 | NZ  | B_ASP_233 | OD2 | 3.146 |
| 2VC2 | B_LYS_354 | NZ  | B_GLU_356 | OE1 | 3.116 |
| 2VC2 | B_ARG_360 | NH2 | B_GLU_358 | OE2 | 3.412 |
| 2VC2 | B_ARG_404 | NH1 | B_GLU_364 | OE2 | 3.062 |
| 2VC2 | B_ARG_404 | NH2 | B_GLU_364 | OE2 | 3.029 |
| 2VC2 | B_LYS_412 | NZ  | B_GLU_365 | OE1 | 2.695 |
| 2VC2 | B_LYS_412 | NZ  | B_GLU_365 | OE2 | 3.221 |
| 2VC2 | H_LYS_38  | NZ  | H_ASP_90  | OD1 | 3.582 |
| 2VC2 | H_ARG_40  | NH2 | H_GLU_46  | OE1 | 3.291 |

|      |           |     |           |     |       |
|------|-----------|-----|-----------|-----|-------|
| 2VC2 | H_ARG_40  | NH2 | H_GLU_46  | OE2 | 3.920 |
| 2VC2 | H_LYS_67  | NZ  | H_ASP_90  | OD2 | 2.912 |
| 2VC2 | H_LYS_214 | NZ  | L_GLU_123 | OE2 | 3.240 |
| 2VC2 | H_LYS_215 | NZ  | H_GLU_217 | OE1 | 3.925 |
| 2VC2 | L_HIS_24  | ND1 | L_ASP_70  | OD1 | 2.720 |
| 2VC2 | L_HIS_24  | ND1 | L_ASP_70  | OD2 | 3.328 |
| 2VC2 | L_LYS_39  | NZ  | L_GLU_81  | OE2 | 3.318 |
| 2VC2 | L_ARG_61  | NH2 | L_ASP_82  | OD1 | 3.251 |
| 2VC2 | L_ARG_61  | NH2 | L_ASP_82  | OD2 | 3.737 |
| 2VC2 | L_LYS_103 | NZ  | L_ASP_85  | OD1 | 2.978 |
| 2VC2 | L_LYS_103 | NZ  | L_ASP_85  | OD2 | 2.787 |
| 2VC2 | L_LYS_149 | NZ  | L_GLU_195 | OE1 | 2.774 |
| 2VC2 | L_LYS_149 | NZ  | L_GLU_195 | OE2 | 3.388 |
| 2VC2 | L_ARG_155 | NH1 | L_GLU_185 | OE1 | 3.167 |
| 2VC2 | L_ARG_155 | NH1 | L_GLU_185 | OE2 | 3.736 |
| 2VC2 | L_ARG_155 | NH2 | L_GLU_185 | OE2 | 3.256 |
| 2VC2 | L_HIS_189 | ND1 | L_ASP_151 | OD1 | 2.726 |
| 2VC2 | L_LYS_199 | NZ  | L_ASP_110 | OD2 | 3.011 |
| 2VDK | A_HIS_30  | ND1 | A_GLU_136 | OE1 | 3.867 |
| 2VDK | A_ARG_77  | NH1 | H_ASP_102 | OD1 | 3.535 |
| 2VDK | A_ARG_77  | NH1 | H_ASP_102 | OD2 | 3.168 |
| 2VDK | A_ARG_77  | NH2 | H_ASP_102 | OD1 | 2.738 |
| 2VDK | A_ARG_77  | NH2 | H_ASP_102 | OD2 | 3.673 |
| 2VDK | A_LYS_88  | NZ  | A_ASP_71  | OD1 | 3.934 |
| 2VDK | A_LYS_88  | NZ  | A_GLU_75  | OE2 | 3.775 |
| 2VDK | A_ARG_153 | NH1 | A_GLU_157 | OE1 | 3.920 |
| 2VDK | A_ARG_153 | NH1 | A_GLU_157 | OE2 | 3.540 |
| 2VDK | A_ARG_153 | NH2 | A_GLU_120 | OE1 | 3.575 |
| 2VDK | A_ARG_153 | NH2 | A_GLU_120 | OE2 | 3.437 |
| 2VDK | A_ARG_165 | NH1 | A_GLU_123 | OE1 | 3.551 |
| 2VDK | A_ARG_165 | NH1 | A_GLU_123 | OE2 | 3.025 |
| 2VDK | A_ARG_165 | NH2 | A_ASP_163 | OD1 | 2.867 |
| 2VDK | A_ARG_165 | NH2 | A_ASP_163 | OD2 | 3.841 |
| 2VDK | A_ARG_279 | NH2 | A_GLU_268 | OE2 | 3.830 |
| 2VDK | A_ARG_317 | NH2 | A_GLU_315 | OE1 | 3.703 |
| 2VDK | A_ARG_327 | NH1 | A_GLU_283 | OE1 | 2.969 |
| 2VDK | A_ARG_327 | NH1 | A_GLU_283 | OE2 | 3.151 |
| 2VDK | A_ARG_422 | NH1 | A_ASP_24  | OD1 | 2.982 |
| 2VDK | A_ARG_422 | NH1 | A_ASP_24  | OD2 | 3.550 |
| 2VDK | B_ARG_62  | NH2 | B_GLU_60  | OE2 | 3.869 |
| 2VDK | B_ARG_67  | NH1 | B_GLU_65  | OE1 | 3.128 |
| 2VDK | B_LYS_72  | NZ  | B_ASP_109 | OD1 | 2.883 |
| 2VDK | B_LYS_72  | NZ  | B_ASP_109 | OD2 | 3.231 |
| 2VDK | B_ARG_87  | NH2 | B_GLU_65  | OE2 | 3.747 |
| 2VDK | B_ARG_105 | NH1 | B_ASP_71  | OD1 | 3.501 |
| 2VDK | B_LYS_159 | NZ  | B_ASP_224 | OD1 | 3.871 |
| 2VDK | B_LYS_159 | NZ  | B_ASP_224 | OD2 | 2.724 |
| 2VDK | B_LYS_209 | NZ  | B_GLU_206 | OE2 | 3.427 |
| 2VDK | B_ARG_214 | NH1 | B_ASP_179 | OD1 | 2.883 |
| 2VDK | B_ARG_214 | NH1 | B_ASP_179 | OD2 | 3.837 |
| 2VDK | B_ARG_214 | NH2 | B_ASP_179 | OD1 | 3.373 |
| 2VDK | B_ARG_214 | NH2 | B_ASP_179 | OD2 | 3.883 |
| 2VDK | B_ARG_216 | NH2 | A_GLU_123 | OE2 | 3.072 |
| 2VDK | B_ARG_239 | NH2 | B_ASP_113 | OD2 | 2.945 |
| 2VDK | B_HIS_244 | NE2 | B_ASP_113 | OD1 | 3.799 |
| 2VDK | B_LYS_253 | NZ  | A_ASP_232 | OD2 | 2.921 |
| 2VDK | B_HIS_255 | ND1 | B_ASP_259 | OD2 | 2.885 |
| 2VDK | B_HIS_255 | NE2 | B_ASP_158 | OD2 | 3.290 |



|      |           |     |           |     |       |
|------|-----------|-----|-----------|-----|-------|
| 2VDK | B_HIS_255 | NE2 | B_ASP_217 | OD1 | 3.718 |
| 2VDK | B_HIS_255 | NE2 | B_ASP_217 | OD2 | 2.719 |
| 2VDK | B_HIS_274 | NE2 | B_ASP_270 | OD1 | 3.028 |
| 2VDK | B_HIS_274 | NE2 | B_ASP_270 | OD2 | 2.677 |
| 2VDK | B_LYS_298 | NZ  | B_GLU_297 | OE2 | 3.464 |
| 2VDK | B_LYS_302 | NZ  | B_ASP_233 | OD1 | 3.247 |
| 2VDK | B_LYS_302 | NZ  | B_ASP_233 | OD2 | 2.825 |
| 2VDK | B_LYS_354 | NZ  | B_GLU_356 | OE1 | 2.748 |
| 2VDK | B_LYS_354 | NZ  | B_GLU_356 | OE2 | 3.777 |
| 2VDK | B_ARG_360 | NH2 | B_GLU_358 | OE1 | 3.701 |
| 2VDK | B_ARG_360 | NH2 | B_GLU_358 | OE2 | 3.427 |
| 2VDK | B_ARG_404 | NH1 | B_GLU_364 | OE2 | 3.192 |
| 2VDK | B_ARG_404 | NH2 | B_GLU_364 | OE2 | 3.127 |
| 2VDK | B_LYS_412 | NZ  | B_GLU_365 | OE1 | 2.671 |
| 2VDK | B_LYS_412 | NZ  | B_GLU_365 | OE2 | 3.186 |
| 2VDK | H_LYS_38  | NZ  | H_GLU_46  | OE1 | 3.930 |
| 2VDK | H_ARG_40  | NH2 | H_GLU_46  | OE1 | 3.206 |
| 2VDK | H_ARG_40  | NH2 | H_GLU_46  | OE2 | 3.861 |
| 2VDK | H_LYS_67  | NZ  | H_ASP_90  | OD1 | 3.807 |
| 2VDK | H_LYS_67  | NZ  | H_ASP_90  | OD2 | 2.831 |
| 2VDK | H_LYS_214 | NZ  | L_GLU_123 | OE2 | 3.461 |
| 2VDK | H_LYS_215 | NZ  | H_GLU_217 | OE1 | 3.919 |
| 2VDK | L_HIS_24  | ND1 | L_ASP_70  | OD1 | 2.714 |
| 2VDK | L_HIS_24  | ND1 | L_ASP_70  | OD2 | 3.907 |
| 2VDK | L_LYS_39  | NZ  | L_GLU_81  | OE2 | 3.076 |
| 2VDK | L_ARG_61  | NH2 | L_ASP_82  | OD1 | 3.150 |
| 2VDK | L_ARG_61  | NH2 | L_ASP_82  | OD2 | 3.695 |
| 2VDK | L_LYS_103 | NZ  | L_ASP_85  | OD1 | 3.316 |
| 2VDK | L_LYS_103 | NZ  | L_ASP_85  | OD2 | 3.639 |
| 2VDK | L_LYS_147 | NZ  | L_GLU_154 | OE1 | 3.768 |
| 2VDK | L_LYS_147 | NZ  | L_GLU_154 | OE2 | 3.469 |
| 2VDK | L_LYS_149 | NZ  | L_GLU_195 | OE1 | 3.051 |
| 2VDK | L_LYS_149 | NZ  | L_GLU_195 | OE2 | 3.550 |
| 2VDK | L_ARG_155 | NH1 | L_GLU_185 | OE1 | 3.070 |
| 2VDK | L_ARG_155 | NH1 | L_GLU_185 | OE2 | 3.757 |
| 2VDK | L_ARG_155 | NH2 | L_GLU_185 | OE1 | 3.874 |
| 2VDK | L_ARG_155 | NH2 | L_GLU_185 | OE2 | 3.166 |
| 2VDK | L_HIS_189 | ND1 | L_ASP_151 | OD1 | 2.842 |
| 2VDK | L_LYS_199 | NZ  | L_ASP_110 | OD2 | 3.918 |
| 2VDL | A_HIS_30  | ND1 | A_GLU_136 | OE1 | 3.983 |
| 2VDL | A_ARG_77  | NH1 | H_ASP_102 | OD1 | 3.566 |
| 2VDL | A_ARG_77  | NH1 | H_ASP_102 | OD2 | 3.106 |
| 2VDL | A_ARG_77  | NH2 | H_ASP_102 | OD1 | 2.722 |
| 2VDL | A_ARG_77  | NH2 | H_ASP_102 | OD2 | 3.538 |
| 2VDL | A_LYS_88  | NZ  | A_ASP_71  | OD2 | 3.901 |
| 2VDL | A_LYS_88  | NZ  | A_GLU_75  | OE2 | 3.727 |
| 2VDL | A_ARG_153 | NH2 | A_GLU_120 | OE1 | 3.211 |
| 2VDL | A_ARG_153 | NH2 | A_GLU_120 | OE2 | 3.450 |
| 2VDL | A_ARG_165 | NH1 | A_GLU_123 | OE1 | 3.959 |
| 2VDL | A_ARG_165 | NH1 | A_GLU_123 | OE2 | 2.984 |
| 2VDL | A_ARG_165 | NH2 | A_ASP_163 | OD1 | 2.925 |
| 2VDL | A_ARG_165 | NH2 | A_ASP_163 | OD2 | 3.806 |
| 2VDL | A_ARG_279 | NH2 | A_GLU_268 | OE2 | 3.603 |
| 2VDL | A_ARG_317 | NH2 | A_GLU_315 | OE1 | 3.612 |
| 2VDL | A_ARG_327 | NH1 | A_GLU_283 | OE1 | 2.900 |
| 2VDL | A_ARG_327 | NH1 | A_GLU_283 | OE2 | 3.367 |
| 2VDL | A_ARG_422 | NH1 | A_ASP_24  | OD1 | 2.923 |
| 2VDL | A_ARG_422 | NH1 | A_ASP_24  | OD2 | 3.362 |

|      |           |     |           |     |       |
|------|-----------|-----|-----------|-----|-------|
| 2VDL | B_ARG_62  | NH2 | B_GLU_60  | OE2 | 3.680 |
| 2VDL | B_ARG_67  | NH1 | B_GLU_65  | OE1 | 3.332 |
| 2VDL | B_LYS_72  | NZ  | B_ASP_109 | OD1 | 2.951 |
| 2VDL | B_LYS_72  | NZ  | B_ASP_109 | OD2 | 3.006 |
| 2VDL | B_ARG_105 | NH1 | B_ASP_71  | OD1 | 3.378 |
| 2VDL | B_LYS_159 | NZ  | B_ASP_224 | OD1 | 3.910 |
| 2VDL | B_LYS_159 | NZ  | B_ASP_224 | OD2 | 2.697 |
| 2VDL | B_ARG_214 | NH1 | B_ASP_179 | OD1 | 3.402 |
| 2VDL | B_ARG_214 | NH1 | B_ASP_179 | OD2 | 3.426 |
| 2VDL | B_ARG_214 | NH2 | B_ASP_179 | OD1 | 3.763 |
| 2VDL | B_ARG_214 | NH2 | B_ASP_179 | OD2 | 3.522 |
| 2VDL | B_ARG_216 | NH2 | A_GLU_123 | OE2 | 3.160 |
| 2VDL | B_ARG_239 | NH2 | B_ASP_113 | OD2 | 2.965 |
| 2VDL | B_HIS_244 | NE2 | B_ASP_113 | OD1 | 3.758 |
| 2VDL | B_LYS_253 | NZ  | A_ASP_232 | OD2 | 2.886 |
| 2VDL | B_HIS_255 | ND1 | B_ASP_259 | OD2 | 2.838 |
| 2VDL | B_HIS_255 | NE2 | B_ASP_158 | OD2 | 3.301 |
| 2VDL | B_HIS_255 | NE2 | B_ASP_217 | OD1 | 3.748 |
| 2VDL | B_HIS_255 | NE2 | B_ASP_217 | OD2 | 2.696 |
| 2VDL | B_HIS_274 | NE2 | B_ASP_270 | OD1 | 3.004 |
| 2VDL | B_HIS_274 | NE2 | B_ASP_270 | OD2 | 2.721 |
| 2VDL | B_LYS_298 | NZ  | B_GLU_297 | OE2 | 3.472 |
| 2VDL | B_LYS_302 | NZ  | B_ASP_233 | OD1 | 3.054 |
| 2VDL | B_LYS_302 | NZ  | B_ASP_233 | OD2 | 3.066 |
| 2VDL | B_LYS_354 | NZ  | B_GLU_356 | OE1 | 2.717 |
| 2VDL | B_ARG_360 | NH2 | B_GLU_358 | OE1 | 3.910 |
| 2VDL | B_ARG_360 | NH2 | B_GLU_358 | OE2 | 3.469 |
| 2VDL | B_ARG_404 | NH1 | B_GLU_364 | OE2 | 3.049 |
| 2VDL | B_ARG_404 | NH2 | B_GLU_364 | OE2 | 3.073 |
| 2VDL | B_LYS_417 | NZ  | B_GLU_358 | OE2 | 3.933 |
| 2VDL | H_ARG_40  | NH2 | H_GLU_46  | OE1 | 3.013 |
| 2VDL | H_ARG_40  | NH2 | H_GLU_46  | OE2 | 3.976 |
| 2VDL | H_LYS_59  | NZ  | A_GLU_117 | OE2 | 3.964 |
| 2VDL | H_LYS_67  | NZ  | H_ASP_90  | OD1 | 3.729 |
| 2VDL | H_LYS_67  | NZ  | H_ASP_90  | OD2 | 2.693 |
| 2VDL | H_LYS_214 | NZ  | L_GLU_123 | OE2 | 3.400 |
| 2VDL | L_HIS_24  | ND1 | L_ASP_70  | OD1 | 2.670 |
| 2VDL | L_HIS_24  | ND1 | L_ASP_70  | OD2 | 3.843 |
| 2VDL | L_ARG_61  | NH2 | L_ASP_82  | OD1 | 3.133 |
| 2VDL | L_ARG_61  | NH2 | L_ASP_82  | OD2 | 3.618 |
| 2VDL | L_LYS_103 | NZ  | L_ASP_85  | OD1 | 3.222 |
| 2VDL | L_LYS_103 | NZ  | L_ASP_85  | OD2 | 3.662 |
| 2VDL | L_LYS_147 | NZ  | L_GLU_154 | OE1 | 3.870 |
| 2VDL | L_LYS_149 | NZ  | L_GLU_195 | OE1 | 3.028 |
| 2VDL | L_LYS_149 | NZ  | L_GLU_195 | OE2 | 3.950 |
| 2VDL | L_ARG_155 | NH1 | L_GLU_185 | OE1 | 3.118 |
| 2VDL | L_ARG_155 | NH1 | L_GLU_185 | OE2 | 3.879 |
| 2VDL | L_ARG_155 | NH2 | L_GLU_185 | OE1 | 3.756 |
| 2VDL | L_ARG_155 | NH2 | L_GLU_185 | OE2 | 3.072 |
| 2VDL | L_HIS_189 | ND1 | L_ASP_151 | OD1 | 2.876 |
| 2VDL | L_LYS_199 | NZ  | L_ASP_110 | OD2 | 3.382 |
| 2VDM | A_HIS_30  | ND1 | A_GLU_136 | OE1 | 3.623 |
| 2VDM | A_ARG_77  | NH1 | H_ASP_102 | OD1 | 3.512 |
| 2VDM | A_ARG_77  | NH1 | H_ASP_102 | OD2 | 3.196 |
| 2VDM | A_ARG_77  | NH2 | H_ASP_102 | OD1 | 2.762 |
| 2VDM | A_ARG_77  | NH2 | H_ASP_102 | OD2 | 3.757 |
| 2VDM | A_LYS_88  | NZ  | A_ASP_71  | OD1 | 3.506 |
| 2VDM | A_LYS_88  | NZ  | A_GLU_75  | OE2 | 3.717 |

|      |           |     |           |     |       |
|------|-----------|-----|-----------|-----|-------|
| 2VDM | A_ARG_153 | NH1 | A_GLU_157 | OE2 | 3.526 |
| 2VDM | A_ARG_153 | NH2 | A_GLU_120 | OE1 | 3.629 |
| 2VDM | A_ARG_153 | NH2 | A_GLU_120 | OE2 | 3.472 |
| 2VDM | A_ARG_165 | NH1 | A_GLU_123 | OE1 | 3.954 |
| 2VDM | A_ARG_165 | NH1 | A_GLU_123 | OE2 | 2.915 |
| 2VDM | A_ARG_165 | NH2 | A_ASP_163 | OD1 | 2.984 |
| 2VDM | A_ARG_279 | NH2 | A_GLU_268 | OE2 | 3.711 |
| 2VDM | A_ARG_317 | NH2 | A_GLU_315 | OE1 | 3.553 |
| 2VDM | A_ARG_327 | NH1 | A_GLU_283 | OE1 | 3.196 |
| 2VDM | A_ARG_327 | NH1 | A_GLU_283 | OE2 | 3.335 |
| 2VDM | A_ARG_422 | NH1 | A_ASP_24  | OD1 | 2.877 |
| 2VDM | A_ARG_422 | NH1 | A_ASP_24  | OD2 | 3.314 |
| 2VDM | B_ARG_62  | NH2 | B_GLU_60  | OE2 | 3.866 |
| 2VDM | B_LYS_72  | NZ  | B_ASP_109 | OD1 | 2.865 |
| 2VDM | B_LYS_72  | NZ  | B_ASP_109 | OD2 | 3.109 |
| 2VDM | B_ARG_91  | NH2 | B_GLU_60  | OE1 | 3.150 |
| 2VDM | B_ARG_105 | NH1 | B_ASP_71  | OD1 | 3.646 |
| 2VDM | B_LYS_159 | NZ  | B_ASP_224 | OD1 | 3.821 |
| 2VDM | B_LYS_159 | NZ  | B_ASP_224 | OD2 | 2.737 |
| 2VDM | B_LYS_209 | NZ  | B_GLU_206 | OE2 | 3.484 |
| 2VDM | B_ARG_214 | NH1 | B_ASP_179 | OD2 | 3.120 |
| 2VDM | B_ARG_216 | NH2 | A_GLU_123 | OE2 | 2.982 |
| 2VDM | B_ARG_239 | NH2 | B_ASP_113 | OD2 | 3.117 |
| 2VDM | B_HIS_244 | NE2 | B_ASP_113 | OD1 | 3.810 |
| 2VDM | B_LYS_253 | NZ  | A_ASP_232 | OD2 | 3.306 |
| 2VDM | B_HIS_255 | ND1 | B_ASP_259 | OD2 | 2.883 |
| 2VDM | B_HIS_255 | NE2 | B_ASP_158 | OD2 | 3.162 |
| 2VDM | B_HIS_255 | NE2 | B_ASP_217 | OD1 | 3.723 |
| 2VDM | B_HIS_255 | NE2 | B_ASP_217 | OD2 | 2.768 |
| 2VDM | B_HIS_274 | NE2 | B_ASP_270 | OD1 | 3.033 |
| 2VDM | B_HIS_274 | NE2 | B_ASP_270 | OD2 | 2.759 |
| 2VDM | B_HIS_280 | ND1 | B_ASP_278 | OD2 | 3.990 |
| 2VDM | B_LYS_298 | NZ  | B_GLU_297 | OE2 | 3.783 |
| 2VDM | B_LYS_302 | NZ  | B_ASP_233 | OD1 | 3.512 |
| 2VDM | B_LYS_302 | NZ  | B_ASP_233 | OD2 | 3.089 |
| 2VDM | B_LYS_354 | NZ  | B_GLU_356 | OE1 | 2.934 |
| 2VDM | B_LYS_354 | NZ  | B_GLU_356 | OE2 | 3.448 |
| 2VDM | B_ARG_360 | NH2 | B_GLU_358 | OE2 | 3.602 |
| 2VDM | B_LYS_390 | NZ  | B_ASP_393 | OD1 | 3.190 |
| 2VDM | B_ARG_404 | NH1 | B_GLU_364 | OE2 | 3.379 |
| 2VDM | B_ARG_404 | NH2 | B_GLU_364 | OE2 | 3.556 |
| 2VDM | B_LYS_412 | NZ  | B_GLU_365 | OE1 | 2.778 |
| 2VDM | B_LYS_412 | NZ  | B_GLU_365 | OE2 | 3.744 |
| 2VDM | B_LYS_417 | NZ  | B_GLU_358 | OE2 | 3.687 |
| 2VDM | H_ARG_40  | NH2 | H_GLU_46  | OE1 | 3.139 |
| 2VDM | H_LYS_67  | NZ  | H_ASP_90  | OD1 | 3.953 |
| 2VDM | H_LYS_67  | NZ  | H_ASP_90  | OD2 | 2.810 |
| 2VDM | H_LYS_214 | NZ  | L_GLU_123 | OE2 | 3.334 |
| 2VDM | H_LYS_215 | NZ  | H_GLU_217 | OE1 | 3.652 |
| 2VDM | L_HIS_24  | ND1 | L_ASP_70  | OD1 | 2.661 |
| 2VDM | L_HIS_24  | ND1 | L_ASP_70  | OD2 | 3.812 |
| 2VDM | L_LYS_39  | NZ  | L_GLU_81  | OE2 | 3.325 |
| 2VDM | L_ARG_61  | NH2 | L_ASP_79  | OD1 | 3.812 |
| 2VDM | L_ARG_61  | NH2 | L_ASP_82  | OD1 | 3.292 |
| 2VDM | L_ARG_61  | NH2 | L_ASP_82  | OD2 | 3.719 |
| 2VDM | L_LYS_103 | NZ  | L_ASP_85  | OD1 | 2.836 |
| 2VDM | L_LYS_103 | NZ  | L_ASP_85  | OD2 | 3.351 |
| 2VDM | L_LYS_147 | NZ  | L_GLU_154 | OE1 | 3.824 |

|      |           |     |           |     |       |
|------|-----------|-----|-----------|-----|-------|
| 2VDM | L_LYS_147 | NZ  | L_GLU_154 | OE2 | 3.630 |
| 2VDM | L_LYS_149 | NZ  | L_GLU_195 | OE1 | 3.194 |
| 2VDM | L_LYS_149 | NZ  | L_GLU_195 | OE2 | 3.563 |
| 2VDM | L_ARG_155 | NH1 | L_GLU_185 | OE1 | 3.186 |
| 2VDM | L_ARG_155 | NH2 | L_GLU_185 | OE1 | 3.687 |
| 2VDM | L_ARG_155 | NH2 | L_GLU_185 | OE2 | 3.288 |
| 2VDM | L_HIS_189 | ND1 | L_ASP_151 | OD1 | 2.728 |
| 2VDM | L_LYS_199 | NZ  | L_ASP_110 | OD2 | 3.757 |
| 2VDN | A_HIS_30  | ND1 | A_GLU_136 | OE1 | 3.948 |
| 2VDN | A_ARG_77  | NH1 | H_ASP_102 | OD1 | 3.491 |
| 2VDN | A_ARG_77  | NH1 | H_ASP_102 | OD2 | 3.169 |
| 2VDN | A_ARG_77  | NH2 | H_ASP_102 | OD1 | 2.808 |
| 2VDN | A_ARG_77  | NH2 | H_ASP_102 | OD2 | 3.762 |
| 2VDN | A_LYS_88  | NZ  | A_ASP_71  | OD1 | 3.146 |
| 2VDN | A_LYS_88  | NZ  | A_GLU_75  | OE2 | 3.755 |
| 2VDN | A_ARG_153 | NH1 | A_GLU_157 | OE2 | 3.732 |
| 2VDN | A_ARG_153 | NH2 | A_GLU_120 | OE1 | 3.385 |
| 2VDN | A_ARG_153 | NH2 | A_GLU_120 | OE2 | 3.434 |
| 2VDN | A_ARG_165 | NH1 | A_GLU_123 | OE1 | 3.564 |
| 2VDN | A_ARG_165 | NH1 | A_GLU_123 | OE2 | 3.322 |
| 2VDN | A_ARG_165 | NH2 | A_ASP_163 | OD1 | 2.897 |
| 2VDN | A_ARG_165 | NH2 | A_ASP_163 | OD2 | 3.963 |
| 2VDN | A_ARG_317 | NH2 | A_GLU_315 | OE1 | 3.869 |
| 2VDN | A_ARG_327 | NH1 | A_GLU_283 | OE1 | 3.115 |
| 2VDN | A_ARG_327 | NH1 | A_GLU_283 | OE2 | 3.543 |
| 2VDN | A_ARG_422 | NH1 | A_ASP_24  | OD1 | 2.918 |
| 2VDN | A_ARG_422 | NH1 | A_ASP_24  | OD2 | 3.024 |
| 2VDN | A_ARG_422 | NH2 | A_ASP_24  | OD2 | 3.873 |
| 2VDN | B_ARG_62  | NH2 | B_GLU_60  | OE1 | 3.892 |
| 2VDN | B_ARG_62  | NH2 | B_GLU_60  | OE2 | 3.874 |
| 2VDN | B_ARG_67  | NH1 | B_GLU_65  | OE1 | 3.311 |
| 2VDN | B_LYS_72  | NZ  | B_ASP_109 | OD1 | 2.643 |
| 2VDN | B_LYS_72  | NZ  | B_ASP_109 | OD2 | 3.617 |
| 2VDN | B_ARG_87  | NH2 | B_GLU_65  | OE2 | 3.986 |
| 2VDN | B_ARG_91  | NH1 | B_GLU_60  | OE2 | 3.487 |
| 2VDN | B_ARG_91  | NH2 | B_GLU_60  | OE2 | 3.817 |
| 2VDN | B_ARG_105 | NH1 | B_ASP_71  | OD1 | 3.631 |
| 2VDN | B_LYS_159 | NZ  | B_ASP_224 | OD1 | 3.745 |
| 2VDN | B_LYS_159 | NZ  | B_ASP_224 | OD2 | 2.600 |
| 2VDN | B_LYS_209 | NZ  | B_GLU_206 | OE2 | 3.458 |
| 2VDN | B_ARG_214 | NH1 | B_ASP_179 | OD2 | 2.971 |
| 2VDN | B_ARG_214 | NH2 | B_ASP_179 | OD2 | 3.917 |
| 2VDN | B_ARG_216 | NH2 | A_GLU_123 | OE2 | 2.995 |
| 2VDN | B_ARG_239 | NH2 | B_ASP_113 | OD2 | 3.167 |
| 2VDN | B_HIS_244 | NE2 | B_ASP_113 | OD1 | 3.751 |
| 2VDN | B_HIS_255 | ND1 | B_ASP_259 | OD2 | 2.831 |
| 2VDN | B_HIS_255 | NE2 | B_ASP_158 | OD2 | 3.236 |
| 2VDN | B_HIS_255 | NE2 | B_ASP_217 | OD1 | 3.761 |
| 2VDN | B_HIS_255 | NE2 | B_ASP_217 | OD2 | 2.725 |
| 2VDN | B_HIS_274 | NE2 | B_ASP_270 | OD1 | 3.136 |
| 2VDN | B_HIS_274 | NE2 | B_ASP_270 | OD2 | 2.767 |
| 2VDN | B_HIS_280 | ND1 | B_ASP_278 | OD2 | 3.961 |
| 2VDN | B_LYS_302 | NZ  | B_ASP_233 | OD1 | 3.616 |
| 2VDN | B_LYS_302 | NZ  | B_ASP_233 | OD2 | 3.020 |
| 2VDN | B_LYS_354 | NZ  | B_GLU_356 | OE1 | 2.617 |
| 2VDN | B_ARG_360 | NH2 | B_GLU_358 | OE2 | 3.301 |
| 2VDN | B_LYS_390 | NZ  | B_ASP_393 | OD1 | 3.452 |
| 2VDN | B_ARG_404 | NH1 | B_GLU_364 | OE2 | 3.371 |

|      |           |     |           |     |       |
|------|-----------|-----|-----------|-----|-------|
| 2VDN | B_ARG_404 | NH2 | B_GLU_364 | OE2 | 2.851 |
| 2VDN | B_LYS_412 | NZ  | B_GLU_365 | OE1 | 2.766 |
| 2VDN | B_LYS_412 | NZ  | B_GLU_365 | OE2 | 3.273 |
| 2VDN | B_LYS_412 | NZ  | B_GLU_409 | OE2 | 3.840 |
| 2VDN | B_LYS_417 | NZ  | B_GLU_358 | OE2 | 3.820 |
| 2VDN | H_ARG_40  | NH2 | H_GLU_46  | OE1 | 3.092 |
| 2VDN | H_LYS_67  | NZ  | H_ASP_90  | OD1 | 3.750 |
| 2VDN | H_LYS_67  | NZ  | H_ASP_90  | OD2 | 2.688 |
| 2VDN | H_LYS_214 | NZ  | L_GLU_123 | OE2 | 3.685 |
| 2VDN | H_LYS_215 | NZ  | H_GLU_217 | OE1 | 3.744 |
| 2VDN | L_HIS_24  | ND1 | L_ASP_70  | OD1 | 2.783 |
| 2VDN | L_LYS_39  | NZ  | L_GLU_81  | OE2 | 3.138 |
| 2VDN | L_ARG_61  | NH2 | L_ASP_82  | OD1 | 3.159 |
| 2VDN | L_ARG_61  | NH2 | L_ASP_82  | OD2 | 3.820 |
| 2VDN | L_LYS_103 | NZ  | L_ASP_85  | OD1 | 3.058 |
| 2VDN | L_LYS_103 | NZ  | L_ASP_85  | OD2 | 3.355 |
| 2VDN | L_LYS_147 | NZ  | L_GLU_154 | OE1 | 3.309 |
| 2VDN | L_LYS_147 | NZ  | L_GLU_154 | OE2 | 3.600 |
| 2VDN | L_LYS_149 | NZ  | L_GLU_195 | OE1 | 3.164 |
| 2VDN | L_LYS_149 | NZ  | L_GLU_195 | OE2 | 3.705 |
| 2VDN | L_ARG_155 | NH1 | L_GLU_185 | OE1 | 3.044 |
| 2VDN | L_ARG_155 | NH1 | L_GLU_185 | OE2 | 3.873 |
| 2VDN | L_ARG_155 | NH2 | L_GLU_185 | OE1 | 3.640 |
| 2VDN | L_ARG_155 | NH2 | L_GLU_185 | OE2 | 3.207 |
| 2VDN | L_LYS_199 | NZ  | L_ASP_110 | OD2 | 3.394 |
| 2VDO | A_HIS_30  | ND1 | A_GLU_136 | OE1 | 3.920 |
| 2VDO | A_ARG_77  | NH1 | H_ASP_102 | OD1 | 3.703 |
| 2VDO | A_ARG_77  | NH1 | H_ASP_102 | OD2 | 3.042 |
| 2VDO | A_ARG_77  | NH2 | H_ASP_102 | OD1 | 2.789 |
| 2VDO | A_ARG_77  | NH2 | H_ASP_102 | OD2 | 3.375 |
| 2VDO | A_LYS_88  | NZ  | A_GLU_75  | OE2 | 3.810 |
| 2VDO | A_ARG_153 | NH1 | A_GLU_157 | OE2 | 3.784 |
| 2VDO | A_ARG_153 | NH2 | A_GLU_120 | OE1 | 3.533 |
| 2VDO | A_ARG_153 | NH2 | A_GLU_120 | OE2 | 3.754 |
| 2VDO | A_ARG_165 | NH1 | A_GLU_123 | OE1 | 3.613 |
| 2VDO | A_ARG_165 | NH1 | A_GLU_123 | OE2 | 3.354 |
| 2VDO | A_ARG_165 | NH2 | A_ASP_163 | OD1 | 2.853 |
| 2VDO | A_ARG_165 | NH2 | A_ASP_163 | OD2 | 3.749 |
| 2VDO | A_ARG_279 | NH2 | A_GLU_268 | OE2 | 3.621 |
| 2VDO | A_ARG_303 | NH2 | A_ASP_301 | OD2 | 3.328 |
| 2VDO | A_ARG_317 | NH2 | A_GLU_315 | OE1 | 3.691 |
| 2VDO | A_ARG_327 | NH1 | A_GLU_283 | OE1 | 3.064 |
| 2VDO | A_ARG_327 | NH1 | A_GLU_283 | OE2 | 3.315 |
| 2VDO | A_ARG_422 | NH1 | A_ASP_24  | OD1 | 3.045 |
| 2VDO | A_ARG_422 | NH1 | A_ASP_24  | OD2 | 3.220 |
| 2VDO | A_ARG_422 | NH2 | A_ASP_24  | OD2 | 3.964 |
| 2VDO | B_LYS_72  | NZ  | B_ASP_109 | OD1 | 2.524 |
| 2VDO | B_LYS_72  | NZ  | B_ASP_109 | OD2 | 3.663 |
| 2VDO | B_ARG_91  | NH1 | B_GLU_60  | OE1 | 3.543 |
| 2VDO | B_ARG_105 | NH1 | B_ASP_71  | OD1 | 3.285 |
| 2VDO | B_LYS_159 | NZ  | B_ASP_224 | OD1 | 3.842 |
| 2VDO | B_LYS_159 | NZ  | B_ASP_224 | OD2 | 2.647 |
| 2VDO | B_LYS_209 | NZ  | B_GLU_206 | OE2 | 3.221 |
| 2VDO | B_ARG_214 | NH1 | B_ASP_179 | OD1 | 3.754 |
| 2VDO | B_ARG_214 | NH1 | B_ASP_179 | OD2 | 2.724 |
| 2VDO | B_ARG_216 | NH2 | A_GLU_123 | OE2 | 3.092 |
| 2VDO | B_ARG_239 | NH2 | B_ASP_113 | OD2 | 2.947 |
| 2VDO | B_HIS_244 | NE2 | B_ASP_113 | OD1 | 3.778 |

|      |           |     |           |     |       |
|------|-----------|-----|-----------|-----|-------|
| 2VDO | B_LYS_253 | NZ  | A_ASP_232 | OD2 | 2.836 |
| 2VDO | B_HIS_255 | ND1 | B_ASP_259 | OD2 | 2.644 |
| 2VDO | B_HIS_255 | NE2 | B_ASP_158 | OD2 | 3.337 |
| 2VDO | B_HIS_255 | NE2 | B_ASP_217 | OD1 | 3.680 |
| 2VDO | B_HIS_255 | NE2 | B_ASP_217 | OD2 | 2.699 |
| 2VDO | B_HIS_274 | NE2 | B_ASP_270 | OD1 | 3.105 |
| 2VDO | B_HIS_274 | NE2 | B_ASP_270 | OD2 | 2.754 |
| 2VDO | B_HIS_280 | ND1 | B_ASP_278 | OD2 | 3.796 |
| 2VDO | B_LYS_298 | NZ  | B_GLU_297 | OE2 | 3.249 |
| 2VDO | B_LYS_302 | NZ  | B_ASP_233 | OD1 | 3.475 |
| 2VDO | B_LYS_302 | NZ  | B_ASP_233 | OD2 | 3.319 |
| 2VDO | B_LYS_354 | NZ  | B_GLU_356 | OE1 | 2.694 |
| 2VDO | B_LYS_390 | NZ  | B_ASP_393 | OD1 | 2.830 |
| 2VDO | B_LYS_390 | NZ  | B_ASP_393 | OD2 | 3.993 |
| 2VDO | B_ARG_404 | NH1 | B_GLU_364 | OE2 | 3.382 |
| 2VDO | B_ARG_404 | NH2 | B_GLU_364 | OE2 | 2.912 |
| 2VDO | C_LYS_406 | NZ  | A_ASP_224 | OD1 | 2.673 |
| 2VDO | C_LYS_406 | NZ  | A_ASP_224 | OD2 | 3.263 |
| 2VDO | H_ARG_40  | NH2 | H_GLU_46  | OE1 | 3.274 |
| 2VDO | H_LYS_67  | NZ  | H_ASP_90  | OD1 | 3.624 |
| 2VDO | H_LYS_67  | NZ  | H_ASP_90  | OD2 | 2.582 |
| 2VDO | L_HIS_24  | ND1 | L_ASP_70  | OD1 | 2.820 |
| 2VDO | L_HIS_24  | ND1 | L_ASP_70  | OD2 | 3.898 |
| 2VDO | L_LYS_39  | NZ  | L_GLU_81  | OE1 | 3.127 |
| 2VDO | L_ARG_61  | NH2 | L_ASP_82  | OD1 | 3.036 |
| 2VDO | L_ARG_61  | NH2 | L_ASP_82  | OD2 | 3.553 |
| 2VDO | L_LYS_103 | NZ  | L_ASP_85  | OD1 | 3.186 |
| 2VDO | L_LYS_103 | NZ  | L_ASP_85  | OD2 | 3.792 |
| 2VDO | L_LYS_147 | NZ  | L_GLU_154 | OE1 | 3.276 |
| 2VDO | L_LYS_147 | NZ  | L_GLU_154 | OE2 | 3.435 |
| 2VDO | L_LYS_149 | NZ  | L_GLU_195 | OE1 | 3.199 |
| 2VDO | L_LYS_149 | NZ  | L_GLU_195 | OE2 | 3.780 |
| 2VDO | L_HIS_189 | ND1 | L_ASP_151 | OD1 | 2.775 |
| 2VDO | L_LYS_199 | NZ  | L_ASP_110 | OD2 | 3.339 |
| 2VDP | A_HIS_30  | ND1 | A_GLU_136 | OE1 | 3.660 |
| 2VDP | A_ARG_77  | NH1 | H_ASP_102 | OD1 | 3.519 |
| 2VDP | A_ARG_77  | NH1 | H_ASP_102 | OD2 | 3.089 |
| 2VDP | A_ARG_77  | NH2 | H_ASP_102 | OD1 | 2.733 |
| 2VDP | A_ARG_77  | NH2 | H_ASP_102 | OD2 | 3.585 |
| 2VDP | A_LYS_88  | NZ  | A_ASP_71  | OD1 | 3.039 |
| 2VDP | A_LYS_88  | NZ  | A_GLU_75  | OE2 | 3.920 |
| 2VDP | A_ARG_153 | NH1 | A_GLU_157 | OE1 | 3.962 |
| 2VDP | A_ARG_153 | NH1 | A_GLU_157 | OE2 | 3.572 |
| 2VDP | A_ARG_153 | NH2 | A_GLU_120 | OE1 | 3.448 |
| 2VDP | A_ARG_153 | NH2 | A_GLU_120 | OE2 | 3.842 |
| 2VDP | A_ARG_165 | NH1 | A_GLU_123 | OE2 | 2.955 |
| 2VDP | A_ARG_165 | NH2 | A_ASP_163 | OD1 | 2.890 |
| 2VDP | A_ARG_165 | NH2 | A_ASP_163 | OD2 | 3.894 |
| 2VDP | A_ARG_279 | NH2 | A_GLU_268 | OE2 | 3.568 |
| 2VDP | A_ARG_303 | NH2 | A_ASP_301 | OD2 | 3.133 |
| 2VDP | A_ARG_317 | NH2 | A_GLU_315 | OE1 | 3.662 |
| 2VDP | A_ARG_327 | NH1 | A_GLU_283 | OE1 | 3.008 |
| 2VDP | A_ARG_327 | NH1 | A_GLU_283 | OE2 | 3.186 |
| 2VDP | A_ARG_422 | NH1 | A_ASP_24  | OD1 | 3.204 |
| 2VDP | A_ARG_422 | NH1 | A_ASP_24  | OD2 | 3.337 |
| 2VDP | B_LYS_72  | NZ  | B_ASP_109 | OD1 | 2.827 |
| 2VDP | B_LYS_72  | NZ  | B_ASP_109 | OD2 | 3.031 |
| 2VDP | B_ARG_105 | NH1 | B_ASP_71  | OD1 | 3.982 |

|      |           |     |           |     |       |
|------|-----------|-----|-----------|-----|-------|
| 2VDP | B.LYS_159 | NZ  | B.ASP_224 | OD1 | 3.737 |
| 2VDP | B.LYS_159 | NZ  | B.ASP_224 | OD2 | 2.652 |
| 2VDP | B.ARG_214 | NH1 | B.ASP_179 | OD1 | 3.890 |
| 2VDP | B.ARG_214 | NH1 | B.ASP_179 | OD2 | 2.793 |
| 2VDP | B.ARG_214 | NH2 | B.ASP_179 | OD1 | 3.782 |
| 2VDP | B.ARG_214 | NH2 | B.ASP_179 | OD2 | 3.940 |
| 2VDP | B.ARG_216 | NH2 | A.GLU_123 | OE2 | 3.038 |
| 2VDP | B.ARG_239 | NH2 | B.ASP_113 | OD2 | 3.143 |
| 2VDP | B.HIS_244 | NE2 | B.ASP_113 | OD1 | 3.933 |
| 2VDP | B.LYS_253 | NZ  | A.ASP_232 | OD2 | 2.914 |
| 2VDP | B.HIS_255 | ND1 | B.ASP_259 | OD2 | 2.924 |
| 2VDP | B.HIS_255 | NE2 | B.ASP_158 | OD2 | 3.261 |
| 2VDP | B.HIS_255 | NE2 | B.ASP_217 | OD1 | 3.670 |
| 2VDP | B.HIS_255 | NE2 | B.ASP_217 | OD2 | 2.811 |
| 2VDP | B.HIS_274 | NE2 | B.ASP_270 | OD1 | 2.909 |
| 2VDP | B.HIS_274 | NE2 | B.ASP_270 | OD2 | 2.812 |
| 2VDP | B.HIS_280 | ND1 | B.ASP_278 | OD2 | 3.653 |
| 2VDP | B.LYS_298 | NZ  | B.GLU_297 | OE2 | 3.585 |
| 2VDP | B.LYS_302 | NZ  | B.ASP_233 | OD1 | 3.588 |
| 2VDP | B.LYS_302 | NZ  | B.ASP_233 | OD2 | 3.086 |
| 2VDP | B.LYS_354 | NZ  | B.GLU_356 | OE1 | 2.651 |
| 2VDP | B.ARG_360 | NH2 | B.GLU_358 | OE2 | 3.559 |
| 2VDP | B.LYS_390 | NZ  | B.ASP_393 | OD1 | 2.846 |
| 2VDP | B.LYS_412 | NZ  | B.GLU_365 | OE1 | 2.691 |
| 2VDP | B.LYS_412 | NZ  | B.GLU_365 | OE2 | 3.358 |
| 2VDP | C.LYS_406 | NZ  | A.ASP_224 | OD1 | 2.604 |
| 2VDP | C.LYS_406 | NZ  | A.ASP_224 | OD2 | 3.297 |
| 2VDP | H.ARG_40  | NH2 | H.GLU_46  | OE1 | 3.121 |
| 2VDP | H.LYS_67  | NZ  | H.ASP_90  | OD1 | 3.700 |
| 2VDP | H.LYS_67  | NZ  | H.ASP_90  | OD2 | 2.763 |
| 2VDP | H.LYS_214 | NZ  | L.GLU_123 | OE2 | 3.425 |
| 2VDP | L.HIS_24  | ND1 | L.ASP_70  | OD1 | 2.731 |
| 2VDP | L.HIS_24  | ND1 | L.ASP_70  | OD2 | 3.759 |
| 2VDP | L.LYS_39  | NZ  | L.GLU_81  | OE1 | 3.012 |
| 2VDP | L.ARG_61  | NH2 | L.ASP_82  | OD1 | 3.212 |
| 2VDP | L.ARG_61  | NH2 | L.ASP_82  | OD2 | 3.647 |
| 2VDP | L.LYS_103 | NZ  | L.ASP_85  | OD1 | 3.404 |
| 2VDP | L.LYS_103 | NZ  | L.ASP_85  | OD2 | 3.147 |
| 2VDP | L.LYS_147 | NZ  | L.GLU_154 | OE1 | 3.927 |
| 2VDP | L.LYS_147 | NZ  | L.GLU_154 | OE2 | 3.984 |
| 2VDP | L.LYS_149 | NZ  | L.GLU_195 | OE1 | 3.337 |
| 2VDP | L.LYS_149 | NZ  | L.GLU_195 | OE2 | 3.651 |
| 2VDP | L.ARG_155 | NH1 | L.GLU_185 | OE1 | 3.124 |
| 2VDP | L.ARG_155 | NH1 | L.GLU_185 | OE2 | 3.854 |
| 2VDP | L.ARG_155 | NH2 | L.GLU_185 | OE1 | 3.803 |
| 2VDP | L.ARG_155 | NH2 | L.GLU_185 | OE2 | 3.129 |
| 2VDP | L.HIS_189 | ND1 | L.ASP_151 | OD1 | 3.064 |
| 2VDP | L.LYS_199 | NZ  | L.ASP_110 | OD2 | 3.415 |
| 2VDQ | A.ARG_77  | NH1 | H.ASP_102 | OD1 | 3.603 |
| 2VDQ | A.ARG_77  | NH1 | H.ASP_102 | OD2 | 3.057 |
| 2VDQ | A.ARG_77  | NH2 | H.ASP_102 | OD1 | 2.765 |
| 2VDQ | A.ARG_77  | NH2 | H.ASP_102 | OD2 | 3.398 |
| 2VDQ | A.LYS_88  | NZ  | A.GLU_75  | OE2 | 3.857 |
| 2VDQ | A.ARG_153 | NH1 | A.GLU_157 | OE2 | 3.540 |
| 2VDQ | A.ARG_153 | NH2 | A.GLU_120 | OE1 | 3.469 |
| 2VDQ | A.ARG_153 | NH2 | A.GLU_120 | OE2 | 3.910 |
| 2VDQ | A.ARG_165 | NH1 | A.GLU_123 | OE1 | 3.775 |
| 2VDQ | A.ARG_165 | NH1 | A.GLU_123 | OE2 | 3.560 |

|      |           |     |           |     |       |
|------|-----------|-----|-----------|-----|-------|
| 2VDQ | A_ARG_165 | NH2 | A_ASP_163 | OD1 | 2.874 |
| 2VDQ | A_ARG_165 | NH2 | A_ASP_163 | OD2 | 3.776 |
| 2VDQ | A_ARG_279 | NH2 | A_GLU_268 | OE2 | 3.474 |
| 2VDQ | A_ARG_317 | NH2 | A_GLU_315 | OE1 | 3.631 |
| 2VDQ | A_ARG_327 | NH1 | A_GLU_283 | OE1 | 3.069 |
| 2VDQ | A_ARG_327 | NH1 | A_GLU_283 | OE2 | 3.317 |
| 2VDQ | A_ARG_422 | NH1 | A_ASP_24  | OD1 | 2.959 |
| 2VDQ | A_ARG_422 | NH1 | A_ASP_24  | OD2 | 3.217 |
| 2VDQ | B_ARG_67  | NH1 | B_GLU_65  | OE1 | 3.626 |
| 2VDQ | B_LYS_72  | NZ  | B_ASP_109 | OD1 | 2.465 |
| 2VDQ | B_LYS_72  | NZ  | B_ASP_109 | OD2 | 3.694 |
| 2VDQ | B_ARG_91  | NH1 | B_GLU_60  | OE1 | 3.580 |
| 2VDQ | B_ARG_91  | NH2 | B_GLU_60  | OE1 | 2.967 |
| 2VDQ | B_ARG_105 | NH1 | B_ASP_71  | OD1 | 3.573 |
| 2VDQ | B_LYS_159 | NZ  | B_ASP_224 | OD1 | 3.868 |
| 2VDQ | B_LYS_159 | NZ  | B_ASP_224 | OD2 | 2.786 |
| 2VDQ | B_LYS_209 | NZ  | B_GLU_206 | OE2 | 3.302 |
| 2VDQ | B_ARG_214 | NH1 | B_ASP_179 | OD1 | 3.942 |
| 2VDQ | B_ARG_214 | NH1 | B_ASP_179 | OD2 | 2.723 |
| 2VDQ | B_ARG_216 | NH2 | A_GLU_123 | OE2 | 2.900 |
| 2VDQ | B_ARG_239 | NH2 | B_ASP_113 | OD2 | 2.900 |
| 2VDQ | B_HIS_244 | NE2 | B_ASP_113 | OD1 | 3.769 |
| 2VDQ | B_LYS_253 | NZ  | A_ASP_232 | OD2 | 3.522 |
| 2VDQ | B_HIS_255 | ND1 | B_ASP_259 | OD2 | 2.795 |
| 2VDQ | B_HIS_255 | NE2 | B_ASP_158 | OD2 | 3.253 |
| 2VDQ | B_HIS_255 | NE2 | B_ASP_217 | OD1 | 3.618 |
| 2VDQ | B_HIS_255 | NE2 | B_ASP_217 | OD2 | 2.719 |
| 2VDQ | B_HIS_274 | NE2 | B_ASP_270 | OD1 | 3.015 |
| 2VDQ | B_HIS_274 | NE2 | B_ASP_270 | OD2 | 2.786 |
| 2VDQ | B_HIS_280 | ND1 | B_ASP_278 | OD2 | 3.936 |
| 2VDQ | B_LYS_298 | NZ  | B_GLU_297 | OE2 | 3.339 |
| 2VDQ | B_LYS_302 | NZ  | B_ASP_233 | OD1 | 3.182 |
| 2VDQ | B_LYS_302 | NZ  | B_ASP_233 | OD2 | 3.177 |
| 2VDQ | B_LYS_354 | NZ  | B_GLU_356 | OE1 | 2.632 |
| 2VDQ | B_ARG_360 | NH2 | B_GLU_358 | OE2 | 3.805 |
| 2VDQ | B_LYS_390 | NZ  | B_ASP_393 | OD1 | 2.810 |
| 2VDQ | B_LYS_390 | NZ  | B_ASP_393 | OD2 | 3.977 |
| 2VDQ | B_ARG_404 | NH1 | B_GLU_364 | OE2 | 3.193 |
| 2VDQ | B_ARG_404 | NH2 | B_GLU_364 | OE2 | 3.023 |
| 2VDQ | B_ARG_447 | NH2 | B_GLU_442 | OE1 | 3.552 |
| 2VDQ | C_ARG_408 | NH1 | A_ASP_224 | OD1 | 3.059 |
| 2VDQ | C_ARG_408 | NH1 | A_ASP_224 | OD2 | 3.490 |
| 2VDQ | C_ARG_408 | NH2 | A_ASP_224 | OD1 | 3.054 |
| 2VDQ | C_ARG_408 | NH2 | A_ASP_224 | OD2 | 3.761 |
| 2VDQ | H_ARG_40  | NH2 | H_GLU_46  | OE1 | 3.061 |
| 2VDQ | H_LYS_59  | NZ  | A_GLU_117 | OE2 | 3.921 |
| 2VDQ | H_LYS_67  | NZ  | H_ASP_90  | OD1 | 3.616 |
| 2VDQ | H_LYS_67  | NZ  | H_ASP_90  | OD2 | 2.592 |
| 2VDQ | H_LYS_214 | NZ  | L_GLU_123 | OE2 | 3.223 |
| 2VDQ | L_HIS_24  | ND1 | L_ASP_70  | OD1 | 2.751 |
| 2VDQ | L_HIS_24  | ND1 | L_ASP_70  | OD2 | 3.828 |
| 2VDQ | L_LYS_39  | NZ  | L_GLU_81  | OE2 | 3.151 |
| 2VDQ | L_ARG_61  | NH2 | L_ASP_82  | OD1 | 2.929 |
| 2VDQ | L_ARG_61  | NH2 | L_ASP_82  | OD2 | 3.560 |
| 2VDQ | L_LYS_103 | NZ  | L_ASP_85  | OD1 | 3.020 |
| 2VDQ | L_LYS_103 | NZ  | L_ASP_85  | OD2 | 3.466 |
| 2VDQ | L_LYS_149 | NZ  | L_GLU_195 | OE1 | 3.063 |
| 2VDQ | L_LYS_149 | NZ  | L_GLU_195 | OE2 | 3.588 |



|      |           |     |           |     |       |
|------|-----------|-----|-----------|-----|-------|
| 2VDQ | L_HIS_189 | ND1 | L_ASP_151 | OD1 | 2.754 |
| 2VDQ | L_LYS_199 | NZ  | L_ASP_110 | OD2 | 3.557 |
| 2VDR | A_HIS_30  | ND1 | A_GLU_136 | OE1 | 3.834 |
| 2VDR | A_ARG_77  | NH1 | H_ASP_102 | OD1 | 3.703 |
| 2VDR | A_ARG_77  | NH1 | H_ASP_102 | OD2 | 3.091 |
| 2VDR | A_ARG_77  | NH2 | H_ASP_102 | OD1 | 2.791 |
| 2VDR | A_ARG_77  | NH2 | H_ASP_102 | OD2 | 3.414 |
| 2VDR | A_LYS_88  | NZ  | A_GLU_75  | OE2 | 3.555 |
| 2VDR | A_ARG_153 | NH1 | A_GLU_157 | OE2 | 3.722 |
| 2VDR | A_ARG_153 | NH2 | A_GLU_120 | OE1 | 3.592 |
| 2VDR | A_ARG_153 | NH2 | A_GLU_120 | OE2 | 3.473 |
| 2VDR | A_ARG_165 | NH1 | A_GLU_123 | OE1 | 3.684 |
| 2VDR | A_ARG_165 | NH1 | A_GLU_123 | OE2 | 3.385 |
| 2VDR | A_ARG_165 | NH2 | A_ASP_163 | OD1 | 2.924 |
| 2VDR | A_ARG_165 | NH2 | A_ASP_163 | OD2 | 3.830 |
| 2VDR | A_ARG_279 | NH2 | A_GLU_268 | OE2 | 3.601 |
| 2VDR | A_ARG_303 | NH2 | A_ASP_301 | OD2 | 3.138 |
| 2VDR | A_ARG_317 | NH2 | A_GLU_315 | OE1 | 3.881 |
| 2VDR | A_ARG_327 | NH1 | A_GLU_283 | OE1 | 2.937 |
| 2VDR | A_ARG_327 | NH1 | A_GLU_283 | OE2 | 3.446 |
| 2VDR | A_ARG_422 | NH1 | A_ASP_24  | OD1 | 3.228 |
| 2VDR | A_ARG_422 | NH1 | A_ASP_24  | OD2 | 3.380 |
| 2VDR | A_ARG_422 | NH2 | A_ASP_24  | OD1 | 3.926 |
| 2VDR | A_ARG_422 | NH2 | A_ASP_24  | OD2 | 3.754 |
| 2VDR | B_LYS_72  | NZ  | B_ASP_109 | OD1 | 2.563 |
| 2VDR | B_ARG_91  | NH1 | B_GLU_60  | OE1 | 3.916 |
| 2VDR | B_ARG_91  | NH2 | B_GLU_60  | OE1 | 2.976 |
| 2VDR | B_ARG_105 | NH1 | B_ASP_71  | OD1 | 3.494 |
| 2VDR | B_LYS_159 | NZ  | B_ASP_224 | OD1 | 3.854 |
| 2VDR | B_LYS_159 | NZ  | B_ASP_224 | OD2 | 2.660 |
| 2VDR | B_LYS_209 | NZ  | B_GLU_206 | OE2 | 3.062 |
| 2VDR | B_ARG_214 | NH1 | B_ASP_179 | OD2 | 2.701 |
| 2VDR | B_ARG_216 | NH2 | A_GLU_123 | OE2 | 2.956 |
| 2VDR | B_ARG_239 | NH2 | B_ASP_113 | OD2 | 2.921 |
| 2VDR | B_HIS_244 | NE2 | B_ASP_113 | OD1 | 3.852 |
| 2VDR | B_LYS_253 | NZ  | A_ASP_232 | OD2 | 3.191 |
| 2VDR | B_HIS_255 | ND1 | B_ASP_259 | OD2 | 2.853 |
| 2VDR | B_HIS_255 | NE2 | B_ASP_158 | OD2 | 3.204 |
| 2VDR | B_HIS_255 | NE2 | B_ASP_217 | OD1 | 3.553 |
| 2VDR | B_HIS_255 | NE2 | B_ASP_217 | OD2 | 2.706 |
| 2VDR | B_HIS_274 | NE2 | B_ASP_270 | OD1 | 3.093 |
| 2VDR | B_HIS_274 | NE2 | B_ASP_270 | OD2 | 2.677 |
| 2VDR | B_HIS_280 | ND1 | B_ASP_278 | OD2 | 3.699 |
| 2VDR | B_LYS_298 | NZ  | B_GLU_297 | OE2 | 3.371 |
| 2VDR | B_LYS_302 | NZ  | B_ASP_233 | OD1 | 3.473 |
| 2VDR | B_LYS_302 | NZ  | B_ASP_233 | OD2 | 2.921 |
| 2VDR | B_LYS_354 | NZ  | B_GLU_356 | OE1 | 2.603 |
| 2VDR | B_ARG_360 | NH2 | B_GLU_358 | OE2 | 3.500 |
| 2VDR | B_LYS_390 | NZ  | B_ASP_393 | OD1 | 2.719 |
| 2VDR | B_ARG_404 | NH1 | B_GLU_364 | OE2 | 3.173 |
| 2VDR | B_ARG_404 | NH2 | B_GLU_364 | OE2 | 3.177 |
| 2VDR | C_ARG_408 | NH1 | A_ASP_224 | OD1 | 3.062 |
| 2VDR | C_ARG_408 | NH1 | A_ASP_224 | OD2 | 3.850 |
| 2VDR | C_ARG_408 | NH2 | A_ASP_224 | OD1 | 3.028 |
| 2VDR | C_ARG_408 | NH2 | A_ASP_224 | OD2 | 3.839 |
| 2VDR | H_ARG_40  | NH2 | H_GLU_46  | OE1 | 3.176 |
| 2VDR | H_LYS_67  | NZ  | H_ASP_90  | OD1 | 3.584 |
| 2VDR | H_LYS_67  | NZ  | H_ASP_90  | OD2 | 2.527 |

|      |           |     |           |     |       |
|------|-----------|-----|-----------|-----|-------|
| 2VDR | H.LYS_214 | NZ  | L.GLU_123 | OE2 | 3.860 |
| 2VDR | L.HIS_24  | ND1 | L.ASP_70  | OD1 | 2.825 |
| 2VDR | L.HIS_24  | ND1 | L.ASP_70  | OD2 | 3.852 |
| 2VDR | L.ARG_61  | NH2 | L.ASP_82  | OD1 | 2.979 |
| 2VDR | L.ARG_61  | NH2 | L.ASP_82  | OD2 | 3.650 |
| 2VDR | L.LYS_103 | NZ  | L.ASP_85  | OD1 | 3.110 |
| 2VDR | L.LYS_103 | NZ  | L.ASP_85  | OD2 | 3.591 |
| 2VDR | L.LYS_149 | NZ  | L.GLU_195 | OE1 | 2.973 |
| 2VDR | L.LYS_149 | NZ  | L.GLU_195 | OE2 | 3.700 |
| 2VDR | L.ARG_155 | NH1 | L.GLU_185 | OE1 | 3.211 |
| 2VDR | L.ARG_155 | NH1 | L.GLU_185 | OE2 | 3.858 |
| 2VDR | L.ARG_155 | NH2 | L.GLU_185 | OE1 | 3.840 |
| 2VDR | L.ARG_155 | NH2 | L.GLU_185 | OE2 | 3.062 |
| 2VDR | L.HIS_189 | ND1 | L.ASP_151 | OD1 | 2.610 |
| 2VDR | L.LYS_199 | NZ  | L.ASP_110 | OD2 | 3.796 |
| 2VIR | A.ARG_    | NH2 | A.GLU_    | OE2 | 3.607 |
| 2VIR | A.ARG_    | NH2 | A.ASP_    | OD1 | 3.333 |
| 2VIR | A.ARG_    | NH2 | A.ASP_    | OD2 | 3.123 |
| 2VIR | A.LYS_152 | NZ  | A.GLU_206 | OE1 | 3.754 |
| 2VIR | A.HIS_191 | ND1 | A.ASP_154 | OD2 | 2.799 |
| 2VIR | B.HIS_    | NE2 | B.ASP_    | OD1 | 3.115 |
| 2VIR | B.ARG_    | NH1 | B.GLU_    | OE1 | 2.667 |
| 2VIR | B.ARG_    | NH2 | B.ASP_    | OD1 | 2.935 |
| 2VIR | B.ARG_    | NH1 | B.ASP_    | OD1 | 3.962 |
| 2VIR | B.ARG_    | NH2 | B.ASP_    | OD1 | 3.249 |
| 2VIR | B.ARG_    | NH2 | B.ASP_    | OD2 | 2.668 |
| 2VIR | B.LYS_    | NZ  | B.ASP_    | OD1 | 3.397 |
| 2VIR | B.LYS_    | NZ  | B.ASP_    | OD2 | 3.134 |
| 2VIR | B.ARG_    | NH2 | B.ASP_    | OD1 | 3.596 |
| 2VIR | B.ARG_    | NH2 | B.ASP_    | OD2 | 2.875 |
| 2VIR | B.LYS_    | NZ  | A.GLU_127 | OE2 | 3.017 |
| 2VIR | B.HIS_173 | NE2 | A.ASP_141 | OD1 | 3.726 |
| 2VIR | B.HIS_173 | NE2 | A.ASP_141 | OD2 | 3.076 |
| 2VIR | B.LYS_217 | NZ  | A.GLU_126 | OE2 | 3.903 |
| 2VIR | C.LYS_    | NZ  | C.ASP_    | OD1 | 3.597 |
| 2VIR | C.LYS_    | NZ  | C.ASP_    | OD2 | 3.554 |
| 2VIR | C.HIS_    | NE2 | C.GLU_    | OE1 | 3.437 |
| 2VIR | C.HIS_    | NE2 | C.GLU_    | OE2 | 2.908 |
| 2VIR | C.ARG_    | NH1 | C.GLU_    | OE2 | 3.901 |
| 2VIR | C.ARG_    | NH2 | C.GLU_    | OE2 | 2.550 |
| 2VIR | C.HIS_    | ND1 | C.ASP_    | OD1 | 2.834 |
| 2VIR | C.HIS_    | NE2 | C.ASP_    | OD1 | 3.558 |
| 2VIR | C.ARG_    | NH2 | C.ASP_    | OD1 | 3.792 |
| 2VIR | C.ARG_    | NH2 | C.ASP_    | OD2 | 2.918 |
| 2VIR | C.LYS_    | NZ  | C.ASP_    | OD1 | 2.776 |
| 2VIR | C.ARG_    | NH1 | C.GLU_    | OE1 | 2.706 |
| 2VIR | C.ARG_    | NH1 | C.GLU_    | OE2 | 2.891 |
| 2VIR | C.ARG_    | NH2 | C.GLU_    | OE1 | 3.747 |
| 2VIR | C.ARG_    | NH2 | C.ASP_    | OD1 | 2.621 |
| 2VIR | C.ARG_    | NH2 | C.ASP_    | OD2 | 3.048 |
| 2VIR | C.LYS_    | NZ  | C.GLU_    | OE2 | 3.095 |
| 2VIR | C.LYS_    | NZ  | C.ASP_    | OD1 | 3.929 |
| 2VIR | C.ARG_    | NH2 | C.ASP_    | OD2 | 3.709 |
| 2VIR | C.LYS_    | NZ  | C.ASP_    | OD1 | 3.380 |
| 2VIR | C.LYS_    | NZ  | C.ASP_    | OD2 | 2.593 |
| 2VIR | C.ARG_    | NH1 | C.GLU_    | OE1 | 3.911 |
| 2VIR | C.ARG_    | NH2 | C.GLU_    | OE1 | 3.735 |
| 2VIR | C.LYS_    | NZ  | C.ASP_    | OD1 | 3.157 |

|      |           |     |           |     |       |
|------|-----------|-----|-----------|-----|-------|
| 2VIS | A_ARG_    | NH2 | A_GLU_    | OE2 | 3.528 |
| 2VIS | A_ARG_    | NH2 | A_ASP_    | OD1 | 3.225 |
| 2VIS | A_ARG_    | NH2 | A_ASP_    | OD2 | 3.101 |
| 2VIS | A_LYS_152 | NZ  | A_GLU_206 | OE1 | 3.762 |
| 2VIS | A_HIS_191 | ND1 | A_ASP_154 | OD2 | 2.830 |
| 2VIS | B_HIS_    | NE2 | B_ASP_    | OD1 | 3.059 |
| 2VIS | B_ARG_    | NH1 | B_GLU_    | OE1 | 2.654 |
| 2VIS | B_ARG_    | NH2 | B_ASP_    | OD1 | 3.129 |
| 2VIS | B_ARG_    | NH1 | B_ASP_    | OD1 | 3.798 |
| 2VIS | B_ARG_    | NH2 | B_ASP_    | OD1 | 3.126 |
| 2VIS | B_ARG_    | NH2 | B_ASP_    | OD2 | 2.566 |
| 2VIS | B_LYS_    | NZ  | B_ASP_    | OD1 | 3.701 |
| 2VIS | B_LYS_    | NZ  | B_ASP_    | OD2 | 3.019 |
| 2VIS | B_ARG_    | NH2 | B_ASP_    | OD1 | 3.616 |
| 2VIS | B_ARG_    | NH2 | B_ASP_    | OD2 | 2.750 |
| 2VIS | B_LYS_    | NZ  | A_GLU_127 | OE2 | 2.999 |
| 2VIS | B_HIS_173 | NE2 | A_ASP_141 | OD1 | 3.763 |
| 2VIS | B_HIS_173 | NE2 | A_ASP_141 | OD2 | 3.158 |
| 2VIS | B_LYS_217 | NZ  | A_GLU_126 | OE2 | 3.709 |
| 2VIS | C_LYS_    | NZ  | C_ASP_    | OD1 | 3.551 |
| 2VIS | C_LYS_    | NZ  | C_ASP_    | OD2 | 3.585 |
| 2VIS | C_HIS_    | NE2 | C_GLU_    | OE1 | 3.359 |
| 2VIS | C_HIS_    | NE2 | C_GLU_    | OE2 | 2.830 |
| 2VIS | C_ARG_    | NH1 | C_GLU_    | OE2 | 3.968 |
| 2VIS | C_ARG_    | NH2 | C_GLU_    | OE2 | 2.722 |
| 2VIS | C_HIS_    | ND1 | C_ASP_    | OD1 | 2.788 |
| 2VIS | C_HIS_    | NE2 | C_ASP_    | OD1 | 3.544 |
| 2VIS | C_ARG_    | NH2 | C_ASP_    | OD1 | 3.769 |
| 2VIS | C_ARG_    | NH2 | C_ASP_    | OD2 | 2.897 |
| 2VIS | C_LYS_    | NZ  | C_ASP_    | OD1 | 2.890 |
| 2VIS | C_ARG_    | NH1 | C_GLU_    | OE1 | 2.736 |
| 2VIS | C_ARG_    | NH1 | C_GLU_    | OE2 | 2.823 |
| 2VIS | C_ARG_    | NH2 | C_GLU_    | OE1 | 3.753 |
| 2VIS | C_ARG_    | NH2 | C_ASP_    | OD1 | 2.729 |
| 2VIS | C_ARG_    | NH2 | C_ASP_    | OD2 | 2.980 |
| 2VIS | C_LYS_    | NZ  | C_GLU_    | OE2 | 3.175 |
| 2VIS | C_LYS_    | NZ  | C_ASP_    | OD1 | 3.910 |
| 2VIS | C_HIS_    | NE2 | C_GLU_    | OE2 | 3.842 |
| 2VIS | C_ARG_    | NH2 | C_ASP_    | OD2 | 3.593 |
| 2VIS | C_LYS_    | NZ  | C_ASP_    | OD1 | 3.401 |
| 2VIS | C_LYS_    | NZ  | C_ASP_    | OD2 | 2.618 |
| 2VIS | C_LYS_    | NZ  | C_ASP_    | OD1 | 3.801 |
| 2VIS | C_ARG_    | NH1 | C_GLU_    | OE1 | 3.717 |
| 2VIS | C_ARG_    | NH2 | C_GLU_    | OE1 | 3.508 |
| 2VIS | C_LYS_    | NZ  | C_ASP_    | OD1 | 3.060 |
| 2VIS | C_LYS_    | NZ  | C_ASP_    | OD2 | 3.941 |
| 2VIT | A_ARG_    | NH1 | A_ASP_    | OD2 | 3.967 |
| 2VIT | A_ARG_    | NH2 | A_GLU_    | OE2 | 3.548 |
| 2VIT | A_ARG_    | NH2 | A_ASP_    | OD1 | 3.241 |
| 2VIT | A_ARG_    | NH2 | A_ASP_    | OD2 | 3.098 |
| 2VIT | A_LYS_152 | NZ  | A_GLU_206 | OE1 | 3.712 |
| 2VIT | A_HIS_191 | ND1 | A_ASP_154 | OD2 | 2.838 |
| 2VIT | B_HIS_    | NE2 | B_ASP_    | OD1 | 2.907 |
| 2VIT | B_ARG_    | NH1 | B_GLU_    | OE1 | 2.629 |
| 2VIT | B_ARG_    | NH2 | B_ASP_    | OD1 | 2.987 |
| 2VIT | B_ARG_    | NH1 | B_ASP_    | OD1 | 3.943 |
| 2VIT | B_ARG_    | NH2 | B_ASP_    | OD1 | 3.230 |
| 2VIT | B_ARG_    | NH2 | B_ASP_    | OD2 | 2.635 |

|      |           |     |           |     |       |
|------|-----------|-----|-----------|-----|-------|
| 2VIT | B_LYS_    | NZ  | B_ASP_    | OD1 | 3.471 |
| 2VIT | B_LYS_    | NZ  | B_ASP_    | OD2 | 3.207 |
| 2VIT | B_ARG_    | NH2 | B_ASP_    | OD1 | 3.554 |
| 2VIT | B_ARG_    | NH2 | B_ASP_    | OD2 | 2.686 |
| 2VIT | B_LYS_    | NZ  | A_GLU_127 | OE2 | 2.939 |
| 2VIT | B_HIS_173 | NE2 | A_ASP_141 | OD1 | 3.614 |
| 2VIT | B_HIS_173 | NE2 | A_ASP_141 | OD2 | 3.333 |
| 2VIT | B_LYS_217 | NZ  | A_GLU_126 | OE2 | 3.872 |
| 2VIT | C_LYS_    | NZ  | C_ASP_    | OD1 | 3.503 |
| 2VIT | C_LYS_    | NZ  | C_ASP_    | OD2 | 3.623 |
| 2VIT | C_HIS_    | NE2 | C_GLU_    | OE1 | 3.344 |
| 2VIT | C_HIS_    | NE2 | C_GLU_    | OE2 | 2.697 |
| 2VIT | C_ARG_    | NH2 | C_GLU_    | OE2 | 2.611 |
| 2VIT | C_HIS_    | ND1 | C_ASP_    | OD1 | 2.743 |
| 2VIT | C_HIS_    | ND1 | C_ASP_    | OD2 | 3.981 |
| 2VIT | C_HIS_    | NE2 | C_ASP_    | OD1 | 3.636 |
| 2VIT | C_ARG_    | NH2 | C_ASP_    | OD1 | 3.818 |
| 2VIT | C_ARG_    | NH2 | C_ASP_    | OD2 | 2.935 |
| 2VIT | C_LYS_    | NZ  | C_ASP_    | OD1 | 2.814 |
| 2VIT | C_ARG_    | NH1 | C_GLU_    | OE1 | 2.724 |
| 2VIT | C_ARG_    | NH1 | C_GLU_    | OE2 | 3.066 |
| 2VIT | C_ARG_    | NH2 | C_GLU_    | OE1 | 3.650 |
| 2VIT | C_ARG_    | NH2 | C_ASP_    | OD1 | 2.732 |
| 2VIT | C_ARG_    | NH2 | C_ASP_    | OD2 | 2.999 |
| 2VIT | C_LYS_    | NZ  | C_GLU_    | OE2 | 3.169 |
| 2VIT | C_LYS_    | NZ  | C_ASP_    | OD1 | 3.896 |
| 2VIT | C_ARG_    | NH2 | C_ASP_    | OD2 | 3.650 |
| 2VIT | C_LYS_    | NZ  | C_ASP_    | OD1 | 3.387 |
| 2VIT | C_LYS_    | NZ  | C_ASP_    | OD2 | 2.696 |
| 2VIT | C_ARG_    | NH2 | C_GLU_    | OE1 | 3.981 |
| 2VIT | C_LYS_    | NZ  | C_ASP_    | OD1 | 3.143 |
| 2VIU | A_LYS_27  | NZ  | B_GLU_97  | OE1 | 3.686 |
| 2VIU | A_LYS_27  | NZ  | B_GLU_97  | OE2 | 2.721 |
| 2VIU | A_ARG_57  | NH1 | A_GLU_82  | OE1 | 3.419 |
| 2VIU | A_ARG_57  | NH2 | A_GLU_82  | OE1 | 2.696 |
| 2VIU | A_ARG_57  | NH2 | A_GLU_82  | OE2 | 3.793 |
| 2VIU | A_HIS_75  | ND1 | A_ASP_73  | OD1 | 2.756 |
| 2VIU | A_HIS_75  | ND1 | A_ASP_73  | OD2 | 3.587 |
| 2VIU | A_HIS_75  | NE2 | A_ASP_63  | OD1 | 3.916 |
| 2VIU | A_ARG_90  | NH2 | A_ASP_60  | OD1 | 3.851 |
| 2VIU | A_ARG_90  | NH2 | A_ASP_60  | OD2 | 3.197 |
| 2VIU | A_ARG_109 | NH1 | B_GLU_67  | OE1 | 3.978 |
| 2VIU | A_ARG_109 | NH1 | B_GLU_67  | OE2 | 3.053 |
| 2VIU | A_ARG_109 | NH2 | A_GLU_89  | OE1 | 2.928 |
| 2VIU | A_ARG_141 | NH2 | A_ASP_77  | OD1 | 2.769 |
| 2VIU | A_ARG_141 | NH2 | A_ASP_77  | OD2 | 2.741 |
| 2VIU | A_LYS_176 | NZ  | A_GLU_123 | OE2 | 2.681 |
| 2VIU | A_HIS_183 | NE2 | A_GLU_190 | OE2 | 3.745 |
| 2VIU | A_ARG_207 | NH1 | A_ASP_241 | OD1 | 3.937 |
| 2VIU | A_ARG_208 | NH1 | A_ASP_241 | OD2 | 3.116 |
| 2VIU | A_LYS_238 | NZ  | A_ASP_175 | OD2 | 3.292 |
| 2VIU | A_ARG_261 | NH2 | A_GLU_119 | OE1 | 3.027 |
| 2VIU | A_ARG_261 | NH2 | A_GLU_119 | OE2 | 2.600 |
| 2VIU | A_LYS_264 | NZ  | A_ASP_85  | OD1 | 3.975 |
| 2VIU | A_LYS_264 | NZ  | A_ASP_85  | OD2 | 3.658 |
| 2VIU | A_ARG_269 | NH1 | B_GLU_67  | OE1 | 2.986 |
| 2VIU | A_LYS_292 | NZ  | A_ASP_291 | OD2 | 3.041 |
| 2VIU | A_LYS_310 | NZ  | B_ASP_90  | OD1 | 2.868 |

|      |           |     |           |     |       |
|------|-----------|-----|-----------|-----|-------|
| 2VIU | A_LYS_315 | NZ  | A_GLU_41  | OE1 | 3.081 |
| 2VIU | B_LYS_51  | NZ  | B_GLU_103 | OE1 | 2.786 |
| 2VIU | B_LYS_68  | NZ  | B_GLU_85  | OE1 | 3.467 |
| 2VIU | B_LYS_68  | NZ  | B_GLU_85  | OE2 | 2.818 |
| 2VIU | B_LYS_117 | NZ  | B_GLU_114 | OE1 | 3.690 |
| 2VIU | B_LYS_117 | NZ  | B_GLU_114 | OE2 | 2.769 |
| 2VIU | B_ARG_123 | NH1 | B_GLU_120 | OE1 | 2.873 |
| 2VIU | B_ARG_123 | NH1 | B_GLU_120 | OE2 | 3.282 |
| 2VIU | B_ARG_153 | NH2 | B_GLU_150 | OE1 | 2.715 |
| 2VIU | B_HIS_159 | NE2 | B_ASP_160 | OD1 | 3.760 |
| 2VIU | B_HIS_159 | NE2 | B_ASP_160 | OD2 | 3.318 |
| 2VIU | B_ARG_170 | NH1 | B_GLU_128 | OE1 | 2.843 |
| 2VIU | B_ARG_170 | NH2 | B_GLU_128 | OE1 | 3.875 |
| 2VIU | B_ARG_170 | NH2 | B_GLU_131 | OE2 | 3.472 |
| 2VXS | A_ARG_55  | NH2 | A_GLU_57  | OE2 | 3.745 |
| 2VXS | A_HIS_86  | ND1 | A_ASP_84  | OD1 | 2.794 |
| 2VXS | A_HIS_86  | ND1 | A_ASP_84  | OD2 | 3.861 |
| 2VXS | B_ARG_46  | NH1 | B_ASP_42  | OD2 | 2.944 |
| 2VXS | B_ARG_55  | NH2 | B_GLU_57  | OE2 | 2.792 |
| 2VXS | B_HIS_86  | ND1 | B_ASP_84  | OD1 | 3.029 |
| 2VXS | B_HIS_86  | ND1 | B_ASP_84  | OD2 | 3.887 |
| 2VXS | C_HIS_86  | ND1 | C_ASP_84  | OD1 | 2.647 |
| 2VXS | C_HIS_86  | ND1 | C_ASP_84  | OD2 | 3.590 |
| 2VXS | C_LYS_114 | NZ  | C_GLU_95  | OE2 | 3.592 |
| 2VXS | D_ARG_46  | NH1 | D_ASP_42  | OD2 | 3.642 |
| 2VXS | D_ARG_55  | NH2 | D_GLU_57  | OE2 | 3.715 |
| 2VXS | D_ARG_61  | NH1 | D_ASP_58  | OD2 | 3.553 |
| 2VXS | D_ARG_61  | NH2 | D_ASP_58  | OD2 | 2.803 |
| 2VXS | D_HIS_86  | ND1 | D_ASP_84  | OD1 | 2.787 |
| 2VXS | D_HIS_86  | ND1 | D_ASP_84  | OD2 | 3.565 |
| 2VXS | H_ARG_38  | NH1 | H_ASP_86  | OD1 | 3.009 |
| 2VXS | H_ARG_38  | NH2 | H_GLU_46  | OE1 | 3.046 |
| 2VXS | H_ARG_38  | NH2 | H_GLU_46  | OE2 | 3.669 |
| 2VXS | H_ARG_38  | NH2 | H_ASP_86  | OD1 | 3.964 |
| 2VXS | H_LYS_64  | NZ  | H_ASP_61  | OD1 | 3.737 |
| 2VXS | H_ARG_66  | NH1 | H_ASP_86  | OD1 | 3.951 |
| 2VXS | H_ARG_66  | NH1 | H_ASP_86  | OD2 | 2.759 |
| 2VXS | H_ARG_66  | NH2 | H_ASP_86  | OD1 | 3.290 |
| 2VXS | H_ARG_66  | NH2 | H_ASP_86  | OD2 | 3.569 |
| 2VXS | H_LYS_143 | NZ  | L_GLU_125 | OE2 | 2.772 |
| 2VXS | L_ARG_38  | NH1 | L_ASP_86  | OD1 | 3.106 |
| 2VXS | L_ARG_38  | NH2 | L_GLU_46  | OE1 | 3.024 |
| 2VXS | L_ARG_38  | NH2 | L_GLU_46  | OE2 | 3.297 |
| 2VXS | L_ARG_38  | NH2 | L_ASP_86  | OD1 | 3.845 |
| 2VXS | L_LYS_64  | NZ  | L_ASP_61  | OD1 | 3.015 |
| 2VXS | L_ARG_66  | NH1 | L_ASP_86  | OD1 | 3.881 |
| 2VXS | L_ARG_66  | NH1 | L_ASP_86  | OD2 | 2.775 |
| 2VXS | L_ARG_66  | NH2 | L_ASP_86  | OD1 | 2.818 |
| 2VXS | L_ARG_66  | NH2 | L_ASP_86  | OD2 | 3.215 |
| 2VXS | L_LYS_143 | NZ  | L_ASP_144 | OD1 | 3.889 |
| 2VXS | L_LYS_210 | NZ  | L_GLU_212 | OE1 | 2.766 |
| 2VXS | L_LYS_214 | NZ  | M_GLU_124 | OE1 | 3.186 |
| 2VXS | J_ARG_    | NH1 | J_ASP_    | OD1 | 2.755 |
| 2VXS | J_ARG_    | NH2 | J_GLU_    | OE1 | 3.312 |
| 2VXS | J_ARG_    | NH2 | J_GLU_    | OE2 | 3.407 |
| 2VXS | J_ARG_    | NH2 | J_ASP_    | OD1 | 3.826 |
| 2VXS | J_LYS_64  | NZ  | J_ASP_    | OD1 | 3.275 |
| 2VXS | J_ARG_    | NH1 | J_ASP_    | OD1 | 3.912 |

|      |           |     |           |     |       |
|------|-----------|-----|-----------|-----|-------|
| 2VXS | J_ARG_    | NH1 | J_ASP_    | OD2 | 2.751 |
| 2VXS | J_ARG_    | NH2 | J_ASP_    | OD1 | 3.250 |
| 2VXS | J_ARG_    | NH2 | J_ASP_    | OD2 | 3.560 |
| 2VXS | J_LYS_    | NZ  | J_ASP_    | OD1 | 3.641 |
| 2VXS | J_LYS_206 | NZ  | J_ASP_208 | OD1 | 3.503 |
| 2VXS | J_LYS_    | NZ  | N_GLU_    | OE1 | 2.922 |
| 2VXS | K_ARG_38  | NH1 | K_ASP_86  | OD1 | 3.239 |
| 2VXS | K_ARG_38  | NH2 | K_GLU_46  | OE1 | 3.227 |
| 2VXS | K_ARG_38  | NH2 | K_GLU_46  | OE2 | 3.826 |
| 2VXS | K_ARG_38  | NH2 | K_ASP_86  | OD1 | 3.916 |
| 2VXS | K_LYS_64  | NZ  | K_ASP_61  | OD1 | 3.799 |
| 2VXS | K_ARG_66  | NH1 | K_ASP_86  | OD1 | 3.713 |
| 2VXS | K_ARG_66  | NH1 | K_ASP_86  | OD2 | 2.833 |
| 2VXS | K_ARG_66  | NH2 | K_ASP_86  | OD1 | 2.845 |
| 2VXS | K_ARG_66  | NH2 | K_ASP_86  | OD2 | 3.489 |
| 2VXS | K_LYS_210 | NZ  | K_GLU_212 | OE1 | 3.930 |
| 2VXS | K_LYS_214 | NZ  | O_GLU_124 | OE1 | 3.391 |
| 2VXS | L_ARG_54  | NH1 | L_ASP_60  | OD1 | 3.471 |
| 2VXS | L_ARG_61  | NH2 | L_ASP_82  | OD1 | 2.601 |
| 2VXS | L_ARG_61  | NH2 | L_ASP_82  | OD2 | 2.642 |
| 2VXS | L_LYS_103 | NZ  | L_ASP_85  | OD1 | 3.412 |
| 2VXS | L_LYS_167 | NZ  | L_GLU_83  | OE1 | 3.289 |
| 2VXS | L_LYS_172 | NZ  | L_ASP_139 | OD1 | 3.795 |
| 2VXS | L_HIS_189 | ND1 | L_ASP_152 | OD2 | 2.849 |
| 2VXS | M_ARG_61  | NH1 | M_ASP_82  | OD1 | 3.983 |
| 2VXS | M_ARG_61  | NH2 | M_ASP_82  | OD1 | 2.482 |
| 2VXS | M_ARG_61  | NH2 | M_ASP_82  | OD2 | 2.420 |
| 2VXS | M_LYS_103 | NZ  | M_ASP_85  | OD1 | 3.469 |
| 2VXS | M_LYS_167 | NZ  | M_GLU_83  | OE1 | 2.810 |
| 2VXS | M_HIS_189 | ND1 | M_ASP_152 | OD2 | 3.666 |
| 2VXS | M_HIS_198 | NE2 | M_GLU_199 | OE2 | 3.892 |
| 2VXS | N_ARG_61  | NH2 | N_ASP_    | OD1 | 2.670 |
| 2VXS | N_ARG_61  | NH2 | N_ASP_    | OD2 | 2.989 |
| 2VXS | N_LYS_    | NZ  | N_ASP_    | OD1 | 3.427 |
| 2VXS | N_LYS_    | NZ  | J_ASP_    | OD2 | 3.949 |
| 2VXS | N_LYS_    | NZ  | N_GLU_    | OE1 | 2.677 |
| 2VXS | N_HIS_    | ND1 | N_ASP_    | OD2 | 3.568 |
| 2VXS | O_ARG_61  | NH2 | O_ASP_82  | OD1 | 2.574 |
| 2VXS | O_ARG_61  | NH2 | O_ASP_82  | OD2 | 2.733 |
| 2VXS | O_LYS_103 | NZ  | O_ASP_85  | OD1 | 2.839 |
| 2VXS | O_LYS_103 | NZ  | O_ASP_85  | OD2 | 3.719 |
| 2VXS | O_LYS_167 | NZ  | O_GLU_83  | OE1 | 3.622 |
| 2VXS | O_LYS_167 | NZ  | O_GLU_83  | OE2 | 3.743 |
| 2VXS | O_HIS_189 | ND1 | O_ASP_152 | OD2 | 3.412 |
| 2VXS | O_HIS_198 | NE2 | O_GLU_199 | OE2 | 3.877 |
| 2VXT | H_LYS_62  | NZ  | H_GLU_46  | OE1 | 3.909 |
| 2VXT | H_LYS_62  | NZ  | H_GLU_46  | OE2 | 2.756 |
| 2VXT | H_LYS_66  | NZ  | H_ASP_86  | OD1 | 3.652 |
| 2VXT | H_LYS_66  | NZ  | H_ASP_86  | OD2 | 2.674 |
| 2VXT | H_ARG_94  | NH2 | I_GLU_179 | OE1 | 2.816 |
| 2VXT | H_ARG_94  | NH2 | I_GLU_179 | OE2 | 3.466 |
| 2VXT | H_ARG_101 | NH1 | I_GLU_179 | OE1 | 2.914 |
| 2VXT | H_LYS_208 | NZ  | L_GLU_123 | OE2 | 2.940 |
| 2VXT | I_LYS_44  | NZ  | I_GLU_42  | OE1 | 3.741 |
| 2VXT | I_ARG_49  | NH2 | I_ASP_71  | OD1 | 3.048 |
| 2VXT | I_LYS_106 | NZ  | I_GLU_121 | OE1 | 3.321 |
| 2VXT | I_HIS_145 | NE2 | H_ASP_50  | OD1 | 2.753 |
| 2VXT | I_LYS_148 | NZ  | H_ASP_56  | OD2 | 2.664 |

|      |           |     |           |     |       |
|------|-----------|-----|-----------|-----|-------|
| 2VXT | L.LYS_175 | NZ  | L.ASP_182 | OD1 | 3.559 |
| 2VXT | L.LYS_175 | NZ  | L.ASP_182 | OD2 | 2.678 |
| 2VXT | L.ARG_46  | NH2 | L.ASP_55  | OD1 | 2.847 |
| 2VXT | L.ARG_46  | NH2 | L.ASP_55  | OD2 | 3.641 |
| 2VXT | L.ARG_61  | NH1 | L.GLU_79  | OE2 | 3.449 |
| 2VXT | L.ARG_61  | NH2 | L.GLU_81  | OE2 | 3.316 |
| 2VXT | L.ARG_61  | NH2 | L.ASP_82  | OD1 | 2.855 |
| 2VXT | L.ARG_61  | NH2 | L.ASP_82  | OD2 | 3.570 |
| 2VXT | L.ARG_66  | NH2 | L.ASP_28  | OD1 | 3.957 |
| 2VXT | L.ARG_155 | NH1 | L.GLU_185 | OE1 | 3.695 |
| 2VXT | L.ARG_155 | NH1 | L.GLU_185 | OE2 | 2.926 |
| 2VXT | L.ARG_155 | NH2 | L.GLU_185 | OE1 | 3.294 |
| 2VXT | L.ARG_155 | NH2 | L.GLU_185 | OE2 | 3.952 |
| 2VXT | L.LYS_199 | NZ  | L.ASP_110 | OD1 | 3.760 |
| 2VXT | L.LYS_199 | NZ  | L.ASP_110 | OD2 | 2.706 |
| 2VXU | H.LYS_43  | NZ  | L.ASP_85  | OD1 | 3.097 |
| 2VXU | H.LYS_62  | NZ  | H.GLU_46  | OE1 | 3.879 |
| 2VXU | H.LYS_62  | NZ  | H.GLU_46  | OE2 | 2.639 |
| 2VXU | H.LYS_66  | NZ  | H.ASP_86  | OD2 | 3.095 |
| 2VXU | L.LYS_62  | NZ  | L.GLU_46  | OE1 | 3.778 |
| 2VXU | L.LYS_62  | NZ  | L.GLU_46  | OE2 | 2.481 |
| 2VXU | L.LYS_66  | NZ  | L.ASP_86  | OD1 | 3.703 |
| 2VXU | L.LYS_66  | NZ  | L.ASP_86  | OD2 | 2.733 |
| 2VXU | L.LYS_208 | NZ  | M.GLU_123 | OE1 | 2.734 |
| 2VXU | L.LYS_208 | NZ  | M.GLU_123 | OE2 | 2.893 |
| 2VXU | L.ARG_24  | NH2 | L.ASP_70  | OD1 | 3.272 |
| 2VXU | L.ARG_24  | NH2 | L.ASP_70  | OD2 | 2.791 |
| 2VXU | L.ARG_46  | NH2 | L.ASP_55  | OD1 | 2.844 |
| 2VXU | L.ARG_46  | NH2 | L.ASP_55  | OD2 | 3.772 |
| 2VXU | L.ARG_61  | NH2 | L.GLU_81  | OE2 | 3.219 |
| 2VXU | L.ARG_61  | NH2 | L.ASP_82  | OD1 | 3.151 |
| 2VXU | L.ARG_61  | NH2 | L.ASP_82  | OD2 | 3.745 |
| 2VXU | L.ARG_66  | NH2 | L.ASP_28  | OD1 | 3.861 |
| 2VXU | L.LYS_142 | NZ  | L.ASP_143 | OD1 | 3.748 |
| 2VXU | L.LYS_199 | NZ  | L.ASP_110 | OD2 | 3.400 |
| 2VXU | M.ARG_24  | NH2 | M.ASP_70  | OD1 | 3.639 |
| 2VXU | M.ARG_24  | NH2 | M.ASP_70  | OD2 | 3.054 |
| 2VXU | M.ARG_46  | NH2 | M.ASP_55  | OD1 | 2.799 |
| 2VXU | M.ARG_46  | NH2 | M.ASP_55  | OD2 | 3.746 |
| 2VXU | M.ARG_61  | NH1 | M.GLU_79  | OE2 | 3.549 |
| 2VXU | M.ARG_61  | NH2 | M.GLU_81  | OE2 | 3.079 |
| 2VXU | M.ARG_61  | NH2 | M.ASP_82  | OD1 | 2.801 |
| 2VXU | M.ARG_61  | NH2 | M.ASP_82  | OD2 | 3.460 |
| 2VXU | M.ARG_66  | NH2 | M.ASP_28  | OD1 | 3.960 |
| 2VXU | M.LYS_107 | NZ  | M.GLU_17  | OE1 | 3.246 |
| 2VXU | M.LYS_107 | NZ  | M.GLU_17  | OE2 | 2.558 |
| 2VXU | M.LYS_142 | NZ  | M.ASP_143 | OD1 | 3.635 |
| 2VXU | M.ARG_155 | NH1 | M.GLU_185 | OE1 | 3.951 |
| 2VXU | M.ARG_155 | NH1 | M.GLU_185 | OE2 | 2.762 |
| 2VXU | M.ARG_155 | NH2 | M.GLU_185 | OE1 | 3.497 |
| 2VXU | M.ARG_155 | NH2 | M.GLU_185 | OE2 | 3.662 |
| 2VXU | M.HIS_189 | ND1 | M.ASP_151 | OD2 | 2.958 |
| 2VXV | H.ARG_38  | NH2 | H.GLU_46  | OE1 | 2.913 |
| 2VXV | H.ARG_38  | NH2 | H.GLU_46  | OE2 | 3.297 |
| 2VXV | H.ARG_58  | NH2 | H.GLU_56  | OE2 | 2.796 |
| 2VXV | H.ARG_94  | NH2 | H.ASP_101 | OD1 | 3.566 |
| 2VXV | H.ARG_94  | NH2 | H.ASP_101 | OD2 | 2.867 |
| 2VXV | H.LYS_143 | NZ  | H.ASP_144 | OD1 | 3.484 |

|      |           |     |           |     |       |
|------|-----------|-----|-----------|-----|-------|
| 2VXV | H_LYS_214 | NZ  | L_ASP_122 | OD1 | 3.721 |
| 2VXV | H_LYS_214 | NZ  | L_ASP_122 | OD2 | 2.868 |
| 2VXV | L_ARG_61  | NH2 | L_GLU_81  | OE2 | 3.747 |
| 2VXV | L_ARG_61  | NH2 | L_ASP_82  | OD1 | 2.862 |
| 2VXV | L_ARG_61  | NH2 | L_ASP_82  | OD2 | 3.507 |
| 2VXV | L_HIS_189 | ND1 | L_ASP_151 | OD2 | 2.974 |
| 2XEF | A_HIS_56  | NE2 | A_GLU_408 | OE2 | 2.799 |
| 2XEF | A_LYS_59  | NZ  | A_ASP_63  | OD1 | 3.841 |
| 2XEF | A_LYS_59  | NZ  | A_ASP_63  | OD2 | 3.009 |
| 2XEF | A_ARG_181 | NH1 | A_GLU_183 | OE2 | 3.625 |
| 2XEF | A_ARG_181 | NH2 | A_ASP_184 | OD1 | 2.949 |
| 2XEF | A_ARG_181 | NH2 | A_ASP_184 | OD2 | 3.602 |
| 2XEF | A_ARG_190 | NH1 | A_ASP_714 | OD1 | 2.918 |
| 2XEF | A_ARG_190 | NH1 | A_ASP_714 | OD2 | 3.597 |
| 2XEF | A_ARG_190 | NH2 | A_ASP_714 | OD1 | 3.579 |
| 2XEF | A_ARG_190 | NH2 | A_ASP_714 | OD2 | 2.730 |
| 2XEF | A_ARG_204 | NH1 | A_ASP_233 | OD2 | 3.163 |
| 2XEF | A_ARG_255 | NH1 | A_GLU_145 | OE1 | 2.685 |
| 2XEF | A_ARG_255 | NH2 | A_GLU_145 | OE1 | 2.757 |
| 2XEF | A_LYS_341 | NZ  | A_ASP_173 | OD1 | 3.395 |
| 2XEF | A_LYS_341 | NZ  | A_ASP_173 | OD2 | 3.841 |
| 2XEF | A_LYS_343 | NZ  | A_GLU_171 | OE1 | 2.875 |
| 2XEF | A_HIS_345 | ND1 | A_GLU_137 | OE2 | 3.926 |
| 2XEF | A_HIS_345 | NE2 | A_GLU_137 | OE1 | 3.980 |
| 2XEF | A_HIS_345 | NE2 | A_GLU_137 | OE2 | 3.120 |
| 2XEF | A_ARG_354 | NH2 | A_ASP_114 | OD1 | 3.536 |
| 2XEF | A_ARG_354 | NH2 | A_ASP_114 | OD2 | 2.909 |
| 2XEF | A_ARG_363 | NH2 | A_ASP_106 | OD1 | 3.752 |
| 2XEF | A_ARG_370 | NH1 | A_ASP_369 | OD1 | 3.987 |
| 2XEF | A_ARG_370 | NH1 | A_ASP_369 | OD2 | 3.614 |
| 2XEF | A_ARG_370 | NH2 | A_ASP_666 | OD1 | 2.894 |
| 2XEF | A_ARG_370 | NH2 | A_ASP_666 | OD2 | 3.631 |
| 2XEF | A_HIS_377 | ND1 | A_ASP_379 | OD1 | 2.940 |
| 2XEF | A_HIS_377 | ND1 | A_GLU_424 | OE1 | 3.983 |
| 2XEF | A_HIS_377 | NE2 | A_ASP_387 | OD1 | 3.185 |
| 2XEF | A_HIS_377 | NE2 | A_GLU_424 | OE1 | 3.244 |
| 2XEF | A_HIS_377 | NE2 | A_GLU_425 | OE2 | 3.914 |
| 2XEF | A_HIS_377 | NE2 | A_ASP_453 | OD1 | 3.247 |
| 2XEF | A_HIS_377 | NE2 | A_ASP_453 | OD2 | 3.086 |
| 2XEF | A_ARG_378 | NH2 | A_ASP_422 | OD1 | 3.926 |
| 2XEF | A_ARG_378 | NH2 | A_ASP_422 | OD2 | 3.342 |
| 2XEF | A_ARG_400 | NH1 | A_GLU_64  | OE2 | 3.095 |
| 2XEF | A_ARG_400 | NH1 | A_GLU_397 | OE1 | 3.701 |
| 2XEF | A_ARG_400 | NH1 | A_GLU_397 | OE2 | 2.838 |
| 2XEF | A_ARG_400 | NH2 | A_GLU_64  | OE2 | 2.882 |
| 2XEF | A_LYS_406 | NZ  | A_ASP_106 | OD1 | 3.218 |
| 2XEF | A_ARG_411 | NH1 | A_ASP_106 | OD1 | 3.513 |
| 2XEF | A_ARG_411 | NH1 | A_ASP_106 | OD2 | 2.703 |
| 2XEF | A_ARG_411 | NH2 | A_ASP_106 | OD1 | 2.830 |
| 2XEF | A_ARG_411 | NH2 | A_ASP_106 | OD2 | 3.623 |
| 2XEF | A_ARG_413 | NH2 | A_GLU_367 | OE2 | 3.405 |
| 2XEF | A_ARG_414 | NH2 | A_GLU_367 | OE2 | 3.182 |
| 2XEF | A_ARG_463 | NH1 | A_GLU_457 | OE1 | 3.344 |
| 2XEF | A_ARG_463 | NH1 | A_GLU_457 | OE2 | 3.045 |
| 2XEF | A_ARG_463 | NH2 | A_ASP_465 | OD2 | 2.862 |
| 2XEF | A_LYS_491 | NZ  | A_GLU_495 | OE2 | 3.112 |
| 2XEF | A_LYS_500 | NZ  | A_ASP_485 | OD2 | 2.872 |
| 2XEF | A_ARG_527 | NH1 | A_GLU_436 | OE1 | 2.777 |



|      |           |     |           |     |       |
|------|-----------|-----|-----------|-----|-------|
| 2XEF | A_ARG_527 | NH2 | A_GLU_436 | OE1 | 2.984 |
| 2XEF | A_ARG_536 | NH1 | A_GLU_457 | OE1 | 2.900 |
| 2XEF | A_HIS_553 | NE2 | A_ASP_387 | OD2 | 2.946 |
| 2XEF | A_HIS_553 | NE2 | A_GLU_425 | OE1 | 3.142 |
| 2XEF | A_HIS_553 | NE2 | A_GLU_425 | OE2 | 3.233 |
| 2XEF | A_HIS_573 | ND1 | A_ASP_567 | OD2 | 2.719 |
| 2XEF | A_ARG_598 | NH2 | A_ASP_596 | OD1 | 3.762 |
| 2XEF | A_ARG_598 | NH2 | A_ASP_596 | OD2 | 2.978 |
| 2XEF | A_LYS_606 | NZ  | A_GLU_505 | OE1 | 3.281 |
| 2XEF | A_LYS_606 | NZ  | A_GLU_505 | OE2 | 3.681 |
| 2XEF | A_LYS_610 | NZ  | A_GLU_703 | OE2 | 2.847 |
| 2XEF | A_HIS_618 | NE2 | A_GLU_716 | OE1 | 3.725 |
| 2XEF | A_LYS_637 | NZ  | A_GLU_641 | OE1 | 3.067 |
| 2XEF | A_LYS_637 | NZ  | A_GLU_641 | OE2 | 3.880 |
| 2XEF | A_ARG_684 | NH2 | A_ASP_710 | OD2 | 3.381 |
| 2XEF | A_HIS_689 | NE2 | A_GLU_672 | OE2 | 2.802 |
| 2XEF | A_ARG_730 | NH2 | A_GLU_727 | OE1 | 3.848 |
| 2XEF | A_ARG_730 | NH2 | A_GLU_727 | OE2 | 3.085 |
| 2XEG | A_HIS_56  | ND1 | A_GLU_408 | OE2 | 3.766 |
| 2XEG | A_HIS_56  | NE2 | A_GLU_408 | OE2 | 3.847 |
| 2XEG | A_LYS_59  | NZ  | A_ASP_63  | OD1 | 3.760 |
| 2XEG | A_LYS_59  | NZ  | A_ASP_63  | OD2 | 2.920 |
| 2XEG | A_ARG_181 | NH1 | A_GLU_183 | OE2 | 3.616 |
| 2XEG | A_ARG_181 | NH2 | A_ASP_184 | OD1 | 2.935 |
| 2XEG | A_ARG_181 | NH2 | A_ASP_184 | OD2 | 3.536 |
| 2XEG | A_ARG_190 | NH1 | A_ASP_714 | OD1 | 2.995 |
| 2XEG | A_ARG_190 | NH1 | A_ASP_714 | OD2 | 3.628 |
| 2XEG | A_ARG_190 | NH2 | A_ASP_714 | OD1 | 3.604 |
| 2XEG | A_ARG_190 | NH2 | A_ASP_714 | OD2 | 2.717 |
| 2XEG | A_ARG_204 | NH1 | A_ASP_233 | OD1 | 3.945 |
| 2XEG | A_ARG_204 | NH1 | A_ASP_233 | OD2 | 3.115 |
| 2XEG | A_ARG_255 | NH1 | A_GLU_145 | OE1 | 2.705 |
| 2XEG | A_ARG_255 | NH2 | A_GLU_145 | OE1 | 2.760 |
| 2XEG | A_LYS_341 | NZ  | A_ASP_173 | OD1 | 3.295 |
| 2XEG | A_LYS_341 | NZ  | A_ASP_173 | OD2 | 3.942 |
| 2XEG | A_HIS_345 | ND1 | A_GLU_137 | OE2 | 3.875 |
| 2XEG | A_HIS_345 | NE2 | A_GLU_137 | OE2 | 3.207 |
| 2XEG | A_ARG_354 | NH2 | A_ASP_114 | OD1 | 3.519 |
| 2XEG | A_ARG_354 | NH2 | A_ASP_114 | OD2 | 2.914 |
| 2XEG | A_ARG_363 | NH2 | A_ASP_106 | OD1 | 3.705 |
| 2XEG | A_ARG_370 | NH1 | A_ASP_369 | OD1 | 3.956 |
| 2XEG | A_ARG_370 | NH1 | A_ASP_369 | OD2 | 3.628 |
| 2XEG | A_ARG_370 | NH2 | A_ASP_666 | OD1 | 2.842 |
| 2XEG | A_ARG_370 | NH2 | A_ASP_666 | OD2 | 3.618 |
| 2XEG | A_HIS_377 | ND1 | A_ASP_379 | OD1 | 2.925 |
| 2XEG | A_HIS_377 | NE2 | A_ASP_387 | OD1 | 3.241 |
| 2XEG | A_HIS_377 | NE2 | A_GLU_424 | OE1 | 3.209 |
| 2XEG | A_HIS_377 | NE2 | A_GLU_425 | OE2 | 3.926 |
| 2XEG | A_HIS_377 | NE2 | A_ASP_453 | OD1 | 3.264 |
| 2XEG | A_HIS_377 | NE2 | A_ASP_453 | OD2 | 3.104 |
| 2XEG | A_ARG_378 | NH2 | A_ASP_422 | OD1 | 3.876 |
| 2XEG | A_ARG_378 | NH2 | A_ASP_422 | OD2 | 3.238 |
| 2XEG | A_ARG_400 | NH1 | A_GLU_64  | OE2 | 3.039 |
| 2XEG | A_ARG_400 | NH1 | A_GLU_397 | OE1 | 3.703 |
| 2XEG | A_ARG_400 | NH1 | A_GLU_397 | OE2 | 2.812 |
| 2XEG | A_ARG_400 | NH2 | A_GLU_64  | OE2 | 2.850 |
| 2XEG | A_LYS_406 | NZ  | A_ASP_106 | OD1 | 3.308 |
| 2XEG | A_ARG_411 | NH1 | A_ASP_106 | OD1 | 3.560 |

|      |           |     |           |     |       |
|------|-----------|-----|-----------|-----|-------|
| 2XEG | A_ARG_411 | NH1 | A_ASP_106 | OD2 | 2.790 |
| 2XEG | A_ARG_411 | NH2 | A_ASP_106 | OD1 | 2.807 |
| 2XEG | A_ARG_411 | NH2 | A_ASP_106 | OD2 | 3.629 |
| 2XEG | A_ARG_413 | NH2 | A_GLU_367 | OE2 | 3.344 |
| 2XEG | A_ARG_414 | NH2 | A_GLU_367 | OE2 | 3.206 |
| 2XEG | A_LYS_491 | NZ  | A_GLU_495 | OE2 | 3.175 |
| 2XEG | A_LYS_500 | NZ  | A_ASP_485 | OD2 | 2.873 |
| 2XEG | A_ARG_527 | NH1 | A_GLU_436 | OE1 | 2.787 |
| 2XEG | A_ARG_527 | NH2 | A_GLU_436 | OE1 | 2.964 |
| 2XEG | A_ARG_536 | NH1 | A_GLU_457 | OE1 | 2.897 |
| 2XEG | A_HIS_553 | NE2 | A_ASP_387 | OD2 | 2.992 |
| 2XEG | A_HIS_553 | NE2 | A_GLU_425 | OE1 | 3.084 |
| 2XEG | A_HIS_553 | NE2 | A_GLU_425 | OE2 | 3.216 |
| 2XEG | A_HIS_573 | ND1 | A_ASP_567 | OD2 | 2.723 |
| 2XEG | A_ARG_598 | NH2 | A_ASP_596 | OD1 | 3.731 |
| 2XEG | A_ARG_598 | NH2 | A_ASP_596 | OD2 | 2.927 |
| 2XEG | A_LYS_606 | NZ  | A_GLU_505 | OE1 | 3.338 |
| 2XEG | A_LYS_606 | NZ  | A_GLU_505 | OE2 | 3.829 |
| 2XEG | A_HIS_618 | NE2 | A_GLU_716 | OE1 | 3.759 |
| 2XEG | A_LYS_637 | NZ  | A_GLU_641 | OE1 | 2.943 |
| 2XEG | A_LYS_637 | NZ  | A_GLU_641 | OE2 | 3.902 |
| 2XEG | A_ARG_684 | NH2 | A_ASP_710 | OD2 | 3.396 |
| 2XEG | A_HIS_689 | NE2 | A_GLU_672 | OE2 | 2.814 |
| 2XEI | A_HIS_56  | NE2 | A_GLU_408 | OE2 | 2.969 |
| 2XEI | A_LYS_59  | NZ  | A_ASP_63  | OD2 | 2.953 |
| 2XEI | A_ARG_181 | NH1 | A_GLU_183 | OE2 | 3.722 |
| 2XEI | A_ARG_181 | NH2 | A_ASP_184 | OD1 | 2.939 |
| 2XEI | A_ARG_181 | NH2 | A_ASP_184 | OD2 | 3.606 |
| 2XEI | A_LYS_187 | NZ  | A_ASP_316 | OD2 | 3.720 |
| 2XEI | A_ARG_190 | NH1 | A_ASP_714 | OD1 | 2.931 |
| 2XEI | A_ARG_190 | NH1 | A_ASP_714 | OD2 | 3.551 |
| 2XEI | A_ARG_190 | NH2 | A_ASP_714 | OD1 | 3.589 |
| 2XEI | A_ARG_190 | NH2 | A_ASP_714 | OD2 | 2.720 |
| 2XEI | A_ARG_204 | NH1 | A_ASP_233 | OD1 | 3.976 |
| 2XEI | A_ARG_204 | NH1 | A_ASP_233 | OD2 | 3.187 |
| 2XEI | A_ARG_255 | NH1 | A_GLU_145 | OE1 | 2.647 |
| 2XEI | A_ARG_255 | NH2 | A_GLU_145 | OE1 | 2.713 |
| 2XEI | A_LYS_304 | NZ  | A_GLU_307 | OE2 | 3.381 |
| 2XEI | A_LYS_341 | NZ  | A_ASP_173 | OD1 | 3.842 |
| 2XEI | A_LYS_343 | NZ  | A_GLU_171 | OE1 | 3.105 |
| 2XEI | A_HIS_345 | NE2 | A_GLU_137 | OE1 | 3.939 |
| 2XEI | A_HIS_345 | NE2 | A_GLU_137 | OE2 | 2.664 |
| 2XEI | A_ARG_354 | NH2 | A_ASP_114 | OD1 | 3.459 |
| 2XEI | A_ARG_354 | NH2 | A_ASP_114 | OD2 | 2.831 |
| 2XEI | A_ARG_363 | NH2 | A_ASP_106 | OD1 | 3.622 |
| 2XEI | A_ARG_370 | NH1 | A_ASP_369 | OD2 | 3.552 |
| 2XEI | A_ARG_370 | NH2 | A_ASP_666 | OD1 | 2.830 |
| 2XEI | A_ARG_370 | NH2 | A_ASP_666 | OD2 | 3.553 |
| 2XEI | A_HIS_377 | ND1 | A_ASP_379 | OD1 | 2.915 |
| 2XEI | A_HIS_377 | ND1 | A_GLU_424 | OE1 | 3.971 |
| 2XEI | A_HIS_377 | NE2 | A_ASP_387 | OD1 | 3.175 |
| 2XEI | A_HIS_377 | NE2 | A_GLU_424 | OE1 | 3.231 |
| 2XEI | A_HIS_377 | NE2 | A_GLU_425 | OE2 | 3.821 |
| 2XEI | A_HIS_377 | NE2 | A_ASP_453 | OD1 | 3.238 |
| 2XEI | A_HIS_377 | NE2 | A_ASP_453 | OD2 | 3.140 |
| 2XEI | A_ARG_378 | NH2 | A_ASP_422 | OD1 | 3.870 |
| 2XEI | A_ARG_378 | NH2 | A_ASP_422 | OD2 | 3.255 |
| 2XEI | A_ARG_400 | NH1 | A_GLU_64  | OE2 | 2.965 |

|      |           |     |           |     |       |
|------|-----------|-----|-----------|-----|-------|
| 2XEI | A_ARG_400 | NH1 | A_GLU_397 | OE1 | 3.705 |
| 2XEI | A_ARG_400 | NH1 | A_GLU_397 | OE2 | 2.906 |
| 2XEI | A_ARG_400 | NH2 | A_GLU_64  | OE2 | 2.816 |
| 2XEI | A_LYS_406 | NZ  | A_ASP_106 | OD1 | 3.048 |
| 2XEI | A_ARG_411 | NH1 | A_ASP_106 | OD1 | 3.535 |
| 2XEI | A_ARG_411 | NH1 | A_ASP_106 | OD2 | 2.723 |
| 2XEI | A_ARG_411 | NH2 | A_ASP_106 | OD1 | 2.835 |
| 2XEI | A_ARG_411 | NH2 | A_ASP_106 | OD2 | 3.617 |
| 2XEI | A_ARG_413 | NH2 | A_GLU_367 | OE2 | 3.221 |
| 2XEI | A_ARG_414 | NH2 | A_GLU_367 | OE2 | 3.265 |
| 2XEI | A_ARG_463 | NH1 | A_GLU_457 | OE1 | 3.475 |
| 2XEI | A_ARG_463 | NH1 | A_GLU_457 | OE2 | 3.028 |
| 2XEI | A_ARG_463 | NH2 | A_ASP_465 | OD1 | 3.828 |
| 2XEI | A_ARG_463 | NH2 | A_ASP_465 | OD2 | 2.781 |
| 2XEI | A_LYS_491 | NZ  | A_GLU_495 | OE2 | 3.533 |
| 2XEI | A_LYS_500 | NZ  | A_ASP_485 | OD2 | 2.834 |
| 2XEI | A_ARG_527 | NH1 | A_GLU_436 | OE1 | 2.782 |
| 2XEI | A_ARG_527 | NH2 | A_GLU_436 | OE1 | 2.914 |
| 2XEI | A_ARG_536 | NH2 | A_GLU_457 | OE1 | 2.981 |
| 2XEI | A_HIS_553 | NE2 | A_ASP_387 | OD2 | 2.945 |
| 2XEI | A_HIS_553 | NE2 | A_GLU_425 | OE1 | 3.184 |
| 2XEI | A_HIS_553 | NE2 | A_GLU_425 | OE2 | 3.250 |
| 2XEI | A_HIS_573 | ND1 | A_ASP_567 | OD2 | 2.635 |
| 2XEI | A_ARG_598 | NH2 | A_ASP_596 | OD1 | 3.686 |
| 2XEI | A_ARG_598 | NH2 | A_ASP_596 | OD2 | 2.928 |
| 2XEI | A_LYS_606 | NZ  | A_GLU_505 | OE2 | 2.921 |
| 2XEI | A_LYS_610 | NZ  | A_GLU_703 | OE2 | 2.865 |
| 2XEI | A_LYS_637 | NZ  | A_GLU_641 | OE1 | 2.954 |
| 2XEI | A_LYS_637 | NZ  | A_GLU_641 | OE2 | 3.988 |
| 2XEI | A_ARG_684 | NH2 | A_ASP_710 | OD2 | 3.374 |
| 2XEI | A_HIS_689 | NE2 | A_GLU_672 | OE2 | 2.779 |
| 2XEI | A_ARG_730 | NH2 | A_GLU_727 | OE1 | 3.881 |
| 2XEI | A_ARG_730 | NH2 | A_GLU_727 | OE2 | 3.068 |
| 2XEJ | A_HIS_56  | ND1 | A_GLU_408 | OE2 | 3.595 |
| 2XEJ | A_HIS_56  | NE2 | A_GLU_408 | OE2 | 3.649 |
| 2XEJ | A_LYS_59  | NZ  | A_ASP_63  | OD1 | 3.833 |
| 2XEJ | A_LYS_59  | NZ  | A_ASP_63  | OD2 | 3.161 |
| 2XEJ | A_ARG_181 | NH1 | A_GLU_183 | OE2 | 3.636 |
| 2XEJ | A_ARG_181 | NH2 | A_ASP_184 | OD1 | 3.044 |
| 2XEJ | A_ARG_181 | NH2 | A_ASP_184 | OD2 | 3.609 |
| 2XEJ | A_ARG_190 | NH1 | A_ASP_714 | OD1 | 2.993 |
| 2XEJ | A_ARG_190 | NH1 | A_ASP_714 | OD2 | 3.604 |
| 2XEJ | A_ARG_190 | NH2 | A_ASP_714 | OD1 | 3.611 |
| 2XEJ | A_ARG_190 | NH2 | A_ASP_714 | OD2 | 2.731 |
| 2XEJ | A_ARG_204 | NH1 | A_ASP_233 | OD1 | 3.963 |
| 2XEJ | A_ARG_204 | NH1 | A_ASP_233 | OD2 | 3.162 |
| 2XEJ | A_ARG_255 | NH1 | A_GLU_145 | OE1 | 2.709 |
| 2XEJ | A_ARG_255 | NH2 | A_GLU_145 | OE1 | 2.779 |
| 2XEJ | A_LYS_304 | NZ  | A_GLU_307 | OE2 | 3.882 |
| 2XEJ | A_LYS_341 | NZ  | A_ASP_173 | OD1 | 3.630 |
| 2XEJ | A_HIS_345 | NE2 | A_GLU_137 | OE1 | 3.939 |
| 2XEJ | A_HIS_345 | NE2 | A_GLU_137 | OE2 | 3.101 |
| 2XEJ | A_ARG_354 | NH2 | A_ASP_114 | OD1 | 3.439 |
| 2XEJ | A_ARG_354 | NH2 | A_ASP_114 | OD2 | 2.884 |
| 2XEJ | A_ARG_363 | NH2 | A_ASP_106 | OD1 | 3.838 |
| 2XEJ | A_ARG_370 | NH1 | A_ASP_369 | OD1 | 3.947 |
| 2XEJ | A_ARG_370 | NH1 | A_ASP_369 | OD2 | 3.540 |
| 2XEJ | A_ARG_370 | NH2 | A_ASP_666 | OD1 | 2.915 |

|      |           |     |           |     |       |
|------|-----------|-----|-----------|-----|-------|
| 2XEJ | A_ARG_370 | NH2 | A_ASP_666 | OD2 | 3.607 |
| 2XEJ | A_HIS_377 | ND1 | A_ASP_379 | OD1 | 2.947 |
| 2XEJ | A_HIS_377 | ND1 | A_GLU_424 | OE1 | 3.959 |
| 2XEJ | A_HIS_377 | NE2 | A_ASP_387 | OD1 | 3.198 |
| 2XEJ | A_HIS_377 | NE2 | A_GLU_424 | OE1 | 3.200 |
| 2XEJ | A_HIS_377 | NE2 | A_GLU_425 | OE2 | 3.909 |
| 2XEJ | A_HIS_377 | NE2 | A_ASP_453 | OD1 | 3.288 |
| 2XEJ | A_HIS_377 | NE2 | A_ASP_453 | OD2 | 3.106 |
| 2XEJ | A_ARG_378 | NH2 | A_ASP_422 | OD1 | 3.906 |
| 2XEJ | A_ARG_378 | NH2 | A_ASP_422 | OD2 | 3.305 |
| 2XEJ | A_ARG_400 | NH1 | A_GLU_64  | OE2 | 3.030 |
| 2XEJ | A_ARG_400 | NH1 | A_GLU_397 | OE1 | 3.701 |
| 2XEJ | A_ARG_400 | NH1 | A_GLU_397 | OE2 | 2.808 |
| 2XEJ | A_ARG_400 | NH2 | A_GLU_64  | OE2 | 2.879 |
| 2XEJ | A_LYS_406 | NZ  | A_ASP_106 | OD1 | 3.327 |
| 2XEJ | A_ARG_411 | NH1 | A_ASP_106 | OD1 | 3.525 |
| 2XEJ | A_ARG_411 | NH1 | A_ASP_106 | OD2 | 2.766 |
| 2XEJ | A_ARG_411 | NH2 | A_ASP_106 | OD1 | 2.901 |
| 2XEJ | A_ARG_411 | NH2 | A_ASP_106 | OD2 | 3.711 |
| 2XEJ | A_ARG_413 | NH2 | A_GLU_367 | OE2 | 3.406 |
| 2XEJ | A_ARG_414 | NH2 | A_GLU_367 | OE2 | 3.157 |
| 2XEJ | A_ARG_463 | NH1 | A_GLU_457 | OE1 | 3.276 |
| 2XEJ | A_ARG_463 | NH1 | A_GLU_457 | OE2 | 3.003 |
| 2XEJ | A_ARG_463 | NH2 | A_ASP_465 | OD1 | 3.986 |
| 2XEJ | A_ARG_463 | NH2 | A_ASP_465 | OD2 | 2.863 |
| 2XEJ | A_LYS_491 | NZ  | A_GLU_495 | OE2 | 3.392 |
| 2XEJ | A_LYS_500 | NZ  | A_ASP_485 | OD2 | 2.873 |
| 2XEJ | A_ARG_527 | NH1 | A_GLU_436 | OE1 | 2.804 |
| 2XEJ | A_ARG_527 | NH2 | A_GLU_436 | OE1 | 3.018 |
| 2XEJ | A_ARG_536 | NH1 | A_GLU_457 | OE1 | 2.942 |
| 2XEJ | A_HIS_553 | NE2 | A_ASP_387 | OD2 | 2.982 |
| 2XEJ | A_HIS_553 | NE2 | A_GLU_425 | OE1 | 3.077 |
| 2XEJ | A_HIS_553 | NE2 | A_GLU_425 | OE2 | 3.221 |
| 2XEJ | A_HIS_573 | ND1 | A_ASP_567 | OD2 | 2.723 |
| 2XEJ | A_ARG_598 | NH2 | A_ASP_596 | OD1 | 3.718 |
| 2XEJ | A_ARG_598 | NH2 | A_ASP_596 | OD2 | 2.988 |
| 2XEJ | A_LYS_606 | NZ  | A_GLU_505 | OE1 | 3.097 |
| 2XEJ | A_LYS_606 | NZ  | A_GLU_505 | OE2 | 3.795 |
| 2XEJ | A_LYS_610 | NZ  | A_GLU_703 | OE2 | 2.940 |
| 2XEJ | A_HIS_618 | NE2 | A_GLU_716 | OE1 | 3.742 |
| 2XEJ | A_LYS_637 | NZ  | A_GLU_641 | OE1 | 2.900 |
| 2XEJ | A_LYS_637 | NZ  | A_GLU_641 | OE2 | 3.785 |
| 2XEJ | A_ARG_684 | NH2 | A_ASP_710 | OD2 | 3.390 |
| 2XEJ | A_HIS_689 | NE2 | A_GLU_672 | OE2 | 2.745 |
| 2XZQ | H_ARG_40  | NH1 | H_GLU_89  | OE2 | 3.454 |
| 2XZQ | H_ARG_40  | NH2 | H_GLU_89  | OE2 | 2.650 |
| 2XZQ | H_LYS_65  | NZ  | H_GLU_62  | OE1 | 2.508 |
| 2XZQ | H_LYS_65  | NZ  | H_GLU_62  | OE2 | 3.892 |
| 2XZQ | H_LYS_67  | NZ  | H_ASP_90  | OD1 | 3.800 |
| 2XZQ | H_LYS_67  | NZ  | H_ASP_90  | OD2 | 3.016 |
| 2XZQ | H_ARG_98  | NH1 | H_ASP_108 | OD1 | 3.377 |
| 2XZQ | H_ARG_98  | NH1 | H_ASP_108 | OD2 | 2.748 |
| 2XZQ | H_LYS_150 | NZ  | L_GLU_127 | OE2 | 3.822 |
| 2XZQ | H_LYS_212 | NZ  | H_ASP_214 | OD1 | 3.314 |
| 2XZQ | H_LYS_215 | NZ  | L_GLU_126 | OE2 | 2.689 |
| 2XZQ | L_ARG_23  | NH1 | L_ASP_71  | OD1 | 3.290 |
| 2XZQ | L_ARG_23  | NH1 | L_ASP_71  | OD2 | 3.939 |
| 2XZQ | L_ARG_23  | NH2 | L_ASP_71  | OD1 | 2.856 |

|      |           |     |           |     |       |
|------|-----------|-----|-----------|-----|-------|
| 2XZQ | L_ARG_23  | NH2 | L_ASP_71  | OD2 | 3.986 |
| 2XZQ | L_HIS_44  | ND1 | L_GLU_40  | OE2 | 3.471 |
| 2XZQ | L_ARG_63  | NH2 | L_ASP_84  | OD1 | 2.551 |
| 2XZQ | L_ARG_63  | NH2 | L_ASP_84  | OD2 | 3.490 |
| 2XZQ | L_LYS_105 | NZ  | L_GLU_85  | OE2 | 3.885 |
| 2XZQ | L_LYS_113 | NZ  | L_GLU_201 | OE1 | 2.868 |
| 2Y06 | H_LYS_63  | NZ  | H_GLU_46  | OE1 | 3.321 |
| 2Y06 | H_LYS_63  | NZ  | H_GLU_46  | OE2 | 2.855 |
| 2Y06 | H_LYS_67  | NZ  | H_ASP_90  | OD2 | 3.290 |
| 2Y06 | H_ARG_98  | NH1 | H_ASP_108 | OD1 | 3.019 |
| 2Y06 | H_ARG_98  | NH1 | H_ASP_108 | OD2 | 3.194 |
| 2Y06 | H_LYS_215 | NZ  | L_GLU_126 | OE2 | 2.373 |
| 2Y06 | L_ARG_23  | NH1 | L_ASP_71  | OD1 | 3.453 |
| 2Y06 | L_ARG_23  | NH2 | L_ASP_71  | OD1 | 2.764 |
| 2Y06 | L_ARG_63  | NH2 | L_ASP_84  | OD1 | 2.907 |
| 2Y06 | L_ARG_63  | NH2 | L_ASP_84  | OD2 | 3.632 |
| 2Y06 | L_LYS_113 | NZ  | L_GLU_201 | OE1 | 3.332 |
| 2Y06 | L_LYS_169 | NZ  | L_GLU_85  | OE2 | 3.628 |
| 2Y07 | H_LYS_67  | NZ  | H_ASP_90  | OD1 | 3.687 |
| 2Y07 | H_LYS_67  | NZ  | H_ASP_90  | OD2 | 2.861 |
| 2Y07 | H_ARG_98  | NH1 | H_ASP_108 | OD1 | 3.962 |
| 2Y07 | H_ARG_98  | NH1 | H_ASP_108 | OD2 | 2.823 |
| 2Y07 | H_LYS_215 | NZ  | L_GLU_126 | OE2 | 2.390 |
| 2Y07 | L_ARG_23  | NH1 | L_ASP_71  | OD1 | 3.698 |
| 2Y07 | L_ARG_23  | NH1 | L_ASP_71  | OD2 | 3.356 |
| 2Y07 | L_ARG_23  | NH2 | L_ASP_71  | OD1 | 2.962 |
| 2Y07 | L_ARG_23  | NH2 | L_ASP_71  | OD2 | 2.784 |
| 2Y07 | L_ARG_63  | NH2 | L_GLU_82  | OE2 | 3.307 |
| 2Y07 | L_ARG_63  | NH2 | L_ASP_83  | OD1 | 2.727 |
| 2Y07 | L_ARG_63  | NH2 | L_ASP_83  | OD2 | 3.778 |
| 2Y07 | L_LYS_113 | NZ  | L_GLU_201 | OE1 | 3.255 |
| 2Y07 | L_LYS_113 | NZ  | L_GLU_201 | OE2 | 3.532 |
| 2Y07 | L_HIS_200 | NE2 | L_GLU_201 | OE1 | 3.946 |
| 2Y07 | L_ARG_211 | NH1 | L_GLU_189 | OE1 | 3.826 |
| 2Y36 | H_ARG_40  | NH1 | H_GLU_89  | OE1 | 3.909 |
| 2Y36 | H_ARG_40  | NH1 | H_GLU_89  | OE2 | 3.356 |
| 2Y36 | H_ARG_40  | NH2 | H_GLU_89  | OE2 | 2.875 |
| 2Y36 | H_LYS_65  | NZ  | H_GLU_62  | OE1 | 2.983 |
| 2Y36 | H_LYS_67  | NZ  | H_ASP_90  | OD2 | 3.261 |
| 2Y36 | H_ARG_98  | NH1 | H_ASP_108 | OD1 | 3.408 |
| 2Y36 | H_ARG_98  | NH1 | H_ASP_108 | OD2 | 2.494 |
| 2Y36 | H_LYS_150 | NZ  | L_GLU_127 | OE2 | 3.849 |
| 2Y36 | H_LYS_215 | NZ  | L_GLU_126 | OE2 | 2.707 |
| 2Y36 | L_ARG_23  | NH1 | L_ASP_71  | OD2 | 3.674 |
| 2Y36 | L_ARG_23  | NH2 | L_ASP_71  | OD1 | 3.148 |
| 2Y36 | L_ARG_23  | NH2 | L_ASP_71  | OD2 | 3.652 |
| 2Y36 | L_ARG_63  | NH2 | L_GLU_83  | OE2 | 3.566 |
| 2Y36 | L_ARG_63  | NH2 | L_ASP_84  | OD1 | 2.616 |
| 2Y36 | L_ARG_63  | NH2 | L_ASP_84  | OD2 | 3.443 |
| 2Y36 | L_LYS_113 | NZ  | L_GLU_201 | OE1 | 3.248 |
| 2Y36 | L_HIS_191 | NE2 | L_ASP_154 | OD2 | 3.845 |
| 2Y7S | A_LYS_27  | NZ  | A_ASP_25  | OD2 | 3.076 |
| 2Y7S | A_LYS_45  | NZ  | A_GLU_83  | OE1 | 2.864 |
| 2Y7S | A_LYS_47  | NZ  | A_GLU_54  | OE1 | 3.042 |
| 2Y7S | A_LYS_67  | NZ  | A_ASP_28  | OD1 | 3.289 |
| 2Y7S | A_LYS_67  | NZ  | A_ASP_28  | OD2 | 2.809 |
| 2Y7S | A_ARG_75  | NH1 | A_GLU_95  | OE1 | 2.862 |
| 2Y7S | A_ARG_75  | NH1 | A_GLU_95  | OE2 | 3.954 |

|      |           |     |           |     |       |
|------|-----------|-----|-----------|-----|-------|
| 2Y7S | A_ARG_80  | NH1 | A_GLU_44  | OE1 | 2.923 |
| 2Y7S | A_ARG_80  | NH1 | A_GLU_44  | OE2 | 3.022 |
| 2Y7S | A_ARG_80  | NH2 | A_GLU_92  | OE1 | 3.248 |
| 2Y7S | A_ARG_127 | NH1 | A_ASP_159 | OD1 | 3.706 |
| 2Y7S | A_ARG_127 | NH1 | A_ASP_159 | OD2 | 2.895 |
| 2Y7S | A_ARG_127 | NH1 | B_GLU_118 | OE1 | 3.457 |
| 2Y7S | A_ARG_127 | NH2 | A_GLU_112 | OE1 | 3.963 |
| 2Y7S | A_ARG_127 | NH2 | A_GLU_112 | OE2 | 2.936 |
| 2Y7S | A_ARG_127 | NH2 | A_ASP_159 | OD1 | 2.847 |
| 2Y7S | A_ARG_127 | NH2 | A_ASP_159 | OD2 | 3.582 |
| 2Y7S | A_ARG_130 | NH1 | A_GLU_92  | OE1 | 3.851 |
| 2Y7S | A_ARG_130 | NH1 | A_GLU_92  | OE2 | 3.019 |
| 2Y7S | A_ARG_130 | NH2 | A_GLU_92  | OE1 | 3.136 |
| 2Y7S | A_ARG_130 | NH2 | A_GLU_92  | OE2 | 3.650 |
| 2Y7S | A_ARG_152 | NH1 | A_GLU_150 | OE1 | 3.228 |
| 2Y7S | A_ARG_152 | NH2 | A_GLU_150 | OE1 | 3.600 |
| 2Y7S | A_LYS_179 | NZ  | A_GLU_181 | OE1 | 3.798 |
| 2Y7S | A_LYS_179 | NZ  | A_GLU_181 | OE2 | 3.366 |
| 2Y7S | A_LYS_218 | NZ  | A_GLU_216 | OE1 | 3.816 |
| 2Y7S | A_LYS_218 | NZ  | B_ASP_85  | OD1 | 3.014 |
| 2Y7S | A_LYS_240 | NZ  | A_GLU_217 | OE1 | 3.163 |
| 2Y7S | A_LYS_240 | NZ  | A_GLU_217 | OE2 | 3.626 |
| 2Y7S | A_LYS_253 | NZ  | A_ASP_71  | OD1 | 3.458 |
| 2Y7S | A_LYS_253 | NZ  | A_ASP_71  | OD2 | 2.809 |
| 2Y7S | B_ARG_41  | NH2 | A_GLU_238 | OE2 | 2.757 |
| 2Y7S | B_LYS_42  | NZ  | B_ASP_37  | OD1 | 3.966 |
| 2Y7S | B_LYS_47  | NZ  | B_GLU_54  | OE1 | 3.576 |
| 2Y7S | B_LYS_47  | NZ  | B_GLU_54  | OE2 | 3.620 |
| 2Y7S | B_LYS_67  | NZ  | B_ASP_28  | OD1 | 3.186 |
| 2Y7S | B_LYS_67  | NZ  | B_ASP_28  | OD2 | 3.425 |
| 2Y7S | B_ARG_75  | NH1 | B_GLU_95  | OE2 | 2.817 |
| 2Y7S | B_ARG_80  | NH1 | B_GLU_44  | OE1 | 3.002 |
| 2Y7S | B_ARG_80  | NH1 | B_GLU_44  | OE2 | 3.573 |
| 2Y7S | B_ARG_80  | NH2 | B_GLU_92  | OE1 | 2.824 |
| 2Y7S | B_HIS_103 | ND1 | B_GLU_137 | OE1 | 2.807 |
| 2Y7S | B_HIS_119 | NE2 | B_ASP_116 | OD2 | 3.821 |
| 2Y7S | B_LYS_122 | NZ  | B_ASP_116 | OD2 | 3.879 |
| 2Y7S | B_ARG_127 | NH1 | B_ASP_159 | OD1 | 3.795 |
| 2Y7S | B_ARG_127 | NH1 | B_ASP_159 | OD2 | 2.884 |
| 2Y7S | B_ARG_127 | NH2 | B_GLU_112 | OE1 | 3.910 |
| 2Y7S | B_ARG_127 | NH2 | B_GLU_112 | OE2 | 2.774 |
| 2Y7S | B_ARG_127 | NH2 | B_ASP_159 | OD1 | 2.931 |
| 2Y7S | B_ARG_127 | NH2 | B_ASP_159 | OD2 | 3.540 |
| 2Y7S | B_ARG_130 | NH1 | B_GLU_92  | OE1 | 3.502 |
| 2Y7S | B_ARG_130 | NH1 | B_GLU_92  | OE2 | 2.814 |
| 2Y7S | B_ARG_130 | NH2 | B_GLU_92  | OE1 | 3.119 |
| 2Y7S | B_ARG_130 | NH2 | B_GLU_92  | OE2 | 3.783 |
| 2Y7S | B_LYS_148 | NZ  | B_ASP_170 | OD2 | 3.415 |
| 2Y7S | B_ARG_152 | NH1 | B_GLU_150 | OE1 | 2.822 |
| 2Y7S | B_ARG_152 | NH2 | B_GLU_150 | OE1 | 3.268 |
| 2Y7S | B_LYS_173 | NZ  | B_ASP_170 | OD2 | 3.896 |
| 2Y7S | B_LYS_179 | NZ  | B_GLU_181 | OE1 | 3.992 |
| 2Y7S | B_LYS_179 | NZ  | B_GLU_181 | OE2 | 3.341 |
| 2Y7S | B_LYS_198 | NZ  | B_GLU_196 | OE1 | 3.898 |
| 2Y7S | B_HIS_204 | ND1 | B_ASP_200 | OD2 | 3.949 |
| 2Y7S | B_ARG_212 | NH2 | B_ASP_210 | OD2 | 3.869 |
| 2Y7S | B_LYS_218 | NZ  | B_GLU_187 | OE1 | 3.745 |
| 2Y7S | B_LYS_218 | NZ  | B_GLU_216 | OE2 | 3.499 |

|      |           |     |           |     |       |
|------|-----------|-----|-----------|-----|-------|
| 2Y7S | B.LYS_253 | NZ  | B.ASP_71  | OD1 | 3.851 |
| 2Y7S | B.LYS_253 | NZ  | B.ASP_71  | OD2 | 3.059 |
| 2YPV | A.HIS_26  | ND1 | A.ASP_25  | OD1 | 3.615 |
| 2YPV | A.LYS_47  | NZ  | A.GLU_54  | OE2 | 3.265 |
| 2YPV | A.LYS_67  | NZ  | A.ASP_28  | OD1 | 3.119 |
| 2YPV | A.LYS_67  | NZ  | A.ASP_28  | OD2 | 2.907 |
| 2YPV | A.ARG_80  | NH1 | A.GLU_44  | OE1 | 3.085 |
| 2YPV | A.ARG_80  | NH1 | A.GLU_44  | OE2 | 3.642 |
| 2YPV | A.ARG_80  | NH2 | A.GLU_92  | OE2 | 3.509 |
| 2YPV | A.HIS_103 | ND1 | A.GLU_137 | OE1 | 2.799 |
| 2YPV | A.HIS_103 | ND1 | A.GLU_137 | OE2 | 3.510 |
| 2YPV | A.ARG_127 | NH1 | A.ASP_160 | OD1 | 3.664 |
| 2YPV | A.ARG_127 | NH1 | A.ASP_160 | OD2 | 2.748 |
| 2YPV | A.ARG_127 | NH2 | A.GLU_112 | OE1 | 3.713 |
| 2YPV | A.ARG_127 | NH2 | A.GLU_112 | OE2 | 2.780 |
| 2YPV | A.ARG_127 | NH2 | A.ASP_160 | OD1 | 2.809 |
| 2YPV | A.ARG_127 | NH2 | A.ASP_160 | OD2 | 3.468 |
| 2YPV | A.ARG_130 | NH2 | L.ASP_92  | OD1 | 2.916 |
| 2YPV | A.ARG_149 | NH2 | A.ASP_171 | OD2 | 2.711 |
| 2YPV | A.LYS_180 | NZ  | A.GLU_182 | OE1 | 3.802 |
| 2YPV | A.LYS_180 | NZ  | A.GLU_182 | OE2 | 3.312 |
| 2YPV | A.ARG_204 | NH2 | A.ASP_142 | OD1 | 2.851 |
| 2YPV | A.ARG_204 | NH2 | A.ASP_142 | OD2 | 3.577 |
| 2YPV | A.HIS_205 | ND1 | A.ASP_201 | OD2 | 3.920 |
| 2YPV | A.LYS_219 | NZ  | H.ASP_52  | OD2 | 3.469 |
| 2YPV | A.LYS_241 | NZ  | H.ASP_99  | OD2 | 2.741 |
| 2YPV | A.ARG_247 | NH1 | A.GLU_188 | OE2 | 3.707 |
| 2YPV | A.LYS_254 | NZ  | A.ASP_71  | OD1 | 3.594 |
| 2YPV | A.LYS_254 | NZ  | A.ASP_71  | OD2 | 2.807 |
| 2YPV | H.LYS_54  | NZ  | H.ASP_31  | OD1 | 2.744 |
| 2YPV | H.LYS_67  | NZ  | H.ASP_90  | OD1 | 3.738 |
| 2YPV | H.LYS_67  | NZ  | H.ASP_90  | OD2 | 2.816 |
| 2YPV | H.LYS_214 | NZ  | L.GLU_123 | OE1 | 2.788 |
| 2YPV | H.LYS_214 | NZ  | L.GLU_123 | OE2 | 2.975 |
| 2YPV | L.HIS_30  | ND1 | L.ASP_28  | OD1 | 3.934 |
| 2YPV | L.HIS_30  | ND1 | L.ASP_92  | OD1 | 3.607 |
| 2YPV | L.HIS_30  | ND1 | L.ASP_92  | OD2 | 2.797 |
| 2YPV | L.HIS_30  | NE2 | L.ASP_28  | OD2 | 3.772 |
| 2YPV | L.ARG_50  | NH2 | A.GLU_239 | OE1 | 3.110 |
| 2YPV | L.ARG_50  | NH2 | A.GLU_239 | OE2 | 3.975 |
| 2YPV | L.ARG_61  | NH1 | L.GLU_79  | OE1 | 3.426 |
| 2YPV | L.ARG_61  | NH1 | L.GLU_81  | OE2 | 3.737 |
| 2YPV | L.ARG_61  | NH1 | L.ASP_82  | OD1 | 2.772 |
| 2YPV | L.ARG_61  | NH1 | L.ASP_82  | OD2 | 3.085 |
| 2YPV | L.ARG_61  | NH2 | L.GLU_79  | OE1 | 2.918 |
| 2YPV | L.ARG_61  | NH2 | L.GLU_79  | OE2 | 3.335 |
| 2YPV | L.ARG_61  | NH2 | L.GLU_81  | OE2 | 3.973 |
| 2YPV | L.LYS_149 | NZ  | L.GLU_195 | OE1 | 2.918 |
| 2YPV | L.LYS_149 | NZ  | L.GLU_195 | OE2 | 3.889 |
| 2YPV | L.HIS_189 | ND1 | L.ASP_151 | OD2 | 2.963 |
| 2YPV | L.LYS_199 | NZ  | L.ASP_110 | OD2 | 3.962 |
| 2YWY | A.ARG_33  | NH2 | A.ASP_35  | OD1 | 3.217 |
| 2YWY | A.LYS_48  | NZ  | A.ASP_35  | OD1 | 3.576 |
| 2YWY | A.LYS_48  | NZ  | A.ASP_35  | OD2 | 2.413 |
| 2YWY | A.LYS_48  | NZ  | B.GLU_32  | OE1 | 3.306 |
| 2YWY | A.LYS_48  | NZ  | B.GLU_32  | OE2 | 2.998 |
| 2YWY | A.ARG_54  | NH1 | A.ASP_77  | OD1 | 3.047 |
| 2YWY | A.ARG_54  | NH1 | A.ASP_77  | OD2 | 3.216 |

|      |           |     |           |     |       |
|------|-----------|-----|-----------|-----|-------|
| 2YWY | A_ARG_54  | NH2 | A_ASP_77  | OD1 | 3.942 |
| 2YWY | A_ARG_54  | NH2 | A_ASP_77  | OD2 | 2.619 |
| 2YWY | A_LYS_61  | NZ  | B_GLU_57  | OE1 | 2.550 |
| 2YWY | A_LYS_61  | NZ  | B_GLU_57  | OE2 | 3.211 |
| 2YWY | A_LYS_82  | NZ  | C_ASP_89  | OD1 | 3.260 |
| 2YWY | A_LYS_102 | NZ  | A_GLU_46  | OE1 | 2.844 |
| 2YWY | A_LYS_102 | NZ  | A_GLU_46  | OE2 | 2.777 |
| 2YWY | B_LYS_25  | NZ  | B_ASP_4   | OD1 | 3.823 |
| 2YWY | B_ARG_33  | NH2 | A_GLU_32  | OE1 | 3.506 |
| 2YWY | B_ARG_33  | NH2 | B_ASP_35  | OD1 | 3.061 |
| 2YWY | B_ARG_33  | NH2 | B_ASP_35  | OD2 | 3.585 |
| 2YWY | B_ARG_38  | NH2 | B_ASP_77  | OD1 | 2.791 |
| 2YWY | B_LYS_48  | NZ  | A_GLU_32  | OE1 | 3.520 |
| 2YWY | B_LYS_48  | NZ  | A_GLU_32  | OE2 | 2.757 |
| 2YWY | B_ARG_54  | NH1 | B_ASP_77  | OD2 | 3.038 |
| 2YWY | B_ARG_54  | NH2 | B_ASP_77  | OD1 | 2.760 |
| 2YWY | B_ARG_54  | NH2 | B_ASP_77  | OD2 | 2.618 |
| 2YWY | B_LYS_61  | NZ  | A_GLU_57  | OE1 | 3.086 |
| 2YWY | B_LYS_102 | NZ  | B_GLU_46  | OE1 | 3.457 |
| 2YWY | C_LYS_12  | NZ  | C_GLU_16  | OE2 | 3.484 |
| 2YWY | C_ARG_33  | NH2 | C_ASP_35  | OD1 | 3.627 |
| 2YWY | C_LYS_48  | NZ  | C_ASP_35  | OD2 | 3.144 |
| 2YWY | C_LYS_48  | NZ  | D_GLU_32  | OE1 | 2.723 |
| 2YWY | C_LYS_48  | NZ  | D_GLU_32  | OE2 | 3.404 |
| 2YWY | C_ARG_54  | NH1 | C_ASP_77  | OD1 | 2.958 |
| 2YWY | C_ARG_54  | NH1 | C_ASP_77  | OD2 | 3.216 |
| 2YWY | C_ARG_54  | NH2 | C_ASP_77  | OD1 | 3.555 |
| 2YWY | C_ARG_54  | NH2 | C_ASP_77  | OD2 | 2.224 |
| 2YWY | C_LYS_61  | NZ  | D_GLU_57  | OE1 | 2.801 |
| 2YWY | C_LYS_61  | NZ  | D_GLU_57  | OE2 | 3.948 |
| 2YWY | C_ARG_74  | NH1 | C_ASP_77  | OD2 | 3.935 |
| 2YWY | C_LYS_102 | NZ  | C_GLU_46  | OE1 | 3.626 |
| 2YWY | D_ARG_33  | NH2 | D_ASP_35  | OD1 | 3.658 |
| 2YWY | D_ARG_38  | NH2 | D_ASP_77  | OD1 | 2.919 |
| 2YWY | D_LYS_48  | NZ  | C_GLU_32  | OE1 | 3.239 |
| 2YWY | D_LYS_48  | NZ  | C_GLU_32  | OE2 | 2.447 |
| 2YWY | D_ARG_54  | NH1 | D_ASP_77  | OD1 | 3.877 |
| 2YWY | D_ARG_54  | NH1 | D_ASP_77  | OD2 | 2.884 |
| 2YWY | D_ARG_54  | NH2 | D_ASP_77  | OD1 | 2.689 |
| 2YWY | D_ARG_54  | NH2 | D_ASP_77  | OD2 | 3.195 |
| 2YWY | D_LYS_61  | NZ  | C_GLU_57  | OE1 | 2.837 |
| 2YWY | D_LYS_61  | NZ  | C_GLU_57  | OE2 | 3.637 |
| 2YWY | D_ARG_71  | NH1 | D_ASP_72  | OD1 | 2.537 |
| 2YWY | D_ARG_71  | NH1 | D_ASP_72  | OD2 | 3.727 |
| 2YWY | D_ARG_71  | NH2 | D_ASP_72  | OD1 | 3.924 |
| 2YWY | D_LYS_102 | NZ  | D_GLU_46  | OE1 | 3.940 |
| 2YWZ | A_ARG_8   | NH1 | A_ASP_4   | OD2 | 3.114 |
| 2YWZ | A_LYS_25  | NZ  | A_ASP_4   | OD1 | 3.407 |
| 2YWZ | A_ARG_54  | NH1 | A_ASP_77  | OD1 | 3.632 |
| 2YWZ | A_ARG_54  | NH1 | A_ASP_77  | OD2 | 2.888 |
| 2YWZ | A_ARG_54  | NH2 | A_ASP_77  | OD1 | 3.024 |
| 2YWZ | A_ARG_54  | NH2 | A_ASP_77  | OD2 | 3.599 |
| 2YWZ | A_ARG_74  | NH1 | A_ASP_72  | OD2 | 2.842 |
| 2YWZ | A_LYS_82  | NZ  | A_GLU_46  | OE1 | 3.217 |
| 2YWZ | A_LYS_82  | NZ  | A_GLU_46  | OE2 | 3.322 |
| 2YWZ | A_LYS_82  | NZ  | A_GLU_102 | OE1 | 3.820 |
| 2YWZ | A_LYS_82  | NZ  | A_GLU_102 | OE2 | 3.005 |
| 2ZCH | P_HIS_57  | ND1 | P_ASP_102 | OD1 | 3.188 |



|      |           |     |            |     |       |
|------|-----------|-----|------------|-----|-------|
| 2ZCH | P_HIS_57  | ND1 | P_ASP_102  | OD2 | 2.701 |
| 2ZCH | P_HIS_70  | NE2 | P_GLU_21   | OE1 | 3.047 |
| 2ZCH | P_LYS_119 | NZ  | P_ASP_116  | OD1 | 3.130 |
| 2ZCH | P_LYS_178 | NZ  | H_ASP_96   | OD1 | 3.502 |
| 2ZCH | P_LYS_178 | NZ  | H_ASP_96   | OD2 | 3.400 |
| 2ZCH | P_ARG_185 | NH2 | P_ASP_159  | OD1 | 3.236 |
| 2ZCH | P_ARG_185 | NH2 | P_ASP_159  | OD2 | 3.391 |
| 2ZCH | P_LYS_188 | NZ  | P_ASP_159  | OD2 | 3.769 |
| 2ZCH | P_LYS_230 | NZ  | P_GLU_129  | OE1 | 3.520 |
| 2ZCH | P_LYS_230 | NZ  | P_GLU_129  | OE2 | 2.924 |
| 2ZCH | P_ARG_235 | NH1 | L_ASP_28   | OD2 | 2.443 |
| 2ZCH | P_ARG_235 | NH2 | L_ASP_28   | OD2 | 3.166 |
| 2ZCH | P_LYS_236 | NZ  | H_GLU_100C | OE2 | 3.089 |
| 2ZCH | P_LYS_239 | NZ  | P_ASP_240  | OD1 | 3.042 |
| 2ZCH | L_LYS_24  | NZ  | L_ASP_70   | OD1 | 3.285 |
| 2ZCH | L_LYS_24  | NZ  | L_ASP_70   | OD2 | 3.649 |
| 2ZCH | L_ARG_61  | NH1 | L_ASP_82   | OD2 | 2.822 |
| 2ZCH | L_ARG_61  | NH2 | L_GLU_79   | OE1 | 3.619 |
| 2ZCH | L_ARG_61  | NH2 | L_GLU_81   | OE2 | 3.092 |
| 2ZCH | L_ARG_61  | NH2 | L_ASP_82   | OD1 | 3.377 |
| 2ZCH | L_ARG_61  | NH2 | L_ASP_82   | OD2 | 3.215 |
| 2ZCH | L_LYS_103 | NZ  | L_ASP_165  | OD1 | 2.730 |
| 2ZCH | L_LYS_147 | NZ  | L_GLU_195  | OE1 | 3.268 |
| 2ZCH | L_ARG_155 | NH1 | L_GLU_185  | OE2 | 3.338 |
| 2ZCH | L_HIS_189 | ND1 | L_GLU_185  | OE1 | 3.822 |
| 2ZCH | L_LYS_199 | NZ  | L_ASP_110  | OD1 | 3.298 |
| 2ZCH | L_ARG_211 | NH2 | L_GLU_187  | OE2 | 2.494 |
| 2ZCH | H_ARG_38  | NH1 | H_GLU_46   | OE1 | 3.046 |
| 2ZCH | H_ARG_38  | NH2 | H_ASP_86   | OD1 | 3.480 |
| 2ZCH | H_ARG_40  | NH1 | H_GLU_85   | OE2 | 3.170 |
| 2ZCH | H_ARG_40  | NH2 | H_GLU_85   | OE2 | 3.818 |
| 2ZCH | H_ARG_50  | NH1 | H_GLU_100C | OE1 | 3.902 |
| 2ZCH | H_ARG_50  | NH2 | L_ASP_94   | OD1 | 2.658 |
| 2ZCH | H_ARG_50  | NH2 | L_ASP_94   | OD2 | 2.887 |
| 2ZCH | H_LYS_66  | NZ  | H_ASP_86   | OD1 | 3.386 |
| 2ZCH | H_ARG_94  | NH2 | H_ASP_101  | OD1 | 3.421 |
| 2ZCH | H_ARG_94  | NH2 | H_ASP_101  | OD2 | 2.694 |
| 2ZCH | H_LYS_208 | NZ  | L_GLU_123  | OE1 | 3.921 |
| 2ZCH | H_LYS_208 | NZ  | L_GLU_123  | OE2 | 3.396 |
| 2ZCK | P_HIS_25  | NE2 | P_GLU_77   | OE2 | 3.078 |
| 2ZCK | P_HIS_57  | ND1 | P_ASP_102  | OD1 | 3.235 |
| 2ZCK | P_HIS_57  | ND1 | P_ASP_102  | OD2 | 2.810 |
| 2ZCK | P_ARG_69  | NH2 | P_GLU_77   | OE1 | 3.765 |
| 2ZCK | P_HIS_70  | NE2 | P_GLU_21   | OE1 | 3.922 |
| 2ZCK | P_ARG_95G | NH2 | P_GLU_218  | OE2 | 2.834 |
| 2ZCK | P_LYS_178 | NZ  | H_ASP_96   | OD1 | 3.892 |
| 2ZCK | P_LYS_178 | NZ  | H_ASP_96   | OD2 | 3.060 |
| 2ZCK | P_ARG_185 | NH2 | P_ASP_159  | OD1 | 2.897 |
| 2ZCK | P_ARG_185 | NH2 | P_ASP_159  | OD2 | 3.599 |
| 2ZCK | P_LYS_188 | NZ  | P_ASP_159  | OD2 | 3.306 |
| 2ZCK | P_LYS_231 | NZ  | P_GLU_129  | OE1 | 3.939 |
| 2ZCK | P_ARG_236 | NH2 | L_ASP_28   | OD1 | 3.496 |
| 2ZCK | P_LYS_240 | NZ  | P_ASP_241  | OD1 | 3.131 |
| 2ZCK | L_ARG_61  | NH1 | L_ASP_82   | OD1 | 3.643 |
| 2ZCK | L_ARG_61  | NH1 | L_ASP_82   | OD2 | 2.898 |
| 2ZCK | L_ARG_61  | NH2 | L_GLU_79   | OE1 | 3.648 |
| 2ZCK | L_ARG_61  | NH2 | L_GLU_81   | OE2 | 3.878 |
| 2ZCK | L_ARG_61  | NH2 | L_ASP_82   | OD1 | 3.492 |

|      |           |     |           |     |       |
|------|-----------|-----|-----------|-----|-------|
| 2ZCK | L_LYS_103 | NZ  | L_ASP_165 | OD1 | 3.500 |
| 2ZCK | L_LYS_183 | NZ  | L_GLU_187 | OE1 | 3.434 |
| 2ZCK | L_LYS_183 | NZ  | L_GLU_187 | OE2 | 3.899 |
| 2ZCK | L_ARG_188 | NH1 | L_GLU_185 | OE2 | 3.774 |
| 2ZCK | L_ARG_188 | NH2 | L_ASP_184 | OD1 | 3.893 |
| 2ZCK | L_HIS_189 | ND1 | L_GLU_185 | OE1 | 3.762 |
| 2ZCK | L_HIS_189 | ND1 | L_GLU_185 | OE2 | 3.555 |
| 2ZCK | H_ARG_38  | NH1 | H_GLU_46  | OE1 | 3.860 |
| 2ZCK | H_ARG_38  | NH1 | H_GLU_46  | OE2 | 3.777 |
| 2ZCK | H_ARG_38  | NH2 | H_ASP_86  | OD1 | 2.988 |
| 2ZCK | H_ARG_50  | NH2 | L_ASP_94  | OD1 | 3.095 |
| 2ZCK | H_ARG_50  | NH2 | L_ASP_94  | OD2 | 2.679 |
| 2ZCK | H_ARG_94  | NH2 | H_ASP_101 | OD1 | 3.492 |
| 2ZCK | H_ARG_94  | NH2 | H_ASP_101 | OD2 | 2.952 |
| 2ZCK | H_LYS_208 | NZ  | L_GLU_123 | OE2 | 2.731 |
| 2ZCK | H_ARG_213 | NH1 | H_ASP_214 | OD2 | 3.175 |
| 2ZCK | H_ARG_213 | NH2 | H_ASP_214 | OD2 | 2.814 |
| 2ZCL | P_HIS_57  | ND1 | P_ASP_102 | OD1 | 3.443 |
| 2ZCL | P_HIS_57  | ND1 | P_ASP_102 | OD2 | 2.832 |
| 2ZCL | P_HIS_70  | ND1 | P_GLU_77  | OE2 | 3.941 |
| 2ZCL | P_HIS_70  | NE2 | P_GLU_21  | OE2 | 3.315 |
| 2ZCL | P_LYS_175 | NZ  | P_ASP_98  | OD1 | 2.885 |
| 2ZCL | P_LYS_178 | NZ  | H_ASP_96  | OD1 | 3.272 |
| 2ZCL | P_LYS_178 | NZ  | H_ASP_96  | OD2 | 2.771 |
| 2ZCL | P_ARG_185 | NH1 | P_ASP_159 | OD1 | 3.520 |
| 2ZCL | P_ARG_185 | NH1 | P_ASP_159 | OD2 | 3.828 |
| 2ZCL | P_ARG_235 | NH2 | L_ASP_28  | OD1 | 3.392 |
| 2ZCL | P_LYS_239 | NZ  | P_ASP_240 | OD1 | 3.379 |
| 2ZCL | L_LYS_24  | NZ  | L_ASP_70  | OD1 | 3.131 |
| 2ZCL | L_LYS_24  | NZ  | L_ASP_70  | OD2 | 3.129 |
| 2ZCL | L_ARG_61  | NH1 | L_ASP_82  | OD2 | 2.822 |
| 2ZCL | L_ARG_61  | NH2 | L_GLU_79  | OE1 | 3.403 |
| 2ZCL | L_ARG_61  | NH2 | L_GLU_81  | OE2 | 3.290 |
| 2ZCL | L_ARG_61  | NH2 | L_ASP_82  | OD1 | 3.751 |
| 2ZCL | L_ARG_61  | NH2 | L_ASP_82  | OD2 | 3.541 |
| 2ZCL | L_LYS_103 | NZ  | L_ASP_165 | OD1 | 3.980 |
| 2ZCL | L_ARG_108 | NH1 | L_ASP_170 | OD2 | 3.834 |
| 2ZCL | L_HIS_189 | ND1 | L_GLU_185 | OE1 | 2.939 |
| 2ZCL | L_LYS_199 | NZ  | L_ASP_110 | OD2 | 3.830 |
| 2ZCL | L_ARG_211 | NH1 | L_GLU_187 | OE1 | 2.851 |
| 2ZCL | H_ARG_38  | NH2 | H_ASP_86  | OD2 | 3.902 |
| 2ZCL | H_ARG_50  | NH2 | L_ASP_94  | OD1 | 3.155 |
| 2ZCL | H_ARG_50  | NH2 | L_ASP_94  | OD2 | 2.864 |
| 2ZCL | H_LYS_64  | NZ  | H_GLU_61  | OE1 | 3.636 |
| 2ZCL | H_ARG_94  | NH2 | H_ASP_101 | OD1 | 3.425 |
| 2ZCL | H_ARG_94  | NH2 | H_ASP_101 | OD2 | 2.661 |
| 2ZNW | A_ARG_61  | NH1 | A_GLU_81  | OE2 | 3.724 |
| 2ZNW | A_ARG_61  | NH2 | A_GLU_81  | OE1 | 3.857 |
| 2ZNW | A_ARG_61  | NH2 | A_GLU_81  | OE2 | 2.689 |
| 2ZNW | A_ARG_61  | NH2 | A_ASP_82  | OD1 | 2.714 |
| 2ZNW | A_ARG_61  | NH2 | A_ASP_82  | OD2 | 3.434 |
| 2ZNW | A_LYS_103 | NZ  | A_GLU_105 | OE1 | 2.950 |
| 2ZNW | A_LYS_103 | NZ  | A_GLU_105 | OE2 | 3.174 |
| 2ZNW | A_ARG_160 | NH1 | A_ASP_211 | OD1 | 2.916 |
| 2ZNW | A_ARG_160 | NH2 | A_GLU_168 | OE1 | 2.840 |
| 2ZNW | A_ARG_160 | NH2 | A_ASP_211 | OD1 | 3.551 |
| 2ZNW | A_ARG_188 | NH1 | A_ASP_211 | OD1 | 3.826 |
| 2ZNW | A_ARG_188 | NH1 | A_ASP_211 | OD2 | 3.091 |

|      |           |     |           |     |       |
|------|-----------|-----|-----------|-----|-------|
| 2ZWN | A_ARG_188 | NH2 | A_ASP_211 | OD1 | 3.128 |
| 2ZWN | A_ARG_188 | NH2 | A_ASP_211 | OD2 | 3.623 |
| 2ZWN | A_LYS_197 | NZ  | A_ASP_194 | OD2 | 3.664 |
| 2ZWN | Y_LYS_1   | NZ  | Y_GLU_7   | OE2 | 2.868 |
| 2ZWN | Y_ARG_61  | NH2 | Y_ASP_48  | OD2 | 3.340 |
| 2ZWN | Y_LYS_97  | NZ  | A_ASP_154 | OD1 | 2.612 |
| 2ZWN | Y_LYS_97  | NZ  | A_ASP_154 | OD2 | 3.786 |
| 2ZWN | Y_LYS_97  | NZ  | A_ASP_221 | OD1 | 3.143 |
| 2ZWN | Y_LYS_97  | NZ  | A_ASP_221 | OD2 | 3.719 |
| 2ZWN | Y_LYS_116 | NZ  | B_ASP_203 | OD1 | 2.664 |
| 2ZWN | Y_ARG_125 | NH1 | Y_ASP_119 | OD2 | 2.994 |
| 2ZWN | Y_ARG_125 | NH2 | Y_ASP_119 | OD1 | 3.200 |
| 2ZWN | Y_ARG_125 | NH2 | Y_ASP_119 | OD2 | 3.148 |
| 2ZWN | B_LYS_39  | NZ  | B_GLU_81  | OE1 | 2.664 |
| 2ZWN | B_ARG_45  | NH2 | B_GLU_42  | OE1 | 3.967 |
| 2ZWN | B_ARG_61  | NH1 | B_GLU_79  | OE1 | 2.886 |
| 2ZWN | B_ARG_61  | NH1 | B_GLU_81  | OE2 | 3.684 |
| 2ZWN | B_ARG_61  | NH2 | B_GLU_79  | OE1 | 3.980 |
| 2ZWN | B_ARG_61  | NH2 | B_GLU_81  | OE2 | 2.740 |
| 2ZWN | B_ARG_61  | NH2 | B_ASP_82  | OD1 | 2.575 |
| 2ZWN | B_ARG_61  | NH2 | B_ASP_82  | OD2 | 3.124 |
| 2ZWN | B_LYS_103 | NZ  | B_GLU_105 | OE2 | 3.056 |
| 2ZWN | B_ARG_160 | NH1 | B_ASP_211 | OD1 | 2.739 |
| 2ZWN | B_ARG_160 | NH2 | B_GLU_168 | OE1 | 2.827 |
| 2ZWN | B_ARG_160 | NH2 | B_ASP_211 | OD1 | 3.579 |
| 2ZWN | B_ARG_188 | NH1 | B_ASP_211 | OD2 | 3.191 |
| 2ZWN | B_ARG_188 | NH2 | B_ASP_211 | OD1 | 3.246 |
| 2ZWN | B_ARG_188 | NH2 | B_ASP_211 | OD2 | 3.554 |
| 2ZWN | Z_LYS_1   | NZ  | Z_GLU_7   | OE2 | 2.784 |
| 2ZWN | Z_ARG_61  | NH1 | Z_ASP_48  | OD2 | 2.495 |
| 2ZWN | Z_ARG_61  | NH2 | Z_ASP_48  | OD2 | 3.711 |
| 2ZWN | Z_ARG_68  | NH2 | Z_ASP_66  | OD2 | 2.978 |
| 2ZWN | Z_LYS_97  | NZ  | B_ASP_154 | OD1 | 3.042 |
| 2ZWN | Z_LYS_97  | NZ  | B_ASP_221 | OD1 | 2.782 |
| 2ZWN | Z_LYS_97  | NZ  | B_ASP_221 | OD2 | 3.319 |
| 2ZWN | Z_LYS_116 | NZ  | A_ASP_203 | OD1 | 2.989 |
| 2ZWN | Z_ARG_125 | NH1 | Z_ASP_119 | OD2 | 3.101 |
| 2ZWN | Z_ARG_125 | NH2 | Z_ASP_119 | OD1 | 3.435 |
| 2ZWN | Z_ARG_125 | NH2 | Z_ASP_119 | OD2 | 3.343 |
| 2ZNX | A_ARG_61  | NH2 | A_GLU_81  | OE1 | 3.274 |
| 2ZNX | A_ARG_61  | NH2 | A_GLU_81  | OE2 | 3.380 |
| 2ZNX | A_ARG_61  | NH2 | A_ASP_82  | OD1 | 2.710 |
| 2ZNX | A_ARG_61  | NH2 | A_ASP_82  | OD2 | 3.576 |
| 2ZNX | A_ARG_160 | NH1 | A_ASP_211 | OD1 | 2.745 |
| 2ZNX | A_ARG_160 | NH2 | A_GLU_168 | OE1 | 2.794 |
| 2ZNX | A_ARG_160 | NH2 | A_ASP_211 | OD1 | 3.557 |
| 2ZNX | A_ARG_188 | NH1 | A_ASP_211 | OD1 | 3.903 |
| 2ZNX | A_ARG_188 | NH1 | A_ASP_211 | OD2 | 3.003 |
| 2ZNX | A_ARG_188 | NH2 | A_ASP_211 | OD1 | 3.102 |
| 2ZNX | A_ARG_188 | NH2 | A_ASP_211 | OD2 | 3.513 |
| 2ZNX | A_LYS_197 | NZ  | A_ASP_194 | OD2 | 3.759 |
| 2ZNX | Y_LYS_1   | NZ  | Y_GLU_7   | OE2 | 2.738 |
| 2ZNX | Y_ARG_61  | NH2 | Y_ASP_48  | OD2 | 3.990 |
| 2ZNX | Y_LYS_97  | NZ  | A_ASP_154 | OD1 | 2.701 |
| 2ZNX | Y_LYS_97  | NZ  | A_ASP_221 | OD1 | 2.716 |
| 2ZNX | Y_LYS_97  | NZ  | A_ASP_221 | OD2 | 3.355 |
| 2ZNX | Y_LYS_116 | NZ  | B_ASP_203 | OD1 | 3.871 |
| 2ZNX | Y_LYS_116 | NZ  | B_ASP_203 | OD2 | 2.956 |

|      |           |     |           |     |       |
|------|-----------|-----|-----------|-----|-------|
| 2ZNX | Y_ARG_125 | NH1 | Y_ASP_119 | OD2 | 3.017 |
| 2ZNX | Y_ARG_125 | NH2 | Y_ASP_119 | OD1 | 3.028 |
| 2ZNX | Y_ARG_125 | NH2 | Y_ASP_119 | OD2 | 3.017 |
| 2ZNX | B_LYS_39  | NZ  | B_GLU_81  | OE1 | 3.694 |
| 2ZNX | B_LYS_39  | NZ  | B_GLU_81  | OE2 | 3.627 |
| 2ZNX | B_ARG_61  | NH1 | B_GLU_79  | OE1 | 3.548 |
| 2ZNX | B_ARG_61  | NH1 | B_GLU_79  | OE2 | 3.265 |
| 2ZNX | B_ARG_61  | NH2 | B_GLU_81  | OE1 | 3.903 |
| 2ZNX | B_ARG_61  | NH2 | B_GLU_81  | OE2 | 3.625 |
| 2ZNX | B_ARG_61  | NH2 | B_ASP_82  | OD1 | 2.303 |
| 2ZNX | B_ARG_61  | NH2 | B_ASP_82  | OD2 | 3.001 |
| 2ZNX | B_LYS_103 | NZ  | B_GLU_105 | OE1 | 3.986 |
| 2ZNX | B_LYS_103 | NZ  | B_GLU_105 | OE2 | 2.781 |
| 2ZNX | B_LYS_135 | NZ  | Y_ASP_119 | OD2 | 3.744 |
| 2ZNX | B_ARG_160 | NH1 | B_ASP_211 | OD1 | 2.901 |
| 2ZNX | B_ARG_160 | NH2 | B_GLU_168 | OE1 | 2.918 |
| 2ZNX | B_ARG_160 | NH2 | B_ASP_211 | OD1 | 3.424 |
| 2ZNX | B_ARG_188 | NH1 | B_ASP_211 | OD1 | 3.668 |
| 2ZNX | B_ARG_188 | NH1 | B_ASP_211 | OD2 | 2.960 |
| 2ZNX | B_ARG_188 | NH2 | B_ASP_211 | OD1 | 2.965 |
| 2ZNX | B_ARG_188 | NH2 | B_ASP_211 | OD2 | 3.589 |
| 2ZNX | Z_LYS_1   | NZ  | Z_GLU_7   | OE2 | 2.717 |
| 2ZNX | Z_ARG_68  | NH2 | Z_ASP_66  | OD2 | 2.870 |
| 2ZNX | Z_LYS_97  | NZ  | B_ASP_154 | OD1 | 2.804 |
| 2ZNX | Z_LYS_97  | NZ  | B_ASP_221 | OD1 | 3.005 |
| 2ZNX | Z_LYS_97  | NZ  | B_ASP_221 | OD2 | 3.520 |
| 2ZNX | Z_LYS_116 | NZ  | A_ASP_203 | OD1 | 3.699 |
| 2ZNX | Z_LYS_116 | NZ  | A_ASP_203 | OD2 | 3.427 |
| 2ZNX | Z_ARG_125 | NH1 | Z_ASP_119 | OD2 | 3.079 |
| 2ZNX | Z_ARG_125 | NH2 | Z_ASP_119 | OD1 | 3.710 |
| 2ZNX | Z_ARG_125 | NH2 | Z_ASP_119 | OD2 | 3.679 |
| 2ZPK | L_ARG_61  | NH2 | L_GLU_81  | OE2 | 3.597 |
| 2ZPK | L_ARG_61  | NH2 | L_ASP_82  | OD1 | 2.750 |
| 2ZPK | L_ARG_61  | NH2 | L_ASP_82  | OD2 | 3.576 |
| 2ZPK | L_HIS_95  | NE2 | H_ASP_62  | OD1 | 3.977 |
| 2ZPK | L_LYS_111 | NZ  | L_GLU_199 | OE1 | 3.322 |
| 2ZPK | L_HIS_189 | ND1 | L_ASP_152 | OD2 | 2.821 |
| 2ZPK | H_LYS_64  | NZ  | H_GLU_61  | OE1 | 2.974 |
| 2ZPK | H_ARG_66  | NH1 | H_ASP_86  | OD1 | 3.749 |
| 2ZPK | H_ARG_66  | NH1 | H_ASP_86  | OD2 | 2.760 |
| 2ZPK | H_ARG_66  | NH2 | H_ASP_86  | OD1 | 2.842 |
| 2ZPK | H_ARG_66  | NH2 | H_ASP_86  | OD2 | 3.335 |
| 2ZPK | H_LYS_143 | NZ  | L_GLU_125 | OE2 | 2.882 |
| 2ZPK | H_LYS_208 | NZ  | L_GLU_124 | OE2 | 3.548 |
| 2ZPK | M_LYS_39  | NZ  | M_GLU_81  | OE2 | 3.913 |
| 2ZPK | M_HIS_42  | ND1 | M_GLU_38  | OE2 | 3.014 |
| 2ZPK | M_ARG_61  | NH2 | M_GLU_81  | OE1 | 3.031 |
| 2ZPK | M_ARG_61  | NH2 | M_ASP_82  | OD1 | 2.872 |
| 2ZPK | M_ARG_61  | NH2 | M_ASP_82  | OD2 | 3.561 |
| 2ZPK | I_LYS_46  | NZ  | I_ASP_62  | OD1 | 3.734 |
| 2ZPK | I_ARG_66  | NH1 | I_ASP_86  | OD1 | 3.902 |
| 2ZPK | I_ARG_66  | NH1 | I_ASP_86  | OD2 | 2.665 |
| 2ZPK | I_ARG_66  | NH2 | I_ASP_86  | OD1 | 2.915 |
| 2ZPK | I_ARG_66  | NH2 | I_ASP_86  | OD2 | 3.188 |
| 2ZPK | I_LYS_143 | NZ  | M_GLU_125 | OE2 | 2.672 |
| 2ZPK | I_LYS_208 | NZ  | M_GLU_124 | OE2 | 3.137 |
| 32C2 | A_ARG_24  | NH1 | A_ASP_74  | OD2 | 3.409 |
| 32C2 | A_ARG_65  | NH1 | A_GLU_83  | OE1 | 3.875 |

|      |           |     |           |     |       |
|------|-----------|-----|-----------|-----|-------|
| 32C2 | A_ARG.65  | NH1 | A_ASP.86  | OD1 | 3.841 |
| 32C2 | A_ARG.65  | NH1 | A_ASP.86  | OD2 | 3.487 |
| 32C2 | A_ARG.65  | NH2 | A_GLU.83  | OE1 | 2.370 |
| 32C2 | A_ARG.65  | NH2 | A_GLU.83  | OE2 | 3.913 |
| 32C2 | A_ARG.65  | NH2 | A_ASP.86  | OD1 | 3.622 |
| 32C2 | A_LYS.106 | NZ  | A_GLU.108 | OE2 | 3.990 |
| 32C2 | A_LYS.152 | NZ  | A_GLU.198 | OE1 | 2.795 |
| 32C2 | A_LYS.152 | NZ  | A_GLU.198 | OE2 | 3.245 |
| 32C2 | A_ARG.158 | NH2 | A_GLU.188 | OE2 | 2.691 |
| 32C2 | A_LYS.186 | NZ  | A_GLU.190 | OE1 | 3.548 |
| 32C2 | A_HIS.192 | NE2 | A_ASP.154 | OD2 | 3.916 |
| 32C2 | A_LYS.202 | NZ  | A_ASP.113 | OD1 | 3.644 |
| 32C2 | A_LYS.202 | NZ  | A_ASP.113 | OD2 | 3.444 |
| 32C2 | B_ARG.39  | NH1 | B_ASP.90  | OD1 | 2.671 |
| 32C2 | B_ARG.39  | NH2 | B_GLU.47  | OE1 | 3.125 |
| 32C2 | B_ARG.39  | NH2 | B_ASP.90  | OD1 | 3.482 |
| 32C2 | B_ARG.67  | NH1 | B_ASP.90  | OD1 | 3.556 |
| 32C2 | B_ARG.67  | NH1 | B_ASP.90  | OD2 | 3.694 |
| 32C2 | B_ARG.67  | NH2 | B_ASP.90  | OD1 | 3.933 |
| 32C2 | B_ARG.67  | NH2 | B_ASP.90  | OD2 | 2.676 |
| 32C2 | B_LYS.76  | NZ  | B_ASP.73  | OD1 | 3.680 |
| 32C2 | B_LYS.76  | NZ  | B_ASP.73  | OD2 | 2.879 |
| 32C2 | B_LYS.214 | NZ  | A_GLU.126 | OE1 | 3.056 |
| 32C2 | B_LYS.214 | NZ  | A_GLU.126 | OE2 | 3.702 |
| 3A67 | L_ARG.61  | NH2 | L_GLU.81  | OE2 | 2.941 |
| 3A67 | L_ARG.61  | NH2 | L_ASP.82  | OD1 | 2.851 |
| 3A67 | L_ARG.61  | NH2 | L_ASP.82  | OD2 | 3.509 |
| 3A67 | L_LYS.103 | NZ  | L_GLU.105 | OE2 | 3.056 |
| 3A67 | H_ARG.38  | NH1 | H_ASP.89  | OD1 | 2.872 |
| 3A67 | H_ARG.38  | NH2 | H_GLU.46  | OE1 | 2.908 |
| 3A67 | H_ARG.38  | NH2 | H_ASP.89  | OD1 | 3.548 |
| 3A67 | H_ARG.66  | NH1 | H_ASP.89  | OD1 | 3.735 |
| 3A67 | H_ARG.66  | NH1 | H_ASP.89  | OD2 | 3.043 |
| 3A67 | H_ARG.66  | NH2 | H_ASP.89  | OD1 | 2.999 |
| 3A67 | H_ARG.66  | NH2 | H_ASP.89  | OD2 | 3.634 |
| 3A67 | Y_LYS.1   | NZ  | Y_GLU.7   | OE2 | 3.083 |
| 3A67 | Y_ARG.61  | NH2 | Y_ASP.48  | OD2 | 3.340 |
| 3A67 | Y_ARG.68  | NH2 | Y_ASP.66  | OD2 | 3.751 |
| 3A67 | Y_LYS.96  | NZ  | L_ASP.31  | OD1 | 2.774 |
| 3A67 | Y_LYS.96  | NZ  | L_ASP.31  | OD2 | 3.727 |
| 3A67 | Y_LYS.97  | NZ  | H_ASP.32  | OD1 | 2.657 |
| 3A67 | Y_LYS.97  | NZ  | H_ASP.99  | OD1 | 3.291 |
| 3A67 | Y_LYS.97  | NZ  | H_ASP.99  | OD2 | 2.885 |
| 3A67 | Y_ARG.125 | NH1 | Y_ASP.119 | OD2 | 2.827 |
| 3A67 | Y_ARG.125 | NH2 | Y_ASP.119 | OD1 | 3.106 |
| 3A67 | Y_ARG.125 | NH2 | Y_ASP.119 | OD2 | 3.044 |
| 3A6B | L_ARG.61  | NH2 | L_GLU.81  | OE2 | 2.699 |
| 3A6B | L_ARG.61  | NH2 | L_ASP.82  | OD1 | 2.827 |
| 3A6B | L_ARG.61  | NH2 | L_ASP.82  | OD2 | 3.489 |
| 3A6B | L_LYS.103 | NZ  | L_GLU.105 | OE2 | 2.854 |
| 3A6B | H_ARG.38  | NH1 | H_ASP.89  | OD1 | 2.881 |
| 3A6B | H_ARG.38  | NH2 | H_GLU.46  | OE1 | 2.870 |
| 3A6B | H_ARG.38  | NH2 | H_ASP.89  | OD1 | 3.597 |
| 3A6B | H_ARG.66  | NH1 | H_ASP.89  | OD1 | 3.690 |
| 3A6B | H_ARG.66  | NH1 | H_ASP.89  | OD2 | 3.008 |
| 3A6B | H_ARG.66  | NH2 | H_ASP.89  | OD1 | 2.915 |
| 3A6B | H_ARG.66  | NH2 | H_ASP.89  | OD2 | 3.568 |
| 3A6B | Y_LYS.1   | NZ  | Y_GLU.7   | OE2 | 3.049 |

|      |           |     |           |     |       |
|------|-----------|-----|-----------|-----|-------|
| 3A6B | Y_ARG_61  | NH1 | Y_ASP_48  | OD1 | 3.308 |
| 3A6B | Y_ARG_61  | NH1 | Y_ASP_48  | OD2 | 2.807 |
| 3A6B | Y_ARG_61  | NH2 | Y_ASP_48  | OD2 | 3.969 |
| 3A6B | Y_LYS_96  | NZ  | L_ASP_32  | OD1 | 2.734 |
| 3A6B | Y_LYS_97  | NZ  | H_ASP_32  | OD1 | 2.700 |
| 3A6B | Y_LYS_97  | NZ  | H_ASP_32  | OD2 | 3.941 |
| 3A6B | Y_LYS_97  | NZ  | H_ASP_99  | OD1 | 2.956 |
| 3A6B | Y_LYS_97  | NZ  | H_ASP_99  | OD2 | 3.259 |
| 3A6B | Y_ARG_125 | NH1 | Y_ASP_119 | OD2 | 3.668 |
| 3A6B | Y_ARG_125 | NH2 | Y_ASP_119 | OD1 | 3.613 |
| 3A6B | Y_ARG_125 | NH2 | Y_ASP_119 | OD2 | 3.218 |
| 3A6C | L_ARG_61  | NH1 | L_GLU_81  | OE2 | 3.920 |
| 3A6C | L_ARG_61  | NH2 | L_GLU_81  | OE2 | 2.707 |
| 3A6C | L_ARG_61  | NH2 | L_ASP_82  | OD1 | 2.812 |
| 3A6C | L_ARG_61  | NH2 | L_ASP_82  | OD2 | 3.543 |
| 3A6C | L_LYS_103 | NZ  | L_GLU_105 | OE2 | 3.380 |
| 3A6C | H_ARG_38  | NH1 | H_ASP_89  | OD1 | 2.907 |
| 3A6C | H_ARG_38  | NH2 | H_GLU_46  | OE1 | 2.827 |
| 3A6C | H_ARG_38  | NH2 | H_ASP_89  | OD1 | 3.601 |
| 3A6C | H_ARG_66  | NH1 | H_ASP_89  | OD1 | 3.604 |
| 3A6C | H_ARG_66  | NH1 | H_ASP_89  | OD2 | 2.873 |
| 3A6C | H_ARG_66  | NH2 | H_ASP_89  | OD1 | 2.870 |
| 3A6C | H_ARG_66  | NH2 | H_ASP_89  | OD2 | 3.526 |
| 3A6C | Y_LYS_1   | NZ  | Y_GLU_7   | OE1 | 3.880 |
| 3A6C | Y_LYS_1   | NZ  | Y_GLU_7   | OE2 | 2.870 |
| 3A6C | Y_ARG_61  | NH1 | Y_ASP_48  | OD2 | 2.954 |
| 3A6C | Y_ARG_61  | NH2 | Y_ASP_48  | OD2 | 3.848 |
| 3A6C | Y_ARG_68  | NH2 | Y_ASP_66  | OD2 | 3.805 |
| 3A6C | Y_LYS_97  | NZ  | H_ASP_32  | OD1 | 2.672 |
| 3A6C | Y_LYS_97  | NZ  | H_ASP_32  | OD2 | 3.916 |
| 3A6C | Y_LYS_97  | NZ  | H_ASP_99  | OD1 | 2.965 |
| 3A6C | Y_LYS_97  | NZ  | H_ASP_99  | OD2 | 3.291 |
| 3A6C | Y_ARG_125 | NH1 | Y_ASP_119 | OD2 | 3.478 |
| 3A6C | Y_ARG_125 | NH2 | Y_ASP_119 | OD1 | 3.773 |
| 3A6C | Y_ARG_125 | NH2 | Y_ASP_119 | OD2 | 3.566 |
| 3AUV | A_ARG_72  | NH2 | A_GLU_92  | OE2 | 3.439 |
| 3AUV | A_ARG_72  | NH2 | A_ASP_93  | OD1 | 2.723 |
| 3AUV | A_ARG_72  | NH2 | A_ASP_93  | OD2 | 3.631 |
| 3AUV | A_LYS_114 | NZ  | A_GLU_116 | OE1 | 3.774 |
| 3AUV | A_LYS_114 | NZ  | A_GLU_116 | OE2 | 3.679 |
| 3AUV | A_ARG_172 | NH1 | A_ASP_224 | OD2 | 2.750 |
| 3AUV | A_ARG_172 | NH2 | A_GLU_180 | OE1 | 2.793 |
| 3AUV | A_ARG_172 | NH2 | A_GLU_180 | OE2 | 3.594 |
| 3AUV | A_ARG_172 | NH2 | A_ASP_224 | OD2 | 3.992 |
| 3AUV | A_ARG_201 | NH1 | A_ASP_224 | OD1 | 2.699 |
| 3AUV | A_ARG_201 | NH1 | A_ASP_224 | OD2 | 3.899 |
| 3AUV | A_ARG_201 | NH2 | A_ASP_224 | OD1 | 3.500 |
| 3AUV | A_ARG_201 | NH2 | A_ASP_224 | OD2 | 3.246 |
| 3AUV | A_ARG_232 | NH2 | A_ASP_242 | OD1 | 2.869 |
| 3AUV | A_ARG_232 | NH2 | A_ASP_242 | OD2 | 3.766 |
| 3AUV | B_ARG_72  | NH2 | B_GLU_92  | OE2 | 3.579 |
| 3AUV | B_ARG_72  | NH2 | B_ASP_93  | OD1 | 2.590 |
| 3AUV | B_ARG_72  | NH2 | B_ASP_93  | OD2 | 3.569 |
| 3AUV | B_LYS_114 | NZ  | B_GLU_116 | OE1 | 3.722 |
| 3AUV | B_LYS_114 | NZ  | B_GLU_116 | OE2 | 3.387 |
| 3AUV | B_ARG_172 | NH1 | B_ASP_224 | OD2 | 2.806 |
| 3AUV | B_ARG_172 | NH2 | B_GLU_180 | OE1 | 2.717 |
| 3AUV | B_ARG_172 | NH2 | B_GLU_180 | OE2 | 3.567 |

|      |           |     |           |     |       |
|------|-----------|-----|-----------|-----|-------|
| 3AUV | B_ARG_201 | NH1 | B_ASP_224 | OD1 | 2.684 |
| 3AUV | B_ARG_201 | NH1 | B_ASP_224 | OD2 | 3.823 |
| 3AUV | B_ARG_201 | NH2 | B_ASP_224 | OD1 | 3.593 |
| 3AUV | B_ARG_201 | NH2 | B_ASP_224 | OD2 | 3.291 |
| 3AUV | B_LYS_210 | NZ  | B_ASP_207 | OD1 | 3.963 |
| 3AUV | B_ARG_232 | NH2 | B_ASP_242 | OD1 | 2.862 |
| 3AUV | B_ARG_232 | NH2 | B_ASP_242 | OD2 | 3.702 |
| 3AUV | C_ARG_72  | NH2 | C_GLU_92  | OE2 | 3.470 |
| 3AUV | C_ARG_72  | NH2 | C_ASP_93  | OD1 | 2.695 |
| 3AUV | C_ARG_72  | NH2 | C_ASP_93  | OD2 | 3.642 |
| 3AUV | C_LYS_114 | NZ  | C_GLU_116 | OE1 | 3.676 |
| 3AUV | C_LYS_114 | NZ  | C_GLU_116 | OE2 | 3.581 |
| 3AUV | C_ARG_172 | NH1 | C_ASP_224 | OD2 | 2.837 |
| 3AUV | C_ARG_172 | NH2 | C_GLU_180 | OE1 | 2.666 |
| 3AUV | C_ARG_172 | NH2 | C_GLU_180 | OE2 | 3.575 |
| 3AUV | C_ARG_201 | NH1 | C_ASP_224 | OD1 | 2.642 |
| 3AUV | C_ARG_201 | NH1 | C_ASP_224 | OD2 | 3.881 |
| 3AUV | C_ARG_201 | NH2 | C_ASP_224 | OD1 | 3.488 |
| 3AUV | C_ARG_201 | NH2 | C_ASP_224 | OD2 | 3.269 |
| 3AUV | C_ARG_232 | NH2 | C_ASP_242 | OD1 | 2.909 |
| 3AUV | C_ARG_232 | NH2 | C_ASP_242 | OD2 | 3.643 |
| 3AUV | D_ARG_72  | NH2 | D_GLU_92  | OE2 | 3.526 |
| 3AUV | D_ARG_72  | NH2 | D_ASP_93  | OD1 | 2.640 |
| 3AUV | D_ARG_72  | NH2 | D_ASP_93  | OD2 | 3.608 |
| 3AUV | D_LYS_114 | NZ  | D_GLU_116 | OE1 | 3.727 |
| 3AUV | D_LYS_114 | NZ  | D_GLU_116 | OE2 | 3.600 |
| 3AUV | D_ARG_172 | NH1 | D_ASP_224 | OD2 | 2.810 |
| 3AUV | D_ARG_172 | NH2 | D_GLU_180 | OE1 | 2.707 |
| 3AUV | D_ARG_172 | NH2 | D_GLU_180 | OE2 | 3.528 |
| 3AUV | D_ARG_201 | NH1 | D_ASP_224 | OD1 | 2.734 |
| 3AUV | D_ARG_201 | NH1 | D_ASP_224 | OD2 | 3.954 |
| 3AUV | D_ARG_201 | NH2 | D_ASP_224 | OD1 | 3.560 |
| 3AUV | D_ARG_201 | NH2 | D_ASP_224 | OD2 | 3.357 |
| 3AUV | D_ARG_232 | NH2 | D_ASP_242 | OD1 | 2.882 |
| 3AUV | D_ARG_232 | NH2 | D_ASP_242 | OD2 | 3.743 |
| 3AUV | E_ARG_72  | NH2 | E_GLU_92  | OE2 | 3.531 |
| 3AUV | E_ARG_72  | NH2 | E_ASP_93  | OD1 | 2.643 |
| 3AUV | E_ARG_72  | NH2 | E_ASP_93  | OD2 | 3.543 |
| 3AUV | E_LYS_114 | NZ  | E_GLU_116 | OE1 | 3.794 |
| 3AUV | E_LYS_114 | NZ  | E_GLU_116 | OE2 | 3.627 |
| 3AUV | E_ARG_172 | NH1 | E_ASP_224 | OD2 | 2.874 |
| 3AUV | E_ARG_172 | NH2 | E_GLU_180 | OE1 | 2.698 |
| 3AUV | E_ARG_172 | NH2 | E_GLU_180 | OE2 | 3.466 |
| 3AUV | E_ARG_201 | NH1 | E_ASP_224 | OD1 | 2.747 |
| 3AUV | E_ARG_201 | NH1 | E_ASP_224 | OD2 | 3.871 |
| 3AUV | E_ARG_201 | NH2 | E_ASP_224 | OD1 | 3.622 |
| 3AUV | E_ARG_201 | NH2 | E_ASP_224 | OD2 | 3.262 |
| 3AUV | E_ARG_232 | NH2 | E_ASP_242 | OD1 | 2.876 |
| 3AUV | E_ARG_232 | NH2 | E_ASP_242 | OD2 | 3.697 |
| 3AUV | F_ARG_72  | NH2 | F_GLU_92  | OE2 | 3.450 |
| 3AUV | F_ARG_72  | NH2 | F_ASP_93  | OD1 | 2.646 |
| 3AUV | F_ARG_72  | NH2 | F_ASP_93  | OD2 | 3.561 |
| 3AUV | F_LYS_114 | NZ  | F_GLU_116 | OE1 | 3.643 |
| 3AUV | F_LYS_114 | NZ  | F_GLU_116 | OE2 | 3.465 |
| 3AUV | F_ARG_172 | NH1 | F_ASP_224 | OD2 | 2.862 |
| 3AUV | F_ARG_172 | NH2 | F_GLU_180 | OE1 | 2.639 |
| 3AUV | F_ARG_172 | NH2 | F_GLU_180 | OE2 | 3.493 |
| 3AUV | F_ARG_201 | NH1 | F_ASP_224 | OD1 | 2.716 |

|      |           |     |           |     |       |
|------|-----------|-----|-----------|-----|-------|
| 3AUV | F_ARG_201 | NH2 | F_ASP_224 | OD1 | 3.519 |
| 3AUV | F_ARG_201 | NH2 | F_ASP_224 | OD2 | 3.349 |
| 3AUV | F_LYS_210 | NZ  | F_ASP_207 | OD1 | 3.959 |
| 3AUV | F_ARG_232 | NH2 | F_ASP_242 | OD1 | 2.985 |
| 3AUV | F_ARG_232 | NH2 | F_ASP_242 | OD2 | 3.837 |
| 3B9K | L_ARG_61  | NH1 | L_GLU_81  | OE2 | 3.453 |
| 3B9K | L_ARG_61  | NH1 | L_ASP_82  | OD1 | 2.335 |
| 3B9K | L_ARG_61  | NH1 | L_ASP_82  | OD2 | 3.046 |
| 3B9K | L_ARG_61  | NH2 | L_GLU_81  | OE2 | 2.771 |
| 3B9K | L_LYS_149 | NZ  | L_GLU_195 | OE1 | 3.690 |
| 3B9K | L_LYS_149 | NZ  | L_GLU_195 | OE2 | 2.757 |
| 3B9K | L_HIS_189 | ND1 | L_ASP_151 | OD2 | 2.589 |
| 3B9K | L_LYS_199 | NZ  | L_ASP_110 | OD1 | 3.618 |
| 3B9K | H_ARG_38  | NH1 | H_ASP_86  | OD1 | 2.944 |
| 3B9K | H_ARG_38  | NH2 | H_GLU_46  | OE1 | 3.373 |
| 3B9K | H_ARG_38  | NH2 | H_ASP_86  | OD1 | 3.659 |
| 3B9K | H_ARG_66  | NH1 | H_ASP_86  | OD1 | 3.550 |
| 3B9K | H_ARG_66  | NH2 | H_ASP_86  | OD1 | 3.185 |
| 3B9K | H_ARG_66  | NH2 | H_ASP_86  | OD2 | 2.639 |
| 3B9K | H_HIS_172 | NE2 | H_ASP_167 | OD1 | 3.568 |
| 3B9K | H_LYS_221 | NZ  | L_GLU_123 | OE1 | 2.886 |
| 3B9K | A_ARG_8   | NH1 | A_GLU_6   | OE2 | 3.916 |
| 3B9K | A_LYS_13  | NZ  | B_ASP_42  | OD2 | 3.894 |
| 3B9K | B_LYS_17  | NZ  | B_GLU_72  | OE1 | 3.264 |
| 3B9K | B_LYS_27  | NZ  | H_ASP_32  | OD1 | 2.409 |
| 3B9K | B_ARG_35  | NH2 | B_ASP_92  | OD2 | 2.954 |
| 3B9K | B_ARG_37  | NH1 | B_ASP_39  | OD1 | 3.890 |
| 3B9K | B_ARG_37  | NH2 | B_GLU_46  | OE1 | 3.384 |
| 3B9K | B_ARG_37  | NH2 | B_GLU_46  | OE2 | 3.762 |
| 3B9K | B_ARG_37  | NH2 | B_ASP_64  | OD1 | 3.954 |
| 3B9K | B_ARG_37  | NH2 | B_ASP_64  | OD2 | 3.329 |
| 3B9K | B_LYS_43  | NZ  | B_GLU_36  | OE2 | 3.566 |
| 3B9K | B_ARG_77  | NH1 | B_GLU_21  | OE2 | 3.466 |
| 3B9K | B_ARG_77  | NH2 | L_ASP_92  | OD1 | 3.184 |
| 3B9K | B_ARG_77  | NH2 | B_GLU_21  | OE2 | 3.014 |
| 3B9K | B_ARG_78  | NH2 | L_ASP_92  | OD1 | 2.834 |
| 3B9K | B_LYS_103 | NZ  | A_ASP_66  | OD1 | 3.058 |
| 3B9K | C_ARG_    | NH1 | C_GLU_81  | OE2 | 3.400 |
| 3B9K | C_ARG_    | NH1 | C_ASP_82  | OD1 | 2.519 |
| 3B9K | C_ARG_    | NH1 | C_ASP_    | OD2 | 2.958 |
| 3B9K | C_ARG_    | NH2 | C_GLU_81  | OE2 | 2.927 |
| 3B9K | C_LYS_149 | NZ  | C_GLU_195 | OE2 | 3.057 |
| 3B9K | C_LYS_183 | NZ  | C_GLU_187 | OE1 | 2.738 |
| 3B9K | C_HIS_189 | ND1 | C_ASP_151 | OD1 | 3.967 |
| 3B9K | C_HIS_189 | ND1 | C_ASP_151 | OD2 | 2.217 |
| 3B9K | C_LYS_    | NZ  | C_ASP_    | OD1 | 3.537 |
| 3B9K | C_LYS_    | NZ  | C_ASP_    | OD2 | 2.778 |
| 3B9K | D_ARG_38  | NH1 | D_ASP_86  | OD1 | 2.985 |
| 3B9K | D_ARG_38  | NH2 | D_GLU_46  | OE1 | 3.027 |
| 3B9K | D_ARG_38  | NH2 | D_ASP_86  | OD1 | 3.686 |
| 3B9K | D_ARG_66  | NH1 | D_ASP_86  | OD1 | 3.146 |
| 3B9K | D_ARG_66  | NH1 | D_ASP_86  | OD2 | 3.512 |
| 3B9K | D_ARG_66  | NH2 | D_ASP_86  | OD1 | 3.576 |
| 3B9K | D_ARG_66  | NH2 | D_ASP_86  | OD2 | 2.412 |
| 3B9K | D_ARG_96  | NH1 | D_GLU_97  | OE2 | 2.918 |
| 3B9K | D_ARG_96  | NH2 | D_GLU_97  | OE2 | 3.934 |
| 3B9K | D_HIS_172 | NE2 | D_ASP_167 | OD1 | 2.867 |
| 3B9K | D_LYS_221 | NZ  | C_GLU_123 | OE1 | 3.178 |



|      |           |     |           |     |       |
|------|-----------|-----|-----------|-----|-------|
| 3B9K | E_ARG_8   | NH1 | E_GLU_27  | OE1 | 3.719 |
| 3B9K | E_ARG_8   | NH2 | E_GLU_27  | OE1 | 3.635 |
| 3B9K | E_LYS_    | NZ  | E_ASP_23  | OD1 | 3.889 |
| 3B9K | F_LYS_27  | NZ  | D_ASP_32  | OD1 | 2.318 |
| 3B9K | F_ARG_35  | NH2 | F_ASP_39  | OD2 | 3.634 |
| 3B9K | F_ARG_35  | NH2 | F_ASP_92  | OD2 | 2.801 |
| 3B9K | F_ARG_37  | NH1 | F_ASP_39  | OD2 | 3.691 |
| 3B9K | F_ARG_37  | NH2 | F_GLU_46  | OE1 | 3.350 |
| 3B9K | F_ARG_77  | NH1 | F_GLU_21  | OE2 | 3.321 |
| 3B9K | F_ARG_77  | NH2 | C_ASP_92  | OD1 | 2.984 |
| 3B9K | F_ARG_77  | NH2 | F_GLU_21  | OE2 | 3.185 |
| 3B9K | F_ARG_78  | NH2 | C_ASP_92  | OD1 | 3.141 |
| 3B9K | F_ARG_78  | NH2 | C_ASP_92  | OD2 | 3.951 |
| 3B9K | F_LYS_103 | NZ  | E_ASP_    | OD1 | 3.044 |
| 3BDY | H_ARG_38  | NH1 | H_ASP_86  | OD1 | 2.999 |
| 3BDY | H_ARG_38  | NH2 | H_GLU_46  | OE1 | 2.808 |
| 3BDY | H_ARG_38  | NH2 | H_GLU_46  | OE2 | 3.622 |
| 3BDY | H_ARG_66  | NH1 | H_ASP_86  | OD1 | 3.951 |
| 3BDY | H_ARG_66  | NH1 | H_ASP_86  | OD2 | 3.006 |
| 3BDY | H_ARG_66  | NH2 | H_ASP_86  | OD1 | 3.023 |
| 3BDY | H_ARG_66  | NH2 | H_ASP_86  | OD2 | 3.512 |
| 3BDY | H_ARG_94  | NH2 | H_ASP_103 | OD1 | 3.777 |
| 3BDY | H_ARG_94  | NH2 | H_ASP_103 | OD2 | 3.008 |
| 3BDY | H_LYS_145 | NZ  | H_ASP_146 | OD1 | 3.125 |
| 3BDY | H_LYS_145 | NZ  | H_ASP_146 | OD2 | 3.665 |
| 3BDY | H_LYS_211 | NZ  | L_GLU_123 | OE2 | 2.706 |
| 3BDY | L_ARG_24  | NH1 | L_ASP_70  | OD1 | 2.932 |
| 3BDY | L_ARG_24  | NH1 | L_ASP_70  | OD2 | 3.729 |
| 3BDY | L_ARG_27D | NH2 | L_ASP_70  | OD2 | 3.711 |
| 3BDY | L_ARG_61  | NH2 | L_GLU_81  | OE1 | 3.501 |
| 3BDY | L_ARG_61  | NH2 | L_ASP_82  | OD1 | 2.848 |
| 3BDY | L_ARG_61  | NH2 | L_ASP_82  | OD2 | 3.523 |
| 3BDY | L_HIS_189 | ND1 | L_ASP_151 | OD2 | 2.958 |
| 3BDY | V_ARG_56  | NH1 | V_GLU_38  | OE1 | 3.008 |
| 3BDY | V_ARG_56  | NH1 | V_GLU_38  | OE2 | 3.618 |
| 3BDY | V_ARG_56  | NH2 | V_GLU_38  | OE1 | 3.690 |
| 3BDY | V_ARG_82  | NH2 | V_GLU_42  | OE1 | 3.019 |
| 3BDY | V_ARG_82  | NH2 | V_GLU_42  | OE2 | 3.920 |
| 3BDY | V_LYS_84  | NZ  | V_GLU_44  | OE2 | 3.490 |
| 3BDY | V_LYS_    | NZ  | V_GLU_    | OE1 | 2.740 |
| 3BDY | V_ARG_    | NH1 | V_GLU_    | OE1 | 3.312 |
| 3BDY | V_ARG_    | NH1 | V_GLU_    | OE2 | 3.557 |
| 3BE1 | A_ARG_25  | NH2 | A_ASP_22  | OD1 | 3.635 |
| 3BE1 | A_ARG_25  | NH2 | A_ASP_22  | OD2 | 3.334 |
| 3BE1 | A_HIS_66  | NE2 | A_ASP_96  | OD2 | 3.628 |
| 3BE1 | A_ARG_81  | NH2 | A_GLU_57  | OE1 | 3.307 |
| 3BE1 | A_ARG_121 | NH1 | A_ASP_189 | OD1 | 2.843 |
| 3BE1 | A_ARG_121 | NH1 | A_ASP_189 | OD2 | 3.507 |
| 3BE1 | A_ARG_135 | NH2 | A_ASP_96  | OD1 | 3.481 |
| 3BE1 | A_ARG_135 | NH2 | A_ASP_96  | OD2 | 3.295 |
| 3BE1 | A_ARG_166 | NH1 | A_ASP_143 | OD2 | 3.604 |
| 3BE1 | A_ARG_166 | NH2 | A_ASP_143 | OD1 | 3.395 |
| 3BE1 | A_ARG_166 | NH2 | A_ASP_143 | OD2 | 3.597 |
| 3BE1 | A_HIS_171 | ND1 | A_GLU_185 | OE1 | 2.686 |
| 3BE1 | A_ARG_204 | NH1 | A_ASP_149 | OD2 | 3.810 |
| 3BE1 | A_ARG_204 | NH2 | A_GLU_125 | OE1 | 3.119 |
| 3BE1 | A_ARG_204 | NH2 | A_GLU_125 | OE2 | 3.480 |
| 3BE1 | A_HIS_215 | ND1 | A_GLU_216 | OE2 | 3.902 |

|      |           |     |           |     |       |
|------|-----------|-----|-----------|-----|-------|
| 3BE1 | A_HIS_238 | ND1 | A_GLU_243 | OE1 | 2.848 |
| 3BE1 | A_HIS_238 | ND1 | A_GLU_243 | OE2 | 3.970 |
| 3BE1 | A_ARG_308 | NH2 | A_ASP_285 | OD1 | 3.913 |
| 3BE1 | A_HIS_327 | NE2 | A_GLU_341 | OE2 | 3.469 |
| 3BE1 | A_ARG_332 | NH2 | A_GLU_357 | OE2 | 2.835 |
| 3BE1 | A_LYS_346 | NZ  | A_GLU_382 | OE1 | 3.395 |
| 3BE1 | A_LYS_346 | NZ  | A_GLU_382 | OE2 | 3.325 |
| 3BE1 | A_LYS_347 | NZ  | A_GLU_299 | OE1 | 3.844 |
| 3BE1 | A_LYS_347 | NZ  | A_GLU_383 | OE1 | 2.990 |
| 3BE1 | A_LYS_347 | NZ  | A_GLU_383 | OE2 | 3.026 |
| 3BE1 | A_ARG_410 | NH1 | A_GLU_438 | OE2 | 3.687 |
| 3BE1 | A_ARG_410 | NH2 | A_GLU_383 | OE1 | 3.367 |
| 3BE1 | A_ARG_410 | NH2 | A_GLU_383 | OE2 | 3.274 |
| 3BE1 | A_ARG_412 | NH1 | A_GLU_299 | OE1 | 3.591 |
| 3BE1 | A_ARG_412 | NH1 | A_GLU_299 | OE2 | 3.484 |
| 3BE1 | A_ARG_437 | NH1 | A_GLU_438 | OE1 | 3.301 |
| 3BE1 | A_ARG_465 | NH2 | A_GLU_438 | OE1 | 3.503 |
| 3BE1 | A_ARG_477 | NH1 | A_GLU_485 | OE1 | 3.451 |
| 3BE1 | A_ARG_477 | NH2 | A_GLU_481 | OE1 | 3.986 |
| 3BE1 | A_ARG_477 | NH2 | A_GLU_485 | OE1 | 3.615 |
| 3BE1 | A_ARG_477 | NH2 | A_GLU_485 | OE2 | 3.180 |
| 3BE1 | A_ARG_514 | NH2 | A_GLU_531 | OE1 | 3.183 |
| 3BE1 | A_ARG_523 | NH1 | A_GLU_531 | OE1 | 3.371 |
| 3BE1 | A_ARG_523 | NH1 | A_GLU_531 | OE2 | 3.636 |
| 3BE1 | A_LYS_593 | NZ  | A_ASP_570 | OD1 | 2.769 |
| 3BE1 | A_LYS_593 | NZ  | A_ASP_570 | OD2 | 2.849 |
| 3BE1 | H_ARG_38  | NH1 | H_ASP_86  | OD1 | 3.053 |
| 3BE1 | H_ARG_38  | NH2 | H_GLU_46  | OE1 | 3.297 |
| 3BE1 | H_ARG_38  | NH2 | H_ASP_86  | OD1 | 3.486 |
| 3BE1 | H_ARG_50  | NH1 | A_ASP_560 | OD2 | 3.215 |
| 3BE1 | H_ARG_50  | NH2 | A_GLU_558 | OE1 | 3.092 |
| 3BE1 | H_ARG_50  | NH2 | A_GLU_558 | OE2 | 3.263 |
| 3BE1 | H_ARG_50  | NH2 | A_ASP_560 | OD1 | 3.492 |
| 3BE1 | H_ARG_50  | NH2 | A_ASP_560 | OD2 | 3.175 |
| 3BE1 | H_ARG_66  | NH1 | H_ASP_86  | OD2 | 3.082 |
| 3BE1 | H_ARG_66  | NH2 | H_ASP_86  | OD1 | 3.252 |
| 3BE1 | H_ARG_66  | NH2 | H_ASP_86  | OD2 | 3.284 |
| 3BE1 | H_ARG_94  | NH2 | H_ASP_103 | OD1 | 3.969 |
| 3BE1 | H_ARG_94  | NH2 | H_ASP_103 | OD2 | 3.289 |
| 3BE1 | L_ARG_24  | NH1 | L_ASP_70  | OD1 | 3.044 |
| 3BE1 | L_ARG_61  | NH2 | L_GLU_81  | OE1 | 3.206 |
| 3BE1 | L_ARG_61  | NH2 | L_ASP_82  | OD1 | 2.979 |
| 3BE1 | L_ARG_61  | NH2 | L_ASP_82  | OD2 | 3.663 |
| 3BE1 | L_LYS_149 | NZ  | L_GLU_195 | OE2 | 2.739 |
| 3BE1 | L_LYS_183 | NZ  | L_GLU_187 | OE2 | 3.540 |
| 3BE1 | L_LYS_188 | NZ  | L_ASP_185 | OD1 | 3.780 |
| 3BE1 | L_HIS_189 | ND1 | L_ASP_151 | OD1 | 3.324 |
| 3BE1 | L_HIS_189 | ND1 | L_ASP_151 | OD2 | 2.626 |
| 3BE1 | L_ARG_211 | NH2 | L_GLU_187 | OE1 | 3.516 |
| 3BGF | S_ARG_342 | NH2 | S_ASP_385 | OD1 | 3.676 |
| 3BGF | S_ARG_342 | NH2 | S_ASP_385 | OD2 | 3.162 |
| 3BGF | S_ARG_426 | NH1 | H_ASP_56  | OD1 | 3.504 |
| 3BGF | S_ARG_426 | NH1 | H_ASP_56  | OD2 | 2.403 |
| 3BGF | S_LYS_439 | NZ  | S_ASP_480 | OD1 | 3.797 |
| 3BGF | S_LYS_439 | NZ  | A_ASP_480 | OD2 | 3.161 |
| 3BGF | S_ARG_441 | NH2 | S_ASP_454 | OD1 | 2.963 |
| 3BGF | S_ARG_444 | NH2 | S_GLU_452 | OE2 | 3.267 |
| 3BGF | S_ARG_444 | NH2 | S_ASP_454 | OD2 | 3.815 |

|      |           |     |           |     |       |
|------|-----------|-----|-----------|-----|-------|
| 3BGF | S_LYS_447 | NZ  | S_ASP_407 | OD1 | 3.987 |
| 3BGF | S_LYS_447 | NZ  | S_ASP_407 | OD2 | 3.876 |
| 3BGF | S_ARG_449 | NH2 | S_GLU_452 | OE1 | 3.535 |
| 3BGF | S_ARG_495 | NH2 | S_ASP_429 | OD1 | 3.362 |
| 3BGF | S_ARG_495 | NH2 | S_ASP_429 | OD2 | 3.615 |
| 3BGF | A_ARG_342 | NH2 | A_ASP_385 | OD1 | 3.423 |
| 3BGF | A_ARG_342 | NH2 | A_ASP_385 | OD2 | 2.961 |
| 3BGF | A_LYS_390 | NZ  | A_ASP_393 | OD1 | 3.583 |
| 3BGF | A_LYS_390 | NZ  | A_ASP_393 | OD2 | 3.966 |
| 3BGF | A_LYS_439 | NZ  | S_ASP_480 | OD2 | 2.520 |
| 3BGF | A_LYS_439 | NZ  | A_ASP_480 | OD1 | 3.180 |
| 3BGF | A_ARG_441 | NH2 | A_ASP_454 | OD1 | 3.440 |
| 3BGF | A_ARG_444 | NH2 | A_GLU_452 | OE2 | 3.371 |
| 3BGF | A_ARG_444 | NH2 | A_ASP_454 | OD2 | 3.730 |
| 3BGF | A_LYS_447 | NZ  | A_ASP_407 | OD1 | 2.877 |
| 3BGF | A_LYS_447 | NZ  | A_ASP_407 | OD2 | 2.805 |
| 3BGF | A_ARG_495 | NH2 | A_ASP_429 | OD1 | 3.108 |
| 3BGF | A_ARG_495 | NH2 | A_ASP_429 | OD2 | 2.922 |
| 3BGF | L_ARG_24  | NH2 | L_ASP_70  | OD1 | 3.258 |
| 3BGF | L_ARG_24  | NH2 | L_ASP_70  | OD2 | 2.893 |
| 3BGF | L_ARG_46  | NH1 | L_ASP_55  | OD1 | 3.016 |
| 3BGF | L_ARG_46  | NH1 | L_ASP_55  | OD2 | 3.557 |
| 3BGF | L_ARG_61  | NH1 | L_GLU_79  | OE1 | 3.984 |
| 3BGF | L_ARG_61  | NH1 | L_GLU_79  | OE2 | 3.405 |
| 3BGF | L_ARG_61  | NH2 | L_ASP_82  | OD1 | 2.650 |
| 3BGF | L_ARG_61  | NH2 | L_ASP_82  | OD2 | 2.907 |
| 3BGF | L_ARG_66  | NH2 | L_GLU_28  | OE2 | 2.738 |
| 3BGF | L_LYS_149 | NZ  | L_GLU_195 | OE1 | 3.683 |
| 3BGF | L_LYS_149 | NZ  | L_GLU_195 | OE2 | 3.129 |
| 3BGF | L_HIS_189 | ND1 | L_ASP_151 | OD1 | 2.696 |
| 3BGF | H_ARG_33  | NH1 | H_ASP_56  | OD2 | 3.848 |
| 3BGF | H_HIS_35  | NE2 | H_GLU_95  | OE1 | 2.884 |
| 3BGF | H_LYS_38  | NZ  | H_ASP_86  | OD1 | 3.661 |
| 3BGF | H_LYS_62  | NZ  | H_GLU_46  | OE1 | 2.635 |
| 3BGF | H_LYS_62  | NZ  | H_GLU_46  | OE2 | 3.712 |
| 3BGF | H_LYS_66  | NZ  | H_ASP_86  | OD1 | 3.553 |
| 3BGF | H_LYS_66  | NZ  | H_ASP_86  | OD2 | 2.671 |
| 3BGF | H_ARG_94  | NH1 | H_ASP_101 | OD1 | 2.347 |
| 3BGF | H_ARG_94  | NH1 | H_ASP_101 | OD2 | 3.381 |
| 3BGF | H_LYS_210 | NZ  | L_GLU_123 | OE1 | 3.997 |
| 3BGF | H_LYS_211 | NZ  | H_GLU_213 | OE2 | 3.764 |
| 3BGF | C_ARG_24  | NH2 | C_ASP_70  | OD1 | 3.766 |
| 3BGF | C_ARG_46  | NH1 | C_ASP_55  | OD1 | 2.965 |
| 3BGF | C_ARG_61  | NH1 | C_GLU_79  | OE1 | 3.352 |
| 3BGF | C_ARG_61  | NH1 | C_GLU_79  | OE2 | 3.278 |
| 3BGF | C_ARG_61  | NH2 | C_GLU_81  | OE2 | 3.045 |
| 3BGF | C_ARG_61  | NH2 | C_ASP_82  | OD1 | 2.379 |
| 3BGF | C_ARG_61  | NH2 | C_ASP_82  | OD2 | 2.905 |
| 3BGF | C_ARG_66  | NH2 | C_GLU_28  | OE1 | 3.607 |
| 3BGF | C_ARG_66  | NH2 | C_GLU_28  | OE2 | 2.938 |
| 3BGF | C_LYS_142 | NZ  | C_GLU_105 | OE1 | 3.341 |
| 3BGF | C_LYS_149 | NZ  | C_GLU_195 | OE1 | 3.352 |
| 3BGF | C_LYS_149 | NZ  | C_GLU_195 | OE2 | 3.898 |
| 3BGF | C_ARG_155 | NH2 | C_GLU_185 | OE2 | 3.481 |
| 3BGF | C_LYS_199 | NZ  | C_ASP_110 | OD2 | 3.825 |
| 3BGF | B_HIS_35  | NE2 | B_GLU_95  | OE1 | 2.642 |
| 3BGF | B_LYS_38  | NZ  | B_ASP_86  | OD1 | 3.591 |
| 3BGF | B_LYS_62  | NZ  | B_GLU_46  | OE1 | 2.547 |

|      |            |     |           |     |       |
|------|------------|-----|-----------|-----|-------|
| 3BGF | B.LYS.62   | NZ  | B.GLU.46  | OE2 | 3.280 |
| 3BGF | B.LYS.66   | NZ  | B.ASP.86  | OD1 | 3.814 |
| 3BGF | B.LYS.66   | NZ  | B.ASP.86  | OD2 | 2.805 |
| 3BGF | B.ARG.94   | NH1 | B.ASP.101 | OD1 | 2.357 |
| 3BGF | B.ARG.94   | NH1 | B.ASP.101 | OD2 | 2.930 |
| 3BGF | B.ARG.100B | NH1 | B.ASP.101 | OD1 | 3.816 |
| 3BIK | A.ARG.84   | NH1 | A.ASP.108 | OD1 | 2.911 |
| 3BIK | A.ARG.84   | NH1 | A.ASP.108 | OD2 | 3.517 |
| 3BIK | A.ARG.84   | NH2 | A.ASP.108 | OD1 | 3.587 |
| 3BIK | A.ARG.84   | NH2 | A.ASP.108 | OD2 | 2.826 |
| 3BIK | A.LYS.105  | NZ  | A.ASP.103 | OD2 | 3.863 |
| 3BIK | A.ARG.113  | NH2 | B.GLU.136 | OE2 | 3.149 |
| 3BIK | A.LYS.124  | NZ  | A.ASP.122 | OD1 | 3.019 |
| 3BIK | A.LYS.124  | NZ  | A.ASP.122 | OD2 | 3.912 |
| 3BIK | A.ARG.125  | NH2 | B.GLU.136 | OE1 | 3.033 |
| 3BIK | A.ARG.125  | NH2 | B.GLU.136 | OE2 | 3.001 |
| 3BIK | A.ARG.198  | NH1 | A.GLU.152 | OE1 | 3.772 |
| 3BIK | A.ARG.198  | NH2 | A.GLU.152 | OE1 | 3.590 |
| 3BIK | A.ARG.213  | NH1 | A.GLU.218 | OE2 | 3.954 |
| 3BIK | A.ARG.213  | NH2 | A.GLU.218 | OE1 | 3.723 |
| 3BIK | A.ARG.213  | NH2 | A.GLU.218 | OE2 | 3.505 |
| 3BIK | A.HIS.220  | NE2 | A.GLU.218 | OE1 | 3.627 |
| 3BIK | A.HIS.220  | NE2 | A.GLU.218 | OE2 | 3.391 |
| 3BIK | B.ARG.33   | NH1 | B.GLU.135 | OE2 | 3.354 |
| 3BIK | B.ARG.94   | NH1 | B.ASP.117 | OD1 | 3.896 |
| 3BIK | B.ARG.94   | NH1 | B.ASP.117 | OD2 | 2.841 |
| 3BIK | B.ARG.94   | NH2 | B.ASP.92  | OD2 | 2.969 |
| 3BIK | B.ARG.94   | NH2 | B.ASP.117 | OD1 | 3.201 |
| 3BIK | B.ARG.94   | NH2 | B.ASP.117 | OD2 | 3.582 |
| 3BIK | B.ARG.103  | NH2 | B.GLU.61  | OE1 | 3.685 |
| 3BIK | B.HIS.104  | NE2 | B.ASP.105 | OD1 | 3.734 |
| 3BIK | C.ARG.33   | NH2 | C.GLU.135 | OE2 | 3.450 |
| 3BIK | C.ARG.94   | NH1 | C.ASP.117 | OD1 | 3.747 |
| 3BIK | C.ARG.94   | NH1 | C.ASP.117 | OD2 | 2.682 |
| 3BIK | C.ARG.94   | NH2 | C.ASP.92  | OD2 | 3.003 |
| 3BIK | C.ARG.94   | NH2 | C.ASP.117 | OD1 | 2.982 |
| 3BIK | C.ARG.94   | NH2 | C.ASP.117 | OD2 | 3.409 |
| 3BIK | C.HIS.104  | ND1 | C.ASP.105 | OD1 | 2.573 |
| 3BIK | C.HIS.104  | ND1 | C.ASP.105 | OD2 | 3.992 |
| 3BIK | C.ARG.114  | NH1 | C.ASP.92  | OD2 | 3.856 |
| 3BIK | C.ARG.115  | NH1 | C.GLU.146 | OE1 | 3.596 |
| 3BIK | C.HIS.129  | NE2 | C.ASP.62  | OD1 | 3.754 |
| 3BIS | A.ARG.84   | NH1 | A.ASP.108 | OD1 | 2.733 |
| 3BIS | A.ARG.84   | NH1 | A.ASP.108 | OD2 | 3.411 |
| 3BIS | A.ARG.84   | NH2 | A.ASP.108 | OD1 | 3.339 |
| 3BIS | A.ARG.84   | NH2 | A.ASP.108 | OD2 | 2.608 |
| 3BIS | A.LYS.105  | NZ  | A.GLU.187 | OE1 | 3.664 |
| 3BIS | A.LYS.124  | NZ  | A.ASP.122 | OD1 | 3.773 |
| 3BIS | A.ARG.140  | NH2 | A.GLU.152 | OE1 | 3.939 |
| 3BIS | A.ARG.186  | NH1 | A.GLU.158 | OE1 | 2.989 |
| 3BIS | A.ARG.186  | NH1 | A.GLU.158 | OE2 | 3.114 |
| 3BIS | A.LYS.189  | NZ  | A.GLU.188 | OE1 | 3.362 |
| 3BIS | A.ARG.198  | NH1 | A.GLU.150 | OE1 | 3.697 |
| 3BIS | A.ARG.198  | NH1 | A.GLU.150 | OE2 | 2.793 |
| 3BIS | A.ARG.198  | NH2 | A.GLU.152 | OE2 | 2.965 |
| 3BIS | A.ARG.212  | NH2 | A.GLU.217 | OE1 | 3.792 |
| 3BIS | A.HIS.220  | NE2 | A.GLU.218 | OE1 | 2.735 |
| 3BIS | B.ARG.84   | NH1 | B.ASP.108 | OD1 | 3.434 |

|      |           |     |           |     |       |
|------|-----------|-----|-----------|-----|-------|
| 3BIS | B_ARG_84  | NH1 | B_ASP_108 | OD2 | 3.455 |
| 3BIS | B_ARG_84  | NH2 | B_ASP_108 | OD2 | 2.983 |
| 3BIS | B_LYS_105 | NZ  | B_GLU_188 | OE2 | 3.684 |
| 3BIS | B_ARG_113 | NH2 | B_GLU_58  | OE1 | 3.749 |
| 3BIS | B_LYS_124 | NZ  | B_ASP_122 | OD1 | 3.846 |
| 3BIS | B_ARG_140 | NH2 | B_GLU_152 | OE2 | 3.790 |
| 3BIS | B_ARG_198 | NH1 | B_GLU_150 | OE1 | 2.555 |
| 3BIS | B_ARG_212 | NH2 | B_GLU_164 | OE1 | 3.367 |
| 3BIS | B_ARG_213 | NH2 | B_GLU_218 | OE2 | 3.315 |
| 3BKY | H_LYS_38  | NZ  | H_ASP_90  | OD1 | 3.615 |
| 3BKY | H_LYS_63  | NZ  | H_GLU_46  | OE1 | 3.943 |
| 3BKY | H_LYS_63  | NZ  | H_GLU_46  | OE2 | 3.735 |
| 3BKY | H_LYS_67  | NZ  | H_ASP_90  | OD2 | 2.780 |
| 3BKY | H_ARG_98  | NH1 | H_ASP_110 | OD1 | 3.350 |
| 3BKY | H_ARG_98  | NH2 | H_ASP_110 | OD1 | 3.826 |
| 3BKY | H_LYS_138 | NZ  | L_GLU_212 | OE2 | 2.743 |
| 3BKY | H_LYS_152 | NZ  | H_ASP_153 | OD1 | 3.472 |
| 3BKY | H_LYS_152 | NZ  | H_ASP_153 | OD2 | 3.466 |
| 3BKY | L_ARG_60  | NH2 | L_GLU_80  | OE2 | 3.597 |
| 3BKY | L_ARG_60  | NH2 | L_ASP_81  | OD1 | 2.516 |
| 3BKY | L_ARG_60  | NH2 | L_ASP_81  | OD2 | 3.432 |
| 3BKY | L_ARG_76  | NH1 | L_GLU_78  | OE1 | 2.817 |
| 3BKY | L_LYS_102 | NZ  | L_GLU_164 | OE1 | 3.978 |
| 3BKY | L_LYS_182 | NZ  | L_GLU_186 | OE1 | 3.284 |
| 3BKY | L_LYS_187 | NZ  | L_ASP_184 | OD1 | 3.336 |
| 3BKY | L_HIS_188 | ND1 | L_ASP_150 | OD2 | 2.994 |
| 3BO8 | A_HIS_3   | ND1 | A_ASP_29  | OD1 | 3.478 |
| 3BO8 | A_HIS_3   | ND1 | A_ASP_29  | OD2 | 2.703 |
| 3BO8 | A_ARG_6   | NH1 | A_ASP_102 | OD1 | 2.861 |
| 3BO8 | A_ARG_6   | NH2 | A_ASP_102 | OD1 | 2.772 |
| 3BO8 | A_ARG_6   | NH2 | A_ASP_102 | OD2 | 3.556 |
| 3BO8 | A_ARG_14  | NH1 | A_ASP_39  | OD1 | 3.690 |
| 3BO8 | A_ARG_14  | NH1 | A_ASP_39  | OD2 | 2.892 |
| 3BO8 | A_ARG_14  | NH2 | A_ASP_39  | OD1 | 3.076 |
| 3BO8 | A_ARG_14  | NH2 | A_ASP_39  | OD2 | 3.735 |
| 3BO8 | A_ARG_21  | NH1 | A_ASP_39  | OD2 | 3.805 |
| 3BO8 | A_ARG_21  | NH2 | A_ASP_37  | OD1 | 3.686 |
| 3BO8 | A_ARG_21  | NH2 | A_ASP_37  | OD2 | 2.860 |
| 3BO8 | A_ARG_35  | NH1 | A_ASP_37  | OD2 | 3.901 |
| 3BO8 | A_ARG_35  | NH1 | B_ASP_53  | OD1 | 3.541 |
| 3BO8 | A_ARG_35  | NH2 | A_GLU_46  | OE2 | 3.239 |
| 3BO8 | A_ARG_48  | NH1 | B_ASP_53  | OD1 | 3.101 |
| 3BO8 | A_ARG_48  | NH1 | B_ASP_53  | OD2 | 3.041 |
| 3BO8 | A_ARG_48  | NH2 | B_ASP_53  | OD1 | 3.771 |
| 3BO8 | A_ARG_48  | NH2 | B_ASP_53  | OD2 | 3.368 |
| 3BO8 | A_HIS_70  | NE2 | A_ASP_74  | OD1 | 3.486 |
| 3BO8 | A_HIS_70  | NE2 | A_ASP_74  | OD2 | 3.411 |
| 3BO8 | A_ARG_75  | NH1 | A_GLU_19  | OE1 | 2.819 |
| 3BO8 | A_HIS_93  | ND1 | A_ASP_119 | OD1 | 3.501 |
| 3BO8 | A_HIS_93  | ND1 | A_ASP_119 | OD2 | 2.724 |
| 3BO8 | A_ARG_111 | NH2 | A_GLU_128 | OE1 | 3.927 |
| 3BO8 | A_ARG_114 | NH2 | A_ASP_116 | OD1 | 3.531 |
| 3BO8 | A_ARG_114 | NH2 | A_ASP_116 | OD2 | 3.063 |
| 3BO8 | A_LYS_144 | NZ  | A_GLU_148 | OE1 | 3.974 |
| 3BO8 | A_LYS_144 | NZ  | A_GLU_148 | OE2 | 2.691 |
| 3BO8 | A_ARG_156 | NH1 | C_ASP_3   | OD1 | 3.842 |
| 3BO8 | A_ARG_156 | NH1 | C_ASP_3   | OD2 | 2.711 |
| 3BO8 | A_ARG_163 | NH1 | A_ASP_166 | OD2 | 3.922 |

|      |           |     |           |     |       |
|------|-----------|-----|-----------|-----|-------|
| 3BO8 | A_ARG_163 | NH2 | C_GLU_1   | OE1 | 3.484 |
| 3BO8 | A_ARG_163 | NH2 | C_GLU_1   | OE2 | 2.848 |
| 3BO8 | A_ARG_170 | NH1 | C_GLU_1   | OE2 | 2.801 |
| 3BO8 | A_ARG_170 | NH2 | A_GLU_55  | OE1 | 3.555 |
| 3BO8 | A_ARG_170 | NH2 | A_GLU_55  | OE2 | 3.453 |
| 3BO8 | A_ARG_170 | NH2 | C_GLU_1   | OE2 | 3.023 |
| 3BO8 | A_LYS_176 | NZ  | A_GLU_173 | OE2 | 3.954 |
| 3BO8 | A_HIS_191 | NE2 | A_GLU_254 | OE2 | 2.780 |
| 3BO8 | A_HIS_192 | NE2 | B_ASP_98  | OD1 | 3.566 |
| 3BO8 | A_HIS_192 | NE2 | B_ASP_98  | OD2 | 3.950 |
| 3BO8 | A_ARG_256 | NH1 | A_GLU_253 | OE1 | 2.918 |
| 3BO8 | A_ARG_256 | NH2 | A_ASP_220 | OD1 | 3.803 |
| 3BO8 | A_ARG_256 | NH2 | A_ASP_220 | OD2 | 2.636 |
| 3BO8 | B_LYS_75  | NZ  | B_GLU_74  | OE1 | 3.603 |
| 3BO8 | B_ARG_81  | NH2 | B_ASP_38  | OD2 | 2.762 |
| 3BT2 | A_HIS_29  | NE2 | A_ASP_12  | OD1 | 2.667 |
| 3BT2 | A_HIS_29  | NE2 | A_ASP_12  | OD2 | 2.134 |
| 3BT2 | A_HIS_41  | NE2 | A_ASP_12  | OD1 | 3.088 |
| 3BT2 | A_HIS_41  | NE2 | A_ASP_12  | OD2 | 2.030 |
| 3BT2 | A_ARG_69  | NH2 | A_ASP_65  | OD2 | 3.423 |
| 3BT2 | A_HIS_87  | ND1 | U_ASP_11  | OD2 | 3.629 |
| 3BT2 | A_ARG_88  | NH1 | A_ASP_90  | OD1 | 3.618 |
| 3BT2 | A_ARG_88  | NH1 | A_ASP_90  | OD2 | 3.108 |
| 3BT2 | A_ARG_108 | NH1 | A_ASP_106 | OD1 | 3.445 |
| 3BT2 | A_ARG_108 | NH1 | A_ASP_106 | OD2 | 2.718 |
| 3BT2 | A_ARG_108 | NH2 | A_ASP_106 | OD2 | 3.817 |
| 3BT2 | A_ARG_110 | NH2 | A_GLU_125 | OE1 | 3.432 |
| 3BT2 | L_LYS_53  | NZ  | L_GLU_50  | OE1 | 2.553 |
| 3BT2 | L_ARG_61  | NH1 | L_GLU_79  | OE1 | 2.871 |
| 3BT2 | L_ARG_61  | NH1 | L_GLU_79  | OE2 | 3.194 |
| 3BT2 | L_ARG_61  | NH2 | L_GLU_79  | OE1 | 3.460 |
| 3BT2 | L_ARG_61  | NH2 | L_GLU_81  | OE2 | 3.022 |
| 3BT2 | L_ARG_61  | NH2 | L_ASP_82  | OD1 | 3.009 |
| 3BT2 | L_ARG_61  | NH2 | L_ASP_82  | OD2 | 3.824 |
| 3BT2 | L_LYS_103 | NZ  | L_ASP_164 | OD1 | 3.404 |
| 3BT2 | L_LYS_148 | NZ  | L_GLU_194 | OE1 | 3.204 |
| 3BT2 | L_LYS_148 | NZ  | L_GLU_194 | OE2 | 3.996 |
| 3BT2 | L_ARG_154 | NH1 | L_GLU_184 | OE1 | 3.573 |
| 3BT2 | L_ARG_154 | NH1 | L_GLU_184 | OE2 | 2.970 |
| 3BT2 | L_ARG_154 | NH2 | L_GLU_184 | OE1 | 2.853 |
| 3BT2 | L_ARG_154 | NH2 | L_GLU_184 | OE2 | 3.786 |
| 3BT2 | L_ARG_187 | NH1 | L_ASP_183 | OD1 | 3.352 |
| 3BT2 | L_HIS_188 | ND1 | L_ASP_150 | OD2 | 2.836 |
| 3BT2 | H_ARG_40  | NH1 | H_GLU_85  | OE1 | 3.704 |
| 3BT2 | H_ARG_40  | NH2 | H_GLU_85  | OE2 | 3.856 |
| 3BT2 | H_LYS_64  | NZ  | H_GLU_61  | OE1 | 2.698 |
| 3BT2 | H_LYS_64  | NZ  | H_GLU_61  | OE2 | 3.977 |
| 3BT2 | H_LYS_66  | NZ  | H_ASP_86  | OD1 | 3.311 |
| 3BT2 | H_LYS_66  | NZ  | H_ASP_86  | OD2 | 2.587 |
| 3BT2 | H_ARG_94  | NH2 | H_ASP_101 | OD1 | 3.593 |
| 3BT2 | H_ARG_94  | NH2 | H_ASP_101 | OD2 | 2.737 |
| 3BT2 | H_HIS_98  | ND1 | L_GLU_50  | OE1 | 2.845 |
| 3BT2 | H_HIS_98  | ND1 | L_GLU_50  | OE2 | 2.191 |
| 3BT2 | H_HIS_98  | NE2 | L_GLU_50  | OE1 | 3.301 |
| 3BT2 | H_HIS_98  | NE2 | L_GLU_50  | OE2 | 3.904 |
| 3BT2 | H_LYS_203 | NZ  | L_GLU_122 | OE2 | 3.715 |
| 3BT2 | U_ARG_2   | NH2 | U_ASP_74  | OD2 | 3.379 |
| 3BT2 | U_LYS_7   | NZ  | U_ASP_11  | OD1 | 3.738 |

|      |           |     |           |     |       |
|------|-----------|-----|-----------|-----|-------|
| 3BT2 | U_ARG_25  | NH1 | U_GLU_42  | OE2 | 3.052 |
| 3BT2 | U_ARG_25  | NH2 | U_GLU_42  | OE2 | 3.321 |
| 3BT2 | U_LYS_50  | NZ  | U_ASP_254 | OD2 | 2.962 |
| 3BT2 | U_ARG_53  | NH1 | U_ASP_254 | OD2 | 3.811 |
| 3BT2 | U_ARG_91  | NH1 | B_ASP_22  | OD1 | 3.502 |
| 3BT2 | U_ARG_91  | NH1 | B_ASP_22  | OD2 | 3.574 |
| 3BT2 | U_ARG_91  | NH2 | B_ASP_22  | OD1 | 3.066 |
| 3BT2 | U_HIS_128 | ND1 | U_GLU_183 | OE1 | 3.844 |
| 3BT2 | U_HIS_128 | ND1 | U_GLU_183 | OE2 | 3.947 |
| 3BT2 | U_HIS_128 | NE2 | U_GLU_183 | OE1 | 2.249 |
| 3BT2 | U_HIS_128 | NE2 | U_GLU_183 | OE2 | 1.923 |
| 3BT2 | U_HIS_143 | NE2 | U_GLU_183 | OE1 | 3.609 |
| 3BT2 | U_HIS_143 | NE2 | U_GLU_183 | OE2 | 1.958 |
| 3BT2 | U_ARG_145 | NH2 | U_ASP_124 | OD2 | 3.397 |
| 3BT2 | U_LYS_175 | NZ  | U_GLU_94  | OE1 | 3.795 |
| 3BT2 | U_ARG_192 | NH1 | H_GLU_58  | OE2 | 2.836 |
| 3BT2 | U_HIS_260 | ND1 | U_ASP_262 | OD1 | 3.731 |
| 3BZ4 | A_LYS_27  | NZ  | E_ASP_1   | OD1 | 3.348 |
| 3BZ4 | A_LYS_27  | NZ  | E_ASP_1   | OD2 | 3.551 |
| 3BZ4 | A_HIS_27D | ND1 | A_ASP_28  | OD1 | 3.339 |
| 3BZ4 | A_HIS_27D | ND1 | A_ASP_28  | OD2 | 3.472 |
| 3BZ4 | A_ARG_61  | NH1 | A_ASP_82  | OD1 | 3.791 |
| 3BZ4 | A_ARG_61  | NH1 | A_ASP_82  | OD2 | 2.748 |
| 3BZ4 | A_ARG_61  | NH2 | A_GLU_79  | OE1 | 3.444 |
| 3BZ4 | A_ARG_61  | NH2 | A_GLU_81  | OE2 | 3.683 |
| 3BZ4 | A_ARG_61  | NH2 | A_ASP_82  | OD1 | 2.925 |
| 3BZ4 | A_ARG_61  | NH2 | A_ASP_82  | OD2 | 3.346 |
| 3BZ4 | A_ARG_96  | NH2 | B_GLU_50  | OE1 | 3.591 |
| 3BZ4 | A_ARG_96  | NH2 | B_GLU_50  | OE2 | 2.914 |
| 3BZ4 | A_LYS_147 | NZ  | A_GLU_154 | OE1 | 3.729 |
| 3BZ4 | A_LYS_149 | NZ  | A_GLU_195 | OE1 | 3.803 |
| 3BZ4 | A_LYS_149 | NZ  | A_GLU_195 | OE2 | 2.957 |
| 3BZ4 | A_ARG_155 | NH1 | A_GLU_185 | OE1 | 3.022 |
| 3BZ4 | A_ARG_188 | NH2 | A_ASP_184 | OD1 | 2.966 |
| 3BZ4 | A_ARG_188 | NH2 | A_ASP_184 | OD2 | 3.794 |
| 3BZ4 | A_HIS_189 | ND1 | A_ASP_151 | OD2 | 3.568 |
| 3BZ4 | B_ARG_38  | NH1 | B_ASP_86  | OD1 | 2.836 |
| 3BZ4 | B_ARG_38  | NH2 | B_GLU_46  | OE1 | 3.315 |
| 3BZ4 | B_ARG_38  | NH2 | B_GLU_46  | OE2 | 3.392 |
| 3BZ4 | B_ARG_38  | NH2 | B_ASP_86  | OD1 | 3.736 |
| 3BZ4 | B_ARG_52  | NH2 | B_GLU_50  | OE2 | 2.961 |
| 3BZ4 | B_LYS_64  | NZ  | B_GLU_61  | OE1 | 2.578 |
| 3BZ4 | B_LYS_64  | NZ  | B_GLU_61  | OE2 | 3.962 |
| 3BZ4 | B_LYS_66  | NZ  | B_ASP_86  | OD1 | 3.832 |
| 3BZ4 | B_LYS_66  | NZ  | B_ASP_86  | OD2 | 2.772 |
| 3BZ4 | B_ARG_71  | NH2 | B_ASP_73  | OD1 | 3.536 |
| 3BZ4 | B_LYS_75  | NZ  | B_ASP_72  | OD2 | 3.736 |
| 3BZ4 | B_LYS_210 | NZ  | A_GLU_123 | OE2 | 2.839 |
| 3BZ4 | C_LYS_27  | NZ  | C_GLU_93  | OE1 | 2.862 |
| 3BZ4 | C_LYS_27  | NZ  | C_GLU_93  | OE2 | 3.387 |
| 3BZ4 | C_HIS_27D | ND1 | C_ASP_28  | OD1 | 3.351 |
| 3BZ4 | C_HIS_27D | ND1 | C_ASP_28  | OD2 | 3.496 |
| 3BZ4 | C_LYS_39  | NZ  | C_GLU_81  | OE2 | 3.178 |
| 3BZ4 | C_ARG_61  | NH1 | C_ASP_82  | OD1 | 3.875 |
| 3BZ4 | C_ARG_61  | NH1 | C_ASP_82  | OD2 | 2.759 |
| 3BZ4 | C_ARG_61  | NH2 | C_GLU_79  | OE1 | 3.734 |
| 3BZ4 | C_ARG_61  | NH2 | C_GLU_79  | OE2 | 3.949 |
| 3BZ4 | C_ARG_61  | NH2 | C_ASP_82  | OD1 | 3.042 |

|      |           |     |           |     |       |
|------|-----------|-----|-----------|-----|-------|
| 3BZ4 | C_ARG_61  | NH2 | C_ASP_82  | OD2 | 3.345 |
| 3BZ4 | C_ARG_96  | NH2 | D_GLU_50  | OE1 | 3.615 |
| 3BZ4 | C_ARG_96  | NH2 | D_GLU_50  | OE2 | 2.938 |
| 3BZ4 | C_LYS_103 | NZ  | C_ASP_165 | OD1 | 3.993 |
| 3BZ4 | C_LYS_147 | NZ  | C_GLU_195 | OE1 | 3.076 |
| 3BZ4 | C_LYS_149 | NZ  | C_GLU_195 | OE2 | 2.853 |
| 3BZ4 | C_ARG_155 | NH1 | C_GLU_185 | OE2 | 3.198 |
| 3BZ4 | C_ARG_155 | NH2 | C_GLU_185 | OE1 | 2.972 |
| 3BZ4 | C_ARG_155 | NH2 | C_GLU_185 | OE2 | 3.144 |
| 3BZ4 | C_HIS_189 | ND1 | C_ASP_151 | OD2 | 3.072 |
| 3BZ4 | D_LYS_3   | NZ  | D_GLU_5   | OE1 | 3.731 |
| 3BZ4 | D_ARG_38  | NH1 | D_ASP_86  | OD1 | 2.733 |
| 3BZ4 | D_ARG_38  | NH2 | D_GLU_46  | OE1 | 3.389 |
| 3BZ4 | D_ARG_38  | NH2 | D_GLU_46  | OE2 | 3.315 |
| 3BZ4 | D_ARG_38  | NH2 | D_ASP_86  | OD1 | 3.699 |
| 3BZ4 | D_ARG_52  | NH2 | D_GLU_50  | OE2 | 2.968 |
| 3BZ4 | D_ARG_71  | NH2 | D_ASP_73  | OD1 | 3.463 |
| 3BZ4 | D_ARG_83  | NH1 | D_GLU_85  | OE2 | 3.445 |
| 3BZ4 | D_ARG_83  | NH2 | D_GLU_85  | OE2 | 3.957 |
| 3BZ4 | D_ARG_83  | NH2 | D_ASP_86  | OD1 | 2.967 |
| 3BZ4 | D_ARG_83  | NH2 | D_ASP_86  | OD2 | 3.511 |
| 3BZ4 | D_LYS_210 | NZ  | C_GLU_123 | OE2 | 2.929 |
| 3BZ4 | E_LYS_27  | NZ  | E_GLU_93  | OE1 | 2.598 |
| 3BZ4 | E_LYS_27  | NZ  | E_GLU_93  | OE2 | 3.386 |
| 3BZ4 | E_HIS_27D | ND1 | E_ASP_28  | OD1 | 3.329 |
| 3BZ4 | E_HIS_27D | ND1 | E_ASP_28  | OD2 | 3.369 |
| 3BZ4 | E_ARG_61  | NH1 | E_ASP_82  | OD1 | 3.767 |
| 3BZ4 | E_ARG_61  | NH1 | E_ASP_82  | OD2 | 2.681 |
| 3BZ4 | E_ARG_61  | NH2 | E_GLU_79  | OE1 | 3.679 |
| 3BZ4 | E_ARG_61  | NH2 | E_GLU_79  | OE2 | 3.909 |
| 3BZ4 | E_ARG_61  | NH2 | E_ASP_82  | OD1 | 2.988 |
| 3BZ4 | E_ARG_61  | NH2 | E_ASP_82  | OD2 | 3.375 |
| 3BZ4 | E_ARG_96  | NH2 | F_GLU_50  | OE1 | 3.659 |
| 3BZ4 | E_ARG_96  | NH2 | F_GLU_50  | OE2 | 3.062 |
| 3BZ4 | E_LYS_103 | NZ  | E_ASP_165 | OD1 | 3.694 |
| 3BZ4 | E_LYS_142 | NZ  | E_GLU_105 | OE1 | 2.683 |
| 3BZ4 | E_LYS_147 | NZ  | E_GLU_154 | OE1 | 3.191 |
| 3BZ4 | E_LYS_149 | NZ  | E_GLU_195 | OE2 | 3.492 |
| 3BZ4 | E_ARG_155 | NH1 | E_GLU_185 | OE2 | 2.852 |
| 3BZ4 | E_ARG_155 | NH2 | E_GLU_185 | OE1 | 3.247 |
| 3BZ4 | E_ARG_155 | NH2 | E_GLU_185 | OE2 | 3.385 |
| 3BZ4 | E_LYS_183 | NZ  | E_GLU_187 | OE1 | 3.938 |
| 3BZ4 | E_ARG_188 | NH1 | E_ASP_184 | OD1 | 2.897 |
| 3BZ4 | E_HIS_189 | ND1 | E_ASP_151 | OD2 | 2.915 |
| 3BZ4 | E_LYS_199 | NZ  | E_ASP_110 | OD2 | 3.617 |
| 3BZ4 | F_ARG_38  | NH1 | F_ASP_86  | OD1 | 2.816 |
| 3BZ4 | F_ARG_38  | NH2 | F_GLU_46  | OE1 | 3.339 |
| 3BZ4 | F_ARG_38  | NH2 | F_GLU_46  | OE2 | 3.116 |
| 3BZ4 | F_ARG_38  | NH2 | F_ASP_86  | OD1 | 3.767 |
| 3BZ4 | F_ARG_52  | NH2 | F_GLU_50  | OE2 | 2.956 |
| 3BZ4 | F_LYS_66  | NZ  | F_ASP_86  | OD1 | 3.548 |
| 3BZ4 | F_LYS_66  | NZ  | F_ASP_86  | OD2 | 2.726 |
| 3BZ4 | F_ARG_71  | NH2 | F_ASP_73  | OD1 | 3.320 |
| 3BZ4 | F_LYS_75  | NZ  | F_ASP_72  | OD2 | 3.820 |
| 3BZ4 | F_LYS_210 | NZ  | E_GLU_123 | OE2 | 2.855 |
| 3BZ4 | G_LYS_27  | NZ  | G_GLU_93  | OE1 | 3.193 |
| 3BZ4 | G_LYS_27  | NZ  | G_GLU_93  | OE2 | 3.324 |
| 3BZ4 | G_HIS_27D | ND1 | G_ASP_28  | OD1 | 3.438 |



|      |           |     |           |     |       |
|------|-----------|-----|-----------|-----|-------|
| 3BZ4 | G_HIS_27D | ND1 | G_ASP_28  | OD2 | 3.691 |
| 3BZ4 | G_LYS_39  | NZ  | G_GLU_81  | OE2 | 3.982 |
| 3BZ4 | G_ARG_61  | NH1 | G_ASP_82  | OD1 | 3.687 |
| 3BZ4 | G_ARG_61  | NH1 | G_ASP_82  | OD2 | 2.777 |
| 3BZ4 | G_ARG_61  | NH2 | G_GLU_79  | OE1 | 3.890 |
| 3BZ4 | G_ARG_61  | NH2 | G_GLU_81  | OE2 | 3.793 |
| 3BZ4 | G_ARG_61  | NH2 | G_ASP_82  | OD1 | 3.189 |
| 3BZ4 | G_ARG_61  | NH2 | G_ASP_82  | OD2 | 3.680 |
| 3BZ4 | G_ARG_96  | NH2 | H_GLU_50  | OE1 | 3.659 |
| 3BZ4 | G_ARG_96  | NH2 | H_GLU_50  | OE2 | 3.021 |
| 3BZ4 | G_LYS_147 | NZ  | C_GLU_154 | OE1 | 3.559 |
| 3BZ4 | G_LYS_149 | NZ  | G_GLU_195 | OE1 | 3.699 |
| 3BZ4 | G_LYS_149 | NZ  | G_GLU_195 | OE2 | 3.854 |
| 3BZ4 | G_ARG_188 | NH1 | G_ASP_184 | OD1 | 3.650 |
| 3BZ4 | G_HIS_189 | ND1 | G_ASP_151 | OD2 | 3.087 |
| 3BZ4 | G_LYS_199 | NZ  | G_ASP_110 | OD2 | 3.816 |
| 3BZ4 | H_ARG_38  | NH1 | H_ASP_86  | OD1 | 2.822 |
| 3BZ4 | H_ARG_38  | NH2 | H_GLU_46  | OE1 | 3.285 |
| 3BZ4 | H_ARG_38  | NH2 | H_GLU_46  | OE2 | 3.289 |
| 3BZ4 | H_ARG_38  | NH2 | H_ASP_86  | OD1 | 3.691 |
| 3BZ4 | H_ARG_52  | NH2 | H_GLU_50  | OE2 | 3.000 |
| 3BZ4 | H_LYS_66  | NZ  | H_ASP_86  | OD1 | 3.582 |
| 3BZ4 | H_LYS_66  | NZ  | H_ASP_86  | OD2 | 2.709 |
| 3BZ4 | H_ARG_71  | NH2 | H_ASP_73  | OD1 | 3.418 |
| 3C09 | L_ARG_60  | NH2 | L_ASP_81  | OD1 | 3.198 |
| 3C09 | L_ARG_60  | NH2 | L_ASP_81  | OD2 | 3.773 |
| 3C09 | L_HIS_93  | NE2 | D_ASP_434 | OD1 | 2.739 |
| 3C09 | L_HIS_93  | NE2 | D_ASP_434 | OD2 | 3.466 |
| 3C09 | L_HIS_188 | ND1 | L_ASP_150 | OD1 | 3.925 |
| 3C09 | H_HIS_32  | NE2 | H_ASP_100 | OD2 | 3.604 |
| 3C09 | H_HIS_32  | NE2 | H_ASP_102 | OD1 | 3.701 |
| 3C09 | H_ARG_38  | NH2 | H_GLU_46  | OE1 | 2.766 |
| 3C09 | H_ARG_38  | NH2 | H_GLU_46  | OE2 | 3.957 |
| 3C09 | H_ARG_57  | NH2 | D_GLU_431 | OE1 | 3.682 |
| 3C09 | H_LYS_151 | NZ  | H_ASP_152 | OD2 | 3.689 |
| 3C09 | A_HIS_346 | NE2 | A_ASP_344 | OD2 | 3.992 |
| 3C09 | A_HIS_394 | NE2 | A_ASP_369 | OD1 | 3.580 |
| 3C09 | A_ARG_403 | NH1 | A_GLU_376 | OE1 | 2.815 |
| 3C09 | A_ARG_403 | NH1 | A_GLU_376 | OE2 | 3.396 |
| 3C09 | A_LYS_407 | NZ  | A_ASP_434 | OD2 | 3.026 |
| 3C09 | A_ARG_427 | NH1 | A_GLU_397 | OE1 | 3.943 |
| 3C09 | A_ARG_427 | NH2 | A_ASP_392 | OD2 | 3.700 |
| 3C09 | A_ARG_427 | NH2 | A_ASP_498 | OD1 | 3.376 |
| 3C09 | A_LYS_454 | NZ  | C_ASP_100 | OD1 | 2.467 |
| 3C09 | A_LYS_463 | NZ  | B_ASP_49  | OD2 | 2.856 |
| 3C09 | B_ARG_60  | NH2 | B_ASP_81  | OD1 | 2.668 |
| 3C09 | B_ARG_60  | NH2 | B_ASP_81  | OD2 | 3.698 |
| 3C09 | B_HIS_93  | NE2 | A_ASP_434 | OD1 | 2.346 |
| 3C09 | C_LYS_12  | NZ  | C_GLU_10  | OE1 | 3.298 |
| 3C09 | C_HIS_32  | NE2 | C_ASP_102 | OD1 | 3.417 |
| 3C09 | C_HIS_35  | ND1 | C_GLU_50  | OE2 | 3.377 |
| 3C09 | C_HIS_35  | NE2 | C_GLU_50  | OE2 | 3.892 |
| 3C09 | C_ARG_38  | NH1 | C_ASP_90  | OD1 | 3.955 |
| 3C09 | C_ARG_38  | NH2 | C_GLU_46  | OE1 | 2.986 |
| 3C09 | C_ARG_38  | NH2 | C_GLU_46  | OE2 | 3.298 |
| 3C09 | D_HIS_394 | ND1 | D_ASP_369 | OD1 | 3.451 |
| 3C09 | D_ARG_403 | NH2 | D_GLU_376 | OE1 | 3.699 |
| 3C09 | D_ARG_403 | NH2 | D_GLU_376 | OE2 | 3.471 |

|      |           |     |           |     |       |
|------|-----------|-----|-----------|-----|-------|
| 3C09 | D_LYS_407 | NZ  | D_ASP_434 | OD1 | 3.698 |
| 3C09 | D_LYS_407 | NZ  | D_ASP_434 | OD2 | 2.480 |
| 3C09 | D_LYS_454 | NZ  | H_ASP_100 | OD2 | 3.482 |
| 3C09 | D_LYS_463 | NZ  | L_ASP_49  | OD2 | 3.418 |
| 3C5S | A_ARG_61  | NH1 | A_ASP_82  | OD2 | 3.030 |
| 3C5S | A_ARG_61  | NH2 | A_GLU_79  | OE2 | 3.851 |
| 3C5S | A_ARG_61  | NH2 | A_ASP_82  | OD1 | 3.184 |
| 3C5S | A_ARG_61  | NH2 | A_ASP_82  | OD2 | 3.437 |
| 3C5S | A_ARG_96  | NH2 | B_GLU_50  | OE1 | 3.517 |
| 3C5S | A_ARG_96  | NH2 | B_GLU_50  | OE2 | 2.932 |
| 3C5S | A_LYS_103 | NZ  | A_ASP_165 | OD1 | 3.305 |
| 3C5S | A_LYS_147 | NZ  | A_GLU_154 | OE1 | 2.905 |
| 3C5S | A_LYS_149 | NZ  | A_GLU_195 | OE1 | 2.670 |
| 3C5S | A_ARG_188 | NH1 | A_ASP_184 | OD1 | 2.405 |
| 3C5S | A_LYS_199 | NZ  | A_ASP_110 | OD1 | 3.889 |
| 3C5S | A_LYS_199 | NZ  | A_ASP_110 | OD2 | 2.335 |
| 3C5S | B_LYS_3   | NZ  | B_GLU_5   | OE1 | 3.341 |
| 3C5S | B_ARG_38  | NH1 | B_ASP_86  | OD1 | 2.908 |
| 3C5S | B_ARG_38  | NH2 | B_GLU_46  | OE1 | 3.058 |
| 3C5S | B_ARG_38  | NH2 | B_ASP_86  | OD1 | 3.943 |
| 3C5S | B_LYS_43  | NZ  | B_GLU_46  | OE2 | 2.800 |
| 3C5S | B_ARG_52  | NH2 | B_GLU_50  | OE2 | 2.999 |
| 3C5S | B_LYS_64  | NZ  | B_GLU_61  | OE1 | 2.552 |
| 3C5S | B_LYS_64  | NZ  | B_GLU_61  | OE2 | 3.116 |
| 3C5S | B_ARG_71  | NH2 | B_ASP_73  | OD1 | 3.320 |
| 3C5S | B_LYS_75  | NZ  | B_ASP_72  | OD2 | 3.056 |
| 3C5S | B_ARG_83  | NH2 | B_ASP_86  | OD1 | 3.087 |
| 3C5S | B_ARG_83  | NH2 | B_ASP_86  | OD2 | 3.434 |
| 3C5S | B_LYS_210 | NZ  | A_GLU_123 | OE2 | 3.553 |
| 3C5S | C_ARG_61  | NH1 | C_ASP_82  | OD1 | 3.085 |
| 3C5S | C_ARG_61  | NH2 | C_GLU_79  | OE1 | 3.892 |
| 3C5S | C_ARG_61  | NH2 | C_GLU_79  | OE2 | 3.694 |
| 3C5S | C_ARG_61  | NH2 | C_GLU_81  | OE2 | 2.868 |
| 3C5S | C_ARG_61  | NH2 | C_ASP_82  | OD1 | 3.573 |
| 3C5S | C_ARG_61  | NH2 | C_ASP_82  | OD2 | 3.274 |
| 3C5S | C_ARG_96  | NH2 | D_GLU_50  | OE1 | 3.571 |
| 3C5S | C_ARG_96  | NH2 | D_GLU_50  | OE2 | 2.973 |
| 3C5S | C_LYS_103 | NZ  | C_ASP_165 | OD1 | 3.149 |
| 3C5S | C_LYS_142 | NZ  | C_GLU_105 | OE2 | 3.286 |
| 3C5S | C_LYS_147 | NZ  | C_GLU_154 | OE1 | 2.994 |
| 3C5S | C_LYS_149 | NZ  | C_GLU_195 | OE1 | 2.716 |
| 3C5S | C_LYS_149 | NZ  | C_GLU_195 | OE2 | 3.839 |
| 3C5S | C_ARG_155 | NH1 | C_GLU_185 | OE1 | 3.904 |
| 3C5S | C_ARG_155 | NH2 | C_GLU_185 | OE1 | 3.268 |
| 3C5S | C_ARG_188 | NH2 | C_ASP_184 | OD2 | 3.258 |
| 3C5S | C_HIS_189 | ND1 | C_ASP_151 | OD2 | 2.806 |
| 3C5S | C_LYS_199 | NZ  | C_ASP_110 | OD2 | 2.615 |
| 3C5S | C_ARG_211 | NH1 | C_GLU_187 | OE1 | 3.163 |
| 3C5S | D_LYS_3   | NZ  | D_GLU_5   | OE2 | 3.300 |
| 3C5S | D_ARG_38  | NH1 | D_ASP_86  | OD1 | 2.823 |
| 3C5S | D_ARG_38  | NH2 | D_GLU_46  | OE1 | 3.094 |
| 3C5S | D_ARG_38  | NH2 | D_GLU_46  | OE2 | 3.865 |
| 3C5S | D_ARG_38  | NH2 | D_ASP_86  | OD1 | 3.695 |
| 3C5S | D_ARG_52  | NH2 | D_GLU_50  | OE2 | 2.971 |
| 3C5S | D_LYS_66  | NZ  | D_ASP_86  | OD1 | 3.839 |
| 3C5S | D_LYS_66  | NZ  | D_ASP_86  | OD2 | 2.657 |
| 3C5S | D_ARG_71  | NH2 | D_ASP_73  | OD1 | 3.461 |
| 3C6S | A_LYS_27  | NZ  | F_GLU_61  | OE1 | 2.945 |

|      |           |     |           |     |       |
|------|-----------|-----|-----------|-----|-------|
| 3C6S | A_HIS_27D | NE2 | A_ASP_28  | OD2 | 3.782 |
| 3C6S | A_ARG_61  | NH1 | A_ASP_82  | OD1 | 3.871 |
| 3C6S | A_ARG_61  | NH1 | A_ASP_82  | OD2 | 2.772 |
| 3C6S | A_ARG_61  | NH2 | A_GLU_79  | OE1 | 3.467 |
| 3C6S | A_ARG_61  | NH2 | A_GLU_81  | OE2 | 3.840 |
| 3C6S | A_ARG_61  | NH2 | A_ASP_82  | OD1 | 3.008 |
| 3C6S | A_ARG_61  | NH2 | A_ASP_82  | OD2 | 3.321 |
| 3C6S | A_ARG_96  | NH2 | B_GLU_50  | OE1 | 3.551 |
| 3C6S | A_ARG_96  | NH2 | B_GLU_50  | OE2 | 2.936 |
| 3C6S | A_LYS_103 | NZ  | A_ASP_165 | OD1 | 3.865 |
| 3C6S | A_LYS_147 | NZ  | A_GLU_154 | OE1 | 3.762 |
| 3C6S | A_LYS_149 | NZ  | A_GLU_195 | OE1 | 3.629 |
| 3C6S | A_LYS_149 | NZ  | A_GLU_195 | OE2 | 3.115 |
| 3C6S | A_ARG_155 | NH1 | A_GLU_185 | OE1 | 2.818 |
| 3C6S | A_ARG_155 | NH1 | A_GLU_185 | OE2 | 3.763 |
| 3C6S | A_ARG_155 | NH2 | A_GLU_185 | OE1 | 3.570 |
| 3C6S | A_ARG_155 | NH2 | A_GLU_185 | OE2 | 3.121 |
| 3C6S | A_HIS_189 | ND1 | A_ASP_151 | OD2 | 3.710 |
| 3C6S | B_LYS_3   | NZ  | B_GLU_5   | OE1 | 3.976 |
| 3C6S | B_ARG_38  | NH1 | B_ASP_86  | OD1 | 2.860 |
| 3C6S | B_ARG_38  | NH2 | B_GLU_46  | OE1 | 3.287 |
| 3C6S | B_ARG_38  | NH2 | B_GLU_46  | OE2 | 3.192 |
| 3C6S | B_ARG_38  | NH2 | B_ASP_86  | OD1 | 3.858 |
| 3C6S | B_ARG_52  | NH2 | B_GLU_50  | OE2 | 3.018 |
| 3C6S | B_LYS_64  | NZ  | B_GLU_61  | OE1 | 3.776 |
| 3C6S | B_LYS_66  | NZ  | B_ASP_86  | OD1 | 3.351 |
| 3C6S | B_LYS_66  | NZ  | B_ASP_86  | OD2 | 2.603 |
| 3C6S | B_ARG_71  | NH2 | B_ASP_73  | OD1 | 3.493 |
| 3C6S | B_ARG_83  | NH2 | B_GLU_85  | OE2 | 3.633 |
| 3C6S | B_LYS_207 | NZ  | B_ASP_209 | OD2 | 3.344 |
| 3C6S | B_LYS_210 | NZ  | A_GLU_123 | OE2 | 2.871 |
| 3C6S | C_HIS_27D | NE2 | C_ASP_28  | OD2 | 3.911 |
| 3C6S | C_LYS_39  | NZ  | C_GLU_81  | OE2 | 2.611 |
| 3C6S | C_ARG_61  | NH1 | C_ASP_82  | OD1 | 3.977 |
| 3C6S | C_ARG_61  | NH1 | C_ASP_82  | OD2 | 2.797 |
| 3C6S | C_ARG_61  | NH2 | C_GLU_79  | OE1 | 3.899 |
| 3C6S | C_ARG_61  | NH2 | C_ASP_82  | OD1 | 3.285 |
| 3C6S | C_ARG_61  | NH2 | C_ASP_82  | OD2 | 3.465 |
| 3C6S | C_ARG_96  | NH2 | D_GLU_50  | OE1 | 3.699 |
| 3C6S | C_ARG_96  | NH2 | D_GLU_50  | OE2 | 2.915 |
| 3C6S | C_LYS_149 | NZ  | C_GLU_195 | OE2 | 3.377 |
| 3C6S | C_ARG_155 | NH1 | C_GLU_185 | OE1 | 2.919 |
| 3C6S | C_ARG_155 | NH2 | C_GLU_185 | OE1 | 3.617 |
| 3C6S | C_ARG_155 | NH2 | C_GLU_185 | OE2 | 3.372 |
| 3C6S | C_LYS_183 | NZ  | C_GLU_187 | OE1 | 3.948 |
| 3C6S | C_ARG_188 | NH1 | C_ASP_184 | OD1 | 3.896 |
| 3C6S | C_ARG_188 | NH1 | C_ASP_184 | OD2 | 3.104 |
| 3C6S | C_ARG_188 | NH2 | C_GLU_185 | OE1 | 3.688 |
| 3C6S | C_HIS_189 | ND1 | C_ASP_151 | OD2 | 2.779 |
| 3C6S | C_LYS_199 | NZ  | C_ASP_110 | OD2 | 3.859 |
| 3C6S | D_LYS_3   | NZ  | D_GLU_5   | OE1 | 2.880 |
| 3C6S | D_LYS_3   | NZ  | D_GLU_5   | OE2 | 3.546 |
| 3C6S | D_ARG_38  | NH1 | D_ASP_86  | OD1 | 2.816 |
| 3C6S | D_ARG_38  | NH2 | D_GLU_46  | OE1 | 3.293 |
| 3C6S | D_ARG_38  | NH2 | D_GLU_46  | OE2 | 3.209 |
| 3C6S | D_ARG_38  | NH2 | D_ASP_86  | OD1 | 3.686 |
| 3C6S | D_ARG_52  | NH2 | D_GLU_50  | OE2 | 2.953 |
| 3C6S | D_LYS_64  | NZ  | D_GLU_61  | OE1 | 2.522 |

|      |           |     |           |     |       |
|------|-----------|-----|-----------|-----|-------|
| 3C6S | D_LYS_66  | NZ  | D_ASP_86  | OD1 | 3.557 |
| 3C6S | D_LYS_66  | NZ  | D_ASP_86  | OD2 | 2.620 |
| 3C6S | D_ARG_71  | NH2 | D_ASP_73  | OD1 | 3.499 |
| 3C6S | D_LYS_115 | NZ  | H_GLU_85  | OE1 | 3.000 |
| 3C6S | D_LYS_115 | NZ  | H_GLU_85  | OE2 | 3.884 |
| 3C6S | D_LYS_210 | NZ  | C_GLU_123 | OE2 | 2.801 |
| 3C6S | E_LYS_27  | NZ  | A_ASP_1   | OD1 | 3.387 |
| 3C6S | E_LYS_27  | NZ  | A_ASP_1   | OD2 | 3.431 |
| 3C6S | E_HIS_27D | NE2 | E_ASP_28  | OD2 | 3.987 |
| 3C6S | E_ARG_61  | NH1 | E_ASP_82  | OD1 | 3.693 |
| 3C6S | E_ARG_61  | NH1 | E_ASP_82  | OD2 | 2.790 |
| 3C6S | E_ARG_61  | NH2 | E_GLU_79  | OE1 | 3.369 |
| 3C6S | E_ARG_61  | NH2 | E_GLU_81  | OE2 | 3.772 |
| 3C6S | E_ARG_61  | NH2 | E_ASP_82  | OD1 | 2.890 |
| 3C6S | E_ARG_61  | NH2 | E_ASP_82  | OD2 | 3.360 |
| 3C6S | E_ARG_96  | NH2 | F_GLU_50  | OE1 | 3.703 |
| 3C6S | E_ARG_96  | NH2 | F_GLU_50  | OE2 | 3.164 |
| 3C6S | E_LYS_149 | NZ  | E_GLU_195 | OE1 | 3.276 |
| 3C6S | E_LYS_149 | NZ  | E_GLU_195 | OE2 | 3.217 |
| 3C6S | E_ARG_155 | NH1 | E_GLU_185 | OE2 | 3.054 |
| 3C6S | E_ARG_155 | NH2 | E_GLU_185 | OE1 | 3.295 |
| 3C6S | E_ARG_155 | NH2 | E_GLU_185 | OE2 | 3.558 |
| 3C6S | E_LYS_183 | NZ  | E_GLU_187 | OE1 | 3.890 |
| 3C6S | E_ARG_188 | NH1 | E_ASP_184 | OD1 | 3.999 |
| 3C6S | E_ARG_188 | NH1 | E_ASP_184 | OD2 | 2.649 |
| 3C6S | E_ARG_188 | NH2 | E_GLU_185 | OE2 | 3.771 |
| 3C6S | E_HIS_189 | ND1 | E_ASP_151 | OD2 | 2.858 |
| 3C6S | E_LYS_199 | NZ  | E_ASP_110 | OD2 | 3.786 |
| 3C6S | F_ARG_38  | NH1 | F_ASP_86  | OD1 | 2.884 |
| 3C6S | F_ARG_38  | NH2 | F_GLU_46  | OE1 | 3.272 |
| 3C6S | F_ARG_38  | NH2 | F_GLU_46  | OE2 | 3.427 |
| 3C6S | F_ARG_38  | NH2 | F_ASP_86  | OD1 | 3.691 |
| 3C6S | F_ARG_52  | NH2 | F_GLU_50  | OE2 | 2.936 |
| 3C6S | F_LYS_64  | NZ  | F_GLU_61  | OE1 | 3.674 |
| 3C6S | F_LYS_64  | NZ  | F_GLU_61  | OE2 | 3.896 |
| 3C6S | F_LYS_66  | NZ  | F_ASP_86  | OD1 | 3.774 |
| 3C6S | F_LYS_66  | NZ  | F_ASP_86  | OD2 | 2.770 |
| 3C6S | F_ARG_71  | NH2 | F_ASP_73  | OD1 | 3.453 |
| 3C6S | F_LYS_207 | NZ  | F_ASP_209 | OD1 | 2.611 |
| 3C6S | F_LYS_207 | NZ  | F_ASP_209 | OD2 | 3.473 |
| 3C6S | F_LYS_210 | NZ  | E_GLU_123 | OE2 | 3.016 |
| 3C6S | G_LYS_27  | NZ  | G_GLU_93  | OE1 | 2.636 |
| 3C6S | G_LYS_27  | NZ  | G_GLU_93  | OE2 | 3.112 |
| 3C6S | G_HIS_27D | NE2 | G_ASP_28  | OD2 | 3.978 |
| 3C6S | G_ARG_61  | NH1 | G_ASP_82  | OD2 | 2.808 |
| 3C6S | G_ARG_61  | NH2 | G_GLU_79  | OE1 | 3.851 |
| 3C6S | G_ARG_61  | NH2 | G_ASP_82  | OD1 | 3.155 |
| 3C6S | G_ARG_61  | NH2 | G_ASP_82  | OD2 | 3.092 |
| 3C6S | G_ARG_96  | NH2 | H_GLU_50  | OE1 | 3.733 |
| 3C6S | G_ARG_96  | NH2 | H_GLU_50  | OE2 | 2.958 |
| 3C6S | G_LYS_147 | NZ  | G_GLU_154 | OE2 | 3.966 |
| 3C6S | G_LYS_149 | NZ  | G_GLU_195 | OE1 | 3.546 |
| 3C6S | G_LYS_149 | NZ  | G_GLU_195 | OE2 | 3.011 |
| 3C6S | G_ARG_155 | NH1 | G_GLU_185 | OE2 | 3.226 |
| 3C6S | G_LYS_169 | NZ  | G_GLU_81  | OE1 | 2.347 |
| 3C6S | G_LYS_169 | NZ  | G_GLU_81  | OE2 | 3.920 |
| 3C6S | G_ARG_188 | NH2 | G_GLU_185 | OE1 | 2.920 |
| 3C6S | G_HIS_189 | ND1 | G_ASP_151 | OD2 | 3.004 |

|      |           |     |           |     |       |
|------|-----------|-----|-----------|-----|-------|
| 3C6S | G_HIS_189 | NE2 | G_GLU_185 | OE1 | 3.998 |
| 3C6S | G_LYS_199 | NZ  | G_ASP_110 | OD2 | 3.920 |
| 3C6S | H_LYS_3   | NZ  | H_GLU_5   | OE1 | 2.755 |
| 3C6S | H_ARG_38  | NH1 | H_ASP_86  | OD1 | 2.900 |
| 3C6S | H_ARG_38  | NH2 | H_GLU_46  | OE1 | 3.369 |
| 3C6S | H_ARG_38  | NH2 | H_GLU_46  | OE2 | 3.273 |
| 3C6S | H_ARG_38  | NH2 | H_ASP_86  | OD1 | 3.683 |
| 3C6S | H_ARG_52  | NH2 | H_GLU_50  | OE2 | 3.044 |
| 3C6S | H_ARG_71  | NH2 | H_ASP_73  | OD1 | 3.344 |
| 3C6S | H_LYS_75  | NZ  | H_ASP_72  | OD2 | 3.808 |
| 3C6S | H_ARG_83  | NH1 | H_GLU_85  | OE2 | 3.502 |
| 3C6S | H_ARG_83  | NH2 | H_ASP_86  | OD1 | 2.979 |
| 3C6S | H_ARG_83  | NH2 | H_ASP_86  | OD2 | 3.571 |
| 3C6S | H_LYS_210 | NZ  | G_GLU_123 | OE2 | 2.402 |
| 3CVH | A_HIS_3   | ND1 | A_ASP_29  | OD1 | 3.340 |
| 3CVH | A_HIS_3   | ND1 | A_ASP_29  | OD2 | 3.186 |
| 3CVH | A_ARG_6   | NH2 | A_ASP_30  | OD1 | 3.294 |
| 3CVH | A_ARG_14  | NH1 | A_ASP_39  | OD2 | 2.927 |
| 3CVH | A_ARG_14  | NH2 | A_ASP_39  | OD1 | 3.777 |
| 3CVH | A_ARG_14  | NH2 | A_ASP_39  | OD2 | 2.767 |
| 3CVH | A_ARG_21  | NH2 | A_ASP_37  | OD1 | 3.377 |
| 3CVH | A_ARG_21  | NH2 | A_ASP_37  | OD2 | 2.615 |
| 3CVH | A_ARG_35  | NH1 | A_GLU_32  | OE1 | 2.677 |
| 3CVH | A_ARG_35  | NH1 | A_GLU_32  | OE2 | 2.491 |
| 3CVH | A_ARG_44  | NH2 | A_GLU_61  | OE1 | 2.791 |
| 3CVH | A_ARG_48  | NH1 | B_ASP_53  | OD2 | 3.820 |
| 3CVH | A_ARG_48  | NH2 | A_GLU_32  | OE2 | 3.651 |
| 3CVH | A_ARG_48  | NH2 | B_ASP_53  | OD2 | 2.637 |
| 3CVH | A_ARG_62  | NH1 | L_GLU_26  | OE1 | 3.514 |
| 3CVH | A_ARG_62  | NH1 | L_GLU_26  | OE2 | 3.458 |
| 3CVH | A_ARG_62  | NH2 | L_GLU_26  | OE1 | 3.664 |
| 3CVH | A_LYS_66  | NZ  | A_GLU_63  | OE1 | 2.982 |
| 3CVH | A_LYS_66  | NZ  | A_GLU_63  | OE2 | 3.930 |
| 3CVH | A_ARG_75  | NH1 | A_GLU_19  | OE1 | 2.649 |
| 3CVH | A_ARG_75  | NH1 | A_GLU_71  | OE1 | 3.442 |
| 3CVH | A_ARG_75  | NH2 | A_GLU_19  | OE1 | 3.819 |
| 3CVH | A_ARG_75  | NH2 | A_GLU_71  | OE1 | 3.726 |
| 3CVH | A_HIS_93  | ND1 | A_ASP_119 | OD1 | 3.615 |
| 3CVH | A_HIS_93  | ND1 | A_ASP_119 | OD2 | 2.743 |
| 3CVH | A_ARG_108 | NH2 | M_GLU_223 | OE2 | 3.938 |
| 3CVH | A_ARG_155 | NH2 | A_GLU_152 | OE1 | 3.097 |
| 3CVH | A_ARG_155 | NH2 | A_GLU_152 | OE2 | 2.655 |
| 3CVH | A_ARG_157 | NH2 | A_GLU_161 | OE2 | 3.326 |
| 3CVH | A_ARG_170 | NH2 | A_GLU_55  | OE1 | 2.438 |
| 3CVH | A_ARG_170 | NH2 | A_GLU_55  | OE2 | 3.042 |
| 3CVH | A_ARG_181 | NH2 | A_ASP_183 | OD2 | 3.102 |
| 3CVH | A_HIS_192 | ND1 | B_ASP_98  | OD2 | 3.410 |
| 3CVH | B_LYS_3   | NZ  | B_ASP_59  | OD2 | 3.798 |
| 3CVH | B_LYS_19  | NZ  | B_GLU_16  | OE1 | 3.984 |
| 3CVH | B_LYS_83  | NZ  | B_GLU_36  | OE1 | 3.948 |
| 3CVH | C_LYS_7   | NZ  | H_ASP_49  | OD1 | 3.577 |
| 3CVH | C_LYS_7   | NZ  | H_ASP_49  | OD2 | 3.552 |
| 3CVH | H_LYS_37  | NZ  | H_ASP_89  | OD1 | 4.000 |
| 3CVH | H_LYS_66  | NZ  | H_ASP_89  | OD1 | 3.905 |
| 3CVH | H_LYS_66  | NZ  | H_ASP_89  | OD2 | 2.944 |
| 3CVH | H_LYS_98  | NZ  | H_ASP_34  | OD1 | 3.326 |
| 3CVH | H_LYS_98  | NZ  | H_ASP_34  | OD2 | 3.016 |
| 3CVH | H_LYS_98  | NZ  | H_ASP_49  | OD2 | 3.605 |

|      |           |     |           |     |       |
|------|-----------|-----|-----------|-----|-------|
| 3CVH | H.LYS_215 | NZ  | L_GLU_122 | OE2 | 2.643 |
| 3CVH | L.LYS_23  | NZ  | L_ASP_69  | OD1 | 2.944 |
| 3CVH | L.LYS_23  | NZ  | L_ASP_69  | OD2 | 3.859 |
| 3CVH | L_ARG_60  | NH1 | L_GLU_80  | OE1 | 3.977 |
| 3CVH | L_ARG_60  | NH2 | L_GLU_80  | OE1 | 3.053 |
| 3CVH | L_ARG_60  | NH2 | L_ASP_81  | OD1 | 3.208 |
| 3CVH | L_ARG_60  | NH2 | L_ASP_81  | OD2 | 2.613 |
| 3CVH | L_ARG_67  | NH2 | L_ASP_27  | OD1 | 3.678 |
| 3CVH | L_ARG_67  | NH2 | L_ASP_27  | OD2 | 2.811 |
| 3CVH | L.LYS_146 | NZ  | L_GLU_153 | OE1 | 3.893 |
| 3CVH | L.LYS_146 | NZ  | L_GLU_153 | OE2 | 3.978 |
| 3CVH | L.LYS_148 | NZ  | L_GLU_194 | OE1 | 3.826 |
| 3CVH | L_ARG_154 | NH1 | L_GLU_184 | OE1 | 3.751 |
| 3CVH | L.LYS_182 | NZ  | L_GLU_186 | OE1 | 3.005 |
| 3CVH | L.LYS_182 | NZ  | L_GLU_186 | OE2 | 3.813 |
| 3CVH | L_ARG_187 | NH2 | L_ASP_183 | OD1 | 3.139 |
| 3CVH | L_ARG_187 | NH2 | L_ASP_183 | OD2 | 2.810 |
| 3CVH | L.LYS_198 | NZ  | L_ASP_109 | OD2 | 3.543 |
| 3CVH | M.HIS_3   | ND1 | M_ASP_29  | OD1 | 2.963 |
| 3CVH | M.HIS_3   | ND1 | M_ASP_29  | OD2 | 2.771 |
| 3CVH | M_ARG_14  | NH1 | M_ASP_39  | OD1 | 3.573 |
| 3CVH | M_ARG_14  | NH2 | M_ASP_39  | OD1 | 2.587 |
| 3CVH | M_ARG_21  | NH1 | M_ASP_39  | OD2 | 3.455 |
| 3CVH | M_ARG_21  | NH2 | M_ASP_37  | OD1 | 3.446 |
| 3CVH | M_ARG_21  | NH2 | M_ASP_37  | OD2 | 2.717 |
| 3CVH | M_ARG_21  | NH2 | M_ASP_39  | OD2 | 3.712 |
| 3CVH | M_ARG_35  | NH2 | M_GLU_32  | OE1 | 3.151 |
| 3CVH | M_ARG_35  | NH2 | M_GLU_32  | OE2 | 3.351 |
| 3CVH | M_ARG_48  | NH1 | M_GLU_46  | OE1 | 3.444 |
| 3CVH | M_ARG_48  | NH1 | M_GLU_46  | OE2 | 3.832 |
| 3CVH | M_ARG_48  | NH1 | N_ASP_53  | OD2 | 3.601 |
| 3CVH | M_ARG_48  | NH2 | M_GLU_32  | OE2 | 3.692 |
| 3CVH | M_ARG_48  | NH2 | N_ASP_53  | OD2 | 2.621 |
| 3CVH | M_ARG_50  | NH2 | M_GLU_53  | OE2 | 3.272 |
| 3CVH | M_ARG_62  | NH1 | R_GLU_26  | OE1 | 3.418 |
| 3CVH | M_ARG_62  | NH2 | R_GLU_26  | OE1 | 3.162 |
| 3CVH | M_ARG_62  | NH2 | R_GLU_26  | OE2 | 2.706 |
| 3CVH | M.LYS_66  | NZ  | M_GLU_63  | OE1 | 3.245 |
| 3CVH | M_ARG_75  | NH1 | M_GLU_19  | OE1 | 3.628 |
| 3CVH | M_ARG_75  | NH2 | M_GLU_71  | OE1 | 3.921 |
| 3CVH | M_ARG_75  | NH2 | M_GLU_71  | OE2 | 2.545 |
| 3CVH | M.HIS_93  | ND1 | M_ASP_119 | OD1 | 3.830 |
| 3CVH | M.HIS_93  | ND1 | M_ASP_119 | OD2 | 2.828 |
| 3CVH | M_ARG_108 | NH2 | A_GLU_223 | OE1 | 3.207 |
| 3CVH | M_ARG_108 | NH2 | A_GLU_223 | OE2 | 3.250 |
| 3CVH | M_ARG_111 | NH1 | M_GLU_128 | OE2 | 3.369 |
| 3CVH | M_ARG_111 | NH2 | M_GLU_128 | OE2 | 2.639 |
| 3CVH | M.HIS_145 | ND1 | M_GLU_148 | OE1 | 3.811 |
| 3CVH | M_ARG_155 | NH2 | M_GLU_152 | OE1 | 3.335 |
| 3CVH | M_ARG_155 | NH2 | M_GLU_152 | OE2 | 2.756 |
| 3CVH | M_ARG_157 | NH2 | M_GLU_161 | OE1 | 2.814 |
| 3CVH | M_ARG_157 | NH2 | M_GLU_161 | OE2 | 3.333 |
| 3CVH | M_ARG_169 | NH1 | A_GLU_268 | OE2 | 3.364 |
| 3CVH | M_ARG_170 | NH2 | M_GLU_55  | OE1 | 2.487 |
| 3CVH | M_ARG_170 | NH2 | M_GLU_55  | OE2 | 3.462 |
| 3CVH | M_ARG_181 | NH2 | M_ASP_183 | OD2 | 3.222 |
| 3CVH | N.LYS_83  | NZ  | N_GLU_36  | OE1 | 2.685 |
| 3CVH | N.LYS_83  | NZ  | N_GLU_36  | OE2 | 3.981 |

|      |           |     |           |     |       |
|------|-----------|-----|-----------|-----|-------|
| 3CVH | O_LYS_7   | NZ  | Q_ASP_49  | OD1 | 3.648 |
| 3CVH | O_LYS_7   | NZ  | Q_ASP_49  | OD2 | 3.052 |
| 3CVH | Q_LYS_37  | NZ  | Q_ASP_89  | OD1 | 3.997 |
| 3CVH | Q_LYS_98  | NZ  | Q_ASP_34  | OD1 | 3.064 |
| 3CVH | Q_LYS_98  | NZ  | Q_ASP_34  | OD2 | 2.433 |
| 3CVH | Q_LYS_98  | NZ  | Q_ASP_49  | OD2 | 3.431 |
| 3CVH | Q_LYS_215 | NZ  | R_GLU_122 | OE1 | 3.557 |
| 3CVH | R_ARG_60  | NH1 | R_ASP_81  | OD1 | 3.125 |
| 3CVH | R_ARG_60  | NH1 | R_ASP_81  | OD2 | 2.738 |
| 3CVH | R_ARG_60  | NH2 | R_GLU_80  | OE1 | 3.793 |
| 3CVH | R_LYS_102 | NZ  | R_ASP_164 | OD1 | 3.388 |
| 3CVH | R_LYS_141 | NZ  | R_GLU_104 | OE1 | 3.136 |
| 3CVH | R_LYS_148 | NZ  | R_GLU_194 | OE1 | 3.875 |
| 3CVH | R_ARG_154 | NH2 | R_GLU_184 | OE1 | 3.709 |
| 3CVH | R_HIS_188 | ND1 | R_ASP_150 | OD2 | 3.342 |
| 3CVH | R_HIS_188 | NE2 | R_GLU_184 | OE2 | 3.904 |
| 3CXD | L_ARG_61  | NH2 | L_GLU_81  | OE2 | 3.336 |
| 3CXD | L_ARG_61  | NH2 | L_ASP_82  | OD1 | 3.305 |
| 3CXD | L_ARG_61  | NH2 | L_ASP_82  | OD2 | 2.791 |
| 3CXD | L_LYS_147 | NZ  | L_GLU_154 | OE2 | 3.401 |
| 3CXD | L_LYS_149 | NZ  | L_GLU_195 | OE2 | 2.939 |
| 3CXD | L_ARG_155 | NH1 | L_GLU_185 | OE1 | 3.386 |
| 3CXD | L_ARG_155 | NH2 | L_GLU_185 | OE1 | 3.845 |
| 3CXD | L_ARG_155 | NH2 | L_GLU_185 | OE2 | 3.314 |
| 3CXD | L_ARG_188 | NH2 | L_ASP_184 | OD1 | 3.219 |
| 3CXD | L_HIS_189 | ND1 | L_ASP_151 | OD2 | 2.794 |
| 3CXD | L_LYS_199 | NZ  | L_ASP_110 | OD1 | 3.656 |
| 3CXD | L_LYS_199 | NZ  | L_ASP_110 | OD2 | 3.337 |
| 3CXD | H_ARG_38  | NH1 | H_GLU_46  | OE1 | 3.619 |
| 3CXD | H_ARG_38  | NH1 | H_GLU_46  | OE2 | 2.600 |
| 3CXD | H_ARG_38  | NH2 | H_ASP_92  | OD1 | 2.807 |
| 3CXD | H_ARG_52  | NH1 | P_ASP_47  | OD1 | 3.830 |
| 3CXD | H_ARG_52  | NH1 | P_ASP_47  | OD2 | 3.528 |
| 3CXD | H_LYS_67  | NZ  | H_ASP_64  | OD1 | 2.806 |
| 3CXD | H_ARG_69  | NH1 | H_ASP_92  | OD2 | 2.720 |
| 3CXD | H_ARG_69  | NH2 | H_ASP_92  | OD1 | 3.121 |
| 3CXD | H_ARG_69  | NH2 | H_ASP_92  | OD2 | 2.861 |
| 3CXD | H_ARG_74  | NH2 | H_ASP_76  | OD1 | 3.600 |
| 3CXD | H_ARG_100 | NH2 | H_ASP_104 | OD1 | 3.226 |
| 3CXD | H_ARG_100 | NH2 | H_ASP_104 | OD2 | 2.671 |
| 3D0L | A_ARG_37  | NH1 | A_GLU_81  | OE2 | 3.366 |
| 3D0L | A_ARG_37  | NH1 | A_ASP_82  | OD1 | 2.929 |
| 3D0L | A_ARG_37  | NH2 | A_GLU_81  | OE2 | 3.080 |
| 3D0L | A_ARG_61  | NH2 | A_GLU_81  | OE1 | 3.374 |
| 3D0L | A_ARG_61  | NH2 | A_ASP_82  | OD1 | 2.776 |
| 3D0L | A_ARG_61  | NH2 | A_ASP_82  | OD2 | 3.420 |
| 3D0L | A_HIS_96  | NE2 | C_ASP_5   | OD1 | 3.014 |
| 3D0L | A_LYS_149 | NZ  | A_GLU_195 | OE1 | 3.487 |
| 3D0L | A_LYS_183 | NZ  | A_GLU_187 | OE2 | 3.124 |
| 3D0L | A_LYS_190 | NZ  | A_GLU_213 | OE2 | 3.283 |
| 3D0L | B_ARG_38  | NH1 | B_GLU_46  | OE1 | 2.512 |
| 3D0L | B_ARG_38  | NH1 | B_GLU_46  | OE2 | 3.477 |
| 3D0L | B_ARG_38  | NH2 | B_ASP_86  | OD1 | 2.546 |
| 3D0L | B_LYS_57  | NZ  | B_ASP_55  | OD2 | 3.516 |
| 3D0L | B_ARG_58  | NH1 | B_ASP_56  | OD1 | 2.533 |
| 3D0L | B_ARG_58  | NH1 | B_ASP_56  | OD2 | 3.774 |
| 3D0L | B_ARG_58  | NH2 | B_ASP_56  | OD1 | 3.951 |
| 3D0L | B_ARG_58  | NH2 | C_GLU_3   | OE1 | 3.473 |

|      |           |     |           |     |       |
|------|-----------|-----|-----------|-----|-------|
| 3D0L | B_ARG_58  | NH2 | C_GLU_3   | OE2 | 3.109 |
| 3D0L | B_ARG_66  | NH1 | B_ASP_86  | OD1 | 3.615 |
| 3D0L | B_ARG_66  | NH2 | B_ASP_86  | OD1 | 3.276 |
| 3D0L | B_ARG_66  | NH2 | B_ASP_86  | OD2 | 2.898 |
| 3D0L | B_HIS_94  | ND1 | B_ASP_101 | OD1 | 2.602 |
| 3D0L | B_HIS_94  | ND1 | B_ASP_101 | OD2 | 3.437 |
| 3D0L | B_ARG_95  | NH1 | C_ASP_5   | OD1 | 2.695 |
| 3D0L | B_ARG_95  | NH1 | C_ASP_5   | OD2 | 3.449 |
| 3D0L | B_ARG_95  | NH2 | C_ASP_5   | OD1 | 3.596 |
| 3D0L | B_ARG_95  | NH2 | C_ASP_5   | OD2 | 3.078 |
| 3D0L | B_ARG_96  | NH1 | A_GLU_55  | OE1 | 3.284 |
| 3D0L | B_ARG_96  | NH1 | A_GLU_55  | OE2 | 3.522 |
| 3D0L | B_ARG_96  | NH1 | B_ASP_101 | OD2 | 3.433 |
| 3D0L | B_ARG_96  | NH2 | A_GLU_55  | OE1 | 3.455 |
| 3D0L | B_LYS_143 | NZ  | B_ASP_144 | OD1 | 3.418 |
| 3D0L | B_LYS_143 | NZ  | B_ASP_144 | OD2 | 3.784 |
| 3D0L | B_ARG_210 | NH2 | B_GLU_212 | OE1 | 2.865 |
| 3D0L | C_LYS_6   | NZ  | B_ASP_54  | OD1 | 2.251 |
| 3D0L | C_LYS_6   | NZ  | B_ASP_54  | OD2 | 2.930 |
| 3D0L | C_LYS_6   | NZ  | B_ASP_56  | OD2 | 3.751 |
| 3D0V | A_ARG_37  | NH1 | A_ASP_82  | OD1 | 2.771 |
| 3D0V | A_ARG_61  | NH2 | A_GLU_81  | OE2 | 3.952 |
| 3D0V | A_ARG_61  | NH2 | A_ASP_82  | OD1 | 2.926 |
| 3D0V | A_ARG_61  | NH2 | A_ASP_82  | OD2 | 3.288 |
| 3D0V | A_ARG_79  | NH1 | A_GLU_81  | OE2 | 3.015 |
| 3D0V | A_ARG_79  | NH2 | A_GLU_81  | OE2 | 2.700 |
| 3D0V | A_HIS_96  | NE2 | C_ASP_5   | OD1 | 2.775 |
| 3D0V | A_LYS_149 | NZ  | A_GLU_195 | OE1 | 3.493 |
| 3D0V | A_LYS_149 | NZ  | A_GLU_195 | OE2 | 3.064 |
| 3D0V | A_LYS_183 | NZ  | A_GLU_187 | OE2 | 3.032 |
| 3D0V | A_ARG_211 | NH1 | A_GLU_187 | OE1 | 3.976 |
| 3D0V | B_ARG_38  | NH1 | B_GLU_46  | OE1 | 2.804 |
| 3D0V | B_ARG_38  | NH1 | B_GLU_46  | OE2 | 3.705 |
| 3D0V | B_ARG_38  | NH2 | B_ASP_86  | OD1 | 2.434 |
| 3D0V | B_LYS_57  | NZ  | B_ASP_55  | OD1 | 3.625 |
| 3D0V | B_LYS_57  | NZ  | B_ASP_55  | OD2 | 3.392 |
| 3D0V | B_ARG_58  | NH1 | B_ASP_56  | OD1 | 3.726 |
| 3D0V | B_ARG_58  | NH1 | B_ASP_56  | OD2 | 2.549 |
| 3D0V | B_ARG_58  | NH2 | B_ASP_56  | OD2 | 3.911 |
| 3D0V | B_ARG_58  | NH2 | C_GLU_3   | OE1 | 2.733 |
| 3D0V | B_ARG_66  | NH1 | B_ASP_86  | OD1 | 3.446 |
| 3D0V | B_ARG_66  | NH1 | B_ASP_86  | OD2 | 3.728 |
| 3D0V | B_ARG_66  | NH2 | B_ASP_86  | OD1 | 3.289 |
| 3D0V | B_ARG_66  | NH2 | B_ASP_86  | OD2 | 2.373 |
| 3D0V | B_HIS_94  | ND1 | B_ASP_101 | OD1 | 2.627 |
| 3D0V | B_HIS_94  | ND1 | B_ASP_101 | OD2 | 3.607 |
| 3D0V | B_ARG_95  | NH1 | C_ASP_5   | OD1 | 2.808 |
| 3D0V | B_ARG_95  | NH1 | C_ASP_5   | OD2 | 3.484 |
| 3D0V | B_ARG_95  | NH2 | C_ASP_5   | OD1 | 3.359 |
| 3D0V | B_ARG_95  | NH2 | C_ASP_5   | OD2 | 2.831 |
| 3D0V | B_ARG_96  | NH1 | A_GLU_55  | OE1 | 3.250 |
| 3D0V | B_ARG_96  | NH1 | A_GLU_55  | OE2 | 3.216 |
| 3D0V | B_ARG_96  | NH1 | B_ASP_101 | OD2 | 3.014 |
| 3D0V | B_ARG_96  | NH2 | A_GLU_55  | OE1 | 3.184 |
| 3D0V | B_LYS_143 | NZ  | B_ASP_144 | OD1 | 3.460 |
| 3D0V | B_LYS_143 | NZ  | B_ASP_144 | OD2 | 3.988 |
| 3D0V | B_LYS_209 | NZ  | A_GLU_123 | OE1 | 3.487 |
| 3D0V | B_ARG_210 | NH1 | B_GLU_212 | OE1 | 2.267 |



|      |           |     |           |     |       |
|------|-----------|-----|-----------|-----|-------|
| 3D0V | B_ARG_210 | NH2 | B_GLU_212 | OE1 | 3.360 |
| 3D0V | C_LYS_6   | NZ  | B_ASP_54  | OD1 | 3.609 |
| 3D0V | C_LYS_6   | NZ  | B_ASP_54  | OD2 | 2.826 |
| 3D0V | C_LYS_6   | NZ  | B_ASP_56  | OD1 | 3.006 |
| 3D9A | C_LYS_601 | NZ  | C_GLU_607 | OE2 | 3.151 |
| 3D9A | C_LYS_697 | NZ  | H_ASP_332 | OD2 | 2.741 |
| 3D9A | C_LYS_697 | NZ  | H_ASP_399 | OD1 | 2.864 |
| 3D9A | C_LYS_697 | NZ  | H_ASP_399 | OD2 | 3.300 |
| 3D9A | L_ARG_24  | NH2 | L_ASP_70  | OD1 | 3.000 |
| 3D9A | L_ARG_24  | NH2 | L_ASP_70  | OD2 | 3.752 |
| 3D9A | L_ARG_61  | NH1 | L_GLU_79  | OE1 | 3.658 |
| 3D9A | L_ARG_61  | NH1 | L_GLU_79  | OE2 | 3.448 |
| 3D9A | L_ARG_61  | NH2 | L_GLU_79  | OE1 | 3.298 |
| 3D9A | L_ARG_61  | NH2 | L_ASP_82  | OD1 | 2.829 |
| 3D9A | L_ARG_61  | NH2 | L_ASP_82  | OD2 | 3.674 |
| 3D9A | L_LYS_147 | NZ  | L_GLU_154 | OE1 | 3.943 |
| 3D9A | L_LYS_149 | NZ  | L_GLU_195 | OE2 | 3.477 |
| 3D9A | L_LYS_169 | NZ  | L_ASP_167 | OD2 | 3.989 |
| 3D9A | L_LYS_199 | NZ  | L_ASP_110 | OD1 | 3.878 |
| 3D9A | L_LYS_199 | NZ  | L_ASP_110 | OD2 | 3.357 |
| 3D9A | H_ARG_338 | NH1 | H_ASP_389 | OD1 | 2.834 |
| 3D9A | H_ARG_338 | NH2 | H_GLU_346 | OE1 | 2.922 |
| 3D9A | H_ARG_338 | NH2 | H_ASP_389 | OD1 | 3.583 |
| 3D9A | H_ARG_366 | NH1 | H_ASP_389 | OD1 | 2.956 |
| 3D9A | H_ARG_366 | NH1 | H_ASP_389 | OD2 | 3.486 |
| 3D9A | H_ARG_366 | NH2 | H_ASP_389 | OD1 | 3.662 |
| 3D9A | H_ARG_366 | NH2 | H_ASP_389 | OD2 | 2.925 |
| 3D9A | H_LYS_508 | NZ  | L_GLU_123 | OE1 | 3.029 |
| 3D9A | H_LYS_508 | NZ  | L_GLU_123 | OE2 | 3.809 |
| 3DRO | A_ARG_37  | NH1 | A_ASP_82  | OD1 | 2.782 |
| 3DRO | A_ARG_61  | NH2 | A_ASP_82  | OD1 | 2.866 |
| 3DRO | A_ARG_61  | NH2 | A_ASP_82  | OD2 | 3.498 |
| 3DRO | A_ARG_107 | NH1 | A_ASP_17  | OD2 | 3.044 |
| 3DRO | A_ARG_107 | NH2 | A_ASP_17  | OD2 | 3.360 |
| 3DRO | A_LYS_149 | NZ  | A_GLU_195 | OE2 | 3.983 |
| 3DRO | A_LYS_183 | NZ  | A_GLU_187 | OE1 | 3.983 |
| 3DRO | A_LYS_183 | NZ  | A_GLU_187 | OE2 | 3.458 |
| 3DRO | A_LYS_188 | NZ  | A_ASP_185 | OD1 | 3.977 |
| 3DRO | A_LYS_190 | NZ  | A_GLU_213 | OE2 | 3.164 |
| 3DRO | B_ARG_1   | NH1 | B_ASP_101 | OD2 | 3.834 |
| 3DRO | B_ARG_38  | NH1 | B_GLU_46  | OE1 | 2.549 |
| 3DRO | B_ARG_38  | NH1 | B_GLU_46  | OE2 | 3.279 |
| 3DRO | B_ARG_38  | NH2 | B_GLU_46  | OE1 | 3.448 |
| 3DRO | B_ARG_38  | NH2 | B_ASP_86  | OD1 | 3.555 |
| 3DRO | B_ARG_58  | NH1 | B_ASP_56  | OD2 | 3.804 |
| 3DRO | B_ARG_66  | NH1 | B_ASP_86  | OD1 | 3.732 |
| 3DRO | B_ARG_66  | NH2 | B_ASP_86  | OD1 | 3.385 |
| 3DRO | B_ARG_66  | NH2 | B_ASP_86  | OD2 | 2.816 |
| 3DRO | B_HIS_94  | ND1 | B_ASP_101 | OD1 | 2.877 |
| 3DRO | B_HIS_94  | ND1 | B_ASP_101 | OD2 | 3.841 |
| 3DRO | B_ARG_95  | NH1 | P_ASP_5   | OD1 | 3.590 |
| 3DRO | B_ARG_95  | NH1 | P_ASP_5   | OD2 | 3.370 |
| 3DRO | B_ARG_95  | NH2 | P_ASP_5   | OD2 | 3.007 |
| 3DRO | B_ARG_96  | NH1 | B_ASP_101 | OD2 | 2.827 |
| 3DRO | B_ARG_96  | NH2 | A_GLU_55  | OE1 | 2.727 |
| 3DRO | B_ARG_96  | NH2 | A_GLU_55  | OE2 | 3.426 |
| 3DRO | B_ARG_96  | NH2 | B_ASP_101 | OD2 | 3.688 |
| 3DRO | B_LYS_143 | NZ  | B_ASP_144 | OD1 | 3.378 |

|      |           |     |           |     |       |
|------|-----------|-----|-----------|-----|-------|
| 3DRO | B_LYS_143 | NZ  | B_ASP_144 | OD2 | 3.463 |
| 3DRO | B_LYS_209 | NZ  | A_GLU_123 | OE1 | 3.782 |
| 3DRO | B_ARG_210 | NH2 | B_GLU_212 | OE1 | 3.532 |
| 3DRO | P_LYS_6   | NZ  | B_ASP_54  | OD1 | 2.913 |
| 3DRO | P_LYS_6   | NZ  | B_ASP_54  | OD2 | 3.775 |
| 3DRO | P_LYS_6   | NZ  | B_ASP_56  | OD1 | 3.330 |
| 3DRO | P_LYS_6   | NZ  | B_ASP_56  | OD2 | 3.868 |
| 3DRQ | A_ARG_37  | NH1 | A_ASP_82  | OD1 | 2.863 |
| 3DRQ | A_LYS_39  | NZ  | A_GLU_81  | OE1 | 2.913 |
| 3DRQ | A_ARG_61  | NH2 | A_ASP_82  | OD1 | 2.860 |
| 3DRQ | A_ARG_61  | NH2 | A_ASP_82  | OD2 | 3.418 |
| 3DRQ | A_HIS_96  | NE2 | C_ASP_5   | OD1 | 2.866 |
| 3DRQ | A_ARG_107 | NH1 | A_ASP_17  | OD2 | 3.572 |
| 3DRQ | A_LYS_149 | NZ  | A_GLU_195 | OE1 | 3.681 |
| 3DRQ | A_LYS_183 | NZ  | A_GLU_187 | OE2 | 3.873 |
| 3DRQ | A_LYS_190 | NZ  | A_GLU_213 | OE2 | 3.586 |
| 3DRQ | B_ARG_1   | NH1 | B_ASP_101 | OD2 | 3.864 |
| 3DRQ | B_ARG_38  | NH1 | B_GLU_46  | OE1 | 2.536 |
| 3DRQ | B_ARG_38  | NH1 | B_GLU_46  | OE2 | 3.423 |
| 3DRQ | B_ARG_38  | NH2 | B_ASP_86  | OD1 | 2.585 |
| 3DRQ | B_LYS_57  | NZ  | B_ASP_55  | OD2 | 3.992 |
| 3DRQ | B_ARG_58  | NH1 | B_ASP_56  | OD2 | 3.411 |
| 3DRQ | B_ARG_58  | NH2 | C_GLU_3   | OE1 | 3.516 |
| 3DRQ | B_ARG_66  | NH1 | B_ASP_86  | OD1 | 3.694 |
| 3DRQ | B_ARG_66  | NH2 | B_ASP_86  | OD1 | 3.360 |
| 3DRQ | B_ARG_66  | NH2 | B_ASP_86  | OD2 | 2.903 |
| 3DRQ | B_HIS_94  | ND1 | B_ASP_101 | OD1 | 2.538 |
| 3DRQ | B_HIS_94  | ND1 | B_ASP_101 | OD2 | 3.527 |
| 3DRQ | B_ARG_95  | NH1 | C_ASP_5   | OD1 | 2.806 |
| 3DRQ | B_ARG_95  | NH1 | C_ASP_5   | OD2 | 3.209 |
| 3DRQ | B_ARG_95  | NH2 | C_ASP_5   | OD1 | 3.572 |
| 3DRQ | B_ARG_95  | NH2 | C_ASP_5   | OD2 | 2.688 |
| 3DRQ | B_ARG_96  | NH1 | A_GLU_55  | OE1 | 2.721 |
| 3DRQ | B_ARG_96  | NH1 | A_GLU_55  | OE2 | 2.397 |
| 3DRQ | B_ARG_96  | NH1 | B_ASP_101 | OD2 | 3.478 |
| 3DRQ | B_ARG_96  | NH2 | A_GLU_55  | OE1 | 3.293 |
| 3DRQ | B_LYS_143 | NZ  | B_ASP_144 | OD1 | 3.320 |
| 3DRQ | B_LYS_143 | NZ  | B_ASP_144 | OD2 | 3.881 |
| 3DRQ | B_LYS_209 | NZ  | A_GLU_123 | OE1 | 3.837 |
| 3DRQ | C_LYS_6   | NZ  | B_ASP_54  | OD1 | 2.921 |
| 3DRQ | C_LYS_6   | NZ  | B_ASP_54  | OD2 | 2.342 |
| 3DRQ | C_LYS_6   | NZ  | B_ASP_56  | OD1 | 3.006 |
| 3DSF | L_ARG_61  | NH1 | L_GLU_81  | OE2 | 3.610 |
| 3DSF | L_ARG_61  | NH2 | L_GLU_81  | OE2 | 2.775 |
| 3DSF | L_ARG_61  | NH2 | L_ASP_82  | OD1 | 3.453 |
| 3DSF | L_ARG_61  | NH2 | L_ASP_82  | OD2 | 2.517 |
| 3DSF | L_LYS_147 | NZ  | L_GLU_154 | OE2 | 3.411 |
| 3DSF | L_LYS_149 | NZ  | L_GLU_195 | OE2 | 3.065 |
| 3DSF | L_ARG_155 | NH1 | L_GLU_185 | OE1 | 3.133 |
| 3DSF | L_ARG_155 | NH2 | L_GLU_185 | OE1 | 3.886 |
| 3DSF | L_ARG_155 | NH2 | L_GLU_185 | OE2 | 3.560 |
| 3DSF | L_ARG_188 | NH2 | L_ASP_184 | OD1 | 3.232 |
| 3DSF | L_HIS_189 | ND1 | L_ASP_151 | OD2 | 2.709 |
| 3DSF | L_LYS_199 | NZ  | L_ASP_110 | OD1 | 3.100 |
| 3DSF | L_LYS_199 | NZ  | L_ASP_110 | OD2 | 2.808 |
| 3DSF | H_ARG_38  | NH1 | H_GLU_46  | OE1 | 3.258 |
| 3DSF | H_ARG_38  | NH1 | H_GLU_46  | OE2 | 2.451 |
| 3DSF | H_ARG_38  | NH2 | H_ASP_92  | OD1 | 2.841 |

|      |           |     |           |     |       |
|------|-----------|-----|-----------|-----|-------|
| 3DSF | H_ARG_52  | NH1 | P_ASP_47  | OD2 | 3.172 |
| 3DSF | H_LYS_67  | NZ  | H_ASP_64  | OD1 | 3.269 |
| 3DSF | H_ARG_69  | NH1 | H_ASP_92  | OD2 | 2.681 |
| 3DSF | H_ARG_69  | NH2 | H_ASP_92  | OD1 | 3.011 |
| 3DSF | H_ARG_69  | NH2 | H_ASP_92  | OD2 | 3.022 |
| 3DSF | H_ARG_74  | NH2 | H_ASP_76  | OD1 | 3.842 |
| 3DSF | H_ARG_100 | NH2 | H_ASP_104 | OD1 | 3.055 |
| 3DSF | H_ARG_100 | NH2 | H_ASP_104 | OD2 | 2.952 |
| 3EBA | A_ARG_49  | NH1 | A_ASP_52  | OD1 | 3.900 |
| 3EBA | A_ARG_64  | NH1 | A_ASP_87  | OD1 | 3.739 |
| 3EBA | A_ARG_64  | NH1 | A_ASP_87  | OD2 | 2.820 |
| 3EBA | A_ARG_64  | NH2 | A_ASP_87  | OD1 | 2.913 |
| 3EBA | A_ARG_64  | NH2 | A_ASP_87  | OD2 | 3.515 |
| 3EBA | A_LYS_84  | NZ  | A_GLU_86  | OE1 | 3.206 |
| 3EBA | B_LYS_69  | NZ  | B_ASP_67  | OD2 | 3.295 |
| 3EBA | B_LYS_97  | NZ  | A_GLU_97  | OE2 | 3.240 |
| 3EBA | B_ARG_101 | NH1 | A_ASP_109 | OD1 | 3.083 |
| 3EBA | B_ARG_101 | NH1 | A_ASP_109 | OD2 | 2.691 |
| 3EBA | B_ARG_101 | NH2 | A_ASP_109 | OD1 | 3.308 |
| 3EBA | B_ARG_101 | NH2 | A_ASP_109 | OD2 | 3.134 |
| 3EOA | L_ARG_24  | NH2 | L_ASP_70  | OD1 | 3.574 |
| 3EOA | L_ARG_24  | NH2 | L_ASP_70  | OD2 | 2.606 |
| 3EOA | L_ARG_61  | NH1 | L_GLU_81  | OE2 | 3.484 |
| 3EOA | L_ARG_61  | NH1 | L_ASP_82  | OD1 | 3.804 |
| 3EOA | L_LYS_149 | NZ  | L_GLU_195 | OE1 | 2.415 |
| 3EOA | H_ARG_38  | NH1 | H_ASP_90  | OD1 | 2.905 |
| 3EOA | H_ARG_38  | NH2 | H_GLU_46  | OE2 | 3.821 |
| 3EOA | H_ARG_38  | NH2 | H_ASP_90  | OD1 | 3.860 |
| 3EOA | H_ARG_67  | NH1 | H_ASP_90  | OD2 | 2.949 |
| 3EOA | H_ARG_67  | NH2 | H_ASP_90  | OD1 | 3.556 |
| 3EOA | H_ARG_67  | NH2 | H_ASP_90  | OD2 | 3.648 |
| 3EOA | H_ARG_87  | NH1 | H_GLU_89  | OE1 | 2.782 |
| 3EOA | H_ARG_98  | NH1 | H_ASP_109 | OD2 | 2.755 |
| 3EOA | H_LYS_151 | NZ  | H_ASP_152 | OD1 | 3.488 |
| 3EOA | H_LYS_151 | NZ  | H_ASP_152 | OD2 | 3.869 |
| 3EOA | H_LYS_217 | NZ  | L_GLU_123 | OE2 | 3.037 |
| 3EOA | I_LYS_149 | NZ  | I_ASP_145 | OD1 | 2.783 |
| 3EOA | I_LYS_149 | NZ  | I_ASP_145 | OD2 | 2.826 |
| 3EOA | I_LYS_155 | NZ  | I_ASP_152 | OD1 | 3.581 |
| 3EOA | I_LYS_155 | NZ  | I_ASP_193 | OD1 | 2.723 |
| 3EOA | I_LYS_159 | NZ  | I_ASP_156 | OD1 | 3.990 |
| 3EOA | I_LYS_159 | NZ  | I_ASP_193 | OD2 | 3.917 |
| 3EOA | I_LYS_178 | NZ  | I_GLU_180 | OE1 | 3.466 |
| 3EOA | I_LYS_197 | NZ  | H_ASP_55  | OD1 | 3.170 |
| 3EOA | I_LYS_197 | NZ  | H_GLU_57  | OE1 | 2.719 |
| 3EOA | I_HIS_198 | NE2 | H_GLU_57  | OE1 | 3.638 |
| 3EOA | I_HIS_198 | NE2 | H_GLU_57  | OE2 | 3.098 |
| 3EOA | I_ARG_221 | NH1 | I_GLU_223 | OE2 | 3.700 |
| 3EOA | I_ARG_227 | NH2 | I_ASP_131 | OD2 | 2.628 |
| 3EOA | I_LYS_252 | NZ  | I_ASP_249 | OD2 | 3.806 |
| 3EOA | A_ARG_61  | NH1 | A_GLU_81  | OE2 | 3.839 |
| 3EOA | A_ARG_61  | NH1 | A_ASP_82  | OD1 | 2.580 |
| 3EOA | A_ARG_61  | NH1 | A_ASP_82  | OD2 | 3.564 |
| 3EOA | A_LYS_103 | NZ  | A_GLU_165 | OE1 | 3.460 |
| 3EOA | A_LYS_103 | NZ  | A_GLU_165 | OE2 | 3.931 |
| 3EOA | A_LYS_    | NZ  | A_GLU_    | OE1 | 3.399 |
| 3EOA | A_LYS_    | NZ  | A_GLU_    | OE2 | 3.445 |
| 3EOA | A_LYS_    | NZ  | A_GLU_    | OE2 | 3.194 |

|      |           |     |           |     |       |
|------|-----------|-----|-----------|-----|-------|
| 3EOA | A_ARG_    | NH2 | A_GLU_    | OE2 | 3.408 |
| 3EOA | B_ARG_38  | NH1 | B_ASP_90  | OD1 | 2.938 |
| 3EOA | B_ARG_38  | NH2 | B_GLU_46  | OE2 | 3.688 |
| 3EOA | B_ARG_38  | NH2 | B_ASP_90  | OD1 | 3.785 |
| 3EOA | B_ARG_67  | NH1 | B_ASP_90  | OD1 | 3.358 |
| 3EOA | B_ARG_67  | NH1 | B_ASP_90  | OD2 | 2.533 |
| 3EOA | B_ARG_67  | NH2 | B_ASP_90  | OD1 | 3.191 |
| 3EOA | B_ARG_67  | NH2 | B_ASP_90  | OD2 | 3.831 |
| 3EOA | B_ARG_98  | NH1 | B_ASP_109 | OD1 | 3.621 |
| 3EOA | B_ARG_98  | NH1 | B_ASP_109 | OD2 | 2.877 |
| 3EOA | B_LYS_    | NZ  | A_GLU_    | OE2 | 3.673 |
| 3EOA | J_LYS_149 | NZ  | J_ASP_145 | OD1 | 3.029 |
| 3EOA | J_LYS_149 | NZ  | J_GLU_293 | OE2 | 2.826 |
| 3EOA | J_LYS_155 | NZ  | J_ASP_193 | OD1 | 2.719 |
| 3EOA | J_LYS_159 | NZ  | J_ASP_193 | OD2 | 3.556 |
| 3EOA | J_LYS_178 | NZ  | J_GLU_180 | OE1 | 3.070 |
| 3EOA | J_LYS_178 | NZ  | J_GLU_180 | OE2 | 3.956 |
| 3EOA | J_LYS_197 | NZ  | B_ASP_55  | OD1 | 2.626 |
| 3EOA | J_LYS_197 | NZ  | B_ASP_55  | OD2 | 2.997 |
| 3EOA | J_LYS_197 | NZ  | B_GLU_57  | OE1 | 2.784 |
| 3EOA | J_HIS_198 | NE2 | B_GLU_57  | OE1 | 3.322 |
| 3EOA | J_HIS_198 | NE2 | B_GLU_57  | OE2 | 2.793 |
| 3EOA | J_ARG_221 | NH1 | J_GLU_223 | OE1 | 3.385 |
| 3EOA | J_ARG_221 | NH2 | J_GLU_218 | OE1 | 3.711 |
| 3EOA | J_ARG_227 | NH2 | J_ASP_131 | OD2 | 3.169 |
| 3EOA | J_LYS_232 | NZ  | J_ASP_253 | OD1 | 3.326 |
| 3EOB | L_ARG_24  | NH2 | L_ASP_70  | OD2 | 3.407 |
| 3EOB | L_ARG_61  | NH1 | L_ASP_82  | OD1 | 3.432 |
| 3EOB | L_ARG_108 | NH2 | L_ASP_170 | OD1 | 2.979 |
| 3EOB | L_LYS_149 | NZ  | L_GLU_195 | OE1 | 3.677 |
| 3EOB | H_ARG_38  | NH1 | H_ASP_90  | OD1 | 3.001 |
| 3EOB | H_ARG_38  | NH2 | H_GLU_46  | OE2 | 3.103 |
| 3EOB | H_ARG_38  | NH2 | H_ASP_90  | OD1 | 3.672 |
| 3EOB | H_LYS_63  | NZ  | H_GLU_46  | OE1 | 3.646 |
| 3EOB | H_ARG_67  | NH1 | H_ASP_90  | OD1 | 3.982 |
| 3EOB | H_ARG_67  | NH1 | H_ASP_90  | OD2 | 2.820 |
| 3EOB | H_ARG_67  | NH2 | H_ASP_90  | OD1 | 3.369 |
| 3EOB | H_ARG_67  | NH2 | H_ASP_90  | OD2 | 3.450 |
| 3EOB | H_ARG_87  | NH1 | H_GLU_89  | OE1 | 3.348 |
| 3EOB | H_ARG_98  | NH1 | H_ASP_109 | OD2 | 2.860 |
| 3EOB | H_LYS_217 | NZ  | L_GLU_123 | OE2 | 3.176 |
| 3EOB | I_LYS_149 | NZ  | I_ASP_145 | OD1 | 3.604 |
| 3EOB | I_LYS_149 | NZ  | I_ASP_145 | OD2 | 2.585 |
| 3EOB | I_LYS_155 | NZ  | I_ASP_193 | OD1 | 3.215 |
| 3EOB | I_LYS_159 | NZ  | I_ASP_193 | OD2 | 3.529 |
| 3EOB | I_LYS_178 | NZ  | I_GLU_180 | OE1 | 3.871 |
| 3EOB | I_LYS_197 | NZ  | H_GLU_57  | OE1 | 2.792 |
| 3EOB | I_LYS_197 | NZ  | H_GLU_57  | OE2 | 3.051 |
| 3EOB | I_HIS_198 | ND1 | H_GLU_57  | OE2 | 3.691 |
| 3EOB | I_HIS_198 | NE2 | H_GLU_57  | OE1 | 2.182 |
| 3EOB | I_HIS_198 | NE2 | H_GLU_57  | OE2 | 2.522 |
| 3EOB | I_ARG_221 | NH1 | I_GLU_223 | OE1 | 2.856 |
| 3EOB | I_ARG_227 | NH2 | I_ASP_131 | OD2 | 2.963 |
| 3EOB | I_LYS_232 | NZ  | I_ASP_253 | OD1 | 3.583 |
| 3EOB | I_HIS_264 | NE2 | J_GLU_241 | OE1 | 2.369 |
| 3EOB | I_HIS_264 | NE2 | J_GLU_241 | OE2 | 2.595 |
| 3EOB | I_HIS_275 | ND1 | I_GLU_272 | OE2 | 3.714 |
| 3EOB | A_ARG_24  | NH2 | A_ASP_70  | OD1 | 3.782 |

|      |            |     |            |     |       |
|------|------------|-----|------------|-----|-------|
| 3EOB | A_ARG_24   | NH2 | A_ASP_70   | OD2 | 3.414 |
| 3EOB | A_ARG_61   | NH1 | A_GLU_81   | OE2 | 3.358 |
| 3EOB | A_ARG_61   | NH1 | A_ASP_82   | OD1 | 2.901 |
| 3EOB | A_ARG_61   | NH1 | A_ASP_82   | OD2 | 3.391 |
| 3EOB | A_ARG_108  | NH2 | A_ASP_170  | OD1 | 3.529 |
| 3EOB | A_LYS_     | NZ  | A_GLU_     | OE1 | 3.265 |
| 3EOB | B_ARG_38   | NH1 | B_ASP_90   | OD1 | 3.354 |
| 3EOB | B_ARG_38   | NH2 | B_GLU_46   | OE2 | 3.502 |
| 3EOB | B_ARG_38   | NH2 | B_ASP_90   | OD1 | 3.996 |
| 3EOB | B_LYS_63   | NZ  | B_GLU_46   | OE1 | 3.294 |
| 3EOB | B_ARG_67   | NH1 | B_ASP_90   | OD2 | 2.904 |
| 3EOB | B_ARG_67   | NH2 | B_ASP_90   | OD1 | 3.362 |
| 3EOB | B_ARG_67   | NH2 | B_ASP_90   | OD2 | 3.179 |
| 3EOB | B_ARG_87   | NH1 | B_GLU_89   | OE1 | 2.946 |
| 3EOB | B_ARG_98   | NH1 | B_ASP_109  | OD2 | 3.051 |
| 3EOB | B_LYS_     | NZ  | A_GLU_     | OE1 | 3.788 |
| 3EOB | B_LYS_     | NZ  | A_GLU_     | OE2 | 3.219 |
| 3EOB | J_LYS_149  | NZ  | J_ASP_145  | OD1 | 2.827 |
| 3EOB | J_LYS_149  | NZ  | J_ASP_145  | OD2 | 3.169 |
| 3EOB | J_LYS_155  | NZ  | J_ASP_193  | OD1 | 3.290 |
| 3EOB | J_LYS_159  | NZ  | J_ASP_193  | OD1 | 3.983 |
| 3EOB | J_LYS_159  | NZ  | J_ASP_193  | OD2 | 2.888 |
| 3EOB | J_LYS_197  | NZ  | B_ASP_55   | OD1 | 3.833 |
| 3EOB | J_LYS_197  | NZ  | B_GLU_57   | OE1 | 2.107 |
| 3EOB | J_LYS_197  | NZ  | B_GLU_57   | OE2 | 3.802 |
| 3EOB | J_HIS_198  | ND1 | B_GLU_57   | OE2 | 3.839 |
| 3EOB | J_HIS_198  | NE2 | B_GLU_57   | OE1 | 2.356 |
| 3EOB | J_HIS_198  | NE2 | B_GLU_57   | OE2 | 2.609 |
| 3EOB | J_ARG_221  | NH1 | J_GLU_223  | OE1 | 3.220 |
| 3EOB | J_ARG_227  | NH2 | J_ASP_131  | OD2 | 2.997 |
| 3EOB | J_LYS_232  | NZ  | J_ASP_253  | OD1 | 3.217 |
| 3EOB | J_HIS_264  | NE2 | I_GLU_241  | OE1 | 2.434 |
| 3EOB | J_HIS_264  | NE2 | I_GLU_241  | OE2 | 2.722 |
| 3EOB | J_LYS_294  | NZ  | J_ASP_290  | OD2 | 3.936 |
| 3ESU | F_ARG_61   | NH2 | F_GLU_81   | OE2 | 3.099 |
| 3ESU | F_ARG_61   | NH2 | F_ASP_82   | OD1 | 2.818 |
| 3ESU | F_ARG_61   | NH2 | F_ASP_82   | OD2 | 3.481 |
| 3ESU | F_LYS_103  | NZ  | F_GLU_105  | OE2 | 3.657 |
| 3ESU | F_LYS_1038 | NZ  | F_ASP_1086 | OD1 | 3.978 |
| 3ESU | F_LYS_1062 | NZ  | F_GLU_1046 | OE1 | 2.626 |
| 3ESU | F_LYS_1062 | NZ  | F_GLU_1046 | OE2 | 3.804 |
| 3ESU | F_LYS_1066 | NZ  | F_ASP_1086 | OD1 | 3.810 |
| 3ESU | F_LYS_1066 | NZ  | F_ASP_1086 | OD2 | 2.823 |
| 3ESU | F_ARG_1094 | NH1 | F_ASP_1024 | OD2 | 2.978 |
| 3ESV | F_LYS_0    | NZ  | G_ASP_1054 | OD1 | 3.499 |
| 3ESV | F_LYS_0    | NZ  | G_ASP_1054 | OD2 | 2.774 |
| 3ESV | F_LYS_0    | NZ  | G_ASP_1056 | OD2 | 3.090 |
| 3ESV | F_ARG_61   | NH1 | F_GLU_79   | OE1 | 3.359 |
| 3ESV | F_ARG_61   | NH2 | F_GLU_79   | OE1 | 3.662 |
| 3ESV | F_ARG_61   | NH2 | F_GLU_81   | OE2 | 3.198 |
| 3ESV | F_ARG_61   | NH2 | F_ASP_82   | OD1 | 2.780 |
| 3ESV | F_ARG_61   | NH2 | F_ASP_82   | OD2 | 3.438 |
| 3ESV | F_LYS_1066 | NZ  | F_ASP_1086 | OD1 | 3.900 |
| 3ESV | F_LYS_1066 | NZ  | F_ASP_1086 | OD2 | 2.918 |
| 3ESV | F_ARG_1094 | NH1 | F_ASP_1101 | OD2 | 3.844 |
| 3ESV | F_ARG_1094 | NH2 | F_ASP_1101 | OD2 | 3.978 |
| 3ESV | F_ARG_1099 | NH2 | F_ASP_1101 | OD2 | 3.038 |
| 3ESV | G_ARG_53   | NH1 | F_ASP_1056 | OD1 | 2.802 |

|      |            |     |            |     |       |
|------|------------|-----|------------|-----|-------|
| 3ESV | G_ARG_53   | NH2 | F_ASP_1056 | OD1 | 3.489 |
| 3ESV | G_ARG_61   | NH1 | G_GLU_79   | OE1 | 2.958 |
| 3ESV | G_ARG_61   | NH2 | G_GLU_79   | OE1 | 3.174 |
| 3ESV | G_ARG_61   | NH2 | G_GLU_81   | OE1 | 2.849 |
| 3ESV | G_ARG_61   | NH2 | G_ASP_82   | OD1 | 2.663 |
| 3ESV | G_ARG_61   | NH2 | G_ASP_82   | OD2 | 3.554 |
| 3ESV | G_LYS_103  | NZ  | G_GLU_105  | OE1 | 3.664 |
| 3ESV | G_LYS_1066 | NZ  | G_ASP_1086 | OD1 | 3.520 |
| 3ESV | G_LYS_1066 | NZ  | G_ASP_1086 | OD2 | 2.664 |
| 3ESV | G_ARG_1099 | NH2 | G_ASP_1101 | OD2 | 3.345 |
| 3ET9 | F_ARG_61   | NH2 | F_GLU_81   | OE2 | 3.021 |
| 3ET9 | F_ARG_61   | NH2 | F_ASP_82   | OD1 | 2.714 |
| 3ET9 | F_ARG_61   | NH2 | F_ASP_82   | OD2 | 3.090 |
| 3ET9 | F_LYS_103  | NZ  | F_GLU_105  | OE1 | 3.734 |
| 3ET9 | F_LYS_1038 | NZ  | F_ASP_1086 | OD1 | 3.668 |
| 3ET9 | F_LYS_1062 | NZ  | F_GLU_1046 | OE1 | 3.916 |
| 3ET9 | F_LYS_1066 | NZ  | F_ASP_1086 | OD2 | 3.146 |
| 3ET9 | F_ARG_1094 | NH1 | F_ASP_1024 | OD1 | 3.640 |
| 3ET9 | F_ARG_1094 | NH1 | F_ASP_1024 | OD2 | 2.893 |
| 3ETB | F_ARG_24   | NH1 | G_ASP_70   | OD1 | 3.579 |
| 3ETB | F_ARG_24   | NH1 | G_ASP_70   | OD2 | 3.034 |
| 3ETB | F_ARG_24   | NH2 | G_ASP_70   | OD1 | 3.608 |
| 3ETB | F_ARG_24   | NH2 | G_ASP_70   | OD2 | 3.774 |
| 3ETB | F_ARG_30   | NH1 | J_ASP_658  | OD2 | 3.129 |
| 3ETB | F_ARG_53   | NH1 | J_GLU_654  | OE1 | 3.838 |
| 3ETB | F_ARG_53   | NH2 | J_GLU_654  | OE1 | 3.771 |
| 3ETB | F_ARG_61   | NH1 | F_GLU_79   | OE2 | 3.574 |
| 3ETB | F_ARG_61   | NH2 | F_GLU_79   | OE1 | 3.945 |
| 3ETB | F_ARG_61   | NH2 | F_ASP_82   | OD1 | 2.649 |
| 3ETB | F_ARG_61   | NH2 | F_ASP_82   | OD2 | 2.469 |
| 3ETB | F_ARG_1050 | NH2 | J_ASP_683  | OD2 | 3.114 |
| 3ETB | F_LYS_1062 | NZ  | F_GLU_1046 | OE1 | 3.184 |
| 3ETB | F_LYS_1062 | NZ  | F_GLU_1046 | OE2 | 3.847 |
| 3ETB | F_LYS_1066 | NZ  | F_ASP_1086 | OD2 | 3.203 |
| 3ETB | F_ARG_1094 | NH1 | F_ASP_1101 | OD1 | 2.832 |
| 3ETB | G_ARG_24   | NH1 | F_ASP_70   | OD1 | 3.633 |
| 3ETB | G_ARG_24   | NH1 | F_ASP_70   | OD2 | 3.127 |
| 3ETB | G_ARG_24   | NH2 | F_ASP_70   | OD1 | 3.702 |
| 3ETB | G_ARG_24   | NH2 | F_ASP_70   | OD2 | 3.878 |
| 3ETB | G_ARG_30   | NH1 | K_ASP_658  | OD2 | 3.266 |
| 3ETB | G_ARG_53   | NH2 | K_ASP_648  | OD2 | 3.972 |
| 3ETB | G_ARG_53   | NH2 | K_GLU_654  | OE1 | 3.990 |
| 3ETB | G_ARG_61   | NH1 | G_GLU_79   | OE2 | 3.534 |
| 3ETB | G_ARG_61   | NH2 | G_GLU_79   | OE1 | 3.999 |
| 3ETB | G_ARG_61   | NH2 | G_ASP_82   | OD1 | 2.660 |
| 3ETB | G_ARG_61   | NH2 | G_ASP_82   | OD2 | 2.433 |
| 3ETB | G_ARG_1050 | NH2 | K_ASP_683  | OD1 | 3.853 |
| 3ETB | G_ARG_1050 | NH2 | K_ASP_683  | OD2 | 2.796 |
| 3ETB | G_LYS_1062 | NZ  | G_GLU_1046 | OE1 | 3.161 |
| 3ETB | G_LYS_1062 | NZ  | G_GLU_1046 | OE2 | 3.812 |
| 3ETB | G_LYS_1066 | NZ  | G_ASP_1086 | OD2 | 3.138 |
| 3ETB | G_ARG_1094 | NH1 | G_ASP_1101 | OD1 | 2.918 |
| 3ETB | H_ARG_24   | NH1 | I_ASP_70   | OD1 | 3.544 |
| 3ETB | H_ARG_24   | NH1 | I_ASP_70   | OD2 | 3.118 |
| 3ETB | H_ARG_24   | NH2 | I_ASP_70   | OD1 | 3.662 |
| 3ETB | H_ARG_24   | NH2 | I_ASP_70   | OD2 | 3.905 |
| 3ETB | H_ARG_30   | NH1 | L_ASP_658  | OD1 | 3.824 |
| 3ETB | H_ARG_30   | NH1 | L_ASP_658  | OD2 | 2.913 |

|      |            |     |            |     |       |
|------|------------|-----|------------|-----|-------|
| 3ETB | H_ARG_53   | NH1 | L_GLU_654  | OE1 | 3.771 |
| 3ETB | H_ARG_53   | NH2 | L_GLU_654  | OE1 | 3.669 |
| 3ETB | H_ARG_61   | NH1 | H_GLU_79   | OE2 | 3.579 |
| 3ETB | H_ARG_61   | NH2 | H_GLU_79   | OE1 | 3.984 |
| 3ETB | H_ARG_61   | NH2 | H_ASP_82   | OD1 | 2.635 |
| 3ETB | H_ARG_61   | NH2 | H_ASP_82   | OD2 | 2.472 |
| 3ETB | H_ARG_1050 | NH2 | L_ASP_683  | OD2 | 3.159 |
| 3ETB | H_LYS_1062 | NZ  | H_GLU_1046 | OE1 | 3.123 |
| 3ETB | H_LYS_1062 | NZ  | H_GLU_1046 | OE2 | 3.731 |
| 3ETB | H_LYS_1066 | NZ  | H_ASP_1086 | OD1 | 3.989 |
| 3ETB | H_LYS_1066 | NZ  | H_ASP_1086 | OD2 | 3.171 |
| 3ETB | H_ARG_1094 | NH1 | H_ASP_1101 | OD1 | 2.766 |
| 3ETB | I_ARG_24   | NH1 | H_ASP_70   | OD1 | 3.448 |
| 3ETB | I_ARG_24   | NH1 | H_ASP_70   | OD2 | 2.998 |
| 3ETB | I_ARG_24   | NH2 | H_ASP_70   | OD1 | 3.537 |
| 3ETB | I_ARG_24   | NH2 | H_ASP_70   | OD2 | 3.789 |
| 3ETB | I_ARG_30   | NH1 | M_ASP_658  | OD2 | 3.315 |
| 3ETB | I_ARG_53   | NH1 | M_GLU_654  | OE1 | 3.885 |
| 3ETB | I_ARG_53   | NH2 | M_GLU_654  | OE1 | 3.890 |
| 3ETB | I_ARG_61   | NH1 | I_GLU_79   | OE2 | 3.590 |
| 3ETB | I_ARG_61   | NH2 | I_ASP_82   | OD1 | 2.608 |
| 3ETB | I_ARG_61   | NH2 | I_ASP_82   | OD2 | 2.422 |
| 3ETB | I_ARG_1050 | NH2 | M_ASP_683  | OD2 | 3.093 |
| 3ETB | I_LYS_1062 | NZ  | I_GLU_1046 | OE1 | 3.276 |
| 3ETB | I_LYS_1062 | NZ  | I_GLU_1046 | OE2 | 3.841 |
| 3ETB | I_LYS_1066 | NZ  | I_ASP_1086 | OD1 | 3.951 |
| 3ETB | I_LYS_1066 | NZ  | I_ASP_1086 | OD2 | 3.038 |
| 3ETB | I_ARG_1094 | NH1 | I_ASP_1101 | OD1 | 2.853 |
| 3ETB | J_HIS_597  | ND1 | J_GLU_704  | OE2 | 3.548 |
| 3ETB | J_HIS_597  | NE2 | J_ASP_608  | OD1 | 2.727 |
| 3ETB | J_LYS_613  | NZ  | J_GLU_609  | OE1 | 3.973 |
| 3ETB | J_LYS_633  | NZ  | J_ASP_634  | OD1 | 3.253 |
| 3ETB | J_LYS_653  | NZ  | G_ASP_17   | OD1 | 2.972 |
| 3ETB | J_ARG_659  | NH1 | J_ASP_661  | OD1 | 3.263 |
| 3ETB | J_ARG_659  | NH1 | J_ASP_661  | OD2 | 3.124 |
| 3ETB | J_ARG_659  | NH2 | J_ASP_661  | OD1 | 3.589 |
| 3ETB | J_ARG_669  | NH2 | J_ASP_671  | OD1 | 3.245 |
| 3ETB | J_ARG_669  | NH2 | J_ASP_671  | OD2 | 3.457 |
| 3ETB | J_LYS_679  | NZ  | J_GLU_625  | OE1 | 3.523 |
| 3ETB | J_LYS_684  | NZ  | F_ASP_1054 | OD1 | 3.728 |
| 3ETB | J_LYS_684  | NZ  | F_ASP_1054 | OD2 | 3.401 |
| 3ETB | J_LYS_684  | NZ  | F_ASP_1056 | OD1 | 3.220 |
| 3ETB | J_LYS_684  | NZ  | F_ASP_1056 | OD2 | 3.481 |
| 3ETB | K_HIS_597  | ND1 | K_GLU_704  | OE2 | 3.588 |
| 3ETB | K_HIS_597  | NE2 | K_ASP_608  | OD1 | 2.693 |
| 3ETB | K_HIS_597  | NE2 | K_ASP_608  | OD2 | 3.992 |
| 3ETB | K_LYS_613  | NZ  | K_GLU_609  | OE1 | 3.913 |
| 3ETB | K_LYS_633  | NZ  | K_ASP_634  | OD1 | 3.167 |
| 3ETB | K_LYS_653  | NZ  | F_ASP_17   | OD1 | 3.083 |
| 3ETB | K_ARG_659  | NH1 | K_ASP_661  | OD1 | 3.380 |
| 3ETB | K_ARG_659  | NH1 | K_ASP_661  | OD2 | 3.241 |
| 3ETB | K_ARG_659  | NH2 | K_ASP_661  | OD1 | 3.692 |
| 3ETB | K_ARG_669  | NH2 | K_ASP_671  | OD1 | 3.263 |
| 3ETB | K_ARG_669  | NH2 | K_ASP_671  | OD2 | 3.367 |
| 3ETB | K_LYS_679  | NZ  | K_GLU_625  | OE1 | 3.601 |
| 3ETB | K_LYS_684  | NZ  | G_ASP_1054 | OD1 | 3.379 |
| 3ETB | K_LYS_684  | NZ  | G_ASP_1054 | OD2 | 3.075 |
| 3ETB | K_LYS_684  | NZ  | G_ASP_1056 | OD1 | 3.162 |

|      |           |     |            |     |       |
|------|-----------|-----|------------|-----|-------|
| 3ETB | K_LYS_684 | NZ  | G_ASP_1056 | OD2 | 3.578 |
| 3ETB | L_HIS_597 | ND1 | L_GLU_704  | OE2 | 3.614 |
| 3ETB | L_HIS_597 | NE2 | L_ASP_608  | OD1 | 2.704 |
| 3ETB | L_LYS_613 | NZ  | L_GLU_609  | OE1 | 3.941 |
| 3ETB | L_LYS_633 | NZ  | L_ASP_634  | OD1 | 3.041 |
| 3ETB | L_LYS_653 | NZ  | L_ASP_17   | OD1 | 2.978 |
| 3ETB | L_ARG_659 | NH1 | L_ASP_661  | OD1 | 3.373 |
| 3ETB | L_ARG_659 | NH1 | L_ASP_661  | OD2 | 3.245 |
| 3ETB | L_ARG_659 | NH2 | L_ASP_661  | OD1 | 3.600 |
| 3ETB | L_ARG_669 | NH2 | L_ASP_671  | OD1 | 3.400 |
| 3ETB | L_ARG_669 | NH2 | L_ASP_671  | OD2 | 3.495 |
| 3ETB | L_LYS_679 | NZ  | L_GLU_625  | OE1 | 3.532 |
| 3ETB | L_LYS_684 | NZ  | H_ASP_1056 | OD1 | 3.616 |
| 3ETB | L_LYS_684 | NZ  | H_ASP_1056 | OD2 | 3.187 |
| 3ETB | M_HIS_597 | ND1 | M_GLU_704  | OE2 | 3.644 |
| 3ETB | M_HIS_597 | NE2 | M_ASP_608  | OD1 | 2.880 |
| 3ETB | M_LYS_613 | NZ  | M_GLU_609  | OE1 | 3.907 |
| 3ETB | M_LYS_633 | NZ  | M_ASP_634  | OD1 | 3.141 |
| 3ETB | M_LYS_653 | NZ  | H_ASP_17   | OD1 | 3.060 |
| 3ETB | M_ARG_659 | NH1 | M_ASP_661  | OD1 | 3.383 |
| 3ETB | M_ARG_659 | NH1 | M_ASP_661  | OD2 | 3.234 |
| 3ETB | M_ARG_659 | NH2 | M_ASP_661  | OD1 | 3.730 |
| 3ETB | M_ARG_669 | NH2 | M_ASP_671  | OD1 | 3.256 |
| 3ETB | M_ARG_669 | NH2 | M_ASP_671  | OD2 | 3.369 |
| 3ETB | M_LYS_679 | NZ  | M_GLU_625  | OE1 | 3.500 |
| 3ETB | M_LYS_684 | NZ  | L_ASP_1054 | OD1 | 3.625 |
| 3ETB | M_LYS_684 | NZ  | L_ASP_1054 | OD2 | 3.167 |
| 3ETB | M_LYS_684 | NZ  | L_ASP_1056 | OD1 | 3.241 |
| 3ETB | M_LYS_684 | NZ  | L_ASP_1056 | OD2 | 3.478 |
| 3EYV | L_LYS_55  | NZ  | H_ASP_102  | OD2 | 3.565 |
| 3EYV | L_ARG_66  | NH2 | L_GLU_86   | OE2 | 3.710 |
| 3EYV | L_ARG_66  | NH2 | L_ASP_87   | OD1 | 2.915 |
| 3EYV | L_ARG_66  | NH2 | L_ASP_87   | OD2 | 3.931 |
| 3EYV | L_LYS_108 | NZ  | L_GLU_170  | OE1 | 3.179 |
| 3EYV | L_LYS_154 | NZ  | L_GLU_200  | OE2 | 3.356 |
| 3EYV | L_LYS_188 | NZ  | L_GLU_192  | OE1 | 3.296 |
| 3EYV | L_LYS_188 | NZ  | L_GLU_192  | OE2 | 2.586 |
| 3EYV | L_HIS_194 | ND1 | L_ASP_156  | OD2 | 2.824 |
| 3EYV | L_HIS_194 | NE2 | L_ASP_190  | OD1 | 3.486 |
| 3EYV | H_ARG_38  | NH1 | H_ASP_90   | OD1 | 2.819 |
| 3EYV | H_ARG_38  | NH2 | H_GLU_46   | OE1 | 3.776 |
| 3EYV | H_ARG_38  | NH2 | H_GLU_46   | OE2 | 3.233 |
| 3EYV | H_ARG_38  | NH2 | H_ASP_90   | OD1 | 3.948 |
| 3EYV | H_LYS_65  | NZ  | H_ASP_59   | OD1 | 2.876 |
| 3EYV | H_ARG_67  | NH1 | H_ASP_90   | OD1 | 3.779 |
| 3EYV | H_ARG_67  | NH1 | H_ASP_90   | OD2 | 2.779 |
| 3EYV | H_ARG_67  | NH2 | H_ASP_90   | OD1 | 3.386 |
| 3EYV | H_ARG_67  | NH2 | H_ASP_90   | OD2 | 3.752 |
| 3EYV | H_ARG_101 | NH1 | H_ASP_31   | OD2 | 3.262 |
| 3EYV | H_ARG_101 | NH2 | H_ASP_31   | OD2 | 3.521 |
| 3EYV | H_LYS_149 | NZ  | H_ASP_150  | OD1 | 3.279 |
| 3EYV | H_LYS_149 | NZ  | H_ASP_150  | OD2 | 3.718 |
| 3EYV | H_LYS_212 | NZ  | H_ASP_214  | OD1 | 3.958 |
| 3EYV | H_LYS_212 | NZ  | H_ASP_214  | OD2 | 2.546 |
| 3EYV | H_LYS_215 | NZ  | L_GLU_128  | OE2 | 3.627 |
| 3EYV | H_LYS_216 | NZ  | H_GLU_218  | OE2 | 3.932 |
| 3EYV | A_LYS_55  | NZ  | B_ASP_102  | OD2 | 3.151 |
| 3EYV | A_ARG_66  | NH2 | A_GLU_86   | OE2 | 3.631 |



|      |           |     |           |     |       |
|------|-----------|-----|-----------|-----|-------|
| 3EYV | A_ARG_66  | NH2 | A_ASP_87  | OD1 | 3.103 |
| 3EYV | A_ARG_66  | NH2 | A_ASP_87  | OD2 | 3.416 |
| 3EYV | A_LYS_108 | NZ  | A_GLU_170 | OE1 | 3.086 |
| 3EYV | A_LYS_108 | NZ  | A_GLU_170 | OE2 | 3.645 |
| 3EYV | A_LYS_154 | NZ  | A_GLU_200 | OE1 | 3.963 |
| 3EYV | A_LYS_154 | NZ  | A_GLU_200 | OE2 | 2.945 |
| 3EYV | A_LYS_193 | NZ  | A_ASP_190 | OD1 | 3.557 |
| 3EYV | A_HIS_194 | ND1 | A_ASP_156 | OD1 | 2.892 |
| 3EYV | B_ARG_38  | NH1 | B_ASP_90  | OD1 | 2.718 |
| 3EYV | B_ARG_38  | NH2 | B_GLU_46  | OE1 | 3.428 |
| 3EYV | B_ARG_38  | NH2 | B_GLU_46  | OE2 | 3.023 |
| 3EYV | B_ARG_38  | NH2 | B_ASP_90  | OD1 | 3.972 |
| 3EYV | B_LYS_65  | NZ  | B_ASP_59  | OD1 | 2.790 |
| 3EYV | B_ARG_67  | NH1 | B_ASP_90  | OD1 | 3.866 |
| 3EYV | B_ARG_67  | NH1 | B_ASP_90  | OD2 | 2.720 |
| 3EYV | B_ARG_67  | NH2 | B_ASP_90  | OD1 | 3.285 |
| 3EYV | B_ARG_67  | NH2 | B_ASP_90  | OD2 | 3.497 |
| 3EYV | B_ARG_87  | NH1 | B_GLU_89  | OE1 | 3.883 |
| 3EYV | B_ARG_101 | NH1 | B_ASP_31  | OD2 | 3.502 |
| 3EYV | B_LYS_220 | NZ  | A_ASP_127 | OD2 | 3.402 |
| 3FMG | L_LYS_50  | NZ  | H_ASP_106 | OD1 | 3.132 |
| 3FMG | L_ARG_61  | NH1 | L_ASP_82  | OD1 | 3.084 |
| 3FMG | L_ARG_61  | NH1 | L_ASP_82  | OD2 | 2.397 |
| 3FMG | L_ARG_61  | NH2 | L_GLU_81  | OE2 | 3.990 |
| 3FMG | L_ARG_61  | NH2 | L_ASP_82  | OD2 | 3.861 |
| 3FMG | L_LYS_103 | NZ  | L_GLU_105 | OE2 | 2.781 |
| 3FMG | L_LYS_103 | NZ  | L_ASP_165 | OD1 | 3.422 |
| 3FMG | L_LYS_103 | NZ  | L_ASP_165 | OD2 | 3.673 |
| 3FMG | L_LYS_147 | NZ  | L_GLU_154 | OE1 | 3.671 |
| 3FMG | L_LYS_149 | NZ  | L_GLU_195 | OE1 | 2.879 |
| 3FMG | L_LYS_149 | NZ  | L_GLU_195 | OE2 | 3.536 |
| 3FMG | L_ARG_155 | NH1 | L_GLU_185 | OE2 | 3.733 |
| 3FMG | L_ARG_155 | NH2 | L_GLU_185 | OE2 | 3.838 |
| 3FMG | L_LYS_169 | NZ  | L_ASP_167 | OD1 | 3.814 |
| 3FMG | L_LYS_183 | NZ  | L_GLU_187 | OE1 | 3.890 |
| 3FMG | L_LYS_183 | NZ  | L_GLU_187 | OE2 | 3.515 |
| 3FMG | L_HIS_189 | ND1 | L_ASP_151 | OD2 | 3.000 |
| 3FMG | L_HIS_189 | NE2 | L_GLU_185 | OE1 | 3.777 |
| 3FMG | L_LYS_199 | NZ  | L_ASP_110 | OD1 | 3.137 |
| 3FMG | L_LYS_199 | NZ  | L_ASP_110 | OD2 | 3.503 |
| 3FMG | H_LYS_19  | NZ  | H_GLU_10  | OE1 | 2.764 |
| 3FMG | H_LYS_19  | NZ  | H_GLU_10  | OE2 | 2.857 |
| 3FMG | H_LYS_38  | NZ  | H_ASP_92  | OD1 | 3.712 |
| 3FMG | H_LYS_64  | NZ  | L_ASP_1   | OD2 | 3.241 |
| 3FMG | H_LYS_68  | NZ  | H_ASP_92  | OD1 | 3.504 |
| 3FMG | H_LYS_68  | NZ  | H_ASP_92  | OD2 | 2.490 |
| 3FMG | H_ARG_100 | NH1 | H_ASP_111 | OD1 | 2.791 |
| 3FMG | H_ARG_100 | NH1 | H_ASP_111 | OD2 | 3.868 |
| 3FMG | H_ARG_100 | NH2 | H_ASP_111 | OD1 | 3.539 |
| 3FMG | H_ARG_100 | NH2 | H_ASP_111 | OD2 | 3.163 |
| 3FMG | H_HIS_102 | ND1 | H_ASP_111 | OD2 | 2.692 |
| 3FMG | H_HIS_108 | ND1 | H_GLU_35  | OE1 | 3.839 |
| 3FMG | H_HIS_108 | ND1 | H_GLU_50  | OE1 | 3.875 |
| 3FMG | H_HIS_108 | ND1 | H_GLU_50  | OE2 | 3.683 |
| 3FMG | H_HIS_108 | NE2 | H_GLU_50  | OE1 | 3.647 |
| 3FMG | H_LYS_125 | NZ  | H_ASP_193 | OD2 | 3.410 |
| 3FMG | H_LYS_228 | NZ  | H_ASP_230 | OD1 | 2.777 |
| 3FMG | A_LYS_143 | NZ  | A_GLU_88  | OE1 | 3.153 |

|      |           |     |           |     |       |
|------|-----------|-----|-----------|-----|-------|
| 3FMG | A_LYS_183 | NZ  | A_ASP_228 | OD2 | 3.491 |
| 3FMG | A_LYS_194 | NZ  | A_GLU_217 | OE2 | 2.678 |
| 3FMG | A_LYS_250 | NZ  | A_ASP_179 | OD1 | 3.375 |
| 3FMG | A_LYS_251 | NZ  | A_ASP_157 | OD1 | 2.865 |
| 3FMG | A_LYS_251 | NZ  | A_ASP_157 | OD2 | 3.990 |
| 3FMG | A_ARG_255 | NH1 | A_GLU_162 | OE1 | 3.900 |
| 3FMG | A_ARG_255 | NH1 | A_GLU_162 | OE2 | 3.506 |
| 3FMG | A_ARG_255 | NH2 | A_GLU_162 | OE1 | 3.265 |
| 3FMG | A_ARG_283 | NH1 | A_GLU_256 | OE1 | 2.718 |
| 3FMG | A_ARG_283 | NH1 | A_GLU_256 | OE2 | 3.791 |
| 3FMG | A_ARG_283 | NH2 | A_GLU_256 | OE1 | 3.447 |
| 3FMG | A_ARG_283 | NH2 | A_GLU_256 | OE2 | 2.994 |
| 3FMG | A_LYS_312 | NZ  | A_GLU_282 | OE1 | 3.755 |
| 3FMG | A_LYS_312 | NZ  | A_GLU_282 | OE2 | 3.300 |
| 3G39 | A_ARG_57  | NH2 | A_ASP_59  | OD1 | 3.706 |
| 3G39 | A_ARG_57  | NH2 | A_ASP_59  | OD2 | 2.784 |
| 3G39 | A_ARG_125 | NH2 | A_GLU_159 | OE1 | 3.701 |
| 3G39 | A_ARG_125 | NH2 | A_GLU_159 | OE2 | 2.699 |
| 3G39 | A_ARG_155 | NH2 | A_ASP_143 | OD1 | 3.190 |
| 3G39 | A_ARG_155 | NH2 | A_ASP_143 | OD2 | 3.105 |
| 3G3A | A_ARG_57  | NH2 | A_ASP_59  | OD2 | 3.133 |
| 3G3A | A_ARG_155 | NH1 | A_ASP_143 | OD1 | 3.039 |
| 3G3A | A_ARG_155 | NH1 | A_ASP_143 | OD2 | 3.682 |
| 3G3A | B_LYS_1   | NZ  | B_GLU_7   | OE2 | 2.851 |
| 3G3A | B_ARG_61  | NH2 | A_ASP_59  | OD2 | 3.447 |
| 3G3A | B_ARG_73  | NH1 | A_ASP_61  | OD1 | 2.630 |
| 3G3A | B_ARG_73  | NH1 | A_ASP_61  | OD2 | 3.494 |
| 3G3A | B_ARG_73  | NH2 | A_ASP_59  | OD2 | 3.260 |
| 3G3A | B_ARG_73  | NH2 | A_ASP_61  | OD1 | 3.287 |
| 3G3A | B_ARG_73  | NH2 | A_ASP_61  | OD2 | 2.479 |
| 3G3A | B_LYS_97  | NZ  | B_ASP_101 | OD1 | 3.864 |
| 3G3A | B_LYS_97  | NZ  | B_ASP_101 | OD2 | 3.365 |
| 3G3A | B_ARG_112 | NH1 | A_ASP_141 | OD1 | 3.611 |
| 3G3A | B_ARG_112 | NH1 | A_ASP_141 | OD2 | 2.906 |
| 3G3A | B_ARG_112 | NH2 | A_ASP_141 | OD1 | 2.901 |
| 3G3A | B_ARG_112 | NH2 | A_ASP_141 | OD2 | 3.689 |
| 3G3A | B_ARG_112 | NH2 | A_ASP_143 | OD2 | 3.389 |
| 3G3A | C_LYS_43  | NZ  | C_GLU_45  | OE2 | 3.006 |
| 3G3A | C_ARG_57  | NH2 | C_ASP_59  | OD1 | 3.619 |
| 3G3A | C_ARG_57  | NH2 | C_ASP_59  | OD2 | 2.899 |
| 3G3A | C_ARG_94  | NH2 | C_ASP_119 | OD1 | 3.786 |
| 3G3A | C_ARG_155 | NH1 | C_ASP_143 | OD1 | 2.753 |
| 3G3A | C_ARG_155 | NH1 | C_ASP_143 | OD2 | 3.605 |
| 3G3A | D_LYS_1   | NZ  | D_GLU_7   | OE1 | 3.499 |
| 3G3A | D_LYS_1   | NZ  | D_GLU_7   | OE2 | 2.566 |
| 3G3A | D_ARG_61  | NH1 | C_ASP_59  | OD2 | 3.676 |
| 3G3A | D_ARG_61  | NH2 | C_ASP_59  | OD1 | 3.900 |
| 3G3A | D_ARG_61  | NH2 | C_ASP_59  | OD2 | 3.137 |
| 3G3A | D_ARG_73  | NH1 | C_ASP_61  | OD1 | 3.720 |
| 3G3A | D_ARG_73  | NH1 | C_ASP_61  | OD2 | 2.705 |
| 3G3A | D_ARG_73  | NH2 | C_ASP_59  | OD2 | 2.913 |
| 3G3A | D_ARG_73  | NH2 | C_ASP_61  | OD1 | 2.638 |
| 3G3A | D_ARG_73  | NH2 | C_ASP_61  | OD2 | 3.209 |
| 3G3A | D_LYS_97  | NZ  | D_ASP_101 | OD1 | 3.653 |
| 3G3A | D_LYS_97  | NZ  | D_ASP_101 | OD2 | 2.889 |
| 3G3A | D_ARG_112 | NH1 | C_ASP_141 | OD1 | 3.483 |
| 3G3A | D_ARG_112 | NH1 | C_ASP_141 | OD2 | 2.837 |
| 3G3A | D_ARG_112 | NH2 | C_ASP_141 | OD1 | 2.752 |

|      |           |     |           |     |       |
|------|-----------|-----|-----------|-----|-------|
| 3G3A | D_ARG.112 | NH2 | C_ASP.141 | OD2 | 3.622 |
| 3G3A | D_ARG.112 | NH2 | C_ASP.143 | OD2 | 3.602 |
| 3G3A | E_ARG.57  | NH2 | E_ASP.59  | OD1 | 3.565 |
| 3G3A | E_ARG.57  | NH2 | E_ASP.59  | OD2 | 3.054 |
| 3G3A | E_ARG.155 | NH1 | E_ASP.143 | OD1 | 2.889 |
| 3G3A | F_LYS.1   | NZ  | F_GLU.7   | OE2 | 2.598 |
| 3G3A | F_ARG.61  | NH1 | E_ASP.59  | OD2 | 3.922 |
| 3G3A | F_ARG.61  | NH2 | E_ASP.59  | OD1 | 3.681 |
| 3G3A | F_ARG.61  | NH2 | E_ASP.59  | OD2 | 2.804 |
| 3G3A | F_ARG.73  | NH1 | E_ASP.61  | OD1 | 3.367 |
| 3G3A | F_ARG.73  | NH1 | E_ASP.61  | OD2 | 2.915 |
| 3G3A | F_ARG.73  | NH2 | E_ASP.59  | OD2 | 2.686 |
| 3G3A | F_ARG.73  | NH2 | E_ASP.61  | OD1 | 2.874 |
| 3G3A | F_ARG.73  | NH2 | E_ASP.61  | OD2 | 3.960 |
| 3G3A | F_LYS.97  | NZ  | F_ASP.101 | OD1 | 3.077 |
| 3G3A | F_LYS.97  | NZ  | F_ASP.101 | OD2 | 2.523 |
| 3G3A | F_ARG.112 | NH1 | E_ASP.141 | OD1 | 3.733 |
| 3G3A | F_ARG.112 | NH1 | E_ASP.141 | OD2 | 3.195 |
| 3G3A | F_ARG.112 | NH2 | E_ASP.141 | OD1 | 3.001 |
| 3G3A | F_ARG.112 | NH2 | E_ASP.141 | OD2 | 3.839 |
| 3G3A | F_ARG.112 | NH2 | E_ASP.143 | OD2 | 3.491 |
| 3G3A | G_ARG.57  | NH2 | G_ASP.59  | OD1 | 3.304 |
| 3G3A | G_ARG.57  | NH2 | G_ASP.59  | OD2 | 2.668 |
| 3G3A | G_ARG.125 | NH2 | G_GLU.159 | OE1 | 3.890 |
| 3G3A | G_ARG.125 | NH2 | G_GLU.159 | OE2 | 3.239 |
| 3G3A | G_ARG.155 | NH1 | G_ASP.143 | OD1 | 3.004 |
| 3G3A | G_ARG.155 | NH1 | G_ASP.143 | OD2 | 3.791 |
| 3G3A | H_LYS.1   | NZ  | H_GLU.7   | OE2 | 2.729 |
| 3G3A | H_LYS.13  | NZ  | H_ASP.18  | OD2 | 3.987 |
| 3G3A | H_ARG.61  | NH2 | G_ASP.59  | OD2 | 3.367 |
| 3G3A | H_ARG.73  | NH1 | G_ASP.59  | OD2 | 3.259 |
| 3G3A | H_ARG.73  | NH2 | G_ASP.59  | OD2 | 3.473 |
| 3G3A | H_ARG.73  | NH2 | G_ASP.61  | OD1 | 2.486 |
| 3G3A | H_ARG.73  | NH2 | G_ASP.61  | OD2 | 2.698 |
| 3G3A | H_ARG.112 | NH1 | G_ASP.141 | OD1 | 3.280 |
| 3G3A | H_ARG.112 | NH1 | G_ASP.143 | OD2 | 3.578 |
| 3G3A | H_ARG.112 | NH2 | G_ASP.141 | OD1 | 3.102 |
| 3G3A | H_ARG.112 | NH2 | G_ASP.141 | OD2 | 2.609 |
| 3G3B | A_LYS.43  | NZ  | A_GLU.45  | OE1 | 2.858 |
| 3G3B | A_LYS.43  | NZ  | A_GLU.45  | OE2 | 2.415 |
| 3G3B | A_ARG.57  | NH2 | A_ASP.59  | OD1 | 3.729 |
| 3G3B | A_ARG.57  | NH2 | A_ASP.59  | OD2 | 2.852 |
| 3G3B | A_HIS.142 | ND1 | A_ASP.143 | OD1 | 3.605 |
| 3G3B | A_ARG.155 | NH1 | A_ASP.143 | OD1 | 2.852 |
| 3G3B | B_LYS.1   | NZ  | B_GLU.7   | OE1 | 3.921 |
| 3G3B | B_LYS.1   | NZ  | B_GLU.7   | OE2 | 2.875 |
| 3G3B | B_ARG.61  | NH2 | A_ASP.59  | OD1 | 3.551 |
| 3G3B | B_ARG.61  | NH2 | A_ASP.59  | OD2 | 3.590 |
| 3G3B | B_ARG.73  | NH1 | A_ASP.61  | OD1 | 2.527 |
| 3G3B | B_ARG.73  | NH1 | A_ASP.61  | OD2 | 3.439 |
| 3G3B | B_ARG.73  | NH2 | A_ASP.59  | OD2 | 2.967 |
| 3G3B | B_ARG.73  | NH2 | A_ASP.61  | OD1 | 3.469 |
| 3G3B | B_ARG.73  | NH2 | A_ASP.61  | OD2 | 2.765 |
| 3G3B | B_ARG.112 | NH1 | A_ASP.141 | OD1 | 3.569 |
| 3G3B | B_ARG.112 | NH1 | A_ASP.141 | OD2 | 2.625 |
| 3G3B | B_ARG.112 | NH2 | A_ASP.141 | OD1 | 2.926 |
| 3G3B | B_ARG.112 | NH2 | A_ASP.141 | OD2 | 3.538 |
| 3G3B | B_ARG.112 | NH2 | A_ASP.143 | OD2 | 3.804 |

|      |           |     |           |     |       |
|------|-----------|-----|-----------|-----|-------|
| 3G3B | B_ARG_125 | NH1 | B_ASP_119 | OD1 | 3.478 |
| 3G3B | B_ARG_125 | NH1 | B_ASP_119 | OD2 | 3.346 |
| 3G3B | C_LYS_43  | NZ  | C_GLU_45  | OE1 | 3.803 |
| 3G3B | C_LYS_43  | NZ  | C_GLU_45  | OE2 | 3.490 |
| 3G3B | C_ARG_57  | NH2 | C_ASP_59  | OD1 | 3.660 |
| 3G3B | C_ARG_57  | NH2 | C_ASP_59  | OD2 | 2.836 |
| 3G3B | C_HIS_142 | NE2 | C_ASP_143 | OD1 | 3.850 |
| 3G3B | C_ARG_155 | NH2 | C_ASP_143 | OD1 | 2.863 |
| 3G3B | C_ARG_155 | NH2 | C_ASP_143 | OD2 | 3.947 |
| 3G3B | D_LYS_1   | NZ  | D_GLU_7   | OE2 | 2.651 |
| 3G3B | D_LYS_13  | NZ  | D_ASP_18  | OD2 | 3.185 |
| 3G3B | D_ARG_61  | NH2 | C_ASP_59  | OD1 | 3.954 |
| 3G3B | D_ARG_73  | NH1 | C_ASP_61  | OD1 | 2.753 |
| 3G3B | D_ARG_73  | NH1 | C_ASP_61  | OD2 | 3.824 |
| 3G3B | D_ARG_73  | NH2 | C_ASP_59  | OD2 | 3.136 |
| 3G3B | D_ARG_73  | NH2 | C_ASP_61  | OD1 | 3.224 |
| 3G3B | D_ARG_73  | NH2 | C_ASP_61  | OD2 | 2.702 |
| 3G3B | D_ARG_112 | NH1 | C_ASP_141 | OD1 | 3.812 |
| 3G3B | D_ARG_112 | NH1 | C_ASP_141 | OD2 | 2.690 |
| 3G3B | D_ARG_112 | NH2 | C_ASP_141 | OD1 | 2.826 |
| 3G3B | D_ARG_112 | NH2 | C_ASP_141 | OD2 | 3.301 |
| 3G3B | D_ARG_112 | NH2 | C_ASP_143 | OD2 | 3.656 |
| 3G3B | D_ARG_125 | NH2 | D_ASP_119 | OD1 | 2.448 |
| 3G3B | D_ARG_125 | NH2 | D_ASP_119 | OD2 | 3.449 |
| 3G3B | E_ARG_57  | NH2 | E_ASP_59  | OD1 | 3.602 |
| 3G3B | E_ARG_57  | NH2 | E_ASP_59  | OD2 | 2.890 |
| 3G3B | E_HIS_142 | ND1 | E_ASP_143 | OD1 | 3.479 |
| 3G3B | E_ARG_155 | NH2 | E_ASP_143 | OD1 | 3.325 |
| 3G3B | F_LYS_1   | NZ  | F_GLU_7   | OE1 | 3.789 |
| 3G3B | F_LYS_1   | NZ  | F_GLU_7   | OE2 | 2.690 |
| 3G3B | F_ARG_61  | NH2 | E_ASP_59  | OD2 | 3.820 |
| 3G3B | F_ARG_73  | NH1 | E_ASP_61  | OD1 | 2.535 |
| 3G3B | F_ARG_73  | NH1 | E_ASP_61  | OD2 | 3.949 |
| 3G3B | F_ARG_73  | NH2 | E_ASP_59  | OD2 | 2.812 |
| 3G3B | F_ARG_73  | NH2 | E_ASP_61  | OD1 | 3.056 |
| 3G3B | F_ARG_73  | NH2 | E_ASP_61  | OD2 | 2.934 |
| 3G3B | F_ARG_112 | NH1 | E_ASP_141 | OD2 | 2.714 |
| 3G3B | F_ARG_112 | NH2 | E_ASP_141 | OD1 | 3.020 |
| 3G3B | F_ARG_112 | NH2 | E_ASP_141 | OD2 | 3.176 |
| 3G3B | F_ARG_112 | NH2 | E_ASP_143 | OD2 | 3.737 |
| 3G3B | G_ARG_57  | NH2 | G_ASP_59  | OD1 | 3.515 |
| 3G3B | G_ARG_57  | NH2 | G_ASP_59  | OD2 | 3.110 |
| 3G3B | G_HIS_142 | NE2 | G_ASP_143 | OD1 | 3.761 |
| 3G3B | G_ARG_155 | NH2 | G_ASP_143 | OD1 | 2.619 |
| 3G3B | G_ARG_155 | NH2 | G_ASP_143 | OD2 | 3.786 |
| 3G3B | H_LYS_1   | NZ  | H_GLU_7   | OE1 | 3.238 |
| 3G3B | H_LYS_1   | NZ  | H_GLU_7   | OE2 | 2.526 |
| 3G3B | H_ARG_61  | NH1 | H_ASP_48  | OD2 | 3.554 |
| 3G3B | H_ARG_73  | NH1 | G_ASP_61  | OD1 | 2.839 |
| 3G3B | H_ARG_73  | NH1 | G_ASP_61  | OD2 | 3.791 |
| 3G3B | H_ARG_73  | NH2 | G_ASP_59  | OD2 | 2.431 |
| 3G3B | H_ARG_73  | NH2 | G_ASP_61  | OD1 | 3.464 |
| 3G3B | H_ARG_73  | NH2 | G_ASP_61  | OD2 | 2.896 |
| 3G3B | H_ARG_112 | NH1 | G_ASP_141 | OD1 | 3.676 |
| 3G3B | H_ARG_112 | NH1 | G_ASP_141 | OD2 | 2.564 |
| 3G3B | H_ARG_112 | NH2 | G_ASP_141 | OD1 | 2.813 |
| 3G3B | H_ARG_112 | NH2 | G_ASP_141 | OD2 | 3.280 |
| 3G3B | H_ARG_112 | NH2 | G_ASP_143 | OD2 | 3.506 |

|      |           |     |           |     |       |
|------|-----------|-----|-----------|-----|-------|
| 3GGW | A_LYS_27  | NZ  | A_GLU_93  | OE1 | 3.004 |
| 3GGW | A_LYS_27  | NZ  | A_GLU_93  | OE2 | 3.494 |
| 3GGW | A_HIS_27D | ND1 | A_ASP_28  | OD1 | 3.397 |
| 3GGW | A_HIS_27D | ND1 | A_ASP_28  | OD2 | 3.638 |
| 3GGW | A_ARG_61  | NH1 | A_ASP_82  | OD1 | 3.619 |
| 3GGW | A_ARG_61  | NH1 | A_ASP_82  | OD2 | 2.849 |
| 3GGW | A_ARG_61  | NH2 | A_GLU_79  | OE1 | 3.759 |
| 3GGW | A_ARG_61  | NH2 | A_ASP_82  | OD1 | 2.856 |
| 3GGW | A_ARG_61  | NH2 | A_ASP_82  | OD2 | 3.530 |
| 3GGW | A_ARG_96  | NH2 | B_GLU_50  | OE1 | 3.590 |
| 3GGW | A_ARG_96  | NH2 | B_GLU_50  | OE2 | 2.762 |
| 3GGW | A_ARG_155 | NH1 | A_GLU_185 | OE1 | 3.605 |
| 3GGW | A_ARG_188 | NH2 | A_GLU_185 | OE2 | 2.743 |
| 3GGW | A_HIS_189 | ND1 | A_GLU_185 | OE1 | 3.933 |
| 3GGW | A_LYS_199 | NZ  | A_ASP_110 | OD2 | 3.552 |
| 3GGW | B_ARG_38  | NH1 | B_ASP_86  | OD1 | 2.900 |
| 3GGW | B_ARG_38  | NH2 | B_GLU_46  | OE1 | 3.283 |
| 3GGW | B_ARG_38  | NH2 | B_GLU_46  | OE2 | 3.311 |
| 3GGW | B_ARG_38  | NH2 | B_ASP_86  | OD1 | 3.834 |
| 3GGW | B_LYS_43  | NZ  | B_GLU_42  | OE2 | 3.946 |
| 3GGW | B_ARG_52  | NH1 | E_ASP_4   | OD2 | 3.092 |
| 3GGW | B_LYS_64  | NZ  | B_GLU_61  | OE1 | 3.190 |
| 3GGW | B_LYS_66  | NZ  | B_ASP_86  | OD1 | 3.381 |
| 3GGW | B_LYS_66  | NZ  | B_ASP_86  | OD2 | 2.679 |
| 3GGW | B_ARG_71  | NH2 | B_ASP_73  | OD1 | 3.573 |
| 3GGW | B_ARG_83  | NH1 | B_GLU_85  | OE1 | 3.507 |
| 3GGW | B_LYS_207 | NZ  | B_ASP_209 | OD1 | 3.783 |
| 3GGW | B_LYS_207 | NZ  | B_ASP_209 | OD2 | 2.712 |
| 3GGW | B_LYS_210 | NZ  | A_GLU_123 | OE2 | 3.208 |
| 3GGW | C_ARG_24  | NH2 | C_ASP_70  | OD2 | 3.799 |
| 3GGW | C_LYS_27  | NZ  | C_GLU_93  | OE1 | 2.551 |
| 3GGW | C_HIS_27D | ND1 | C_ASP_28  | OD1 | 3.282 |
| 3GGW | C_HIS_27D | ND1 | C_ASP_28  | OD2 | 3.541 |
| 3GGW | C_LYS_39  | NZ  | C_GLU_81  | OE2 | 2.827 |
| 3GGW | C_ARG_61  | NH1 | C_ASP_82  | OD1 | 3.646 |
| 3GGW | C_ARG_61  | NH1 | C_ASP_82  | OD2 | 2.827 |
| 3GGW | C_ARG_61  | NH2 | C_GLU_79  | OE1 | 3.494 |
| 3GGW | C_ARG_61  | NH2 | C_GLU_79  | OE2 | 3.557 |
| 3GGW | C_ARG_61  | NH2 | C_ASP_82  | OD1 | 2.827 |
| 3GGW | C_ARG_61  | NH2 | C_ASP_82  | OD2 | 3.383 |
| 3GGW | C_ARG_96  | NH2 | D_GLU_50  | OE1 | 3.555 |
| 3GGW | C_ARG_96  | NH2 | D_GLU_50  | OE2 | 2.962 |
| 3GGW | C_LYS_142 | NZ  | C_GLU_105 | OE1 | 3.612 |
| 3GGW | C_ARG_155 | NH1 | C_GLU_185 | OE1 | 2.976 |
| 3GGW | C_ARG_155 | NH1 | C_GLU_185 | OE2 | 3.624 |
| 3GGW | C_ARG_155 | NH2 | C_GLU_185 | OE1 | 3.679 |
| 3GGW | C_ARG_155 | NH2 | C_GLU_185 | OE2 | 2.798 |
| 3GGW | C_LYS_183 | NZ  | C_GLU_187 | OE1 | 2.937 |
| 3GGW | C_LYS_183 | NZ  | C_GLU_187 | OE2 | 3.524 |
| 3GGW | C_ARG_188 | NH2 | C_ASP_184 | OD1 | 3.157 |
| 3GGW | C_ARG_188 | NH2 | C_ASP_184 | OD2 | 3.938 |
| 3GGW | C_LYS_199 | NZ  | C_ASP_110 | OD2 | 3.525 |
| 3GGW | D_ARG_38  | NH1 | D_ASP_86  | OD1 | 2.856 |
| 3GGW | D_ARG_38  | NH2 | D_GLU_46  | OE1 | 3.438 |
| 3GGW | D_ARG_38  | NH2 | D_GLU_46  | OE2 | 3.122 |
| 3GGW | D_ARG_38  | NH2 | D_ASP_86  | OD1 | 3.653 |
| 3GGW | D_ARG_52  | NH1 | F_ASP_4   | OD2 | 3.127 |
| 3GGW | D_LYS_64  | NZ  | D_GLU_61  | OE1 | 2.566 |

|      |           |     |            |     |       |
|------|-----------|-----|------------|-----|-------|
| 3GGW | D_LYS_64  | NZ  | D_GLU_61   | OE2 | 3.883 |
| 3GGW | D_LYS_66  | NZ  | D_ASP_86   | OD1 | 3.597 |
| 3GGW | D_LYS_66  | NZ  | D_ASP_86   | OD2 | 2.711 |
| 3GGW | D_ARG_71  | NH2 | D_ASP_73   | OD1 | 3.666 |
| 3GGW | D_LYS_210 | NZ  | C_GLU_123  | OE2 | 2.871 |
| 3GGW | D_ARG_215 | NH2 | C_GLU_213  | OE1 | 3.834 |
| 3GGW | D_ARG_215 | NH2 | C_GLU_213  | OE2 | 2.618 |
| 3GHB | L_ARG_61  | NH1 | L_ASP_82   | OD1 | 3.774 |
| 3GHB | L_ARG_61  | NH1 | L_ASP_82   | OD2 | 2.845 |
| 3GHB | L_ARG_61  | NH2 | L_ASP_82   | OD1 | 2.959 |
| 3GHB | L_ARG_61  | NH2 | L_ASP_82   | OD2 | 3.458 |
| 3GHB | L_LYS_110 | NZ  | L_GLU_198  | OE1 | 2.584 |
| 3GHB | L_HIS_188 | NE2 | L_ASP_151  | OD2 | 3.966 |
| 3GHB | H_ARG_38  | NH1 | H_ASP_86   | OD1 | 2.865 |
| 3GHB | H_ARG_38  | NH2 | H_GLU_46   | OE1 | 2.815 |
| 3GHB | H_ARG_38  | NH2 | H_GLU_46   | OE2 | 3.771 |
| 3GHB | H_ARG_50  | NH1 | H_ASP_58   | OD2 | 3.042 |
| 3GHB | H_ARG_66  | NH1 | H_ASP_86   | OD1 | 3.838 |
| 3GHB | H_ARG_66  | NH1 | H_ASP_86   | OD2 | 2.797 |
| 3GHB | H_ARG_66  | NH2 | H_ASP_86   | OD1 | 3.183 |
| 3GHB | H_ARG_66  | NH2 | H_ASP_86   | OD2 | 3.533 |
| 3GHB | H_ARG_71  | NH2 | H_ASP_73   | OD1 | 3.367 |
| 3GHB | H_LYS_83  | NZ  | H_GLU_85   | OE2 | 3.603 |
| 3GHB | H_LYS_143 | NZ  | L_GLU_124  | OE2 | 2.614 |
| 3GHB | H_LYS_209 | NZ  | L_GLU_123  | OE1 | 2.751 |
| 3GHB | H_LYS_209 | NZ  | L_GLU_123  | OE2 | 3.411 |
| 3GHB | P_LYS_305 | NZ  | H_GLU_100E | OE1 | 3.508 |
| 3GHB | P_LYS_305 | NZ  | H_ASP_100F | OD2 | 3.835 |
| 3GHB | M_ARG_61  | NH1 | M_ASP_82   | OD1 | 3.907 |
| 3GHB | M_ARG_61  | NH1 | M_ASP_82   | OD2 | 3.095 |
| 3GHB | M_ARG_61  | NH2 | M_ASP_82   | OD1 | 2.973 |
| 3GHB | M_ARG_61  | NH2 | M_ASP_82   | OD2 | 3.466 |
| 3GHB | M_LYS_110 | NZ  | M_GLU_198  | OE1 | 2.627 |
| 3GHB | L_ARG_38  | NH1 | L_ASP_86   | OD1 | 2.974 |
| 3GHB | L_ARG_38  | NH2 | L_GLU_46   | OE1 | 2.852 |
| 3GHB | L_ARG_38  | NH2 | L_GLU_46   | OE2 | 3.761 |
| 3GHB | L_ARG_38  | NH2 | L_ASP_86   | OD1 | 3.952 |
| 3GHB | L_ARG_50  | NH1 | L_ASP_58   | OD2 | 2.747 |
| 3GHB | L_ARG_66  | NH1 | L_ASP_86   | OD1 | 3.695 |
| 3GHB | L_ARG_66  | NH1 | L_ASP_86   | OD2 | 2.620 |
| 3GHB | L_ARG_66  | NH2 | L_ASP_86   | OD1 | 3.166 |
| 3GHB | L_ARG_66  | NH2 | L_ASP_86   | OD2 | 3.599 |
| 3GHB | L_ARG_71  | NH2 | L_ASP_73   | OD1 | 3.399 |
| 3GHB | L_LYS_75  | NZ  | L_ASP_72   | OD2 | 3.232 |
| 3GHB | L_LYS_143 | NZ  | M_GLU_124  | OE2 | 2.607 |
| 3GHB | L_LYS_209 | NZ  | M_GLU_123  | OE1 | 2.988 |
| 3GHB | L_LYS_209 | NZ  | M_GLU_123  | OE2 | 3.773 |
| 3GHB | L_ARG_210 | NH1 | L_GLU_212  | OE2 | 3.691 |
| 3GHB | Q_LYS_305 | NZ  | L_ASP_100F | OD1 | 3.174 |
| 3GHE | L_LYS_53  | NZ  | L_ASP_50   | OD2 | 3.235 |
| 3GHE | L_ARG_61  | NH1 | L_ASP_82   | OD1 | 2.784 |
| 3GHE | L_ARG_61  | NH1 | L_ASP_82   | OD2 | 3.800 |
| 3GHE | L_ARG_61  | NH2 | L_ASP_82   | OD1 | 3.483 |
| 3GHE | L_ARG_61  | NH2 | L_ASP_82   | OD2 | 3.001 |
| 3GHE | L_LYS_149 | NZ  | L_GLU_203  | OE2 | 2.932 |
| 3GHE | H_ARG_38  | NH1 | H_ASP_86   | OD1 | 3.169 |
| 3GHE | H_ARG_38  | NH2 | H_GLU_46   | OE1 | 2.908 |
| 3GHE | H_LYS_64  | NZ  | H_ASP_61   | OD2 | 2.560 |

|      |           |     |            |     |       |
|------|-----------|-----|------------|-----|-------|
| 3GHE | H_ARG_66  | NH1 | H_ASP_86   | OD2 | 2.889 |
| 3GHE | H_ARG_66  | NH2 | H_ASP_86   | OD1 | 2.967 |
| 3GHE | H_ARG_66  | NH2 | H_ASP_86   | OD2 | 3.314 |
| 3GHE | H_ARG_94  | NH2 | H_ASP_101  | OD1 | 2.641 |
| 3GHE | H_ARG_94  | NH2 | H_ASP_101  | OD2 | 3.324 |
| 3GHE | H_LYS_143 | NZ  | L_GLU_124  | OE2 | 2.684 |
| 3GHE | H_LYS_209 | NZ  | L_GLU_123  | OE1 | 2.541 |
| 3GHE | H_LYS_209 | NZ  | L_GLU_123  | OE2 | 3.149 |
| 3GHE | H_ARG_210 | NH1 | H_GLU_212  | OE2 | 2.984 |
| 3GHE | H_ARG_210 | NH2 | H_GLU_212  | OE2 | 3.330 |
| 3GHE | P_ARG_304 | NH1 | H_ASP_100A | OD1 | 3.397 |
| 3GHE | P_ARG_304 | NH2 | H_ASP_100A | OD1 | 3.243 |
| 3GHE | P_ARG_304 | NH2 | H_ASP_100A | OD2 | 3.833 |
| 3GHE | P_HIS_308 | ND1 | H_ASP_100H | OD2 | 3.415 |
| 3GHE | P_ARG_315 | NH1 | H_GLU_95   | OE1 | 3.518 |
| 3GHE | P_ARG_315 | NH1 | H_GLU_95   | OE2 | 2.720 |
| 3GHE | P_ARG_315 | NH2 | H_GLU_95   | OE2 | 3.104 |
| 3GJF | A_HIS_3   | NE2 | A_ASP_29   | OD2 | 3.680 |
| 3GJF | A_ARG_6   | NH1 | A_ASP_102  | OD1 | 3.006 |
| 3GJF | A_ARG_14  | NH1 | A_ASP_39   | OD1 | 3.408 |
| 3GJF | A_ARG_14  | NH1 | A_ASP_39   | OD2 | 2.727 |
| 3GJF | A_ARG_14  | NH2 | A_ASP_39   | OD1 | 2.801 |
| 3GJF | A_ARG_14  | NH2 | A_ASP_39   | OD2 | 3.691 |
| 3GJF | A_ARG_17  | NH1 | A_ASP_39   | OD2 | 3.993 |
| 3GJF | A_ARG_21  | NH1 | A_ASP_39   | OD2 | 3.840 |
| 3GJF | A_ARG_21  | NH2 | A_ASP_37   | OD1 | 3.518 |
| 3GJF | A_ARG_21  | NH2 | A_ASP_37   | OD2 | 2.869 |
| 3GJF | A_ARG_35  | NH1 | A_GLU_46   | OE2 | 3.379 |
| 3GJF | A_ARG_35  | NH2 | A_GLU_46   | OE2 | 2.626 |
| 3GJF | A_ARG_44  | NH1 | A_ASP_61   | OD1 | 3.185 |
| 3GJF | A_ARG_44  | NH2 | A_ASP_61   | OD1 | 2.672 |
| 3GJF | A_ARG_48  | NH2 | B_ASP_53   | OD2 | 3.786 |
| 3GJF | A_ARG_65  | NH1 | L_ASP_52   | OD1 | 3.134 |
| 3GJF | A_ARG_65  | NH1 | L_ASP_52   | OD2 | 3.382 |
| 3GJF | A_ARG_65  | NH2 | L_ASP_52   | OD1 | 2.989 |
| 3GJF | A_ARG_65  | NH2 | L_ASP_52   | OD2 | 3.338 |
| 3GJF | A_LYS_66  | NZ  | A_GLU_63   | OE2 | 2.881 |
| 3GJF | A_ARG_75  | NH1 | A_GLU_19   | OE1 | 2.951 |
| 3GJF | A_ARG_75  | NH1 | A_GLU_19   | OE2 | 2.915 |
| 3GJF | A_HIS_93  | ND1 | A_ASP_119  | OD1 | 3.615 |
| 3GJF | A_HIS_93  | ND1 | A_ASP_119  | OD2 | 2.772 |
| 3GJF | A_ARG_97  | NH2 | A_ASP_77   | OD2 | 3.819 |
| 3GJF | A_ARG_111 | NH1 | A_GLU_128  | OE1 | 3.014 |
| 3GJF | A_ARG_111 | NH1 | A_GLU_128  | OE2 | 3.991 |
| 3GJF | A_LYS_121 | NZ  | A_ASP_137  | OD1 | 2.725 |
| 3GJF | A_LYS_144 | NZ  | A_GLU_148  | OE2 | 2.717 |
| 3GJF | A_HIS_151 | ND1 | A_GLU_154  | OE1 | 3.544 |
| 3GJF | A_ARG_170 | NH2 | A_GLU_55   | OE1 | 2.781 |
| 3GJF | A_ARG_170 | NH2 | A_GLU_55   | OE2 | 3.295 |
| 3GJF | A_LYS_176 | NZ  | A_GLU_177  | OE2 | 2.868 |
| 3GJF | A_ARG_181 | NH2 | A_ASP_183  | OD2 | 3.746 |
| 3GJF | A_HIS_191 | ND1 | A_GLU_254  | OE2 | 3.677 |
| 3GJF | A_HIS_191 | NE2 | A_GLU_254  | OE2 | 3.660 |
| 3GJF | A_ARG_219 | NH1 | A_GLU_222  | OE2 | 3.609 |
| 3GJF | B_ARG_45  | NH1 | B_ASP_38   | OD1 | 3.417 |
| 3GJF | B_ARG_81  | NH1 | B_ASP_38   | OD2 | 3.146 |
| 3GJF | D_HIS_3   | NE2 | D_ASP_29   | OD2 | 3.680 |
| 3GJF | D_ARG_6   | NH1 | D_ASP_102  | OD1 | 2.883 |

|      |           |     |           |     |       |
|------|-----------|-----|-----------|-----|-------|
| 3GJF | D_ARG_14  | NH1 | D_ASP_39  | OD1 | 3.632 |
| 3GJF | D_ARG_14  | NH1 | D_ASP_39  | OD2 | 2.832 |
| 3GJF | D_ARG_14  | NH2 | D_ASP_39  | OD1 | 2.791 |
| 3GJF | D_ARG_14  | NH2 | D_ASP_39  | OD2 | 3.560 |
| 3GJF | D_ARG_21  | NH2 | D_ASP_37  | OD1 | 3.457 |
| 3GJF | D_ARG_21  | NH2 | D_ASP_37  | OD2 | 2.717 |
| 3GJF | D_ARG_35  | NH1 | D_GLU_46  | OE1 | 2.983 |
| 3GJF | D_ARG_35  | NH2 | E_ASP_53  | OD1 | 3.050 |
| 3GJF | D_ARG_35  | NH2 | E_ASP_53  | OD2 | 3.940 |
| 3GJF | D_ARG_44  | NH1 | D_ASP_61  | OD1 | 3.254 |
| 3GJF | D_ARG_44  | NH2 | D_ASP_61  | OD1 | 2.599 |
| 3GJF | D_ARG_48  | NH2 | E_ASP_53  | OD1 | 3.764 |
| 3GJF | D_ARG_48  | NH2 | E_ASP_53  | OD2 | 3.452 |
| 3GJF | D_ARG_65  | NH1 | K_ASP_52  | OD1 | 3.173 |
| 3GJF | D_ARG_65  | NH1 | K_ASP_52  | OD2 | 3.530 |
| 3GJF | D_ARG_65  | NH2 | K_ASP_52  | OD1 | 3.166 |
| 3GJF | D_ARG_65  | NH2 | K_ASP_52  | OD2 | 2.445 |
| 3GJF | D_LYS_66  | NZ  | D_GLU_63  | OE1 | 3.919 |
| 3GJF | D_LYS_66  | NZ  | D_GLU_63  | OE2 | 2.898 |
| 3GJF | D_ARG_82  | NH1 | D_GLU_89  | OE1 | 3.854 |
| 3GJF | D_ARG_82  | NH1 | D_GLU_89  | OE2 | 3.318 |
| 3GJF | D_ARG_82  | NH2 | D_GLU_89  | OE2 | 3.224 |
| 3GJF | D_HIS_93  | ND1 | D_ASP_119 | OD1 | 3.533 |
| 3GJF | D_HIS_93  | ND1 | D_ASP_119 | OD2 | 2.640 |
| 3GJF | D_ARG_97  | NH2 | D_ASP_77  | OD2 | 3.677 |
| 3GJF | D_LYS_144 | NZ  | D_GLU_148 | OE1 | 3.748 |
| 3GJF | D_LYS_144 | NZ  | D_GLU_148 | OE2 | 2.769 |
| 3GJF | D_ARG_170 | NH2 | D_GLU_55  | OE1 | 2.756 |
| 3GJF | D_ARG_170 | NH2 | D_GLU_55  | OE2 | 3.140 |
| 3GJF | D_LYS_176 | NZ  | D_GLU_177 | OE1 | 2.829 |
| 3GJF | D_ARG_181 | NH2 | D_ASP_183 | OD2 | 3.518 |
| 3GJF | D_HIS_191 | NE2 | D_GLU_254 | OE2 | 3.719 |
| 3GJF | E_LYS_6   | NZ  | D_GLU_232 | OE1 | 3.774 |
| 3GJF | E_LYS_6   | NZ  | D_GLU_232 | OE2 | 2.502 |
| 3GJF | E_ARG_45  | NH1 | E_ASP_38  | OD1 | 3.925 |
| 3GJF | E_ARG_81  | NH1 | E_ASP_38  | OD2 | 3.008 |
| 3GJF | L_HIS_51  | ND1 | L_ASP_52  | OD2 | 2.609 |
| 3GJF | L_ARG_56  | NH1 | L_ASP_62  | OD1 | 3.571 |
| 3GJF | L_ARG_63  | NH1 | L_ASP_84  | OD1 | 2.750 |
| 3GJF | L_ARG_63  | NH1 | L_ASP_84  | OD2 | 3.305 |
| 3GJF | L_ARG_63  | NH2 | L_ASP_84  | OD1 | 3.570 |
| 3GJF | L_ARG_63  | NH2 | L_ASP_84  | OD2 | 2.571 |
| 3GJF | K_HIS_51  | ND1 | K_ASP_52  | OD2 | 2.643 |
| 3GJF | K_ARG_56  | NH1 | K_ASP_62  | OD1 | 3.501 |
| 3GJF | K_ARG_63  | NH2 | K_GLU_83  | OE1 | 3.808 |
| 3GJF | K_ARG_63  | NH2 | K_ASP_84  | OD1 | 2.545 |
| 3GJF | K_ARG_63  | NH2 | K_ASP_84  | OD2 | 3.209 |
| 3GJF | K_LYS_169 | NZ  | K_GLU_85  | OE1 | 2.843 |
| 3GJF | H_ARG_38  | NH1 | H_ASP_90  | OD1 | 2.830 |
| 3GJF | H_ARG_38  | NH2 | H_GLU_46  | OE1 | 3.081 |
| 3GJF | H_ARG_38  | NH2 | H_GLU_46  | OE2 | 3.817 |
| 3GJF | H_ARG_38  | NH2 | H_ASP_90  | OD1 | 3.756 |
| 3GJF | H_ARG_67  | NH1 | H_ASP_90  | OD1 | 3.830 |
| 3GJF | H_ARG_67  | NH1 | H_ASP_90  | OD2 | 2.795 |
| 3GJF | H_ARG_67  | NH2 | H_ASP_90  | OD1 | 3.041 |
| 3GJF | H_ARG_67  | NH2 | H_ASP_90  | OD2 | 3.477 |
| 3GJF | H_LYS_216 | NZ  | H_GLU_218 | OE2 | 2.600 |
| 3GJF | M_ARG_38  | NH1 | M_ASP_90  | OD1 | 2.821 |



|      |           |     |            |     |       |
|------|-----------|-----|------------|-----|-------|
| 3GJF | M_ARG_38  | NH2 | M_GLU_46   | OE1 | 3.436 |
| 3GJF | M_ARG_38  | NH2 | M_GLU_46   | OE2 | 2.897 |
| 3GJF | M_ARG_38  | NH2 | M_ASP_90   | OD1 | 3.855 |
| 3GJF | M_LYS_65  | NZ  | M_ASP_62   | OD1 | 3.858 |
| 3GJF | M_ARG_67  | NH1 | M_ASP_90   | OD1 | 3.892 |
| 3GJF | M_ARG_67  | NH1 | M_ASP_90   | OD2 | 2.801 |
| 3GJF | M_ARG_67  | NH2 | M_ASP_90   | OD1 | 3.068 |
| 3GJF | M_ARG_67  | NH2 | M_ASP_90   | OD2 | 3.441 |
| 3GJF | M_LYS_215 | NZ  | K_GLU_126  | OE1 | 3.244 |
| 3GJF | M_LYS_215 | NZ  | K_GLU_126  | OE2 | 2.553 |
| 3GNM | L_ARG_66  | NH1 | L_ASP_87   | OD1 | 3.577 |
| 3GNM | L_ARG_66  | NH1 | L_ASP_87   | OD2 | 2.682 |
| 3GNM | L_ARG_66  | NH2 | L_GLU_84   | OE1 | 3.405 |
| 3GNM | L_ARG_66  | NH2 | L_ASP_87   | OD1 | 2.573 |
| 3GNM | L_ARG_66  | NH2 | L_ASP_87   | OD2 | 3.204 |
| 3GNM | L_LYS_152 | NZ  | L_GLU_159  | OE1 | 3.752 |
| 3GNM | L_LYS_154 | NZ  | L_GLU_200  | OE1 | 2.730 |
| 3GNM | L_ARG_160 | NH1 | L_GLU_190  | OE2 | 3.689 |
| 3GNM | L_ARG_160 | NH2 | L_GLU_190  | OE2 | 2.931 |
| 3GNM | L_LYS_188 | NZ  | L_GLU_192  | OE1 | 3.327 |
| 3GNM | L_LYS_188 | NZ  | L_GLU_192  | OE2 | 3.845 |
| 3GNM | L_LYS_204 | NZ  | L_ASP_115  | OD2 | 2.734 |
| 3GNM | H_ARG_40  | NH2 | H_GLU_89   | OE1 | 3.735 |
| 3GNM | H_ARG_65  | NH2 | H_ASP_66   | OD1 | 3.349 |
| 3GNM | H_ARG_65  | NH2 | H_ASP_66   | OD2 | 3.203 |
| 3GNM | H_LYS_67  | NZ  | H_ASP_90   | OD1 | 3.628 |
| 3GNM | H_LYS_67  | NZ  | H_ASP_90   | OD2 | 2.714 |
| 3GNM | H_ARG_98  | NH2 | H_ASP_106  | OD1 | 3.662 |
| 3GNM | H_ARG_98  | NH2 | H_ASP_106  | OD2 | 2.562 |
| 3GNM | H_ARG_169 | NH1 | L_ASP_172  | OD1 | 3.348 |
| 3GNM | H_ARG_169 | NH2 | L_ASP_172  | OD1 | 3.542 |
| 3GNM | H_ARG_169 | NH2 | L_ASP_175  | OD1 | 3.297 |
| 3GNM | H_LYS_213 | NZ  | L_GLU_128  | OE1 | 2.721 |
| 3GNM | H_LYS_213 | NZ  | L_GLU_128  | OE2 | 3.840 |
| 3GO1 | L_ARG_61  | NH1 | L_ASP_82   | OD1 | 3.138 |
| 3GO1 | L_ARG_61  | NH1 | L_ASP_82   | OD2 | 3.572 |
| 3GO1 | L_ARG_61  | NH2 | L_ASP_82   | OD1 | 3.465 |
| 3GO1 | L_ARG_61  | NH2 | L_ASP_82   | OD2 | 2.449 |
| 3GO1 | L_LYS_166 | NZ  | L_GLU_83   | OE2 | 2.723 |
| 3GO1 | L_HIS_188 | ND1 | L_ASP_151  | OD2 | 3.200 |
| 3GO1 | H_ARG_38  | NH1 | H_ASP_86   | OD1 | 2.757 |
| 3GO1 | H_ARG_38  | NH2 | H_GLU_46   | OE1 | 3.013 |
| 3GO1 | H_ARG_38  | NH2 | H_ASP_86   | OD1 | 3.570 |
| 3GO1 | H_ARG_66  | NH1 | H_ASP_86   | OD1 | 3.680 |
| 3GO1 | H_ARG_66  | NH1 | H_ASP_86   | OD2 | 3.112 |
| 3GO1 | H_ARG_66  | NH2 | H_ASP_86   | OD1 | 2.980 |
| 3GO1 | H_ARG_66  | NH2 | H_ASP_86   | OD2 | 3.607 |
| 3GO1 | H_LYS_143 | NZ  | H_ASP_144  | OD1 | 3.162 |
| 3GO1 | H_LYS_143 | NZ  | H_ASP_144  | OD2 | 3.468 |
| 3GO1 | H_LYS_209 | NZ  | L_GLU_123  | OE1 | 2.728 |
| 3GO1 | H_LYS_209 | NZ  | L_GLU_123  | OE2 | 3.471 |
| 3GO1 | P_LYS_305 | NZ  | L_ASP_51   | OD1 | 2.931 |
| 3GO1 | P_ARG_315 | NH1 | H_GLU_95   | OE2 | 3.127 |
| 3GO1 | P_ARG_315 | NH2 | H_GLU_95   | OE2 | 2.921 |
| 3GO1 | P_ARG_315 | NH2 | H_ASP_100A | OD2 | 3.393 |
| 3HAE | A_HIS_3   | NE2 | A_ASP_29   | OD2 | 3.587 |
| 3HAE | A_ARG_6   | NH1 | A_ASP_102  | OD1 | 2.847 |
| 3HAE | A_ARG_6   | NH2 | A_ASP_102  | OD1 | 3.019 |

|      |           |     |           |     |       |
|------|-----------|-----|-----------|-----|-------|
| 3HAE | A_ARG_6   | NH2 | A_ASP_102 | OD2 | 3.923 |
| 3HAE | A_ARG_14  | NH1 | A_ASP_39  | OD1 | 3.472 |
| 3HAE | A_ARG_14  | NH1 | A_ASP_39  | OD2 | 3.188 |
| 3HAE | A_ARG_14  | NH2 | A_ASP_39  | OD1 | 2.664 |
| 3HAE | A_ARG_14  | NH2 | A_ASP_39  | OD2 | 3.862 |
| 3HAE | A_ARG_21  | NH2 | A_ASP_37  | OD1 | 3.621 |
| 3HAE | A_ARG_21  | NH2 | A_ASP_37  | OD2 | 2.935 |
| 3HAE | A_ARG_35  | NH1 | B_ASP_53  | OD1 | 3.527 |
| 3HAE | A_ARG_35  | NH1 | B_ASP_53  | OD2 | 2.844 |
| 3HAE | A_ARG_35  | NH2 | A_GLU_46  | OE2 | 3.050 |
| 3HAE | A_ARG_44  | NH1 | A_ASP_61  | OD1 | 3.254 |
| 3HAE | A_ARG_44  | NH2 | A_ASP_61  | OD1 | 3.535 |
| 3HAE | A_ARG_48  | NH2 | B_ASP_53  | OD2 | 3.583 |
| 3HAE | A_ARG_65  | NH1 | L_ASP_52  | OD1 | 3.495 |
| 3HAE | A_ARG_65  | NH1 | L_ASP_52  | OD2 | 2.908 |
| 3HAE | A_ARG_65  | NH2 | L_ASP_52  | OD1 | 3.452 |
| 3HAE | A_ARG_65  | NH2 | L_ASP_52  | OD2 | 3.099 |
| 3HAE | A_LYS_66  | NZ  | A_GLU_63  | OE1 | 3.753 |
| 3HAE | A_LYS_66  | NZ  | A_GLU_63  | OE2 | 2.237 |
| 3HAE | A_HIS_93  | ND1 | A_ASP_119 | OD1 | 3.412 |
| 3HAE | A_HIS_93  | ND1 | A_ASP_119 | OD2 | 2.765 |
| 3HAE | A_ARG_97  | NH2 | A_ASP_77  | OD2 | 3.602 |
| 3HAE | A_ARG_111 | NH1 | A_GLU_128 | OE1 | 2.647 |
| 3HAE | A_LYS_121 | NZ  | A_ASP_137 | OD1 | 3.114 |
| 3HAE | A_LYS_144 | NZ  | A_GLU_148 | OE1 | 3.429 |
| 3HAE | A_LYS_144 | NZ  | A_GLU_148 | OE2 | 3.081 |
| 3HAE | A_HIS_151 | ND1 | A_GLU_154 | OE1 | 3.731 |
| 3HAE | A_ARG_170 | NH2 | A_GLU_55  | OE1 | 3.140 |
| 3HAE | A_ARG_170 | NH2 | A_GLU_55  | OE2 | 3.964 |
| 3HAE | A_ARG_266 | NH2 | A_ASP_220 | OD1 | 2.688 |
| 3HAE | B_LYS_6   | NZ  | A_GLU_232 | OE2 | 2.622 |
| 3HAE | B_ARG_81  | NH1 | B_ASP_38  | OD2 | 2.783 |
| 3HAE | D_ARG_6   | NH2 | D_ASP_102 | OD1 | 2.556 |
| 3HAE | D_ARG_6   | NH2 | D_ASP_102 | OD2 | 2.949 |
| 3HAE | D_ARG_14  | NH1 | D_ASP_39  | OD2 | 3.857 |
| 3HAE | D_ARG_14  | NH2 | D_ASP_39  | OD1 | 2.936 |
| 3HAE | D_ARG_14  | NH2 | D_ASP_39  | OD2 | 3.916 |
| 3HAE | D_ARG_21  | NH1 | D_ASP_37  | OD2 | 3.671 |
| 3HAE | D_ARG_21  | NH2 | D_ASP_37  | OD2 | 3.722 |
| 3HAE | D_ARG_21  | NH2 | D_ASP_39  | OD2 | 3.808 |
| 3HAE | D_ARG_35  | NH1 | D_GLU_46  | OE2 | 3.262 |
| 3HAE | D_ARG_35  | NH1 | E_ASP_53  | OD1 | 3.949 |
| 3HAE | D_ARG_35  | NH1 | E_ASP_53  | OD2 | 3.963 |
| 3HAE | D_ARG_35  | NH2 | E_ASP_53  | OD1 | 3.106 |
| 3HAE | D_ARG_44  | NH1 | D_ASP_61  | OD1 | 3.859 |
| 3HAE | D_ARG_44  | NH2 | D_ASP_61  | OD1 | 2.693 |
| 3HAE | D_ARG_48  | NH2 | E_ASP_53  | OD2 | 3.593 |
| 3HAE | D_ARG_65  | NH1 | G_ASP_52  | OD1 | 3.201 |
| 3HAE | D_ARG_65  | NH2 | G_ASP_52  | OD1 | 2.885 |
| 3HAE | D_ARG_65  | NH2 | G_ASP_52  | OD2 | 3.031 |
| 3HAE | D_LYS_66  | NZ  | D_GLU_63  | OE2 | 2.605 |
| 3HAE | D_ARG_75  | NH1 | D_GLU_19  | OE1 | 3.280 |
| 3HAE | D_ARG_75  | NH1 | D_GLU_19  | OE2 | 3.330 |
| 3HAE | D_ARG_75  | NH2 | D_GLU_19  | OE2 | 2.623 |
| 3HAE | D_ARG_82  | NH1 | D_GLU_89  | OE2 | 3.821 |
| 3HAE | D_ARG_82  | NH2 | D_GLU_89  | OE2 | 2.676 |
| 3HAE | D_HIS_93  | ND1 | D_ASP_119 | OD1 | 3.379 |
| 3HAE | D_HIS_93  | ND1 | D_ASP_119 | OD2 | 3.104 |

|      |           |     |           |     |       |
|------|-----------|-----|-----------|-----|-------|
| 3HAE | D_ARG_97  | NH2 | D_ASP_77  | OD2 | 3.161 |
| 3HAE | D_ARG_108 | NH2 | D_ASP_106 | OD2 | 3.619 |
| 3HAE | D_ARG_111 | NH1 | D_GLU_128 | OE1 | 3.567 |
| 3HAE | D_ARG_111 | NH2 | D_GLU_128 | OE1 | 3.292 |
| 3HAE | D_LYS_144 | NZ  | D_GLU_148 | OE2 | 3.433 |
| 3HAE | D_HIS_151 | ND1 | D_GLU_154 | OE1 | 3.330 |
| 3HAE | D_ARG_170 | NH2 | D_GLU_55  | OE1 | 2.334 |
| 3HAE | D_ARG_170 | NH2 | D_GLU_55  | OE2 | 3.072 |
| 3HAE | D_LYS_176 | NZ  | D_GLU_177 | OE2 | 3.306 |
| 3HAE | D_ARG_181 | NH2 | D_ASP_183 | OD2 | 3.347 |
| 3HAE | D_ARG_256 | NH2 | D_ASP_220 | OD1 | 2.715 |
| 3HAE | E_LYS_41  | NZ  | E_ASP_76  | OD2 | 3.802 |
| 3HAE | E_ARG_81  | NH1 | E_ASP_38  | OD2 | 3.706 |
| 3HAE | J_HIS_3   | NE2 | J_ASP_29  | OD2 | 3.809 |
| 3HAE | J_ARG_6   | NH1 | J_ASP_102 | OD1 | 2.906 |
| 3HAE | J_ARG_6   | NH1 | J_ASP_102 | OD2 | 3.945 |
| 3HAE | J_ARG_6   | NH2 | J_ASP_102 | OD1 | 2.506 |
| 3HAE | J_ARG_14  | NH1 | J_ASP_39  | OD1 | 3.669 |
| 3HAE | J_ARG_14  | NH1 | J_ASP_39  | OD2 | 2.840 |
| 3HAE | J_ARG_14  | NH2 | J_ASP_39  | OD1 | 2.935 |
| 3HAE | J_ARG_14  | NH2 | J_ASP_39  | OD2 | 3.651 |
| 3HAE | J_ARG_21  | NH2 | J_ASP_37  | OD1 | 3.222 |
| 3HAE | J_ARG_21  | NH2 | J_ASP_37  | OD2 | 2.441 |
| 3HAE | J_ARG_35  | NH1 | J_GLU_46  | OE1 | 3.957 |
| 3HAE | J_ARG_35  | NH1 | J_GLU_46  | OE2 | 2.953 |
| 3HAE | J_ARG_35  | NH2 | K_ASP_53  | OD1 | 3.520 |
| 3HAE | J_ARG_44  | NH1 | J_ASP_61  | OD1 | 3.422 |
| 3HAE | J_ARG_44  | NH2 | J_ASP_61  | OD1 | 3.290 |
| 3HAE | J_ARG_48  | NH2 | K_ASP_53  | OD1 | 3.945 |
| 3HAE | J_ARG_48  | NH2 | K_ASP_53  | OD2 | 3.051 |
| 3HAE | J_ARG_65  | NH1 | N_ASP_52  | OD1 | 3.749 |
| 3HAE | J_ARG_65  | NH2 | N_ASP_52  | OD1 | 2.440 |
| 3HAE | J_ARG_65  | NH2 | N_ASP_52  | OD2 | 2.989 |
| 3HAE | J_LYS_66  | NZ  | J_GLU_63  | OE1 | 2.982 |
| 3HAE | J_LYS_66  | NZ  | J_GLU_63  | OE2 | 2.809 |
| 3HAE | J_HIS_93  | ND1 | J_ASP_119 | OD1 | 3.377 |
| 3HAE | J_HIS_93  | ND1 | J_ASP_119 | OD2 | 2.805 |
| 3HAE | J_ARG_108 | NH2 | J_ASP_106 | OD1 | 3.482 |
| 3HAE | J_ARG_108 | NH2 | J_ASP_106 | OD2 | 3.608 |
| 3HAE | J_LYS_121 | NZ  | J_ASP_137 | OD1 | 3.426 |
| 3HAE | J_HIS_151 | ND1 | J_GLU_154 | OE1 | 3.986 |
| 3HAE | J_ARG_170 | NH2 | J_GLU_55  | OE1 | 2.482 |
| 3HAE | J_ARG_170 | NH2 | J_GLU_55  | OE2 | 3.313 |
| 3HAE | J_ARG_181 | NH2 | J_ASP_183 | OD2 | 3.327 |
| 3HAE | J_HIS_191 | ND1 | J_GLU_254 | OE2 | 3.434 |
| 3HAE | J_ARG_256 | NH2 | J_ASP_220 | OD1 | 3.258 |
| 3HAE | K_ARG_81  | NH1 | K_ASP_38  | OD2 | 2.492 |
| 3HAE | P_HIS_3   | NE2 | P_ASP_29  | OD2 | 3.769 |
| 3HAE | P_ARG_6   | NH1 | P_ASP_102 | OD1 | 2.755 |
| 3HAE | P_ARG_6   | NH2 | P_ASP_102 | OD1 | 3.424 |
| 3HAE | P_ARG_14  | NH1 | P_ASP_39  | OD1 | 3.423 |
| 3HAE | P_ARG_14  | NH1 | P_ASP_39  | OD2 | 3.000 |
| 3HAE | P_ARG_14  | NH2 | P_ASP_39  | OD1 | 2.960 |
| 3HAE | P_ARG_14  | NH2 | P_ASP_39  | OD2 | 3.984 |
| 3HAE | P_ARG_21  | NH2 | P_ASP_37  | OD1 | 3.733 |
| 3HAE | P_ARG_21  | NH2 | P_ASP_37  | OD2 | 3.125 |
| 3HAE | P_ARG_35  | NH1 | P_GLU_46  | OE2 | 3.659 |
| 3HAE | P_ARG_35  | NH1 | Q_ASP_53  | OD2 | 3.921 |

|      |           |     |           |     |       |
|------|-----------|-----|-----------|-----|-------|
| 3HAE | P_ARG_35  | NH2 | P_GLU_46  | OE2 | 2.679 |
| 3HAE | P_ARG_44  | NH1 | P_ASP_61  | OD1 | 3.128 |
| 3HAE | P_ARG_44  | NH2 | P_ASP_61  | OD1 | 3.068 |
| 3HAE | P_ARG_48  | NH2 | Q_ASP_53  | OD1 | 3.566 |
| 3HAE | P_ARG_48  | NH2 | Q_ASP_53  | OD2 | 2.872 |
| 3HAE | P_ARG_65  | NH1 | S_ASP_52  | OD1 | 3.579 |
| 3HAE | P_ARG_65  | NH1 | S_ASP_52  | OD2 | 3.466 |
| 3HAE | P_ARG_65  | NH2 | S_ASP_52  | OD1 | 3.120 |
| 3HAE | P_ARG_65  | NH2 | S_ASP_52  | OD2 | 2.826 |
| 3HAE | P_LYS_66  | NZ  | P_GLU_63  | OE1 | 3.514 |
| 3HAE | P_LYS_66  | NZ  | P_GLU_63  | OE2 | 3.135 |
| 3HAE | P_HIS_93  | ND1 | P_ASP_119 | OD1 | 3.199 |
| 3HAE | P_HIS_93  | ND1 | P_ASP_119 | OD2 | 2.626 |
| 3HAE | P_ARG_97  | NH2 | P_ASP_77  | OD2 | 3.656 |
| 3HAE | P_ARG_108 | NH2 | P_ASP_106 | OD1 | 3.268 |
| 3HAE | P_ARG_108 | NH2 | P_ASP_106 | OD2 | 2.709 |
| 3HAE | P_ARG_111 | NH1 | P_GLU_128 | OE1 | 3.578 |
| 3HAE | P_LYS_144 | NZ  | P_GLU_148 | OE1 | 3.286 |
| 3HAE | P_HIS_151 | ND1 | P_GLU_154 | OE1 | 3.029 |
| 3HAE | P_ARG_157 | NH2 | P_GLU_161 | OE1 | 3.353 |
| 3HAE | P_ARG_157 | NH2 | P_GLU_161 | OE2 | 3.284 |
| 3HAE | P_ARG_170 | NH1 | P_GLU_55  | OE1 | 3.443 |
| 3HAE | P_ARG_170 | NH1 | P_GLU_55  | OE2 | 3.001 |
| 3HAE | P_ARG_170 | NH2 | P_GLU_55  | OE1 | 3.201 |
| 3HAE | P_ARG_170 | NH2 | P_GLU_55  | OE2 | 3.200 |
| 3HAE | P_ARG_181 | NH2 | P_ASP_183 | OD2 | 3.944 |
| 3HAE | P_HIS_191 | ND1 | P_GLU_254 | OE2 | 3.652 |
| 3HAE | P_HIS_191 | NE2 | P_GLU_254 | OE2 | 3.983 |
| 3HAE | P_ARG_256 | NH2 | P_ASP_220 | OD2 | 2.906 |
| 3HAE | Q_LYS_6   | NZ  | P_GLU_232 | OE2 | 3.965 |
| 3HAE | Q_ARG_45  | NH1 | Q_ASP_38  | OD1 | 3.784 |
| 3HAE | Q_ARG_45  | NH2 | Q_GLU_47  | OE1 | 3.894 |
| 3HAE | Q_LYS_75  | NZ  | Q_GLU_74  | OE2 | 3.176 |
| 3HAE | L_HIS_51  | ND1 | L_ASP_52  | OD2 | 3.196 |
| 3HAE | L_ARG_63  | NH1 | L_GLU_83  | OE1 | 3.861 |
| 3HAE | L_ARG_63  | NH1 | L_ASP_84  | OD1 | 3.672 |
| 3HAE | L_ARG_63  | NH1 | L_ASP_84  | OD2 | 3.946 |
| 3HAE | L_ARG_63  | NH2 | L_ASP_84  | OD1 | 2.766 |
| 3HAE | L_ARG_63  | NH2 | L_ASP_84  | OD2 | 2.158 |
| 3HAE | L_HIS_87  | ND1 | L_ASP_105 | OD1 | 3.871 |
| 3HAE | L_HIS_87  | NE2 | L_ASP_105 | OD1 | 3.639 |
| 3HAE | L_LYS_169 | NZ  | L_GLU_85  | OE1 | 2.871 |
| 3HAE | G_HIS_51  | ND1 | G_ASP_52  | OD2 | 2.400 |
| 3HAE | G_ARG_63  | NH1 | G_ASP_84  | OD1 | 3.142 |
| 3HAE | G_ARG_63  | NH1 | G_ASP_84  | OD2 | 3.199 |
| 3HAE | G_ARG_63  | NH2 | G_ASP_84  | OD1 | 3.746 |
| 3HAE | G_ARG_63  | NH2 | G_ASP_84  | OD2 | 2.857 |
| 3HAE | G_LYS_169 | NZ  | G_GLU_85  | OE1 | 2.988 |
| 3HAE | N_HIS_51  | ND1 | N_ASP_52  | OD2 | 2.806 |
| 3HAE | N_ARG_63  | NH1 | N_ASP_84  | OD1 | 3.108 |
| 3HAE | N_ARG_63  | NH1 | N_ASP_84  | OD2 | 3.603 |
| 3HAE | N_ARG_63  | NH2 | N_ASP_84  | OD1 | 3.712 |
| 3HAE | N_ARG_63  | NH2 | N_ASP_84  | OD2 | 2.760 |
| 3HAE | N_HIS_87  | ND1 | N_ASP_105 | OD1 | 3.966 |
| 3HAE | N_HIS_87  | NE2 | N_ASP_105 | OD1 | 3.798 |
| 3HAE | N_LYS_132 | NZ  | O_ASP_150 | OD2 | 3.615 |
| 3HAE | N_LYS_169 | NZ  | N_GLU_85  | OE1 | 3.035 |
| 3HAE | N_LYS_169 | NZ  | N_GLU_85  | OE2 | 3.916 |

|      |           |     |           |     |       |
|------|-----------|-----|-----------|-----|-------|
| 3HAE | S_HIS_51  | ND1 | S_ASP_52  | OD2 | 2.614 |
| 3HAE | S_ARG_63  | NH1 | S_ASP_84  | OD1 | 3.147 |
| 3HAE | S_ARG_63  | NH1 | S_ASP_84  | OD2 | 3.129 |
| 3HAE | S_ARG_63  | NH2 | S_ASP_84  | OD1 | 3.845 |
| 3HAE | S_ARG_63  | NH2 | S_ASP_84  | OD2 | 2.474 |
| 3HAE | S_HIS_87  | ND1 | S_ASP_105 | OD1 | 3.612 |
| 3HAE | S_HIS_87  | NE2 | S_ASP_105 | OD1 | 3.221 |
| 3HAE | S_LYS_169 | NZ  | S_GLU_85  | OE2 | 3.086 |
| 3HAE | S_LYS_174 | NZ  | S_ASP_141 | OD2 | 3.360 |
| 3HAE | H_ARG_38  | NH1 | H_ASP_90  | OD1 | 3.222 |
| 3HAE | H_ARG_38  | NH2 | H_GLU_46  | OE1 | 3.510 |
| 3HAE | H_ARG_38  | NH2 | H_GLU_46  | OE2 | 2.712 |
| 3HAE | H_ARG_38  | NH2 | H_ASP_90  | OD1 | 4.000 |
| 3HAE | H_LYS_65  | NZ  | H_ASP_62  | OD1 | 3.122 |
| 3HAE | H_ARG_67  | NH1 | H_ASP_90  | OD1 | 3.984 |
| 3HAE | H_ARG_67  | NH1 | H_ASP_90  | OD2 | 2.555 |
| 3HAE | H_ARG_67  | NH2 | H_ASP_90  | OD1 | 2.773 |
| 3HAE | H_ARG_67  | NH2 | H_ASP_90  | OD2 | 2.913 |
| 3HAE | H_LYS_76  | NZ  | H_ASP_73  | OD1 | 3.678 |
| 3HAE | H_LYS_215 | NZ  | L_GLU_126 | OE1 | 3.537 |
| 3HAE | H_LYS_215 | NZ  | L_GLU_126 | OE2 | 3.674 |
| 3HAE | L_ARG_38  | NH1 | L_ASP_90  | OD1 | 3.105 |
| 3HAE | L_ARG_38  | NH2 | L_GLU_46  | OE1 | 3.780 |
| 3HAE | L_ARG_38  | NH2 | L_GLU_46  | OE2 | 2.913 |
| 3HAE | L_ARG_38  | NH2 | L_ASP_90  | OD1 | 3.959 |
| 3HAE | L_LYS_65  | NZ  | L_ASP_62  | OD1 | 2.989 |
| 3HAE | L_ARG_67  | NH1 | L_ASP_90  | OD2 | 2.847 |
| 3HAE | L_ARG_67  | NH2 | L_ASP_90  | OD1 | 2.911 |
| 3HAE | L_ARG_67  | NH2 | L_ASP_90  | OD2 | 3.060 |
| 3HAE | L_LYS_76  | NZ  | L_ASP_73  | OD1 | 3.921 |
| 3HAE | L_LYS_149 | NZ  | L_ASP_150 | OD1 | 3.830 |
| 3HAE | L_LYS_212 | NZ  | L_ASP_214 | OD1 | 2.825 |
| 3HAE | L_LYS_212 | NZ  | L_ASP_214 | OD2 | 3.108 |
| 3HAE | L_LYS_215 | NZ  | G_GLU_126 | OE1 | 3.678 |
| 3HAE | L_LYS_216 | NZ  | L_GLU_218 | OE2 | 3.121 |
| 3HAE | O_ARG_38  | NH1 | O_ASP_90  | OD1 | 2.713 |
| 3HAE | O_ARG_38  | NH2 | O_GLU_46  | OE1 | 3.369 |
| 3HAE | O_ARG_38  | NH2 | O_GLU_46  | OE2 | 3.065 |
| 3HAE | O_ARG_38  | NH2 | O_ASP_90  | OD1 | 3.703 |
| 3HAE | O_ARG_67  | NH1 | O_ASP_90  | OD2 | 2.733 |
| 3HAE | O_ARG_67  | NH2 | O_ASP_90  | OD1 | 3.178 |
| 3HAE | O_ARG_67  | NH2 | O_ASP_90  | OD2 | 3.173 |
| 3HAE | O_LYS_215 | NZ  | N_GLU_126 | OE2 | 3.736 |
| 3HAE | O_LYS_216 | NZ  | O_GLU_218 | OE2 | 3.610 |
| 3HAE | T_ARG_38  | NH1 | T_ASP_90  | OD1 | 3.080 |
| 3HAE | T_ARG_38  | NH2 | T_GLU_46  | OE1 | 3.373 |
| 3HAE | T_ARG_38  | NH2 | T_GLU_46  | OE2 | 2.779 |
| 3HAE | T_ARG_38  | NH2 | T_ASP_90  | OD1 | 3.979 |
| 3HAE | T_ARG_67  | NH1 | T_ASP_90  | OD2 | 2.923 |
| 3HAE | T_ARG_67  | NH2 | T_ASP_90  | OD1 | 3.524 |
| 3HAE | T_ARG_67  | NH2 | T_ASP_90  | OD2 | 3.612 |
| 3HAE | T_LYS_212 | NZ  | T_ASP_214 | OD1 | 3.968 |
| 3HAE | T_LYS_215 | NZ  | S_GLU_126 | OE1 | 2.660 |
| 3HAE | T_LYS_215 | NZ  | S_GLU_126 | OE2 | 3.779 |
| 3HAE | T_LYS_216 | NZ  | T_GLU_218 | OE2 | 3.675 |
| 3HFM | L_HIS_34  | ND1 | H_ASP_99  | OD1 | 3.756 |
| 3HFM | L_HIS_34  | ND1 | H_ASP_99  | OD2 | 3.698 |
| 3HFM | L_LYS_49  | NZ  | H_ASP_99  | OD1 | 3.423 |

|      |           |     |           |     |       |
|------|-----------|-----|-----------|-----|-------|
| 3HFM | L_ARG_61  | NH1 | L_ASP_82  | OD1 | 2.585 |
| 3HFM | L_ARG_61  | NH1 | L_ASP_82  | OD2 | 2.332 |
| 3HFM | L_ARG_61  | NH2 | L_GLU_79  | OE1 | 3.732 |
| 3HFM | L_ARG_108 | NH1 | L_ASP_170 | OD1 | 3.833 |
| 3HFM | L_LYS_142 | NZ  | L_GLU_105 | OE2 | 3.995 |
| 3HFM | L_LYS_147 | NZ  | L_GLU_154 | OE2 | 3.463 |
| 3HFM | L_LYS_149 | NZ  | L_GLU_195 | OE1 | 3.304 |
| 3HFM | L_LYS_149 | NZ  | L_GLU_195 | OE2 | 3.873 |
| 3HFM | L_HIS_189 | ND1 | L_ASP_151 | OD1 | 2.425 |
| 3HFM | L_LYS_199 | NZ  | L_ASP_110 | OD2 | 3.937 |
| 3HFM | H_ARG_38  | NH1 | H_ASP_89  | OD2 | 3.586 |
| 3HFM | H_ARG_38  | NH2 | H_GLU_46  | OE1 | 3.434 |
| 3HFM | H_ARG_38  | NH2 | H_GLU_46  | OE2 | 2.361 |
| 3HFM | H_ARG_66  | NH1 | H_ASP_89  | OD1 | 2.908 |
| 3HFM | H_ARG_66  | NH1 | H_ASP_89  | OD2 | 3.682 |
| 3HFM | H_ARG_66  | NH2 | H_ASP_89  | OD1 | 3.356 |
| 3HFM | H_ARG_66  | NH2 | H_ASP_89  | OD2 | 2.574 |
| 3HFM | H_LYS_209 | NZ  | L_GLU_123 | OE1 | 2.622 |
| 3HFM | H_ARG_213 | NH2 | L_GLU_123 | OE1 | 3.991 |
| 3HFM | Y_LYS_1   | NZ  | Y_GLU_7   | OE1 | 2.881 |
| 3HFM | Y_LYS_1   | NZ  | Y_GLU_7   | OE2 | 2.663 |
| 3HFM | Y_LYS_97  | NZ  | H_ASP_32  | OD1 | 3.609 |
| 3HFM | Y_ARG_125 | NH1 | Y_ASP_119 | OD2 | 3.874 |
| 3HI6 | A_LYS_155 | NZ  | A_ASP_193 | OD1 | 2.768 |
| 3HI6 | A_LYS_178 | NZ  | A_GLU_180 | OE1 | 3.586 |
| 3HI6 | A_ARG_221 | NH1 | A_GLU_218 | OE1 | 3.057 |
| 3HI6 | A_ARG_227 | NH2 | A_ASP_131 | OD1 | 2.862 |
| 3HI6 | A_LYS_252 | NZ  | A_ASP_249 | OD2 | 3.996 |
| 3HI6 | A_LYS_287 | NZ  | A_GLU_301 | OE1 | 3.340 |
| 3HI6 | A_LYS_287 | NZ  | A_GLU_301 | OE2 | 2.773 |
| 3HI6 | A_LYS_304 | NZ  | A_GLU_301 | OE2 | 2.760 |
| 3HI6 | B_LYS_155 | NZ  | B_ASP_193 | OD1 | 3.786 |
| 3HI6 | B_LYS_159 | NZ  | B_ASP_193 | OD1 | 3.099 |
| 3HI6 | B_LYS_159 | NZ  | B_ASP_193 | OD2 | 3.154 |
| 3HI6 | B_LYS_178 | NZ  | B_GLU_180 | OE1 | 2.889 |
| 3HI6 | B_ARG_221 | NH1 | B_GLU_223 | OE2 | 2.829 |
| 3HI6 | B_ARG_221 | NH2 | B_GLU_218 | OE1 | 3.646 |
| 3HI6 | B_ARG_227 | NH2 | B_ASP_131 | OD1 | 2.921 |
| 3HI6 | B_LYS_304 | NZ  | B_GLU_301 | OE2 | 3.130 |
| 3HI6 | H_ARG_38  | NH1 | H_ASP_90  | OD1 | 3.103 |
| 3HI6 | H_ARG_38  | NH2 | H_GLU_46  | OE1 | 3.371 |
| 3HI6 | H_ARG_38  | NH2 | H_GLU_46  | OE2 | 3.628 |
| 3HI6 | H_LYS_65  | NZ  | H_ASP_62  | OD1 | 3.388 |
| 3HI6 | H_ARG_67  | NH1 | H_ASP_90  | OD1 | 3.897 |
| 3HI6 | H_ARG_67  | NH1 | H_ASP_90  | OD2 | 2.936 |
| 3HI6 | H_ARG_67  | NH2 | H_ASP_90  | OD1 | 3.035 |
| 3HI6 | H_ARG_67  | NH2 | H_ASP_90  | OD2 | 3.561 |
| 3HI6 | H_LYS_150 | NZ  | H_ASP_151 | OD1 | 3.237 |
| 3HI6 | H_LYS_150 | NZ  | H_ASP_151 | OD2 | 3.331 |
| 3HI6 | H_LYS_216 | NZ  | L_GLU_122 | OE1 | 2.896 |
| 3HI6 | H_LYS_216 | NZ  | L_GLU_122 | OE2 | 3.887 |
| 3HI6 | H_ARG_217 | NH2 | H_GLU_219 | OE1 | 3.060 |
| 3HI6 | L_ARG_61  | NH2 | L_ASP_82  | OD1 | 2.928 |
| 3HI6 | L_ARG_61  | NH2 | L_ASP_82  | OD2 | 3.639 |
| 3HI6 | L_LYS_102 | NZ  | L_GLU_164 | OE1 | 3.006 |
| 3HI6 | L_LYS_102 | NZ  | L_GLU_164 | OE2 | 3.181 |
| 3HI6 | L_LYS_106 | NZ  | L_ASP_17  | OD2 | 3.521 |
| 3HI6 | L_ARG_141 | NH1 | L_GLU_164 | OE2 | 3.935 |

|      |           |     |           |     |       |
|------|-----------|-----|-----------|-----|-------|
| 3HI6 | L_HIS_188 | ND1 | L_ASP_150 | OD2 | 2.681 |
| 3HI6 | X_ARG_38  | NH1 | X_ASP_90  | OD1 | 2.944 |
| 3HI6 | X_ARG_38  | NH2 | X_GLU_46  | OE1 | 3.305 |
| 3HI6 | X_ARG_38  | NH2 | X_GLU_46  | OE2 | 3.929 |
| 3HI6 | X_ARG_38  | NH2 | X_ASP_90  | OD1 | 3.837 |
| 3HI6 | X_ARG_67  | NH1 | X_ASP_90  | OD2 | 3.146 |
| 3HI6 | X_ARG_67  | NH2 | X_ASP_90  | OD1 | 3.168 |
| 3HI6 | X_ARG_67  | NH2 | X_ASP_90  | OD2 | 3.554 |
| 3HI6 | X_LYS_150 | NZ  | X_ASP_151 | OD2 | 3.620 |
| 3HI6 | X_LYS_216 | NZ  | Y_GLU_122 | OE1 | 3.212 |
| 3HI6 | Y_ARG_    | NH1 | Y_ASP_70  | OD1 | 2.911 |
| 3HI6 | Y_ARG_    | NH1 | Y_ASP_70  | OD2 | 3.450 |
| 3HI6 | Y_ARG_    | NH2 | Y_ASP_70  | OD1 | 3.656 |
| 3HI6 | Y_ARG_61  | NH2 | Y_GLU_81  | OE1 | 3.524 |
| 3HI6 | Y_ARG_61  | NH2 | Y_ASP_82  | OD1 | 2.775 |
| 3HI6 | Y_ARG_61  | NH2 | Y_ASP_82  | OD2 | 3.667 |
| 3HI6 | Y_HIS_188 | ND1 | Y_ASP_150 | OD2 | 3.043 |
| 3HMG | A_LYS_27  | NZ  | A_ASP_32  | OD2 | 2.671 |
| 3HMG | A_HIS_56  | ND1 | A_ASP_85  | OD2 | 3.968 |
| 3HMG | A_ARG_57  | NH1 | A_GLU_82  | OE1 | 2.607 |
| 3HMG | A_ARG_57  | NH1 | A_GLU_82  | OE2 | 3.527 |
| 3HMG | A_HIS_75  | ND1 | A_ASP_73  | OD1 | 3.517 |
| 3HMG | A_HIS_75  | ND1 | A_ASP_73  | OD2 | 2.768 |
| 3HMG | A_HIS_75  | NE2 | A_ASP_63  | OD1 | 3.581 |
| 3HMG | A_ARG_90  | NH1 | A_ASP_60  | OD1 | 2.768 |
| 3HMG | A_ARG_90  | NH1 | A_ASP_60  | OD2 | 3.650 |
| 3HMG | A_LYS_92  | NZ  | A_ASP_271 | OD2 | 3.725 |
| 3HMG | A_ARG_109 | NH1 | B_GLU_67  | OE1 | 3.372 |
| 3HMG | A_ARG_109 | NH1 | B_GLU_67  | OE2 | 2.849 |
| 3HMG | A_ARG_109 | NH2 | A_GLU_89  | OE1 | 3.268 |
| 3HMG | A_ARG_109 | NH2 | A_GLU_89  | OE2 | 2.513 |
| 3HMG | A_ARG_141 | NH1 | A_ASP_77  | OD1 | 2.813 |
| 3HMG | A_ARG_141 | NH1 | A_ASP_77  | OD2 | 3.101 |
| 3HMG | A_LYS_176 | NZ  | A_GLU_123 | OE1 | 2.594 |
| 3HMG | A_LYS_176 | NZ  | A_GLU_123 | OE2 | 3.871 |
| 3HMG | A_HIS_183 | NE2 | A_GLU_190 | OE1 | 3.525 |
| 3HMG | A_ARG_208 | NH2 | A_ASP_241 | OD2 | 2.755 |
| 3HMG | A_LYS_238 | NZ  | A_ASP_175 | OD1 | 2.646 |
| 3HMG | A_LYS_238 | NZ  | A_ASP_175 | OD2 | 3.452 |
| 3HMG | A_LYS_238 | NZ  | F_GLU_72  | OE2 | 2.747 |
| 3HMG | A_ARG_261 | NH1 | A_GLU_119 | OE1 | 2.789 |
| 3HMG | A_ARG_261 | NH1 | A_GLU_119 | OE2 | 2.604 |
| 3HMG | A_ARG_261 | NH2 | A_GLU_119 | OE1 | 3.241 |
| 3HMG | A_LYS_264 | NZ  | A_ASP_85  | OD1 | 3.861 |
| 3HMG | A_LYS_264 | NZ  | A_ASP_85  | OD2 | 2.924 |
| 3HMG | A_ARG_269 | NH2 | B_GLU_67  | OE1 | 2.883 |
| 3HMG | A_LYS_292 | NZ  | A_ASP_291 | OD1 | 2.917 |
| 3HMG | A_LYS_299 | NZ  | B_GLU_69  | OE1 | 3.233 |
| 3HMG | A_LYS_310 | NZ  | B_ASP_90  | OD1 | 2.577 |
| 3HMG | A_LYS_315 | NZ  | A_GLU_41  | OE2 | 3.626 |
| 3HMG | B_ARG_25  | NH1 | A_GLU_325 | OE1 | 3.777 |
| 3HMG | B_LYS_51  | NZ  | B_GLU_103 | OE2 | 2.839 |
| 3HMG | B_ARG_54  | NH1 | F_GLU_97  | OE1 | 2.798 |
| 3HMG | B_ARG_54  | NH2 | B_GLU_57  | OE1 | 2.910 |
| 3HMG | B_ARG_54  | NH2 | B_GLU_57  | OE2 | 3.325 |
| 3HMG | B_ARG_54  | NH2 | F_GLU_97  | OE1 | 3.127 |
| 3HMG | B_LYS_62  | NZ  | F_ASP_86  | OD1 | 2.986 |
| 3HMG | B_LYS_62  | NZ  | F_ASP_86  | OD2 | 2.761 |

|      |           |     |           |     |       |
|------|-----------|-----|-----------|-----|-------|
| 3HMG | B_LYS_62  | NZ  | F_ASP_90  | OD1 | 3.490 |
| 3HMG | B_LYS_62  | NZ  | F_ASP_90  | OD2 | 2.774 |
| 3HMG | B_HIS_64  | NE2 | F_ASP_79  | OD1 | 3.991 |
| 3HMG | B_HIS_64  | NE2 | F_ASP_79  | OD2 | 3.618 |
| 3HMG | B_LYS_68  | NZ  | B_GLU_85  | OE1 | 3.186 |
| 3HMG | B_LYS_68  | NZ  | B_GLU_85  | OE2 | 2.686 |
| 3HMG | B_ARG_76  | NH1 | D_GLU_74  | OE1 | 3.445 |
| 3HMG | B_ARG_76  | NH1 | D_GLU_74  | OE2 | 2.823 |
| 3HMG | B_ARG_76  | NH1 | D_GLU_81  | OE1 | 2.738 |
| 3HMG | B_ARG_76  | NH1 | D_GLU_81  | OE2 | 3.615 |
| 3HMG | B_ARG_76  | NH2 | D_GLU_74  | OE1 | 2.830 |
| 3HMG | B_ARG_76  | NH2 | D_GLU_74  | OE2 | 3.630 |
| 3HMG | B_LYS_117 | NZ  | B_GLU_114 | OE1 | 2.569 |
| 3HMG | B_LYS_117 | NZ  | B_GLU_114 | OE2 | 3.024 |
| 3HMG | B_ARG_123 | NH1 | F_GLU_132 | OE2 | 3.281 |
| 3HMG | B_ARG_123 | NH2 | B_GLU_120 | OE1 | 2.630 |
| 3HMG | B_ARG_123 | NH2 | B_GLU_120 | OE2 | 3.334 |
| 3HMG | B_ARG_124 | NH1 | F_GLU_132 | OE1 | 3.422 |
| 3HMG | B_ARG_124 | NH1 | F_GLU_132 | OE2 | 3.128 |
| 3HMG | B_ARG_124 | NH2 | B_GLU_120 | OE1 | 3.713 |
| 3HMG | B_ARG_127 | NH2 | F_GLU_131 | OE1 | 2.404 |
| 3HMG | B_ARG_153 | NH2 | B_GLU_150 | OE2 | 2.579 |
| 3HMG | B_HIS_159 | NE2 | B_ASP_160 | OD2 | 3.179 |
| 3HMG | B_ARG_163 | NH1 | F_GLU_131 | OE1 | 2.713 |
| 3HMG | B_ARG_163 | NH1 | F_GLU_131 | OE2 | 2.661 |
| 3HMG | B_ARG_170 | NH1 | B_GLU_128 | OE1 | 2.573 |
| 3HMG | B_ARG_170 | NH2 | B_GLU_131 | OE2 | 2.707 |
| 3HMG | B_ARG_170 | NH2 | D_GLU_128 | OE1 | 3.667 |
| 3HMG | B_ARG_170 | NH2 | D_GLU_128 | OE2 | 3.704 |
| 3HMG | C_LYS_27  | NZ  | C_ASP_32  | OD2 | 2.666 |
| 3HMG | C_HIS_56  | ND1 | C_ASP_85  | OD2 | 3.933 |
| 3HMG | C_ARG_57  | NH1 | C_GLU_82  | OE1 | 2.582 |
| 3HMG | C_ARG_57  | NH1 | C_GLU_82  | OE2 | 3.551 |
| 3HMG | C_HIS_75  | ND1 | C_ASP_73  | OD1 | 3.511 |
| 3HMG | C_HIS_75  | ND1 | C_ASP_73  | OD2 | 2.757 |
| 3HMG | C_HIS_75  | NE2 | C_ASP_63  | OD1 | 3.577 |
| 3HMG | C_ARG_90  | NH1 | C_ASP_60  | OD1 | 2.751 |
| 3HMG | C_ARG_90  | NH1 | C_ASP_60  | OD2 | 3.640 |
| 3HMG | C_LYS_92  | NZ  | C_ASP_271 | OD2 | 3.710 |
| 3HMG | C_ARG_109 | NH1 | D_GLU_67  | OE1 | 3.376 |
| 3HMG | C_ARG_109 | NH1 | D_GLU_67  | OE2 | 2.842 |
| 3HMG | C_ARG_109 | NH2 | C_GLU_89  | OE1 | 3.278 |
| 3HMG | C_ARG_109 | NH2 | C_GLU_89  | OE2 | 2.563 |
| 3HMG | C_ARG_141 | NH1 | C_ASP_77  | OD1 | 2.813 |
| 3HMG | C_ARG_141 | NH1 | C_ASP_77  | OD2 | 3.109 |
| 3HMG | C_LYS_176 | NZ  | C_GLU_123 | OE1 | 2.579 |
| 3HMG | C_LYS_176 | NZ  | C_GLU_123 | OE2 | 3.881 |
| 3HMG | C_HIS_183 | NE2 | C_GLU_190 | OE1 | 3.534 |
| 3HMG | C_ARG_208 | NH2 | C_ASP_241 | OD2 | 2.719 |
| 3HMG | C_LYS_238 | NZ  | B_GLU_72  | OE2 | 2.625 |
| 3HMG | C_LYS_238 | NZ  | C_ASP_175 | OD1 | 2.646 |
| 3HMG | C_LYS_238 | NZ  | C_ASP_175 | OD2 | 3.428 |
| 3HMG | C_ARG_261 | NH1 | C_GLU_119 | OE1 | 2.776 |
| 3HMG | C_ARG_261 | NH1 | C_GLU_119 | OE2 | 2.620 |
| 3HMG | C_ARG_261 | NH2 | C_GLU_119 | OE1 | 3.254 |
| 3HMG | C_LYS_264 | NZ  | C_ASP_85  | OD1 | 3.851 |
| 3HMG | C_LYS_264 | NZ  | C_ASP_85  | OD2 | 2.872 |
| 3HMG | C_ARG_269 | NH2 | D_GLU_67  | OE1 | 2.813 |



|      |           |     |           |     |       |
|------|-----------|-----|-----------|-----|-------|
| 3HMG | C_LYS_292 | NZ  | C_ASP_291 | OD1 | 2.970 |
| 3HMG | C_LYS_299 | NZ  | D_GLU_69  | OE1 | 3.251 |
| 3HMG | C_LYS_310 | NZ  | D_ASP_90  | OD1 | 2.544 |
| 3HMG | C_LYS_315 | NZ  | C_GLU_41  | OE2 | 3.625 |
| 3HMG | D_LYS_51  | NZ  | D_GLU_103 | OE2 | 2.876 |
| 3HMG | D_ARG_54  | NH1 | B_GLU_97  | OE1 | 2.804 |
| 3HMG | D_ARG_54  | NH2 | B_GLU_97  | OE1 | 3.138 |
| 3HMG | D_ARG_54  | NH2 | D_GLU_57  | OE1 | 2.911 |
| 3HMG | D_ARG_54  | NH2 | D_GLU_57  | OE2 | 3.348 |
| 3HMG | D_LYS_62  | NZ  | B_ASP_86  | OD1 | 2.985 |
| 3HMG | D_LYS_62  | NZ  | B_ASP_86  | OD2 | 2.721 |
| 3HMG | D_LYS_62  | NZ  | B_ASP_90  | OD1 | 3.453 |
| 3HMG | D_LYS_62  | NZ  | B_ASP_90  | OD2 | 2.701 |
| 3HMG | D_HIS_64  | NE2 | B_ASP_79  | OD1 | 3.960 |
| 3HMG | D_HIS_64  | NE2 | B_ASP_79  | OD2 | 3.444 |
| 3HMG | D_LYS_68  | NZ  | D_GLU_85  | OE1 | 3.145 |
| 3HMG | D_LYS_68  | NZ  | D_GLU_85  | OE2 | 2.743 |
| 3HMG | D_ARG_76  | NH1 | F_GLU_74  | OE1 | 3.513 |
| 3HMG | D_ARG_76  | NH1 | F_GLU_74  | OE2 | 2.767 |
| 3HMG | D_ARG_76  | NH1 | F_GLU_81  | OE1 | 2.643 |
| 3HMG | D_ARG_76  | NH1 | F_GLU_81  | OE2 | 3.636 |
| 3HMG | D_ARG_76  | NH2 | F_GLU_74  | OE1 | 2.766 |
| 3HMG | D_ARG_76  | NH2 | F_GLU_74  | OE2 | 3.449 |
| 3HMG | D_LYS_117 | NZ  | D_GLU_114 | OE1 | 2.579 |
| 3HMG | D_LYS_117 | NZ  | D_GLU_114 | OE2 | 3.024 |
| 3HMG | D_ARG_123 | NH1 | B_GLU_132 | OE2 | 3.299 |
| 3HMG | D_ARG_123 | NH2 | D_GLU_120 | OE1 | 2.630 |
| 3HMG | D_ARG_123 | NH2 | D_GLU_120 | OE2 | 3.353 |
| 3HMG | D_ARG_124 | NH1 | B_GLU_132 | OE1 | 3.459 |
| 3HMG | D_ARG_124 | NH1 | B_GLU_132 | OE2 | 3.169 |
| 3HMG | D_ARG_124 | NH2 | D_GLU_120 | OE1 | 3.725 |
| 3HMG | D_ARG_127 | NH2 | B_GLU_131 | OE1 | 2.449 |
| 3HMG | D_ARG_153 | NH2 | D_GLU_150 | OE1 | 2.831 |
| 3HMG | D_HIS_159 | NE2 | D_ASP_160 | OD2 | 3.206 |
| 3HMG | D_ARG_163 | NH1 | B_GLU_131 | OE1 | 2.694 |
| 3HMG | D_ARG_163 | NH1 | B_GLU_131 | OE2 | 2.707 |
| 3HMG | D_ARG_170 | NH1 | D_GLU_128 | OE1 | 2.604 |
| 3HMG | D_ARG_170 | NH2 | D_GLU_131 | OE2 | 2.731 |
| 3HMG | D_ARG_170 | NH2 | F_GLU_128 | OE1 | 3.716 |
| 3HMG | D_ARG_170 | NH2 | F_GLU_128 | OE2 | 3.859 |
| 3HMG | E_LYS_27  | NZ  | E_ASP_32  | OD2 | 2.652 |
| 3HMG | E_HIS_56  | ND1 | E_ASP_85  | OD2 | 3.934 |
| 3HMG | E_ARG_57  | NH1 | E_GLU_82  | OE1 | 2.626 |
| 3HMG | E_ARG_57  | NH1 | E_GLU_82  | OE2 | 3.570 |
| 3HMG | E_HIS_75  | ND1 | E_ASP_73  | OD1 | 3.497 |
| 3HMG | E_HIS_75  | ND1 | E_ASP_73  | OD2 | 2.783 |
| 3HMG | E_HIS_75  | NE2 | E_ASP_63  | OD1 | 3.565 |
| 3HMG | E_ARG_90  | NH1 | E_ASP_60  | OD1 | 2.760 |
| 3HMG | E_ARG_90  | NH1 | E_ASP_60  | OD2 | 3.651 |
| 3HMG | E_LYS_92  | NZ  | E_ASP_271 | OD2 | 3.691 |
| 3HMG | E_ARG_109 | NH1 | F_GLU_67  | OE1 | 3.402 |
| 3HMG | E_ARG_109 | NH1 | F_GLU_67  | OE2 | 2.841 |
| 3HMG | E_ARG_109 | NH2 | E_GLU_89  | OE1 | 3.254 |
| 3HMG | E_ARG_109 | NH2 | E_GLU_89  | OE2 | 2.493 |
| 3HMG | E_ARG_141 | NH1 | E_ASP_77  | OD1 | 2.813 |
| 3HMG | E_ARG_141 | NH1 | E_ASP_77  | OD2 | 3.105 |
| 3HMG | E_LYS_176 | NZ  | E_GLU_123 | OE1 | 2.615 |
| 3HMG | E_LYS_176 | NZ  | E_GLU_123 | OE2 | 3.893 |

|      |           |     |           |     |       |
|------|-----------|-----|-----------|-----|-------|
| 3HMG | E_HIS_183 | NE2 | E_GLU_190 | OE1 | 3.535 |
| 3HMG | E_ARG_208 | NH2 | E_ASP_241 | OD2 | 2.774 |
| 3HMG | E_LYS_238 | NZ  | D_GLU_72  | OE2 | 2.745 |
| 3HMG | E_LYS_238 | NZ  | E_ASP_175 | OD1 | 2.643 |
| 3HMG | E_LYS_238 | NZ  | E_ASP_175 | OD2 | 3.469 |
| 3HMG | E_ARG_261 | NH1 | E_GLU_119 | OE1 | 2.788 |
| 3HMG | E_ARG_261 | NH1 | E_GLU_119 | OE2 | 2.617 |
| 3HMG | E_ARG_261 | NH2 | E_GLU_119 | OE1 | 3.257 |
| 3HMG | E_LYS_264 | NZ  | E_ASP_85  | OD1 | 3.857 |
| 3HMG | E_LYS_264 | NZ  | E_ASP_85  | OD2 | 2.875 |
| 3HMG | E_ARG_269 | NH2 | F_GLU_67  | OE1 | 2.840 |
| 3HMG | E_LYS_292 | NZ  | E_ASP_291 | OD1 | 2.926 |
| 3HMG | E_LYS_299 | NZ  | F_GLU_69  | OE1 | 3.192 |
| 3HMG | E_LYS_310 | NZ  | F_ASP_90  | OD1 | 2.563 |
| 3HMG | E_LYS_315 | NZ  | E_GLU_41  | OE2 | 3.619 |
| 3HMG | F_ARG_25  | NH1 | E_GLU_325 | OE2 | 3.879 |
| 3HMG | F_ARG_25  | NH2 | E_GLU_325 | OE2 | 3.668 |
| 3HMG | F_LYS_51  | NZ  | F_GLU_103 | OE2 | 2.823 |
| 3HMG | F_ARG_54  | NH1 | D_GLU_97  | OE1 | 2.700 |
| 3HMG | F_ARG_54  | NH2 | D_GLU_97  | OE1 | 3.155 |
| 3HMG | F_ARG_54  | NH2 | F_GLU_57  | OE1 | 2.900 |
| 3HMG | F_ARG_54  | NH2 | F_GLU_57  | OE2 | 3.295 |
| 3HMG | F_LYS_62  | NZ  | D_ASP_86  | OD1 | 2.928 |
| 3HMG | F_LYS_62  | NZ  | D_ASP_86  | OD2 | 2.697 |
| 3HMG | F_LYS_62  | NZ  | D_ASP_90  | OD1 | 3.563 |
| 3HMG | F_LYS_62  | NZ  | D_ASP_90  | OD2 | 2.800 |
| 3HMG | F_HIS_64  | NE2 | D_ASP_79  | OD1 | 3.875 |
| 3HMG | F_HIS_64  | NE2 | D_ASP_79  | OD2 | 3.441 |
| 3HMG | F_LYS_68  | NZ  | F_GLU_85  | OE1 | 3.194 |
| 3HMG | F_LYS_68  | NZ  | F_GLU_85  | OE2 | 2.724 |
| 3HMG | F_ARG_76  | NH1 | B_GLU_74  | OE1 | 3.414 |
| 3HMG | F_ARG_76  | NH1 | B_GLU_74  | OE2 | 2.793 |
| 3HMG | F_ARG_76  | NH1 | B_GLU_81  | OE1 | 2.687 |
| 3HMG | F_ARG_76  | NH1 | B_GLU_81  | OE2 | 3.711 |
| 3HMG | F_ARG_76  | NH2 | B_GLU_74  | OE1 | 2.734 |
| 3HMG | F_ARG_76  | NH2 | B_GLU_74  | OE2 | 3.548 |
| 3HMG | F_LYS_117 | NZ  | F_GLU_114 | OE1 | 2.569 |
| 3HMG | F_LYS_117 | NZ  | F_GLU_114 | OE2 | 3.073 |
| 3HMG | F_ARG_123 | NH1 | D_GLU_132 | OE2 | 3.319 |
| 3HMG | F_ARG_123 | NH2 | F_GLU_120 | OE1 | 2.637 |
| 3HMG | F_ARG_123 | NH2 | F_GLU_120 | OE2 | 3.351 |
| 3HMG | F_ARG_124 | NH1 | D_GLU_132 | OE1 | 3.517 |
| 3HMG | F_ARG_124 | NH1 | D_GLU_132 | OE2 | 3.294 |
| 3HMG | F_ARG_124 | NH1 | F_GLU_120 | OE1 | 3.989 |
| 3HMG | F_ARG_124 | NH2 | F_GLU_120 | OE1 | 3.690 |
| 3HMG | F_ARG_127 | NH2 | D_GLU_131 | OE1 | 2.559 |
| 3HMG | F_HIS_159 | NE2 | F_ASP_160 | OD2 | 3.217 |
| 3HMG | F_ARG_163 | NH1 | D_GLU_131 | OE1 | 2.673 |
| 3HMG | F_ARG_163 | NH1 | D_GLU_131 | OE2 | 2.666 |
| 3HMG | F_ARG_170 | NH1 | F_GLU_128 | OE1 | 2.616 |
| 3HMG | F_ARG_170 | NH2 | B_GLU_128 | OE1 | 3.705 |
| 3HMG | F_ARG_170 | NH2 | B_GLU_128 | OE2 | 3.753 |
| 3HMG | F_ARG_170 | NH2 | F_GLU_131 | OE2 | 2.717 |
| 3HZK | A_LYS_24  | NZ  | A_ASP_70  | OD1 | 3.032 |
| 3HZK | A_LYS_24  | NZ  | A_ASP_70  | OD2 | 3.302 |
| 3HZK | A_ARG_61  | NH1 | A_ASP_82  | OD1 | 2.826 |
| 3HZK | A_ARG_61  | NH1 | A_ASP_82  | OD2 | 3.622 |
| 3HZK | A_ARG_95  | NH2 | B_ASP_95  | OD1 | 3.611 |

|      |           |     |            |     |       |
|------|-----------|-----|------------|-----|-------|
| 3HZK | A_ARG_95  | NH2 | B_ASP_95   | OD2 | 2.795 |
| 3HZK | A_LYS_102 | NZ  | A_GLU_104  | OE1 | 3.918 |
| 3HZK | A_LYS_148 | NZ  | A_GLU_194  | OE1 | 3.895 |
| 3HZK | A_LYS_148 | NZ  | A_GLU_194  | OE2 | 3.185 |
| 3HZK | A_ARG_154 | NH1 | A_GLU_184  | OE1 | 3.701 |
| 3HZK | A_ARG_154 | NH2 | A_GLU_184  | OE1 | 3.490 |
| 3HZK | A_LYS_182 | NZ  | A_GLU_186  | OE1 | 2.645 |
| 3HZK | A_LYS_182 | NZ  | A_GLU_186  | OE2 | 3.525 |
| 3HZK | A_HIS_188 | ND1 | A_ASP_150  | OD2 | 3.092 |
| 3HZK | A_LYS_198 | NZ  | A_ASP_109  | OD2 | 3.722 |
| 3HZK | B_ARG_38  | NH1 | B_ASP_86   | OD2 | 2.994 |
| 3HZK | B_ARG_38  | NH2 | B_GLU_46   | OE1 | 3.036 |
| 3HZK | B_ARG_38  | NH2 | B_GLU_46   | OE2 | 3.939 |
| 3HZK | B_ARG_38  | NH2 | B_ASP_86   | OD2 | 3.973 |
| 3HZK | B_ARG_52  | NH1 | B_GLU_58   | OE2 | 2.780 |
| 3HZK | B_ARG_52  | NH2 | B_GLU_58   | OE2 | 3.087 |
| 3HZK | B_ARG_66  | NH1 | B_ASP_86   | OD1 | 2.850 |
| 3HZK | B_ARG_66  | NH1 | B_ASP_86   | OD2 | 3.686 |
| 3HZK | B_ARG_66  | NH2 | B_ASP_86   | OD1 | 3.613 |
| 3HZK | B_ARG_66  | NH2 | B_ASP_86   | OD2 | 2.940 |
| 3HZK | B_ARG_94  | NH2 | B_ASP_101  | OD1 | 3.902 |
| 3HZK | B_ARG_94  | NH2 | B_ASP_101  | OD2 | 2.967 |
| 3HZK | B_LYS_207 | NZ  | A_GLU_122  | OE2 | 3.993 |
| 3HZM | A_LYS_24  | NZ  | A_ASP_70   | OD1 | 2.853 |
| 3HZM | A_LYS_24  | NZ  | A_ASP_70   | OD2 | 3.528 |
| 3HZM | A_LYS_39  | NZ  | A_GLU_81   | OE2 | 3.193 |
| 3HZM | A_ARG_61  | NH1 | A_GLU_81   | OE1 | 3.361 |
| 3HZM | A_ARG_61  | NH1 | A_ASP_82   | OD1 | 2.891 |
| 3HZM | A_ARG_61  | NH1 | A_ASP_82   | OD2 | 3.592 |
| 3HZM | A_ARG_95  | NH2 | B_ASP_95   | OD1 | 3.493 |
| 3HZM | A_ARG_95  | NH2 | B_ASP_95   | OD2 | 2.771 |
| 3HZM | A_ARG_95  | NH2 | B_ASP_100E | OD1 | 3.831 |
| 3HZM | A_LYS_146 | NZ  | A_GLU_153  | OE2 | 3.706 |
| 3HZM | A_LYS_148 | NZ  | A_GLU_194  | OE1 | 3.173 |
| 3HZM | A_LYS_148 | NZ  | A_GLU_194  | OE2 | 2.785 |
| 3HZM | A_ARG_154 | NH1 | A_GLU_184  | OE2 | 3.270 |
| 3HZM | A_LYS_182 | NZ  | A_GLU_186  | OE1 | 3.833 |
| 3HZM | A_LYS_182 | NZ  | A_GLU_186  | OE2 | 3.992 |
| 3HZM | A_ARG_187 | NH2 | A_GLU_184  | OE1 | 3.077 |
| 3HZM | A_HIS_188 | ND1 | A_ASP_150  | OD2 | 3.055 |
| 3HZM | A_HIS_188 | NE2 | A_GLU_184  | OE1 | 3.680 |
| 3HZM | A_HIS_188 | NE2 | A_GLU_184  | OE2 | 3.167 |
| 3HZM | A_LYS_198 | NZ  | A_ASP_109  | OD2 | 3.763 |
| 3HZM | B_ARG_38  | NH1 | B_ASP_86   | OD2 | 2.747 |
| 3HZM | B_ARG_38  | NH2 | B_GLU_46   | OE1 | 2.957 |
| 3HZM | B_ARG_38  | NH2 | B_GLU_46   | OE2 | 3.921 |
| 3HZM | B_ARG_38  | NH2 | B_ASP_86   | OD2 | 3.860 |
| 3HZM | B_ARG_52  | NH1 | B_GLU_58   | OE2 | 2.944 |
| 3HZM | B_ARG_52  | NH2 | B_GLU_58   | OE2 | 2.835 |
| 3HZM | B_ARG_66  | NH1 | B_ASP_86   | OD1 | 2.764 |
| 3HZM | B_ARG_66  | NH1 | B_ASP_86   | OD2 | 3.758 |
| 3HZM | B_ARG_66  | NH2 | B_ASP_86   | OD1 | 3.543 |
| 3HZM | B_ARG_66  | NH2 | B_ASP_86   | OD2 | 3.021 |
| 3HZM | B_ARG_94  | NH2 | B_ASP_101  | OD1 | 3.649 |
| 3HZM | B_ARG_94  | NH2 | B_ASP_101  | OD2 | 2.613 |
| 3HZM | B_LYS_207 | NZ  | A_GLU_122  | OE2 | 3.353 |
| 3HZV | A_LYS_24  | NZ  | A_ASP_70   | OD1 | 3.175 |
| 3HZV | A_LYS_24  | NZ  | A_ASP_70   | OD2 | 3.513 |

|      |           |     |            |     |       |
|------|-----------|-----|------------|-----|-------|
| 3HZV | A_LYS_39  | NZ  | A_GLU_81   | OE2 | 2.855 |
| 3HZV | A_ARG_61  | NH1 | A_GLU_81   | OE1 | 3.565 |
| 3HZV | A_ARG_61  | NH1 | A_ASP_82   | OD1 | 2.789 |
| 3HZV | A_ARG_61  | NH1 | A_ASP_82   | OD2 | 3.461 |
| 3HZV | A_ARG_95  | NH2 | B_ASP_95   | OD1 | 3.498 |
| 3HZV | A_ARG_95  | NH2 | B_ASP_95   | OD2 | 2.821 |
| 3HZV | A_ARG_95  | NH2 | B_ASP_100E | OD1 | 3.905 |
| 3HZV | A_LYS_148 | NZ  | A_GLU_194  | OE1 | 3.263 |
| 3HZV | A_LYS_148 | NZ  | A_GLU_194  | OE2 | 3.225 |
| 3HZV | A_LYS_182 | NZ  | A_GLU_186  | OE1 | 3.453 |
| 3HZV | A_ARG_187 | NH2 | A_GLU_184  | OE1 | 2.816 |
| 3HZV | A_HIS_188 | ND1 | A_ASP_150  | OD2 | 2.755 |
| 3HZV | A_HIS_188 | NE2 | A_GLU_184  | OE1 | 3.971 |
| 3HZV | A_HIS_188 | NE2 | A_GLU_184  | OE2 | 3.358 |
| 3HZV | A_LYS_198 | NZ  | A_ASP_109  | OD2 | 3.800 |
| 3HZV | B_ARG_38  | NH1 | B_ASP_86   | OD2 | 2.840 |
| 3HZV | B_ARG_38  | NH2 | B_GLU_46   | OE1 | 3.130 |
| 3HZV | B_ARG_38  | NH2 | B_ASP_86   | OD2 | 3.863 |
| 3HZV | B_ARG_52  | NH1 | B_GLU_58   | OE2 | 2.906 |
| 3HZV | B_ARG_52  | NH2 | B_GLU_58   | OE2 | 2.746 |
| 3HZV | B_ARG_66  | NH1 | B_ASP_86   | OD1 | 2.687 |
| 3HZV | B_ARG_66  | NH1 | B_ASP_86   | OD2 | 3.671 |
| 3HZV | B_ARG_66  | NH2 | B_ASP_86   | OD1 | 3.381 |
| 3HZV | B_ARG_66  | NH2 | B_ASP_86   | OD2 | 2.850 |
| 3HZV | B_ARG_94  | NH2 | B_ASP_101  | OD1 | 3.676 |
| 3HZV | B_ARG_94  | NH2 | B_ASP_101  | OD2 | 2.608 |
| 3HZV | B_LYS_207 | NZ  | A_GLU_122  | OE2 | 3.521 |
| 3HZY | A_LYS_24  | NZ  | A_ASP_70   | OD1 | 2.966 |
| 3HZY | A_LYS_24  | NZ  | A_ASP_70   | OD2 | 3.808 |
| 3HZY | A_LYS_39  | NZ  | A_GLU_81   | OE2 | 3.561 |
| 3HZY | A_ARG_54  | NH2 | A_ASP_60   | OD2 | 3.979 |
| 3HZY | A_ARG_61  | NH1 | A_ASP_82   | OD1 | 2.810 |
| 3HZY | A_ARG_61  | NH1 | A_ASP_82   | OD2 | 3.525 |
| 3HZY | A_ARG_95  | NH2 | B_ASP_95   | OD1 | 3.688 |
| 3HZY | A_ARG_95  | NH2 | B_ASP_95   | OD2 | 3.045 |
| 3HZY | A_ARG_95  | NH2 | B_ASP_100E | OD1 | 3.820 |
| 3HZY | A_LYS_146 | NZ  | A_GLU_153  | OE2 | 3.963 |
| 3HZY | A_LYS_148 | NZ  | A_GLU_194  | OE1 | 2.878 |
| 3HZY | A_LYS_148 | NZ  | A_GLU_194  | OE2 | 3.571 |
| 3HZY | A_ARG_154 | NH1 | A_GLU_184  | OE2 | 3.171 |
| 3HZY | A_ARG_187 | NH2 | A_GLU_184  | OE1 | 2.952 |
| 3HZY | A_HIS_188 | ND1 | A_ASP_150  | OD2 | 3.206 |
| 3HZY | A_HIS_188 | NE2 | A_GLU_184  | OE2 | 3.220 |
| 3HZY | A_LYS_198 | NZ  | A_ASP_109  | OD2 | 3.836 |
| 3HZY | B_LYS_3   | NZ  | B_GLU_1    | OE2 | 3.921 |
| 3HZY | B_ARG_38  | NH1 | B_ASP_86   | OD2 | 2.721 |
| 3HZY | B_ARG_38  | NH2 | B_ASP_86   | OD2 | 3.756 |
| 3HZY | B_ARG_52  | NH1 | B_GLU_58   | OE2 | 2.797 |
| 3HZY | B_ARG_52  | NH2 | B_GLU_58   | OE2 | 2.569 |
| 3HZY | B_ARG_66  | NH1 | B_ASP_86   | OD1 | 2.833 |
| 3HZY | B_ARG_66  | NH1 | B_ASP_86   | OD2 | 3.703 |
| 3HZY | B_ARG_66  | NH2 | B_ASP_86   | OD1 | 3.472 |
| 3HZY | B_ARG_66  | NH2 | B_ASP_86   | OD2 | 2.924 |
| 3HZY | B_ARG_94  | NH2 | B_ASP_101  | OD1 | 3.400 |
| 3HZY | B_ARG_94  | NH2 | B_ASP_101  | OD2 | 2.530 |
| 3HZY | B_LYS_207 | NZ  | A_GLU_122  | OE2 | 3.902 |
| 3I02 | A_ARG_61  | NH1 | A_ASP_82   | OD1 | 3.000 |
| 3I02 | A_ARG_61  | NH1 | A_ASP_82   | OD2 | 3.958 |

|      |           |     |            |     |       |
|------|-----------|-----|------------|-----|-------|
| 3I02 | A_ARG_95  | NH2 | B_ASP_95   | OD2 | 3.028 |
| 3I02 | A_LYS_102 | NZ  | A_GLU_104  | OE2 | 2.902 |
| 3I02 | A_LYS_146 | NZ  | A_GLU_194  | OE2 | 2.628 |
| 3I02 | A_LYS_148 | NZ  | A_GLU_194  | OE2 | 3.134 |
| 3I02 | A_ARG_154 | NH1 | A_GLU_184  | OE2 | 3.155 |
| 3I02 | A_LYS_182 | NZ  | A_ASP_183  | OD1 | 3.921 |
| 3I02 | A_LYS_182 | NZ  | A_GLU_186  | OE2 | 2.799 |
| 3I02 | A_ARG_187 | NH2 | A_GLU_184  | OE1 | 2.793 |
| 3I02 | A_HIS_188 | ND1 | A_ASP_150  | OD2 | 3.259 |
| 3I02 | A_LYS_198 | NZ  | A_ASP_109  | OD1 | 3.541 |
| 3I02 | A_LYS_198 | NZ  | A_ASP_109  | OD2 | 3.982 |
| 3I02 | B_ARG_38  | NH1 | B_ASP_86   | OD2 | 2.730 |
| 3I02 | B_ARG_38  | NH2 | B_GLU_46   | OE1 | 3.082 |
| 3I02 | B_ARG_38  | NH2 | B_GLU_46   | OE2 | 3.832 |
| 3I02 | B_ARG_38  | NH2 | B_ASP_86   | OD2 | 3.854 |
| 3I02 | B_ARG_52  | NH1 | B_ASP_58   | OD2 | 3.947 |
| 3I02 | B_ARG_52  | NH2 | B_ASP_58   | OD2 | 3.567 |
| 3I02 | B_ARG_66  | NH1 | B_ASP_86   | OD1 | 2.819 |
| 3I02 | B_ARG_66  | NH1 | B_ASP_86   | OD2 | 3.716 |
| 3I02 | B_ARG_66  | NH2 | B_ASP_86   | OD1 | 3.582 |
| 3I02 | B_ARG_66  | NH2 | B_ASP_86   | OD2 | 3.033 |
| 3I02 | B_ARG_94  | NH2 | B_ASP_101  | OD2 | 2.982 |
| 3I02 | B_ARG_98  | NH1 | B_ASP_100  | OD2 | 3.749 |
| 3I02 | B_ARG_98  | NH2 | B_ASP_100  | OD2 | 3.470 |
| 3I02 | B_ARG_98  | NH2 | B_ASP_100A | OD1 | 3.832 |
| 3I02 | B_ARG_98  | NH2 | B_ASP_100A | OD2 | 3.991 |
| 3I02 | C_LYS_24  | NZ  | C_ASP_70   | OD2 | 3.426 |
| 3I02 | C_ARG_61  | NH1 | C_ASP_82   | OD1 | 2.423 |
| 3I02 | C_ARG_61  | NH1 | C_ASP_82   | OD2 | 3.328 |
| 3I02 | C_ARG_95  | NH2 | D_ASP_95   | OD1 | 3.601 |
| 3I02 | C_ARG_95  | NH2 | D_ASP_95   | OD2 | 2.826 |
| 3I02 | C_LYS_102 | NZ  | C_GLU_104  | OE2 | 3.372 |
| 3I02 | C_ARG_187 | NH2 | C_GLU_184  | OE1 | 2.763 |
| 3I02 | C_HIS_188 | NE2 | C_GLU_184  | OE2 | 3.413 |
| 3I02 | C_LYS_198 | NZ  | C_ASP_109  | OD1 | 3.870 |
| 3I02 | C_LYS_198 | NZ  | C_ASP_109  | OD2 | 2.949 |
| 3I02 | D_ARG_38  | NH1 | D_ASP_86   | OD2 | 2.646 |
| 3I02 | D_ARG_38  | NH2 | D_GLU_46   | OE1 | 2.952 |
| 3I02 | D_ARG_38  | NH2 | D_GLU_46   | OE2 | 3.936 |
| 3I02 | D_ARG_38  | NH2 | D_ASP_86   | OD2 | 3.805 |
| 3I02 | D_ARG_52  | NH1 | D_ASP_58   | OD2 | 3.197 |
| 3I02 | D_ARG_52  | NH2 | D_ASP_58   | OD2 | 2.792 |
| 3I02 | D_ARG_66  | NH1 | D_ASP_86   | OD1 | 2.833 |
| 3I02 | D_ARG_66  | NH1 | D_ASP_86   | OD2 | 3.584 |
| 3I02 | D_ARG_66  | NH2 | D_ASP_86   | OD1 | 3.662 |
| 3I02 | D_ARG_66  | NH2 | D_ASP_86   | OD2 | 2.930 |
| 3I02 | D_ARG_94  | NH2 | D_ASP_101  | OD2 | 2.660 |
| 3I02 | D_ARG_97  | NH2 | D_ASP_100A | OD2 | 3.024 |
| 3I02 | D_LYS_208 | NZ  | C_GLU_122  | OE2 | 3.585 |
| 3I9G | H_ARG_38  | NH2 | H_GLU_46   | OE1 | 2.845 |
| 3I9G | H_ARG_38  | NH2 | H_GLU_46   | OE2 | 3.261 |
| 3I9G | H_ARG_53  | NH2 | H_ASP_31   | OD1 | 2.786 |
| 3I9G | H_ARG_94  | NH1 | H_ASP_101  | OD1 | 3.167 |
| 3I9G | H_ARG_94  | NH1 | H_ASP_101  | OD2 | 3.902 |
| 3I9G | H_LYS_143 | NZ  | H_ASP_144  | OD1 | 3.018 |
| 3I9G | H_LYS_143 | NZ  | H_ASP_144  | OD2 | 2.935 |
| 3I9G | H_ARG_210 | NH2 | H_GLU_212  | OE2 | 2.989 |
| 3I9G | L_LYS_42  | NZ  | L_GLU_39   | OE1 | 2.937 |

|      |           |     |           |     |       |
|------|-----------|-----|-----------|-----|-------|
| 3I9G | L_ARG_61  | NH2 | L_GLU_81  | OE1 | 3.841 |
| 3I9G | L_ARG_61  | NH2 | L_ASP_82  | OD1 | 2.775 |
| 3I9G | L_ARG_61  | NH2 | L_ASP_82  | OD2 | 3.368 |
| 3I9G | L_LYS_149 | NZ  | L_GLU_195 | OE1 | 3.806 |
| 3I9G | L_LYS_149 | NZ  | L_GLU_195 | OE2 | 3.005 |
| 3I9G | L_LYS_183 | NZ  | L_GLU_187 | OE1 | 3.717 |
| 3I9G | L_LYS_183 | NZ  | L_GLU_187 | OE2 | 3.176 |
| 3IET | A_LYS_50  | NZ  | X_GLU_8   | OE1 | 3.701 |
| 3IET | A_LYS_50  | NZ  | X_GLU_8   | OE2 | 3.403 |
| 3IET | A_ARG_61  | NH1 | A_GLU_79  | OE1 | 3.211 |
| 3IET | A_ARG_61  | NH1 | A_GLU_79  | OE2 | 3.820 |
| 3IET | A_ARG_61  | NH2 | A_ASP_82  | OD1 | 3.553 |
| 3IET | A_ARG_61  | NH2 | A_ASP_82  | OD2 | 2.781 |
| 3IET | A_LYS_149 | NZ  | A_GLU_195 | OE1 | 2.884 |
| 3IET | A_LYS_149 | NZ  | A_GLU_195 | OE2 | 3.548 |
| 3IET | A_ARG_155 | NH1 | A_GLU_185 | OE2 | 3.262 |
| 3IET | A_LYS_183 | NZ  | A_GLU_187 | OE1 | 3.582 |
| 3IET | A_LYS_183 | NZ  | A_GLU_187 | OE2 | 3.667 |
| 3IET | A_ARG_188 | NH1 | A_GLU_185 | OE1 | 3.150 |
| 3IET | A_HIS_189 | ND1 | A_ASP_151 | OD1 | 2.682 |
| 3IET | A_HIS_189 | NE2 | A_GLU_185 | OE1 | 3.596 |
| 3IET | A_HIS_189 | NE2 | A_GLU_185 | OE2 | 3.220 |
| 3IET | A_LYS_199 | NZ  | A_ASP_110 | OD1 | 3.761 |
| 3IET | A_LYS_199 | NZ  | A_ASP_110 | OD2 | 3.765 |
| 3IET | B_ARG_38  | NH1 | B_GLU_46  | OE1 | 3.404 |
| 3IET | B_ARG_38  | NH1 | B_GLU_46  | OE2 | 3.350 |
| 3IET | B_ARG_38  | NH2 | B_ASP_86  | OD1 | 2.967 |
| 3IET | B_LYS_43  | NZ  | B_GLU_46  | OE1 | 3.606 |
| 3IET | B_LYS_43  | NZ  | B_GLU_46  | OE2 | 2.694 |
| 3IET | B_ARG_52  | NH1 | B_GLU_50  | OE1 | 3.452 |
| 3IET | B_HIS_55  | NE2 | B_ASP_73  | OD1 | 2.597 |
| 3IET | B_HIS_55  | NE2 | B_ASP_73  | OD2 | 3.551 |
| 3IET | B_LYS_64  | NZ  | B_GLU_61  | OE1 | 2.971 |
| 3IET | B_ARG_66  | NH1 | B_ASP_86  | OD1 | 2.974 |
| 3IET | B_ARG_66  | NH1 | B_ASP_86  | OD2 | 3.464 |
| 3IET | B_ARG_66  | NH2 | B_ASP_86  | OD1 | 3.752 |
| 3IET | B_ARG_66  | NH2 | B_ASP_86  | OD2 | 2.865 |
| 3IET | B_ARG_71  | NH1 | B_ASP_73  | OD2 | 3.338 |
| 3IET | B_ARG_83  | NH2 | B_GLU_85  | OE2 | 3.927 |
| 3IET | B_LYS_96  | NZ  | B_ASP_31  | OD2 | 3.537 |
| 3IET | B_ARG_98  | NH1 | B_ASP_35  | OD1 | 2.639 |
| 3IET | B_ARG_98  | NH1 | B_ASP_35  | OD2 | 3.020 |
| 3IET | B_ARG_98  | NH1 | B_GLU_50  | OE2 | 3.794 |
| 3IET | B_LYS_208 | NZ  | A_GLU_123 | OE1 | 3.818 |
| 3IET | C_ARG_54  | NH2 | C_ASP_60  | OD2 | 3.637 |
| 3IET | C_ARG_61  | NH1 | C_GLU_79  | OE1 | 3.085 |
| 3IET | C_ARG_61  | NH2 | C_GLU_79  | OE1 | 3.940 |
| 3IET | C_ARG_61  | NH2 | C_ASP_82  | OD1 | 2.938 |
| 3IET | C_ARG_61  | NH2 | C_ASP_82  | OD2 | 3.003 |
| 3IET | C_LYS_147 | NZ  | C_GLU_154 | OE1 | 3.272 |
| 3IET | C_LYS_149 | NZ  | C_GLU_195 | OE2 | 3.728 |
| 3IET | C_ARG_188 | NH1 | C_GLU_185 | OE1 | 3.678 |
| 3IET | C_HIS_189 | ND1 | C_ASP_151 | OD1 | 2.372 |
| 3IET | C_HIS_189 | NE2 | C_GLU_185 | OE1 | 3.376 |
| 3IET | C_HIS_189 | NE2 | C_GLU_185 | OE2 | 2.388 |
| 3IET | C_LYS_199 | NZ  | C_ASP_110 | OD1 | 3.614 |
| 3IET | D_ARG_38  | NH1 | D_GLU_46  | OE1 | 3.769 |
| 3IET | D_ARG_38  | NH1 | D_GLU_46  | OE2 | 3.554 |

|      |           |     |           |     |       |
|------|-----------|-----|-----------|-----|-------|
| 3IET | D_ARG_38  | NH2 | D_ASP_86  | OD1 | 3.017 |
| 3IET | D_ARG_52  | NH1 | D_GLU_50  | OE1 | 3.520 |
| 3IET | D_HIS_55  | ND1 | A_ASP_143 | OD1 | 3.412 |
| 3IET | D_HIS_55  | ND1 | A_ASP_143 | OD2 | 3.385 |
| 3IET | D_HIS_55  | NE2 | D_ASP_73  | OD1 | 2.773 |
| 3IET | D_HIS_55  | NE2 | D_ASP_73  | OD2 | 3.630 |
| 3IET | D_LYS_64  | NZ  | D_GLU_61  | OE1 | 2.801 |
| 3IET | D_LYS_64  | NZ  | D_GLU_61  | OE2 | 3.652 |
| 3IET | D_ARG_66  | NH1 | D_ASP_86  | OD1 | 2.949 |
| 3IET | D_ARG_66  | NH1 | D_ASP_86  | OD2 | 3.534 |
| 3IET | D_ARG_66  | NH2 | D_ASP_86  | OD1 | 3.686 |
| 3IET | D_ARG_66  | NH2 | D_ASP_86  | OD2 | 2.898 |
| 3IET | D_ARG_71  | NH1 | D_ASP_73  | OD2 | 3.179 |
| 3IET | D_LYS_75  | NZ  | D_ASP_72  | OD1 | 3.887 |
| 3IET | D_LYS_75  | NZ  | D_ASP_72  | OD2 | 3.840 |
| 3IET | D_LYS_96  | NZ  | D_ASP_31  | OD2 | 3.952 |
| 3IET | D_ARG_98  | NH1 | D_ASP_35  | OD1 | 2.733 |
| 3IET | D_ARG_98  | NH1 | D_ASP_35  | OD2 | 2.840 |
| 3IET | D_LYS_114 | NZ  | D_ASP_173 | OD2 | 3.662 |
| 3IET | D_LYS_208 | NZ  | C_GLU_123 | OE2 | 3.321 |
| 3IET | D_LYS_209 | NZ  | D_GLU_211 | OE1 | 3.547 |
| 3IF1 | A_ARG_24  | NH1 | A_ASP_70  | OD2 | 3.644 |
| 3IF1 | A_ARG_24  | NH2 | A_ASP_70  | OD2 | 3.131 |
| 3IF1 | A_ARG_61  | NH1 | A_GLU_79  | OE1 | 3.948 |
| 3IF1 | A_ARG_61  | NH1 | A_GLU_79  | OE2 | 3.315 |
| 3IF1 | A_ARG_61  | NH2 | A_ASP_82  | OD1 | 2.825 |
| 3IF1 | A_ARG_61  | NH2 | A_ASP_82  | OD2 | 2.702 |
| 3IF1 | A_LYS_142 | NZ  | A_GLU_105 | OE2 | 3.983 |
| 3IF1 | A_LYS_147 | NZ  | A_GLU_154 | OE1 | 3.522 |
| 3IF1 | A_LYS_149 | NZ  | A_GLU_195 | OE1 | 2.902 |
| 3IF1 | A_ARG_155 | NH1 | A_GLU_185 | OE2 | 2.578 |
| 3IF1 | A_ARG_188 | NH1 | A_GLU_185 | OE1 | 3.024 |
| 3IF1 | A_HIS_189 | ND1 | A_ASP_151 | OD1 | 2.587 |
| 3IF1 | A_HIS_189 | NE2 | A_GLU_185 | OE1 | 3.887 |
| 3IF1 | A_HIS_189 | NE2 | A_GLU_185 | OE2 | 3.017 |
| 3IF1 | A_LYS_199 | NZ  | A_ASP_110 | OD1 | 2.811 |
| 3IF1 | A_LYS_199 | NZ  | A_ASP_110 | OD2 | 3.664 |
| 3IF1 | B_ARG_38  | NH1 | B_GLU_46  | OE1 | 3.546 |
| 3IF1 | B_ARG_38  | NH1 | B_GLU_46  | OE2 | 3.505 |
| 3IF1 | B_ARG_38  | NH1 | B_ASP_86  | OD1 | 3.939 |
| 3IF1 | B_ARG_38  | NH2 | B_ASP_86  | OD1 | 3.024 |
| 3IF1 | B_LYS_43  | NZ  | B_GLU_46  | OE1 | 3.786 |
| 3IF1 | B_LYS_43  | NZ  | B_GLU_46  | OE2 | 2.709 |
| 3IF1 | B_ARG_52  | NH1 | B_GLU_50  | OE1 | 3.600 |
| 3IF1 | B_HIS_55  | NE2 | B_ASP_73  | OD1 | 2.678 |
| 3IF1 | B_HIS_55  | NE2 | B_ASP_73  | OD2 | 3.590 |
| 3IF1 | B_LYS_64  | NZ  | B_GLU_61  | OE1 | 3.313 |
| 3IF1 | B_ARG_66  | NH1 | B_ASP_86  | OD1 | 3.142 |
| 3IF1 | B_ARG_66  | NH1 | B_ASP_86  | OD2 | 3.480 |
| 3IF1 | B_ARG_66  | NH2 | B_ASP_86  | OD1 | 3.813 |
| 3IF1 | B_ARG_66  | NH2 | B_ASP_86  | OD2 | 2.708 |
| 3IF1 | B_ARG_71  | NH1 | B_ASP_73  | OD2 | 3.261 |
| 3IF1 | B_LYS_96  | NZ  | B_ASP_31  | OD2 | 3.416 |
| 3IF1 | B_ARG_98  | NH1 | B_ASP_35  | OD1 | 2.801 |
| 3IF1 | B_ARG_98  | NH1 | B_ASP_35  | OD2 | 2.999 |
| 3IF1 | B_ARG_98  | NH1 | B_GLU_50  | OE1 | 3.809 |
| 3IF1 | B_ARG_98  | NH1 | B_GLU_50  | OE2 | 3.524 |
| 3IF1 | B_ARG_98  | NH2 | B_GLU_50  | OE1 | 3.792 |

|      |           |     |            |     |       |
|------|-----------|-----|------------|-----|-------|
| 3IF1 | B_ARG_98  | NH2 | B_GLU_50   | OE2 | 3.692 |
| 3IF1 | C_ARG_24  | NH1 | C_ASP_70   | OD2 | 3.431 |
| 3IF1 | C_ARG_24  | NH2 | C_ASP_70   | OD2 | 2.995 |
| 3IF1 | C_ARG_61  | NH1 | C_GLU_79   | OE2 | 3.277 |
| 3IF1 | C_ARG_61  | NH2 | C_ASP_82   | OD1 | 2.778 |
| 3IF1 | C_ARG_61  | NH2 | C_ASP_82   | OD2 | 2.710 |
| 3IF1 | C_LYS_147 | NZ  | C_GLU_154  | OE1 | 3.247 |
| 3IF1 | C_LYS_149 | NZ  | C_GLU_195  | OE1 | 3.400 |
| 3IF1 | C_ARG_155 | NH1 | C_GLU_185  | OE2 | 2.578 |
| 3IF1 | C_ARG_188 | NH1 | C_GLU_185  | OE1 | 2.910 |
| 3IF1 | C_HIS_189 | ND1 | C_ASP_151  | OD1 | 2.543 |
| 3IF1 | C_HIS_189 | NE2 | C_GLU_185  | OE2 | 2.831 |
| 3IF1 | C_LYS_199 | NZ  | C_ASP_110  | OD1 | 2.846 |
| 3IF1 | C_LYS_199 | NZ  | C_ASP_110  | OD2 | 3.766 |
| 3IF1 | D_ARG_38  | NH1 | D_GLU_46   | OE1 | 3.513 |
| 3IF1 | D_ARG_38  | NH1 | D_GLU_46   | OE2 | 3.484 |
| 3IF1 | D_ARG_38  | NH2 | D_ASP_86   | OD1 | 3.055 |
| 3IF1 | D_LYS_43  | NZ  | D_GLU_46   | OE1 | 3.762 |
| 3IF1 | D_LYS_43  | NZ  | D_GLU_46   | OE2 | 3.359 |
| 3IF1 | D_ARG_52  | NH1 | D_GLU_50   | OE1 | 3.903 |
| 3IF1 | D_LYS_52B | NZ  | A_ASP_143  | OD2 | 3.658 |
| 3IF1 | D_HIS_55  | ND1 | A_ASP_143  | OD1 | 3.559 |
| 3IF1 | D_HIS_55  | ND1 | A_ASP_143  | OD2 | 3.251 |
| 3IF1 | D_HIS_55  | NE2 | D_ASP_73   | OD1 | 2.642 |
| 3IF1 | D_HIS_55  | NE2 | D_ASP_73   | OD2 | 3.393 |
| 3IF1 | D_LYS_64  | NZ  | D_GLU_61   | OE1 | 3.366 |
| 3IF1 | D_ARG_66  | NH1 | D_ASP_86   | OD1 | 2.982 |
| 3IF1 | D_ARG_66  | NH1 | D_ASP_86   | OD2 | 3.435 |
| 3IF1 | D_ARG_66  | NH2 | D_ASP_86   | OD1 | 3.897 |
| 3IF1 | D_ARG_66  | NH2 | D_ASP_86   | OD2 | 2.982 |
| 3IF1 | D_ARG_71  | NH1 | D_ASP_73   | OD2 | 3.435 |
| 3IF1 | D_ARG_98  | NH1 | D_ASP_35   | OD1 | 2.797 |
| 3IF1 | D_ARG_98  | NH1 | D_ASP_35   | OD2 | 2.984 |
| 3IF1 | D_ARG_98  | NH1 | D_GLU_50   | OE1 | 3.619 |
| 3IF1 | D_ARG_98  | NH1 | D_GLU_50   | OE2 | 3.743 |
| 3IF1 | D_ARG_98  | NH2 | D_GLU_50   | OE1 | 3.809 |
| 3IF1 | D_ARG_98  | NH2 | D_GLU_50   | OE2 | 3.688 |
| 3IF1 | D_LYS_209 | NZ  | D_GLU_211  | OE1 | 3.626 |
| 3IF1 | D_LYS_209 | NZ  | D_GLU_211  | OE2 | 3.891 |
| 3IJH | A_ARG_54  | NH1 | A_ASP_60   | OD1 | 3.984 |
| 3IJH | A_ARG_61  | NH1 | A_ASP_82   | OD1 | 3.244 |
| 3IJH | A_ARG_61  | NH1 | A_ASP_82   | OD2 | 2.314 |
| 3IJH | A_ARG_61  | NH2 | A_ASP_82   | OD1 | 3.682 |
| 3IJH | A_ARG_95  | NH2 | B_ASP_95   | OD1 | 3.392 |
| 3IJH | A_ARG_95  | NH2 | B_ASP_95   | OD2 | 2.832 |
| 3IJH | A_ARG_95  | NH2 | B_GLU_100E | OE1 | 3.920 |
| 3IJH | A_LYS_148 | NZ  | A_GLU_194  | OE1 | 3.527 |
| 3IJH | A_LYS_148 | NZ  | A_GLU_194  | OE2 | 2.720 |
| 3IJH | A_ARG_154 | NH2 | A_GLU_184  | OE2 | 3.756 |
| 3IJH | A_HIS_188 | ND1 | A_ASP_150  | OD2 | 2.926 |
| 3IJH | A_LYS_198 | NZ  | A_ASP_109  | OD2 | 3.088 |
| 3IJH | B_ARG_38  | NH1 | B_ASP_86   | OD2 | 2.842 |
| 3IJH | B_ARG_38  | NH2 | B_GLU_46   | OE1 | 3.209 |
| 3IJH | B_ARG_38  | NH2 | B_ASP_86   | OD2 | 3.896 |
| 3IJH | B_ARG_52  | NH1 | B_GLU_58   | OE2 | 2.824 |
| 3IJH | B_ARG_52  | NH2 | B_GLU_58   | OE2 | 3.202 |
| 3IJH | B_ARG_66  | NH1 | B_ASP_86   | OD1 | 2.813 |
| 3IJH | B_ARG_66  | NH1 | B_ASP_86   | OD2 | 3.750 |



|      |           |     |            |     |       |
|------|-----------|-----|------------|-----|-------|
| 3IJH | B_ARG_66  | NH2 | B_ASP_86   | OD1 | 3.334 |
| 3IJH | B_ARG_66  | NH2 | B_ASP_86   | OD2 | 2.758 |
| 3IJH | B_ARG_83  | NH1 | B_ASP_86   | OD2 | 3.914 |
| 3IJH | B_ARG_164 | NH1 | A_ASP_166  | OD1 | 3.428 |
| 3IJH | B_ARG_164 | NH2 | A_ASP_166  | OD1 | 3.938 |
| 3IJH | B_LYS_208 | NZ  | A_GLU_122  | OE1 | 2.744 |
| 3IJH | C_LYS_24  | NZ  | C_ASP_70   | OD2 | 3.835 |
| 3IJH | C_ARG_54  | NH1 | C_ASP_60   | OD1 | 3.972 |
| 3IJH | C_ARG_61  | NH1 | C_ASP_82   | OD1 | 2.606 |
| 3IJH | C_ARG_61  | NH1 | C_ASP_82   | OD2 | 2.580 |
| 3IJH | C_ARG_95  | NH2 | D_ASP_95   | OD1 | 3.394 |
| 3IJH | C_ARG_95  | NH2 | D_ASP_95   | OD2 | 2.734 |
| 3IJH | C_LYS_102 | NZ  | C_GLU_104  | OE2 | 3.655 |
| 3IJH | C_LYS_146 | NZ  | C_GLU_153  | OE2 | 3.796 |
| 3IJH | C_LYS_148 | NZ  | C_GLU_194  | OE1 | 3.503 |
| 3IJH | C_LYS_148 | NZ  | C_GLU_194  | OE2 | 3.158 |
| 3IJH | C_LYS_198 | NZ  | C_ASP_109  | OD2 | 3.332 |
| 3IJH | D_ARG_38  | NH1 | D_ASP_86   | OD2 | 2.796 |
| 3IJH | D_ARG_38  | NH2 | D_GLU_46   | OE1 | 3.273 |
| 3IJH | D_ARG_38  | NH2 | D_ASP_86   | OD2 | 3.880 |
| 3IJH | D_ARG_52  | NH1 | D_GLU_58   | OE2 | 2.836 |
| 3IJH | D_ARG_52  | NH2 | D_GLU_58   | OE2 | 3.043 |
| 3IJH | D_ARG_66  | NH1 | D_ASP_86   | OD1 | 2.773 |
| 3IJH | D_ARG_66  | NH1 | D_ASP_86   | OD2 | 3.767 |
| 3IJH | D_ARG_66  | NH2 | D_ASP_86   | OD1 | 3.326 |
| 3IJH | D_ARG_66  | NH2 | D_ASP_86   | OD2 | 2.861 |
| 3IJH | D_ARG_83  | NH1 | D_GLU_85   | OE2 | 2.756 |
| 3IJH | D_ARG_164 | NH1 | C_ASP_166  | OD1 | 3.593 |
| 3IJH | D_ARG_164 | NH2 | C_ASP_166  | OD1 | 3.440 |
| 3IJH | D_ARG_209 | NH1 | D_GLU_211  | OE2 | 3.993 |
| 3IJH | D_ARG_209 | NH2 | D_GLU_211  | OE1 | 3.933 |
| 3IJS | A_ARG_61  | NH1 | A_ASP_82   | OD1 | 2.832 |
| 3IJS | A_ARG_61  | NH1 | A_ASP_82   | OD2 | 2.527 |
| 3IJS | A_ARG_61  | NH2 | A_GLU_81   | OE1 | 3.669 |
| 3IJS | A_ARG_61  | NH2 | A_ASP_82   | OD1 | 3.818 |
| 3IJS | A_ARG_95  | NH2 | B_ASP_95   | OD1 | 3.603 |
| 3IJS | A_ARG_95  | NH2 | B_ASP_95   | OD2 | 3.018 |
| 3IJS | A_ARG_95  | NH2 | B_GLU_100E | OE1 | 3.734 |
| 3IJS | A_LYS_102 | NZ  | A_GLU_104  | OE2 | 3.940 |
| 3IJS | A_LYS_146 | NZ  | A_GLU_153  | OE2 | 3.777 |
| 3IJS | A_LYS_148 | NZ  | A_GLU_194  | OE1 | 3.285 |
| 3IJS | A_LYS_148 | NZ  | A_GLU_194  | OE2 | 2.974 |
| 3IJS | A_LYS_182 | NZ  | A_GLU_186  | OE1 | 2.825 |
| 3IJS | A_LYS_182 | NZ  | A_GLU_186  | OE2 | 2.949 |
| 3IJS | A_HIS_188 | ND1 | A_ASP_150  | OD2 | 2.814 |
| 3IJS | A_LYS_198 | NZ  | A_ASP_109  | OD2 | 3.057 |
| 3IJS | B_ARG_38  | NH1 | B_ASP_86   | OD2 | 2.852 |
| 3IJS | B_ARG_38  | NH2 | B_GLU_46   | OE1 | 3.406 |
| 3IJS | B_ARG_38  | NH2 | B_ASP_86   | OD2 | 3.872 |
| 3IJS | B_ARG_52  | NH1 | B_GLU_58   | OE2 | 2.821 |
| 3IJS | B_ARG_52  | NH2 | B_GLU_58   | OE2 | 2.883 |
| 3IJS | B_ARG_66  | NH1 | B_ASP_86   | OD1 | 2.838 |
| 3IJS | B_ARG_66  | NH1 | B_ASP_86   | OD2 | 3.824 |
| 3IJS | B_ARG_66  | NH2 | B_ASP_86   | OD1 | 3.278 |
| 3IJS | B_ARG_66  | NH2 | B_ASP_86   | OD2 | 2.729 |
| 3IJS | B_ARG_83  | NH1 | B_GLU_85   | OE2 | 3.989 |
| 3IJS | B_ARG_164 | NH1 | A_ASP_166  | OD1 | 3.855 |
| 3IJS | B_LYS_208 | NZ  | A_GLU_122  | OE1 | 2.963 |

|      |           |     |            |     |       |
|------|-----------|-----|------------|-----|-------|
| 3IJS | C_ARG_54  | NH1 | C_ASP_60   | OD2 | 3.567 |
| 3IJS | C_ARG_61  | NH1 | C_ASP_82   | OD1 | 2.893 |
| 3IJS | C_ARG_61  | NH1 | C_ASP_82   | OD2 | 3.574 |
| 3IJS | C_ARG_95  | NH2 | D_ASP_95   | OD1 | 3.466 |
| 3IJS | C_ARG_95  | NH2 | D_ASP_95   | OD2 | 2.795 |
| 3IJS | C_ARG_95  | NH2 | D_GLU_100E | OE1 | 3.752 |
| 3IJS | C_LYS_102 | NZ  | C_GLU_104  | OE2 | 3.639 |
| 3IJS | C_LYS_146 | NZ  | C_GLU_153  | OE1 | 3.935 |
| 3IJS | C_LYS_148 | NZ  | C_GLU_194  | OE2 | 3.029 |
| 3IJS | C_ARG_154 | NH2 | C_GLU_184  | OE2 | 3.755 |
| 3IJS | C_HIS_188 | ND1 | C_ASP_150  | OD2 | 3.093 |
| 3IJS | C_LYS_198 | NZ  | C_ASP_109  | OD2 | 3.489 |
| 3IJS | D_ARG_38  | NH1 | D_ASP_86   | OD2 | 2.884 |
| 3IJS | D_ARG_38  | NH2 | D_GLU_46   | OE1 | 3.237 |
| 3IJS | D_ARG_38  | NH2 | D_GLU_46   | OE2 | 3.977 |
| 3IJS | D_ARG_52  | NH1 | D_GLU_58   | OE2 | 3.033 |
| 3IJS | D_ARG_52  | NH2 | D_GLU_58   | OE2 | 3.006 |
| 3IJS | D_ARG_66  | NH1 | D_ASP_86   | OD1 | 2.827 |
| 3IJS | D_ARG_66  | NH1 | D_ASP_86   | OD2 | 3.633 |
| 3IJS | D_ARG_66  | NH2 | D_ASP_86   | OD1 | 3.506 |
| 3IJS | D_ARG_66  | NH2 | D_ASP_86   | OD2 | 2.897 |
| 3IJS | D_ARG_164 | NH1 | C_ASP_166  | OD1 | 3.815 |
| 3IJS | D_ARG_164 | NH2 | C_ASP_166  | OD1 | 3.576 |
| 3IJS | D_LYS_208 | NZ  | C_GLU_122  | OE1 | 3.219 |
| 3IJS | D_LYS_208 | NZ  | C_GLU_122  | OE2 | 2.679 |
| 3IJS | D_ARG_209 | NH1 | D_GLU_211  | OE2 | 2.704 |
| 3IJY | A_LYS_24  | NZ  | A_ASP_70   | OD2 | 3.532 |
| 3IJY | A_ARG_54  | NH1 | A_ASP_60   | OD1 | 3.326 |
| 3IJY | A_ARG_54  | NH2 | A_ASP_60   | OD1 | 3.494 |
| 3IJY | A_ARG_61  | NH1 | A_ASP_82   | OD1 | 2.847 |
| 3IJY | A_ARG_61  | NH1 | A_ASP_82   | OD2 | 2.458 |
| 3IJY | A_ARG_61  | NH2 | A_GLU_81   | OE1 | 3.326 |
| 3IJY | A_ARG_61  | NH2 | A_ASP_82   | OD1 | 3.959 |
| 3IJY | A_ARG_95  | NH2 | B_ASP_95   | OD1 | 3.420 |
| 3IJY | A_ARG_95  | NH2 | B_ASP_95   | OD2 | 2.800 |
| 3IJY | A_ARG_95  | NH2 | B_GLU_100E | OE1 | 3.751 |
| 3IJY | A_LYS_148 | NZ  | A_GLU_194  | OE1 | 3.793 |
| 3IJY | A_LYS_148 | NZ  | A_GLU_194  | OE2 | 3.098 |
| 3IJY | A_HIS_188 | ND1 | A_ASP_150  | OD2 | 3.295 |
| 3IJY | A_LYS_198 | NZ  | A_ASP_109  | OD1 | 3.840 |
| 3IJY | A_LYS_198 | NZ  | A_ASP_109  | OD2 | 3.869 |
| 3IJY | B_ARG_38  | NH1 | B_ASP_86   | OD2 | 2.847 |
| 3IJY | B_ARG_38  | NH2 | B_GLU_46   | OE1 | 3.463 |
| 3IJY | B_ARG_38  | NH2 | B_ASP_86   | OD2 | 3.755 |
| 3IJY | B_ARG_52  | NH1 | B_GLU_58   | OE2 | 3.349 |
| 3IJY | B_ARG_52  | NH2 | B_GLU_58   | OE2 | 3.866 |
| 3IJY | B_ARG_66  | NH1 | B_ASP_86   | OD1 | 3.730 |
| 3IJY | B_ARG_66  | NH2 | B_ASP_86   | OD1 | 2.942 |
| 3IJY | B_ARG_66  | NH2 | B_ASP_86   | OD2 | 2.730 |
| 3IJY | B_ARG_83  | NH1 | B_GLU_85   | OE2 | 3.920 |
| 3IJY | B_ARG_83  | NH1 | B_ASP_86   | OD2 | 3.633 |
| 3IJY | B_ARG_164 | NH2 | A_ASP_166  | OD1 | 3.730 |
| 3IJY | B_ARG_164 | NH2 | A_ASP_166  | OD2 | 3.693 |
| 3IJY | B_LYS_208 | NZ  | A_GLU_122  | OE1 | 2.748 |
| 3IJY | B_ARG_209 | NH2 | B_GLU_211  | OE2 | 3.922 |
| 3IJY | C_ARG_54  | NH1 | C_ASP_60   | OD1 | 3.685 |
| 3IJY | C_ARG_61  | NH1 | C_ASP_82   | OD1 | 2.672 |
| 3IJY | C_ARG_61  | NH1 | C_ASP_82   | OD2 | 2.698 |

|      |           |     |            |     |       |
|------|-----------|-----|------------|-----|-------|
| 3IJY | C_ARG_95  | NH2 | D_ASP_95   | OD1 | 2.992 |
| 3IJY | C_ARG_95  | NH2 | D_ASP_95   | OD2 | 2.767 |
| 3IJY | C_ARG_95  | NH2 | D_GLU_100E | OE1 | 3.905 |
| 3IJY | C_LYS_102 | NZ  | C_GLU_104  | OE2 | 3.111 |
| 3IJY | C_LYS_148 | NZ  | C_GLU_194  | OE1 | 3.624 |
| 3IJY | C_LYS_148 | NZ  | C_GLU_194  | OE2 | 2.838 |
| 3IJY | C_ARG_154 | NH1 | C_GLU_184  | OE2 | 3.667 |
| 3IJY | D_ARG_38  | NH1 | D_ASP_86   | OD2 | 3.093 |
| 3IJY | D_ARG_38  | NH2 | D_GLU_46   | OE1 | 3.401 |
| 3IJY | D_ARG_52  | NH1 | D_GLU_58   | OE2 | 3.273 |
| 3IJY | D_ARG_52  | NH2 | D_GLU_58   | OE2 | 3.154 |
| 3IJY | D_ARG_66  | NH1 | D_ASP_86   | OD1 | 2.831 |
| 3IJY | D_ARG_66  | NH1 | D_ASP_86   | OD2 | 3.858 |
| 3IJY | D_ARG_66  | NH2 | D_ASP_86   | OD1 | 3.574 |
| 3IJY | D_ARG_66  | NH2 | D_ASP_86   | OD2 | 3.130 |
| 3IJY | D_ARG_83  | NH1 | D_GLU_85   | OE2 | 2.929 |
| 3IJY | D_ARG_164 | NH2 | C_ASP_166  | OD1 | 3.199 |
| 3IJY | D_ARG_209 | NH1 | D_GLU_211  | OE2 | 2.725 |
| 3IKC | A_ARG_54  | NH1 | A_ASP_60   | OD1 | 3.615 |
| 3IKC | A_ARG_54  | NH2 | A_ASP_60   | OD1 | 3.863 |
| 3IKC | A_ARG_61  | NH1 | A_ASP_82   | OD1 | 2.899 |
| 3IKC | A_ARG_61  | NH1 | A_ASP_82   | OD2 | 2.400 |
| 3IKC | A_ARG_61  | NH2 | A_GLU_81   | OE1 | 3.912 |
| 3IKC | A_ARG_61  | NH2 | A_ASP_82   | OD1 | 3.699 |
| 3IKC | A_ARG_95  | NH2 | B_ASP_95   | OD1 | 3.326 |
| 3IKC | A_ARG_95  | NH2 | B_ASP_95   | OD2 | 2.867 |
| 3IKC | A_ARG_95  | NH2 | B_GLU_100E | OE1 | 3.865 |
| 3IKC | A_LYS_148 | NZ  | A_GLU_194  | OE1 | 3.579 |
| 3IKC | A_LYS_148 | NZ  | A_GLU_194  | OE2 | 2.692 |
| 3IKC | A_ARG_154 | NH2 | A_GLU_184  | OE2 | 3.624 |
| 3IKC | A_HIS_188 | ND1 | A_ASP_150  | OD2 | 2.784 |
| 3IKC | A_LYS_198 | NZ  | A_ASP_109  | OD2 | 3.594 |
| 3IKC | B_ARG_38  | NH1 | B_ASP_86   | OD2 | 2.851 |
| 3IKC | B_ARG_38  | NH2 | B_GLU_46   | OE1 | 3.629 |
| 3IKC | B_ARG_38  | NH2 | B_GLU_46   | OE2 | 3.974 |
| 3IKC | B_ARG_38  | NH2 | B_ASP_86   | OD2 | 3.641 |
| 3IKC | B_ARG_52  | NH1 | B_GLU_58   | OE2 | 2.895 |
| 3IKC | B_ARG_52  | NH2 | B_GLU_58   | OE2 | 3.215 |
| 3IKC | B_ARG_66  | NH1 | B_ASP_86   | OD1 | 3.007 |
| 3IKC | B_ARG_66  | NH2 | B_ASP_86   | OD1 | 3.019 |
| 3IKC | B_ARG_66  | NH2 | B_ASP_86   | OD2 | 2.604 |
| 3IKC | B_ARG_83  | NH1 | B_ASP_86   | OD2 | 3.982 |
| 3IKC | B_LYS_208 | NZ  | A_GLU_122  | OE1 | 3.042 |
| 3IKC | C_LYS_24  | NZ  | C_ASP_70   | OD2 | 3.866 |
| 3IKC | C_ARG_54  | NH1 | C_ASP_60   | OD1 | 3.727 |
| 3IKC | C_ARG_61  | NH1 | C_ASP_82   | OD1 | 2.574 |
| 3IKC | C_ARG_61  | NH1 | C_ASP_82   | OD2 | 2.683 |
| 3IKC | C_ARG_95  | NH2 | D_ASP_95   | OD1 | 3.250 |
| 3IKC | C_ARG_95  | NH2 | D_ASP_95   | OD2 | 2.670 |
| 3IKC | C_LYS_102 | NZ  | C_GLU_104  | OE2 | 3.309 |
| 3IKC | C_LYS_148 | NZ  | C_GLU_194  | OE1 | 3.402 |
| 3IKC | C_LYS_148 | NZ  | C_GLU_194  | OE2 | 2.783 |
| 3IKC | C_ARG_154 | NH1 | C_GLU_184  | OE2 | 3.991 |
| 3IKC | C_LYS_198 | NZ  | C_ASP_109  | OD2 | 3.716 |
| 3IKC | D_ARG_38  | NH1 | D_ASP_86   | OD2 | 2.796 |
| 3IKC | D_ARG_38  | NH2 | D_GLU_46   | OE1 | 3.035 |
| 3IKC | D_ARG_38  | NH2 | D_GLU_46   | OE2 | 3.845 |
| 3IKC | D_ARG_52  | NH1 | D_GLU_58   | OE2 | 2.859 |

|      |           |     |           |     |       |
|------|-----------|-----|-----------|-----|-------|
| 3IKC | D_ARG_52  | NH2 | D_GLU_58  | OE2 | 3.107 |
| 3IKC | D_ARG_66  | NH1 | D_ASP_86  | OD1 | 2.890 |
| 3IKC | D_ARG_66  | NH1 | D_ASP_86  | OD2 | 3.713 |
| 3IKC | D_ARG_66  | NH2 | D_ASP_86  | OD1 | 3.634 |
| 3IKC | D_ARG_66  | NH2 | D_ASP_86  | OD2 | 3.025 |
| 3IKC | D_ARG_83  | NH1 | D_GLU_85  | OE2 | 2.787 |
| 3IKC | D_ARG_164 | NH1 | C_ASP_166 | OD1 | 3.903 |
| 3IKC | D_ARG_164 | NH2 | C_ASP_166 | OD1 | 3.107 |
| 3IKC | D_ARG_209 | NH1 | D_GLU_211 | OE2 | 3.689 |
| 3IKC | D_ARG_209 | NH2 | D_GLU_211 | OE1 | 3.739 |
| 3IU3 | A_ARG_29  | NH2 | K_ASP_6   | OD1 | 2.779 |
| 3IU3 | A_HIS_33  | ND1 | A_ASP_97  | OD1 | 3.722 |
| 3IU3 | A_HIS_33  | NE2 | A_ASP_97  | OD1 | 3.462 |
| 3IU3 | A_LYS_36  | NZ  | A_ASP_88  | OD1 | 3.600 |
| 3IU3 | A_ARG_96  | NH2 | A_ASP_103 | OD1 | 3.718 |
| 3IU3 | A_ARG_96  | NH2 | A_ASP_103 | OD2 | 2.602 |
| 3IU3 | A_LYS_211 | NZ  | B_GLU_120 | OE1 | 2.457 |
| 3IU3 | B_LYS_52  | NZ  | B_ASP_49  | OD2 | 3.235 |
| 3IU3 | B_ARG_60  | NH1 | B_GLU_80  | OE2 | 3.898 |
| 3IU3 | B_ARG_60  | NH1 | B_ASP_81  | OD1 | 2.333 |
| 3IU3 | B_ARG_60  | NH1 | B_ASP_81  | OD2 | 2.901 |
| 3IU3 | B_ARG_60  | NH2 | B_GLU_78  | OE1 | 3.558 |
| 3IU3 | B_ARG_60  | NH2 | B_GLU_78  | OE2 | 3.050 |
| 3IU3 | B_ARG_90  | NH1 | B_ASP_49  | OD1 | 2.801 |
| 3IU3 | B_ARG_90  | NH1 | K_ASP_56  | OD2 | 3.059 |
| 3IU3 | B_ARG_90  | NH2 | B_ASP_49  | OD1 | 2.779 |
| 3IU3 | B_LYS_100 | NZ  | B_GLU_162 | OE1 | 3.331 |
| 3IU3 | B_LYS_100 | NZ  | B_GLU_162 | OE2 | 3.171 |
| 3IU3 | B_LYS_146 | NZ  | B_GLU_192 | OE1 | 3.006 |
| 3IU3 | B_LYS_146 | NZ  | B_GLU_192 | OE2 | 3.977 |
| 3IU3 | B_HIS_186 | ND1 | B_ASP_148 | OD2 | 3.079 |
| 3IU3 | C_ARG_29  | NH1 | J_ASP_6   | OD1 | 3.038 |
| 3IU3 | C_ARG_29  | NH1 | J_ASP_6   | OD2 | 3.788 |
| 3IU3 | C_ARG_29  | NH2 | J_ASP_6   | OD1 | 3.464 |
| 3IU3 | C_HIS_33  | ND1 | C_ASP_97  | OD2 | 3.423 |
| 3IU3 | C_HIS_33  | NE2 | C_ASP_97  | OD2 | 3.493 |
| 3IU3 | C_ARG_38  | NH2 | C_GLU_87  | OE2 | 3.961 |
| 3IU3 | C_LYS_61  | NZ  | C_GLU_44  | OE2 | 2.894 |
| 3IU3 | C_LYS_65  | NZ  | C_ASP_88  | OD2 | 3.093 |
| 3IU3 | C_LYS_67  | NZ  | C_GLU_80  | OE2 | 3.813 |
| 3IU3 | C_ARG_96  | NH1 | C_ASP_103 | OD1 | 3.896 |
| 3IU3 | C_ARG_96  | NH1 | C_ASP_103 | OD2 | 2.604 |
| 3IU3 | C_LYS_145 | NZ  | C_ASP_146 | OD1 | 3.489 |
| 3IU3 | C_LYS_145 | NZ  | C_ASP_146 | OD2 | 3.988 |
| 3IU3 | C_LYS_211 | NZ  | D_GLU_120 | OE2 | 3.231 |
| 3IU3 | C_ARG_212 | NH1 | C_GLU_214 | OE1 | 3.436 |
| 3IU3 | C_ARG_212 | NH1 | C_GLU_214 | OE2 | 3.171 |
| 3IU3 | D_LYS_52  | NZ  | D_ASP_49  | OD2 | 2.969 |
| 3IU3 | D_ARG_60  | NH1 | D_GLU_78  | OE1 | 3.425 |
| 3IU3 | D_ARG_60  | NH1 | D_GLU_78  | OE2 | 3.777 |
| 3IU3 | D_ARG_60  | NH2 | D_GLU_78  | OE1 | 3.729 |
| 3IU3 | D_ARG_60  | NH2 | D_ASP_81  | OD1 | 2.613 |
| 3IU3 | D_ARG_60  | NH2 | D_ASP_81  | OD2 | 3.360 |
| 3IU3 | D_ARG_90  | NH1 | D_ASP_49  | OD1 | 2.486 |
| 3IU3 | D_ARG_90  | NH1 | D_ASP_49  | OD2 | 3.966 |
| 3IU3 | D_ARG_90  | NH2 | D_ASP_49  | OD1 | 2.791 |
| 3IU3 | D_ARG_90  | NH2 | J_ASP_56  | OD2 | 3.101 |
| 3IU3 | D_LYS_100 | NZ  | D_GLU_162 | OE1 | 3.352 |

|      |           |     |           |     |       |
|------|-----------|-----|-----------|-----|-------|
| 3IU3 | D_LYS_100 | NZ  | D_GLU_162 | OE2 | 3.241 |
| 3IU3 | D_ARG_139 | NH2 | D_GLU_102 | OE1 | 3.961 |
| 3IU3 | D_ARG_139 | NH2 | D_GLU_102 | OE2 | 2.898 |
| 3IU3 | D_LYS_146 | NZ  | D_GLU_192 | OE1 | 3.339 |
| 3IU3 | D_HIS_186 | ND1 | D_ASP_148 | OD2 | 3.055 |
| 3IU3 | H_ARG_29  | NH1 | L_ASP_6   | OD1 | 3.964 |
| 3IU3 | H_ARG_29  | NH1 | L_ASP_6   | OD2 | 3.865 |
| 3IU3 | H_ARG_29  | NH2 | L_ASP_6   | OD1 | 2.749 |
| 3IU3 | H_ARG_29  | NH2 | L_ASP_6   | OD2 | 3.378 |
| 3IU3 | H_HIS_33  | ND1 | H_ASP_97  | OD2 | 3.649 |
| 3IU3 | H_HIS_33  | NE2 | H_ASP_97  | OD2 | 3.672 |
| 3IU3 | H_ARG_38  | NH2 | H_GLU_87  | OE2 | 3.294 |
| 3IU3 | H_LYS_65  | NZ  | H_ASP_88  | OD1 | 3.023 |
| 3IU3 | H_LYS_65  | NZ  | H_ASP_88  | OD2 | 2.754 |
| 3IU3 | H_ARG_96  | NH2 | H_ASP_103 | OD1 | 3.935 |
| 3IU3 | H_ARG_96  | NH2 | H_ASP_103 | OD2 | 2.794 |
| 3IU3 | H_HIS_166 | NE2 | L_ASP_164 | OD1 | 3.898 |
| 3IU3 | H_LYS_211 | NZ  | L_GLU_120 | OE2 | 3.694 |
| 3IU3 | L_ARG_29  | NH2 | L_ASP_56  | OD2 | 3.164 |
| 3IU3 | L_LYS_52  | NZ  | L_ASP_49  | OD2 | 2.964 |
| 3IU3 | L_ARG_60  | NH1 | L_GLU_78  | OE1 | 3.113 |
| 3IU3 | L_ARG_60  | NH1 | L_GLU_78  | OE2 | 3.592 |
| 3IU3 | L_ARG_60  | NH2 | L_GLU_78  | OE1 | 3.507 |
| 3IU3 | L_ARG_60  | NH2 | L_GLU_80  | OE1 | 3.605 |
| 3IU3 | L_ARG_60  | NH2 | L_ASP_81  | OD1 | 2.623 |
| 3IU3 | L_ARG_60  | NH2 | L_ASP_81  | OD2 | 3.232 |
| 3IU3 | L_ARG_90  | NH1 | L_ASP_49  | OD1 | 2.693 |
| 3IU3 | L_ARG_90  | NH2 | L_ASP_49  | OD1 | 2.879 |
| 3IU3 | L_ARG_90  | NH2 | L_ASP_56  | OD1 | 2.806 |
| 3IU3 | L_LYS_100 | NZ  | L_GLU_102 | OE2 | 3.519 |
| 3IU3 | L_LYS_100 | NZ  | L_GLU_162 | OE1 | 3.094 |
| 3IU3 | L_LYS_100 | NZ  | L_GLU_162 | OE2 | 3.091 |
| 3IU3 | L_ARG_139 | NH1 | L_GLU_102 | OE2 | 3.791 |
| 3IU3 | L_ARG_139 | NH2 | L_GLU_102 | OE1 | 3.338 |
| 3IU3 | L_ARG_139 | NH2 | L_GLU_102 | OE2 | 2.994 |
| 3IU3 | L_LYS_185 | NZ  | L_ASP_182 | OD1 | 3.411 |
| 3IU3 | L_HIS_186 | ND1 | L_ASP_148 | OD2 | 2.793 |
| 3IU3 | L_ARG_36  | NH1 | H_ASP_55  | OD1 | 3.819 |
| 3IU3 | L_ARG_36  | NH2 | H_ASP_55  | OD1 | 3.008 |
| 3IU3 | L_ARG_36  | NH2 | H_ASP_55  | OD2 | 2.747 |
| 3IU3 | L_ARG_117 | NH2 | L_GLU_106 | OE2 | 3.361 |
| 3IU3 | L_HIS_120 | NE2 | L_ASP_4   | OD2 | 3.993 |
| 3IU3 | J_ARG_117 | NH2 | J_GLU_113 | OE1 | 3.255 |
| 3IU3 | J_ARG_117 | NH2 | J_GLU_113 | OE2 | 3.394 |
| 3IU3 | K_LYS_16  | NZ  | K_GLU_116 | OE1 | 3.890 |
| 3IU3 | K_ARG_117 | NH2 | K_GLU_113 | OE1 | 3.765 |
| 3IU3 | K_ARG_117 | NH2 | K_GLU_113 | OE2 | 3.085 |
| 3IU3 | K_HIS_120 | NE2 | K_ASP_4   | OD1 | 3.824 |
| 3IU4 | H_ARG_38  | NH1 | H_ASP_86  | OD1 | 2.694 |
| 3IU4 | H_ARG_38  | NH2 | H_GLU_46  | OE1 | 2.936 |
| 3IU4 | H_ARG_38  | NH2 | H_GLU_46  | OE2 | 3.977 |
| 3IU4 | H_ARG_38  | NH2 | H_ASP_86  | OD1 | 3.682 |
| 3IU4 | H_ARG_66  | NH1 | H_ASP_86  | OD1 | 3.618 |
| 3IU4 | H_ARG_66  | NH1 | H_ASP_86  | OD2 | 2.904 |
| 3IU4 | H_ARG_66  | NH2 | H_ASP_86  | OD1 | 2.858 |
| 3IU4 | H_ARG_66  | NH2 | H_ASP_86  | OD2 | 3.468 |
| 3IU4 | H_LYS_143 | NZ  | H_ASP_144 | OD1 | 3.173 |
| 3IU4 | H_LYS_143 | NZ  | H_ASP_144 | OD2 | 3.097 |

|      |           |     |           |     |       |
|------|-----------|-----|-----------|-----|-------|
| 3IU4 | H.LYS_210 | NZ  | H.GLU_212 | OE2 | 3.515 |
| 3IU4 | L.ARG_54  | NH2 | L.ASP_60  | OD1 | 3.494 |
| 3IU4 | L.ARG_61  | NH2 | L.ASP_82  | OD1 | 2.721 |
| 3IU4 | L.ARG_61  | NH2 | L.ASP_82  | OD2 | 3.542 |
| 3IU4 | L.LYS_103 | NZ  | L.GLU_165 | OE1 | 2.777 |
| 3IU4 | L.LYS_103 | NZ  | L.GLU_165 | OE2 | 3.441 |
| 3IU4 | L.LYS_149 | NZ  | L.GLU_195 | OE2 | 3.735 |
| 3IU4 | L.LYS_190 | NZ  | L.GLU_213 | OE2 | 2.585 |
| 3IVK | L.ARG_25  | NH2 | L.ASP_71  | OD1 | 3.565 |
| 3IVK | L.ARG_25  | NH2 | L.ASP_71  | OD2 | 3.118 |
| 3IVK | L.ARG_62  | NH2 | L.GLU_82  | OE1 | 3.240 |
| 3IVK | L.ARG_62  | NH2 | L.ASP_83  | OD1 | 3.041 |
| 3IVK | L.ARG_62  | NH2 | L.ASP_83  | OD2 | 3.362 |
| 3IVK | L.LYS_104 | NZ  | L.GLU_106 | OE2 | 2.881 |
| 3IVK | L.ARG_143 | NH1 | L.GLU_106 | OE2 | 2.980 |
| 3IVK | L.LYS_150 | NZ  | L.GLU_196 | OE2 | 2.646 |
| 3IVK | H.ARG_41  | NH1 | H.ASP_93  | OD1 | 2.697 |
| 3IVK | H.ARG_41  | NH2 | H.GLU_49  | OE1 | 3.359 |
| 3IVK | H.ARG_41  | NH2 | H.GLU_49  | OE2 | 3.688 |
| 3IVK | H.ARG_41  | NH2 | H.ASP_93  | OD1 | 3.849 |
| 3IVK | H.ARG_70  | NH1 | H.ASP_93  | OD2 | 2.963 |
| 3IVK | H.ARG_70  | NH2 | H.ASP_93  | OD1 | 2.795 |
| 3IVK | H.ARG_70  | NH2 | H.ASP_93  | OD2 | 2.668 |
| 3IVK | H.LYS_79  | NZ  | H.ASP_76  | OD2 | 3.978 |
| 3IVK | H.ARG_101 | NH2 | H.ASP_113 | OD2 | 3.051 |
| 3IVK | H.ARG_107 | NH1 | H.ASP_113 | OD2 | 3.782 |
| 3IVK | H.LYS_155 | NZ  | H.ASP_156 | OD1 | 3.783 |
| 3IVK | H.LYS_155 | NZ  | H.ASP_156 | OD2 | 3.283 |
| 3IVK | H.LYS_218 | NZ  | H.ASP_220 | OD1 | 3.490 |
| 3IVK | H.LYS_218 | NZ  | H.ASP_220 | OD2 | 3.548 |
| 3IVK | H.LYS_222 | NZ  | H.GLU_224 | OE1 | 3.186 |
| 3IVK | H.LYS_222 | NZ  | H.GLU_224 | OE2 | 3.235 |
| 3IVK | B.ARG_25  | NH2 | B.ASP_71  | OD1 | 3.579 |
| 3IVK | B.ARG_25  | NH2 | B.ASP_71  | OD2 | 3.085 |
| 3IVK | B.ARG_62  | NH2 | B.GLU_82  | OE1 | 3.276 |
| 3IVK | B.ARG_62  | NH2 | B.ASP_83  | OD1 | 3.056 |
| 3IVK | B.ARG_62  | NH2 | B.ASP_83  | OD2 | 3.370 |
| 3IVK | B.LYS_104 | NZ  | B.GLU_106 | OE2 | 2.879 |
| 3IVK | B.ARG_143 | NH1 | B.GLU_106 | OE2 | 2.970 |
| 3IVK | B.LYS_150 | NZ  | B.GLU_196 | OE2 | 2.638 |
| 3IVK | A.ARG_41  | NH1 | A.ASP_93  | OD1 | 2.649 |
| 3IVK | A.ARG_41  | NH2 | A.GLU_49  | OE1 | 3.405 |
| 3IVK | A.ARG_41  | NH2 | A.GLU_49  | OE2 | 3.702 |
| 3IVK | A.ARG_41  | NH2 | A.ASP_93  | OD1 | 3.815 |
| 3IVK | A.ARG_70  | NH1 | A.ASP_93  | OD2 | 2.973 |
| 3IVK | A.ARG_70  | NH2 | A.ASP_93  | OD1 | 2.836 |
| 3IVK | A.ARG_70  | NH2 | A.ASP_93  | OD2 | 2.675 |
| 3IVK | A.LYS_79  | NZ  | A.ASP_76  | OD2 | 3.988 |
| 3IVK | A.ARG_101 | NH2 | A.ASP_113 | OD2 | 3.070 |
| 3IVK | A.ARG_107 | NH1 | A.ASP_113 | OD2 | 3.837 |
| 3IVK | A.LYS_155 | NZ  | A.ASP_156 | OD1 | 3.802 |
| 3IVK | A.LYS_155 | NZ  | A.ASP_156 | OD2 | 3.283 |
| 3IVK | A.LYS_218 | NZ  | A.ASP_220 | OD1 | 3.505 |
| 3IVK | A.LYS_218 | NZ  | A.ASP_220 | OD2 | 3.577 |
| 3IVK | A.LYS_222 | NZ  | A.GLU_224 | OE1 | 3.213 |
| 3IVK | A.LYS_222 | NZ  | A.GLU_224 | OE2 | 3.240 |
| 3J5M | A.LYS_46  | NZ  | A.GLU_492 | OE1 | 3.718 |
| 3J5M | A.LYS_46  | NZ  | A.GLU_492 | OE2 | 2.915 |

|      |           |     |           |     |       |
|------|-----------|-----|-----------|-----|-------|
| 3J5M | A_HIS_66  | ND1 | A_GLU_64  | OE2 | 3.151 |
| 3J5M | A_ARG_143 | NH2 | A_GLU_145 | OE1 | 2.805 |
| 3J5M | A_ARG_143 | NH2 | A_GLU_145 | OE2 | 3.445 |
| 3J5M | A_LYS_229 | NZ  | A_GLU_83  | OE1 | 2.907 |
| 3J5M | A_LYS_231 | NZ  | A_GLU_268 | OE2 | 2.874 |
| 3J5M | A_HIS_249 | NE2 | A_GLU_482 | OE1 | 3.482 |
| 3J5M | A_LYS_282 | NZ  | A_GLU_275 | OE1 | 2.857 |
| 3J5M | A_LYS_282 | NZ  | A_GLU_275 | OE2 | 3.935 |
| 3J5M | A_LYS_344 | NZ  | A_GLU_340 | OE2 | 3.897 |
| 3J5M | A_LYS_421 | NZ  | A_GLU_145 | OE2 | 3.812 |
| 3J5M | A_ARG_429 | NH2 | D_ASP_74  | OD1 | 3.207 |
| 3J5M | A_ARG_429 | NH2 | D_ASP_74  | OD2 | 3.203 |
| 3J5M | A_ARG_456 | NH1 | A_GLU_466 | OE1 | 2.968 |
| 3J5M | A_ARG_476 | NH2 | A_ASP_474 | OD1 | 3.858 |
| 3J5M | A_ARG_480 | NH1 | A_ASP_477 | OD1 | 2.834 |
| 3J5M | A_LYS_487 | NZ  | A_GLU_91  | OE2 | 2.895 |
| 3J5M | C_ARG_54  | NH2 | C_ASP_60  | OD1 | 2.987 |
| 3J5M | C_ARG_61  | NH1 | C_GLU_79  | OE2 | 3.926 |
| 3J5M | C_ARG_61  | NH2 | C_GLU_79  | OE1 | 3.624 |
| 3J5M | C_ARG_61  | NH2 | C_ASP_82  | OD1 | 3.040 |
| 3J5M | C_ARG_61  | NH2 | C_ASP_82  | OD2 | 3.088 |
| 3J5M | C_ARG_103 | NH2 | C_GLU_165 | OE1 | 2.814 |
| 3J5M | C_ARG_142 | NH1 | C_GLU_165 | OE1 | 3.243 |
| 3J5M | C_ARG_142 | NH2 | C_GLU_105 | OE2 | 3.198 |
| 3J5M | C_LYS_149 | NZ  | C_GLU_195 | OE1 | 3.376 |
| 3J5M | C_LYS_149 | NZ  | C_GLU_195 | OE2 | 2.944 |
| 3J5M | C_HIS_189 | ND1 | C_ASP_151 | OD2 | 2.803 |
| 3J5M | D_ARG_19  | NH1 | D_ASP_81  | OD2 | 3.870 |
| 3J5M | D_ARG_19  | NH2 | D_ASP_81  | OD2 | 3.177 |
| 3J5M | D_ARG_31  | NH2 | D_ASP_27  | OD2 | 3.998 |
| 3J5M | D_ARG_38  | NH1 | D_ASP_86  | OD1 | 2.857 |
| 3J5M | D_ARG_38  | NH2 | D_GLU_46  | OE2 | 2.922 |
| 3J5M | D_LYS_52  | NZ  | A_ASP_474 | OD2 | 2.827 |
| 3J5M | D_LYS_52  | NZ  | D_GLU_33  | OE2 | 3.615 |
| 3J5M | D_ARG_64  | NH2 | A_ASP_457 | OD2 | 3.079 |
| 3J5M | D_ARG_73  | NH2 | D_GLU_30  | OE1 | 2.847 |
| 3J5M | D_ARG_73  | NH2 | D_GLU_30  | OE2 | 3.839 |
| 3J5M | D_LYS_209 | NZ  | C_GLU_123 | OE1 | 3.480 |
| 3J5M | D_LYS_209 | NZ  | C_GLU_123 | OE2 | 2.844 |
| 3J5M | D_LYS_214 | NZ  | C_ASP_122 | OD2 | 2.841 |
| 3J5M | E_LYS_46  | NZ  | E_GLU_492 | OE1 | 3.718 |
| 3J5M | E_LYS_46  | NZ  | E_GLU_492 | OE2 | 2.915 |
| 3J5M | E_HIS_66  | ND1 | E_GLU_64  | OE2 | 3.151 |
| 3J5M | E_ARG_143 | NH2 | E_GLU_145 | OE1 | 2.804 |
| 3J5M | E_ARG_143 | NH2 | E_GLU_145 | OE2 | 3.444 |
| 3J5M | E_LYS_229 | NZ  | E_GLU_83  | OE1 | 2.907 |
| 3J5M | E_LYS_231 | NZ  | E_GLU_268 | OE2 | 2.874 |
| 3J5M | E_HIS_249 | NE2 | E_GLU_482 | OE1 | 3.482 |
| 3J5M | E_LYS_282 | NZ  | E_GLU_275 | OE1 | 2.858 |
| 3J5M | E_LYS_282 | NZ  | E_GLU_275 | OE2 | 3.935 |
| 3J5M | E_LYS_344 | NZ  | E_GLU_340 | OE2 | 3.897 |
| 3J5M | E_LYS_421 | NZ  | E_GLU_145 | OE2 | 3.812 |
| 3J5M | E_ARG_429 | NH2 | H_ASP_74  | OD1 | 3.207 |
| 3J5M | E_ARG_429 | NH2 | H_ASP_74  | OD2 | 3.202 |
| 3J5M | E_ARG_456 | NH1 | E_GLU_466 | OE1 | 2.967 |
| 3J5M | E_ARG_476 | NH2 | E_ASP_474 | OD1 | 3.859 |
| 3J5M | E_ARG_480 | NH1 | E_ASP_477 | OD1 | 2.834 |
| 3J5M | E_LYS_487 | NZ  | E_GLU_91  | OE2 | 2.894 |

|      |           |     |           |     |       |
|------|-----------|-----|-----------|-----|-------|
| 3J5M | G_ARG_54  | NH2 | G_ASP_60  | OD1 | 2.988 |
| 3J5M | G_ARG_61  | NH1 | G_GLU_79  | OE2 | 3.925 |
| 3J5M | G_ARG_61  | NH2 | G_GLU_79  | OE1 | 3.624 |
| 3J5M | G_ARG_61  | NH2 | G_ASP_82  | OD1 | 3.040 |
| 3J5M | G_ARG_61  | NH2 | G_ASP_82  | OD2 | 3.087 |
| 3J5M | G_ARG_103 | NH2 | G_GLU_165 | OE1 | 2.814 |
| 3J5M | G_ARG_142 | NH1 | G_GLU_165 | OE1 | 3.243 |
| 3J5M | G_ARG_142 | NH2 | G_GLU_105 | OE2 | 3.199 |
| 3J5M | G_LYS_149 | NZ  | G_GLU_195 | OE1 | 3.376 |
| 3J5M | G_LYS_149 | NZ  | G_GLU_195 | OE2 | 2.944 |
| 3J5M | G_HIS_189 | ND1 | G_ASP_151 | OD2 | 2.802 |
| 3J5M | H_ARG_19  | NH1 | H_ASP_81  | OD2 | 3.869 |
| 3J5M | H_ARG_19  | NH2 | H_ASP_81  | OD2 | 3.177 |
| 3J5M | H_ARG_31  | NH2 | H_ASP_27  | OD2 | 3.998 |
| 3J5M | H_ARG_38  | NH1 | H_ASP_86  | OD1 | 2.857 |
| 3J5M | H_ARG_38  | NH2 | H_GLU_46  | OE2 | 2.922 |
| 3J5M | H_LYS_52  | NZ  | E_ASP_474 | OD2 | 2.827 |
| 3J5M | H_LYS_52  | NZ  | H_GLU_33  | OE2 | 3.614 |
| 3J5M | H_ARG_64  | NH2 | E_ASP_457 | OD2 | 3.078 |
| 3J5M | H_ARG_73  | NH2 | H_GLU_30  | OE1 | 2.847 |
| 3J5M | H_ARG_73  | NH2 | H_GLU_30  | OE2 | 3.840 |
| 3J5M | H_LYS_209 | NZ  | G_GLU_123 | OE1 | 3.479 |
| 3J5M | H_LYS_209 | NZ  | G_GLU_123 | OE2 | 2.843 |
| 3J5M | H_LYS_214 | NZ  | G_ASP_122 | OD2 | 2.842 |
| 3J5M | I_LYS_46  | NZ  | I_GLU_492 | OE1 | 3.718 |
| 3J5M | I_LYS_46  | NZ  | I_GLU_492 | OE2 | 2.915 |
| 3J5M | I_HIS_66  | ND1 | I_GLU_64  | OE2 | 3.151 |
| 3J5M | I_ARG_143 | NH2 | I_GLU_145 | OE1 | 2.805 |
| 3J5M | I_ARG_143 | NH2 | I_GLU_145 | OE2 | 3.445 |
| 3J5M | I_LYS_229 | NZ  | I_GLU_83  | OE1 | 2.907 |
| 3J5M | I_LYS_231 | NZ  | I_GLU_268 | OE2 | 2.875 |
| 3J5M | I_HIS_249 | NE2 | I_GLU_482 | OE1 | 3.482 |
| 3J5M | I_LYS_282 | NZ  | I_GLU_275 | OE1 | 2.857 |
| 3J5M | I_LYS_282 | NZ  | I_GLU_275 | OE2 | 3.934 |
| 3J5M | I_LYS_344 | NZ  | I_GLU_340 | OE2 | 3.896 |
| 3J5M | I_LYS_421 | NZ  | I_GLU_145 | OE2 | 3.811 |
| 3J5M | I_ARG_429 | NH2 | L_ASP_74  | OD1 | 3.207 |
| 3J5M | I_ARG_429 | NH2 | L_ASP_74  | OD2 | 3.202 |
| 3J5M | I_ARG_456 | NH1 | I_GLU_466 | OE1 | 2.967 |
| 3J5M | I_ARG_476 | NH2 | I_ASP_474 | OD1 | 3.859 |
| 3J5M | I_ARG_480 | NH1 | I_ASP_477 | OD1 | 2.834 |
| 3J5M | I_LYS_487 | NZ  | I_GLU_91  | OE2 | 2.895 |
| 3J5M | K_ARG_54  | NH2 | K_ASP_60  | OD1 | 2.987 |
| 3J5M | K_ARG_61  | NH1 | K_GLU_79  | OE2 | 3.926 |
| 3J5M | K_ARG_61  | NH2 | K_GLU_79  | OE1 | 3.624 |
| 3J5M | K_ARG_61  | NH2 | K_ASP_82  | OD1 | 3.041 |
| 3J5M | K_ARG_61  | NH2 | K_ASP_82  | OD2 | 3.088 |
| 3J5M | K_ARG_103 | NH2 | K_GLU_165 | OE1 | 2.814 |
| 3J5M | K_ARG_142 | NH1 | K_GLU_165 | OE1 | 3.243 |
| 3J5M | K_ARG_142 | NH2 | K_GLU_105 | OE2 | 3.198 |
| 3J5M | K_LYS_149 | NZ  | K_GLU_195 | OE1 | 3.376 |
| 3J5M | K_LYS_149 | NZ  | K_GLU_195 | OE2 | 2.944 |
| 3J5M | K_HIS_189 | ND1 | K_ASP_151 | OD2 | 2.803 |
| 3J5M | L_ARG_19  | NH1 | L_ASP_81  | OD2 | 3.870 |
| 3J5M | L_ARG_19  | NH2 | L_ASP_81  | OD2 | 3.177 |
| 3J5M | L_ARG_31  | NH2 | L_ASP_27  | OD2 | 3.998 |
| 3J5M | L_ARG_38  | NH1 | L_ASP_86  | OD1 | 2.857 |
| 3J5M | L_ARG_38  | NH2 | L_GLU_46  | OE2 | 2.922 |



|      |           |     |           |     |       |
|------|-----------|-----|-----------|-----|-------|
| 3J5M | L_LYS_52  | NZ  | I_ASP_474 | OD2 | 2.827 |
| 3J5M | L_LYS_52  | NZ  | L_GLU_33  | OE2 | 3.615 |
| 3J5M | L_ARG_64  | NH2 | I_ASP_457 | OD2 | 3.078 |
| 3J5M | L_ARG_73  | NH2 | L_GLU_30  | OE1 | 2.847 |
| 3J5M | L_ARG_73  | NH2 | L_GLU_30  | OE2 | 3.839 |
| 3J5M | L_LYS_209 | NZ  | K_GLU_123 | OE1 | 3.480 |
| 3J5M | L_LYS_209 | NZ  | K_GLU_123 | OE2 | 2.844 |
| 3J5M | L_LYS_214 | NZ  | K_ASP_122 | OD2 | 2.841 |
| 3J70 | A_ARG_38  | NH1 | A_ASP_86  | OD1 | 3.866 |
| 3J70 | A_ARG_38  | NH2 | A_GLU_46  | OE1 | 2.795 |
| 3J70 | A_ARG_38  | NH2 | A_ASP_86  | OD1 | 2.823 |
| 3J70 | A_LYS_62  | NZ  | A_GLU_46  | OE2 | 2.813 |
| 3J70 | A_ARG_64  | NH2 | B_ASP_1   | OD1 | 2.676 |
| 3J70 | A_ARG_66  | NH2 | A_ASP_86  | OD2 | 2.896 |
| 3J70 | A_ARG_83  | NH2 | A_GLU_85  | OE2 | 3.748 |
| 3J70 | A_LYS_209 | NZ  | B_GLU_123 | OE1 | 3.744 |
| 3J70 | A_LYS_209 | NZ  | B_GLU_123 | OE2 | 2.604 |
| 3J70 | A_LYS_210 | NZ  | A_GLU_212 | OE1 | 3.567 |
| 3J70 | A_LYS_214 | NZ  | A_GLU_212 | OE1 | 3.762 |
| 3J70 | A_LYS_214 | NZ  | A_GLU_212 | OE2 | 3.583 |
| 3J70 | B_ARG_61  | NH2 | B_ASP_82  | OD1 | 2.797 |
| 3J70 | B_ARG_61  | NH2 | B_ASP_82  | OD2 | 2.800 |
| 3J70 | B_LYS_103 | NZ  | B_GLU_165 | OE1 | 2.848 |
| 3J70 | B_LYS_103 | NZ  | B_GLU_165 | OE2 | 3.750 |
| 3J70 | B_ARG_108 | NH1 | B_ASP_170 | OD2 | 3.189 |
| 3J70 | B_LYS_149 | NZ  | B_GLU_195 | OE1 | 3.334 |
| 3J70 | B_LYS_149 | NZ  | B_GLU_195 | OE2 | 2.862 |
| 3J70 | C_LYS_8   | NZ  | C_GLU_119 | OE1 | 2.764 |
| 3J70 | C_HIS_27  | ND1 | C_GLU_85  | OE1 | 3.187 |
| 3J70 | C_LYS_29  | NZ  | C_GLU_85  | OE1 | 3.965 |
| 3J70 | C_LYS_29  | NZ  | D_ASP_279 | OD2 | 2.704 |
| 3J70 | C_LYS_46  | NZ  | C_ASP_56  | OD1 | 2.811 |
| 3J70 | C_LYS_50  | NZ  | C_GLU_77  | OE1 | 2.765 |
| 3J70 | C_LYS_50  | NZ  | C_GLU_77  | OE2 | 3.345 |
| 3J70 | C_ARG_54  | NH1 | C_ASP_78  | OD2 | 2.875 |
| 3J70 | C_ARG_54  | NH2 | C_ASP_78  | OD1 | 2.822 |
| 3J70 | C_ARG_54  | NH2 | C_ASP_78  | OD2 | 2.827 |
| 3J70 | C_ARG_59  | NH1 | D_ASP_368 | OD1 | 3.842 |
| 3J70 | C_ARG_59  | NH1 | D_ASP_368 | OD2 | 2.986 |
| 3J70 | C_ARG_59  | NH2 | D_ASP_368 | OD1 | 2.621 |
| 3J70 | C_ARG_59  | NH2 | D_ASP_368 | OD2 | 3.173 |
| 3J70 | C_LYS_72  | NZ  | C_ASP_56  | OD2 | 2.565 |
| 3J70 | C_LYS_90  | NZ  | C_GLU_85  | OE2 | 2.709 |
| 3J70 | C_HIS_107 | ND1 | C_ASP_105 | OD2 | 3.850 |
| 3J70 | C_ARG_134 | NH2 | C_ASP_153 | OD1 | 3.650 |
| 3J70 | C_ARG_134 | NH2 | C_ASP_153 | OD2 | 3.960 |
| 3J70 | D_LYS_46  | NZ  | D_GLU_492 | OE1 | 2.843 |
| 3J70 | D_LYS_46  | NZ  | D_GLU_492 | OE2 | 2.835 |
| 3J70 | D_LYS_130 | NZ  | D_GLU_150 | OE2 | 2.774 |
| 3J70 | D_ARG_146 | NH1 | C_GLU_169 | OE1 | 2.841 |
| 3J70 | D_ARG_146 | NH1 | C_GLU_169 | OE2 | 2.796 |
| 3J70 | D_ARG_146 | NH2 | C_GLU_169 | OE1 | 3.599 |
| 3J70 | D_LYS_171 | NZ  | C_GLU_13  | OE1 | 3.949 |
| 3J70 | D_LYS_192 | NZ  | D_ASP_137 | OD2 | 2.718 |
| 3J70 | D_LYS_207 | NZ  | D_GLU_381 | OE2 | 2.776 |
| 3J70 | D_HIS_249 | NE2 | D_GLU_482 | OE1 | 2.775 |
| 3J70 | D_LYS_282 | NZ  | D_ASP_279 | OD1 | 2.794 |
| 3J70 | D_LYS_322 | NZ  | A_ASP_95  | OD2 | 2.908 |

|      |           |     |           |     |       |
|------|-----------|-----|-----------|-----|-------|
| 3J70 | D_ARG_327 | NH2 | A_ASP_52  | OD2 | 3.286 |
| 3J70 | D_LYS_337 | NZ  | D_GLU_293 | OE2 | 2.865 |
| 3J70 | D_LYS_348 | NZ  | D_GLU_269 | OE1 | 2.779 |
| 3J70 | D_LYS_348 | NZ  | D_GLU_269 | OE2 | 3.998 |
| 3J70 | D_ARG_419 | NH1 | A_ASP_54  | OD1 | 3.985 |
| 3J70 | D_ARG_456 | NH1 | D_GLU_466 | OE1 | 2.870 |
| 3J70 | D_ARG_456 | NH1 | D_GLU_466 | OE2 | 2.877 |
| 3J70 | D_ARG_469 | NH1 | D_ASP_457 | OD1 | 2.823 |
| 3J70 | D_ARG_469 | NH1 | D_ASP_457 | OD2 | 3.449 |
| 3J70 | D_ARG_469 | NH2 | D_ASP_457 | OD2 | 3.357 |
| 3J70 | D_ARG_476 | NH1 | D_ASP_474 | OD1 | 2.860 |
| 3J70 | D_ARG_480 | NH1 | D_ASP_474 | OD2 | 2.862 |
| 3J70 | D_ARG_480 | NH1 | D_ASP_477 | OD1 | 2.641 |
| 3J70 | D_ARG_480 | NH1 | D_ASP_477 | OD2 | 3.954 |
| 3J70 | D_ARG_480 | NH2 | D_ASP_474 | OD2 | 3.415 |
| 3J70 | D_LYS_487 | NZ  | D_GLU_47  | OE2 | 3.606 |
| 3J70 | D_LYS_487 | NZ  | D_GLU_91  | OE2 | 2.796 |
| 3J70 | M_ARG_38  | NH1 | M_ASP_86  | OD1 | 3.866 |
| 3J70 | M_ARG_38  | NH2 | M_GLU_46  | OE1 | 2.795 |
| 3J70 | M_ARG_38  | NH2 | M_ASP_86  | OD1 | 2.824 |
| 3J70 | M_LYS_62  | NZ  | M_GLU_46  | OE2 | 2.814 |
| 3J70 | M_ARG_64  | NH2 | N_ASP_1   | OD1 | 2.677 |
| 3J70 | M_ARG_66  | NH2 | M_ASP_86  | OD2 | 2.896 |
| 3J70 | M_ARG_83  | NH2 | M_GLU_85  | OE2 | 3.748 |
| 3J70 | M_LYS_209 | NZ  | N_GLU_123 | OE1 | 3.744 |
| 3J70 | M_LYS_209 | NZ  | N_GLU_123 | OE2 | 2.604 |
| 3J70 | M_LYS_210 | NZ  | M_GLU_212 | OE1 | 3.567 |
| 3J70 | M_LYS_214 | NZ  | M_GLU_212 | OE1 | 3.762 |
| 3J70 | M_LYS_214 | NZ  | M_GLU_212 | OE2 | 3.583 |
| 3J70 | N_ARG_61  | NH2 | N_ASP_82  | OD1 | 2.798 |
| 3J70 | N_ARG_61  | NH2 | N_ASP_82  | OD2 | 2.800 |
| 3J70 | N_LYS_103 | NZ  | N_GLU_165 | OE1 | 2.848 |
| 3J70 | N_LYS_103 | NZ  | N_GLU_165 | OE2 | 3.750 |
| 3J70 | N_ARG_108 | NH1 | N_ASP_170 | OD2 | 3.190 |
| 3J70 | N_LYS_149 | NZ  | N_GLU_195 | OE1 | 3.334 |
| 3J70 | N_LYS_149 | NZ  | N_GLU_195 | OE2 | 2.861 |
| 3J70 | O_LYS_8   | NZ  | O_GLU_119 | OE1 | 2.765 |
| 3J70 | O_HIS_27  | ND1 | O_GLU_85  | OE1 | 3.187 |
| 3J70 | O_LYS_29  | NZ  | O_GLU_85  | OE1 | 3.964 |
| 3J70 | O_LYS_29  | NZ  | P_ASP_279 | OD2 | 2.704 |
| 3J70 | O_LYS_46  | NZ  | O_ASP_56  | OD1 | 2.811 |
| 3J70 | O_LYS_50  | NZ  | O_GLU_77  | OE1 | 2.765 |
| 3J70 | O_LYS_50  | NZ  | O_GLU_77  | OE2 | 3.346 |
| 3J70 | O_ARG_54  | NH1 | O_ASP_78  | OD2 | 2.875 |
| 3J70 | O_ARG_54  | NH2 | O_ASP_78  | OD1 | 2.822 |
| 3J70 | O_ARG_54  | NH2 | O_ASP_78  | OD2 | 2.827 |
| 3J70 | O_ARG_59  | NH1 | P_ASP_368 | OD1 | 3.842 |
| 3J70 | O_ARG_59  | NH1 | P_ASP_368 | OD2 | 2.986 |
| 3J70 | O_ARG_59  | NH2 | P_ASP_368 | OD1 | 2.620 |
| 3J70 | O_ARG_59  | NH2 | P_ASP_368 | OD2 | 3.173 |
| 3J70 | O_LYS_72  | NZ  | O_ASP_56  | OD2 | 2.565 |
| 3J70 | O_LYS_90  | NZ  | O_GLU_85  | OE2 | 2.709 |
| 3J70 | O_HIS_107 | ND1 | O_ASP_105 | OD2 | 3.851 |
| 3J70 | O_ARG_134 | NH2 | O_ASP_153 | OD1 | 3.650 |
| 3J70 | O_ARG_134 | NH2 | O_ASP_153 | OD2 | 3.960 |
| 3J70 | P_LYS_46  | NZ  | P_GLU_492 | OE1 | 2.843 |
| 3J70 | P_LYS_46  | NZ  | P_GLU_492 | OE2 | 2.835 |
| 3J70 | P_LYS_130 | NZ  | P_GLU_150 | OE2 | 2.774 |

|      |           |     |           |     |       |
|------|-----------|-----|-----------|-----|-------|
| 3J70 | P_ARG_146 | NH1 | O_GLU_169 | OE1 | 2.841 |
| 3J70 | P_ARG_146 | NH1 | O_GLU_169 | OE2 | 2.796 |
| 3J70 | P_ARG_146 | NH2 | O_GLU_169 | OE1 | 3.599 |
| 3J70 | P_LYS_171 | NZ  | O_GLU_13  | OE1 | 3.948 |
| 3J70 | P_LYS_192 | NZ  | P_ASP_137 | OD2 | 2.718 |
| 3J70 | P_LYS_207 | NZ  | P_GLU_381 | OE2 | 2.776 |
| 3J70 | P_HIS_249 | NE2 | P_GLU_482 | OE1 | 2.775 |
| 3J70 | P_LYS_282 | NZ  | P_ASP_279 | OD1 | 2.794 |
| 3J70 | P_LYS_322 | NZ  | M_ASP_95  | OD2 | 2.909 |
| 3J70 | P_ARG_327 | NH2 | M_ASP_52  | OD2 | 3.286 |
| 3J70 | P_LYS_337 | NZ  | P_GLU_293 | OE2 | 2.865 |
| 3J70 | P_LYS_348 | NZ  | P_GLU_269 | OE1 | 2.779 |
| 3J70 | P_LYS_348 | NZ  | P_GLU_269 | OE2 | 3.999 |
| 3J70 | P_ARG_419 | NH1 | M_ASP_54  | OD1 | 3.985 |
| 3J70 | P_ARG_456 | NH1 | P_GLU_466 | OE1 | 2.870 |
| 3J70 | P_ARG_456 | NH1 | P_GLU_466 | OE2 | 2.877 |
| 3J70 | P_ARG_469 | NH1 | P_ASP_457 | OD1 | 2.823 |
| 3J70 | P_ARG_469 | NH1 | P_ASP_457 | OD2 | 3.450 |
| 3J70 | P_ARG_469 | NH2 | P_ASP_457 | OD2 | 3.357 |
| 3J70 | P_ARG_476 | NH1 | P_ASP_474 | OD1 | 2.859 |
| 3J70 | P_ARG_480 | NH1 | P_ASP_474 | OD2 | 2.862 |
| 3J70 | P_ARG_480 | NH1 | P_ASP_477 | OD1 | 2.642 |
| 3J70 | P_ARG_480 | NH1 | P_ASP_477 | OD2 | 3.954 |
| 3J70 | P_ARG_480 | NH2 | P_ASP_474 | OD2 | 3.415 |
| 3J70 | P_LYS_487 | NZ  | P_GLU_47  | OE2 | 3.605 |
| 3J70 | P_LYS_487 | NZ  | P_GLU_91  | OE2 | 2.797 |
| 3J70 | R_ARG_38  | NH1 | R_ASP_86  | OD1 | 3.866 |
| 3J70 | R_ARG_38  | NH2 | R_GLU_46  | OE1 | 2.795 |
| 3J70 | R_ARG_38  | NH2 | R_ASP_86  | OD1 | 2.824 |
| 3J70 | R_LYS_62  | NZ  | R_GLU_46  | OE2 | 2.814 |
| 3J70 | R_ARG_64  | NH2 | S_ASP_1   | OD1 | 2.677 |
| 3J70 | R_ARG_66  | NH2 | R_ASP_86  | OD2 | 2.896 |
| 3J70 | R_ARG_83  | NH2 | R_GLU_85  | OE2 | 3.748 |
| 3J70 | R_LYS_209 | NZ  | S_GLU_123 | OE1 | 3.743 |
| 3J70 | R_LYS_209 | NZ  | S_GLU_123 | OE2 | 2.603 |
| 3J70 | R_LYS_210 | NZ  | R_GLU_212 | OE1 | 3.567 |
| 3J70 | R_LYS_214 | NZ  | R_GLU_212 | OE1 | 3.762 |
| 3J70 | R_LYS_214 | NZ  | R_GLU_212 | OE2 | 3.584 |
| 3J70 | S_ARG_61  | NH2 | S_ASP_82  | OD1 | 2.798 |
| 3J70 | S_ARG_61  | NH2 | S_ASP_82  | OD2 | 2.800 |
| 3J70 | S_LYS_103 | NZ  | S_GLU_165 | OE1 | 2.848 |
| 3J70 | S_LYS_103 | NZ  | S_GLU_165 | OE2 | 3.750 |
| 3J70 | S_ARG_108 | NH1 | S_ASP_170 | OD2 | 3.190 |
| 3J70 | S_LYS_149 | NZ  | S_GLU_195 | OE1 | 3.334 |
| 3J70 | S_LYS_149 | NZ  | S_GLU_195 | OE2 | 2.862 |
| 3J70 | T_LYS_8   | NZ  | T_GLU_119 | OE1 | 2.764 |
| 3J70 | T_HIS_27  | ND1 | T_GLU_85  | OE1 | 3.187 |
| 3J70 | T_LYS_29  | NZ  | T_GLU_85  | OE1 | 3.965 |
| 3J70 | T_LYS_29  | NZ  | U_ASP_279 | OD2 | 2.704 |
| 3J70 | T_LYS_46  | NZ  | T_ASP_56  | OD1 | 2.811 |
| 3J70 | T_LYS_50  | NZ  | T_GLU_77  | OE1 | 2.766 |
| 3J70 | T_LYS_50  | NZ  | T_GLU_77  | OE2 | 3.346 |
| 3J70 | T_ARG_54  | NH1 | T_ASP_78  | OD2 | 2.876 |
| 3J70 | T_ARG_54  | NH2 | T_ASP_78  | OD1 | 2.822 |
| 3J70 | T_ARG_54  | NH2 | T_ASP_78  | OD2 | 2.826 |
| 3J70 | T_ARG_59  | NH1 | U_ASP_368 | OD1 | 3.842 |
| 3J70 | T_ARG_59  | NH1 | U_ASP_368 | OD2 | 2.986 |
| 3J70 | T_ARG_59  | NH2 | U_ASP_368 | OD1 | 2.621 |

|      |           |     |           |     |       |
|------|-----------|-----|-----------|-----|-------|
| 3J70 | T_ARG_59  | NH2 | U_ASP_368 | OD2 | 3.174 |
| 3J70 | T_LYS_72  | NZ  | T_ASP_56  | OD2 | 2.565 |
| 3J70 | T_LYS_90  | NZ  | T_GLU_85  | OE2 | 2.710 |
| 3J70 | T_HIS_107 | ND1 | T_ASP_105 | OD2 | 3.850 |
| 3J70 | T_ARG_134 | NH2 | T_ASP_153 | OD1 | 3.650 |
| 3J70 | T_ARG_134 | NH2 | T_ASP_153 | OD2 | 3.960 |
| 3J70 | U_LYS_46  | NZ  | U_GLU_492 | OE1 | 2.842 |
| 3J70 | U_LYS_46  | NZ  | U_GLU_492 | OE2 | 2.835 |
| 3J70 | U_LYS_130 | NZ  | U_GLU_150 | OE2 | 2.774 |
| 3J70 | U_ARG_146 | NH1 | T_GLU_169 | OE1 | 2.840 |
| 3J70 | U_ARG_146 | NH1 | T_GLU_169 | OE2 | 2.796 |
| 3J70 | U_ARG_146 | NH2 | T_GLU_169 | OE1 | 3.599 |
| 3J70 | U_LYS_171 | NZ  | T_GLU_13  | OE1 | 3.949 |
| 3J70 | U_LYS_192 | NZ  | U_ASP_137 | OD2 | 2.718 |
| 3J70 | U_LYS_207 | NZ  | U_GLU_381 | OE2 | 2.777 |
| 3J70 | U_HIS_249 | NE2 | U_GLU_482 | OE1 | 2.776 |
| 3J70 | U_LYS_282 | NZ  | U_ASP_279 | OD1 | 2.794 |
| 3J70 | U_LYS_322 | NZ  | R_ASP_95  | OD2 | 2.909 |
| 3J70 | U_ARG_327 | NH2 | R_ASP_52  | OD2 | 3.287 |
| 3J70 | U_LYS_337 | NZ  | U_GLU_293 | OE2 | 2.865 |
| 3J70 | U_LYS_348 | NZ  | U_GLU_269 | OE1 | 2.778 |
| 3J70 | U_LYS_348 | NZ  | U_GLU_269 | OE2 | 3.998 |
| 3J70 | U_ARG_419 | NH1 | R_ASP_54  | OD1 | 3.985 |
| 3J70 | U_ARG_456 | NH1 | U_GLU_466 | OE1 | 2.869 |
| 3J70 | U_ARG_456 | NH1 | U_GLU_466 | OE2 | 2.877 |
| 3J70 | U_ARG_469 | NH1 | U_ASP_457 | OD1 | 2.823 |
| 3J70 | U_ARG_469 | NH1 | U_ASP_457 | OD2 | 3.449 |
| 3J70 | U_ARG_469 | NH2 | U_ASP_457 | OD2 | 3.356 |
| 3J70 | U_ARG_476 | NH1 | U_ASP_474 | OD1 | 2.860 |
| 3J70 | U_ARG_480 | NH1 | U_ASP_474 | OD2 | 2.861 |
| 3J70 | U_ARG_480 | NH1 | U_ASP_477 | OD1 | 2.641 |
| 3J70 | U_ARG_480 | NH1 | U_ASP_477 | OD2 | 3.954 |
| 3J70 | U_ARG_480 | NH2 | U_ASP_474 | OD2 | 3.415 |
| 3J70 | U_LYS_487 | NZ  | U_GLU_47  | OE2 | 3.606 |
| 3J70 | U_LYS_487 | NZ  | U_GLU_91  | OE2 | 2.796 |
| 3JCC | A_LYS_46  | NZ  | A_GLU_492 | OE1 | 3.517 |
| 3JCC | A_LYS_227 | NZ  | A_GLU_83  | OE2 | 3.448 |
| 3JCC | A_ARG_429 | NH2 | D_ASP_63  | OD2 | 3.854 |
| 3JCC | A_ARG_456 | NH2 | A_GLU_466 | OE1 | 3.660 |
| 3JCC | A_ARG_456 | NH2 | A_GLU_466 | OE2 | 3.547 |
| 3JCC | A_ARG_469 | NH2 | A_ASP_457 | OD2 | 3.023 |
| 3JCC | A_ARG_476 | NH1 | A_ASP_474 | OD1 | 3.399 |
| 3JCC | A_ARG_476 | NH1 | A_ASP_474 | OD2 | 2.964 |
| 3JCC | A_ARG_480 | NH2 | A_ASP_477 | OD1 | 2.803 |
| 3JCC | A_LYS_485 | NZ  | A_GLU_267 | OE2 | 3.722 |
| 3JCC | A_LYS_487 | NZ  | A_ASP_47  | OD2 | 3.970 |
| 3JCC | B_ARG_61  | NH1 | B_ASP_82  | OD2 | 2.931 |
| 3JCC | B_ARG_61  | NH2 | B_ASP_82  | OD1 | 3.215 |
| 3JCC | B_ARG_61  | NH2 | B_ASP_82  | OD2 | 3.003 |
| 3JCC | B_HIS_189 | ND1 | B_ASP_152 | OD2 | 2.901 |
| 3JCC | C_ARG_38  | NH1 | C_ASP_86  | OD1 | 2.894 |
| 3JCC | C_ARG_38  | NH2 | C_GLU_46  | OE1 | 2.884 |
| 3JCC | C_ARG_38  | NH2 | C_ASP_86  | OD1 | 3.828 |
| 3JCC | C_ARG_66  | NH1 | C_ASP_86  | OD1 | 3.699 |
| 3JCC | C_ARG_66  | NH1 | C_ASP_86  | OD2 | 2.932 |
| 3JCC | C_ARG_66  | NH2 | C_ASP_86  | OD1 | 3.002 |
| 3JCC | C_ARG_66  | NH2 | C_ASP_86  | OD2 | 3.413 |
| 3JCC | C_LYS_73  | NZ  | C_ASP_53  | OD1 | 3.190 |

|      |           |     |           |     |       |
|------|-----------|-----|-----------|-----|-------|
| 3JCC | C_LYS_73  | NZ  | C_ASP_53  | OD2 | 3.723 |
| 3JCC | C_LYS_207 | NZ  | B_GLU_124 | OE1 | 3.629 |
| 3JCC | D_LYS_8   | NZ  | D_GLU_119 | OE1 | 3.039 |
| 3JCC | D_LYS_8   | NZ  | D_GLU_119 | OE2 | 3.886 |
| 3JCC | D_LYS_29  | NZ  | D_GLU_85  | OE1 | 2.956 |
| 3JCC | D_LYS_29  | NZ  | D_GLU_85  | OE2 | 3.072 |
| 3JCC | D_ARG_54  | NH1 | D_ASP_78  | OD2 | 2.902 |
| 3JCC | D_ARG_54  | NH2 | D_ASP_78  | OD1 | 3.053 |
| 3JCC | D_ARG_54  | NH2 | D_ASP_78  | OD2 | 2.965 |
| 3JCC | D_ARG_58  | NH1 | D_GLU_13  | OE1 | 3.576 |
| 3JCC | D_ARG_58  | NH1 | D_GLU_13  | OE2 | 3.174 |
| 3JCC | D_ARG_58  | NH2 | D_GLU_13  | OE1 | 2.940 |
| 3JCC | D_ARG_58  | NH2 | D_GLU_13  | OE2 | 3.860 |
| 3JCC | D_ARG_59  | NH2 | A_ASP_368 | OD1 | 2.961 |
| 3JCC | D_ARG_59  | NH2 | A_ASP_368 | OD2 | 3.986 |
| 3JCC | E_LYS_46  | NZ  | E_GLU_492 | OE1 | 3.569 |
| 3JCC | E_LYS_46  | NZ  | E_GLU_492 | OE2 | 3.703 |
| 3JCC | E_LYS_97  | NZ  | E_GLU_275 | OE2 | 3.827 |
| 3JCC | E_LYS_227 | NZ  | E_GLU_83  | OE1 | 3.969 |
| 3JCC | E_LYS_227 | NZ  | E_GLU_83  | OE2 | 3.697 |
| 3JCC | E_LYS_282 | NZ  | E_GLU_275 | OE1 | 3.981 |
| 3JCC | E_ARG_298 | NH2 | E_GLU_381 | OE1 | 3.660 |
| 3JCC | E_ARG_298 | NH2 | E_GLU_381 | OE2 | 3.777 |
| 3JCC | E_LYS_305 | NZ  | E_ASP_321 | OD2 | 3.131 |
| 3JCC | E_ARG_456 | NH1 | E_GLU_466 | OE1 | 3.660 |
| 3JCC | E_ARG_456 | NH1 | E_GLU_466 | OE2 | 3.969 |
| 3JCC | E_ARG_456 | NH2 | E_GLU_466 | OE1 | 3.908 |
| 3JCC | E_ARG_456 | NH2 | E_GLU_466 | OE2 | 3.604 |
| 3JCC | E_ARG_469 | NH1 | E_ASP_457 | OD1 | 3.767 |
| 3JCC | E_ARG_480 | NH1 | E_ASP_477 | OD1 | 3.074 |
| 3JCC | E_LYS_485 | NZ  | E_GLU_267 | OE2 | 3.897 |
| 3JCC | E_LYS_487 | NZ  | E_ASP_47  | OD2 | 3.681 |
| 3JCC | E_LYS_490 | NZ  | E_GLU_49  | OE2 | 2.934 |
| 3JCC | I_LYS_46  | NZ  | I_GLU_492 | OE1 | 3.919 |
| 3JCC | I_ARG_166 | NH2 | I_ASP_167 | OD2 | 3.510 |
| 3JCC | I_LYS_227 | NZ  | I_GLU_83  | OE2 | 3.974 |
| 3JCC | I_LYS_305 | NZ  | I_ASP_321 | OD2 | 3.762 |
| 3JCC | I_ARG_456 | NH2 | I_GLU_466 | OE1 | 3.385 |
| 3JCC | I_ARG_456 | NH2 | I_GLU_466 | OE2 | 3.431 |
| 3JCC | I_ARG_476 | NH1 | I_ASP_474 | OD2 | 3.645 |
| 3JCC | I_ARG_480 | NH1 | I_ASP_477 | OD1 | 3.186 |
| 3JCC | I_LYS_490 | NZ  | I_GLU_49  | OE2 | 3.753 |
| 3KS0 | L_ARG_63  | NH2 | L_GLU_83  | OE2 | 3.743 |
| 3KS0 | L_ARG_63  | NH2 | L_ASP_84  | OD1 | 3.432 |
| 3KS0 | L_ARG_63  | NH2 | L_ASP_84  | OD2 | 3.922 |
| 3KS0 | L_LYS_113 | NZ  | L_GLU_201 | OE1 | 3.009 |
| 3KS0 | H_ARG_38  | NH1 | H_ASP_89  | OD1 | 2.927 |
| 3KS0 | H_ARG_38  | NH2 | H_GLU_46  | OE1 | 2.737 |
| 3KS0 | H_LYS_39  | NZ  | L_GLU_40  | OE1 | 3.686 |
| 3KS0 | H_LYS_39  | NZ  | L_GLU_40  | OE2 | 2.843 |
| 3KS0 | H_ARG_66  | NH1 | H_ASP_89  | OD1 | 2.901 |
| 3KS0 | H_ARG_66  | NH1 | H_ASP_89  | OD2 | 3.003 |
| 3KS0 | H_ARG_66  | NH2 | H_ASP_89  | OD1 | 3.781 |
| 3KS0 | H_ARG_97  | NH2 | H_ASP_105 | OD1 | 3.237 |
| 3KS0 | H_ARG_97  | NH2 | H_ASP_105 | OD2 | 2.854 |
| 3KS0 | H_LYS_147 | NZ  | L_GLU_127 | OE2 | 3.112 |
| 3KS0 | H_LYS_212 | NZ  | L_GLU_126 | OE1 | 3.920 |
| 3KS0 | H_LYS_212 | NZ  | L_GLU_126 | OE2 | 3.042 |

|      |           |     |           |     |       |
|------|-----------|-----|-----------|-----|-------|
| 3KS0 | A_LYS_18  | NZ  | A_GLU_15  | OE2 | 3.032 |
| 3KS0 | A_HIS_19  | ND1 | A_GLU_15  | OE1 | 3.858 |
| 3KS0 | A_HIS_19  | NE2 | A_GLU_15  | OE1 | 3.591 |
| 3KS0 | A_HIS_19  | NE2 | A_ASP_24  | OD1 | 3.901 |
| 3KS0 | A_HIS_19  | NE2 | A_ASP_24  | OD2 | 3.803 |
| 3KS0 | A_LYS_79  | NZ  | A_ASP_35  | OD2 | 3.088 |
| 3KS0 | A_LYS_80  | NZ  | A_ASP_72  | OD1 | 2.255 |
| 3KS0 | A_LYS_80  | NZ  | A_ASP_72  | OD2 | 3.580 |
| 3KS0 | J_ARG_63  | NH2 | J_GLU_83  | OE2 | 3.774 |
| 3KS0 | J_ARG_63  | NH2 | J_ASP_84  | OD1 | 2.968 |
| 3KS0 | J_ARG_63  | NH2 | J_ASP_84  | OD2 | 3.838 |
| 3KS0 | J_LYS_113 | NZ  | J_GLU_201 | OE1 | 3.035 |
| 3KS0 | J_HIS_191 | NE2 | J_ASP_154 | OD2 | 3.977 |
| 3KS0 | K_ARG_38  | NH1 | K_ASP_89  | OD1 | 2.723 |
| 3KS0 | K_ARG_38  | NH2 | K_GLU_46  | OE1 | 2.728 |
| 3KS0 | K_ARG_38  | NH2 | K_GLU_46  | OE2 | 3.919 |
| 3KS0 | K_LYS_39  | NZ  | J_GLU_40  | OE1 | 3.754 |
| 3KS0 | K_LYS_39  | NZ  | J_GLU_40  | OE2 | 2.934 |
| 3KS0 | K_ARG_66  | NH1 | K_ASP_89  | OD1 | 3.466 |
| 3KS0 | K_ARG_66  | NH1 | K_ASP_89  | OD2 | 2.993 |
| 3KS0 | K_ARG_66  | NH2 | K_ASP_89  | OD1 | 3.246 |
| 3KS0 | K_ARG_97  | NH1 | K_ASP_27  | OD2 | 3.899 |
| 3KS0 | K_ARG_97  | NH2 | K_ASP_105 | OD1 | 3.477 |
| 3KS0 | K_ARG_97  | NH2 | K_ASP_105 | OD2 | 3.126 |
| 3KS0 | K_LYS_147 | NZ  | J_GLU_127 | OE2 | 3.169 |
| 3KS0 | K_LYS_212 | NZ  | J_GLU_126 | OE1 | 3.344 |
| 3KS0 | K_LYS_212 | NZ  | J_GLU_126 | OE2 | 2.562 |
| 3KS0 | B_LYS_18  | NZ  | B_GLU_15  | OE2 | 3.407 |
| 3KS0 | B_HIS_19  | NE2 | B_GLU_15  | OE1 | 3.733 |
| 3KS0 | B_HIS_19  | NE2 | B_ASP_24  | OD1 | 3.929 |
| 3KS0 | B_LYS_79  | NZ  | B_ASP_35  | OD2 | 3.032 |
| 3KS0 | B_LYS_80  | NZ  | B_ASP_72  | OD1 | 2.482 |
| 3KS0 | B_LYS_80  | NZ  | B_ASP_72  | OD2 | 3.798 |
| 3L7E | L_ARG_61  | NH1 | L_ASP_82  | OD1 | 3.610 |
| 3L7E | L_ARG_61  | NH1 | L_ASP_82  | OD2 | 2.820 |
| 3L7E | L_ARG_61  | NH2 | L_GLU_79  | OE1 | 3.380 |
| 3L7E | L_ARG_61  | NH2 | L_GLU_79  | OE2 | 3.052 |
| 3L7E | L_ARG_61  | NH2 | L_ASP_82  | OD1 | 3.146 |
| 3L7E | L_ARG_61  | NH2 | L_ASP_82  | OD2 | 3.585 |
| 3L7E | L_LYS_103 | NZ  | L_GLU_165 | OE1 | 2.700 |
| 3L7E | L_LYS_145 | NZ  | L_GLU_161 | OE1 | 3.739 |
| 3L7E | L_LYS_145 | NZ  | L_GLU_161 | OE2 | 2.941 |
| 3L7E | L_LYS_149 | NZ  | L_GLU_195 | OE2 | 3.782 |
| 3L7E | H_ARG_40  | NH1 | H_ASP_91  | OD1 | 2.619 |
| 3L7E | H_ARG_40  | NH2 | H_GLU_48  | OE1 | 3.221 |
| 3L7E | H_ARG_40  | NH2 | H_ASP_91  | OD1 | 3.670 |
| 3L7E | H_ARG_68  | NH1 | H_ASP_91  | OD1 | 3.997 |
| 3L7E | H_ARG_68  | NH1 | H_ASP_91  | OD2 | 3.070 |
| 3L7E | H_ARG_68  | NH2 | H_ASP_91  | OD1 | 3.385 |
| 3L7E | H_ARG_68  | NH2 | H_ASP_91  | OD2 | 3.481 |
| 3L7E | H_ARG_99  | NH2 | H_ASP_109 | OD1 | 3.758 |
| 3L7E | H_ARG_99  | NH2 | H_ASP_109 | OD2 | 2.966 |
| 3L7E | H_LYS_151 | NZ  | H_ASP_152 | OD1 | 3.202 |
| 3L7E | H_LYS_151 | NZ  | H_ASP_152 | OD2 | 3.603 |
| 3L7E | H_LYS_214 | NZ  | H_ASP_216 | OD2 | 3.774 |
| 3L7E | H_LYS_217 | NZ  | L_GLU_123 | OE1 | 3.175 |
| 3L7E | H_LYS_218 | NZ  | H_GLU_220 | OE2 | 2.784 |
| 3L7E | A_ARG_61  | NH1 | A_ASP_82  | OD1 | 3.894 |

|      |            |     |           |     |       |
|------|------------|-----|-----------|-----|-------|
| 3L7E | A_ARG_61   | NH1 | A_ASP_82  | OD2 | 2.738 |
| 3L7E | A_ARG_61   | NH2 | A_GLU_79  | OE1 | 3.630 |
| 3L7E | A_ARG_61   | NH2 | A_GLU_79  | OE2 | 3.597 |
| 3L7E | A_ARG_61   | NH2 | A_ASP_82  | OD1 | 2.858 |
| 3L7E | A_ARG_61   | NH2 | A_ASP_82  | OD2 | 3.208 |
| 3L7E | A_LYS_103  | NZ  | A_GLU_165 | OE1 | 2.858 |
| 3L7E | A_LYS_103  | NZ  | A_GLU_165 | OE2 | 3.136 |
| 3L7E | A_LYS_149  | NZ  | A_GLU_195 | OE1 | 2.753 |
| 3L7E | A_ARG_211  | NH2 | A_GLU_187 | OE2 | 3.405 |
| 3L7E | B_ARG_40   | NH1 | B_ASP_91  | OD1 | 2.997 |
| 3L7E | B_ARG_40   | NH2 | B_GLU_48  | OE1 | 3.270 |
| 3L7E | B_ARG_40   | NH2 | B_GLU_48  | OE2 | 3.888 |
| 3L7E | B_ARG_40   | NH2 | B_ASP_91  | OD1 | 3.815 |
| 3L7E | B_LYS_59   | NZ  | B_ASP_57  | OD1 | 3.071 |
| 3L7E | B_LYS_59   | NZ  | B_ASP_57  | OD2 | 3.376 |
| 3L7E | B_ARG_68   | NH1 | B_ASP_91  | OD2 | 3.159 |
| 3L7E | B_ARG_68   | NH2 | B_ASP_91  | OD1 | 2.945 |
| 3L7E | B_ARG_68   | NH2 | B_ASP_91  | OD2 | 2.970 |
| 3L7E | B_ARG_99   | NH2 | B_ASP_109 | OD1 | 3.495 |
| 3L7E | B_ARG_99   | NH2 | B_ASP_109 | OD2 | 2.485 |
| 3L7E | B_LYS_151  | NZ  | B_ASP_152 | OD1 | 3.115 |
| 3L7E | B_LYS_151  | NZ  | B_ASP_152 | OD2 | 3.672 |
| 3L7E | B_LYS_217  | NZ  | A_GLU_123 | OE1 | 2.697 |
| 3L7E | B_LYS_217  | NZ  | A_GLU_123 | OE2 | 3.970 |
| 3L7E | B_LYS_218  | NZ  | B_GLU_220 | OE2 | 3.907 |
| 3LZF | A_LYS_53   | NZ  | A_ASP_276 | OD1 | 3.007 |
| 3LZF | A_LYS_63   | NZ  | A_GLU_75  | OE1 | 3.244 |
| 3LZF | A_ARG_109  | NH1 | A_GLU_89  | OE1 | 2.815 |
| 3LZF | A_ARG_109  | NH1 | A_GLU_89  | OE2 | 3.490 |
| 3LZF | A_ARG_109  | NH2 | A_GLU_89  | OE1 | 3.694 |
| 3LZF | A_ARG_109  | NH2 | A_GLU_89  | OE2 | 3.025 |
| 3LZF | A_ARG_109  | NH2 | B_GLU_69  | OE1 | 3.970 |
| 3LZF | A_ARG_109  | NH2 | B_GLU_69  | OE2 | 2.555 |
| 3LZF | A_LYS_133A | NZ  | A_GLU_131 | OE1 | 3.911 |
| 3LZF | A_ARG_149  | NH2 | A_ASP_77  | OD1 | 3.274 |
| 3LZF | A_ARG_149  | NH2 | A_ASP_77  | OD2 | 2.737 |
| 3LZF | A_LYS_157  | NZ  | H_ASP_52  | OD1 | 3.712 |
| 3LZF | A_LYS_157  | NZ  | H_ASP_52  | OD2 | 3.952 |
| 3LZF | A_LYS_157  | NZ  | H_ASP_54  | OD2 | 2.960 |
| 3LZF | A_LYS_163  | NZ  | A_GLU_246 | OE1 | 3.633 |
| 3LZF | A_LYS_166  | NZ  | L_ASP_93  | OD1 | 2.890 |
| 3LZF | A_LYS_166  | NZ  | L_ASP_93  | OD2 | 2.667 |
| 3LZF | A_LYS_174  | NZ  | A_GLU_119 | OE1 | 2.507 |
| 3LZF | A_LYS_174  | NZ  | A_GLU_119 | OE2 | 3.039 |
| 3LZF | A_HIS_184  | ND1 | A_GLU_216 | OE1 | 3.917 |
| 3LZF | A_LYS_208  | NZ  | A_GLU_238 | OE2 | 3.278 |
| 3LZF | A_ARG_262  | NH2 | A_GLU_175 | OE1 | 3.039 |
| 3LZF | A_ARG_262  | NH2 | A_GLU_175 | OE2 | 3.035 |
| 3LZF | A_ARG_310  | NH1 | B_ASP_90  | OD1 | 2.412 |
| 3LZF | A_ARG_310  | NH2 | B_ASP_90  | OD1 | 3.228 |
| 3LZF | A_ARG_315  | NH1 | A_ASP_24  | OD2 | 3.770 |
| 3LZF | A_ARG_321  | NH1 | A_GLU_31  | OE1 | 3.446 |
| 3LZF | A_ARG_321  | NH1 | A_GLU_31  | OE2 | 3.361 |
| 3LZF | B_LYS_51   | NZ  | B_GLU_103 | OE1 | 2.812 |
| 3LZF | B_LYS_68   | NZ  | A_GLU_110 | OE1 | 3.290 |
| 3LZF | B_LYS_68   | NZ  | A_GLU_110 | OE2 | 2.778 |
| 3LZF | B_LYS_82   | NZ  | B_ASP_86  | OD2 | 3.052 |
| 3LZF | B_ARG_116  | NH2 | B_GLU_120 | OE1 | 3.732 |

|      |            |     |            |     |       |
|------|------------|-----|------------|-----|-------|
| 3LZF | B_ARG_116  | NH2 | B_GLU_120  | OE2 | 3.831 |
| 3LZF | B_LYS_123  | NZ  | B_GLU_132  | OE2 | 2.843 |
| 3LZF | B_LYS_143  | NZ  | B_GLU_29   | OE1 | 3.843 |
| 3LZF | B_LYS_143  | NZ  | B_GLU_29   | OE2 | 3.948 |
| 3LZF | B_ARG_153  | NH2 | B_GLU_150  | OE2 | 3.778 |
| 3LZF | H_ARG_38   | NH1 | H_ASP_86   | OD1 | 2.752 |
| 3LZF | H_ARG_38   | NH2 | H_GLU_46   | OE1 | 2.805 |
| 3LZF | H_ARG_38   | NH2 | H_ASP_86   | OD1 | 3.834 |
| 3LZF | H_ARG_66   | NH1 | H_ASP_86   | OD2 | 3.179 |
| 3LZF | H_ARG_66   | NH2 | H_ASP_86   | OD1 | 3.026 |
| 3LZF | H_ARG_66   | NH2 | H_ASP_86   | OD2 | 3.038 |
| 3LZF | H_LYS_71   | NZ  | H_ASP_55   | OD1 | 2.502 |
| 3LZF | H_ARG_94   | NH2 | H_ASP_101  | OD2 | 2.420 |
| 3LZF | H_ARG_97   | NH1 | H_ASP_52   | OD1 | 2.811 |
| 3LZF | H_ARG_97   | NH1 | H_ASP_52   | OD2 | 3.899 |
| 3LZF | H_ARG_97   | NH2 | H_ASP_52   | OD1 | 2.854 |
| 3LZF | H_ARG_97   | NH2 | H_ASP_52   | OD2 | 2.731 |
| 3LZF | H_ARG_97   | NH2 | H_ASP_53   | OD1 | 2.942 |
| 3LZF | H_ARG_100D | NH2 | H_ASP_100A | OD2 | 2.691 |
| 3LZF | H_LYS_145  | NZ  | H_ASP_146  | OD1 | 3.565 |
| 3LZF | H_LYS_221  | NZ  | L_GLU_123  | OE2 | 3.483 |
| 3LZF | L_ARG_61   | NH2 | L_ASP_82   | OD1 | 3.298 |
| 3LZF | L_ARG_61   | NH2 | L_ASP_82   | OD2 | 3.277 |
| 3LZF | L_LYS_103  | NZ  | L_ASP_85   | OD1 | 3.336 |
| 3LZF | L_LYS_166  | NZ  | L_GLU_83   | OE1 | 2.813 |
| 3LZF | L_HIS_189  | ND1 | L_ASP_     | OD2 | 3.741 |
| 3M18 | A_ARG_55   | NH1 | A_ASP_80   | OD1 | 3.709 |
| 3M18 | A_ARG_136  | NH2 | A_GLU_134  | OE2 | 2.915 |
| 3M18 | A_LYS_232  | NZ  | A_ASP_230  | OD1 | 3.832 |
| 3M18 | A_LYS_232  | NZ  | A_ASP_230  | OD2 | 2.770 |
| 3M18 | A_ARG_235  | NH2 | A_ASP_224  | OD1 | 3.588 |
| 3M18 | A_ARG_235  | NH2 | A_ASP_224  | OD2 | 3.213 |
| 3M18 | B_LYS_1    | NZ  | B_GLU_7    | OE2 | 2.569 |
| 3M18 | B_LYS_13   | NZ  | B_ASP_18   | OD2 | 3.673 |
| 3M18 | B_ARG_61   | NH1 | B_ASP_48   | OD2 | 3.299 |
| 3M18 | B_ARG_125  | NH1 | B_ASP_119  | OD2 | 3.044 |
| 3M18 | B_ARG_125  | NH2 | B_ASP_119  | OD1 | 3.195 |
| 3M18 | B_ARG_125  | NH2 | B_ASP_119  | OD2 | 3.443 |
| 3M19 | A_LYS_59   | NZ  | A_GLU_37   | OE2 | 3.221 |
| 3M19 | A_HIS_104  | ND1 | A_ASP_79   | OD1 | 3.554 |
| 3M19 | A_HIS_104  | NE2 | A_ASP_79   | OD1 | 3.514 |
| 3M19 | A_HIS_104  | NE2 | A_ASP_79   | OD2 | 3.839 |
| 3M19 | A_ARG_128  | NH1 | A_ASP_103  | OD2 | 3.998 |
| 3M19 | A_ARG_128  | NH2 | A_ASP_103  | OD2 | 3.816 |
| 3M19 | A_ARG_136  | NH2 | A_GLU_134  | OE2 | 2.501 |
| 3M19 | A_LYS_243  | NZ  | A_GLU_245  | OE2 | 3.905 |
| 3M19 | B_HIS_104  | ND1 | B_ASP_79   | OD1 | 3.606 |
| 3M19 | B_HIS_104  | NE2 | B_ASP_79   | OD1 | 3.640 |
| 3M19 | B_HIS_104  | NE2 | B_ASP_79   | OD2 | 3.894 |
| 3M19 | B_ARG_128  | NH1 | B_ASP_103  | OD2 | 3.698 |
| 3M19 | B_ARG_128  | NH2 | B_ASP_103  | OD2 | 3.517 |
| 3M19 | B_ARG_136  | NH2 | B_GLU_134  | OE1 | 2.918 |
| 3M19 | B_ARG_136  | NH2 | B_GLU_134  | OE2 | 3.574 |
| 3M19 | B_LYS_152  | NZ  | B_ASP_127  | OD1 | 3.986 |
| 3M19 | B_LYS_152  | NZ  | B_ASP_127  | OD2 | 3.666 |
| 3M19 | B_ARG_194  | NH2 | B_ASP_191  | OD2 | 3.254 |
| 3MLR | L_LYS_27   | NZ  | L_ASP_92   | OD1 | 2.852 |
| 3MLR | L_LYS_31   | NZ  | L_ASP_30   | OD1 | 3.628 |



|      |            |     |           |     |       |
|------|------------|-----|-----------|-----|-------|
| 3MLR | L_LYS_31   | NZ  | L_ASP_30  | OD2 | 3.071 |
| 3MLR | L_ARG_61   | NH1 | L_ASP_82  | OD1 | 3.647 |
| 3MLR | L_ARG_61   | NH1 | L_ASP_82  | OD2 | 2.892 |
| 3MLR | L_ARG_61   | NH2 | L_ASP_82  | OD1 | 2.845 |
| 3MLR | L_ARG_61   | NH2 | L_ASP_82  | OD2 | 3.527 |
| 3MLR | L_LYS_66   | NZ  | L_ASP_51  | OD1 | 3.042 |
| 3MLR | L_LYS_66   | NZ  | L_ASP_51  | OD2 | 3.142 |
| 3MLR | L_ARG_106A | NH2 | L_ASP_85  | OD1 | 3.458 |
| 3MLR | L_ARG_106A | NH2 | L_ASP_85  | OD2 | 3.111 |
| 3MLR | L_LYS_153  | NZ  | L_GLU_207 | OE2 | 3.546 |
| 3MLR | H_ARG_38   | NH2 | H_GLU_46  | OE1 | 2.819 |
| 3MLR | H_ARG_94   | NH2 | H_ASP_101 | OD1 | 3.334 |
| 3MLR | H_ARG_94   | NH2 | H_ASP_101 | OD2 | 2.709 |
| 3MLR | H_LYS_129  | NZ  | L_ASP_142 | OD2 | 3.806 |
| 3MLR | H_LYS_209  | NZ  | L_GLU_127 | OE2 | 3.182 |
| 3MLR | P_LYS_304  | NZ  | H_ASP_31  | OD1 | 3.470 |
| 3MLR | P_LYS_305  | NZ  | H_ASP_54  | OD1 | 2.683 |
| 3MLR | P_LYS_305  | NZ  | H_ASP_54  | OD2 | 3.624 |
| 3MLR | P_LYS_305  | NZ  | H_ASP_56  | OD2 | 3.011 |
| 3MLS | L_LYS_27   | NZ  | L_ASP_92  | OD1 | 3.433 |
| 3MLS | L_LYS_27   | NZ  | L_ASP_92  | OD2 | 3.469 |
| 3MLS | L_LYS_31   | NZ  | L_ASP_30  | OD1 | 3.032 |
| 3MLS | L_LYS_31   | NZ  | L_ASP_30  | OD2 | 2.898 |
| 3MLS | L_ARG_61   | NH1 | L_ASP_82  | OD1 | 3.401 |
| 3MLS | L_ARG_61   | NH2 | L_ASP_82  | OD1 | 3.515 |
| 3MLS | L_ARG_61   | NH2 | L_ASP_82  | OD2 | 3.451 |
| 3MLS | L_LYS_66   | NZ  | L_ASP_51  | OD1 | 3.260 |
| 3MLS | L_LYS_66   | NZ  | L_ASP_51  | OD2 | 3.251 |
| 3MLS | L_LYS_69   | NZ  | L_ASP_29  | OD1 | 3.080 |
| 3MLS | L_ARG_106A | NH2 | L_ASP_85  | OD1 | 3.981 |
| 3MLS | L_ARG_106A | NH2 | L_ASP_85  | OD2 | 3.840 |
| 3MLS | H_ARG_38   | NH1 | H_ASP_86  | OD1 | 3.821 |
| 3MLS | H_ARG_38   | NH2 | H_GLU_46  | OE1 | 3.613 |
| 3MLS | H_ARG_38   | NH2 | H_GLU_46  | OE2 | 3.084 |
| 3MLS | H_LYS_73   | NZ  | H_ASP_53  | OD1 | 3.435 |
| 3MLS | H_LYS_73   | NZ  | L_ASP_31  | OD1 | 3.962 |
| 3MLS | H_LYS_73   | NZ  | L_ASP_31  | OD2 | 2.716 |
| 3MLS | H_LYS_73   | NZ  | L_ASP_53  | OD1 | 3.242 |
| 3MLS | H_LYS_73   | NZ  | L_ASP_53  | OD2 | 3.339 |
| 3MLS | H_ARG_94   | NH2 | H_ASP_101 | OD1 | 2.712 |
| 3MLS | H_ARG_94   | NH2 | H_ASP_101 | OD2 | 2.782 |
| 3MLS | H_LYS_117  | NZ  | J_GLU_10  | OE1 | 3.515 |
| 3MLS | H_LYS_143  | NZ  | L_GLU_128 | OE2 | 2.664 |
| 3MLS | H_LYS_209  | NZ  | L_GLU_127 | OE1 | 2.677 |
| 3MLS | H_LYS_210  | NZ  | H_GLU_212 | OE2 | 2.981 |
| 3MLS | P_ARG_11   | NH1 | H_GLU_99  | OE1 | 3.690 |
| 3MLS | P_ARG_11   | NH1 | H_GLU_99  | OE2 | 3.548 |
| 3MLS | P_ARG_11   | NH2 | H_GLU_99  | OE1 | 3.097 |
| 3MLS | P_ARG_11   | NH2 | H_GLU_99  | OE2 | 3.355 |
| 3MLS | P_LYS_12   | NZ  | H_ASP_54  | OD1 | 3.420 |
| 3MLS | P_LYS_12   | NZ  | H_ASP_54  | OD2 | 2.807 |
| 3MLS | P_LYS_12   | NZ  | H_ASP_56  | OD1 | 3.833 |
| 3MLS | P_LYS_12   | NZ  | H_ASP_56  | OD2 | 3.175 |
| 3MLS | M_LYS_27   | NZ  | M_ASP_92  | OD1 | 2.791 |
| 3MLS | M_LYS_27   | NZ  | M_ASP_92  | OD2 | 3.981 |
| 3MLS | M_LYS_31   | NZ  | M_ASP_30  | OD1 | 2.980 |
| 3MLS | M_LYS_31   | NZ  | M_ASP_30  | OD2 | 3.022 |
| 3MLS | M_ARG_61   | NH1 | M_ASP_82  | OD2 | 2.881 |

|      |            |     |           |     |       |
|------|------------|-----|-----------|-----|-------|
| 3MLS | M_ARG_61   | NH2 | M_ASP_82  | OD1 | 3.067 |
| 3MLS | M_ARG_61   | NH2 | M_ASP_82  | OD2 | 3.143 |
| 3MLS | M_LYS_66   | NZ  | M_ASP_51  | OD1 | 3.245 |
| 3MLS | M_LYS_66   | NZ  | M_ASP_51  | OD2 | 3.348 |
| 3MLS | M_LYS_69   | NZ  | M_ASP_29  | OD1 | 3.369 |
| 3MLS | M_ARG_106A | NH2 | M_ASP_85  | OD1 | 3.977 |
| 3MLS | M_ARG_106A | NH2 | M_ASP_85  | OD2 | 3.547 |
| 3MLS | M_LYS_170  | NZ  | M_GLU_83  | OE1 | 3.910 |
| 3MLS | I_ARG_38   | NH2 | I_GLU_46  | OE1 | 2.757 |
| 3MLS | I_ARG_38   | NH2 | I_GLU_46  | OE2 | 3.394 |
| 3MLS | I_ARG_94   | NH2 | I_ASP_101 | OD1 | 3.196 |
| 3MLS | I_ARG_94   | NH2 | I_ASP_101 | OD2 | 2.556 |
| 3MLS | I_LYS_143  | NZ  | M_GLU_128 | OE2 | 2.744 |
| 3MLS | I_LYS_210  | NZ  | I_GLU_212 | OE2 | 3.234 |
| 3MLS | Q_LYS_12   | NZ  | I_ASP_54  | OD1 | 2.683 |
| 3MLS | Q_LYS_12   | NZ  | I_ASP_54  | OD2 | 3.484 |
| 3MLS | Q_LYS_12   | NZ  | I_ASP_56  | OD1 | 3.650 |
| 3MLS | N_LYS_27   | NZ  | N_ASP_92  | OD1 | 2.638 |
| 3MLS | N_LYS_27   | NZ  | N_ASP_92  | OD2 | 3.279 |
| 3MLS | N_LYS_31   | NZ  | N_ASP_92  | OD1 | 3.789 |
| 3MLS | N_ARG_61   | NH1 | N_ASP_82  | OD1 | 3.670 |
| 3MLS | N_ARG_61   | NH1 | N_ASP_82  | OD2 | 2.886 |
| 3MLS | N_ARG_61   | NH2 | N_ASP_82  | OD1 | 2.936 |
| 3MLS | N_ARG_61   | NH2 | N_ASP_82  | OD2 | 3.467 |
| 3MLS | N_LYS_66   | NZ  | N_ASP_51  | OD1 | 2.940 |
| 3MLS | N_LYS_66   | NZ  | N_ASP_51  | OD2 | 2.905 |
| 3MLS | N_LYS_69   | NZ  | N_ASP_26  | OD2 | 3.361 |
| 3MLS | N_LYS_97   | NZ  | J_GLU_64  | OE2 | 3.402 |
| 3MLS | N_ARG_106A | NH1 | N_ASP_85  | OD1 | 3.854 |
| 3MLS | N_ARG_106A | NH2 | N_ASP_85  | OD1 | 3.571 |
| 3MLS | N_ARG_106A | NH2 | N_ASP_85  | OD2 | 3.057 |
| 3MLS | N_LYS_153  | NZ  | N_GLU_207 | OE2 | 2.702 |
| 3MLS | N_HIS_192  | ND1 | N_ASP_155 | OD1 | 2.942 |
| 3MLS | N_LYS_193  | NZ  | N_ASP_155 | OD1 | 3.885 |
| 3MLS | N_LYS_193  | NZ  | N_ASP_155 | OD2 | 3.535 |
| 3MLS | J_ARG_38   | NH2 | J_GLU_46  | OE1 | 3.096 |
| 3MLS | J_ARG_38   | NH2 | J_GLU_46  | OE2 | 3.226 |
| 3MLS | J_ARG_94   | NH2 | J_ASP_101 | OD1 | 3.116 |
| 3MLS | J_ARG_94   | NH2 | J_ASP_101 | OD2 | 2.667 |
| 3MLS | J_LYS_117  | NZ  | H_GLU_10  | OE1 | 3.984 |
| 3MLS | J_LYS_209  | NZ  | N_GLU_127 | OE2 | 3.428 |
| 3MLS | J_LYS_210  | NZ  | J_GLU_212 | OE1 | 2.956 |
| 3MLS | J_LYS_210  | NZ  | J_GLU_212 | OE2 | 3.284 |
| 3MLS | R_LYS_12   | NZ  | J_ASP_54  | OD1 | 2.569 |
| 3MLS | R_LYS_12   | NZ  | J_ASP_54  | OD2 | 3.629 |
| 3MLS | R_LYS_12   | NZ  | J_ASP_56  | OD2 | 2.975 |
| 3MLS | O_LYS_27   | NZ  | O_ASP_92  | OD1 | 3.055 |
| 3MLS | O_LYS_27   | NZ  | O_ASP_92  | OD2 | 3.636 |
| 3MLS | O_LYS_31   | NZ  | O_ASP_30  | OD1 | 3.500 |
| 3MLS | O_LYS_31   | NZ  | O_ASP_30  | OD2 | 3.178 |
| 3MLS | O_ARG_61   | NH1 | O_ASP_82  | OD1 | 3.846 |
| 3MLS | O_ARG_61   | NH1 | O_ASP_82  | OD2 | 3.018 |
| 3MLS | O_ARG_61   | NH2 | O_ASP_82  | OD1 | 2.964 |
| 3MLS | O_ARG_61   | NH2 | O_ASP_82  | OD2 | 3.525 |
| 3MLS | O_LYS_66   | NZ  | O_ASP_51  | OD1 | 3.127 |
| 3MLS | O_LYS_66   | NZ  | O_ASP_51  | OD2 | 3.042 |
| 3MLS | O_LYS_69   | NZ  | O_ASP_26  | OD1 | 3.632 |
| 3MLS | O_LYS_69   | NZ  | O_ASP_29  | OD2 | 3.396 |

|      |            |     |           |     |       |
|------|------------|-----|-----------|-----|-------|
| 3MLS | O_ARG_106A | NH2 | O_ASP_85  | OD1 | 3.674 |
| 3MLS | O_ARG_106A | NH2 | O_ASP_85  | OD2 | 3.358 |
| 3MLS | O_LYS_153  | NZ  | O_GLU_207 | OE1 | 2.594 |
| 3MLS | O_HIS_192  | NE2 | O_ASP_155 | OD2 | 3.869 |
| 3MLS | K_ARG_38   | NH2 | K_GLU_46  | OE1 | 2.675 |
| 3MLS | K_ARG_38   | NH2 | K_GLU_46  | OE2 | 3.386 |
| 3MLS | K_ARG_94   | NH1 | K_ASP_101 | OD1 | 2.987 |
| 3MLS | K_ARG_94   | NH1 | K_ASP_101 | OD2 | 2.783 |
| 3MLS | K_LYS_117  | NZ  | L_GLU_10  | OE1 | 3.985 |
| 3MLS | K_LYS_210  | NZ  | K_GLU_212 | OE1 | 3.047 |
| 3MLS | S_LYS_12   | NZ  | K_ASP_54  | OD1 | 2.573 |
| 3MLS | S_LYS_12   | NZ  | K_ASP_54  | OD2 | 3.736 |
| 3MLS | S_LYS_12   | NZ  | K_ASP_56  | OD2 | 3.122 |
| 3MLT | L_LYS_27   | NZ  | L_ASP_26  | OD1 | 2.656 |
| 3MLT | L_LYS_31   | NZ  | L_ASP_92  | OD1 | 3.056 |
| 3MLT | L_ARG_61   | NH1 | L_ASP_82  | OD1 | 3.939 |
| 3MLT | L_ARG_61   | NH1 | L_ASP_82  | OD2 | 2.821 |
| 3MLT | L_ARG_61   | NH2 | L_ASP_82  | OD1 | 2.818 |
| 3MLT | L_ARG_61   | NH2 | L_ASP_82  | OD2 | 3.100 |
| 3MLT | L_LYS_66   | NZ  | L_ASP_51  | OD1 | 2.985 |
| 3MLT | L_ARG_106A | NH2 | L_ASP_85  | OD1 | 3.829 |
| 3MLT | L_ARG_106A | NH2 | L_ASP_85  | OD2 | 3.125 |
| 3MLT | H_ARG_38   | NH2 | H_GLU_46  | OE1 | 3.303 |
| 3MLT | H_ARG_38   | NH2 | H_GLU_46  | OE2 | 2.941 |
| 3MLT | H_ARG_94   | NH2 | H_ASP_101 | OD1 | 3.578 |
| 3MLT | H_ARG_94   | NH2 | H_ASP_101 | OD2 | 2.428 |
| 3MLT | P_ARG_304  | NH1 | H_ASP_31  | OD1 | 2.766 |
| 3MLT | P_LYS_305  | NZ  | H_ASP_54  | OD1 | 2.503 |
| 3MLT | P_LYS_305  | NZ  | H_ASP_54  | OD2 | 3.276 |
| 3MLT | P_LYS_305  | NZ  | H_ASP_56  | OD2 | 2.482 |
| 3MLT | A_ARG_61   | NH1 | A_ASP_82  | OD1 | 3.737 |
| 3MLT | A_ARG_61   | NH1 | A_ASP_82  | OD2 | 2.967 |
| 3MLT | A_ARG_61   | NH2 | A_ASP_82  | OD1 | 2.371 |
| 3MLT | A_ARG_61   | NH2 | A_ASP_82  | OD2 | 3.018 |
| 3MLT | A_LYS_66   | NZ  | A_ASP_51  | OD1 | 2.928 |
| 3MLT | A_LYS_66   | NZ  | A_ASP_51  | OD2 | 3.040 |
| 3MLT | A_LYS_69   | NZ  | A_ASP_26  | OD2 | 2.462 |
| 3MLT | A_ARG_106A | NH2 | A_ASP_85  | OD1 | 3.818 |
| 3MLT | A_ARG_106A | NH2 | A_ASP_85  | OD2 | 2.999 |
| 3MLT | A_LYS_114  | NZ  | A_GLU_202 | OE2 | 3.077 |
| 3MLT | B_ARG_38   | NH2 | B_GLU_46  | OE1 | 3.094 |
| 3MLT | B_ARG_38   | NH2 | B_GLU_46  | OE2 | 3.367 |
| 3MLT | B_ARG_94   | NH2 | B_ASP_101 | OD1 | 3.119 |
| 3MLT | B_ARG_94   | NH2 | B_ASP_101 | OD2 | 2.679 |
| 3MLT | B_LYS_209  | NZ  | A_GLU_127 | OE2 | 3.807 |
| 3MLT | C_LYS_305  | NZ  | B_ASP_54  | OD1 | 3.099 |
| 3MLT | C_LYS_305  | NZ  | B_ASP_54  | OD2 | 3.737 |
| 3MLT | C_LYS_305  | NZ  | B_ASP_56  | OD2 | 3.095 |
| 3MLT | D_LYS_27   | NZ  | D_ASP_92  | OD1 | 3.259 |
| 3MLT | D_LYS_27   | NZ  | D_ASP_92  | OD2 | 3.970 |
| 3MLT | D_ARG_61   | NH1 | D_ASP_82  | OD1 | 3.697 |
| 3MLT | D_ARG_61   | NH1 | D_ASP_82  | OD2 | 3.252 |
| 3MLT | D_ARG_61   | NH2 | D_ASP_82  | OD1 | 2.341 |
| 3MLT | D_ARG_61   | NH2 | D_ASP_82  | OD2 | 3.303 |
| 3MLT | D_LYS_66   | NZ  | D_ASP_51  | OD1 | 3.307 |
| 3MLT | D_ARG_106A | NH1 | D_ASP_85  | OD1 | 3.298 |
| 3MLT | D_ARG_106A | NH1 | D_ASP_85  | OD2 | 2.670 |
| 3MLT | E_ARG_38   | NH2 | E_GLU_46  | OE1 | 2.985 |

|      |            |     |           |     |       |
|------|------------|-----|-----------|-----|-------|
| 3MLT | E_ARG_38   | NH2 | E_GLU_46  | OE2 | 2.979 |
| 3MLT | E_LYS_73   | NZ  | E_ASP_53  | OD1 | 3.727 |
| 3MLT | E_ARG_94   | NH2 | E_ASP_101 | OD1 | 3.644 |
| 3MLT | E_ARG_94   | NH2 | E_ASP_101 | OD2 | 2.588 |
| 3MLT | E_LYS_143  | NZ  | E_ASP_144 | OD1 | 3.787 |
| 3MLT | E_LYS_209  | NZ  | D_GLU_127 | OE2 | 3.591 |
| 3MLT | E_LYS_210  | NZ  | E_GLU_212 | OE2 | 3.760 |
| 3MLT | G_LYS_27   | NZ  | G_ASP_92  | OD2 | 2.642 |
| 3MLT | G_ARG_61   | NH1 | G_ASP_82  | OD1 | 3.714 |
| 3MLT | G_ARG_61   | NH1 | G_ASP_82  | OD2 | 2.758 |
| 3MLT | G_ARG_61   | NH2 | G_ASP_82  | OD1 | 2.637 |
| 3MLT | G_ARG_61   | NH2 | G_ASP_82  | OD2 | 2.852 |
| 3MLT | G_LYS_66   | NZ  | G_ASP_51  | OD1 | 3.206 |
| 3MLT | G_LYS_66   | NZ  | G_ASP_51  | OD2 | 2.686 |
| 3MLT | G_LYS_69   | NZ  | G_ASP_26  | OD2 | 3.323 |
| 3MLT | G_ARG_106A | NH2 | G_ASP_85  | OD1 | 3.421 |
| 3MLT | G_ARG_106A | NH2 | G_ASP_85  | OD2 | 2.884 |
| 3MLT | G_LYS_153  | NZ  | G_GLU_207 | OE2 | 2.787 |
| 3MLT | L_ARG_38   | NH2 | L_GLU_46  | OE1 | 3.057 |
| 3MLT | L_ARG_38   | NH2 | L_GLU_46  | OE2 | 3.429 |
| 3MLT | L_LYS_73   | NZ  | L_ASP_53  | OD1 | 3.113 |
| 3MLT | L_ARG_94   | NH2 | L_ASP_101 | OD1 | 3.494 |
| 3MLT | L_ARG_94   | NH2 | L_ASP_101 | OD2 | 2.793 |
| 3MLT | L_LYS_209  | NZ  | G_GLU_127 | OE2 | 3.669 |
| 3MLT | L_LYS_210  | NZ  | L_GLU_212 | OE2 | 3.480 |
| 3MLU | L_LYS_27   | NZ  | L_ASP_92  | OD1 | 2.977 |
| 3MLU | L_LYS_27   | NZ  | L_ASP_92  | OD2 | 3.686 |
| 3MLU | L_LYS_31   | NZ  | L_ASP_30  | OD1 | 2.935 |
| 3MLU | L_ARG_61   | NH1 | L_ASP_82  | OD1 | 3.030 |
| 3MLU | L_ARG_61   | NH1 | L_ASP_82  | OD2 | 2.397 |
| 3MLU | L_ARG_61   | NH2 | L_ASP_82  | OD1 | 3.188 |
| 3MLU | L_ARG_61   | NH2 | L_ASP_82  | OD2 | 3.941 |
| 3MLU | L_LYS_66   | NZ  | L_ASP_51  | OD1 | 3.330 |
| 3MLU | L_LYS_66   | NZ  | L_ASP_51  | OD2 | 3.601 |
| 3MLU | L_LYS_69   | NZ  | L_ASP_29  | OD1 | 3.656 |
| 3MLU | L_ARG_106A | NH1 | L_ASP_85  | OD1 | 2.728 |
| 3MLU | L_ARG_106A | NH1 | L_ASP_85  | OD2 | 2.846 |
| 3MLU | L_ARG_106A | NH2 | L_ASP_85  | OD2 | 3.672 |
| 3MLU | L_LYS_133  | NZ  | H_ASP_144 | OD2 | 3.641 |
| 3MLU | H_ARG_38   | NH2 | H_GLU_46  | OE1 | 2.684 |
| 3MLU | H_ARG_38   | NH2 | H_GLU_46  | OE2 | 3.582 |
| 3MLU | H_ARG_94   | NH2 | H_ASP_101 | OD1 | 3.350 |
| 3MLU | H_ARG_94   | NH2 | H_ASP_101 | OD2 | 2.802 |
| 3MLU | H_LYS_143  | NZ  | H_ASP_144 | OD1 | 3.930 |
| 3MLU | P_LYS_305  | NZ  | H_ASP_54  | OD1 | 2.586 |
| 3MLU | P_LYS_305  | NZ  | H_ASP_54  | OD2 | 3.496 |
| 3MLU | P_LYS_305  | NZ  | H_ASP_56  | OD2 | 3.684 |
| 3MLV | L_LYS_27   | NZ  | L_ASP_92  | OD1 | 2.732 |
| 3MLV | L_LYS_27   | NZ  | L_ASP_92  | OD2 | 3.328 |
| 3MLV | L_LYS_31   | NZ  | L_ASP_30  | OD1 | 3.535 |
| 3MLV | L_LYS_31   | NZ  | L_ASP_30  | OD2 | 3.503 |
| 3MLV | L_ARG_61   | NH1 | L_ASP_82  | OD1 | 3.622 |
| 3MLV | L_ARG_61   | NH1 | L_ASP_82  | OD2 | 2.916 |
| 3MLV | L_ARG_61   | NH2 | L_ASP_82  | OD1 | 2.553 |
| 3MLV | L_ARG_61   | NH2 | L_ASP_82  | OD2 | 3.370 |
| 3MLV | L_LYS_66   | NZ  | L_ASP_51  | OD1 | 3.119 |
| 3MLV | L_LYS_66   | NZ  | L_ASP_51  | OD2 | 3.196 |
| 3MLV | L_LYS_69   | NZ  | L_ASP_26  | OD1 | 3.247 |

|      |            |     |            |     |       |
|------|------------|-----|------------|-----|-------|
| 3MLV | L_ARG_106A | NH2 | L_ASP_85   | OD2 | 3.095 |
| 3MLV | L_LYS_153  | NZ  | L_GLU_207  | OE2 | 3.705 |
| 3MLV | H_ARG_38   | NH2 | H_GLU_46   | OE1 | 2.542 |
| 3MLV | H_LYS_73   | NZ  | H_ASP_53   | OD1 | 3.402 |
| 3MLV | H_ARG_94   | NH2 | H_ASP_101  | OD1 | 2.930 |
| 3MLV | H_ARG_94   | NH2 | H_ASP_101  | OD2 | 2.968 |
| 3MLV | P_ARG_304  | NH1 | H_ASP_31   | OD1 | 3.750 |
| 3MLV | P_LYS_305  | NZ  | H_ASP_54   | OD1 | 2.508 |
| 3MLV | P_LYS_305  | NZ  | H_ASP_54   | OD2 | 3.477 |
| 3MLV | P_LYS_305  | NZ  | H_ASP_56   | OD2 | 2.918 |
| 3MLV | M_LYS_27   | NZ  | M_ASP_92   | OD1 | 3.721 |
| 3MLV | M_LYS_27   | NZ  | M_ASP_92   | OD2 | 3.379 |
| 3MLV | M_LYS_31   | NZ  | M_ASP_30   | OD1 | 3.507 |
| 3MLV | M_LYS_31   | NZ  | M_ASP_30   | OD2 | 3.277 |
| 3MLV | M_ARG_54   | NH1 | M_GLU_60   | OE1 | 3.723 |
| 3MLV | M_ARG_61   | NH1 | M_ASP_82   | OD2 | 2.841 |
| 3MLV | M_ARG_61   | NH2 | M_ASP_82   | OD1 | 2.635 |
| 3MLV | M_ARG_61   | NH2 | M_ASP_82   | OD2 | 2.881 |
| 3MLV | M_LYS_66   | NZ  | M_ASP_51   | OD1 | 2.909 |
| 3MLV | M_LYS_66   | NZ  | M_ASP_51   | OD2 | 3.135 |
| 3MLV | M_LYS_97   | NZ  | N_GLU_64   | OE1 | 2.901 |
| 3MLV | M_ARG_106A | NH1 | M_ASP_85   | OD1 | 3.025 |
| 3MLV | M_ARG_106A | NH1 | M_ASP_85   | OD2 | 3.882 |
| 3MLV | M_LYS_133  | NZ  | M_GLU_128  | OE2 | 3.108 |
| 3MLV | M_LYS_153  | NZ  | M_GLU_207  | OE1 | 3.506 |
| 3MLV | M_LYS_153  | NZ  | M_GLU_207  | OE2 | 2.957 |
| 3MLV | N_ARG_38   | NH2 | N_GLU_46   | OE1 | 3.294 |
| 3MLV | N_ARG_38   | NH2 | N_GLU_46   | OE2 | 3.518 |
| 3MLV | N_HIS_58   | NE2 | N_ASP_56   | OD1 | 3.956 |
| 3MLV | N_ARG_94   | NH2 | N_ASP_101  | OD1 | 2.759 |
| 3MLV | N_ARG_94   | NH2 | N_ASP_101  | OD2 | 2.721 |
| 3MLV | N_LYS_117  | NZ  | N_ASP_144  | OD2 | 3.293 |
| 3MLV | N_LYS_210  | NZ  | N_GLU_212  | OE1 | 3.364 |
| 3MLV | Q_ARG_304  | NH1 | N_GLU_99   | OE2 | 3.900 |
| 3MLV | Q_ARG_304  | NH2 | N_GLU_99   | OE2 | 3.849 |
| 3MLV | Q_LYS_305  | NZ  | N_ASP_54   | OD1 | 3.154 |
| 3MLV | Q_LYS_305  | NZ  | N_ASP_54   | OD2 | 3.686 |
| 3MLV | Q_LYS_305  | NZ  | N_ASP_56   | OD2 | 2.702 |
| 3MLW | L_ARG_50   | NH1 | H_ASP_100G | OD1 | 2.178 |
| 3MLW | L_ARG_50   | NH1 | H_ASP_100G | OD2 | 3.432 |
| 3MLW | L_ARG_61   | NH1 | L_ASP_82   | OD1 | 3.181 |
| 3MLW | L_ARG_61   | NH1 | L_ASP_82   | OD2 | 2.655 |
| 3MLW | L_ARG_61   | NH2 | L_ASP_82   | OD1 | 3.279 |
| 3MLW | L_ARG_61   | NH2 | L_ASP_82   | OD2 | 3.991 |
| 3MLW | L_LYS_66   | NZ  | L_ASP_51   | OD1 | 3.270 |
| 3MLW | L_LYS_66   | NZ  | L_ASP_51   | OD2 | 3.246 |
| 3MLW | L_ARG_95   | NH2 | L_ASP_95D  | OD1 | 3.851 |
| 3MLW | L_ARG_95   | NH2 | L_ASP_95D  | OD2 | 3.710 |
| 3MLW | L_LYS_129  | NZ  | H_ASP_144  | OD2 | 3.472 |
| 3MLW | L_HIS_188  | ND1 | L_ASP_151  | OD1 | 3.480 |
| 3MLW | H_LYS_12   | NZ  | H_GLU_10   | OE2 | 3.873 |
| 3MLW | H_ARG_38   | NH2 | H_GLU_46   | OE2 | 2.598 |
| 3MLW | H_ARG_58   | NH1 | L_ASP_95D  | OD1 | 3.535 |
| 3MLW | H_ARG_58   | NH1 | L_ASP_95D  | OD2 | 2.585 |
| 3MLW | H_ARG_66   | NH1 | H_GLU_83   | OE1 | 3.904 |
| 3MLW | H_ARG_66   | NH1 | H_ASP_86   | OD1 | 3.710 |
| 3MLW | H_ARG_66   | NH1 | H_ASP_86   | OD2 | 3.995 |
| 3MLW | H_ARG_66   | NH2 | H_GLU_83   | OE1 | 3.901 |

|      |            |     |            |     |       |
|------|------------|-----|------------|-----|-------|
| 3MLW | H_ARG.66   | NH2 | H_ASP.86   | OD1 | 3.540 |
| 3MLW | H_ARG.66   | NH2 | H_ASP.86   | OD2 | 2.479 |
| 3MLW | H_LYS.143  | NZ  | H_ASP.144  | OD1 | 3.302 |
| 3MLW | H_LYS.210  | NZ  | H_GLU.212  | OE2 | 3.365 |
| 3MLW | P_LYS.303  | NZ  | H_ASP.31   | OD2 | 3.075 |
| 3MLW | P_ARG.304  | NH1 | H_ASP.31   | OD1 | 3.646 |
| 3MLW | P_LYS.305  | NZ  | H_ASP.54   | OD1 | 3.646 |
| 3MLW | P_LYS.305  | NZ  | H_ASP.54   | OD2 | 2.863 |
| 3MLW | P_LYS.305  | NZ  | H_ASP.56   | OD1 | 3.537 |
| 3MLW | P_ARG.315  | NH1 | L_ASP.93   | OD1 | 2.718 |
| 3MLW | P_ARG.315  | NH1 | L_ASP.93   | OD2 | 3.239 |
| 3MLW | M_ARG.50   | NH2 | L_ASP.100G | OD1 | 2.708 |
| 3MLW | M_ARG.50   | NH2 | L_ASP.100G | OD2 | 3.923 |
| 3MLW | M_ARG.54   | NH2 | M_ASP.60   | OD2 | 3.038 |
| 3MLW | M_ARG.61   | NH1 | M_ASP.82   | OD1 | 3.703 |
| 3MLW | M_ARG.61   | NH1 | M_ASP.82   | OD2 | 2.485 |
| 3MLW | M_ARG.61   | NH2 | M_ASP.82   | OD1 | 3.327 |
| 3MLW | M_ARG.61   | NH2 | M_ASP.82   | OD2 | 3.484 |
| 3MLW | M_LYS.66   | NZ  | M_ASP.51   | OD1 | 3.422 |
| 3MLW | M_LYS.66   | NZ  | M_ASP.51   | OD2 | 3.571 |
| 3MLW | M_ARG.95   | NH2 | M_ASP.95D  | OD1 | 3.135 |
| 3MLW | M_ARG.95   | NH2 | M_ASP.95D  | OD2 | 3.399 |
| 3MLW | M_LYS.149  | NZ  | M_GLU.203  | OE1 | 3.625 |
| 3MLW | L_LYS.12   | NZ  | L_GLU.10   | OE2 | 3.682 |
| 3MLW | L_ARG.58   | NH1 | M_ASP.95D  | OD1 | 2.653 |
| 3MLW | L_ARG.58   | NH1 | M_ASP.95D  | OD2 | 3.643 |
| 3MLW | L_ARG.66   | NH1 | L_ASP.86   | OD1 | 3.246 |
| 3MLW | L_ARG.66   | NH1 | L_ASP.86   | OD2 | 3.692 |
| 3MLW | L_ARG.66   | NH2 | L_ASP.86   | OD1 | 3.577 |
| 3MLW | L_ARG.66   | NH2 | L_ASP.86   | OD2 | 2.544 |
| 3MLW | L_LYS.143  | NZ  | L_ASP.144  | OD1 | 3.053 |
| 3MLW | L_LYS.209  | NZ  | M_GLU.123  | OE1 | 2.581 |
| 3MLW | L_LYS.209  | NZ  | M_GLU.123  | OE2 | 3.213 |
| 3MLW | L_LYS.210  | NZ  | L_GLU.212  | OE1 | 3.364 |
| 3MLW | Q_LYS.305  | NZ  | L_ASP.54   | OD2 | 3.005 |
| 3MLW | Q_LYS.305  | NZ  | L_ASP.56   | OD1 | 2.747 |
| 3MLW | Q_ARG.315  | NH1 | M_ASP.93   | OD1 | 3.021 |
| 3MLX | L_LYS.53   | NZ  | L_GLU.50   | OE1 | 2.558 |
| 3MLX | L_ARG.61   | NH1 | L_ASP.82   | OD1 | 3.582 |
| 3MLX | L_ARG.61   | NH1 | L_ASP.82   | OD2 | 2.890 |
| 3MLX | L_ARG.61   | NH2 | L_ASP.82   | OD1 | 2.629 |
| 3MLX | L_ARG.61   | NH2 | L_ASP.82   | OD2 | 3.257 |
| 3MLX | L_LYS.110  | NZ  | L_GLU.198  | OE1 | 3.541 |
| 3MLX | L_LYS.110  | NZ  | L_GLU.198  | OE2 | 2.823 |
| 3MLX | L_ARG.189  | NH1 | L_ASP.151  | OD2 | 3.869 |
| 3MLX | H_ARG.38   | NH1 | H_ASP.86   | OD1 | 2.668 |
| 3MLX | H_ARG.38   | NH2 | H_GLU.46   | OE1 | 2.979 |
| 3MLX | H_ARG.38   | NH2 | H_ASP.86   | OD1 | 3.494 |
| 3MLX | H_ARG.66   | NH1 | H_ASP.86   | OD1 | 3.775 |
| 3MLX | H_ARG.66   | NH1 | H_ASP.86   | OD2 | 3.101 |
| 3MLX | H_ARG.66   | NH2 | H_ASP.86   | OD1 | 3.040 |
| 3MLX | H_ARG.66   | NH2 | H_ASP.86   | OD2 | 3.650 |
| 3MLX | H_ARG.94   | NH2 | H_ASP.101  | OD1 | 3.962 |
| 3MLX | H_ARG.94   | NH2 | H_ASP.101  | OD2 | 2.675 |
| 3MLX | H_HIS.100  | NE2 | H_GLU.98   | OE1 | 3.039 |
| 3MLX | H_ARG.100D | NH1 | H_ASP.100B | OD1 | 3.189 |
| 3MLX | H_ARG.100D | NH1 | H_ASP.100B | OD2 | 2.525 |
| 3MLX | H_ARG.100D | NH2 | H_ASP.100B | OD2 | 3.445 |

|      |            |     |            |     |       |
|------|------------|-----|------------|-----|-------|
| 3MLX | H_LYS_143  | NZ  | L_GLU_124  | OE2 | 3.021 |
| 3MLX | H_LYS_143  | NZ  | H_ASP_144  | OD2 | 3.971 |
| 3MLX | H_LYS_210  | NZ  | H_GLU_212  | OE1 | 3.310 |
| 3MLX | P_HIS_308  | ND1 | H_GLU_98   | OE2 | 3.800 |
| 3MLX | P_HIS_308  | NE2 | H_GLU_98   | OE2 | 3.892 |
| 3MLX | M_LYS_53   | NZ  | M_GLU_50   | OE1 | 2.998 |
| 3MLX | M_ARG_61   | NH1 | M_ASP_82   | OD1 | 3.548 |
| 3MLX | M_ARG_61   | NH1 | M_ASP_82   | OD2 | 2.848 |
| 3MLX | M_ARG_61   | NH2 | M_ASP_82   | OD1 | 2.885 |
| 3MLX | M_ARG_61   | NH2 | M_ASP_82   | OD2 | 3.369 |
| 3MLX | M_LYS_110  | NZ  | M_GLU_198  | OE1 | 3.722 |
| 3MLX | M_LYS_110  | NZ  | M_GLU_198  | OE2 | 2.779 |
| 3MLX | L_ARG_38   | NH1 | L_ASP_86   | OD1 | 2.800 |
| 3MLX | L_ARG_38   | NH2 | L_GLU_46   | OE1 | 2.963 |
| 3MLX | L_ARG_38   | NH2 | L_ASP_86   | OD1 | 3.764 |
| 3MLX | L_ARG_66   | NH1 | L_ASP_86   | OD1 | 3.651 |
| 3MLX | L_ARG_66   | NH1 | L_ASP_86   | OD2 | 3.063 |
| 3MLX | L_ARG_66   | NH2 | L_ASP_86   | OD1 | 2.826 |
| 3MLX | L_ARG_66   | NH2 | L_ASP_86   | OD2 | 3.585 |
| 3MLX | L_ARG_94   | NH2 | L_ASP_101  | OD1 | 3.940 |
| 3MLX | L_ARG_94   | NH2 | L_ASP_101  | OD2 | 2.619 |
| 3MLX | L_ARG_100D | NH2 | L_ASP_100B | OD1 | 3.500 |
| 3MLX | L_LYS_143  | NZ  | M_GLU_124  | OE2 | 2.608 |
| 3MLX | L_LYS_214  | NZ  | M_GLU_123  | OE1 | 3.588 |
| 3MLX | Q_HIS_308  | ND1 | L_GLU_98   | OE1 | 3.280 |
| 3MLY | L_LYS_53   | NZ  | L_GLU_50   | OE1 | 2.642 |
| 3MLY | L_ARG_61   | NH1 | L_ASP_82   | OD1 | 3.644 |
| 3MLY | L_ARG_61   | NH1 | L_ASP_82   | OD2 | 2.899 |
| 3MLY | L_ARG_61   | NH2 | L_ASP_82   | OD1 | 2.860 |
| 3MLY | L_ARG_61   | NH2 | L_ASP_82   | OD2 | 3.465 |
| 3MLY | L_LYS_110  | NZ  | L_GLU_198  | OE2 | 2.940 |
| 3MLY | L_ARG_189  | NH1 | L_ASP_151  | OD2 | 3.794 |
| 3MLY | L_ARG_189  | NH2 | L_ASP_151  | OD1 | 3.939 |
| 3MLY | L_ARG_189  | NH2 | L_ASP_151  | OD2 | 3.922 |
| 3MLY | H_ARG_38   | NH1 | H_ASP_86   | OD1 | 2.772 |
| 3MLY | H_ARG_38   | NH2 | H_GLU_46   | OE1 | 3.019 |
| 3MLY | H_ARG_38   | NH2 | H_ASP_86   | OD1 | 3.609 |
| 3MLY | H_ARG_66   | NH1 | H_ASP_86   | OD1 | 3.669 |
| 3MLY | H_ARG_66   | NH1 | H_ASP_86   | OD2 | 3.034 |
| 3MLY | H_ARG_66   | NH2 | H_ASP_86   | OD1 | 2.918 |
| 3MLY | H_ARG_66   | NH2 | H_ASP_86   | OD2 | 3.605 |
| 3MLY | H_ARG_94   | NH2 | H_ASP_101  | OD1 | 3.843 |
| 3MLY | H_ARG_94   | NH2 | H_ASP_101  | OD2 | 2.725 |
| 3MLY | H_ARG_100D | NH1 | H_ASP_100B | OD1 | 3.662 |
| 3MLY | H_ARG_100D | NH1 | H_ASP_100B | OD2 | 2.984 |
| 3MLY | H_ARG_100D | NH2 | H_ASP_100B | OD2 | 3.444 |
| 3MLY | H_LYS_143  | NZ  | L_GLU_124  | OE2 | 3.991 |
| 3MLY | H_LYS_143  | NZ  | H_ASP_144  | OD1 | 3.690 |
| 3MLY | H_LYS_143  | NZ  | H_ASP_144  | OD2 | 3.304 |
| 3MLY | H_LYS_210  | NZ  | H_GLU_212  | OE1 | 3.480 |
| 3MLY | H_LYS_214  | NZ  | L_GLU_123  | OE1 | 3.745 |
| 3MLY | P_LYS_308  | NZ  | L_GLU_50   | OE1 | 3.397 |
| 3MLY | P_LYS_308  | NZ  | L_GLU_50   | OE2 | 3.390 |
| 3MLY | M_LYS_53   | NZ  | M_GLU_50   | OE1 | 3.091 |
| 3MLY | M_ARG_61   | NH1 | M_ASP_82   | OD1 | 3.807 |
| 3MLY | M_ARG_61   | NH1 | M_ASP_82   | OD2 | 2.828 |
| 3MLY | M_ARG_61   | NH2 | M_ASP_82   | OD1 | 2.920 |
| 3MLY | M_ARG_61   | NH2 | M_ASP_82   | OD2 | 3.357 |

|      |            |     |            |     |       |
|------|------------|-----|------------|-----|-------|
| 3MLY | M.LYS_110  | NZ  | M_GLU_198  | OE1 | 3.945 |
| 3MLY | M.LYS_110  | NZ  | M_GLU_198  | OE2 | 2.680 |
| 3MLY | L.ARG_38   | NH1 | L.ASP_86   | OD1 | 2.750 |
| 3MLY | L.ARG_38   | NH2 | L_GLU_46   | OE1 | 3.018 |
| 3MLY | L.ARG_38   | NH2 | L.ASP_86   | OD1 | 3.672 |
| 3MLY | L.ARG_66   | NH1 | L.ASP_86   | OD1 | 3.657 |
| 3MLY | L.ARG_66   | NH1 | L.ASP_86   | OD2 | 2.961 |
| 3MLY | L.ARG_66   | NH2 | L.ASP_86   | OD1 | 2.888 |
| 3MLY | L.ARG_66   | NH2 | L.ASP_86   | OD2 | 3.536 |
| 3MLY | L.ARG_94   | NH2 | L.ASP_101  | OD1 | 3.875 |
| 3MLY | L.ARG_94   | NH2 | L.ASP_101  | OD2 | 2.678 |
| 3MLY | L.ARG_100D | NH2 | L.ASP_100B | OD1 | 3.986 |
| 3MLY | L.ARG_100D | NH2 | L.ASP_100B | OD2 | 3.120 |
| 3MLY | L.LYS_143  | NZ  | M_GLU_124  | OE2 | 2.661 |
| 3MLY | L.LYS_214  | NZ  | M_GLU_123  | OE1 | 3.594 |
| 3MLZ | L.LYS_     | NZ  | L_GLU_     | OE1 | 2.997 |
| 3MLZ | L.ARG_     | NH1 | L.ASP_     | OD1 | 3.594 |
| 3MLZ | L.ARG_     | NH1 | L.ASP_     | OD2 | 2.458 |
| 3MLZ | L.ARG_     | NH2 | L.ASP_     | OD1 | 3.627 |
| 3MLZ | L.ARG_     | NH2 | L.ASP_     | OD2 | 3.688 |
| 3MLZ | H.ARG_     | NH1 | H.ASP_     | OD1 | 2.831 |
| 3MLZ | H.ARG_     | NH2 | H_GLU_     | OE1 | 2.975 |
| 3MLZ | H.ARG_     | NH2 | H_GLU_     | OE2 | 3.939 |
| 3MLZ | H.ARG_     | NH2 | H.ASP_     | OD1 | 3.724 |
| 3MLZ | H.ARG_     | NH1 | H.ASP_     | OD1 | 3.168 |
| 3MLZ | H.ARG_     | NH1 | H.ASP_     | OD2 | 2.769 |
| 3MLZ | H.ARG_     | NH2 | H.ASP_     | OD1 | 2.975 |
| 3MLZ | H.ARG_     | NH2 | H.ASP_     | OD2 | 3.884 |
| 3MLZ | H.ARG_     | NH2 | H.ASP_     | OD1 | 3.878 |
| 3MLZ | H.ARG_     | NH2 | H.ASP_     | OD2 | 3.028 |
| 3MLZ | H.HIS_     | ND1 | H.ASP_     | OD2 | 3.791 |
| 3MLZ | H.HIS_     | NE2 | H_GLU_     | OE1 | 3.406 |
| 3MLZ | H.HIS_     | NE2 | H_GLU_     | OE2 | 3.681 |
| 3MLZ | H.ARG_     | NH2 | H.ASP_     | OD2 | 2.582 |
| 3MLZ | H.LYS_     | NZ  | L_GLU_     | OE1 | 3.724 |
| 3MLZ | H.LYS_     | NZ  | L_GLU_     | OE2 | 3.184 |
| 3MLZ | H.LYS_     | NZ  | L_GLU_     | OE2 | 2.805 |
| 3MLZ | H.LYS_     | NZ  | L_GLU_     | OE1 | 3.039 |
| 3MLZ | H.LYS_     | NZ  | L_GLU_     | OE2 | 3.262 |
| 3NFP | A.ARG_33   | NH1 | K.ASP_4    | OD1 | 3.227 |
| 3NFP | A.ARG_33   | NH2 | K.ASP_6    | OD1 | 3.995 |
| 3NFP | A.ARG_33   | NH2 | K.ASP_6    | OD2 | 2.804 |
| 3NFP | A.HIS_35   | NE2 | K.ASP_4    | OD1 | 3.568 |
| 3NFP | A.HIS_35   | NE2 | K.ASP_4    | OD2 | 3.384 |
| 3NFP | A.ARG_38   | NH1 | A_GLU_46   | OE1 | 3.521 |
| 3NFP | A.ARG_38   | NH1 | A_GLU_46   | OE2 | 2.606 |
| 3NFP | A.ARG_38   | NH2 | A_GLU_46   | OE1 | 3.385 |
| 3NFP | A.ARG_38   | NH2 | A_GLU_46   | OE2 | 3.747 |
| 3NFP | A.LYS_63   | NZ  | A_GLU_46   | OE1 | 3.380 |
| 3NFP | A.LYS_67   | NZ  | A.ASP_90   | OD2 | 3.506 |
| 3NFP | A.LYS_146  | NZ  | A.ASP_147  | OD1 | 3.848 |
| 3NFP | A.LYS_146  | NZ  | A.ASP_147  | OD2 | 3.462 |
| 3NFP | B.LYS_38   | NZ  | B.ASP_80   | OD1 | 3.548 |
| 3NFP | B.LYS_38   | NZ  | B.ASP_80   | OD2 | 3.365 |
| 3NFP | B.ARG_60   | NH2 | B.ASP_81   | OD1 | 2.805 |
| 3NFP | B.ARG_60   | NH2 | B.ASP_81   | OD2 | 3.684 |
| 3NFP | B.LYS_125  | NZ  | B_GLU_122  | OE1 | 3.467 |
| 3NFP | B.LYS_148  | NZ  | B_GLU_194  | OE1 | 2.803 |



|      |           |     |           |     |       |
|------|-----------|-----|-----------|-----|-------|
| 3NFP | B_LYS_148 | NZ  | B_GLU_194 | OE2 | 3.777 |
| 3NFP | B_HIS_188 | ND1 | B_ASP_150 | OD2 | 2.700 |
| 3NFP | H_ARG_33  | NH1 | I_ASP_4   | OD2 | 2.868 |
| 3NFP | H_ARG_33  | NH2 | I_ASP_6   | OD2 | 3.531 |
| 3NFP | H_HIS_35  | NE2 | I_ASP_4   | OD1 | 3.314 |
| 3NFP | H_HIS_35  | NE2 | I_ASP_4   | OD2 | 3.660 |
| 3NFP | H_ARG_38  | NH2 | H_GLU_46  | OE1 | 3.221 |
| 3NFP | H_ARG_38  | NH2 | H_GLU_46  | OE2 | 2.659 |
| 3NFP | H_LYS_67  | NZ  | H_ASP_90  | OD2 | 3.005 |
| 3NFP | H_LYS_212 | NZ  | L_GLU_122 | OE1 | 3.767 |
| 3NFP | L_LYS_38  | NZ  | L_ASP_80  | OD1 | 3.309 |
| 3NFP | L_ARG_60  | NH2 | L_ASP_81  | OD1 | 2.888 |
| 3NFP | L_ARG_60  | NH2 | L_ASP_81  | OD2 | 3.365 |
| 3NFP | L_LYS_148 | NZ  | L_GLU_194 | OE1 | 3.812 |
| 3NFP | L_LYS_148 | NZ  | L_GLU_194 | OE2 | 2.763 |
| 3NFP | L_LYS_182 | NZ  | L_GLU_186 | OE2 | 3.310 |
| 3NFP | L_HIS_188 | ND1 | L_ASP_150 | OD2 | 3.342 |
| 3NFP | L_ARG_117 | NH2 | I_GLU_113 | OE1 | 3.200 |
| 3NFP | L_ARG_117 | NH2 | I_GLU_113 | OE2 | 2.798 |
| 3NFP | I_HIS_120 | NE2 | H_GLU_59  | OE1 | 3.799 |
| 3NFP | I_HIS_120 | NE2 | H_GLU_59  | OE2 | 3.285 |
| 3NFP | K_ARG_117 | NH1 | K_GLU_106 | OE2 | 2.607 |
| 3NFP | K_ARG_117 | NH2 | K_GLU_113 | OE1 | 3.049 |
| 3NFP | K_ARG_117 | NH2 | K_GLU_113 | OE2 | 2.896 |
| 3NFP | K_HIS_120 | NE2 | A_GLU_59  | OE2 | 3.393 |
| 3NGB | G_LYS_46  | NZ  | G_GLU_492 | OE1 | 3.975 |
| 3NGB | G_LYS_    | NZ  | G_GLU_    | OE1 | 3.767 |
| 3NGB | G_HIS_    | NE2 | G_GLU_    | OE1 | 3.641 |
| 3NGB | G_HIS_    | ND1 | G_GLU_    | OE2 | 2.917 |
| 3NGB | G_LYS_97  | NZ  | G_GLU_275 | OE2 | 3.810 |
| 3NGB | G_LYS_97  | NZ  | H_ASP_99  | OD2 | 3.903 |
| 3NGB | G_LYS_    | NZ  | G_GLU_    | OE1 | 3.983 |
| 3NGB | G_LYS_    | NZ  | G_GLU_    | OE2 | 3.483 |
| 3NGB | G_HIS_    | NE2 | G_GLU_    | OE1 | 3.355 |
| 3NGB | G_LYS_282 | NZ  | G_GLU_275 | OE1 | 3.701 |
| 3NGB | G_ARG_456 | NH1 | G_GLU_466 | OE2 | 3.510 |
| 3NGB | G_ARG_469 | NH2 | G_ASP_457 | OD1 | 2.956 |
| 3NGB | G_LYS_476 | NZ  | G_GLU_102 | OE1 | 2.614 |
| 3NGB | G_ARG_480 | NH1 | G_ASP_477 | OD1 | 2.964 |
| 3NGB | G_ARG_480 | NH2 | G_GLU_102 | OE2 | 3.814 |
| 3NGB | G_LYS_487 | NZ  | G_ASP_47  | OD1 | 2.938 |
| 3NGB | G_LYS_487 | NZ  | G_ASP_47  | OD2 | 3.396 |
| 3NGB | G_LYS_487 | NZ  | G_GLU_91  | OE1 | 2.798 |
| 3NGB | H_LYS_12  | NZ  | H_GLU_16  | OE2 | 3.621 |
| 3NGB | H_ARG_38  | NH1 | H_GLU_46  | OE1 | 3.003 |
| 3NGB | H_ARG_38  | NH2 | H_ASP_86  | OD1 | 2.813 |
| 3NGB | H_ARG_66  | NH1 | H_ASP_86  | OD1 | 3.475 |
| 3NGB | H_ARG_66  | NH2 | H_ASP_86  | OD1 | 2.969 |
| 3NGB | H_ARG_66  | NH2 | H_ASP_86  | OD2 | 2.693 |
| 3NGB | H_ARG_71  | NH1 | G_ASP_368 | OD1 | 3.623 |
| 3NGB | H_ARG_71  | NH1 | G_ASP_368 | OD2 | 3.004 |
| 3NGB | H_ARG_71  | NH2 | G_ASP_368 | OD1 | 2.815 |
| 3NGB | H_ARG_71  | NH2 | G_ASP_368 | OD2 | 3.723 |
| 3NGB | H_ARG_82A | NH1 | H_GLU_81  | OE2 | 3.784 |
| 3NGB | H_LYS_209 | NZ  | L_GLU_125 | OE1 | 3.421 |
| 3NGB | H_LYS_209 | NZ  | L_GLU_125 | OE2 | 3.841 |
| 3NGB | H_LYS_210 | NZ  | H_GLU_212 | OE2 | 3.426 |
| 3NGB | L_ARG_61  | NH1 | L_ASP_82  | OD2 | 2.817 |

|      |           |     |           |     |       |
|------|-----------|-----|-----------|-----|-------|
| 3NGB | L_ARG_61  | NH2 | L_ASP_82  | OD1 | 3.422 |
| 3NGB | L_ARG_61  | NH2 | L_ASP_82  | OD2 | 2.949 |
| 3NGB | L_LYS_109 | NZ  | L_GLU_17  | OE1 | 3.534 |
| 3NGB | L_LYS_151 | NZ  | L_GLU_197 | OE2 | 3.936 |
| 3NGB | L_HIS_191 | ND1 | L_ASP_153 | OD2 | 2.883 |
| 3NGB | L_HIS_191 | NE2 | L_ASP_187 | OD2 | 3.579 |
| 3NGB | L_ARG_213 | NH2 | L_GLU_189 | OE1 | 2.766 |
| 3NGB | A_LYS_46  | NZ  | A_GLU_492 | OE1 | 3.410 |
| 3NGB | A_HIS_66  | ND1 | A_GLU_64  | OE2 | 2.775 |
| 3NGB | A_LYS_97  | NZ  | B_ASP_99  | OD2 | 3.768 |
| 3NGB | A_LYS_207 | NZ  | A_GLU_381 | OE1 | 3.837 |
| 3NGB | A_LYS_207 | NZ  | A_GLU_381 | OE2 | 2.908 |
| 3NGB | A_LYS_231 | NZ  | A_GLU_267 | OE2 | 3.487 |
| 3NGB | A_HIS_249 | NE2 | A_GLU_482 | OE1 | 3.108 |
| 3NGB | A_LYS_282 | NZ  | A_GLU_275 | OE1 | 3.363 |
| 3NGB | A_LYS_343 | NZ  | A_GLU_405 | OE2 | 2.857 |
| 3NGB | A_LYS_348 | NZ  | A_GLU_269 | OE1 | 3.929 |
| 3NGB | A_LYS_348 | NZ  | A_GLU_269 | OE2 | 3.717 |
| 3NGB | A_ARG_456 | NH1 | A_GLU_466 | OE1 | 3.489 |
| 3NGB | A_ARG_469 | NH2 | A_ASP_457 | OD1 | 2.818 |
| 3NGB | A_LYS_476 | NZ  | A_GLU_102 | OE1 | 2.746 |
| 3NGB | A_ARG_480 | NH1 | A_ASP_477 | OD1 | 3.036 |
| 3NGB | A_ARG_480 | NH2 | A_GLU_102 | OE2 | 3.823 |
| 3NGB | A_LYS_487 | NZ  | A_ASP_47  | OD1 | 3.201 |
| 3NGB | A_LYS_487 | NZ  | A_ASP_47  | OD2 | 3.287 |
| 3NGB | A_LYS_487 | NZ  | A_GLU_91  | OE1 | 2.776 |
| 3NGB | B_LYS_12  | NZ  | B_GLU_16  | OE2 | 3.669 |
| 3NGB | B_ARG_38  | NH1 | B_ASP_86  | OD1 | 3.017 |
| 3NGB | B_ARG_38  | NH2 | B_GLU_46  | OE1 | 3.330 |
| 3NGB | B_ARG_38  | NH2 | B_GLU_46  | OE2 | 3.608 |
| 3NGB | B_ARG_38  | NH2 | B_ASP_86  | OD1 | 3.928 |
| 3NGB | B_ARG_66  | NH1 | B_ASP_86  | OD1 | 3.986 |
| 3NGB | B_ARG_66  | NH2 | B_ASP_86  | OD1 | 3.009 |
| 3NGB | B_ARG_66  | NH2 | B_ASP_86  | OD2 | 2.581 |
| 3NGB | B_ARG_71  | NH1 | A_ASP_368 | OD1 | 3.647 |
| 3NGB | B_ARG_71  | NH1 | A_ASP_368 | OD2 | 2.944 |
| 3NGB | B_ARG_71  | NH2 | A_ASP_368 | OD1 | 2.895 |
| 3NGB | B_ARG_71  | NH2 | A_ASP_368 | OD2 | 3.718 |
| 3NGB | B_ARG_82A | NH1 | B_GLU_81  | OE2 | 3.349 |
| 3NGB | B_HIS_102 | NE2 | B_GLU_101 | OE1 | 3.498 |
| 3NGB | B_LYS_209 | NZ  | C_GLU_125 | OE1 | 2.774 |
| 3NGB | B_LYS_209 | NZ  | C_GLU_125 | OE2 | 2.799 |
| 3NGB | C_ARG_61  | NH1 | C_ASP_82  | OD2 | 2.721 |
| 3NGB | C_ARG_61  | NH2 | C_GLU_79  | OE1 | 3.703 |
| 3NGB | C_ARG_61  | NH2 | C_ASP_82  | OD1 | 3.248 |
| 3NGB | C_ARG_61  | NH2 | C_ASP_82  | OD2 | 2.976 |
| 3NGB | C_LYS_109 | NZ  | C_GLU_17  | OE1 | 3.524 |
| 3NGB | C_LYS_151 | NZ  | C_GLU_197 | OE2 | 3.960 |
| 3NGB | C_LYS_185 | NZ  | C_GLU_189 | OE2 | 3.711 |
| 3NGB | C_HIS_191 | ND1 | C_ASP_153 | OD2 | 2.841 |
| 3NGB | C_ARG_213 | NH2 | C_GLU_189 | OE1 | 2.808 |
| 3NGB | D_LYS_46  | NZ  | D_GLU_492 | OE1 | 2.932 |
| 3NGB | D_HIS_66  | ND1 | D_GLU_64  | OE2 | 2.933 |
| 3NGB | D_LYS_97  | NZ  | D_GLU_275 | OE2 | 3.702 |
| 3NGB | D_LYS_97  | NZ  | E_ASP_99  | OD1 | 3.709 |
| 3NGB | D_LYS_207 | NZ  | D_GLU_381 | OE1 | 3.872 |
| 3NGB | D_LYS_207 | NZ  | D_GLU_381 | OE2 | 3.299 |
| 3NGB | D_LYS_231 | NZ  | D_GLU_267 | OE2 | 3.490 |

|      |           |     |           |     |       |
|------|-----------|-----|-----------|-----|-------|
| 3NGB | D_HIS_249 | NE2 | D_GLU_482 | OE1 | 3.177 |
| 3NGB | D_LYS_282 | NZ  | D_GLU_275 | OE1 | 2.984 |
| 3NGB | D_LYS_282 | NZ  | D_GLU_275 | OE2 | 3.901 |
| 3NGB | D_ARG_327 | NH1 | D_ASP_325 | OD1 | 3.823 |
| 3NGB | D_LYS_348 | NZ  | D_GLU_269 | OE2 | 3.794 |
| 3NGB | D_LYS_348 | NZ  | D_GLU_351 | OE1 | 3.701 |
| 3NGB | D_ARG_456 | NH1 | D_GLU_466 | OE2 | 3.539 |
| 3NGB | D_ARG_469 | NH2 | D_ASP_457 | OD1 | 2.868 |
| 3NGB | D_LYS_476 | NZ  | D_GLU_102 | OE1 | 2.805 |
| 3NGB | D_LYS_476 | NZ  | D_GLU_102 | OE2 | 3.737 |
| 3NGB | D_ARG_480 | NH1 | D_ASP_477 | OD1 | 2.794 |
| 3NGB | D_LYS_487 | NZ  | D_ASP_47  | OD1 | 3.083 |
| 3NGB | D_LYS_487 | NZ  | D_ASP_47  | OD2 | 3.202 |
| 3NGB | D_LYS_487 | NZ  | D_GLU_91  | OE1 | 2.774 |
| 3NGB | E_LYS_12  | NZ  | E_GLU_16  | OE2 | 3.601 |
| 3NGB | E_ARG_38  | NH1 | E_GLU_46  | OE1 | 2.881 |
| 3NGB | E_ARG_38  | NH2 | E_ASP_86  | OD1 | 2.976 |
| 3NGB | E_ARG_53  | NH2 | E_ASP_31  | OD1 | 3.658 |
| 3NGB | E_ARG_66  | NH2 | E_ASP_86  | OD1 | 2.908 |
| 3NGB | E_ARG_66  | NH2 | E_ASP_86  | OD2 | 2.859 |
| 3NGB | E_ARG_71  | NH1 | D_ASP_368 | OD1 | 3.715 |
| 3NGB | E_ARG_71  | NH1 | D_ASP_368 | OD2 | 3.074 |
| 3NGB | E_ARG_71  | NH2 | D_ASP_368 | OD1 | 3.026 |
| 3NGB | E_ARG_71  | NH2 | D_ASP_368 | OD2 | 3.848 |
| 3NGB | E_ARG_82A | NH1 | E_GLU_81  | OE2 | 3.296 |
| 3NGB | E_LYS_    | NZ  | E_ASP_    | OD1 | 3.774 |
| 3NGB | E_HIS_164 | ND1 | F_ASP_169 | OD1 | 3.984 |
| 3NGB | E_LYS_    | NZ  | F_GLU_    | OE1 | 3.345 |
| 3NGB | E_LYS_    | NZ  | F_GLU_    | OE2 | 2.927 |
| 3NGB | F_ARG_61  | NH1 | F_ASP_82  | OD2 | 3.066 |
| 3NGB | F_ARG_61  | NH2 | F_ASP_82  | OD1 | 3.415 |
| 3NGB | F_ARG_61  | NH2 | F_ASP_82  | OD2 | 2.796 |
| 3NGB | F_LYS_109 | NZ  | F_GLU_17  | OE1 | 3.447 |
| 3NGB | F_HIS_    | ND1 | F_ASP_    | OD2 | 2.855 |
| 3NGB | F_ARG_    | NH1 | F_GLU_    | OE1 | 3.426 |
| 3NGB | I_LYS_46  | NZ  | I_GLU_492 | OE1 | 3.345 |
| 3NGB | I_LYS_97  | NZ  | J_ASP_99  | OD1 | 3.443 |
| 3NGB | I_LYS_207 | NZ  | I_GLU_381 | OE1 | 3.684 |
| 3NGB | I_LYS_207 | NZ  | I_GLU_381 | OE2 | 3.363 |
| 3NGB | I_HIS_249 | NE2 | I_GLU_482 | OE1 | 3.245 |
| 3NGB | I_LYS_282 | NZ  | I_GLU_275 | OE1 | 3.040 |
| 3NGB | I_LYS_348 | NZ  | I_GLU_269 | OE2 | 3.888 |
| 3NGB | I_LYS_348 | NZ  | I_GLU_351 | OE1 | 3.585 |
| 3NGB | I_ARG_456 | NH1 | I_GLU_466 | OE1 | 3.750 |
| 3NGB | I_ARG_456 | NH1 | I_GLU_466 | OE2 | 3.932 |
| 3NGB | I_ARG_469 | NH2 | I_ASP_457 | OD1 | 3.266 |
| 3NGB | I_LYS_476 | NZ  | I_GLU_102 | OE1 | 2.886 |
| 3NGB | I_LYS_476 | NZ  | I_GLU_102 | OE2 | 3.914 |
| 3NGB | I_ARG_480 | NH1 | I_ASP_477 | OD1 | 2.955 |
| 3NGB | I_LYS_487 | NZ  | I_ASP_47  | OD1 | 2.972 |
| 3NGB | I_LYS_487 | NZ  | I_ASP_47  | OD2 | 3.331 |
| 3NGB | I_LYS_487 | NZ  | I_GLU_91  | OE1 | 3.195 |
| 3NGB | J_LYS_12  | NZ  | J_GLU_16  | OE2 | 3.692 |
| 3NGB | J_ARG_19  | NH1 | J_GLU_81  | OE1 | 3.898 |
| 3NGB | J_ARG_38  | NH1 | J_GLU_46  | OE1 | 3.036 |
| 3NGB | J_ARG_38  | NH1 | J_GLU_46  | OE2 | 3.958 |
| 3NGB | J_ARG_38  | NH2 | J_ASP_86  | OD1 | 3.148 |
| 3NGB | J_ARG_53  | NH2 | J_ASP_31  | OD1 | 3.422 |

|      |           |     |           |     |       |
|------|-----------|-----|-----------|-----|-------|
| 3NGB | J_ARG_66  | NH2 | J_ASP_86  | OD1 | 2.966 |
| 3NGB | J_ARG_66  | NH2 | J_ASP_86  | OD2 | 2.680 |
| 3NGB | J_ARG_71  | NH1 | L_ASP_368 | OD1 | 3.645 |
| 3NGB | J_ARG_71  | NH1 | L_ASP_368 | OD2 | 3.125 |
| 3NGB | J_ARG_71  | NH2 | L_ASP_368 | OD1 | 3.120 |
| 3NGB | J_ARG_82A | NH1 | J_GLU_81  | OE2 | 3.471 |
| 3NGB | J_HIS_102 | NE2 | J_GLU_101 | OE1 | 3.491 |
| 3NGB | J_LYS_143 | NZ  | J_ASP_144 | OD1 | 3.698 |
| 3NGB | J_LYS_209 | NZ  | K_GLU_125 | OE1 | 2.929 |
| 3NGB | J_LYS_209 | NZ  | K_GLU_125 | OE2 | 3.060 |
| 3NGB | J_LYS_210 | NZ  | J_GLU_212 | OE2 | 3.040 |
| 3NGB | J_LYS_214 | NZ  | K_ASP_124 | OD1 | 3.305 |
| 3NGB | K_ARG_24  | NH1 | K_ASP_70  | OD1 | 3.807 |
| 3NGB | K_ARG_24  | NH2 | K_ASP_70  | OD1 | 3.052 |
| 3NGB | K_ARG_61  | NH1 | K_ASP_82  | OD2 | 2.794 |
| 3NGB | K_ARG_61  | NH2 | K_GLU_79  | OE2 | 3.644 |
| 3NGB | K_ARG_61  | NH2 | K_ASP_82  | OD1 | 3.448 |
| 3NGB | K_ARG_61  | NH2 | K_ASP_82  | OD2 | 3.147 |
| 3NGB | K_LYS_109 | NZ  | K_GLU_17  | OE1 | 3.600 |
| 3NGB | K_LYS_151 | NZ  | K_GLU_197 | OE2 | 2.833 |
| 3NGB | K_LYS_185 | NZ  | K_GLU_189 | OE2 | 3.051 |
| 3NH7 | H_ARG_38  | NH1 | H_ASP_90  | OD1 | 3.170 |
| 3NH7 | H_ARG_38  | NH2 | H_GLU_46  | OE1 | 2.648 |
| 3NH7 | H_ARG_38  | NH2 | H_GLU_46  | OE2 | 3.155 |
| 3NH7 | H_LYS_65  | NZ  | H_ASP_62  | OD1 | 3.429 |
| 3NH7 | H_ARG_67  | NH1 | H_ASP_90  | OD1 | 3.942 |
| 3NH7 | H_ARG_67  | NH1 | H_ASP_90  | OD2 | 3.259 |
| 3NH7 | H_ARG_67  | NH2 | H_ASP_90  | OD1 | 3.009 |
| 3NH7 | H_ARG_67  | NH2 | H_ASP_90  | OD2 | 3.648 |
| 3NH7 | H_ARG_98  | NH1 | H_ASP_108 | OD1 | 3.173 |
| 3NH7 | H_ARG_98  | NH1 | H_ASP_108 | OD2 | 2.691 |
| 3NH7 | H_ARG_98  | NH1 | A_ASP_67  | OD2 | 3.819 |
| 3NH7 | H_ARG_98  | NH2 | A_ASP_67  | OD1 | 2.850 |
| 3NH7 | H_ARG_98  | NH2 | A_ASP_67  | OD2 | 2.389 |
| 3NH7 | H_ARG_100 | NH2 | A_GLU_64  | OE2 | 3.004 |
| 3NH7 | H_HIS_102 | ND1 | A_GLU_64  | OE1 | 2.378 |
| 3NH7 | H_ARG_104 | NH2 | A_GLU_81  | OE1 | 3.515 |
| 3NH7 | H_ARG_104 | NH2 | A_GLU_81  | OE2 | 2.462 |
| 3NH7 | H_HIS_109 | ND1 | H_ASP_108 | OD1 | 3.252 |
| 3NH7 | H_HIS_109 | ND1 | H_ASP_108 | OD2 | 3.832 |
| 3NH7 | H_LYS_216 | NZ  | L_GLU_125 | OE2 | 3.557 |
| 3NH7 | H_LYS_217 | NZ  | H_GLU_219 | OE2 | 2.342 |
| 3NH7 | L_ARG_60  | NH1 | L_ASP_81  | OD1 | 2.484 |
| 3NH7 | L_ARG_60  | NH1 | L_ASP_81  | OD2 | 2.037 |
| 3NH7 | L_ARG_60  | NH2 | L_GLU_80  | OE2 | 3.016 |
| 3NH7 | L_ARG_60  | NH2 | L_ASP_81  | OD1 | 3.954 |
| 3NH7 | L_LYS_112 | NZ  | L_GLU_200 | OE1 | 3.379 |
| 3NH7 | L_HIS_190 | ND1 | L_ASP_153 | OD2 | 3.719 |
| 3NH7 | A_LYS_79  | NZ  | L_ASP_50  | OD1 | 3.333 |
| 3NH7 | A_LYS_79  | NZ  | L_ASP_50  | OD2 | 3.058 |
| 3NH7 | A_LYS_92  | NZ  | H_GLU_99  | OE1 | 3.975 |
| 3NH7 | A_LYS_92  | NZ  | H_GLU_99  | OE2 | 3.561 |
| 3NH7 | A_ARG_96  | NH1 | A_GLU_65  | OE1 | 3.606 |
| 3NH7 | A_ARG_96  | NH1 | A_GLU_65  | OE2 | 2.868 |
| 3NH7 | L_ARG_38  | NH1 | L_ASP_90  | OD1 | 2.985 |
| 3NH7 | L_ARG_38  | NH2 | L_GLU_46  | OE1 | 2.998 |
| 3NH7 | L_ARG_38  | NH2 | L_GLU_46  | OE2 | 3.375 |
| 3NH7 | L_LYS_65  | NZ  | L_ASP_62  | OD1 | 3.472 |

|      |           |     |           |     |       |
|------|-----------|-----|-----------|-----|-------|
| 3NH7 | L_ARG_67  | NH1 | L_ASP_90  | OD1 | 3.848 |
| 3NH7 | L_ARG_67  | NH1 | L_ASP_90  | OD2 | 2.660 |
| 3NH7 | L_ARG_67  | NH2 | L_ASP_90  | OD1 | 2.985 |
| 3NH7 | L_ARG_67  | NH2 | L_ASP_90  | OD2 | 3.250 |
| 3NH7 | L_ARG_98  | NH1 | L_ASP_108 | OD1 | 3.301 |
| 3NH7 | L_ARG_98  | NH1 | L_ASP_108 | OD2 | 2.609 |
| 3NH7 | L_ARG_98  | NH1 | B_ASP_67  | OD2 | 3.924 |
| 3NH7 | L_ARG_98  | NH2 | B_ASP_67  | OD1 | 3.388 |
| 3NH7 | L_ARG_98  | NH2 | B_ASP_67  | OD2 | 2.296 |
| 3NH7 | L_ARG_100 | NH2 | B_GLU_64  | OE2 | 2.996 |
| 3NH7 | L_HIS_102 | ND1 | B_GLU_64  | OE1 | 2.707 |
| 3NH7 | L_ARG_104 | NH2 | B_GLU_81  | OE1 | 3.637 |
| 3NH7 | L_ARG_104 | NH2 | B_GLU_81  | OE2 | 2.502 |
| 3NH7 | L_HIS_109 | ND1 | L_ASP_108 | OD1 | 3.553 |
| 3NH7 | L_HIS_109 | ND1 | L_ASP_108 | OD2 | 3.821 |
| 3NH7 | L_LYS_216 | NZ  | M_GLU_125 | OE1 | 3.301 |
| 3NH7 | L_LYS_216 | NZ  | M_GLU_125 | OE2 | 3.320 |
| 3NH7 | L_LYS_217 | NZ  | L_GLU_219 | OE2 | 3.028 |
| 3NH7 | M_ARG_60  | NH1 | M_ASP_81  | OD1 | 2.461 |
| 3NH7 | M_ARG_60  | NH1 | M_ASP_81  | OD2 | 1.882 |
| 3NH7 | M_ARG_60  | NH2 | M_GLU_80  | OE2 | 3.159 |
| 3NH7 | M_ARG_60  | NH2 | M_ASP_81  | OD1 | 3.816 |
| 3NH7 | M_LYS_112 | NZ  | M_GLU_200 | OE1 | 3.202 |
| 3NH7 | M_HIS_190 | ND1 | M_ASP_153 | OD2 | 3.749 |
| 3NH7 | B_LYS_79  | NZ  | M_ASP_50  | OD1 | 3.625 |
| 3NH7 | B_LYS_79  | NZ  | M_ASP_50  | OD2 | 2.953 |
| 3NH7 | B_LYS_92  | NZ  | L_GLU_99  | OE1 | 3.831 |
| 3NH7 | B_LYS_92  | NZ  | L_GLU_99  | OE2 | 3.683 |
| 3NH7 | B_ARG_96  | NH1 | B_GLU_65  | OE1 | 3.695 |
| 3NH7 | B_ARG_96  | NH1 | B_GLU_65  | OE2 | 2.714 |
| 3NH7 | J_ARG_38  | NH1 | J_ASP_90  | OD1 | 2.984 |
| 3NH7 | J_ARG_38  | NH2 | J_GLU_46  | OE1 | 2.989 |
| 3NH7 | J_ARG_38  | NH2 | J_GLU_46  | OE2 | 3.443 |
| 3NH7 | J_LYS_65  | NZ  | J_ASP_62  | OD1 | 3.599 |
| 3NH7 | J_ARG_67  | NH1 | J_ASP_90  | OD1 | 3.748 |
| 3NH7 | J_ARG_67  | NH1 | J_ASP_90  | OD2 | 2.498 |
| 3NH7 | J_ARG_67  | NH2 | J_ASP_90  | OD1 | 3.051 |
| 3NH7 | J_ARG_67  | NH2 | J_ASP_90  | OD2 | 3.237 |
| 3NH7 | J_ARG_98  | NH1 | J_ASP_108 | OD1 | 3.197 |
| 3NH7 | J_ARG_98  | NH1 | J_ASP_108 | OD2 | 2.669 |
| 3NH7 | J_ARG_98  | NH1 | C_ASP_67  | OD2 | 3.893 |
| 3NH7 | J_ARG_98  | NH2 | C_ASP_67  | OD1 | 3.313 |
| 3NH7 | J_ARG_98  | NH2 | C_ASP_67  | OD2 | 2.401 |
| 3NH7 | J_ARG_100 | NH2 | C_GLU_64  | OE2 | 3.173 |
| 3NH7 | J_HIS_102 | ND1 | C_GLU_64  | OE1 | 2.668 |
| 3NH7 | J_ARG_104 | NH2 | C_GLU_81  | OE1 | 3.595 |
| 3NH7 | J_ARG_104 | NH2 | C_GLU_81  | OE2 | 2.634 |
| 3NH7 | J_HIS_109 | ND1 | J_ASP_108 | OD1 | 3.604 |
| 3NH7 | J_HIS_109 | ND1 | J_ASP_108 | OD2 | 3.993 |
| 3NH7 | J_LYS_216 | NZ  | N_GLU_125 | OE1 | 2.816 |
| 3NH7 | J_LYS_216 | NZ  | N_GLU_125 | OE2 | 3.044 |
| 3NH7 | J_LYS_217 | NZ  | J_GLU_219 | OE2 | 3.134 |
| 3NH7 | N_ARG_60  | NH1 | N_ASP_81  | OD1 | 2.494 |
| 3NH7 | N_ARG_60  | NH1 | N_ASP_81  | OD2 | 2.049 |
| 3NH7 | N_ARG_60  | NH2 | N_GLU_80  | OE2 | 3.067 |
| 3NH7 | N_ARG_60  | NH2 | N_ASP_81  | OD1 | 3.767 |
| 3NH7 | N_LYS_112 | NZ  | N_GLU_200 | OE1 | 3.295 |
| 3NH7 | N_HIS_190 | ND1 | N_ASP_153 | OD2 | 3.738 |

|      |           |     |           |     |       |
|------|-----------|-----|-----------|-----|-------|
| 3NH7 | C.LYS.79  | NZ  | N.ASP.50  | OD1 | 3.064 |
| 3NH7 | C.LYS.79  | NZ  | N.ASP.50  | OD2 | 3.315 |
| 3NH7 | C.LYS.92  | NZ  | J.GLU.99  | OE1 | 3.721 |
| 3NH7 | C.LYS.92  | NZ  | J.GLU.99  | OE2 | 3.806 |
| 3NH7 | C.ARG.96  | NH1 | C.GLU.65  | OE1 | 3.714 |
| 3NH7 | C.ARG.96  | NH1 | C.GLU.65  | OE2 | 2.792 |
| 3NH7 | K.ARG.38  | NH1 | K.ASP.90  | OD1 | 2.979 |
| 3NH7 | K.ARG.38  | NH2 | K.GLU.46  | OE1 | 2.902 |
| 3NH7 | K.ARG.38  | NH2 | K.GLU.46  | OE2 | 3.544 |
| 3NH7 | K.LYS.65  | NZ  | K.ASP.62  | OD1 | 3.572 |
| 3NH7 | K.ARG.67  | NH1 | K.ASP.90  | OD1 | 3.729 |
| 3NH7 | K.ARG.67  | NH1 | K.ASP.90  | OD2 | 2.672 |
| 3NH7 | K.ARG.67  | NH2 | K.ASP.90  | OD1 | 2.973 |
| 3NH7 | K.ARG.67  | NH2 | K.ASP.90  | OD2 | 3.433 |
| 3NH7 | K.ARG.98  | NH1 | K.ASP.108 | OD1 | 3.399 |
| 3NH7 | K.ARG.98  | NH1 | K.ASP.108 | OD2 | 2.677 |
| 3NH7 | K.ARG.98  | NH1 | D.ASP.67  | OD2 | 3.348 |
| 3NH7 | K.ARG.98  | NH2 | D.ASP.67  | OD1 | 3.350 |
| 3NH7 | K.ARG.98  | NH2 | D.ASP.67  | OD2 | 2.647 |
| 3NH7 | K.ARG.100 | NH2 | D.GLU.64  | OE2 | 3.101 |
| 3NH7 | K.HIS.102 | ND1 | D.GLU.64  | OE1 | 2.313 |
| 3NH7 | K.ARG.104 | NH2 | D.GLU.81  | OE1 | 3.830 |
| 3NH7 | K.ARG.104 | NH2 | D.GLU.81  | OE2 | 2.800 |
| 3NH7 | K.HIS.109 | ND1 | K.ASP.108 | OD1 | 3.611 |
| 3NH7 | K.HIS.109 | ND1 | K.ASP.108 | OD2 | 3.969 |
| 3NH7 | K.LYS.216 | NZ  | O.GLU.125 | OE1 | 3.159 |
| 3NH7 | K.LYS.216 | NZ  | O.GLU.125 | OE2 | 3.376 |
| 3NH7 | K.LYS.217 | NZ  | K.GLU.219 | OE2 | 3.149 |
| 3NH7 | O.ARG.60  | NH1 | O.ASP.81  | OD1 | 2.503 |
| 3NH7 | O.ARG.60  | NH1 | O.ASP.81  | OD2 | 2.023 |
| 3NH7 | O.ARG.60  | NH2 | O.GLU.80  | OE2 | 3.060 |
| 3NH7 | O.LYS.112 | NZ  | O.GLU.200 | OE1 | 3.202 |
| 3NH7 | O.HIS.190 | ND1 | O.ASP.153 | OD2 | 3.736 |
| 3NH7 | D.LYS.79  | NZ  | O.ASP.50  | OD1 | 3.661 |
| 3NH7 | D.LYS.79  | NZ  | O.ASP.50  | OD2 | 3.355 |
| 3NH7 | D.LYS.92  | NZ  | K.GLU.99  | OE1 | 3.766 |
| 3NH7 | D.LYS.92  | NZ  | K.GLU.99  | OE2 | 3.832 |
| 3NH7 | D.ARG.96  | NH1 | D.GLU.65  | OE1 | 3.668 |
| 3NH7 | D.ARG.96  | NH1 | D.GLU.65  | OE2 | 2.730 |
| 3NZ8 | A.LYS.62  | NZ  | A.GLU.46  | OE2 | 3.140 |
| 3NZ8 | A.LYS.64  | NZ  | A.GLU.61  | OE2 | 2.792 |
| 3NZ8 | A.ARG.94  | NH2 | A.ASP.101 | OD1 | 3.538 |
| 3NZ8 | A.ARG.94  | NH2 | A.ASP.101 | OD2 | 2.636 |
| 3NZ8 | A.HIS.164 | NE2 | B.ASP.167 | OD1 | 3.115 |
| 3NZ8 | A.LYS.208 | NZ  | B.GLU.123 | OE2 | 3.283 |
| 3NZ8 | B.ARG.24  | NH2 | B.ASP.70  | OD1 | 3.560 |
| 3NZ8 | B.LYS.39  | NZ  | B.GLU.81  | OE1 | 3.652 |
| 3NZ8 | B.ARG.61  | NH1 | B.ASP.82  | OD1 | 3.498 |
| 3NZ8 | B.ARG.61  | NH1 | B.ASP.82  | OD2 | 3.472 |
| 3NZ8 | B.ARG.61  | NH2 | B.GLU.79  | OE1 | 3.670 |
| 3NZ8 | B.ARG.61  | NH2 | B.ASP.82  | OD1 | 3.552 |
| 3NZ8 | B.ARG.61  | NH2 | B.ASP.82  | OD2 | 2.363 |
| 3NZ8 | B.HIS.189 | ND1 | B.ASP.151 | OD2 | 2.708 |
| 3NZ8 | B.LYS.199 | NZ  | B.ASP.110 | OD2 | 2.820 |
| 3NZ8 | H.LYS.62  | NZ  | H.GLU.46  | OE1 | 3.871 |
| 3NZ8 | H.LYS.62  | NZ  | H.GLU.46  | OE2 | 3.041 |
| 3NZ8 | H.LYS.64  | NZ  | H.GLU.61  | OE1 | 2.981 |
| 3NZ8 | H.ARG.94  | NH2 | H.ASP.101 | OD1 | 2.752 |

|      |           |     |           |     |       |
|------|-----------|-----|-----------|-----|-------|
| 3NZ8 | H_ARG_94  | NH2 | H_ASP_101 | OD2 | 3.572 |
| 3NZ8 | H_LYS_208 | NZ  | L_GLU_123 | OE2 | 3.808 |
| 3NZ8 | L_ARG_61  | NH1 | L_GLU_79  | OE1 | 3.401 |
| 3NZ8 | L_ARG_61  | NH2 | L_GLU_79  | OE1 | 3.938 |
| 3NZ8 | L_ARG_61  | NH2 | L_ASP_82  | OD1 | 2.739 |
| 3NZ8 | L_ARG_61  | NH2 | L_ASP_82  | OD2 | 2.929 |
| 3NZ8 | L_LYS_103 | NZ  | L_ASP_165 | OD1 | 2.546 |
| 3NZ8 | L_LYS_147 | NZ  | L_GLU_154 | OE2 | 3.916 |
| 3NZ8 | L_LYS_149 | NZ  | L_GLU_195 | OE2 | 3.208 |
| 3NZ8 | L_ARG_155 | NH1 | L_GLU_185 | OE1 | 3.404 |
| 3NZ8 | L_ARG_155 | NH2 | L_GLU_185 | OE1 | 2.909 |
| 3NZ8 | L_ARG_155 | NH2 | L_GLU_185 | OE2 | 2.942 |
| 3NZ8 | L_LYS_183 | NZ  | L_GLU_187 | OE1 | 3.631 |
| 3NZ8 | L_LYS_183 | NZ  | L_GLU_187 | OE2 | 3.993 |
| 3NZ8 | L_HIS_189 | ND1 | L_ASP_151 | OD2 | 2.961 |
| 3NZ8 | L_HIS_189 | NE2 | L_GLU_185 | OE2 | 3.576 |
| 3O2D | L_ARG_61  | NH1 | L_GLU_81  | OE2 | 3.060 |
| 3O2D | L_ARG_61  | NH1 | L_ASP_82  | OD1 | 2.620 |
| 3O2D | L_ARG_61  | NH1 | L_ASP_82  | OD2 | 3.291 |
| 3O2D | L_ARG_61  | NH2 | L_GLU_81  | OE2 | 3.508 |
| 3O2D | L_ARG_95  | NH1 | H_GLU_95  | OE2 | 2.847 |
| 3O2D | L_ARG_95  | NH2 | H_GLU_95  | OE2 | 3.717 |
| 3O2D | L_LYS_102 | NZ  | L_GLU_164 | OE1 | 3.911 |
| 3O2D | L_LYS_148 | NZ  | L_GLU_194 | OE1 | 2.853 |
| 3O2D | L_HIS_188 | ND1 | L_ASP_150 | OD2 | 3.198 |
| 3O2D | L_HIS_188 | NE2 | L_ASP_184 | OD1 | 3.050 |
| 3O2D | L_ARG_210 | NH2 | L_GLU_186 | OE1 | 3.119 |
| 3O2D | H_HIS_35  | NE2 | H_GLU_95  | OE2 | 2.861 |
| 3O2D | H_ARG_38  | NH2 | H_ASP_46  | OD2 | 3.124 |
| 3O2D | H_LYS_66  | NZ  | H_ASP_86  | OD1 | 2.870 |
| 3O2D | H_LYS_66  | NZ  | H_ASP_86  | OD2 | 2.859 |
| 3O2D | H_ARG_83  | NH1 | H_GLU_85  | OE2 | 3.005 |
| 3O2D | H_ARG_83  | NH2 | H_ASP_86  | OD1 | 3.533 |
| 3O2D | H_LYS_143 | NZ  | H_ASP_144 | OD1 | 3.677 |
| 3O2D | H_LYS_209 | NZ  | L_GLU_122 | OE1 | 2.503 |
| 3O2D | H_LYS_209 | NZ  | L_GLU_122 | OE2 | 3.547 |
| 3O2D | H_ARG_210 | NH1 | H_GLU_212 | OE2 | 3.400 |
| 3O2D | A_LYS_8   | NZ  | A_GLU_119 | OE1 | 3.898 |
| 3O2D | A_LYS_8   | NZ  | A_GLU_119 | OE2 | 2.918 |
| 3O2D | A_HIS_27  | NE2 | A_GLU_85  | OE1 | 3.858 |
| 3O2D | A_LYS_29  | NZ  | A_GLU_85  | OE1 | 3.824 |
| 3O2D | A_ARG_54  | NH1 | A_ASP_78  | OD1 | 3.603 |
| 3O2D | A_ARG_54  | NH1 | A_ASP_78  | OD2 | 2.872 |
| 3O2D | A_ARG_54  | NH2 | A_ASP_78  | OD1 | 3.001 |
| 3O2D | A_ARG_54  | NH2 | A_ASP_78  | OD2 | 3.706 |
| 3O2D | A_LYS_90  | NZ  | A_GLU_92  | OE1 | 3.860 |
| 3O2D | A_ARG_134 | NH1 | A_GLU_150 | OE1 | 3.461 |
| 3O2D | A_LYS_171 | NZ  | A_GLU_169 | OE1 | 3.959 |
| 3O41 | L_LYS_39  | NZ  | L_GLU_81  | OE1 | 3.974 |
| 3O41 | L_ARG_61  | NH1 | L_GLU_79  | OE1 | 3.261 |
| 3O41 | L_ARG_61  | NH1 | L_GLU_79  | OE2 | 3.697 |
| 3O41 | L_ARG_61  | NH1 | L_GLU_81  | OE2 | 3.860 |
| 3O41 | L_ARG_61  | NH2 | L_GLU_79  | OE2 | 3.810 |
| 3O41 | L_ARG_61  | NH2 | L_GLU_81  | OE2 | 2.759 |
| 3O41 | L_ARG_61  | NH2 | L_ASP_82  | OD1 | 2.918 |
| 3O41 | L_ARG_61  | NH2 | L_ASP_82  | OD2 | 3.904 |
| 3O41 | L_LYS_149 | NZ  | L_GLU_195 | OE1 | 2.951 |
| 3O41 | L_LYS_149 | NZ  | L_GLU_195 | OE2 | 3.097 |

|      |           |     |           |     |       |
|------|-----------|-----|-----------|-----|-------|
| 3O41 | L_ARG_155 | NH2 | L_GLU_185 | OE2 | 3.569 |
| 3O41 | L_HIS_189 | ND1 | L_ASP_151 | OD2 | 3.090 |
| 3O41 | L_LYS_199 | NZ  | L_ASP_110 | OD2 | 3.725 |
| 3O41 | H_ARG_38  | NH1 | H_ASP_86  | OD1 | 2.779 |
| 3O41 | H_ARG_38  | NH2 | H_GLU_46  | OE1 | 3.126 |
| 3O41 | H_ARG_38  | NH2 | H_ASP_86  | OD1 | 3.703 |
| 3O41 | H_LYS_57  | NZ  | H_ASP_55  | OD1 | 3.135 |
| 3O41 | H_LYS_57  | NZ  | H_ASP_55  | OD2 | 3.981 |
| 3O41 | H_ARG_58  | NH1 | H_ASP_56  | OD1 | 2.885 |
| 3O41 | H_ARG_58  | NH1 | H_ASP_56  | OD2 | 2.978 |
| 3O41 | H_ARG_58  | NH2 | H_ASP_56  | OD2 | 2.836 |
| 3O41 | H_ARG_66  | NH1 | H_ASP_86  | OD1 | 3.749 |
| 3O41 | H_ARG_66  | NH1 | H_ASP_86  | OD2 | 2.911 |
| 3O41 | H_ARG_66  | NH2 | H_ASP_86  | OD1 | 2.994 |
| 3O41 | H_ARG_66  | NH2 | H_ASP_86  | OD2 | 3.466 |
| 3O41 | H_ARG_94  | NH1 | A_GLU_191 | OE1 | 2.970 |
| 3O41 | H_ARG_94  | NH1 | A_GLU_191 | OE2 | 3.394 |
| 3O41 | H_ARG_94  | NH2 | A_GLU_191 | OE1 | 3.744 |
| 3O41 | H_ARG_94  | NH2 | A_GLU_191 | OE2 | 2.660 |
| 3O41 | H_LYS_208 | NZ  | L_GLU_123 | OE2 | 3.054 |
| 3O41 | A_ARG_38  | NH1 | A_ASP_86  | OD1 | 2.874 |
| 3O41 | A_ARG_38  | NH2 | A_GLU_46  | OE1 | 2.942 |
| 3O41 | A_ARG_38  | NH2 | A_ASP_86  | OD1 | 3.757 |
| 3O41 | A_LYS_57  | NZ  | A_ASP_55  | OD1 | 3.432 |
| 3O41 | A_LYS_57  | NZ  | A_ASP_55  | OD2 | 3.491 |
| 3O41 | A_ARG_58  | NH1 | A_ASP_56  | OD1 | 2.791 |
| 3O41 | A_ARG_58  | NH1 | A_ASP_56  | OD2 | 3.222 |
| 3O41 | A_ARG_58  | NH2 | A_ASP_56  | OD1 | 3.748 |
| 3O41 | A_ARG_58  | NH2 | A_ASP_56  | OD2 | 2.672 |
| 3O41 | A_ARG_66  | NH1 | A_ASP_86  | OD1 | 3.581 |
| 3O41 | A_ARG_66  | NH1 | A_ASP_86  | OD2 | 2.922 |
| 3O41 | A_ARG_66  | NH2 | A_ASP_86  | OD1 | 2.880 |
| 3O41 | A_ARG_66  | NH2 | A_ASP_86  | OD2 | 3.514 |
| 3O41 | A_ARG_75  | NH1 | A_ASP_72  | OD2 | 2.827 |
| 3O41 | A_LYS_208 | NZ  | B_GLU_123 | OE2 | 2.651 |
| 3O41 | B_ARG_24  | NH1 | B_ASP_70  | OD1 | 3.055 |
| 3O41 | B_ARG_24  | NH1 | B_ASP_70  | OD2 | 2.756 |
| 3O41 | B_LYS_39  | NZ  | B_GLU_81  | OE1 | 3.471 |
| 3O41 | B_ARG_61  | NH1 | B_GLU_79  | OE1 | 3.277 |
| 3O41 | B_ARG_61  | NH1 | B_GLU_79  | OE2 | 3.207 |
| 3O41 | B_ARG_61  | NH2 | B_GLU_79  | OE2 | 3.637 |
| 3O41 | B_ARG_61  | NH2 | B_GLU_81  | OE2 | 3.110 |
| 3O41 | B_ARG_61  | NH2 | B_ASP_82  | OD1 | 2.801 |
| 3O41 | B_ARG_61  | NH2 | B_ASP_82  | OD2 | 3.822 |
| 3O41 | B_LYS_149 | NZ  | B_GLU_195 | OE2 | 3.553 |
| 3O41 | B_ARG_155 | NH2 | B_GLU_185 | OE1 | 3.463 |
| 3O41 | B_ARG_155 | NH2 | B_GLU_185 | OE2 | 2.863 |
| 3O41 | B_HIS_189 | ND1 | B_ASP_151 | OD2 | 3.087 |
| 3O41 | B_LYS_199 | NZ  | B_ASP_110 | OD2 | 3.995 |
| 3O41 | P_LYS_433 | NZ  | H_ASP_54  | OD1 | 3.659 |
| 3O41 | P_LYS_433 | NZ  | H_ASP_54  | OD2 | 2.887 |
| 3O41 | P_LYS_433 | NZ  | H_ASP_56  | OD2 | 2.760 |
| 3O41 | C_LYS_433 | NZ  | A_ASP_54  | OD1 | 3.503 |
| 3O41 | C_LYS_433 | NZ  | A_ASP_54  | OD2 | 2.671 |
| 3O41 | C_LYS_433 | NZ  | A_ASP_56  | OD2 | 2.936 |
| 3O45 | L_LYS_39  | NZ  | L_GLU_81  | OE1 | 3.955 |
| 3O45 | L_ARG_61  | NH1 | L_GLU_79  | OE1 | 3.563 |
| 3O45 | L_ARG_61  | NH1 | L_GLU_79  | OE2 | 3.651 |



|      |           |     |           |     |       |
|------|-----------|-----|-----------|-----|-------|
| 3O45 | L_ARG_61  | NH2 | L_GLU_79  | OE2 | 3.980 |
| 3O45 | L_ARG_61  | NH2 | L_GLU_81  | OE2 | 2.981 |
| 3O45 | L_ARG_61  | NH2 | L_ASP_82  | OD1 | 2.891 |
| 3O45 | L_LYS_149 | NZ  | L_GLU_195 | OE1 | 3.064 |
| 3O45 | L_LYS_149 | NZ  | L_GLU_195 | OE2 | 2.826 |
| 3O45 | L_ARG_155 | NH2 | L_GLU_185 | OE2 | 2.881 |
| 3O45 | L_HIS_189 | ND1 | L_ASP_151 | OD2 | 3.388 |
| 3O45 | L_LYS_199 | NZ  | L_ASP_110 | OD2 | 3.915 |
| 3O45 | H_ARG_38  | NH1 | H_ASP_86  | OD1 | 2.834 |
| 3O45 | H_ARG_38  | NH2 | H_GLU_46  | OE1 | 3.512 |
| 3O45 | H_ARG_38  | NH2 | H_ASP_86  | OD1 | 3.614 |
| 3O45 | H_LYS_57  | NZ  | H_ASP_55  | OD1 | 2.960 |
| 3O45 | H_LYS_57  | NZ  | H_ASP_55  | OD2 | 3.684 |
| 3O45 | H_ARG_58  | NH1 | H_ASP_56  | OD1 | 2.872 |
| 3O45 | H_ARG_58  | NH1 | H_ASP_56  | OD2 | 2.820 |
| 3O45 | H_ARG_58  | NH2 | H_ASP_56  | OD2 | 3.333 |
| 3O45 | H_ARG_66  | NH1 | H_ASP_86  | OD2 | 2.963 |
| 3O45 | H_ARG_66  | NH2 | H_ASP_86  | OD1 | 3.158 |
| 3O45 | H_ARG_66  | NH2 | H_ASP_86  | OD2 | 3.218 |
| 3O45 | H_LYS_71  | NZ  | H_ASP_55  | OD1 | 3.837 |
| 3O45 | H_ARG_94  | NH1 | A_GLU_191 | OE1 | 3.085 |
| 3O45 | H_ARG_94  | NH1 | A_GLU_191 | OE2 | 3.621 |
| 3O45 | H_ARG_94  | NH2 | A_GLU_191 | OE1 | 3.709 |
| 3O45 | H_ARG_94  | NH2 | A_GLU_191 | OE2 | 2.802 |
| 3O45 | H_LYS_208 | NZ  | L_GLU_123 | OE2 | 3.033 |
| 3O45 | A_ARG_38  | NH1 | A_ASP_86  | OD1 | 2.784 |
| 3O45 | A_ARG_38  | NH2 | A_GLU_46  | OE1 | 3.151 |
| 3O45 | A_ARG_38  | NH2 | A_ASP_86  | OD1 | 3.920 |
| 3O45 | A_LYS_57  | NZ  | A_ASP_55  | OD1 | 3.779 |
| 3O45 | A_LYS_57  | NZ  | A_ASP_55  | OD2 | 3.231 |
| 3O45 | A_ARG_58  | NH1 | A_ASP_56  | OD1 | 2.824 |
| 3O45 | A_ARG_58  | NH1 | A_ASP_56  | OD2 | 3.062 |
| 3O45 | A_ARG_58  | NH2 | A_ASP_56  | OD2 | 2.817 |
| 3O45 | A_ARG_66  | NH1 | A_ASP_86  | OD2 | 2.985 |
| 3O45 | A_ARG_66  | NH2 | A_ASP_86  | OD1 | 2.861 |
| 3O45 | A_ARG_66  | NH2 | A_ASP_86  | OD2 | 3.279 |
| 3O45 | A_LYS_71  | NZ  | A_ASP_55  | OD1 | 3.913 |
| 3O45 | A_ARG_75  | NH1 | A_ASP_72  | OD2 | 3.016 |
| 3O45 | A_LYS_208 | NZ  | B_GLU_123 | OE2 | 2.878 |
| 3O45 | B_ARG_24  | NH1 | B_ASP_70  | OD1 | 2.848 |
| 3O45 | B_ARG_24  | NH1 | B_ASP_70  | OD2 | 2.930 |
| 3O45 | B_LYS_39  | NZ  | B_GLU_81  | OE1 | 3.627 |
| 3O45 | B_ARG_61  | NH1 | B_GLU_79  | OE1 | 3.550 |
| 3O45 | B_ARG_61  | NH1 | B_GLU_79  | OE2 | 3.481 |
| 3O45 | B_ARG_61  | NH2 | B_GLU_79  | OE2 | 3.674 |
| 3O45 | B_ARG_61  | NH2 | B_GLU_81  | OE2 | 3.283 |
| 3O45 | B_ARG_61  | NH2 | B_ASP_82  | OD1 | 2.929 |
| 3O45 | B_ARG_61  | NH2 | B_ASP_82  | OD2 | 3.946 |
| 3O45 | B_LYS_149 | NZ  | B_GLU_195 | OE2 | 3.399 |
| 3O45 | B_ARG_155 | NH2 | B_GLU_185 | OE1 | 3.860 |
| 3O45 | B_ARG_155 | NH2 | B_GLU_185 | OE2 | 2.997 |
| 3O45 | B_HIS_189 | ND1 | B_ASP_151 | OD2 | 3.113 |
| 3O45 | B_LYS_199 | NZ  | B_ASP_110 | OD2 | 3.896 |
| 3O45 | P_LYS_433 | NZ  | H_ASP_54  | OD1 | 3.518 |
| 3O45 | P_LYS_433 | NZ  | H_ASP_54  | OD2 | 2.818 |
| 3O45 | P_LYS_433 | NZ  | H_ASP_56  | OD2 | 2.927 |
| 3O45 | C_LYS_433 | NZ  | A_ASP_54  | OD1 | 3.297 |
| 3O45 | C_LYS_433 | NZ  | A_ASP_54  | OD2 | 2.723 |

|      |           |     |           |     |       |
|------|-----------|-----|-----------|-----|-------|
| 3O45 | C_LYS_433 | NZ  | A_ASP_56  | OD2 | 2.899 |
| 3OJD | A_ARG_61  | NH2 | A_GLU_81  | OE1 | 3.519 |
| 3OJD | A_ARG_61  | NH2 | A_ASP_82  | OD1 | 2.711 |
| 3OJD | A_ARG_61  | NH2 | A_ASP_82  | OD2 | 3.501 |
| 3OJD | A_LYS_149 | NZ  | A_GLU_195 | OE1 | 3.123 |
| 3OJD | A_LYS_149 | NZ  | A_GLU_195 | OE2 | 3.726 |
| 3OJD | A_ARG_155 | NH2 | A_GLU_185 | OE2 | 2.919 |
| 3OJD | A_LYS_183 | NZ  | A_GLU_187 | OE2 | 3.320 |
| 3OJD | A_HIS_189 | ND1 | A_ASP_151 | OD2 | 2.920 |
| 3OJD | A_HIS_189 | NE2 | A_GLU_185 | OE1 | 3.630 |
| 3OJD | B_LYS_13  | NZ  | B_GLU_16  | OE2 | 2.846 |
| 3OJD | B_LYS_64  | NZ  | B_ASP_61  | OD1 | 3.166 |
| 3OJD | B_ARG_66  | NH1 | B_ASP_86  | OD1 | 3.558 |
| 3OJD | B_ARG_66  | NH1 | B_ASP_86  | OD2 | 2.686 |
| 3OJD | B_ARG_66  | NH2 | B_ASP_86  | OD1 | 2.934 |
| 3OJD | B_ARG_66  | NH2 | B_ASP_86  | OD2 | 3.558 |
| 3OJD | B_LYS_83  | NZ  | B_GLU_85  | OE1 | 3.736 |
| 3OJD | B_LYS_83  | NZ  | B_GLU_85  | OE2 | 2.635 |
| 3OJD | B_ARG_94  | NH2 | B_ASP_101 | OD1 | 2.661 |
| 3OJD | B_ARG_94  | NH2 | B_ASP_101 | OD2 | 3.562 |
| 3OJD | B_LYS_205 | NZ  | B_ASP_207 | OD1 | 3.219 |
| 3OJD | B_LYS_205 | NZ  | B_ASP_207 | OD2 | 3.147 |
| 3OJD | B_LYS_208 | NZ  | A_GLU_123 | OE2 | 3.588 |
| 3OJD | B_ARG_213 | NH1 | A_GLU_213 | OE2 | 3.118 |
| 3OJD | B_ARG_213 | NH2 | A_GLU_213 | OE2 | 3.609 |
| 3P0V | L_ARG_61  | NH2 | L_GLU_81  | OE2 | 3.980 |
| 3P0V | L_ARG_61  | NH2 | L_ASP_82  | OD1 | 2.725 |
| 3P0V | L_ARG_61  | NH2 | L_ASP_82  | OD2 | 3.097 |
| 3P0V | L_LYS_103 | NZ  | L_GLU_165 | OE2 | 2.532 |
| 3P0V | L_LYS_149 | NZ  | L_GLU_195 | OE1 | 3.890 |
| 3P0V | L_LYS_149 | NZ  | L_GLU_195 | OE2 | 2.540 |
| 3P0V | L_LYS_188 | NZ  | L_ASP_185 | OD1 | 3.371 |
| 3P0V | H_HIS_35  | NE2 | H_GLU_50  | OE1 | 3.401 |
| 3P0V | H_HIS_35  | NE2 | H_GLU_95  | OE2 | 3.628 |
| 3P0V | H_ARG_38  | NH1 | H_ASP_86  | OD1 | 2.715 |
| 3P0V | H_ARG_38  | NH2 | H_GLU_46  | OE1 | 3.599 |
| 3P0V | H_ARG_38  | NH2 | H_ASP_86  | OD1 | 3.530 |
| 3P0V | H_LYS_64  | NZ  | H_ASP_58  | OD1 | 3.681 |
| 3P0V | H_ARG_66  | NH1 | H_ASP_86  | OD1 | 3.613 |
| 3P0V | H_ARG_66  | NH1 | H_ASP_86  | OD2 | 3.306 |
| 3P0V | H_ARG_66  | NH2 | H_ASP_86  | OD1 | 3.888 |
| 3P0V | H_ARG_83  | NH1 | H_GLU_85  | OE2 | 3.227 |
| 3P0V | H_ARG_94  | NH2 | H_ASP_32  | OD2 | 3.649 |
| 3P0V | H_ARG_97  | NH1 | H_ASP_32  | OD1 | 3.877 |
| 3P0V | H_ARG_97  | NH1 | H_ASP_32  | OD2 | 3.520 |
| 3P0V | H_LYS_143 | NZ  | H_ASP_144 | OD2 | 3.455 |
| 3P0V | M_ARG_24  | NH1 | M_ASP_70  | OD1 | 2.624 |
| 3P0V | M_ARG_61  | NH2 | M_GLU_81  | OE2 | 3.977 |
| 3P0V | M_ARG_61  | NH2 | M_ASP_82  | OD1 | 2.677 |
| 3P0V | M_ARG_61  | NH2 | M_ASP_82  | OD2 | 3.250 |
| 3P0V | M_LYS_103 | NZ  | M_GLU_165 | OE2 | 2.754 |
| 3P0V | M_LYS_149 | NZ  | M_GLU_195 | OE2 | 2.947 |
| 3P0V | M_LYS_188 | NZ  | M_ASP_185 | OD1 | 3.655 |
| 3P0V | I_HIS_35  | NE2 | I_GLU_50  | OE1 | 3.344 |
| 3P0V | I_HIS_35  | NE2 | I_GLU_95  | OE2 | 3.386 |
| 3P0V | I_ARG_38  | NH1 | I_ASP_86  | OD1 | 2.831 |
| 3P0V | I_ARG_38  | NH2 | I_GLU_46  | OE1 | 3.289 |
| 3P0V | I_ARG_38  | NH2 | I_GLU_46  | OE2 | 3.805 |

|      |           |     |           |     |       |
|------|-----------|-----|-----------|-----|-------|
| 3P0V | L_ARG_38  | NH2 | L_ASP_86  | OD1 | 3.779 |
| 3P0V | L_LYS_64  | NZ  | L_ASP_58  | OD1 | 3.535 |
| 3P0V | L_ARG_66  | NH1 | L_ASP_86  | OD1 | 3.463 |
| 3P0V | L_ARG_66  | NH1 | L_ASP_86  | OD2 | 3.181 |
| 3P0V | L_ARG_66  | NH2 | L_ASP_86  | OD1 | 3.209 |
| 3P0V | L_ARG_66  | NH2 | L_ASP_86  | OD2 | 3.655 |
| 3P0V | L_ARG_83  | NH1 | L_GLU_85  | OE2 | 2.465 |
| 3P0V | L_ARG_94  | NH2 | L_ASP_32  | OD1 | 3.895 |
| 3P0V | L_ARG_94  | NH2 | L_ASP_32  | OD2 | 3.368 |
| 3P0V | L_LYS_143 | NZ  | L_ASP_144 | OD2 | 3.595 |
| 3P0Y | A_LYS_322 | NZ  | A_ASP_323 | OD1 | 3.929 |
| 3P0Y | A_LYS_372 | NZ  | A_ASP_369 | OD1 | 3.817 |
| 3P0Y | A_LYS_372 | NZ  | A_GLU_397 | OE2 | 3.911 |
| 3P0Y | A_HIS_394 | NE2 | A_ASP_369 | OD1 | 3.176 |
| 3P0Y | A_ARG_403 | NH2 | A_GLU_376 | OE2 | 3.071 |
| 3P0Y | A_LYS_407 | NZ  | A_ASP_434 | OD2 | 2.888 |
| 3P0Y | A_ARG_427 | NH1 | A_ASP_392 | OD2 | 3.627 |
| 3P0Y | A_ARG_427 | NH1 | A_ASP_498 | OD1 | 3.045 |
| 3P0Y | A_ARG_427 | NH2 | A_GLU_397 | OE1 | 3.220 |
| 3P0Y | A_LYS_455 | NZ  | A_GLU_489 | OE1 | 3.791 |
| 3P0Y | A_LYS_455 | NZ  | A_GLU_489 | OE2 | 3.520 |
| 3P0Y | A_LYS_463 | NZ  | H_GLU_95  | OE2 | 2.859 |
| 3P0Y | A_LYS_465 | NZ  | H_GLU_50  | OE1 | 2.656 |
| 3P0Y | A_LYS_465 | NZ  | H_GLU_50  | OE2 | 3.845 |
| 3P0Y | A_LYS_465 | NZ  | H_GLU_95  | OE1 | 2.777 |
| 3P0Y | A_LYS_465 | NZ  | H_GLU_95  | OE2 | 3.671 |
| 3P0Y | H_HIS_35  | NE2 | H_GLU_50  | OE1 | 3.331 |
| 3P0Y | H_HIS_35  | NE2 | H_GLU_95  | OE1 | 3.467 |
| 3P0Y | H_ARG_38  | NH1 | H_ASP_86  | OD1 | 2.814 |
| 3P0Y | H_ARG_38  | NH2 | H_GLU_46  | OE1 | 3.115 |
| 3P0Y | H_ARG_38  | NH2 | H_GLU_46  | OE2 | 3.997 |
| 3P0Y | H_ARG_38  | NH2 | H_ASP_86  | OD1 | 3.796 |
| 3P0Y | H_LYS_64  | NZ  | H_ASP_61  | OD1 | 3.749 |
| 3P0Y | H_ARG_66  | NH1 | H_ASP_86  | OD1 | 3.756 |
| 3P0Y | H_ARG_66  | NH1 | H_ASP_86  | OD2 | 2.816 |
| 3P0Y | H_ARG_66  | NH2 | H_ASP_86  | OD1 | 3.074 |
| 3P0Y | H_ARG_66  | NH2 | H_ASP_86  | OD2 | 3.530 |
| 3P0Y | H_LYS_75  | NZ  | H_ASP_72  | OD2 | 3.063 |
| 3P0Y | H_ARG_94  | NH2 | H_ASP_101 | OD1 | 3.544 |
| 3P0Y | H_ARG_94  | NH2 | H_ASP_101 | OD2 | 2.757 |
| 3P0Y | H_ARG_97  | NH1 | A_ASP_436 | OD1 | 2.876 |
| 3P0Y | H_ARG_97  | NH1 | A_ASP_436 | OD2 | 3.533 |
| 3P0Y | H_ARG_97  | NH2 | A_ASP_436 | OD1 | 3.647 |
| 3P0Y | H_ARG_97  | NH2 | A_ASP_436 | OD2 | 2.823 |
| 3P0Y | H_LYS_143 | NZ  | H_ASP_144 | OD1 | 3.090 |
| 3P0Y | H_LYS_143 | NZ  | H_ASP_144 | OD2 | 3.144 |
| 3P0Y | H_LYS_209 | NZ  | L_GLU_123 | OE1 | 2.674 |
| 3P0Y | H_LYS_209 | NZ  | L_GLU_123 | OE2 | 3.317 |
| 3P0Y | H_LYS_210 | NZ  | H_GLU_212 | OE1 | 3.756 |
| 3P0Y | L_ARG_61  | NH2 | L_GLU_81  | OE2 | 3.697 |
| 3P0Y | L_ARG_61  | NH2 | L_ASP_82  | OD1 | 2.833 |
| 3P0Y | L_ARG_61  | NH2 | L_ASP_82  | OD2 | 3.670 |
| 3P0Y | L_LYS_149 | NZ  | L_GLU_195 | OE1 | 2.821 |
| 3P0Y | L_HIS_189 | ND1 | L_ASP_151 | OD2 | 3.174 |
| 3P0Y | L_LYS_190 | NZ  | L_GLU_213 | OE2 | 3.914 |
| 3P11 | H_HIS_35  | NE2 | H_GLU_50  | OE1 | 3.507 |
| 3P11 | H_HIS_35  | NE2 | H_GLU_95  | OE2 | 3.809 |
| 3P11 | H_ARG_38  | NH1 | H_ASP_86  | OD1 | 3.036 |

|      |           |     |           |     |       |
|------|-----------|-----|-----------|-----|-------|
| 3P11 | H_ARG_38  | NH2 | H_GLU_46  | OE1 | 2.678 |
| 3P11 | H_ARG_38  | NH2 | H_GLU_46  | OE2 | 3.985 |
| 3P11 | H_LYS_64  | NZ  | H_ASP_58  | OD1 | 3.516 |
| 3P11 | H_ARG_66  | NH1 | H_ASP_86  | OD2 | 3.567 |
| 3P11 | H_ARG_66  | NH2 | H_ASP_86  | OD1 | 3.699 |
| 3P11 | H_ARG_94  | NH1 | H_ASP_101 | OD1 | 3.477 |
| 3P11 | H_ARG_94  | NH1 | H_ASP_101 | OD2 | 3.282 |
| 3P11 | H_ARG_94  | NH2 | H_ASP_32  | OD2 | 3.500 |
| 3P11 | H_ARG_97  | NH1 | H_ASP_32  | OD1 | 3.837 |
| 3P11 | L_ARG_24  | NH1 | L_ASP_70  | OD2 | 3.972 |
| 3P11 | L_ARG_61  | NH1 | L_GLU_81  | OE2 | 3.937 |
| 3P11 | L_ARG_61  | NH2 | L_GLU_81  | OE2 | 3.076 |
| 3P11 | L_ARG_61  | NH2 | L_ASP_82  | OD1 | 2.965 |
| 3P11 | L_ARG_61  | NH2 | L_ASP_82  | OD2 | 3.758 |
| 3P11 | L_LYS_103 | NZ  | L_GLU_105 | OE1 | 3.365 |
| 3P11 | L_LYS_103 | NZ  | L_GLU_165 | OE2 | 2.876 |
| 3P11 | L_LYS_183 | NZ  | L_GLU_187 | OE1 | 2.907 |
| 3P11 | A_HIS_51  | ND1 | A_GLU_74  | OE1 | 3.956 |
| 3P11 | A_ARG_62  | NH1 | A_GLU_38  | OE1 | 3.231 |
| 3P11 | A_ARG_62  | NH2 | A_GLU_63  | OE2 | 3.811 |
| 3P11 | A_ARG_87  | NH1 | A_GLU_63  | OE1 | 3.389 |
| 3P11 | A_ARG_116 | NH1 | A_ASP_182 | OD1 | 3.330 |
| 3P11 | A_ARG_116 | NH1 | A_ASP_182 | OD2 | 2.794 |
| 3P11 | A_LYS_    | NZ  | A_GLU_131 | OE1 | 3.633 |
| 3P11 | A_ARG_    | NH2 | A_ASP_134 | OD2 | 3.573 |
| 3P11 | A_HIS_209 | NE2 | A_ASP_221 | OD1 | 3.391 |
| 3P11 | A_LYS_260 | NZ  | A_ASP_232 | OD1 | 3.022 |
| 3P11 | A_LYS_290 | NZ  | A_ASP_278 | OD1 | 2.957 |
| 3P11 | A_ARG_402 | NH1 | A_GLU_373 | OE1 | 3.428 |
| 3P11 | A_ARG_441 | NH1 | H_ASP_58  | OD2 | 3.356 |
| 3P11 | A_ARG_441 | NH1 | L_GLU_94  | OE1 | 2.859 |
| 3P11 | A_ARG_441 | NH1 | L_GLU_94  | OE2 | 3.310 |
| 3P11 | A_ARG_441 | NH2 | L_GLU_94  | OE2 | 3.075 |
| 3P11 | A_ARG_456 | NH1 | A_GLU_429 | OE1 | 3.324 |
| 3P11 | A_ARG_456 | NH2 | A_GLU_429 | OE1 | 3.225 |
| 3P11 | A_LYS_466 | NZ  | H_GLU_95  | OE1 | 2.568 |
| 3P11 | A_LYS_466 | NZ  | H_GLU_95  | OE2 | 3.227 |
| 3P11 | A_HIS_467 | ND1 | H_GLU_50  | OE2 | 3.466 |
| 3P11 | A_HIS_467 | ND1 | L_GLU_94  | OE2 | 3.926 |
| 3P11 | A_HIS_467 | NE2 | H_GLU_50  | OE1 | 3.754 |
| 3P11 | A_HIS_467 | NE2 | H_GLU_50  | OE2 | 3.679 |
| 3P11 | A_HIS_467 | NE2 | H_GLU_95  | OE2 | 3.533 |
| 3P11 | A_ARG_469 | NH1 | A_GLU_477 | OE1 | 3.032 |
| 3P11 | A_ARG_469 | NH2 | A_ASP_473 | OD2 | 3.365 |
| 3P11 | A_ARG_469 | NH2 | A_GLU_477 | OE1 | 3.595 |
| 3P11 | A_ARG_469 | NH2 | A_GLU_477 | OE2 | 3.199 |
| 3PGF | A_LYS_15  | NZ  | A_ASP_14  | OD1 | 2.931 |
| 3PGF | A_LYS_15  | NZ  | A_GLU_111 | OE2 | 3.982 |
| 3PGF | A_LYS_26  | NZ  | A_ASP_30  | OD2 | 2.898 |
| 3PGF | A_LYS_83  | NZ  | A_ASP_87  | OD1 | 3.179 |
| 3PGF | A_ARG_98  | NH1 | A_ASP_95  | OD1 | 2.849 |
| 3PGF | A_LYS_140 | NZ  | A_ASP_136 | OD1 | 3.415 |
| 3PGF | A_LYS_140 | NZ  | A_ASP_136 | OD2 | 2.764 |
| 3PGF | A_HIS_203 | ND1 | A_ASP_136 | OD2 | 2.718 |
| 3PGF | A_LYS_251 | NZ  | A_ASP_164 | OD1 | 3.745 |
| 3PGF | A_LYS_251 | NZ  | A_ASP_164 | OD2 | 2.761 |
| 3PGF | A_ARG_316 | NH1 | A_ASP_236 | OD1 | 3.984 |
| 3PGF | A_ARG_316 | NH1 | A_ASP_236 | OD2 | 3.954 |

|      |           |     |           |     |       |
|------|-----------|-----|-----------|-----|-------|
| 3PGF | A_ARG_316 | NH2 | A_ASP_314 | OD2 | 2.795 |
| 3PGF | A_LYS_326 | NZ  | A_GLU_322 | OE2 | 2.961 |
| 3PGF | H_ARG_38  | NH1 | H_ASP_86  | OD1 | 3.038 |
| 3PGF | H_ARG_38  | NH2 | H_GLU_46  | OE1 | 2.948 |
| 3PGF | H_ARG_66  | NH1 | H_ASP_86  | OD1 | 3.643 |
| 3PGF | H_ARG_66  | NH1 | H_ASP_86  | OD2 | 2.938 |
| 3PGF | H_ARG_66  | NH2 | H_ASP_86  | OD1 | 3.135 |
| 3PGF | H_ARG_66  | NH2 | H_ASP_86  | OD2 | 3.904 |
| 3PGF | H_ARG_94  | NH2 | H_ASP_101 | OD1 | 3.471 |
| 3PGF | H_ARG_94  | NH2 | H_ASP_101 | OD2 | 2.638 |
| 3PGF | L_ARG_24  | NH1 | L_ASP_70  | OD1 | 3.567 |
| 3PGF | L_ARG_24  | NH1 | L_ASP_70  | OD2 | 3.066 |
| 3PGF | L_ARG_61  | NH2 | L_GLU_81  | OE2 | 3.869 |
| 3PGF | L_ARG_61  | NH2 | L_ASP_82  | OD1 | 2.691 |
| 3PGF | L_ARG_61  | NH2 | L_ASP_82  | OD2 | 3.502 |
| 3PGF | L_ARG_66  | NH1 | A_GLU_309 | OE2 | 3.045 |
| 3PGF | L_ARG_66  | NH2 | A_GLU_309 | OE2 | 2.501 |
| 3PGF | L_LYS_149 | NZ  | L_GLU_195 | OE2 | 3.143 |
| 3PGF | L_LYS_190 | NZ  | L_GLU_213 | OE2 | 3.299 |
| 3PNW | A_ARG_62  | NH2 | A_GLU_82  | OE2 | 2.760 |
| 3PNW | A_ARG_62  | NH2 | A_ASP_83  | OD1 | 3.251 |
| 3PNW | A_LYS_106 | NZ  | A_GLU_168 | OE1 | 3.588 |
| 3PNW | A_LYS_106 | NZ  | A_GLU_168 | OE2 | 3.143 |
| 3PNW | A_LYS_152 | NZ  | A_GLU_198 | OE1 | 3.462 |
| 3PNW | A_HIS_192 | ND1 | A_ASP_154 | OD2 | 2.766 |
| 3PNW | B_ARG_41  | NH1 | B_GLU_49  | OE1 | 3.120 |
| 3PNW | B_ARG_41  | NH1 | B_GLU_49  | OE2 | 3.686 |
| 3PNW | B_ARG_41  | NH1 | B_ASP_93  | OD1 | 3.860 |
| 3PNW | B_ARG_41  | NH2 | B_ASP_93  | OD1 | 2.838 |
| 3PNW | B_ARG_70  | NH1 | B_ASP_93  | OD1 | 3.254 |
| 3PNW | B_ARG_70  | NH1 | B_ASP_93  | OD2 | 3.946 |
| 3PNW | B_ARG_70  | NH2 | B_ASP_93  | OD1 | 3.639 |
| 3PNW | B_ARG_70  | NH2 | B_ASP_93  | OD2 | 2.902 |
| 3PNW | B_LYS_79  | NZ  | B_ASP_76  | OD2 | 2.841 |
| 3PNW | B_ARG_90  | NH1 | B_GLU_92  | OE1 | 3.741 |
| 3PNW | B_ARG_101 | NH2 | B_ASP_117 | OD2 | 3.317 |
| 3PNW | B_ARG_104 | NH1 | C_GLU_599 | OE1 | 3.048 |
| 3PNW | B_LYS_159 | NZ  | B_ASP_160 | OD1 | 3.439 |
| 3PNW | C_LYS_557 | NZ  | C_ASP_560 | OD1 | 3.049 |
| 3PNW | C_LYS_557 | NZ  | C_ASP_560 | OD2 | 3.693 |
| 3PNW | C_LYS_590 | NZ  | C_GLU_576 | OE1 | 3.383 |
| 3PNW | D_ARG_25  | NH1 | J_GLU_82  | OE1 | 2.858 |
| 3PNW | D_ARG_25  | NH1 | J_GLU_82  | OE2 | 3.430 |
| 3PNW | D_ARG_25  | NH2 | J_GLU_82  | OE1 | 3.626 |
| 3PNW | D_ARG_25  | NH2 | J_GLU_82  | OE2 | 3.034 |
| 3PNW | D_ARG_62  | NH2 | D_GLU_82  | OE2 | 3.353 |
| 3PNW | D_ARG_62  | NH2 | D_ASP_83  | OD1 | 3.192 |
| 3PNW | D_ARG_62  | NH2 | D_ASP_83  | OD2 | 3.678 |
| 3PNW | D_ARG_145 | NH1 | D_GLU_108 | OE2 | 3.475 |
| 3PNW | D_ARG_145 | NH2 | D_GLU_108 | OE1 | 3.526 |
| 3PNW | D_ARG_145 | NH2 | D_GLU_108 | OE2 | 3.197 |
| 3PNW | D_LYS_152 | NZ  | D_GLU_198 | OE1 | 3.454 |
| 3PNW | D_LYS_152 | NZ  | D_GLU_198 | OE2 | 3.452 |
| 3PNW | D_LYS_186 | NZ  | D_GLU_190 | OE1 | 3.419 |
| 3PNW | D_LYS_186 | NZ  | D_GLU_190 | OE2 | 2.925 |
| 3PNW | D_HIS_192 | ND1 | D_ASP_154 | OD2 | 2.749 |
| 3PNW | E_ARG_41  | NH1 | E_GLU_49  | OE1 | 3.072 |
| 3PNW | E_ARG_41  | NH1 | E_GLU_49  | OE2 | 3.615 |

|      |           |     |           |     |       |
|------|-----------|-----|-----------|-----|-------|
| 3PNW | E_ARG_41  | NH1 | E_ASP_93  | OD1 | 3.772 |
| 3PNW | E_ARG_41  | NH2 | E_ASP_93  | OD1 | 2.776 |
| 3PNW | E_LYS_68  | NZ  | E_ASP_65  | OD1 | 2.738 |
| 3PNW | E_ARG_70  | NH1 | E_ASP_93  | OD1 | 3.047 |
| 3PNW | E_ARG_70  | NH1 | E_ASP_93  | OD2 | 3.582 |
| 3PNW | E_ARG_70  | NH2 | E_ASP_93  | OD1 | 3.597 |
| 3PNW | E_ARG_70  | NH2 | E_ASP_93  | OD2 | 2.576 |
| 3PNW | E_LYS_79  | NZ  | E_ASP_76  | OD2 | 2.902 |
| 3PNW | E_ARG_101 | NH2 | E_ASP_117 | OD2 | 3.400 |
| 3PNW | E_ARG_104 | NH1 | F_GLU_599 | OE2 | 2.653 |
| 3PNW | E_LYS_159 | NZ  | E_ASP_160 | OD1 | 3.050 |
| 3PNW | E_LYS_159 | NZ  | E_ASP_160 | OD2 | 2.633 |
| 3PNW | F_LYS_590 | NZ  | F_GLU_576 | OE2 | 3.831 |
| 3PNW | G_ARG_25  | NH1 | G_ASP_71  | OD1 | 3.445 |
| 3PNW | G_ARG_25  | NH1 | G_ASP_71  | OD2 | 2.863 |
| 3PNW | G_ARG_62  | NH2 | G_GLU_82  | OE2 | 3.208 |
| 3PNW | G_ARG_62  | NH2 | G_ASP_83  | OD1 | 2.937 |
| 3PNW | G_ARG_62  | NH2 | G_ASP_83  | OD2 | 3.584 |
| 3PNW | G_LYS_106 | NZ  | G_GLU_168 | OE1 | 2.721 |
| 3PNW | G_LYS_106 | NZ  | G_GLU_168 | OE2 | 3.243 |
| 3PNW | G_LYS_152 | NZ  | G_GLU_198 | OE2 | 3.706 |
| 3PNW | G_LYS_186 | NZ  | G_GLU_190 | OE2 | 3.219 |
| 3PNW | G_HIS_192 | ND1 | G_ASP_154 | OD2 | 3.161 |
| 3PNW | G_HIS_192 | NE2 | G_ASP_188 | OD1 | 3.976 |
| 3PNW | H_ARG_41  | NH1 | H_GLU_49  | OE1 | 3.103 |
| 3PNW | H_ARG_41  | NH1 | H_GLU_49  | OE2 | 3.667 |
| 3PNW | H_ARG_41  | NH1 | H_ASP_93  | OD1 | 3.761 |
| 3PNW | H_ARG_41  | NH2 | H_ASP_93  | OD1 | 2.861 |
| 3PNW | H_LYS_68  | NZ  | H_ASP_65  | OD1 | 2.900 |
| 3PNW | H_ARG_70  | NH1 | H_ASP_93  | OD1 | 3.098 |
| 3PNW | H_ARG_70  | NH1 | H_ASP_93  | OD2 | 3.479 |
| 3PNW | H_ARG_70  | NH2 | H_ASP_93  | OD1 | 3.791 |
| 3PNW | H_ARG_70  | NH2 | H_ASP_93  | OD2 | 2.662 |
| 3PNW | H_LYS_79  | NZ  | H_ASP_76  | OD2 | 3.008 |
| 3PNW | H_ARG_90  | NH1 | H_GLU_92  | OE2 | 3.922 |
| 3PNW | H_ARG_101 | NH2 | H_ASP_117 | OD2 | 3.291 |
| 3PNW | H_ARG_104 | NH1 | I_GLU_599 | OE1 | 3.020 |
| 3PNW | H_LYS_159 | NZ  | H_ASP_160 | OD1 | 3.348 |
| 3PNW | H_LYS_159 | NZ  | H_ASP_160 | OD2 | 3.221 |
| 3PNW | I_LYS_590 | NZ  | I_GLU_576 | OE1 | 3.342 |
| 3PNW | J_ARG_25  | NH2 | J_ASP_71  | OD1 | 3.699 |
| 3PNW | J_ARG_62  | NH2 | J_GLU_82  | OE2 | 3.268 |
| 3PNW | J_ARG_62  | NH2 | J_ASP_83  | OD1 | 3.032 |
| 3PNW | J_ARG_62  | NH2 | J_ASP_83  | OD2 | 3.641 |
| 3PNW | J_LYS_106 | NZ  | J_GLU_168 | OE1 | 2.693 |
| 3PNW | J_LYS_106 | NZ  | J_GLU_168 | OE2 | 3.468 |
| 3PNW | J_ARG_145 | NH1 | J_GLU_108 | OE1 | 3.314 |
| 3PNW | J_ARG_145 | NH1 | J_GLU_108 | OE2 | 2.910 |
| 3PNW | J_ARG_145 | NH2 | J_GLU_108 | OE1 | 3.149 |
| 3PNW | J_LYS_152 | NZ  | J_GLU_198 | OE2 | 2.718 |
| 3PNW | J_HIS_192 | ND1 | J_ASP_154 | OD2 | 2.849 |
| 3PNW | J_ARG_214 | NH2 | J_GLU_190 | OE1 | 3.561 |
| 3PNW | K_ARG_41  | NH1 | K_GLU_49  | OE1 | 3.097 |
| 3PNW | K_ARG_41  | NH1 | K_GLU_49  | OE2 | 3.636 |
| 3PNW | K_ARG_41  | NH1 | K_ASP_93  | OD1 | 3.969 |
| 3PNW | K_ARG_41  | NH2 | K_ASP_93  | OD1 | 2.946 |
| 3PNW | K_LYS_68  | NZ  | K_ASP_65  | OD1 | 2.902 |
| 3PNW | K_ARG_70  | NH1 | K_ASP_93  | OD1 | 3.172 |

|      |           |     |           |     |       |
|------|-----------|-----|-----------|-----|-------|
| 3PNW | K_ARG_70  | NH1 | K_ASP_93  | OD2 | 3.777 |
| 3PNW | K_ARG_70  | NH2 | K_ASP_93  | OD1 | 3.650 |
| 3PNW | K_ARG_70  | NH2 | K_ASP_93  | OD2 | 2.817 |
| 3PNW | K_LYS_79  | NZ  | K_ASP_76  | OD2 | 3.145 |
| 3PNW | K_ARG_101 | NH2 | K_ASP_117 | OD2 | 3.216 |
| 3PNW | K_ARG_104 | NH1 | L_GLU_599 | OE1 | 2.888 |
| 3PNW | K_ARG_104 | NH1 | L_GLU_599 | OE2 | 2.772 |
| 3PNW | K_ARG_104 | NH2 | L_GLU_599 | OE2 | 3.083 |
| 3PNW | K_LYS_159 | NZ  | K_ASP_160 | OD1 | 3.020 |
| 3PNW | K_LYS_159 | NZ  | K_ASP_160 | OD2 | 2.839 |
| 3PNW | M_ARG_62  | NH2 | M_GLU_82  | OE2 | 2.988 |
| 3PNW | M_ARG_62  | NH2 | M_ASP_83  | OD1 | 2.932 |
| 3PNW | M_ARG_62  | NH2 | M_ASP_83  | OD2 | 3.718 |
| 3PNW | M_LYS_106 | NZ  | M_GLU_168 | OE1 | 3.752 |
| 3PNW | M_LYS_106 | NZ  | M_GLU_168 | OE2 | 2.837 |
| 3PNW | M_LYS_152 | NZ  | M_GLU_198 | OE1 | 3.636 |
| 3PNW | M_LYS_152 | NZ  | M_GLU_198 | OE2 | 3.599 |
| 3PNW | M_LYS_191 | NZ  | M_ASP_188 | OD1 | 2.912 |
| 3PNW | M_HIS_192 | ND1 | M_ASP_154 | OD2 | 3.108 |
| 3PNW | N_ARG_41  | NH1 | N_GLU_49  | OE1 | 3.141 |
| 3PNW | N_ARG_41  | NH1 | N_GLU_49  | OE2 | 3.699 |
| 3PNW | N_ARG_41  | NH1 | N_ASP_93  | OD1 | 3.824 |
| 3PNW | N_ARG_41  | NH2 | N_ASP_93  | OD1 | 2.841 |
| 3PNW | N_ARG_70  | NH1 | N_ASP_93  | OD1 | 3.199 |
| 3PNW | N_ARG_70  | NH1 | N_ASP_93  | OD2 | 3.846 |
| 3PNW | N_ARG_70  | NH2 | N_ASP_93  | OD1 | 3.653 |
| 3PNW | N_ARG_70  | NH2 | N_ASP_93  | OD2 | 2.921 |
| 3PNW | N_LYS_79  | NZ  | N_ASP_76  | OD2 | 2.793 |
| 3PNW | N_ARG_101 | NH2 | N_ASP_117 | OD2 | 3.225 |
| 3PNW | N_LYS_159 | NZ  | N_ASP_160 | OD1 | 3.030 |
| 3PNW | N_LYS_159 | NZ  | N_ASP_160 | OD2 | 3.040 |
| 3PNW | O_LYS_557 | NZ  | O_ASP_560 | OD1 | 3.174 |
| 3PNW | O_LYS_557 | NZ  | O_ASP_560 | OD2 | 3.756 |
| 3PNW | P_ARG_25  | NH2 | P_ASP_71  | OD1 | 3.282 |
| 3PNW | P_ARG_25  | NH2 | P_ASP_71  | OD2 | 3.069 |
| 3PNW | P_ARG_62  | NH2 | P_GLU_82  | OE2 | 3.510 |
| 3PNW | P_ARG_62  | NH2 | P_ASP_83  | OD1 | 2.765 |
| 3PNW | P_ARG_62  | NH2 | P_ASP_83  | OD2 | 3.484 |
| 3PNW | P_LYS_106 | NZ  | P_GLU_108 | OE2 | 3.990 |
| 3PNW | P_LYS_106 | NZ  | P_GLU_168 | OE1 | 2.957 |
| 3PNW | P_LYS_106 | NZ  | P_GLU_168 | OE2 | 2.919 |
| 3PNW | P_LYS_152 | NZ  | P_GLU_198 | OE1 | 3.282 |
| 3PNW | P_LYS_186 | NZ  | P_GLU_190 | OE1 | 3.349 |
| 3PNW | P_LYS_186 | NZ  | P_GLU_190 | OE2 | 3.801 |
| 3PNW | Q_ARG_41  | NH1 | Q_GLU_49  | OE1 | 2.971 |
| 3PNW | Q_ARG_41  | NH1 | Q_GLU_49  | OE2 | 3.698 |
| 3PNW | Q_ARG_41  | NH1 | Q_ASP_93  | OD1 | 3.890 |
| 3PNW | Q_ARG_41  | NH2 | Q_ASP_93  | OD1 | 2.813 |
| 3PNW | Q_LYS_68  | NZ  | Q_ASP_65  | OD1 | 2.792 |
| 3PNW | Q_ARG_70  | NH1 | Q_ASP_93  | OD1 | 3.070 |
| 3PNW | Q_ARG_70  | NH1 | Q_ASP_93  | OD2 | 3.435 |
| 3PNW | Q_ARG_70  | NH2 | Q_ASP_93  | OD1 | 3.828 |
| 3PNW | Q_ARG_70  | NH2 | Q_ASP_93  | OD2 | 2.681 |
| 3PNW | Q_LYS_79  | NZ  | Q_ASP_76  | OD2 | 3.067 |
| 3PNW | Q_ARG_101 | NH2 | Q_ASP_117 | OD2 | 3.288 |
| 3PNW | Q_ARG_104 | NH1 | R_GLU_599 | OE1 | 3.284 |
| 3PNW | Q_LYS_159 | NZ  | Q_ASP_160 | OD1 | 2.929 |
| 3PNW | Q_LYS_159 | NZ  | Q_ASP_160 | OD2 | 2.916 |

|      |           |     |           |     |       |
|------|-----------|-----|-----------|-----|-------|
| 3PNW | R_LYS_590 | NZ  | R_GLU_576 | OE1 | 3.429 |
| 3PNW | S_ARG_62  | NH2 | S_GLU_82  | OE2 | 3.335 |
| 3PNW | S_ARG_62  | NH2 | S_ASP_83  | OD1 | 3.032 |
| 3PNW | S_LYS_106 | NZ  | S_GLU_168 | OE1 | 2.994 |
| 3PNW | S_LYS_106 | NZ  | S_GLU_168 | OE2 | 3.350 |
| 3PNW | S_LYS_186 | NZ  | S_GLU_190 | OE2 | 3.826 |
| 3PNW | S_HIS_192 | ND1 | S_ASP_154 | OD2 | 2.873 |
| 3PNW | S_ARG_214 | NH2 | S_GLU_190 | OE1 | 3.425 |
| 3PNW | T_ARG_41  | NH1 | T_GLU_49  | OE1 | 3.208 |
| 3PNW | T_ARG_41  | NH1 | T_GLU_49  | OE2 | 3.692 |
| 3PNW | T_ARG_41  | NH1 | T_ASP_93  | OD1 | 3.888 |
| 3PNW | T_ARG_41  | NH2 | T_ASP_93  | OD1 | 2.764 |
| 3PNW | T_ARG_70  | NH1 | T_ASP_93  | OD1 | 2.873 |
| 3PNW | T_ARG_70  | NH1 | T_ASP_93  | OD2 | 3.677 |
| 3PNW | T_ARG_70  | NH2 | T_ASP_93  | OD1 | 3.433 |
| 3PNW | T_ARG_70  | NH2 | T_ASP_93  | OD2 | 2.704 |
| 3PNW | T_LYS_79  | NZ  | T_ASP_76  | OD2 | 2.965 |
| 3PNW | T_ARG_101 | NH2 | T_ASP_117 | OD2 | 3.568 |
| 3PNW | T_ARG_104 | NH1 | U_GLU_599 | OE2 | 2.955 |
| 3PNW | T_LYS_159 | NZ  | T_ASP_160 | OD1 | 2.985 |
| 3PNW | T_LYS_159 | NZ  | T_ASP_160 | OD2 | 2.572 |
| 3PNW | U_LYS_590 | NZ  | U_GLU_576 | OE1 | 3.326 |
| 3PNW | V_ARG_62  | NH2 | V_GLU_82  | OE2 | 3.071 |
| 3PNW | V_ARG_62  | NH2 | V_ASP_83  | OD1 | 3.114 |
| 3PNW | V_ARG_62  | NH2 | V_ASP_83  | OD2 | 3.749 |
| 3PNW | V_LYS_106 | NZ  | V_GLU_168 | OE1 | 3.033 |
| 3PNW | V_LYS_106 | NZ  | V_GLU_168 | OE2 | 2.809 |
| 3PNW | V_LYS_152 | NZ  | V_GLU_198 | OE1 | 3.564 |
| 3PNW | V_LYS_152 | NZ  | V_GLU_198 | OE2 | 3.540 |
| 3PNW | V_LYS_186 | NZ  | V_GLU_190 | OE1 | 3.466 |
| 3PNW | V_HIS_192 | ND1 | V_ASP_154 | OD2 | 2.830 |
| 3PNW | W_ARG_41  | NH1 | W_GLU_49  | OE1 | 3.191 |
| 3PNW | W_ARG_41  | NH1 | W_GLU_49  | OE2 | 3.754 |
| 3PNW | W_ARG_41  | NH1 | W_ASP_93  | OD1 | 3.797 |
| 3PNW | W_ARG_41  | NH2 | W_ASP_93  | OD1 | 2.759 |
| 3PNW | W_ARG_70  | NH1 | W_ASP_93  | OD1 | 3.055 |
| 3PNW | W_ARG_70  | NH1 | W_ASP_93  | OD2 | 3.508 |
| 3PNW | W_ARG_70  | NH2 | W_ASP_93  | OD1 | 3.808 |
| 3PNW | W_ARG_70  | NH2 | W_ASP_93  | OD2 | 2.825 |
| 3PNW | W_LYS_79  | NZ  | W_ASP_76  | OD2 | 3.031 |
| 3PNW | W_ARG_101 | NH2 | W_ASP_117 | OD2 | 3.265 |
| 3PNW | W_ARG_104 | NH2 | X_GLU_599 | OE2 | 3.113 |
| 3PNW | W_LYS_159 | NZ  | W_ASP_160 | OD1 | 3.077 |
| 3PNW | W_LYS_159 | NZ  | W_ASP_160 | OD2 | 3.386 |
| 3PNW | X_LYS_590 | NZ  | X_GLU_576 | OE1 | 3.570 |
| 3PP4 | H_ARG_38  | NH1 | H_ASP_90  | OD1 | 2.857 |
| 3PP4 | H_ARG_38  | NH2 | H_ASP_90  | OD1 | 3.876 |
| 3PP4 | H_ARG_50  | NH2 | H_ASP_59  | OD2 | 3.031 |
| 3PP4 | H_LYS_63  | NZ  | H_GLU_46  | OE1 | 3.948 |
| 3PP4 | H_ARG_67  | NH1 | H_ASP_90  | OD1 | 3.622 |
| 3PP4 | H_ARG_67  | NH1 | H_ASP_90  | OD2 | 2.862 |
| 3PP4 | H_ARG_67  | NH2 | H_ASP_90  | OD1 | 2.967 |
| 3PP4 | H_ARG_67  | NH2 | H_ASP_90  | OD2 | 3.587 |
| 3PP4 | H_ARG_87  | NH2 | H_GLU_89  | OE2 | 3.547 |
| 3PP4 | H_LYS_149 | NZ  | H_ASP_150 | OD1 | 3.507 |
| 3PP4 | H_LYS_215 | NZ  | L_GLU_128 | OE1 | 3.038 |
| 3PP4 | H_LYS_215 | NZ  | L_GLU_128 | OE2 | 2.948 |
| 3PP4 | L_LYS_27  | NZ  | L_GLU_98  | OE1 | 2.607 |



|      |           |     |           |     |       |
|------|-----------|-----|-----------|-----|-------|
| 3PP4 | L_LYS_27  | NZ  | L_GLU_98  | OE2 | 3.934 |
| 3PP4 | L_ARG_66  | NH2 | L_ASP_87  | OD1 | 2.843 |
| 3PP4 | L_ARG_66  | NH2 | L_ASP_87  | OD2 | 3.715 |
| 3PP4 | L_LYS_108 | NZ  | L_GLU_170 | OE1 | 2.761 |
| 3PP4 | L_LYS_108 | NZ  | L_GLU_170 | OE2 | 3.634 |
| 3PP4 | L_ARG_147 | NH1 | L_GLU_110 | OE1 | 3.275 |
| 3PP4 | L_ARG_147 | NH1 | L_GLU_110 | OE2 | 3.845 |
| 3PP4 | L_ARG_147 | NH2 | L_GLU_110 | OE1 | 3.278 |
| 3PP4 | L_ARG_147 | NH2 | L_GLU_110 | OE2 | 2.614 |
| 3PP4 | L_LYS_154 | NZ  | L_GLU_200 | OE1 | 2.680 |
| 3PP4 | L_LYS_188 | NZ  | L_GLU_192 | OE2 | 3.037 |
| 3PP4 | L_HIS_194 | ND1 | L_ASP_156 | OD2 | 3.533 |
| 3PP4 | P_LYS_175 | NZ  | H_ASP_57  | OD2 | 3.518 |
| 3Q3G | C_ARG_67  | NH1 | C_GLU_87  | OE2 | 3.777 |
| 3Q3G | C_ARG_67  | NH1 | C_ASP_88  | OD1 | 2.749 |
| 3Q3G | C_ARG_67  | NH1 | C_ASP_88  | OD2 | 3.177 |
| 3Q3G | C_ARG_67  | NH2 | C_GLU_87  | OE2 | 3.999 |
| 3Q3G | C_LYS_109 | NZ  | D_GLU_44  | OE1 | 3.620 |
| 3Q3G | C_LYS_113 | NZ  | C_GLU_17  | OE1 | 3.434 |
| 3Q3G | C_LYS_113 | NZ  | C_GLU_17  | OE2 | 3.287 |
| 3Q3G | C_LYS_153 | NZ  | C_GLU_160 | OE2 | 3.996 |
| 3Q3G | C_LYS_153 | NZ  | C_GLU_201 | OE1 | 3.776 |
| 3Q3G | C_LYS_155 | NZ  | C_GLU_201 | OE2 | 3.559 |
| 3Q3G | C_ARG_161 | NH2 | C_GLU_191 | OE2 | 3.538 |
| 3Q3G | C_LYS_205 | NZ  | C_ASP_116 | OD1 | 3.501 |
| 3Q3G | C_LYS_205 | NZ  | C_ASP_116 | OD2 | 3.005 |
| 3Q3G | D_LYS_21  | NZ  | H_GLU_202 | OE2 | 2.633 |
| 3Q3G | D_ARG_42  | NH1 | D_GLU_48  | OE1 | 3.596 |
| 3Q3G | D_ARG_52  | NH1 | G_GLU_179 | OE2 | 3.405 |
| 3Q3G | D_ARG_52  | NH2 | G_GLU_178 | OE1 | 2.845 |
| 3Q3G | D_ARG_52  | NH2 | G_GLU_179 | OE2 | 2.628 |
| 3Q3G | D_LYS_69  | NZ  | D_ASP_92  | OD1 | 3.860 |
| 3Q3G | D_LYS_69  | NZ  | D_ASP_92  | OD2 | 2.915 |
| 3Q3G | D_LYS_219 | NZ  | C_GLU_129 | OE2 | 3.237 |
| 3Q3G | G_ARG_152 | NH1 | G_ASP_149 | OD1 | 2.824 |
| 3Q3G | G_LYS_166 | NZ  | G_GLU_320 | OE1 | 3.506 |
| 3Q3G | G_ARG_196 | NH1 | G_GLU_155 | OE1 | 2.640 |
| 3Q3G | G_ARG_196 | NH1 | G_GLU_155 | OE2 | 3.732 |
| 3Q3G | G_ARG_196 | NH2 | G_GLU_155 | OE1 | 3.730 |
| 3Q3G | G_ARG_196 | NH2 | G_GLU_155 | OE2 | 3.858 |
| 3Q3G | G_ARG_196 | NH2 | G_GLU_162 | OE1 | 2.809 |
| 3Q3G | G_ARG_208 | NH1 | D_GLU_101 | OE1 | 3.693 |
| 3Q3G | G_ARG_208 | NH1 | D_GLU_101 | OE2 | 2.792 |
| 3Q3G | G_ARG_208 | NH1 | G_GLU_178 | OE2 | 2.763 |
| 3Q3G | G_ARG_208 | NH2 | D_GLU_101 | OE1 | 2.994 |
| 3Q3G | G_ARG_208 | NH2 | D_GLU_101 | OE2 | 3.045 |
| 3Q3G | G_LYS_217 | NZ  | G_GLU_221 | OE2 | 3.531 |
| 3Q3G | G_ARG_220 | NH2 | G_GLU_258 | OE1 | 3.606 |
| 3Q3G | G_ARG_220 | NH2 | G_GLU_258 | OE2 | 3.754 |
| 3Q3G | G_ARG_230 | NH1 | G_ASP_132 | OD1 | 3.893 |
| 3Q3G | G_ARG_230 | NH1 | G_ASP_134 | OD1 | 2.660 |
| 3Q3G | G_ARG_230 | NH2 | G_ASP_132 | OD1 | 3.914 |
| 3Q3G | G_LYS_235 | NZ  | G_GLU_262 | OE1 | 3.889 |
| 3Q3G | G_ARG_266 | NH1 | G_ASP_260 | OD1 | 2.915 |
| 3Q3G | G_ARG_266 | NH2 | G_ASP_260 | OD1 | 3.197 |
| 3Q3G | G_LYS_279 | NZ  | G_GLU_244 | OE2 | 3.345 |
| 3Q3G | G_LYS_306 | NZ  | G_GLU_303 | OE2 | 2.592 |
| 3Q3G | G_ARG_313 | NH2 | G_GLU_314 | OE2 | 2.833 |

|      |           |     |           |     |       |
|------|-----------|-----|-----------|-----|-------|
| 3Q3G | A_ARG.67  | NH1 | A_GLU.87  | OE2 | 3.721 |
| 3Q3G | A_ARG.67  | NH1 | A_ASP.88  | OD1 | 2.647 |
| 3Q3G | A_ARG.67  | NH1 | A_ASP.88  | OD2 | 3.126 |
| 3Q3G | A_ARG.67  | NH2 | A_GLU.87  | OE2 | 3.644 |
| 3Q3G | A_LYS.113 | NZ  | A_GLU.17  | OE1 | 3.382 |
| 3Q3G | A_LYS.113 | NZ  | A_GLU.17  | OE2 | 3.288 |
| 3Q3G | A_LYS.153 | NZ  | A_GLU.201 | OE1 | 3.786 |
| 3Q3G | A_ARG.161 | NH1 | A_GLU.191 | OE2 | 3.907 |
| 3Q3G | A_ARG.161 | NH2 | A_GLU.191 | OE2 | 2.992 |
| 3Q3G | A_LYS.205 | NZ  | A_ASP.116 | OD1 | 3.527 |
| 3Q3G | A_LYS.205 | NZ  | A_ASP.116 | OD2 | 2.946 |
| 3Q3G | B_LYS.21  | NZ  | K_GLU.202 | OE2 | 2.668 |
| 3Q3G | B_ARG.42  | NH2 | B_GLU.91  | OE2 | 2.813 |
| 3Q3G | B_ARG.52  | NH1 | E_GLU.179 | OE2 | 3.409 |
| 3Q3G | B_ARG.52  | NH2 | E_GLU.178 | OE1 | 2.858 |
| 3Q3G | B_ARG.52  | NH2 | E_GLU.179 | OE2 | 2.617 |
| 3Q3G | B_LYS.69  | NZ  | B_ASP.92  | OD1 | 3.850 |
| 3Q3G | B_LYS.69  | NZ  | B_ASP.92  | OD2 | 2.909 |
| 3Q3G | B_LYS.219 | NZ  | A_GLU.129 | OE2 | 3.294 |
| 3Q3G | E_ARG.152 | NH1 | E_ASP.149 | OD1 | 2.849 |
| 3Q3G | E_ARG.196 | NH1 | E_GLU.155 | OE2 | 3.730 |
| 3Q3G | E_ARG.196 | NH2 | E_GLU.162 | OE1 | 2.828 |
| 3Q3G | E_ARG.208 | NH1 | B_GLU.101 | OE1 | 3.701 |
| 3Q3G | E_ARG.208 | NH1 | B_GLU.101 | OE2 | 2.888 |
| 3Q3G | E_ARG.208 | NH1 | E_GLU.178 | OE2 | 2.758 |
| 3Q3G | E_ARG.208 | NH2 | B_GLU.101 | OE1 | 3.046 |
| 3Q3G | E_ARG.208 | NH2 | B_GLU.101 | OE2 | 3.227 |
| 3Q3G | E_LYS.217 | NZ  | E_GLU.221 | OE2 | 3.514 |
| 3Q3G | E_ARG.220 | NH2 | E_GLU.258 | OE1 | 3.606 |
| 3Q3G | E_ARG.220 | NH2 | E_GLU.258 | OE2 | 3.748 |
| 3Q3G | E_ARG.230 | NH1 | E_ASP.132 | OD1 | 3.896 |
| 3Q3G | E_ARG.230 | NH1 | E_ASP.134 | OD1 | 2.958 |
| 3Q3G | E_ARG.230 | NH2 | E_ASP.132 | OD1 | 3.948 |
| 3Q3G | E_LYS.235 | NZ  | E_GLU.262 | OE1 | 3.891 |
| 3Q3G | E_ARG.266 | NH1 | E_ASP.260 | OD1 | 2.728 |
| 3Q3G | E_ARG.266 | NH2 | E_ASP.260 | OD1 | 3.401 |
| 3Q3G | E_ARG.276 | NH1 | E_ASP.273 | OD1 | 3.848 |
| 3Q3G | E_LYS.306 | NZ  | E_GLU.303 | OE1 | 3.875 |
| 3Q3G | E_LYS.306 | NZ  | E_GLU.303 | OE2 | 2.953 |
| 3Q3G | E_ARG.313 | NH2 | E_GLU.314 | OE2 | 2.838 |
| 3Q3G | F_ARG.67  | NH1 | F_GLU.87  | OE2 | 3.457 |
| 3Q3G | F_ARG.67  | NH1 | F_ASP.88  | OD1 | 2.936 |
| 3Q3G | F_ARG.67  | NH1 | F_ASP.88  | OD2 | 3.406 |
| 3Q3G | F_ARG.67  | NH2 | F_GLU.87  | OE2 | 3.930 |
| 3Q3G | F_LYS.113 | NZ  | F_GLU.17  | OE1 | 3.384 |
| 3Q3G | F_LYS.113 | NZ  | F_GLU.17  | OE2 | 3.304 |
| 3Q3G | F_LYS.153 | NZ  | F_GLU.201 | OE1 | 3.790 |
| 3Q3G | F_LYS.155 | NZ  | F_GLU.160 | OE2 | 3.570 |
| 3Q3G | F_ARG.161 | NH1 | F_GLU.191 | OE2 | 3.911 |
| 3Q3G | F_ARG.161 | NH2 | F_GLU.191 | OE2 | 3.286 |
| 3Q3G | F_LYS.205 | NZ  | F_ASP.116 | OD1 | 3.529 |
| 3Q3G | F_LYS.205 | NZ  | F_ASP.116 | OD2 | 2.950 |
| 3Q3G | H_LYS.40  | NZ  | H_ASP.92  | OD1 | 3.981 |
| 3Q3G | H_ARG.42  | NH2 | H_GLU.91  | OE2 | 3.153 |
| 3Q3G | H_ARG.52  | NH1 | I_GLU.179 | OE2 | 3.532 |
| 3Q3G | H_ARG.52  | NH2 | I_GLU.178 | OE1 | 2.972 |
| 3Q3G | H_ARG.52  | NH2 | I_GLU.179 | OE2 | 2.629 |
| 3Q3G | H_LYS.61  | NZ  | I_GLU.179 | OE2 | 3.923 |

|      |           |     |           |     |       |
|------|-----------|-----|-----------|-----|-------|
| 3Q3G | H.LYS.69  | NZ  | H.ASP.92  | OD1 | 3.838 |
| 3Q3G | H.LYS.69  | NZ  | H.ASP.92  | OD2 | 2.905 |
| 3Q3G | H.LYS.219 | NZ  | F.GLU.129 | OE2 | 3.319 |
| 3Q3G | I.ARG.152 | NH1 | I.ASP.149 | OD1 | 2.842 |
| 3Q3G | I.ARG.196 | NH1 | I.GLU.155 | OE1 | 2.643 |
| 3Q3G | I.ARG.196 | NH1 | I.GLU.155 | OE2 | 3.755 |
| 3Q3G | I.ARG.196 | NH2 | I.GLU.155 | OE1 | 3.725 |
| 3Q3G | I.ARG.196 | NH2 | I.GLU.155 | OE2 | 3.863 |
| 3Q3G | I.ARG.196 | NH2 | I.GLU.162 | OE1 | 2.829 |
| 3Q3G | I.ARG.208 | NH1 | H.GLU.101 | OE1 | 3.704 |
| 3Q3G | I.ARG.208 | NH1 | H.GLU.101 | OE2 | 2.809 |
| 3Q3G | I.ARG.208 | NH1 | I.GLU.178 | OE2 | 2.759 |
| 3Q3G | I.ARG.208 | NH2 | H.GLU.101 | OE1 | 3.098 |
| 3Q3G | I.ARG.208 | NH2 | H.GLU.101 | OE2 | 3.125 |
| 3Q3G | I.LYS.217 | NZ  | I.GLU.221 | OE2 | 3.508 |
| 3Q3G | I.ARG.220 | NH2 | I.GLU.258 | OE1 | 3.602 |
| 3Q3G | I.ARG.220 | NH2 | I.GLU.258 | OE2 | 3.748 |
| 3Q3G | I.ARG.230 | NH1 | I.ASP.132 | OD1 | 3.884 |
| 3Q3G | I.ARG.230 | NH1 | I.ASP.134 | OD1 | 2.627 |
| 3Q3G | I.ARG.230 | NH2 | I.ASP.132 | OD1 | 3.901 |
| 3Q3G | I.LYS.235 | NZ  | I.GLU.262 | OE1 | 3.888 |
| 3Q3G | I.ARG.266 | NH1 | I.ASP.260 | OD1 | 2.847 |
| 3Q3G | I.ARG.266 | NH2 | I.ASP.260 | OD1 | 3.632 |
| 3Q3G | I.ARG.276 | NH1 | I.ASP.273 | OD1 | 3.306 |
| 3Q3G | I.ARG.293 | NH1 | I.ASP.294 | OD1 | 2.569 |
| 3Q3G | I.ARG.293 | NH1 | I.ASP.294 | OD2 | 3.199 |
| 3Q3G | I.ARG.293 | NH2 | I.ASP.294 | OD2 | 3.674 |
| 3Q3G | I.LYS.306 | NZ  | I.GLU.303 | OE2 | 2.953 |
| 3Q3G | I.ARG.313 | NH2 | I.GLU.314 | OE2 | 2.841 |
| 3Q3G | J.ARG.67  | NH1 | J.GLU.87  | OE2 | 3.904 |
| 3Q3G | J.ARG.67  | NH1 | J.ASP.88  | OD1 | 2.685 |
| 3Q3G | J.ARG.67  | NH1 | J.ASP.88  | OD2 | 2.963 |
| 3Q3G | J.ARG.67  | NH2 | J.GLU.87  | OE2 | 3.860 |
| 3Q3G | J.LYS.109 | NZ  | K.GLU.44  | OE1 | 3.972 |
| 3Q3G | J.LYS.113 | NZ  | J.GLU.17  | OE1 | 3.413 |
| 3Q3G | J.LYS.113 | NZ  | J.GLU.17  | OE2 | 3.281 |
| 3Q3G | J.LYS.153 | NZ  | J.GLU.201 | OE1 | 3.780 |
| 3Q3G | J.LYS.155 | NZ  | J.GLU.201 | OE2 | 2.804 |
| 3Q3G | J.ARG.161 | NH1 | J.GLU.191 | OE2 | 3.912 |
| 3Q3G | J.ARG.161 | NH2 | J.GLU.191 | OE2 | 3.262 |
| 3Q3G | J.LYS.205 | NZ  | J.ASP.116 | OD1 | 3.511 |
| 3Q3G | J.LYS.205 | NZ  | J.ASP.116 | OD2 | 2.982 |
| 3Q3G | K.LYS.40  | NZ  | K.ASP.92  | OD1 | 3.980 |
| 3Q3G | K.ARG.52  | NH1 | L.GLU.179 | OE2 | 3.394 |
| 3Q3G | K.ARG.52  | NH2 | L.GLU.178 | OE1 | 2.871 |
| 3Q3G | K.ARG.52  | NH2 | L.GLU.179 | OE2 | 2.626 |
| 3Q3G | K.LYS.69  | NZ  | K.ASP.92  | OD1 | 3.854 |
| 3Q3G | K.LYS.69  | NZ  | K.ASP.92  | OD2 | 2.911 |
| 3Q3G | K.LYS.219 | NZ  | J.GLU.129 | OE2 | 3.216 |
| 3Q3G | L.ARG.152 | NH1 | L.ASP.149 | OD1 | 2.835 |
| 3Q3G | L.ARG.196 | NH1 | L.GLU.155 | OE1 | 2.611 |
| 3Q3G | L.ARG.196 | NH1 | L.GLU.155 | OE2 | 3.736 |
| 3Q3G | L.ARG.196 | NH2 | L.GLU.155 | OE1 | 3.784 |
| 3Q3G | L.ARG.196 | NH2 | L.GLU.162 | OE1 | 2.844 |
| 3Q3G | L.ARG.208 | NH1 | K.GLU.101 | OE1 | 3.706 |
| 3Q3G | L.ARG.208 | NH1 | K.GLU.101 | OE2 | 2.777 |
| 3Q3G | L.ARG.208 | NH1 | L.GLU.178 | OE2 | 2.802 |
| 3Q3G | L.ARG.208 | NH2 | K.GLU.101 | OE1 | 3.099 |

|      |           |     |           |     |       |
|------|-----------|-----|-----------|-----|-------|
| 3Q3G | L_ARG_208 | NH2 | K_GLU_101 | OE2 | 3.162 |
| 3Q3G | L_LYS_217 | NZ  | L_GLU_221 | OE2 | 3.517 |
| 3Q3G | L_ARG_220 | NH2 | L_GLU_258 | OE1 | 3.603 |
| 3Q3G | L_ARG_220 | NH2 | L_GLU_258 | OE2 | 3.763 |
| 3Q3G | L_ARG_230 | NH1 | L_ASP_132 | OD1 | 3.881 |
| 3Q3G | L_ARG_230 | NH1 | L_ASP_134 | OD1 | 2.707 |
| 3Q3G | L_ARG_230 | NH1 | L_ASP_134 | OD2 | 3.460 |
| 3Q3G | L_ARG_230 | NH2 | L_ASP_132 | OD1 | 3.905 |
| 3Q3G | L_LYS_235 | NZ  | L_GLU_262 | OE1 | 3.906 |
| 3Q3G | L_ARG_266 | NH1 | L_ASP_260 | OD1 | 2.751 |
| 3Q3G | L_ARG_266 | NH2 | L_ASP_260 | OD1 | 2.771 |
| 3Q3G | L_ARG_266 | NH2 | L_ASP_260 | OD2 | 3.493 |
| 3Q3G | L_ARG_276 | NH2 | L_ASP_273 | OD1 | 3.904 |
| 3Q3G | L_ARG_276 | NH2 | L_ASP_273 | OD2 | 3.992 |
| 3Q3G | L_ARG_281 | NH1 | L_GLU_278 | OE2 | 3.655 |
| 3Q3G | L_LYS_306 | NZ  | L_GLU_303 | OE2 | 3.422 |
| 3Q3G | L_ARG_313 | NH2 | L_GLU_314 | OE2 | 2.844 |
| 3QA3 | C_LYS_24  | NZ  | C_ASP_76  | OD2 | 3.522 |
| 3QA3 | C_ARG_67  | NH1 | C_GLU_87  | OE2 | 3.269 |
| 3QA3 | C_ARG_67  | NH1 | C_ASP_88  | OD1 | 2.660 |
| 3QA3 | C_ARG_67  | NH1 | C_ASP_88  | OD2 | 2.924 |
| 3QA3 | C_ARG_67  | NH2 | C_GLU_87  | OE2 | 3.168 |
| 3QA3 | C_LYS_109 | NZ  | C_ASP_171 | OD1 | 3.926 |
| 3QA3 | C_LYS_109 | NZ  | D_GLU_44  | OE1 | 3.919 |
| 3QA3 | C_LYS_113 | NZ  | C_GLU_17  | OE1 | 3.598 |
| 3QA3 | C_LYS_113 | NZ  | C_GLU_17  | OE2 | 3.105 |
| 3QA3 | C_LYS_155 | NZ  | C_GLU_201 | OE2 | 3.611 |
| 3QA3 | C_ARG_161 | NH2 | C_GLU_191 | OE2 | 3.603 |
| 3QA3 | C_LYS_189 | NZ  | C_GLU_193 | OE1 | 3.703 |
| 3QA3 | C_LYS_205 | NZ  | C_ASP_116 | OD1 | 3.367 |
| 3QA3 | C_LYS_205 | NZ  | C_ASP_116 | OD2 | 2.961 |
| 3QA3 | C_ARG_217 | NH1 | C_GLU_193 | OE2 | 3.785 |
| 3QA3 | D_LYS_21  | NZ  | B_GLU_202 | OE2 | 2.710 |
| 3QA3 | D_LYS_40  | NZ  | D_ASP_92  | OD1 | 3.621 |
| 3QA3 | D_ARG_42  | NH2 | D_GLU_91  | OE1 | 3.456 |
| 3QA3 | D_ARG_52  | NH1 | G_GLU_179 | OE2 | 3.492 |
| 3QA3 | D_ARG_52  | NH2 | G_GLU_178 | OE1 | 3.012 |
| 3QA3 | D_ARG_52  | NH2 | G_GLU_179 | OE2 | 2.776 |
| 3QA3 | D_LYS_61  | NZ  | G_GLU_179 | OE1 | 3.896 |
| 3QA3 | D_LYS_61  | NZ  | G_GLU_179 | OE2 | 3.867 |
| 3QA3 | D_LYS_69  | NZ  | D_ASP_92  | OD2 | 3.339 |
| 3QA3 | D_LYS_219 | NZ  | C_GLU_129 | OE2 | 3.586 |
| 3QA3 | G_ARG_151 | NH1 | G_GLU_155 | OE1 | 3.186 |
| 3QA3 | G_ARG_151 | NH1 | G_GLU_155 | OE2 | 3.465 |
| 3QA3 | G_ARG_152 | NH1 | G_ASP_149 | OD1 | 3.120 |
| 3QA3 | G_ARG_196 | NH2 | G_GLU_162 | OE1 | 3.407 |
| 3QA3 | G_ARG_208 | NH1 | D_GLU_101 | OE1 | 3.094 |
| 3QA3 | G_ARG_208 | NH1 | D_GLU_101 | OE2 | 3.755 |
| 3QA3 | G_ARG_208 | NH1 | G_GLU_178 | OE2 | 2.905 |
| 3QA3 | G_ARG_208 | NH2 | D_GLU_101 | OE1 | 2.802 |
| 3QA3 | G_LYS_217 | NZ  | G_GLU_221 | OE1 | 3.238 |
| 3QA3 | G_LYS_217 | NZ  | G_GLU_221 | OE2 | 3.591 |
| 3QA3 | G_ARG_220 | NH2 | G_GLU_258 | OE1 | 3.098 |
| 3QA3 | G_ARG_220 | NH2 | G_GLU_258 | OE2 | 3.589 |
| 3QA3 | G_ARG_230 | NH1 | G_ASP_134 | OD1 | 2.776 |
| 3QA3 | G_LYS_235 | NZ  | G_GLU_262 | OE1 | 3.322 |
| 3QA3 | G_ARG_266 | NH1 | G_ASP_260 | OD1 | 3.130 |
| 3QA3 | G_ARG_266 | NH2 | G_ASP_260 | OD1 | 3.273 |

|      |           |     |           |     |       |
|------|-----------|-----|-----------|-----|-------|
| 3QA3 | G_ARG_266 | NH2 | G_ASP_260 | OD2 | 3.917 |
| 3QA3 | G_ARG_281 | NH1 | G_GLU_278 | OE2 | 3.336 |
| 3QA3 | G_ARG_293 | NH2 | G_ASP_294 | OD2 | 3.535 |
| 3QA3 | G_LYS_306 | NZ  | F_GLU_61  | OE1 | 2.676 |
| 3QA3 | G_LYS_306 | NZ  | F_GLU_61  | OE2 | 3.962 |
| 3QA3 | G_ARG_313 | NH2 | G_GLU_314 | OE2 | 3.236 |
| 3QA3 | A_LYS_24  | NZ  | A_ASP_76  | OD2 | 3.526 |
| 3QA3 | A_ARG_67  | NH1 | A_GLU_87  | OE2 | 3.266 |
| 3QA3 | A_ARG_67  | NH1 | A_ASP_88  | OD1 | 2.659 |
| 3QA3 | A_ARG_67  | NH1 | A_ASP_88  | OD2 | 2.926 |
| 3QA3 | A_ARG_67  | NH2 | A_GLU_87  | OE2 | 3.154 |
| 3QA3 | A_LYS_109 | NZ  | A_ASP_171 | OD1 | 3.971 |
| 3QA3 | A_LYS_113 | NZ  | A_GLU_17  | OE1 | 3.580 |
| 3QA3 | A_LYS_113 | NZ  | A_GLU_17  | OE2 | 3.100 |
| 3QA3 | A_LYS_155 | NZ  | A_GLU_201 | OE2 | 2.971 |
| 3QA3 | A_LYS_205 | NZ  | A_ASP_116 | OD1 | 3.377 |
| 3QA3 | A_LYS_205 | NZ  | A_ASP_116 | OD2 | 2.963 |
| 3QA3 | B_LYS_40  | NZ  | B_ASP_92  | OD1 | 3.602 |
| 3QA3 | B_ARG_52  | NH1 | E_GLU_179 | OE2 | 3.674 |
| 3QA3 | B_ARG_52  | NH2 | E_GLU_178 | OE1 | 3.139 |
| 3QA3 | B_ARG_52  | NH2 | E_GLU_179 | OE2 | 2.772 |
| 3QA3 | B_LYS_61  | NZ  | E_GLU_179 | OE1 | 3.626 |
| 3QA3 | B_LYS_61  | NZ  | E_GLU_179 | OE2 | 3.531 |
| 3QA3 | B_LYS_69  | NZ  | B_ASP_92  | OD2 | 3.326 |
| 3QA3 | B_LYS_219 | NZ  | A_GLU_129 | OE2 | 3.689 |
| 3QA3 | E_ARG_152 | NH1 | E_ASP_149 | OD1 | 3.421 |
| 3QA3 | E_ARG_152 | NH1 | E_GLU_303 | OE2 | 3.891 |
| 3QA3 | E_ARG_196 | NH1 | E_GLU_155 | OE2 | 2.779 |
| 3QA3 | E_ARG_196 | NH1 | E_GLU_162 | OE1 | 3.631 |
| 3QA3 | E_ARG_196 | NH2 | E_GLU_155 | OE1 | 3.951 |
| 3QA3 | E_ARG_196 | NH2 | E_GLU_155 | OE2 | 3.547 |
| 3QA3 | E_ARG_196 | NH2 | E_GLU_162 | OE1 | 3.609 |
| 3QA3 | E_ARG_208 | NH1 | B_GLU_101 | OE1 | 3.112 |
| 3QA3 | E_ARG_208 | NH1 | B_GLU_101 | OE2 | 3.639 |
| 3QA3 | E_ARG_208 | NH1 | E_GLU_178 | OE1 | 3.992 |
| 3QA3 | E_ARG_208 | NH1 | E_GLU_178 | OE2 | 2.905 |
| 3QA3 | E_ARG_208 | NH2 | B_GLU_101 | OE1 | 2.913 |
| 3QA3 | E_ARG_208 | NH2 | B_GLU_101 | OE2 | 3.978 |
| 3QA3 | E_LYS_217 | NZ  | E_GLU_221 | OE1 | 3.240 |
| 3QA3 | E_LYS_217 | NZ  | E_GLU_221 | OE2 | 3.588 |
| 3QA3 | E_ARG_220 | NH2 | E_GLU_258 | OE1 | 3.091 |
| 3QA3 | E_ARG_220 | NH2 | E_GLU_258 | OE2 | 3.588 |
| 3QA3 | E_ARG_230 | NH1 | E_ASP_134 | OD1 | 2.769 |
| 3QA3 | E_LYS_235 | NZ  | E_GLU_262 | OE1 | 3.320 |
| 3QA3 | E_ARG_266 | NH1 | E_ASP_260 | OD1 | 3.181 |
| 3QA3 | E_ARG_266 | NH2 | E_ASP_260 | OD1 | 3.305 |
| 3QA3 | E_ARG_281 | NH1 | E_GLU_278 | OE2 | 2.753 |
| 3QA3 | F_LYS_24  | NZ  | F_ASP_76  | OD2 | 3.520 |
| 3QA3 | F_ARG_67  | NH1 | F_GLU_87  | OE2 | 3.259 |
| 3QA3 | F_ARG_67  | NH1 | F_ASP_88  | OD1 | 2.663 |
| 3QA3 | F_ARG_67  | NH1 | F_ASP_88  | OD2 | 2.926 |
| 3QA3 | F_ARG_67  | NH2 | F_GLU_87  | OE2 | 3.150 |
| 3QA3 | F_LYS_113 | NZ  | F_GLU_17  | OE1 | 3.577 |
| 3QA3 | F_LYS_113 | NZ  | F_GLU_17  | OE2 | 3.091 |
| 3QA3 | F_LYS_153 | NZ  | F_GLU_201 | OE1 | 3.153 |
| 3QA3 | F_LYS_155 | NZ  | F_GLU_201 | OE1 | 3.670 |
| 3QA3 | F_LYS_155 | NZ  | F_GLU_201 | OE2 | 3.187 |
| 3QA3 | F_HIS_195 | ND1 | F_ASP_157 | OD2 | 2.743 |

|      |           |     |           |     |       |
|------|-----------|-----|-----------|-----|-------|
| 3QA3 | F_LYS_205 | NZ  | F_ASP_116 | OD1 | 3.352 |
| 3QA3 | F_LYS_205 | NZ  | F_ASP_116 | OD2 | 2.987 |
| 3QA3 | F_ARG_217 | NH1 | F_GLU_193 | OE2 | 3.646 |
| 3QA3 | H_LYS_21  | NZ  | K_GLU_202 | OE1 | 2.630 |
| 3QA3 | H_LYS_40  | NZ  | H_ASP_92  | OD1 | 3.607 |
| 3QA3 | H_ARG_52  | NH1 | I_GLU_179 | OE2 | 3.536 |
| 3QA3 | H_ARG_52  | NH2 | I_GLU_178 | OE1 | 3.079 |
| 3QA3 | H_ARG_52  | NH2 | I_GLU_179 | OE2 | 2.753 |
| 3QA3 | H_LYS_61  | NZ  | I_GLU_179 | OE1 | 3.833 |
| 3QA3 | H_LYS_61  | NZ  | I_GLU_179 | OE2 | 3.714 |
| 3QA3 | H_LYS_69  | NZ  | H_ASP_92  | OD2 | 3.333 |
| 3QA3 | H_LYS_219 | NZ  | F_GLU_129 | OE2 | 3.683 |
| 3QA3 | I_ARG_151 | NH1 | I_GLU_155 | OE1 | 3.176 |
| 3QA3 | I_ARG_151 | NH1 | I_GLU_155 | OE2 | 3.423 |
| 3QA3 | I_ARG_152 | NH1 | I_ASP_149 | OD1 | 3.295 |
| 3QA3 | I_ARG_208 | NH1 | H_GLU_101 | OE1 | 2.952 |
| 3QA3 | I_ARG_208 | NH1 | H_GLU_101 | OE2 | 3.280 |
| 3QA3 | I_ARG_208 | NH1 | I_GLU_178 | OE2 | 2.910 |
| 3QA3 | I_ARG_208 | NH2 | H_GLU_101 | OE1 | 2.858 |
| 3QA3 | I_ARG_208 | NH2 | H_GLU_101 | OE2 | 3.749 |
| 3QA3 | I_LYS_217 | NZ  | I_GLU_221 | OE1 | 3.237 |
| 3QA3 | I_LYS_217 | NZ  | I_GLU_221 | OE2 | 3.599 |
| 3QA3 | I_ARG_220 | NH2 | I_GLU_258 | OE1 | 3.094 |
| 3QA3 | I_ARG_220 | NH2 | I_GLU_258 | OE2 | 3.593 |
| 3QA3 | I_ARG_230 | NH1 | I_ASP_134 | OD1 | 2.778 |
| 3QA3 | I_LYS_235 | NZ  | I_GLU_262 | OE1 | 3.330 |
| 3QA3 | I_ARG_266 | NH1 | I_ASP_260 | OD1 | 2.823 |
| 3QA3 | I_ARG_266 | NH2 | I_ASP_260 | OD1 | 2.813 |
| 3QA3 | I_ARG_266 | NH2 | I_ASP_260 | OD2 | 3.696 |
| 3QA3 | I_ARG_293 | NH2 | I_ASP_294 | OD2 | 3.520 |
| 3QA3 | I_LYS_306 | NZ  | C_GLU_61  | OE1 | 3.836 |
| 3QA3 | J_LYS_24  | NZ  | J_ASP_76  | OD2 | 3.532 |
| 3QA3 | J_ARG_67  | NH1 | J_GLU_87  | OE2 | 3.263 |
| 3QA3 | J_ARG_67  | NH1 | J_ASP_88  | OD1 | 2.670 |
| 3QA3 | J_ARG_67  | NH1 | J_ASP_88  | OD2 | 2.921 |
| 3QA3 | J_ARG_67  | NH2 | J_GLU_87  | OE2 | 3.148 |
| 3QA3 | J_LYS_109 | NZ  | K_GLU_44  | OE1 | 3.982 |
| 3QA3 | J_LYS_113 | NZ  | J_GLU_17  | OE1 | 3.620 |
| 3QA3 | J_LYS_113 | NZ  | J_GLU_17  | OE2 | 3.124 |
| 3QA3 | J_LYS_205 | NZ  | J_ASP_116 | OD1 | 3.342 |
| 3QA3 | J_LYS_205 | NZ  | J_ASP_116 | OD2 | 2.981 |
| 3QA3 | K_LYS_40  | NZ  | K_ASP_92  | OD1 | 3.624 |
| 3QA3 | K_ARG_52  | NH1 | L_GLU_179 | OE2 | 3.477 |
| 3QA3 | K_ARG_52  | NH2 | L_GLU_178 | OE1 | 3.052 |
| 3QA3 | K_ARG_52  | NH2 | L_GLU_179 | OE2 | 2.734 |
| 3QA3 | K_LYS_61  | NZ  | L_GLU_179 | OE1 | 3.839 |
| 3QA3 | K_LYS_61  | NZ  | L_GLU_179 | OE2 | 3.819 |
| 3QA3 | K_LYS_69  | NZ  | K_ASP_92  | OD2 | 3.339 |
| 3QA3 | K_LYS_219 | NZ  | J_GLU_129 | OE2 | 3.538 |
| 3QA3 | L_ARG_152 | NH1 | L_ASP_149 | OD1 | 3.084 |
| 3QA3 | L_LYS_165 | NZ  | L_GLU_162 | OE2 | 3.035 |
| 3QA3 | L_ARG_196 | NH2 | L_GLU_162 | OE1 | 3.491 |
| 3QA3 | L_ARG_208 | NH1 | K_GLU_101 | OE1 | 3.296 |
| 3QA3 | L_ARG_208 | NH1 | K_GLU_101 | OE2 | 3.152 |
| 3QA3 | L_ARG_208 | NH1 | L_GLU_178 | OE1 | 3.993 |
| 3QA3 | L_ARG_208 | NH1 | L_GLU_178 | OE2 | 2.907 |
| 3QA3 | L_ARG_208 | NH2 | K_GLU_101 | OE1 | 3.120 |
| 3QA3 | L_ARG_208 | NH2 | K_GLU_101 | OE2 | 3.548 |

|      |           |     |           |     |       |
|------|-----------|-----|-----------|-----|-------|
| 3QA3 | L_LYS_217 | NZ  | L_GLU_221 | OE1 | 3.242 |
| 3QA3 | L_LYS_217 | NZ  | L_GLU_221 | OE2 | 3.595 |
| 3QA3 | L_ARG_220 | NH2 | L_GLU_258 | OE1 | 3.097 |
| 3QA3 | L_ARG_220 | NH2 | L_GLU_258 | OE2 | 3.600 |
| 3QA3 | L_ARG_230 | NH1 | L_ASP_134 | OD1 | 2.780 |
| 3QA3 | L_LYS_235 | NZ  | L_GLU_262 | OE1 | 3.332 |
| 3QA3 | L_ARG_266 | NH1 | L_ASP_260 | OD1 | 2.676 |
| 3QA3 | L_ARG_266 | NH2 | L_ASP_260 | OD1 | 3.599 |
| 3QA3 | L_LYS_279 | NZ  | L_GLU_244 | OE1 | 3.218 |
| 3QA3 | L_LYS_279 | NZ  | L_GLU_244 | OE2 | 3.599 |
| 3QA3 | L_ARG_281 | NH1 | L_GLU_278 | OE2 | 2.973 |
| 3QA3 | L_ARG_293 | NH2 | L_ASP_294 | OD2 | 3.523 |
| 3QG6 | A_ARG_61  | NH1 | A_ASP_82  | OD1 | 3.432 |
| 3QG6 | A_ARG_61  | NH1 | A_ASP_82  | OD2 | 2.717 |
| 3QG6 | A_ARG_61  | NH2 | A_GLU_79  | OE1 | 3.943 |
| 3QG6 | A_ARG_61  | NH2 | A_ASP_82  | OD1 | 3.288 |
| 3QG6 | A_ARG_61  | NH2 | A_ASP_82  | OD2 | 3.964 |
| 3QG6 | A_LYS_142 | NZ  | A_GLU_105 | OE1 | 3.461 |
| 3QG6 | A_LYS_142 | NZ  | A_GLU_105 | OE2 | 3.669 |
| 3QG6 | A_LYS_147 | NZ  | A_GLU_154 | OE1 | 3.545 |
| 3QG6 | A_LYS_149 | NZ  | A_GLU_195 | OE1 | 2.687 |
| 3QG6 | A_LYS_149 | NZ  | A_GLU_195 | OE2 | 3.955 |
| 3QG6 | A_ARG_155 | NH1 | A_GLU_185 | OE1 | 3.832 |
| 3QG6 | A_ARG_155 | NH1 | A_GLU_185 | OE2 | 3.376 |
| 3QG6 | A_ARG_155 | NH2 | A_GLU_185 | OE1 | 3.065 |
| 3QG6 | A_ARG_155 | NH2 | A_GLU_185 | OE2 | 3.907 |
| 3QG6 | A_LYS_183 | NZ  | A_GLU_187 | OE1 | 3.106 |
| 3QG6 | A_LYS_183 | NZ  | A_GLU_187 | OE2 | 3.334 |
| 3QG6 | A_ARG_188 | NH1 | H_ASP_86  | OD2 | 3.997 |
| 3QG6 | A_ARG_188 | NH2 | H_ASP_86  | OD1 | 3.422 |
| 3QG6 | A_HIS_189 | ND1 | A_ASP_151 | OD2 | 2.899 |
| 3QG6 | A_HIS_189 | NE2 | A_GLU_185 | OE2 | 3.272 |
| 3QG6 | A_HIS_189 | NE2 | H_GLU_85  | OE1 | 3.361 |
| 3QG6 | A_HIS_189 | NE2 | H_GLU_85  | OE2 | 3.215 |
| 3QG6 | A_LYS_199 | NZ  | A_ASP_110 | OD2 | 3.955 |
| 3QG6 | B_ARG_38  | NH1 | B_ASP_86  | OD1 | 2.928 |
| 3QG6 | B_ARG_38  | NH2 | B_GLU_46  | OE1 | 2.323 |
| 3QG6 | B_LYS_44  | NZ  | B_GLU_46  | OE2 | 3.659 |
| 3QG6 | B_LYS_44  | NZ  | L_ASP_151 | OD2 | 2.912 |
| 3QG6 | B_LYS_64  | NZ  | L_GLU_187 | OE1 | 3.778 |
| 3QG6 | B_LYS_75  | NZ  | B_ASP_72  | OD2 | 3.646 |
| 3QG6 | B_ARG_94  | NH2 | B_ASP_101 | OD2 | 2.932 |
| 3QG6 | B_LYS_221 | NZ  | A_GLU_123 | OE1 | 2.433 |
| 3QG6 | H_ARG_38  | NH1 | H_ASP_86  | OD1 | 2.717 |
| 3QG6 | H_ARG_38  | NH2 | H_GLU_46  | OE1 | 2.691 |
| 3QG6 | H_ARG_38  | NH2 | H_ASP_86  | OD1 | 3.824 |
| 3QG6 | H_LYS_44  | NZ  | A_ASP_151 | OD2 | 2.924 |
| 3QG6 | H_LYS_44  | NZ  | H_GLU_46  | OE2 | 3.702 |
| 3QG6 | H_LYS_64  | NZ  | A_GLU_187 | OE1 | 3.924 |
| 3QG6 | H_LYS_75  | NZ  | H_ASP_72  | OD2 | 3.688 |
| 3QG6 | H_ARG_94  | NH1 | H_ASP_101 | OD2 | 2.954 |
| 3QG6 | H_LYS_221 | NZ  | L_GLU_123 | OE1 | 2.733 |
| 3QG6 | L_ARG_61  | NH1 | L_ASP_82  | OD1 | 2.705 |
| 3QG6 | L_ARG_61  | NH1 | L_ASP_82  | OD2 | 2.689 |
| 3QG6 | L_ARG_61  | NH2 | L_GLU_79  | OE1 | 3.908 |
| 3QG6 | L_ARG_61  | NH2 | L_GLU_79  | OE2 | 3.936 |
| 3QG6 | L_LYS_142 | NZ  | L_GLU_105 | OE1 | 3.323 |
| 3QG6 | L_LYS_142 | NZ  | L_GLU_105 | OE2 | 3.219 |

|      |           |     |           |     |       |
|------|-----------|-----|-----------|-----|-------|
| 3QG6 | L_LYS_147 | NZ  | L_GLU_154 | OE1 | 3.582 |
| 3QG6 | L_LYS_149 | NZ  | L_GLU_195 | OE1 | 2.845 |
| 3QG6 | L_ARG_155 | NH1 | L_GLU_185 | OE1 | 3.862 |
| 3QG6 | L_ARG_155 | NH1 | L_GLU_185 | OE2 | 3.392 |
| 3QG6 | L_ARG_155 | NH2 | L_GLU_185 | OE1 | 3.092 |
| 3QG6 | L_ARG_155 | NH2 | L_GLU_185 | OE2 | 3.899 |
| 3QG6 | L_LYS_183 | NZ  | L_GLU_187 | OE1 | 3.324 |
| 3QG6 | L_LYS_183 | NZ  | L_GLU_187 | OE2 | 3.444 |
| 3QG6 | L_HIS_189 | ND1 | L_ASP_151 | OD2 | 2.895 |
| 3QG6 | L_HIS_189 | NE2 | B_GLU_85  | OE1 | 3.320 |
| 3QG6 | L_HIS_189 | NE2 | B_GLU_85  | OE2 | 3.623 |
| 3QG6 | L_HIS_189 | NE2 | L_GLU_185 | OE2 | 3.346 |
| 3QG6 | L_LYS_199 | NZ  | L_ASP_110 | OD2 | 3.663 |
| 3QG7 | H_ARG_38  | NH1 | H_ASP_86  | OD1 | 2.959 |
| 3QG7 | H_ARG_38  | NH2 | H_GLU_46  | OE1 | 2.726 |
| 3QG7 | H_ARG_94  | NH2 | H_ASP_101 | OD2 | 3.399 |
| 3QG7 | H_LYS_221 | NZ  | L_GLU_123 | OE2 | 2.769 |
| 3QG7 | H_LYS_222 | NZ  | H_GLU_226 | OE2 | 3.925 |
| 3QG7 | L_ARG_61  | NH1 | L_ASP_82  | OD2 | 3.032 |
| 3QG7 | L_ARG_61  | NH2 | L_GLU_79  | OE1 | 3.794 |
| 3QG7 | L_ARG_61  | NH2 | L_ASP_82  | OD1 | 3.231 |
| 3QG7 | L_ARG_61  | NH2 | L_ASP_82  | OD2 | 3.013 |
| 3QG7 | L_LYS_103 | NZ  | L_ASP_165 | OD1 | 3.787 |
| 3QG7 | L_LYS_147 | NZ  | L_GLU_195 | OE1 | 3.261 |
| 3QG7 | L_LYS_149 | NZ  | L_GLU_195 | OE1 | 3.464 |
| 3QG7 | L_LYS_149 | NZ  | L_GLU_195 | OE2 | 2.727 |
| 3QG7 | L_ARG_155 | NH1 | L_GLU_185 | OE1 | 2.977 |
| 3QG7 | L_LYS_183 | NZ  | L_GLU_187 | OE1 | 2.941 |
| 3QG7 | L_LYS_183 | NZ  | L_GLU_187 | OE2 | 2.894 |
| 3QG7 | L_LYS_199 | NZ  | L_ASP_110 | OD2 | 3.998 |
| 3QO1 | A_ARG_24  | NH1 | A_ASP_75  | OD1 | 3.412 |
| 3QO1 | A_ARG_24  | NH2 | A_ASP_75  | OD1 | 2.963 |
| 3QO1 | A_ARG_31  | NH1 | A_ASP_37  | OD1 | 3.003 |
| 3QO1 | A_ARG_31  | NH2 | A_ASP_33  | OD1 | 3.693 |
| 3QO1 | A_ARG_31  | NH2 | A_ASP_33  | OD2 | 3.104 |
| 3QO1 | A_HIS_35  | ND1 | A_ASP_33  | OD1 | 3.949 |
| 3QO1 | A_HIS_35  | ND1 | A_ASP_33  | OD2 | 3.517 |
| 3QO1 | A_LYS_44  | NZ  | A_GLU_86  | OE1 | 3.342 |
| 3QO1 | A_ARG_59  | NH2 | A_ASP_65  | OD1 | 3.479 |
| 3QO1 | A_ARG_66  | NH2 | A_ASP_87  | OD1 | 2.560 |
| 3QO1 | A_ARG_66  | NH2 | A_ASP_87  | OD2 | 2.753 |
| 3QO1 | B_ARG_38  | NH1 | B_GLU_46  | OE1 | 3.400 |
| 3QO1 | B_ARG_38  | NH1 | B_ASP_92  | OD1 | 3.707 |
| 3QO1 | B_ARG_38  | NH2 | B_ASP_92  | OD1 | 2.890 |
| 3QO1 | B_LYS_52  | NZ  | B_GLU_56  | OE2 | 2.709 |
| 3QO1 | B_ARG_53  | NH1 | B_GLU_56  | OE1 | 3.115 |
| 3QO1 | B_ARG_69  | NH1 | B_ASP_92  | OD1 | 3.910 |
| 3QO1 | B_ARG_69  | NH1 | B_ASP_92  | OD2 | 2.658 |
| 3QO1 | B_ARG_69  | NH2 | B_ASP_92  | OD1 | 3.220 |
| 3QO1 | B_ARG_69  | NH2 | B_ASP_92  | OD2 | 3.334 |
| 3QO1 | B_ARG_74  | NH1 | B_ASP_58  | OD1 | 2.936 |
| 3QO1 | B_ARG_74  | NH2 | B_ASP_58  | OD1 | 3.003 |
| 3QO1 | B_ARG_74  | NH2 | B_ASP_58  | OD2 | 3.404 |
| 3QO1 | B_ARG_74  | NH2 | B_ASP_76  | OD1 | 3.459 |
| 3QO1 | B_ARG_74  | NH2 | B_ASP_76  | OD2 | 2.806 |
| 3QO1 | B_ARG_101 | NH1 | A_GLU_39  | OE1 | 3.830 |
| 3QO1 | B_ARG_101 | NH1 | A_GLU_39  | OE2 | 2.711 |
| 3QO1 | B_ARG_101 | NH2 | A_GLU_39  | OE1 | 2.782 |



|      |           |     |           |     |       |
|------|-----------|-----|-----------|-----|-------|
| 3QO1 | B_ARG_101 | NH2 | A_GLU_39  | OE2 | 3.238 |
| 3QO1 | B_LYS_149 | NZ  | B_ASP_150 | OD1 | 3.291 |
| 3QO1 | B_LYS_149 | NZ  | B_ASP_150 | OD2 | 3.610 |
| 3QO1 | B_LYS_215 | NZ  | A_GLU_128 | OE1 | 3.939 |
| 3QO1 | B_ARG_216 | NH2 | B_GLU_218 | OE2 | 3.982 |
| 3QUM | P_ARG_36  | NH1 | A_ASP_94  | OD2 | 3.603 |
| 3QUM | P_ARG_36  | NH1 | B_GLU_58  | OE1 | 3.234 |
| 3QUM | P_ARG_36  | NH1 | B_GLU_58  | OE2 | 3.373 |
| 3QUM | P_ARG_36  | NH2 | B_GLU_58  | OE1 | 3.423 |
| 3QUM | P_HIS_57  | ND1 | P_ASP_102 | OD1 | 3.257 |
| 3QUM | P_HIS_57  | ND1 | P_ASP_102 | OD2 | 2.714 |
| 3QUM | P_LYS_62  | NZ  | B_GLU_58  | OE2 | 3.762 |
| 3QUM | P_LYS_119 | NZ  | H_ASP_54  | OD1 | 2.788 |
| 3QUM | P_LYS_119 | NZ  | H_ASP_54  | OD2 | 3.700 |
| 3QUM | P_LYS_119 | NZ  | H_ASP_56  | OD2 | 3.000 |
| 3QUM | P_LYS_230 | NZ  | P_GLU_129 | OE1 | 3.910 |
| 3QUM | P_LYS_236 | NZ  | P_ASP_240 | OD1 | 3.355 |
| 3QUM | P_LYS_236 | NZ  | P_ASP_240 | OD2 | 3.879 |
| 3QUM | L_ARG_24  | NH2 | L_ASP_70  | OD2 | 3.454 |
| 3QUM | L_LYS_27  | NZ  | L_GLU_93  | OE2 | 2.631 |
| 3QUM | L_ARG_50  | NH2 | P_GLU_23  | OE1 | 2.715 |
| 3QUM | L_ARG_61  | NH1 | L_ASP_82  | OD1 | 3.063 |
| 3QUM | L_ARG_61  | NH1 | L_ASP_82  | OD2 | 2.700 |
| 3QUM | L_ARG_61  | NH2 | L_GLU_79  | OE1 | 3.466 |
| 3QUM | L_LYS_149 | NZ  | L_GLU_195 | OE1 | 3.180 |
| 3QUM | L_LYS_149 | NZ  | L_GLU_195 | OE2 | 2.848 |
| 3QUM | L_HIS_189 | ND1 | L_ASP_151 | OD1 | 3.513 |
| 3QUM | L_HIS_189 | ND1 | L_ASP_151 | OD2 | 3.827 |
| 3QUM | H_ARG_50  | NH1 | H_ASP_95  | OD2 | 2.461 |
| 3QUM | H_LYS_62  | NZ  | H_GLU_46  | OE1 | 2.726 |
| 3QUM | H_LYS_66  | NZ  | H_ASP_86  | OD1 | 3.700 |
| 3QUM | H_LYS_66  | NZ  | H_ASP_86  | OD2 | 2.890 |
| 3QUM | H_ARG_94  | NH2 | H_ASP_101 | OD1 | 3.980 |
| 3QUM | H_ARG_94  | NH2 | H_ASP_101 | OD2 | 2.778 |
| 3QUM | H_ARG_98  | NH2 | P_ASP_159 | OD1 | 3.868 |
| 3QUM | H_ARG_98  | NH2 | P_ASP_159 | OD2 | 3.474 |
| 3QUM | H_HIS_164 | NE2 | L_ASP_167 | OD1 | 3.746 |
| 3QUM | H_LYS_208 | NZ  | L_GLU_123 | OE1 | 3.317 |
| 3QUM | A_ARG_61  | NH1 | A_ASP_82  | OD2 | 2.784 |
| 3QUM | A_ARG_61  | NH2 | A_ASP_82  | OD2 | 3.879 |
| 3QUM | A_ARG_68  | NH2 | A_ASP_27C | OD2 | 3.611 |
| 3QUM | A_ARG_188 | NH1 | A_GLU_185 | OE1 | 3.541 |
| 3QUM | A_ARG_188 | NH1 | A_GLU_185 | OE2 | 2.650 |
| 3QUM | A_HIS_189 | ND1 | A_ASP_151 | OD2 | 3.524 |
| 3QUM | A_HIS_189 | NE2 | A_GLU_185 | OE1 | 3.506 |
| 3QUM | A_LYS_207 | NZ  | M_ASP_70  | OD2 | 3.646 |
| 3QUM | B_ARG_40  | NH1 | B_GLU_85  | OE2 | 3.723 |
| 3QUM | B_LYS_62  | NZ  | A_ASP_1   | OD1 | 3.967 |
| 3QUM | B_LYS_62  | NZ  | A_ASP_1   | OD2 | 3.654 |
| 3QUM | B_LYS_64  | NZ  | B_ASP_65  | OD1 | 3.709 |
| 3QUM | B_LYS_64  | NZ  | B_ASP_65  | OD2 | 3.188 |
| 3QUM | B_ARG_94  | NH2 | B_ASP_102 | OD1 | 3.002 |
| 3QUM | B_ARG_94  | NH2 | B_ASP_102 | OD2 | 3.802 |
| 3QUM | B_LYS_209 | NZ  | A_GLU_123 | OE1 | 3.994 |
| 3QUM | B_LYS_209 | NZ  | A_GLU_123 | OE2 | 2.553 |
| 3QUM | Q_HIS_57  | ND1 | Q_ASP_102 | OD2 | 3.489 |
| 3QUM | Q_ARG_69  | NH1 | Q_GLU_77  | OE1 | 2.522 |
| 3QUM | Q_ARG_69  | NH2 | Q_GLU_77  | OE1 | 2.832 |

|      |           |     |           |     |       |
|------|-----------|-----|-----------|-----|-------|
| 3QUM | Q_LYS_119 | NZ  | K_ASP_54  | OD1 | 3.579 |
| 3QUM | Q_LYS_119 | NZ  | K_ASP_54  | OD2 | 2.557 |
| 3QUM | Q_LYS_119 | NZ  | K_ASP_56  | OD2 | 3.138 |
| 3QUM | Q_LYS_230 | NZ  | Q_GLU_129 | OE2 | 2.982 |
| 3QUM | M_ARG_24  | NH2 | B_ASP_131 | OD1 | 2.867 |
| 3QUM | M_ARG_24  | NH2 | B_ASP_131 | OD2 | 3.402 |
| 3QUM | M_ARG_50  | NH1 | Q_GLU_21  | OE2 | 3.456 |
| 3QUM | M_ARG_50  | NH2 | Q_GLU_21  | OE2 | 3.792 |
| 3QUM | M_ARG_61  | NH1 | M_GLU_79  | OE1 | 2.865 |
| 3QUM | M_ARG_61  | NH1 | M_GLU_79  | OE2 | 3.959 |
| 3QUM | M_ARG_61  | NH2 | M_GLU_79  | OE1 | 3.169 |
| 3QUM | M_ARG_61  | NH2 | M_ASP_82  | OD1 | 2.669 |
| 3QUM | M_ARG_61  | NH2 | M_ASP_82  | OD2 | 2.826 |
| 3QUM | M_LYS_183 | NZ  | M_GLU_187 | OE1 | 3.466 |
| 3QUM | K_ARG_50  | NH1 | K_ASP_95  | OD2 | 2.549 |
| 3QUM | K_LYS_58  | NZ  | Q_ASP_116 | OD2 | 3.811 |
| 3QUM | K_LYS_58  | NZ  | K_ASP_56  | OD1 | 3.915 |
| 3QUM | K_LYS_58  | NZ  | K_ASP_56  | OD2 | 3.991 |
| 3QUM | K_LYS_62  | NZ  | M_ASP_1   | OD1 | 2.803 |
| 3QUM | K_LYS_66  | NZ  | K_ASP_86  | OD1 | 3.473 |
| 3QUM | K_LYS_66  | NZ  | K_ASP_86  | OD2 | 3.448 |
| 3QUM | K_ARG_94  | NH2 | K_ASP_101 | OD1 | 2.367 |
| 3QUM | K_ARG_94  | NH2 | K_ASP_101 | OD2 | 2.940 |
| 3QUM | K_ARG_98  | NH2 | Q_ASP_159 | OD2 | 3.098 |
| 3QUM | K_LYS_208 | NZ  | M_GLU_123 | OE1 | 3.358 |
| 3QUM | K_ARG_213 | NH2 | K_ASP_214 | OD2 | 3.796 |
| 3QUM | C_ARG_24  | NH1 | C_ASP_70  | OD1 | 3.778 |
| 3QUM | C_ARG_24  | NH1 | C_ASP_70  | OD2 | 2.622 |
| 3QUM | C_ARG_24  | NH2 | C_ASP_70  | OD1 | 2.926 |
| 3QUM | C_ARG_24  | NH2 | C_ASP_70  | OD2 | 3.340 |
| 3QUM | C_LYS_39  | NZ  | C_ASP_81  | OD1 | 2.883 |
| 3QUM | C_ARG_61  | NH1 | C_GLU_79  | OE1 | 2.943 |
| 3QUM | C_ARG_61  | NH1 | C_ASP_82  | OD2 | 3.848 |
| 3QUM | C_ARG_61  | NH2 | C_ASP_82  | OD1 | 3.376 |
| 3QUM | C_ARG_61  | NH2 | C_ASP_82  | OD2 | 3.578 |
| 3QUM | C_LYS_142 | NZ  | C_GLU_105 | OE1 | 2.648 |
| 3QUM | C_LYS_142 | NZ  | C_GLU_105 | OE2 | 3.163 |
| 3QUM | C_LYS_147 | NZ  | C_GLU_195 | OE2 | 3.770 |
| 3QUM | C_LYS_149 | NZ  | C_GLU_195 | OE1 | 2.711 |
| 3QUM | C_LYS_149 | NZ  | C_GLU_195 | OE2 | 3.595 |
| 3QUM | C_ARG_188 | NH1 | C_GLU_185 | OE1 | 3.368 |
| 3QUM | D_LYS_38  | NZ  | D_GLU_46  | OE2 | 3.663 |
| 3QUM | D_ARG_40  | NH1 | D_GLU_85  | OE1 | 2.968 |
| 3QUM | D_LYS_66  | NZ  | D_ASP_86  | OD1 | 3.445 |
| 3QUM | D_ARG_94  | NH2 | D_ASP_102 | OD2 | 2.430 |
| 3QUM | D_ARG_97  | NH1 | C_GLU_55  | OE1 | 3.578 |
| 3QUM | D_ARG_97  | NH1 | C_GLU_55  | OE2 | 3.784 |
| 3QUM | D_ARG_97  | NH2 | Q_GLU_110 | OE2 | 3.547 |
| 3R08 | L_ARG_61  | NH1 | L_GLU_79  | OE1 | 3.254 |
| 3R08 | L_ARG_61  | NH1 | L_GLU_79  | OE2 | 3.378 |
| 3R08 | L_ARG_61  | NH2 | L_GLU_79  | OE1 | 2.676 |
| 3R08 | L_ARG_61  | NH2 | L_GLU_81  | OE2 | 3.468 |
| 3R08 | L_ARG_61  | NH2 | L_ASP_82  | OD1 | 3.777 |
| 3R08 | L_ARG_61  | NH2 | L_ASP_82  | OD2 | 3.454 |
| 3R08 | L_LYS_103 | NZ  | L_ASP_165 | OD1 | 3.486 |
| 3R08 | L_LYS_142 | NZ  | L_GLU_105 | OE1 | 3.662 |
| 3R08 | L_LYS_147 | NZ  | L_GLU_195 | OE1 | 2.773 |
| 3R08 | L_LYS_155 | NZ  | L_ASP_185 | OD2 | 3.988 |

|      |           |     |            |     |       |
|------|-----------|-----|------------|-----|-------|
| 3R08 | L_ARG_156 | NH1 | L_GLU_154  | OE2 | 3.311 |
| 3R08 | L_LYS_183 | NZ  | L_GLU_187  | OE2 | 3.914 |
| 3R08 | L_ARG_188 | NH1 | L_ASP_185  | OD1 | 3.352 |
| 3R08 | L_HIS_189 | ND1 | L_ASP_151  | OD2 | 3.760 |
| 3R08 | L_HIS_189 | NE2 | L_ASP_185  | OD1 | 3.852 |
| 3R08 | L_LYS_199 | NZ  | L_ASP_110  | OD2 | 3.241 |
| 3R08 | L_LYS_207 | NZ  | H_ASP_129  | OD1 | 3.653 |
| 3R08 | L_LYS_207 | NZ  | H_ASP_129  | OD2 | 2.868 |
| 3R08 | L_ARG_211 | NH1 | L_GLU_187  | OE1 | 3.899 |
| 3R08 | L_ARG_211 | NH2 | L_GLU_187  | OE1 | 3.052 |
| 3R08 | H_ARG_38  | NH1 | H_ASP_86   | OD1 | 3.285 |
| 3R08 | H_ARG_38  | NH2 | H_GLU_46   | OE1 | 3.027 |
| 3R08 | H_ARG_43  | NH1 | H_GLU_46   | OE1 | 3.166 |
| 3R08 | H_ARG_43  | NH1 | H_GLU_46   | OE2 | 2.679 |
| 3R08 | H_ARG_43  | NH2 | H_GLU_46   | OE1 | 3.767 |
| 3R08 | H_ARG_43  | NH2 | H_GLU_46   | OE2 | 3.517 |
| 3R08 | H_LYS_58  | NZ  | E_GLU_4    | OE2 | 3.175 |
| 3R08 | H_ARG_66  | NH1 | H_ASP_86   | OD1 | 3.453 |
| 3R08 | H_ARG_66  | NH1 | H_ASP_86   | OD2 | 3.405 |
| 3R08 | H_LYS_83  | NZ  | H_GLU_85   | OE2 | 3.138 |
| 3R08 | H_ARG_94  | NH2 | H_ASP_96   | OD1 | 3.331 |
| 3R08 | H_ARG_94  | NH2 | H_ASP_96   | OD2 | 3.042 |
| 3R08 | H_LYS_99  | NZ  | L_ASP_56   | OD2 | 3.746 |
| 3R08 | E_HIS_45  | ND1 | E_ASP_43   | OD2 | 3.535 |
| 3R08 | E_LYS_69  | NZ  | E_GLU_4    | OE1 | 2.708 |
| 3R08 | E_LYS_76  | NZ  | E_GLU_53   | OE2 | 3.300 |
| 3SE8 | G_HIS_66  | ND1 | G_GLU_64   | OE2 | 2.819 |
| 3SE8 | G_LYS_207 | NZ  | G_GLU_381  | OE1 | 3.451 |
| 3SE8 | G_LYS_207 | NZ  | G_GLU_381  | OE2 | 2.740 |
| 3SE8 | G_LYS_231 | NZ  | G_GLU_267  | OE1 | 3.718 |
| 3SE8 | G_HIS_249 | NE2 | G_GLU_482  | OE1 | 2.997 |
| 3SE8 | G_LYS_282 | NZ  | G_GLU_275  | OE1 | 2.928 |
| 3SE8 | G_LYS_282 | NZ  | H_ASP_100C | OD2 | 3.668 |
| 3SE8 | G_LYS_343 | NZ  | G_GLU_347  | OE1 | 3.295 |
| 3SE8 | G_LYS_348 | NZ  | G_GLU_269  | OE2 | 2.902 |
| 3SE8 | G_LYS_348 | NZ  | G_GLU_351  | OE1 | 2.955 |
| 3SE8 | G_LYS_348 | NZ  | G_GLU_351  | OE2 | 3.971 |
| 3SE8 | G_LYS_350 | NZ  | G_GLU_347  | OE1 | 3.922 |
| 3SE8 | G_LYS_357 | NZ  | G_GLU_466  | OE2 | 3.935 |
| 3SE8 | G_ARG_379 | NH2 | G_ASP_211  | OD1 | 3.636 |
| 3SE8 | G_ARG_379 | NH2 | G_ASP_211  | OD2 | 3.899 |
| 3SE8 | G_ARG_456 | NH1 | G_GLU_466  | OE1 | 3.921 |
| 3SE8 | G_ARG_469 | NH2 | G_ASP_457  | OD1 | 2.926 |
| 3SE8 | G_ARG_469 | NH2 | G_ASP_457  | OD2 | 3.898 |
| 3SE8 | G_LYS_476 | NZ  | G_GLU_102  | OE1 | 2.540 |
| 3SE8 | G_ARG_480 | NH1 | G_ASP_477  | OD1 | 2.656 |
| 3SE8 | G_LYS_487 | NZ  | G_ASP_47   | OD1 | 2.902 |
| 3SE8 | G_LYS_487 | NZ  | G_GLU_91   | OE1 | 2.578 |
| 3SE8 | H_LYS_19  | NZ  | H_GLU_81   | OE1 | 3.800 |
| 3SE8 | H_ARG_38  | NH1 | H_GLU_46   | OE1 | 2.640 |
| 3SE8 | H_ARG_38  | NH1 | H_ASP_86   | OD1 | 3.748 |
| 3SE8 | H_ARG_38  | NH2 | H_ASP_86   | OD1 | 2.672 |
| 3SE8 | H_ARG_66  | NH1 | H_ASP_86   | OD1 | 3.543 |
| 3SE8 | H_ARG_66  | NH1 | H_ASP_86   | OD2 | 3.893 |
| 3SE8 | H_ARG_66  | NH2 | H_ASP_86   | OD1 | 3.365 |
| 3SE8 | H_ARG_66  | NH2 | H_ASP_86   | OD2 | 2.596 |
| 3SE8 | H_ARG_71  | NH1 | G_ASP_368  | OD1 | 3.115 |
| 3SE8 | H_ARG_71  | NH1 | G_ASP_368  | OD2 | 3.763 |

|      |           |     |           |     |       |
|------|-----------|-----|-----------|-----|-------|
| 3SE8 | H_ARG_71  | NH2 | G_ASP_368 | OD1 | 3.733 |
| 3SE8 | H_ARG_71  | NH2 | G_ASP_368 | OD2 | 2.907 |
| 3SE8 | H_LYS_143 | NZ  | H_ASP_144 | OD1 | 3.313 |
| 3SE8 | H_LYS_143 | NZ  | H_ASP_144 | OD2 | 3.811 |
| 3SE8 | H_LYS_209 | NZ  | L_GLU_123 | OE1 | 3.768 |
| 3SE8 | H_LYS_210 | NZ  | H_GLU_212 | OE1 | 2.816 |
| 3SE8 | H_LYS_210 | NZ  | H_GLU_212 | OE2 | 3.024 |
| 3SE8 | L_LYS_24  | NZ  | L_ASP_70  | OD1 | 2.618 |
| 3SE8 | L_LYS_24  | NZ  | L_ASP_70  | OD2 | 3.708 |
| 3SE8 | L_ARG_39  | NH1 | L_GLU_81  | OE1 | 3.909 |
| 3SE8 | L_ARG_53  | NH1 | L_ASP_50  | OD2 | 3.743 |
| 3SE8 | L_ARG_61  | NH2 | L_ASP_82  | OD1 | 2.770 |
| 3SE8 | L_ARG_61  | NH2 | L_ASP_82  | OD2 | 3.437 |
| 3SE8 | L_ARG_142 | NH1 | L_GLU_103 | OE1 | 3.000 |
| 3SE8 | L_ARG_142 | NH1 | L_GLU_103 | OE2 | 3.759 |
| 3SE8 | L_ARG_142 | NH2 | L_GLU_103 | OE1 | 3.192 |
| 3SE8 | L_ARG_142 | NH2 | L_GLU_103 | OE2 | 2.840 |
| 3SE8 | L_ARG_142 | NH2 | L_GLU_105 | OE2 | 3.734 |
| 3SE8 | L_LYS_188 | NZ  | L_ASP_185 | OD2 | 3.776 |
| 3SE9 | G_HIS_66  | ND1 | G_GLU_64  | OE2 | 2.728 |
| 3SE9 | G_LYS_207 | NZ  | G_GLU_381 | OE1 | 3.396 |
| 3SE9 | G_LYS_207 | NZ  | G_GLU_381 | OE2 | 3.043 |
| 3SE9 | G_HIS_249 | NE2 | G_GLU_482 | OE1 | 3.086 |
| 3SE9 | G_LYS_282 | NZ  | G_GLU_275 | OE1 | 3.135 |
| 3SE9 | G_LYS_343 | NZ  | G_GLU_347 | OE2 | 2.995 |
| 3SE9 | G_LYS_348 | NZ  | G_GLU_269 | OE2 | 3.584 |
| 3SE9 | G_LYS_348 | NZ  | G_GLU_351 | OE1 | 3.691 |
| 3SE9 | G_LYS_357 | NZ  | G_GLU_466 | OE1 | 3.212 |
| 3SE9 | G_ARG_456 | NH1 | G_GLU_466 | OE2 | 2.713 |
| 3SE9 | G_ARG_469 | NH1 | G_ASP_457 | OD1 | 2.966 |
| 3SE9 | G_ARG_469 | NH1 | G_ASP_457 | OD2 | 3.436 |
| 3SE9 | G_LYS_476 | NZ  | G_GLU_102 | OE1 | 2.755 |
| 3SE9 | G_LYS_476 | NZ  | G_GLU_102 | OE2 | 3.946 |
| 3SE9 | G_ARG_480 | NH1 | G_ASP_477 | OD1 | 3.009 |
| 3SE9 | G_ARG_480 | NH2 | G_GLU_102 | OE2 | 3.763 |
| 3SE9 | G_LYS_487 | NZ  | G_ASP_47  | OD1 | 2.626 |
| 3SE9 | G_LYS_487 | NZ  | G_ASP_47  | OD2 | 3.721 |
| 3SE9 | G_LYS_487 | NZ  | G_GLU_91  | OE1 | 2.626 |
| 3SE9 | H_ARG_19  | NH2 | H_ASP_81  | OD1 | 3.575 |
| 3SE9 | H_ARG_19  | NH2 | H_ASP_81  | OD2 | 3.127 |
| 3SE9 | H_ARG_31  | NH2 | H_GLU_30  | OE2 | 3.962 |
| 3SE9 | H_ARG_38  | NH1 | H_ASP_86  | OD1 | 2.864 |
| 3SE9 | H_ARG_38  | NH2 | H_GLU_46  | OE1 | 3.505 |
| 3SE9 | H_ARG_64  | NH1 | G_ASP_457 | OD2 | 3.853 |
| 3SE9 | H_ARG_64  | NH2 | G_ASP_457 | OD1 | 3.358 |
| 3SE9 | H_ARG_64  | NH2 | G_ASP_457 | OD2 | 3.280 |
| 3SE9 | H_ARG_66  | NH1 | H_ASP_62  | OD1 | 3.472 |
| 3SE9 | H_ARG_66  | NH1 | H_ASP_62  | OD2 | 2.990 |
| 3SE9 | H_ARG_66  | NH1 | H_ASP_86  | OD1 | 3.657 |
| 3SE9 | H_ARG_66  | NH1 | H_ASP_86  | OD2 | 3.617 |
| 3SE9 | H_ARG_66  | NH2 | H_ASP_86  | OD1 | 3.675 |
| 3SE9 | H_ARG_66  | NH2 | H_ASP_86  | OD2 | 2.373 |
| 3SE9 | H_ARG_71  | NH1 | G_ASP_368 | OD1 | 3.515 |
| 3SE9 | H_ARG_71  | NH1 | G_ASP_368 | OD2 | 2.768 |
| 3SE9 | H_ARG_71  | NH2 | G_ASP_368 | OD1 | 3.012 |
| 3SE9 | H_ARG_71  | NH2 | G_ASP_368 | OD2 | 3.769 |
| 3SE9 | H_ARG_94  | NH2 | H_ASP_101 | OD1 | 2.737 |
| 3SE9 | H_ARG_94  | NH2 | H_ASP_101 | OD2 | 3.906 |

|      |           |     |           |     |       |
|------|-----------|-----|-----------|-----|-------|
| 3SE9 | H.LYS_143 | NZ  | H.ASP_144 | OD1 | 3.511 |
| 3SE9 | H.LYS_209 | NZ  | L.GLU_123 | OE1 | 3.388 |
| 3SE9 | H.LYS_214 | NZ  | L.ASP_122 | OD1 | 3.332 |
| 3SE9 | L.ARG_61  | NH1 | L.ASP_82  | OD1 | 2.919 |
| 3SE9 | L.ARG_61  | NH1 | L.ASP_82  | OD2 | 3.116 |
| 3SE9 | L.LYS_183 | NZ  | L.GLU_187 | OE1 | 2.818 |
| 3SE9 | L.HIS_189 | ND1 | L.ASP_151 | OD2 | 2.887 |
| 3SGD | L.LYS_24  | NZ  | L.ASP_75  | OD1 | 2.783 |
| 3SGD | L.ARG_51  | NH2 | L.ASP_60  | OD1 | 3.495 |
| 3SGD | L.ARG_51  | NH2 | L.ASP_60  | OD2 | 3.021 |
| 3SGD | L.ARG_66  | NH1 | L.ASP_87  | OD1 | 3.680 |
| 3SGD | L.ARG_66  | NH1 | L.ASP_87  | OD2 | 2.782 |
| 3SGD | L.ARG_66  | NH2 | L.GLU_84  | OE1 | 3.767 |
| 3SGD | L.ARG_66  | NH2 | L.ASP_87  | OD1 | 2.989 |
| 3SGD | L.ARG_66  | NH2 | L.ASP_87  | OD2 | 3.564 |
| 3SGD | L.HIS_98  | ND1 | L.ASP_31  | OD2 | 3.644 |
| 3SGD | L.LYS_152 | NZ  | L.GLU_159 | OE1 | 3.644 |
| 3SGD | L.LYS_152 | NZ  | L.GLU_159 | OE2 | 3.885 |
| 3SGD | L.LYS_154 | NZ  | L.GLU_200 | OE1 | 3.346 |
| 3SGD | L.LYS_154 | NZ  | L.GLU_200 | OE2 | 3.354 |
| 3SGD | L.ARG_160 | NH2 | L.GLU_190 | OE1 | 2.808 |
| 3SGD | L.ARG_160 | NH2 | L.GLU_190 | OE2 | 2.668 |
| 3SGD | L.ARG_193 | NH1 | L.ASP_189 | OD2 | 2.692 |
| 3SGD | L.ARG_193 | NH2 | L.GLU_190 | OE2 | 3.962 |
| 3SGD | L.HIS_194 | ND1 | L.ASP_156 | OD2 | 2.735 |
| 3SGD | L.HIS_194 | NE2 | L.GLU_190 | OE2 | 3.628 |
| 3SGD | L.LYS_204 | NZ  | L.ASP_115 | OD2 | 3.348 |
| 3SGD | L.LYS_204 | NZ  | J.ASP_75  | OD1 | 3.665 |
| 3SGD | L.LYS_204 | NZ  | J.ASP_75  | OD2 | 3.246 |
| 3SGD | H.ARG_38  | NH1 | H.ASP_92  | OD2 | 2.803 |
| 3SGD | H.ARG_38  | NH2 | H.GLU_46  | OE2 | 3.026 |
| 3SGD | H.ARG_38  | NH2 | H.ASP_92  | OD2 | 3.826 |
| 3SGD | H.LYS_43  | NZ  | J.ASP_68  | OD1 | 3.910 |
| 3SGD | H.ARG_69  | NH1 | H.ASP_92  | OD1 | 2.725 |
| 3SGD | H.ARG_69  | NH1 | H.ASP_92  | OD2 | 3.812 |
| 3SGD | H.ARG_69  | NH2 | H.ASP_92  | OD1 | 3.411 |
| 3SGD | H.ARG_69  | NH2 | H.ASP_92  | OD2 | 3.054 |
| 3SGD | H.ARG_74  | NH2 | H.ASP_76  | OD1 | 3.619 |
| 3SGD | H.LYS_210 | NZ  | L.GLU_128 | OE1 | 3.898 |
| 3SGD | L.LYS_24  | NZ  | L.ASP_75  | OD1 | 3.796 |
| 3SGD | L.LYS_24  | NZ  | L.ASP_75  | OD2 | 2.962 |
| 3SGD | L.ARG_44  | NH2 | L.GLU_86  | OE2 | 3.752 |
| 3SGD | L.ARG_51  | NH2 | L.ASP_60  | OD1 | 2.717 |
| 3SGD | L.ARG_51  | NH2 | L.ASP_60  | OD2 | 3.541 |
| 3SGD | L.ARG_66  | NH1 | L.ASP_87  | OD1 | 3.518 |
| 3SGD | L.ARG_66  | NH1 | L.ASP_87  | OD2 | 2.585 |
| 3SGD | L.ARG_66  | NH2 | L.GLU_84  | OE1 | 3.635 |
| 3SGD | L.ARG_66  | NH2 | L.GLU_86  | OE1 | 3.914 |
| 3SGD | L.ARG_66  | NH2 | L.GLU_86  | OE2 | 3.879 |
| 3SGD | L.ARG_66  | NH2 | L.ASP_87  | OD1 | 2.899 |
| 3SGD | L.ARG_66  | NH2 | L.ASP_87  | OD2 | 3.479 |
| 3SGD | L.ARG_82  | NH1 | L.GLU_84  | OE2 | 2.800 |
| 3SGD | L.ARG_82  | NH2 | L.GLU_84  | OE2 | 3.178 |
| 3SGD | L.LYS_154 | NZ  | L.GLU_200 | OE1 | 3.141 |
| 3SGD | L.LYS_154 | NZ  | L.GLU_200 | OE2 | 2.988 |
| 3SGD | L.LYS_174 | NZ  | L.ASP_172 | OD1 | 3.706 |
| 3SGD | L.LYS_174 | NZ  | L.ASP_172 | OD2 | 3.091 |
| 3SGD | L.LYS_174 | NZ  | L.ASP_175 | OD1 | 3.919 |

|      |           |     |            |     |       |
|------|-----------|-----|------------|-----|-------|
| 3SGD | L_ARG_193 | NH2 | L_ASP_189  | OD2 | 2.737 |
| 3SGD | L_HIS_194 | ND1 | L_ASP_156  | OD2 | 2.901 |
| 3SGD | L_LYS_204 | NZ  | L_ASP_115  | OD2 | 3.676 |
| 3SGD | J_LYS_19  | NZ  | L_ASP_148  | OD1 | 3.248 |
| 3SGD | J_LYS_19  | NZ  | L_ASP_148  | OD2 | 2.952 |
| 3SGD | J_ARG_38  | NH1 | J_ASP_92   | OD2 | 2.794 |
| 3SGD | J_ARG_38  | NH2 | J_GLU_46   | OE1 | 3.737 |
| 3SGD | J_ARG_38  | NH2 | J_GLU_46   | OE2 | 2.952 |
| 3SGD | J_ARG_38  | NH2 | J_ASP_92   | OD2 | 3.905 |
| 3SGD | J_ARG_69  | NH1 | J_ASP_92   | OD1 | 2.689 |
| 3SGD | J_ARG_69  | NH1 | J_ASP_92   | OD2 | 3.808 |
| 3SGD | J_ARG_69  | NH2 | J_ASP_92   | OD1 | 3.488 |
| 3SGD | J_ARG_69  | NH2 | J_ASP_92   | OD2 | 3.217 |
| 3SGD | J_ARG_74  | NH2 | J_ASP_76   | OD1 | 3.467 |
| 3SKJ | L_ARG_24  | NH1 | L_GLU_70   | OE1 | 3.770 |
| 3SKJ | L_ARG_61  | NH2 | L_ASP_82   | OD1 | 2.965 |
| 3SKJ | L_ARG_61  | NH2 | L_ASP_82   | OD2 | 3.776 |
| 3SKJ | L_ARG_96  | NH1 | H_GLU_100I | OE1 | 2.505 |
| 3SKJ | L_ARG_96  | NH1 | H_GLU_100I | OE2 | 2.799 |
| 3SKJ | L_LYS_103 | NZ  | L_GLU_165  | OE1 | 2.601 |
| 3SKJ | L_LYS_103 | NZ  | L_GLU_165  | OE2 | 3.499 |
| 3SKJ | L_HIS_189 | ND1 | L_ASP_151  | OD2 | 3.871 |
| 3SKJ | L_ARG_211 | NH2 | L_GLU_187  | OE2 | 3.617 |
| 3SKJ | H_HIS_31  | ND1 | H_ASP_96   | OD2 | 2.640 |
| 3SKJ | H_HIS_31  | NE2 | E_GLU_133  | OE2 | 3.297 |
| 3SKJ | H_ARG_38  | NH1 | H_ASP_86   | OD1 | 2.911 |
| 3SKJ | H_ARG_38  | NH2 | H_GLU_46   | OE1 | 3.116 |
| 3SKJ | H_ARG_38  | NH2 | H_GLU_46   | OE2 | 3.301 |
| 3SKJ | H_ARG_38  | NH2 | H_ASP_86   | OD1 | 3.993 |
| 3SKJ | H_ARG_50  | NH1 | H_GLU_100I | OE1 | 3.128 |
| 3SKJ | H_LYS_64  | NZ  | H_ASP_61   | OD2 | 3.941 |
| 3SKJ | H_ARG_66  | NH1 | H_ASP_86   | OD1 | 3.677 |
| 3SKJ | H_ARG_66  | NH2 | H_ASP_86   | OD1 | 3.495 |
| 3SKJ | H_ARG_66  | NH2 | H_ASP_86   | OD2 | 2.568 |
| 3SKJ | H_HIS_161 | NE2 | L_ASP_167  | OD2 | 3.763 |
| 3SKJ | H_LYS_206 | NZ  | L_GLU_123  | OE1 | 2.501 |
| 3SKJ | H_LYS_206 | NZ  | L_GLU_123  | OE2 | 3.323 |
| 3SKJ | H_ARG_207 | NH1 | H_GLU_209  | OE2 | 3.580 |
| 3SKJ | M_ARG_24  | NH1 | M_GLU_70   | OE1 | 3.068 |
| 3SKJ | M_ARG_24  | NH1 | M_GLU_70   | OE2 | 3.024 |
| 3SKJ | M_ARG_24  | NH2 | M_GLU_70   | OE1 | 3.407 |
| 3SKJ | M_LYS_39  | NZ  | M_ASP_81   | OD1 | 2.568 |
| 3SKJ | M_ARG_61  | NH2 | M_ASP_82   | OD1 | 2.991 |
| 3SKJ | M_ARG_61  | NH2 | M_ASP_82   | OD2 | 2.909 |
| 3SKJ | M_ARG_96  | NH2 | L_GLU_100I | OE1 | 3.081 |
| 3SKJ | M_ARG_96  | NH2 | L_GLU_100I | OE2 | 3.831 |
| 3SKJ | M_LYS_103 | NZ  | M_GLU_165  | OE2 | 3.149 |
| 3SKJ | M_LYS_149 | NZ  | M_GLU_195  | OE2 | 3.240 |
| 3SKJ | M_LYS_188 | NZ  | M_ASP_185  | OD2 | 3.381 |
| 3SKJ | L_ARG_38  | NH1 | L_ASP_86   | OD1 | 2.866 |
| 3SKJ | L_ARG_38  | NH2 | L_GLU_46   | OE1 | 3.262 |
| 3SKJ | L_ARG_38  | NH2 | L_GLU_46   | OE2 | 3.203 |
| 3SKJ | L_LYS_43  | NZ  | L_ASP_1    | OD1 | 3.862 |
| 3SKJ | L_ARG_50  | NH1 | L_GLU_100I | OE1 | 3.217 |
| 3SKJ | L_ARG_50  | NH1 | L_GLU_100I | OE2 | 3.198 |
| 3SKJ | L_ARG_66  | NH1 | L_ASP_86   | OD1 | 3.975 |
| 3SKJ | L_ARG_66  | NH1 | L_ASP_86   | OD2 | 2.891 |
| 3SKJ | L_ARG_66  | NH2 | L_ASP_86   | OD1 | 3.263 |

|      |            |     |            |     |       |
|------|------------|-----|------------|-----|-------|
| 3SKJ | L_ARG.66   | NH2 | L_ASP.86   | OD2 | 3.539 |
| 3SKJ | L_ARG.83   | NH1 | L_GLU.85   | OE1 | 3.307 |
| 3SKJ | L_ARG.83   | NH1 | L_GLU.85   | OE2 | 3.711 |
| 3SKJ | L_LYS.140  | NZ  | L_ASP.141  | OD1 | 2.912 |
| 3SKJ | L_LYS.140  | NZ  | L_ASP.141  | OD2 | 3.281 |
| 3SKJ | L_LYS.211  | NZ  | M_ASP.122  | OD2 | 3.816 |
| 3SKJ | L_LYS.211  | NZ  | M_GLU.123  | OE1 | 3.612 |
| 3SKJ | E_LYS.112  | NZ  | E_ASP.54   | OD1 | 3.156 |
| 3SKJ | E_ARG.144  | NH1 | E_GLU.142  | OE1 | 3.346 |
| 3SKJ | E_ARG.144  | NH2 | E_ASP.119  | OD1 | 3.475 |
| 3SKJ | E_ARG.144  | NH2 | E_GLU.142  | OE1 | 3.494 |
| 3SKJ | E_ARG.171  | NH1 | E_GLU.73   | OE1 | 3.665 |
| 3SKJ | E_ARG.171  | NH1 | E_GLU.73   | OE2 | 3.183 |
| 3SKJ | E_ARG.171  | NH2 | E_GLU.4    | OE1 | 2.631 |
| 3SKJ | E_LYS.176  | NZ  | E_GLU.66   | OE2 | 2.522 |
| 3SY0 | A_LYS.24   | NZ  | A_ASP.70   | OD1 | 2.683 |
| 3SY0 | A_LYS.24   | NZ  | A_ASP.70   | OD2 | 3.488 |
| 3SY0 | A_LYS.39   | NZ  | A_GLU.81   | OE1 | 2.857 |
| 3SY0 | A_ARG.61   | NH1 | A_GLU.81   | OE2 | 3.627 |
| 3SY0 | A_ARG.61   | NH1 | A_ASP.82   | OD1 | 2.753 |
| 3SY0 | A_ARG.61   | NH1 | A_ASP.82   | OD2 | 3.623 |
| 3SY0 | A_ARG.95   | NH2 | B_ASP.95   | OD1 | 3.609 |
| 3SY0 | A_ARG.95   | NH2 | B_ASP.95   | OD2 | 2.821 |
| 3SY0 | A_LYS.146  | NZ  | A_GLU.194  | OE2 | 3.742 |
| 3SY0 | A_LYS.148  | NZ  | A_GLU.194  | OE1 | 2.676 |
| 3SY0 | A_LYS.148  | NZ  | A_GLU.194  | OE2 | 2.913 |
| 3SY0 | A_LYS.182  | NZ  | A_GLU.186  | OE1 | 2.287 |
| 3SY0 | A_LYS.182  | NZ  | A_GLU.186  | OE2 | 3.835 |
| 3SY0 | A_ARG.187  | NH2 | A_GLU.184  | OE1 | 2.876 |
| 3SY0 | A_HIS.188  | ND1 | A_ASP.150  | OD2 | 2.895 |
| 3SY0 | A_HIS.188  | NE2 | A_GLU.184  | OE2 | 2.965 |
| 3SY0 | A_LYS.198  | NZ  | A_ASP.109  | OD2 | 3.892 |
| 3SY0 | B_ARG.38   | NH1 | B_ASP.86   | OD2 | 2.779 |
| 3SY0 | B_ARG.38   | NH2 | B_GLU.46   | OE1 | 3.151 |
| 3SY0 | B_ARG.38   | NH2 | B_GLU.46   | OE2 | 4.000 |
| 3SY0 | B_ARG.38   | NH2 | B_ASP.86   | OD2 | 3.804 |
| 3SY0 | B_ARG.52   | NH1 | B_GLU.56   | OE2 | 2.894 |
| 3SY0 | B_ARG.52   | NH2 | B_GLU.56   | OE2 | 3.121 |
| 3SY0 | B_ARG.64   | NH1 | B_ASP.86   | OD1 | 2.875 |
| 3SY0 | B_ARG.64   | NH1 | B_ASP.86   | OD2 | 3.721 |
| 3SY0 | B_ARG.64   | NH2 | B_ASP.86   | OD1 | 3.464 |
| 3SY0 | B_ARG.64   | NH2 | B_ASP.86   | OD2 | 2.919 |
| 3SY0 | B_HIS.96   | ND1 | B_GLU.100A | OE2 | 3.230 |
| 3SY0 | B_HIS.96   | NE2 | B_GLU.100A | OE2 | 3.820 |
| 3SY0 | B_ARG.100B | NH1 | A_GLU.55   | OE1 | 2.843 |
| 3SY0 | B_ARG.100B | NH1 | A_GLU.55   | OE2 | 3.786 |
| 3SY0 | B_LYS.206  | NZ  | A_GLU.122  | OE1 | 3.980 |
| 3T4Y | A_LYS.24   | NZ  | A_ASP.70   | OD1 | 2.903 |
| 3T4Y | A_LYS.24   | NZ  | A_ASP.70   | OD2 | 3.502 |
| 3T4Y | A_LYS.39   | NZ  | A_GLU.81   | OE2 | 3.124 |
| 3T4Y | A_ARG.61   | NH1 | A_GLU.81   | OE1 | 3.284 |
| 3T4Y | A_ARG.61   | NH1 | A_ASP.82   | OD1 | 2.653 |
| 3T4Y | A_ARG.61   | NH1 | A_ASP.82   | OD2 | 3.419 |
| 3T4Y | A_ARG.95   | NH2 | B_ASP.95   | OD1 | 3.796 |
| 3T4Y | A_ARG.95   | NH2 | B_ASP.95   | OD2 | 2.951 |
| 3T4Y | A_LYS.148  | NZ  | A_GLU.194  | OE1 | 2.908 |
| 3T4Y | A_LYS.148  | NZ  | A_GLU.194  | OE2 | 3.013 |
| 3T4Y | A_ARG.187  | NH2 | A_GLU.184  | OE1 | 2.855 |

|      |            |     |            |     |       |
|------|------------|-----|------------|-----|-------|
| 3T4Y | A_HIS_188  | ND1 | A_ASP_150  | OD2 | 2.865 |
| 3T4Y | A_HIS_188  | NE2 | A_GLU_184  | OE2 | 2.755 |
| 3T4Y | B_ARG_38   | NH1 | B_ASP_86   | OD2 | 2.806 |
| 3T4Y | B_ARG_38   | NH2 | B_GLU_46   | OE1 | 3.203 |
| 3T4Y | B_ARG_38   | NH2 | B_GLU_85   | OE2 | 3.852 |
| 3T4Y | B_ARG_38   | NH2 | B_ASP_86   | OD2 | 3.884 |
| 3T4Y | B_ARG_52   | NH1 | B_GLU_56   | OE2 | 2.817 |
| 3T4Y | B_ARG_52   | NH2 | B_GLU_56   | OE2 | 2.987 |
| 3T4Y | B_ARG_64   | NH1 | B_ASP_86   | OD1 | 2.822 |
| 3T4Y | B_ARG_64   | NH1 | B_ASP_86   | OD2 | 3.726 |
| 3T4Y | B_ARG_64   | NH2 | B_ASP_86   | OD1 | 3.460 |
| 3T4Y | B_ARG_64   | NH2 | B_ASP_86   | OD2 | 2.866 |
| 3T4Y | B_HIS_96   | ND1 | B_GLU_100A | OE2 | 3.510 |
| 3T4Y | B_HIS_96   | NE2 | B_GLU_100A | OE2 | 3.981 |
| 3T4Y | B_ARG_100B | NH1 | A_GLU_55   | OE1 | 3.824 |
| 3T4Y | B_ARG_100B | NH1 | A_GLU_55   | OE2 | 2.840 |
| 3T4Y | B_LYS_206  | NZ  | A_GLU_122  | OE2 | 2.652 |
| 3T65 | B_ARG_38   | NH1 | B_ASP_86   | OD2 | 2.756 |
| 3T65 | B_ARG_38   | NH2 | B_GLU_46   | OE1 | 3.099 |
| 3T65 | B_ARG_38   | NH2 | B_GLU_85   | OE1 | 3.408 |
| 3T65 | B_ARG_38   | NH2 | B_ASP_86   | OD2 | 3.896 |
| 3T65 | B_ARG_52   | NH1 | B_GLU_56   | OE2 | 2.912 |
| 3T65 | B_ARG_52   | NH2 | B_GLU_56   | OE2 | 3.090 |
| 3T65 | B_ARG_64   | NH1 | B_ASP_86   | OD1 | 2.927 |
| 3T65 | B_ARG_64   | NH1 | B_ASP_86   | OD2 | 3.734 |
| 3T65 | B_ARG_64   | NH2 | B_ASP_86   | OD1 | 3.486 |
| 3T65 | B_ARG_64   | NH2 | B_ASP_86   | OD2 | 2.925 |
| 3T65 | B_HIS_96   | ND1 | B_GLU_100A | OE2 | 3.351 |
| 3T65 | B_HIS_96   | NE2 | B_GLU_100A | OE2 | 3.804 |
| 3T65 | B_ARG_100B | NH1 | A_GLU_55   | OE1 | 3.841 |
| 3T65 | B_ARG_100B | NH1 | A_GLU_55   | OE2 | 2.883 |
| 3T65 | A_LYS_24   | NZ  | A_ASP_70   | OD1 | 2.811 |
| 3T65 | A_LYS_24   | NZ  | A_ASP_70   | OD2 | 3.571 |
| 3T65 | A_LYS_39   | NZ  | A_GLU_81   | OE2 | 3.467 |
| 3T65 | A_ARG_54   | NH2 | A_ASP_60   | OD1 | 3.593 |
| 3T65 | A_ARG_61   | NH1 | A_GLU_81   | OE1 | 3.085 |
| 3T65 | A_ARG_61   | NH1 | A_ASP_82   | OD1 | 2.841 |
| 3T65 | A_ARG_61   | NH1 | A_ASP_82   | OD2 | 3.657 |
| 3T65 | A_ARG_95   | NH2 | B_ASP_95   | OD1 | 3.666 |
| 3T65 | A_ARG_95   | NH2 | B_ASP_95   | OD2 | 2.866 |
| 3T65 | A_LYS_146  | NZ  | A_GLU_153  | OE2 | 3.733 |
| 3T65 | A_LYS_148  | NZ  | A_GLU_194  | OE1 | 2.726 |
| 3T65 | A_LYS_148  | NZ  | A_GLU_194  | OE2 | 3.149 |
| 3T65 | A_LYS_182  | NZ  | A_GLU_186  | OE1 | 3.601 |
| 3T65 | A_LYS_182  | NZ  | A_GLU_186  | OE2 | 3.775 |
| 3T65 | A_ARG_187  | NH2 | A_GLU_184  | OE1 | 2.825 |
| 3T65 | A_HIS_188  | ND1 | A_ASP_150  | OD2 | 2.935 |
| 3T65 | A_HIS_188  | NE2 | A_GLU_184  | OE2 | 2.940 |
| 3T65 | A_LYS_198  | NZ  | A_ASP_109  | OD2 | 3.914 |
| 3T77 | A_LYS_24   | NZ  | A_ASP_70   | OD1 | 2.759 |
| 3T77 | A_LYS_24   | NZ  | A_ASP_70   | OD2 | 3.590 |
| 3T77 | A_LYS_39   | NZ  | A_GLU_81   | OE1 | 3.726 |
| 3T77 | A_ARG_61   | NH2 | A_GLU_81   | OE2 | 3.966 |
| 3T77 | A_ARG_61   | NH2 | A_ASP_82   | OD1 | 2.868 |
| 3T77 | A_ARG_61   | NH2 | A_ASP_82   | OD2 | 3.521 |
| 3T77 | A_ARG_95   | NH2 | B_ASP_95   | OD1 | 3.723 |
| 3T77 | A_ARG_95   | NH2 | B_ASP_95   | OD2 | 2.997 |
| 3T77 | A_LYS_102  | NZ  | A_GLU_104  | OE1 | 3.775 |



|      |            |     |            |     |       |
|------|------------|-----|------------|-----|-------|
| 3T77 | A_LYS_102  | NZ  | A_GLU_104  | OE2 | 3.007 |
| 3T77 | A_LYS_148  | NZ  | A_GLU_194  | OE1 | 3.783 |
| 3T77 | A_LYS_148  | NZ  | A_GLU_194  | OE2 | 2.306 |
| 3T77 | A_LYS_182  | NZ  | A_GLU_186  | OE1 | 3.731 |
| 3T77 | A_ARG_187  | NH2 | A_GLU_184  | OE1 | 2.585 |
| 3T77 | A_HIS_188  | ND1 | A_ASP_150  | OD2 | 3.031 |
| 3T77 | A_HIS_188  | NE2 | A_GLU_184  | OE2 | 2.771 |
| 3T77 | A_LYS_198  | NZ  | A_ASP_109  | OD1 | 3.952 |
| 3T77 | B_ARG_38   | NH1 | B_ASP_86   | OD2 | 2.829 |
| 3T77 | B_ARG_38   | NH2 | B_GLU_46   | OE1 | 3.138 |
| 3T77 | B_ARG_38   | NH2 | B_ASP_86   | OD2 | 3.744 |
| 3T77 | B_ARG_52   | NH1 | B_GLU_56   | OE2 | 2.717 |
| 3T77 | B_ARG_52   | NH2 | B_GLU_56   | OE2 | 3.056 |
| 3T77 | B_ARG_64   | NH1 | B_ASP_86   | OD1 | 2.807 |
| 3T77 | B_ARG_64   | NH1 | B_ASP_86   | OD2 | 3.626 |
| 3T77 | B_ARG_64   | NH2 | B_ASP_86   | OD1 | 3.476 |
| 3T77 | B_ARG_64   | NH2 | B_ASP_86   | OD2 | 2.870 |
| 3T77 | B_HIS_96   | ND1 | B_GLU_100A | OE1 | 3.974 |
| 3T77 | B_HIS_96   | NE2 | B_GLU_100A | OE1 | 2.416 |
| 3T77 | B_ARG_100B | NH1 | A_GLU_55   | OE1 | 3.125 |
| 3T77 | B_ARG_100B | NH1 | A_GLU_55   | OE2 | 2.687 |
| 3T77 | B_LYS_206  | NZ  | A_GLU_122  | OE2 | 3.917 |
| 3THM | L_ARG_31   | NH1 | L_ASP_94   | OD1 | 2.844 |
| 3THM | L_ARG_31   | NH1 | L_ASP_94   | OD2 | 2.885 |
| 3THM | L_ARG_55   | NH1 | L_ASP_61   | OD2 | 3.667 |
| 3THM | L_ARG_62   | NH2 | L_ASP_83   | OD1 | 3.471 |
| 3THM | L_ARG_62   | NH2 | L_ASP_83   | OD2 | 2.633 |
| 3THM | L_ARG_77   | NH1 | L_ASP_78   | OD2 | 2.791 |
| 3THM | L_HIS_192  | ND1 | L_ASP_155  | OD1 | 2.840 |
| 3THM | L_ARG_193  | NH1 | L_ASP_155  | OD2 | 3.695 |
| 3THM | L_ARG_193  | NH2 | L_ASP_155  | OD1 | 3.787 |
| 3THM | H_ARG_40   | NH1 | H_ASP_96   | OD1 | 2.763 |
| 3THM | H_ARG_40   | NH2 | H_GLU_48   | OE1 | 3.112 |
| 3THM | H_ARG_40   | NH2 | H_ASP_96   | OD1 | 3.732 |
| 3THM | H_ARG_73   | NH1 | H_ASP_96   | OD1 | 3.781 |
| 3THM | H_ARG_73   | NH1 | H_ASP_96   | OD2 | 3.095 |
| 3THM | H_ARG_73   | NH2 | H_ASP_96   | OD1 | 2.910 |
| 3THM | H_ARG_73   | NH2 | H_ASP_96   | OD2 | 3.508 |
| 3THM | H_LYS_82   | NZ  | H_ASP_79   | OD2 | 3.975 |
| 3THM | H_ARG_104  | NH2 | H_ASP_120  | OD1 | 3.520 |
| 3THM | H_ARG_104  | NH2 | H_ASP_120  | OD2 | 2.748 |
| 3THM | H_LYS_225  | NZ  | H_ASP_227  | OD2 | 3.663 |
| 3THM | H_LYS_229  | NZ  | H_GLU_231  | OE1 | 3.584 |
| 3THM | F_HIS_38   | ND1 | F_ASP_56   | OD1 | 3.082 |
| 3THM | F_HIS_38   | ND1 | F_ASP_56   | OD2 | 2.768 |
| 3THM | F_LYS_45   | NZ  | L_GLU_97   | OE2 | 3.172 |
| 3THM | F_LYS_53   | NZ  | F_GLU_63   | OE1 | 2.774 |
| 3THM | F_LYS_78   | NZ  | L_ASP_52   | OD1 | 3.702 |
| 3THM | F_ARG_112  | NH2 | F_GLU_98   | OE1 | 3.774 |
| 3TJE | L_ARG_31   | NH1 | L_ASP_94   | OD1 | 2.809 |
| 3TJE | L_ARG_62   | NH1 | L_ASP_83   | OD1 | 3.626 |
| 3TJE | L_ARG_62   | NH1 | L_ASP_83   | OD2 | 2.774 |
| 3TJE | L_ARG_62   | NH2 | L_ASP_83   | OD1 | 2.866 |
| 3TJE | L_ARG_62   | NH2 | L_ASP_83   | OD2 | 3.498 |
| 3TJE | L_ARG_77   | NH1 | L_ASP_78   | OD2 | 2.738 |
| 3TJE | L_ARG_77   | NH2 | L_ASP_61   | OD2 | 3.491 |
| 3TJE | L_LYS_114  | NZ  | L_GLU_202  | OE2 | 3.788 |
| 3TJE | H_ARG_40   | NH1 | H_ASP_96   | OD1 | 2.839 |

|      |            |     |            |     |       |
|------|------------|-----|------------|-----|-------|
| 3TJE | H_ARG_40   | NH2 | H_GLU_48   | OE1 | 3.044 |
| 3TJE | H_ARG_40   | NH2 | H_ASP_96   | OD1 | 3.722 |
| 3TJE | H_ARG_73   | NH1 | H_ASP_96   | OD1 | 3.710 |
| 3TJE | H_ARG_73   | NH1 | H_ASP_96   | OD2 | 2.838 |
| 3TJE | H_ARG_73   | NH2 | H_ASP_96   | OD1 | 2.943 |
| 3TJE | H_ARG_73   | NH2 | H_ASP_96   | OD2 | 3.439 |
| 3TJE | H_ARG_104  | NH2 | H_ASP_120  | OD1 | 3.469 |
| 3TJE | H_ARG_104  | NH2 | H_ASP_120  | OD2 | 2.676 |
| 3TJE | H_LYS_225  | NZ  | H_ASP_227  | OD2 | 3.295 |
| 3TJE | H_LYS_229  | NZ  | H_GLU_231  | OE1 | 3.568 |
| 3TJE | F_LYS_53   | NZ  | F_GLU_63   | OE1 | 2.653 |
| 3TJE | F_HIS_95   | ND1 | F_ASP_92   | OD2 | 3.202 |
| 3TJE | F_ARG_105  | NH1 | F_GLU_71   | OE1 | 3.450 |
| 3TJE | F_ARG_105  | NH1 | F_GLU_71   | OE2 | 3.955 |
| 3TJE | F_ARG_105  | NH2 | F_GLU_71   | OE2 | 3.995 |
| 3TJE | F_LYS_110  | NZ  | F_GLU_100  | OE1 | 2.868 |
| 3TJE | F_LYS_110  | NZ  | F_GLU_100  | OE2 | 3.645 |
| 3TJE | F_ARG_112  | NH2 | F_GLU_98   | OE2 | 3.462 |
| 3TJE | F_LYS_114  | NZ  | F_GLU_93   | OE2 | 3.047 |
| 3TJE | F_HIS_126  | NE2 | F_ASP_128  | OD1 | 3.055 |
| 3TJE | F_HIS_126  | NE2 | F_ASP_128  | OD2 | 3.467 |
| 3U1S | L_LYS_24   | NZ  | L_ASP_70   | OD2 | 3.165 |
| 3U1S | L_HIS_27D  | NE2 | H_ASP_100B | OD2 | 2.859 |
| 3U1S | L_ARG_61   | NH1 | L_ASP_82   | OD1 | 3.331 |
| 3U1S | L_ARG_61   | NH1 | L_ASP_82   | OD2 | 2.471 |
| 3U1S | L_ARG_61   | NH2 | L_GLU_79   | OE1 | 3.597 |
| 3U1S | L_ARG_61   | NH2 | L_GLU_79   | OE2 | 3.692 |
| 3U1S | L_ARG_61   | NH2 | L_ASP_82   | OD1 | 2.705 |
| 3U1S | L_ARG_61   | NH2 | L_ASP_82   | OD2 | 3.338 |
| 3U1S | L_LYS_149  | NZ  | L_GLU_195  | OE2 | 2.775 |
| 3U1S | L_HIS_189  | ND1 | L_ASP_151  | OD2 | 3.043 |
| 3U1S | H_LYS_12   | NZ  | H_GLU_10   | OE2 | 3.798 |
| 3U1S | H_ARG_38   | NH1 | H_ASP_86   | OD1 | 2.812 |
| 3U1S | H_ARG_38   | NH2 | H_GLU_46   | OE1 | 3.161 |
| 3U1S | H_ARG_38   | NH2 | H_ASP_86   | OD1 | 3.811 |
| 3U1S | H_HIS_52A  | ND1 | H_GLU_52B  | OE1 | 3.637 |
| 3U1S | H_HIS_52A  | NE2 | H_ASP_33   | OD1 | 3.943 |
| 3U1S | H_HIS_52A  | NE2 | H_GLU_52B  | OE1 | 3.544 |
| 3U1S | H_HIS_52A  | NE2 | H_GLU_52B  | OE2 | 3.663 |
| 3U1S | H_LYS_60   | NZ  | H_GLU_46   | OE1 | 3.515 |
| 3U1S | H_LYS_60   | NZ  | H_GLU_46   | OE2 | 2.683 |
| 3U1S | H_ARG_64   | NH1 | H_ASP_86   | OD1 | 3.631 |
| 3U1S | H_ARG_64   | NH1 | H_ASP_86   | OD2 | 3.169 |
| 3U1S | H_ARG_64   | NH2 | H_ASP_86   | OD1 | 2.578 |
| 3U1S | H_ARG_64   | NH2 | H_ASP_86   | OD2 | 3.420 |
| 3U1S | H_LYS_97   | NZ  | H_ASP_33   | OD1 | 2.873 |
| 3U1S | H_LYS_97   | NZ  | H_ASP_33   | OD2 | 3.430 |
| 3U1S | H_LYS_97   | NZ  | H_GLU_52B  | OE1 | 2.747 |
| 3U1S | H_LYS_97   | NZ  | H_GLU_52B  | OE2 | 3.729 |
| 3U1S | H_ARG_99   | NH1 | H_GLU_52B  | OE1 | 3.885 |
| 3U1S | H_ARG_99   | NH1 | H_GLU_52B  | OE2 | 3.932 |
| 3U1S | H_ARG_99   | NH1 | H_ASP_53   | OD1 | 2.841 |
| 3U1S | H_ARG_99   | NH1 | H_ASP_53   | OD2 | 3.415 |
| 3U1S | H_ARG_99   | NH2 | H_ASP_53   | OD1 | 3.710 |
| 3U1S | H_ARG_99   | NH2 | H_ASP_53   | OD2 | 2.972 |
| 3U1S | H_ARG_99   | NH2 | H_ASP_100R | OD1 | 3.526 |
| 3U1S | H_ARG_99   | NH2 | H_ASP_100R | OD2 | 2.851 |
| 3U1S | H_ARG_100A | NH1 | H_GLU_100N | OE2 | 3.328 |

|      |           |     |            |     |       |
|------|-----------|-----|------------|-----|-------|
| 3U1S | H.LYS_211 | NZ  | H.ASP_213  | OD1 | 2.712 |
| 3U1S | H.LYS_211 | NZ  | H.ASP_213  | OD2 | 3.729 |
| 3U1S | H.LYS_214 | NZ  | L.GLU_123  | OE1 | 3.475 |
| 3U1S | H.LYS_215 | NZ  | H.GLU_217  | OE2 | 3.772 |
| 3U2S | H.ARG_31  | NH1 | H.ASP_100L | OD2 | 3.978 |
| 3U2S | H.ARG_31  | NH2 | H.ASP_100L | OD1 | 3.963 |
| 3U2S | H.ARG_31  | NH2 | H.ASP_100L | OD2 | 2.965 |
| 3U2S | H.HIS_35  | NE2 | H.GLU_95   | OE1 | 2.640 |
| 3U2S | H.ARG_38  | NH1 | H.ASP_86   | OD1 | 2.839 |
| 3U2S | H.ARG_38  | NH2 | H.GLU_46   | OE1 | 3.925 |
| 3U2S | H.ARG_38  | NH2 | H.GLU_46   | OE2 | 2.923 |
| 3U2S | H.ARG_38  | NH2 | H.ASP_86   | OD1 | 3.911 |
| 3U2S | H.LYS_52  | NZ  | H.ASP_100I | OD2 | 3.366 |
| 3U2S | H.ARG_66  | NH1 | H.ASP_86   | OD1 | 3.572 |
| 3U2S | H.ARG_66  | NH1 | H.ASP_86   | OD2 | 2.527 |
| 3U2S | H.ARG_66  | NH2 | H.ASP_86   | OD1 | 2.931 |
| 3U2S | H.ARG_66  | NH2 | H.ASP_86   | OD2 | 3.433 |
| 3U2S | H.ARG_94  | NH2 | H.ASP_101  | OD1 | 3.597 |
| 3U2S | H.ARG_94  | NH2 | H.ASP_101  | OD2 | 2.850 |
| 3U2S | L.LYS_53  | NZ  | L.ASP_50   | OD2 | 2.841 |
| 3U2S | L.ARG_54  | NH2 | C.ASP_167  | OD1 | 3.525 |
| 3U2S | L.ARG_54  | NH2 | C.ASP_167  | OD2 | 3.282 |
| 3U2S | L.ARG_61  | NH1 | L.ASP_82   | OD1 | 3.649 |
| 3U2S | L.ARG_61  | NH1 | L.ASP_82   | OD2 | 2.861 |
| 3U2S | L.ARG_61  | NH2 | L.ASP_82   | OD1 | 2.965 |
| 3U2S | L.ARG_61  | NH2 | L.ASP_82   | OD2 | 3.572 |
| 3U2S | L.LYS_66  | NZ  | L.GLU_31   | OE2 | 2.988 |
| 3U2S | L.ARG_95A | NH1 | H.ASP_61   | OD1 | 2.794 |
| 3U2S | L.ARG_95A | NH1 | H.ASP_61   | OD2 | 3.373 |
| 3U2S | L.ARG_95A | NH2 | H.ASP_61   | OD1 | 2.338 |
| 3U2S | L.ARG_96  | NH2 | H.GLU_95   | OE1 | 3.743 |
| 3U2S | L.ARG_96  | NH2 | H.GLU_95   | OE2 | 2.869 |
| 3U2S | L.LYS_129 | NZ  | H.ASP_144  | OD1 | 3.881 |
| 3U2S | L.HIS_188 | ND1 | L.ASP_151  | OD2 | 3.681 |
| 3U2S | G.ARG_168 | NH2 | H.ASP_100L | OD1 | 3.358 |
| 3U2S | G.ARG_168 | NH2 | H.ASP_100L | OD2 | 3.104 |
| 3U2S | G.LYS_171 | NZ  | H.ASP_100I | OD1 | 3.178 |
| 3U2S | A.ARG_31  | NH2 | A.ASP_100L | OD1 | 3.437 |
| 3U2S | A.ARG_31  | NH2 | A.ASP_100L | OD2 | 3.464 |
| 3U2S | A.HIS_35  | NE2 | A.GLU_95   | OE1 | 2.700 |
| 3U2S | A.ARG_38  | NH1 | A.ASP_86   | OD1 | 2.886 |
| 3U2S | A.ARG_38  | NH2 | A.GLU_46   | OE1 | 3.872 |
| 3U2S | A.ARG_38  | NH2 | A.GLU_46   | OE2 | 2.898 |
| 3U2S | A.ARG_38  | NH2 | A.ASP_86   | OD1 | 3.831 |
| 3U2S | A.LYS_52  | NZ  | A.ASP_100I | OD2 | 3.513 |
| 3U2S | A.ARG_66  | NH1 | A.ASP_86   | OD1 | 3.554 |
| 3U2S | A.ARG_66  | NH1 | A.ASP_86   | OD2 | 2.481 |
| 3U2S | A.ARG_66  | NH2 | A.ASP_86   | OD1 | 3.013 |
| 3U2S | A.ARG_66  | NH2 | A.ASP_86   | OD2 | 3.477 |
| 3U2S | A.ARG_83  | NH1 | A.GLU_85   | OE1 | 2.914 |
| 3U2S | A.ARG_94  | NH2 | A.ASP_101  | OD1 | 3.528 |
| 3U2S | A.ARG_94  | NH2 | A.ASP_101  | OD2 | 2.897 |
| 3U2S | A.LYS_143 | NZ  | B.GLU_124  | OE2 | 3.550 |
| 3U2S | B.LYS_53  | NZ  | B.ASP_50   | OD2 | 2.754 |
| 3U2S | B.ARG_61  | NH1 | B.ASP_82   | OD1 | 3.698 |
| 3U2S | B.ARG_61  | NH1 | B.ASP_82   | OD2 | 2.775 |
| 3U2S | B.ARG_61  | NH2 | B.ASP_82   | OD1 | 2.930 |
| 3U2S | B.ARG_61  | NH2 | B.ASP_82   | OD2 | 3.413 |

|      |           |     |            |     |       |
|------|-----------|-----|------------|-----|-------|
| 3U2S | B_LYS_66  | NZ  | B_GLU_31   | OE2 | 3.053 |
| 3U2S | B_ARG_95A | NH1 | A_ASP_61   | OD1 | 2.632 |
| 3U2S | B_ARG_95A | NH1 | A_ASP_61   | OD2 | 3.483 |
| 3U2S | B_ARG_95A | NH2 | A_ASP_61   | OD1 | 3.270 |
| 3U2S | B_ARG_96  | NH2 | A_GLU_95   | OE1 | 3.738 |
| 3U2S | B_ARG_96  | NH2 | A_GLU_95   | OE2 | 2.983 |
| 3U2S | C_ARG_168 | NH2 | A_ASP_100L | OD1 | 2.424 |
| 3U2S | C_ARG_168 | NH2 | A_ASP_100L | OD2 | 3.228 |
| 3U2S | C_LYS_169 | NZ  | C_ASP_223  | OD1 | 3.001 |
| 3U2S | C_LYS_169 | NZ  | C_ASP_223  | OD2 | 3.464 |
| 3U2S | C_LYS_169 | NZ  | C_GLU_239  | OE2 | 2.484 |
| 3U2S | C_LYS_171 | NZ  | A_ASP_100I | OD1 | 3.279 |
| 3U36 | H_HIS_35  | NE2 | H_GLU_95   | OE1 | 2.791 |
| 3U36 | H_ARG_38  | NH1 | H_ASP_86   | OD1 | 3.091 |
| 3U36 | H_ARG_38  | NH2 | H_GLU_46   | OE2 | 3.256 |
| 3U36 | H_ARG_66  | NH1 | H_ASP_86   | OD1 | 3.636 |
| 3U36 | H_ARG_66  | NH1 | H_ASP_86   | OD2 | 2.875 |
| 3U36 | H_ARG_66  | NH2 | H_ASP_86   | OD1 | 3.304 |
| 3U36 | H_ARG_66  | NH2 | H_ASP_86   | OD2 | 3.804 |
| 3U36 | H_ARG_83  | NH1 | H_GLU_85   | OE2 | 3.153 |
| 3U36 | H_ARG_94  | NH2 | H_ASP_101  | OD1 | 3.359 |
| 3U36 | H_ARG_94  | NH2 | H_ASP_101  | OD2 | 2.948 |
| 3U36 | H_LYS_210 | NZ  | H_GLU_212  | OE1 | 3.728 |
| 3U36 | L_LYS_53  | NZ  | L_ASP_50   | OD2 | 3.306 |
| 3U36 | L_ARG_61  | NH1 | L_ASP_82   | OD1 | 3.774 |
| 3U36 | L_ARG_61  | NH1 | L_ASP_82   | OD2 | 2.558 |
| 3U36 | L_ARG_61  | NH2 | L_ASP_82   | OD1 | 2.956 |
| 3U36 | L_ARG_61  | NH2 | L_ASP_82   | OD2 | 3.131 |
| 3U36 | L_LYS_66  | NZ  | L_GLU_31   | OE1 | 3.601 |
| 3U36 | L_LYS_66  | NZ  | L_GLU_31   | OE2 | 3.328 |
| 3U36 | L_LYS_89  | NZ  | H_GLU_95   | OE1 | 3.857 |
| 3U36 | L_ARG_95A | NH1 | H_ASP_61   | OD1 | 3.290 |
| 3U36 | L_ARG_95A | NH1 | H_ASP_61   | OD2 | 1.959 |
| 3U36 | L_ARG_95A | NH2 | H_ASP_61   | OD1 | 3.530 |
| 3U36 | L_ARG_95A | NH2 | H_ASP_61   | OD2 | 3.624 |
| 3U36 | L_ARG_96  | NH2 | H_GLU_95   | OE2 | 3.606 |
| 3U36 | L_HIS_188 | ND1 | L_ASP_151  | OD2 | 3.797 |
| 3U36 | A_HIS_35  | NE2 | A_GLU_95   | OE1 | 2.797 |
| 3U36 | A_ARG_38  | NH1 | A_ASP_86   | OD1 | 3.094 |
| 3U36 | A_ARG_38  | NH2 | A_GLU_46   | OE1 | 3.989 |
| 3U36 | A_ARG_38  | NH2 | A_GLU_46   | OE2 | 3.229 |
| 3U36 | A_ARG_66  | NH1 | A_ASP_86   | OD1 | 3.636 |
| 3U36 | A_ARG_66  | NH1 | A_ASP_86   | OD2 | 2.878 |
| 3U36 | A_ARG_66  | NH2 | A_ASP_86   | OD1 | 3.312 |
| 3U36 | A_ARG_66  | NH2 | A_ASP_86   | OD2 | 3.805 |
| 3U36 | A_ARG_83  | NH1 | A_GLU_85   | OE2 | 3.159 |
| 3U36 | A_ARG_94  | NH2 | A_ASP_101  | OD1 | 3.386 |
| 3U36 | A_ARG_94  | NH2 | A_ASP_101  | OD2 | 2.941 |
| 3U36 | A_LYS_210 | NZ  | A_GLU_212  | OE1 | 3.743 |
| 3U36 | B_LYS_53  | NZ  | B_ASP_50   | OD2 | 3.349 |
| 3U36 | B_ARG_61  | NH1 | B_ASP_82   | OD1 | 3.756 |
| 3U36 | B_ARG_61  | NH1 | B_ASP_82   | OD2 | 2.547 |
| 3U36 | B_ARG_61  | NH2 | B_ASP_82   | OD1 | 2.945 |
| 3U36 | B_ARG_61  | NH2 | B_ASP_82   | OD2 | 3.139 |
| 3U36 | B_LYS_66  | NZ  | B_GLU_31   | OE1 | 3.580 |
| 3U36 | B_LYS_66  | NZ  | B_GLU_31   | OE2 | 3.318 |
| 3U36 | B_LYS_89  | NZ  | A_GLU_95   | OE1 | 3.772 |
| 3U36 | B_ARG_95A | NH1 | A_ASP_61   | OD1 | 3.519 |

|      |           |     |           |     |       |
|------|-----------|-----|-----------|-----|-------|
| 3U36 | B_ARG_95A | NH1 | A_ASP_61  | OD2 | 2.198 |
| 3U36 | B_ARG_95A | NH2 | A_ASP_61  | OD1 | 3.831 |
| 3U36 | B_ARG_95A | NH2 | A_ASP_61  | OD2 | 3.817 |
| 3U36 | B_ARG_96  | NH2 | A_GLU_95  | OE2 | 3.395 |
| 3U36 | B_LYS_129 | NZ  | A_ASP_144 | OD1 | 3.769 |
| 3U36 | B_HIS_188 | ND1 | B_ASP_151 | OD2 | 3.839 |
| 3U36 | C_HIS_35  | NE2 | C_GLU_95  | OE1 | 2.789 |
| 3U36 | C_ARG_38  | NH1 | C_ASP_86  | OD1 | 3.079 |
| 3U36 | C_ARG_38  | NH2 | C_GLU_46  | OE2 | 3.262 |
| 3U36 | C_ARG_38  | NH2 | C_ASP_86  | OD1 | 3.997 |
| 3U36 | C_ARG_66  | NH1 | C_ASP_86  | OD1 | 3.625 |
| 3U36 | C_ARG_66  | NH1 | C_ASP_86  | OD2 | 2.865 |
| 3U36 | C_ARG_66  | NH2 | C_ASP_86  | OD1 | 3.335 |
| 3U36 | C_ARG_66  | NH2 | C_ASP_86  | OD2 | 3.835 |
| 3U36 | C_ARG_83  | NH1 | C_GLU_85  | OE2 | 3.161 |
| 3U36 | C_ARG_94  | NH2 | C_ASP_101 | OD1 | 3.358 |
| 3U36 | C_ARG_94  | NH2 | C_ASP_101 | OD2 | 2.963 |
| 3U36 | C_LYS_210 | NZ  | C_GLU_212 | OE1 | 3.726 |
| 3U36 | D_LYS_53  | NZ  | D_ASP_50  | OD2 | 3.331 |
| 3U36 | D_ARG_61  | NH1 | D_ASP_82  | OD1 | 3.763 |
| 3U36 | D_ARG_61  | NH1 | D_ASP_82  | OD2 | 2.558 |
| 3U36 | D_ARG_61  | NH2 | D_ASP_82  | OD1 | 2.940 |
| 3U36 | D_ARG_61  | NH2 | D_ASP_82  | OD2 | 3.134 |
| 3U36 | D_LYS_66  | NZ  | D_GLU_31  | OE1 | 3.617 |
| 3U36 | D_LYS_66  | NZ  | D_GLU_31  | OE2 | 3.349 |
| 3U36 | D_LYS_89  | NZ  | C_GLU_95  | OE1 | 3.877 |
| 3U36 | D_ARG_95A | NH1 | C_ASP_61  | OD1 | 3.266 |
| 3U36 | D_ARG_95A | NH1 | C_ASP_61  | OD2 | 2.045 |
| 3U36 | D_ARG_95A | NH2 | C_ASP_61  | OD1 | 3.629 |
| 3U36 | D_ARG_95A | NH2 | C_ASP_61  | OD2 | 3.782 |
| 3U36 | D_ARG_96  | NH2 | C_GLU_95  | OE2 | 3.569 |
| 3U36 | D_HIS_188 | ND1 | D_ASP_151 | OD2 | 3.779 |
| 3U36 | E_HIS_35  | NE2 | E_GLU_95  | OE1 | 2.788 |
| 3U36 | E_ARG_38  | NH1 | E_ASP_86  | OD1 | 3.110 |
| 3U36 | E_ARG_38  | NH2 | E_GLU_46  | OE2 | 3.229 |
| 3U36 | E_ARG_66  | NH1 | E_ASP_86  | OD1 | 3.638 |
| 3U36 | E_ARG_66  | NH1 | E_ASP_86  | OD2 | 2.884 |
| 3U36 | E_ARG_66  | NH2 | E_ASP_86  | OD1 | 3.328 |
| 3U36 | E_ARG_66  | NH2 | E_ASP_86  | OD2 | 3.837 |
| 3U36 | E_ARG_83  | NH1 | E_GLU_85  | OE2 | 3.161 |
| 3U36 | E_ARG_94  | NH2 | E_ASP_101 | OD1 | 3.373 |
| 3U36 | E_ARG_94  | NH2 | E_ASP_101 | OD2 | 2.982 |
| 3U36 | E_LYS_210 | NZ  | E_GLU_212 | OE1 | 3.712 |
| 3U36 | F_LYS_53  | NZ  | F_ASP_50  | OD2 | 3.348 |
| 3U36 | F_ARG_61  | NH1 | F_ASP_82  | OD1 | 3.756 |
| 3U36 | F_ARG_61  | NH1 | F_ASP_82  | OD2 | 2.549 |
| 3U36 | F_ARG_61  | NH2 | F_ASP_82  | OD1 | 2.945 |
| 3U36 | F_ARG_61  | NH2 | F_ASP_82  | OD2 | 3.125 |
| 3U36 | F_LYS_66  | NZ  | F_GLU_31  | OE1 | 3.599 |
| 3U36 | F_LYS_66  | NZ  | F_GLU_31  | OE2 | 3.326 |
| 3U36 | F_ARG_95A | NH1 | E_ASP_61  | OD1 | 3.076 |
| 3U36 | F_ARG_95A | NH1 | E_ASP_61  | OD2 | 1.876 |
| 3U36 | F_ARG_95A | NH2 | E_ASP_61  | OD1 | 3.424 |
| 3U36 | F_ARG_95A | NH2 | E_ASP_61  | OD2 | 3.670 |
| 3U36 | F_ARG_96  | NH2 | E_GLU_95  | OE2 | 3.739 |
| 3U36 | F_HIS_188 | ND1 | F_ASP_151 | OD2 | 3.814 |
| 3UBX | A_ARG_21  | NH2 | A_GLU_92  | OE1 | 3.225 |
| 3UBX | A_ARG_21  | NH2 | A_GLU_92  | OE2 | 2.650 |

|      |           |     |           |     |       |
|------|-----------|-----|-----------|-----|-------|
| 3UBX | A_ARG_25  | NH2 | A_ASP_27  | OD1 | 3.138 |
| 3UBX | A_ARG_25  | NH2 | A_ASP_27  | OD2 | 3.670 |
| 3UBX | A_ARG_25  | NH2 | A_ASP_43  | OD2 | 3.995 |
| 3UBX | A_ARG_39  | NH2 | B_ASP_53  | OD2 | 3.336 |
| 3UBX | A_LYS_51  | NZ  | A_GLU_243 | OE1 | 2.918 |
| 3UBX | A_LYS_51  | NZ  | A_GLU_243 | OE2 | 3.104 |
| 3UBX | A_HIS_203 | ND1 | A_ASP_252 | OD1 | 3.478 |
| 3UBX | A_ARG_204 | NH1 | A_GLU_258 | OE2 | 2.763 |
| 3UBX | A_ARG_204 | NH2 | A_GLU_258 | OE2 | 2.916 |
| 3UBX | A_ARG_264 | NH2 | A_ASP_274 | OD2 | 3.397 |
| 3UBX | A_LYS_266 | NZ  | A_ASP_274 | OD2 | 2.636 |
| 3UBX | A_HIS_282 | NE2 | B_ASP_98  | OD1 | 3.815 |
| 3UBX | A_HIS_282 | NE2 | B_ASP_98  | OD2 | 3.128 |
| 3UBX | B_ARG_12  | NH2 | A_ASP_242 | OD1 | 3.715 |
| 3UBX | B_ARG_12  | NH2 | A_ASP_242 | OD2 | 3.324 |
| 3UBX | B_LYS_19  | NZ  | B_GLU_16  | OE1 | 3.108 |
| 3UBX | B_LYS_19  | NZ  | B_GLU_16  | OE2 | 3.855 |
| 3UBX | B_LYS_    | NZ  | B_ASP_76  | OD2 | 3.469 |
| 3UBX | B_HIS_67  | NE2 | B_GLU_50  | OE1 | 3.182 |
| 3UBX | D_ARG_21  | NH2 | D_GLU_92  | OE1 | 3.198 |
| 3UBX | D_ARG_21  | NH2 | D_GLU_92  | OE2 | 2.624 |
| 3UBX | D_ARG_    | NH2 | D_ASP_    | OD1 | 3.097 |
| 3UBX | D_ARG_    | NH2 | D_ASP_    | OD2 | 3.631 |
| 3UBX | D_ARG_    | NH2 | E_ASP_    | OD2 | 3.464 |
| 3UBX | D_LYS_    | NZ  | D_GLU_    | OE1 | 2.938 |
| 3UBX | D_LYS_    | NZ  | D_GLU_    | OE2 | 3.121 |
| 3UBX | D_HIS_    | ND1 | D_ASP_    | OD1 | 3.543 |
| 3UBX | D_ARG_    | NH1 | D_GLU_    | OE2 | 2.718 |
| 3UBX | D_ARG_    | NH2 | D_GLU_    | OE2 | 2.872 |
| 3UBX | D_ARG_    | NH2 | D_ASP_    | OD2 | 3.382 |
| 3UBX | D_LYS_    | NZ  | D_ASP_    | OD2 | 2.644 |
| 3UBX | D_HIS_    | NE2 | E_ASP_    | OD1 | 3.963 |
| 3UBX | D_HIS_    | NE2 | E_ASP_    | OD2 | 3.193 |
| 3UBX | E_ARG_    | NH2 | D_ASP_    | OD1 | 3.594 |
| 3UBX | E_ARG_    | NH2 | D_ASP_    | OD2 | 3.257 |
| 3UBX | E_LYS_    | NZ  | E_GLU_    | OE1 | 3.157 |
| 3UBX | E_LYS_    | NZ  | E_GLU_    | OE2 | 3.909 |
| 3UBX | E_HIS_    | ND1 | D_GLU_97  | OE1 | 3.846 |
| 3UBX | E_LYS_    | NZ  | E_ASP_    | OD2 | 3.547 |
| 3UBX | E_HIS_    | NE2 | E_GLU_    | OE1 | 3.185 |
| 3UBX | L_ARG_32  | NH2 | A_ASP_80  | OD1 | 3.479 |
| 3UBX | L_ARG_32  | NH2 | A_ASP_80  | OD2 | 3.348 |
| 3UBX | L_ARG_32  | NH2 | A_ASP_153 | OD2 | 3.795 |
| 3UBX | L_ARG_61  | NH2 | L_ASP_82  | OD1 | 2.895 |
| 3UBX | L_ARG_61  | NH2 | L_ASP_82  | OD2 | 3.241 |
| 3UBX | L_LYS_103 | NZ  | L_ASP_165 | OD1 | 3.380 |
| 3UBX | L_LYS_142 | NZ  | L_GLU_105 | OE1 | 2.881 |
| 3UBX | L_LYS_142 | NZ  | L_GLU_105 | OE2 | 3.829 |
| 3UBX | L_LYS_    | NZ  | L_GLU_    | OE1 | 3.629 |
| 3UBX | L_LYS_    | NZ  | L_GLU_    | OE2 | 3.666 |
| 3UBX | L_ARG_    | NH1 | L_GLU_    | OE2 | 3.855 |
| 3UBX | L_LYS_169 | NZ  | L_GLU_81  | OE1 | 3.852 |
| 3UBX | L_LYS_169 | NZ  | L_GLU_81  | OE2 | 3.096 |
| 3UBX | L_HIS_    | NE2 | L_GLU_    | OE2 | 3.994 |
| 3UBX | L_LYS_    | NZ  | L_ASP_    | OD2 | 3.189 |
| 3UBX | H_LYS_12  | NZ  | H_GLU_10  | OE2 | 3.934 |
| 3UBX | H_LYS_65  | NZ  | H_ASP_62  | OD1 | 3.945 |
| 3UBX | H_ARG_67  | NH2 | H_ASP_90  | OD1 | 2.984 |

|      |           |     |           |     |       |
|------|-----------|-----|-----------|-----|-------|
| 3UBX | H_ARG_67  | NH2 | H_ASP_90  | OD2 | 2.362 |
| 3UBX | H_ARG_103 | NH2 | A_ASP_80  | OD1 | 2.578 |
| 3UBX | H_LYS_215 | NZ  | L_GLU_123 | OE1 | 3.082 |
| 3UBX | H_LYS_215 | NZ  | L_GLU_123 | OE2 | 3.481 |
| 3UBX | L_ARG_32  | NH2 | D_ASP_80  | OD1 | 3.383 |
| 3UBX | L_ARG_32  | NH2 | D_ASP_80  | OD2 | 3.294 |
| 3UBX | L_ARG_32  | NH2 | D_ASP_153 | OD2 | 3.950 |
| 3UBX | L_ARG_61  | NH2 | L_ASP_82  | OD1 | 2.893 |
| 3UBX | L_ARG_61  | NH2 | L_ASP_82  | OD2 | 3.343 |
| 3UBX | L_LYS_103 | NZ  | L_ASP_165 | OD1 | 3.385 |
| 3UBX | L_LYS_142 | NZ  | L_GLU_105 | OE1 | 2.848 |
| 3UBX | L_LYS_142 | NZ  | L_GLU_105 | OE2 | 3.795 |
| 3UBX | L_LYS_149 | NZ  | L_GLU_195 | OE1 | 3.611 |
| 3UBX | L_LYS_149 | NZ  | L_GLU_195 | OE2 | 3.678 |
| 3UBX | L_ARG_155 | NH1 | L_GLU_185 | OE2 | 3.804 |
| 3UBX | L_LYS_169 | NZ  | L_GLU_81  | OE1 | 3.837 |
| 3UBX | L_LYS_169 | NZ  | L_GLU_81  | OE2 | 3.130 |
| 3UBX | L_LYS_199 | NZ  | L_ASP_110 | OD2 | 3.216 |
| 3UBX | G_LYS_12  | NZ  | G_GLU_10  | OE2 | 3.983 |
| 3UBX | G_ARG_67  | NH2 | G_ASP_90  | OD1 | 3.006 |
| 3UBX | G_ARG_67  | NH2 | G_ASP_90  | OD2 | 2.366 |
| 3UBX | G_ARG_103 | NH2 | D_ASP_80  | OD1 | 2.614 |
| 3UBX | G_LYS_215 | NZ  | L_GLU_123 | OE1 | 3.204 |
| 3UBX | G_LYS_215 | NZ  | L_GLU_123 | OE2 | 3.514 |
| 3UJI | L_LYS_53  | NZ  | L_GLU_50  | OE1 | 2.671 |
| 3UJI | L_ARG_61  | NH2 | L_ASP_82  | OD1 | 2.783 |
| 3UJI | L_ARG_61  | NH2 | L_ASP_82  | OD2 | 3.833 |
| 3UJI | L_LYS_66  | NZ  | L_ASP_51  | OD1 | 2.934 |
| 3UJI | L_LYS_66  | NZ  | L_ASP_51  | OD2 | 3.132 |
| 3UJI | L_LYS_103 | NZ  | L_ASP_85  | OD1 | 2.947 |
| 3UJI | L_LYS_103 | NZ  | L_ASP_85  | OD2 | 3.475 |
| 3UJI | L_LYS_110 | NZ  | L_GLU_198 | OE1 | 2.866 |
| 3UJI | L_LYS_110 | NZ  | L_GLU_198 | OE2 | 3.915 |
| 3UJI | L_HIS_188 | ND1 | L_ASP_151 | OD2 | 3.040 |
| 3UJI | L_LYS_189 | NZ  | L_ASP_151 | OD1 | 3.884 |
| 3UJI | H_LYS_12  | NZ  | H_GLU_16  | OE1 | 3.975 |
| 3UJI | H_LYS_73  | NZ  | H_ASP_53  | OD2 | 3.330 |
| 3UJI | H_ARG_94  | NH2 | H_ASP_101 | OD1 | 3.451 |
| 3UJI | H_ARG_94  | NH2 | H_ASP_101 | OD2 | 2.842 |
| 3UJI | H_LYS_143 | NZ  | L_GLU_124 | OE2 | 2.632 |
| 3UJI | H_LYS_206 | NZ  | H_ASP_208 | OD1 | 3.500 |
| 3UJI | H_LYS_209 | NZ  | L_GLU_123 | OE1 | 3.097 |
| 3UJI | H_LYS_209 | NZ  | L_GLU_123 | OE2 | 2.701 |
| 3UJI | H_LYS_210 | NZ  | H_GLU_212 | OE1 | 3.946 |
| 3UJI | H_LYS_210 | NZ  | H_GLU_212 | OE2 | 3.699 |
| 3UJI | P_LYS_305 | NZ  | H_ASP_54  | OD1 | 2.722 |
| 3UJI | P_LYS_305 | NZ  | H_ASP_54  | OD2 | 3.687 |
| 3UJI | P_LYS_305 | NZ  | H_ASP_56  | OD2 | 2.744 |
| 3UJI | P_HIS_308 | ND1 | H_GLU_98  | OE1 | 2.731 |
| 3UJI | P_HIS_308 | ND1 | H_GLU_98  | OE2 | 3.371 |
| 3UJJ | L_LYS_39  | NZ  | L_ASP_81  | OD2 | 3.776 |
| 3UJJ | L_ARG_61  | NH1 | L_ASP_81  | OD1 | 3.440 |
| 3UJJ | L_ARG_61  | NH1 | L_ASP_82  | OD1 | 2.656 |
| 3UJJ | L_ARG_61  | NH1 | L_ASP_82  | OD2 | 3.380 |
| 3UJJ | L_ARG_66  | NH2 | L_ASP_51  | OD1 | 3.920 |
| 3UJJ | L_ARG_66  | NH2 | L_ASP_51  | OD2 | 2.951 |
| 3UJJ | H_ARG_38  | NH2 | H_GLU_46  | OE1 | 3.170 |
| 3UJJ | H_ARG_38  | NH2 | H_GLU_46  | OE2 | 3.073 |

|      |           |     |           |     |       |
|------|-----------|-----|-----------|-----|-------|
| 3UJJ | H_ARG_58  | NH2 | H_ASP_56  | OD1 | 3.555 |
| 3UJJ | H_ARG_58  | NH2 | H_ASP_56  | OD2 | 2.847 |
| 3UJJ | H_LYS_143 | NZ  | H_ASP_144 | OD1 | 2.864 |
| 3UJJ | H_LYS_143 | NZ  | H_ASP_144 | OD2 | 2.969 |
| 3UJJ | H_LYS_209 | NZ  | L_GLU_123 | OE1 | 2.859 |
| 3UJJ | H_LYS_209 | NZ  | L_GLU_123 | OE2 | 2.771 |
| 3UJJ | H_LYS_210 | NZ  | H_GLU_212 | OE2 | 2.981 |
| 3UJJ | P_LYS_305 | NZ  | H_ASP_54  | OD1 | 3.600 |
| 3UJJ | P_LYS_305 | NZ  | H_ASP_54  | OD2 | 2.628 |
| 3UJJ | P_LYS_305 | NZ  | H_ASP_56  | OD2 | 2.857 |
| 3UJJ | P_ARG_308 | NH2 | L_GLU_50  | OE2 | 2.898 |
| 3UJT | H_LYS_19  | NZ  | H_ASP_78  | OD1 | 2.829 |
| 3UJT | H_HIS_35  | ND1 | H_GLU_50  | OE1 | 3.828 |
| 3UJT | H_HIS_35  | NE2 | H_GLU_50  | OE1 | 3.223 |
| 3UJT | H_ARG_40  | NH1 | H_GLU_85  | OE2 | 3.140 |
| 3UJT | H_LYS_64  | NZ  | H_GLU_61  | OE1 | 2.811 |
| 3UJT | H_LYS_66  | NZ  | H_ASP_86  | OD1 | 3.766 |
| 3UJT | H_LYS_66  | NZ  | H_ASP_86  | OD2 | 2.865 |
| 3UJT | H_LYS_143 | NZ  | M_ASP_60  | OD2 | 3.914 |
| 3UJT | H_LYS_208 | NZ  | L_GLU_123 | OE2 | 2.966 |
| 3UJT | H_LYS_209 | NZ  | H_GLU_211 | OE2 | 3.384 |
| 3UJT | L_ARG_61  | NH2 | L_ASP_82  | OD1 | 2.769 |
| 3UJT | L_ARG_61  | NH2 | L_ASP_82  | OD2 | 3.414 |
| 3UJT | L_LYS_103 | NZ  | L_ASP_85  | OD1 | 3.942 |
| 3UJT | L_LYS_149 | NZ  | L_GLU_195 | OE2 | 3.036 |
| 3UJT | L_ARG_155 | NH1 | L_GLU_185 | OE1 | 2.986 |
| 3UJT | L_ARG_155 | NH2 | L_GLU_185 | OE1 | 3.804 |
| 3UJT | L_LYS_183 | NZ  | L_GLU_187 | OE1 | 3.131 |
| 3UJT | L_LYS_183 | NZ  | L_GLU_187 | OE2 | 3.169 |
| 3UJT | L_HIS_189 | ND1 | L_ASP_151 | OD2 | 3.929 |
| 3UJT | L_HIS_35  | ND1 | L_GLU_50  | OE1 | 3.921 |
| 3UJT | L_HIS_35  | NE2 | L_GLU_50  | OE1 | 3.458 |
| 3UJT | L_ARG_40  | NH1 | L_GLU_85  | OE1 | 3.716 |
| 3UJT | L_LYS_66  | NZ  | L_ASP_86  | OD1 | 3.625 |
| 3UJT | L_LYS_66  | NZ  | L_ASP_86  | OD2 | 2.830 |
| 3UJT | L_HIS_164 | NE2 | M_ASP_167 | OD1 | 3.917 |
| 3UJT | L_LYS_208 | NZ  | M_GLU_123 | OE2 | 3.024 |
| 3UJT | L_LYS_209 | NZ  | L_GLU_211 | OE2 | 3.830 |
| 3UJT | M_LYS_39  | NZ  | M_GLU_81  | OE2 | 3.196 |
| 3UJT | M_ARG_61  | NH2 | M_GLU_81  | OE1 | 3.337 |
| 3UJT | M_ARG_61  | NH2 | M_ASP_82  | OD1 | 2.863 |
| 3UJT | M_ARG_61  | NH2 | M_ASP_82  | OD2 | 3.614 |
| 3UJT | M_LYS_103 | NZ  | M_GLU_105 | OE2 | 3.799 |
| 3UJT | M_LYS_147 | NZ  | M_GLU_154 | OE1 | 3.066 |
| 3UJT | M_LYS_149 | NZ  | M_GLU_195 | OE2 | 3.255 |
| 3UJT | M_LYS_183 | NZ  | M_GLU_187 | OE1 | 3.301 |
| 3UJT | M_HIS_189 | ND1 | M_ASP_151 | OD2 | 2.746 |
| 3UJT | M_LYS_199 | NZ  | M_ASP_110 | OD2 | 3.794 |
| 3UO1 | H_ARG_38  | NH1 | H_ASP_90  | OD1 | 3.119 |
| 3UO1 | H_ARG_38  | NH2 | H_GLU_46  | OE1 | 3.165 |
| 3UO1 | H_ARG_67  | NH1 | H_ASP_90  | OD2 | 2.918 |
| 3UO1 | H_ARG_67  | NH2 | H_ASP_90  | OD1 | 3.039 |
| 3UO1 | H_ARG_67  | NH2 | H_ASP_90  | OD2 | 3.214 |
| 3UO1 | H_ARG_87  | NH1 | H_GLU_89  | OE2 | 3.676 |
| 3UO1 | H_ARG_98  | NH2 | H_ASP_105 | OD1 | 3.545 |
| 3UO1 | H_ARG_98  | NH2 | H_ASP_105 | OD2 | 2.915 |
| 3UO1 | H_LYS_147 | NZ  | H_GLU_175 | OE2 | 3.203 |
| 3UO1 | H_LYS_212 | NZ  | L_GLU_127 | OE2 | 2.634 |



|      |           |     |           |     |       |
|------|-----------|-----|-----------|-----|-------|
| 3UO1 | L_ARG_24  | NH2 | L_ASP_75  | OD1 | 3.866 |
| 3UO1 | L_ARG_66  | NH1 | L_ASP_87  | OD1 | 3.885 |
| 3UO1 | L_ARG_66  | NH1 | L_ASP_87  | OD2 | 2.800 |
| 3UO1 | L_ARG_66  | NH2 | L_GLU_84  | OE1 | 3.875 |
| 3UO1 | L_ARG_66  | NH2 | L_GLU_84  | OE2 | 3.880 |
| 3UO1 | L_ARG_66  | NH2 | L_ASP_87  | OD1 | 3.014 |
| 3UO1 | L_ARG_66  | NH2 | L_ASP_87  | OD2 | 3.371 |
| 3UO1 | L_LYS_153 | NZ  | L_GLU_199 | OE1 | 3.850 |
| 3UO1 | L_LYS_153 | NZ  | L_GLU_199 | OE2 | 3.003 |
| 3UO1 | L_ARG_159 | NH1 | L_GLU_189 | OE1 | 3.609 |
| 3UO1 | L_ARG_159 | NH2 | L_GLU_189 | OE1 | 3.559 |
| 3UO1 | L_ARG_192 | NH2 | L_ASP_188 | OD1 | 3.033 |
| 3UO1 | L_HIS_193 | ND1 | L_ASP_155 | OD2 | 2.858 |
| 3UO1 | L_LYS_203 | NZ  | L_ASP_114 | OD2 | 3.912 |
| 3UYR | H_ARG_38  | NH1 | H_ASP_90  | OD1 | 3.056 |
| 3UYR | H_ARG_38  | NH2 | H_GLU_46  | OE1 | 3.014 |
| 3UYR | H_ARG_67  | NH1 | H_ASP_90  | OD2 | 3.083 |
| 3UYR | H_ARG_67  | NH2 | H_ASP_90  | OD1 | 3.206 |
| 3UYR | H_ARG_67  | NH2 | H_ASP_90  | OD2 | 3.238 |
| 3UYR | H_ARG_98  | NH2 | H_ASP_105 | OD1 | 3.584 |
| 3UYR | H_ARG_98  | NH2 | H_ASP_105 | OD2 | 2.920 |
| 3UYR | H_LYS_212 | NZ  | L_GLU_127 | OE2 | 2.869 |
| 3UYR | H_LYS_213 | NZ  | H_GLU_215 | OE2 | 3.848 |
| 3UYR | L_ARG_24  | NH1 | L_ASP_75  | OD1 | 3.439 |
| 3UYR | L_ARG_59  | NH1 | L_ASP_65  | OD1 | 3.730 |
| 3UYR | L_ARG_66  | NH1 | L_ASP_87  | OD1 | 3.905 |
| 3UYR | L_ARG_66  | NH1 | L_ASP_87  | OD2 | 2.920 |
| 3UYR | L_ARG_66  | NH2 | L_GLU_84  | OE1 | 3.701 |
| 3UYR | L_ARG_66  | NH2 | L_GLU_84  | OE2 | 3.783 |
| 3UYR | L_ARG_66  | NH2 | L_ASP_87  | OD1 | 3.182 |
| 3UYR | L_ARG_66  | NH2 | L_ASP_87  | OD2 | 3.579 |
| 3UYR | L_LYS_153 | NZ  | L_GLU_199 | OE2 | 3.046 |
| 3UYR | L_ARG_192 | NH2 | L_ASP_188 | OD1 | 3.145 |
| 3UYR | L_HIS_193 | ND1 | L_ASP_155 | OD2 | 2.932 |
| 3UYR | L_LYS_203 | NZ  | L_ASP_114 | OD2 | 3.650 |
| 3V4P | A_HIS_28  | NE2 | A_ASP_138 | OD1 | 3.437 |
| 3V4P | A_ARG_57  | NH2 | A_GLU_69  | OE1 | 3.613 |
| 3V4P | A_ARG_57  | NH2 | A_GLU_69  | OE2 | 3.235 |
| 3V4P | A_LYS_126 | NZ  | A_GLU_88  | OE1 | 3.906 |
| 3V4P | A_LYS_126 | NZ  | A_GLU_88  | OE2 | 3.280 |
| 3V4P | A_LYS_157 | NZ  | A_GLU_160 | OE1 | 3.915 |
| 3V4P | A_LYS_203 | NZ  | A_GLU_255 | OE2 | 3.829 |
| 3V4P | A_ARG_228 | NH1 | A_GLU_234 | OE2 | 3.256 |
| 3V4P | A_ARG_228 | NH2 | A_GLU_234 | OE2 | 3.842 |
| 3V4P | A_HIS_242 | NE2 | A_GLU_243 | OE1 | 3.925 |
| 3V4P | A_LYS_247 | NZ  | A_GLU_263 | OE2 | 2.474 |
| 3V4P | A_LYS_265 | NZ  | A_GLU_243 | OE2 | 3.624 |
| 3V4P | A_ARG_305 | NH1 | A_ASP_329 | OD1 | 2.732 |
| 3V4P | A_ARG_305 | NH2 | A_ASP_329 | OD1 | 2.778 |
| 3V4P | A_ARG_305 | NH2 | A_ASP_329 | OD2 | 3.464 |
| 3V4P | A_LYS_330 | NZ  | A_GLU_360 | OE1 | 3.537 |
| 3V4P | A_LYS_330 | NZ  | A_ASP_361 | OD1 | 3.264 |
| 3V4P | A_LYS_330 | NZ  | A_ASP_361 | OD2 | 3.668 |
| 3V4P | A_ARG_334 | NH1 | A_GLU_337 | OE1 | 3.017 |
| 3V4P | A_ARG_334 | NH1 | A_GLU_337 | OE2 | 2.987 |
| 3V4P | A_ARG_334 | NH2 | A_GLU_302 | OE2 | 3.593 |
| 3V4P | A_ARG_384 | NH1 | A_GLU_386 | OE1 | 3.396 |
| 3V4P | A_ARG_384 | NH2 | A_GLU_360 | OE1 | 2.505 |

|      |           |     |           |     |       |
|------|-----------|-----|-----------|-----|-------|
| 3V4P | A_ARG_384 | NH2 | A_ASP_361 | OD2 | 3.166 |
| 3V4P | A_ARG_384 | NH2 | A_GLU_386 | OE1 | 3.325 |
| 3V4P | A_ARG_429 | NH2 | A_ASP_408 | OD2 | 3.082 |
| 3V4P | A_ARG_499 | NH1 | A_ASP_489 | OD2 | 3.923 |
| 3V4P | A_ARG_499 | NH1 | A_ASP_537 | OD2 | 3.979 |
| 3V4P | A_ARG_532 | NH1 | A_ASP_534 | OD2 | 3.421 |
| 3V4P | A_LYS_533 | NZ  | A_GLU_455 | OE1 | 3.724 |
| 3V4P | A_LYS_533 | NZ  | A_GLU_455 | OE2 | 3.681 |
| 3V4P | A_ARG_536 | NH2 | A_ASP_534 | OD1 | 3.784 |
| 3V4P | A_LYS_574 | NZ  | A_ASP_375 | OD1 | 2.978 |
| 3V4P | B_ARG_108 | NH2 | B_GLU_450 | OE1 | 2.652 |
| 3V4P | B_ARG_110 | NH1 | B_GLU_85  | OE1 | 3.635 |
| 3V4P | B_ARG_110 | NH2 | B_GLU_450 | OE2 | 3.758 |
| 3V4P | B_ARG_124 | NH2 | B_ASP_89  | OD1 | 3.110 |
| 3V4P | B_ARG_124 | NH2 | B_ASP_89  | OD2 | 3.634 |
| 3V4P | B_LYS_146 | NZ  | B_GLU_202 | OE2 | 2.939 |
| 3V4P | B_LYS_180 | NZ  | B_ASP_244 | OD1 | 3.554 |
| 3V4P | B_LYS_180 | NZ  | B_ASP_244 | OD2 | 2.740 |
| 3V4P | B_ARG_194 | NH1 | H_ASP_102 | OD1 | 2.860 |
| 3V4P | B_ARG_194 | NH1 | H_ASP_102 | OD2 | 2.764 |
| 3V4P | B_ARG_200 | NH2 | H_ASP_102 | OD1 | 3.172 |
| 3V4P | B_ARG_259 | NH2 | B_ASP_134 | OD1 | 2.676 |
| 3V4P | B_HIS_274 | ND1 | B_ASP_278 | OD2 | 2.831 |
| 3V4P | B_HIS_274 | NE2 | B_ASP_179 | OD2 | 3.371 |
| 3V4P | B_HIS_274 | NE2 | B_ASP_237 | OD2 | 2.863 |
| 3V4P | B_HIS_293 | NE2 | B_ASP_289 | OD1 | 2.750 |
| 3V4P | B_HIS_293 | NE2 | B_ASP_289 | OD2 | 2.939 |
| 3V4P | B_ARG_302 | NH2 | B_GLU_305 | OE1 | 3.376 |
| 3V4P | B_ARG_399 | NH1 | B_GLU_390 | OE1 | 3.166 |
| 3V4P | B_ARG_399 | NH1 | B_GLU_390 | OE2 | 2.988 |
| 3V4P | B_ARG_399 | NH2 | B_GLU_390 | OE2 | 3.915 |
| 3V4P | B_LYS_402 | NZ  | B_GLU_404 | OE2 | 3.864 |
| 3V4P | B_HIS_434 | NE2 | B_GLU_432 | OE1 | 3.790 |
| 3V4P | B_ARG_439 | NH2 | B_GLU_377 | OE1 | 3.416 |
| 3V4P | B_HIS_452 | ND1 | B_GLU_450 | OE2 | 3.943 |
| 3V4P | C_HIS_28  | NE2 | C_ASP_138 | OD1 | 3.435 |
| 3V4P | C_ARG_57  | NH2 | C_GLU_69  | OE1 | 3.610 |
| 3V4P | C_ARG_57  | NH2 | C_GLU_69  | OE2 | 3.231 |
| 3V4P | C_LYS_126 | NZ  | C_GLU_88  | OE1 | 3.915 |
| 3V4P | C_LYS_126 | NZ  | C_GLU_88  | OE2 | 3.295 |
| 3V4P | C_LYS_157 | NZ  | C_GLU_160 | OE1 | 3.917 |
| 3V4P | C_LYS_203 | NZ  | C_GLU_255 | OE2 | 3.826 |
| 3V4P | C_ARG_228 | NH1 | C_GLU_234 | OE2 | 3.252 |
| 3V4P | C_ARG_228 | NH2 | C_GLU_234 | OE2 | 3.840 |
| 3V4P | C_HIS_242 | NE2 | C_GLU_243 | OE1 | 3.935 |
| 3V4P | C_LYS_247 | NZ  | C_GLU_263 | OE2 | 2.476 |
| 3V4P | C_LYS_265 | NZ  | C_GLU_243 | OE2 | 3.624 |
| 3V4P | C_ARG_305 | NH1 | C_ASP_329 | OD1 | 2.736 |
| 3V4P | C_ARG_305 | NH2 | C_ASP_329 | OD1 | 2.777 |
| 3V4P | C_ARG_305 | NH2 | C_ASP_329 | OD2 | 3.462 |
| 3V4P | C_LYS_330 | NZ  | C_GLU_360 | OE1 | 3.551 |
| 3V4P | C_LYS_330 | NZ  | C_ASP_361 | OD1 | 3.262 |
| 3V4P | C_LYS_330 | NZ  | C_ASP_361 | OD2 | 3.668 |
| 3V4P | C_ARG_334 | NH1 | C_GLU_337 | OE1 | 3.021 |
| 3V4P | C_ARG_334 | NH1 | C_GLU_337 | OE2 | 2.997 |
| 3V4P | C_ARG_334 | NH2 | C_GLU_302 | OE2 | 3.598 |
| 3V4P | C_ARG_384 | NH1 | C_GLU_386 | OE1 | 3.393 |
| 3V4P | C_ARG_384 | NH2 | C_GLU_360 | OE1 | 2.506 |

|      |           |     |           |     |       |
|------|-----------|-----|-----------|-----|-------|
| 3V4P | C_ARG_384 | NH2 | C_ASP_361 | OD2 | 3.170 |
| 3V4P | C_ARG_384 | NH2 | C_GLU_386 | OE1 | 3.316 |
| 3V4P | C_ARG_429 | NH2 | C_ASP_408 | OD2 | 3.082 |
| 3V4P | C_ARG_499 | NH1 | C_ASP_489 | OD2 | 3.928 |
| 3V4P | C_ARG_499 | NH1 | C_ASP_537 | OD2 | 3.667 |
| 3V4P | C_ARG_532 | NH1 | C_ASP_534 | OD2 | 3.504 |
| 3V4P | C_LYS_533 | NZ  | C_GLU_455 | OE1 | 3.658 |
| 3V4P | C_ARG_536 | NH2 | C_ASP_534 | OD1 | 3.773 |
| 3V4P | C_LYS_574 | NZ  | C_ASP_375 | OD1 | 3.893 |
| 3V4P | D_ARG_108 | NH2 | D_GLU_450 | OE1 | 2.653 |
| 3V4P | D_ARG_110 | NH1 | D_GLU_85  | OE1 | 3.633 |
| 3V4P | D_ARG_110 | NH2 | D_GLU_450 | OE2 | 3.756 |
| 3V4P | D_ARG_124 | NH2 | D_ASP_89  | OD1 | 3.117 |
| 3V4P | D_ARG_124 | NH2 | D_ASP_89  | OD2 | 3.640 |
| 3V4P | D_LYS_146 | NZ  | D_GLU_202 | OE2 | 2.944 |
| 3V4P | D_LYS_180 | NZ  | D_ASP_244 | OD1 | 3.559 |
| 3V4P | D_LYS_180 | NZ  | D_ASP_244 | OD2 | 2.747 |
| 3V4P | D_ARG_194 | NH1 | M_ASP_102 | OD1 | 2.738 |
| 3V4P | D_ARG_194 | NH1 | M_ASP_102 | OD2 | 2.760 |
| 3V4P | D_ARG_200 | NH2 | M_ASP_102 | OD1 | 3.233 |
| 3V4P | D_ARG_259 | NH2 | D_ASP_134 | OD1 | 2.676 |
| 3V4P | D_HIS_274 | ND1 | D_ASP_278 | OD2 | 2.837 |
| 3V4P | D_HIS_274 | NE2 | D_ASP_179 | OD2 | 3.371 |
| 3V4P | D_HIS_274 | NE2 | D_ASP_237 | OD2 | 2.865 |
| 3V4P | D_HIS_293 | NE2 | D_ASP_289 | OD1 | 2.751 |
| 3V4P | D_HIS_293 | NE2 | D_ASP_289 | OD2 | 2.938 |
| 3V4P | D_ARG_302 | NH2 | D_GLU_305 | OE1 | 3.367 |
| 3V4P | D_ARG_399 | NH1 | D_GLU_390 | OE1 | 3.160 |
| 3V4P | D_ARG_399 | NH1 | D_GLU_390 | OE2 | 2.983 |
| 3V4P | D_ARG_399 | NH2 | D_GLU_390 | OE2 | 3.909 |
| 3V4P | D_LYS_402 | NZ  | D_GLU_404 | OE2 | 3.866 |
| 3V4P | D_HIS_434 | NE2 | D_GLU_432 | OE1 | 3.794 |
| 3V4P | D_ARG_439 | NH2 | D_GLU_377 | OE1 | 3.413 |
| 3V4P | D_HIS_452 | ND1 | D_GLU_450 | OE2 | 3.942 |
| 3V4P | H_HIS_35  | ND1 | H_GLU_50  | OE1 | 3.827 |
| 3V4P | H_ARG_40  | NH1 | H_GLU_46  | OE2 | 3.925 |
| 3V4P | H_ARG_40  | NH2 | H_GLU_46  | OE2 | 3.891 |
| 3V4P | H_LYS_63  | NZ  | H_GLU_46  | OE1 | 3.617 |
| 3V4P | H_LYS_67  | NZ  | H_ASP_90  | OD1 | 3.016 |
| 3V4P | H_LYS_67  | NZ  | H_ASP_90  | OD2 | 2.785 |
| 3V4P | H_ARG_98  | NH2 | H_ASP_109 | OD1 | 3.538 |
| 3V4P | H_ARG_98  | NH2 | H_ASP_109 | OD2 | 2.869 |
| 3V4P | H_LYS_151 | NZ  | H_GLU_179 | OE1 | 3.924 |
| 3V4P | H_LYS_151 | NZ  | H_GLU_179 | OE2 | 3.342 |
| 3V4P | H_HIS_172 | ND1 | L_ASP_172 | OD2 | 3.780 |
| 3V4P | H_LYS_216 | NZ  | L_GLU_128 | OE2 | 3.270 |
| 3V4P | L_ARG_24  | NH2 | L_ASP_75  | OD2 | 3.872 |
| 3V4P | L_ARG_66  | NH2 | L_GLU_86  | OE1 | 3.540 |
| 3V4P | L_ARG_66  | NH2 | L_ASP_87  | OD1 | 2.923 |
| 3V4P | L_ARG_66  | NH2 | L_ASP_87  | OD2 | 3.479 |
| 3V4P | L_HIS_194 | ND1 | L_ASP_156 | OD1 | 3.668 |
| 3V4P | L_HIS_194 | ND1 | L_ASP_156 | OD2 | 3.022 |
| 3V4P | M_HIS_35  | ND1 | M_GLU_50  | OE1 | 3.826 |
| 3V4P | M_ARG_40  | NH1 | M_GLU_46  | OE2 | 3.929 |
| 3V4P | M_ARG_40  | NH2 | M_GLU_46  | OE2 | 3.895 |
| 3V4P | M_LYS_63  | NZ  | M_GLU_46  | OE1 | 3.628 |
| 3V4P | M_LYS_67  | NZ  | M_ASP_90  | OD1 | 3.021 |
| 3V4P | M_LYS_67  | NZ  | M_ASP_90  | OD2 | 2.783 |

|      |           |     |           |     |       |
|------|-----------|-----|-----------|-----|-------|
| 3V4P | M_ARG_98  | NH2 | M_ASP_109 | OD1 | 3.527 |
| 3V4P | M_ARG_98  | NH2 | M_ASP_109 | OD2 | 2.863 |
| 3V4P | M_LYS_151 | NZ  | M_GLU_179 | OE1 | 3.922 |
| 3V4P | M_LYS_151 | NZ  | M_GLU_179 | OE2 | 3.343 |
| 3V4P | M_HIS_172 | ND1 | N_ASP_172 | OD2 | 3.600 |
| 3V4P | M_LYS_216 | NZ  | N_GLU_128 | OE2 | 3.408 |
| 3V4P | N_ARG_24  | NH2 | N_ASP_75  | OD2 | 3.878 |
| 3V4P | N_ARG_66  | NH2 | N_GLU_86  | OE1 | 3.541 |
| 3V4P | N_ARG_66  | NH2 | N_ASP_87  | OD1 | 2.925 |
| 3V4P | N_ARG_66  | NH2 | N_ASP_87  | OD2 | 3.479 |
| 3V4P | N_HIS_194 | ND1 | N_ASP_156 | OD1 | 3.669 |
| 3V4P | N_HIS_194 | ND1 | N_ASP_156 | OD2 | 3.021 |
| 3V4U | H_ARG_38  | NH1 | H_ASP_90  | OD1 | 3.026 |
| 3V4U | H_ARG_38  | NH2 | H_GLU_46  | OE1 | 2.923 |
| 3V4U | H_ARG_38  | NH2 | H_ASP_90  | OD1 | 3.942 |
| 3V4U | H_ARG_67  | NH1 | H_ASP_90  | OD2 | 3.062 |
| 3V4U | H_ARG_67  | NH2 | H_ASP_90  | OD1 | 3.515 |
| 3V4U | H_ARG_67  | NH2 | H_ASP_90  | OD2 | 3.172 |
| 3V4U | H_ARG_98  | NH2 | H_ASP_105 | OD1 | 3.657 |
| 3V4U | H_ARG_98  | NH2 | H_ASP_105 | OD2 | 3.151 |
| 3V4U | H_LYS_147 | NZ  | H_GLU_175 | OE2 | 2.827 |
| 3V4U | H_LYS_212 | NZ  | L_GLU_127 | OE2 | 2.667 |
| 3V4U | L_ARG_24  | NH2 | L_ASP_75  | OD1 | 3.756 |
| 3V4U | L_ARG_66  | NH1 | L_ASP_87  | OD1 | 3.777 |
| 3V4U | L_ARG_66  | NH1 | L_ASP_87  | OD2 | 2.819 |
| 3V4U | L_ARG_66  | NH2 | L_GLU_84  | OE1 | 3.720 |
| 3V4U | L_ARG_66  | NH2 | L_GLU_84  | OE2 | 3.860 |
| 3V4U | L_ARG_66  | NH2 | L_ASP_87  | OD1 | 2.775 |
| 3V4U | L_ARG_66  | NH2 | L_ASP_87  | OD2 | 3.243 |
| 3V4U | L_LYS_153 | NZ  | L_GLU_199 | OE1 | 3.350 |
| 3V4U | L_LYS_153 | NZ  | L_GLU_199 | OE2 | 2.923 |
| 3V4U | L_ARG_159 | NH1 | L_GLU_189 | OE1 | 2.754 |
| 3V4U | L_ARG_159 | NH2 | L_GLU_189 | OE1 | 3.366 |
| 3V4U | L_LYS_187 | NZ  | L_GLU_191 | OE2 | 3.065 |
| 3V4U | L_ARG_192 | NH2 | L_ASP_188 | OD1 | 3.394 |
| 3V4V | A_HIS_28  | NE2 | A_ASP_138 | OD1 | 3.625 |
| 3V4V | A_ARG_57  | NH2 | A_GLU_69  | OE2 | 3.446 |
| 3V4V | A_LYS_126 | NZ  | A_GLU_88  | OE1 | 3.984 |
| 3V4V | A_LYS_126 | NZ  | A_GLU_88  | OE2 | 3.844 |
| 3V4V | A_LYS_157 | NZ  | A_GLU_160 | OE1 | 3.707 |
| 3V4V | A_LYS_203 | NZ  | A_GLU_255 | OE2 | 4.000 |
| 3V4V | A_ARG_228 | NH2 | A_GLU_234 | OE2 | 3.810 |
| 3V4V | A_HIS_242 | NE2 | A_GLU_243 | OE1 | 3.962 |
| 3V4V | A_LYS_247 | NZ  | A_GLU_263 | OE2 | 2.864 |
| 3V4V | A_ARG_301 | NH2 | A_GLU_302 | OE1 | 3.852 |
| 3V4V | A_ARG_305 | NH1 | A_ASP_329 | OD1 | 2.728 |
| 3V4V | A_ARG_305 | NH2 | A_ASP_329 | OD1 | 2.929 |
| 3V4V | A_ARG_305 | NH2 | A_ASP_329 | OD2 | 3.468 |
| 3V4V | A_LYS_330 | NZ  | A_GLU_360 | OE1 | 3.937 |
| 3V4V | A_LYS_330 | NZ  | A_ASP_361 | OD1 | 3.025 |
| 3V4V | A_LYS_330 | NZ  | A_ASP_361 | OD2 | 3.585 |
| 3V4V | A_ARG_334 | NH1 | A_GLU_337 | OE1 | 3.450 |
| 3V4V | A_ARG_334 | NH1 | A_GLU_337 | OE2 | 3.152 |
| 3V4V | A_ARG_334 | NH2 | A_GLU_302 | OE2 | 3.584 |
| 3V4V | A_ARG_384 | NH1 | A_GLU_386 | OE1 | 3.340 |
| 3V4V | A_ARG_384 | NH2 | A_GLU_360 | OE1 | 2.718 |
| 3V4V | A_ARG_384 | NH2 | A_ASP_361 | OD2 | 3.178 |
| 3V4V | A_ARG_384 | NH2 | A_GLU_386 | OE1 | 2.970 |

|      |           |     |           |     |       |
|------|-----------|-----|-----------|-----|-------|
| 3V4V | A_ARG_429 | NH2 | A_ASP_408 | OD2 | 2.821 |
| 3V4V | A_ARG_499 | NH1 | A_ASP_489 | OD2 | 3.736 |
| 3V4V | A_ARG_499 | NH1 | A_ASP_537 | OD2 | 3.000 |
| 3V4V | A_ARG_499 | NH2 | A_ASP_537 | OD2 | 3.346 |
| 3V4V | A_ARG_532 | NH1 | A_ASP_534 | OD2 | 3.643 |
| 3V4V | A_LYS_533 | NZ  | A_GLU_455 | OE1 | 3.618 |
| 3V4V | A_ARG_536 | NH2 | A_ASP_534 | OD1 | 3.812 |
| 3V4V | A_LYS_574 | NZ  | A_ASP_375 | OD1 | 3.230 |
| 3V4V | A_LYS_574 | NZ  | A_ASP_375 | OD2 | 3.530 |
| 3V4V | B_ARG_108 | NH2 | B_GLU_450 | OE1 | 2.540 |
| 3V4V | B_ARG_110 | NH1 | B_GLU_85  | OE1 | 3.653 |
| 3V4V | B_ARG_110 | NH2 | B_GLU_450 | OE2 | 3.788 |
| 3V4V | B_ARG_124 | NH2 | B_ASP_89  | OD1 | 3.503 |
| 3V4V | B_LYS_180 | NZ  | B_ASP_244 | OD1 | 3.343 |
| 3V4V | B_LYS_180 | NZ  | B_ASP_244 | OD2 | 2.615 |
| 3V4V | B_ARG_194 | NH1 | H_ASP_102 | OD1 | 2.874 |
| 3V4V | B_ARG_194 | NH1 | H_ASP_102 | OD2 | 3.211 |
| 3V4V | B_ARG_200 | NH2 | H_ASP_102 | OD1 | 3.237 |
| 3V4V | B_ARG_259 | NH2 | B_ASP_134 | OD1 | 2.874 |
| 3V4V | B_HIS_274 | ND1 | B_ASP_278 | OD2 | 3.045 |
| 3V4V | B_HIS_274 | NE2 | B_ASP_179 | OD2 | 3.250 |
| 3V4V | B_HIS_274 | NE2 | B_ASP_237 | OD2 | 3.128 |
| 3V4V | B_HIS_293 | NE2 | B_ASP_289 | OD1 | 2.625 |
| 3V4V | B_HIS_293 | NE2 | B_ASP_289 | OD2 | 2.924 |
| 3V4V | B_ARG_302 | NH2 | B_GLU_305 | OE1 | 3.474 |
| 3V4V | B_ARG_399 | NH1 | B_GLU_390 | OE1 | 2.982 |
| 3V4V | B_ARG_399 | NH1 | B_GLU_390 | OE2 | 2.814 |
| 3V4V | B_ARG_399 | NH2 | B_GLU_390 | OE2 | 3.187 |
| 3V4V | B_LYS_402 | NZ  | B_GLU_404 | OE2 | 3.543 |
| 3V4V | B_HIS_434 | NE2 | B_GLU_432 | OE1 | 3.549 |
| 3V4V | B_ARG_439 | NH2 | B_GLU_377 | OE1 | 3.529 |
| 3V4V | B_HIS_452 | ND1 | B_GLU_450 | OE2 | 3.839 |
| 3V4V | H_HIS_35  | ND1 | H_GLU_50  | OE1 | 3.868 |
| 3V4V | H_HIS_35  | NE2 | H_GLU_50  | OE1 | 3.873 |
| 3V4V | H_ARG_40  | NH2 | H_GLU_89  | OE1 | 3.118 |
| 3V4V | H_LYS_63  | NZ  | H_GLU_46  | OE1 | 3.657 |
| 3V4V | H_LYS_67  | NZ  | H_ASP_90  | OD1 | 2.996 |
| 3V4V | H_LYS_67  | NZ  | H_ASP_90  | OD2 | 2.684 |
| 3V4V | H_ARG_98  | NH2 | H_ASP_109 | OD1 | 3.554 |
| 3V4V | H_ARG_98  | NH2 | H_ASP_109 | OD2 | 2.682 |
| 3V4V | H_LYS_151 | NZ  | H_GLU_179 | OE2 | 3.864 |
| 3V4V | H_HIS_172 | ND1 | L_ASP_172 | OD1 | 3.644 |
| 3V4V | H_LYS_216 | NZ  | L_GLU_128 | OE2 | 3.607 |
| 3V4V | L_ARG_66  | NH2 | L_GLU_86  | OE1 | 3.477 |
| 3V4V | L_ARG_66  | NH2 | L_ASP_87  | OD1 | 3.326 |
| 3V4V | L_ARG_66  | NH2 | L_ASP_87  | OD2 | 3.224 |
| 3V4V | L_LYS_152 | NZ  | L_GLU_200 | OE2 | 3.741 |
| 3V4V | L_HIS_194 | ND1 | L_ASP_156 | OD1 | 3.854 |
| 3V4V | L_HIS_194 | ND1 | L_ASP_156 | OD2 | 2.969 |
| 3V4V | C_HIS_28  | NE2 | C_ASP_138 | OD1 | 3.619 |
| 3V4V | C_ARG_57  | NH2 | C_GLU_69  | OE2 | 3.454 |
| 3V4V | C_LYS_126 | NZ  | C_GLU_88  | OE1 | 3.966 |
| 3V4V | C_LYS_126 | NZ  | C_GLU_88  | OE2 | 3.832 |
| 3V4V | C_LYS_157 | NZ  | C_GLU_160 | OE1 | 3.712 |
| 3V4V | C_ARG_228 | NH2 | C_GLU_234 | OE2 | 3.809 |
| 3V4V | C_HIS_242 | NE2 | C_GLU_243 | OE1 | 3.957 |
| 3V4V | C_LYS_247 | NZ  | C_GLU_263 | OE2 | 2.858 |
| 3V4V | C_ARG_301 | NH2 | C_GLU_302 | OE1 | 3.856 |

|      |           |     |           |     |       |
|------|-----------|-----|-----------|-----|-------|
| 3V4V | C_ARG_305 | NH1 | C_ASP_329 | OD1 | 2.717 |
| 3V4V | C_ARG_305 | NH2 | C_ASP_329 | OD1 | 2.917 |
| 3V4V | C_ARG_305 | NH2 | C_ASP_329 | OD2 | 3.457 |
| 3V4V | C_LYS_330 | NZ  | C_GLU_360 | OE1 | 3.928 |
| 3V4V | C_LYS_330 | NZ  | C_ASP_361 | OD1 | 3.024 |
| 3V4V | C_LYS_330 | NZ  | C_ASP_361 | OD2 | 3.579 |
| 3V4V | C_ARG_334 | NH1 | C_GLU_337 | OE1 | 3.446 |
| 3V4V | C_ARG_334 | NH1 | C_GLU_337 | OE2 | 3.179 |
| 3V4V | C_ARG_334 | NH2 | C_GLU_302 | OE2 | 3.589 |
| 3V4V | C_ARG_373 | NH2 | C_GLU_575 | OE2 | 3.832 |
| 3V4V | C_ARG_384 | NH1 | C_GLU_386 | OE1 | 3.331 |
| 3V4V | C_ARG_384 | NH2 | C_GLU_360 | OE1 | 2.721 |
| 3V4V | C_ARG_384 | NH2 | C_ASP_361 | OD2 | 3.178 |
| 3V4V | C_ARG_384 | NH2 | C_GLU_386 | OE1 | 2.966 |
| 3V4V | C_ARG_429 | NH2 | C_ASP_408 | OD2 | 2.836 |
| 3V4V | C_ARG_499 | NH1 | C_ASP_489 | OD2 | 3.733 |
| 3V4V | C_ARG_499 | NH1 | C_ASP_537 | OD2 | 3.002 |
| 3V4V | C_ARG_499 | NH2 | C_ASP_537 | OD2 | 3.340 |
| 3V4V | C_ARG_532 | NH1 | C_ASP_534 | OD2 | 3.655 |
| 3V4V | C_LYS_533 | NZ  | C_GLU_455 | OE1 | 3.182 |
| 3V4V | C_LYS_533 | NZ  | C_GLU_455 | OE2 | 3.301 |
| 3V4V | C_ARG_536 | NH2 | C_ASP_534 | OD1 | 3.809 |
| 3V4V | C_LYS_573 | NZ  | C_ASP_577 | OD1 | 3.849 |
| 3V4V | C_LYS_574 | NZ  | C_ASP_346 | OD2 | 3.367 |
| 3V4V | C_LYS_574 | NZ  | C_ASP_348 | OD2 | 3.730 |
| 3V4V | D_ARG_108 | NH2 | D_GLU_450 | OE1 | 2.539 |
| 3V4V | D_ARG_110 | NH1 | D_GLU_85  | OE1 | 3.659 |
| 3V4V | D_ARG_110 | NH2 | D_GLU_450 | OE2 | 3.785 |
| 3V4V | D_ARG_124 | NH2 | D_ASP_89  | OD1 | 3.506 |
| 3V4V | D_LYS_146 | NZ  | D_GLU_202 | OE2 | 3.999 |
| 3V4V | D_LYS_180 | NZ  | D_ASP_244 | OD1 | 3.344 |
| 3V4V | D_LYS_180 | NZ  | D_ASP_244 | OD2 | 2.642 |
| 3V4V | D_ARG_194 | NH1 | M_ASP_102 | OD1 | 2.657 |
| 3V4V | D_ARG_194 | NH1 | M_ASP_102 | OD2 | 2.923 |
| 3V4V | D_ARG_200 | NH2 | M_ASP_102 | OD1 | 3.070 |
| 3V4V | D_ARG_259 | NH2 | D_ASP_134 | OD1 | 2.871 |
| 3V4V | D_HIS_274 | ND1 | D_ASP_278 | OD2 | 3.033 |
| 3V4V | D_HIS_274 | NE2 | D_ASP_179 | OD2 | 3.229 |
| 3V4V | D_HIS_274 | NE2 | D_ASP_237 | OD2 | 3.108 |
| 3V4V | D_HIS_293 | NE2 | D_ASP_289 | OD1 | 2.628 |
| 3V4V | D_HIS_293 | NE2 | D_ASP_289 | OD2 | 2.920 |
| 3V4V | D_ARG_302 | NH2 | D_GLU_305 | OE1 | 3.475 |
| 3V4V | D_ARG_399 | NH1 | D_GLU_390 | OE1 | 2.981 |
| 3V4V | D_ARG_399 | NH1 | D_GLU_390 | OE2 | 2.805 |
| 3V4V | D_ARG_399 | NH2 | D_GLU_390 | OE2 | 3.180 |
| 3V4V | D_LYS_402 | NZ  | D_GLU_404 | OE2 | 3.526 |
| 3V4V | D_HIS_434 | NE2 | D_GLU_432 | OE1 | 3.565 |
| 3V4V | D_ARG_439 | NH2 | D_GLU_377 | OE1 | 3.517 |
| 3V4V | D_HIS_452 | ND1 | D_GLU_450 | OE2 | 3.844 |
| 3V4V | M_HIS_35  | ND1 | M_GLU_50  | OE1 | 3.871 |
| 3V4V | M_HIS_35  | NE2 | M_GLU_50  | OE1 | 3.860 |
| 3V4V | M_ARG_40  | NH2 | M_GLU_89  | OE1 | 3.456 |
| 3V4V | M_LYS_63  | NZ  | M_GLU_46  | OE1 | 3.661 |
| 3V4V | M_LYS_67  | NZ  | M_ASP_90  | OD1 | 2.998 |
| 3V4V | M_LYS_67  | NZ  | M_ASP_90  | OD2 | 2.683 |
| 3V4V | M_ARG_98  | NH2 | M_ASP_109 | OD1 | 3.565 |
| 3V4V | M_ARG_98  | NH2 | M_ASP_109 | OD2 | 2.672 |
| 3V4V | M_LYS_151 | NZ  | M_GLU_179 | OE2 | 3.863 |

|      |           |     |           |     |       |
|------|-----------|-----|-----------|-----|-------|
| 3V4V | M_HIS_172 | ND1 | N_ASP_172 | OD1 | 3.594 |
| 3V4V | M_LYS_216 | NZ  | N_GLU_128 | OE2 | 3.217 |
| 3V4V | N_ARG_66  | NH2 | N_GLU_86  | OE1 | 3.488 |
| 3V4V | N_ARG_66  | NH2 | N_ASP_87  | OD1 | 3.328 |
| 3V4V | N_ARG_66  | NH2 | N_ASP_87  | OD2 | 3.226 |
| 3V4V | N_LYS_152 | NZ  | N_GLU_200 | OE2 | 3.759 |
| 3V4V | N_HIS_194 | ND1 | N_ASP_156 | OD1 | 3.862 |
| 3V4V | N_HIS_194 | ND1 | N_ASP_156 | OD2 | 2.969 |
| 3V52 | H_ARG_38  | NH1 | H_ASP_90  | OD1 | 3.011 |
| 3V52 | H_ARG_38  | NH2 | H_GLU_46  | OE1 | 2.934 |
| 3V52 | H_ARG_67  | NH1 | H_ASP_90  | OD2 | 3.055 |
| 3V52 | H_ARG_67  | NH2 | H_ASP_90  | OD1 | 3.178 |
| 3V52 | H_ARG_67  | NH2 | H_ASP_90  | OD2 | 3.296 |
| 3V52 | H_ARG_98  | NH2 | H_ASP_105 | OD1 | 3.591 |
| 3V52 | H_ARG_98  | NH2 | H_ASP_105 | OD2 | 2.829 |
| 3V52 | H_LYS_212 | NZ  | L_GLU_127 | OE2 | 2.929 |
| 3V52 | H_LYS_213 | NZ  | H_GLU_215 | OE2 | 3.959 |
| 3V52 | L_ARG_66  | NH1 | L_ASP_87  | OD1 | 3.858 |
| 3V52 | L_ARG_66  | NH1 | L_ASP_87  | OD2 | 2.692 |
| 3V52 | L_ARG_66  | NH2 | L_GLU_84  | OE1 | 3.797 |
| 3V52 | L_ARG_66  | NH2 | L_GLU_84  | OE2 | 3.912 |
| 3V52 | L_ARG_66  | NH2 | L_ASP_87  | OD1 | 3.033 |
| 3V52 | L_ARG_66  | NH2 | L_ASP_87  | OD2 | 3.323 |
| 3V52 | L_LYS_153 | NZ  | L_GLU_199 | OE2 | 2.980 |
| 3V52 | L_ARG_159 | NH1 | L_GLU_189 | OE1 | 3.150 |
| 3V52 | L_ARG_159 | NH2 | L_GLU_189 | OE1 | 2.854 |
| 3V52 | L_ARG_192 | NH2 | L_ASP_188 | OD1 | 3.092 |
| 3V52 | L_ARG_192 | NH2 | L_ASP_188 | OD2 | 3.931 |
| 3V52 | L_HIS_193 | ND1 | L_ASP_155 | OD2 | 2.916 |
| 3V52 | L_LYS_203 | NZ  | L_ASP_114 | OD2 | 2.574 |
| 3V6F | A_ARG_38  | NH1 | A_ASP_86  | OD1 | 2.911 |
| 3V6F | A_ARG_38  | NH2 | A_GLU_46  | OE1 | 3.291 |
| 3V6F | A_ARG_38  | NH2 | A_GLU_46  | OE2 | 3.661 |
| 3V6F | A_ARG_38  | NH2 | A_ASP_86  | OD1 | 3.667 |
| 3V6F | A_LYS_64  | NZ  | A_ASP_61  | OD1 | 2.842 |
| 3V6F | A_ARG_66  | NH1 | A_ASP_86  | OD1 | 3.978 |
| 3V6F | A_ARG_66  | NH1 | A_ASP_86  | OD2 | 2.845 |
| 3V6F | A_ARG_66  | NH2 | A_ASP_86  | OD1 | 3.048 |
| 3V6F | A_ARG_66  | NH2 | A_ASP_86  | OD2 | 3.388 |
| 3V6F | A_LYS_75  | NZ  | A_ASP_72  | OD2 | 3.618 |
| 3V6F | A_ARG_94  | NH1 | A_ASP_106 | OD1 | 3.312 |
| 3V6F | A_ARG_94  | NH1 | A_ASP_106 | OD2 | 3.358 |
| 3V6F | A_LYS_213 | NZ  | B_GLU_130 | OE1 | 3.799 |
| 3V6F | B_ARG_60  | NH1 | B_ASP_66  | OD1 | 3.189 |
| 3V6F | B_ARG_60  | NH2 | B_ASP_66  | OD1 | 3.662 |
| 3V6F | B_ARG_67  | NH2 | B_ASP_88  | OD1 | 2.925 |
| 3V6F | B_ARG_67  | NH2 | B_ASP_88  | OD2 | 3.716 |
| 3V6F | B_ARG_162 | NH1 | B_GLU_192 | OE2 | 3.473 |
| 3V6F | B_ARG_195 | NH1 | B_GLU_192 | OE1 | 3.435 |
| 3V6F | B_ARG_195 | NH1 | B_GLU_192 | OE2 | 2.954 |
| 3V6F | B_HIS_196 | ND1 | B_GLU_192 | OE2 | 3.778 |
| 3V6F | C_ARG_38  | NH1 | C_ASP_86  | OD1 | 2.982 |
| 3V6F | C_ARG_38  | NH2 | C_GLU_46  | OE1 | 3.377 |
| 3V6F | C_ARG_38  | NH2 | C_GLU_46  | OE2 | 3.714 |
| 3V6F | C_ARG_38  | NH2 | C_ASP_86  | OD1 | 3.729 |
| 3V6F | C_LYS_64  | NZ  | C_ASP_61  | OD1 | 2.824 |
| 3V6F | C_ARG_66  | NH1 | C_ASP_86  | OD1 | 3.704 |
| 3V6F | C_ARG_66  | NH1 | C_ASP_86  | OD2 | 2.748 |

|      |           |     |           |     |       |
|------|-----------|-----|-----------|-----|-------|
| 3V6F | C_ARG.66  | NH2 | C_ASP.86  | OD1 | 3.318 |
| 3V6F | C_ARG.66  | NH2 | C_ASP.86  | OD2 | 3.791 |
| 3V6F | C_LYS.75  | NZ  | C_ASP.72  | OD2 | 3.653 |
| 3V6F | C_ARG.94  | NH1 | C_ASP.106 | OD1 | 3.027 |
| 3V6F | C_ARG.94  | NH1 | C_ASP.106 | OD2 | 2.907 |
| 3V6F | C_LYS.213 | NZ  | D_GLU.130 | OE1 | 3.956 |
| 3V6F | D_ARG.60  | NH1 | D_ASP.66  | OD1 | 3.192 |
| 3V6F | D_ARG.60  | NH2 | D_ASP.66  | OD1 | 3.669 |
| 3V6F | D_ARG.67  | NH2 | D_ASP.88  | OD1 | 2.880 |
| 3V6F | D_ARG.67  | NH2 | D_ASP.88  | OD2 | 3.702 |
| 3V6F | D_ARG.162 | NH1 | D_GLU.192 | OE2 | 3.490 |
| 3V6F | D_ARG.195 | NH1 | D_GLU.192 | OE1 | 3.464 |
| 3V6F | D_ARG.195 | NH1 | D_GLU.192 | OE2 | 2.977 |
| 3V6F | D_HIS.196 | ND1 | D_GLU.192 | OE2 | 3.829 |
| 3V6F | E_ARG.38  | NH1 | E_ASP.86  | OD1 | 2.938 |
| 3V6F | E_ARG.38  | NH2 | E_GLU.46  | OE1 | 3.288 |
| 3V6F | E_ARG.38  | NH2 | E_GLU.46  | OE2 | 3.689 |
| 3V6F | E_ARG.38  | NH2 | E_ASP.86  | OD1 | 3.691 |
| 3V6F | E_LYS.64  | NZ  | E_ASP.61  | OD1 | 3.118 |
| 3V6F | E_ARG.66  | NH1 | E_ASP.86  | OD1 | 3.831 |
| 3V6F | E_ARG.66  | NH1 | E_ASP.86  | OD2 | 2.617 |
| 3V6F | E_ARG.66  | NH2 | E_ASP.86  | OD1 | 2.929 |
| 3V6F | E_ARG.66  | NH2 | E_ASP.86  | OD2 | 3.284 |
| 3V6F | E_LYS.75  | NZ  | E_ASP.72  | OD2 | 3.617 |
| 3V6F | E_ARG.94  | NH1 | E_ASP.106 | OD1 | 3.312 |
| 3V6F | E_ARG.94  | NH1 | E_ASP.106 | OD2 | 3.177 |
| 3V6F | E_LYS.213 | NZ  | F_GLU.130 | OE1 | 3.763 |
| 3V6F | F_ARG.60  | NH1 | F_ASP.66  | OD1 | 3.236 |
| 3V6F | F_ARG.60  | NH2 | F_ASP.66  | OD1 | 3.718 |
| 3V6F | F_ARG.67  | NH2 | F_ASP.88  | OD1 | 2.889 |
| 3V6F | F_ARG.67  | NH2 | F_ASP.88  | OD2 | 3.693 |
| 3V6F | F_LYS.114 | NZ  | F_GLU.17  | OE1 | 3.958 |
| 3V6F | F_ARG.162 | NH1 | F_GLU.192 | OE2 | 3.447 |
| 3V6F | F_ARG.195 | NH1 | F_GLU.192 | OE1 | 3.438 |
| 3V6F | F_ARG.195 | NH1 | F_GLU.192 | OE2 | 2.943 |
| 3V6F | F_HIS.196 | ND1 | F_GLU.192 | OE2 | 3.828 |
| 3V6F | H_ARG.38  | NH1 | H_ASP.86  | OD1 | 2.929 |
| 3V6F | H_ARG.38  | NH2 | H_GLU.46  | OE1 | 3.278 |
| 3V6F | H_ARG.38  | NH2 | H_GLU.46  | OE2 | 3.715 |
| 3V6F | H_ARG.38  | NH2 | H_ASP.86  | OD1 | 3.746 |
| 3V6F | H_LYS.64  | NZ  | H_ASP.61  | OD1 | 2.949 |
| 3V6F | H_ARG.66  | NH1 | H_ASP.86  | OD1 | 3.602 |
| 3V6F | H_ARG.66  | NH1 | H_ASP.86  | OD2 | 2.554 |
| 3V6F | H_ARG.66  | NH2 | H_ASP.86  | OD1 | 2.925 |
| 3V6F | H_ARG.66  | NH2 | H_ASP.86  | OD2 | 3.444 |
| 3V6F | H_LYS.75  | NZ  | H_ASP.72  | OD2 | 3.633 |
| 3V6F | H_ARG.94  | NH1 | H_ASP.106 | OD1 | 3.513 |
| 3V6F | H_ARG.94  | NH1 | H_ASP.106 | OD2 | 2.779 |
| 3V6F | H_HIS.169 | NE2 | L_ASP.174 | OD1 | 3.656 |
| 3V6F | L_ARG.60  | NH1 | L_ASP.66  | OD1 | 3.201 |
| 3V6F | L_ARG.60  | NH2 | L_ASP.66  | OD1 | 3.668 |
| 3V6F | L_ARG.67  | NH2 | L_ASP.88  | OD1 | 2.904 |
| 3V6F | L_ARG.67  | NH2 | L_ASP.88  | OD2 | 3.773 |
| 3V6F | L_ARG.162 | NH1 | L_GLU.192 | OE2 | 3.508 |
| 3V6F | L_ARG.195 | NH1 | L_GLU.192 | OE1 | 3.445 |
| 3V6F | L_ARG.195 | NH1 | L_GLU.192 | OE2 | 2.967 |
| 3V6F | L_HIS.196 | ND1 | L_GLU.192 | OE2 | 3.834 |
| 3WIH | L_ARG.24  | NH1 | L_ASP.70  | OD1 | 3.918 |



|      |           |     |           |     |       |
|------|-----------|-----|-----------|-----|-------|
| 3WIH | L_ARG_24  | NH1 | L_ASP_70  | OD2 | 2.824 |
| 3WIH | L_ARG_61  | NH1 | L_GLU_81  | OE1 | 3.206 |
| 3WIH | L_ARG_61  | NH1 | L_ASP_82  | OD1 | 2.733 |
| 3WIH | L_ARG_61  | NH1 | L_ASP_82  | OD2 | 3.500 |
| 3WIH | L_LYS_103 | NZ  | L_GLU_105 | OE2 | 3.849 |
| 3WIH | L_LYS_149 | NZ  | L_GLU_195 | OE1 | 3.529 |
| 3WIH | L_LYS_149 | NZ  | L_GLU_195 | OE2 | 2.994 |
| 3WIH | L_ARG_155 | NH1 | L_GLU_185 | OE2 | 3.108 |
| 3WIH | L_ARG_155 | NH2 | L_GLU_185 | OE1 | 3.573 |
| 3WIH | L_ARG_155 | NH2 | L_GLU_185 | OE2 | 3.738 |
| 3WIH | L_LYS_183 | NZ  | L_GLU_187 | OE1 | 2.854 |
| 3WIH | L_LYS_183 | NZ  | L_GLU_187 | OE2 | 2.954 |
| 3WIH | L_HIS_189 | ND1 | L_ASP_151 | OD2 | 2.633 |
| 3WIH | L_LYS_199 | NZ  | L_GLU_110 | OE2 | 3.646 |
| 3WIH | H_LYS_67  | NZ  | H_ASP_90  | OD1 | 3.761 |
| 3WIH | H_LYS_67  | NZ  | H_ASP_90  | OD2 | 2.892 |
| 3WIH | H_ARG_98  | NH2 | H_ASP_107 | OD1 | 3.653 |
| 3WIH | H_ARG_98  | NH2 | H_ASP_107 | OD2 | 2.796 |
| 3WIH | H_LYS_214 | NZ  | L_GLU_123 | OE2 | 3.755 |
| 3WIH | H_LYS_215 | NZ  | H_GLU_217 | OE2 | 3.819 |
| 3WIH | M_ARG_61  | NH1 | M_GLU_81  | OE1 | 3.086 |
| 3WIH | M_ARG_61  | NH1 | M_ASP_82  | OD1 | 2.841 |
| 3WIH | M_ARG_61  | NH1 | M_ASP_82  | OD2 | 3.629 |
| 3WIH | M_LYS_103 | NZ  | M_GLU_105 | OE2 | 3.685 |
| 3WIH | M_LYS_147 | NZ  | M_GLU_154 | OE1 | 3.932 |
| 3WIH | M_LYS_149 | NZ  | M_GLU_195 | OE1 | 3.414 |
| 3WIH | M_LYS_149 | NZ  | M_GLU_195 | OE2 | 2.992 |
| 3WIH | M_ARG_155 | NH1 | M_GLU_185 | OE2 | 3.084 |
| 3WIH | M_ARG_155 | NH2 | M_GLU_185 | OE1 | 3.729 |
| 3WIH | M_ARG_155 | NH2 | M_GLU_185 | OE2 | 3.794 |
| 3WIH | M_HIS_189 | ND1 | M_ASP_151 | OD2 | 2.674 |
| 3WIH | I_LYS_67  | NZ  | I_ASP_90  | OD1 | 3.687 |
| 3WIH | I_LYS_67  | NZ  | I_ASP_90  | OD2 | 2.807 |
| 3WIH | I_ARG_98  | NH2 | I_ASP_107 | OD1 | 3.645 |
| 3WIH | I_ARG_98  | NH2 | I_ASP_107 | OD2 | 2.793 |
| 3WIH | I_LYS_214 | NZ  | M_GLU_123 | OE1 | 2.678 |
| 3WIH | I_LYS_214 | NZ  | M_GLU_123 | OE2 | 3.619 |
| 3WIH | I_LYS_215 | NZ  | I_GLU_217 | OE2 | 3.670 |
| 3WN5 | A_ARG_255 | NH1 | A_ASP_249 | OD1 | 2.832 |
| 3WN5 | A_HIS_285 | NE2 | A_GLU_283 | OE2 | 3.642 |
| 3WN5 | A_LYS_317 | NZ  | A_ASP_312 | OD1 | 2.941 |
| 3WN5 | A_LYS_320 | NZ  | A_GLU_333 | OE1 | 3.207 |
| 3WN5 | A_LYS_338 | NZ  | A_GLU_430 | OE1 | 3.924 |
| 3WN5 | A_LYS_338 | NZ  | A_GLU_430 | OE2 | 3.222 |
| 3WN5 | A_LYS_370 | NZ  | B_GLU_357 | OE2 | 3.815 |
| 3WN5 | A_LYS_409 | NZ  | B_ASP_399 | OD2 | 3.327 |
| 3WN5 | A_ARG_416 | NH1 | A_GLU_388 | OE1 | 3.624 |
| 3WN5 | A_ARG_416 | NH1 | A_GLU_388 | OE2 | 3.234 |
| 3WN5 | A_ARG_416 | NH2 | A_GLU_388 | OE1 | 2.983 |
| 3WN5 | A_ARG_416 | NH2 | A_GLU_388 | OE2 | 3.949 |
| 3WN5 | B_LYS_248 | NZ  | B_GLU_380 | OE1 | 2.957 |
| 3WN5 | B_LYS_248 | NZ  | B_GLU_380 | OE2 | 3.881 |
| 3WN5 | B_ARG_255 | NH1 | B_ASP_249 | OD1 | 2.667 |
| 3WN5 | B_HIS_285 | NE2 | B_GLU_283 | OE2 | 2.816 |
| 3WN5 | B_LYS_317 | NZ  | B_ASP_312 | OD1 | 3.123 |
| 3WN5 | B_LYS_320 | NZ  | B_GLU_333 | OE1 | 3.014 |
| 3WN5 | B_LYS_338 | NZ  | B_GLU_430 | OE1 | 3.374 |
| 3WN5 | B_LYS_370 | NZ  | A_GLU_357 | OE1 | 3.801 |

|      |           |     |           |     |       |
|------|-----------|-----|-----------|-----|-------|
| 3WN5 | B_LYS_409 | NZ  | A_ASP_399 | OD1 | 3.830 |
| 3WN5 | B_LYS_409 | NZ  | A_ASP_399 | OD2 | 3.511 |
| 3WN5 | B_ARG_416 | NH1 | B_GLU_388 | OE1 | 2.996 |
| 3WN5 | B_ARG_416 | NH1 | B_GLU_388 | OE2 | 3.505 |
| 3WN5 | B_ARG_416 | NH2 | B_GLU_388 | OE1 | 3.528 |
| 3WN5 | B_ARG_416 | NH2 | B_GLU_388 | OE2 | 2.698 |
| 3WN5 | C_LYS_4   | NZ  | C_ASP_77  | OD1 | 3.098 |
| 3WN5 | C_LYS_4   | NZ  | C_ASP_77  | OD2 | 2.841 |
| 3WN5 | C_ARG_67  | NH1 | C_GLU_65  | OE1 | 3.514 |
| 3WN5 | C_HIS_84  | ND1 | C_GLU_163 | OE1 | 3.890 |
| 3WN5 | C_HIS_84  | NE2 | C_GLU_82  | OE1 | 2.954 |
| 3WN5 | C_HIS_104 | NE2 | C_ASP_135 | OD2 | 2.827 |
| 3WN5 | C_HIS_108 | ND1 | C_ASP_20  | OD2 | 3.561 |
| 3WN5 | C_HIS_108 | NE2 | C_ASP_20  | OD1 | 3.787 |
| 3WN5 | C_LYS_117 | NZ  | B_ASP_265 | OD2 | 2.853 |
| 3WN5 | C_ARG_127 | NH1 | C_ASP_145 | OD1 | 3.210 |
| 3WN5 | C_ARG_127 | NH2 | C_ASP_145 | OD1 | 3.171 |
| 3WN5 | C_HIS_131 | NE2 | B_ASP_270 | OD1 | 3.342 |
| 3WN5 | C_HIS_131 | NE2 | B_ASP_270 | OD2 | 2.619 |
| 3WN5 | D_LYS_248 | NZ  | D_GLU_380 | OE1 | 2.793 |
| 3WN5 | D_LYS_248 | NZ  | D_GLU_380 | OE2 | 3.908 |
| 3WN5 | D_HIS_268 | NE2 | D_GLU_294 | OE2 | 3.025 |
| 3WN5 | D_HIS_285 | NE2 | D_GLU_283 | OE2 | 3.554 |
| 3WN5 | D_LYS_317 | NZ  | D_ASP_312 | OD1 | 2.899 |
| 3WN5 | D_LYS_320 | NZ  | D_GLU_333 | OE1 | 3.733 |
| 3WN5 | D_LYS_338 | NZ  | D_GLU_430 | OE1 | 3.660 |
| 3WN5 | D_LYS_338 | NZ  | D_GLU_430 | OE2 | 3.172 |
| 3WN5 | D_ARG_344 | NH1 | D_ASP_401 | OD2 | 3.301 |
| 3WN5 | D_LYS_370 | NZ  | E_GLU_357 | OE2 | 3.279 |
| 3WN5 | D_LYS_409 | NZ  | E_ASP_399 | OD2 | 3.246 |
| 3WN5 | D_ARG_416 | NH2 | D_GLU_388 | OE1 | 2.919 |
| 3WN5 | D_ARG_416 | NH2 | D_GLU_388 | OE2 | 3.802 |
| 3WN5 | E_LYS_248 | NZ  | E_GLU_380 | OE1 | 2.911 |
| 3WN5 | E_ARG_255 | NH1 | E_ASP_249 | OD1 | 3.513 |
| 3WN5 | E_HIS_285 | NE2 | E_GLU_283 | OE2 | 3.997 |
| 3WN5 | E_LYS_320 | NZ  | E_GLU_333 | OE1 | 3.266 |
| 3WN5 | E_LYS_338 | NZ  | E_GLU_430 | OE1 | 3.039 |
| 3WN5 | E_LYS_338 | NZ  | E_GLU_430 | OE2 | 3.495 |
| 3WN5 | E_ARG_344 | NH1 | E_ASP_401 | OD2 | 3.679 |
| 3WN5 | E_LYS_370 | NZ  | D_GLU_357 | OE1 | 3.843 |
| 3WN5 | E_LYS_409 | NZ  | D_ASP_399 | OD2 | 2.789 |
| 3WN5 | E_ARG_416 | NH1 | E_GLU_388 | OE1 | 2.774 |
| 3WN5 | E_ARG_416 | NH2 | E_GLU_388 | OE1 | 3.165 |
| 3WN5 | E_ARG_416 | NH2 | E_GLU_388 | OE2 | 3.510 |
| 3WN5 | F_HIS_84  | ND1 | F_GLU_163 | OE1 | 3.205 |
| 3WN5 | F_HIS_84  | NE2 | F_GLU_82  | OE1 | 3.100 |
| 3WN5 | F_HIS_104 | NE2 | F_ASP_135 | OD2 | 2.820 |
| 3WN5 | F_HIS_108 | ND1 | F_ASP_20  | OD2 | 3.674 |
| 3WN5 | F_HIS_108 | NE2 | F_ASP_20  | OD1 | 3.365 |
| 3WN5 | F_HIS_108 | NE2 | F_ASP_20  | OD2 | 3.881 |
| 3WN5 | F_LYS_117 | NZ  | E_ASP_265 | OD2 | 3.157 |
| 3WN5 | F_ARG_127 | NH1 | F_ASP_145 | OD1 | 3.151 |
| 3WN5 | F_ARG_127 | NH2 | F_ASP_145 | OD1 | 3.144 |
| 3WN5 | F_HIS_131 | NE2 | E_ASP_270 | OD2 | 2.923 |
| 3WN5 | F_LYS_140 | NZ  | F_GLU_100 | OE1 | 3.841 |
| 3X0E | A_LYS_124 | NZ  | A_ASP_195 | OD1 | 3.186 |
| 3X0E | A_LYS_124 | NZ  | A_ASP_195 | OD2 | 2.999 |
| 3X0E | A_LYS_187 | NZ  | A_ASP_155 | OD1 | 2.836 |

|      |           |     |           |     |       |
|------|-----------|-----|-----------|-----|-------|
| 3X0E | A_LYS_187 | NZ  | A_ASP_155 | OD2 | 3.800 |
| 3X0E | A_HIS_191 | NE2 | A_ASP_128 | OD1 | 2.835 |
| 3X0E | A_HIS_191 | NE2 | A_ASP_128 | OD2 | 3.342 |
| 3X0E | B_LYS_124 | NZ  | B_ASP_195 | OD1 | 2.748 |
| 3X0E | B_LYS_124 | NZ  | B_ASP_195 | OD2 | 3.043 |
| 3X0E | B_LYS_144 | NZ  | B_ASP_138 | OD2 | 3.823 |
| 3X0E | B_HIS_191 | NE2 | B_ASP_128 | OD1 | 2.682 |
| 3X0E | B_HIS_191 | NE2 | B_ASP_128 | OD2 | 3.448 |
| 3X0F | A_LYS_124 | NZ  | A_ASP_195 | OD1 | 2.914 |
| 3X0F | A_LYS_124 | NZ  | A_ASP_195 | OD2 | 3.712 |
| 3X0F | A_LYS_148 | NZ  | A_GLU_152 | OE2 | 2.835 |
| 3X0F | A_ARG_171 | NH2 | A_ASP_138 | OD1 | 3.978 |
| 3X0F | A_ARG_171 | NH2 | A_ASP_138 | OD2 | 3.900 |
| 3X0F | A_HIS_191 | NE2 | A_ASP_128 | OD1 | 2.650 |
| 3X0F | A_HIS_191 | NE2 | A_ASP_128 | OD2 | 3.274 |
| 3X0F | B_LYS_124 | NZ  | B_ASP_195 | OD2 | 3.594 |
| 3X0F | B_ARG_171 | NH2 | B_ASP_138 | OD1 | 2.531 |
| 3X0F | B_HIS_191 | NE2 | B_ASP_128 | OD1 | 2.685 |
| 3X0F | B_HIS_191 | NE2 | B_ASP_128 | OD2 | 3.306 |
| 4A6Y | A_ARG_23  | NH1 | A_ASP_71  | OD1 | 3.205 |
| 4A6Y | A_ARG_23  | NH1 | A_ASP_71  | OD2 | 3.345 |
| 4A6Y | A_ARG_23  | NH2 | A_ASP_71  | OD2 | 3.364 |
| 4A6Y | A_ARG_63  | NH2 | A_GLU_83  | OE2 | 2.831 |
| 4A6Y | A_ARG_63  | NH2 | A_ASP_84  | OD1 | 3.057 |
| 4A6Y | A_ARG_63  | NH2 | A_ASP_84  | OD2 | 3.695 |
| 4A6Y | A_LYS_72  | NZ  | A_ASP_71  | OD1 | 3.673 |
| 4A6Y | A_ARG_186 | NH2 | H_ASP_180 | OD2 | 3.656 |
| 4A6Y | A_ARG_190 | NH1 | H_GLU_89  | OE2 | 3.969 |
| 4A6Y | A_HIS_191 | ND1 | A_ASP_154 | OD2 | 3.123 |
| 4A6Y | A_ARG_211 | NH2 | A_GLU_189 | OE1 | 3.962 |
| 4A6Y | A_ARG_211 | NH2 | A_GLU_189 | OE2 | 2.597 |
| 4A6Y | B_ARG_40  | NH1 | B_GLU_89  | OE1 | 2.984 |
| 4A6Y | B_ARG_40  | NH1 | B_GLU_89  | OE2 | 3.972 |
| 4A6Y | B_ARG_40  | NH2 | B_GLU_89  | OE1 | 3.630 |
| 4A6Y | B_LYS_65  | NZ  | B_GLU_62  | OE1 | 3.475 |
| 4A6Y | B_LYS_67  | NZ  | B_ASP_90  | OD1 | 3.299 |
| 4A6Y | B_LYS_67  | NZ  | B_ASP_90  | OD2 | 3.248 |
| 4A6Y | B_ARG_98  | NH2 | B_ASP_108 | OD1 | 3.444 |
| 4A6Y | B_ARG_98  | NH2 | B_ASP_108 | OD2 | 3.726 |
| 4A6Y | B_LYS_150 | NZ  | A_GLU_127 | OE2 | 3.258 |
| 4A6Y | H_LYS_38  | NZ  | H_ASP_90  | OD1 | 3.850 |
| 4A6Y | H_ARG_40  | NH2 | H_GLU_89  | OE1 | 2.546 |
| 4A6Y | H_ARG_40  | NH2 | H_GLU_89  | OE2 | 3.778 |
| 4A6Y | H_LYS_67  | NZ  | H_ASP_90  | OD1 | 3.781 |
| 4A6Y | H_LYS_67  | NZ  | H_ASP_90  | OD2 | 3.430 |
| 4A6Y | H_ARG_98  | NH2 | H_ASP_108 | OD1 | 3.889 |
| 4A6Y | H_ARG_98  | NH2 | H_ASP_108 | OD2 | 2.725 |
| 4A6Y | H_LYS_150 | NZ  | L_GLU_127 | OE2 | 3.131 |
| 4A6Y | H_HIS_171 | NE2 | L_ASP_141 | OD1 | 3.968 |
| 4A6Y | L_ARG_63  | NH2 | L_ASP_84  | OD1 | 3.284 |
| 4A6Y | L_LYS_113 | NZ  | L_GLU_201 | OE2 | 3.880 |
| 4A6Y | L_ARG_190 | NH2 | B_GLU_89  | OE2 | 3.440 |
| 4A6Y | L_HIS_191 | ND1 | L_ASP_154 | OD2 | 2.878 |
| 4AG4 | A_ARG_40  | NH1 | A_ASP_68  | OD2 | 3.311 |
| 4AG4 | A_ARG_40  | NH2 | A_ASP_68  | OD1 | 3.723 |
| 4AG4 | A_ARG_40  | NH2 | A_ASP_68  | OD2 | 3.146 |
| 4AG4 | A_ARG_60  | NH1 | A_ASP_55  | OD1 | 3.893 |
| 4AG4 | A_ARG_60  | NH2 | A_ASP_55  | OD1 | 2.714 |

|      |           |     |           |     |       |
|------|-----------|-----|-----------|-----|-------|
| 4AG4 | A_ARG_60  | NH2 | A_ASP_55  | OD2 | 2.648 |
| 4AG4 | A_ARG_63  | NH2 | A_ASP_44  | OD1 | 3.060 |
| 4AG4 | A_ARG_105 | NH2 | A_GLU_113 | OE1 | 2.869 |
| 4AG4 | A_ARG_105 | NH2 | A_GLU_113 | OE2 | 2.817 |
| 4AG4 | A_ARG_119 | NH1 | A_GLU_83  | OE1 | 3.220 |
| 4AG4 | A_ARG_119 | NH1 | A_GLU_83  | OE2 | 3.262 |
| 4AG4 | A_ARG_119 | NH2 | A_GLU_83  | OE1 | 3.601 |
| 4AG4 | A_ARG_124 | NH1 | A_ASP_216 | OD2 | 3.269 |
| 4AG4 | A_ARG_124 | NH2 | A_ASP_216 | OD1 | 3.026 |
| 4AG4 | A_ARG_124 | NH2 | A_ASP_216 | OD2 | 2.840 |
| 4AG4 | A_ARG_162 | NH1 | A_ASP_90  | OD1 | 2.607 |
| 4AG4 | A_ARG_162 | NH1 | A_ASP_90  | OD2 | 3.377 |
| 4AG4 | A_ARG_162 | NH2 | A_ASP_90  | OD1 | 3.110 |
| 4AG4 | A_ARG_162 | NH2 | A_ASP_90  | OD2 | 2.698 |
| 4AG4 | A_ARG_242 | NH2 | A_ASP_240 | OD1 | 3.701 |
| 4AG4 | A_ARG_242 | NH2 | A_ASP_240 | OD2 | 3.113 |
| 4AG4 | A_ARG_278 | NH2 | A_ASP_275 | OD1 | 3.438 |
| 4AG4 | A_ARG_278 | NH2 | A_ASP_275 | OD2 | 3.642 |
| 4AG4 | A_ARG_304 | NH2 | A_GLU_302 | OE1 | 3.291 |
| 4AG4 | A_ARG_307 | NH2 | A_GLU_314 | OE2 | 3.264 |
| 4AG4 | A_ARG_330 | NH2 | A_ASP_328 | OD2 | 3.952 |
| 4AG4 | A_ARG_332 | NH1 | A_ASP_328 | OD2 | 3.874 |
| 4AG4 | A_ARG_349 | NH1 | A_GLU_269 | OE2 | 2.534 |
| 4AG4 | H_LYS_62  | NZ  | H_GLU_46  | OE1 | 3.542 |
| 4AG4 | H_LYS_62  | NZ  | H_GLU_46  | OE2 | 3.611 |
| 4AG4 | H_ARG_94  | NH2 | H_ASP_101 | OD1 | 3.424 |
| 4AG4 | H_ARG_94  | NH2 | H_ASP_101 | OD2 | 2.703 |
| 4AG4 | H_LYS_208 | NZ  | L_GLU_123 | OE2 | 2.708 |
| 4AG4 | L_ARG_61  | NH1 | L_GLU_81  | OE2 | 3.821 |
| 4AG4 | L_ARG_61  | NH2 | L_GLU_81  | OE2 | 3.157 |
| 4AG4 | L_ARG_61  | NH2 | L_ASP_82  | OD1 | 2.518 |
| 4AG4 | L_ARG_61  | NH2 | L_ASP_82  | OD2 | 3.022 |
| 4AG4 | L_LYS_103 | NZ  | L_GLU_105 | OE2 | 3.708 |
| 4AG4 | L_LYS_103 | NZ  | L_ASP_165 | OD1 | 3.872 |
| 4AG4 | L_LYS_103 | NZ  | L_ASP_165 | OD2 | 3.264 |
| 4AG4 | L_LYS_147 | NZ  | L_GLU_154 | OE1 | 3.276 |
| 4AG4 | L_ARG_155 | NH2 | L_GLU_185 | OE1 | 3.301 |
| 4AG4 | L_HIS_189 | ND1 | L_ASP_151 | OD2 | 2.672 |
| 4AG4 | L_LYS_199 | NZ  | L_ASP_110 | OD2 | 3.556 |
| 4B50 | A_ARG_38  | NH1 | A_ASP_86  | OD1 | 2.836 |
| 4B50 | A_ARG_38  | NH2 | A_GLU_46  | OE1 | 3.561 |
| 4B50 | A_ARG_38  | NH2 | A_ASP_86  | OD1 | 3.779 |
| 4B50 | A_ARG_66  | NH1 | A_ASP_86  | OD1 | 3.976 |
| 4B50 | A_ARG_66  | NH1 | A_ASP_86  | OD2 | 2.773 |
| 4B50 | A_ARG_66  | NH2 | A_ASP_86  | OD1 | 3.265 |
| 4B50 | A_ARG_66  | NH2 | A_ASP_86  | OD2 | 3.358 |
| 4B50 | A_ARG_93  | NH1 | A_GLU_95  | OE2 | 3.608 |
| 4B50 | A_ARG_93  | NH2 | A_GLU_95  | OE2 | 3.523 |
| 4B50 | A_ARG_93  | NH2 | A_ASP_101 | OD1 | 3.368 |
| 4B50 | A_ARG_93  | NH2 | A_ASP_101 | OD2 | 2.912 |
| 4BH7 | A_ARG_24  | NH1 | A_ASP_70  | OD1 | 3.258 |
| 4BH7 | A_ARG_24  | NH1 | A_ASP_70  | OD2 | 3.469 |
| 4BH7 | A_ARG_24  | NH2 | A_ASP_70  | OD2 | 3.985 |
| 4BH7 | A_ARG_61  | NH1 | A_GLU_79  | OE1 | 2.456 |
| 4BH7 | A_ARG_61  | NH1 | A_GLU_79  | OE2 | 3.328 |
| 4BH7 | A_ARG_61  | NH2 | A_GLU_79  | OE1 | 3.232 |
| 4BH7 | A_ARG_61  | NH2 | A_GLU_81  | OE1 | 3.871 |
| 4BH7 | A_ARG_61  | NH2 | A_ASP_82  | OD1 | 3.092 |

|      |           |     |           |     |       |
|------|-----------|-----|-----------|-----|-------|
| 4BH7 | A_ARG_61  | NH2 | A_ASP_82  | OD2 | 3.325 |
| 4BH7 | A_LYS_103 | NZ  | A_ASP_165 | OD1 | 3.734 |
| 4BH7 | A_LYS_147 | NZ  | A_GLU_154 | OE2 | 3.502 |
| 4BH7 | A_LYS_149 | NZ  | A_GLU_195 | OE1 | 3.693 |
| 4BH7 | A_LYS_149 | NZ  | A_GLU_195 | OE2 | 2.842 |
| 4BH7 | A_ARG_155 | NH1 | A_GLU_185 | OE1 | 3.587 |
| 4BH7 | A_ARG_155 | NH1 | A_GLU_185 | OE2 | 2.731 |
| 4BH7 | A_ARG_155 | NH2 | A_GLU_185 | OE1 | 3.886 |
| 4BH7 | A_LYS_183 | NZ  | A_GLU_187 | OE2 | 3.868 |
| 4BH7 | A_LYS_199 | NZ  | A_ASP_110 | OD1 | 3.983 |
| 4BH7 | A_LYS_199 | NZ  | A_ASP_110 | OD2 | 3.698 |
| 4BH7 | B_LYS_38  | NZ  | B_ASP_90  | OD1 | 3.793 |
| 4BH7 | B_ARG_40  | NH2 | B_GLU_89  | OE1 | 3.542 |
| 4BH7 | B_ARG_40  | NH2 | B_GLU_89  | OE2 | 2.796 |
| 4BH7 | B_LYS_63  | NZ  | B_GLU_46  | OE1 | 3.614 |
| 4BH7 | B_LYS_63  | NZ  | B_GLU_46  | OE2 | 2.841 |
| 4BH7 | B_ARG_98  | NH2 | B_ASP_109 | OD1 | 3.844 |
| 4BH7 | B_ARG_98  | NH2 | B_ASP_109 | OD2 | 2.412 |
| 4BH8 | A_ARG_24  | NH2 | A_ASP_70  | OD2 | 3.331 |
| 4BH8 | A_ARG_61  | NH1 | A_GLU_79  | OE1 | 3.277 |
| 4BH8 | A_ARG_61  | NH2 | A_GLU_79  | OE1 | 3.420 |
| 4BH8 | A_ARG_61  | NH2 | A_GLU_81  | OE2 | 3.313 |
| 4BH8 | A_ARG_61  | NH2 | A_ASP_82  | OD1 | 2.737 |
| 4BH8 | A_ARG_61  | NH2 | A_ASP_82  | OD2 | 3.137 |
| 4BH8 | A_LYS_103 | NZ  | A_ASP_165 | OD1 | 3.847 |
| 4BH8 | A_LYS_142 | NZ  | A_ASP_143 | OD1 | 3.850 |
| 4BH8 | A_LYS_147 | NZ  | A_GLU_154 | OE1 | 3.754 |
| 4BH8 | A_LYS_149 | NZ  | A_GLU_195 | OE1 | 3.565 |
| 4BH8 | A_LYS_149 | NZ  | A_GLU_195 | OE2 | 2.762 |
| 4BH8 | A_ARG_155 | NH1 | A_GLU_185 | OE2 | 2.660 |
| 4BH8 | A_ARG_155 | NH2 | A_GLU_185 | OE1 | 3.812 |
| 4BH8 | A_ARG_155 | NH2 | A_GLU_185 | OE2 | 3.243 |
| 4BH8 | A_LYS_183 | NZ  | A_GLU_187 | OE1 | 2.950 |
| 4BH8 | A_LYS_183 | NZ  | A_GLU_187 | OE2 | 3.305 |
| 4BH8 | A_LYS_199 | NZ  | A_ASP_110 | OD1 | 3.983 |
| 4BH8 | A_LYS_199 | NZ  | A_ASP_110 | OD2 | 3.388 |
| 4BH8 | B_ARG_40  | NH1 | B_GLU_89  | OE1 | 3.007 |
| 4BH8 | B_ARG_40  | NH2 | B_GLU_46  | OE1 | 3.740 |
| 4BH8 | B_LYS_63  | NZ  | B_GLU_46  | OE1 | 3.869 |
| 4BH8 | B_LYS_63  | NZ  | B_GLU_46  | OE2 | 2.693 |
| 4BH8 | B_ARG_98  | NH2 | B_ASP_109 | OD1 | 3.876 |
| 4BH8 | B_ARG_98  | NH2 | B_ASP_109 | OD2 | 2.532 |
| 4C83 | A_HIS_35  | NE2 | A_ASP_95  | OD1 | 2.464 |
| 4C83 | A_ARG_38  | NH1 | A_ASP_86  | OD1 | 3.261 |
| 4C83 | A_ARG_38  | NH2 | A_GLU_46  | OE1 | 3.691 |
| 4C83 | A_ARG_38  | NH2 | A_GLU_46  | OE2 | 3.824 |
| 4C83 | A_ARG_66  | NH1 | A_ASP_86  | OD1 | 3.704 |
| 4C83 | A_ARG_66  | NH1 | A_ASP_86  | OD2 | 2.349 |
| 4C83 | A_ARG_66  | NH2 | A_ASP_86  | OD1 | 3.078 |
| 4C83 | A_ARG_66  | NH2 | A_ASP_86  | OD2 | 3.279 |
| 4C83 | A_ARG_83  | NH2 | A_GLU_85  | OE2 | 3.570 |
| 4C83 | A_ARG_94  | NH1 | A_GLU_96  | OE1 | 2.827 |
| 4C83 | A_ARG_94  | NH1 | A_GLU_96  | OE2 | 2.141 |
| 4C83 | B_LYS_53  | NZ  | B_ASP_50  | OD1 | 3.953 |
| 4C83 | B_LYS_53  | NZ  | B_ASP_50  | OD2 | 3.875 |
| 4C83 | B_ARG_61  | NH1 | B_GLU_79  | OE1 | 3.356 |
| 4C83 | B_ARG_61  | NH1 | B_ASP_82  | OD1 | 3.496 |
| 4C83 | B_ARG_61  | NH1 | B_ASP_82  | OD2 | 2.349 |

|      |           |     |           |     |       |
|------|-----------|-----|-----------|-----|-------|
| 4C83 | B_ARG_61  | NH2 | B_GLU_79  | OE1 | 3.840 |
| 4C83 | B_ARG_61  | NH2 | B_ASP_82  | OD1 | 2.878 |
| 4C83 | B_ARG_61  | NH2 | B_ASP_82  | OD2 | 3.259 |
| 4C83 | B_LYS_103 | NZ  | B_GLU_105 | OE1 | 3.618 |
| 4C83 | B_LYS_103 | NZ  | B_GLU_105 | OE2 | 3.871 |
| 4C83 | B_LYS_147 | NZ  | B_GLU_154 | OE2 | 3.593 |
| 4C83 | B_LYS_149 | NZ  | B_GLU_195 | OE1 | 2.933 |
| 4C83 | B_LYS_149 | NZ  | B_GLU_195 | OE2 | 2.669 |
| 4C83 | B_ARG_155 | NH2 | B_GLU_185 | OE2 | 3.551 |
| 4C83 | B_ARG_188 | NH1 | B_GLU_185 | OE1 | 3.402 |
| 4C83 | C_HIS_35  | NE2 | C_ASP_95  | OD1 | 2.757 |
| 4C83 | C_ARG_38  | NH1 | C_ASP_86  | OD1 | 3.096 |
| 4C83 | C_ARG_38  | NH2 | C_GLU_46  | OE1 | 3.335 |
| 4C83 | C_ARG_38  | NH2 | C_ASP_86  | OD1 | 3.866 |
| 4C83 | C_ARG_66  | NH1 | C_ASP_86  | OD2 | 3.260 |
| 4C83 | C_ARG_66  | NH2 | C_ASP_86  | OD1 | 2.653 |
| 4C83 | C_ARG_66  | NH2 | C_ASP_86  | OD2 | 1.985 |
| 4C83 | C_ARG_94  | NH1 | C_GLU_96  | OE1 | 3.930 |
| 4C83 | C_ARG_94  | NH1 | C_GLU_96  | OE2 | 1.996 |
| 4C83 | C_ARG_94  | NH2 | C_GLU_96  | OE2 | 3.476 |
| 4C83 | C_LYS_208 | NZ  | D_GLU_123 | OE1 | 2.304 |
| 4C83 | C_LYS_208 | NZ  | D_GLU_123 | OE2 | 2.598 |
| 4C83 | D_LYS_53  | NZ  | D_ASP_50  | OD2 | 3.324 |
| 4C83 | D_ARG_61  | NH1 | D_GLU_79  | OE1 | 3.777 |
| 4C83 | D_ARG_61  | NH1 | D_ASP_82  | OD1 | 2.299 |
| 4C83 | D_ARG_61  | NH1 | D_ASP_82  | OD2 | 2.134 |
| 4C83 | D_ARG_61  | NH2 | D_GLU_79  | OE1 | 3.916 |
| 4C83 | D_ARG_61  | NH2 | D_ASP_82  | OD1 | 3.608 |
| 4C83 | D_LYS_103 | NZ  | D_GLU_105 | OE2 | 3.442 |
| 4C83 | D_LYS_103 | NZ  | D_ASP_165 | OD1 | 3.353 |
| 4C83 | D_LYS_147 | NZ  | D_GLU_154 | OE2 | 3.595 |
| 4C83 | D_LYS_149 | NZ  | D_GLU_195 | OE1 | 3.533 |
| 4C83 | D_LYS_149 | NZ  | D_GLU_195 | OE2 | 2.856 |
| 4C83 | D_ARG_155 | NH2 | D_GLU_185 | OE2 | 3.932 |
| 4C83 | D_LYS_183 | NZ  | D_ASP_184 | OD1 | 3.344 |
| 4C83 | D_HIS_189 | ND1 | D_ASP_151 | OD2 | 2.752 |
| 4C83 | D_LYS_199 | NZ  | D_ASP_110 | OD1 | 3.795 |
| 4CJD | A_LYS_35  | NZ  | A_ASP_31  | OD1 | 3.731 |
| 4CJD | A_LYS_35  | NZ  | A_ASP_31  | OD2 | 2.727 |
| 4CJD | A_LYS_52  | NZ  | A_ASP_55  | OD1 | 2.992 |
| 4CJD | A_ARG_68  | NH1 | A_ASP_74  | OD1 | 3.693 |
| 4CJD | A_ARG_68  | NH1 | A_ASP_74  | OD2 | 3.009 |
| 4CJD | A_ARG_68  | NH2 | A_ASP_74  | OD1 | 2.966 |
| 4CJD | A_ARG_68  | NH2 | A_ASP_74  | OD2 | 3.665 |
| 4CJD | A_LYS_76  | NZ  | A_GLU_72  | OE2 | 3.775 |
| 4DAG | A_ARG_40  | NH2 | A_ASP_336 | OD1 | 2.596 |
| 4DAG | A_ARG_40  | NH2 | A_ASP_336 | OD2 | 3.693 |
| 4DAG | A_ARG_91  | NH1 | A_GLU_92  | OE1 | 3.086 |
| 4DAG | A_ARG_248 | NH1 | A_ASP_224 | OD2 | 2.986 |
| 4DAG | A_ARG_252 | NH2 | A_ASP_224 | OD1 | 2.791 |
| 4DAG | A_ARG_304 | NH2 | A_ASP_306 | OD2 | 3.086 |
| 4DAG | A_LYS_312 | NZ  | A_GLU_345 | OE1 | 3.422 |
| 4DAG | A_HIS_332 | NE2 | A_ASP_280 | OD1 | 3.787 |
| 4DAG | H_ARG_38  | NH1 | H_GLU_46  | OE2 | 3.364 |
| 4DAG | H_ARG_38  | NH2 | H_ASP_89  | OD1 | 3.055 |
| 4DAG | H_ARG_66  | NH1 | H_ASP_89  | OD1 | 3.443 |
| 4DAG | H_ARG_66  | NH1 | H_ASP_89  | OD2 | 3.823 |
| 4DAG | H_ARG_66  | NH2 | H_ASP_89  | OD1 | 3.179 |

|      |           |     |           |     |       |
|------|-----------|-----|-----------|-----|-------|
| 4DAG | H_ARG.66  | NH2 | H_ASP.89  | OD2 | 2.772 |
| 4DAG | H_LYS.75  | NZ  | H_ASP.72  | OD2 | 3.891 |
| 4DAG | H_ARG.97  | NH2 | H_ASP.110 | OD2 | 2.600 |
| 4DAG | H_ARG.101 | NH2 | A_GLU.33  | OE1 | 3.620 |
| 4DAG | H_ARG.101 | NH2 | A_GLU.33  | OE2 | 2.107 |
| 4DAG | H_LYS.152 | NZ  | H_ASP.153 | OD2 | 3.881 |
| 4DAG | L_LYS.46  | NZ  | A_ASP.414 | OD1 | 3.558 |
| 4DAG | L_LYS.46  | NZ  | A_ASP.414 | OD2 | 3.550 |
| 4DAG | L_LYS.50  | NZ  | L_ASP.111 | OD1 | 3.845 |
| 4DAG | L_ARG.80  | NH2 | L_ASP.101 | OD1 | 3.368 |
| 4DAG | L_ARG.80  | NH2 | L_ASP.101 | OD2 | 3.445 |
| 4DAG | L_LYS.186 | NZ  | L_GLU.102 | OE1 | 3.649 |
| 4DAG | L_LYS.186 | NZ  | L_GLU.102 | OE2 | 2.377 |
| 4DGV | H_HIS.35  | NE2 | H_ASP.95  | OD2 | 2.670 |
| 4DGV | H_ARG.38  | NH1 | H_ASP.86  | OD1 | 2.801 |
| 4DGV | H_ARG.38  | NH2 | H_GLU.46  | OE1 | 3.005 |
| 4DGV | H_ARG.38  | NH2 | H_GLU.46  | OE2 | 3.829 |
| 4DGV | H_ARG.38  | NH2 | H_ASP.86  | OD1 | 3.806 |
| 4DGV | H_ARG.64  | NH1 | H_ASP.61  | OD1 | 2.727 |
| 4DGV | H_ARG.64  | NH2 | H_ASP.61  | OD1 | 2.493 |
| 4DGV | H_ARG.66  | NH1 | H_ASP.86  | OD1 | 3.757 |
| 4DGV | H_ARG.66  | NH1 | H_ASP.86  | OD2 | 2.704 |
| 4DGV | H_ARG.66  | NH2 | H_ASP.86  | OD1 | 3.075 |
| 4DGV | H_ARG.66  | NH2 | H_ASP.86  | OD2 | 3.481 |
| 4DGV | H_ARG.94  | NH2 | H_ASP.101 | OD1 | 3.600 |
| 4DGV | H_ARG.94  | NH2 | H_ASP.101 | OD2 | 2.840 |
| 4DGV | H_LYS.143 | NZ  | H_ASP.144 | OD1 | 3.303 |
| 4DGV | H_LYS.143 | NZ  | H_ASP.144 | OD2 | 3.171 |
| 4DGV | H_LYS.209 | NZ  | L_GLU.123 | OE1 | 2.915 |
| 4DGV | H_LYS.209 | NZ  | L_GLU.123 | OE2 | 3.422 |
| 4DGV | H_LYS.210 | NZ  | H_GLU.212 | OE2 | 3.411 |
| 4DGV | L_ARG.61  | NH1 | L_ASP.82  | OD2 | 2.699 |
| 4DGV | L_ARG.61  | NH2 | L_GLU.79  | OE1 | 3.439 |
| 4DGV | L_ARG.61  | NH2 | L_GLU.79  | OE2 | 3.431 |
| 4DGV | L_ARG.61  | NH2 | L_ASP.82  | OD1 | 3.032 |
| 4DGV | L_ARG.61  | NH2 | L_ASP.82  | OD2 | 3.080 |
| 4DGV | L_LYS.149 | NZ  | L_GLU.195 | OE1 | 3.591 |
| 4DGV | L_LYS.149 | NZ  | L_GLU.195 | OE2 | 3.604 |
| 4DGV | L_HIS.189 | ND1 | L_ASP.151 | OD2 | 3.493 |
| 4DGY | H_HIS.35  | NE2 | H_ASP.95  | OD2 | 2.790 |
| 4DGY | H_ARG.38  | NH1 | H_ASP.86  | OD1 | 2.922 |
| 4DGY | H_ARG.38  | NH2 | H_GLU.46  | OE1 | 2.965 |
| 4DGY | H_ARG.38  | NH2 | H_GLU.46  | OE2 | 3.707 |
| 4DGY | H_LYS.43  | NZ  | H_GLU.85  | OE1 | 3.738 |
| 4DGY | H_ARG.64  | NH1 | H_ASP.61  | OD1 | 2.545 |
| 4DGY | H_ARG.64  | NH2 | H_ASP.61  | OD1 | 3.007 |
| 4DGY | H_ARG.66  | NH1 | H_ASP.86  | OD1 | 3.675 |
| 4DGY | H_ARG.66  | NH1 | H_ASP.86  | OD2 | 2.708 |
| 4DGY | H_ARG.66  | NH2 | H_ASP.86  | OD1 | 3.089 |
| 4DGY | H_ARG.66  | NH2 | H_ASP.86  | OD2 | 3.611 |
| 4DGY | H_LYS.83  | NZ  | H_GLU.85  | OE2 | 2.758 |
| 4DGY | H_ARG.94  | NH2 | H_ASP.101 | OD1 | 3.594 |
| 4DGY | H_ARG.94  | NH2 | H_ASP.101 | OD2 | 2.861 |
| 4DGY | H_LYS.143 | NZ  | H_ASP.144 | OD1 | 3.074 |
| 4DGY | H_LYS.143 | NZ  | H_ASP.144 | OD2 | 3.615 |
| 4DGY | H_LYS.210 | NZ  | H_GLU.212 | OE1 | 3.786 |
| 4DGY | H_LYS.214 | NZ  | L_ASP.122 | OD1 | 3.699 |
| 4DGY | H_LYS.214 | NZ  | L_ASP.122 | OD2 | 2.517 |

|      |           |     |           |     |       |
|------|-----------|-----|-----------|-----|-------|
| 4DGY | L_ARG.61  | NH2 | L_ASP_82  | OD1 | 2.957 |
| 4DGY | L_ARG.61  | NH2 | L_ASP_82  | OD2 | 3.558 |
| 4DGY | L_LYS_149 | NZ  | L_GLU_195 | OE1 | 2.631 |
| 4DGY | L_HIS_189 | ND1 | L_ASP_185 | OD1 | 2.991 |
| 4DGY | L_ARG.211 | NH1 | L_GLU_187 | OE1 | 3.660 |
| 4E9O | X_LYS_13  | NZ  | X_ASP_83  | OD1 | 2.596 |
| 4E9O | X_LYS_13  | NZ  | X_ASP_83  | OD2 | 3.399 |
| 4E9O | X_HIS_80  | ND1 | X_GLU_90  | OE1 | 3.847 |
| 4E9O | X_HIS_80  | ND1 | X_GLU_90  | OE2 | 3.037 |
| 4E9O | X_LYS_100 | NZ  | X_ASP_112 | OD2 | 2.817 |
| 4E9O | X_HIS_110 | NE2 | X_GLU_106 | OE2 | 2.743 |
| 4E9O | X_HIS_192 | ND1 | X_ASP_194 | OD1 | 3.800 |
| 4E9O | X_HIS_192 | ND1 | X_ASP_194 | OD2 | 3.793 |
| 4E9O | X_HIS_192 | NE2 | X_ASP_125 | OD1 | 3.109 |
| 4E9O | X_ARG.200 | NH1 | X_ASP_74  | OD1 | 3.919 |
| 4E9O | X_ARG.200 | NH2 | X_ASP_74  | OD1 | 3.092 |
| 4EBQ | H_ARG.41  | NH2 | H_GLU_90  | OE2 | 3.943 |
| 4EBQ | H_LYS.64  | NZ  | H_GLU_47  | OE1 | 3.182 |
| 4EBQ | H_LYS.68  | NZ  | H_ASP_91  | OD1 | 3.801 |
| 4EBQ | H_LYS.68  | NZ  | H_ASP_91  | OD2 | 2.849 |
| 4EBQ | H_ARG.99  | NH2 | H_ASP_108 | OD1 | 3.551 |
| 4EBQ | H_ARG.99  | NH2 | H_ASP_108 | OD2 | 2.902 |
| 4EBQ | H_LYS_215 | NZ  | L_GLU_123 | OE2 | 2.960 |
| 4EBQ | H_LYS_216 | NZ  | H_GLU_218 | OE2 | 3.694 |
| 4EBQ | L_ARG.61  | NH1 | L_GLU_79  | OE1 | 3.472 |
| 4EBQ | L_ARG.61  | NH1 | L_GLU_79  | OE2 | 3.398 |
| 4EBQ | L_ARG.61  | NH2 | L_GLU_79  | OE1 | 3.555 |
| 4EBQ | L_ARG.61  | NH2 | L_GLU_81  | OE2 | 2.928 |
| 4EBQ | L_ARG.61  | NH2 | L_ASP_82  | OD1 | 2.828 |
| 4EBQ | L_ARG.61  | NH2 | L_ASP_82  | OD2 | 3.746 |
| 4EBQ | L_LYS_149 | NZ  | L_GLU_195 | OE1 | 3.126 |
| 4EBQ | L_HIS_189 | ND1 | L_ASP_151 | OD2 | 2.598 |
| 4EBQ | L_HIS_198 | NE2 | L_ASP_143 | OD1 | 3.201 |
| 4EBQ | L_HIS_198 | NE2 | L_ASP_143 | OD2 | 3.999 |
| 4EBQ | L_ARG.211 | NH1 | L_GLU_187 | OE1 | 3.580 |
| 4EDW | V_LYS.25  | NZ  | V_GLU_55  | OE2 | 2.812 |
| 4EDW | V_ARG.59  | NH1 | V_ASP_16  | OD2 | 3.820 |
| 4EDW | V_ARG.69  | NH1 | V_ASP_16  | OD2 | 3.587 |
| 4EDW | V_ARG.69  | NH1 | V_ASP_65  | OD2 | 3.446 |
| 4EDW | V_ARG.69  | NH2 | V_ASP_16  | OD1 | 2.627 |
| 4EDW | V_ARG.69  | NH2 | V_ASP_16  | OD2 | 3.468 |
| 4EDW | V_HIS_75  | ND1 | V_ASP_72  | OD2 | 3.959 |
| 4EDW | V_HIS_84  | NE2 | V_ASP_105 | OD1 | 3.310 |
| 4EDW | V_ARG.100 | NH2 | V_ASP_93  | OD2 | 3.018 |
| 4EDW | L_ARG.61  | NH2 | L_GLU_81  | OE2 | 3.755 |
| 4EDW | L_ARG.61  | NH2 | L_ASP_82  | OD1 | 3.001 |
| 4EDW | L_LYS_149 | NZ  | L_GLU_195 | OE1 | 3.988 |
| 4EDW | L_LYS_149 | NZ  | L_GLU_195 | OE2 | 3.571 |
| 4EDW | H_ARG.38  | NH1 | H_ASP_86  | OD1 | 2.786 |
| 4EDW | H_ARG.38  | NH2 | H_GLU_46  | OE1 | 3.202 |
| 4EDW | H_ARG.38  | NH2 | H_GLU_46  | OE2 | 3.836 |
| 4EDW | H_ARG.38  | NH2 | H_ASP_86  | OD1 | 3.735 |
| 4EDW | H_LYS.64  | NZ  | H_ASP_58  | OD1 | 3.460 |
| 4EDW | H_ARG.66  | NH1 | H_ASP_86  | OD1 | 3.705 |
| 4EDW | H_ARG.66  | NH1 | H_ASP_86  | OD2 | 3.011 |
| 4EDW | H_ARG.66  | NH2 | H_ASP_86  | OD1 | 3.297 |
| 4EDW | H_ARG.66  | NH2 | H_ASP_86  | OD2 | 3.810 |
| 4EDW | H_ARG.94  | NH1 | H_ASP_101 | OD1 | 3.531 |



|      |           |     |           |     |       |
|------|-----------|-----|-----------|-----|-------|
| 4EDW | H_ARG_94  | NH1 | H_ASP_101 | OD2 | 3.123 |
| 4EDW | H_LYS_143 | NZ  | H_ASP_144 | OD1 | 3.362 |
| 4EDW | H_LYS_143 | NZ  | H_ASP_144 | OD2 | 3.438 |
| 4EDW | H_LYS_206 | NZ  | H_ASP_199 | OD1 | 3.486 |
| 4EDW | H_LYS_206 | NZ  | H_ASP_199 | OD2 | 3.672 |
| 4EDW | H_LYS_209 | NZ  | L_GLU_123 | OE2 | 2.707 |
| 4EDX | W_LYS_25  | NZ  | W_GLU_55  | OE1 | 3.801 |
| 4EDX | W_LYS_25  | NZ  | W_GLU_55  | OE2 | 2.552 |
| 4EDX | W_LYS_32  | NZ  | H_ASP_58  | OD1 | 2.886 |
| 4EDX | W_LYS_32  | NZ  | H_ASP_58  | OD2 | 2.677 |
| 4EDX | W_LYS_34  | NZ  | W_ASP_93  | OD1 | 3.065 |
| 4EDX | W_LYS_34  | NZ  | W_ASP_93  | OD2 | 3.190 |
| 4EDX | W_ARG_69  | NH1 | W_ASP_16  | OD1 | 3.423 |
| 4EDX | W_ARG_69  | NH1 | W_ASP_16  | OD2 | 3.292 |
| 4EDX | W_ARG_69  | NH2 | W_ASP_16  | OD1 | 3.501 |
| 4EDX | W_ARG_69  | NH2 | W_ASP_16  | OD2 | 3.076 |
| 4EDX | W_HIS_75  | ND1 | W_ASP_72  | OD1 | 2.972 |
| 4EDX | W_HIS_75  | ND1 | W_ASP_72  | OD2 | 2.422 |
| 4EDX | W_HIS_75  | NE2 | W_ASP_72  | OD1 | 3.095 |
| 4EDX | W_HIS_75  | NE2 | W_ASP_72  | OD2 | 3.906 |
| 4EDX | W_HIS_84  | NE2 | W_ASP_105 | OD1 | 3.552 |
| 4EDX | A_ARG_24  | NH1 | A_ASP_70  | OD1 | 2.849 |
| 4EDX | A_ARG_24  | NH1 | A_ASP_70  | OD2 | 3.069 |
| 4EDX | A_ARG_53  | NH1 | W_GLU_11  | OE1 | 2.795 |
| 4EDX | A_ARG_61  | NH1 | A_GLU_79  | OE1 | 3.710 |
| 4EDX | A_ARG_61  | NH1 | A_GLU_79  | OE2 | 3.737 |
| 4EDX | A_ARG_61  | NH2 | A_GLU_81  | OE2 | 3.420 |
| 4EDX | A_ARG_61  | NH2 | A_ASP_82  | OD1 | 2.960 |
| 4EDX | A_ARG_61  | NH2 | A_ASP_82  | OD2 | 3.581 |
| 4EDX | A_LYS_142 | NZ  | A_ASP_143 | OD2 | 3.962 |
| 4EDX | A_LYS_149 | NZ  | A_GLU_195 | OE1 | 3.345 |
| 4EDX | A_ARG_155 | NH1 | A_GLU_185 | OE2 | 3.186 |
| 4EDX | A_ARG_155 | NH2 | A_GLU_185 | OE1 | 3.161 |
| 4EDX | A_ARG_155 | NH2 | A_GLU_185 | OE2 | 3.235 |
| 4EDX | A_HIS_189 | ND1 | A_ASP_151 | OD2 | 2.695 |
| 4EDX | A_LYS_199 | NZ  | A_ASP_110 | OD2 | 3.513 |
| 4EDX | B_ARG_38  | NH1 | B_ASP_86  | OD1 | 2.727 |
| 4EDX | B_ARG_38  | NH2 | B_GLU_46  | OE1 | 3.309 |
| 4EDX | B_ARG_38  | NH2 | B_GLU_46  | OE2 | 3.547 |
| 4EDX | B_ARG_38  | NH2 | B_ASP_86  | OD1 | 3.872 |
| 4EDX | B_ARG_66  | NH1 | B_ASP_86  | OD1 | 3.949 |
| 4EDX | B_ARG_66  | NH2 | B_ASP_86  | OD1 | 3.356 |
| 4EDX | B_ARG_66  | NH2 | B_ASP_86  | OD2 | 2.590 |
| 4EDX | B_ARG_83  | NH1 | B_ASP_85  | OD2 | 3.918 |
| 4EDX | B_ARG_94  | NH2 | B_ASP_101 | OD1 | 3.751 |
| 4EDX | B_ARG_94  | NH2 | B_ASP_101 | OD2 | 2.789 |
| 4EDX | B_LYS_221 | NZ  | A_GLU_123 | OE2 | 3.878 |
| 4EDX | V_LYS_25  | NZ  | V_GLU_55  | OE2 | 2.718 |
| 4EDX | V_LYS_32  | NZ  | B_ASP_58  | OD1 | 3.117 |
| 4EDX | V_LYS_32  | NZ  | B_ASP_58  | OD2 | 2.681 |
| 4EDX | V_LYS_34  | NZ  | V_ASP_93  | OD1 | 2.694 |
| 4EDX | V_LYS_34  | NZ  | V_ASP_93  | OD2 | 3.572 |
| 4EDX | V_ARG_69  | NH1 | V_ASP_16  | OD1 | 3.521 |
| 4EDX | V_HIS_75  | ND1 | V_ASP_72  | OD2 | 2.859 |
| 4EDX | V_HIS_84  | NE2 | V_ASP_105 | OD1 | 3.612 |
| 4EDX | V_LYS_88  | NZ  | B_ASP_54  | OD2 | 3.805 |
| 4EDX | V_ARG_100 | NH1 | V_ASP_30  | OD2 | 3.837 |
| 4EDX | L_ARG_24  | NH1 | L_ASP_70  | OD1 | 2.767 |

|      |           |     |           |     |       |
|------|-----------|-----|-----------|-----|-------|
| 4EDX | L_ARG_24  | NH1 | L_ASP_70  | OD2 | 3.056 |
| 4EDX | L_ARG_53  | NH1 | V_GLU_11  | OE1 | 3.269 |
| 4EDX | L_ARG_61  | NH1 | L_GLU_79  | OE1 | 3.421 |
| 4EDX | L_ARG_61  | NH1 | L_GLU_79  | OE2 | 3.637 |
| 4EDX | L_ARG_61  | NH2 | L_GLU_79  | OE1 | 3.585 |
| 4EDX | L_ARG_61  | NH2 | L_GLU_81  | OE1 | 3.985 |
| 4EDX | L_ARG_61  | NH2 | L_GLU_81  | OE2 | 3.833 |
| 4EDX | L_ARG_61  | NH2 | L_ASP_82  | OD1 | 3.225 |
| 4EDX | L_LYS_149 | NZ  | L_GLU_195 | OE1 | 3.431 |
| 4EDX | L_LYS_149 | NZ  | L_GLU_195 | OE2 | 2.686 |
| 4EDX | L_ARG_155 | NH1 | L_GLU_185 | OE1 | 3.892 |
| 4EDX | L_ARG_155 | NH1 | L_GLU_185 | OE2 | 3.334 |
| 4EDX | L_ARG_155 | NH2 | L_GLU_185 | OE1 | 3.107 |
| 4EDX | L_ARG_155 | NH2 | L_GLU_185 | OE2 | 3.593 |
| 4EDX | L_LYS_199 | NZ  | L_ASP_110 | OD2 | 2.658 |
| 4EDX | L_ARG_211 | NH1 | L_GLU_187 | OE1 | 3.902 |
| 4EDX | H_ARG_38  | NH1 | H_ASP_86  | OD1 | 2.944 |
| 4EDX | H_ARG_38  | NH2 | H_GLU_46  | OE1 | 3.536 |
| 4EDX | H_ARG_38  | NH2 | H_GLU_46  | OE2 | 3.204 |
| 4EDX | H_ARG_66  | NH2 | H_ASP_86  | OD1 | 3.277 |
| 4EDX | H_ARG_66  | NH2 | H_ASP_86  | OD2 | 2.900 |
| 4EDX | H_ARG_94  | NH2 | H_ASP_101 | OD1 | 3.827 |
| 4EDX | H_ARG_94  | NH2 | H_ASP_101 | OD2 | 3.037 |
| 4EDX | H_LYS_221 | NZ  | L_GLU_123 | OE2 | 3.893 |
| 4EDX | H_LYS_222 | NZ  | H_GLU_226 | OE2 | 3.370 |
| 4ETQ | H_ARG_41  | NH1 | H_GLU_90  | OE1 | 3.867 |
| 4ETQ | H_ARG_41  | NH2 | H_GLU_90  | OE1 | 3.122 |
| 4ETQ | H_ARG_60  | NH1 | C_ASP_179 | OD1 | 3.609 |
| 4ETQ | H_ARG_60  | NH2 | C_ASP_179 | OD1 | 3.375 |
| 4ETQ | H_LYS_68  | NZ  | H_ASP_91  | OD2 | 3.125 |
| 4ETQ | H_ARG_99  | NH2 | H_ASP_108 | OD1 | 3.442 |
| 4ETQ | H_ARG_99  | NH2 | H_ASP_108 | OD2 | 2.818 |
| 4ETQ | H_ARG_103 | NH1 | C_GLU_217 | OE1 | 3.862 |
| 4ETQ | H_ARG_103 | NH1 | C_GLU_217 | OE2 | 2.754 |
| 4ETQ | H_ARG_103 | NH2 | C_GLU_217 | OE2 | 2.933 |
| 4ETQ | H_LYS_215 | NZ  | L_GLU_123 | OE2 | 3.075 |
| 4ETQ | L_ARG_61  | NH1 | L_GLU_79  | OE1 | 3.879 |
| 4ETQ | L_ARG_61  | NH1 | L_GLU_79  | OE2 | 3.227 |
| 4ETQ | L_ARG_61  | NH2 | L_GLU_81  | OE1 | 3.581 |
| 4ETQ | L_ARG_61  | NH2 | L_ASP_82  | OD1 | 2.731 |
| 4ETQ | L_ARG_61  | NH2 | L_ASP_82  | OD2 | 3.292 |
| 4ETQ | L_LYS_142 | NZ  | L_GLU_105 | OE2 | 3.174 |
| 4ETQ | L_LYS_147 | NZ  | L_GLU_195 | OE2 | 3.710 |
| 4ETQ | L_LYS_149 | NZ  | L_GLU_195 | OE1 | 3.106 |
| 4ETQ | L_ARG_155 | NH2 | L_GLU_185 | OE1 | 3.585 |
| 4ETQ | L_ARG_155 | NH2 | L_GLU_185 | OE2 | 2.828 |
| 4ETQ | L_LYS_183 | NZ  | L_GLU_187 | OE1 | 3.169 |
| 4ETQ | L_LYS_183 | NZ  | L_GLU_187 | OE2 | 2.853 |
| 4ETQ | L_HIS_189 | ND1 | L_ASP_151 | OD2 | 2.872 |
| 4ETQ | L_LYS_199 | NZ  | L_ASP_110 | OD2 | 3.675 |
| 4ETQ | A_LYS_39  | NZ  | A_GLU_90  | OE1 | 3.180 |
| 4ETQ | A_LYS_39  | NZ  | A_GLU_90  | OE2 | 3.761 |
| 4ETQ | A_LYS_68  | NZ  | A_ASP_91  | OD1 | 3.615 |
| 4ETQ | A_LYS_68  | NZ  | A_ASP_91  | OD2 | 2.627 |
| 4ETQ | A_ARG_99  | NH2 | A_ASP_108 | OD1 | 3.812 |
| 4ETQ | A_ARG_99  | NH2 | A_ASP_108 | OD2 | 2.756 |
| 4ETQ | A_ARG_103 | NH1 | X_GLU_217 | OE1 | 2.753 |
| 4ETQ | A_ARG_103 | NH1 | X_GLU_217 | OE2 | 3.565 |

|      |           |     |           |     |       |
|------|-----------|-----|-----------|-----|-------|
| 4ETQ | A_ARG_103 | NH2 | X_GLU_217 | OE1 | 2.983 |
| 4ETQ | A_ARG_103 | NH2 | X_GLU_217 | OE2 | 3.995 |
| 4ETQ | A_LYS_215 | NZ  | B_GLU_123 | OE2 | 3.774 |
| 4ETQ | B_ARG_61  | NH1 | B_GLU_79  | OE1 | 3.950 |
| 4ETQ | B_ARG_61  | NH1 | B_GLU_79  | OE2 | 3.355 |
| 4ETQ | B_ARG_61  | NH2 | B_GLU_81  | OE2 | 3.928 |
| 4ETQ | B_ARG_61  | NH2 | B_ASP_82  | OD1 | 2.543 |
| 4ETQ | B_ARG_61  | NH2 | B_ASP_82  | OD2 | 3.461 |
| 4ETQ | B_LYS_149 | NZ  | B_GLU_195 | OE1 | 3.167 |
| 4ETQ | B_ARG_155 | NH1 | B_GLU_185 | OE1 | 3.157 |
| 4ETQ | B_ARG_155 | NH1 | B_GLU_185 | OE2 | 3.489 |
| 4ETQ | B_ARG_155 | NH2 | B_GLU_185 | OE2 | 3.114 |
| 4ETQ | B_LYS_183 | NZ  | B_GLU_187 | OE1 | 3.261 |
| 4ETQ | B_LYS_183 | NZ  | B_GLU_187 | OE2 | 2.751 |
| 4ETQ | B_HIS_189 | ND1 | B_ASP_151 | OD2 | 2.691 |
| 4ETQ | B_LYS_199 | NZ  | B_ASP_110 | OD2 | 3.415 |
| 4ETQ | X_LYS_14  | NZ  | X_GLU_11  | OE1 | 2.773 |
| 4ETQ | X_LYS_14  | NZ  | X_GLU_11  | OE2 | 3.470 |
| 4ETQ | X_HIS_27  | NE2 | X_ASP_25  | OD1 | 3.152 |
| 4ETQ | X_HIS_27  | NE2 | X_ASP_25  | OD2 | 2.861 |
| 4ETQ | X_ARG_44  | NH1 | A_GLU_56  | OE1 | 3.611 |
| 4ETQ | X_ARG_44  | NH1 | A_GLU_56  | OE2 | 3.023 |
| 4ETQ | X_HIS_80  | ND1 | X_GLU_90  | OE1 | 3.588 |
| 4ETQ | X_HIS_80  | ND1 | X_GLU_90  | OE2 | 2.761 |
| 4ETQ | X_LYS_100 | NZ  | X_ASP_112 | OD2 | 2.820 |
| 4ETQ | X_LYS_108 | NZ  | A_GLU_58  | OE2 | 3.014 |
| 4ETQ | X_LYS_108 | NZ  | X_GLU_105 | OE2 | 3.377 |
| 4ETQ | X_LYS_109 | NZ  | X_GLU_106 | OE1 | 3.662 |
| 4ETQ | X_HIS_110 | NE2 | X_GLU_106 | OE2 | 3.990 |
| 4ETQ | X_HIS_192 | ND1 | X_ASP_194 | OD1 | 3.490 |
| 4ETQ | X_HIS_192 | NE2 | X_ASP_125 | OD2 | 3.701 |
| 4ETQ | X_ARG_200 | NH1 | X_ASP_74  | OD1 | 3.672 |
| 4ETQ | X_ARG_200 | NH2 | X_ASP_74  | OD1 | 3.193 |
| 4ETQ | X_ARG_220 | NH1 | A_ASP_105 | OD1 | 3.937 |
| 4ETQ | X_ARG_220 | NH2 | A_ASP_105 | OD1 | 2.929 |
| 4ETQ | C_HIS_27  | NE2 | C_ASP_25  | OD2 | 2.566 |
| 4ETQ | C_ARG_44  | NH1 | H_GLU_56  | OE1 | 2.601 |
| 4ETQ | C_HIS_80  | ND1 | C_GLU_90  | OE1 | 3.837 |
| 4ETQ | C_HIS_80  | ND1 | C_GLU_90  | OE2 | 2.937 |
| 4ETQ | C_LYS_100 | NZ  | C_ASP_112 | OD1 | 3.753 |
| 4ETQ | C_LYS_100 | NZ  | C_ASP_112 | OD2 | 2.909 |
| 4ETQ | C_LYS_109 | NZ  | C_GLU_106 | OE1 | 3.550 |
| 4ETQ | C_HIS_110 | ND1 | C_GLU_106 | OE2 | 3.980 |
| 4ETQ | C_HIS_192 | ND1 | C_ASP_194 | OD2 | 3.346 |
| 4ETQ | C_HIS_192 | NE2 | C_ASP_125 | OD1 | 3.763 |
| 4ETQ | C_ARG_200 | NH1 | C_ASP_74  | OD1 | 3.594 |
| 4ETQ | C_ARG_200 | NH2 | C_ASP_74  | OD1 | 3.106 |
| 4ETQ | C_ARG_220 | NH1 | H_ASP_105 | OD1 | 3.872 |
| 4ETQ | C_ARG_220 | NH2 | H_ASP_105 | OD1 | 3.103 |
| 4F33 | A_LYS_39  | NZ  | A_ASP_83  | OD1 | 2.996 |
| 4F33 | A_LYS_53  | NZ  | A_ASP_50  | OD2 | 3.806 |
| 4F33 | A_ARG_61  | NH1 | A_GLU_79  | OE1 | 3.342 |
| 4F33 | A_ARG_61  | NH1 | A_GLU_79  | OE2 | 3.490 |
| 4F33 | A_ARG_61  | NH2 | A_GLU_79  | OE1 | 3.654 |
| 4F33 | A_ARG_61  | NH2 | A_GLU_81  | OE2 | 3.050 |
| 4F33 | A_ARG_61  | NH2 | A_ASP_82  | OD1 | 2.710 |
| 4F33 | A_ARG_61  | NH2 | A_ASP_82  | OD2 | 3.535 |
| 4F33 | A_LYS_103 | NZ  | A_GLU_165 | OE1 | 3.608 |

|      |           |     |           |     |       |
|------|-----------|-----|-----------|-----|-------|
| 4F33 | A_LYS_103 | NZ  | A_GLU_165 | OE2 | 2.863 |
| 4F33 | A_LYS_149 | NZ  | A_GLU_195 | OE1 | 2.590 |
| 4F33 | A_LYS_149 | NZ  | A_GLU_195 | OE2 | 3.755 |
| 4F33 | A_LYS_183 | NZ  | A_GLU_187 | OE1 | 2.975 |
| 4F33 | A_LYS_183 | NZ  | A_GLU_187 | OE2 | 2.979 |
| 4F33 | A_LYS_188 | NZ  | A_ASP_185 | OD1 | 3.192 |
| 4F33 | A_HIS_189 | ND1 | A_ASP_151 | OD2 | 3.095 |
| 4F33 | B_LYS_19  | NZ  | B_ASP_82  | OD1 | 2.810 |
| 4F33 | B_LYS_19  | NZ  | B_ASP_82  | OD2 | 3.855 |
| 4F33 | B_LYS_63  | NZ  | B_GLU_46  | OE1 | 3.902 |
| 4F33 | B_LYS_63  | NZ  | B_GLU_46  | OE2 | 2.703 |
| 4F33 | B_LYS_67  | NZ  | B_ASP_90  | OD1 | 3.672 |
| 4F33 | B_LYS_67  | NZ  | B_ASP_90  | OD2 | 2.735 |
| 4F33 | B_ARG_98  | NH2 | B_ASP_107 | OD1 | 3.642 |
| 4F33 | B_ARG_98  | NH2 | B_ASP_107 | OD2 | 2.737 |
| 4F33 | B_ARG_104 | NH1 | B_ASP_107 | OD2 | 2.783 |
| 4F33 | B_ARG_104 | NH2 | B_ASP_102 | OD1 | 3.769 |
| 4F33 | B_ARG_104 | NH2 | B_ASP_102 | OD2 | 2.871 |
| 4F33 | B_LYS_149 | NZ  | B_ASP_150 | OD1 | 3.476 |
| 4F33 | B_LYS_212 | NZ  | B_ASP_214 | OD1 | 2.935 |
| 4F33 | B_LYS_212 | NZ  | B_ASP_214 | OD2 | 3.480 |
| 4F33 | B_LYS_215 | NZ  | A_GLU_123 | OE1 | 2.676 |
| 4F33 | B_LYS_215 | NZ  | A_GLU_123 | OE2 | 3.528 |
| 4F33 | B_LYS_216 | NZ  | B_GLU_218 | OE2 | 3.538 |
| 4F33 | C_LYS_39  | NZ  | C_ASP_83  | OD1 | 3.023 |
| 4F33 | C_ARG_61  | NH1 | C_GLU_79  | OE1 | 3.546 |
| 4F33 | C_ARG_61  | NH1 | C_GLU_79  | OE2 | 3.480 |
| 4F33 | C_ARG_61  | NH2 | C_GLU_79  | OE1 | 3.378 |
| 4F33 | C_ARG_61  | NH2 | C_GLU_81  | OE2 | 3.030 |
| 4F33 | C_ARG_61  | NH2 | C_ASP_82  | OD1 | 2.905 |
| 4F33 | C_ARG_61  | NH2 | C_ASP_82  | OD2 | 3.629 |
| 4F33 | C_LYS_103 | NZ  | C_GLU_165 | OE1 | 3.632 |
| 4F33 | C_LYS_103 | NZ  | C_GLU_165 | OE2 | 2.738 |
| 4F33 | C_LYS_149 | NZ  | C_GLU_195 | OE1 | 2.670 |
| 4F33 | C_LYS_149 | NZ  | C_GLU_195 | OE2 | 3.770 |
| 4F33 | C_LYS_183 | NZ  | C_GLU_187 | OE1 | 2.957 |
| 4F33 | C_LYS_183 | NZ  | C_GLU_187 | OE2 | 3.355 |
| 4F33 | C_HIS_189 | ND1 | C_ASP_151 | OD2 | 3.653 |
| 4F33 | D_LYS_19  | NZ  | D_ASP_82  | OD1 | 2.919 |
| 4F33 | D_LYS_19  | NZ  | D_ASP_82  | OD2 | 3.318 |
| 4F33 | D_LYS_63  | NZ  | D_GLU_46  | OE1 | 3.665 |
| 4F33 | D_LYS_63  | NZ  | D_GLU_46  | OE2 | 2.603 |
| 4F33 | D_LYS_67  | NZ  | D_ASP_90  | OD1 | 3.611 |
| 4F33 | D_LYS_67  | NZ  | D_ASP_90  | OD2 | 2.762 |
| 4F33 | D_ARG_98  | NH2 | D_ASP_107 | OD1 | 3.663 |
| 4F33 | D_ARG_98  | NH2 | D_ASP_107 | OD2 | 2.741 |
| 4F33 | D_ARG_104 | NH1 | D_ASP_107 | OD2 | 2.826 |
| 4F33 | D_ARG_104 | NH2 | D_ASP_102 | OD1 | 3.818 |
| 4F33 | D_ARG_104 | NH2 | D_ASP_102 | OD2 | 2.913 |
| 4F33 | D_LYS_149 | NZ  | D_ASP_150 | OD1 | 3.466 |
| 4F33 | D_LYS_149 | NZ  | D_ASP_150 | OD2 | 3.828 |
| 4F33 | D_LYS_212 | NZ  | D_ASP_214 | OD1 | 2.938 |
| 4F33 | D_LYS_212 | NZ  | D_ASP_214 | OD2 | 3.473 |
| 4F33 | D_LYS_215 | NZ  | C_GLU_123 | OE1 | 2.787 |
| 4F33 | D_LYS_215 | NZ  | C_GLU_123 | OE2 | 3.695 |
| 4F33 | D_LYS_216 | NZ  | D_GLU_218 | OE2 | 3.391 |
| 4F33 | E_LYS_39  | NZ  | E_ASP_83  | OD1 | 2.874 |
| 4F33 | E_LYS_53  | NZ  | E_ASP_50  | OD2 | 3.486 |

|      |           |     |           |     |       |
|------|-----------|-----|-----------|-----|-------|
| 4F33 | E_ARG.61  | NH1 | E_GLU_79  | OE1 | 3.890 |
| 4F33 | E_ARG.61  | NH1 | E_GLU_79  | OE2 | 3.753 |
| 4F33 | E_ARG.61  | NH2 | E_GLU_79  | OE1 | 3.703 |
| 4F33 | E_ARG.61  | NH2 | E_GLU_81  | OE2 | 3.201 |
| 4F33 | E_ARG.61  | NH2 | E_ASP_82  | OD1 | 2.824 |
| 4F33 | E_ARG.61  | NH2 | E_ASP_82  | OD2 | 3.545 |
| 4F33 | E_LYS_103 | NZ  | E_GLU_165 | OE1 | 3.553 |
| 4F33 | E_LYS_103 | NZ  | E_GLU_165 | OE2 | 3.041 |
| 4F33 | E_LYS_149 | NZ  | E_GLU_195 | OE1 | 2.766 |
| 4F33 | E_LYS_149 | NZ  | E_GLU_195 | OE2 | 3.971 |
| 4F33 | E_LYS_183 | NZ  | E_GLU_187 | OE1 | 3.278 |
| 4F33 | E_LYS_183 | NZ  | E_GLU_187 | OE2 | 2.769 |
| 4F33 | E_LYS_188 | NZ  | E_ASP_185 | OD1 | 3.409 |
| 4F33 | E_HIS_189 | ND1 | E_ASP_151 | OD2 | 3.133 |
| 4F33 | F_LYS_19  | NZ  | F_ASP_82  | OD1 | 3.043 |
| 4F33 | F_LYS_63  | NZ  | F_GLU_46  | OE1 | 3.844 |
| 4F33 | F_LYS_63  | NZ  | F_GLU_46  | OE2 | 2.677 |
| 4F33 | F_LYS_67  | NZ  | F_ASP_90  | OD1 | 3.822 |
| 4F33 | F_LYS_67  | NZ  | F_ASP_90  | OD2 | 2.975 |
| 4F33 | F_ARG_98  | NH2 | F_ASP_107 | OD1 | 3.603 |
| 4F33 | F_ARG_98  | NH2 | F_ASP_107 | OD2 | 2.766 |
| 4F33 | F_ARG_104 | NH1 | F_ASP_107 | OD2 | 2.837 |
| 4F33 | F_ARG_104 | NH2 | F_ASP_102 | OD1 | 3.766 |
| 4F33 | F_ARG_104 | NH2 | F_ASP_102 | OD2 | 2.901 |
| 4F33 | F_LYS_149 | NZ  | F_ASP_150 | OD1 | 3.004 |
| 4F33 | F_LYS_149 | NZ  | F_ASP_150 | OD2 | 3.043 |
| 4F33 | F_LYS_212 | NZ  | D_ASP_214 | OD2 | 3.519 |
| 4F33 | F_LYS_212 | NZ  | F_ASP_214 | OD1 | 3.366 |
| 4F33 | F_LYS_212 | NZ  | F_ASP_214 | OD2 | 3.190 |
| 4F33 | F_LYS_215 | NZ  | E_GLU_123 | OE1 | 2.609 |
| 4F33 | F_LYS_215 | NZ  | E_GLU_123 | OE2 | 3.626 |
| 4F33 | G_LYS_39  | NZ  | G_ASP_83  | OD1 | 2.914 |
| 4F33 | G_LYS_53  | NZ  | G_ASP_50  | OD2 | 3.491 |
| 4F33 | G_ARG.61  | NH1 | G_GLU_79  | OE1 | 3.696 |
| 4F33 | G_ARG.61  | NH1 | G_GLU_79  | OE2 | 3.825 |
| 4F33 | G_ARG.61  | NH2 | G_GLU_79  | OE1 | 3.720 |
| 4F33 | G_ARG.61  | NH2 | G_GLU_81  | OE2 | 2.958 |
| 4F33 | G_ARG.61  | NH2 | G_ASP_82  | OD1 | 2.734 |
| 4F33 | G_ARG.61  | NH2 | G_ASP_82  | OD2 | 3.619 |
| 4F33 | G_LYS_103 | NZ  | G_GLU_165 | OE1 | 3.422 |
| 4F33 | G_LYS_103 | NZ  | G_GLU_165 | OE2 | 2.954 |
| 4F33 | G_LYS_149 | NZ  | G_GLU_195 | OE1 | 3.155 |
| 4F33 | G_LYS_183 | NZ  | G_GLU_187 | OE1 | 3.171 |
| 4F33 | G_LYS_183 | NZ  | G_GLU_187 | OE2 | 3.240 |
| 4F33 | G_HIS_189 | ND1 | G_ASP_151 | OD2 | 2.855 |
| 4F33 | H_LYS_19  | NZ  | H_ASP_82  | OD1 | 2.977 |
| 4F33 | H_LYS_19  | NZ  | H_ASP_82  | OD2 | 3.331 |
| 4F33 | H_LYS_63  | NZ  | H_GLU_46  | OE1 | 3.962 |
| 4F33 | H_LYS_63  | NZ  | H_GLU_46  | OE2 | 2.721 |
| 4F33 | H_LYS_67  | NZ  | H_ASP_90  | OD1 | 3.773 |
| 4F33 | H_LYS_67  | NZ  | H_ASP_90  | OD2 | 2.822 |
| 4F33 | H_ARG_98  | NH2 | H_ASP_107 | OD1 | 3.660 |
| 4F33 | H_ARG_98  | NH2 | H_ASP_107 | OD2 | 2.794 |
| 4F33 | H_ARG_104 | NH1 | H_ASP_107 | OD2 | 2.850 |
| 4F33 | H_ARG_104 | NH2 | H_ASP_102 | OD1 | 3.752 |
| 4F33 | H_ARG_104 | NH2 | H_ASP_102 | OD2 | 2.926 |
| 4F33 | H_LYS_149 | NZ  | H_ASP_150 | OD1 | 3.202 |
| 4F33 | H_LYS_149 | NZ  | H_ASP_150 | OD2 | 3.778 |

|      |           |     |           |     |       |
|------|-----------|-----|-----------|-----|-------|
| 4F33 | H.LYS_212 | NZ  | H.ASP_214 | OD1 | 3.294 |
| 4F33 | H.LYS_212 | NZ  | H.ASP_214 | OD2 | 3.751 |
| 4F33 | H.LYS_215 | NZ  | G.GLU_123 | OE1 | 2.968 |
| 4F33 | H.LYS_215 | NZ  | G.GLU_123 | OE2 | 3.966 |
| 4F3F | A.LYS_39  | NZ  | A.ASP_83  | OD1 | 3.139 |
| 4F3F | A.LYS_53  | NZ  | A.ASP_50  | OD2 | 3.180 |
| 4F3F | A.ARG_61  | NH1 | A.GLU_79  | OE1 | 3.186 |
| 4F3F | A.ARG_61  | NH2 | A.GLU_79  | OE1 | 3.636 |
| 4F3F | A.ARG_61  | NH2 | A.GLU_81  | OE2 | 2.949 |
| 4F3F | A.ARG_61  | NH2 | A.ASP_82  | OD1 | 2.598 |
| 4F3F | A.ARG_61  | NH2 | A.ASP_82  | OD2 | 3.459 |
| 4F3F | A.HIS_94  | NE2 | C.GLU_18  | OE1 | 3.664 |
| 4F3F | A.HIS_94  | NE2 | C.GLU_18  | OE2 | 3.880 |
| 4F3F | A.LYS_103 | NZ  | A.GLU_165 | OE1 | 2.677 |
| 4F3F | A.LYS_103 | NZ  | A.GLU_165 | OE2 | 3.463 |
| 4F3F | A.LYS_126 | NZ  | A.ASP_122 | OD2 | 3.488 |
| 4F3F | A.LYS_149 | NZ  | A.GLU_195 | OE1 | 3.346 |
| 4F3F | A.LYS_149 | NZ  | A.GLU_195 | OE2 | 3.599 |
| 4F3F | A.LYS_188 | NZ  | A.ASP_185 | OD1 | 3.466 |
| 4F3F | A.HIS_189 | ND1 | A.ASP_151 | OD2 | 2.913 |
| 4F3F | B.LYS_67  | NZ  | B.ASP_90  | OD1 | 3.515 |
| 4F3F | B.LYS_67  | NZ  | B.ASP_90  | OD2 | 2.923 |
| 4F3F | B.ARG_98  | NH2 | B.ASP_107 | OD1 | 3.433 |
| 4F3F | B.ARG_98  | NH2 | B.ASP_107 | OD2 | 2.792 |
| 4F3F | B.LYS_149 | NZ  | B.ASP_150 | OD1 | 3.423 |
| 4F3F | B.LYS_149 | NZ  | B.ASP_150 | OD2 | 3.482 |
| 4F3F | C.LYS_11  | NZ  | C.GLU_27  | OE1 | 3.675 |
| 4F3F | C.LYS_11  | NZ  | C.GLU_27  | OE2 | 2.987 |
| 4F3F | C.LYS_24  | NZ  | A.ASP_50  | OD1 | 2.832 |
| 4F3F | C.LYS_24  | NZ  | A.ASP_50  | OD2 | 3.865 |
| 4F3F | C.ARG_43  | NH2 | C.GLU_15  | OE2 | 2.883 |
| 4F3F | C.LYS_60  | NZ  | C.GLU_29  | OE1 | 3.765 |
| 4F3F | C.LYS_60  | NZ  | C.GLU_29  | OE2 | 3.687 |
| 4FFV | A.ARG_39  | NH1 | A.ASP_45  | OD1 | 3.963 |
| 4FFV | A.ARG_39  | NH1 | A.ASP_45  | OD2 | 2.719 |
| 4FFV | A.ARG_39  | NH2 | A.ASP_45  | OD1 | 3.080 |
| 4FFV | A.ARG_39  | NH2 | A.ASP_45  | OD2 | 3.080 |
| 4FFV | A.ARG_59  | NH2 | A.ASP_102 | OD1 | 3.051 |
| 4FFV | A.ARG_109 | NH1 | A.GLU_65  | OE1 | 3.268 |
| 4FFV | A.ARG_109 | NH1 | A.GLU_65  | OE2 | 3.741 |
| 4FFV | A.ARG_109 | NH2 | A.GLU_65  | OE1 | 2.989 |
| 4FFV | A.LYS_120 | NZ  | A.ASP_740 | OD2 | 3.330 |
| 4FFV | A.ARG_123 | NH2 | A.GLU_203 | OE1 | 3.682 |
| 4FFV | A.ARG_123 | NH2 | A.GLU_203 | OE2 | 2.712 |
| 4FFV | A.HIS_160 | ND1 | A.ASP_108 | OD2 | 2.635 |
| 4FFV | A.HIS_160 | NE2 | A.GLU_175 | OE1 | 3.358 |
| 4FFV | A.HIS_160 | NE2 | A.GLU_175 | OE2 | 2.796 |
| 4FFV | A.LYS_161 | NZ  | A.ASP_272 | OD1 | 2.746 |
| 4FFV | A.LYS_161 | NZ  | A.ASP_272 | OD2 | 3.688 |
| 4FFV | A.ARG_182 | NH1 | A.ASP_169 | OD1 | 3.856 |
| 4FFV | A.ARG_182 | NH1 | A.ASP_169 | OD2 | 2.767 |
| 4FFV | A.ARG_182 | NH2 | A.ASP_169 | OD2 | 3.302 |
| 4FFV | A.ARG_308 | NH2 | A.ASP_327 | OD2 | 3.552 |
| 4FFV | A.ARG_316 | NH1 | A.ASP_295 | OD2 | 3.083 |
| 4FFV | A.ARG_316 | NH2 | A.GLU_669 | OE1 | 3.538 |
| 4FFV | A.ARG_316 | NH2 | A.GLU_669 | OE2 | 2.880 |
| 4FFV | A.ARG_354 | NH2 | A.GLU_404 | OE1 | 2.806 |
| 4FFV | A.HIS_361 | NE2 | A.GLU_359 | OE2 | 3.865 |

|      |           |     |           |     |       |
|------|-----------|-----|-----------|-----|-------|
| 4FFV | A_LYS_371 | NZ  | A_GLU_345 | OE1 | 3.266 |
| 4FFV | A_LYS_380 | NZ  | A_ASP_589 | OD1 | 3.110 |
| 4FFV | A_LYS_380 | NZ  | A_ASP_589 | OD2 | 3.542 |
| 4FFV | A_HIS_381 | NE2 | A_ASP_375 | OD2 | 3.813 |
| 4FFV | A_LYS_443 | NZ  | A_GLU_422 | OE1 | 2.784 |
| 4FFV | A_LYS_443 | NZ  | A_GLU_422 | OE2 | 3.590 |
| 4FFV | A_LYS_513 | NZ  | A_ASP_557 | OD1 | 3.202 |
| 4FFV | A_LYS_514 | NZ  | A_ASP_516 | OD2 | 3.647 |
| 4FFV | A_ARG_524 | NH1 | A_GLU_425 | OE1 | 3.869 |
| 4FFV | A_LYS_555 | NZ  | A_ASP_546 | OD1 | 3.412 |
| 4FFV | A_LYS_555 | NZ  | A_ASP_546 | OD2 | 3.059 |
| 4FFV | A_ARG_561 | NH1 | A_ASP_557 | OD1 | 2.919 |
| 4FFV | A_ARG_561 | NH1 | A_ASP_557 | OD2 | 3.499 |
| 4FFV | A_ARG_561 | NH2 | A_ASP_557 | OD1 | 3.437 |
| 4FFV | A_ARG_561 | NH2 | A_ASP_557 | OD2 | 2.894 |
| 4FFV | A_ARG_582 | NH2 | A_GLU_605 | OE2 | 3.235 |
| 4FFV | A_ARG_582 | NH2 | A_ASP_606 | OD1 | 2.825 |
| 4FFV | A_ARG_582 | NH2 | A_ASP_606 | OD2 | 3.726 |
| 4FFV | A_LYS_597 | NZ  | A_ASP_679 | OD1 | 2.818 |
| 4FFV | A_LYS_597 | NZ  | A_ASP_679 | OD2 | 3.476 |
| 4FFV | A_ARG_624 | NH2 | A_ASP_621 | OD2 | 3.551 |
| 4FFV | A_LYS_649 | NZ  | A_GLU_700 | OE2 | 3.425 |
| 4FFV | A_ARG_659 | NH1 | A_GLU_661 | OE1 | 2.918 |
| 4FFV | A_ARG_659 | NH1 | A_GLU_661 | OE2 | 3.900 |
| 4FFV | A_ARG_659 | NH2 | B_GLU_242 | OE2 | 2.683 |
| 4FFV | A_LYS_697 | NZ  | A_GLU_694 | OE1 | 2.696 |
| 4FFV | A_HIS_705 | NE2 | A_ASP_709 | OD2 | 3.369 |
| 4FFV | A_HIS_741 | ND1 | A_ASP_709 | OD1 | 3.395 |
| 4FFV | A_HIS_741 | ND1 | A_ASP_709 | OD2 | 2.789 |
| 4FFV | A_HIS_755 | ND1 | B_ASP_730 | OD1 | 2.996 |
| 4FFV | B_ARG_39  | NH1 | B_ASP_45  | OD1 | 2.616 |
| 4FFV | B_ARG_39  | NH1 | B_ASP_45  | OD2 | 3.948 |
| 4FFV | B_ARG_39  | NH2 | B_ASP_45  | OD1 | 3.428 |
| 4FFV | B_ARG_39  | NH2 | B_ASP_45  | OD2 | 3.350 |
| 4FFV | B_ARG_59  | NH2 | B_ASP_102 | OD1 | 2.946 |
| 4FFV | B_ARG_109 | NH2 | B_GLU_65  | OE1 | 2.873 |
| 4FFV | B_ARG_109 | NH2 | B_GLU_65  | OE2 | 3.587 |
| 4FFV | B_ARG_123 | NH2 | B_GLU_203 | OE1 | 3.775 |
| 4FFV | B_ARG_123 | NH2 | B_GLU_203 | OE2 | 2.935 |
| 4FFV | B_HIS_160 | ND1 | B_ASP_108 | OD2 | 2.803 |
| 4FFV | B_HIS_160 | NE2 | B_GLU_175 | OE1 | 2.723 |
| 4FFV | B_HIS_160 | NE2 | B_GLU_175 | OE2 | 3.449 |
| 4FFV | B_LYS_161 | NZ  | B_ASP_272 | OD1 | 2.924 |
| 4FFV | B_ARG_182 | NH2 | B_ASP_169 | OD1 | 2.817 |
| 4FFV | B_ARG_308 | NH1 | B_ASP_327 | OD1 | 2.983 |
| 4FFV | B_ARG_308 | NH1 | B_ASP_327 | OD2 | 2.869 |
| 4FFV | B_ARG_316 | NH1 | B_GLU_669 | OE1 | 3.104 |
| 4FFV | B_ARG_316 | NH1 | B_GLU_669 | OE2 | 3.019 |
| 4FFV | B_ARG_316 | NH2 | B_ASP_295 | OD2 | 3.354 |
| 4FFV | B_ARG_354 | NH2 | B_GLU_404 | OE1 | 2.935 |
| 4FFV | B_LYS_371 | NZ  | B_GLU_345 | OE1 | 2.807 |
| 4FFV | B_LYS_467 | NZ  | B_GLU_80  | OE2 | 3.637 |
| 4FFV | B_ARG_485 | NH2 | B_ASP_488 | OD1 | 2.633 |
| 4FFV | B_LYS_513 | NZ  | B_ASP_557 | OD1 | 3.220 |
| 4FFV | B_ARG_524 | NH1 | B_GLU_425 | OE1 | 3.953 |
| 4FFV | B_ARG_524 | NH2 | B_GLU_425 | OE1 | 3.954 |
| 4FFV | B_LYS_555 | NZ  | B_ASP_546 | OD1 | 3.219 |
| 4FFV | B_LYS_555 | NZ  | B_ASP_546 | OD2 | 3.109 |

|      |           |     |           |     |       |
|------|-----------|-----|-----------|-----|-------|
| 4FFV | B_ARG_561 | NH1 | B_ASP_557 | OD1 | 2.961 |
| 4FFV | B_ARG_561 | NH1 | B_ASP_557 | OD2 | 3.596 |
| 4FFV | B_ARG_561 | NH2 | B_ASP_557 | OD1 | 3.466 |
| 4FFV | B_ARG_561 | NH2 | B_ASP_557 | OD2 | 2.798 |
| 4FFV | B_ARG_582 | NH2 | B_ASP_606 | OD1 | 2.846 |
| 4FFV | B_ARG_582 | NH2 | B_ASP_606 | OD2 | 3.802 |
| 4FFV | B_ARG_612 | NH1 | B_GLU_609 | OE2 | 3.858 |
| 4FFV | B_LYS_623 | NZ  | B_ASP_621 | OD1 | 3.779 |
| 4FFV | B_ARG_624 | NH1 | B_ASP_621 | OD2 | 2.973 |
| 4FFV | B_ARG_659 | NH1 | B_GLU_661 | OE1 | 3.697 |
| 4FFV | B_ARG_659 | NH1 | B_GLU_661 | OE2 | 2.842 |
| 4FFV | B_ARG_659 | NH2 | A_GLU_242 | OE2 | 2.592 |
| 4FFV | B_LYS_697 | NZ  | B_GLU_694 | OE2 | 3.213 |
| 4FFV | B_HIS_705 | NE2 | B_ASP_709 | OD2 | 3.391 |
| 4FFV | B_HIS_741 | ND1 | B_ASP_709 | OD1 | 3.377 |
| 4FFV | B_HIS_741 | ND1 | B_ASP_709 | OD2 | 2.794 |
| 4FFV | B_HIS_755 | ND1 | A_ASP_730 | OD1 | 2.989 |
| 4FFV | B_HIS_755 | ND1 | A_ASP_730 | OD2 | 3.942 |
| 4FFV | C_ARG_60  | NH2 | C_GLU_78  | OE2 | 2.738 |
| 4FFV | C_LYS_146 | NZ  | C_GLU_153 | OE2 | 3.897 |
| 4FFV | D_LYS_54  | NZ  | B_GLU_89  | OE1 | 3.460 |
| 4FFV | D_LYS_54  | NZ  | B_GLU_89  | OE2 | 3.556 |
| 4FFV | D_LYS_54  | NZ  | D_ASP_31  | OD1 | 3.816 |
| 4FFV | D_LYS_63  | NZ  | D_GLU_46  | OE2 | 3.471 |
| 4FFV | D_LYS_67  | NZ  | D_ASP_90  | OD2 | 2.846 |
| 4FFV | D_ARG_98  | NH2 | D_ASP_105 | OD1 | 3.968 |
| 4FFV | D_ARG_98  | NH2 | D_ASP_105 | OD2 | 2.804 |
| 4FFV | D_LYS_209 | NZ  | D_ASP_211 | OD1 | 3.459 |
| 4FFV | L_ARG_60  | NH1 | L_GLU_78  | OE2 | 3.980 |
| 4FFV | L_ARG_60  | NH2 | L_GLU_80  | OE2 | 2.908 |
| 4FFV | L_ARG_76  | NH1 | L_GLU_78  | OE2 | 3.920 |
| 4FFV | L_ARG_76  | NH2 | L_GLU_78  | OE2 | 3.454 |
| 4FFV | L_LYS_146 | NZ  | L_GLU_153 | OE2 | 3.863 |
| 4FFV | L_LYS_148 | NZ  | L_GLU_194 | OE1 | 3.895 |
| 4FFV | L_LYS_168 | NZ  | L_ASP_169 | OD2 | 3.641 |
| 4FFV | H_LYS_54  | NZ  | A_GLU_89  | OE1 | 3.584 |
| 4FFV | H_LYS_54  | NZ  | A_GLU_89  | OE2 | 3.871 |
| 4FFV | H_LYS_63  | NZ  | H_GLU_46  | OE2 | 3.768 |
| 4FFV | H_LYS_67  | NZ  | H_ASP_90  | OD1 | 2.976 |
| 4FFV | H_LYS_67  | NZ  | H_ASP_90  | OD2 | 3.578 |
| 4FFV | H_ARG_98  | NH1 | H_ASP_105 | OD1 | 3.804 |
| 4FFV | H_ARG_98  | NH1 | H_ASP_105 | OD2 | 3.268 |
| 4FFV | H_ARG_98  | NH2 | H_ASP_105 | OD2 | 3.823 |
| 4FFV | H_HIS_168 | NE2 | L_ASP_166 | OD1 | 3.178 |
| 4FFV | H_HIS_168 | NE2 | L_ASP_166 | OD2 | 3.870 |
| 4FFV | H_LYS_209 | NZ  | H_ASP_211 | OD1 | 3.064 |
| 4FFW | A_ARG_39  | NH2 | A_ASP_45  | OD1 | 3.225 |
| 4FFW | A_ARG_39  | NH2 | A_ASP_45  | OD2 | 2.703 |
| 4FFW | A_ARG_109 | NH1 | A_GLU_65  | OE1 | 3.415 |
| 4FFW | A_ARG_109 | NH1 | A_GLU_65  | OE2 | 3.525 |
| 4FFW | A_ARG_109 | NH2 | A_GLU_65  | OE1 | 3.203 |
| 4FFW | A_LYS_120 | NZ  | A_ASP_740 | OD2 | 3.434 |
| 4FFW | A_ARG_123 | NH2 | A_GLU_203 | OE2 | 3.187 |
| 4FFW | A_HIS_160 | NE2 | A_ASP_108 | OD2 | 3.962 |
| 4FFW | A_LYS_161 | NZ  | A_ASP_272 | OD1 | 2.704 |
| 4FFW | A_ARG_182 | NH1 | A_ASP_169 | OD2 | 2.886 |
| 4FFW | A_ARG_308 | NH2 | A_ASP_327 | OD2 | 3.670 |
| 4FFW | A_ARG_316 | NH1 | A_ASP_295 | OD2 | 3.273 |



|      |           |     |           |     |       |
|------|-----------|-----|-----------|-----|-------|
| 4FFW | A_ARG_316 | NH2 | A_GLU_669 | OE1 | 3.641 |
| 4FFW | A_ARG_316 | NH2 | A_GLU_669 | OE2 | 2.963 |
| 4FFW | A_ARG_354 | NH2 | A_GLU_404 | OE1 | 3.227 |
| 4FFW | A_HIS_361 | NE2 | A_GLU_359 | OE2 | 3.514 |
| 4FFW | A_LYS_371 | NZ  | A_GLU_345 | OE1 | 2.680 |
| 4FFW | A_LYS_380 | NZ  | A_ASP_589 | OD1 | 3.098 |
| 4FFW | A_LYS_380 | NZ  | A_ASP_589 | OD2 | 2.829 |
| 4FFW | A_LYS_443 | NZ  | A_GLU_422 | OE1 | 2.937 |
| 4FFW | A_LYS_513 | NZ  | A_ASP_557 | OD1 | 3.106 |
| 4FFW | A_ARG_524 | NH1 | A_GLU_425 | OE1 | 2.739 |
| 4FFW | A_LYS_555 | NZ  | A_ASP_546 | OD1 | 3.312 |
| 4FFW | A_ARG_561 | NH1 | A_ASP_557 | OD1 | 2.928 |
| 4FFW | A_ARG_561 | NH1 | A_ASP_557 | OD2 | 3.570 |
| 4FFW | A_ARG_561 | NH2 | A_ASP_557 | OD1 | 3.591 |
| 4FFW | A_ARG_561 | NH2 | A_ASP_557 | OD2 | 3.082 |
| 4FFW | A_ARG_582 | NH2 | A_GLU_605 | OE2 | 3.554 |
| 4FFW | A_ARG_582 | NH2 | A_ASP_606 | OD1 | 3.161 |
| 4FFW | A_ARG_582 | NH2 | A_ASP_606 | OD2 | 3.803 |
| 4FFW | A_LYS_597 | NZ  | A_ASP_679 | OD1 | 2.982 |
| 4FFW | A_ARG_624 | NH2 | A_ASP_621 | OD2 | 3.236 |
| 4FFW | A_LYS_649 | NZ  | A_GLU_700 | OE2 | 3.883 |
| 4FFW | A_ARG_659 | NH1 | A_GLU_661 | OE1 | 3.045 |
| 4FFW | A_ARG_659 | NH2 | B_GLU_242 | OE2 | 3.187 |
| 4FFW | A_LYS_697 | NZ  | A_GLU_694 | OE1 | 3.166 |
| 4FFW | A_HIS_705 | NE2 | A_ASP_709 | OD2 | 3.560 |
| 4FFW | A_HIS_741 | ND1 | A_ASP_709 | OD1 | 3.680 |
| 4FFW | A_HIS_741 | ND1 | A_ASP_709 | OD2 | 2.834 |
| 4FFW | A_HIS_755 | ND1 | B_ASP_730 | OD1 | 3.111 |
| 4FFW | B_ARG_39  | NH1 | B_ASP_45  | OD1 | 3.148 |
| 4FFW | B_ARG_39  | NH2 | B_ASP_45  | OD1 | 3.305 |
| 4FFW | B_ARG_39  | NH2 | B_ASP_45  | OD2 | 3.479 |
| 4FFW | B_ARG_59  | NH2 | B_ASP_102 | OD1 | 3.000 |
| 4FFW | B_ARG_109 | NH2 | B_GLU_65  | OE1 | 3.413 |
| 4FFW | B_ARG_109 | NH2 | B_GLU_65  | OE2 | 3.745 |
| 4FFW | B_LYS_120 | NZ  | B_ASP_740 | OD2 | 3.578 |
| 4FFW | B_ARG_123 | NH2 | B_GLU_203 | OE2 | 2.505 |
| 4FFW | B_HIS_160 | ND1 | B_ASP_108 | OD2 | 3.785 |
| 4FFW | B_HIS_160 | NE2 | B_GLU_175 | OE1 | 2.698 |
| 4FFW | B_HIS_160 | NE2 | B_GLU_175 | OE2 | 3.643 |
| 4FFW | B_LYS_161 | NZ  | B_ASP_272 | OD1 | 3.156 |
| 4FFW | B_ARG_182 | NH2 | B_ASP_169 | OD1 | 2.942 |
| 4FFW | B_ARG_308 | NH1 | B_ASP_327 | OD1 | 3.218 |
| 4FFW | B_ARG_308 | NH1 | B_ASP_327 | OD2 | 2.634 |
| 4FFW | B_ARG_316 | NH1 | B_GLU_669 | OE1 | 2.973 |
| 4FFW | B_ARG_316 | NH1 | B_GLU_669 | OE2 | 3.097 |
| 4FFW | B_ARG_316 | NH2 | B_ASP_295 | OD2 | 3.399 |
| 4FFW | B_LYS_330 | NZ  | B_ASP_307 | OD2 | 3.516 |
| 4FFW | B_ARG_354 | NH2 | B_GLU_404 | OE1 | 2.920 |
| 4FFW | B_ARG_356 | NH2 | B_ASP_300 | OD2 | 3.885 |
| 4FFW | B_LYS_371 | NZ  | B_GLU_345 | OE1 | 2.782 |
| 4FFW | B_LYS_371 | NZ  | B_GLU_345 | OE2 | 3.778 |
| 4FFW | B_LYS_380 | NZ  | B_ASP_589 | OD2 | 3.568 |
| 4FFW | B_ARG_485 | NH2 | B_ASP_488 | OD1 | 3.387 |
| 4FFW | B_LYS_513 | NZ  | B_ASP_557 | OD1 | 3.212 |
| 4FFW | B_LYS_514 | NZ  | B_ASP_516 | OD1 | 3.257 |
| 4FFW | B_ARG_524 | NH1 | B_GLU_425 | OE1 | 3.639 |
| 4FFW | B_LYS_555 | NZ  | B_ASP_546 | OD1 | 3.368 |
| 4FFW | B_ARG_561 | NH1 | B_ASP_557 | OD1 | 3.049 |

|      |           |     |           |     |       |
|------|-----------|-----|-----------|-----|-------|
| 4FFW | B_ARG_561 | NH1 | B_ASP_557 | OD2 | 3.722 |
| 4FFW | B_ARG_561 | NH2 | B_ASP_557 | OD1 | 3.485 |
| 4FFW | B_ARG_561 | NH2 | B_ASP_557 | OD2 | 3.243 |
| 4FFW | B_ARG_582 | NH2 | B_ASP_606 | OD1 | 3.041 |
| 4FFW | B_LYS_597 | NZ  | B_ASP_679 | OD1 | 3.641 |
| 4FFW | B_LYS_623 | NZ  | B_ASP_621 | OD1 | 3.750 |
| 4FFW | B_ARG_624 | NH1 | B_ASP_621 | OD2 | 3.247 |
| 4FFW | B_ARG_659 | NH1 | B_GLU_661 | OE2 | 2.930 |
| 4FFW | B_ARG_659 | NH2 | A_GLU_242 | OE2 | 3.068 |
| 4FFW | B_ARG_670 | NH2 | B_GLU_204 | OE1 | 3.913 |
| 4FFW | B_HIS_705 | NE2 | B_ASP_709 | OD2 | 3.534 |
| 4FFW | B_HIS_741 | ND1 | B_ASP_709 | OD1 | 3.671 |
| 4FFW | B_HIS_741 | ND1 | B_ASP_709 | OD2 | 2.858 |
| 4FFW | C_ARG_60  | NH2 | C_GLU_80  | OE2 | 3.345 |
| 4FFW | C_LYS_146 | NZ  | C_GLU_153 | OE1 | 3.486 |
| 4FFW | C_LYS_146 | NZ  | C_GLU_153 | OE2 | 3.680 |
| 4FFW | C_ARG_154 | NH1 | C_GLU_184 | OE2 | 3.454 |
| 4FFW | C_ARG_154 | NH2 | C_GLU_184 | OE2 | 3.842 |
| 4FFW | C_LYS_182 | NZ  | C_GLU_186 | OE2 | 2.882 |
| 4FFW | D_LYS_54  | NZ  | B_GLU_89  | OE1 | 3.085 |
| 4FFW | D_LYS_54  | NZ  | B_GLU_89  | OE2 | 3.381 |
| 4FFW | D_LYS_63  | NZ  | D_GLU_46  | OE2 | 3.795 |
| 4FFW | D_LYS_67  | NZ  | D_ASP_90  | OD2 | 2.893 |
| 4FFW | D_ARG_98  | NH2 | D_ASP_105 | OD1 | 3.888 |
| 4FFW | D_ARG_98  | NH2 | D_ASP_105 | OD2 | 3.038 |
| 4FFW | H_LYS_54  | NZ  | A_GLU_89  | OE1 | 3.517 |
| 4FFW | H_LYS_54  | NZ  | A_GLU_89  | OE2 | 3.666 |
| 4FFW | H_LYS_63  | NZ  | H_GLU_46  | OE2 | 3.928 |
| 4FFW | H_ARG_98  | NH2 | H_ASP_105 | OD1 | 3.858 |
| 4FFW | H_ARG_98  | NH2 | H_ASP_105 | OD2 | 3.152 |
| 4FFW | H_HIS_168 | NE2 | L_ASP_166 | OD1 | 3.737 |
| 4FFW | L_ARG_60  | NH1 | L_GLU_78  | OE2 | 3.910 |
| 4FFW | L_ARG_60  | NH2 | L_GLU_80  | OE2 | 3.325 |
| 4FFW | L_ARG_60  | NH2 | L_ASP_81  | OD1 | 2.865 |
| 4FFW | L_ARG_60  | NH2 | L_ASP_81  | OD2 | 3.727 |
| 4FFW | L_LYS_    | NZ  | L_GLU_    | OE2 | 3.349 |
| 4FQH | H_ARG_38  | NH1 | H_ASP_86  | OD1 | 2.793 |
| 4FQH | H_ARG_38  | NH2 | H_ASP_86  | OD1 | 3.878 |
| 4FQH | H_LYS_62  | NZ  | H_ASP_46  | OD2 | 3.060 |
| 4FQH | H_ARG_66  | NH1 | H_ASP_86  | OD1 | 3.673 |
| 4FQH | H_ARG_66  | NH1 | H_ASP_86  | OD2 | 2.888 |
| 4FQH | H_ARG_66  | NH2 | H_ASP_86  | OD1 | 2.891 |
| 4FQH | H_ARG_66  | NH2 | H_ASP_86  | OD2 | 3.511 |
| 4FQH | H_ARG_94  | NH1 | H_ASP_101 | OD1 | 3.949 |
| 4FQH | H_ARG_94  | NH1 | H_ASP_101 | OD2 | 3.141 |
| 4FQH | H_ARG_94  | NH2 | H_ASP_101 | OD1 | 3.729 |
| 4FQH | H_ARG_94  | NH2 | H_ASP_101 | OD2 | 3.721 |
| 4FQH | H_LYS_143 | NZ  | L_GLU_124 | OE2 | 2.906 |
| 4FQH | H_LYS_214 | NZ  | L_GLU_123 | OE1 | 3.752 |
| 4FQH | H_LYS_214 | NZ  | L_GLU_123 | OE2 | 2.217 |
| 4FQH | L_ARG_30  | NH1 | L_ASP_93  | OD2 | 3.341 |
| 4FQH | L_ARG_31  | NH1 | L_ASP_93  | OD1 | 2.902 |
| 4FQH | L_ARG_31  | NH1 | L_ASP_93  | OD2 | 3.963 |
| 4FQH | L_ARG_61  | NH2 | L_ASP_82  | OD1 | 2.708 |
| 4FQH | L_ARG_61  | NH2 | L_ASP_82  | OD2 | 3.349 |
| 4FQH | L_HIS_188 | ND1 | L_ASP_151 | OD1 | 2.726 |
| 4FQH | A_ARG_38  | NH1 | A_ASP_86  | OD1 | 2.939 |
| 4FQH | A_LYS_62  | NZ  | A_ASP_46  | OD1 | 3.347 |

|      |           |     |           |     |       |
|------|-----------|-----|-----------|-----|-------|
| 4FQH | A_LYS_62  | NZ  | A_ASP_46  | OD2 | 2.737 |
| 4FQH | A_ARG_66  | NH1 | A_ASP_86  | OD1 | 3.497 |
| 4FQH | A_ARG_66  | NH1 | A_ASP_86  | OD2 | 2.905 |
| 4FQH | A_ARG_66  | NH2 | A_ASP_86  | OD1 | 2.643 |
| 4FQH | A_ARG_66  | NH2 | A_ASP_86  | OD2 | 3.511 |
| 4FQH | A_LYS_143 | NZ  | A_ASP_144 | OD2 | 3.998 |
| 4FQH | A_LYS_143 | NZ  | B_GLU_124 | OE2 | 3.049 |
| 4FQH | A_LYS_214 | NZ  | B_GLU_123 | OE1 | 3.132 |
| 4FQH | B_ARG_31  | NH2 | B_ASP_93  | OD1 | 2.853 |
| 4FQH | B_ARG_61  | NH2 | B_ASP_82  | OD1 | 2.666 |
| 4FQH | B_ARG_61  | NH2 | B_ASP_82  | OD2 | 3.538 |
| 4FQI | A_LYS_45  | NZ  | A_ASP_41  | OD1 | 3.116 |
| 4FQI | A_LYS_45  | NZ  | A_ASP_41  | OD2 | 2.607 |
| 4FQI | A_LYS_46  | NZ  | A_GLU_44  | OE1 | 2.647 |
| 4FQI | A_LYS_46  | NZ  | A_GLU_44  | OE2 | 3.567 |
| 4FQI | A_ARG_62  | NH1 | A_GLU_78  | OE1 | 3.913 |
| 4FQI | A_ARG_62  | NH1 | A_GLU_78  | OE2 | 3.007 |
| 4FQI | A_LYS_90  | NZ  | A_GLU_273 | OE1 | 2.798 |
| 4FQI | A_LYS_109 | NZ  | A_GLU_89  | OE1 | 2.835 |
| 4FQI | A_LYS_109 | NZ  | A_GLU_89  | OE2 | 3.759 |
| 4FQI | A_LYS_109 | NZ  | B_GLU_69  | OE1 | 2.615 |
| 4FQI | A_LYS_109 | NZ  | B_GLU_69  | OE2 | 3.205 |
| 4FQI | A_ARG_149 | NH2 | A_ASP_77  | OD1 | 3.711 |
| 4FQI | A_ARG_149 | NH2 | A_ASP_77  | OD2 | 2.863 |
| 4FQI | A_HIS_184 | NE2 | A_GLU_231 | OE1 | 2.822 |
| 4FQI | A_ARG_216 | NH1 | A_GLU_231 | OE1 | 3.982 |
| 4FQI | A_ARG_216 | NH2 | A_GLU_231 | OE1 | 3.265 |
| 4FQI | A_LYS_259 | NZ  | A_GLU_119 | OE1 | 3.578 |
| 4FQI | A_LYS_261 | NZ  | A_GLU_83A | OE1 | 3.943 |
| 4FQI | A_LYS_261 | NZ  | A_GLU_83A | OE2 | 2.598 |
| 4FQI | A_LYS_262 | NZ  | A_ASP_175 | OD2 | 3.224 |
| 4FQI | A_LYS_269 | NZ  | A_GLU_89  | OE1 | 2.759 |
| 4FQI | A_LYS_307 | NZ  | B_GLU_64  | OE2 | 3.371 |
| 4FQI | A_LYS_310 | NZ  | B_ASP_90  | OD1 | 2.687 |
| 4FQI | A_LYS_310 | NZ  | B_ASP_90  | OD2 | 3.739 |
| 4FQI | B_LYS_51  | NZ  | B_GLU_103 | OE1 | 2.743 |
| 4FQI | B_ARG_68  | NH1 | B_GLU_85  | OE2 | 3.042 |
| 4FQI | B_LYS_82  | NZ  | B_ASP_86  | OD2 | 2.769 |
| 4FQI | B_ARG_123 | NH2 | B_ASP_120 | OD1 | 3.250 |
| 4FQI | B_ARG_153 | NH2 | B_GLU_150 | OE2 | 2.775 |
| 4FQI | B_ARG_167 | NH2 | B_GLU_164 | OE1 | 3.918 |
| 4FQI | B_ARG_167 | NH2 | B_GLU_164 | OE2 | 2.444 |
| 4FQI | B_ARG_170 | NH1 | B_ASP_128 | OD1 | 3.871 |
| 4FQI | B_ARG_170 | NH1 | B_ASP_128 | OD2 | 3.616 |
| 4FQI | B_ARG_170 | NH2 | B_ASP_128 | OD2 | 3.649 |
| 4FQI | H_ARG_38  | NH1 | H_ASP_86  | OD1 | 2.837 |
| 4FQI | H_ARG_38  | NH2 | H_ASP_86  | OD1 | 3.841 |
| 4FQI | H_LYS_62  | NZ  | H_ASP_46  | OD1 | 3.985 |
| 4FQI | H_LYS_62  | NZ  | H_ASP_46  | OD2 | 2.950 |
| 4FQI | H_ARG_66  | NH1 | H_ASP_86  | OD1 | 3.456 |
| 4FQI | H_ARG_66  | NH1 | H_ASP_86  | OD2 | 2.873 |
| 4FQI | H_ARG_66  | NH2 | H_ASP_86  | OD1 | 2.889 |
| 4FQI | H_ARG_66  | NH2 | H_ASP_86  | OD2 | 3.655 |
| 4FQI | H_LYS_143 | NZ  | L_GLU_124 | OE2 | 2.947 |
| 4FQI | H_LYS_206 | NZ  | H_ASP_208 | OD1 | 2.657 |
| 4FQI | H_LYS_206 | NZ  | H_ASP_208 | OD2 | 3.897 |
| 4FQI | L_ARG_30  | NH1 | L_ASP_93  | OD2 | 2.748 |
| 4FQI | L_ARG_30  | NH2 | L_ASP_93  | OD2 | 3.772 |

|      |           |     |           |     |       |
|------|-----------|-----|-----------|-----|-------|
| 4FQI | L_ARG_31  | NH2 | L_ASP_93  | OD1 | 2.914 |
| 4FQI | L_ARG_31  | NH2 | L_ASP_93  | OD2 | 3.671 |
| 4FQI | L_ARG_61  | NH2 | L_GLU_81  | OE2 | 3.854 |
| 4FQI | L_ARG_61  | NH2 | L_ASP_82  | OD1 | 2.818 |
| 4FQI | L_ARG_61  | NH2 | L_ASP_82  | OD2 | 3.558 |
| 4G6A | C_ARG_38  | NH1 | C_ASP_86  | OD1 | 2.901 |
| 4G6A | C_ARG_38  | NH2 | C_GLU_46  | OE1 | 2.973 |
| 4G6A | C_ARG_38  | NH2 | C_ASP_86  | OD1 | 3.508 |
| 4G6A | C_ARG_64  | NH1 | D_ASP_94  | OD1 | 3.792 |
| 4G6A | C_ARG_64  | NH1 | D_ASP_94  | OD2 | 3.701 |
| 4G6A | C_ARG_66  | NH1 | C_ASP_86  | OD1 | 3.401 |
| 4G6A | C_ARG_66  | NH1 | C_ASP_86  | OD2 | 2.759 |
| 4G6A | C_ARG_66  | NH2 | C_ASP_86  | OD1 | 2.824 |
| 4G6A | C_ARG_66  | NH2 | C_ASP_86  | OD2 | 3.567 |
| 4G6A | C_LYS_143 | NZ  | C_ASP_144 | OD1 | 3.200 |
| 4G6A | C_LYS_143 | NZ  | C_ASP_144 | OD2 | 3.786 |
| 4G6A | C_LYS_209 | NZ  | D_GLU_123 | OE1 | 2.784 |
| 4G6A | C_LYS_209 | NZ  | D_GLU_123 | OE2 | 3.529 |
| 4G6A | C_LYS_210 | NZ  | C_GLU_212 | OE2 | 3.247 |
| 4G6A | D_ARG_18  | NH2 | D_ASP_76  | OD2 | 2.934 |
| 4G6A | D_ARG_18  | NH2 | L_GLU_27  | OE2 | 3.721 |
| 4G6A | D_LYS_39  | NZ  | D_ASP_81  | OD1 | 2.823 |
| 4G6A | D_ARG_61  | NH1 | D_ASP_82  | OD1 | 3.328 |
| 4G6A | D_ARG_61  | NH1 | D_ASP_82  | OD2 | 2.369 |
| 4G6A | D_ARG_61  | NH2 | D_ASP_82  | OD1 | 2.953 |
| 4G6A | D_ARG_61  | NH2 | D_ASP_82  | OD2 | 3.506 |
| 4G6A | D_LYS_149 | NZ  | D_GLU_195 | OE1 | 3.087 |
| 4G6A | D_LYS_183 | NZ  | D_GLU_187 | OE1 | 3.747 |
| 4G6A | D_LYS_183 | NZ  | D_GLU_187 | OE2 | 3.452 |
| 4G6A | D_LYS_188 | NZ  | D_ASP_185 | OD1 | 3.129 |
| 4G6A | D_HIS_189 | ND1 | D_ASP_151 | OD2 | 3.322 |
| 4G6A | D_LYS_190 | NZ  | D_GLU_213 | OE2 | 2.978 |
| 4G6A | H_ARG_38  | NH1 | H_ASP_86  | OD1 | 3.081 |
| 4G6A | H_ARG_38  | NH2 | H_GLU_46  | OE1 | 3.078 |
| 4G6A | H_ARG_38  | NH2 | H_ASP_86  | OD1 | 3.738 |
| 4G6A | H_ARG_64  | NH2 | L_ASP_94  | OD1 | 3.443 |
| 4G6A | H_ARG_64  | NH2 | L_ASP_94  | OD2 | 3.275 |
| 4G6A | H_ARG_66  | NH1 | H_ASP_86  | OD1 | 3.684 |
| 4G6A | H_ARG_66  | NH1 | H_ASP_86  | OD2 | 3.528 |
| 4G6A | H_ARG_66  | NH2 | H_ASP_86  | OD1 | 2.640 |
| 4G6A | H_ARG_66  | NH2 | H_ASP_86  | OD2 | 3.507 |
| 4G6A | H_LYS_143 | NZ  | H_ASP_144 | OD1 | 3.327 |
| 4G6A | H_LYS_143 | NZ  | H_ASP_144 | OD2 | 3.934 |
| 4G6A | H_LYS_206 | NZ  | H_ASP_208 | OD1 | 2.915 |
| 4G6A | H_LYS_206 | NZ  | H_ASP_208 | OD2 | 3.666 |
| 4G6A | H_LYS_209 | NZ  | L_GLU_123 | OE1 | 2.940 |
| 4G6A | H_LYS_209 | NZ  | L_GLU_123 | OE2 | 3.622 |
| 4G6A | H_LYS_210 | NZ  | H_GLU_212 | OE2 | 3.489 |
| 4G6A | L_ARG_18  | NH2 | L_ASP_76  | OD2 | 3.695 |
| 4G6A | L_LYS_39  | NZ  | L_ASP_81  | OD1 | 2.869 |
| 4G6A | L_LYS_39  | NZ  | L_ASP_81  | OD2 | 3.930 |
| 4G6A | L_ARG_61  | NH1 | L_ASP_82  | OD1 | 3.564 |
| 4G6A | L_ARG_61  | NH1 | L_ASP_82  | OD2 | 2.948 |
| 4G6A | L_ARG_61  | NH2 | L_ASP_82  | OD1 | 3.384 |
| 4G6A | L_LYS_149 | NZ  | L_GLU_195 | OE2 | 3.404 |
| 4G6A | L_LYS_183 | NZ  | L_GLU_187 | OE1 | 3.001 |
| 4G6A | L_LYS_183 | NZ  | L_GLU_187 | OE2 | 3.388 |
| 4G6A | L_LYS_190 | NZ  | L_GLU_213 | OE2 | 3.611 |

|      |           |     |            |     |       |
|------|-----------|-----|------------|-----|-------|
| 4G6F | H_ARG_38  | NH1 | H_ASP_86   | OD1 | 2.906 |
| 4G6F | H_ARG_38  | NH2 | H_GLU_46   | OE1 | 3.116 |
| 4G6F | H_ARG_38  | NH2 | H_GLU_46   | OE2 | 3.531 |
| 4G6F | H_ARG_38  | NH2 | H_ASP_86   | OD1 | 3.904 |
| 4G6F | H_ARG_50  | NH1 | H_ASP_58   | OD2 | 3.658 |
| 4G6F | H_ARG_50  | NH1 | H_GLU_100J | OE1 | 3.226 |
| 4G6F | H_ARG_50  | NH1 | H_GLU_100J | OE2 | 2.985 |
| 4G6F | H_ARG_50  | NH2 | H_ASP_58   | OD2 | 2.110 |
| 4G6F | H_ARG_66  | NH1 | H_ASP_86   | OD1 | 3.936 |
| 4G6F | H_ARG_66  | NH1 | H_ASP_86   | OD2 | 2.633 |
| 4G6F | H_ARG_66  | NH2 | H_ASP_86   | OD1 | 3.136 |
| 4G6F | H_ARG_66  | NH2 | H_ASP_86   | OD2 | 3.299 |
| 4G6F | H_ARG_83  | NH2 | H_GLU_85   | OE1 | 3.916 |
| 4G6F | H_ARG_94  | NH2 | H_ASP_102  | OD2 | 3.304 |
| 4G6F | H_LYS_143 | NZ  | H_ASP_144  | OD2 | 3.573 |
| 4G6F | H_LYS_143 | NZ  | L_GLU_125  | OE2 | 3.341 |
| 4G6F | H_LYS_209 | NZ  | L_GLU_124  | OE1 | 3.080 |
| 4G6F | H_LYS_209 | NZ  | L_GLU_124  | OE2 | 2.558 |
| 4G6F | H_ARG_210 | NH1 | H_GLU_212  | OE2 | 3.716 |
| 4G6F | B_ARG_38  | NH1 | B_ASP_86   | OD1 | 3.151 |
| 4G6F | B_ARG_38  | NH2 | B_GLU_46   | OE1 | 3.414 |
| 4G6F | B_ARG_38  | NH2 | B_GLU_46   | OE2 | 3.922 |
| 4G6F | B_ARG_50  | NH1 | B_ASP_58   | OD2 | 3.630 |
| 4G6F | B_ARG_50  | NH1 | B_GLU_100J | OE1 | 3.222 |
| 4G6F | B_ARG_50  | NH1 | B_GLU_100J | OE2 | 2.975 |
| 4G6F | B_ARG_50  | NH2 | B_ASP_58   | OD2 | 2.343 |
| 4G6F | B_ARG_66  | NH1 | B_ASP_86   | OD1 | 3.598 |
| 4G6F | B_ARG_66  | NH1 | B_ASP_86   | OD2 | 2.769 |
| 4G6F | B_ARG_66  | NH2 | B_ASP_86   | OD1 | 2.916 |
| 4G6F | B_ARG_66  | NH2 | B_ASP_86   | OD2 | 3.570 |
| 4G6F | B_ARG_83  | NH2 | B_GLU_85   | OE1 | 3.938 |
| 4G6F | B_ARG_94  | NH2 | B_ASP_102  | OD2 | 3.253 |
| 4G6F | B_LYS_143 | NZ  | D_GLU_125  | OE2 | 2.735 |
| 4G6F | B_LYS_209 | NZ  | D_GLU_124  | OE1 | 3.470 |
| 4G6F | B_LYS_209 | NZ  | D_GLU_124  | OE2 | 2.107 |
| 4G6F | L_ARG_29  | NH1 | L_ASP_26   | OD1 | 3.314 |
| 4G6F | L_HIS_31  | ND1 | H_GLU_100I | OE2 | 2.912 |
| 4G6F | L_ARG_54  | NH1 | L_ASP_60   | OD1 | 3.621 |
| 4G6F | L_ARG_61  | NH2 | L_GLU_81   | OE1 | 3.555 |
| 4G6F | L_ARG_61  | NH2 | L_ASP_82   | OD1 | 2.760 |
| 4G6F | L_ARG_61  | NH2 | L_ASP_82   | OD2 | 3.527 |
| 4G6F | L_ARG_91  | NH1 | H_GLU_100J | OE2 | 2.715 |
| 4G6F | L_ARG_91  | NH2 | H_GLU_100J | OE2 | 2.951 |
| 4G6F | L_LYS_103 | NZ  | L_ASP_83   | OD1 | 2.500 |
| 4G6F | L_LYS_111 | NZ  | L_GLU_199  | OE1 | 3.003 |
| 4G6F | L_LYS_150 | NZ  | L_GLU_204  | OE2 | 2.904 |
| 4G6F | D_HIS_31  | ND1 | B_GLU_100I | OE2 | 2.954 |
| 4G6F | D_ARG_54  | NH1 | D_ASP_60   | OD1 | 3.426 |
| 4G6F | D_ARG_61  | NH2 | D_ASP_82   | OD1 | 2.776 |
| 4G6F | D_ARG_61  | NH2 | D_ASP_82   | OD2 | 3.304 |
| 4G6F | D_ARG_91  | NH1 | B_GLU_100J | OE2 | 2.854 |
| 4G6F | D_ARG_91  | NH2 | B_GLU_100J | OE2 | 2.880 |
| 4G6F | D_ARG_95B | NH2 | B_ASP_58   | OD1 | 3.343 |
| 4G6F | D_LYS_103 | NZ  | D_ASP_83   | OD1 | 2.777 |
| 4G6F | D_LYS_111 | NZ  | D_GLU_199  | OE1 | 3.031 |
| 4G6F | D_LYS_150 | NZ  | D_GLU_204  | OE1 | 3.970 |
| 4G6F | D_LYS_150 | NZ  | D_GLU_204  | OE2 | 2.492 |
| 4G6F | D_LYS_167 | NZ  | D_ASP_83   | OD2 | 3.935 |

|      |           |     |           |     |       |
|------|-----------|-----|-----------|-----|-------|
| 4G6F | D_LYS_172 | NZ  | D_ASP_139 | OD2 | 3.592 |
| 4G6F | D_ARG_190 | NH2 | D_ASP_152 | OD2 | 3.898 |
| 4G6F | P_LYS_665 | NZ  | P_GLU_662 | OE2 | 3.965 |
| 4G6F | F_LYS_665 | NZ  | F_GLU_662 | OE1 | 3.301 |
| 4G6F | F_LYS_665 | NZ  | F_GLU_662 | OE2 | 2.956 |
| 4GMT | L_LYS_24  | NZ  | L_ASP_70  | OD1 | 3.260 |
| 4GMT | L_LYS_24  | NZ  | L_ASP_70  | OD2 | 3.149 |
| 4GMT | L_ARG_61  | NH2 | L_GLU_81  | OE2 | 3.799 |
| 4GMT | L_ARG_61  | NH2 | L_ASP_82  | OD1 | 3.260 |
| 4GMT | L_ARG_61  | NH2 | L_ASP_82  | OD2 | 2.628 |
| 4GMT | L_ARG_108 | NH1 | L_ASP_170 | OD1 | 3.942 |
| 4GMT | L_LYS_142 | NZ  | L_ASP_143 | OD1 | 3.297 |
| 4GMT | L_LYS_142 | NZ  | L_ASP_143 | OD2 | 2.972 |
| 4GMT | L_LYS_147 | NZ  | L_GLU_195 | OE1 | 3.733 |
| 4GMT | L_LYS_149 | NZ  | L_GLU_195 | OE2 | 3.437 |
| 4GMT | L_ARG_155 | NH1 | L_GLU_185 | OE2 | 3.030 |
| 4GMT | L_ARG_155 | NH2 | L_GLU_185 | OE1 | 3.075 |
| 4GMT | L_ARG_155 | NH2 | L_GLU_185 | OE2 | 2.988 |
| 4GMT | L_HIS_189 | ND1 | L_ASP_151 | OD2 | 3.653 |
| 4GMT | L_LYS_199 | NZ  | L_ASP_110 | OD2 | 2.866 |
| 4GMT | L_ARG_211 | NH1 | L_GLU_187 | OE2 | 3.717 |
| 4GMT | H_LYS_12  | NZ  | H_GLU_10  | OE1 | 3.698 |
| 4GMT | H_ARG_40  | NH1 | H_GLU_85  | OE1 | 3.459 |
| 4GMT | H_ARG_40  | NH2 | H_GLU_85  | OE1 | 3.548 |
| 4GMT | H_LYS_64  | NZ  | H_GLU_61  | OE1 | 3.355 |
| 4GMT | H_LYS_64  | NZ  | H_GLU_61  | OE2 | 3.496 |
| 4GMT | H_LYS_66  | NZ  | H_ASP_86  | OD2 | 3.279 |
| 4GMT | H_HIS_164 | NE2 | L_ASP_167 | OD2 | 3.650 |
| 4GMT | H_LYS_205 | NZ  | H_ASP_207 | OD1 | 2.972 |
| 4GMT | H_LYS_205 | NZ  | H_ASP_207 | OD2 | 3.617 |
| 4GMT | M_ARG_61  | NH1 | M_GLU_81  | OE2 | 3.800 |
| 4GMT | M_ARG_61  | NH2 | M_GLU_81  | OE2 | 3.404 |
| 4GMT | M_ARG_61  | NH2 | M_ASP_82  | OD1 | 3.417 |
| 4GMT | M_ARG_61  | NH2 | M_ASP_82  | OD2 | 2.761 |
| 4GMT | M_LYS_103 | NZ  | M_GLU_85  | OE1 | 3.664 |
| 4GMT | M_LYS_107 | NZ  | M_ASP_17  | OD2 | 3.878 |
| 4GMT | M_LYS_142 | NZ  | M_ASP_143 | OD1 | 2.867 |
| 4GMT | M_ARG_155 | NH1 | M_GLU_185 | OE1 | 3.423 |
| 4GMT | M_ARG_188 | NH2 | M_GLU_185 | OE2 | 2.544 |
| 4GMT | M_LYS_199 | NZ  | M_ASP_110 | OD2 | 3.054 |
| 4GMT | I_LYS_38  | NZ  | I_GLU_46  | OE1 | 3.821 |
| 4GMT | I_ARG_40  | NH1 | I_GLU_85  | OE1 | 2.810 |
| 4GMT | I_ARG_40  | NH2 | I_GLU_85  | OE1 | 3.101 |
| 4GMT | I_ARG_40  | NH2 | I_GLU_85  | OE2 | 3.496 |
| 4GMT | I_LYS_64  | NZ  | I_GLU_61  | OE1 | 2.992 |
| 4GMT | I_LYS_66  | NZ  | I_ASP_86  | OD1 | 3.775 |
| 4GMT | I_LYS_66  | NZ  | I_ASP_86  | OD2 | 3.105 |
| 4GMT | I_LYS_205 | NZ  | I_ASP_207 | OD1 | 3.730 |
| 4GXU | A_LYS_    | NZ  | F_GLU_    | OE1 | 3.529 |
| 4GXU | A_LYS_    | NZ  | F_GLU_    | OE2 | 3.469 |
| 4GXU | A_LYS_53  | NZ  | A_ASP_276 | OD1 | 3.005 |
| 4GXU | A_LYS_    | NZ  | A_GLU_75  | OE1 | 2.922 |
| 4GXU | A_ARG_109 | NH1 | A_GLU_89  | OE1 | 2.638 |
| 4GXU | A_ARG_109 | NH1 | A_GLU_89  | OE2 | 3.793 |
| 4GXU | A_ARG_109 | NH2 | A_GLU_89  | OE1 | 3.235 |
| 4GXU | A_ARG_109 | NH2 | A_GLU_89  | OE2 | 3.010 |
| 4GXU | A_ARG_109 | NH2 | B_GLU_69  | OE1 | 3.987 |
| 4GXU | A_ARG_109 | NH2 | B_GLU_69  | OE2 | 3.286 |

|      |           |     |           |     |       |
|------|-----------|-----|-----------|-----|-------|
| 4GXU | A_ARG_149 | NH2 | A_ASP_77  | OD1 | 3.644 |
| 4GXU | A_ARG_149 | NH2 | A_ASP_77  | OD2 | 2.613 |
| 4GXU | A_LYS_163 | NZ  | A_GLU_246 | OE1 | 2.988 |
| 4GXU | A_LYS_163 | NZ  | A_GLU_246 | OE2 | 3.949 |
| 4GXU | A_LYS_174 | NZ  | A_GLU_119 | OE1 | 2.547 |
| 4GXU | A_LYS_174 | NZ  | A_GLU_119 | OE2 | 3.226 |
| 4GXU | A_LYS_208 | NZ  | A_GLU_238 | OE1 | 3.242 |
| 4GXU | A_LYS_208 | NZ  | A_GLU_238 | OE2 | 3.214 |
| 4GXU | A_ARG_262 | NH2 | A_GLU_175 | OE1 | 3.438 |
| 4GXU | A_ARG_262 | NH2 | A_GLU_175 | OE2 | 2.905 |
| 4GXU | A_ARG_    | NH1 | B_ASP_    | OD1 | 2.648 |
| 4GXU | A_ARG_    | NH2 | B_ASP_    | OD1 | 2.545 |
| 4GXU | A_ARG_    | NH1 | A_GLU_    | OE2 | 3.223 |
| 4GXU | A_ARG_    | NH2 | A_GLU_    | OE2 | 3.931 |
| 4GXU | B_LYS_    | NZ  | B_GLU_    | OE1 | 2.602 |
| 4GXU | B_LYS_58  | NZ  | B_GLU_57  | OE1 | 3.935 |
| 4GXU | B_LYS_58  | NZ  | D_GLU_97  | OE1 | 3.748 |
| 4GXU | B_LYS_68  | NZ  | A_GLU_110 | OE2 | 3.492 |
| 4GXU | B_ARG_76  | NH1 | F_GLU_74  | OE1 | 3.015 |
| 4GXU | B_ARG_76  | NH1 | F_GLU_74  | OE2 | 2.935 |
| 4GXU | B_ARG_76  | NH2 | E_GLU_107 | OE2 | 3.559 |
| 4GXU | B_ARG_76  | NH2 | F_GLU_74  | OE2 | 2.547 |
| 4GXU | B_LYS_83  | NZ  | F_ASP_85  | OD1 | 3.431 |
| 4GXU | B_LYS_83  | NZ  | F_ASP_85  | OD2 | 3.614 |
| 4GXU | B_ARG_    | NH2 | D_ASP_    | OD2 | 3.432 |
| 4GXU | B_ARG_    | NH1 | F_GLU_    | OE1 | 3.168 |
| 4GXU | B_ARG_    | NH2 | F_GLU_    | OE1 | 3.085 |
| 4GXU | B_ARG_    | NH2 | F_GLU_    | OE2 | 3.110 |
| 4GXU | B_LYS_    | NZ  | B_GLU_    | OE1 | 3.038 |
| 4GXU | B_LYS_    | NZ  | B_GLU_    | OE2 | 3.952 |
| 4GXU | B_ARG_    | NH1 | B_GLU_    | OE2 | 2.823 |
| 4GXU | B_LYS_    | NZ  | B_GLU_    | OE1 | 3.999 |
| 4GXU | C_LYS_32  | NZ  | B_GLU_57  | OE1 | 3.823 |
| 4GXU | C_LYS_32  | NZ  | B_GLU_57  | OE2 | 3.681 |
| 4GXU | C_LYS_    | NZ  | C_ASP_276 | OD1 | 3.258 |
| 4GXU | C_LYS_63  | NZ  | C_GLU_75  | OE1 | 3.089 |
| 4GXU | C_ARG_109 | NH1 | C_GLU_89  | OE1 | 2.661 |
| 4GXU | C_ARG_109 | NH1 | C_GLU_89  | OE2 | 3.514 |
| 4GXU | C_ARG_109 | NH2 | C_GLU_89  | OE1 | 3.287 |
| 4GXU | C_ARG_109 | NH2 | C_GLU_89  | OE2 | 2.852 |
| 4GXU | C_ARG_109 | NH2 | D_GLU_69  | OE1 | 3.507 |
| 4GXU | C_ARG_109 | NH2 | D_GLU_69  | OE2 | 3.205 |
| 4GXU | C_ARG_149 | NH2 | C_ASP_77  | OD1 | 3.970 |
| 4GXU | C_ARG_149 | NH2 | C_ASP_77  | OD2 | 3.229 |
| 4GXU | C_LYS_163 | NZ  | C_GLU_246 | OE1 | 3.356 |
| 4GXU | C_LYS_    | NZ  | C_GLU_119 | OE1 | 2.755 |
| 4GXU | C_LYS_    | NZ  | C_GLU_119 | OE2 | 2.730 |
| 4GXU | C_LYS_208 | NZ  | C_GLU_238 | OE1 | 3.337 |
| 4GXU | C_LYS_208 | NZ  | C_GLU_238 | OE2 | 3.528 |
| 4GXU | C_LYS_    | NZ  | C_GLU_    | OE2 | 3.454 |
| 4GXU | C_ARG_310 | NH1 | D_ASP_90  | OD1 | 3.385 |
| 4GXU | C_ARG_310 | NH2 | D_ASP_90  | OD1 | 3.336 |
| 4GXU | C_ARG_321 | NH1 | C_GLU_31  | OE2 | 3.152 |
| 4GXU | C_ARG_321 | NH2 | C_GLU_31  | OE2 | 3.675 |
| 4GXU | D_HIS_    | NE2 | D_ASP_    | OD1 | 3.647 |
| 4GXU | D_LYS_    | NZ  | D_GLU_    | OE1 | 2.571 |
| 4GXU | D_LYS_    | NZ  | D_GLU_    | OE1 | 3.860 |
| 4GXU | D_LYS_68  | NZ  | C_GLU_110 | OE2 | 3.981 |

|      |           |     |           |     |       |
|------|-----------|-----|-----------|-----|-------|
| 4GXU | D_ARG_76  | NH1 | B_GLU_74  | OE1 | 2.948 |
| 4GXU | D_ARG_76  | NH1 | B_GLU_74  | OE2 | 3.453 |
| 4GXU | D_ARG_76  | NH2 | A_GLU_107 | OE2 | 3.465 |
| 4GXU | D_ARG_76  | NH2 | B_GLU_74  | OE1 | 3.835 |
| 4GXU | D_ARG_76  | NH2 | B_GLU_74  | OE2 | 2.916 |
| 4GXU | D_LYS_83  | NZ  | B_ASP_85  | OD1 | 3.057 |
| 4GXU | D_LYS_83  | NZ  | B_ASP_85  | OD2 | 3.527 |
| 4GXU | D_ARG_    | NH2 | F_ASP_    | OD2 | 3.392 |
| 4GXU | D_ARG_    | NH1 | B_GLU_    | OE1 | 2.743 |
| 4GXU | D_ARG_    | NH1 | B_GLU_    | OE2 | 3.931 |
| 4GXU | D_ARG_    | NH2 | B_GLU_    | OE1 | 2.897 |
| 4GXU | D_ARG_    | NH2 | B_GLU_    | OE2 | 2.579 |
| 4GXU | D_ARG_    | NH2 | D_GLU_    | OE2 | 3.558 |
| 4GXU | D_LYS_    | NZ  | D_GLU_    | OE1 | 3.191 |
| 4GXU | D_LYS_    | NZ  | D_GLU_    | OE2 | 3.786 |
| 4GXU | D_ARG_    | NH1 | D_GLU_    | OE2 | 2.518 |
| 4GXU | D_LYS_    | NZ  | D_GLU_    | OE1 | 3.949 |
| 4GXU | E_LYS_    | NZ  | D_GLU_    | OE1 | 3.848 |
| 4GXU | E_LYS_    | NZ  | D_GLU_    | OE2 | 3.549 |
| 4GXU | E_LYS_    | NZ  | E_ASP_    | OD1 | 3.280 |
| 4GXU | E_LYS_    | NZ  | E_GLU_    | OE1 | 3.829 |
| 4GXU | E_LYS_    | NZ  | E_GLU_    | OE1 | 2.868 |
| 4GXU | E_ARG_109 | NH1 | E_GLU_89  | OE1 | 2.836 |
| 4GXU | E_ARG_109 | NH1 | E_GLU_89  | OE2 | 3.830 |
| 4GXU | E_ARG_109 | NH2 | E_GLU_89  | OE1 | 3.271 |
| 4GXU | E_ARG_109 | NH2 | E_GLU_89  | OE2 | 2.995 |
| 4GXU | E_ARG_109 | NH2 | F_GLU_69  | OE1 | 3.819 |
| 4GXU | E_ARG_109 | NH2 | F_GLU_69  | OE2 | 3.459 |
| 4GXU | E_ARG_149 | NH2 | E_ASP_77  | OD2 | 3.169 |
| 4GXU | E_LYS_163 | NZ  | E_GLU_246 | OE1 | 3.757 |
| 4GXU | E_LYS_    | NZ  | E_GLU_    | OE1 | 2.406 |
| 4GXU | E_LYS_    | NZ  | E_GLU_    | OE2 | 3.375 |
| 4GXU | E_LYS_208 | NZ  | E_GLU_    | OE1 | 3.387 |
| 4GXU | E_LYS_208 | NZ  | E_GLU_238 | OE2 | 3.285 |
| 4GXU | E_ARG_262 | NH2 | E_GLU_    | OE1 | 3.936 |
| 4GXU | E_ARG_262 | NH2 | E_GLU_    | OE2 | 3.458 |
| 4GXU | E_LYS_    | NZ  | E_GLU_    | OE2 | 3.797 |
| 4GXU | E_ARG_310 | NH1 | F_ASP_90  | OD1 | 2.704 |
| 4GXU | E_ARG_310 | NH2 | F_ASP_90  | OD1 | 2.770 |
| 4GXU | E_ARG_    | NH1 | E_GLU_    | OE1 | 3.512 |
| 4GXU | E_ARG_    | NH1 | E_GLU_    | OE2 | 2.851 |
| 4GXU | E_ARG_    | NH2 | E_GLU_    | OE2 | 3.048 |
| 4GXU | F_LYS_    | NZ  | F_GLU_    | OE1 | 2.531 |
| 4GXU | F_LYS_    | NZ  | B_GLU_    | OE1 | 3.893 |
| 4GXU | F_LYS_68  | NZ  | E_GLU_110 | OE2 | 3.968 |
| 4GXU | F_ARG_76  | NH1 | D_GLU_74  | OE1 | 2.787 |
| 4GXU | F_ARG_76  | NH1 | D_GLU_74  | OE2 | 3.366 |
| 4GXU | F_ARG_76  | NH2 | C_GLU_107 | OE2 | 3.548 |
| 4GXU | F_ARG_76  | NH2 | D_GLU_74  | OE1 | 3.616 |
| 4GXU | F_ARG_76  | NH2 | D_GLU_74  | OE2 | 2.732 |
| 4GXU | F_LYS_83  | NZ  | D_ASP_85  | OD1 | 3.339 |
| 4GXU | F_LYS_83  | NZ  | D_ASP_85  | OD2 | 3.717 |
| 4GXU | F_ARG_    | NH2 | B_ASP_    | OD2 | 3.670 |
| 4GXU | F_ARG_    | NH1 | D_GLU_    | OE1 | 3.077 |
| 4GXU | F_ARG_    | NH2 | D_GLU_    | OE1 | 2.952 |
| 4GXU | F_ARG_    | NH2 | D_GLU_    | OE2 | 3.074 |
| 4GXU | F_ARG_    | NH2 | F_GLU_    | OE2 | 3.328 |
| 4GXU | F_LYS_    | NZ  | F_GLU_    | OE1 | 3.535 |



|      |        |     |        |     |       |
|------|--------|-----|--------|-----|-------|
| 4GXU | F_LYS_ | NZ  | F_GLU_ | OE2 | 3.712 |
| 4GXU | F_ARG_ | NH1 | F_GLU_ | OE2 | 2.854 |
| 4GXU | G_LYS_ | NZ  | J_GLU_ | OE1 | 3.601 |
| 4GXU | G_LYS_ | NZ  | J_GLU_ | OE2 | 3.403 |
| 4GXU | G_LYS_ | NZ  | G_ASP_ | OD1 | 3.005 |
| 4GXU | G_LYS_ | NZ  | G_GLU_ | OE1 | 2.980 |
| 4GXU | G_ARG_ | NH1 | G_GLU_ | OE1 | 2.812 |
| 4GXU | G_ARG_ | NH1 | G_GLU_ | OE2 | 3.396 |
| 4GXU | G_ARG_ | NH2 | G_GLU_ | OE1 | 3.672 |
| 4GXU | G_ARG_ | NH2 | G_GLU_ | OE2 | 2.896 |
| 4GXU | G_ARG_ | NH2 | H_GLU_ | OE2 | 3.183 |
| 4GXU | G_ARG_ | NH2 | G_ASP_ | OD1 | 3.470 |
| 4GXU | G_ARG_ | NH2 | G_ASP_ | OD2 | 2.671 |
| 4GXU | G_LYS_ | NZ  | G_GLU_ | OE1 | 3.089 |
| 4GXU | G_LYS_ | NZ  | G_GLU_ | OE2 | 3.833 |
| 4GXU | G_LYS_ | NZ  | G_GLU_ | OE1 | 2.593 |
| 4GXU | G_LYS_ | NZ  | G_GLU_ | OE2 | 3.863 |
| 4GXU | G_LYS_ | NZ  | G_GLU_ | OE1 | 3.478 |
| 4GXU | G_ARG_ | NH2 | G_GLU_ | OE1 | 3.819 |
| 4GXU | G_ARG_ | NH2 | G_GLU_ | OE2 | 3.300 |
| 4GXU | G_ARG_ | NH1 | H_ASP_ | OD1 | 2.337 |
| 4GXU | G_ARG_ | NH2 | H_ASP_ | OD1 | 2.900 |
| 4GXU | G_ARG_ | NH1 | G_ASP_ | OD1 | 3.664 |
| 4GXU | G_ARG_ | NH1 | G_GLU_ | OE1 | 3.532 |
| 4GXU | G_ARG_ | NH1 | G_GLU_ | OE2 | 3.002 |
| 4GXU | G_ARG_ | NH2 | G_GLU_ | OE2 | 3.072 |
| 4GXU | H_HIS_ | NE2 | H_ASP_ | OD1 | 3.881 |
| 4GXU | H_LYS_ | NZ  | H_GLU_ | OE1 | 2.920 |
| 4GXU | H_LYS_ | NZ  | L_GLU_ | OE1 | 3.639 |
| 4GXU | H_LYS_ | NZ  | G_GLU_ | OE2 | 3.438 |
| 4GXU | H_ARG_ | NH1 | J_GLU_ | OE1 | 2.612 |
| 4GXU | H_ARG_ | NH1 | J_GLU_ | OE2 | 3.374 |
| 4GXU | H_ARG_ | NH2 | L_GLU_ | OE2 | 3.506 |
| 4GXU | H_ARG_ | NH2 | J_GLU_ | OE1 | 3.326 |
| 4GXU | H_ARG_ | NH2 | J_GLU_ | OE2 | 2.517 |
| 4GXU | H_LYS_ | NZ  | J_ASP_ | OD1 | 2.938 |
| 4GXU | H_LYS_ | NZ  | J_ASP_ | OD2 | 3.368 |
| 4GXU | H_ARG_ | NH2 | L_ASP_ | OD2 | 3.212 |
| 4GXU | H_ARG_ | NH1 | J_GLU_ | OE1 | 3.044 |
| 4GXU | H_ARG_ | NH2 | J_GLU_ | OE1 | 2.714 |
| 4GXU | H_ARG_ | NH2 | J_GLU_ | OE2 | 3.067 |
| 4GXU | H_LYS_ | NZ  | H_GLU_ | OE1 | 3.090 |
| 4GXU | H_ARG_ | NH1 | H_GLU_ | OE2 | 2.508 |
| 4GXU | H_LYS_ | NZ  | H_GLU_ | OE1 | 3.808 |
| 4GXU | H_LYS_ | NZ  | H_GLU_ | OE2 | 3.001 |
| 4GXU | L_LYS_ | NZ  | L_GLU_ | OE1 | 3.747 |
| 4GXU | L_LYS_ | NZ  | L_GLU_ | OE2 | 3.353 |
| 4GXU | L_LYS_ | NZ  | L_ASP_ | OD1 | 3.170 |
| 4GXU | L_LYS_ | NZ  | L_GLU_ | OE1 | 2.809 |
| 4GXU | L_ARG_ | NH1 | L_GLU_ | OE1 | 2.622 |
| 4GXU | L_ARG_ | NH1 | L_GLU_ | OE2 | 3.326 |
| 4GXU | L_ARG_ | NH2 | L_GLU_ | OE1 | 3.446 |
| 4GXU | L_ARG_ | NH2 | L_GLU_ | OE2 | 2.752 |
| 4GXU | L_ARG_ | NH2 | J_GLU_ | OE1 | 3.762 |
| 4GXU | L_ARG_ | NH2 | J_GLU_ | OE2 | 2.924 |
| 4GXU | L_ARG_ | NH2 | L_ASP_ | OD1 | 3.969 |
| 4GXU | L_ARG_ | NH2 | L_ASP_ | OD2 | 2.932 |
| 4GXU | L_LYS_ | NZ  | L_GLU_ | OE1 | 3.315 |

|      |        |     |        |     |       |
|------|--------|-----|--------|-----|-------|
| 4GXU | LLYS_  | NZ  | L_GLU_ | OE2 | 3.981 |
| 4GXU | LLYS_  | NZ  | L_GLU_ | OE1 | 2.410 |
| 4GXU | LLYS_  | NZ  | L_GLU_ | OE2 | 3.536 |
| 4GXU | LLYS_  | NZ  | L_GLU_ | OE1 | 3.215 |
| 4GXU | L_ARG_ | NH2 | L_GLU_ | OE2 | 3.984 |
| 4GXU | LLYS_  | NZ  | L_GLU_ | OE1 | 3.949 |
| 4GXU | LLYS_  | NZ  | L_GLU_ | OE2 | 3.673 |
| 4GXU | L_ARG_ | NH1 | J_ASP_ | OD1 | 2.388 |
| 4GXU | L_ARG_ | NH2 | J_ASP_ | OD1 | 2.649 |
| 4GXU | L_ARG_ | NH1 | L_GLU_ | OE1 | 3.395 |
| 4GXU | L_ARG_ | NH1 | L_GLU_ | OE2 | 2.991 |
| 4GXU | L_ARG_ | NH2 | L_GLU_ | OE2 | 3.022 |
| 4GXU | J_HIS_ | NE2 | J_ASP_ | OD1 | 3.723 |
| 4GXU | J_LYS_ | NZ  | J_GLU_ | OE1 | 2.696 |
| 4GXU | J_LYS_ | NZ  | H_GLU_ | OE1 | 3.949 |
| 4GXU | J_LYS_ | NZ  | L_GLU_ | OE2 | 3.674 |
| 4GXU | J_ARG_ | NH1 | L_GLU_ | OE1 | 2.912 |
| 4GXU | J_ARG_ | NH1 | L_GLU_ | OE2 | 3.322 |
| 4GXU | J_ARG_ | NH2 | K_GLU_ | OE2 | 3.542 |
| 4GXU | J_ARG_ | NH2 | L_GLU_ | OE1 | 3.621 |
| 4GXU | J_ARG_ | NH2 | L_GLU_ | OE2 | 2.520 |
| 4GXU | J_LYS_ | NZ  | L_ASP_ | OD1 | 3.139 |
| 4GXU | J_LYS_ | NZ  | L_ASP_ | OD2 | 3.566 |
| 4GXU | J_ARG_ | NH2 | H_ASP_ | OD2 | 3.270 |
| 4GXU | J_ARG_ | NH1 | L_GLU_ | OE1 | 3.377 |
| 4GXU | J_ARG_ | NH2 | J_GLU_ | OE2 | 3.805 |
| 4GXU | J_ARG_ | NH2 | L_GLU_ | OE1 | 2.504 |
| 4GXU | J_ARG_ | NH2 | L_GLU_ | OE2 | 3.208 |
| 4GXU | J_LYS_ | NZ  | J_GLU_ | OE1 | 3.200 |
| 4GXU | J_LYS_ | NZ  | J_GLU_ | OE2 | 3.922 |
| 4GXU | J_ARG_ | NH1 | J_GLU_ | OE2 | 2.706 |
| 4GXU | J_LYS_ | NZ  | J_GLU_ | OE1 | 3.514 |
| 4GXU | J_LYS_ | NZ  | J_GLU_ | OE2 | 3.322 |
| 4GXU | K_LYS_ | NZ  | H_GLU_ | OE2 | 3.068 |
| 4GXU | K_LYS_ | NZ  | K_ASP_ | OD1 | 3.466 |
| 4GXU | K_LYS_ | NZ  | K_GLU_ | OE1 | 2.616 |
| 4GXU | K_ARG_ | NH1 | K_GLU_ | OE1 | 2.847 |
| 4GXU | K_ARG_ | NH1 | K_GLU_ | OE2 | 3.789 |
| 4GXU | K_ARG_ | NH2 | K_GLU_ | OE1 | 3.337 |
| 4GXU | K_ARG_ | NH2 | K_GLU_ | OE2 | 2.934 |
| 4GXU | K_ARG_ | NH2 | L_GLU_ | OE1 | 3.835 |
| 4GXU | K_ARG_ | NH2 | L_GLU_ | OE2 | 3.159 |
| 4GXU | K_ARG_ | NH2 | K_ASP_ | OD1 | 3.461 |
| 4GXU | K_ARG_ | NH2 | K_ASP_ | OD2 | 2.584 |
| 4GXU | K_LYS_ | NZ  | K_GLU_ | OE1 | 2.688 |
| 4GXU | K_LYS_ | NZ  | K_GLU_ | OE2 | 3.997 |
| 4GXU | K_LYS_ | NZ  | K_GLU_ | OE1 | 3.262 |
| 4GXU | K_LYS_ | NZ  | K_GLU_ | OE2 | 2.919 |
| 4GXU | K_ARG_ | NH2 | K_GLU_ | OE1 | 3.557 |
| 4GXU | K_ARG_ | NH2 | K_GLU_ | OE2 | 3.243 |
| 4GXU | K_ARG_ | NH1 | L_ASP_ | OD1 | 2.447 |
| 4GXU | K_ARG_ | NH2 | L_ASP_ | OD1 | 2.754 |
| 4GXU | K_ARG_ | NH1 | K_GLU_ | OE1 | 3.546 |
| 4GXU | K_ARG_ | NH1 | K_GLU_ | OE2 | 2.807 |
| 4GXU | K_ARG_ | NH2 | K_GLU_ | OE2 | 3.397 |
| 4GXU | L_LYS_ | NZ  | L_GLU_ | OE1 | 2.769 |
| 4GXU | L_LYS_ | NZ  | J_GLU_ | OE1 | 3.674 |
| 4GXU | L_LYS_ | NZ  | L_GLU_ | OE1 | 3.962 |

|      |           |     |           |     |       |
|------|-----------|-----|-----------|-----|-------|
| 4GXU | L_LYS_    | NZ  | K_GLU_    | OE2 | 3.305 |
| 4GXU | L_ARG_    | NH1 | H_GLU_    | OE1 | 2.958 |
| 4GXU | L_ARG_    | NH1 | H_GLU_    | OE2 | 3.138 |
| 4GXU | L_ARG_    | NH2 | G_GLU_    | OE2 | 3.886 |
| 4GXU | L_ARG_    | NH2 | H_GLU_    | OE1 | 3.887 |
| 4GXU | L_ARG_    | NH2 | H_GLU_    | OE2 | 2.595 |
| 4GXU | L_LYS_    | NZ  | H_ASP_    | OD1 | 2.732 |
| 4GXU | L_LYS_    | NZ  | H_ASP_    | OD2 | 3.190 |
| 4GXU | L_ARG_    | NH2 | J_ASP_    | OD2 | 3.583 |
| 4GXU | L_ARG_    | NH1 | H_GLU_    | OE1 | 3.044 |
| 4GXU | L_ARG_    | NH2 | H_GLU_    | OE1 | 2.477 |
| 4GXU | L_ARG_    | NH2 | H_GLU_    | OE2 | 3.036 |
| 4GXU | L_ARG_    | NH2 | L_GLU_    | OE2 | 3.856 |
| 4GXU | L_LYS_    | NZ  | L_GLU_    | OE1 | 2.914 |
| 4GXU | L_LYS_    | NZ  | L_GLU_    | OE2 | 3.773 |
| 4GXU | L_LYS_    | NZ  | L_GLU_    | OE2 | 3.996 |
| 4GXU | L_LYS_    | NZ  | L_GLU_    | OE1 | 3.816 |
| 4GXU | L_ARG_    | NH1 | L_GLU_    | OE1 | 3.472 |
| 4GXU | L_LYS_    | NZ  | L_GLU_    | OE1 | 3.566 |
| 4GXU | M_ARG_    | NH2 | H_GLU_    | OE2 | 3.356 |
| 4GXU | M_HIS_35  | NE2 | M_GLU_95  | OE1 | 2.618 |
| 4GXU | M_ARG_    | NH1 | M_ASP_    | OD1 | 2.787 |
| 4GXU | M_ARG_    | NH2 | M_GLU_46  | OE1 | 3.155 |
| 4GXU | M_ARG_    | NH2 | M_GLU_46  | OE2 | 3.384 |
| 4GXU | M_ARG_    | NH2 | M_ASP_    | OD1 | 3.807 |
| 4GXU | M_ARG_    | NH1 | M_ASP_    | OD1 | 2.866 |
| 4GXU | M_ARG_    | NH1 | M_ASP_    | OD1 | 3.767 |
| 4GXU | M_ARG_    | NH1 | M_ASP_    | OD2 | 2.685 |
| 4GXU | M_ARG_    | NH2 | M_ASP_    | OD1 | 3.010 |
| 4GXU | M_ARG_    | NH2 | M_ASP_    | OD2 | 3.446 |
| 4GXU | M_LYS_    | NZ  | N_GLU_    | OE2 | 2.851 |
| 4GXU | M_LYS_    | NZ  | N_GLU_    | OE1 | 3.371 |
| 4GXU | M_ARG_210 | NH1 | M_GLU_212 | OE2 | 3.375 |
| 4GXU | N_ARG_61  | NH1 | N_ASP_82  | OD1 | 3.079 |
| 4GXU | N_ARG_61  | NH1 | N_ASP_82  | OD2 | 3.905 |
| 4GXU | N_ARG_61  | NH2 | N_ASP_82  | OD1 | 3.806 |
| 4GXU | N_ARG_61  | NH2 | N_ASP_82  | OD2 | 3.473 |
| 4GXU | N_HIS_95C | NE2 | N_ASP_92  | OD2 | 3.978 |
| 4GXU | N_LYS_149 | NZ  | N_GLU_203 | OE1 | 3.458 |
| 4GXU | N_LYS_149 | NZ  | N_GLU_203 | OE2 | 3.365 |
| 4GXU | N_LYS_    | NZ  | N_GLU_    | OE2 | 3.800 |
| 4GXU | N_ARG_189 | NH2 | N_ASP_151 | OD2 | 3.992 |
| 4GXU | O_HIS_35  | NE2 | O_GLU_95  | OE1 | 2.632 |
| 4GXU | O_ARG_38  | NH1 | O_ASP_86  | OD1 | 2.799 |
| 4GXU | O_ARG_38  | NH2 | O_GLU_46  | OE1 | 3.065 |
| 4GXU | O_ARG_38  | NH2 | O_GLU_46  | OE2 | 3.637 |
| 4GXU | O_ARG_38  | NH2 | O_ASP_86  | OD1 | 3.453 |
| 4GXU | O_ARG_55  | NH1 | O_ASP_53  | OD1 | 3.043 |
| 4GXU | O_ARG_66  | NH1 | O_ASP_86  | OD2 | 2.898 |
| 4GXU | O_ARG_66  | NH2 | O_ASP_86  | OD1 | 3.023 |
| 4GXU | O_ARG_66  | NH2 | O_ASP_86  | OD2 | 2.955 |
| 4GXU | P_ARG_61  | NH1 | P_ASP_82  | OD1 | 2.845 |
| 4GXU | P_ARG_61  | NH2 | P_ASP_82  | OD1 | 3.213 |
| 4GXU | P_ARG_61  | NH2 | P_ASP_82  | OD2 | 3.256 |
| 4GXU | P_HIS_95C | NE2 | P_ASP_92  | OD2 | 3.801 |
| 4GXU | Q_HIS_35  | NE2 | Q_GLU_95  | OE1 | 2.629 |
| 4GXU | Q_ARG_38  | NH1 | Q_ASP_    | OD1 | 2.771 |
| 4GXU | Q_ARG_38  | NH2 | Q_GLU_46  | OE1 | 3.023 |

|      |           |     |           |     |       |
|------|-----------|-----|-----------|-----|-------|
| 4GXU | Q_ARG_38  | NH2 | Q_GLU_46  | OE2 | 3.310 |
| 4GXU | Q_ARG_38  | NH2 | Q_ASP_    | OD1 | 3.767 |
| 4GXU | Q_ARG_    | NH1 | Q_ASP_53  | OD1 | 2.937 |
| 4GXU | Q_ARG_    | NH1 | Q_ASP_    | OD2 | 3.290 |
| 4GXU | Q_ARG_    | NH2 | Q_ASP_    | OD1 | 3.283 |
| 4GXU | Q_ARG_    | NH2 | Q_ASP_    | OD2 | 3.512 |
| 4GXU | Q_LYS_143 | NZ  | R_GLU_124 | OE2 | 3.025 |
| 4GXU | Q_LYS_209 | NZ  | R_GLU_123 | OE1 | 3.619 |
| 4GXU | Q_LYS_209 | NZ  | R_GLU_123 | OE2 | 3.564 |
| 4GXU | Q_ARG_210 | NH1 | Q_GLU_212 | OE2 | 3.790 |
| 4GXU | R_ARG_61  | NH1 | R_ASP_82  | OD1 | 3.111 |
| 4GXU | R_ARG_61  | NH2 | R_ASP_82  | OD1 | 3.457 |
| 4GXU | R_ARG_61  | NH2 | R_ASP_82  | OD2 | 3.282 |
| 4GXU | R_HIS_95C | NE2 | R_ASP_92  | OD2 | 3.471 |
| 4GXU | R_LYS_103 | NZ  | R_GLU_83  | OE1 | 3.281 |
| 4GXU | R_LYS_149 | NZ  | R_GLU_203 | OE1 | 3.940 |
| 4GXU | R_LYS_149 | NZ  | R_GLU_203 | OE2 | 3.587 |
| 4GXU | R_LYS_166 | NZ  | R_GLU_83  | OE1 | 3.059 |
| 4GXU | R_ARG_189 | NH2 | R_ASP_151 | OD2 | 3.874 |
| 4GXU | S_HIS_    | NE2 | S_GLU_    | OE1 | 2.529 |
| 4GXU | S_ARG_    | NH1 | S_ASP_    | OD1 | 2.740 |
| 4GXU | S_ARG_    | NH2 | S_GLU_    | OE1 | 3.285 |
| 4GXU | S_ARG_    | NH2 | S_GLU_    | OE2 | 3.746 |
| 4GXU | S_ARG_    | NH2 | S_ASP_    | OD1 | 2.949 |
| 4GXU | S_ARG_    | NH1 | S_ASP_    | OD1 | 3.061 |
| 4GXU | S_ARG_    | NH1 | S_ASP_    | OD2 | 3.313 |
| 4GXU | S_ARG_    | NH2 | S_ASP_    | OD1 | 3.673 |
| 4GXU | S_ARG_    | NH2 | S_ASP_    | OD2 | 3.715 |
| 4GXU | T_ARG_    | NH1 | T_ASP_    | OD1 | 3.011 |
| 4GXU | T_ARG_    | NH1 | T_ASP_    | OD2 | 3.957 |
| 4GXU | T_ARG_    | NH2 | T_GLU_    | OE2 | 3.945 |
| 4GXU | T_ARG_    | NH2 | T_ASP_    | OD1 | 3.986 |
| 4GXU | T_ARG_    | NH2 | T_ASP_    | OD2 | 3.749 |
| 4GXU | T_HIS_    | NE2 | T_ASP_    | OD1 | 3.982 |
| 4GXU | T_HIS_    | NE2 | T_ASP_    | OD2 | 3.480 |
| 4GXU | U_HIS_    | NE2 | U_GLU_    | OE1 | 2.653 |
| 4GXU | U_ARG_    | NH1 | U_ASP_    | OD1 | 2.802 |
| 4GXU | U_ARG_    | NH2 | U_GLU_    | OE1 | 3.190 |
| 4GXU | U_ARG_    | NH2 | U_GLU_    | OE2 | 3.845 |
| 4GXU | U_ARG_    | NH2 | U_ASP_    | OD1 | 3.446 |
| 4GXU | U_ARG_    | NH1 | U_ASP_    | OD1 | 2.649 |
| 4GXU | U_ARG_    | NH1 | U_ASP_    | OD1 | 3.706 |
| 4GXU | U_ARG_    | NH1 | U_ASP_    | OD2 | 2.832 |
| 4GXU | U_ARG_    | NH2 | U_ASP_    | OD1 | 3.260 |
| 4GXU | U_ARG_    | NH2 | U_ASP_    | OD2 | 3.829 |
| 4GXU | V_ARG_    | NH1 | V_ASP_    | OD1 | 2.994 |
| 4GXU | V_ARG_    | NH1 | V_ASP_    | OD2 | 3.811 |
| 4GXU | V_ARG_    | NH2 | V_GLU_    | OE2 | 3.535 |
| 4GXU | V_ARG_    | NH2 | V_ASP_    | OD1 | 3.986 |
| 4GXU | V_ARG_    | NH2 | V_ASP_    | OD2 | 3.677 |
| 4GXU | V_HIS_    | NE2 | V_ASP_    | OD2 | 3.617 |
| 4GXU | V_LYS_    | NZ  | V_GLU_    | OE1 | 3.869 |
| 4GXU | W_HIS_    | NE2 | W_GLU_    | OE1 | 2.707 |
| 4GXU | W_ARG_    | NH1 | W_ASP_    | OD1 | 3.050 |
| 4GXU | W_ARG_    | NH2 | W_GLU_    | OE1 | 2.832 |
| 4GXU | W_ARG_    | NH2 | W_GLU_    | OE2 | 3.553 |
| 4GXU | W_ARG_    | NH2 | W_ASP_    | OD1 | 3.987 |
| 4GXU | W_ARG_    | NH1 | W_ASP_    | OD1 | 3.089 |

|      |            |     |            |     |       |
|------|------------|-----|------------|-----|-------|
| 4GXU | W_ARG_     | NH1 | W_ASP_     | OD2 | 3.168 |
| 4GXU | W_ARG_     | NH2 | W_ASP_     | OD1 | 3.409 |
| 4GXU | W_ARG_     | NH2 | W_ASP_     | OD2 | 3.720 |
| 4GXU | X_ARG_     | NH1 | X_ASP_     | OD1 | 2.797 |
| 4GXU | X_ARG_     | NH1 | X_ASP_     | OD2 | 3.814 |
| 4GXU | X_ARG_     | NH2 | X_GLU_     | OE2 | 3.994 |
| 4GXU | X_ARG_     | NH2 | X_ASP_     | OD1 | 3.445 |
| 4GXU | X_ARG_     | NH2 | X_ASP_     | OD2 | 3.232 |
| 4GXU | X_HIS_     | NE2 | X_ASP_     | OD2 | 3.599 |
| 4GXU | X_LYS_     | NZ  | X_GLU_     | OE1 | 3.798 |
| 4GXV | H_HIS_35   | NE2 | H_GLU_95   | OE1 | 2.785 |
| 4GXV | H_ARG_38   | NH1 | H_ASP_86   | OD1 | 3.019 |
| 4GXV | H_ARG_38   | NH2 | H_GLU_46   | OE1 | 2.905 |
| 4GXV | H_LYS_64   | NZ  | H_ASP_61   | OD2 | 3.173 |
| 4GXV | H_ARG_66   | NH1 | H_ASP_86   | OD1 | 3.703 |
| 4GXV | H_ARG_66   | NH1 | H_ASP_86   | OD2 | 2.746 |
| 4GXV | H_ARG_66   | NH2 | H_ASP_86   | OD1 | 2.952 |
| 4GXV | H_ARG_66   | NH2 | H_ASP_86   | OD2 | 3.509 |
| 4GXV | H_ARG_83   | NH2 | H_GLU_85   | OE2 | 3.727 |
| 4GXV | H_HIS_100C | ND1 | H_ASP_100B | OD1 | 3.205 |
| 4GXV | H_LYS_143  | NZ  | L_GLU_124  | OE2 | 2.866 |
| 4GXV | H_LYS_209  | NZ  | L_GLU_123  | OE1 | 3.472 |
| 4GXV | H_LYS_209  | NZ  | L_GLU_123  | OE2 | 2.731 |
| 4GXV | L_ARG_61   | NH2 | L_GLU_81   | OE2 | 3.689 |
| 4GXV | L_ARG_61   | NH2 | L_ASP_82   | OD1 | 3.502 |
| 4GXV | L_ARG_61   | NH2 | L_ASP_82   | OD2 | 2.802 |
| 4GXV | L_HIS_35   | NE2 | L_GLU_95   | OE1 | 2.829 |
| 4GXV | L_ARG_38   | NH1 | L_ASP_86   | OD1 | 2.848 |
| 4GXV | L_ARG_38   | NH2 | L_GLU_46   | OE1 | 2.855 |
| 4GXV | L_ARG_38   | NH2 | L_GLU_46   | OE2 | 3.582 |
| 4GXV | L_ARG_38   | NH2 | L_ASP_86   | OD1 | 3.824 |
| 4GXV | L_ARG_55   | NH1 | L_ASP_53   | OD1 | 3.307 |
| 4GXV | L_ARG_66   | NH1 | L_ASP_86   | OD1 | 3.857 |
| 4GXV | L_ARG_66   | NH1 | L_ASP_86   | OD2 | 2.776 |
| 4GXV | L_ARG_66   | NH2 | L_ASP_86   | OD1 | 2.973 |
| 4GXV | L_ARG_66   | NH2 | L_ASP_86   | OD2 | 3.413 |
| 4GXV | L_LYS_143  | NZ  | M_GLU_124  | OE2 | 2.455 |
| 4GXV | L_LYS_209  | NZ  | M_GLU_123  | OE1 | 2.930 |
| 4GXV | L_LYS_209  | NZ  | M_GLU_123  | OE2 | 3.487 |
| 4GXV | L_ARG_210  | NH1 | L_GLU_212  | OE2 | 3.879 |
| 4GXV | M_ARG_61   | NH1 | M_ASP_82   | OD1 | 2.653 |
| 4GXV | M_ARG_61   | NH1 | M_ASP_82   | OD2 | 3.622 |
| 4GXV | M_ARG_61   | NH2 | M_ASP_82   | OD1 | 3.282 |
| 4GXV | M_ARG_61   | NH2 | M_ASP_82   | OD2 | 2.922 |
| 4GXV | M_HIS_95C  | NE2 | M_ASP_92   | OD2 | 3.598 |
| 4GXV | M_LYS_149  | NZ  | M_GLU_203  | OE1 | 2.967 |
| 4GXV | M_LYS_149  | NZ  | M_GLU_203  | OE2 | 3.317 |
| 4GXV | M_LYS_186  | NZ  | M_GLU_183  | OE2 | 3.984 |
| 4GXX | A_LYS_32   | NZ  | D_GLU_57   | OE1 | 3.386 |
| 4GXX | A_LYS_53   | NZ  | A_ASP_276  | OD1 | 2.754 |
| 4GXX | A_LYS_63   | NZ  | A_GLU_75   | OE1 | 2.652 |
| 4GXX | A_ARG_109  | NH1 | A_GLU_89   | OE1 | 2.892 |
| 4GXX | A_ARG_109  | NH1 | A_GLU_89   | OE2 | 3.475 |
| 4GXX | A_ARG_109  | NH2 | A_GLU_89   | OE1 | 3.797 |
| 4GXX | A_ARG_109  | NH2 | A_GLU_89   | OE2 | 3.059 |
| 4GXX | A_ARG_109  | NH2 | B_GLU_69   | OE2 | 3.594 |
| 4GXX | A_ARG_149  | NH2 | A_ASP_77   | OD1 | 3.790 |
| 4GXX | A_ARG_149  | NH2 | A_ASP_77   | OD2 | 2.838 |

|      |           |     |           |     |       |
|------|-----------|-----|-----------|-----|-------|
| 4GXX | A_LYS_163 | NZ  | A_GLU_246 | OE1 | 3.535 |
| 4GXX | A_LYS_163 | NZ  | A_GLU_246 | OE2 | 2.771 |
| 4GXX | A_LYS_174 | NZ  | A_GLU_119 | OE1 | 2.872 |
| 4GXX | A_LYS_174 | NZ  | A_GLU_119 | OE2 | 3.399 |
| 4GXX | A_HIS_183 | NE2 | A_GLU_190 | OE2 | 3.881 |
| 4GXX | A_ARG_262 | NH2 | A_GLU_175 | OE1 | 2.990 |
| 4GXX | A_ARG_262 | NH2 | A_GLU_175 | OE2 | 3.463 |
| 4GXX | A_LYS_280 | NZ  | A_GLU_304 | OE2 | 3.580 |
| 4GXX | A_ARG_310 | NH1 | B_ASP_90  | OD1 | 2.488 |
| 4GXX | A_ARG_310 | NH2 | B_ASP_90  | OD1 | 2.951 |
| 4GXX | A_ARG_315 | NH1 | A_ASP_24  | OD1 | 3.593 |
| 4GXX | A_ARG_315 | NH1 | A_ASP_24  | OD2 | 3.965 |
| 4GXX | A_ARG_321 | NH1 | A_GLU_31  | OE1 | 3.882 |
| 4GXX | A_ARG_321 | NH1 | A_GLU_31  | OE2 | 3.177 |
| 4GXX | A_ARG_321 | NH2 | A_GLU_31  | OE2 | 3.764 |
| 4GXX | B_LYS_51  | NZ  | B_GLU_103 | OE1 | 3.113 |
| 4GXX | B_LYS_58  | NZ  | B_GLU_57  | OE1 | 3.239 |
| 4GXX | B_LYS_58  | NZ  | F_GLU_97  | OE1 | 3.721 |
| 4GXX | B_LYS_68  | NZ  | A_GLU_110 | OE2 | 2.734 |
| 4GXX | B_ARG_76  | NH1 | D_GLU_74  | OE1 | 2.782 |
| 4GXX | B_ARG_76  | NH1 | D_GLU_74  | OE2 | 3.511 |
| 4GXX | B_ARG_76  | NH2 | C_GLU_107 | OE2 | 3.651 |
| 4GXX | B_ARG_76  | NH2 | D_GLU_74  | OE1 | 3.625 |
| 4GXX | B_ARG_76  | NH2 | D_GLU_74  | OE2 | 2.818 |
| 4GXX | B_LYS_82  | NZ  | B_ASP_86  | OD1 | 3.639 |
| 4GXX | B_LYS_82  | NZ  | B_ASP_86  | OD2 | 2.969 |
| 4GXX | B_LYS_83  | NZ  | D_ASP_85  | OD1 | 2.661 |
| 4GXX | B_LYS_83  | NZ  | D_ASP_85  | OD2 | 3.421 |
| 4GXX | B_ARG_106 | NH2 | F_ASP_109 | OD2 | 3.780 |
| 4GXX | B_ARG_116 | NH2 | B_GLU_120 | OE2 | 3.845 |
| 4GXX | B_ARG_116 | NH2 | D_GLU_120 | OE1 | 2.669 |
| 4GXX | B_LYS_123 | NZ  | B_GLU_132 | OE1 | 2.906 |
| 4GXX | B_LYS_123 | NZ  | B_GLU_132 | OE2 | 3.252 |
| 4GXX | B_LYS_    | NZ  | B_GLU_    | OE1 | 3.764 |
| 4GXX | B_LYS_    | NZ  | B_GLU_139 | OE2 | 3.010 |
| 4GXX | B_LYS_    | NZ  | B_GLU_    | OE1 | 3.439 |
| 4GXX | B_ARG_153 | NH1 | B_GLU_150 | OE2 | 2.852 |
| 4GXX | C_LYS_32  | NZ  | F_GLU_57  | OE2 | 3.165 |
| 4GXX | C_LYS_53  | NZ  | C_ASP_276 | OD1 | 3.539 |
| 4GXX | C_LYS_63  | NZ  | C_GLU_75  | OE2 | 3.863 |
| 4GXX | C_ARG_109 | NH1 | C_GLU_89  | OE1 | 2.866 |
| 4GXX | C_ARG_109 | NH1 | C_GLU_89  | OE2 | 3.437 |
| 4GXX | C_ARG_109 | NH2 | C_GLU_89  | OE1 | 3.601 |
| 4GXX | C_ARG_109 | NH2 | C_GLU_89  | OE2 | 2.826 |
| 4GXX | C_ARG_109 | NH2 | D_GLU_69  | OE1 | 3.802 |
| 4GXX | C_ARG_109 | NH2 | D_GLU_69  | OE2 | 3.427 |
| 4GXX | C_ARG_149 | NH2 | C_ASP_77  | OD1 | 3.699 |
| 4GXX | C_ARG_149 | NH2 | C_ASP_77  | OD2 | 2.803 |
| 4GXX | C_LYS_174 | NZ  | C_GLU_119 | OE1 | 3.067 |
| 4GXX | C_LYS_174 | NZ  | C_GLU_119 | OE2 | 3.650 |
| 4GXX | C_LYS_208 | NZ  | C_GLU_238 | OE1 | 3.321 |
| 4GXX | C_LYS_208 | NZ  | C_GLU_238 | OE2 | 3.002 |
| 4GXX | C_ARG_262 | NH2 | C_GLU_175 | OE1 | 3.519 |
| 4GXX | C_ARG_262 | NH2 | C_GLU_175 | OE2 | 2.926 |
| 4GXX | C_LYS_280 | NZ  | C_GLU_304 | OE1 | 3.956 |
| 4GXX | C_ARG_310 | NH1 | D_ASP_90  | OD1 | 2.336 |
| 4GXX | C_ARG_310 | NH2 | D_ASP_86  | OD1 | 3.727 |
| 4GXX | C_ARG_310 | NH2 | D_ASP_90  | OD1 | 3.012 |

|      |           |     |           |     |       |
|------|-----------|-----|-----------|-----|-------|
| 4GXX | C_ARG.315 | NH1 | C_ASP.24  | OD2 | 3.922 |
| 4GXX | D_LYS.51  | NZ  | D_GLU.103 | OE1 | 2.595 |
| 4GXX | D_LYS.58  | NZ  | B_GLU.97  | OE1 | 3.529 |
| 4GXX | D_LYS.68  | NZ  | C_GLU.110 | OE2 | 2.872 |
| 4GXX | D_ARG.76  | NH1 | F_GLU.74  | OE1 | 2.910 |
| 4GXX | D_ARG.76  | NH1 | F_GLU.74  | OE2 | 3.571 |
| 4GXX | D_ARG.76  | NH2 | E_GLU.107 | OE2 | 3.622 |
| 4GXX | D_ARG.76  | NH2 | F_GLU.74  | OE1 | 3.615 |
| 4GXX | D_ARG.76  | NH2 | F_GLU.74  | OE2 | 2.803 |
| 4GXX | D_LYS.83  | NZ  | F_ASP.85  | OD1 | 2.774 |
| 4GXX | D_LYS.83  | NZ  | F_ASP.85  | OD2 | 3.514 |
| 4GXX | D_ARG.106 | NH2 | B_ASP.109 | OD2 | 3.920 |
| 4GXX | D_ARG.116 | NH1 | F_GLU.120 | OE1 | 3.357 |
| 4GXX | D_ARG.116 | NH2 | D_GLU.120 | OE1 | 3.858 |
| 4GXX | D_ARG.116 | NH2 | F_GLU.120 | OE1 | 3.225 |
| 4GXX | D_ARG.116 | NH2 | F_GLU.120 | OE2 | 3.007 |
| 4GXX | D_LYS.123 | NZ  | D_GLU.132 | OE1 | 3.074 |
| 4GXX | D_LYS.123 | NZ  | D_GLU.132 | OE2 | 3.639 |
| 4GXX | D_LYS.131 | NZ  | D_GLU.139 | OE2 | 3.654 |
| 4GXX | D_ARG.153 | NH1 | D_GLU.150 | OE2 | 2.580 |
| 4GXX | E_LYS.32  | NZ  | B_GLU.57  | OE2 | 3.237 |
| 4GXX | E_LYS.53  | NZ  | E_ASP.276 | OD1 | 3.134 |
| 4GXX | E_LYS.63  | NZ  | E_GLU.75  | OE1 | 2.624 |
| 4GXX | E_ARG.109 | NH1 | E_GLU.89  | OE1 | 2.778 |
| 4GXX | E_ARG.109 | NH1 | E_GLU.89  | OE2 | 3.312 |
| 4GXX | E_ARG.109 | NH2 | E_GLU.89  | OE1 | 3.734 |
| 4GXX | E_ARG.109 | NH2 | E_GLU.89  | OE2 | 2.889 |
| 4GXX | E_ARG.109 | NH2 | F_GLU.69  | OE1 | 3.858 |
| 4GXX | E_ARG.109 | NH2 | F_GLU.69  | OE2 | 2.773 |
| 4GXX | E_ARG.149 | NH2 | E_ASP.77  | OD1 | 3.759 |
| 4GXX | E_ARG.149 | NH2 | E_ASP.77  | OD2 | 2.793 |
| 4GXX | E_LYS.163 | NZ  | E_GLU.246 | OE1 | 3.415 |
| 4GXX | E_LYS.174 | NZ  | E_GLU.119 | OE1 | 2.751 |
| 4GXX | E_LYS.174 | NZ  | E_GLU.119 | OE2 | 3.791 |
| 4GXX | E_LYS.208 | NZ  | E_GLU.238 | OE1 | 3.310 |
| 4GXX | E_LYS.208 | NZ  | E_GLU.238 | OE2 | 3.144 |
| 4GXX | E_ARG.262 | NH2 | E_GLU.175 | OE1 | 3.412 |
| 4GXX | E_ARG.262 | NH2 | E_GLU.175 | OE2 | 3.052 |
| 4GXX | E_ARG.310 | NH1 | F_ASP.90  | OD1 | 2.470 |
| 4GXX | E_ARG.310 | NH2 | F_ASP.90  | OD1 | 2.925 |
| 4GXX | E_ARG.315 | NH1 | E_ASP.24  | OD1 | 3.908 |
| 4GXX | E_ARG.321 | NH1 | E_GLU.31  | OE1 | 3.912 |
| 4GXX | E_ARG.321 | NH1 | E_GLU.31  | OE2 | 2.977 |
| 4GXX | E_ARG.321 | NH2 | E_GLU.31  | OE2 | 3.461 |
| 4GXX | F_HIS.26  | NE2 | F_ASP.146 | OD1 | 3.842 |
| 4GXX | F_LYS.51  | NZ  | F_GLU.103 | OE1 | 2.680 |
| 4GXX | F_LYS.58  | NZ  | D_GLU.97  | OE1 | 3.142 |
| 4GXX | F_LYS.68  | NZ  | E_GLU.110 | OE2 | 2.982 |
| 4GXX | F_ARG.76  | NH1 | B_GLU.74  | OE1 | 2.798 |
| 4GXX | F_ARG.76  | NH1 | B_GLU.74  | OE2 | 3.572 |
| 4GXX | F_ARG.76  | NH2 | A_GLU.107 | OE2 | 3.644 |
| 4GXX | F_ARG.76  | NH2 | B_GLU.74  | OE1 | 3.566 |
| 4GXX | F_ARG.76  | NH2 | B_GLU.74  | OE2 | 2.823 |
| 4GXX | F_LYS.83  | NZ  | B_ASP.85  | OD1 | 2.859 |
| 4GXX | F_LYS.83  | NZ  | B_ASP.85  | OD2 | 3.462 |
| 4GXX | F_ARG.106 | NH2 | D_ASP.109 | OD2 | 3.576 |
| 4GXX | F_ARG.116 | NH1 | B_GLU.120 | OE1 | 2.775 |
| 4GXX | F_ARG.116 | NH1 | B_GLU.120 | OE2 | 3.643 |

|      |           |     |           |     |       |
|------|-----------|-----|-----------|-----|-------|
| 4GXX | F_ARG.116 | NH2 | B_GLU.120 | OE1 | 3.285 |
| 4GXX | F_ARG.116 | NH2 | B_GLU.120 | OE2 | 2.552 |
| 4GXX | F_ARG.116 | NH2 | F_GLU.120 | OE2 | 3.662 |
| 4GXX | F_LYS.123 | NZ  | F_GLU.132 | OE1 | 2.969 |
| 4GXX | F_LYS.123 | NZ  | F_GLU.132 | OE2 | 3.560 |
| 4GXX | F_LYS.    | NZ  | F_GLU.139 | OE2 | 3.889 |
| 4GXX | F_ARG.153 | NH1 | F_GLU.150 | OE2 | 2.818 |
| 4GXX | F_LYS.    | NZ  | F_GLU.    | OE1 | 3.562 |
| 4GXX | F_LYS.    | NZ  | F_GLU.    | OE2 | 3.737 |
| 4H0G | A_LYS.64  | NZ  | A_GLU.47  | OE1 | 3.762 |
| 4H0G | A_LYS.64  | NZ  | A_GLU.47  | OE2 | 3.209 |
| 4H0G | A_LYS.68  | NZ  | A_ASP.91  | OD1 | 2.637 |
| 4H0G | A_LYS.68  | NZ  | A_ASP.91  | OD2 | 2.768 |
| 4H0G | A_ARG.99  | NH2 | A_ASP.108 | OD1 | 3.595 |
| 4H0G | A_ARG.99  | NH2 | A_ASP.108 | OD2 | 3.122 |
| 4H0G | A_ARG.205 | NH2 | A_ASP.226 | OD1 | 2.570 |
| 4H0G | A_ARG.205 | NH2 | A_ASP.226 | OD2 | 3.224 |
| 4H0G | A_LYS.247 | NZ  | A_GLU.249 | OE1 | 2.645 |
| 4H0H | B_LYS.64  | NZ  | B_GLU.47  | OE2 | 2.501 |
| 4H0H | B_LYS.68  | NZ  | B_ASP.91  | OD1 | 3.545 |
| 4H0H | B_LYS.68  | NZ  | B_ASP.91  | OD2 | 2.692 |
| 4H0H | B_ARG.99  | NH2 | B_ASP.108 | OD1 | 3.511 |
| 4H0H | B_ARG.99  | NH2 | B_ASP.108 | OD2 | 2.749 |
| 4H0H | B_ARG.163 | NH1 | B_ASP.214 | OD1 | 3.546 |
| 4H0H | B_ARG.163 | NH2 | B_ASP.214 | OD1 | 3.756 |
| 4H0H | B_ARG.205 | NH1 | B_GLU.223 | OE2 | 3.240 |
| 4H0H | B_ARG.205 | NH2 | B_GLU.223 | OE1 | 3.635 |
| 4H0H | B_ARG.205 | NH2 | B_GLU.223 | OE2 | 3.897 |
| 4H0H | B_ARG.205 | NH2 | B_GLU.225 | OE1 | 2.872 |
| 4H0H | B_ARG.205 | NH2 | B_ASP.226 | OD1 | 2.832 |
| 4H0H | B_ARG.205 | NH2 | B_ASP.226 | OD2 | 3.613 |
| 4H0H | B_ARG.221 | NH2 | B_GLU.223 | OE2 | 2.851 |
| 4H0I | A_LYS.68  | NZ  | A_ASP.91  | OD1 | 3.664 |
| 4H0I | A_LYS.68  | NZ  | A_ASP.91  | OD2 | 2.815 |
| 4H0I | A_ARG.99  | NH2 | A_ASP.108 | OD1 | 3.509 |
| 4H0I | A_ARG.99  | NH2 | A_ASP.108 | OD2 | 2.911 |
| 4H0I | A_ARG.163 | NH2 | A_ASP.214 | OD1 | 2.763 |
| 4H0I | A_ARG.205 | NH1 | A_GLU.223 | OE2 | 3.851 |
| 4H0I | A_ARG.205 | NH2 | A_GLU.225 | OE2 | 2.757 |
| 4H0I | A_ARG.205 | NH2 | A_ASP.226 | OD1 | 3.005 |
| 4H0I | A_ARG.205 | NH2 | A_ASP.226 | OD2 | 3.508 |
| 4H0I | A_ARG.221 | NH2 | A_GLU.223 | OE2 | 3.683 |
| 4H0I | A_LYS.247 | NZ  | A_GLU.249 | OE1 | 3.405 |
| 4H0I | A_LYS.247 | NZ  | A_GLU.249 | OE2 | 3.892 |
| 4H8W | G_HIS.66  | ND1 | G_GLU.64  | OE2 | 2.743 |
| 4H8W | G_LYS.207 | NZ  | G_GLU.381 | OE1 | 3.361 |
| 4H8W | G_LYS.207 | NZ  | G_GLU.381 | OE2 | 2.825 |
| 4H8W | G_LYS.227 | NZ  | G_GLU.83  | OE1 | 3.758 |
| 4H8W | G_LYS.231 | NZ  | G_GLU.267 | OE1 | 2.924 |
| 4H8W | G_HIS.249 | NE2 | G_GLU.482 | OE1 | 2.960 |
| 4H8W | G_LYS.282 | NZ  | G_GLU.275 | OE1 | 2.895 |
| 4H8W | G_LYS.343 | NZ  | G_GLU.347 | OE2 | 3.998 |
| 4H8W | G_LYS.348 | NZ  | G_GLU.269 | OE1 | 3.647 |
| 4H8W | G_LYS.348 | NZ  | G_GLU.269 | OE2 | 3.325 |
| 4H8W | G_LYS.348 | NZ  | G_GLU.351 | OE2 | 2.761 |
| 4H8W | G_ARG.379 | NH1 | G_ASP.211 | OD2 | 3.811 |
| 4H8W | G_ARG.456 | NH1 | G_GLU.466 | OE1 | 2.922 |
| 4H8W | G_ARG.456 | NH1 | G_GLU.466 | OE2 | 3.660 |



|      |           |     |           |     |       |
|------|-----------|-----|-----------|-----|-------|
| 4H8W | G_ARG_469 | NH2 | G_ASP_457 | OD1 | 3.748 |
| 4H8W | G_ARG_469 | NH2 | G_ASP_457 | OD2 | 2.810 |
| 4H8W | G_LYS_476 | NZ  | G_GLU_102 | OE1 | 3.752 |
| 4H8W | G_ARG_480 | NH1 | G_ASP_477 | OD1 | 2.732 |
| 4H8W | G_LYS_485 | NZ  | G_GLU_267 | OE2 | 3.866 |
| 4H8W | G_LYS_487 | NZ  | G_ASP_47  | OD1 | 2.663 |
| 4H8W | G_LYS_487 | NZ  | G_ASP_47  | OD2 | 3.551 |
| 4H8W | G_LYS_487 | NZ  | G_GLU_91  | OE1 | 3.873 |
| 4H8W | G_LYS_487 | NZ  | G_GLU_91  | OE2 | 3.127 |
| 4H8W | H_ARG_38  | NH1 | H_ASP_86  | OD2 | 2.753 |
| 4H8W | H_ARG_38  | NH2 | H_GLU_46  | OE1 | 2.942 |
| 4H8W | H_ARG_38  | NH2 | H_GLU_46  | OE2 | 3.785 |
| 4H8W | H_ARG_38  | NH2 | H_ASP_86  | OD2 | 3.820 |
| 4H8W | H_ARG_55  | NH1 | G_ASP_107 | OD1 | 3.623 |
| 4H8W | H_ARG_55  | NH1 | G_ASP_107 | OD2 | 3.025 |
| 4H8W | H_ARG_66  | NH1 | H_ASP_86  | OD1 | 3.602 |
| 4H8W | H_ARG_66  | NH1 | H_ASP_86  | OD2 | 3.242 |
| 4H8W | H_ARG_66  | NH2 | H_ASP_86  | OD1 | 2.663 |
| 4H8W | H_ARG_66  | NH2 | H_ASP_86  | OD2 | 3.744 |
| 4H8W | H_LYS_94  | NZ  | H_ASP_101 | OD1 | 3.932 |
| 4H8W | H_LYS_94  | NZ  | H_ASP_101 | OD2 | 3.783 |
| 4H8W | H_LYS_209 | NZ  | L_GLU_124 | OE1 | 2.673 |
| 4H8W | H_LYS_209 | NZ  | L_GLU_124 | OE2 | 2.808 |
| 4H8W | H_ARG_210 | NH2 | H_GLU_212 | OE2 | 3.750 |
| 4H8W | L_ARG_61  | NH1 | L_ASP_82  | OD1 | 3.642 |
| 4H8W | L_ARG_61  | NH1 | L_ASP_82  | OD2 | 2.727 |
| 4H8W | L_ARG_61  | NH2 | L_ASP_82  | OD1 | 2.875 |
| 4H8W | L_ARG_61  | NH2 | L_ASP_82  | OD2 | 3.419 |
| 4H8W | L_LYS_167 | NZ  | L_GLU_83  | OE1 | 3.479 |
| 4H8W | L_LYS_167 | NZ  | L_GLU_83  | OE2 | 2.659 |
| 4H8W | L_ARG_190 | NH1 | L_ASP_152 | OD1 | 3.209 |
| 4H8W | L_ARG_190 | NH1 | L_ASP_152 | OD2 | 3.525 |
| 4H8W | C_LYS_8   | NZ  | C_GLU_119 | OE1 | 2.938 |
| 4H8W | C_LYS_29  | NZ  | C_GLU_85  | OE1 | 3.161 |
| 4H8W | C_LYS_29  | NZ  | C_GLU_85  | OE2 | 3.156 |
| 4H8W | C_ARG_54  | NH1 | C_ASP_78  | OD1 | 3.760 |
| 4H8W | C_ARG_54  | NH1 | C_ASP_78  | OD2 | 2.826 |
| 4H8W | C_ARG_54  | NH2 | C_ASP_78  | OD1 | 2.862 |
| 4H8W | C_ARG_54  | NH2 | C_ASP_78  | OD2 | 3.438 |
| 4H8W | C_ARG_58  | NH2 | C_GLU_13  | OE1 | 3.422 |
| 4H8W | C_ARG_58  | NH2 | C_GLU_13  | OE2 | 2.940 |
| 4H8W | C_ARG_59  | NH1 | G_ASP_368 | OD1 | 2.952 |
| 4H8W | C_ARG_59  | NH1 | G_ASP_368 | OD2 | 3.318 |
| 4H8W | C_ARG_59  | NH2 | G_ASP_368 | OD1 | 3.741 |
| 4H8W | C_ARG_59  | NH2 | G_ASP_368 | OD2 | 2.611 |
| 4H8W | C_ARG_134 | NH1 | C_GLU_150 | OE2 | 3.466 |
| 4H8W | C_ARG_134 | NH2 | C_GLU_150 | OE2 | 2.720 |
| 4H8W | C_ARG_134 | NH2 | C_ASP_153 | OD1 | 2.923 |
| 4H8W | C_ARG_134 | NH2 | C_ASP_153 | OD2 | 3.632 |
| 4HF5 | A_LYS_45  | NZ  | A_ASP_41  | OD1 | 3.023 |
| 4HF5 | A_LYS_45  | NZ  | A_ASP_41  | OD2 | 2.738 |
| 4HF5 | A_LYS_50  | NZ  | A_GLU_275 | OE1 | 3.846 |
| 4HF5 | A_LYS_109 | NZ  | A_GLU_89  | OE1 | 3.835 |
| 4HF5 | A_LYS_109 | NZ  | B_GLU_69  | OE1 | 3.017 |
| 4HF5 | A_LYS_119 | NZ  | A_GLU_255 | OE2 | 3.751 |
| 4HF5 | A_LYS_123 | NZ  | A_GLU_255 | OE1 | 3.191 |
| 4HF5 | A_ARG_137 | NH1 | H_ASP_97  | OD2 | 2.969 |
| 4HF5 | A_ARG_137 | NH2 | H_ASP_97  | OD1 | 3.008 |

|      |           |     |           |     |       |
|------|-----------|-----|-----------|-----|-------|
| 4HF5 | A_ARG_137 | NH2 | H_ASP_97  | OD2 | 2.797 |
| 4HF5 | A_HIS_183 | NE2 | A_GLU_190 | OE2 | 3.373 |
| 4HF5 | A_HIS_184 | NE2 | A_GLU_231 | OE1 | 3.723 |
| 4HF5 | A_LYS_262 | NZ  | A_GLU_83  | OE1 | 3.426 |
| 4HF5 | A_LYS_262 | NZ  | A_GLU_83  | OE2 | 2.633 |
| 4HF5 | A_ARG_263 | NH1 | A_GLU_174 | OE2 | 3.471 |
| 4HF5 | A_ARG_263 | NH2 | A_GLU_174 | OE2 | 2.803 |
| 4HF5 | A_LYS_269 | NZ  | A_GLU_89  | OE1 | 3.758 |
| 4HF5 | A_LYS_269 | NZ  | B_GLU_69  | OE1 | 2.931 |
| 4HF5 | A_LYS_269 | NZ  | B_GLU_69  | OE2 | 3.200 |
| 4HF5 | A_LYS_280 | NZ  | A_GLU_278 | OE2 | 2.927 |
| 4HF5 | A_LYS_307 | NZ  | B_GLU_64  | OE2 | 3.558 |
| 4HF5 | A_LYS_310 | NZ  | B_ASP_90  | OD1 | 2.877 |
| 4HF5 | A_ARG_321 | NH1 | A_GLU_31  | OE1 | 2.994 |
| 4HF5 | A_ARG_321 | NH1 | A_GLU_31  | OE2 | 2.844 |
| 4HF5 | A_ARG_321 | NH2 | A_GLU_31  | OE1 | 3.793 |
| 4HF5 | B_LYS_51  | NZ  | B_GLU_103 | OE1 | 3.501 |
| 4HF5 | B_ARG_75  | NH1 | B_GLU_78  | OE1 | 2.803 |
| 4HF5 | B_ARG_75  | NH1 | B_GLU_78  | OE2 | 3.443 |
| 4HF5 | B_ARG_75  | NH2 | B_GLU_78  | OE1 | 2.681 |
| 4HF5 | B_LYS_82  | NZ  | B_ASP_86  | OD1 | 3.014 |
| 4HF5 | B_ARG_123 | NH1 | B_ASP_120 | OD2 | 3.836 |
| 4HF5 | B_LYS_143 | NZ  | A_ASP_11  | OD2 | 3.934 |
| 4HF5 | B_ARG_170 | NH2 | B_ASP_128 | OD2 | 3.090 |
| 4HF5 | H_ARG_38  | NH1 | H_ASP_86  | OD1 | 3.397 |
| 4HF5 | H_ARG_38  | NH2 | H_GLU_46  | OE1 | 3.432 |
| 4HF5 | H_ARG_38  | NH2 | H_GLU_46  | OE2 | 3.377 |
| 4HF5 | H_ARG_64  | NH1 | H_ASP_61  | OD1 | 3.700 |
| 4HF5 | H_ARG_64  | NH2 | H_ASP_61  | OD1 | 3.901 |
| 4HF5 | H_ARG_66  | NH1 | H_ASP_86  | OD1 | 3.656 |
| 4HF5 | H_ARG_66  | NH2 | H_ASP_86  | OD1 | 2.847 |
| 4HF5 | H_ARG_66  | NH2 | H_ASP_86  | OD2 | 2.651 |
| 4HF5 | H_LYS_75  | NZ  | H_ASP_72  | OD1 | 3.287 |
| 4HF5 | H_ARG_94  | NH2 | H_ASP_101 | OD1 | 3.485 |
| 4HF5 | H_ARG_94  | NH2 | H_ASP_101 | OD2 | 2.891 |
| 4HF5 | H_LYS_143 | NZ  | H_ASP_144 | OD1 | 2.973 |
| 4HF5 | H_LYS_143 | NZ  | H_ASP_144 | OD2 | 2.934 |
| 4HF5 | L_HIS_53  | ND1 | L_GLU_52  | OE1 | 3.652 |
| 4HF5 | L_HIS_53  | NE2 | L_GLU_52  | OE1 | 3.847 |
| 4HF5 | L_ARG_54  | NH2 | L_ASP_60  | OD1 | 2.781 |
| 4HF5 | L_ARG_61  | NH2 | L_ASP_82  | OD1 | 3.562 |
| 4HF5 | L_LYS_66  | NZ  | L_ASP_51  | OD1 | 3.019 |
| 4HF5 | L_LYS_66  | NZ  | L_ASP_51  | OD2 | 3.023 |
| 4HF5 | L_LYS_103 | NZ  | L_ASP_85  | OD1 | 3.547 |
| 4HF5 | L_LYS_103 | NZ  | L_ASP_85  | OD2 | 2.955 |
| 4HGK | A_HIS_9   | ND1 | A_GLU_6   | OE2 | 3.257 |
| 4HGK | A_HIS_9   | ND1 | A_ASP_13  | OD2 | 3.915 |
| 4HGK | A_HIS_9   | NE2 | A_ASP_13  | OD1 | 3.802 |
| 4HGK | A_HIS_9   | NE2 | A_ASP_13  | OD2 | 2.774 |
| 4HGK | A_ARG_10  | NH1 | A_ASP_255 | OD2 | 2.741 |
| 4HGK | A_ARG_10  | NH2 | A_GLU_6   | OE2 | 3.561 |
| 4HGK | A_LYS_12  | NZ  | A_GLU_57  | OE2 | 2.562 |
| 4HGK | A_LYS_51  | NZ  | A_GLU_16  | OE1 | 2.813 |
| 4HGK | A_HIS_67  | ND1 | A_ASP_249 | OD1 | 3.864 |
| 4HGK | A_HIS_67  | NE2 | A_ASP_249 | OD1 | 2.767 |
| 4HGK | A_HIS_67  | NE2 | A_ASP_249 | OD2 | 3.220 |
| 4HGK | A_LYS_73  | NZ  | A_GLU_45  | OE1 | 3.064 |
| 4HGK | A_ARG_98  | NH1 | A_ASP_72  | OD1 | 2.860 |

|      |           |     |           |     |       |
|------|-----------|-----|-----------|-----|-------|
| 4HGK | A_ARG_98  | NH2 | A_ASP_72  | OD1 | 3.120 |
| 4HGK | A_ARG_98  | NH2 | A_GLU_95  | OE2 | 2.998 |
| 4HGK | A_HIS_105 | NE2 | A_GLU_86  | OE1 | 3.472 |
| 4HGK | A_ARG_117 | NH2 | A_ASP_183 | OD1 | 3.422 |
| 4HGK | A_ARG_117 | NH2 | A_ASP_183 | OD2 | 3.534 |
| 4HGK | A_ARG_144 | NH1 | A_GLU_141 | OE1 | 3.085 |
| 4HGK | A_ARG_145 | NH2 | A_GLU_141 | OE1 | 2.935 |
| 4HGK | A_ARG_160 | NH1 | A_GLU_285 | OE2 | 3.710 |
| 4HGK | A_LYS_162 | NZ  | A_GLU_131 | OE2 | 3.380 |
| 4HGK | A_LYS_174 | NZ  | A_ASP_121 | OD1 | 3.589 |
| 4HGK | A_LYS_181 | NZ  | A_GLU_167 | OE1 | 2.954 |
| 4HGK | A_LYS_181 | NZ  | A_GLU_167 | OE2 | 3.073 |
| 4HGK | A_ARG_186 | NH1 | A_ASP_187 | OD1 | 3.404 |
| 4HGK | A_LYS_190 | NZ  | A_GLU_425 | OE1 | 3.698 |
| 4HGK | A_LYS_190 | NZ  | A_GLU_425 | OE2 | 3.906 |
| 4HGK | A_ARG_209 | NH1 | A_ASP_324 | OD1 | 3.792 |
| 4HGK | A_ARG_209 | NH2 | A_ASP_324 | OD1 | 3.124 |
| 4HGK | A_ARG_209 | NH2 | A_GLU_354 | OE1 | 3.847 |
| 4HGK | A_ARG_209 | NH2 | A_GLU_354 | OE2 | 3.387 |
| 4HGK | A_LYS_212 | NZ  | A_GLU_208 | OE2 | 3.796 |
| 4HGK | A_LYS_225 | NZ  | A_ASP_296 | OD1 | 3.782 |
| 4HGK | A_LYS_225 | NZ  | A_ASP_296 | OD2 | 3.781 |
| 4HGK | A_LYS_233 | NZ  | A_ASP_237 | OD1 | 3.352 |
| 4HGK | A_LYS_233 | NZ  | A_ASP_237 | OD2 | 2.652 |
| 4HGK | A_LYS_240 | NZ  | A_ASP_256 | OD2 | 3.517 |
| 4HGK | A_ARG_257 | NH1 | A_GLU_153 | OE2 | 3.027 |
| 4HGK | A_ARG_257 | NH2 | A_GLU_153 | OE2 | 2.860 |
| 4HGK | A_LYS_274 | NZ  | A_GLU_294 | OE1 | 3.878 |
| 4HGK | A_LYS_274 | NZ  | A_GLU_294 | OE2 | 3.129 |
| 4HGK | A_HIS_288 | ND1 | A_GLU_153 | OE1 | 2.949 |
| 4HGK | A_HIS_288 | ND1 | A_GLU_153 | OE2 | 3.659 |
| 4HGK | A_LYS_323 | NZ  | A_GLU_358 | OE1 | 2.748 |
| 4HGK | A_LYS_323 | NZ  | A_GLU_358 | OE2 | 3.753 |
| 4HGK | A_ARG_336 | NH1 | A_GLU_333 | OE1 | 2.887 |
| 4HGK | A_ARG_336 | NH1 | A_GLU_333 | OE2 | 3.968 |
| 4HGK | A_ARG_337 | NH1 | A_GLU_333 | OE1 | 2.815 |
| 4HGK | A_ARG_337 | NH2 | A_GLU_333 | OE1 | 3.771 |
| 4HGK | A_ARG_348 | NH1 | A_GLU_450 | OE2 | 3.559 |
| 4HGK | A_ARG_348 | NH2 | A_GLU_450 | OE2 | 2.854 |
| 4HGK | A_LYS_378 | NZ  | A_ASP_375 | OD1 | 3.797 |
| 4HGK | A_ARG_428 | NH2 | A_GLU_425 | OE2 | 3.049 |
| 4HGK | A_ARG_485 | NH1 | A_GLU_383 | OE2 | 3.444 |
| 4HGK | A_ARG_485 | NH2 | A_GLU_383 | OE1 | 2.699 |
| 4HGK | A_ARG_485 | NH2 | A_GLU_383 | OE2 | 3.000 |
| 4HGK | A_ARG_485 | NH2 | A_GLU_450 | OE2 | 3.657 |
| 4HGK | B_LYS_4   | NZ  | B_GLU_57  | OE1 | 3.991 |
| 4HGK | B_HIS_9   | ND1 | B_GLU_6   | OE2 | 3.774 |
| 4HGK | B_HIS_9   | NE2 | B_ASP_13  | OD2 | 2.894 |
| 4HGK | B_ARG_10  | NH1 | B_ASP_255 | OD2 | 2.787 |
| 4HGK | B_ARG_10  | NH2 | B_GLU_6   | OE2 | 3.189 |
| 4HGK | B_LYS_12  | NZ  | B_GLU_57  | OE1 | 3.527 |
| 4HGK | B_LYS_12  | NZ  | B_GLU_57  | OE2 | 3.163 |
| 4HGK | B_LYS_51  | NZ  | B_GLU_16  | OE1 | 2.848 |
| 4HGK | B_HIS_67  | ND1 | B_ASP_249 | OD1 | 3.381 |
| 4HGK | B_HIS_67  | NE2 | B_ASP_249 | OD1 | 2.384 |
| 4HGK | B_HIS_67  | NE2 | B_ASP_249 | OD2 | 2.929 |
| 4HGK | B_LYS_73  | NZ  | B_GLU_45  | OE1 | 3.090 |
| 4HGK | B_ARG_98  | NH1 | B_ASP_72  | OD1 | 2.872 |

|      |           |     |           |     |       |
|------|-----------|-----|-----------|-----|-------|
| 4HGK | B_ARG_98  | NH2 | B_ASP_72  | OD1 | 3.149 |
| 4HGK | B_ARG_98  | NH2 | B_GLU_95  | OE2 | 3.021 |
| 4HGK | B_HIS_105 | NE2 | B_GLU_86  | OE1 | 3.473 |
| 4HGK | B_ARG_117 | NH1 | B_ASP_183 | OD1 | 3.152 |
| 4HGK | B_ARG_117 | NH2 | B_ASP_183 | OD1 | 2.607 |
| 4HGK | B_ARG_117 | NH2 | B_ASP_183 | OD2 | 3.783 |
| 4HGK | B_ARG_144 | NH1 | B_GLU_141 | OE1 | 3.094 |
| 4HGK | B_ARG_145 | NH2 | B_GLU_141 | OE1 | 2.948 |
| 4HGK | B_ARG_160 | NH1 | B_GLU_285 | OE2 | 3.974 |
| 4HGK | B_LYS_162 | NZ  | B_GLU_131 | OE2 | 3.359 |
| 4HGK | B_LYS_181 | NZ  | B_GLU_167 | OE1 | 2.749 |
| 4HGK | B_LYS_181 | NZ  | B_GLU_167 | OE2 | 2.805 |
| 4HGK | B_LYS_205 | NZ  | B_GLU_465 | OE2 | 3.218 |
| 4HGK | B_ARG_209 | NH2 | B_ASP_324 | OD1 | 3.305 |
| 4HGK | B_ARG_209 | NH2 | B_GLU_354 | OE2 | 3.723 |
| 4HGK | B_LYS_225 | NZ  | B_ASP_296 | OD1 | 3.981 |
| 4HGK | B_LYS_233 | NZ  | B_ASP_237 | OD1 | 3.425 |
| 4HGK | B_LYS_233 | NZ  | B_ASP_237 | OD2 | 2.618 |
| 4HGK | B_LYS_240 | NZ  | B_ASP_256 | OD2 | 3.510 |
| 4HGK | B_HIS_247 | NE2 | B_ASP_249 | OD2 | 3.558 |
| 4HGK | B_ARG_257 | NH1 | B_GLU_153 | OE1 | 3.383 |
| 4HGK | B_ARG_257 | NH2 | B_GLU_153 | OE1 | 2.959 |
| 4HGK | B_LYS_262 | NZ  | B_GLU_266 | OE1 | 3.407 |
| 4HGK | B_LYS_262 | NZ  | B_GLU_266 | OE2 | 3.772 |
| 4HGK | B_LYS_274 | NZ  | B_GLU_294 | OE1 | 3.883 |
| 4HGK | B_LYS_274 | NZ  | B_GLU_294 | OE2 | 3.144 |
| 4HGK | B_HIS_288 | ND1 | B_GLU_153 | OE1 | 3.601 |
| 4HGK | B_HIS_288 | ND1 | B_GLU_153 | OE2 | 2.554 |
| 4HGK | B_LYS_317 | NZ  | B_ASP_314 | OD2 | 3.790 |
| 4HGK | B_LYS_323 | NZ  | B_GLU_358 | OE1 | 2.750 |
| 4HGK | B_LYS_323 | NZ  | B_GLU_358 | OE2 | 3.753 |
| 4HGK | B_ARG_336 | NH1 | B_GLU_333 | OE1 | 2.876 |
| 4HGK | B_ARG_336 | NH1 | B_GLU_333 | OE2 | 3.980 |
| 4HGK | B_ARG_337 | NH1 | B_GLU_333 | OE1 | 2.817 |
| 4HGK | B_ARG_337 | NH2 | B_GLU_333 | OE1 | 3.764 |
| 4HGK | B_ARG_348 | NH1 | B_GLU_450 | OE2 | 3.585 |
| 4HGK | B_ARG_348 | NH2 | B_GLU_450 | OE2 | 2.871 |
| 4HGK | B_LYS_378 | NZ  | B_ASP_375 | OD1 | 3.753 |
| 4HGK | B_LYS_389 | NZ  | B_GLU_393 | OE1 | 3.466 |
| 4HGK | B_ARG_445 | NH1 | B_GLU_442 | OE2 | 3.842 |
| 4HGK | B_ARG_445 | NH2 | B_GLU_442 | OE2 | 3.028 |
| 4HGK | B_ARG_485 | NH1 | B_GLU_383 | OE2 | 3.455 |
| 4HGK | B_ARG_485 | NH2 | B_GLU_383 | OE1 | 2.708 |
| 4HGK | B_ARG_485 | NH2 | B_GLU_383 | OE2 | 3.008 |
| 4HGK | B_ARG_485 | NH2 | B_GLU_450 | OE2 | 3.644 |
| 4HGK | C_ARG_21  | NH1 | C_ASP_45  | OD2 | 2.805 |
| 4HGK | C_ARG_21  | NH2 | C_ASP_23  | OD2 | 3.642 |
| 4HGK | C_ARG_21  | NH2 | C_ASP_45  | OD2 | 3.962 |
| 4HGK | C_LYS_65  | NZ  | B_GLU_230 | OE1 | 3.917 |
| 4HGK | C_LYS_65  | NZ  | C_ASP_113 | OD2 | 3.638 |
| 4HGK | C_ARG_73  | NH2 | C_ASP_96  | OD1 | 2.911 |
| 4HGK | C_ARG_73  | NH2 | C_ASP_96  | OD2 | 3.688 |
| 4HGK | C_ARG_103 | NH1 | B_GLU_230 | OE1 | 3.099 |
| 4HGK | C_ARG_103 | NH2 | B_GLU_230 | OE1 | 3.263 |
| 4HGK | C_ARG_103 | NH2 | B_GLU_230 | OE2 | 3.968 |
| 4HGK | C_ARG_103 | NH2 | C_ASP_113 | OD1 | 3.388 |
| 4HGK | C_ARG_103 | NH2 | C_ASP_113 | OD2 | 2.979 |
| 4HGK | D_ARG_21  | NH1 | D_ASP_45  | OD2 | 2.813 |

|      |           |     |           |     |       |
|------|-----------|-----|-----------|-----|-------|
| 4HGK | D_ARG_21  | NH2 | D_ASP_45  | OD2 | 3.945 |
| 4HGK | D_ARG_27  | NH1 | D_ASP_23  | OD1 | 3.814 |
| 4HGK | D_ARG_57  | NH2 | D_ASP_96  | OD1 | 3.778 |
| 4HGK | D_LYS_65  | NZ  | A_GLU_230 | OE1 | 3.741 |
| 4HGK | D_LYS_65  | NZ  | D_ASP_113 | OD2 | 3.664 |
| 4HGK | D_ARG_73  | NH2 | D_ASP_96  | OD1 | 3.000 |
| 4HGK | D_ARG_73  | NH2 | D_ASP_96  | OD2 | 3.124 |
| 4HGK | D_ARG_103 | NH1 | A_GLU_230 | OE1 | 3.115 |
| 4HGK | D_ARG_103 | NH2 | A_GLU_230 | OE1 | 3.112 |
| 4HGK | D_ARG_103 | NH2 | A_GLU_230 | OE2 | 3.907 |
| 4HGK | D_ARG_103 | NH2 | D_ASP_113 | OD1 | 3.384 |
| 4HGK | D_ARG_103 | NH2 | D_ASP_113 | OD2 | 2.984 |
| 4HH9 | A_ARG_54  | NH1 | C_ASP_50  | OD2 | 3.238 |
| 4HH9 | A_ARG_54  | NH2 | C_ASP_50  | OD2 | 3.183 |
| 4HH9 | A_ARG_61  | NH1 | A_GLU_79  | OE1 | 3.519 |
| 4HH9 | A_ARG_61  | NH1 | A_GLU_79  | OE2 | 3.676 |
| 4HH9 | A_ARG_61  | NH2 | A_GLU_79  | OE1 | 3.286 |
| 4HH9 | A_ARG_61  | NH2 | A_GLU_81  | OE1 | 3.129 |
| 4HH9 | A_ARG_61  | NH2 | A_ASP_82  | OD1 | 3.001 |
| 4HH9 | A_ARG_61  | NH2 | A_ASP_82  | OD2 | 3.679 |
| 4HH9 | A_ARG_91  | NH2 | A_ASP_50  | OD1 | 2.827 |
| 4HH9 | A_LYS_149 | NZ  | A_GLU_195 | OE1 | 3.346 |
| 4HH9 | A_LYS_183 | NZ  | A_GLU_187 | OE2 | 3.477 |
| 4HH9 | B_HIS_35  | NE2 | B_GLU_95  | OE2 | 2.800 |
| 4HH9 | B_ARG_38  | NH1 | B_ASP_86  | OD1 | 2.849 |
| 4HH9 | B_ARG_38  | NH2 | B_ASP_86  | OD1 | 3.956 |
| 4HH9 | B_LYS_64  | NZ  | B_ASP_61  | OD1 | 2.675 |
| 4HH9 | B_ARG_66  | NH1 | B_ASP_86  | OD1 | 3.513 |
| 4HH9 | B_ARG_66  | NH1 | B_ASP_86  | OD2 | 3.921 |
| 4HH9 | B_ARG_66  | NH2 | B_ASP_86  | OD1 | 3.293 |
| 4HH9 | B_ARG_66  | NH2 | B_ASP_86  | OD2 | 2.337 |
| 4HH9 | B_LYS_75  | NZ  | B_ASP_72  | OD2 | 2.839 |
| 4HH9 | B_ARG_94  | NH2 | B_ASP_101 | OD1 | 3.522 |
| 4HH9 | B_ARG_94  | NH2 | B_ASP_101 | OD2 | 2.685 |
| 4HH9 | B_LYS_143 | NZ  | B_ASP_144 | OD1 | 3.830 |
| 4HH9 | B_LYS_209 | NZ  | A_GLU_123 | OE1 | 3.274 |
| 4HH9 | B_LYS_209 | NZ  | A_GLU_123 | OE2 | 3.488 |
| 4HH9 | B_LYS_214 | NZ  | A_ASP_122 | OD1 | 3.788 |
| 4HH9 | C_ARG_24  | NH2 | C_ASP_70  | OD2 | 3.842 |
| 4HH9 | C_ARG_54  | NH1 | A_ASP_50  | OD2 | 2.782 |
| 4HH9 | C_ARG_54  | NH2 | A_ASP_50  | OD2 | 3.752 |
| 4HH9 | C_ARG_61  | NH1 | C_GLU_79  | OE1 | 3.726 |
| 4HH9 | C_ARG_61  | NH1 | C_GLU_79  | OE2 | 3.687 |
| 4HH9 | C_ARG_61  | NH2 | C_GLU_79  | OE1 | 3.548 |
| 4HH9 | C_ARG_61  | NH2 | C_GLU_81  | OE1 | 3.056 |
| 4HH9 | C_ARG_61  | NH2 | C_ASP_82  | OD1 | 2.727 |
| 4HH9 | C_ARG_61  | NH2 | C_ASP_82  | OD2 | 3.346 |
| 4HH9 | C_ARG_91  | NH2 | C_ASP_50  | OD1 | 2.719 |
| 4HH9 | C_LYS_149 | NZ  | C_GLU_195 | OE1 | 3.641 |
| 4HH9 | C_LYS_149 | NZ  | C_GLU_195 | OE2 | 3.059 |
| 4HH9 | C_HIS_189 | NE2 | C_ASP_151 | OD2 | 3.983 |
| 4HH9 | C_ARG_211 | NH1 | C_GLU_187 | OE1 | 3.912 |
| 4HH9 | D_HIS_35  | NE2 | D_GLU_95  | OE2 | 2.710 |
| 4HH9 | D_ARG_38  | NH1 | D_ASP_86  | OD1 | 2.846 |
| 4HH9 | D_ARG_38  | NH2 | D_ASP_86  | OD1 | 3.935 |
| 4HH9 | D_ARG_66  | NH1 | D_ASP_86  | OD1 | 3.013 |
| 4HH9 | D_ARG_66  | NH1 | D_ASP_86  | OD2 | 3.359 |
| 4HH9 | D_ARG_66  | NH2 | D_ASP_86  | OD1 | 3.871 |

|      |           |     |           |     |       |
|------|-----------|-----|-----------|-----|-------|
| 4HH9 | D_ARG_66  | NH2 | D_ASP_86  | OD2 | 2.760 |
| 4HH9 | D_ARG_94  | NH2 | D_ASP_101 | OD1 | 3.831 |
| 4HH9 | D_ARG_94  | NH2 | D_ASP_101 | OD2 | 2.965 |
| 4HH9 | D_LYS_129 | NZ  | C_GLU_213 | OE1 | 3.401 |
| 4HH9 | D_LYS_129 | NZ  | C_GLU_213 | OE2 | 3.163 |
| 4HH9 | D_LYS_143 | NZ  | D_ASP_144 | OD1 | 3.474 |
| 4HH9 | D_LYS_143 | NZ  | D_ASP_144 | OD2 | 3.679 |
| 4HH9 | D_LYS_209 | NZ  | C_GLU_123 | OE2 | 3.057 |
| 4HH9 | D_LYS_210 | NZ  | D_GLU_212 | OE1 | 3.242 |
| 4HH9 | D_LYS_214 | NZ  | C_ASP_122 | OD2 | 3.367 |
| 4HHA | A_ARG_61  | NH1 | A_GLU_79  | OE1 | 3.133 |
| 4HHA | A_ARG_61  | NH2 | A_GLU_79  | OE1 | 3.839 |
| 4HHA | A_ARG_61  | NH2 | A_ASP_82  | OD1 | 2.950 |
| 4HHA | A_ARG_61  | NH2 | A_ASP_82  | OD2 | 3.472 |
| 4HHA | A_ARG_91  | NH2 | A_ASP_50  | OD1 | 2.826 |
| 4HHA | A_ARG_103 | NH1 | A_GLU_105 | OE1 | 3.652 |
| 4HHA | A_ARG_103 | NH2 | A_GLU_105 | OE1 | 3.992 |
| 4HHA | A_LYS_107 | NZ  | A_GLU_17  | OE1 | 3.316 |
| 4HHA | A_LYS_107 | NZ  | A_GLU_17  | OE2 | 3.376 |
| 4HHA | A_LYS_149 | NZ  | A_GLU_195 | OE2 | 2.569 |
| 4HHA | A_ARG_211 | NH1 | A_GLU_187 | OE1 | 2.769 |
| 4HHA | B_HIS_32  | ND1 | P_GLU_1   | OE1 | 4.000 |
| 4HHA | B_HIS_32  | NE2 | P_GLU_1   | OE1 | 3.076 |
| 4HHA | B_HIS_32  | NE2 | P_GLU_1   | OE2 | 2.639 |
| 4HHA | B_HIS_35  | NE2 | B_GLU_95  | OE2 | 2.765 |
| 4HHA | B_ARG_38  | NH1 | B_ASP_86  | OD1 | 2.958 |
| 4HHA | B_ARG_66  | NH1 | B_ASP_86  | OD1 | 3.061 |
| 4HHA | B_ARG_66  | NH1 | B_ASP_86  | OD2 | 3.374 |
| 4HHA | B_ARG_66  | NH2 | B_ASP_86  | OD1 | 3.930 |
| 4HHA | B_ARG_66  | NH2 | B_ASP_86  | OD2 | 2.793 |
| 4HHA | B_ARG_87  | NH2 | B_GLU_148 | OE1 | 3.817 |
| 4HHA | B_ARG_87  | NH2 | B_GLU_148 | OE2 | 3.007 |
| 4HHA | B_ARG_94  | NH1 | P_GLU_1   | OE2 | 3.723 |
| 4HHA | B_ARG_94  | NH2 | B_ASP_101 | OD1 | 3.771 |
| 4HHA | B_ARG_94  | NH2 | B_ASP_101 | OD2 | 2.779 |
| 4HHA | B_ARG_94  | NH2 | P_GLU_1   | OE2 | 3.026 |
| 4HHA | B_LYS_143 | NZ  | B_ASP_144 | OD1 | 3.788 |
| 4HHA | B_HIS_164 | NE2 | A_ASP_167 | OD1 | 3.917 |
| 4HHA | B_LYS_209 | NZ  | A_GLU_123 | OE2 | 2.754 |
| 4HHA | B_LYS_210 | NZ  | B_GLU_212 | OE1 | 3.348 |
| 4HIE | A_ARG_24  | NH1 | A_ASP_70  | OD2 | 2.822 |
| 4HIE | A_ARG_61  | NH2 | A_GLU_81  | OE1 | 3.581 |
| 4HIE | A_ARG_61  | NH2 | A_ASP_82  | OD1 | 2.932 |
| 4HIE | A_ARG_61  | NH2 | A_ASP_82  | OD2 | 3.691 |
| 4HIE | A_ARG_91  | NH2 | B_GLU_95  | OE1 | 3.457 |
| 4HIE | A_ARG_91  | NH2 | B_GLU_95  | OE2 | 3.317 |
| 4HIE | A_LYS_188 | NZ  | A_ASP_185 | OD1 | 3.766 |
| 4HIE | B_HIS_35  | NE2 | B_GLU_95  | OE2 | 2.692 |
| 4HIE | B_ARG_38  | NH2 | B_GLU_46  | OE1 | 3.053 |
| 4HIE | B_ARG_38  | NH2 | B_GLU_46  | OE2 | 3.761 |
| 4HIE | B_ARG_66  | NH1 | B_ASP_86  | OD1 | 2.947 |
| 4HIE | B_ARG_66  | NH1 | B_ASP_86  | OD2 | 3.482 |
| 4HIE | B_ARG_66  | NH2 | B_ASP_86  | OD1 | 3.793 |
| 4HIE | B_ARG_66  | NH2 | B_ASP_86  | OD2 | 2.815 |
| 4HIE | B_LYS_94  | NZ  | B_ASP_101 | OD1 | 3.259 |
| 4HIE | B_LYS_94  | NZ  | B_ASP_101 | OD2 | 2.919 |
| 4HIE | B_LYS_143 | NZ  | B_ASP_144 | OD1 | 3.226 |
| 4HIE | B_LYS_143 | NZ  | B_ASP_144 | OD2 | 3.341 |

|      |           |     |           |     |       |
|------|-----------|-----|-----------|-----|-------|
| 4HIE | B.LYS_201 | NZ  | B.ASP_199 | OD2 | 3.632 |
| 4HIH | A.ARG_24  | NH1 | A.ASP_70  | OD1 | 3.074 |
| 4HIH | A.ARG_24  | NH1 | A.ASP_70  | OD2 | 2.888 |
| 4HIH | A.ARG_61  | NH2 | A.GLU_81  | OE1 | 3.240 |
| 4HIH | A.ARG_61  | NH2 | A.ASP_82  | OD1 | 2.810 |
| 4HIH | A.ARG_61  | NH2 | A.ASP_82  | OD2 | 3.489 |
| 4HIH | A.ARG_91  | NH2 | B.GLU_95  | OE1 | 3.470 |
| 4HIH | A.ARG_91  | NH2 | B.GLU_95  | OE2 | 3.314 |
| 4HIH | A.LYS_107 | NZ  | A.GLU_17  | OE1 | 3.699 |
| 4HIH | A.LYS_149 | NZ  | A.GLU_195 | OE1 | 3.559 |
| 4HIH | A.LYS_169 | NZ  | A.ASP_170 | OD2 | 3.069 |
| 4HIH | A.LYS_188 | NZ  | A.ASP_185 | OD1 | 3.565 |
| 4HIH | A.ARG_211 | NH1 | A.GLU_187 | OE1 | 3.810 |
| 4HIH | B.HIS_35  | NE2 | B.GLU_95  | OE2 | 2.814 |
| 4HIH | B.ARG_38  | NH2 | B.GLU_46  | OE1 | 3.181 |
| 4HIH | B.ARG_38  | NH2 | B.GLU_46  | OE2 | 3.797 |
| 4HIH | B.ARG_55  | NH1 | B.ASP_53  | OD1 | 3.769 |
| 4HIH | B.ARG_55  | NH1 | B.ASP_53  | OD2 | 3.363 |
| 4HIH | B.ARG_66  | NH1 | B.ASP_86  | OD1 | 3.461 |
| 4HIH | B.ARG_66  | NH2 | B.ASP_86  | OD1 | 3.186 |
| 4HIH | B.ARG_66  | NH2 | B.ASP_86  | OD2 | 2.400 |
| 4HIH | B.LYS_94  | NZ  | B.ASP_101 | OD1 | 3.233 |
| 4HIH | B.LYS_94  | NZ  | B.ASP_101 | OD2 | 2.906 |
| 4HIH | B.LYS_143 | NZ  | B.ASP_144 | OD1 | 3.210 |
| 4HIH | B.LYS_143 | NZ  | B.ASP_144 | OD2 | 3.587 |
| 4HIH | B.LYS_209 | NZ  | A.GLU_123 | OE1 | 2.853 |
| 4HIH | B.LYS_209 | NZ  | A.GLU_123 | OE2 | 3.685 |
| 4HIH | C.ARG_24  | NH1 | C.ASP_70  | OD2 | 2.725 |
| 4HIH | C.ARG_24  | NH2 | C.ASP_70  | OD2 | 2.940 |
| 4HIH | C.ARG_61  | NH2 | C.ASP_82  | OD1 | 3.061 |
| 4HIH | C.ARG_61  | NH2 | C.ASP_82  | OD2 | 3.666 |
| 4HIH | C.ARG_91  | NH2 | D.GLU_95  | OE1 | 3.527 |
| 4HIH | C.ARG_91  | NH2 | D.GLU_95  | OE2 | 3.339 |
| 4HIH | C.LYS_169 | NZ  | C.ASP_167 | OD1 | 3.850 |
| 4HIH | C.LYS_169 | NZ  | C.ASP_170 | OD2 | 3.306 |
| 4HIH | C.LYS_183 | NZ  | C.GLU_187 | OE2 | 3.644 |
| 4HIH | C.LYS_188 | NZ  | C.ASP_185 | OD1 | 3.956 |
| 4HIH | C.ARG_211 | NH1 | C.GLU_187 | OE1 | 3.874 |
| 4HIH | D.HIS_35  | NE2 | D.GLU_95  | OE2 | 2.717 |
| 4HIH | D.ARG_38  | NH2 | D.GLU_46  | OE1 | 2.906 |
| 4HIH | D.ARG_38  | NH2 | D.GLU_46  | OE2 | 3.704 |
| 4HIH | D.ARG_55  | NH1 | D.ASP_53  | OD2 | 3.143 |
| 4HIH | D.LYS_64  | NZ  | D.ASP_61  | OD1 | 3.074 |
| 4HIH | D.ARG_66  | NH1 | D.ASP_86  | OD1 | 3.418 |
| 4HIH | D.ARG_66  | NH1 | D.ASP_86  | OD2 | 3.903 |
| 4HIH | D.ARG_66  | NH2 | D.ASP_86  | OD1 | 3.186 |
| 4HIH | D.ARG_66  | NH2 | D.ASP_86  | OD2 | 2.280 |
| 4HIH | D.LYS_94  | NZ  | D.ASP_101 | OD1 | 3.190 |
| 4HIH | D.LYS_94  | NZ  | D.ASP_101 | OD2 | 2.845 |
| 4HIH | D.LYS_143 | NZ  | D.ASP_144 | OD1 | 2.994 |
| 4HIH | D.LYS_143 | NZ  | D.ASP_144 | OD2 | 3.430 |
| 4HIH | D.LYS_209 | NZ  | C.GLU_123 | OE1 | 2.616 |
| 4HIH | D.LYS_209 | NZ  | C.GLU_123 | OE2 | 2.820 |
| 4HII | A.ARG_24  | NH1 | A.ASP_70  | OD1 | 2.503 |
| 4HII | A.ARG_24  | NH1 | A.ASP_70  | OD2 | 2.815 |
| 4HII | A.ARG_61  | NH2 | A.GLU_81  | OE1 | 2.820 |
| 4HII | A.ARG_61  | NH2 | A.ASP_82  | OD1 | 3.181 |
| 4HII | A.ARG_61  | NH2 | A.ASP_82  | OD2 | 3.709 |

|      |           |     |           |     |       |
|------|-----------|-----|-----------|-----|-------|
| 4HII | A_ARG_91  | NH2 | B_GLU_95  | OE1 | 3.439 |
| 4HII | A_ARG_91  | NH2 | B_GLU_95  | OE2 | 3.542 |
| 4HII | A_LYS_107 | NZ  | A_GLU_17  | OE1 | 3.144 |
| 4HII | A_LYS_107 | NZ  | A_GLU_17  | OE2 | 3.461 |
| 4HII | A_LYS_183 | NZ  | A_GLU_187 | OE2 | 3.590 |
| 4HII | B_HIS_35  | NE2 | B_GLU_95  | OE2 | 2.635 |
| 4HII | B_ARG_38  | NH2 | B_GLU_46  | OE1 | 3.115 |
| 4HII | B_ARG_38  | NH2 | B_GLU_46  | OE2 | 3.676 |
| 4HII | B_ARG_55  | NH1 | B_ASP_53  | OD2 | 2.693 |
| 4HII | B_LYS_64  | NZ  | B_ASP_61  | OD1 | 3.295 |
| 4HII | B_ARG_66  | NH1 | B_ASP_86  | OD1 | 3.781 |
| 4HII | B_ARG_66  | NH2 | B_ASP_86  | OD1 | 3.392 |
| 4HII | B_ARG_66  | NH2 | B_ASP_86  | OD2 | 2.480 |
| 4HII | B_LYS_94  | NZ  | B_ASP_101 | OD1 | 3.440 |
| 4HII | B_LYS_94  | NZ  | B_ASP_101 | OD2 | 3.082 |
| 4HII | B_LYS_143 | NZ  | B_ASP_144 | OD1 | 3.286 |
| 4HII | B_LYS_143 | NZ  | B_ASP_144 | OD2 | 3.429 |
| 4HII | B_LYS_201 | NZ  | B_ASP_199 | OD2 | 3.171 |
| 4HII | B_LYS_209 | NZ  | A_GLU_123 | OE1 | 2.845 |
| 4HII | B_LYS_209 | NZ  | A_GLU_123 | OE2 | 2.723 |
| 4HII | C_ARG_24  | NH1 | C_ASP_70  | OD2 | 2.819 |
| 4HII | C_ARG_24  | NH2 | C_ASP_70  | OD2 | 3.355 |
| 4HII | C_ARG_61  | NH2 | C_ASP_82  | OD1 | 3.075 |
| 4HII | C_ARG_61  | NH2 | C_ASP_82  | OD2 | 3.678 |
| 4HII | C_ARG_91  | NH1 | D_GLU_95  | OE2 | 3.915 |
| 4HII | C_ARG_91  | NH2 | D_GLU_95  | OE1 | 3.687 |
| 4HII | C_ARG_91  | NH2 | D_GLU_95  | OE2 | 3.380 |
| 4HII | C_ARG_211 | NH1 | C_GLU_187 | OE1 | 3.789 |
| 4HII | D_HIS_35  | NE2 | D_GLU_95  | OE2 | 2.645 |
| 4HII | D_ARG_38  | NH2 | D_GLU_46  | OE1 | 2.570 |
| 4HII | D_ARG_38  | NH2 | D_GLU_46  | OE2 | 3.392 |
| 4HII | D_ARG_55  | NH1 | D_ASP_53  | OD2 | 3.825 |
| 4HII | D_LYS_64  | NZ  | D_ASP_61  | OD1 | 2.713 |
| 4HII | D_ARG_66  | NH1 | D_ASP_86  | OD1 | 3.823 |
| 4HII | D_ARG_66  | NH2 | D_ASP_86  | OD1 | 2.954 |
| 4HII | D_ARG_66  | NH2 | D_ASP_86  | OD2 | 2.357 |
| 4HII | D_LYS_94  | NZ  | D_ASP_101 | OD1 | 3.250 |
| 4HII | D_LYS_94  | NZ  | D_ASP_101 | OD2 | 2.971 |
| 4HII | D_LYS_143 | NZ  | D_ASP_144 | OD1 | 3.120 |
| 4HII | D_LYS_143 | NZ  | D_ASP_144 | OD2 | 3.351 |
| 4HII | D_LYS_201 | NZ  | D_ASP_199 | OD2 | 3.563 |
| 4HIJ | A_ARG_24  | NH1 | A_ASP_70  | OD2 | 2.299 |
| 4HIJ | A_ARG_24  | NH2 | A_ASP_70  | OD2 | 3.791 |
| 4HIJ | A_ARG_61  | NH2 | A_GLU_81  | OE1 | 2.950 |
| 4HIJ | A_ARG_61  | NH2 | A_ASP_82  | OD1 | 3.410 |
| 4HIJ | A_ARG_61  | NH2 | A_ASP_82  | OD2 | 3.898 |
| 4HIJ | A_ARG_91  | NH1 | B_GLU_95  | OE2 | 3.962 |
| 4HIJ | A_ARG_91  | NH2 | B_GLU_95  | OE1 | 3.390 |
| 4HIJ | A_ARG_91  | NH2 | B_GLU_95  | OE2 | 3.274 |
| 4HIJ | A_LYS_107 | NZ  | A_GLU_17  | OE1 | 3.611 |
| 4HIJ | B_HIS_35  | NE2 | B_GLU_95  | OE2 | 2.959 |
| 4HIJ | B_ARG_38  | NH1 | B_ASP_86  | OD1 | 3.073 |
| 4HIJ | B_ARG_38  | NH2 | B_GLU_46  | OE1 | 3.833 |
| 4HIJ | B_ARG_66  | NH2 | B_ASP_86  | OD1 | 3.357 |
| 4HIJ | B_ARG_66  | NH2 | B_ASP_86  | OD2 | 2.483 |
| 4HIJ | B_LYS_94  | NZ  | B_ASP_101 | OD1 | 3.665 |
| 4HIJ | B_LYS_94  | NZ  | B_ASP_101 | OD2 | 3.228 |
| 4HIJ | B_LYS_143 | NZ  | B_ASP_144 | OD1 | 3.068 |



|      |           |     |           |     |       |
|------|-----------|-----|-----------|-----|-------|
| 4HIJ | B.LYS_143 | NZ  | B.ASP_144 | OD2 | 3.410 |
| 4HIJ | B.LYS_201 | NZ  | B.ASP_199 | OD2 | 3.924 |
| 4HIJ | C.ARG_24  | NH1 | C.ASP_70  | OD1 | 2.906 |
| 4HIJ | C.ARG_24  | NH1 | C.ASP_70  | OD2 | 2.387 |
| 4HIJ | C.ARG_24  | NH2 | C.ASP_70  | OD2 | 3.911 |
| 4HIJ | C.ARG_61  | NH2 | C.ASP_82  | OD1 | 3.100 |
| 4HIJ | C.ARG_61  | NH2 | C.ASP_82  | OD2 | 3.911 |
| 4HIJ | C.ARG_91  | NH2 | D.GLU_95  | OE1 | 3.772 |
| 4HIJ | C.ARG_91  | NH2 | D.GLU_95  | OE2 | 3.260 |
| 4HIJ | C.ARG_211 | NH1 | C.GLU_187 | OE1 | 3.642 |
| 4HIJ | D.HIS_35  | NE2 | D.GLU_95  | OE2 | 3.142 |
| 4HIJ | D.ARG_38  | NH1 | D.GLU_46  | OE1 | 2.836 |
| 4HIJ | D.ARG_38  | NH1 | D.GLU_46  | OE2 | 3.204 |
| 4HIJ | D.ARG_38  | NH2 | D.GLU_46  | OE1 | 2.304 |
| 4HIJ | D.ARG_38  | NH2 | D.GLU_46  | OE2 | 3.866 |
| 4HIJ | D.ARG_66  | NH1 | D.ASP_86  | OD1 | 3.893 |
| 4HIJ | D.ARG_66  | NH2 | D.ASP_86  | OD1 | 3.106 |
| 4HIJ | D.ARG_66  | NH2 | D.ASP_86  | OD2 | 2.216 |
| 4HIJ | D.ARG_83  | NH1 | D.GLU_85  | OE1 | 3.248 |
| 4HIJ | D.LYS_94  | NZ  | D.ASP_101 | OD1 | 3.449 |
| 4HIJ | D.LYS_94  | NZ  | D.ASP_101 | OD2 | 2.903 |
| 4HIJ | D.LYS_143 | NZ  | D.ASP_144 | OD1 | 3.444 |
| 4HIJ | D.LYS_201 | NZ  | D.ASP_199 | OD2 | 3.897 |
| 4HIJ | D.LYS_209 | NZ  | C.GLU_123 | OE2 | 3.644 |
| 4HK0 | A.ARG_38  | NH1 | A.ASP_90  | OD1 | 3.774 |
| 4HK0 | A.ARG_38  | NH2 | A.GLU_46  | OE1 | 3.385 |
| 4HK0 | A.LYS_63  | NZ  | A.GLU_46  | OE1 | 3.620 |
| 4HK0 | A.LYS_63  | NZ  | A.GLU_46  | OE2 | 2.816 |
| 4HK0 | A.ARG_98  | NH1 | A.ASP_114 | OD1 | 2.925 |
| 4HK0 | A.ARG_98  | NH1 | A.ASP_114 | OD2 | 2.908 |
| 4HK0 | A.LYS_156 | NZ  | A.ASP_157 | OD2 | 3.983 |
| 4HK0 | A.LYS_222 | NZ  | B.GLU_125 | OE2 | 2.735 |
| 4HK0 | B.HIS_33  | ND1 | B.ASP_49  | OD1 | 3.937 |
| 4HK0 | B.ARG_53  | NH2 | B.GLU_59  | OE1 | 3.235 |
| 4HK0 | B.ARG_60  | NH1 | B.ASP_81  | OD1 | 3.686 |
| 4HK0 | B.ARG_60  | NH1 | B.ASP_81  | OD2 | 2.420 |
| 4HK0 | B.ARG_60  | NH2 | B.GLU_78  | OE1 | 3.881 |
| 4HK0 | B.ARG_60  | NH2 | B.GLU_78  | OE2 | 3.957 |
| 4HK0 | B.ARG_60  | NH2 | B.ASP_81  | OD1 | 2.791 |
| 4HK0 | B.ARG_60  | NH2 | B.ASP_81  | OD2 | 3.073 |
| 4HK0 | B.LYS_168 | NZ  | B.GLU_82  | OE1 | 2.997 |
| 4HK0 | C.LYS_12  | NZ  | C.GLU_10  | OE1 | 3.899 |
| 4HK0 | C.ARG_38  | NH1 | C.ASP_90  | OD1 | 3.244 |
| 4HK0 | C.ARG_38  | NH2 | C.GLU_46  | OE1 | 3.777 |
| 4HK0 | C.LYS_63  | NZ  | C.GLU_46  | OE1 | 3.276 |
| 4HK0 | C.LYS_63  | NZ  | C.GLU_46  | OE2 | 3.058 |
| 4HK0 | C.ARG_98  | NH1 | C.ASP_114 | OD1 | 3.138 |
| 4HK0 | C.ARG_98  | NH1 | C.ASP_114 | OD2 | 3.046 |
| 4HK0 | C.ARG_104 | NH2 | D.ASP_95  | OD2 | 3.573 |
| 4HK0 | C.ARG_223 | NH1 | C.GLU_225 | OE2 | 2.198 |
| 4HK0 | D.HIS_33  | ND1 | D.ASP_49  | OD1 | 3.742 |
| 4HK0 | D.ARG_60  | NH1 | D.ASP_81  | OD1 | 3.821 |
| 4HK0 | D.ARG_60  | NH1 | D.ASP_81  | OD2 | 2.677 |
| 4HK0 | D.ARG_60  | NH2 | D.GLU_78  | OE1 | 3.974 |
| 4HK0 | D.ARG_60  | NH2 | D.GLU_78  | OE2 | 3.744 |
| 4HK0 | D.ARG_60  | NH2 | D.ASP_81  | OD1 | 2.869 |
| 4HK0 | D.ARG_60  | NH2 | D.ASP_81  | OD2 | 3.194 |
| 4HK0 | D.LYS_104 | NZ  | B.ASP_50  | OD1 | 3.601 |

|      |           |     |           |     |       |
|------|-----------|-----|-----------|-----|-------|
| 4HK0 | D_LYS_104 | NZ  | B_ASP_50  | OD2 | 2.755 |
| 4HK0 | D_LYS_168 | NZ  | D_GLU_82  | OE1 | 2.591 |
| 4HK0 | D_LYS_168 | NZ  | D_GLU_82  | OE2 | 3.531 |
| 4HK3 | J_LYS_12  | NZ  | J_GLU_10  | OE1 | 3.915 |
| 4HK3 | J_ARG_38  | NH2 | J_GLU_46  | OE1 | 2.769 |
| 4HK3 | J_ARG_38  | NH2 | J_GLU_46  | OE2 | 3.282 |
| 4HK3 | J_LYS_63  | NZ  | J_GLU_46  | OE2 | 2.332 |
| 4HK3 | J_ARG_87  | NH1 | J_ASP_89  | OD2 | 2.971 |
| 4HK3 | J_ARG_87  | NH2 | J_ASP_89  | OD2 | 3.577 |
| 4HK3 | J_ARG_98  | NH2 | J_ASP_114 | OD2 | 3.696 |
| 4HK3 | J_LYS_222 | NZ  | N_GLU_125 | OE2 | 3.801 |
| 4HK3 | N_ARG_60  | NH1 | N_ASP_81  | OD1 | 3.992 |
| 4HK3 | N_ARG_60  | NH1 | N_ASP_81  | OD2 | 2.782 |
| 4HK3 | N_ARG_60  | NH2 | N_GLU_78  | OE1 | 3.386 |
| 4HK3 | N_ARG_60  | NH2 | N_ASP_81  | OD1 | 3.085 |
| 4HK3 | N_ARG_60  | NH2 | N_ASP_81  | OD2 | 3.312 |
| 4HK3 | N_LYS_168 | NZ  | N_GLU_82  | OE1 | 3.394 |
| 4HK3 | N_HIS_190 | ND1 | N_ASP_153 | OD2 | 3.547 |
| 4HK3 | N_ARG_191 | NH2 | N_ASP_153 | OD1 | 3.900 |
| 4HKB | J_ARG_12  | NH2 | J_GLU_10  | OE1 | 3.239 |
| 4HKB | J_ARG_12  | NH2 | J_GLU_10  | OE2 | 3.220 |
| 4HKB | J_LYS_19  | NZ  | J_GLU_82  | OE1 | 3.848 |
| 4HKB | J_LYS_23  | NZ  | C_ASP_73  | OD1 | 3.505 |
| 4HKB | J_ARG_38  | NH1 | J_ASP_90  | OD1 | 3.980 |
| 4HKB | J_ARG_38  | NH2 | J_GLU_46  | OE1 | 3.646 |
| 4HKB | J_LYS_63  | NZ  | J_GLU_46  | OE1 | 3.117 |
| 4HKB | J_LYS_63  | NZ  | J_GLU_46  | OE2 | 3.110 |
| 4HKB | J_ARG_72  | NH2 | A_GLU_10  | OE1 | 3.065 |
| 4HKB | J_ARG_72  | NH2 | A_GLU_10  | OE2 | 2.664 |
| 4HKB | J_ARG_87  | NH1 | J_ASP_89  | OD2 | 3.926 |
| 4HKB | J_ARG_87  | NH2 | J_ASP_89  | OD2 | 2.996 |
| 4HKB | J_ARG_98  | NH2 | J_ASP_114 | OD2 | 3.564 |
| 4HKB | J_LYS_222 | NZ  | N_GLU_125 | OE1 | 3.188 |
| 4HKB | J_LYS_222 | NZ  | N_GLU_125 | OE2 | 3.564 |
| 4HKB | A_ARG_12  | NH2 | A_GLU_10  | OE1 | 3.493 |
| 4HKB | A_ARG_12  | NH2 | A_GLU_10  | OE2 | 3.910 |
| 4HKB | A_LYS_19  | NZ  | A_GLU_82  | OE2 | 2.857 |
| 4HKB | A_LYS_63  | NZ  | A_GLU_46  | OE1 | 2.508 |
| 4HKB | A_LYS_63  | NZ  | A_GLU_46  | OE2 | 3.155 |
| 4HKB | A_ARG_72  | NH2 | C_GLU_10  | OE1 | 3.154 |
| 4HKB | A_ARG_72  | NH2 | C_GLU_10  | OE2 | 2.755 |
| 4HKB | A_ARG_87  | NH2 | A_ASP_90  | OD1 | 3.948 |
| 4HKB | A_ARG_98  | NH1 | A_ASP_114 | OD2 | 3.306 |
| 4HKB | A_LYS_156 | NZ  | B_GLU_126 | OE2 | 3.919 |
| 4HKB | A_LYS_222 | NZ  | B_GLU_125 | OE1 | 3.019 |
| 4HKB | A_LYS_222 | NZ  | B_GLU_125 | OE2 | 3.903 |
| 4HKB | C_LYS_63  | NZ  | E_ASP_89  | OD1 | 3.939 |
| 4HKB | C_LYS_63  | NZ  | E_ASP_89  | OD2 | 3.374 |
| 4HKB | C_ARG_87  | NH2 | E_ASP_90  | OD1 | 3.045 |
| 4HKB | C_ARG_87  | NH2 | E_ASP_90  | OD2 | 2.962 |
| 4HKB | C_ARG_98  | NH2 | C_ASP_114 | OD2 | 3.961 |
| 4HKB | C_LYS_222 | NZ  | D_GLU_125 | OE1 | 3.332 |
| 4HKB | C_LYS_222 | NZ  | D_GLU_125 | OE2 | 3.836 |
| 4HKB | E_LYS_23  | NZ  | G_ASP_73  | OD1 | 2.630 |
| 4HKB | E_ARG_38  | NH2 | E_GLU_46  | OE1 | 2.965 |
| 4HKB | E_LYS_63  | NZ  | C_ASP_89  | OD1 | 3.625 |
| 4HKB | E_LYS_63  | NZ  | C_ASP_89  | OD2 | 3.095 |
| 4HKB | E_ARG_72  | NH1 | I_GLU_10  | OE1 | 2.874 |

|      |           |     |           |     |       |
|------|-----------|-----|-----------|-----|-------|
| 4HKB | E_ARG_72  | NH1 | L_GLU_10  | OE2 | 2.849 |
| 4HKB | E_ARG_87  | NH1 | C_ASP_90  | OD1 | 3.489 |
| 4HKB | E_ARG_87  | NH1 | C_ASP_90  | OD2 | 3.954 |
| 4HKB | E_ARG_87  | NH2 | C_ASP_90  | OD1 | 3.930 |
| 4HKB | E_ARG_87  | NH2 | C_ASP_90  | OD2 | 3.219 |
| 4HKB | E_ARG_98  | NH1 | E_ASP_114 | OD1 | 3.817 |
| 4HKB | E_ARG_98  | NH2 | E_ASP_114 | OD1 | 3.776 |
| 4HKB | E_ARG_98  | NH2 | E_ASP_114 | OD2 | 3.131 |
| 4HKB | E_LYS_222 | NZ  | F_GLU_125 | OE2 | 3.327 |
| 4HKB | G_ARG_12  | NH2 | G_GLU_10  | OE1 | 3.730 |
| 4HKB | G_LYS_63  | NZ  | G_GLU_46  | OE1 | 3.337 |
| 4HKB | G_LYS_63  | NZ  | G_GLU_46  | OE2 | 2.386 |
| 4HKB | G_ARG_87  | NH1 | J_ASP_90  | OD1 | 3.108 |
| 4HKB | G_ARG_87  | NH1 | J_ASP_90  | OD2 | 3.912 |
| 4HKB | G_ARG_87  | NH2 | J_ASP_90  | OD2 | 3.607 |
| 4HKB | G_ARG_98  | NH1 | G_ASP_114 | OD1 | 3.184 |
| 4HKB | G_ARG_98  | NH1 | G_ASP_114 | OD2 | 2.840 |
| 4HKB | I_ARG_12  | NH1 | I_GLU_10  | OE2 | 3.852 |
| 4HKB | I_ARG_12  | NH2 | I_GLU_10  | OE1 | 2.937 |
| 4HKB | I_ARG_12  | NH2 | I_GLU_10  | OE2 | 2.684 |
| 4HKB | I_LYS_63  | NZ  | I_GLU_46  | OE1 | 3.642 |
| 4HKB | I_LYS_63  | NZ  | I_GLU_46  | OE2 | 2.727 |
| 4HKB | I_ARG_72  | NH2 | G_GLU_10  | OE1 | 3.560 |
| 4HKB | I_ARG_72  | NH2 | G_GLU_10  | OE2 | 2.553 |
| 4HKB | I_ARG_87  | NH2 | I_ASP_90  | OD1 | 3.524 |
| 4HKB | I_ARG_98  | NH1 | I_ASP_114 | OD1 | 2.891 |
| 4HKB | I_ARG_98  | NH1 | I_ASP_114 | OD2 | 2.660 |
| 4HKB | I_LYS_222 | NZ  | K_GLU_125 | OE2 | 3.211 |
| 4HKB | N_ARG_29  | NH1 | J_ASP_107 | OD1 | 3.664 |
| 4HKB | N_ARG_29  | NH1 | J_ASP_107 | OD2 | 2.469 |
| 4HKB | N_ARG_31  | NH1 | N_ASP_33  | OD2 | 3.836 |
| 4HKB | N_ARG_31  | NH2 | N_ASP_33  | OD1 | 2.568 |
| 4HKB | N_ARG_31  | NH2 | N_ASP_33  | OD2 | 3.159 |
| 4HKB | N_ARG_60  | NH1 | N_GLU_78  | OE1 | 3.549 |
| 4HKB | N_ARG_60  | NH2 | N_GLU_78  | OE1 | 3.300 |
| 4HKB | N_ARG_60  | NH2 | N_GLU_78  | OE2 | 3.943 |
| 4HKB | N_ARG_60  | NH2 | N_ASP_81  | OD1 | 3.653 |
| 4HKB | N_ARG_60  | NH2 | N_ASP_81  | OD2 | 3.144 |
| 4HKB | N_ARG_76  | NH2 | N_GLU_59  | OE1 | 3.931 |
| 4HKB | N_LYS_104 | NZ  | N_ASP_84  | OD1 | 3.498 |
| 4HKB | N_LYS_131 | NZ  | J_ASP_157 | OD2 | 3.951 |
| 4HKB | B_ARG_29  | NH1 | A_ASP_107 | OD2 | 3.659 |
| 4HKB | B_LYS_30  | NZ  | B_ASP_91  | OD1 | 3.949 |
| 4HKB | B_ARG_31  | NH2 | B_ASP_33  | OD1 | 3.960 |
| 4HKB | B_ARG_31  | NH2 | B_ASP_33  | OD2 | 3.759 |
| 4HKB | B_ARG_60  | NH1 | B_GLU_78  | OE2 | 3.613 |
| 4HKB | B_ARG_60  | NH2 | B_ASP_81  | OD1 | 3.250 |
| 4HKB | B_ARG_60  | NH2 | B_ASP_81  | OD2 | 3.168 |
| 4HKB | D_ARG_29  | NH1 | C_ASP_107 | OD2 | 3.254 |
| 4HKB | D_LYS_30  | NZ  | D_ASP_91  | OD1 | 2.419 |
| 4HKB | D_ARG_60  | NH1 | D_ASP_81  | OD2 | 3.419 |
| 4HKB | D_ARG_60  | NH2 | D_ASP_81  | OD1 | 2.947 |
| 4HKB | D_ARG_60  | NH2 | D_ASP_81  | OD2 | 2.756 |
| 4HKB | D_LYS_173 | NZ  | D_ASP_140 | OD1 | 3.957 |
| 4HKB | F_ARG_60  | NH1 | F_GLU_78  | OE2 | 3.243 |
| 4HKB | F_ARG_60  | NH1 | F_ASP_81  | OD2 | 3.702 |
| 4HKB | F_ARG_60  | NH2 | F_GLU_78  | OE2 | 3.760 |
| 4HKB | F_ARG_60  | NH2 | F_ASP_81  | OD1 | 3.084 |

|      |           |     |           |     |       |
|------|-----------|-----|-----------|-----|-------|
| 4HKB | F_ARG_60  | NH2 | F_ASP_81  | OD2 | 2.449 |
| 4HKB | H_ARG_29  | NH1 | G_ASP_107 | OD2 | 3.325 |
| 4HKB | H_ARG_29  | NH2 | G_ASP_107 | OD2 | 3.189 |
| 4HKB | H_LYS_30  | NZ  | H_ASP_91  | OD1 | 3.082 |
| 4HKB | H_ARG_31  | NH1 | H_ASP_33  | OD1 | 3.793 |
| 4HKB | H_ARG_31  | NH1 | H_ASP_33  | OD2 | 3.908 |
| 4HKB | H_ARG_31  | NH2 | H_ASP_33  | OD1 | 2.388 |
| 4HKB | H_ARG_31  | NH2 | H_ASP_33  | OD2 | 3.779 |
| 4HKB | H_ARG_60  | NH1 | H_GLU_78  | OE1 | 3.666 |
| 4HKB | H_ARG_60  | NH2 | H_GLU_78  | OE1 | 3.977 |
| 4HKB | H_ARG_60  | NH2 | H_ASP_81  | OD1 | 2.952 |
| 4HKB | H_ARG_60  | NH2 | H_ASP_81  | OD2 | 3.391 |
| 4HKB | K_ARG_31  | NH1 | I_ASP_107 | OD2 | 3.242 |
| 4HKB | K_ARG_60  | NH1 | K_GLU_78  | OE1 | 2.918 |
| 4HKB | K_ARG_60  | NH1 | K_ASP_81  | OD2 | 3.967 |
| 4HKB | K_ARG_60  | NH2 | K_GLU_78  | OE1 | 3.867 |
| 4HKB | K_ARG_60  | NH2 | K_ASP_81  | OD1 | 3.109 |
| 4HKB | K_ARG_60  | NH2 | K_ASP_81  | OD2 | 3.013 |
| 4HKB | K_LYS_168 | NZ  | K_GLU_82  | OE1 | 3.989 |
| 4HKX | E_LYS_86  | NZ  | E_GLU_90  | OE2 | 3.670 |
| 4HKX | E_ARG_106 | NH1 | E_GLU_85  | OE1 | 2.849 |
| 4HKX | E_ARG_106 | NH1 | E_GLU_85  | OE2 | 3.341 |
| 4HKX | E_ARG_117 | NH2 | E_GLU_72  | OE1 | 2.670 |
| 4HKX | E_ARG_117 | NH2 | E_GLU_72  | OE2 | 3.532 |
| 4HKX | E_ARG_192 | NH1 | B_ASP_95  | OD2 | 3.293 |
| 4HKX | E_ARG_192 | NH2 | E_GLU_198 | OE1 | 3.620 |
| 4HKX | E_ARG_192 | NH2 | E_GLU_198 | OE2 | 3.387 |
| 4HKX | E_HIS_208 | NE2 | E_GLU_238 | OE2 | 2.261 |
| 4HKX | E_LYS_219 | NZ  | E_GLU_227 | OE1 | 3.854 |
| 4HKX | E_LYS_219 | NZ  | B_ASP_93  | OD1 | 2.877 |
| 4HKX | E_LYS_219 | NZ  | B_ASP_93  | OD2 | 3.792 |
| 4HKX | E_LYS_222 | NZ  | E_ASP_225 | OD1 | 3.665 |
| 4HKX | E_ARG_255 | NH2 | E_GLU_119 | OE2 | 3.522 |
| 4HKX | E_ARG_262 | NH1 | E_GLU_175 | OE2 | 3.705 |
| 4HKX | E_ARG_262 | NH2 | E_GLU_175 | OE1 | 3.350 |
| 4HKX | E_ARG_262 | NH2 | E_GLU_175 | OE2 | 2.626 |
| 4HKX | A_ARG_12  | NH1 | A_GLU_10  | OE1 | 2.383 |
| 4HKX | A_ARG_12  | NH2 | A_GLU_10  | OE1 | 3.758 |
| 4HKX | A_ARG_38  | NH1 | A_ASP_90  | OD1 | 3.193 |
| 4HKX | A_ARG_38  | NH2 | A_GLU_46  | OE1 | 3.363 |
| 4HKX | A_LYS_63  | NZ  | A_GLU_46  | OE1 | 3.731 |
| 4HKX | A_LYS_63  | NZ  | A_GLU_46  | OE2 | 3.103 |
| 4HKX | A_ARG_87  | NH2 | A_ASP_89  | OD2 | 3.799 |
| 4HKX | A_ARG_98  | NH1 | A_ASP_114 | OD1 | 3.449 |
| 4HKX | A_ARG_98  | NH1 | A_ASP_114 | OD2 | 2.980 |
| 4HKX | A_LYS_222 | NZ  | B_GLU_125 | OE1 | 3.981 |
| 4HKX | B_ARG_29  | NH2 | A_ASP_107 | OD2 | 3.853 |
| 4HKX | B_ARG_31  | NH1 | B_ASP_33  | OD1 | 2.677 |
| 4HKX | B_ARG_31  | NH1 | B_ASP_33  | OD2 | 2.578 |
| 4HKX | B_ARG_60  | NH1 | B_ASP_81  | OD1 | 3.864 |
| 4HKX | B_ARG_60  | NH1 | B_ASP_81  | OD2 | 2.652 |
| 4HKX | B_ARG_60  | NH2 | B_GLU_78  | OE1 | 3.882 |
| 4HKX | B_ARG_60  | NH2 | B_GLU_78  | OE2 | 3.841 |
| 4HKX | B_ARG_60  | NH2 | B_ASP_81  | OD1 | 3.111 |
| 4HKX | B_ARG_60  | NH2 | B_ASP_81  | OD2 | 3.335 |
| 4HKX | B_LYS_104 | NZ  | B_ASP_84  | OD1 | 2.803 |
| 4HKX | B_LYS_104 | NZ  | B_ASP_84  | OD2 | 3.287 |
| 4HKX | B_LYS_112 | NZ  | B_GLU_200 | OE1 | 2.796 |

|      |           |     |           |     |       |
|------|-----------|-----|-----------|-----|-------|
| 4HKX | B.LYS_131 | NZ  | A.ASP_157 | OD2 | 3.310 |
| 4HKX | B.HIS_190 | ND1 | B.ASP_153 | OD2 | 3.199 |
| 4HLZ | A.LYS_45  | NZ  | A.ASP_41  | OD1 | 3.467 |
| 4HLZ | A.LYS_45  | NZ  | A.ASP_41  | OD2 | 2.740 |
| 4HLZ | A.LYS_50  | NZ  | A.GLU_275 | OE1 | 3.453 |
| 4HLZ | A.ARG_94  | NH1 | A.ASP_63  | OD1 | 3.722 |
| 4HLZ | A.ARG_94  | NH1 | A.ASP_63  | OD2 | 2.940 |
| 4HLZ | A.LYS_109 | NZ  | A.GLU_89  | OE1 | 2.563 |
| 4HLZ | A.LYS_109 | NZ  | A.GLU_89  | OE2 | 3.402 |
| 4HLZ | A.LYS_109 | NZ  | B.GLU_69  | OE1 | 3.478 |
| 4HLZ | A.LYS_109 | NZ  | B.GLU_69  | OE2 | 2.999 |
| 4HLZ | A.LYS_119 | NZ  | A.GLU_255 | OE2 | 3.868 |
| 4HLZ | A.LYS_123 | NZ  | A.GLU_255 | OE1 | 3.335 |
| 4HLZ | A.LYS_123 | NZ  | A.GLU_255 | OE2 | 2.676 |
| 4HLZ | A.ARG_149 | NH1 | A.ASP_77  | OD2 | 3.932 |
| 4HLZ | A.ARG_149 | NH2 | A.ASP_77  | OD1 | 3.367 |
| 4HLZ | A.ARG_149 | NH2 | A.ASP_77  | OD2 | 2.770 |
| 4HLZ | A.LYS_165 | NZ  | A.GLU_246 | OE1 | 3.809 |
| 4HLZ | A.HIS_184 | NE2 | A.GLU_231 | OE1 | 3.401 |
| 4HLZ | A.ARG_263 | NH2 | A.GLU_174 | OE1 | 3.264 |
| 4HLZ | A.LYS_269 | NZ  | A.GLU_89  | OE1 | 3.398 |
| 4HLZ | A.LYS_310 | NZ  | B.ASP_90  | OD1 | 2.429 |
| 4HLZ | A.LYS_310 | NZ  | B.ASP_90  | OD2 | 3.948 |
| 4HLZ | A.LYS_313 | NZ  | A.ASP_27  | OD2 | 3.590 |
| 4HLZ | A.ARG_321 | NH1 | A.GLU_31  | OE1 | 3.534 |
| 4HLZ | A.ARG_321 | NH1 | A.GLU_31  | OE2 | 3.033 |
| 4HLZ | A.ARG_321 | NH2 | A.GLU_31  | OE1 | 2.812 |
| 4HLZ | A.ARG_321 | NH2 | A.GLU_31  | OE2 | 3.752 |
| 4HLZ | B.LYS_51  | NZ  | B.GLU_103 | OE1 | 2.548 |
| 4HLZ | B.LYS_58  | NZ  | F.GLU_97  | OE1 | 3.865 |
| 4HLZ | B.LYS_58  | NZ  | F.GLU_97  | OE2 | 3.885 |
| 4HLZ | B.ARG_75  | NH1 | B.GLU_78  | OE1 | 2.253 |
| 4HLZ | B.ARG_75  | NH1 | B.GLU_78  | OE2 | 3.633 |
| 4HLZ | B.ARG_76  | NH1 | D.GLU_74  | OE1 | 2.838 |
| 4HLZ | B.ARG_76  | NH1 | D.GLU_74  | OE2 | 3.993 |
| 4HLZ | B.ARG_76  | NH2 | D.GLU_74  | OE1 | 3.145 |
| 4HLZ | B.ARG_76  | NH2 | D.GLU_74  | OE2 | 2.917 |
| 4HLZ | B.LYS_82  | NZ  | B.ASP_86  | OD1 | 3.774 |
| 4HLZ | B.LYS_82  | NZ  | B.ASP_86  | OD2 | 2.458 |
| 4HLZ | B.LYS_83  | NZ  | D.GLU_85  | OE2 | 2.459 |
| 4HLZ | B.ARG_106 | NH2 | F.ASP_109 | OD2 | 3.278 |
| 4HLZ | B.ARG_123 | NH2 | B.ASP_120 | OD1 | 3.032 |
| 4HLZ | B.LYS_131 | NZ  | B.GLU_139 | OE2 | 3.861 |
| 4HLZ | B.LYS_143 | NZ  | A.ASP_11  | OD1 | 3.527 |
| 4HLZ | B.LYS_143 | NZ  | A.ASP_11  | OD2 | 3.714 |
| 4HLZ | B.LYS_143 | NZ  | B.ASP_29  | OD1 | 3.825 |
| 4HLZ | B.LYS_143 | NZ  | B.ASP_29  | OD2 | 2.836 |
| 4HLZ | B.ARG_170 | NH1 | B.ASP_128 | OD2 | 3.529 |
| 4HLZ | B.ARG_170 | NH2 | B.ASP_128 | OD2 | 3.130 |
| 4HLZ | C.ARG_32  | NH1 | F.GLU_57  | OE1 | 3.413 |
| 4HLZ | C.LYS_45  | NZ  | C.ASP_41  | OD1 | 3.408 |
| 4HLZ | C.LYS_45  | NZ  | C.ASP_41  | OD2 | 2.813 |
| 4HLZ | C.LYS_90  | NZ  | C.ASP_63  | OD1 | 3.022 |
| 4HLZ | C.LYS_90  | NZ  | C.ASP_63  | OD2 | 3.647 |
| 4HLZ | C.ARG_94  | NH1 | C.GLU_75  | OE1 | 3.383 |
| 4HLZ | C.ARG_94  | NH1 | C.ASP_95  | OD1 | 3.179 |
| 4HLZ | C.ARG_94  | NH1 | C.ASP_95  | OD2 | 3.935 |
| 4HLZ | C.LYS_109 | NZ  | C.GLU_89  | OE1 | 2.906 |

|      |           |     |            |     |       |
|------|-----------|-----|------------|-----|-------|
| 4HLZ | C_LYS_109 | NZ  | C_GLU_89   | OE2 | 3.287 |
| 4HLZ | C_LYS_109 | NZ  | D_GLU_69   | OE1 | 2.904 |
| 4HLZ | C_LYS_109 | NZ  | D_GLU_69   | OE2 | 3.394 |
| 4HLZ | C_ARG_126 | NH2 | C_ASP_125  | OD2 | 3.430 |
| 4HLZ | C_ARG_149 | NH1 | C_ASP_77   | OD2 | 3.631 |
| 4HLZ | C_ARG_149 | NH2 | C_ASP_77   | OD1 | 3.636 |
| 4HLZ | C_ARG_149 | NH2 | C_ASP_77   | OD2 | 2.529 |
| 4HLZ | C_HIS_184 | NE2 | C_GLU_231  | OE1 | 3.054 |
| 4HLZ | C_ARG_263 | NH2 | C_GLU_174  | OE1 | 2.955 |
| 4HLZ | C_ARG_263 | NH2 | C_GLU_174  | OE2 | 3.891 |
| 4HLZ | C_LYS_269 | NZ  | C_GLU_89   | OE1 | 2.769 |
| 4HLZ | C_LYS_310 | NZ  | D_ASP_86   | OD2 | 2.827 |
| 4HLZ | C_LYS_310 | NZ  | D_ASP_90   | OD1 | 2.357 |
| 4HLZ | C_LYS_310 | NZ  | D_ASP_90   | OD2 | 3.459 |
| 4HLZ | C_LYS_313 | NZ  | C_ASP_27   | OD2 | 2.972 |
| 4HLZ | C_ARG_321 | NH1 | C_GLU_31   | OE1 | 3.468 |
| 4HLZ | C_ARG_321 | NH1 | C_GLU_31   | OE2 | 3.239 |
| 4HLZ | C_ARG_321 | NH2 | C_GLU_31   | OE1 | 3.056 |
| 4HLZ | C_ARG_321 | NH2 | C_GLU_31   | OE2 | 3.827 |
| 4HLZ | D_LYS_51  | NZ  | D_GLU_103  | OE1 | 2.956 |
| 4HLZ | D_LYS_58  | NZ  | B_GLU_97   | OE1 | 2.796 |
| 4HLZ | D_LYS_58  | NZ  | D_GLU_57   | OE2 | 3.744 |
| 4HLZ | D_ARG_75  | NH1 | D_GLU_78   | OE1 | 3.640 |
| 4HLZ | D_ARG_75  | NH1 | D_GLU_78   | OE2 | 2.859 |
| 4HLZ | D_ARG_76  | NH1 | F_GLU_74   | OE1 | 3.279 |
| 4HLZ | D_ARG_76  | NH1 | F_GLU_74   | OE2 | 2.976 |
| 4HLZ | D_ARG_76  | NH2 | E_GLU_107  | OE2 | 3.277 |
| 4HLZ | D_ARG_76  | NH2 | F_GLU_74   | OE2 | 2.480 |
| 4HLZ | D_LYS_83  | NZ  | F_GLU_85   | OE2 | 2.714 |
| 4HLZ | D_ARG_106 | NH2 | B_ASP_109  | OD2 | 3.865 |
| 4HLZ | D_LYS_116 | NZ  | D_ASP_120  | OD2 | 3.998 |
| 4HLZ | D_ARG_123 | NH2 | D_ASP_120  | OD1 | 2.808 |
| 4HLZ | D_LYS_131 | NZ  | F_ASP_128  | OD1 | 3.317 |
| 4HLZ | D_LYS_167 | NZ  | D_GLU_164  | OE1 | 2.593 |
| 4HLZ | E_LYS_45  | NZ  | E_ASP_41   | OD1 | 3.643 |
| 4HLZ | E_LYS_45  | NZ  | E_ASP_41   | OD2 | 2.964 |
| 4HLZ | E_LYS_90  | NZ  | E_ASP_63   | OD1 | 3.784 |
| 4HLZ | E_LYS_109 | NZ  | E_GLU_89   | OE1 | 3.198 |
| 4HLZ | E_LYS_109 | NZ  | E_GLU_89   | OE2 | 3.420 |
| 4HLZ | E_LYS_109 | NZ  | F_GLU_69   | OE1 | 2.572 |
| 4HLZ | E_LYS_109 | NZ  | F_GLU_69   | OE2 | 3.930 |
| 4HLZ | E_LYS_123 | NZ  | E_GLU_255  | OE1 | 3.027 |
| 4HLZ | E_ARG_149 | NH2 | E_ASP_77   | OD1 | 3.597 |
| 4HLZ | E_ARG_149 | NH2 | E_ASP_77   | OD2 | 3.190 |
| 4HLZ | E_HIS_183 | NE2 | E_GLU_190  | OE2 | 3.927 |
| 4HLZ | E_LYS_259 | NZ  | E_GLU_116C | OE1 | 3.783 |
| 4HLZ | E_LYS_259 | NZ  | E_GLU_116C | OE2 | 3.326 |
| 4HLZ | E_LYS_269 | NZ  | E_GLU_89   | OE1 | 3.197 |
| 4HLZ | E_LYS_280 | NZ  | E_GLU_304  | OE1 | 3.278 |
| 4HLZ | E_LYS_310 | NZ  | F_ASP_86   | OD1 | 3.890 |
| 4HLZ | E_LYS_310 | NZ  | F_ASP_90   | OD1 | 3.800 |
| 4HLZ | E_ARG_321 | NH1 | E_GLU_31   | OE1 | 3.413 |
| 4HLZ | E_ARG_321 | NH1 | E_GLU_31   | OE2 | 2.743 |
| 4HLZ | E_ARG_321 | NH2 | E_GLU_31   | OE1 | 3.001 |
| 4HLZ | E_ARG_321 | NH2 | E_GLU_31   | OE2 | 3.732 |
| 4HLZ | F_LYS_51  | NZ  | F_GLU_103  | OE1 | 2.737 |
| 4HLZ | F_LYS_58  | NZ  | D_GLU_97   | OE1 | 3.641 |
| 4HLZ | F_ARG_75  | NH1 | F_GLU_78   | OE1 | 2.620 |

|      |           |     |           |     |       |
|------|-----------|-----|-----------|-----|-------|
| 4HLZ | F_ARG_75  | NH2 | F_GLU_78  | OE1 | 3.832 |
| 4HLZ | F_ARG_76  | NH1 | B_GLU_74  | OE1 | 3.514 |
| 4HLZ | F_ARG_76  | NH1 | B_GLU_74  | OE2 | 3.227 |
| 4HLZ | F_ARG_76  | NH2 | B_GLU_74  | OE1 | 3.962 |
| 4HLZ | F_ARG_76  | NH2 | B_GLU_74  | OE2 | 2.467 |
| 4HLZ | F_ARG_106 | NH1 | F_GLU_103 | OE2 | 3.652 |
| 4HLZ | F_LYS_116 | NZ  | F_ASP_120 | OD2 | 2.737 |
| 4HLZ | F_ARG_123 | NH2 | F_ASP_120 | OD1 | 2.964 |
| 4HLZ | F_LYS_131 | NZ  | F_GLU_139 | OE1 | 3.361 |
| 4HLZ | F_LYS_131 | NZ  | F_GLU_139 | OE2 | 3.419 |
| 4HLZ | F_LYS_143 | NZ  | F_ASP_29  | OD1 | 2.830 |
| 4HLZ | F_ARG_170 | NH1 | F_ASP_128 | OD2 | 3.604 |
| 4HLZ | F_ARG_170 | NH2 | F_ASP_128 | OD2 | 3.330 |
| 4HLZ | G_ARG_38  | NH1 | G_ASP_86  | OD1 | 3.271 |
| 4HLZ | G_ARG_38  | NH2 | G_GLU_46  | OE1 | 3.356 |
| 4HLZ | G_ARG_38  | NH2 | G_GLU_46  | OE2 | 3.777 |
| 4HLZ | G_ARG_38  | NH2 | G_ASP_86  | OD1 | 3.890 |
| 4HLZ | G_ARG_52  | NH2 | G_ASP_32  | OD1 | 2.343 |
| 4HLZ | G_ARG_52  | NH2 | G_ASP_32  | OD2 | 3.536 |
| 4HLZ | G_ARG_66  | NH1 | G_ASP_86  | OD1 | 3.326 |
| 4HLZ | G_ARG_66  | NH1 | G_ASP_86  | OD2 | 2.639 |
| 4HLZ | G_ARG_66  | NH2 | G_ASP_86  | OD1 | 3.814 |
| 4HLZ | G_ARG_83  | NH1 | G_GLU_85  | OE1 | 3.950 |
| 4HLZ | H_ARG_63  | NH2 | H_ASP_84  | OD1 | 2.596 |
| 4HLZ | H_ARG_63  | NH2 | H_ASP_84  | OD2 | 2.745 |
| 4HLZ | H_LYS_144 | NZ  | H_GLU_107 | OE1 | 3.903 |
| 4HLZ | H_LYS_144 | NZ  | H_GLU_107 | OE2 | 3.652 |
| 4HLZ | H_LYS_151 | NZ  | H_GLU_197 | OE1 | 3.384 |
| 4HLZ | H_LYS_151 | NZ  | H_GLU_197 | OE2 | 3.081 |
| 4HLZ | H_LYS_201 | NZ  | H_ASP_112 | OD2 | 3.156 |
| 4HLZ | H_ARG_213 | NH2 | H_GLU_189 | OE1 | 2.950 |
| 4HLZ | I_ARG_38  | NH1 | I_ASP_86  | OD2 | 2.915 |
| 4HLZ | I_ARG_38  | NH2 | I_GLU_46  | OE1 | 3.111 |
| 4HLZ | I_ARG_38  | NH2 | I_GLU_46  | OE2 | 3.673 |
| 4HLZ | I_ARG_38  | NH2 | I_ASP_86  | OD2 | 3.591 |
| 4HLZ | I_ARG_52  | NH2 | I_ASP_32  | OD1 | 2.561 |
| 4HLZ | I_ARG_52  | NH2 | I_ASP_32  | OD2 | 3.549 |
| 4HLZ | I_ARG_66  | NH1 | I_ASP_86  | OD1 | 2.650 |
| 4HLZ | I_ARG_66  | NH1 | I_ASP_86  | OD2 | 3.900 |
| 4HLZ | I_ARG_66  | NH2 | I_ASP_86  | OD1 | 3.129 |
| 4HLZ | I_ARG_66  | NH2 | I_ASP_86  | OD2 | 2.801 |
| 4HLZ | I_ARG_71  | NH2 | I_ASP_31  | OD2 | 3.990 |
| 4HLZ | I_ARG_83  | NH2 | I_GLU_85  | OE1 | 3.778 |
| 4HLZ | I_LYS_96  | NZ  | D_ASP_46  | OD1 | 2.912 |
| 4HLZ | I_LYS_96  | NZ  | D_ASP_46  | OD2 | 3.655 |
| 4HLZ | I_LYS_205 | NZ  | I_ASP_207 | OD1 | 2.427 |
| 4HLZ | I_LYS_208 | NZ  | J_GLU_125 | OE2 | 3.495 |
| 4HLZ | I_ARG_213 | NH2 | J_GLU_125 | OE1 | 3.227 |
| 4HLZ | I_ARG_213 | NH2 | J_GLU_125 | OE2 | 3.829 |
| 4HLZ | J_ARG_63  | NH2 | J_ASP_84  | OD2 | 2.740 |
| 4HLZ | J_LYS_149 | NZ  | J_GLU_156 | OE2 | 3.758 |
| 4HLZ | J_LYS_151 | NZ  | J_GLU_197 | OE2 | 2.583 |
| 4HLZ | J_ARG_157 | NH2 | J_GLU_187 | OE1 | 3.252 |
| 4HLZ | J_ARG_190 | NH1 | J_ASP_186 | OD2 | 3.881 |
| 4HLZ | J_ARG_190 | NH2 | J_ASP_186 | OD2 | 3.287 |
| 4HLZ | J_LYS_201 | NZ  | J_ASP_112 | OD1 | 3.693 |
| 4HLZ | J_LYS_201 | NZ  | J_ASP_112 | OD2 | 2.715 |
| 4HLZ | K_ARG_38  | NH1 | K_ASP_86  | OD2 | 2.904 |

|      |           |     |           |     |       |
|------|-----------|-----|-----------|-----|-------|
| 4HLZ | K_ARG_38  | NH2 | K_GLU_46  | OE1 | 3.825 |
| 4HLZ | K_ARG_38  | NH2 | K_GLU_46  | OE2 | 3.374 |
| 4HLZ | K_ARG_38  | NH2 | K_ASP_86  | OD2 | 3.795 |
| 4HLZ | K_ARG_52  | NH2 | K_ASP_32  | OD2 | 3.514 |
| 4HLZ | K_ARG_66  | NH1 | K_ASP_86  | OD1 | 2.524 |
| 4HLZ | K_ARG_66  | NH2 | K_ASP_86  | OD1 | 2.641 |
| 4HLZ | K_ARG_66  | NH2 | K_ASP_86  | OD2 | 2.778 |
| 4HLZ | L_ARG_63  | NH2 | L_ASP_84  | OD1 | 3.511 |
| 4HLZ | L_ARG_63  | NH2 | L_ASP_84  | OD2 | 3.426 |
| 4HLZ | L_LYS_151 | NZ  | L_GLU_197 | OE2 | 3.915 |
| 4HMG | A_LYS_27  | NZ  | B_GLU_97  | OE1 | 2.795 |
| 4HMG | A_LYS_27  | NZ  | B_GLU_97  | OE2 | 3.247 |
| 4HMG | A_LYS_50  | NZ  | A_ASP_275 | OD1 | 2.738 |
| 4HMG | A_HIS_56  | NE2 | A_GLU_280 | OE2 | 3.458 |
| 4HMG | A_ARG_57  | NH1 | A_GLU_82  | OE1 | 2.930 |
| 4HMG | A_ARG_57  | NH1 | A_GLU_82  | OE2 | 3.739 |
| 4HMG | A_ARG_57  | NH2 | A_GLU_82  | OE1 | 3.316 |
| 4HMG | A_HIS_75  | ND1 | A_ASP_73  | OD1 | 2.731 |
| 4HMG | A_HIS_75  | ND1 | A_ASP_73  | OD2 | 3.421 |
| 4HMG | A_HIS_75  | NE2 | A_ASP_63  | OD1 | 3.435 |
| 4HMG | A_ARG_90  | NH1 | A_ASP_60  | OD1 | 2.846 |
| 4HMG | A_ARG_90  | NH1 | A_ASP_60  | OD2 | 3.713 |
| 4HMG | A_ARG_109 | NH1 | B_GLU_67  | OE1 | 3.584 |
| 4HMG | A_ARG_109 | NH1 | B_GLU_67  | OE2 | 2.773 |
| 4HMG | A_ARG_109 | NH2 | A_GLU_89  | OE1 | 3.290 |
| 4HMG | A_ARG_109 | NH2 | A_GLU_89  | OE2 | 2.543 |
| 4HMG | A_ARG_141 | NH1 | A_ASP_77  | OD1 | 2.714 |
| 4HMG | A_ARG_141 | NH1 | A_ASP_77  | OD2 | 3.370 |
| 4HMG | A_ARG_141 | NH2 | A_ASP_77  | OD1 | 2.707 |
| 4HMG | A_LYS_176 | NZ  | A_GLU_123 | OE1 | 2.555 |
| 4HMG | A_LYS_176 | NZ  | A_GLU_123 | OE2 | 3.715 |
| 4HMG | A_HIS_183 | NE2 | A_GLU_190 | OE1 | 3.735 |
| 4HMG | A_ARG_207 | NH2 | A_ASP_241 | OD1 | 3.612 |
| 4HMG | A_ARG_208 | NH2 | A_ASP_241 | OD1 | 3.591 |
| 4HMG | A_ARG_208 | NH2 | A_ASP_241 | OD2 | 2.706 |
| 4HMG | A_LYS_238 | NZ  | A_ASP_175 | OD1 | 2.945 |
| 4HMG | A_LYS_238 | NZ  | A_ASP_175 | OD2 | 2.559 |
| 4HMG | A_LYS_238 | NZ  | F_GLU_72  | OE2 | 2.782 |
| 4HMG | A_ARG_261 | NH1 | A_GLU_119 | OE1 | 3.272 |
| 4HMG | A_ARG_261 | NH1 | A_GLU_119 | OE2 | 3.090 |
| 4HMG | A_ARG_261 | NH2 | A_GLU_119 | OE1 | 2.807 |
| 4HMG | A_ARG_261 | NH2 | A_GLU_119 | OE2 | 2.795 |
| 4HMG | A_LYS_264 | NZ  | A_ASP_85  | OD1 | 3.254 |
| 4HMG | A_LYS_264 | NZ  | A_ASP_85  | OD2 | 2.704 |
| 4HMG | A_ARG_269 | NH2 | B_GLU_67  | OE1 | 2.783 |
| 4HMG | A_LYS_292 | NZ  | A_ASP_291 | OD1 | 2.976 |
| 4HMG | A_LYS_292 | NZ  | A_ASP_291 | OD2 | 2.795 |
| 4HMG | A_LYS_310 | NZ  | B_ASP_90  | OD1 | 3.350 |
| 4HMG | A_LYS_310 | NZ  | B_ASP_90  | OD2 | 2.711 |
| 4HMG | A_LYS_315 | NZ  | A_GLU_41  | OE2 | 3.691 |
| 4HMG | B_LYS_51  | NZ  | B_GLU_103 | OE2 | 2.574 |
| 4HMG | B_ARG_54  | NH1 | F_GLU_97  | OE1 | 3.078 |
| 4HMG | B_ARG_54  | NH2 | B_GLU_57  | OE1 | 2.870 |
| 4HMG | B_ARG_54  | NH2 | B_GLU_57  | OE2 | 3.339 |
| 4HMG | B_ARG_54  | NH2 | E_ASP_32  | OD2 | 3.863 |
| 4HMG | B_ARG_54  | NH2 | F_GLU_97  | OE1 | 3.088 |
| 4HMG | B_LYS_62  | NZ  | F_ASP_86  | OD1 | 2.890 |
| 4HMG | B_LYS_62  | NZ  | F_ASP_86  | OD2 | 2.630 |



|      |           |     |           |     |       |
|------|-----------|-----|-----------|-----|-------|
| 4HMG | B.LYS.62  | NZ  | F.ASP.90  | OD1 | 3.620 |
| 4HMG | B.LYS.62  | NZ  | F.ASP.90  | OD2 | 3.931 |
| 4HMG | B.HIS.64  | NE2 | F.ASP.79  | OD2 | 3.785 |
| 4HMG | B.LYS.68  | NZ  | B.GLU.85  | OE1 | 2.990 |
| 4HMG | B.LYS.68  | NZ  | B.GLU.85  | OE2 | 2.568 |
| 4HMG | B.ARG.76  | NH1 | D.GLU.74  | OE1 | 2.796 |
| 4HMG | B.ARG.76  | NH1 | D.GLU.74  | OE2 | 3.711 |
| 4HMG | B.ARG.76  | NH1 | D.GLU.81  | OE1 | 2.672 |
| 4HMG | B.ARG.76  | NH1 | D.GLU.81  | OE2 | 3.308 |
| 4HMG | B.ARG.76  | NH2 | D.GLU.74  | OE1 | 3.404 |
| 4HMG | B.ARG.76  | NH2 | D.GLU.74  | OE2 | 2.827 |
| 4HMG | B.LYS.117 | NZ  | B.GLU.114 | OE1 | 2.600 |
| 4HMG | B.LYS.117 | NZ  | B.GLU.114 | OE2 | 3.394 |
| 4HMG | B.ARG.123 | NH1 | F.GLU.132 | OE2 | 3.178 |
| 4HMG | B.ARG.123 | NH2 | B.GLU.120 | OE1 | 2.819 |
| 4HMG | B.ARG.123 | NH2 | B.GLU.120 | OE2 | 2.567 |
| 4HMG | B.ARG.124 | NH1 | F.GLU.132 | OE1 | 3.359 |
| 4HMG | B.ARG.124 | NH1 | F.GLU.132 | OE2 | 3.102 |
| 4HMG | B.ARG.124 | NH2 | B.GLU.120 | OE2 | 3.559 |
| 4HMG | B.ARG.127 | NH2 | F.GLU.131 | OE1 | 2.525 |
| 4HMG | B.LYS.143 | NZ  | B.ASP.145 | OD2 | 3.353 |
| 4HMG | B.HIS.159 | NE2 | B.ASP.160 | OD1 | 3.910 |
| 4HMG | B.HIS.159 | NE2 | B.ASP.160 | OD2 | 3.133 |
| 4HMG | B.ARG.163 | NH1 | F.GLU.131 | OE1 | 3.338 |
| 4HMG | B.ARG.163 | NH1 | F.GLU.131 | OE2 | 2.796 |
| 4HMG | B.ARG.163 | NH2 | F.GLU.131 | OE1 | 2.694 |
| 4HMG | B.ARG.163 | NH2 | F.GLU.131 | OE2 | 3.492 |
| 4HMG | B.ARG.170 | NH1 | B.GLU.128 | OE1 | 2.770 |
| 4HMG | B.ARG.170 | NH2 | B.GLU.131 | OE2 | 2.764 |
| 4HMG | B.ARG.170 | NH2 | D.GLU.128 | OE1 | 3.784 |
| 4HMG | B.ARG.170 | NH2 | D.GLU.128 | OE2 | 3.698 |
| 4HMG | C.LYS.27  | NZ  | D.GLU.97  | OE1 | 2.789 |
| 4HMG | C.LYS.27  | NZ  | D.GLU.97  | OE2 | 3.246 |
| 4HMG | C.LYS.50  | NZ  | C.ASP.275 | OD1 | 2.725 |
| 4HMG | C.HIS.56  | NE2 | C.GLU.280 | OE2 | 3.428 |
| 4HMG | C.ARG.57  | NH1 | C.GLU.82  | OE1 | 2.906 |
| 4HMG | C.ARG.57  | NH1 | C.GLU.82  | OE2 | 3.723 |
| 4HMG | C.ARG.57  | NH2 | C.GLU.82  | OE1 | 3.281 |
| 4HMG | C.HIS.75  | ND1 | C.ASP.73  | OD1 | 2.703 |
| 4HMG | C.HIS.75  | ND1 | C.ASP.73  | OD2 | 3.384 |
| 4HMG | C.HIS.75  | NE2 | C.ASP.63  | OD1 | 3.436 |
| 4HMG | C.ARG.90  | NH1 | C.ASP.60  | OD1 | 2.839 |
| 4HMG | C.ARG.90  | NH1 | C.ASP.60  | OD2 | 3.741 |
| 4HMG | C.ARG.109 | NH1 | D.GLU.67  | OE1 | 3.616 |
| 4HMG | C.ARG.109 | NH1 | D.GLU.67  | OE2 | 2.791 |
| 4HMG | C.ARG.109 | NH2 | C.GLU.89  | OE1 | 3.304 |
| 4HMG | C.ARG.109 | NH2 | C.GLU.89  | OE2 | 2.531 |
| 4HMG | C.ARG.141 | NH1 | C.ASP.77  | OD1 | 2.711 |
| 4HMG | C.ARG.141 | NH1 | C.ASP.77  | OD2 | 3.370 |
| 4HMG | C.ARG.141 | NH2 | C.ASP.77  | OD1 | 2.681 |
| 4HMG | C.LYS.176 | NZ  | C.GLU.123 | OE1 | 2.557 |
| 4HMG | C.LYS.176 | NZ  | C.GLU.123 | OE2 | 3.685 |
| 4HMG | C.HIS.183 | NE2 | C.GLU.190 | OE1 | 3.742 |
| 4HMG | C.ARG.207 | NH2 | C.ASP.241 | OD1 | 3.569 |
| 4HMG | C.ARG.208 | NH2 | C.ASP.241 | OD1 | 3.571 |
| 4HMG | C.ARG.208 | NH2 | C.ASP.241 | OD2 | 2.695 |
| 4HMG | C.LYS.238 | NZ  | B.GLU.72  | OE2 | 2.606 |
| 4HMG | C.LYS.238 | NZ  | C.ASP.175 | OD1 | 2.940 |

|      |           |     |           |     |       |
|------|-----------|-----|-----------|-----|-------|
| 4HMG | C_LYS_238 | NZ  | C_ASP_175 | OD2 | 2.570 |
| 4HMG | C_ARG_261 | NH1 | C_GLU_119 | OE1 | 3.250 |
| 4HMG | C_ARG_261 | NH1 | C_GLU_119 | OE2 | 3.087 |
| 4HMG | C_ARG_261 | NH2 | C_GLU_119 | OE1 | 2.811 |
| 4HMG | C_ARG_261 | NH2 | C_GLU_119 | OE2 | 2.823 |
| 4HMG | C_LYS_264 | NZ  | C_ASP_85  | OD1 | 3.271 |
| 4HMG | C_LYS_264 | NZ  | C_ASP_85  | OD2 | 2.729 |
| 4HMG | C_ARG_269 | NH2 | D_GLU_67  | OE1 | 2.764 |
| 4HMG | C_LYS_292 | NZ  | C_ASP_291 | OD1 | 2.981 |
| 4HMG | C_LYS_292 | NZ  | C_ASP_291 | OD2 | 2.812 |
| 4HMG | C_LYS_310 | NZ  | D_ASP_90  | OD1 | 3.321 |
| 4HMG | C_LYS_310 | NZ  | D_ASP_90  | OD2 | 2.697 |
| 4HMG | C_LYS_315 | NZ  | C_GLU_41  | OE2 | 3.694 |
| 4HMG | C_LYS_326 | NZ  | D_GLU_15  | OE1 | 3.836 |
| 4HMG | C_LYS_326 | NZ  | D_GLU_15  | OE2 | 2.684 |
| 4HMG | D_LYS_51  | NZ  | D_GLU_103 | OE2 | 2.595 |
| 4HMG | D_ARG_54  | NH1 | B_GLU_97  | OE1 | 3.076 |
| 4HMG | D_ARG_54  | NH2 | A_ASP_32  | OD2 | 3.995 |
| 4HMG | D_ARG_54  | NH2 | B_GLU_97  | OE1 | 3.112 |
| 4HMG | D_ARG_54  | NH2 | D_GLU_57  | OE1 | 2.847 |
| 4HMG | D_ARG_54  | NH2 | D_GLU_57  | OE2 | 3.364 |
| 4HMG | D_LYS_62  | NZ  | B_ASP_86  | OD1 | 2.940 |
| 4HMG | D_LYS_62  | NZ  | B_ASP_86  | OD2 | 2.591 |
| 4HMG | D_LYS_62  | NZ  | B_ASP_90  | OD1 | 3.586 |
| 4HMG | D_LYS_62  | NZ  | B_ASP_90  | OD2 | 3.891 |
| 4HMG | D_HIS_64  | NE2 | B_ASP_79  | OD2 | 3.731 |
| 4HMG | D_LYS_68  | NZ  | D_GLU_85  | OE1 | 2.969 |
| 4HMG | D_LYS_68  | NZ  | D_GLU_85  | OE2 | 2.606 |
| 4HMG | D_ARG_76  | NH1 | F_GLU_74  | OE1 | 2.745 |
| 4HMG | D_ARG_76  | NH1 | F_GLU_74  | OE2 | 3.756 |
| 4HMG | D_ARG_76  | NH1 | F_GLU_81  | OE1 | 2.644 |
| 4HMG | D_ARG_76  | NH1 | F_GLU_81  | OE2 | 3.314 |
| 4HMG | D_ARG_76  | NH2 | F_GLU_74  | OE1 | 3.255 |
| 4HMG | D_ARG_76  | NH2 | F_GLU_74  | OE2 | 2.777 |
| 4HMG | D_LYS_117 | NZ  | D_GLU_114 | OE1 | 2.606 |
| 4HMG | D_LYS_117 | NZ  | D_GLU_114 | OE2 | 3.387 |
| 4HMG | D_ARG_123 | NH1 | B_GLU_132 | OE2 | 3.157 |
| 4HMG | D_ARG_123 | NH2 | D_GLU_120 | OE1 | 2.828 |
| 4HMG | D_ARG_123 | NH2 | D_GLU_120 | OE2 | 2.538 |
| 4HMG | D_ARG_124 | NH1 | B_GLU_132 | OE1 | 3.347 |
| 4HMG | D_ARG_124 | NH1 | B_GLU_132 | OE2 | 3.074 |
| 4HMG | D_ARG_124 | NH2 | D_GLU_120 | OE2 | 3.592 |
| 4HMG | D_ARG_127 | NH2 | B_GLU_131 | OE1 | 2.541 |
| 4HMG | D_LYS_143 | NZ  | D_ASP_145 | OD2 | 3.357 |
| 4HMG | D_HIS_159 | NE2 | D_ASP_160 | OD1 | 3.925 |
| 4HMG | D_HIS_159 | NE2 | D_ASP_160 | OD2 | 3.140 |
| 4HMG | D_ARG_163 | NH1 | B_GLU_131 | OE1 | 3.321 |
| 4HMG | D_ARG_163 | NH1 | B_GLU_131 | OE2 | 2.801 |
| 4HMG | D_ARG_163 | NH2 | B_GLU_131 | OE1 | 2.729 |
| 4HMG | D_ARG_163 | NH2 | B_GLU_131 | OE2 | 3.526 |
| 4HMG | D_ARG_170 | NH1 | D_GLU_128 | OE1 | 2.798 |
| 4HMG | D_ARG_170 | NH2 | D_GLU_131 | OE2 | 2.778 |
| 4HMG | D_ARG_170 | NH2 | F_GLU_128 | OE1 | 3.859 |
| 4HMG | D_ARG_170 | NH2 | F_GLU_128 | OE2 | 3.829 |
| 4HMG | E_LYS_27  | NZ  | F_GLU_97  | OE1 | 2.764 |
| 4HMG | E_LYS_27  | NZ  | F_GLU_97  | OE2 | 3.247 |
| 4HMG | E_LYS_50  | NZ  | E_ASP_275 | OD1 | 2.749 |
| 4HMG | E_HIS_56  | NE2 | E_GLU_280 | OE2 | 3.460 |

|      |           |     |           |     |       |
|------|-----------|-----|-----------|-----|-------|
| 4HMG | E_ARG_57  | NH1 | E_GLU_82  | OE1 | 2.908 |
| 4HMG | E_ARG_57  | NH1 | E_GLU_82  | OE2 | 3.750 |
| 4HMG | E_ARG_57  | NH2 | E_GLU_82  | OE1 | 3.320 |
| 4HMG | E_HIS_75  | ND1 | E_ASP_73  | OD1 | 2.714 |
| 4HMG | E_HIS_75  | ND1 | E_ASP_73  | OD2 | 3.391 |
| 4HMG | E_HIS_75  | NE2 | E_ASP_63  | OD1 | 3.445 |
| 4HMG | E_ARG_90  | NH1 | E_ASP_60  | OD1 | 2.880 |
| 4HMG | E_ARG_90  | NH1 | E_ASP_60  | OD2 | 3.726 |
| 4HMG | E_ARG_109 | NH1 | F_GLU_67  | OE1 | 3.614 |
| 4HMG | E_ARG_109 | NH1 | F_GLU_67  | OE2 | 2.773 |
| 4HMG | E_ARG_109 | NH2 | E_GLU_89  | OE1 | 3.299 |
| 4HMG | E_ARG_109 | NH2 | E_GLU_89  | OE2 | 2.546 |
| 4HMG | E_ARG_141 | NH1 | E_ASP_77  | OD1 | 2.709 |
| 4HMG | E_ARG_141 | NH1 | E_ASP_77  | OD2 | 3.383 |
| 4HMG | E_ARG_141 | NH2 | E_ASP_77  | OD1 | 2.687 |
| 4HMG | E_LYS_176 | NZ  | E_GLU_123 | OE1 | 2.598 |
| 4HMG | E_LYS_176 | NZ  | E_GLU_123 | OE2 | 3.726 |
| 4HMG | E_HIS_183 | NE2 | E_GLU_190 | OE1 | 3.747 |
| 4HMG | E_ARG_207 | NH2 | E_ASP_241 | OD1 | 3.575 |
| 4HMG | E_ARG_208 | NH2 | E_ASP_241 | OD1 | 3.603 |
| 4HMG | E_ARG_208 | NH2 | E_ASP_241 | OD2 | 2.770 |
| 4HMG | E_LYS_238 | NZ  | D_GLU_72  | OE2 | 2.707 |
| 4HMG | E_LYS_238 | NZ  | E_ASP_175 | OD1 | 2.946 |
| 4HMG | E_LYS_238 | NZ  | E_ASP_175 | OD2 | 2.555 |
| 4HMG | E_ARG_261 | NH1 | E_GLU_119 | OE1 | 3.244 |
| 4HMG | E_ARG_261 | NH1 | E_GLU_119 | OE2 | 3.073 |
| 4HMG | E_ARG_261 | NH2 | E_GLU_119 | OE1 | 2.813 |
| 4HMG | E_ARG_261 | NH2 | E_GLU_119 | OE2 | 2.815 |
| 4HMG | E_LYS_264 | NZ  | E_ASP_85  | OD1 | 3.266 |
| 4HMG | E_LYS_264 | NZ  | E_ASP_85  | OD2 | 2.734 |
| 4HMG | E_ARG_269 | NH2 | F_GLU_67  | OE1 | 2.739 |
| 4HMG | E_LYS_292 | NZ  | E_ASP_291 | OD1 | 3.009 |
| 4HMG | E_LYS_292 | NZ  | E_ASP_291 | OD2 | 2.847 |
| 4HMG | E_LYS_310 | NZ  | F_ASP_90  | OD1 | 3.300 |
| 4HMG | E_LYS_310 | NZ  | F_ASP_90  | OD2 | 2.685 |
| 4HMG | E_LYS_315 | NZ  | E_GLU_41  | OE2 | 3.689 |
| 4HMG | F_ARG_25  | NH1 | E_GLU_325 | OE1 | 3.853 |
| 4HMG | F_LYS_51  | NZ  | F_GLU_103 | OE2 | 2.620 |
| 4HMG | F_ARG_54  | NH1 | D_GLU_97  | OE1 | 3.052 |
| 4HMG | F_ARG_54  | NH2 | C_ASP_32  | OD2 | 3.923 |
| 4HMG | F_ARG_54  | NH2 | D_GLU_97  | OE1 | 3.130 |
| 4HMG | F_ARG_54  | NH2 | F_GLU_57  | OE1 | 2.861 |
| 4HMG | F_ARG_54  | NH2 | F_GLU_57  | OE2 | 3.350 |
| 4HMG | F_LYS_62  | NZ  | D_ASP_86  | OD1 | 2.900 |
| 4HMG | F_LYS_62  | NZ  | D_ASP_86  | OD2 | 2.597 |
| 4HMG | F_LYS_62  | NZ  | D_ASP_90  | OD1 | 3.664 |
| 4HMG | F_LYS_62  | NZ  | D_ASP_90  | OD2 | 3.951 |
| 4HMG | F_HIS_64  | NE2 | D_ASP_79  | OD2 | 3.646 |
| 4HMG | F_LYS_68  | NZ  | F_GLU_85  | OE1 | 3.007 |
| 4HMG | F_LYS_68  | NZ  | F_GLU_85  | OE2 | 2.563 |
| 4HMG | F_ARG_76  | NH1 | B_GLU_74  | OE1 | 2.714 |
| 4HMG | F_ARG_76  | NH1 | B_GLU_74  | OE2 | 3.687 |
| 4HMG | F_ARG_76  | NH1 | B_GLU_81  | OE1 | 2.651 |
| 4HMG | F_ARG_76  | NH1 | B_GLU_81  | OE2 | 3.434 |
| 4HMG | F_ARG_76  | NH2 | B_GLU_74  | OE1 | 3.281 |
| 4HMG | F_ARG_76  | NH2 | B_GLU_74  | OE2 | 2.711 |
| 4HMG | F_LYS_117 | NZ  | F_GLU_114 | OE1 | 2.613 |
| 4HMG | F_LYS_117 | NZ  | F_GLU_114 | OE2 | 3.409 |

|      |           |     |           |     |       |
|------|-----------|-----|-----------|-----|-------|
| 4HMG | F_ARG_123 | NH1 | D_GLU_132 | OE2 | 3.178 |
| 4HMG | F_ARG_123 | NH2 | F_GLU_120 | OE1 | 2.836 |
| 4HMG | F_ARG_123 | NH2 | F_GLU_120 | OE2 | 2.539 |
| 4HMG | F_ARG_124 | NH1 | D_GLU_132 | OE1 | 3.402 |
| 4HMG | F_ARG_124 | NH1 | D_GLU_132 | OE2 | 3.132 |
| 4HMG | F_ARG_124 | NH2 | F_GLU_120 | OE2 | 3.562 |
| 4HMG | F_ARG_127 | NH2 | D_GLU_131 | OE1 | 2.579 |
| 4HMG | F_LYS_143 | NZ  | F_ASP_145 | OD2 | 3.346 |
| 4HMG | F_ARG_153 | NH2 | F_GLU_150 | OE1 | 2.613 |
| 4HMG | F_HIS_159 | NE2 | F_ASP_160 | OD1 | 3.932 |
| 4HMG | F_HIS_159 | NE2 | F_ASP_160 | OD2 | 3.131 |
| 4HMG | F_ARG_163 | NH1 | D_GLU_131 | OE1 | 3.299 |
| 4HMG | F_ARG_163 | NH1 | D_GLU_131 | OE2 | 2.816 |
| 4HMG | F_ARG_163 | NH2 | D_GLU_131 | OE1 | 2.752 |
| 4HMG | F_ARG_163 | NH2 | D_GLU_131 | OE2 | 3.575 |
| 4HMG | F_ARG_170 | NH1 | F_GLU_128 | OE1 | 2.781 |
| 4HMG | F_ARG_170 | NH2 | B_GLU_128 | OE1 | 3.815 |
| 4HMG | F_ARG_170 | NH2 | B_GLU_128 | OE2 | 3.719 |
| 4HMG | F_ARG_170 | NH2 | F_GLU_131 | OE2 | 2.764 |
| 4HWB | A_ARG_230 | NH2 | H_ASP_56  | OD2 | 3.246 |
| 4HWB | A_ARG_285 | NH2 | A_GLU_237 | OE1 | 2.762 |
| 4HWB | A_ARG_285 | NH2 | A_GLU_237 | OE2 | 3.252 |
| 4HWB | A_ARG_287 | NH2 | A_GLU_235 | OE1 | 2.730 |
| 4HWB | A_ARG_287 | NH2 | A_GLU_235 | OE2 | 3.307 |
| 4HWB | H_ARG_39  | NH2 | H_GLU_47  | OE2 | 3.027 |
| 4HWB | H_ARG_99  | NH2 | H_ASP_107 | OD1 | 3.362 |
| 4HWB | H_ARG_99  | NH2 | H_ASP_107 | OD2 | 2.612 |
| 4HWB | H_LYS_149 | NZ  | H_ASP_150 | OD1 | 3.433 |
| 4HWB | H_LYS_149 | NZ  | H_ASP_150 | OD2 | 3.050 |
| 4HWB | H_LYS_215 | NZ  | L_GLU_120 | OE2 | 3.469 |
| 4HWB | L_ARG_24  | NH1 | L_ASP_71  | OD2 | 3.912 |
| 4HWB | L_ARG_62  | NH2 | L_GLU_82  | OE1 | 3.563 |
| 4HWB | L_ARG_62  | NH2 | L_ASP_83  | OD1 | 3.123 |
| 4HWB | L_ARG_62  | NH2 | L_ASP_83  | OD2 | 3.996 |
| 4HWB | L_LYS_146 | NZ  | L_GLU_192 | OE2 | 2.824 |
| 4HWB | L_LYS_180 | NZ  | L_GLU_184 | OE2 | 3.810 |
| 4HWB | L_HIS_186 | ND1 | L_ASP_148 | OD2 | 3.236 |
| 4HXA | L_HIS_34  | ND1 | L_ASP_50  | OD2 | 3.892 |
| 4HXA | L_ARG_61  | NH1 | L_GLU_79  | OE1 | 3.572 |
| 4HXA | L_ARG_61  | NH1 | L_GLU_79  | OE2 | 3.959 |
| 4HXA | L_ARG_61  | NH2 | L_GLU_79  | OE1 | 3.712 |
| 4HXA | L_ARG_61  | NH2 | L_GLU_81  | OE2 | 2.919 |
| 4HXA | L_ARG_61  | NH2 | L_ASP_82  | OD1 | 2.910 |
| 4HXA | L_ARG_61  | NH2 | L_ASP_82  | OD2 | 3.687 |
| 4HXA | L_LYS_103 | NZ  | L_ASP_165 | OD1 | 3.306 |
| 4HXA | L_LYS_142 | NZ  | L_GLU_105 | OE1 | 2.359 |
| 4HXA | L_LYS_142 | NZ  | L_GLU_105 | OE2 | 3.217 |
| 4HXA | L_LYS_147 | NZ  | L_GLU_154 | OE2 | 3.699 |
| 4HXA | L_LYS_183 | NZ  | L_GLU_187 | OE1 | 2.855 |
| 4HXA | L_LYS_183 | NZ  | L_GLU_187 | OE2 | 3.206 |
| 4HXA | L_HIS_189 | ND1 | L_ASP_151 | OD1 | 2.656 |
| 4HXA | L_LYS_199 | NZ  | L_ASP_110 | OD1 | 2.782 |
| 4HXA | H_ARG_33  | NH2 | H_ASP_53  | OD2 | 3.146 |
| 4HXA | H_ARG_38  | NH1 | H_ASP_86  | OD1 | 2.911 |
| 4HXA | H_ARG_38  | NH2 | H_GLU_46  | OE1 | 3.220 |
| 4HXA | H_ARG_38  | NH2 | H_GLU_46  | OE2 | 3.961 |
| 4HXA | H_ARG_38  | NH2 | H_ASP_86  | OD1 | 3.758 |
| 4HXA | H_ARG_66  | NH1 | H_ASP_86  | OD1 | 3.213 |

|      |           |     |           |     |       |
|------|-----------|-----|-----------|-----|-------|
| 4HXA | H_ARG.66  | NH1 | H_ASP.86  | OD2 | 3.541 |
| 4HXA | H_ARG.66  | NH2 | H_ASP.86  | OD1 | 3.547 |
| 4HXA | H_ARG.66  | NH2 | H_ASP.86  | OD2 | 2.335 |
| 4HXA | H_ARG.71  | NH2 | H_ASP.73  | OD2 | 3.421 |
| 4HXA | H_LYS.75  | NZ  | H_ASP.72  | OD1 | 2.706 |
| 4HXA | H_ARG.94  | NH2 | H_ASP.101 | OD1 | 2.566 |
| 4HXA | H_ARG.94  | NH2 | H_ASP.101 | OD2 | 3.802 |
| 4HXA | H_ARG.98  | NH1 | L_ASP.50  | OD1 | 2.959 |
| 4HXA | H_ARG.98  | NH1 | L_ASP.50  | OD2 | 3.607 |
| 4HXA | H_HIS.164 | NE2 | L_ASP.167 | OD1 | 3.601 |
| 4HXA | H_LYS.205 | NZ  | H_ASP.207 | OD1 | 3.339 |
| 4HXA | H_LYS.205 | NZ  | H_ASP.207 | OD2 | 2.614 |
| 4HXB | L_ARG.61  | NH1 | L_ASP.82  | OD1 | 3.754 |
| 4HXB | L_ARG.61  | NH1 | L_ASP.82  | OD2 | 2.851 |
| 4HXB | L_ARG.61  | NH2 | L_GLU.79  | OE2 | 3.892 |
| 4HXB | L_ARG.61  | NH2 | L_GLU.81  | OE2 | 3.579 |
| 4HXB | L_ARG.61  | NH2 | L_ASP.82  | OD1 | 2.893 |
| 4HXB | L_ARG.61  | NH2 | L_ASP.82  | OD2 | 3.275 |
| 4HXB | L_LYS.147 | NZ  | L_GLU.195 | OE2 | 2.100 |
| 4HXB | L_LYS.149 | NZ  | L_GLU.195 | OE1 | 2.509 |
| 4HXB | L_LYS.149 | NZ  | L_GLU.195 | OE2 | 3.644 |
| 4HXB | L_ARG.155 | NH1 | L_GLU.185 | OE2 | 3.650 |
| 4HXB | L_ARG.155 | NH2 | L_GLU.185 | OE1 | 2.787 |
| 4HXB | L_ARG.155 | NH2 | L_GLU.185 | OE2 | 2.877 |
| 4HXB | L_LYS.183 | NZ  | L_GLU.187 | OE1 | 3.719 |
| 4HXB | L_HIS.189 | ND1 | L_ASP.151 | OD2 | 2.591 |
| 4HXB | L_HIS.189 | NE2 | L_GLU.185 | OE2 | 3.681 |
| 4HXB | L_LYS.199 | NZ  | L_ASP.110 | OD2 | 3.163 |
| 4HXB | H_LYS.12  | NZ  | H_GLU.10  | OE2 | 3.536 |
| 4HXB | H_LYS.46  | NZ  | H_ASP.62  | OD2 | 2.395 |
| 4HXB | H_LYS.64  | NZ  | H_GLU.61  | OE1 | 2.630 |
| 4HXB | H_LYS.64  | NZ  | H_GLU.61  | OE2 | 2.953 |
| 4HXB | H_ARG.66  | NH1 | H_ASP.86  | OD1 | 3.620 |
| 4HXB | H_ARG.66  | NH1 | H_ASP.86  | OD2 | 2.850 |
| 4HXB | H_ARG.66  | NH2 | H_ASP.86  | OD1 | 2.767 |
| 4HXB | H_ARG.66  | NH2 | H_ASP.86  | OD2 | 3.484 |
| 4HXB | H_LYS.83  | NZ  | H_GLU.85  | OE1 | 2.634 |
| 4HXB | H_ARG.94  | NH1 | H_ASP.101 | OD1 | 3.226 |
| 4HXB | H_ARG.94  | NH1 | H_ASP.101 | OD2 | 2.767 |
| 4HXB | H_ARG.96  | NH1 | L_ASP.94  | OD1 | 3.212 |
| 4HXB | H_ARG.96  | NH1 | L_ASP.94  | OD2 | 2.665 |
| 4HXB | H_ARG.96  | NH2 | L_ASP.94  | OD1 | 2.669 |
| 4HXB | H_ARG.96  | NH2 | L_ASP.94  | OD2 | 3.708 |
| 4I2X | A_LYS.24  | NZ  | A_ASP.70  | OD1 | 3.809 |
| 4I2X | A_ARG.61  | NH2 | A_ASP.82  | OD1 | 2.612 |
| 4I2X | A_ARG.61  | NH2 | A_ASP.82  | OD2 | 3.075 |
| 4I2X | A_LYS.147 | NZ  | A_GLU.154 | OE2 | 3.876 |
| 4I2X | A_LYS.149 | NZ  | A_GLU.195 | OE2 | 3.016 |
| 4I2X | A_ARG.155 | NH2 | A_GLU.185 | OE1 | 2.492 |
| 4I2X | A_LYS.199 | NZ  | A_ASP.110 | OD2 | 3.998 |
| 4I2X | A_ARG.211 | NH1 | A_GLU.187 | OE1 | 2.914 |
| 4I2X | B_LYS.38  | NZ  | B_ASP.90  | OD1 | 3.997 |
| 4I2X | B_LYS.59  | NZ  | E_GLU.10  | OE2 | 3.418 |
| 4I2X | B_LYS.65  | NZ  | E_ASP.208 | OD1 | 3.256 |
| 4I2X | B_LYS.67  | NZ  | B_ASP.90  | OD1 | 3.836 |
| 4I2X | B_LYS.67  | NZ  | B_ASP.90  | OD2 | 2.957 |
| 4I2X | B_LYS.214 | NZ  | A_GLU.123 | OE2 | 3.742 |
| 4I2X | C_ARG.61  | NH2 | C_GLU.81  | OE2 | 3.536 |

|      |           |     |           |     |       |
|------|-----------|-----|-----------|-----|-------|
| 4I2X | C_ARG_61  | NH2 | C_ASP_82  | OD1 | 2.611 |
| 4I2X | C_ARG_61  | NH2 | C_ASP_82  | OD2 | 3.223 |
| 4I2X | C_LYS_147 | NZ  | C_GLU_154 | OE2 | 3.881 |
| 4I2X | C_LYS_147 | NZ  | C_GLU_195 | OE1 | 3.855 |
| 4I2X | C_LYS_149 | NZ  | C_GLU_195 | OE2 | 3.745 |
| 4I2X | C_ARG_155 | NH1 | C_GLU_185 | OE1 | 3.098 |
| 4I2X | C_ARG_155 | NH2 | C_GLU_185 | OE1 | 2.928 |
| 4I2X | C_LYS_183 | NZ  | C_GLU_187 | OE2 | 3.224 |
| 4I2X | C_LYS_199 | NZ  | C_ASP_110 | OD1 | 3.402 |
| 4I2X | C_LYS_199 | NZ  | C_ASP_110 | OD2 | 3.168 |
| 4I2X | C_ARG_211 | NH1 | C_GLU_187 | OE1 | 3.303 |
| 4I2X | D_ARG_40  | NH1 | D_GLU_89  | OE1 | 3.368 |
| 4I2X | D_ARG_40  | NH2 | D_GLU_89  | OE1 | 3.617 |
| 4I2X | D_LYS_63  | NZ  | C_ASP_1   | OD2 | 3.656 |
| 4I2X | D_LYS_65  | NZ  | F_ASP_208 | OD1 | 3.848 |
| 4I2X | D_LYS_67  | NZ  | D_ASP_90  | OD1 | 3.613 |
| 4I2X | D_LYS_67  | NZ  | D_ASP_90  | OD2 | 3.084 |
| 4I2X | D_HIS_170 | ND1 | C_ASP_167 | OD2 | 3.958 |
| 4I2X | D_LYS_211 | NZ  | D_ASP_213 | OD1 | 3.197 |
| 4I2X | D_LYS_214 | NZ  | C_GLU_123 | OE2 | 3.815 |
| 4I2X | E_HIS_24  | ND1 | E_GLU_10  | OE1 | 3.035 |
| 4I2X | E_ARG_40  | NH2 | E_GLU_47  | OE1 | 3.242 |
| 4I2X | E_ARG_40  | NH2 | E_GLU_47  | OE2 | 3.478 |
| 4I2X | E_ARG_46  | NH1 | E_GLU_103 | OE1 | 2.979 |
| 4I2X | E_ARG_46  | NH2 | E_GLU_103 | OE1 | 3.021 |
| 4I2X | E_ARG_59  | NH1 | E_ASP_85  | OD1 | 2.932 |
| 4I2X | E_ARG_59  | NH1 | E_ASP_85  | OD2 | 3.555 |
| 4I2X | E_ARG_59  | NH2 | E_ASP_85  | OD1 | 3.558 |
| 4I2X | E_ARG_59  | NH2 | E_ASP_85  | OD2 | 2.755 |
| 4I2X | E_HIS_143 | ND1 | E_GLU_141 | OE1 | 3.000 |
| 4I2X | E_HIS_143 | ND1 | E_GLU_141 | OE2 | 3.158 |
| 4I2X | E_LYS_153 | NZ  | E_GLU_160 | OE1 | 3.145 |
| 4I2X | E_LYS_153 | NZ  | E_GLU_160 | OE2 | 3.307 |
| 4I2X | E_LYS_156 | NZ  | E_ASP_188 | OD2 | 3.753 |
| 4I2X | E_LYS_156 | NZ  | E_ASP_191 | OD1 | 3.430 |
| 4I2X | E_LYS_156 | NZ  | E_ASP_191 | OD2 | 2.599 |
| 4I2X | E_ARG_180 | NH2 | E_ASP_169 | OD2 | 3.719 |
| 4I2X | E_ARG_193 | NH1 | E_GLU_274 | OE2 | 3.753 |
| 4I2X | E_ARG_193 | NH2 | E_GLU_274 | OE2 | 2.935 |
| 4I2X | E_ARG_211 | NH2 | E_GLU_199 | OE2 | 2.968 |
| 4I2X | E_ARG_221 | NH1 | E_ASP_306 | OD2 | 2.386 |
| 4I2X | E_ARG_246 | NH1 | E_GLU_227 | OE1 | 3.432 |
| 4I2X | E_ARG_266 | NH1 | E_GLU_259 | OE2 | 2.959 |
| 4I2X | F_HIS_24  | ND1 | F_GLU_10  | OE1 | 3.383 |
| 4I2X | F_ARG_40  | NH2 | F_GLU_47  | OE1 | 2.707 |
| 4I2X | F_ARG_40  | NH2 | F_GLU_47  | OE2 | 3.337 |
| 4I2X | F_ARG_46  | NH1 | F_GLU_103 | OE1 | 3.160 |
| 4I2X | F_ARG_46  | NH1 | F_GLU_103 | OE2 | 3.864 |
| 4I2X | F_ARG_46  | NH2 | F_GLU_103 | OE1 | 3.013 |
| 4I2X | F_ARG_59  | NH1 | F_ASP_85  | OD1 | 2.871 |
| 4I2X | F_ARG_59  | NH1 | F_ASP_85  | OD2 | 2.922 |
| 4I2X | F_ARG_59  | NH2 | F_ASP_85  | OD1 | 3.943 |
| 4I2X | F_ARG_59  | NH2 | F_ASP_85  | OD2 | 2.928 |
| 4I2X | F_HIS_143 | ND1 | F_GLU_141 | OE1 | 2.771 |
| 4I2X | F_HIS_143 | ND1 | F_GLU_141 | OE2 | 3.495 |
| 4I2X | F_LYS_156 | NZ  | F_ASP_188 | OD2 | 3.315 |
| 4I2X | F_LYS_156 | NZ  | F_ASP_191 | OD2 | 3.515 |
| 4I2X | F_ARG_180 | NH1 | E_GLU_47  | OE1 | 3.834 |

|      |           |     |           |     |       |
|------|-----------|-----|-----------|-----|-------|
| 4I2X | F_ARG_211 | NH2 | F_GLU_199 | OE2 | 2.770 |
| 4I2X | F_ARG_221 | NH1 | F_ASP_306 | OD2 | 2.711 |
| 4I2X | F_ARG_246 | NH1 | F_GLU_227 | OE1 | 2.969 |
| 4I2X | F_ARG_266 | NH1 | F_GLU_259 | OE2 | 3.157 |
| 4I3R | G_LYS_282 | NZ  | H_GLU_33  | OE1 | 3.996 |
| 4I3R | G_LYS_282 | NZ  | H_GLU_33  | OE2 | 2.684 |
| 4I3R | G_LYS_351 | NZ  | G_GLU_269 | OE1 | 3.563 |
| 4I3R | G_ARG_456 | NH1 | G_GLU_466 | OE1 | 3.067 |
| 4I3R | G_ARG_469 | NH2 | G_ASP_457 | OD1 | 3.936 |
| 4I3R | G_ARG_469 | NH2 | G_ASP_457 | OD2 | 2.877 |
| 4I3R | H_ARG_19  | NH1 | H_ASP_81  | OD1 | 3.627 |
| 4I3R | H_ARG_19  | NH1 | H_ASP_81  | OD2 | 3.350 |
| 4I3R | H_ARG_38  | NH1 | H_ASP_86  | OD1 | 3.177 |
| 4I3R | H_ARG_38  | NH2 | H_GLU_46  | OE1 | 3.721 |
| 4I3R | H_ARG_38  | NH2 | H_ASP_86  | OD1 | 3.995 |
| 4I3R | H_LYS_52  | NZ  | H_GLU_33  | OE2 | 3.671 |
| 4I3R | H_ARG_64  | NH2 | G_ASP_457 | OD1 | 3.551 |
| 4I3R | H_ARG_64  | NH2 | G_ASP_457 | OD2 | 3.482 |
| 4I3R | H_ARG_66  | NH1 | H_ASP_62  | OD1 | 3.277 |
| 4I3R | H_ARG_66  | NH1 | H_ASP_62  | OD2 | 3.049 |
| 4I3R | H_ARG_66  | NH1 | H_ASP_86  | OD1 | 3.545 |
| 4I3R | H_ARG_66  | NH1 | H_ASP_86  | OD2 | 3.903 |
| 4I3R | H_ARG_66  | NH2 | H_ASP_86  | OD1 | 3.310 |
| 4I3R | H_ARG_66  | NH2 | H_ASP_86  | OD2 | 2.449 |
| 4I3R | H_ARG_71  | NH1 | G_ASP_368 | OD1 | 3.996 |
| 4I3R | H_ARG_71  | NH1 | G_ASP_368 | OD2 | 2.319 |
| 4I3R | H_ARG_71  | NH2 | G_ASP_368 | OD1 | 3.997 |
| 4I3R | H_ARG_71  | NH2 | G_ASP_368 | OD2 | 3.530 |
| 4I3R | H_ARG_94  | NH1 | H_ASP_101 | OD1 | 2.785 |
| 4I3R | H_ARG_94  | NH1 | H_ASP_101 | OD2 | 2.504 |
| 4I3R | H_LYS_96  | NZ  | H_ASP_101 | OD2 | 3.693 |
| 4I3R | H_LYS_143 | NZ  | H_ASP_144 | OD1 | 3.690 |
| 4I3R | H_LYS_143 | NZ  | H_ASP_144 | OD2 | 3.274 |
| 4I3R | H_LYS_206 | NZ  | H_ASP_208 | OD1 | 3.805 |
| 4I3R | H_LYS_209 | NZ  | L_GLU_123 | OE2 | 2.484 |
| 4I3R | L_LYS_39  | NZ  | L_GLU_81  | OE1 | 3.444 |
| 4I3R | L_ARG_54  | NH2 | L_ASP_60  | OD1 | 2.979 |
| 4I3R | L_ARG_61  | NH1 | L_ASP_82  | OD1 | 2.605 |
| 4I3R | L_ARG_61  | NH1 | L_ASP_82  | OD2 | 2.581 |
| 4I3R | L_ARG_61  | NH2 | L_GLU_79  | OE1 | 3.506 |
| 4I3R | L_ARG_61  | NH2 | L_GLU_79  | OE2 | 3.423 |
| 4I3R | L_ARG_103 | NH1 | L_GLU_105 | OE2 | 3.685 |
| 4I3R | L_ARG_107 | NH2 | L_GLU_17  | OE1 | 3.953 |
| 4I3R | L_ARG_107 | NH2 | L_GLU_17  | OE2 | 3.600 |
| 4I3R | L_LYS_149 | NZ  | L_GLU_195 | OE2 | 3.690 |
| 4I3R | L_LYS_183 | NZ  | L_GLU_187 | OE2 | 3.197 |
| 4I3S | G_LYS_282 | NZ  | G_GLU_275 | OE1 | 3.977 |
| 4I3S | G_LYS_282 | NZ  | H_GLU_33  | OE1 | 3.669 |
| 4I3S | G_LYS_282 | NZ  | H_GLU_33  | OE2 | 3.690 |
| 4I3S | G_ARG_456 | NH1 | G_GLU_466 | OE2 | 3.826 |
| 4I3S | G_ARG_469 | NH2 | G_ASP_457 | OD2 | 3.288 |
| 4I3S | H_ARG_19  | NH1 | H_ASP_81  | OD2 | 3.959 |
| 4I3S | H_ARG_31  | NH1 | H_ASP_27  | OD2 | 3.996 |
| 4I3S | H_ARG_31  | NH2 | H_ASP_27  | OD2 | 3.298 |
| 4I3S | H_ARG_38  | NH1 | H_ASP_86  | OD1 | 2.791 |
| 4I3S | H_ARG_38  | NH2 | H_GLU_46  | OE1 | 3.972 |
| 4I3S | H_ARG_38  | NH2 | H_ASP_86  | OD1 | 3.641 |
| 4I3S | H_ARG_64  | NH2 | G_ASP_457 | OD1 | 3.430 |

|      |           |     |           |     |       |
|------|-----------|-----|-----------|-----|-------|
| 4I3S | H_ARG_64  | NH2 | G_ASP_457 | OD2 | 3.082 |
| 4I3S | H_ARG_66  | NH1 | H_ASP_86  | OD1 | 3.764 |
| 4I3S | H_ARG_66  | NH1 | H_ASP_86  | OD2 | 3.474 |
| 4I3S | H_ARG_66  | NH2 | H_ASP_62  | OD2 | 3.970 |
| 4I3S | H_ARG_66  | NH2 | H_ASP_86  | OD1 | 2.906 |
| 4I3S | H_ARG_66  | NH2 | H_ASP_86  | OD2 | 3.336 |
| 4I3S | H_ARG_71  | NH1 | G_ASP_368 | OD1 | 3.370 |
| 4I3S | H_ARG_71  | NH1 | G_ASP_368 | OD2 | 3.053 |
| 4I3S | H_ARG_71  | NH2 | G_ASP_368 | OD1 | 3.484 |
| 4I3S | H_ARG_94  | NH1 | H_ASP_101 | OD1 | 3.080 |
| 4I3S | H_ARG_94  | NH1 | H_ASP_101 | OD2 | 2.812 |
| 4I3S | H_LYS_209 | NZ  | L_GLU_123 | OE1 | 2.882 |
| 4I3S | L_ARG_54  | NH1 | L_ASP_60  | OD1 | 3.742 |
| 4I3S | L_ARG_54  | NH2 | L_ASP_60  | OD1 | 3.363 |
| 4I3S | L_ARG_61  | NH1 | L_GLU_79  | OE2 | 2.892 |
| 4I3S | L_ARG_61  | NH2 | L_ASP_82  | OD1 | 3.478 |
| 4I3S | L_ARG_103 | NH1 | L_GLU_105 | OE1 | 3.837 |
| 4I3S | L_ARG_211 | NH1 | L_GLU_187 | OE1 | 3.303 |
| 4I3S | L_ARG_211 | NH2 | L_GLU_187 | OE1 | 3.109 |
| 4JAM | H_LYS_13  | NZ  | H_GLU_16  | OE2 | 3.105 |
| 4JAM | H_ARG_38  | NH1 | H_ASP_86  | OD1 | 2.909 |
| 4JAM | H_ARG_38  | NH2 | H_GLU_46  | OE2 | 3.439 |
| 4JAM | H_ARG_38  | NH2 | H_ASP_86  | OD1 | 3.603 |
| 4JAM | H_ARG_66  | NH1 | H_ASP_86  | OD1 | 3.959 |
| 4JAM | H_ARG_66  | NH1 | H_ASP_86  | OD2 | 3.260 |
| 4JAM | H_ARG_66  | NH2 | H_ASP_86  | OD1 | 2.963 |
| 4JAM | H_ARG_66  | NH2 | H_ASP_86  | OD2 | 3.519 |
| 4JAM | H_LYS_143 | NZ  | H_ASP_144 | OD1 | 2.996 |
| 4JAM | H_LYS_143 | NZ  | H_ASP_144 | OD2 | 3.461 |
| 4JAM | H_LYS_209 | NZ  | L_GLU_123 | OE2 | 3.865 |
| 4JAM | H_LYS_210 | NZ  | H_GLU_212 | OE2 | 3.818 |
| 4JAM | L_LYS_53  | NZ  | L_GLU_50  | OE1 | 2.810 |
| 4JAM | L_ARG_54  | NH1 | L_ASP_60  | OD1 | 3.496 |
| 4JAM | L_ARG_54  | NH2 | L_ASP_60  | OD1 | 3.753 |
| 4JAM | L_ARG_61  | NH2 | L_ASP_82  | OD1 | 2.928 |
| 4JAM | L_ARG_61  | NH2 | L_ASP_82  | OD2 | 3.591 |
| 4JAM | L_LYS_110 | NZ  | L_GLU_198 | OE1 | 2.600 |
| 4JAM | L_LYS_110 | NZ  | L_GLU_198 | OE2 | 3.111 |
| 4JAM | L_LYS_149 | NZ  | L_GLU_203 | OE1 | 2.760 |
| 4JAM | A_ARG_38  | NH1 | A_ASP_86  | OD1 | 2.792 |
| 4JAM | A_ARG_38  | NH2 | A_GLU_46  | OE1 | 3.309 |
| 4JAM | A_ARG_38  | NH2 | A_ASP_86  | OD1 | 3.667 |
| 4JAM | A_ARG_66  | NH1 | A_ASP_86  | OD1 | 3.551 |
| 4JAM | A_ARG_66  | NH1 | A_ASP_86  | OD2 | 3.941 |
| 4JAM | A_ARG_66  | NH2 | A_ASP_86  | OD1 | 3.154 |
| 4JAM | A_ARG_66  | NH2 | A_ASP_86  | OD2 | 2.339 |
| 4JAM | A_LYS_143 | NZ  | A_ASP_144 | OD1 | 3.127 |
| 4JAM | A_LYS_143 | NZ  | A_ASP_144 | OD2 | 3.610 |
| 4JAM | A_LYS_206 | NZ  | A_ASP_208 | OD1 | 2.503 |
| 4JAM | A_LYS_206 | NZ  | A_ASP_208 | OD2 | 3.012 |
| 4JAM | A_LYS_209 | NZ  | B_GLU_123 | OE2 | 3.814 |
| 4JAM | A_LYS_210 | NZ  | A_GLU_212 | OE2 | 3.874 |
| 4JAM | B_LYS_53  | NZ  | B_GLU_50  | OE1 | 2.752 |
| 4JAM | B_ARG_61  | NH2 | B_ASP_82  | OD1 | 2.903 |
| 4JAM | B_ARG_61  | NH2 | B_ASP_82  | OD2 | 3.571 |
| 4JAM | B_LYS_110 | NZ  | B_GLU_198 | OE2 | 3.885 |
| 4JAM | B_LYS_149 | NZ  | B_GLU_203 | OE1 | 3.006 |
| 4JAM | B_ARG_189 | NH1 | B_ASP_151 | OD1 | 3.987 |



|      |           |     |           |     |       |
|------|-----------|-----|-----------|-----|-------|
| 4JAM | B_ARG_189 | NH1 | B_ASP_151 | OD2 | 3.937 |
| 4JAN | G_LYS_282 | NZ  | G_GLU_275 | OE1 | 3.474 |
| 4JAN | G_LYS_360 | NZ  | G_GLU_362 | OE1 | 3.523 |
| 4JAN | G_ARG_456 | NH1 | G_GLU_466 | OE1 | 3.351 |
| 4JAN | G_ARG_456 | NH1 | G_GLU_466 | OE2 | 3.176 |
| 4JAN | G_ARG_469 | NH2 | G_GLU_362 | OE2 | 3.387 |
| 4JAN | H_ARG_38  | NH1 | H_ASP_86  | OD1 | 3.352 |
| 4JAN | H_ARG_38  | NH2 | H_GLU_46  | OE1 | 3.075 |
| 4JAN | H_ARG_66  | NH1 | H_ASP_86  | OD1 | 3.928 |
| 4JAN | H_ARG_66  | NH1 | H_ASP_86  | OD2 | 3.649 |
| 4JAN | H_ARG_66  | NH2 | H_ASP_86  | OD1 | 2.680 |
| 4JAN | H_ARG_66  | NH2 | H_ASP_86  | OD2 | 3.194 |
| 4JAN | H_ARG_97  | NH2 | G_ASP_368 | OD2 | 2.609 |
| 4JAN | H_ARG_97  | NH2 | G_GLU_370 | OE1 | 2.554 |
| 4JAN | H_LYS_143 | NZ  | H_ASP_144 | OD2 | 3.820 |
| 4JAN | H_LYS_143 | NZ  | L_GLU_124 | OE2 | 3.811 |
| 4JAN | H_LYS_209 | NZ  | L_GLU_123 | OE1 | 2.888 |
| 4JAN | L_LYS_53  | NZ  | L_GLU_50  | OE1 | 2.884 |
| 4JAN | L_ARG_61  | NH2 | L_ASP_82  | OD1 | 2.695 |
| 4JAN | L_ARG_61  | NH2 | L_ASP_82  | OD2 | 3.778 |
| 4JAN | L_ARG_107 | NH1 | L_GLU_83  | OE1 | 3.896 |
| 4JAN | L_LYS_110 | NZ  | L_GLU_198 | OE1 | 2.837 |
| 4JAN | L_LYS_129 | NZ  | H_ASP_144 | OD2 | 3.458 |
| 4JAN | L_LYS_344 | NZ  | L_GLU_290 | OE1 | 3.334 |
| 4JAN | L_LYS_357 | NZ  | L_ASP_464 | OD1 | 2.885 |
| 4JAN | L_LYS_360 | NZ  | L_GLU_362 | OE1 | 3.054 |
| 4JAN | L_ARG_456 | NH1 | L_GLU_466 | OE1 | 3.190 |
| 4JAN | L_ARG_456 | NH1 | L_GLU_466 | OE2 | 3.591 |
| 4JAN | L_ARG_469 | NH1 | L_GLU_362 | OE2 | 3.886 |
| 4JAN | L_ARG_469 | NH2 | L_GLU_362 | OE2 | 3.292 |
| 4JAN | L_ARG_469 | NH2 | L_ASP_457 | OD2 | 3.746 |
| 4JAN | A_ARG_38  | NH1 | A_ASP_86  | OD1 | 3.100 |
| 4JAN | A_ARG_38  | NH2 | A_GLU_46  | OE1 | 2.957 |
| 4JAN | A_ARG_38  | NH2 | A_ASP_86  | OD1 | 3.991 |
| 4JAN | A_LYS_43  | NZ  | A_ASP_86  | OD1 | 3.939 |
| 4JAN | A_ARG_66  | NH1 | A_ASP_86  | OD2 | 3.380 |
| 4JAN | A_ARG_66  | NH2 | A_ASP_86  | OD1 | 3.178 |
| 4JAN | A_ARG_66  | NH2 | A_ASP_86  | OD2 | 3.385 |
| 4JAN | A_ARG_97  | NH2 | L_ASP_368 | OD1 | 2.825 |
| 4JAN | A_ARG_97  | NH2 | L_ASP_368 | OD2 | 3.792 |
| 4JAN | A_ARG_97  | NH2 | L_GLU_370 | OE1 | 3.106 |
| 4JAN | A_LYS_143 | NZ  | A_ASP_144 | OD1 | 3.191 |
| 4JAN | A_LYS_143 | NZ  | A_ASP_144 | OD2 | 3.150 |
| 4JAN | A_LYS_209 | NZ  | B_GLU_123 | OE1 | 3.788 |
| 4JAN | A_LYS_209 | NZ  | B_GLU_123 | OE2 | 3.189 |
| 4JAN | A_LYS_210 | NZ  | A_GLU_212 | OE2 | 3.659 |
| 4JAN | B_LYS_53  | NZ  | B_GLU_50  | OE1 | 2.587 |
| 4JAN | B_ARG_61  | NH2 | B_ASP_82  | OD1 | 2.736 |
| 4JAN | B_ARG_61  | NH2 | B_ASP_82  | OD2 | 3.458 |
| 4JAN | B_HIS_188 | NE2 | B_ASP_151 | OD2 | 3.951 |
| 4JHA | H_ARG_30  | NH2 | H_GLU_73  | OE1 | 2.826 |
| 4JHA | H_ARG_30  | NH2 | H_GLU_73  | OE2 | 3.416 |
| 4JHA | H_ARG_38  | NH1 | H_ASP_86  | OD1 | 2.732 |
| 4JHA | H_ARG_38  | NH2 | H_GLU_85  | OE1 | 3.002 |
| 4JHA | H_ARG_38  | NH2 | H_ASP_86  | OD1 | 3.574 |
| 4JHA | H_LYS_62  | NZ  | H_GLU_46  | OE1 | 3.088 |
| 4JHA | H_LYS_62  | NZ  | H_GLU_46  | OE2 | 3.359 |
| 4JHA | H_LYS_62  | NZ  | H_GLU_85  | OE1 | 3.798 |

|      |            |     |           |     |       |
|------|------------|-----|-----------|-----|-------|
| 4JHA | H_ARG_66   | NH1 | H_ASP_86  | OD1 | 3.556 |
| 4JHA | H_ARG_66   | NH1 | H_ASP_86  | OD2 | 2.912 |
| 4JHA | H_ARG_66   | NH2 | H_GLU_85  | OE1 | 3.941 |
| 4JHA | H_ARG_66   | NH2 | H_GLU_85  | OE2 | 3.694 |
| 4JHA | H_ARG_66   | NH2 | H_ASP_86  | OD1 | 2.845 |
| 4JHA | H_ARG_66   | NH2 | H_ASP_86  | OD2 | 3.591 |
| 4JHA | H_ARG_83   | NH1 | H_GLU_85  | OE2 | 3.452 |
| 4JHA | H_HIS_100G | ND1 | H_GLU_95  | OE1 | 2.690 |
| 4JHA | H_HIS_100G | ND1 | H_GLU_95  | OE2 | 3.485 |
| 4JHA | H_LYS_143  | NZ  | H_ASP_144 | OD1 | 3.717 |
| 4JHA | L_ARG_61   | NH2 | L_GLU_81  | OE2 | 3.203 |
| 4JHA | L_ARG_61   | NH2 | L_ASP_82  | OD1 | 2.990 |
| 4JHA | L_ARG_61   | NH2 | L_ASP_82  | OD2 | 3.835 |
| 4JHA | L_LYS_103  | NZ  | L_GLU_165 | OE1 | 3.560 |
| 4JHA | L_HIS_189  | ND1 | L_ASP_151 | OD1 | 3.067 |
| 4JHA | L_HIS_189  | ND1 | L_ASP_151 | OD2 | 2.332 |
| 4JHW | H_LYS_12   | NZ  | H_GLU_10  | OE1 | 3.774 |
| 4JHW | H_LYS_12   | NZ  | H_GLU_10  | OE2 | 3.410 |
| 4JHW | H_ARG_30   | NH2 | H_GLU_73  | OE1 | 3.253 |
| 4JHW | H_ARG_30   | NH2 | H_GLU_73  | OE2 | 3.595 |
| 4JHW | H_ARG_38   | NH1 | H_ASP_86  | OD1 | 2.933 |
| 4JHW | H_ARG_38   | NH2 | H_GLU_85  | OE1 | 3.397 |
| 4JHW | H_LYS_62   | NZ  | H_GLU_46  | OE1 | 3.508 |
| 4JHW | H_LYS_62   | NZ  | H_GLU_46  | OE2 | 3.235 |
| 4JHW | H_ARG_66   | NH1 | H_ASP_86  | OD1 | 3.796 |
| 4JHW | H_ARG_66   | NH1 | H_ASP_86  | OD2 | 3.522 |
| 4JHW | H_ARG_66   | NH2 | H_ASP_86  | OD1 | 3.083 |
| 4JHW | H_ARG_83   | NH1 | H_GLU_85  | OE2 | 3.470 |
| 4JHW | H_HIS_100G | ND1 | H_GLU_95  | OE1 | 2.582 |
| 4JHW | H_HIS_100G | ND1 | H_GLU_95  | OE2 | 3.471 |
| 4JHW | H_LYS_143  | NZ  | H_ASP_144 | OD1 | 3.702 |
| 4JHW | L_ARG_61   | NH2 | L_GLU_81  | OE2 | 2.896 |
| 4JHW | L_ARG_61   | NH2 | L_ASP_82  | OD1 | 3.273 |
| 4JHW | L_ARG_61   | NH2 | L_ASP_82  | OD2 | 3.811 |
| 4JHW | L_LYS_103  | NZ  | L_GLU_165 | OE1 | 3.410 |
| 4JHW | L_LYS_103  | NZ  | L_GLU_165 | OE2 | 3.764 |
| 4JHW | L_HIS_189  | ND1 | L_ASP_151 | OD1 | 3.229 |
| 4JHW | L_HIS_189  | ND1 | L_ASP_151 | OD2 | 2.338 |
| 4JHW | F_ARG_49   | NH2 | F_ASP_368 | OD1 | 3.536 |
| 4JHW | F_LYS_85   | NZ  | F_GLU_82  | OE1 | 3.836 |
| 4JHW | F_LYS_166  | NZ  | F_GLU_163 | OE2 | 3.574 |
| 4JHW | F_LYS_168  | NZ  | F_GLU_294 | OE1 | 3.244 |
| 4JHW | F_LYS_176  | NZ  | F_ASP_263 | OD2 | 3.508 |
| 4JHW | F_LYS_191  | NZ  | F_GLU_60  | OE2 | 3.607 |
| 4JHW | F_LYS_191  | NZ  | F_ASP_194 | OD2 | 3.605 |
| 4JHW | F_LYS_196  | NZ  | F_GLU_60  | OE1 | 2.692 |
| 4JHW | F_LYS_209  | NZ  | H_ASP_101 | OD2 | 3.535 |
| 4JHW | F_LYS_209  | NZ  | L_GLU_55  | OE1 | 2.845 |
| 4JHW | F_LYS_209  | NZ  | L_GLU_55  | OE2 | 3.356 |
| 4JHW | F_ARG_229  | NH1 | F_GLU_256 | OE1 | 3.739 |
| 4JHW | F_ARG_229  | NH1 | F_GLU_256 | OE2 | 3.024 |
| 4JHW | F_ARG_229  | NH2 | F_GLU_256 | OE1 | 2.796 |
| 4JHW | F_ARG_229  | NH2 | F_GLU_256 | OE2 | 3.605 |
| 4JHW | F_ARG_235  | NH2 | F_GLU_236 | OE2 | 3.517 |
| 4JHW | F_ARG_336  | NH2 | F_ASP_338 | OD1 | 3.908 |
| 4JHW | F_ARG_336  | NH2 | F_ASP_338 | OD2 | 3.114 |
| 4JHW | F_ARG_364  | NH1 | F_ASP_310 | OD1 | 2.617 |
| 4JHW | F_ARG_364  | NH2 | F_ASP_310 | OD1 | 2.621 |

|      |           |     |           |     |       |
|------|-----------|-----|-----------|-----|-------|
| 4JHW | F_LYS_433 | NZ  | F_ASP_440 | OD2 | 3.857 |
| 4JHW | F_LYS_461 | NZ  | F_ASP_448 | OD1 | 2.628 |
| 4JHW | F_LYS_498 | NZ  | F_GLU_487 | OE1 | 3.211 |
| 4JHW | F_LYS_498 | NZ  | F_GLU_487 | OE2 | 3.707 |
| 4JHW | F_ARG_507 | NH1 | F_GLU_511 | OE2 | 3.100 |
| 4JO1 | L_LYS_39  | NZ  | L_ASP_81  | OD2 | 2.927 |
| 4JO1 | L_LYS_53  | NZ  | L_ASP_50  | OD1 | 2.687 |
| 4JO1 | L_ARG_61  | NH1 | L_ASP_82  | OD1 | 2.727 |
| 4JO1 | L_ARG_61  | NH1 | L_ASP_82  | OD2 | 3.457 |
| 4JO1 | L_ARG_61  | NH2 | L_ASP_82  | OD1 | 3.476 |
| 4JO1 | L_ARG_61  | NH2 | L_ASP_82  | OD2 | 2.757 |
| 4JO1 | L_LYS_138 | NZ  | L_ASP_169 | OD1 | 2.582 |
| 4JO1 | L_LYS_162 | NZ  | L_ASP_142 | OD1 | 2.686 |
| 4JO1 | L_LYS_162 | NZ  | L_ASP_142 | OD2 | 3.695 |
| 4JO1 | H_ARG_38  | NH1 | H_ASP_86  | OD2 | 2.789 |
| 4JO1 | H_ARG_38  | NH2 | H_GLU_46  | OE1 | 3.151 |
| 4JO1 | H_ARG_38  | NH2 | H_ASP_86  | OD2 | 3.780 |
| 4JO1 | H_ARG_66  | NH1 | H_ASP_86  | OD1 | 2.959 |
| 4JO1 | H_ARG_66  | NH1 | H_ASP_86  | OD2 | 3.751 |
| 4JO1 | H_ARG_66  | NH2 | H_ASP_86  | OD1 | 3.523 |
| 4JO1 | H_ARG_66  | NH2 | H_ASP_86  | OD2 | 3.003 |
| 4JO1 | P_ARG_304 | NH1 | H_ASP_34  | OD1 | 3.045 |
| 4JO1 | P_ARG_304 | NH1 | H_ASP_34  | OD2 | 3.346 |
| 4JO1 | P_ARG_304 | NH2 | H_ASP_34  | OD2 | 2.892 |
| 4JO1 | M_LYS_39  | NZ  | M_ASP_81  | OD2 | 2.924 |
| 4JO1 | M_LYS_53  | NZ  | M_ASP_50  | OD1 | 2.678 |
| 4JO1 | M_ARG_61  | NH1 | M_ASP_82  | OD1 | 2.722 |
| 4JO1 | M_ARG_61  | NH1 | M_ASP_82  | OD2 | 3.406 |
| 4JO1 | M_ARG_61  | NH2 | M_ASP_82  | OD1 | 3.488 |
| 4JO1 | M_ARG_61  | NH2 | M_ASP_82  | OD2 | 2.707 |
| 4JO1 | M_LYS_138 | NZ  | M_ASP_169 | OD1 | 2.539 |
| 4JO1 | M_LYS_162 | NZ  | M_ASP_142 | OD1 | 2.679 |
| 4JO1 | M_LYS_162 | NZ  | M_ASP_142 | OD2 | 3.651 |
| 4JO1 | L_ARG_38  | NH1 | L_ASP_86  | OD2 | 2.786 |
| 4JO1 | L_ARG_38  | NH2 | L_GLU_46  | OE1 | 3.154 |
| 4JO1 | L_ARG_38  | NH2 | L_ASP_86  | OD2 | 3.771 |
| 4JO1 | L_ARG_66  | NH1 | L_ASP_86  | OD1 | 3.031 |
| 4JO1 | L_ARG_66  | NH1 | L_ASP_86  | OD2 | 3.805 |
| 4JO1 | L_ARG_66  | NH2 | L_ASP_86  | OD1 | 3.492 |
| 4JO1 | L_ARG_66  | NH2 | L_ASP_86  | OD2 | 2.959 |
| 4JO1 | Q_ARG_304 | NH1 | L_ASP_34  | OD1 | 2.949 |
| 4JO1 | Q_ARG_304 | NH1 | L_ASP_34  | OD2 | 3.344 |
| 4JO1 | Q_ARG_304 | NH2 | L_ASP_34  | OD1 | 3.946 |
| 4JO1 | Q_ARG_304 | NH2 | L_ASP_34  | OD2 | 2.878 |
| 4JO2 | L_LYS_39  | NZ  | L_ASP_81  | OD2 | 2.922 |
| 4JO2 | L_LYS_53  | NZ  | L_ASP_50  | OD1 | 3.017 |
| 4JO2 | L_ARG_61  | NH1 | L_ASP_82  | OD1 | 3.605 |
| 4JO2 | L_ARG_61  | NH1 | L_ASP_82  | OD2 | 2.772 |
| 4JO2 | L_ARG_61  | NH2 | L_ASP_82  | OD1 | 3.007 |
| 4JO2 | L_ARG_61  | NH2 | L_ASP_82  | OD2 | 3.330 |
| 4JO2 | L_LYS_138 | NZ  | L_ASP_169 | OD2 | 3.573 |
| 4JO2 | L_LYS_162 | NZ  | L_ASP_142 | OD2 | 3.171 |
| 4JO2 | H_ARG_38  | NH1 | H_ASP_86  | OD2 | 2.606 |
| 4JO2 | H_ARG_38  | NH2 | H_GLU_46  | OE1 | 2.897 |
| 4JO2 | H_ARG_38  | NH2 | H_ASP_86  | OD2 | 3.987 |
| 4JO2 | H_ARG_66  | NH1 | H_ASP_86  | OD1 | 2.938 |
| 4JO2 | H_ARG_66  | NH1 | H_ASP_86  | OD2 | 3.840 |
| 4JO2 | H_ARG_66  | NH2 | H_ASP_86  | OD1 | 3.186 |

|      |           |     |           |     |       |
|------|-----------|-----|-----------|-----|-------|
| 4JO2 | H_ARG_66  | NH2 | H_ASP_86  | OD2 | 2.917 |
| 4JO2 | P_ARG_304 | NH1 | H_ASP_34  | OD1 | 2.726 |
| 4JO2 | P_ARG_304 | NH1 | H_ASP_34  | OD2 | 3.333 |
| 4JO2 | P_ARG_304 | NH2 | H_ASP_34  | OD1 | 3.721 |
| 4JO2 | P_ARG_304 | NH2 | H_ASP_34  | OD2 | 2.854 |
| 4JO2 | M_LYS_39  | NZ  | M_ASP_81  | OD1 | 3.476 |
| 4JO2 | M_LYS_39  | NZ  | M_ASP_81  | OD2 | 3.290 |
| 4JO2 | M_LYS_53  | NZ  | M_ASP_50  | OD2 | 3.292 |
| 4JO2 | M_ARG_61  | NH1 | M_ASP_82  | OD1 | 3.140 |
| 4JO2 | M_ARG_61  | NH1 | M_ASP_82  | OD2 | 3.618 |
| 4JO2 | M_ARG_61  | NH2 | M_ASP_82  | OD1 | 3.726 |
| 4JO2 | M_ARG_61  | NH2 | M_ASP_82  | OD2 | 2.780 |
| 4JO2 | M_LYS_138 | NZ  | M_ASP_169 | OD2 | 2.742 |
| 4JO2 | M_LYS_162 | NZ  | M_ASP_142 | OD1 | 3.921 |
| 4JO2 | M_LYS_162 | NZ  | M_ASP_142 | OD2 | 3.385 |
| 4JO2 | L_ARG_38  | NH1 | L_ASP_86  | OD2 | 2.900 |
| 4JO2 | L_ARG_38  | NH2 | L_GLU_46  | OE1 | 3.086 |
| 4JO2 | L_ARG_38  | NH2 | L_ASP_86  | OD2 | 3.924 |
| 4JO2 | L_ARG_66  | NH1 | L_ASP_86  | OD1 | 2.929 |
| 4JO2 | L_ARG_66  | NH1 | L_ASP_86  | OD2 | 3.643 |
| 4JO2 | L_ARG_66  | NH2 | L_ASP_86  | OD1 | 3.202 |
| 4JO2 | L_ARG_66  | NH2 | L_ASP_86  | OD2 | 2.584 |
| 4JO2 | L_LYS_199 | NZ  | L_ASP_201 | OD1 | 3.625 |
| 4JO2 | L_LYS_199 | NZ  | L_ASP_201 | OD2 | 3.197 |
| 4JO2 | Q_ARG_304 | NH1 | L_ASP_34  | OD1 | 2.965 |
| 4JO2 | Q_ARG_304 | NH1 | L_ASP_34  | OD2 | 3.252 |
| 4JO2 | Q_ARG_304 | NH2 | L_ASP_34  | OD2 | 3.328 |
| 4JO3 | L_LYS_39  | NZ  | L_ASP_81  | OD1 | 3.210 |
| 4JO3 | L_LYS_39  | NZ  | L_ASP_81  | OD2 | 3.108 |
| 4JO3 | L_ARG_61  | NH1 | L_ASP_82  | OD1 | 3.683 |
| 4JO3 | L_ARG_61  | NH1 | L_ASP_82  | OD2 | 2.743 |
| 4JO3 | L_ARG_61  | NH2 | L_ASP_82  | OD1 | 2.826 |
| 4JO3 | L_ARG_61  | NH2 | L_ASP_82  | OD2 | 3.482 |
| 4JO3 | L_LYS_162 | NZ  | L_ASP_142 | OD1 | 2.811 |
| 4JO3 | L_LYS_162 | NZ  | L_ASP_142 | OD2 | 3.312 |
| 4JO3 | H_ARG_38  | NH1 | H_ASP_86  | OD2 | 2.684 |
| 4JO3 | H_ARG_38  | NH2 | H_GLU_46  | OE1 | 3.692 |
| 4JO3 | H_ARG_38  | NH2 | H_ASP_86  | OD2 | 3.553 |
| 4JO3 | H_ARG_54  | NH1 | P_GLU_321 | OE1 | 3.970 |
| 4JO3 | H_ARG_66  | NH1 | H_ASP_86  | OD1 | 2.860 |
| 4JO3 | H_ARG_66  | NH1 | H_ASP_86  | OD2 | 3.702 |
| 4JO3 | H_ARG_66  | NH2 | H_ASP_86  | OD1 | 3.555 |
| 4JO3 | H_ARG_66  | NH2 | H_ASP_86  | OD2 | 3.007 |
| 4JO3 | H_ARG_94  | NH1 | H_ASP_101 | OD1 | 2.669 |
| 4JO3 | H_ARG_94  | NH1 | H_ASP_101 | OD2 | 3.152 |
| 4JO3 | P_ARG_327 | NH1 | L_ASP_1   | OD1 | 2.994 |
| 4JO3 | P_ARG_327 | NH2 | L_ASP_1   | OD1 | 2.732 |
| 4JO3 | P_ARG_327 | NH2 | L_GLU_27  | OE1 | 3.272 |
| 4JO3 | P_ARG_327 | NH2 | L_GLU_27  | OE2 | 3.099 |
| 4JO3 | M_LYS_39  | NZ  | M_ASP_81  | OD1 | 3.363 |
| 4JO3 | M_LYS_39  | NZ  | M_ASP_81  | OD2 | 3.485 |
| 4JO3 | M_ARG_61  | NH1 | M_ASP_82  | OD1 | 3.977 |
| 4JO3 | M_ARG_61  | NH1 | M_ASP_82  | OD2 | 2.819 |
| 4JO3 | M_ARG_61  | NH2 | M_ASP_82  | OD1 | 2.923 |
| 4JO3 | M_ARG_61  | NH2 | M_ASP_82  | OD2 | 3.229 |
| 4JO3 | M_LYS_162 | NZ  | M_ASP_142 | OD1 | 3.056 |
| 4JO3 | M_LYS_162 | NZ  | M_ASP_142 | OD2 | 3.799 |
| 4JO3 | L_ARG_38  | NH1 | L_ASP_86  | OD2 | 2.673 |

|      |           |     |           |     |       |
|------|-----------|-----|-----------|-----|-------|
| 4JO3 | L_ARG_38  | NH2 | L_GLU_46  | OE1 | 3.528 |
| 4JO3 | L_ARG_38  | NH2 | L_GLU_46  | OE2 | 3.898 |
| 4JO3 | L_ARG_38  | NH2 | L_ASP_86  | OD2 | 3.887 |
| 4JO3 | L_ARG_66  | NH1 | L_ASP_86  | OD1 | 3.159 |
| 4JO3 | L_ARG_66  | NH1 | L_ASP_86  | OD2 | 3.577 |
| 4JO3 | L_ARG_66  | NH2 | L_ASP_86  | OD1 | 3.570 |
| 4JO3 | L_ARG_66  | NH2 | L_ASP_86  | OD2 | 2.893 |
| 4JO3 | L_ARG_94  | NH1 | L_ASP_101 | OD1 | 2.954 |
| 4JO3 | L_ARG_94  | NH1 | L_ASP_101 | OD2 | 3.750 |
| 4JO3 | Q_ARG_327 | NH1 | M_ASP_1   | OD1 | 3.248 |
| 4JO3 | Q_ARG_327 | NH2 | M_ASP_1   | OD1 | 2.447 |
| 4JO3 | Q_ARG_327 | NH2 | M_ASP_1   | OD2 | 3.524 |
| 4JO3 | Q_ARG_327 | NH2 | M_GLU_27  | OE1 | 3.837 |
| 4JO3 | Q_ARG_327 | NH2 | M_GLU_27  | OE2 | 3.723 |
| 4JO4 | L_LYS_39  | NZ  | L_ASP_81  | OD1 | 3.937 |
| 4JO4 | L_LYS_39  | NZ  | L_ASP_81  | OD2 | 3.155 |
| 4JO4 | L_ARG_61  | NH1 | L_ASP_82  | OD1 | 3.796 |
| 4JO4 | L_ARG_61  | NH1 | L_ASP_82  | OD2 | 2.750 |
| 4JO4 | L_ARG_61  | NH2 | L_ASP_82  | OD1 | 3.079 |
| 4JO4 | L_ARG_61  | NH2 | L_ASP_82  | OD2 | 3.445 |
| 4JO4 | L_LYS_162 | NZ  | L_ASP_142 | OD1 | 2.940 |
| 4JO4 | L_LYS_162 | NZ  | L_ASP_142 | OD2 | 3.881 |
| 4JO4 | H_ARG_38  | NH1 | H_ASP_86  | OD2 | 2.736 |
| 4JO4 | H_ARG_38  | NH2 | H_GLU_46  | OE1 | 3.500 |
| 4JO4 | H_ARG_38  | NH2 | H_GLU_46  | OE2 | 3.857 |
| 4JO4 | H_ARG_38  | NH2 | H_ASP_86  | OD2 | 3.761 |
| 4JO4 | H_ARG_66  | NH1 | H_ASP_86  | OD1 | 2.970 |
| 4JO4 | H_ARG_66  | NH1 | H_ASP_86  | OD2 | 3.623 |
| 4JO4 | H_ARG_66  | NH2 | H_ASP_86  | OD1 | 3.534 |
| 4JO4 | H_ARG_66  | NH2 | H_ASP_86  | OD2 | 2.909 |
| 4JO4 | H_ARG_94  | NH1 | H_ASP_101 | OD1 | 2.897 |
| 4JO4 | H_ARG_94  | NH1 | H_ASP_101 | OD2 | 3.447 |
| 4JO4 | M_LYS_39  | NZ  | M_ASP_81  | OD1 | 2.860 |
| 4JO4 | M_LYS_39  | NZ  | M_ASP_81  | OD2 | 3.880 |
| 4JO4 | M_ARG_61  | NH1 | M_ASP_82  | OD1 | 3.524 |
| 4JO4 | M_ARG_61  | NH1 | M_ASP_82  | OD2 | 2.695 |
| 4JO4 | M_ARG_61  | NH2 | M_ASP_82  | OD1 | 2.799 |
| 4JO4 | M_ARG_61  | NH2 | M_ASP_82  | OD2 | 3.460 |
| 4JO4 | M_LYS_162 | NZ  | M_ASP_142 | OD1 | 2.860 |
| 4JO4 | M_LYS_162 | NZ  | M_ASP_142 | OD2 | 3.801 |
| 4JO4 | L_ARG_38  | NH1 | L_ASP_86  | OD2 | 2.762 |
| 4JO4 | L_ARG_38  | NH2 | L_GLU_46  | OE1 | 3.585 |
| 4JO4 | L_ARG_38  | NH2 | L_GLU_46  | OE2 | 3.974 |
| 4JO4 | L_ARG_38  | NH2 | L_ASP_86  | OD2 | 3.717 |
| 4JO4 | L_ARG_66  | NH1 | L_ASP_86  | OD1 | 2.993 |
| 4JO4 | L_ARG_66  | NH1 | L_ASP_86  | OD2 | 3.710 |
| 4JO4 | L_ARG_66  | NH2 | L_ASP_86  | OD1 | 3.487 |
| 4JO4 | L_ARG_66  | NH2 | L_ASP_86  | OD2 | 2.841 |
| 4JO4 | L_ARG_94  | NH1 | L_ASP_101 | OD1 | 3.375 |
| 4JO4 | L_ARG_94  | NH1 | L_ASP_101 | OD2 | 2.907 |
| 4K24 | A_LYS_46  | NZ  | U_GLU_33  | OE2 | 3.632 |
| 4K24 | A_LYS_46  | NZ  | U_GLU_36  | OE2 | 2.856 |
| 4K24 | A_ARG_69  | NH1 | A_ASP_65  | OD2 | 2.685 |
| 4K24 | A_HIS_87  | ND1 | U_ASP_11  | OD1 | 3.994 |
| 4K24 | A_ARG_88  | NH1 | A_ASP_90  | OD1 | 2.450 |
| 4K24 | A_ARG_88  | NH1 | A_ASP_90  | OD2 | 2.041 |
| 4K24 | A_ARG_88  | NH2 | A_ASP_90  | OD2 | 3.515 |
| 4K24 | A_ARG_108 | NH2 | A_ASP_106 | OD1 | 3.775 |

|      |           |     |           |     |       |
|------|-----------|-----|-----------|-----|-------|
| 4K24 | A_ARG_109 | NH2 | A_GLU_125 | OE1 | 3.204 |
| 4K24 | A_ARG_109 | NH2 | A_GLU_125 | OE2 | 3.379 |
| 4K24 | A_ARG_110 | NH2 | A_GLU_125 | OE1 | 3.434 |
| 4K24 | B_LYS_6   | NZ  | B_GLU_38  | OE1 | 3.295 |
| 4K24 | B_LYS_6   | NZ  | B_GLU_38  | OE2 | 3.051 |
| 4K24 | H_LYS_62  | NZ  | L_ASP_1   | OD1 | 3.610 |
| 4K24 | H_ARG_66  | NH2 | H_ASP_86  | OD1 | 3.579 |
| 4K24 | H_ARG_66  | NH2 | H_ASP_86  | OD2 | 3.959 |
| 4K24 | H_ARG_94  | NH2 | H_ASP_101 | OD2 | 3.501 |
| 4K24 | H_LYS_205 | NZ  | H_ASP_207 | OD1 | 3.964 |
| 4K24 | H_LYS_208 | NZ  | L_GLU_123 | OE1 | 2.286 |
| 4K24 | H_LYS_208 | NZ  | L_GLU_123 | OE2 | 3.345 |
| 4K24 | L_ARG_46  | NH2 | L_ASP_55  | OD1 | 2.623 |
| 4K24 | L_ARG_46  | NH2 | L_ASP_55  | OD2 | 2.874 |
| 4K24 | L_ARG_61  | NH1 | L_GLU_79  | OE1 | 3.659 |
| 4K24 | L_ARG_61  | NH1 | L_ASP_82  | OD2 | 3.380 |
| 4K24 | L_ARG_61  | NH2 | L_GLU_79  | OE1 | 2.490 |
| 4K24 | L_ARG_61  | NH2 | L_GLU_79  | OE2 | 3.979 |
| 4K24 | L_ARG_61  | NH2 | L_ASP_82  | OD1 | 3.491 |
| 4K24 | L_ARG_61  | NH2 | L_ASP_82  | OD2 | 3.569 |
| 4K24 | L_LYS_142 | NZ  | L_ASP_143 | OD1 | 3.088 |
| 4K24 | L_LYS_147 | NZ  | L_GLU_154 | OE1 | 3.964 |
| 4K24 | L_LYS_147 | NZ  | L_GLU_154 | OE2 | 3.385 |
| 4K24 | L_LYS_147 | NZ  | L_GLU_195 | OE2 | 3.600 |
| 4K24 | L_HIS_189 | ND1 | L_GLU_185 | OE2 | 3.464 |
| 4K24 | L_HIS_189 | NE2 | L_ASP_151 | OD2 | 3.905 |
| 4K24 | L_ARG_211 | NH1 | L_GLU_187 | OE1 | 3.878 |
| 4K24 | L_ARG_211 | NH2 | L_GLU_187 | OE1 | 2.437 |
| 4K24 | U_ARG_25  | NH1 | U_GLU_42  | OE2 | 3.583 |
| 4K24 | U_ARG_25  | NH1 | U_GLU_68  | OE1 | 3.761 |
| 4K24 | U_ARG_25  | NH2 | U_GLU_42  | OE2 | 3.008 |
| 4K24 | U_ARG_30  | NH1 | U_GLU_37  | OE2 | 3.811 |
| 4K24 | U_ARG_30  | NH2 | U_GLU_37  | OE1 | 3.105 |
| 4K24 | U_ARG_30  | NH2 | U_GLU_37  | OE2 | 2.352 |
| 4K24 | U_LYS_50  | NZ  | U_GLU_68  | OE2 | 3.702 |
| 4K24 | U_LYS_50  | NZ  | U_ASP_254 | OD1 | 3.827 |
| 4K24 | U_ARG_53  | NH1 | U_ASP_254 | OD1 | 3.567 |
| 4K24 | U_ARG_53  | NH1 | U_ASP_254 | OD2 | 3.288 |
| 4K24 | U_ARG_53  | NH2 | U_ASP_254 | OD1 | 3.503 |
| 4K24 | U_ARG_53  | NH2 | U_ASP_254 | OD2 | 3.622 |
| 4K24 | U_LYS_62  | NZ  | U_GLU_33  | OE1 | 3.765 |
| 4K24 | U_ARG_91  | NH1 | B_ASP_22  | OD2 | 3.233 |
| 4K24 | U_ARG_91  | NH2 | B_ASP_22  | OD1 | 3.988 |
| 4K24 | U_ARG_91  | NH2 | B_ASP_22  | OD2 | 3.635 |
| 4K24 | U_HIS_143 | ND1 | U_GLU_106 | OE2 | 3.213 |
| 4K24 | U_ARG_145 | NH1 | U_ASP_124 | OD1 | 3.705 |
| 4K24 | U_ARG_145 | NH2 | U_ASP_124 | OD1 | 2.588 |
| 4K24 | U_ARG_145 | NH2 | U_ASP_124 | OD2 | 3.556 |
| 4K24 | U_LYS_175 | NZ  | U_GLU_178 | OE2 | 3.964 |
| 4K2U | A_LYS_    | NZ  | A_GLU_    | OE1 | 3.768 |
| 4K2U | A_LYS_    | NZ  | A_GLU_    | OE2 | 2.609 |
| 4K2U | A_ARG_    | NH1 | A_ASP_    | OD1 | 2.573 |
| 4K2U | A_ARG_    | NH1 | A_ASP_    | OD2 | 3.255 |
| 4K2U | A_LYS_    | NZ  | A_ASP_    | OD1 | 2.738 |
| 4K2U | A_LYS_    | NZ  | A_ASP_    | OD1 | 3.468 |
| 4K2U | A_ARG_    | NH1 | A_ASP_    | OD2 | 2.783 |
| 4K2U | A_ARG_    | NH2 | A_ASP_    | OD2 | 2.667 |
| 4K2U | A_ARG_    | NH2 | A_GLU_    | OE1 | 3.027 |

|      |        |     |        |     |       |
|------|--------|-----|--------|-----|-------|
| 4K2U | A_ARG_ | NH2 | A_GLU_ | OE2 | 3.639 |
| 4K2U | A_ARG_ | NH1 | A_ASP_ | OD2 | 3.283 |
| 4K2U | A_ARG_ | NH2 | A_ASP_ | OD1 | 3.700 |
| 4K2U | A_ARG_ | NH2 | A_ASP_ | OD2 | 2.890 |
| 4K2U | A_ARG_ | NH2 | A_ASP_ | OD2 | 3.924 |
| 4K2U | A_LYS_ | NZ  | A_GLU_ | OE1 | 3.682 |
| 4K2U | A_LYS_ | NZ  | A_GLU_ | OE2 | 3.521 |
| 4K2U | A_LYS_ | NZ  | A_ASP_ | OD2 | 3.301 |
| 4K2U | A_LYS_ | NZ  | A_ASP_ | OD2 | 3.690 |
| 4K2U | A_ARG_ | NH1 | A_GLU_ | OE1 | 3.492 |
| 4K2U | A_ARG_ | NH1 | A_GLU_ | OE2 | 3.531 |
| 4K2U | A_ARG_ | NH2 | A_GLU_ | OE1 | 3.963 |
| 4K2U | A_ARG_ | NH2 | A_GLU_ | OE2 | 2.886 |
| 4K2U | A_HIS_ | NE2 | A_GLU_ | OE1 | 3.170 |
| 4K2U | A_LYS_ | NZ  | A_GLU_ | OE1 | 3.297 |
| 4K2U | A_LYS_ | NZ  | A_GLU_ | OE2 | 3.450 |
| 4K2U | A_ARG_ | NH1 | A_ASP_ | OD1 | 3.497 |
| 4K2U | A_ARG_ | NH2 | A_ASP_ | OD1 | 3.758 |
| 4K2U | B_LYS_ | NZ  | B_GLU_ | OE1 | 3.571 |
| 4K2U | B_LYS_ | NZ  | B_GLU_ | OE2 | 2.646 |
| 4K2U | B_ARG_ | NH1 | B_ASP_ | OD1 | 2.642 |
| 4K2U | B_ARG_ | NH1 | B_ASP_ | OD2 | 3.466 |
| 4K2U | B_LYS_ | NZ  | B_ASP_ | OD1 | 2.561 |
| 4K2U | B_ARG_ | NH1 | B_ASP_ | OD2 | 2.664 |
| 4K2U | B_ARG_ | NH2 | B_ASP_ | OD2 | 2.621 |
| 4K2U | B_ARG_ | NH2 | B_GLU_ | OE1 | 3.057 |
| 4K2U | B_ARG_ | NH2 | B_GLU_ | OE2 | 3.570 |
| 4K2U | B_ARG_ | NH1 | B_ASP_ | OD2 | 3.462 |
| 4K2U | B_ARG_ | NH2 | B_ASP_ | OD1 | 3.706 |
| 4K2U | B_ARG_ | NH2 | B_ASP_ | OD2 | 3.043 |
| 4K2U | B_ARG_ | NH2 | B_ASP_ | OD2 | 3.804 |
| 4K2U | B_LYS_ | NZ  | B_GLU_ | OE1 | 3.474 |
| 4K2U | B_LYS_ | NZ  | B_GLU_ | OE2 | 3.437 |
| 4K2U | B_LYS_ | NZ  | B_GLU_ | OE2 | 3.372 |
| 4K2U | B_LYS_ | NZ  | B_ASP_ | OD2 | 3.125 |
| 4K2U | B_ARG_ | NH1 | B_GLU_ | OE2 | 2.841 |
| 4K2U | B_ARG_ | NH2 | B_GLU_ | OE1 | 3.192 |
| 4K2U | B_ARG_ | NH2 | B_GLU_ | OE2 | 3.341 |
| 4K2U | B_LYS_ | NZ  | B_GLU_ | OE1 | 3.826 |
| 4K2U | B_HIS_ | NE2 | B_GLU_ | OE1 | 3.714 |
| 4K2U | B_LYS_ | NZ  | B_GLU_ | OE1 | 3.312 |
| 4K2U | B_LYS_ | NZ  | B_GLU_ | OE2 | 3.705 |
| 4K2U | B_ARG_ | NH1 | B_ASP_ | OD1 | 3.090 |
| 4K2U | B_ARG_ | NH2 | B_ASP_ | OD1 | 3.461 |
| 4K2U | B_LYS_ | NZ  | B_GLU_ | OE2 | 3.384 |
| 4K2U | B_LYS_ | NZ  | B_ASP_ | OD1 | 3.229 |
| 4K2U | B_LYS_ | NZ  | B_ASP_ | OD2 | 2.796 |
| 4K2U | H_ARG_ | NH1 | H_GLU_ | OE1 | 3.927 |
| 4K2U | H_LYS_ | NZ  | H_ASP_ | OD1 | 3.481 |
| 4K2U | H_LYS_ | NZ  | H_ASP_ | OD2 | 3.636 |
| 4K2U | H_LYS_ | NZ  | L_ASP_ | OD2 | 2.646 |
| 4K2U | H_LYS_ | NZ  | H_ASP_ | OD1 | 3.694 |
| 4K2U | H_LYS_ | NZ  | H_ASP_ | OD2 | 2.669 |
| 4K2U | H_ARG_ | NH2 | H_ASP_ | OD1 | 3.475 |
| 4K2U | H_ARG_ | NH2 | H_GLU_ | OE1 | 2.820 |
| 4K2U | H_LYS_ | NZ  | L_GLU_ | OE2 | 3.160 |
| 4K2U | I_ARG_ | NH1 | I_GLU_ | OE1 | 3.521 |
| 4K2U | I_ARG_ | NH2 | I_GLU_ | OE1 | 2.623 |

|      |           |     |           |     |       |
|------|-----------|-----|-----------|-----|-------|
| 4K2U | L_LYS_    | NZ  | I_ASP_    | OD1 | 3.612 |
| 4K2U | L_LYS_    | NZ  | I_ASP_    | OD2 | 3.457 |
| 4K2U | L_LYS_    | NZ  | M_ASP_    | OD2 | 2.895 |
| 4K2U | L_LYS_    | NZ  | I_ASP_    | OD1 | 3.839 |
| 4K2U | L_LYS_    | NZ  | I_ASP_    | OD2 | 2.840 |
| 4K2U | L_ARG_    | NH2 | I_ASP_    | OD1 | 3.888 |
| 4K2U | L_ARG_    | NH2 | I_GLU_    | OE1 | 2.738 |
| 4K2U | L_ARG_    | NH1 | L_ASP_    | OD1 | 2.627 |
| 4K2U | L_ARG_    | NH1 | L_ASP_    | OD2 | 2.684 |
| 4K2U | L_ARG_    | NH1 | A_GLU_    | OE1 | 2.808 |
| 4K2U | L_ARG_    | NH1 | A_GLU_    | OE2 | 3.439 |
| 4K2U | L_ARG_    | NH2 | A_GLU_    | OE1 | 3.591 |
| 4K2U | L_ARG_    | NH2 | A_GLU_    | OE2 | 2.619 |
| 4K2U | L_ARG_    | NH1 | L_GLU_    | OE1 | 3.276 |
| 4K2U | L_ARG_    | NH1 | L_GLU_    | OE2 | 3.602 |
| 4K2U | L_ARG_    | NH2 | L_GLU_    | OE2 | 3.191 |
| 4K2U | L_ARG_    | NH2 | L_GLU_    | OE1 | 3.486 |
| 4K2U | L_ARG_    | NH2 | L_ASP_    | OD1 | 3.236 |
| 4K2U | L_ARG_    | NH2 | L_ASP_    | OD2 | 3.657 |
| 4K2U | L_LYS_    | NZ  | L_GLU_    | OE1 | 3.754 |
| 4K2U | L_LYS_    | NZ  | L_GLU_    | OE2 | 2.528 |
| 4K2U | L_ARG_    | NH1 | L_GLU_    | OE2 | 3.762 |
| 4K2U | L_ARG_    | NH2 | L_GLU_    | OE1 | 3.990 |
| 4K2U | L_ARG_    | NH2 | L_GLU_    | OE2 | 2.325 |
| 4K2U | L_HIS_    | ND1 | L_ASP_    | OD2 | 2.555 |
| 4K2U | M_ARG_    | NH1 | M_ASP_    | OD1 | 2.384 |
| 4K2U | M_ARG_    | NH1 | M_ASP_    | OD2 | 3.237 |
| 4K2U | M_ARG_    | NH1 | B_GLU_    | OE1 | 2.744 |
| 4K2U | M_ARG_    | NH1 | B_GLU_    | OE2 | 3.321 |
| 4K2U | M_ARG_    | NH2 | B_GLU_    | OE1 | 3.489 |
| 4K2U | M_ARG_    | NH2 | B_GLU_    | OE2 | 2.673 |
| 4K2U | M_HIS_    | ND1 | I_GLU_    | OE2 | 3.997 |
| 4K2U | M_ARG_    | NH1 | M_GLU_    | OE2 | 3.472 |
| 4K2U | M_ARG_    | NH2 | M_GLU_    | OE2 | 3.787 |
| 4K2U | M_ARG_    | NH2 | M_GLU_    | OE1 | 3.410 |
| 4K2U | M_ARG_    | NH2 | M_ASP_    | OD1 | 3.140 |
| 4K2U | M_ARG_    | NH2 | M_ASP_    | OD1 | 3.175 |
| 4K2U | M_LYS_    | NZ  | M_GLU_    | OE1 | 3.487 |
| 4K2U | M_LYS_    | NZ  | M_GLU_    | OE2 | 2.899 |
| 4K2U | M_HIS_    | ND1 | M_ASP_    | OD2 | 2.547 |
| 4KI5 | C_HIS_35  | NE2 | C_GLU_99  | OE1 | 2.952 |
| 4KI5 | C_LYS_46  | NZ  | C_ASP_63  | OD2 | 2.850 |
| 4KI5 | C_LYS_65  | NZ  | C_ASP_62  | OD1 | 3.382 |
| 4KI5 | C_ARG_67  | NH1 | C_ASP_90  | OD1 | 3.757 |
| 4KI5 | C_ARG_67  | NH1 | C_ASP_90  | OD2 | 2.867 |
| 4KI5 | C_ARG_67  | NH2 | C_ASP_90  | OD1 | 3.010 |
| 4KI5 | C_ARG_67  | NH2 | C_ASP_90  | OD2 | 3.538 |
| 4KI5 | C_ARG_98  | NH1 | C_ASP_100 | OD1 | 3.340 |
| 4KI5 | C_LYS_211 | NZ  | D_GLU_122 | OE2 | 2.907 |
| 4KI5 | C_ARG_216 | NH2 | C_GLU_214 | OE1 | 3.340 |
| 4KI5 | D_ARG_60  | NH2 | D_GLU_80  | OE2 | 3.447 |
| 4KI5 | D_ARG_60  | NH2 | D_ASP_81  | OD1 | 2.653 |
| 4KI5 | D_ARG_60  | NH2 | D_ASP_81  | OD2 | 3.443 |
| 4KI5 | D_LYS_102 | NZ  | D_ASP_164 | OD1 | 3.660 |
| 4KI5 | D_LYS_102 | NZ  | D_ASP_164 | OD2 | 3.125 |
| 4KI5 | D_LYS_146 | NZ  | D_GLU_153 | OE1 | 3.729 |
| 4KI5 | D_LYS_148 | NZ  | D_GLU_194 | OE1 | 2.836 |
| 4KI5 | D_ARG_154 | NH1 | D_GLU_184 | OE1 | 3.010 |



|      |            |     |            |     |       |
|------|------------|-----|------------|-----|-------|
| 4KI5 | D_ARG_154  | NH2 | D_GLU_184  | OE1 | 3.600 |
| 4KI5 | D_LYS_182  | NZ  | D_GLU_186  | OE2 | 3.376 |
| 4KI5 | D_HIS_188  | ND1 | D_ASP_150  | OD2 | 2.808 |
| 4KI5 | D_HIS_197  | ND1 | D_ASP_142  | OD1 | 2.559 |
| 4KI5 | D_HIS_197  | ND1 | D_ASP_142  | OD2 | 3.147 |
| 4KI5 | E_ARG_40   | NH2 | E_GLU_89   | OE2 | 3.648 |
| 4KI5 | E_ARG_63   | NH1 | E_GLU_46   | OE2 | 2.566 |
| 4KI5 | E_LYS_65   | NZ  | E_GLU_62   | OE1 | 3.306 |
| 4KI5 | E_LYS_65   | NZ  | E_GLU_62   | OE2 | 3.510 |
| 4KI5 | E_LYS_67   | NZ  | E_ASP_90   | OD1 | 3.938 |
| 4KI5 | E_LYS_67   | NZ  | E_ASP_90   | OD2 | 2.897 |
| 4KI5 | E_ARG_98   | NH2 | E_ASP_110  | OD1 | 3.380 |
| 4KI5 | E_ARG_98   | NH2 | E_ASP_110  | OD2 | 2.498 |
| 4KI5 | E_LYS_217  | NZ  | F_GLU_123  | OE2 | 3.401 |
| 4KI5 | E_LYS_218  | NZ  | E_GLU_220  | OE2 | 3.129 |
| 4KI5 | E_ARG_222  | NH1 | F_GLU_123  | OE1 | 3.106 |
| 4KI5 | E_ARG_222  | NH1 | F_GLU_123  | OE2 | 3.925 |
| 4KI5 | E_ARG_222  | NH2 | F_GLU_123  | OE1 | 3.823 |
| 4KI5 | E_ARG_222  | NH2 | F_GLU_123  | OE2 | 3.234 |
| 4KI5 | F_ARG_24   | NH2 | F_ASP_70   | OD1 | 3.045 |
| 4KI5 | F_ARG_24   | NH2 | F_ASP_70   | OD2 | 2.870 |
| 4KI5 | F_ARG_46   | NH2 | F_ASP_55   | OD2 | 3.256 |
| 4KI5 | F_ARG_61   | NH1 | F_ASP_79   | OD2 | 3.671 |
| 4KI5 | F_ARG_61   | NH2 | F_ASP_79   | OD2 | 3.651 |
| 4KI5 | F_ARG_61   | NH2 | F_ASP_82   | OD1 | 2.633 |
| 4KI5 | F_ARG_61   | NH2 | F_ASP_82   | OD2 | 3.268 |
| 4KI5 | F_ARG_66   | NH1 | F_GLU_28   | OE2 | 3.847 |
| 4KI5 | F_ARG_66   | NH2 | F_GLU_28   | OE2 | 3.615 |
| 4KI5 | F_LYS_103  | NZ  | F_ASP_165  | OD1 | 3.937 |
| 4KI5 | F_LYS_103  | NZ  | F_ASP_165  | OD2 | 3.643 |
| 4KI5 | F_LYS_149  | NZ  | F_GLU_195  | OE1 | 2.911 |
| 4KI5 | F_ARG_155  | NH1 | F_GLU_185  | OE2 | 3.880 |
| 4KI5 | F_ARG_155  | NH2 | F_GLU_185  | OE2 | 2.938 |
| 4KI5 | F_LYS_169  | NZ  | F_GLU_81   | OE2 | 3.864 |
| 4KI5 | F_LYS_183  | NZ  | F_ASP_184  | OD1 | 2.750 |
| 4KI5 | F_HIS_189  | ND1 | F_ASP_151  | OD2 | 2.998 |
| 4KI5 | F_ARG_211  | NH2 | F_GLU_187  | OE1 | 3.825 |
| 4KI5 | M_ARG_2209 | NH2 | M_ASP_2187 | OD2 | 2.570 |
| 4KI5 | M_ARG_2215 | NH1 | C_ASP_100  | OD1 | 2.868 |
| 4KI5 | M_ARG_2215 | NH1 | C_ASP_100  | OD2 | 3.241 |
| 4KI5 | M_ARG_2215 | NH2 | C_ASP_100  | OD1 | 3.324 |
| 4KI5 | M_ARG_2215 | NH2 | C_ASP_100  | OD2 | 2.939 |
| 4KI5 | M_ARG_2215 | NH2 | C_ASP_101  | OD2 | 3.819 |
| 4KI5 | M_LYS_2227 | NZ  | E_GLU_50   | OE1 | 3.493 |
| 4KI5 | M_ARG_2304 | NH2 | M_ASP_2233 | OD1 | 3.696 |
| 4KI5 | M_ARG_2304 | NH2 | M_ASP_2233 | OD2 | 3.280 |
| 4KJY | A_LYS_39   | NZ  | B_ASP_100  | OD1 | 2.809 |
| 4KJY | A_LYS_41   | NZ  | A_GLU_97   | OE2 | 2.999 |
| 4KJY | A_LYS_41   | NZ  | A_GLU_106  | OE1 | 2.835 |
| 4KJY | A_ARG_45   | NH1 | A_ASP_62   | OD1 | 3.701 |
| 4KJY | A_ARG_45   | NH1 | A_ASP_62   | OD2 | 2.667 |
| 4KJY | A_ARG_45   | NH2 | A_ASP_62   | OD2 | 2.900 |
| 4KJY | A_HIS_90   | NE2 | A_ASP_62   | OD2 | 3.464 |
| 4KJY | A_ARG_103  | NH2 | A_GLU_100  | OE1 | 3.259 |
| 4KJY | A_ARG_103  | NH2 | A_GLU_100  | OE2 | 3.050 |
| 4KJY | B_ARG_46   | NH1 | B_GLU_102  | OE1 | 3.091 |
| 4KJY | B_ARG_46   | NH2 | B_GLU_102  | OE1 | 3.045 |
| 4KJY | B_ARG_53   | NH1 | A_GLU_97   | OE2 | 3.571 |

|      |           |     |           |     |       |
|------|-----------|-----|-----------|-----|-------|
| 4KJY | B_ARG_53  | NH1 | A_GLU_106 | OE1 | 3.135 |
| 4KJY | B_ARG_59  | NH1 | B_ASP_85  | OD1 | 3.565 |
| 4KJY | B_ARG_59  | NH2 | B_ASP_85  | OD1 | 3.099 |
| 4KJY | B_ARG_59  | NH2 | B_ASP_85  | OD2 | 2.288 |
| 4KJY | B_ARG_68  | NH1 | B_GLU_65  | OE1 | 3.402 |
| 4KJY | B_ARG_68  | NH2 | B_GLU_65  | OE1 | 3.828 |
| 4KJY | B_ARG_69  | NH1 | A_GLU_35  | OE1 | 2.737 |
| 4KJY | B_ARG_69  | NH1 | A_GLU_35  | OE2 | 3.607 |
| 4KJY | B_ARG_69  | NH1 | A_GLU_100 | OE2 | 2.961 |
| 4KJY | B_ARG_69  | NH2 | A_GLU_35  | OE1 | 3.476 |
| 4KJY | B_ARG_69  | NH2 | A_GLU_35  | OE2 | 2.813 |
| 4KJY | B_LYS_96  | NZ  | A_GLU_97  | OE1 | 2.567 |
| 4KJY | B_LYS_96  | NZ  | B_ASP_100 | OD1 | 3.158 |
| 4KJY | B_LYS_96  | NZ  | B_ASP_100 | OD2 | 2.571 |
| 4KJY | B_LYS_104 | NZ  | B_GLU_3   | OE1 | 3.935 |
| 4KJY | B_LYS_104 | NZ  | B_GLU_3   | OE2 | 3.416 |
| 4KJY | C_LYS_41  | NZ  | C_GLU_97  | OE2 | 2.660 |
| 4KJY | C_LYS_41  | NZ  | C_GLU_106 | OE1 | 2.848 |
| 4KJY | C_ARG_45  | NH1 | C_ASP_62  | OD2 | 3.404 |
| 4KJY | C_ARG_45  | NH2 | C_ASP_62  | OD1 | 3.143 |
| 4KJY | C_ARG_45  | NH2 | C_ASP_62  | OD2 | 3.381 |
| 4KJY | C_LYS_67  | NZ  | C_GLU_69  | OE1 | 3.854 |
| 4KJY | C_LYS_67  | NZ  | C_GLU_69  | OE2 | 2.799 |
| 4KJY | C_LYS_81  | NZ  | C_GLU_69  | OE2 | 2.680 |
| 4KJY | C_HIS_90  | NE2 | C_ASP_62  | OD2 | 3.141 |
| 4KJY | C_ARG_103 | NH2 | C_GLU_100 | OE1 | 3.185 |
| 4KJY | C_ARG_103 | NH2 | C_GLU_100 | OE2 | 3.021 |
| 4KJY | D_ARG_40  | NH1 | A_GLU_29  | OE1 | 3.310 |
| 4KJY | D_ARG_40  | NH2 | A_GLU_29  | OE1 | 3.253 |
| 4KJY | D_ARG_40  | NH2 | A_GLU_29  | OE2 | 2.999 |
| 4KJY | D_ARG_40  | NH2 | B_GLU_70  | OE1 | 3.440 |
| 4KJY | D_ARG_46  | NH1 | D_GLU_102 | OE1 | 3.026 |
| 4KJY | D_ARG_46  | NH2 | D_GLU_102 | OE1 | 2.981 |
| 4KJY | D_ARG_53  | NH1 | C_GLU_97  | OE2 | 3.949 |
| 4KJY | D_ARG_53  | NH2 | C_GLU_104 | OE1 | 3.112 |
| 4KJY | D_ARG_53  | NH2 | C_GLU_104 | OE2 | 3.607 |
| 4KJY | D_ARG_59  | NH1 | D_ASP_85  | OD1 | 3.248 |
| 4KJY | D_ARG_59  | NH2 | D_ASP_85  | OD1 | 3.278 |
| 4KJY | D_ARG_59  | NH2 | D_ASP_85  | OD2 | 2.654 |
| 4KJY | D_ARG_68  | NH2 | D_GLU_65  | OE1 | 2.908 |
| 4KJY | D_ARG_69  | NH1 | C_GLU_35  | OE1 | 2.786 |
| 4KJY | D_ARG_69  | NH1 | C_GLU_35  | OE2 | 3.903 |
| 4KJY | D_ARG_69  | NH1 | C_GLU_100 | OE2 | 3.005 |
| 4KJY | D_ARG_69  | NH2 | C_GLU_35  | OE1 | 3.286 |
| 4KJY | D_ARG_69  | NH2 | C_GLU_35  | OE2 | 2.868 |
| 4KJY | D_LYS_96  | NZ  | C_GLU_97  | OE1 | 2.747 |
| 4KJY | D_LYS_96  | NZ  | D_ASP_100 | OD1 | 3.105 |
| 4KJY | D_LYS_96  | NZ  | D_ASP_100 | OD2 | 2.750 |
| 4KJY | D_LYS_104 | NZ  | D_GLU_3   | OE1 | 2.954 |
| 4KPH | L_LYS_39  | NZ  | L_GLU_81  | OE1 | 3.604 |
| 4KPH | L_ARG_61  | NH1 | L_ASP_82  | OD1 | 3.220 |
| 4KPH | L_ARG_61  | NH1 | L_ASP_82  | OD2 | 2.394 |
| 4KPH | L_ARG_61  | NH2 | L_GLU_79  | OE1 | 3.711 |
| 4KPH | L_ARG_61  | NH2 | L_GLU_79  | OE2 | 3.781 |
| 4KPH | L_ARG_61  | NH2 | L_ASP_82  | OD1 | 2.574 |
| 4KPH | L_ARG_61  | NH2 | L_ASP_82  | OD2 | 3.380 |
| 4KPH | L_ARG_61  | NH2 | L_GLU_85  | OE2 | 3.345 |
| 4KPH | L_LYS_103 | NZ  | L_ASP_85  | OD1 | 2.968 |

|      |           |     |           |     |       |
|------|-----------|-----|-----------|-----|-------|
| 4KPH | L_LYS_103 | NZ  | L_ASP_85  | OD2 | 3.649 |
| 4KPH | L_LYS_147 | NZ  | L_GLU_154 | OE2 | 3.845 |
| 4KPH | L_LYS_149 | NZ  | L_GLU_195 | OE1 | 3.580 |
| 4KPH | L_LYS_149 | NZ  | L_GLU_195 | OE2 | 2.888 |
| 4KPH | L_ARG_155 | NH1 | L_GLU_185 | OE2 | 3.834 |
| 4KPH | L_LYS_169 | NZ  | L_GLU_81  | OE2 | 3.946 |
| 4KPH | L_ARG_188 | NH1 | L_GLU_185 | OE1 | 2.941 |
| 4KPH | L_ARG_188 | NH2 | L_GLU_185 | OE1 | 3.830 |
| 4KPH | L_HIS_189 | ND1 | L_ASP_151 | OD2 | 3.425 |
| 4KPH | L_HIS_189 | NE2 | L_GLU_185 | OE2 | 3.271 |
| 4KPH | L_LYS_199 | NZ  | L_ASP_110 | OD2 | 3.817 |
| 4KPH | H_ARG_38  | NH1 | H_ASP_86  | OD1 | 2.609 |
| 4KPH | H_ARG_38  | NH2 | H_GLU_46  | OE2 | 2.879 |
| 4KPH | H_ARG_38  | NH2 | H_ASP_86  | OD1 | 3.494 |
| 4KPH | H_ARG_66  | NH1 | H_ASP_86  | OD1 | 3.691 |
| 4KPH | H_ARG_66  | NH1 | H_ASP_86  | OD2 | 3.301 |
| 4KPH | H_ARG_66  | NH2 | H_ASP_86  | OD1 | 2.689 |
| 4KPH | H_ARG_66  | NH2 | H_ASP_86  | OD2 | 2.980 |
| 4KPH | H_LYS_75  | NZ  | H_ASP_72  | OD2 | 2.680 |
| 4KPH | H_LYS_208 | NZ  | L_GLU_123 | OE2 | 2.903 |
| 4KPH | M_LYS_39  | NZ  | M_GLU_81  | OE1 | 3.784 |
| 4KPH | M_ARG_61  | NH1 | M_ASP_82  | OD1 | 3.526 |
| 4KPH | M_ARG_61  | NH1 | M_ASP_82  | OD2 | 2.643 |
| 4KPH | M_ARG_61  | NH2 | M_GLU_79  | OE1 | 3.955 |
| 4KPH | M_ARG_61  | NH2 | M_GLU_79  | OE2 | 3.623 |
| 4KPH | M_ARG_61  | NH2 | M_ASP_82  | OD1 | 2.593 |
| 4KPH | M_ARG_61  | NH2 | M_ASP_82  | OD2 | 3.290 |
| 4KPH | L_ARG_38  | NH1 | L_ASP_86  | OD1 | 2.756 |
| 4KPH | L_ARG_38  | NH2 | L_GLU_46  | OE1 | 2.881 |
| 4KPH | L_ARG_38  | NH2 | L_ASP_86  | OD1 | 3.615 |
| 4KPH | L_ARG_66  | NH1 | L_ASP_86  | OD1 | 3.166 |
| 4KPH | L_ARG_66  | NH1 | L_ASP_86  | OD2 | 2.662 |
| 4KPH | L_ARG_66  | NH2 | L_ASP_86  | OD1 | 3.175 |
| 4KPH | L_ARG_66  | NH2 | L_ASP_86  | OD2 | 3.816 |
| 4KPH | L_LYS_75  | NZ  | L_ASP_72  | OD2 | 2.592 |
| 4KPH | L_LYS_208 | NZ  | M_GLU_123 | OE2 | 2.312 |
| 4KRL | B_ARG_19  | NH2 | B_ASP_80  | OD2 | 3.165 |
| 4KRL | B_ARG_30  | NH1 | A_ASP_355 | OD1 | 3.258 |
| 4KRL | B_ARG_30  | NH1 | A_ASP_355 | OD2 | 2.275 |
| 4KRL | B_ARG_30  | NH2 | A_ASP_355 | OD1 | 3.549 |
| 4KRL | B_ARG_30  | NH2 | A_ASP_355 | OD2 | 3.938 |
| 4KRL | B_ARG_38  | NH1 | B_ASP_90  | OD2 | 3.344 |
| 4KRL | B_ARG_38  | NH2 | B_GLU_46  | OE1 | 2.859 |
| 4KRL | B_ARG_38  | NH2 | B_ASP_90  | OD2 | 3.931 |
| 4KRL | B_ARG_67  | NH1 | B_ASP_90  | OD1 | 2.738 |
| 4KRL | B_ARG_67  | NH1 | B_ASP_90  | OD2 | 3.832 |
| 4KRL | B_ARG_67  | NH2 | B_ASP_90  | OD1 | 3.067 |
| 4KRL | B_ARG_67  | NH2 | B_ASP_90  | OD2 | 2.979 |
| 4KRL | A_ARG_353 | NH1 | B_GLU_110 | OE1 | 2.654 |
| 4KRL | A_ARG_353 | NH2 | B_ASP_112 | OD1 | 3.873 |
| 4KRL | A_ARG_353 | NH2 | B_ASP_112 | OD2 | 2.978 |
| 4KRL | A_LYS_372 | NZ  | A_GLU_397 | OE2 | 2.311 |
| 4KRL | A_HIS_394 | NE2 | A_ASP_369 | OD1 | 3.965 |
| 4KRL | A_ARG_403 | NH1 | A_GLU_376 | OE1 | 2.323 |
| 4KRL | A_ARG_403 | NH1 | A_GLU_376 | OE2 | 3.739 |
| 4KRL | A_LYS_407 | NZ  | A_ASP_434 | OD1 | 3.147 |
| 4KRL | A_LYS_407 | NZ  | A_ASP_434 | OD2 | 3.510 |
| 4KRL | A_ARG_427 | NH1 | A_GLU_397 | OE1 | 3.352 |

|      |           |     |           |     |       |
|------|-----------|-----|-----------|-----|-------|
| 4KRL | A_ARG_427 | NH2 | A_GLU_495 | OE1 | 3.797 |
| 4KRL | A_ARG_427 | NH2 | A_ASP_498 | OD1 | 2.739 |
| 4KRL | A_ARG_427 | NH2 | A_ASP_498 | OD2 | 3.969 |
| 4KRL | A_LYS_455 | NZ  | A_GLU_489 | OE2 | 3.930 |
| 4KRL | A_LYS_463 | NZ  | A_ASP_436 | OD2 | 3.876 |
| 4KRM | A_HIS_334 | ND1 | A_GLU_320 | OE1 | 3.977 |
| 4KRM | A_HIS_334 | ND1 | A_GLU_320 | OE2 | 2.370 |
| 4KRM | A_HIS_334 | NE2 | A_GLU_320 | OE2 | 3.990 |
| 4KRM | A_ARG_353 | NH1 | B_GLU_110 | OE1 | 2.811 |
| 4KRM | A_ARG_353 | NH2 | B_ASP_112 | OD1 | 3.965 |
| 4KRM | A_ARG_353 | NH2 | B_ASP_112 | OD2 | 2.932 |
| 4KRM | A_LYS_372 | NZ  | A_GLU_397 | OE2 | 3.950 |
| 4KRM | A_ARG_390 | NH1 | A_ASP_369 | OD1 | 3.291 |
| 4KRM | A_ARG_390 | NH2 | A_ASP_369 | OD1 | 3.166 |
| 4KRM | A_ARG_390 | NH2 | A_ASP_369 | OD2 | 3.036 |
| 4KRM | A_HIS_394 | ND1 | A_ASP_392 | OD1 | 3.439 |
| 4KRM | A_HIS_394 | ND1 | A_ASP_392 | OD2 | 3.192 |
| 4KRM | A_HIS_394 | ND1 | A_GLU_397 | OE1 | 3.878 |
| 4KRM | A_HIS_394 | NE2 | A_ASP_392 | OD2 | 2.923 |
| 4KRM | A_ARG_403 | NH2 | A_GLU_376 | OE1 | 2.698 |
| 4KRM | A_LYS_407 | NZ  | A_ASP_434 | OD1 | 2.923 |
| 4KRM | A_LYS_407 | NZ  | H_GLU_5   | OE1 | 3.498 |
| 4KRM | A_LYS_407 | NZ  | H_GLU_5   | OE2 | 3.022 |
| 4KRM | A_LYS_463 | NZ  | A_ASP_436 | OD2 | 3.346 |
| 4KRM | B_ARG_19  | NH2 | B_ASP_80  | OD1 | 2.971 |
| 4KRM | B_ARG_30  | NH1 | A_ASP_355 | OD1 | 3.162 |
| 4KRM | B_ARG_30  | NH1 | A_ASP_355 | OD2 | 2.423 |
| 4KRM | B_ARG_30  | NH2 | A_ASP_355 | OD1 | 3.525 |
| 4KRM | B_ARG_38  | NH1 | B_ASP_90  | OD2 | 2.849 |
| 4KRM | B_ARG_38  | NH2 | B_GLU_46  | OE1 | 3.190 |
| 4KRM | B_ARG_38  | NH2 | B_ASP_90  | OD2 | 3.870 |
| 4KRM | B_ARG_67  | NH1 | B_ASP_90  | OD1 | 2.285 |
| 4KRM | B_ARG_67  | NH1 | B_ASP_90  | OD2 | 3.184 |
| 4KRM | B_ARG_67  | NH2 | B_ASP_90  | OD2 | 3.620 |
| 4KRM | C_LYS_310 | NZ  | C_GLU_308 | OE2 | 3.505 |
| 4KRM | C_HIS_334 | ND1 | C_GLU_320 | OE1 | 3.487 |
| 4KRM | C_ARG_353 | NH1 | D_GLU_110 | OE1 | 2.866 |
| 4KRM | C_ARG_353 | NH2 | D_ASP_112 | OD2 | 3.218 |
| 4KRM | C_LYS_372 | NZ  | C_GLU_397 | OE2 | 3.670 |
| 4KRM | C_HIS_394 | NE2 | C_GLU_397 | OE1 | 2.760 |
| 4KRM | C_HIS_394 | NE2 | C_GLU_397 | OE2 | 3.646 |
| 4KRM | C_ARG_403 | NH1 | C_GLU_376 | OE1 | 2.996 |
| 4KRM | C_ARG_403 | NH2 | C_GLU_431 | OE2 | 3.962 |
| 4KRM | C_LYS_407 | NZ  | C_ASP_434 | OD1 | 2.908 |
| 4KRM | C_ARG_427 | NH1 | C_GLU_397 | OE1 | 3.430 |
| 4KRM | C_ARG_427 | NH2 | C_ASP_498 | OD1 | 2.428 |
| 4KRM | C_ARG_427 | NH2 | C_ASP_498 | OD2 | 3.809 |
| 4KRM | C_LYS_455 | NZ  | C_GLU_489 | OE1 | 2.730 |
| 4KRM | C_LYS_455 | NZ  | C_GLU_489 | OE2 | 3.273 |
| 4KRM | C_LYS_463 | NZ  | C_ASP_436 | OD2 | 3.365 |
| 4KRM | D_ARG_19  | NH2 | D_ASP_80  | OD1 | 3.355 |
| 4KRM | D_ARG_19  | NH2 | D_ASP_80  | OD2 | 3.916 |
| 4KRM | D_ARG_30  | NH1 | C_ASP_355 | OD1 | 3.295 |
| 4KRM | D_ARG_30  | NH1 | C_ASP_355 | OD2 | 2.452 |
| 4KRM | D_ARG_30  | NH2 | C_ASP_355 | OD1 | 3.096 |
| 4KRM | D_ARG_30  | NH2 | C_ASP_355 | OD2 | 3.699 |
| 4KRM | D_ARG_38  | NH1 | D_ASP_90  | OD2 | 3.036 |
| 4KRM | D_ARG_38  | NH2 | D_GLU_46  | OE1 | 3.135 |

|      |           |     |           |     |       |
|------|-----------|-----|-----------|-----|-------|
| 4KRM | D_ARG_67  | NH2 | D_ASP_90  | OD1 | 2.355 |
| 4KRM | D_ARG_67  | NH2 | D_ASP_90  | OD2 | 3.277 |
| 4KRM | E_HIS_334 | ND1 | E_GLU_320 | OE2 | 2.610 |
| 4KRM | E_ARG_353 | NH1 | F_GLU_110 | OE1 | 2.855 |
| 4KRM | E_ARG_353 | NH2 | F_ASP_112 | OD2 | 2.965 |
| 4KRM | E_LYS_372 | NZ  | E_GLU_397 | OE2 | 3.677 |
| 4KRM | E_LYS_375 | NZ  | E_GLU_308 | OE2 | 3.450 |
| 4KRM | E_ARG_390 | NH1 | E_ASP_369 | OD1 | 3.281 |
| 4KRM | E_HIS_394 | ND1 | E_GLU_397 | OE1 | 3.143 |
| 4KRM | E_HIS_394 | ND1 | E_GLU_397 | OE2 | 3.895 |
| 4KRM | E_HIS_394 | NE2 | E_GLU_397 | OE1 | 3.783 |
| 4KRM | E_HIS_394 | NE2 | E_GLU_397 | OE2 | 3.447 |
| 4KRM | E_ARG_403 | NH1 | E_GLU_376 | OE1 | 2.574 |
| 4KRM | E_ARG_403 | NH1 | E_GLU_376 | OE2 | 3.773 |
| 4KRM | E_LYS_407 | NZ  | E_ASP_434 | OD1 | 2.654 |
| 4KRM | E_LYS_407 | NZ  | E_ASP_434 | OD2 | 3.337 |
| 4KRM | E_LYS_407 | NZ  | L_GLU_5   | OE1 | 3.054 |
| 4KRM | E_LYS_407 | NZ  | L_GLU_5   | OE2 | 2.995 |
| 4KRM | E_ARG_427 | NH1 | E_GLU_495 | OE1 | 3.905 |
| 4KRM | E_ARG_427 | NH1 | E_ASP_498 | OD1 | 3.791 |
| 4KRM | E_ARG_427 | NH2 | E_ASP_498 | OD1 | 2.763 |
| 4KRM | E_ARG_427 | NH2 | E_ASP_498 | OD2 | 3.959 |
| 4KRM | F_ARG_19  | NH2 | F_ASP_80  | OD1 | 2.815 |
| 4KRM | F_ARG_30  | NH1 | E_ASP_355 | OD1 | 3.119 |
| 4KRM | F_ARG_30  | NH1 | E_ASP_355 | OD2 | 2.396 |
| 4KRM | F_ARG_30  | NH2 | E_ASP_355 | OD1 | 3.504 |
| 4KRM | F_ARG_38  | NH1 | F_ASP_90  | OD2 | 2.948 |
| 4KRM | F_ARG_38  | NH2 | F_GLU_46  | OE1 | 2.970 |
| 4KRM | F_ARG_38  | NH2 | F_ASP_90  | OD2 | 3.609 |
| 4KRM | F_ARG_67  | NH1 | F_ASP_90  | OD1 | 3.689 |
| 4KRM | F_ARG_67  | NH1 | F_ASP_90  | OD2 | 3.954 |
| 4KRM | F_ARG_67  | NH2 | F_ASP_90  | OD1 | 2.190 |
| 4KRM | F_ARG_67  | NH2 | F_ASP_90  | OD2 | 3.534 |
| 4KRM | G_LYS_310 | NZ  | G_GLU_376 | OE2 | 3.271 |
| 4KRM | G_ARG_353 | NH1 | H_GLU_110 | OE1 | 3.021 |
| 4KRM | G_ARG_353 | NH2 | H_ASP_112 | OD2 | 3.118 |
| 4KRM | G_LYS_372 | NZ  | G_GLU_397 | OE1 | 3.892 |
| 4KRM | G_LYS_372 | NZ  | G_GLU_397 | OE2 | 2.517 |
| 4KRM | G_LYS_375 | NZ  | G_GLU_308 | OE2 | 2.881 |
| 4KRM | G_HIS_394 | ND1 | G_GLU_397 | OE1 | 3.232 |
| 4KRM | G_ARG_403 | NH1 | G_GLU_376 | OE1 | 2.469 |
| 4KRM | G_LYS_407 | NZ  | B_GLU_5   | OE1 | 3.493 |
| 4KRM | G_LYS_407 | NZ  | B_GLU_5   | OE2 | 2.984 |
| 4KRM | G_LYS_407 | NZ  | G_ASP_434 | OD1 | 2.773 |
| 4KRM | G_ARG_427 | NH1 | G_GLU_397 | OE1 | 2.912 |
| 4KRM | G_ARG_427 | NH2 | G_ASP_392 | OD2 | 3.305 |
| 4KRM | G_ARG_427 | NH2 | G_ASP_498 | OD1 | 3.141 |
| 4KRM | G_LYS_463 | NZ  | G_ASP_436 | OD2 | 2.681 |
| 4KRM | G_ARG_497 | NH2 | G_GLU_495 | OE1 | 3.599 |
| 4KRM | H_ARG_19  | NH2 | H_ASP_80  | OD1 | 3.560 |
| 4KRM | H_ARG_19  | NH2 | H_ASP_80  | OD2 | 3.970 |
| 4KRM | H_ARG_27  | NH1 | G_ASP_323 | OD1 | 2.688 |
| 4KRM | H_ARG_27  | NH2 | G_ASP_323 | OD1 | 3.952 |
| 4KRM | H_ARG_30  | NH1 | G_ASP_355 | OD1 | 3.358 |
| 4KRM | H_ARG_30  | NH1 | G_ASP_355 | OD2 | 2.448 |
| 4KRM | H_ARG_30  | NH2 | G_ASP_355 | OD1 | 3.423 |
| 4KRM | H_ARG_30  | NH2 | G_ASP_355 | OD2 | 3.935 |
| 4KRM | H_ARG_38  | NH1 | H_ASP_90  | OD2 | 2.777 |

|      |           |     |           |     |       |
|------|-----------|-----|-----------|-----|-------|
| 4KRM | H_ARG_38  | NH2 | H_GLU_46  | OE1 | 3.420 |
| 4KRM | H_ARG_38  | NH2 | H_ASP_90  | OD2 | 3.551 |
| 4KRM | H_ARG_67  | NH1 | H_ASP_90  | OD2 | 3.818 |
| 4KRM | H_ARG_67  | NH2 | H_ASP_90  | OD1 | 2.298 |
| 4KRM | H_ARG_67  | NH2 | H_ASP_90  | OD2 | 3.171 |
| 4KRM | L_ARG_353 | NH1 | J_GLU_110 | OE1 | 2.862 |
| 4KRM | L_ARG_353 | NH2 | J_ASP_112 | OD2 | 2.998 |
| 4KRM | L_ARG_390 | NH2 | L_ASP_369 | OD1 | 2.686 |
| 4KRM | L_ARG_390 | NH2 | L_ASP_369 | OD2 | 3.689 |
| 4KRM | L_ARG_403 | NH1 | L_GLU_376 | OE1 | 2.441 |
| 4KRM | L_LYS_407 | NZ  | L_ASP_434 | OD2 | 3.279 |
| 4KRM | L_ARG_427 | NH1 | L_GLU_397 | OE1 | 3.054 |
| 4KRM | L_ARG_427 | NH2 | L_ASP_498 | OD1 | 3.187 |
| 4KRM | L_LYS_463 | NZ  | L_ASP_436 | OD2 | 3.450 |
| 4KRM | J_ARG_19  | NH2 | J_ASP_80  | OD1 | 3.277 |
| 4KRM | J_ARG_30  | NH1 | L_ASP_355 | OD1 | 3.164 |
| 4KRM | J_ARG_30  | NH1 | L_ASP_355 | OD2 | 2.382 |
| 4KRM | J_ARG_30  | NH2 | L_ASP_355 | OD1 | 3.707 |
| 4KRM | J_ARG_38  | NH1 | J_ASP_90  | OD2 | 2.970 |
| 4KRM | J_ARG_38  | NH2 | J_GLU_46  | OE1 | 3.503 |
| 4KRM | J_ARG_38  | NH2 | J_ASP_90  | OD2 | 3.921 |
| 4KRM | J_ARG_54  | NH1 | J_ASP_56  | OD1 | 3.183 |
| 4KRM | J_ARG_54  | NH1 | J_ASP_56  | OD2 | 2.886 |
| 4KRM | J_ARG_54  | NH2 | J_ASP_56  | OD2 | 3.668 |
| 4KRM | J_ARG_67  | NH1 | J_ASP_90  | OD1 | 3.429 |
| 4KRM | J_ARG_67  | NH1 | J_ASP_90  | OD2 | 3.042 |
| 4KRM | J_ARG_67  | NH2 | J_ASP_90  | OD1 | 2.611 |
| 4KRM | J_ARG_67  | NH2 | J_ASP_90  | OD2 | 3.747 |
| 4KRM | K_HIS_334 | ND1 | K_GLU_320 | OE2 | 3.444 |
| 4KRM | K_ARG_353 | NH1 | L_GLU_110 | OE1 | 2.887 |
| 4KRM | K_ARG_353 | NH1 | L_ASP_112 | OD2 | 3.973 |
| 4KRM | K_ARG_353 | NH2 | L_ASP_112 | OD2 | 2.890 |
| 4KRM | K_LYS_375 | NZ  | K_GLU_400 | OE2 | 3.857 |
| 4KRM | K_HIS_394 | ND1 | K_GLU_397 | OE1 | 3.459 |
| 4KRM | K_HIS_394 | NE2 | K_GLU_397 | OE1 | 3.631 |
| 4KRM | K_HIS_394 | NE2 | K_GLU_397 | OE2 | 3.863 |
| 4KRM | K_ARG_403 | NH1 | K_GLU_376 | OE1 | 3.745 |
| 4KRM | K_ARG_403 | NH1 | K_GLU_376 | OE2 | 2.249 |
| 4KRM | K_LYS_407 | NZ  | K_ASP_434 | OD1 | 3.042 |
| 4KRM | K_LYS_407 | NZ  | K_ASP_434 | OD2 | 3.679 |
| 4KRM | K_ARG_427 | NH2 | K_ASP_498 | OD1 | 3.193 |
| 4KRM | L_ARG_19  | NH2 | L_ASP_80  | OD1 | 3.556 |
| 4KRM | L_ARG_30  | NH1 | K_ASP_355 | OD1 | 3.487 |
| 4KRM | L_ARG_30  | NH1 | K_ASP_355 | OD2 | 2.441 |
| 4KRM | L_ARG_30  | NH2 | K_ASP_355 | OD1 | 3.452 |
| 4KRM | L_ARG_30  | NH2 | K_ASP_355 | OD2 | 3.835 |
| 4KRM | L_ARG_38  | NH1 | L_ASP_90  | OD2 | 3.094 |
| 4KRM | L_ARG_38  | NH2 | L_GLU_46  | OE1 | 3.277 |
| 4KRM | L_ARG_67  | NH1 | L_ASP_90  | OD1 | 3.933 |
| 4KRM | L_ARG_67  | NH1 | L_ASP_90  | OD2 | 3.289 |
| 4KRM | L_ARG_67  | NH2 | L_ASP_90  | OD1 | 2.604 |
| 4KRM | L_ARG_67  | NH2 | L_ASP_90  | OD2 | 3.420 |
| 4KRO | A_ARG_310 | NH2 | A_GLU_376 | OE2 | 2.978 |
| 4KRO | A_HIS_394 | NE2 | A_ASP_369 | OD1 | 3.673 |
| 4KRO | A_ARG_403 | NH1 | A_GLU_376 | OE1 | 2.481 |
| 4KRO | A_ARG_403 | NH1 | A_GLU_376 | OE2 | 3.999 |
| 4KRO | A_ARG_403 | NH2 | B_ASP_118 | OD2 | 3.168 |
| 4KRO | A_ARG_405 | NH2 | B_ASP_118 | OD1 | 3.123 |

|      |           |     |           |     |       |
|------|-----------|-----|-----------|-----|-------|
| 4KRO | A_ARG_405 | NH2 | B_ASP_118 | OD2 | 3.849 |
| 4KRO | A_LYS_407 | NZ  | A_ASP_434 | OD1 | 3.794 |
| 4KRO | A_LYS_407 | NZ  | A_ASP_434 | OD2 | 2.246 |
| 4KRO | A_ARG_427 | NH1 | A_GLU_397 | OE1 | 3.467 |
| 4KRO | A_ARG_427 | NH2 | A_ASP_498 | OD1 | 2.615 |
| 4KRO | A_LYS_443 | NZ  | D_ASP_58  | OD1 | 2.597 |
| 4KRO | A_LYS_443 | NZ  | D_ASP_58  | OD2 | 3.457 |
| 4KRO | A_LYS_465 | NZ  | D_ASP_103 | OD2 | 2.400 |
| 4KRO | A_LYS_476 | NZ  | A_GLU_472 | OE1 | 3.768 |
| 4KRO | A_ARG_503 | NH1 | A_ASP_513 | OD1 | 3.566 |
| 4KRO | A_ARG_507 | NH2 | A_GLU_524 | OE1 | 3.712 |
| 4KRO | A_HIS_594 | NE2 | A_ASP_588 | OD1 | 2.943 |
| 4KRO | B_ARG_27  | NH1 | A_GLU_431 | OE1 | 3.073 |
| 4KRO | B_ARG_27  | NH2 | A_GLU_431 | OE1 | 3.933 |
| 4KRO | B_ARG_113 | NH1 | B_ASP_116 | OD2 | 3.449 |
| 4KRO | B_ARG_113 | NH2 | B_ASP_116 | OD1 | 2.666 |
| 4KRO | B_ARG_113 | NH2 | B_ASP_116 | OD2 | 3.479 |
| 4KRO | C_LYS_49  | NZ  | D_GLU_105 | OE2 | 3.247 |
| 4KRO | C_ARG_61  | NH1 | C_GLU_79  | OE2 | 3.404 |
| 4KRO | C_ARG_61  | NH2 | C_GLU_81  | OE2 | 3.298 |
| 4KRO | C_ARG_61  | NH2 | C_ASP_82  | OD1 | 2.644 |
| 4KRO | C_ARG_61  | NH2 | C_ASP_82  | OD2 | 3.807 |
| 4KRO | C_LYS_103 | NZ  | C_GLU_165 | OE1 | 3.774 |
| 4KRO | C_LYS_103 | NZ  | C_GLU_165 | OE2 | 3.693 |
| 4KRO | D_ARG_38  | NH1 | D_ASP_89  | OD1 | 3.529 |
| 4KRO | D_ARG_38  | NH2 | D_GLU_46  | OE1 | 2.983 |
| 4KRO | D_ARG_38  | NH2 | D_GLU_46  | OE2 | 3.441 |
| 4KRO | D_ARG_66  | NH1 | D_ASP_89  | OD2 | 3.598 |
| 4KRO | D_ARG_66  | NH2 | D_ASP_89  | OD1 | 2.749 |
| 4KRO | D_ARG_66  | NH2 | D_ASP_89  | OD2 | 3.332 |
| 4KRO | D_LYS_149 | NZ  | D_ASP_150 | OD1 | 3.048 |
| 4KRO | D_LYS_149 | NZ  | D_ASP_150 | OD2 | 2.797 |
| 4KRP | A_ARG_310 | NH2 | A_GLU_376 | OE1 | 3.735 |
| 4KRP | A_ARG_310 | NH2 | A_GLU_376 | OE2 | 2.935 |
| 4KRP | A_HIS_394 | NE2 | A_ASP_369 | OD1 | 3.309 |
| 4KRP | A_ARG_403 | NH1 | A_GLU_376 | OE1 | 2.285 |
| 4KRP | A_ARG_403 | NH2 | B_ASP_115 | OD2 | 3.818 |
| 4KRP | A_ARG_405 | NH1 | B_GLU_113 | OE1 | 2.923 |
| 4KRP | A_ARG_405 | NH2 | B_GLU_113 | OE1 | 3.376 |
| 4KRP | A_ARG_405 | NH2 | B_ASP_115 | OD1 | 2.626 |
| 4KRP | A_LYS_407 | NZ  | A_ASP_434 | OD2 | 2.386 |
| 4KRP | A_ARG_427 | NH2 | A_ASP_392 | OD2 | 3.997 |
| 4KRP | A_ARG_427 | NH2 | A_ASP_498 | OD1 | 2.593 |
| 4KRP | A_ARG_427 | NH2 | A_ASP_498 | OD2 | 3.626 |
| 4KRP | A_LYS_443 | NZ  | D_ASP_58  | OD1 | 2.649 |
| 4KRP | A_LYS_443 | NZ  | D_ASP_58  | OD2 | 3.951 |
| 4KRP | A_LYS_455 | NZ  | A_GLU_489 | OE1 | 2.953 |
| 4KRP | A_LYS_455 | NZ  | A_GLU_489 | OE2 | 2.814 |
| 4KRP | A_LYS_463 | NZ  | A_ASP_436 | OD2 | 3.639 |
| 4KRP | A_LYS_465 | NZ  | D_ASP_103 | OD2 | 2.931 |
| 4KRP | A_ARG_497 | NH2 | A_GLU_495 | OE1 | 3.513 |
| 4KRP | A_ARG_507 | NH2 | A_GLU_524 | OE1 | 3.179 |
| 4KRP | A_ARG_550 | NH1 | A_GLU_527 | OE2 | 2.828 |
| 4KRP | A_ARG_550 | NH2 | A_GLU_527 | OE1 | 3.298 |
| 4KRP | A_ARG_550 | NH2 | A_GLU_527 | OE2 | 2.540 |
| 4KRP | A_HIS_560 | NE2 | A_GLU_537 | OE1 | 3.908 |
| 4KRP | A_LYS_585 | NZ  | A_ASP_563 | OD1 | 2.533 |
| 4KRP | C_LYS_49  | NZ  | C_GLU_53  | OE1 | 2.808 |

|      |           |     |           |     |       |
|------|-----------|-----|-----------|-----|-------|
| 4KRP | C_ARG.61  | NH1 | C_GLU_79  | OE2 | 3.577 |
| 4KRP | C_ARG.61  | NH2 | C_GLU_79  | OE1 | 3.975 |
| 4KRP | C_ARG.61  | NH2 | C_GLU_81  | OE1 | 3.909 |
| 4KRP | C_ARG.61  | NH2 | C_GLU_81  | OE2 | 3.782 |
| 4KRP | C_ARG.61  | NH2 | C_ASP_82  | OD1 | 2.795 |
| 4KRP | C_ARG.61  | NH2 | C_ASP_82  | OD2 | 3.835 |
| 4KRP | C_LYS_103 | NZ  | C_GLU_105 | OE2 | 2.819 |
| 4KRP | C_LYS_149 | NZ  | C_GLU_195 | OE1 | 2.866 |
| 4KRP | D_ARG.38  | NH1 | D_ASP_89  | OD1 | 2.914 |
| 4KRP | D_ARG.38  | NH2 | D_GLU_46  | OE1 | 3.258 |
| 4KRP | D_ARG.38  | NH2 | D_ASP_89  | OD1 | 3.860 |
| 4KRP | D_ARG.66  | NH1 | D_ASP_89  | OD1 | 3.718 |
| 4KRP | D_ARG.66  | NH1 | D_ASP_89  | OD2 | 3.786 |
| 4KRP | D_ARG.66  | NH2 | D_ASP_89  | OD1 | 2.586 |
| 4KRP | D_ARG.66  | NH2 | D_ASP_89  | OD2 | 3.503 |
| 4KRP | D_LYS_149 | NZ  | D_ASP_150 | OD1 | 3.078 |
| 4KRP | D_LYS_149 | NZ  | D_ASP_150 | OD2 | 2.845 |
| 4KRP | B_ARG.27  | NH1 | A_GLU_431 | OE1 | 3.144 |
| 4KRP | B_ARG.27  | NH2 | B_GLU_1   | OE2 | 3.797 |
| 4KV5 | C_LYS.26  | NZ  | C_ASP_23  | OD2 | 3.341 |
| 4KV5 | C_LYS.60  | NZ  | G_ASP_56  | OD2 | 3.911 |
| 4KV5 | C_LYS.60  | NZ  | G_GLU_74  | OE2 | 3.252 |
| 4KV5 | C_ARG.94  | NH1 | E_ASP_231 | OD2 | 3.776 |
| 4KV5 | C_ARG.107 | NH1 | C_GLU_84  | OE1 | 2.912 |
| 4KV5 | D_LYS.26  | NZ  | D_ASP_23  | OD2 | 3.617 |
| 4KV5 | D_LYS.60  | NZ  | E_GLU_74  | OE2 | 3.237 |
| 4KV5 | D_ARG.107 | NH1 | D_GLU_84  | OE1 | 2.427 |
| 4KV5 | D_ARG.107 | NH1 | D_GLU_84  | OE2 | 3.699 |
| 4KV5 | A_LYS.26  | NZ  | A_ASP_23  | OD1 | 3.905 |
| 4KV5 | A_LYS.26  | NZ  | A_ASP_23  | OD2 | 3.181 |
| 4KV5 | A_ARG.94  | NH1 | H_ASP_231 | OD2 | 3.628 |
| 4KV5 | A_ARG.107 | NH1 | A_GLU_84  | OE1 | 2.439 |
| 4KV5 | A_ARG.107 | NH1 | A_GLU_84  | OE2 | 3.529 |
| 4KV5 | B_LYS.26  | NZ  | B_ASP_23  | OD2 | 3.176 |
| 4KV5 | B_LYS.60  | NZ  | H_ASP_56  | OD2 | 3.938 |
| 4KV5 | B_LYS.60  | NZ  | H_GLU_74  | OE2 | 3.524 |
| 4KV5 | B_ARG.107 | NH1 | B_GLU_84  | OE1 | 2.808 |
| 4KV5 | B_ARG.107 | NH1 | B_GLU_84  | OE2 | 3.463 |
| 4KV5 | J_LYS.12  | NZ  | J_GLU_10  | OE1 | 3.764 |
| 4KV5 | J_ARG.38  | NH1 | J_ASP_90  | OD1 | 3.233 |
| 4KV5 | J_ARG.38  | NH2 | J_GLU_46  | OE1 | 3.110 |
| 4KV5 | J_ARG.38  | NH2 | J_ASP_90  | OD1 | 3.659 |
| 4KV5 | J_ARG.63  | NH1 | J_GLU_138 | OE2 | 3.309 |
| 4KV5 | J_ARG.63  | NH2 | J_GLU_46  | OE1 | 3.549 |
| 4KV5 | J_ARG.63  | NH2 | J_GLU_46  | OE2 | 2.611 |
| 4KV5 | J_ARG.67  | NH1 | J_ASP_90  | OD2 | 3.363 |
| 4KV5 | J_ARG.67  | NH2 | J_ASP_90  | OD1 | 3.304 |
| 4KV5 | J_ARG.67  | NH2 | J_ASP_90  | OD2 | 3.334 |
| 4KV5 | J_ARG.161 | NH1 | J_ASP_208 | OD2 | 3.042 |
| 4KV5 | J_ARG.199 | NH1 | J_GLU_217 | OE2 | 3.577 |
| 4KV5 | J_ARG.199 | NH1 | J_GLU_219 | OE1 | 3.495 |
| 4KV5 | J_ARG.199 | NH1 | J_ASP_220 | OD1 | 2.798 |
| 4KV5 | J_ARG.199 | NH1 | J_ASP_220 | OD2 | 3.031 |
| 4KV5 | J_ARG.199 | NH2 | J_GLU_217 | OE1 | 3.655 |
| 4KV5 | H_LYS.12  | NZ  | H_GLU_10  | OE1 | 3.355 |
| 4KV5 | H_ARG.38  | NH1 | H_ASP_90  | OD1 | 3.401 |
| 4KV5 | H_ARG.38  | NH2 | H_GLU_46  | OE1 | 3.103 |
| 4KV5 | H_ARG.38  | NH2 | H_ASP_90  | OD1 | 3.880 |



|      |           |     |           |     |       |
|------|-----------|-----|-----------|-----|-------|
| 4KV5 | H_ARG.63  | NH1 | H_GLU_138 | OE2 | 3.222 |
| 4KV5 | H_ARG.63  | NH2 | H_GLU_46  | OE1 | 3.904 |
| 4KV5 | H_ARG.63  | NH2 | H_GLU_46  | OE2 | 3.081 |
| 4KV5 | H_ARG.67  | NH1 | H_ASP_90  | OD2 | 3.586 |
| 4KV5 | H_ARG.67  | NH2 | H_ASP_90  | OD1 | 3.193 |
| 4KV5 | H_ARG.67  | NH2 | H_ASP_90  | OD2 | 3.057 |
| 4KV5 | H_ARG.161 | NH1 | H_ASP_208 | OD1 | 3.304 |
| 4KV5 | H_ARG.161 | NH1 | H_ASP_208 | OD2 | 2.542 |
| 4KV5 | H_LYS_177 | NZ  | H_GLU_219 | OE2 | 3.873 |
| 4KV5 | H_ARG.199 | NH1 | H_GLU_219 | OE1 | 3.591 |
| 4KV5 | H_ARG.199 | NH1 | H_ASP_220 | OD1 | 2.535 |
| 4KV5 | H_ARG.199 | NH1 | H_ASP_220 | OD2 | 2.810 |
| 4KV5 | H_ARG.199 | NH2 | H_GLU_217 | OE1 | 3.657 |
| 4KV5 | E_LYS.12  | NZ  | E_GLU_10  | OE1 | 3.582 |
| 4KV5 | E_ARG.38  | NH1 | E_ASP_90  | OD1 | 3.243 |
| 4KV5 | E_ARG.38  | NH2 | E_GLU_46  | OE1 | 3.194 |
| 4KV5 | E_ARG.38  | NH2 | E_ASP_90  | OD1 | 3.863 |
| 4KV5 | E_ARG.63  | NH1 | E_GLU_138 | OE2 | 3.426 |
| 4KV5 | E_ARG.63  | NH2 | E_GLU_46  | OE1 | 3.563 |
| 4KV5 | E_ARG.63  | NH2 | E_GLU_46  | OE2 | 3.213 |
| 4KV5 | E_ARG.67  | NH1 | E_ASP_90  | OD2 | 3.666 |
| 4KV5 | E_ARG.67  | NH2 | E_ASP_90  | OD1 | 2.990 |
| 4KV5 | E_ARG.67  | NH2 | E_ASP_90  | OD2 | 3.041 |
| 4KV5 | E_ARG.161 | NH1 | E_ASP_208 | OD1 | 3.920 |
| 4KV5 | E_ARG.161 | NH1 | E_ASP_208 | OD2 | 2.895 |
| 4KV5 | E_LYS_177 | NZ  | E_GLU_219 | OE2 | 3.890 |
| 4KV5 | E_ARG.199 | NH1 | E_GLU_217 | OE2 | 3.831 |
| 4KV5 | E_ARG.199 | NH1 | E_GLU_219 | OE1 | 3.226 |
| 4KV5 | E_ARG.199 | NH1 | E_ASP_220 | OD1 | 3.288 |
| 4KV5 | E_ARG.199 | NH1 | E_ASP_220 | OD2 | 3.702 |
| 4KV5 | E_ARG.199 | NH2 | E_GLU_217 | OE1 | 3.523 |
| 4KV5 | G_LYS.12  | NZ  | G_GLU_10  | OE1 | 3.677 |
| 4KV5 | G_ARG.38  | NH1 | G_ASP_90  | OD1 | 3.460 |
| 4KV5 | G_ARG.38  | NH2 | G_GLU_46  | OE1 | 2.859 |
| 4KV5 | G_ARG.38  | NH2 | G_ASP_90  | OD1 | 3.976 |
| 4KV5 | G_ARG.63  | NH1 | G_GLU_138 | OE2 | 3.087 |
| 4KV5 | G_ARG.63  | NH2 | G_GLU_46  | OE1 | 3.637 |
| 4KV5 | G_ARG.63  | NH2 | G_GLU_46  | OE2 | 2.834 |
| 4KV5 | G_ARG.67  | NH1 | G_ASP_90  | OD2 | 3.423 |
| 4KV5 | G_ARG.67  | NH2 | G_ASP_90  | OD1 | 3.401 |
| 4KV5 | G_ARG.67  | NH2 | G_ASP_90  | OD2 | 3.441 |
| 4KV5 | G_ARG.161 | NH1 | G_ASP_208 | OD1 | 3.631 |
| 4KV5 | G_ARG.161 | NH1 | G_ASP_208 | OD2 | 2.851 |
| 4KV5 | G_ARG.199 | NH1 | G_GLU_217 | OE2 | 3.903 |
| 4KV5 | G_ARG.199 | NH1 | G_GLU_219 | OE1 | 3.208 |
| 4KV5 | G_ARG.199 | NH1 | G_GLU_219 | OE2 | 3.799 |
| 4KV5 | G_ARG.199 | NH1 | G_ASP_220 | OD1 | 3.065 |
| 4KV5 | G_ARG.199 | NH1 | G_ASP_220 | OD2 | 3.673 |
| 4KV5 | G_ARG.199 | NH2 | G_GLU_217 | OE1 | 3.544 |
| 4KXZ | A_ARG.26  | NH1 | A_ASP_27  | OD1 | 3.110 |
| 4KXZ | A_ARG.26  | NH1 | A_ASP_27  | OD2 | 2.701 |
| 4KXZ | A_ARG.60  | NH2 | J_GLU_74  | OE1 | 3.804 |
| 4KXZ | A_LYS_107 | NZ  | A_GLU_84  | OE1 | 2.831 |
| 4KXZ | A_LYS_110 | NZ  | A_ASP_55  | OD1 | 3.869 |
| 4KXZ | A_LYS_110 | NZ  | A_ASP_55  | OD2 | 3.509 |
| 4KXZ | B_ARG.26  | NH1 | B_ASP_27  | OD1 | 3.225 |
| 4KXZ | B_ARG.26  | NH1 | B_ASP_27  | OD2 | 2.899 |
| 4KXZ | B_LYS_37  | NZ  | B_GLU_35  | OE2 | 3.695 |

|      |           |     |           |     |       |
|------|-----------|-----|-----------|-----|-------|
| 4KXZ | B_ARG_60  | NH2 | H_ASP_56  | OD1 | 3.585 |
| 4KXZ | B_ARG_60  | NH2 | H_GLU_74  | OE1 | 3.374 |
| 4KXZ | B_ARG_60  | NH2 | H_GLU_74  | OE2 | 3.199 |
| 4KXZ | B_LYS_107 | NZ  | B_GLU_84  | OE1 | 2.748 |
| 4KXZ | D_ARG_26  | NH1 | D_ASP_27  | OD1 | 3.954 |
| 4KXZ | D_ARG_26  | NH1 | D_ASP_27  | OD2 | 3.663 |
| 4KXZ | D_LYS_37  | NZ  | D_GLU_35  | OE1 | 2.767 |
| 4KXZ | D_LYS_37  | NZ  | D_GLU_35  | OE2 | 3.981 |
| 4KXZ | D_ARG_60  | NH1 | N_GLU_74  | OE2 | 3.775 |
| 4KXZ | D_ARG_60  | NH2 | N_GLU_74  | OE2 | 2.746 |
| 4KXZ | D_LYS_110 | NZ  | D_ASP_55  | OD1 | 3.900 |
| 4KXZ | D_LYS_110 | NZ  | D_ASP_55  | OD2 | 3.944 |
| 4KXZ | E_ARG_26  | NH1 | E_ASP_27  | OD1 | 3.052 |
| 4KXZ | E_ARG_26  | NH1 | E_ASP_27  | OD2 | 2.752 |
| 4KXZ | E_LYS_37  | NZ  | E_GLU_35  | OE1 | 2.815 |
| 4KXZ | E_ARG_60  | NH1 | Q_GLU_74  | OE1 | 3.619 |
| 4KXZ | E_LYS_107 | NZ  | E_GLU_84  | OE1 | 2.833 |
| 4KXZ | E_LYS_110 | NZ  | E_ASP_55  | OD1 | 3.262 |
| 4KXZ | E_LYS_110 | NZ  | E_ASP_55  | OD2 | 3.430 |
| 4KXZ | H_LYS_12  | NZ  | H_GLU_10  | OE1 | 3.843 |
| 4KXZ | H_ARG_38  | NH1 | H_ASP_90  | OD1 | 2.815 |
| 4KXZ | H_ARG_38  | NH2 | H_GLU_46  | OE2 | 3.360 |
| 4KXZ | H_ARG_38  | NH2 | H_ASP_90  | OD1 | 3.535 |
| 4KXZ | H_ARG_63  | NH1 | H_GLU_46  | OE2 | 2.772 |
| 4KXZ | H_ARG_67  | NH1 | H_ASP_90  | OD1 | 3.629 |
| 4KXZ | H_ARG_67  | NH1 | H_ASP_90  | OD2 | 2.716 |
| 4KXZ | H_ARG_67  | NH2 | H_ASP_90  | OD1 | 3.064 |
| 4KXZ | H_ARG_67  | NH2 | H_ASP_90  | OD2 | 3.651 |
| 4KXZ | H_LYS_150 | NZ  | H_ASP_151 | OD1 | 3.357 |
| 4KXZ | H_LYS_150 | NZ  | H_ASP_151 | OD2 | 3.542 |
| 4KXZ | H_LYS_208 | NZ  | H_ASP_206 | OD2 | 3.838 |
| 4KXZ | H_HIS_219 | NE2 | Q_ASP_56  | OD2 | 3.789 |
| 4KXZ | H_HIS_223 | ND1 | Q_GLU_82  | OE1 | 3.688 |
| 4KXZ | H_HIS_223 | ND1 | Q_GLU_82  | OE2 | 3.984 |
| 4KXZ | H_HIS_223 | ND1 | L_ASP_123 | OD1 | 3.085 |
| 4KXZ | H_HIS_223 | NE2 | Q_GLU_82  | OE2 | 3.368 |
| 4KXZ | H_HIS_223 | NE2 | L_ASP_123 | OD1 | 3.457 |
| 4KXZ | J_LYS_12  | NZ  | J_GLU_10  | OE1 | 3.778 |
| 4KXZ | J_ARG_38  | NH1 | J_ASP_90  | OD1 | 3.085 |
| 4KXZ | J_ARG_38  | NH2 | J_GLU_46  | OE1 | 3.558 |
| 4KXZ | J_ARG_38  | NH2 | J_ASP_90  | OD1 | 3.950 |
| 4KXZ | J_ARG_63  | NH1 | J_GLU_46  | OE2 | 2.664 |
| 4KXZ | J_ARG_67  | NH1 | J_ASP_90  | OD1 | 3.719 |
| 4KXZ | J_ARG_67  | NH1 | J_ASP_90  | OD2 | 2.552 |
| 4KXZ | J_ARG_67  | NH2 | J_ASP_90  | OD1 | 2.776 |
| 4KXZ | J_ARG_67  | NH2 | J_ASP_90  | OD2 | 3.166 |
| 4KXZ | J_LYS_150 | NZ  | J_ASP_151 | OD1 | 3.358 |
| 4KXZ | J_LYS_150 | NZ  | J_ASP_151 | OD2 | 3.511 |
| 4KXZ | J_LYS_208 | NZ  | J_ASP_206 | OD2 | 3.900 |
| 4KXZ | J_LYS_216 | NZ  | I_GLU_124 | OE1 | 2.736 |
| 4KXZ | J_LYS_216 | NZ  | I_GLU_124 | OE2 | 3.105 |
| 4KXZ | N_LYS_12  | NZ  | N_GLU_10  | OE1 | 3.790 |
| 4KXZ | N_ARG_38  | NH1 | N_ASP_90  | OD1 | 3.020 |
| 4KXZ | N_ARG_38  | NH2 | N_GLU_46  | OE1 | 3.356 |
| 4KXZ | N_ARG_38  | NH2 | N_ASP_90  | OD1 | 3.762 |
| 4KXZ | N_ARG_63  | NH1 | N_GLU_46  | OE2 | 2.704 |
| 4KXZ | N_ARG_67  | NH1 | N_ASP_90  | OD1 | 3.612 |
| 4KXZ | N_ARG_67  | NH1 | N_ASP_90  | OD2 | 2.733 |

|      |           |     |           |     |       |
|------|-----------|-----|-----------|-----|-------|
| 4KXZ | N_ARG.67  | NH2 | N_ASP_90  | OD1 | 3.034 |
| 4KXZ | N_ARG.67  | NH2 | N_ASP_90  | OD2 | 3.633 |
| 4KXZ | N_ARG.87  | NH2 | N_GLU_89  | OE1 | 3.697 |
| 4KXZ | N_LYS_150 | NZ  | N_ASP_151 | OD1 | 3.348 |
| 4KXZ | N_LYS_150 | NZ  | N_ASP_151 | OD2 | 3.490 |
| 4KXZ | N_LYS_208 | NZ  | N_ASP_206 | OD2 | 3.916 |
| 4KXZ | N_HIS_219 | NE2 | J_ASP_56  | OD2 | 3.889 |
| 4KXZ | N_HIS_223 | ND1 | J_GLU_82  | OE1 | 3.240 |
| 4KXZ | N_HIS_223 | ND1 | M_ASP_123 | OD1 | 3.197 |
| 4KXZ | N_HIS_223 | NE2 | J_GLU_82  | OE1 | 3.650 |
| 4KXZ | N_HIS_223 | NE2 | J_GLU_82  | OE2 | 3.394 |
| 4KXZ | N_HIS_223 | NE2 | M_ASP_123 | OD1 | 3.310 |
| 4KXZ | Q_LYS_12  | NZ  | Q_GLU_10  | OE1 | 3.907 |
| 4KXZ | Q_ARG.38  | NH1 | Q_ASP_90  | OD1 | 3.058 |
| 4KXZ | Q_ARG.38  | NH2 | Q_GLU_46  | OE1 | 3.407 |
| 4KXZ | Q_ARG.38  | NH2 | Q_ASP_90  | OD1 | 3.856 |
| 4KXZ | Q_ARG.63  | NH1 | Q_GLU_46  | OE2 | 2.707 |
| 4KXZ | Q_ARG.67  | NH1 | Q_ASP_90  | OD1 | 3.587 |
| 4KXZ | Q_ARG.67  | NH1 | Q_ASP_90  | OD2 | 2.735 |
| 4KXZ | Q_ARG.67  | NH2 | Q_ASP_90  | OD1 | 3.009 |
| 4KXZ | Q_ARG.67  | NH2 | Q_ASP_90  | OD2 | 3.660 |
| 4KXZ | Q_LYS_150 | NZ  | Q_ASP_151 | OD1 | 3.335 |
| 4KXZ | Q_LYS_150 | NZ  | Q_ASP_151 | OD2 | 3.512 |
| 4KXZ | Q_LYS_208 | NZ  | Q_ASP_206 | OD2 | 3.889 |
| 4KXZ | L_ARG.24  | NH1 | L_ASP_71  | OD1 | 3.813 |
| 4KXZ | L_ARG.24  | NH2 | L_ASP_71  | OD1 | 3.864 |
| 4KXZ | L_ARG.24  | NH2 | L_ASP_71  | OD2 | 3.073 |
| 4KXZ | L_ARG.55  | NH1 | L_ASP_61  | OD1 | 3.473 |
| 4KXZ | L_ARG.62  | NH1 | L_GLU_82  | OE1 | 3.700 |
| 4KXZ | L_ARG.62  | NH1 | L_ASP_83  | OD1 | 3.621 |
| 4KXZ | L_ARG.62  | NH1 | L_ASP_83  | OD2 | 2.958 |
| 4KXZ | L_LYS_108 | NZ  | L_GLU_17  | OE2 | 3.073 |
| 4KXZ | L_LYS_150 | NZ  | L_GLU_196 | OE1 | 2.905 |
| 4KXZ | L_HIS_190 | ND1 | L_ASP_152 | OD1 | 2.847 |
| 4KXZ | L_HIS_190 | NE2 | L_ASP_186 | OD1 | 3.845 |
| 4KXZ | L_ARG.24  | NH1 | L_ASP_71  | OD1 | 3.783 |
| 4KXZ | L_ARG.24  | NH2 | L_ASP_71  | OD1 | 3.857 |
| 4KXZ | L_ARG.24  | NH2 | L_ASP_71  | OD2 | 3.080 |
| 4KXZ | L_ARG.62  | NH1 | L_GLU_82  | OE1 | 3.794 |
| 4KXZ | L_ARG.62  | NH1 | L_ASP_83  | OD1 | 3.459 |
| 4KXZ | L_ARG.62  | NH1 | L_ASP_83  | OD2 | 2.664 |
| 4KXZ | L_ARG.78  | NH2 | L_ASP_61  | OD1 | 3.145 |
| 4KXZ | L_ARG.104 | NH1 | L_GLU_166 | OE1 | 3.969 |
| 4KXZ | L_LYS_127 | NZ  | L_GLU_124 | OE1 | 3.662 |
| 4KXZ | L_LYS_127 | NZ  | L_GLU_124 | OE2 | 3.133 |
| 4KXZ | L_LYS_150 | NZ  | L_GLU_196 | OE1 | 2.895 |
| 4KXZ | L_HIS_190 | ND1 | L_ASP_152 | OD1 | 3.069 |
| 4KXZ | L_HIS_190 | NE2 | L_ASP_186 | OD1 | 3.912 |
| 4KXZ | M_ARG.24  | NH1 | M_ASP_71  | OD1 | 3.817 |
| 4KXZ | M_ARG.24  | NH2 | M_ASP_71  | OD1 | 3.870 |
| 4KXZ | M_ARG.24  | NH2 | M_ASP_71  | OD2 | 3.074 |
| 4KXZ | M_ARG.62  | NH1 | M_GLU_82  | OE1 | 3.945 |
| 4KXZ | M_ARG.62  | NH1 | M_ASP_83  | OD1 | 2.966 |
| 4KXZ | M_ARG.62  | NH1 | M_ASP_83  | OD2 | 2.505 |
| 4KXZ | M_ARG.104 | NH1 | M_GLU_166 | OE1 | 3.774 |
| 4KXZ | M_LYS_127 | NZ  | M_GLU_124 | OE1 | 3.654 |
| 4KXZ | M_LYS_127 | NZ  | M_GLU_124 | OE2 | 3.133 |
| 4KXZ | M_LYS_150 | NZ  | M_GLU_196 | OE1 | 2.934 |

|      |           |     |           |     |       |
|------|-----------|-----|-----------|-----|-------|
| 4KXZ | M_HIS_190 | ND1 | M_ASP_152 | OD1 | 2.804 |
| 4KXZ | M_HIS_190 | NE2 | M_ASP_186 | OD1 | 3.796 |
| 4KXZ | P_ARG_24  | NH1 | P_ASP_71  | OD1 | 3.864 |
| 4KXZ | P_ARG_24  | NH2 | P_ASP_71  | OD1 | 3.911 |
| 4KXZ | P_ARG_24  | NH2 | P_ASP_71  | OD2 | 3.105 |
| 4KXZ | P_ARG_62  | NH1 | P_GLU_82  | OE1 | 3.797 |
| 4KXZ | P_ARG_62  | NH1 | P_ASP_83  | OD1 | 3.211 |
| 4KXZ | P_ARG_62  | NH1 | P_ASP_83  | OD2 | 2.770 |
| 4KXZ | P_ARG_104 | NH1 | P_GLU_166 | OE1 | 3.937 |
| 4KXZ | P_LYS_127 | NZ  | P_GLU_124 | OE1 | 3.704 |
| 4KXZ | P_LYS_127 | NZ  | P_GLU_124 | OE2 | 3.171 |
| 4KXZ | P_LYS_150 | NZ  | P_GLU_196 | OE1 | 2.899 |
| 4KXZ | P_HIS_190 | ND1 | P_ASP_186 | OD1 | 3.702 |
| 4LQF | A_HIS_113 | NE2 | A_GLU_129 | OE1 | 3.149 |
| 4LQF | A_HIS_113 | NE2 | A_GLU_129 | OE2 | 3.669 |
| 4LQF | A_ARG_176 | NH1 | A_GLU_174 | OE1 | 2.869 |
| 4LQF | A_ARG_176 | NH2 | A_GLU_174 | OE1 | 2.927 |
| 4LQF | H_ARG_38  | NH1 | H_ASP_90  | OD1 | 2.938 |
| 4LQF | H_ARG_38  | NH2 | H_GLU_46  | OE1 | 3.480 |
| 4LQF | H_ARG_38  | NH2 | H_GLU_46  | OE2 | 3.018 |
| 4LQF | H_ARG_38  | NH2 | H_ASP_90  | OD1 | 3.987 |
| 4LQF | H_LYS_65  | NZ  | H_ASP_62  | OD1 | 3.431 |
| 4LQF | H_ARG_67  | NH1 | H_ASP_90  | OD1 | 3.786 |
| 4LQF | H_ARG_67  | NH1 | H_ASP_90  | OD2 | 2.716 |
| 4LQF | H_ARG_67  | NH2 | H_ASP_90  | OD1 | 2.856 |
| 4LQF | H_ARG_67  | NH2 | H_ASP_90  | OD2 | 3.328 |
| 4LQF | H_ARG_98  | NH2 | H_ASP_105 | OD1 | 3.789 |
| 4LQF | H_ARG_98  | NH2 | H_ASP_105 | OD2 | 2.616 |
| 4LQF | H_LYS_212 | NZ  | L_GLU_129 | OE1 | 2.714 |
| 4LQF | H_LYS_212 | NZ  | L_GLU_129 | OE2 | 3.879 |
| 4LQF | H_LYS_213 | NZ  | H_GLU_215 | OE2 | 3.811 |
| 4LQF | L_ARG_24  | NH2 | L_ASP_75  | OD1 | 3.452 |
| 4LQF | L_LYS_55  | NZ  | A_ASP_170 | OD2 | 2.731 |
| 4LQF | L_ARG_59  | NH2 | L_ASP_65  | OD1 | 3.368 |
| 4LQF | L_ARG_66  | NH1 | L_GLU_84  | OE1 | 3.227 |
| 4LQF | L_ARG_66  | NH2 | L_GLU_84  | OE1 | 3.232 |
| 4LQF | L_ARG_66  | NH2 | L_GLU_86  | OE1 | 3.495 |
| 4LQF | L_ARG_66  | NH2 | L_ASP_87  | OD1 | 2.884 |
| 4LQF | L_ARG_66  | NH2 | L_ASP_87  | OD2 | 3.750 |
| 4LQF | L_LYS_109 | NZ  | L_ASP_171 | OD1 | 3.085 |
| 4LQF | L_LYS_153 | NZ  | L_GLU_201 | OE2 | 3.416 |
| 4LQF | L_LYS_155 | NZ  | L_GLU_201 | OE1 | 2.827 |
| 4LQF | L_LYS_155 | NZ  | L_GLU_201 | OE2 | 3.989 |
| 4LQF | L_ARG_161 | NH1 | L_GLU_191 | OE2 | 2.916 |
| 4LQF | L_ARG_161 | NH2 | L_GLU_191 | OE2 | 3.407 |
| 4LQF | L_LYS_189 | NZ  | L_ASP_190 | OD1 | 2.644 |
| 4LQF | L_HIS_195 | ND1 | L_ASP_157 | OD2 | 2.742 |
| 4LQF | L_HIS_195 | NE2 | L_GLU_191 | OE2 | 3.503 |
| 4LQF | L_LYS_205 | NZ  | L_ASP_116 | OD1 | 3.781 |
| 4LQF | L_LYS_205 | NZ  | L_ASP_116 | OD2 | 2.661 |
| 4LSS | G_LYS_46  | NZ  | G_GLU_492 | OE2 | 3.983 |
| 4LSS | G_LYS_59  | NZ  | G_ASP_57  | OD1 | 3.236 |
| 4LSS | G_LYS_59  | NZ  | G_ASP_57  | OD2 | 3.806 |
| 4LSS | G_HIS_66  | ND1 | G_GLU_64  | OE2 | 2.739 |
| 4LSS | G_LYS_97  | NZ  | G_GLU_275 | OE2 | 2.397 |
| 4LSS | G_LYS_97  | NZ  | H_ASP_99  | OD2 | 3.791 |
| 4LSS | G_LYS_207 | NZ  | G_GLU_381 | OE1 | 3.905 |
| 4LSS | G_LYS_207 | NZ  | G_GLU_381 | OE2 | 3.089 |

|      |           |     |           |     |       |
|------|-----------|-----|-----------|-----|-------|
| 4LSS | G_LYS_229 | NZ  | G_GLU_83  | OE2 | 3.491 |
| 4LSS | G_HIS_249 | NE2 | G_GLU_482 | OE1 | 3.577 |
| 4LSS | G_LYS_282 | NZ  | G_GLU_275 | OE1 | 3.241 |
| 4LSS | G_ARG_335 | NH2 | G_ASP_412 | OD2 | 3.767 |
| 4LSS | G_LYS_351 | NZ  | G_GLU_269 | OE2 | 3.712 |
| 4LSS | G_ARG_419 | NH2 | G_ASP_325 | OD1 | 3.444 |
| 4LSS | G_ARG_419 | NH2 | G_ASP_325 | OD2 | 2.969 |
| 4LSS | G_ARG_429 | NH1 | G_ASP_113 | OD1 | 3.219 |
| 4LSS | G_ARG_429 | NH1 | G_ASP_113 | OD2 | 3.237 |
| 4LSS | G_ARG_429 | NH2 | G_ASP_113 | OD2 | 2.924 |
| 4LSS | G_ARG_456 | NH1 | G_GLU_466 | OE1 | 3.330 |
| 4LSS | G_ARG_469 | NH2 | G_ASP_457 | OD2 | 2.938 |
| 4LSS | G_ARG_476 | NH1 | G_GLU_102 | OE1 | 3.477 |
| 4LSS | G_ARG_476 | NH1 | G_GLU_102 | OE2 | 3.366 |
| 4LSS | G_ARG_476 | NH2 | G_ASP_474 | OD2 | 3.933 |
| 4LSS | G_ARG_476 | NH2 | H_ASP_31  | OD1 | 3.839 |
| 4LSS | G_ARG_480 | NH1 | G_ASP_477 | OD1 | 2.752 |
| 4LSS | G_LYS_485 | NZ  | G_GLU_267 | OE2 | 3.906 |
| 4LSS | G_LYS_487 | NZ  | G_GLU_91  | OE1 | 2.643 |
| 4LSS | H_ARG_19  | NH2 | H_GLU_81  | OE1 | 3.566 |
| 4LSS | H_ARG_38  | NH1 | H_ASP_86  | OD1 | 3.014 |
| 4LSS | H_ARG_38  | NH2 | H_GLU_46  | OE1 | 3.219 |
| 4LSS | H_ARG_38  | NH2 | H_ASP_86  | OD1 | 3.812 |
| 4LSS | H_ARG_53  | NH2 | H_ASP_31  | OD1 | 3.384 |
| 4LSS | H_ARG_61  | NH2 | G_GLU_466 | OE1 | 3.951 |
| 4LSS | H_ARG_66  | NH1 | H_ASP_86  | OD1 | 3.855 |
| 4LSS | H_ARG_66  | NH2 | H_ASP_86  | OD1 | 2.799 |
| 4LSS | H_ARG_66  | NH2 | H_ASP_86  | OD2 | 2.736 |
| 4LSS | H_ARG_71  | NH1 | G_ASP_368 | OD1 | 3.719 |
| 4LSS | H_ARG_71  | NH1 | G_ASP_368 | OD2 | 3.126 |
| 4LSS | H_ARG_71  | NH2 | G_ASP_368 | OD1 | 3.278 |
| 4LSS | H_ARG_82A | NH1 | H_GLU_81  | OE2 | 3.430 |
| 4LSS | H_LYS_209 | NZ  | L_GLU_125 | OE1 | 3.429 |
| 4LSS | H_LYS_209 | NZ  | L_GLU_125 | OE2 | 3.562 |
| 4LSS | H_LYS_210 | NZ  | H_GLU_212 | OE2 | 3.090 |
| 4LSS | L_ARG_24  | NH2 | L_ASP_70  | OD1 | 3.687 |
| 4LSS | L_ARG_24  | NH2 | L_ASP_70  | OD2 | 3.435 |
| 4LSS | L_ARG_54  | NH1 | L_ASP_60  | OD2 | 3.825 |
| 4LSS | L_ARG_61  | NH1 | L_ASP_82  | OD1 | 3.979 |
| 4LSS | L_ARG_61  | NH1 | L_ASP_82  | OD2 | 2.997 |
| 4LSS | L_ARG_61  | NH2 | L_GLU_79  | OE1 | 3.337 |
| 4LSS | L_ARG_61  | NH2 | L_ASP_82  | OD1 | 3.196 |
| 4LSS | L_ARG_61  | NH2 | L_ASP_82  | OD2 | 3.376 |
| 4LSS | L_LYS_109 | NZ  | L_GLU_17  | OE1 | 3.541 |
| 4LSS | L_LYS_109 | NZ  | L_GLU_17  | OE2 | 3.227 |
| 4LSS | L_LYS_109 | NZ  | L_ASP_107 | OD1 | 3.475 |
| 4LSS | L_LYS_151 | NZ  | L_GLU_197 | OE2 | 3.341 |
| 4LST | G_HIS_66  | ND1 | G_GLU_64  | OE1 | 3.932 |
| 4LST | G_HIS_66  | ND1 | G_GLU_64  | OE2 | 2.793 |
| 4LST | G_LYS_207 | NZ  | G_GLU_381 | OE1 | 2.992 |
| 4LST | G_LYS_207 | NZ  | G_GLU_381 | OE2 | 2.424 |
| 4LST | G_HIS_249 | NE2 | G_GLU_482 | OE1 | 3.272 |
| 4LST | G_LYS_282 | NZ  | G_GLU_275 | OE1 | 2.940 |
| 4LST | G_LYS_357 | NZ  | G_ASP_461 | OD2 | 3.749 |
| 4LST | G_LYS_357 | NZ  | G_ASP_464 | OD1 | 3.358 |
| 4LST | G_LYS_357 | NZ  | L_GLU_1   | OE1 | 2.783 |
| 4LST | G_LYS_360 | NZ  | G_GLU_362 | OE1 | 3.583 |
| 4LST | G_ARG_419 | NH2 | G_ASP_325 | OD1 | 3.855 |

|      |           |     |           |     |       |
|------|-----------|-----|-----------|-----|-------|
| 4LST | G_ARG_419 | NH2 | G_ASP_325 | OD2 | 3.169 |
| 4LST | G_ARG_456 | NH1 | G_GLU_466 | OE1 | 3.211 |
| 4LST | G_ARG_469 | NH1 | G_GLU_362 | OE2 | 3.557 |
| 4LST | G_ARG_469 | NH2 | G_GLU_362 | OE2 | 3.437 |
| 4LST | G_ARG_469 | NH2 | G_ASP_457 | OD2 | 3.388 |
| 4LST | G_ARG_476 | NH1 | G_ASP_474 | OD1 | 3.272 |
| 4LST | G_ARG_476 | NH1 | G_ASP_474 | OD2 | 2.826 |
| 4LST | G_ARG_480 | NH1 | G_ASP_477 | OD1 | 3.383 |
| 4LST | H_LYS_12  | NZ  | H_GLU_16  | OE2 | 3.461 |
| 4LST | H_ARG_38  | NH1 | H_ASP_86  | OD1 | 2.980 |
| 4LST | H_ARG_38  | NH2 | H_GLU_46  | OE1 | 3.044 |
| 4LST | H_ARG_38  | NH2 | H_ASP_86  | OD1 | 3.692 |
| 4LST | H_LYS_43  | NZ  | H_ASP_85  | OD1 | 3.823 |
| 4LST | H_ARG_53  | NH1 | H_ASP_31  | OD1 | 3.186 |
| 4LST | H_ARG_53  | NH2 | H_ASP_31  | OD1 | 3.110 |
| 4LST | H_ARG_61  | NH1 | G_GLU_466 | OE1 | 3.812 |
| 4LST | H_ARG_61  | NH2 | G_ASP_461 | OD1 | 2.947 |
| 4LST | H_ARG_66  | NH1 | H_ASP_86  | OD1 | 3.435 |
| 4LST | H_ARG_66  | NH2 | H_ASP_86  | OD1 | 2.875 |
| 4LST | H_ARG_66  | NH2 | H_ASP_86  | OD2 | 2.791 |
| 4LST | H_ARG_71  | NH1 | G_ASP_368 | OD1 | 3.527 |
| 4LST | H_ARG_71  | NH1 | G_ASP_368 | OD2 | 2.632 |
| 4LST | H_ARG_71  | NH2 | G_ASP_368 | OD1 | 2.939 |
| 4LST | H_ARG_71  | NH2 | G_ASP_368 | OD2 | 3.624 |
| 4LST | H_ARG_82A | NH1 | H_GLU_81  | OE2 | 3.069 |
| 4LST | H_HIS_102 | NE2 | H_GLU_101 | OE1 | 3.589 |
| 4LST | H_LYS_143 | NZ  | H_ASP_144 | OD2 | 3.387 |
| 4LST | H_LYS_209 | NZ  | L_GLU_125 | OE2 | 3.921 |
| 4LST | H_LYS_214 | NZ  | L_ASP_124 | OD1 | 3.010 |
| 4LST | H_LYS_214 | NZ  | L_ASP_124 | OD2 | 3.020 |
| 4LST | L_ARG_24  | NH1 | L_ASP_70  | OD1 | 3.104 |
| 4LST | L_ARG_24  | NH1 | L_ASP_70  | OD2 | 3.678 |
| 4LST | L_ARG_61  | NH1 | L_ASP_82  | OD1 | 3.975 |
| 4LST | L_ARG_61  | NH1 | L_ASP_82  | OD2 | 2.621 |
| 4LST | L_ARG_61  | NH2 | L_GLU_79  | OE1 | 3.426 |
| 4LST | L_ARG_61  | NH2 | L_ASP_82  | OD1 | 3.303 |
| 4LST | L_ARG_61  | NH2 | L_ASP_82  | OD2 | 3.231 |
| 4LST | L_LYS_109 | NZ  | L_GLU_17  | OE1 | 2.684 |
| 4LST | L_LYS_185 | NZ  | L_GLU_189 | OE2 | 3.865 |
| 4LU5 | A_HIS_113 | NE2 | A_GLU_129 | OE2 | 3.983 |
| 4LU5 | A_LYS_161 | NZ  | A_ASP_146 | OD1 | 3.296 |
| 4LU5 | A_LYS_161 | NZ  | A_GLU_149 | OE1 | 3.749 |
| 4LU5 | A_LYS_161 | NZ  | A_GLU_149 | OE2 | 3.934 |
| 4LU5 | A_ARG_176 | NH1 | A_ASP_150 | OD1 | 2.940 |
| 4LU5 | A_ARG_176 | NH2 | A_GLU_174 | OE1 | 2.726 |
| 4LU5 | B_HIS_113 | ND1 | B_ASP_115 | OD1 | 3.948 |
| 4LU5 | B_LYS_161 | NZ  | B_ASP_146 | OD1 | 3.334 |
| 4LU5 | B_LYS_161 | NZ  | B_GLU_149 | OE2 | 3.499 |
| 4LU5 | B_ARG_176 | NH1 | B_ASP_150 | OD2 | 3.286 |
| 4LU5 | B_ARG_176 | NH2 | B_GLU_174 | OE1 | 3.070 |
| 4LU5 | H_ARG_38  | NH1 | H_ASP_90  | OD1 | 2.792 |
| 4LU5 | H_ARG_38  | NH2 | H_GLU_46  | OE1 | 3.705 |
| 4LU5 | H_ARG_38  | NH2 | H_ASP_90  | OD1 | 3.789 |
| 4LU5 | H_ARG_44  | NH1 | H_GLU_42  | OE2 | 3.479 |
| 4LU5 | H_ARG_44  | NH2 | H_GLU_46  | OE2 | 3.762 |
| 4LU5 | H_LYS_65  | NZ  | H_ASP_62  | OD1 | 3.768 |
| 4LU5 | H_ARG_67  | NH1 | H_ASP_90  | OD1 | 3.815 |
| 4LU5 | H_ARG_67  | NH1 | H_ASP_90  | OD2 | 2.768 |

|      |           |     |           |     |       |
|------|-----------|-----|-----------|-----|-------|
| 4LU5 | H_ARG_67  | NH2 | H_ASP_90  | OD1 | 2.850 |
| 4LU5 | H_ARG_67  | NH2 | H_ASP_90  | OD2 | 3.112 |
| 4LU5 | H_ARG_98  | NH2 | B_ASP_168 | OD2 | 3.392 |
| 4LU5 | H_LYS_208 | NZ  | L_GLU_128 | OE1 | 3.058 |
| 4LU5 | H_LYS_208 | NZ  | L_GLU_128 | OE2 | 3.445 |
| 4LU5 | H_LYS_209 | NZ  | H_GLU_211 | OE1 | 2.959 |
| 4LU5 | L_ARG_51  | NH1 | H_ASP_101 | OD1 | 3.227 |
| 4LU5 | L_ARG_51  | NH2 | H_ASP_101 | OD1 | 2.925 |
| 4LU5 | L_ARG_51  | NH2 | L_ASP_60  | OD1 | 2.906 |
| 4LU5 | L_ARG_51  | NH2 | L_ASP_60  | OD2 | 3.008 |
| 4LU5 | L_ARG_66  | NH1 | L_GLU_84  | OE1 | 3.197 |
| 4LU5 | L_ARG_66  | NH1 | L_GLU_84  | OE2 | 3.353 |
| 4LU5 | L_ARG_66  | NH2 | L_ASP_87  | OD1 | 2.665 |
| 4LU5 | L_ARG_66  | NH2 | L_ASP_87  | OD2 | 2.880 |
| 4LU5 | L_ARG_82  | NH2 | L_GLU_84  | OE2 | 3.688 |
| 4LU5 | L_LYS_108 | NZ  | L_GLU_110 | OE2 | 3.434 |
| 4LU5 | L_LYS_154 | NZ  | L_GLU_200 | OE1 | 3.567 |
| 4LU5 | L_ARG_160 | NH2 | L_GLU_190 | OE1 | 3.714 |
| 4LU5 | L_ARG_160 | NH2 | L_GLU_190 | OE2 | 2.875 |
| 4LU5 | L_LYS_174 | NZ  | L_GLU_86  | OE2 | 3.749 |
| 4LU5 | L_LYS_188 | NZ  | L_GLU_192 | OE1 | 2.486 |
| 4LU5 | L_HIS_194 | ND1 | L_ASP_156 | OD2 | 2.594 |
| 4LU5 | L_LYS_204 | NZ  | L_ASP_115 | OD2 | 3.897 |
| 4LU5 | L_ARG_38  | NH1 | L_ASP_90  | OD1 | 2.773 |
| 4LU5 | L_ARG_38  | NH2 | L_GLU_46  | OE1 | 3.420 |
| 4LU5 | L_ARG_38  | NH2 | L_ASP_90  | OD1 | 3.756 |
| 4LU5 | L_ARG_44  | NH1 | L_GLU_42  | OE1 | 3.393 |
| 4LU5 | L_ARG_44  | NH1 | L_GLU_42  | OE2 | 2.926 |
| 4LU5 | L_ARG_44  | NH2 | L_GLU_42  | OE2 | 3.842 |
| 4LU5 | L_ARG_44  | NH2 | L_GLU_46  | OE2 | 3.631 |
| 4LU5 | L_LYS_65  | NZ  | L_ASP_62  | OD1 | 3.327 |
| 4LU5 | L_ARG_67  | NH1 | L_ASP_90  | OD1 | 3.710 |
| 4LU5 | L_ARG_67  | NH1 | L_ASP_90  | OD2 | 2.762 |
| 4LU5 | L_ARG_67  | NH2 | L_ASP_90  | OD1 | 2.979 |
| 4LU5 | L_ARG_67  | NH2 | L_ASP_90  | OD2 | 3.184 |
| 4LU5 | L_ARG_98  | NH2 | A_ASP_168 | OD2 | 3.317 |
| 4LU5 | L_LYS_209 | NZ  | L_GLU_211 | OE2 | 3.549 |
| 4LU5 | M_LYS_24  | NZ  | M_ASP_75  | OD1 | 3.847 |
| 4LU5 | M_ARG_51  | NH1 | L_ASP_101 | OD2 | 3.086 |
| 4LU5 | M_ARG_51  | NH2 | L_ASP_101 | OD1 | 3.927 |
| 4LU5 | M_ARG_51  | NH2 | L_ASP_101 | OD2 | 2.770 |
| 4LU5 | M_ARG_51  | NH2 | M_ASP_60  | OD1 | 3.599 |
| 4LU5 | M_ARG_51  | NH2 | M_ASP_60  | OD2 | 3.102 |
| 4LU5 | M_ARG_66  | NH1 | M_GLU_84  | OE1 | 3.699 |
| 4LU5 | M_ARG_66  | NH1 | M_GLU_84  | OE2 | 3.904 |
| 4LU5 | M_ARG_66  | NH2 | M_ASP_87  | OD1 | 2.686 |
| 4LU5 | M_ARG_66  | NH2 | M_ASP_87  | OD2 | 3.050 |
| 4LU5 | M_ARG_82  | NH1 | M_GLU_84  | OE2 | 2.836 |
| 4LU5 | M_LYS_152 | NZ  | M_GLU_200 | OE2 | 3.478 |
| 4LU5 | M_LYS_154 | NZ  | M_GLU_200 | OE1 | 3.458 |
| 4LU5 | M_LYS_154 | NZ  | M_GLU_200 | OE2 | 3.926 |
| 4LU5 | M_ARG_160 | NH1 | M_GLU_190 | OE2 | 3.887 |
| 4LU5 | M_ARG_160 | NH2 | M_GLU_190 | OE2 | 2.853 |
| 4LU5 | M_LYS_188 | NZ  | M_GLU_192 | OE1 | 3.556 |
| 4LU5 | M_ARG_193 | NH1 | M_ASP_189 | OD2 | 3.951 |
| 4LU5 | M_HIS_194 | ND1 | M_ASP_156 | OD2 | 2.781 |
| 4LU5 | M_LYS_204 | NZ  | M_ASP_115 | OD2 | 3.771 |
| 4M1D | L_ARG_61  | NH1 | L_ASP_82  | OD1 | 3.859 |

|      |           |     |           |     |       |
|------|-----------|-----|-----------|-----|-------|
| 4M1D | L_ARG_61  | NH1 | L_ASP_82  | OD2 | 2.922 |
| 4M1D | L_ARG_61  | NH2 | L_ASP_82  | OD1 | 2.932 |
| 4M1D | L_ARG_61  | NH2 | L_ASP_82  | OD2 | 3.341 |
| 4M1D | L_LYS_103 | NZ  | L_GLU_83  | OE2 | 3.169 |
| 4M1D | L_LYS_110 | NZ  | L_GLU_198 | OE1 | 2.670 |
| 4M1D | L_LYS_129 | NZ  | H_ASP_144 | OD2 | 3.436 |
| 4M1D | L_LYS_149 | NZ  | L_GLU_203 | OE2 | 3.944 |
| 4M1D | H_ARG_38  | NH1 | H_ASP_86  | OD1 | 2.929 |
| 4M1D | H_ARG_38  | NH2 | H_GLU_46  | OE1 | 3.018 |
| 4M1D | H_ARG_38  | NH2 | H_GLU_46  | OE2 | 3.822 |
| 4M1D | H_ARG_38  | NH2 | H_ASP_86  | OD1 | 3.988 |
| 4M1D | H_ARG_50  | NH1 | H_ASP_58  | OD2 | 2.819 |
| 4M1D | H_ARG_66  | NH1 | H_ASP_86  | OD1 | 3.809 |
| 4M1D | H_ARG_66  | NH1 | H_ASP_86  | OD2 | 2.702 |
| 4M1D | H_ARG_66  | NH2 | H_ASP_86  | OD1 | 3.069 |
| 4M1D | H_ARG_66  | NH2 | H_ASP_86  | OD2 | 3.476 |
| 4M1D | H_ARG_71  | NH2 | H_ASP_73  | OD1 | 3.470 |
| 4M1D | H_LYS_143 | NZ  | L_GLU_124 | OE2 | 2.547 |
| 4M1D | H_LYS_209 | NZ  | L_GLU_123 | OE1 | 2.798 |
| 4M1D | H_LYS_209 | NZ  | L_GLU_123 | OE2 | 2.782 |
| 4M1D | P_ARG_315 | NH2 | H_ASP_95  | OD2 | 3.175 |
| 4M1D | M_ARG_61  | NH1 | M_ASP_82  | OD1 | 3.820 |
| 4M1D | M_ARG_61  | NH1 | M_ASP_82  | OD2 | 2.675 |
| 4M1D | M_ARG_61  | NH2 | M_ASP_82  | OD1 | 2.789 |
| 4M1D | M_ARG_61  | NH2 | M_ASP_82  | OD2 | 3.154 |
| 4M1D | M_LYS_149 | NZ  | M_GLU_203 | OE2 | 3.156 |
| 4M1D | L_ARG_38  | NH1 | L_ASP_86  | OD1 | 2.903 |
| 4M1D | L_ARG_38  | NH2 | L_GLU_46  | OE1 | 3.115 |
| 4M1D | L_ARG_38  | NH2 | L_GLU_46  | OE2 | 3.904 |
| 4M1D | L_ARG_38  | NH2 | L_ASP_86  | OD1 | 3.856 |
| 4M1D | L_ARG_50  | NH1 | L_ASP_58  | OD2 | 2.888 |
| 4M1D | L_ARG_66  | NH1 | L_ASP_86  | OD1 | 3.904 |
| 4M1D | L_ARG_66  | NH1 | L_ASP_86  | OD2 | 2.765 |
| 4M1D | L_ARG_66  | NH2 | L_ASP_86  | OD1 | 3.096 |
| 4M1D | L_ARG_66  | NH2 | L_ASP_86  | OD2 | 3.440 |
| 4M1D | L_ARG_71  | NH2 | L_ASP_73  | OD1 | 3.398 |
| 4M1D | L_LYS_209 | NZ  | M_GLU_123 | OE1 | 3.060 |
| 4M1D | L_LYS_209 | NZ  | M_GLU_123 | OE2 | 2.485 |
| 4M1D | L_ARG_210 | NH1 | L_GLU_212 | OE2 | 3.506 |
| 4M1D | Q_ARG_315 | NH2 | L_ASP_95  | OD2 | 3.051 |
| 4M1G | L_ARG_62  | NH2 | L_GLU_82  | OE2 | 3.764 |
| 4M1G | L_ARG_62  | NH2 | L_ASP_83  | OD1 | 2.800 |
| 4M1G | L_ARG_62  | NH2 | L_ASP_83  | OD2 | 3.468 |
| 4M1G | L_LYS_104 | NZ  | L_ASP_166 | OD1 | 2.839 |
| 4M1G | L_LYS_143 | NZ  | L_GLU_106 | OE1 | 2.794 |
| 4M1G | L_LYS_143 | NZ  | L_GLU_106 | OE2 | 3.443 |
| 4M1G | L_LYS_150 | NZ  | L_GLU_196 | OE1 | 3.090 |
| 4M1G | L_LYS_150 | NZ  | L_GLU_196 | OE2 | 3.774 |
| 4M1G | L_ARG_156 | NH1 | L_GLU_186 | OE2 | 2.941 |
| 4M1G | L_ARG_189 | NH2 | L_ASP_185 | OD2 | 3.981 |
| 4M1G | L_HIS_190 | ND1 | L_ASP_152 | OD2 | 2.973 |
| 4M1G | L_LYS_200 | NZ  | L_ASP_111 | OD2 | 3.784 |
| 4M1G | H_ARG_38  | NH1 | H_GLU_46  | OE1 | 3.046 |
| 4M1G | H_ARG_38  | NH1 | H_ASP_89  | OD1 | 3.832 |
| 4M1G | H_ARG_38  | NH2 | H_ASP_89  | OD1 | 2.835 |
| 4M1G | H_ARG_66  | NH1 | H_ASP_89  | OD1 | 3.787 |
| 4M1G | H_ARG_66  | NH1 | H_ASP_89  | OD2 | 2.752 |
| 4M1G | H_ARG_66  | NH2 | H_ASP_89  | OD1 | 2.894 |



|      |           |     |           |     |       |
|------|-----------|-----|-----------|-----|-------|
| 4M1G | H_ARG_66  | NH2 | H_ASP_89  | OD2 | 3.336 |
| 4M1G | H_LYS_97  | NZ  | H_ASP_106 | OD1 | 3.138 |
| 4M1G | H_LYS_97  | NZ  | H_ASP_106 | OD2 | 2.944 |
| 4M1G | H_LYS_210 | NZ  | H_ASP_212 | OD2 | 3.380 |
| 4M1G | H_LYS_213 | NZ  | L_GLU_124 | OE2 | 2.837 |
| 4M1G | H_ARG_218 | NH2 | L_GLU_124 | OE1 | 2.657 |
| 4M1G | H_ARG_218 | NH2 | L_GLU_124 | OE2 | 3.648 |
| 4M1G | A_LYS_161 | NZ  | H_ASP_31  | OD1 | 3.895 |
| 4M1G | A_LYS_161 | NZ  | A_ASP_146 | OD1 | 2.636 |
| 4M1G | A_ARG_176 | NH2 | A_GLU_174 | OE2 | 2.901 |
| 4M1G | B_LYS_161 | NZ  | B_ASP_146 | OD1 | 3.297 |
| 4M1G | B_ARG_176 | NH1 | B_GLU_174 | OE1 | 3.072 |
| 4M1G | B_ARG_176 | NH2 | B_ASP_150 | OD1 | 3.937 |
| 4M1G | B_ARG_176 | NH2 | B_GLU_174 | OE1 | 3.174 |
| 4M3J | A_ARG_66  | NH1 | A_ASP_89  | OD1 | 2.995 |
| 4M3J | A_ARG_66  | NH1 | A_ASP_89  | OD2 | 3.290 |
| 4M3J | A_ARG_66  | NH2 | A_ASP_89  | OD1 | 3.827 |
| 4M3J | A_ARG_66  | NH2 | A_ASP_89  | OD2 | 2.608 |
| 4M3J | B_ARG_19  | NH2 | B_GLU_81  | OE2 | 4.000 |
| 4M3J | B_ARG_38  | NH1 | B_ASP_89  | OD1 | 2.933 |
| 4M3J | B_ARG_38  | NH2 | B_GLU_46  | OE2 | 3.526 |
| 4M3J | B_ARG_66  | NH1 | B_ASP_89  | OD1 | 2.977 |
| 4M3J | B_ARG_66  | NH1 | B_ASP_89  | OD2 | 3.346 |
| 4M3J | B_ARG_66  | NH2 | B_ASP_89  | OD1 | 3.861 |
| 4M3J | B_ARG_66  | NH2 | B_ASP_89  | OD2 | 2.734 |
| 4M3K | A_LYS_43  | NZ  | A_GLU_64  | OE1 | 3.810 |
| 4M3K | A_LYS_43  | NZ  | A_GLU_64  | OE2 | 3.952 |
| 4M3K | A_ARG_61  | NH2 | A_GLU_37  | OE1 | 2.874 |
| 4M3K | A_ARG_61  | NH2 | A_GLU_37  | OE2 | 2.937 |
| 4M3K | A_LYS_73  | NZ  | A_GLU_166 | OE2 | 3.458 |
| 4M3K | A_ARG_128 | NH2 | A_ASP_124 | OD1 | 2.865 |
| 4M3K | A_ARG_128 | NH2 | A_ASP_124 | OD2 | 3.740 |
| 4M3K | A_LYS_149 | NZ  | A_GLU_163 | OE2 | 2.784 |
| 4M3K | A_LYS_154 | NZ  | A_GLU_151 | OE1 | 3.231 |
| 4M3K | A_ARG_164 | NH2 | A_ASP_179 | OD2 | 2.865 |
| 4M3K | A_ARG_184 | NH2 | A_ASP_63  | OD1 | 3.681 |
| 4M3K | A_ARG_184 | NH2 | A_ASP_63  | OD2 | 2.944 |
| 4M3K | A_ARG_204 | NH1 | A_GLU_196 | OE2 | 2.953 |
| 4M3K | A_ARG_204 | NH2 | A_GLU_196 | OE2 | 3.454 |
| 4M3K | A_LYS_212 | NZ  | A_GLU_230 | OE2 | 3.176 |
| 4M3K | A_ARG_213 | NH2 | A_ASP_124 | OD2 | 3.388 |
| 4M3K | A_ARG_213 | NH2 | A_ASP_209 | OD2 | 3.177 |
| 4M3K | A_ARG_244 | NH2 | A_ASP_276 | OD1 | 3.324 |
| 4M3K | A_ARG_244 | NH2 | A_ASP_276 | OD2 | 3.717 |
| 4M3K | A_ARG_267 | NH2 | A_ASP_41  | OD2 | 2.755 |
| 4M3K | A_LYS_277 | NZ  | A_GLU_281 | OE2 | 3.368 |
| 4M3K | A_LYS_284 | NZ  | A_GLU_281 | OE2 | 3.066 |
| 4M3K | A_LYS_288 | NZ  | A_ASP_32  | OD1 | 3.999 |
| 4M3K | B_ARG_38  | NH1 | B_ASP_89  | OD1 | 2.927 |
| 4M3K | B_ARG_38  | NH2 | B_GLU_46  | OE2 | 3.059 |
| 4M3K | B_ARG_66  | NH1 | B_ASP_89  | OD1 | 3.228 |
| 4M3K | B_ARG_66  | NH1 | B_ASP_89  | OD2 | 3.507 |
| 4M3K | B_ARG_66  | NH2 | B_ASP_89  | OD1 | 3.903 |
| 4M3K | B_ARG_66  | NH2 | B_ASP_89  | OD2 | 2.748 |
| 4M5Y | H_ARG_38  | NH1 | H_ASP_86  | OD1 | 2.740 |
| 4M5Y | H_ARG_38  | NH2 | H_GLU_46  | OE1 | 3.005 |
| 4M5Y | H_ARG_38  | NH2 | H_GLU_46  | OE2 | 3.867 |
| 4M5Y | H_ARG_38  | NH2 | H_ASP_86  | OD1 | 3.427 |

|      |           |     |           |     |       |
|------|-----------|-----|-----------|-----|-------|
| 4M5Y | H.LYS_60  | NZ  | H.GLU_46  | OE2 | 3.961 |
| 4M5Y | H.ARG_66  | NH1 | H.ASP_86  | OD1 | 3.597 |
| 4M5Y | H.ARG_66  | NH1 | H.ASP_86  | OD2 | 3.103 |
| 4M5Y | H.ARG_66  | NH2 | H.ASP_86  | OD1 | 3.032 |
| 4M5Y | H.ARG_66  | NH2 | H.ASP_86  | OD2 | 3.612 |
| 4M5Y | H.ARG_94  | NH2 | H.ASP_101 | OD1 | 3.590 |
| 4M5Y | H.ARG_94  | NH2 | H.ASP_101 | OD2 | 2.687 |
| 4M5Y | H.LYS_143 | NZ  | L.GLU_124 | OE2 | 2.602 |
| 4M5Y | H.ARG_210 | NH1 | H.GLU_212 | OE2 | 3.298 |
| 4M5Y | L.ARG_61  | NH1 | L.ASP_82  | OD1 | 3.807 |
| 4M5Y | L.ARG_61  | NH1 | L.ASP_82  | OD2 | 2.837 |
| 4M5Y | L.ARG_61  | NH2 | L.GLU_79  | OE1 | 3.774 |
| 4M5Y | L.ARG_61  | NH2 | L.GLU_79  | OE2 | 3.834 |
| 4M5Y | L.ARG_61  | NH2 | L.ASP_82  | OD1 | 2.987 |
| 4M5Y | L.ARG_61  | NH2 | L.ASP_82  | OD2 | 3.453 |
| 4M5Y | L.LYS_103 | NZ  | L.ASP_85  | OD1 | 2.950 |
| 4M5Y | L.LYS_103 | NZ  | L.ASP_85  | OD2 | 3.655 |
| 4M5Y | L.LYS_166 | NZ  | L.GLU_83  | OE1 | 3.021 |
| 4M5Y | L.ARG_38  | NH1 | L.ASP_86  | OD1 | 2.800 |
| 4M5Y | L.ARG_38  | NH2 | L.GLU_46  | OE1 | 3.015 |
| 4M5Y | L.ARG_38  | NH2 | L.GLU_46  | OE2 | 3.972 |
| 4M5Y | L.ARG_38  | NH2 | L.ASP_86  | OD1 | 3.483 |
| 4M5Y | L.LYS_60  | NZ  | L.GLU_46  | OE2 | 3.961 |
| 4M5Y | L.ARG_66  | NH1 | L.ASP_86  | OD1 | 3.585 |
| 4M5Y | L.ARG_66  | NH1 | L.ASP_86  | OD2 | 3.054 |
| 4M5Y | L.ARG_66  | NH2 | L.ASP_86  | OD1 | 3.004 |
| 4M5Y | L.ARG_66  | NH2 | L.ASP_86  | OD2 | 3.622 |
| 4M5Y | L.ARG_94  | NH2 | L.ASP_101 | OD1 | 3.599 |
| 4M5Y | L.ARG_94  | NH2 | L.ASP_101 | OD2 | 2.713 |
| 4M5Y | L.LYS_143 | NZ  | M.GLU_124 | OE2 | 2.668 |
| 4M5Y | L.ARG_210 | NH2 | L.GLU_212 | OE1 | 3.354 |
| 4M5Y | L.ARG_210 | NH2 | L.GLU_212 | OE2 | 2.881 |
| 4M5Y | M.ARG_61  | NH1 | M.ASP_82  | OD1 | 3.838 |
| 4M5Y | M.ARG_61  | NH1 | M.ASP_82  | OD2 | 2.829 |
| 4M5Y | M.ARG_61  | NH2 | M.GLU_79  | OE1 | 3.888 |
| 4M5Y | M.ARG_61  | NH2 | M.GLU_79  | OE2 | 3.912 |
| 4M5Y | M.ARG_61  | NH2 | M.ASP_82  | OD1 | 2.982 |
| 4M5Y | M.ARG_61  | NH2 | M.ASP_82  | OD2 | 3.418 |
| 4M5Y | M.LYS_103 | NZ  | M.ASP_85  | OD1 | 2.936 |
| 4M5Y | M.LYS_103 | NZ  | M.ASP_85  | OD2 | 3.698 |
| 4M5Y | M.LYS_166 | NZ  | M.GLU_83  | OE1 | 2.838 |
| 4M7J | H.ARG_38  | NH1 | H.ASP_86  | OD1 | 2.851 |
| 4M7J | H.ARG_38  | NH2 | H.GLU_46  | OE1 | 2.998 |
| 4M7J | H.ARG_38  | NH2 | H.GLU_46  | OE2 | 3.979 |
| 4M7J | H.ARG_38  | NH2 | H.ASP_86  | OD1 | 3.844 |
| 4M7J | H.ARG_66  | NH1 | H.ASP_86  | OD1 | 3.723 |
| 4M7J | H.ARG_66  | NH1 | H.ASP_86  | OD2 | 2.912 |
| 4M7J | H.ARG_66  | NH2 | H.ASP_86  | OD1 | 2.833 |
| 4M7J | H.ARG_66  | NH2 | H.ASP_86  | OD2 | 3.435 |
| 4M7J | H.ARG_94  | NH2 | H.ASP_100 | OD1 | 2.757 |
| 4M7J | H.ARG_94  | NH2 | H.ASP_100 | OD2 | 3.594 |
| 4M7J | H.LYS_208 | NZ  | L.GLU_123 | OE1 | 3.727 |
| 4M7J | H.LYS_208 | NZ  | L.GLU_123 | OE2 | 3.593 |
| 4M7J | L.ARG_24  | NH2 | L.ASP_70  | OD1 | 2.939 |
| 4M7J | L.ARG_24  | NH2 | L.ASP_70  | OD2 | 3.255 |
| 4M7J | L.ARG_61  | NH1 | L.GLU_79  | OE1 | 3.494 |
| 4M7J | L.ARG_61  | NH1 | L.GLU_79  | OE2 | 3.711 |
| 4M7J | L.ARG_61  | NH1 | L.GLU_81  | OE2 | 3.788 |

|      |           |     |           |     |       |
|------|-----------|-----|-----------|-----|-------|
| 4M7J | L_ARG_61  | NH2 | L_GLU_79  | OE1 | 3.751 |
| 4M7J | L_ARG_61  | NH2 | L_GLU_81  | OE2 | 3.003 |
| 4M7J | L_ARG_61  | NH2 | L_ASP_82  | OD1 | 2.487 |
| 4M7J | L_ARG_61  | NH2 | L_ASP_82  | OD2 | 3.268 |
| 4M7J | L_LYS_103 | NZ  | L_GLU_105 | OE1 | 3.663 |
| 4M7J | L_LYS_142 | NZ  | L_GLU_105 | OE1 | 3.970 |
| 4M7J | L_LYS_149 | NZ  | L_GLU_195 | OE2 | 3.349 |
| 4M7J | L_ARG_155 | NH1 | L_GLU_185 | OE1 | 3.230 |
| 4M7J | L_ARG_155 | NH1 | L_GLU_185 | OE2 | 3.937 |
| 4M7J | L_ARG_155 | NH2 | L_GLU_185 | OE1 | 3.656 |
| 4M7J | L_ARG_155 | NH2 | L_GLU_185 | OE2 | 2.916 |
| 4M7J | L_HIS_189 | ND1 | L_ASP_151 | OD2 | 3.046 |
| 4M7J | L_LYS_199 | NZ  | L_ASP_110 | OD1 | 3.848 |
| 4M7J | L_LYS_199 | NZ  | L_ASP_110 | OD2 | 2.665 |
| 4M7Z | B_ARG_38  | NH1 | B_ASP_86  | OD1 | 2.932 |
| 4M7Z | B_ARG_38  | NH2 | B_ASP_86  | OD1 | 3.472 |
| 4M7Z | B_ARG_66  | NH1 | B_ASP_86  | OD2 | 3.153 |
| 4M7Z | B_ARG_66  | NH2 | B_ASP_86  | OD1 | 2.921 |
| 4M7Z | B_ARG_66  | NH2 | B_ASP_86  | OD2 | 2.946 |
| 4M7Z | B_LYS_208 | NZ  | C_GLU_123 | OE1 | 3.318 |
| 4M7Z | B_LYS_208 | NZ  | C_GLU_123 | OE2 | 3.881 |
| 4M7Z | H_ARG_38  | NH1 | H_ASP_86  | OD1 | 2.917 |
| 4M7Z | H_ARG_38  | NH2 | H_ASP_86  | OD1 | 3.458 |
| 4M7Z | H_ARG_66  | NH1 | H_ASP_86  | OD2 | 3.181 |
| 4M7Z | H_ARG_66  | NH2 | H_ASP_86  | OD1 | 2.909 |
| 4M7Z | H_ARG_66  | NH2 | H_ASP_86  | OD2 | 2.975 |
| 4M7Z | H_LYS_208 | NZ  | L_GLU_123 | OE1 | 3.192 |
| 4M7Z | C_ARG_54  | NH2 | C_ASP_60  | OD1 | 3.316 |
| 4M7Z | C_ARG_61  | NH1 | C_GLU_79  | OE1 | 3.863 |
| 4M7Z | C_ARG_61  | NH2 | C_GLU_79  | OE1 | 3.870 |
| 4M7Z | C_ARG_61  | NH2 | C_ASP_82  | OD1 | 2.761 |
| 4M7Z | C_ARG_61  | NH2 | C_ASP_82  | OD2 | 3.263 |
| 4M7Z | C_LYS_103 | NZ  | C_ASP_165 | OD1 | 2.648 |
| 4M7Z | C_LYS_103 | NZ  | C_ASP_165 | OD2 | 3.360 |
| 4M7Z | C_LYS_142 | NZ  | C_GLU_105 | OE2 | 2.662 |
| 4M7Z | C_LYS_149 | NZ  | C_GLU_195 | OE2 | 3.957 |
| 4M7Z | C_ARG_155 | NH2 | C_GLU_185 | OE1 | 3.931 |
| 4M7Z | C_LYS_183 | NZ  | C_GLU_187 | OE1 | 3.956 |
| 4M7Z | C_LYS_183 | NZ  | C_GLU_187 | OE2 | 2.784 |
| 4M7Z | C_ARG_188 | NH2 | C_GLU_185 | OE2 | 2.653 |
| 4M7Z | C_HIS_189 | ND1 | C_ASP_151 | OD2 | 2.788 |
| 4M7Z | C_HIS_189 | NE2 | C_GLU_185 | OE1 | 2.917 |
| 4M7Z | C_LYS_199 | NZ  | C_ASP_110 | OD1 | 3.655 |
| 4M7Z | C_LYS_199 | NZ  | C_ASP_110 | OD2 | 3.049 |
| 4M7Z | L_ARG_24  | NH2 | L_ASP_70  | OD1 | 3.791 |
| 4M7Z | L_ARG_54  | NH2 | L_ASP_60  | OD1 | 3.293 |
| 4M7Z | L_ARG_61  | NH1 | L_GLU_79  | OE1 | 3.704 |
| 4M7Z | L_ARG_61  | NH1 | L_GLU_79  | OE2 | 3.709 |
| 4M7Z | L_ARG_61  | NH2 | L_ASP_82  | OD1 | 2.705 |
| 4M7Z | L_ARG_61  | NH2 | L_ASP_82  | OD2 | 2.341 |
| 4M7Z | L_LYS_103 | NZ  | L_ASP_165 | OD1 | 2.672 |
| 4M7Z | L_LYS_103 | NZ  | L_ASP_165 | OD2 | 3.377 |
| 4M7Z | L_LYS_142 | NZ  | L_GLU_105 | OE1 | 3.125 |
| 4M7Z | L_LYS_147 | NZ  | L_GLU_195 | OE1 | 3.579 |
| 4M7Z | L_LYS_149 | NZ  | L_GLU_195 | OE2 | 3.946 |
| 4M7Z | L_ARG_155 | NH1 | L_GLU_185 | OE2 | 3.594 |
| 4M7Z | L_ARG_155 | NH2 | L_GLU_185 | OE2 | 2.584 |
| 4M7Z | L_LYS_183 | NZ  | L_GLU_187 | OE1 | 3.987 |

|      |           |     |           |     |       |
|------|-----------|-----|-----------|-----|-------|
| 4M7Z | L_LYS_183 | NZ  | L_GLU_187 | OE2 | 2.788 |
| 4M7Z | L_HIS_189 | ND1 | L_ASP_151 | OD2 | 2.804 |
| 4M7Z | L_LYS_199 | NZ  | L_ASP_110 | OD1 | 3.668 |
| 4M7Z | L_LYS_199 | NZ  | L_ASP_110 | OD2 | 3.056 |
| 4M93 | L_ARG_24  | NH1 | L_ASP_70  | OD1 | 3.616 |
| 4M93 | L_ARG_24  | NH2 | L_ASP_70  | OD1 | 3.168 |
| 4M93 | L_ARG_24  | NH2 | L_ASP_70  | OD2 | 3.984 |
| 4M93 | L_ARG_61  | NH1 | L_GLU_79  | OE1 | 2.878 |
| 4M93 | L_ARG_61  | NH1 | L_GLU_79  | OE2 | 3.335 |
| 4M93 | L_ARG_61  | NH2 | L_GLU_79  | OE1 | 2.843 |
| 4M93 | L_ARG_61  | NH2 | L_GLU_81  | OE1 | 3.821 |
| 4M93 | L_ARG_61  | NH2 | L_ASP_82  | OD1 | 2.762 |
| 4M93 | L_ARG_61  | NH2 | L_ASP_82  | OD2 | 3.319 |
| 4M93 | L_LYS_103 | NZ  | L_GLU_105 | OE1 | 3.651 |
| 4M93 | L_LYS_142 | NZ  | L_GLU_105 | OE2 | 3.741 |
| 4M93 | L_LYS_147 | NZ  | L_GLU_154 | OE2 | 3.291 |
| 4M93 | L_LYS_149 | NZ  | L_GLU_195 | OE1 | 3.825 |
| 4M93 | L_LYS_149 | NZ  | L_GLU_195 | OE2 | 2.937 |
| 4M93 | L_ARG_155 | NH1 | L_GLU_185 | OE1 | 3.047 |
| 4M93 | L_ARG_155 | NH2 | L_GLU_185 | OE1 | 3.711 |
| 4M93 | L_ARG_155 | NH2 | L_GLU_185 | OE2 | 3.785 |
| 4M93 | L_HIS_189 | ND1 | L_ASP_151 | OD2 | 3.324 |
| 4M93 | H_ARG_38  | NH1 | H_ASP_86  | OD1 | 2.784 |
| 4M93 | H_ARG_38  | NH2 | H_GLU_46  | OE1 | 2.935 |
| 4M93 | H_ARG_38  | NH2 | H_GLU_46  | OE2 | 3.934 |
| 4M93 | H_ARG_38  | NH2 | H_ASP_86  | OD1 | 3.972 |
| 4M93 | H_ARG_66  | NH1 | H_ASP_86  | OD1 | 3.479 |
| 4M93 | H_ARG_66  | NH1 | H_ASP_86  | OD2 | 2.918 |
| 4M93 | H_ARG_66  | NH2 | H_ASP_86  | OD1 | 2.693 |
| 4M93 | H_ARG_66  | NH2 | H_ASP_86  | OD2 | 3.421 |
| 4M93 | H_LYS_208 | NZ  | L_GLU_123 | OE1 | 3.795 |
| 4M93 | C_ARG_24  | NH1 | C_ASP_70  | OD1 | 3.167 |
| 4M93 | C_ARG_61  | NH1 | C_GLU_79  | OE1 | 3.833 |
| 4M93 | C_ARG_61  | NH1 | C_GLU_79  | OE2 | 3.475 |
| 4M93 | C_ARG_61  | NH2 | C_GLU_79  | OE1 | 3.979 |
| 4M93 | C_ARG_61  | NH2 | C_GLU_81  | OE1 | 3.225 |
| 4M93 | C_ARG_61  | NH2 | C_ASP_82  | OD1 | 2.620 |
| 4M93 | C_ARG_61  | NH2 | C_ASP_82  | OD2 | 3.543 |
| 4M93 | C_LYS_149 | NZ  | C_GLU_195 | OE2 | 3.911 |
| 4M93 | C_ARG_155 | NH1 | C_GLU_185 | OE1 | 2.917 |
| 4M93 | C_LYS_169 | NZ  | C_ASP_170 | OD1 | 2.606 |
| 4M93 | C_LYS_183 | NZ  | C_GLU_187 | OE2 | 3.968 |
| 4M93 | C_HIS_189 | ND1 | C_ASP_151 | OD2 | 2.956 |
| 4M93 | C_LYS_199 | NZ  | C_ASP_110 | OD2 | 3.011 |
| 4M93 | B_ARG_38  | NH1 | B_ASP_86  | OD1 | 2.720 |
| 4M93 | B_ARG_38  | NH2 | B_GLU_46  | OE1 | 3.263 |
| 4M93 | B_ARG_38  | NH2 | B_ASP_86  | OD1 | 3.854 |
| 4M93 | B_ARG_66  | NH1 | B_ASP_86  | OD1 | 3.675 |
| 4M93 | B_ARG_66  | NH1 | B_ASP_86  | OD2 | 3.114 |
| 4M93 | B_ARG_66  | NH2 | B_ASP_86  | OD1 | 2.983 |
| 4M93 | B_ARG_66  | NH2 | B_ASP_86  | OD2 | 3.452 |
| 4M93 | B_LYS_208 | NZ  | C_GLU_123 | OE1 | 3.203 |
| 4MA1 | B_LYS_5   | NZ  | F_GLU_187 | OE1 | 3.315 |
| 4MA1 | B_ARG_38  | NH1 | B_ASP_86  | OD1 | 2.969 |
| 4MA1 | B_ARG_38  | NH2 | B_GLU_46  | OE1 | 3.713 |
| 4MA1 | B_ARG_66  | NH1 | B_ASP_86  | OD1 | 3.588 |
| 4MA1 | B_ARG_66  | NH1 | B_ASP_86  | OD2 | 2.940 |
| 4MA1 | B_ARG_66  | NH2 | B_ASP_86  | OD1 | 2.611 |

|      |           |     |           |     |       |
|------|-----------|-----|-----------|-----|-------|
| 4MA1 | B_ARG_66  | NH2 | B_ASP_86  | OD2 | 3.400 |
| 4MA1 | B_LYS_208 | NZ  | C_GLU_123 | OE1 | 3.857 |
| 4MA1 | E_ARG_38  | NH1 | E_ASP_86  | OD1 | 3.045 |
| 4MA1 | E_ARG_38  | NH2 | E_GLU_46  | OE1 | 3.606 |
| 4MA1 | E_ARG_38  | NH2 | E_ASP_86  | OD1 | 3.907 |
| 4MA1 | E_ARG_66  | NH1 | E_ASP_86  | OD2 | 3.475 |
| 4MA1 | E_ARG_66  | NH2 | E_ASP_86  | OD1 | 2.678 |
| 4MA1 | E_ARG_66  | NH2 | E_ASP_86  | OD2 | 3.064 |
| 4MA1 | H_ARG_38  | NH1 | H_ASP_86  | OD1 | 2.748 |
| 4MA1 | H_ARG_38  | NH2 | H_GLU_46  | OE1 | 3.316 |
| 4MA1 | H_ARG_38  | NH2 | H_GLU_46  | OE2 | 3.996 |
| 4MA1 | H_ARG_38  | NH2 | H_ASP_86  | OD1 | 3.832 |
| 4MA1 | H_ARG_66  | NH1 | H_ASP_86  | OD1 | 3.691 |
| 4MA1 | H_ARG_66  | NH1 | H_ASP_86  | OD2 | 2.891 |
| 4MA1 | H_ARG_66  | NH2 | H_ASP_86  | OD1 | 2.643 |
| 4MA1 | H_ARG_66  | NH2 | H_ASP_86  | OD2 | 3.187 |
| 4MA1 | H_LYS_208 | NZ  | L_GLU_123 | OE1 | 3.752 |
| 4MA1 | C_ARG_61  | NH1 | C_GLU_79  | OE1 | 3.057 |
| 4MA1 | C_ARG_61  | NH2 | C_GLU_79  | OE1 | 3.843 |
| 4MA1 | C_ARG_61  | NH2 | C_GLU_81  | OE1 | 3.130 |
| 4MA1 | C_ARG_61  | NH2 | C_ASP_82  | OD1 | 2.795 |
| 4MA1 | C_ARG_61  | NH2 | C_ASP_82  | OD2 | 3.615 |
| 4MA1 | C_LYS_103 | NZ  | C_GLU_105 | OE1 | 2.684 |
| 4MA1 | C_LYS_142 | NZ  | C_GLU_105 | OE1 | 3.393 |
| 4MA1 | C_LYS_142 | NZ  | C_GLU_105 | OE2 | 3.621 |
| 4MA1 | C_LYS_149 | NZ  | C_GLU_195 | OE1 | 2.926 |
| 4MA1 | C_ARG_155 | NH1 | C_GLU_185 | OE1 | 3.289 |
| 4MA1 | C_ARG_155 | NH1 | C_GLU_185 | OE2 | 3.515 |
| 4MA1 | C_ARG_155 | NH2 | C_GLU_185 | OE2 | 3.110 |
| 4MA1 | C_LYS_183 | NZ  | C_GLU_187 | OE2 | 3.186 |
| 4MA1 | C_HIS_189 | ND1 | C_ASP_151 | OD2 | 3.088 |
| 4MA1 | C_LYS_199 | NZ  | C_ASP_110 | OD2 | 3.151 |
| 4MA1 | F_ARG_24  | NH2 | F_ASP_70  | OD2 | 2.964 |
| 4MA1 | F_ARG_61  | NH1 | F_GLU_79  | OE1 | 3.869 |
| 4MA1 | F_ARG_61  | NH1 | F_GLU_79  | OE2 | 3.320 |
| 4MA1 | F_ARG_61  | NH2 | F_GLU_79  | OE1 | 3.924 |
| 4MA1 | F_ARG_61  | NH2 | F_GLU_81  | OE2 | 3.033 |
| 4MA1 | F_ARG_61  | NH2 | F_ASP_82  | OD1 | 2.712 |
| 4MA1 | F_ARG_61  | NH2 | F_ASP_82  | OD2 | 3.811 |
| 4MA1 | F_ARG_77  | NH2 | F_GLU_79  | OE2 | 3.716 |
| 4MA1 | F_LYS_103 | NZ  | F_GLU_105 | OE2 | 2.828 |
| 4MA1 | F_LYS_142 | NZ  | F_GLU_105 | OE1 | 3.726 |
| 4MA1 | F_LYS_142 | NZ  | F_GLU_105 | OE2 | 3.145 |
| 4MA1 | F_LYS_149 | NZ  | F_GLU_195 | OE2 | 2.884 |
| 4MA1 | F_ARG_155 | NH1 | F_GLU_185 | OE1 | 3.214 |
| 4MA1 | F_ARG_155 | NH1 | F_GLU_185 | OE2 | 3.510 |
| 4MA1 | F_ARG_155 | NH2 | F_GLU_185 | OE2 | 2.964 |
| 4MA1 | F_LYS_183 | NZ  | F_GLU_187 | OE2 | 3.006 |
| 4MA1 | F_HIS_189 | ND1 | F_ASP_151 | OD2 | 2.997 |
| 4MA1 | F_LYS_199 | NZ  | F_ASP_110 | OD2 | 3.201 |
| 4MA1 | L_ARG_61  | NH1 | L_GLU_79  | OE2 | 3.784 |
| 4MA1 | L_ARG_61  | NH2 | L_GLU_79  | OE2 | 3.895 |
| 4MA1 | L_ARG_61  | NH2 | L_GLU_81  | OE1 | 3.533 |
| 4MA1 | L_ARG_61  | NH2 | L_ASP_82  | OD1 | 2.756 |
| 4MA1 | L_ARG_61  | NH2 | L_ASP_82  | OD2 | 3.629 |
| 4MA1 | L_LYS_142 | NZ  | L_GLU_105 | OE1 | 2.731 |
| 4MA1 | L_LYS_142 | NZ  | L_GLU_105 | OE2 | 3.970 |
| 4MA1 | L_LYS_149 | NZ  | L_GLU_195 | OE1 | 3.692 |

|      |           |     |           |     |       |
|------|-----------|-----|-----------|-----|-------|
| 4MA1 | L_LYS_149 | NZ  | L_GLU_195 | OE2 | 2.968 |
| 4MA1 | L_ARG_155 | NH1 | L_GLU_185 | OE1 | 3.117 |
| 4MA1 | L_ARG_155 | NH1 | L_GLU_185 | OE2 | 3.471 |
| 4MA1 | L_ARG_155 | NH2 | L_GLU_185 | OE2 | 3.260 |
| 4MA1 | L_LYS_183 | NZ  | L_GLU_187 | OE2 | 3.272 |
| 4MA1 | L_HIS_189 | ND1 | L_ASP_151 | OD2 | 2.941 |
| 4MA1 | L_LYS_199 | NZ  | L_ASP_110 | OD2 | 3.106 |
| 4N0Y | H_LYS_12  | NZ  | H_GLU_10  | OE1 | 3.602 |
| 4N0Y | H_HIS_35  | NE2 | H_ASP_95  | OD2 | 2.820 |
| 4N0Y | H_ARG_38  | NH1 | H_ASP_86  | OD1 | 2.849 |
| 4N0Y | H_ARG_38  | NH2 | H_ASP_86  | OD1 | 3.733 |
| 4N0Y | H_ARG_62  | NH1 | H_GLU_46  | OE1 | 3.633 |
| 4N0Y | H_ARG_62  | NH1 | H_GLU_46  | OE2 | 2.564 |
| 4N0Y | H_ARG_66  | NH1 | H_ASP_86  | OD1 | 3.587 |
| 4N0Y | H_ARG_66  | NH1 | H_ASP_86  | OD2 | 2.986 |
| 4N0Y | H_ARG_66  | NH2 | H_ASP_86  | OD1 | 2.907 |
| 4N0Y | H_ARG_66  | NH2 | H_ASP_86  | OD2 | 3.646 |
| 4N0Y | H_LYS_143 | NZ  | H_ASP_144 | OD1 | 3.625 |
| 4N0Y | H_LYS_143 | NZ  | H_ASP_144 | OD2 | 3.475 |
| 4N0Y | H_LYS_209 | NZ  | L_GLU_123 | OE1 | 2.939 |
| 4N0Y | H_LYS_210 | NZ  | H_GLU_212 | OE1 | 3.922 |
| 4N0Y | L_ARG_61  | NH2 | L_GLU_81  | OE2 | 3.404 |
| 4N0Y | L_ARG_61  | NH2 | L_ASP_82  | OD1 | 2.584 |
| 4N0Y | L_ARG_61  | NH2 | L_ASP_82  | OD2 | 3.315 |
| 4N0Y | L_LYS_110 | NZ  | L_GLU_198 | OE1 | 3.860 |
| 4N1H | A_LYS_35  | NZ  | A_ASP_32  | OD1 | 2.685 |
| 4N1H | A_ARG_61  | NH2 | A_GLU_37  | OE1 | 3.246 |
| 4N1H | A_ARG_61  | NH2 | A_GLU_37  | OE2 | 3.574 |
| 4N1H | A_LYS_73  | NZ  | A_GLU_166 | OE1 | 3.851 |
| 4N1H | A_LYS_111 | NZ  | C_GLU_202 | OE1 | 3.097 |
| 4N1H | A_LYS_111 | NZ  | C_GLU_202 | OE2 | 2.712 |
| 4N1H | A_HIS_112 | ND1 | C_GLU_205 | OE2 | 3.407 |
| 4N1H | A_HIS_112 | NE2 | C_GLU_202 | OE1 | 2.950 |
| 4N1H | A_HIS_112 | NE2 | C_GLU_205 | OE2 | 3.971 |
| 4N1H | A_ARG_128 | NH1 | C_GLU_89  | OE1 | 3.101 |
| 4N1H | A_ARG_128 | NH2 | A_ASP_124 | OD1 | 3.594 |
| 4N1H | A_ARG_128 | NH2 | A_ASP_124 | OD2 | 3.398 |
| 4N1H | A_LYS_149 | NZ  | A_GLU_163 | OE1 | 3.271 |
| 4N1H | A_LYS_150 | NZ  | B_ASP_115 | OD2 | 2.748 |
| 4N1H | A_ARG_153 | NH2 | B_ASP_106 | OD1 | 3.262 |
| 4N1H | A_ARG_153 | NH2 | B_ASP_106 | OD2 | 3.262 |
| 4N1H | A_LYS_154 | NZ  | A_GLU_151 | OE1 | 3.414 |
| 4N1H | A_LYS_154 | NZ  | A_GLU_151 | OE2 | 2.635 |
| 4N1H | A_ARG_164 | NH2 | A_ASP_179 | OD2 | 2.730 |
| 4N1H | A_ARG_184 | NH2 | A_ASP_63  | OD1 | 3.800 |
| 4N1H | A_ARG_184 | NH2 | A_ASP_63  | OD2 | 3.087 |
| 4N1H | A_ARG_204 | NH2 | A_GLU_196 | OE2 | 3.365 |
| 4N1H | A_LYS_212 | NZ  | A_GLU_230 | OE2 | 3.115 |
| 4N1H | A_ARG_213 | NH2 | A_ASP_209 | OD1 | 2.990 |
| 4N1H | A_ARG_213 | NH2 | A_ASP_209 | OD2 | 2.705 |
| 4N1H | A_ARG_222 | NH2 | A_ASP_233 | OD1 | 3.305 |
| 4N1H | A_ARG_244 | NH2 | A_ASP_276 | OD1 | 3.949 |
| 4N1H | A_ARG_244 | NH2 | A_ASP_276 | OD2 | 3.570 |
| 4N1H | A_ARG_267 | NH2 | A_ASP_41  | OD2 | 3.599 |
| 4N1H | A_LYS_284 | NZ  | A_GLU_281 | OE1 | 3.697 |
| 4N1H | A_LYS_284 | NZ  | A_GLU_281 | OE2 | 2.598 |
| 4N1H | B_ARG_38  | NH1 | B_ASP_90  | OD1 | 3.247 |
| 4N1H | B_ARG_38  | NH2 | B_GLU_46  | OE2 | 3.382 |

|      |           |     |           |     |       |
|------|-----------|-----|-----------|-----|-------|
| 4N1H | B_ARG_38  | NH2 | B_ASP_90  | OD1 | 3.865 |
| 4N1H | B_ARG_67  | NH2 | B_ASP_90  | OD1 | 2.723 |
| 4N1H | B_ARG_67  | NH2 | B_ASP_90  | OD2 | 2.861 |
| 4N1H | C_LYS_43  | NZ  | C_GLU_64  | OE2 | 2.688 |
| 4N1H | C_ARG_61  | NH2 | C_GLU_37  | OE1 | 2.807 |
| 4N1H | C_ARG_61  | NH2 | C_GLU_37  | OE2 | 3.294 |
| 4N1H | C_LYS_73  | NZ  | C_GLU_166 | OE2 | 3.581 |
| 4N1H | C_LYS_149 | NZ  | C_GLU_163 | OE1 | 3.581 |
| 4N1H | C_LYS_149 | NZ  | C_GLU_163 | OE2 | 3.310 |
| 4N1H | C_LYS_149 | NZ  | D_ASP_106 | OD1 | 3.587 |
| 4N1H | C_LYS_149 | NZ  | D_ASP_106 | OD2 | 3.735 |
| 4N1H | C_LYS_150 | NZ  | D_ASP_115 | OD1 | 3.157 |
| 4N1H | C_ARG_153 | NH2 | D_ASP_106 | OD1 | 2.772 |
| 4N1H | C_LYS_154 | NZ  | C_GLU_151 | OE1 | 3.966 |
| 4N1H | C_LYS_154 | NZ  | C_GLU_151 | OE2 | 3.090 |
| 4N1H | C_ARG_164 | NH2 | C_ASP_179 | OD2 | 2.708 |
| 4N1H | C_ARG_204 | NH2 | A_GLU_121 | OE2 | 3.425 |
| 4N1H | C_LYS_212 | NZ  | C_GLU_230 | OE2 | 3.370 |
| 4N1H | C_ARG_213 | NH2 | C_ASP_209 | OD2 | 2.965 |
| 4N1H | C_ARG_222 | NH2 | C_ASP_233 | OD1 | 3.546 |
| 4N1H | C_ARG_244 | NH2 | C_ASP_276 | OD1 | 3.134 |
| 4N1H | C_ARG_267 | NH2 | C_ASP_41  | OD2 | 2.979 |
| 4N1H | C_LYS_277 | NZ  | C_GLU_281 | OE2 | 3.711 |
| 4N1H | C_LYS_284 | NZ  | C_GLU_281 | OE1 | 3.788 |
| 4N1H | C_LYS_284 | NZ  | C_GLU_281 | OE2 | 2.689 |
| 4N1H | D_ARG_38  | NH1 | D_ASP_90  | OD1 | 2.942 |
| 4N1H | D_ARG_38  | NH2 | D_ASP_90  | OD1 | 3.612 |
| 4N1H | D_ARG_45  | NH1 | D_GLU_111 | OE1 | 3.652 |
| 4N1H | D_ARG_45  | NH1 | D_GLU_111 | OE2 | 3.043 |
| 4N1H | D_LYS_65  | NZ  | D_ASP_62  | OD1 | 2.639 |
| 4N1H | D_LYS_65  | NZ  | D_ASP_62  | OD2 | 3.577 |
| 4N1H | D_ARG_67  | NH1 | D_ASP_90  | OD1 | 2.750 |
| 4N1H | D_ARG_67  | NH1 | D_ASP_90  | OD2 | 3.293 |
| 4N1H | D_ARG_67  | NH2 | D_ASP_90  | OD1 | 3.769 |
| 4N1H | D_ARG_67  | NH2 | D_ASP_90  | OD2 | 2.732 |
| 4NBX | A_LYS_31  | NZ  | A_GLU_20  | OE1 | 3.754 |
| 4NBX | A_LYS_31  | NZ  | A_GLU_20  | OE2 | 2.760 |
| 4NBX | A_ARG_75  | NH2 | A_ASP_65  | OD1 | 3.378 |
| 4NBX | B_ARG_34  | NH1 | B_ASP_39  | OD2 | 2.728 |
| 4NBX | B_ARG_34  | NH2 | B_ASP_39  | OD2 | 3.692 |
| 4NBX | B_ARG_45  | NH1 | B_ASP_97  | OD1 | 3.021 |
| 4NBX | B_ARG_45  | NH2 | B_GLU_53  | OE2 | 3.422 |
| 4NBX | B_ARG_52  | NH2 | B_ASP_115 | OD1 | 3.103 |
| 4NBX | B_ARG_52  | NH2 | B_ASP_115 | OD2 | 3.478 |
| 4NBX | B_ARG_74  | NH1 | B_ASP_97  | OD1 | 3.854 |
| 4NBX | B_ARG_74  | NH1 | B_ASP_97  | OD2 | 2.776 |
| 4NBX | B_ARG_74  | NH2 | B_ASP_97  | OD1 | 2.873 |
| 4NBX | B_ARG_74  | NH2 | B_ASP_97  | OD2 | 3.326 |
| 4NBX | B_LYS_83  | NZ  | B_ASP_80  | OD2 | 3.208 |
| 4NBX | B_ARG_114 | NH2 | B_GLU_116 | OE1 | 3.887 |
| 4NBY | A_LYS_42  | NZ  | A_GLU_97  | OE1 | 2.799 |
| 4NBY | A_LYS_149 | NZ  | A_GLU_138 | OE1 | 2.480 |
| 4NBY | A_LYS_149 | NZ  | A_GLU_138 | OE2 | 3.061 |
| 4NBY | A_ARG_193 | NH2 | A_ASP_183 | OD1 | 3.347 |
| 4NBY | B_ARG_34  | NH1 | B_ASP_39  | OD1 | 2.677 |
| 4NBY | B_ARG_34  | NH2 | B_ASP_39  | OD1 | 3.790 |
| 4NBY | B_ARG_45  | NH1 | B_ASP_97  | OD1 | 2.996 |
| 4NBY | B_ARG_45  | NH2 | B_GLU_53  | OE2 | 3.496 |

|      |           |     |           |     |       |
|------|-----------|-----|-----------|-----|-------|
| 4NBY | B_ARG_52  | NH2 | B_ASP_115 | OD2 | 3.092 |
| 4NBY | B_ARG_74  | NH1 | B_ASP_97  | OD1 | 3.798 |
| 4NBY | B_ARG_74  | NH1 | B_ASP_97  | OD2 | 2.779 |
| 4NBY | B_ARG_74  | NH2 | B_ASP_97  | OD1 | 2.996 |
| 4NBY | B_ARG_74  | NH2 | B_ASP_97  | OD2 | 3.496 |
| 4NBY | C_ARG_34  | NH1 | C_ASP_39  | OD1 | 2.785 |
| 4NBY | C_ARG_34  | NH2 | C_ASP_39  | OD1 | 3.629 |
| 4NBY | C_ARG_45  | NH1 | C_ASP_97  | OD1 | 2.914 |
| 4NBY | C_ARG_45  | NH2 | C_GLU_53  | OE2 | 3.403 |
| 4NBY | C_ARG_45  | NH2 | C_ASP_97  | OD1 | 3.956 |
| 4NBY | C_LYS_72  | NZ  | C_ASP_69  | OD1 | 3.359 |
| 4NBY | C_ARG_74  | NH1 | C_ASP_97  | OD1 | 3.947 |
| 4NBY | C_ARG_74  | NH1 | C_ASP_97  | OD2 | 2.935 |
| 4NBY | C_ARG_74  | NH2 | C_ASP_97  | OD1 | 2.957 |
| 4NBY | C_ARG_74  | NH2 | C_ASP_97  | OD2 | 3.430 |
| 4NBY | C_LYS_83  | NZ  | C_ASP_80  | OD2 | 3.758 |
| 4NBZ | A_LYS_31  | NZ  | A_GLU_20  | OE2 | 2.992 |
| 4NBZ | A_ARG_75  | NH2 | A_ASP_65  | OD2 | 3.115 |
| 4NBZ | B_ARG_38  | NH1 | B_ASP_90  | OD1 | 2.831 |
| 4NBZ | B_ARG_38  | NH2 | B_GLU_46  | OE2 | 3.420 |
| 4NBZ | B_ARG_38  | NH2 | B_ASP_90  | OD1 | 3.761 |
| 4NBZ | B_ARG_67  | NH1 | B_ASP_90  | OD1 | 3.836 |
| 4NBZ | B_ARG_67  | NH1 | B_ASP_90  | OD2 | 2.796 |
| 4NBZ | B_ARG_67  | NH2 | B_ASP_90  | OD1 | 3.068 |
| 4NBZ | B_ARG_67  | NH2 | B_ASP_90  | OD2 | 3.514 |
| 4NBZ | B_ARG_104 | NH1 | B_ASP_107 | OD2 | 2.788 |
| 4NBZ | B_ARG_104 | NH1 | B_GLU_110 | OE2 | 2.708 |
| 4NBZ | B_ARG_104 | NH2 | B_ASP_107 | OD2 | 3.003 |
| 4NBZ | C_LYS_31  | NZ  | C_GLU_20  | OE2 | 3.958 |
| 4NBZ | C_ARG_75  | NH2 | C_ASP_65  | OD2 | 3.050 |
| 4NBZ | D_ARG_38  | NH1 | D_ASP_90  | OD1 | 2.888 |
| 4NBZ | D_ARG_38  | NH2 | D_ASP_90  | OD1 | 3.800 |
| 4NBZ | D_ARG_67  | NH1 | D_ASP_90  | OD1 | 3.887 |
| 4NBZ | D_ARG_67  | NH1 | D_ASP_90  | OD2 | 2.770 |
| 4NBZ | D_ARG_67  | NH2 | D_ASP_90  | OD1 | 3.220 |
| 4NBZ | D_ARG_67  | NH2 | D_ASP_90  | OD2 | 3.516 |
| 4NBZ | D_ARG_104 | NH1 | D_ASP_107 | OD2 | 3.039 |
| 4NBZ | D_ARG_104 | NH2 | D_ASP_107 | OD2 | 2.649 |
| 4NBZ | D_ARG_104 | NH2 | D_GLU_110 | OE2 | 2.846 |
| 4NC0 | A_LYS_20  | NZ  | A_ASP_18  | OD2 | 3.612 |
| 4NC0 | A_LYS_21  | NZ  | A_ASP_69  | OD2 | 3.571 |
| 4NC0 | A_ARG_102 | NH2 | A_ASP_92  | OD1 | 3.131 |
| 4NC0 | A_LYS_149 | NZ  | A_GLU_138 | OE1 | 3.144 |
| 4NC0 | A_LYS_149 | NZ  | A_GLU_138 | OE2 | 3.032 |
| 4NC0 | B_ARG_38  | NH1 | B_ASP_90  | OD1 | 2.856 |
| 4NC0 | B_ARG_38  | NH2 | B_GLU_46  | OE2 | 3.008 |
| 4NC0 | B_ARG_38  | NH2 | B_ASP_90  | OD1 | 3.917 |
| 4NC0 | B_ARG_67  | NH1 | B_ASP_90  | OD1 | 3.847 |
| 4NC0 | B_ARG_67  | NH1 | B_ASP_90  | OD2 | 2.731 |
| 4NC0 | B_ARG_67  | NH2 | B_ASP_90  | OD1 | 3.092 |
| 4NC0 | B_ARG_67  | NH2 | B_ASP_90  | OD2 | 3.455 |
| 4NC0 | B_ARG_104 | NH2 | B_GLU_110 | OE2 | 3.883 |
| 4NC1 | A_LYS_122 | NZ  | A_GLU_84  | OE1 | 3.788 |
| 4NC1 | A_ARG_133 | NH1 | D_ASP_115 | OD2 | 3.145 |
| 4NC1 | A_LYS_149 | NZ  | A_GLU_138 | OE2 | 3.865 |
| 4NC1 | C_ARG_34  | NH1 | C_ASP_39  | OD1 | 2.542 |
| 4NC1 | C_ARG_34  | NH2 | C_ASP_39  | OD1 | 3.596 |
| 4NC1 | C_ARG_45  | NH1 | C_ASP_97  | OD1 | 3.313 |



|      |           |     |           |     |       |
|------|-----------|-----|-----------|-----|-------|
| 4NC1 | C_ARG_45  | NH2 | C_GLU_53  | OE2 | 3.315 |
| 4NC1 | C_ARG_52  | NH2 | C_ASP_115 | OD2 | 3.087 |
| 4NC1 | C_LYS_72  | NZ  | C_ASP_69  | OD1 | 2.940 |
| 4NC1 | C_ARG_74  | NH1 | C_ASP_97  | OD2 | 3.393 |
| 4NC1 | C_ARG_74  | NH2 | C_ASP_97  | OD1 | 3.034 |
| 4NC1 | C_ARG_74  | NH2 | C_ASP_97  | OD2 | 3.018 |
| 4NC1 | C_ARG_114 | NH1 | D_ASP_115 | OD1 | 3.051 |
| 4NC1 | C_ARG_114 | NH1 | D_ASP_115 | OD2 | 3.046 |
| 4NC1 | C_ARG_114 | NH2 | D_ASP_115 | OD1 | 2.896 |
| 4NC1 | E_ARG_38  | NH1 | E_ASP_90  | OD1 | 3.159 |
| 4NC1 | E_ARG_38  | NH2 | E_GLU_46  | OE2 | 3.512 |
| 4NC1 | E_ARG_38  | NH2 | E_ASP_90  | OD1 | 3.704 |
| 4NC1 | E_ARG_67  | NH1 | E_ASP_90  | OD1 | 3.858 |
| 4NC1 | E_ARG_67  | NH1 | E_ASP_90  | OD2 | 2.770 |
| 4NC1 | E_ARG_67  | NH2 | E_ASP_90  | OD1 | 2.972 |
| 4NC1 | E_ARG_67  | NH2 | E_ASP_90  | OD2 | 3.415 |
| 4NC1 | E_LYS_87  | NZ  | E_GLU_89  | OE2 | 3.782 |
| 4NC1 | E_ARG_104 | NH1 | E_ASP_107 | OD1 | 2.648 |
| 4NC1 | E_ARG_104 | NH1 | E_GLU_110 | OE2 | 3.366 |
| 4NC1 | E_ARG_104 | NH2 | E_ASP_107 | OD1 | 3.918 |
| 4NC1 | B_HIS_63  | ND1 | B_GLU_84  | OE1 | 3.153 |
| 4NC1 | B_HIS_63  | ND1 | B_GLU_84  | OE2 | 3.732 |
| 4NC1 | B_ARG_102 | NH1 | B_ASP_92  | OD1 | 3.669 |
| 4NC1 | B_ARG_102 | NH1 | B_ASP_92  | OD2 | 3.606 |
| 4NC1 | B_ARG_102 | NH2 | B_ASP_92  | OD1 | 3.288 |
| 4NC1 | B_ARG_133 | NH2 | C_ASP_115 | OD2 | 3.404 |
| 4NC1 | B_LYS_149 | NZ  | B_GLU_138 | OE1 | 3.187 |
| 4NC1 | B_LYS_149 | NZ  | B_GLU_138 | OE2 | 3.383 |
| 4NC1 | B_LYS_154 | NZ  | B_ASP_152 | OD2 | 3.007 |
| 4NC1 | D_ARG_34  | NH1 | D_ASP_39  | OD1 | 2.692 |
| 4NC1 | D_ARG_34  | NH2 | D_ASP_39  | OD1 | 3.446 |
| 4NC1 | D_ARG_45  | NH1 | D_ASP_97  | OD1 | 3.007 |
| 4NC1 | D_ARG_45  | NH2 | D_GLU_53  | OE2 | 3.250 |
| 4NC1 | D_ARG_52  | NH2 | D_ASP_115 | OD2 | 2.993 |
| 4NC1 | D_ARG_63  | NH1 | B_ASP_112 | OD2 | 3.125 |
| 4NC1 | D_LYS_72  | NZ  | D_ASP_69  | OD1 | 2.783 |
| 4NC1 | D_ARG_74  | NH1 | D_ASP_97  | OD1 | 3.561 |
| 4NC1 | D_ARG_74  | NH1 | D_ASP_97  | OD2 | 2.537 |
| 4NC1 | D_ARG_74  | NH2 | D_ASP_97  | OD1 | 2.939 |
| 4NC1 | D_ARG_74  | NH2 | D_ASP_97  | OD2 | 3.487 |
| 4NC1 | D_ARG_114 | NH1 | C_ASP_115 | OD1 | 2.908 |
| 4NC1 | D_ARG_114 | NH2 | C_ASP_115 | OD1 | 2.942 |
| 4NC1 | F_ARG_38  | NH1 | F_ASP_90  | OD1 | 2.906 |
| 4NC1 | F_ARG_38  | NH2 | F_GLU_46  | OE2 | 3.353 |
| 4NC1 | F_LYS_65  | NZ  | F_ASP_62  | OD1 | 3.606 |
| 4NC1 | F_ARG_67  | NH1 | F_ASP_90  | OD1 | 3.956 |
| 4NC1 | F_ARG_67  | NH1 | F_ASP_90  | OD2 | 2.763 |
| 4NC1 | F_ARG_67  | NH2 | F_ASP_90  | OD1 | 2.876 |
| 4NC1 | F_ARG_67  | NH2 | F_ASP_90  | OD2 | 3.144 |
| 4NC1 | F_ARG_104 | NH2 | F_ASP_107 | OD1 | 2.987 |
| 4NC2 | A_LYS_41  | NZ  | A_GLU_78  | OE1 | 2.781 |
| 4NC2 | A_LYS_41  | NZ  | A_GLU_78  | OE2 | 3.286 |
| 4NC2 | A_HIS_67  | ND1 | A_GLU_76  | OE1 | 3.371 |
| 4NC2 | A_HIS_67  | ND1 | A_GLU_76  | OE2 | 3.155 |
| 4NC2 | A_ARG_92  | NH2 | A_ASP_87  | OD1 | 3.549 |
| 4NC2 | A_ARG_92  | NH2 | A_ASP_87  | OD2 | 3.725 |
| 4NC2 | B_ARG_38  | NH1 | B_ASP_89  | OD1 | 2.682 |
| 4NC2 | B_ARG_38  | NH2 | B_GLU_46  | OE2 | 3.122 |

|      |           |     |           |     |       |
|------|-----------|-----|-----------|-----|-------|
| 4NC2 | B_ARG_38  | NH2 | B_ASP_89  | OD1 | 3.705 |
| 4NC2 | B_ARG_66  | NH1 | B_ASP_89  | OD2 | 2.844 |
| 4NC2 | B_ARG_66  | NH2 | B_ASP_89  | OD1 | 3.155 |
| 4NC2 | B_ARG_66  | NH2 | B_ASP_89  | OD2 | 3.294 |
| 4NC2 | B_LYS_86  | NZ  | B_GLU_88  | OE1 | 3.812 |
| 4NC2 | B_ARG_104 | NH2 | B_ASP_102 | OD1 | 3.825 |
| 4NC2 | B_ARG_104 | NH2 | B_ASP_102 | OD2 | 2.662 |
| 4NGH | L_ARG_54  | NH2 | L_ASP_60  | OD1 | 3.463 |
| 4NGH | L_ARG_61  | NH1 | L_GLU_79  | OE1 | 3.684 |
| 4NGH | L_ARG_61  | NH2 | L_GLU_81  | OE2 | 3.634 |
| 4NGH | L_ARG_61  | NH2 | L_ASP_82  | OD1 | 2.877 |
| 4NGH | L_ARG_61  | NH2 | L_ASP_82  | OD2 | 3.482 |
| 4NGH | L_LYS_188 | NZ  | L_ASP_185 | OD2 | 3.961 |
| 4NGH | L_HIS_189 | ND1 | L_ASP_151 | OD2 | 3.057 |
| 4NGH | H_ARG_38  | NH1 | H_ASP_86  | OD1 | 3.532 |
| 4NGH | H_ARG_38  | NH2 | H_ASP_86  | OD1 | 2.824 |
| 4NGH | H_ARG_62  | NH2 | H_GLU_46  | OE1 | 2.983 |
| 4NGH | H_ARG_66  | NH1 | H_ASP_86  | OD1 | 3.419 |
| 4NGH | H_ARG_66  | NH1 | H_ASP_86  | OD2 | 2.324 |
| 4NGH | H_ARG_66  | NH2 | H_ASP_86  | OD1 | 3.466 |
| 4NGH | H_ARG_66  | NH2 | H_ASP_86  | OD2 | 3.699 |
| 4NGH | H_LYS_145 | NZ  | H_ASP_146 | OD1 | 3.519 |
| 4NGH | H_LYS_145 | NZ  | H_ASP_146 | OD2 | 3.560 |
| 4NGH | H_LYS_228 | NZ  | L_ASP_122 | OD1 | 3.887 |
| 4NHC | L_ARG_24  | NH1 | L_ASP_70  | OD2 | 3.488 |
| 4NHC | L_ARG_24  | NH2 | L_ASP_70  | OD1 | 2.813 |
| 4NHC | L_ARG_24  | NH2 | L_ASP_70  | OD2 | 3.633 |
| 4NHC | L_ARG_61  | NH1 | L_GLU_81  | OE2 | 3.514 |
| 4NHC | L_ARG_61  | NH2 | L_GLU_81  | OE2 | 3.347 |
| 4NHC | L_ARG_61  | NH2 | L_ASP_82  | OD1 | 2.882 |
| 4NHC | L_ARG_61  | NH2 | L_ASP_82  | OD2 | 3.443 |
| 4NHC | L_LYS_103 | NZ  | L_GLU_165 | OE1 | 3.841 |
| 4NHC | L_HIS_189 | ND1 | L_ASP_151 | OD2 | 3.138 |
| 4NHC | H_ARG_38  | NH1 | H_GLU_46  | OE2 | 3.463 |
| 4NHC | H_ARG_38  | NH1 | H_ASP_86  | OD1 | 3.758 |
| 4NHC | H_ARG_38  | NH2 | H_ASP_86  | OD1 | 2.917 |
| 4NHC | H_ARG_62  | NH1 | H_GLU_46  | OE1 | 2.931 |
| 4NHC | H_ARG_62  | NH1 | H_GLU_46  | OE2 | 3.111 |
| 4NHC | H_ARG_66  | NH1 | H_ASP_86  | OD1 | 2.881 |
| 4NHC | H_ARG_66  | NH1 | H_ASP_86  | OD2 | 2.433 |
| 4NHC | H_LYS_145 | NZ  | H_ASP_146 | OD1 | 3.579 |
| 4NHC | H_LYS_145 | NZ  | H_ASP_146 | OD2 | 3.804 |
| 4NHC | H_LYS_222 | NZ  | H_GLU_226 | OE1 | 3.793 |
| 4NIK | A_ARG_35  | NH2 | A_ASP_29  | OD2 | 3.085 |
| 4NIK | A_ARG_41  | NH2 | A_ASP_70  | OD2 | 3.597 |
| 4NIK | A_ARG_145 | NH1 | A_ASP_136 | OD2 | 2.773 |
| 4NIK | A_LYS_153 | NZ  | B_ASP_104 | OD1 | 3.730 |
| 4NIK | A_LYS_153 | NZ  | B_ASP_104 | OD2 | 2.794 |
| 4NIK | A_LYS_153 | NZ  | B_GLU_186 | OE2 | 2.639 |
| 4NIK | A_LYS_189 | NZ  | A_GLU_186 | OE2 | 3.854 |
| 4NIK | A_LYS_206 | NZ  | A_GLU_204 | OE1 | 3.160 |
| 4NIK | A_LYS_213 | NZ  | A_ASP_181 | OD1 | 3.738 |
| 4NIK | A_LYS_221 | NZ  | A_GLU_225 | OE1 | 3.992 |
| 4NIK | B_ARG_40  | NH1 | B_ASP_92  | OD1 | 3.000 |
| 4NIK | B_ARG_40  | NH2 | B_GLU_48  | OE1 | 3.129 |
| 4NIK | B_ARG_40  | NH2 | B_ASP_92  | OD1 | 3.930 |
| 4NIK | B_ARG_69  | NH1 | B_ASP_92  | OD2 | 3.600 |
| 4NIK | B_ARG_69  | NH2 | B_ASP_92  | OD1 | 3.146 |

|      |           |     |           |     |       |
|------|-----------|-----|-----------|-----|-------|
| 4NIK | B_ARG_69  | NH2 | B_ASP_92  | OD2 | 2.929 |
| 4NIK | B_ARG_100 | NH2 | B_ASP_107 | OD2 | 2.770 |
| 4NIK | B_ARG_197 | NH1 | B_ASP_218 | OD1 | 2.833 |
| 4NIK | B_ARG_197 | NH1 | B_ASP_218 | OD2 | 3.035 |
| 4NIK | B_LYS_202 | NZ  | B_ASP_187 | OD1 | 2.979 |
| 4NIK | B_LYS_202 | NZ  | B_ASP_187 | OD2 | 3.172 |
| 4NZR | H_ARG_38  | NH1 | H_ASP_86  | OD1 | 2.731 |
| 4NZR | H_ARG_38  | NH2 | H_GLU_46  | OE1 | 2.782 |
| 4NZR | H_ARG_38  | NH2 | H_ASP_86  | OD1 | 3.585 |
| 4NZR | H_LYS_43  | NZ  | H_GLU_46  | OE1 | 3.101 |
| 4NZR | H_HIS_52  | NE2 | H_ASP_31G | OD1 | 2.604 |
| 4NZR | H_LYS_60  | NZ  | H_GLU_46  | OE2 | 3.047 |
| 4NZR | H_LYS_60  | NZ  | L_GLU_1   | OE1 | 3.647 |
| 4NZR | H_ARG_66  | NH1 | H_ASP_86  | OD1 | 3.620 |
| 4NZR | H_ARG_66  | NH1 | H_ASP_86  | OD2 | 2.979 |
| 4NZR | H_ARG_66  | NH2 | H_ASP_86  | OD1 | 3.027 |
| 4NZR | H_ARG_66  | NH2 | H_ASP_86  | OD2 | 3.661 |
| 4NZR | H_ARG_94  | NH2 | H_ASP_101 | OD1 | 3.578 |
| 4NZR | H_ARG_94  | NH2 | H_ASP_101 | OD2 | 2.728 |
| 4NZR | H_ARG_96  | NH2 | H_ASP_101 | OD2 | 2.950 |
| 4NZR | H_HIS_97  | NE2 | L_GLU_50  | OE2 | 3.635 |
| 4NZR | H_HIS_98  | NE2 | L_GLU_50  | OE1 | 2.875 |
| 4NZR | H_HIS_172 | NE2 | L_ASP_167 | OD2 | 3.398 |
| 4NZR | H_LYS_221 | NZ  | L_GLU_123 | OE2 | 2.989 |
| 4NZR | H_ARG_222 | NH2 | H_GLU_226 | OE1 | 3.956 |
| 4NZR | H_ARG_222 | NH2 | H_GLU_226 | OE2 | 3.389 |
| 4NZR | L_ARG_24  | NH2 | L_GLU_70  | OE1 | 3.307 |
| 4NZR | L_ARG_61  | NH1 | L_ASP_82  | OD1 | 3.803 |
| 4NZR | L_ARG_61  | NH1 | L_ASP_82  | OD2 | 2.705 |
| 4NZR | L_ARG_61  | NH2 | L_ASP_82  | OD1 | 2.855 |
| 4NZR | L_ARG_61  | NH2 | L_ASP_82  | OD2 | 3.226 |
| 4NZR | L_LYS_103 | NZ  | L_GLU_165 | OE1 | 3.228 |
| 4NZR | L_LYS_183 | NZ  | L_GLU_187 | OE1 | 3.271 |
| 4NZR | L_LYS_183 | NZ  | L_GLU_187 | OE2 | 3.181 |
| 4NZR | L_LYS_188 | NZ  | L_ASP_185 | OD1 | 3.734 |
| 4NZR | L_HIS_189 | ND1 | L_ASP_151 | OD2 | 2.848 |
| 4NZR | M_LYS_114 | NZ  | L_GLU_17  | OE1 | 3.119 |
| 4NZR | M_LYS_130 | NZ  | M_ASP_87  | OD2 | 3.899 |
| 4NZR | M_LYS_141 | NZ  | M_GLU_124 | OE1 | 3.708 |
| 4NZR | M_LYS_141 | NZ  | M_GLU_124 | OE2 | 2.958 |
| 4NZR | M_ARG_167 | NH2 | M_ASP_339 | OD1 | 2.843 |
| 4NZR | M_LYS_218 | NZ  | M_GLU_261 | OE1 | 3.674 |
| 4NZR | M_LYS_218 | NZ  | M_GLU_261 | OE2 | 3.033 |
| 4NZR | M_LYS_242 | NZ  | M_GLU_261 | OE1 | 2.962 |
| 4NZR | M_LYS_249 | NZ  | M_ASP_250 | OD1 | 2.926 |
| 4NZR | M_LYS_249 | NZ  | M_ASP_250 | OD2 | 3.476 |
| 4NZR | M_ARG_269 | NH1 | M_ASP_217 | OD2 | 2.818 |
| 4NZR | M_ARG_269 | NH2 | M_ASP_217 | OD2 | 3.169 |
| 4NZR | M_LYS_289 | NZ  | M_GLU_311 | OE1 | 2.888 |
| 4NZR | M_LYS_289 | NZ  | M_GLU_313 | OE1 | 3.192 |
| 4NZR | M_LYS_289 | NZ  | M_GLU_313 | OE2 | 2.704 |
| 4NZR | M_LYS_370 | NZ  | M_GLU_420 | OE1 | 2.609 |
| 4NZR | M_ARG_380 | NH1 | M_GLU_383 | OE1 | 2.654 |
| 4NZR | M_ARG_380 | NH1 | M_GLU_383 | OE2 | 3.072 |
| 4NZR | M_ARG_381 | NH2 | M_GLU_162 | OE1 | 2.997 |
| 4NZR | M_ARG_384 | NH2 | L_GLU_81  | OE1 | 3.444 |
| 4NZR | M_ARG_384 | NH2 | L_GLU_81  | OE2 | 3.239 |
| 4NZR | M_LYS_397 | NZ  | M_ASP_396 | OD1 | 2.896 |

|      |           |     |           |     |       |
|------|-----------|-----|-----------|-----|-------|
| 4NZR | M_LYS_397 | NZ  | M_ASP_396 | OD2 | 3.739 |
| 4NZR | M_ARG_416 | NH1 | M_GLU_464 | OE1 | 3.487 |
| 4NZR | M_ARG_416 | NH1 | M_GLU_464 | OE2 | 2.684 |
| 4NZR | M_ARG_416 | NH2 | M_ASP_412 | OD1 | 3.736 |
| 4NZR | M_ARG_416 | NH2 | M_GLU_464 | OE1 | 2.883 |
| 4NZR | M_ARG_416 | NH2 | M_GLU_464 | OE2 | 3.634 |
| 4NZR | M_LYS_419 | NZ  | M_GLU_451 | OE2 | 3.987 |
| 4NZR | M_ARG_430 | NH1 | M_ASP_411 | OD1 | 2.838 |
| 4NZR | M_ARG_430 | NH1 | M_ASP_411 | OD2 | 3.179 |
| 4NZR | M_ARG_430 | NH2 | M_ASP_408 | OD1 | 3.554 |
| 4NZR | M_ARG_430 | NH2 | M_ASP_411 | OD1 | 3.944 |
| 4NZR | M_ARG_430 | NH2 | M_ASP_411 | OD2 | 2.828 |
| 4NZR | M_ARG_438 | NH2 | M_ASP_396 | OD2 | 3.613 |
| 4NZR | M_ARG_454 | NH1 | M_ASP_412 | OD1 | 2.790 |
| 4NZR | M_ARG_454 | NH2 | M_ASP_412 | OD1 | 3.325 |
| 4NZR | M_ARG_457 | NH1 | H_ASP_31E | OD1 | 2.958 |
| 4NZR | M_ARG_457 | NH1 | H_ASP_31E | OD2 | 3.096 |
| 4NZR | M_ARG_457 | NH2 | H_ASP_31E | OD1 | 3.746 |
| 4NZR | M_ARG_457 | NH2 | H_ASP_31E | OD2 | 2.554 |
| 4NZT | M_ARG_99  | NH1 | M_GLU_162 | OE1 | 3.515 |
| 4NZT | M_ARG_99  | NH1 | M_GLU_162 | OE2 | 2.816 |
| 4NZT | M_ARG_99  | NH2 | M_GLU_162 | OE1 | 2.782 |
| 4NZT | M_ARG_99  | NH2 | M_GLU_162 | OE2 | 3.647 |
| 4NZT | M_ARG_99  | NH2 | L_ASP_60  | OD1 | 3.096 |
| 4NZT | M_LYS_130 | NZ  | M_GLU_85  | OE2 | 3.790 |
| 4NZT | M_LYS_141 | NZ  | M_GLU_124 | OE1 | 3.986 |
| 4NZT | M_LYS_141 | NZ  | M_GLU_124 | OE2 | 3.262 |
| 4NZT | M_ARG_167 | NH2 | M_ASP_339 | OD1 | 3.102 |
| 4NZT | M_ARG_185 | NH2 | M_GLU_313 | OE2 | 3.948 |
| 4NZT | M_ARG_192 | NH2 | M_ASP_189 | OD1 | 3.955 |
| 4NZT | M_LYS_218 | NZ  | M_GLU_261 | OE1 | 3.101 |
| 4NZT | M_LYS_218 | NZ  | M_GLU_261 | OE2 | 2.614 |
| 4NZT | M_LYS_242 | NZ  | M_GLU_261 | OE1 | 2.807 |
| 4NZT | M_LYS_249 | NZ  | M_ASP_250 | OD1 | 3.040 |
| 4NZT | M_LYS_249 | NZ  | M_ASP_250 | OD2 | 3.872 |
| 4NZT | M_LYS_255 | NZ  | M_ASP_259 | OD1 | 3.504 |
| 4NZT | M_LYS_255 | NZ  | M_ASP_259 | OD2 | 2.413 |
| 4NZT | M_LYS_289 | NZ  | M_GLU_311 | OE1 | 2.933 |
| 4NZT | M_LYS_289 | NZ  | M_GLU_313 | OE1 | 3.576 |
| 4NZT | M_LYS_289 | NZ  | M_GLU_313 | OE2 | 2.891 |
| 4NZT | M_LYS_370 | NZ  | M_GLU_420 | OE1 | 2.990 |
| 4NZT | M_ARG_380 | NH1 | M_GLU_383 | OE1 | 2.676 |
| 4NZT | M_ARG_380 | NH1 | M_GLU_383 | OE2 | 2.970 |
| 4NZT | M_ARG_381 | NH2 | M_GLU_162 | OE1 | 3.002 |
| 4NZT | M_ARG_384 | NH2 | L_GLU_81  | OE1 | 3.193 |
| 4NZT | M_ARG_384 | NH2 | L_GLU_81  | OE2 | 3.684 |
| 4NZT | M_LYS_397 | NZ  | M_ASP_396 | OD1 | 2.602 |
| 4NZT | M_LYS_397 | NZ  | M_ASP_396 | OD2 | 3.737 |
| 4NZT | M_ARG_416 | NH2 | M_ASP_412 | OD2 | 3.317 |
| 4NZT | M_LYS_419 | NZ  | M_GLU_451 | OE2 | 3.820 |
| 4NZT | M_ARG_430 | NH1 | M_ASP_408 | OD1 | 3.883 |
| 4NZT | M_ARG_430 | NH2 | M_ASP_408 | OD1 | 2.461 |
| 4NZT | M_ARG_430 | NH2 | M_ASP_411 | OD2 | 3.064 |
| 4NZT | M_ARG_438 | NH1 | M_GLU_426 | OE1 | 2.584 |
| 4NZT | M_ARG_438 | NH2 | M_GLU_426 | OE1 | 3.586 |
| 4NZT | M_ARG_438 | NH2 | M_GLU_427 | OE1 | 3.398 |
| 4NZT | M_ARG_454 | NH2 | M_ASP_408 | OD1 | 3.446 |
| 4NZT | M_ARG_454 | NH2 | M_ASP_411 | OD2 | 3.646 |

|      |            |     |           |     |       |
|------|------------|-----|-----------|-----|-------|
| 4NZT | H.LYS.19   | NZ  | H.GLU.81  | OE1 | 3.595 |
| 4NZT | H.ARG.38   | NH1 | H.ASP.86  | OD1 | 2.816 |
| 4NZT | H.ARG.38   | NH2 | H.ASP.86  | OD1 | 3.377 |
| 4NZT | H.LYS.62   | NZ  | H.ASP.46  | OD1 | 3.175 |
| 4NZT | H.LYS.62   | NZ  | H.ASP.46  | OD2 | 3.992 |
| 4NZT | H.ARG.66   | NH1 | H.ASP.86  | OD2 | 3.140 |
| 4NZT | H.ARG.66   | NH2 | H.ASP.86  | OD1 | 2.815 |
| 4NZT | H.ARG.66   | NH2 | H.ASP.86  | OD2 | 3.193 |
| 4NZT | H.LYS.145  | NZ  | L.GLU.124 | OE2 | 2.541 |
| 4NZT | H.LYS.218  | NZ  | H.ASP.220 | OD2 | 3.664 |
| 4NZT | L.ARG.31   | NH1 | L.ASP.93  | OD1 | 3.320 |
| 4NZT | L.ARG.31   | NH1 | L.ASP.93  | OD2 | 2.823 |
| 4NZT | L.ARG.61   | NH1 | L.ASP.82  | OD1 | 3.965 |
| 4NZT | L.ARG.61   | NH1 | L.ASP.82  | OD2 | 2.961 |
| 4NZT | L.ARG.61   | NH2 | L.ASP.82  | OD1 | 2.857 |
| 4NZT | L.ARG.61   | NH2 | L.ASP.82  | OD2 | 3.259 |
| 4NZT | L.LYS.149  | NZ  | L.GLU.206 | OE1 | 3.814 |
| 4NZT | L.LYS.166  | NZ  | L.GLU.83  | OE2 | 3.236 |
| 4NZU | L.ARG.61   | NH2 | L.GLU.81  | OE2 | 3.339 |
| 4NZU | L.ARG.61   | NH2 | L.ASP.82  | OD1 | 2.846 |
| 4NZU | L.ARG.61   | NH2 | L.ASP.82  | OD2 | 3.553 |
| 4NZU | L.HIS.90   | NE2 | L.ASP.93  | OD1 | 3.539 |
| 4NZU | L.LYS.149  | NZ  | L.GLU.195 | OE1 | 2.806 |
| 4NZU | L.LYS.169  | NZ  | L.ASP.170 | OD2 | 3.815 |
| 4NZU | L.HIS.189  | ND1 | L.ASP.151 | OD2 | 3.001 |
| 4NZU | L.HIS.189  | NE2 | L.ASP.185 | OD1 | 3.093 |
| 4NZU | L.ARG.211  | NH1 | L.GLU.187 | OE1 | 3.760 |
| 4NZU | H.ARG.38   | NH1 | H.ASP.86  | OD1 | 2.872 |
| 4NZU | H.ARG.38   | NH2 | H.GLU.46  | OE2 | 3.007 |
| 4NZU | H.ARG.38   | NH2 | H.ASP.86  | OD1 | 3.843 |
| 4NZU | H.ARG.66   | NH1 | H.ASP.86  | OD1 | 3.832 |
| 4NZU | H.ARG.66   | NH1 | H.ASP.86  | OD2 | 2.798 |
| 4NZU | H.ARG.66   | NH2 | H.ASP.86  | OD1 | 3.266 |
| 4NZU | H.ARG.66   | NH2 | H.ASP.86  | OD2 | 3.679 |
| 4NZU | H.ARG.94   | NH2 | H.ASP.97  | OD1 | 2.847 |
| 4NZU | H.LYS.100E | NZ  | L.ASP.50  | OD1 | 3.991 |
| 4NZU | H.LYS.100E | NZ  | L.ASP.50  | OD2 | 2.752 |
| 4NZU | H.LYS.145  | NZ  | H.ASP.146 | OD1 | 3.213 |
| 4NZU | H.LYS.145  | NZ  | H.ASP.146 | OD2 | 3.743 |
| 4NZU | H.LYS.218  | NZ  | H.ASP.220 | OD1 | 3.972 |
| 4NZU | H.LYS.218  | NZ  | H.ASP.220 | OD2 | 3.728 |
| 4NZU | H.LYS.221  | NZ  | L.GLU.123 | OE2 | 2.899 |
| 4O5L | L.ARG.61   | NH1 | L.ASP.82  | OD1 | 3.592 |
| 4O5L | L.ARG.61   | NH1 | L.ASP.82  | OD2 | 2.774 |
| 4O5L | L.ARG.61   | NH2 | L.ASP.82  | OD1 | 2.915 |
| 4O5L | L.ARG.61   | NH2 | L.ASP.82  | OD2 | 3.469 |
| 4O5L | H.LYS.12   | NZ  | H.GLU.10  | OE2 | 3.928 |
| 4O5L | H.ARG.38   | NH1 | H.ASP.86  | OD1 | 2.874 |
| 4O5L | H.ARG.38   | NH2 | H.GLU.46  | OE1 | 3.001 |
| 4O5L | H.ARG.38   | NH2 | H.ASP.86  | OD1 | 3.839 |
| 4O5L | H.LYS.62   | NZ  | H.GLU.46  | OE1 | 3.697 |
| 4O5L | H.LYS.62   | NZ  | H.GLU.46  | OE2 | 2.608 |
| 4O5L | H.ARG.66   | NH1 | H.ASP.86  | OD1 | 3.710 |
| 4O5L | H.ARG.66   | NH1 | H.ASP.86  | OD2 | 2.867 |
| 4O5L | H.ARG.66   | NH2 | H.ASP.86  | OD1 | 2.964 |
| 4O5L | H.ARG.66   | NH2 | H.ASP.86  | OD2 | 3.444 |
| 4O5L | H.LYS.100I | NZ  | L.ASP.93  | OD1 | 2.723 |
| 4O5L | H.LYS.100I | NZ  | L.ASP.93  | OD2 | 3.455 |

|      |           |     |            |     |       |
|------|-----------|-----|------------|-----|-------|
| 4O5L | H.LYS_210 | NZ  | H.GLU_212  | OE2 | 3.158 |
| 4OLU | G.HIS_66  | ND1 | G.GLU_64   | OE1 | 3.959 |
| 4OLU | G.HIS_66  | ND1 | G.GLU_64   | OE2 | 2.779 |
| 4OLU | G.LYS_97  | NZ  | G.GLU_275  | OE2 | 3.740 |
| 4OLU | G.LYS_97  | NZ  | H.ASP_100B | OD1 | 3.513 |
| 4OLU | G.LYS_97  | NZ  | H.ASP_100B | OD2 | 2.385 |
| 4OLU | G.LYS_207 | NZ  | G.GLU_381  | OE1 | 3.549 |
| 4OLU | G.LYS_207 | NZ  | G.GLU_381  | OE2 | 2.955 |
| 4OLU | G.HIS_249 | NE2 | G.GLU_482  | OE1 | 2.876 |
| 4OLU | G.LYS_282 | NZ  | G.GLU_275  | OE1 | 3.870 |
| 4OLU | G.LYS_343 | NZ  | G.GLU_347  | OE2 | 2.649 |
| 4OLU | G.LYS_348 | NZ  | G.GLU_269  | OE2 | 3.261 |
| 4OLU | G.LYS_350 | NZ  | G.GLU_347  | OE2 | 3.965 |
| 4OLU | G.LYS_357 | NZ  | G.GLU_466  | OE2 | 3.506 |
| 4OLU | G.ARG_379 | NH2 | G.ASP_211  | OD1 | 3.811 |
| 4OLU | G.ARG_456 | NH1 | G.GLU_466  | OE1 | 3.682 |
| 4OLU | G.ARG_469 | NH2 | G.ASP_457  | OD1 | 3.894 |
| 4OLU | G.ARG_469 | NH2 | G.ASP_457  | OD2 | 2.873 |
| 4OLU | G.LYS_476 | NZ  | G.GLU_102  | OE1 | 2.812 |
| 4OLU | G.LYS_476 | NZ  | G.GLU_102  | OE2 | 3.887 |
| 4OLU | G.ARG_480 | NH1 | G.ASP_477  | OD1 | 2.835 |
| 4OLU | G.LYS_487 | NZ  | G.ASP_47   | OD1 | 2.977 |
| 4OLU | G.LYS_487 | NZ  | G.ASP_47   | OD2 | 3.556 |
| 4OLU | G.LYS_487 | NZ  | G.GLU_91   | OE1 | 2.775 |
| 4OLU | H.ARG_19  | NH2 | H.GLU_81   | OE1 | 3.190 |
| 4OLU | H.ARG_38  | NH1 | H.ASP_86   | OD1 | 2.943 |
| 4OLU | H.ARG_38  | NH2 | H.GLU_46   | OE1 | 2.821 |
| 4OLU | H.ARG_38  | NH2 | H.GLU_46   | OE2 | 3.765 |
| 4OLU | H.ARG_38  | NH2 | H.ASP_86   | OD1 | 3.966 |
| 4OLU | H.ARG_61  | NH1 | G.GLU_466  | OE1 | 2.734 |
| 4OLU | H.ARG_66  | NH2 | H.ASP_86   | OD1 | 3.375 |
| 4OLU | H.ARG_66  | NH2 | H.ASP_86   | OD2 | 3.135 |
| 4OLU | H.ARG_71  | NH1 | G.ASP_368  | OD1 | 3.753 |
| 4OLU | H.ARG_71  | NH1 | G.ASP_368  | OD2 | 2.863 |
| 4OLU | H.ARG_71  | NH2 | G.ASP_368  | OD1 | 3.092 |
| 4OLU | H.ARG_71  | NH2 | G.ASP_368  | OD2 | 3.692 |
| 4OLU | H.ARG_82A | NH1 | H.GLU_81   | OE2 | 3.267 |
| 4OLU | H.HIS_102 | NE2 | H.GLU_101  | OE1 | 3.618 |
| 4OLU | H.LYS_143 | NZ  | H.ASP_144  | OD1 | 3.446 |
| 4OLU | H.LYS_209 | NZ  | L.GLU_125  | OE1 | 3.927 |
| 4OLU | H.LYS_209 | NZ  | L.GLU_125  | OE2 | 3.166 |
| 4OLU | H.LYS_210 | NZ  | H.GLU_212  | OE1 | 3.680 |
| 4OLU | L.ARG_24  | NH1 | L.ASP_70   | OD1 | 3.438 |
| 4OLU | L.ARG_24  | NH1 | L.ASP_70   | OD2 | 3.910 |
| 4OLU | L.ARG_24  | NH2 | L.ASP_70   | OD1 | 3.381 |
| 4OLU | L.ARG_24  | NH2 | L.ASP_70   | OD2 | 3.367 |
| 4OLU | L.ARG_61  | NH1 | L.ASP_82   | OD1 | 3.876 |
| 4OLU | L.ARG_61  | NH1 | L.ASP_82   | OD2 | 2.552 |
| 4OLU | L.ARG_61  | NH2 | L.GLU_79   | OE1 | 3.652 |
| 4OLU | L.ARG_61  | NH2 | L.GLU_79   | OE2 | 3.968 |
| 4OLU | L.ARG_61  | NH2 | L.ASP_82   | OD1 | 3.189 |
| 4OLU | L.ARG_61  | NH2 | L.ASP_82   | OD2 | 3.276 |
| 4OLU | L.LYS_109 | NZ  | L.GLU_17   | OE2 | 3.752 |
| 4OLU | L.LYS_151 | NZ  | L.GLU_197  | OE1 | 3.524 |
| 4OLV | G.HIS_66  | ND1 | G.GLU_64   | OE1 | 3.978 |
| 4OLV | G.HIS_66  | ND1 | G.GLU_64   | OE2 | 2.916 |
| 4OLV | G.LYS_97  | NZ  | G.GLU_275  | OE1 | 3.722 |
| 4OLV | G.LYS_97  | NZ  | G.GLU_275  | OE2 | 2.587 |

|      |           |     |            |     |       |
|------|-----------|-----|------------|-----|-------|
| 4OLV | G.LYS_97  | NZ  | H.ASP_100B | OD1 | 3.067 |
| 4OLV | G.LYS_97  | NZ  | H.ASP_100B | OD2 | 2.942 |
| 4OLV | G.LYS_207 | NZ  | G.GLU_381  | OE1 | 3.681 |
| 4OLV | G.LYS_207 | NZ  | G.GLU_381  | OE2 | 2.814 |
| 4OLV | G.HIS_249 | NE2 | G.GLU_482  | OE1 | 2.670 |
| 4OLV | G.LYS_282 | NZ  | G.GLU_275  | OE1 | 3.553 |
| 4OLV | G.LYS_343 | NZ  | G.GLU_347  | OE2 | 2.439 |
| 4OLV | G.LYS_348 | NZ  | G.GLU_269  | OE2 | 3.240 |
| 4OLV | G.LYS_357 | NZ  | G.GLU_466  | OE2 | 3.394 |
| 4OLV | G.ARG_456 | NH1 | G.GLU_466  | OE1 | 3.770 |
| 4OLV | G.ARG_469 | NH2 | G.ASP_457  | OD2 | 3.028 |
| 4OLV | G.LYS_476 | NZ  | G.GLU_102  | OE1 | 2.934 |
| 4OLV | G.LYS_476 | NZ  | G.GLU_102  | OE2 | 3.534 |
| 4OLV | G.ARG_480 | NH1 | G.ASP_477  | OD1 | 2.701 |
| 4OLV | G.ARG_480 | NH2 | G.GLU_102  | OE2 | 3.998 |
| 4OLV | G.LYS_487 | NZ  | G.ASP_47   | OD1 | 3.089 |
| 4OLV | G.LYS_487 | NZ  | G.ASP_47   | OD2 | 3.641 |
| 4OLV | G.LYS_487 | NZ  | G.GLU_91   | OE1 | 2.653 |
| 4OLV | H.ARG_19  | NH2 | H.GLU_81   | OE1 | 3.551 |
| 4OLV | H.ARG_38  | NH1 | H.ASP_86   | OD1 | 2.917 |
| 4OLV | H.ARG_38  | NH2 | H.GLU_46   | OE1 | 2.756 |
| 4OLV | H.ARG_38  | NH2 | H.GLU_46   | OE2 | 3.739 |
| 4OLV | H.ARG_38  | NH2 | H.ASP_86   | OD1 | 3.920 |
| 4OLV | H.ARG_61  | NH1 | G.GLU_466  | OE1 | 2.769 |
| 4OLV | H.ARG_66  | NH1 | H.ASP_86   | OD1 | 3.961 |
| 4OLV | H.ARG_66  | NH2 | H.ASP_86   | OD1 | 3.054 |
| 4OLV | H.ARG_66  | NH2 | H.ASP_86   | OD2 | 2.735 |
| 4OLV | H.ARG_71  | NH1 | G.ASP_368  | OD1 | 3.700 |
| 4OLV | H.ARG_71  | NH1 | G.ASP_368  | OD2 | 2.815 |
| 4OLV | H.ARG_71  | NH2 | G.ASP_368  | OD1 | 3.136 |
| 4OLV | H.ARG_71  | NH2 | G.ASP_368  | OD2 | 3.717 |
| 4OLV | H.ARG_82A | NH1 | H.GLU_81   | OE1 | 3.993 |
| 4OLV | H.ARG_82A | NH1 | H.GLU_81   | OE2 | 3.151 |
| 4OLV | H.HIS_102 | NE2 | H.GLU_101  | OE1 | 3.357 |
| 4OLV | H.LYS_209 | NZ  | L.GLU_125  | OE1 | 3.978 |
| 4OLV | H.LYS_209 | NZ  | L.GLU_125  | OE2 | 3.214 |
| 4OLV | H.LYS_210 | NZ  | H.GLU_212  | OE1 | 2.484 |
| 4OLV | L.ARG_24  | NH2 | L.ASP_70   | OD1 | 3.226 |
| 4OLV | L.ARG_24  | NH2 | L.ASP_70   | OD2 | 2.875 |
| 4OLV | L.ARG_61  | NH1 | L.ASP_82   | OD1 | 3.700 |
| 4OLV | L.ARG_61  | NH1 | L.ASP_82   | OD2 | 2.636 |
| 4OLV | L.ARG_61  | NH2 | L.GLU_79   | OE1 | 3.645 |
| 4OLV | L.ARG_61  | NH2 | L.GLU_79   | OE2 | 3.982 |
| 4OLV | L.ARG_61  | NH2 | L.ASP_82   | OD1 | 3.217 |
| 4OLV | L.ARG_61  | NH2 | L.ASP_82   | OD2 | 3.476 |
| 4OLV | L.LYS_109 | NZ  | L.GLU_17   | OE2 | 2.752 |
| 4OLV | L.LYS_151 | NZ  | L.GLU_197  | OE1 | 3.476 |
| 4OLV | L.LYS_151 | NZ  | L.GLU_197  | OE2 | 3.958 |
| 4OLW | G.HIS_66  | ND1 | G.GLU_64   | OE2 | 2.882 |
| 4OLW | G.LYS_97  | NZ  | G.GLU_275  | OE1 | 3.783 |
| 4OLW | G.LYS_97  | NZ  | G.GLU_275  | OE2 | 2.873 |
| 4OLW | G.LYS_97  | NZ  | H.ASP_100B | OD1 | 3.637 |
| 4OLW | G.LYS_97  | NZ  | H.ASP_100B | OD2 | 3.575 |
| 4OLW | G.LYS_207 | NZ  | G.GLU_381  | OE1 | 3.441 |
| 4OLW | G.LYS_207 | NZ  | G.GLU_381  | OE2 | 3.248 |
| 4OLW | G.HIS_249 | NE2 | G.GLU_482  | OE1 | 2.947 |
| 4OLW | G.LYS_343 | NZ  | G.GLU_347  | OE2 | 2.661 |
| 4OLW | G.LYS_348 | NZ  | G.GLU_269  | OE2 | 2.637 |

|      |            |     |            |     |       |
|------|------------|-----|------------|-----|-------|
| 4OLW | G_LYS_348  | NZ  | G_GLU_351  | OE1 | 2.952 |
| 4OLW | G_LYS_357  | NZ  | G_GLU_466  | OE2 | 3.143 |
| 4OLW | G_ARG_379  | NH2 | G_ASP_211  | OD2 | 3.654 |
| 4OLW | G_ARG_469  | NH2 | G_ASP_457  | OD2 | 3.245 |
| 4OLW | G_LYS_476  | NZ  | G_GLU_102  | OE1 | 2.987 |
| 4OLW | G_LYS_476  | NZ  | G_GLU_102  | OE2 | 3.972 |
| 4OLW | G_ARG_480  | NH1 | G_ASP_477  | OD1 | 2.768 |
| 4OLW | G_ARG_480  | NH2 | G_GLU_102  | OE2 | 3.752 |
| 4OLW | G_LYS_487  | NZ  | G_ASP_47   | OD1 | 3.005 |
| 4OLW | G_LYS_487  | NZ  | G_ASP_47   | OD2 | 3.475 |
| 4OLW | G_LYS_487  | NZ  | G_GLU_91   | OE1 | 2.972 |
| 4OLW | H_ARG_19   | NH2 | H_GLU_81   | OE1 | 3.633 |
| 4OLW | H_ARG_38   | NH1 | H_ASP_86   | OD1 | 2.849 |
| 4OLW | H_ARG_38   | NH2 | H_GLU_46   | OE1 | 3.103 |
| 4OLW | H_ARG_38   | NH2 | H_GLU_46   | OE2 | 3.816 |
| 4OLW | H_ARG_38   | NH2 | H_ASP_86   | OD1 | 3.655 |
| 4OLW | H_ARG_61   | NH1 | G_GLU_466  | OE1 | 2.598 |
| 4OLW | H_ARG_61   | NH2 | G_GLU_466  | OE1 | 3.969 |
| 4OLW | H_ARG_66   | NH2 | H_ASP_86   | OD1 | 2.804 |
| 4OLW | H_ARG_66   | NH2 | H_ASP_86   | OD2 | 2.718 |
| 4OLW | H_ARG_71   | NH1 | G_ASP_368  | OD1 | 3.570 |
| 4OLW | H_ARG_71   | NH1 | G_ASP_368  | OD2 | 2.966 |
| 4OLW | H_ARG_71   | NH2 | G_ASP_368  | OD1 | 3.028 |
| 4OLW | H_ARG_71   | NH2 | G_ASP_368  | OD2 | 3.898 |
| 4OLW | H_ARG_82A  | NH1 | H_GLU_81   | OE2 | 3.263 |
| 4OLW | H_ARG_100A | NH2 | G_GLU_106  | OE1 | 3.908 |
| 4OLW | H_HIS_102  | NE2 | H_GLU_101  | OE1 | 3.698 |
| 4OLW | H_LYS_209  | NZ  | L_GLU_125  | OE1 | 2.861 |
| 4OLW | H_LYS_209  | NZ  | L_GLU_125  | OE2 | 2.764 |
| 4OLW | H_LYS_210  | NZ  | H_GLU_212  | OE1 | 3.770 |
| 4OLW | H_LYS_214  | NZ  | L_ASP_124  | OD1 | 3.031 |
| 4OLW | H_LYS_214  | NZ  | L_ASP_124  | OD2 | 3.691 |
| 4OLW | L_ARG_24   | NH1 | L_ASP_70   | OD1 | 3.761 |
| 4OLW | L_ARG_24   | NH1 | L_ASP_70   | OD2 | 3.911 |
| 4OLW | L_ARG_24   | NH2 | L_ASP_70   | OD1 | 3.614 |
| 4OLW | L_ARG_24   | NH2 | L_ASP_70   | OD2 | 3.428 |
| 4OLW | L_ARG_61   | NH1 | L_ASP_82   | OD2 | 2.747 |
| 4OLW | L_ARG_61   | NH2 | L_GLU_79   | OE1 | 3.693 |
| 4OLW | L_ARG_61   | NH2 | L_GLU_79   | OE2 | 3.864 |
| 4OLW | L_ARG_61   | NH2 | L_ASP_82   | OD1 | 3.396 |
| 4OLW | L_ARG_61   | NH2 | L_ASP_82   | OD2 | 2.990 |
| 4OLW | L_LYS_109  | NZ  | L_GLU_17   | OE2 | 2.961 |
| 4OLX | G_HIS_66   | ND1 | G_GLU_64   | OE1 | 3.879 |
| 4OLX | G_HIS_66   | ND1 | G_GLU_64   | OE2 | 2.717 |
| 4OLX | G_LYS_97   | NZ  | G_GLU_275  | OE2 | 3.052 |
| 4OLX | G_LYS_97   | NZ  | H_ASP_100B | OD1 | 3.339 |
| 4OLX | G_LYS_97   | NZ  | H_ASP_100B | OD2 | 2.904 |
| 4OLX | G_LYS_121  | NZ  | G_ASP_113  | OD1 | 3.856 |
| 4OLX | G_LYS_207  | NZ  | G_GLU_381  | OE1 | 3.451 |
| 4OLX | G_LYS_207  | NZ  | G_GLU_381  | OE2 | 3.129 |
| 4OLX | G_HIS_249  | NE2 | G_GLU_482  | OE1 | 3.186 |
| 4OLX | G_LYS_282  | NZ  | G_GLU_275  | OE1 | 3.971 |
| 4OLX | G_LYS_343  | NZ  | G_GLU_347  | OE2 | 2.614 |
| 4OLX | G_LYS_348  | NZ  | G_GLU_269  | OE2 | 2.682 |
| 4OLX | G_LYS_348  | NZ  | G_GLU_351  | OE1 | 3.091 |
| 4OLX | G_ARG_379  | NH2 | G_ASP_211  | OD2 | 3.162 |
| 4OLX | G_ARG_456  | NH1 | G_GLU_466  | OE1 | 3.738 |
| 4OLX | G_ARG_469  | NH2 | G_ASP_457  | OD2 | 3.011 |



|      |            |     |            |     |       |
|------|------------|-----|------------|-----|-------|
| 4OLX | G_LYS_476  | NZ  | G_GLU_102  | OE1 | 2.845 |
| 4OLX | G_LYS_476  | NZ  | G_GLU_102  | OE2 | 3.693 |
| 4OLX | G_ARG_480  | NH1 | G_ASP_477  | OD1 | 2.869 |
| 4OLX | G_LYS_487  | NZ  | G_ASP_47   | OD1 | 2.956 |
| 4OLX | G_LYS_487  | NZ  | G_ASP_47   | OD2 | 3.569 |
| 4OLX | G_LYS_487  | NZ  | G_GLU_91   | OE1 | 2.836 |
| 4OLX | H_ARG_19   | NH2 | H_GLU_81   | OE1 | 3.130 |
| 4OLX | H_ARG_38   | NH1 | H_ASP_86   | OD1 | 2.798 |
| 4OLX | H_ARG_38   | NH2 | H_GLU_46   | OE1 | 2.957 |
| 4OLX | H_ARG_38   | NH2 | H_GLU_46   | OE2 | 3.969 |
| 4OLX | H_ARG_38   | NH2 | H_ASP_86   | OD1 | 3.641 |
| 4OLX | H_ARG_61   | NH1 | G_GLU_466  | OE1 | 2.655 |
| 4OLX | H_ARG_66   | NH1 | H_ASP_86   | OD1 | 3.694 |
| 4OLX | H_ARG_66   | NH2 | H_ASP_86   | OD1 | 2.980 |
| 4OLX | H_ARG_66   | NH2 | H_ASP_86   | OD2 | 2.792 |
| 4OLX | H_ARG_71   | NH1 | G_ASP_368  | OD1 | 3.883 |
| 4OLX | H_ARG_71   | NH1 | G_ASP_368  | OD2 | 2.896 |
| 4OLX | H_ARG_71   | NH2 | G_ASP_368  | OD1 | 3.066 |
| 4OLX | H_ARG_71   | NH2 | G_ASP_368  | OD2 | 3.572 |
| 4OLX | H_ARG_82A  | NH1 | H_GLU_81   | OE2 | 3.153 |
| 4OLX | H_ARG_100A | NH2 | G_GLU_106  | OE1 | 3.646 |
| 4OLX | H_HIS_102  | NE2 | H_GLU_101  | OE1 | 3.407 |
| 4OLX | H_LYS_209  | NZ  | L_GLU_125  | OE2 | 3.132 |
| 4OLX | H_LYS_210  | NZ  | H_GLU_212  | OE1 | 3.806 |
| 4OLX | L_ARG_24   | NH1 | L_ASP_70   | OD1 | 3.727 |
| 4OLX | L_ARG_24   | NH1 | L_ASP_70   | OD2 | 3.694 |
| 4OLX | L_ARG_24   | NH2 | L_ASP_70   | OD1 | 3.311 |
| 4OLX | L_ARG_24   | NH2 | L_ASP_70   | OD2 | 3.200 |
| 4OLX | L_ARG_61   | NH1 | L_ASP_82   | OD1 | 3.778 |
| 4OLX | L_ARG_61   | NH1 | L_ASP_82   | OD2 | 2.580 |
| 4OLX | L_ARG_61   | NH2 | L_GLU_79   | OE1 | 3.684 |
| 4OLX | L_ARG_61   | NH2 | L_GLU_79   | OE2 | 3.925 |
| 4OLX | L_ARG_61   | NH2 | L_ASP_82   | OD1 | 3.428 |
| 4OLX | L_ARG_61   | NH2 | L_ASP_82   | OD2 | 3.600 |
| 4OLX | L_LYS_109  | NZ  | L_GLU_17   | OE2 | 3.701 |
| 4OLY | G_HIS_66   | ND1 | G_GLU_64   | OE1 | 3.788 |
| 4OLY | G_HIS_66   | ND1 | G_GLU_64   | OE2 | 2.753 |
| 4OLY | G_LYS_97   | NZ  | G_GLU_275  | OE2 | 3.627 |
| 4OLY | G_LYS_97   | NZ  | H_ASP_100B | OD1 | 3.240 |
| 4OLY | G_LYS_97   | NZ  | H_ASP_100B | OD2 | 2.829 |
| 4OLY | G_LYS_207  | NZ  | G_GLU_381  | OE1 | 3.205 |
| 4OLY | G_LYS_207  | NZ  | G_GLU_381  | OE2 | 2.631 |
| 4OLY | G_HIS_249  | NE2 | G_GLU_482  | OE1 | 3.173 |
| 4OLY | G_LYS_343  | NZ  | G_GLU_347  | OE2 | 2.662 |
| 4OLY | G_LYS_348  | NZ  | G_GLU_269  | OE2 | 3.719 |
| 4OLY | G_LYS_350  | NZ  | G_GLU_347  | OE2 | 3.790 |
| 4OLY | G_LYS_357  | NZ  | G_GLU_466  | OE2 | 3.515 |
| 4OLY | G_ARG_379  | NH1 | G_ASP_211  | OD2 | 3.852 |
| 4OLY | G_ARG_379  | NH2 | G_ASP_211  | OD2 | 2.543 |
| 4OLY | G_ARG_456  | NH1 | G_GLU_466  | OE1 | 3.658 |
| 4OLY | G_ARG_469  | NH2 | G_ASP_457  | OD1 | 3.982 |
| 4OLY | G_ARG_469  | NH2 | G_ASP_457  | OD2 | 2.914 |
| 4OLY | G_LYS_476  | NZ  | G_GLU_102  | OE1 | 2.927 |
| 4OLY | G_LYS_476  | NZ  | G_GLU_102  | OE2 | 3.744 |
| 4OLY | G_ARG_480  | NH1 | G_ASP_477  | OD1 | 2.751 |
| 4OLY | G_LYS_487  | NZ  | G_ASP_47   | OD1 | 3.049 |
| 4OLY | G_LYS_487  | NZ  | G_ASP_47   | OD2 | 3.763 |
| 4OLY | G_LYS_487  | NZ  | G_GLU_91   | OE1 | 2.756 |

|      |           |     |            |     |       |
|------|-----------|-----|------------|-----|-------|
| 4OLY | H_ARG_19  | NH2 | H_GLU_81   | OE1 | 3.423 |
| 4OLY | H_ARG_38  | NH1 | H_ASP_86   | OD1 | 2.745 |
| 4OLY | H_ARG_38  | NH2 | H_GLU_46   | OE1 | 2.979 |
| 4OLY | H_ARG_38  | NH2 | H_GLU_46   | OE2 | 3.847 |
| 4OLY | H_ARG_38  | NH2 | H_ASP_86   | OD1 | 3.687 |
| 4OLY | H_ARG_61  | NH1 | G_GLU_466  | OE1 | 2.641 |
| 4OLY | H_ARG_66  | NH1 | H_ASP_86   | OD1 | 3.641 |
| 4OLY | H_ARG_66  | NH2 | H_ASP_86   | OD1 | 3.013 |
| 4OLY | H_ARG_66  | NH2 | H_ASP_86   | OD2 | 2.555 |
| 4OLY | H_ARG_71  | NH1 | G_ASP_368  | OD1 | 3.538 |
| 4OLY | H_ARG_71  | NH1 | G_ASP_368  | OD2 | 2.816 |
| 4OLY | H_ARG_71  | NH2 | G_ASP_368  | OD1 | 3.002 |
| 4OLY | H_ARG_71  | NH2 | G_ASP_368  | OD2 | 3.765 |
| 4OLY | H_ARG_82A | NH1 | H_GLU_81   | OE2 | 3.546 |
| 4OLY | H_HIS_102 | NE2 | H_GLU_101  | OE1 | 3.748 |
| 4OLY | H_LYS_209 | NZ  | L_GLU_125  | OE1 | 3.888 |
| 4OLY | H_LYS_209 | NZ  | L_GLU_125  | OE2 | 3.336 |
| 4OLY | H_LYS_210 | NZ  | H_GLU_212  | OE1 | 3.837 |
| 4OLY | L_ARG_24  | NH1 | L_ASP_70   | OD1 | 3.758 |
| 4OLY | L_ARG_24  | NH1 | L_ASP_70   | OD2 | 3.814 |
| 4OLY | L_ARG_24  | NH2 | L_ASP_70   | OD1 | 3.375 |
| 4OLY | L_ARG_24  | NH2 | L_ASP_70   | OD2 | 3.161 |
| 4OLY | L_ARG_61  | NH1 | L_ASP_82   | OD2 | 2.658 |
| 4OLY | L_ARG_61  | NH2 | L_GLU_79   | OE1 | 3.938 |
| 4OLY | L_ARG_61  | NH2 | L_ASP_82   | OD1 | 3.043 |
| 4OLY | L_ARG_61  | NH2 | L_ASP_82   | OD2 | 2.970 |
| 4OLZ | G_HIS_66  | ND1 | G_GLU_64   | OE1 | 3.923 |
| 4OLZ | G_HIS_66  | ND1 | G_GLU_64   | OE2 | 2.689 |
| 4OLZ | G_LYS_97  | NZ  | G_GLU_275  | OE1 | 3.801 |
| 4OLZ | G_LYS_97  | NZ  | G_GLU_275  | OE2 | 2.401 |
| 4OLZ | G_LYS_97  | NZ  | H_ASP_100B | OD1 | 3.552 |
| 4OLZ | G_LYS_97  | NZ  | H_ASP_100B | OD2 | 3.545 |
| 4OLZ | G_LYS_207 | NZ  | G_GLU_381  | OE1 | 3.397 |
| 4OLZ | G_LYS_207 | NZ  | G_GLU_381  | OE2 | 3.037 |
| 4OLZ | G_HIS_249 | NE2 | G_GLU_482  | OE1 | 2.924 |
| 4OLZ | G_LYS_282 | NZ  | G_GLU_275  | OE1 | 3.959 |
| 4OLZ | G_LYS_343 | NZ  | G_GLU_347  | OE2 | 2.767 |
| 4OLZ | G_LYS_348 | NZ  | G_GLU_269  | OE2 | 2.968 |
| 4OLZ | G_LYS_348 | NZ  | G_GLU_351  | OE1 | 3.207 |
| 4OLZ | G_ARG_379 | NH2 | G_ASP_211  | OD2 | 3.935 |
| 4OLZ | G_ARG_469 | NH2 | G_ASP_457  | OD1 | 3.787 |
| 4OLZ | G_ARG_469 | NH2 | G_ASP_457  | OD2 | 2.835 |
| 4OLZ | G_LYS_476 | NZ  | G_GLU_102  | OE1 | 2.783 |
| 4OLZ | G_LYS_476 | NZ  | G_GLU_102  | OE2 | 3.635 |
| 4OLZ | G_ARG_480 | NH1 | G_ASP_477  | OD1 | 2.745 |
| 4OLZ | G_LYS_487 | NZ  | G_ASP_47   | OD1 | 2.885 |
| 4OLZ | G_LYS_487 | NZ  | G_ASP_47   | OD2 | 3.377 |
| 4OLZ | G_LYS_487 | NZ  | G_GLU_91   | OE1 | 2.760 |
| 4OLZ | H_ARG_19  | NH2 | H_GLU_81   | OE1 | 3.284 |
| 4OLZ | H_ARG_38  | NH1 | H_ASP_86   | OD1 | 2.920 |
| 4OLZ | H_ARG_38  | NH2 | H_GLU_46   | OE1 | 3.145 |
| 4OLZ | H_ARG_38  | NH2 | H_ASP_86   | OD1 | 3.640 |
| 4OLZ | H_ARG_61  | NH1 | G_GLU_466  | OE1 | 2.620 |
| 4OLZ | H_ARG_66  | NH2 | H_ASP_86   | OD1 | 2.412 |
| 4OLZ | H_ARG_66  | NH2 | H_ASP_86   | OD2 | 3.005 |
| 4OLZ | H_ARG_71  | NH1 | G_ASP_368  | OD1 | 3.472 |
| 4OLZ | H_ARG_71  | NH1 | G_ASP_368  | OD2 | 2.715 |
| 4OLZ | H_ARG_71  | NH2 | G_ASP_368  | OD1 | 2.877 |

|      |           |     |            |     |       |
|------|-----------|-----|------------|-----|-------|
| 4OLZ | H_ARG_71  | NH2 | G_ASP_368  | OD2 | 3.685 |
| 4OLZ | H_ARG_82A | NH1 | H_GLU_81   | OE2 | 3.365 |
| 4OLZ | H_HIS_102 | NE2 | H_GLU_101  | OE1 | 3.537 |
| 4OLZ | H_LYS_143 | NZ  | H_ASP_144  | OD1 | 3.616 |
| 4OLZ | H_LYS_209 | NZ  | L_GLU_125  | OE1 | 3.703 |
| 4OLZ | H_LYS_209 | NZ  | L_GLU_125  | OE2 | 3.063 |
| 4OLZ | H_LYS_210 | NZ  | H_GLU_212  | OE1 | 3.813 |
| 4OLZ | H_LYS_214 | NZ  | L_ASP_124  | OD1 | 3.528 |
| 4OLZ | H_LYS_214 | NZ  | L_ASP_124  | OD2 | 3.896 |
| 4OLZ | L_ARG_24  | NH2 | L_ASP_70   | OD1 | 3.107 |
| 4OLZ | L_ARG_24  | NH2 | L_ASP_70   | OD2 | 2.518 |
| 4OLZ | L_ARG_61  | NH1 | L_ASP_82   | OD1 | 3.951 |
| 4OLZ | L_ARG_61  | NH1 | L_ASP_82   | OD2 | 2.771 |
| 4OLZ | L_ARG_61  | NH2 | L_GLU_79   | OE1 | 3.245 |
| 4OLZ | L_ARG_61  | NH2 | L_GLU_79   | OE2 | 3.953 |
| 4OLZ | L_ARG_61  | NH2 | L_ASP_82   | OD1 | 3.377 |
| 4OLZ | L_ARG_61  | NH2 | L_ASP_82   | OD2 | 3.458 |
| 4OLZ | L_LYS_109 | NZ  | L_GLU_17   | OE2 | 2.896 |
| 4OM0 | G_HIS_66  | ND1 | G_GLU_64   | OE1 | 3.833 |
| 4OM0 | G_HIS_66  | ND1 | G_GLU_64   | OE2 | 2.725 |
| 4OM0 | G_LYS_97  | NZ  | G_GLU_275  | OE1 | 3.804 |
| 4OM0 | G_LYS_97  | NZ  | G_GLU_275  | OE2 | 2.555 |
| 4OM0 | G_LYS_97  | NZ  | H_ASP_100B | OD1 | 3.843 |
| 4OM0 | G_LYS_97  | NZ  | H_ASP_100B | OD2 | 3.296 |
| 4OM0 | G_LYS_207 | NZ  | G_GLU_381  | OE1 | 3.664 |
| 4OM0 | G_LYS_207 | NZ  | G_GLU_381  | OE2 | 3.001 |
| 4OM0 | G_HIS_249 | NE2 | G_GLU_482  | OE1 | 3.206 |
| 4OM0 | G_LYS_282 | NZ  | G_GLU_275  | OE1 | 3.687 |
| 4OM0 | G_LYS_343 | NZ  | G_GLU_347  | OE2 | 2.544 |
| 4OM0 | G_LYS_348 | NZ  | G_GLU_269  | OE2 | 2.992 |
| 4OM0 | G_LYS_348 | NZ  | G_GLU_351  | OE1 | 3.079 |
| 4OM0 | G_ARG_379 | NH2 | G_ASP_211  | OD1 | 3.805 |
| 4OM0 | G_ARG_469 | NH2 | G_ASP_457  | OD1 | 3.868 |
| 4OM0 | G_ARG_469 | NH2 | G_ASP_457  | OD2 | 2.885 |
| 4OM0 | G_LYS_476 | NZ  | G_GLU_102  | OE1 | 2.824 |
| 4OM0 | G_ARG_480 | NH1 | G_ASP_477  | OD1 | 2.762 |
| 4OM0 | G_ARG_480 | NH2 | G_GLU_102  | OE2 | 3.978 |
| 4OM0 | G_LYS_487 | NZ  | G_ASP_47   | OD1 | 2.993 |
| 4OM0 | G_LYS_487 | NZ  | G_ASP_47   | OD2 | 3.296 |
| 4OM0 | G_LYS_487 | NZ  | G_GLU_91   | OE1 | 2.866 |
| 4OM0 | H_ARG_19  | NH2 | H_GLU_81   | OE1 | 3.635 |
| 4OM0 | H_ARG_38  | NH1 | H_ASP_86   | OD1 | 2.891 |
| 4OM0 | H_ARG_38  | NH2 | H_GLU_46   | OE1 | 3.152 |
| 4OM0 | H_ARG_38  | NH2 | H_GLU_46   | OE2 | 3.952 |
| 4OM0 | H_ARG_38  | NH2 | H_ASP_86   | OD1 | 3.799 |
| 4OM0 | H_ARG_61  | NH1 | G_GLU_466  | OE1 | 2.871 |
| 4OM0 | H_ARG_66  | NH1 | H_ASP_86   | OD1 | 3.542 |
| 4OM0 | H_ARG_66  | NH2 | H_ASP_86   | OD1 | 3.067 |
| 4OM0 | H_ARG_66  | NH2 | H_ASP_86   | OD2 | 2.679 |
| 4OM0 | H_ARG_71  | NH1 | G_ASP_368  | OD1 | 3.724 |
| 4OM0 | H_ARG_71  | NH1 | G_ASP_368  | OD2 | 2.771 |
| 4OM0 | H_ARG_71  | NH2 | G_ASP_368  | OD1 | 3.189 |
| 4OM0 | H_ARG_71  | NH2 | G_ASP_368  | OD2 | 3.713 |
| 4OM0 | H_ARG_82A | NH1 | H_GLU_81   | OE2 | 3.957 |
| 4OM0 | H_HIS_102 | NE2 | H_GLU_101  | OE1 | 3.389 |
| 4OM0 | H_LYS_143 | NZ  | H_ASP_144  | OD1 | 3.715 |
| 4OM0 | H_LYS_209 | NZ  | L_GLU_125  | OE2 | 3.121 |
| 4OM0 | H_LYS_210 | NZ  | H_GLU_212  | OE1 | 3.995 |

|      |           |     |            |     |       |
|------|-----------|-----|------------|-----|-------|
| 4OM0 | L_ARG_24  | NH1 | L_ASP_70   | OD1 | 3.645 |
| 4OM0 | L_ARG_24  | NH1 | L_ASP_70   | OD2 | 3.913 |
| 4OM0 | L_ARG_24  | NH2 | L_ASP_70   | OD1 | 3.504 |
| 4OM0 | L_ARG_24  | NH2 | L_ASP_70   | OD2 | 3.395 |
| 4OM0 | L_ARG_61  | NH1 | L_ASP_82   | OD1 | 3.878 |
| 4OM0 | L_ARG_61  | NH1 | L_ASP_82   | OD2 | 2.597 |
| 4OM0 | L_ARG_61  | NH2 | L_GLU_79   | OE1 | 3.542 |
| 4OM0 | L_ARG_61  | NH2 | L_GLU_79   | OE2 | 3.993 |
| 4OM0 | L_ARG_61  | NH2 | L_ASP_82   | OD1 | 3.348 |
| 4OM0 | L_ARG_61  | NH2 | L_ASP_82   | OD2 | 3.442 |
| 4OM1 | G_HIS_66  | ND1 | G_GLU_64   | OE1 | 3.968 |
| 4OM1 | G_HIS_66  | ND1 | G_GLU_64   | OE2 | 2.708 |
| 4OM1 | G_LYS_97  | NZ  | G_GLU_275  | OE1 | 3.600 |
| 4OM1 | G_LYS_97  | NZ  | G_GLU_275  | OE2 | 2.568 |
| 4OM1 | G_LYS_97  | NZ  | H_ASP_100B | OD1 | 3.927 |
| 4OM1 | G_LYS_97  | NZ  | H_ASP_100B | OD2 | 3.635 |
| 4OM1 | G_LYS_207 | NZ  | G_GLU_381  | OE1 | 3.308 |
| 4OM1 | G_LYS_207 | NZ  | G_GLU_381  | OE2 | 2.686 |
| 4OM1 | G_HIS_249 | NE2 | G_GLU_482  | OE1 | 3.036 |
| 4OM1 | G_LYS_282 | NZ  | G_GLU_275  | OE1 | 3.818 |
| 4OM1 | G_LYS_343 | NZ  | G_GLU_347  | OE2 | 2.690 |
| 4OM1 | G_LYS_348 | NZ  | G_GLU_351  | OE1 | 3.702 |
| 4OM1 | G_LYS_357 | NZ  | G_GLU_466  | OE2 | 2.685 |
| 4OM1 | G_LYS_357 | NZ  | L_GLU_1    | OE2 | 3.763 |
| 4OM1 | G_ARG_379 | NH2 | G_ASP_211  | OD2 | 3.954 |
| 4OM1 | G_ARG_456 | NH1 | G_GLU_466  | OE1 | 3.023 |
| 4OM1 | G_ARG_469 | NH2 | G_ASP_457  | OD1 | 3.972 |
| 4OM1 | G_ARG_469 | NH2 | G_ASP_457  | OD2 | 2.755 |
| 4OM1 | G_LYS_476 | NZ  | G_GLU_102  | OE1 | 2.848 |
| 4OM1 | G_LYS_476 | NZ  | G_GLU_102  | OE2 | 3.744 |
| 4OM1 | G_ARG_480 | NH1 | G_ASP_477  | OD1 | 2.846 |
| 4OM1 | G_LYS_487 | NZ  | G_ASP_47   | OD1 | 2.990 |
| 4OM1 | G_LYS_487 | NZ  | G_ASP_47   | OD2 | 3.195 |
| 4OM1 | G_LYS_487 | NZ  | G_GLU_91   | OE1 | 2.549 |
| 4OM1 | H_ARG_19  | NH2 | H_GLU_81   | OE1 | 3.387 |
| 4OM1 | H_ARG_38  | NH1 | H_ASP_86   | OD1 | 2.946 |
| 4OM1 | H_ARG_38  | NH2 | H_GLU_46   | OE1 | 2.854 |
| 4OM1 | H_ARG_38  | NH2 | H_GLU_46   | OE2 | 3.922 |
| 4OM1 | H_ARG_38  | NH2 | H_ASP_86   | OD1 | 3.859 |
| 4OM1 | H_ARG_66  | NH1 | H_ASP_86   | OD1 | 3.431 |
| 4OM1 | H_ARG_66  | NH2 | H_ASP_86   | OD1 | 2.947 |
| 4OM1 | H_ARG_66  | NH2 | H_ASP_86   | OD2 | 2.686 |
| 4OM1 | H_ARG_71  | NH1 | G_ASP_368  | OD1 | 3.565 |
| 4OM1 | H_ARG_71  | NH1 | G_ASP_368  | OD2 | 2.752 |
| 4OM1 | H_ARG_71  | NH2 | G_ASP_368  | OD1 | 3.031 |
| 4OM1 | H_ARG_71  | NH2 | G_ASP_368  | OD2 | 3.734 |
| 4OM1 | H_ARG_82A | NH1 | H_GLU_81   | OE2 | 3.380 |
| 4OM1 | H_LYS_96  | NZ  | H_GLU_101  | OE1 | 3.890 |
| 4OM1 | H_LYS_96  | NZ  | H_GLU_101  | OE2 | 3.816 |
| 4OM1 | H_HIS_102 | NE2 | H_GLU_101  | OE1 | 3.730 |
| 4OM1 | H_LYS_209 | NZ  | L_GLU_125  | OE1 | 3.639 |
| 4OM1 | H_LYS_209 | NZ  | L_GLU_125  | OE2 | 3.008 |
| 4OM1 | H_LYS_210 | NZ  | H_GLU_212  | OE1 | 3.752 |
| 4OM1 | L_ARG_24  | NH2 | L_ASP_70   | OD1 | 3.182 |
| 4OM1 | L_ARG_24  | NH2 | L_ASP_70   | OD2 | 2.699 |
| 4OM1 | L_ARG_61  | NH1 | L_ASP_82   | OD1 | 3.829 |
| 4OM1 | L_ARG_61  | NH1 | L_ASP_82   | OD2 | 2.671 |
| 4OM1 | L_ARG_61  | NH2 | L_GLU_79   | OE1 | 3.602 |

|      |           |     |           |     |       |
|------|-----------|-----|-----------|-----|-------|
| 4OM1 | L_ARG_61  | NH2 | L_GLU_79  | OE2 | 3.954 |
| 4OM1 | L_ARG_61  | NH2 | L_ASP_82  | OD1 | 3.243 |
| 4OM1 | L_ARG_61  | NH2 | L_ASP_82  | OD2 | 3.379 |
| 4OM1 | L_LYS_109 | NZ  | L_GLU_17  | OE1 | 3.450 |
| 4OM1 | L_LYS_109 | NZ  | L_GLU_17  | OE2 | 2.771 |
| 4OM1 | L_HIS_191 | ND1 | L_ASP_153 | OD2 | 2.919 |
| 4OT1 | A_ARG_131 | NH1 | A_GLU_422 | OE2 | 3.994 |
| 4OT1 | A_ARG_357 | NH2 | A_ASP_122 | OD2 | 2.900 |
| 4OT1 | A_LYS_378 | NZ  | A_ASP_362 | OD1 | 3.505 |
| 4OT1 | A_LYS_378 | NZ  | A_ASP_362 | OD2 | 3.358 |
| 4OT1 | A_LYS_379 | NZ  | A_GLU_359 | OE2 | 2.737 |
| 4OT1 | A_ARG_393 | NH1 | A_ASP_390 | OD1 | 2.905 |
| 4OT1 | A_ARG_393 | NH2 | A_ASP_390 | OD1 | 2.768 |
| 4OT1 | A_LYS_435 | NZ  | A_GLU_413 | OE2 | 2.567 |
| 4OT1 | H_ARG_12  | NH1 | H_GLU_10  | OE1 | 3.166 |
| 4OT1 | H_ARG_12  | NH2 | H_GLU_10  | OE1 | 3.283 |
| 4OT1 | H_LYS_30  | NZ  | H_ASP_31  | OD1 | 3.047 |
| 4OT1 | H_ARG_38  | NH1 | H_ASP_90  | OD1 | 2.615 |
| 4OT1 | H_ARG_38  | NH2 | H_GLU_46  | OE1 | 3.314 |
| 4OT1 | H_ARG_38  | NH2 | H_ASP_90  | OD1 | 3.679 |
| 4OT1 | H_LYS_63  | NZ  | H_GLU_46  | OE1 | 3.385 |
| 4OT1 | H_LYS_63  | NZ  | H_GLU_46  | OE2 | 2.667 |
| 4OT1 | H_ARG_67  | NH1 | H_ASP_90  | OD1 | 3.883 |
| 4OT1 | H_ARG_67  | NH1 | H_ASP_90  | OD2 | 3.033 |
| 4OT1 | H_ARG_67  | NH2 | H_ASP_90  | OD1 | 3.016 |
| 4OT1 | H_ARG_67  | NH2 | H_ASP_90  | OD2 | 3.552 |
| 4OT1 | H_ARG_87  | NH2 | H_ASP_89  | OD1 | 3.432 |
| 4OT1 | H_ARG_87  | NH2 | H_ASP_89  | OD2 | 2.704 |
| 4OT1 | H_ARG_98  | NH2 | H_ASP_119 | OD1 | 3.496 |
| 4OT1 | H_ARG_98  | NH2 | H_ASP_119 | OD2 | 2.884 |
| 4OT1 | H_HIS_115 | ND1 | H_ASP_99  | OD1 | 2.738 |
| 4OT1 | H_HIS_115 | ND1 | H_ASP_99  | OD2 | 3.714 |
| 4OT1 | H_LYS_161 | NZ  | L_GLU_127 | OE2 | 2.572 |
| 4OT1 | H_LYS_227 | NZ  | L_GLU_126 | OE1 | 2.521 |
| 4OT1 | H_LYS_227 | NZ  | L_GLU_126 | OE2 | 3.241 |
| 4OT1 | L_LYS_54  | NZ  | L_ASP_51  | OD2 | 3.014 |
| 4OT1 | L_ARG_55  | NH1 | L_ASP_61  | OD1 | 3.917 |
| 4OT1 | L_ARG_62  | NH1 | L_ASP_83  | OD1 | 2.721 |
| 4OT1 | L_ARG_62  | NH1 | L_ASP_83  | OD2 | 3.462 |
| 4OT1 | L_ARG_62  | NH2 | L_ASP_83  | OD1 | 3.562 |
| 4OT1 | L_ARG_62  | NH2 | L_ASP_83  | OD2 | 2.996 |
| 4OT1 | L_LYS_67  | NZ  | A_GLU_361 | OE2 | 3.026 |
| 4OT1 | L_LYS_152 | NZ  | L_GLU_206 | OE1 | 3.999 |
| 4OT1 | L_LYS_152 | NZ  | L_GLU_206 | OE2 | 2.900 |
| 4OTX | L_ARG_54  | NH1 | L_ASP_60  | OD1 | 3.335 |
| 4OTX | L_ARG_54  | NH2 | L_ASP_60  | OD1 | 2.587 |
| 4OTX | L_ARG_61  | NH2 | L_GLU_81  | OE1 | 3.052 |
| 4OTX | L_ARG_61  | NH2 | L_ASP_82  | OD1 | 2.662 |
| 4OTX | L_ARG_61  | NH2 | L_ASP_82  | OD2 | 3.622 |
| 4OTX | L_LYS_149 | NZ  | L_GLU_195 | OE1 | 3.784 |
| 4OTX | L_HIS_189 | ND1 | L_ASP_151 | OD2 | 2.906 |
| 4OTX | H_LYS_62  | NZ  | H_GLU_46  | OE1 | 3.813 |
| 4OTX | H_LYS_62  | NZ  | H_GLU_46  | OE2 | 2.843 |
| 4OTX | H_LYS_66  | NZ  | H_ASP_86  | OD1 | 3.726 |
| 4OTX | H_LYS_66  | NZ  | H_ASP_86  | OD2 | 2.772 |
| 4OTX | M_LYS_24  | NZ  | M_ASP_70  | OD1 | 3.831 |
| 4OTX | M_ARG_54  | NH2 | M_ASP_60  | OD1 | 3.076 |
| 4OTX | M_ARG_61  | NH2 | M_GLU_81  | OE2 | 2.931 |

|      |           |     |           |     |       |
|------|-----------|-----|-----------|-----|-------|
| 4OTX | M_ARG_61  | NH2 | M_ASP_82  | OD1 | 2.705 |
| 4OTX | M_ARG_61  | NH2 | M_ASP_82  | OD2 | 3.780 |
| 4OTX | M_ARG_155 | NH1 | M_GLU_185 | OE2 | 2.645 |
| 4OTX | M_ARG_155 | NH2 | M_GLU_185 | OE1 | 3.700 |
| 4OTX | M_ARG_155 | NH2 | M_GLU_185 | OE2 | 3.518 |
| 4OTX | M_HIS_189 | ND1 | M_ASP_151 | OD2 | 2.662 |
| 4OTX | M_ARG_211 | NH1 | M_GLU_187 | OE2 | 3.522 |
| 4OTX | I_LYS_62  | NZ  | I_GLU_46  | OE2 | 2.424 |
| 4OTX | I_LYS_66  | NZ  | I_ASP_86  | OD2 | 2.972 |
| 4OTX | I_ARG_94  | NH2 | I_ASP_101 | OD2 | 3.905 |
| 4OTX | I_LYS_209 | NZ  | I_GLU_211 | OE1 | 3.618 |
| 4P49 | A_LYS_33  | NZ  | A_GLU_76  | OE2 | 3.764 |
| 4P49 | A_ARG_56  | NH2 | A_GLU_76  | OE1 | 3.151 |
| 4P49 | A_ARG_56  | NH2 | A_ASP_77  | OD1 | 2.851 |
| 4P49 | A_ARG_56  | NH2 | A_ASP_77  | OD2 | 3.564 |
| 4P49 | A_ARG_158 | NH1 | A_ASP_211 | OD1 | 2.929 |
| 4P49 | A_ARG_158 | NH2 | A_GLU_166 | OE1 | 3.049 |
| 4P49 | A_ARG_158 | NH2 | A_ASP_211 | OD1 | 3.847 |
| 4P49 | A_ARG_188 | NH1 | A_ASP_211 | OD1 | 3.709 |
| 4P49 | A_ARG_188 | NH1 | A_ASP_211 | OD2 | 2.796 |
| 4P49 | A_ARG_188 | NH2 | A_ASP_211 | OD1 | 2.980 |
| 4P49 | A_ARG_188 | NH2 | A_ASP_211 | OD2 | 3.547 |
| 4P49 | A_ARG_219 | NH2 | A_ASP_232 | OD1 | 3.462 |
| 4P49 | A_ARG_219 | NH2 | A_ASP_232 | OD2 | 2.815 |
| 4P49 | A_HIS_221 | ND1 | A_ASP_232 | OD2 | 2.753 |
| 4P49 | A_HIS_236 | ND1 | A_GLU_126 | OE1 | 3.338 |
| 4P49 | A_HIS_236 | NE2 | A_ASP_125 | OD1 | 2.678 |
| 4P49 | A_HIS_236 | NE2 | A_GLU_126 | OE1 | 3.576 |
| 4P9H | C_LYS_7   | NZ  | C_ASP_10  | OD2 | 3.690 |
| 4P9H | C_LYS_8   | NZ  | C_GLU_119 | OE1 | 3.955 |
| 4P9H | C_LYS_8   | NZ  | C_GLU_119 | OE2 | 2.953 |
| 4P9H | C_LYS_29  | NZ  | C_GLU_85  | OE1 | 3.562 |
| 4P9H | C_LYS_29  | NZ  | C_GLU_85  | OE2 | 3.697 |
| 4P9H | C_ARG_54  | NH1 | C_ASP_78  | OD2 | 2.976 |
| 4P9H | C_ARG_54  | NH2 | C_ASP_78  | OD1 | 3.086 |
| 4P9H | C_ARG_54  | NH2 | C_ASP_78  | OD2 | 2.930 |
| 4P9H | C_ARG_58  | NH1 | C_GLU_13  | OE1 | 2.881 |
| 4P9H | C_ARG_58  | NH1 | C_GLU_13  | OE2 | 2.882 |
| 4P9H | C_ARG_58  | NH2 | C_GLU_13  | OE2 | 3.671 |
| 4P9H | C_ARG_59  | NH1 | G_ASP_368 | OD1 | 2.832 |
| 4P9H | C_ARG_59  | NH1 | G_ASP_368 | OD2 | 3.395 |
| 4P9H | C_ARG_59  | NH2 | G_ASP_368 | OD1 | 3.561 |
| 4P9H | C_ARG_59  | NH2 | G_ASP_368 | OD2 | 2.514 |
| 4P9H | C_LYS_171 | NZ  | C_GLU_169 | OE2 | 3.618 |
| 4P9H | G_HIS_66  | ND1 | G_GLU_64  | OE1 | 3.936 |
| 4P9H | G_HIS_66  | ND1 | G_GLU_64  | OE2 | 2.459 |
| 4P9H | G_LYS_227 | NZ  | G_GLU_83  | OE2 | 3.669 |
| 4P9H | G_HIS_249 | NE2 | G_GLU_482 | OE1 | 2.955 |
| 4P9H | G_LYS_282 | NZ  | G_GLU_275 | OE1 | 3.022 |
| 4P9H | G_LYS_282 | NZ  | G_GLU_275 | OE2 | 3.961 |
| 4P9H | G_LYS_348 | NZ  | G_GLU_269 | OE1 | 2.726 |
| 4P9H | G_LYS_348 | NZ  | G_GLU_351 | OE1 | 3.154 |
| 4P9H | G_LYS_348 | NZ  | G_GLU_351 | OE2 | 3.034 |
| 4P9H | G_LYS_357 | NZ  | G_GLU_466 | OE2 | 2.986 |
| 4P9H | G_ARG_456 | NH1 | G_GLU_466 | OE1 | 3.795 |
| 4P9H | G_ARG_456 | NH1 | G_GLU_466 | OE2 | 3.185 |
| 4P9H | G_ARG_469 | NH2 | G_ASP_457 | OD2 | 3.218 |
| 4P9H | G_LYS_476 | NZ  | G_GLU_102 | OE1 | 2.706 |

|      |           |     |           |     |       |
|------|-----------|-----|-----------|-----|-------|
| 4P9H | G_ARG_480 | NH1 | G_ASP_477 | OD1 | 3.014 |
| 4P9H | G_ARG_480 | NH2 | G_GLU_102 | OE2 | 3.549 |
| 4P9H | G_LYS_487 | NZ  | G_ASP_47  | OD1 | 3.793 |
| 4P9H | G_LYS_487 | NZ  | G_ASP_47  | OD2 | 2.540 |
| 4P9H | G_LYS_487 | NZ  | G_GLU_91  | OE2 | 2.794 |
| 4P9H | H_ARG_38  | NH1 | H_ASP_86  | OD1 | 2.679 |
| 4P9H | H_ARG_38  | NH2 | H_GLU_46  | OE1 | 3.970 |
| 4P9H | H_ARG_38  | NH2 | H_ASP_86  | OD1 | 3.498 |
| 4P9H | H_HIS_61  | NE2 | L_ASP_1   | OD2 | 3.817 |
| 4P9H | H_ARG_66  | NH2 | H_ASP_86  | OD1 | 2.897 |
| 4P9H | H_ARG_66  | NH2 | H_ASP_86  | OD2 | 2.412 |
| 4P9H | H_LYS_143 | NZ  | H_ASP_144 | OD1 | 3.073 |
| 4P9H | H_LYS_143 | NZ  | H_ASP_144 | OD2 | 2.969 |
| 4P9H | L_ARG_24  | NH2 | L_ASP_70  | OD1 | 3.255 |
| 4P9H | L_ARG_61  | NH1 | L_GLU_81  | OE2 | 3.724 |
| 4P9H | L_ARG_61  | NH1 | L_ASP_82  | OD1 | 3.931 |
| 4P9H | L_ARG_61  | NH1 | L_ASP_82  | OD2 | 2.983 |
| 4P9H | L_ARG_61  | NH2 | L_GLU_81  | OE2 | 2.893 |
| 4P9H | L_ARG_61  | NH2 | L_ASP_82  | OD1 | 3.839 |
| 4PTT | A_ARG_24  | NH1 | A_ASP_70  | OD1 | 3.965 |
| 4PTT | A_ARG_24  | NH1 | A_ASP_70  | OD2 | 3.009 |
| 4PTT | A_ARG_53  | NH1 | A_ASP_50  | OD2 | 3.791 |
| 4PTT | A_ARG_53  | NH2 | A_ASP_50  | OD2 | 2.752 |
| 4PTT | A_ARG_61  | NH1 | A_GLU_79  | OE1 | 3.274 |
| 4PTT | A_ARG_61  | NH2 | A_GLU_79  | OE1 | 3.194 |
| 4PTT | A_ARG_61  | NH2 | A_GLU_81  | OE1 | 3.963 |
| 4PTT | A_ARG_61  | NH2 | A_ASP_82  | OD1 | 2.721 |
| 4PTT | A_ARG_61  | NH2 | A_ASP_82  | OD2 | 3.451 |
| 4PTT | A_ARG_91  | NH2 | B_GLU_95  | OE1 | 3.477 |
| 4PTT | A_ARG_91  | NH2 | B_GLU_95  | OE2 | 3.208 |
| 4PTT | A_LYS_107 | NZ  | A_GLU_17  | OE1 | 3.991 |
| 4PTT | A_LYS_107 | NZ  | A_GLU_17  | OE2 | 3.451 |
| 4PTT | A_LYS_149 | NZ  | A_GLU_195 | OE1 | 2.707 |
| 4PTT | A_LYS_149 | NZ  | A_GLU_195 | OE2 | 2.811 |
| 4PTT | A_LYS_188 | NZ  | A_ASP_185 | OD1 | 3.692 |
| 4PTT | A_ARG_211 | NH1 | A_GLU_187 | OE1 | 3.911 |
| 4PTT | B_HIS_32  | ND1 | B_ASP_97  | OD1 | 3.351 |
| 4PTT | B_HIS_32  | NE2 | B_ASP_97  | OD1 | 3.881 |
| 4PTT | B_HIS_35  | NE2 | B_GLU_95  | OE2 | 2.791 |
| 4PTT | B_ARG_38  | NH1 | B_ASP_86  | OD1 | 2.956 |
| 4PTT | B_ARG_38  | NH2 | B_GLU_46  | OE1 | 3.058 |
| 4PTT | B_ARG_38  | NH2 | B_GLU_46  | OE2 | 3.774 |
| 4PTT | B_ARG_66  | NH1 | B_ASP_86  | OD1 | 3.031 |
| 4PTT | B_ARG_66  | NH1 | B_ASP_86  | OD2 | 3.456 |
| 4PTT | B_ARG_66  | NH2 | B_ASP_86  | OD1 | 3.848 |
| 4PTT | B_ARG_66  | NH2 | B_ASP_86  | OD2 | 2.768 |
| 4PTT | B_LYS_94  | NZ  | B_ASP_97  | OD1 | 2.735 |
| 4PTT | B_LYS_94  | NZ  | B_ASP_97  | OD2 | 3.827 |
| 4PTT | B_LYS_94  | NZ  | B_ASP_101 | OD1 | 3.084 |
| 4PTT | B_LYS_94  | NZ  | B_ASP_101 | OD2 | 2.853 |
| 4PTT | B_LYS_143 | NZ  | B_ASP_144 | OD1 | 3.257 |
| 4PTT | B_LYS_143 | NZ  | B_ASP_144 | OD2 | 3.722 |
| 4PTT | B_LYS_209 | NZ  | A_GLU_123 | OE2 | 3.476 |
| 4PTT | B_ARG_210 | NH1 | B_GLU_212 | OE2 | 3.500 |
| 4PTT | B_ARG_210 | NH2 | B_GLU_212 | OE2 | 2.861 |
| 4PTU | A_ARG_24  | NH1 | A_ASP_70  | OD2 | 3.705 |
| 4PTU | A_ARG_53  | NH1 | A_ASP_50  | OD2 | 3.480 |
| 4PTU | A_ARG_53  | NH2 | A_ASP_50  | OD2 | 2.718 |

|      |           |     |            |     |       |
|------|-----------|-----|------------|-----|-------|
| 4PTU | A_ARG_61  | NH1 | A_GLU_79   | OE1 | 3.172 |
| 4PTU | A_ARG_61  | NH2 | A_GLU_79   | OE1 | 3.200 |
| 4PTU | A_ARG_61  | NH2 | A_ASP_82   | OD1 | 2.746 |
| 4PTU | A_ARG_61  | NH2 | A_ASP_82   | OD2 | 3.514 |
| 4PTU | A_ARG_91  | NH2 | B_GLU_95   | OE1 | 3.438 |
| 4PTU | A_ARG_91  | NH2 | B_GLU_95   | OE2 | 3.334 |
| 4PTU | A_LYS_107 | NZ  | A_GLU_17   | OE1 | 3.740 |
| 4PTU | A_LYS_107 | NZ  | A_GLU_17   | OE2 | 3.243 |
| 4PTU | A_LYS_149 | NZ  | A_GLU_195  | OE1 | 3.016 |
| 4PTU | A_LYS_149 | NZ  | A_GLU_195  | OE2 | 3.379 |
| 4PTU | A_LYS_183 | NZ  | A_GLU_187  | OE1 | 2.720 |
| 4PTU | A_LYS_188 | NZ  | A_ASP_185  | OD1 | 3.765 |
| 4PTU | A_HIS_189 | ND1 | A_ASP_151  | OD2 | 3.327 |
| 4PTU | B_HIS_32  | ND1 | B_ASP_97   | OD1 | 3.387 |
| 4PTU | B_HIS_32  | NE2 | B_ASP_97   | OD1 | 3.899 |
| 4PTU | B_HIS_35  | NE2 | B_GLU_95   | OE2 | 2.750 |
| 4PTU | B_ARG_38  | NH1 | B_ASP_86   | OD1 | 2.924 |
| 4PTU | B_ARG_38  | NH2 | B_GLU_46   | OE1 | 3.021 |
| 4PTU | B_ARG_38  | NH2 | B_GLU_46   | OE2 | 3.729 |
| 4PTU | B_ARG_38  | NH2 | B_ASP_86   | OD1 | 3.966 |
| 4PTU | B_ARG_66  | NH1 | B_ASP_86   | OD1 | 3.085 |
| 4PTU | B_ARG_66  | NH1 | B_ASP_86   | OD2 | 3.410 |
| 4PTU | B_ARG_66  | NH2 | B_ASP_86   | OD1 | 3.877 |
| 4PTU | B_ARG_66  | NH2 | B_ASP_86   | OD2 | 2.723 |
| 4PTU | B_LYS_94  | NZ  | B_ASP_97   | OD1 | 2.781 |
| 4PTU | B_LYS_94  | NZ  | B_ASP_97   | OD2 | 3.846 |
| 4PTU | B_LYS_94  | NZ  | B_ASP_101  | OD1 | 3.172 |
| 4PTU | B_LYS_94  | NZ  | B_ASP_101  | OD2 | 2.801 |
| 4PTU | B_LYS_143 | NZ  | B_ASP_144  | OD1 | 3.236 |
| 4PTU | B_LYS_143 | NZ  | B_ASP_144  | OD2 | 3.531 |
| 4PTU | B_LYS_209 | NZ  | A_GLU_123  | OE1 | 3.628 |
| 4PTU | B_ARG_210 | NH1 | B_GLU_212  | OE2 | 3.352 |
| 4Q6I | A_ARG_24  | NH2 | A_ASP_70   | OD1 | 3.547 |
| 4Q6I | A_LYS_49  | NZ  | A_GLU_55   | OE1 | 3.733 |
| 4Q6I | A_LYS_49  | NZ  | B_ASP_100A | OD1 | 2.964 |
| 4Q6I | A_ARG_61  | NH1 | A_GLU_79   | OE1 | 3.355 |
| 4Q6I | A_ARG_61  | NH1 | A_GLU_79   | OE2 | 3.338 |
| 4Q6I | A_ARG_61  | NH1 | A_GLU_81   | OE2 | 3.926 |
| 4Q6I | A_ARG_61  | NH2 | A_GLU_79   | OE2 | 3.547 |
| 4Q6I | A_ARG_61  | NH2 | A_GLU_81   | OE2 | 3.022 |
| 4Q6I | A_ARG_61  | NH2 | A_ASP_82   | OD1 | 2.927 |
| 4Q6I | A_ARG_61  | NH2 | A_ASP_82   | OD2 | 3.845 |
| 4Q6I | A_LYS_103 | NZ  | A_GLU_105  | OE2 | 3.808 |
| 4Q6I | A_LYS_142 | NZ  | A_GLU_105  | OE1 | 3.421 |
| 4Q6I | A_LYS_142 | NZ  | A_GLU_105  | OE2 | 2.841 |
| 4Q6I | A_LYS_147 | NZ  | A_GLU_154  | OE1 | 3.796 |
| 4Q6I | A_LYS_149 | NZ  | A_GLU_195  | OE1 | 3.162 |
| 4Q6I | A_LYS_149 | NZ  | A_GLU_195  | OE2 | 3.016 |
| 4Q6I | A_ARG_155 | NH1 | A_GLU_185  | OE2 | 3.506 |
| 4Q6I | A_HIS_189 | ND1 | A_ASP_151  | OD2 | 2.954 |
| 4Q6I | B_HIS_66  | ND1 | B_ASP_61   | OD1 | 3.699 |
| 4Q6I | B_HIS_66  | ND1 | B_ASP_61   | OD2 | 3.085 |
| 4Q6I | B_HIS_66  | NE2 | B_ASP_86   | OD1 | 3.906 |
| 4Q6I | B_HIS_66  | NE2 | B_ASP_86   | OD2 | 2.658 |
| 4Q6I | B_ARG_94  | NH2 | B_ASP_101  | OD1 | 3.897 |
| 4Q6I | B_ARG_94  | NH2 | B_ASP_101  | OD2 | 2.713 |
| 4Q6I | B_LYS_208 | NZ  | A_GLU_123  | OE2 | 2.822 |
| 4Q6I | C_LYS_8   | NZ  | C_GLU_119  | OE1 | 2.805 |



|      |           |     |            |     |       |
|------|-----------|-----|------------|-----|-------|
| 4Q6I | C_HIS_27  | NE2 | C_GLU_85   | OE1 | 3.053 |
| 4Q6I | C_LYS_50  | NZ  | C_GLU_77   | OE2 | 3.944 |
| 4Q6I | C_LYS_50  | NZ  | L_GLU_93   | OE2 | 2.549 |
| 4Q6I | C_ARG_54  | NH1 | C_ASP_78   | OD2 | 2.778 |
| 4Q6I | C_ARG_54  | NH2 | C_ASP_78   | OD1 | 3.552 |
| 4Q6I | C_ARG_54  | NH2 | C_ASP_78   | OD2 | 3.385 |
| 4Q6I | C_ARG_134 | NH1 | C_GLU_150  | OE1 | 2.907 |
| 4Q6I | C_ARG_134 | NH1 | C_GLU_150  | OE2 | 3.926 |
| 4Q6I | C_LYS_136 | NZ  | C_ASP_153  | OD1 | 3.102 |
| 4Q6I | C_LYS_136 | NZ  | C_ASP_153  | OD2 | 3.702 |
| 4Q6I | C_LYS_167 | NZ  | C_GLU_169  | OE2 | 3.766 |
| 4Q6I | C_LYS_181 | NZ  | G_GLU_56   | OE1 | 2.499 |
| 4Q6I | D_ARG_24  | NH2 | D_ASP_70   | OD1 | 3.494 |
| 4Q6I | D_LYS_49  | NZ  | D_GLU_55   | OE1 | 3.186 |
| 4Q6I | D_LYS_49  | NZ  | D_GLU_55   | OE2 | 3.674 |
| 4Q6I | D_LYS_49  | NZ  | E_ASP_100A | OD1 | 3.008 |
| 4Q6I | D_ARG_61  | NH1 | D_GLU_79   | OE1 | 3.297 |
| 4Q6I | D_ARG_61  | NH1 | D_GLU_79   | OE2 | 3.483 |
| 4Q6I | D_ARG_61  | NH2 | D_GLU_79   | OE2 | 3.497 |
| 4Q6I | D_ARG_61  | NH2 | D_GLU_81   | OE2 | 3.188 |
| 4Q6I | D_ARG_61  | NH2 | D_ASP_82   | OD1 | 3.128 |
| 4Q6I | D_ARG_61  | NH2 | D_ASP_82   | OD2 | 3.997 |
| 4Q6I | D_LYS_142 | NZ  | D_GLU_105  | OE1 | 3.699 |
| 4Q6I | D_LYS_142 | NZ  | D_GLU_105  | OE2 | 2.690 |
| 4Q6I | D_LYS_147 | NZ  | D_GLU_154  | OE1 | 3.636 |
| 4Q6I | D_LYS_149 | NZ  | D_GLU_195  | OE1 | 3.195 |
| 4Q6I | D_LYS_149 | NZ  | D_GLU_195  | OE2 | 2.990 |
| 4Q6I | D_ARG_155 | NH1 | D_GLU_185  | OE2 | 3.476 |
| 4Q6I | D_ARG_155 | NH2 | D_GLU_185  | OE2 | 3.858 |
| 4Q6I | D_HIS_189 | ND1 | D_ASP_151  | OD2 | 2.792 |
| 4Q6I | E_HIS_66  | ND1 | E_ASP_61   | OD1 | 3.611 |
| 4Q6I | E_HIS_66  | ND1 | E_ASP_61   | OD2 | 3.049 |
| 4Q6I | E_HIS_66  | NE2 | E_ASP_86   | OD1 | 3.914 |
| 4Q6I | E_HIS_66  | NE2 | E_ASP_86   | OD2 | 2.560 |
| 4Q6I | E_ARG_94  | NH2 | E_ASP_101  | OD1 | 3.957 |
| 4Q6I | E_ARG_94  | NH2 | E_ASP_101  | OD2 | 2.680 |
| 4Q6I | E_LYS_208 | NZ  | D_GLU_123  | OE2 | 3.047 |
| 4Q6I | F_ARG_24  | NH2 | F_ASP_70   | OD1 | 3.340 |
| 4Q6I | F_ARG_24  | NH2 | F_ASP_70   | OD2 | 3.665 |
| 4Q6I | F_LYS_49  | NZ  | F_GLU_55   | OE1 | 3.518 |
| 4Q6I | F_LYS_49  | NZ  | G_ASP_100A | OD1 | 3.146 |
| 4Q6I | F_ARG_61  | NH1 | F_GLU_79   | OE1 | 3.116 |
| 4Q6I | F_ARG_61  | NH1 | F_GLU_79   | OE2 | 3.200 |
| 4Q6I | F_ARG_61  | NH2 | F_GLU_79   | OE2 | 3.435 |
| 4Q6I | F_ARG_61  | NH2 | F_GLU_81   | OE2 | 3.194 |
| 4Q6I | F_ARG_61  | NH2 | F_ASP_82   | OD1 | 2.864 |
| 4Q6I | F_ARG_61  | NH2 | F_ASP_82   | OD2 | 3.691 |
| 4Q6I | F_LYS_103 | NZ  | F_GLU_105  | OE2 | 3.989 |
| 4Q6I | F_LYS_142 | NZ  | F_GLU_105  | OE1 | 3.572 |
| 4Q6I | F_LYS_142 | NZ  | F_GLU_105  | OE2 | 2.671 |
| 4Q6I | F_LYS_147 | NZ  | F_GLU_154  | OE1 | 3.784 |
| 4Q6I | F_LYS_149 | NZ  | F_GLU_195  | OE1 | 3.282 |
| 4Q6I | F_LYS_149 | NZ  | F_GLU_195  | OE2 | 2.913 |
| 4Q6I | F_ARG_155 | NH1 | F_GLU_185  | OE2 | 3.619 |
| 4Q6I | F_ARG_155 | NH2 | F_GLU_185  | OE2 | 3.997 |
| 4Q6I | F_HIS_189 | ND1 | F_ASP_151  | OD2 | 2.927 |
| 4Q6I | G_HIS_66  | ND1 | G_ASP_61   | OD1 | 3.622 |
| 4Q6I | G_HIS_66  | ND1 | G_ASP_61   | OD2 | 3.038 |

|      |           |     |            |     |       |
|------|-----------|-----|------------|-----|-------|
| 4Q6I | G_HIS_66  | NE2 | G_ASP_86   | OD1 | 3.886 |
| 4Q6I | G_HIS_66  | NE2 | G_ASP_86   | OD2 | 2.589 |
| 4Q6I | G_ARG_94  | NH2 | G_ASP_101  | OD1 | 3.834 |
| 4Q6I | G_ARG_94  | NH2 | G_ASP_101  | OD2 | 2.611 |
| 4Q6I | G_LYS_208 | NZ  | F_GLU_123  | OE2 | 3.409 |
| 4Q6I | H_HIS_66  | ND1 | H_ASP_61   | OD1 | 3.559 |
| 4Q6I | H_HIS_66  | ND1 | H_ASP_61   | OD2 | 2.808 |
| 4Q6I | H_HIS_66  | NE2 | H_ASP_86   | OD1 | 3.762 |
| 4Q6I | H_HIS_66  | NE2 | H_ASP_86   | OD2 | 2.594 |
| 4Q6I | H_ARG_94  | NH2 | H_ASP_101  | OD1 | 3.987 |
| 4Q6I | H_ARG_94  | NH2 | H_ASP_101  | OD2 | 2.731 |
| 4Q6I | H_LYS_208 | NZ  | L_GLU_123  | OE2 | 3.045 |
| 4Q6I | I_LYS_8   | NZ  | I_GLU_119  | OE1 | 2.686 |
| 4Q6I | I_LYS_8   | NZ  | I_GLU_119  | OE2 | 3.813 |
| 4Q6I | I_HIS_27  | NE2 | I_GLU_85   | OE1 | 3.108 |
| 4Q6I | I_LYS_50  | NZ  | F_GLU_93   | OE2 | 2.473 |
| 4Q6I | I_LYS_50  | NZ  | I_GLU_77   | OE2 | 3.955 |
| 4Q6I | I_ARG_54  | NH1 | I_ASP_78   | OD2 | 2.649 |
| 4Q6I | I_ARG_54  | NH2 | I_ASP_78   | OD1 | 3.358 |
| 4Q6I | I_ARG_54  | NH2 | I_ASP_78   | OD2 | 3.298 |
| 4Q6I | I_ARG_134 | NH1 | I_GLU_150  | OE1 | 2.570 |
| 4Q6I | I_ARG_134 | NH1 | I_GLU_150  | OE2 | 3.190 |
| 4Q6I | I_LYS_136 | NZ  | I_ASP_153  | OD1 | 2.871 |
| 4Q6I | I_LYS_136 | NZ  | I_ASP_153  | OD2 | 3.533 |
| 4Q6I | I_LYS_167 | NZ  | I_GLU_169  | OE2 | 3.738 |
| 4Q6I | I_LYS_181 | NZ  | H_GLU_56   | OE1 | 3.345 |
| 4Q6I | J_LYS_8   | NZ  | J_GLU_119  | OE1 | 2.575 |
| 4Q6I | J_LYS_8   | NZ  | J_GLU_119  | OE2 | 3.660 |
| 4Q6I | J_HIS_27  | NE2 | J_GLU_85   | OE1 | 3.112 |
| 4Q6I | J_LYS_50  | NZ  | D_GLU_93   | OE2 | 2.666 |
| 4Q6I | J_LYS_50  | NZ  | J_GLU_77   | OE2 | 3.985 |
| 4Q6I | J_ARG_54  | NH1 | J_ASP_78   | OD2 | 2.642 |
| 4Q6I | J_ARG_54  | NH2 | J_ASP_78   | OD1 | 3.414 |
| 4Q6I | J_ARG_54  | NH2 | J_ASP_78   | OD2 | 3.086 |
| 4Q6I | J_ARG_134 | NH1 | J_GLU_150  | OE1 | 3.114 |
| 4Q6I | J_LYS_136 | NZ  | J_ASP_153  | OD1 | 2.951 |
| 4Q6I | J_LYS_136 | NZ  | J_ASP_153  | OD2 | 3.722 |
| 4Q6I | J_LYS_167 | NZ  | J_GLU_169  | OE2 | 3.737 |
| 4Q6I | K_LYS_8   | NZ  | K_GLU_119  | OE1 | 2.674 |
| 4Q6I | K_LYS_8   | NZ  | K_GLU_119  | OE2 | 3.835 |
| 4Q6I | K_HIS_27  | NE2 | K_GLU_85   | OE1 | 2.922 |
| 4Q6I | K_LYS_50  | NZ  | A_GLU_93   | OE2 | 2.835 |
| 4Q6I | K_LYS_50  | NZ  | K_GLU_77   | OE2 | 3.766 |
| 4Q6I | K_ARG_54  | NH1 | K_ASP_78   | OD2 | 2.757 |
| 4Q6I | K_ARG_54  | NH2 | K_ASP_78   | OD1 | 3.522 |
| 4Q6I | K_ARG_54  | NH2 | K_ASP_78   | OD2 | 3.092 |
| 4Q6I | K_ARG_134 | NH1 | K_GLU_150  | OE1 | 2.737 |
| 4Q6I | K_ARG_134 | NH1 | K_GLU_150  | OE2 | 2.516 |
| 4Q6I | K_LYS_136 | NZ  | K_ASP_153  | OD1 | 3.074 |
| 4Q6I | K_LYS_136 | NZ  | K_ASP_153  | OD2 | 3.548 |
| 4Q6I | L_ARG_24  | NH2 | L_ASP_70   | OD1 | 3.386 |
| 4Q6I | L_ARG_24  | NH2 | L_ASP_70   | OD2 | 3.804 |
| 4Q6I | L_LYS_49  | NZ  | H_ASP_100A | OD1 | 3.063 |
| 4Q6I | L_LYS_49  | NZ  | L_GLU_55   | OE1 | 3.608 |
| 4Q6I | L_ARG_61  | NH1 | L_GLU_79   | OE1 | 3.293 |
| 4Q6I | L_ARG_61  | NH1 | L_GLU_79   | OE2 | 3.453 |
| 4Q6I | L_ARG_61  | NH2 | L_GLU_79   | OE2 | 3.533 |
| 4Q6I | L_ARG_61  | NH2 | L_GLU_81   | OE2 | 3.058 |

|      |           |     |           |     |       |
|------|-----------|-----|-----------|-----|-------|
| 4Q6I | L_ARG_61  | NH2 | L_ASP_82  | OD1 | 3.103 |
| 4Q6I | L_LYS_142 | NZ  | L_GLU_105 | OE1 | 3.663 |
| 4Q6I | L_LYS_142 | NZ  | L_GLU_105 | OE2 | 2.645 |
| 4Q6I | L_LYS_147 | NZ  | L_GLU_154 | OE1 | 3.681 |
| 4Q6I | L_LYS_149 | NZ  | L_GLU_195 | OE1 | 3.252 |
| 4Q6I | L_LYS_149 | NZ  | L_GLU_195 | OE2 | 2.874 |
| 4Q6I | L_ARG_155 | NH1 | L_GLU_185 | OE2 | 3.717 |
| 4Q6I | L_ARG_155 | NH2 | L_GLU_185 | OE2 | 3.978 |
| 4Q6I | L_HIS_189 | ND1 | L_ASP_151 | OD2 | 2.862 |
| 4Q97 | A_LYS_181 | NZ  | A_GLU_215 | OE1 | 3.508 |
| 4Q97 | A_LYS_181 | NZ  | A_GLU_215 | OE2 | 2.452 |
| 4Q97 | A_ARG_218 | NH2 | A_GLU_215 | OE1 | 3.903 |
| 4Q97 | A_ARG_240 | NH2 | A_GLU_238 | OE1 | 2.864 |
| 4Q97 | A_ARG_240 | NH2 | A_GLU_238 | OE2 | 3.199 |
| 4Q97 | B_LYS_181 | NZ  | B_GLU_215 | OE1 | 3.498 |
| 4Q97 | B_LYS_181 | NZ  | B_GLU_215 | OE2 | 2.431 |
| 4Q97 | B_ARG_218 | NH2 | B_GLU_215 | OE1 | 3.910 |
| 4Q97 | B_ARG_240 | NH2 | B_GLU_238 | OE1 | 2.853 |
| 4Q97 | B_ARG_240 | NH2 | B_GLU_238 | OE2 | 3.203 |
| 4Q9B | A_ARG_250 | NH1 | A_GLU_268 | OE2 | 2.895 |
| 4Q9B | A_ARG_288 | NH1 | A_GLU_316 | OE1 | 3.608 |
| 4Q9B | A_ARG_288 | NH1 | A_GLU_316 | OE2 | 2.926 |
| 4Q9B | A_ARG_288 | NH2 | A_GLU_316 | OE1 | 2.765 |
| 4Q9B | A_ARG_288 | NH2 | A_GLU_316 | OE2 | 3.617 |
| 4Q9B | A_ARG_309 | NH1 | A_GLU_295 | OE1 | 2.883 |
| 4Q9B | A_ARG_309 | NH1 | A_GLU_295 | OE2 | 3.399 |
| 4Q9B | A_ARG_309 | NH1 | B_GLU_255 | OE1 | 3.484 |
| 4Q9B | A_ARG_309 | NH1 | B_GLU_255 | OE2 | 2.912 |
| 4Q9B | A_ARG_309 | NH2 | B_GLU_255 | OE2 | 3.212 |
| 4Q9B | A_ARG_339 | NH2 | A_GLU_322 | OE1 | 3.788 |
| 4Q9B | A_ARG_339 | NH2 | A_GLU_322 | OE2 | 2.973 |
| 4Q9B | A_ARG_341 | NH1 | A_GLU_322 | OE2 | 3.129 |
| 4Q9B | B_ARG_250 | NH1 | B_GLU_268 | OE2 | 2.773 |
| 4Q9B | B_ARG_288 | NH1 | B_GLU_316 | OE1 | 3.649 |
| 4Q9B | B_ARG_288 | NH1 | B_GLU_316 | OE2 | 2.767 |
| 4Q9B | B_ARG_288 | NH2 | B_GLU_316 | OE1 | 2.902 |
| 4Q9B | B_ARG_288 | NH2 | B_GLU_316 | OE2 | 3.570 |
| 4Q9B | B_ARG_309 | NH1 | A_GLU_255 | OE1 | 3.145 |
| 4Q9B | B_ARG_309 | NH1 | A_GLU_255 | OE2 | 2.858 |
| 4Q9B | B_ARG_309 | NH1 | B_GLU_295 | OE1 | 3.156 |
| 4Q9B | B_ARG_309 | NH1 | B_GLU_295 | OE2 | 3.958 |
| 4Q9B | B_ARG_309 | NH2 | B_GLU_295 | OE1 | 2.549 |
| 4Q9B | B_ARG_339 | NH2 | B_GLU_322 | OE1 | 2.438 |
| 4Q9B | B_ARG_339 | NH2 | B_GLU_322 | OE2 | 3.097 |
| 4Q9B | B_ARG_341 | NH2 | B_GLU_322 | OE2 | 2.672 |
| 4Q9C | A_LYS_388 | NZ  | A_GLU_422 | OE1 | 3.305 |
| 4Q9C | A_LYS_428 | NZ  | A_ASP_390 | OD2 | 3.566 |
| 4QEX | A_LYS_17  | NZ  | A_GLU_71  | OE1 | 3.725 |
| 4QEX | A_LYS_17  | NZ  | A_GLU_71  | OE2 | 2.956 |
| 4QEX | A_ARG_18  | NH1 | A_ASP_39  | OD1 | 2.342 |
| 4QEX | A_ARG_18  | NH1 | A_ASP_39  | OD2 | 2.888 |
| 4QEX | A_ARG_18  | NH2 | A_ASP_39  | OD1 | 3.858 |
| 4QEX | A_LYS_19  | NZ  | A_ASP_80  | OD1 | 2.818 |
| 4QEX | A_LYS_19  | NZ  | A_ASP_80  | OD2 | 3.469 |
| 4QEX | A_LYS_26  | NZ  | A_ASP_108 | OD1 | 3.934 |
| 4QEX | A_ARG_40  | NH1 | A_ASP_97  | OD2 | 2.989 |
| 4QEX | A_ARG_40  | NH2 | A_ASP_97  | OD2 | 2.794 |
| 4QEX | A_ARG_40  | NH2 | A_GLU_182 | OE1 | 3.072 |

|      |           |     |           |     |       |
|------|-----------|-----|-----------|-----|-------|
| 4QEX | A_ARG_40  | NH2 | A_GLU_182 | OE2 | 3.122 |
| 4QEX | A_ARG_41  | NH1 | A_ASP_108 | OD2 | 2.767 |
| 4QEX | A_ARG_41  | NH2 | A_ASP_106 | OD1 | 3.672 |
| 4QEX | A_ARG_41  | NH2 | A_ASP_106 | OD2 | 2.658 |
| 4QEX | A_ARG_41  | NH2 | A_ASP_108 | OD2 | 3.573 |
| 4QEX | A_LYS_61  | NZ  | A_GLU_146 | OE2 | 3.762 |
| 4QEX | A_LYS_78  | NZ  | A_ASP_90  | OD1 | 3.235 |
| 4QEX | A_ARG_140 | NH1 | A_GLU_117 | OE2 | 3.439 |
| 4QEX | A_LYS_141 | NZ  | A_GLU_172 | OE1 | 3.378 |
| 4QEX | A_HIS_159 | NE2 | A_GLU_158 | OE2 | 3.794 |
| 4QEX | A_LYS_181 | NZ  | A_GLU_173 | OE1 | 3.704 |
| 4QEX | A_LYS_181 | NZ  | A_GLU_173 | OE2 | 3.359 |
| 4QEX | A_ARG_191 | NH2 | A_ASP_263 | OD2 | 3.924 |
| 4QEX | A_ARG_194 | NH2 | A_GLU_190 | OE2 | 3.371 |
| 4QEX | A_LYS_199 | NZ  | A_GLU_276 | OE2 | 3.126 |
| 4QEX | A_LYS_230 | NZ  | A_ASP_274 | OD1 | 3.711 |
| 4QEX | A_LYS_230 | NZ  | A_ASP_274 | OD2 | 3.195 |
| 4QEX | A_LYS_284 | NZ  | A_ASP_309 | OD2 | 3.762 |
| 4QEX | A_LYS_284 | NZ  | A_ASP_312 | OD1 | 3.824 |
| 4QEX | A_LYS_284 | NZ  | A_ASP_312 | OD2 | 2.849 |
| 4QEX | A_LYS_320 | NZ  | A_ASP_311 | OD1 | 3.730 |
| 4QEX | A_LYS_333 | NZ  | A_GLU_331 | OE1 | 2.647 |
| 4QEX | A_LYS_341 | NZ  | A_GLU_545 | OE1 | 3.181 |
| 4QEX | A_LYS_341 | NZ  | A_GLU_545 | OE2 | 2.966 |
| 4QEX | A_LYS_341 | NZ  | H_ASP_53  | OD1 | 3.875 |
| 4QEX | A_ARG_348 | NH1 | A_ASP_405 | OD2 | 3.055 |
| 4QEX | A_ARG_348 | NH2 | A_ASP_405 | OD2 | 2.876 |
| 4QEX | A_ARG_348 | NH2 | A_GLU_488 | OE1 | 3.045 |
| 4QEX | A_ARG_348 | NH2 | A_GLU_488 | OE2 | 3.938 |
| 4QEX | A_ARG_349 | NH2 | A_ASP_414 | OD1 | 3.531 |
| 4QEX | A_ARG_349 | NH2 | A_ASP_414 | OD2 | 2.996 |
| 4QEX | A_LYS_384 | NZ  | A_GLU_306 | OE1 | 3.997 |
| 4QEX | A_LYS_384 | NZ  | A_GLU_306 | OE2 | 3.752 |
| 4QEX | A_ARG_385 | NH2 | A_ASP_324 | OD1 | 3.155 |
| 4QEX | A_LYS_386 | NZ  | A_GLU_351 | OE1 | 3.481 |
| 4QEX | A_LYS_386 | NZ  | A_GLU_351 | OE2 | 3.992 |
| 4QEX | A_ARG_422 | NH2 | H_ASP_97  | OD2 | 3.116 |
| 4QEX | A_LYS_423 | NZ  | A_ASP_358 | OD1 | 3.415 |
| 4QEX | A_LYS_423 | NZ  | A_ASP_358 | OD2 | 3.036 |
| 4QEX | A_LYS_427 | NZ  | A_ASP_362 | OD1 | 2.843 |
| 4QEX | A_ARG_437 | NH2 | A_ASP_442 | OD2 | 3.346 |
| 4QEX | A_LYS_443 | NZ  | A_ASP_447 | OD1 | 3.941 |
| 4QEX | A_LYS_443 | NZ  | A_ASP_447 | OD2 | 2.889 |
| 4QEX | A_ARG_484 | NH1 | A_ASP_408 | OD2 | 3.149 |
| 4QEX | A_ARG_484 | NH2 | A_ASP_405 | OD1 | 3.156 |
| 4QEX | A_ARG_484 | NH2 | A_ASP_405 | OD2 | 3.109 |
| 4QEX | A_ARG_484 | NH2 | A_ASP_408 | OD2 | 3.711 |
| 4QEX | A_LYS_497 | NZ  | A_GLU_582 | OE1 | 2.757 |
| 4QEX | A_LYS_531 | NZ  | A_GLU_535 | OE2 | 3.270 |
| 4QEX | A_LYS_532 | NZ  | A_GLU_535 | OE1 | 3.348 |
| 4QEX | A_LYS_532 | NZ  | A_GLU_535 | OE2 | 3.847 |
| 4QEX | A_LYS_573 | NZ  | A_GLU_394 | OE2 | 3.110 |
| 4QEX | L_ARG_18  | NH2 | L_ASP_76  | OD1 | 3.851 |
| 4QEX | L_ARG_24  | NH2 | L_ASP_70  | OD2 | 3.377 |
| 4QEX | L_LYS_27  | NZ  | L_GLU_93  | OE1 | 3.354 |
| 4QEX | L_ARG_39  | NH1 | L_ASP_81  | OD1 | 3.904 |
| 4QEX | L_ARG_61  | NH1 | L_ASP_82  | OD1 | 2.872 |
| 4QEX | L_ARG_61  | NH1 | L_ASP_82  | OD2 | 2.775 |

|      |           |     |           |     |       |
|------|-----------|-----|-----------|-----|-------|
| 4QEX | L_ARG_61  | NH2 | L_GLU_79  | OE1 | 3.798 |
| 4QEX | L_ARG_61  | NH2 | L_ASP_82  | OD1 | 2.840 |
| 4QEX | L_ARG_61  | NH2 | L_ASP_82  | OD2 | 3.147 |
| 4QEX | L_LYS_149 | NZ  | L_GLU_154 | OE1 | 3.545 |
| 4QEX | L_ARG_155 | NH2 | L_GLU_185 | OE2 | 3.880 |
| 4QEX | L_HIS_189 | ND1 | L_ASP_151 | OD2 | 3.464 |
| 4QEX | L_LYS_199 | NZ  | L_ASP_110 | OD2 | 3.727 |
| 4QEX | H_LYS_38  | NZ  | H_ASP_86  | OD1 | 3.545 |
| 4QEX | H_LYS_62  | NZ  | H_ASP_46  | OD1 | 3.147 |
| 4QEX | H_LYS_62  | NZ  | H_ASP_46  | OD2 | 3.315 |
| 4QEX | H_LYS_66  | NZ  | H_ASP_86  | OD2 | 3.686 |
| 4QEX | H_ARG_82A | NH2 | H_GLU_81  | OE1 | 3.257 |
| 4QEX | B_LYS_17  | NZ  | B_GLU_71  | OE1 | 3.723 |
| 4QEX | B_LYS_17  | NZ  | B_GLU_71  | OE2 | 2.955 |
| 4QEX | B_ARG_18  | NH1 | B_ASP_39  | OD1 | 2.348 |
| 4QEX | B_ARG_18  | NH1 | B_ASP_39  | OD2 | 2.891 |
| 4QEX | B_ARG_18  | NH2 | B_ASP_39  | OD1 | 3.859 |
| 4QEX | B_LYS_19  | NZ  | B_ASP_80  | OD1 | 2.821 |
| 4QEX | B_LYS_19  | NZ  | B_ASP_80  | OD2 | 3.471 |
| 4QEX | B_LYS_26  | NZ  | B_ASP_108 | OD1 | 3.946 |
| 4QEX | B_ARG_40  | NH1 | B_ASP_97  | OD2 | 2.987 |
| 4QEX | B_ARG_40  | NH2 | B_ASP_97  | OD2 | 2.795 |
| 4QEX | B_ARG_40  | NH2 | B_GLU_182 | OE1 | 3.067 |
| 4QEX | B_ARG_40  | NH2 | B_GLU_182 | OE2 | 3.120 |
| 4QEX | B_ARG_41  | NH1 | B_ASP_108 | OD2 | 2.740 |
| 4QEX | B_ARG_41  | NH2 | B_ASP_106 | OD1 | 3.677 |
| 4QEX | B_ARG_41  | NH2 | B_ASP_106 | OD2 | 2.651 |
| 4QEX | B_ARG_41  | NH2 | B_ASP_108 | OD2 | 3.554 |
| 4QEX | B_LYS_61  | NZ  | B_GLU_146 | OE2 | 3.752 |
| 4QEX | B_LYS_78  | NZ  | B_ASP_90  | OD1 | 3.242 |
| 4QEX | B_LYS_125 | NZ  | B_GLU_130 | OE1 | 3.909 |
| 4QEX | B_ARG_140 | NH1 | B_GLU_117 | OE2 | 3.438 |
| 4QEX | B_LYS_141 | NZ  | B_GLU_172 | OE1 | 3.375 |
| 4QEX | B_HIS_159 | NE2 | B_GLU_158 | OE2 | 3.791 |
| 4QEX | B_LYS_181 | NZ  | B_GLU_173 | OE1 | 3.691 |
| 4QEX | B_LYS_181 | NZ  | B_GLU_173 | OE2 | 3.345 |
| 4QEX | B_ARG_191 | NH2 | B_ASP_263 | OD2 | 3.920 |
| 4QEX | B_ARG_194 | NH2 | B_GLU_190 | OE2 | 3.366 |
| 4QEX | B_LYS_199 | NZ  | B_GLU_276 | OE2 | 3.126 |
| 4QEX | B_LYS_230 | NZ  | B_ASP_274 | OD1 | 3.714 |
| 4QEX | B_LYS_230 | NZ  | B_ASP_274 | OD2 | 3.188 |
| 4QEX | B_LYS_284 | NZ  | B_ASP_309 | OD2 | 3.751 |
| 4QEX | B_LYS_284 | NZ  | B_ASP_312 | OD1 | 3.816 |
| 4QEX | B_LYS_284 | NZ  | B_ASP_312 | OD2 | 2.842 |
| 4QEX | B_LYS_320 | NZ  | B_ASP_311 | OD1 | 3.720 |
| 4QEX | B_LYS_333 | NZ  | B_GLU_331 | OE1 | 2.649 |
| 4QEX | B_LYS_341 | NZ  | B_GLU_545 | OE1 | 3.179 |
| 4QEX | B_LYS_341 | NZ  | B_GLU_545 | OE2 | 2.971 |
| 4QEX | B_ARG_348 | NH1 | B_ASP_405 | OD2 | 3.038 |
| 4QEX | B_ARG_348 | NH2 | B_ASP_405 | OD2 | 2.871 |
| 4QEX | B_ARG_348 | NH2 | B_GLU_488 | OE1 | 3.051 |
| 4QEX | B_ARG_348 | NH2 | B_GLU_488 | OE2 | 3.938 |
| 4QEX | B_ARG_349 | NH2 | B_ASP_414 | OD1 | 3.521 |
| 4QEX | B_ARG_349 | NH2 | B_ASP_414 | OD2 | 2.994 |
| 4QEX | B_LYS_384 | NZ  | B_GLU_306 | OE2 | 3.763 |
| 4QEX | B_ARG_385 | NH2 | B_ASP_324 | OD1 | 3.156 |
| 4QEX | B_LYS_386 | NZ  | B_GLU_351 | OE1 | 3.485 |
| 4QEX | B_LYS_386 | NZ  | B_GLU_351 | OE2 | 3.984 |

|      |           |     |           |     |       |
|------|-----------|-----|-----------|-----|-------|
| 4QEX | B_LYS_423 | NZ  | B_ASP_358 | OD1 | 3.425 |
| 4QEX | B_LYS_423 | NZ  | B_ASP_358 | OD2 | 3.036 |
| 4QEX | B_LYS_427 | NZ  | B_ASP_362 | OD1 | 2.827 |
| 4QEX | B_ARG_437 | NH2 | B_ASP_442 | OD2 | 3.351 |
| 4QEX | B_LYS_443 | NZ  | B_ASP_447 | OD1 | 3.938 |
| 4QEX | B_LYS_443 | NZ  | B_ASP_447 | OD2 | 2.877 |
| 4QEX | B_ARG_484 | NH1 | B_ASP_408 | OD2 | 3.150 |
| 4QEX | B_ARG_484 | NH2 | B_ASP_405 | OD1 | 3.172 |
| 4QEX | B_ARG_484 | NH2 | B_ASP_405 | OD2 | 3.124 |
| 4QEX | B_ARG_484 | NH2 | B_ASP_408 | OD2 | 3.702 |
| 4QEX | B_LYS_497 | NZ  | B_GLU_582 | OE1 | 2.759 |
| 4QEX | B_LYS_531 | NZ  | B_GLU_535 | OE2 | 3.281 |
| 4QEX | B_LYS_532 | NZ  | B_GLU_535 | OE1 | 3.369 |
| 4QEX | B_LYS_532 | NZ  | B_GLU_535 | OE2 | 3.868 |
| 4QEX | B_LYS_573 | NZ  | B_GLU_394 | OE2 | 3.119 |
| 4QEX | M_ARG_18  | NH2 | M_ASP_76  | OD1 | 3.849 |
| 4QEX | M_ARG_24  | NH2 | M_ASP_70  | OD2 | 3.380 |
| 4QEX | M_LYS_27  | NZ  | M_GLU_93  | OE1 | 3.352 |
| 4QEX | M_ARG_39  | NH1 | M_ASP_81  | OD1 | 3.900 |
| 4QEX | M_ARG_61  | NH1 | M_ASP_82  | OD1 | 2.873 |
| 4QEX | M_ARG_61  | NH1 | M_ASP_82  | OD2 | 2.791 |
| 4QEX | M_ARG_61  | NH2 | M_GLU_79  | OE1 | 3.795 |
| 4QEX | M_ARG_61  | NH2 | M_ASP_82  | OD1 | 2.843 |
| 4QEX | M_ARG_61  | NH2 | M_ASP_82  | OD2 | 3.151 |
| 4QEX | M_LYS_149 | NZ  | M_GLU_154 | OE1 | 3.545 |
| 4QEX | M_ARG_155 | NH2 | M_GLU_185 | OE2 | 3.873 |
| 4QEX | M_HIS_189 | ND1 | M_ASP_151 | OD2 | 3.467 |
| 4QEX | M_LYS_199 | NZ  | M_ASP_110 | OD2 | 3.724 |
| 4QEX | L_LYS_38  | NZ  | L_ASP_86  | OD1 | 3.550 |
| 4QEX | L_LYS_62  | NZ  | L_ASP_46  | OD1 | 3.149 |
| 4QEX | L_LYS_62  | NZ  | L_ASP_46  | OD2 | 3.316 |
| 4QEX | L_LYS_66  | NZ  | L_ASP_86  | OD2 | 3.689 |
| 4QEX | L_ARG_82A | NH2 | L_GLU_81  | OE1 | 3.265 |
| 4QHU | L_LYS_30  | NZ  | L_ASP_29  | OD1 | 3.579 |
| 4QHU | L_LYS_30  | NZ  | L_ASP_91  | OD2 | 3.632 |
| 4QHU | L_ARG_60  | NH2 | L_GLU_80  | OE2 | 3.111 |
| 4QHU | L_ARG_60  | NH2 | L_ASP_81  | OD1 | 2.567 |
| 4QHU | L_ARG_60  | NH2 | L_ASP_81  | OD2 | 3.488 |
| 4QHU | L_LYS_104 | NZ  | L_ASP_84  | OD1 | 3.091 |
| 4QHU | L_LYS_104 | NZ  | L_ASP_84  | OD2 | 3.639 |
| 4QHU | L_LYS_151 | NZ  | L_GLU_205 | OE1 | 3.904 |
| 4QHU | L_LYS_151 | NZ  | L_GLU_205 | OE2 | 3.118 |
| 4QHU | L_LYS_168 | NZ  | L_GLU_82  | OE2 | 2.712 |
| 4QHU | L_ARG_191 | NH2 | L_ASP_153 | OD1 | 3.474 |
| 4QHU | L_ARG_191 | NH2 | L_ASP_153 | OD2 | 3.847 |
| 4QHU | H_ARG_38  | NH1 | H_ASP_90  | OD1 | 2.949 |
| 4QHU | H_ARG_38  | NH2 | H_GLU_46  | OE1 | 3.628 |
| 4QHU | H_ARG_38  | NH2 | H_GLU_46  | OE2 | 3.083 |
| 4QHU | H_ARG_38  | NH2 | H_ASP_90  | OD1 | 3.976 |
| 4QHU | H_LYS_65  | NZ  | H_ASP_62  | OD1 | 2.679 |
| 4QHU | H_ARG_67  | NH1 | H_ASP_90  | OD1 | 3.783 |
| 4QHU | H_ARG_67  | NH1 | H_ASP_90  | OD2 | 2.761 |
| 4QHU | H_ARG_67  | NH2 | H_ASP_90  | OD1 | 3.192 |
| 4QHU | H_ARG_67  | NH2 | H_ASP_90  | OD2 | 3.606 |
| 4QHU | H_LYS_76  | NZ  | H_ASP_73  | OD2 | 3.381 |
| 4QHU | H_ARG_98  | NH1 | H_ASP_103 | OD1 | 3.756 |
| 4QHU | H_ARG_98  | NH1 | H_ASP_103 | OD2 | 2.704 |
| 4QHU | H_LYS_208 | NZ  | H_ASP_210 | OD1 | 3.995 |

|      |           |     |           |     |       |
|------|-----------|-----|-----------|-----|-------|
| 4QHU | A_LYS_30  | NZ  | A_ASP_91  | OD2 | 4.000 |
| 4QHU | A_ARG_60  | NH1 | A_GLU_80  | OE2 | 3.278 |
| 4QHU | A_ARG_60  | NH1 | A_ASP_81  | OD1 | 2.573 |
| 4QHU | A_ARG_60  | NH1 | A_ASP_81  | OD2 | 3.449 |
| 4QHU | A_LYS_104 | NZ  | A_ASP_84  | OD1 | 3.029 |
| 4QHU | A_LYS_104 | NZ  | A_ASP_84  | OD2 | 3.813 |
| 4QHU | A_LYS_168 | NZ  | A_GLU_82  | OE1 | 3.026 |
| 4QHU | A_HIS_190 | ND1 | A_ASP_153 | OD2 | 2.727 |
| 4QHU | A_ARG_191 | NH1 | A_ASP_153 | OD1 | 3.616 |
| 4QHU | A_ARG_191 | NH2 | A_ASP_153 | OD1 | 3.771 |
| 4QHU | A_ARG_191 | NH2 | A_ASP_153 | OD2 | 3.954 |
| 4QHU | B_ARG_38  | NH1 | B_ASP_90  | OD1 | 2.780 |
| 4QHU | B_ARG_38  | NH2 | B_GLU_46  | OE1 | 3.193 |
| 4QHU | B_ARG_38  | NH2 | B_GLU_46  | OE2 | 3.721 |
| 4QHU | B_ARG_38  | NH2 | B_ASP_90  | OD1 | 3.946 |
| 4QHU | B_LYS_65  | NZ  | B_ASP_62  | OD1 | 3.086 |
| 4QHU | B_ARG_67  | NH1 | B_ASP_90  | OD1 | 3.968 |
| 4QHU | B_ARG_67  | NH1 | B_ASP_90  | OD2 | 2.779 |
| 4QHU | B_ARG_67  | NH2 | B_ASP_90  | OD1 | 3.132 |
| 4QHU | B_ARG_67  | NH2 | B_ASP_90  | OD2 | 3.380 |
| 4QHU | B_ARG_98  | NH2 | B_ASP_103 | OD1 | 3.608 |
| 4QHU | B_ARG_98  | NH2 | B_ASP_103 | OD2 | 2.836 |
| 4QHU | B_LYS_145 | NZ  | A_GLU_126 | OE2 | 2.821 |
| 4QHU | B_LYS_212 | NZ  | B_GLU_214 | OE2 | 3.019 |
| 4QHU | C_ARG_20  | NH2 | C_ASP_15  | OD1 | 3.523 |
| 4QHU | C_HIS_29  | ND1 | D_GLU_113 | OE1 | 3.672 |
| 4QHU | C_ARG_31  | NH1 | D_GLU_113 | OE2 | 3.297 |
| 4QHU | C_ARG_31  | NH2 | D_GLU_113 | OE1 | 3.241 |
| 4QHU | C_ARG_31  | NH2 | D_GLU_113 | OE2 | 3.844 |
| 4QHU | C_ARG_39  | NH1 | L_ASP_52  | OD1 | 3.835 |
| 4QHU | C_ARG_39  | NH1 | L_ASP_52  | OD2 | 2.646 |
| 4QHU | C_ARG_46  | NH1 | C_ASP_42  | OD1 | 3.319 |
| 4QHU | C_ARG_55  | NH1 | L_ASP_49  | OD1 | 2.860 |
| 4QHU | C_ARG_55  | NH1 | L_ASP_49  | OD2 | 3.543 |
| 4QHU | C_ARG_55  | NH1 | C_GLU_57  | OE2 | 3.286 |
| 4QHU | C_ARG_55  | NH2 | C_GLU_57  | OE2 | 2.950 |
| 4QHU | C_HIS_86  | ND1 | C_ASP_84  | OD1 | 2.680 |
| 4QHU | C_ARG_100 | NH1 | C_ASP_58  | OD2 | 2.953 |
| 4QHU | C_ARG_100 | NH2 | C_ASP_58  | OD1 | 3.928 |
| 4QHU | C_ARG_100 | NH2 | C_ASP_58  | OD2 | 3.080 |
| 4QHU | C_ARG_111 | NH1 | C_GLU_102 | OE2 | 2.856 |
| 4QHU | D_ARG_46  | NH1 | D_ASP_42  | OD1 | 3.904 |
| 4QHU | D_ARG_55  | NH1 | D_GLU_57  | OE1 | 2.360 |
| 4QHU | D_ARG_55  | NH2 | D_GLU_57  | OE1 | 3.394 |
| 4QHU | D_HIS_86  | ND1 | D_ASP_84  | OD1 | 2.832 |
| 4QHU | D_ARG_100 | NH1 | D_ASP_58  | OD1 | 3.905 |
| 4QHU | D_ARG_100 | NH1 | D_ASP_58  | OD2 | 3.109 |
| 4QHU | D_ARG_100 | NH2 | D_ASP_58  | OD2 | 3.081 |
| 4QHU | D_ARG_100 | NH2 | D_GLU_113 | OE2 | 3.668 |
| 4QHU | D_LYS_114 | NZ  | D_GLU_95  | OE2 | 2.739 |
| 4QTI | H_ARG_38  | NH2 | H_GLU_46  | OE1 | 3.681 |
| 4QTI | H_ARG_38  | NH2 | H_GLU_46  | OE2 | 2.663 |
| 4QTI | H_LYS_67  | NZ  | H_ASP_90  | OD1 | 3.556 |
| 4QTI | H_LYS_67  | NZ  | H_ASP_90  | OD2 | 2.827 |
| 4QTI | H_ARG_98  | NH2 | H_ASP_110 | OD2 | 3.023 |
| 4QTI | H_LYS_217 | NZ  | L_GLU_123 | OE2 | 2.684 |
| 4QTI | L_ARG_24  | NH1 | L_ASP_70  | OD1 | 3.175 |
| 4QTI | L_ARG_24  | NH1 | L_ASP_70  | OD2 | 2.707 |

|      |           |     |           |     |       |
|------|-----------|-----|-----------|-----|-------|
| 4QTI | L_ARG_24  | NH2 | L_ASP_70  | OD1 | 3.394 |
| 4QTI | L_ARG_24  | NH2 | L_ASP_70  | OD2 | 3.619 |
| 4QTI | L_ARG_46  | NH2 | L_ASP_55  | OD1 | 2.886 |
| 4QTI | L_ARG_46  | NH2 | L_ASP_55  | OD2 | 3.715 |
| 4QTI | L_ARG_61  | NH2 | L_ASP_82  | OD1 | 2.723 |
| 4QTI | L_ARG_61  | NH2 | L_ASP_82  | OD2 | 3.112 |
| 4QTI | L_ARG_66  | NH1 | L_ASP_28  | OD2 | 3.786 |
| 4QTI | L_LYS_103 | NZ  | L_GLU_105 | OE1 | 2.889 |
| 4QTI | L_LYS_103 | NZ  | L_GLU_105 | OE2 | 3.497 |
| 4QTI | L_LYS_147 | NZ  | L_GLU_154 | OE1 | 3.641 |
| 4QTI | L_LYS_149 | NZ  | L_GLU_195 | OE1 | 2.748 |
| 4QTI | L_ARG_188 | NH2 | L_ASP_184 | OD1 | 3.219 |
| 4QTI | L_HIS_189 | ND1 | L_ASP_151 | OD2 | 3.900 |
| 4QTI | L_LYS_199 | NZ  | L_ASP_110 | OD2 | 3.524 |
| 4QTI | L_ARG_211 | NH2 | L_GLU_187 | OE2 | 2.655 |
| 4QTI | U_ARG_2   | NH1 | U_GLU_16  | OE1 | 3.772 |
| 4QTI | U_ARG_2   | NH1 | U_GLU_16  | OE2 | 3.501 |
| 4QTI | U_ARG_25  | NH2 | U_GLU_42  | OE2 | 3.368 |
| 4QTI | U_LYS_50  | NZ  | U_GLU_230 | OE2 | 3.973 |
| 4QTI | U_ARG_53  | NH1 | U_ASP_254 | OD2 | 3.882 |
| 4QTI | U_ARG_53  | NH2 | U_ASP_254 | OD1 | 3.258 |
| 4QTI | U_ARG_58  | NH2 | H_ASP_103 | OD2 | 2.819 |
| 4QTI | U_ARG_89  | NH1 | H_ASP_99  | OD2 | 3.048 |
| 4QTI | U_ARG_91  | NH1 | H_ASP_99  | OD1 | 2.759 |
| 4QTI | U_ARG_91  | NH1 | H_ASP_99  | OD2 | 2.751 |
| 4QTI | U_ARG_91  | NH2 | H_ASP_99  | OD2 | 3.786 |
| 4QTI | U_ARG_116 | NH1 | H_ASP_103 | OD2 | 3.777 |
| 4QTI | U_ARG_116 | NH2 | H_ASP_103 | OD1 | 3.889 |
| 4QTI | U_HIS_143 | NE2 | U_GLU_183 | OE2 | 3.484 |
| 4QTI | U_LYS_175 | NZ  | U_GLU_94  | OE2 | 2.662 |
| 4QTI | U_LYS_198 | NZ  | U_ASP_163 | OD1 | 2.860 |
| 4QTI | U_LYS_198 | NZ  | U_ASP_163 | OD2 | 3.382 |
| 4QTI | U_ARG_239 | NH1 | U_ASP_277 | OD1 | 2.952 |
| 4QTI | U_ARG_239 | NH1 | U_ASP_277 | OD2 | 3.438 |
| 4QTI | U_ARG_239 | NH2 | U_ASP_277 | OD1 | 3.749 |
| 4QTI | U_ARG_239 | NH2 | U_ASP_277 | OD2 | 2.737 |
| 4QTI | U_HIS_273 | ND1 | U_ASP_275 | OD1 | 3.694 |
| 4QTI | U_HIS_273 | ND1 | U_ASP_275 | OD2 | 3.712 |
| 4QXG | H_ARG_38  | NH1 | H_GLU_46  | OE1 | 3.582 |
| 4QXG | H_ARG_38  | NH1 | H_GLU_46  | OE2 | 3.109 |
| 4QXG | H_ARG_38  | NH2 | H_ASP_90  | OD1 | 3.835 |
| 4QXG | H_LYS_87  | NZ  | H_ASP_90  | OD1 | 2.584 |
| 4QXG | H_LYS_87  | NZ  | H_ASP_90  | OD2 | 3.997 |
| 4QXG | H_ARG_98  | NH2 | H_ASP_100 | OD2 | 3.302 |
| 4QXG | H_ARG_98  | NH2 | H_ASP_105 | OD1 | 3.741 |
| 4QXG | H_ARG_98  | NH2 | H_ASP_105 | OD2 | 2.750 |
| 4QXG | H_LYS_147 | NZ  | H_ASP_148 | OD1 | 3.049 |
| 4QXG | H_LYS_147 | NZ  | H_ASP_148 | OD2 | 3.141 |
| 4QXG | H_LYS_213 | NZ  | L_GLU_124 | OE2 | 3.477 |
| 4QXG | L_ARG_24  | NH2 | L_ASP_71  | OD2 | 3.349 |
| 4QXG | L_ARG_55  | NH1 | L_ASP_61  | OD1 | 3.811 |
| 4QXG | L_ARG_55  | NH2 | L_ASP_61  | OD1 | 3.150 |
| 4QXG | L_ARG_62  | NH2 | L_GLU_82  | OE2 | 3.622 |
| 4QXG | L_ARG_62  | NH2 | L_ASP_83  | OD1 | 2.986 |
| 4QXG | L_ARG_62  | NH2 | L_ASP_83  | OD2 | 3.699 |
| 4QXG | L_LYS_150 | NZ  | L_GLU_196 | OE1 | 2.605 |
| 4QXG | L_HIS_190 | ND1 | L_ASP_152 | OD2 | 2.741 |
| 4QXG | L_LYS_191 | NZ  | L_GLU_214 | OE1 | 3.615 |



|      |           |     |           |     |       |
|------|-----------|-----|-----------|-----|-------|
| 4QXG | L_LYS_191 | NZ  | L_GLU_214 | OE2 | 3.288 |
| 4R2G | E_LYS_121 | NZ  | E_GLU_429 | OE2 | 2.858 |
| 4R2G | E_LYS_236 | NZ  | E_ASP_275 | OD1 | 2.708 |
| 4R2G | E_HIS_249 | NE2 | E_GLU_482 | OE1 | 3.748 |
| 4R2G | E_LYS_269 | NZ  | E_GLU_347 | OE1 | 3.075 |
| 4R2G | E_ARG_298 | NH1 | E_GLU_381 | OE1 | 3.375 |
| 4R2G | E_ARG_298 | NH1 | E_GLU_381 | OE2 | 2.613 |
| 4R2G | E_LYS_348 | NZ  | E_GLU_351 | OE1 | 3.563 |
| 4R2G | E_LYS_357 | NZ  | E_GLU_466 | OE1 | 3.854 |
| 4R2G | E_ARG_456 | NH1 | E_GLU_466 | OE1 | 3.060 |
| 4R2G | E_ARG_456 | NH1 | E_GLU_466 | OE2 | 3.336 |
| 4R2G | E_ARG_469 | NH2 | E_ASP_457 | OD2 | 2.761 |
| 4R2G | E_ARG_476 | NH1 | E_GLU_102 | OE1 | 3.512 |
| 4R2G | E_ARG_476 | NH1 | E_GLU_102 | OE2 | 3.993 |
| 4R2G | E_ARG_476 | NH2 | E_ASP_474 | OD1 | 3.762 |
| 4R2G | E_ARG_476 | NH2 | E_ASP_474 | OD2 | 3.245 |
| 4R2G | E_ARG_480 | NH1 | E_ASP_477 | OD1 | 2.966 |
| 4R2G | F_LYS_8   | NZ  | F_GLU_119 | OE1 | 2.961 |
| 4R2G | F_LYS_8   | NZ  | F_GLU_119 | OE2 | 3.833 |
| 4R2G | F_LYS_29  | NZ  | E_ASP_279 | OD2 | 2.979 |
| 4R2G | F_LYS_29  | NZ  | F_GLU_85  | OE1 | 3.831 |
| 4R2G | F_ARG_54  | NH1 | F_ASP_78  | OD1 | 3.678 |
| 4R2G | F_ARG_54  | NH1 | F_ASP_78  | OD2 | 2.955 |
| 4R2G | F_ARG_54  | NH2 | F_ASP_78  | OD1 | 3.395 |
| 4R2G | F_ARG_54  | NH2 | F_ASP_78  | OD2 | 3.824 |
| 4R2G | F_ARG_58  | NH1 | F_GLU_13  | OE1 | 3.679 |
| 4R2G | F_ARG_58  | NH1 | F_GLU_13  | OE2 | 2.912 |
| 4R2G | F_ARG_58  | NH2 | F_GLU_13  | OE2 | 3.429 |
| 4R2G | F_ARG_59  | NH1 | E_ASP_368 | OD1 | 2.950 |
| 4R2G | F_ARG_59  | NH1 | E_ASP_368 | OD2 | 2.577 |
| 4R2G | F_ARG_59  | NH2 | E_ASP_368 | OD2 | 3.352 |
| 4R2G | F_LYS_90  | NZ  | F_GLU_85  | OE2 | 3.878 |
| 4R2G | P_ARG_31  | NH2 | P_ASP_66A | OD1 | 3.703 |
| 4R2G | P_ARG_61  | NH1 | P_GLU_79  | OE1 | 3.610 |
| 4R2G | P_ARG_61  | NH1 | P_ASP_82  | OD1 | 2.724 |
| 4R2G | P_ARG_61  | NH1 | P_ASP_82  | OD2 | 2.827 |
| 4R2G | P_ARG_61  | NH2 | P_ASP_82  | OD2 | 2.747 |
| 4R2G | P_ARG_103 | NH2 | P_ASP_85  | OD1 | 3.554 |
| 4R2G | P_ARG_103 | NH2 | P_ASP_85  | OD2 | 3.072 |
| 4R2G | P_LYS_167 | NZ  | P_GLU_83  | OE2 | 2.375 |
| 4R2G | Q_ARG_38  | NH1 | Q_ASP_86  | OD1 | 2.531 |
| 4R2G | Q_ARG_38  | NH2 | Q_GLU_46  | OE2 | 3.197 |
| 4R2G | Q_ARG_38  | NH2 | Q_ASP_86  | OD1 | 3.417 |
| 4R2G | Q_ARG_66  | NH1 | Q_ASP_86  | OD2 | 3.138 |
| 4R2G | Q_ARG_66  | NH2 | Q_ASP_86  | OD1 | 3.109 |
| 4R2G | Q_ARG_66  | NH2 | Q_ASP_86  | OD2 | 3.353 |
| 4R2G | Q_ARG_71  | NH2 | Q_GLU_55  | OE1 | 2.657 |
| 4R2G | Q_ARG_96  | NH1 | Q_ASP_101 | OD2 | 2.840 |
| 4R2G | Q_ARG_96  | NH2 | Q_ASP_101 | OD1 | 3.076 |
| 4R2G | Q_ARG_96  | NH2 | Q_ASP_101 | OD2 | 2.587 |
| 4R2G | Q_ARG_100 | NH2 | P_ASP_66A | OD2 | 2.815 |
| 4R2G | Q_LYS_227 | NZ  | P_GLU_124 | OE2 | 3.083 |
| 4R2G | B_LYS_29  | NZ  | O_ASP_279 | OD2 | 3.448 |
| 4R2G | B_ARG_54  | NH1 | B_ASP_78  | OD1 | 2.279 |
| 4R2G | B_ARG_54  | NH1 | B_ASP_78  | OD2 | 2.720 |
| 4R2G | B_ARG_54  | NH2 | B_ASP_78  | OD1 | 3.403 |
| 4R2G | B_ARG_54  | NH2 | B_ASP_78  | OD2 | 1.961 |
| 4R2G | B_ARG_58  | NH1 | B_GLU_13  | OE2 | 3.274 |

|      |           |     |           |     |       |
|------|-----------|-----|-----------|-----|-------|
| 4R2G | B_ARG_58  | NH2 | B_GLU_13  | OE2 | 3.415 |
| 4R2G | B_ARG_59  | NH1 | O_ASP_368 | OD1 | 2.838 |
| 4R2G | B_ARG_59  | NH1 | O_ASP_368 | OD2 | 3.428 |
| 4R2G | B_ARG_59  | NH2 | O_ASP_368 | OD1 | 3.471 |
| 4R2G | B_ARG_59  | NH2 | O_ASP_368 | OD2 | 2.776 |
| 4R2G | B_ARG_134 | NH1 | B_ASP_153 | OD1 | 3.163 |
| 4R2G | B_ARG_134 | NH2 | B_ASP_153 | OD1 | 3.693 |
| 4R2G | C_ARG_31  | NH1 | C_ASP_66A | OD1 | 3.082 |
| 4R2G | C_ARG_54  | NH1 | C_GLU_60  | OE2 | 3.362 |
| 4R2G | C_ARG_61  | NH1 | C_GLU_79  | OE1 | 3.445 |
| 4R2G | C_ARG_61  | NH1 | C_ASP_82  | OD1 | 3.443 |
| 4R2G | C_ARG_61  | NH1 | C_ASP_82  | OD2 | 2.957 |
| 4R2G | C_ARG_61  | NH2 | C_ASP_82  | OD2 | 3.224 |
| 4R2G | C_ARG_103 | NH1 | C_ASP_85  | OD1 | 3.613 |
| 4R2G | C_ARG_103 | NH2 | C_ASP_85  | OD2 | 3.803 |
| 4R2G | C_LYS_167 | NZ  | C_GLU_83  | OE2 | 3.124 |
| 4R2G | C_HIS_189 | ND1 | C_ASP_152 | OD1 | 3.916 |
| 4R2G | C_HIS_189 | ND1 | C_ASP_152 | OD2 | 2.449 |
| 4R2G | D_ARG_13  | NH2 | D_GLU_16  | OE1 | 3.234 |
| 4R2G | D_ARG_13  | NH2 | D_GLU_16  | OE2 | 2.237 |
| 4R2G | D_ARG_38  | NH1 | D_ASP_86  | OD1 | 2.671 |
| 4R2G | D_ARG_38  | NH2 | D_GLU_46  | OE1 | 3.784 |
| 4R2G | D_ARG_38  | NH2 | D_GLU_46  | OE2 | 3.013 |
| 4R2G | D_ARG_38  | NH2 | D_ASP_86  | OD1 | 3.766 |
| 4R2G | D_ARG_66  | NH1 | D_ASP_86  | OD1 | 3.577 |
| 4R2G | D_ARG_66  | NH1 | D_ASP_86  | OD2 | 3.981 |
| 4R2G | D_ARG_66  | NH2 | D_ASP_86  | OD1 | 3.085 |
| 4R2G | D_ARG_66  | NH2 | D_ASP_86  | OD2 | 3.712 |
| 4R2G | D_ARG_71  | NH2 | D_GLU_55  | OE1 | 2.726 |
| 4R2G | D_ARG_71  | NH2 | D_GLU_55  | OE2 | 3.442 |
| 4R2G | D_ARG_96  | NH1 | D_ASP_101 | OD2 | 3.369 |
| 4R2G | D_ARG_100 | NH2 | C_ASP_66A | OD2 | 3.131 |
| 4R2G | D_LYS_227 | NZ  | C_GLU_124 | OE1 | 3.473 |
| 4R2G | D_LYS_227 | NZ  | C_GLU_124 | OE2 | 3.405 |
| 4R2G | H_LYS_8   | NZ  | H_GLU_119 | OE1 | 2.920 |
| 4R2G | H_LYS_8   | NZ  | H_GLU_119 | OE2 | 3.405 |
| 4R2G | H_LYS_29  | NZ  | H_GLU_85  | OE1 | 3.621 |
| 4R2G | H_LYS_29  | NZ  | H_GLU_85  | OE2 | 3.077 |
| 4R2G | H_LYS_29  | NZ  | K_ASP_279 | OD1 | 2.934 |
| 4R2G | H_LYS_46  | NZ  | H_ASP_56  | OD2 | 3.403 |
| 4R2G | H_ARG_54  | NH1 | H_ASP_78  | OD1 | 3.987 |
| 4R2G | H_ARG_54  | NH1 | H_ASP_78  | OD2 | 2.782 |
| 4R2G | H_ARG_54  | NH2 | H_ASP_78  | OD1 | 2.816 |
| 4R2G | H_ARG_54  | NH2 | H_ASP_78  | OD2 | 3.143 |
| 4R2G | H_ARG_59  | NH1 | K_ASP_368 | OD1 | 2.502 |
| 4R2G | H_ARG_59  | NH1 | K_ASP_368 | OD2 | 3.259 |
| 4R2G | H_LYS_90  | NZ  | H_GLU_85  | OE2 | 3.434 |
| 4R2G | H_LYS_171 | NZ  | H_GLU_169 | OE1 | 3.154 |
| 4R2G | I_ARG_31  | NH1 | I_ASP_66A | OD1 | 3.172 |
| 4R2G | I_ARG_61  | NH1 | I_ASP_82  | OD1 | 2.991 |
| 4R2G | I_ARG_61  | NH1 | I_ASP_82  | OD2 | 3.035 |
| 4R2G | I_ARG_61  | NH2 | I_ASP_82  | OD2 | 2.782 |
| 4R2G | I_ARG_103 | NH1 | I_ASP_85  | OD1 | 2.492 |
| 4R2G | I_ARG_103 | NH1 | I_ASP_85  | OD2 | 3.056 |
| 4R2G | I_ARG_103 | NH2 | I_ASP_85  | OD1 | 3.464 |
| 4R2G | I_ARG_103 | NH2 | I_ASP_85  | OD2 | 3.445 |
| 4R2G | I_LYS_167 | NZ  | I_GLU_83  | OE1 | 3.520 |
| 4R2G | I_LYS_167 | NZ  | I_GLU_83  | OE2 | 3.546 |

|      |           |     |           |     |       |
|------|-----------|-----|-----------|-----|-------|
| 4R2G | L_HIS_189 | ND1 | L_ASP_152 | OD2 | 3.243 |
| 4R2G | J_ARG_38  | NH1 | J_ASP_86  | OD1 | 2.814 |
| 4R2G | J_ARG_38  | NH2 | J_GLU_46  | OE1 | 3.964 |
| 4R2G | J_ARG_38  | NH2 | J_GLU_46  | OE2 | 3.167 |
| 4R2G | J_ARG_38  | NH2 | J_ASP_86  | OD1 | 3.659 |
| 4R2G | J_ARG_66  | NH1 | J_ASP_86  | OD1 | 3.625 |
| 4R2G | J_ARG_66  | NH1 | J_ASP_86  | OD2 | 3.378 |
| 4R2G | J_ARG_66  | NH2 | J_ASP_86  | OD1 | 2.765 |
| 4R2G | J_ARG_66  | NH2 | J_ASP_86  | OD2 | 3.353 |
| 4R2G | J_ARG_71  | NH1 | J_GLU_55  | OE1 | 3.851 |
| 4R2G | J_ARG_96  | NH2 | J_ASP_101 | OD1 | 3.956 |
| 4R2G | J_ARG_96  | NH2 | J_ASP_101 | OD2 | 3.793 |
| 4R2G | J_ARG_100 | NH2 | L_ASP_66A | OD2 | 3.189 |
| 4R2G | J_LYS_161 | NZ  | L_GLU_125 | OE2 | 3.537 |
| 4R2G | L_LYS_8   | NZ  | L_GLU_119 | OE1 | 3.207 |
| 4R2G | L_LYS_29  | NZ  | L_GLU_85  | OE2 | 3.720 |
| 4R2G | L_LYS_29  | NZ  | A_ASP_279 | OD1 | 3.450 |
| 4R2G | L_ARG_54  | NH1 | L_ASP_78  | OD1 | 3.725 |
| 4R2G | L_ARG_54  | NH1 | L_ASP_78  | OD2 | 2.856 |
| 4R2G | L_ARG_54  | NH2 | L_ASP_78  | OD1 | 3.320 |
| 4R2G | L_ARG_54  | NH2 | L_ASP_78  | OD2 | 3.657 |
| 4R2G | L_ARG_59  | NH1 | A_ASP_368 | OD1 | 2.642 |
| 4R2G | L_ARG_59  | NH1 | A_ASP_368 | OD2 | 2.825 |
| 4R2G | L_ARG_59  | NH2 | A_ASP_368 | OD1 | 3.793 |
| 4R2G | L_ARG_59  | NH2 | A_ASP_368 | OD2 | 2.422 |
| 4R2G | L_LYS_90  | NZ  | L_GLU_85  | OE1 | 3.363 |
| 4R2G | M_ARG_31  | NH1 | M_ASP_66A | OD1 | 2.301 |
| 4R2G | M_ARG_31  | NH2 | M_ASP_66A | OD1 | 3.968 |
| 4R2G | M_ARG_61  | NH1 | M_GLU_79  | OE1 | 3.516 |
| 4R2G | M_ARG_61  | NH1 | M_ASP_82  | OD1 | 3.186 |
| 4R2G | M_ARG_61  | NH1 | M_ASP_82  | OD2 | 3.220 |
| 4R2G | M_ARG_61  | NH2 | M_ASP_82  | OD1 | 3.607 |
| 4R2G | M_ARG_61  | NH2 | M_ASP_82  | OD2 | 2.287 |
| 4R2G | M_ARG_103 | NH2 | M_ASP_85  | OD1 | 3.750 |
| 4R2G | M_ARG_103 | NH2 | M_ASP_85  | OD2 | 2.638 |
| 4R2G | M_LYS_167 | NZ  | M_GLU_83  | OE2 | 3.138 |
| 4R2G | M_HIS_189 | ND1 | M_ASP_152 | OD2 | 3.175 |
| 4R2G | M_LYS_190 | NZ  | M_ASP_152 | OD1 | 3.703 |
| 4R2G | M_LYS_190 | NZ  | M_ASP_152 | OD2 | 3.996 |
| 4R2G | N_ARG_38  | NH1 | N_ASP_86  | OD1 | 2.735 |
| 4R2G | N_ARG_38  | NH2 | N_GLU_46  | OE2 | 2.998 |
| 4R2G | N_ARG_38  | NH2 | N_ASP_86  | OD1 | 3.645 |
| 4R2G | N_ARG_66  | NH1 | N_ASP_86  | OD1 | 3.424 |
| 4R2G | N_ARG_66  | NH1 | N_ASP_86  | OD2 | 3.369 |
| 4R2G | N_ARG_66  | NH2 | N_ASP_86  | OD1 | 3.057 |
| 4R2G | N_ARG_66  | NH2 | N_ASP_86  | OD2 | 3.652 |
| 4R2G | N_ARG_71  | NH2 | N_GLU_55  | OE1 | 3.590 |
| 4R2G | N_ARG_71  | NH2 | N_GLU_55  | OE2 | 2.787 |
| 4R2G | N_ARG_96  | NH2 | N_ASP_101 | OD2 | 3.284 |
| 4R2G | N_ARG_100 | NH2 | M_ASP_66A | OD2 | 3.592 |
| 4R2G | N_LYS_161 | NZ  | M_GLU_125 | OE2 | 2.706 |
| 4R2G | N_LYS_228 | NZ  | N_GLU_230 | OE2 | 3.127 |
| 4R2G | O_LYS_121 | NZ  | O_ASP_113 | OD1 | 3.734 |
| 4R2G | O_LYS_121 | NZ  | O_GLU_429 | OE2 | 2.953 |
| 4R2G | O_LYS_231 | NZ  | O_GLU_267 | OE1 | 3.348 |
| 4R2G | O_LYS_236 | NZ  | O_ASP_275 | OD1 | 3.482 |
| 4R2G | O_HIS_249 | NE2 | O_GLU_482 | OE1 | 3.152 |
| 4R2G | O_LYS_282 | NZ  | O_ASP_275 | OD2 | 3.470 |

|      |           |     |            |     |       |
|------|-----------|-----|------------|-----|-------|
| 4R2G | O_ARG_298 | NH1 | O_GLU_381  | OE1 | 3.809 |
| 4R2G | O_ARG_327 | NH1 | D_GLU_100I | OE2 | 3.858 |
| 4R2G | O_LYS_348 | NZ  | O_GLU_351  | OE1 | 3.344 |
| 4R2G | O_LYS_348 | NZ  | O_GLU_351  | OE2 | 3.244 |
| 4R2G | O_LYS_357 | NZ  | O_GLU_466  | OE1 | 3.349 |
| 4R2G | O_LYS_400 | NZ  | O_ASP_397  | OD2 | 3.952 |
| 4R2G | O_ARG_456 | NH2 | O_GLU_466  | OE2 | 3.589 |
| 4R2G | O_ARG_469 | NH2 | O_ASP_457  | OD1 | 3.913 |
| 4R2G | O_ARG_469 | NH2 | O_ASP_457  | OD2 | 2.731 |
| 4R2G | O_ARG_476 | NH1 | O_ASP_474  | OD1 | 3.974 |
| 4R2G | O_ARG_476 | NH2 | O_ASP_474  | OD1 | 3.817 |
| 4R2G | O_ARG_476 | NH2 | O_ASP_474  | OD2 | 3.016 |
| 4R2G | O_ARG_480 | NH1 | O_ASP_477  | OD1 | 3.400 |
| 4R2G | A_LYS_121 | NZ  | A_ASP_113  | OD1 | 3.373 |
| 4R2G | A_LYS_236 | NZ  | A_ASP_275  | OD1 | 3.935 |
| 4R2G | A_LYS_236 | NZ  | A_ASP_275  | OD2 | 3.895 |
| 4R2G | A_ARG_298 | NH2 | A_GLU_381  | OE2 | 3.354 |
| 4R2G | A_ARG_327 | NH1 | N_GLU_100I | OE1 | 3.235 |
| 4R2G | A_LYS_348 | NZ  | A_GLU_351  | OE1 | 3.114 |
| 4R2G | A_LYS_348 | NZ  | A_GLU_351  | OE2 | 3.018 |
| 4R2G | A_LYS_357 | NZ  | A_GLU_466  | OE1 | 3.762 |
| 4R2G | A_ARG_456 | NH2 | A_GLU_466  | OE1 | 3.604 |
| 4R2G | A_ARG_456 | NH2 | A_GLU_466  | OE2 | 3.481 |
| 4R2G | A_ARG_469 | NH2 | A_ASP_457  | OD2 | 3.008 |
| 4R2G | A_ARG_476 | NH2 | A_ASP_474  | OD2 | 3.246 |
| 4R2G | A_ARG_480 | NH1 | A_ASP_477  | OD1 | 3.318 |
| 4R2G | K_LYS_121 | NZ  | K_GLU_429  | OE2 | 2.599 |
| 4R2G | K_LYS_236 | NZ  | K_ASP_275  | OD1 | 3.419 |
| 4R2G | K_HIS_249 | NE2 | K_GLU_482  | OE1 | 3.520 |
| 4R2G | K_ARG_298 | NH1 | K_GLU_381  | OE2 | 3.970 |
| 4R2G | K_ARG_298 | NH2 | K_GLU_381  | OE2 | 3.778 |
| 4R2G | K_LYS_348 | NZ  | K_GLU_351  | OE1 | 3.371 |
| 4R2G | K_LYS_348 | NZ  | K_GLU_351  | OE2 | 3.265 |
| 4R2G | K_ARG_350 | NH2 | K_ASP_397  | OD1 | 3.693 |
| 4R2G | K_LYS_357 | NZ  | K_GLU_466  | OE2 | 3.015 |
| 4R2G | K_ARG_469 | NH2 | K_ASP_457  | OD2 | 3.592 |
| 4R2G | K_ARG_476 | NH1 | K_ASP_474  | OD2 | 3.916 |
| 4R2G | K_ARG_476 | NH2 | K_ASP_474  | OD2 | 3.188 |
| 4R2G | K_ARG_480 | NH1 | K_ASP_477  | OD1 | 2.647 |
| 4R2G | K_LYS_487 | NZ  | K_ASP_92   | OD1 | 3.177 |
| 4R4H | A_HIS_66  | ND1 | A_GLU_64   | OE1 | 3.252 |
| 4R4H | A_LYS_207 | NZ  | A_GLU_380  | OE1 | 3.742 |
| 4R4H | A_LYS_207 | NZ  | A_GLU_380  | OE2 | 3.215 |
| 4R4H | A_HIS_249 | NE2 | A_GLU_482  | OE1 | 2.873 |
| 4R4H | A_LYS_348 | NZ  | A_ASP_269  | OD2 | 3.101 |
| 4R4H | A_LYS_348 | NZ  | A_GLU_351  | OE1 | 3.859 |
| 4R4H | A_LYS_356 | NZ  | A_GLU_466  | OE2 | 2.887 |
| 4R4H | A_ARG_455 | NH1 | A_GLU_466  | OE1 | 3.185 |
| 4R4H | A_ARG_455 | NH1 | A_GLU_466  | OE2 | 3.399 |
| 4R4H | A_ARG_469 | NH2 | A_ASP_456  | OD2 | 3.413 |
| 4R4H | A_ARG_476 | NH1 | A_ASP_474  | OD1 | 3.458 |
| 4R4H | A_ARG_480 | NH1 | A_ASP_477  | OD1 | 2.787 |
| 4R4H | A_LYS_487 | NZ  | A_GLU_47   | OE2 | 3.588 |
| 4R4H | A_LYS_487 | NZ  | A_GLU_91   | OE2 | 2.837 |
| 4R4H | B_LYS_7   | NZ  | B_ASP_10   | OD2 | 3.666 |
| 4R4H | B_LYS_29  | NZ  | A_ASP_279  | OD1 | 2.795 |
| 4R4H | B_LYS_29  | NZ  | B_GLU_85   | OE1 | 3.423 |
| 4R4H | B_LYS_29  | NZ  | B_GLU_85   | OE2 | 3.572 |

|      |           |     |           |     |       |
|------|-----------|-----|-----------|-----|-------|
| 4R4H | B_ARG_54  | NH1 | B_ASP_78  | OD2 | 2.980 |
| 4R4H | B_ARG_54  | NH2 | B_ASP_78  | OD1 | 3.209 |
| 4R4H | B_ARG_54  | NH2 | B_ASP_78  | OD2 | 3.205 |
| 4R4H | B_ARG_58  | NH1 | B_GLU_13  | OE1 | 3.001 |
| 4R4H | B_ARG_58  | NH1 | B_GLU_13  | OE2 | 3.359 |
| 4R4H | B_ARG_58  | NH2 | B_GLU_13  | OE2 | 3.123 |
| 4R4H | B_ARG_59  | NH1 | A_ASP_367 | OD1 | 3.294 |
| 4R4H | B_ARG_59  | NH1 | A_ASP_367 | OD2 | 3.409 |
| 4R4H | B_ARG_59  | NH2 | A_ASP_367 | OD2 | 3.834 |
| 4R4H | B_LYS_171 | NZ  | B_GLU_169 | OE1 | 3.963 |
| 4R4H | B_LYS_171 | NZ  | B_GLU_169 | OE2 | 3.179 |
| 4R4H | L_ARG_61  | NH2 | L_GLU_81  | OE2 | 2.783 |
| 4R4H | L_ARG_61  | NH2 | L_ASP_82  | OD1 | 3.470 |
| 4R4H | L_LYS_    | NZ  | L_GLU_    | OE1 | 2.933 |
| 4R4H | L_HIS_    | ND1 | L_ASP_    | OD2 | 2.805 |
| 4R4H | L_HIS_    | NE2 | L_ASP_    | OD1 | 3.352 |
| 4R4H | H_HIS_32  | ND1 | H_GLU_27  | OE2 | 3.036 |
| 4R4H | H_HIS_32  | NE2 | H_GLU_27  | OE2 | 3.485 |
| 4R4H | H_ARG_38  | NH1 | H_ASP_89  | OD1 | 3.491 |
| 4R4H | H_ARG_38  | NH2 | H_GLU_46  | OE1 | 3.502 |
| 4R4H | H_ARG_38  | NH2 | H_GLU_46  | OE2 | 3.452 |
| 4R4H | H_LYS_52  | NZ  | A_ASP_78  | OD1 | 3.615 |
| 4R4H | H_ARG_66  | NH1 | H_ASP_89  | OD2 | 3.497 |
| 4R4H | H_ARG_66  | NH2 | H_ASP_89  | OD1 | 3.408 |
| 4R4H | H_ARG_66  | NH2 | H_ASP_89  | OD2 | 3.604 |
| 4R4H | H_LYS_75  | NZ  | H_ASP_72  | OD2 | 3.924 |
| 4R4H | H_ARG_97  | NH1 | H_GLU_27  | OE1 | 2.972 |
| 4R4H | H_ARG_97  | NH1 | H_GLU_27  | OE2 | 2.769 |
| 4R4H | H_ARG_98  | NH1 | H_GLU_50  | OE1 | 3.064 |
| 4R4H | H_ARG_98  | NH1 | H_GLU_50  | OE2 | 3.007 |
| 4R4H | H_LYS_    | NZ  | H_ASP_    | OD1 | 2.850 |
| 4R4H | H_LYS_    | NZ  | H_ASP_    | OD2 | 3.439 |
| 4R4H | H_LYS_    | NZ  | H_GLU_    | OE2 | 3.585 |
| 4R4H | H_LYS_    | NZ  | L_ASP_    | OD2 | 3.470 |
| 4R7D | A_ARG_39  | NH1 | A_ASP_90  | OD1 | 2.757 |
| 4R7D | A_ARG_39  | NH2 | A_GLU_47  | OE1 | 3.609 |
| 4R7D | A_ARG_39  | NH2 | A_GLU_47  | OE2 | 3.143 |
| 4R7D | A_ARG_39  | NH2 | A_ASP_90  | OD1 | 3.533 |
| 4R7D | A_LYS_65  | NZ  | A_ASP_59  | OD1 | 3.382 |
| 4R7D | A_ARG_67  | NH1 | A_ASP_90  | OD2 | 3.363 |
| 4R7D | A_ARG_67  | NH2 | A_ASP_90  | OD1 | 3.104 |
| 4R7D | A_ARG_67  | NH2 | A_ASP_90  | OD2 | 3.445 |
| 4R7D | A_LYS_76  | NZ  | A_ASP_73  | OD2 | 3.850 |
| 4R7D | A_LYS_148 | NZ  | A_ASP_149 | OD1 | 3.326 |
| 4R7D | A_LYS_148 | NZ  | A_ASP_149 | OD2 | 3.734 |
| 4R7D | A_LYS_214 | NZ  | B_GLU_123 | OE1 | 3.736 |
| 4R7D | B_ARG_61  | NH1 | B_GLU_81  | OE1 | 3.280 |
| 4R7D | B_ARG_61  | NH1 | B_ASP_82  | OD1 | 2.669 |
| 4R7D | B_ARG_61  | NH1 | B_ASP_82  | OD2 | 3.082 |
| 4R7D | B_ARG_61  | NH2 | B_GLU_81  | OE1 | 3.146 |
| 4R7D | B_LYS_107 | NZ  | D_ASP_9   | OD2 | 3.947 |
| 4R7D | B_LYS_126 | NZ  | B_ASP_122 | OD1 | 2.338 |
| 4R7D | B_ARG_142 | NH1 | B_GLU_143 | OE1 | 3.636 |
| 4R7D | B_ARG_142 | NH2 | B_GLU_105 | OE1 | 3.989 |
| 4R7D | B_LYS_149 | NZ  | B_GLU_195 | OE1 | 3.373 |
| 4R7D | B_LYS_149 | NZ  | B_GLU_195 | OE2 | 3.135 |
| 4R7D | B_HIS_189 | ND1 | B_ASP_151 | OD2 | 2.870 |
| 4R7D | C_ARG_39  | NH1 | C_ASP_90  | OD1 | 2.627 |

|      |           |     |           |     |       |
|------|-----------|-----|-----------|-----|-------|
| 4R7D | C_ARG_39  | NH2 | C_GLU_47  | OE2 | 3.405 |
| 4R7D | C_ARG_39  | NH2 | C_ASP_90  | OD1 | 3.918 |
| 4R7D | C_ARG_67  | NH1 | C_ASP_90  | OD1 | 3.705 |
| 4R7D | C_ARG_67  | NH1 | C_ASP_90  | OD2 | 3.301 |
| 4R7D | C_ARG_67  | NH2 | C_ASP_90  | OD1 | 3.685 |
| 4R7D | C_LYS_99  | NZ  | C_ASP_103 | OD2 | 3.216 |
| 4R7D | C_LYS_148 | NZ  | C_ASP_149 | OD1 | 3.368 |
| 4R7D | C_LYS_211 | NZ  | C_ASP_213 | OD1 | 2.945 |
| 4R7D | D_LYS_18  | NZ  | B_ASP_70  | OD2 | 3.792 |
| 4R7D | D_HIS_32  | NE2 | D_ASP_31  | OD1 | 3.817 |
| 4R7D | D_ARG_61  | NH2 | D_ASP_82  | OD1 | 2.539 |
| 4R7D | D_ARG_61  | NH2 | D_ASP_82  | OD2 | 3.670 |
| 4R7D | D_LYS_103 | NZ  | D_GLU_165 | OE1 | 3.985 |
| 4R7D | D_LYS_107 | NZ  | B_ASP_9   | OD2 | 3.503 |
| 4R7D | D_HIS_189 | ND1 | D_ASP_151 | OD2 | 2.473 |
| 4R7D | E_ARG_39  | NH1 | E_ASP_90  | OD1 | 2.896 |
| 4R7D | E_ARG_39  | NH2 | E_GLU_47  | OE1 | 3.759 |
| 4R7D | E_ARG_39  | NH2 | E_GLU_47  | OE2 | 3.092 |
| 4R7D | E_ARG_67  | NH1 | E_ASP_90  | OD1 | 3.553 |
| 4R7D | E_ARG_67  | NH1 | E_ASP_90  | OD2 | 3.603 |
| 4R7D | E_ARG_67  | NH2 | E_ASP_90  | OD1 | 3.329 |
| 4R7D | E_ARG_67  | NH2 | E_ASP_90  | OD2 | 3.799 |
| 4R7D | E_LYS_76  | NZ  | E_ASP_73  | OD2 | 3.684 |
| 4R7D | E_LYS_148 | NZ  | E_ASP_149 | OD2 | 2.850 |
| 4R7D | E_LYS_214 | NZ  | F_GLU_123 | OE1 | 3.862 |
| 4R7D | E_LYS_214 | NZ  | F_GLU_123 | OE2 | 3.571 |
| 4R7D | E_ARG_215 | NH1 | E_GLU_217 | OE1 | 3.936 |
| 4R7D | E_ARG_215 | NH1 | E_GLU_217 | OE2 | 3.249 |
| 4R7D | E_ARG_215 | NH2 | E_GLU_217 | OE1 | 2.728 |
| 4R7D | E_ARG_215 | NH2 | E_GLU_217 | OE2 | 3.501 |
| 4R7D | F_LYS_16  | NZ  | F_GLU_79  | OE2 | 3.230 |
| 4R7D | F_HIS_32  | NE2 | F_ASP_31  | OD1 | 3.921 |
| 4R7D | F_ARG_61  | NH2 | F_ASP_82  | OD1 | 2.326 |
| 4R7D | F_ARG_61  | NH2 | F_ASP_82  | OD2 | 2.732 |
| 4R7D | F_LYS_103 | NZ  | F_GLU_165 | OE1 | 3.918 |
| 4R7D | F_LYS_103 | NZ  | F_GLU_165 | OE2 | 3.931 |
| 4R7D | F_LYS_149 | NZ  | F_GLU_195 | OE1 | 3.595 |
| 4R7D | F_LYS_149 | NZ  | F_GLU_195 | OE2 | 3.164 |
| 4R7D | F_LYS_169 | NZ  | F_GLU_81  | OE2 | 3.685 |
| 4R7D | G_ARG_39  | NH1 | G_ASP_90  | OD1 | 2.853 |
| 4R7D | G_ARG_39  | NH2 | G_GLU_47  | OE2 | 2.958 |
| 4R7D | G_ARG_39  | NH2 | G_ASP_90  | OD1 | 3.467 |
| 4R7D | G_LYS_65  | NZ  | G_ASP_59  | OD1 | 3.423 |
| 4R7D | G_ARG_67  | NH1 | G_ASP_90  | OD1 | 3.986 |
| 4R7D | G_ARG_67  | NH1 | G_ASP_90  | OD2 | 3.243 |
| 4R7D | G_ARG_67  | NH2 | G_ASP_90  | OD1 | 2.698 |
| 4R7D | G_ARG_67  | NH2 | G_ASP_90  | OD2 | 3.350 |
| 4R7D | G_LYS_99  | NZ  | G_ASP_103 | OD2 | 3.638 |
| 4R7D | G_LYS_148 | NZ  | G_ASP_149 | OD2 | 2.977 |
| 4R7D | H_HIS_32  | NE2 | H_ASP_31  | OD1 | 3.837 |
| 4R7D | H_ARG_61  | NH1 | H_GLU_79  | OE1 | 3.684 |
| 4R7D | H_ARG_61  | NH2 | H_GLU_81  | OE1 | 3.325 |
| 4R7D | H_ARG_61  | NH2 | H_ASP_82  | OD1 | 2.892 |
| 4R7D | H_ARG_61  | NH2 | H_ASP_82  | OD2 | 3.435 |
| 4R7D | H_LYS_126 | NZ  | H_ASP_122 | OD2 | 3.954 |
| 4R7D | H_ARG_142 | NH1 | H_GLU_143 | OE1 | 3.953 |
| 4R7D | H_ARG_142 | NH2 | H_GLU_105 | OE2 | 3.620 |
| 4R7D | H_LYS_149 | NZ  | H_GLU_195 | OE2 | 2.396 |

|      |           |     |           |     |       |
|------|-----------|-----|-----------|-----|-------|
| 4R7D | H_LYS_183 | NZ  | H_GLU_187 | OE2 | 3.853 |
| 4R7D | H_LYS_188 | NZ  | H_ASP_185 | OD1 | 3.959 |
| 4R7D | H_HIS_189 | ND1 | H_ASP_151 | OD2 | 2.743 |
| 4R7D | L_ARG_39  | NH1 | L_ASP_90  | OD1 | 2.779 |
| 4R7D | L_ARG_39  | NH2 | L_GLU_47  | OE2 | 3.308 |
| 4R7D | L_ARG_39  | NH2 | L_ASP_90  | OD1 | 3.305 |
| 4R7D | L_LYS_65  | NZ  | L_ASP_59  | OD1 | 3.650 |
| 4R7D | L_ARG_67  | NH1 | L_ASP_90  | OD2 | 3.228 |
| 4R7D | L_ARG_67  | NH2 | L_ASP_90  | OD1 | 2.929 |
| 4R7D | L_ARG_67  | NH2 | L_ASP_90  | OD2 | 3.207 |
| 4R7D | L_HIS_169 | NE2 | J_ASP_167 | OD1 | 3.970 |
| 4R7D | L_LYS_211 | NZ  | L_ASP_213 | OD1 | 3.549 |
| 4R7D | J_LYS_16  | NZ  | J_GLU_79  | OE2 | 3.737 |
| 4R7D | J_LYS_18  | NZ  | N_ASP_70  | OD1 | 3.913 |
| 4R7D | J_ARG_24  | NH2 | N_GLU_17  | OE1 | 3.275 |
| 4R7D | J_ARG_24  | NH2 | N_GLU_17  | OE2 | 2.135 |
| 4R7D | J_ARG_61  | NH1 | J_GLU_79  | OE1 | 3.344 |
| 4R7D | J_ARG_61  | NH1 | J_GLU_79  | OE2 | 3.871 |
| 4R7D | J_ARG_61  | NH2 | J_GLU_81  | OE1 | 3.710 |
| 4R7D | J_ARG_61  | NH2 | J_ASP_82  | OD1 | 3.792 |
| 4R7D | J_HIS_189 | ND1 | J_ASP_151 | OD2 | 3.674 |
| 4R7D | K_ARG_39  | NH1 | K_ASP_90  | OD1 | 3.019 |
| 4R7D | K_ARG_39  | NH2 | K_GLU_47  | OE1 | 3.928 |
| 4R7D | K_ARG_39  | NH2 | K_GLU_47  | OE2 | 3.206 |
| 4R7D | K_ARG_39  | NH2 | K_ASP_90  | OD1 | 3.749 |
| 4R7D | K_ARG_67  | NH1 | K_ASP_90  | OD1 | 3.223 |
| 4R7D | K_ARG_67  | NH1 | K_ASP_90  | OD2 | 3.237 |
| 4R7D | K_ARG_67  | NH2 | K_ASP_90  | OD1 | 3.233 |
| 4R7D | K_LYS_76  | NZ  | K_ASP_73  | OD2 | 3.794 |
| 4R7D | K_LYS_99  | NZ  | K_ASP_103 | OD1 | 2.821 |
| 4R7D | K_LYS_148 | NZ  | K_ASP_149 | OD2 | 3.160 |
| 4R7D | K_HIS_169 | NE2 | L_ASP_167 | OD2 | 3.666 |
| 4R7D | K_LYS_214 | NZ  | L_GLU_123 | OE1 | 3.074 |
| 4R7D | L_HIS_32  | NE2 | L_ASP_31  | OD1 | 3.658 |
| 4R7D | L_LYS_49  | NZ  | K_ASP_100 | OD2 | 3.591 |
| 4R7D | L_ARG_61  | NH2 | L_GLU_79  | OE1 | 3.885 |
| 4R7D | L_ARG_61  | NH2 | L_GLU_79  | OE2 | 3.873 |
| 4R7D | L_LYS_149 | NZ  | L_GLU_195 | OE1 | 3.728 |
| 4R7D | L_LYS_149 | NZ  | L_GLU_195 | OE2 | 3.660 |
| 4R7D | L_LYS_188 | NZ  | L_ASP_185 | OD1 | 3.757 |
| 4R7D | L_HIS_189 | ND1 | L_ASP_151 | OD2 | 2.882 |
| 4R7D | M_ARG_39  | NH1 | M_ASP_90  | OD1 | 2.741 |
| 4R7D | M_ARG_39  | NH2 | M_GLU_47  | OE2 | 3.151 |
| 4R7D | M_ARG_39  | NH2 | M_ASP_90  | OD1 | 3.559 |
| 4R7D | M_LYS_65  | NZ  | M_ASP_59  | OD1 | 3.528 |
| 4R7D | M_ARG_67  | NH1 | M_ASP_90  | OD2 | 3.446 |
| 4R7D | M_ARG_67  | NH2 | M_ASP_90  | OD1 | 3.853 |
| 4R7D | M_LYS_76  | NZ  | M_ASP_73  | OD2 | 3.604 |
| 4R7D | M_LYS_99  | NZ  | M_ASP_103 | OD2 | 2.528 |
| 4R7D | M_LYS_148 | NZ  | M_ASP_149 | OD1 | 3.371 |
| 4R7D | M_LYS_211 | NZ  | M_ASP_213 | OD1 | 3.991 |
| 4R7D | M_LYS_214 | NZ  | N_GLU_123 | OE1 | 3.058 |
| 4R7D | M_LYS_214 | NZ  | N_GLU_123 | OE2 | 2.866 |
| 4R7D | M_ARG_215 | NH2 | M_GLU_217 | OE1 | 3.754 |
| 4R7D | N_ARG_61  | NH1 | N_GLU_79  | OE1 | 3.461 |
| 4R7D | N_LYS_103 | NZ  | N_GLU_165 | OE1 | 3.691 |
| 4R7D | N_LYS_107 | NZ  | J_ASP_9   | OD2 | 3.244 |
| 4R7D | N_LYS_149 | NZ  | N_GLU_195 | OE1 | 3.733 |

|      |           |     |           |     |       |
|------|-----------|-----|-----------|-----|-------|
| 4R7D | N_LYS_149 | NZ  | N_GLU_195 | OE2 | 3.015 |
| 4R7D | N_HIS_189 | ND1 | N_ASP_151 | OD2 | 2.626 |
| 4R7D | O_ARG_39  | NH1 | O_ASP_90  | OD1 | 2.621 |
| 4R7D | O_ARG_39  | NH2 | O_GLU_47  | OE2 | 2.902 |
| 4R7D | O_ARG_39  | NH2 | O_ASP_90  | OD1 | 3.952 |
| 4R7D | O_ARG_67  | NH1 | O_ASP_90  | OD2 | 3.648 |
| 4R7D | O_ARG_67  | NH2 | O_ASP_90  | OD1 | 2.490 |
| 4R7D | O_ARG_67  | NH2 | O_ASP_90  | OD2 | 2.748 |
| 4R7D | O_LYS_76  | NZ  | O_ASP_73  | OD2 | 3.837 |
| 4R7D | O_LYS_214 | NZ  | P_GLU_123 | OE1 | 2.454 |
| 4R7D | O_LYS_214 | NZ  | P_GLU_123 | OE2 | 3.167 |
| 4R7D | O_ARG_215 | NH1 | O_GLU_217 | OE1 | 2.819 |
| 4R7D | O_ARG_215 | NH1 | O_GLU_217 | OE2 | 2.975 |
| 4R7D | O_ARG_215 | NH2 | O_GLU_217 | OE1 | 3.432 |
| 4R7D | P_LYS_16  | NZ  | P_GLU_79  | OE2 | 3.343 |
| 4R7D | P_ARG_61  | NH2 | P_ASP_82  | OD1 | 2.934 |
| 4R7D | P_ARG_61  | NH2 | P_ASP_82  | OD2 | 3.314 |
| 4R7D | P_ARG_142 | NH1 | P_GLU_143 | OE1 | 3.551 |
| 4R7D | P_ARG_142 | NH2 | P_GLU_105 | OE1 | 3.275 |
| 4R7D | P_ARG_142 | NH2 | P_GLU_105 | OE2 | 3.523 |
| 4R7D | P_LYS_149 | NZ  | P_GLU_195 | OE1 | 3.907 |
| 4R7D | P_LYS_149 | NZ  | P_GLU_195 | OE2 | 2.589 |
| 4R7D | P_HIS_189 | ND1 | P_ASP_151 | OD2 | 3.283 |
| 4R7N | A_ARG_39  | NH1 | A_ASP_90  | OD1 | 2.825 |
| 4R7N | A_ARG_39  | NH2 | A_GLU_47  | OE2 | 3.023 |
| 4R7N | A_ARG_39  | NH2 | A_ASP_90  | OD1 | 3.603 |
| 4R7N | A_ARG_67  | NH1 | A_ASP_90  | OD1 | 3.650 |
| 4R7N | A_ARG_67  | NH1 | A_ASP_90  | OD2 | 2.898 |
| 4R7N | A_ARG_67  | NH2 | A_ASP_90  | OD1 | 3.091 |
| 4R7N | A_ARG_67  | NH2 | A_ASP_90  | OD2 | 3.794 |
| 4R7N | A_ARG_98  | NH1 | A_ASP_100 | OD2 | 3.775 |
| 4R7N | A_ARG_98  | NH2 | A_ASP_100 | OD2 | 2.512 |
| 4R7N | A_LYS_148 | NZ  | A_ASP_149 | OD1 | 2.897 |
| 4R7N | A_LYS_148 | NZ  | A_ASP_149 | OD2 | 2.755 |
| 4R7N | A_LYS_214 | NZ  | B_GLU_123 | OE1 | 3.674 |
| 4R7N | A_LYS_214 | NZ  | B_GLU_123 | OE2 | 3.683 |
| 4R7N | B_LYS_16  | NZ  | B_GLU_79  | OE1 | 3.765 |
| 4R7N | B_LYS_16  | NZ  | B_GLU_79  | OE2 | 3.236 |
| 4R7N | B_ARG_24  | NH2 | J_GLU_17  | OE1 | 3.625 |
| 4R7N | B_ARG_24  | NH2 | J_GLU_17  | OE2 | 2.355 |
| 4R7N | B_ARG_61  | NH1 | B_GLU_81  | OE1 | 3.359 |
| 4R7N | B_ARG_61  | NH2 | B_GLU_81  | OE1 | 3.738 |
| 4R7N | B_ARG_61  | NH2 | B_ASP_82  | OD1 | 2.397 |
| 4R7N | B_ARG_61  | NH2 | B_ASP_82  | OD2 | 3.170 |
| 4R7N | B_LYS_103 | NZ  | B_GLU_165 | OE1 | 3.820 |
| 4R7N | B_LYS_107 | NZ  | J_ASP_9   | OD2 | 3.605 |
| 4R7N | B_LYS_149 | NZ  | B_GLU_195 | OE2 | 2.745 |
| 4R7N | C_ARG_39  | NH1 | C_ASP_90  | OD1 | 2.845 |
| 4R7N | C_ARG_39  | NH2 | C_GLU_47  | OE2 | 2.963 |
| 4R7N | C_ARG_39  | NH2 | C_ASP_90  | OD1 | 3.701 |
| 4R7N | C_ARG_67  | NH1 | C_ASP_90  | OD1 | 3.078 |
| 4R7N | C_ARG_67  | NH1 | C_ASP_90  | OD2 | 2.222 |
| 4R7N | C_ARG_67  | NH2 | C_ASP_90  | OD1 | 2.771 |
| 4R7N | C_ARG_67  | NH2 | C_ASP_90  | OD2 | 3.580 |
| 4R7N | C_LYS_76  | NZ  | C_ASP_73  | OD2 | 2.761 |
| 4R7N | C_ARG_98  | NH2 | C_ASP_100 | OD2 | 3.773 |
| 4R7N | C_LYS_211 | NZ  | C_ASP_213 | OD1 | 3.637 |
| 4R7N | C_LYS_214 | NZ  | D_GLU_123 | OE1 | 2.537 |



|      |           |     |           |     |       |
|------|-----------|-----|-----------|-----|-------|
| 4R7N | C_LYS_214 | NZ  | D_GLU_123 | OE2 | 3.321 |
| 4R7N | C_ARG_215 | NH1 | C_GLU_217 | OE2 | 3.613 |
| 4R7N | C_ARG_215 | NH2 | C_GLU_217 | OE1 | 3.821 |
| 4R7N | C_ARG_215 | NH2 | C_GLU_217 | OE2 | 3.518 |
| 4R7N | D_ARG_24  | NH2 | F_GLU_17  | OE1 | 3.787 |
| 4R7N | D_ARG_24  | NH2 | F_GLU_17  | OE2 | 2.414 |
| 4R7N | D_ARG_61  | NH1 | D_GLU_81  | OE1 | 3.464 |
| 4R7N | D_ARG_61  | NH1 | D_ASP_82  | OD1 | 2.853 |
| 4R7N | D_ARG_61  | NH1 | D_ASP_82  | OD2 | 3.611 |
| 4R7N | D_ARG_61  | NH2 | D_GLU_81  | OE1 | 3.128 |
| 4R7N | D_LYS_103 | NZ  | D_GLU_165 | OE1 | 3.770 |
| 4R7N | D_LYS_107 | NZ  | F_ASP_9   | OD2 | 3.633 |
| 4R7N | D_LYS_149 | NZ  | D_GLU_195 | OE2 | 3.176 |
| 4R7N | D_HIS_189 | ND1 | D_ASP_151 | OD2 | 3.153 |
| 4R7N | E_ARG_39  | NH1 | E_ASP_90  | OD1 | 2.803 |
| 4R7N | E_ARG_39  | NH2 | E_GLU_47  | OE1 | 3.978 |
| 4R7N | E_ARG_39  | NH2 | E_GLU_47  | OE2 | 3.076 |
| 4R7N | E_ARG_39  | NH2 | E_ASP_90  | OD1 | 3.735 |
| 4R7N | E_LYS_65  | NZ  | E_ASP_59  | OD1 | 3.735 |
| 4R7N | E_ARG_67  | NH1 | E_ASP_90  | OD1 | 3.124 |
| 4R7N | E_ARG_67  | NH1 | E_ASP_90  | OD2 | 3.240 |
| 4R7N | E_ARG_98  | NH1 | E_ASP_100 | OD2 | 3.090 |
| 4R7N | E_ARG_98  | NH2 | E_ASP_100 | OD2 | 2.869 |
| 4R7N | E_HIS_169 | NE2 | F_ASP_167 | OD1 | 3.616 |
| 4R7N | E_HIS_169 | NE2 | F_ASP_167 | OD2 | 3.474 |
| 4R7N | E_LYS_214 | NZ  | F_GLU_123 | OE2 | 3.072 |
| 4R7N | F_LYS_16  | NZ  | F_GLU_79  | OE1 | 3.193 |
| 4R7N | F_LYS_16  | NZ  | F_GLU_79  | OE2 | 2.766 |
| 4R7N | F_ARG_24  | NH2 | D_GLU_17  | OE1 | 3.696 |
| 4R7N | F_ARG_24  | NH2 | D_GLU_17  | OE2 | 2.325 |
| 4R7N | F_ARG_61  | NH2 | F_GLU_81  | OE2 | 3.726 |
| 4R7N | F_ARG_61  | NH2 | F_ASP_82  | OD1 | 2.275 |
| 4R7N | F_ARG_61  | NH2 | F_ASP_82  | OD2 | 3.114 |
| 4R7N | F_LYS_103 | NZ  | F_GLU_165 | OE1 | 3.429 |
| 4R7N | F_LYS_107 | NZ  | D_ASP_9   | OD2 | 3.641 |
| 4R7N | F_ARG_142 | NH1 | F_GLU_143 | OE1 | 3.991 |
| 4R7N | F_ARG_142 | NH2 | F_GLU_105 | OE1 | 3.315 |
| 4R7N | F_LYS_149 | NZ  | F_GLU_195 | OE1 | 3.479 |
| 4R7N | F_LYS_149 | NZ  | F_GLU_195 | OE2 | 2.946 |
| 4R7N | G_ARG_39  | NH1 | G_ASP_90  | OD1 | 2.781 |
| 4R7N | G_ARG_39  | NH2 | G_GLU_47  | OE1 | 3.904 |
| 4R7N | G_ARG_39  | NH2 | G_GLU_47  | OE2 | 2.981 |
| 4R7N | G_ARG_39  | NH2 | G_ASP_90  | OD1 | 3.571 |
| 4R7N | G_LYS_65  | NZ  | G_ASP_59  | OD1 | 3.786 |
| 4R7N | G_ARG_67  | NH1 | G_ASP_90  | OD1 | 3.700 |
| 4R7N | G_ARG_67  | NH1 | G_ASP_90  | OD2 | 2.751 |
| 4R7N | G_ARG_67  | NH2 | G_ASP_90  | OD1 | 3.048 |
| 4R7N | G_ARG_67  | NH2 | G_ASP_90  | OD2 | 3.620 |
| 4R7N | G_ARG_98  | NH1 | G_ASP_100 | OD1 | 3.954 |
| 4R7N | G_ARG_98  | NH1 | G_ASP_100 | OD2 | 2.296 |
| 4R7N | G_ARG_98  | NH2 | G_ASP_100 | OD2 | 3.918 |
| 4R7N | G_LYS_214 | NZ  | H_GLU_123 | OE1 | 2.389 |
| 4R7N | G_LYS_214 | NZ  | H_GLU_123 | OE2 | 3.440 |
| 4R7N | G_ARG_215 | NH2 | G_GLU_217 | OE2 | 3.692 |
| 4R7N | H_LYS_16  | NZ  | H_GLU_79  | OE1 | 3.784 |
| 4R7N | H_LYS_16  | NZ  | H_GLU_79  | OE2 | 3.778 |
| 4R7N | H_ARG_24  | NH2 | L_GLU_17  | OE1 | 3.413 |
| 4R7N | H_ARG_24  | NH2 | L_GLU_17  | OE2 | 2.312 |

|      |           |     |           |     |       |
|------|-----------|-----|-----------|-----|-------|
| 4R7N | H_ARG_61  | NH1 | H_GLU_81  | OE1 | 3.674 |
| 4R7N | H_ARG_61  | NH1 | H_ASP_82  | OD1 | 2.998 |
| 4R7N | H_ARG_61  | NH1 | H_ASP_82  | OD2 | 3.659 |
| 4R7N | H_ARG_61  | NH2 | H_GLU_81  | OE1 | 3.398 |
| 4R7N | H_LYS_103 | NZ  | H_GLU_165 | OE1 | 3.531 |
| 4R7N | H_LYS_149 | NZ  | H_GLU_195 | OE2 | 2.677 |
| 4R7N | I_ARG_39  | NH1 | I_ASP_90  | OD1 | 2.559 |
| 4R7N | I_ARG_39  | NH2 | I_GLU_47  | OE2 | 3.220 |
| 4R7N | I_ARG_39  | NH2 | I_ASP_90  | OD1 | 3.236 |
| 4R7N | I_ARG_67  | NH1 | I_ASP_90  | OD1 | 3.787 |
| 4R7N | I_ARG_67  | NH1 | I_ASP_90  | OD2 | 2.994 |
| 4R7N | I_ARG_67  | NH2 | I_ASP_90  | OD1 | 2.852 |
| 4R7N | I_ARG_67  | NH2 | I_ASP_90  | OD2 | 3.576 |
| 4R7N | I_ARG_98  | NH1 | I_ASP_100 | OD2 | 3.172 |
| 4R7N | I_ARG_98  | NH2 | I_ASP_100 | OD2 | 3.171 |
| 4R7N | I_LYS_214 | NZ  | J_GLU_123 | OE1 | 3.635 |
| 4R7N | I_LYS_214 | NZ  | J_GLU_123 | OE2 | 2.942 |
| 4R7N | J_ARG_24  | NH2 | B_GLU_17  | OE1 | 3.555 |
| 4R7N | J_ARG_24  | NH2 | B_GLU_17  | OE2 | 2.304 |
| 4R7N | J_ARG_61  | NH1 | J_ASP_82  | OD1 | 2.881 |
| 4R7N | J_ARG_61  | NH1 | J_ASP_82  | OD2 | 2.940 |
| 4R7N | J_ARG_142 | NH2 | J_GLU_105 | OE1 | 3.516 |
| 4R7N | J_LYS_149 | NZ  | J_GLU_195 | OE1 | 2.936 |
| 4R7N | K_ARG_39  | NH1 | K_ASP_90  | OD1 | 2.585 |
| 4R7N | K_ARG_39  | NH2 | K_GLU_47  | OE2 | 3.296 |
| 4R7N | K_ARG_39  | NH2 | K_ASP_90  | OD1 | 3.354 |
| 4R7N | K_ARG_67  | NH1 | K_ASP_90  | OD1 | 3.756 |
| 4R7N | K_ARG_67  | NH1 | K_ASP_90  | OD2 | 2.865 |
| 4R7N | K_ARG_67  | NH2 | K_ASP_90  | OD1 | 3.074 |
| 4R7N | K_ARG_67  | NH2 | K_ASP_90  | OD2 | 3.668 |
| 4R7N | K_ARG_98  | NH2 | K_ASP_100 | OD2 | 3.706 |
| 4R7N | K_LYS_148 | NZ  | K_ASP_149 | OD1 | 2.955 |
| 4R7N | K_LYS_148 | NZ  | K_ASP_149 | OD2 | 2.836 |
| 4R7N | K_LYS_214 | NZ  | L_GLU_123 | OE2 | 3.794 |
| 4R7N | K_ARG_215 | NH2 | K_GLU_217 | OE2 | 2.789 |
| 4R7N | L_LYS_16  | NZ  | L_GLU_79  | OE1 | 3.348 |
| 4R7N | L_LYS_16  | NZ  | L_GLU_79  | OE2 | 3.110 |
| 4R7N | L_ARG_24  | NH2 | H_GLU_17  | OE1 | 3.531 |
| 4R7N | L_ARG_24  | NH2 | H_GLU_17  | OE2 | 2.313 |
| 4R7N | L_ARG_61  | NH1 | L_ASP_82  | OD1 | 3.398 |
| 4R7N | L_ARG_61  | NH1 | L_ASP_82  | OD2 | 2.327 |
| 4R7N | L_ARG_61  | NH2 | L_ASP_82  | OD1 | 2.642 |
| 4R7N | L_ARG_61  | NH2 | L_ASP_82  | OD2 | 3.265 |
| 4R7N | L_LYS_103 | NZ  | L_GLU_165 | OE1 | 3.773 |
| 4R7N | L_LYS_149 | NZ  | L_GLU_195 | OE1 | 3.879 |
| 4R7N | L_LYS_149 | NZ  | L_GLU_195 | OE2 | 3.013 |
| 4R7N | M_ARG_39  | NH1 | M_ASP_90  | OD1 | 2.831 |
| 4R7N | M_ARG_39  | NH2 | M_GLU_47  | OE2 | 3.008 |
| 4R7N | M_ARG_39  | NH2 | M_ASP_90  | OD1 | 3.609 |
| 4R7N | M_ARG_67  | NH1 | M_ASP_90  | OD2 | 3.507 |
| 4R7N | M_ARG_67  | NH2 | M_ASP_90  | OD1 | 3.326 |
| 4R7N | M_ARG_67  | NH2 | M_ASP_90  | OD2 | 3.775 |
| 4R7N | M_LYS_76  | NZ  | M_ASP_73  | OD1 | 3.417 |
| 4R7N | M_LYS_76  | NZ  | M_ASP_73  | OD2 | 3.788 |
| 4R7N | M_ARG_98  | NH1 | M_ASP_100 | OD2 | 2.760 |
| 4R7N | M_ARG_98  | NH2 | M_ASP_100 | OD2 | 2.685 |
| 4R7N | M_LYS_148 | NZ  | M_ASP_149 | OD1 | 2.958 |
| 4R7N | M_LYS_148 | NZ  | M_ASP_149 | OD2 | 2.802 |

|      |           |     |           |     |       |
|------|-----------|-----|-----------|-----|-------|
| 4R7N | N_ARG_24  | NH2 | P_GLU_17  | OE1 | 3.814 |
| 4R7N | N_ARG_24  | NH2 | P_GLU_17  | OE2 | 2.289 |
| 4R7N | N_ARG_61  | NH1 | N_GLU_79  | OE1 | 2.882 |
| 4R7N | N_ARG_61  | NH1 | N_ASP_82  | OD1 | 2.547 |
| 4R7N | N_ARG_61  | NH1 | N_ASP_82  | OD2 | 3.212 |
| 4R7N | N_ARG_61  | NH2 | N_GLU_79  | OE1 | 3.252 |
| 4R7N | N_LYS_103 | NZ  | N_GLU_165 | OE1 | 3.332 |
| 4R7N | N_LYS_107 | NZ  | P_ASP_9   | OD2 | 3.591 |
| 4R7N | N_LYS_149 | NZ  | N_GLU_195 | OE1 | 2.916 |
| 4R7N | N_HIS_189 | ND1 | N_ASP_151 | OD2 | 2.809 |
| 4R7N | N_LYS_190 | NZ  | N_GLU_187 | OE1 | 3.890 |
| 4R7N | O_ARG_39  | NH1 | O_ASP_90  | OD1 | 2.710 |
| 4R7N | O_ARG_39  | NH2 | O_GLU_47  | OE1 | 3.778 |
| 4R7N | O_ARG_39  | NH2 | O_GLU_47  | OE2 | 2.955 |
| 4R7N | O_ARG_39  | NH2 | O_ASP_90  | OD1 | 3.975 |
| 4R7N | O_ARG_67  | NH1 | O_ASP_90  | OD1 | 3.623 |
| 4R7N | O_ARG_67  | NH1 | O_ASP_90  | OD2 | 2.994 |
| 4R7N | O_ARG_67  | NH2 | O_ASP_90  | OD1 | 3.294 |
| 4R7N | O_ARG_98  | NH2 | O_ASP_100 | OD2 | 3.721 |
| 4R7N | O_HIS_169 | NE2 | P_ASP_167 | OD2 | 3.725 |
| 4R7N | P_ARG_24  | NH2 | N_GLU_17  | OE1 | 3.525 |
| 4R7N | P_ARG_24  | NH2 | N_GLU_17  | OE2 | 2.277 |
| 4R7N | P_ARG_61  | NH1 | P_GLU_79  | OE1 | 2.179 |
| 4R7N | P_ARG_61  | NH1 | P_GLU_79  | OE2 | 3.956 |
| 4R7N | P_ARG_61  | NH2 | P_GLU_79  | OE1 | 3.623 |
| 4R7N | P_LYS_103 | NZ  | P_GLU_165 | OE1 | 3.040 |
| 4R7N | P_ARG_108 | NH1 | P_GLU_105 | OE2 | 2.550 |
| 4R7N | P_ARG_108 | NH2 | P_GLU_105 | OE2 | 3.860 |
| 4R7N | P_LYS_149 | NZ  | P_GLU_195 | OE1 | 3.164 |
| 4R7N | P_LYS_149 | NZ  | P_GLU_195 | OE2 | 3.343 |
| 4R7N | P_LYS_188 | NZ  | P_ASP_185 | OD1 | 3.703 |
| 4R7N | P_HIS_189 | ND1 | P_ASP_151 | OD2 | 2.247 |
| 4R7N | Q_ARG_39  | NH1 | Q_ASP_90  | OD1 | 2.764 |
| 4R7N | Q_ARG_39  | NH2 | Q_GLU_47  | OE1 | 3.665 |
| 4R7N | Q_ARG_39  | NH2 | Q_GLU_47  | OE2 | 2.481 |
| 4R7N | Q_ARG_67  | NH2 | Q_ASP_90  | OD1 | 3.614 |
| 4R7N | Q_ARG_67  | NH2 | Q_ASP_90  | OD2 | 2.212 |
| 4R7N | Q_ARG_98  | NH1 | Q_ASP_100 | OD2 | 2.913 |
| 4R7N | Q_ARG_98  | NH2 | Q_ASP_100 | OD2 | 2.616 |
| 4R7N | Q_LYS_148 | NZ  | Q_ASP_149 | OD1 | 3.127 |
| 4R7N | Q_LYS_148 | NZ  | Q_ASP_149 | OD2 | 2.663 |
| 4R7N | Q_LYS_211 | NZ  | G_ASP_213 | OD2 | 3.009 |
| 4R7N | Q_LYS_214 | NZ  | R_GLU_123 | OE1 | 3.438 |
| 4R7N | Q_LYS_214 | NZ  | R_GLU_123 | OE2 | 3.002 |
| 4R7N | Q_ARG_215 | NH2 | Q_GLU_217 | OE2 | 3.165 |
| 4R7N | R_ARG_61  | NH2 | R_ASP_82  | OD1 | 3.978 |
| 4R7N | R_LYS_103 | NZ  | R_GLU_165 | OE1 | 2.945 |
| 4R7N | R_LYS_103 | NZ  | R_GLU_165 | OE2 | 3.633 |
| 4R7N | R_LYS_145 | NZ  | F_ASP_93  | OD2 | 3.627 |
| 4R7N | R_LYS_149 | NZ  | R_GLU_195 | OE1 | 3.543 |
| 4R7N | R_LYS_149 | NZ  | R_GLU_195 | OE2 | 2.531 |
| 4R7N | R_LYS_188 | NZ  | R_ASP_185 | OD1 | 2.716 |
| 4R7N | R_LYS_188 | NZ  | R_ASP_185 | OD2 | 3.719 |
| 4R7N | S_ARG_39  | NH1 | S_ASP_90  | OD1 | 2.779 |
| 4R7N | S_ARG_39  | NH2 | S_GLU_47  | OE2 | 3.044 |
| 4R7N | S_ARG_39  | NH2 | S_ASP_90  | OD1 | 3.585 |
| 4R7N | S_ARG_67  | NH1 | S_ASP_90  | OD1 | 3.352 |
| 4R7N | S_ARG_67  | NH1 | S_ASP_90  | OD2 | 2.290 |

|      |           |     |           |     |       |
|------|-----------|-----|-----------|-----|-------|
| 4R7N | S_ARG_67  | NH2 | S_ASP_90  | OD1 | 2.345 |
| 4R7N | S_ARG_67  | NH2 | S_ASP_90  | OD2 | 3.063 |
| 4R7N | S_ARG_98  | NH1 | S_ASP_100 | OD2 | 2.688 |
| 4R7N | S_ARG_98  | NH2 | S_ASP_100 | OD2 | 2.786 |
| 4R7N | S_LYS_148 | NZ  | S_ASP_149 | OD1 | 3.013 |
| 4R7N | S_LYS_148 | NZ  | S_ASP_149 | OD2 | 2.778 |
| 4R7N | S_LYS_214 | NZ  | T_GLU_123 | OE1 | 3.934 |
| 4R7N | S_LYS_214 | NZ  | T_GLU_123 | OE2 | 3.931 |
| 4R7N | T_LYS_16  | NZ  | T_GLU_79  | OE1 | 3.838 |
| 4R7N | T_LYS_16  | NZ  | T_GLU_79  | OE2 | 3.370 |
| 4R7N | T_ARG_61  | NH1 | T_GLU_81  | OE1 | 3.260 |
| 4R7N | T_ARG_61  | NH2 | T_GLU_81  | OE1 | 3.615 |
| 4R7N | T_ARG_61  | NH2 | T_ASP_82  | OD1 | 2.440 |
| 4R7N | T_ARG_61  | NH2 | T_ASP_82  | OD2 | 3.240 |
| 4R7N | T_LYS_103 | NZ  | T_GLU_165 | OE1 | 3.688 |
| 4R7N | T_LYS_149 | NZ  | T_GLU_195 | OE2 | 2.601 |
| 4R9Y | L_ARG_86  | NH2 | L_ASP_107 | OD1 | 3.056 |
| 4R9Y | L_ARG_86  | NH2 | L_ASP_107 | OD2 | 2.747 |
| 4R9Y | L_LYS_128 | NZ  | L_ASP_190 | OD2 | 3.847 |
| 4R9Y | L_LYS_174 | NZ  | L_GLU_220 | OE1 | 2.876 |
| 4R9Y | L_ARG_180 | NH2 | L_GLU_210 | OE2 | 3.355 |
| 4R9Y | L_HIS_214 | ND1 | L_GLU_210 | OE1 | 3.897 |
| 4R9Y | H_LYS_37  | NZ  | H_GLU_45  | OE1 | 2.976 |
| 4R9Y | H_ARG_66  | NH1 | H_GLU_88  | OE2 | 2.888 |
| 4R9Y | H_ARG_66  | NH2 | H_GLU_88  | OE2 | 3.617 |
| 4R9Y | H_LYS_214 | NZ  | L_GLU_148 | OE2 | 2.745 |
| 4R9Y | B_LYS_50  | NZ  | B_GLU_28  | OE2 | 3.071 |
| 4R9Y | A_LYS_50  | NZ  | A_GLU_28  | OE2 | 2.662 |
| 4R9Y | M_ARG_79  | NH2 | M_ASP_85  | OD1 | 3.700 |
| 4R9Y | M_ARG_86  | NH2 | M_ASP_107 | OD1 | 2.946 |
| 4R9Y | M_ARG_86  | NH2 | M_ASP_107 | OD2 | 2.694 |
| 4R9Y | M_LYS_128 | NZ  | M_ASP_190 | OD1 | 3.808 |
| 4R9Y | M_LYS_128 | NZ  | M_ASP_190 | OD2 | 3.124 |
| 4R9Y | M_LYS_    | NZ  | M_GLU_    | OE1 | 3.152 |
| 4R9Y | M_ARG_    | NH2 | M_GLU_    | OE2 | 3.203 |
| 4R9Y | M_HIS_    | ND1 | M_GLU_    | OE1 | 3.630 |
| 4R9Y | M_LYS_    | NZ  | M_ASP_    | OD1 | 3.535 |
| 4R9Y | M_LYS_    | NZ  | M_ASP_    | OD2 | 3.766 |
| 4R9Y | N_LYS_37  | NZ  | N_GLU_45  | OE1 | 2.708 |
| 4R9Y | N_ARG_66  | NH1 | N_GLU_88  | OE2 | 3.382 |
| 4R9Y | N_ARG_66  | NH2 | N_GLU_88  | OE2 | 3.864 |
| 4R9Y | N_LYS_    | NZ  | M_GLU_    | OE2 | 3.272 |
| 4RAU | A_ARG_39  | NH1 | A_ASP_84  | OD1 | 3.918 |
| 4RAU | A_ARG_63  | NH1 | A_ASP_84  | OD1 | 3.252 |
| 4RAU | A_ARG_63  | NH1 | A_ASP_84  | OD2 | 2.474 |
| 4RAU | A_ARG_63  | NH2 | A_GLU_81  | OE1 | 3.641 |
| 4RAU | A_LYS_95  | NZ  | C_ASP_7   | OD1 | 3.997 |
| 4RAU | A_LYS_95  | NZ  | C_ASP_7   | OD2 | 3.077 |
| 4RAU | A_LYS_105 | NZ  | A_ASP_167 | OD1 | 3.803 |
| 4RAU | A_LYS_144 | NZ  | A_GLU_107 | OE1 | 3.648 |
| 4RAU | A_LYS_149 | NZ  | A_GLU_156 | OE1 | 3.640 |
| 4RAU | A_LYS_149 | NZ  | A_GLU_156 | OE2 | 3.515 |
| 4RAU | A_LYS_151 | NZ  | A_GLU_197 | OE1 | 3.640 |
| 4RAU | A_LYS_151 | NZ  | A_GLU_197 | OE2 | 2.823 |
| 4RAU | A_LYS_185 | NZ  | A_GLU_189 | OE1 | 3.707 |
| 4RAU | A_LYS_185 | NZ  | A_GLU_189 | OE2 | 3.597 |
| 4RAU | A_HIS_191 | ND1 | A_ASP_153 | OD2 | 2.734 |
| 4RAU | A_LYS_201 | NZ  | A_ASP_112 | OD2 | 3.033 |

|      |           |     |           |     |       |
|------|-----------|-----|-----------|-----|-------|
| 4RAU | B_ARG_40  | NH1 | B_ASP_92  | OD1 | 3.503 |
| 4RAU | B_ARG_40  | NH2 | B_GLU_48  | OE1 | 3.720 |
| 4RAU | B_ARG_40  | NH2 | B_GLU_48  | OE2 | 3.277 |
| 4RAU | B_ARG_46  | NH1 | B_GLU_44  | OE1 | 3.716 |
| 4RAU | B_ARG_69  | NH1 | B_ASP_92  | OD2 | 2.694 |
| 4RAU | B_ARG_69  | NH2 | B_ASP_92  | OD1 | 3.312 |
| 4RAU | B_ARG_69  | NH2 | B_ASP_92  | OD2 | 3.295 |
| 4RAU | B_ARG_89  | NH1 | B_GLU_91  | OE1 | 3.989 |
| 4RAU | B_ARG_100 | NH2 | B_ASP_109 | OD1 | 3.691 |
| 4RAU | B_ARG_100 | NH2 | B_ASP_109 | OD2 | 2.652 |
| 4RAU | D_ARG_39  | NH1 | D_ASP_84  | OD1 | 3.919 |
| 4RAU | D_ARG_63  | NH1 | D_ASP_84  | OD1 | 3.251 |
| 4RAU | D_ARG_63  | NH1 | D_ASP_84  | OD2 | 2.476 |
| 4RAU | D_ARG_63  | NH2 | D_GLU_81  | OE1 | 3.630 |
| 4RAU | D_LYS_95  | NZ  | F_ASP_7   | OD1 | 3.860 |
| 4RAU | D_LYS_105 | NZ  | D_ASP_167 | OD1 | 3.863 |
| 4RAU | D_LYS_144 | NZ  | D_GLU_107 | OE1 | 3.652 |
| 4RAU | D_LYS_149 | NZ  | D_GLU_156 | OE1 | 3.639 |
| 4RAU | D_LYS_149 | NZ  | D_GLU_156 | OE2 | 3.516 |
| 4RAU | D_LYS_151 | NZ  | D_GLU_197 | OE1 | 3.630 |
| 4RAU | D_LYS_151 | NZ  | D_GLU_197 | OE2 | 2.814 |
| 4RAU | D_LYS_185 | NZ  | D_GLU_189 | OE1 | 3.707 |
| 4RAU | D_LYS_185 | NZ  | D_GLU_189 | OE2 | 3.596 |
| 4RAU | D_HIS_191 | ND1 | D_ASP_153 | OD2 | 2.728 |
| 4RAU | D_LYS_201 | NZ  | D_ASP_112 | OD2 | 3.033 |
| 4RAU | E_ARG_40  | NH1 | E_ASP_92  | OD1 | 3.503 |
| 4RAU | E_ARG_40  | NH2 | E_GLU_48  | OE1 | 3.725 |
| 4RAU | E_ARG_40  | NH2 | E_GLU_48  | OE2 | 3.283 |
| 4RAU | E_ARG_46  | NH1 | E_GLU_44  | OE1 | 3.723 |
| 4RAU | E_ARG_69  | NH1 | E_ASP_92  | OD2 | 2.692 |
| 4RAU | E_ARG_69  | NH2 | E_ASP_92  | OD1 | 3.311 |
| 4RAU | E_ARG_69  | NH2 | E_ASP_92  | OD2 | 3.296 |
| 4RAU | E_ARG_89  | NH1 | E_GLU_91  | OE1 | 3.988 |
| 4RAU | E_ARG_100 | NH2 | E_ASP_109 | OD1 | 3.682 |
| 4RAU | E_ARG_100 | NH2 | E_ASP_109 | OD2 | 2.642 |
| 4RAU | G_ARG_39  | NH1 | G_ASP_84  | OD1 | 3.926 |
| 4RAU | G_LYS_41  | NZ  | G_GLU_83  | OE2 | 3.332 |
| 4RAU | G_ARG_63  | NH1 | G_ASP_84  | OD1 | 3.251 |
| 4RAU | G_ARG_63  | NH1 | G_ASP_84  | OD2 | 2.480 |
| 4RAU | G_ARG_63  | NH2 | G_GLU_81  | OE1 | 3.649 |
| 4RAU | G_LYS_95  | NZ  | I_ASP_7   | OD1 | 3.805 |
| 4RAU | G_LYS_95  | NZ  | I_ASP_7   | OD2 | 2.755 |
| 4RAU | G_LYS_105 | NZ  | G_ASP_167 | OD1 | 3.810 |
| 4RAU | G_LYS_144 | NZ  | G_GLU_107 | OE1 | 3.652 |
| 4RAU | G_LYS_149 | NZ  | G_GLU_156 | OE1 | 3.643 |
| 4RAU | G_LYS_149 | NZ  | G_GLU_156 | OE2 | 3.517 |
| 4RAU | G_LYS_151 | NZ  | G_GLU_197 | OE1 | 3.632 |
| 4RAU | G_LYS_151 | NZ  | G_GLU_197 | OE2 | 2.815 |
| 4RAU | G_LYS_185 | NZ  | G_GLU_189 | OE1 | 3.707 |
| 4RAU | G_LYS_185 | NZ  | G_GLU_189 | OE2 | 3.598 |
| 4RAU | G_HIS_191 | ND1 | G_ASP_153 | OD2 | 2.730 |
| 4RAU | G_LYS_201 | NZ  | G_ASP_112 | OD2 | 3.033 |
| 4RAU | H_ARG_40  | NH1 | H_ASP_92  | OD1 | 3.494 |
| 4RAU | H_ARG_40  | NH2 | H_GLU_48  | OE1 | 3.724 |
| 4RAU | H_ARG_40  | NH2 | H_GLU_48  | OE2 | 3.281 |
| 4RAU | H_ARG_46  | NH1 | H_GLU_44  | OE1 | 3.700 |
| 4RAU | H_ARG_69  | NH1 | H_ASP_92  | OD2 | 2.699 |
| 4RAU | H_ARG_69  | NH2 | H_ASP_92  | OD1 | 3.317 |

|      |           |     |           |     |       |
|------|-----------|-----|-----------|-----|-------|
| 4RAU | H_ARG_69  | NH2 | H_ASP_92  | OD2 | 3.297 |
| 4RAU | H_ARG_89  | NH1 | H_GLU_91  | OE1 | 3.985 |
| 4RAU | H_ARG_100 | NH2 | H_ASP_109 | OD1 | 3.685 |
| 4RAU | H_ARG_100 | NH2 | H_ASP_109 | OD2 | 2.644 |
| 4RAU | J_ARG_39  | NH1 | J_ASP_84  | OD1 | 3.913 |
| 4RAU | J_ARG_63  | NH1 | J_ASP_84  | OD1 | 3.253 |
| 4RAU | J_ARG_63  | NH1 | J_ASP_84  | OD2 | 2.480 |
| 4RAU | J_ARG_63  | NH2 | J_GLU_81  | OE1 | 3.649 |
| 4RAU | J_LYS_105 | NZ  | J_ASP_167 | OD1 | 3.805 |
| 4RAU | J_LYS_144 | NZ  | J_GLU_107 | OE1 | 3.646 |
| 4RAU | J_LYS_149 | NZ  | J_GLU_156 | OE1 | 3.641 |
| 4RAU | J_LYS_149 | NZ  | J_GLU_156 | OE2 | 3.516 |
| 4RAU | J_LYS_151 | NZ  | J_GLU_197 | OE1 | 3.631 |
| 4RAU | J_LYS_151 | NZ  | J_GLU_197 | OE2 | 2.814 |
| 4RAU | J_LYS_171 | NZ  | J_ASP_169 | OD2 | 3.647 |
| 4RAU | J_LYS_185 | NZ  | J_GLU_189 | OE1 | 3.708 |
| 4RAU | J_LYS_185 | NZ  | J_GLU_189 | OE2 | 3.602 |
| 4RAU | J_HIS_191 | ND1 | J_ASP_153 | OD2 | 2.728 |
| 4RAU | J_LYS_201 | NZ  | J_ASP_112 | OD2 | 3.034 |
| 4RAU | K_ARG_40  | NH1 | K_ASP_92  | OD1 | 3.498 |
| 4RAU | K_ARG_40  | NH2 | K_GLU_48  | OE1 | 3.722 |
| 4RAU | K_ARG_40  | NH2 | K_GLU_48  | OE2 | 3.276 |
| 4RAU | K_ARG_46  | NH1 | K_GLU_44  | OE1 | 3.698 |
| 4RAU | K_ARG_69  | NH1 | K_ASP_92  | OD2 | 2.699 |
| 4RAU | K_ARG_69  | NH2 | K_ASP_92  | OD1 | 3.319 |
| 4RAU | K_ARG_69  | NH2 | K_ASP_92  | OD2 | 3.299 |
| 4RAU | K_ARG_89  | NH1 | K_GLU_91  | OE1 | 3.987 |
| 4RAU | K_ARG_100 | NH2 | K_ASP_109 | OD1 | 3.690 |
| 4RAU | K_ARG_100 | NH2 | K_ASP_109 | OD2 | 2.645 |
| 4RAU | K_LYS_216 | NZ  | J_GLU_125 | OE2 | 3.935 |
| 4RAU | M_ARG_39  | NH1 | M_ASP_84  | OD1 | 3.922 |
| 4RAU | M_ARG_63  | NH1 | M_ASP_84  | OD1 | 3.250 |
| 4RAU | M_ARG_63  | NH1 | M_ASP_84  | OD2 | 2.472 |
| 4RAU | M_ARG_63  | NH2 | M_GLU_81  | OE1 | 3.646 |
| 4RAU | M_LYS_105 | NZ  | M_ASP_167 | OD1 | 3.861 |
| 4RAU | M_LYS_149 | NZ  | M_GLU_156 | OE1 | 3.646 |
| 4RAU | M_LYS_149 | NZ  | M_GLU_156 | OE2 | 3.522 |
| 4RAU | M_LYS_151 | NZ  | M_GLU_197 | OE1 | 3.627 |
| 4RAU | M_LYS_151 | NZ  | M_GLU_197 | OE2 | 2.809 |
| 4RAU | M_LYS_185 | NZ  | M_GLU_189 | OE1 | 3.710 |
| 4RAU | M_LYS_185 | NZ  | M_GLU_189 | OE2 | 3.598 |
| 4RAU | M_HIS_191 | ND1 | M_ASP_153 | OD2 | 2.731 |
| 4RAU | M_LYS_201 | NZ  | M_ASP_112 | OD2 | 3.028 |
| 4RAU | N_ARG_40  | NH1 | N_ASP_92  | OD1 | 3.508 |
| 4RAU | N_ARG_40  | NH2 | N_GLU_48  | OE1 | 3.718 |
| 4RAU | N_ARG_40  | NH2 | N_GLU_48  | OE2 | 3.273 |
| 4RAU | N_ARG_46  | NH2 | N_GLU_44  | OE1 | 2.944 |
| 4RAU | N_ARG_69  | NH1 | N_ASP_92  | OD2 | 2.695 |
| 4RAU | N_ARG_69  | NH2 | N_ASP_92  | OD1 | 3.318 |
| 4RAU | N_ARG_69  | NH2 | N_ASP_92  | OD2 | 3.302 |
| 4RAU | N_ARG_89  | NH1 | N_GLU_91  | OE1 | 3.987 |
| 4RAU | N_ARG_100 | NH2 | N_ASP_109 | OD1 | 3.684 |
| 4RAU | N_ARG_100 | NH2 | N_ASP_109 | OD2 | 2.647 |
| 4RAU | O_ARG_49  | NH2 | X_ASP_7   | OD1 | 2.993 |
| 4RAU | O_ARG_49  | NH2 | X_ASP_7   | OD2 | 3.647 |
| 4RAU | P_ARG_39  | NH1 | P_ASP_84  | OD1 | 3.913 |
| 4RAU | P_ARG_63  | NH1 | P_ASP_84  | OD1 | 3.257 |
| 4RAU | P_ARG_63  | NH1 | P_ASP_84  | OD2 | 2.479 |

|      |           |     |           |     |       |
|------|-----------|-----|-----------|-----|-------|
| 4RAU | P_ARG_63  | NH2 | P_GLU_81  | OE1 | 3.679 |
| 4RAU | P_LYS_    | NZ  | R_ASP_    | OD1 | 3.104 |
| 4RAU | P_LYS_105 | NZ  | P_ASP_167 | OD1 | 3.844 |
| 4RAU | P_LYS_144 | NZ  | P_GLU_107 | OE1 | 3.654 |
| 4RAU | P_LYS_149 | NZ  | P_GLU_156 | OE1 | 3.641 |
| 4RAU | P_LYS_149 | NZ  | P_GLU_156 | OE2 | 3.516 |
| 4RAU | P_LYS_151 | NZ  | P_GLU_197 | OE1 | 3.629 |
| 4RAU | P_LYS_151 | NZ  | P_GLU_197 | OE2 | 2.811 |
| 4RAU | P_LYS_185 | NZ  | P_GLU_189 | OE1 | 3.705 |
| 4RAU | P_LYS_185 | NZ  | P_GLU_189 | OE2 | 3.595 |
| 4RAU | P_HIS_191 | ND1 | P_ASP_153 | OD2 | 2.722 |
| 4RAU | P_LYS_201 | NZ  | P_ASP_112 | OD2 | 3.034 |
| 4RAU | Q_ARG_40  | NH1 | Q_ASP_92  | OD1 | 3.502 |
| 4RAU | Q_ARG_40  | NH2 | Q_GLU_48  | OE1 | 3.727 |
| 4RAU | Q_ARG_40  | NH2 | Q_GLU_48  | OE2 | 3.276 |
| 4RAU | Q_ARG_46  | NH1 | Q_GLU_44  | OE1 | 3.700 |
| 4RAU | Q_ARG_69  | NH1 | Q_ASP_92  | OD2 | 2.695 |
| 4RAU | Q_ARG_69  | NH2 | Q_ASP_92  | OD1 | 3.314 |
| 4RAU | Q_ARG_69  | NH2 | Q_ASP_92  | OD2 | 3.297 |
| 4RAU | Q_ARG_89  | NH1 | Q_GLU_91  | OE1 | 3.990 |
| 4RAU | Q_ARG_100 | NH2 | Q_ASP_109 | OD1 | 3.684 |
| 4RAU | Q_ARG_100 | NH2 | Q_ASP_109 | OD2 | 2.645 |
| 4RAU | S_ARG_39  | NH2 | S_ASP_84  | OD1 | 2.426 |
| 4RAU | S_ARG_63  | NH1 | S_ASP_84  | OD1 | 3.257 |
| 4RAU | S_ARG_63  | NH1 | S_ASP_84  | OD2 | 2.480 |
| 4RAU | S_ARG_63  | NH2 | S_GLU_81  | OE1 | 3.645 |
| 4RAU | S_LYS_105 | NZ  | S_ASP_167 | OD1 | 3.810 |
| 4RAU | S_LYS_144 | NZ  | S_GLU_107 | OE1 | 3.627 |
| 4RAU | S_LYS_149 | NZ  | S_GLU_156 | OE1 | 3.640 |
| 4RAU | S_LYS_149 | NZ  | S_GLU_156 | OE2 | 3.514 |
| 4RAU | S_LYS_151 | NZ  | S_GLU_197 | OE1 | 3.630 |
| 4RAU | S_LYS_151 | NZ  | S_GLU_197 | OE2 | 2.813 |
| 4RAU | S_LYS_185 | NZ  | S_GLU_189 | OE1 | 3.708 |
| 4RAU | S_LYS_185 | NZ  | S_GLU_189 | OE2 | 3.598 |
| 4RAU | S_HIS_191 | ND1 | S_ASP_153 | OD2 | 2.725 |
| 4RAU | S_LYS_201 | NZ  | S_ASP_112 | OD2 | 3.035 |
| 4RAU | T_ARG_40  | NH1 | T_ASP_92  | OD1 | 3.503 |
| 4RAU | T_ARG_40  | NH2 | T_GLU_48  | OE1 | 3.728 |
| 4RAU | T_ARG_40  | NH2 | T_GLU_48  | OE2 | 3.283 |
| 4RAU | T_ARG_46  | NH1 | T_GLU_44  | OE1 | 3.699 |
| 4RAU | T_ARG_69  | NH1 | T_ASP_92  | OD2 | 2.696 |
| 4RAU | T_ARG_69  | NH2 | T_ASP_92  | OD1 | 3.316 |
| 4RAU | T_ARG_69  | NH2 | T_ASP_92  | OD2 | 3.295 |
| 4RAU | T_ARG_89  | NH1 | T_GLU_91  | OE1 | 3.989 |
| 4RAU | T_ARG_100 | NH2 | T_ASP_109 | OD1 | 3.693 |
| 4RAU | T_ARG_100 | NH2 | T_ASP_109 | OD2 | 2.653 |
| 4RAU | V_ARG_39  | NH1 | V_ASP_84  | OD1 | 3.915 |
| 4RAU | V_ARG_63  | NH1 | V_ASP_84  | OD1 | 3.255 |
| 4RAU | V_ARG_63  | NH1 | V_ASP_84  | OD2 | 2.479 |
| 4RAU | V_ARG_63  | NH2 | V_GLU_81  | OE1 | 3.648 |
| 4RAU | V_LYS_95  | NZ  | X_ASP_7   | OD1 | 3.972 |
| 4RAU | V_LYS_95  | NZ  | X_ASP_7   | OD2 | 3.050 |
| 4RAU | V_LYS_105 | NZ  | V_ASP_167 | OD1 | 3.821 |
| 4RAU | V_LYS_144 | NZ  | V_GLU_107 | OE1 | 3.639 |
| 4RAU | V_LYS_149 | NZ  | V_GLU_156 | OE1 | 3.641 |
| 4RAU | V_LYS_149 | NZ  | V_GLU_156 | OE2 | 3.514 |
| 4RAU | V_LYS_151 | NZ  | V_GLU_197 | OE1 | 3.631 |
| 4RAU | V_LYS_151 | NZ  | V_GLU_197 | OE2 | 2.814 |

|      |           |     |           |     |       |
|------|-----------|-----|-----------|-----|-------|
| 4RAU | V_LYS_185 | NZ  | V_GLU_189 | OE1 | 3.708 |
| 4RAU | V_LYS_185 | NZ  | V_GLU_189 | OE2 | 3.599 |
| 4RAU | V_HIS_191 | ND1 | V_ASP_153 | OD2 | 2.732 |
| 4RAU | V_LYS_201 | NZ  | V_ASP_112 | OD2 | 3.032 |
| 4RAU | W_ARG_40  | NH1 | W_ASP_92  | OD1 | 3.502 |
| 4RAU | W_ARG_40  | NH2 | W_GLU_48  | OE1 | 3.718 |
| 4RAU | W_ARG_40  | NH2 | W_GLU_48  | OE2 | 3.275 |
| 4RAU | W_ARG_46  | NH1 | W_GLU_44  | OE1 | 3.702 |
| 4RAU | W_ARG_69  | NH1 | W_ASP_92  | OD2 | 2.696 |
| 4RAU | W_ARG_69  | NH2 | W_ASP_92  | OD1 | 3.317 |
| 4RAU | W_ARG_69  | NH2 | W_ASP_92  | OD2 | 3.298 |
| 4RAU | W_ARG_89  | NH1 | W_GLU_91  | OE1 | 3.988 |
| 4RAU | W_ARG_100 | NH2 | W_ASP_109 | OD1 | 3.693 |
| 4RAU | W_ARG_100 | NH2 | W_ASP_109 | OD2 | 2.652 |
| 4RAU | X_ARG_49  | NH2 | O_ASP_7   | OD1 | 2.791 |
| 4RAU | X_ARG_49  | NH2 | O_ASP_7   | OD2 | 3.699 |
| 4RRP | A_ARG_24  | NH2 | A_ASP_70  | OD1 | 3.536 |
| 4RRP | A_ARG_24  | NH2 | A_ASP_70  | OD2 | 3.877 |
| 4RRP | A_ARG_61  | NH2 | A_GLU_81  | OE2 | 3.090 |
| 4RRP | A_ARG_61  | NH2 | A_ASP_82  | OD1 | 2.844 |
| 4RRP | A_ARG_61  | NH2 | A_ASP_82  | OD2 | 3.386 |
| 4RRP | A_LYS_149 | NZ  | A_GLU_195 | OE1 | 2.796 |
| 4RRP | A_LYS_149 | NZ  | A_GLU_195 | OE2 | 3.574 |
| 4RRP | A_LYS_169 | NZ  | A_ASP_167 | OD1 | 3.364 |
| 4RRP | A_LYS_169 | NZ  | A_ASP_167 | OD2 | 3.265 |
| 4RRP | A_LYS_183 | NZ  | A_GLU_187 | OE1 | 3.356 |
| 4RRP | A_LYS_183 | NZ  | A_GLU_187 | OE2 | 2.482 |
| 4RRP | A_LYS_188 | NZ  | A_ASP_185 | OD1 | 3.338 |
| 4RRP | G_ARG_38  | NH1 | G_ASP_86  | OD1 | 3.090 |
| 4RRP | G_ARG_38  | NH2 | G_GLU_46  | OE1 | 3.292 |
| 4RRP | G_ARG_38  | NH2 | G_GLU_46  | OE2 | 3.713 |
| 4RRP | G_ARG_38  | NH2 | G_ASP_86  | OD1 | 3.929 |
| 4RRP | G_LYS_64  | NZ  | G_ASP_61  | OD1 | 3.718 |
| 4RRP | G_ARG_66  | NH1 | G_ASP_86  | OD1 | 3.753 |
| 4RRP | G_ARG_66  | NH1 | G_ASP_86  | OD2 | 2.642 |
| 4RRP | G_ARG_66  | NH2 | G_ASP_86  | OD1 | 3.093 |
| 4RRP | G_ARG_66  | NH2 | G_ASP_86  | OD2 | 3.474 |
| 4RRP | G_LYS_75  | NZ  | G_ASP_72  | OD2 | 3.613 |
| 4RRP | G_ARG_94  | NH1 | G_ASP_101 | OD2 | 2.572 |
| 4RRP | G_LYS_143 | NZ  | G_ASP_144 | OD1 | 3.513 |
| 4RRP | G_LYS_143 | NZ  | G_ASP_144 | OD2 | 3.377 |
| 4RRP | G_LYS_214 | NZ  | A_ASP_122 | OD1 | 3.271 |
| 4RRP | G_LYS_214 | NZ  | A_ASP_122 | OD2 | 3.253 |
| 4RRP | B_ARG_24  | NH1 | B_ASP_70  | OD1 | 2.974 |
| 4RRP | B_ARG_24  | NH2 | B_ASP_70  | OD1 | 3.509 |
| 4RRP | B_ARG_24  | NH2 | B_ASP_70  | OD2 | 3.520 |
| 4RRP | B_ARG_61  | NH1 | Q_GLU_32  | OE1 | 3.055 |
| 4RRP | B_ARG_61  | NH1 | Q_GLU_32  | OE2 | 3.683 |
| 4RRP | B_ARG_61  | NH2 | B_GLU_81  | OE2 | 3.319 |
| 4RRP | B_ARG_61  | NH2 | B_ASP_82  | OD1 | 2.867 |
| 4RRP | B_ARG_61  | NH2 | B_ASP_82  | OD2 | 3.594 |
| 4RRP | B_ARG_61  | NH2 | Q_GLU_32  | OE2 | 3.637 |
| 4RRP | B_LYS_103 | NZ  | B_GLU_165 | OE1 | 2.902 |
| 4RRP | B_LYS_103 | NZ  | B_GLU_165 | OE2 | 2.974 |
| 4RRP | B_LYS_149 | NZ  | B_GLU_195 | OE2 | 2.877 |
| 4RRP | B_LYS_188 | NZ  | B_ASP_185 | OD1 | 3.756 |
| 4RRP | B_HIS_189 | ND1 | B_ASP_151 | OD2 | 3.126 |
| 4RRP | H_ARG_38  | NH1 | H_ASP_86  | OD1 | 2.743 |



|      |           |     |           |     |       |
|------|-----------|-----|-----------|-----|-------|
| 4RRP | H_ARG_38  | NH2 | H_GLU_46  | OE1 | 3.267 |
| 4RRP | H_ARG_38  | NH2 | H_GLU_46  | OE2 | 3.655 |
| 4RRP | H_ARG_38  | NH2 | H_ASP_86  | OD1 | 3.792 |
| 4RRP | H_ARG_66  | NH1 | H_ASP_86  | OD2 | 2.961 |
| 4RRP | H_ARG_66  | NH2 | H_ASP_86  | OD1 | 3.400 |
| 4RRP | H_ARG_66  | NH2 | H_ASP_86  | OD2 | 3.201 |
| 4RRP | H_ARG_94  | NH2 | H_ASP_101 | OD1 | 3.922 |
| 4RRP | H_ARG_94  | NH2 | H_ASP_101 | OD2 | 2.800 |
| 4RRP | H_LYS_143 | NZ  | H_ASP_144 | OD1 | 3.372 |
| 4RRP | H_LYS_143 | NZ  | H_ASP_144 | OD2 | 3.115 |
| 4RRP | H_LYS_210 | NZ  | H_GLU_212 | OE2 | 3.908 |
| 4RRP | C_ARG_24  | NH1 | C_ASP_70  | OD1 | 3.210 |
| 4RRP | C_ARG_24  | NH1 | C_ASP_70  | OD2 | 3.811 |
| 4RRP | C_ARG_24  | NH2 | C_ASP_70  | OD1 | 3.266 |
| 4RRP | C_ARG_24  | NH2 | C_ASP_70  | OD2 | 3.021 |
| 4RRP | C_ARG_61  | NH2 | C_GLU_81  | OE2 | 3.872 |
| 4RRP | C_ARG_61  | NH2 | C_ASP_82  | OD1 | 2.499 |
| 4RRP | C_ARG_61  | NH2 | C_ASP_82  | OD2 | 3.003 |
| 4RRP | C_LYS_103 | NZ  | C_GLU_105 | OE1 | 2.759 |
| 4RRP | C_LYS_103 | NZ  | C_GLU_165 | OE1 | 3.916 |
| 4RRP | C_LYS_188 | NZ  | C_ASP_185 | OD1 | 3.719 |
| 4RRP | L_ARG_38  | NH1 | L_ASP_86  | OD1 | 3.037 |
| 4RRP | L_ARG_38  | NH2 | L_GLU_46  | OE1 | 3.102 |
| 4RRP | L_ARG_38  | NH2 | L_GLU_46  | OE2 | 3.753 |
| 4RRP | L_LYS_64  | NZ  | L_ASP_61  | OD1 | 2.958 |
| 4RRP | L_ARG_66  | NH1 | L_ASP_86  | OD1 | 3.306 |
| 4RRP | L_ARG_66  | NH1 | L_ASP_86  | OD2 | 3.894 |
| 4RRP | L_ARG_66  | NH2 | L_ASP_86  | OD1 | 3.160 |
| 4RRP | L_ARG_66  | NH2 | L_ASP_86  | OD2 | 2.282 |
| 4RRP | L_ARG_94  | NH1 | L_ASP_101 | OD2 | 2.705 |
| 4RRP | L_LYS_143 | NZ  | L_ASP_144 | OD1 | 3.710 |
| 4RRP | D_ARG_24  | NH2 | D_ASP_70  | OD1 | 3.941 |
| 4RRP | D_ARG_61  | NH2 | D_GLU_81  | OE2 | 3.108 |
| 4RRP | D_ARG_61  | NH2 | D_ASP_82  | OD1 | 2.819 |
| 4RRP | D_ARG_61  | NH2 | D_ASP_82  | OD2 | 3.344 |
| 4RRP | D_LYS_103 | NZ  | D_GLU_165 | OE1 | 3.545 |
| 4RRP | D_LYS_103 | NZ  | D_GLU_165 | OE2 | 3.420 |
| 4RRP | D_LYS_149 | NZ  | D_GLU_195 | OE2 | 2.585 |
| 4RRP | D_LYS_188 | NZ  | D_ASP_185 | OD1 | 2.752 |
| 4RRP | D_HIS_189 | ND1 | D_ASP_151 | OD2 | 3.191 |
| 4RRP | J_ARG_38  | NH1 | J_ASP_86  | OD1 | 3.091 |
| 4RRP | J_ARG_38  | NH2 | J_GLU_46  | OE1 | 3.176 |
| 4RRP | J_ARG_38  | NH2 | J_ASP_86  | OD1 | 3.697 |
| 4RRP | J_ARG_66  | NH1 | J_ASP_86  | OD1 | 3.907 |
| 4RRP | J_ARG_66  | NH1 | J_ASP_86  | OD2 | 2.891 |
| 4RRP | J_ARG_66  | NH2 | J_ASP_86  | OD1 | 2.922 |
| 4RRP | J_ARG_66  | NH2 | J_ASP_86  | OD2 | 3.426 |
| 4RRP | J_ARG_83  | NH1 | J_GLU_85  | OE2 | 3.812 |
| 4RRP | J_ARG_94  | NH2 | J_ASP_101 | OD1 | 3.162 |
| 4RRP | J_LYS_143 | NZ  | J_ASP_144 | OD1 | 3.206 |
| 4RRP | J_LYS_143 | NZ  | J_ASP_144 | OD2 | 3.279 |
| 4RRP | J_LYS_210 | NZ  | J_GLU_212 | OE2 | 3.248 |
| 4RRP | J_LYS_214 | NZ  | D_ASP_122 | OD1 | 3.176 |
| 4RRP | J_LYS_214 | NZ  | D_ASP_122 | OD2 | 2.924 |
| 4RRP | E_ARG_24  | NH1 | E_ASP_70  | OD1 | 3.504 |
| 4RRP | E_ARG_24  | NH1 | E_ASP_70  | OD2 | 2.757 |
| 4RRP | E_ARG_24  | NH2 | E_ASP_70  | OD1 | 3.612 |
| 4RRP | E_ARG_24  | NH2 | E_ASP_70  | OD2 | 3.877 |

|      |           |     |           |     |       |
|------|-----------|-----|-----------|-----|-------|
| 4RRP | E_ARG.61  | NH2 | E_GLU_81  | OE2 | 3.265 |
| 4RRP | E_ARG.61  | NH2 | E_ASP_82  | OD1 | 2.971 |
| 4RRP | E_ARG.61  | NH2 | E_ASP_82  | OD2 | 3.278 |
| 4RRP | E_LYS_103 | NZ  | E_GLU_165 | OE1 | 3.997 |
| 4RRP | E_ARG_108 | NH1 | E_ASP_170 | OD1 | 3.279 |
| 4RRP | E_LYS_188 | NZ  | E_ASP_185 | OD1 | 3.369 |
| 4RRP | E_HIS_189 | ND1 | E_ASP_151 | OD2 | 3.342 |
| 4RRP | K_ARG_38  | NH1 | K_ASP_86  | OD1 | 3.316 |
| 4RRP | K_ARG_38  | NH2 | K_GLU_46  | OE1 | 3.348 |
| 4RRP | K_ARG_38  | NH2 | K_GLU_46  | OE2 | 3.150 |
| 4RRP | K_ARG_38  | NH2 | K_ASP_86  | OD1 | 3.806 |
| 4RRP | K_ARG_66  | NH1 | K_ASP_86  | OD1 | 3.794 |
| 4RRP | K_ARG_66  | NH1 | K_ASP_86  | OD2 | 2.585 |
| 4RRP | K_ARG_94  | NH2 | K_ASP_101 | OD2 | 3.065 |
| 4RRP | K_LYS_143 | NZ  | K_ASP_144 | OD1 | 3.052 |
| 4RRP | K_LYS_143 | NZ  | K_ASP_144 | OD2 | 3.747 |
| 4RRP | K_LYS_210 | NZ  | K_GLU_212 | OE2 | 3.209 |
| 4RRP | F_ARG_24  | NH1 | F_ASP_70  | OD1 | 3.513 |
| 4RRP | F_ARG_24  | NH2 | F_ASP_70  | OD1 | 3.347 |
| 4RRP | F_ARG_24  | NH2 | F_ASP_70  | OD2 | 3.453 |
| 4RRP | F_ARG_61  | NH2 | F_GLU_81  | OE2 | 3.201 |
| 4RRP | F_ARG_61  | NH2 | F_ASP_82  | OD1 | 3.111 |
| 4RRP | F_ARG_61  | NH2 | F_ASP_82  | OD2 | 2.880 |
| 4RRP | F_LYS_183 | NZ  | F_GLU_187 | OE2 | 3.854 |
| 4RRP | F_HIS_189 | ND1 | F_ASP_151 | OD2 | 3.499 |
| 4RRP | L_ARG_38  | NH1 | L_ASP_86  | OD1 | 2.782 |
| 4RRP | L_ARG_38  | NH2 | L_GLU_46  | OE1 | 2.958 |
| 4RRP | L_ARG_38  | NH2 | L_GLU_46  | OE2 | 3.099 |
| 4RRP | L_ARG_38  | NH2 | L_ASP_86  | OD1 | 3.809 |
| 4RRP | L_ARG_66  | NH1 | L_ASP_86  | OD2 | 3.387 |
| 4RRP | L_ARG_66  | NH2 | L_ASP_86  | OD1 | 3.433 |
| 4RRP | L_ARG_66  | NH2 | L_ASP_86  | OD2 | 3.328 |
| 4RRP | L_ARG_94  | NH1 | L_ASP_101 | OD1 | 2.541 |
| 4RRP | L_ARG_94  | NH2 | L_ASP_101 | OD1 | 3.963 |
| 4RRP | L_HIS_164 | NE2 | F_ASP_167 | OD1 | 3.853 |
| 4RRP | L_LYS_214 | NZ  | F_ASP_122 | OD2 | 3.247 |
| 4RRP | M_LYS_10  | NZ  | M_GLU_25  | OE2 | 2.815 |
| 4RRP | M_LYS_10  | NZ  | N_GLU_29  | OE1 | 3.876 |
| 4RRP | M_LYS_10  | NZ  | N_GLU_29  | OE2 | 3.237 |
| 4RRP | M_LYS_41  | NZ  | M_GLU_39  | OE1 | 3.872 |
| 4RRP | M_ARG_104 | NH1 | M_ASP_102 | OD2 | 2.905 |
| 4RRP | M_ARG_104 | NH2 | M_ASP_102 | OD2 | 3.495 |
| 4RRP | M_ARG_108 | NH2 | M_GLU_105 | OE1 | 3.086 |
| 4RRP | M_ARG_108 | NH2 | M_GLU_105 | OE2 | 3.305 |
| 4RRP | M_ARG_123 | NH1 | M_GLU_120 | OE1 | 3.669 |
| 4RRP | M_ARG_123 | NH1 | M_GLU_120 | OE2 | 3.750 |
| 4RRP | M_HIS_134 | ND1 | M_ASP_118 | OD2 | 2.756 |
| 4RRP | M_HIS_134 | ND1 | M_GLU_119 | OE1 | 3.923 |
| 4RRP | N_LYS_10  | NZ  | M_GLU_29  | OE1 | 3.319 |
| 4RRP | N_LYS_10  | NZ  | M_GLU_29  | OE2 | 2.389 |
| 4RRP | N_LYS_10  | NZ  | N_GLU_25  | OE1 | 2.628 |
| 4RRP | N_HIS_36  | ND1 | N_ASP_102 | OD1 | 3.589 |
| 4RRP | N_HIS_36  | ND1 | N_ASP_102 | OD2 | 3.342 |
| 4RRP | N_ARG_104 | NH1 | N_ASP_102 | OD2 | 2.932 |
| 4RRP | N_ARG_104 | NH2 | N_ASP_102 | OD2 | 3.308 |
| 4RRP | N_ARG_108 | NH2 | N_GLU_105 | OE1 | 3.337 |
| 4RRP | N_ARG_108 | NH2 | N_GLU_105 | OE2 | 2.984 |
| 4RRP | O_LYS_10  | NZ  | O_GLU_25  | OE2 | 3.092 |

|      |           |     |           |     |       |
|------|-----------|-----|-----------|-----|-------|
| 4RRP | O_LYS_35  | NZ  | O_GLU_156 | OE2 | 3.793 |
| 4RRP | O_LYS_41  | NZ  | O_GLU_56  | OE1 | 3.628 |
| 4RRP | O_LYS_71  | NZ  | O_GLU_25  | OE2 | 3.721 |
| 4RRP | O_ARG_104 | NH1 | O_ASP_102 | OD2 | 3.187 |
| 4RRP | O_ARG_104 | NH2 | O_ASP_102 | OD2 | 2.791 |
| 4RRP | O_ARG_108 | NH2 | O_GLU_105 | OE2 | 3.068 |
| 4RRP | O_ARG_123 | NH1 | Q_ASP_54  | OD1 | 3.356 |
| 4RRP | O_ARG_123 | NH1 | Q_ASP_54  | OD2 | 3.533 |
| 4RRP | O_ARG_123 | NH2 | O_GLU_120 | OE1 | 3.551 |
| 4RRP | O_ARG_123 | NH2 | Q_ASP_54  | OD2 | 3.134 |
| 4RRP | O_HIS_134 | ND1 | O_ASP_118 | OD1 | 3.804 |
| 4RRP | O_HIS_134 | ND1 | O_ASP_118 | OD2 | 2.643 |
| 4RRP | O_HIS_134 | NE2 | N_GLU_121 | OE1 | 3.780 |
| 4RRP | O_HIS_134 | NE2 | N_GLU_121 | OE2 | 3.192 |
| 4RRP | O_ARG_145 | NH2 | Q_GLU_116 | OE1 | 3.921 |
| 4RRP | O_ARG_145 | NH2 | Q_GLU_116 | OE2 | 3.324 |
| 4RRP | P_LYS_10  | NZ  | P_GLU_25  | OE2 | 2.613 |
| 4RRP | P_HIS_36  | ND1 | P_ASP_102 | OD1 | 3.540 |
| 4RRP | P_HIS_36  | NE2 | P_ASP_102 | OD2 | 3.863 |
| 4RRP | P_ARG_49  | NH1 | P_GLU_88  | OE2 | 3.737 |
| 4RRP | P_HIS_53  | ND1 | P_ASP_54  | OD1 | 3.310 |
| 4RRP | P_ARG_104 | NH1 | P_ASP_102 | OD2 | 2.923 |
| 4RRP | P_ARG_104 | NH2 | P_ASP_102 | OD2 | 3.980 |
| 4RRP | P_ARG_108 | NH2 | P_GLU_105 | OE1 | 2.888 |
| 4RRP | P_ARG_108 | NH2 | P_GLU_105 | OE2 | 3.217 |
| 4RRP | P_ARG_123 | NH2 | P_GLU_120 | OE1 | 2.430 |
| 4RRP | P_HIS_134 | ND1 | P_ASP_118 | OD1 | 3.512 |
| 4RRP | P_HIS_134 | ND1 | P_ASP_118 | OD2 | 2.998 |
| 4RRP | P_HIS_134 | ND1 | P_GLU_119 | OE2 | 3.490 |
| 4RRP | P_HIS_134 | NE2 | P_ASP_133 | OD2 | 3.140 |
| 4RRP | Q_LYS_10  | NZ  | Q_GLU_25  | OE2 | 2.946 |
| 4RRP | Q_HIS_36  | NE2 | Q_ASP_102 | OD2 | 3.552 |
| 4RRP | Q_LYS_41  | NZ  | Q_GLU_56  | OE1 | 3.618 |
| 4RRP | Q_HIS_53  | ND1 | Q_GLU_88  | OE2 | 3.194 |
| 4RRP | Q_ARG_104 | NH1 | Q_ASP_102 | OD1 | 3.295 |
| 4RRP | Q_ARG_108 | NH2 | Q_GLU_105 | OE1 | 3.208 |
| 4RRP | Q_ARG_108 | NH2 | Q_GLU_105 | OE2 | 3.290 |
| 4RRP | Q_ARG_123 | NH1 | Q_GLU_120 | OE1 | 3.019 |
| 4RRP | Q_HIS_134 | ND1 | Q_ASP_118 | OD1 | 3.096 |
| 4RRP | Q_HIS_134 | ND1 | Q_ASP_118 | OD2 | 3.045 |
| 4RRP | Q_ARG_145 | NH1 | O_GLU_116 | OE2 | 3.050 |
| 4RRP | Q_ARG_145 | NH2 | O_GLU_116 | OE2 | 3.244 |
| 4RRP | R_LYS_10  | NZ  | R_GLU_25  | OE2 | 2.771 |
| 4RRP | R_LYS_41  | NZ  | R_GLU_56  | OE2 | 3.957 |
| 4RRP | R_LYS_71  | NZ  | R_GLU_25  | OE1 | 3.947 |
| 4RRP | R_LYS_71  | NZ  | R_GLU_25  | OE2 | 3.610 |
| 4RRP | R_ARG_104 | NH1 | R_ASP_102 | OD2 | 3.150 |
| 4RRP | R_ARG_104 | NH2 | R_ASP_102 | OD2 | 3.913 |
| 4RRP | R_ARG_108 | NH2 | R_GLU_105 | OE1 | 3.360 |
| 4RRP | R_ARG_108 | NH2 | R_GLU_105 | OE2 | 3.892 |
| 4RRP | R_HIS_134 | NE2 | R_GLU_119 | OE2 | 3.581 |
| 4TRP | H_LYS_63  | NZ  | H_GLU_46  | OE1 | 3.694 |
| 4TRP | H_LYS_63  | NZ  | H_GLU_46  | OE2 | 2.776 |
| 4TRP | H_ARG_67  | NH1 | H_ASP_90  | OD1 | 3.592 |
| 4TRP | H_ARG_67  | NH1 | H_ASP_90  | OD2 | 2.874 |
| 4TRP | H_ARG_67  | NH2 | H_ASP_90  | OD1 | 2.862 |
| 4TRP | H_ARG_67  | NH2 | H_ASP_90  | OD2 | 3.539 |
| 4TRP | H_LYS_208 | NZ  | L_GLU_129 | OE2 | 3.281 |

|      |           |     |           |     |       |
|------|-----------|-----|-----------|-----|-------|
| 4TRP | H.LYS_209 | NZ  | H.GLU_211 | OE1 | 3.661 |
| 4TRP | H.LYS_209 | NZ  | H.GLU_211 | OE2 | 3.286 |
| 4TRP | L.ARG_66  | NH2 | L.GLU_86  | OE1 | 3.076 |
| 4TRP | L.ARG_66  | NH2 | L.ASP_87  | OD1 | 2.816 |
| 4TRP | L.ARG_66  | NH2 | L.ASP_87  | OD2 | 3.551 |
| 4TRP | L.LYS_153 | NZ  | L.GLU_160 | OE1 | 2.821 |
| 4TRP | L.LYS_153 | NZ  | L.GLU_160 | OE2 | 3.459 |
| 4TRP | L.LYS_155 | NZ  | L.GLU_201 | OE1 | 2.685 |
| 4TRP | L.LYS_155 | NZ  | L.GLU_201 | OE2 | 3.225 |
| 4TRP | L.ARG_161 | NH1 | L.GLU_191 | OE1 | 3.775 |
| 4TRP | L.ARG_161 | NH1 | L.GLU_191 | OE2 | 2.926 |
| 4TRP | L.ARG_161 | NH2 | L.GLU_191 | OE1 | 3.592 |
| 4TRP | L.ARG_161 | NH2 | L.GLU_191 | OE2 | 3.079 |
| 4TRP | L.ARG_194 | NH1 | L.ASP_190 | OD2 | 2.875 |
| 4TRP | L.HIS_195 | ND1 | L.ASP_157 | OD2 | 2.604 |
| 4TRP | L.LYS_205 | NZ  | L.ASP_116 | OD1 | 3.811 |
| 4TRP | L.LYS_205 | NZ  | L.ASP_116 | OD2 | 3.031 |
| 4TUJ | A.ARG_38  | NH1 | A.ASP_90  | OD1 | 2.738 |
| 4TUJ | A.ARG_38  | NH2 | A.GLU_46  | OE1 | 3.121 |
| 4TUJ | A.ARG_38  | NH2 | A.ASP_90  | OD1 | 3.886 |
| 4TUJ | A.ARG_67  | NH1 | A.ASP_90  | OD1 | 3.524 |
| 4TUJ | A.ARG_67  | NH1 | A.ASP_90  | OD2 | 2.860 |
| 4TUJ | A.ARG_67  | NH2 | A.ASP_90  | OD1 | 3.074 |
| 4TUJ | A.ARG_67  | NH2 | A.ASP_90  | OD2 | 3.761 |
| 4TUJ | B.ARG_59  | NH1 | B.ASP_65  | OD1 | 3.932 |
| 4TUJ | B.ARG_66  | NH1 | B.GLU_84  | OE1 | 3.650 |
| 4TUJ | B.ARG_66  | NH1 | B.GLU_84  | OE2 | 3.183 |
| 4TUJ | B.ARG_66  | NH2 | B.GLU_84  | OE1 | 3.557 |
| 4TUJ | B.ARG_66  | NH2 | B.GLU_86  | OE1 | 2.800 |
| 4TUJ | B.ARG_66  | NH2 | B.ASP_87  | OD1 | 2.741 |
| 4TUJ | B.ARG_66  | NH2 | B.ASP_87  | OD2 | 3.500 |
| 4TUJ | B.LYS_153 | NZ  | B.GLU_160 | OE1 | 2.671 |
| 4TUJ | B.LYS_153 | NZ  | B.GLU_160 | OE2 | 2.941 |
| 4TUJ | B.LYS_155 | NZ  | B.GLU_201 | OE1 | 2.816 |
| 4TUJ | B.LYS_155 | NZ  | B.GLU_201 | OE2 | 3.174 |
| 4TUJ | B.HIS_195 | ND1 | B.ASP_157 | OD2 | 3.098 |
| 4TUJ | B.LYS_205 | NZ  | B.ASP_116 | OD1 | 3.715 |
| 4TUJ | B.LYS_205 | NZ  | B.ASP_116 | OD2 | 2.602 |
| 4TUJ | C.ARG_38  | NH1 | C.ASP_90  | OD1 | 2.708 |
| 4TUJ | C.ARG_38  | NH2 | C.GLU_46  | OE1 | 3.153 |
| 4TUJ | C.ARG_38  | NH2 | C.ASP_90  | OD1 | 3.791 |
| 4TUJ | C.ARG_67  | NH1 | C.ASP_90  | OD1 | 3.571 |
| 4TUJ | C.ARG_67  | NH1 | C.ASP_90  | OD2 | 2.878 |
| 4TUJ | C.ARG_67  | NH2 | C.ASP_90  | OD1 | 2.853 |
| 4TUJ | C.ARG_67  | NH2 | C.ASP_90  | OD2 | 3.465 |
| 4TUJ | D.ARG_66  | NH1 | D.GLU_84  | OE1 | 3.649 |
| 4TUJ | D.ARG_66  | NH1 | D.GLU_84  | OE2 | 3.433 |
| 4TUJ | D.ARG_66  | NH2 | D.GLU_84  | OE1 | 3.528 |
| 4TUJ | D.ARG_66  | NH2 | D.ASP_87  | OD1 | 2.665 |
| 4TUJ | D.ARG_66  | NH2 | D.ASP_87  | OD2 | 3.342 |
| 4TUJ | D.LYS_148 | NZ  | D.GLU_111 | OE1 | 2.802 |
| 4TUJ | D.LYS_148 | NZ  | D.GLU_111 | OE2 | 3.509 |
| 4TUJ | D.LYS_155 | NZ  | D.GLU_201 | OE1 | 2.443 |
| 4TUJ | D.LYS_155 | NZ  | D.GLU_201 | OE2 | 3.654 |
| 4TUK | H.ARG_38  | NH1 | H.ASP_90  | OD1 | 2.774 |
| 4TUK | H.ARG_38  | NH2 | H.GLU_46  | OE1 | 2.957 |
| 4TUK | H.ARG_38  | NH2 | H.ASP_90  | OD1 | 3.936 |
| 4TUK | H.LYS_63  | NZ  | H.GLU_46  | OE1 | 3.702 |

|      |           |     |           |     |       |
|------|-----------|-----|-----------|-----|-------|
| 4TUK | H.LYS.63  | NZ  | H.GLU.46  | OE2 | 2.804 |
| 4TUK | H.ARG.67  | NH1 | H.ASP.90  | OD1 | 3.628 |
| 4TUK | H.ARG.67  | NH1 | H.ASP.90  | OD2 | 2.878 |
| 4TUK | H.ARG.67  | NH2 | H.ASP.90  | OD1 | 2.889 |
| 4TUK | H.ARG.67  | NH2 | H.ASP.90  | OD2 | 3.540 |
| 4TUK | H.LYS.208 | NZ  | L.GLU.129 | OE2 | 3.061 |
| 4TUK | L.ARG.24  | NH2 | L.ASP.75  | OD2 | 3.142 |
| 4TUK | L.ARG.66  | NH2 | L.GLU.86  | OE1 | 3.710 |
| 4TUK | L.ARG.66  | NH2 | L.GLU.86  | OE2 | 3.717 |
| 4TUK | L.ARG.66  | NH2 | L.ASP.87  | OD1 | 2.787 |
| 4TUK | L.ARG.66  | NH2 | L.ASP.87  | OD2 | 3.636 |
| 4TUK | L.LYS.148 | NZ  | L.GLU.111 | OE1 | 3.533 |
| 4TUK | L.LYS.148 | NZ  | L.GLU.111 | OE2 | 2.823 |
| 4TUK | L.LYS.153 | NZ  | L.GLU.160 | OE1 | 2.835 |
| 4TUK | L.LYS.153 | NZ  | L.GLU.160 | OE2 | 3.347 |
| 4TUK | L.LYS.155 | NZ  | L.GLU.201 | OE1 | 2.857 |
| 4TUK | L.LYS.155 | NZ  | L.GLU.201 | OE2 | 3.381 |
| 4TUK | L.HIS.195 | ND1 | L.ASP.157 | OD2 | 2.878 |
| 4TUK | L.LYS.205 | NZ  | L.ASP.116 | OD1 | 3.635 |
| 4TUK | L.LYS.205 | NZ  | L.ASP.116 | OD2 | 3.012 |
| 4TUL | H.ARG.38  | NH1 | H.ASP.90  | OD1 | 2.759 |
| 4TUL | H.ARG.38  | NH2 | H.GLU.46  | OE1 | 2.795 |
| 4TUL | H.ARG.38  | NH2 | H.GLU.46  | OE2 | 3.616 |
| 4TUL | H.LYS.63  | NZ  | H.GLU.46  | OE1 | 3.726 |
| 4TUL | H.LYS.63  | NZ  | H.GLU.46  | OE2 | 2.751 |
| 4TUL | H.ARG.67  | NH1 | H.ASP.90  | OD1 | 3.442 |
| 4TUL | H.ARG.67  | NH1 | H.ASP.90  | OD2 | 2.779 |
| 4TUL | H.ARG.67  | NH2 | H.ASP.90  | OD1 | 2.973 |
| 4TUL | H.ARG.67  | NH2 | H.ASP.90  | OD2 | 3.614 |
| 4TUL | H.LYS.205 | NZ  | H.ASP.207 | OD2 | 3.859 |
| 4TUL | H.LYS.208 | NZ  | L.GLU.129 | OE1 | 3.059 |
| 4TUL | H.LYS.208 | NZ  | L.GLU.129 | OE2 | 2.741 |
| 4TUL | H.LYS.209 | NZ  | H.GLU.211 | OE2 | 3.869 |
| 4TUL | L.ARG.66  | NH1 | L.GLU.84  | OE1 | 3.630 |
| 4TUL | L.ARG.66  | NH2 | L.GLU.84  | OE1 | 3.505 |
| 4TUL | L.ARG.66  | NH2 | L.GLU.84  | OE2 | 3.947 |
| 4TUL | L.ARG.66  | NH2 | L.ASP.87  | OD1 | 2.922 |
| 4TUL | L.ARG.66  | NH2 | L.ASP.87  | OD2 | 3.565 |
| 4TUL | L.LYS.148 | NZ  | L.GLU.111 | OE1 | 2.732 |
| 4TUL | L.LYS.148 | NZ  | L.GLU.111 | OE2 | 3.835 |
| 4TUL | L.LYS.153 | NZ  | L.GLU.160 | OE1 | 2.798 |
| 4TUL | L.LYS.153 | NZ  | L.GLU.160 | OE2 | 3.593 |
| 4TUL | L.LYS.155 | NZ  | L.GLU.201 | OE1 | 2.684 |
| 4TUL | L.LYS.155 | NZ  | L.GLU.201 | OE2 | 3.268 |
| 4TUL | L.HIS.195 | ND1 | L.ASP.157 | OD2 | 2.731 |
| 4TUL | L.LYS.205 | NZ  | L.ASP.116 | OD1 | 3.657 |
| 4TUL | L.LYS.205 | NZ  | L.ASP.116 | OD2 | 2.664 |
| 4TUO | A.ARG.38  | NH1 | A.ASP.90  | OD1 | 2.863 |
| 4TUO | A.ARG.38  | NH2 | A.GLU.46  | OE1 | 3.170 |
| 4TUO | A.ARG.38  | NH2 | A.ASP.90  | OD1 | 3.978 |
| 4TUO | A.LYS.63  | NZ  | A.GLU.46  | OE1 | 3.760 |
| 4TUO | A.LYS.63  | NZ  | A.GLU.46  | OE2 | 2.759 |
| 4TUO | A.ARG.67  | NH1 | A.ASP.90  | OD1 | 3.571 |
| 4TUO | A.ARG.67  | NH1 | A.ASP.90  | OD2 | 2.889 |
| 4TUO | A.ARG.67  | NH2 | A.ASP.90  | OD1 | 3.053 |
| 4TUO | A.ARG.67  | NH2 | A.ASP.90  | OD2 | 3.693 |
| 4TUO | A.LYS.208 | NZ  | B.GLU.129 | OE1 | 3.043 |
| 4TUO | B.ARG.66  | NH1 | B.GLU.84  | OE2 | 3.371 |

|      |           |     |           |     |       |
|------|-----------|-----|-----------|-----|-------|
| 4TUO | B_ARG_66  | NH2 | B_GLU_84  | OE1 | 3.783 |
| 4TUO | B_ARG_66  | NH2 | B_GLU_86  | OE1 | 2.770 |
| 4TUO | B_ARG_66  | NH2 | B_ASP_87  | OD1 | 2.806 |
| 4TUO | B_ARG_66  | NH2 | B_ASP_87  | OD2 | 3.596 |
| 4TUO | B_ARG_82  | NH1 | B_GLU_84  | OE2 | 3.609 |
| 4TUO | B_LYS_153 | NZ  | B_GLU_160 | OE1 | 3.151 |
| 4TUO | B_LYS_153 | NZ  | C_GLU_10  | OE2 | 3.051 |
| 4TUO | B_LYS_155 | NZ  | B_GLU_201 | OE1 | 2.809 |
| 4TUO | B_LYS_155 | NZ  | B_GLU_201 | OE2 | 3.457 |
| 4TUO | B_ARG_161 | NH1 | B_GLU_191 | OE1 | 3.847 |
| 4TUO | B_ARG_161 | NH1 | B_GLU_191 | OE2 | 3.170 |
| 4TUO | B_ARG_161 | NH2 | B_GLU_191 | OE1 | 3.069 |
| 4TUO | B_ARG_161 | NH2 | B_GLU_191 | OE2 | 3.668 |
| 4TUO | B_HIS_195 | ND1 | B_ASP_157 | OD2 | 3.859 |
| 4TUO | B_LYS_205 | NZ  | B_ASP_116 | OD1 | 3.307 |
| 4TUO | B_LYS_205 | NZ  | B_ASP_116 | OD2 | 3.070 |
| 4TUO | C_ARG_38  | NH1 | C_ASP_90  | OD1 | 2.853 |
| 4TUO | C_ARG_38  | NH2 | C_GLU_46  | OE1 | 3.152 |
| 4TUO | C_LYS_63  | NZ  | C_GLU_46  | OE1 | 3.805 |
| 4TUO | C_LYS_63  | NZ  | C_GLU_46  | OE2 | 2.709 |
| 4TUO | C_ARG_67  | NH1 | C_ASP_90  | OD1 | 3.699 |
| 4TUO | C_ARG_67  | NH1 | C_ASP_90  | OD2 | 2.901 |
| 4TUO | C_ARG_67  | NH2 | C_ASP_90  | OD1 | 3.051 |
| 4TUO | C_ARG_67  | NH2 | C_ASP_90  | OD2 | 3.598 |
| 4TUO | C_LYS_208 | NZ  | D_GLU_129 | OE1 | 2.720 |
| 4TUO | C_LYS_208 | NZ  | D_GLU_129 | OE2 | 3.136 |
| 4TUO | C_LYS_209 | NZ  | C_GLU_211 | OE2 | 2.713 |
| 4TUO | D_ARG_66  | NH1 | D_GLU_84  | OE1 | 3.352 |
| 4TUO | D_ARG_66  | NH1 | D_GLU_84  | OE2 | 3.741 |
| 4TUO | D_ARG_66  | NH2 | D_GLU_84  | OE2 | 3.775 |
| 4TUO | D_ARG_66  | NH2 | D_GLU_86  | OE2 | 3.297 |
| 4TUO | D_ARG_66  | NH2 | D_ASP_87  | OD1 | 2.690 |
| 4TUO | D_ARG_66  | NH2 | D_ASP_87  | OD2 | 3.681 |
| 4TUO | D_LYS_148 | NZ  | D_GLU_111 | OE1 | 3.722 |
| 4TUO | D_LYS_148 | NZ  | D_GLU_111 | OE2 | 2.538 |
| 4TUO | D_LYS_153 | NZ  | D_GLU_160 | OE1 | 3.774 |
| 4TUO | D_LYS_155 | NZ  | D_GLU_201 | OE1 | 3.955 |
| 4TUO | D_ARG_161 | NH1 | D_GLU_191 | OE1 | 3.866 |
| 4TUO | D_ARG_194 | NH1 | D_ASP_190 | OD1 | 3.370 |
| 4TUO | D_ARG_194 | NH1 | D_ASP_190 | OD2 | 2.866 |
| 4TUO | D_HIS_195 | ND1 | D_ASP_157 | OD2 | 3.872 |
| 4TUO | D_HIS_195 | NE2 | D_GLU_191 | OE1 | 2.622 |
| 4TUO | D_LYS_205 | NZ  | D_ASP_116 | OD1 | 3.469 |
| 4TUO | D_LYS_205 | NZ  | D_ASP_116 | OD2 | 2.762 |
| 4U0Q | A_HIS_187 | NE2 | A_ASP_183 | OD1 | 2.822 |
| 4U0Q | A_HIS_187 | NE2 | A_ASP_183 | OD2 | 3.914 |
| 4U0Q | A_LYS_211 | NZ  | A_GLU_215 | OE2 | 3.825 |
| 4U0Q | A_LYS_221 | NZ  | A_ASP_172 | OD1 | 3.037 |
| 4U0Q | A_HIS_240 | NE2 | A_GLU_168 | OE1 | 2.387 |
| 4U0Q | A_HIS_240 | NE2 | A_GLU_168 | OE2 | 3.627 |
| 4U0Q | A_LYS_302 | NZ  | A_ASP_305 | OD1 | 3.987 |
| 4U0Q | A_LYS_302 | NZ  | A_ASP_305 | OD2 | 2.715 |
| 4U0Q | A_LYS_310 | NZ  | A_ASP_230 | OD2 | 2.731 |
| 4U0Q | A_LYS_366 | NZ  | A_GLU_362 | OE1 | 3.983 |
| 4U0Q | A_HIS_414 | NE2 | A_GLU_391 | OE1 | 2.780 |
| 4U0Q | A_HIS_414 | NE2 | A_GLU_391 | OE2 | 3.302 |
| 4U0Q | A_ARG_423 | NH2 | A_ASP_162 | OD2 | 3.272 |
| 4U0Q | A_HIS_427 | NE2 | A_ASP_162 | OD1 | 3.792 |

|      |           |     |           |     |       |
|------|-----------|-----|-----------|-----|-------|
| 4U0Q | A_LYS_434 | NZ  | A_GLU_465 | OE2 | 2.539 |
| 4U0Q | A_LYS_436 | NZ  | A_ASP_440 | OD1 | 3.388 |
| 4U0Q | A_LYS_436 | NZ  | A_ASP_440 | OD2 | 3.258 |
| 4U0Q | A_LYS_441 | NZ  | A_ASP_461 | OD1 | 2.915 |
| 4U0Q | A_LYS_441 | NZ  | A_ASP_461 | OD2 | 3.189 |
| 4U0Q | A_LYS_441 | NZ  | A_GLU_465 | OE1 | 3.453 |
| 4U0Q | A_ARG_458 | NH2 | A_GLU_454 | OE1 | 3.364 |
| 4U0Q | A_ARG_476 | NH1 | A_ASP_473 | OD1 | 3.385 |
| 4U0Q | A_LYS_486 | NZ  | A_GLU_239 | OE1 | 3.379 |
| 4U0Q | A_LYS_486 | NZ  | A_GLU_239 | OE2 | 2.794 |
| 4U0Q | A_HIS_489 | NE2 | A_GLU_168 | OE1 | 2.333 |
| 4U0Q | A_HIS_489 | NE2 | A_GLU_239 | OE1 | 3.275 |
| 4U0Q | A_HIS_495 | NE2 | D_GLU_31  | OE1 | 3.802 |
| 4U0Q | A_HIS_495 | NE2 | D_GLU_31  | OE2 | 2.620 |
| 4U0Q | A_HIS_496 | ND1 | D_GLU_31  | OE1 | 3.680 |
| 4U0Q | B_HIS_53  | ND1 | B_GLU_64  | OE1 | 2.648 |
| 4U0Q | B_HIS_53  | ND1 | B_GLU_64  | OE2 | 3.336 |
| 4U0Q | B_ARG_54  | NH2 | B_GLU_92  | OE1 | 2.778 |
| 4U0Q | B_ARG_54  | NH2 | B_GLU_92  | OE2 | 3.437 |
| 4U0Q | B_LYS_148 | NZ  | B_GLU_155 | OE2 | 3.304 |
| 4U0Q | B_ARG_157 | NH1 | B_ASP_179 | OD2 | 3.570 |
| 4U0Q | B_ARG_157 | NH2 | B_ASP_179 | OD1 | 2.730 |
| 4U0Q | B_ARG_157 | NH2 | B_ASP_179 | OD2 | 2.748 |
| 4U0Q | B_HIS_170 | ND1 | D_GLU_172 | OE1 | 2.788 |
| 4U0Q | B_HIS_170 | NE2 | B_GLU_168 | OE1 | 3.394 |
| 4U0Q | B_ARG_184 | NH2 | B_ASP_147 | OD2 | 3.560 |
| 4U0Q | C_HIS_187 | NE2 | C_ASP_183 | OD1 | 2.825 |
| 4U0Q | C_HIS_187 | NE2 | C_ASP_183 | OD2 | 3.905 |
| 4U0Q | C_LYS_211 | NZ  | C_GLU_215 | OE2 | 3.781 |
| 4U0Q | C_LYS_221 | NZ  | C_ASP_172 | OD1 | 3.043 |
| 4U0Q | C_HIS_240 | NE2 | C_GLU_168 | OE1 | 2.360 |
| 4U0Q | C_HIS_240 | NE2 | C_GLU_168 | OE2 | 3.605 |
| 4U0Q | C_LYS_310 | NZ  | C_ASP_230 | OD2 | 2.754 |
| 4U0Q | C_LYS_327 | NZ  | C_ASP_331 | OD1 | 3.020 |
| 4U0Q | C_LYS_327 | NZ  | C_ASP_331 | OD2 | 3.351 |
| 4U0Q | C_LYS_411 | NZ  | C_ASP_408 | OD1 | 3.493 |
| 4U0Q | C_HIS_414 | NE2 | C_GLU_391 | OE2 | 3.600 |
| 4U0Q | C_ARG_423 | NH2 | C_ASP_162 | OD2 | 3.190 |
| 4U0Q | C_HIS_427 | NE2 | C_ASP_162 | OD1 | 3.751 |
| 4U0Q | C_LYS_434 | NZ  | C_GLU_465 | OE2 | 2.762 |
| 4U0Q | C_LYS_436 | NZ  | C_ASP_440 | OD1 | 3.394 |
| 4U0Q | C_LYS_436 | NZ  | C_ASP_440 | OD2 | 3.260 |
| 4U0Q | C_LYS_441 | NZ  | C_ASP_461 | OD1 | 3.208 |
| 4U0Q | C_LYS_441 | NZ  | C_ASP_461 | OD2 | 2.815 |
| 4U0Q | C_LYS_441 | NZ  | C_GLU_465 | OE1 | 3.460 |
| 4U0Q | C_ARG_476 | NH2 | C_ASP_473 | OD1 | 2.770 |
| 4U0Q | C_LYS_486 | NZ  | C_GLU_239 | OE1 | 3.354 |
| 4U0Q | C_LYS_486 | NZ  | C_GLU_239 | OE2 | 2.814 |
| 4U0Q | C_HIS_489 | NE2 | C_GLU_168 | OE1 | 2.335 |
| 4U0Q | C_HIS_489 | NE2 | C_GLU_239 | OE1 | 3.280 |
| 4U0Q | C_HIS_495 | ND1 | B_ASP_32  | OD2 | 3.411 |
| 4U0Q | D_HIS_53  | ND1 | D_GLU_64  | OE1 | 2.807 |
| 4U0Q | D_HIS_53  | ND1 | D_GLU_64  | OE2 | 3.881 |
| 4U0Q | D_ARG_54  | NH2 | D_GLU_92  | OE1 | 2.781 |
| 4U0Q | D_ARG_54  | NH2 | D_GLU_92  | OE2 | 3.453 |
| 4U0Q | D_LYS_63  | NZ  | D_ASP_65  | OD1 | 3.005 |
| 4U0Q | D_LYS_63  | NZ  | D_ASP_65  | OD2 | 3.008 |
| 4U0Q | D_ARG_106 | NH1 | D_GLU_129 | OE1 | 2.747 |

|      |           |     |            |     |       |
|------|-----------|-----|------------|-----|-------|
| 4U0Q | D_ARG_106 | NH1 | D_GLU_129  | OE2 | 3.871 |
| 4U0Q | D_LYS_148 | NZ  | D_GLU_155  | OE2 | 3.319 |
| 4U0Q | D_ARG_157 | NH1 | D_ASP_179  | OD1 | 3.344 |
| 4U0Q | D_ARG_157 | NH1 | D_ASP_179  | OD2 | 2.708 |
| 4U0Q | D_ARG_157 | NH2 | D_GLU_155  | OE1 | 3.810 |
| 4U0Q | D_ARG_157 | NH2 | D_ASP_179  | OD1 | 2.790 |
| 4U0Q | D_ARG_157 | NH2 | D_ASP_179  | OD2 | 3.368 |
| 4U0Q | D_HIS_170 | ND1 | B_GLU_172  | OE1 | 2.879 |
| 4U0Q | D_HIS_170 | ND1 | B_GLU_172  | OE2 | 2.959 |
| 4U0Q | D_HIS_170 | NE2 | D_GLU_168  | OE1 | 3.465 |
| 4U0Q | D_ARG_184 | NH2 | D_ASP_147  | OD2 | 3.553 |
| 4U0Q | D_LYS_191 | NZ  | C_GLU_362  | OE2 | 3.108 |
| 4U3X | A_ARG_38  | NH1 | A_ASP_90   | OD1 | 2.898 |
| 4U3X | A_ARG_67  | NH1 | A_ASP_90   | OD1 | 3.886 |
| 4U3X | A_ARG_67  | NH1 | A_ASP_90   | OD2 | 2.695 |
| 4U3X | A_ARG_67  | NH2 | A_ASP_90   | OD1 | 3.163 |
| 4U3X | A_ARG_67  | NH2 | A_ASP_90   | OD2 | 3.392 |
| 4U3X | A_LYS_98  | NZ  | A_GLU_32   | OE2 | 3.316 |
| 4U3X | A_HIS_106 | NE2 | B_GLU_35   | OE1 | 2.597 |
| 4U3X | A_HIS_106 | NE2 | B_GLU_35   | OE2 | 3.650 |
| 4U3X | B_LYS_1   | NZ  | B_GLU_7    | OE1 | 2.763 |
| 4U3X | B_LYS_1   | NZ  | B_GLU_7    | OE2 | 3.987 |
| 4U3X | B_ARG_61  | NH1 | A_ASP_33   | OD2 | 2.723 |
| 4U3X | B_ARG_61  | NH2 | A_ASP_33   | OD2 | 2.983 |
| 4U3X | B_ARG_112 | NH2 | A_ASP_109  | OD1 | 3.763 |
| 4U3X | B_ARG_112 | NH2 | A_ASP_109  | OD2 | 3.035 |
| 4U3X | B_ARG_125 | NH1 | B_ASP_119  | OD2 | 3.378 |
| 4U3X | B_ARG_125 | NH2 | B_ASP_119  | OD1 | 3.266 |
| 4U3X | B_ARG_125 | NH2 | B_ASP_119  | OD2 | 3.781 |
| 4U3X | C_ARG_38  | NH1 | C_ASP_90   | OD1 | 3.008 |
| 4U3X | C_ARG_38  | NH2 | C_ASP_90   | OD1 | 3.918 |
| 4U3X | C_ARG_67  | NH1 | C_ASP_90   | OD1 | 3.636 |
| 4U3X | C_ARG_67  | NH1 | C_ASP_90   | OD2 | 3.951 |
| 4U3X | C_ARG_67  | NH2 | C_ASP_90   | OD1 | 3.430 |
| 4U3X | C_ARG_67  | NH2 | C_ASP_90   | OD2 | 2.349 |
| 4U3X | C_LYS_98  | NZ  | C_GLU_32   | OE1 | 3.558 |
| 4U3X | C_LYS_98  | NZ  | C_GLU_32   | OE2 | 2.950 |
| 4U3X | C_HIS_106 | NE2 | D_GLU_35   | OE1 | 2.720 |
| 4U3X | C_HIS_106 | NE2 | D_GLU_35   | OE2 | 3.669 |
| 4U3X | D_LYS_1   | NZ  | D_GLU_7    | OE1 | 3.339 |
| 4U3X | D_LYS_1   | NZ  | D_GLU_7    | OE2 | 2.952 |
| 4U3X | D_LYS_13  | NZ  | D_ASP_18   | OD2 | 3.704 |
| 4U3X | D_ARG_61  | NH1 | C_ASP_33   | OD2 | 3.116 |
| 4U3X | D_ARG_61  | NH2 | C_ASP_33   | OD2 | 3.400 |
| 4U3X | D_ARG_112 | NH2 | C_ASP_109  | OD2 | 3.567 |
| 4U3X | D_ARG_125 | NH1 | D_ASP_119  | OD1 | 3.983 |
| 4U3X | D_ARG_125 | NH1 | D_ASP_119  | OD2 | 3.205 |
| 4U3X | D_ARG_125 | NH2 | D_ASP_119  | OD1 | 3.233 |
| 4U3X | D_ARG_125 | NH2 | D_ASP_119  | OD2 | 3.715 |
| 4U6G | H_ARG_38  | NH1 | H_ASP_86   | OD1 | 3.182 |
| 4U6G | H_ARG_38  | NH2 | H_GLU_46   | OE1 | 3.518 |
| 4U6G | H_ARG_38  | NH2 | H_GLU_46   | OE2 | 3.054 |
| 4U6G | H_ARG_50  | NH1 | H_ASP_58   | OD2 | 3.942 |
| 4U6G | H_ARG_50  | NH1 | H_GLU_100J | OE1 | 3.369 |
| 4U6G | H_ARG_50  | NH1 | H_GLU_100J | OE2 | 2.951 |
| 4U6G | H_ARG_50  | NH2 | H_ASP_58   | OD2 | 2.415 |
| 4U6G | H_ARG_66  | NH1 | H_ASP_86   | OD2 | 3.486 |
| 4U6G | H_ARG_66  | NH2 | H_ASP_86   | OD1 | 3.579 |



|      |           |     |            |     |       |
|------|-----------|-----|------------|-----|-------|
| 4U6G | H_ARG_66  | NH2 | H_ASP_86   | OD2 | 3.807 |
| 4U6G | H_ARG_94  | NH2 | H_ASP_102  | OD1 | 2.954 |
| 4U6G | H_LYS_143 | NZ  | L_GLU_125  | OE2 | 3.603 |
| 4U6G | H_LYS_209 | NZ  | L_GLU_124  | OE1 | 2.829 |
| 4U6G | H_LYS_209 | NZ  | L_GLU_124  | OE2 | 2.866 |
| 4U6G | H_ARG_210 | NH1 | H_GLU_212  | OE2 | 3.692 |
| 4U6G | H_ARG_210 | NH2 | H_GLU_212  | OE2 | 3.652 |
| 4U6G | L_ARG_29  | NH1 | L_ASP_26   | OD1 | 3.440 |
| 4U6G | L_HIS_31  | ND1 | H_GLU_100I | OE2 | 3.196 |
| 4U6G | L_ARG_54  | NH1 | L_ASP_60   | OD1 | 3.819 |
| 4U6G | L_ARG_61  | NH1 | B_GLU_81   | OE1 | 3.298 |
| 4U6G | L_ARG_61  | NH2 | L_ASP_82   | OD1 | 3.284 |
| 4U6G | L_ARG_61  | NH2 | L_ASP_82   | OD2 | 3.928 |
| 4U6G | L_ARG_91  | NH1 | H_GLU_100J | OE1 | 3.679 |
| 4U6G | L_ARG_91  | NH1 | H_GLU_100J | OE2 | 3.478 |
| 4U6G | L_ARG_91  | NH2 | H_GLU_100J | OE2 | 3.428 |
| 4U6G | L_LYS_93  | NZ  | L_GLU_3    | OE2 | 3.425 |
| 4U6G | L_LYS_103 | NZ  | L_ASP_83   | OD1 | 2.775 |
| 4U6G | L_LYS_150 | NZ  | L_GLU_204  | OE2 | 3.294 |
| 4U6G | A_ARG_38  | NH1 | A_ASP_86   | OD1 | 3.130 |
| 4U6G | A_ARG_38  | NH2 | A_GLU_46   | OE2 | 3.390 |
| 4U6G | A_ARG_50  | NH1 | A_GLU_100J | OE1 | 2.748 |
| 4U6G | A_ARG_50  | NH1 | A_GLU_100J | OE2 | 2.961 |
| 4U6G | A_ARG_50  | NH2 | A_ASP_58   | OD2 | 2.646 |
| 4U6G | A_ARG_50  | NH2 | A_GLU_100J | OE2 | 3.684 |
| 4U6G | A_ARG_66  | NH1 | A_ASP_86   | OD2 | 3.552 |
| 4U6G | A_ARG_66  | NH2 | A_ASP_86   | OD1 | 3.394 |
| 4U6G | A_ARG_66  | NH2 | A_ASP_86   | OD2 | 3.979 |
| 4U6G | A_ARG_94  | NH2 | A_ASP_102  | OD1 | 2.808 |
| 4U6G | A_LYS_143 | NZ  | B_GLU_125  | OE2 | 3.217 |
| 4U6G | A_LYS_201 | NZ  | H_ASP_30   | OD1 | 3.983 |
| 4U6G | A_LYS_209 | NZ  | B_GLU_124  | OE1 | 2.769 |
| 4U6G | A_LYS_209 | NZ  | B_GLU_124  | OE2 | 3.063 |
| 4U6G | B_ARG_29  | NH1 | B_ASP_26   | OD1 | 3.536 |
| 4U6G | B_HIS_31  | ND1 | A_GLU_100I | OE2 | 3.102 |
| 4U6G | B_ARG_54  | NH1 | B_ASP_60   | OD1 | 3.700 |
| 4U6G | B_ARG_61  | NH2 | B_GLU_81   | OE1 | 3.869 |
| 4U6G | B_ARG_61  | NH2 | B_ASP_82   | OD1 | 3.159 |
| 4U6G | B_ARG_61  | NH2 | B_ASP_82   | OD2 | 3.682 |
| 4U6G | B_ARG_91  | NH1 | A_GLU_100J | OE1 | 3.587 |
| 4U6G | B_ARG_91  | NH1 | A_GLU_100J | OE2 | 3.310 |
| 4U6G | B_ARG_91  | NH2 | A_GLU_100J | OE2 | 3.407 |
| 4U6G | B_LYS_103 | NZ  | B_ASP_83   | OD1 | 2.873 |
| 4U6G | B_LYS_111 | NZ  | B_GLU_199  | OE1 | 3.272 |
| 4U6G | B_LYS_150 | NZ  | B_GLU_204  | OE1 | 3.711 |
| 4U6G | B_LYS_150 | NZ  | B_GLU_204  | OE2 | 3.254 |
| 4U6V | H_HIS_35  | NE2 | H_ASP_98   | OD1 | 3.305 |
| 4U6V | H_HIS_35  | NE2 | H_ASP_98   | OD2 | 2.654 |
| 4U6V | H_ARG_38  | NH1 | H_ASP_89   | OD2 | 2.858 |
| 4U6V | H_ARG_38  | NH2 | H_GLU_46   | OE1 | 3.188 |
| 4U6V | H_ARG_38  | NH2 | H_GLU_46   | OE2 | 3.968 |
| 4U6V | H_ARG_38  | NH2 | H_ASP_89   | OD2 | 3.604 |
| 4U6V | H_ARG_66  | NH1 | H_ASP_89   | OD1 | 2.752 |
| 4U6V | H_ARG_66  | NH1 | H_ASP_89   | OD2 | 3.786 |
| 4U6V | H_ARG_66  | NH2 | H_ASP_89   | OD1 | 3.455 |
| 4U6V | H_ARG_66  | NH2 | H_ASP_89   | OD2 | 2.979 |
| 4U6V | H_ARG_97  | NH2 | H_ASP_110  | OD2 | 2.478 |
| 4U6V | H_ARG_99  | NH2 | H_ASP_110  | OD1 | 3.312 |

|      |           |     |           |     |       |
|------|-----------|-----|-----------|-----|-------|
| 4U6V | H_ARG_99  | NH2 | L_GLU_55  | OE1 | 2.660 |
| 4U6V | H_ARG_99  | NH2 | L_GLU_55  | OE2 | 2.823 |
| 4U6V | H_HIS_105 | NE2 | A_ASP_183 | OD1 | 3.150 |
| 4U6V | H_HIS_105 | NE2 | A_ASP_183 | OD2 | 3.236 |
| 4U6V | H_LYS_152 | NZ  | H_ASP_153 | OD1 | 3.594 |
| 4U6V | H_LYS_152 | NZ  | H_ASP_153 | OD2 | 3.480 |
| 4U6V | H_LYS_215 | NZ  | H_ASP_217 | OD1 | 3.333 |
| 4U6V | H_LYS_215 | NZ  | H_ASP_217 | OD2 | 3.285 |
| 4U6V | H_LYS_218 | NZ  | L_GLU_122 | OE1 | 2.258 |
| 4U6V | H_LYS_218 | NZ  | L_GLU_122 | OE2 | 3.923 |
| 4U6V | H_ARG_219 | NH1 | H_GLU_221 | OE1 | 3.555 |
| 4U6V | L_ARG_24  | NH2 | L_GLU_70  | OE1 | 3.373 |
| 4U6V | L_LYS_39  | NZ  | L_ASP_81  | OD1 | 3.062 |
| 4U6V | L_LYS_39  | NZ  | L_ASP_81  | OD2 | 3.255 |
| 4U6V | L_ARG_61  | NH2 | L_ASP_82  | OD1 | 2.876 |
| 4U6V | L_ARG_61  | NH2 | L_ASP_82  | OD2 | 3.235 |
| 4U6V | L_ARG_141 | NH1 | L_GLU_164 | OE2 | 3.480 |
| 4U6V | L_ARG_141 | NH2 | L_GLU_104 | OE1 | 3.162 |
| 4U6V | L_ARG_141 | NH2 | L_GLU_104 | OE2 | 3.384 |
| 4U6V | L_ARG_141 | NH2 | L_GLU_164 | OE1 | 3.915 |
| 4U6V | L_ARG_141 | NH2 | L_GLU_164 | OE2 | 3.880 |
| 4U6V | L_LYS_148 | NZ  | L_GLU_194 | OE2 | 3.817 |
| 4U6V | L_LYS_187 | NZ  | L_ASP_184 | OD1 | 3.136 |
| 4U6V | A_LYS_36  | NZ  | A_GLU_280 | OE1 | 3.134 |
| 4U6V | A_LYS_46  | NZ  | A_ASP_44  | OD2 | 3.954 |
| 4U6V | A_LYS_51  | NZ  | A_ASP_44  | OD2 | 3.960 |
| 4U6V | A_LYS_51  | NZ  | A_GLU_289 | OE2 | 3.066 |
| 4U6V | A_ARG_56  | NH2 | A_ASP_227 | OD1 | 3.348 |
| 4U6V | A_ARG_56  | NH2 | A_ASP_227 | OD2 | 2.841 |
| 4U6V | A_LYS_85  | NZ  | A_GLU_250 | OE2 | 3.967 |
| 4U6V | A_ARG_104 | NH2 | A_ASP_100 | OD1 | 3.350 |
| 4U6V | A_ARG_104 | NH2 | A_ASP_100 | OD2 | 2.842 |
| 4U6V | A_LYS_147 | NZ  | A_GLU_111 | OE1 | 3.728 |
| 4U6V | A_LYS_163 | NZ  | A_ASP_162 | OD2 | 3.943 |
| 4U6V | A_LYS_164 | NZ  | A_GLU_158 | OE1 | 3.750 |
| 4U6V | A_ARG_184 | NH2 | A_ASP_254 | OD1 | 2.848 |
| 4U6V | A_ARG_184 | NH2 | A_ASP_254 | OD2 | 2.966 |
| 4U6V | A_ARG_184 | NH2 | A_ASP_272 | OD1 | 2.573 |
| 4U6V | A_ARG_200 | NH1 | H_ASP_56  | OD1 | 3.722 |
| 4U6V | A_ARG_200 | NH1 | H_ASP_56  | OD2 | 3.481 |
| 4U6V | A_LYS_205 | NZ  | A_GLU_70  | OE1 | 3.668 |
| 4U6V | A_LYS_205 | NZ  | A_GLU_70  | OE2 | 3.472 |
| 4U6V | A_ARG_236 | NH1 | A_ASP_44  | OD1 | 3.407 |
| 4U6V | A_ARG_236 | NH2 | A_ASP_44  | OD1 | 3.125 |
| 4U6V | A_ARG_251 | NH2 | A_ASP_276 | OD2 | 3.363 |
| 4U6V | A_ARG_253 | NH2 | A_ASP_276 | OD1 | 2.926 |
| 4U6V | A_ARG_253 | NH2 | A_ASP_276 | OD2 | 3.227 |
| 4U6V | A_LYS_266 | NZ  | L_ASP_93  | OD1 | 2.981 |
| 4U6V | A_LYS_271 | NZ  | A_ASP_185 | OD1 | 2.718 |
| 4U6V | A_LYS_273 | NZ  | A_ASP_255 | OD2 | 3.278 |
| 4U6V | A_ARG_277 | NH2 | A_GLU_250 | OE1 | 2.466 |
| 4U6V | A_ARG_281 | NH2 | A_ASP_246 | OD1 | 2.738 |
| 4U6V | K_HIS_35  | NE2 | K_ASP_98  | OD1 | 3.310 |
| 4U6V | K_HIS_35  | NE2 | K_ASP_98  | OD2 | 2.683 |
| 4U6V | K_ARG_38  | NH1 | K_ASP_89  | OD2 | 2.844 |
| 4U6V | K_ARG_38  | NH2 | K_GLU_46  | OE1 | 3.203 |
| 4U6V | K_ARG_38  | NH2 | K_GLU_46  | OE2 | 3.978 |
| 4U6V | K_ARG_38  | NH2 | K_ASP_89  | OD2 | 3.616 |

|      |           |     |           |     |       |
|------|-----------|-----|-----------|-----|-------|
| 4U6V | K_ARG_66  | NH1 | K_ASP_89  | OD1 | 2.744 |
| 4U6V | K_ARG_66  | NH1 | K_ASP_89  | OD2 | 3.770 |
| 4U6V | K_ARG_66  | NH2 | K_ASP_89  | OD1 | 3.441 |
| 4U6V | K_ARG_66  | NH2 | K_ASP_89  | OD2 | 2.968 |
| 4U6V | K_ARG_97  | NH2 | K_ASP_110 | OD2 | 2.501 |
| 4U6V | K_ARG_99  | NH2 | K_ASP_110 | OD1 | 3.302 |
| 4U6V | K_ARG_99  | NH2 | M_GLU_55  | OE1 | 2.606 |
| 4U6V | K_ARG_99  | NH2 | M_GLU_55  | OE2 | 2.857 |
| 4U6V | K_HIS_105 | NE2 | B_ASP_183 | OD1 | 2.992 |
| 4U6V | K_HIS_105 | NE2 | B_ASP_183 | OD2 | 3.142 |
| 4U6V | K_LYS_152 | NZ  | K_ASP_153 | OD1 | 3.584 |
| 4U6V | K_LYS_152 | NZ  | K_ASP_153 | OD2 | 3.467 |
| 4U6V | K_LYS_215 | NZ  | K_ASP_217 | OD1 | 3.339 |
| 4U6V | K_LYS_215 | NZ  | K_ASP_217 | OD2 | 3.278 |
| 4U6V | K_LYS_218 | NZ  | M_GLU_122 | OE1 | 2.653 |
| 4U6V | K_ARG_219 | NH1 | K_GLU_221 | OE1 | 3.551 |
| 4U6V | M_ARG_24  | NH2 | M_GLU_70  | OE1 | 3.369 |
| 4U6V | M_LYS_39  | NZ  | M_ASP_81  | OD1 | 3.066 |
| 4U6V | M_LYS_39  | NZ  | M_ASP_81  | OD2 | 3.241 |
| 4U6V | M_ARG_61  | NH2 | M_ASP_82  | OD1 | 2.871 |
| 4U6V | M_ARG_61  | NH2 | M_ASP_82  | OD2 | 3.232 |
| 4U6V | M_ARG_141 | NH1 | M_GLU_164 | OE2 | 3.486 |
| 4U6V | M_ARG_141 | NH2 | M_GLU_104 | OE1 | 3.180 |
| 4U6V | M_ARG_141 | NH2 | M_GLU_104 | OE2 | 3.454 |
| 4U6V | M_ARG_141 | NH2 | M_GLU_164 | OE1 | 3.895 |
| 4U6V | M_ARG_141 | NH2 | M_GLU_164 | OE2 | 3.876 |
| 4U6V | M_LYS_148 | NZ  | M_GLU_194 | OE1 | 3.300 |
| 4U6V | M_LYS_168 | NZ  | M_ASP_166 | OD1 | 3.534 |
| 4U6V | M_LYS_168 | NZ  | M_ASP_169 | OD2 | 3.988 |
| 4U6V | M_LYS_187 | NZ  | M_ASP_184 | OD1 | 3.129 |
| 4U6V | M_HIS_188 | ND1 | M_ASP_150 | OD2 | 3.072 |
| 4U6V | B_LYS_36  | NZ  | B_GLU_280 | OE1 | 3.143 |
| 4U6V | B_LYS_46  | NZ  | B_ASP_44  | OD2 | 3.962 |
| 4U6V | B_LYS_51  | NZ  | B_ASP_44  | OD2 | 3.959 |
| 4U6V | B_LYS_51  | NZ  | B_GLU_289 | OE2 | 3.068 |
| 4U6V | B_ARG_56  | NH2 | B_ASP_227 | OD1 | 3.358 |
| 4U6V | B_ARG_56  | NH2 | B_ASP_227 | OD2 | 2.849 |
| 4U6V | B_LYS_85  | NZ  | B_GLU_250 | OE2 | 3.970 |
| 4U6V | B_ARG_104 | NH2 | B_ASP_100 | OD1 | 3.340 |
| 4U6V | B_ARG_104 | NH2 | B_ASP_100 | OD2 | 2.845 |
| 4U6V | B_LYS_147 | NZ  | B_GLU_111 | OE1 | 3.726 |
| 4U6V | B_LYS_163 | NZ  | B_ASP_162 | OD2 | 3.942 |
| 4U6V | B_LYS_164 | NZ  | B_GLU_158 | OE1 | 3.594 |
| 4U6V | B_ARG_184 | NH2 | B_ASP_254 | OD1 | 2.852 |
| 4U6V | B_ARG_184 | NH2 | B_ASP_254 | OD2 | 2.960 |
| 4U6V | B_ARG_184 | NH2 | B_ASP_272 | OD1 | 2.585 |
| 4U6V | B_ARG_200 | NH1 | K_ASP_56  | OD1 | 3.809 |
| 4U6V | B_ARG_200 | NH1 | K_ASP_56  | OD2 | 3.557 |
| 4U6V | B_LYS_205 | NZ  | B_GLU_70  | OE1 | 3.673 |
| 4U6V | B_LYS_205 | NZ  | B_GLU_70  | OE2 | 3.473 |
| 4U6V | B_ARG_236 | NH1 | B_ASP_44  | OD1 | 3.418 |
| 4U6V | B_ARG_236 | NH2 | B_ASP_44  | OD1 | 3.133 |
| 4U6V | B_ARG_251 | NH2 | B_ASP_276 | OD2 | 3.376 |
| 4U6V | B_ARG_253 | NH2 | B_ASP_276 | OD1 | 2.931 |
| 4U6V | B_ARG_253 | NH2 | B_ASP_276 | OD2 | 3.222 |
| 4U6V | B_LYS_266 | NZ  | M_ASP_93  | OD1 | 3.145 |
| 4U6V | B_LYS_271 | NZ  | B_ASP_185 | OD1 | 2.724 |
| 4U6V | B_LYS_273 | NZ  | B_ASP_255 | OD2 | 3.277 |

|      |           |     |            |     |       |
|------|-----------|-----|------------|-----|-------|
| 4U6V | B_ARG_277 | NH2 | B_GLU_250  | OE1 | 2.460 |
| 4U6V | B_ARG_281 | NH2 | B_ASP_246  | OD1 | 2.737 |
| 4UAO | A_ARG_73  | NH2 | A_GLU_201  | OE1 | 3.924 |
| 4UAO | A_ARG_73  | NH2 | A_GLU_201  | OE2 | 3.498 |
| 4UAO | A_ARG_120 | NH1 | A_GLU_123  | OE1 | 3.546 |
| 4UAO | A_ARG_120 | NH1 | A_ASP_216  | OD2 | 3.693 |
| 4UAO | A_ARG_120 | NH2 | A_GLU_123  | OE1 | 3.780 |
| 4UAO | A_LYS_122 | NZ  | A_ASP_216  | OD2 | 2.797 |
| 4UAO | A_LYS_190 | NZ  | A_ASP_158  | OD2 | 3.237 |
| 4UAO | A_LYS_190 | NZ  | A_GLU_187  | OE2 | 3.980 |
| 4UAO | A_LYS_237 | NZ  | A_GLU_78   | OE1 | 3.297 |
| 4UAO | A_ARG_249 | NH1 | A_GLU_187  | OE1 | 3.415 |
| 4UAO | A_ARG_249 | NH1 | A_GLU_381  | OE1 | 3.557 |
| 4UAO | A_ARG_249 | NH1 | A_GLU_381  | OE2 | 3.345 |
| 4UAO | A_ARG_249 | NH2 | A_GLU_187  | OE1 | 3.981 |
| 4UAO | A_LYS_250 | NZ  | A_GLU_381  | OE2 | 3.404 |
| 4UAO | A_LYS_256 | NZ  | A_GLU_267  | OE1 | 2.830 |
| 4UAO | A_LYS_256 | NZ  | A_GLU_267  | OE2 | 3.541 |
| 4UAO | A_ARG_277 | NH1 | A_GLU_275  | OE1 | 2.891 |
| 4UAO | A_ARG_280 | NH1 | A_ASP_230  | OD1 | 2.845 |
| 4UAO | A_ARG_280 | NH1 | A_ASP_230  | OD2 | 3.123 |
| 4UAO | A_ARG_280 | NH2 | A_ASP_230  | OD2 | 3.328 |
| 4UAO | A_ARG_284 | NH2 | A_ASP_224  | OD1 | 3.788 |
| 4UAO | A_ARG_284 | NH2 | A_ASP_224  | OD2 | 3.066 |
| 4UAO | A_ARG_296 | NH2 | A_GLU_288  | OE1 | 2.772 |
| 4UAO | A_ARG_317 | NH1 | C_GLU_100B | OE2 | 3.537 |
| 4UAO | A_ARG_317 | NH2 | C_GLU_100B | OE1 | 3.794 |
| 4UAO | A_ARG_317 | NH2 | C_GLU_100B | OE2 | 2.800 |
| 4UAO | A_LYS_336 | NZ  | A_ASP_79   | OD1 | 2.775 |
| 4UAO | A_LYS_336 | NZ  | A_ASP_79   | OD2 | 3.272 |
| 4UAO | A_LYS_353 | NZ  | A_GLU_273  | OE1 | 3.628 |
| 4UAO | A_LYS_360 | NZ  | A_ASP_63   | OD1 | 3.580 |
| 4UAO | A_LYS_360 | NZ  | A_ASP_63   | OD2 | 3.421 |
| 4UAO | B_ARG_61  | NH2 | B_ASP_82   | OD1 | 3.532 |
| 4UAO | B_ARG_66  | NH2 | B_ASP_28   | OD1 | 3.432 |
| 4UAO | B_LYS_92  | NZ  | B_ASP_28   | OD2 | 3.374 |
| 4UAO | B_ARG_103 | NH2 | B_ASP_165  | OD1 | 2.738 |
| 4UAO | B_ARG_108 | NH1 | B_ASP_170  | OD2 | 3.952 |
| 4UAO | B_LYS_149 | NZ  | B_GLU_195  | OE2 | 3.010 |
| 4UAO | B_ARG_155 | NH1 | B_ASP_157  | OD1 | 3.116 |
| 4UAO | B_ARG_155 | NH1 | B_ASP_185  | OD2 | 3.521 |
| 4UAO | B_ARG_155 | NH2 | B_ASP_185  | OD1 | 3.054 |
| 4UAO | B_ARG_155 | NH2 | B_ASP_185  | OD2 | 3.232 |
| 4UAO | B_HIS_189 | ND1 | B_ASP_185  | OD1 | 3.890 |
| 4UAO | B_LYS_199 | NZ  | B_ASP_110  | OD1 | 3.495 |
| 4UAO | B_LYS_199 | NZ  | B_ASP_110  | OD2 | 3.079 |
| 4UAO | C_ARG_38  | NH1 | C_ASP_86   | OD1 | 3.163 |
| 4UAO | C_ARG_38  | NH2 | C_GLU_46   | OE1 | 3.888 |
| 4UAO | C_ARG_38  | NH2 | C_GLU_46   | OE2 | 3.064 |
| 4UAO | C_ARG_38  | NH2 | C_ASP_86   | OD1 | 3.804 |
| 4UAO | C_ARG_56  | NH1 | A_GLU_81   | OE2 | 2.819 |
| 4UAO | C_ARG_56  | NH2 | A_ASP_174  | OD1 | 3.129 |
| 4UAO | C_ARG_56  | NH2 | A_ASP_174  | OD2 | 2.857 |
| 4UAO | C_ARG_66  | NH1 | C_GLU_83   | OE1 | 3.463 |
| 4UAO | C_ARG_66  | NH1 | C_ASP_86   | OD1 | 2.970 |
| 4UAO | C_ARG_66  | NH1 | C_ASP_86   | OD2 | 2.789 |
| 4UAO | C_ARG_66  | NH2 | C_GLU_83   | OE1 | 3.731 |
| 4UAO | C_ARG_94  | NH1 | C_GLU_100B | OE1 | 2.986 |

|      |           |     |            |     |       |
|------|-----------|-----|------------|-----|-------|
| 4UAO | C_ARG_94  | NH1 | C_ASP_101  | OD1 | 3.545 |
| 4UAO | C_ARG_94  | NH1 | C_ASP_101  | OD2 | 3.032 |
| 4UAO | C_ARG_95  | NH1 | C_ASP_100C | OD2 | 2.956 |
| 4UAO | C_ARG_95  | NH2 | A_GLU_173  | OE2 | 3.027 |
| 4UV6 | A_ARG_73  | NH1 | A_GLU_201  | OE1 | 2.994 |
| 4UV6 | A_ARG_73  | NH1 | A_GLU_201  | OE2 | 3.932 |
| 4UV6 | A_ARG_73  | NH2 | A_GLU_201  | OE1 | 3.217 |
| 4UV6 | A_ARG_73  | NH2 | A_GLU_201  | OE2 | 2.666 |
| 4UV6 | A_ARG_73  | NH2 | A_GLU_288  | OE2 | 3.591 |
| 4UV6 | A_ARG_120 | NH1 | A_GLU_123  | OE2 | 3.707 |
| 4UV6 | A_ARG_120 | NH2 | A_ASP_216  | OD1 | 3.645 |
| 4UV6 | A_LYS_122 | NZ  | A_ASP_216  | OD1 | 3.360 |
| 4UV6 | A_ARG_146 | NH2 | A_ASP_133  | OD2 | 3.248 |
| 4UV6 | A_LYS_148 | NZ  | A_GLU_145  | OE2 | 3.128 |
| 4UV6 | A_LYS_190 | NZ  | A_ASP_158  | OD2 | 3.666 |
| 4UV6 | A_LYS_222 | NZ  | A_GLU_104  | OE2 | 2.916 |
| 4UV6 | A_LYS_237 | NZ  | A_GLU_78   | OE1 | 2.996 |
| 4UV6 | A_LYS_237 | NZ  | A_GLU_78   | OE2 | 3.806 |
| 4UV6 | A_LYS_246 | NZ  | A_ASP_242  | OD2 | 3.993 |
| 4UV6 | A_ARG_249 | NH1 | A_GLU_187  | OE1 | 3.777 |
| 4UV6 | A_ARG_249 | NH1 | A_GLU_187  | OE2 | 2.741 |
| 4UV6 | A_ARG_249 | NH2 | A_GLU_187  | OE1 | 2.790 |
| 4UV6 | A_ARG_249 | NH2 | A_GLU_187  | OE2 | 3.285 |
| 4UV6 | A_ARG_249 | NH2 | A_GLU_381  | OE1 | 3.049 |
| 4UV6 | A_ARG_249 | NH2 | A_GLU_381  | OE2 | 2.841 |
| 4UV6 | A_LYS_256 | NZ  | A_GLU_267  | OE1 | 3.465 |
| 4UV6 | A_LYS_256 | NZ  | A_GLU_267  | OE2 | 3.209 |
| 4UV6 | A_LYS_256 | NZ  | A_ASP_367  | OD2 | 3.488 |
| 4UV6 | A_ARG_277 | NH2 | A_GLU_275  | OE2 | 3.331 |
| 4UV6 | A_ARG_280 | NH1 | A_ASP_230  | OD1 | 2.732 |
| 4UV6 | A_ARG_280 | NH1 | A_ASP_230  | OD2 | 3.546 |
| 4UV6 | A_ARG_280 | NH2 | A_GLU_227  | OE1 | 3.879 |
| 4UV6 | A_ARG_280 | NH2 | A_ASP_230  | OD1 | 3.530 |
| 4UV6 | A_ARG_280 | NH2 | A_ASP_230  | OD2 | 2.776 |
| 4UV6 | A_ARG_284 | NH2 | A_ASP_224  | OD1 | 3.612 |
| 4UV6 | A_ARG_284 | NH2 | A_ASP_224  | OD2 | 3.190 |
| 4UV6 | A_ARG_296 | NH2 | A_GLU_288  | OE2 | 3.629 |
| 4UV6 | A_ARG_313 | NH1 | A_GLU_310  | OE1 | 2.851 |
| 4UV6 | A_ARG_313 | NH1 | A_GLU_310  | OE2 | 3.172 |
| 4UV6 | A_LYS_321 | NZ  | A_ASP_318  | OD1 | 3.965 |
| 4UV6 | A_LYS_336 | NZ  | A_ASP_79   | OD1 | 3.453 |
| 4UV6 | A_LYS_336 | NZ  | A_ASP_79   | OD2 | 3.112 |
| 4UV6 | A_LYS_336 | NZ  | A_ASP_333  | OD1 | 3.782 |
| 4UV6 | A_HIS_378 | NE2 | A_GLU_381  | OE2 | 3.710 |
| 4UV6 | B_ARG_73  | NH1 | B_GLU_201  | OE1 | 3.228 |
| 4UV6 | B_ARG_73  | NH2 | B_GLU_201  | OE1 | 3.286 |
| 4UV6 | B_ARG_73  | NH2 | B_GLU_201  | OE2 | 2.695 |
| 4UV6 | B_ARG_73  | NH2 | B_GLU_288  | OE2 | 3.736 |
| 4UV6 | B_LYS_148 | NZ  | B_GLU_145  | OE2 | 3.156 |
| 4UV6 | B_ARG_180 | NH2 | A_GLU_396  | OE2 | 2.784 |
| 4UV6 | B_LYS_190 | NZ  | B_ASP_158  | OD2 | 3.677 |
| 4UV6 | B_LYS_222 | NZ  | B_GLU_104  | OE2 | 2.924 |
| 4UV6 | B_LYS_237 | NZ  | B_GLU_78   | OE1 | 2.994 |
| 4UV6 | B_LYS_237 | NZ  | B_GLU_78   | OE2 | 3.805 |
| 4UV6 | B_LYS_246 | NZ  | B_ASP_242  | OD2 | 3.993 |
| 4UV6 | B_ARG_249 | NH1 | B_GLU_187  | OE1 | 3.799 |
| 4UV6 | B_ARG_249 | NH1 | B_GLU_187  | OE2 | 2.742 |
| 4UV6 | B_ARG_249 | NH2 | B_GLU_187  | OE1 | 2.790 |

|      |           |     |           |     |       |
|------|-----------|-----|-----------|-----|-------|
| 4UV6 | B_ARG_249 | NH2 | B_GLU_187 | OE2 | 3.296 |
| 4UV6 | B_ARG_249 | NH2 | B_GLU_381 | OE1 | 3.038 |
| 4UV6 | B_ARG_249 | NH2 | B_GLU_381 | OE2 | 2.812 |
| 4UV6 | B_LYS_256 | NZ  | B_GLU_267 | OE1 | 3.476 |
| 4UV6 | B_LYS_256 | NZ  | B_GLU_267 | OE2 | 3.242 |
| 4UV6 | B_LYS_256 | NZ  | B_ASP_367 | OD2 | 3.465 |
| 4UV6 | B_ARG_277 | NH2 | B_GLU_275 | OE2 | 3.309 |
| 4UV6 | B_ARG_280 | NH1 | B_ASP_230 | OD1 | 2.709 |
| 4UV6 | B_ARG_280 | NH1 | B_ASP_230 | OD2 | 3.518 |
| 4UV6 | B_ARG_280 | NH2 | B_GLU_227 | OE2 | 3.911 |
| 4UV6 | B_ARG_280 | NH2 | B_ASP_230 | OD1 | 3.525 |
| 4UV6 | B_ARG_280 | NH2 | B_ASP_230 | OD2 | 2.745 |
| 4UV6 | B_ARG_284 | NH2 | B_ASP_224 | OD1 | 3.584 |
| 4UV6 | B_ARG_284 | NH2 | B_ASP_224 | OD2 | 3.156 |
| 4UV6 | B_ARG_313 | NH1 | B_GLU_310 | OE1 | 2.951 |
| 4UV6 | B_ARG_313 | NH1 | B_GLU_310 | OE2 | 2.848 |
| 4UV6 | B_ARG_313 | NH2 | A_GLU_60  | OE1 | 2.768 |
| 4UV6 | B_LYS_321 | NZ  | B_ASP_318 | OD1 | 3.922 |
| 4UV6 | B_LYS_336 | NZ  | B_ASP_79  | OD2 | 3.702 |
| 4UV6 | B_LYS_336 | NZ  | B_ASP_333 | OD1 | 3.823 |
| 4UV6 | B_HIS_378 | NE2 | B_GLU_381 | OE2 | 3.739 |
| 4WEU | D_ARG_838 | NH1 | D_ASP_890 | OD1 | 3.018 |
| 4WEU | D_ARG_838 | NH2 | D_GLU_846 | OE1 | 2.933 |
| 4WEU | D_ARG_838 | NH2 | D_GLU_846 | OE2 | 3.823 |
| 4WEU | D_ARG_867 | NH1 | D_ASP_890 | OD1 | 3.567 |
| 4WEU | D_ARG_867 | NH1 | D_ASP_890 | OD2 | 2.686 |
| 4WEU | D_ARG_867 | NH2 | D_ASP_890 | OD1 | 2.946 |
| 4WEU | D_ARG_867 | NH2 | D_ASP_890 | OD2 | 3.615 |
| 4WEU | D_LYS_887 | NZ  | A_GLU_145 | OE1 | 3.143 |
| 4WEU | A_LYS_49  | NZ  | A_GLU_240 | OE2 | 2.906 |
| 4WEU | A_ARG_64  | NH1 | A_GLU_26  | OE2 | 3.571 |
| 4WEU | A_LYS_66  | NZ  | A_GLU_26  | OE1 | 3.929 |
| 4WEU | A_ARG_96  | NH1 | A_GLU_94  | OE2 | 3.701 |
| 4WEU | A_ARG_96  | NH1 | B_GLU_94  | OE1 | 3.636 |
| 4WEU | A_ARG_96  | NH1 | B_GLU_94  | OE2 | 3.058 |
| 4WEU | A_ARG_96  | NH2 | B_GLU_94  | OE1 | 2.949 |
| 4WEU | A_ARG_96  | NH2 | B_GLU_94  | OE2 | 3.852 |
| 4WEU | A_LYS_104 | NZ  | A_GLU_101 | OE1 | 3.418 |
| 4WEU | A_LYS_120 | NZ  | A_GLU_89  | OE1 | 2.914 |
| 4WEU | A_ARG_136 | NH1 | D_GLU_889 | OE1 | 2.898 |
| 4WEU | A_ARG_136 | NH2 | A_GLU_145 | OE1 | 3.553 |
| 4WEU | A_HIS_155 | NE2 | A_GLU_152 | OE2 | 2.869 |
| 4WEU | A_LYS_172 | NZ  | A_GLU_170 | OE2 | 3.445 |
| 4WEU | B_LYS_49  | NZ  | B_GLU_240 | OE1 | 3.611 |
| 4WEU | B_LYS_49  | NZ  | B_GLU_240 | OE2 | 3.160 |
| 4WEU | B_ARG_64  | NH1 | B_GLU_26  | OE2 | 3.559 |
| 4WEU | B_LYS_66  | NZ  | B_GLU_26  | OE1 | 3.923 |
| 4WEU | B_ARG_96  | NH1 | A_GLU_94  | OE1 | 3.754 |
| 4WEU | B_ARG_96  | NH1 | A_GLU_94  | OE2 | 2.795 |
| 4WEU | B_ARG_96  | NH1 | B_GLU_94  | OE2 | 3.704 |
| 4WEU | B_ARG_96  | NH2 | A_GLU_94  | OE1 | 2.707 |
| 4WEU | B_ARG_96  | NH2 | A_GLU_94  | OE2 | 3.344 |
| 4WEU | B_LYS_120 | NZ  | B_GLU_89  | OE1 | 2.742 |
| 4WEU | B_ARG_136 | NH2 | B_GLU_145 | OE1 | 3.533 |
| 4WEU | B_HIS_155 | NE2 | B_GLU_152 | OE1 | 3.472 |
| 4WEU | B_HIS_155 | NE2 | B_GLU_152 | OE2 | 2.880 |
| 4WEU | B_LYS_172 | NZ  | B_GLU_170 | OE2 | 3.468 |
| 4WEU | B_ARG_198 | NH1 | B_GLU_67  | OE2 | 2.375 |

|      |           |     |           |     |       |
|------|-----------|-----|-----------|-----|-------|
| 4WEU | B_ARG_198 | NH2 | B_GLU_67  | OE2 | 3.911 |
| 4WEU | E_ARG_838 | NH1 | E_ASP_890 | OD1 | 3.012 |
| 4WEU | E_ARG_838 | NH2 | E_GLU_846 | OE1 | 2.950 |
| 4WEU | E_ARG_838 | NH2 | E_GLU_846 | OE2 | 3.817 |
| 4WEU | E_ARG_867 | NH1 | E_ASP_890 | OD1 | 3.574 |
| 4WEU | E_ARG_867 | NH1 | E_ASP_890 | OD2 | 2.661 |
| 4WEU | E_ARG_867 | NH2 | E_ASP_890 | OD1 | 2.927 |
| 4WEU | E_ARG_867 | NH2 | E_ASP_890 | OD2 | 3.566 |
| 4WHT | A_ARG_38  | NH1 | A_ASP_90  | OD1 | 2.990 |
| 4WHT | A_ARG_38  | NH2 | A_GLU_46  | OE1 | 2.993 |
| 4WHT | A_ARG_38  | NH2 | A_GLU_89  | OE1 | 3.403 |
| 4WHT | A_ARG_61  | NH2 | A_GLU_46  | OE2 | 3.778 |
| 4WHT | A_LYS_65  | NZ  | A_ASP_62  | OD1 | 3.169 |
| 4WHT | A_ARG_67  | NH1 | A_ASP_90  | OD1 | 3.859 |
| 4WHT | A_ARG_67  | NH1 | A_ASP_90  | OD2 | 2.717 |
| 4WHT | A_ARG_67  | NH2 | A_GLU_89  | OE1 | 3.463 |
| 4WHT | A_ARG_67  | NH2 | A_ASP_90  | OD1 | 3.102 |
| 4WHT | A_ARG_67  | NH2 | A_ASP_90  | OD2 | 3.428 |
| 4WHT | A_ARG_98  | NH1 | A_ASP_100 | OD1 | 3.573 |
| 4WHT | A_ARG_98  | NH1 | A_ASP_100 | OD2 | 2.704 |
| 4WHT | A_LYS_207 | NZ  | B_GLU_127 | OE1 | 2.607 |
| 4WHT | A_LYS_207 | NZ  | B_GLU_127 | OE2 | 3.670 |
| 4WHT | C_ARG_38  | NH1 | C_ASP_90  | OD1 | 2.946 |
| 4WHT | C_ARG_38  | NH2 | C_GLU_46  | OE1 | 2.996 |
| 4WHT | C_ARG_38  | NH2 | C_GLU_89  | OE1 | 3.393 |
| 4WHT | C_ARG_61  | NH2 | C_GLU_46  | OE2 | 3.777 |
| 4WHT | C_LYS_65  | NZ  | C_ASP_62  | OD1 | 3.197 |
| 4WHT | C_ARG_67  | NH1 | C_ASP_90  | OD1 | 3.881 |
| 4WHT | C_ARG_67  | NH1 | C_ASP_90  | OD2 | 2.676 |
| 4WHT | C_ARG_67  | NH2 | C_GLU_89  | OE1 | 3.528 |
| 4WHT | C_ARG_67  | NH2 | C_ASP_90  | OD1 | 3.088 |
| 4WHT | C_ARG_67  | NH2 | C_ASP_90  | OD2 | 3.360 |
| 4WHT | C_ARG_98  | NH2 | C_ASP_100 | OD1 | 3.559 |
| 4WHT | C_ARG_98  | NH2 | C_ASP_100 | OD2 | 2.716 |
| 4WHT | C_LYS_204 | NZ  | C_ASP_206 | OD1 | 2.994 |
| 4WHT | C_LYS_204 | NZ  | C_ASP_206 | OD2 | 3.710 |
| 4WHT | C_LYS_207 | NZ  | D_GLU_127 | OE1 | 3.293 |
| 4WHT | E_ARG_38  | NH1 | E_ASP_90  | OD1 | 2.955 |
| 4WHT | E_ARG_38  | NH2 | E_GLU_46  | OE1 | 2.986 |
| 4WHT | E_ARG_38  | NH2 | E_GLU_89  | OE1 | 3.434 |
| 4WHT | E_ARG_61  | NH2 | E_GLU_46  | OE2 | 3.795 |
| 4WHT | E_LYS_65  | NZ  | E_ASP_62  | OD1 | 3.160 |
| 4WHT | E_ARG_67  | NH1 | E_ASP_90  | OD1 | 3.902 |
| 4WHT | E_ARG_67  | NH1 | E_ASP_90  | OD2 | 2.757 |
| 4WHT | E_ARG_67  | NH2 | E_GLU_89  | OE1 | 3.512 |
| 4WHT | E_ARG_67  | NH2 | E_ASP_90  | OD1 | 3.132 |
| 4WHT | E_ARG_67  | NH2 | E_ASP_90  | OD2 | 3.444 |
| 4WHT | E_ARG_98  | NH2 | E_ASP_100 | OD1 | 3.535 |
| 4WHT | E_ARG_98  | NH2 | E_ASP_100 | OD2 | 2.656 |
| 4WHT | E_LYS_204 | NZ  | E_ASP_206 | OD1 | 2.987 |
| 4WHT | E_LYS_204 | NZ  | E_ASP_206 | OD2 | 3.777 |
| 4WHT | E_LYS_207 | NZ  | F_GLU_127 | OE1 | 3.118 |
| 4WHT | G_ARG_38  | NH1 | G_ASP_90  | OD1 | 2.947 |
| 4WHT | G_ARG_38  | NH2 | G_GLU_46  | OE1 | 2.995 |
| 4WHT | G_ARG_61  | NH2 | G_GLU_46  | OE2 | 3.807 |
| 4WHT | G_LYS_65  | NZ  | G_ASP_62  | OD1 | 3.270 |
| 4WHT | G_ARG_67  | NH1 | G_ASP_90  | OD1 | 3.770 |
| 4WHT | G_ARG_67  | NH1 | G_ASP_90  | OD2 | 2.706 |

|      |           |     |           |     |       |
|------|-----------|-----|-----------|-----|-------|
| 4WHT | G_ARG_67  | NH2 | G_ASP_90  | OD1 | 3.124 |
| 4WHT | G_ARG_67  | NH2 | G_ASP_90  | OD2 | 3.413 |
| 4WHT | G_ARG_98  | NH2 | G_ASP_100 | OD1 | 3.568 |
| 4WHT | G_ARG_98  | NH2 | G_ASP_100 | OD2 | 2.686 |
| 4WHT | G_LYS_204 | NZ  | G_ASP_206 | OD1 | 2.980 |
| 4WHT | G_LYS_204 | NZ  | G_ASP_206 | OD2 | 3.681 |
| 4WHT | G_LYS_204 | NZ  | U_ASP_206 | OD2 | 3.854 |
| 4WHT | I_ARG_38  | NH1 | I_ASP_90  | OD1 | 2.871 |
| 4WHT | I_ARG_38  | NH2 | I_GLU_46  | OE1 | 3.011 |
| 4WHT | I_ARG_38  | NH2 | I_ASP_90  | OD1 | 3.937 |
| 4WHT | I_ARG_61  | NH2 | I_GLU_46  | OE2 | 3.804 |
| 4WHT | I_LYS_65  | NZ  | I_ASP_62  | OD1 | 3.703 |
| 4WHT | I_LYS_65  | NZ  | R_GLU_84  | OE2 | 3.044 |
| 4WHT | I_ARG_67  | NH1 | I_ASP_90  | OD1 | 3.990 |
| 4WHT | I_ARG_67  | NH1 | I_ASP_90  | OD2 | 2.725 |
| 4WHT | I_ARG_67  | NH2 | I_ASP_90  | OD1 | 3.173 |
| 4WHT | I_ARG_67  | NH2 | I_ASP_90  | OD2 | 3.289 |
| 4WHT | I_ARG_98  | NH2 | I_ASP_100 | OD1 | 3.524 |
| 4WHT | I_ARG_98  | NH2 | I_ASP_100 | OD2 | 2.670 |
| 4WHT | I_LYS_207 | NZ  | J_GLU_127 | OE1 | 2.774 |
| 4WHT | I_LYS_207 | NZ  | J_GLU_127 | OE2 | 3.846 |
| 4WHT | J_ARG_24  | NH1 | J_ASP_75  | OD1 | 2.778 |
| 4WHT | J_ARG_24  | NH1 | J_ASP_75  | OD2 | 3.695 |
| 4WHT | J_ARG_66  | NH2 | J_ASP_87  | OD1 | 2.769 |
| 4WHT | J_ARG_66  | NH2 | J_ASP_87  | OD2 | 3.342 |
| 4WHT | J_LYS_153 | NZ  | J_GLU_199 | OE1 | 3.137 |
| 4WHT | J_LYS_153 | NZ  | J_GLU_199 | OE2 | 3.249 |
| 4WHT | J_ARG_159 | NH1 | J_ASP_189 | OD1 | 3.763 |
| 4WHT | J_ARG_159 | NH1 | J_ASP_189 | OD2 | 2.878 |
| 4WHT | J_ARG_159 | NH2 | J_ASP_189 | OD1 | 2.936 |
| 4WHT | J_ARG_159 | NH2 | J_ASP_189 | OD2 | 3.572 |
| 4WHT | J_LYS_187 | NZ  | J_GLU_191 | OE1 | 2.768 |
| 4WHT | J_HIS_193 | ND1 | J_ASP_189 | OD1 | 3.761 |
| 4WHT | J_LYS_203 | NZ  | J_ASP_114 | OD2 | 2.967 |
| 4WHT | K_ARG_38  | NH1 | K_GLU_89  | OE1 | 3.948 |
| 4WHT | K_ARG_38  | NH1 | K_ASP_90  | OD1 | 2.761 |
| 4WHT | K_ARG_38  | NH2 | K_GLU_46  | OE1 | 2.930 |
| 4WHT | K_ARG_38  | NH2 | K_GLU_89  | OE1 | 3.349 |
| 4WHT | K_LYS_65  | NZ  | K_ASP_62  | OD1 | 3.187 |
| 4WHT | K_ARG_67  | NH1 | K_ASP_90  | OD1 | 3.739 |
| 4WHT | K_ARG_67  | NH1 | K_ASP_90  | OD2 | 2.796 |
| 4WHT | K_ARG_67  | NH2 | K_GLU_89  | OE1 | 3.552 |
| 4WHT | K_ARG_67  | NH2 | K_ASP_90  | OD1 | 3.403 |
| 4WHT | K_ARG_67  | NH2 | K_ASP_90  | OD2 | 3.608 |
| 4WHT | K_ARG_98  | NH2 | K_ASP_100 | OD1 | 3.517 |
| 4WHT | K_ARG_98  | NH2 | K_ASP_100 | OD2 | 2.664 |
| 4WHT | K_LYS_204 | NZ  | K_ASP_206 | OD1 | 2.984 |
| 4WHT | K_LYS_204 | NZ  | K_ASP_206 | OD2 | 3.680 |
| 4WHT | K_LYS_207 | NZ  | L_GLU_127 | OE1 | 2.813 |
| 4WHT | M_ARG_38  | NH1 | M_ASP_90  | OD1 | 2.959 |
| 4WHT | M_ARG_38  | NH2 | M_GLU_46  | OE1 | 2.979 |
| 4WHT | M_ARG_38  | NH2 | M_GLU_89  | OE1 | 3.377 |
| 4WHT | M_ARG_61  | NH2 | M_GLU_46  | OE2 | 3.777 |
| 4WHT | M_LYS_65  | NZ  | M_ASP_62  | OD1 | 3.185 |
| 4WHT | M_ARG_67  | NH1 | M_ASP_90  | OD1 | 3.861 |
| 4WHT | M_ARG_67  | NH1 | M_ASP_90  | OD2 | 2.742 |
| 4WHT | M_ARG_67  | NH2 | M_GLU_89  | OE1 | 3.527 |
| 4WHT | M_ARG_67  | NH2 | M_ASP_90  | OD1 | 3.102 |



|      |           |     |           |     |       |
|------|-----------|-----|-----------|-----|-------|
| 4WHT | M_ARG_67  | NH2 | M_ASP_90  | OD2 | 3.458 |
| 4WHT | M_ARG_98  | NH2 | M_ASP_100 | OD1 | 3.946 |
| 4WHT | M_ARG_98  | NH2 | M_ASP_100 | OD2 | 3.534 |
| 4WHT | M_LYS_204 | NZ  | K_ASP_206 | OD2 | 2.701 |
| 4WHT | M_LYS_207 | NZ  | N_GLU_127 | OE1 | 3.186 |
| 4WHT | O_ARG_38  | NH1 | O_ASP_90  | OD1 | 2.964 |
| 4WHT | O_ARG_38  | NH2 | O_GLU_46  | OE1 | 3.022 |
| 4WHT | O_ARG_38  | NH2 | O_GLU_89  | OE1 | 3.336 |
| 4WHT | O_ARG_61  | NH2 | O_GLU_46  | OE2 | 3.788 |
| 4WHT | O_LYS_65  | NZ  | O_ASP_62  | OD1 | 3.252 |
| 4WHT | O_ARG_67  | NH1 | O_ASP_90  | OD1 | 3.841 |
| 4WHT | O_ARG_67  | NH1 | O_ASP_90  | OD2 | 2.724 |
| 4WHT | O_ARG_67  | NH2 | O_GLU_89  | OE1 | 3.541 |
| 4WHT | O_ARG_67  | NH2 | O_ASP_90  | OD1 | 3.068 |
| 4WHT | O_ARG_67  | NH2 | O_ASP_90  | OD2 | 3.434 |
| 4WHT | O_ARG_98  | NH2 | O_ASP_100 | OD1 | 3.531 |
| 4WHT | O_ARG_98  | NH2 | O_ASP_100 | OD2 | 2.711 |
| 4WHT | O_LYS_204 | NZ  | O_ASP_206 | OD1 | 2.964 |
| 4WHT | O_LYS_204 | NZ  | O_ASP_206 | OD2 | 3.737 |
| 4WHT | O_LYS_207 | NZ  | P_GLU_127 | OE1 | 3.812 |
| 4WHT | O_LYS_207 | NZ  | P_GLU_127 | OE2 | 2.822 |
| 4WHT | Q_ARG_38  | NH1 | Q_ASP_90  | OD1 | 2.935 |
| 4WHT | Q_ARG_38  | NH2 | Q_GLU_46  | OE1 | 3.059 |
| 4WHT | Q_ARG_38  | NH2 | Q_ASP_90  | OD1 | 3.866 |
| 4WHT | Q_ARG_61  | NH2 | Q_GLU_46  | OE2 | 3.813 |
| 4WHT | Q_LYS_65  | NZ  | Q_ASP_62  | OD1 | 3.159 |
| 4WHT | Q_ARG_67  | NH1 | Q_ASP_90  | OD1 | 3.892 |
| 4WHT | Q_ARG_67  | NH1 | Q_ASP_90  | OD2 | 2.790 |
| 4WHT | Q_ARG_67  | NH2 | Q_ASP_90  | OD1 | 3.108 |
| 4WHT | Q_ARG_67  | NH2 | Q_ASP_90  | OD2 | 3.473 |
| 4WHT | Q_ARG_98  | NH2 | Q_ASP_100 | OD1 | 3.545 |
| 4WHT | Q_ARG_98  | NH2 | Q_ASP_100 | OD2 | 2.754 |
| 4WHT | Q_LYS_207 | NZ  | R_GLU_127 | OE1 | 2.572 |
| 4WHT | Q_LYS_207 | NZ  | R_GLU_127 | OE2 | 3.627 |
| 4WHT | S_ARG_38  | NH1 | S_ASP_90  | OD1 | 2.866 |
| 4WHT | S_ARG_38  | NH2 | S_GLU_46  | OE1 | 2.984 |
| 4WHT | S_ARG_38  | NH2 | S_GLU_89  | OE1 | 3.382 |
| 4WHT | S_ARG_38  | NH2 | S_ASP_90  | OD1 | 3.993 |
| 4WHT | S_ARG_61  | NH2 | S_GLU_46  | OE1 | 3.723 |
| 4WHT | S_ARG_61  | NH2 | S_GLU_46  | OE2 | 3.200 |
| 4WHT | S_ARG_67  | NH1 | S_ASP_90  | OD2 | 2.809 |
| 4WHT | S_ARG_67  | NH2 | S_GLU_89  | OE1 | 3.479 |
| 4WHT | S_ARG_67  | NH2 | S_ASP_90  | OD1 | 3.317 |
| 4WHT | S_ARG_67  | NH2 | S_ASP_90  | OD2 | 3.452 |
| 4WHT | S_LYS_76  | NZ  | S_ASP_73  | OD2 | 2.618 |
| 4WHT | S_ARG_98  | NH2 | S_ASP_100 | OD1 | 3.534 |
| 4WHT | S_ARG_98  | NH2 | S_ASP_100 | OD2 | 2.742 |
| 4WHT | S_LYS_204 | NZ  | S_ASP_206 | OD1 | 3.164 |
| 4WHT | S_LYS_207 | NZ  | T_GLU_127 | OE1 | 3.197 |
| 4WHT | U_ARG_38  | NH1 | U_ASP_90  | OD1 | 2.992 |
| 4WHT | U_ARG_38  | NH2 | U_GLU_46  | OE1 | 3.032 |
| 4WHT | U_ARG_38  | NH2 | U_GLU_89  | OE1 | 3.377 |
| 4WHT | U_ARG_61  | NH2 | U_GLU_46  | OE2 | 3.808 |
| 4WHT | U_LYS_65  | NZ  | U_ASP_62  | OD1 | 3.172 |
| 4WHT | U_ARG_67  | NH1 | U_ASP_90  | OD1 | 3.855 |
| 4WHT | U_ARG_67  | NH1 | U_ASP_90  | OD2 | 2.721 |
| 4WHT | U_ARG_67  | NH2 | U_GLU_89  | OE1 | 3.526 |
| 4WHT | U_ARG_67  | NH2 | U_ASP_90  | OD1 | 3.080 |

|      |           |     |           |     |       |
|------|-----------|-----|-----------|-----|-------|
| 4WHT | U_ARG_67  | NH2 | U_ASP_90  | OD2 | 3.418 |
| 4WHT | U_ARG_98  | NH2 | U_ASP_100 | OD1 | 3.455 |
| 4WHT | U_ARG_98  | NH2 | U_ASP_100 | OD2 | 2.628 |
| 4WHT | U_LYS_204 | NZ  | G_ASP_206 | OD2 | 3.954 |
| 4WHT | U_LYS_204 | NZ  | U_ASP_206 | OD1 | 2.956 |
| 4WHT | U_LYS_204 | NZ  | U_ASP_206 | OD2 | 3.682 |
| 4WHT | U_LYS_207 | NZ  | V_GLU_127 | OE1 | 3.622 |
| 4WHT | X_ARG_38  | NH1 | X_ASP_90  | OD1 | 2.631 |
| 4WHT | X_ARG_38  | NH2 | X_GLU_46  | OE1 | 3.058 |
| 4WHT | X_ARG_38  | NH2 | X_GLU_46  | OE2 | 3.652 |
| 4WHT | X_ARG_38  | NH2 | X_ASP_90  | OD1 | 3.918 |
| 4WHT | X_ARG_61  | NH2 | X_GLU_46  | OE2 | 3.153 |
| 4WHT | X_LYS_65  | NZ  | X_ASP_62  | OD1 | 3.157 |
| 4WHT | X_ARG_67  | NH1 | X_ASP_90  | OD1 | 3.978 |
| 4WHT | X_ARG_67  | NH1 | X_ASP_90  | OD2 | 2.777 |
| 4WHT | X_ARG_67  | NH2 | X_ASP_90  | OD1 | 3.272 |
| 4WHT | X_ARG_67  | NH2 | X_ASP_90  | OD2 | 3.480 |
| 4WHT | X_ARG_98  | NH2 | X_ASP_100 | OD1 | 3.516 |
| 4WHT | X_ARG_98  | NH2 | X_ASP_100 | OD2 | 2.709 |
| 4WHT | X_LYS_207 | NZ  | Y_GLU_127 | OE2 | 2.718 |
| 4WHT | B_ARG_24  | NH1 | B_ASP_75  | OD1 | 2.804 |
| 4WHT | B_ARG_24  | NH1 | B_ASP_75  | OD2 | 3.712 |
| 4WHT | B_ARG_66  | NH2 | B_ASP_87  | OD1 | 2.784 |
| 4WHT | B_ARG_66  | NH2 | B_ASP_87  | OD2 | 3.450 |
| 4WHT | B_LYS_111 | NZ  | J_GLU_73  | OE2 | 3.842 |
| 4WHT | B_LYS_153 | NZ  | B_GLU_199 | OE1 | 3.076 |
| 4WHT | B_LYS_153 | NZ  | B_GLU_199 | OE2 | 3.271 |
| 4WHT | B_ARG_159 | NH1 | B_ASP_189 | OD1 | 3.800 |
| 4WHT | B_ARG_159 | NH1 | B_ASP_189 | OD2 | 2.909 |
| 4WHT | B_ARG_159 | NH2 | B_ASP_189 | OD1 | 2.972 |
| 4WHT | B_ARG_159 | NH2 | B_ASP_189 | OD2 | 3.584 |
| 4WHT | B_LYS_    | NZ  | B_GLU_    | OE1 | 2.805 |
| 4WHT | B_HIS_193 | ND1 | B_ASP_155 | OD2 | 3.362 |
| 4WHT | B_HIS_193 | NE2 | B_ASP_189 | OD1 | 3.524 |
| 4WHT | B_LYS_203 | NZ  | B_ASP_114 | OD2 | 2.836 |
| 4WHT | D_ARG_24  | NH1 | D_ASP_75  | OD1 | 2.773 |
| 4WHT | D_ARG_24  | NH1 | D_ASP_75  | OD2 | 3.816 |
| 4WHT | D_ARG_44  | NH1 | D_GLU_86  | OE2 | 3.678 |
| 4WHT | D_ARG_44  | NH2 | D_GLU_86  | OE2 | 2.752 |
| 4WHT | D_ARG_66  | NH2 | D_ASP_87  | OD1 | 2.868 |
| 4WHT | D_ARG_66  | NH2 | D_ASP_87  | OD2 | 3.621 |
| 4WHT | D_LYS_151 | NZ  | D_GLU_199 | OE2 | 3.961 |
| 4WHT | D_LYS_151 | NZ  | L_GLU_191 | OE2 | 3.259 |
| 4WHT | D_LYS_153 | NZ  | D_GLU_199 | OE1 | 3.094 |
| 4WHT | D_LYS_153 | NZ  | D_GLU_199 | OE2 | 3.252 |
| 4WHT | D_ARG_159 | NH1 | D_ASP_189 | OD1 | 3.780 |
| 4WHT | D_ARG_159 | NH1 | D_ASP_189 | OD2 | 2.927 |
| 4WHT | D_ARG_159 | NH2 | D_ASP_189 | OD1 | 2.960 |
| 4WHT | D_ARG_159 | NH2 | D_ASP_189 | OD2 | 3.602 |
| 4WHT | D_LYS_187 | NZ  | I_GLU_114 | OE1 | 3.576 |
| 4WHT | D_LYS_187 | NZ  | I_GLU_114 | OE2 | 3.498 |
| 4WHT | D_LYS_187 | NZ  | D_GLU_191 | OE1 | 2.796 |
| 4WHT | D_HIS_193 | ND1 | D_ASP_189 | OD1 | 3.687 |
| 4WHT | D_LYS_203 | NZ  | D_ASP_114 | OD2 | 2.798 |
| 4WHT | F_ARG_24  | NH1 | F_ASP_75  | OD1 | 2.809 |
| 4WHT | F_ARG_24  | NH1 | F_ASP_75  | OD2 | 3.755 |
| 4WHT | F_ARG_66  | NH2 | F_GLU_86  | OE1 | 3.638 |
| 4WHT | F_ARG_66  | NH2 | F_GLU_86  | OE2 | 3.286 |

|      |           |     |           |     |       |
|------|-----------|-----|-----------|-----|-------|
| 4WHT | F_ARG_66  | NH2 | F_ASP_87  | OD1 | 2.757 |
| 4WHT | F_ARG_66  | NH2 | F_ASP_87  | OD2 | 3.450 |
| 4WHT | F_LYS_151 | NZ  | F_GLU_199 | OE2 | 3.084 |
| 4WHT | F_LYS_153 | NZ  | F_GLU_199 | OE1 | 3.224 |
| 4WHT | F_LYS_153 | NZ  | F_GLU_199 | OE2 | 3.396 |
| 4WHT | F_ARG_159 | NH1 | F_ASP_189 | OD1 | 3.759 |
| 4WHT | F_ARG_159 | NH1 | F_ASP_189 | OD2 | 2.800 |
| 4WHT | F_ARG_159 | NH2 | F_ASP_189 | OD1 | 2.952 |
| 4WHT | F_ARG_159 | NH2 | F_ASP_189 | OD2 | 3.529 |
| 4WHT | F_ARG_160 | NH2 | F_GLU_158 | OE2 | 3.114 |
| 4WHT | F_LYS_187 | NZ  | F_GLU_191 | OE1 | 2.776 |
| 4WHT | F_HIS_193 | ND1 | F_ASP_155 | OD2 | 3.338 |
| 4WHT | F_HIS_193 | NE2 | F_ASP_189 | OD1 | 3.541 |
| 4WHT | H_ARG_24  | NH1 | H_ASP_75  | OD1 | 2.789 |
| 4WHT | H_ARG_24  | NH1 | H_ASP_75  | OD2 | 3.775 |
| 4WHT | H_ARG_66  | NH1 | Q_ASP_62  | OD2 | 3.949 |
| 4WHT | H_ARG_66  | NH2 | H_ASP_87  | OD1 | 2.787 |
| 4WHT | H_ARG_66  | NH2 | H_ASP_87  | OD2 | 3.453 |
| 4WHT | H_LYS_151 | NZ  | H_GLU_199 | OE2 | 3.589 |
| 4WHT | H_LYS_153 | NZ  | H_GLU_199 | OE1 | 3.108 |
| 4WHT | H_LYS_153 | NZ  | H_GLU_199 | OE2 | 3.315 |
| 4WHT | H_ARG_159 | NH1 | H_ASP_189 | OD1 | 3.818 |
| 4WHT | H_ARG_159 | NH1 | H_ASP_189 | OD2 | 2.990 |
| 4WHT | H_ARG_159 | NH2 | H_ASP_189 | OD1 | 2.984 |
| 4WHT | H_ARG_159 | NH2 | H_ASP_189 | OD2 | 3.636 |
| 4WHT | H_LYS_187 | NZ  | H_GLU_191 | OE1 | 2.806 |
| 4WHT | H_HIS_193 | ND1 | H_ASP_155 | OD2 | 3.385 |
| 4WHT | H_HIS_193 | NE2 | H_ASP_189 | OD1 | 3.584 |
| 4WHT | H_LYS_203 | NZ  | H_ASP_114 | OD2 | 2.843 |
| 4WHT | L_ARG_24  | NH1 | L_ASP_75  | OD1 | 2.813 |
| 4WHT | L_ARG_24  | NH1 | L_ASP_75  | OD2 | 3.652 |
| 4WHT | L_ARG_66  | NH2 | L_ASP_87  | OD1 | 2.659 |
| 4WHT | L_ARG_66  | NH2 | L_ASP_87  | OD2 | 3.387 |
| 4WHT | L_LYS_151 | NZ  | L_GLU_158 | OE1 | 3.149 |
| 4WHT | L_LYS_151 | NZ  | L_GLU_158 | OE2 | 3.351 |
| 4WHT | L_LYS_153 | NZ  | L_GLU_199 | OE1 | 3.106 |
| 4WHT | L_LYS_153 | NZ  | L_GLU_199 | OE2 | 3.200 |
| 4WHT | L_ARG_159 | NH1 | L_ASP_189 | OD1 | 3.780 |
| 4WHT | L_ARG_159 | NH1 | L_ASP_189 | OD2 | 2.946 |
| 4WHT | L_ARG_159 | NH2 | L_ASP_189 | OD1 | 2.925 |
| 4WHT | L_ARG_159 | NH2 | L_ASP_189 | OD2 | 3.602 |
| 4WHT | L_LYS_187 | NZ  | L_GLU_191 | OE1 | 2.795 |
| 4WHT | L_HIS_193 | ND1 | L_ASP_155 | OD2 | 3.400 |
| 4WHT | L_HIS_193 | NE2 | L_ASP_189 | OD1 | 3.590 |
| 4WHT | L_LYS_203 | NZ  | L_ASP_114 | OD2 | 2.774 |
| 4WHT | N_ARG_24  | NH1 | N_ASP_75  | OD1 | 3.802 |
| 4WHT | N_ARG_24  | NH1 | N_ASP_75  | OD2 | 3.728 |
| 4WHT | N_ARG_66  | NH2 | N_ASP_87  | OD1 | 2.772 |
| 4WHT | N_ARG_66  | NH2 | N_ASP_87  | OD2 | 3.477 |
| 4WHT | N_LYS_151 | NZ  | N_GLU_199 | OE2 | 3.991 |
| 4WHT | N_LYS_153 | NZ  | N_GLU_199 | OE1 | 3.073 |
| 4WHT | N_LYS_153 | NZ  | N_GLU_199 | OE2 | 3.236 |
| 4WHT | N_ARG_159 | NH1 | N_ASP_189 | OD2 | 3.146 |
| 4WHT | N_ARG_159 | NH2 | N_ASP_189 | OD1 | 2.954 |
| 4WHT | N_ARG_159 | NH2 | N_ASP_189 | OD2 | 3.533 |
| 4WHT | N_ARG_160 | NH2 | N_GLU_158 | OE1 | 2.762 |
| 4WHT | N_LYS_187 | NZ  | K_GLU_114 | OE1 | 3.270 |
| 4WHT | N_LYS_187 | NZ  | K_GLU_114 | OE2 | 3.221 |

|      |           |     |           |     |       |
|------|-----------|-----|-----------|-----|-------|
| 4WHT | N_LYS_187 | NZ  | N_GLU_191 | OE1 | 2.851 |
| 4WHT | N_HIS_193 | ND1 | N_ASP_189 | OD1 | 3.702 |
| 4WHT | N_LYS_203 | NZ  | N_ASP_147 | OD2 | 3.088 |
| 4WHT | P_ARG_24  | NH1 | P_ASP_75  | OD1 | 2.762 |
| 4WHT | P_ARG_24  | NH1 | P_ASP_75  | OD2 | 3.651 |
| 4WHT | P_ARG_66  | NH2 | P_ASP_87  | OD1 | 2.759 |
| 4WHT | P_ARG_66  | NH2 | P_ASP_87  | OD2 | 3.423 |
| 4WHT | P_LYS_151 | NZ  | P_GLU_199 | OE1 | 3.866 |
| 4WHT | P_LYS_153 | NZ  | P_GLU_199 | OE1 | 3.110 |
| 4WHT | P_LYS_153 | NZ  | P_GLU_199 | OE2 | 3.243 |
| 4WHT | P_ARG_159 | NH1 | P_ASP_189 | OD1 | 3.789 |
| 4WHT | P_ARG_159 | NH1 | P_ASP_189 | OD2 | 2.890 |
| 4WHT | P_ARG_159 | NH2 | P_ASP_189 | OD1 | 2.989 |
| 4WHT | P_ARG_159 | NH2 | P_ASP_189 | OD2 | 3.601 |
| 4WHT | P_LYS_187 | NZ  | P_GLU_191 | OE1 | 2.785 |
| 4WHT | P_HIS_193 | ND1 | P_ASP_155 | OD2 | 3.395 |
| 4WHT | P_HIS_193 | NE2 | P_ASP_189 | OD1 | 3.524 |
| 4WHT | R_ARG_24  | NH1 | R_ASP_75  | OD1 | 2.839 |
| 4WHT | R_ARG_24  | NH1 | R_ASP_75  | OD2 | 3.562 |
| 4WHT | R_ARG_66  | NH2 | R_ASP_87  | OD1 | 2.765 |
| 4WHT | R_ARG_66  | NH2 | R_ASP_87  | OD2 | 3.213 |
| 4WHT | R_LYS_153 | NZ  | R_GLU_199 | OE1 | 3.156 |
| 4WHT | R_LYS_153 | NZ  | R_GLU_199 | OE2 | 3.439 |
| 4WHT | R_ARG_159 | NH1 | R_ASP_189 | OD1 | 3.788 |
| 4WHT | R_ARG_159 | NH1 | R_ASP_189 | OD2 | 2.882 |
| 4WHT | R_ARG_159 | NH2 | R_ASP_189 | OD1 | 2.978 |
| 4WHT | R_ARG_159 | NH2 | R_ASP_189 | OD2 | 3.578 |
| 4WHT | R_LYS_187 | NZ  | R_GLU_191 | OE1 | 2.817 |
| 4WHT | R_HIS_193 | ND1 | R_ASP_189 | OD1 | 3.674 |
| 4WHT | R_LYS_203 | NZ  | R_ASP_114 | OD2 | 2.819 |
| 4WHT | T_ARG_24  | NH1 | T_ASP_75  | OD1 | 2.790 |
| 4WHT | T_ARG_24  | NH1 | T_ASP_75  | OD2 | 3.795 |
| 4WHT | T_ARG_66  | NH2 | T_ASP_87  | OD1 | 2.749 |
| 4WHT | T_ARG_66  | NH2 | T_ASP_87  | OD2 | 3.461 |
| 4WHT | T_LYS_153 | NZ  | T_GLU_199 | OE1 | 3.110 |
| 4WHT | T_LYS_153 | NZ  | T_GLU_199 | OE2 | 3.186 |
| 4WHT | T_ARG_159 | NH1 | T_ASP_189 | OD1 | 3.798 |
| 4WHT | T_ARG_159 | NH1 | T_ASP_189 | OD2 | 2.872 |
| 4WHT | T_ARG_159 | NH2 | T_ASP_189 | OD1 | 3.018 |
| 4WHT | T_ARG_159 | NH2 | T_ASP_189 | OD2 | 3.596 |
| 4WHT | T_LYS_187 | NZ  | T_GLU_191 | OE1 | 3.436 |
| 4WHT | T_LYS_187 | NZ  | T_GLU_191 | OE2 | 3.114 |
| 4WHT | T_HIS_193 | ND1 | T_ASP_155 | OD2 | 2.632 |
| 4WHT | T_HIS_193 | NE2 | T_ASP_189 | OD1 | 3.485 |
| 4WHT | T_LYS_203 | NZ  | T_ASP_114 | OD2 | 2.869 |
| 4WHT | V_ARG_66  | NH2 | V_ASP_87  | OD1 | 2.798 |
| 4WHT | V_ARG_66  | NH2 | V_ASP_87  | OD2 | 3.518 |
| 4WHT | V_LYS_151 | NZ  | V_GLU_199 | OE2 | 2.908 |
| 4WHT | V_LYS_153 | NZ  | V_GLU_199 | OE1 | 3.090 |
| 4WHT | V_LYS_153 | NZ  | V_GLU_199 | OE2 | 3.267 |
| 4WHT | V_ARG_159 | NH1 | V_ASP_189 | OD1 | 3.784 |
| 4WHT | V_ARG_159 | NH1 | V_ASP_189 | OD2 | 2.899 |
| 4WHT | V_ARG_159 | NH2 | V_ASP_189 | OD1 | 2.972 |
| 4WHT | V_ARG_159 | NH2 | V_ASP_189 | OD2 | 3.593 |
| 4WHT | V_LYS_187 | NZ  | G_GLU_114 | OE1 | 3.353 |
| 4WHT | V_LYS_187 | NZ  | G_GLU_114 | OE2 | 3.189 |
| 4WHT | V_LYS_187 | NZ  | V_GLU_191 | OE1 | 2.841 |
| 4WHT | V_HIS_193 | NE2 | V_ASP_189 | OD1 | 3.541 |

|      |           |     |           |     |       |
|------|-----------|-----|-----------|-----|-------|
| 4WHT | Y_ARG_24  | NH1 | Y_ASP_75  | OD1 | 3.206 |
| 4WHT | Y_ARG_24  | NH1 | Y_ASP_75  | OD2 | 2.692 |
| 4WHT | Y_ARG_66  | NH2 | Y_GLU_86  | OE2 | 3.955 |
| 4WHT | Y_ARG_66  | NH2 | Y_ASP_87  | OD1 | 2.832 |
| 4WHT | Y_ARG_66  | NH2 | Y_ASP_87  | OD2 | 3.932 |
| 4WHT | Y_LYS_153 | NZ  | Y_GLU_199 | OE1 | 3.170 |
| 4WHT | Y_LYS_153 | NZ  | Y_GLU_199 | OE2 | 2.813 |
| 4WHT | Y_ARG_159 | NH1 | Y_GLU_158 | OE1 | 3.340 |
| 4WHT | Y_ARG_160 | NH1 | Y_ASP_165 | OD2 | 3.538 |
| 4WHT | Y_ARG_160 | NH2 | Y_ASP_165 | OD2 | 3.332 |
| 4WHT | Y_HIS_193 | ND1 | Y_ASP_155 | OD2 | 3.964 |
| 4WHT | Y_LYS_203 | NZ  | Y_ASP_114 | OD2 | 2.871 |
| 4WHY | G_ARG_38  | NH1 | G_ASP_90  | OD1 | 3.796 |
| 4WHY | G_ARG_38  | NH2 | G_GLU_46  | OE1 | 3.426 |
| 4WHY | G_ARG_38  | NH2 | G_GLU_89  | OE1 | 3.357 |
| 4WHY | G_ARG_61  | NH2 | G_GLU_46  | OE2 | 3.723 |
| 4WHY | G_LYS_65  | NZ  | G_ASP_62  | OD1 | 2.662 |
| 4WHY | G_ARG_67  | NH1 | G_ASP_90  | OD1 | 3.682 |
| 4WHY | G_ARG_67  | NH1 | G_ASP_90  | OD2 | 2.803 |
| 4WHY | G_ARG_67  | NH2 | G_GLU_89  | OE1 | 3.560 |
| 4WHY | G_ARG_67  | NH2 | G_ASP_90  | OD1 | 3.140 |
| 4WHY | G_ARG_67  | NH2 | G_ASP_90  | OD2 | 3.738 |
| 4WHY | G_ARG_98  | NH2 | G_ASP_100 | OD1 | 3.694 |
| 4WHY | G_ARG_98  | NH2 | G_ASP_100 | OD2 | 2.760 |
| 4WHY | H_ARG_24  | NH1 | H_ASP_75  | OD1 | 3.176 |
| 4WHY | H_ARG_24  | NH1 | H_ASP_75  | OD2 | 3.772 |
| 4WHY | H_ARG_24  | NH2 | H_ASP_75  | OD1 | 3.589 |
| 4WHY | H_ARG_66  | NH2 | H_GLU_86  | OE2 | 3.670 |
| 4WHY | H_ARG_66  | NH2 | H_ASP_87  | OD1 | 2.742 |
| 4WHY | H_ARG_66  | NH2 | H_ASP_87  | OD2 | 3.368 |
| 4WHY | H_LYS_153 | NZ  | H_GLU_199 | OE1 | 2.781 |
| 4WHY | H_ARG_159 | NH1 | H_ASP_161 | OD2 | 3.986 |
| 4WHY | H_ARG_159 | NH2 | H_ASP_189 | OD2 | 3.516 |
| 4WHY | H_LYS_187 | NZ  | H_GLU_191 | OE1 | 3.190 |
| 4WHY | H_HIS_193 | NE2 | H_ASP_189 | OD1 | 2.905 |
| 4WHY | H_LYS_203 | NZ  | H_ASP_114 | OD2 | 2.769 |
| 4WHY | L_ARG_38  | NH1 | L_ASP_90  | OD1 | 2.978 |
| 4WHY | L_ARG_38  | NH2 | L_GLU_46  | OE1 | 3.414 |
| 4WHY | L_ARG_38  | NH2 | L_GLU_89  | OE1 | 3.357 |
| 4WHY | L_ARG_38  | NH2 | L_ASP_90  | OD1 | 3.749 |
| 4WHY | L_ARG_61  | NH2 | L_GLU_46  | OE2 | 3.662 |
| 4WHY | L_LYS_65  | NZ  | L_ASP_62  | OD1 | 2.662 |
| 4WHY | L_ARG_67  | NH1 | L_ASP_90  | OD1 | 3.785 |
| 4WHY | L_ARG_67  | NH1 | L_ASP_90  | OD2 | 2.958 |
| 4WHY | L_ARG_67  | NH2 | L_GLU_89  | OE1 | 3.554 |
| 4WHY | L_ARG_67  | NH2 | L_ASP_90  | OD1 | 3.099 |
| 4WHY | L_ARG_67  | NH2 | L_ASP_90  | OD2 | 3.665 |
| 4WHY | L_ARG_98  | NH2 | L_ASP_100 | OD1 | 3.706 |
| 4WHY | L_ARG_98  | NH2 | L_ASP_100 | OD2 | 2.729 |
| 4WHY | L_LYS_204 | NZ  | L_ASP_206 | OD1 | 3.011 |
| 4WHY | L_LYS_204 | NZ  | L_ASP_206 | OD2 | 3.199 |
| 4WHY | J_ARG_24  | NH1 | J_ASP_75  | OD1 | 3.069 |
| 4WHY | J_ARG_24  | NH2 | J_ASP_75  | OD1 | 3.630 |
| 4WHY | J_ARG_66  | NH1 | J_GLU_84  | OE1 | 3.874 |
| 4WHY | J_ARG_66  | NH2 | J_GLU_86  | OE2 | 3.624 |
| 4WHY | J_ARG_66  | NH2 | J_ASP_87  | OD1 | 2.726 |
| 4WHY | J_ARG_66  | NH2 | J_ASP_87  | OD2 | 3.349 |
| 4WHY | J_LYS_153 | NZ  | J_GLU_199 | OE1 | 3.490 |

|      |           |     |           |     |       |
|------|-----------|-----|-----------|-----|-------|
| 4WHY | J_LYS_153 | NZ  | J_GLU_199 | OE2 | 3.292 |
| 4WHY | J_ARG_159 | NH1 | J_ASP_189 | OD2 | 3.515 |
| 4WHY | J_ARG_159 | NH2 | J_ASP_189 | OD1 | 3.310 |
| 4WHY | J_ARG_159 | NH2 | J_ASP_189 | OD2 | 3.228 |
| 4WHY | J_LYS_187 | NZ  | J_GLU_191 | OE1 | 3.198 |
| 4WHY | J_HIS_193 | NE2 | J_ASP_189 | OD1 | 2.893 |
| 4WHY | J_LYS_203 | NZ  | J_ASP_114 | OD2 | 2.763 |
| 4WHY | K_ARG_38  | NH1 | K_ASP_90  | OD1 | 2.916 |
| 4WHY | K_ARG_38  | NH2 | K_GLU_46  | OE1 | 3.411 |
| 4WHY | K_ARG_38  | NH2 | K_GLU_89  | OE1 | 3.357 |
| 4WHY | K_ARG_38  | NH2 | K_ASP_90  | OD1 | 3.663 |
| 4WHY | K_LYS_43  | NZ  | K_GLU_46  | OE2 | 3.479 |
| 4WHY | K_ARG_61  | NH2 | K_GLU_46  | OE1 | 3.975 |
| 4WHY | K_ARG_61  | NH2 | K_GLU_46  | OE2 | 3.699 |
| 4WHY | K_LYS_65  | NZ  | K_ASP_62  | OD1 | 2.646 |
| 4WHY | K_ARG_67  | NH1 | K_ASP_90  | OD2 | 3.001 |
| 4WHY | K_ARG_67  | NH2 | K_GLU_89  | OE1 | 3.597 |
| 4WHY | K_ARG_67  | NH2 | K_ASP_90  | OD1 | 3.410 |
| 4WHY | K_ARG_67  | NH2 | K_ASP_90  | OD2 | 3.539 |
| 4WHY | K_ARG_98  | NH2 | K_ASP_100 | OD1 | 3.492 |
| 4WHY | K_ARG_98  | NH2 | K_ASP_100 | OD2 | 2.572 |
| 4WHY | K_LYS_204 | NZ  | G_ASP_206 | OD2 | 3.182 |
| 4WHY | K_LYS_204 | NZ  | K_ASP_206 | OD1 | 3.046 |
| 4WHY | K_LYS_204 | NZ  | K_ASP_206 | OD2 | 3.729 |
| 4WHY | K_LYS_207 | NZ  | L_GLU_127 | OE1 | 3.798 |
| 4WHY | L_ARG_66  | NH1 | L_GLU_84  | OE2 | 3.906 |
| 4WHY | L_ARG_66  | NH2 | L_GLU_86  | OE2 | 3.615 |
| 4WHY | L_ARG_66  | NH2 | L_ASP_87  | OD1 | 2.731 |
| 4WHY | L_ARG_66  | NH2 | L_ASP_87  | OD2 | 3.360 |
| 4WHY | L_LYS_153 | NZ  | L_GLU_199 | OE1 | 3.524 |
| 4WHY | L_LYS_153 | NZ  | L_GLU_199 | OE2 | 3.214 |
| 4WHY | L_ARG_159 | NH1 | L_ASP_189 | OD1 | 3.322 |
| 4WHY | L_ARG_159 | NH1 | L_ASP_189 | OD2 | 2.478 |
| 4WHY | L_ARG_159 | NH2 | L_ASP_189 | OD1 | 3.410 |
| 4WHY | L_ARG_159 | NH2 | L_ASP_189 | OD2 | 3.993 |
| 4WHY | L_LYS_187 | NZ  | G_GLU_114 | OE1 | 3.275 |
| 4WHY | L_LYS_187 | NZ  | G_GLU_114 | OE2 | 3.634 |
| 4WHY | L_LYS_187 | NZ  | L_GLU_191 | OE1 | 3.202 |
| 4WHY | L_HIS_193 | NE2 | L_ASP_189 | OD1 | 2.644 |
| 4WHY | M_ARG_38  | NH1 | M_ASP_90  | OD1 | 3.063 |
| 4WHY | M_ARG_38  | NH2 | M_GLU_46  | OE1 | 3.415 |
| 4WHY | M_ARG_38  | NH2 | M_GLU_89  | OE1 | 3.380 |
| 4WHY | M_ARG_61  | NH2 | M_GLU_46  | OE2 | 3.734 |
| 4WHY | M_LYS_65  | NZ  | M_ASP_62  | OD1 | 2.631 |
| 4WHY | M_ARG_67  | NH1 | M_ASP_90  | OD1 | 3.787 |
| 4WHY | M_ARG_67  | NH1 | M_ASP_90  | OD2 | 2.862 |
| 4WHY | M_ARG_67  | NH2 | M_GLU_89  | OE1 | 3.563 |
| 4WHY | M_ARG_67  | NH2 | M_ASP_90  | OD1 | 3.288 |
| 4WHY | M_ARG_67  | NH2 | M_ASP_90  | OD2 | 3.753 |
| 4WHY | M_ARG_87  | NH1 | M_GLU_89  | OE1 | 3.642 |
| 4WHY | M_ARG_87  | NH1 | M_GLU_89  | OE2 | 2.644 |
| 4WHY | M_ARG_98  | NH2 | M_ASP_100 | OD1 | 3.669 |
| 4WHY | M_ARG_98  | NH2 | M_ASP_100 | OD2 | 2.644 |
| 4WHY | M_LYS_207 | NZ  | N_GLU_127 | OE1 | 3.795 |
| 4WHY | N_ARG_24  | NH1 | N_ASP_75  | OD1 | 3.064 |
| 4WHY | N_ARG_24  | NH2 | N_ASP_75  | OD1 | 3.627 |
| 4WHY | N_ARG_66  | NH1 | N_GLU_84  | OE1 | 3.806 |
| 4WHY | N_ARG_66  | NH2 | N_GLU_86  | OE2 | 3.626 |

|      |           |     |           |     |       |
|------|-----------|-----|-----------|-----|-------|
| 4WHY | N_ARG.66  | NH2 | N_ASP.87  | OD1 | 2.746 |
| 4WHY | N_ARG.66  | NH2 | N_ASP.87  | OD2 | 3.352 |
| 4WHY | N_LYS.153 | NZ  | N_GLU.199 | OE1 | 3.388 |
| 4WHY | N_LYS.153 | NZ  | N_GLU.199 | OE2 | 3.311 |
| 4WHY | N_ARG.159 | NH1 | N_ASP.189 | OD1 | 3.704 |
| 4WHY | N_ARG.159 | NH1 | N_ASP.189 | OD2 | 2.785 |
| 4WHY | N_ARG.159 | NH2 | N_ASP.189 | OD2 | 3.806 |
| 4WHY | N_LYS.187 | NZ  | I_GLU.114 | OE1 | 2.397 |
| 4WHY | N_LYS.187 | NZ  | I_GLU.114 | OE2 | 3.551 |
| 4WHY | N_LYS.187 | NZ  | N_GLU.191 | OE1 | 3.175 |
| 4WHY | N_HIS.193 | NE2 | N_ASP.189 | OD1 | 2.893 |
| 4WHY | N_LYS.203 | NZ  | N_ASP.114 | OD2 | 2.778 |
| 4WUU | A_HIS.3   | ND1 | A_ASP.29  | OD1 | 3.341 |
| 4WUU | A_HIS.3   | ND1 | A_ASP.29  | OD2 | 2.929 |
| 4WUU | A_ARG.6   | NH2 | A_ASP.102 | OD1 | 3.941 |
| 4WUU | A_ARG.6   | NH2 | A_ASP.102 | OD2 | 3.738 |
| 4WUU | A_ARG.14  | NH2 | A_ASP.39  | OD1 | 3.219 |
| 4WUU | A_ARG.14  | NH2 | A_ASP.39  | OD2 | 2.950 |
| 4WUU | A_ARG.21  | NH1 | A_ASP.39  | OD2 | 2.675 |
| 4WUU | A_ARG.21  | NH2 | A_ASP.37  | OD2 | 3.480 |
| 4WUU | A_ARG.35  | NH1 | B_ASP.53  | OD1 | 3.025 |
| 4WUU | A_ARG.35  | NH1 | B_ASP.53  | OD2 | 3.278 |
| 4WUU | A_ARG.35  | NH2 | A_GLU.46  | OE1 | 3.105 |
| 4WUU | A_ARG.44  | NH1 | A_ASP.61  | OD1 | 3.882 |
| 4WUU | A_ARG.44  | NH2 | A_ASP.61  | OD1 | 3.159 |
| 4WUU | A_ARG.48  | NH2 | B_ASP.53  | OD1 | 3.607 |
| 4WUU | A_ARG.48  | NH2 | B_ASP.53  | OD2 | 3.368 |
| 4WUU | A_HIS.74  | ND1 | A_ASP.77  | OD2 | 3.868 |
| 4WUU | A_ARG.75  | NH1 | A_GLU.19  | OE2 | 3.917 |
| 4WUU | A_ARG.82  | NH1 | A_GLU.89  | OE2 | 3.819 |
| 4WUU | A_ARG.82  | NH2 | A_GLU.89  | OE2 | 3.766 |
| 4WUU | A_HIS.93  | ND1 | A_ASP.119 | OD1 | 3.903 |
| 4WUU | A_HIS.93  | ND1 | A_ASP.119 | OD2 | 3.323 |
| 4WUU | A_ARG.111 | NH2 | A_ASP.102 | OD2 | 3.306 |
| 4WUU | A_ARG.157 | NH1 | A_GLU.161 | OE1 | 3.446 |
| 4WUU | A_ARG.157 | NH1 | A_GLU.161 | OE2 | 3.465 |
| 4WUU | A_ARG.157 | NH2 | A_GLU.161 | OE1 | 3.936 |
| 4WUU | A_ARG.170 | NH2 | A_GLU.55  | OE1 | 3.101 |
| 4WUU | A_ARG.170 | NH2 | A_GLU.55  | OE2 | 3.506 |
| 4WUU | A_ARG.181 | NH1 | A_ASP.183 | OD2 | 3.977 |
| 4WUU | A_HIS.191 | NE2 | A_GLU.254 | OE2 | 3.880 |
| 4WUU | A_HIS.197 | ND1 | A_GLU.198 | OE1 | 3.876 |
| 4WUU | B_ARG.3   | NH2 | B_ASP.59  | OD1 | 3.704 |
| 4WUU | B_LYS.19  | NZ  | B_GLU.16  | OE1 | 3.969 |
| 4WUU | B_LYS.19  | NZ  | B_GLU.16  | OE2 | 3.703 |
| 4WUU | B_ARG.45  | NH2 | B_GLU.47  | OE2 | 2.936 |
| 4WUU | B_LYS.94  | NZ  | B_GLU.77  | OE2 | 3.352 |
| 4WUU | D_ARG.62  | NH2 | D_GLU.82  | OE2 | 3.196 |
| 4WUU | D_ARG.62  | NH2 | D_ASP.83  | OD1 | 2.858 |
| 4WUU | D_ARG.62  | NH2 | D_ASP.83  | OD2 | 3.260 |
| 4WUU | D_LYS.114 | NZ  | D_GLU.202 | OE1 | 2.842 |
| 4WUU | E_LYS.12  | NZ  | E_GLU.16  | OE2 | 3.576 |
| 4WUU | E_ARG.38  | NH2 | E_GLU.46  | OE1 | 2.721 |
| 4WUU | E_ARG.38  | NH2 | E_GLU.46  | OE2 | 3.649 |
| 4WUU | E_ARG.50  | NH1 | A_GLU.166 | OE2 | 3.181 |
| 4WUU | E_ARG.50  | NH2 | A_GLU.166 | OE1 | 3.839 |
| 4WUU | E_ARG.50  | NH2 | A_GLU.166 | OE2 | 2.671 |
| 4WUU | E_LYS.87  | NZ  | E_ASP.90  | OD1 | 3.097 |

|      |           |     |           |     |       |
|------|-----------|-----|-----------|-----|-------|
| 4WUU | E_ARG_98  | NH2 | E_ASP_109 | OD2 | 3.982 |
| 4WUU | E_ARG_218 | NH1 | E_GLU_220 | OE1 | 3.981 |
| 4WUU | E_ARG_218 | NH2 | E_GLU_220 | OE1 | 3.055 |
| 4XVJ | A_ARG_1   | NH2 | L_ASP_51  | OD1 | 3.482 |
| 4XVJ | H_ARG_38  | NH1 | H_ASP_90  | OD2 | 3.020 |
| 4XVJ | H_ARG_38  | NH2 | H_GLU_46  | OE1 | 2.936 |
| 4XVJ | H_LYS_65  | NZ  | H_ASP_62  | OD1 | 3.256 |
| 4XVJ | H_ARG_67  | NH1 | H_ASP_90  | OD1 | 2.560 |
| 4XVJ | H_ARG_67  | NH1 | H_ASP_90  | OD2 | 3.768 |
| 4XVJ | H_ARG_67  | NH2 | H_ASP_90  | OD1 | 3.378 |
| 4XVJ | H_ARG_67  | NH2 | H_ASP_90  | OD2 | 3.034 |
| 4XVJ | H_ARG_98  | NH2 | H_ASP_115 | OD1 | 3.741 |
| 4XVJ | H_ARG_98  | NH2 | H_ASP_115 | OD2 | 2.973 |
| 4XVJ | L_LYS_17  | NZ  | L_ASP_75  | OD2 | 3.177 |
| 4XVJ | L_ARG_62  | NH1 | L_ASP_83  | OD1 | 3.002 |
| 4XVJ | L_ARG_62  | NH1 | L_ASP_83  | OD2 | 3.479 |
| 4XVJ | L_ARG_62  | NH2 | L_ASP_83  | OD1 | 3.793 |
| 4XVJ | L_ARG_62  | NH2 | L_ASP_83  | OD2 | 2.894 |
| 4YHP | P_LYS_4   | NZ  | H_ASP_62  | OD1 | 3.318 |
| 4YHP | A_ARG_38  | NH1 | A_ASP_90  | OD1 | 2.967 |
| 4YHP | A_ARG_38  | NH2 | A_GLU_46  | OE1 | 2.987 |
| 4YHP | A_ARG_67  | NH1 | A_ASP_90  | OD1 | 3.983 |
| 4YHP | A_ARG_67  | NH1 | A_ASP_90  | OD2 | 2.902 |
| 4YHP | A_ARG_67  | NH2 | A_ASP_90  | OD1 | 2.805 |
| 4YHP | A_ARG_67  | NH2 | A_ASP_90  | OD2 | 3.034 |
| 4YHP | A_LYS_76  | NZ  | A_ASP_73  | OD1 | 3.954 |
| 4YHP | A_LYS_76  | NZ  | A_ASP_73  | OD2 | 3.046 |
| 4YHP | A_ARG_98  | NH2 | A_ASP_109 | OD1 | 3.450 |
| 4YHP | A_ARG_98  | NH2 | A_ASP_109 | OD2 | 2.693 |
| 4YHP | A_LYS_151 | NZ  | A_ASP_152 | OD1 | 3.053 |
| 4YHP | A_LYS_151 | NZ  | A_ASP_152 | OD2 | 3.629 |
| 4YHP | A_LYS_214 | NZ  | A_ASP_216 | OD1 | 3.351 |
| 4YHP | A_LYS_218 | NZ  | A_GLU_220 | OE2 | 2.671 |
| 4YHP | A_LYS_222 | NZ  | B_ASP_123 | OD2 | 3.677 |
| 4YHP | B_ARG_53  | NH2 | B_GLU_59  | OE1 | 3.593 |
| 4YHP | B_ARG_60  | NH1 | B_ASP_81  | OD1 | 3.610 |
| 4YHP | B_ARG_60  | NH1 | B_ASP_81  | OD2 | 2.819 |
| 4YHP | B_ARG_60  | NH2 | B_GLU_78  | OE2 | 3.931 |
| 4YHP | B_ARG_60  | NH2 | B_ASP_81  | OD1 | 3.172 |
| 4YHP | B_ARG_60  | NH2 | B_ASP_81  | OD2 | 3.721 |
| 4YHP | B_LYS_104 | NZ  | B_ASP_84  | OD1 | 3.453 |
| 4YHP | B_LYS_104 | NZ  | B_GLU_166 | OE2 | 3.500 |
| 4YHP | B_LYS_150 | NZ  | B_GLU_196 | OE1 | 3.634 |
| 4YHP | B_LYS_150 | NZ  | B_GLU_196 | OE2 | 3.240 |
| 4YHP | B_LYS_184 | NZ  | B_GLU_188 | OE1 | 3.665 |
| 4YHP | B_LYS_184 | NZ  | B_GLU_188 | OE2 | 2.296 |
| 4YHP | Q_LYS_4   | NZ  | C_ASP_62  | OD1 | 3.313 |
| 4YHP | C_ARG_38  | NH1 | C_ASP_90  | OD1 | 2.918 |
| 4YHP | C_ARG_38  | NH2 | C_GLU_46  | OE1 | 2.810 |
| 4YHP | C_ARG_38  | NH2 | C_ASP_90  | OD1 | 3.983 |
| 4YHP | C_ARG_67  | NH1 | C_ASP_90  | OD1 | 3.935 |
| 4YHP | C_ARG_67  | NH1 | C_ASP_90  | OD2 | 2.912 |
| 4YHP | C_ARG_67  | NH2 | C_ASP_90  | OD1 | 3.223 |
| 4YHP | C_ARG_67  | NH2 | C_ASP_90  | OD2 | 3.530 |
| 4YHP | C_ARG_98  | NH2 | C_ASP_109 | OD1 | 3.729 |
| 4YHP | C_ARG_98  | NH2 | C_ASP_109 | OD2 | 2.531 |
| 4YHP | C_LYS_151 | NZ  | C_ASP_152 | OD1 | 3.396 |
| 4YHP | C_LYS_151 | NZ  | C_ASP_152 | OD2 | 3.552 |



|      |           |     |           |     |       |
|------|-----------|-----|-----------|-----|-------|
| 4YHP | C_LYS_218 | NZ  | C_GLU_220 | OE2 | 3.718 |
| 4YHP | C_LYS_222 | NZ  | D_ASP_123 | OD1 | 3.776 |
| 4YHP | C_LYS_222 | NZ  | D_ASP_123 | OD2 | 3.442 |
| 4YHP | D_ARG_60  | NH1 | D_ASP_81  | OD1 | 3.548 |
| 4YHP | D_ARG_60  | NH1 | D_ASP_81  | OD2 | 2.563 |
| 4YHP | D_ARG_60  | NH2 | D_GLU_78  | OE1 | 3.956 |
| 4YHP | D_ARG_60  | NH2 | D_ASP_81  | OD1 | 3.366 |
| 4YHP | D_ARG_60  | NH2 | D_ASP_81  | OD2 | 3.671 |
| 4YHP | D_LYS_104 | NZ  | D_ASP_84  | OD1 | 3.616 |
| 4YHP | D_LYS_104 | NZ  | D_ASP_84  | OD2 | 3.921 |
| 4YHP | D_LYS_104 | NZ  | D_GLU_166 | OE1 | 3.541 |
| 4YHP | D_LYS_104 | NZ  | D_GLU_166 | OE2 | 2.873 |
| 4YHP | D_LYS_150 | NZ  | D_GLU_196 | OE1 | 3.981 |
| 4YHP | D_LYS_150 | NZ  | D_GLU_196 | OE2 | 2.313 |
| 4YHP | D_LYS_189 | NZ  | D_ASP_186 | OD1 | 2.853 |
| 4YHP | D_HIS_190 | ND1 | D_ASP_152 | OD2 | 2.771 |
| 4YHP | D_HIS_190 | NE2 | L_GLU_59  | OE2 | 2.478 |
| 4YHP | E_ARG_38  | NH1 | E_ASP_90  | OD1 | 3.131 |
| 4YHP | E_ARG_38  | NH2 | E_GLU_46  | OE1 | 2.855 |
| 4YHP | E_ARG_67  | NH1 | E_ASP_90  | OD1 | 3.715 |
| 4YHP | E_ARG_67  | NH1 | E_ASP_90  | OD2 | 2.746 |
| 4YHP | E_ARG_67  | NH2 | E_ASP_90  | OD1 | 3.053 |
| 4YHP | E_ARG_67  | NH2 | E_ASP_90  | OD2 | 3.561 |
| 4YHP | E_ARG_98  | NH2 | E_ASP_109 | OD1 | 3.385 |
| 4YHP | E_ARG_98  | NH2 | E_ASP_109 | OD2 | 2.631 |
| 4YHP | E_LYS_151 | NZ  | E_ASP_152 | OD1 | 3.289 |
| 4YHP | E_LYS_151 | NZ  | E_ASP_152 | OD2 | 3.442 |
| 4YHP | E_LYS_222 | NZ  | F_ASP_123 | OD1 | 3.304 |
| 4YHP | E_LYS_222 | NZ  | F_ASP_123 | OD2 | 2.842 |
| 4YHP | H_ARG_38  | NH1 | H_ASP_90  | OD1 | 2.947 |
| 4YHP | H_ARG_38  | NH2 | H_GLU_46  | OE1 | 2.947 |
| 4YHP | H_ARG_38  | NH2 | H_ASP_90  | OD1 | 3.968 |
| 4YHP | H_ARG_67  | NH1 | H_ASP_90  | OD1 | 3.789 |
| 4YHP | H_ARG_67  | NH1 | H_ASP_90  | OD2 | 2.848 |
| 4YHP | H_ARG_67  | NH2 | H_ASP_90  | OD1 | 3.026 |
| 4YHP | H_ARG_67  | NH2 | H_ASP_90  | OD2 | 3.449 |
| 4YHP | H_LYS_76  | NZ  | H_ASP_73  | OD2 | 3.599 |
| 4YHP | H_ARG_98  | NH2 | H_ASP_109 | OD1 | 3.571 |
| 4YHP | H_ARG_98  | NH2 | H_ASP_109 | OD2 | 2.451 |
| 4YHP | H_LYS_151 | NZ  | H_ASP_152 | OD1 | 3.964 |
| 4YHP | H_LYS_151 | NZ  | H_ASP_152 | OD2 | 3.805 |
| 4YHP | H_LYS_218 | NZ  | H_GLU_220 | OE1 | 3.935 |
| 4YHP | L_ARG_60  | NH1 | L_ASP_81  | OD1 | 3.435 |
| 4YHP | L_ARG_60  | NH1 | L_ASP_81  | OD2 | 2.451 |
| 4YHP | L_ARG_60  | NH2 | L_GLU_78  | OE2 | 3.891 |
| 4YHP | L_ARG_60  | NH2 | L_ASP_81  | OD1 | 3.204 |
| 4YHP | L_ARG_60  | NH2 | L_ASP_81  | OD2 | 3.593 |
| 4YHP | L_LYS_104 | NZ  | L_ASP_84  | OD1 | 2.935 |
| 4YHP | L_LYS_104 | NZ  | L_ASP_84  | OD2 | 3.845 |
| 4YHP | L_LYS_104 | NZ  | L_GLU_166 | OE2 | 3.174 |
| 4YHP | L_LYS_150 | NZ  | L_GLU_196 | OE2 | 2.309 |
| 4YHP | L_LYS_189 | NZ  | L_ASP_186 | OD1 | 2.837 |
| 4YHP | L_HIS_190 | ND1 | L_ASP_152 | OD2 | 2.727 |
| 4YHP | F_HIS_33  | ND1 | F_ASP_49  | OD1 | 3.954 |
| 4YHP | F_ARG_60  | NH1 | F_ASP_81  | OD1 | 3.515 |
| 4YHP | F_ARG_60  | NH1 | F_ASP_81  | OD2 | 2.794 |
| 4YHP | F_ARG_60  | NH2 | F_GLU_78  | OE2 | 3.996 |
| 4YHP | F_ARG_60  | NH2 | F_ASP_81  | OD1 | 3.303 |

|      |           |     |           |     |       |
|------|-----------|-----|-----------|-----|-------|
| 4YHP | F_ARG_60  | NH2 | F_ASP_81  | OD2 | 3.936 |
| 4YHP | F_LYS_104 | NZ  | F_ASP_84  | OD1 | 3.436 |
| 4YHP | F_LYS_104 | NZ  | F_GLU_166 | OE2 | 3.438 |
| 4YHP | F_HIS_190 | ND1 | F_ASP_152 | OD2 | 3.922 |
| 4YHY | C_HIS_33  | ND1 | C_ASP_49  | OD1 | 3.834 |
| 4YHY | C_ARG_60  | NH1 | C_ASP_81  | OD1 | 3.547 |
| 4YHY | C_ARG_60  | NH1 | C_ASP_81  | OD2 | 2.684 |
| 4YHY | C_ARG_60  | NH2 | C_GLU_78  | OE1 | 3.841 |
| 4YHY | C_ARG_60  | NH2 | C_ASP_81  | OD1 | 2.796 |
| 4YHY | C_ARG_60  | NH2 | C_ASP_81  | OD2 | 3.359 |
| 4YHY | C_LYS_104 | NZ  | C_ASP_84  | OD1 | 3.080 |
| 4YHY | C_LYS_104 | NZ  | C_ASP_84  | OD2 | 3.747 |
| 4YHY | C_LYS_104 | NZ  | C_GLU_166 | OE1 | 3.855 |
| 4YHY | C_LYS_104 | NZ  | C_GLU_166 | OE2 | 3.371 |
| 4YHY | C_LYS_184 | NZ  | C_GLU_188 | OE1 | 2.479 |
| 4YHY | C_LYS_184 | NZ  | C_GLU_188 | OE2 | 3.850 |
| 4YHY | C_LYS_189 | NZ  | C_ASP_186 | OD1 | 3.979 |
| 4YHY | C_HIS_190 | ND1 | C_ASP_152 | OD2 | 3.638 |
| 4YHY | B_ARG_38  | NH1 | B_ASP_90  | OD1 | 2.962 |
| 4YHY | B_ARG_38  | NH2 | B_GLU_46  | OE1 | 3.075 |
| 4YHY | B_ARG_38  | NH2 | B_ASP_90  | OD1 | 3.920 |
| 4YHY | B_ARG_67  | NH1 | B_ASP_90  | OD1 | 3.667 |
| 4YHY | B_ARG_67  | NH1 | B_ASP_90  | OD2 | 2.922 |
| 4YHY | B_ARG_67  | NH2 | B_ASP_90  | OD1 | 2.906 |
| 4YHY | B_ARG_67  | NH2 | B_ASP_90  | OD2 | 3.527 |
| 4YHY | B_ARG_98  | NH2 | B_ASP_109 | OD1 | 3.412 |
| 4YHY | B_ARG_98  | NH2 | B_ASP_109 | OD2 | 2.741 |
| 4YHY | B_LYS_151 | NZ  | B_ASP_152 | OD1 | 3.708 |
| 4YHY | B_LYS_151 | NZ  | B_ASP_152 | OD2 | 3.789 |
| 4YHY | B_LYS_218 | NZ  | B_GLU_220 | OE2 | 3.937 |
| 4YHY | H_ARG_38  | NH1 | H_ASP_90  | OD1 | 2.943 |
| 4YHY | H_ARG_38  | NH2 | H_GLU_46  | OE1 | 3.065 |
| 4YHY | H_ARG_38  | NH2 | H_ASP_90  | OD1 | 3.927 |
| 4YHY | H_ARG_67  | NH1 | H_ASP_90  | OD1 | 3.683 |
| 4YHY | H_ARG_67  | NH1 | H_ASP_90  | OD2 | 2.873 |
| 4YHY | H_ARG_67  | NH2 | H_ASP_90  | OD1 | 2.953 |
| 4YHY | H_ARG_67  | NH2 | H_ASP_90  | OD2 | 3.520 |
| 4YHY | H_ARG_98  | NH2 | H_ASP_109 | OD1 | 3.446 |
| 4YHY | H_ARG_98  | NH2 | H_ASP_109 | OD2 | 2.805 |
| 4YHY | H_LYS_151 | NZ  | H_ASP_152 | OD1 | 3.926 |
| 4YHY | L_HIS_33  | ND1 | L_ASP_49  | OD1 | 3.834 |
| 4YHY | L_ARG_60  | NH1 | L_ASP_81  | OD1 | 3.514 |
| 4YHY | L_ARG_60  | NH1 | L_ASP_81  | OD2 | 2.687 |
| 4YHY | L_ARG_60  | NH2 | L_GLU_78  | OE1 | 3.800 |
| 4YHY | L_ARG_60  | NH2 | L_ASP_81  | OD1 | 2.830 |
| 4YHY | L_ARG_60  | NH2 | L_ASP_81  | OD2 | 3.411 |
| 4YHY | L_LYS_104 | NZ  | L_ASP_84  | OD1 | 3.118 |
| 4YHY | L_LYS_104 | NZ  | L_ASP_84  | OD2 | 3.782 |
| 4YHY | L_LYS_104 | NZ  | L_GLU_166 | OE1 | 3.846 |
| 4YHY | L_LYS_104 | NZ  | L_GLU_166 | OE2 | 3.435 |
| 4YHY | L_LYS_184 | NZ  | L_GLU_188 | OE1 | 2.816 |
| 4YHY | L_LYS_189 | NZ  | L_ASP_186 | OD1 | 3.965 |
| 4YHY | L_HIS_190 | ND1 | L_ASP_152 | OD2 | 3.667 |
| 4YHZ | H_ARG_38  | NH1 | H_ASP_90  | OD1 | 3.041 |
| 4YHZ | H_ARG_38  | NH2 | H_GLU_46  | OE1 | 2.993 |
| 4YHZ | H_ARG_67  | NH1 | H_ASP_90  | OD1 | 3.565 |
| 4YHZ | H_ARG_67  | NH1 | H_ASP_90  | OD2 | 2.787 |
| 4YHZ | H_ARG_67  | NH2 | H_ASP_90  | OD1 | 3.041 |

|      |           |     |           |     |       |
|------|-----------|-----|-----------|-----|-------|
| 4YHZ | H_ARG_67  | NH2 | H_ASP_90  | OD2 | 3.647 |
| 4YHZ | H_ARG_98  | NH2 | H_ASP_109 | OD1 | 3.319 |
| 4YHZ | H_ARG_98  | NH2 | H_ASP_109 | OD2 | 2.731 |
| 4YHZ | H_ARG_102 | NH1 | L_ASP_52  | OD2 | 3.952 |
| 4YHZ | H_LYS_151 | NZ  | H_ASP_152 | OD1 | 3.146 |
| 4YHZ | H_LYS_151 | NZ  | H_ASP_152 | OD2 | 3.730 |
| 4YHZ | H_LYS_218 | NZ  | H_GLU_220 | OE2 | 2.294 |
| 4YHZ | L_ARG_60  | NH1 | L_ASP_81  | OD1 | 3.699 |
| 4YHZ | L_ARG_60  | NH1 | L_ASP_81  | OD2 | 2.763 |
| 4YHZ | L_ARG_60  | NH2 | L_GLU_78  | OE2 | 3.725 |
| 4YHZ | L_ARG_60  | NH2 | L_ASP_81  | OD1 | 2.809 |
| 4YHZ | L_ARG_60  | NH2 | L_ASP_81  | OD2 | 3.312 |
| 4YHZ | L_LYS_104 | NZ  | L_ASP_84  | OD1 | 2.930 |
| 4YHZ | L_LYS_104 | NZ  | L_ASP_84  | OD2 | 3.859 |
| 4YHZ | L_LYS_104 | NZ  | L_GLU_166 | OE2 | 3.711 |
| 4YHZ | L_LYS_150 | NZ  | L_GLU_196 | OE1 | 3.382 |
| 4YHZ | L_LYS_150 | NZ  | L_GLU_196 | OE2 | 3.096 |
| 4YHZ | L_LYS_189 | NZ  | L_ASP_186 | OD1 | 3.342 |
| 4YNY | A_ARG_57  | NH1 | A_ASP_109 | OD1 | 2.933 |
| 4YNY | A_ARG_57  | NH2 | A_GLU_65  | OE1 | 3.525 |
| 4YNY | A_ARG_57  | NH2 | A_GLU_65  | OE2 | 3.243 |
| 4YNY | A_ARG_57  | NH2 | A_ASP_109 | OD1 | 3.948 |
| 4YNY | A_ARG_86  | NH1 | A_ASP_109 | OD1 | 3.716 |
| 4YNY | A_ARG_86  | NH1 | A_ASP_109 | OD2 | 2.746 |
| 4YNY | A_ARG_86  | NH2 | A_ASP_109 | OD1 | 3.047 |
| 4YNY | A_ARG_86  | NH2 | A_ASP_109 | OD2 | 3.560 |
| 4YNY | A_ARG_106 | NH2 | A_GLU_108 | OE1 | 3.999 |
| 4YNY | A_LYS_117 | NZ  | A_ASP_124 | OD1 | 3.494 |
| 4YNY | A_LYS_117 | NZ  | A_ASP_124 | OD2 | 2.864 |
| 4YNY | A_LYS_166 | NZ  | B_GLU_146 | OE2 | 2.702 |
| 4YNY | B_LYS_73  | NZ  | B_ASP_72  | OD2 | 3.025 |
| 4YNY | B_ARG_81  | NH1 | B_ASP_104 | OD1 | 3.819 |
| 4YNY | B_ARG_81  | NH1 | B_ASP_104 | OD2 | 2.603 |
| 4YNY | B_ARG_81  | NH2 | B_ASP_104 | OD1 | 2.915 |
| 4YNY | B_ARG_81  | NH2 | B_ASP_104 | OD2 | 3.187 |
| 4YNY | B_LYS_132 | NZ  | B_GLU_219 | OE2 | 3.320 |
| 4YNY | B_LYS_188 | NZ  | B_GLU_105 | OE1 | 3.576 |
| 4YNY | B_LYS_188 | NZ  | B_GLU_105 | OE2 | 2.488 |
| 4YNY | B_LYS_192 | NZ  | B_ASP_160 | OD1 | 3.032 |
| 4YNY | B_ARG_200 | NH2 | B_ASP_182 | OD1 | 3.555 |
| 4YNY | B_ARG_200 | NH2 | B_ASP_182 | OD2 | 2.866 |
| 4YNY | C_ARG_57  | NH1 | C_ASP_109 | OD1 | 2.834 |
| 4YNY | C_ARG_57  | NH2 | C_GLU_65  | OE1 | 3.680 |
| 4YNY | C_ARG_57  | NH2 | C_GLU_65  | OE2 | 3.119 |
| 4YNY | C_ARG_57  | NH2 | C_ASP_109 | OD1 | 3.921 |
| 4YNY | C_ARG_86  | NH1 | C_ASP_109 | OD1 | 3.790 |
| 4YNY | C_ARG_86  | NH1 | C_ASP_109 | OD2 | 2.710 |
| 4YNY | C_ARG_86  | NH2 | C_ASP_109 | OD1 | 3.106 |
| 4YNY | C_ARG_86  | NH2 | C_ASP_109 | OD2 | 3.542 |
| 4YNY | C_LYS_117 | NZ  | C_ASP_124 | OD1 | 3.354 |
| 4YNY | C_LYS_117 | NZ  | C_ASP_124 | OD2 | 2.744 |
| 4YNY | C_LYS_166 | NZ  | D_GLU_146 | OE2 | 2.776 |
| 4YNY | D_LYS_73  | NZ  | D_ASP_72  | OD1 | 3.416 |
| 4YNY | D_ARG_81  | NH1 | D_ASP_104 | OD1 | 3.697 |
| 4YNY | D_ARG_81  | NH1 | D_ASP_104 | OD2 | 2.693 |
| 4YNY | D_ARG_81  | NH2 | D_ASP_104 | OD1 | 2.906 |
| 4YNY | D_ARG_81  | NH2 | D_ASP_104 | OD2 | 3.380 |
| 4YNY | D_LYS_188 | NZ  | D_GLU_105 | OE1 | 3.077 |

|      |           |     |           |     |       |
|------|-----------|-----|-----------|-----|-------|
| 4YNY | D_LYS_192 | NZ  | D_ASP_160 | OD2 | 3.867 |
| 4YNY | D_ARG_200 | NH2 | D_ASP_182 | OD1 | 3.317 |
| 4YNY | D_ARG_200 | NH2 | D_ASP_182 | OD2 | 3.323 |
| 4YO0 | A_ARG_57  | NH1 | A_ASP_109 | OD1 | 3.022 |
| 4YO0 | A_ARG_57  | NH2 | A_GLU_65  | OE1 | 3.398 |
| 4YO0 | A_LYS_76  | NZ  | E_ASP_11  | OD1 | 3.807 |
| 4YO0 | A_LYS_76  | NZ  | E_ASP_11  | OD2 | 3.094 |
| 4YO0 | A_ARG_86  | NH1 | A_ASP_109 | OD1 | 3.794 |
| 4YO0 | A_ARG_86  | NH1 | A_ASP_109 | OD2 | 2.742 |
| 4YO0 | A_ARG_86  | NH2 | A_ASP_109 | OD1 | 2.929 |
| 4YO0 | A_ARG_86  | NH2 | A_ASP_109 | OD2 | 3.356 |
| 4YO0 | A_LYS_95  | NZ  | A_ASP_92  | OD2 | 3.971 |
| 4YO0 | A_LYS_117 | NZ  | A_ASP_124 | OD1 | 3.329 |
| 4YO0 | A_LYS_117 | NZ  | A_ASP_124 | OD2 | 2.540 |
| 4YO0 | A_LYS_166 | NZ  | B_GLU_146 | OE2 | 2.816 |
| 4YO0 | B_ARG_81  | NH2 | B_ASP_104 | OD1 | 2.781 |
| 4YO0 | B_ARG_81  | NH2 | B_ASP_104 | OD2 | 3.330 |
| 4YO0 | B_LYS_188 | NZ  | B_GLU_105 | OE2 | 2.712 |
| 4YO0 | B_LYS_192 | NZ  | B_ASP_160 | OD1 | 3.003 |
| 4YO0 | B_ARG_200 | NH1 | B_ASP_182 | OD1 | 3.660 |
| 4YO0 | B_ARG_200 | NH1 | B_ASP_182 | OD2 | 2.289 |
| 4YO0 | C_ARG_57  | NH1 | C_ASP_109 | OD1 | 2.959 |
| 4YO0 | C_ARG_57  | NH2 | C_GLU_65  | OE1 | 3.257 |
| 4YO0 | C_ARG_57  | NH2 | C_ASP_109 | OD1 | 3.982 |
| 4YO0 | C_LYS_76  | NZ  | F_GLU_10  | OE2 | 3.111 |
| 4YO0 | C_LYS_76  | NZ  | F_ASP_11  | OD1 | 3.515 |
| 4YO0 | C_LYS_76  | NZ  | F_ASP_11  | OD2 | 2.782 |
| 4YO0 | C_ARG_86  | NH1 | C_ASP_109 | OD1 | 3.789 |
| 4YO0 | C_ARG_86  | NH1 | C_ASP_109 | OD2 | 2.778 |
| 4YO0 | C_ARG_86  | NH2 | C_ASP_109 | OD1 | 2.949 |
| 4YO0 | C_ARG_86  | NH2 | C_ASP_109 | OD2 | 3.459 |
| 4YO0 | C_LYS_117 | NZ  | C_ASP_124 | OD1 | 3.359 |
| 4YO0 | C_LYS_117 | NZ  | C_ASP_124 | OD2 | 2.756 |
| 4YO0 | C_LYS_166 | NZ  | D_GLU_146 | OE2 | 2.660 |
| 4YO0 | C_LYS_231 | NZ  | D_GLU_145 | OE1 | 3.828 |
| 4YO0 | C_LYS_231 | NZ  | D_GLU_145 | OE2 | 3.815 |
| 4YO0 | D_LYS_188 | NZ  | D_GLU_105 | OE1 | 2.881 |
| 4YO0 | D_LYS_192 | NZ  | D_ASP_160 | OD1 | 2.854 |
| 4YO0 | D_ARG_200 | NH1 | D_ASP_182 | OD2 | 2.726 |
| 4Z0X | A_LYS_30  | NZ  | A_ASP_91  | OD1 | 2.897 |
| 4Z0X | A_ARG_60  | NH1 | A_ASP_81  | OD1 | 3.753 |
| 4Z0X | A_ARG_60  | NH1 | A_ASP_81  | OD2 | 2.721 |
| 4Z0X | A_ARG_60  | NH2 | A_ASP_81  | OD1 | 3.000 |
| 4Z0X | A_ARG_60  | NH2 | A_ASP_81  | OD2 | 3.078 |
| 4Z0X | B_LYS_37  | NZ  | B_GLU_35  | OE1 | 3.057 |
| 4Z0X | B_ARG_63  | NH1 | B_ASP_115 | OD1 | 2.995 |
| 4Z0X | B_ARG_63  | NH2 | B_GLU_71  | OE2 | 3.549 |
| 4Z0X | B_ARG_63  | NH2 | B_ASP_115 | OD1 | 3.828 |
| 4Z0X | B_ARG_92  | NH1 | B_ASP_115 | OD1 | 3.502 |
| 4Z0X | B_ARG_92  | NH1 | B_ASP_115 | OD2 | 2.905 |
| 4Z0X | B_ARG_92  | NH2 | B_ASP_115 | OD1 | 2.679 |
| 4Z0X | B_ARG_92  | NH2 | B_ASP_115 | OD2 | 3.355 |
| 4Z0X | B_ARG_123 | NH1 | B_ASP_132 | OD1 | 3.837 |
| 4Z0X | C_LYS_446 | NZ  | A_ASP_50  | OD1 | 3.873 |
| 4Z0X | C_LYS_446 | NZ  | A_ASP_50  | OD2 | 2.440 |
| 4ZD3 | H_ARG_43  | NH2 | H_GLU_51  | OE1 | 2.895 |
| 4ZD3 | H_ARG_43  | NH2 | H_GLU_51  | OE2 | 3.597 |
| 4ZD3 | H_ARG_66  | NH2 | H_ASP_64  | OD1 | 3.286 |

|      |           |     |           |     |       |
|------|-----------|-----|-----------|-----|-------|
| 4ZD3 | H_ARG_66  | NH2 | H_ASP_64  | OD2 | 2.638 |
| 4ZD3 | H_ARG_106 | NH2 | H_ASP_116 | OD1 | 3.450 |
| 4ZD3 | H_ARG_106 | NH2 | H_ASP_116 | OD2 | 3.904 |
| 4ZD3 | H_HIS_108 | ND1 | H_ASP_116 | OD1 | 3.941 |
| 4ZD3 | H_HIS_108 | ND1 | H_ASP_116 | OD2 | 2.771 |
| 4ZD3 | H_HIS_108 | NE2 | L_GLU_68  | OE1 | 2.549 |
| 4ZD3 | H_HIS_108 | NE2 | L_GLU_68  | OE2 | 3.986 |
| 4ZD3 | H_LYS_158 | NZ  | H_ASP_159 | OD1 | 3.455 |
| 4ZD3 | H_LYS_158 | NZ  | H_ASP_159 | OD2 | 3.407 |
| 4ZD3 | H_LYS_224 | NZ  | L_GLU_143 | OE2 | 2.997 |
| 4ZD3 | L_ARG_75  | NH2 | L_ASP_98  | OD1 | 2.930 |
| 4ZD3 | L_ARG_75  | NH2 | L_ASP_98  | OD2 | 3.672 |
| 4ZD3 | L_LYS_123 | NZ  | L_GLU_185 | OE2 | 3.206 |
| 4ZD3 | L_ARG_128 | NH2 | L_ASP_190 | OD1 | 3.816 |
| 4ZD3 | L_LYS_169 | NZ  | L_GLU_215 | OE1 | 2.511 |
| 4ZFF | A_ARG_38  | NH1 | A_ASP_86  | OD1 | 2.818 |
| 4ZFF | A_ARG_38  | NH2 | A_GLU_46  | OE2 | 2.795 |
| 4ZFF | A_ARG_66  | NH1 | A_ASP_86  | OD1 | 3.744 |
| 4ZFF | A_ARG_66  | NH1 | A_ASP_86  | OD2 | 2.802 |
| 4ZFF | A_ARG_66  | NH2 | A_ASP_86  | OD1 | 2.833 |
| 4ZFF | A_ARG_66  | NH2 | A_ASP_86  | OD2 | 3.432 |
| 4ZFF | A_LYS_75  | NZ  | A_ASP_72  | OD2 | 3.517 |
| 4ZFF | A_ARG_94  | NH2 | A_ASP_101 | OD1 | 2.782 |
| 4ZFF | A_ARG_94  | NH2 | A_ASP_101 | OD2 | 3.644 |
| 4ZFF | A_LYS_143 | NZ  | A_ASP_144 | OD2 | 3.566 |
| 4ZFF | A_LYS_209 | NZ  | B_GLU_123 | OE1 | 3.193 |
| 4ZFF | B_ARG_61  | NH1 | B_GLU_81  | OE2 | 3.817 |
| 4ZFF | B_ARG_61  | NH1 | B_ASP_82  | OD1 | 2.656 |
| 4ZFF | B_ARG_61  | NH1 | B_ASP_82  | OD2 | 3.672 |
| 4ZFF | B_LYS_149 | NZ  | B_GLU_195 | OE2 | 2.800 |
| 4ZFF | B_HIS_189 | ND1 | B_ASP_151 | OD1 | 3.097 |
| 4ZFF | B_HIS_189 | ND1 | B_ASP_151 | OD2 | 3.583 |
| 4ZFF | C_ARG_23  | NH1 | D_GLU_30  | OE1 | 3.414 |
| 4ZFF | C_ARG_56  | NH1 | C_GLU_38  | OE2 | 3.486 |
| 4ZFF | C_ARG_56  | NH2 | C_GLU_38  | OE1 | 2.778 |
| 4ZFF | C_ARG_56  | NH2 | C_GLU_38  | OE2 | 3.528 |
| 4ZFF | C_ARG_82  | NH2 | C_GLU_42  | OE1 | 3.647 |
| 4ZFF | C_ARG_82  | NH2 | C_GLU_42  | OE2 | 2.877 |
| 4ZFF | C_HIS_99  | NE2 | C_GLU_73  | OE2 | 3.973 |
| 4ZFF | C_ARG_105 | NH2 | C_GLU_103 | OE1 | 3.895 |
| 4ZFF | C_ARG_105 | NH2 | C_GLU_103 | OE2 | 2.902 |
| 4ZFF | C_LYS_107 | NZ  | C_GLU_64  | OE1 | 3.791 |
| 4ZFF | C_LYS_107 | NZ  | C_GLU_64  | OE2 | 3.768 |
| 4ZFF | D_ARG_23  | NH2 | D_ASP_19  | OD2 | 3.386 |
| 4ZFF | D_ARG_56  | NH1 | D_GLU_38  | OE2 | 3.530 |
| 4ZFF | D_ARG_56  | NH2 | D_GLU_38  | OE1 | 2.807 |
| 4ZFF | D_ARG_56  | NH2 | D_GLU_38  | OE2 | 3.533 |
| 4ZFF | D_ARG_82  | NH1 | D_GLU_42  | OE1 | 2.977 |
| 4ZFF | D_ARG_82  | NH1 | D_GLU_42  | OE2 | 3.475 |
| 4ZFF | D_LYS_84  | NZ  | D_GLU_44  | OE1 | 2.813 |
| 4ZFF | D_LYS_84  | NZ  | D_GLU_44  | OE2 | 3.787 |
| 4ZFF | D_HIS_99  | NE2 | D_GLU_73  | OE2 | 3.971 |
| 4ZFF | D_ARG_105 | NH2 | D_GLU_103 | OE1 | 3.892 |
| 4ZFF | D_ARG_105 | NH2 | D_GLU_103 | OE2 | 2.901 |
| 4ZFF | D_LYS_107 | NZ  | D_GLU_64  | OE1 | 3.795 |
| 4ZFF | D_LYS_107 | NZ  | D_GLU_64  | OE2 | 3.756 |
| 4ZFF | H_ARG_38  | NH1 | H_ASP_86  | OD1 | 3.173 |
| 4ZFF | H_ARG_38  | NH2 | H_GLU_46  | OE2 | 3.109 |

|      |           |     |           |     |       |
|------|-----------|-----|-----------|-----|-------|
| 4ZFF | H_ARG_66  | NH1 | H_ASP_86  | OD1 | 3.724 |
| 4ZFF | H_ARG_66  | NH1 | H_ASP_86  | OD2 | 2.802 |
| 4ZFF | H_ARG_66  | NH2 | H_ASP_86  | OD1 | 2.829 |
| 4ZFF | H_ARG_66  | NH2 | H_ASP_86  | OD2 | 3.437 |
| 4ZFF | H_LYS_75  | NZ  | H_ASP_72  | OD2 | 3.526 |
| 4ZFF | H_ARG_94  | NH2 | H_ASP_101 | OD1 | 2.747 |
| 4ZFF | H_ARG_94  | NH2 | H_ASP_101 | OD2 | 3.634 |
| 4ZFF | H_LYS_143 | NZ  | H_ASP_144 | OD2 | 3.565 |
| 4ZFF | H_LYS_209 | NZ  | L_GLU_123 | OE1 | 3.731 |
| 4ZFF | L_ARG_61  | NH1 | L_GLU_81  | OE2 | 3.489 |
| 4ZFF | L_ARG_61  | NH1 | L_ASP_82  | OD1 | 2.794 |
| 4ZFF | L_ARG_61  | NH1 | L_ASP_82  | OD2 | 3.847 |
| 4ZFF | L_LYS_    | NZ  | L_GLU_195 | OE1 | 3.785 |
| 4ZFF | L_LYS_    | NZ  | L_GLU_195 | OE2 | 2.790 |
| 4ZFF | L_LYS_    | NZ  | L_ASP_    | OD1 | 3.960 |
| 4ZFF | L_HIS_    | ND1 | L_ASP_    | OD1 | 3.345 |
| 4ZFG | A_ARG_282 | NH1 | A_GLU_286 | OE2 | 2.789 |
| 4ZFG | A_ARG_337 | NH2 | A_GLU_341 | OE2 | 3.147 |
| 4ZFG | A_LYS_343 | NZ  | A_GLU_395 | OE1 | 3.481 |
| 4ZFG | A_LYS_343 | NZ  | A_GLU_395 | OE2 | 2.744 |
| 4ZFG | A_ARG_400 | NH2 | A_ASP_422 | OD1 | 3.271 |
| 4ZFG | A_LYS_478 | NZ  | A_ASP_377 | OD1 | 2.811 |
| 4ZFG | H_ARG_38  | NH1 | H_ASP_86  | OD1 | 2.945 |
| 4ZFG | H_ARG_38  | NH2 | H_GLU_46  | OE1 | 3.779 |
| 4ZFG | H_ARG_38  | NH2 | H_GLU_46  | OE2 | 2.970 |
| 4ZFG | H_ARG_38  | NH2 | H_ASP_86  | OD1 | 3.795 |
| 4ZFG | H_ARG_66  | NH1 | H_ASP_86  | OD1 | 3.748 |
| 4ZFG | H_ARG_66  | NH1 | H_ASP_86  | OD2 | 2.697 |
| 4ZFG | H_ARG_66  | NH2 | H_ASP_86  | OD1 | 3.191 |
| 4ZFG | H_ARG_66  | NH2 | H_ASP_86  | OD2 | 3.631 |
| 4ZFG | H_ARG_94  | NH2 | H_ASP_101 | OD1 | 2.815 |
| 4ZFG | H_ARG_94  | NH2 | H_ASP_101 | OD2 | 3.685 |
| 4ZFG | H_LYS_143 | NZ  | H_ASP_144 | OD1 | 3.369 |
| 4ZFG | H_LYS_143 | NZ  | H_ASP_144 | OD2 | 3.092 |
| 4ZFG | H_LYS_209 | NZ  | L_GLU_123 | OE1 | 2.808 |
| 4ZFG | H_LYS_210 | NZ  | H_GLU_212 | OE1 | 3.187 |
| 4ZFG | H_LYS_210 | NZ  | H_GLU_212 | OE2 | 3.341 |
| 4ZFG | L_ARG_61  | NH2 | L_GLU_81  | OE2 | 3.382 |
| 4ZFG | L_ARG_61  | NH2 | L_ASP_82  | OD1 | 2.847 |
| 4ZFG | L_ARG_61  | NH2 | L_ASP_82  | OD2 | 3.547 |
| 4ZFG | L_LYS_149 | NZ  | L_GLU_195 | OE1 | 2.802 |
| 4ZFG | L_HIS_189 | ND1 | L_ASP_151 | OD2 | 3.313 |
| 4ZFO | F_HIS_19  | NE2 | A_GLU_50  | OE1 | 2.994 |
| 4ZFO | F_HIS_19  | NE2 | A_GLU_50  | OE2 | 3.320 |
| 4ZFO | L_LYS_24  | NZ  | L_ASP_70  | OD1 | 2.843 |
| 4ZFO | L_LYS_24  | NZ  | L_ASP_70  | OD2 | 3.681 |
| 4ZFO | L_ARG_41  | NH1 | L_GLU_165 | OE1 | 2.854 |
| 4ZFO | L_ARG_41  | NH1 | L_GLU_165 | OE2 | 3.771 |
| 4ZFO | L_ARG_41  | NH2 | L_GLU_165 | OE1 | 3.602 |
| 4ZFO | L_ARG_41  | NH2 | L_GLU_165 | OE2 | 3.007 |
| 4ZFO | L_ARG_61  | NH1 | L_GLU_81  | OE2 | 3.554 |
| 4ZFO | L_ARG_61  | NH1 | L_ASP_82  | OD1 | 2.833 |
| 4ZFO | L_ARG_61  | NH1 | L_ASP_82  | OD2 | 3.587 |
| 4ZFO | L_LYS_149 | NZ  | L_GLU_195 | OE2 | 3.249 |
| 4ZFO | L_HIS_189 | ND1 | L_ASP_151 | OD2 | 2.754 |
| 4ZFO | H_ARG_38  | NH1 | H_ASP_90  | OD1 | 2.859 |
| 4ZFO | H_ARG_38  | NH2 | H_GLU_46  | OE2 | 3.054 |
| 4ZFO | H_ARG_38  | NH2 | H_ASP_90  | OD1 | 3.757 |

|      |           |     |           |     |       |
|------|-----------|-----|-----------|-----|-------|
| 4ZFO | H_ARG_39  | NH1 | L_GLU_85  | OE2 | 3.425 |
| 4ZFO | H_ARG_39  | NH2 | L_GLU_85  | OE1 | 3.703 |
| 4ZFO | H_ARG_39  | NH2 | L_GLU_85  | OE2 | 2.644 |
| 4ZFO | H_LYS_67  | NZ  | H_ASP_90  | OD1 | 3.687 |
| 4ZFO | H_LYS_67  | NZ  | H_ASP_90  | OD2 | 2.794 |
| 4ZFO | H_LYS_150 | NZ  | H_ASP_151 | OD1 | 3.394 |
| 4ZFO | H_LYS_216 | NZ  | L_GLU_123 | OE2 | 3.666 |
| 4ZFO | H_ARG_217 | NH2 | H_GLU_219 | OE1 | 3.524 |
| 4ZFO | B_LYS_24  | NZ  | B_ASP_70  | OD1 | 2.732 |
| 4ZFO | B_LYS_24  | NZ  | B_ASP_70  | OD2 | 3.699 |
| 4ZFO | B_ARG_61  | NH1 | B_GLU_81  | OE1 | 3.604 |
| 4ZFO | B_ARG_61  | NH1 | B_ASP_82  | OD1 | 2.928 |
| 4ZFO | B_ARG_61  | NH1 | B_ASP_82  | OD2 | 3.562 |
| 4ZFO | B_LYS_103 | NZ  | B_GLU_165 | OE1 | 3.091 |
| 4ZFO | B_LYS_103 | NZ  | B_GLU_165 | OE2 | 2.652 |
| 4ZFO | B_LYS_149 | NZ  | B_GLU_195 | OE1 | 2.655 |
| 4ZFO | B_LYS_149 | NZ  | B_GLU_195 | OE2 | 3.647 |
| 4ZFO | B_LYS_183 | NZ  | B_GLU_187 | OE2 | 3.657 |
| 4ZFO | B_LYS_188 | NZ  | B_ASP_185 | OD1 | 2.524 |
| 4ZFO | B_HIS_189 | ND1 | B_ASP_151 | OD2 | 2.980 |
| 4ZFO | A_ARG_31  | NH1 | A_ASP_102 | OD1 | 3.536 |
| 4ZFO | A_ARG_31  | NH1 | A_ASP_102 | OD2 | 2.769 |
| 4ZFO | A_ARG_38  | NH1 | A_ASP_90  | OD1 | 2.884 |
| 4ZFO | A_ARG_38  | NH2 | A_GLU_46  | OE1 | 3.650 |
| 4ZFO | A_ARG_38  | NH2 | A_GLU_46  | OE2 | 2.886 |
| 4ZFO | A_ARG_38  | NH2 | A_ASP_90  | OD1 | 3.988 |
| 4ZFO | A_ARG_39  | NH1 | B_GLU_85  | OE1 | 3.845 |
| 4ZFO | A_ARG_39  | NH2 | B_GLU_85  | OE1 | 2.855 |
| 4ZFO | A_ARG_39  | NH2 | B_GLU_85  | OE2 | 3.746 |
| 4ZFO | A_LYS_67  | NZ  | A_ASP_90  | OD1 | 3.473 |
| 4ZFO | A_LYS_67  | NZ  | A_ASP_90  | OD2 | 2.764 |
| 4ZFO | A_LYS_150 | NZ  | A_ASP_151 | OD1 | 3.442 |
| 4ZFO | K_HIS_19  | NE2 | H_GLU_50  | OE1 | 2.755 |
| 4ZFO | K_HIS_19  | NE2 | H_GLU_50  | OE2 | 3.392 |
| 4ZH7 | A_ARG_32  | NH1 | A_ASP_28  | OD1 | 2.616 |
| 4ZH7 | A_ARG_32  | NH1 | A_ASP_28  | OD2 | 2.970 |
| 4ZH7 | A_LYS_155 | NZ  | A_GLU_151 | OE2 | 3.235 |
| 4ZH7 | A_ARG_169 | NH2 | A_ASP_257 | OD2 | 3.147 |
| 4ZH7 | A_LYS_175 | NZ  | A_GLU_176 | OE2 | 3.803 |
| 4ZH7 | A_LYS_251 | NZ  | A_GLU_253 | OE1 | 3.001 |
| 4ZH7 | A_LYS_251 | NZ  | A_GLU_253 | OE2 | 3.952 |
| 4ZH7 | A_LYS_313 | NZ  | A_ASP_317 | OD2 | 2.913 |
| 4ZH7 | A_LYS_343 | NZ  | A_ASP_350 | OD1 | 3.604 |
| 4ZH7 | A_LYS_343 | NZ  | A_ASP_350 | OD2 | 2.780 |
| 4ZH7 | A_LYS_366 | NZ  | A_GLU_320 | OE2 | 2.717 |
| 4ZH7 | A_LYS_437 | NZ  | A_GLU_381 | OE1 | 3.484 |
| 4ZH7 | A_LYS_437 | NZ  | A_GLU_381 | OE2 | 3.811 |
| 4ZH7 | A_ARG_466 | NH2 | A_ASP_458 | OD1 | 2.975 |
| 4ZH7 | A_ARG_466 | NH2 | A_ASP_458 | OD2 | 3.143 |
| 5A2I | H_ARG_38  | NH1 | H_ASP_86  | OD1 | 2.884 |
| 5A2I | H_ARG_38  | NH2 | H_GLU_46  | OE1 | 3.128 |
| 5A2I | H_ARG_38  | NH2 | H_GLU_46  | OE2 | 3.996 |
| 5A2I | H_ARG_38  | NH2 | H_ASP_86  | OD1 | 3.809 |
| 5A2I | H_ARG_52  | NH1 | H_GLU_50  | OE2 | 2.458 |
| 5A2I | H_HIS_58  | ND1 | H_GLU_50  | OE2 | 2.942 |
| 5A2I | H_ARG_66  | NH1 | H_ASP_86  | OD1 | 3.097 |
| 5A2I | H_ARG_66  | NH1 | H_ASP_86  | OD2 | 3.703 |
| 5A2I | H_ARG_66  | NH2 | H_ASP_86  | OD1 | 3.277 |

|      |            |     |            |     |       |
|------|------------|-----|------------|-----|-------|
| 5A2I | H_ARG_66   | NH2 | H_ASP_86   | OD2 | 2.349 |
| 5A2I | H_ARG_71   | NH2 | H_ASP_73   | OD1 | 3.396 |
| 5A2I | H_ARG_1024 | NH1 | H_ASP_1069 | OD2 | 3.870 |
| 5A2I | H_ARG_1024 | NH2 | H_ASP_1069 | OD1 | 2.961 |
| 5A2I | H_ARG_1024 | NH2 | H_ASP_1069 | OD2 | 3.137 |
| 5A2I | H_HIS_1042 | ND1 | H_GLU_1038 | OE2 | 3.431 |
| 5A2I | H_HIS_1042 | ND1 | H_ASP_1041 | OD1 | 3.140 |
| 5A2I | H_HIS_1042 | NE2 | H_ASP_1041 | OD1 | 2.854 |
| 5A2I | H_ARG_1061 | NH2 | H_GLU_1081 | OE2 | 3.967 |
| 5A2I | H_ARG_1061 | NH2 | H_ASP_1082 | OD1 | 2.886 |
| 5A2I | H_ARG_1061 | NH2 | H_ASP_1082 | OD2 | 3.803 |
| 5A2J | H_ARG_38   | NH1 | H_ASP_86   | OD1 | 2.875 |
| 5A2J | H_ARG_38   | NH2 | H_GLU_46   | OE1 | 3.145 |
| 5A2J | H_ARG_38   | NH2 | H_GLU_46   | OE2 | 3.372 |
| 5A2J | H_ARG_38   | NH2 | H_ASP_86   | OD1 | 3.987 |
| 5A2J | H_LYS_43   | NZ  | H_GLU_46   | OE1 | 3.646 |
| 5A2J | H_LYS_43   | NZ  | H_GLU_85   | OE1 | 2.765 |
| 5A2J | H_ARG_52   | NH2 | H_GLU_50   | OE2 | 2.945 |
| 5A2J | H_ARG_66   | NH1 | H_ASP_86   | OD1 | 3.341 |
| 5A2J | H_ARG_66   | NH1 | H_ASP_86   | OD2 | 3.539 |
| 5A2J | H_ARG_66   | NH2 | H_ASP_86   | OD1 | 3.626 |
| 5A2J | H_ARG_66   | NH2 | H_ASP_86   | OD2 | 2.364 |
| 5A2J | H_ARG_71   | NH2 | H_ASP_73   | OD1 | 3.334 |
| 5A2J | H_LYS_75   | NZ  | H_ASP_72   | OD2 | 3.979 |
| 5A2J | H_ARG_83   | NH1 | H_GLU_85   | OE2 | 3.360 |
| 5A2J | H_ARG_1024 | NH1 | H_ASP_1069 | OD1 | 3.811 |
| 5A2J | H_ARG_1024 | NH1 | H_ASP_1069 | OD2 | 2.838 |
| 5A2J | H_ARG_1024 | NH2 | H_ASP_1069 | OD1 | 3.142 |
| 5A2J | H_ARG_1024 | NH2 | H_ASP_1069 | OD2 | 3.430 |
| 5A2J | H_HIS_1042 | ND1 | H_GLU_1038 | OE2 | 3.360 |
| 5A2J | H_ARG_1061 | NH2 | H_GLU_1081 | OE2 | 3.894 |
| 5A2J | H_ARG_1061 | NH2 | H_ASP_1082 | OD1 | 2.853 |
| 5A2J | H_ARG_1061 | NH2 | H_ASP_1082 | OD2 | 3.674 |
| 5A2K | H_ARG_38   | NH1 | H_ASP_86   | OD1 | 2.875 |
| 5A2K | H_ARG_38   | NH2 | H_GLU_46   | OE1 | 2.994 |
| 5A2K | H_ARG_38   | NH2 | H_GLU_46   | OE2 | 3.664 |
| 5A2K | H_ARG_38   | NH2 | H_ASP_86   | OD1 | 3.944 |
| 5A2K | H_LYS_43   | NZ  | H_GLU_46   | OE1 | 3.807 |
| 5A2K | H_LYS_43   | NZ  | H_GLU_85   | OE1 | 3.399 |
| 5A2K | H_ARG_52   | NH1 | H_GLU_50   | OE1 | 3.946 |
| 5A2K | H_ARG_52   | NH1 | H_GLU_50   | OE2 | 2.653 |
| 5A2K | H_HIS_58   | ND1 | H_GLU_50   | OE2 | 2.712 |
| 5A2K | H_ARG_66   | NH1 | H_ASP_86   | OD1 | 3.221 |
| 5A2K | H_ARG_66   | NH1 | H_ASP_86   | OD2 | 3.625 |
| 5A2K | H_ARG_66   | NH2 | H_ASP_86   | OD1 | 3.474 |
| 5A2K | H_ARG_66   | NH2 | H_ASP_86   | OD2 | 2.358 |
| 5A2K | H_ARG_71   | NH2 | H_ASP_73   | OD1 | 3.340 |
| 5A2K | H_ARG_83   | NH1 | H_GLU_85   | OE2 | 3.612 |
| 5A2K | H_HIS_1042 | ND1 | H_GLU_1038 | OE2 | 3.466 |
| 5A2K | H_HIS_1042 | NE2 | H_ASP_1041 | OD1 | 3.782 |
| 5A2K | H_ARG_1061 | NH2 | H_GLU_1081 | OE2 | 3.980 |
| 5A2K | H_ARG_1061 | NH2 | H_ASP_1082 | OD1 | 2.834 |
| 5A2K | H_ARG_1061 | NH2 | H_ASP_1082 | OD2 | 3.700 |
| 5A2L | H_ARG_38   | NH1 | H_ASP_86   | OD1 | 2.857 |
| 5A2L | H_ARG_38   | NH2 | H_GLU_46   | OE1 | 3.272 |
| 5A2L | H_ARG_38   | NH2 | H_GLU_46   | OE2 | 3.166 |
| 5A2L | H_ARG_38   | NH2 | H_ASP_86   | OD1 | 3.882 |
| 5A2L | H_LYS_43   | NZ  | H_GLU_46   | OE1 | 2.594 |



|      |            |     |            |     |       |
|------|------------|-----|------------|-----|-------|
| 5A2L | H.LYS_43   | NZ  | H.GLU_46   | OE2 | 3.749 |
| 5A2L | H.LYS_43   | NZ  | H.GLU_85   | OE1 | 3.820 |
| 5A2L | H.ARG_52   | NH1 | H.GLU_50   | OE2 | 2.656 |
| 5A2L | H.HIS_58   | ND1 | H.GLU_50   | OE2 | 2.623 |
| 5A2L | H.ARG_66   | NH1 | H.ASP_86   | OD1 | 3.373 |
| 5A2L | H.ARG_66   | NH1 | H.ASP_86   | OD2 | 3.769 |
| 5A2L | H.ARG_66   | NH2 | H.ASP_86   | OD1 | 3.135 |
| 5A2L | H.ARG_66   | NH2 | H.ASP_86   | OD2 | 2.092 |
| 5A2L | H.ARG_71   | NH2 | H.ASP_73   | OD1 | 3.516 |
| 5A2L | H.ARG_83   | NH1 | H.GLU_85   | OE2 | 3.111 |
| 5A2L | H.ARG_1024 | NH1 | H.ASP_1069 | OD2 | 3.824 |
| 5A2L | H.ARG_1024 | NH2 | H.ASP_1069 | OD1 | 3.107 |
| 5A2L | H.ARG_1024 | NH2 | H.ASP_1069 | OD2 | 2.735 |
| 5A2L | H.HIS_1042 | ND1 | H.GLU_1038 | OE2 | 3.532 |
| 5A2L | H.ARG_1061 | NH2 | H.GLU_1081 | OE2 | 3.627 |
| 5A2L | H.ARG_1061 | NH2 | H.ASP_1082 | OD1 | 2.860 |
| 5A2L | H.ARG_1061 | NH2 | H.ASP_1082 | OD2 | 3.701 |
| 5A2L | H.LYS_1103 | NZ  | H.GLU_1083 | OE2 | 3.909 |
| 5A7X | A.LYS_121  | NZ  | A.GLU_429  | OE1 | 3.568 |
| 5A7X | A.LYS_121  | NZ  | A.GLU_429  | OE2 | 2.734 |
| 5A7X | A.LYS_207  | NZ  | A.GLU_381  | OE1 | 3.945 |
| 5A7X | A.LYS_207  | NZ  | A.GLU_381  | OE2 | 3.126 |
| 5A7X | A.LYS_232  | NZ  | A.GLU_351  | OE1 | 3.994 |
| 5A7X | A.HIS_249  | NE2 | A.GLU_482  | OE1 | 3.525 |
| 5A7X | A.LYS_282  | NZ  | A.GLU_275  | OE1 | 3.953 |
| 5A7X | A.LYS_282  | NZ  | A.GLU_275  | OE2 | 2.643 |
| 5A7X | A.LYS_348  | NZ  | A.GLU_269  | OE1 | 3.207 |
| 5A7X | A.LYS_348  | NZ  | A.GLU_351  | OE1 | 3.940 |
| 5A7X | A.LYS_348  | NZ  | A.GLU_351  | OE2 | 3.259 |
| 5A7X | A.LYS_350  | NZ  | A.ASP_395  | OD2 | 3.580 |
| 5A7X | A.LYS_357  | NZ  | A.GLU_466  | OE2 | 3.719 |
| 5A7X | A.ARG_419  | NH1 | D.GLU_100B | OE1 | 3.000 |
| 5A7X | A.ARG_419  | NH1 | D.GLU_100B | OE2 | 3.675 |
| 5A7X | A.ARG_419  | NH2 | D.GLU_99   | OE1 | 2.292 |
| 5A7X | A.ARG_419  | NH2 | D.GLU_100B | OE2 | 3.969 |
| 5A7X | A.ARG_456  | NH2 | A.GLU_466  | OE1 | 3.535 |
| 5A7X | A.ARG_456  | NH2 | A.GLU_466  | OE2 | 3.469 |
| 5A7X | A.ARG_469  | NH2 | A.ASP_457  | OD2 | 3.234 |
| 5A7X | A.ARG_476  | NH1 | A.ASP_474  | OD1 | 3.441 |
| 5A7X | A.ARG_476  | NH2 | A.GLU_102  | OE1 | 3.296 |
| 5A7X | A.ARG_476  | NH2 | A.GLU_102  | OE2 | 3.010 |
| 5A7X | A.LYS_487  | NZ  | A.GLU_91   | OE1 | 3.525 |
| 5A7X | A.LYS_490  | NZ  | A.GLU_492  | OE1 | 3.300 |
| 5A7X | B.LYS_29   | NZ  | B.GLU_85   | OE1 | 2.833 |
| 5A7X | B.LYS_29   | NZ  | B.GLU_85   | OE2 | 3.848 |
| 5A7X | B.LYS_35   | NZ  | A.ASP_457  | OD1 | 3.741 |
| 5A7X | B.ARG_54   | NH1 | B.ASP_78   | OD1 | 3.987 |
| 5A7X | B.ARG_54   | NH1 | B.ASP_78   | OD2 | 2.755 |
| 5A7X | B.ARG_54   | NH2 | B.ASP_78   | OD1 | 2.666 |
| 5A7X | B.ARG_54   | NH2 | B.ASP_78   | OD2 | 2.988 |
| 5A7X | B.ARG_59   | NH1 | A.ASP_368  | OD1 | 3.154 |
| 5A7X | B.ARG_59   | NH1 | A.ASP_368  | OD2 | 3.344 |
| 5A7X | B.ARG_59   | NH2 | A.ASP_368  | OD1 | 2.976 |
| 5A7X | B.ARG_59   | NH2 | A.ASP_368  | OD2 | 2.433 |
| 5A7X | B.HIS_107  | ND1 | B.ASP_105  | OD1 | 3.166 |
| 5A7X | B.HIS_107  | ND1 | B.ASP_105  | OD2 | 2.892 |
| 5A7X | B.ARG_134  | NH2 | B.ASP_153  | OD1 | 3.765 |
| 5A7X | B.LYS_136  | NZ  | B.GLU_150  | OE2 | 3.886 |

|      |           |     |            |     |       |
|------|-----------|-----|------------|-----|-------|
| 5A7X | B_LYS_136 | NZ  | B_ASP_153  | OD1 | 3.937 |
| 5A7X | B_LYS_136 | NZ  | B_ASP_153  | OD2 | 2.987 |
| 5A7X | B_LYS_171 | NZ  | B_GLU_169  | OE2 | 2.874 |
| 5A7X | C_ARG_61  | NH2 | C_GLU_81   | OE2 | 3.127 |
| 5A7X | C_ARG_61  | NH2 | C_ASP_82   | OD1 | 3.575 |
| 5A7X | C_ARG_95B | NH2 | C_ASP_1    | OD2 | 2.985 |
| 5A7X | C_HIS_189 | ND1 | C_ASP_151  | OD2 | 2.584 |
| 5A7X | C_HIS_189 | NE2 | C_ASP_185  | OD1 | 2.801 |
| 5A7X | C_HIS_189 | NE2 | C_ASP_185  | OD2 | 3.600 |
| 5A7X | C_ARG_211 | NH1 | C_GLU_187  | OE1 | 3.852 |
| 5A7X | D_ARG_31  | NH2 | D_ASP_100A | OD1 | 3.069 |
| 5A7X | D_ARG_31  | NH2 | D_ASP_100A | OD2 | 3.614 |
| 5A7X | D_ARG_38  | NH1 | D_GLU_46   | OE1 | 2.778 |
| 5A7X | D_ARG_38  | NH1 | D_GLU_46   | OE2 | 3.341 |
| 5A7X | D_ARG_38  | NH2 | D_ASP_86   | OD1 | 2.685 |
| 5A7X | D_ARG_50  | NH2 | D_GLU_97   | OE2 | 2.331 |
| 5A7X | D_ARG_66  | NH1 | D_ASP_86   | OD2 | 3.597 |
| 5A7X | D_ARG_66  | NH2 | D_ASP_86   | OD1 | 2.740 |
| 5A7X | D_ARG_66  | NH2 | D_ASP_86   | OD2 | 2.415 |
| 5A7X | D_LYS_73  | NZ  | D_ASP_55   | OD1 | 2.968 |
| 5A7X | D_ARG_82A | NH2 | D_GLU_81   | OE1 | 3.271 |
| 5A7X | D_LYS_143 | NZ  | D_ASP_144  | OD1 | 2.614 |
| 5A7X | D_LYS_143 | NZ  | D_ASP_144  | OD2 | 3.235 |
| 5A7X | D_HIS_164 | NE2 | C_ASP_167  | OD1 | 3.880 |
| 5A7X | D_HIS_164 | NE2 | C_ASP_167  | OD2 | 2.506 |
| 5A7X | D_LYS_206 | NZ  | D_ASP_208  | OD1 | 3.965 |
| 5A7X | D_LYS_209 | NZ  | C_GLU_123  | OE1 | 3.513 |
| 5A7X | D_LYS_209 | NZ  | C_GLU_123  | OE2 | 3.583 |
| 5A7X | E_LYS_121 | NZ  | E_GLU_429  | OE1 | 3.567 |
| 5A7X | E_LYS_121 | NZ  | E_GLU_429  | OE2 | 2.734 |
| 5A7X | E_LYS_207 | NZ  | E_GLU_381  | OE1 | 3.946 |
| 5A7X | E_LYS_207 | NZ  | E_GLU_381  | OE2 | 3.125 |
| 5A7X | E_LYS_232 | NZ  | E_GLU_351  | OE1 | 3.995 |
| 5A7X | E_HIS_249 | NE2 | E_GLU_482  | OE1 | 3.525 |
| 5A7X | E_LYS_282 | NZ  | E_GLU_275  | OE1 | 3.954 |
| 5A7X | E_LYS_282 | NZ  | E_GLU_275  | OE2 | 2.642 |
| 5A7X | E_LYS_348 | NZ  | E_GLU_269  | OE1 | 3.207 |
| 5A7X | E_LYS_348 | NZ  | E_GLU_351  | OE1 | 3.941 |
| 5A7X | E_LYS_348 | NZ  | E_GLU_351  | OE2 | 3.259 |
| 5A7X | E_LYS_350 | NZ  | E_ASP_395  | OD2 | 3.580 |
| 5A7X | E_LYS_357 | NZ  | E_GLU_466  | OE2 | 3.719 |
| 5A7X | E_ARG_419 | NH1 | H_GLU_100B | OE1 | 2.998 |
| 5A7X | E_ARG_419 | NH1 | H_GLU_100B | OE2 | 3.674 |
| 5A7X | E_ARG_419 | NH2 | H_GLU_99   | OE1 | 2.293 |
| 5A7X | E_ARG_419 | NH2 | H_GLU_100B | OE2 | 3.968 |
| 5A7X | E_ARG_456 | NH2 | E_GLU_466  | OE1 | 3.536 |
| 5A7X | E_ARG_456 | NH2 | E_GLU_466  | OE2 | 3.468 |
| 5A7X | E_ARG_469 | NH2 | E_ASP_457  | OD2 | 3.234 |
| 5A7X | E_ARG_476 | NH1 | E_ASP_474  | OD1 | 3.440 |
| 5A7X | E_ARG_476 | NH2 | E_GLU_102  | OE1 | 3.296 |
| 5A7X | E_ARG_476 | NH2 | E_GLU_102  | OE2 | 3.010 |
| 5A7X | E_LYS_487 | NZ  | E_GLU_91   | OE1 | 3.524 |
| 5A7X | E_LYS_490 | NZ  | E_GLU_492  | OE1 | 3.301 |
| 5A7X | F_LYS_29  | NZ  | F_GLU_85   | OE1 | 2.832 |
| 5A7X | F_LYS_29  | NZ  | F_GLU_85   | OE2 | 3.847 |
| 5A7X | F_LYS_35  | NZ  | E_ASP_457  | OD1 | 3.741 |
| 5A7X | F_ARG_54  | NH1 | F_ASP_78   | OD1 | 3.987 |
| 5A7X | F_ARG_54  | NH1 | F_ASP_78   | OD2 | 2.755 |

|      |           |     |            |     |       |
|------|-----------|-----|------------|-----|-------|
| 5A7X | F_ARG_54  | NH2 | F_ASP_78   | OD1 | 2.666 |
| 5A7X | F_ARG_54  | NH2 | F_ASP_78   | OD2 | 2.988 |
| 5A7X | F_ARG_59  | NH1 | E_ASP_368  | OD1 | 3.154 |
| 5A7X | F_ARG_59  | NH1 | E_ASP_368  | OD2 | 3.343 |
| 5A7X | F_ARG_59  | NH2 | E_ASP_368  | OD1 | 2.977 |
| 5A7X | F_ARG_59  | NH2 | E_ASP_368  | OD2 | 2.434 |
| 5A7X | F_HIS_107 | ND1 | F_ASP_105  | OD1 | 3.166 |
| 5A7X | F_HIS_107 | ND1 | F_ASP_105  | OD2 | 2.891 |
| 5A7X | F_ARG_134 | NH2 | F_ASP_153  | OD1 | 3.765 |
| 5A7X | F_LYS_136 | NZ  | F_GLU_150  | OE2 | 3.883 |
| 5A7X | F_LYS_136 | NZ  | F_ASP_153  | OD1 | 3.936 |
| 5A7X | F_LYS_136 | NZ  | F_ASP_153  | OD2 | 2.987 |
| 5A7X | F_LYS_171 | NZ  | F_GLU_169  | OE2 | 2.875 |
| 5A7X | G_ARG_61  | NH2 | G_GLU_81   | OE2 | 3.126 |
| 5A7X | G_ARG_61  | NH2 | G_ASP_82   | OD1 | 3.576 |
| 5A7X | G_ARG_95B | NH2 | G_ASP_1    | OD2 | 2.984 |
| 5A7X | G_HIS_189 | ND1 | G_ASP_151  | OD2 | 2.584 |
| 5A7X | G_HIS_189 | NE2 | G_ASP_185  | OD1 | 2.802 |
| 5A7X | G_HIS_189 | NE2 | G_ASP_185  | OD2 | 3.599 |
| 5A7X | G_ARG_211 | NH1 | G_GLU_187  | OE1 | 3.852 |
| 5A7X | H_ARG_31  | NH2 | H_ASP_100A | OD1 | 3.070 |
| 5A7X | H_ARG_31  | NH2 | H_ASP_100A | OD2 | 3.615 |
| 5A7X | H_ARG_38  | NH1 | H_GLU_46   | OE1 | 2.780 |
| 5A7X | H_ARG_38  | NH1 | H_GLU_46   | OE2 | 3.343 |
| 5A7X | H_ARG_38  | NH2 | H_ASP_86   | OD1 | 2.684 |
| 5A7X | H_ARG_50  | NH2 | H_GLU_97   | OE2 | 2.333 |
| 5A7X | H_ARG_66  | NH1 | H_ASP_86   | OD2 | 3.598 |
| 5A7X | H_ARG_66  | NH2 | H_ASP_86   | OD1 | 2.739 |
| 5A7X | H_ARG_66  | NH2 | H_ASP_86   | OD2 | 2.416 |
| 5A7X | H_LYS_73  | NZ  | H_ASP_55   | OD1 | 2.968 |
| 5A7X | H_ARG_82A | NH2 | H_GLU_81   | OE1 | 3.271 |
| 5A7X | H_LYS_143 | NZ  | H_ASP_144  | OD1 | 2.614 |
| 5A7X | H_LYS_143 | NZ  | H_ASP_144  | OD2 | 3.234 |
| 5A7X | H_HIS_164 | NE2 | G_ASP_167  | OD1 | 3.880 |
| 5A7X | H_HIS_164 | NE2 | G_ASP_167  | OD2 | 2.505 |
| 5A7X | H_LYS_206 | NZ  | H_ASP_208  | OD1 | 3.966 |
| 5A7X | H_LYS_209 | NZ  | G_GLU_123  | OE1 | 3.512 |
| 5A7X | H_LYS_209 | NZ  | G_GLU_123  | OE2 | 3.584 |
| 5A7X | LLYS_121  | NZ  | I_GLU_429  | OE1 | 3.568 |
| 5A7X | LLYS_121  | NZ  | I_GLU_429  | OE2 | 2.736 |
| 5A7X | LLYS_207  | NZ  | I_GLU_381  | OE1 | 3.945 |
| 5A7X | LLYS_207  | NZ  | I_GLU_381  | OE2 | 3.127 |
| 5A7X | LLYS_232  | NZ  | I_GLU_351  | OE1 | 3.995 |
| 5A7X | I_HIS_249 | NE2 | I_GLU_482  | OE1 | 3.525 |
| 5A7X | LLYS_282  | NZ  | I_GLU_275  | OE1 | 3.953 |
| 5A7X | LLYS_282  | NZ  | I_GLU_275  | OE2 | 2.643 |
| 5A7X | LLYS_348  | NZ  | I_GLU_269  | OE1 | 3.206 |
| 5A7X | LLYS_348  | NZ  | I_GLU_351  | OE1 | 3.941 |
| 5A7X | LLYS_348  | NZ  | I_GLU_351  | OE2 | 3.259 |
| 5A7X | LLYS_350  | NZ  | I_ASP_395  | OD2 | 3.579 |
| 5A7X | LLYS_357  | NZ  | I_GLU_466  | OE2 | 3.720 |
| 5A7X | I_ARG_419 | NH1 | L_GLU_100B | OE1 | 2.999 |
| 5A7X | I_ARG_419 | NH1 | L_GLU_100B | OE2 | 3.675 |
| 5A7X | I_ARG_419 | NH2 | L_GLU_99   | OE1 | 2.293 |
| 5A7X | I_ARG_419 | NH2 | L_GLU_100B | OE2 | 3.968 |
| 5A7X | I_ARG_456 | NH2 | I_GLU_466  | OE1 | 3.536 |
| 5A7X | I_ARG_456 | NH2 | I_GLU_466  | OE2 | 3.468 |
| 5A7X | I_ARG_469 | NH2 | I_ASP_457  | OD2 | 3.234 |

|      |           |     |            |     |       |
|------|-----------|-----|------------|-----|-------|
| 5A7X | L_ARG_476 | NH1 | L_ASP_474  | OD1 | 3.441 |
| 5A7X | L_ARG_476 | NH2 | L_GLU_102  | OE1 | 3.297 |
| 5A7X | L_ARG_476 | NH2 | L_GLU_102  | OE2 | 3.009 |
| 5A7X | L_LYS_487 | NZ  | L_GLU_91   | OE1 | 3.523 |
| 5A7X | L_LYS_490 | NZ  | L_GLU_492  | OE1 | 3.300 |
| 5A7X | J_LYS_29  | NZ  | J_GLU_85   | OE1 | 2.833 |
| 5A7X | J_LYS_29  | NZ  | J_GLU_85   | OE2 | 3.848 |
| 5A7X | J_LYS_35  | NZ  | L_ASP_457  | OD1 | 3.740 |
| 5A7X | J_ARG_54  | NH1 | J_ASP_78   | OD1 | 3.987 |
| 5A7X | J_ARG_54  | NH1 | J_ASP_78   | OD2 | 2.755 |
| 5A7X | J_ARG_54  | NH2 | J_ASP_78   | OD1 | 2.665 |
| 5A7X | J_ARG_54  | NH2 | J_ASP_78   | OD2 | 2.989 |
| 5A7X | J_ARG_59  | NH1 | L_ASP_368  | OD1 | 3.154 |
| 5A7X | J_ARG_59  | NH1 | L_ASP_368  | OD2 | 3.344 |
| 5A7X | J_ARG_59  | NH2 | L_ASP_368  | OD1 | 2.976 |
| 5A7X | J_ARG_59  | NH2 | L_ASP_368  | OD2 | 2.433 |
| 5A7X | J_HIS_107 | ND1 | J_ASP_105  | OD1 | 3.166 |
| 5A7X | J_HIS_107 | ND1 | J_ASP_105  | OD2 | 2.892 |
| 5A7X | J_ARG_134 | NH2 | J_ASP_153  | OD1 | 3.765 |
| 5A7X | J_LYS_136 | NZ  | J_GLU_150  | OE2 | 3.885 |
| 5A7X | J_LYS_136 | NZ  | J_ASP_153  | OD1 | 3.936 |
| 5A7X | J_LYS_136 | NZ  | J_ASP_153  | OD2 | 2.987 |
| 5A7X | J_LYS_171 | NZ  | J_GLU_169  | OE2 | 2.873 |
| 5A7X | K_ARG_61  | NH2 | K_GLU_81   | OE2 | 3.128 |
| 5A7X | K_ARG_61  | NH2 | K_ASP_82   | OD1 | 3.577 |
| 5A7X | K_ARG_95B | NH2 | K_ASP_1    | OD2 | 2.985 |
| 5A7X | K_HIS_189 | ND1 | K_ASP_151  | OD2 | 2.584 |
| 5A7X | K_HIS_189 | NE2 | K_ASP_185  | OD1 | 2.801 |
| 5A7X | K_HIS_189 | NE2 | K_ASP_185  | OD2 | 3.597 |
| 5A7X | K_ARG_211 | NH1 | K_GLU_187  | OE1 | 3.851 |
| 5A7X | L_ARG_31  | NH2 | L_ASP_100A | OD1 | 3.070 |
| 5A7X | L_ARG_31  | NH2 | L_ASP_100A | OD2 | 3.615 |
| 5A7X | L_ARG_38  | NH1 | L_GLU_46   | OE1 | 2.779 |
| 5A7X | L_ARG_38  | NH1 | L_GLU_46   | OE2 | 3.342 |
| 5A7X | L_ARG_38  | NH2 | L_ASP_86   | OD1 | 2.685 |
| 5A7X | L_ARG_50  | NH2 | L_GLU_97   | OE2 | 2.332 |
| 5A7X | L_ARG_66  | NH1 | L_ASP_86   | OD2 | 3.598 |
| 5A7X | L_ARG_66  | NH2 | L_ASP_86   | OD1 | 2.739 |
| 5A7X | L_ARG_66  | NH2 | L_ASP_86   | OD2 | 2.415 |
| 5A7X | L_LYS_73  | NZ  | L_ASP_55   | OD1 | 2.968 |
| 5A7X | L_ARG_82A | NH2 | L_GLU_81   | OE1 | 3.271 |
| 5A7X | L_LYS_143 | NZ  | L_ASP_144  | OD1 | 2.615 |
| 5A7X | L_LYS_143 | NZ  | L_ASP_144  | OD2 | 3.236 |
| 5A7X | L_HIS_164 | NE2 | K_ASP_167  | OD1 | 3.880 |
| 5A7X | L_HIS_164 | NE2 | K_ASP_167  | OD2 | 2.504 |
| 5A7X | L_LYS_206 | NZ  | L_ASP_208  | OD1 | 3.966 |
| 5A7X | L_LYS_209 | NZ  | K_GLU_123  | OE1 | 3.514 |
| 5A7X | L_LYS_209 | NZ  | K_GLU_123  | OE2 | 3.585 |
| 5A7X | M_ARG_24  | NH2 | M_ASP_70   | OD1 | 3.351 |
| 5A7X | M_ARG_24  | NH2 | M_ASP_70   | OD2 | 2.877 |
| 5A7X | M_ARG_61  | NH1 | M_ASP_82   | OD1 | 3.079 |
| 5A7X | M_ARG_61  | NH1 | M_ASP_82   | OD2 | 3.077 |
| 5A7X | M_ARG_61  | NH2 | M_GLU_81   | OE2 | 3.862 |
| 5A7X | M_LYS_103 | NZ  | M_GLU_165  | OE1 | 3.804 |
| 5A7X | M_LYS_149 | NZ  | M_GLU_195  | OE1 | 2.746 |
| 5A7X | M_LYS_149 | NZ  | M_GLU_195  | OE2 | 3.963 |
| 5A7X | M_LYS_183 | NZ  | M_GLU_187  | OE2 | 2.699 |
| 5A7X | M_HIS_189 | ND1 | M_ASP_151  | OD1 | 3.975 |

|      |            |     |            |     |       |
|------|------------|-----|------------|-----|-------|
| 5A7X | M_HIS_189  | ND1 | M_ASP_151  | OD2 | 2.261 |
| 5A7X | N_ARG_38   | NH1 | N_ASP_86   | OD1 | 3.024 |
| 5A7X | N_ARG_38   | NH2 | N_GLU_46   | OE1 | 3.886 |
| 5A7X | N_ARG_66   | NH1 | N_ASP_86   | OD1 | 3.550 |
| 5A7X | N_ARG_66   | NH1 | N_ASP_86   | OD2 | 2.799 |
| 5A7X | N_ARG_66   | NH2 | N_ASP_86   | OD1 | 2.933 |
| 5A7X | N_ARG_66   | NH2 | N_ASP_86   | OD2 | 3.625 |
| 5A7X | N_LYS_82A  | NZ  | N_GLU_81   | OE2 | 2.705 |
| 5A7X | N_HIS_100F | ND1 | N_ASP_100G | OD2 | 3.940 |
| 5A7X | N_LYS_143  | NZ  | N_ASP_144  | OD1 | 3.370 |
| 5A7X | N_LYS_143  | NZ  | N_ASP_144  | OD2 | 3.506 |
| 5A7X | N_LYS_206  | NZ  | N_ASP_208  | OD2 | 3.418 |
| 5A7X | O_ARG_24   | NH2 | O_ASP_70   | OD1 | 3.351 |
| 5A7X | O_ARG_24   | NH2 | O_ASP_70   | OD2 | 2.877 |
| 5A7X | O_ARG_61   | NH1 | O_ASP_82   | OD1 | 3.079 |
| 5A7X | O_ARG_61   | NH1 | O_ASP_82   | OD2 | 3.077 |
| 5A7X | O_ARG_61   | NH2 | O_GLU_81   | OE2 | 3.862 |
| 5A7X | O_LYS_103  | NZ  | O_GLU_165  | OE1 | 3.804 |
| 5A7X | O_LYS_149  | NZ  | O_GLU_195  | OE1 | 2.747 |
| 5A7X | O_LYS_149  | NZ  | O_GLU_195  | OE2 | 3.963 |
| 5A7X | O_LYS_183  | NZ  | O_GLU_187  | OE2 | 2.699 |
| 5A7X | O_HIS_189  | ND1 | O_ASP_151  | OD1 | 3.974 |
| 5A7X | O_HIS_189  | ND1 | O_ASP_151  | OD2 | 2.260 |
| 5A7X | P_ARG_38   | NH1 | P_ASP_86   | OD1 | 3.023 |
| 5A7X | P_ARG_38   | NH2 | P_GLU_46   | OE1 | 3.886 |
| 5A7X | P_ARG_66   | NH1 | P_ASP_86   | OD1 | 3.549 |
| 5A7X | P_ARG_66   | NH1 | P_ASP_86   | OD2 | 2.799 |
| 5A7X | P_ARG_66   | NH2 | P_ASP_86   | OD1 | 2.932 |
| 5A7X | P_ARG_66   | NH2 | P_ASP_86   | OD2 | 3.625 |
| 5A7X | P_LYS_82A  | NZ  | P_GLU_81   | OE2 | 2.706 |
| 5A7X | P_HIS_100F | ND1 | P_ASP_100G | OD2 | 3.938 |
| 5A7X | P_LYS_143  | NZ  | P_ASP_144  | OD1 | 3.371 |
| 5A7X | P_LYS_143  | NZ  | P_ASP_144  | OD2 | 3.506 |
| 5A7X | P_LYS_206  | NZ  | P_ASP_208  | OD2 | 3.418 |
| 5A7X | Q_ARG_24   | NH2 | Q_ASP_70   | OD1 | 3.350 |
| 5A7X | Q_ARG_24   | NH2 | Q_ASP_70   | OD2 | 2.876 |
| 5A7X | Q_ARG_61   | NH1 | Q_ASP_82   | OD1 | 3.081 |
| 5A7X | Q_ARG_61   | NH1 | Q_ASP_82   | OD2 | 3.078 |
| 5A7X | Q_ARG_61   | NH2 | Q_GLU_81   | OE2 | 3.863 |
| 5A7X | Q_LYS_103  | NZ  | Q_GLU_165  | OE1 | 3.804 |
| 5A7X | Q_LYS_149  | NZ  | Q_GLU_195  | OE1 | 2.747 |
| 5A7X | Q_LYS_149  | NZ  | Q_GLU_195  | OE2 | 3.963 |
| 5A7X | Q_LYS_183  | NZ  | Q_GLU_187  | OE2 | 2.698 |
| 5A7X | Q_HIS_189  | ND1 | Q_ASP_151  | OD1 | 3.974 |
| 5A7X | Q_HIS_189  | ND1 | Q_ASP_151  | OD2 | 2.260 |
| 5A7X | R_ARG_38   | NH1 | R_ASP_86   | OD1 | 3.024 |
| 5A7X | R_ARG_38   | NH2 | R_GLU_46   | OE1 | 3.886 |
| 5A7X | R_ARG_66   | NH1 | R_ASP_86   | OD1 | 3.548 |
| 5A7X | R_ARG_66   | NH1 | R_ASP_86   | OD2 | 2.798 |
| 5A7X | R_ARG_66   | NH2 | R_ASP_86   | OD1 | 2.932 |
| 5A7X | R_ARG_66   | NH2 | R_ASP_86   | OD2 | 3.625 |
| 5A7X | R_LYS_82A  | NZ  | R_GLU_81   | OE2 | 2.705 |
| 5A7X | R_HIS_100F | ND1 | R_ASP_100G | OD2 | 3.938 |
| 5A7X | R_LYS_143  | NZ  | R_ASP_144  | OD1 | 3.370 |
| 5A7X | R_LYS_143  | NZ  | R_ASP_144  | OD2 | 3.506 |
| 5A7X | R_LYS_206  | NZ  | R_ASP_208  | OD2 | 3.419 |
| 5A8H | A_LYS_121  | NZ  | A_GLU_429  | OE1 | 3.567 |
| 5A8H | A_LYS_121  | NZ  | A_GLU_429  | OE2 | 2.735 |

|      |           |     |            |     |       |
|------|-----------|-----|------------|-----|-------|
| 5A8H | A_LYS_207 | NZ  | A_GLU_381  | OE1 | 3.945 |
| 5A8H | A_LYS_207 | NZ  | A_GLU_381  | OE2 | 3.126 |
| 5A8H | A_LYS_232 | NZ  | A_GLU_351  | OE1 | 3.995 |
| 5A8H | A_HIS_249 | NE2 | A_GLU_482  | OE1 | 3.525 |
| 5A8H | A_LYS_282 | NZ  | A_GLU_275  | OE1 | 3.954 |
| 5A8H | A_LYS_282 | NZ  | A_GLU_275  | OE2 | 2.643 |
| 5A8H | A_LYS_348 | NZ  | A_GLU_269  | OE1 | 3.206 |
| 5A8H | A_LYS_348 | NZ  | A_GLU_351  | OE1 | 3.941 |
| 5A8H | A_LYS_348 | NZ  | A_GLU_351  | OE2 | 3.259 |
| 5A8H | A_LYS_350 | NZ  | A_ASP_395  | OD2 | 3.579 |
| 5A8H | A_LYS_357 | NZ  | A_GLU_466  | OE2 | 3.720 |
| 5A8H | A_ARG_419 | NH1 | D_GLU_100B | OE1 | 2.999 |
| 5A8H | A_ARG_419 | NH1 | D_GLU_100B | OE2 | 3.674 |
| 5A8H | A_ARG_419 | NH2 | D_GLU_99   | OE1 | 2.292 |
| 5A8H | A_ARG_419 | NH2 | D_GLU_100B | OE2 | 3.968 |
| 5A8H | A_ARG_456 | NH2 | A_GLU_466  | OE1 | 3.537 |
| 5A8H | A_ARG_456 | NH2 | A_GLU_466  | OE2 | 3.468 |
| 5A8H | A_ARG_469 | NH2 | A_ASP_457  | OD2 | 3.234 |
| 5A8H | A_ARG_476 | NH1 | A_ASP_474  | OD1 | 3.441 |
| 5A8H | A_ARG_476 | NH2 | A_GLU_102  | OE1 | 3.296 |
| 5A8H | A_ARG_476 | NH2 | A_GLU_102  | OE2 | 3.009 |
| 5A8H | A_LYS_487 | NZ  | A_GLU_91   | OE1 | 3.523 |
| 5A8H | A_LYS_490 | NZ  | A_GLU_492  | OE1 | 3.301 |
| 5A8H | B_LYS_29  | NZ  | B_GLU_85   | OE1 | 2.833 |
| 5A8H | B_LYS_29  | NZ  | B_GLU_85   | OE2 | 3.848 |
| 5A8H | B_LYS_35  | NZ  | A_ASP_457  | OD1 | 3.740 |
| 5A8H | B_ARG_54  | NH1 | B_ASP_78   | OD1 | 3.987 |
| 5A8H | B_ARG_54  | NH1 | B_ASP_78   | OD2 | 2.755 |
| 5A8H | B_ARG_54  | NH2 | B_ASP_78   | OD1 | 2.665 |
| 5A8H | B_ARG_54  | NH2 | B_ASP_78   | OD2 | 2.988 |
| 5A8H | B_ARG_59  | NH1 | A_ASP_368  | OD1 | 3.154 |
| 5A8H | B_ARG_59  | NH1 | A_ASP_368  | OD2 | 3.342 |
| 5A8H | B_ARG_59  | NH2 | A_ASP_368  | OD1 | 2.977 |
| 5A8H | B_ARG_59  | NH2 | A_ASP_368  | OD2 | 2.433 |
| 5A8H | B_HIS_107 | ND1 | B_ASP_105  | OD1 | 3.166 |
| 5A8H | B_HIS_107 | ND1 | B_ASP_105  | OD2 | 2.891 |
| 5A8H | B_ARG_134 | NH2 | B_ASP_153  | OD1 | 3.766 |
| 5A8H | B_LYS_136 | NZ  | B_GLU_150  | OE2 | 3.884 |
| 5A8H | B_LYS_136 | NZ  | B_ASP_153  | OD1 | 3.937 |
| 5A8H | B_LYS_136 | NZ  | B_ASP_153  | OD2 | 2.986 |
| 5A8H | B_LYS_171 | NZ  | B_GLU_169  | OE2 | 2.874 |
| 5A8H | C_ARG_61  | NH2 | C_GLU_81   | OE2 | 3.127 |
| 5A8H | C_ARG_61  | NH2 | C_ASP_82   | OD1 | 3.576 |
| 5A8H | C_ARG_95B | NH2 | C_ASP_1    | OD2 | 2.985 |
| 5A8H | C_HIS_189 | ND1 | C_ASP_151  | OD2 | 2.585 |
| 5A8H | C_HIS_189 | NE2 | C_ASP_185  | OD1 | 2.803 |
| 5A8H | C_HIS_189 | NE2 | C_ASP_185  | OD2 | 3.599 |
| 5A8H | C_ARG_211 | NH1 | C_GLU_187  | OE1 | 3.851 |
| 5A8H | D_ARG_31  | NH2 | D_ASP_100A | OD1 | 3.070 |
| 5A8H | D_ARG_31  | NH2 | D_ASP_100A | OD2 | 3.615 |
| 5A8H | D_ARG_38  | NH1 | D_GLU_46   | OE1 | 2.779 |
| 5A8H | D_ARG_38  | NH1 | D_GLU_46   | OE2 | 3.342 |
| 5A8H | D_ARG_38  | NH2 | D_ASP_86   | OD1 | 2.684 |
| 5A8H | D_ARG_50  | NH2 | D_GLU_97   | OE2 | 2.333 |
| 5A8H | D_ARG_66  | NH1 | D_ASP_86   | OD2 | 3.597 |
| 5A8H | D_ARG_66  | NH2 | D_ASP_86   | OD1 | 2.739 |
| 5A8H | D_ARG_66  | NH2 | D_ASP_86   | OD2 | 2.414 |
| 5A8H | D_LYS_73  | NZ  | D_ASP_55   | OD1 | 2.968 |

|      |            |     |            |     |       |
|------|------------|-----|------------|-----|-------|
| 5A8H | D_ARG_82A  | NH2 | D_GLU_81   | OE1 | 3.271 |
| 5A8H | D_LYS_143  | NZ  | D_ASP_144  | OD1 | 2.615 |
| 5A8H | D_LYS_143  | NZ  | D_ASP_144  | OD2 | 3.235 |
| 5A8H | D_HIS_164  | NE2 | C_ASP_167  | OD1 | 3.880 |
| 5A8H | D_HIS_164  | NE2 | C_ASP_167  | OD2 | 2.505 |
| 5A8H | D_LYS_206  | NZ  | D_ASP_208  | OD1 | 3.966 |
| 5A8H | D_LYS_209  | NZ  | C_GLU_123  | OE1 | 3.514 |
| 5A8H | D_LYS_209  | NZ  | C_GLU_123  | OE2 | 3.584 |
| 5A8H | E_ARG_24   | NH2 | E_ASP_70   | OD1 | 3.351 |
| 5A8H | E_ARG_24   | NH2 | E_ASP_70   | OD2 | 2.876 |
| 5A8H | E_ARG_61   | NH1 | E_ASP_82   | OD1 | 3.079 |
| 5A8H | E_ARG_61   | NH1 | E_ASP_82   | OD2 | 3.077 |
| 5A8H | E_ARG_61   | NH2 | E_GLU_81   | OE2 | 3.862 |
| 5A8H | E_LYS_103  | NZ  | E_GLU_165  | OE1 | 3.805 |
| 5A8H | E_LYS_149  | NZ  | E_GLU_195  | OE1 | 2.746 |
| 5A8H | E_LYS_149  | NZ  | E_GLU_195  | OE2 | 3.963 |
| 5A8H | E_LYS_183  | NZ  | E_GLU_187  | OE2 | 2.699 |
| 5A8H | E_HIS_189  | ND1 | E_ASP_151  | OD1 | 3.975 |
| 5A8H | E_HIS_189  | ND1 | E_ASP_151  | OD2 | 2.260 |
| 5A8H | F_ARG_38   | NH1 | F_ASP_86   | OD1 | 3.024 |
| 5A8H | F_ARG_38   | NH2 | F_GLU_46   | OE1 | 3.885 |
| 5A8H | F_ARG_66   | NH1 | F_ASP_86   | OD1 | 3.548 |
| 5A8H | F_ARG_66   | NH1 | F_ASP_86   | OD2 | 2.798 |
| 5A8H | F_ARG_66   | NH2 | F_ASP_86   | OD1 | 2.933 |
| 5A8H | F_ARG_66   | NH2 | F_ASP_86   | OD2 | 3.625 |
| 5A8H | F_LYS_82A  | NZ  | F_GLU_81   | OE2 | 2.706 |
| 5A8H | F_LYS_100  | NZ  | A_GLU_91   | OE1 | 3.015 |
| 5A8H | F_LYS_100  | NZ  | A_GLU_91   | OE2 | 3.536 |
| 5A8H | F_HIS_100F | ND1 | F_ASP_100G | OD2 | 3.939 |
| 5A8H | F_LYS_143  | NZ  | F_ASP_144  | OD1 | 3.370 |
| 5A8H | F_LYS_143  | NZ  | F_ASP_144  | OD2 | 3.507 |
| 5A8H | F_LYS_206  | NZ  | F_ASP_208  | OD2 | 3.418 |
| 5A8H | G_LYS_121  | NZ  | G_GLU_429  | OE1 | 3.567 |
| 5A8H | G_LYS_121  | NZ  | G_GLU_429  | OE2 | 2.734 |
| 5A8H | G_LYS_207  | NZ  | G_GLU_381  | OE1 | 3.945 |
| 5A8H | G_LYS_207  | NZ  | G_GLU_381  | OE2 | 3.127 |
| 5A8H | G_LYS_232  | NZ  | G_GLU_351  | OE1 | 3.995 |
| 5A8H | G_HIS_249  | NE2 | G_GLU_482  | OE1 | 3.524 |
| 5A8H | G_LYS_282  | NZ  | G_GLU_275  | OE1 | 3.953 |
| 5A8H | G_LYS_282  | NZ  | G_GLU_275  | OE2 | 2.642 |
| 5A8H | G_LYS_348  | NZ  | G_GLU_269  | OE1 | 3.206 |
| 5A8H | G_LYS_348  | NZ  | G_GLU_351  | OE1 | 3.942 |
| 5A8H | G_LYS_348  | NZ  | G_GLU_351  | OE2 | 3.260 |
| 5A8H | G_LYS_350  | NZ  | G_ASP_395  | OD2 | 3.580 |
| 5A8H | G_LYS_357  | NZ  | G_GLU_466  | OE2 | 3.719 |
| 5A8H | G_ARG_419  | NH1 | J_GLU_100B | OE1 | 2.998 |
| 5A8H | G_ARG_419  | NH1 | J_GLU_100B | OE2 | 3.675 |
| 5A8H | G_ARG_419  | NH2 | J_GLU_99   | OE1 | 2.292 |
| 5A8H | G_ARG_419  | NH2 | J_GLU_100B | OE2 | 3.969 |
| 5A8H | G_ARG_456  | NH2 | G_GLU_466  | OE1 | 3.536 |
| 5A8H | G_ARG_456  | NH2 | G_GLU_466  | OE2 | 3.469 |
| 5A8H | G_ARG_469  | NH2 | G_ASP_457  | OD2 | 3.234 |
| 5A8H | G_ARG_476  | NH1 | G_ASP_474  | OD1 | 3.441 |
| 5A8H | G_ARG_476  | NH2 | G_GLU_102  | OE1 | 3.297 |
| 5A8H | G_ARG_476  | NH2 | G_GLU_102  | OE2 | 3.010 |
| 5A8H | G_LYS_487  | NZ  | G_GLU_91   | OE1 | 3.524 |
| 5A8H | G_LYS_490  | NZ  | G_GLU_492  | OE1 | 3.300 |
| 5A8H | H_LYS_29   | NZ  | H_GLU_85   | OE1 | 2.833 |

|      |           |     |            |     |       |
|------|-----------|-----|------------|-----|-------|
| 5A8H | H.LYS_29  | NZ  | H.GLU_85   | OE2 | 3.847 |
| 5A8H | H.LYS_35  | NZ  | G.ASP_457  | OD1 | 3.741 |
| 5A8H | H.ARG_54  | NH1 | H.ASP_78   | OD1 | 3.987 |
| 5A8H | H.ARG_54  | NH1 | H.ASP_78   | OD2 | 2.755 |
| 5A8H | H.ARG_54  | NH2 | H.ASP_78   | OD1 | 2.666 |
| 5A8H | H.ARG_54  | NH2 | H.ASP_78   | OD2 | 2.989 |
| 5A8H | H.ARG_59  | NH1 | G.ASP_368  | OD1 | 3.154 |
| 5A8H | H.ARG_59  | NH1 | G.ASP_368  | OD2 | 3.343 |
| 5A8H | H.ARG_59  | NH2 | G.ASP_368  | OD1 | 2.977 |
| 5A8H | H.ARG_59  | NH2 | G.ASP_368  | OD2 | 2.433 |
| 5A8H | H.HIS_107 | ND1 | H.ASP_105  | OD1 | 3.165 |
| 5A8H | H.HIS_107 | ND1 | H.ASP_105  | OD2 | 2.890 |
| 5A8H | H.ARG_134 | NH2 | H.ASP_153  | OD1 | 3.766 |
| 5A8H | H.LYS_136 | NZ  | H.GLU_150  | OE2 | 3.885 |
| 5A8H | H.LYS_136 | NZ  | H.ASP_153  | OD1 | 3.936 |
| 5A8H | H.LYS_136 | NZ  | H.ASP_153  | OD2 | 2.987 |
| 5A8H | H.LYS_171 | NZ  | H.GLU_169  | OE2 | 2.874 |
| 5A8H | I.ARG_61  | NH2 | I.GLU_81   | OE2 | 3.127 |
| 5A8H | I.ARG_61  | NH2 | I.ASP_82   | OD1 | 3.576 |
| 5A8H | I.ARG_95B | NH2 | I.ASP_1    | OD2 | 2.985 |
| 5A8H | I.HIS_189 | ND1 | I.ASP_151  | OD2 | 2.585 |
| 5A8H | I.HIS_189 | NE2 | I.ASP_185  | OD1 | 2.802 |
| 5A8H | I.HIS_189 | NE2 | I.ASP_185  | OD2 | 3.598 |
| 5A8H | I.ARG_211 | NH1 | I.GLU_187  | OE1 | 3.851 |
| 5A8H | J.ARG_31  | NH2 | J.ASP_100A | OD1 | 3.070 |
| 5A8H | J.ARG_31  | NH2 | J.ASP_100A | OD2 | 3.615 |
| 5A8H | J.ARG_38  | NH1 | J.GLU_46   | OE1 | 2.778 |
| 5A8H | J.ARG_38  | NH1 | J.GLU_46   | OE2 | 3.342 |
| 5A8H | J.ARG_38  | NH2 | J.ASP_86   | OD1 | 2.685 |
| 5A8H | J.ARG_50  | NH2 | J.GLU_97   | OE2 | 2.333 |
| 5A8H | J.ARG_66  | NH1 | J.ASP_86   | OD2 | 3.597 |
| 5A8H | J.ARG_66  | NH2 | J.ASP_86   | OD1 | 2.739 |
| 5A8H | J.ARG_66  | NH2 | J.ASP_86   | OD2 | 2.414 |
| 5A8H | J.LYS_73  | NZ  | J.ASP_55   | OD1 | 2.968 |
| 5A8H | J.ARG_82A | NH2 | J.GLU_81   | OE1 | 3.271 |
| 5A8H | J.LYS_143 | NZ  | J.ASP_144  | OD1 | 2.615 |
| 5A8H | J.LYS_143 | NZ  | J.ASP_144  | OD2 | 3.235 |
| 5A8H | J.HIS_164 | NE2 | I.ASP_167  | OD1 | 3.881 |
| 5A8H | J.HIS_164 | NE2 | I.ASP_167  | OD2 | 2.505 |
| 5A8H | J.LYS_206 | NZ  | J.ASP_208  | OD1 | 3.966 |
| 5A8H | J.LYS_209 | NZ  | I.GLU_123  | OE1 | 3.513 |
| 5A8H | J.LYS_209 | NZ  | I.GLU_123  | OE2 | 3.584 |
| 5A8H | K.ARG_24  | NH2 | K.ASP_70   | OD1 | 3.351 |
| 5A8H | K.ARG_24  | NH2 | K.ASP_70   | OD2 | 2.876 |
| 5A8H | K.ARG_61  | NH1 | K.ASP_82   | OD1 | 3.079 |
| 5A8H | K.ARG_61  | NH1 | K.ASP_82   | OD2 | 3.077 |
| 5A8H | K.ARG_61  | NH2 | K.GLU_81   | OE2 | 3.862 |
| 5A8H | K.LYS_103 | NZ  | K.GLU_165  | OE1 | 3.804 |
| 5A8H | K.LYS_149 | NZ  | K.GLU_195  | OE1 | 2.745 |
| 5A8H | K.LYS_149 | NZ  | K.GLU_195  | OE2 | 3.962 |
| 5A8H | K.LYS_183 | NZ  | K.GLU_187  | OE2 | 2.699 |
| 5A8H | K.HIS_189 | ND1 | K.ASP_151  | OD1 | 3.974 |
| 5A8H | K.HIS_189 | ND1 | K.ASP_151  | OD2 | 2.260 |
| 5A8H | L.ARG_38  | NH1 | L.ASP_86   | OD1 | 3.025 |
| 5A8H | L.ARG_38  | NH2 | L.GLU_46   | OE1 | 3.886 |
| 5A8H | L.ARG_66  | NH1 | L.ASP_86   | OD1 | 3.549 |
| 5A8H | L.ARG_66  | NH1 | L.ASP_86   | OD2 | 2.799 |
| 5A8H | L.ARG_66  | NH2 | L.ASP_86   | OD1 | 2.933 |



|      |            |     |            |     |       |
|------|------------|-----|------------|-----|-------|
| 5A8H | L_ARG_66   | NH2 | L_ASP_86   | OD2 | 3.625 |
| 5A8H | L_LYS_82A  | NZ  | L_GLU_81   | OE2 | 2.706 |
| 5A8H | L_LYS_100  | NZ  | G_GLU_87   | OE1 | 2.922 |
| 5A8H | L_LYS_100  | NZ  | G_GLU_87   | OE2 | 3.552 |
| 5A8H | L_HIS_100E | NE2 | G_GLU_91   | OE2 | 3.049 |
| 5A8H | L_HIS_100F | ND1 | L_ASP_100G | OD2 | 3.939 |
| 5A8H | L_LYS_143  | NZ  | L_ASP_144  | OD1 | 3.369 |
| 5A8H | L_LYS_143  | NZ  | L_ASP_144  | OD2 | 3.505 |
| 5A8H | L_LYS_206  | NZ  | L_ASP_208  | OD2 | 3.418 |
| 5A8H | M_LYS_121  | NZ  | M_GLU_429  | OE1 | 3.568 |
| 5A8H | M_LYS_121  | NZ  | M_GLU_429  | OE2 | 2.734 |
| 5A8H | M_LYS_207  | NZ  | M_GLU_381  | OE1 | 3.945 |
| 5A8H | M_LYS_207  | NZ  | M_GLU_381  | OE2 | 3.127 |
| 5A8H | M_LYS_232  | NZ  | M_GLU_351  | OE1 | 3.995 |
| 5A8H | M_HIS_249  | NE2 | M_GLU_482  | OE1 | 3.525 |
| 5A8H | M_LYS_282  | NZ  | M_GLU_275  | OE1 | 3.953 |
| 5A8H | M_LYS_282  | NZ  | M_GLU_275  | OE2 | 2.642 |
| 5A8H | M_LYS_348  | NZ  | M_GLU_269  | OE1 | 3.206 |
| 5A8H | M_LYS_348  | NZ  | M_GLU_351  | OE1 | 3.941 |
| 5A8H | M_LYS_348  | NZ  | M_GLU_351  | OE2 | 3.259 |
| 5A8H | M_LYS_350  | NZ  | M_ASP_395  | OD2 | 3.579 |
| 5A8H | M_LYS_357  | NZ  | M_GLU_466  | OE2 | 3.719 |
| 5A8H | M_ARG_419  | NH1 | P_GLU_100B | OE1 | 2.999 |
| 5A8H | M_ARG_419  | NH1 | P_GLU_100B | OE2 | 3.675 |
| 5A8H | M_ARG_419  | NH2 | P_GLU_99   | OE1 | 2.292 |
| 5A8H | M_ARG_419  | NH2 | P_GLU_100B | OE2 | 3.969 |
| 5A8H | M_ARG_456  | NH2 | M_GLU_466  | OE1 | 3.537 |
| 5A8H | M_ARG_456  | NH2 | M_GLU_466  | OE2 | 3.469 |
| 5A8H | M_ARG_469  | NH2 | M_ASP_457  | OD2 | 3.235 |
| 5A8H | M_ARG_476  | NH1 | M_ASP_474  | OD1 | 3.441 |
| 5A8H | M_ARG_476  | NH2 | M_GLU_102  | OE1 | 3.296 |
| 5A8H | M_ARG_476  | NH2 | M_GLU_102  | OE2 | 3.009 |
| 5A8H | M_LYS_487  | NZ  | M_GLU_91   | OE1 | 3.525 |
| 5A8H | M_LYS_490  | NZ  | M_GLU_492  | OE1 | 3.300 |
| 5A8H | N_LYS_29   | NZ  | N_GLU_85   | OE1 | 2.833 |
| 5A8H | N_LYS_29   | NZ  | N_GLU_85   | OE2 | 3.848 |
| 5A8H | N_LYS_35   | NZ  | M_ASP_457  | OD1 | 3.741 |
| 5A8H | N_ARG_54   | NH1 | N_ASP_78   | OD1 | 3.987 |
| 5A8H | N_ARG_54   | NH1 | N_ASP_78   | OD2 | 2.755 |
| 5A8H | N_ARG_54   | NH2 | N_ASP_78   | OD1 | 2.666 |
| 5A8H | N_ARG_54   | NH2 | N_ASP_78   | OD2 | 2.989 |
| 5A8H | N_ARG_59   | NH1 | M_ASP_368  | OD1 | 3.154 |
| 5A8H | N_ARG_59   | NH1 | M_ASP_368  | OD2 | 3.343 |
| 5A8H | N_ARG_59   | NH2 | M_ASP_368  | OD1 | 2.977 |
| 5A8H | N_ARG_59   | NH2 | M_ASP_368  | OD2 | 2.433 |
| 5A8H | N_HIS_107  | ND1 | N_ASP_105  | OD1 | 3.166 |
| 5A8H | N_HIS_107  | ND1 | N_ASP_105  | OD2 | 2.891 |
| 5A8H | N_ARG_134  | NH2 | N_ASP_153  | OD1 | 3.765 |
| 5A8H | N_LYS_136  | NZ  | N_GLU_150  | OE2 | 3.885 |
| 5A8H | N_LYS_136  | NZ  | N_ASP_153  | OD1 | 3.936 |
| 5A8H | N_LYS_136  | NZ  | N_ASP_153  | OD2 | 2.986 |
| 5A8H | N_LYS_171  | NZ  | N_GLU_169  | OE2 | 2.873 |
| 5A8H | O_ARG_61   | NH2 | O_GLU_81   | OE2 | 3.127 |
| 5A8H | O_ARG_61   | NH2 | O_ASP_82   | OD1 | 3.576 |
| 5A8H | O_ARG_95B  | NH2 | O_ASP_1    | OD2 | 2.985 |
| 5A8H | O_LYS_145  | NZ  | C_GLU_17   | OE1 | 3.474 |
| 5A8H | O_LYS_145  | NZ  | C_GLU_17   | OE2 | 2.123 |
| 5A8H | O_HIS_189  | ND1 | O_ASP_151  | OD2 | 2.585 |

|      |            |     |            |     |       |
|------|------------|-----|------------|-----|-------|
| 5A8H | O_HIS_189  | NE2 | O_ASP_185  | OD1 | 2.802 |
| 5A8H | O_HIS_189  | NE2 | O_ASP_185  | OD2 | 3.598 |
| 5A8H | O_ARG_211  | NH1 | O_GLU_187  | OE1 | 3.851 |
| 5A8H | P_ARG_31   | NH2 | P_ASP_100A | OD1 | 3.070 |
| 5A8H | P_ARG_31   | NH2 | P_ASP_100A | OD2 | 3.615 |
| 5A8H | P_ARG_38   | NH1 | P_GLU_46   | OE1 | 2.780 |
| 5A8H | P_ARG_38   | NH1 | P_GLU_46   | OE2 | 3.342 |
| 5A8H | P_ARG_38   | NH2 | P_ASP_86   | OD1 | 2.685 |
| 5A8H | P_ARG_50   | NH2 | P_GLU_97   | OE2 | 2.332 |
| 5A8H | P_ARG_66   | NH1 | P_ASP_86   | OD2 | 3.598 |
| 5A8H | P_ARG_66   | NH2 | P_ASP_86   | OD1 | 2.740 |
| 5A8H | P_ARG_66   | NH2 | P_ASP_86   | OD2 | 2.415 |
| 5A8H | P_LYS_73   | NZ  | P_ASP_55   | OD1 | 2.967 |
| 5A8H | P_ARG_82A  | NH2 | P_GLU_81   | OE1 | 3.272 |
| 5A8H | P_LYS_143  | NZ  | P_ASP_144  | OD1 | 2.615 |
| 5A8H | P_LYS_143  | NZ  | P_ASP_144  | OD2 | 3.235 |
| 5A8H | P_HIS_164  | NE2 | O_ASP_167  | OD1 | 3.881 |
| 5A8H | P_HIS_164  | NE2 | O_ASP_167  | OD2 | 2.505 |
| 5A8H | P_LYS_206  | NZ  | P_ASP_208  | OD1 | 3.966 |
| 5A8H | P_LYS_209  | NZ  | O_GLU_123  | OE1 | 3.514 |
| 5A8H | P_LYS_209  | NZ  | O_GLU_123  | OE2 | 3.584 |
| 5A8H | Q_ARG_24   | NH2 | Q_ASP_70   | OD1 | 3.351 |
| 5A8H | Q_ARG_24   | NH2 | Q_ASP_70   | OD2 | 2.877 |
| 5A8H | Q_ARG_61   | NH1 | Q_ASP_82   | OD1 | 3.079 |
| 5A8H | Q_ARG_61   | NH1 | Q_ASP_82   | OD2 | 3.077 |
| 5A8H | Q_ARG_61   | NH2 | Q_GLU_81   | OE2 | 3.861 |
| 5A8H | Q_LYS_103  | NZ  | Q_GLU_165  | OE1 | 3.805 |
| 5A8H | Q_LYS_149  | NZ  | Q_GLU_195  | OE1 | 2.746 |
| 5A8H | Q_LYS_149  | NZ  | Q_GLU_195  | OE2 | 3.963 |
| 5A8H | Q_LYS_183  | NZ  | Q_GLU_187  | OE2 | 2.700 |
| 5A8H | Q_HIS_189  | ND1 | Q_ASP_151  | OD1 | 3.975 |
| 5A8H | Q_HIS_189  | ND1 | Q_ASP_151  | OD2 | 2.261 |
| 5A8H | R_ARG_38   | NH1 | R_ASP_86   | OD1 | 3.024 |
| 5A8H | R_ARG_38   | NH2 | R_GLU_46   | OE1 | 3.885 |
| 5A8H | R_ARG_66   | NH1 | R_ASP_86   | OD1 | 3.548 |
| 5A8H | R_ARG_66   | NH1 | R_ASP_86   | OD2 | 2.798 |
| 5A8H | R_ARG_66   | NH2 | R_ASP_86   | OD1 | 2.932 |
| 5A8H | R_ARG_66   | NH2 | R_ASP_86   | OD2 | 3.625 |
| 5A8H | R_LYS_82A  | NZ  | R_GLU_81   | OE2 | 2.706 |
| 5A8H | R_HIS_100E | ND1 | M_GLU_87   | OE2 | 2.709 |
| 5A8H | R_HIS_100E | NE2 | M_GLU_87   | OE2 | 3.097 |
| 5A8H | R_HIS_100F | ND1 | R_ASP_100G | OD2 | 3.938 |
| 5A8H | R_LYS_143  | NZ  | R_ASP_144  | OD1 | 3.369 |
| 5A8H | R_LYS_143  | NZ  | R_ASP_144  | OD2 | 3.506 |
| 5A8H | R_LYS_206  | NZ  | R_ASP_208  | OD2 | 3.418 |
| 5AZE | L_HIS_36   | NE2 | H_GLU_105  | OE2 | 2.756 |
| 5AZE | L_ARG_63   | NH2 | L_GLU_83   | OE1 | 3.980 |
| 5AZE | L_ARG_63   | NH2 | L_GLU_83   | OE2 | 3.863 |
| 5AZE | L_ARG_63   | NH2 | L_ASP_84   | OD1 | 2.738 |
| 5AZE | L_ARG_63   | NH2 | L_ASP_84   | OD2 | 3.659 |
| 5AZE | L_LYS_154  | NZ  | L_GLU_208  | OE1 | 3.064 |
| 5AZE | L_LYS_154  | NZ  | L_GLU_208  | OE2 | 3.679 |
| 5AZE | L_HIS_193  | ND1 | L_ASP_156  | OD2 | 2.884 |
| 5AZE | H_LYS_12   | NZ  | H_GLU_10   | OE1 | 3.838 |
| 5AZE | H_HIS_35   | NE2 | H_ASP_99   | OD1 | 3.262 |
| 5AZE | H_ARG_38   | NH1 | H_GLU_46   | OE1 | 2.776 |
| 5AZE | H_ARG_38   | NH2 | H_ASP_90   | OD1 | 2.628 |
| 5AZE | H_ARG_67   | NH1 | H_ASP_90   | OD1 | 3.423 |

|      |           |     |           |     |       |
|------|-----------|-----|-----------|-----|-------|
| 5AZE | H_ARG_67  | NH1 | H_ASP_90  | OD2 | 3.983 |
| 5AZE | H_ARG_67  | NH2 | H_ASP_90  | OD1 | 3.299 |
| 5AZE | H_ARG_67  | NH2 | H_ASP_90  | OD2 | 2.559 |
| 5AZE | H_ARG_98  | NH2 | H_ASP_109 | OD1 | 3.795 |
| 5AZE | H_ARG_98  | NH2 | H_ASP_109 | OD2 | 3.043 |
| 5AZE | H_LYS_137 | NZ  | L_ASP_143 | OD2 | 2.939 |
| 5AZE | H_LYS_214 | NZ  | H_ASP_216 | OD1 | 3.542 |
| 5AZE | H_LYS_214 | NZ  | H_ASP_216 | OD2 | 3.113 |
| 5AZE | H_LYS_217 | NZ  | L_GLU_128 | OE2 | 2.701 |
| 5BW7 | A_LYS_248 | NZ  | A_GLU_380 | OE1 | 3.595 |
| 5BW7 | A_LYS_248 | NZ  | A_GLU_380 | OE2 | 2.687 |
| 5BW7 | A_ARG_255 | NH2 | A_ASP_249 | OD2 | 3.416 |
| 5BW7 | A_HIS_285 | NE2 | A_GLU_283 | OE2 | 3.140 |
| 5BW7 | A_ARG_292 | NH2 | A_GLU_272 | OE1 | 3.982 |
| 5BW7 | A_ARG_292 | NH2 | A_GLU_272 | OE2 | 2.655 |
| 5BW7 | A_LYS_317 | NZ  | A_ASP_312 | OD1 | 3.705 |
| 5BW7 | A_LYS_320 | NZ  | A_GLU_333 | OE2 | 3.392 |
| 5BW7 | A_LYS_338 | NZ  | A_GLU_430 | OE1 | 3.180 |
| 5BW7 | A_LYS_338 | NZ  | A_GLU_430 | OE2 | 3.249 |
| 5BW7 | A_LYS_370 | NZ  | B_GLU_357 | OE2 | 3.993 |
| 5BW7 | A_LYS_409 | NZ  | B_ASP_399 | OD1 | 3.864 |
| 5BW7 | A_LYS_409 | NZ  | B_ASP_399 | OD2 | 2.990 |
| 5BW7 | A_ARG_416 | NH1 | A_GLU_388 | OE1 | 2.970 |
| 5BW7 | A_ARG_416 | NH1 | A_GLU_388 | OE2 | 3.913 |
| 5BW7 | A_ARG_416 | NH2 | A_GLU_388 | OE1 | 3.370 |
| 5BW7 | A_ARG_416 | NH2 | A_GLU_388 | OE2 | 2.800 |
| 5BW7 | B_LYS_248 | NZ  | B_GLU_380 | OE1 | 3.958 |
| 5BW7 | B_LYS_248 | NZ  | B_GLU_380 | OE2 | 2.755 |
| 5BW7 | B_ARG_255 | NH2 | B_ASP_249 | OD1 | 2.907 |
| 5BW7 | B_HIS_268 | NE2 | B_GLU_294 | OE1 | 3.100 |
| 5BW7 | B_HIS_268 | NE2 | B_GLU_294 | OE2 | 3.206 |
| 5BW7 | B_ARG_301 | NH1 | B_GLU_293 | OE1 | 3.024 |
| 5BW7 | B_LYS_317 | NZ  | B_ASP_312 | OD1 | 3.532 |
| 5BW7 | B_LYS_320 | NZ  | B_GLU_333 | OE1 | 2.787 |
| 5BW7 | B_LYS_320 | NZ  | B_GLU_333 | OE2 | 3.803 |
| 5BW7 | B_LYS_338 | NZ  | B_GLU_430 | OE1 | 3.215 |
| 5BW7 | B_LYS_338 | NZ  | B_GLU_430 | OE2 | 3.370 |
| 5BW7 | B_ARG_344 | NH1 | B_ASP_401 | OD2 | 3.270 |
| 5BW7 | B_LYS_370 | NZ  | A_GLU_357 | OE2 | 3.748 |
| 5BW7 | B_LYS_409 | NZ  | A_ASP_399 | OD1 | 3.328 |
| 5BW7 | B_LYS_409 | NZ  | A_ASP_399 | OD2 | 2.988 |
| 5BW7 | B_ARG_416 | NH1 | B_GLU_388 | OE1 | 3.138 |
| 5BW7 | B_ARG_416 | NH1 | B_GLU_388 | OE2 | 3.904 |
| 5BW7 | B_ARG_416 | NH2 | B_GLU_388 | OE1 | 3.540 |
| 5BW7 | B_ARG_416 | NH2 | B_GLU_388 | OE2 | 2.872 |
| 5BW7 | C_ARG_18  | NH1 | C_GLU_85  | OE1 | 3.505 |
| 5BW7 | C_HIS_87  | NE2 | C_GLU_85  | OE1 | 2.748 |
| 5BW7 | C_ARG_97  | NH2 | C_ASP_104 | OD2 | 2.992 |
| 5BW7 | C_HIS_107 | NE2 | C_ASP_138 | OD2 | 2.660 |
| 5BW7 | C_HIS_111 | NE2 | C_ASP_23  | OD1 | 2.716 |
| 5BW7 | C_HIS_111 | NE2 | C_ASP_23  | OD2 | 3.022 |
| 5BW7 | C_LYS_120 | NZ  | A_ASP_265 | OD2 | 2.730 |
| 5BW7 | C_ARG_130 | NH1 | C_ASP_148 | OD1 | 3.404 |
| 5BW7 | C_ARG_130 | NH2 | C_ASP_148 | OD1 | 3.221 |
| 5BW7 | C_LYS_131 | NZ  | A_GLU_269 | OE1 | 3.414 |
| 5BW7 | C_LYS_131 | NZ  | A_GLU_269 | OE2 | 2.642 |
| 5CMA | A_ARG_45  | NH2 | A_GLU_42  | OE2 | 3.432 |
| 5CMA | A_ARG_61  | NH1 | A_ASP_82  | OD1 | 3.594 |

|      |           |     |           |     |       |
|------|-----------|-----|-----------|-----|-------|
| 5CMA | A_ARG_61  | NH1 | A_ASP_82  | OD2 | 2.573 |
| 5CMA | A_LYS_149 | NZ  | A_GLU_195 | OE1 | 3.918 |
| 5CMA | A_LYS_149 | NZ  | A_GLU_195 | OE2 | 3.051 |
| 5CMA | A_LYS_183 | NZ  | A_GLU_187 | OE1 | 2.559 |
| 5CMA | A_LYS_183 | NZ  | A_GLU_187 | OE2 | 3.255 |
| 5CMA | A_HIS_189 | ND1 | A_ASP_151 | OD2 | 2.867 |
| 5CMA | B_ARG_38  | NH1 | B_ASP_90  | OD1 | 3.651 |
| 5CMA | B_ARG_38  | NH2 | B_GLU_46  | OE2 | 3.149 |
| 5CMA | B_ARG_40  | NH1 | B_GLU_89  | OE2 | 3.793 |
| 5CMA | B_LYS_67  | NZ  | B_ASP_90  | OD1 | 3.746 |
| 5CMA | B_LYS_67  | NZ  | B_ASP_90  | OD2 | 3.140 |
| 5CMA | B_LYS_148 | NZ  | B_ASP_149 | OD1 | 2.890 |
| 5CMA | B_LYS_148 | NZ  | B_ASP_149 | OD2 | 3.271 |
| 5CMA | B_LYS_214 | NZ  | A_GLU_123 | OE1 | 2.706 |
| 5CMA | B_LYS_214 | NZ  | A_GLU_123 | OE2 | 3.531 |
| 5CMA | B_ARG_215 | NH2 | B_GLU_217 | OE2 | 3.910 |
| 5CP3 | A_LYS_24  | NZ  | A_ASP_75  | OD1 | 2.942 |
| 5CP3 | A_ARG_51  | NH2 | A_ASP_60  | OD2 | 3.029 |
| 5CP3 | A_ARG_62  | NH2 | A_ASP_60  | OD1 | 3.616 |
| 5CP3 | A_ARG_62  | NH2 | A_ASP_60  | OD2 | 2.822 |
| 5CP3 | A_ARG_66  | NH1 | A_ASP_87  | OD1 | 3.163 |
| 5CP3 | A_ARG_66  | NH1 | A_ASP_87  | OD2 | 2.516 |
| 5CP3 | A_ARG_66  | NH2 | A_ASP_87  | OD1 | 2.966 |
| 5CP3 | A_ARG_66  | NH2 | A_ASP_87  | OD2 | 3.742 |
| 5CP3 | A_LYS_154 | NZ  | A_GLU_200 | OE1 | 3.304 |
| 5CP3 | A_LYS_154 | NZ  | A_GLU_200 | OE2 | 3.326 |
| 5CP3 | A_ARG_160 | NH2 | A_GLU_190 | OE1 | 3.660 |
| 5CP3 | A_HIS_194 | ND1 | A_ASP_156 | OD2 | 3.197 |
| 5CP3 | A_LYS_204 | NZ  | A_GLU_115 | OE2 | 2.402 |
| 5CP3 | H_ARG_39  | NH1 | H_ASP_90  | OD1 | 2.626 |
| 5CP3 | H_ARG_39  | NH2 | H_GLU_47  | OE1 | 2.850 |
| 5CP3 | H_ARG_39  | NH2 | H_ASP_90  | OD1 | 3.448 |
| 5CP3 | H_ARG_67  | NH1 | H_ASP_90  | OD1 | 3.807 |
| 5CP3 | H_ARG_67  | NH1 | H_ASP_90  | OD2 | 2.888 |
| 5CP3 | H_ARG_67  | NH2 | H_ASP_90  | OD1 | 3.094 |
| 5CP3 | H_ARG_67  | NH2 | H_ASP_90  | OD2 | 3.526 |
| 5CP3 | H_LYS_207 | NZ  | A_GLU_128 | OE2 | 2.762 |
| 5CP7 | A_LYS_24  | NZ  | A_ASP_75  | OD1 | 3.319 |
| 5CP7 | A_LYS_24  | NZ  | A_ASP_75  | OD2 | 2.961 |
| 5CP7 | A_ARG_51  | NH2 | A_ASP_60  | OD1 | 2.851 |
| 5CP7 | A_ARG_62  | NH1 | A_ASP_60  | OD1 | 3.820 |
| 5CP7 | A_ARG_62  | NH1 | A_ASP_60  | OD2 | 3.151 |
| 5CP7 | A_ARG_62  | NH2 | A_ASP_60  | OD2 | 3.961 |
| 5CP7 | A_ARG_66  | NH1 | A_ASP_87  | OD1 | 3.341 |
| 5CP7 | A_ARG_66  | NH1 | A_ASP_87  | OD2 | 2.576 |
| 5CP7 | A_ARG_66  | NH2 | A_ASP_87  | OD1 | 2.858 |
| 5CP7 | A_ARG_66  | NH2 | A_ASP_87  | OD2 | 3.668 |
| 5CP7 | A_LYS_154 | NZ  | A_GLU_200 | OE1 | 3.247 |
| 5CP7 | A_LYS_154 | NZ  | A_GLU_200 | OE2 | 3.620 |
| 5CP7 | A_ARG_160 | NH2 | A_GLU_190 | OE1 | 3.902 |
| 5CP7 | A_HIS_194 | ND1 | A_ASP_156 | OD1 | 2.879 |
| 5CP7 | A_LYS_204 | NZ  | A_ASP_115 | OD2 | 3.110 |
| 5CP7 | B_ARG_39  | NH1 | B_ASP_90  | OD1 | 2.860 |
| 5CP7 | B_ARG_39  | NH2 | B_GLU_47  | OE1 | 2.798 |
| 5CP7 | B_ARG_39  | NH2 | B_ASP_90  | OD1 | 3.702 |
| 5CP7 | B_ARG_67  | NH1 | B_ASP_90  | OD1 | 3.401 |
| 5CP7 | B_ARG_67  | NH1 | B_ASP_90  | OD2 | 3.152 |
| 5CP7 | B_ARG_67  | NH2 | B_ASP_90  | OD1 | 2.884 |

|      |           |     |           |     |       |
|------|-----------|-----|-----------|-----|-------|
| 5CP7 | B_ARG_67  | NH2 | B_ASP_90  | OD2 | 3.459 |
| 5CP7 | B_LYS_76  | NZ  | B_ASP_73  | OD1 | 3.357 |
| 5CP7 | B_LYS_76  | NZ  | B_ASP_73  | OD2 | 2.651 |
| 5CP7 | B_LYS_204 | NZ  | B_ASP_206 | OD1 | 2.613 |
| 5CP7 | B_LYS_204 | NZ  | B_ASP_206 | OD2 | 3.566 |
| 5CP7 | B_LYS_207 | NZ  | C_GLU_128 | OE2 | 3.335 |
| 5CP7 | C_LYS_24  | NZ  | C_ASP_75  | OD1 | 2.777 |
| 5CP7 | C_ARG_51  | NH2 | C_ASP_60  | OD1 | 2.666 |
| 5CP7 | C_LYS_58  | NZ  | H_ASP_1   | OD1 | 3.663 |
| 5CP7 | C_LYS_58  | NZ  | H_ASP_1   | OD2 | 3.316 |
| 5CP7 | C_ARG_62  | NH1 | C_ASP_60  | OD1 | 3.272 |
| 5CP7 | C_ARG_62  | NH1 | C_ASP_60  | OD2 | 2.754 |
| 5CP7 | C_ARG_66  | NH1 | C_GLU_84  | OE2 | 3.677 |
| 5CP7 | C_ARG_66  | NH2 | C_GLU_86  | OE1 | 3.796 |
| 5CP7 | C_ARG_66  | NH2 | C_ASP_87  | OD1 | 3.282 |
| 5CP7 | C_ARG_66  | NH2 | C_ASP_87  | OD2 | 3.388 |
| 5CP7 | C_LYS_154 | NZ  | C_GLU_200 | OE1 | 3.236 |
| 5CP7 | C_LYS_154 | NZ  | C_GLU_200 | OE2 | 3.406 |
| 5CP7 | C_HIS_194 | ND1 | C_ASP_156 | OD1 | 3.216 |
| 5CP7 | D_ARG_39  | NH1 | D_ASP_90  | OD1 | 3.144 |
| 5CP7 | D_ARG_39  | NH2 | D_GLU_47  | OE1 | 2.804 |
| 5CP7 | D_ARG_39  | NH2 | D_ASP_90  | OD1 | 3.507 |
| 5CP7 | D_ARG_67  | NH1 | D_ASP_90  | OD1 | 3.613 |
| 5CP7 | D_ARG_67  | NH1 | D_ASP_90  | OD2 | 2.972 |
| 5CP7 | D_ARG_67  | NH2 | D_ASP_90  | OD1 | 2.843 |
| 5CP7 | D_ARG_67  | NH2 | D_ASP_90  | OD2 | 3.447 |
| 5CP7 | D_LYS_207 | NZ  | E_GLU_128 | OE2 | 2.825 |
| 5CP7 | E_LYS_24  | NZ  | E_ASP_75  | OD1 | 2.820 |
| 5CP7 | E_LYS_24  | NZ  | E_ASP_75  | OD2 | 3.689 |
| 5CP7 | E_ARG_44  | NH1 | E_ASP_87  | OD1 | 3.971 |
| 5CP7 | E_LYS_50  | NZ  | E_ASP_60  | OD2 | 2.506 |
| 5CP7 | E_ARG_51  | NH2 | E_ASP_60  | OD1 | 2.623 |
| 5CP7 | E_ARG_66  | NH2 | E_GLU_84  | OE1 | 2.942 |
| 5CP7 | E_ARG_66  | NH2 | E_ASP_87  | OD1 | 3.262 |
| 5CP7 | E_ARG_66  | NH2 | E_ASP_87  | OD2 | 2.428 |
| 5CP7 | E_ARG_193 | NH2 | E_GLU_190 | OE1 | 3.878 |
| 5CP7 | E_HIS_194 | ND1 | E_ASP_156 | OD1 | 3.868 |
| 5CP7 | E_LYS_204 | NZ  | E_ASP_115 | OD2 | 2.617 |
| 5CP7 | F_ARG_39  | NH1 | F_ASP_90  | OD1 | 3.469 |
| 5CP7 | F_ARG_39  | NH2 | F_GLU_47  | OE1 | 2.925 |
| 5CP7 | F_ARG_67  | NH1 | F_ASP_90  | OD1 | 3.818 |
| 5CP7 | F_ARG_67  | NH1 | F_ASP_90  | OD2 | 2.761 |
| 5CP7 | F_ARG_67  | NH2 | F_ASP_90  | OD1 | 2.929 |
| 5CP7 | F_ARG_67  | NH2 | F_ASP_90  | OD2 | 3.414 |
| 5CP7 | F_LYS_76  | NZ  | F_ASP_73  | OD2 | 2.874 |
| 5CP7 | F_HIS_163 | ND1 | G_ASP_172 | OD2 | 3.652 |
| 5CP7 | F_LYS_207 | NZ  | G_GLU_128 | OE2 | 3.951 |
| 5CP7 | G_ARG_44  | NH1 | G_GLU_86  | OE2 | 3.392 |
| 5CP7 | G_ARG_51  | NH2 | G_ASP_60  | OD1 | 3.311 |
| 5CP7 | G_ARG_66  | NH1 | G_GLU_84  | OE1 | 3.858 |
| 5CP7 | G_ARG_66  | NH1 | G_GLU_84  | OE2 | 3.754 |
| 5CP7 | G_ARG_66  | NH2 | G_GLU_84  | OE2 | 3.523 |
| 5CP7 | G_ARG_66  | NH2 | G_ASP_87  | OD1 | 3.495 |
| 5CP7 | G_ARG_66  | NH2 | G_ASP_87  | OD2 | 3.175 |
| 5CP7 | G_ARG_82  | NH2 | G_ASP_65  | OD1 | 3.926 |
| 5CP7 | G_LYS_152 | NZ  | G_GLU_159 | OE1 | 3.709 |
| 5CP7 | G_ARG_160 | NH1 | G_GLU_190 | OE1 | 3.944 |
| 5CP7 | G_LYS_204 | NZ  | G_ASP_115 | OD2 | 3.779 |

|      |            |     |            |     |       |
|------|------------|-----|------------|-----|-------|
| 5CP7 | H_ARG_39   | NH1 | H_ASP_90   | OD1 | 2.809 |
| 5CP7 | H_ARG_39   | NH2 | H_GLU_47   | OE1 | 3.145 |
| 5CP7 | H_ARG_39   | NH2 | H_ASP_90   | OD1 | 3.745 |
| 5CP7 | H_ARG_67   | NH1 | H_ASP_90   | OD1 | 3.710 |
| 5CP7 | H_ARG_67   | NH1 | H_ASP_90   | OD2 | 3.464 |
| 5CP7 | H_ARG_67   | NH2 | H_ASP_90   | OD1 | 2.784 |
| 5CP7 | H_ARG_67   | NH2 | H_ASP_90   | OD2 | 3.529 |
| 5CP7 | H_LYS_207  | NZ  | A_GLU_128  | OE2 | 3.290 |
| 5DFV | A_LYS_116  | NZ  | A_ASP_117  | OD2 | 3.422 |
| 5DFV | A_LYS_124  | NZ  | A_ASP_195  | OD1 | 3.196 |
| 5DFV | A_LYS_124  | NZ  | A_ASP_195  | OD2 | 2.771 |
| 5DFV | A_LYS_171  | NZ  | C_ASP_288  | OD1 | 3.582 |
| 5DFV | A_LYS_171  | NZ  | C_ASP_288  | OD2 | 2.737 |
| 5DFV | A_LYS_171  | NZ  | C_ASP_290  | OD2 | 2.874 |
| 5DFV | A_HIS_191  | NE2 | A_ASP_128  | OD1 | 3.031 |
| 5DFV | A_HIS_191  | NE2 | A_ASP_128  | OD2 | 2.615 |
| 5DFV | B_LYS_124  | NZ  | B_ASP_195  | OD1 | 2.682 |
| 5DFV | B_LYS_124  | NZ  | B_ASP_195  | OD2 | 3.204 |
| 5DFV | B_LYS_171  | NZ  | E_ASP_288  | OD1 | 3.695 |
| 5DFV | B_LYS_171  | NZ  | E_ASP_288  | OD2 | 3.653 |
| 5DFV | B_LYS_171  | NZ  | E_ASP_290  | OD2 | 2.646 |
| 5DFV | B_HIS_191  | NE2 | B_ASP_128  | OD1 | 2.625 |
| 5DFV | B_HIS_191  | NE2 | B_ASP_128  | OD2 | 3.194 |
| 5DFV | C_LYS_203  | NZ  | C_ASP_324  | OD1 | 3.802 |
| 5DFV | C_ARG_251  | NH2 | C_GLU_351  | OE1 | 2.978 |
| 5DFV | C_ARG_251  | NH2 | C_GLU_351  | OE2 | 3.038 |
| 5DFV | C_LYS_301  | NZ  | C_ASP_324  | OD1 | 3.240 |
| 5DFV | C_LYS_301  | NZ  | C_ASP_324  | OD2 | 2.740 |
| 5DFV | C_ARG_398  | NH1 | C_ASP_394  | OD1 | 2.945 |
| 5DFV | C_ARG_398  | NH1 | C_ASP_394  | OD2 | 3.790 |
| 5DFV | C_ARG_398  | NH2 | D_GLU_698  | OE1 | 3.277 |
| 5DFV | C_LYS_1095 | NZ  | C_GLU_1097 | OE1 | 3.280 |
| 5DFV | C_ARG_1099 | NH1 | C_GLU_1097 | OE1 | 3.200 |
| 5DFV | C_ARG_1099 | NH2 | C_GLU_1097 | OE1 | 3.340 |
| 5DFV | C_ARG_1099 | NH2 | C_GLU_1097 | OE2 | 3.202 |
| 5DFV | D_ARG_551  | NH1 | D_ASP_716  | OD1 | 3.170 |
| 5DFV | D_ARG_551  | NH1 | D_ASP_716  | OD2 | 3.766 |
| 5DFV | D_ARG_551  | NH2 | D_ASP_716  | OD1 | 3.082 |
| 5DFV | D_ARG_551  | NH2 | D_ASP_716  | OD2 | 3.372 |
| 5DFV | D_LYS_556  | NZ  | D_GLU_755  | OE1 | 3.326 |
| 5DFV | D_ARG_705  | NH1 | D_GLU_725  | OE2 | 3.117 |
| 5DFV | D_ARG_705  | NH1 | D_GLU_727  | OE2 | 3.146 |
| 5DFV | D_ARG_705  | NH1 | D_ASP_728  | OD2 | 3.659 |
| 5DFV | D_ARG_705  | NH2 | D_GLU_725  | OE1 | 3.510 |
| 5DFV | D_ARG_705  | NH2 | D_GLU_725  | OE2 | 3.133 |
| 5DFV | D_LYS_2039 | NZ  | D_GLU_2087 | OE1 | 3.958 |
| 5DFV | D_LYS_2041 | NZ  | D_GLU_2087 | OE1 | 3.712 |
| 5DFV | D_LYS_2041 | NZ  | D_GLU_2087 | OE2 | 2.836 |
| 5DFV | D_LYS_2091 | NZ  | D_ASP_2002 | OD1 | 3.903 |
| 5DFV | D_ARG_2103 | NH1 | D_GLU_2079 | OE1 | 3.925 |
| 5DFV | E_ARG_251  | NH2 | E_GLU_351  | OE1 | 2.986 |
| 5DFV | E_ARG_251  | NH2 | E_GLU_351  | OE2 | 2.952 |
| 5DFV | E_LYS_301  | NZ  | E_ASP_324  | OD2 | 2.835 |
| 5DFV | E_ARG_398  | NH1 | F_GLU_698  | OE2 | 3.319 |
| 5DFV | E_ARG_398  | NH2 | E_ASP_394  | OD1 | 3.919 |
| 5DFV | E_ARG_398  | NH2 | E_ASP_394  | OD2 | 2.696 |
| 5DFV | E_LYS_1094 | NZ  | F_GLU_2015 | OE1 | 3.713 |
| 5DFV | E_LYS_1095 | NZ  | E_GLU_1097 | OE1 | 2.895 |

|      |            |     |            |     |       |
|------|------------|-----|------------|-----|-------|
| 5DFV | E_ARG_1099 | NH1 | F_GLU_2105 | OE2 | 3.679 |
| 5DFV | F_ARG_551  | NH1 | F_ASP_716  | OD2 | 3.150 |
| 5DFV | F_LYS_556  | NZ  | F_GLU_755  | OE1 | 2.676 |
| 5DFV | F_LYS_556  | NZ  | F_GLU_755  | OE2 | 3.758 |
| 5DFV | F_LYS_615  | NZ  | F_GLU_698  | OE2 | 3.399 |
| 5DFV | F_ARG_705  | NH1 | F_GLU_727  | OE2 | 3.693 |
| 5DFV | F_ARG_705  | NH1 | F_ASP_728  | OD1 | 3.492 |
| 5DFV | F_ARG_705  | NH1 | F_ASP_728  | OD2 | 3.045 |
| 5DFV | F_LYS_2041 | NZ  | F_GLU_2087 | OE1 | 3.680 |
| 5DFV | F_LYS_2041 | NZ  | F_GLU_2087 | OE2 | 2.777 |
| 5DFV | F_LYS_2091 | NZ  | F_ASP_2002 | OD1 | 2.898 |
| 5DFV | F_LYS_2091 | NZ  | F_ASP_2002 | OD2 | 2.887 |
| 5DFW | A_LYS_124  | NZ  | A_ASP_195  | OD1 | 3.150 |
| 5DFW | A_LYS_124  | NZ  | A_ASP_195  | OD2 | 3.337 |
| 5DFW | A_LYS_171  | NZ  | H_ASP_156  | OD2 | 2.691 |
| 5DFW | A_LYS_171  | NZ  | H_ASP_253  | OD1 | 2.751 |
| 5DFW | A_LYS_171  | NZ  | H_ASP_253  | OD2 | 3.799 |
| 5DFW | A_LYS_187  | NZ  | A_ASP_155  | OD2 | 3.976 |
| 5DFW | A_HIS_191  | NE2 | A_ASP_128  | OD1 | 3.407 |
| 5DFW | A_HIS_191  | NE2 | A_ASP_128  | OD2 | 2.578 |
| 5DFW | A_LYS_193  | NZ  | A_ASP_155  | OD1 | 3.885 |
| 5DFW | H_LYS_203  | NZ  | H_ASP_324  | OD1 | 3.276 |
| 5DFW | H_ARG_251  | NH2 | A_ASP_138  | OD1 | 3.392 |
| 5DFW | H_ARG_251  | NH2 | A_ASP_138  | OD2 | 2.698 |
| 5DFW | H_LYS_292  | NZ  | A_ASP_138  | OD1 | 3.884 |
| 5DFW | H_LYS_292  | NZ  | A_ASP_138  | OD2 | 2.950 |
| 5DFW | H_LYS_292  | NZ  | A_ASP_139  | OD1 | 3.019 |
| 5DFW | H_LYS_296  | NZ  | H_ASP_294  | OD1 | 3.151 |
| 5DFW | H_LYS_301  | NZ  | H_ASP_324  | OD1 | 3.890 |
| 5DFW | H_LYS_301  | NZ  | H_ASP_324  | OD2 | 3.833 |
| 5DFW | H_ARG_705  | NH1 | H_GLU_727  | OE2 | 3.307 |
| 5DFW | H_ARG_705  | NH2 | H_ASP_728  | OD2 | 2.557 |
| 5DFW | H_LYS_806  | NZ  | H_GLU_808  | OE2 | 3.023 |
| 5DMI | A_LYS_46   | NZ  | L_ASP_31   | OD1 | 2.761 |
| 5DMI | A_LYS_46   | NZ  | L_ASP_31   | OD2 | 3.234 |
| 5DMI | A_HIS_76   | ND1 | H_ASP_100A | OD2 | 3.977 |
| 5DMI | A_HIS_78   | ND1 | A_GLU_74   | OE1 | 3.991 |
| 5DMI | A_HIS_78   | NE2 | A_GLU_74   | OE2 | 3.806 |
| 5DMI | H_ARG_66   | NH1 | H_ASP_86   | OD1 | 3.834 |
| 5DMI | H_ARG_66   | NH1 | H_ASP_86   | OD2 | 2.698 |
| 5DMI | H_ARG_66   | NH2 | H_ASP_86   | OD1 | 3.014 |
| 5DMI | H_ARG_66   | NH2 | H_ASP_86   | OD2 | 2.861 |
| 5DMI | H_LYS_221  | NZ  | L_GLU_123  | OE2 | 3.105 |
| 5DMI | L_ARG_45   | NH1 | L_GLU_42   | OE1 | 2.998 |
| 5DMI | L_ARG_45   | NH1 | L_GLU_42   | OE2 | 3.354 |
| 5DMI | L_ARG_45   | NH2 | L_GLU_42   | OE1 | 2.809 |
| 5DMI | L_ARG_61   | NH1 | L_GLU_81   | OE1 | 3.011 |
| 5DMI | L_ARG_61   | NH1 | L_ASP_82   | OD1 | 2.794 |
| 5DMI | L_ARG_61   | NH1 | L_ASP_82   | OD2 | 3.657 |
| 5DMI | L_ARG_61   | NH2 | L_GLU_79   | OE1 | 3.312 |
| 5DMI | L_ARG_61   | NH2 | L_GLU_79   | OE2 | 3.348 |
| 5DMI | L_LYS_103  | NZ  | L_GLU_105  | OE1 | 3.441 |
| 5DMI | L_LYS_103  | NZ  | L_GLU_165  | OE2 | 3.954 |
| 5DMI | L_LYS_149  | NZ  | L_GLU_195  | OE2 | 2.814 |
| 5DMI | L_LYS_183  | NZ  | L_GLU_187  | OE1 | 2.795 |
| 5DMI | L_LYS_188  | NZ  | L_ASP_185  | OD1 | 2.852 |
| 5DMI | L_ARG_211  | NH1 | L_GLU_187  | OE2 | 3.522 |
| 5DMJ | A_HIS_78   | NE2 | A_GLU_74   | OE2 | 3.682 |

|      |           |     |           |     |       |
|------|-----------|-----|-----------|-----|-------|
| 5DMJ | A_HIS_162 | NE2 | A_GLU_159 | OE1 | 3.307 |
| 5DMJ | B_ARG_38  | NH1 | B_GLU_46  | OE1 | 3.733 |
| 5DMJ | B_ARG_38  | NH1 | B_GLU_46  | OE2 | 3.183 |
| 5DMJ | B_ARG_38  | NH1 | B_ASP_86  | OD1 | 3.833 |
| 5DMJ | B_ARG_38  | NH2 | B_ASP_86  | OD1 | 2.916 |
| 5DMJ | B_ARG_66  | NH1 | B_ASP_86  | OD1 | 3.274 |
| 5DMJ | B_ARG_66  | NH1 | B_ASP_86  | OD2 | 2.599 |
| 5DMJ | B_ARG_66  | NH2 | B_ASP_86  | OD1 | 3.293 |
| 5DMJ | B_ARG_83  | NH2 | G_ASP_72  | OD1 | 3.449 |
| 5DMJ | B_LYS_94  | NZ  | B_ASP_102 | OD1 | 3.363 |
| 5DMJ | D_HIS_78  | NE2 | D_GLU_74  | OE2 | 3.689 |
| 5DMJ | D_ARG_123 | NH1 | D_ASP_140 | OD2 | 3.071 |
| 5DMJ | D_HIS_162 | NE2 | D_GLU_159 | OE1 | 3.282 |
| 5DMJ | D_LYS_181 | NZ  | D_ASP_180 | OD2 | 3.498 |
| 5DMJ | E_ARG_38  | NH1 | E_GLU_46  | OE1 | 3.747 |
| 5DMJ | E_ARG_38  | NH1 | E_GLU_46  | OE2 | 3.182 |
| 5DMJ | E_ARG_38  | NH1 | E_ASP_86  | OD1 | 3.846 |
| 5DMJ | E_ARG_38  | NH2 | E_ASP_86  | OD1 | 2.939 |
| 5DMJ | E_ARG_66  | NH1 | E_ASP_86  | OD1 | 3.321 |
| 5DMJ | E_ARG_66  | NH1 | E_ASP_86  | OD2 | 2.623 |
| 5DMJ | E_ARG_66  | NH2 | E_ASP_86  | OD1 | 3.325 |
| 5DMJ | E_LYS_75  | NZ  | E_ASP_72  | OD2 | 3.917 |
| 5DMJ | E_LYS_94  | NZ  | E_ASP_102 | OD1 | 3.533 |
| 5DMJ | F_HIS_78  | NE2 | F_GLU_74  | OE2 | 3.703 |
| 5DMJ | F_HIS_162 | NE2 | F_GLU_159 | OE1 | 3.306 |
| 5DMJ | G_ARG_38  | NH1 | G_GLU_46  | OE1 | 3.769 |
| 5DMJ | G_ARG_38  | NH1 | G_GLU_46  | OE2 | 3.178 |
| 5DMJ | G_ARG_38  | NH1 | G_ASP_86  | OD1 | 3.862 |
| 5DMJ | G_ARG_38  | NH2 | G_ASP_86  | OD1 | 2.937 |
| 5DMJ | G_ARG_66  | NH1 | G_ASP_86  | OD1 | 3.324 |
| 5DMJ | G_ARG_66  | NH1 | G_ASP_86  | OD2 | 2.634 |
| 5DMJ | G_ARG_66  | NH2 | G_ASP_86  | OD1 | 3.327 |
| 5DMJ | G_LYS_75  | NZ  | B_GLU_85  | OE1 | 3.187 |
| 5DMJ | G_LYS_94  | NZ  | G_ASP_102 | OD1 | 3.775 |
| 5DWU | B_ARG_377 | NH2 | B_ASP_379 | OD1 | 3.390 |
| 5DWU | B_ARG_407 | NH1 | B_ASP_435 | OD1 | 2.835 |
| 5DWU | B_ARG_407 | NH2 | B_ASP_435 | OD1 | 3.962 |
| 5DWU | H_ARG_38  | NH1 | H_ASP_90  | OD1 | 2.590 |
| 5DWU | H_ARG_38  | NH2 | H_GLU_46  | OE1 | 2.502 |
| 5DWU | H_ARG_52  | NH1 | A_ASP_107 | OD1 | 3.435 |
| 5DWU | H_ARG_52  | NH1 | A_ASP_107 | OD2 | 2.568 |
| 5DWU | H_ARG_52  | NH2 | A_ASP_107 | OD1 | 2.685 |
| 5DWU | H_ARG_52  | NH2 | A_ASP_107 | OD2 | 3.250 |
| 5DWU | H_ARG_98  | NH2 | H_ASP_105 | OD2 | 3.961 |
| 5DWU | L_ARG_61  | NH1 | L_ASP_82  | OD1 | 3.900 |
| 5DWU | L_ARG_61  | NH2 | L_ASP_82  | OD1 | 2.608 |
| 5DWU | L_ARG_61  | NH2 | L_ASP_82  | OD2 | 2.917 |
| 5DWU | L_HIS_189 | ND1 | L_ASP_151 | OD2 | 3.598 |
| 5ERW | A_LYS_12  | NZ  | A_GLU_10  | OE1 | 2.949 |
| 5ERW | A_ARG_38  | NH1 | A_ASP_90  | OD1 | 2.885 |
| 5ERW | A_ARG_38  | NH2 | A_GLU_46  | OE1 | 3.486 |
| 5ERW | A_ARG_38  | NH2 | A_GLU_46  | OE2 | 3.818 |
| 5ERW | A_ARG_38  | NH2 | A_ASP_90  | OD1 | 3.778 |
| 5ERW | A_ARG_67  | NH1 | A_ASP_90  | OD2 | 2.657 |
| 5ERW | A_ARG_67  | NH2 | A_ASP_90  | OD1 | 3.007 |
| 5ERW | A_ARG_67  | NH2 | A_ASP_90  | OD2 | 3.030 |
| 5ERW | A_ARG_87  | NH1 | A_GLU_89  | OE2 | 3.913 |
| 5ERW | A_ARG_103 | NH1 | B_ASP_49  | OD2 | 2.990 |



|      |           |     |           |     |       |
|------|-----------|-----|-----------|-----|-------|
| 5ERW | A_LYS_214 | NZ  | B_GLU_122 | OE1 | 2.490 |
| 5ERW | B_LYS_30  | NZ  | B_ASP_91  | OD1 | 2.653 |
| 5ERW | B_HIS_33  | ND1 | B_ASP_49  | OD1 | 3.753 |
| 5ERW | B_ARG_60  | NH2 | B_ASP_81  | OD1 | 2.998 |
| 5ERW | B_ARG_60  | NH2 | B_ASP_81  | OD2 | 2.524 |
| 5ERW | B_LYS_102 | NZ  | B_ASP_84  | OD1 | 3.442 |
| 5ERW | B_LYS_102 | NZ  | B_ASP_84  | OD2 | 3.632 |
| 5ERW | B_LYS_102 | NZ  | B_ASP_164 | OD1 | 3.634 |
| 5ERW | B_LYS_146 | NZ  | B_GLU_153 | OE1 | 2.547 |
| 5ERW | B_LYS_146 | NZ  | B_GLU_153 | OE2 | 3.654 |
| 5ERW | B_LYS_148 | NZ  | B_GLU_194 | OE1 | 3.651 |
| 5ERW | B_LYS_148 | NZ  | B_GLU_194 | OE2 | 2.963 |
| 5ERW | B_ARG_154 | NH1 | B_GLU_184 | OE1 | 3.549 |
| 5ERW | B_LYS_168 | NZ  | B_ASP_166 | OD2 | 3.760 |
| 5ERW | B_LYS_182 | NZ  | B_GLU_186 | OE1 | 3.952 |
| 5ERW | B_LYS_182 | NZ  | B_GLU_186 | OE2 | 2.341 |
| 5ERW | B_HIS_188 | ND1 | B_ASP_150 | OD2 | 2.455 |
| 5ERW | B_LYS_198 | NZ  | B_ASP_109 | OD1 | 3.278 |
| 5ERW | B_LYS_198 | NZ  | B_ASP_109 | OD2 | 2.412 |
| 5ERW | C_LYS_446 | NZ  | B_ASP_50  | OD1 | 3.926 |
| 5ERW | C_LYS_446 | NZ  | B_ASP_50  | OD2 | 2.398 |
| 5EZI | H_ARG_45  | NH2 | H_ASP_42  | OD2 | 3.860 |
| 5EZI | H_ARG_52  | NH1 | H_GLU_60  | OE1 | 3.045 |
| 5EZI | H_ARG_52  | NH1 | H_ASP_104 | OD1 | 3.782 |
| 5EZI | H_ARG_52  | NH2 | H_ASP_104 | OD1 | 2.793 |
| 5EZI | H_LYS_79  | NZ  | H_ASP_80  | OD1 | 3.553 |
| 5EZI | H_LYS_79  | NZ  | H_ASP_80  | OD2 | 3.228 |
| 5EZI | H_LYS_81  | NZ  | H_ASP_104 | OD1 | 3.557 |
| 5EZI | H_LYS_81  | NZ  | H_ASP_104 | OD2 | 2.766 |
| 5EZI | H_ARG_112 | NH2 | H_ASP_121 | OD1 | 3.513 |
| 5EZI | H_ARG_112 | NH2 | H_ASP_121 | OD2 | 2.756 |
| 5EZI | L_ARG_54  | NH1 | L_ASP_56  | OD2 | 3.800 |
| 5EZI | L_ARG_54  | NH2 | L_ASP_56  | OD1 | 3.697 |
| 5EZI | L_ARG_54  | NH2 | L_ASP_56  | OD2 | 2.546 |
| 5EZI | L_ARG_78  | NH2 | L_ASP_84  | OD1 | 3.854 |
| 5EZI | L_ARG_85  | NH2 | L_GLU_105 | OE2 | 3.655 |
| 5EZI | L_ARG_85  | NH2 | L_ASP_106 | OD1 | 2.746 |
| 5EZI | L_ARG_85  | NH2 | L_ASP_106 | OD2 | 3.689 |
| 5EZI | L_ARG_120 | NH1 | H_GLU_64  | OE1 | 3.561 |
| 5EZI | L_ARG_120 | NH1 | H_GLU_64  | OE2 | 2.826 |
| 5EZI | L_LYS_166 | NZ  | L_GLU_129 | OE2 | 3.752 |
| 5EZI | L_LYS_173 | NZ  | L_GLU_219 | OE1 | 3.356 |
| 5EZI | L_LYS_173 | NZ  | L_GLU_219 | OE2 | 2.974 |
| 5EZI | L_ARG_179 | NH1 | L_GLU_209 | OE1 | 3.490 |
| 5EZI | L_ARG_179 | NH1 | L_GLU_209 | OE2 | 3.054 |
| 5EZI | L_ARG_179 | NH2 | L_GLU_209 | OE1 | 3.322 |
| 5EZI | L_HIS_213 | ND1 | L_ASP_175 | OD2 | 3.083 |
| 5EZI | L_LYS_223 | NZ  | L_ASP_134 | OD2 | 3.368 |
| 5EZJ | A_ARG_52  | NH1 | A_GLU_60  | OE1 | 2.978 |
| 5EZJ | A_ARG_52  | NH1 | A_ASP_104 | OD1 | 3.803 |
| 5EZJ | A_ARG_52  | NH2 | A_ASP_104 | OD1 | 2.735 |
| 5EZJ | A_LYS_79  | NZ  | A_ASP_80  | OD1 | 3.518 |
| 5EZJ | A_LYS_79  | NZ  | A_ASP_80  | OD2 | 2.915 |
| 5EZJ | A_LYS_81  | NZ  | A_ASP_104 | OD1 | 3.567 |
| 5EZJ | A_LYS_81  | NZ  | A_ASP_104 | OD2 | 2.848 |
| 5EZJ | A_ARG_112 | NH2 | A_ASP_121 | OD1 | 2.747 |
| 5EZJ | A_ARG_112 | NH2 | A_ASP_121 | OD2 | 3.431 |
| 5EZJ | A_LYS_228 | NZ  | B_GLU_147 | OE1 | 3.274 |

|      |           |     |           |     |       |
|------|-----------|-----|-----------|-----|-------|
| 5EZJ | A_LYS_229 | NZ  | A_GLU_231 | OE2 | 3.771 |
| 5EZJ | B_LYS_48  | NZ  | B_ASP_94  | OD1 | 3.784 |
| 5EZJ | B_LYS_48  | NZ  | B_ASP_94  | OD2 | 2.891 |
| 5EZJ | B_ARG_54  | NH2 | B_ASP_56  | OD1 | 3.856 |
| 5EZJ | B_ARG_54  | NH2 | B_ASP_56  | OD2 | 2.671 |
| 5EZJ | B_ARG_78  | NH2 | B_ASP_84  | OD1 | 3.656 |
| 5EZJ | B_ARG_85  | NH1 | B_ASP_106 | OD1 | 2.928 |
| 5EZJ | B_ARG_85  | NH1 | B_ASP_106 | OD2 | 3.850 |
| 5EZJ | B_ARG_120 | NH1 | A_GLU_64  | OE1 | 3.637 |
| 5EZJ | B_ARG_120 | NH1 | A_GLU_64  | OE2 | 2.843 |
| 5EZJ | B_LYS_127 | NZ  | B_GLU_129 | OE1 | 3.869 |
| 5EZJ | B_LYS_173 | NZ  | B_GLU_219 | OE1 | 3.389 |
| 5EZJ | B_LYS_173 | NZ  | B_GLU_219 | OE2 | 2.427 |
| 5EZJ | B_ARG_179 | NH1 | B_GLU_209 | OE1 | 3.217 |
| 5EZJ | B_ARG_179 | NH1 | B_GLU_209 | OE2 | 3.402 |
| 5EZJ | B_ARG_179 | NH2 | B_GLU_209 | OE1 | 3.880 |
| 5EZJ | B_ARG_179 | NH2 | B_GLU_209 | OE2 | 2.776 |
| 5EZJ | B_HIS_213 | ND1 | B_ASP_175 | OD2 | 3.143 |
| 5EZL | A_ARG_45  | NH2 | A_ASP_42  | OD2 | 3.885 |
| 5EZL | A_ARG_52  | NH1 | A_GLU_60  | OE1 | 3.345 |
| 5EZL | A_ARG_52  | NH1 | A_ASP_104 | OD1 | 3.820 |
| 5EZL | A_ARG_52  | NH2 | A_ASP_104 | OD1 | 2.908 |
| 5EZL | A_LYS_81  | NZ  | A_ASP_104 | OD1 | 3.524 |
| 5EZL | A_LYS_81  | NZ  | A_ASP_104 | OD2 | 2.698 |
| 5EZL | A_ARG_112 | NH1 | A_ASP_121 | OD2 | 2.196 |
| 5EZL | A_LYS_228 | NZ  | B_GLU_147 | OE1 | 3.314 |
| 5EZL | A_LYS_229 | NZ  | A_GLU_231 | OE2 | 2.784 |
| 5EZL | B_ARG_54  | NH2 | B_ASP_56  | OD1 | 3.684 |
| 5EZL | B_ARG_54  | NH2 | B_ASP_56  | OD2 | 2.960 |
| 5EZL | B_ARG_78  | NH2 | B_ASP_84  | OD1 | 3.876 |
| 5EZL | B_ARG_85  | NH1 | B_ASP_106 | OD1 | 2.623 |
| 5EZL | B_ARG_85  | NH1 | B_ASP_106 | OD2 | 2.985 |
| 5EZL | B_ARG_120 | NH1 | A_GLU_64  | OE1 | 3.901 |
| 5EZL | B_ARG_120 | NH1 | A_GLU_64  | OE2 | 2.804 |
| 5EZL | B_LYS_127 | NZ  | B_GLU_129 | OE2 | 3.626 |
| 5EZL | B_LYS_173 | NZ  | B_GLU_219 | OE1 | 3.456 |
| 5EZL | B_LYS_173 | NZ  | B_GLU_219 | OE2 | 2.709 |
| 5EZL | B_LYS_223 | NZ  | B_ASP_134 | OD2 | 3.131 |
| 5EZL | H_ARG_52  | NH1 | H_GLU_60  | OE1 | 3.219 |
| 5EZL | H_ARG_52  | NH1 | H_GLU_60  | OE2 | 3.769 |
| 5EZL | H_ARG_52  | NH1 | H_ASP_104 | OD1 | 3.785 |
| 5EZL | H_ARG_52  | NH2 | H_ASP_104 | OD1 | 3.045 |
| 5EZL | H_LYS_81  | NZ  | H_ASP_104 | OD1 | 3.442 |
| 5EZL | H_LYS_81  | NZ  | H_ASP_104 | OD2 | 2.623 |
| 5EZL | H_ARG_112 | NH1 | H_ASP_121 | OD1 | 3.400 |
| 5EZL | H_ARG_112 | NH1 | H_ASP_121 | OD2 | 2.409 |
| 5EZL | H_LYS_228 | NZ  | L_GLU_147 | OE2 | 3.445 |
| 5EZL | H_LYS_229 | NZ  | H_GLU_231 | OE2 | 2.742 |
| 5EZL | L_ARG_54  | NH2 | L_ASP_56  | OD1 | 3.764 |
| 5EZL | L_ARG_54  | NH2 | L_ASP_56  | OD2 | 2.783 |
| 5EZL | L_LYS_63  | NZ  | L_GLU_105 | OE1 | 3.769 |
| 5EZL | L_ARG_78  | NH1 | L_ASP_84  | OD1 | 3.894 |
| 5EZL | L_ARG_78  | NH2 | L_ASP_84  | OD1 | 3.679 |
| 5EZL | L_ARG_85  | NH2 | L_GLU_105 | OE1 | 3.813 |
| 5EZL | L_ARG_85  | NH2 | L_GLU_105 | OE2 | 3.287 |
| 5EZL | L_ARG_85  | NH2 | L_ASP_106 | OD1 | 3.191 |
| 5EZL | L_ARG_85  | NH2 | L_ASP_106 | OD2 | 3.915 |
| 5EZL | L_ARG_120 | NH1 | H_GLU_64  | OE1 | 3.668 |

|      |           |     |           |     |       |
|------|-----------|-----|-----------|-----|-------|
| 5EZL | L_ARG_120 | NH1 | H_GLU_64  | OE2 | 2.626 |
| 5EZL | L_LYS_127 | NZ  | L_ASP_189 | OD1 | 3.123 |
| 5EZL | L_LYS_173 | NZ  | L_GLU_219 | OE2 | 2.984 |
| 5EZL | L_LYS_223 | NZ  | L_ASP_134 | OD2 | 3.564 |
| 5EZN | A_ARG_58  | NH1 | E_ASP_336 | OD2 | 3.940 |
| 5EZN | A_ARG_58  | NH2 | E_ASP_336 | OD2 | 2.479 |
| 5EZN | A_HIS_76  | ND1 | A_ASP_92  | OD2 | 3.010 |
| 5EZN | A_HIS_76  | NE2 | A_GLU_74  | OE2 | 3.795 |
| 5EZN | A_LYS_81  | NZ  | A_GLU_59  | OE1 | 3.642 |
| 5EZN | A_LYS_95  | NZ  | A_ASP_92  | OD2 | 2.550 |
| 5EZN | A_ARG_102 | NH2 | A_ASP_67  | OD2 | 3.108 |
| 5EZN | A_HIS_104 | NE2 | A_ASP_121 | OD1 | 3.856 |
| 5EZN | A_HIS_134 | NE2 | A_ASP_98  | OD2 | 3.544 |
| 5EZN | A_LYS_188 | NZ  | A_GLU_123 | OE1 | 3.017 |
| 5EZN | E_LYS_204 | NZ  | A_GLU_113 | OE1 | 2.243 |
| 5EZN | E_LYS_204 | NZ  | A_GLU_113 | OE2 | 3.142 |
| 5EZN | E_LYS_215 | NZ  | E_GLU_265 | OE2 | 3.398 |
| 5EZN | E_LYS_220 | NZ  | E_ASP_245 | OD2 | 3.852 |
| 5EZN | E_ARG_229 | NH2 | E_ASP_282 | OD1 | 2.680 |
| 5EZN | E_ARG_229 | NH2 | E_ASP_282 | OD2 | 3.870 |
| 5EZN | E_HIS_240 | NE2 | E_ASP_282 | OD1 | 3.980 |
| 5EZN | E_LYS_251 | NZ  | B_GLU_72  | OE2 | 3.130 |
| 5EZN | E_ARG_271 | NH1 | E_GLU_257 | OE2 | 3.148 |
| 5EZN | E_LYS_334 | NZ  | E_GLU_337 | OE1 | 3.441 |
| 5EZN | E_LYS_334 | NZ  | E_GLU_337 | OE2 | 3.486 |
| 5EZN | B_ARG_36  | NH1 | B_GLU_38  | OE2 | 3.346 |
| 5EZN | B_LYS_69  | NZ  | B_GLU_72  | OE1 | 2.194 |
| 5EZN | B_LYS_69  | NZ  | B_GLU_74  | OE1 | 3.478 |
| 5EZN | B_HIS_76  | ND1 | B_ASP_92  | OD2 | 3.694 |
| 5EZN | B_LYS_81  | NZ  | B_GLU_59  | OE2 | 2.979 |
| 5EZN | B_ARG_102 | NH2 | B_ASP_67  | OD2 | 3.883 |
| 5EZN | B_HIS_134 | ND1 | B_GLU_148 | OE1 | 3.830 |
| 5EZN | B_HIS_134 | NE2 | B_GLU_148 | OE1 | 3.515 |
| 5EZN | B_ARG_135 | NH1 | G_GLU_206 | OE2 | 3.927 |
| 5EZN | B_ARG_135 | NH2 | G_GLU_206 | OE2 | 3.596 |
| 5EZN | G_LYS_204 | NZ  | B_GLU_112 | OE1 | 2.749 |
| 5EZN | G_LYS_204 | NZ  | B_GLU_112 | OE2 | 3.972 |
| 5EZN | G_LYS_204 | NZ  | B_GLU_113 | OE2 | 3.260 |
| 5EZN | G_LYS_215 | NZ  | G_ASP_194 | OD1 | 3.377 |
| 5EZN | G_LYS_215 | NZ  | G_ASP_194 | OD2 | 2.294 |
| 5EZN | G_ARG_229 | NH1 | G_ASP_282 | OD1 | 3.051 |
| 5EZN | G_ARG_229 | NH2 | G_ASP_282 | OD1 | 3.739 |
| 5EZN | G_HIS_240 | NE2 | G_ASP_282 | OD1 | 3.769 |
| 5EZN | G_LYS_262 | NZ  | G_GLU_265 | OE1 | 3.917 |
| 5EZN | G_LYS_316 | NZ  | G_GLU_302 | OE2 | 2.834 |
| 5EZN | G_LYS_334 | NZ  | G_GLU_337 | OE1 | 3.582 |
| 5EZN | G_LYS_334 | NZ  | G_GLU_337 | OE2 | 2.552 |
| 5EZN | G_ARG_339 | NH2 | G_ASP_336 | OD2 | 3.484 |
| 5EZO | H_ARG_56  | NH1 | H_GLU_64  | OE1 | 3.259 |
| 5EZO | H_ARG_56  | NH1 | H_ASP_108 | OD1 | 3.756 |
| 5EZO | H_ARG_56  | NH2 | H_ASP_108 | OD1 | 2.964 |
| 5EZO | H_LYS_85  | NZ  | H_ASP_108 | OD1 | 3.343 |
| 5EZO | H_LYS_85  | NZ  | H_ASP_108 | OD2 | 3.101 |
| 5EZO | H_ARG_116 | NH1 | H_ASP_125 | OD1 | 3.598 |
| 5EZO | H_ARG_116 | NH1 | H_ASP_125 | OD2 | 2.331 |
| 5EZO | H_LYS_232 | NZ  | L_GLU_143 | OE1 | 3.314 |
| 5EZO | H_LYS_232 | NZ  | L_GLU_143 | OE2 | 2.456 |
| 5EZO | H_LYS_233 | NZ  | H_GLU_235 | OE2 | 3.779 |

|      |           |     |           |     |       |
|------|-----------|-----|-----------|-----|-------|
| 5EZO | L_ARG_50  | NH1 | A_ASP_66  | OD1 | 3.943 |
| 5EZO | L_ARG_50  | NH1 | A_ASP_66  | OD2 | 3.721 |
| 5EZO | L_LYS_59  | NZ  | L_GLU_101 | OE1 | 3.526 |
| 5EZO | L_ARG_74  | NH1 | L_ASP_80  | OD1 | 3.915 |
| 5EZO | L_ARG_81  | NH1 | L_GLU_101 | OE2 | 3.291 |
| 5EZO | L_ARG_81  | NH1 | L_ASP_102 | OD1 | 3.399 |
| 5EZO | L_ARG_81  | NH1 | L_ASP_102 | OD2 | 3.360 |
| 5EZO | L_ARG_81  | NH2 | L_GLU_101 | OE2 | 3.105 |
| 5EZO | L_ARG_116 | NH1 | H_GLU_68  | OE1 | 3.718 |
| 5EZO | L_ARG_116 | NH1 | H_GLU_68  | OE2 | 2.774 |
| 5EZO | L_LYS_123 | NZ  | L_ASP_185 | OD1 | 3.241 |
| 5EZO | L_LYS_123 | NZ  | L_ASP_185 | OD2 | 3.353 |
| 5EZO | L_LYS_219 | NZ  | L_ASP_130 | OD2 | 3.420 |
| 5EZO | A_ARG_36  | NH1 | A_GLU_38  | OE2 | 2.554 |
| 5EZO | A_LYS_43  | NZ  | A_ASP_85  | OD2 | 3.209 |
| 5EZO | A_HIS_76  | ND1 | A_ASP_92  | OD2 | 2.596 |
| 5EZO | A_LYS_81  | NZ  | A_GLU_59  | OE2 | 2.928 |
| 5EZO | A_ARG_102 | NH2 | A_ASP_67  | OD2 | 2.790 |
| 5EZO | A_LYS_129 | NZ  | A_GLU_122 | OE2 | 3.798 |
| 5EZO | A_HIS_134 | ND1 | A_GLU_148 | OE1 | 3.764 |
| 5EZO | A_ARG_135 | NH1 | A_GLU_206 | OE2 | 3.876 |
| 5EZO | A_ARG_135 | NH2 | A_GLU_206 | OE2 | 3.659 |
| 5EZO | A_LYS_186 | NZ  | A_ASP_195 | OD1 | 2.722 |
| 5EZO | A_LYS_192 | NZ  | A_ASP_217 | OD2 | 3.683 |
| 5EZO | A_LYS_204 | NZ  | A_GLU_112 | OE1 | 3.269 |
| 5EZO | A_LYS_204 | NZ  | A_GLU_113 | OE2 | 3.314 |
| 5EZO | A_ARG_229 | NH2 | A_ASP_282 | OD1 | 2.774 |
| 5EZO | A_ARG_229 | NH2 | A_ASP_282 | OD2 | 3.510 |
| 5EZO | A_HIS_240 | NE2 | A_ASP_282 | OD1 | 3.983 |
| 5EZO | A_ARG_271 | NH1 | A_GLU_257 | OE1 | 3.813 |
| 5EZO | A_LYS_316 | NZ  | A_GLU_302 | OE2 | 3.408 |
| 5EZO | A_LYS_334 | NZ  | A_GLU_337 | OE1 | 3.354 |
| 5EZO | A_LYS_334 | NZ  | A_GLU_337 | OE2 | 2.671 |
| 5EZO | A_ARG_339 | NH2 | A_ASP_336 | OD2 | 3.220 |
| 5GGV | L_ARG_24  | NH1 | L_ASP_70  | OD1 | 2.800 |
| 5GGV | L_ARG_24  | NH1 | L_ASP_70  | OD2 | 3.234 |
| 5GGV | L_ARG_24  | NH2 | L_ASP_70  | OD1 | 3.597 |
| 5GGV | L_ARG_61  | NH2 | L_GLU_81  | OE2 | 3.323 |
| 5GGV | L_ARG_61  | NH2 | L_ASP_82  | OD1 | 2.670 |
| 5GGV | L_ARG_61  | NH2 | L_ASP_82  | OD2 | 3.226 |
| 5GGV | L_LYS_149 | NZ  | L_GLU_195 | OE1 | 3.933 |
| 5GGV | L_LYS_183 | NZ  | L_GLU_187 | OE2 | 3.997 |
| 5GGV | L_HIS_189 | ND1 | L_ASP_151 | OD2 | 2.820 |
| 5GGV | L_LYS_190 | NZ  | L_GLU_213 | OE2 | 2.696 |
| 5GGV | H_HIS_35  | NE2 | H_ASP_99  | OD2 | 2.983 |
| 5GGV | H_ARG_38  | NH1 | H_ASP_90  | OD1 | 2.864 |
| 5GGV | H_ARG_38  | NH2 | H_GLU_46  | OE1 | 3.166 |
| 5GGV | H_ARG_38  | NH2 | H_ASP_90  | OD1 | 3.783 |
| 5GGV | H_ARG_67  | NH1 | H_ASP_90  | OD1 | 3.548 |
| 5GGV | H_ARG_67  | NH1 | H_ASP_90  | OD2 | 3.804 |
| 5GGV | H_ARG_67  | NH2 | H_ASP_90  | OD1 | 3.503 |
| 5GGV | H_ARG_67  | NH2 | H_ASP_90  | OD2 | 2.364 |
| 5GGV | H_LYS_76  | NZ  | H_ASP_73  | OD2 | 3.976 |
| 5GGV | H_ARG_98  | NH2 | H_ASP_113 | OD1 | 3.862 |
| 5GGV | H_ARG_98  | NH2 | H_ASP_113 | OD2 | 2.927 |
| 5GGV | H_ARG_101 | NH1 | Y_GLU_97  | OE2 | 3.572 |
| 5GGV | H_LYS_155 | NZ  | H_ASP_156 | OD1 | 3.101 |
| 5GGV | H_LYS_155 | NZ  | H_ASP_156 | OD2 | 3.435 |

|      |           |     |           |     |       |
|------|-----------|-----|-----------|-----|-------|
| 5GGV | H.LYS_221 | NZ  | L.GLU_123 | OE1 | 2.304 |
| 5GGV | H.LYS_221 | NZ  | L.GLU_123 | OE2 | 3.975 |
| 5GKR | A.ARG_38  | NH1 | A.ASP_86  | OD1 | 2.742 |
| 5GKR | A.ARG_38  | NH2 | A.GLU_46  | OE1 | 2.810 |
| 5GKR | A.ARG_38  | NH2 | A.ASP_86  | OD1 | 3.641 |
| 5GKR | A.ARG_66  | NH1 | A.ASP_86  | OD1 | 3.332 |
| 5GKR | A.ARG_66  | NH1 | A.ASP_86  | OD2 | 3.801 |
| 5GKR | A.ARG_66  | NH2 | A.ASP_86  | OD1 | 3.354 |
| 5GKR | A.ARG_66  | NH2 | A.ASP_86  | OD2 | 2.729 |
| 5GKR | A.ARG_94  | NH1 | A.ASP_101 | OD1 | 3.700 |
| 5GKR | A.ARG_94  | NH1 | A.ASP_101 | OD2 | 2.566 |
| 5GKR | A.LYS_143 | NZ  | B.GLU_125 | OE2 | 2.806 |
| 5GKR | A.LYS_201 | NZ  | A.ASP_199 | OD2 | 2.935 |
| 5GKR | A.LYS_206 | NZ  | A.ASP_199 | OD1 | 3.198 |
| 5GKR | A.LYS_209 | NZ  | B.GLU_124 | OE1 | 2.825 |
| 5GKR | A.LYS_209 | NZ  | B.GLU_124 | OE2 | 3.325 |
| 5GKR | B.LYS_53  | NZ  | B.ASP_50  | OD2 | 3.716 |
| 5GKR | B.ARG_61  | NH2 | B.GLU_81  | OE2 | 3.803 |
| 5GKR | B.ARG_61  | NH2 | B.ASP_82  | OD1 | 2.896 |
| 5GKR | B.ARG_61  | NH2 | B.ASP_82  | OD2 | 3.817 |
| 5GKR | B.LYS_130 | NZ  | A.ASP_144 | OD2 | 3.639 |
| 5GKR | B.LYS_164 | NZ  | B.ASP_85  | OD2 | 2.873 |
| 5GKR | B.HIS_189 | ND1 | B.ASP_152 | OD2 | 3.078 |
| 5GKR | C.ARG_38  | NH1 | C.ASP_86  | OD1 | 2.720 |
| 5GKR | C.ARG_38  | NH2 | C.GLU_46  | OE2 | 2.991 |
| 5GKR | C.ARG_38  | NH2 | C.ASP_86  | OD1 | 3.638 |
| 5GKR | C.ARG_66  | NH1 | C.ASP_86  | OD1 | 3.317 |
| 5GKR | C.ARG_66  | NH1 | C.ASP_86  | OD2 | 3.769 |
| 5GKR | C.ARG_66  | NH2 | C.ASP_86  | OD1 | 3.362 |
| 5GKR | C.ARG_66  | NH2 | C.ASP_86  | OD2 | 2.717 |
| 5GKR | C.ARG_94  | NH2 | C.ASP_101 | OD1 | 3.797 |
| 5GKR | C.ARG_94  | NH2 | C.ASP_101 | OD2 | 2.747 |
| 5GKR | C.LYS_143 | NZ  | D.GLU_125 | OE2 | 2.591 |
| 5GKR | C.LYS_206 | NZ  | C.ASP_199 | OD1 | 3.203 |
| 5GKR | C.LYS_209 | NZ  | D.GLU_124 | OE1 | 2.486 |
| 5GKR | C.LYS_209 | NZ  | D.GLU_124 | OE2 | 2.893 |
| 5GKR | D.LYS_53  | NZ  | D.ASP_50  | OD2 | 3.715 |
| 5GKR | D.ARG_61  | NH1 | D.ASP_82  | OD1 | 3.020 |
| 5GKR | D.ARG_61  | NH1 | D.ASP_82  | OD2 | 3.903 |
| 5GKR | D.LYS_130 | NZ  | C.ASP_144 | OD2 | 3.574 |
| 5GKR | D.LYS_164 | NZ  | D.ASP_85  | OD2 | 2.940 |
| 5GKR | D.ARG_190 | NH2 | D.ASP_152 | OD1 | 3.635 |
| 5GKS | A.ARG_38  | NH1 | A.ASP_86  | OD1 | 2.822 |
| 5GKS | A.ARG_38  | NH2 | A.GLU_46  | OE1 | 2.937 |
| 5GKS | A.ARG_38  | NH2 | A.ASP_86  | OD1 | 3.692 |
| 5GKS | A.ARG_66  | NH1 | A.ASP_86  | OD1 | 3.105 |
| 5GKS | A.ARG_66  | NH1 | A.ASP_86  | OD2 | 3.788 |
| 5GKS | A.ARG_66  | NH2 | A.ASP_86  | OD1 | 3.456 |
| 5GKS | A.ARG_66  | NH2 | A.ASP_86  | OD2 | 2.799 |
| 5GKS | A.ARG_94  | NH1 | A.ASP_101 | OD1 | 3.889 |
| 5GKS | A.ARG_94  | NH1 | A.ASP_101 | OD2 | 2.710 |
| 5GKS | A.ARG_96  | NH2 | A.ASP_101 | OD2 | 3.709 |
| 5GKS | A.LYS_143 | NZ  | A.ASP_144 | OD1 | 3.345 |
| 5GKS | A.LYS_143 | NZ  | A.ASP_144 | OD2 | 3.710 |
| 5GKS | A.LYS_    | NZ  | A.ASP_    | OD2 | 3.919 |
| 5GKS | A.LYS_    | NZ  | B.GLU_124 | OE1 | 3.518 |
| 5GKS | A.LYS_    | NZ  | B.GLU_124 | OE2 | 2.790 |
| 5GKS | B.LYS_53  | NZ  | B.ASP_50  | OD2 | 3.623 |

|      |           |     |           |     |       |
|------|-----------|-----|-----------|-----|-------|
| 5GKS | B_ARG_    | NH1 | B_ASP_    | OD1 | 2.870 |
| 5GKS | B_ARG_    | NH1 | B_ASP_82  | OD2 | 3.493 |
| 5GKS | B_LYS_111 | NZ  | B_GLU_199 | OE1 | 3.161 |
| 5GKS | B_LYS_130 | NZ  | A_ASP_144 | OD2 | 3.783 |
| 5GKS | B_LYS_150 | NZ  | B_GLU_204 | OE2 | 3.960 |
| 5GKS | B_LYS_164 | NZ  | B_ASP_85  | OD2 | 3.552 |
| 5GKS | B_HIS_189 | ND1 | B_ASP_152 | OD2 | 3.043 |
| 5GKS | C_ARG_    | NH1 | C_ASP_    | OD1 | 2.746 |
| 5GKS | C_ARG_    | NH2 | C_GLU_    | OE1 | 3.164 |
| 5GKS | C_ARG_    | NH2 | C_ASP_    | OD1 | 3.556 |
| 5GKS | C_ARG_66  | NH1 | C_ASP_    | OD1 | 3.136 |
| 5GKS | C_ARG_66  | NH1 | C_ASP_    | OD2 | 3.770 |
| 5GKS | C_ARG_66  | NH2 | C_ASP_    | OD1 | 3.522 |
| 5GKS | C_ARG_66  | NH2 | C_ASP_    | OD2 | 2.841 |
| 5GKS | C_ARG_    | NH1 | C_ASP_    | OD1 | 3.682 |
| 5GKS | C_ARG_    | NH1 | C_ASP_    | OD2 | 2.656 |
| 5GKS | C_ARG_    | NH2 | C_ASP_    | OD2 | 3.498 |
| 5GKS | C_LYS_    | NZ  | C_ASP_    | OD1 | 3.276 |
| 5GKS | C_LYS_    | NZ  | C_ASP_    | OD2 | 3.251 |
| 5GKS | C_LYS_    | NZ  | C_ASP_    | OD2 | 3.224 |
| 5GKS | C_LYS_    | NZ  | C_ASP_    | OD1 | 3.903 |
| 5GKS | C_LYS_    | NZ  | C_ASP_    | OD2 | 3.334 |
| 5GKS | C_LYS_    | NZ  | D_GLU_    | OE1 | 3.455 |
| 5GKS | C_LYS_    | NZ  | D_GLU_    | OE2 | 2.665 |
| 5GKS | D_LYS_    | NZ  | D_ASP_    | OD2 | 3.974 |
| 5GKS | D_ARG_    | NH1 | D_ASP_    | OD1 | 2.964 |
| 5GKS | D_ARG_    | NH1 | D_GLU_    | OE2 | 3.512 |
| 5GKS | D_ARG_    | NH1 | D_ASP_    | OD1 | 2.891 |
| 5GKS | D_ARG_    | NH1 | D_ASP_    | OD2 | 3.896 |
| 5GKS | D_LYS_    | NZ  | D_GLU_    | OE1 | 2.751 |
| 5GKS | D_LYS_    | NZ  | D_GLU_    | OE2 | 3.899 |
| 5GKS | D_HIS_189 | ND1 | D_ASP_152 | OD2 | 3.002 |
| 5HDQ | A_HIS_40  | NE2 | A_ASP_58  | OD1 | 2.837 |
| 5HDQ | A_HIS_50  | NE2 | A_GLU_189 | OE2 | 3.103 |
| 5HDQ | A_HIS_50  | NE2 | A_ASP_264 | OD1 | 3.865 |
| 5HDQ | A_HIS_50  | NE2 | A_ASP_264 | OD2 | 3.335 |
| 5HDQ | A_HIS_123 | ND1 | A_ASP_121 | OD2 | 2.936 |
| 5HDQ | A_HIS_123 | NE2 | A_GLU_189 | OE1 | 3.291 |
| 5HDQ | A_HIS_123 | NE2 | A_GLU_189 | OE2 | 3.492 |
| 5HDQ | A_HIS_123 | NE2 | A_ASP_264 | OD1 | 2.880 |
| 5HDQ | A_HIS_123 | NE2 | A_ASP_264 | OD2 | 3.860 |
| 5HDQ | A_HIS_149 | ND1 | A_ASP_146 | OD1 | 3.055 |
| 5HDQ | A_HIS_149 | ND1 | A_ASP_146 | OD2 | 2.834 |
| 5HDQ | A_LYS_172 | NZ  | A_ASP_129 | OD1 | 3.820 |
| 5HDQ | A_LYS_193 | NZ  | A_GLU_208 | OE2 | 3.325 |
| 5HDQ | A_HIS_230 | ND1 | A_GLU_181 | OE1 | 3.289 |
| 5HDQ | A_HIS_234 | ND1 | H_ASP_97  | OD2 | 3.865 |
| 5HDQ | A_LYS_243 | NZ  | A_GLU_260 | OE2 | 3.481 |
| 5HDQ | A_LYS_254 | NZ  | A_GLU_251 | OE1 | 3.552 |
| 5HDQ | A_LYS_278 | NZ  | A_ASP_274 | OD1 | 2.808 |
| 5HDQ | A_HIS_288 | NE2 | A_ASP_177 | OD1 | 3.242 |
| 5HDQ | A_HIS_288 | NE2 | A_ASP_177 | OD2 | 3.881 |
| 5HDQ | H_LYS_62  | NZ  | H_GLU_46  | OE1 | 3.737 |
| 5HDQ | H_LYS_62  | NZ  | H_GLU_46  | OE2 | 2.605 |
| 5HDQ | H_LYS_66  | NZ  | H_ASP_86  | OD1 | 3.893 |
| 5HDQ | H_LYS_66  | NZ  | H_ASP_86  | OD2 | 2.747 |
| 5HDQ | H_ARG_94  | NH1 | H_ASP_101 | OD1 | 3.466 |
| 5HDQ | H_ARG_94  | NH1 | H_ASP_101 | OD2 | 2.979 |

|      |           |     |           |     |       |
|------|-----------|-----|-----------|-----|-------|
| 5HDQ | H.LYS_95  | NZ  | A_ASP_256 | OD2 | 3.739 |
| 5HDQ | H.LYS_208 | NZ  | L_GLU_123 | OE1 | 2.947 |
| 5HDQ | L.LYS_24  | NZ  | L_ASP_70  | OD2 | 2.740 |
| 5HDQ | L_ARG_54  | NH1 | L_ASP_60  | OD1 | 3.546 |
| 5HDQ | L_ARG_61  | NH1 | L_GLU_81  | OE1 | 3.772 |
| 5HDQ | L_ARG_61  | NH1 | L_ASP_82  | OD1 | 2.690 |
| 5HDQ | L_ARG_61  | NH1 | L_ASP_82  | OD2 | 3.697 |
| 5HDQ | L.LYS_103 | NZ  | L_GLU_105 | OE2 | 3.387 |
| 5HDQ | L.LYS_142 | NZ  | L_GLU_105 | OE1 | 3.286 |
| 5HDQ | L.LYS_142 | NZ  | L_GLU_105 | OE2 | 2.974 |
| 5HDQ | L.LYS_149 | NZ  | L_GLU_195 | OE2 | 3.652 |
| 5HDQ | L.LYS_183 | NZ  | L_GLU_187 | OE1 | 2.880 |
| 5HDQ | L.LYS_183 | NZ  | L_GLU_187 | OE2 | 3.085 |
| 5HDQ | L.HIS_189 | ND1 | L_ASP_151 | OD2 | 2.925 |
| 5HDQ | L.HIS_189 | NE2 | L_GLU_185 | OE1 | 3.931 |
| 5HDQ | L.HIS_189 | NE2 | L_GLU_185 | OE2 | 3.287 |
| 5HMG | A.LYS_27  | NZ  | B_GLU_97  | OE1 | 2.931 |
| 5HMG | A.LYS_27  | NZ  | B_GLU_97  | OE2 | 3.005 |
| 5HMG | A.HIS_56  | ND1 | A_ASP_85  | OD2 | 3.602 |
| 5HMG | A_ARG_57  | NH1 | A_GLU_82  | OE1 | 2.653 |
| 5HMG | A_ARG_57  | NH1 | A_GLU_82  | OE2 | 3.746 |
| 5HMG | A.HIS_75  | ND1 | A_ASP_73  | OD1 | 3.505 |
| 5HMG | A.HIS_75  | ND1 | A_ASP_73  | OD2 | 2.667 |
| 5HMG | A.HIS_75  | NE2 | A_ASP_63  | OD1 | 3.736 |
| 5HMG | A_ARG_90  | NH1 | A_ASP_60  | OD1 | 2.782 |
| 5HMG | A_ARG_90  | NH1 | A_ASP_60  | OD2 | 3.490 |
| 5HMG | A_ARG_109 | NH1 | B_GLU_67  | OE1 | 2.841 |
| 5HMG | A_ARG_109 | NH1 | B_GLU_67  | OE2 | 3.185 |
| 5HMG | A_ARG_109 | NH2 | A_GLU_89  | OE1 | 2.955 |
| 5HMG | A_ARG_109 | NH2 | A_GLU_89  | OE2 | 2.579 |
| 5HMG | A_ARG_141 | NH1 | A_ASP_77  | OD1 | 3.382 |
| 5HMG | A_ARG_141 | NH1 | A_ASP_77  | OD2 | 3.145 |
| 5HMG | A_ARG_141 | NH2 | A_ASP_77  | OD1 | 2.618 |
| 5HMG | A_ARG_141 | NH2 | A_ASP_77  | OD2 | 2.942 |
| 5HMG | A.LYS_176 | NZ  | A_GLU_123 | OE1 | 2.608 |
| 5HMG | A.LYS_176 | NZ  | A_GLU_123 | OE2 | 3.621 |
| 5HMG | A.HIS_183 | NE2 | A_GLU_190 | OE1 | 3.761 |
| 5HMG | A_ARG_207 | NH2 | A_ASP_241 | OD1 | 3.512 |
| 5HMG | A_ARG_261 | NH1 | A_GLU_119 | OE1 | 3.028 |
| 5HMG | A_ARG_261 | NH1 | A_GLU_119 | OE2 | 3.069 |
| 5HMG | A_ARG_261 | NH2 | A_GLU_119 | OE1 | 2.801 |
| 5HMG | A_ARG_261 | NH2 | A_GLU_119 | OE2 | 2.923 |
| 5HMG | A.LYS_264 | NZ  | A_ASP_85  | OD1 | 3.963 |
| 5HMG | A.LYS_264 | NZ  | A_ASP_85  | OD2 | 2.713 |
| 5HMG | A_ARG_269 | NH1 | B_GLU_67  | OE1 | 3.577 |
| 5HMG | A_ARG_269 | NH2 | B_GLU_67  | OE1 | 3.220 |
| 5HMG | A.LYS_292 | NZ  | A_ASP_291 | OD1 | 2.545 |
| 5HMG | A.LYS_299 | NZ  | B_GLU_69  | OE1 | 3.343 |
| 5HMG | A.LYS_310 | NZ  | B_ASP_86  | OD1 | 3.434 |
| 5HMG | A.LYS_310 | NZ  | B_ASP_90  | OD1 | 2.661 |
| 5HMG | A.LYS_315 | NZ  | A_GLU_41  | OE2 | 2.757 |
| 5HMG | B.LYS_51  | NZ  | B_GLU_103 | OE2 | 2.773 |
| 5HMG | B_ARG_54  | NH1 | F_GLU_97  | OE1 | 2.843 |
| 5HMG | B_ARG_54  | NH2 | B_GLU_57  | OE2 | 3.728 |
| 5HMG | B_ARG_54  | NH2 | F_GLU_97  | OE1 | 2.937 |
| 5HMG | B.LYS_58  | NZ  | B_GLU_57  | OE1 | 3.084 |
| 5HMG | B.LYS_58  | NZ  | B_GLU_57  | OE2 | 3.561 |
| 5HMG | B.LYS_58  | NZ  | F_GLU_97  | OE1 | 3.606 |

|      |           |     |           |     |       |
|------|-----------|-----|-----------|-----|-------|
| 5HMG | B.LYS_58  | NZ  | F_GLU_97  | OE2 | 3.524 |
| 5HMG | B.LYS_62  | NZ  | F_ASP_86  | OD1 | 3.085 |
| 5HMG | B.LYS_62  | NZ  | F_ASP_86  | OD2 | 2.792 |
| 5HMG | B.LYS_62  | NZ  | F_ASP_90  | OD1 | 3.679 |
| 5HMG | B.LYS_62  | NZ  | F_ASP_90  | OD2 | 2.748 |
| 5HMG | B_HIS_64  | NE2 | F_ASP_79  | OD2 | 3.617 |
| 5HMG | B.LYS_68  | NZ  | B_GLU_85  | OE1 | 3.409 |
| 5HMG | B.LYS_68  | NZ  | B_GLU_85  | OE2 | 2.733 |
| 5HMG | B_ARG_76  | NH1 | D_GLU_74  | OE1 | 3.275 |
| 5HMG | B_ARG_76  | NH1 | D_GLU_74  | OE2 | 2.882 |
| 5HMG | B_ARG_76  | NH1 | D_GLU_81  | OE1 | 2.781 |
| 5HMG | B_ARG_76  | NH1 | D_GLU_81  | OE2 | 3.484 |
| 5HMG | B_ARG_76  | NH2 | D_GLU_74  | OE1 | 2.814 |
| 5HMG | B_ARG_76  | NH2 | D_GLU_74  | OE2 | 3.691 |
| 5HMG | B.LYS_117 | NZ  | B_GLU_114 | OE1 | 2.674 |
| 5HMG | B.LYS_117 | NZ  | B_GLU_114 | OE2 | 3.512 |
| 5HMG | B_ARG_123 | NH1 | B_GLU_120 | OE1 | 3.893 |
| 5HMG | B_ARG_123 | NH1 | F_GLU_132 | OE2 | 3.002 |
| 5HMG | B_ARG_123 | NH2 | B_GLU_120 | OE1 | 2.612 |
| 5HMG | B_ARG_123 | NH2 | B_GLU_120 | OE2 | 3.339 |
| 5HMG | B_ARG_124 | NH1 | B_GLU_120 | OE1 | 3.640 |
| 5HMG | B_ARG_124 | NH1 | F_GLU_132 | OE1 | 3.424 |
| 5HMG | B_ARG_124 | NH1 | F_GLU_132 | OE2 | 3.265 |
| 5HMG | B_ARG_124 | NH2 | B_GLU_120 | OE1 | 3.919 |
| 5HMG | B_ARG_127 | NH2 | F_GLU_131 | OE1 | 2.537 |
| 5HMG | B.LYS_143 | NZ  | B_ASP_145 | OD1 | 2.698 |
| 5HMG | B_ARG_153 | NH2 | B_GLU_150 | OE1 | 3.021 |
| 5HMG | B_HIS_159 | NE2 | B_ASP_160 | OD2 | 3.062 |
| 5HMG | B_ARG_163 | NH1 | F_GLU_131 | OE1 | 2.770 |
| 5HMG | B_ARG_163 | NH1 | F_GLU_131 | OE2 | 2.532 |
| 5HMG | B_ARG_170 | NH1 | B_GLU_128 | OE1 | 3.922 |
| 5HMG | B_ARG_170 | NH1 | B_GLU_131 | OE2 | 3.597 |
| 5HMG | B_ARG_170 | NH1 | D_GLU_128 | OE1 | 3.169 |
| 5HMG | B_ARG_170 | NH1 | D_GLU_128 | OE2 | 3.597 |
| 5HMG | B_ARG_170 | NH2 | B_GLU_128 | OE1 | 3.011 |
| 5HMG | C.LYS_27  | NZ  | D_GLU_97  | OE1 | 2.934 |
| 5HMG | C.LYS_27  | NZ  | D_GLU_97  | OE2 | 2.988 |
| 5HMG | C_HIS_56  | ND1 | C_ASP_85  | OD2 | 3.578 |
| 5HMG | C_ARG_57  | NH1 | C_GLU_82  | OE1 | 2.634 |
| 5HMG | C_ARG_57  | NH1 | C_GLU_82  | OE2 | 3.752 |
| 5HMG | C_HIS_75  | ND1 | C_ASP_73  | OD1 | 3.515 |
| 5HMG | C_HIS_75  | ND1 | C_ASP_73  | OD2 | 2.678 |
| 5HMG | C_HIS_75  | NE2 | C_ASP_63  | OD1 | 3.699 |
| 5HMG | C_ARG_90  | NH1 | C_ASP_60  | OD1 | 2.783 |
| 5HMG | C_ARG_90  | NH1 | C_ASP_60  | OD2 | 3.521 |
| 5HMG | C_ARG_109 | NH1 | D_GLU_67  | OE1 | 2.853 |
| 5HMG | C_ARG_109 | NH1 | D_GLU_67  | OE2 | 3.184 |
| 5HMG | C_ARG_109 | NH2 | C_GLU_89  | OE1 | 2.925 |
| 5HMG | C_ARG_109 | NH2 | C_GLU_89  | OE2 | 2.571 |
| 5HMG | C_ARG_141 | NH1 | C_ASP_77  | OD1 | 3.417 |
| 5HMG | C_ARG_141 | NH1 | C_ASP_77  | OD2 | 3.195 |
| 5HMG | C_ARG_141 | NH2 | C_ASP_77  | OD1 | 2.635 |
| 5HMG | C_ARG_141 | NH2 | C_ASP_77  | OD2 | 2.953 |
| 5HMG | C.LYS_176 | NZ  | C_GLU_123 | OE1 | 2.578 |
| 5HMG | C.LYS_176 | NZ  | C_GLU_123 | OE2 | 3.604 |
| 5HMG | C_HIS_183 | NE2 | C_GLU_190 | OE1 | 3.762 |
| 5HMG | C_ARG_207 | NH2 | C_ASP_241 | OD1 | 3.485 |
| 5HMG | C_ARG_261 | NH1 | C_GLU_119 | OE1 | 3.007 |



|      |           |     |           |     |       |
|------|-----------|-----|-----------|-----|-------|
| 5HMG | C_ARG_261 | NH1 | C_GLU_119 | OE2 | 3.058 |
| 5HMG | C_ARG_261 | NH2 | C_GLU_119 | OE1 | 2.812 |
| 5HMG | C_ARG_261 | NH2 | C_GLU_119 | OE2 | 2.915 |
| 5HMG | C_LYS_264 | NZ  | C_ASP_85  | OD1 | 3.974 |
| 5HMG | C_LYS_264 | NZ  | C_ASP_85  | OD2 | 2.709 |
| 5HMG | C_ARG_269 | NH1 | D_GLU_67  | OE1 | 3.552 |
| 5HMG | C_ARG_269 | NH2 | D_GLU_67  | OE1 | 3.173 |
| 5HMG | C_LYS_292 | NZ  | C_ASP_291 | OD1 | 2.561 |
| 5HMG | C_LYS_299 | NZ  | D_GLU_69  | OE1 | 3.348 |
| 5HMG | C_LYS_310 | NZ  | D_ASP_86  | OD1 | 3.449 |
| 5HMG | C_LYS_310 | NZ  | D_ASP_90  | OD1 | 2.638 |
| 5HMG | C_LYS_315 | NZ  | C_GLU_41  | OE2 | 2.755 |
| 5HMG | D_LYS_51  | NZ  | D_GLU_103 | OE2 | 2.776 |
| 5HMG | D_ARG_54  | NH1 | B_GLU_97  | OE1 | 2.819 |
| 5HMG | D_ARG_54  | NH2 | B_GLU_97  | OE1 | 2.943 |
| 5HMG | D_ARG_54  | NH2 | D_GLU_57  | OE2 | 3.747 |
| 5HMG | D_LYS_58  | NZ  | B_GLU_97  | OE1 | 3.646 |
| 5HMG | D_LYS_58  | NZ  | B_GLU_97  | OE2 | 3.528 |
| 5HMG | D_LYS_58  | NZ  | D_GLU_57  | OE1 | 3.109 |
| 5HMG | D_LYS_58  | NZ  | D_GLU_57  | OE2 | 3.568 |
| 5HMG | D_LYS_62  | NZ  | B_ASP_86  | OD1 | 3.110 |
| 5HMG | D_LYS_62  | NZ  | B_ASP_86  | OD2 | 2.718 |
| 5HMG | D_LYS_62  | NZ  | B_ASP_90  | OD1 | 3.686 |
| 5HMG | D_LYS_62  | NZ  | B_ASP_90  | OD2 | 2.685 |
| 5HMG | D_HIS_64  | NE2 | B_ASP_79  | OD2 | 3.446 |
| 5HMG | D_LYS_68  | NZ  | D_GLU_85  | OE1 | 3.418 |
| 5HMG | D_LYS_68  | NZ  | D_GLU_85  | OE2 | 2.785 |
| 5HMG | D_ARG_76  | NH1 | F_GLU_74  | OE1 | 3.349 |
| 5HMG | D_ARG_76  | NH1 | F_GLU_74  | OE2 | 2.805 |
| 5HMG | D_ARG_76  | NH1 | F_GLU_81  | OE1 | 2.685 |
| 5HMG | D_ARG_76  | NH1 | F_GLU_81  | OE2 | 3.513 |
| 5HMG | D_ARG_76  | NH2 | F_GLU_74  | OE1 | 2.710 |
| 5HMG | D_ARG_76  | NH2 | F_GLU_74  | OE2 | 3.478 |
| 5HMG | D_LYS_117 | NZ  | D_GLU_114 | OE1 | 2.687 |
| 5HMG | D_LYS_117 | NZ  | D_GLU_114 | OE2 | 3.495 |
| 5HMG | D_ARG_123 | NH1 | B_GLU_132 | OE2 | 2.981 |
| 5HMG | D_ARG_123 | NH1 | D_GLU_120 | OE1 | 3.874 |
| 5HMG | D_ARG_123 | NH2 | D_GLU_120 | OE1 | 2.616 |
| 5HMG | D_ARG_123 | NH2 | D_GLU_120 | OE2 | 3.345 |
| 5HMG | D_ARG_124 | NH1 | B_GLU_132 | OE1 | 3.466 |
| 5HMG | D_ARG_124 | NH1 | B_GLU_132 | OE2 | 3.303 |
| 5HMG | D_ARG_124 | NH1 | D_GLU_120 | OE1 | 3.636 |
| 5HMG | D_ARG_124 | NH2 | D_GLU_120 | OE1 | 3.931 |
| 5HMG | D_ARG_127 | NH2 | B_GLU_131 | OE1 | 2.578 |
| 5HMG | D_LYS_143 | NZ  | D_ASP_145 | OD1 | 2.713 |
| 5HMG | D_ARG_153 | NH2 | D_GLU_150 | OE1 | 2.620 |
| 5HMG | D_HIS_159 | NE2 | D_ASP_160 | OD2 | 3.088 |
| 5HMG | D_ARG_163 | NH1 | B_GLU_131 | OE1 | 2.694 |
| 5HMG | D_ARG_163 | NH1 | B_GLU_131 | OE2 | 2.571 |
| 5HMG | D_ARG_170 | NH1 | D_GLU_128 | OE1 | 3.949 |
| 5HMG | D_ARG_170 | NH1 | D_GLU_131 | OE2 | 3.612 |
| 5HMG | D_ARG_170 | NH1 | F_GLU_128 | OE1 | 3.252 |
| 5HMG | D_ARG_170 | NH1 | F_GLU_128 | OE2 | 3.705 |
| 5HMG | D_ARG_170 | NH2 | D_GLU_128 | OE1 | 3.068 |
| 5HMG | E_LYS_27  | NZ  | F_GLU_97  | OE1 | 2.935 |
| 5HMG | E_LYS_27  | NZ  | F_GLU_97  | OE2 | 3.012 |
| 5HMG | E_HIS_56  | ND1 | E_ASP_85  | OD2 | 3.574 |
| 5HMG | E_ARG_57  | NH1 | E_GLU_82  | OE1 | 2.672 |

|      |           |     |           |     |       |
|------|-----------|-----|-----------|-----|-------|
| 5HMG | E_ARG_57  | NH1 | E_GLU_82  | OE2 | 3.760 |
| 5HMG | E_HIS_75  | ND1 | E_ASP_73  | OD1 | 3.480 |
| 5HMG | E_HIS_75  | ND1 | E_ASP_73  | OD2 | 2.665 |
| 5HMG | E_HIS_75  | NE2 | E_ASP_63  | OD1 | 3.721 |
| 5HMG | E_ARG_90  | NH1 | E_ASP_60  | OD1 | 2.808 |
| 5HMG | E_ARG_90  | NH1 | E_ASP_60  | OD2 | 3.495 |
| 5HMG | E_ARG_109 | NH1 | F_GLU_67  | OE1 | 2.825 |
| 5HMG | E_ARG_109 | NH1 | F_GLU_67  | OE2 | 3.180 |
| 5HMG | E_ARG_109 | NH2 | E_GLU_89  | OE1 | 2.931 |
| 5HMG | E_ARG_109 | NH2 | E_GLU_89  | OE2 | 2.544 |
| 5HMG | E_ARG_141 | NH1 | E_ASP_77  | OD1 | 3.401 |
| 5HMG | E_ARG_141 | NH1 | E_ASP_77  | OD2 | 3.198 |
| 5HMG | E_ARG_141 | NH2 | E_ASP_77  | OD1 | 2.626 |
| 5HMG | E_ARG_141 | NH2 | E_ASP_77  | OD2 | 2.960 |
| 5HMG | E_LYS_176 | NZ  | E_GLU_123 | OE1 | 2.587 |
| 5HMG | E_LYS_176 | NZ  | E_GLU_123 | OE2 | 3.609 |
| 5HMG | E_HIS_183 | NE2 | E_GLU_190 | OE1 | 3.758 |
| 5HMG | E_ARG_207 | NH2 | E_ASP_241 | OD1 | 3.508 |
| 5HMG | E_ARG_261 | NH1 | E_GLU_119 | OE1 | 2.998 |
| 5HMG | E_ARG_261 | NH1 | E_GLU_119 | OE2 | 3.065 |
| 5HMG | E_ARG_261 | NH2 | E_GLU_119 | OE1 | 2.789 |
| 5HMG | E_ARG_261 | NH2 | E_GLU_119 | OE2 | 2.904 |
| 5HMG | E_LYS_264 | NZ  | E_ASP_85  | OD1 | 3.978 |
| 5HMG | E_LYS_264 | NZ  | E_ASP_85  | OD2 | 2.713 |
| 5HMG | E_ARG_269 | NH1 | F_GLU_67  | OE1 | 3.584 |
| 5HMG | E_ARG_269 | NH2 | F_GLU_67  | OE1 | 3.233 |
| 5HMG | E_LYS_292 | NZ  | E_ASP_291 | OD1 | 2.537 |
| 5HMG | E_LYS_299 | NZ  | F_GLU_69  | OE1 | 3.318 |
| 5HMG | E_LYS_310 | NZ  | F_ASP_86  | OD1 | 3.440 |
| 5HMG | E_LYS_310 | NZ  | F_ASP_90  | OD1 | 2.621 |
| 5HMG | E_LYS_315 | NZ  | E_GLU_41  | OE2 | 2.747 |
| 5HMG | F_LYS_51  | NZ  | F_GLU_103 | OE2 | 2.774 |
| 5HMG | F_ARG_54  | NH1 | D_GLU_97  | OE1 | 2.726 |
| 5HMG | F_ARG_54  | NH2 | D_GLU_97  | OE1 | 2.912 |
| 5HMG | F_ARG_54  | NH2 | F_GLU_57  | OE2 | 3.744 |
| 5HMG | F_LYS_58  | NZ  | D_GLU_97  | OE1 | 3.765 |
| 5HMG | F_LYS_58  | NZ  | D_GLU_97  | OE2 | 3.593 |
| 5HMG | F_LYS_58  | NZ  | F_GLU_57  | OE1 | 3.108 |
| 5HMG | F_LYS_58  | NZ  | F_GLU_57  | OE2 | 3.569 |
| 5HMG | F_LYS_62  | NZ  | D_ASP_86  | OD1 | 3.013 |
| 5HMG | F_LYS_62  | NZ  | D_ASP_86  | OD2 | 2.694 |
| 5HMG | F_LYS_62  | NZ  | D_ASP_90  | OD1 | 3.718 |
| 5HMG | F_LYS_62  | NZ  | D_ASP_90  | OD2 | 2.750 |
| 5HMG | F_HIS_64  | NE2 | D_ASP_79  | OD1 | 3.885 |
| 5HMG | F_HIS_64  | NE2 | D_ASP_79  | OD2 | 3.364 |
| 5HMG | F_LYS_68  | NZ  | F_GLU_85  | OE1 | 3.382 |
| 5HMG | F_LYS_68  | NZ  | F_GLU_85  | OE2 | 2.722 |
| 5HMG | F_ARG_76  | NH1 | B_GLU_74  | OE1 | 3.251 |
| 5HMG | F_ARG_76  | NH1 | B_GLU_74  | OE2 | 2.826 |
| 5HMG | F_ARG_76  | NH1 | B_GLU_81  | OE1 | 2.735 |
| 5HMG | F_ARG_76  | NH1 | B_GLU_81  | OE2 | 3.601 |
| 5HMG | F_ARG_76  | NH2 | B_GLU_74  | OE1 | 2.649 |
| 5HMG | F_ARG_76  | NH2 | B_GLU_74  | OE2 | 3.569 |
| 5HMG | F_LYS_117 | NZ  | F_GLU_114 | OE1 | 2.666 |
| 5HMG | F_LYS_117 | NZ  | F_GLU_114 | OE2 | 3.516 |
| 5HMG | F_ARG_123 | NH1 | D_GLU_132 | OE2 | 2.992 |
| 5HMG | F_ARG_123 | NH1 | F_GLU_120 | OE1 | 3.906 |
| 5HMG | F_ARG_123 | NH2 | F_GLU_120 | OE1 | 2.639 |

|      |           |     |           |     |       |
|------|-----------|-----|-----------|-----|-------|
| 5HMG | F_ARG.123 | NH2 | F_GLU.120 | OE2 | 3.377 |
| 5HMG | F_ARG.124 | NH1 | D_GLU.132 | OE1 | 3.514 |
| 5HMG | F_ARG.124 | NH1 | D_GLU.132 | OE2 | 3.395 |
| 5HMG | F_ARG.124 | NH1 | F_GLU.120 | OE1 | 3.630 |
| 5HMG | F_ARG.124 | NH2 | F_GLU.120 | OE1 | 3.883 |
| 5HMG | F_ARG.127 | NH2 | D_GLU.131 | OE1 | 2.609 |
| 5HMG | F_LYS.143 | NZ  | F_ASP.145 | OD1 | 2.695 |
| 5HMG | F_HIS.159 | NE2 | F_ASP.160 | OD2 | 3.088 |
| 5HMG | F_ARG.163 | NH1 | D_GLU.131 | OE1 | 2.712 |
| 5HMG | F_ARG.163 | NH1 | D_GLU.131 | OE2 | 2.596 |
| 5HMG | F_ARG.170 | NH1 | B_GLU.128 | OE1 | 3.210 |
| 5HMG | F_ARG.170 | NH1 | B_GLU.128 | OE2 | 3.530 |
| 5HMG | F_ARG.170 | NH1 | F_GLU.128 | OE1 | 3.950 |
| 5HMG | F_ARG.170 | NH1 | F_GLU.131 | OE2 | 3.600 |
| 5HMG | F_ARG.170 | NH2 | F_GLU.128 | OE1 | 3.064 |
| 5I4F | A_LYS.64  | NZ  | A_GLU.47  | OE2 | 2.666 |
| 5I4F | A_LYS.68  | NZ  | A_ASP.91  | OD1 | 3.548 |
| 5I4F | A_LYS.68  | NZ  | A_ASP.91  | OD2 | 2.948 |
| 5I4F | A_ARG.99  | NH2 | A_ASP.108 | OD1 | 3.501 |
| 5I4F | A_ARG.99  | NH2 | A_ASP.108 | OD2 | 2.781 |
| 5I4F | A_ARG.198 | NH2 | A_ASP.204 | OD1 | 3.850 |
| 5I4F | A_ARG.205 | NH1 | A_GLU.223 | OE2 | 3.321 |
| 5I4F | A_ARG.205 | NH2 | A_GLU.223 | OE1 | 3.768 |
| 5I4F | A_ARG.205 | NH2 | A_GLU.223 | OE2 | 3.756 |
| 5I4F | A_ARG.205 | NH2 | A_GLU.225 | OE2 | 2.829 |
| 5I4F | A_ARG.205 | NH2 | A_ASP.226 | OD1 | 2.710 |
| 5I4F | A_ARG.205 | NH2 | A_ASP.226 | OD2 | 3.577 |
| 5I76 | A_ARG.24  | NH1 | A_ASP.70  | OD2 | 3.774 |
| 5I76 | A_LYS.49  | NZ  | A_GLU.53  | OE1 | 2.941 |
| 5I76 | A_LYS.49  | NZ  | B_GLU.105 | OE1 | 3.995 |
| 5I76 | A_ARG.61  | NH1 | A_GLU.79  | OE2 | 3.393 |
| 5I76 | A_ARG.61  | NH1 | A_GLU.81  | OE2 | 3.803 |
| 5I76 | A_ARG.61  | NH2 | A_GLU.79  | OE2 | 3.760 |
| 5I76 | A_ARG.61  | NH2 | A_GLU.81  | OE2 | 2.766 |
| 5I76 | A_ARG.61  | NH2 | A_ASP.82  | OD1 | 2.773 |
| 5I76 | A_ARG.61  | NH2 | A_ASP.82  | OD2 | 3.589 |
| 5I76 | A_LYS.103 | NZ  | A_GLU.165 | OE1 | 3.841 |
| 5I76 | A_LYS.145 | NZ  | A_GLU.143 | OE1 | 3.548 |
| 5I76 | A_LYS.145 | NZ  | A_GLU.143 | OE2 | 2.870 |
| 5I76 | A_LYS.149 | NZ  | A_GLU.195 | OE1 | 2.637 |
| 5I76 | A_HIS.189 | ND1 | A_ASP.151 | OD2 | 3.111 |
| 5I76 | A_HIS.189 | NE2 | A_ASP.185 | OD1 | 3.124 |
| 5I76 | B_ARG.38  | NH1 | B_ASP.89  | OD1 | 2.810 |
| 5I76 | B_ARG.38  | NH2 | B_GLU.46  | OE1 | 3.124 |
| 5I76 | B_ARG.38  | NH2 | B_ASP.89  | OD1 | 3.773 |
| 5I76 | B_ARG.66  | NH1 | B_ASP.89  | OD1 | 3.709 |
| 5I76 | B_ARG.66  | NH1 | B_ASP.89  | OD2 | 2.960 |
| 5I76 | B_ARG.66  | NH2 | B_ASP.89  | OD1 | 2.836 |
| 5I76 | B_ARG.66  | NH2 | B_ASP.89  | OD2 | 3.415 |
| 5I76 | B_LYS.149 | NZ  | B_ASP.150 | OD1 | 3.571 |
| 5I76 | B_LYS.215 | NZ  | A_GLU.123 | OE1 | 2.731 |
| 5I76 | B_LYS.215 | NZ  | A_GLU.123 | OE2 | 2.888 |
| 5I76 | B_ARG.216 | NH2 | B_GLU.218 | OE1 | 2.687 |
| 5I76 | B_LYS.220 | NZ  | A_ASP.122 | OD2 | 3.474 |
| 5I76 | C_ARG.24  | NH1 | A_ASP.70  | OD1 | 3.725 |
| 5I76 | C_ARG.24  | NH1 | A_ASP.70  | OD2 | 2.949 |
| 5I76 | C_ARG.24  | NH1 | C_ASP.70  | OD1 | 3.422 |
| 5I76 | C_ARG.24  | NH2 | A_ASP.70  | OD1 | 3.138 |

|      |           |     |           |     |       |
|------|-----------|-----|-----------|-----|-------|
| 5I76 | C_ARG_24  | NH2 | A_ASP_70  | OD2 | 3.394 |
| 5I76 | C_LYS_49  | NZ  | C_GLU_53  | OE1 | 2.642 |
| 5I76 | C_ARG_61  | NH1 | C_GLU_79  | OE2 | 3.544 |
| 5I76 | C_ARG_61  | NH1 | C_GLU_81  | OE2 | 3.961 |
| 5I76 | C_ARG_61  | NH2 | C_GLU_79  | OE2 | 3.781 |
| 5I76 | C_ARG_61  | NH2 | C_GLU_81  | OE2 | 2.825 |
| 5I76 | C_ARG_61  | NH2 | C_ASP_82  | OD1 | 2.761 |
| 5I76 | C_ARG_61  | NH2 | C_ASP_82  | OD2 | 3.560 |
| 5I76 | C_LYS_103 | NZ  | C_ASP_85  | OD1 | 3.711 |
| 5I76 | C_LYS_103 | NZ  | C_ASP_85  | OD2 | 3.969 |
| 5I76 | C_LYS_103 | NZ  | C_GLU_165 | OE1 | 3.241 |
| 5I76 | C_LYS_103 | NZ  | C_GLU_165 | OE2 | 3.658 |
| 5I76 | C_LYS_149 | NZ  | C_GLU_195 | OE1 | 2.493 |
| 5I76 | C_LYS_183 | NZ  | C_GLU_187 | OE1 | 3.091 |
| 5I76 | C_LYS_183 | NZ  | C_GLU_187 | OE2 | 3.350 |
| 5I76 | C_HIS_189 | ND1 | C_ASP_151 | OD2 | 2.352 |
| 5I76 | D_ARG_38  | NH1 | D_ASP_89  | OD1 | 2.883 |
| 5I76 | D_ARG_38  | NH2 | D_GLU_46  | OE1 | 3.400 |
| 5I76 | D_ARG_38  | NH2 | D_ASP_89  | OD1 | 3.880 |
| 5I76 | D_ARG_66  | NH1 | D_ASP_89  | OD1 | 3.587 |
| 5I76 | D_ARG_66  | NH1 | D_ASP_89  | OD2 | 2.851 |
| 5I76 | D_ARG_66  | NH2 | D_ASP_89  | OD1 | 2.736 |
| 5I76 | D_ARG_66  | NH2 | D_ASP_89  | OD2 | 3.459 |
| 5I76 | D_LYS_149 | NZ  | D_ASP_150 | OD1 | 2.862 |
| 5I76 | D_LYS_149 | NZ  | D_ASP_150 | OD2 | 2.853 |
| 5I76 | D_LYS_215 | NZ  | C_GLU_123 | OE1 | 2.596 |
| 5I76 | D_LYS_215 | NZ  | C_GLU_123 | OE2 | 3.738 |
| 5IHL | A_HIS_78  | NE2 | A_ASP_69  | OD1 | 3.151 |
| 5IHL | A_HIS_78  | NE2 | A_GLU_74  | OE1 | 3.112 |
| 5IHL | A_HIS_78  | NE2 | A_GLU_74  | OE2 | 3.476 |
| 5IHL | A_LYS_81  | NZ  | A_ASP_100 | OD2 | 3.844 |
| 5IHL | A_ARG_123 | NH1 | A_ASP_140 | OD2 | 3.023 |
| 5IHL | A_ARG_123 | NH2 | A_ASP_140 | OD2 | 3.466 |
| 5IHL | A_LYS_132 | NZ  | A_GLU_144 | OE2 | 3.445 |
| 5IHL | B_ARG_38  | NH1 | B_GLU_46  | OE2 | 3.444 |
| 5IHL | B_ARG_38  | NH1 | B_ASP_86  | OD1 | 3.975 |
| 5IHL | B_ARG_38  | NH2 | B_ASP_86  | OD1 | 3.323 |
| 5IHL | B_ARG_66  | NH1 | B_ASP_86  | OD1 | 3.298 |
| 5IHL | B_ARG_66  | NH1 | B_ASP_86  | OD2 | 2.656 |
| 5IHL | B_ARG_66  | NH2 | B_ASP_86  | OD1 | 3.517 |
| 5IHL | D_HIS_78  | NE2 | D_ASP_69  | OD1 | 3.189 |
| 5IHL | D_HIS_78  | NE2 | D_GLU_74  | OE1 | 3.120 |
| 5IHL | D_HIS_78  | NE2 | D_GLU_74  | OE2 | 3.496 |
| 5IHL | D_ARG_123 | NH2 | D_ASP_140 | OD2 | 3.433 |
| 5IHL | D_HIS_162 | NE2 | D_GLU_159 | OE1 | 3.297 |
| 5IHL | E_ARG_38  | NH1 | E_ASP_86  | OD1 | 3.969 |
| 5IHL | E_ARG_38  | NH2 | E_ASP_86  | OD1 | 3.308 |
| 5IHL | E_ARG_66  | NH1 | E_ASP_86  | OD1 | 3.287 |
| 5IHL | E_ARG_66  | NH1 | E_ASP_86  | OD2 | 2.657 |
| 5IHL | E_ARG_66  | NH2 | E_ASP_86  | OD1 | 3.504 |
| 5IHL | F_HIS_78  | ND1 | F_ASP_69  | OD1 | 3.127 |
| 5IHL | F_HIS_78  | NE2 | F_GLU_74  | OE1 | 3.224 |
| 5IHL | F_HIS_110 | ND1 | F_ASP_140 | OD1 | 3.789 |
| 5IHL | F_HIS_110 | ND1 | F_ASP_140 | OD2 | 2.873 |
| 5IHL | F_ARG_123 | NH1 | F_ASP_140 | OD2 | 3.408 |
| 5IHL | F_HIS_162 | NE2 | F_GLU_159 | OE1 | 2.954 |
| 5IHL | G_ARG_38  | NH1 | G_GLU_46  | OE1 | 3.917 |
| 5IHL | G_ARG_38  | NH1 | G_GLU_46  | OE2 | 3.596 |

|      |           |     |           |     |       |
|------|-----------|-----|-----------|-----|-------|
| 5IHL | G_ARG_38  | NH1 | G_ASP_86  | OD1 | 3.962 |
| 5IHL | G_ARG_38  | NH2 | G_ASP_86  | OD1 | 3.314 |
| 5IHL | G_ARG_66  | NH1 | G_ASP_86  | OD1 | 3.297 |
| 5IHL | G_ARG_66  | NH1 | G_ASP_86  | OD2 | 2.675 |
| 5IHL | G_ARG_66  | NH2 | G_ASP_86  | OD1 | 3.505 |
| 5IHL | H_LYS_29  | NZ  | H_GLU_28  | OE1 | 3.389 |
| 5IHL | H_HIS_78  | NE2 | H_ASP_69  | OD1 | 3.188 |
| 5IHL | H_HIS_78  | NE2 | H_GLU_74  | OE1 | 3.148 |
| 5IHL | H_HIS_78  | NE2 | H_GLU_74  | OE2 | 3.496 |
| 5IHL | L_ARG_38  | NH1 | L_GLU_46  | OE1 | 3.944 |
| 5IHL | L_ARG_38  | NH1 | L_GLU_46  | OE2 | 3.555 |
| 5IHL | L_ARG_38  | NH1 | L_ASP_86  | OD1 | 3.950 |
| 5IHL | L_ARG_38  | NH2 | L_ASP_86  | OD1 | 3.321 |
| 5IHL | L_ARG_66  | NH1 | L_ASP_86  | OD1 | 3.272 |
| 5IHL | L_ARG_66  | NH1 | L_ASP_86  | OD2 | 2.644 |
| 5IHL | L_ARG_66  | NH2 | L_ASP_86  | OD1 | 3.520 |
| 5ITB | H_ARG_43  | NH1 | H_ASP_98  | OD1 | 2.808 |
| 5ITB | H_ARG_43  | NH2 | H_GLU_51  | OE1 | 2.922 |
| 5ITB | H_ARG_43  | NH2 | H_GLU_51  | OE2 | 3.615 |
| 5ITB | H_ARG_43  | NH2 | H_ASP_98  | OD1 | 3.996 |
| 5ITB | H_ARG_75  | NH1 | H_ASP_98  | OD1 | 3.710 |
| 5ITB | H_ARG_75  | NH1 | H_ASP_98  | OD2 | 2.943 |
| 5ITB | H_ARG_75  | NH2 | H_ASP_98  | OD1 | 3.077 |
| 5ITB | H_ARG_75  | NH2 | H_ASP_98  | OD2 | 3.700 |
| 5ITB | H_ARG_107 | NH1 | H_ASP_114 | OD1 | 3.122 |
| 5ITB | H_ARG_111 | NH1 | L_GLU_68  | OE1 | 3.426 |
| 5ITB | H_ARG_111 | NH2 | H_ASP_114 | OD2 | 2.687 |
| 5ITB | H_ARG_111 | NH2 | H_ASP_116 | OD2 | 3.548 |
| 5ITB | H_ARG_111 | NH2 | L_GLU_68  | OE1 | 2.856 |
| 5ITB | H_LYS_224 | NZ  | L_GLU_143 | OE1 | 3.323 |
| 5ITB | H_LYS_224 | NZ  | L_GLU_143 | OE2 | 2.099 |
| 5ITB | H_ARG_225 | NH2 | H_GLU_227 | OE2 | 3.950 |
| 5ITB | L_LYS_45  | NZ  | L_ASP_97  | OD1 | 3.221 |
| 5ITB | L_LYS_45  | NZ  | L_ASP_97  | OD2 | 3.180 |
| 5ITB | L_ARG_75  | NH2 | L_ASP_98  | OD1 | 2.991 |
| 5ITB | L_ARG_75  | NH2 | L_ASP_98  | OD2 | 3.652 |
| 5ITB | L_LYS_203 | NZ  | L_GLU_207 | OE1 | 3.111 |
| 5ITB | L_LYS_203 | NZ  | L_GLU_207 | OE2 | 2.934 |
| 5ITB | L_HIS_209 | ND1 | L_ASP_171 | OD2 | 3.207 |
| 5ITB | L_HIS_209 | NE2 | L_ASP_205 | OD1 | 2.812 |
| 5ITB | L_HIS_209 | NE2 | L_ASP_205 | OD2 | 3.009 |
| 5J3D | A_ARG_43  | NH1 | A_ASP_98  | OD1 | 2.896 |
| 5J3D | A_ARG_43  | NH2 | A_GLU_51  | OE1 | 2.997 |
| 5J3D | A_ARG_43  | NH2 | A_GLU_51  | OE2 | 2.988 |
| 5J3D | A_ARG_75  | NH1 | A_ASP_98  | OD1 | 3.601 |
| 5J3D | A_ARG_75  | NH1 | A_ASP_98  | OD2 | 3.013 |
| 5J3D | A_ARG_75  | NH2 | A_ASP_98  | OD1 | 3.254 |
| 5J3D | A_ARG_95  | NH2 | A_GLU_97  | OE2 | 3.552 |
| 5J3D | A_ARG_107 | NH1 | A_ASP_114 | OD1 | 3.567 |
| 5J3D | A_ARG_111 | NH2 | A_ASP_114 | OD2 | 3.401 |
| 5J3D | A_ARG_111 | NH2 | B_GLU_68  | OE1 | 3.664 |
| 5J3D | A_LYS_158 | NZ  | A_ASP_159 | OD1 | 3.439 |
| 5J3D | A_LYS_158 | NZ  | A_ASP_159 | OD2 | 3.508 |
| 5J3D | A_LYS_224 | NZ  | B_GLU_143 | OE1 | 3.390 |
| 5J3D | A_LYS_229 | NZ  | B_ASP_142 | OD1 | 3.902 |
| 5J3D | A_LYS_229 | NZ  | B_ASP_142 | OD2 | 3.196 |
| 5J3D | B_LYS_45  | NZ  | B_ASP_97  | OD1 | 3.783 |
| 5J3D | B_ARG_75  | NH2 | B_ASP_97  | OD2 | 3.805 |

|      |           |     |           |     |       |
|------|-----------|-----|-----------|-----|-------|
| 5J3D | B_LYS_123 | NZ  | B_GLU_185 | OE2 | 3.379 |
| 5J3D | B_LYS_169 | NZ  | B_GLU_215 | OE2 | 3.640 |
| 5J3D | B_LYS_203 | NZ  | B_GLU_207 | OE2 | 2.374 |
| 5J3D | B_HIS_209 | ND1 | B_ASP_171 | OD1 | 3.892 |
| 5J3D | B_HIS_209 | ND1 | B_ASP_171 | OD2 | 2.212 |
| 5J3D | C_ARG_    | NH1 | C_ASP_    | OD1 | 3.000 |
| 5J3D | C_ARG_    | NH2 | C_GLU_    | OE1 | 3.686 |
| 5J3D | C_ARG_    | NH2 | C_ASP_    | OD1 | 3.849 |
| 5J3D | C_ARG_    | NH1 | C_ASP_    | OD1 | 3.639 |
| 5J3D | C_ARG_    | NH1 | C_ASP_    | OD2 | 3.007 |
| 5J3D | C_ARG_    | NH2 | C_ASP_    | OD1 | 3.160 |
| 5J3D | C_ARG_    | NH2 | C_ASP_    | OD2 | 3.889 |
| 5J3D | C_ARG_107 | NH1 | C_ASP_114 | OD1 | 2.971 |
| 5J3D | C_ARG_107 | NH1 | C_ASP_114 | OD2 | 3.218 |
| 5J3D | C_ARG_111 | NH2 | C_ASP_114 | OD2 | 3.073 |
| 5J3D | C_ARG_111 | NH2 | D_GLU_68  | OE1 | 3.489 |
| 5J3D | C_LYS_    | NZ  | C_ASP_    | OD1 | 3.508 |
| 5J3D | C_LYS_    | NZ  | C_ASP_    | OD2 | 3.782 |
| 5J3D | C_LYS_    | NZ  | D_GLU_    | OE1 | 3.377 |
| 5J3D | C_LYS_    | NZ  | D_ASP_    | OD1 | 2.847 |
| 5J3D | C_LYS_    | NZ  | D_ASP_    | OD2 | 2.791 |
| 5J3D | D_ARG_75  | NH2 | D_ASP_97  | OD1 | 3.325 |
| 5J3D | D_LYS_    | NZ  | D_GLU_    | OE1 | 3.275 |
| 5J3D | D_LYS_    | NZ  | D_GLU_    | OE2 | 2.521 |
| 5J3D | D_LYS_    | NZ  | D_GLU_    | OE1 | 3.944 |
| 5J3D | D_LYS_    | NZ  | D_GLU_    | OE2 | 3.225 |
| 5J3D | D_HIS_    | ND1 | D_ASP_    | OD2 | 2.270 |
| 5J3D | E_ARG_49  | NH2 | F_ASP_368 | OD1 | 2.801 |
| 5J3D | E_ARG_49  | NH2 | F_ASP_368 | OD2 | 3.628 |
| 5J3D | E_LYS_80  | NZ  | E_ASP_84  | OD2 | 2.975 |
| 5J3D | E_LYS_85  | NZ  | E_GLU_82  | OE1 | 3.904 |
| 5J3D | E_LYS_85  | NZ  | E_GLU_82  | OE2 | 3.954 |
| 5J3D | F_LYS_    | NZ  | I_GLU_    | OE2 | 3.850 |
| 5J3D | F_HIS_    | NE2 | F_GLU_    | OE1 | 3.357 |
| 5J3D | F_LYS_191 | NZ  | F_ASP_194 | OD2 | 3.179 |
| 5J3D | F_LYS_196 | NZ  | I_ASP_489 | OD1 | 2.634 |
| 5J3D | F_LYS_196 | NZ  | I_ASP_489 | OD2 | 3.067 |
| 5J3D | F_LYS_201 | NZ  | F_ASP_200 | OD2 | 3.113 |
| 5J3D | F_ARG_229 | NH1 | F_GLU_256 | OE1 | 3.268 |
| 5J3D | F_ARG_229 | NH1 | F_GLU_256 | OE2 | 2.433 |
| 5J3D | F_ARG_229 | NH2 | F_GLU_256 | OE1 | 2.288 |
| 5J3D | F_ARG_229 | NH2 | F_GLU_256 | OE2 | 3.196 |
| 5J3D | F_ARG_235 | NH1 | I_GLU_232 | OE1 | 3.071 |
| 5J3D | F_ARG_235 | NH1 | I_GLU_232 | OE2 | 2.514 |
| 5J3D | F_ARG_235 | NH2 | F_GLU_232 | OE2 | 3.966 |
| 5J3D | F_LYS_272 | NZ  | B_ASP_56  | OD2 | 3.606 |
| 5J3D | F_LYS_293 | NZ  | F_GLU_295 | OE2 | 3.714 |
| 5J3D | F_ARG_336 | NH2 | F_ASP_338 | OD1 | 2.882 |
| 5J3D | F_ARG_336 | NH2 | F_ASP_338 | OD2 | 3.428 |
| 5J3D | F_ARG_364 | NH1 | F_ASP_310 | OD1 | 3.194 |
| 5J3D | F_ARG_364 | NH2 | F_ASP_310 | OD1 | 2.918 |
| 5J3D | F_LYS_399 | NZ  | K_ASP_392 | OD1 | 3.567 |
| 5J3D | F_LYS_470 | NZ  | J_GLU_60  | OE1 | 3.190 |
| 5J3D | F_LYS_470 | NZ  | J_GLU_60  | OE2 | 3.891 |
| 5J3D | G_ARG_49  | NH2 | I_ASP_368 | OD1 | 3.151 |
| 5J3D | G_LYS_80  | NZ  | G_ASP_84  | OD2 | 2.927 |
| 5J3D | G_LYS_85  | NZ  | G_GLU_82  | OE2 | 3.889 |
| 5J3D | H_ARG_43  | NH1 | H_ASP_98  | OD1 | 2.849 |

|      |           |     |           |     |       |
|------|-----------|-----|-----------|-----|-------|
| 5J3D | H_ARG_43  | NH2 | H_GLU_51  | OE1 | 3.608 |
| 5J3D | H_ARG_43  | NH2 | H_GLU_51  | OE2 | 3.183 |
| 5J3D | H_ARG_43  | NH2 | H_ASP_98  | OD1 | 3.954 |
| 5J3D | H_ARG_75  | NH1 | H_ASP_98  | OD2 | 3.150 |
| 5J3D | H_ARG_75  | NH2 | H_ASP_98  | OD1 | 3.434 |
| 5J3D | H_ARG_75  | NH2 | H_ASP_98  | OD2 | 3.495 |
| 5J3D | H_ARG_107 | NH1 | H_ASP_114 | OD1 | 3.119 |
| 5J3D | H_ARG_107 | NH1 | H_ASP_114 | OD2 | 3.930 |
| 5J3D | H_ARG_111 | NH2 | H_ASP_114 | OD2 | 2.954 |
| 5J3D | H_ARG_111 | NH2 | L_GLU_68  | OE1 | 3.466 |
| 5J3D | H_LYS_158 | NZ  | H_ASP_159 | OD1 | 3.555 |
| 5J3D | H_LYS_158 | NZ  | H_ASP_159 | OD2 | 3.908 |
| 5J3D | H_LYS_224 | NZ  | L_GLU_143 | OE1 | 3.364 |
| 5J3D | H_LYS_    | NZ  | L_ASP_    | OD1 | 3.352 |
| 5J3D | H_LYS_    | NZ  | L_ASP_    | OD2 | 3.692 |
| 5J3D | I_LYS_    | NZ  | K_GLU_    | OE1 | 3.226 |
| 5J3D | I_LYS_    | NZ  | K_GLU_    | OE2 | 3.914 |
| 5J3D | I_LYS_    | NZ  | L_GLU_    | OE1 | 3.318 |
| 5J3D | I_LYS_191 | NZ  | L_ASP_194 | OD2 | 3.257 |
| 5J3D | I_LYS_196 | NZ  | K_ASP_489 | OD1 | 2.833 |
| 5J3D | I_LYS_196 | NZ  | K_ASP_489 | OD2 | 3.027 |
| 5J3D | I_LYS_201 | NZ  | L_ASP_200 | OD2 | 3.213 |
| 5J3D | I_ARG_229 | NH1 | L_GLU_256 | OE1 | 3.887 |
| 5J3D | I_ARG_229 | NH1 | L_GLU_256 | OE2 | 2.592 |
| 5J3D | I_ARG_229 | NH2 | L_GLU_256 | OE1 | 2.607 |
| 5J3D | I_ARG_229 | NH2 | L_GLU_256 | OE2 | 2.843 |
| 5J3D | I_ARG_235 | NH1 | K_GLU_232 | OE1 | 3.110 |
| 5J3D | I_ARG_235 | NH1 | K_GLU_232 | OE2 | 2.664 |
| 5J3D | I_LYS_272 | NZ  | D_ASP_56  | OD2 | 3.795 |
| 5J3D | I_LYS_293 | NZ  | L_GLU_295 | OE2 | 3.743 |
| 5J3D | I_ARG_336 | NH2 | L_ASP_338 | OD1 | 3.080 |
| 5J3D | I_ARG_336 | NH2 | L_ASP_338 | OD2 | 3.543 |
| 5J3D | I_ARG_364 | NH1 | L_ASP_310 | OD1 | 3.192 |
| 5J3D | I_ARG_364 | NH2 | L_ASP_310 | OD1 | 2.780 |
| 5J3D | I_LYS_399 | NZ  | F_ASP_392 | OD1 | 3.746 |
| 5J3D | I_LYS_470 | NZ  | E_GLU_60  | OE1 | 3.634 |
| 5J3D | I_LYS_470 | NZ  | E_GLU_60  | OE2 | 3.872 |
| 5J3D | J_ARG_49  | NH2 | K_ASP_368 | OD1 | 3.049 |
| 5J3D | J_ARG_49  | NH2 | K_ASP_368 | OD2 | 3.898 |
| 5J3D | J_LYS_80  | NZ  | J_ASP_84  | OD2 | 3.423 |
| 5J3D | J_LYS_85  | NZ  | J_GLU_82  | OE1 | 3.982 |
| 5J3D | J_LYS_85  | NZ  | J_GLU_82  | OE2 | 3.902 |
| 5J3D | J_LYS_87  | NZ  | K_GLU_294 | OE1 | 3.791 |
| 5J3D | K_LYS_    | NZ  | F_GLU_    | OE1 | 2.905 |
| 5J3D | K_LYS_    | NZ  | K_GLU_    | OE1 | 3.429 |
| 5J3D | K_LYS_191 | NZ  | K_ASP_194 | OD2 | 3.194 |
| 5J3D | K_LYS_196 | NZ  | F_ASP_489 | OD1 | 2.822 |
| 5J3D | K_LYS_196 | NZ  | F_ASP_489 | OD2 | 3.022 |
| 5J3D | K_LYS_201 | NZ  | K_ASP_200 | OD2 | 2.845 |
| 5J3D | K_ARG_229 | NH1 | K_GLU_256 | OE1 | 3.743 |
| 5J3D | K_ARG_229 | NH1 | K_GLU_256 | OE2 | 2.813 |
| 5J3D | K_ARG_229 | NH2 | K_GLU_256 | OE1 | 2.714 |
| 5J3D | K_ARG_229 | NH2 | K_GLU_256 | OE2 | 3.345 |
| 5J3D | K_ARG_235 | NH1 | F_GLU_232 | OE1 | 2.445 |
| 5J3D | K_ARG_235 | NH1 | F_GLU_232 | OE2 | 2.683 |
| 5J3D | K_ARG_235 | NH2 | F_GLU_232 | OE2 | 3.814 |
| 5J3D | K_ARG_235 | NH2 | K_GLU_232 | OE2 | 3.561 |
| 5J3D | K_LYS_293 | NZ  | K_GLU_295 | OE2 | 3.880 |

|      |           |     |            |     |       |
|------|-----------|-----|------------|-----|-------|
| 5J3D | K_ARG_336 | NH2 | K_ASP_338  | OD1 | 2.871 |
| 5J3D | K_ARG_336 | NH2 | K_ASP_338  | OD2 | 3.213 |
| 5J3D | K_LYS_359 | NZ  | K_GLU_356  | OE2 | 3.629 |
| 5J3D | K_ARG_364 | NH1 | K_ASP_310  | OD1 | 3.298 |
| 5J3D | K_ARG_364 | NH2 | K_ASP_310  | OD1 | 2.637 |
| 5J3D | K_ARG_364 | NH2 | K_ASP_310  | OD2 | 3.766 |
| 5J3D | K_LYS_399 | NZ  | L_ASP_392  | OD1 | 3.598 |
| 5J3D | K_LYS_470 | NZ  | G_GLU_60   | OE1 | 3.953 |
| 5J3D | L_ARG_75  | NH2 | L_ASP_97   | OD2 | 3.011 |
| 5J3D | L_LYS_123 | NZ  | L_GLU_185  | OE2 | 3.382 |
| 5J3D | L_LYS_169 | NZ  | L_GLU_215  | OE2 | 3.052 |
| 5J3D | L_LYS_203 | NZ  | L_GLU_207  | OE1 | 3.556 |
| 5J3D | L_LYS_203 | NZ  | L_GLU_207  | OE2 | 2.397 |
| 5J3D | L_HIS_209 | ND1 | L_ASP_171  | OD2 | 2.293 |
| 5JO5 | H_ARG_38  | NH1 | H_ASP_86   | OD1 | 2.872 |
| 5JO5 | H_ARG_38  | NH2 | H_GLU_46   | OE1 | 3.137 |
| 5JO5 | H_ARG_38  | NH2 | H_ASP_86   | OD1 | 3.899 |
| 5JO5 | H_ARG_50  | NH1 | H_ASP_58   | OD2 | 3.272 |
| 5JO5 | H_ARG_50  | NH1 | H_GLU_100J | OE1 | 3.655 |
| 5JO5 | H_ARG_50  | NH1 | H_GLU_100J | OE2 | 3.015 |
| 5JO5 | H_ARG_50  | NH2 | H_ASP_58   | OD2 | 2.837 |
| 5JO5 | H_ARG_66  | NH1 | H_ASP_86   | OD1 | 3.782 |
| 5JO5 | H_ARG_66  | NH1 | H_ASP_86   | OD2 | 2.781 |
| 5JO5 | H_ARG_66  | NH2 | H_ASP_86   | OD1 | 3.036 |
| 5JO5 | H_ARG_66  | NH2 | H_ASP_86   | OD2 | 3.534 |
| 5JO5 | H_ARG_71  | NH2 | H_ASP_73   | OD1 | 3.590 |
| 5JO5 | H_LYS_75  | NZ  | H_ASP_72   | OD2 | 3.855 |
| 5JO5 | H_ARG_94  | NH1 | H_ASP_102  | OD2 | 2.698 |
| 5JO5 | H_LYS_143 | NZ  | L_GLU_124  | OE2 | 2.459 |
| 5JO5 | H_LYS_206 | NZ  | H_ASP_208  | OD1 | 3.914 |
| 5JO5 | H_LYS_206 | NZ  | H_ASP_208  | OD2 | 3.240 |
| 5JO5 | H_LYS_209 | NZ  | L_GLU_     | OE2 | 2.531 |
| 5JO5 | L_ARG_61  | NH2 | L_GLU_81   | OE2 | 2.979 |
| 5JO5 | L_ARG_61  | NH2 | L_ASP_82   | OD1 | 2.750 |
| 5JO5 | L_ARG_61  | NH2 | L_ASP_82   | OD2 | 3.466 |
| 5JO5 | L_ARG_91  | NH1 | H_GLU_100J | OE2 | 3.301 |
| 5JO5 | L_ARG_91  | NH2 | H_GLU_100J | OE2 | 2.691 |
| 5JO5 | L_ARG_95B | NH2 | H_ASP_58   | OD1 | 3.439 |
| 5JO5 | L_LYS_110 | NZ  | L_GLU_198  | OE1 | 2.940 |
| 5JO5 | L_LYS_149 | NZ  | L_GLU_203  | OE2 | 3.049 |
| 5JO5 | A_ARG_38  | NH1 | A_ASP_86   | OD1 | 2.834 |
| 5JO5 | A_ARG_38  | NH2 | A_GLU_46   | OE1 | 3.010 |
| 5JO5 | A_ARG_38  | NH2 | A_ASP_86   | OD1 | 3.868 |
| 5JO5 | A_ARG_50  | NH1 | A_ASP_58   | OD2 | 3.242 |
| 5JO5 | A_ARG_50  | NH1 | A_GLU_100J | OE1 | 3.684 |
| 5JO5 | A_ARG_50  | NH1 | A_GLU_100J | OE2 | 2.906 |
| 5JO5 | A_ARG_50  | NH2 | A_ASP_58   | OD2 | 2.882 |
| 5JO5 | A_ARG_66  | NH1 | A_ASP_86   | OD1 | 3.892 |
| 5JO5 | A_ARG_66  | NH1 | A_ASP_86   | OD2 | 2.803 |
| 5JO5 | A_ARG_66  | NH2 | A_ASP_86   | OD1 | 3.001 |
| 5JO5 | A_ARG_66  | NH2 | A_ASP_86   | OD2 | 3.402 |
| 5JO5 | A_ARG_71  | NH2 | A_ASP_73   | OD1 | 3.562 |
| 5JO5 | A_ARG_94  | NH1 | A_ASP_102  | OD2 | 2.584 |
| 5JO5 | A_LYS_143 | NZ  | B_GLU_124  | OE2 | 2.618 |
| 5JO5 | A_LYS_209 | NZ  | B_GLU_123  | OE2 | 2.545 |
| 5JO5 | A_ARG_210 | NH1 | A_GLU_212  | OE2 | 3.723 |
| 5JO5 | A_ARG_210 | NH2 | A_GLU_212  | OE2 | 3.222 |
| 5JO5 | B_ARG_61  | NH2 | B_GLU_81   | OE2 | 3.302 |



|      |           |     |            |     |       |
|------|-----------|-----|------------|-----|-------|
| 5JO5 | B_ARG_61  | NH2 | B_ASP_82   | OD1 | 2.664 |
| 5JO5 | B_ARG_61  | NH2 | B_ASP_82   | OD2 | 3.454 |
| 5JO5 | B_ARG_91  | NH1 | A_GLU_100J | OE2 | 3.353 |
| 5JO5 | B_ARG_91  | NH2 | A_GLU_100J | OE2 | 3.038 |
| 5JO5 | C_ARG_38  | NH1 | C_ASP_86   | OD1 | 2.847 |
| 5JO5 | C_ARG_38  | NH2 | C_GLU_46   | OE1 | 3.028 |
| 5JO5 | C_ARG_38  | NH2 | C_ASP_86   | OD1 | 3.875 |
| 5JO5 | C_ARG_50  | NH1 | C_ASP_58   | OD2 | 2.775 |
| 5JO5 | C_ARG_50  | NH2 | C_ASP_58   | OD2 | 3.216 |
| 5JO5 | C_ARG_50  | NH2 | C_GLU_100J | OE1 | 3.640 |
| 5JO5 | C_ARG_50  | NH2 | C_GLU_100J | OE2 | 2.862 |
| 5JO5 | C_ARG_66  | NH1 | C_ASP_86   | OD1 | 3.889 |
| 5JO5 | C_ARG_66  | NH1 | C_ASP_86   | OD2 | 2.829 |
| 5JO5 | C_ARG_66  | NH2 | C_ASP_86   | OD1 | 3.094 |
| 5JO5 | C_ARG_66  | NH2 | C_ASP_86   | OD2 | 3.488 |
| 5JO5 | C_ARG_71  | NH2 | C_ASP_73   | OD1 | 3.622 |
| 5JO5 | C_ARG_94  | NH1 | C_ASP_102  | OD2 | 2.554 |
| 5JO5 | C_LYS_143 | NZ  | D_GLU_124  | OE2 | 2.788 |
| 5JO5 | C_LYS_209 | NZ  | D_GLU_123  | OE2 | 2.583 |
| 5JO5 | C_ARG_    | NH1 | C_GLU_     | OE2 | 2.988 |
| 5JO5 | D_ARG_61  | NH2 | D_ASP_82   | OD1 | 2.885 |
| 5JO5 | D_ARG_61  | NH2 | D_ASP_82   | OD2 | 3.652 |
| 5JO5 | D_ARG_91  | NH1 | C_GLU_100J | OE2 | 3.302 |
| 5JO5 | D_ARG_91  | NH2 | C_GLU_100J | OE2 | 3.077 |
| 5JO5 | D_LYS_93  | NZ  | D_GLU_3    | OE2 | 3.062 |
| 5JO5 | D_ARG_95B | NH2 | C_ASP_58   | OD1 | 3.978 |
| 5JO5 | D_LYS_149 | NZ  | D_GLU_203  | OE2 | 2.721 |
| 5JO5 | D_HIS_188 | ND1 | D_ASP_151  | OD2 | 2.674 |
| 5JO5 | E_ARG_38  | NH1 | E_ASP_86   | OD1 | 2.821 |
| 5JO5 | E_ARG_38  | NH2 | E_GLU_46   | OE1 | 3.015 |
| 5JO5 | E_ARG_38  | NH2 | E_GLU_46   | OE2 | 3.976 |
| 5JO5 | E_ARG_38  | NH2 | E_ASP_86   | OD1 | 3.922 |
| 5JO5 | E_ARG_50  | NH1 | E_ASP_58   | OD2 | 2.782 |
| 5JO5 | E_ARG_50  | NH2 | E_ASP_58   | OD2 | 3.264 |
| 5JO5 | E_ARG_50  | NH2 | E_GLU_100J | OE1 | 3.626 |
| 5JO5 | E_ARG_50  | NH2 | E_GLU_100J | OE2 | 2.982 |
| 5JO5 | E_ARG_66  | NH1 | E_ASP_86   | OD1 | 3.801 |
| 5JO5 | E_ARG_66  | NH1 | E_ASP_86   | OD2 | 2.750 |
| 5JO5 | E_ARG_66  | NH2 | E_ASP_86   | OD1 | 3.037 |
| 5JO5 | E_ARG_66  | NH2 | E_ASP_86   | OD2 | 3.493 |
| 5JO5 | E_ARG_71  | NH2 | E_ASP_73   | OD1 | 3.535 |
| 5JO5 | E_LYS_75  | NZ  | E_ASP_72   | OD2 | 3.717 |
| 5JO5 | E_ARG_94  | NH2 | E_ASP_102  | OD2 | 2.730 |
| 5JO5 | E_LYS_143 | NZ  | F_GLU_124  | OE2 | 2.545 |
| 5JO5 | E_LYS_209 | NZ  | F_GLU_123  | OE2 | 2.567 |
| 5JO5 | E_ARG_210 | NH1 | E_GLU_212  | OE2 | 3.744 |
| 5JO5 | E_ARG_210 | NH2 | E_GLU_212  | OE2 | 3.125 |
| 5JO5 | F_ARG_54  | NH1 | F_ASP_60   | OD1 | 2.423 |
| 5JO5 | F_ARG_61  | NH2 | F_GLU_81   | OE2 | 3.010 |
| 5JO5 | F_ARG_61  | NH2 | F_ASP_82   | OD1 | 2.807 |
| 5JO5 | F_ARG_61  | NH2 | F_ASP_82   | OD2 | 3.560 |
| 5JO5 | F_ARG_91  | NH1 | E_GLU_100J | OE2 | 3.369 |
| 5JO5 | F_ARG_91  | NH2 | E_GLU_100J | OE2 | 2.722 |
| 5JO5 | F_ARG_95B | NH2 | E_ASP_58   | OD1 | 3.518 |
| 5JO5 | F_LYS_110 | NZ  | F_GLU_198  | OE1 | 2.973 |
| 5JOF | H_LYS_12  | NZ  | H_GLU_10   | OE1 | 3.976 |
| 5JOF | H_ARG_38  | NH1 | H_ASP_86   | OD1 | 2.816 |
| 5JOF | H_ARG_38  | NH2 | H_GLU_46   | OE1 | 2.389 |

|      |           |     |            |     |       |
|------|-----------|-----|------------|-----|-------|
| 5JOF | H_ARG_38  | NH2 | H_GLU_46   | OE2 | 3.859 |
| 5JOF | H_LYS_62  | NZ  | H_GLU_46   | OE2 | 2.776 |
| 5JOF | H_ARG_66  | NH1 | H_ASP_86   | OD2 | 2.820 |
| 5JOF | H_ARG_66  | NH2 | H_ASP_86   | OD1 | 3.127 |
| 5JOF | H_ARG_66  | NH2 | H_ASP_86   | OD2 | 3.314 |
| 5JOF | H_LYS_212 | NZ  | L_GLU_123  | OE2 | 3.883 |
| 5JOF | H_LYS_213 | NZ  | H_GLU_215  | OE1 | 3.500 |
| 5JOF | H_LYS_217 | NZ  | L_ASP_122  | OD2 | 3.165 |
| 5JOF | L_ARG_54  | NH1 | L_ASP_60   | OD1 | 3.764 |
| 5JOF | L_ARG_61  | NH2 | L_GLU_81   | OE2 | 3.643 |
| 5JOF | L_ARG_61  | NH2 | L_ASP_82   | OD1 | 3.848 |
| 5JOF | L_ARG_61  | NH2 | L_ASP_82   | OD2 | 3.642 |
| 5JOF | L_ARG_142 | NH1 | L_GLU_103  | OE1 | 3.845 |
| 5JOF | L_ARG_142 | NH1 | L_GLU_105  | OE2 | 3.937 |
| 5JOF | L_ARG_142 | NH2 | L_GLU_103  | OE1 | 3.654 |
| 5JOF | L_ARG_142 | NH2 | L_GLU_103  | OE2 | 2.697 |
| 5JOF | L_ARG_142 | NH2 | L_GLU_105  | OE2 | 3.736 |
| 5JOF | L_LYS_149 | NZ  | L_GLU_195  | OE1 | 3.071 |
| 5JOF | A_LYS_12  | NZ  | A_GLU_10   | OE1 | 3.516 |
| 5JOF | A_HIS_35  | NE2 | A_ASP_100C | OD1 | 2.627 |
| 5JOF | A_ARG_38  | NH1 | A_GLU_46   | OE1 | 3.912 |
| 5JOF | A_ARG_38  | NH1 | A_ASP_86   | OD1 | 3.722 |
| 5JOF | A_ARG_38  | NH2 | A_ASP_86   | OD1 | 2.667 |
| 5JOF | A_ARG_66  | NH1 | A_ASP_86   | OD1 | 2.903 |
| 5JOF | A_ARG_66  | NH1 | A_ASP_86   | OD2 | 2.899 |
| 5JOF | A_ARG_83  | NH2 | A_ASP_85   | OD2 | 3.607 |
| 5JOF | A_LYS_143 | NZ  | A_ASP_144  | OD1 | 3.485 |
| 5JOF | A_LYS_209 | NZ  | B_GLU_123  | OE1 | 3.449 |
| 5JOF | A_LYS_209 | NZ  | B_GLU_123  | OE2 | 3.809 |
| 5JOF | B_ARG_24  | NH1 | C_ASP_99   | OD1 | 2.692 |
| 5JOF | B_ARG_24  | NH1 | C_ASP_99   | OD2 | 3.960 |
| 5JOF | B_ARG_61  | NH2 | B_GLU_81   | OE2 | 3.500 |
| 5JOF | B_ARG_61  | NH2 | B_ASP_82   | OD1 | 3.535 |
| 5JOF | B_ARG_61  | NH2 | B_ASP_82   | OD2 | 3.507 |
| 5JOF | B_ARG_77  | NH1 | B_GLU_79   | OE1 | 3.191 |
| 5JOF | B_ARG_77  | NH1 | B_GLU_79   | OE2 | 3.717 |
| 5JOF | B_HIS_189 | ND1 | B_ASP_151  | OD2 | 2.926 |
| 5JOF | C_LYS_12  | NZ  | C_GLU_10   | OE1 | 3.233 |
| 5JOF | C_HIS_35  | NE2 | C_ASP_100C | OD1 | 2.684 |
| 5JOF | C_ARG_38  | NH1 | C_ASP_86   | OD1 | 3.621 |
| 5JOF | C_ARG_38  | NH2 | C_GLU_46   | OE1 | 3.694 |
| 5JOF | C_ARG_38  | NH2 | C_ASP_86   | OD1 | 3.344 |
| 5JOF | C_LYS_62  | NZ  | C_GLU_46   | OE1 | 3.985 |
| 5JOF | C_LYS_62  | NZ  | C_GLU_46   | OE2 | 3.097 |
| 5JOF | C_ARG_66  | NH1 | C_ASP_86   | OD1 | 3.730 |
| 5JOF | C_ARG_66  | NH1 | C_ASP_86   | OD2 | 2.579 |
| 5JOF | C_ARG_94  | NH1 | B_GLU_1    | OE2 | 2.653 |
| 5JOF | C_ARG_94  | NH2 | B_GLU_1    | OE2 | 3.195 |
| 5JOF | C_LYS_210 | NZ  | C_GLU_212  | OE1 | 3.967 |
| 5JOF | C_LYS_214 | NZ  | D_ASP_122  | OD2 | 3.772 |
| 5JOF | C_LYS_214 | NZ  | D_GLU_123  | OE1 | 2.987 |
| 5JOF | C_LYS_214 | NZ  | D_GLU_123  | OE2 | 3.631 |
| 5JOF | D_ARG_24  | NH2 | D_ASP_70   | OD2 | 3.929 |
| 5JOF | D_LYS_39  | NZ  | D_GLU_81   | OE2 | 3.210 |
| 5JOF | D_ARG_54  | NH1 | D_ASP_60   | OD1 | 3.417 |
| 5JOF | D_ARG_54  | NH2 | D_ASP_60   | OD1 | 2.714 |
| 5JOF | D_ARG_61  | NH1 | D_GLU_79   | OE1 | 3.968 |
| 5JOF | D_ARG_61  | NH2 | D_GLU_79   | OE1 | 3.623 |

|      |           |     |            |     |       |
|------|-----------|-----|------------|-----|-------|
| 5JOF | D_ARG_61  | NH2 | D_ASP_82   | OD1 | 3.619 |
| 5JOF | D_LYS_149 | NZ  | D_GLU_195  | OE1 | 3.879 |
| 5JOF | D_LYS_183 | NZ  | D_GLU_187  | OE1 | 3.559 |
| 5JOF | D_ARG_211 | NH2 | D_GLU_187  | OE2 | 3.871 |
| 5JOF | E_HIS_35  | NE2 | E_ASP_100C | OD1 | 3.045 |
| 5JOF | E_ARG_38  | NH1 | E_ASP_86   | OD1 | 2.429 |
| 5JOF | E_ARG_38  | NH2 | E_GLU_46   | OE1 | 3.439 |
| 5JOF | E_ARG_38  | NH2 | E_ASP_86   | OD1 | 3.968 |
| 5JOF | E_LYS_62  | NZ  | E_GLU_46   | OE1 | 3.849 |
| 5JOF | E_LYS_62  | NZ  | E_GLU_46   | OE2 | 3.146 |
| 5JOF | E_ARG_66  | NH1 | E_ASP_86   | OD1 | 3.702 |
| 5JOF | E_ARG_66  | NH1 | E_ASP_86   | OD2 | 2.671 |
| 5JOF | E_LYS_209 | NZ  | F_GLU_123  | OE1 | 2.331 |
| 5JOF | E_LYS_209 | NZ  | F_GLU_123  | OE2 | 3.588 |
| 5JOF | E_LYS_214 | NZ  | F_ASP_122  | OD2 | 3.802 |
| 5JOF | F_ARG_54  | NH1 | F_ASP_60   | OD1 | 2.591 |
| 5JOF | F_ARG_61  | NH1 | F_ASP_82   | OD1 | 2.348 |
| 5JOF | F_ARG_61  | NH1 | F_ASP_82   | OD2 | 1.974 |
| 5JOF | F_ARG_61  | NH2 | F_ASP_82   | OD1 | 3.989 |
| 5JOF | F_LYS_149 | NZ  | F_GLU_195  | OE1 | 2.606 |
| 5JOF | F_LYS_183 | NZ  | F_GLU_187  | OE1 | 3.917 |
| 5JOF | F_LYS_183 | NZ  | F_GLU_187  | OE2 | 3.217 |
| 5JR1 | H_ARG_38  | NH1 | H_ASP_86   | OD1 | 2.944 |
| 5JR1 | H_ARG_38  | NH2 | H_GLU_46   | OE2 | 2.675 |
| 5JR1 | H_ARG_38  | NH2 | H_ASP_86   | OD1 | 3.952 |
| 5JR1 | H_ARG_50  | NH1 | H_GLU_100J | OE1 | 3.342 |
| 5JR1 | H_ARG_50  | NH1 | H_GLU_100J | OE2 | 3.375 |
| 5JR1 | H_ARG_50  | NH2 | H_GLU_100J | OE1 | 3.986 |
| 5JR1 | H_LYS_52  | NZ  | H_ASP_53   | OD1 | 2.855 |
| 5JR1 | H_ARG_66  | NH1 | H_ASP_86   | OD1 | 3.760 |
| 5JR1 | H_ARG_66  | NH1 | H_ASP_86   | OD2 | 2.716 |
| 5JR1 | H_ARG_66  | NH2 | H_ASP_86   | OD1 | 3.157 |
| 5JR1 | H_ARG_66  | NH2 | H_ASP_86   | OD2 | 3.593 |
| 5JR1 | H_ARG_71  | NH2 | H_ASP_73   | OD1 | 3.546 |
| 5JR1 | H_ARG_94  | NH1 | H_ASP_102  | OD2 | 2.955 |
| 5JR1 | H_LYS_143 | NZ  | H_ASP_144  | OD1 | 3.485 |
| 5JR1 | H_LYS_143 | NZ  | H_ASP_144  | OD2 | 2.637 |
| 5JR1 | H_HIS_164 | NE2 | L_ASP_139  | OD1 | 3.232 |
| 5JR1 | H_HIS_164 | NE2 | L_ASP_139  | OD2 | 3.168 |
| 5JR1 | H_LYS_206 | NZ  | H_ASP_208  | OD1 | 2.690 |
| 5JR1 | L_HIS_31  | ND1 | H_ASP_100  | OD2 | 3.496 |
| 5JR1 | L_HIS_31  | ND1 | H_GLU_100I | OE2 | 3.149 |
| 5JR1 | L_ARG_61  | NH2 | L_GLU_81   | OE2 | 3.044 |
| 5JR1 | L_ARG_61  | NH2 | L_ASP_82   | OD1 | 2.738 |
| 5JR1 | L_ARG_61  | NH2 | L_ASP_82   | OD2 | 3.536 |
| 5JR1 | L_ARG_95B | NH1 | H_ASP_58   | OD1 | 3.367 |
| 5JR1 | L_ARG_95B | NH1 | H_ASP_58   | OD2 | 3.787 |
| 5JR1 | L_ARG_95B | NH2 | H_ASP_58   | OD1 | 3.502 |
| 5JR1 | L_ARG_95B | NH2 | H_ASP_58   | OD2 | 2.474 |
| 5JR1 | L_LYS_110 | NZ  | L_GLU_199  | OE1 | 2.769 |
| 5JR1 | L_HIS_189 | ND1 | L_ASP_152  | OD2 | 3.281 |
| 5JUE | L_ARG_61  | NH1 | L_ASP_82   | OD1 | 2.841 |
| 5JUE | L_ARG_61  | NH1 | L_ASP_82   | OD2 | 3.261 |
| 5JUE | L_ARG_61  | NH2 | L_ASP_82   | OD1 | 3.675 |
| 5JUE | L_ARG_61  | NH2 | L_ASP_82   | OD2 | 2.578 |
| 5JUE | L_LYS_103 | NZ  | L_ASP_165  | OD1 | 3.155 |
| 5JUE | L_LYS_147 | NZ  | L_GLU_154  | OE1 | 3.955 |
| 5JUE | L_LYS_149 | NZ  | L_GLU_195  | OE1 | 3.435 |

|      |           |     |           |     |       |
|------|-----------|-----|-----------|-----|-------|
| 5JUE | L_LYS_149 | NZ  | L_GLU_195 | OE2 | 2.940 |
| 5JUE | L_ARG_155 | NH1 | L_GLU_185 | OE1 | 2.977 |
| 5JUE | L_ARG_155 | NH1 | L_GLU_185 | OE2 | 3.732 |
| 5JUE | L_ARG_155 | NH2 | L_GLU_185 | OE1 | 3.822 |
| 5JUE | L_ARG_155 | NH2 | L_GLU_185 | OE2 | 3.203 |
| 5JUE | L_ARG_188 | NH2 | L_ASP_184 | OD1 | 3.007 |
| 5JUE | L_ARG_188 | NH2 | L_ASP_184 | OD2 | 3.926 |
| 5JUE | L_HIS_189 | ND1 | L_ASP_151 | OD2 | 2.628 |
| 5JUE | L_LYS_199 | NZ  | L_ASP_110 | OD1 | 3.968 |
| 5JUE | L_LYS_199 | NZ  | L_ASP_110 | OD2 | 3.647 |
| 5JUE | H_LYS_66  | NZ  | H_ASP_86  | OD1 | 3.729 |
| 5JUE | H_LYS_66  | NZ  | H_ASP_86  | OD2 | 2.761 |
| 5JUE | H_ARG_94  | NH2 | H_ASP_101 | OD1 | 3.685 |
| 5JUE | H_ARG_94  | NH2 | H_ASP_101 | OD2 | 2.851 |
| 5JUE | H_LYS_208 | NZ  | L_GLU_123 | OE1 | 2.809 |
| 5JUE | H_LYS_208 | NZ  | L_GLU_123 | OE2 | 2.812 |
| 5JUE | H_LYS_209 | NZ  | H_GLU_211 | OE1 | 3.891 |
| 5JXA | H_ARG_38  | NH1 | H_ASP_86  | OD1 | 2.740 |
| 5JXA | H_ARG_38  | NH2 | H_GLU_46  | OE1 | 2.757 |
| 5JXA | H_ARG_38  | NH2 | H_ASP_86  | OD1 | 3.580 |
| 5JXA | H_ARG_66  | NH1 | H_ASP_86  | OD1 | 3.702 |
| 5JXA | H_ARG_66  | NH1 | H_ASP_86  | OD2 | 3.100 |
| 5JXA | H_ARG_66  | NH2 | H_ASP_86  | OD1 | 2.964 |
| 5JXA | H_ARG_66  | NH2 | H_ASP_86  | OD2 | 3.681 |
| 5JXA | H_ARG_95  | NH1 | H_ASP_99  | OD1 | 3.572 |
| 5JXA | H_ARG_95  | NH2 | H_ASP_99  | OD1 | 2.948 |
| 5JXA | H_LYS_143 | NZ  | H_ASP_144 | OD1 | 2.917 |
| 5JXA | H_LYS_143 | NZ  | H_ASP_144 | OD2 | 3.163 |
| 5JXA | H_LYS_209 | NZ  | L_GLU_123 | OE1 | 3.277 |
| 5JXA | H_LYS_210 | NZ  | H_GLU_212 | OE1 | 2.675 |
| 5JXA | H_LYS_210 | NZ  | H_GLU_212 | OE2 | 3.292 |
| 5JXA | H_LYS_214 | NZ  | L_ASP_122 | OD1 | 2.755 |
| 5JXA | H_LYS_214 | NZ  | L_ASP_122 | OD2 | 3.275 |
| 5JXA | L_LYS_24  | NZ  | L_ASP_70  | OD1 | 2.561 |
| 5JXA | L_LYS_24  | NZ  | L_ASP_70  | OD2 | 3.785 |
| 5JXA | L_ARG_39  | NH2 | L_GLU_81  | OE1 | 3.801 |
| 5JXA | L_ARG_61  | NH2 | L_ASP_82  | OD1 | 2.836 |
| 5JXA | L_ARG_61  | NH2 | L_ASP_82  | OD2 | 3.523 |
| 5JXA | L_ARG_142 | NH1 | L_GLU_103 | OE1 | 2.871 |
| 5JXA | L_ARG_142 | NH1 | L_GLU_103 | OE2 | 3.755 |
| 5JXA | L_ARG_142 | NH2 | L_GLU_103 | OE1 | 3.345 |
| 5JXA | L_ARG_142 | NH2 | L_GLU_103 | OE2 | 2.786 |
| 5JXA | L_ARG_142 | NH2 | L_GLU_105 | OE2 | 3.779 |
| 5JXA | L_LYS_149 | NZ  | L_GLU_195 | OE2 | 3.064 |
| 5JXA | L_LYS_188 | NZ  | L_ASP_185 | OD1 | 2.848 |
| 5JXA | L_HIS_189 | ND1 | L_ASP_151 | OD2 | 3.368 |
| 5KZP | H_HIS_35  | NE2 | H_ASP_99  | OD2 | 2.522 |
| 5KZP | H_ARG_38  | NH1 | H_ASP_90  | OD1 | 2.873 |
| 5KZP | H_ARG_38  | NH2 | H_GLU_46  | OE1 | 3.219 |
| 5KZP | H_ARG_38  | NH2 | H_GLU_46  | OE2 | 3.666 |
| 5KZP | H_ARG_38  | NH2 | H_ASP_90  | OD1 | 3.689 |
| 5KZP | H_ARG_65  | NH1 | H_ASP_62  | OD1 | 2.911 |
| 5KZP | H_ARG_65  | NH2 | H_ASP_62  | OD1 | 2.885 |
| 5KZP | H_ARG_67  | NH1 | H_ASP_90  | OD1 | 3.700 |
| 5KZP | H_ARG_67  | NH1 | H_ASP_90  | OD2 | 2.484 |
| 5KZP | H_ARG_67  | NH2 | H_ASP_90  | OD1 | 2.918 |
| 5KZP | H_ARG_67  | NH2 | H_ASP_90  | OD2 | 3.301 |
| 5KZP | H_ARG_98  | NH2 | H_ASP_111 | OD1 | 3.703 |

|      |           |     |           |     |       |
|------|-----------|-----|-----------|-----|-------|
| 5KZP | H_ARG_98  | NH2 | H_ASP_111 | OD2 | 2.809 |
| 5KZP | H_LYS_153 | NZ  | H_ASP_154 | OD1 | 3.314 |
| 5KZP | H_LYS_153 | NZ  | H_ASP_154 | OD2 | 3.555 |
| 5KZP | H_LYS_224 | NZ  | L_ASP_122 | OD2 | 3.852 |
| 5KZP | L_ARG_61  | NH1 | L_GLU_79  | OE1 | 3.104 |
| 5KZP | L_ARG_61  | NH1 | L_GLU_79  | OE2 | 3.279 |
| 5KZP | L_ARG_61  | NH2 | L_GLU_79  | OE2 | 3.588 |
| 5KZP | L_ARG_61  | NH2 | L_GLU_81  | OE1 | 3.551 |
| 5KZP | L_ARG_61  | NH2 | L_ASP_82  | OD1 | 2.835 |
| 5KZP | L_ARG_61  | NH2 | L_ASP_82  | OD2 | 3.395 |
| 5KZP | L_ARG_103 | NH1 | L_GLU_105 | OE1 | 3.734 |
| 5KZP | L_ARG_103 | NH2 | L_GLU_105 | OE1 | 3.962 |
| 5KZP | L_LYS_149 | NZ  | L_GLU_195 | OE1 | 3.543 |
| 5KZP | L_LYS_183 | NZ  | L_GLU_187 | OE2 | 3.769 |
| 5KZP | E_HIS_35  | NE2 | E_ASP_99  | OD2 | 2.563 |
| 5KZP | E_ARG_38  | NH1 | E_ASP_90  | OD1 | 3.683 |
| 5KZP | E_ARG_65  | NH1 | E_ASP_62  | OD1 | 2.341 |
| 5KZP | E_ARG_65  | NH2 | E_ASP_62  | OD1 | 2.619 |
| 5KZP | E_ARG_65  | NH2 | K_GLU_1   | OE2 | 3.580 |
| 5KZP | E_ARG_98  | NH2 | E_ASP_111 | OD1 | 3.416 |
| 5KZP | E_ARG_98  | NH2 | E_ASP_111 | OD2 | 2.790 |
| 5KZP | E_LYS_153 | NZ  | E_ASP_154 | OD1 | 2.756 |
| 5KZP | E_LYS_153 | NZ  | E_ASP_154 | OD2 | 2.951 |
| 5KZP | E_LYS_219 | NZ  | L_GLU_123 | OE1 | 2.944 |
| 5KZP | E_LYS_219 | NZ  | L_GLU_123 | OE2 | 2.510 |
| 5KZP | L_ARG_24  | NH1 | L_ASP_70  | OD1 | 3.891 |
| 5KZP | L_ARG_24  | NH1 | L_ASP_70  | OD2 | 3.598 |
| 5KZP | L_ARG_61  | NH2 | L_GLU_81  | OE1 | 3.907 |
| 5KZP | L_ARG_61  | NH2 | L_ASP_82  | OD1 | 2.991 |
| 5KZP | L_ARG_61  | NH2 | L_ASP_82  | OD2 | 3.614 |
| 5KZP | L_HIS_189 | ND1 | L_ASP_185 | OD1 | 3.770 |
| 5KZP | F_HIS_35  | NE2 | F_ASP_99  | OD2 | 2.631 |
| 5KZP | F_ARG_38  | NH1 | F_ASP_90  | OD1 | 2.940 |
| 5KZP | F_ARG_38  | NH2 | F_GLU_46  | OE1 | 2.834 |
| 5KZP | F_ARG_38  | NH2 | F_GLU_46  | OE2 | 3.617 |
| 5KZP | F_ARG_65  | NH1 | F_ASP_62  | OD1 | 2.904 |
| 5KZP | F_ARG_65  | NH2 | F_ASP_62  | OD1 | 2.941 |
| 5KZP | F_ARG_67  | NH1 | F_ASP_90  | OD1 | 3.792 |
| 5KZP | F_ARG_67  | NH1 | F_ASP_90  | OD2 | 2.747 |
| 5KZP | F_ARG_67  | NH2 | F_ASP_90  | OD1 | 3.178 |
| 5KZP | F_ARG_67  | NH2 | F_ASP_90  | OD2 | 3.633 |
| 5KZP | F_ARG_98  | NH2 | F_ASP_111 | OD1 | 3.568 |
| 5KZP | F_ARG_98  | NH2 | F_ASP_111 | OD2 | 2.783 |
| 5KZP | F_LYS_139 | NZ  | J_GLU_213 | OE2 | 2.615 |
| 5KZP | F_LYS_153 | NZ  | F_ASP_154 | OD2 | 3.275 |
| 5KZP | J_ARG_61  | NH2 | J_GLU_81  | OE1 | 3.789 |
| 5KZP | J_ARG_61  | NH2 | J_ASP_82  | OD1 | 2.791 |
| 5KZP | J_ARG_61  | NH2 | J_ASP_82  | OD2 | 3.369 |
| 5KZP | J_ARG_211 | NH1 | J_GLU_187 | OE1 | 3.757 |
| 5KZP | J_ARG_211 | NH2 | J_GLU_187 | OE1 | 3.382 |
| 5KZP | G_HIS_35  | NE2 | G_ASP_99  | OD2 | 3.393 |
| 5KZP | G_ARG_38  | NH1 | G_ASP_90  | OD1 | 3.839 |
| 5KZP | G_ARG_38  | NH2 | G_GLU_46  | OE1 | 3.198 |
| 5KZP | G_ARG_38  | NH2 | G_GLU_46  | OE2 | 3.193 |
| 5KZP | G_ARG_65  | NH2 | G_ASP_62  | OD1 | 3.015 |
| 5KZP | G_ARG_67  | NH1 | G_ASP_90  | OD2 | 3.513 |
| 5KZP | G_LYS_87  | NZ  | G_GLU_89  | OE1 | 2.242 |
| 5KZP | G_LYS_87  | NZ  | G_GLU_89  | OE2 | 3.284 |

|      |           |     |           |     |       |
|------|-----------|-----|-----------|-----|-------|
| 5KZP | G_ARG_98  | NH2 | G_ASP_111 | OD1 | 3.923 |
| 5KZP | G_ARG_98  | NH2 | G_ASP_111 | OD2 | 3.052 |
| 5KZP | G_LYS_153 | NZ  | G_ASP_154 | OD1 | 2.784 |
| 5KZP | G_LYS_153 | NZ  | G_ASP_154 | OD2 | 3.265 |
| 5KZP | G_LYS_219 | NZ  | K_GLU_123 | OE2 | 3.381 |
| 5KZP | G_LYS_220 | NZ  | G_GLU_222 | OE1 | 3.746 |
| 5KZP | G_LYS_220 | NZ  | G_GLU_222 | OE2 | 2.332 |
| 5KZP | K_ARG_24  | NH2 | K_ASP_70  | OD1 | 2.089 |
| 5KZP | K_ARG_24  | NH2 | K_ASP_70  | OD2 | 3.470 |
| 5KZP | K_ARG_61  | NH2 | K_GLU_81  | OE1 | 3.540 |
| 5KZP | K_ARG_61  | NH2 | K_ASP_82  | OD1 | 2.863 |
| 5KZP | K_ARG_61  | NH2 | K_ASP_82  | OD2 | 3.407 |
| 5KZP | K_ARG_103 | NH1 | K_GLU_105 | OE2 | 3.064 |
| 5KZP | K_HIS_189 | ND1 | K_ASP_185 | OD1 | 3.899 |
| 5KZP | K_ARG_211 | NH1 | K_GLU_187 | OE2 | 3.000 |
| 5KZP | K_ARG_211 | NH2 | K_GLU_187 | OE2 | 3.195 |
| 5LDN | A_ARG_72  | NH2 | A_ASP_74  | OD1 | 3.403 |
| 5LDN | A_ARG_72  | NH2 | A_ASP_74  | OD2 | 3.634 |
| 5LDN | A_LYS_80  | NZ  | A_ASP_71  | OD2 | 3.125 |
| 5LDN | A_LYS_80  | NZ  | A_GLU_73  | OE1 | 3.933 |
| 5LDN | A_LYS_80  | NZ  | A_GLU_73  | OE2 | 2.939 |
| 5LDN | A_LYS_80  | NZ  | A_GLU_581 | OE1 | 2.882 |
| 5LDN | A_ARG_82  | NH1 | A_ASP_71  | OD2 | 3.811 |
| 5LDN | A_ARG_82  | NH1 | A_GLU_581 | OE1 | 2.442 |
| 5LDN | A_ARG_82  | NH2 | A_GLU_581 | OE1 | 3.951 |
| 5LDN | A_LYS_193 | NZ  | A_GLU_188 | OE2 | 3.913 |
| 5LDN | A_ARG_221 | NH2 | A_GLU_288 | OE1 | 2.862 |
| 5LDN | A_ARG_221 | NH2 | A_GLU_288 | OE2 | 3.399 |
| 5LDN | A_LYS_225 | NZ  | A_ASP_135 | OD1 | 3.401 |
| 5LDN | A_LYS_225 | NZ  | A_ASP_135 | OD2 | 3.221 |
| 5LDN | A_LYS_238 | NZ  | A_ASP_291 | OD2 | 3.266 |
| 5LDN | A_LYS_238 | NZ  | A_GLU_293 | OE2 | 3.311 |
| 5LDN | A_ARG_311 | NH2 | A_GLU_136 | OE1 | 3.150 |
| 5LDN | A_ARG_311 | NH2 | A_GLU_136 | OE2 | 3.587 |
| 5LDN | A_ARG_363 | NH1 | A_ASP_359 | OD1 | 3.274 |
| 5LDN | A_ARG_363 | NH2 | A_ASP_923 | OD1 | 2.881 |
| 5LDN | A_ARG_363 | NH2 | A_ASP_923 | OD2 | 3.367 |
| 5LDN | A_ARG_379 | NH1 | A_ASP_330 | OD1 | 3.918 |
| 5LDN | A_ARG_379 | NH1 | A_ASP_330 | OD2 | 3.115 |
| 5LDN | A_ARG_379 | NH2 | A_ASP_330 | OD1 | 2.861 |
| 5LDN | A_ARG_379 | NH2 | A_ASP_330 | OD2 | 3.485 |
| 5LDN | A_ARG_398 | NH2 | A_ASP_866 | OD1 | 2.806 |
| 5LDN | A_ARG_398 | NH2 | A_ASP_866 | OD2 | 3.196 |
| 5LDN | A_HIS_403 | NE2 | A_GLU_401 | OE1 | 3.143 |
| 5LDN | A_LYS_440 | NZ  | A_ASP_447 | OD2 | 3.777 |
| 5LDN | A_LYS_483 | NZ  | A_ASP_910 | OD2 | 3.275 |
| 5LDN | A_LYS_505 | NZ  | A_ASP_501 | OD1 | 3.131 |
| 5LDN | A_LYS_505 | NZ  | A_ASP_501 | OD2 | 3.450 |
| 5LDN | A_ARG_506 | NH2 | A_ASP_482 | OD1 | 3.756 |
| 5LDN | A_ARG_506 | NH2 | A_ASP_482 | OD2 | 3.168 |
| 5LDN | A_ARG_522 | NH2 | A_GLU_401 | OE2 | 3.872 |
| 5LDN | A_ARG_538 | NH1 | A_ASP_394 | OD2 | 3.250 |
| 5LDN | A_ARG_545 | NH2 | A_ASP_391 | OD1 | 2.660 |
| 5LDN | A_ARG_545 | NH2 | A_ASP_391 | OD2 | 3.895 |
| 5LDN | A_ARG_553 | NH1 | A_ASP_107 | OD1 | 3.270 |
| 5LDN | A_ARG_553 | NH1 | A_ASP_107 | OD2 | 3.176 |
| 5LDN | A_HIS_558 | NE2 | A_ASP_101 | OD1 | 3.369 |
| 5LDN | A_HIS_558 | NE2 | A_ASP_101 | OD2 | 2.749 |

|      |           |     |           |     |       |
|------|-----------|-----|-----------|-----|-------|
| 5LDN | A_LYS_564 | NZ  | A_GLU_366 | OE1 | 2.705 |
| 5LDN | A_LYS_586 | NZ  | A_ASP_74  | OD2 | 3.049 |
| 5LDN | A_ARG_601 | NH1 | A_ASP_587 | OD1 | 3.101 |
| 5LDN | A_ARG_601 | NH1 | A_ASP_587 | OD2 | 2.666 |
| 5LDN | A_ARG_634 | NH2 | A_GLU_630 | OE2 | 3.382 |
| 5LDN | A_ARG_675 | NH1 | A_GLU_920 | OE2 | 3.980 |
| 5LDN | A_ARG_675 | NH2 | A_GLU_920 | OE2 | 3.771 |
| 5LDN | A_LYS_683 | NZ  | A_GLU_911 | OE1 | 2.897 |
| 5LDN | A_LYS_719 | NZ  | A_GLU_741 | OE1 | 3.754 |
| 5LDN | A_LYS_719 | NZ  | A_GLU_741 | OE2 | 3.492 |
| 5LDN | A_LYS_745 | NZ  | A_ASP_907 | OD1 | 3.711 |
| 5LDN | A_LYS_745 | NZ  | A_ASP_907 | OD2 | 2.722 |
| 5LDN | A_ARG_746 | NH1 | A_GLU_743 | OE1 | 2.687 |
| 5LDN | A_ARG_746 | NH1 | A_GLU_743 | OE2 | 2.969 |
| 5LDN | A_ARG_802 | NH1 | A_ASP_526 | OD2 | 3.579 |
| 5LDN | A_LYS_862 | NZ  | A_ASP_526 | OD1 | 2.598 |
| 5LDN | A_LYS_862 | NZ  | A_ASP_529 | OD1 | 3.751 |
| 5LDN | A_LYS_862 | NZ  | A_ASP_529 | OD2 | 2.683 |
| 5LDN | A_ARG_871 | NH1 | A_GLU_920 | OE2 | 3.400 |
| 5LDN | A_HIS_898 | ND1 | A_ASP_725 | OD1 | 3.639 |
| 5LDN | A_HIS_898 | ND1 | A_ASP_725 | OD2 | 2.775 |
| 5LDN | A_ARG_926 | NH2 | A_ASP_639 | OD2 | 3.350 |
| 5LDN | A_HIS_928 | ND1 | A_ASP_639 | OD1 | 2.832 |
| 5LDN | A_HIS_928 | ND1 | A_ASP_639 | OD2 | 3.728 |
| 5LDN | A_HIS_928 | NE2 | A_ASP_636 | OD2 | 3.490 |
| 5LDN | A_ARG_932 | NH1 | A_ASP_89  | OD2 | 3.407 |
| 5LDN | A_ARG_932 | NH2 | A_ASP_89  | OD1 | 3.679 |
| 5LDN | A_ARG_932 | NH2 | A_ASP_89  | OD2 | 2.766 |
| 5LDN | A_ARG_932 | NH2 | A_GLU_630 | OE1 | 3.434 |
| 5LDN | A_ARG_932 | NH2 | A_GLU_630 | OE2 | 3.081 |
| 5LDN | A_ARG_941 | NH1 | A_ASP_362 | OD1 | 3.367 |
| 5LDN | A_ARG_941 | NH1 | A_ASP_362 | OD2 | 3.176 |
| 5LDN | A_ARG_941 | NH2 | A_ASP_362 | OD1 | 3.000 |
| 5LDN | A_ARG_941 | NH2 | A_ASP_362 | OD2 | 3.971 |
| 5LDN | L_LYS_44  | NZ  | L_ASP_90  | OD1 | 2.996 |
| 5LDN | L_ARG_81  | NH1 | L_ASP_102 | OD1 | 3.268 |
| 5LDN | L_ARG_81  | NH1 | L_ASP_102 | OD2 | 2.452 |
| 5LDN | L_ARG_81  | NH2 | L_ASP_102 | OD1 | 3.517 |
| 5LDN | L_ARG_    | NH1 | L_GLU_    | OE1 | 3.301 |
| 5LDN | L_ARG_    | NH2 | L_GLU_    | OE1 | 3.915 |
| 5LDN | L_ARG_    | NH1 | L_GLU_    | OE2 | 3.234 |
| 5LDN | L_HIS_    | ND1 | L_ASP_    | OD1 | 3.989 |
| 5LDN | L_HIS_    | ND1 | L_ASP_    | OD2 | 2.838 |
| 5LDN | H_ARG_37  | NH1 | H_ASP_88  | OD1 | 2.969 |
| 5LDN | H_ARG_37  | NH2 | H_GLU_45  | OE2 | 3.151 |
| 5LDN | H_ARG_65  | NH1 | H_ASP_88  | OD1 | 3.733 |
| 5LDN | H_ARG_65  | NH1 | H_ASP_    | OD2 | 3.243 |
| 5LDN | H_ARG_65  | NH2 | H_ASP_88  | OD1 | 2.798 |
| 5LDN | H_ARG_65  | NH2 | H_ASP_    | OD2 | 3.381 |
| 5LDN | H_LYS_70  | NZ  | H_ASP_72  | OD2 | 3.198 |
| 5LDN | H_ARG_    | NH1 | H_ASP_    | OD1 | 3.345 |
| 5LDN | H_ARG_    | NH2 | H_ASP_    | OD1 | 3.435 |
| 5LDN | H_LYS_    | NZ  | L_GLU_    | OE1 | 3.019 |
| 5M2C | A_LYS_124 | NZ  | A_ASP_195 | OD1 | 2.994 |
| 5M2C | A_LYS_124 | NZ  | A_ASP_195 | OD2 | 3.852 |
| 5M2C | A_LYS_144 | NZ  | A_ASP_138 | OD1 | 2.840 |
| 5M2C | A_LYS_171 | NZ  | A_ASP_138 | OD1 | 3.119 |
| 5M2C | A_LYS_187 | NZ  | A_ASP_155 | OD1 | 3.762 |

|      |           |     |           |     |       |
|------|-----------|-----|-----------|-----|-------|
| 5M2C | A_LYS_187 | NZ  | A_ASP_155 | OD2 | 3.179 |
| 5M2C | A_HIS_191 | NE2 | A_ASP_128 | OD1 | 3.269 |
| 5M2C | A_HIS_191 | NE2 | A_ASP_128 | OD2 | 2.695 |
| 5M2C | B_LYS_124 | NZ  | B_ASP_195 | OD1 | 3.117 |
| 5M2C | B_LYS_124 | NZ  | B_ASP_195 | OD2 | 3.775 |
| 5M2C | B_LYS_144 | NZ  | B_ASP_138 | OD1 | 2.798 |
| 5M2C | B_LYS_171 | NZ  | B_ASP_138 | OD1 | 3.131 |
| 5M2C | B_LYS_187 | NZ  | B_ASP_155 | OD1 | 3.683 |
| 5M2C | B_LYS_187 | NZ  | B_ASP_155 | OD2 | 3.174 |
| 5M2C | B_HIS_191 | NE2 | B_ASP_128 | OD1 | 3.220 |
| 5M2C | B_HIS_191 | NE2 | B_ASP_128 | OD2 | 2.713 |
| 5M33 | A_LYS_124 | NZ  | A_ASP_195 | OD1 | 2.806 |
| 5M33 | A_LYS_124 | NZ  | A_ASP_195 | OD2 | 3.061 |
| 5M33 | A_LYS_187 | NZ  | A_ASP_155 | OD1 | 2.820 |
| 5M33 | A_HIS_191 | NE2 | A_ASP_128 | OD1 | 3.390 |
| 5M33 | A_HIS_191 | NE2 | A_ASP_128 | OD2 | 2.760 |
| 5M33 | A_LYS_193 | NZ  | A_GLU_188 | OE1 | 2.934 |
| 5M33 | B_LYS_124 | NZ  | B_ASP_195 | OD1 | 3.243 |
| 5M33 | B_LYS_124 | NZ  | B_ASP_195 | OD2 | 2.646 |
| 5M33 | B_HIS_191 | NE2 | B_ASP_128 | OD1 | 3.361 |
| 5M33 | B_HIS_191 | NE2 | B_ASP_128 | OD2 | 2.690 |
| 5M3D | A_LYS_116 | NZ  | A_ASP_117 | OD1 | 3.826 |
| 5M3D | A_LYS_124 | NZ  | A_ASP_195 | OD1 | 3.095 |
| 5M3D | A_LYS_124 | NZ  | A_ASP_195 | OD2 | 2.681 |
| 5M3D | A_LYS_144 | NZ  | A_ASP_138 | OD1 | 3.722 |
| 5M3D | A_LYS_148 | NZ  | A_GLU_152 | OE2 | 2.745 |
| 5M3D | A_LYS_187 | NZ  | A_ASP_155 | OD2 | 2.929 |
| 5M3D | A_HIS_191 | NE2 | A_ASP_128 | OD1 | 3.275 |
| 5M3D | A_HIS_191 | NE2 | A_ASP_128 | OD2 | 2.681 |
| 5M3D | A_LYS_201 | NZ  | A_ASP_196 | OD1 | 3.448 |
| 5M3D | B_LYS_116 | NZ  | B_ASP_117 | OD1 | 3.148 |
| 5M3D | B_LYS_124 | NZ  | B_ASP_195 | OD1 | 2.979 |
| 5M3D | B_LYS_124 | NZ  | B_ASP_195 | OD2 | 2.591 |
| 5M3D | B_LYS_144 | NZ  | B_ASP_138 | OD1 | 3.668 |
| 5M3D | B_LYS_148 | NZ  | B_GLU_152 | OE2 | 2.496 |
| 5M3D | B_LYS_187 | NZ  | B_ASP_155 | OD2 | 3.090 |
| 5M3D | B_HIS_191 | NE2 | B_ASP_128 | OD1 | 3.349 |
| 5M3D | B_HIS_191 | NE2 | B_ASP_128 | OD2 | 2.596 |
| 5M3D | C_LYS_124 | NZ  | C_ASP_195 | OD1 | 2.934 |
| 5M3D | C_LYS_124 | NZ  | C_ASP_195 | OD2 | 3.127 |
| 5M3D | C_LYS_148 | NZ  | C_GLU_152 | OE2 | 2.588 |
| 5M3D | C_LYS_171 | NZ  | C_ASP_137 | OD1 | 3.243 |
| 5M3D | C_LYS_171 | NZ  | C_ASP_137 | OD2 | 3.458 |
| 5M3D | C_LYS_187 | NZ  | C_ASP_155 | OD2 | 3.290 |
| 5M3D | C_HIS_191 | NE2 | C_ASP_128 | OD1 | 3.231 |
| 5M3D | C_HIS_191 | NE2 | C_ASP_128 | OD2 | 2.539 |
| 5M3D | D_LYS_124 | NZ  | D_ASP_195 | OD1 | 3.141 |
| 5M3D | D_LYS_124 | NZ  | D_ASP_195 | OD2 | 3.445 |
| 5M3D | D_LYS_148 | NZ  | D_GLU_152 | OE1 | 3.259 |
| 5M3D | D_LYS_171 | NZ  | D_ASP_137 | OD1 | 2.423 |
| 5M3D | D_LYS_171 | NZ  | D_ASP_137 | OD2 | 3.425 |
| 5M3D | D_LYS_187 | NZ  | D_ASP_155 | OD2 | 3.128 |
| 5M3D | D_HIS_191 | NE2 | D_ASP_128 | OD1 | 3.228 |
| 5M3D | D_HIS_191 | NE2 | D_ASP_128 | OD2 | 2.528 |
| 5M3T | A_LYS_124 | NZ  | A_ASP_195 | OD1 | 3.045 |
| 5M3T | A_LYS_124 | NZ  | A_ASP_195 | OD2 | 3.381 |
| 5M3T | A_LYS_144 | NZ  | A_ASP_137 | OD1 | 3.126 |
| 5M3T | A_HIS_191 | NE2 | A_ASP_128 | OD1 | 2.701 |



|      |           |     |           |     |       |
|------|-----------|-----|-----------|-----|-------|
| 5M3T | A_HIS_191 | NE2 | A_ASP_128 | OD2 | 3.351 |
| 5M3T | B_LYS_116 | NZ  | B_ASP_117 | OD1 | 3.281 |
| 5M3T | B_LYS_124 | NZ  | B_ASP_195 | OD1 | 2.763 |
| 5M3T | B_LYS_124 | NZ  | B_ASP_195 | OD2 | 2.942 |
| 5M3T | B_LYS_144 | NZ  | B_ASP_138 | OD1 | 2.688 |
| 5M3T | B_LYS_144 | NZ  | B_ASP_138 | OD2 | 3.938 |
| 5M3T | B_LYS_148 | NZ  | B_GLU_152 | OE2 | 3.571 |
| 5M3T | B_LYS_187 | NZ  | B_ASP_155 | OD1 | 3.212 |
| 5M3T | B_HIS_191 | NE2 | B_ASP_128 | OD1 | 2.761 |
| 5M3T | B_HIS_191 | NE2 | B_ASP_128 | OD2 | 3.127 |
| 5M4R | A_LYS_124 | NZ  | A_ASP_195 | OD1 | 3.169 |
| 5M4R | A_LYS_124 | NZ  | A_ASP_195 | OD2 | 3.633 |
| 5M4R | A_LYS_171 | NZ  | A_ASP_138 | OD1 | 2.609 |
| 5M4R | A_LYS_187 | NZ  | A_ASP_155 | OD2 | 3.101 |
| 5M4R | A_HIS_191 | NE2 | A_ASP_128 | OD1 | 3.374 |
| 5M4R | A_HIS_191 | NE2 | A_ASP_128 | OD2 | 2.535 |
| 5M4R | B_LYS_124 | NZ  | B_ASP_195 | OD1 | 3.161 |
| 5M4R | B_LYS_124 | NZ  | B_ASP_195 | OD2 | 3.629 |
| 5M4R | B_LYS_144 | NZ  | B_ASP_138 | OD1 | 2.408 |
| 5M4R | B_LYS_187 | NZ  | B_ASP_155 | OD1 | 3.374 |
| 5M4R | B_HIS_191 | NE2 | B_ASP_128 | OD1 | 3.385 |
| 5M4R | B_HIS_191 | NE2 | B_ASP_128 | OD2 | 2.546 |
| 5M4R | C_LYS_124 | NZ  | C_ASP_195 | OD1 | 3.153 |
| 5M4R | C_LYS_124 | NZ  | C_ASP_195 | OD2 | 3.571 |
| 5M4R | C_LYS_171 | NZ  | C_ASP_138 | OD1 | 3.210 |
| 5M4R | C_LYS_187 | NZ  | C_ASP_155 | OD1 | 3.818 |
| 5M4R | C_HIS_191 | NE2 | C_ASP_128 | OD1 | 3.374 |
| 5M4R | C_HIS_191 | NE2 | C_ASP_128 | OD2 | 2.549 |
| 5M4R | D_LYS_124 | NZ  | D_ASP_195 | OD1 | 3.169 |
| 5M4R | D_LYS_124 | NZ  | D_ASP_195 | OD2 | 3.626 |
| 5M4R | D_LYS_187 | NZ  | D_ASP_155 | OD1 | 3.733 |
| 5M4R | D_LYS_187 | NZ  | D_ASP_155 | OD2 | 3.658 |
| 5M4R | D_HIS_191 | NE2 | D_ASP_128 | OD1 | 3.367 |
| 5M4R | D_HIS_191 | NE2 | D_ASP_128 | OD2 | 2.515 |
| 5M4R | E_LYS_124 | NZ  | E_ASP_195 | OD1 | 3.158 |
| 5M4R | E_LYS_124 | NZ  | E_ASP_195 | OD2 | 3.599 |
| 5M4R | E_LYS_144 | NZ  | E_ASP_137 | OD2 | 3.235 |
| 5M4R | E_LYS_187 | NZ  | E_ASP_155 | OD1 | 3.706 |
| 5M4R | E_HIS_191 | NE2 | E_ASP_128 | OD1 | 3.375 |
| 5M4R | E_HIS_191 | NE2 | E_ASP_128 | OD2 | 2.532 |
| 5M4R | E_LYS_201 | NZ  | E_ASP_196 | OD1 | 3.587 |
| 5MO9 | H_HIS_35  | NE2 | H_GLU_33  | OE1 | 3.220 |
| 5MO9 | H_HIS_43  | NE2 | H_GLU_89  | OE1 | 3.753 |
| 5MO9 | H_LYS_63  | NZ  | H_GLU_46  | OE1 | 3.930 |
| 5MO9 | H_LYS_63  | NZ  | H_GLU_46  | OE2 | 3.238 |
| 5MO9 | H_LYS_67  | NZ  | H_ASP_90  | OD1 | 3.821 |
| 5MO9 | H_LYS_67  | NZ  | H_ASP_90  | OD2 | 2.804 |
| 5MO9 | H_ARG_84  | NH1 | H_GLU_82  | OE1 | 3.999 |
| 5MO9 | H_ARG_84  | NH1 | H_GLU_82  | OE2 | 3.132 |
| 5MO9 | H_LYS_146 | NZ  | H_ASP_147 | OD1 | 3.365 |
| 5MO9 | H_LYS_146 | NZ  | H_ASP_147 | OD2 | 3.626 |
| 5MO9 | H_LYS_212 | NZ  | L_GLU_128 | OE2 | 3.509 |
| 5MO9 | H_LYS_213 | NZ  | H_GLU_215 | OE2 | 3.368 |
| 5MO9 | L_LYS_44  | NZ  | L_GLU_86  | OE2 | 3.853 |
| 5MO9 | L_LYS_55  | NZ  | X_GLU_371 | OE2 | 2.811 |
| 5MO9 | L_ARG_59  | NH1 | L_ASP_65  | OD1 | 3.142 |
| 5MO9 | L_ARG_66  | NH1 | L_ASP_87  | OD1 | 3.324 |
| 5MO9 | L_ARG_66  | NH1 | L_ASP_87  | OD2 | 2.775 |

|      |            |     |            |     |       |
|------|------------|-----|------------|-----|-------|
| 5MO9 | L_ARG.66   | NH2 | L_ASP.87   | OD1 | 2.980 |
| 5MO9 | L_ARG.66   | NH2 | L_ASP.87   | OD2 | 3.846 |
| 5MO9 | L_LYS.108  | NZ  | L_GLU.170  | OE2 | 3.379 |
| 5MO9 | L_LYS.154  | NZ  | L_GLU.200  | OE2 | 3.767 |
| 5MO9 | X_HIS.343  | NE2 | X_GLU.341  | OE2 | 3.960 |
| 5MO9 | X_LYS.364  | NZ  | H_GLU.33   | OE2 | 2.799 |
| 5MO9 | X_LYS.364  | NZ  | H_ASP.52   | OD1 | 3.966 |
| 5MO9 | X_LYS.369  | NZ  | X_GLU.371  | OE1 | 3.611 |
| 5MO9 | X_LYS.372  | NZ  | X_ASP.370  | OD1 | 3.437 |
| 5N2B | A_LYS.82   | NZ  | A_ASP.144  | OD1 | 3.469 |
| 5N4J | L_ARG.38   | NH1 | H_ASP.100  | OD1 | 2.794 |
| 5N4J | L_ARG.38   | NH1 | H_ASP.100  | OD2 | 3.589 |
| 5N4J | L_ARG.60   | NH2 | L_ASP.66   | OD1 | 3.938 |
| 5N4J | L_ARG.67   | NH2 | L_GLU.87   | OE2 | 2.853 |
| 5N4J | L_ARG.67   | NH2 | L_ASP.88   | OD1 | 2.770 |
| 5N4J | L_ARG.67   | NH2 | L_ASP.88   | OD2 | 3.658 |
| 5N4J | L_LYS.174  | NZ  | L_GLU.89   | OE2 | 2.818 |
| 5N4J | H_LYS.11   | NZ  | H_GLU.9    | OE1 | 3.995 |
| 5N4J | H_ARG.37   | NH1 | H_ASP.89   | OD1 | 2.887 |
| 5N4J | H_ARG.37   | NH2 | H_GLU.45   | OE1 | 3.779 |
| 5N4J | H_ARG.37   | NH2 | H_GLU.45   | OE2 | 3.178 |
| 5N4J | H_ARG.37   | NH2 | H_ASP.89   | OD1 | 3.973 |
| 5N4J | H_LYS.62   | NZ  | H_GLU.45   | OE1 | 2.843 |
| 5N4J | H_LYS.62   | NZ  | H_GLU.45   | OE2 | 3.909 |
| 5N4J | H_ARG.66   | NH1 | H_ASP.89   | OD1 | 3.808 |
| 5N4J | H_ARG.66   | NH1 | H_ASP.89   | OD2 | 2.928 |
| 5N4J | H_ARG.66   | NH2 | H_ASP.89   | OD1 | 2.878 |
| 5N4J | H_ARG.66   | NH2 | H_ASP.89   | OD2 | 3.415 |
| 5N4J | H_ARG.83   | NH1 | H_GLU.81   | OE1 | 2.921 |
| 5N4J | H_ARG.86   | NH2 | H_ASP.88   | OD1 | 3.231 |
| 5N4J | H_ARG.86   | NH2 | H_ASP.88   | OD2 | 2.601 |
| 5N4J | H_ARG.97   | NH2 | H_ASP.102  | OD1 | 3.488 |
| 5N4J | H_ARG.97   | NH2 | H_ASP.102  | OD2 | 2.852 |
| 5N4J | H_LYS.210  | NZ  | L_GLU.131  | OE1 | 2.936 |
| 5N4J | H_LYS.210  | NZ  | L_GLU.131  | OE2 | 3.282 |
| 5N4J | H_ARG.211  | NH1 | H_GLU.213  | OE2 | 3.986 |
| 5N7B | H_ARG.38   | NH1 | H_ASP.92   | OD1 | 2.899 |
| 5N7B | H_ARG.38   | NH2 | H_GLU.46   | OE1 | 3.245 |
| 5N7B | H_ARG.38   | NH2 | H_GLU.46   | OE2 | 3.600 |
| 5N7B | H_ARG.38   | NH2 | H_ASP.92   | OD1 | 3.935 |
| 5N7B | H_LYS.43   | NZ  | H_GLU.46   | OE1 | 3.841 |
| 5N7B | H_LYS.43   | NZ  | H_GLU.91   | OE1 | 3.761 |
| 5N7B | H_ARG.52   | NH1 | H_GLU.50   | OE2 | 2.676 |
| 5N7B | H_ARG.69   | NH1 | H_ASP.92   | OD1 | 3.313 |
| 5N7B | H_ARG.69   | NH1 | H_ASP.92   | OD2 | 3.638 |
| 5N7B | H_ARG.69   | NH2 | H_ASP.92   | OD1 | 3.498 |
| 5N7B | H_ARG.69   | NH2 | H_ASP.92   | OD2 | 2.337 |
| 5N7B | H_ARG.74   | NH2 | H_ASP.76   | OD1 | 3.523 |
| 5N7B | H_ARG.89   | NH1 | H_GLU.91   | OE2 | 3.715 |
| 5N7B | H_HIS.1051 | ND1 | H_GLU.1047 | OE2 | 2.925 |
| 5N7B | H_HIS.1051 | NE2 | H_ASP.1050 | OD1 | 3.871 |
| 5N7B | H_ARG.1070 | NH2 | H_GLU.1090 | OE2 | 3.894 |
| 5N7B | H_ARG.1070 | NH2 | H_ASP.1091 | OD1 | 2.787 |
| 5N7B | H_ARG.1070 | NH2 | H_ASP.1091 | OD2 | 3.671 |
| 5N7W | A_LYS.12   | NZ  | A_GLU.10   | OE1 | 3.956 |
| 5N7W | A_ARG.38   | NH1 | A_ASP.90   | OD1 | 2.843 |
| 5N7W | A_ARG.38   | NH2 | A_GLU.46   | OE1 | 3.305 |
| 5N7W | A_ARG.38   | NH2 | A_ASP.90   | OD1 | 3.827 |

|      |           |     |           |     |       |
|------|-----------|-----|-----------|-----|-------|
| 5N7W | A_LYS.63  | NZ  | A_GLU_46  | OE1 | 3.619 |
| 5N7W | A_LYS.63  | NZ  | A_GLU_46  | OE2 | 2.845 |
| 5N7W | A_ARG.67  | NH1 | A_ASP_90  | OD1 | 3.584 |
| 5N7W | A_ARG.67  | NH1 | A_ASP_90  | OD2 | 2.765 |
| 5N7W | A_ARG.67  | NH2 | A_ASP_90  | OD1 | 2.880 |
| 5N7W | A_ARG.67  | NH2 | A_ASP_90  | OD2 | 3.520 |
| 5N7W | A_ARG.98  | NH2 | A_ASP_107 | OD1 | 3.757 |
| 5N7W | A_ARG.98  | NH2 | A_ASP_107 | OD2 | 2.848 |
| 5N7W | A_LYS.149 | NZ  | B_GLU_126 | OE2 | 2.961 |
| 5N7W | A_LYS.215 | NZ  | B_GLU_125 | OE1 | 2.755 |
| 5N7W | A_LYS.215 | NZ  | B_GLU_125 | OE2 | 3.335 |
| 5N7W | B_LYS.39  | NZ  | B_GLU_81  | OE2 | 3.652 |
| 5N7W | B_ARG.61  | NH2 | B_ASP_82  | OD1 | 2.909 |
| 5N7W | B_ARG.61  | NH2 | B_ASP_82  | OD2 | 3.717 |
| 5N7W | B_HIS.190 | ND1 | B_ASP_153 | OD2 | 2.856 |
| 5N7W | H_LYS.12  | NZ  | H_GLU_10  | OE1 | 3.973 |
| 5N7W | H_ARG.38  | NH1 | H_ASP_90  | OD1 | 2.822 |
| 5N7W | H_ARG.38  | NH2 | H_GLU_46  | OE1 | 3.307 |
| 5N7W | H_ARG.38  | NH2 | H_ASP_90  | OD1 | 3.828 |
| 5N7W | H_LYS.63  | NZ  | H_GLU_46  | OE1 | 3.613 |
| 5N7W | H_LYS.63  | NZ  | H_GLU_46  | OE2 | 2.860 |
| 5N7W | H_ARG.67  | NH1 | H_ASP_90  | OD1 | 3.649 |
| 5N7W | H_ARG.67  | NH1 | H_ASP_90  | OD2 | 2.788 |
| 5N7W | H_ARG.67  | NH2 | H_ASP_90  | OD1 | 2.914 |
| 5N7W | H_ARG.67  | NH2 | H_ASP_90  | OD2 | 3.510 |
| 5N7W | H_ARG.98  | NH2 | H_ASP_107 | OD1 | 3.723 |
| 5N7W | H_ARG.98  | NH2 | H_ASP_107 | OD2 | 2.808 |
| 5N7W | H_LYS.149 | NZ  | L_GLU_126 | OE2 | 2.605 |
| 5N7W | H_ARG.216 | NH2 | H_GLU_218 | OE2 | 2.838 |
| 5N7W | L_LYS.39  | NZ  | L_GLU_81  | OE1 | 3.895 |
| 5N7W | L_ARG.61  | NH1 | L_GLU_81  | OE2 | 3.879 |
| 5N7W | L_ARG.61  | NH2 | L_GLU_81  | OE2 | 3.018 |
| 5N7W | L_ARG.61  | NH2 | L_ASP_82  | OD1 | 2.869 |
| 5N7W | L_ARG.61  | NH2 | L_ASP_82  | OD2 | 3.688 |
| 5N7W | X_HIS.54  | NE2 | X_GLU_68  | OE1 | 3.783 |
| 5N7W | X_ARG.55  | NH1 | X_GLU_57  | OE2 | 2.811 |
| 5N7W | X_ARG.55  | NH2 | X_GLU_57  | OE2 | 2.683 |
| 5N7W | X_ARG.100 | NH1 | X_ASP_58  | OD1 | 3.676 |
| 5N7W | X_ARG.100 | NH1 | X_ASP_58  | OD2 | 3.093 |
| 5N7W | X_ARG.100 | NH2 | X_ASP_58  | OD2 | 2.743 |
| 5N7W | X_ARG.100 | NH2 | X_GLU_113 | OE2 | 3.977 |
| 5N7W | X_ARG.101 | NH2 | X_GLU_60  | OE1 | 3.293 |
| 5N7W | X_ARG.101 | NH2 | X_GLU_60  | OE2 | 3.261 |
| 5N7W | X_HIS.105 | NE2 | X_GLU_60  | OE1 | 3.956 |
| 5N7W | X_HIS.105 | NE2 | X_GLU_60  | OE2 | 4.000 |
| 5N7W | X_ARG.111 | NH2 | X_GLU_102 | OE1 | 3.583 |
| 5N7W | Y_ARG.46  | NH1 | Y_ASP_42  | OD2 | 2.678 |
| 5N7W | Y_ARG.55  | NH2 | Y_GLU_57  | OE2 | 2.650 |
| 5N7W | Y_ARG.100 | NH1 | Y_ASP_58  | OD1 | 3.688 |
| 5N7W | Y_ARG.100 | NH1 | Y_ASP_58  | OD2 | 3.136 |
| 5N7W | Y_ARG.100 | NH2 | Y_ASP_58  | OD2 | 2.751 |
| 5N7W | Y_ARG.100 | NH2 | Y_GLU_113 | OE1 | 3.830 |
| 5N7W | Y_ARG.101 | NH2 | Y_GLU_60  | OE1 | 3.497 |
| 5N7W | Y_ARG.101 | NH2 | Y_GLU_60  | OE2 | 3.078 |
| 5N7W | Y_HIS.105 | NE2 | Y_GLU_60  | OE1 | 3.784 |
| 5N7W | Y_HIS.105 | NE2 | Y_GLU_60  | OE2 | 3.473 |
| 5N7W | Y_ARG.111 | NH2 | Y_GLU_102 | OE1 | 3.366 |
| 5N88 | H_ARG.38  | NH1 | H_ASP_90  | OD1 | 2.861 |

|      |           |     |           |     |       |
|------|-----------|-----|-----------|-----|-------|
| 5N88 | H_ARG_38  | NH2 | H_GLU_46  | OE1 | 2.966 |
| 5N88 | H_ARG_38  | NH2 | H_GLU_46  | OE2 | 3.874 |
| 5N88 | H_ARG_38  | NH2 | H_ASP_90  | OD1 | 3.775 |
| 5N88 | H_ARG_53  | NH2 | H_ASP_105 | OD1 | 3.754 |
| 5N88 | H_ARG_53  | NH2 | H_ASP_105 | OD2 | 2.841 |
| 5N88 | H_LYS_65  | NZ  | H_ASP_62  | OD1 | 2.674 |
| 5N88 | H_ARG_67  | NH1 | H_ASP_90  | OD1 | 3.790 |
| 5N88 | H_ARG_67  | NH1 | H_ASP_90  | OD2 | 2.789 |
| 5N88 | H_ARG_67  | NH2 | H_ASP_90  | OD1 | 3.111 |
| 5N88 | H_ARG_67  | NH2 | H_ASP_90  | OD2 | 3.597 |
| 5N88 | H_ARG_98  | NH2 | H_ASP_115 | OD1 | 3.514 |
| 5N88 | H_ARG_98  | NH2 | H_ASP_115 | OD2 | 2.816 |
| 5N88 | D_ARG_351 | NH2 | D_GLU_379 | OE1 | 2.947 |
| 5N88 | D_ARG_354 | NH1 | D_GLU_379 | OE1 | 3.813 |
| 5N88 | D_ARG_354 | NH2 | D_GLU_358 | OE1 | 3.788 |
| 5N88 | D_ARG_354 | NH2 | D_GLU_358 | OE2 | 3.296 |
| 5N88 | D_ARG_354 | NH2 | D_GLU_379 | OE1 | 3.408 |
| 5N88 | D_ARG_354 | NH2 | D_GLU_379 | OE2 | 2.654 |
| 5N88 | D_ARG_372 | NH1 | D_ASP_369 | OD2 | 3.104 |
| 5N88 | D_LYS_392 | NZ  | D_ASP_349 | OD1 | 3.585 |
| 5N88 | D_LYS_392 | NZ  | D_ASP_349 | OD2 | 3.429 |
| 5N88 | D_HIS_393 | NE2 | D_ASP_349 | OD1 | 2.893 |
| 5N88 | D_LYS_415 | NZ  | D_ASP_378 | OD1 | 2.913 |
| 5N88 | A_ARG_38  | NH1 | A_ASP_90  | OD1 | 2.946 |
| 5N88 | A_ARG_38  | NH2 | A_GLU_46  | OE1 | 2.784 |
| 5N88 | A_ARG_38  | NH2 | A_ASP_90  | OD1 | 3.960 |
| 5N88 | A_LYS_65  | NZ  | A_ASP_62  | OD1 | 2.935 |
| 5N88 | A_ARG_67  | NH1 | A_ASP_90  | OD1 | 3.771 |
| 5N88 | A_ARG_67  | NH1 | A_ASP_90  | OD2 | 2.724 |
| 5N88 | A_ARG_67  | NH2 | A_ASP_90  | OD1 | 3.229 |
| 5N88 | A_ARG_67  | NH2 | A_ASP_90  | OD2 | 3.677 |
| 5N88 | A_LYS_76  | NZ  | A_ASP_73  | OD2 | 3.426 |
| 5N88 | A_ARG_87  | NH1 | A_GLU_89  | OE1 | 3.467 |
| 5N88 | A_ARG_87  | NH2 | A_GLU_89  | OE1 | 3.356 |
| 5N88 | A_ARG_98  | NH2 | A_ASP_115 | OD1 | 3.457 |
| 5N88 | A_ARG_98  | NH2 | A_ASP_115 | OD2 | 3.121 |
| 5N88 | E_ARG_372 | NH2 | E_GLU_358 | OE1 | 2.751 |
| 5N88 | E_ARG_372 | NH2 | E_GLU_358 | OE2 | 3.550 |
| 5N88 | E_LYS_392 | NZ  | E_ASP_349 | OD1 | 2.862 |
| 5N88 | E_LYS_392 | NZ  | E_ASP_349 | OD2 | 3.023 |
| 5N88 | E_HIS_393 | NE2 | E_ASP_349 | OD1 | 3.833 |
| 5N88 | E_LYS_415 | NZ  | E_ASP_378 | OD1 | 2.913 |
| 5N88 | E_LYS_415 | NZ  | E_ASP_378 | OD2 | 3.971 |
| 5NPH | H_LYS_63  | NZ  | H_GLU_46  | OE1 | 2.774 |
| 5NPH | H_LYS_63  | NZ  | H_GLU_46  | OE2 | 3.824 |
| 5NPH | H_LYS_67  | NZ  | H_ASP_90  | OD1 | 3.768 |
| 5NPH | H_LYS_67  | NZ  | H_ASP_90  | OD2 | 2.830 |
| 5NPH | H_ARG_84  | NH2 | H_GLU_82  | OE2 | 2.962 |
| 5NPH | H_ARG_98  | NH2 | H_ASP_108 | OD1 | 3.726 |
| 5NPH | H_ARG_98  | NH2 | H_ASP_108 | OD2 | 2.829 |
| 5NPH | H_LYS_215 | NZ  | L_GLU_123 | OE2 | 2.787 |
| 5NPH | L_ARG_61  | NH2 | L_GLU_81  | OE1 | 2.810 |
| 5NPH | L_ARG_61  | NH2 | L_ASP_82  | OD1 | 2.818 |
| 5NPH | L_ARG_61  | NH2 | L_ASP_82  | OD2 | 3.582 |
| 5NPH | L_LYS_93  | NZ  | A_GLU_533 | OE1 | 3.679 |
| 5NPH | L_LYS_149 | NZ  | L_GLU_195 | OE1 | 3.660 |
| 5NPH | L_HIS_189 | ND1 | L_ASP_151 | OD2 | 3.036 |
| 5NPH | L_LYS_199 | NZ  | L_ASP_110 | OD2 | 2.799 |

|      |           |     |           |     |       |
|------|-----------|-----|-----------|-----|-------|
| 5NPI | A_LYS_63  | NZ  | A_GLU_46  | OE1 | 2.778 |
| 5NPI | A_LYS_63  | NZ  | A_GLU_46  | OE2 | 3.947 |
| 5NPI | A_LYS_67  | NZ  | A_ASP_90  | OD1 | 3.854 |
| 5NPI | A_LYS_67  | NZ  | A_ASP_90  | OD2 | 2.867 |
| 5NPI | A_ARG_98  | NH2 | A_ASP_108 | OD1 | 3.690 |
| 5NPI | A_ARG_98  | NH2 | A_ASP_108 | OD2 | 2.811 |
| 5NPI | A_HIS_181 | NE2 | B_GLU_10  | OE1 | 3.570 |
| 5NPI | A_HIS_181 | NE2 | B_GLU_10  | OE2 | 3.750 |
| 5NPI | A_ARG_201 | NH2 | A_GLU_221 | OE1 | 2.818 |
| 5NPI | A_ARG_201 | NH2 | A_ASP_222 | OD1 | 2.795 |
| 5NPI | A_ARG_201 | NH2 | A_ASP_222 | OD2 | 3.637 |
| 5NPI | A_LYS_243 | NZ  | A_GLU_245 | OE1 | 3.089 |
| 5NPI | B_LYS_63  | NZ  | B_GLU_46  | OE1 | 2.773 |
| 5NPI | B_LYS_63  | NZ  | B_GLU_46  | OE2 | 3.955 |
| 5NPI | B_LYS_67  | NZ  | B_ASP_90  | OD1 | 3.936 |
| 5NPI | B_LYS_67  | NZ  | B_ASP_90  | OD2 | 2.892 |
| 5NPI | B_ARG_98  | NH2 | B_ASP_108 | OD1 | 3.701 |
| 5NPI | B_ARG_98  | NH2 | B_ASP_108 | OD2 | 2.749 |
| 5NPI | B_HIS_181 | NE2 | A_GLU_10  | OE1 | 3.757 |
| 5NPI | B_HIS_181 | NE2 | A_GLU_10  | OE2 | 3.882 |
| 5NPI | B_ARG_201 | NH2 | B_GLU_221 | OE1 | 2.813 |
| 5NPI | B_ARG_201 | NH2 | B_ASP_222 | OD1 | 2.796 |
| 5NPI | B_ARG_201 | NH2 | B_ASP_222 | OD2 | 3.658 |
| 5NPI | B_LYS_233 | NZ  | E_GLU_533 | OE1 | 3.924 |
| 5NPI | B_LYS_243 | NZ  | B_GLU_245 | OE1 | 3.090 |
| 5NPJ | A_LYS_63  | NZ  | A_GLU_46  | OE1 | 2.799 |
| 5NPJ | A_LYS_67  | NZ  | A_ASP_90  | OD1 | 3.867 |
| 5NPJ | A_LYS_67  | NZ  | A_ASP_90  | OD2 | 2.954 |
| 5NPJ | A_ARG_98  | NH2 | A_ASP_108 | OD1 | 3.695 |
| 5NPJ | A_ARG_98  | NH2 | A_ASP_108 | OD2 | 2.771 |
| 5NPJ | A_HIS_181 | NE2 | B_GLU_10  | OE1 | 3.540 |
| 5NPJ | A_HIS_181 | NE2 | B_GLU_10  | OE2 | 3.793 |
| 5NPJ | A_ARG_201 | NH2 | A_GLU_221 | OE1 | 2.812 |
| 5NPJ | A_ARG_201 | NH2 | A_ASP_222 | OD1 | 2.769 |
| 5NPJ | A_ARG_201 | NH2 | A_ASP_222 | OD2 | 3.614 |
| 5NPJ | A_LYS_243 | NZ  | A_GLU_245 | OE1 | 2.814 |
| 5NPJ | B_LYS_63  | NZ  | B_GLU_46  | OE1 | 2.797 |
| 5NPJ | B_LYS_67  | NZ  | B_ASP_90  | OD1 | 3.887 |
| 5NPJ | B_LYS_67  | NZ  | B_ASP_90  | OD2 | 2.961 |
| 5NPJ | B_ARG_98  | NH2 | B_ASP_108 | OD1 | 3.704 |
| 5NPJ | B_ARG_98  | NH2 | B_ASP_108 | OD2 | 2.768 |
| 5NPJ | B_HIS_181 | NE2 | A_GLU_10  | OE1 | 3.734 |
| 5NPJ | B_HIS_181 | NE2 | A_GLU_10  | OE2 | 3.967 |
| 5NPJ | B_ARG_201 | NH2 | B_GLU_221 | OE1 | 2.825 |
| 5NPJ | B_ARG_201 | NH2 | B_ASP_222 | OD1 | 2.760 |
| 5NPJ | B_ARG_201 | NH2 | B_ASP_222 | OD2 | 3.648 |
| 5NPJ | B_LYS_243 | NZ  | B_GLU_245 | OE1 | 2.926 |
| 5NST | A_ARG_39  | NH1 | C_GLU_81  | OE1 | 3.260 |
| 5NST | A_ARG_39  | NH1 | C_GLU_81  | OE2 | 3.263 |
| 5NST | A_ARG_39  | NH2 | C_GLU_81  | OE1 | 3.038 |
| 5NST | A_ARG_61  | NH1 | A_ASP_82  | OD1 | 3.453 |
| 5NST | A_ARG_61  | NH1 | A_ASP_82  | OD2 | 2.620 |
| 5NST | A_ARG_61  | NH2 | A_ASP_82  | OD1 | 3.456 |
| 5NST | A_ARG_61  | NH2 | A_ASP_82  | OD2 | 3.977 |
| 5NST | A_LYS_147 | NZ  | A_GLU_195 | OE2 | 3.805 |
| 5NST | A_LYS_149 | NZ  | A_GLU_195 | OE1 | 3.194 |
| 5NST | A_LYS_149 | NZ  | A_GLU_195 | OE2 | 3.752 |
| 5NST | A_ARG_155 | NH1 | A_GLU_185 | OE2 | 3.200 |

|      |           |     |           |     |       |
|------|-----------|-----|-----------|-----|-------|
| 5NST | A_ARG_155 | NH2 | A_GLU_185 | OE2 | 2.920 |
| 5NST | A_HIS_189 | ND1 | A_ASP_151 | OD2 | 3.206 |
| 5NST | A_LYS_199 | NZ  | A_ASP_110 | OD1 | 3.008 |
| 5NST | A_LYS_199 | NZ  | A_ASP_110 | OD2 | 3.591 |
| 5NST | B_ARG_33  | NH2 | B_ASP_27  | OD1 | 3.734 |
| 5NST | B_ARG_33  | NH2 | B_ASP_27  | OD2 | 3.892 |
| 5NST | B_ARG_39  | NH1 | B_ASP_90  | OD1 | 3.041 |
| 5NST | B_ARG_39  | NH2 | B_GLU_47  | OE1 | 3.114 |
| 5NST | B_ARG_39  | NH2 | B_ASP_90  | OD1 | 3.726 |
| 5NST | B_HIS_53  | NE2 | B_GLU_51  | OE2 | 3.083 |
| 5NST | B_ARG_67  | NH1 | B_ASP_90  | OD1 | 3.015 |
| 5NST | B_ARG_67  | NH1 | B_ASP_90  | OD2 | 2.796 |
| 5NST | B_ARG_67  | NH2 | B_ASP_90  | OD1 | 3.245 |
| 5NST | B_LYS_76  | NZ  | B_ASP_73  | OD2 | 2.807 |
| 5NST | B_ARG_98  | NH1 | B_ASP_27  | OD2 | 2.918 |
| 5NST | B_ARG_98  | NH2 | B_ASP_238 | OD1 | 3.501 |
| 5NST | B_ARG_98  | NH2 | B_ASP_238 | OD2 | 2.970 |
| 5NST | B_LYS_103 | NZ  | B_ASP_233 | OD1 | 2.837 |
| 5NST | B_ARG_112 | NH1 | B_ASP_198 | OD1 | 3.483 |
| 5NST | B_ARG_112 | NH1 | B_ASP_198 | OD2 | 3.324 |
| 5NST | B_ARG_112 | NH2 | B_ASP_198 | OD1 | 3.105 |
| 5NST | B_ARG_134 | NH1 | B_GLU_167 | OE1 | 3.225 |
| 5NST | B_ARG_143 | NH2 | B_ASP_154 | OD1 | 3.483 |
| 5NST | B_ARG_143 | NH2 | B_ASP_154 | OD2 | 3.145 |
| 5NST | B_ARG_169 | NH1 | B_GLU_118 | OE1 | 3.192 |
| 5NST | B_ARG_169 | NH2 | B_GLU_167 | OE2 | 3.020 |
| 5NST | B_ARG_171 | NH1 | B_ASP_173 | OD1 | 2.814 |
| 5NST | B_ARG_171 | NH2 | B_ASP_173 | OD1 | 3.985 |
| 5NST | B_ARG_184 | NH2 | B_GLU_145 | OE1 | 3.999 |
| 5NST | B_LYS_345 | NZ  | A_GLU_123 | OE1 | 3.069 |
| 5NST | C_ARG_24  | NH2 | C_ASP_70  | OD2 | 2.795 |
| 5NST | C_ARG_39  | NH1 | A_GLU_81  | OE1 | 3.247 |
| 5NST | C_ARG_39  | NH1 | A_GLU_81  | OE2 | 3.139 |
| 5NST | C_ARG_39  | NH2 | A_GLU_81  | OE1 | 3.004 |
| 5NST | C_ARG_61  | NH2 | C_GLU_81  | OE2 | 3.339 |
| 5NST | C_ARG_61  | NH2 | C_ASP_82  | OD1 | 2.949 |
| 5NST | C_ARG_61  | NH2 | C_ASP_82  | OD2 | 3.501 |
| 5NST | C_ARG_103 | NH1 | C_ASP_165 | OD1 | 3.414 |
| 5NST | C_LYS_147 | NZ  | C_GLU_195 | OE2 | 3.756 |
| 5NST | C_LYS_149 | NZ  | C_GLU_195 | OE1 | 3.043 |
| 5NST | C_LYS_149 | NZ  | C_GLU_195 | OE2 | 3.450 |
| 5NST | C_ARG_188 | NH1 | C_ASP_151 | OD2 | 2.746 |
| 5NST | C_ARG_188 | NH2 | C_GLU_187 | OE1 | 2.814 |
| 5NST | C_LYS_199 | NZ  | C_ASP_110 | OD1 | 3.560 |
| 5NST | C_LYS_199 | NZ  | C_ASP_110 | OD2 | 3.855 |
| 5NST | D_ARG_33  | NH2 | D_ASP_27  | OD2 | 3.973 |
| 5NST | D_ARG_39  | NH1 | D_ASP_90  | OD1 | 3.042 |
| 5NST | D_ARG_39  | NH2 | D_GLU_47  | OE1 | 3.103 |
| 5NST | D_ARG_39  | NH2 | D_ASP_90  | OD1 | 3.721 |
| 5NST | D_HIS_53  | NE2 | D_GLU_51  | OE2 | 2.781 |
| 5NST | D_ARG_67  | NH1 | D_ASP_90  | OD1 | 2.697 |
| 5NST | D_ARG_67  | NH1 | D_ASP_90  | OD2 | 3.158 |
| 5NST | D_LYS_76  | NZ  | D_ASP_73  | OD2 | 2.790 |
| 5NST | D_LYS_82  | NZ  | D_ASP_84  | OD2 | 3.904 |
| 5NST | D_ARG_98  | NH1 | D_ASP_27  | OD2 | 2.885 |
| 5NST | D_ARG_98  | NH2 | D_ASP_238 | OD1 | 3.522 |
| 5NST | D_ARG_98  | NH2 | D_ASP_238 | OD2 | 2.972 |
| 5NST | D_LYS_103 | NZ  | D_ASP_233 | OD1 | 3.094 |

|      |           |     |            |     |       |
|------|-----------|-----|------------|-----|-------|
| 5NST | D_LYS_103 | NZ  | D_ASP_233  | OD2 | 3.059 |
| 5NST | D_ARG_112 | NH1 | D_ASP_198  | OD1 | 3.172 |
| 5NST | D_ARG_112 | NH1 | D_ASP_198  | OD2 | 3.063 |
| 5NST | D_ARG_112 | NH2 | D_ASP_198  | OD1 | 2.909 |
| 5NST | D_ARG_134 | NH1 | D_GLU_165  | OE1 | 3.890 |
| 5NST | D_ARG_134 | NH1 | D_GLU_167  | OE1 | 3.201 |
| 5NST | D_ARG_143 | NH2 | D_ASP_154  | OD1 | 3.487 |
| 5NST | D_ARG_143 | NH2 | D_ASP_154  | OD2 | 3.164 |
| 5NST | D_ARG_169 | NH1 | D_GLU_118  | OE1 | 3.163 |
| 5NST | D_ARG_169 | NH2 | D_GLU_167  | OE2 | 3.007 |
| 5NST | D_ARG_171 | NH1 | D_ASP_173  | OD1 | 2.813 |
| 5NST | D_ARG_171 | NH2 | D_ASP_173  | OD1 | 3.989 |
| 5NST | D_LYS_345 | NZ  | C_GLU_123  | OE2 | 3.272 |
| 5NUZ | A_LYS_66  | NZ  | A_ASP_86   | OD1 | 3.693 |
| 5NUZ | A_LYS_66  | NZ  | A_ASP_86   | OD2 | 2.849 |
| 5NUZ | A_ARG_94  | NH2 | A_ASP_101  | OD1 | 3.574 |
| 5NUZ | A_ARG_94  | NH2 | A_ASP_101  | OD2 | 2.713 |
| 5NUZ | A_ARG_95  | NH1 | C_ASP_114  | OD1 | 3.502 |
| 5NUZ | A_ARG_95  | NH1 | C_ASP_114  | OD2 | 2.701 |
| 5NUZ | A_ARG_95  | NH2 | A_ASP_100A | OD2 | 3.027 |
| 5NUZ | A_ARG_95  | NH2 | C_ASP_114  | OD1 | 2.822 |
| 5NUZ | A_ARG_95  | NH2 | C_ASP_114  | OD2 | 3.585 |
| 5NUZ | A_LYS_208 | NZ  | B_GLU_123  | OE1 | 3.889 |
| 5NUZ | A_LYS_208 | NZ  | B_GLU_123  | OE2 | 2.684 |
| 5NUZ | H_LYS_66  | NZ  | H_ASP_86   | OD1 | 3.692 |
| 5NUZ | H_LYS_66  | NZ  | H_ASP_86   | OD2 | 2.845 |
| 5NUZ | H_ARG_94  | NH2 | H_ASP_101  | OD1 | 3.585 |
| 5NUZ | H_ARG_94  | NH2 | H_ASP_101  | OD2 | 2.715 |
| 5NUZ | H_ARG_95  | NH1 | D_ASP_114  | OD1 | 3.679 |
| 5NUZ | H_ARG_95  | NH1 | D_ASP_114  | OD2 | 2.753 |
| 5NUZ | H_ARG_95  | NH2 | H_ASP_100A | OD2 | 3.002 |
| 5NUZ | H_ARG_95  | NH2 | D_ASP_114  | OD1 | 2.850 |
| 5NUZ | H_ARG_95  | NH2 | D_ASP_114  | OD2 | 3.470 |
| 5NUZ | H_LYS_208 | NZ  | L_GLU_123  | OE2 | 2.982 |
| 5NUZ | B_ARG_24  | NH1 | B_ASP_70   | OD1 | 3.493 |
| 5NUZ | B_ARG_24  | NH1 | B_ASP_70   | OD2 | 3.358 |
| 5NUZ | B_ARG_61  | NH1 | B_ASP_81   | OD1 | 3.247 |
| 5NUZ | B_ARG_61  | NH1 | B_ASP_82   | OD1 | 2.766 |
| 5NUZ | B_ARG_61  | NH1 | B_ASP_82   | OD2 | 3.636 |
| 5NUZ | B_ARG_61  | NH2 | L_GLU_79   | OE1 | 3.072 |
| 5NUZ | B_ARG_61  | NH2 | L_GLU_79   | OE2 | 3.676 |
| 5NUZ | B_LYS_92  | NZ  | B_GLU_93   | OE2 | 2.758 |
| 5NUZ | B_LYS_103 | NZ  | B_GLU_105  | OE2 | 3.588 |
| 5NUZ | B_LYS_142 | NZ  | B_GLU_105  | OE1 | 3.907 |
| 5NUZ | B_LYS_142 | NZ  | B_GLU_105  | OE2 | 2.608 |
| 5NUZ | B_LYS_147 | NZ  | B_GLU_195  | OE1 | 3.572 |
| 5NUZ | B_LYS_149 | NZ  | B_GLU_195  | OE2 | 3.615 |
| 5NUZ | B_ARG_155 | NH1 | B_GLU_185  | OE1 | 3.558 |
| 5NUZ | B_ARG_155 | NH1 | B_GLU_185  | OE2 | 3.557 |
| 5NUZ | B_ARG_155 | NH2 | B_GLU_185  | OE2 | 2.757 |
| 5NUZ | B_ARG_188 | NH1 | B_GLU_185  | OE1 | 3.922 |
| 5NUZ | B_HIS_189 | ND1 | B_ASP_151  | OD2 | 3.016 |
| 5NUZ | B_LYS_199 | NZ  | B_ASP_110  | OD2 | 3.082 |
| 5NUZ | C_LYS_181 | NZ  | C_GLU_186  | OE1 | 3.275 |
| 5NUZ | C_LYS_191 | NZ  | C_ASP_159  | OD1 | 3.275 |
| 5NUZ | C_LYS_191 | NZ  | C_ASP_159  | OD2 | 2.624 |
| 5NUZ | C_LYS_193 | NZ  | C_ASP_205  | OD2 | 3.554 |
| 5NUZ | C_LYS_211 | NZ  | A_ASP_54   | OD1 | 3.758 |

|      |           |     |           |     |       |
|------|-----------|-----|-----------|-----|-------|
| 5NUZ | C.LYS_211 | NZ  | A.ASP_54  | OD2 | 3.058 |
| 5NUZ | C.LYS_211 | NZ  | A.ASP_56  | OD2 | 2.861 |
| 5NUZ | C.LYS_216 | NZ  | C.ASP_113 | OD1 | 2.638 |
| 5NUZ | L.ARG_61  | NH1 | L.ASP_82  | OD1 | 2.773 |
| 5NUZ | L.ARG_61  | NH1 | L.ASP_82  | OD2 | 3.655 |
| 5NUZ | L.ARG_61  | NH2 | B.GLU_79  | OE1 | 3.765 |
| 5NUZ | L.ARG_61  | NH2 | B.GLU_79  | OE2 | 2.966 |
| 5NUZ | L.LYS_92  | NZ  | L.GLU_93  | OE2 | 2.743 |
| 5NUZ | L.LYS_103 | NZ  | L.GLU_105 | OE2 | 3.583 |
| 5NUZ | L.LYS_142 | NZ  | L.GLU_105 | OE1 | 3.968 |
| 5NUZ | L.LYS_142 | NZ  | L.GLU_105 | OE2 | 2.583 |
| 5NUZ | L.LYS_149 | NZ  | L.GLU_195 | OE2 | 3.652 |
| 5NUZ | L.ARG_155 | NH1 | L.GLU_185 | OE1 | 3.502 |
| 5NUZ | L.ARG_155 | NH1 | L.GLU_185 | OE2 | 3.552 |
| 5NUZ | L.ARG_155 | NH2 | L.GLU_185 | OE2 | 2.742 |
| 5NUZ | L.LYS_183 | NZ  | L.GLU_187 | OE2 | 3.902 |
| 5NUZ | L.HIS_189 | ND1 | L.ASP_151 | OD2 | 3.012 |
| 5NUZ | L.LYS_199 | NZ  | L.ASP_110 | OD2 | 3.059 |
| 5NUZ | D.LYS_169 | NZ  | D.GLU_171 | OE1 | 3.996 |
| 5NUZ | D.LYS_181 | NZ  | D.ASP_205 | OD2 | 3.184 |
| 5NUZ | D.LYS_190 | NZ  | D.GLU_186 | OE2 | 3.856 |
| 5NUZ | D.LYS_191 | NZ  | D.ASP_159 | OD1 | 3.278 |
| 5NUZ | D.LYS_191 | NZ  | D.ASP_159 | OD2 | 2.625 |
| 5NUZ | D.LYS_193 | NZ  | D.ASP_205 | OD2 | 3.551 |
| 5NUZ | D.LYS_211 | NZ  | H.ASP_54  | OD1 | 3.910 |
| 5NUZ | D.LYS_211 | NZ  | H.ASP_54  | OD2 | 3.105 |
| 5NUZ | D.LYS_211 | NZ  | H.ASP_56  | OD2 | 2.803 |
| 5NUZ | D.LYS_216 | NZ  | D.ASP_113 | OD1 | 2.650 |
| 5O14 | A.LYS_67  | NZ  | A.ASP_28  | OD1 | 3.407 |
| 5O14 | A.LYS_67  | NZ  | A.ASP_28  | OD2 | 3.007 |
| 5O14 | A.ARG_75  | NH2 | A.GLU_95  | OE2 | 3.608 |
| 5O14 | A.ARG_80  | NH1 | A.GLU_44  | OE1 | 2.660 |
| 5O14 | A.ARG_80  | NH1 | A.GLU_44  | OE2 | 2.889 |
| 5O14 | A.ARG_80  | NH2 | A.GLU_92  | OE2 | 3.706 |
| 5O14 | A.HIS_103 | ND1 | A.GLU_137 | OE1 | 2.640 |
| 5O14 | A.HIS_103 | ND1 | A.GLU_137 | OE2 | 3.720 |
| 5O14 | A.ARG_127 | NH1 | A.GLU_112 | OE1 | 2.708 |
| 5O14 | A.ARG_127 | NH1 | A.GLU_112 | OE2 | 3.026 |
| 5O14 | A.ARG_127 | NH1 | A.ASP_160 | OD1 | 3.772 |
| 5O14 | A.ARG_127 | NH2 | A.ASP_160 | OD1 | 2.801 |
| 5O14 | A.ARG_127 | NH2 | A.ASP_160 | OD2 | 2.429 |
| 5O14 | A.ARG_130 | NH1 | A.GLU_92  | OE1 | 2.377 |
| 5O14 | A.ARG_130 | NH1 | A.GLU_92  | OE2 | 3.180 |
| 5O14 | A.ARG_130 | NH2 | A.GLU_92  | OE2 | 3.816 |
| 5O14 | A.ARG_149 | NH1 | A.ASP_171 | OD2 | 3.921 |
| 5O14 | A.LYS_180 | NZ  | A.GLU_182 | OE1 | 3.683 |
| 5O14 | A.LYS_180 | NZ  | A.GLU_182 | OE2 | 3.327 |
| 5O14 | A.LYS_185 | NZ  | H.ASP_55  | OD1 | 3.249 |
| 5O14 | A.LYS_185 | NZ  | H.ASP_55  | OD2 | 2.764 |
| 5O14 | A.LYS_185 | NZ  | H.ASP_57  | OD2 | 2.802 |
| 5O14 | A.ARG_204 | NH1 | A.ASP_142 | OD1 | 3.025 |
| 5O14 | A.ARG_204 | NH1 | A.ASP_142 | OD2 | 3.586 |
| 5O14 | A.ARG_204 | NH1 | B.GLU_218 | OE1 | 3.625 |
| 5O14 | A.LYS_254 | NZ  | A.ASP_71  | OD1 | 3.427 |
| 5O14 | A.LYS_254 | NZ  | A.ASP_71  | OD2 | 2.831 |
| 5O14 | B.LYS_67  | NZ  | B.ASP_28  | OD1 | 3.290 |
| 5O14 | B.LYS_67  | NZ  | B.ASP_28  | OD2 | 3.377 |
| 5O14 | B.ARG_75  | NH2 | B.GLU_95  | OE2 | 3.639 |



|      |           |     |           |     |       |
|------|-----------|-----|-----------|-----|-------|
| 5O14 | B_ARG_80  | NH1 | B_GLU_92  | OE1 | 2.081 |
| 5O14 | B_ARG_80  | NH1 | B_GLU_92  | OE2 | 3.936 |
| 5O14 | B_HIS_103 | ND1 | B_GLU_137 | OE1 | 2.779 |
| 5O14 | B_ARG_127 | NH1 | B_GLU_112 | OE1 | 3.567 |
| 5O14 | B_ARG_127 | NH1 | B_GLU_112 | OE2 | 3.007 |
| 5O14 | B_ARG_127 | NH1 | B_ASP_160 | OD1 | 3.642 |
| 5O14 | B_ARG_127 | NH1 | B_ASP_160 | OD2 | 3.977 |
| 5O14 | B_ARG_127 | NH2 | B_ASP_160 | OD1 | 3.089 |
| 5O14 | B_ARG_127 | NH2 | B_ASP_160 | OD2 | 2.271 |
| 5O14 | B_ARG_130 | NH1 | B_GLU_92  | OE1 | 3.575 |
| 5O14 | B_ARG_130 | NH2 | B_GLU_92  | OE1 | 3.187 |
| 5O14 | B_ARG_130 | NH2 | B_GLU_92  | OE2 | 2.572 |
| 5O14 | B_LYS_180 | NZ  | B_GLU_182 | OE1 | 3.557 |
| 5O14 | B_LYS_180 | NZ  | B_GLU_182 | OE2 | 3.069 |
| 5O14 | B_LYS_185 | NZ  | C_ASP_55  | OD1 | 3.234 |
| 5O14 | B_LYS_185 | NZ  | C_ASP_55  | OD2 | 2.720 |
| 5O14 | B_LYS_185 | NZ  | C_ASP_57  | OD2 | 2.736 |
| 5O14 | B_ARG_204 | NH2 | B_ASP_142 | OD1 | 2.625 |
| 5O14 | B_ARG_204 | NH2 | B_ASP_142 | OD2 | 3.290 |
| 5O14 | B_HIS_248 | ND1 | B_GLU_239 | OE2 | 3.868 |
| 5O14 | B_LYS_254 | NZ  | B_ASP_71  | OD1 | 3.441 |
| 5O14 | B_LYS_254 | NZ  | B_ASP_71  | OD2 | 2.876 |
| 5O14 | C_ARG_38  | NH2 | C_GLU_46  | OE1 | 3.250 |
| 5O14 | C_ARG_38  | NH2 | C_GLU_46  | OE2 | 3.275 |
| 5O14 | C_ARG_54  | NH2 | B_ASP_161 | OD1 | 2.870 |
| 5O14 | C_ARG_54  | NH2 | B_ASP_161 | OD2 | 3.505 |
| 5O14 | C_ARG_59  | NH2 | C_ASP_57  | OD1 | 3.868 |
| 5O14 | C_ARG_59  | NH2 | C_ASP_57  | OD2 | 2.946 |
| 5O14 | C_ARG_67  | NH1 | C_ASP_90  | OD1 | 3.547 |
| 5O14 | C_ARG_67  | NH1 | C_ASP_90  | OD2 | 2.749 |
| 5O14 | C_ARG_67  | NH2 | C_ASP_90  | OD1 | 2.849 |
| 5O14 | C_ARG_67  | NH2 | C_ASP_90  | OD2 | 3.598 |
| 5O14 | C_LYS_152 | NZ  | C_ASP_153 | OD1 | 3.378 |
| 5O14 | C_LYS_152 | NZ  | C_ASP_153 | OD2 | 3.892 |
| 5O14 | C_LYS_218 | NZ  | D_GLU_124 | OE1 | 3.107 |
| 5O14 | C_LYS_219 | NZ  | C_GLU_221 | OE2 | 3.134 |
| 5O14 | D_ARG_18  | NH1 | A_GLU_218 | OE1 | 3.301 |
| 5O14 | D_ARG_61  | NH2 | D_GLU_81  | OE1 | 3.945 |
| 5O14 | D_ARG_61  | NH2 | D_ASP_82  | OD1 | 2.914 |
| 5O14 | D_ARG_61  | NH2 | D_ASP_82  | OD2 | 3.547 |
| 5O14 | D_LYS_104 | NZ  | D_GLU_166 | OE1 | 3.330 |
| 5O14 | D_HIS_190 | ND1 | D_ASP_152 | OD2 | 2.554 |
| 5O14 | L_ARG_61  | NH2 | L_GLU_81  | OE2 | 3.920 |
| 5O14 | L_ARG_61  | NH2 | L_ASP_82  | OD1 | 2.835 |
| 5O14 | L_ARG_61  | NH2 | L_ASP_82  | OD2 | 3.469 |
| 5O14 | L_HIS_190 | ND1 | L_ASP_152 | OD2 | 2.475 |
| 5O14 | H_ARG_38  | NH2 | H_GLU_46  | OE1 | 3.594 |
| 5O14 | H_ARG_38  | NH2 | H_GLU_46  | OE2 | 3.310 |
| 5O14 | H_ARG_54  | NH1 | A_ASP_161 | OD1 | 2.861 |
| 5O14 | H_ARG_54  | NH1 | A_ASP_161 | OD2 | 3.283 |
| 5O14 | H_ARG_59  | NH1 | L_ASP_94  | OD1 | 3.733 |
| 5O14 | H_ARG_59  | NH1 | L_ASP_94  | OD2 | 3.698 |
| 5O14 | H_ARG_59  | NH2 | H_ASP_57  | OD2 | 3.228 |
| 5O14 | H_ARG_67  | NH1 | H_ASP_90  | OD1 | 2.800 |
| 5O14 | H_ARG_67  | NH1 | H_ASP_90  | OD2 | 3.115 |
| 5O14 | H_ARG_67  | NH2 | H_ASP_90  | OD1 | 3.984 |
| 5O14 | H_ARG_67  | NH2 | H_ASP_90  | OD2 | 2.770 |
| 5O14 | H_LYS_152 | NZ  | H_ASP_153 | OD1 | 3.488 |

|      |           |     |           |     |       |
|------|-----------|-----|-----------|-----|-------|
| 5O14 | H_LYS_152 | NZ  | H_ASP_153 | OD2 | 3.902 |
| 5O1R | A_HIS_325 | NE2 | A_ASP_359 | OD2 | 3.546 |
| 5O1R | A_ARG_339 | NH1 | H_ASP_100 | OD1 | 3.968 |
| 5O1R | A_ARG_339 | NH1 | H_ASP_100 | OD2 | 3.203 |
| 5O1R | A_ARG_339 | NH2 | A_ASP_356 | OD2 | 3.370 |
| 5O1R | A_HIS_362 | ND1 | A_ASP_359 | OD1 | 3.211 |
| 5O1R | A_HIS_362 | ND1 | A_ASP_359 | OD2 | 3.253 |
| 5O1R | B_HIS_325 | NE2 | B_ASP_359 | OD2 | 3.534 |
| 5O1R | B_HIS_327 | ND1 | B_ASP_359 | OD2 | 3.365 |
| 5O1R | B_HIS_327 | NE2 | B_GLU_329 | OE1 | 3.540 |
| 5O1R | B_ARG_339 | NH1 | L_ASP_100 | OD1 | 3.595 |
| 5O1R | B_ARG_339 | NH1 | L_ASP_100 | OD2 | 2.991 |
| 5O1R | B_ARG_339 | NH2 | B_ASP_356 | OD2 | 3.328 |
| 5O1R | B_HIS_362 | ND1 | B_ASP_359 | OD1 | 3.462 |
| 5O1R | B_HIS_362 | ND1 | B_ASP_359 | OD2 | 3.359 |
| 5O1R | B_LYS_369 | NZ  | B_ASP_352 | OD1 | 3.251 |
| 5O1R | B_LYS_369 | NZ  | B_ASP_352 | OD2 | 3.231 |
| 5O1R | B_LYS_414 | NZ  | B_GLU_329 | OE1 | 2.817 |
| 5O1R | H_ARG_40  | NH1 | H_ASP_91  | OD1 | 2.787 |
| 5O1R | H_ARG_40  | NH2 | H_GLU_48  | OE1 | 3.205 |
| 5O1R | H_ARG_40  | NH2 | H_ASP_91  | OD1 | 3.587 |
| 5O1R | H_ARG_68  | NH1 | H_ASP_91  | OD1 | 3.869 |
| 5O1R | H_ARG_68  | NH1 | H_ASP_91  | OD2 | 2.814 |
| 5O1R | H_ARG_68  | NH2 | H_ASP_91  | OD1 | 2.730 |
| 5O1R | H_ARG_68  | NH2 | H_ASP_91  | OD2 | 3.072 |
| 5O1R | H_LYS_77  | NZ  | H_ASP_74  | OD2 | 3.598 |
| 5O1R | H_ARG_99  | NH1 | H_ASP_111 | OD2 | 2.787 |
| 5O1R | H_ARG_99  | NH2 | H_ASP_111 | OD2 | 3.771 |
| 5O1R | H_ARG_101 | NH1 | H_ASP_111 | OD1 | 3.295 |
| 5O1R | H_LYS_153 | NZ  | H_ASP_154 | OD1 | 3.367 |
| 5O1R | H_LYS_153 | NZ  | H_ASP_154 | OD2 | 3.373 |
| 5O1R | H_LYS_216 | NZ  | H_ASP_218 | OD1 | 2.810 |
| 5O1R | H_LYS_216 | NZ  | H_ASP_218 | OD2 | 3.814 |
| 5O1R | L_ARG_40  | NH1 | L_ASP_91  | OD1 | 2.950 |
| 5O1R | L_ARG_40  | NH2 | L_GLU_48  | OE1 | 3.324 |
| 5O1R | L_ARG_40  | NH2 | L_ASP_91  | OD1 | 3.459 |
| 5O1R | L_ARG_68  | NH1 | L_ASP_91  | OD1 | 3.823 |
| 5O1R | L_ARG_68  | NH1 | L_ASP_91  | OD2 | 2.796 |
| 5O1R | L_ARG_68  | NH2 | L_ASP_91  | OD1 | 2.735 |
| 5O1R | L_ARG_68  | NH2 | L_ASP_91  | OD2 | 3.137 |
| 5O1R | L_ARG_99  | NH1 | L_ASP_111 | OD2 | 2.797 |
| 5O1R | L_ARG_99  | NH2 | L_ASP_111 | OD2 | 3.787 |
| 5O1R | L_ARG_101 | NH1 | L_ASP_111 | OD1 | 3.285 |
| 5O1R | L_LYS_153 | NZ  | L_ASP_154 | OD1 | 3.364 |
| 5O1R | L_LYS_153 | NZ  | L_ASP_154 | OD2 | 3.368 |
| 5O1R | L_ARG_61  | NH2 | L_ASP_82  | OD1 | 2.771 |
| 5O1R | L_ARG_61  | NH2 | L_ASP_82  | OD2 | 3.474 |
| 5O1R | L_ARG_106 | NH2 | L_ASP_17  | OD2 | 3.826 |
| 5O1R | L_LYS_148 | NZ  | L_GLU_194 | OE1 | 3.986 |
| 5O1R | L_LYS_148 | NZ  | L_GLU_194 | OE2 | 3.121 |
| 5O1R | L_LYS_187 | NZ  | L_ASP_184 | OD2 | 2.794 |
| 5O1R | L_ARG_210 | NH1 | L_GLU_186 | OE1 | 3.088 |
| 5O1R | M_ARG_61  | NH2 | M_ASP_82  | OD1 | 2.703 |
| 5O1R | M_ARG_61  | NH2 | M_ASP_82  | OD2 | 3.538 |
| 5O1R | M_ARG_106 | NH2 | M_ASP_17  | OD2 | 3.805 |
| 5O1R | M_LYS_148 | NZ  | M_GLU_194 | OE1 | 3.979 |
| 5O1R | M_LYS_148 | NZ  | M_GLU_194 | OE2 | 3.088 |
| 5O1R | M_LYS_168 | NZ  | M_ASP_166 | OD2 | 3.194 |

|      |           |     |           |     |       |
|------|-----------|-----|-----------|-----|-------|
| 5O1R | M.LYS_168 | NZ  | M.ASP_169 | OD1 | 3.618 |
| 5O1R | M.LYS_187 | NZ  | M.ASP_184 | OD2 | 2.800 |
| 5O1R | M.HIS_188 | ND1 | M.ASP_150 | OD2 | 3.718 |
| 5OLM | A.HIS_0   | NE2 | B.GLU_97  | OE1 | 2.769 |
| 5OLM | A.HIS_0   | NE2 | B.GLU_97  | OE2 | 2.598 |
| 5OLM | A.ARG_6   | NH2 | B.GLU_82  | OE1 | 3.071 |
| 5OLM | A.ARG_67  | NH1 | A.GLU_25  | OE1 | 3.750 |
| 5OLM | A.ARG_67  | NH1 | A.GLU_25  | OE2 | 3.549 |
| 5OLM | A.ARG_118 | NH2 | A.GLU_12  | OE1 | 3.821 |
| 5OLM | A.ARG_118 | NH2 | A.GLU_12  | OE2 | 2.560 |
| 5OLM | A.LYS_119 | NZ  | A.ASP_21  | OD1 | 2.937 |
| 5OLM | A.LYS_119 | NZ  | A.ASP_21  | OD2 | 3.505 |
| 5OLM | A.HIS_120 | ND1 | A.ASP_106 | OD2 | 2.406 |
| 5OLM | A.HIS_120 | NE2 | A.ASP_106 | OD2 | 3.755 |
| 5OLM | A.HIS_123 | ND1 | A.ASP_106 | OD1 | 3.485 |
| 5OLM | A.HIS_123 | ND1 | A.ASP_106 | OD2 | 3.274 |
| 5OLM | B.HIS_0   | NE2 | A.GLU_97  | OE1 | 2.741 |
| 5OLM | B.HIS_0   | NE2 | A.GLU_97  | OE2 | 3.001 |
| 5OLM | B.ARG_6   | NH2 | A.GLU_82  | OE2 | 2.559 |
| 5OLM | B.ARG_67  | NH1 | B.GLU_25  | OE1 | 3.574 |
| 5OLM | B.ARG_118 | NH1 | B.GLU_12  | OE1 | 2.892 |
| 5OLM | B.ARG_118 | NH1 | B.GLU_12  | OE2 | 3.281 |
| 5OLM | B.LYS_119 | NZ  | B.ASP_21  | OD1 | 2.647 |
| 5OLM | B.LYS_119 | NZ  | B.ASP_21  | OD2 | 3.211 |
| 5OLM | B.HIS_120 | ND1 | B.ASP_106 | OD2 | 2.889 |
| 5OLM | B.HIS_123 | ND1 | B.ASP_106 | OD2 | 2.910 |
| 5OPY | H.ARG_38  | NH1 | H.ASP_90  | OD1 | 3.516 |
| 5OPY | H.ARG_38  | NH2 | H.GLU_46  | OE1 | 3.707 |
| 5OPY | H.ARG_38  | NH2 | H.GLU_46  | OE2 | 3.605 |
| 5OPY | H.ARG_67  | NH1 | H.ASP_90  | OD1 | 3.928 |
| 5OPY | H.ARG_67  | NH1 | H.ASP_90  | OD2 | 2.808 |
| 5OPY | H.ARG_67  | NH2 | H.ASP_90  | OD1 | 3.025 |
| 5OPY | H.ARG_67  | NH2 | H.ASP_90  | OD2 | 3.394 |
| 5OPY | H.LYS_212 | NZ  | L.GLU_123 | OE2 | 3.578 |
| 5OPY | L.ARG_61  | NH1 | L.ASP_82  | OD1 | 3.825 |
| 5OPY | L.ARG_61  | NH1 | L.ASP_82  | OD2 | 2.771 |
| 5OPY | L.ARG_61  | NH2 | L.GLU_79  | OE1 | 3.579 |
| 5OPY | L.ARG_61  | NH2 | L.GLU_79  | OE2 | 3.640 |
| 5OPY | L.ARG_61  | NH2 | L.ASP_82  | OD1 | 3.036 |
| 5OPY | L.ARG_61  | NH2 | L.ASP_82  | OD2 | 3.486 |
| 5OPY | L.LYS_147 | NZ  | L.GLU_154 | OE2 | 3.483 |
| 5OPY | L.LYS_149 | NZ  | L.GLU_195 | OE1 | 3.661 |
| 5OPY | L.LYS_149 | NZ  | L.GLU_195 | OE2 | 3.217 |
| 5OPY | L.ARG_155 | NH2 | L.GLU_185 | OE1 | 3.459 |
| 5OPY | L.LYS_183 | NZ  | L.GLU_187 | OE1 | 3.576 |
| 5OPY | L.LYS_183 | NZ  | L.GLU_187 | OE2 | 2.833 |
| 5OPY | L.HIS_189 | ND1 | L.ASP_151 | OD2 | 3.278 |
| 5OPY | L.HIS_189 | NE2 | L.GLU_185 | OE1 | 2.982 |
| 5OPY | L.HIS_189 | NE2 | L.GLU_185 | OE2 | 3.936 |
| 5OPY | L.LYS_199 | NZ  | L.ASP_143 | OD1 | 3.965 |
| 5OWP | H.ARG_38  | NH1 | H.ASP_92  | OD1 | 2.637 |
| 5OWP | H.ARG_38  | NH2 | H.GLU_46  | OE1 | 3.304 |
| 5OWP | H.ARG_38  | NH2 | H.GLU_46  | OE2 | 3.626 |
| 5OWP | H.ARG_38  | NH2 | H.ASP_92  | OD1 | 3.777 |
| 5OWP | H.ARG_52  | NH1 | H.GLU_50  | OE1 | 3.856 |
| 5OWP | H.ARG_52  | NH1 | H.GLU_50  | OE2 | 2.567 |
| 5OWP | H.HIS_61  | ND1 | H.GLU_50  | OE2 | 2.863 |
| 5OWP | H.ARG_69  | NH1 | H.ASP_92  | OD1 | 3.470 |

|      |            |     |            |     |       |
|------|------------|-----|------------|-----|-------|
| 5OWP | H_ARG_69   | NH1 | H_ASP_92   | OD2 | 3.501 |
| 5OWP | H_ARG_69   | NH2 | H_ASP_92   | OD1 | 3.595 |
| 5OWP | H_ARG_69   | NH2 | H_ASP_92   | OD2 | 2.233 |
| 5OWP | H_ARG_74   | NH2 | H_ASP_76   | OD1 | 3.541 |
| 5OWP | H_ARG_89   | NH1 | H_GLU_91   | OE1 | 3.703 |
| 5OWP | H_HIS_1051 | ND1 | H_GLU_1047 | OE2 | 3.012 |
| 5OWP | H_HIS_1051 | NE2 | H_ASP_1050 | OD1 | 3.919 |
| 5OWP | H_ARG_1070 | NH2 | H_GLU_1090 | OE2 | 3.696 |
| 5OWP | H_ARG_1070 | NH2 | H_ASP_1091 | OD1 | 2.948 |
| 5OWP | H_ARG_1070 | NH2 | H_ASP_1091 | OD2 | 3.682 |
| 5SV3 | A_ARG_38   | NH1 | A_ASP_90   | OD1 | 2.898 |
| 5SV3 | A_ARG_38   | NH2 | A_GLU_46   | OE1 | 3.409 |
| 5SV3 | A_ARG_38   | NH2 | A_GLU_46   | OE2 | 3.843 |
| 5SV3 | A_ARG_53   | NH2 | A_ASP_31   | OD1 | 3.179 |
| 5SV3 | A_ARG_67   | NH1 | A_ASP_90   | OD1 | 3.708 |
| 5SV3 | A_ARG_67   | NH1 | A_ASP_90   | OD2 | 2.739 |
| 5SV3 | A_ARG_67   | NH2 | A_ASP_90   | OD1 | 3.001 |
| 5SV3 | A_ARG_67   | NH2 | A_ASP_90   | OD2 | 3.495 |
| 5SV3 | A_ARG_108  | NH2 | A_ASP_59   | OD1 | 2.902 |
| 5SV3 | A_ARG_108  | NH2 | A_ASP_59   | OD2 | 3.573 |
| 5SV3 | B_ARG_56   | NH2 | B_GLU_99   | OE2 | 2.640 |
| 5SV3 | B_ARG_85   | NH1 | B_ASP_110  | OD1 | 3.300 |
| 5SV3 | B_ARG_85   | NH2 | B_ASP_110  | OD1 | 3.843 |
| 5SV3 | B_HIS_106  | NE2 | B_GLU_102  | OE1 | 3.940 |
| 5SV3 | B_HIS_106  | NE2 | B_GLU_102  | OE2 | 3.110 |
| 5SV3 | B_ARG_134  | NH2 | B_GLU_127  | OE2 | 3.441 |
| 5SV3 | C_ARG_38   | NH1 | C_ASP_90   | OD1 | 2.882 |
| 5SV3 | C_ARG_38   | NH2 | C_GLU_46   | OE1 | 3.359 |
| 5SV3 | C_ARG_53   | NH2 | C_ASP_31   | OD1 | 3.440 |
| 5SV3 | C_ARG_65   | NH1 | C_ASP_59   | OD1 | 3.685 |
| 5SV3 | C_ARG_67   | NH1 | C_ASP_90   | OD1 | 3.690 |
| 5SV3 | C_ARG_67   | NH1 | C_ASP_90   | OD2 | 2.685 |
| 5SV3 | C_ARG_67   | NH2 | C_ASP_90   | OD1 | 3.040 |
| 5SV3 | C_ARG_67   | NH2 | C_ASP_90   | OD2 | 3.474 |
| 5SV3 | C_ARG_108  | NH2 | C_ASP_59   | OD1 | 2.968 |
| 5SV3 | C_ARG_108  | NH2 | C_ASP_59   | OD2 | 3.652 |
| 5SV3 | D_ARG_56   | NH1 | D_ASP_75   | OD1 | 2.619 |
| 5SV3 | D_ARG_56   | NH1 | D_ASP_75   | OD2 | 3.392 |
| 5SV3 | D_ARG_56   | NH2 | D_ASP_75   | OD1 | 3.670 |
| 5SV3 | D_ARG_56   | NH2 | D_ASP_75   | OD2 | 2.993 |
| 5SV3 | D_ARG_56   | NH2 | D_ASP_100  | OD1 | 3.462 |
| 5SV3 | D_ARG_85   | NH2 | D_GLU_61   | OE2 | 3.968 |
| 5SV3 | D_HIS_106  | NE2 | D_GLU_102  | OE2 | 2.939 |
| 5SV3 | D_ARG_134  | NH2 | D_GLU_127  | OE2 | 3.653 |
| 5SV4 | A_ARG_38   | NH1 | A_ASP_90   | OD1 | 2.712 |
| 5SV4 | A_ARG_38   | NH2 | A_ASP_90   | OD1 | 3.862 |
| 5SV4 | A_ARG_53   | NH2 | A_ASP_31   | OD1 | 3.931 |
| 5SV4 | A_ARG_65   | NH1 | A_ASP_62   | OD1 | 3.431 |
| 5SV4 | A_ARG_65   | NH2 | A_ASP_59   | OD1 | 3.543 |
| 5SV4 | A_ARG_67   | NH1 | A_ASP_90   | OD1 | 3.932 |
| 5SV4 | A_ARG_67   | NH1 | A_ASP_90   | OD2 | 2.726 |
| 5SV4 | A_ARG_67   | NH2 | A_ASP_90   | OD1 | 2.988 |
| 5SV4 | A_ARG_67   | NH2 | A_ASP_90   | OD2 | 3.261 |
| 5SV4 | A_LYS_76   | NZ  | A_ASP_73   | OD2 | 3.315 |
| 5SV4 | A_ARG_108  | NH2 | A_ASP_59   | OD1 | 3.667 |
| 5SV4 | A_ARG_108  | NH2 | A_ASP_59   | OD2 | 3.318 |
| 5SV4 | A_HIS_115  | ND1 | A_GLU_1    | OE1 | 3.848 |
| 5SV4 | B_ARG_38   | NH1 | B_ASP_90   | OD1 | 2.707 |

|      |           |     |           |     |       |
|------|-----------|-----|-----------|-----|-------|
| 5SV4 | B_ARG_38  | NH2 | B_GLU_46  | OE2 | 3.766 |
| 5SV4 | B_ARG_38  | NH2 | B_ASP_90  | OD1 | 3.824 |
| 5SV4 | B_ARG_65  | NH2 | B_ASP_59  | OD1 | 2.826 |
| 5SV4 | B_ARG_67  | NH1 | B_ASP_90  | OD1 | 3.935 |
| 5SV4 | B_ARG_67  | NH1 | B_ASP_90  | OD2 | 2.734 |
| 5SV4 | B_ARG_67  | NH2 | B_ASP_90  | OD1 | 2.973 |
| 5SV4 | B_ARG_67  | NH2 | B_ASP_90  | OD2 | 3.240 |
| 5SV4 | B_LYS_76  | NZ  | B_ASP_73  | OD2 | 2.871 |
| 5SV4 | B_ARG_108 | NH2 | B_ASP_59  | OD2 | 3.154 |
| 5SV4 | B_HIS_115 | NE2 | B_GLU_1   | OE1 | 3.463 |
| 5T6P | A_ARG_24  | NH2 | A_ASP_75  | OD1 | 3.082 |
| 5T6P | A_ARG_24  | NH2 | A_ASP_75  | OD2 | 3.476 |
| 5T6P | A_LYS_58  | NZ  | F_ASP_3   | OD2 | 1.997 |
| 5T6P | A_ARG_66  | NH1 | A_ASP_87  | OD1 | 3.333 |
| 5T6P | A_ARG_66  | NH1 | A_ASP_87  | OD2 | 2.414 |
| 5T6P | A_ARG_66  | NH2 | A_GLU_84  | OE1 | 3.740 |
| 5T6P | A_ARG_66  | NH2 | A_ASP_87  | OD1 | 2.866 |
| 5T6P | A_ARG_66  | NH2 | A_ASP_87  | OD2 | 3.216 |
| 5T6P | A_LYS_152 | NZ  | A_GLU_200 | OE2 | 3.883 |
| 5T6P | A_LYS_154 | NZ  | A_GLU_200 | OE1 | 3.251 |
| 5T6P | A_LYS_154 | NZ  | A_GLU_200 | OE2 | 3.726 |
| 5T6P | A_ARG_160 | NH1 | A_GLU_190 | OE2 | 3.359 |
| 5T6P | A_ARG_160 | NH2 | A_GLU_190 | OE1 | 3.571 |
| 5T6P | A_ARG_160 | NH2 | A_GLU_190 | OE2 | 3.087 |
| 5T6P | A_LYS_174 | NZ  | C_GLU_128 | OE2 | 3.605 |
| 5T6P | A_LYS_188 | NZ  | A_GLU_192 | OE1 | 3.265 |
| 5T6P | A_LYS_188 | NZ  | A_GLU_192 | OE2 | 2.843 |
| 5T6P | A_HIS_194 | ND1 | A_ASP_156 | OD2 | 2.597 |
| 5T6P | A_LYS_204 | NZ  | A_ASP_115 | OD2 | 3.286 |
| 5T6P | B_ARG_38  | NH1 | B_ASP_90  | OD1 | 3.096 |
| 5T6P | B_ARG_38  | NH2 | B_GLU_46  | OE1 | 3.132 |
| 5T6P | B_ARG_38  | NH2 | B_ASP_90  | OD1 | 3.992 |
| 5T6P | B_ARG_44  | NH1 | B_GLU_42  | OE1 | 3.832 |
| 5T6P | B_ARG_44  | NH2 | B_GLU_42  | OE1 | 3.154 |
| 5T6P | B_LYS_65  | NZ  | B_ASP_62  | OD1 | 3.614 |
| 5T6P | B_ARG_67  | NH2 | B_ASP_90  | OD1 | 3.026 |
| 5T6P | B_ARG_67  | NH2 | B_ASP_90  | OD2 | 2.391 |
| 5T6P | C_ARG_24  | NH2 | C_ASP_75  | OD1 | 2.942 |
| 5T6P | C_ARG_24  | NH2 | C_ASP_75  | OD2 | 3.165 |
| 5T6P | C_ARG_55  | NH1 | E_ASP_3   | OD2 | 3.191 |
| 5T6P | C_LYS_58  | NZ  | E_ASP_3   | OD2 | 2.925 |
| 5T6P | C_ARG_59  | NH2 | C_ASP_65  | OD1 | 3.527 |
| 5T6P | C_ARG_66  | NH1 | C_ASP_87  | OD1 | 3.426 |
| 5T6P | C_ARG_66  | NH1 | C_ASP_87  | OD2 | 2.481 |
| 5T6P | C_ARG_66  | NH2 | C_GLU_84  | OE1 | 3.835 |
| 5T6P | C_ARG_66  | NH2 | C_GLU_84  | OE2 | 3.800 |
| 5T6P | C_ARG_66  | NH2 | C_ASP_87  | OD1 | 3.132 |
| 5T6P | C_ARG_66  | NH2 | C_ASP_87  | OD2 | 3.431 |
| 5T6P | C_LYS_154 | NZ  | C_GLU_200 | OE1 | 3.347 |
| 5T6P | C_ARG_160 | NH1 | C_GLU_190 | OE2 | 3.251 |
| 5T6P | C_ARG_160 | NH2 | C_GLU_190 | OE1 | 3.781 |
| 5T6P | C_ARG_160 | NH2 | C_GLU_190 | OE2 | 3.563 |
| 5T6P | C_LYS_188 | NZ  | C_GLU_192 | OE1 | 3.328 |
| 5T6P | C_LYS_188 | NZ  | C_GLU_192 | OE2 | 3.157 |
| 5T6P | C_HIS_194 | ND1 | C_ASP_156 | OD2 | 2.748 |
| 5T6P | C_LYS_204 | NZ  | C_ASP_115 | OD2 | 3.242 |
| 5T6P | D_ARG_38  | NH1 | D_ASP_90  | OD1 | 2.948 |
| 5T6P | D_ARG_38  | NH2 | D_GLU_46  | OE1 | 3.287 |

|      |           |     |           |     |       |
|------|-----------|-----|-----------|-----|-------|
| 5T6P | D_ARG_44  | NH2 | D_GLU_42  | OE1 | 3.539 |
| 5T6P | D_LYS_65  | NZ  | D_ASP_62  | OD1 | 3.833 |
| 5T6P | D_ARG_67  | NH2 | D_ASP_90  | OD1 | 2.581 |
| 5T6P | D_ARG_67  | NH2 | D_ASP_90  | OD2 | 2.532 |
| 5T6P | E_ARG_5   | NH2 | C_GLU_39  | OE1 | 3.351 |
| 5T6P | E_ARG_5   | NH2 | C_GLU_39  | OE2 | 2.626 |
| 5T6P | F_ARG_5   | NH2 | A_GLU_39  | OE1 | 3.661 |
| 5T6P | F_ARG_5   | NH2 | A_GLU_39  | OE2 | 2.718 |
| 5T78 | A_ARG_24  | NH2 | A_ASP_75  | OD1 | 3.292 |
| 5T78 | A_ARG_24  | NH2 | A_ASP_75  | OD2 | 3.506 |
| 5T78 | A_LYS_44  | NZ  | A_GLU_86  | OE2 | 3.456 |
| 5T78 | A_LYS_58  | NZ  | F_ASP_3   | OD1 | 2.579 |
| 5T78 | A_LYS_58  | NZ  | F_ASP_3   | OD2 | 3.334 |
| 5T78 | A_ARG_66  | NH1 | A_ASP_87  | OD1 | 3.316 |
| 5T78 | A_ARG_66  | NH1 | A_ASP_87  | OD2 | 2.549 |
| 5T78 | A_ARG_66  | NH2 | A_GLU_84  | OE1 | 3.229 |
| 5T78 | A_ARG_66  | NH2 | A_GLU_84  | OE2 | 3.938 |
| 5T78 | A_ARG_66  | NH2 | A_ASP_87  | OD1 | 2.866 |
| 5T78 | A_ARG_66  | NH2 | A_ASP_87  | OD2 | 3.475 |
| 5T78 | A_LYS_152 | NZ  | A_GLU_200 | OE2 | 3.993 |
| 5T78 | A_LYS_154 | NZ  | A_GLU_200 | OE1 | 3.160 |
| 5T78 | A_LYS_154 | NZ  | A_GLU_200 | OE2 | 3.631 |
| 5T78 | A_ARG_160 | NH1 | A_GLU_190 | OE2 | 2.874 |
| 5T78 | A_ARG_160 | NH2 | A_GLU_190 | OE1 | 3.635 |
| 5T78 | A_ARG_160 | NH2 | A_GLU_190 | OE2 | 3.190 |
| 5T78 | A_LYS_188 | NZ  | A_GLU_192 | OE1 | 3.158 |
| 5T78 | A_LYS_188 | NZ  | A_GLU_192 | OE2 | 2.974 |
| 5T78 | A_HIS_194 | ND1 | A_ASP_156 | OD2 | 2.728 |
| 5T78 | A_LYS_204 | NZ  | A_ASP_115 | OD1 | 3.976 |
| 5T78 | A_LYS_204 | NZ  | A_ASP_115 | OD2 | 3.220 |
| 5T78 | B_LYS_3   | NZ  | B_GLU_1   | OE2 | 3.096 |
| 5T78 | B_ARG_38  | NH1 | B_ASP_90  | OD1 | 2.890 |
| 5T78 | B_ARG_38  | NH2 | B_GLU_46  | OE1 | 3.379 |
| 5T78 | B_ARG_38  | NH2 | B_ASP_90  | OD1 | 3.918 |
| 5T78 | B_ARG_44  | NH2 | B_GLU_42  | OE1 | 2.944 |
| 5T78 | B_ARG_67  | NH2 | B_ASP_90  | OD1 | 2.740 |
| 5T78 | B_ARG_67  | NH2 | B_ASP_90  | OD2 | 2.732 |
| 5T78 | F_ARG_5   | NH1 | A_GLU_39  | OE1 | 2.678 |
| 5T78 | F_ARG_5   | NH1 | A_GLU_39  | OE2 | 2.480 |
| 5T78 | C_ARG_24  | NH2 | C_ASP_75  | OD1 | 3.347 |
| 5T78 | C_ARG_24  | NH2 | C_ASP_75  | OD2 | 3.277 |
| 5T78 | C_ARG_55  | NH2 | E_ASP_3   | OD1 | 3.685 |
| 5T78 | C_LYS_58  | NZ  | E_ASP_3   | OD1 | 2.753 |
| 5T78 | C_LYS_58  | NZ  | E_ASP_3   | OD2 | 2.872 |
| 5T78 | C_ARG_59  | NH1 | C_ASP_65  | OD1 | 2.623 |
| 5T78 | C_ARG_66  | NH1 | C_ASP_87  | OD1 | 3.605 |
| 5T78 | C_ARG_66  | NH1 | C_ASP_87  | OD2 | 2.346 |
| 5T78 | C_ARG_66  | NH2 | C_GLU_84  | OE1 | 3.346 |
| 5T78 | C_ARG_66  | NH2 | C_GLU_84  | OE2 | 3.846 |
| 5T78 | C_ARG_66  | NH2 | C_GLU_86  | OE2 | 3.475 |
| 5T78 | C_ARG_66  | NH2 | C_ASP_87  | OD1 | 3.004 |
| 5T78 | C_ARG_66  | NH2 | C_ASP_87  | OD2 | 3.187 |
| 5T78 | C_LYS_154 | NZ  | C_GLU_200 | OE1 | 3.236 |
| 5T78 | C_ARG_160 | NH1 | C_GLU_190 | OE1 | 3.681 |
| 5T78 | C_ARG_160 | NH1 | C_GLU_190 | OE2 | 2.945 |
| 5T78 | C_ARG_160 | NH2 | C_GLU_190 | OE1 | 3.366 |
| 5T78 | C_ARG_160 | NH2 | C_GLU_190 | OE2 | 3.933 |
| 5T78 | C_LYS_188 | NZ  | C_GLU_192 | OE1 | 3.411 |

|      |           |     |           |     |       |
|------|-----------|-----|-----------|-----|-------|
| 5T78 | C_LYS_188 | NZ  | C_GLU_192 | OE2 | 3.168 |
| 5T78 | C_HIS_194 | ND1 | C_ASP_156 | OD2 | 2.579 |
| 5T78 | C_LYS_204 | NZ  | C_ASP_115 | OD2 | 3.148 |
| 5T78 | D_ARG_38  | NH1 | D_ASP_90  | OD1 | 2.853 |
| 5T78 | D_ARG_38  | NH2 | D_GLU_46  | OE1 | 3.156 |
| 5T78 | D_ARG_38  | NH2 | D_ASP_90  | OD1 | 3.962 |
| 5T78 | D_ARG_67  | NH2 | D_ASP_90  | OD1 | 2.642 |
| 5T78 | D_ARG_67  | NH2 | D_ASP_90  | OD2 | 2.478 |
| 5T78 | D_LYS_211 | NZ  | C_GLU_128 | OE1 | 3.376 |
| 5T78 | E_ARG_5   | NH1 | C_GLU_39  | OE1 | 2.693 |
| 5T78 | E_ARG_5   | NH1 | C_GLU_39  | OE2 | 2.664 |
| 5TCX | A_LYS_124 | NZ  | A_ASP_195 | OD1 | 3.385 |
| 5TCX | A_LYS_124 | NZ  | A_ASP_195 | OD2 | 2.891 |
| 5TCX | A_LYS_144 | NZ  | A_ASP_138 | OD1 | 2.296 |
| 5TCX | A_LYS_171 | NZ  | A_ASP_138 | OD1 | 3.371 |
| 5TCX | A_LYS_187 | NZ  | A_ASP_155 | OD1 | 3.854 |
| 5TCX | A_LYS_187 | NZ  | A_ASP_155 | OD2 | 3.942 |
| 5TCX | A_HIS_191 | NE2 | A_ASP_128 | OD1 | 2.502 |
| 5TCX | A_HIS_191 | NE2 | A_ASP_128 | OD2 | 3.422 |
| 5TCX | A_LYS_193 | NZ  | A_GLU_188 | OE2 | 2.937 |
| 5TCX | A_LYS_201 | NZ  | A_ASP_196 | OD2 | 3.323 |
| 5TIH | A_HIS_3   | ND1 | A_GLU_333 | OE1 | 3.713 |
| 5TIH | A_LYS_28  | NZ  | A_GLU_83  | OE1 | 3.102 |
| 5TIH | A_ARG_29  | NH2 | A_ASP_307 | OD2 | 2.694 |
| 5TIH | A_LYS_40  | NZ  | A_ASP_38  | OD1 | 3.409 |
| 5TIH | A_LYS_40  | NZ  | A_ASP_38  | OD2 | 3.673 |
| 5TIH | A_HIS_47  | ND1 | A_ASP_63  | OD2 | 2.822 |
| 5TIH | A_LYS_52  | NZ  | A_GLU_30  | OE1 | 2.433 |
| 5TIH | A_LYS_52  | NZ  | A_GLU_30  | OE2 | 3.751 |
| 5TIH | A_LYS_66  | NZ  | L_ASP_92  | OD1 | 3.482 |
| 5TIH | A_ARG_73  | NH2 | A_ASP_38  | OD2 | 3.662 |
| 5TIH | A_HIS_75  | NE2 | A_ASP_92  | OD1 | 3.360 |
| 5TIH | A_LYS_100 | NZ  | A_ASP_124 | OD1 | 3.619 |
| 5TIH | A_ARG_106 | NH1 | A_GLU_177 | OE2 | 3.261 |
| 5TIH | A_LYS_130 | NZ  | A_ASP_165 | OD1 | 3.418 |
| 5TIH | A_LYS_130 | NZ  | A_ASP_165 | OD2 | 3.868 |
| 5TIH | A_LYS_157 | NZ  | A_ASP_160 | OD1 | 3.149 |
| 5TIH | A_LYS_157 | NZ  | A_ASP_166 | OD1 | 2.621 |
| 5TIH | A_LYS_164 | NZ  | A_GLU_236 | OE1 | 3.487 |
| 5TIH | A_LYS_164 | NZ  | A_GLU_236 | OE2 | 2.956 |
| 5TIH | A_LYS_175 | NZ  | A_GLU_84  | OE1 | 2.559 |
| 5TIH | A_LYS_175 | NZ  | A_GLU_84  | OE2 | 3.472 |
| 5TIH | A_LYS_186 | NZ  | A_ASP_188 | OD2 | 3.836 |
| 5TIH | A_LYS_205 | NZ  | A_ASP_259 | OD1 | 3.347 |
| 5TIH | A_LYS_205 | NZ  | A_GLU_308 | OE1 | 3.703 |
| 5TIH | A_LYS_205 | NZ  | A_GLU_308 | OE2 | 3.973 |
| 5TIH | A_HIS_211 | NE2 | A_ASP_253 | OD1 | 3.623 |
| 5TIH | A_LYS_305 | NZ  | A_GLU_308 | OE1 | 2.934 |
| 5TIH | A_LYS_305 | NZ  | A_GLU_308 | OE2 | 3.911 |
| 5TIH | H_HIS_35  | NE2 | A_ASP_69  | OD1 | 2.973 |
| 5TIH | H_HIS_35  | NE2 | A_ASP_69  | OD2 | 3.535 |
| 5TIH | H_ARG_67  | NH2 | H_ASP_90  | OD1 | 3.399 |
| 5TIH | H_ARG_67  | NH2 | H_ASP_90  | OD2 | 3.193 |
| 5TIH | H_ARG_100 | NH2 | A_ASP_69  | OD1 | 3.080 |
| 5TIH | H_ARG_101 | NH2 | A_GLU_119 | OE1 | 3.357 |
| 5TIH | H_ARG_101 | NH2 | A_GLU_119 | OE2 | 3.359 |
| 5TIH | L_ARG_24  | NH1 | L_ASP_70  | OD1 | 2.418 |
| 5TIH | L_ARG_24  | NH1 | L_ASP_70  | OD2 | 3.060 |

|      |           |     |           |     |       |
|------|-----------|-----|-----------|-----|-------|
| 5TIH | L_ARG_24  | NH2 | L_ASP_70  | OD2 | 3.324 |
| 5TIH | L_LYS_39  | NZ  | L_GLU_81  | OE2 | 3.732 |
| 5TIH | L_LYS_45  | NZ  | L_GLU_81  | OE2 | 3.780 |
| 5TIH | L_ARG_46  | NH2 | L_ASP_55  | OD1 | 3.597 |
| 5TIH | L_ARG_46  | NH2 | L_ASP_55  | OD2 | 2.892 |
| 5TIH | L_ARG_61  | NH2 | L_GLU_81  | OE1 | 3.907 |
| 5TIH | L_ARG_61  | NH2 | L_ASP_82  | OD1 | 3.126 |
| 5TIH | L_ARG_61  | NH2 | L_ASP_82  | OD2 | 3.816 |
| 5TIH | L_ARG_66  | NH2 | L_GLU_28  | OE1 | 2.831 |
| 5TIH | L_ARG_66  | NH2 | L_GLU_28  | OE2 | 3.769 |
| 5TIH | L_LYS_103 | NZ  | L_ASP_85  | OD2 | 3.969 |
| 5TIH | L_LYS_142 | NZ  | L_GLU_105 | OE1 | 3.302 |
| 5TIH | L_LYS_142 | NZ  | L_GLU_105 | OE2 | 3.271 |
| 5TIH | L_LYS_147 | NZ  | L_GLU_195 | OE2 | 3.679 |
| 5TIH | L_LYS_149 | NZ  | L_GLU_195 | OE1 | 3.506 |
| 5TIH | L_LYS_149 | NZ  | L_GLU_195 | OE2 | 3.625 |
| 5TIH | L_ARG_155 | NH1 | L_GLU_185 | OE1 | 3.848 |
| 5TIH | L_ARG_155 | NH2 | L_GLU_185 | OE1 | 3.868 |
| 5TIH | L_HIS_189 | ND1 | L_ASP_151 | OD2 | 3.122 |
| 5TIH | L_ARG_211 | NH1 | L_GLU_187 | OE2 | 3.061 |
| 5TIK | A_HIS_3   | ND1 | D_GLU_9   | OE2 | 3.832 |
| 5TIK | A_HIS_3   | NE2 | B_GLU_9   | OE2 | 3.597 |
| 5TIK | A_LYS_28  | NZ  | A_GLU_83  | OE1 | 3.971 |
| 5TIK | A_HIS_47  | NE2 | A_GLU_45  | OE1 | 3.808 |
| 5TIK | A_HIS_47  | NE2 | A_GLU_45  | OE2 | 2.915 |
| 5TIK | A_HIS_47  | NE2 | A_ASP_63  | OD2 | 3.962 |
| 5TIK | A_LYS_52  | NZ  | A_GLU_30  | OE1 | 3.759 |
| 5TIK | A_LYS_52  | NZ  | A_GLU_30  | OE2 | 2.781 |
| 5TIK | A_HIS_75  | NE2 | A_ASP_92  | OD1 | 3.609 |
| 5TIK | A_HIS_75  | NE2 | A_ASP_92  | OD2 | 3.079 |
| 5TIK | A_ARG_145 | NH1 | A_ASP_234 | OD2 | 3.502 |
| 5TIK | A_ARG_145 | NH2 | A_ASP_234 | OD1 | 2.795 |
| 5TIK | A_ARG_145 | NH2 | A_ASP_234 | OD2 | 3.031 |
| 5TIK | A_LYS_157 | NZ  | A_ASP_160 | OD1 | 3.965 |
| 5TIK | A_LYS_157 | NZ  | A_ASP_161 | OD1 | 3.943 |
| 5TIK | A_LYS_157 | NZ  | A_ASP_166 | OD1 | 3.100 |
| 5TIK | A_LYS_164 | NZ  | A_ASP_160 | OD1 | 3.523 |
| 5TIK | A_LYS_175 | NZ  | A_ASP_81  | OD2 | 2.307 |
| 5TIK | A_LYS_175 | NZ  | A_GLU_84  | OE2 | 2.899 |
| 5TIK | A_LYS_182 | NZ  | A_ASP_165 | OD2 | 3.588 |
| 5TIK | A_LYS_205 | NZ  | A_GLU_308 | OE1 | 3.830 |
| 5TIK | A_LYS_205 | NZ  | A_GLU_308 | OE2 | 3.734 |
| 5TIK | A_HIS_211 | NE2 | A_ASP_253 | OD1 | 3.988 |
| 5TIK | A_LYS_287 | NZ  | A_GLU_273 | OE2 | 3.653 |
| 5TIK | A_LYS_305 | NZ  | A_GLU_308 | OE1 | 3.281 |
| 5TIK | A_LYS_305 | NZ  | A_GLU_308 | OE2 | 3.263 |
| 5TIK | B_HIS_3   | NE2 | A_GLU_9   | OE1 | 3.627 |
| 5TIK | B_HIS_3   | NE2 | A_GLU_9   | OE2 | 3.175 |
| 5TIK | B_HIS_3   | NE2 | C_GLU_9   | OE1 | 3.296 |
| 5TIK | B_HIS_3   | NE2 | C_GLU_9   | OE2 | 3.823 |
| 5TIK | B_LYS_28  | NZ  | B_GLU_83  | OE1 | 3.175 |
| 5TIK | B_LYS_28  | NZ  | B_GLU_83  | OE2 | 3.839 |
| 5TIK | B_HIS_47  | ND1 | B_ASP_63  | OD2 | 3.018 |
| 5TIK | B_LYS_52  | NZ  | B_GLU_30  | OE1 | 3.671 |
| 5TIK | B_HIS_75  | NE2 | B_ASP_92  | OD2 | 2.903 |
| 5TIK | B_LYS_100 | NZ  | B_ASP_124 | OD1 | 3.470 |
| 5TIK | B_LYS_100 | NZ  | B_ASP_124 | OD2 | 2.292 |
| 5TIK | B_ARG_106 | NH2 | B_GLU_177 | OE2 | 3.673 |



|      |           |     |           |     |       |
|------|-----------|-----|-----------|-----|-------|
| 5TIK | B_LYS_157 | NZ  | B_ASP_161 | OD1 | 3.470 |
| 5TIK | B_LYS_157 | NZ  | B_ASP_166 | OD1 | 2.331 |
| 5TIK | B_LYS_157 | NZ  | B_ASP_166 | OD2 | 3.739 |
| 5TIK | B_LYS_175 | NZ  | B_GLU_84  | OE1 | 3.721 |
| 5TIK | B_LYS_175 | NZ  | B_GLU_84  | OE2 | 3.186 |
| 5TIK | B_LYS_182 | NZ  | B_ASP_165 | OD1 | 3.333 |
| 5TIK | B_LYS_186 | NZ  | B_GLU_236 | OE1 | 2.882 |
| 5TIK | B_LYS_186 | NZ  | B_GLU_236 | OE2 | 3.887 |
| 5TIK | B_LYS_205 | NZ  | B_ASP_259 | OD2 | 3.092 |
| 5TIK | B_HIS_211 | NE2 | B_ASP_253 | OD1 | 3.835 |
| 5TIK | B_ARG_242 | NH2 | B_GLU_228 | OE2 | 3.300 |
| 5TIK | B_LYS_290 | NZ  | A_GLU_281 | OE1 | 3.703 |
| 5TIK | B_LYS_305 | NZ  | B_GLU_308 | OE1 | 2.748 |
| 5TIK | B_ARG_310 | NH2 | B_ASP_307 | OD2 | 3.708 |
| 5TIK | C_HIS_3   | NE2 | B_GLU_9   | OE1 | 2.908 |
| 5TIK | C_ARG_29  | NH2 | B_ASP_259 | OD2 | 3.311 |
| 5TIK | C_HIS_47  | ND1 | C_ASP_63  | OD2 | 3.231 |
| 5TIK | C_LYS_52  | NZ  | C_GLU_30  | OE1 | 3.235 |
| 5TIK | C_LYS_52  | NZ  | C_GLU_30  | OE2 | 3.319 |
| 5TIK | C_LYS_66  | NZ  | C_ASP_63  | OD2 | 3.918 |
| 5TIK | C_LYS_99  | NZ  | C_GLU_93  | OE2 | 2.385 |
| 5TIK | C_ARG_106 | NH2 | C_GLU_177 | OE2 | 3.784 |
| 5TIK | C_LYS_157 | NZ  | C_ASP_161 | OD1 | 3.341 |
| 5TIK | C_LYS_157 | NZ  | C_ASP_161 | OD2 | 3.707 |
| 5TIK | C_LYS_157 | NZ  | C_ASP_166 | OD1 | 2.361 |
| 5TIK | C_HIS_173 | ND1 | C_ASP_174 | OD2 | 3.723 |
| 5TIK | C_LYS_175 | NZ  | C_GLU_84  | OE1 | 3.431 |
| 5TIK | C_LYS_175 | NZ  | C_GLU_84  | OE2 | 2.598 |
| 5TIK | C_LYS_182 | NZ  | C_ASP_165 | OD2 | 3.481 |
| 5TIK | C_LYS_186 | NZ  | C_GLU_232 | OE1 | 3.373 |
| 5TIK | C_LYS_205 | NZ  | C_ASP_259 | OD1 | 2.434 |
| 5TIK | C_LYS_205 | NZ  | C_ASP_259 | OD2 | 3.747 |
| 5TIK | C_LYS_205 | NZ  | C_GLU_308 | OE1 | 3.839 |
| 5TIK | C_LYS_205 | NZ  | C_GLU_308 | OE2 | 3.684 |
| 5TIK | C_LYS_287 | NZ  | C_GLU_273 | OE1 | 3.786 |
| 5TIK | C_LYS_305 | NZ  | C_GLU_308 | OE1 | 3.517 |
| 5TIK | C_LYS_305 | NZ  | C_GLU_308 | OE2 | 3.437 |
| 5TIK | C_ARG_310 | NH1 | C_ASP_307 | OD2 | 3.297 |
| 5TIK | D_HIS_3   | NE2 | A_GLU_9   | OE1 | 2.950 |
| 5TIK | D_HIS_3   | NE2 | A_GLU_9   | OE2 | 2.918 |
| 5TIK | D_ARG_7   | NH1 | D_GLU_9   | OE1 | 3.447 |
| 5TIK | D_LYS_28  | NZ  | D_GLU_83  | OE1 | 3.595 |
| 5TIK | D_LYS_28  | NZ  | D_GLU_83  | OE2 | 2.506 |
| 5TIK | D_HIS_47  | ND1 | D_ASP_63  | OD2 | 2.503 |
| 5TIK | D_LYS_52  | NZ  | D_GLU_30  | OE1 | 2.944 |
| 5TIK | D_LYS_52  | NZ  | D_GLU_30  | OE2 | 3.601 |
| 5TIK | D_HIS_75  | NE2 | D_ASP_92  | OD1 | 3.926 |
| 5TIK | D_LYS_99  | NZ  | D_GLU_91  | OE1 | 3.765 |
| 5TIK | D_ARG_106 | NH1 | D_GLU_177 | OE1 | 3.872 |
| 5TIK | D_ARG_106 | NH1 | D_GLU_177 | OE2 | 3.044 |
| 5TIK | D_ARG_106 | NH2 | D_GLU_177 | OE2 | 3.983 |
| 5TIK | D_LYS_157 | NZ  | D_ASP_161 | OD1 | 2.995 |
| 5TIK | D_LYS_157 | NZ  | D_ASP_166 | OD1 | 2.612 |
| 5TIK | D_LYS_157 | NZ  | D_ASP_166 | OD2 | 3.577 |
| 5TIK | D_LYS_175 | NZ  | D_GLU_146 | OE1 | 3.788 |
| 5TIK | D_LYS_205 | NZ  | D_GLU_308 | OE2 | 3.635 |
| 5TIK | D_LYS_287 | NZ  | D_GLU_273 | OE1 | 3.724 |
| 5TIK | D_LYS_305 | NZ  | D_GLU_308 | OE1 | 3.354 |

|      |           |     |           |     |       |
|------|-----------|-----|-----------|-----|-------|
| 5TIK | D_LYS_305 | NZ  | D_GLU_308 | OE2 | 2.963 |
| 5TL5 | L_LYS_24  | NZ  | L_ASP_74  | OD1 | 3.254 |
| 5TL5 | L_LYS_24  | NZ  | L_ASP_74  | OD2 | 3.141 |
| 5TL5 | L_ARG_65  | NH1 | L_ASP_86  | OD1 | 3.543 |
| 5TL5 | L_ARG_65  | NH1 | L_ASP_86  | OD2 | 2.755 |
| 5TL5 | L_ARG_65  | NH2 | L_GLU_85  | OE2 | 3.698 |
| 5TL5 | L_ARG_65  | NH2 | L_ASP_86  | OD1 | 2.948 |
| 5TL5 | L_ARG_65  | NH2 | L_ASP_86  | OD2 | 3.662 |
| 5TL5 | L_LYS_153 | NZ  | L_GLU_199 | OE1 | 2.824 |
| 5TL5 | L_HIS_193 | ND1 | L_ASP_189 | OD1 | 3.571 |
| 5TL5 | L_ARG_215 | NH1 | L_GLU_191 | OE1 | 3.322 |
| 5TL5 | H_ARG_40  | NH1 | H_GLU_89  | OE1 | 3.264 |
| 5TL5 | H_ARG_40  | NH2 | H_GLU_89  | OE1 | 3.195 |
| 5TL5 | H_ARG_40  | NH2 | H_GLU_89  | OE2 | 3.409 |
| 5TL5 | H_ARG_50  | NH1 | L_ASP_98  | OD1 | 2.887 |
| 5TL5 | H_ARG_50  | NH1 | L_ASP_98  | OD2 | 3.532 |
| 5TL5 | H_ARG_50  | NH2 | L_ASP_98  | OD1 | 3.785 |
| 5TL5 | H_ARG_50  | NH2 | L_ASP_98  | OD2 | 2.933 |
| 5TL5 | H_LYS_67  | NZ  | H_ASP_90  | OD1 | 3.648 |
| 5TL5 | H_LYS_67  | NZ  | H_ASP_90  | OD2 | 2.769 |
| 5TL5 | H_ARG_98  | NH2 | H_ASP_100 | OD1 | 3.835 |
| 5TL5 | H_LYS_150 | NZ  | H_ASP_151 | OD1 | 3.624 |
| 5TL5 | H_LYS_150 | NZ  | H_ASP_151 | OD2 | 3.145 |
| 5TL5 | H_LYS_216 | NZ  | L_GLU_127 | OE1 | 3.027 |
| 5TL5 | H_LYS_216 | NZ  | L_GLU_127 | OE2 | 3.571 |
| 5TL5 | A_LYS_17  | NZ  | H_ASP_55  | OD1 | 3.610 |
| 5TL5 | A_LYS_17  | NZ  | H_ASP_55  | OD2 | 2.637 |
| 5TL5 | A_LYS_17  | NZ  | H_ASP_57  | OD1 | 2.990 |
| 5TL5 | A_HIS_36  | NE2 | H_ASP_104 | OD1 | 3.017 |
| 5TL5 | A_HIS_36  | NE2 | H_ASP_104 | OD2 | 2.947 |
| 5TL5 | A_ARG_37  | NH2 | H_ASP_104 | OD2 | 2.895 |
| 5TL5 | A_ARG_58  | NH1 | A_ASP_54  | OD1 | 3.167 |
| 5TL5 | A_ARG_58  | NH1 | A_ASP_54  | OD2 | 3.803 |
| 5TL5 | A_ARG_58  | NH1 | A_GLU_62  | OE2 | 3.990 |
| 5TL5 | A_ARG_58  | NH2 | A_ASP_54  | OD1 | 2.943 |
| 5TL5 | A_ARG_58  | NH2 | A_GLU_62  | OE2 | 3.654 |
| 5TL5 | A_ARG_65  | NH1 | A_GLU_96  | OE2 | 3.447 |
| 5TL5 | A_ARG_65  | NH2 | A_GLU_96  | OE2 | 3.907 |
| 5TL5 | A_ARG_74  | NH1 | A_GLU_83  | OE1 | 3.799 |
| 5TL5 | A_ARG_74  | NH2 | A_GLU_83  | OE1 | 3.360 |
| 5TLJ | A_ARG_65  | NH1 | A_GLU_83  | OE2 | 2.851 |
| 5TLJ | A_ARG_65  | NH1 | A_GLU_85  | OE2 | 3.561 |
| 5TLJ | A_ARG_65  | NH2 | A_ASP_86  | OD1 | 2.756 |
| 5TLJ | A_ARG_65  | NH2 | A_ASP_86  | OD2 | 2.866 |
| 5TLJ | A_LYS_153 | NZ  | A_GLU_199 | OE1 | 3.517 |
| 5TLJ | A_LYS_153 | NZ  | A_GLU_199 | OE2 | 2.835 |
| 5TLJ | A_ARG_215 | NH1 | A_GLU_191 | OE1 | 2.713 |
| 5TLJ | B_LYS_38  | NZ  | B_GLU_46  | OE1 | 3.196 |
| 5TLJ | B_LYS_38  | NZ  | B_ASP_90  | OD1 | 3.704 |
| 5TLJ | B_ARG_40  | NH1 | B_GLU_89  | OE2 | 2.861 |
| 5TLJ | B_ARG_50  | NH1 | A_ASP_98  | OD1 | 2.672 |
| 5TLJ | B_ARG_50  | NH1 | A_ASP_98  | OD2 | 3.926 |
| 5TLJ | B_LYS_63  | NZ  | B_GLU_46  | OE1 | 3.698 |
| 5TLJ | B_LYS_63  | NZ  | B_GLU_89  | OE1 | 3.182 |
| 5TLJ | B_LYS_63  | NZ  | B_GLU_89  | OE2 | 3.310 |
| 5TLJ | B_LYS_67  | NZ  | B_ASP_90  | OD2 | 3.121 |
| 5TLJ | B_LYS_150 | NZ  | B_ASP_151 | OD1 | 3.569 |
| 5TLJ | B_LYS_150 | NZ  | B_ASP_151 | OD2 | 3.604 |

|      |           |     |           |     |       |
|------|-----------|-----|-----------|-----|-------|
| 5TLJ | B_LYS_213 | NZ  | B_ASP_215 | OD2 | 3.942 |
| 5TLJ | C_ARG_65  | NH1 | C_ASP_86  | OD1 | 2.756 |
| 5TLJ | C_ARG_65  | NH1 | C_ASP_86  | OD2 | 2.971 |
| 5TLJ | C_ARG_65  | NH2 | C_GLU_83  | OE1 | 3.613 |
| 5TLJ | C_ARG_65  | NH2 | C_ASP_86  | OD1 | 3.864 |
| 5TLJ | C_LYS_153 | NZ  | C_GLU_199 | OE1 | 3.775 |
| 5TLJ | C_LYS_153 | NZ  | C_GLU_199 | OE2 | 3.308 |
| 5TLJ | C_HIS_193 | ND1 | C_ASP_189 | OD1 | 3.530 |
| 5TLJ | C_ARG_215 | NH1 | C_GLU_191 | OE2 | 3.808 |
| 5TLJ | C_ARG_215 | NH2 | C_GLU_191 | OE2 | 3.846 |
| 5TLJ | D_ARG_38  | NH1 | D_ASP_90  | OD1 | 3.566 |
| 5TLJ | D_ARG_38  | NH2 | D_GLU_46  | OE1 | 2.710 |
| 5TLJ | D_ARG_38  | NH2 | D_GLU_46  | OE2 | 3.743 |
| 5TLJ | D_ARG_38  | NH2 | D_ASP_90  | OD1 | 3.868 |
| 5TLJ | D_ARG_67  | NH1 | D_ASP_90  | OD2 | 3.824 |
| 5TLJ | D_ARG_67  | NH2 | D_ASP_90  | OD1 | 3.650 |
| 5TLJ | D_ARG_100 | NH1 | X_ASP_43  | OD2 | 3.396 |
| 5TLJ | D_ARG_100 | NH2 | C_GLU_59  | OE1 | 2.703 |
| 5TLJ | D_ARG_100 | NH2 | C_GLU_59  | OE2 | 3.403 |
| 5TLJ | D_ARG_100 | NH2 | X_ASP_43  | OD2 | 3.844 |
| 5TLJ | D_LYS_147 | NZ  | D_ASP_148 | OD1 | 3.264 |
| 5TLJ | D_LYS_147 | NZ  | D_ASP_148 | OD2 | 2.806 |
| 5TLJ | E_LYS_24  | NZ  | E_ASP_74  | OD1 | 3.563 |
| 5TLJ | E_ARG_65  | NH1 | E_GLU_83  | OE2 | 3.709 |
| 5TLJ | E_ARG_65  | NH2 | E_GLU_85  | OE1 | 3.881 |
| 5TLJ | E_ARG_65  | NH2 | E_ASP_86  | OD1 | 2.674 |
| 5TLJ | E_ARG_65  | NH2 | E_ASP_86  | OD2 | 3.332 |
| 5TLJ | E_ARG_146 | NH2 | E_GLU_169 | OE1 | 3.285 |
| 5TLJ | E_ARG_215 | NH1 | E_GLU_191 | OE2 | 3.303 |
| 5TLJ | F_LYS_38  | NZ  | F_GLU_46  | OE1 | 3.804 |
| 5TLJ | F_ARG_50  | NH1 | E_ASP_98  | OD1 | 3.689 |
| 5TLJ | F_ARG_50  | NH1 | E_ASP_98  | OD2 | 2.897 |
| 5TLJ | F_ARG_50  | NH2 | E_ASP_98  | OD1 | 3.671 |
| 5TLJ | F_ARG_50  | NH2 | E_ASP_98  | OD2 | 3.575 |
| 5TLJ | F_LYS_63  | NZ  | F_GLU_89  | OE1 | 3.558 |
| 5TLJ | F_LYS_67  | NZ  | F_ASP_90  | OD1 | 3.830 |
| 5TLJ | F_LYS_67  | NZ  | F_ASP_90  | OD2 | 3.115 |
| 5TLJ | F_ARG_98  | NH1 | F_ASP_100 | OD1 | 3.189 |
| 5TLJ | F_ARG_98  | NH1 | F_ASP_100 | OD2 | 3.943 |
| 5TLJ | F_LYS_150 | NZ  | F_ASP_151 | OD1 | 3.468 |
| 5TLJ | F_HIS_171 | ND1 | E_ASP_171 | OD1 | 3.892 |
| 5TLJ | F_HIS_171 | NE2 | E_ASP_171 | OD2 | 3.411 |
| 5TLJ | F_LYS_217 | NZ  | F_GLU_219 | OE2 | 2.788 |
| 5TLJ | G_ARG_24  | NH2 | G_ASP_74  | OD1 | 3.512 |
| 5TLJ | G_ARG_65  | NH1 | G_GLU_83  | OE1 | 3.877 |
| 5TLJ | G_ARG_65  | NH1 | G_ASP_86  | OD1 | 3.552 |
| 5TLJ | G_ARG_65  | NH1 | G_ASP_86  | OD2 | 2.689 |
| 5TLJ | G_ARG_65  | NH2 | G_GLU_83  | OE1 | 3.030 |
| 5TLJ | G_LYS_187 | NZ  | G_GLU_191 | OE2 | 3.996 |
| 5TLJ | H_ARG_38  | NH1 | H_GLU_46  | OE1 | 3.968 |
| 5TLJ | H_ARG_38  | NH1 | H_ASP_90  | OD1 | 3.590 |
| 5TLJ | H_ARG_38  | NH2 | H_GLU_46  | OE1 | 2.850 |
| 5TLJ | H_ARG_38  | NH2 | H_GLU_46  | OE2 | 3.149 |
| 5TLJ | H_ARG_38  | NH2 | H_ASP_90  | OD1 | 3.501 |
| 5TLJ | H_ARG_67  | NH1 | H_ASP_90  | OD1 | 3.809 |
| 5TLJ | H_ARG_67  | NH1 | H_ASP_90  | OD2 | 2.805 |
| 5TLJ | H_ARG_67  | NH2 | H_ASP_90  | OD1 | 3.038 |
| 5TLJ | H_ARG_67  | NH2 | H_ASP_90  | OD2 | 3.316 |

|      |           |     |           |     |       |
|------|-----------|-----|-----------|-----|-------|
| 5TLJ | H_ARG_76  | NH2 | H_ASP_73  | OD2 | 3.334 |
| 5TLJ | H_ARG_98  | NH2 | H_ASP_105 | OD2 | 3.277 |
| 5TLJ | H_ARG_100 | NH2 | G_GLU_59  | OE1 | 2.761 |
| 5TLJ | H_LYS_147 | NZ  | H_ASP_148 | OD1 | 3.556 |
| 5TLJ | H_LYS_147 | NZ  | H_ASP_148 | OD2 | 2.892 |
| 5TLJ | X_LYS_17  | NZ  | B_ASP_57  | OD2 | 3.053 |
| 5TLJ | X_HIS_36  | NE2 | B_ASP_104 | OD1 | 3.121 |
| 5TLJ | X_HIS_36  | NE2 | B_ASP_104 | OD2 | 2.886 |
| 5TLJ | X_ARG_58  | NH1 | X_GLU_62  | OE2 | 2.792 |
| 5TLJ | X_ARG_58  | NH2 | X_ASP_54  | OD1 | 3.157 |
| 5TLJ | X_ARG_58  | NH2 | X_GLU_62  | OE2 | 3.987 |
| 5TLJ | X_ARG_65  | NH2 | X_GLU_83  | OE2 | 3.778 |
| 5TLK | A_LYS_24  | NZ  | A_ASP_74  | OD1 | 3.675 |
| 5TLK | A_ARG_65  | NH1 | A_ASP_86  | OD1 | 3.826 |
| 5TLK | A_ARG_65  | NH1 | A_ASP_86  | OD2 | 2.689 |
| 5TLK | A_ARG_65  | NH2 | A_GLU_83  | OE2 | 3.993 |
| 5TLK | A_ARG_65  | NH2 | A_ASP_86  | OD1 | 3.142 |
| 5TLK | A_ARG_65  | NH2 | A_ASP_86  | OD2 | 3.459 |
| 5TLK | A_LYS_107 | NZ  | A_GLU_169 | OE2 | 3.867 |
| 5TLK | A_LYS_153 | NZ  | A_GLU_199 | OE1 | 2.764 |
| 5TLK | B_ARG_50  | NH1 | A_ASP_98  | OD1 | 3.277 |
| 5TLK | B_ARG_50  | NH1 | A_ASP_98  | OD2 | 2.898 |
| 5TLK | B_ARG_50  | NH2 | A_ASP_98  | OD1 | 2.923 |
| 5TLK | B_LYS_63  | NZ  | B_GLU_46  | OE1 | 3.471 |
| 5TLK | B_LYS_63  | NZ  | B_GLU_46  | OE2 | 3.192 |
| 5TLK | B_LYS_67  | NZ  | B_ASP_90  | OD1 | 3.881 |
| 5TLK | B_LYS_67  | NZ  | B_ASP_90  | OD2 | 2.993 |
| 5TLK | B_LYS_150 | NZ  | B_ASP_151 | OD1 | 3.046 |
| 5TLK | B_LYS_150 | NZ  | B_ASP_151 | OD2 | 2.798 |
| 5TLK | B_LYS_216 | NZ  | A_GLU_127 | OE1 | 3.067 |
| 5TLK | B_LYS_216 | NZ  | A_GLU_127 | OE2 | 3.588 |
| 5TLK | C_ARG_24  | NH1 | C_ASP_74  | OD1 | 3.109 |
| 5TLK | C_ARG_24  | NH1 | C_ASP_74  | OD2 | 2.746 |
| 5TLK | C_LYS_27  | NZ  | C_GLU_97  | OE1 | 3.042 |
| 5TLK | C_ARG_57  | NH2 | X_ASP_43  | OD1 | 3.384 |
| 5TLK | C_ARG_65  | NH1 | C_ASP_86  | OD1 | 3.594 |
| 5TLK | C_ARG_65  | NH1 | C_ASP_86  | OD2 | 2.481 |
| 5TLK | C_ARG_65  | NH2 | C_ASP_86  | OD1 | 2.770 |
| 5TLK | C_ARG_65  | NH2 | C_ASP_86  | OD2 | 3.157 |
| 5TLK | C_LYS_107 | NZ  | C_GLU_169 | OE2 | 2.732 |
| 5TLK | C_LYS_153 | NZ  | C_GLU_199 | OE1 | 2.786 |
| 5TLK | C_LYS_153 | NZ  | C_GLU_199 | OE2 | 3.954 |
| 5TLK | C_LYS_187 | NZ  | C_GLU_191 | OE2 | 3.768 |
| 5TLK | C_ARG_215 | NH1 | C_GLU_191 | OE1 | 3.277 |
| 5TLK | D_ARG_38  | NH1 | D_ASP_90  | OD1 | 2.987 |
| 5TLK | D_ARG_38  | NH2 | D_GLU_46  | OE1 | 2.875 |
| 5TLK | D_ARG_38  | NH2 | D_GLU_46  | OE2 | 3.558 |
| 5TLK | D_ARG_38  | NH2 | D_ASP_90  | OD1 | 3.987 |
| 5TLK | D_LYS_65  | NZ  | D_ASP_62  | OD1 | 2.814 |
| 5TLK | D_ARG_67  | NH1 | D_ASP_90  | OD2 | 2.614 |
| 5TLK | D_ARG_67  | NH2 | D_ASP_90  | OD1 | 3.114 |
| 5TLK | D_ARG_67  | NH2 | D_ASP_90  | OD2 | 3.161 |
| 5TLK | D_ARG_98  | NH2 | D_ASP_105 | OD1 | 3.927 |
| 5TLK | D_ARG_98  | NH2 | D_ASP_105 | OD2 | 2.700 |
| 5TLK | D_ARG_100 | NH1 | X_ASP_43  | OD2 | 2.904 |
| 5TLK | D_ARG_100 | NH2 | C_GLU_59  | OE1 | 2.708 |
| 5TLK | D_ARG_100 | NH2 | C_GLU_59  | OE2 | 3.299 |
| 5TLK | D_ARG_100 | NH2 | X_ASP_43  | OD2 | 3.882 |

|      |           |     |           |     |       |
|------|-----------|-----|-----------|-----|-------|
| 5TLK | D_LYS_147 | NZ  | D_ASP_148 | OD1 | 3.173 |
| 5TLK | D_LYS_147 | NZ  | D_ASP_148 | OD2 | 3.344 |
| 5TLK | E_ARG_65  | NH1 | E_ASP_86  | OD1 | 3.727 |
| 5TLK | E_ARG_65  | NH1 | E_ASP_86  | OD2 | 2.581 |
| 5TLK | E_ARG_65  | NH2 | E_GLU_83  | OE1 | 3.517 |
| 5TLK | E_ARG_65  | NH2 | E_ASP_86  | OD1 | 2.787 |
| 5TLK | E_ARG_65  | NH2 | E_ASP_86  | OD2 | 3.198 |
| 5TLK | E_LYS_153 | NZ  | E_GLU_199 | OE1 | 2.662 |
| 5TLK | E_LYS_187 | NZ  | E_GLU_191 | OE1 | 3.794 |
| 5TLK | F_LYS_38  | NZ  | F_ASP_90  | OD1 | 3.722 |
| 5TLK | F_ARG_40  | NH1 | F_GLU_89  | OE1 | 3.871 |
| 5TLK | F_ARG_40  | NH2 | F_GLU_89  | OE1 | 3.823 |
| 5TLK | F_ARG_40  | NH2 | F_GLU_89  | OE2 | 2.772 |
| 5TLK | F_ARG_50  | NH1 | E_ASP_98  | OD1 | 3.086 |
| 5TLK | F_ARG_50  | NH1 | E_ASP_98  | OD2 | 3.224 |
| 5TLK | F_ARG_50  | NH2 | E_ASP_98  | OD1 | 2.767 |
| 5TLK | F_ARG_50  | NH2 | E_ASP_98  | OD2 | 3.943 |
| 5TLK | F_LYS_67  | NZ  | F_ASP_90  | OD2 | 3.364 |
| 5TLK | F_ARG_98  | NH1 | F_ASP_100 | OD1 | 3.582 |
| 5TLK | F_LYS_150 | NZ  | F_ASP_151 | OD1 | 3.689 |
| 5TLK | G_ARG_24  | NH1 | G_ASP_74  | OD2 | 2.978 |
| 5TLK | G_ARG_24  | NH2 | G_ASP_74  | OD1 | 3.856 |
| 5TLK | G_ARG_24  | NH2 | G_ASP_74  | OD2 | 3.656 |
| 5TLK | G_LYS_27  | NZ  | G_GLU_97  | OE1 | 3.620 |
| 5TLK | G_ARG_33  | NH1 | Y_GLU_24  | OE2 | 3.993 |
| 5TLK | G_ARG_33  | NH2 | Y_GLU_24  | OE2 | 3.475 |
| 5TLK | G_ARG_65  | NH1 | G_ASP_86  | OD1 | 3.101 |
| 5TLK | G_ARG_65  | NH1 | G_ASP_86  | OD2 | 2.770 |
| 5TLK | G_ARG_65  | NH2 | G_GLU_85  | OE2 | 3.596 |
| 5TLK | G_LYS_107 | NZ  | G_GLU_169 | OE2 | 3.886 |
| 5TLK | G_LYS_153 | NZ  | G_GLU_199 | OE1 | 2.760 |
| 5TLK | G_LYS_187 | NZ  | G_GLU_191 | OE2 | 2.938 |
| 5TLK | G_HIS_193 | ND1 | G_ASP_189 | OD1 | 3.813 |
| 5TLK | G_ARG_215 | NH1 | G_GLU_191 | OE1 | 3.873 |
| 5TLK | H_ARG_38  | NH1 | H_ASP_90  | OD1 | 2.755 |
| 5TLK | H_ARG_38  | NH2 | H_GLU_46  | OE1 | 3.268 |
| 5TLK | H_ARG_38  | NH2 | H_GLU_46  | OE2 | 3.476 |
| 5TLK | H_ARG_38  | NH2 | H_ASP_90  | OD1 | 3.679 |
| 5TLK | H_LYS_65  | NZ  | H_ASP_62  | OD1 | 3.982 |
| 5TLK | H_ARG_67  | NH1 | H_ASP_90  | OD2 | 2.783 |
| 5TLK | H_ARG_67  | NH2 | H_ASP_90  | OD1 | 2.925 |
| 5TLK | H_ARG_67  | NH2 | H_ASP_90  | OD2 | 2.986 |
| 5TLK | H_ARG_98  | NH2 | H_ASP_105 | OD1 | 3.818 |
| 5TLK | H_ARG_98  | NH2 | H_ASP_105 | OD2 | 2.712 |
| 5TLK | H_ARG_100 | NH1 | G_GLU_59  | OE1 | 3.531 |
| 5TLK | H_ARG_100 | NH1 | Y_ASP_43  | OD2 | 3.423 |
| 5TLK | H_ARG_100 | NH2 | G_GLU_59  | OE1 | 2.787 |
| 5TLK | H_ARG_100 | NH2 | G_GLU_59  | OE2 | 3.306 |
| 5TLK | H_LYS_147 | NZ  | H_ASP_148 | OD1 | 3.296 |
| 5TLK | H_LYS_147 | NZ  | H_ASP_148 | OD2 | 3.127 |
| 5TLK | H_LYS_213 | NZ  | G_GLU_127 | OE1 | 3.569 |
| 5TLK | X_LYS_17  | NZ  | B_ASP_55  | OD1 | 3.914 |
| 5TLK | X_LYS_17  | NZ  | B_ASP_55  | OD2 | 3.018 |
| 5TLK | X_LYS_17  | NZ  | B_ASP_57  | OD2 | 3.114 |
| 5TLK | X_HIS_36  | NE2 | B_ASP_104 | OD1 | 3.010 |
| 5TLK | X_HIS_36  | NE2 | B_ASP_104 | OD2 | 2.891 |
| 5TLK | X_ARG_37  | NH2 | B_ASP_104 | OD1 | 2.703 |
| 5TLK | X_HIS_56  | ND1 | X_ASP_54  | OD1 | 3.625 |

|      |           |     |           |     |       |
|------|-----------|-----|-----------|-----|-------|
| 5TLK | X_ARG_58  | NH2 | X_ASP_54  | OD1 | 2.720 |
| 5TLK | X_ARG_58  | NH2 | X_ASP_54  | OD2 | 3.583 |
| 5TLK | X_ARG_74  | NH1 | X_GLU_83  | OE2 | 3.772 |
| 5TLK | X_ARG_74  | NH2 | X_GLU_83  | OE2 | 3.777 |
| 5TLK | Y_LYS_17  | NZ  | F_ASP_55  | OD1 | 3.581 |
| 5TLK | Y_LYS_17  | NZ  | F_ASP_55  | OD2 | 3.170 |
| 5TLK | Y_LYS_17  | NZ  | F_ASP_57  | OD2 | 3.380 |
| 5TLK | Y_HIS_36  | NE2 | F_ASP_104 | OD1 | 3.198 |
| 5TLK | Y_HIS_36  | NE2 | F_ASP_104 | OD2 | 2.793 |
| 5TLK | Y_ARG_37  | NH2 | F_ASP_104 | OD1 | 3.616 |
| 5TLK | Y_ARG_58  | NH2 | Y_ASP_54  | OD1 | 3.024 |
| 5TLK | Y_ARG_74  | NH1 | Y_GLU_83  | OE2 | 3.804 |
| 5TLK | Y_ARG_74  | NH2 | Y_GLU_83  | OE2 | 3.441 |
| 5TRU | L_ARG_24  | NH1 | L_ASP_71  | OD2 | 3.954 |
| 5TRU | L_ARG_55  | NH2 | L_ASP_61  | OD1 | 3.408 |
| 5TRU | L_ARG_62  | NH2 | L_ASP_83  | OD1 | 2.775 |
| 5TRU | L_ARG_62  | NH2 | L_ASP_83  | OD2 | 3.715 |
| 5TRU | L_LYS_150 | NZ  | L_GLU_196 | OE1 | 3.945 |
| 5TRU | L_HIS_190 | ND1 | L_ASP_152 | OD2 | 3.931 |
| 5TRU | H_ARG_38  | NH1 | H_ASP_90  | OD1 | 2.859 |
| 5TRU | H_ARG_38  | NH2 | H_GLU_46  | OE1 | 3.419 |
| 5TRU | H_ARG_38  | NH2 | H_ASP_90  | OD1 | 3.391 |
| 5TRU | H_ARG_67  | NH1 | H_ASP_90  | OD1 | 3.755 |
| 5TRU | H_ARG_67  | NH1 | H_ASP_90  | OD2 | 2.634 |
| 5TRU | H_ARG_67  | NH2 | H_ASP_90  | OD1 | 2.978 |
| 5TRU | H_ARG_67  | NH2 | H_ASP_90  | OD2 | 3.388 |
| 5TRU | H_ARG_98  | NH2 | H_ASP_106 | OD1 | 3.783 |
| 5TRU | H_ARG_98  | NH2 | H_ASP_106 | OD2 | 2.740 |
| 5TRU | H_LYS_148 | NZ  | H_ASP_149 | OD1 | 3.967 |
| 5TRU | H_LYS_148 | NZ  | H_ASP_149 | OD2 | 3.741 |
| 5TRU | L_ARG_55  | NH2 | L_ASP_61  | OD1 | 2.796 |
| 5TRU | L_ARG_62  | NH2 | L_ASP_83  | OD1 | 2.608 |
| 5TRU | L_ARG_62  | NH2 | L_ASP_83  | OD2 | 3.126 |
| 5TRU | L_ARG_78  | NH1 | L_GLU_80  | OE2 | 2.858 |
| 5TRU | L_LYS_104 | NZ  | L_GLU_166 | OE2 | 3.131 |
| 5TRU | L_LYS_127 | NZ  | L_ASP_123 | OD2 | 3.360 |
| 5TRU | h_ARG_38  | NH1 | h_ASP_90  | OD1 | 2.730 |
| 5TRU | h_ARG_38  | NH2 | h_GLU_46  | OE1 | 3.334 |
| 5TRU | h_ARG_38  | NH2 | h_ASP_90  | OD1 | 3.607 |
| 5TRU | h_ARG_67  | NH1 | h_ASP_90  | OD1 | 3.906 |
| 5TRU | h_ARG_67  | NH1 | h_ASP_90  | OD2 | 2.771 |
| 5TRU | h_ARG_67  | NH2 | h_ASP_90  | OD1 | 3.264 |
| 5TRU | h_ARG_67  | NH2 | h_ASP_90  | OD2 | 3.554 |
| 5TRU | h_ARG_98  | NH2 | h_ASP_106 | OD2 | 3.484 |
| 5TRU | h_HIS_169 | NE2 | L_ASP_168 | OD2 | 3.995 |
| 5TZ2 | H_LYS_12  | NZ  | H_GLU_16  | OE1 | 3.837 |
| 5TZ2 | H_ARG_38  | NH2 | H_GLU_46  | OE1 | 3.145 |
| 5TZ2 | H_ARG_38  | NH2 | H_GLU_46  | OE2 | 3.092 |
| 5TZ2 | H_ARG_59  | NH2 | H_ASP_57  | OD1 | 3.404 |
| 5TZ2 | H_ARG_59  | NH2 | H_ASP_57  | OD2 | 2.670 |
| 5TZ2 | H_ARG_98  | NH2 | H_ASP_108 | OD1 | 3.872 |
| 5TZ2 | H_ARG_98  | NH2 | H_ASP_108 | OD2 | 2.930 |
| 5TZ2 | H_ARG_101 | NH1 | C_ASP_46  | OD2 | 3.182 |
| 5TZ2 | H_HIS_105 | NE2 | C_ASP_51  | OD1 | 2.798 |
| 5TZ2 | H_HIS_105 | NE2 | C_ASP_51  | OD2 | 2.654 |
| 5TZ2 | H_LYS_150 | NZ  | H_ASP_151 | OD1 | 3.764 |
| 5TZ2 | L_ARG_61  | NH2 | L_ASP_82  | OD1 | 3.176 |
| 5TZ2 | L_ARG_61  | NH2 | L_ASP_82  | OD2 | 3.586 |

|      |           |     |           |     |       |
|------|-----------|-----|-----------|-----|-------|
| 5TZ2 | C_LYS_41  | NZ  | C_ASP_46  | OD1 | 2.641 |
| 5TZ2 | C_ARG_45  | NH1 | C_ASP_62  | OD2 | 3.329 |
| 5TZ2 | C_ARG_45  | NH2 | C_ASP_62  | OD1 | 3.717 |
| 5TZ2 | C_ARG_45  | NH2 | C_ASP_62  | OD2 | 3.722 |
| 5TZ2 | C_LYS_56  | NZ  | H_ASP_55  | OD1 | 3.222 |
| 5TZ2 | C_LYS_56  | NZ  | H_ASP_55  | OD2 | 2.489 |
| 5TZ2 | C_LYS_56  | NZ  | H_ASP_57  | OD2 | 3.354 |
| 5TZ2 | C_HIS_90  | NE2 | C_ASP_62  | OD2 | 3.559 |
| 5TZ2 | C_ARG_103 | NH2 | C_GLU_29  | OE2 | 3.947 |
| 5TZ2 | C_ARG_103 | NH2 | C_GLU_100 | OE1 | 2.920 |
| 5TZ2 | C_ARG_103 | NH2 | C_GLU_100 | OE2 | 3.895 |
| 5TZT | B_ARG_82  | NH2 | H_ASP_31  | OD1 | 2.783 |
| 5TZT | B_ARG_82  | NH2 | H_ASP_31  | OD2 | 3.806 |
| 5TZT | B_LYS_108 | NZ  | B_GLU_110 | OE2 | 3.764 |
| 5TZT | B_HIS_194 | ND1 | B_ASP_156 | OD2 | 2.786 |
| 5TZT | A_LYS_19  | NZ  | A_GLU_82  | OE1 | 3.806 |
| 5TZT | A_ARG_38  | NH1 | A_ASP_90  | OD2 | 3.536 |
| 5TZT | A_ARG_38  | NH2 | A_GLU_46  | OE1 | 3.836 |
| 5TZT | A_ARG_38  | NH2 | A_GLU_46  | OE2 | 2.074 |
| 5TZT | A_LYS_63  | NZ  | A_GLU_46  | OE1 | 3.429 |
| 5TZT | A_LYS_63  | NZ  | A_GLU_46  | OE2 | 3.935 |
| 5TZT | A_ARG_67  | NH1 | A_ASP_90  | OD1 | 3.187 |
| 5TZT | A_ARG_67  | NH1 | A_ASP_90  | OD2 | 3.312 |
| 5TZT | A_ARG_67  | NH2 | A_ASP_90  | OD1 | 2.897 |
| 5TZT | A_ARG_87  | NH1 | A_GLU_89  | OE1 | 3.756 |
| 5TZT | A_ARG_98  | NH1 | A_ASP_105 | OD1 | 3.423 |
| 5TZT | A_ARG_98  | NH1 | A_ASP_105 | OD2 | 2.447 |
| 5TZT | A_HIS_102 | ND1 | D_GLU_104 | OE2 | 3.803 |
| 5TZT | L_LYS_55  | NZ  | C_GLU_104 | OE1 | 3.704 |
| 5TZT | L_LYS_55  | NZ  | C_GLU_104 | OE2 | 2.899 |
| 5TZT | L_ARG_66  | NH1 | L_ASP_87  | OD1 | 3.313 |
| 5TZT | L_ARG_66  | NH1 | L_ASP_87  | OD2 | 2.679 |
| 5TZT | L_ARG_66  | NH2 | L_GLU_84  | OE1 | 2.654 |
| 5TZT | L_ARG_66  | NH2 | L_GLU_84  | OE2 | 3.502 |
| 5TZT | L_HIS_194 | ND1 | L_ASP_156 | OD2 | 3.224 |
| 5TZT | H_ARG_38  | NH2 | H_GLU_46  | OE1 | 3.226 |
| 5TZT | H_LYS_63  | NZ  | H_GLU_46  | OE2 | 3.670 |
| 5TZT | H_ARG_67  | NH2 | H_ASP_90  | OD2 | 3.363 |
| 5TZT | H_ARG_98  | NH1 | H_ASP_105 | OD1 | 3.531 |
| 5TZT | H_ARG_98  | NH1 | H_ASP_105 | OD2 | 2.846 |
| 5TZT | H_ARG_98  | NH2 | H_ASP_105 | OD1 | 3.738 |
| 5TZT | H_HIS_102 | ND1 | C_GLU_104 | OE1 | 2.856 |
| 5TZT | C_ARG_45  | NH1 | C_ASP_62  | OD1 | 2.637 |
| 5TZT | C_ARG_45  | NH1 | C_ASP_62  | OD2 | 2.581 |
| 5TZT | C_ARG_45  | NH2 | C_ASP_62  | OD1 | 3.454 |
| 5TZT | C_HIS_90  | NE2 | C_ASP_62  | OD1 | 3.571 |
| 5TZT | D_HIS_90  | NE2 | D_ASP_62  | OD1 | 3.274 |
| 5TZT | D_ARG_103 | NH2 | D_GLU_100 | OE1 | 2.563 |
| 5TZT | D_ARG_114 | NH1 | D_GLU_11  | OE1 | 3.807 |
| 5TZT | D_ARG_114 | NH1 | D_GLU_11  | OE2 | 3.964 |
| 5TZU | L_LYS_49  | NZ  | C_ASP_51  | OD1 | 3.523 |
| 5TZU | L_LYS_49  | NZ  | C_ASP_51  | OD2 | 2.772 |
| 5TZU | L_ARG_61  | NH1 | L_GLU_79  | OE1 | 3.734 |
| 5TZU | L_ARG_61  | NH1 | L_GLU_81  | OE2 | 3.054 |
| 5TZU | L_ARG_61  | NH1 | L_ASP_82  | OD1 | 2.764 |
| 5TZU | L_ARG_61  | NH1 | L_ASP_82  | OD2 | 3.551 |
| 5TZU | L_ARG_61  | NH2 | L_GLU_79  | OE1 | 3.680 |
| 5TZU | L_ARG_96  | NH1 | C_GLU_104 | OE1 | 3.230 |

|      |           |     |           |     |       |
|------|-----------|-----|-----------|-----|-------|
| 5TZU | L_ARG_96  | NH1 | C_GLU_104 | OE2 | 3.808 |
| 5TZU | L_ARG_96  | NH2 | C_GLU_104 | OE1 | 2.901 |
| 5TZU | L_LYS_103 | NZ  | L_GLU_165 | OE1 | 3.822 |
| 5TZU | L_LYS_103 | NZ  | L_GLU_165 | OE2 | 3.206 |
| 5TZU | L_ARG_211 | NH1 | L_GLU_187 | OE1 | 3.562 |
| 5TZU | H_ARG_38  | NH1 | H_ASP_90  | OD2 | 2.785 |
| 5TZU | H_ARG_38  | NH2 | H_GLU_46  | OE1 | 2.862 |
| 5TZU | H_ARG_38  | NH2 | H_GLU_46  | OE2 | 3.976 |
| 5TZU | H_ARG_38  | NH2 | H_ASP_90  | OD2 | 3.917 |
| 5TZU | H_ARG_67  | NH1 | H_ASP_90  | OD1 | 2.777 |
| 5TZU | H_ARG_67  | NH1 | H_ASP_90  | OD2 | 3.488 |
| 5TZU | H_ARG_67  | NH2 | H_ASP_90  | OD1 | 3.415 |
| 5TZU | H_ARG_67  | NH2 | H_ASP_90  | OD2 | 3.088 |
| 5TZU | H_ARG_98  | NH2 | H_ASP_106 | OD1 | 3.900 |
| 5TZU | H_ARG_98  | NH2 | H_ASP_106 | OD2 | 2.795 |
| 5TZU | H_LYS_214 | NZ  | L_GLU_123 | OE1 | 2.584 |
| 5TZU | H_LYS_214 | NZ  | L_GLU_123 | OE2 | 3.416 |
| 5TZU | C_LYS_39  | NZ  | L_ASP_31  | OD1 | 3.076 |
| 5TZU | C_LYS_39  | NZ  | L_ASP_31  | OD2 | 2.978 |
| 5TZU | C_LYS_39  | NZ  | C_ASP_46  | OD1 | 3.593 |
| 5TZU | C_LYS_39  | NZ  | C_GLU_97  | OE2 | 3.431 |
| 5TZU | C_LYS_41  | NZ  | C_ASP_46  | OD2 | 2.556 |
| 5TZU | C_ARG_45  | NH1 | C_ASP_62  | OD2 | 3.407 |
| 5TZU | C_ARG_45  | NH2 | C_ASP_62  | OD1 | 3.389 |
| 5TZU | C_ARG_45  | NH2 | C_ASP_62  | OD2 | 3.679 |
| 5TZU | C_HIS_90  | NE2 | C_ASP_62  | OD2 | 3.453 |
| 5TZU | C_ARG_103 | NH1 | C_GLU_29  | OE2 | 3.912 |
| 5TZU | C_ARG_103 | NH2 | C_GLU_29  | OE1 | 3.883 |
| 5TZU | C_ARG_103 | NH2 | C_GLU_100 | OE1 | 3.920 |
| 5TZU | C_ARG_103 | NH2 | C_GLU_100 | OE2 | 3.101 |
| 5U3J | H_ARG_38  | NH1 | H_ASP_86  | OD1 | 2.854 |
| 5U3J | H_ARG_38  | NH2 | H_GLU_46  | OE1 | 3.279 |
| 5U3J | H_ARG_38  | NH2 | H_GLU_46  | OE2 | 3.381 |
| 5U3J | H_ARG_50  | NH2 | H_GLU_58  | OE1 | 2.789 |
| 5U3J | H_ARG_52A | NH1 | H_ASP_53  | OD1 | 3.274 |
| 5U3J | H_ARG_52A | NH1 | H_ASP_53  | OD2 | 3.547 |
| 5U3J | H_ARG_52A | NH1 | A_ASP_674 | OD1 | 3.805 |
| 5U3J | H_ARG_52A | NH1 | A_ASP_674 | OD2 | 3.646 |
| 5U3J | H_ARG_52A | NH2 | A_ASP_674 | OD2 | 3.216 |
| 5U3J | H_LYS_52C | NZ  | A_ASP_674 | OD1 | 3.151 |
| 5U3J | H_LYS_52C | NZ  | A_ASP_674 | OD2 | 3.836 |
| 5U3J | H_ARG_66  | NH1 | H_ASP_86  | OD1 | 3.711 |
| 5U3J | H_ARG_66  | NH1 | H_ASP_86  | OD2 | 2.572 |
| 5U3J | H_ARG_66  | NH2 | H_ASP_86  | OD1 | 2.894 |
| 5U3J | H_ARG_66  | NH2 | H_ASP_86  | OD2 | 3.336 |
| 5U3J | H_ARG_71  | NH2 | H_ASP_73  | OD1 | 3.654 |
| 5U3J | H_LYS_143 | NZ  | H_ASP_144 | OD1 | 3.689 |
| 5U3J | H_LYS_209 | NZ  | L_GLU_123 | OE1 | 3.171 |
| 5U3J | H_LYS_209 | NZ  | L_GLU_123 | OE2 | 2.412 |
| 5U3J | L_ARG_24  | NH1 | L_ASP_70  | OD1 | 3.454 |
| 5U3J | L_ARG_24  | NH1 | L_ASP_70  | OD2 | 3.616 |
| 5U3J | L_LYS_39  | NZ  | L_GLU_81  | OE1 | 2.718 |
| 5U3J | L_ARG_61  | NH2 | L_ASP_82  | OD2 | 3.220 |
| 5U3J | L_LYS_149 | NZ  | L_GLU_195 | OE1 | 2.981 |
| 5U3J | L_LYS_188 | NZ  | L_ASP_185 | OD1 | 3.489 |
| 5U3J | L_ARG_211 | NH1 | L_GLU_187 | OE2 | 3.588 |
| 5U3N | H_ARG_38  | NH1 | H_ASP_86  | OD1 | 3.106 |
| 5U3N | H_ARG_38  | NH2 | H_GLU_46  | OE1 | 3.388 |



|      |            |     |            |     |       |
|------|------------|-----|------------|-----|-------|
| 5U3N | H_ARG_38   | NH2 | H_GLU_46   | OE2 | 3.678 |
| 5U3N | H_ARG_50   | NH2 | H_ASP_58   | OD2 | 3.019 |
| 5U3N | H_ARG_52A  | NH1 | A_ASP_674  | OD2 | 2.997 |
| 5U3N | H_ARG_52A  | NH2 | H_ASP_53   | OD1 | 2.927 |
| 5U3N | H_ARG_52A  | NH2 | H_ASP_53   | OD2 | 3.679 |
| 5U3N | H_ARG_52A  | NH2 | A_ASP_674  | OD1 | 3.173 |
| 5U3N | H_ARG_52A  | NH2 | A_ASP_674  | OD2 | 3.047 |
| 5U3N | H_ARG_66   | NH1 | H_ASP_86   | OD1 | 3.888 |
| 5U3N | H_ARG_66   | NH1 | H_ASP_86   | OD2 | 2.734 |
| 5U3N | H_ARG_66   | NH2 | H_ASP_86   | OD1 | 3.118 |
| 5U3N | H_ARG_66   | NH2 | H_ASP_86   | OD2 | 3.431 |
| 5U3N | H_ARG_71   | NH2 | H_ASP_73   | OD1 | 3.283 |
| 5U3N | H_ARG_100B | NH1 | L_ASP_31   | OD1 | 3.593 |
| 5U3N | H_ARG_100B | NH1 | L_ASP_31   | OD2 | 2.967 |
| 5U3N | H_ARG_100B | NH2 | H_GLU_100E | OE1 | 3.425 |
| 5U3N | H_ARG_100B | NH2 | H_GLU_100E | OE2 | 2.907 |
| 5U3N | H_ARG_100B | NH2 | L_ASP_31   | OD1 | 2.974 |
| 5U3N | H_ARG_100B | NH2 | L_ASP_31   | OD2 | 3.816 |
| 5U3N | H_LYS_143  | NZ  | H_ASP_144  | OD1 | 3.337 |
| 5U3N | H_LYS_209  | NZ  | L_GLU_123  | OE1 | 3.254 |
| 5U3N | H_ARG_210  | NH1 | H_GLU_212  | OE2 | 3.469 |
| 5U3N | H_ARG_210  | NH2 | H_GLU_212  | OE2 | 3.206 |
| 5U3N | L_LYS_30   | NZ  | H_GLU_100E | OE1 | 3.899 |
| 5U3N | L_ARG_55   | NH2 | H_ASP_101  | OD1 | 3.682 |
| 5U3N | L_ARG_55   | NH2 | H_ASP_101  | OD2 | 2.901 |
| 5U3N | L_ARG_61   | NH1 | L_ASP_82   | OD1 | 3.771 |
| 5U3N | L_ARG_61   | NH1 | L_ASP_82   | OD2 | 2.649 |
| 5U3N | L_ARG_61   | NH2 | L_ASP_82   | OD1 | 3.486 |
| 5U3N | L_ARG_61   | NH2 | L_ASP_82   | OD2 | 3.672 |
| 5U3N | L_LYS_149  | NZ  | L_GLU_195  | OE1 | 2.891 |
| 5U3N | L_LYS_190  | NZ  | L_GLU_213  | OE1 | 3.468 |
| 5U3N | L_ARG_211  | NH1 | L_GLU_187  | OE2 | 3.281 |
| 5UCB | H_ARG_38   | NH1 | H_ASP_86   | OD1 | 2.881 |
| 5UCB | H_ARG_38   | NH2 | H_GLU_46   | OE1 | 3.076 |
| 5UCB | H_ARG_38   | NH2 | H_GLU_46   | OE2 | 3.531 |
| 5UCB | H_ARG_38   | NH2 | H_ASP_86   | OD1 | 3.930 |
| 5UCB | H_ARG_66   | NH1 | H_ASP_86   | OD1 | 3.749 |
| 5UCB | H_ARG_66   | NH1 | H_ASP_86   | OD2 | 2.753 |
| 5UCB | H_ARG_66   | NH2 | H_ASP_86   | OD1 | 3.062 |
| 5UCB | H_ARG_66   | NH2 | H_ASP_86   | OD2 | 3.559 |
| 5UCB | H_ARG_94   | NH2 | H_ASP_101  | OD2 | 3.041 |
| 5UCB | H_LYS_143  | NZ  | H_ASP_144  | OD1 | 3.312 |
| 5UCB | H_LYS_143  | NZ  | H_ASP_144  | OD2 | 3.791 |
| 5UCB | L_ARG_24   | NH1 | L_ASP_70   | OD1 | 3.024 |
| 5UCB | L_ARG_24   | NH1 | L_ASP_70   | OD2 | 3.164 |
| 5UCB | L_ARG_61   | NH2 | L_GLU_81   | OE2 | 3.626 |
| 5UCB | L_ARG_61   | NH2 | L_ASP_82   | OD1 | 2.851 |
| 5UCB | L_ARG_61   | NH2 | L_ASP_82   | OD2 | 3.578 |
| 5UCB | L_ARG_66   | NH2 | B_ASP_51   | OD1 | 2.894 |
| 5UCB | L_LYS_103  | NZ  | L_GLU_165  | OE1 | 2.767 |
| 5UCB | L_LYS_103  | NZ  | L_GLU_165  | OE2 | 3.262 |
| 5UCB | L_LYS_149  | NZ  | L_GLU_195  | OE1 | 3.236 |
| 5UCB | L_LYS_149  | NZ  | L_GLU_195  | OE2 | 2.876 |
| 5UCB | L_LYS_188  | NZ  | L_ASP_185  | OD1 | 3.509 |
| 5UCB | B_LYS_16   | NZ  | B_ASP_132  | OD1 | 2.899 |
| 5UCB | B_LYS_40   | NZ  | B_GLU_55   | OE1 | 3.387 |
| 5UCB | B_HIS_52   | NE2 | B_GLU_87   | OE1 | 3.757 |
| 5UCB | B_ARG_103  | NH1 | B_ASP_101  | OD2 | 2.895 |

|      |           |     |           |     |       |
|------|-----------|-----|-----------|-----|-------|
| 5UCB | B_ARG_103 | NH2 | B_ASP_101 | OD2 | 3.593 |
| 5UCB | B_ARG_107 | NH2 | B_GLU_104 | OE1 | 3.008 |
| 5UCB | B_ARG_107 | NH2 | B_GLU_104 | OE2 | 3.594 |
| 5UCB | B_ARG_122 | NH2 | B_GLU_119 | OE1 | 3.126 |
| 5UCB | B_HIS_133 | ND1 | B_ASP_117 | OD1 | 2.951 |
| 5UCB | B_HIS_133 | ND1 | B_ASP_117 | OD2 | 3.612 |
| 5UCB | B_HIS_133 | ND1 | B_GLU_118 | OE2 | 3.928 |
| 5UCB | B_ARG_144 | NH2 | L_ASP_91  | OD1 | 2.844 |
| 5UCB | B_ARG_144 | NH2 | L_ASP_91  | OD2 | 3.495 |
| 5UEA | A_ARG_38  | NH1 | A_ASP_86  | OD1 | 2.925 |
| 5UEA | A_ARG_38  | NH2 | A_GLU_46  | OE1 | 3.053 |
| 5UEA | A_ARG_38  | NH2 | A_GLU_46  | OE2 | 3.718 |
| 5UEA | A_ARG_38  | NH2 | A_ASP_86  | OD1 | 3.982 |
| 5UEA | A_LYS_64  | NZ  | A_ASP_61  | OD1 | 3.564 |
| 5UEA | A_ARG_66  | NH1 | A_ASP_86  | OD1 | 3.801 |
| 5UEA | A_ARG_66  | NH1 | A_ASP_86  | OD2 | 2.753 |
| 5UEA | A_ARG_66  | NH2 | A_ASP_86  | OD1 | 3.014 |
| 5UEA | A_ARG_66  | NH2 | A_ASP_86  | OD2 | 3.470 |
| 5UEA | A_LYS_75  | NZ  | A_ASP_72  | OD2 | 2.831 |
| 5UEA | A_ARG_83  | NH1 | A_GLU_85  | OE2 | 3.478 |
| 5UEA | A_ARG_94  | NH1 | A_ASP_101 | OD2 | 3.648 |
| 5UEA | A_LYS_143 | NZ  | A_ASP_144 | OD1 | 3.213 |
| 5UEA | A_LYS_143 | NZ  | A_ASP_144 | OD2 | 3.068 |
| 5UEA | A_LYS_210 | NZ  | A_GLU_212 | OE2 | 3.717 |
| 5UEA | X_LYS_10  | NZ  | X_GLU_25  | OE1 | 2.830 |
| 5UEA | X_LYS_10  | NZ  | X_GLU_25  | OE2 | 3.963 |
| 5UEA | X_LYS_10  | NZ  | D_GLU_29  | OE1 | 3.740 |
| 5UEA | X_LYS_10  | NZ  | D_GLU_29  | OE2 | 2.855 |
| 5UEA | X_HIS_36  | ND1 | X_ASP_102 | OD1 | 3.747 |
| 5UEA | X_HIS_53  | ND1 | X_ASP_54  | OD1 | 3.697 |
| 5UEA | X_HIS_53  | NE2 | X_ASP_54  | OD1 | 3.655 |
| 5UEA | X_LYS_71  | NZ  | D_GLU_29  | OE2 | 3.320 |
| 5UEA | X_ARG_104 | NH1 | X_ASP_102 | OD2 | 3.117 |
| 5UEA | X_ARG_104 | NH2 | X_ASP_102 | OD2 | 3.925 |
| 5UEA | X_ARG_108 | NH2 | X_GLU_105 | OE1 | 2.916 |
| 5UEA | X_ARG_108 | NH2 | X_GLU_105 | OE2 | 3.333 |
| 5UEA | X_ARG_123 | NH2 | X_GLU_120 | OE1 | 3.394 |
| 5UEA | X_HIS_134 | ND1 | X_ASP_118 | OD2 | 2.696 |
| 5UEA | X_HIS_134 | ND1 | X_GLU_119 | OE1 | 3.900 |
| 5UEA | X_HIS_134 | NE2 | X_ASP_133 | OD2 | 3.951 |
| 5UEA | H_ARG_38  | NH1 | H_ASP_86  | OD1 | 2.893 |
| 5UEA | H_ARG_38  | NH2 | H_GLU_46  | OE1 | 3.038 |
| 5UEA | H_ARG_38  | NH2 | H_GLU_46  | OE2 | 3.945 |
| 5UEA | H_ARG_38  | NH2 | H_ASP_86  | OD1 | 3.946 |
| 5UEA | H_ARG_66  | NH1 | H_ASP_86  | OD1 | 3.977 |
| 5UEA | H_ARG_66  | NH1 | H_ASP_86  | OD2 | 2.837 |
| 5UEA | H_ARG_66  | NH2 | H_ASP_86  | OD1 | 3.030 |
| 5UEA | H_ARG_66  | NH2 | H_ASP_86  | OD2 | 3.367 |
| 5UEA | H_LYS_75  | NZ  | H_ASP_72  | OD2 | 3.470 |
| 5UEA | H_ARG_94  | NH1 | H_ASP_101 | OD2 | 3.608 |
| 5UEA | H_LYS_143 | NZ  | H_ASP_144 | OD1 | 3.356 |
| 5UEA | H_LYS_143 | NZ  | H_ASP_144 | OD2 | 3.506 |
| 5UEA | D_LYS_10  | NZ  | X_GLU_29  | OE1 | 3.485 |
| 5UEA | D_LYS_10  | NZ  | X_GLU_29  | OE2 | 2.490 |
| 5UEA | D_LYS_10  | NZ  | D_GLU_25  | OE1 | 2.206 |
| 5UEA | D_LYS_10  | NZ  | D_GLU_25  | OE2 | 3.753 |
| 5UEA | D_HIS_36  | NE2 | D_ASP_102 | OD2 | 3.900 |
| 5UEA | D_LYS_70  | NZ  | X_GLU_29  | OE2 | 3.861 |

|      |           |     |           |     |       |
|------|-----------|-----|-----------|-----|-------|
| 5UEA | D_ARG_104 | NH1 | D_ASP_102 | OD2 | 3.466 |
| 5UEA | D_ARG_108 | NH2 | D_GLU_105 | OE1 | 2.929 |
| 5UEA | D_ARG_108 | NH2 | D_GLU_105 | OE2 | 3.455 |
| 5UEA | D_HIS_134 | ND1 | D_ASP_118 | OD2 | 2.708 |
| 5UEA | L_ARG_24  | NH2 | L_ASP_70  | OD1 | 3.498 |
| 5UEA | L_ARG_24  | NH2 | L_ASP_70  | OD2 | 2.931 |
| 5UEA | L_ARG_61  | NH2 | L_GLU_81  | OE2 | 3.429 |
| 5UEA | L_ARG_61  | NH2 | L_ASP_82  | OD1 | 2.822 |
| 5UEA | L_ARG_61  | NH2 | L_ASP_82  | OD2 | 3.535 |
| 5UEA | L_LYS_103 | NZ  | L_GLU_165 | OE1 | 2.845 |
| 5UEA | L_LYS_103 | NZ  | L_GLU_165 | OE2 | 3.041 |
| 5UEA | L_LYS_149 | NZ  | L_GLU_195 | OE1 | 3.248 |
| 5UEA | L_LYS_183 | NZ  | L_GLU_187 | OE1 | 3.535 |
| 5UEA | L_LYS_183 | NZ  | L_GLU_187 | OE2 | 2.491 |
| 5UEA | B_ARG_24  | NH1 | B_ASP_70  | OD1 | 2.938 |
| 5UEA | B_ARG_24  | NH1 | B_ASP_70  | OD2 | 3.769 |
| 5UEA | B_ARG_61  | NH2 | B_GLU_81  | OE2 | 3.252 |
| 5UEA | B_ARG_61  | NH2 | B_ASP_82  | OD1 | 2.947 |
| 5UEA | B_ARG_61  | NH2 | B_ASP_82  | OD2 | 3.541 |
| 5UEA | B_LYS_103 | NZ  | B_GLU_165 | OE1 | 3.082 |
| 5UEA | B_LYS_103 | NZ  | B_GLU_165 | OE2 | 2.513 |
| 5UEA | B_LYS_107 | NZ  | B_ASP_17  | OD2 | 3.363 |
| 5UEA | B_ARG_142 | NH1 | B_GLU_105 | OE1 | 2.937 |
| 5UEA | B_ARG_142 | NH1 | B_GLU_105 | OE2 | 2.716 |
| 5UEA | B_ARG_142 | NH2 | B_GLU_105 | OE1 | 2.783 |
| 5UEA | B_LYS_149 | NZ  | B_GLU_195 | OE1 | 3.063 |
| 5UEA | B_LYS_183 | NZ  | B_GLU_187 | OE2 | 3.815 |
| 5UEA | B_ARG_211 | NH1 | B_GLU_187 | OE1 | 3.735 |
| 5UEK | A_LYS_10  | NZ  | A_GLU_25  | OE1 | 3.987 |
| 5UEK | A_HIS_36  | ND1 | A_ASP_154 | OD1 | 3.867 |
| 5UEK | A_HIS_36  | NE2 | A_ASP_102 | OD1 | 3.958 |
| 5UEK | A_LYS_41  | NZ  | A_GLU_39  | OE1 | 3.964 |
| 5UEK | A_LYS_41  | NZ  | A_GLU_56  | OE1 | 2.739 |
| 5UEK | A_ARG_49  | NH1 | A_GLU_88  | OE1 | 3.431 |
| 5UEK | A_ARG_104 | NH1 | A_ASP_102 | OD2 | 2.895 |
| 5UEK | A_ARG_104 | NH2 | A_ASP_102 | OD2 | 3.461 |
| 5UEK | A_ARG_108 | NH2 | A_GLU_105 | OE1 | 2.914 |
| 5UEK | A_ARG_108 | NH2 | A_GLU_105 | OE2 | 3.466 |
| 5UEK | A_ARG_123 | NH1 | A_GLU_116 | OE1 | 3.682 |
| 5UEK | A_HIS_134 | ND1 | A_ASP_133 | OD1 | 2.831 |
| 5UEK | A_HIS_134 | NE2 | A_GLU_119 | OE1 | 3.693 |
| 5UEK | A_ARG_145 | NH2 | L_ASP_91  | OD1 | 2.787 |
| 5UEK | A_ARG_145 | NH2 | L_ASP_91  | OD2 | 3.426 |
| 5UEK | H_ARG_38  | NH1 | H_ASP_86  | OD2 | 2.930 |
| 5UEK | H_ARG_38  | NH2 | H_GLU_46  | OE1 | 3.662 |
| 5UEK | H_ARG_38  | NH2 | H_GLU_46  | OE2 | 3.239 |
| 5UEK | H_ARG_38  | NH2 | H_GLU_85  | OE1 | 2.889 |
| 5UEK | H_ARG_38  | NH2 | H_ASP_86  | OD2 | 3.876 |
| 5UEK | H_ARG_66  | NH1 | H_ASP_86  | OD1 | 2.840 |
| 5UEK | H_ARG_66  | NH1 | H_ASP_86  | OD2 | 3.752 |
| 5UEK | H_ARG_66  | NH2 | H_GLU_85  | OE1 | 3.536 |
| 5UEK | H_ARG_66  | NH2 | H_ASP_86  | OD1 | 3.599 |
| 5UEK | H_ARG_66  | NH2 | H_ASP_86  | OD2 | 3.048 |
| 5UEK | H_ARG_83  | NH1 | H_GLU_85  | OE2 | 3.252 |
| 5UEK | H_ARG_94  | NH2 | H_ASP_101 | OD1 | 3.975 |
| 5UEK | H_ARG_94  | NH2 | H_ASP_101 | OD2 | 2.845 |
| 5UEK | H_LYS_143 | NZ  | H_ASP_144 | OD1 | 3.123 |
| 5UEK | H_LYS_143 | NZ  | H_ASP_144 | OD2 | 3.057 |

|      |           |     |           |     |       |
|------|-----------|-----|-----------|-----|-------|
| 5UEK | H.LYS_210 | NZ  | H.GLU_212 | OE1 | 3.851 |
| 5UEK | H.LYS_210 | NZ  | H.GLU_212 | OE2 | 2.516 |
| 5UEK | L.ARG_24  | NH1 | L.ASP_70  | OD1 | 3.080 |
| 5UEK | L.ARG_24  | NH1 | L.ASP_70  | OD2 | 2.941 |
| 5UEK | L.ARG_61  | NH2 | L.GLU_81  | OE1 | 3.355 |
| 5UEK | L.ARG_61  | NH2 | L.ASP_82  | OD1 | 2.825 |
| 5UEK | L.ARG_61  | NH2 | L.ASP_82  | OD2 | 3.599 |
| 5UEK | L.ARG_66  | NH2 | A.ASP_52  | OD1 | 2.873 |
| 5UEK | L.LYS_103 | NZ  | L.GLU_105 | OE2 | 2.640 |
| 5UEK | L.LYS_103 | NZ  | L.GLU_165 | OE1 | 3.290 |
| 5UEK | L.LYS_149 | NZ  | L.GLU_195 | OE2 | 3.692 |
| 5UEK | L.LYS_183 | NZ  | L.GLU_187 | OE1 | 2.986 |
| 5UG0 | A.LYS_44  | NZ  | A.ASP_276 | OD1 | 3.145 |
| 5UG0 | A.ARG_106 | NH1 | A.GLU_85  | OE1 | 3.304 |
| 5UG0 | A.ARG_106 | NH1 | B.GLU_69  | OE1 | 3.096 |
| 5UG0 | A.ARG_106 | NH1 | B.GLU_69  | OE2 | 3.964 |
| 5UG0 | A.ARG_106 | NH2 | A.GLU_85  | OE1 | 2.806 |
| 5UG0 | A.ARG_106 | NH2 | A.GLU_85  | OE2 | 3.674 |
| 5UG0 | A.ARG_106 | NH2 | B.GLU_69  | OE1 | 3.415 |
| 5UG0 | A.ARG_106 | NH2 | B.GLU_69  | OE2 | 3.059 |
| 5UG0 | A.HIS_141 | ND1 | A.GLU_70  | OE2 | 2.794 |
| 5UG0 | A.LYS_149 | NZ  | A.GLU_72  | OE1 | 3.216 |
| 5UG0 | A.LYS_149 | NZ  | A.GLU_72  | OE2 | 2.794 |
| 5UG0 | A.LYS_172 | NZ  | A.GLU_116 | OE2 | 3.654 |
| 5UG0 | A.ARG_192 | NH1 | A.GLU_198 | OE1 | 3.844 |
| 5UG0 | A.ARG_192 | NH1 | A.GLU_198 | OE2 | 3.866 |
| 5UG0 | A.LYS_222 | NZ  | A.ASP_225 | OD1 | 3.696 |
| 5UG0 | A.LYS_222 | NZ  | A.GLU_227 | OE2 | 3.476 |
| 5UG0 | A.LYS_222 | NZ  | D.ASP_107 | OD2 | 3.472 |
| 5UG0 | A.ARG_255 | NH2 | A.GLU_119 | OE2 | 3.754 |
| 5UG0 | A.ARG_255 | NH2 | A.GLU_124 | OE2 | 3.685 |
| 5UG0 | A.ARG_262 | NH1 | A.GLU_175 | OE1 | 3.614 |
| 5UG0 | A.ARG_262 | NH1 | A.GLU_175 | OE2 | 2.850 |
| 5UG0 | A.ARG_311 | NH1 | B.ASP_90  | OD1 | 2.840 |
| 5UG0 | A.ARG_311 | NH2 | B.ASP_86  | OD1 | 2.770 |
| 5UG0 | A.ARG_311 | NH2 | B.ASP_90  | OD1 | 3.313 |
| 5UG0 | A.ARG_322 | NH2 | A.GLU_25  | OE2 | 3.810 |
| 5UG0 | B.LYS_68  | NZ  | A.GLU_107 | OE2 | 3.009 |
| 5UG0 | B.ARG_75  | NH1 | B.GLU_78  | OE2 | 3.343 |
| 5UG0 | B.LYS_116 | NZ  | B.GLU_120 | OE2 | 3.389 |
| 5UG0 | B.LYS_123 | NZ  | B.GLU_120 | OE1 | 3.342 |
| 5UG0 | B.LYS_123 | NZ  | B.GLU_120 | OE2 | 3.653 |
| 5UG0 | B.LYS_131 | NZ  | B.GLU_139 | OE1 | 3.933 |
| 5UG0 | B.LYS_153 | NZ  | B.GLU_150 | OE1 | 3.568 |
| 5UG0 | B.LYS_153 | NZ  | B.GLU_150 | OE2 | 2.976 |
| 5UG0 | B.LYS_161 | NZ  | B.GLU_165 | OE1 | 3.465 |
| 5UG0 | C.ARG_55  | NH1 | C.ASP_61  | OD1 | 3.504 |
| 5UG0 | C.ARG_62  | NH2 | C.GLU_82  | OE1 | 3.126 |
| 5UG0 | C.ARG_62  | NH2 | C.GLU_82  | OE2 | 3.930 |
| 5UG0 | C.ARG_62  | NH2 | C.ASP_83  | OD1 | 2.816 |
| 5UG0 | C.ARG_62  | NH2 | C.ASP_83  | OD2 | 3.378 |
| 5UG0 | C.LYS_109 | NZ  | C.GLU_107 | OE1 | 3.664 |
| 5UG0 | C.ARG_144 | NH1 | C.GLU_107 | OE1 | 3.309 |
| 5UG0 | C.ARG_144 | NH1 | C.GLU_107 | OE2 | 3.710 |
| 5UG0 | C.ARG_144 | NH1 | C.GLU_167 | OE1 | 3.879 |
| 5UG0 | C.ARG_144 | NH2 | C.GLU_167 | OE1 | 3.902 |
| 5UG0 | C.ARG_144 | NH2 | C.GLU_167 | OE2 | 3.194 |
| 5UG0 | C.LYS_147 | NZ  | C.GLU_145 | OE2 | 2.927 |

|      |           |     |           |     |       |
|------|-----------|-----|-----------|-----|-------|
| 5UG0 | C_LYS_151 | NZ  | C_GLU_197 | OE1 | 3.587 |
| 5UG0 | C_LYS_151 | NZ  | C_GLU_197 | OE2 | 3.166 |
| 5UG0 | C_HIS_191 | ND1 | C_ASP_153 | OD2 | 3.193 |
| 5UG0 | D_ARG_38  | NH1 | D_ASP_89  | OD1 | 3.285 |
| 5UG0 | D_ARG_38  | NH2 | D_GLU_46  | OE1 | 3.648 |
| 5UG0 | D_ARG_38  | NH2 | D_ASP_89  | OD1 | 3.488 |
| 5UG0 | D_ARG_86  | NH2 | D_ASP_89  | OD1 | 3.223 |
| 5UG0 | D_ARG_100 | NH1 | A_ASP_190 | OD1 | 3.522 |
| 5UG0 | D_ARG_100 | NH1 | A_ASP_190 | OD2 | 3.877 |
| 5UG0 | D_HIS_178 | NE2 | C_ASP_169 | OD2 | 3.490 |
| 5UG0 | D_LYS_223 | NZ  | C_GLU_125 | OE2 | 3.392 |
| 5UJZ | A_LYS_86  | NZ  | A_GLU_90  | OE2 | 3.056 |
| 5UJZ | A_ARG_106 | NH1 | A_GLU_85  | OE1 | 3.777 |
| 5UJZ | A_ARG_106 | NH1 | A_GLU_85  | OE2 | 2.785 |
| 5UJZ | A_ARG_106 | NH1 | B_GLU_569 | OE2 | 3.797 |
| 5UJZ | A_ARG_106 | NH2 | A_GLU_85  | OE1 | 3.157 |
| 5UJZ | A_ARG_106 | NH2 | A_GLU_85  | OE2 | 3.125 |
| 5UJZ | A_ARG_106 | NH2 | B_GLU_569 | OE1 | 3.958 |
| 5UJZ | A_ARG_106 | NH2 | B_GLU_569 | OE2 | 3.070 |
| 5UJZ | A_HIS_141 | ND1 | A_GLU_70  | OE2 | 3.820 |
| 5UJZ | A_LYS_174 | NZ  | A_GLU_116 | OE2 | 3.728 |
| 5UJZ | A_ARG_192 | NH2 | A_GLU_198 | OE2 | 2.656 |
| 5UJZ | A_HIS_208 | ND1 | A_GLU_238 | OE2 | 3.816 |
| 5UJZ | A_LYS_219 | NZ  | A_GLU_227 | OE2 | 3.960 |
| 5UJZ | A_ARG_262 | NH1 | A_GLU_175 | OE1 | 2.805 |
| 5UJZ | A_ARG_262 | NH1 | A_GLU_175 | OE2 | 3.687 |
| 5UJZ | A_ARG_311 | NH1 | B_ASP_586 | OD1 | 3.689 |
| 5UJZ | A_ARG_311 | NH1 | B_ASP_590 | OD1 | 3.217 |
| 5UJZ | A_ARG_311 | NH1 | B_ASP_590 | OD2 | 3.955 |
| 5UJZ | A_ARG_311 | NH2 | B_ASP_586 | OD1 | 2.782 |
| 5UJZ | B_LYS_551 | NZ  | B_GLU_603 | OE1 | 3.842 |
| 5UJZ | B_LYS_558 | NZ  | F_GLU_597 | OE1 | 3.688 |
| 5UJZ | B_LYS_558 | NZ  | F_GLU_597 | OE2 | 3.874 |
| 5UJZ | B_ARG_576 | NH1 | D_GLU_574 | OE1 | 3.986 |
| 5UJZ | B_ARG_576 | NH1 | D_GLU_574 | OE2 | 3.042 |
| 5UJZ | B_ARG_576 | NH2 | C_GLU_104 | OE2 | 3.168 |
| 5UJZ | B_LYS_582 | NZ  | B_ASP_586 | OD2 | 3.643 |
| 5UJZ | B_LYS_583 | NZ  | D_ASP_585 | OD1 | 3.717 |
| 5UJZ | B_ARG_606 | NH2 | F_ASP_609 | OD2 | 2.744 |
| 5UJZ | B_LYS_623 | NZ  | B_GLU_632 | OE2 | 3.820 |
| 5UJZ | B_LYS_631 | NZ  | B_GLU_639 | OE1 | 3.976 |
| 5UJZ | B_LYS_643 | NZ  | A_GLU_4   | OE1 | 2.954 |
| 5UJZ | B_LYS_643 | NZ  | A_ASP_5   | OD1 | 2.763 |
| 5UJZ | B_LYS_643 | NZ  | A_ASP_5   | OD2 | 3.863 |
| 5UJZ | B_LYS_643 | NZ  | B_GLU_529 | OE2 | 3.375 |
| 5UJZ | B_LYS_653 | NZ  | B_GLU_650 | OE1 | 3.647 |
| 5UJZ | B_LYS_661 | NZ  | B_GLU_647 | OE1 | 3.374 |
| 5UJZ | B_ARG_670 | NH2 | B_GLU_671 | OE2 | 2.839 |
| 5UJZ | C_LYS_86  | NZ  | C_GLU_90  | OE2 | 3.056 |
| 5UJZ | C_ARG_106 | NH1 | C_GLU_85  | OE1 | 3.777 |
| 5UJZ | C_ARG_106 | NH1 | C_GLU_85  | OE2 | 2.784 |
| 5UJZ | C_ARG_106 | NH1 | D_GLU_569 | OE2 | 3.872 |
| 5UJZ | C_ARG_106 | NH2 | C_GLU_85  | OE1 | 3.158 |
| 5UJZ | C_ARG_106 | NH2 | C_GLU_85  | OE2 | 3.125 |
| 5UJZ | C_ARG_106 | NH2 | D_GLU_569 | OE2 | 3.260 |
| 5UJZ | C_HIS_141 | ND1 | C_GLU_70  | OE2 | 3.819 |
| 5UJZ | C_LYS_174 | NZ  | C_GLU_116 | OE2 | 3.728 |
| 5UJZ | C_ARG_192 | NH2 | C_GLU_198 | OE2 | 2.657 |

|      |           |     |           |     |       |
|------|-----------|-----|-----------|-----|-------|
| 5UJZ | C_HIS_208 | ND1 | C_GLU_238 | OE2 | 3.817 |
| 5UJZ | C_LYS_219 | NZ  | C_GLU_227 | OE2 | 3.960 |
| 5UJZ | C_ARG_262 | NH1 | C_GLU_175 | OE1 | 2.805 |
| 5UJZ | C_ARG_262 | NH1 | C_GLU_175 | OE2 | 3.686 |
| 5UJZ | C_ARG_311 | NH1 | D_ASP_586 | OD1 | 3.865 |
| 5UJZ | C_ARG_311 | NH1 | D_ASP_590 | OD1 | 3.148 |
| 5UJZ | C_ARG_311 | NH1 | D_ASP_590 | OD2 | 3.998 |
| 5UJZ | C_ARG_311 | NH2 | D_ASP_586 | OD1 | 2.921 |
| 5UJZ | D_LYS_551 | NZ  | D_GLU_603 | OE1 | 3.842 |
| 5UJZ | D_LYS_558 | NZ  | B_GLU_597 | OE1 | 3.772 |
| 5UJZ | D_LYS_572 | NZ  | E_GLU_238 | OE1 | 3.910 |
| 5UJZ | D_ARG_576 | NH1 | F_GLU_574 | OE1 | 3.863 |
| 5UJZ | D_ARG_576 | NH1 | F_GLU_574 | OE2 | 2.716 |
| 5UJZ | D_ARG_576 | NH2 | E_GLU_104 | OE2 | 3.170 |
| 5UJZ | D_LYS_582 | NZ  | D_ASP_586 | OD2 | 3.642 |
| 5UJZ | D_LYS_583 | NZ  | F_ASP_585 | OD1 | 3.807 |
| 5UJZ | D_ARG_606 | NH2 | B_ASP_609 | OD2 | 2.766 |
| 5UJZ | D_LYS_623 | NZ  | D_GLU_632 | OE2 | 3.820 |
| 5UJZ | D_LYS_631 | NZ  | D_GLU_639 | OE1 | 3.976 |
| 5UJZ | D_LYS_643 | NZ  | C_GLU_4   | OE1 | 3.185 |
| 5UJZ | D_LYS_643 | NZ  | C_ASP_5   | OD1 | 2.519 |
| 5UJZ | D_LYS_643 | NZ  | C_ASP_5   | OD2 | 3.642 |
| 5UJZ | D_LYS_643 | NZ  | D_GLU_529 | OE2 | 3.375 |
| 5UJZ | D_LYS_653 | NZ  | D_GLU_650 | OE1 | 3.648 |
| 5UJZ | D_LYS_661 | NZ  | D_GLU_647 | OE1 | 3.376 |
| 5UJZ | D_ARG_670 | NH2 | D_GLU_671 | OE2 | 2.839 |
| 5UJZ | E_LYS_86  | NZ  | E_GLU_90  | OE2 | 3.056 |
| 5UJZ | E_ARG_106 | NH1 | E_GLU_85  | OE1 | 3.777 |
| 5UJZ | E_ARG_106 | NH1 | E_GLU_85  | OE2 | 2.784 |
| 5UJZ | E_ARG_106 | NH2 | E_GLU_85  | OE1 | 3.158 |
| 5UJZ | E_ARG_106 | NH2 | E_GLU_85  | OE2 | 3.126 |
| 5UJZ | E_ARG_106 | NH2 | F_GLU_569 | OE2 | 3.361 |
| 5UJZ | E_HIS_141 | ND1 | E_GLU_70  | OE2 | 3.819 |
| 5UJZ | E_LYS_174 | NZ  | E_GLU_116 | OE2 | 3.728 |
| 5UJZ | E_ARG_192 | NH2 | E_GLU_198 | OE2 | 2.656 |
| 5UJZ | E_HIS_208 | ND1 | E_GLU_238 | OE2 | 3.816 |
| 5UJZ | E_LYS_219 | NZ  | E_GLU_227 | OE2 | 3.960 |
| 5UJZ | E_ARG_262 | NH1 | E_GLU_175 | OE1 | 2.805 |
| 5UJZ | E_ARG_262 | NH1 | E_GLU_175 | OE2 | 3.687 |
| 5UJZ | E_ARG_311 | NH1 | F_ASP_586 | OD1 | 3.477 |
| 5UJZ | E_ARG_311 | NH1 | F_ASP_590 | OD1 | 3.629 |
| 5UJZ | E_ARG_311 | NH2 | F_ASP_586 | OD1 | 2.793 |
| 5UJZ | F_LYS_551 | NZ  | F_GLU_603 | OE1 | 3.843 |
| 5UJZ | F_ARG_576 | NH1 | B_GLU_574 | OE1 | 3.655 |
| 5UJZ | F_ARG_576 | NH1 | B_GLU_574 | OE2 | 2.847 |
| 5UJZ | F_ARG_576 | NH2 | A_GLU_104 | OE2 | 3.211 |
| 5UJZ | F_LYS_582 | NZ  | F_ASP_586 | OD2 | 3.643 |
| 5UJZ | F_LYS_583 | NZ  | B_ASP_585 | OD1 | 3.548 |
| 5UJZ | F_ARG_606 | NH2 | D_ASP_609 | OD2 | 2.609 |
| 5UJZ | F_LYS_623 | NZ  | F_GLU_632 | OE2 | 3.821 |
| 5UJZ | F_LYS_631 | NZ  | F_GLU_639 | OE1 | 3.976 |
| 5UJZ | F_LYS_643 | NZ  | E_GLU_4   | OE1 | 3.009 |
| 5UJZ | F_LYS_643 | NZ  | E_ASP_5   | OD1 | 2.882 |
| 5UJZ | F_LYS_643 | NZ  | E_ASP_5   | OD2 | 3.935 |
| 5UJZ | F_LYS_643 | NZ  | F_GLU_529 | OE2 | 3.375 |
| 5UJZ | F_LYS_653 | NZ  | F_GLU_650 | OE1 | 3.646 |
| 5UJZ | F_LYS_661 | NZ  | F_GLU_647 | OE1 | 3.375 |
| 5UJZ | F_ARG_670 | NH2 | F_GLU_671 | OE2 | 2.839 |

|      |           |     |           |     |       |
|------|-----------|-----|-----------|-----|-------|
| 5UJZ | G_HIS_160 | NE2 | G_ASP_158 | OD1 | 3.708 |
| 5UJZ | G_ARG_163 | NH1 | G_ASP_214 | OD1 | 3.087 |
| 5UJZ | G_ARG_163 | NH2 | G_GLU_171 | OE1 | 2.822 |
| 5UJZ | G_ARG_163 | NH2 | G_GLU_171 | OE2 | 3.867 |
| 5UJZ | G_ARG_191 | NH1 | G_ASP_214 | OD2 | 3.584 |
| 5UJZ | G_ARG_225 | NH1 | A_ASP_190 | OD1 | 3.090 |
| 5UJZ | G_ARG_225 | NH1 | A_ASP_190 | OD2 | 3.996 |
| 5UJZ | G_ARG_225 | NH2 | A_ASP_190 | OD1 | 3.715 |
| 5UJZ | G_ARG_225 | NH2 | A_ASP_190 | OD2 | 3.410 |
| 5UJZ | H_HIS_160 | NE2 | H_ASP_158 | OD1 | 3.708 |
| 5UJZ | H_ARG_163 | NH1 | H_ASP_214 | OD1 | 3.088 |
| 5UJZ | H_ARG_163 | NH2 | H_GLU_171 | OE1 | 2.821 |
| 5UJZ | H_ARG_163 | NH2 | H_GLU_171 | OE2 | 3.867 |
| 5UJZ | H_ARG_191 | NH1 | H_ASP_214 | OD2 | 3.583 |
| 5UJZ | H_ARG_225 | NH1 | C_ASP_190 | OD1 | 3.041 |
| 5UJZ | H_ARG_225 | NH2 | C_ASP_190 | OD1 | 3.552 |
| 5UJZ | H_ARG_225 | NH2 | C_ASP_190 | OD2 | 3.366 |
| 5UJZ | I_HIS_160 | NE2 | I_ASP_158 | OD1 | 3.708 |
| 5UJZ | I_ARG_163 | NH1 | I_ASP_214 | OD1 | 3.088 |
| 5UJZ | I_ARG_163 | NH2 | I_GLU_171 | OE1 | 2.823 |
| 5UJZ | I_ARG_163 | NH2 | I_GLU_171 | OE2 | 3.868 |
| 5UJZ | I_ARG_191 | NH1 | I_ASP_214 | OD2 | 3.584 |
| 5UJZ | I_ARG_225 | NH1 | E_ASP_190 | OD1 | 3.119 |
| 5UJZ | I_ARG_225 | NH1 | E_ASP_190 | OD2 | 3.970 |
| 5UJZ | I_ARG_225 | NH2 | E_ASP_190 | OD1 | 3.713 |
| 5UJZ | I_ARG_225 | NH2 | E_ASP_190 | OD2 | 3.347 |
| 5UK0 | A_LYS_86  | NZ  | A_GLU_90  | OE2 | 3.309 |
| 5UK0 | A_ARG_106 | NH1 | A_GLU_85  | OE1 | 3.645 |
| 5UK0 | A_ARG_106 | NH1 | A_GLU_85  | OE2 | 3.045 |
| 5UK0 | A_ARG_106 | NH1 | B_GLU_569 | OE2 | 3.967 |
| 5UK0 | A_ARG_106 | NH2 | A_GLU_85  | OE1 | 3.291 |
| 5UK0 | A_ARG_106 | NH2 | A_GLU_85  | OE2 | 3.562 |
| 5UK0 | A_ARG_106 | NH2 | B_GLU_569 | OE2 | 3.244 |
| 5UK0 | A_LYS_174 | NZ  | A_GLU_116 | OE2 | 3.452 |
| 5UK0 | A_ARG_192 | NH2 | A_GLU_198 | OE2 | 2.543 |
| 5UK0 | A_HIS_208 | ND1 | A_GLU_238 | OE2 | 3.818 |
| 5UK0 | A_HIS_208 | NE2 | A_GLU_238 | OE2 | 3.885 |
| 5UK0 | A_ARG_220 | NH2 | C_ASP_241 | OD1 | 3.711 |
| 5UK0 | A_ARG_220 | NH2 | C_ASP_241 | OD2 | 3.819 |
| 5UK0 | A_ARG_262 | NH1 | A_GLU_175 | OE1 | 3.069 |
| 5UK0 | A_ARG_311 | NH1 | B_ASP_590 | OD1 | 3.139 |
| 5UK0 | A_ARG_311 | NH1 | B_ASP_590 | OD2 | 3.961 |
| 5UK0 | A_ARG_311 | NH2 | B_ASP_586 | OD1 | 3.197 |
| 5UK0 | B_LYS_551 | NZ  | B_GLU_603 | OE1 | 3.035 |
| 5UK0 | B_LYS_558 | NZ  | F_GLU_597 | OE1 | 3.717 |
| 5UK0 | B_LYS_568 | NZ  | A_GLU_107 | OE2 | 3.962 |
| 5UK0 | B_ARG_576 | NH1 | D_GLU_574 | OE1 | 2.500 |
| 5UK0 | B_ARG_576 | NH1 | D_GLU_574 | OE2 | 3.431 |
| 5UK0 | B_ARG_576 | NH2 | C_GLU_104 | OE2 | 3.446 |
| 5UK0 | B_ARG_576 | NH2 | D_GLU_574 | OE1 | 3.430 |
| 5UK0 | B_ARG_576 | NH2 | D_GLU_574 | OE2 | 3.016 |
| 5UK0 | B_LYS_582 | NZ  | B_ASP_586 | OD2 | 3.693 |
| 5UK0 | B_ARG_606 | NH2 | F_ASP_609 | OD2 | 2.765 |
| 5UK0 | B_LYS_623 | NZ  | B_GLU_632 | OE2 | 3.579 |
| 5UK0 | B_LYS_643 | NZ  | A_GLU_4   | OE1 | 2.724 |
| 5UK0 | B_LYS_643 | NZ  | A_ASP_5   | OD1 | 2.705 |
| 5UK0 | B_LYS_643 | NZ  | A_ASP_5   | OD2 | 3.831 |
| 5UK0 | B_LYS_643 | NZ  | B_GLU_529 | OE2 | 3.437 |

|      |           |     |           |     |       |
|------|-----------|-----|-----------|-----|-------|
| 5UK0 | B_LYS_661 | NZ  | B_GLU_647 | OE1 | 3.387 |
| 5UK0 | B_ARG_670 | NH2 | B_GLU_671 | OE2 | 2.699 |
| 5UK0 | C_LYS_86  | NZ  | C_GLU_90  | OE2 | 3.309 |
| 5UK0 | C_ARG_106 | NH1 | C_GLU_85  | OE1 | 3.646 |
| 5UK0 | C_ARG_106 | NH1 | C_GLU_85  | OE2 | 3.045 |
| 5UK0 | C_ARG_106 | NH1 | D_GLU_569 | OE2 | 3.998 |
| 5UK0 | C_ARG_106 | NH2 | C_GLU_85  | OE1 | 3.291 |
| 5UK0 | C_ARG_106 | NH2 | C_GLU_85  | OE2 | 3.562 |
| 5UK0 | C_ARG_106 | NH2 | D_GLU_569 | OE2 | 3.213 |
| 5UK0 | C_LYS_174 | NZ  | C_GLU_116 | OE2 | 3.452 |
| 5UK0 | C_ARG_192 | NH2 | C_GLU_198 | OE2 | 2.542 |
| 5UK0 | C_HIS_208 | ND1 | C_GLU_238 | OE2 | 3.819 |
| 5UK0 | C_HIS_208 | NE2 | C_GLU_238 | OE2 | 3.885 |
| 5UK0 | C_ARG_220 | NH2 | E_ASP_241 | OD1 | 3.755 |
| 5UK0 | C_ARG_220 | NH2 | E_ASP_241 | OD2 | 3.891 |
| 5UK0 | C_ARG_262 | NH1 | C_GLU_175 | OE1 | 3.069 |
| 5UK0 | C_ARG_311 | NH1 | D_ASP_586 | OD1 | 3.901 |
| 5UK0 | C_ARG_311 | NH1 | D_ASP_590 | OD1 | 3.110 |
| 5UK0 | C_ARG_311 | NH1 | D_ASP_590 | OD2 | 3.851 |
| 5UK0 | C_ARG_311 | NH2 | D_ASP_586 | OD1 | 2.981 |
| 5UK0 | D_LYS_551 | NZ  | D_GLU_603 | OE1 | 3.035 |
| 5UK0 | D_LYS_558 | NZ  | B_GLU_597 | OE1 | 3.800 |
| 5UK0 | D_LYS_572 | NZ  | E_GLU_238 | OE1 | 3.723 |
| 5UK0 | D_ARG_576 | NH1 | F_GLU_574 | OE1 | 2.823 |
| 5UK0 | D_ARG_576 | NH1 | F_GLU_574 | OE2 | 3.743 |
| 5UK0 | D_ARG_576 | NH2 | E_GLU_104 | OE2 | 3.003 |
| 5UK0 | D_ARG_576 | NH2 | F_GLU_574 | OE1 | 3.596 |
| 5UK0 | D_ARG_576 | NH2 | F_GLU_574 | OE2 | 3.278 |
| 5UK0 | D_LYS_582 | NZ  | D_ASP_586 | OD2 | 3.695 |
| 5UK0 | D_ARG_606 | NH2 | B_ASP_609 | OD2 | 2.683 |
| 5UK0 | D_LYS_623 | NZ  | D_GLU_632 | OE2 | 3.578 |
| 5UK0 | D_LYS_643 | NZ  | C_GLU_4   | OE1 | 2.844 |
| 5UK0 | D_LYS_643 | NZ  | C_ASP_5   | OD1 | 2.693 |
| 5UK0 | D_LYS_643 | NZ  | C_ASP_5   | OD2 | 3.673 |
| 5UK0 | D_LYS_643 | NZ  | D_GLU_529 | OE2 | 3.436 |
| 5UK0 | D_LYS_661 | NZ  | D_GLU_647 | OE1 | 3.387 |
| 5UK0 | D_ARG_670 | NH2 | D_GLU_671 | OE2 | 2.700 |
| 5UK0 | E_LYS_86  | NZ  | E_GLU_90  | OE2 | 3.309 |
| 5UK0 | E_ARG_106 | NH1 | E_GLU_85  | OE1 | 3.645 |
| 5UK0 | E_ARG_106 | NH1 | E_GLU_85  | OE2 | 3.045 |
| 5UK0 | E_ARG_106 | NH1 | F_GLU_569 | OE2 | 3.924 |
| 5UK0 | E_ARG_106 | NH2 | E_GLU_85  | OE1 | 3.291 |
| 5UK0 | E_ARG_106 | NH2 | E_GLU_85  | OE2 | 3.563 |
| 5UK0 | E_ARG_106 | NH2 | F_GLU_569 | OE2 | 3.130 |
| 5UK0 | E_LYS_174 | NZ  | E_GLU_116 | OE2 | 3.453 |
| 5UK0 | E_ARG_192 | NH2 | E_GLU_198 | OE2 | 2.543 |
| 5UK0 | E_HIS_208 | ND1 | E_GLU_238 | OE2 | 3.818 |
| 5UK0 | E_HIS_208 | NE2 | E_GLU_238 | OE2 | 3.885 |
| 5UK0 | E_ARG_220 | NH2 | A_ASP_241 | OD1 | 3.703 |
| 5UK0 | E_ARG_220 | NH2 | A_ASP_241 | OD2 | 3.860 |
| 5UK0 | E_ARG_262 | NH1 | E_GLU_175 | OE1 | 3.069 |
| 5UK0 | E_ARG_311 | NH1 | F_ASP_586 | OD1 | 3.927 |
| 5UK0 | E_ARG_311 | NH1 | F_ASP_590 | OD1 | 3.174 |
| 5UK0 | E_ARG_311 | NH1 | F_ASP_590 | OD2 | 3.882 |
| 5UK0 | E_ARG_311 | NH2 | F_ASP_586 | OD1 | 3.095 |
| 5UK0 | F_LYS_551 | NZ  | F_GLU_603 | OE1 | 3.034 |
| 5UK0 | F_LYS_558 | NZ  | D_GLU_597 | OE1 | 3.758 |
| 5UK0 | F_LYS_568 | NZ  | E_GLU_107 | OE2 | 3.989 |



|      |           |     |           |     |       |
|------|-----------|-----|-----------|-----|-------|
| 5UK0 | F_LYS_572 | NZ  | A_GLU_238 | OE1 | 3.995 |
| 5UK0 | F_ARG_576 | NH1 | B_GLU_574 | OE1 | 2.515 |
| 5UK0 | F_ARG_576 | NH1 | B_GLU_574 | OE2 | 3.607 |
| 5UK0 | F_ARG_576 | NH2 | A_GLU_104 | OE2 | 3.281 |
| 5UK0 | F_ARG_576 | NH2 | B_GLU_574 | OE1 | 3.248 |
| 5UK0 | F_ARG_576 | NH2 | B_GLU_574 | OE2 | 3.003 |
| 5UK0 | F_LYS_582 | NZ  | F_ASP_586 | OD2 | 3.694 |
| 5UK0 | F_ARG_606 | NH2 | D_ASP_609 | OD2 | 2.740 |
| 5UK0 | F_LYS_623 | NZ  | F_GLU_632 | OE2 | 3.578 |
| 5UK0 | F_LYS_643 | NZ  | E_GLU_4   | OE1 | 2.987 |
| 5UK0 | F_LYS_643 | NZ  | E_ASP_5   | OD1 | 2.694 |
| 5UK0 | F_LYS_643 | NZ  | E_ASP_5   | OD2 | 3.721 |
| 5UK0 | F_LYS_643 | NZ  | F_GLU_529 | OE2 | 3.437 |
| 5UK0 | F_LYS_661 | NZ  | F_GLU_647 | OE1 | 3.387 |
| 5UK0 | F_ARG_670 | NH2 | F_GLU_671 | OE2 | 2.698 |
| 5UK0 | G_ARG_163 | NH1 | G_ASP_214 | OD1 | 2.891 |
| 5UK0 | G_ARG_163 | NH2 | G_GLU_171 | OE1 | 2.986 |
| 5UK0 | G_ARG_163 | NH2 | G_GLU_171 | OE2 | 3.691 |
| 5UK0 | G_ARG_191 | NH1 | G_ASP_214 | OD2 | 3.874 |
| 5UK0 | G_ARG_225 | NH1 | A_ASP_190 | OD1 | 3.056 |
| 5UK0 | G_ARG_225 | NH1 | A_ASP_190 | OD2 | 3.844 |
| 5UK0 | G_ARG_225 | NH1 | G_ASP_233 | OD1 | 3.964 |
| 5UK0 | G_ARG_225 | NH2 | A_ASP_190 | OD1 | 3.909 |
| 5UK0 | G_ARG_225 | NH2 | A_ASP_190 | OD2 | 3.442 |
| 5UK0 | H_ARG_163 | NH1 | H_ASP_214 | OD1 | 2.890 |
| 5UK0 | H_ARG_163 | NH2 | H_GLU_171 | OE1 | 2.986 |
| 5UK0 | H_ARG_163 | NH2 | H_GLU_171 | OE2 | 3.690 |
| 5UK0 | H_ARG_191 | NH1 | H_ASP_214 | OD2 | 3.874 |
| 5UK0 | H_ARG_225 | NH1 | C_ASP_190 | OD1 | 3.008 |
| 5UK0 | H_ARG_225 | NH1 | C_ASP_190 | OD2 | 3.873 |
| 5UK0 | H_ARG_225 | NH1 | H_ASP_233 | OD1 | 3.965 |
| 5UK0 | H_ARG_225 | NH2 | C_ASP_190 | OD1 | 3.782 |
| 5UK0 | H_ARG_225 | NH2 | C_ASP_190 | OD2 | 3.377 |
| 5UK0 | I_ARG_163 | NH1 | I_ASP_214 | OD1 | 2.890 |
| 5UK0 | I_ARG_163 | NH2 | I_GLU_171 | OE1 | 2.985 |
| 5UK0 | I_ARG_163 | NH2 | I_GLU_171 | OE2 | 3.690 |
| 5UK0 | I_ARG_191 | NH1 | I_ASP_214 | OD2 | 3.873 |
| 5UK0 | I_ARG_225 | NH1 | E_ASP_190 | OD1 | 3.078 |
| 5UK0 | I_ARG_225 | NH1 | E_ASP_190 | OD2 | 3.875 |
| 5UK0 | I_ARG_225 | NH1 | I_ASP_233 | OD1 | 3.965 |
| 5UK0 | I_ARG_225 | NH2 | E_ASP_190 | OD1 | 3.886 |
| 5UK0 | I_ARG_225 | NH2 | E_ASP_190 | OD2 | 3.433 |
| 5UK1 | A_LYS_44  | NZ  | A_ASP_276 | OD2 | 3.906 |
| 5UK1 | A_LYS_86  | NZ  | A_GLU_90  | OE2 | 3.504 |
| 5UK1 | A_ARG_106 | NH1 | A_GLU_85  | OE1 | 3.701 |
| 5UK1 | A_ARG_106 | NH1 | A_GLU_85  | OE2 | 3.090 |
| 5UK1 | A_ARG_106 | NH1 | B_GLU_569 | OE2 | 3.892 |
| 5UK1 | A_ARG_106 | NH2 | A_GLU_85  | OE1 | 3.008 |
| 5UK1 | A_ARG_106 | NH2 | A_GLU_85  | OE2 | 3.228 |
| 5UK1 | A_ARG_106 | NH2 | B_GLU_569 | OE2 | 2.755 |
| 5UK1 | A_LYS_174 | NZ  | A_GLU_116 | OE2 | 3.687 |
| 5UK1 | A_ARG_192 | NH2 | A_GLU_198 | OE2 | 2.985 |
| 5UK1 | A_ARG_262 | NH1 | A_GLU_175 | OE1 | 3.086 |
| 5UK1 | A_ARG_311 | NH1 | B_ASP_590 | OD1 | 2.545 |
| 5UK1 | A_ARG_311 | NH1 | B_ASP_590 | OD2 | 3.367 |
| 5UK1 | A_ARG_311 | NH2 | B_ASP_586 | OD1 | 3.117 |
| 5UK1 | A_ARG_322 | NH2 | A_GLU_25  | OE1 | 3.980 |
| 5UK1 | B_LYS_558 | NZ  | F_GLU_597 | OE1 | 3.470 |

|      |           |     |           |     |       |
|------|-----------|-----|-----------|-----|-------|
| 5UK1 | B_ARG_576 | NH1 | D_GLU_574 | OE1 | 3.845 |
| 5UK1 | B_ARG_576 | NH1 | D_GLU_574 | OE2 | 3.273 |
| 5UK1 | B_ARG_576 | NH2 | C_GLU_104 | OE2 | 2.839 |
| 5UK1 | B_LYS_582 | NZ  | B_ASP_586 | OD2 | 3.755 |
| 5UK1 | B_ARG_606 | NH2 | F_ASP_609 | OD2 | 3.320 |
| 5UK1 | B_LYS_623 | NZ  | B_GLU_632 | OE2 | 3.460 |
| 5UK1 | B_LYS_631 | NZ  | B_GLU_639 | OE1 | 3.968 |
| 5UK1 | B_LYS_643 | NZ  | A_GLU_4   | OE1 | 2.898 |
| 5UK1 | B_LYS_643 | NZ  | A_ASP_5   | OD1 | 2.632 |
| 5UK1 | B_LYS_643 | NZ  | A_ASP_5   | OD2 | 3.703 |
| 5UK1 | B_LYS_643 | NZ  | B_GLU_529 | OE2 | 3.727 |
| 5UK1 | B_LYS_653 | NZ  | B_GLU_650 | OE1 | 3.697 |
| 5UK1 | B_LYS_661 | NZ  | B_GLU_647 | OE1 | 3.063 |
| 5UK1 | B_ARG_670 | NH2 | B_GLU_671 | OE2 | 2.925 |
| 5UK1 | C_LYS_44  | NZ  | C_ASP_276 | OD2 | 3.906 |
| 5UK1 | C_LYS_86  | NZ  | C_GLU_90  | OE2 | 3.504 |
| 5UK1 | C_ARG_106 | NH1 | C_GLU_85  | OE1 | 3.701 |
| 5UK1 | C_ARG_106 | NH1 | C_GLU_85  | OE2 | 3.090 |
| 5UK1 | C_ARG_106 | NH2 | C_GLU_85  | OE1 | 3.009 |
| 5UK1 | C_ARG_106 | NH2 | C_GLU_85  | OE2 | 3.227 |
| 5UK1 | C_ARG_106 | NH2 | D_GLU_569 | OE2 | 3.108 |
| 5UK1 | C_LYS_174 | NZ  | C_GLU_116 | OE2 | 3.686 |
| 5UK1 | C_ARG_192 | NH2 | C_GLU_198 | OE2 | 2.984 |
| 5UK1 | C_ARG_262 | NH1 | C_GLU_175 | OE1 | 3.087 |
| 5UK1 | C_ARG_311 | NH1 | D_ASP_590 | OD1 | 2.901 |
| 5UK1 | C_ARG_311 | NH1 | D_ASP_590 | OD2 | 3.798 |
| 5UK1 | C_ARG_311 | NH2 | D_ASP_586 | OD1 | 3.261 |
| 5UK1 | C_ARG_322 | NH2 | C_GLU_25  | OE1 | 3.979 |
| 5UK1 | D_LYS_558 | NZ  | B_GLU_597 | OE1 | 3.543 |
| 5UK1 | D_ARG_576 | NH1 | F_GLU_574 | OE1 | 3.490 |
| 5UK1 | D_ARG_576 | NH1 | F_GLU_574 | OE2 | 3.058 |
| 5UK1 | D_ARG_576 | NH2 | E_GLU_104 | OE2 | 3.186 |
| 5UK1 | D_LYS_582 | NZ  | D_ASP_586 | OD2 | 3.755 |
| 5UK1 | D_ARG_606 | NH2 | B_ASP_609 | OD2 | 3.177 |
| 5UK1 | D_LYS_623 | NZ  | D_GLU_632 | OE2 | 3.460 |
| 5UK1 | D_LYS_631 | NZ  | D_GLU_639 | OE1 | 3.968 |
| 5UK1 | D_LYS_643 | NZ  | C_GLU_4   | OE1 | 3.015 |
| 5UK1 | D_LYS_643 | NZ  | C_ASP_5   | OD1 | 2.615 |
| 5UK1 | D_LYS_643 | NZ  | C_ASP_5   | OD2 | 3.806 |
| 5UK1 | D_LYS_643 | NZ  | D_GLU_529 | OE2 | 3.727 |
| 5UK1 | D_LYS_653 | NZ  | D_GLU_650 | OE1 | 3.695 |
| 5UK1 | D_LYS_661 | NZ  | D_GLU_647 | OE1 | 3.063 |
| 5UK1 | D_ARG_670 | NH2 | D_GLU_671 | OE2 | 2.927 |
| 5UK1 | E_LYS_44  | NZ  | E_ASP_276 | OD2 | 3.905 |
| 5UK1 | E_LYS_86  | NZ  | E_GLU_90  | OE2 | 3.505 |
| 5UK1 | E_ARG_106 | NH1 | E_GLU_85  | OE1 | 3.700 |
| 5UK1 | E_ARG_106 | NH1 | E_GLU_85  | OE2 | 3.089 |
| 5UK1 | E_ARG_106 | NH2 | E_GLU_85  | OE1 | 3.009 |
| 5UK1 | E_ARG_106 | NH2 | E_GLU_85  | OE2 | 3.227 |
| 5UK1 | E_ARG_106 | NH2 | F_GLU_569 | OE2 | 2.991 |
| 5UK1 | E_LYS_174 | NZ  | E_GLU_116 | OE2 | 3.687 |
| 5UK1 | E_ARG_192 | NH2 | E_GLU_198 | OE2 | 2.984 |
| 5UK1 | E_ARG_262 | NH1 | E_GLU_175 | OE1 | 3.086 |
| 5UK1 | E_ARG_311 | NH1 | F_ASP_590 | OD1 | 2.696 |
| 5UK1 | E_ARG_311 | NH1 | F_ASP_590 | OD2 | 3.637 |
| 5UK1 | E_ARG_311 | NH2 | F_ASP_586 | OD1 | 3.291 |
| 5UK1 | E_ARG_322 | NH2 | E_GLU_25  | OE1 | 3.980 |
| 5UK1 | F_LYS_558 | NZ  | D_GLU_597 | OE1 | 3.566 |

|      |           |     |           |     |       |
|------|-----------|-----|-----------|-----|-------|
| 5UK1 | F_ARG_576 | NH1 | B_GLU_574 | OE1 | 3.570 |
| 5UK1 | F_ARG_576 | NH1 | B_GLU_574 | OE2 | 3.065 |
| 5UK1 | F_ARG_576 | NH2 | A_GLU_104 | OE2 | 3.295 |
| 5UK1 | F_LYS_582 | NZ  | F_ASP_586 | OD2 | 3.755 |
| 5UK1 | F_ARG_606 | NH2 | D_ASP_609 | OD2 | 3.182 |
| 5UK1 | F_LYS_623 | NZ  | F_GLU_632 | OE2 | 3.459 |
| 5UK1 | F_LYS_631 | NZ  | F_GLU_639 | OE1 | 3.967 |
| 5UK1 | F_LYS_643 | NZ  | E_GLU_4   | OE1 | 3.024 |
| 5UK1 | F_LYS_643 | NZ  | E_ASP_5   | OD1 | 2.503 |
| 5UK1 | F_LYS_643 | NZ  | E_ASP_5   | OD2 | 3.650 |
| 5UK1 | F_LYS_643 | NZ  | F_GLU_529 | OE2 | 3.727 |
| 5UK1 | F_LYS_653 | NZ  | F_GLU_650 | OE1 | 3.696 |
| 5UK1 | F_LYS_661 | NZ  | F_GLU_647 | OE1 | 3.063 |
| 5UK1 | F_ARG_670 | NH2 | F_GLU_671 | OE2 | 2.926 |
| 5UK1 | G_HIS_160 | NE2 | G_ASP_158 | OD1 | 3.432 |
| 5UK1 | G_ARG_163 | NH1 | G_ASP_214 | OD1 | 2.991 |
| 5UK1 | G_ARG_163 | NH2 | G_GLU_171 | OE1 | 2.756 |
| 5UK1 | G_ARG_163 | NH2 | G_GLU_171 | OE2 | 3.832 |
| 5UK1 | G_ARG_225 | NH1 | A_ASP_190 | OD1 | 2.887 |
| 5UK1 | G_ARG_225 | NH1 | A_ASP_190 | OD2 | 3.709 |
| 5UK1 | G_ARG_225 | NH2 | A_ASP_190 | OD1 | 3.956 |
| 5UK1 | G_ARG_225 | NH2 | A_ASP_190 | OD2 | 3.555 |
| 5UK1 | H_HIS_160 | NE2 | H_ASP_158 | OD1 | 3.431 |
| 5UK1 | H_ARG_163 | NH1 | H_ASP_214 | OD1 | 2.991 |
| 5UK1 | H_ARG_163 | NH2 | H_GLU_171 | OE1 | 2.756 |
| 5UK1 | H_ARG_163 | NH2 | H_GLU_171 | OE2 | 3.832 |
| 5UK1 | H_ARG_225 | NH1 | C_ASP_190 | OD1 | 2.683 |
| 5UK1 | H_ARG_225 | NH1 | C_ASP_190 | OD2 | 3.511 |
| 5UK1 | H_ARG_225 | NH2 | C_ASP_190 | OD1 | 3.809 |
| 5UK1 | H_ARG_225 | NH2 | C_ASP_190 | OD2 | 3.346 |
| 5UK1 | I_HIS_160 | NE2 | I_ASP_158 | OD1 | 3.432 |
| 5UK1 | I_ARG_163 | NH1 | I_ASP_214 | OD1 | 2.991 |
| 5UK1 | I_ARG_163 | NH2 | I_GLU_171 | OE1 | 2.756 |
| 5UK1 | I_ARG_163 | NH2 | I_GLU_171 | OE2 | 3.832 |
| 5UK1 | I_ARG_225 | NH1 | E_ASP_190 | OD1 | 2.885 |
| 5UK1 | I_ARG_225 | NH1 | E_ASP_190 | OD2 | 3.789 |
| 5UK1 | I_ARG_225 | NH2 | E_ASP_190 | OD1 | 3.888 |
| 5UK1 | I_ARG_225 | NH2 | E_ASP_190 | OD2 | 3.567 |
| 5UK2 | A_LYS_86  | NZ  | A_GLU_90  | OE2 | 3.657 |
| 5UK2 | A_ARG_106 | NH1 | A_GLU_85  | OE2 | 2.898 |
| 5UK2 | A_ARG_106 | NH1 | B_GLU_569 | OE2 | 3.935 |
| 5UK2 | A_ARG_106 | NH2 | A_GLU_85  | OE1 | 3.401 |
| 5UK2 | A_ARG_106 | NH2 | A_GLU_85  | OE2 | 3.141 |
| 5UK2 | A_ARG_106 | NH2 | B_GLU_569 | OE2 | 2.216 |
| 5UK2 | A_HIS_141 | ND1 | A_GLU_70  | OE2 | 3.497 |
| 5UK2 | A_LYS_174 | NZ  | A_GLU_116 | OE2 | 3.324 |
| 5UK2 | A_ARG_192 | NH2 | A_GLU_198 | OE2 | 3.178 |
| 5UK2 | A_HIS_208 | ND1 | A_GLU_238 | OE2 | 3.989 |
| 5UK2 | A_LYS_219 | NZ  | A_GLU_227 | OE2 | 3.929 |
| 5UK2 | A_ARG_262 | NH1 | A_GLU_175 | OE1 | 3.101 |
| 5UK2 | A_ARG_311 | NH1 | B_ASP_586 | OD1 | 3.877 |
| 5UK2 | A_ARG_311 | NH1 | B_ASP_590 | OD1 | 2.946 |
| 5UK2 | A_ARG_311 | NH1 | B_ASP_590 | OD2 | 3.729 |
| 5UK2 | A_ARG_311 | NH2 | B_ASP_586 | OD1 | 3.044 |
| 5UK2 | B_LYS_551 | NZ  | B_GLU_603 | OE1 | 3.663 |
| 5UK2 | B_LYS_558 | NZ  | F_GLU_597 | OE1 | 3.672 |
| 5UK2 | B_LYS_568 | NZ  | A_GLU_107 | OE1 | 3.896 |
| 5UK2 | B_ARG_576 | NH1 | D_GLU_574 | OE1 | 3.949 |

|      |           |     |           |     |       |
|------|-----------|-----|-----------|-----|-------|
| 5UK2 | B_ARG_576 | NH1 | D_GLU_574 | OE2 | 2.806 |
| 5UK2 | B_ARG_576 | NH2 | C_GLU_104 | OE2 | 3.501 |
| 5UK2 | B_LYS_582 | NZ  | B_ASP_586 | OD2 | 3.917 |
| 5UK2 | B_LYS_583 | NZ  | D_ASP_585 | OD1 | 3.241 |
| 5UK2 | B_LYS_583 | NZ  | D_ASP_585 | OD2 | 3.954 |
| 5UK2 | B_ARG_606 | NH2 | F_ASP_609 | OD2 | 2.779 |
| 5UK2 | B_LYS_623 | NZ  | B_GLU_632 | OE2 | 3.089 |
| 5UK2 | B_LYS_643 | NZ  | A_GLU_4   | OE1 | 3.076 |
| 5UK2 | B_LYS_643 | NZ  | A_ASP_5   | OD1 | 2.565 |
| 5UK2 | B_LYS_643 | NZ  | A_ASP_5   | OD2 | 3.717 |
| 5UK2 | B_LYS_643 | NZ  | B_GLU_529 | OE2 | 3.623 |
| 5UK2 | B_LYS_661 | NZ  | B_GLU_647 | OE1 | 3.251 |
| 5UK2 | B_ARG_670 | NH2 | B_GLU_671 | OE2 | 2.809 |
| 5UK2 | C_LYS_86  | NZ  | C_GLU_90  | OE2 | 3.657 |
| 5UK2 | C_ARG_106 | NH1 | C_GLU_85  | OE2 | 2.898 |
| 5UK2 | C_ARG_106 | NH1 | D_GLU_569 | OE2 | 3.977 |
| 5UK2 | C_ARG_106 | NH2 | C_GLU_85  | OE1 | 3.401 |
| 5UK2 | C_ARG_106 | NH2 | C_GLU_85  | OE2 | 3.141 |
| 5UK2 | C_ARG_106 | NH2 | D_GLU_569 | OE2 | 2.287 |
| 5UK2 | C_HIS_141 | ND1 | C_GLU_70  | OE2 | 3.498 |
| 5UK2 | C_LYS_174 | NZ  | C_GLU_116 | OE2 | 3.326 |
| 5UK2 | C_ARG_192 | NH2 | C_GLU_198 | OE2 | 3.177 |
| 5UK2 | C_HIS_208 | ND1 | C_GLU_238 | OE2 | 3.990 |
| 5UK2 | C_LYS_219 | NZ  | C_GLU_227 | OE2 | 3.929 |
| 5UK2 | C_ARG_262 | NH1 | C_GLU_175 | OE1 | 3.100 |
| 5UK2 | C_ARG_311 | NH1 | D_ASP_586 | OD1 | 3.894 |
| 5UK2 | C_ARG_311 | NH1 | D_ASP_590 | OD1 | 2.932 |
| 5UK2 | C_ARG_311 | NH1 | D_ASP_590 | OD2 | 3.727 |
| 5UK2 | C_ARG_311 | NH2 | D_ASP_586 | OD1 | 3.043 |
| 5UK2 | D_LYS_551 | NZ  | D_GLU_603 | OE1 | 3.662 |
| 5UK2 | D_LYS_558 | NZ  | B_GLU_597 | OE1 | 3.518 |
| 5UK2 | D_LYS_558 | NZ  | B_GLU_597 | OE2 | 3.929 |
| 5UK2 | D_LYS_568 | NZ  | C_GLU_107 | OE1 | 3.830 |
| 5UK2 | D_ARG_576 | NH1 | F_GLU_574 | OE1 | 3.823 |
| 5UK2 | D_ARG_576 | NH1 | F_GLU_574 | OE2 | 2.724 |
| 5UK2 | D_ARG_576 | NH2 | E_GLU_104 | OE2 | 3.539 |
| 5UK2 | D_LYS_582 | NZ  | D_ASP_586 | OD2 | 3.917 |
| 5UK2 | D_LYS_583 | NZ  | F_ASP_585 | OD1 | 3.067 |
| 5UK2 | D_LYS_583 | NZ  | F_ASP_585 | OD2 | 3.783 |
| 5UK2 | D_ARG_606 | NH2 | B_ASP_609 | OD2 | 2.604 |
| 5UK2 | D_LYS_623 | NZ  | D_GLU_632 | OE2 | 3.089 |
| 5UK2 | D_LYS_643 | NZ  | C_GLU_4   | OE1 | 3.112 |
| 5UK2 | D_LYS_643 | NZ  | C_ASP_5   | OD1 | 2.525 |
| 5UK2 | D_LYS_643 | NZ  | C_ASP_5   | OD2 | 3.631 |
| 5UK2 | D_LYS_643 | NZ  | D_GLU_529 | OE2 | 3.624 |
| 5UK2 | D_LYS_661 | NZ  | D_GLU_647 | OE1 | 3.251 |
| 5UK2 | D_ARG_670 | NH2 | D_GLU_671 | OE2 | 2.809 |
| 5UK2 | E_LYS_86  | NZ  | E_GLU_90  | OE2 | 3.657 |
| 5UK2 | E_ARG_106 | NH1 | E_GLU_85  | OE2 | 2.898 |
| 5UK2 | E_ARG_106 | NH1 | F_GLU_569 | OE2 | 3.948 |
| 5UK2 | E_ARG_106 | NH2 | E_GLU_85  | OE1 | 3.401 |
| 5UK2 | E_ARG_106 | NH2 | E_GLU_85  | OE2 | 3.140 |
| 5UK2 | E_ARG_106 | NH2 | F_GLU_569 | OE2 | 2.300 |
| 5UK2 | E_HIS_141 | ND1 | E_GLU_70  | OE2 | 3.497 |
| 5UK2 | E_LYS_174 | NZ  | E_GLU_116 | OE2 | 3.326 |
| 5UK2 | E_ARG_192 | NH2 | E_GLU_198 | OE2 | 3.179 |
| 5UK2 | E_HIS_208 | ND1 | E_GLU_238 | OE2 | 3.988 |
| 5UK2 | E_LYS_219 | NZ  | E_GLU_227 | OE2 | 3.928 |

|      |           |     |           |     |       |
|------|-----------|-----|-----------|-----|-------|
| 5UK2 | E_ARG_262 | NH1 | E_GLU_175 | OE1 | 3.100 |
| 5UK2 | E_ARG_311 | NH1 | F_ASP_586 | OD1 | 3.963 |
| 5UK2 | E_ARG_311 | NH1 | F_ASP_590 | OD1 | 2.962 |
| 5UK2 | E_ARG_311 | NH1 | F_ASP_590 | OD2 | 3.800 |
| 5UK2 | E_ARG_311 | NH2 | F_ASP_586 | OD1 | 3.154 |
| 5UK2 | F_LYS_551 | NZ  | F_GLU_603 | OE1 | 3.663 |
| 5UK2 | F_LYS_558 | NZ  | D_GLU_597 | OE1 | 3.583 |
| 5UK2 | F_LYS_558 | NZ  | D_GLU_597 | OE2 | 3.900 |
| 5UK2 | F_LYS_568 | NZ  | E_GLU_107 | OE1 | 3.789 |
| 5UK2 | F_ARG_576 | NH1 | B_GLU_574 | OE1 | 3.881 |
| 5UK2 | F_ARG_576 | NH1 | B_GLU_574 | OE2 | 2.699 |
| 5UK2 | F_ARG_576 | NH2 | A_GLU_104 | OE2 | 3.688 |
| 5UK2 | F_LYS_582 | NZ  | F_ASP_586 | OD2 | 3.917 |
| 5UK2 | F_LYS_583 | NZ  | B_ASP_585 | OD1 | 3.058 |
| 5UK2 | F_LYS_583 | NZ  | B_ASP_585 | OD2 | 3.745 |
| 5UK2 | F_ARG_606 | NH2 | D_ASP_609 | OD2 | 2.605 |
| 5UK2 | F_LYS_623 | NZ  | F_GLU_632 | OE2 | 3.089 |
| 5UK2 | F_LYS_643 | NZ  | E_GLU_4   | OE1 | 3.293 |
| 5UK2 | F_LYS_643 | NZ  | E_ASP_5   | OD1 | 2.450 |
| 5UK2 | F_LYS_643 | NZ  | E_ASP_5   | OD2 | 3.677 |
| 5UK2 | F_LYS_643 | NZ  | F_GLU_529 | OE2 | 3.624 |
| 5UK2 | F_LYS_661 | NZ  | F_GLU_647 | OE1 | 3.251 |
| 5UK2 | F_ARG_670 | NH2 | F_GLU_671 | OE2 | 2.809 |
| 5UK2 | G_HIS_160 | NE2 | G_ASP_158 | OD1 | 3.898 |
| 5UK2 | G_ARG_163 | NH1 | G_ASP_214 | OD1 | 2.808 |
| 5UK2 | G_ARG_163 | NH2 | G_GLU_171 | OE1 | 3.032 |
| 5UK2 | G_ARG_163 | NH2 | G_GLU_171 | OE2 | 3.708 |
| 5UK2 | G_ARG_225 | NH1 | A_ASP_190 | OD1 | 2.979 |
| 5UK2 | G_ARG_225 | NH1 | A_ASP_190 | OD2 | 3.894 |
| 5UK2 | G_ARG_225 | NH2 | A_ASP_190 | OD1 | 3.206 |
| 5UK2 | G_ARG_225 | NH2 | A_ASP_190 | OD2 | 2.785 |
| 5UK2 | H_HIS_160 | NE2 | H_ASP_158 | OD1 | 3.898 |
| 5UK2 | H_ARG_163 | NH1 | H_ASP_214 | OD1 | 2.808 |
| 5UK2 | H_ARG_163 | NH2 | H_GLU_171 | OE1 | 3.032 |
| 5UK2 | H_ARG_163 | NH2 | H_GLU_171 | OE2 | 3.708 |
| 5UK2 | H_ARG_225 | NH1 | C_ASP_190 | OD1 | 3.085 |
| 5UK2 | H_ARG_225 | NH2 | C_ASP_190 | OD1 | 3.195 |
| 5UK2 | H_ARG_225 | NH2 | C_ASP_190 | OD2 | 2.865 |
| 5UK2 | L_HIS_160 | NE2 | L_ASP_158 | OD1 | 3.898 |
| 5UK2 | L_ARG_163 | NH1 | L_ASP_214 | OD1 | 2.807 |
| 5UK2 | L_ARG_163 | NH2 | L_GLU_171 | OE1 | 3.032 |
| 5UK2 | L_ARG_163 | NH2 | L_GLU_171 | OE2 | 3.708 |
| 5UK2 | L_ARG_225 | NH1 | E_ASP_190 | OD1 | 2.888 |
| 5UK2 | L_ARG_225 | NH1 | E_ASP_190 | OD2 | 3.869 |
| 5UK2 | L_ARG_225 | NH2 | E_ASP_190 | OD1 | 3.014 |
| 5UK2 | L_ARG_225 | NH2 | E_ASP_190 | OD2 | 2.625 |
| 5UR8 | A_ARG_38  | NH2 | A_GLU_46  | OE1 | 3.406 |
| 5UR8 | A_ARG_38  | NH2 | A_GLU_46  | OE2 | 2.842 |
| 5UR8 | A_ARG_59  | NH1 | B_ASP_95  | OD1 | 3.084 |
| 5UR8 | A_ARG_59  | NH1 | B_ASP_95  | OD2 | 3.357 |
| 5UR8 | A_ARG_59  | NH2 | A_ASP_57  | OD1 | 2.972 |
| 5UR8 | A_ARG_59  | NH2 | A_ASP_57  | OD2 | 3.995 |
| 5UR8 | A_ARG_67  | NH1 | A_ASP_90  | OD1 | 2.756 |
| 5UR8 | A_ARG_67  | NH1 | A_ASP_90  | OD2 | 3.331 |
| 5UR8 | A_ARG_67  | NH2 | A_ASP_90  | OD1 | 3.669 |
| 5UR8 | A_ARG_67  | NH2 | A_ASP_90  | OD2 | 2.616 |
| 5UR8 | A_LYS_138 | NZ  | B_GLU_215 | OE2 | 2.961 |
| 5UR8 | A_LYS_152 | NZ  | A_ASP_153 | OD1 | 3.501 |

|      |           |     |           |     |       |
|------|-----------|-----|-----------|-----|-------|
| 5UR8 | A_LYS_152 | NZ  | A_ASP_153 | OD2 | 3.066 |
| 5UR8 | B_ARG_62  | NH2 | B_GLU_82  | OE2 | 3.548 |
| 5UR8 | B_ARG_62  | NH2 | B_ASP_83  | OD1 | 2.828 |
| 5UR8 | B_ARG_62  | NH2 | B_ASP_83  | OD2 | 3.632 |
| 5UR8 | B_LYS_105 | NZ  | B_GLU_167 | OE1 | 2.973 |
| 5UR8 | B_LYS_105 | NZ  | B_GLU_167 | OE2 | 3.906 |
| 5UR8 | B_LYS_151 | NZ  | B_GLU_197 | OE1 | 2.809 |
| 5UR8 | B_LYS_151 | NZ  | B_GLU_197 | OE2 | 3.414 |
| 5UR8 | B_LYS_190 | NZ  | B_ASP_187 | OD1 | 3.286 |
| 5UR8 | B_HIS_191 | ND1 | B_ASP_153 | OD1 | 3.243 |
| 5VF2 | A_LYS_64  | NZ  | A_GLU_47  | OE2 | 2.716 |
| 5VF2 | A_LYS_68  | NZ  | A_ASP_91  | OD1 | 3.611 |
| 5VF2 | A_LYS_68  | NZ  | A_ASP_91  | OD2 | 2.737 |
| 5VF2 | A_ARG_99  | NH2 | A_ASP_108 | OD1 | 3.519 |
| 5VF2 | A_ARG_99  | NH2 | A_ASP_108 | OD2 | 2.783 |
| 5VL3 | Q_HIS_28  | NE2 | Q_GLU_130 | OE2 | 3.358 |
| 5VL3 | Q_ARG_75  | NH1 | Q_GLU_78  | OE2 | 3.350 |
| 5VL3 | Q_ARG_91  | NH1 | Q_ASP_113 | OD1 | 3.515 |
| 5VL3 | Q_ARG_91  | NH1 | Q_ASP_113 | OD2 | 2.674 |
| 5VL3 | Q_ARG_91  | NH2 | Q_ASP_113 | OD1 | 3.050 |
| 5VL3 | Q_ARG_91  | NH2 | Q_ASP_113 | OD2 | 3.746 |
| 5VL3 | Q_HIS_110 | ND1 | Q_GLU_36  | OE1 | 3.316 |
| 5VL3 | Q_HIS_110 | ND1 | Q_GLU_36  | OE2 | 2.335 |
| 5VL3 | Q_HIS_213 | NE2 | H_GLU_58  | OE2 | 3.352 |
| 5VL3 | Q_LYS_239 | NZ  | Q_GLU_150 | OE1 | 3.878 |
| 5VL3 | Q_LYS_239 | NZ  | Q_GLU_150 | OE2 | 3.128 |
| 5VL3 | Q_LYS_243 | NZ  | Q_GLU_153 | OE1 | 2.660 |
| 5VL3 | Q_LYS_243 | NZ  | Q_GLU_153 | OE2 | 2.886 |
| 5VL3 | Q_LYS_281 | NZ  | Q_ASP_282 | OD2 | 3.077 |
| 5VL3 | Q_LYS_306 | NZ  | Q_GLU_322 | OE1 | 3.813 |
| 5VL3 | R_HIS_28  | NE2 | R_GLU_130 | OE2 | 3.389 |
| 5VL3 | R_LYS_70  | NZ  | R_ASP_72  | OD1 | 3.096 |
| 5VL3 | R_ARG_91  | NH1 | R_ASP_113 | OD1 | 3.738 |
| 5VL3 | R_ARG_91  | NH1 | R_ASP_113 | OD2 | 2.609 |
| 5VL3 | R_ARG_91  | NH2 | R_ASP_113 | OD1 | 2.934 |
| 5VL3 | R_ARG_91  | NH2 | R_ASP_113 | OD2 | 3.371 |
| 5VL3 | R_HIS_110 | ND1 | R_GLU_36  | OE1 | 3.943 |
| 5VL3 | R_HIS_110 | ND1 | R_GLU_36  | OE2 | 2.329 |
| 5VL3 | R_ARG_120 | NH2 | T_GLU_54  | OE2 | 3.782 |
| 5VL3 | R_LYS_127 | NZ  | R_GLU_122 | OE2 | 3.799 |
| 5VL3 | R_LYS_127 | NZ  | T_GLU_54  | OE1 | 2.927 |
| 5VL3 | R_LYS_127 | NZ  | T_GLU_122 | OE1 | 2.999 |
| 5VL3 | R_HIS_213 | NE2 | A_GLU_58  | OE2 | 3.157 |
| 5VL3 | R_LYS_239 | NZ  | R_GLU_150 | OE1 | 3.277 |
| 5VL3 | R_LYS_247 | NZ  | R_GLU_266 | OE2 | 3.438 |
| 5VL3 | R_LYS_281 | NZ  | R_ASP_282 | OD2 | 3.188 |
| 5VL3 | R_LYS_306 | NZ  | R_GLU_322 | OE1 | 3.817 |
| 5VL3 | R_ARG_319 | NH2 | R_GLU_322 | OE2 | 3.267 |
| 5VL3 | S_LYS_23  | NZ  | S_ASP_50  | OD2 | 3.917 |
| 5VL3 | S_HIS_28  | NE2 | S_GLU_130 | OE2 | 3.287 |
| 5VL3 | S_ARG_75  | NH1 | S_GLU_78  | OE2 | 2.970 |
| 5VL3 | S_LYS_100 | NZ  | S_ASP_97  | OD2 | 2.933 |
| 5VL3 | S_LYS_205 | NZ  | S_GLU_156 | OE2 | 3.382 |
| 5VL3 | S_HIS_213 | NE2 | C_GLU_58  | OE2 | 3.140 |
| 5VL3 | S_LYS_227 | NZ  | S_ASP_225 | OD1 | 3.967 |
| 5VL3 | S_LYS_239 | NZ  | S_GLU_150 | OE2 | 3.417 |
| 5VL3 | S_LYS_243 | NZ  | S_GLU_153 | OE1 | 2.988 |
| 5VL3 | S_LYS_243 | NZ  | S_GLU_153 | OE2 | 2.544 |

|      |           |     |           |     |       |
|------|-----------|-----|-----------|-----|-------|
| 5VL3 | S_LYS_281 | NZ  | S_ASP_282 | OD2 | 3.330 |
| 5VL3 | S_LYS_306 | NZ  | S_GLU_322 | OE1 | 3.934 |
| 5VL3 | T_HIS_28  | NE2 | T_GLU_130 | OE2 | 3.482 |
| 5VL3 | T_ARG_75  | NH1 | T_GLU_78  | OE2 | 2.965 |
| 5VL3 | T_ARG_91  | NH2 | T_ASP_113 | OD1 | 2.973 |
| 5VL3 | T_ARG_91  | NH2 | T_ASP_113 | OD2 | 2.700 |
| 5VL3 | T_LYS_98  | NZ  | T_ASP_52  | OD2 | 3.823 |
| 5VL3 | T_HIS_110 | ND1 | T_GLU_36  | OE1 | 3.602 |
| 5VL3 | T_HIS_110 | ND1 | T_GLU_36  | OE2 | 2.613 |
| 5VL3 | T_LYS_127 | NZ  | R_GLU_54  | OE1 | 3.658 |
| 5VL3 | T_LYS_127 | NZ  | R_GLU_122 | OE1 | 3.863 |
| 5VL3 | T_LYS_205 | NZ  | T_GLU_156 | OE1 | 3.981 |
| 5VL3 | T_HIS_213 | NE2 | E_GLU_58  | OE2 | 3.636 |
| 5VL3 | T_LYS_239 | NZ  | T_GLU_150 | OE2 | 3.518 |
| 5VL3 | T_LYS_243 | NZ  | T_GLU_153 | OE1 | 3.300 |
| 5VL3 | T_LYS_243 | NZ  | T_GLU_153 | OE2 | 2.403 |
| 5VL3 | T_LYS_247 | NZ  | T_GLU_266 | OE2 | 3.696 |
| 5VL3 | T_LYS_281 | NZ  | T_ASP_282 | OD2 | 3.114 |
| 5VL3 | T_ARG_319 | NH2 | T_GLU_322 | OE2 | 3.136 |
| 5VL3 | A_ARG_38  | NH1 | A_GLU_46  | OE2 | 3.328 |
| 5VL3 | A_ARG_53  | NH2 | R_ASP_232 | OD1 | 3.883 |
| 5VL3 | A_ARG_53  | NH2 | R_ASP_232 | OD2 | 3.340 |
| 5VL3 | A_LYS_66  | NZ  | A_ASP_86  | OD1 | 3.151 |
| 5VL3 | A_LYS_66  | NZ  | A_ASP_86  | OD2 | 3.194 |
| 5VL3 | A_ARG_83  | NH2 | A_GLU_85  | OE1 | 2.855 |
| 5VL3 | A_ARG_83  | NH2 | A_GLU_85  | OE2 | 3.048 |
| 5VL3 | A_ARG_95  | NH1 | R_GLU_179 | OE1 | 3.121 |
| 5VL3 | A_ARG_95  | NH1 | R_GLU_179 | OE2 | 3.607 |
| 5VL3 | A_ARG_95  | NH2 | R_GLU_179 | OE2 | 3.046 |
| 5VL3 | A_LYS_210 | NZ  | B_GLU_124 | OE2 | 3.976 |
| 5VL3 | A_LYS_215 | NZ  | A_GLU_213 | OE1 | 2.311 |
| 5VL3 | C_ARG_38  | NH1 | C_GLU_46  | OE2 | 3.106 |
| 5VL3 | C_ARG_53  | NH2 | S_ASP_232 | OD2 | 3.370 |
| 5VL3 | C_ARG_94  | NH1 | C_ASP_96  | OD1 | 3.364 |
| 5VL3 | C_ARG_94  | NH2 | C_ASP_96  | OD1 | 3.938 |
| 5VL3 | C_ARG_95  | NH1 | S_GLU_179 | OE1 | 3.505 |
| 5VL3 | C_ARG_95  | NH1 | S_GLU_179 | OE2 | 3.184 |
| 5VL3 | C_ARG_95  | NH2 | S_GLU_179 | OE2 | 3.815 |
| 5VL3 | C_LYS_144 | NZ  | C_ASP_145 | OD1 | 3.207 |
| 5VL3 | C_LYS_144 | NZ  | C_ASP_145 | OD2 | 2.725 |
| 5VL3 | E_ARG_38  | NH1 | E_GLU_46  | OE2 | 3.258 |
| 5VL3 | E_ARG_53  | NH2 | T_ASP_232 | OD1 | 3.852 |
| 5VL3 | E_ARG_53  | NH2 | T_ASP_232 | OD2 | 3.470 |
| 5VL3 | E_ARG_83  | NH1 | E_ASP_86  | OD1 | 3.861 |
| 5VL3 | E_ARG_94  | NH1 | E_ASP_96  | OD1 | 2.513 |
| 5VL3 | E_ARG_95  | NH1 | T_GLU_179 | OE1 | 2.688 |
| 5VL3 | E_ARG_95  | NH1 | T_GLU_179 | OE2 | 2.993 |
| 5VL3 | E_ARG_95  | NH2 | T_GLU_179 | OE2 | 3.079 |
| 5VL3 | E_LYS_144 | NZ  | E_ASP_145 | OD1 | 2.943 |
| 5VL3 | E_LYS_144 | NZ  | E_ASP_145 | OD2 | 2.901 |
| 5VL3 | E_LYS_210 | NZ  | F_GLU_    | OE2 | 3.778 |
| 5VL3 | E_LYS_    | NZ  | F_ASP_    | OD2 | 3.984 |
| 5VL3 | H_ARG_38  | NH1 | H_GLU_46  | OE2 | 2.851 |
| 5VL3 | H_ARG_53  | NH2 | Q_ASP_232 | OD1 | 3.950 |
| 5VL3 | H_ARG_53  | NH2 | Q_ASP_232 | OD2 | 3.411 |
| 5VL3 | H_LYS_66  | NZ  | H_ASP_86  | OD1 | 3.327 |
| 5VL3 | H_LYS_66  | NZ  | H_ASP_86  | OD2 | 2.190 |
| 5VL3 | H_ARG_83  | NH2 | H_GLU_85  | OE1 | 3.339 |

|      |           |     |           |     |       |
|------|-----------|-----|-----------|-----|-------|
| 5VL3 | H_ARG_83  | NH2 | H_GLU_85  | OE2 | 3.382 |
| 5VL3 | H_ARG_94  | NH1 | H_ASP_96  | OD1 | 3.684 |
| 5VL3 | H_ARG_95  | NH1 | Q_GLU_179 | OE1 | 3.431 |
| 5VL3 | H_ARG_95  | NH1 | Q_GLU_179 | OE2 | 3.819 |
| 5VL3 | H_ARG_95  | NH2 | Q_GLU_179 | OE2 | 3.149 |
| 5VL3 | H_LYS_144 | NZ  | H_ASP_145 | OD1 | 2.853 |
| 5VL3 | H_LYS_144 | NZ  | H_ASP_145 | OD2 | 2.951 |
| 5VL3 | B_ARG_61  | NH2 | B_GLU_81  | OE1 | 3.497 |
| 5VL3 | B_ARG_61  | NH2 | B_ASP_82  | OD1 | 2.798 |
| 5VL3 | B_ARG_61  | NH2 | B_ASP_82  | OD2 | 3.720 |
| 5VL3 | D_ARG_61  | NH2 | D_GLU_81  | OE1 | 3.609 |
| 5VL3 | D_ARG_61  | NH2 | D_ASP_82  | OD1 | 3.084 |
| 5VL3 | D_ARG_61  | NH2 | D_ASP_82  | OD2 | 3.921 |
| 5VL3 | D_LYS_150 | NZ  | D_GLU_196 | OE1 | 3.872 |
| 5VL3 | D_LYS_150 | NZ  | D_GLU_196 | OE2 | 3.186 |
| 5VL3 | D_LYS_189 | NZ  | D_ASP_186 | OD1 | 3.734 |
| 5VL3 | F_ARG_61  | NH1 | F_GLU_81  | OE2 | 3.708 |
| 5VL3 | F_ARG_61  | NH2 | F_GLU_81  | OE2 | 2.960 |
| 5VL3 | F_ARG_61  | NH2 | F_ASP_82  | OD1 | 2.834 |
| 5VL3 | F_ARG_61  | NH2 | F_ASP_82  | OD2 | 3.453 |
| 5VL3 | F_LYS_150 | NZ  | F_GLU_196 | OE1 | 3.617 |
| 5VL3 | F_LYS_150 | NZ  | F_GLU_196 | OE2 | 3.530 |
| 5VL3 | L_ARG_18  | NH2 | R_GLU_36  | OE2 | 3.892 |
| 5VL3 | L_ARG_61  | NH2 | L_GLU_81  | OE1 | 3.403 |
| 5VL3 | L_ARG_61  | NH2 | L_ASP_82  | OD1 | 2.637 |
| 5VL3 | L_ARG_61  | NH2 | L_ASP_82  | OD2 | 3.407 |
| 5VL3 | L_LYS_150 | NZ  | L_GLU_196 | OE1 | 3.651 |
| 5VL3 | L_LYS_150 | NZ  | L_GLU_196 | OE2 | 3.240 |
| 5VN8 | G_LYS_34  | NZ  | A_ASP_612 | OD1 | 3.263 |
| 5VN8 | G_LYS_46  | NZ  | A_GLU_632 | OE1 | 3.416 |
| 5VN8 | G_LYS_46  | NZ  | A_GLU_632 | OE2 | 2.866 |
| 5VN8 | G_LYS_282 | NZ  | G_GLU_275 | OE1 | 3.041 |
| 5VN8 | G_ARG_337 | NH1 | G_GLU_290 | OE1 | 3.439 |
| 5VN8 | G_ARG_337 | NH1 | G_GLU_290 | OE2 | 3.645 |
| 5VN8 | G_ARG_337 | NH1 | G_GLU_340 | OE1 | 3.059 |
| 5VN8 | G_LYS_348 | NZ  | G_GLU_269 | OE2 | 2.496 |
| 5VN8 | G_LYS_348 | NZ  | G_GLU_351 | OE1 | 3.775 |
| 5VN8 | G_LYS_356 | NZ  | G_GLU_466 | OE2 | 2.685 |
| 5VN8 | G_ARG_456 | NH1 | G_GLU_466 | OE2 | 3.971 |
| 5VN8 | G_ARG_469 | NH2 | G_ASP_457 | OD2 | 3.488 |
| 5VN8 | G_ARG_476 | NH2 | G_GLU_102 | OE1 | 2.991 |
| 5VN8 | G_ARG_476 | NH2 | G_GLU_102 | OE2 | 3.449 |
| 5VN8 | G_LYS_487 | NZ  | G_GLU_47  | OE1 | 3.496 |
| 5VN8 | G_LYS_487 | NZ  | G_GLU_91  | OE2 | 3.186 |
| 5VN8 | A_ARG_542 | NH2 | C_GLU_647 | OE2 | 2.749 |
| 5VN8 | A_ARG_579 | NH1 | C_GLU_584 | OE1 | 3.931 |
| 5VN8 | H_LYS_12  | NZ  | H_GLU_10  | OE2 | 2.532 |
| 5VN8 | H_ARG_28  | NH1 | G_ASP_457 | OD1 | 2.893 |
| 5VN8 | H_ARG_38  | NH1 | H_ASP_86  | OD1 | 2.826 |
| 5VN8 | H_ARG_38  | NH2 | H_GLU_46  | OE1 | 3.729 |
| 5VN8 | H_ARG_38  | NH2 | H_GLU_46  | OE2 | 2.857 |
| 5VN8 | H_LYS_62  | NZ  | H_GLU_46  | OE1 | 3.455 |
| 5VN8 | H_ARG_66  | NH2 | H_ASP_86  | OD1 | 3.206 |
| 5VN8 | H_ARG_66  | NH2 | H_ASP_86  | OD2 | 2.433 |
| 5VN8 | H_ARG_82A | NH1 | H_ASP_65  | OD1 | 3.493 |
| 5VN8 | H_ARG_94  | NH2 | H_ASP_101 | OD2 | 3.929 |
| 5VN8 | L_HIS_27  | NE2 | L_GLU_1   | OE2 | 2.752 |
| 5VN8 | L_HIS_49  | ND1 | H_ASP_101 | OD1 | 3.097 |



|      |           |     |           |     |       |
|------|-----------|-----|-----------|-----|-------|
| 5VN8 | L_ARG_61  | NH1 | L_ASP_82  | OD2 | 2.660 |
| 5VN8 | L_ARG_61  | NH2 | L_GLU_81  | OE2 | 3.818 |
| 5VN8 | L_ARG_61  | NH2 | L_ASP_82  | OD1 | 3.890 |
| 5VN8 | L_ARG_61  | NH2 | L_ASP_82  | OD2 | 2.783 |
| 5VN8 | L_LYS_103 | NZ  | L_GLU_105 | OE1 | 3.506 |
| 5VN8 | D_LYS_34  | NZ  | B_ASP_612 | OD1 | 3.397 |
| 5VN8 | D_LYS_46  | NZ  | B_GLU_632 | OE1 | 3.407 |
| 5VN8 | D_LYS_46  | NZ  | B_GLU_632 | OE2 | 2.853 |
| 5VN8 | D_LYS_282 | NZ  | D_GLU_275 | OE1 | 3.041 |
| 5VN8 | D_ARG_337 | NH1 | D_GLU_290 | OE1 | 3.439 |
| 5VN8 | D_ARG_337 | NH1 | D_GLU_290 | OE2 | 3.644 |
| 5VN8 | D_ARG_337 | NH1 | D_GLU_340 | OE1 | 3.058 |
| 5VN8 | D_LYS_348 | NZ  | D_GLU_269 | OE2 | 2.495 |
| 5VN8 | D_LYS_348 | NZ  | D_GLU_351 | OE1 | 3.775 |
| 5VN8 | D_LYS_356 | NZ  | D_GLU_466 | OE2 | 2.685 |
| 5VN8 | D_ARG_456 | NH1 | D_GLU_466 | OE2 | 3.971 |
| 5VN8 | D_ARG_469 | NH2 | D_ASP_457 | OD2 | 3.488 |
| 5VN8 | D_ARG_476 | NH2 | D_GLU_102 | OE1 | 2.992 |
| 5VN8 | D_ARG_476 | NH2 | D_GLU_102 | OE2 | 3.449 |
| 5VN8 | D_LYS_487 | NZ  | D_GLU_47  | OE1 | 3.496 |
| 5VN8 | D_LYS_487 | NZ  | D_GLU_91  | OE2 | 3.186 |
| 5VN8 | B_ARG_542 | NH2 | A_GLU_647 | OE1 | 3.985 |
| 5VN8 | B_ARG_542 | NH2 | A_GLU_647 | OE2 | 2.712 |
| 5VN8 | B_ARG_579 | NH1 | A_GLU_584 | OE1 | 3.986 |
| 5VN8 | F_LYS_12  | NZ  | F_GLU_10  | OE2 | 2.532 |
| 5VN8 | F_ARG_28  | NH1 | D_ASP_457 | OD1 | 2.808 |
| 5VN8 | F_ARG_38  | NH1 | F_ASP_86  | OD1 | 2.826 |
| 5VN8 | F_ARG_38  | NH2 | F_GLU_46  | OE1 | 3.728 |
| 5VN8 | F_ARG_38  | NH2 | F_GLU_46  | OE2 | 2.856 |
| 5VN8 | F_LYS_62  | NZ  | F_GLU_46  | OE1 | 3.454 |
| 5VN8 | F_ARG_66  | NH2 | F_ASP_86  | OD1 | 3.206 |
| 5VN8 | F_ARG_66  | NH2 | F_ASP_86  | OD2 | 2.433 |
| 5VN8 | F_ARG_82A | NH1 | F_ASP_65  | OD1 | 3.494 |
| 5VN8 | F_ARG_94  | NH2 | F_ASP_101 | OD2 | 3.929 |
| 5VN8 | J_HIS_27  | NE2 | J_GLU_1   | OE2 | 2.753 |
| 5VN8 | J_HIS_49  | ND1 | F_ASP_101 | OD1 | 3.213 |
| 5VN8 | J_ARG_61  | NH1 | J_ASP_82  | OD2 | 2.661 |
| 5VN8 | J_ARG_61  | NH2 | J_GLU_81  | OE2 | 3.818 |
| 5VN8 | J_ARG_61  | NH2 | J_ASP_82  | OD1 | 3.889 |
| 5VN8 | J_ARG_61  | NH2 | J_ASP_82  | OD2 | 2.783 |
| 5VN8 | J_LYS_103 | NZ  | J_GLU_105 | OE1 | 3.505 |
| 5VN8 | E_LYS_34  | NZ  | C_ASP_612 | OD1 | 3.266 |
| 5VN8 | E_LYS_46  | NZ  | C_GLU_632 | OE1 | 3.380 |
| 5VN8 | E_LYS_46  | NZ  | C_GLU_632 | OE2 | 2.776 |
| 5VN8 | E_LYS_282 | NZ  | E_GLU_275 | OE1 | 3.041 |
| 5VN8 | E_ARG_337 | NH1 | E_GLU_290 | OE1 | 3.439 |
| 5VN8 | E_ARG_337 | NH1 | E_GLU_290 | OE2 | 3.643 |
| 5VN8 | E_ARG_337 | NH1 | E_GLU_340 | OE1 | 3.057 |
| 5VN8 | E_LYS_348 | NZ  | E_GLU_269 | OE2 | 2.495 |
| 5VN8 | E_LYS_348 | NZ  | E_GLU_351 | OE1 | 3.775 |
| 5VN8 | E_LYS_356 | NZ  | E_GLU_466 | OE2 | 2.685 |
| 5VN8 | E_ARG_456 | NH1 | E_GLU_466 | OE2 | 3.971 |
| 5VN8 | E_ARG_469 | NH2 | E_ASP_457 | OD2 | 3.488 |
| 5VN8 | E_ARG_476 | NH2 | E_GLU_102 | OE1 | 2.991 |
| 5VN8 | E_ARG_476 | NH2 | E_GLU_102 | OE2 | 3.449 |
| 5VN8 | E_LYS_487 | NZ  | E_GLU_47  | OE1 | 3.496 |
| 5VN8 | E_LYS_487 | NZ  | E_GLU_91  | OE2 | 3.186 |
| 5VN8 | C_ARG_542 | NH2 | B_GLU_647 | OE2 | 2.738 |

|      |           |     |           |     |       |
|------|-----------|-----|-----------|-----|-------|
| 5VN8 | C_ARG_579 | NH1 | B_GLU_584 | OE1 | 3.772 |
| 5VN8 | L_LYS_12  | NZ  | L_GLU_10  | OE2 | 2.532 |
| 5VN8 | L_ARG_28  | NH1 | E_ASP_457 | OD1 | 3.234 |
| 5VN8 | L_ARG_38  | NH1 | L_ASP_86  | OD1 | 2.826 |
| 5VN8 | L_ARG_38  | NH2 | L_GLU_46  | OE1 | 3.728 |
| 5VN8 | L_ARG_38  | NH2 | L_GLU_46  | OE2 | 2.857 |
| 5VN8 | L_LYS_62  | NZ  | L_GLU_46  | OE1 | 3.455 |
| 5VN8 | L_ARG_66  | NH2 | L_ASP_86  | OD1 | 3.206 |
| 5VN8 | L_ARG_66  | NH2 | L_ASP_86  | OD2 | 2.435 |
| 5VN8 | L_ARG_82A | NH1 | L_ASP_65  | OD1 | 3.494 |
| 5VN8 | L_ARG_94  | NH2 | L_ASP_101 | OD2 | 3.929 |
| 5VN8 | K_HIS_27  | NE2 | K_GLU_1   | OE2 | 2.754 |
| 5VN8 | K_HIS_49  | ND1 | L_ASP_101 | OD1 | 3.072 |
| 5VN8 | K_HIS_49  | NE2 | L_ASP_101 | OD1 | 3.981 |
| 5VN8 | K_ARG_61  | NH1 | K_ASP_82  | OD2 | 2.660 |
| 5VN8 | K_ARG_61  | NH2 | K_GLU_81  | OE2 | 3.818 |
| 5VN8 | K_ARG_61  | NH2 | K_ASP_82  | OD1 | 3.890 |
| 5VN8 | K_ARG_61  | NH2 | K_ASP_82  | OD2 | 2.783 |
| 5VN8 | K_LYS_103 | NZ  | K_GLU_105 | OE1 | 3.505 |
| 5VXJ | A_ARG_55  | NH2 | A_ASP_309 | OD2 | 2.897 |
| 5VXJ | A_LYS_63  | NZ  | A_GLU_64  | OE1 | 2.911 |
| 5VXJ | A_ARG_101 | NH2 | A_ASP_97  | OD2 | 3.249 |
| 5VXJ | A_LYS_151 | NZ  | A_GLU_147 | OE1 | 3.093 |
| 5VXJ | A_LYS_151 | NZ  | A_GLU_147 | OE2 | 3.176 |
| 5VXJ | A_LYS_196 | NZ  | A_ASP_261 | OD1 | 2.840 |
| 5VXJ | A_LYS_197 | NZ  | A_GLU_201 | OE1 | 3.559 |
| 5VXJ | A_LYS_197 | NZ  | A_GLU_201 | OE2 | 2.683 |
| 5VXJ | A_LYS_203 | NZ  | A_ASP_254 | OD1 | 2.485 |
| 5VXJ | A_LYS_203 | NZ  | A_ASP_254 | OD2 | 3.995 |
| 5VXJ | A_LYS_205 | NZ  | A_ASP_166 | OD2 | 2.597 |
| 5VXJ | A_LYS_207 | NZ  | A_GLU_204 | OE2 | 3.657 |
| 5VXJ | A_LYS_207 | NZ  | A_ASP_208 | OD2 | 3.848 |
| 5VXJ | A_LYS_291 | NZ  | A_ASP_287 | OD2 | 2.858 |
| 5VXJ | A_LYS_300 | NZ  | A_GLU_229 | OE2 | 3.809 |
| 5VXJ | B_ARG_19  | NH2 | A_ASP_97  | OD1 | 2.652 |
| 5VXJ | B_ARG_38  | NH1 | B_ASP_90  | OD1 | 2.762 |
| 5VXJ | B_ARG_38  | NH2 | B_GLU_46  | OE2 | 3.072 |
| 5VXJ | B_ARG_38  | NH2 | B_ASP_90  | OD1 | 3.724 |
| 5VXJ | B_ARG_50  | NH1 | L_GLU_200 | OE1 | 2.921 |
| 5VXJ | B_ARG_50  | NH2 | L_GLU_200 | OE1 | 3.757 |
| 5VXJ | B_ARG_67  | NH1 | B_ASP_90  | OD2 | 2.822 |
| 5VXJ | B_ARG_67  | NH2 | B_ASP_90  | OD1 | 2.956 |
| 5VXJ | B_ARG_67  | NH2 | B_ASP_90  | OD2 | 3.171 |
| 5VXJ | B_LYS_76  | NZ  | A_GLU_122 | OE1 | 2.874 |
| 5VXJ | B_HIS_80  | NE2 | A_ASP_144 | OD1 | 3.165 |
| 5VXJ | B_HIS_80  | NE2 | A_ASP_144 | OD2 | 3.364 |
| 5VXJ | C_ARG_55  | NH2 | C_ASP_309 | OD1 | 3.860 |
| 5VXJ | C_ARG_55  | NH2 | C_ASP_309 | OD2 | 2.973 |
| 5VXJ | C_LYS_72  | NZ  | C_GLU_76  | OE2 | 3.986 |
| 5VXJ | C_HIS_81  | NE2 | C_GLU_77  | OE1 | 3.864 |
| 5VXJ | C_ARG_101 | NH2 | C_ASP_97  | OD2 | 3.028 |
| 5VXJ | C_ARG_111 | NH1 | C_ASP_126 | OD1 | 3.446 |
| 5VXJ | C_LYS_137 | NZ  | C_ASP_124 | OD1 | 3.580 |
| 5VXJ | C_LYS_137 | NZ  | C_ASP_124 | OD2 | 3.859 |
| 5VXJ | C_LYS_151 | NZ  | C_GLU_147 | OE1 | 3.347 |
| 5VXJ | C_LYS_151 | NZ  | C_GLU_147 | OE2 | 3.417 |
| 5VXJ | C_LYS_189 | NZ  | C_GLU_268 | OE1 | 3.664 |
| 5VXJ | C_LYS_196 | NZ  | C_ASP_261 | OD1 | 2.639 |

|      |           |     |           |     |       |
|------|-----------|-----|-----------|-----|-------|
| 5VXJ | C_LYS_196 | NZ  | C_ASP_261 | OD2 | 3.513 |
| 5VXJ | C_LYS_197 | NZ  | C_GLU_201 | OE1 | 2.594 |
| 5VXJ | C_LYS_197 | NZ  | C_GLU_201 | OE2 | 3.519 |
| 5VXJ | C_LYS_203 | NZ  | C_ASP_254 | OD1 | 2.687 |
| 5VXJ | C_LYS_205 | NZ  | C_ASP_166 | OD2 | 2.854 |
| 5VXJ | C_LYS_207 | NZ  | C_GLU_204 | OE1 | 3.423 |
| 5VXJ | C_LYS_207 | NZ  | C_GLU_204 | OE2 | 2.767 |
| 5VXJ | C_LYS_275 | NZ  | C_ASP_272 | OD2 | 3.447 |
| 5VXJ | D_ARG_19  | NH1 | C_ASP_97  | OD1 | 3.252 |
| 5VXJ | D_ARG_31  | NH1 | D_ASP_102 | OD1 | 3.380 |
| 5VXJ | D_ARG_38  | NH1 | D_ASP_90  | OD1 | 2.860 |
| 5VXJ | D_ARG_38  | NH2 | D_GLU_46  | OE2 | 2.886 |
| 5VXJ | D_ARG_50  | NH1 | E_GLU_200 | OE1 | 3.721 |
| 5VXJ | D_ARG_50  | NH2 | E_GLU_200 | OE1 | 3.781 |
| 5VXJ | D_ARG_67  | NH1 | D_ASP_90  | OD1 | 3.893 |
| 5VXJ | D_ARG_67  | NH1 | D_ASP_90  | OD2 | 2.756 |
| 5VXJ | D_ARG_67  | NH2 | D_ASP_90  | OD1 | 2.919 |
| 5VXJ | D_ARG_67  | NH2 | D_ASP_90  | OD2 | 3.254 |
| 5VXJ | D_LYS_76  | NZ  | C_GLU_122 | OE1 | 3.854 |
| 5VXJ | D_HIS_80  | NE2 | C_ASP_144 | OD1 | 3.067 |
| 5VXJ | D_HIS_80  | NE2 | C_ASP_144 | OD2 | 3.196 |
| 5VXJ | E_ARG_55  | NH2 | E_ASP_309 | OD1 | 3.935 |
| 5VXJ | E_ARG_55  | NH2 | E_ASP_309 | OD2 | 2.817 |
| 5VXJ | E_ARG_101 | NH1 | E_ASP_97  | OD2 | 2.865 |
| 5VXJ | E_LYS_119 | NZ  | E_GLU_120 | OE2 | 3.261 |
| 5VXJ | E_LYS_137 | NZ  | F_ASP_73  | OD1 | 3.543 |
| 5VXJ | E_LYS_137 | NZ  | F_ASP_73  | OD2 | 2.771 |
| 5VXJ | E_LYS_151 | NZ  | E_GLU_154 | OE1 | 3.893 |
| 5VXJ | E_LYS_196 | NZ  | E_ASP_261 | OD1 | 3.147 |
| 5VXJ | E_LYS_196 | NZ  | E_ASP_261 | OD2 | 3.896 |
| 5VXJ | E_LYS_197 | NZ  | E_GLU_201 | OE1 | 3.410 |
| 5VXJ | E_LYS_197 | NZ  | E_GLU_201 | OE2 | 2.471 |
| 5VXJ | E_LYS_203 | NZ  | E_ASP_254 | OD1 | 2.551 |
| 5VXJ | E_LYS_203 | NZ  | E_ASP_254 | OD2 | 3.950 |
| 5VXJ | E_LYS_205 | NZ  | E_ASP_166 | OD2 | 2.795 |
| 5VXJ | E_LYS_207 | NZ  | E_GLU_204 | OE2 | 3.844 |
| 5VXJ | E_LYS_207 | NZ  | E_ASP_208 | OD1 | 3.647 |
| 5VXJ | E_LYS_207 | NZ  | E_ASP_208 | OD2 | 3.353 |
| 5VXJ | E_LYS_275 | NZ  | E_ASP_272 | OD1 | 3.514 |
| 5VXJ | E_LYS_275 | NZ  | E_ASP_272 | OD2 | 3.831 |
| 5VXJ | E_LYS_291 | NZ  | E_ASP_287 | OD2 | 3.845 |
| 5VXJ | E_LYS_291 | NZ  | E_GLU_288 | OE2 | 3.598 |
| 5VXJ | F_ARG_19  | NH2 | E_ASP_97  | OD1 | 2.921 |
| 5VXJ | F_ARG_38  | NH1 | F_ASP_90  | OD1 | 2.919 |
| 5VXJ | F_ARG_38  | NH2 | F_GLU_46  | OE2 | 2.728 |
| 5VXJ | F_ARG_50  | NH1 | G_GLU_200 | OE1 | 3.576 |
| 5VXJ | F_ARG_50  | NH2 | G_GLU_200 | OE1 | 2.702 |
| 5VXJ | F_ARG_67  | NH1 | F_ASP_90  | OD1 | 3.836 |
| 5VXJ | F_ARG_67  | NH1 | F_ASP_90  | OD2 | 2.827 |
| 5VXJ | F_ARG_67  | NH2 | F_ASP_90  | OD1 | 3.120 |
| 5VXJ | F_ARG_67  | NH2 | F_ASP_90  | OD2 | 3.574 |
| 5VXJ | F_LYS_76  | NZ  | E_GLU_122 | OE1 | 3.693 |
| 5VXJ | F_HIS_80  | NE2 | E_ASP_144 | OD1 | 3.009 |
| 5VXJ | F_HIS_80  | NE2 | E_ASP_144 | OD2 | 3.134 |
| 5VXJ | F_ARG_106 | NH2 | F_ASP_102 | OD1 | 3.541 |
| 5VXJ | G_ARG_55  | NH2 | G_ASP_309 | OD1 | 3.852 |
| 5VXJ | G_ARG_55  | NH2 | G_ASP_309 | OD2 | 3.242 |
| 5VXJ | G_ARG_101 | NH2 | G_ASP_97  | OD2 | 3.466 |

|      |           |     |           |     |       |
|------|-----------|-----|-----------|-----|-------|
| 5VXJ | G_HIS_115 | ND1 | G_GLU_112 | OE1 | 3.174 |
| 5VXJ | G_LYS_119 | NZ  | G_GLU_120 | OE2 | 3.684 |
| 5VXJ | G_LYS_137 | NZ  | G_ASP_124 | OD2 | 3.625 |
| 5VXJ | G_LYS_137 | NZ  | H_ASP_73  | OD1 | 3.131 |
| 5VXJ | G_LYS_137 | NZ  | H_ASP_73  | OD2 | 2.336 |
| 5VXJ | G_LYS_151 | NZ  | G_GLU_147 | OE1 | 3.540 |
| 5VXJ | G_LYS_151 | NZ  | G_GLU_147 | OE2 | 3.043 |
| 5VXJ | G_LYS_196 | NZ  | G_ASP_261 | OD1 | 2.809 |
| 5VXJ | G_LYS_197 | NZ  | G_GLU_201 | OE1 | 3.460 |
| 5VXJ | G_LYS_197 | NZ  | G_GLU_201 | OE2 | 2.587 |
| 5VXJ | G_LYS_203 | NZ  | G_ASP_254 | OD1 | 2.489 |
| 5VXJ | G_LYS_203 | NZ  | G_ASP_254 | OD2 | 3.948 |
| 5VXJ | G_LYS_205 | NZ  | G_ASP_166 | OD2 | 2.817 |
| 5VXJ | G_LYS_207 | NZ  | G_GLU_204 | OE2 | 3.639 |
| 5VXJ | G_LYS_207 | NZ  | G_ASP_208 | OD1 | 3.592 |
| 5VXJ | G_LYS_207 | NZ  | G_ASP_208 | OD2 | 3.456 |
| 5VXJ | G_LYS_291 | NZ  | G_GLU_288 | OE1 | 3.119 |
| 5VXJ | H_ARG_19  | NH2 | G_ASP_97  | OD1 | 2.467 |
| 5VXJ | H_ARG_31  | NH1 | H_ASP_102 | OD1 | 3.947 |
| 5VXJ | H_ARG_31  | NH2 | H_ASP_102 | OD1 | 3.898 |
| 5VXJ | H_ARG_38  | NH1 | H_ASP_90  | OD1 | 2.996 |
| 5VXJ | H_ARG_38  | NH2 | H_GLU_46  | OE1 | 3.400 |
| 5VXJ | H_LYS_65  | NZ  | H_ASP_62  | OD1 | 3.343 |
| 5VXJ | H_ARG_67  | NH1 | H_ASP_90  | OD1 | 3.939 |
| 5VXJ | H_ARG_67  | NH1 | H_ASP_90  | OD2 | 2.890 |
| 5VXJ | H_ARG_67  | NH2 | H_ASP_90  | OD1 | 3.245 |
| 5VXJ | H_ARG_67  | NH2 | H_ASP_90  | OD2 | 3.633 |
| 5VXJ | H_LYS_76  | NZ  | G_ASP_124 | OD2 | 3.951 |
| 5VXJ | H_HIS_80  | NE2 | G_ASP_144 | OD1 | 3.186 |
| 5VXJ | H_HIS_80  | NE2 | G_ASP_144 | OD2 | 3.321 |
| 5VXJ | H_ARG_106 | NH2 | H_ASP_102 | OD2 | 2.976 |
| 5VXJ | L_ARG_55  | NH2 | L_ASP_309 | OD2 | 3.083 |
| 5VXJ | L_HIS_81  | NE2 | L_GLU_77  | OE1 | 3.831 |
| 5VXJ | L_ARG_101 | NH2 | L_ASP_97  | OD2 | 3.365 |
| 5VXJ | L_LYS_137 | NZ  | J_ASP_73  | OD1 | 3.804 |
| 5VXJ | L_LYS_137 | NZ  | J_ASP_73  | OD2 | 2.902 |
| 5VXJ | L_LYS_151 | NZ  | L_GLU_147 | OE1 | 3.728 |
| 5VXJ | L_LYS_151 | NZ  | L_GLU_147 | OE2 | 3.585 |
| 5VXJ | L_LYS_196 | NZ  | L_ASP_261 | OD1 | 2.688 |
| 5VXJ | L_LYS_196 | NZ  | L_ASP_261 | OD2 | 3.785 |
| 5VXJ | L_LYS_197 | NZ  | L_GLU_201 | OE1 | 3.642 |
| 5VXJ | L_LYS_197 | NZ  | L_GLU_201 | OE2 | 2.731 |
| 5VXJ | L_LYS_203 | NZ  | L_ASP_254 | OD1 | 2.602 |
| 5VXJ | L_LYS_205 | NZ  | L_ASP_166 | OD2 | 2.773 |
| 5VXJ | L_LYS_207 | NZ  | L_GLU_204 | OE1 | 3.025 |
| 5VXJ | L_LYS_207 | NZ  | L_GLU_204 | OE2 | 3.929 |
| 5VXJ | L_LYS_275 | NZ  | L_ASP_272 | OD1 | 3.295 |
| 5VXJ | L_LYS_275 | NZ  | L_ASP_272 | OD2 | 2.777 |
| 5VXJ | L_LYS_300 | NZ  | L_GLU_229 | OE1 | 3.150 |
| 5VXJ | J_ARG_19  | NH2 | L_ASP_97  | OD1 | 2.772 |
| 5VXJ | J_ARG_31  | NH1 | J_ASP_102 | OD1 | 3.834 |
| 5VXJ | J_ARG_38  | NH1 | J_ASP_90  | OD1 | 2.886 |
| 5VXJ | J_ARG_38  | NH2 | J_GLU_46  | OE2 | 2.770 |
| 5VXJ | J_LYS_65  | NZ  | J_ASP_62  | OD1 | 2.928 |
| 5VXJ | J_ARG_67  | NH1 | J_ASP_90  | OD1 | 3.756 |
| 5VXJ | J_ARG_67  | NH1 | J_ASP_90  | OD2 | 2.548 |
| 5VXJ | J_ARG_67  | NH2 | J_ASP_90  | OD1 | 2.840 |
| 5VXJ | J_ARG_67  | NH2 | J_ASP_90  | OD2 | 3.177 |

|      |           |     |           |     |       |
|------|-----------|-----|-----------|-----|-------|
| 5VXJ | J_LYS_76  | NZ  | I_GLU_122 | OE2 | 2.338 |
| 5VXJ | J_HIS_80  | NE2 | I_ASP_144 | OD1 | 3.036 |
| 5VXJ | J_HIS_80  | NE2 | I_ASP_144 | OD2 | 3.151 |
| 5VXK | B_ARG_38  | NH1 | B_ASP_90  | OD1 | 3.007 |
| 5VXK | B_ARG_38  | NH2 | B_GLU_46  | OE1 | 3.833 |
| 5VXK | B_ARG_38  | NH2 | B_GLU_89  | OE2 | 3.179 |
| 5VXK | B_ARG_67  | NH1 | B_ASP_90  | OD1 | 3.692 |
| 5VXK | B_ARG_67  | NH1 | B_ASP_90  | OD2 | 3.910 |
| 5VXK | B_ARG_67  | NH2 | B_ASP_90  | OD1 | 3.395 |
| 5VXK | B_ARG_67  | NH2 | B_ASP_90  | OD2 | 2.274 |
| 5VXK | B_HIS_80  | NE2 | B_ASP_73  | OD2 | 3.665 |
| 5VXK | B_ARG_100 | NH2 | B_ASP_31  | OD2 | 3.630 |
| 5VXK | A_LYS_151 | NZ  | A_GLU_147 | OE1 | 2.685 |
| 5VXK | A_LYS_151 | NZ  | A_GLU_147 | OE2 | 3.996 |
| 5VXK | A_LYS_196 | NZ  | A_ASP_261 | OD2 | 2.739 |
| 5VXK | A_LYS_203 | NZ  | A_ASP_254 | OD1 | 2.600 |
| 5VXK | A_LYS_203 | NZ  | A_ASP_254 | OD2 | 3.429 |
| 5VXK | A_LYS_205 | NZ  | A_ASP_166 | OD1 | 3.632 |
| 5VXK | A_LYS_225 | NZ  | A_GLU_229 | OE1 | 3.736 |
| 5VXK | A_LYS_291 | NZ  | A_ASP_287 | OD1 | 3.331 |
| 5VXK | A_LYS_291 | NZ  | A_GLU_288 | OE1 | 3.331 |
| 5VXK | A_LYS_291 | NZ  | A_GLU_288 | OE2 | 2.840 |
| 5VXK | A_LYS_313 | NZ  | A_ASP_309 | OD2 | 3.376 |
| 5VXL | A_ARG_55  | NH1 | A_ASP_309 | OD1 | 3.335 |
| 5VXL | A_ARG_55  | NH1 | A_ASP_309 | OD2 | 2.392 |
| 5VXL | A_ARG_101 | NH1 | A_ASP_97  | OD1 | 3.775 |
| 5VXL | A_ARG_101 | NH1 | A_ASP_97  | OD2 | 3.730 |
| 5VXL | A_ARG_101 | NH2 | A_ASP_97  | OD1 | 3.151 |
| 5VXL | A_ARG_101 | NH2 | A_ASP_97  | OD2 | 2.610 |
| 5VXL | A_LYS_151 | NZ  | A_GLU_147 | OE1 | 2.946 |
| 5VXL | A_LYS_151 | NZ  | A_GLU_147 | OE2 | 3.503 |
| 5VXL | A_LYS_189 | NZ  | A_GLU_268 | OE1 | 3.767 |
| 5VXL | A_LYS_196 | NZ  | A_ASP_261 | OD1 | 2.987 |
| 5VXL | A_LYS_197 | NZ  | A_GLU_201 | OE2 | 2.961 |
| 5VXL | A_LYS_203 | NZ  | A_ASP_254 | OD1 | 2.551 |
| 5VXL | A_LYS_203 | NZ  | A_ASP_254 | OD2 | 3.633 |
| 5VXL | A_LYS_205 | NZ  | A_ASP_166 | OD1 | 3.841 |
| 5VXL | A_LYS_205 | NZ  | A_ASP_166 | OD2 | 2.867 |
| 5VXL | A_LYS_205 | NZ  | B_ASP_52  | OD2 | 2.998 |
| 5VXL | A_LYS_291 | NZ  | A_ASP_287 | OD2 | 3.686 |
| 5VXL | B_ARG_19  | NH2 | B_GLU_83  | OE1 | 3.609 |
| 5VXL | B_ARG_38  | NH1 | B_ASP_91  | OD1 | 2.974 |
| 5VXL | B_ARG_38  | NH2 | B_GLU_46  | OE1 | 3.298 |
| 5VXL | B_ARG_38  | NH2 | B_GLU_46  | OE2 | 3.686 |
| 5VXL | B_LYS_66  | NZ  | B_ASP_63  | OD1 | 2.473 |
| 5VXL | B_ARG_68  | NH1 | B_ASP_91  | OD2 | 2.829 |
| 5VXL | B_ARG_68  | NH2 | B_ASP_91  | OD1 | 3.190 |
| 5VXL | B_ARG_68  | NH2 | B_ASP_91  | OD2 | 3.203 |
| 5VXL | B_ARG_79  | NH1 | B_GLU_77  | OE1 | 3.438 |
| 5VXL | B_ARG_102 | NH1 | A_GLU_201 | OE1 | 3.097 |
| 5VXL | B_ARG_102 | NH2 | A_GLU_201 | OE1 | 3.202 |
| 5VXL | B_ARG_102 | NH2 | A_GLU_201 | OE2 | 2.871 |
| 5VXM | A_ARG_55  | NH2 | A_ASP_309 | OD2 | 2.709 |
| 5VXM | A_HIS_81  | ND1 | A_GLU_64  | OE1 | 2.699 |
| 5VXM | A_HIS_81  | ND1 | A_GLU_64  | OE2 | 3.443 |
| 5VXM | A_LYS_203 | NZ  | A_ASP_254 | OD1 | 3.048 |
| 5VXM | A_LYS_205 | NZ  | A_ASP_166 | OD2 | 2.794 |
| 5VXM | A_LYS_205 | NZ  | B_ASP_53  | OD1 | 3.221 |

|      |           |     |            |     |       |
|------|-----------|-----|------------|-----|-------|
| 5VXM | A.LYS_205 | NZ  | B.ASP_53   | OD2 | 3.090 |
| 5VXM | A.LYS_240 | NZ  | A.ASP_208  | OD2 | 3.009 |
| 5VXM | A.LYS_291 | NZ  | A.ASP_287  | OD1 | 3.603 |
| 5VXM | A.LYS_291 | NZ  | A.ASP_287  | OD2 | 3.020 |
| 5VXM | A.LYS_291 | NZ  | A.GLU_288  | OE2 | 2.698 |
| 5VXM | B.ARG_38  | NH1 | B.ASP_90   | OD1 | 2.771 |
| 5VXM | B.ARG_38  | NH2 | B.GLU_46   | OE1 | 3.784 |
| 5VXM | B.ARG_38  | NH2 | B.GLU_46   | OE2 | 3.779 |
| 5VXM | B.ARG_38  | NH2 | B.ASP_90   | OD1 | 3.793 |
| 5VXM | B.ARG_59  | NH2 | A.GLU_201  | OE1 | 3.364 |
| 5VXM | B.LYS_65  | NZ  | B.ASP_62   | OD1 | 2.888 |
| 5VXM | B.ARG_67  | NH1 | B.ASP_90   | OD1 | 3.808 |
| 5VXM | B.ARG_67  | NH1 | B.ASP_90   | OD2 | 2.755 |
| 5VXM | B.ARG_67  | NH2 | B.ASP_90   | OD1 | 3.073 |
| 5VXM | B.ARG_67  | NH2 | B.ASP_90   | OD2 | 3.515 |
| 5VXR | H.ARG_38  | NH1 | H.ASP_89   | OD1 | 2.812 |
| 5VXR | H.ARG_38  | NH2 | H.GLU_46   | OE1 | 2.830 |
| 5VXR | H.ARG_38  | NH2 | H.ASP_89   | OD1 | 3.607 |
| 5VXR | H.ARG_66  | NH1 | H.ASP_89   | OD1 | 3.628 |
| 5VXR | H.ARG_66  | NH1 | H.ASP_89   | OD2 | 3.027 |
| 5VXR | H.ARG_66  | NH2 | H.ASP_89   | OD1 | 2.986 |
| 5VXR | H.ARG_66  | NH2 | H.ASP_89   | OD2 | 3.606 |
| 5VXR | H.ARG_97  | NH2 | H.ASP_27   | OD2 | 3.982 |
| 5VXR | H.LYS_214 | NZ  | L.GLU_123  | OE2 | 2.932 |
| 5VXR | H.LYS_215 | NZ  | H.GLU_217  | OE1 | 3.858 |
| 5VXR | L.ARG_24  | NH1 | L.ASP_70   | OD1 | 3.927 |
| 5VXR | L.LYS_39  | NZ  | L.ASP_81   | OD1 | 2.793 |
| 5VXR | L.LYS_39  | NZ  | L.ASP_81   | OD2 | 3.461 |
| 5VXR | L.ARG_61  | NH1 | L.ASP_82   | OD1 | 3.414 |
| 5VXR | L.ARG_61  | NH1 | L.ASP_82   | OD2 | 2.748 |
| 5VXR | L.ARG_61  | NH2 | L.GLU_79   | OE1 | 3.909 |
| 5VXR | L.ARG_61  | NH2 | L.ASP_82   | OD1 | 2.825 |
| 5VXR | L.ARG_61  | NH2 | L.ASP_82   | OD2 | 3.695 |
| 5VXR | L.LYS_147 | NZ  | L.GLU_154  | OE2 | 3.969 |
| 5VXR | L.LYS_149 | NZ  | L.GLU_195  | OE1 | 3.427 |
| 5VXR | L.LYS_149 | NZ  | L.GLU_195  | OE2 | 3.261 |
| 5VXR | L.ARG_155 | NH2 | L.GLU_185  | OE1 | 3.900 |
| 5VXR | L.HIS_189 | ND1 | L.ASP_151  | OD2 | 2.731 |
| 5VXR | L.LYS_199 | NZ  | L.ASP_110  | OD2 | 3.874 |
| 5VZR | H.HIS_35  | NE2 | H.ASP_100C | OD1 | 2.839 |
| 5VZR | H.HIS_35  | NE2 | H.ASP_100C | OD2 | 3.345 |
| 5VZR | H.ARG_66  | NH1 | H.ASP_86   | OD1 | 3.315 |
| 5VZR | H.ARG_66  | NH1 | H.ASP_86   | OD2 | 2.889 |
| 5VZR | H.ARG_66  | NH2 | H.ASP_86   | OD1 | 2.686 |
| 5VZR | H.ARG_66  | NH2 | H.ASP_86   | OD2 | 3.653 |
| 5VZR | H.ARG_94  | NH2 | H.ASP_101  | OD1 | 3.645 |
| 5VZR | H.ARG_94  | NH2 | H.ASP_101  | OD2 | 2.665 |
| 5VZR | H.LYS_219 | NZ  | L.GLU_123  | OE2 | 3.208 |
| 5VZR | L.LYS_39  | NZ  | L.ASP_81   | OD1 | 3.338 |
| 5VZR | L.LYS_39  | NZ  | L.ASP_81   | OD2 | 2.831 |
| 5VZR | L.ARG_61  | NH1 | L.ASP_82   | OD1 | 3.560 |
| 5VZR | L.ARG_61  | NH1 | L.ASP_82   | OD2 | 2.794 |
| 5VZR | L.ARG_61  | NH2 | L.GLU_79   | OE2 | 3.432 |
| 5VZR | L.ARG_61  | NH2 | L.ASP_82   | OD1 | 2.758 |
| 5VZR | L.ARG_61  | NH2 | L.ASP_82   | OD2 | 3.575 |
| 5VZR | L.ARG_96  | NH2 | H.ASP_100C | OD2 | 3.042 |
| 5VZR | L.LYS_147 | NZ  | L.GLU_195  | OE2 | 3.957 |
| 5VZR | L.LYS_149 | NZ  | L.GLU_195  | OE1 | 3.473 |

|      |           |     |            |     |       |
|------|-----------|-----|------------|-----|-------|
| 5VZR | L_LYS_149 | NZ  | L_GLU_195  | OE2 | 3.623 |
| 5VZR | L_ARG_155 | NH1 | L_GLU_185  | OE1 | 3.298 |
| 5VZR | L_ARG_155 | NH2 | L_GLU_185  | OE1 | 3.461 |
| 5VZR | L_LYS_183 | NZ  | L_GLU_187  | OE1 | 3.869 |
| 5VZR | L_HIS_189 | ND1 | L_ASP_151  | OD2 | 2.938 |
| 5VZR | L_LYS_199 | NZ  | L_ASP_110  | OD1 | 3.115 |
| 5VZR | L_LYS_199 | NZ  | L_ASP_110  | OD2 | 3.180 |
| 5VZR | A_HIS_35  | NE2 | A_ASP_100C | OD1 | 2.841 |
| 5VZR | A_HIS_35  | NE2 | A_ASP_100C | OD2 | 3.362 |
| 5VZR | A_ARG_66  | NH1 | A_ASP_86   | OD1 | 3.497 |
| 5VZR | A_ARG_66  | NH1 | A_ASP_86   | OD2 | 2.943 |
| 5VZR | A_ARG_66  | NH2 | A_ASP_86   | OD1 | 2.855 |
| 5VZR | A_ARG_66  | NH2 | A_ASP_86   | OD2 | 3.669 |
| 5VZR | A_ARG_94  | NH2 | A_ASP_101  | OD1 | 3.759 |
| 5VZR | A_ARG_94  | NH2 | A_ASP_101  | OD2 | 2.688 |
| 5VZR | A_LYS_219 | NZ  | B_GLU_123  | OE1 | 3.381 |
| 5VZR | B_ARG_24  | NH1 | B_ASP_70   | OD1 | 3.001 |
| 5VZR | B_ARG_24  | NH1 | B_ASP_70   | OD2 | 3.957 |
| 5VZR | B_LYS_39  | NZ  | B_ASP_81   | OD1 | 3.456 |
| 5VZR | B_LYS_39  | NZ  | B_ASP_81   | OD2 | 2.971 |
| 5VZR | B_ARG_61  | NH1 | B_ASP_82   | OD1 | 3.543 |
| 5VZR | B_ARG_61  | NH1 | B_ASP_82   | OD2 | 2.682 |
| 5VZR | B_ARG_61  | NH2 | B_GLU_79   | OE2 | 3.666 |
| 5VZR | B_ARG_61  | NH2 | B_ASP_82   | OD1 | 2.894 |
| 5VZR | B_ARG_61  | NH2 | B_ASP_82   | OD2 | 3.609 |
| 5VZR | B_ARG_96  | NH2 | A_ASP_100C | OD2 | 2.983 |
| 5VZR | B_LYS_147 | NZ  | B_GLU_154  | OE1 | 3.313 |
| 5VZR | B_LYS_147 | NZ  | B_GLU_154  | OE2 | 3.668 |
| 5VZR | B_LYS_149 | NZ  | B_GLU_195  | OE1 | 2.858 |
| 5VZR | B_LYS_149 | NZ  | B_GLU_195  | OE2 | 3.431 |
| 5VZR | B_ARG_155 | NH2 | B_GLU_185  | OE2 | 3.691 |
| 5VZR | B_LYS_183 | NZ  | B_GLU_187  | OE1 | 3.084 |
| 5VZR | B_LYS_183 | NZ  | B_GLU_187  | OE2 | 3.264 |
| 5VZR | B_ARG_188 | NH2 | B_GLU_185  | OE1 | 2.762 |
| 5VZR | B_HIS_189 | ND1 | B_ASP_151  | OD2 | 3.256 |
| 5VZR | B_HIS_189 | NE2 | B_GLU_185  | OE2 | 2.898 |
| 5W2B | H_ARG_41  | NH1 | H_ASP_93   | OD1 | 2.811 |
| 5W2B | H_ARG_41  | NH2 | H_GLU_49   | OE1 | 3.026 |
| 5W2B | H_ARG_41  | NH2 | H_GLU_49   | OE2 | 3.821 |
| 5W2B | H_ARG_41  | NH2 | H_ASP_93   | OD1 | 3.696 |
| 5W2B | H_LYS_68  | NZ  | H_ASP_65   | OD1 | 3.641 |
| 5W2B | H_ARG_70  | NH1 | H_ASP_93   | OD2 | 3.880 |
| 5W2B | H_ARG_70  | NH2 | H_ASP_93   | OD1 | 3.178 |
| 5W2B | H_ARG_70  | NH2 | H_ASP_93   | OD2 | 3.275 |
| 5W2B | H_ARG_90  | NH1 | H_GLU_92   | OE2 | 3.439 |
| 5W2B | H_ARG_101 | NH2 | H_ASP_116  | OD1 | 3.885 |
| 5W2B | H_ARG_101 | NH2 | H_ASP_116  | OD2 | 2.522 |
| 5W2B | H_LYS_158 | NZ  | H_ASP_159  | OD1 | 3.610 |
| 5W2B | H_LYS_158 | NZ  | H_ASP_159  | OD2 | 3.126 |
| 5W2B | H_LYS_225 | NZ  | H_GLU_227  | OE2 | 3.518 |
| 5W2B | L_ARG_25  | NH1 | L_ASP_71   | OD2 | 3.833 |
| 5W2B | L_ARG_25  | NH2 | L_ASP_71   | OD2 | 3.096 |
| 5W2B | L_ARG_62  | NH1 | L_GLU_82   | OE2 | 3.995 |
| 5W2B | L_ARG_62  | NH2 | L_GLU_82   | OE2 | 2.777 |
| 5W2B | L_ARG_62  | NH2 | L_ASP_83   | OD1 | 2.811 |
| 5W2B | L_ARG_62  | NH2 | L_ASP_83   | OD2 | 3.485 |
| 5W2B | L_LYS_104 | NZ  | L_GLU_166  | OE1 | 2.996 |
| 5W2B | L_LYS_104 | NZ  | L_GLU_166  | OE2 | 3.194 |

|      |            |     |            |     |       |
|------|------------|-----|------------|-----|-------|
| 5W2B | L_LYS_127  | NZ  | L_ASP_123  | OD1 | 2.992 |
| 5W2B | L_LYS_127  | NZ  | L_ASP_123  | OD2 | 3.947 |
| 5W2B | L_ARG_143  | NH1 | L_GLU_106  | OE1 | 3.368 |
| 5W2B | L_ARG_143  | NH1 | L_GLU_106  | OE2 | 3.850 |
| 5W2B | L_ARG_143  | NH2 | L_GLU_106  | OE1 | 3.513 |
| 5W2B | L_ARG_143  | NH2 | L_GLU_106  | OE2 | 2.678 |
| 5W2B | L_LYS_150  | NZ  | L_GLU_196  | OE1 | 3.463 |
| 5W2B | L_HIS_190  | ND1 | L_ASP_152  | OD2 | 3.239 |
| 5W2B | A_HIS_653  | NE2 | A_GLU_649  | OE1 | 3.647 |
| 5W2B | A_LYS_672  | NZ  | A_GLU_674  | OE2 | 3.333 |
| 5W2B | A_ARG_728  | NH1 | A_ASP_729  | OD1 | 3.255 |
| 5W2B | A_HIS_738  | ND1 | A_ASP_682  | OD1 | 3.266 |
| 5W2B | A_HIS_738  | ND1 | A_ASP_682  | OD2 | 2.866 |
| 5W9H | A_ARG_758  | NH1 | p_ASP_740  | OD1 | 3.106 |
| 5W9H | A_LYS_779  | NZ  | A_GLU_1148 | OE1 | 2.900 |
| 5W9H | A_LYS_801  | NZ  | A_ASP_843  | OD1 | 2.837 |
| 5W9H | A_LYS_801  | NZ  | A_ASP_843  | OD2 | 3.404 |
| 5W9H | A_LYS_807  | NZ  | A_GLU_818  | OE2 | 3.090 |
| 5W9H | A_ARG_841  | NH2 | A_ASP_844  | OD2 | 2.768 |
| 5W9H | A_ARG_847  | NH2 | A_ASP_844  | OD1 | 2.690 |
| 5W9H | A_ARG_887  | NH2 | A_ASP_892  | OD1 | 2.869 |
| 5W9H | A_ARG_887  | NH2 | A_ASP_892  | OD2 | 3.887 |
| 5W9H | A_HIS_1020 | NE2 | A_ASP_1024 | OD2 | 2.968 |
| 5W9H | A_ARG_1057 | NH1 | A_ASP_1053 | OD2 | 3.477 |
| 5W9H | A_ARG_1057 | NH2 | A_ASP_1053 | OD1 | 3.268 |
| 5W9H | A_ARG_1057 | NH2 | A_ASP_1053 | OD2 | 3.305 |
| 5W9H | A_LYS_1102 | NZ  | A_GLU_793  | OE1 | 2.898 |
| 5W9H | A_LYS_1102 | NZ  | A_GLU_793  | OE2 | 3.271 |
| 5W9H | A_ARG_1113 | NH1 | A_GLU_1105 | OE1 | 3.282 |
| 5W9H | A_ARG_1113 | NH1 | A_GLU_1105 | OE2 | 3.829 |
| 5W9H | A_ARG_1113 | NH2 | D_GLU_1105 | OE1 | 3.583 |
| 5W9H | A_HIS_1138 | NE2 | A_GLU_793  | OE1 | 3.148 |
| 5W9H | A_LYS_1174 | NZ  | A_GLU_1183 | OE1 | 2.609 |
| 5W9H | A_ARG_1179 | NH2 | B_ASP_31   | OD1 | 2.752 |
| 5W9H | B_LYS_19   | NZ  | B_GLU_81   | OE1 | 3.976 |
| 5W9H | B_LYS_38   | NZ  | B_ASP_86   | OD1 | 3.271 |
| 5W9H | B_LYS_62   | NZ  | B_GLU_46   | OE1 | 2.834 |
| 5W9H | B_LYS_62   | NZ  | B_GLU_46   | OE2 | 3.973 |
| 5W9H | B_ARG_66   | NH2 | B_ASP_86   | OD1 | 2.870 |
| 5W9H | B_ARG_66   | NH2 | B_ASP_86   | OD2 | 3.022 |
| 5W9H | B_ARG_94   | NH2 | B_ASP_101  | OD2 | 2.758 |
| 5W9H | B_LYS_95   | NZ  | B_ASP_100C | OD2 | 3.768 |
| 5W9H | C_ARG_24   | NH1 | C_ASP_70   | OD1 | 2.971 |
| 5W9H | C_ARG_24   | NH1 | C_ASP_70   | OD2 | 3.712 |
| 5W9H | C_ARG_61   | NH1 | C_ASP_82   | OD1 | 3.151 |
| 5W9H | C_ARG_61   | NH1 | C_ASP_82   | OD2 | 3.358 |
| 5W9H | C_LYS_92   | NZ  | C_GLU_93   | OE1 | 3.334 |
| 5W9H | C_ARG_96   | NH1 | B_ASP_100C | OD2 | 2.859 |
| 5W9H | C_ARG_96   | NH2 | A_GLU_1183 | OE1 | 3.871 |
| 5W9H | C_ARG_96   | NH2 | A_GLU_1183 | OE2 | 2.827 |
| 5W9H | C_ARG_96   | NH2 | B_ASP_100C | OD2 | 2.885 |
| 5W9H | C_LYS_103  | NZ  | C_GLU_105  | OE1 | 3.465 |
| 5W9H | D_LYS_779  | NZ  | D_ASP_771  | OD2 | 3.242 |
| 5W9H | D_LYS_779  | NZ  | D_GLU_1148 | OE1 | 3.666 |
| 5W9H | D_LYS_801  | NZ  | D_ASP_843  | OD1 | 2.844 |
| 5W9H | D_LYS_801  | NZ  | D_ASP_843  | OD2 | 3.387 |
| 5W9H | D_LYS_816  | NZ  | D_ASP_1064 | OD1 | 3.505 |
| 5W9H | D_LYS_816  | NZ  | D_ASP_1064 | OD2 | 2.929 |



|      |            |     |            |     |       |
|------|------------|-----|------------|-----|-------|
| 5W9H | D_ARG.841  | NH1 | D_GLU.1090 | OE1 | 2.843 |
| 5W9H | D_ARG.841  | NH2 | D_GLU.1090 | OE1 | 2.754 |
| 5W9H | D_ARG.847  | NH2 | D_ASP.844  | OD1 | 2.671 |
| 5W9H | D_ARG.887  | NH2 | D_ASP.892  | OD1 | 2.891 |
| 5W9H | D_ARG.887  | NH2 | D_ASP.892  | OD2 | 3.987 |
| 5W9H | D_HIS.1020 | NE2 | D_ASP.1024 | OD1 | 3.700 |
| 5W9H | D_HIS.1020 | NE2 | D_ASP.1024 | OD2 | 3.194 |
| 5W9H | D_ARG.1057 | NH1 | D_ASP.1053 | OD1 | 3.487 |
| 5W9H | D_LYS.1102 | NZ  | D_GLU.793  | OE1 | 2.907 |
| 5W9H | D_LYS.1102 | NZ  | D_GLU.793  | OE2 | 3.062 |
| 5W9H | D_ARG.1113 | NH1 | G_GLU.1105 | OE1 | 3.247 |
| 5W9H | D_ARG.1113 | NH2 | D_GLU.1105 | OE1 | 3.897 |
| 5W9H | D_ARG.1113 | NH2 | D_GLU.1105 | OE2 | 3.876 |
| 5W9H | D_HIS.1138 | NE2 | D_GLU.793  | OE1 | 2.876 |
| 5W9H | D_LYS.1174 | NZ  | D_GLU.1183 | OE2 | 2.738 |
| 5W9H | E_LYS.38   | NZ  | E_ASP.86   | OD1 | 3.906 |
| 5W9H | E_LYS.62   | NZ  | E_GLU.46   | OE1 | 2.861 |
| 5W9H | E_LYS.62   | NZ  | E_GLU.46   | OE2 | 3.757 |
| 5W9H | E_ARG.66   | NH1 | E_ASP.86   | OD1 | 2.947 |
| 5W9H | E_ARG.66   | NH1 | E_ASP.86   | OD2 | 3.381 |
| 5W9H | E_ARG.94   | NH2 | E_ASP.101  | OD2 | 3.822 |
| 5W9H | E_LYS.95   | NZ  | E_ASP.100C | OD1 | 3.733 |
| 5W9H | F_ARG.61   | NH1 | F_ASP.82   | OD1 | 3.217 |
| 5W9H | F_ARG.61   | NH1 | F_ASP.82   | OD2 | 3.689 |
| 5W9H | F_ARG.61   | NH2 | F_ASP.82   | OD1 | 3.660 |
| 5W9H | F_ARG.61   | NH2 | F_ASP.82   | OD2 | 2.716 |
| 5W9H | F_ARG.96   | NH1 | E_ASP.100C | OD2 | 2.830 |
| 5W9H | F_ARG.96   | NH2 | E_ASP.100C | OD2 | 2.948 |
| 5W9H | G_ARG.758  | NH1 | r_ASP.740  | OD1 | 2.922 |
| 5W9H | G_LYS.779  | NZ  | G_ASP.771  | OD2 | 2.887 |
| 5W9H | G_LYS.779  | NZ  | G_GLU.1148 | OE1 | 3.575 |
| 5W9H | G_LYS.801  | NZ  | G_ASP.843  | OD1 | 2.852 |
| 5W9H | G_LYS.801  | NZ  | G_ASP.843  | OD2 | 3.379 |
| 5W9H | G_LYS.807  | NZ  | G_GLU.818  | OE1 | 2.858 |
| 5W9H | G_LYS.807  | NZ  | G_GLU.818  | OE2 | 3.782 |
| 5W9H | G_LYS.816  | NZ  | G_ASP.1064 | OD1 | 3.397 |
| 5W9H | G_LYS.816  | NZ  | G_ASP.1064 | OD2 | 2.986 |
| 5W9H | G_ARG.841  | NH2 | G_ASP.844  | OD2 | 2.751 |
| 5W9H | G_ARG.847  | NH2 | G_ASP.844  | OD1 | 2.677 |
| 5W9H | G_ARG.887  | NH2 | G_ASP.892  | OD1 | 2.871 |
| 5W9H | G_ARG.887  | NH2 | G_ASP.892  | OD2 | 3.986 |
| 5W9H | G_HIS.1020 | NE2 | G_ASP.1024 | OD2 | 2.969 |
| 5W9H | G_LYS.1102 | NZ  | G_GLU.793  | OE1 | 3.868 |
| 5W9H | G_LYS.1102 | NZ  | G_GLU.793  | OE2 | 3.570 |
| 5W9H | G_ARG.1113 | NH2 | A_GLU.1105 | OE1 | 3.110 |
| 5W9H | G_HIS.1138 | NE2 | G_GLU.793  | OE2 | 2.825 |
| 5W9H | G_LYS.1174 | NZ  | G_GLU.1183 | OE1 | 2.701 |
| 5W9H | G_ARG.1179 | NH2 | H_ASP.31   | OD1 | 2.809 |
| 5W9H | H_LYS.38   | NZ  | H_ASP.86   | OD1 | 3.793 |
| 5W9H | H_LYS.62   | NZ  | H_GLU.46   | OE1 | 3.235 |
| 5W9H | H_LYS.62   | NZ  | H_GLU.46   | OE2 | 2.887 |
| 5W9H | H_ARG.66   | NH1 | H_ASP.86   | OD1 | 3.910 |
| 5W9H | H_ARG.66   | NH1 | H_ASP.86   | OD2 | 3.798 |
| 5W9H | H_ARG.66   | NH2 | H_ASP.86   | OD1 | 3.900 |
| 5W9H | H_ARG.66   | NH2 | H_ASP.86   | OD2 | 2.887 |
| 5W9H | H_ARG.94   | NH2 | H_ASP.101  | OD2 | 2.744 |
| 5W9H | H_LYS.95   | NZ  | H_ASP.100C | OD1 | 3.649 |
| 5W9H | L_ARG.24   | NH1 | L_ASP.70   | OD1 | 2.956 |

|      |           |     |            |     |       |
|------|-----------|-----|------------|-----|-------|
| 5W9H | L_ARG_24  | NH1 | L_ASP_70   | OD2 | 3.606 |
| 5W9H | L_ARG_24  | NH2 | L_ASP_70   | OD1 | 3.918 |
| 5W9H | L_ARG_61  | NH1 | L_GLU_79   | OE2 | 2.865 |
| 5W9H | L_ARG_61  | NH1 | L_ASP_82   | OD1 | 3.820 |
| 5W9H | L_ARG_61  | NH1 | L_ASP_82   | OD2 | 3.014 |
| 5W9H | L_ARG_61  | NH2 | L_GLU_79   | OE2 | 2.954 |
| 5W9H | L_ARG_96  | NH1 | H_ASP_100C | OD2 | 2.791 |
| 5W9H | L_ARG_96  | NH2 | G_GLU_1183 | OE2 | 2.911 |
| 5W9H | L_ARG_96  | NH2 | H_ASP_100C | OD2 | 2.950 |
| 5W9H | p_HIS_81  | ND1 | p_ASP_80   | OD1 | 3.485 |
| 5W9H | p_LYS_99  | NZ  | p_GLU_32   | OE1 | 2.779 |
| 5W9H | p_LYS_110 | NZ  | p_ASP_83   | OD2 | 2.727 |
| 5W9H | p_ARG_119 | NH2 | p_ASP_54   | OD2 | 3.407 |
| 5W9H | p_LYS_142 | NZ  | p_GLU_252  | OE1 | 3.739 |
| 5W9H | p_LYS_142 | NZ  | p_GLU_252  | OE2 | 3.528 |
| 5W9H | p_ARG_190 | NH1 | p_ASP_24   | OD2 | 3.182 |
| 5W9H | p_ARG_190 | NH2 | p_ASP_24   | OD2 | 3.492 |
| 5W9H | p_HIS_194 | NE2 | p_GLU_32   | OE1 | 3.741 |
| 5W9H | p_ARG_235 | NH2 | p_GLU_188  | OE1 | 2.810 |
| 5W9H | p_ARG_235 | NH2 | p_GLU_188  | OE2 | 3.752 |
| 5W9H | p_ARG_269 | NH1 | p_GLU_252  | OE1 | 3.003 |
| 5W9H | p_ARG_334 | NH2 | p_ASP_330  | OD1 | 3.952 |
| 5W9H | p_ARG_334 | NH2 | p_ASP_330  | OD2 | 3.020 |
| 5W9H | p_ARG_335 | NH2 | p_ASP_326  | OD2 | 2.866 |
| 5W9H | p_ARG_401 | NH2 | p_ASP_444  | OD1 | 3.583 |
| 5W9H | p_ARG_401 | NH2 | p_ASP_444  | OD2 | 2.889 |
| 5W9H | p_LYS_496 | NZ  | p_GLU_536  | OE1 | 3.232 |
| 5W9H | p_LYS_496 | NZ  | p_GLU_536  | OE2 | 3.655 |
| 5W9H | p_LYS_502 | NZ  | p_GLU_513  | OE2 | 2.865 |
| 5W9H | p_ARG_614 | NH2 | p_GLU_605  | OE2 | 2.933 |
| 5W9H | p_ARG_629 | NH1 | p_GLU_376  | OE1 | 3.493 |
| 5W9H | p_ARG_629 | NH1 | p_ASP_644  | OD1 | 2.871 |
| 5W9H | p_ARG_629 | NH1 | p_ASP_644  | OD2 | 3.990 |
| 5W9H | p_ARG_629 | NH2 | p_ASP_644  | OD1 | 2.880 |
| 5W9H | p_ARG_629 | NH2 | p_ASP_644  | OD2 | 3.886 |
| 5W9H | p_LYS_665 | NZ  | p_ASP_355  | OD2 | 3.928 |
| 5W9H | p_HIS_681 | NE2 | D_ASP_910  | OD1 | 2.819 |
| 5W9H | p_HIS_681 | NE2 | D_ASP_910  | OD2 | 3.760 |
| 5W9H | p_ARG_694 | NH1 | p_ASP_343  | OD1 | 3.986 |
| 5W9H | p_ARG_694 | NH1 | p_ASP_343  | OD2 | 2.926 |
| 5W9H | p_ARG_694 | NH2 | p_ASP_343  | OD1 | 3.403 |
| 5W9H | p_ARG_694 | NH2 | p_ASP_343  | OD2 | 3.427 |
| 5W9H | p_LYS_728 | NZ  | p_ASP_726  | OD2 | 2.881 |
| 5W9H | q_LYS_99  | NZ  | q_GLU_32   | OE1 | 2.764 |
| 5W9H | q_LYS_110 | NZ  | q_ASP_83   | OD2 | 2.762 |
| 5W9H | q_LYS_110 | NZ  | q_ASP_108  | OD2 | 3.795 |
| 5W9H | q_ARG_119 | NH2 | q_ASP_54   | OD2 | 3.096 |
| 5W9H | q_LYS_142 | NZ  | q_GLU_252  | OE1 | 2.907 |
| 5W9H | q_LYS_142 | NZ  | q_GLU_252  | OE2 | 3.991 |
| 5W9H | q_ARG_181 | NH1 | q_ASP_174  | OD2 | 3.114 |
| 5W9H | q_HIS_194 | NE2 | q_GLU_32   | OE1 | 3.504 |
| 5W9H | q_HIS_208 | ND1 | q_ASP_213  | OD2 | 3.767 |
| 5W9H | q_ARG_235 | NH1 | q_ASP_24   | OD1 | 3.943 |
| 5W9H | q_ARG_235 | NH1 | q_ASP_24   | OD2 | 3.081 |
| 5W9H | q_ARG_235 | NH2 | q_ASP_24   | OD2 | 2.878 |
| 5W9H | q_ARG_235 | NH2 | q_GLU_188  | OE1 | 2.783 |
| 5W9H | q_ARG_235 | NH2 | q_GLU_188  | OE2 | 3.707 |
| 5W9H | q_ARG_269 | NH1 | q_GLU_252  | OE2 | 3.153 |

|      |            |     |            |     |       |
|------|------------|-----|------------|-----|-------|
| 5W9H | q_ARG_335  | NH2 | q_ASP_326  | OD2 | 2.856 |
| 5W9H | q_ARG_401  | NH2 | q_ASP_444  | OD1 | 3.945 |
| 5W9H | q_ARG_401  | NH2 | q_ASP_444  | OD2 | 3.807 |
| 5W9H | q_LYS_502  | NZ  | q_GLU_513  | OE2 | 2.769 |
| 5W9H | q_LYS_543  | NZ  | q_GLU_549  | OE1 | 3.143 |
| 5W9H | q_LYS_543  | NZ  | q_GLU_549  | OE2 | 2.917 |
| 5W9H | q_LYS_587  | NZ  | q_GLU_382  | OE2 | 2.893 |
| 5W9H | q_ARG_614  | NH1 | q_GLU_605  | OE2 | 3.381 |
| 5W9H | q_ARG_629  | NH1 | q_ASP_644  | OD1 | 3.524 |
| 5W9H | q_ARG_629  | NH1 | q_ASP_644  | OD2 | 3.882 |
| 5W9H | q_LYS_668  | NZ  | q_ASP_355  | OD1 | 3.851 |
| 5W9H | q_HIS_681  | ND1 | q_GLU_680  | OE2 | 3.860 |
| 5W9H | q_LYS_728  | NZ  | q_ASP_726  | OD2 | 2.831 |
| 5W9H | r_LYS_27   | NZ  | r_GLU_230  | OE2 | 2.686 |
| 5W9H | r_LYS_52   | NZ  | r_ASP_49   | OD2 | 3.239 |
| 5W9H | r_LYS_99   | NZ  | r_GLU_32   | OE1 | 2.778 |
| 5W9H | r_LYS_110  | NZ  | r_ASP_83   | OD2 | 3.861 |
| 5W9H | r_LYS_110  | NZ  | r_ASP_108  | OD1 | 3.126 |
| 5W9H | r_LYS_110  | NZ  | r_ASP_108  | OD2 | 3.630 |
| 5W9H | r_ARG_119  | NH2 | r_ASP_54   | OD2 | 3.338 |
| 5W9H | r_LYS_142  | NZ  | r_GLU_252  | OE2 | 3.806 |
| 5W9H | r_ARG_181  | NH1 | r_ASP_174  | OD2 | 3.239 |
| 5W9H | r_ARG_190  | NH1 | r_ASP_24   | OD1 | 3.106 |
| 5W9H | r_ARG_190  | NH1 | r_ASP_24   | OD2 | 3.916 |
| 5W9H | r_ARG_190  | NH2 | r_ASP_24   | OD1 | 2.743 |
| 5W9H | r_HIS_194  | NE2 | r_GLU_32   | OE1 | 3.751 |
| 5W9H | r_ARG_235  | NH2 | r_GLU_188  | OE1 | 3.176 |
| 5W9H | r_ARG_269  | NH1 | r_GLU_252  | OE1 | 3.002 |
| 5W9H | r_ARG_335  | NH2 | r_ASP_326  | OD2 | 2.830 |
| 5W9H | r_ARG_401  | NH2 | r_ASP_444  | OD1 | 3.679 |
| 5W9H | r_ARG_401  | NH2 | r_ASP_444  | OD2 | 3.146 |
| 5W9H | r_LYS_413  | NZ  | r_GLU_382  | OE1 | 3.858 |
| 5W9H | r_LYS_413  | NZ  | r_GLU_382  | OE2 | 2.731 |
| 5W9H | r_LYS_502  | NZ  | r_GLU_513  | OE1 | 3.965 |
| 5W9H | r_LYS_502  | NZ  | r_GLU_513  | OE2 | 2.807 |
| 5W9H | r_ARG_511  | NH2 | r_ASP_509  | OD2 | 3.938 |
| 5W9H | r_ARG_614  | NH1 | r_GLU_605  | OE2 | 3.430 |
| 5W9H | r_ARG_629  | NH2 | r_ASP_644  | OD1 | 3.737 |
| 5W9H | r_LYS_665  | NZ  | r_GLU_666  | OE2 | 2.722 |
| 5W9H | r_HIS_681  | NE2 | A_ASP_910  | OD1 | 2.850 |
| 5W9H | r_HIS_681  | NE2 | A_ASP_910  | OD2 | 3.840 |
| 5W9H | r_LYS_728  | NZ  | r_ASP_726  | OD2 | 2.800 |
| 5W9I | A_ARG_758  | NH1 | B_ASP_740  | OD1 | 2.830 |
| 5W9I | A_LYS_779  | NZ  | A_ASP_771  | OD2 | 2.920 |
| 5W9I | A_LYS_779  | NZ  | A_GLU_1148 | OE1 | 3.679 |
| 5W9I | A_LYS_801  | NZ  | A_ASP_843  | OD1 | 2.853 |
| 5W9I | A_LYS_801  | NZ  | A_ASP_843  | OD2 | 3.508 |
| 5W9I | A_LYS_807  | NZ  | A_GLU_818  | OE1 | 3.679 |
| 5W9I | A_LYS_807  | NZ  | A_GLU_818  | OE2 | 2.901 |
| 5W9I | A_LYS_816  | NZ  | A_ASP_1064 | OD1 | 3.819 |
| 5W9I | A_LYS_816  | NZ  | A_ASP_1064 | OD2 | 3.674 |
| 5W9I | A_ARG_841  | NH1 | A_GLU_1090 | OE1 | 2.870 |
| 5W9I | A_ARG_841  | NH2 | A_GLU_1090 | OE1 | 2.843 |
| 5W9I | A_ARG_847  | NH1 | F_ASP_726  | OD1 | 3.733 |
| 5W9I | A_ARG_847  | NH1 | F_ASP_726  | OD2 | 2.884 |
| 5W9I | A_ARG_847  | NH2 | A_ASP_844  | OD1 | 2.784 |
| 5W9I | A_ARG_887  | NH2 | A_ASP_892  | OD1 | 2.922 |
| 5W9I | A_HIS_1020 | NE2 | A_ASP_1024 | OD2 | 3.009 |

|      |            |     |            |     |       |
|------|------------|-----|------------|-----|-------|
| 5W9I | A_LYS_1021 | NZ  | A_GLU_1017 | OE2 | 3.419 |
| 5W9I | A_LYS_1102 | NZ  | A_GLU_793  | OE1 | 2.923 |
| 5W9I | A_LYS_1102 | NZ  | A_GLU_793  | OE2 | 2.903 |
| 5W9I | A_ARG_1113 | NH1 | A_GLU_1105 | OE1 | 2.902 |
| 5W9I | A_ARG_1113 | NH1 | A_GLU_1105 | OE2 | 3.646 |
| 5W9I | A_ARG_1113 | NH2 | I_GLU_1105 | OE2 | 2.773 |
| 5W9I | A_HIS_1138 | NE2 | A_GLU_793  | OE2 | 2.945 |
| 5W9I | A_LYS_1174 | NZ  | A_GLU_1183 | OE1 | 2.820 |
| 5W9I | A_ARG_1179 | NH2 | C_ASP_31   | OD1 | 2.834 |
| 5W9I | B_LYS_99   | NZ  | B_GLU_32   | OE1 | 2.800 |
| 5W9I | B_LYS_110  | NZ  | B_ASP_83   | OD2 | 2.763 |
| 5W9I | B_ARG_119  | NH2 | B_ASP_54   | OD2 | 3.186 |
| 5W9I | B_LYS_142  | NZ  | B_GLU_252  | OE1 | 2.883 |
| 5W9I | B_HIS_194  | NE2 | B_GLU_32   | OE1 | 3.646 |
| 5W9I | B_ARG_235  | NH1 | B_ASP_24   | OD1 | 3.781 |
| 5W9I | B_ARG_235  | NH1 | B_ASP_24   | OD2 | 3.330 |
| 5W9I | B_ARG_235  | NH2 | B_ASP_24   | OD2 | 2.925 |
| 5W9I | B_ARG_235  | NH2 | B_GLU_188  | OE1 | 2.886 |
| 5W9I | B_ARG_235  | NH2 | B_GLU_188  | OE2 | 3.821 |
| 5W9I | B_ARG_335  | NH2 | B_ASP_326  | OD2 | 2.866 |
| 5W9I | B_ARG_614  | NH1 | B_GLU_367  | OE2 | 2.904 |
| 5W9I | B_ARG_614  | NH2 | B_GLU_367  | OE2 | 2.914 |
| 5W9I | B_ARG_629  | NH1 | B_GLU_376  | OE1 | 3.454 |
| 5W9I | B_ARG_629  | NH1 | B_ASP_644  | OD1 | 2.966 |
| 5W9I | B_ARG_629  | NH1 | B_ASP_644  | OD2 | 3.812 |
| 5W9I | B_ARG_629  | NH2 | B_ASP_644  | OD1 | 2.995 |
| 5W9I | B_LYS_665  | NZ  | B_GLU_357  | OE1 | 2.866 |
| 5W9I | B_LYS_665  | NZ  | B_GLU_357  | OE2 | 3.798 |
| 5W9I | B_LYS_668  | NZ  | B_ASP_355  | OD1 | 2.986 |
| 5W9I | B_HIS_681  | NE2 | I_ASP_910  | OD1 | 2.801 |
| 5W9I | B_HIS_681  | NE2 | I_ASP_910  | OD2 | 3.893 |
| 5W9I | B_LYS_728  | NZ  | B_ASP_726  | OD2 | 2.881 |
| 5W9I | C_LYS_38   | NZ  | C_ASP_86   | OD1 | 3.889 |
| 5W9I | C_LYS_62   | NZ  | C_GLU_46   | OE1 | 3.450 |
| 5W9I | C_LYS_62   | NZ  | C_GLU_46   | OE2 | 2.930 |
| 5W9I | C_ARG_66   | NH1 | C_ASP_86   | OD1 | 3.145 |
| 5W9I | C_ARG_66   | NH1 | C_ASP_86   | OD2 | 3.495 |
| 5W9I | C_ARG_66   | NH2 | C_ASP_86   | OD1 | 3.789 |
| 5W9I | C_ARG_66   | NH2 | C_ASP_86   | OD2 | 2.783 |
| 5W9I | C_ARG_94   | NH2 | C_ASP_101  | OD1 | 2.867 |
| 5W9I | C_ARG_94   | NH2 | C_ASP_101  | OD2 | 3.643 |
| 5W9I | C_LYS_95   | NZ  | C_ASP_100C | OD1 | 3.543 |
| 5W9I | C_LYS_95   | NZ  | C_ASP_100C | OD2 | 3.727 |
| 5W9I | D_ARG_24   | NH2 | D_ASP_70   | OD1 | 2.945 |
| 5W9I | D_ARG_24   | NH2 | D_ASP_70   | OD2 | 3.831 |
| 5W9I | D_ARG_61   | NH1 | D_ASP_82   | OD1 | 3.202 |
| 5W9I | D_ARG_61   | NH1 | D_ASP_82   | OD2 | 3.681 |
| 5W9I | D_ARG_61   | NH2 | D_ASP_82   | OD1 | 3.712 |
| 5W9I | D_ARG_61   | NH2 | D_ASP_82   | OD2 | 2.777 |
| 5W9I | D_ARG_96   | NH1 | C_ASP_100C | OD2 | 2.837 |
| 5W9I | D_ARG_96   | NH2 | A_GLU_1183 | OE2 | 2.862 |
| 5W9I | D_ARG_96   | NH2 | C_ASP_100C | OD2 | 2.920 |
| 5W9I | D_LYS_103  | NZ  | D_GLU_105  | OE2 | 3.345 |
| 5W9I | E_ARG_758  | NH1 | F_ASP_740  | OD1 | 2.820 |
| 5W9I | E_LYS_779  | NZ  | E_ASP_771  | OD2 | 2.924 |
| 5W9I | E_LYS_779  | NZ  | E_GLU_1148 | OE1 | 3.718 |
| 5W9I | E_LYS_801  | NZ  | E_ASP_843  | OD1 | 2.850 |
| 5W9I | E_LYS_801  | NZ  | E_ASP_843  | OD2 | 3.507 |

|      |            |     |            |     |       |
|------|------------|-----|------------|-----|-------|
| 5W9I | E_LYS_807  | NZ  | E_GLU_818  | OE1 | 3.745 |
| 5W9I | E_LYS_807  | NZ  | E_GLU_818  | OE2 | 3.005 |
| 5W9I | E_LYS_816  | NZ  | E_ASP_1064 | OD1 | 3.825 |
| 5W9I | E_LYS_816  | NZ  | E_ASP_1064 | OD2 | 3.707 |
| 5W9I | E_ARG_841  | NH1 | E_GLU_1090 | OE1 | 2.868 |
| 5W9I | E_ARG_841  | NH2 | E_GLU_1090 | OE1 | 2.843 |
| 5W9I | E_ARG_847  | NH1 | J_ASP_726  | OD1 | 3.709 |
| 5W9I | E_ARG_847  | NH1 | J_ASP_726  | OD2 | 2.881 |
| 5W9I | E_ARG_847  | NH2 | E_ASP_844  | OD1 | 2.801 |
| 5W9I | E_ARG_887  | NH2 | E_ASP_892  | OD1 | 2.928 |
| 5W9I | E_HIS_1020 | NE2 | E_ASP_1024 | OD2 | 2.999 |
| 5W9I | E_LYS_1021 | NZ  | E_GLU_1017 | OE2 | 3.409 |
| 5W9I | E_LYS_1102 | NZ  | E_GLU_793  | OE1 | 2.968 |
| 5W9I | E_LYS_1102 | NZ  | E_GLU_793  | OE2 | 2.898 |
| 5W9I | E_ARG_1113 | NH1 | E_GLU_1105 | OE1 | 2.970 |
| 5W9I | E_ARG_1113 | NH2 | E_GLU_1105 | OE1 | 3.046 |
| 5W9I | E_ARG_1113 | NH2 | E_GLU_1105 | OE2 | 3.856 |
| 5W9I | E_HIS_1138 | NE2 | E_GLU_793  | OE2 | 2.952 |
| 5W9I | E_LYS_1174 | NZ  | E_GLU_1183 | OE1 | 2.800 |
| 5W9I | E_ARG_1179 | NH2 | G_ASP_31   | OD1 | 2.831 |
| 5W9I | F_LYS_99   | NZ  | F_GLU_32   | OE1 | 2.800 |
| 5W9I | F_LYS_110  | NZ  | F_ASP_83   | OD2 | 2.755 |
| 5W9I | F_ARG_119  | NH2 | F_ASP_54   | OD2 | 3.152 |
| 5W9I | F_LYS_142  | NZ  | F_GLU_252  | OE1 | 2.880 |
| 5W9I | F_HIS_194  | NE2 | F_GLU_32   | OE1 | 3.655 |
| 5W9I | F_ARG_235  | NH1 | F_ASP_24   | OD1 | 3.849 |
| 5W9I | F_ARG_235  | NH1 | F_ASP_24   | OD2 | 3.358 |
| 5W9I | F_ARG_235  | NH2 | F_ASP_24   | OD2 | 2.934 |
| 5W9I | F_ARG_235  | NH2 | F_GLU_188  | OE1 | 2.870 |
| 5W9I | F_ARG_235  | NH2 | F_GLU_188  | OE2 | 3.760 |
| 5W9I | F_ARG_335  | NH2 | F_ASP_326  | OD2 | 2.868 |
| 5W9I | F_ARG_614  | NH1 | F_GLU_367  | OE2 | 3.306 |
| 5W9I | F_ARG_614  | NH2 | F_GLU_367  | OE2 | 3.411 |
| 5W9I | F_ARG_629  | NH1 | F_GLU_376  | OE1 | 3.445 |
| 5W9I | F_ARG_629  | NH1 | F_ASP_644  | OD1 | 2.966 |
| 5W9I | F_ARG_629  | NH1 | F_ASP_644  | OD2 | 3.809 |
| 5W9I | F_ARG_629  | NH2 | F_ASP_644  | OD1 | 2.990 |
| 5W9I | F_LYS_665  | NZ  | F_GLU_357  | OE1 | 2.866 |
| 5W9I | F_LYS_665  | NZ  | F_GLU_357  | OE2 | 3.810 |
| 5W9I | F_HIS_681  | NE2 | A_ASP_910  | OD1 | 2.878 |
| 5W9I | F_HIS_681  | NE2 | A_ASP_910  | OD2 | 3.982 |
| 5W9I | F_HIS_681  | NE2 | F_GLU_680  | OE2 | 3.229 |
| 5W9I | F_LYS_728  | NZ  | F_ASP_726  | OD2 | 2.885 |
| 5W9I | G_LYS_38   | NZ  | G_ASP_86   | OD1 | 3.902 |
| 5W9I | G_LYS_62   | NZ  | G_GLU_46   | OE1 | 3.433 |
| 5W9I | G_LYS_62   | NZ  | G_GLU_46   | OE2 | 2.934 |
| 5W9I | G_ARG_66   | NH1 | G_ASP_86   | OD1 | 3.147 |
| 5W9I | G_ARG_66   | NH1 | G_ASP_86   | OD2 | 3.501 |
| 5W9I | G_ARG_66   | NH2 | G_ASP_86   | OD1 | 3.792 |
| 5W9I | G_ARG_66   | NH2 | G_ASP_86   | OD2 | 2.779 |
| 5W9I | G_ARG_94   | NH2 | G_ASP_101  | OD1 | 3.649 |
| 5W9I | G_ARG_94   | NH2 | G_ASP_101  | OD2 | 2.843 |
| 5W9I | G_LYS_95   | NZ  | G_ASP_100C | OD1 | 3.513 |
| 5W9I | G_LYS_95   | NZ  | G_ASP_100C | OD2 | 3.725 |
| 5W9I | H_ARG_24   | NH2 | H_ASP_70   | OD1 | 2.942 |
| 5W9I | H_ARG_24   | NH2 | H_ASP_70   | OD2 | 3.817 |
| 5W9I | H_ARG_61   | NH1 | H_ASP_82   | OD1 | 3.183 |
| 5W9I | H_ARG_61   | NH1 | H_ASP_82   | OD2 | 3.671 |

|      |            |     |            |     |       |
|------|------------|-----|------------|-----|-------|
| 5W9I | H_ARG_61   | NH2 | H_ASP_82   | OD1 | 3.703 |
| 5W9I | H_ARG_61   | NH2 | H_ASP_82   | OD2 | 2.773 |
| 5W9I | H_LYS_92   | NZ  | H_GLU_93   | OE1 | 3.454 |
| 5W9I | H_ARG_96   | NH1 | G_ASP_100C | OD2 | 2.856 |
| 5W9I | H_ARG_96   | NH2 | E_GLU_1183 | OE2 | 2.871 |
| 5W9I | H_ARG_96   | NH2 | G_ASP_100C | OD2 | 2.925 |
| 5W9I | H_LYS_103  | NZ  | H_GLU_105  | OE2 | 3.616 |
| 5W9I | I_ARG_758  | NH1 | J_ASP_740  | OD1 | 2.804 |
| 5W9I | I_LYS_779  | NZ  | I_ASP_771  | OD2 | 2.925 |
| 5W9I | I_LYS_779  | NZ  | I_GLU_1148 | OE1 | 3.696 |
| 5W9I | I_LYS_801  | NZ  | I_ASP_843  | OD1 | 2.847 |
| 5W9I | I_LYS_801  | NZ  | I_ASP_843  | OD2 | 3.503 |
| 5W9I | I_LYS_807  | NZ  | I_GLU_818  | OE1 | 3.621 |
| 5W9I | I_LYS_807  | NZ  | I_GLU_818  | OE2 | 2.894 |
| 5W9I | I_LYS_816  | NZ  | I_ASP_1064 | OD1 | 3.871 |
| 5W9I | I_LYS_816  | NZ  | I_ASP_1064 | OD2 | 3.720 |
| 5W9I | I_ARG_841  | NH1 | I_GLU_1090 | OE1 | 2.860 |
| 5W9I | I_ARG_841  | NH2 | I_GLU_1090 | OE1 | 2.839 |
| 5W9I | I_ARG_847  | NH1 | B_ASP_726  | OD1 | 3.716 |
| 5W9I | I_ARG_847  | NH1 | B_ASP_726  | OD2 | 2.881 |
| 5W9I | I_ARG_847  | NH2 | I_ASP_844  | OD1 | 2.793 |
| 5W9I | I_ARG_887  | NH2 | I_ASP_892  | OD1 | 2.930 |
| 5W9I | I_HIS_1020 | NE2 | I_ASP_1024 | OD2 | 3.008 |
| 5W9I | I_LYS_1021 | NZ  | I_GLU_1017 | OE2 | 3.414 |
| 5W9I | I_LYS_1102 | NZ  | I_GLU_793  | OE1 | 2.931 |
| 5W9I | I_LYS_1102 | NZ  | I_GLU_793  | OE2 | 2.910 |
| 5W9I | I_ARG_1113 | NH1 | I_GLU_1105 | OE1 | 2.967 |
| 5W9I | I_ARG_1113 | NH1 | I_GLU_1105 | OE2 | 3.647 |
| 5W9I | I_ARG_1113 | NH2 | E_GLU_1105 | OE2 | 2.821 |
| 5W9I | I_HIS_1138 | NE2 | I_GLU_793  | OE2 | 2.948 |
| 5W9I | I_LYS_1174 | NZ  | I_GLU_1183 | OE1 | 2.809 |
| 5W9I | I_ARG_1179 | NH2 | K_ASP_31   | OD1 | 2.785 |
| 5W9I | J_LYS_99   | NZ  | J_GLU_32   | OE1 | 2.800 |
| 5W9I | J_LYS_110  | NZ  | J_ASP_83   | OD2 | 2.766 |
| 5W9I | J_ARG_119  | NH2 | J_ASP_54   | OD2 | 3.206 |
| 5W9I | J_LYS_142  | NZ  | J_GLU_252  | OE1 | 2.986 |
| 5W9I | J_HIS_194  | NE2 | J_GLU_32   | OE1 | 3.656 |
| 5W9I | J_ARG_235  | NH1 | J_ASP_24   | OD1 | 3.840 |
| 5W9I | J_ARG_235  | NH1 | J_ASP_24   | OD2 | 3.366 |
| 5W9I | J_ARG_235  | NH2 | J_ASP_24   | OD2 | 2.931 |
| 5W9I | J_ARG_235  | NH2 | J_GLU_188  | OE1 | 2.868 |
| 5W9I | J_ARG_235  | NH2 | J_GLU_188  | OE2 | 3.758 |
| 5W9I | J_ARG_335  | NH2 | J_ASP_326  | OD2 | 2.865 |
| 5W9I | J_ARG_614  | NH1 | J_GLU_367  | OE2 | 3.042 |
| 5W9I | J_ARG_614  | NH2 | J_GLU_367  | OE2 | 3.261 |
| 5W9I | J_ARG_629  | NH1 | J_ASP_644  | OD1 | 2.970 |
| 5W9I | J_ARG_629  | NH1 | J_ASP_644  | OD2 | 3.960 |
| 5W9I | J_ARG_629  | NH2 | J_ASP_644  | OD1 | 3.193 |
| 5W9I | J_LYS_665  | NZ  | J_GLU_357  | OE1 | 2.867 |
| 5W9I | J_LYS_665  | NZ  | J_GLU_357  | OE2 | 3.780 |
| 5W9I | J_LYS_668  | NZ  | J_ASP_355  | OD1 | 3.043 |
| 5W9I | J_HIS_681  | NE2 | E_ASP_910  | OD1 | 2.832 |
| 5W9I | J_HIS_681  | NE2 | J_GLU_680  | OE2 | 3.209 |
| 5W9I | J_LYS_728  | NZ  | J_ASP_726  | OD2 | 2.883 |
| 5W9I | K_LYS_38   | NZ  | K_ASP_86   | OD1 | 3.899 |
| 5W9I | K_LYS_62   | NZ  | K_GLU_46   | OE1 | 3.395 |
| 5W9I | K_LYS_62   | NZ  | K_GLU_46   | OE2 | 2.930 |
| 5W9I | K_ARG_66   | NH1 | K_ASP_86   | OD1 | 3.149 |

|      |            |     |            |     |       |
|------|------------|-----|------------|-----|-------|
| 5W9I | K_ARG.66   | NH1 | K_ASP.86   | OD2 | 3.507 |
| 5W9I | K_ARG.66   | NH2 | K_ASP.86   | OD1 | 3.795 |
| 5W9I | K_ARG.66   | NH2 | K_ASP.86   | OD2 | 2.786 |
| 5W9I | K_ARG.94   | NH2 | K_ASP.101  | OD1 | 2.859 |
| 5W9I | K_ARG.94   | NH2 | K_ASP.101  | OD2 | 3.615 |
| 5W9I | K_LYS.95   | NZ  | K_ASP.100C | OD1 | 3.504 |
| 5W9I | K_LYS.95   | NZ  | K_ASP.100C | OD2 | 3.759 |
| 5W9I | L_ARG.24   | NH1 | L_ASP.70   | OD1 | 2.947 |
| 5W9I | L_ARG.24   | NH1 | L_ASP.70   | OD2 | 3.851 |
| 5W9I | L_ARG.61   | NH1 | L_ASP.82   | OD1 | 3.190 |
| 5W9I | L_ARG.61   | NH1 | L_ASP.82   | OD2 | 3.680 |
| 5W9I | L_ARG.61   | NH2 | L_ASP.82   | OD1 | 3.703 |
| 5W9I | L_ARG.61   | NH2 | L_ASP.82   | OD2 | 2.775 |
| 5W9I | L_LYS.92   | NZ  | L_GLU.93   | OE1 | 3.397 |
| 5W9I | L_ARG.96   | NH1 | K_ASP.100C | OD2 | 2.856 |
| 5W9I | L_ARG.96   | NH2 | L_GLU.1183 | OE2 | 2.872 |
| 5W9I | L_ARG.96   | NH2 | K_ASP.100C | OD2 | 2.922 |
| 5W9I | L_LYS.103  | NZ  | L_GLU.105  | OE2 | 3.808 |
| 5W9J | D_LYS.779  | NZ  | D_GLU.1148 | OE1 | 2.939 |
| 5W9J | D_LYS.801  | NZ  | D_ASP.843  | OD1 | 3.375 |
| 5W9J | D_LYS.807  | NZ  | D_GLU.818  | OE1 | 2.817 |
| 5W9J | D_LYS.807  | NZ  | D_GLU.818  | OE2 | 3.422 |
| 5W9J | D_LYS.816  | NZ  | D_ASP.1064 | OD1 | 3.520 |
| 5W9J | D_LYS.816  | NZ  | D_ASP.1064 | OD2 | 3.973 |
| 5W9J | D_ARG.841  | NH2 | D_ASP.844  | OD2 | 2.773 |
| 5W9J | D_ARG.847  | NH2 | D_ASP.844  | OD1 | 2.691 |
| 5W9J | D_ARG.887  | NH1 | D_ASP.892  | OD1 | 2.879 |
| 5W9J | D_HIS.1020 | NE2 | D_ASP.1024 | OD1 | 3.785 |
| 5W9J | D_HIS.1020 | NE2 | D_ASP.1024 | OD2 | 2.892 |
| 5W9J | D_ARG.1057 | NH2 | D_ASP.1053 | OD1 | 3.921 |
| 5W9J | D_LYS.1102 | NZ  | D_GLU.793  | OE1 | 2.814 |
| 5W9J | D_LYS.1102 | NZ  | D_GLU.793  | OE2 | 3.963 |
| 5W9J | D_ARG.1113 | NH1 | D_GLU.1105 | OE1 | 3.016 |
| 5W9J | D_ARG.1113 | NH2 | G_GLU.1105 | OE1 | 3.627 |
| 5W9J | D_ARG.1113 | NH2 | G_GLU.1105 | OE2 | 2.779 |
| 5W9J | D_HIS.1138 | NE2 | D_GLU.793  | OE2 | 2.844 |
| 5W9J | E_HIS.35   | NE2 | E_ASP.100C | OD2 | 3.981 |
| 5W9J | E_LYS.38   | NZ  | E_GLU.46   | OE1 | 3.833 |
| 5W9J | E_LYS.38   | NZ  | E_ASP.86   | OD1 | 2.905 |
| 5W9J | E_LYS.62   | NZ  | E_GLU.46   | OE2 | 2.796 |
| 5W9J | E_ARG.94   | NH1 | E_ASP.101  | OD2 | 3.268 |
| 5W9J | E_LYS.95   | NZ  | E_ASP.100C | OD2 | 2.845 |
| 5W9J | F_ARG.61   | NH1 | F_ASP.82   | OD1 | 3.198 |
| 5W9J | F_ARG.61   | NH1 | F_ASP.82   | OD2 | 3.745 |
| 5W9J | F_ARG.61   | NH2 | F_GLU.79   | OE1 | 3.635 |
| 5W9J | F_ARG.61   | NH2 | F_ASP.82   | OD1 | 3.645 |
| 5W9J | F_ARG.61   | NH2 | F_ASP.82   | OD2 | 2.778 |
| 5W9J | F_ARG.96   | NH1 | E_ASP.100C | OD1 | 3.873 |
| 5W9J | F_ARG.96   | NH1 | E_ASP.100C | OD2 | 3.469 |
| 5W9J | A_LYS.779  | NZ  | A_GLU.1148 | OE1 | 2.940 |
| 5W9J | A_LYS.801  | NZ  | A_ASP.843  | OD1 | 3.375 |
| 5W9J | A_LYS.807  | NZ  | A_GLU.818  | OE1 | 2.817 |
| 5W9J | A_LYS.807  | NZ  | A_GLU.818  | OE2 | 3.422 |
| 5W9J | A_LYS.816  | NZ  | A_ASP.1064 | OD1 | 3.520 |
| 5W9J | A_LYS.816  | NZ  | A_ASP.1064 | OD2 | 3.973 |
| 5W9J | A_ARG.841  | NH2 | A_ASP.844  | OD2 | 2.773 |
| 5W9J | A_ARG.847  | NH2 | A_ASP.844  | OD1 | 2.691 |
| 5W9J | A_ARG.887  | NH1 | A_ASP.892  | OD1 | 2.879 |

|      |            |     |            |     |       |
|------|------------|-----|------------|-----|-------|
| 5W9J | A_HIS_1020 | NE2 | A_ASP_1024 | OD1 | 3.785 |
| 5W9J | A_HIS_1020 | NE2 | A_ASP_1024 | OD2 | 2.892 |
| 5W9J | A_ARG_1057 | NH2 | A_ASP_1053 | OD1 | 3.921 |
| 5W9J | A_LYS_1102 | NZ  | A_GLU_793  | OE1 | 2.814 |
| 5W9J | A_LYS_1102 | NZ  | A_GLU_793  | OE2 | 3.964 |
| 5W9J | A_ARG_1113 | NH1 | A_GLU_1105 | OE1 | 3.016 |
| 5W9J | A_ARG_1113 | NH2 | D_GLU_1105 | OE1 | 3.626 |
| 5W9J | A_ARG_1113 | NH2 | D_GLU_1105 | OE2 | 2.778 |
| 5W9J | A_HIS_1138 | NE2 | A_GLU_793  | OE2 | 2.844 |
| 5W9J | B_HIS_35   | NE2 | B_ASP_100C | OD2 | 3.981 |
| 5W9J | B_LYS_38   | NZ  | B_GLU_46   | OE1 | 3.833 |
| 5W9J | B_LYS_38   | NZ  | B_ASP_86   | OD1 | 2.905 |
| 5W9J | B_LYS_62   | NZ  | B_GLU_46   | OE2 | 2.796 |
| 5W9J | B_ARG_94   | NH1 | B_ASP_101  | OD2 | 3.270 |
| 5W9J | B_LYS_95   | NZ  | B_ASP_100C | OD2 | 2.844 |
| 5W9J | C_ARG_61   | NH1 | C_ASP_82   | OD1 | 3.196 |
| 5W9J | C_ARG_61   | NH1 | C_ASP_82   | OD2 | 3.745 |
| 5W9J | C_ARG_61   | NH2 | C_GLU_79   | OE1 | 3.636 |
| 5W9J | C_ARG_61   | NH2 | C_ASP_82   | OD1 | 3.644 |
| 5W9J | C_ARG_61   | NH2 | C_ASP_82   | OD2 | 2.779 |
| 5W9J | C_ARG_96   | NH1 | B_ASP_100C | OD1 | 3.873 |
| 5W9J | C_ARG_96   | NH1 | B_ASP_100C | OD2 | 3.470 |
| 5W9J | G_LYS_779  | NZ  | G_GLU_1148 | OE1 | 2.940 |
| 5W9J | G_LYS_801  | NZ  | G_ASP_843  | OD1 | 3.374 |
| 5W9J | G_LYS_807  | NZ  | G_GLU_818  | OE1 | 2.817 |
| 5W9J | G_LYS_807  | NZ  | G_GLU_818  | OE2 | 3.421 |
| 5W9J | G_LYS_816  | NZ  | G_ASP_1064 | OD1 | 3.521 |
| 5W9J | G_LYS_816  | NZ  | G_ASP_1064 | OD2 | 3.973 |
| 5W9J | G_ARG_841  | NH2 | G_ASP_844  | OD2 | 2.773 |
| 5W9J | G_ARG_847  | NH2 | G_ASP_844  | OD1 | 2.691 |
| 5W9J | G_ARG_887  | NH1 | G_ASP_892  | OD1 | 2.880 |
| 5W9J | G_HIS_1020 | NE2 | G_ASP_1024 | OD1 | 3.785 |
| 5W9J | G_HIS_1020 | NE2 | G_ASP_1024 | OD2 | 2.892 |
| 5W9J | G_ARG_1057 | NH2 | G_ASP_1053 | OD1 | 3.921 |
| 5W9J | G_LYS_1102 | NZ  | G_GLU_793  | OE1 | 2.813 |
| 5W9J | G_LYS_1102 | NZ  | G_GLU_793  | OE2 | 3.963 |
| 5W9J | G_ARG_1113 | NH1 | G_GLU_1105 | OE1 | 3.016 |
| 5W9J | G_ARG_1113 | NH2 | A_GLU_1105 | OE1 | 3.626 |
| 5W9J | G_ARG_1113 | NH2 | A_GLU_1105 | OE2 | 2.777 |
| 5W9J | G_HIS_1138 | NE2 | G_GLU_793  | OE2 | 2.844 |
| 5W9J | H_HIS_35   | NE2 | H_ASP_100C | OD2 | 3.981 |
| 5W9J | H_LYS_38   | NZ  | H_GLU_46   | OE1 | 3.832 |
| 5W9J | H_LYS_38   | NZ  | H_ASP_86   | OD1 | 2.905 |
| 5W9J | H_LYS_62   | NZ  | H_GLU_46   | OE2 | 2.795 |
| 5W9J | H_ARG_94   | NH1 | H_ASP_101  | OD2 | 3.269 |
| 5W9J | H_LYS_95   | NZ  | H_ASP_100C | OD2 | 2.844 |
| 5W9J | I_ARG_61   | NH1 | I_ASP_82   | OD1 | 3.197 |
| 5W9J | I_ARG_61   | NH1 | I_ASP_82   | OD2 | 3.745 |
| 5W9J | I_ARG_61   | NH2 | I_GLU_79   | OE1 | 3.636 |
| 5W9J | I_ARG_61   | NH2 | I_ASP_82   | OD1 | 3.644 |
| 5W9J | I_ARG_61   | NH2 | I_ASP_82   | OD2 | 2.779 |
| 5W9J | I_ARG_96   | NH1 | H_ASP_100C | OD1 | 3.873 |
| 5W9J | I_ARG_96   | NH1 | H_ASP_100C | OD2 | 3.470 |
| 5W9J | J_LYS_52   | NZ  | J_ASP_49   | OD2 | 2.757 |
| 5W9J | J_HIS_81   | ND1 | J_ASP_80   | OD1 | 3.851 |
| 5W9J | J_LYS_99   | NZ  | J_ASP_34   | OD2 | 2.722 |
| 5W9J | J_LYS_110  | NZ  | J_ASP_108  | OD1 | 3.409 |
| 5W9J | J_LYS_110  | NZ  | J_ASP_108  | OD2 | 3.230 |



|      |           |     |           |     |       |
|------|-----------|-----|-----------|-----|-------|
| 5W9J | J_ARG_119 | NH1 | J_ASP_54  | OD2 | 3.696 |
| 5W9J | J_ARG_119 | NH2 | J_ASP_54  | OD2 | 3.009 |
| 5W9J | J_ARG_181 | NH1 | J_ASP_174 | OD2 | 3.331 |
| 5W9J | J_ARG_190 | NH1 | J_ASP_24  | OD1 | 3.612 |
| 5W9J | J_ARG_190 | NH1 | J_ASP_24  | OD2 | 3.889 |
| 5W9J | J_ARG_190 | NH2 | J_ASP_24  | OD1 | 2.692 |
| 5W9J | J_ARG_235 | NH2 | J_GLU_188 | OE1 | 2.796 |
| 5W9J | J_ARG_334 | NH2 | J_ASP_330 | OD2 | 3.710 |
| 5W9J | J_ARG_335 | NH2 | J_ASP_326 | OD2 | 3.031 |
| 5W9J | J_ARG_401 | NH2 | J_ASP_444 | OD1 | 3.639 |
| 5W9J | J_ARG_401 | NH2 | J_ASP_444 | OD2 | 3.140 |
| 5W9J | J_LYS_502 | NZ  | J_GLU_513 | OE2 | 2.796 |
| 5W9J | J_LYS_543 | NZ  | J_GLU_549 | OE2 | 3.291 |
| 5W9J | J_LYS_587 | NZ  | J_GLU_382 | OE2 | 2.820 |
| 5W9J | J_ARG_614 | NH2 | J_GLU_605 | OE2 | 2.932 |
| 5W9J | J_LYS_665 | NZ  | J_GLU_666 | OE2 | 2.774 |
| 5W9J | J_LYS_728 | NZ  | J_ASP_726 | OD2 | 2.840 |
| 5W9J | K_LYS_52  | NZ  | K_ASP_49  | OD2 | 2.756 |
| 5W9J | K_HIS_81  | ND1 | K_ASP_80  | OD1 | 3.851 |
| 5W9J | K_LYS_99  | NZ  | K_ASP_34  | OD2 | 2.723 |
| 5W9J | K_LYS_110 | NZ  | K_ASP_108 | OD1 | 3.410 |
| 5W9J | K_LYS_110 | NZ  | K_ASP_108 | OD2 | 3.231 |
| 5W9J | K_ARG_119 | NH1 | K_ASP_54  | OD2 | 3.694 |
| 5W9J | K_ARG_119 | NH2 | K_ASP_54  | OD2 | 3.008 |
| 5W9J | K_ARG_181 | NH1 | K_ASP_174 | OD2 | 3.331 |
| 5W9J | K_ARG_190 | NH1 | K_ASP_24  | OD1 | 3.611 |
| 5W9J | K_ARG_190 | NH1 | K_ASP_24  | OD2 | 3.890 |
| 5W9J | K_ARG_190 | NH2 | K_ASP_24  | OD1 | 2.691 |
| 5W9J | K_ARG_235 | NH2 | K_GLU_188 | OE1 | 2.796 |
| 5W9J | K_ARG_334 | NH2 | K_ASP_330 | OD2 | 3.710 |
| 5W9J | K_ARG_335 | NH2 | K_ASP_326 | OD2 | 3.030 |
| 5W9J | K_ARG_401 | NH2 | K_ASP_444 | OD1 | 3.638 |
| 5W9J | K_ARG_401 | NH2 | K_ASP_444 | OD2 | 3.140 |
| 5W9J | K_LYS_502 | NZ  | K_GLU_513 | OE2 | 2.796 |
| 5W9J | K_LYS_543 | NZ  | K_GLU_549 | OE2 | 3.291 |
| 5W9J | K_LYS_587 | NZ  | K_GLU_382 | OE2 | 2.819 |
| 5W9J | K_ARG_614 | NH2 | K_GLU_605 | OE2 | 2.931 |
| 5W9J | K_LYS_665 | NZ  | K_GLU_666 | OE2 | 2.774 |
| 5W9J | K_LYS_728 | NZ  | K_ASP_726 | OD2 | 2.839 |
| 5W9J | L_LYS_52  | NZ  | L_ASP_49  | OD2 | 2.756 |
| 5W9J | L_HIS_81  | ND1 | L_ASP_80  | OD1 | 3.851 |
| 5W9J | L_LYS_99  | NZ  | L_ASP_34  | OD2 | 2.724 |
| 5W9J | L_LYS_110 | NZ  | L_ASP_108 | OD1 | 3.409 |
| 5W9J | L_LYS_110 | NZ  | L_ASP_108 | OD2 | 3.231 |
| 5W9J | L_ARG_119 | NH1 | L_ASP_54  | OD2 | 3.695 |
| 5W9J | L_ARG_119 | NH2 | L_ASP_54  | OD2 | 3.009 |
| 5W9J | L_ARG_181 | NH1 | L_ASP_174 | OD2 | 3.331 |
| 5W9J | L_ARG_190 | NH1 | L_ASP_24  | OD1 | 3.612 |
| 5W9J | L_ARG_190 | NH1 | L_ASP_24  | OD2 | 3.889 |
| 5W9J | L_ARG_190 | NH2 | L_ASP_24  | OD1 | 2.692 |
| 5W9J | L_ARG_235 | NH2 | L_GLU_188 | OE1 | 2.796 |
| 5W9J | L_ARG_334 | NH2 | L_ASP_330 | OD2 | 3.710 |
| 5W9J | L_ARG_335 | NH2 | L_ASP_326 | OD2 | 3.031 |
| 5W9J | L_ARG_401 | NH2 | L_ASP_444 | OD1 | 3.638 |
| 5W9J | L_ARG_401 | NH2 | L_ASP_444 | OD2 | 3.140 |
| 5W9J | L_LYS_502 | NZ  | L_GLU_513 | OE2 | 2.796 |
| 5W9J | L_LYS_543 | NZ  | L_GLU_549 | OE2 | 3.291 |
| 5W9J | L_LYS_587 | NZ  | L_GLU_382 | OE2 | 2.820 |

|      |            |     |            |     |       |
|------|------------|-----|------------|-----|-------|
| 5W9J | L_ARG.614  | NH2 | L_GLU.605  | OE2 | 2.931 |
| 5W9J | L_LYS.665  | NZ  | L_GLU.666  | OE2 | 2.773 |
| 5W9J | L_LYS.728  | NZ  | L_ASP.726  | OD2 | 2.839 |
| 5W9K | A_ARG.758  | NH1 | J_ASP.740  | OD1 | 3.054 |
| 5W9K | A_LYS.801  | NZ  | A_ASP.843  | OD1 | 2.794 |
| 5W9K | A_LYS.801  | NZ  | A_ASP.843  | OD2 | 3.729 |
| 5W9K | A_LYS.807  | NZ  | A_GLU.818  | OE2 | 3.490 |
| 5W9K | A_ARG.841  | NH2 | A_ASP.844  | OD2 | 2.781 |
| 5W9K | A_ARG.847  | NH2 | A_ASP.844  | OD1 | 2.722 |
| 5W9K | A_ARG.887  | NH2 | A_ASP.892  | OD1 | 2.945 |
| 5W9K | A_LYS.995  | NZ  | A_ASP.868  | OD1 | 3.265 |
| 5W9K | A_LYS.995  | NZ  | A_ASP.868  | OD2 | 1.942 |
| 5W9K | A_HIS.1020 | NE2 | A_ASP.1024 | OD2 | 2.878 |
| 5W9K | A_LYS.1102 | NZ  | A_GLU.793  | OE1 | 2.948 |
| 5W9K | A_LYS.1102 | NZ  | A_GLU.793  | OE2 | 3.271 |
| 5W9K | A_ARG.1113 | NH1 | A_GLU.1105 | OE1 | 3.481 |
| 5W9K | A_ARG.1113 | NH1 | A_GLU.1105 | OE2 | 2.966 |
| 5W9K | A_ARG.1113 | NH2 | D_GLU.1105 | OE1 | 3.698 |
| 5W9K | A_HIS.1138 | NE2 | A_GLU.793  | OE1 | 2.957 |
| 5W9K | A_LYS.1174 | NZ  | A_GLU.1183 | OE2 | 3.009 |
| 5W9K | B_LYS.62   | NZ  | B_GLU.46   | OE1 | 2.956 |
| 5W9K | B_LYS.62   | NZ  | B_GLU.46   | OE2 | 3.368 |
| 5W9K | B_ARG.66   | NH2 | B_ASP.86   | OD2 | 3.716 |
| 5W9K | B_ARG.94   | NH2 | B_ASP.101  | OD2 | 2.759 |
| 5W9K | B_LYS.95   | NZ  | B_ASP.100C | OD2 | 3.608 |
| 5W9K | C_ARG.61   | NH1 | C_GLU.79   | OE1 | 3.492 |
| 5W9K | C_LYS.92   | NZ  | C_GLU.93   | OE1 | 2.823 |
| 5W9K | C_ARG.96   | NH1 | B_ASP.100C | OD2 | 2.822 |
| 5W9K | C_ARG.96   | NH2 | A_GLU.1183 | OE1 | 3.683 |
| 5W9K | C_ARG.96   | NH2 | B_ASP.100C | OD2 | 3.420 |
| 5W9K | C_LYS.103  | NZ  | C_GLU.105  | OE1 | 3.546 |
| 5W9K | D_LYS.779  | NZ  | D_ASP.771  | OD2 | 2.911 |
| 5W9K | D_LYS.779  | NZ  | D_GLU.1148 | OE1 | 3.847 |
| 5W9K | D_LYS.801  | NZ  | D_ASP.843  | OD1 | 3.006 |
| 5W9K | D_LYS.807  | NZ  | D_GLU.818  | OE1 | 2.844 |
| 5W9K | D_LYS.807  | NZ  | D_GLU.818  | OE2 | 3.659 |
| 5W9K | D_ARG.841  | NH2 | D_GLU.1090 | OE1 | 3.013 |
| 5W9K | D_ARG.841  | NH2 | D_GLU.1090 | OE2 | 3.315 |
| 5W9K | D_ARG.847  | NH1 | D_ASP.844  | OD1 | 2.982 |
| 5W9K | D_ARG.847  | NH2 | A_GLU.1017 | OE2 | 3.108 |
| 5W9K | D_ARG.847  | NH2 | D_ASP.844  | OD1 | 2.962 |
| 5W9K | D_ARG.887  | NH2 | D_ASP.892  | OD1 | 2.947 |
| 5W9K | D_HIS.1020 | NE2 | D_ASP.1024 | OD1 | 3.582 |
| 5W9K | D_HIS.1020 | NE2 | D_ASP.1024 | OD2 | 3.188 |
| 5W9K | D_ARG.1057 | NH1 | D_ASP.1053 | OD1 | 3.444 |
| 5W9K | D_LYS.1102 | NZ  | D_GLU.793  | OE1 | 2.980 |
| 5W9K | D_LYS.1102 | NZ  | D_GLU.793  | OE2 | 3.212 |
| 5W9K | D_ARG.1113 | NH1 | G_GLU.1105 | OE2 | 3.336 |
| 5W9K | D_ARG.1113 | NH2 | D_GLU.1105 | OE1 | 3.680 |
| 5W9K | D_ARG.1113 | NH2 | D_GLU.1105 | OE2 | 3.676 |
| 5W9K | D_HIS.1138 | NE2 | D_GLU.793  | OE1 | 3.055 |
| 5W9K | E_LYS.62   | NZ  | E_GLU.46   | OE1 | 2.864 |
| 5W9K | E_LYS.62   | NZ  | E_GLU.46   | OE2 | 3.729 |
| 5W9K | E_ARG.66   | NH1 | E_ASP.86   | OD1 | 2.957 |
| 5W9K | E_ARG.66   | NH1 | E_ASP.86   | OD2 | 3.366 |
| 5W9K | E_ARG.94   | NH1 | E_ASP.101  | OD2 | 3.378 |
| 5W9K | E_ARG.94   | NH2 | E_ASP.101  | OD2 | 2.893 |
| 5W9K | E_LYS.95   | NZ  | E_ASP.100C | OD1 | 3.994 |

|      |            |     |            |     |       |
|------|------------|-----|------------|-----|-------|
| 5W9K | F_ARG_24   | NH1 | F_ASP_70   | OD1 | 2.969 |
| 5W9K | F_ARG_24   | NH1 | F_ASP_70   | OD2 | 3.751 |
| 5W9K | F_ARG_61   | NH1 | F_GLU_79   | OE1 | 3.263 |
| 5W9K | F_ARG_61   | NH1 | F_GLU_79   | OE2 | 3.365 |
| 5W9K | F_ARG_61   | NH2 | F_GLU_79   | OE2 | 3.136 |
| 5W9K | F_ARG_96   | NH1 | E_ASP_100C | OD2 | 2.856 |
| 5W9K | F_ARG_96   | NH2 | D_GLU_1183 | OE2 | 3.059 |
| 5W9K | F_ARG_96   | NH2 | E_ASP_100C | OD2 | 3.317 |
| 5W9K | G_ARG_758  | NH1 | L_ASP_740  | OD1 | 3.028 |
| 5W9K | G_ARG_758  | NH2 | L_ASP_740  | OD1 | 3.483 |
| 5W9K | G_LYS_801  | NZ  | G_ASP_843  | OD1 | 2.854 |
| 5W9K | G_LYS_801  | NZ  | G_ASP_843  | OD2 | 3.469 |
| 5W9K | G_LYS_816  | NZ  | G_ASP_1064 | OD2 | 3.838 |
| 5W9K | G_ARG_847  | NH1 | K_ASP_726  | OD2 | 3.336 |
| 5W9K | G_ARG_847  | NH2 | G_ASP_844  | OD1 | 2.739 |
| 5W9K | G_ARG_887  | NH2 | G_ASP_892  | OD1 | 2.989 |
| 5W9K | G_ARG_887  | NH2 | G_ASP_892  | OD2 | 3.967 |
| 5W9K | G_HIS_1020 | NE2 | G_ASP_1024 | OD2 | 2.997 |
| 5W9K | G_LYS_1035 | NZ  | G_GLU_1039 | OE2 | 2.927 |
| 5W9K | G_ARG_1057 | NH1 | G_ASP_1053 | OD2 | 3.710 |
| 5W9K | G_ARG_1057 | NH2 | G_ASP_1053 | OD1 | 3.602 |
| 5W9K | G_ARG_1057 | NH2 | G_ASP_1053 | OD2 | 3.839 |
| 5W9K | G_LYS_1102 | NZ  | G_GLU_793  | OE1 | 2.948 |
| 5W9K | G_LYS_1102 | NZ  | G_GLU_793  | OE2 | 3.330 |
| 5W9K | G_ARG_1113 | NH1 | G_GLU_1105 | OE1 | 3.508 |
| 5W9K | G_ARG_1113 | NH1 | G_GLU_1105 | OE2 | 2.905 |
| 5W9K | G_ARG_1113 | NH2 | A_GLU_1105 | OE2 | 3.565 |
| 5W9K | G_HIS_1138 | NE2 | G_GLU_793  | OE1 | 3.027 |
| 5W9K | G_LYS_1174 | NZ  | G_GLU_1183 | OE1 | 3.901 |
| 5W9K | H_LYS_62   | NZ  | H_GLU_46   | OE1 | 3.402 |
| 5W9K | H_LYS_62   | NZ  | H_GLU_46   | OE2 | 2.946 |
| 5W9K | H_ARG_66   | NH2 | H_ASP_86   | OD2 | 2.876 |
| 5W9K | H_ARG_94   | NH2 | H_ASP_101  | OD2 | 2.768 |
| 5W9K | H_LYS_95   | NZ  | H_ASP_100C | OD2 | 3.668 |
| 5W9K | I_ARG_24   | NH1 | I_ASP_70   | OD1 | 3.017 |
| 5W9K | I_ARG_24   | NH2 | I_ASP_70   | OD1 | 3.829 |
| 5W9K | I_LYS_92   | NZ  | I_GLU_93   | OE1 | 2.854 |
| 5W9K | I_ARG_96   | NH1 | H_ASP_100C | OD2 | 2.828 |
| 5W9K | I_ARG_96   | NH2 | G_GLU_1183 | OE2 | 3.651 |
| 5W9K | I_ARG_96   | NH2 | H_ASP_100C | OD2 | 3.553 |
| 5W9K | I_LYS_103  | NZ  | I_GLU_105  | OE1 | 3.522 |
| 5W9K | J_HIS_81   | ND1 | J_ASP_80   | OD1 | 3.968 |
| 5W9K | J_LYS_99   | NZ  | J_GLU_32   | OE1 | 2.810 |
| 5W9K | J_LYS_110  | NZ  | J_ASP_83   | OD2 | 2.940 |
| 5W9K | J_LYS_142  | NZ  | J_GLU_247  | OE1 | 3.288 |
| 5W9K | J_LYS_142  | NZ  | J_GLU_249  | OE2 | 2.849 |
| 5W9K | J_ARG_190  | NH1 | J_ASP_24   | OD1 | 3.560 |
| 5W9K | J_ARG_190  | NH1 | J_ASP_24   | OD2 | 3.246 |
| 5W9K | J_ARG_190  | NH2 | J_ASP_24   | OD1 | 2.727 |
| 5W9K | J_ARG_190  | NH2 | J_ASP_24   | OD2 | 3.757 |
| 5W9K | J_HIS_194  | NE2 | J_GLU_32   | OE1 | 3.514 |
| 5W9K | J_ARG_235  | NH1 | J_GLU_188  | OE1 | 2.902 |
| 5W9K | J_ARG_235  | NH1 | J_GLU_188  | OE2 | 3.519 |
| 5W9K | J_ARG_334  | NH2 | J_ASP_330  | OD1 | 3.961 |
| 5W9K | J_ARG_334  | NH2 | J_ASP_330  | OD2 | 3.087 |
| 5W9K | J_ARG_335  | NH2 | J_ASP_326  | OD2 | 2.876 |
| 5W9K | J_ARG_401  | NH2 | J_ASP_444  | OD1 | 3.806 |
| 5W9K | J_ARG_401  | NH2 | J_ASP_444  | OD2 | 3.280 |

|      |           |     |           |     |       |
|------|-----------|-----|-----------|-----|-------|
| 5W9K | J_LYS_502 | NZ  | J_GLU_513 | OE2 | 3.504 |
| 5W9K | J_ARG_505 | NH1 | J_GLU_549 | OE1 | 3.692 |
| 5W9K | J_ARG_629 | NH1 | J_GLU_376 | OE2 | 3.955 |
| 5W9K | J_LYS_665 | NZ  | J_ASP_355 | OD2 | 3.949 |
| 5W9K | J_HIS_681 | NE2 | D_ASP_910 | OD1 | 2.963 |
| 5W9K | J_ARG_694 | NH1 | J_ASP_343 | OD2 | 3.085 |
| 5W9K | J_ARG_694 | NH2 | J_ASP_343 | OD2 | 2.916 |
| 5W9K | J_ARG_700 | NH2 | A_GLU_756 | OE2 | 2.841 |
| 5W9K | J_LYS_728 | NZ  | J_GLU_666 | OE1 | 3.931 |
| 5W9K | J_LYS_728 | NZ  | J_GLU_666 | OE2 | 3.368 |
| 5W9K | K_HIS_81  | ND1 | K_ASP_80  | OD1 | 3.713 |
| 5W9K | K_LYS_99  | NZ  | K_GLU_32  | OE1 | 2.842 |
| 5W9K | K_LYS_142 | NZ  | K_GLU_252 | OE2 | 3.341 |
| 5W9K | K_ARG_190 | NH1 | K_GLU_188 | OE1 | 2.901 |
| 5W9K | K_HIS_194 | NE2 | K_GLU_32  | OE1 | 3.703 |
| 5W9K | K_ARG_235 | NH1 | K_GLU_188 | OE2 | 3.498 |
| 5W9K | K_ARG_335 | NH2 | K_ASP_326 | OD2 | 2.914 |
| 5W9K | K_ARG_401 | NH2 | K_ASP_444 | OD1 | 3.980 |
| 5W9K | K_ARG_401 | NH2 | K_ASP_444 | OD2 | 3.862 |
| 5W9K | K_LYS_502 | NZ  | K_GLU_513 | OE1 | 2.884 |
| 5W9K | K_LYS_502 | NZ  | K_GLU_513 | OE2 | 3.989 |
| 5W9K | K_LYS_543 | NZ  | K_GLU_549 | OE1 | 3.288 |
| 5W9K | K_LYS_543 | NZ  | K_GLU_549 | OE2 | 3.352 |
| 5W9K | K_LYS_587 | NZ  | K_GLU_382 | OE2 | 2.948 |
| 5W9K | K_LYS_665 | NZ  | K_GLU_666 | OE2 | 2.821 |
| 5W9K | K_LYS_668 | NZ  | K_ASP_355 | OD1 | 3.287 |
| 5W9K | K_LYS_668 | NZ  | K_ASP_355 | OD2 | 3.232 |
| 5W9K | K_LYS_728 | NZ  | K_ASP_726 | OD2 | 2.912 |
| 5W9K | L_LYS_27  | NZ  | L_GLU_230 | OE2 | 3.262 |
| 5W9K | L_HIS_81  | ND1 | L_ASP_80  | OD1 | 3.835 |
| 5W9K | L_LYS_99  | NZ  | L_GLU_32  | OE2 | 3.537 |
| 5W9K | L_LYS_99  | NZ  | L_ASP_34  | OD2 | 3.570 |
| 5W9K | L_LYS_110 | NZ  | L_ASP_83  | OD2 | 2.905 |
| 5W9K | L_ARG_119 | NH1 | L_ASP_54  | OD2 | 3.602 |
| 5W9K | L_LYS_142 | NZ  | L_GLU_252 | OE2 | 3.115 |
| 5W9K | L_ARG_190 | NH1 | L_ASP_24  | OD2 | 3.340 |
| 5W9K | L_ARG_190 | NH2 | L_GLU_188 | OE2 | 3.335 |
| 5W9K | L_HIS_194 | NE2 | L_GLU_32  | OE1 | 3.901 |
| 5W9K | L_ARG_235 | NH1 | L_GLU_188 | OE1 | 2.872 |
| 5W9K | L_ARG_269 | NH1 | L_GLU_252 | OE1 | 2.853 |
| 5W9K | L_ARG_334 | NH2 | L_ASP_330 | OD1 | 3.920 |
| 5W9K | L_ARG_334 | NH2 | L_ASP_330 | OD2 | 3.026 |
| 5W9K | L_ARG_335 | NH2 | L_ASP_326 | OD2 | 2.940 |
| 5W9K | L_ARG_401 | NH2 | L_ASP_444 | OD1 | 3.708 |
| 5W9K | L_ARG_401 | NH2 | L_ASP_444 | OD2 | 3.216 |
| 5W9K | L_LYS_496 | NZ  | L_GLU_536 | OE1 | 2.998 |
| 5W9K | L_LYS_496 | NZ  | L_GLU_536 | OE2 | 3.594 |
| 5W9K | L_LYS_502 | NZ  | L_GLU_513 | OE2 | 3.474 |
| 5W9K | L_ARG_505 | NH1 | L_GLU_549 | OE1 | 2.874 |
| 5W9K | L_ARG_629 | NH1 | L_GLU_376 | OE2 | 3.648 |
| 5W9K | L_ARG_629 | NH1 | L_ASP_644 | OD1 | 2.887 |
| 5W9K | L_ARG_629 | NH1 | L_ASP_644 | OD2 | 3.878 |
| 5W9K | L_ARG_629 | NH2 | L_ASP_644 | OD1 | 2.829 |
| 5W9K | L_ARG_629 | NH2 | L_ASP_644 | OD2 | 3.918 |
| 5W9K | L_HIS_681 | NE2 | A_ASP_910 | OD1 | 3.027 |
| 5W9K | L_HIS_681 | NE2 | A_ASP_910 | OD2 | 3.875 |
| 5W9K | L_ARG_691 | NH2 | L_ASP_343 | OD1 | 3.689 |
| 5W9K | L_ARG_694 | NH1 | L_ASP_343 | OD2 | 3.049 |

|      |            |     |            |     |       |
|------|------------|-----|------------|-----|-------|
| 5W9K | L_ARG.694  | NH2 | L_ASP.343  | OD2 | 2.912 |
| 5W9K | L_ARG.700  | NH2 | G_GLU.756  | OE2 | 2.893 |
| 5W9K | L_LYS.728  | NZ  | L_ASP.726  | OD2 | 2.874 |
| 5W9L | A_ARG.758  | NH1 | B_ASP.740  | OD1 | 2.964 |
| 5W9L | A_ARG.758  | NH2 | B_ASP.740  | OD1 | 3.858 |
| 5W9L | A_LYS.801  | NZ  | A_ASP.843  | OD1 | 2.802 |
| 5W9L | A_LYS.801  | NZ  | A_ASP.843  | OD2 | 3.510 |
| 5W9L | A_LYS.807  | NZ  | A_GLU.818  | OE1 | 2.932 |
| 5W9L | A_LYS.807  | NZ  | A_GLU.818  | OE2 | 3.202 |
| 5W9L | A_ARG.841  | NH1 | A_ASP.844  | OD2 | 3.517 |
| 5W9L | A_ARG.847  | NH2 | A_ASP.844  | OD1 | 2.713 |
| 5W9L | A_ARG.887  | NH2 | A_ASP.892  | OD1 | 2.862 |
| 5W9L | A_ARG.887  | NH2 | A_ASP.892  | OD2 | 3.937 |
| 5W9L | A_HIS.1020 | NE2 | A_ASP.1024 | OD2 | 2.890 |
| 5W9L | A_LYS.1021 | NZ  | A_GLU.793  | OE1 | 3.715 |
| 5W9L | A_LYS.1021 | NZ  | A_GLU.793  | OE2 | 2.898 |
| 5W9L | A_ARG.1057 | NH2 | A_ASP.1053 | OD1 | 3.565 |
| 5W9L | A_ARG.1057 | NH2 | A_ASP.1053 | OD2 | 2.794 |
| 5W9L | A_ARG.1113 | NH1 | A_GLU.1105 | OE1 | 3.356 |
| 5W9L | A_ARG.1113 | NH1 | A_GLU.1105 | OE2 | 2.777 |
| 5W9L | A_ARG.1113 | NH2 | D_GLU.1105 | OE1 | 3.448 |
| 5W9L | A_ARG.1113 | NH2 | D_GLU.1105 | OE2 | 2.879 |
| 5W9L | D_LYS.779  | NZ  | D_ASP.771  | OD2 | 2.899 |
| 5W9L | D_LYS.801  | NZ  | D_ASP.843  | OD1 | 2.808 |
| 5W9L | D_LYS.801  | NZ  | D_ASP.843  | OD2 | 3.150 |
| 5W9L | D_LYS.807  | NZ  | D_GLU.818  | OE1 | 3.544 |
| 5W9L | D_LYS.807  | NZ  | D_GLU.818  | OE2 | 2.846 |
| 5W9L | D_ARG.841  | NH1 | D_GLU.1090 | OE1 | 2.693 |
| 5W9L | D_ARG.841  | NH1 | D_GLU.1090 | OE2 | 3.687 |
| 5W9L | D_ARG.841  | NH2 | D_GLU.1090 | OE1 | 3.508 |
| 5W9L | D_ARG.841  | NH2 | D_GLU.1090 | OE2 | 3.018 |
| 5W9L | D_ARG.847  | NH1 | D_ASP.844  | OD1 | 3.540 |
| 5W9L | D_ARG.847  | NH2 | D_ASP.844  | OD1 | 2.650 |
| 5W9L | D_ARG.887  | NH2 | D_ASP.892  | OD1 | 2.968 |
| 5W9L | D_HIS.1020 | NE2 | D_ASP.1024 | OD1 | 3.581 |
| 5W9L | D_HIS.1020 | NE2 | D_ASP.1024 | OD2 | 2.693 |
| 5W9L | D_LYS.1102 | NZ  | D_GLU.793  | OE1 | 2.889 |
| 5W9L | D_LYS.1102 | NZ  | D_GLU.793  | OE2 | 3.224 |
| 5W9L | D_LYS.1174 | NZ  | D_GLU.1183 | OE1 | 2.743 |
| 5W9L | E_LYS.62   | NZ  | E_GLU.46   | OE2 | 2.839 |
| 5W9L | E_ARG.66   | NH1 | E_ASP.86   | OD1 | 2.896 |
| 5W9L | E_ARG.66   | NH1 | E_ASP.86   | OD2 | 3.239 |
| 5W9L | E_ARG.66   | NH2 | E_ASP.86   | OD1 | 3.963 |
| 5W9L | E_ARG.94   | NH1 | E_ASP.101  | OD2 | 2.725 |
| 5W9L | E_LYS.95   | NZ  | E_ASP.100C | OD1 | 3.912 |
| 5W9L | F_ARG.61   | NH1 | F_ASP.82   | OD1 | 3.203 |
| 5W9L | F_ARG.61   | NH1 | F_ASP.82   | OD2 | 3.638 |
| 5W9L | F_ARG.61   | NH2 | F_GLU.79   | OE2 | 3.934 |
| 5W9L | F_ARG.61   | NH2 | F_ASP.82   | OD1 | 3.694 |
| 5W9L | F_ARG.61   | NH2 | F_ASP.82   | OD2 | 2.714 |
| 5W9L | F_LYS.92   | NZ  | F_GLU.93   | OE1 | 2.893 |
| 5W9L | F_ARG.96   | NH1 | E_ASP.100C | OD2 | 3.246 |
| 5W9L | F_ARG.96   | NH2 | D_GLU.1183 | OE2 | 2.643 |
| 5W9L | F_ARG.96   | NH2 | E_ASP.100C | OD2 | 3.370 |
| 5W9L | G_ARG.758  | NH1 | J_ASP.740  | OD1 | 2.859 |
| 5W9L | G_ARG.758  | NH2 | J_ASP.740  | OD1 | 3.792 |
| 5W9L | G_LYS.801  | NZ  | G_ASP.843  | OD1 | 2.779 |
| 5W9L | G_LYS.801  | NZ  | G_ASP.843  | OD2 | 2.846 |

|      |            |     |            |     |       |
|------|------------|-----|------------|-----|-------|
| 5W9L | G_LYS_807  | NZ  | G_GLU_818  | OE1 | 2.853 |
| 5W9L | G_LYS_807  | NZ  | G_GLU_818  | OE2 | 3.467 |
| 5W9L | G_ARG_841  | NH1 | G_GLU_1090 | OE1 | 3.667 |
| 5W9L | G_ARG_841  | NH1 | G_GLU_1090 | OE2 | 2.809 |
| 5W9L | G_ARG_841  | NH2 | G_GLU_1090 | OE1 | 2.982 |
| 5W9L | G_ARG_841  | NH2 | G_GLU_1090 | OE2 | 3.598 |
| 5W9L | G_ARG_847  | NH1 | G_ASP_844  | OD1 | 3.281 |
| 5W9L | G_ARG_847  | NH2 | G_ASP_844  | OD1 | 2.692 |
| 5W9L | G_ARG_887  | NH2 | G_ASP_892  | OD1 | 2.920 |
| 5W9L | G_HIS_1020 | NE2 | G_ASP_1024 | OD1 | 3.996 |
| 5W9L | G_HIS_1020 | NE2 | G_ASP_1024 | OD2 | 2.966 |
| 5W9L | G_LYS_1021 | NZ  | G_GLU_793  | OE1 | 3.707 |
| 5W9L | G_LYS_1021 | NZ  | G_GLU_793  | OE2 | 2.887 |
| 5W9L | G_LYS_1035 | NZ  | G_GLU_1039 | OE2 | 2.763 |
| 5W9L | G_LYS_1174 | NZ  | G_GLU_1183 | OE2 | 2.797 |
| 5W9L | G_ARG_1179 | NH2 | H_ASP_31   | OD1 | 2.753 |
| 5W9L | H_LYS_19   | NZ  | H_GLU_81   | OE1 | 3.889 |
| 5W9L | H_LYS_38   | NZ  | H_GLU_46   | OE1 | 2.832 |
| 5W9L | H_LYS_62   | NZ  | H_GLU_46   | OE2 | 3.395 |
| 5W9L | H_ARG_66   | NH1 | H_ASP_86   | OD1 | 3.754 |
| 5W9L | H_ARG_66   | NH1 | H_ASP_86   | OD2 | 3.742 |
| 5W9L | H_ARG_66   | NH2 | H_ASP_86   | OD1 | 3.914 |
| 5W9L | H_ARG_66   | NH2 | H_ASP_86   | OD2 | 2.831 |
| 5W9L | H_ARG_94   | NH2 | H_ASP_101  | OD2 | 2.725 |
| 5W9L | H_LYS_95   | NZ  | H_ASP_100C | OD1 | 3.863 |
| 5W9L | L_ARG_24   | NH1 | L_ASP_70   | OD1 | 2.847 |
| 5W9L | L_ARG_24   | NH1 | L_ASP_70   | OD2 | 3.591 |
| 5W9L | L_ARG_61   | NH1 | L_GLU_79   | OE2 | 2.866 |
| 5W9L | L_ARG_61   | NH1 | L_ASP_82   | OD1 | 3.906 |
| 5W9L | L_ARG_61   | NH1 | L_ASP_82   | OD2 | 2.956 |
| 5W9L | L_ARG_61   | NH2 | L_GLU_79   | OE2 | 2.901 |
| 5W9L | L_LYS_92   | NZ  | L_GLU_93   | OE1 | 2.785 |
| 5W9L | L_ARG_96   | NH1 | H_ASP_100C | OD2 | 2.945 |
| 5W9L | L_ARG_96   | NH2 | H_ASP_100C | OD2 | 2.982 |
| 5W9L | B_LYS_27   | NZ  | B_GLU_230  | OE2 | 3.782 |
| 5W9L | B_LYS_99   | NZ  | B_GLU_32   | OE1 | 2.878 |
| 5W9L | B_LYS_110  | NZ  | B_ASP_83   | OD2 | 2.826 |
| 5W9L | B_ARG_119  | NH2 | B_ASP_54   | OD2 | 3.988 |
| 5W9L | B_LYS_142  | NZ  | B_GLU_252  | OE1 | 2.955 |
| 5W9L | B_HIS_194  | NE2 | B_GLU_32   | OE1 | 3.596 |
| 5W9L | B_ARG_235  | NH1 | B_ASP_24   | OD1 | 3.631 |
| 5W9L | B_ARG_235  | NH1 | B_ASP_24   | OD2 | 2.911 |
| 5W9L | B_ARG_235  | NH2 | B_ASP_24   | OD2 | 3.191 |
| 5W9L | B_ARG_235  | NH2 | B_GLU_188  | OE1 | 3.770 |
| 5W9L | B_ARG_235  | NH2 | B_GLU_188  | OE2 | 2.915 |
| 5W9L | B_ARG_335  | NH2 | B_ASP_326  | OD2 | 2.950 |
| 5W9L | B_ARG_401  | NH2 | B_ASP_444  | OD1 | 3.583 |
| 5W9L | B_ARG_401  | NH2 | B_ASP_444  | OD2 | 2.888 |
| 5W9L | B_LYS_496  | NZ  | B_GLU_536  | OE1 | 3.232 |
| 5W9L | B_LYS_496  | NZ  | B_GLU_536  | OE2 | 3.655 |
| 5W9L | B_LYS_502  | NZ  | B_GLU_513  | OE2 | 2.865 |
| 5W9L | B_ARG_614  | NH2 | B_GLU_605  | OE2 | 2.923 |
| 5W9L | B_ARG_629  | NH1 | B_GLU_376  | OE1 | 3.464 |
| 5W9L | B_ARG_629  | NH1 | B_ASP_644  | OD1 | 2.816 |
| 5W9L | B_ARG_629  | NH2 | B_ASP_644  | OD1 | 2.786 |
| 5W9L | B_HIS_681  | NE2 | D_ASP_910  | OD1 | 2.803 |
| 5W9L | B_HIS_681  | NE2 | D_ASP_910  | OD2 | 3.795 |
| 5W9L | B_ARG_691  | NH1 | B_ASP_343  | OD2 | 3.571 |

|      |           |     |           |     |       |
|------|-----------|-----|-----------|-----|-------|
| 5W9L | B_ARG_700 | NH1 | A_GLU_756 | OE2 | 2.893 |
| 5W9L | B_LYS_728 | NZ  | B_ASP_726 | OD2 | 2.978 |
| 5W9L | C_HIS_81  | ND1 | C_ASP_80  | OD1 | 3.849 |
| 5W9L | C_LYS_99  | NZ  | C_GLU_32  | OE1 | 2.902 |
| 5W9L | C_LYS_99  | NZ  | C_GLU_32  | OE2 | 3.891 |
| 5W9L | C_LYS_110 | NZ  | C_ASP_83  | OD2 | 2.851 |
| 5W9L | C_LYS_142 | NZ  | C_GLU_252 | OE1 | 2.960 |
| 5W9L | C_ARG_181 | NH1 | C_ASP_174 | OD2 | 3.375 |
| 5W9L | C_HIS_208 | ND1 | C_ASP_213 | OD2 | 3.867 |
| 5W9L | C_ARG_235 | NH1 | C_ASP_24  | OD1 | 3.815 |
| 5W9L | C_ARG_235 | NH1 | C_ASP_24  | OD2 | 3.367 |
| 5W9L | C_ARG_235 | NH2 | C_ASP_24  | OD2 | 2.948 |
| 5W9L | C_ARG_235 | NH2 | C_GLU_188 | OE1 | 3.081 |
| 5W9L | C_ARG_235 | NH2 | C_GLU_188 | OE2 | 3.858 |
| 5W9L | C_ARG_269 | NH1 | C_GLU_252 | OE2 | 3.121 |
| 5W9L | C_ARG_334 | NH2 | C_ASP_330 | OD2 | 3.055 |
| 5W9L | C_ARG_335 | NH2 | C_ASP_326 | OD2 | 2.939 |
| 5W9L | C_ARG_401 | NH2 | C_ASP_444 | OD1 | 3.945 |
| 5W9L | C_ARG_401 | NH2 | C_ASP_444 | OD2 | 3.806 |
| 5W9L | C_LYS_502 | NZ  | C_GLU_513 | OE2 | 2.769 |
| 5W9L | C_LYS_543 | NZ  | C_GLU_549 | OE1 | 3.142 |
| 5W9L | C_LYS_543 | NZ  | C_GLU_549 | OE2 | 2.917 |
| 5W9L | C_LYS_587 | NZ  | C_GLU_382 | OE2 | 2.765 |
| 5W9L | C_ARG_614 | NH2 | C_GLU_605 | OE2 | 2.923 |
| 5W9L | C_ARG_691 | NH2 | C_ASP_343 | OD1 | 3.440 |
| 5W9L | C_LYS_728 | NZ  | C_ASP_726 | OD2 | 2.825 |
| 5W9L | J_LYS_99  | NZ  | J_GLU_32  | OE1 | 2.885 |
| 5W9L | J_LYS_110 | NZ  | J_ASP_83  | OD2 | 2.834 |
| 5W9L | J_LYS_110 | NZ  | J_ASP_108 | OD2 | 3.969 |
| 5W9L | J_ARG_119 | NH2 | J_ASP_54  | OD2 | 3.754 |
| 5W9L | J_LYS_142 | NZ  | J_GLU_252 | OE1 | 3.881 |
| 5W9L | J_ARG_181 | NH1 | J_ASP_174 | OD2 | 3.154 |
| 5W9L | J_ARG_190 | NH1 | J_ASP_24  | OD1 | 3.142 |
| 5W9L | J_ARG_190 | NH2 | J_ASP_24  | OD1 | 2.772 |
| 5W9L | J_HIS_194 | NE2 | J_GLU_32  | OE1 | 3.916 |
| 5W9L | J_ARG_235 | NH2 | J_GLU_188 | OE1 | 3.860 |
| 5W9L | J_ARG_235 | NH2 | J_GLU_188 | OE2 | 2.919 |
| 5W9L | J_ARG_334 | NH2 | J_ASP_330 | OD2 | 3.039 |
| 5W9L | J_ARG_335 | NH2 | J_ASP_326 | OD2 | 2.959 |
| 5W9L | J_ARG_401 | NH2 | J_ASP_444 | OD1 | 3.680 |
| 5W9L | J_ARG_401 | NH2 | J_ASP_444 | OD2 | 3.147 |
| 5W9L | J_LYS_413 | NZ  | J_GLU_382 | OE1 | 3.990 |
| 5W9L | J_LYS_413 | NZ  | J_GLU_382 | OE2 | 2.824 |
| 5W9L | J_LYS_502 | NZ  | J_GLU_513 | OE1 | 3.965 |
| 5W9L | J_LYS_502 | NZ  | J_GLU_513 | OE2 | 2.807 |
| 5W9L | J_ARG_511 | NH2 | J_ASP_509 | OD2 | 3.938 |
| 5W9L | J_ARG_614 | NH2 | J_GLU_605 | OE1 | 2.958 |
| 5W9L | J_ARG_614 | NH2 | J_GLU_605 | OE2 | 3.605 |
| 5W9L | J_ARG_629 | NH1 | J_GLU_376 | OE1 | 3.967 |
| 5W9L | J_ARG_629 | NH1 | J_ASP_644 | OD1 | 2.719 |
| 5W9L | J_ARG_629 | NH2 | J_ASP_644 | OD1 | 2.638 |
| 5W9L | J_ARG_629 | NH2 | J_ASP_644 | OD2 | 3.881 |
| 5W9L | J_LYS_665 | NZ  | J_GLU_666 | OE2 | 2.675 |
| 5W9L | J_HIS_681 | NE2 | A_ASP_910 | OD1 | 2.810 |
| 5W9L | J_HIS_681 | NE2 | A_ASP_910 | OD2 | 3.815 |
| 5W9L | J_LYS_728 | NZ  | J_ASP_726 | OD2 | 2.753 |
| 5W9M | A_ARG_758 | NH1 | E_ASP_740 | OD1 | 2.862 |
| 5W9M | A_ARG_758 | NH2 | E_ASP_740 | OD1 | 2.970 |

|      |            |     |            |     |       |
|------|------------|-----|------------|-----|-------|
| 5W9M | A_LYS_801  | NZ  | A_ASP_843  | OD1 | 2.883 |
| 5W9M | A_LYS_801  | NZ  | A_ASP_843  | OD2 | 3.678 |
| 5W9M | A_ARG_841  | NH1 | A_GLU_1090 | OE1 | 3.685 |
| 5W9M | A_ARG_841  | NH1 | A_GLU_1090 | OE2 | 2.836 |
| 5W9M | A_ARG_841  | NH2 | A_GLU_1090 | OE1 | 2.984 |
| 5W9M | A_ARG_841  | NH2 | A_GLU_1090 | OE2 | 3.616 |
| 5W9M | A_ARG_847  | NH1 | J_ASP_726  | OD2 | 3.850 |
| 5W9M | A_ARG_847  | NH2 | A_ASP_844  | OD1 | 2.786 |
| 5W9M | A_ARG_887  | NH2 | A_ASP_892  | OD1 | 2.933 |
| 5W9M | A_HIS_1020 | NE2 | A_ASP_1024 | OD2 | 3.018 |
| 5W9M | A_LYS_1035 | NZ  | A_GLU_1039 | OE2 | 2.904 |
| 5W9M | A_ARG_1057 | NH2 | A_ASP_1053 | OD1 | 2.900 |
| 5W9M | A_ARG_1057 | NH2 | A_ASP_1053 | OD2 | 3.314 |
| 5W9M | A_LYS_1102 | NZ  | A_GLU_793  | OE1 | 2.817 |
| 5W9M | A_LYS_1102 | NZ  | A_GLU_793  | OE2 | 3.330 |
| 5W9M | A_ARG_1113 | NH1 | A_GLU_1105 | OE1 | 2.883 |
| 5W9M | A_ARG_1113 | NH1 | A_GLU_1105 | OE2 | 3.760 |
| 5W9M | A_ARG_1113 | NH2 | A_GLU_1105 | OE1 | 2.893 |
| 5W9M | A_HIS_1138 | NE2 | A_GLU_793  | OE2 | 2.874 |
| 5W9M | A_LYS_1174 | NZ  | A_GLU_1183 | OE1 | 2.780 |
| 5W9M | B_LYS_38   | NZ  | B_GLU_46   | OE2 | 3.812 |
| 5W9M | B_LYS_62   | NZ  | B_GLU_46   | OE1 | 2.808 |
| 5W9M | B_LYS_62   | NZ  | B_GLU_46   | OE2 | 3.864 |
| 5W9M | B_ARG_66   | NH2 | B_ASP_86   | OD1 | 2.831 |
| 5W9M | B_ARG_66   | NH2 | B_ASP_86   | OD2 | 3.198 |
| 5W9M | C_ARG_61   | NH1 | C_GLU_79   | OE1 | 2.869 |
| 5W9M | C_ARG_96   | NH1 | B_ASP_100C | OD2 | 2.894 |
| 5W9M | C_ARG_96   | NH2 | A_GLU_1183 | OE2 | 2.938 |
| 5W9M | C_ARG_96   | NH2 | B_ASP_100C | OD2 | 2.940 |
| 5W9M | C_LYS_103  | NZ  | C_GLU_105  | OE1 | 3.072 |
| 5W9M | D_LYS_779  | NZ  | D_GLU_1148 | OE1 | 2.693 |
| 5W9M | D_LYS_801  | NZ  | D_ASP_843  | OD1 | 2.885 |
| 5W9M | D_LYS_801  | NZ  | D_ASP_843  | OD2 | 3.585 |
| 5W9M | D_LYS_816  | NZ  | D_ASP_1064 | OD1 | 3.628 |
| 5W9M | D_LYS_816  | NZ  | D_ASP_1064 | OD2 | 3.861 |
| 5W9M | D_ARG_841  | NH2 | D_GLU_1090 | OE1 | 3.446 |
| 5W9M | D_ARG_841  | NH2 | D_GLU_1090 | OE2 | 2.981 |
| 5W9M | D_ARG_847  | NH1 | A_GLU_1017 | OE2 | 3.300 |
| 5W9M | D_ARG_847  | NH2 | A_GLU_1017 | OE2 | 3.532 |
| 5W9M | D_ARG_847  | NH2 | D_ASP_844  | OD1 | 2.832 |
| 5W9M | D_ARG_887  | NH2 | D_ASP_892  | OD1 | 2.922 |
| 5W9M | D_LYS_995  | NZ  | D_ASP_868  | OD1 | 3.932 |
| 5W9M | D_LYS_995  | NZ  | D_ASP_868  | OD2 | 2.628 |
| 5W9M | D_HIS_1020 | NE2 | D_ASP_1024 | OD1 | 3.644 |
| 5W9M | D_HIS_1020 | NE2 | D_ASP_1024 | OD2 | 3.049 |
| 5W9M | D_LYS_1102 | NZ  | D_GLU_793  | OE1 | 3.825 |
| 5W9M | D_ARG_1113 | NH1 | D_GLU_1105 | OE1 | 2.819 |
| 5W9M | D_ARG_1113 | NH1 | D_GLU_1105 | OE2 | 3.747 |
| 5W9M | D_ARG_1113 | NH2 | D_GLU_1105 | OE1 | 3.533 |
| 5W9M | D_ARG_1113 | NH2 | D_GLU_1105 | OE2 | 2.987 |
| 5W9M | D_HIS_1138 | NE2 | D_GLU_793  | OE2 | 2.837 |
| 5W9M | D_LYS_1174 | NZ  | D_GLU_1183 | OE2 | 2.795 |
| 5W9M | G_ARG_758  | NH1 | J_ASP_740  | OD1 | 2.816 |
| 5W9M | G_ARG_758  | NH2 | J_ASP_740  | OD1 | 3.407 |
| 5W9M | G_LYS_779  | NZ  | G_ASP_771  | OD2 | 2.927 |
| 5W9M | G_LYS_779  | NZ  | G_GLU_1148 | OE1 | 3.707 |
| 5W9M | G_LYS_801  | NZ  | G_ASP_843  | OD1 | 2.888 |
| 5W9M | G_LYS_801  | NZ  | G_ASP_843  | OD2 | 3.840 |



|      |            |     |            |     |       |
|------|------------|-----|------------|-----|-------|
| 5W9M | G_LYS_807  | NZ  | G_GLU_818  | OE2 | 3.982 |
| 5W9M | G_ARG_841  | NH1 | G_GLU_1090 | OE1 | 3.659 |
| 5W9M | G_ARG_841  | NH1 | G_GLU_1090 | OE2 | 2.832 |
| 5W9M | G_ARG_841  | NH2 | G_GLU_1090 | OE1 | 2.944 |
| 5W9M | G_ARG_841  | NH2 | G_GLU_1090 | OE2 | 3.615 |
| 5W9M | G_ARG_847  | NH2 | G_ASP_844  | OD1 | 2.704 |
| 5W9M | G_ARG_887  | NH2 | G_ASP_892  | OD1 | 2.967 |
| 5W9M | G_HIS_1020 | NE2 | G_ASP_1024 | OD1 | 3.635 |
| 5W9M | G_HIS_1020 | NE2 | G_ASP_1024 | OD2 | 3.025 |
| 5W9M | G_LYS_1100 | NZ  | G_ASP_1101 | OD1 | 2.964 |
| 5W9M | G_LYS_1102 | NZ  | G_GLU_793  | OE2 | 3.845 |
| 5W9M | G_ARG_1113 | NH1 | G_GLU_1105 | OE1 | 2.863 |
| 5W9M | G_ARG_1113 | NH1 | G_GLU_1105 | OE2 | 3.297 |
| 5W9M | G_ARG_1113 | NH2 | A_GLU_1105 | OE1 | 3.823 |
| 5W9M | G_ARG_1113 | NH2 | A_GLU_1105 | OE2 | 2.800 |
| 5W9M | G_HIS_1138 | NE2 | G_GLU_793  | OE2 | 2.857 |
| 5W9M | G_LYS_1174 | NZ  | G_GLU_1183 | OE1 | 2.907 |
| 5W9M | G_ARG_1179 | NH1 | H_ASP_31   | OD1 | 3.713 |
| 5W9M | H_LYS_62   | NZ  | H_GLU_46   | OE1 | 3.377 |
| 5W9M | H_LYS_62   | NZ  | H_GLU_46   | OE2 | 2.872 |
| 5W9M | H_ARG_66   | NH1 | H_ASP_86   | OD1 | 3.768 |
| 5W9M | H_ARG_66   | NH1 | H_ASP_86   | OD2 | 3.866 |
| 5W9M | H_ARG_66   | NH2 | H_ASP_86   | OD1 | 3.905 |
| 5W9M | H_ARG_66   | NH2 | H_ASP_86   | OD2 | 2.981 |
| 5W9M | H_ARG_94   | NH1 | H_ASP_101  | OD2 | 3.814 |
| 5W9M | H_ARG_94   | NH2 | H_ASP_101  | OD2 | 2.908 |
| 5W9M | H_LYS_95   | NZ  | H_ASP_100C | OD1 | 3.555 |
| 5W9M | H_LYS_95   | NZ  | H_ASP_100C | OD2 | 2.929 |
| 5W9M | L_ARG_61   | NH1 | L_GLU_79   | OE1 | 2.897 |
| 5W9M | L_ARG_61   | NH1 | L_ASP_82   | OD1 | 3.868 |
| 5W9M | L_ARG_61   | NH1 | L_ASP_82   | OD2 | 2.952 |
| 5W9M | L_ARG_61   | NH2 | L_GLU_79   | OE1 | 2.900 |
| 5W9M | L_ARG_96   | NH1 | H_ASP_100C | OD2 | 2.840 |
| 5W9M | L_ARG_96   | NH2 | G_GLU_1183 | OE2 | 2.957 |
| 5W9M | L_ARG_96   | NH2 | H_ASP_100C | OD2 | 3.363 |
| 5W9M | L_LYS_103  | NZ  | L_GLU_105  | OE2 | 3.254 |
| 5W9M | E_LYS_27   | NZ  | E_GLU_230  | OE2 | 3.877 |
| 5W9M | E_LYS_52   | NZ  | E_ASP_49   | OD2 | 3.990 |
| 5W9M | E_HIS_81   | ND1 | E_ASP_80   | OD1 | 3.823 |
| 5W9M | E_LYS_99   | NZ  | E_GLU_32   | OE1 | 2.847 |
| 5W9M | E_LYS_110  | NZ  | E_ASP_83   | OD2 | 2.742 |
| 5W9M | E_LYS_142  | NZ  | E_GLU_252  | OE1 | 3.416 |
| 5W9M | E_LYS_142  | NZ  | E_GLU_252  | OE2 | 3.425 |
| 5W9M | E_ARG_181  | NH1 | E_ASP_174  | OD2 | 3.814 |
| 5W9M | E_HIS_194  | NE2 | E_GLU_32   | OE1 | 3.141 |
| 5W9M | E_ARG_235  | NH1 | E_GLU_188  | OE1 | 3.017 |
| 5W9M | E_ARG_335  | NH2 | E_ASP_326  | OD2 | 2.919 |
| 5W9M | E_ARG_401  | NH2 | E_ASP_444  | OD1 | 3.595 |
| 5W9M | E_ARG_401  | NH2 | E_ASP_444  | OD2 | 2.975 |
| 5W9M | E_LYS_496  | NZ  | E_GLU_536  | OE1 | 2.925 |
| 5W9M | E_LYS_496  | NZ  | E_GLU_536  | OE2 | 3.563 |
| 5W9M | E_LYS_502  | NZ  | E_GLU_513  | OE2 | 2.857 |
| 5W9M | E_ARG_505  | NH1 | E_GLU_549  | OE1 | 2.887 |
| 5W9M | E_ARG_505  | NH2 | E_GLU_549  | OE1 | 3.647 |
| 5W9M | E_ARG_629  | NH1 | E_GLU_376  | OE2 | 3.561 |
| 5W9M | E_ARG_629  | NH1 | E_ASP_644  | OD1 | 2.850 |
| 5W9M | E_ARG_629  | NH2 | E_ASP_644  | OD1 | 2.751 |
| 5W9M | E_ARG_629  | NH2 | E_ASP_644  | OD2 | 3.949 |

|      |           |     |           |     |       |
|------|-----------|-----|-----------|-----|-------|
| 5W9M | E_LYS_665 | NZ  | E_GLU_666 | OE2 | 2.766 |
| 5W9M | E_HIS_681 | NE2 | D_ASP_910 | OD1 | 2.869 |
| 5W9M | E_HIS_681 | NE2 | D_ASP_910 | OD2 | 3.974 |
| 5W9M | E_ARG_691 | NH2 | E_ASP_343 | OD1 | 3.021 |
| 5W9M | E_ARG_700 | NH2 | A_GLU_756 | OE1 | 3.024 |
| 5W9M | E_ARG_700 | NH2 | A_GLU_756 | OE2 | 3.469 |
| 5W9M | E_LYS_728 | NZ  | E_ASP_726 | OD2 | 2.871 |
| 5W9M | F_HIS_81  | ND1 | F_ASP_80  | OD1 | 3.780 |
| 5W9M | F_LYS_99  | NZ  | F_GLU_32  | OE1 | 3.190 |
| 5W9M | F_LYS_99  | NZ  | F_GLU_32  | OE2 | 3.555 |
| 5W9M | F_LYS_110 | NZ  | F_ASP_83  | OD2 | 3.405 |
| 5W9M | F_LYS_110 | NZ  | F_ASP_108 | OD1 | 3.183 |
| 5W9M | F_LYS_110 | NZ  | F_ASP_108 | OD2 | 3.399 |
| 5W9M | F_ARG_119 | NH1 | F_ASP_54  | OD2 | 3.785 |
| 5W9M | F_ARG_119 | NH2 | F_ASP_54  | OD2 | 3.047 |
| 5W9M | F_LYS_142 | NZ  | F_GLU_252 | OE1 | 2.921 |
| 5W9M | F_HIS_194 | NE2 | F_GLU_32  | OE1 | 3.759 |
| 5W9M | F_ARG_235 | NH1 | F_GLU_188 | OE2 | 3.596 |
| 5W9M | F_ARG_334 | NH2 | F_ASP_330 | OD1 | 3.977 |
| 5W9M | F_ARG_334 | NH2 | F_ASP_330 | OD2 | 3.003 |
| 5W9M | F_ARG_335 | NH2 | F_ASP_326 | OD2 | 2.919 |
| 5W9M | F_ARG_401 | NH2 | F_ASP_444 | OD1 | 3.837 |
| 5W9M | F_ARG_401 | NH2 | F_ASP_444 | OD2 | 3.316 |
| 5W9M | F_LYS_502 | NZ  | F_GLU_513 | OE1 | 2.889 |
| 5W9M | F_LYS_543 | NZ  | F_GLU_549 | OE2 | 3.751 |
| 5W9M | F_LYS_587 | NZ  | F_GLU_382 | OE2 | 2.825 |
| 5W9M | F_ARG_614 | NH2 | F_GLU_605 | OE1 | 2.961 |
| 5W9M | F_HIS_681 | NE2 | G_ASP_910 | OD1 | 2.934 |
| 5W9M | F_HIS_681 | NE2 | G_ASP_910 | OD2 | 3.892 |
| 5W9M | F_ARG_691 | NH2 | F_ASP_343 | OD1 | 2.990 |
| 5W9M | F_LYS_728 | NZ  | F_ASP_726 | OD1 | 3.991 |
| 5W9M | F_LYS_728 | NZ  | F_ASP_726 | OD2 | 2.816 |
| 5W9M | J_HIS_81  | ND1 | J_ASP_80  | OD1 | 3.900 |
| 5W9M | J_LYS_99  | NZ  | J_ASP_34  | OD2 | 2.828 |
| 5W9M | J_ARG_119 | NH2 | J_ASP_54  | OD2 | 3.814 |
| 5W9M | J_LYS_142 | NZ  | J_GLU_252 | OE1 | 3.757 |
| 5W9M | J_LYS_142 | NZ  | J_GLU_252 | OE2 | 3.691 |
| 5W9M | J_HIS_194 | NE2 | J_GLU_32  | OE1 | 3.474 |
| 5W9M | J_ARG_235 | NH2 | J_GLU_188 | OE1 | 3.932 |
| 5W9M | J_ARG_235 | NH2 | J_GLU_188 | OE2 | 2.863 |
| 5W9M | J_ARG_334 | NH2 | J_ASP_330 | OD1 | 3.986 |
| 5W9M | J_ARG_334 | NH2 | J_ASP_330 | OD2 | 2.914 |
| 5W9M | J_ARG_335 | NH2 | J_ASP_326 | OD2 | 2.924 |
| 5W9M | J_ARG_401 | NH2 | J_ASP_444 | OD1 | 3.669 |
| 5W9M | J_ARG_401 | NH2 | J_ASP_444 | OD2 | 3.110 |
| 5W9M | J_LYS_413 | NZ  | J_GLU_382 | OE1 | 3.999 |
| 5W9M | J_LYS_413 | NZ  | J_GLU_382 | OE2 | 2.963 |
| 5W9M | J_HIS_486 | NE2 | J_GLU_565 | OE2 | 3.789 |
| 5W9M | J_LYS_496 | NZ  | J_GLU_536 | OE2 | 3.687 |
| 5W9M | J_LYS_502 | NZ  | J_GLU_513 | OE1 | 2.953 |
| 5W9M | J_LYS_502 | NZ  | J_GLU_513 | OE2 | 3.624 |
| 5W9M | J_ARG_511 | NH2 | J_ASP_509 | OD2 | 3.887 |
| 5W9M | J_ARG_629 | NH1 | J_ASP_644 | OD1 | 2.859 |
| 5W9M | J_ARG_629 | NH2 | J_ASP_644 | OD1 | 2.744 |
| 5W9M | J_ARG_629 | NH2 | J_ASP_644 | OD2 | 3.852 |
| 5W9M | J_HIS_681 | NE2 | A_ASP_910 | OD1 | 3.021 |
| 5W9M | J_LYS_728 | NZ  | J_ASP_726 | OD2 | 2.879 |
| 5W9M | A_ARG_758 | NH1 | H_ASP_740 | OD1 | 3.061 |

|      |            |     |            |     |       |
|------|------------|-----|------------|-----|-------|
| 5W9N | A_ARG_758  | NH2 | H_ASP_740  | OD1 | 3.534 |
| 5W9N | A_LYS_801  | NZ  | A_ASP_843  | OD1 | 2.885 |
| 5W9N | A_LYS_801  | NZ  | A_ASP_843  | OD2 | 3.553 |
| 5W9N | A_LYS_816  | NZ  | A_ASP_1064 | OD2 | 3.955 |
| 5W9N | A_ARG_841  | NH2 | A_ASP_844  | OD2 | 2.840 |
| 5W9N | A_ARG_847  | NH2 | A_ASP_844  | OD1 | 2.793 |
| 5W9N | A_ARG_887  | NH2 | A_ASP_892  | OD1 | 2.922 |
| 5W9N | A_ARG_887  | NH2 | A_ASP_892  | OD2 | 3.858 |
| 5W9N | A_HIS_1020 | NE2 | A_ASP_1024 | OD2 | 2.929 |
| 5W9N | A_ARG_1057 | NH1 | A_ASP_1053 | OD1 | 3.524 |
| 5W9N | A_LYS_1102 | NZ  | A_GLU_793  | OE1 | 2.942 |
| 5W9N | A_LYS_1102 | NZ  | A_GLU_793  | OE2 | 3.253 |
| 5W9N | A_HIS_1138 | NE2 | A_GLU_793  | OE1 | 2.975 |
| 5W9N | B_LYS_62   | NZ  | B_GLU_46   | OE1 | 3.336 |
| 5W9N | B_LYS_62   | NZ  | B_GLU_46   | OE2 | 2.950 |
| 5W9N | B_ARG_66   | NH2 | B_ASP_86   | OD1 | 2.875 |
| 5W9N | B_ARG_66   | NH2 | B_ASP_86   | OD2 | 3.096 |
| 5W9N | B_ARG_94   | NH2 | B_ASP_101  | OD2 | 2.805 |
| 5W9N | B_LYS_95   | NZ  | B_ASP_100C | OD2 | 3.671 |
| 5W9N | C_ARG_24   | NH1 | C_ASP_70   | OD1 | 2.929 |
| 5W9N | C_ARG_24   | NH1 | C_ASP_70   | OD2 | 3.584 |
| 5W9N | C_ARG_24   | NH2 | C_ASP_70   | OD1 | 3.992 |
| 5W9N | C_LYS_92   | NZ  | C_GLU_93   | OE1 | 2.776 |
| 5W9N | C_ARG_96   | NH1 | B_ASP_100C | OD2 | 2.860 |
| 5W9N | C_ARG_96   | NH2 | A_GLU_1183 | OE2 | 2.942 |
| 5W9N | C_ARG_96   | NH2 | B_ASP_100C | OD2 | 3.629 |
| 5W9N | C_LYS_103  | NZ  | C_GLU_105  | OE1 | 3.535 |
| 5W9N | D_LYS_779  | NZ  | D_ASP_771  | OD2 | 2.906 |
| 5W9N | D_LYS_779  | NZ  | D_GLU_1148 | OE1 | 3.841 |
| 5W9N | D_LYS_801  | NZ  | D_ASP_843  | OD1 | 2.866 |
| 5W9N | D_LYS_801  | NZ  | D_ASP_843  | OD2 | 3.784 |
| 5W9N | D_LYS_807  | NZ  | D_GLU_818  | OE1 | 2.846 |
| 5W9N | D_LYS_807  | NZ  | D_GLU_818  | OE2 | 3.746 |
| 5W9N | D_LYS_816  | NZ  | D_ASP_1064 | OD1 | 3.551 |
| 5W9N | D_LYS_816  | NZ  | D_ASP_1064 | OD2 | 2.989 |
| 5W9N | D_ARG_841  | NH2 | D_ASP_844  | OD2 | 2.860 |
| 5W9N | D_ARG_847  | NH2 | D_ASP_844  | OD1 | 2.752 |
| 5W9N | D_ARG_887  | NH2 | D_ASP_892  | OD1 | 2.921 |
| 5W9N | D_HIS_1020 | NE2 | D_ASP_1024 | OD1 | 3.511 |
| 5W9N | D_HIS_1020 | NE2 | D_ASP_1024 | OD2 | 3.177 |
| 5W9N | D_LYS_1102 | NZ  | D_GLU_793  | OE1 | 2.862 |
| 5W9N | D_LYS_1102 | NZ  | D_GLU_793  | OE2 | 3.547 |
| 5W9N | D_ARG_1113 | NH1 | D_GLU_1105 | OE1 | 2.833 |
| 5W9N | D_ARG_1113 | NH1 | D_GLU_1105 | OE2 | 3.606 |
| 5W9N | D_ARG_1113 | NH2 | D_GLU_1105 | OE1 | 3.657 |
| 5W9N | D_ARG_1113 | NH2 | D_GLU_1105 | OE2 | 2.979 |
| 5W9N | D_HIS_1138 | NE2 | D_GLU_793  | OE1 | 3.682 |
| 5W9N | E_LYS_62   | NZ  | E_GLU_46   | OE1 | 2.853 |
| 5W9N | E_LYS_62   | NZ  | E_GLU_46   | OE2 | 3.766 |
| 5W9N | E_ARG_94   | NH1 | E_ASP_101  | OD2 | 3.322 |
| 5W9N | E_ARG_94   | NH2 | E_ASP_101  | OD2 | 2.876 |
| 5W9N | F_ARG_61   | NH1 | F_GLU_79   | OE1 | 3.387 |
| 5W9N | F_ARG_61   | NH1 | F_GLU_79   | OE2 | 3.250 |
| 5W9N | F_ARG_61   | NH2 | F_GLU_79   | OE2 | 3.109 |
| 5W9N | F_ARG_96   | NH1 | E_ASP_100C | OD2 | 2.898 |
| 5W9N | F_ARG_96   | NH2 | D_GLU_1183 | OE2 | 3.465 |
| 5W9N | F_ARG_96   | NH2 | E_ASP_100C | OD2 | 3.359 |
| 5W9N | F_LYS_103  | NZ  | F_GLU_105  | OE2 | 3.523 |

|      |            |     |            |     |       |
|------|------------|-----|------------|-----|-------|
| 5W9N | G_ARG.758  | NH1 | J_ASP.740  | OD1 | 2.883 |
| 5W9N | G_ARG.758  | NH2 | J_ASP.740  | OD1 | 3.992 |
| 5W9N | G_LYS.779  | NZ  | G_GLU.1148 | OE1 | 3.821 |
| 5W9N | G_LYS.801  | NZ  | G_ASP.843  | OD1 | 3.095 |
| 5W9N | G_LYS.807  | NZ  | G_GLU.818  | OE1 | 2.848 |
| 5W9N | G_LYS.807  | NZ  | G_GLU.818  | OE2 | 3.640 |
| 5W9N | G_ARG.841  | NH2 | G_ASP.844  | OD2 | 2.821 |
| 5W9N | G_ARG.847  | NH2 | G_ASP.844  | OD1 | 2.784 |
| 5W9N | G_ARG.887  | NH2 | G_ASP.892  | OD1 | 2.977 |
| 5W9N | G_ARG.887  | NH2 | G_ASP.892  | OD2 | 3.996 |
| 5W9N | G_HIS.1020 | NE2 | G_ASP.1024 | OD1 | 3.933 |
| 5W9N | G_HIS.1020 | NE2 | G_ASP.1024 | OD2 | 2.877 |
| 5W9N | G_ARG.1057 | NH2 | G_ASP.1053 | OD1 | 2.973 |
| 5W9N | G_ARG.1057 | NH2 | G_ASP.1053 | OD2 | 3.603 |
| 5W9N | G_LYS.1102 | NZ  | G_GLU.793  | OE1 | 3.542 |
| 5W9N | G_LYS.1102 | NZ  | G_GLU.793  | OE2 | 3.374 |
| 5W9N | G_ARG.1113 | NH1 | G_GLU.1105 | OE1 | 3.319 |
| 5W9N | G_ARG.1113 | NH2 | A_GLU.1105 | OE1 | 3.089 |
| 5W9N | G_HIS.1138 | NE2 | G_GLU.793  | OE2 | 2.888 |
| 5W9N | H_LYS.99   | NZ  | H_GLU.32   | OE1 | 2.795 |
| 5W9N | H_LYS.110  | NZ  | H_ASP.83   | OD2 | 2.820 |
| 5W9N | H_ARG.119  | NH2 | H_ASP.54   | OD2 | 3.318 |
| 5W9N | H_LYS.142  | NZ  | H_GLU.252  | OE1 | 3.837 |
| 5W9N | H_LYS.142  | NZ  | H_GLU.252  | OE2 | 3.110 |
| 5W9N | H_ARG.181  | NH1 | H_ASP.174  | OD2 | 2.922 |
| 5W9N | H_HIS.194  | NE2 | H_GLU.32   | OE1 | 3.891 |
| 5W9N | H_ARG.334  | NH2 | H_ASP.330  | OD1 | 3.972 |
| 5W9N | H_ARG.334  | NH2 | H_ASP.330  | OD2 | 3.030 |
| 5W9N | H_ARG.335  | NH2 | H_ASP.326  | OD2 | 2.979 |
| 5W9N | H_ARG.401  | NH2 | H_ASP.444  | OD1 | 3.754 |
| 5W9N | H_ARG.401  | NH2 | H_ASP.444  | OD2 | 3.247 |
| 5W9N | H_LYS.496  | NZ  | H_GLU.536  | OE1 | 3.049 |
| 5W9N | H_LYS.496  | NZ  | H_GLU.536  | OE2 | 3.699 |
| 5W9N | H_LYS.502  | NZ  | H_GLU.513  | OE2 | 3.408 |
| 5W9N | H_ARG.505  | NH1 | H_GLU.549  | OE1 | 2.896 |
| 5W9N | H_ARG.505  | NH2 | H_GLU.549  | OE1 | 3.946 |
| 5W9N | H_ARG.629  | NH1 | H_GLU.376  | OE2 | 3.417 |
| 5W9N | H_ARG.629  | NH1 | H_ASP.644  | OD1 | 2.873 |
| 5W9N | H_ARG.629  | NH1 | H_ASP.644  | OD2 | 3.992 |
| 5W9N | H_ARG.629  | NH2 | H_ASP.644  | OD1 | 2.928 |
| 5W9N | H_ARG.629  | NH2 | H_ASP.644  | OD2 | 3.862 |
| 5W9N | H_HIS.681  | NE2 | D_ASP.910  | OD1 | 2.909 |
| 5W9N | H_HIS.681  | NE2 | D_ASP.910  | OD2 | 3.885 |
| 5W9N | H_ARG.691  | NH2 | H_ASP.343  | OD1 | 3.539 |
| 5W9N | H_ARG.694  | NH1 | H_ASP.343  | OD2 | 3.042 |
| 5W9N | H_ARG.694  | NH2 | H_ASP.343  | OD2 | 2.913 |
| 5W9N | H_LYS.728  | NZ  | H_ASP.726  | OD2 | 2.885 |
| 5W9N | I_LYS.99   | NZ  | I_GLU.32   | OE1 | 2.834 |
| 5W9N | I_LYS.110  | NZ  | I_ASP.108  | OD1 | 3.843 |
| 5W9N | I_LYS.110  | NZ  | I_ASP.108  | OD2 | 3.078 |
| 5W9N | I_ARG.119  | NH1 | I_ASP.54   | OD2 | 3.752 |
| 5W9N | I_ARG.119  | NH2 | I_ASP.54   | OD2 | 3.062 |
| 5W9N | I_LYS.142  | NZ  | I_GLU.247  | OE1 | 2.823 |
| 5W9N | I_LYS.142  | NZ  | I_GLU.249  | OE2 | 2.931 |
| 5W9N | I_ARG.181  | NH1 | I_ASP.174  | OD2 | 3.305 |
| 5W9N | I_ARG.190  | NH1 | I_GLU.188  | OE2 | 2.866 |
| 5W9N | I_ARG.334  | NH2 | I_ASP.330  | OD1 | 3.946 |
| 5W9N | I_ARG.334  | NH2 | I_ASP.330  | OD2 | 3.014 |

|      |            |     |            |     |       |
|------|------------|-----|------------|-----|-------|
| 5W9N | I_ARG_335  | NH2 | I_ASP_326  | OD2 | 2.875 |
| 5W9N | I_ARG_401  | NH2 | I_ASP_444  | OD1 | 3.778 |
| 5W9N | I_ARG_401  | NH2 | I_ASP_444  | OD2 | 3.214 |
| 5W9N | I_LYS_502  | NZ  | I_GLU_513  | OE2 | 2.781 |
| 5W9N | I_LYS_587  | NZ  | I_GLU_382  | OE2 | 2.936 |
| 5W9N | I_ARG_614  | NH1 | I_GLU_605  | OE2 | 3.987 |
| 5W9N | I_LYS_668  | NZ  | I_ASP_355  | OD1 | 3.243 |
| 5W9N | I_LYS_668  | NZ  | I_ASP_355  | OD2 | 3.427 |
| 5W9N | I_HIS_681  | ND1 | I_GLU_680  | OE2 | 3.948 |
| 5W9N | I_LYS_728  | NZ  | I_ASP_726  | OD2 | 2.845 |
| 5W9N | J_LYS_52   | NZ  | J_ASP_49   | OD2 | 3.577 |
| 5W9N | J_HIS_81   | ND1 | J_ASP_80   | OD1 | 3.829 |
| 5W9N | J_LYS_99   | NZ  | J_GLU_32   | OE1 | 2.844 |
| 5W9N | J_ARG_119  | NH1 | J_ASP_54   | OD2 | 3.500 |
| 5W9N | J_LYS_142  | NZ  | J_GLU_252  | OE1 | 3.608 |
| 5W9N | J_LYS_142  | NZ  | J_GLU_252  | OE2 | 3.253 |
| 5W9N | J_ARG_190  | NH1 | J_ASP_24   | OD1 | 3.620 |
| 5W9N | J_ARG_190  | NH1 | J_ASP_24   | OD2 | 3.407 |
| 5W9N | J_ARG_190  | NH2 | J_ASP_24   | OD1 | 2.694 |
| 5W9N | J_ARG_190  | NH2 | J_ASP_24   | OD2 | 3.854 |
| 5W9N | J_ARG_235  | NH2 | J_GLU_188  | OE1 | 2.960 |
| 5W9N | J_ARG_235  | NH2 | J_GLU_188  | OE2 | 3.595 |
| 5W9N | J_ARG_334  | NH2 | J_ASP_330  | OD1 | 3.929 |
| 5W9N | J_ARG_334  | NH2 | J_ASP_330  | OD2 | 2.885 |
| 5W9N | J_ARG_335  | NH2 | J_ASP_326  | OD2 | 2.940 |
| 5W9N | J_ARG_401  | NH2 | J_ASP_444  | OD1 | 3.745 |
| 5W9N | J_ARG_401  | NH2 | J_ASP_444  | OD2 | 3.113 |
| 5W9N | J_LYS_413  | NZ  | J_GLU_382  | OE1 | 3.770 |
| 5W9N | J_LYS_413  | NZ  | J_GLU_382  | OE2 | 2.885 |
| 5W9N | J_LYS_502  | NZ  | J_GLU_513  | OE1 | 3.403 |
| 5W9N | J_LYS_502  | NZ  | J_GLU_513  | OE2 | 3.488 |
| 5W9N | J_ARG_511  | NH2 | J_ASP_509  | OD2 | 3.316 |
| 5W9N | J_ARG_614  | NH1 | J_GLU_605  | OE2 | 3.946 |
| 5W9N | J_ARG_629  | NH1 | J_ASP_644  | OD1 | 2.925 |
| 5W9N | J_ARG_629  | NH2 | J_ASP_644  | OD1 | 2.748 |
| 5W9N | J_ARG_629  | NH2 | J_ASP_644  | OD2 | 3.827 |
| 5W9N | J_LYS_665  | NZ  | J_GLU_666  | OE2 | 2.737 |
| 5W9N | J_HIS_681  | NE2 | A_ASP_910  | OD1 | 2.923 |
| 5W9N | J_HIS_681  | NE2 | A_ASP_910  | OD2 | 3.770 |
| 5W9N | J_LYS_728  | NZ  | J_ASP_726  | OD1 | 3.992 |
| 5W9N | J_LYS_728  | NZ  | J_ASP_726  | OD2 | 2.808 |
| 5W9O | A_ARG_758  | NH1 | J_ASP_740  | OD1 | 2.989 |
| 5W9O | A_LYS_779  | NZ  | A_ASP_771  | OD2 | 3.308 |
| 5W9O | A_LYS_779  | NZ  | A_GLU_1148 | OE1 | 3.756 |
| 5W9O | A_LYS_801  | NZ  | A_ASP_843  | OD1 | 2.906 |
| 5W9O | A_LYS_801  | NZ  | A_ASP_843  | OD2 | 3.361 |
| 5W9O | A_LYS_807  | NZ  | A_GLU_818  | OE1 | 3.592 |
| 5W9O | A_LYS_807  | NZ  | A_GLU_818  | OE2 | 2.924 |
| 5W9O | A_ARG_841  | NH2 | A_ASP_844  | OD2 | 2.838 |
| 5W9O | A_ARG_847  | NH1 | A_ASP_844  | OD1 | 3.667 |
| 5W9O | A_ARG_847  | NH2 | A_ASP_844  | OD1 | 2.759 |
| 5W9O | A_ARG_887  | NH2 | A_ASP_892  | OD1 | 3.046 |
| 5W9O | A_ARG_887  | NH2 | A_ASP_892  | OD2 | 3.709 |
| 5W9O | A_HIS_1020 | NE2 | A_ASP_1024 | OD2 | 2.966 |
| 5W9O | A_LYS_1021 | NZ  | A_GLU_793  | OE1 | 3.937 |
| 5W9O | A_LYS_1021 | NZ  | A_GLU_793  | OE2 | 2.905 |
| 5W9O | A_ARG_1057 | NH1 | A_ASP_1053 | OD1 | 2.779 |
| 5W9O | A_ARG_1113 | NH1 | A_GLU_1105 | OE1 | 3.499 |

|      |            |     |            |     |       |
|------|------------|-----|------------|-----|-------|
| 5W9O | A_ARG_1113 | NH1 | A_GLU_1105 | OE2 | 2.983 |
| 5W9O | A_ARG_1113 | NH2 | D_GLU_1105 | OE1 | 3.178 |
| 5W9O | A_ARG_1179 | NH2 | B_ASP_31   | OD1 | 2.796 |
| 5W9O | B_LYS_38   | NZ  | B_GLU_46   | OE1 | 2.988 |
| 5W9O | B_LYS_62   | NZ  | B_GLU_46   | OE1 | 3.057 |
| 5W9O | B_LYS_62   | NZ  | B_GLU_46   | OE2 | 3.242 |
| 5W9O | B_ARG_94   | NH2 | B_ASP_101  | OD2 | 2.810 |
| 5W9O | B_LYS_95   | NZ  | B_ASP_100C | OD1 | 3.658 |
| 5W9O | C_ARG_24   | NH2 | C_ASP_70   | OD1 | 3.533 |
| 5W9O | C_ARG_24   | NH2 | C_ASP_70   | OD2 | 2.999 |
| 5W9O | C_ARG_61   | NH1 | C_GLU_79   | OE2 | 2.984 |
| 5W9O | C_ARG_61   | NH2 | C_GLU_79   | OE2 | 3.885 |
| 5W9O | C_LYS_92   | NZ  | C_GLU_93   | OE1 | 2.863 |
| 5W9O | C_ARG_96   | NH1 | B_ASP_100C | OD2 | 3.180 |
| 5W9O | C_ARG_96   | NH2 | B_ASP_100C | OD2 | 2.879 |
| 5W9O | C_LYS_103  | NZ  | C_GLU_105  | OE1 | 3.349 |
| 5W9O | D_LYS_779  | NZ  | D_ASP_771  | OD2 | 2.942 |
| 5W9O | D_LYS_779  | NZ  | D_GLU_1148 | OE1 | 3.819 |
| 5W9O | D_LYS_801  | NZ  | D_ASP_843  | OD1 | 2.899 |
| 5W9O | D_LYS_801  | NZ  | D_ASP_843  | OD2 | 3.628 |
| 5W9O | D_LYS_807  | NZ  | D_GLU_818  | OE1 | 2.864 |
| 5W9O | D_LYS_807  | NZ  | D_GLU_818  | OE2 | 3.460 |
| 5W9O | D_LYS_816  | NZ  | D_ASP_1064 | OD1 | 3.778 |
| 5W9O | D_LYS_816  | NZ  | D_ASP_1064 | OD2 | 2.905 |
| 5W9O | D_ARG_841  | NH2 | D_ASP_844  | OD2 | 2.807 |
| 5W9O | D_ARG_847  | NH1 | J_ASP_726  | OD2 | 2.979 |
| 5W9O | D_ARG_847  | NH2 | D_ASP_844  | OD1 | 2.817 |
| 5W9O | D_ARG_887  | NH2 | D_ASP_892  | OD1 | 3.050 |
| 5W9O | D_ARG_887  | NH2 | D_ASP_892  | OD2 | 3.816 |
| 5W9O | D_HIS_1020 | NE2 | D_ASP_1024 | OD1 | 3.793 |
| 5W9O | D_HIS_1020 | NE2 | D_ASP_1024 | OD2 | 3.047 |
| 5W9O | D_ARG_1057 | NH1 | D_ASP_1053 | OD1 | 3.689 |
| 5W9O | D_LYS_1102 | NZ  | D_GLU_793  | OE1 | 2.930 |
| 5W9O | D_LYS_1102 | NZ  | D_GLU_793  | OE2 | 3.237 |
| 5W9O | D_ARG_1113 | NH1 | G_GLU_1105 | OE1 | 3.664 |
| 5W9O | D_ARG_1113 | NH2 | D_GLU_1105 | OE1 | 3.068 |
| 5W9O | D_ARG_1113 | NH2 | D_GLU_1105 | OE2 | 3.628 |
| 5W9O | D_HIS_1138 | NE2 | D_GLU_793  | OE1 | 2.926 |
| 5W9O | E_LYS_38   | NZ  | E_ASP_86   | OD1 | 3.864 |
| 5W9O | E_LYS_62   | NZ  | E_GLU_46   | OE1 | 2.853 |
| 5W9O | E_LYS_62   | NZ  | E_GLU_46   | OE2 | 3.614 |
| 5W9O | E_LYS_95   | NZ  | E_ASP_100C | OD1 | 3.641 |
| 5W9O | E_LYS_95   | NZ  | E_ASP_100C | OD2 | 3.940 |
| 5W9O | F_ARG_61   | NH1 | F_GLU_79   | OE1 | 3.425 |
| 5W9O | F_ARG_61   | NH1 | F_GLU_79   | OE2 | 3.162 |
| 5W9O | F_ARG_61   | NH2 | F_GLU_79   | OE2 | 3.303 |
| 5W9O | F_ARG_96   | NH1 | E_ASP_100C | OD2 | 2.799 |
| 5W9O | F_ARG_96   | NH2 | D_GLU_1183 | OE2 | 3.799 |
| 5W9O | F_ARG_96   | NH2 | E_ASP_100C | OD2 | 3.255 |
| 5W9O | G_ARG_758  | NH1 | L_ASP_740  | OD1 | 2.934 |
| 5W9O | G_LYS_779  | NZ  | G_ASP_771  | OD2 | 2.924 |
| 5W9O | G_LYS_779  | NZ  | G_GLU_1148 | OE1 | 3.649 |
| 5W9O | G_LYS_801  | NZ  | G_ASP_843  | OD1 | 2.865 |
| 5W9O | G_LYS_801  | NZ  | G_ASP_843  | OD2 | 3.439 |
| 5W9O | G_LYS_807  | NZ  | G_GLU_818  | OE1 | 2.891 |
| 5W9O | G_LYS_807  | NZ  | G_GLU_818  | OE2 | 3.530 |
| 5W9O | G_LYS_816  | NZ  | G_ASP_1064 | OD1 | 3.715 |
| 5W9O | G_LYS_816  | NZ  | G_ASP_1064 | OD2 | 3.538 |

|      |            |     |            |     |       |
|------|------------|-----|------------|-----|-------|
| 5W9O | G_ARG_841  | NH1 | G_GLU_1090 | OE2 | 3.058 |
| 5W9O | G_ARG_847  | NH1 | K_ASP_726  | OD2 | 3.097 |
| 5W9O | G_ARG_847  | NH2 | G_ASP_844  | OD1 | 2.809 |
| 5W9O | G_ARG_887  | NH2 | G_ASP_892  | OD1 | 2.982 |
| 5W9O | G_HIS_1020 | NE2 | G_ASP_1024 | OD2 | 3.021 |
| 5W9O | G_LYS_1102 | NZ  | G_GLU_793  | OE1 | 3.370 |
| 5W9O | G_LYS_1102 | NZ  | G_GLU_793  | OE2 | 2.830 |
| 5W9O | G_ARG_1113 | NH1 | G_GLU_1105 | OE1 | 3.501 |
| 5W9O | G_ARG_1113 | NH1 | G_GLU_1105 | OE2 | 2.926 |
| 5W9O | G_HIS_1138 | NE2 | G_GLU_793  | OE1 | 3.125 |
| 5W9O | G_LYS_1174 | NZ  | G_GLU_1183 | OE1 | 2.745 |
| 5W9O | G_ARG_1179 | NH2 | H_ASP_31   | OD1 | 2.843 |
| 5W9O | H_HIS_35   | NE2 | H_ASP_100C | OD1 | 3.649 |
| 5W9O | H_HIS_35   | NE2 | H_ASP_100C | OD2 | 3.605 |
| 5W9O | H_LYS_38   | NZ  | H_ASP_86   | OD1 | 3.619 |
| 5W9O | H_LYS_62   | NZ  | H_GLU_46   | OE1 | 2.840 |
| 5W9O | H_LYS_62   | NZ  | H_GLU_46   | OE2 | 3.755 |
| 5W9O | H_ARG_66   | NH2 | H_ASP_86   | OD2 | 3.025 |
| 5W9O | H_ARG_94   | NH2 | H_ASP_101  | OD1 | 3.987 |
| 5W9O | H_ARG_94   | NH2 | H_ASP_101  | OD2 | 2.829 |
| 5W9O | L_ARG_61   | NH1 | L_GLU_79   | OE2 | 2.913 |
| 5W9O | L_ARG_61   | NH1 | L_ASP_82   | OD1 | 3.774 |
| 5W9O | L_ARG_61   | NH1 | L_ASP_82   | OD2 | 2.961 |
| 5W9O | L_ARG_61   | NH2 | L_GLU_79   | OE2 | 3.003 |
| 5W9O | L_LYS_92   | NZ  | L_GLU_93   | OE1 | 3.065 |
| 5W9O | L_ARG_96   | NH1 | H_ASP_100C | OD2 | 3.979 |
| 5W9O | L_ARG_96   | NH2 | G_GLU_1183 | OE2 | 2.715 |
| 5W9O | L_ARG_96   | NH2 | H_ASP_100C | OD2 | 3.993 |
| 5W9O | J_LYS_27   | NZ  | J_GLU_230  | OE2 | 3.475 |
| 5W9O | J_LYS_52   | NZ  | J_ASP_49   | OD2 | 3.987 |
| 5W9O | J_LYS_99   | NZ  | J_GLU_32   | OE1 | 3.930 |
| 5W9O | J_LYS_99   | NZ  | J_GLU_32   | OE2 | 3.469 |
| 5W9O | J_LYS_99   | NZ  | J_ASP_34   | OD2 | 3.652 |
| 5W9O | J_LYS_110  | NZ  | J_ASP_83   | OD2 | 3.502 |
| 5W9O | J_LYS_110  | NZ  | J_ASP_108  | OD1 | 3.336 |
| 5W9O | J_LYS_110  | NZ  | J_ASP_108  | OD2 | 3.601 |
| 5W9O | J_ARG_119  | NH2 | J_ASP_54   | OD2 | 3.505 |
| 5W9O | J_LYS_142  | NZ  | J_GLU_252  | OE2 | 3.340 |
| 5W9O | J_HIS_194  | NE2 | J_GLU_32   | OE1 | 2.883 |
| 5W9O | J_HIS_208  | ND1 | J_ASP_213  | OD2 | 3.923 |
| 5W9O | J_HIS_208  | NE2 | J_ASP_213  | OD2 | 3.787 |
| 5W9O | J_ARG_335  | NH2 | J_ASP_326  | OD2 | 2.668 |
| 5W9O | J_ARG_401  | NH2 | J_ASP_444  | OD2 | 3.561 |
| 5W9O | J_LYS_496  | NZ  | J_GLU_536  | OE1 | 3.601 |
| 5W9O | J_LYS_502  | NZ  | J_GLU_513  | OE2 | 2.998 |
| 5W9O | J_ARG_505  | NH1 | J_GLU_549  | OE1 | 3.551 |
| 5W9O | J_ARG_614  | NH2 | J_GLU_605  | OE2 | 3.078 |
| 5W9O | J_LYS_665  | NZ  | J_GLU_357  | OE1 | 3.881 |
| 5W9O | J_LYS_665  | NZ  | J_GLU_357  | OE2 | 2.936 |
| 5W9O | J_LYS_665  | NZ  | J_GLU_666  | OE2 | 3.739 |
| 5W9O | J_HIS_681  | NE2 | D_ASP_910  | OD1 | 2.932 |
| 5W9O | J_ARG_694  | NH1 | J_ASP_343  | OD2 | 3.143 |
| 5W9O | J_ARG_694  | NH2 | J_ASP_343  | OD2 | 2.962 |
| 5W9O | J_ARG_700  | NH2 | A_GLU_756  | OE1 | 3.931 |
| 5W9O | J_ARG_700  | NH2 | A_GLU_756  | OE2 | 2.914 |
| 5W9O | K_LYS_52   | NZ  | K_ASP_49   | OD2 | 2.630 |
| 5W9O | K_LYS_99   | NZ  | K_GLU_32   | OE1 | 2.833 |
| 5W9O | K_LYS_99   | NZ  | K_GLU_32   | OE2 | 3.941 |

|      |           |     |            |     |       |
|------|-----------|-----|------------|-----|-------|
| 5W9O | K_LYS_110 | NZ  | K_ASP_83   | OD2 | 3.249 |
| 5W9O | K_LYS_110 | NZ  | K_ASP_108  | OD1 | 3.411 |
| 5W9O | K_LYS_110 | NZ  | K_ASP_108  | OD2 | 3.722 |
| 5W9O | K_ARG_119 | NH1 | K_ASP_54   | OD1 | 3.012 |
| 5W9O | K_ARG_119 | NH1 | K_ASP_54   | OD2 | 3.524 |
| 5W9O | K_LYS_142 | NZ  | K_GLU_247  | OE1 | 3.485 |
| 5W9O | K_LYS_142 | NZ  | K_GLU_249  | OE2 | 2.994 |
| 5W9O | K_ARG_190 | NH1 | K_GLU_188  | OE1 | 3.568 |
| 5W9O | K_HIS_194 | NE2 | K_GLU_32   | OE1 | 3.387 |
| 5W9O | K_HIS_194 | NE2 | K_GLU_32   | OE2 | 3.889 |
| 5W9O | K_HIS_208 | NE2 | K_ASP_213  | OD2 | 3.790 |
| 5W9O | K_ARG_335 | NH2 | K_ASP_326  | OD2 | 2.949 |
| 5W9O | K_ARG_401 | NH2 | K_ASP_444  | OD1 | 3.796 |
| 5W9O | K_ARG_401 | NH2 | K_ASP_444  | OD2 | 3.928 |
| 5W9O | K_LYS_502 | NZ  | K_GLU_513  | OE2 | 2.673 |
| 5W9O | K_LYS_587 | NZ  | K_GLU_382  | OE2 | 2.796 |
| 5W9O | K_ARG_629 | NH1 | K_ASP_644  | OD1 | 2.889 |
| 5W9O | K_ARG_629 | NH1 | K_ASP_644  | OD2 | 3.817 |
| 5W9O | K_LYS_665 | NZ  | K_ASP_355  | OD1 | 3.037 |
| 5W9O | K_LYS_665 | NZ  | K_ASP_355  | OD2 | 3.492 |
| 5W9O | K_ARG_694 | NH1 | K_ASP_343  | OD2 | 3.613 |
| 5W9O | K_ARG_694 | NH2 | K_ASP_343  | OD2 | 3.571 |
| 5W9O | L_LYS_27  | NZ  | L_GLU_230  | OE2 | 3.874 |
| 5W9O | L_LYS_99  | NZ  | L_ASP_34   | OD2 | 3.209 |
| 5W9O | L_ARG_119 | NH2 | L_ASP_54   | OD2 | 3.705 |
| 5W9O | L_LYS_142 | NZ  | L_GLU_252  | OE2 | 2.676 |
| 5W9O | L_HIS_194 | NE2 | L_GLU_32   | OE1 | 3.367 |
| 5W9O | L_HIS_194 | NE2 | L_GLU_32   | OE2 | 3.603 |
| 5W9O | L_HIS_208 | NE2 | L_ASP_213  | OD2 | 3.918 |
| 5W9O | L_ARG_235 | NH2 | L_GLU_188  | OE1 | 2.895 |
| 5W9O | L_ARG_235 | NH2 | L_GLU_188  | OE2 | 3.955 |
| 5W9O | L_ARG_335 | NH2 | L_ASP_326  | OD2 | 2.658 |
| 5W9O | L_ARG_401 | NH2 | L_ASP_444  | OD1 | 3.946 |
| 5W9O | L_LYS_413 | NZ  | L_GLU_382  | OE2 | 2.929 |
| 5W9O | L_LYS_502 | NZ  | L_GLU_513  | OE1 | 3.607 |
| 5W9O | L_LYS_502 | NZ  | L_GLU_513  | OE2 | 3.762 |
| 5W9O | L_ARG_614 | NH2 | L_GLU_605  | OE1 | 3.049 |
| 5W9O | L_ARG_614 | NH2 | L_GLU_605  | OE2 | 3.623 |
| 5W9O | L_ARG_629 | NH1 | L_ASP_644  | OD1 | 2.908 |
| 5W9O | L_ARG_629 | NH2 | L_ASP_644  | OD1 | 2.789 |
| 5W9O | L_ARG_629 | NH2 | L_ASP_644  | OD2 | 3.634 |
| 5W9O | L_LYS_665 | NZ  | L_GLU_666  | OE2 | 2.768 |
| 5W9O | L_HIS_681 | NE2 | A_ASP_910  | OD1 | 3.028 |
| 5W9O | L_HIS_681 | NE2 | A_ASP_910  | OD2 | 3.886 |
| 5W9O | L_HIS_681 | NE2 | L_GLU_680  | OE2 | 3.236 |
| 5W9O | L_ARG_694 | NH1 | L_ASP_343  | OD2 | 2.925 |
| 5W9O | L_ARG_694 | NH2 | L_ASP_343  | OD2 | 3.698 |
| 5W9P | J_ARG_758 | NH2 | A_ASP_740  | OD1 | 2.970 |
| 5W9P | J_LYS_779 | NZ  | J_ASP_771  | OD2 | 2.978 |
| 5W9P | J_LYS_779 | NZ  | J_GLU_1148 | OE1 | 2.979 |
| 5W9P | J_LYS_779 | NZ  | J_GLU_1148 | OE2 | 3.840 |
| 5W9P | J_LYS_801 | NZ  | J_ASP_843  | OD1 | 2.959 |
| 5W9P | J_LYS_801 | NZ  | J_ASP_843  | OD2 | 3.857 |
| 5W9P | J_LYS_807 | NZ  | J_GLU_818  | OE1 | 3.681 |
| 5W9P | J_LYS_807 | NZ  | J_GLU_818  | OE2 | 2.920 |
| 5W9P | J_LYS_816 | NZ  | J_ASP_1064 | OD1 | 3.615 |
| 5W9P | J_LYS_816 | NZ  | J_ASP_1064 | OD2 | 2.986 |
| 5W9P | J_ARG_841 | NH2 | J_GLU_1090 | OE1 | 2.927 |



|      |            |     |            |     |       |
|------|------------|-----|------------|-----|-------|
| 5W9P | J_ARG_841  | NH2 | J_GLU_1090 | OE2 | 3.745 |
| 5W9P | J_ARG_847  | NH1 | C_ASP_726  | OD1 | 3.573 |
| 5W9P | J_ARG_847  | NH1 | C_ASP_726  | OD2 | 2.973 |
| 5W9P | J_ARG_847  | NH2 | J_ASP_844  | OD1 | 2.813 |
| 5W9P | J_ARG_887  | NH2 | J_ASP_892  | OD1 | 2.929 |
| 5W9P | J_HIS_1020 | NE2 | J_ASP_1024 | OD2 | 3.009 |
| 5W9P | J_LYS_1021 | NZ  | J_GLU_793  | OE1 | 2.955 |
| 5W9P | J_LYS_1021 | NZ  | J_GLU_793  | OE2 | 3.659 |
| 5W9P | J_ARG_1113 | NH1 | J_GLU_1105 | OE1 | 3.033 |
| 5W9P | J_ARG_1113 | NH2 | H_GLU_1105 | OE1 | 3.990 |
| 5W9P | J_ARG_1113 | NH2 | H_GLU_1105 | OE2 | 2.796 |
| 5W9P | J_LYS_1174 | NZ  | J_GLU_1183 | OE1 | 2.861 |
| 5W9P | J_ARG_1179 | NH2 | F_ASP_31   | OD1 | 2.888 |
| 5W9P | A_LYS_52   | NZ  | A_ASP_49   | OD2 | 2.805 |
| 5W9P | A_LYS_99   | NZ  | A_GLU_32   | OE1 | 2.801 |
| 5W9P | A_LYS_110  | NZ  | A_ASP_83   | OD2 | 2.816 |
| 5W9P | A_ARG_119  | NH2 | A_ASP_54   | OD1 | 3.835 |
| 5W9P | A_ARG_119  | NH2 | A_ASP_54   | OD2 | 3.031 |
| 5W9P | A_LYS_142  | NZ  | A_GLU_252  | OE1 | 2.862 |
| 5W9P | A_HIS_194  | NE2 | A_GLU_32   | OE1 | 3.536 |
| 5W9P | A_ARG_235  | NH1 | A_GLU_188  | OE1 | 2.967 |
| 5W9P | A_ARG_235  | NH1 | A_GLU_188  | OE2 | 3.856 |
| 5W9P | A_ARG_269  | NH1 | A_GLU_252  | OE1 | 3.898 |
| 5W9P | A_ARG_269  | NH1 | A_GLU_252  | OE2 | 2.880 |
| 5W9P | A_ARG_335  | NH2 | A_ASP_326  | OD2 | 2.878 |
| 5W9P | A_ARG_614  | NH1 | A_GLU_367  | OE2 | 2.943 |
| 5W9P | A_ARG_614  | NH2 | A_GLU_367  | OE2 | 2.985 |
| 5W9P | A_ARG_629  | NH1 | A_GLU_376  | OE1 | 3.647 |
| 5W9P | A_ARG_629  | NH1 | A_ASP_644  | OD1 | 2.978 |
| 5W9P | A_ARG_629  | NH2 | A_ASP_644  | OD1 | 2.931 |
| 5W9P | A_LYS_665  | NZ  | A_GLU_357  | OE1 | 3.670 |
| 5W9P | A_LYS_665  | NZ  | A_GLU_357  | OE2 | 2.942 |
| 5W9P | A_HIS_681  | NE2 | H_ASP_910  | OD1 | 3.149 |
| 5W9P | A_HIS_681  | NE2 | H_ASP_910  | OD2 | 3.352 |
| 5W9P | A_ARG_691  | NH2 | H_GLU_818  | OE2 | 2.969 |
| 5W9P | A_ARG_694  | NH2 | A_ASP_343  | OD1 | 2.962 |
| 5W9P | A_ARG_694  | NH2 | A_ASP_343  | OD2 | 3.657 |
| 5W9P | A_ARG_700  | NH2 | J_GLU_756  | OE2 | 2.978 |
| 5W9P | A_LYS_728  | NZ  | A_ASP_726  | OD2 | 2.889 |
| 5W9P | F_LYS_62   | NZ  | F_GLU_46   | OE1 | 2.994 |
| 5W9P | F_LYS_62   | NZ  | F_GLU_46   | OE2 | 3.429 |
| 5W9P | F_ARG_66   | NH1 | F_ASP_86   | OD1 | 3.067 |
| 5W9P | F_ARG_66   | NH1 | F_ASP_86   | OD2 | 3.588 |
| 5W9P | F_ARG_66   | NH2 | F_ASP_86   | OD1 | 3.743 |
| 5W9P | F_ARG_66   | NH2 | F_ASP_86   | OD2 | 2.861 |
| 5W9P | F_ARG_94   | NH2 | F_ASP_101  | OD1 | 3.927 |
| 5W9P | F_ARG_94   | NH2 | F_ASP_101  | OD2 | 2.913 |
| 5W9P | F_LYS_95   | NZ  | F_ASP_100C | OD1 | 2.870 |
| 5W9P | F_LYS_95   | NZ  | F_ASP_100C | OD2 | 3.708 |
| 5W9P | G_ARG_1177 | NH1 | G_ASP_1198 | OD1 | 3.165 |
| 5W9P | G_ARG_1177 | NH1 | G_ASP_1198 | OD2 | 3.744 |
| 5W9P | G_ARG_1177 | NH2 | G_ASP_1198 | OD1 | 3.713 |
| 5W9P | G_ARG_1177 | NH2 | G_ASP_1198 | OD2 | 2.872 |
| 5W9P | G_ARG_1212 | NH1 | J_GLU_1183 | OE2 | 3.421 |
| 5W9P | G_ARG_1212 | NH2 | J_GLU_1183 | OE2 | 2.921 |
| 5W9P | G_ARG_1212 | NH2 | F_ASP_100C | OD2 | 2.848 |
| 5W9P | G_LYS_1219 | NZ  | G_GLU_1221 | OE2 | 2.894 |
| 5W9P | B_ARG_758  | NH2 | C_ASP_740  | OD1 | 2.971 |

|      |            |     |            |     |       |
|------|------------|-----|------------|-----|-------|
| 5W9P | B_LYS_779  | NZ  | B_ASP_771  | OD2 | 2.978 |
| 5W9P | B_LYS_779  | NZ  | B_GLU_1148 | OE1 | 2.979 |
| 5W9P | B_LYS_779  | NZ  | B_GLU_1148 | OE2 | 3.841 |
| 5W9P | B_LYS_801  | NZ  | B_ASP_843  | OD1 | 2.958 |
| 5W9P | B_LYS_801  | NZ  | B_ASP_843  | OD2 | 3.857 |
| 5W9P | B_LYS_807  | NZ  | B_GLU_818  | OE1 | 3.681 |
| 5W9P | B_LYS_807  | NZ  | B_GLU_818  | OE2 | 2.920 |
| 5W9P | B_LYS_816  | NZ  | B_ASP_1064 | OD1 | 3.616 |
| 5W9P | B_LYS_816  | NZ  | B_ASP_1064 | OD2 | 2.986 |
| 5W9P | B_ARG_841  | NH2 | B_GLU_1090 | OE1 | 2.927 |
| 5W9P | B_ARG_841  | NH2 | B_GLU_1090 | OE2 | 3.745 |
| 5W9P | B_ARG_847  | NH1 | I_ASP_726  | OD1 | 3.572 |
| 5W9P | B_ARG_847  | NH1 | I_ASP_726  | OD2 | 2.973 |
| 5W9P | B_ARG_847  | NH2 | B_ASP_844  | OD1 | 2.813 |
| 5W9P | B_ARG_887  | NH2 | B_ASP_892  | OD1 | 2.929 |
| 5W9P | B_HIS_1020 | NE2 | B_ASP_1024 | OD2 | 3.009 |
| 5W9P | B_LYS_1021 | NZ  | B_GLU_793  | OE1 | 2.955 |
| 5W9P | B_LYS_1021 | NZ  | B_GLU_793  | OE2 | 3.659 |
| 5W9P | B_ARG_1113 | NH1 | B_GLU_1105 | OE1 | 3.033 |
| 5W9P | B_ARG_1113 | NH2 | J_GLU_1105 | OE1 | 3.989 |
| 5W9P | B_ARG_1113 | NH2 | J_GLU_1105 | OE2 | 2.795 |
| 5W9P | B_LYS_1174 | NZ  | B_GLU_1183 | OE1 | 2.862 |
| 5W9P | B_ARG_1179 | NH2 | D_ASP_31   | OD1 | 2.887 |
| 5W9P | C_LYS_52   | NZ  | C_ASP_49   | OD2 | 2.805 |
| 5W9P | C_LYS_99   | NZ  | C_GLU_32   | OE1 | 2.802 |
| 5W9P | C_LYS_110  | NZ  | C_ASP_83   | OD2 | 2.816 |
| 5W9P | C_ARG_119  | NH2 | C_ASP_54   | OD1 | 3.834 |
| 5W9P | C_ARG_119  | NH2 | C_ASP_54   | OD2 | 3.030 |
| 5W9P | C_LYS_142  | NZ  | C_GLU_252  | OE1 | 2.862 |
| 5W9P | C_HIS_194  | NE2 | C_GLU_32   | OE1 | 3.534 |
| 5W9P | C_ARG_235  | NH1 | C_GLU_188  | OE1 | 2.966 |
| 5W9P | C_ARG_235  | NH1 | C_GLU_188  | OE2 | 3.856 |
| 5W9P | C_ARG_269  | NH1 | C_GLU_252  | OE1 | 3.899 |
| 5W9P | C_ARG_269  | NH1 | C_GLU_252  | OE2 | 2.881 |
| 5W9P | C_ARG_335  | NH2 | C_ASP_326  | OD2 | 2.876 |
| 5W9P | C_ARG_614  | NH1 | C_GLU_367  | OE2 | 2.943 |
| 5W9P | C_ARG_614  | NH2 | C_GLU_367  | OE2 | 2.984 |
| 5W9P | C_ARG_629  | NH1 | C_GLU_376  | OE1 | 3.647 |
| 5W9P | C_ARG_629  | NH1 | C_ASP_644  | OD1 | 2.978 |
| 5W9P | C_ARG_629  | NH1 | C_ASP_644  | OD2 | 4.000 |
| 5W9P | C_ARG_629  | NH2 | C_ASP_644  | OD1 | 2.931 |
| 5W9P | C_LYS_665  | NZ  | C_GLU_357  | OE1 | 3.671 |
| 5W9P | C_LYS_665  | NZ  | C_GLU_357  | OE2 | 2.942 |
| 5W9P | C_HIS_681  | NE2 | J_ASP_910  | OD1 | 3.149 |
| 5W9P | C_HIS_681  | NE2 | J_ASP_910  | OD2 | 3.352 |
| 5W9P | C_ARG_691  | NH2 | J_GLU_818  | OE2 | 2.970 |
| 5W9P | C_ARG_694  | NH2 | C_ASP_343  | OD1 | 2.962 |
| 5W9P | C_ARG_694  | NH2 | C_ASP_343  | OD2 | 3.658 |
| 5W9P | C_ARG_700  | NH2 | B_GLU_756  | OE2 | 2.978 |
| 5W9P | C_LYS_728  | NZ  | C_ASP_726  | OD2 | 2.889 |
| 5W9P | D_LYS_62   | NZ  | D_GLU_46   | OE1 | 2.993 |
| 5W9P | D_LYS_62   | NZ  | D_GLU_46   | OE2 | 3.428 |
| 5W9P | D_ARG_66   | NH1 | D_ASP_86   | OD1 | 3.067 |
| 5W9P | D_ARG_66   | NH1 | D_ASP_86   | OD2 | 3.588 |
| 5W9P | D_ARG_66   | NH2 | D_ASP_86   | OD1 | 3.743 |
| 5W9P | D_ARG_66   | NH2 | D_ASP_86   | OD2 | 2.862 |
| 5W9P | D_ARG_94   | NH2 | D_ASP_101  | OD1 | 3.928 |
| 5W9P | D_ARG_94   | NH2 | D_ASP_101  | OD2 | 2.914 |

|      |            |     |            |     |       |
|------|------------|-----|------------|-----|-------|
| 5W9P | D_LYS_95   | NZ  | D_ASP_100C | OD1 | 2.871 |
| 5W9P | D_LYS_95   | NZ  | D_ASP_100C | OD2 | 3.708 |
| 5W9P | E_ARG_1177 | NH1 | E_ASP_1198 | OD1 | 3.165 |
| 5W9P | E_ARG_1177 | NH1 | E_ASP_1198 | OD2 | 3.743 |
| 5W9P | E_ARG_1177 | NH2 | E_ASP_1198 | OD1 | 3.713 |
| 5W9P | E_ARG_1177 | NH2 | E_ASP_1198 | OD2 | 2.872 |
| 5W9P | E_ARG_1212 | NH1 | B_GLU_1183 | OE2 | 3.420 |
| 5W9P | E_ARG_1212 | NH2 | B_GLU_1183 | OE2 | 2.920 |
| 5W9P | E_ARG_1212 | NH2 | D_ASP_100C | OD2 | 2.848 |
| 5W9P | E_LYS_1219 | NZ  | E_GLU_1221 | OE2 | 2.894 |
| 5W9P | H_ARG_758  | NH2 | I_ASP_740  | OD1 | 2.969 |
| 5W9P | H_LYS_779  | NZ  | H_ASP_771  | OD2 | 2.978 |
| 5W9P | H_LYS_779  | NZ  | H_GLU_1148 | OE1 | 2.978 |
| 5W9P | H_LYS_779  | NZ  | H_GLU_1148 | OE2 | 3.840 |
| 5W9P | H_LYS_801  | NZ  | H_ASP_843  | OD1 | 2.959 |
| 5W9P | H_LYS_801  | NZ  | H_ASP_843  | OD2 | 3.857 |
| 5W9P | H_LYS_807  | NZ  | H_GLU_818  | OE1 | 3.681 |
| 5W9P | H_LYS_807  | NZ  | H_GLU_818  | OE2 | 2.919 |
| 5W9P | H_LYS_816  | NZ  | H_ASP_1064 | OD1 | 3.616 |
| 5W9P | H_LYS_816  | NZ  | H_ASP_1064 | OD2 | 2.986 |
| 5W9P | H_ARG_841  | NH2 | H_GLU_1090 | OE1 | 2.927 |
| 5W9P | H_ARG_841  | NH2 | H_GLU_1090 | OE2 | 3.745 |
| 5W9P | H_ARG_847  | NH1 | A_ASP_726  | OD1 | 3.572 |
| 5W9P | H_ARG_847  | NH1 | A_ASP_726  | OD2 | 2.973 |
| 5W9P | H_ARG_847  | NH2 | H_ASP_844  | OD1 | 2.813 |
| 5W9P | H_ARG_887  | NH2 | H_ASP_892  | OD1 | 2.929 |
| 5W9P | H_HIS_1020 | NE2 | H_ASP_1024 | OD2 | 3.010 |
| 5W9P | H_LYS_1021 | NZ  | H_GLU_793  | OE1 | 2.954 |
| 5W9P | H_LYS_1021 | NZ  | H_GLU_793  | OE2 | 3.659 |
| 5W9P | H_ARG_1113 | NH1 | H_GLU_1105 | OE1 | 3.032 |
| 5W9P | H_ARG_1113 | NH2 | B_GLU_1105 | OE1 | 3.989 |
| 5W9P | H_ARG_1113 | NH2 | B_GLU_1105 | OE2 | 2.795 |
| 5W9P | H_LYS_1174 | NZ  | H_GLU_1183 | OE1 | 2.861 |
| 5W9P | H_ARG_1179 | NH2 | K_ASP_31   | OD1 | 2.888 |
| 5W9P | I_LYS_52   | NZ  | I_ASP_49   | OD2 | 2.805 |
| 5W9P | I_LYS_99   | NZ  | I_GLU_32   | OE1 | 2.802 |
| 5W9P | I_LYS_110  | NZ  | I_ASP_83   | OD2 | 2.816 |
| 5W9P | I_ARG_119  | NH2 | I_ASP_54   | OD1 | 3.835 |
| 5W9P | I_ARG_119  | NH2 | I_ASP_54   | OD2 | 3.031 |
| 5W9P | I_LYS_142  | NZ  | I_GLU_252  | OE1 | 2.862 |
| 5W9P | I_HIS_194  | NE2 | I_GLU_32   | OE1 | 3.534 |
| 5W9P | I_ARG_235  | NH1 | I_GLU_188  | OE1 | 2.967 |
| 5W9P | I_ARG_235  | NH1 | I_GLU_188  | OE2 | 3.856 |
| 5W9P | I_ARG_269  | NH1 | I_GLU_252  | OE1 | 3.899 |
| 5W9P | I_ARG_269  | NH1 | I_GLU_252  | OE2 | 2.881 |
| 5W9P | I_ARG_335  | NH2 | I_ASP_326  | OD2 | 2.877 |
| 5W9P | I_ARG_614  | NH1 | I_GLU_367  | OE2 | 2.944 |
| 5W9P | I_ARG_614  | NH2 | I_GLU_367  | OE2 | 2.985 |
| 5W9P | I_ARG_629  | NH1 | I_GLU_376  | OE1 | 3.647 |
| 5W9P | I_ARG_629  | NH1 | I_ASP_644  | OD1 | 2.978 |
| 5W9P | I_ARG_629  | NH1 | I_ASP_644  | OD2 | 4.000 |
| 5W9P | I_ARG_629  | NH2 | I_ASP_644  | OD1 | 2.931 |
| 5W9P | I_LYS_665  | NZ  | I_GLU_357  | OE1 | 3.671 |
| 5W9P | I_LYS_665  | NZ  | I_GLU_357  | OE2 | 2.942 |
| 5W9P | I_HIS_681  | NE2 | B_ASP_910  | OD1 | 3.149 |
| 5W9P | I_HIS_681  | NE2 | B_ASP_910  | OD2 | 3.352 |
| 5W9P | I_ARG_691  | NH2 | B_GLU_818  | OE2 | 2.970 |
| 5W9P | I_ARG_694  | NH2 | I_ASP_343  | OD1 | 2.962 |

|      |            |     |            |     |       |
|------|------------|-----|------------|-----|-------|
| 5W9P | L_ARG_694  | NH2 | L_ASP_343  | OD2 | 3.657 |
| 5W9P | L_ARG_700  | NH2 | H_GLU_756  | OE2 | 2.977 |
| 5W9P | L_LYS_728  | NZ  | L_ASP_726  | OD2 | 2.890 |
| 5W9P | K_LYS_62   | NZ  | K_GLU_46   | OE1 | 2.994 |
| 5W9P | K_LYS_62   | NZ  | K_GLU_46   | OE2 | 3.429 |
| 5W9P | K_ARG_66   | NH1 | K_ASP_86   | OD1 | 3.067 |
| 5W9P | K_ARG_66   | NH1 | K_ASP_86   | OD2 | 3.588 |
| 5W9P | K_ARG_66   | NH2 | K_ASP_86   | OD1 | 3.743 |
| 5W9P | K_ARG_66   | NH2 | K_ASP_86   | OD2 | 2.862 |
| 5W9P | K_ARG_94   | NH2 | K_ASP_101  | OD1 | 3.928 |
| 5W9P | K_ARG_94   | NH2 | K_ASP_101  | OD2 | 2.914 |
| 5W9P | K_LYS_95   | NZ  | K_ASP_100C | OD1 | 2.870 |
| 5W9P | K_LYS_95   | NZ  | K_ASP_100C | OD2 | 3.709 |
| 5W9P | L_ARG_1177 | NH1 | L_ASP_1198 | OD1 | 3.165 |
| 5W9P | L_ARG_1177 | NH1 | L_ASP_1198 | OD2 | 3.743 |
| 5W9P | L_ARG_1177 | NH2 | L_ASP_1198 | OD1 | 3.713 |
| 5W9P | L_ARG_1177 | NH2 | L_ASP_1198 | OD2 | 2.871 |
| 5W9P | L_ARG_1212 | NH1 | H_GLU_1183 | OE2 | 3.420 |
| 5W9P | L_ARG_1212 | NH2 | H_GLU_1183 | OE2 | 2.921 |
| 5W9P | L_ARG_1212 | NH2 | K_ASP_100C | OD2 | 2.848 |
| 5W9P | L_LYS_1219 | NZ  | L_GLU_1221 | OE2 | 2.893 |
| 5WK4 | D_ARG_29   | NH2 | E_ASP_36   | OD1 | 3.168 |
| 5WK4 | D_ARG_29   | NH2 | E_ASP_36   | OD2 | 3.056 |
| 5WK4 | D_ARG_38   | NH1 | D_ASP_36   | OD1 | 3.446 |
| 5WK4 | D_ARG_51   | NH1 | D_ASP_50   | OD1 | 3.642 |
| 5WK4 | D_ARG_51   | NH1 | D_ASP_50   | OD2 | 3.657 |
| 5WK4 | D_ARG_101  | NH2 | E_ASP_50   | OD2 | 3.021 |
| 5WK4 | D_ARG_199  | NH1 | D_ASP_187  | OD1 | 3.481 |
| 5WK4 | A_ARG_38   | NH1 | A_ASP_36   | OD1 | 3.370 |
| 5WK4 | A_ARG_51   | NH2 | A_ASP_50   | OD1 | 3.057 |
| 5WK4 | A_ARG_51   | NH2 | A_ASP_50   | OD2 | 3.306 |
| 5WK4 | A_HIS_174  | NE2 | D_GLU_65   | OE2 | 2.738 |
| 5WK4 | A_ARG_199  | NH1 | A_ASP_187  | OD1 | 3.560 |
| 5WK4 | B_ARG_29   | NH2 | C_ASP_36   | OD1 | 3.257 |
| 5WK4 | B_ARG_29   | NH2 | C_ASP_36   | OD2 | 2.944 |
| 5WK4 | B_ARG_38   | NH1 | B_ASP_36   | OD1 | 3.452 |
| 5WK4 | B_ARG_101  | NH1 | C_ASP_50   | OD2 | 3.997 |
| 5WK4 | B_ARG_101  | NH2 | C_ASP_50   | OD2 | 2.811 |
| 5WK4 | B_ARG_199  | NH1 | B_ASP_187  | OD1 | 3.746 |
| 5WK4 | B_ARG_199  | NH1 | B_ASP_187  | OD2 | 3.724 |
| 5WK4 | C_ARG_29   | NH2 | B_ASP_36   | OD1 | 3.196 |
| 5WK4 | C_ARG_29   | NH2 | B_ASP_36   | OD2 | 3.146 |
| 5WK4 | C_ARG_38   | NH1 | C_ASP_36   | OD1 | 3.439 |
| 5WK4 | C_ARG_51   | NH2 | C_ASP_50   | OD1 | 3.405 |
| 5WK4 | C_ARG_51   | NH2 | C_ASP_50   | OD2 | 3.912 |
| 5WK4 | C_ARG_101  | NH1 | B_ASP_50   | OD2 | 3.840 |
| 5WK4 | C_ARG_101  | NH2 | B_ASP_50   | OD2 | 2.874 |
| 5WK4 | C_ARG_199  | NH1 | C_ASP_187  | OD1 | 3.232 |
| 5WK4 | C_ARG_199  | NH1 | C_ASP_187  | OD2 | 3.963 |
| 5WK4 | C_LYS_210  | NZ  | C_GLU_160  | OE1 | 3.001 |
| 5WK4 | E_ARG_29   | NH2 | D_ASP_36   | OD1 | 3.889 |
| 5WK4 | E_ARG_38   | NH1 | E_ASP_36   | OD1 | 3.587 |
| 5WK4 | E_ARG_101  | NH2 | D_ASP_50   | OD2 | 2.922 |
| 5WK4 | E_ARG_199  | NH1 | E_ASP_187  | OD1 | 3.573 |
| 5WK4 | E_ARG_199  | NH1 | E_ASP_187  | OD2 | 3.380 |
| 5WK4 | E_LYS_210  | NZ  | E_GLU_160  | OE1 | 3.540 |
| 5WK4 | F_ARG_38   | NH1 | F_ASP_36   | OD1 | 3.514 |
| 5WK4 | F_ARG_51   | NH1 | F_ASP_50   | OD1 | 3.360 |

|      |           |     |           |     |       |
|------|-----------|-----|-----------|-----|-------|
| 5WK4 | F_ARG_51  | NH1 | F_ASP_50  | OD2 | 3.476 |
| 5WKQ | A_LYS_122 | NZ  | A_GLU_220 | OE1 | 3.888 |
| 5WKQ | A_ARG_135 | NH1 | B_ASP_212 | OD1 | 3.924 |
| 5WKQ | A_ARG_135 | NH2 | B_ASP_212 | OD1 | 3.057 |
| 5WKQ | A_LYS_157 | NZ  | A_ASP_153 | OD1 | 3.684 |
| 5WKQ | A_LYS_157 | NZ  | A_ASP_153 | OD2 | 2.658 |
| 5WKQ | A_ARG_164 | NH2 | A_GLU_174 | OE2 | 3.301 |
| 5WKQ | A_LYS_189 | NZ  | A_ASP_190 | OD1 | 3.185 |
| 5WKQ | B_LYS_115 | NZ  | B_GLU_220 | OE2 | 3.947 |
| 5WKQ | B_LYS_157 | NZ  | B_ASP_153 | OD1 | 3.490 |
| 5WKQ | B_LYS_157 | NZ  | B_ASP_153 | OD2 | 3.167 |
| 5WKQ | B_LYS_189 | NZ  | B_GLU_155 | OE2 | 3.558 |
| 5WKQ | B_ARG_196 | NH1 | B_ASP_148 | OD1 | 2.868 |
| 5WKQ | B_HIS_207 | ND1 | A_GLU_131 | OE1 | 3.383 |
| 5WKQ | B_HIS_207 | ND1 | A_GLU_131 | OE2 | 2.652 |
| 5WKQ | B_LYS_213 | NZ  | B_GLU_129 | OE1 | 3.323 |
| 5WN9 | H_ARG_38  | NH1 | H_GLU_46  | OE1 | 3.227 |
| 5WN9 | H_ARG_38  | NH1 | H_GLU_46  | OE2 | 3.503 |
| 5WN9 | H_ARG_38  | NH1 | H_ASP_90  | OD1 | 3.902 |
| 5WN9 | H_ARG_38  | NH2 | H_ASP_90  | OD1 | 2.913 |
| 5WN9 | H_LYS_63  | NZ  | H_GLU_46  | OE1 | 3.637 |
| 5WN9 | H_LYS_63  | NZ  | H_GLU_46  | OE2 | 3.106 |
| 5WN9 | H_ARG_67  | NH1 | H_ASP_90  | OD1 | 3.282 |
| 5WN9 | H_ARG_67  | NH1 | H_ASP_90  | OD2 | 2.270 |
| 5WN9 | H_ARG_67  | NH2 | H_ASP_90  | OD1 | 3.376 |
| 5WN9 | H_ARG_67  | NH2 | H_ASP_90  | OD2 | 3.700 |
| 5WN9 | H_ARG_84  | NH1 | H_GLU_82  | OE1 | 3.057 |
| 5WN9 | H_ARG_98  | NH1 | H_ASP_112 | OD1 | 3.399 |
| 5WN9 | H_ARG_98  | NH1 | H_ASP_112 | OD2 | 2.841 |
| 5WN9 | H_ARG_168 | NH2 | H_ASP_214 | OD1 | 2.927 |
| 5WN9 | H_ARG_168 | NH2 | H_ASP_214 | OD2 | 3.594 |
| 5WN9 | H_ARG_205 | NH1 | H_GLU_225 | OE2 | 3.482 |
| 5WN9 | H_ARG_205 | NH1 | H_ASP_226 | OD1 | 2.888 |
| 5WN9 | H_ARG_205 | NH1 | H_ASP_226 | OD2 | 3.550 |
| 5WNA | H_ARG_28  | NH2 | H_GLU_31  | OE2 | 3.703 |
| 5WNA | H_ARG_38  | NH1 | H_ASP_90  | OD2 | 2.959 |
| 5WNA | H_ARG_38  | NH2 | H_GLU_46  | OE1 | 3.180 |
| 5WNA | H_LYS_65  | NZ  | H_ASP_62  | OD1 | 2.520 |
| 5WNA | H_ARG_67  | NH1 | H_ASP_90  | OD1 | 3.443 |
| 5WNA | H_ARG_67  | NH1 | H_ASP_90  | OD2 | 3.943 |
| 5WNA | H_ARG_67  | NH2 | H_ASP_90  | OD1 | 3.917 |
| 5WNA | H_ARG_67  | NH2 | H_ASP_90  | OD2 | 3.253 |
| 5WNA | H_LYS_111 | NZ  | H_GLU_2   | OE1 | 2.349 |
| 5WNA | H_LYS_111 | NZ  | H_GLU_2   | OE2 | 2.999 |
| 5WNA | H_LYS_154 | NZ  | H_ASP_155 | OD2 | 3.921 |
| 5WNA | H_LYS_220 | NZ  | L_GLU_122 | OE2 | 3.667 |
| 5WNA | H_LYS_221 | NZ  | H_GLU_223 | OE2 | 2.498 |
| 5WNA | H_LYS_225 | NZ  | L_ASP_121 | OD1 | 3.706 |
| 5WNA | L_HIS_32  | ND1 | L_GLU_50  | OE1 | 2.885 |
| 5WNA | L_HIS_32  | ND1 | L_GLU_50  | OE2 | 3.439 |
| 5WNA | L_LYS_39  | NZ  | D_GLU_81  | OE1 | 2.898 |
| 5WNA | L_LYS_39  | NZ  | D_GLU_81  | OE2 | 2.887 |
| 5WNA | L_ARG_61  | NH2 | L_GLU_81  | OE2 | 2.586 |
| 5WNA | L_ARG_61  | NH2 | L_ASP_82  | OD1 | 3.471 |
| 5WNA | L_ARG_61  | NH2 | L_ASP_82  | OD2 | 2.813 |
| 5WNA | L_LYS_148 | NZ  | L_GLU_194 | OE1 | 2.468 |
| 5WNA | L_LYS_148 | NZ  | L_GLU_194 | OE2 | 3.864 |
| 5WNA | L_LYS_182 | NZ  | L_GLU_186 | OE1 | 3.903 |

|      |           |     |           |     |       |
|------|-----------|-----|-----------|-----|-------|
| 5WNA | L_LYS_182 | NZ  | L_GLU_186 | OE2 | 3.646 |
| 5WNA | C_ARG_28  | NH2 | C_GLU_31  | OE1 | 3.185 |
| 5WNA | C_ARG_38  | NH1 | C_ASP_90  | OD1 | 2.822 |
| 5WNA | C_ARG_38  | NH2 | C_GLU_46  | OE1 | 3.169 |
| 5WNA | C_ARG_38  | NH2 | C_GLU_46  | OE2 | 3.973 |
| 5WNA | C_ARG_38  | NH2 | C_ASP_90  | OD1 | 3.613 |
| 5WNA | C_LYS_65  | NZ  | C_ASP_62  | OD2 | 2.607 |
| 5WNA | C_ARG_67  | NH1 | C_ASP_90  | OD1 | 3.948 |
| 5WNA | C_ARG_67  | NH1 | C_ASP_90  | OD2 | 3.192 |
| 5WNA | C_ARG_67  | NH2 | C_ASP_90  | OD1 | 3.187 |
| 5WNA | C_ARG_67  | NH2 | C_ASP_90  | OD2 | 3.777 |
| 5WNA | C_LYS_76  | NZ  | C_ASP_73  | OD2 | 3.522 |
| 5WNA | C_LYS_111 | NZ  | C_GLU_2   | OE1 | 3.732 |
| 5WNA | C_LYS_111 | NZ  | C_GLU_2   | OE2 | 2.480 |
| 5WNA | C_LYS_154 | NZ  | C_ASP_155 | OD1 | 3.662 |
| 5WNA | C_LYS_220 | NZ  | D_GLU_122 | OE2 | 3.567 |
| 5WNA | C_LYS_221 | NZ  | C_GLU_223 | OE1 | 3.081 |
| 5WNA | D_ARG_24  | NH1 | D_ASP_70  | OD1 | 2.370 |
| 5WNA | D_ARG_24  | NH1 | D_ASP_70  | OD2 | 2.529 |
| 5WNA | D_ARG_24  | NH2 | D_ASP_70  | OD1 | 3.649 |
| 5WNA | D_HIS_32  | ND1 | D_GLU_50  | OE1 | 3.272 |
| 5WNA | D_HIS_32  | ND1 | D_GLU_50  | OE2 | 2.966 |
| 5WNA | D_LYS_39  | NZ  | L_GLU_81  | OE1 | 3.744 |
| 5WNA | D_ARG_61  | NH2 | D_GLU_81  | OE1 | 3.776 |
| 5WNA | D_ARG_61  | NH2 | D_ASP_82  | OD1 | 3.311 |
| 5WNA | D_ARG_61  | NH2 | D_ASP_82  | OD2 | 2.738 |
| 5WNA | D_LYS_148 | NZ  | D_GLU_194 | OE2 | 3.083 |
| 5WNA | D_LYS_182 | NZ  | D_GLU_186 | OE1 | 3.810 |
| 5WNA | D_LYS_182 | NZ  | D_GLU_186 | OE2 | 3.086 |
| 5WNA | D_LYS_187 | NZ  | D_ASP_184 | OD1 | 3.142 |
| 5WNB | H_ARG_19  | NH1 | H_GLU_82  | OE1 | 2.506 |
| 5WNB | H_ARG_38  | NH1 | H_ASP_90  | OD1 | 3.116 |
| 5WNB | H_ARG_38  | NH2 | H_GLU_46  | OE1 | 3.477 |
| 5WNB | H_ARG_38  | NH2 | H_GLU_46  | OE2 | 2.945 |
| 5WNB | H_ARG_38  | NH2 | H_ASP_90  | OD1 | 3.843 |
| 5WNB | H_LYS_65  | NZ  | H_ASP_62  | OD1 | 3.127 |
| 5WNB | H_ARG_67  | NH1 | H_ASP_90  | OD2 | 3.008 |
| 5WNB | H_ARG_67  | NH2 | H_ASP_90  | OD1 | 3.462 |
| 5WNB | H_ARG_67  | NH2 | H_ASP_90  | OD2 | 3.519 |
| 5WNB | H_ARG_72  | NH2 | H_ASP_77  | OD2 | 3.365 |
| 5WNB | H_LYS_76  | NZ  | H_ASP_73  | OD2 | 3.433 |
| 5WNB | H_HIS_108 | ND1 | H_ASP_106 | OD2 | 3.787 |
| 5WNB | H_HIS_108 | NE2 | H_ASP_106 | OD2 | 2.649 |
| 5WNB | H_LYS_140 | NZ  | L_GLU_212 | OE1 | 3.467 |
| 5WNB | H_LYS_140 | NZ  | L_GLU_212 | OE2 | 3.708 |
| 5WNB | H_LYS_154 | NZ  | H_ASP_155 | OD1 | 3.075 |
| 5WNB | H_LYS_154 | NZ  | H_ASP_155 | OD2 | 2.337 |
| 5WNB | L_HIS_32  | ND1 | L_GLU_50  | OE1 | 3.927 |
| 5WNB | L_HIS_32  | ND1 | L_GLU_50  | OE2 | 3.082 |
| 5WNB | L_ARG_61  | NH1 | M_GLU_79  | OE2 | 3.612 |
| 5WNB | L_ARG_61  | NH2 | L_GLU_81  | OE1 | 3.333 |
| 5WNB | L_ARG_61  | NH2 | L_ASP_82  | OD1 | 3.537 |
| 5WNB | L_ARG_61  | NH2 | L_ASP_82  | OD2 | 2.770 |
| 5WNB | L_LYS_148 | NZ  | L_GLU_194 | OE1 | 2.500 |
| 5WNB | L_LYS_187 | NZ  | L_ASP_184 | OD2 | 3.098 |
| 5WNB | L_HIS_188 | ND1 | L_ASP_150 | OD1 | 3.403 |
| 5WNB | L_ARG_38  | NH1 | L_ASP_90  | OD2 | 3.224 |
| 5WNB | L_ARG_38  | NH2 | L_GLU_46  | OE1 | 2.966 |

|      |           |     |           |     |       |
|------|-----------|-----|-----------|-----|-------|
| 5WNB | L_ARG_38  | NH2 | L_GLU_46  | OE2 | 3.754 |
| 5WNB | L_ARG_67  | NH2 | L_ASP_90  | OD1 | 2.682 |
| 5WNB | L_ARG_67  | NH2 | L_ASP_90  | OD2 | 3.569 |
| 5WNB | L_HIS_108 | NE2 | L_ASP_106 | OD2 | 3.548 |
| 5WNB | L_LYS_154 | NZ  | L_ASP_155 | OD1 | 2.470 |
| 5WNB | L_LYS_154 | NZ  | L_ASP_155 | OD2 | 2.919 |
| 5WNB | M_HIS_32  | ND1 | M_GLU_50  | OE1 | 2.976 |
| 5WNB | M_HIS_32  | ND1 | M_GLU_50  | OE2 | 3.054 |
| 5WNB | M_ARG_61  | NH2 | M_GLU_81  | OE1 | 3.769 |
| 5WNB | M_ARG_61  | NH2 | M_ASP_82  | OD1 | 2.298 |
| 5WNB | M_ARG_61  | NH2 | M_ASP_82  | OD2 | 3.245 |
| 5WNB | M_LYS_168 | NZ  | M_ASP_166 | OD1 | 3.331 |
| 5WNB | M_LYS_168 | NZ  | M_ASP_166 | OD2 | 3.217 |
| 5WNB | A_HIS_164 | ND1 | A_GLU_166 | OE1 | 3.440 |
| 5WNB | A_HIS_164 | NE2 | A_ASP_162 | OD1 | 3.262 |
| 5WNB | A_HIS_164 | NE2 | A_ASP_162 | OD2 | 3.502 |
| 5WNB | B_HIS_164 | ND1 | B_GLU_166 | OE1 | 3.999 |
| 5WNB | B_HIS_164 | ND1 | B_GLU_166 | OE2 | 3.280 |
| 5WNB | B_HIS_164 | NE2 | B_ASP_162 | OD1 | 3.381 |
| 5XBM | A_ARG_59  | NH2 | A_GLU_79  | OE1 | 3.378 |
| 5XBM | A_ARG_59  | NH2 | A_ASP_80  | OD2 | 3.511 |
| 5XBM | A_LYS_140 | NZ  | A_GLU_103 | OE2 | 3.814 |
| 5XBM | A_LYS_145 | NZ  | A_GLU_193 | OE1 | 3.556 |
| 5XBM | A_LYS_145 | NZ  | A_GLU_193 | OE2 | 2.956 |
| 5XBM | A_ARG_153 | NH1 | A_GLU_183 | OE1 | 2.925 |
| 5XBM | A_ARG_153 | NH2 | A_GLU_183 | OE1 | 3.437 |
| 5XBM | A_LYS_181 | NZ  | A_GLU_185 | OE2 | 3.524 |
| 5XBM | A_LYS_205 | NZ  | B_ASP_139 | OD1 | 3.654 |
| 5XBM | B_LYS_67  | NZ  | B_ASP_90  | OD1 | 3.066 |
| 5XBM | B_LYS_67  | NZ  | B_ASP_90  | OD2 | 2.464 |
| 5XBM | B_ARG_98  | NH2 | B_ASP_110 | OD2 | 3.054 |
| 5XBM | B_LYS_217 | NZ  | A_GLU_121 | OE1 | 2.614 |
| 5XBM | B_LYS_217 | NZ  | A_GLU_121 | OE2 | 3.625 |
| 5XBM | C_ARG_77  | NH1 | C_GLU_79  | OE1 | 3.381 |
| 5XBM | C_ARG_77  | NH2 | C_GLU_79  | OE1 | 2.852 |
| 5XBM | C_ARG_95  | NH1 | C_ASP_254 | OD2 | 2.603 |
| 5XBM | C_ARG_95  | NH2 | C_GLU_93  | OE2 | 3.851 |
| 5XBM | C_ARG_95  | NH2 | C_GLU_413 | OE1 | 3.677 |
| 5XBM | C_ARG_95  | NH2 | C_GLU_413 | OE2 | 3.452 |
| 5XBM | C_LYS_97  | NZ  | C_ASP_252 | OD2 | 3.959 |
| 5XBM | C_HIS_171 | ND1 | C_GLU_175 | OE2 | 3.888 |
| 5XBM | C_ARG_192 | NH2 | C_ASP_194 | OD2 | 3.106 |
| 5XBM | C_HIS_257 | NE2 | C_GLU_264 | OE2 | 3.860 |
| 5XBM | C_ARG_294 | NH1 | C_GLU_361 | OE2 | 3.640 |
| 5XBM | C_ARG_294 | NH2 | C_ASP_368 | OD2 | 3.362 |
| 5XBM | C_LYS_296 | NZ  | C_GLU_364 | OE1 | 3.065 |
| 5XBM | C_LYS_296 | NZ  | C_GLU_364 | OE2 | 3.891 |
| 5XBM | C_HIS_341 | NE2 | C_GLU_85  | OE2 | 2.443 |
| 5XBM | C_LYS_381 | NZ  | C_ASP_254 | OD1 | 2.330 |
| 5XBM | C_LYS_391 | NZ  | C_ASP_393 | OD2 | 3.425 |
| 5XBM | C_LYS_419 | NZ  | C_GLU_420 | OE2 | 2.764 |
| 5XBM | D_ARG_59  | NH1 | D_ASP_80  | OD2 | 3.136 |
| 5XBM | D_LYS_145 | NZ  | D_GLU_152 | OE2 | 2.597 |
| 5XBM | D_ARG_153 | NH2 | D_GLU_183 | OE2 | 3.712 |
| 5XBM | D_LYS_181 | NZ  | D_GLU_185 | OE2 | 2.414 |
| 5XBM | D_ARG_209 | NH1 | D_GLU_185 | OE1 | 3.438 |
| 5XBM | E_LYS_67  | NZ  | E_ASP_90  | OD2 | 3.658 |
| 5XBM | E_ARG_98  | NH1 | E_ASP_110 | OD1 | 3.749 |

|      |           |     |           |     |       |
|------|-----------|-----|-----------|-----|-------|
| 5XBM | E_ARG_98  | NH2 | E_ASP_110 | OD1 | 3.811 |
| 5XBM | E_LYS_217 | NZ  | D_GLU_121 | OE2 | 3.463 |
| 5XBM | F_ARG_77  | NH1 | D_ASP_31  | OD1 | 3.188 |
| 5XBM | F_ARG_77  | NH1 | F_GLU_79  | OE1 | 3.586 |
| 5XBM | F_ARG_77  | NH1 | F_GLU_79  | OE2 | 3.933 |
| 5XBM | F_ARG_77  | NH2 | D_ASP_31  | OD1 | 3.156 |
| 5XBM | F_ARG_77  | NH2 | D_ASP_31  | OD2 | 3.938 |
| 5XBM | F_ARG_77  | NH2 | F_GLU_73  | OE1 | 3.951 |
| 5XBM | F_ARG_82  | NH1 | F_GLU_354 | OE2 | 3.586 |
| 5XBM | F_ARG_95  | NH2 | F_GLU_93  | OE1 | 3.848 |
| 5XBM | F_ARG_95  | NH2 | F_GLU_413 | OE2 | 2.568 |
| 5XBM | F_LYS_129 | NZ  | F_ASP_127 | OD1 | 3.700 |
| 5XBM | F_LYS_161 | NZ  | C_GLU_154 | OE2 | 3.149 |
| 5XBM | F_HIS_171 | ND1 | F_GLU_175 | OE1 | 3.652 |
| 5XBM | F_HIS_257 | NE2 | F_GLU_264 | OE1 | 3.279 |
| 5XBM | F_HIS_257 | NE2 | F_GLU_264 | OE2 | 3.085 |
| 5XBM | F_ARG_294 | NH1 | F_GLU_285 | OE1 | 3.934 |
| 5XBM | F_ARG_294 | NH2 | F_GLU_285 | OE1 | 2.990 |
| 5XBM | F_ARG_294 | NH2 | F_GLU_285 | OE2 | 3.166 |
| 5XBM | F_ARG_294 | NH2 | F_ASP_368 | OD1 | 3.670 |
| 5XBM | F_LYS_296 | NZ  | F_GLU_364 | OE1 | 3.766 |
| 5XBM | F_LYS_296 | NZ  | F_GLU_364 | OE2 | 3.585 |
| 5XBM | F_HIS_341 | NE2 | F_GLU_85  | OE2 | 2.413 |
| 5XBM | F_LYS_391 | NZ  | F_ASP_393 | OD2 | 3.195 |
| 5XCQ | A_LYS_13  | NZ  | B_ASP_154 | OD1 | 3.910 |
| 5XCQ | A_ARG_66  | NH1 | A_ASP_86  | OD1 | 3.789 |
| 5XCQ | A_ARG_66  | NH1 | A_ASP_86  | OD2 | 2.772 |
| 5XCQ | A_ARG_66  | NH2 | A_ASP_86  | OD1 | 2.957 |
| 5XCQ | A_ARG_66  | NH2 | A_ASP_86  | OD2 | 3.362 |
| 5XCQ | A_LYS_121 | NZ  | A_GLU_118 | OE2 | 2.790 |
| 5XCQ | B_HIS_42  | NE2 | B_ASP_41  | OD1 | 3.768 |
| 5XCQ | B_HIS_42  | NE2 | B_ASP_41  | OD2 | 3.647 |
| 5XCQ | B_HIS_42  | NE2 | B_GLU_140 | OE1 | 3.727 |
| 5XCQ | B_HIS_42  | NE2 | B_GLU_140 | OE2 | 2.593 |
| 5XCQ | B_ARG_61  | NH2 | B_ASP_82  | OD1 | 2.863 |
| 5XCQ | B_ARG_61  | NH2 | B_ASP_82  | OD2 | 3.535 |
| 5XCQ | B_LYS_116 | NZ  | B_GLU_113 | OE1 | 3.934 |
| 5XCQ | B_LYS_116 | NZ  | B_GLU_113 | OE2 | 2.845 |
| 5XCQ | B_LYS_144 | NZ  | A_GLU_142 | OE1 | 3.005 |
| 5XCQ | B_LYS_144 | NZ  | A_GLU_142 | OE2 | 2.931 |
| 5XCR | A_LYS_13  | NZ  | B_ASP_154 | OD1 | 3.316 |
| 5XCR | A_LYS_13  | NZ  | B_ASP_154 | OD2 | 2.938 |
| 5XCR | A_ARG_66  | NH1 | A_ASP_86  | OD1 | 3.686 |
| 5XCR | A_ARG_66  | NH1 | A_ASP_86  | OD2 | 2.734 |
| 5XCR | A_ARG_66  | NH2 | A_ASP_86  | OD1 | 2.875 |
| 5XCR | A_ARG_66  | NH2 | A_ASP_86  | OD2 | 3.410 |
| 5XCR | A_LYS_121 | NZ  | A_GLU_118 | OE2 | 2.719 |
| 5XCR | A_ARG_147 | NH2 | B_GLU_135 | OE2 | 3.104 |
| 5XCR | A_LYS_149 | NZ  | B_ASP_41  | OD1 | 2.692 |
| 5XCR | A_LYS_149 | NZ  | B_ASP_41  | OD2 | 3.682 |
| 5XCR | A_LYS_153 | NZ  | B_ASP_41  | OD1 | 3.567 |
| 5XCR | A_LYS_153 | NZ  | B_ASP_41  | OD2 | 3.385 |
| 5XCR | B_ARG_61  | NH2 | B_GLU_81  | OE2 | 3.905 |
| 5XCR | B_ARG_61  | NH2 | B_ASP_82  | OD1 | 2.794 |
| 5XCR | B_ARG_61  | NH2 | B_ASP_82  | OD2 | 3.586 |
| 5XCR | B_ARG_142 | NH1 | B_GLU_139 | OE1 | 3.167 |
| 5XCR | B_LYS_144 | NZ  | A_GLU_142 | OE1 | 2.665 |
| 5XCR | B_LYS_144 | NZ  | A_GLU_142 | OE2 | 3.686 |



|      |            |     |           |     |       |
|------|------------|-----|-----------|-----|-------|
| 5XCR | D_LYS_13   | NZ  | D_GLU_16  | OE2 | 3.937 |
| 5XCR | D_LYS_64   | NZ  | D_GLU_61  | OE2 | 3.102 |
| 5XCR | D_ARG_66   | NH1 | D_ASP_86  | OD1 | 3.572 |
| 5XCR | D_ARG_66   | NH1 | D_ASP_86  | OD2 | 2.754 |
| 5XCR | D_ARG_66   | NH2 | D_ASP_86  | OD1 | 2.764 |
| 5XCR | D_ARG_66   | NH2 | D_ASP_86  | OD2 | 3.427 |
| 5XCR | D_LYS_149  | NZ  | E_ASP_41  | OD1 | 2.596 |
| 5XCR | D_LYS_149  | NZ  | E_ASP_41  | OD2 | 3.537 |
| 5XCR | D_LYS_149  | NZ  | E_GLU_137 | OE1 | 2.552 |
| 5XCR | D_LYS_149  | NZ  | E_GLU_137 | OE2 | 3.483 |
| 5XCR | D_ARG_154  | NH2 | E_ASP_131 | OD1 | 2.972 |
| 5XCR | E_LYS_39   | NZ  | E_GLU_81  | OE2 | 3.722 |
| 5XCR | E_ARG_61   | NH2 | E_GLU_81  | OE1 | 3.056 |
| 5XCR | E_ARG_61   | NH2 | E_ASP_82  | OD1 | 2.787 |
| 5XCR | E_ARG_61   | NH2 | E_ASP_82  | OD2 | 3.509 |
| 5XCR | E_LYS_116  | NZ  | E_GLU_113 | OE1 | 3.303 |
| 5XCR | E_LYS_116  | NZ  | E_GLU_113 | OE2 | 3.987 |
| 5XCR | E_ARG_126  | NH1 | E_GLU_81  | OE2 | 3.465 |
| 5XCR | E_LYS_144  | NZ  | D_GLU_142 | OE1 | 2.644 |
| 5XCR | E_LYS_144  | NZ  | D_GLU_142 | OE2 | 3.385 |
| 5XCS | A_ARG_38   | NH1 | A_ASP_86  | OD1 | 2.824 |
| 5XCS | A_ARG_38   | NH2 | A_GLU_46  | OE1 | 3.945 |
| 5XCS | A_ARG_38   | NH2 | A_GLU_46  | OE2 | 3.011 |
| 5XCS | A_ARG_38   | NH2 | A_ASP_86  | OD1 | 3.632 |
| 5XCS | A_LYS_43   | NZ  | B_GLU_140 | OE2 | 2.517 |
| 5XCS | A_ARG_66   | NH1 | A_ASP_86  | OD1 | 3.282 |
| 5XCS | A_ARG_66   | NH1 | A_ASP_86  | OD2 | 2.652 |
| 5XCS | A_ARG_66   | NH2 | A_ASP_86  | OD1 | 3.265 |
| 5XCS | A_ARG_66   | NH2 | A_ASP_86  | OD2 | 3.877 |
| 5XCS | A_LYS_75   | NZ  | A_ASP_72  | OD2 | 3.471 |
| 5XCS | A_ARG_94   | NH2 | A_GLU_96  | OE1 | 2.939 |
| 5XCS | A_ARG_94   | NH2 | A_GLU_96  | OE2 | 3.439 |
| 5XCS | A_ARG_95   | NH1 | B_ASP_91  | OD1 | 2.738 |
| 5XCS | A_ARG_95   | NH1 | B_ASP_91  | OD2 | 3.741 |
| 5XCS | A_ARG_95   | NH2 | B_ASP_91  | OD1 | 3.421 |
| 5XCS | A_ARG_95   | NH2 | C_ASP_7   | OD1 | 3.700 |
| 5XCS | A_ARG_95   | NH2 | C_ASP_7   | OD2 | 2.872 |
| 5XCS | A_LYS_100A | NZ  | B_GLU_55  | OE1 | 2.609 |
| 5XCS | A_LYS_100A | NZ  | B_GLU_55  | OE2 | 3.239 |
| 5XCS | A_ARG_147  | NH1 | A_GLU_144 | OE1 | 3.227 |
| 5XCS | A_LYS_149  | NZ  | B_GLU_137 | OE1 | 3.069 |
| 5XCS | A_LYS_149  | NZ  | B_GLU_137 | OE2 | 3.874 |
| 5XCS | B_ARG_61   | NH2 | B_GLU_81  | OE2 | 3.146 |
| 5XCS | B_ARG_61   | NH2 | B_ASP_82  | OD1 | 2.765 |
| 5XCS | B_ARG_61   | NH2 | B_ASP_82  | OD2 | 3.342 |
| 5XCS | B_HIS_94   | NE2 | C_ASP_7   | OD2 | 3.772 |
| 5XCS | B_LYS_103  | NZ  | B_GLU_105 | OE2 | 3.336 |
| 5XCS | B_LYS_125  | NZ  | B_GLU_121 | OE2 | 3.175 |
| 5XCS | B_ARG_142  | NH2 | B_GLU_139 | OE1 | 3.838 |
| 5XCS | B_LYS_144  | NZ  | A_GLU_142 | OE1 | 3.111 |
| 5XCS | B_LYS_144  | NZ  | A_GLU_142 | OE2 | 3.511 |
| 5XCS | B_ARG_149  | NH1 | A_ASP_136 | OD1 | 2.816 |
| 5XCT | A_ARG_66   | NH1 | A_ASP_86  | OD1 | 3.743 |
| 5XCT | A_ARG_66   | NH1 | A_ASP_86  | OD2 | 2.753 |
| 5XCT | A_ARG_66   | NH2 | A_ASP_86  | OD1 | 2.868 |
| 5XCT | A_ARG_66   | NH2 | A_ASP_86  | OD2 | 3.322 |
| 5XCT | A_ARG_131  | NH2 | A_ASP_116 | OD2 | 3.928 |
| 5XCT | B_HIS_42   | NE2 | B_ASP_41  | OD2 | 3.182 |

|      |            |     |           |     |       |
|------|------------|-----|-----------|-----|-------|
| 5XCT | B_HIS_42   | NE2 | B_GLU_140 | OE1 | 3.857 |
| 5XCT | B_HIS_42   | NE2 | B_GLU_140 | OE2 | 3.342 |
| 5XCT | B_ARG_61   | NH2 | B_ASP_82  | OD1 | 2.811 |
| 5XCT | B_ARG_61   | NH2 | B_ASP_82  | OD2 | 3.636 |
| 5XCT | B_LYS_144  | NZ  | A_GLU_142 | OE1 | 2.822 |
| 5XCT | B_LYS_144  | NZ  | A_GLU_142 | OE2 | 3.117 |
| 5XCU | A_LYS_13   | NZ  | B_ASP_154 | OD2 | 3.098 |
| 5XCU | A_ARG_38   | NH1 | A_GLU_46  | OE1 | 2.812 |
| 5XCU | A_ARG_38   | NH1 | A_GLU_46  | OE2 | 3.498 |
| 5XCU | A_ARG_38   | NH1 | A_ASP_86  | OD1 | 3.796 |
| 5XCU | A_ARG_38   | NH2 | A_ASP_86  | OD1 | 2.904 |
| 5XCU | A_ARG_66   | NH1 | A_ASP_86  | OD1 | 2.877 |
| 5XCU | A_ARG_66   | NH1 | A_ASP_86  | OD2 | 3.351 |
| 5XCU | A_ARG_66   | NH2 | A_ASP_86  | OD1 | 3.756 |
| 5XCU | A_ARG_66   | NH2 | A_ASP_86  | OD2 | 2.690 |
| 5XCU | A_ARG_94   | NH2 | A_GLU_96  | OE1 | 3.021 |
| 5XCU | A_ARG_94   | NH2 | A_GLU_96  | OE2 | 3.420 |
| 5XCU | A_ARG_95   | NH1 | B_ASP_91  | OD1 | 2.822 |
| 5XCU | A_ARG_95   | NH1 | B_ASP_91  | OD2 | 3.880 |
| 5XCU | A_ARG_95   | NH2 | B_ASP_91  | OD1 | 3.668 |
| 5XCU | A_ARG_95   | NH2 | C_ASP_7   | OD1 | 3.592 |
| 5XCU | A_ARG_95   | NH2 | C_ASP_7   | OD2 | 2.664 |
| 5XCU | A_LYS_100A | NZ  | A_ASP_99  | OD2 | 3.553 |
| 5XCU | A_LYS_100A | NZ  | B_GLU_55  | OE1 | 3.292 |
| 5XCU | A_LYS_100A | NZ  | B_GLU_55  | OE2 | 3.457 |
| 5XCU | A_LYS_121  | NZ  | A_GLU_118 | OE1 | 2.230 |
| 5XCU | A_LYS_149  | NZ  | B_GLU_137 | OE1 | 3.142 |
| 5XCU | A_LYS_149  | NZ  | B_GLU_137 | OE2 | 3.674 |
| 5XCU | B_LYS_24   | NZ  | B_ASP_70  | OD1 | 2.759 |
| 5XCU | B_LYS_24   | NZ  | B_ASP_70  | OD2 | 2.992 |
| 5XCU | B_ARG_61   | NH2 | B_GLU_81  | OE2 | 3.746 |
| 5XCU | B_ARG_61   | NH2 | B_ASP_82  | OD1 | 2.826 |
| 5XCU | B_ARG_61   | NH2 | B_ASP_82  | OD2 | 3.416 |
| 5XCU | B_HIS_94   | NE2 | C_ASP_7   | OD2 | 3.530 |
| 5XCU | B_LYS_103  | NZ  | B_GLU_105 | OE1 | 2.119 |
| 5XCU | B_LYS_116  | NZ  | B_GLU_113 | OE2 | 2.757 |
| 5XCU | B_ARG_142  | NH1 | B_GLU_139 | OE1 | 3.141 |
| 5XCU | B_ARG_142  | NH2 | D_GLU_100 | OE1 | 3.626 |
| 5XCU | B_ARG_142  | NH2 | D_GLU_100 | OE2 | 3.496 |
| 5XCU | B_LYS_144  | NZ  | A_GLU_142 | OE1 | 2.843 |
| 5XCU | B_LYS_144  | NZ  | A_GLU_142 | OE2 | 2.719 |
| 5XCU | B_ARG_149  | NH2 | A_ASP_136 | OD1 | 3.520 |
| 5XCU | D_LYS_13   | NZ  | E_ASP_154 | OD2 | 2.965 |
| 5XCU | D_ARG_38   | NH1 | D_ASP_86  | OD1 | 2.931 |
| 5XCU | D_ARG_38   | NH2 | D_GLU_46  | OE1 | 2.982 |
| 5XCU | D_ARG_52A  | NH1 | A_GLU_144 | OE1 | 3.014 |
| 5XCU | D_ARG_52A  | NH1 | A_GLU_144 | OE2 | 3.323 |
| 5XCU | D_ARG_52A  | NH2 | A_GLU_144 | OE2 | 3.086 |
| 5XCU | D_ARG_66   | NH1 | D_ASP_86  | OD1 | 3.903 |
| 5XCU | D_ARG_66   | NH1 | D_ASP_86  | OD2 | 2.901 |
| 5XCU | D_ARG_66   | NH2 | D_ASP_86  | OD1 | 3.158 |
| 5XCU | D_ARG_66   | NH2 | D_ASP_86  | OD2 | 3.501 |
| 5XCU | D_ARG_94   | NH2 | D_GLU_96  | OE1 | 3.413 |
| 5XCU | D_ARG_94   | NH2 | D_GLU_96  | OE2 | 3.168 |
| 5XCU | D_ARG_95   | NH1 | E_ASP_91  | OD1 | 2.736 |
| 5XCU | D_ARG_95   | NH1 | E_ASP_91  | OD2 | 3.660 |
| 5XCU | D_ARG_95   | NH2 | E_ASP_91  | OD1 | 3.272 |
| 5XCU | D_ARG_95   | NH2 | F_ASP_7   | OD1 | 3.878 |

|      |            |     |           |     |       |
|------|------------|-----|-----------|-----|-------|
| 5XCU | D_ARG_95   | NH2 | F_ASP_7   | OD2 | 3.169 |
| 5XCU | D_LYS_100A | NZ  | D_ASP_99  | OD2 | 3.711 |
| 5XCU | D_LYS_100A | NZ  | E_GLU_55  | OE1 | 3.852 |
| 5XCU | D_LYS_100A | NZ  | E_GLU_55  | OE2 | 2.994 |
| 5XCU | D_ARG_147  | NH2 | D_GLU_144 | OE1 | 3.695 |
| 5XCU | D_LYS_149  | NZ  | E_GLU_137 | OE1 | 2.785 |
| 5XCU | D_LYS_149  | NZ  | E_GLU_137 | OE2 | 3.293 |
| 5XCU | E_LYS_24   | NZ  | E_ASP_70  | OD1 | 3.892 |
| 5XCU | E_LYS_30F  | NZ  | B_GLU_139 | OE1 | 2.662 |
| 5XCU | E_LYS_30F  | NZ  | B_GLU_139 | OE2 | 3.287 |
| 5XCU | E_ARG_61   | NH1 | E_GLU_81  | OE1 | 3.712 |
| 5XCU | E_ARG_61   | NH1 | E_ASP_82  | OD1 | 3.146 |
| 5XCU | E_ARG_61   | NH1 | E_ASP_82  | OD2 | 3.543 |
| 5XCU | E_HIS_94   | NE2 | F_ASP_7   | OD2 | 3.551 |
| 5XCU | E_LYS_103  | NZ  | E_GLU_105 | OE2 | 3.303 |
| 5XCU | E_ARG_142  | NH1 | E_GLU_139 | OE2 | 3.171 |
| 5XCU | E_ARG_142  | NH2 | D_GLU_140 | OE2 | 3.967 |
| 5XCU | E_LYS_144  | NZ  | D_GLU_142 | OE1 | 3.438 |
| 5XCU | E_LYS_144  | NZ  | D_GLU_142 | OE2 | 2.648 |
| 5XCV | A_ARG_38   | NH1 | A_GLU_46  | OE1 | 3.020 |
| 5XCV | A_ARG_38   | NH1 | A_ASP_86  | OD1 | 3.966 |
| 5XCV | A_ARG_38   | NH2 | A_ASP_86  | OD1 | 2.867 |
| 5XCV | A_LYS_56   | NZ  | C_GLU_10  | OE2 | 3.165 |
| 5XCV | A_LYS_56   | NZ  | C_ASP_11  | OD1 | 3.842 |
| 5XCV | A_LYS_56   | NZ  | C_ASP_11  | OD2 | 2.877 |
| 5XCV | A_ARG_66   | NH1 | A_ASP_86  | OD1 | 3.207 |
| 5XCV | A_ARG_66   | NH1 | A_ASP_86  | OD2 | 3.568 |
| 5XCV | A_ARG_66   | NH2 | A_ASP_86  | OD1 | 3.873 |
| 5XCV | A_ARG_66   | NH2 | A_ASP_86  | OD2 | 2.785 |
| 5XCV | A_LYS_75   | NZ  | A_ASP_72  | OD2 | 3.989 |
| 5XCV | A_ARG_83   | NH2 | A_GLU_85  | OE2 | 3.625 |
| 5XCV | A_LYS_94   | NZ  | A_ASP_101 | OD2 | 3.427 |
| 5XCV | A_LYS_121  | NZ  | A_GLU_118 | OE1 | 2.490 |
| 5XCV | A_LYS_121  | NZ  | A_GLU_118 | OE2 | 3.921 |
| 5XCV | A_ARG_131  | NH1 | D_GLU_142 | OE2 | 2.857 |
| 5XCV | A_ARG_131  | NH2 | D_GLU_142 | OE2 | 3.651 |
| 5XCV | A_LYS_149  | NZ  | B_GLU_137 | OE1 | 3.135 |
| 5XCV | A_LYS_149  | NZ  | B_GLU_137 | OE2 | 2.706 |
| 5XCV | A_ARG_154  | NH2 | B_ASP_131 | OD1 | 2.532 |
| 5XCV | B_LYS_53   | NZ  | B_ASP_52  | OD1 | 2.531 |
| 5XCV | B_LYS_53   | NZ  | B_ASP_52  | OD2 | 3.942 |
| 5XCV | B_ARG_61   | NH1 | B_GLU_81  | OE2 | 2.626 |
| 5XCV | B_ARG_61   | NH1 | B_ASP_82  | OD1 | 3.375 |
| 5XCV | B_ARG_61   | NH1 | B_ASP_82  | OD2 | 3.966 |
| 5XCV | B_ARG_61   | NH2 | B_ASP_82  | OD1 | 2.920 |
| 5XCV | B_ARG_61   | NH2 | B_ASP_82  | OD2 | 2.592 |
| 5XCV | B_ARG_142  | NH1 | B_GLU_135 | OE2 | 3.241 |
| 5XCV | B_ARG_142  | NH1 | B_GLU_139 | OE1 | 2.828 |
| 5XCV | B_ARG_142  | NH2 | B_GLU_135 | OE1 | 3.178 |
| 5XCV | B_ARG_142  | NH2 | B_GLU_135 | OE2 | 3.502 |
| 5XCV | B_LYS_144  | NZ  | A_GLU_142 | OE1 | 2.798 |
| 5XCV | B_LYS_144  | NZ  | A_GLU_142 | OE2 | 3.295 |
| 5XCV | B_ARG_149  | NH2 | A_ASP_136 | OD1 | 3.863 |
| 5XCV | B_ARG_149  | NH2 | A_ASP_136 | OD2 | 3.941 |
| 5XCV | D_ARG_38   | NH1 | D_GLU_46  | OE1 | 3.023 |
| 5XCV | D_ARG_38   | NH1 | D_ASP_86  | OD1 | 3.942 |
| 5XCV | D_ARG_38   | NH2 | D_ASP_86  | OD1 | 2.784 |
| 5XCV | D_ARG_66   | NH1 | D_ASP_86  | OD1 | 3.694 |

|      |           |     |           |     |       |
|------|-----------|-----|-----------|-----|-------|
| 5XCV | D_ARG_66  | NH1 | D_ASP_86  | OD2 | 2.840 |
| 5XCV | D_ARG_66  | NH2 | D_ASP_86  | OD1 | 3.151 |
| 5XCV | D_ARG_66  | NH2 | D_ASP_86  | OD2 | 3.768 |
| 5XCV | D_LYS_94  | NZ  | D_ASP_101 | OD2 | 3.401 |
| 5XCV | D_LYS_121 | NZ  | D_GLU_118 | OE1 | 3.518 |
| 5XCV | D_LYS_121 | NZ  | D_GLU_118 | OE2 | 3.547 |
| 5XCV | D_ARG_131 | NH1 | A_GLU_142 | OE2 | 2.791 |
| 5XCV | D_ARG_131 | NH2 | A_GLU_142 | OE2 | 3.693 |
| 5XCV | D_LYS_149 | NZ  | E_GLU_137 | OE1 | 2.622 |
| 5XCV | D_LYS_149 | NZ  | E_GLU_137 | OE2 | 3.565 |
| 5XCV | D_LYS_153 | NZ  | E_GLU_40  | OE2 | 3.944 |
| 5XCV | E_LYS_53  | NZ  | E_ASP_52  | OD1 | 2.875 |
| 5XCV | E_ARG_61  | NH2 | E_ASP_82  | OD1 | 3.461 |
| 5XCV | E_ARG_61  | NH2 | E_ASP_82  | OD2 | 3.413 |
| 5XCV | E_LYS_116 | NZ  | E_GLU_113 | OE2 | 3.173 |
| 5XCV | E_LYS_144 | NZ  | D_GLU_142 | OE1 | 2.798 |
| 5XCV | E_LYS_144 | NZ  | D_GLU_142 | OE2 | 3.738 |
| 5XJ3 | A_ARG_38  | NH1 | A_ASP_90  | OD1 | 3.056 |
| 5XJ3 | A_ARG_38  | NH2 | A_GLU_46  | OE1 | 3.585 |
| 5XJ3 | A_ARG_38  | NH2 | A_GLU_46  | OE2 | 3.163 |
| 5XJ3 | A_ARG_38  | NH2 | A_GLU_89  | OE1 | 3.576 |
| 5XJ3 | A_ARG_67  | NH1 | A_GLU_89  | OE2 | 3.733 |
| 5XJ3 | A_ARG_67  | NH2 | A_ASP_90  | OD1 | 2.978 |
| 5XJ3 | A_ARG_67  | NH2 | A_ASP_90  | OD2 | 2.554 |
| 5XJ3 | A_ARG_87  | NH1 | A_GLU_89  | OE2 | 3.859 |
| 5XJ3 | A_ARG_98  | NH1 | A_ASP_106 | OD2 | 3.164 |
| 5XJ3 | B_ARG_55  | NH1 | B_ASP_61  | OD1 | 2.406 |
| 5XJ3 | B_ARG_62  | NH2 | B_GLU_82  | OE2 | 2.865 |
| 5XJ3 | B_ARG_62  | NH2 | B_ASP_83  | OD1 | 3.259 |
| 5XJ3 | B_LYS_104 | NZ  | B_GLU_106 | OE1 | 3.023 |
| 5XJ3 | C_ARG_75  | NH1 | C_ASP_123 | OD1 | 3.835 |
| 5XJ3 | C_LYS_130 | NZ  | C_GLU_132 | OE1 | 3.977 |
| 5XJ3 | D_ARG_38  | NH1 | D_ASP_90  | OD1 | 3.121 |
| 5XJ3 | D_ARG_38  | NH2 | D_GLU_46  | OE2 | 3.650 |
| 5XJ3 | D_ARG_38  | NH2 | D_GLU_89  | OE1 | 3.831 |
| 5XJ3 | D_ARG_38  | NH2 | D_ASP_90  | OD1 | 4.000 |
| 5XJ3 | D_ARG_67  | NH1 | D_GLU_89  | OE2 | 3.568 |
| 5XJ3 | D_ARG_67  | NH2 | D_ASP_90  | OD1 | 2.936 |
| 5XJ3 | D_ARG_67  | NH2 | D_ASP_90  | OD2 | 2.379 |
| 5XJ3 | D_ARG_87  | NH1 | D_GLU_89  | OE2 | 3.625 |
| 5XJ3 | D_ARG_98  | NH1 | D_ASP_106 | OD2 | 3.382 |
| 5XJ3 | E_ARG_55  | NH1 | E_ASP_61  | OD1 | 2.462 |
| 5XJ3 | E_ARG_62  | NH2 | E_GLU_82  | OE2 | 2.848 |
| 5XJ3 | E_ARG_62  | NH2 | E_ASP_83  | OD1 | 3.444 |
| 5XJ3 | E_LYS_104 | NZ  | E_GLU_106 | OE1 | 2.817 |
| 5XJ3 | G_ARG_38  | NH1 | G_ASP_90  | OD1 | 3.040 |
| 5XJ3 | G_ARG_38  | NH2 | G_GLU_46  | OE1 | 3.607 |
| 5XJ3 | G_ARG_38  | NH2 | G_GLU_46  | OE2 | 3.241 |
| 5XJ3 | G_ARG_38  | NH2 | G_GLU_89  | OE1 | 3.847 |
| 5XJ3 | G_ARG_67  | NH1 | G_GLU_89  | OE2 | 3.528 |
| 5XJ3 | G_ARG_67  | NH2 | G_ASP_90  | OD1 | 2.953 |
| 5XJ3 | G_ARG_67  | NH2 | G_ASP_90  | OD2 | 2.607 |
| 5XJ3 | G_ARG_87  | NH1 | G_GLU_89  | OE2 | 3.758 |
| 5XJ3 | G_ARG_98  | NH1 | G_ASP_106 | OD2 | 3.240 |
| 5XJ3 | H_ARG_55  | NH1 | H_ASP_61  | OD1 | 2.456 |
| 5XJ3 | H_ARG_62  | NH2 | H_GLU_82  | OE2 | 3.013 |
| 5XJ3 | H_ARG_62  | NH2 | H_ASP_83  | OD1 | 3.165 |
| 5XJ3 | H_LYS_104 | NZ  | H_GLU_106 | OE1 | 3.016 |

|      |           |     |           |     |       |
|------|-----------|-----|-----------|-----|-------|
| 5XJ3 | I_LYS_130 | NZ  | I_GLU_132 | OE1 | 3.959 |
| 5XJ3 | J_ARG_38  | NH1 | J_ASP_90  | OD1 | 3.001 |
| 5XJ3 | J_ARG_38  | NH2 | J_GLU_46  | OE1 | 3.663 |
| 5XJ3 | J_ARG_38  | NH2 | J_GLU_46  | OE2 | 3.259 |
| 5XJ3 | J_ARG_38  | NH2 | J_GLU_89  | OE1 | 3.925 |
| 5XJ3 | J_ARG_67  | NH1 | J_GLU_89  | OE2 | 3.761 |
| 5XJ3 | J_ARG_67  | NH2 | J_ASP_90  | OD1 | 3.129 |
| 5XJ3 | J_ARG_67  | NH2 | J_ASP_90  | OD2 | 2.474 |
| 5XJ3 | J_ARG_87  | NH1 | J_GLU_89  | OE2 | 3.928 |
| 5XJ3 | J_ARG_98  | NH1 | J_ASP_106 | OD2 | 3.259 |
| 5XJ3 | K_ARG_55  | NH1 | K_ASP_61  | OD1 | 2.399 |
| 5XJ3 | K_ARG_55  | NH2 | K_ASP_61  | OD1 | 3.996 |
| 5XJ3 | K_ARG_62  | NH2 | K_GLU_82  | OE2 | 2.984 |
| 5XJ3 | K_ARG_62  | NH2 | K_ASP_83  | OD1 | 3.334 |
| 5XJ3 | K_LYS_104 | NZ  | K_GLU_106 | OE1 | 2.971 |
| 5XJ3 | L_LYS_130 | NZ  | L_GLU_132 | OE1 | 3.881 |
| 5XRT | A_LYS_27  | NZ  | B_GLU_97  | OE2 | 3.178 |
| 5XRT | A_ARG_50  | NH1 | A_ASP_275 | OD1 | 3.489 |
| 5XRT | A_HIS_75  | ND1 | A_ASP_73  | OD1 | 2.934 |
| 5XRT | A_HIS_75  | ND1 | A_ASP_73  | OD2 | 3.817 |
| 5XRT | A_ARG_90  | NH2 | A_ASP_60  | OD1 | 3.541 |
| 5XRT | A_ARG_90  | NH2 | A_ASP_60  | OD2 | 3.101 |
| 5XRT | A_ARG_109 | NH1 | B_GLU_67  | OE2 | 3.059 |
| 5XRT | A_ARG_109 | NH2 | A_GLU_89  | OE1 | 3.449 |
| 5XRT | A_ARG_109 | NH2 | B_GLU_67  | OE2 | 3.511 |
| 5XRT | A_ARG_141 | NH1 | A_ASP_77  | OD1 | 3.404 |
| 5XRT | A_ARG_141 | NH1 | A_ASP_77  | OD2 | 2.369 |
| 5XRT | A_LYS_176 | NZ  | A_GLU_123 | OE1 | 3.717 |
| 5XRT | A_LYS_176 | NZ  | A_GLU_123 | OE2 | 2.851 |
| 5XRT | A_LYS_238 | NZ  | F_GLU_72  | OE1 | 3.452 |
| 5XRT | A_LYS_238 | NZ  | F_GLU_72  | OE2 | 2.683 |
| 5XRT | A_ARG_255 | NH1 | A_ASP_133 | OD2 | 3.443 |
| 5XRT | A_ARG_255 | NH2 | A_ASP_133 | OD2 | 3.614 |
| 5XRT | A_ARG_269 | NH1 | B_GLU_67  | OE1 | 3.465 |
| 5XRT | A_LYS_292 | NZ  | A_ASP_291 | OD2 | 3.086 |
| 5XRT | A_ARG_307 | NH1 | F_ASP_90  | OD2 | 3.867 |
| 5XRT | A_ARG_307 | NH2 | F_ASP_90  | OD2 | 3.590 |
| 5XRT | A_LYS_310 | NZ  | B_ASP_90  | OD1 | 2.844 |
| 5XRT | A_LYS_315 | NZ  | A_GLU_41  | OE1 | 3.734 |
| 5XRT | A_LYS_326 | NZ  | B_GLU_11  | OE1 | 2.808 |
| 5XRT | A_LYS_326 | NZ  | B_GLU_11  | OE2 | 2.925 |
| 5XRT | B_LYS_51  | NZ  | B_GLU_103 | OE1 | 3.416 |
| 5XRT | B_ARG_54  | NH1 | F_GLU_97  | OE2 | 3.836 |
| 5XRT | B_ARG_54  | NH2 | F_GLU_97  | OE2 | 2.767 |
| 5XRT | B_LYS_62  | NZ  | F_ASP_86  | OD1 | 3.336 |
| 5XRT | B_LYS_62  | NZ  | F_ASP_86  | OD2 | 2.617 |
| 5XRT | B_LYS_62  | NZ  | F_ASP_90  | OD1 | 3.654 |
| 5XRT | B_LYS_62  | NZ  | F_ASP_90  | OD2 | 2.589 |
| 5XRT | B_HIS_64  | NE2 | F_ASP_79  | OD2 | 3.582 |
| 5XRT | B_LYS_68  | NZ  | B_GLU_85  | OE1 | 3.082 |
| 5XRT | B_LYS_68  | NZ  | B_GLU_85  | OE2 | 2.799 |
| 5XRT | B_ARG_76  | NH1 | D_GLU_74  | OE1 | 3.704 |
| 5XRT | B_ARG_76  | NH1 | D_GLU_74  | OE2 | 3.032 |
| 5XRT | B_ARG_76  | NH2 | D_GLU_74  | OE1 | 2.984 |
| 5XRT | B_ARG_76  | NH2 | D_GLU_74  | OE2 | 3.801 |
| 5XRT | B_ARG_76  | NH2 | D_GLU_81  | OE1 | 2.864 |
| 5XRT | B_ARG_76  | NH2 | D_GLU_81  | OE2 | 3.722 |
| 5XRT | B_LYS_117 | NZ  | B_GLU_114 | OE2 | 3.280 |

|      |           |     |           |     |       |
|------|-----------|-----|-----------|-----|-------|
| 5XRT | B_ARG_121 | NH2 | B_ASP_37  | OD2 | 3.079 |
| 5XRT | B_ARG_123 | NH1 | B_GLU_120 | OE1 | 2.622 |
| 5XRT | B_ARG_123 | NH1 | B_GLU_120 | OE2 | 3.886 |
| 5XRT | B_ARG_123 | NH2 | B_GLU_120 | OE1 | 3.456 |
| 5XRT | B_ARG_123 | NH2 | F_ASP_132 | OD2 | 3.663 |
| 5XRT | B_ARG_124 | NH1 | F_ASP_132 | OD2 | 2.812 |
| 5XRT | B_ARG_127 | NH2 | F_GLU_131 | OE1 | 3.103 |
| 5XRT | B_ARG_163 | NH1 | F_GLU_131 | OE1 | 3.194 |
| 5XRT | B_ARG_163 | NH1 | F_GLU_131 | OE2 | 3.563 |
| 5XRT | B_ARG_163 | NH2 | F_GLU_131 | OE1 | 3.596 |
| 5XRT | B_ARG_163 | NH2 | F_GLU_131 | OE2 | 2.598 |
| 5XRT | B_ARG_170 | NH1 | B_GLU_128 | OE2 | 3.435 |
| 5XRT | B_ARG_170 | NH2 | B_GLU_131 | OE2 | 3.245 |
| 5XRT | B_ARG_170 | NH2 | D_GLU_128 | OE1 | 3.449 |
| 5XRT | B_ARG_170 | NH2 | D_GLU_128 | OE2 | 3.578 |
| 5XRT | C_LYS_27  | NZ  | D_GLU_97  | OE1 | 3.926 |
| 5XRT | C_LYS_27  | NZ  | D_GLU_97  | OE2 | 3.340 |
| 5XRT | C_HIS_56  | NE2 | C_GLU_280 | OE1 | 3.939 |
| 5XRT | C_HIS_75  | ND1 | C_ASP_73  | OD1 | 2.939 |
| 5XRT | C_HIS_75  | ND1 | C_ASP_73  | OD2 | 3.672 |
| 5XRT | C_ARG_90  | NH2 | C_ASP_60  | OD1 | 3.078 |
| 5XRT | C_ARG_90  | NH2 | C_ASP_60  | OD2 | 2.971 |
| 5XRT | C_ARG_109 | NH1 | D_GLU_67  | OE2 | 2.932 |
| 5XRT | C_ARG_109 | NH2 | C_GLU_89  | OE1 | 3.101 |
| 5XRT | C_ARG_141 | NH2 | C_ASP_77  | OD1 | 3.277 |
| 5XRT | C_ARG_141 | NH2 | C_ASP_77  | OD2 | 3.129 |
| 5XRT | C_LYS_176 | NZ  | C_GLU_123 | OE2 | 3.009 |
| 5XRT | C_LYS_238 | NZ  | B_GLU_72  | OE2 | 3.031 |
| 5XRT | C_ARG_255 | NH1 | C_ASP_133 | OD1 | 3.530 |
| 5XRT | C_ARG_255 | NH2 | C_ASP_133 | OD1 | 3.274 |
| 5XRT | C_ARG_269 | NH1 | D_GLU_67  | OE1 | 3.251 |
| 5XRT | C_LYS_292 | NZ  | C_ASP_291 | OD1 | 3.150 |
| 5XRT | C_ARG_307 | NH2 | B_ASP_90  | OD2 | 3.134 |
| 5XRT | C_LYS_310 | NZ  | D_ASP_90  | OD1 | 3.206 |
| 5XRT | C_LYS_310 | NZ  | D_ASP_90  | OD2 | 3.892 |
| 5XRT | D_LYS_51  | NZ  | D_GLU_103 | OE1 | 3.086 |
| 5XRT | D_ARG_54  | NH2 | B_GLU_97  | OE2 | 3.066 |
| 5XRT | D_LYS_62  | NZ  | B_ASP_86  | OD1 | 3.579 |
| 5XRT | D_LYS_62  | NZ  | B_ASP_86  | OD2 | 3.058 |
| 5XRT | D_LYS_62  | NZ  | B_ASP_90  | OD1 | 3.574 |
| 5XRT | D_LYS_62  | NZ  | B_ASP_90  | OD2 | 2.797 |
| 5XRT | D_HIS_64  | NE2 | B_ASP_79  | OD2 | 3.856 |
| 5XRT | D_LYS_68  | NZ  | D_GLU_85  | OE1 | 3.229 |
| 5XRT | D_LYS_68  | NZ  | D_GLU_85  | OE2 | 3.297 |
| 5XRT | D_ARG_76  | NH1 | F_GLU_74  | OE1 | 3.338 |
| 5XRT | D_ARG_76  | NH1 | F_GLU_74  | OE2 | 2.885 |
| 5XRT | D_ARG_76  | NH2 | F_GLU_74  | OE1 | 2.652 |
| 5XRT | D_ARG_76  | NH2 | F_GLU_74  | OE2 | 3.749 |
| 5XRT | D_ARG_76  | NH2 | F_GLU_81  | OE1 | 2.506 |
| 5XRT | D_ARG_76  | NH2 | F_GLU_81  | OE2 | 3.677 |
| 5XRT | D_LYS_117 | NZ  | D_GLU_114 | OE2 | 2.877 |
| 5XRT | D_ARG_121 | NH1 | D_ASP_37  | OD2 | 3.944 |
| 5XRT | D_ARG_121 | NH2 | D_ASP_37  | OD1 | 3.995 |
| 5XRT | D_ARG_121 | NH2 | D_ASP_37  | OD2 | 3.020 |
| 5XRT | D_ARG_123 | NH1 | D_GLU_120 | OE1 | 2.708 |
| 5XRT | D_ARG_123 | NH1 | D_GLU_120 | OE2 | 3.830 |
| 5XRT | D_ARG_123 | NH2 | B_ASP_132 | OD2 | 3.975 |
| 5XRT | D_ARG_123 | NH2 | D_GLU_120 | OE1 | 3.166 |

|      |           |     |           |     |       |
|------|-----------|-----|-----------|-----|-------|
| 5XRT | D_ARG.124 | NH1 | B_ASP.132 | OD1 | 3.986 |
| 5XRT | D_ARG.124 | NH1 | B_ASP.132 | OD2 | 2.717 |
| 5XRT | D_ARG.127 | NH2 | B_GLU.131 | OE1 | 2.649 |
| 5XRT | D_HIS.159 | NE2 | D_ASP.160 | OD1 | 3.798 |
| 5XRT | D_HIS.159 | NE2 | D_ASP.160 | OD2 | 3.813 |
| 5XRT | D_ARG.163 | NH1 | B_GLU.131 | OE1 | 3.152 |
| 5XRT | D_ARG.163 | NH1 | B_GLU.131 | OE2 | 3.070 |
| 5XRT | D_ARG.163 | NH2 | B_GLU.131 | OE1 | 3.267 |
| 5XRT | D_ARG.163 | NH2 | B_GLU.131 | OE2 | 2.951 |
| 5XRT | D_ARG.170 | NH1 | D_GLU.128 | OE2 | 3.582 |
| 5XRT | D_ARG.170 | NH2 | D_GLU.131 | OE2 | 3.591 |
| 5XRT | D_ARG.170 | NH2 | F_GLU.128 | OE1 | 2.950 |
| 5XRT | D_ARG.170 | NH2 | F_GLU.128 | OE2 | 3.791 |
| 5XRT | E_LYS.27  | NZ  | F_GLU.97  | OE1 | 3.896 |
| 5XRT | E_LYS.27  | NZ  | F_GLU.97  | OE2 | 3.675 |
| 5XRT | E_ARG.50  | NH1 | E_ASP.275 | OD1 | 3.578 |
| 5XRT | E_HIS.56  | NE2 | E_GLU.280 | OE1 | 3.346 |
| 5XRT | E_HIS.75  | ND1 | E_ASP.73  | OD1 | 2.764 |
| 5XRT | E_ARG.90  | NH2 | E_ASP.60  | OD1 | 3.458 |
| 5XRT | E_ARG.90  | NH2 | E_ASP.60  | OD2 | 2.922 |
| 5XRT | E_ARG.109 | NH1 | F_GLU.67  | OE2 | 2.719 |
| 5XRT | E_ARG.109 | NH2 | E_GLU.89  | OE1 | 3.357 |
| 5XRT | E_ARG.109 | NH2 | F_GLU.67  | OE2 | 3.732 |
| 5XRT | E_ARG.141 | NH2 | E_ASP.77  | OD1 | 3.300 |
| 5XRT | E_ARG.141 | NH2 | E_ASP.77  | OD2 | 3.765 |
| 5XRT | E_LYS.176 | NZ  | E_GLU.123 | OE2 | 3.077 |
| 5XRT | E_LYS.238 | NZ  | D_GLU.72  | OE2 | 3.742 |
| 5XRT | E_LYS.238 | NZ  | E_ASP.175 | OD2 | 3.711 |
| 5XRT | E_ARG.255 | NH1 | E_ASP.133 | OD1 | 2.710 |
| 5XRT | E_ARG.269 | NH1 | F_GLU.67  | OE1 | 2.954 |
| 5XRT | E_ARG.269 | NH1 | F_GLU.67  | OE2 | 3.996 |
| 5XRT | E_LYS.292 | NZ  | E_ASP.291 | OD1 | 3.378 |
| 5XRT | E_ARG.307 | NH1 | D_ASP.90  | OD2 | 3.580 |
| 5XRT | E_ARG.307 | NH2 | D_ASP.90  | OD2 | 3.837 |
| 5XRT | E_LYS.310 | NZ  | F_ASP.90  | OD1 | 3.115 |
| 5XRT | E_LYS.326 | NZ  | F_GLU.11  | OE1 | 3.300 |
| 5XRT | F_LYS.51  | NZ  | F_GLU.103 | OE1 | 3.279 |
| 5XRT | F_ARG.54  | NH2 | D_GLU.97  | OE2 | 3.005 |
| 5XRT | F_LYS.62  | NZ  | D_ASP.86  | OD1 | 3.549 |
| 5XRT | F_LYS.62  | NZ  | D_ASP.86  | OD2 | 2.499 |
| 5XRT | F_LYS.62  | NZ  | D_ASP.90  | OD1 | 3.666 |
| 5XRT | F_LYS.62  | NZ  | D_ASP.90  | OD2 | 2.972 |
| 5XRT | F_HIS.64  | NE2 | D_ASP.79  | OD2 | 3.194 |
| 5XRT | F_LYS.68  | NZ  | F_GLU.85  | OE1 | 3.860 |
| 5XRT | F_LYS.68  | NZ  | F_GLU.85  | OE2 | 3.605 |
| 5XRT | F_ARG.76  | NH1 | B_GLU.74  | OE1 | 3.311 |
| 5XRT | F_ARG.76  | NH1 | B_GLU.74  | OE2 | 3.105 |
| 5XRT | F_ARG.76  | NH2 | B_GLU.74  | OE1 | 2.768 |
| 5XRT | F_ARG.76  | NH2 | B_GLU.74  | OE2 | 3.989 |
| 5XRT | F_ARG.76  | NH2 | B_GLU.81  | OE1 | 2.869 |
| 5XRT | F_ARG.76  | NH2 | B_GLU.81  | OE2 | 3.812 |
| 5XRT | F_LYS.117 | NZ  | F_GLU.114 | OE2 | 3.321 |
| 5XRT | F_ARG.121 | NH2 | F_ASP.37  | OD2 | 3.444 |
| 5XRT | F_ARG.123 | NH1 | F_GLU.120 | OE1 | 2.902 |
| 5XRT | F_ARG.123 | NH1 | F_GLU.120 | OE2 | 2.669 |
| 5XRT | F_ARG.123 | NH2 | F_GLU.120 | OE1 | 2.949 |
| 5XRT | F_ARG.124 | NH1 | D_ASP.132 | OD2 | 3.024 |
| 5XRT | F_ARG.127 | NH2 | D_GLU.131 | OE1 | 2.415 |

|      |           |     |           |     |       |
|------|-----------|-----|-----------|-----|-------|
| 5XRT | F_HIS_159 | ND1 | F_ASP_160 | OD1 | 3.993 |
| 5XRT | F_HIS_159 | NE2 | F_ASP_160 | OD1 | 2.911 |
| 5XRT | F_ARG_163 | NH1 | D_GLU_131 | OE1 | 3.516 |
| 5XRT | F_ARG_163 | NH2 | D_GLU_131 | OE1 | 3.296 |
| 5XRT | F_ARG_163 | NH2 | D_GLU_131 | OE2 | 2.611 |
| 5XRT | F_ARG_170 | NH1 | F_GLU_128 | OE2 | 3.390 |
| 5XRT | F_ARG_170 | NH2 | B_GLU_128 | OE1 | 3.475 |
| 5XRT | F_ARG_170 | NH2 | B_GLU_128 | OE2 | 3.657 |
| 5XRT | F_ARG_170 | NH2 | F_GLU_128 | OE2 | 3.860 |
| 5XRT | F_ARG_170 | NH2 | F_GLU_131 | OE2 | 3.345 |
| 5XRT | F_LYS_174 | NZ  | B_ASP_160 | OD1 | 3.902 |
| 5XRT | G_LYS_27  | NZ  | H_GLU_97  | OE2 | 3.228 |
| 5XRT | G_ARG_50  | NH1 | G_ASP_275 | OD1 | 3.487 |
| 5XRT | G_HIS_56  | NE2 | G_GLU_280 | OE1 | 3.893 |
| 5XRT | G_HIS_75  | ND1 | G_ASP_73  | OD1 | 2.567 |
| 5XRT | G_HIS_75  | ND1 | G_ASP_73  | OD2 | 3.814 |
| 5XRT | G_LYS_82  | NZ  | E_GLU_119 | OE1 | 3.805 |
| 5XRT | G_ARG_90  | NH2 | G_ASP_60  | OD1 | 3.337 |
| 5XRT | G_ARG_90  | NH2 | G_ASP_60  | OD2 | 3.035 |
| 5XRT | G_ARG_109 | NH1 | H_GLU_67  | OE1 | 3.826 |
| 5XRT | G_ARG_109 | NH1 | H_GLU_67  | OE2 | 2.804 |
| 5XRT | G_ARG_109 | NH2 | G_GLU_89  | OE1 | 2.924 |
| 5XRT | G_ARG_141 | NH2 | G_ASP_77  | OD1 | 3.443 |
| 5XRT | G_ARG_141 | NH2 | G_ASP_77  | OD2 | 3.249 |
| 5XRT | G_LYS_176 | NZ  | G_GLU_123 | OE2 | 3.413 |
| 5XRT | G_LYS_176 | NZ  | G_ASP_172 | OD2 | 3.797 |
| 5XRT | G_LYS_238 | NZ  | G_ASP_175 | OD1 | 3.036 |
| 5XRT | G_LYS_238 | NZ  | G_ASP_175 | OD2 | 3.186 |
| 5XRT | G_ARG_255 | NH1 | G_ASP_133 | OD2 | 3.599 |
| 5XRT | G_ARG_255 | NH2 | G_ASP_133 | OD2 | 3.335 |
| 5XRT | G_ARG_269 | NH1 | H_GLU_67  | OE1 | 3.306 |
| 5XRT | G_LYS_292 | NZ  | G_ASP_291 | OD1 | 3.807 |
| 5XRT | G_LYS_292 | NZ  | G_ASP_291 | OD2 | 3.964 |
| 5XRT | G_LYS_299 | NZ  | H_GLU_69  | OE2 | 3.918 |
| 5XRT | G_LYS_310 | NZ  | H_ASP_90  | OD1 | 2.955 |
| 5XRT | H_LYS_51  | NZ  | H_GLU_103 | OE1 | 3.120 |
| 5XRT | H_LYS_68  | NZ  | H_GLU_85  | OE1 | 3.706 |
| 5XRT | H_LYS_68  | NZ  | H_GLU_85  | OE2 | 3.564 |
| 5XRT | H_LYS_117 | NZ  | H_GLU_114 | OE2 | 3.149 |
| 5XRT | H_ARG_121 | NH2 | H_ASP_37  | OD2 | 3.626 |
| 5XRT | H_ARG_123 | NH1 | H_GLU_120 | OE1 | 3.412 |
| 5XRT | H_ARG_170 | NH2 | H_GLU_131 | OE2 | 3.622 |
| 5XWD | A_ARG_48  | NH1 | A_GLU_73  | OE2 | 3.630 |
| 5XWD | A_ARG_74  | NH1 | A_GLU_110 | OE1 | 2.554 |
| 5XWD | A_ARG_74  | NH1 | A_GLU_110 | OE2 | 3.566 |
| 5XWD | A_ARG_74  | NH2 | A_GLU_78  | OE2 | 2.523 |
| 5XWD | A_ARG_84  | NH2 | A_GLU_60  | OE1 | 3.684 |
| 5XWD | A_ARG_84  | NH2 | A_GLU_60  | OE2 | 3.617 |
| 5XWD | A_ARG_114 | NH1 | A_GLU_78  | OE1 | 3.452 |
| 5XWD | A_ARG_114 | NH2 | A_GLU_78  | OE1 | 2.694 |
| 5XWD | A_ARG_198 | NH1 | A_ASP_142 | OD2 | 3.491 |
| 5XWD | A_ARG_198 | NH2 | A_GLU_118 | OE2 | 3.197 |
| 5XWD | A_ARG_220 | NH1 | A_GLU_221 | OE1 | 3.463 |
| 5XWD | A_ARG_220 | NH1 | A_GLU_221 | OE2 | 2.447 |
| 5XWD | A_ARG_220 | NH2 | A_GLU_221 | OE2 | 3.674 |
| 5XWD | A_ARG_228 | NH1 | A_GLU_118 | OE2 | 3.743 |
| 5XWD | A_ARG_228 | NH2 | A_GLU_118 | OE2 | 3.666 |
| 5XWD | A_LYS_237 | NZ  | A_ASP_232 | OD2 | 2.616 |



|      |           |     |           |     |       |
|------|-----------|-----|-----------|-----|-------|
| 5XWD | A_LYS_260 | NZ  | A_ASP_232 | OD1 | 2.521 |
| 5XWD | A_LYS_260 | NZ  | A_ASP_232 | OD2 | 3.550 |
| 5XWD | A_LYS_260 | NZ  | A_GLU_233 | OE2 | 3.396 |
| 5XWD | A_LYS_301 | NZ  | A_GLU_296 | OE1 | 3.844 |
| 5XWD | A_LYS_303 | NZ  | A_GLU_296 | OE2 | 3.546 |
| 5XWD | A_LYS_333 | NZ  | A_GLU_367 | OE2 | 3.373 |
| 5XWD | A_ARG_353 | NH2 | D_ASP_96  | OD2 | 3.335 |
| 5XWD | A_LYS_372 | NZ  | A_GLU_397 | OE2 | 3.502 |
| 5XWD | A_ARG_390 | NH1 | A_ASP_369 | OD1 | 3.207 |
| 5XWD | A_HIS_394 | ND1 | A_ASP_369 | OD1 | 3.398 |
| 5XWD | A_HIS_394 | NE2 | A_GLU_397 | OE2 | 3.209 |
| 5XWD | A_ARG_403 | NH2 | A_GLU_376 | OE2 | 3.449 |
| 5XWD | A_LYS_407 | NZ  | A_ASP_434 | OD2 | 3.832 |
| 5XWD | A_HIS_409 | NE2 | H_ASP_108 | OD2 | 2.707 |
| 5XWD | A_ARG_427 | NH1 | A_ASP_498 | OD1 | 2.268 |
| 5XWD | A_ARG_427 | NH1 | A_ASP_498 | OD2 | 3.446 |
| 5XWD | A_ARG_427 | NH2 | A_ASP_392 | OD2 | 3.547 |
| 5XWD | A_LYS_443 | NZ  | D_ASP_51  | OD2 | 2.907 |
| 5XWD | A_LYS_455 | NZ  | A_GLU_489 | OE1 | 2.906 |
| 5XWD | A_LYS_463 | NZ  | A_ASP_436 | OD2 | 2.868 |
| 5XWD | A_LYS_465 | NZ  | D_ASP_53  | OD2 | 3.314 |
| 5XWD | A_ARG_497 | NH2 | A_GLU_510 | OE1 | 3.595 |
| 5XWD | A_ARG_507 | NH1 | A_GLU_524 | OE1 | 3.565 |
| 5XWD | A_ARG_507 | NH1 | A_GLU_524 | OE2 | 2.365 |
| 5XWD | A_ARG_550 | NH2 | A_GLU_527 | OE2 | 2.299 |
| 5XWD | A_HIS_560 | ND1 | A_GLU_537 | OE1 | 2.920 |
| 5XWD | A_HIS_560 | ND1 | A_GLU_537 | OE2 | 3.490 |
| 5XWD | A_HIS_566 | NE2 | A_ASP_553 | OD1 | 3.274 |
| 5XWD | A_HIS_566 | NE2 | A_ASP_553 | OD2 | 3.788 |
| 5XWD | A_LYS_585 | NZ  | A_ASP_563 | OD1 | 2.730 |
| 5XWD | A_LYS_585 | NZ  | A_ASP_563 | OD2 | 3.880 |
| 5XWD | H_ARG_40  | NH1 | H_ASP_91  | OD1 | 2.811 |
| 5XWD | H_ARG_40  | NH2 | H_GLU_48  | OE1 | 3.427 |
| 5XWD | H_ARG_40  | NH2 | H_GLU_48  | OE2 | 3.173 |
| 5XWD | H_ARG_40  | NH2 | H_ASP_91  | OD1 | 3.631 |
| 5XWD | H_ARG_68  | NH1 | H_ASP_91  | OD1 | 3.454 |
| 5XWD | H_ARG_68  | NH1 | H_ASP_91  | OD2 | 3.334 |
| 5XWD | H_ARG_68  | NH2 | H_ASP_91  | OD2 | 3.355 |
| 5XWD | H_ARG_99  | NH1 | H_ASP_108 | OD2 | 3.765 |
| 5XWD | D_ARG_54  | NH2 | D_GLU_60  | OE2 | 3.951 |
| 5XWD | D_ARG_61  | NH1 | D_GLU_79  | OE2 | 3.685 |
| 5XWD | D_ARG_61  | NH2 | D_ASP_82  | OD1 | 3.092 |
| 5XWD | D_ARG_61  | NH2 | D_ASP_82  | OD2 | 2.961 |
| 5YC5 | A_LYS_248 | NZ  | A_GLU_380 | OE1 | 3.797 |
| 5YC5 | A_LYS_248 | NZ  | A_GLU_380 | OE2 | 2.893 |
| 5YC5 | A_ARG_255 | NH2 | A_ASP_249 | OD2 | 2.780 |
| 5YC5 | A_HIS_268 | NE2 | A_GLU_294 | OE1 | 3.378 |
| 5YC5 | A_LYS_317 | NZ  | A_ASP_312 | OD1 | 3.804 |
| 5YC5 | A_LYS_320 | NZ  | A_GLU_333 | OE1 | 3.131 |
| 5YC5 | A_LYS_320 | NZ  | A_GLU_333 | OE2 | 3.746 |
| 5YC5 | A_LYS_322 | NZ  | A_GLU_333 | OE2 | 3.405 |
| 5YC5 | A_LYS_338 | NZ  | A_GLU_430 | OE1 | 3.617 |
| 5YC5 | A_LYS_338 | NZ  | A_GLU_430 | OE2 | 3.041 |
| 5YC5 | A_LYS_340 | NZ  | A_GLU_318 | OE2 | 3.537 |
| 5YC5 | A_ARG_344 | NH2 | A_ASP_401 | OD1 | 3.750 |
| 5YC5 | A_ARG_344 | NH2 | A_ASP_401 | OD2 | 3.122 |
| 5YC5 | A_LYS_409 | NZ  | B_ASP_399 | OD1 | 3.635 |
| 5YC5 | A_LYS_409 | NZ  | B_ASP_399 | OD2 | 2.875 |

|      |           |     |           |     |       |
|------|-----------|-----|-----------|-----|-------|
| 5YC5 | A_ARG_416 | NH1 | A_GLU_388 | OE1 | 3.188 |
| 5YC5 | A_ARG_416 | NH1 | A_GLU_388 | OE2 | 3.570 |
| 5YC5 | A_ARG_416 | NH2 | A_GLU_388 | OE2 | 2.991 |
| 5YC5 | A_LYS_439 | NZ  | B_ASP_356 | OD1 | 3.309 |
| 5YC5 | B_LYS_248 | NZ  | B_GLU_380 | OE1 | 3.889 |
| 5YC5 | B_LYS_248 | NZ  | B_GLU_380 | OE2 | 2.644 |
| 5YC5 | B_ARG_255 | NH2 | B_ASP_249 | OD1 | 3.838 |
| 5YC5 | B_HIS_268 | NE2 | B_GLU_294 | OE1 | 2.811 |
| 5YC5 | B_HIS_268 | NE2 | B_GLU_294 | OE2 | 3.075 |
| 5YC5 | B_HIS_285 | ND1 | B_GLU_283 | OE2 | 3.786 |
| 5YC5 | B_LYS_317 | NZ  | B_ASP_312 | OD1 | 3.231 |
| 5YC5 | B_LYS_320 | NZ  | B_GLU_333 | OE1 | 3.707 |
| 5YC5 | B_LYS_338 | NZ  | B_GLU_430 | OE1 | 3.390 |
| 5YC5 | B_LYS_338 | NZ  | B_GLU_430 | OE2 | 3.171 |
| 5YC5 | B_LYS_340 | NZ  | B_GLU_318 | OE2 | 3.467 |
| 5YC5 | B_ARG_344 | NH2 | B_ASP_401 | OD1 | 3.756 |
| 5YC5 | B_ARG_344 | NH2 | B_ASP_401 | OD2 | 2.965 |
| 5YC5 | B_LYS_409 | NZ  | A_ASP_399 | OD1 | 3.731 |
| 5YC5 | B_LYS_409 | NZ  | A_ASP_399 | OD2 | 2.920 |
| 5YC5 | B_ARG_416 | NH1 | B_GLU_388 | OE1 | 2.764 |
| 5YC5 | B_ARG_416 | NH1 | B_GLU_388 | OE2 | 3.921 |
| 5YC5 | B_ARG_416 | NH2 | B_GLU_388 | OE1 | 3.687 |
| 5YC5 | C_LYS_7   | NZ  | C_ASP_80  | OD1 | 3.624 |
| 5YC5 | C_LYS_7   | NZ  | C_ASP_80  | OD2 | 3.128 |
| 5YC5 | C_ARG_18  | NH1 | C_GLU_85  | OE1 | 3.674 |
| 5YC5 | C_HIS_87  | ND1 | C_GLU_166 | OE1 | 3.687 |
| 5YC5 | C_HIS_87  | ND1 | C_GLU_166 | OE2 | 2.703 |
| 5YC5 | C_HIS_87  | NE2 | C_GLU_85  | OE1 | 3.071 |
| 5YC5 | C_ARG_97  | NH2 | C_ASP_104 | OD2 | 3.100 |
| 5YC5 | C_HIS_107 | NE2 | C_ASP_138 | OD2 | 2.605 |
| 5YC5 | C_HIS_111 | NE2 | C_ASP_23  | OD1 | 2.779 |
| 5YC5 | C_HIS_111 | NE2 | C_ASP_23  | OD2 | 2.823 |
| 5YC5 | C_LYS_120 | NZ  | A_ASP_265 | OD2 | 2.563 |
| 5YC5 | C_ARG_130 | NH1 | C_ASP_148 | OD1 | 3.773 |
| 5YC5 | C_ARG_130 | NH2 | C_ASP_148 | OD1 | 3.062 |
| 5YC5 | C_LYS_131 | NZ  | A_GLU_269 | OE1 | 3.549 |
| 5YC5 | C_LYS_131 | NZ  | A_GLU_269 | OE2 | 2.940 |
| 5ZV3 | A_LYS_67  | NZ  | H_ASP_54  | OD1 | 3.656 |
| 5ZV3 | A_LYS_67  | NZ  | H_ASP_54  | OD2 | 2.636 |
| 5ZV3 | A_LYS_67  | NZ  | H_ASP_56  | OD2 | 3.213 |
| 5ZV3 | H_LYS_12  | NZ  | H_GLU_16  | OE1 | 3.523 |
| 5ZV3 | H_ARG_38  | NH2 | H_GLU_46  | OE1 | 3.368 |
| 5ZV3 | H_ARG_38  | NH2 | H_GLU_46  | OE2 | 2.729 |
| 5ZV3 | H_ARG_58  | NH1 | H_ASP_56  | OD1 | 3.153 |
| 5ZV3 | H_ARG_58  | NH1 | H_ASP_56  | OD2 | 2.840 |
| 5ZV3 | H_ARG_58  | NH2 | A_ASP_65  | OD1 | 3.187 |
| 5ZV3 | H_ARG_58  | NH2 | H_ASP_56  | OD2 | 3.078 |
| 5ZV3 | H_ARG_97  | NH1 | A_GLU_62  | OE2 | 3.412 |
| 5ZV3 | H_ARG_97  | NH2 | A_GLU_62  | OE1 | 3.676 |
| 5ZV3 | H_ARG_97  | NH2 | A_GLU_62  | OE2 | 3.134 |
| 5ZV3 | H_LYS_100 | NZ  | A_GLU_62  | OE1 | 2.715 |
| 5ZV3 | H_LYS_143 | NZ  | H_ASP_144 | OD1 | 3.086 |
| 5ZV3 | H_LYS_143 | NZ  | H_ASP_144 | OD2 | 2.913 |
| 5ZV3 | H_LYS_206 | NZ  | H_ASP_208 | OD1 | 2.838 |
| 5ZV3 | H_LYS_206 | NZ  | H_ASP_208 | OD2 | 3.804 |
| 5ZV3 | H_LYS_209 | NZ  | L_GLU_123 | OE1 | 3.860 |
| 5ZV3 | L_ARG_61  | NH2 | L_GLU_81  | OE1 | 3.640 |
| 5ZV3 | L_ARG_61  | NH2 | L_GLU_81  | OE2 | 2.887 |

|      |           |     |           |     |       |
|------|-----------|-----|-----------|-----|-------|
| 5ZV3 | L_ARG_61  | NH2 | L_ASP_82  | OD1 | 2.840 |
| 5ZV3 | L_ARG_61  | NH2 | L_ASP_82  | OD2 | 3.594 |
| 5ZV3 | L_LYS_149 | NZ  | L_GLU_195 | OE1 | 3.451 |
| 5ZV3 | L_LYS_149 | NZ  | L_GLU_195 | OE2 | 3.726 |
| 5ZV3 | L_LYS_169 | NZ  | L_ASP_167 | OD1 | 3.271 |
| 5ZV3 | L_LYS_169 | NZ  | L_ASP_167 | OD2 | 2.906 |
| 5ZV3 | L_LYS_169 | NZ  | L_ASP_170 | OD2 | 3.903 |
| 5ZV3 | L_LYS_183 | NZ  | L_GLU_187 | OE1 | 3.966 |
| 5ZV3 | L_LYS_183 | NZ  | L_GLU_187 | OE2 | 3.971 |
| 5ZV3 | L_LYS_188 | NZ  | L_ASP_185 | OD1 | 3.915 |
| 6A3V | A_ARG_211 | NH1 | A_GLU_132 | OE1 | 3.731 |
| 6A3V | A_HIS_217 | ND1 | A_ASP_104 | OD2 | 2.707 |
| 6A3V | A_HIS_217 | NE2 | A_GLU_219 | OE2 | 3.407 |
| 6A3V | A_ARG_223 | NH1 | A_ASP_104 | OD1 | 3.394 |
| 6A3V | B_ARG_41  | NH2 | B_ASP_38  | OD2 | 2.943 |
| 6A3V | B_ARG_75  | NH2 | B_ASP_87  | OD2 | 2.598 |
| 6A3V | B_HIS_93  | ND1 | B_ASP_105 | OD1 | 3.013 |
| 6A3V | B_HIS_93  | NE2 | B_GLU_103 | OE1 | 3.252 |
| 6A3V | B_ARG_130 | NH1 | B_ASP_105 | OD2 | 2.750 |
| 6A3V | B_ARG_130 | NH2 | B_ASP_105 | OD2 | 3.837 |
| 6A3V | C_ARG_223 | NH1 | C_ASP_104 | OD2 | 3.845 |
| 6A3V | C_ARG_223 | NH2 | C_ASP_104 | OD2 | 3.259 |
| 6A3V | C_HIS_224 | NE2 | C_GLU_156 | OE1 | 3.858 |
| 6A3V | D_ARG_41  | NH2 | D_ASP_38  | OD2 | 3.204 |
| 6A3V | D_ARG_73  | NH1 | D_ASP_87  | OD1 | 3.159 |
| 6A3V | D_ARG_73  | NH2 | D_ASP_87  | OD1 | 3.076 |
| 6A3V | D_LYS_76  | NZ  | D_GLU_85  | OE2 | 3.594 |
| 6A3V | D_HIS_93  | NE2 | D_GLU_103 | OE1 | 3.727 |
| 6A3V | D_LYS_129 | NZ  | D_ASP_105 | OD2 | 3.162 |
| 6A3V | D_ARG_130 | NH1 | D_ASP_105 | OD2 | 3.228 |
| 6A3V | D_LYS_152 | NZ  | D_ASP_119 | OD2 | 3.272 |
| 6A3V | E_ARG_193 | NH1 | C_ASP_184 | OD1 | 3.333 |
| 6A3V | E_ARG_211 | NH1 | E_GLU_132 | OE1 | 3.556 |
| 6A3V | E_HIS_217 | ND1 | E_ASP_104 | OD2 | 3.184 |
| 6A3V | E_HIS_217 | NE2 | E_GLU_219 | OE2 | 3.906 |
| 6A3V | E_HIS_224 | NE2 | E_GLU_156 | OE1 | 3.569 |
| 6A3V | F_ARG_75  | NH2 | F_ASP_87  | OD2 | 2.816 |
| 6A3V | F_HIS_93  | NE2 | F_GLU_103 | OE1 | 3.902 |
| 6A3V | F_LYS_118 | NZ  | F_GLU_111 | OE2 | 3.173 |
| 6A3V | F_ARG_130 | NH1 | F_ASP_105 | OD2 | 3.184 |
| 6A3V | F_ARG_130 | NH2 | F_ASP_105 | OD2 | 3.490 |
| 6A3V | F_LYS_152 | NZ  | F_ASP_119 | OD2 | 3.307 |
| 6A3V | G_ARG_211 | NH1 | G_GLU_132 | OE1 | 3.434 |
| 6A3V | G_HIS_217 | ND1 | G_ASP_104 | OD2 | 2.526 |
| 6A3V | G_ARG_223 | NH1 | G_ASP_104 | OD1 | 3.210 |
| 6A3V | G_ARG_223 | NH2 | G_ASP_104 | OD1 | 3.429 |
| 6A3V | G_ARG_239 | NH2 | G_GLU_243 | OE1 | 3.944 |
| 6A3V | H_ARG_75  | NH2 | H_ASP_87  | OD1 | 3.886 |
| 6A3V | H_ARG_75  | NH2 | H_ASP_87  | OD2 | 3.340 |
| 6A3V | H_HIS_93  | NE2 | H_ASP_105 | OD1 | 4.000 |
| 6A3V | I_ARG_193 | NH1 | K_ASP_184 | OD1 | 3.791 |
| 6A3V | I_ARG_211 | NH1 | I_GLU_132 | OE1 | 3.418 |
| 6A3V | I_ARG_211 | NH2 | I_GLU_132 | OE1 | 3.588 |
| 6A3V | I_HIS_217 | ND1 | I_ASP_104 | OD2 | 3.427 |
| 6A3V | I_ARG_223 | NH1 | I_ASP_104 | OD1 | 3.086 |
| 6A3V | I_ARG_223 | NH2 | I_ASP_104 | OD1 | 3.348 |
| 6A3V | I_ARG_223 | NH2 | I_ASP_104 | OD2 | 3.799 |
| 6A3V | I_HIS_224 | ND1 | I_GLU_156 | OE1 | 3.995 |

|      |           |     |           |     |       |
|------|-----------|-----|-----------|-----|-------|
| 6A3V | J_ARG_73  | NH1 | J_ASP_87  | OD2 | 3.305 |
| 6A3V | J_ARG_75  | NH1 | J_GLU_85  | OE1 | 2.939 |
| 6A3V | J_ARG_75  | NH1 | J_GLU_85  | OE2 | 3.776 |
| 6A3V | J_HIS_93  | NE2 | J_GLU_103 | OE1 | 3.602 |
| 6A3V | J_LYS_129 | NZ  | J_ASP_105 | OD2 | 3.649 |
| 6A3V | J_LYS_152 | NZ  | J_ASP_119 | OD2 | 3.759 |
| 6A3V | K_ARG_211 | NH1 | K_GLU_132 | OE1 | 3.841 |
| 6A3V | K_ARG_211 | NH2 | K_GLU_132 | OE1 | 3.828 |
| 6A3V | K_HIS_217 | ND1 | K_ASP_104 | OD2 | 3.054 |
| 6A3V | K_HIS_217 | NE2 | K_GLU_219 | OE2 | 3.795 |
| 6A3V | K_ARG_223 | NH1 | K_ASP_104 | OD1 | 3.294 |
| 6A3V | K_ARG_223 | NH2 | K_ASP_104 | OD1 | 2.971 |
| 6A3V | K_ARG_223 | NH2 | K_ASP_104 | OD2 | 3.952 |
| 6A3V | K_HIS_224 | NE2 | K_GLU_156 | OE1 | 2.347 |
| 6A3V | K_ARG_239 | NH1 | K_GLU_243 | OE1 | 3.687 |
| 6A3V | K_ARG_239 | NH2 | K_GLU_243 | OE1 | 3.100 |
| 6A3V | L_ARG_41  | NH2 | L_ASP_38  | OD2 | 2.939 |
| 6A3V | L_ARG_75  | NH2 | L_ASP_87  | OD1 | 3.204 |
| 6A3V | L_ARG_75  | NH2 | L_ASP_87  | OD2 | 2.988 |
| 6A3V | L_HIS_93  | ND1 | L_ASP_105 | OD1 | 3.521 |
| 6A3V | L_LYS_118 | NZ  | L_GLU_111 | OE1 | 3.470 |
| 6A3V | L_ARG_130 | NH1 | L_ASP_105 | OD2 | 2.982 |
| 6A3V | M_ARG_211 | NH1 | M_GLU_132 | OE1 | 3.246 |
| 6A3V | M_ARG_211 | NH2 | M_GLU_132 | OE1 | 3.377 |
| 6A3V | M_HIS_217 | ND1 | M_ASP_104 | OD2 | 3.857 |
| 6A3V | M_HIS_217 | NE2 | M_GLU_219 | OE2 | 3.798 |
| 6A3V | M_ARG_223 | NH2 | M_ASP_104 | OD1 | 3.607 |
| 6A3V | M_HIS_224 | NE2 | M_GLU_156 | OE1 | 2.966 |
| 6A3V | N_ARG_41  | NH1 | N_ASP_38  | OD2 | 3.719 |
| 6A3V | N_ARG_41  | NH2 | N_ASP_38  | OD2 | 3.742 |
| 6A3V | N_ARG_73  | NH1 | N_ASP_87  | OD2 | 3.095 |
| 6A3V | N_ARG_73  | NH2 | N_ASP_87  | OD2 | 3.858 |
| 6A3V | N_HIS_93  | NE2 | N_GLU_103 | OE1 | 3.849 |
| 6A3V | N_ARG_130 | NH1 | N_ASP_105 | OD2 | 3.648 |
| 6A3V | N_LYS_144 | NZ  | N_ASP_142 | OD2 | 3.634 |
| 6A3V | O_ARG_211 | NH1 | O_GLU_132 | OE1 | 3.603 |
| 6A3V | O_HIS_217 | NE2 | O_ASP_104 | OD2 | 3.976 |
| 6A3V | O_ARG_223 | NH2 | O_ASP_104 | OD1 | 3.679 |
| 6A3V | P_ARG_41  | NH1 | P_ASP_38  | OD2 | 3.282 |
| 6A3V | P_ARG_75  | NH2 | P_ASP_87  | OD2 | 3.792 |
| 6A3V | P_LYS_118 | NZ  | P_GLU_111 | OE1 | 3.659 |
| 6A3V | Q_ARG_211 | NH1 | Q_GLU_132 | OE1 | 3.475 |
| 6A3V | Q_HIS_217 | ND1 | Q_ASP_104 | OD2 | 2.963 |
| 6A3V | Q_ARG_223 | NH1 | Q_ASP_104 | OD1 | 2.976 |
| 6A3V | Q_HIS_224 | NE2 | Q_GLU_156 | OE1 | 3.942 |
| 6A3V | R_HIS_93  | NE2 | R_GLU_103 | OE1 | 3.672 |
| 6A3V | R_LYS_118 | NZ  | R_GLU_111 | OE1 | 3.192 |
| 6A3V | R_ARG_130 | NH1 | R_ASP_105 | OD2 | 3.502 |
| 6A3V | S_ARG_211 | NH2 | S_GLU_132 | OE1 | 3.631 |
| 6A3V | S_HIS_217 | ND1 | S_ASP_104 | OD2 | 2.703 |
| 6A3V | S_HIS_217 | NE2 | S_GLU_219 | OE2 | 3.257 |
| 6A3V | S_ARG_223 | NH1 | S_ASP_104 | OD1 | 3.253 |
| 6A3V | S_HIS_224 | NE2 | S_GLU_156 | OE1 | 3.213 |
| 6A3V | T_ARG_73  | NH1 | T_ASP_87  | OD2 | 2.770 |
| 6A3V | T_ARG_73  | NH2 | T_ASP_87  | OD2 | 3.434 |
| 6A3V | T_ARG_75  | NH2 | T_ASP_87  | OD2 | 3.502 |
| 6A3V | T_ARG_130 | NH1 | T_ASP_105 | OD2 | 3.621 |
| 6A3V | T_LYS_152 | NZ  | T_ASP_119 | OD2 | 3.864 |

|      |           |     |           |     |       |
|------|-----------|-----|-----------|-----|-------|
| 6A3V | U_ARG_193 | NH1 | W_ASP_184 | OD1 | 2.218 |
| 6A3V | U_ARG_193 | NH1 | W_ASP_184 | OD2 | 3.282 |
| 6A3V | U_ARG_193 | NH2 | W_ASP_184 | OD1 | 3.966 |
| 6A3V | U_ARG_193 | NH2 | W_ASP_184 | OD2 | 3.892 |
| 6A3V | U_HIS_217 | ND1 | U_ASP_104 | OD2 | 2.618 |
| 6A3V | U_HIS_217 | NE2 | U_GLU_219 | OE2 | 3.783 |
| 6A3V | U_ARG_223 | NH1 | U_ASP_104 | OD1 | 2.826 |
| 6A3V | U_ARG_223 | NH2 | U_ASP_104 | OD1 | 3.610 |
| 6A3V | U_ARG_223 | NH2 | U_ASP_104 | OD2 | 3.971 |
| 6A3V | U_ARG_239 | NH2 | U_GLU_243 | OE1 | 3.949 |
| 6A3V | V_ARG_41  | NH1 | V_ASP_38  | OD2 | 3.081 |
| 6A3V | V_ARG_41  | NH2 | V_ASP_38  | OD2 | 3.046 |
| 6A3V | V_ARG_73  | NH2 | V_ASP_87  | OD2 | 3.990 |
| 6A3V | V_ARG_75  | NH1 | V_GLU_85  | OE1 | 3.013 |
| 6A3V | V_LYS_152 | NZ  | V_ASP_119 | OD2 | 3.972 |
| 6A3V | W_ARG_211 | NH1 | W_GLU_132 | OE1 | 3.268 |
| 6A3V | W_ARG_211 | NH2 | W_GLU_132 | OE1 | 3.360 |
| 6A3V | W_HIS_217 | ND1 | W_ASP_104 | OD2 | 3.170 |
| 6A3V | W_ARG_223 | NH1 | W_ASP_104 | OD1 | 2.419 |
| 6A3V | W_ARG_223 | NH2 | W_ASP_104 | OD1 | 3.222 |
| 6A3V | W_ARG_223 | NH2 | W_ASP_104 | OD2 | 3.772 |
| 6A3V | W_HIS_224 | NE2 | W_GLU_156 | OE1 | 3.235 |
| 6A3V | W_ARG_239 | NH1 | W_GLU_243 | OE1 | 3.294 |
| 6A3V | W_ARG_239 | NH2 | W_GLU_243 | OE1 | 3.255 |
| 6A3V | X_ARG_41  | NH1 | X_ASP_38  | OD2 | 3.260 |
| 6A3V | X_ARG_75  | NH2 | X_ASP_87  | OD1 | 3.736 |
| 6A3V | X_ARG_75  | NH2 | X_ASP_87  | OD2 | 2.379 |
| 6A3V | X_HIS_93  | NE2 | X_GLU_103 | OE2 | 3.466 |
| 6A3V | X_LYS_152 | NZ  | X_ASP_119 | OD2 | 3.649 |
| 6A3W | A_LYS_12  | NZ  | A_GLU_16  | OE1 | 3.967 |
| 6A3W | A_ARG_38  | NH2 | A_GLU_46  | OE1 | 3.186 |
| 6A3W | A_ARG_38  | NH2 | A_GLU_46  | OE2 | 3.290 |
| 6A3W | A_ARG_98  | NH1 | A_ASP_104 | OD1 | 3.876 |
| 6A3W | A_ARG_98  | NH1 | A_ASP_104 | OD2 | 2.660 |
| 6A3W | B_ARG_61  | NH1 | B_ASP_82  | OD1 | 2.815 |
| 6A3W | B_ARG_61  | NH1 | B_ASP_82  | OD2 | 3.460 |
| 6A3W | C_ARG_73  | NH1 | C_ASP_87  | OD1 | 3.716 |
| 6A3W | C_ARG_73  | NH1 | C_ASP_87  | OD2 | 2.737 |
| 6A3W | C_ARG_75  | NH1 | C_ASP_87  | OD2 | 3.237 |
| 6A3W | C_LYS_76  | NZ  | C_GLU_85  | OE2 | 3.299 |
| 6A3W | C_HIS_93  | ND1 | C_ASP_105 | OD1 | 2.579 |
| 6A3W | C_HIS_93  | NE2 | C_GLU_103 | OE1 | 2.951 |
| 6A3W | C_LYS_107 | NZ  | E_ASP_30  | OD2 | 3.465 |
| 6A3W | C_LYS_114 | NZ  | B_ASP_51  | OD2 | 2.835 |
| 6A3W | C_ARG_134 | NH1 | C_ASP_127 | OD1 | 3.596 |
| 6A3W | C_ARG_134 | NH2 | A_ASP_55  | OD2 | 3.122 |
| 6A3W | C_ARG_134 | NH2 | C_ASP_127 | OD2 | 3.828 |
| 6A3W | C_LYS_152 | NZ  | C_ASP_119 | OD2 | 3.915 |
| 6A3W | D_ARG_38  | NH2 | D_GLU_46  | OE1 | 3.287 |
| 6A3W | D_ARG_38  | NH2 | D_GLU_46  | OE2 | 3.072 |
| 6A3W | D_LYS_43  | NZ  | K_ASP_26  | OD1 | 2.407 |
| 6A3W | D_LYS_43  | NZ  | K_ASP_26  | OD2 | 3.696 |
| 6A3W | D_ARG_98  | NH1 | D_ASP_104 | OD1 | 3.875 |
| 6A3W | D_ARG_98  | NH1 | D_ASP_104 | OD2 | 2.630 |
| 6A3W | E_ARG_61  | NH1 | E_ASP_82  | OD1 | 2.951 |
| 6A3W | E_ARG_61  | NH1 | E_ASP_82  | OD2 | 3.557 |
| 6A3W | F_ARG_73  | NH1 | F_ASP_87  | OD1 | 3.885 |
| 6A3W | F_ARG_75  | NH1 | F_GLU_85  | OE2 | 2.970 |

|      |           |     |           |     |       |
|------|-----------|-----|-----------|-----|-------|
| 6A3W | F_ARG_75  | NH2 | F_GLU_85  | OE1 | 3.905 |
| 6A3W | F_ARG_75  | NH2 | F_GLU_85  | OE2 | 2.751 |
| 6A3W | F_LYS_76  | NZ  | F_GLU_85  | OE2 | 3.766 |
| 6A3W | F_HIS_93  | ND1 | F_ASP_105 | OD1 | 2.524 |
| 6A3W | F_HIS_93  | NE2 | F_GLU_103 | OE1 | 2.635 |
| 6A3W | F_LYS_114 | NZ  | E_ASP_51  | OD2 | 2.834 |
| 6A3W | F_ARG_134 | NH1 | F_ASP_127 | OD1 | 3.399 |
| 6A3W | F_ARG_134 | NH1 | F_ASP_127 | OD2 | 3.721 |
| 6A3W | F_ARG_134 | NH2 | D_ASP_55  | OD1 | 3.962 |
| 6A3W | F_ARG_134 | NH2 | D_ASP_55  | OD2 | 2.895 |
| 6A3W | F_LYS_152 | NZ  | F_ASP_119 | OD2 | 3.783 |
| 6A3W | G_ARG_38  | NH2 | G_GLU_46  | OE1 | 3.389 |
| 6A3W | G_ARG_38  | NH2 | G_GLU_46  | OE2 | 3.208 |
| 6A3W | G_ARG_98  | NH1 | G_ASP_104 | OD1 | 3.869 |
| 6A3W | G_ARG_98  | NH1 | G_ASP_104 | OD2 | 2.668 |
| 6A3W | H_ARG_61  | NH1 | H_ASP_82  | OD1 | 2.906 |
| 6A3W | H_ARG_61  | NH1 | H_ASP_82  | OD2 | 3.552 |
| 6A3W | L_ARG_73  | NH1 | L_ASP_87  | OD1 | 2.942 |
| 6A3W | L_ARG_73  | NH1 | L_ASP_87  | OD2 | 3.979 |
| 6A3W | L_ARG_75  | NH1 | L_GLU_85  | OE1 | 2.824 |
| 6A3W | L_ARG_75  | NH2 | L_GLU_85  | OE1 | 2.900 |
| 6A3W | L_HIS_93  | ND1 | L_ASP_105 | OD1 | 2.434 |
| 6A3W | L_HIS_93  | NE2 | L_GLU_103 | OE1 | 3.040 |
| 6A3W | L_LYS_114 | NZ  | H_ASP_51  | OD2 | 2.757 |
| 6A3W | L_LYS_115 | NZ  | L_ASP_119 | OD1 | 3.708 |
| 6A3W | L_LYS_115 | NZ  | L_ASP_119 | OD2 | 3.946 |
| 6A3W | L_ARG_134 | NH1 | L_ASP_127 | OD1 | 2.960 |
| 6A3W | L_ARG_134 | NH1 | L_ASP_127 | OD2 | 3.787 |
| 6A3W | L_ARG_134 | NH2 | G_ASP_55  | OD1 | 3.740 |
| 6A3W | L_ARG_134 | NH2 | G_ASP_55  | OD2 | 2.630 |
| 6A3W | L_ARG_154 | NH1 | E_ASP_26  | OD1 | 2.965 |
| 6A3W | L_ARG_154 | NH2 | E_ASP_26  | OD1 | 3.042 |
| 6A3W | J_ARG_38  | NH2 | J_GLU_46  | OE1 | 3.258 |
| 6A3W | J_ARG_38  | NH2 | J_GLU_46  | OE2 | 2.995 |
| 6A3W | J_ARG_98  | NH1 | J_ASP_104 | OD1 | 3.897 |
| 6A3W | J_ARG_98  | NH1 | J_ASP_104 | OD2 | 2.584 |
| 6A3W | K_ARG_61  | NH1 | K_ASP_82  | OD1 | 2.841 |
| 6A3W | K_ARG_61  | NH1 | K_ASP_82  | OD2 | 3.357 |
| 6A3W | K_LYS_105 | NZ  | K_GLU_83  | OE2 | 3.649 |
| 6A3W | L_ARG_73  | NH1 | L_ASP_87  | OD1 | 2.207 |
| 6A3W | L_ARG_73  | NH1 | L_ASP_87  | OD2 | 3.450 |
| 6A3W | L_ARG_75  | NH1 | L_GLU_85  | OE1 | 2.429 |
| 6A3W | L_ARG_75  | NH2 | L_GLU_85  | OE1 | 3.919 |
| 6A3W | L_HIS_93  | ND1 | L_ASP_105 | OD1 | 2.405 |
| 6A3W | L_HIS_93  | NE2 | L_GLU_103 | OE1 | 2.765 |
| 6A3W | L_LYS_107 | NZ  | H_ASP_30  | OD1 | 3.282 |
| 6A3W | L_LYS_107 | NZ  | H_ASP_30  | OD2 | 2.525 |
| 6A3W | L_LYS_114 | NZ  | K_ASP_51  | OD2 | 2.893 |
| 6A3W | L_ARG_134 | NH1 | L_ASP_127 | OD1 | 3.199 |
| 6A3W | L_ARG_134 | NH1 | L_ASP_127 | OD2 | 3.994 |
| 6A3W | L_ARG_134 | NH2 | J_ASP_55  | OD1 | 3.749 |
| 6A3W | L_ARG_134 | NH2 | J_ASP_55  | OD2 | 2.496 |
| 6A3W | L_LYS_152 | NZ  | L_GLU_153 | OE1 | 2.608 |
| 6A76 | L_ARG_61  | NH1 | L_ASP_82  | OD1 | 3.683 |
| 6A76 | L_ARG_61  | NH1 | L_ASP_82  | OD2 | 2.680 |
| 6A76 | L_ARG_61  | NH2 | L_ASP_82  | OD1 | 3.015 |
| 6A76 | L_ARG_61  | NH2 | L_ASP_82  | OD2 | 3.572 |
| 6A76 | L_LYS_103 | NZ  | L_ASP_165 | OD1 | 3.109 |

|      |           |     |           |     |       |
|------|-----------|-----|-----------|-----|-------|
| 6A76 | L_LYS_142 | NZ  | L_GLU_105 | OE2 | 3.334 |
| 6A76 | L_LYS_149 | NZ  | L_GLU_195 | OE1 | 3.105 |
| 6A76 | L_LYS_149 | NZ  | L_GLU_195 | OE2 | 3.126 |
| 6A76 | L_ARG_155 | NH1 | L_GLU_185 | OE1 | 3.296 |
| 6A76 | L_ARG_155 | NH1 | L_GLU_185 | OE2 | 3.384 |
| 6A76 | L_LYS_183 | NZ  | L_GLU_187 | OE1 | 3.631 |
| 6A76 | L_LYS_183 | NZ  | L_GLU_187 | OE2 | 3.456 |
| 6A76 | L_ARG_188 | NH1 | L_ASP_184 | OD1 | 3.485 |
| 6A76 | L_HIS_189 | ND1 | L_ASP_151 | OD2 | 3.115 |
| 6A76 | L_HIS_189 | NE2 | L_GLU_185 | OE2 | 3.849 |
| 6A76 | L_LYS_199 | NZ  | L_ASP_110 | OD1 | 3.384 |
| 6A76 | H_ARG_36  | NH1 | H_GLU_44  | OE1 | 2.863 |
| 6A76 | H_ARG_36  | NH1 | H_ASP_88  | OD2 | 3.886 |
| 6A76 | H_ARG_36  | NH2 | H_ASP_88  | OD2 | 2.856 |
| 6A76 | H_ARG_42  | NH1 | H_ASP_40  | OD1 | 3.023 |
| 6A76 | H_ARG_65  | NH1 | H_ASP_88  | OD1 | 2.744 |
| 6A76 | H_ARG_65  | NH1 | H_ASP_88  | OD2 | 3.775 |
| 6A76 | H_ARG_65  | NH2 | H_ASP_88  | OD1 | 3.457 |
| 6A76 | H_ARG_65  | NH2 | H_ASP_88  | OD2 | 2.986 |
| 6A76 | H_LYS_74  | NZ  | H_ASP_71  | OD2 | 3.113 |
| 6A76 | H_ARG_96  | NH1 | H_ASP_108 | OD1 | 3.592 |
| 6A76 | H_ARG_96  | NH1 | H_ASP_108 | OD2 | 2.860 |
| 6A76 | H_LYS_213 | NZ  | L_GLU_123 | OE1 | 3.460 |
| 6A77 | A_LYS_44  | NZ  | A_ASP_45  | OD2 | 3.622 |
| 6A77 | A_ARG_55  | NH1 | A_ASP_73  | OD1 | 3.618 |
| 6A77 | A_ARG_55  | NH1 | A_ASP_73  | OD2 | 2.774 |
| 6A77 | A_ARG_55  | NH2 | A_ASP_53  | OD2 | 3.164 |
| 6A77 | A_ARG_55  | NH2 | A_ASP_73  | OD1 | 2.879 |
| 6A77 | A_ARG_55  | NH2 | A_ASP_73  | OD2 | 3.609 |
| 6A77 | A_ARG_67  | NH1 | H_GLU_97  | OE1 | 2.680 |
| 6A77 | A_ARG_67  | NH2 | H_GLU_97  | OE1 | 3.115 |
| 6A77 | A_ARG_67  | NH2 | H_GLU_97  | OE2 | 3.032 |
| 6A77 | L_LYS_39  | NZ  | L_ASP_81  | OD1 | 2.939 |
| 6A77 | L_LYS_39  | NZ  | L_ASP_81  | OD2 | 3.685 |
| 6A77 | L_LYS_58  | NZ  | L_ASP_57  | OD2 | 3.665 |
| 6A77 | L_ARG_61  | NH1 | L_ASP_82  | OD1 | 3.988 |
| 6A77 | L_ARG_61  | NH1 | L_ASP_82  | OD2 | 2.871 |
| 6A77 | L_ARG_61  | NH2 | L_ASP_82  | OD1 | 3.242 |
| 6A77 | L_ARG_61  | NH2 | L_ASP_82  | OD2 | 3.518 |
| 6A77 | L_LYS_103 | NZ  | L_ASP_165 | OD1 | 2.895 |
| 6A77 | L_LYS_149 | NZ  | L_GLU_195 | OE2 | 3.578 |
| 6A77 | L_ARG_155 | NH1 | L_GLU_185 | OE1 | 3.397 |
| 6A77 | L_ARG_155 | NH1 | L_GLU_185 | OE2 | 3.437 |
| 6A77 | L_HIS_189 | ND1 | L_ASP_151 | OD2 | 2.718 |
| 6A77 | L_LYS_199 | NZ  | L_ASP_110 | OD1 | 3.833 |
| 6A77 | H_ARG_36  | NH1 | H_GLU_44  | OE1 | 2.723 |
| 6A77 | H_ARG_36  | NH1 | H_ASP_88  | OD2 | 3.780 |
| 6A77 | H_ARG_36  | NH2 | H_ASP_88  | OD2 | 2.740 |
| 6A77 | H_ARG_42  | NH1 | H_ASP_40  | OD1 | 3.854 |
| 6A77 | H_ARG_65  | NH1 | H_ASP_88  | OD1 | 2.999 |
| 6A77 | H_ARG_65  | NH1 | H_ASP_88  | OD2 | 3.898 |
| 6A77 | H_ARG_65  | NH2 | H_ASP_88  | OD1 | 3.615 |
| 6A77 | H_ARG_65  | NH2 | H_ASP_88  | OD2 | 3.124 |
| 6A77 | H_LYS_74  | NZ  | H_ASP_71  | OD2 | 3.837 |
| 6A77 | H_ARG_96  | NH1 | H_ASP_108 | OD1 | 3.281 |
| 6A77 | H_ARG_96  | NH1 | H_ASP_108 | OD2 | 2.697 |
| 6A78 | A_LYS_44  | NZ  | A_ASP_45  | OD2 | 2.854 |
| 6A78 | A_ARG_55  | NH1 | A_ASP_73  | OD1 | 3.832 |

|      |           |     |           |     |       |
|------|-----------|-----|-----------|-----|-------|
| 6A78 | A_ARG.55  | NH1 | A_ASP.73  | OD2 | 2.833 |
| 6A78 | A_ARG.55  | NH2 | A_ASP.73  | OD1 | 2.906 |
| 6A78 | A_ARG.55  | NH2 | A_ASP.73  | OD2 | 3.320 |
| 6A78 | A_LYS.57  | NZ  | H_GLU.97  | OE1 | 3.795 |
| 6A78 | L_ARG.61  | NH1 | L_ASP.82  | OD1 | 3.686 |
| 6A78 | L_ARG.61  | NH1 | L_ASP.82  | OD2 | 2.718 |
| 6A78 | L_ARG.61  | NH2 | L_ASP.82  | OD1 | 2.728 |
| 6A78 | L_ARG.61  | NH2 | L_ASP.82  | OD2 | 3.282 |
| 6A78 | L_HIS.79  | NE2 | L_ASP.81  | OD1 | 3.422 |
| 6A78 | L_HIS.79  | NE2 | L_ASP.81  | OD2 | 3.962 |
| 6A78 | L_LYS.103 | NZ  | L_GLU.105 | OE1 | 3.231 |
| 6A78 | H_ARG.36  | NH1 | H_GLU.44  | OE1 | 2.888 |
| 6A78 | H_ARG.36  | NH1 | H_ASP.88  | OD2 | 3.771 |
| 6A78 | H_ARG.36  | NH2 | H_ASP.88  | OD2 | 2.790 |
| 6A78 | H_ARG.42  | NH1 | H_ASP.40  | OD1 | 2.849 |
| 6A78 | H_ARG.42  | NH2 | H_ASP.40  | OD1 | 3.906 |
| 6A78 | H_ARG.65  | NH1 | H_ASP.88  | OD1 | 2.758 |
| 6A78 | H_ARG.65  | NH1 | H_ASP.88  | OD2 | 3.837 |
| 6A78 | H_ARG.65  | NH2 | H_ASP.88  | OD1 | 3.387 |
| 6A78 | H_ARG.65  | NH2 | H_ASP.88  | OD2 | 2.998 |
| 6A78 | H_LYS.85  | NZ  | H_GLU.87  | OE1 | 2.690 |
| 6A78 | H_LYS.85  | NZ  | H_GLU.87  | OE2 | 2.968 |
| 6A78 | H_ARG.96  | NH1 | H_ASP.108 | OD1 | 3.531 |
| 6A78 | H_ARG.96  | NH1 | H_ASP.108 | OD2 | 2.835 |
| 6A78 | B_LYS.44  | NZ  | B_ASP.45  | OD2 | 2.857 |
| 6A78 | B_ARG.55  | NH1 | B_ASP.73  | OD1 | 3.872 |
| 6A78 | B_ARG.55  | NH1 | B_ASP.73  | OD2 | 2.818 |
| 6A78 | B_ARG.55  | NH2 | B_ASP.73  | OD1 | 2.889 |
| 6A78 | B_ARG.55  | NH2 | B_ASP.73  | OD2 | 3.230 |
| 6A78 | M_ARG.61  | NH1 | M_ASP.82  | OD1 | 3.726 |
| 6A78 | M_ARG.61  | NH1 | M_ASP.82  | OD2 | 2.765 |
| 6A78 | M_ARG.61  | NH2 | M_ASP.82  | OD1 | 2.709 |
| 6A78 | M_ARG.61  | NH2 | M_ASP.82  | OD2 | 3.204 |
| 6A78 | M_HIS.79  | NE2 | M_ASP.81  | OD1 | 3.457 |
| 6A78 | M_LYS.103 | NZ  | M_GLU.105 | OE1 | 2.516 |
| 6A78 | L_ARG.36  | NH1 | L_GLU.44  | OE1 | 2.879 |
| 6A78 | L_ARG.36  | NH1 | L_ASP.88  | OD2 | 3.824 |
| 6A78 | L_ARG.36  | NH2 | L_ASP.88  | OD2 | 2.775 |
| 6A78 | L_ARG.42  | NH1 | L_ASP.40  | OD1 | 3.724 |
| 6A78 | L_LYS.63  | NZ  | B_ASP.23  | OD1 | 3.699 |
| 6A78 | L_ARG.65  | NH1 | L_ASP.88  | OD1 | 2.785 |
| 6A78 | L_ARG.65  | NH1 | L_ASP.88  | OD2 | 3.893 |
| 6A78 | L_ARG.65  | NH2 | L_ASP.88  | OD1 | 3.383 |
| 6A78 | L_ARG.65  | NH2 | L_ASP.88  | OD2 | 3.054 |
| 6A78 | L_LYS.85  | NZ  | L_GLU.87  | OE1 | 3.246 |
| 6A78 | L_LYS.85  | NZ  | L_GLU.87  | OE2 | 3.483 |
| 6A78 | L_ARG.96  | NH1 | L_ASP.108 | OD1 | 3.557 |
| 6A78 | L_ARG.96  | NH1 | L_ASP.108 | OD2 | 2.895 |
| 6A79 | A_LYS.44  | NZ  | A_ASP.45  | OD2 | 2.831 |
| 6A79 | A_ARG.55  | NH1 | A_ASP.73  | OD1 | 3.891 |
| 6A79 | A_ARG.55  | NH1 | A_ASP.73  | OD2 | 2.680 |
| 6A79 | A_ARG.55  | NH2 | A_ASP.73  | OD1 | 3.082 |
| 6A79 | A_ARG.55  | NH2 | A_ASP.73  | OD2 | 3.256 |
| 6A79 | L_ARG.61  | NH1 | L_ASP.82  | OD1 | 3.024 |
| 6A79 | L_ARG.61  | NH1 | L_ASP.82  | OD2 | 2.736 |
| 6A79 | L_ARG.61  | NH2 | L_ASP.82  | OD1 | 2.726 |
| 6A79 | L_ARG.61  | NH2 | L_ASP.82  | OD2 | 3.768 |
| 6A79 | L_HIS.79  | NE2 | L_ASP.81  | OD1 | 3.224 |



|      |           |     |           |     |       |
|------|-----------|-----|-----------|-----|-------|
| 6A79 | L_HIS_79  | NE2 | L_ASP_81  | OD2 | 3.424 |
| 6A79 | L_LYS_103 | NZ  | L_GLU_105 | OE1 | 2.597 |
| 6A79 | H_ARG_36  | NH1 | H_GLU_44  | OE1 | 3.267 |
| 6A79 | H_ARG_36  | NH1 | H_GLU_44  | OE2 | 3.458 |
| 6A79 | H_ARG_36  | NH1 | H_ASP_88  | OD1 | 3.347 |
| 6A79 | H_ARG_36  | NH2 | H_ASP_88  | OD1 | 2.770 |
| 6A79 | H_ARG_42  | NH1 | H_ASP_40  | OD2 | 3.039 |
| 6A79 | H_ARG_42  | NH2 | H_ASP_40  | OD2 | 3.868 |
| 6A79 | H_ARG_65  | NH1 | H_ASP_88  | OD2 | 3.054 |
| 6A79 | H_ARG_65  | NH2 | H_ASP_88  | OD1 | 3.293 |
| 6A79 | H_ARG_65  | NH2 | H_ASP_88  | OD2 | 3.419 |
| 6A79 | H_LYS_85  | NZ  | H_GLU_87  | OE1 | 3.696 |
| 6A79 | H_LYS_85  | NZ  | H_GLU_87  | OE2 | 2.564 |
| 6A79 | H_ARG_96  | NH1 | H_ASP_108 | OD1 | 3.338 |
| 6A79 | H_ARG_96  | NH1 | H_ASP_108 | OD2 | 2.871 |
| 6A79 | B_LYS_44  | NZ  | B_ASP_45  | OD2 | 2.762 |
| 6A79 | B_ARG_55  | NH1 | B_ASP_73  | OD1 | 3.944 |
| 6A79 | B_ARG_55  | NH1 | B_ASP_73  | OD2 | 2.685 |
| 6A79 | B_ARG_55  | NH2 | B_ASP_73  | OD1 | 3.213 |
| 6A79 | B_ARG_55  | NH2 | B_ASP_73  | OD2 | 3.130 |
| 6A79 | B_ARG_67  | NH1 | L_GLU_97  | OE2 | 3.582 |
| 6A79 | M_ARG_61  | NH1 | M_ASP_82  | OD1 | 3.110 |
| 6A79 | M_ARG_61  | NH1 | M_ASP_82  | OD2 | 2.870 |
| 6A79 | M_ARG_61  | NH2 | M_ASP_82  | OD1 | 2.772 |
| 6A79 | M_ARG_61  | NH2 | M_ASP_82  | OD2 | 3.856 |
| 6A79 | M_HIS_79  | NE2 | M_ASP_81  | OD1 | 3.808 |
| 6A79 | M_HIS_79  | NE2 | M_ASP_81  | OD2 | 3.655 |
| 6A79 | M_LYS_103 | NZ  | M_GLU_105 | OE1 | 2.465 |
| 6A79 | L_ARG_36  | NH1 | L_GLU_44  | OE1 | 3.040 |
| 6A79 | L_ARG_36  | NH1 | L_GLU_44  | OE2 | 3.647 |
| 6A79 | L_ARG_36  | NH1 | L_ASP_88  | OD1 | 3.777 |
| 6A79 | L_ARG_36  | NH2 | L_ASP_88  | OD1 | 2.864 |
| 6A79 | L_ARG_42  | NH1 | L_ASP_40  | OD2 | 3.303 |
| 6A79 | L_ARG_42  | NH2 | L_ASP_40  | OD2 | 3.939 |
| 6A79 | L_ARG_65  | NH1 | L_ASP_88  | OD2 | 2.883 |
| 6A79 | L_ARG_65  | NH2 | L_ASP_88  | OD1 | 3.193 |
| 6A79 | L_ARG_65  | NH2 | L_ASP_88  | OD2 | 3.477 |
| 6A79 | L_LYS_85  | NZ  | L_GLU_87  | OE1 | 3.709 |
| 6A79 | L_LYS_85  | NZ  | L_GLU_87  | OE2 | 2.725 |
| 6A79 | L_ARG_96  | NH1 | L_ASP_108 | OD1 | 3.351 |
| 6A79 | L_ARG_96  | NH1 | L_ASP_108 | OD2 | 2.910 |
| 6AL5 | A_LYS_155 | NZ  | H_GLU_74  | OE1 | 3.542 |
| 6AL5 | A_ARG_163 | NH1 | A_ASP_162 | OD1 | 3.779 |
| 6AL5 | A_ARG_163 | NH1 | A_ASP_162 | OD2 | 2.756 |
| 6AL5 | A_ARG_163 | NH2 | A_ASP_162 | OD2 | 3.912 |
| 6AL5 | A_HIS_218 | NE2 | A_GLU_120 | OE1 | 3.847 |
| 6AL5 | A_HIS_218 | NE2 | A_GLU_120 | OE2 | 3.910 |
| 6AL5 | A_LYS_220 | NZ  | H_ASP_55  | OD1 | 3.389 |
| 6AL5 | A_LYS_220 | NZ  | H_ASP_55  | OD2 | 2.832 |
| 6AL5 | A_LYS_220 | NZ  | H_ASP_57  | OD2 | 3.301 |
| 6AL5 | A_ARG_237 | NH1 | A_ASP_255 | OD1 | 3.153 |
| 6AL5 | A_ARG_237 | NH1 | A_ASP_255 | OD2 | 2.798 |
| 6AL5 | A_ARG_277 | NH2 | A_ASP_32  | OD1 | 2.744 |
| 6AL5 | L_ARG_65  | NH2 | L_ASP_86  | OD1 | 3.023 |
| 6AL5 | L_ARG_65  | NH2 | L_ASP_86  | OD2 | 3.003 |
| 6AL5 | L_LYS_107 | NZ  | L_GLU_109 | OE1 | 3.519 |
| 6AL5 | L_LYS_107 | NZ  | L_GLU_169 | OE1 | 3.283 |
| 6AL5 | L_LYS_107 | NZ  | L_GLU_169 | OE2 | 3.574 |

|      |           |     |           |     |       |
|------|-----------|-----|-----------|-----|-------|
| 6AL5 | L_ARG_146 | NH1 | L_GLU_109 | OE1 | 2.818 |
| 6AL5 | L_LYS_153 | NZ  | L_GLU_199 | OE2 | 3.184 |
| 6AL5 | L_LYS_187 | NZ  | L_GLU_191 | OE2 | 3.556 |
| 6AL5 | L_HIS_193 | ND1 | L_ASP_189 | OD1 | 3.737 |
| 6AL5 | H_ARG_38  | NH1 | H_ASP_90  | OD1 | 3.791 |
| 6AL5 | H_ARG_38  | NH2 | H_GLU_46  | OE1 | 3.814 |
| 6AL5 | H_ARG_67  | NH1 | H_ASP_90  | OD1 | 3.408 |
| 6AL5 | H_ARG_67  | NH1 | H_ASP_90  | OD2 | 3.019 |
| 6AL5 | H_ARG_67  | NH2 | H_ASP_90  | OD1 | 3.382 |
| 6AL5 | H_ARG_98  | NH2 | H_ASP_112 | OD1 | 3.627 |
| 6AL5 | H_ARG_98  | NH2 | H_ASP_112 | OD2 | 2.814 |
| 6AL5 | H_ARG_106 | NH1 | H_GLU_100 | OE1 | 3.206 |
| 6AL5 | H_ARG_106 | NH1 | H_GLU_100 | OE2 | 2.772 |
| 6AL5 | H_ARG_106 | NH2 | L_ASP_54  | OD1 | 3.142 |
| 6AL5 | H_ARG_106 | NH2 | L_ASP_54  | OD2 | 3.298 |
| 6AL5 | H_ARG_106 | NH2 | H_GLU_100 | OE2 | 3.102 |
| 6AL5 | H_LYS_154 | NZ  | H_ASP_155 | OD1 | 3.510 |
| 6AL5 | H_LYS_154 | NZ  | H_ASP_155 | OD2 | 3.733 |
| 6AL5 | H_LYS_220 | NZ  | L_GLU_127 | OE1 | 3.220 |
| 6AL5 | H_LYS_221 | NZ  | H_GLU_223 | OE2 | 3.651 |
| 6ANA | H_LYS_64  | NZ  | H_ASP_65  | OD1 | 3.910 |
| 6ANA | H_LYS_64  | NZ  | H_ASP_65  | OD2 | 2.779 |
| 6ANA | H_LYS_66  | NZ  | H_ASP_86  | OD1 | 3.581 |
| 6ANA | H_LYS_66  | NZ  | H_ASP_86  | OD2 | 2.714 |
| 6ANA | H_ARG_94  | NH2 | H_ASP_96  | OD1 | 3.718 |
| 6ANA | H_ARG_94  | NH2 | H_ASP_96  | OD2 | 3.967 |
| 6ANA | H_LYS_142 | NZ  | H_ASP_143 | OD1 | 3.131 |
| 6ANA | H_LYS_142 | NZ  | H_ASP_143 | OD2 | 2.790 |
| 6ANA | H_ARG_209 | NH1 | H_GLU_211 | OE1 | 3.669 |
| 6ANA | L_ARG_61  | NH2 | L_ASP_82  | OD1 | 2.820 |
| 6ANA | L_ARG_61  | NH2 | L_ASP_82  | OD2 | 3.661 |
| 6ANA | L_LYS_102 | NZ  | L_GLU_104 | OE2 | 2.841 |
| 6ANA | L_LYS_148 | NZ  | L_GLU_194 | OE2 | 2.623 |
| 6ANA | L_LYS_182 | NZ  | L_GLU_186 | OE1 | 2.943 |
| 6ANA | L_LYS_182 | NZ  | L_GLU_186 | OE2 | 3.303 |
| 6ANA | L_LYS_187 | NZ  | L_ASP_184 | OD1 | 2.815 |
| 6ANA | L_LYS_189 | NZ  | L_GLU_212 | OE2 | 2.496 |
| 6AND | H_ARG_38  | NH1 | H_GLU_46  | OE2 | 2.978 |
| 6AND | H_ARG_38  | NH1 | H_ASP_86  | OD1 | 3.864 |
| 6AND | H_ARG_38  | NH2 | H_ASP_86  | OD1 | 2.906 |
| 6AND | H_ARG_50  | NH2 | H_ASP_95  | OD1 | 3.873 |
| 6AND | H_ARG_50  | NH2 | H_ASP_95  | OD2 | 3.421 |
| 6AND | H_LYS_62  | NZ  | H_GLU_46  | OE1 | 2.841 |
| 6AND | H_LYS_62  | NZ  | H_GLU_46  | OE2 | 3.776 |
| 6AND | H_ARG_66  | NH1 | H_ASP_86  | OD1 | 3.755 |
| 6AND | H_ARG_66  | NH1 | H_ASP_86  | OD2 | 2.814 |
| 6AND | H_ARG_66  | NH2 | H_ASP_86  | OD1 | 2.852 |
| 6AND | H_ARG_66  | NH2 | H_ASP_86  | OD2 | 3.248 |
| 6AND | H_ARG_94  | NH2 | H_ASP_101 | OD1 | 3.615 |
| 6AND | H_ARG_94  | NH2 | H_ASP_101 | OD2 | 2.990 |
| 6AND | H_LYS_143 | NZ  | H_ASP_144 | OD1 | 3.840 |
| 6AND | H_LYS_209 | NZ  | L_GLU_123 | OE1 | 2.684 |
| 6AND | H_LYS_209 | NZ  | L_GLU_123 | OE2 | 3.876 |
| 6AND | L_LYS_50  | NZ  | H_ASP_100 | OD1 | 3.188 |
| 6AND | L_ARG_61  | NH2 | L_GLU_81  | OE2 | 3.449 |
| 6AND | L_ARG_61  | NH2 | L_ASP_82  | OD1 | 2.730 |
| 6AND | L_ARG_61  | NH2 | L_ASP_82  | OD2 | 3.513 |
| 6AND | L_LYS_103 | NZ  | L_GLU_165 | OE1 | 3.616 |

|      |           |     |           |     |       |
|------|-----------|-----|-----------|-----|-------|
| 6AND | L_LYS_103 | NZ  | L_GLU_165 | OE2 | 3.146 |
| 6AND | L_LYS_149 | NZ  | L_GLU_195 | OE2 | 2.858 |
| 6AND | L_LYS_188 | NZ  | L_ASP_185 | OD1 | 3.465 |
| 6AND | L_HIS_189 | ND1 | L_ASP_151 | OD2 | 3.034 |
| 6ANI | H_HIS_35  | ND1 | H_GLU_50  | OE1 | 3.692 |
| 6ANI | H_HIS_35  | NE2 | H_GLU_50  | OE1 | 3.990 |
| 6ANI | H_LYS_66  | NZ  | H_ASP_86  | OD1 | 3.842 |
| 6ANI | H_LYS_66  | NZ  | H_ASP_86  | OD2 | 3.014 |
| 6ANI | H_ARG_83  | NH2 | H_ASP_85  | OD2 | 3.086 |
| 6ANI | H_ARG_94  | NH2 | H_ASP_101 | OD1 | 3.640 |
| 6ANI | H_ARG_94  | NH2 | H_ASP_101 | OD2 | 2.660 |
| 6ANI | H_LYS_143 | NZ  | H_ASP_144 | OD1 | 3.153 |
| 6ANI | H_LYS_143 | NZ  | H_ASP_144 | OD2 | 2.622 |
| 6ANI | H_LYS_209 | NZ  | L_GLU_123 | OE1 | 2.397 |
| 6ANI | H_LYS_210 | NZ  | H_GLU_212 | OE1 | 2.867 |
| 6ANI | L_LYS_53  | NZ  | L_ASP_50  | OD2 | 2.769 |
| 6ANI | L_ARG_61  | NH1 | L_GLU_81  | OE2 | 3.915 |
| 6ANI | L_ARG_61  | NH2 | L_GLU_81  | OE2 | 3.089 |
| 6ANI | L_ARG_61  | NH2 | L_ASP_82  | OD1 | 2.623 |
| 6ANI | L_ARG_61  | NH2 | L_ASP_82  | OD2 | 3.423 |
| 6ANI | L_LYS_149 | NZ  | L_GLU_195 | OE1 | 3.748 |
| 6ANI | L_LYS_188 | NZ  | L_ASP_185 | OD1 | 3.446 |
| 6ANI | I_HIS_35  | ND1 | I_GLU_50  | OE1 | 3.825 |
| 6ANI | I_HIS_35  | NE2 | I_GLU_50  | OE1 | 3.743 |
| 6ANI | I_LYS_66  | NZ  | I_ASP_86  | OD1 | 3.950 |
| 6ANI | I_LYS_66  | NZ  | I_ASP_86  | OD2 | 2.953 |
| 6ANI | I_ARG_83  | NH2 | I_ASP_85  | OD2 | 2.907 |
| 6ANI | I_ARG_94  | NH2 | I_ASP_101 | OD1 | 3.760 |
| 6ANI | I_ARG_94  | NH2 | I_ASP_101 | OD2 | 2.654 |
| 6ANI | I_LYS_143 | NZ  | I_ASP_144 | OD1 | 3.006 |
| 6ANI | I_LYS_143 | NZ  | I_ASP_144 | OD2 | 2.878 |
| 6ANI | I_LYS_209 | NZ  | M_GLU_123 | OE2 | 3.950 |
| 6ANI | I_LYS_210 | NZ  | I_GLU_212 | OE2 | 3.076 |
| 6ANI | M_LYS_53  | NZ  | M_ASP_50  | OD2 | 2.878 |
| 6ANI | M_ARG_61  | NH2 | M_ASP_82  | OD1 | 2.930 |
| 6ANI | M_ARG_61  | NH2 | M_ASP_82  | OD2 | 3.730 |
| 6ANI | M_HIS_189 | ND1 | M_ASP_151 | OD2 | 3.008 |
| 6AQ7 | A_ARG_155 | NH1 | A_GLU_195 | OE1 | 2.727 |
| 6AQ7 | A_ARG_155 | NH1 | A_GLU_195 | OE2 | 3.462 |
| 6AQ7 | A_ARG_155 | NH2 | A_ASP_201 | OD1 | 3.324 |
| 6AQ7 | A_ARG_155 | NH2 | A_ASP_201 | OD2 | 3.430 |
| 6AQ7 | A_ARG_163 | NH2 | A_ASP_177 | OD2 | 2.708 |
| 6AQ7 | A_LYS_203 | NZ  | A_GLU_206 | OE1 | 2.779 |
| 6AQ7 | A_LYS_203 | NZ  | A_GLU_206 | OE2 | 3.528 |
| 6AQ7 | H_HIS_34  | NE2 | A_GLU_199 | OE1 | 3.934 |
| 6AQ7 | H_HIS_34  | NE2 | A_GLU_199 | OE2 | 2.717 |
| 6AQ7 | H_ARG_37  | NH1 | H_ASP_89  | OD1 | 2.941 |
| 6AQ7 | H_ARG_37  | NH2 | H_GLU_45  | OE1 | 2.823 |
| 6AQ7 | H_ARG_37  | NH2 | H_ASP_89  | OD1 | 3.962 |
| 6AQ7 | H_ARG_49  | NH1 | A_GLU_199 | OE2 | 2.744 |
| 6AQ7 | H_LYS_66  | NZ  | H_ASP_89  | OD1 | 3.144 |
| 6AQ7 | H_LYS_66  | NZ  | H_ASP_89  | OD2 | 2.568 |
| 6AQ7 | H_ARG_97  | NH2 | H_ASP_103 | OD1 | 3.527 |
| 6AQ7 | H_ARG_97  | NH2 | H_ASP_103 | OD2 | 2.817 |
| 6AQ7 | H_LYS_209 | NZ  | L_GLU_127 | OE2 | 2.651 |
| 6AQ7 | L_LYS_24  | NZ  | L_ASP_74  | OD1 | 3.475 |
| 6AQ7 | L_LYS_24  | NZ  | L_ASP_74  | OD2 | 3.224 |
| 6AQ7 | L_LYS_53  | NZ  | L_GLU_59  | OE1 | 3.832 |

|      |           |     |           |     |       |
|------|-----------|-----|-----------|-----|-------|
| 6AQ7 | L_ARG_65  | NH2 | L_GLU_85  | OE2 | 3.459 |
| 6AQ7 | L_ARG_65  | NH2 | L_ASP_86  | OD1 | 2.720 |
| 6AQ7 | L_ARG_65  | NH2 | L_ASP_86  | OD2 | 3.600 |
| 6AQ7 | L_LYS_146 | NZ  | L_GLU_109 | OE1 | 3.899 |
| 6AQ7 | L_LYS_151 | NZ  | L_GLU_158 | OE2 | 3.172 |
| 6AQ7 | L_LYS_153 | NZ  | L_GLU_199 | OE1 | 3.387 |
| 6AQ7 | L_LYS_153 | NZ  | L_GLU_199 | OE2 | 2.997 |
| 6AQ7 | L_ARG_159 | NH1 | L_GLU_189 | OE2 | 3.035 |
| 6AQ7 | L_ARG_159 | NH2 | L_GLU_189 | OE2 | 3.333 |
| 6AQ7 | L_HIS_193 | ND1 | L_ASP_155 | OD2 | 2.747 |
| 6AQ7 | L_LYS_203 | NZ  | L_ASP_114 | OD1 | 3.000 |
| 6AQ7 | L_LYS_203 | NZ  | L_ASP_114 | OD2 | 2.913 |
| 6ATT | A_ARG_25  | NH2 | A_ASP_22  | OD1 | 3.000 |
| 6ATT | A_HIS_26  | NE2 | A_ASP_22  | OD1 | 3.343 |
| 6ATT | A_ARG_76  | NH1 | A_ASP_54  | OD1 | 2.778 |
| 6ATT | A_ARG_81  | NH2 | A_GLU_57  | OE1 | 3.490 |
| 6ATT | A_ARG_81  | NH2 | A_GLU_57  | OE2 | 3.603 |
| 6ATT | A_ARG_121 | NH1 | A_GLU_188 | OE1 | 3.331 |
| 6ATT | A_ARG_121 | NH1 | A_ASP_189 | OD1 | 3.785 |
| 6ATT | A_ARG_121 | NH2 | A_ASP_189 | OD1 | 3.820 |
| 6ATT | A_ARG_135 | NH1 | A_ASP_96  | OD1 | 3.753 |
| 6ATT | A_ARG_135 | NH1 | A_ASP_96  | OD2 | 3.334 |
| 6ATT | A_ARG_135 | NH2 | A_ASP_96  | OD2 | 3.651 |
| 6ATT | A_HIS_152 | ND1 | A_GLU_125 | OE2 | 3.074 |
| 6ATT | A_ARG_166 | NH1 | A_ASP_143 | OD2 | 3.858 |
| 6ATT | A_HIS_171 | ND1 | A_GLU_185 | OE1 | 3.239 |
| 6ATT | A_ARG_204 | NH1 | A_GLU_125 | OE1 | 3.451 |
| 6ATT | A_ARG_204 | NH2 | A_GLU_125 | OE1 | 3.326 |
| 6ATT | A_ARG_204 | NH2 | A_GLU_125 | OE2 | 3.886 |
| 6ATT | A_HIS_238 | ND1 | A_GLU_243 | OE1 | 3.002 |
| 6ATT | A_HIS_238 | ND1 | A_GLU_243 | OE2 | 3.743 |
| 6ATT | A_ARG_266 | NH2 | A_GLU_264 | OE1 | 3.983 |
| 6ATT | A_ARG_308 | NH1 | A_ASP_304 | OD2 | 3.570 |
| 6ATT | A_ARG_308 | NH2 | A_ASP_304 | OD2 | 2.743 |
| 6ATT | A_HIS_    | NE2 | A_GLU_    | OE1 | 2.757 |
| 6ATT | A_HIS_    | NE2 | A_GLU_    | OE2 | 3.385 |
| 6ATT | A_ARG_329 | NH1 | A_GLU_330 | OE1 | 3.614 |
| 6ATT | A_ARG_329 | NH2 | A_GLU_330 | OE2 | 3.989 |
| 6ATT | A_ARG_    | NH1 | A_GLU_    | OE1 | 2.988 |
| 6ATT | A_ARG_    | NH1 | A_GLU_357 | OE2 | 3.696 |
| 6ATT | A_ARG_332 | NH2 | A_GLU_357 | OE2 | 3.986 |
| 6ATT | A_LYS_    | NZ  | A_GLU_    | OE1 | 3.919 |
| 6ATT | A_LYS_347 | NZ  | A_GLU_299 | OE2 | 3.462 |
| 6ATT | A_LYS_347 | NZ  | A_GLU_383 | OE2 | 3.837 |
| 6ATT | A_ARG_410 | NH1 | A_GLU_438 | OE2 | 3.785 |
| 6ATT | A_ARG_410 | NH2 | A_GLU_383 | OE1 | 3.874 |
| 6ATT | A_ARG_410 | NH2 | A_GLU_383 | OE2 | 3.055 |
| 6ATT | A_ARG_412 | NH1 | A_GLU_299 | OE1 | 3.365 |
| 6ATT | A_ARG_412 | NH1 | A_GLU_299 | OE2 | 3.033 |
| 6ATT | A_ARG_412 | NH2 | A_GLU_299 | OE2 | 3.491 |
| 6ATT | A_ARG_465 | NH1 | A_GLU_438 | OE1 | 3.352 |
| 6ATT | A_ARG_477 | NH1 | A_GLU_485 | OE1 | 3.071 |
| 6ATT | A_ARG_477 | NH2 | A_GLU_481 | OE2 | 3.926 |
| 6ATT | A_ARG_477 | NH2 | A_GLU_485 | OE1 | 3.540 |
| 6ATT | A_ARG_    | NH1 | A_GLU_    | OE1 | 2.803 |
| 6ATT | A_ARG_    | NH1 | A_GLU_    | OE2 | 3.745 |
| 6ATT | A_ARG_    | NH1 | A_GLU_    | OE1 | 3.574 |
| 6ATT | A_ARG_    | NH1 | A_GLU_    | OE2 | 2.811 |

|      |           |     |           |     |       |
|------|-----------|-----|-----------|-----|-------|
| 6ATT | A_HIS_    | ND1 | A_GLU_    | OE1 | 3.143 |
| 6ATT | A_HIS_    | ND1 | A_GLU_    | OE2 | 3.018 |
| 6ATT | H_ARG_38  | NH1 | H_ASP_90  | OD1 | 2.909 |
| 6ATT | H_ARG_38  | NH2 | H_GLU_46  | OE1 | 3.113 |
| 6ATT | H_ARG_38  | NH2 | H_ASP_90  | OD1 | 3.490 |
| 6ATT | H_ARG_67  | NH1 | H_ASP_90  | OD1 | 3.630 |
| 6ATT | H_ARG_67  | NH1 | H_ASP_90  | OD2 | 2.692 |
| 6ATT | H_ARG_67  | NH2 | H_ASP_90  | OD1 | 3.064 |
| 6ATT | H_ARG_67  | NH2 | H_ASP_90  | OD2 | 3.552 |
| 6ATT | H_ARG_98  | NH2 | H_ASP_109 | OD2 | 3.700 |
| 6ATT | H_LYS_151 | NZ  | H_ASP_152 | OD1 | 3.592 |
| 6ATT | H_LYS_151 | NZ  | H_ASP_152 | OD2 | 3.811 |
| 6ATT | H_LYS_217 | NZ  | L_GLU_129 | OE1 | 3.069 |
| 6ATT | H_ARG_218 | NH1 | H_GLU_220 | OE2 | 2.838 |
| 6ATT | H_LYS_222 | NZ  | L_ASP_128 | OD1 | 2.688 |
| 6ATT | L_ARG_32  | NH1 | A_GLU_216 | OE1 | 2.742 |
| 6ATT | L_LYS_45  | NZ  | L_GLU_87  | OE1 | 2.487 |
| 6ATT | L_ARG_67  | NH1 | L_GLU_85  | OE1 | 3.360 |
| 6ATT | L_ARG_67  | NH1 | L_GLU_85  | OE2 | 3.299 |
| 6ATT | L_ARG_67  | NH2 | L_ASP_88  | OD1 | 2.767 |
| 6ATT | L_LYS_155 | NZ  | L_GLU_201 | OE1 | 3.534 |
| 6ATT | L_LYS_155 | NZ  | L_GLU_201 | OE2 | 3.250 |
| 6ATT | L_LYS_189 | NZ  | L_GLU_193 | OE1 | 3.627 |
| 6ATT | L_LYS_189 | NZ  | L_GLU_193 | OE2 | 3.286 |
| 6ATT | L_HIS_195 | ND1 | L_ASP_157 | OD2 | 2.711 |
| 6AZZ | F_HIS_35  | NE2 | F_ASP_95  | OD1 | 2.684 |
| 6AZZ | F_HIS_35  | NE2 | F_ASP_95  | OD2 | 3.272 |
| 6AZZ | F_LYS_62  | NZ  | F_GLU_46  | OE1 | 3.990 |
| 6AZZ | F_LYS_62  | NZ  | F_GLU_46  | OE2 | 2.597 |
| 6AZZ | F_ARG_94  | NH2 | F_ASP_101 | OD1 | 3.814 |
| 6AZZ | F_ARG_94  | NH2 | F_ASP_101 | OD2 | 2.728 |
| 6AZZ | F_LYS_209 | NZ  | E_GLU_124 | OE2 | 3.461 |
| 6AZZ | F_LYS_210 | NZ  | F_GLU_212 | OE1 | 2.660 |
| 6AZZ | E_ARG_61  | NH1 | E_ASP_82  | OD1 | 3.472 |
| 6AZZ | E_ARG_61  | NH1 | E_ASP_82  | OD2 | 2.388 |
| 6AZZ | E_ARG_61  | NH2 | E_GLU_79  | OE1 | 3.246 |
| 6AZZ | E_ARG_61  | NH2 | E_GLU_79  | OE2 | 3.544 |
| 6AZZ | E_ARG_61  | NH2 | E_ASP_82  | OD1 | 2.711 |
| 6AZZ | E_ARG_61  | NH2 | E_ASP_82  | OD2 | 2.961 |
| 6AZZ | E_ARG_77  | NH1 | B_GLU_79  | OE2 | 3.685 |
| 6AZZ | E_ARG_77  | NH2 | B_GLU_79  | OE1 | 3.407 |
| 6AZZ | E_ARG_77  | NH2 | B_GLU_79  | OE2 | 3.489 |
| 6AZZ | E_LYS_111 | NZ  | E_GLU_199 | OE1 | 3.404 |
| 6AZZ | E_LYS_130 | NZ  | F_ASP_144 | OD2 | 3.330 |
| 6AZZ | C_HIS_35  | NE2 | C_ASP_95  | OD1 | 2.700 |
| 6AZZ | C_HIS_35  | NE2 | C_ASP_95  | OD2 | 3.324 |
| 6AZZ | C_LYS_62  | NZ  | C_GLU_46  | OE1 | 3.744 |
| 6AZZ | C_LYS_62  | NZ  | C_GLU_46  | OE2 | 2.907 |
| 6AZZ | C_ARG_94  | NH2 | C_ASP_101 | OD1 | 3.926 |
| 6AZZ | C_ARG_94  | NH2 | C_ASP_101 | OD2 | 2.919 |
| 6AZZ | C_LYS_209 | NZ  | B_GLU_124 | OE1 | 3.784 |
| 6AZZ | C_LYS_209 | NZ  | B_GLU_124 | OE2 | 2.655 |
| 6AZZ | C_LYS_210 | NZ  | C_GLU_212 | OE1 | 2.801 |
| 6AZZ | B_LYS_31  | NZ  | B_ASP_92  | OD1 | 3.992 |
| 6AZZ | B_ARG_61  | NH1 | B_GLU_79  | OE2 | 3.665 |
| 6AZZ | B_ARG_61  | NH2 | B_GLU_79  | OE1 | 3.459 |
| 6AZZ | B_ARG_61  | NH2 | B_GLU_79  | OE2 | 3.381 |
| 6AZZ | B_ARG_61  | NH2 | B_ASP_82  | OD1 | 2.944 |

|      |           |     |           |     |       |
|------|-----------|-----|-----------|-----|-------|
| 6AZZ | B_ARG_61  | NH2 | B_ASP_82  | OD2 | 3.568 |
| 6AZZ | B_LYS_111 | NZ  | B_GLU_199 | OE1 | 3.484 |
| 6AZZ | B_LYS_130 | NZ  | C_ASP_144 | OD2 | 3.121 |
| 6AZZ | A_HIS_20  | NE2 | A_GLU_22  | OE1 | 2.799 |
| 6AZZ | A_LYS_90  | NZ  | B_ASP_51  | OD1 | 3.552 |
| 6AZZ | A_LYS_90  | NZ  | B_ASP_51  | OD2 | 2.501 |
| 6AZZ | A_LYS_98  | NZ  | A_GLU_22  | OE1 | 2.677 |
| 6AZZ | A_LYS_98  | NZ  | A_GLU_22  | OE2 | 3.134 |
| 6AZZ | A_LYS_108 | NZ  | B_ASP_53  | OD2 | 3.868 |
| 6AZZ | A_LYS_108 | NZ  | A_GLU_88  | OE2 | 3.991 |
| 6AZZ | A_LYS_118 | NZ  | A_ASP_131 | OD1 | 2.501 |
| 6AZZ | A_LYS_139 | NZ  | A_ASP_6   | OD1 | 2.975 |
| 6AZZ | D_LYS_10  | NZ  | D_GLU_35  | OE2 | 3.455 |
| 6AZZ | D_ARG_11  | NH1 | D_GLU_26  | OE1 | 3.991 |
| 6AZZ | D_HIS_20  | NE2 | D_GLU_22  | OE1 | 2.833 |
| 6AZZ | D_LYS_90  | NZ  | E_ASP_51  | OD1 | 3.639 |
| 6AZZ | D_LYS_90  | NZ  | E_ASP_51  | OD2 | 2.901 |
| 6AZZ | D_LYS_98  | NZ  | D_GLU_22  | OE1 | 2.924 |
| 6AZZ | D_LYS_98  | NZ  | D_GLU_22  | OE2 | 3.312 |
| 6AZZ | D_LYS_118 | NZ  | D_ASP_131 | OD1 | 2.526 |
| 6AZZ | D_LYS_139 | NZ  | D_ASP_6   | OD1 | 3.014 |
| 6AZZ | D_LYS_139 | NZ  | D_ASP_6   | OD2 | 3.993 |
| 6B08 | C_HIS_35  | NE2 | C_ASP_95  | OD1 | 2.543 |
| 6B08 | C_HIS_35  | NE2 | C_ASP_95  | OD2 | 3.235 |
| 6B08 | C_ARG_38  | NH2 | C_GLU_46  | OE1 | 3.451 |
| 6B08 | C_ARG_94  | NH2 | C_ASP_101 | OD1 | 3.885 |
| 6B08 | C_ARG_94  | NH2 | C_ASP_101 | OD2 | 2.821 |
| 6B08 | C_LYS_143 | NZ  | B_GLU_125 | OE2 | 2.599 |
| 6B08 | B_LYS_31  | NZ  | B_ASP_92  | OD2 | 3.730 |
| 6B08 | B_ARG_61  | NH1 | B_GLU_79  | OE2 | 3.112 |
| 6B08 | B_ARG_61  | NH2 | B_ASP_82  | OD1 | 2.963 |
| 6B08 | B_ARG_61  | NH2 | B_ASP_82  | OD2 | 2.912 |
| 6B08 | B_LYS_167 | NZ  | B_GLU_83  | OE2 | 3.572 |
| 6B08 | A_LYS_10  | NZ  | A_GLU_35  | OE2 | 3.550 |
| 6B08 | A_HIS_20  | NE2 | A_GLU_22  | OE2 | 2.721 |
| 6B08 | A_LYS_90  | NZ  | B_ASP_51  | OD1 | 2.529 |
| 6B08 | A_LYS_90  | NZ  | B_ASP_51  | OD2 | 3.708 |
| 6B08 | A_LYS_98  | NZ  | A_GLU_22  | OE1 | 3.424 |
| 6B08 | A_LYS_98  | NZ  | A_GLU_22  | OE2 | 2.846 |
| 6B08 | A_LYS_118 | NZ  | A_ASP_131 | OD1 | 3.348 |
| 6B08 | A_LYS_142 | NZ  | A_GLU_145 | OE1 | 2.917 |
| 6B08 | A_LYS_142 | NZ  | A_GLU_145 | OE2 | 3.424 |
| 6B0A | H_ARG_38  | NH1 | H_ASP_90  | OD1 | 3.014 |
| 6B0A | H_ARG_38  | NH2 | H_GLU_46  | OE2 | 3.036 |
| 6B0A | H_ARG_38  | NH2 | H_ASP_90  | OD1 | 3.967 |
| 6B0A | H_LYS_65  | NZ  | H_ASP_62  | OD1 | 3.558 |
| 6B0A | H_ARG_67  | NH1 | H_ASP_90  | OD1 | 3.030 |
| 6B0A | H_ARG_67  | NH1 | H_ASP_90  | OD2 | 2.551 |
| 6B0A | H_ARG_67  | NH2 | H_ASP_90  | OD1 | 3.040 |
| 6B0A | H_ARG_67  | NH2 | H_ASP_90  | OD2 | 3.966 |
| 6B0A | H_LYS_98  | NZ  | H_ASP_100 | OD1 | 3.067 |
| 6B0A | H_LYS_98  | NZ  | H_ASP_113 | OD1 | 3.416 |
| 6B0A | H_LYS_98  | NZ  | H_ASP_113 | OD2 | 3.062 |
| 6B0A | H_LYS_218 | NZ  | H_ASP_220 | OD1 | 3.753 |
| 6B0A | L_ARG_62  | NH1 | L_GLU_80  | OE1 | 3.743 |
| 6B0A | L_ARG_62  | NH1 | L_GLU_80  | OE2 | 3.406 |
| 6B0A | L_ARG_62  | NH2 | L_GLU_80  | OE2 | 3.228 |
| 6B0A | L_ARG_62  | NH2 | L_GLU_82  | OE1 | 3.824 |

|      |           |     |           |     |       |
|------|-----------|-----|-----------|-----|-------|
| 6B0A | L_ARG_62  | NH2 | L_ASP_83  | OD1 | 2.621 |
| 6B0A | L_ARG_62  | NH2 | L_ASP_83  | OD2 | 3.165 |
| 6B0A | L_ARG_101 | NH1 | L_GLU_103 | OE1 | 3.058 |
| 6B0A | L_HIS_187 | ND1 | L_ASP_149 | OD2 | 2.488 |
| 6B0A | A_HIS_20  | NE2 | A_GLU_22  | OE1 | 3.003 |
| 6B0A | A_LYS_90  | NZ  | A_ASP_78  | OD2 | 3.536 |
| 6B0A | A_LYS_98  | NZ  | A_GLU_22  | OE1 | 3.288 |
| 6B0A | A_LYS_98  | NZ  | A_GLU_22  | OE2 | 2.898 |
| 6B0A | A_LYS_118 | NZ  | A_ASP_131 | OD1 | 2.522 |
| 6B0E | A_ARG_46  | NH2 | A_ASP_55  | OD1 | 3.681 |
| 6B0E | A_ARG_46  | NH2 | A_ASP_55  | OD2 | 2.616 |
| 6B0E | A_ARG_54  | NH2 | A_ASP_60  | OD1 | 3.407 |
| 6B0E | A_ARG_61  | NH1 | A_GLU_81  | OE2 | 2.864 |
| 6B0E | A_ARG_61  | NH1 | A_ASP_82  | OD1 | 2.718 |
| 6B0E | A_ARG_61  | NH1 | A_ASP_82  | OD2 | 3.652 |
| 6B0E | A_ARG_61  | NH2 | A_GLU_79  | OE1 | 3.681 |
| 6B0E | A_ARG_61  | NH2 | A_GLU_79  | OE2 | 3.517 |
| 6B0E | A_ARG_61  | NH2 | A_GLU_81  | OE2 | 3.930 |
| 6B0E | A_HIS_189 | ND1 | A_ASP_151 | OD2 | 2.935 |
| 6B0E | B_ARG_38  | NH1 | B_ASP_86  | OD1 | 3.019 |
| 6B0E | B_ARG_38  | NH2 | B_GLU_46  | OE2 | 3.029 |
| 6B0E | B_ARG_38  | NH2 | B_ASP_86  | OD1 | 3.941 |
| 6B0E | B_ARG_94  | NH2 | B_ASP_101 | OD1 | 3.699 |
| 6B0E | B_ARG_94  | NH2 | B_ASP_101 | OD2 | 2.508 |
| 6B0E | B_LYS_143 | NZ  | B_ASP_144 | OD1 | 2.734 |
| 6B0E | B_LYS_143 | NZ  | B_ASP_144 | OD2 | 3.061 |
| 6B0E | B_HIS_164 | ND1 | A_ASP_167 | OD2 | 3.677 |
| 6B0E | E_HIS_20  | NE2 | E_GLU_22  | OE1 | 2.862 |
| 6B0E | E_LYS_118 | NZ  | E_ASP_131 | OD1 | 2.359 |
| 6B0E | E_LYS_142 | NZ  | E_GLU_145 | OE1 | 3.928 |
| 6B0E | E_LYS_155 | NZ  | B_ASP_98  | OD2 | 3.864 |
| 6B0G | C_ARG_24  | NH1 | C_ASP_70  | OD1 | 3.644 |
| 6B0G | C_ARG_24  | NH2 | C_ASP_70  | OD1 | 3.217 |
| 6B0G | C_ARG_46  | NH2 | C_ASP_55  | OD1 | 3.667 |
| 6B0G | C_ARG_46  | NH2 | C_ASP_55  | OD2 | 2.584 |
| 6B0G | C_ARG_54  | NH2 | C_ASP_60  | OD1 | 2.717 |
| 6B0G | C_ARG_61  | NH1 | C_GLU_79  | OE1 | 3.756 |
| 6B0G | C_ARG_61  | NH1 | C_GLU_79  | OE2 | 3.832 |
| 6B0G | C_ARG_61  | NH2 | C_GLU_79  | OE1 | 3.846 |
| 6B0G | C_ARG_61  | NH2 | C_ASP_82  | OD1 | 2.542 |
| 6B0G | C_ARG_61  | NH2 | C_ASP_82  | OD2 | 3.446 |
| 6B0G | C_LYS_103 | NZ  | C_GLU_165 | OE1 | 3.504 |
| 6B0G | C_LYS_103 | NZ  | C_GLU_165 | OE2 | 3.698 |
| 6B0G | C_LYS_149 | NZ  | C_GLU_195 | OE1 | 3.121 |
| 6B0G | C_LYS_188 | NZ  | C_ASP_185 | OD1 | 2.887 |
| 6B0G | C_HIS_189 | ND1 | C_ASP_151 | OD2 | 3.287 |
| 6B0G | C_ARG_211 | NH1 | C_GLU_187 | OE1 | 3.151 |
| 6B0G | D_ARG_38  | NH1 | D_ASP_86  | OD1 | 2.889 |
| 6B0G | D_ARG_38  | NH2 | D_ASP_86  | OD1 | 3.880 |
| 6B0G | D_LYS_62  | NZ  | D_GLU_46  | OE1 | 3.387 |
| 6B0G | D_LYS_62  | NZ  | D_GLU_46  | OE2 | 3.344 |
| 6B0G | D_ARG_66  | NH1 | D_ASP_86  | OD1 | 3.686 |
| 6B0G | D_ARG_66  | NH1 | D_ASP_86  | OD2 | 2.815 |
| 6B0G | D_ARG_66  | NH2 | D_ASP_86  | OD1 | 2.895 |
| 6B0G | D_ARG_66  | NH2 | D_ASP_86  | OD2 | 3.345 |
| 6B0G | D_ARG_82A | NH2 | D_GLU_81  | OE1 | 3.967 |
| 6B0G | D_LYS_94  | NZ  | D_ASP_101 | OD1 | 3.857 |
| 6B0G | D_LYS_94  | NZ  | D_ASP_101 | OD2 | 2.849 |

|      |            |     |           |     |       |
|------|------------|-----|-----------|-----|-------|
| 6B0G | D_ARG_100B | NH1 | C_ASP_91  | OD2 | 3.003 |
| 6B0G | D_ARG_100B | NH2 | C_ASP_91  | OD2 | 3.130 |
| 6B0G | D_LYS_148  | NZ  | D_ASP_149 | OD1 | 3.128 |
| 6B0G | D_LYS_148  | NZ  | D_ASP_149 | OD2 | 3.390 |
| 6B0G | D_LYS_214  | NZ  | C_GLU_123 | OE2 | 3.176 |
| 6B0G | D_LYS_215  | NZ  | D_GLU_217 | OE2 | 3.125 |
| 6B0G | E_ARG_11   | NH1 | E_GLU_39  | OE2 | 3.696 |
| 6B0G | E_HIS_20   | NE2 | E_GLU_22  | OE1 | 2.725 |
| 6B0G | E_LYS_90   | NZ  | E_ASP_78  | OD2 | 3.931 |
| 6B0G | E_LYS_98   | NZ  | E_GLU_22  | OE1 | 2.876 |
| 6B0G | E_LYS_98   | NZ  | E_GLU_22  | OE2 | 3.660 |
| 6B0G | E_LYS_118  | NZ  | E_ASP_131 | OD1 | 2.414 |
| 6B0G | E_LYS_139  | NZ  | E_ASP_6   | OD1 | 2.804 |
| 6B0G | E_LYS_139  | NZ  | E_ASP_6   | OD2 | 3.888 |
| 6B0G | E_LYS_155  | NZ  | D_ASP_98  | OD2 | 2.837 |
| 6B0G | E_LYS_155  | NZ  | E_ASP_157 | OD2 | 3.894 |
| 6B0H | I_ARG_11   | NH1 | I_GLU_39  | OE1 | 2.905 |
| 6B0H | I_ARG_11   | NH1 | I_GLU_39  | OE2 | 3.603 |
| 6B0H | I_ARG_11   | NH2 | I_GLU_39  | OE1 | 3.421 |
| 6B0H | I_ARG_11   | NH2 | I_GLU_39  | OE2 | 2.810 |
| 6B0H | I_HIS_20   | NE2 | I_GLU_22  | OE1 | 2.759 |
| 6B0H | I_LYS_24   | NZ  | I_GLU_22  | OE2 | 3.743 |
| 6B0H | I_LYS_90   | NZ  | I_ASP_78  | OD2 | 2.698 |
| 6B0H | I_LYS_118  | NZ  | I_ASP_131 | OD1 | 2.468 |
| 6B0H | I_LYS_127  | NZ  | I_ASP_124 | OD2 | 3.708 |
| 6B0H | I_LYS_139  | NZ  | I_ASP_6   | OD1 | 2.845 |
| 6B0H | I_LYS_139  | NZ  | I_ASP_6   | OD2 | 3.883 |
| 6B0H | I_LYS_142  | NZ  | I_GLU_145 | OE2 | 3.701 |
| 6B0H | I_LYS_155  | NZ  | I_ASP_157 | OD2 | 3.811 |
| 6B0H | J_ARG_11   | NH1 | J_GLU_39  | OE1 | 3.153 |
| 6B0H | J_ARG_11   | NH1 | J_GLU_39  | OE2 | 3.697 |
| 6B0H | J_ARG_11   | NH2 | J_GLU_39  | OE1 | 3.428 |
| 6B0H | J_ARG_11   | NH2 | J_GLU_39  | OE2 | 2.670 |
| 6B0H | J_HIS_20   | NE2 | J_GLU_22  | OE1 | 2.670 |
| 6B0H | J_LYS_24   | NZ  | J_GLU_22  | OE2 | 3.866 |
| 6B0H | J_LYS_90   | NZ  | J_ASP_78  | OD2 | 3.917 |
| 6B0H | J_LYS_98   | NZ  | J_GLU_22  | OE2 | 3.958 |
| 6B0H | J_LYS_118  | NZ  | J_ASP_131 | OD1 | 2.439 |
| 6B0H | J_LYS_127  | NZ  | J_ASP_124 | OD1 | 3.354 |
| 6B0H | J_LYS_127  | NZ  | J_ASP_124 | OD2 | 3.839 |
| 6B0H | J_LYS_139  | NZ  | J_ASP_6   | OD1 | 3.036 |
| 6B0H | B_ARG_38   | NH1 | B_ASP_86  | OD1 | 2.831 |
| 6B0H | B_ARG_38   | NH2 | B_GLU_46  | OE1 | 3.367 |
| 6B0H | B_ARG_38   | NH2 | B_ASP_86  | OD1 | 3.809 |
| 6B0H | B_LYS_43   | NZ  | B_GLU_46  | OE2 | 3.945 |
| 6B0H | B_HIS_58   | ND1 | B_GLU_50  | OE2 | 3.817 |
| 6B0H | B_ARG_66   | NH1 | B_ASP_86  | OD1 | 3.737 |
| 6B0H | B_ARG_66   | NH2 | B_ASP_86  | OD1 | 3.093 |
| 6B0H | B_ARG_66   | NH2 | B_ASP_86  | OD2 | 2.466 |
| 6B0H | B_ARG_94   | NH2 | B_ASP_101 | OD1 | 3.827 |
| 6B0H | B_ARG_94   | NH2 | B_ASP_101 | OD2 | 2.750 |
| 6B0H | B_ARG_97   | NH2 | B_GLU_50  | OE1 | 2.771 |
| 6B0H | B_ARG_97   | NH2 | B_GLU_50  | OE2 | 3.459 |
| 6B0H | B_ARG_97   | NH2 | B_GLU_95  | OE2 | 2.917 |
| 6B0H | B_LYS_144  | NZ  | B_ASP_145 | OD1 | 3.326 |
| 6B0H | B_LYS_144  | NZ  | B_ASP_145 | OD2 | 3.603 |
| 6B0H | D_ARG_38   | NH1 | D_ASP_86  | OD1 | 2.588 |
| 6B0H | D_ARG_38   | NH2 | D_GLU_46  | OE1 | 3.399 |



|      |           |     |           |     |       |
|------|-----------|-----|-----------|-----|-------|
| 6B0H | D_ARG_38  | NH2 | D_ASP_86  | OD1 | 3.688 |
| 6B0H | D_LYS_43  | NZ  | D_GLU_46  | OE2 | 3.764 |
| 6B0H | D_HIS_58  | ND1 | D_GLU_50  | OE1 | 3.722 |
| 6B0H | D_ARG_66  | NH1 | D_ASP_86  | OD1 | 3.850 |
| 6B0H | D_ARG_66  | NH1 | D_ASP_86  | OD2 | 3.946 |
| 6B0H | D_ARG_66  | NH2 | D_ASP_86  | OD1 | 3.173 |
| 6B0H | D_ARG_66  | NH2 | D_ASP_86  | OD2 | 2.383 |
| 6B0H | D_ARG_94  | NH2 | D_ASP_101 | OD1 | 3.853 |
| 6B0H | D_ARG_94  | NH2 | D_ASP_101 | OD2 | 2.885 |
| 6B0H | D_ARG_97  | NH2 | D_GLU_50  | OE1 | 3.508 |
| 6B0H | D_ARG_97  | NH2 | D_GLU_50  | OE2 | 2.823 |
| 6B0H | D_ARG_97  | NH2 | D_GLU_95  | OE2 | 2.857 |
| 6B0H | D_LYS_144 | NZ  | D_ASP_145 | OD1 | 3.294 |
| 6B0H | D_LYS_144 | NZ  | D_ASP_145 | OD2 | 3.795 |
| 6B0H | D_LYS_207 | NZ  | D_ASP_209 | OD1 | 3.527 |
| 6B0H | D_LYS_207 | NZ  | D_ASP_209 | OD2 | 2.851 |
| 6B0H | A_ARG_61  | NH1 | A_GLU_81  | OE2 | 3.989 |
| 6B0H | A_ARG_61  | NH2 | A_GLU_81  | OE2 | 2.801 |
| 6B0H | A_ARG_61  | NH2 | A_ASP_82  | OD1 | 2.591 |
| 6B0H | A_ARG_61  | NH2 | A_ASP_82  | OD2 | 3.548 |
| 6B0H | A_LYS_149 | NZ  | A_GLU_195 | OE1 | 2.772 |
| 6B0H | A_LYS_183 | NZ  | A_GLU_187 | OE1 | 2.500 |
| 6B0H | A_LYS_183 | NZ  | A_GLU_187 | OE2 | 3.165 |
| 6B0H | C_ARG_61  | NH2 | C_GLU_81  | OE2 | 3.031 |
| 6B0H | C_ARG_61  | NH2 | C_ASP_82  | OD1 | 2.583 |
| 6B0H | C_ARG_61  | NH2 | C_ASP_82  | OD2 | 3.415 |
| 6B0H | C_LYS_149 | NZ  | C_GLU_195 | OE1 | 2.730 |
| 6BE2 | H_ARG_38  | NH1 | H_ASP_89  | OD1 | 2.773 |
| 6BE2 | H_ARG_38  | NH2 | H_GLU_46  | OE1 | 3.073 |
| 6BE2 | H_ARG_38  | NH2 | H_ASP_89  | OD1 | 3.711 |
| 6BE2 | H_ARG_66  | NH1 | H_ASP_89  | OD1 | 3.581 |
| 6BE2 | H_ARG_66  | NH1 | H_ASP_89  | OD2 | 2.936 |
| 6BE2 | H_ARG_66  | NH2 | H_ASP_89  | OD1 | 2.937 |
| 6BE2 | H_ARG_66  | NH2 | H_ASP_89  | OD2 | 3.585 |
| 6BE2 | H_ARG_97  | NH2 | H_ASP_112 | OD1 | 3.701 |
| 6BE2 | H_ARG_97  | NH2 | H_ASP_112 | OD2 | 2.907 |
| 6BE2 | H_LYS_154 | NZ  | L_GLU_129 | OE2 | 2.747 |
| 6BE2 | L_LYS_49  | NZ  | H_GLU_108 | OE2 | 2.828 |
| 6BE2 | L_ARG_65  | NH1 | L_ASP_86  | OD1 | 3.600 |
| 6BE2 | L_ARG_65  | NH1 | L_ASP_86  | OD2 | 2.741 |
| 6BE2 | L_ARG_65  | NH2 | L_ASP_86  | OD1 | 2.925 |
| 6BE2 | L_ARG_65  | NH2 | L_ASP_86  | OD2 | 3.429 |
| 6BE2 | L_ARG_100 | NH2 | H_ASP_98  | OD1 | 2.914 |
| 6BE2 | L_LYS_107 | NZ  | L_ASP_89  | OD1 | 2.799 |
| 6BE2 | L_LYS_107 | NZ  | L_ASP_89  | OD2 | 3.237 |
| 6BE2 | L_LYS_171 | NZ  | L_GLU_87  | OE1 | 2.671 |
| 6BE3 | H_ARG_38  | NH1 | H_ASP_89  | OD1 | 2.759 |
| 6BE3 | H_ARG_38  | NH2 | H_GLU_46  | OE1 | 3.050 |
| 6BE3 | H_ARG_38  | NH2 | H_ASP_89  | OD1 | 3.706 |
| 6BE3 | H_ARG_66  | NH1 | H_ASP_89  | OD1 | 3.702 |
| 6BE3 | H_ARG_66  | NH1 | H_ASP_89  | OD2 | 3.027 |
| 6BE3 | H_ARG_66  | NH2 | H_ASP_89  | OD1 | 2.994 |
| 6BE3 | H_ARG_66  | NH2 | H_ASP_89  | OD2 | 3.609 |
| 6BE3 | H_ARG_97  | NH2 | H_ASP_112 | OD1 | 3.602 |
| 6BE3 | H_ARG_97  | NH2 | H_ASP_112 | OD2 | 2.963 |
| 6BE3 | H_LYS_154 | NZ  | L_GLU_129 | OE2 | 2.742 |
| 6BE3 | H_LYS_220 | NZ  | L_GLU_128 | OE1 | 3.265 |
| 6BE3 | H_LYS_220 | NZ  | L_GLU_128 | OE2 | 2.896 |

|      |           |     |           |     |       |
|------|-----------|-----|-----------|-----|-------|
| 6BE3 | L_LYS_49  | NZ  | H_GLU_108 | OE2 | 2.860 |
| 6BE3 | L_ARG_65  | NH1 | L_ASP_86  | OD1 | 3.594 |
| 6BE3 | L_ARG_65  | NH1 | L_ASP_86  | OD2 | 2.669 |
| 6BE3 | L_ARG_65  | NH2 | L_ASP_86  | OD1 | 2.920 |
| 6BE3 | L_ARG_65  | NH2 | L_ASP_86  | OD2 | 3.411 |
| 6BE3 | L_ARG_100 | NH2 | H_ASP_98  | OD1 | 3.147 |
| 6BE3 | L_ARG_100 | NH2 | H_ASP_109 | OD1 | 3.865 |
| 6BE3 | L_LYS_171 | NZ  | L_GLU_87  | OE2 | 2.868 |
| 6BE4 | H_ARG_38  | NH1 | H_ASP_89  | OD2 | 2.649 |
| 6BE4 | H_ARG_38  | NH2 | H_GLU_46  | OE1 | 3.034 |
| 6BE4 | H_ARG_38  | NH2 | H_ASP_89  | OD2 | 3.562 |
| 6BE4 | H_ARG_66  | NH1 | H_ASP_89  | OD1 | 2.856 |
| 6BE4 | H_ARG_66  | NH1 | H_ASP_89  | OD2 | 3.787 |
| 6BE4 | H_ARG_66  | NH2 | H_ASP_89  | OD1 | 3.571 |
| 6BE4 | H_ARG_66  | NH2 | H_ASP_89  | OD2 | 3.108 |
| 6BE4 | H_ARG_97  | NH2 | H_ASP_112 | OD1 | 3.623 |
| 6BE4 | H_ARG_97  | NH2 | H_ASP_112 | OD2 | 3.151 |
| 6BE4 | H_LYS_154 | NZ  | L_GLU_129 | OE1 | 2.824 |
| 6BE4 | H_LYS_221 | NZ  | H_GLU_223 | OE2 | 2.728 |
| 6BE4 | L_ARG_65  | NH1 | L_ASP_86  | OD1 | 3.135 |
| 6BE4 | L_ARG_65  | NH2 | L_ASP_86  | OD1 | 3.000 |
| 6BE4 | L_ARG_65  | NH2 | L_ASP_86  | OD2 | 2.628 |
| 6BE4 | L_ARG_100 | NH2 | H_ASP_98  | OD1 | 3.253 |
| 6BE4 | L_ARG_100 | NH2 | H_ASP_109 | OD1 | 3.926 |
| 6BE4 | L_LYS_171 | NZ  | L_GLU_87  | OE1 | 3.243 |
| 6BE4 | L_ARG_194 | NH1 | L_ASP_156 | OD2 | 3.672 |
| 6BE4 | L_ARG_194 | NH2 | L_ASP_156 | OD1 | 3.622 |
| 6BE4 | L_ARG_194 | NH2 | L_ASP_156 | OD2 | 3.634 |
| 6BIT | L_HIS_35  | NE2 | H_GLU_54  | OE1 | 3.340 |
| 6BIT | L_ARG_40  | NH2 | L_GLU_46  | OE1 | 2.891 |
| 6BIT | L_ARG_50  | NH1 | L_GLU_57  | OE1 | 3.032 |
| 6BIT | L_ARG_50  | NH2 | L_GLU_57  | OE1 | 3.316 |
| 6BIT | L_ARG_50  | NH2 | H_ASP_100 | OD1 | 3.331 |
| 6BIT | L_ARG_50  | NH2 | H_ASP_101 | OD1 | 3.135 |
| 6BIT | L_ARG_50  | NH2 | H_ASP_101 | OD2 | 3.871 |
| 6BIT | L_LYS_59  | NZ  | L_GLU_57  | OE2 | 3.249 |
| 6BIT | L_LYS_59  | NZ  | H_ASP_100 | OD1 | 3.680 |
| 6BIT | L_LYS_63  | NZ  | L_GLU_46  | OE1 | 3.651 |
| 6BIT | L_LYS_63  | NZ  | L_GLU_46  | OE2 | 2.777 |
| 6BIT | L_LYS_67  | NZ  | L_ASP_90  | OD1 | 3.668 |
| 6BIT | L_LYS_67  | NZ  | L_ASP_90  | OD2 | 3.222 |
| 6BIT | L_LYS_208 | NZ  | K_GLU_123 | OE2 | 3.567 |
| 6BIT | L_ARG_213 | NH1 | L_ASP_143 | OD1 | 3.423 |
| 6BIT | K_ARG_61  | NH1 | K_GLU_81  | OE2 | 3.581 |
| 6BIT | K_ARG_61  | NH1 | K_ASP_82  | OD1 | 2.603 |
| 6BIT | K_ARG_61  | NH1 | K_ASP_82  | OD2 | 3.046 |
| 6BIT | K_ARG_61  | NH2 | K_GLU_81  | OE2 | 3.311 |
| 6BIT | K_ARG_96  | NH1 | H_GLU_54  | OE1 | 3.223 |
| 6BIT | K_ARG_96  | NH2 | H_GLU_54  | OE1 | 2.904 |
| 6BIT | K_ARG_96  | NH2 | H_GLU_54  | OE2 | 3.687 |
| 6BIT | K_LYS_103 | NZ  | K_ASP_165 | OD1 | 3.785 |
| 6BIT | K_LYS_149 | NZ  | K_GLU_195 | OE1 | 3.128 |
| 6BIT | K_LYS_149 | NZ  | K_GLU_195 | OE2 | 3.026 |
| 6BIT | K_LYS_183 | NZ  | K_GLU_187 | OE2 | 3.925 |
| 6BIT | K_LYS_199 | NZ  | K_ASP_110 | OD1 | 3.991 |
| 6BIT | K_LYS_199 | NZ  | K_ASP_110 | OD2 | 3.333 |
| 6BIT | H_ARG_24  | NH1 | H_ASP_10  | OD1 | 2.961 |
| 6BIT | H_ARG_24  | NH1 | H_ASP_10  | OD2 | 3.571 |

|      |           |     |           |     |       |
|------|-----------|-----|-----------|-----|-------|
| 6BIT | H_ARG_40  | NH2 | H_GLU_47  | OE1 | 2.715 |
| 6BIT | H_ARG_40  | NH2 | H_GLU_47  | OE2 | 3.722 |
| 6BIT | H_ARG_46  | NH1 | H_GLU_103 | OE1 | 2.965 |
| 6BIT | H_ARG_46  | NH2 | H_GLU_103 | OE1 | 2.785 |
| 6BIT | H_LYS_53  | NZ  | I_ASP_52  | OD1 | 3.518 |
| 6BIT | H_LYS_53  | NZ  | I_GLU_54  | OE1 | 2.817 |
| 6BIT | H_ARG_59  | NH1 | H_ASP_85  | OD1 | 2.707 |
| 6BIT | H_ARG_59  | NH1 | H_ASP_85  | OD2 | 3.494 |
| 6BIT | H_ARG_59  | NH2 | H_ASP_85  | OD1 | 3.485 |
| 6BIT | H_ARG_59  | NH2 | H_ASP_85  | OD2 | 2.872 |
| 6BIT | H_LYS_96  | NZ  | I_ASP_52  | OD2 | 2.786 |
| 6BIT | H_LYS_96  | NZ  | I_ASP_55  | OD1 | 3.426 |
| 6BIT | H_LYS_96  | NZ  | I_ASP_55  | OD2 | 2.655 |
| 6BIT | H_LYS_96  | NZ  | I_GLU_57  | OE1 | 2.771 |
| 6BIT | H_LYS_105 | NZ  | H_GLU_3   | OE2 | 2.864 |
| 6BIT | J_HIS_35  | NE2 | G_GLU_54  | OE1 | 3.221 |
| 6BIT | J_ARG_40  | NH1 | J_GLU_89  | OE1 | 3.452 |
| 6BIT | J_ARG_50  | NH1 | J_GLU_57  | OE2 | 2.730 |
| 6BIT | J_ARG_50  | NH2 | J_GLU_57  | OE2 | 3.003 |
| 6BIT | J_ARG_50  | NH2 | G_ASP_100 | OD1 | 3.724 |
| 6BIT | J_ARG_50  | NH2 | G_ASP_101 | OD1 | 3.330 |
| 6BIT | J_LYS_59  | NZ  | J_GLU_57  | OE1 | 3.468 |
| 6BIT | J_LYS_67  | NZ  | J_ASP_90  | OD1 | 3.323 |
| 6BIT | J_LYS_208 | NZ  | L_GLU_123 | OE2 | 3.539 |
| 6BIT | L_ARG_61  | NH1 | L_GLU_81  | OE2 | 3.351 |
| 6BIT | L_ARG_61  | NH1 | L_ASP_82  | OD1 | 2.686 |
| 6BIT | L_ARG_61  | NH1 | L_ASP_82  | OD2 | 3.128 |
| 6BIT | L_ARG_61  | NH2 | L_GLU_81  | OE2 | 3.264 |
| 6BIT | L_ARG_96  | NH1 | G_GLU_54  | OE1 | 3.007 |
| 6BIT | L_ARG_96  | NH2 | G_GLU_54  | OE1 | 2.768 |
| 6BIT | L_ARG_96  | NH2 | G_GLU_54  | OE2 | 3.419 |
| 6BIT | L_LYS_103 | NZ  | L_ASP_165 | OD1 | 3.780 |
| 6BIT | L_LYS_169 | NZ  | L_ASP_167 | OD1 | 3.582 |
| 6BIT | L_LYS_169 | NZ  | L_ASP_167 | OD2 | 3.848 |
| 6BIT | L_LYS_183 | NZ  | L_GLU_187 | OE2 | 3.386 |
| 6BIT | L_HIS_189 | ND1 | L_ASP_151 | OD2 | 2.866 |
| 6BIT | G_ARG_24  | NH2 | G_ASP_10  | OD1 | 2.805 |
| 6BIT | G_ARG_24  | NH2 | G_ASP_10  | OD2 | 3.462 |
| 6BIT | G_ARG_40  | NH2 | G_GLU_47  | OE1 | 2.503 |
| 6BIT | G_ARG_40  | NH2 | G_GLU_47  | OE2 | 3.922 |
| 6BIT | G_ARG_46  | NH1 | G_GLU_103 | OE1 | 3.088 |
| 6BIT | G_ARG_46  | NH1 | G_GLU_103 | OE2 | 3.993 |
| 6BIT | G_ARG_46  | NH2 | G_GLU_103 | OE1 | 2.832 |
| 6BIT | G_LYS_53  | NZ  | J_ASP_52  | OD1 | 2.843 |
| 6BIT | G_LYS_53  | NZ  | J_ASP_52  | OD2 | 3.656 |
| 6BIT | G_LYS_53  | NZ  | J_GLU_54  | OE1 | 2.681 |
| 6BIT | G_ARG_59  | NH1 | G_ASP_85  | OD1 | 3.056 |
| 6BIT | G_ARG_59  | NH1 | G_ASP_85  | OD2 | 3.619 |
| 6BIT | G_ARG_59  | NH2 | G_ASP_85  | OD1 | 3.597 |
| 6BIT | G_ARG_59  | NH2 | G_ASP_85  | OD2 | 2.677 |
| 6BIT | G_LYS_96  | NZ  | J_ASP_52  | OD2 | 2.719 |
| 6BIT | G_LYS_96  | NZ  | J_ASP_55  | OD1 | 3.165 |
| 6BIT | G_LYS_96  | NZ  | J_ASP_55  | OD2 | 2.701 |
| 6BIT | G_LYS_96  | NZ  | J_GLU_57  | OE2 | 2.943 |
| 6BIT | G_LYS_105 | NZ  | G_GLU_3   | OE1 | 3.650 |
| 6BRB | D_LYS_5   | NZ  | D_GLU_3   | OE1 | 2.959 |
| 6BRB | D_LYS_5   | NZ  | D_GLU_3   | OE2 | 3.636 |
| 6BRB | D_LYS_33  | NZ  | D_GLU_63  | OE1 | 3.743 |

|      |           |     |           |     |       |
|------|-----------|-----|-----------|-----|-------|
| 6BRB | D_ARG.69  | NH2 | D_GLU.27  | OE1 | 3.803 |
| 6BRB | D_ARG.69  | NH2 | D_GLU.27  | OE2 | 3.492 |
| 6BXA | A_ARG.37  | NH1 | C_GLU.101 | OE1 | 3.957 |
| 6BXA | A_ARG.37  | NH1 | C_GLU.101 | OE2 | 3.920 |
| 6BXA | A_ARG.37  | NH2 | C_GLU.101 | OE1 | 3.689 |
| 6BXA | A_ARG.37  | NH2 | C_GLU.101 | OE2 | 2.525 |
| 6BXA | A_LYS.77  | NZ  | A_ASP.53  | OD2 | 3.745 |
| 6BXA | A_LYS.77  | NZ  | A_GLU.79  | OE2 | 3.822 |
| 6BXA | A_LYS.77  | NZ  | C_ASP.34  | OD2 | 2.860 |
| 6BXA | A_ARG.88  | NH1 | A_GLU.112 | OE2 | 2.776 |
| 6BXA | A_ARG.88  | NH2 | A_GLU.61  | OE1 | 3.314 |
| 6BXA | A_LYS.102 | NZ  | C_ASP.34  | OD1 | 2.955 |
| 6BXA | A_ARG.154 | NH1 | A_ASP.177 | OD1 | 3.604 |
| 6BXA | A_ARG.154 | NH1 | A_ASP.177 | OD2 | 2.924 |
| 6BXA | A_ARG.172 | NH2 | A_GLU.149 | OE2 | 3.243 |
| 6BXA | A_LYS.184 | NZ  | A_ASP.211 | OD2 | 2.992 |
| 6BXA | A_LYS.184 | NZ  | B_ASP.133 | OD2 | 2.709 |
| 6BXA | A_ARG.203 | NH1 | A_ASP.177 | OD2 | 3.223 |
| 6BXA | A_LYS.221 | NZ  | A_GLU.189 | OE1 | 2.737 |
| 6BXA | A_LYS.221 | NZ  | A_GLU.189 | OE2 | 3.962 |
| 6BXA | A_LYS.227 | NZ  | A_GLU.188 | OE2 | 3.721 |
| 6BXA | A_LYS.242 | NZ  | A_GLU.214 | OE1 | 2.824 |
| 6BXA | A_LYS.247 | NZ  | A_ASP.251 | OD2 | 3.024 |
| 6BXA | A_LYS.287 | NZ  | A_GLU.290 | OE1 | 3.206 |
| 6BXA | A_LYS.287 | NZ  | A_GLU.290 | OE2 | 3.365 |
| 6BXA | A_LYS.365 | NZ  | A_ASP.364 | OD2 | 2.586 |
| 6BXA | A_ARG.430 | NH1 | A_ASP.425 | OD2 | 2.739 |
| 6BXA | A_ARG.436 | NH1 | A_ASP.432 | OD1 | 3.991 |
| 6BXA | A_ARG.436 | NH1 | A_ASP.432 | OD2 | 3.281 |
| 6BXA | A_ARG.436 | NH2 | A_ASP.432 | OD1 | 3.255 |
| 6BXA | A_ARG.436 | NH2 | A_ASP.432 | OD2 | 3.091 |
| 6BXA | A_ARG.459 | NH2 | A_GLU.445 | OE1 | 3.182 |
| 6BXA | B_ARG.37  | NH2 | D_GLU.101 | OE1 | 3.840 |
| 6BXA | B_ARG.37  | NH2 | D_GLU.101 | OE2 | 2.839 |
| 6BXA | B_LYS.77  | NZ  | B_ASP.53  | OD2 | 3.863 |
| 6BXA | B_LYS.77  | NZ  | B_GLU.79  | OE1 | 3.945 |
| 6BXA | B_LYS.77  | NZ  | B_GLU.79  | OE2 | 3.546 |
| 6BXA | B_LYS.77  | NZ  | D_ASP.34  | OD1 | 2.907 |
| 6BXA | B_ARG.88  | NH1 | B_GLU.112 | OE2 | 2.748 |
| 6BXA | B_ARG.88  | NH2 | B_GLU.61  | OE1 | 3.185 |
| 6BXA | B_ARG.93  | NH2 | B_GLU.64  | OE1 | 2.917 |
| 6BXA | B_ARG.93  | NH2 | B_GLU.64  | OE2 | 2.657 |
| 6BXA | B_LYS.102 | NZ  | D_ASP.34  | OD2 | 3.845 |
| 6BXA | B_ARG.154 | NH2 | B_ASP.177 | OD2 | 4.000 |
| 6BXA | B_LYS.184 | NZ  | A_ASP.133 | OD2 | 2.771 |
| 6BXA | B_LYS.184 | NZ  | B_ASP.211 | OD2 | 2.792 |
| 6BXA | B_ARG.203 | NH1 | B_ASP.177 | OD2 | 3.054 |
| 6BXA | B_LYS.242 | NZ  | B_GLU.214 | OE2 | 3.352 |
| 6BXA | B_LYS.247 | NZ  | B_ASP.251 | OD2 | 2.934 |
| 6BXA | C_ARG.125 | NH1 | C_GLU.127 | OE1 | 2.840 |
| 6BXA | C_ARG.199 | NH2 | C_ASP.187 | OD1 | 3.576 |
| 6BXA | C_ARG.199 | NH2 | C_ASP.187 | OD2 | 3.048 |
| 6BXA | C_LYS.210 | NZ  | C_GLU.160 | OE1 | 3.673 |
| 6BXA | D_ARG.125 | NH1 | D_GLU.127 | OE1 | 2.909 |
| 6BXA | D_ARG.199 | NH2 | D_ASP.187 | OD1 | 2.818 |
| 6BXA | D_ARG.199 | NH2 | D_ASP.187 | OD2 | 3.045 |
| 6BXC | A_ARG.88  | NH1 | A_GLU.112 | OE2 | 3.484 |
| 6BXC | A_LYS.102 | NZ  | A_GLU.79  | OE2 | 2.891 |

|      |           |     |           |     |       |
|------|-----------|-----|-----------|-----|-------|
| 6BXC | A_LYS_102 | NZ  | A_ASP_104 | OD2 | 2.667 |
| 6BXC | A_ARG_154 | NH1 | A_ASP_177 | OD1 | 3.409 |
| 6BXC | A_ARG_154 | NH1 | A_ASP_177 | OD2 | 2.660 |
| 6BXC | A_ARG_172 | NH2 | A_GLU_149 | OE2 | 2.307 |
| 6BXC | A_LYS_184 | NZ  | C_ASP_34  | OD2 | 3.851 |
| 6BXC | A_HIS_198 | NE2 | D_GLU_65  | OE2 | 3.317 |
| 6BXC | A_ARG_203 | NH2 | A_ASP_235 | OD2 | 3.882 |
| 6BXC | A_LYS_247 | NZ  | A_ASP_251 | OD2 | 3.104 |
| 6BXC | A_HIS_314 | ND1 | A_GLU_290 | OE2 | 3.791 |
| 6BXC | A_ARG_358 | NH2 | A_ASP_333 | OD1 | 3.683 |
| 6BXC | A_ARG_358 | NH2 | A_ASP_333 | OD2 | 2.263 |
| 6BXC | B_LYS_77  | NZ  | B_ASP_53  | OD2 | 3.559 |
| 6BXC | B_LYS_77  | NZ  | B_GLU_79  | OE1 | 3.681 |
| 6BXC | B_LYS_77  | NZ  | B_GLU_79  | OE2 | 3.867 |
| 6BXC | B_ARG_88  | NH1 | B_GLU_112 | OE2 | 2.734 |
| 6BXC | B_ARG_88  | NH2 | B_GLU_61  | OE1 | 3.021 |
| 6BXC | B_ARG_154 | NH1 | B_ASP_177 | OD1 | 3.602 |
| 6BXC | B_ARG_154 | NH1 | B_ASP_177 | OD2 | 2.827 |
| 6BXC | B_LYS_159 | NZ  | D_ASP_34  | OD2 | 3.891 |
| 6BXC | B_ARG_172 | NH1 | B_GLU_123 | OE2 | 3.880 |
| 6BXC | B_ARG_172 | NH2 | B_GLU_123 | OE1 | 3.923 |
| 6BXC | B_ARG_172 | NH2 | B_GLU_123 | OE2 | 3.236 |
| 6BXC | B_ARG_172 | NH2 | B_GLU_149 | OE2 | 2.392 |
| 6BXC | B_LYS_182 | NZ  | D_GLU_81  | OE2 | 3.361 |
| 6BXC | B_LYS_184 | NZ  | D_ASP_34  | OD2 | 3.547 |
| 6BXC | B_ARG_203 | NH1 | B_ASP_177 | OD2 | 3.785 |
| 6BXC | B_LYS_221 | NZ  | B_GLU_189 | OE1 | 2.699 |
| 6BXC | B_LYS_227 | NZ  | B_GLU_188 | OE1 | 3.703 |
| 6BXC | B_LYS_227 | NZ  | B_GLU_188 | OE2 | 2.986 |
| 6BXC | B_LYS_247 | NZ  | B_ASP_251 | OD2 | 2.562 |
| 6BXC | B_LYS_287 | NZ  | B_GLU_290 | OE1 | 3.663 |
| 6BXC | B_HIS_314 | ND1 | B_GLU_290 | OE2 | 3.748 |
| 6BXC | B_ARG_358 | NH1 | B_ASP_333 | OD2 | 2.973 |
| 6BXC | B_ARG_358 | NH2 | B_ASP_333 | OD2 | 3.373 |
| 6BXC | B_HIS_420 | NE2 | B_ASP_396 | OD2 | 3.947 |
| 6BXD | A_ARG_125 | NH1 | A_GLU_101 | OE2 | 3.973 |
| 6BXD | A_ARG_199 | NH2 | A_ASP_187 | OD1 | 3.406 |
| 6BXD | A_LYS_210 | NZ  | A_GLU_160 | OE1 | 3.837 |
| 6BXE | A_LYS_63  | NZ  | A_GLU_65  | OE2 | 3.493 |
| 6BXE | A_HIS_125 | NE2 | B_GLU_81  | OE2 | 2.552 |
| 6BXE | B_LYS_63  | NZ  | B_GLU_65  | OE2 | 3.400 |
| 6BXE | B_HIS_125 | NE2 | A_GLU_81  | OE2 | 3.833 |
| 6BXE | B_ARG_168 | NH1 | B_GLU_154 | OE1 | 2.963 |
| 6BZU | A_ARG_38  | NH1 | A_ASP_86  | OD1 | 2.830 |
| 6BZU | A_ARG_38  | NH2 | A_GLU_46  | OE1 | 2.706 |
| 6BZU | A_ARG_38  | NH2 | A_GLU_46  | OE2 | 3.949 |
| 6BZU | A_ARG_38  | NH2 | A_ASP_86  | OD1 | 3.655 |
| 6BZU | A_ARG_64  | NH2 | B_ASP_94  | OD1 | 3.703 |
| 6BZU | A_ARG_66  | NH1 | A_ASP_86  | OD1 | 3.455 |
| 6BZU | A_ARG_66  | NH1 | A_ASP_86  | OD2 | 2.992 |
| 6BZU | A_ARG_66  | NH2 | A_ASP_86  | OD1 | 2.772 |
| 6BZU | A_ARG_66  | NH2 | A_ASP_86  | OD2 | 3.274 |
| 6BZU | A_ARG_94  | NH1 | A_ASP_27  | OD1 | 3.748 |
| 6BZU | A_ARG_94  | NH1 | A_ASP_27  | OD2 | 3.345 |
| 6BZU | A_ARG_94  | NH2 | A_ASP_101 | OD1 | 3.362 |
| 6BZU | A_ARG_94  | NH2 | A_ASP_101 | OD2 | 2.575 |
| 6BZU | A_LYS_143 | NZ  | A_ASP_144 | OD1 | 3.544 |
| 6BZU | A_LYS_206 | NZ  | A_ASP_208 | OD1 | 3.589 |

|      |           |     |           |     |       |
|------|-----------|-----|-----------|-----|-------|
| 6BZU | A_LYS_206 | NZ  | A_ASP_208 | OD2 | 3.931 |
| 6BZU | A_LYS_209 | NZ  | B_GLU_123 | OE2 | 3.980 |
| 6BZU | B_ARG_18  | NH1 | B_ASP_76  | OD2 | 3.621 |
| 6BZU | B_ARG_18  | NH2 | B_ASP_76  | OD2 | 3.174 |
| 6BZU | B_ARG_18  | NH2 | F_ASP_70  | OD2 | 2.642 |
| 6BZU | B_ARG_24  | NH1 | B_ASP_70  | OD1 | 3.347 |
| 6BZU | B_ARG_24  | NH1 | F_ASP_76  | OD1 | 3.597 |
| 6BZU | B_ARG_24  | NH1 | F_ASP_76  | OD2 | 2.861 |
| 6BZU | B_LYS_39  | NZ  | B_ASP_81  | OD1 | 2.891 |
| 6BZU | B_LYS_39  | NZ  | B_ASP_81  | OD2 | 2.853 |
| 6BZU | B_ARG_61  | NH1 | B_ASP_82  | OD1 | 3.370 |
| 6BZU | B_ARG_61  | NH1 | B_ASP_82  | OD2 | 2.618 |
| 6BZU | B_ARG_61  | NH2 | B_ASP_82  | OD1 | 3.228 |
| 6BZU | B_ARG_61  | NH2 | B_ASP_82  | OD2 | 3.877 |
| 6BZU | B_LYS_149 | NZ  | B_GLU_195 | OE2 | 3.153 |
| 6BZU | B_LYS_183 | NZ  | B_GLU_187 | OE1 | 3.079 |
| 6BZU | B_LYS_183 | NZ  | B_GLU_187 | OE2 | 2.953 |
| 6BZU | B_HIS_189 | ND1 | B_ASP_151 | OD1 | 3.911 |
| 6BZU | B_HIS_189 | ND1 | B_ASP_151 | OD2 | 2.360 |
| 6BZU | C_ARG_38  | NH1 | C_ASP_86  | OD1 | 2.726 |
| 6BZU | C_ARG_38  | NH2 | C_GLU_46  | OE1 | 2.726 |
| 6BZU | C_ARG_38  | NH2 | C_GLU_46  | OE2 | 3.930 |
| 6BZU | C_ARG_38  | NH2 | C_ASP_86  | OD1 | 3.517 |
| 6BZU | C_ARG_64  | NH2 | D_ASP_94  | OD1 | 3.618 |
| 6BZU | C_ARG_66  | NH1 | C_ASP_86  | OD1 | 3.539 |
| 6BZU | C_ARG_66  | NH1 | C_ASP_86  | OD2 | 2.951 |
| 6BZU | C_ARG_66  | NH2 | C_ASP_86  | OD1 | 2.783 |
| 6BZU | C_ARG_66  | NH2 | C_ASP_86  | OD2 | 3.152 |
| 6BZU | C_ARG_94  | NH1 | C_ASP_27  | OD2 | 3.167 |
| 6BZU | C_ARG_94  | NH2 | C_ASP_101 | OD1 | 3.308 |
| 6BZU | C_ARG_94  | NH2 | C_ASP_101 | OD2 | 2.595 |
| 6BZU | C_LYS_143 | NZ  | C_ASP_144 | OD1 | 3.728 |
| 6BZU | C_LYS_206 | NZ  | C_ASP_208 | OD1 | 3.579 |
| 6BZU | C_LYS_206 | NZ  | C_ASP_208 | OD2 | 3.842 |
| 6BZU | C_LYS_210 | NZ  | C_GLU_212 | OE2 | 3.412 |
| 6BZU | D_ARG_18  | NH1 | D_ASP_76  | OD2 | 3.756 |
| 6BZU | D_ARG_18  | NH2 | D_ASP_76  | OD2 | 3.639 |
| 6BZU | D_ARG_24  | NH2 | D_ASP_70  | OD1 | 2.824 |
| 6BZU | D_ARG_24  | NH2 | D_ASP_70  | OD2 | 3.740 |
| 6BZU | D_LYS_39  | NZ  | D_ASP_81  | OD1 | 2.752 |
| 6BZU | D_LYS_39  | NZ  | D_ASP_81  | OD2 | 2.990 |
| 6BZU | D_ARG_61  | NH1 | D_ASP_82  | OD1 | 3.166 |
| 6BZU | D_ARG_61  | NH1 | D_ASP_82  | OD2 | 2.739 |
| 6BZU | D_ARG_61  | NH2 | D_ASP_82  | OD1 | 3.480 |
| 6BZU | D_LYS_183 | NZ  | D_GLU_187 | OE1 | 2.974 |
| 6BZU | D_LYS_183 | NZ  | D_GLU_187 | OE2 | 3.283 |
| 6BZU | D_HIS_189 | ND1 | D_ASP_151 | OD2 | 3.151 |
| 6BZU | E_ARG_38  | NH1 | E_ASP_86  | OD1 | 2.631 |
| 6BZU | E_ARG_38  | NH2 | E_GLU_46  | OE1 | 2.648 |
| 6BZU | E_ARG_38  | NH2 | E_GLU_46  | OE2 | 3.839 |
| 6BZU | E_ARG_38  | NH2 | E_ASP_86  | OD1 | 3.682 |
| 6BZU | E_ARG_64  | NH2 | F_ASP_94  | OD1 | 3.701 |
| 6BZU | E_ARG_66  | NH1 | E_ASP_86  | OD1 | 3.600 |
| 6BZU | E_ARG_66  | NH1 | E_ASP_86  | OD2 | 3.079 |
| 6BZU | E_ARG_66  | NH2 | E_ASP_86  | OD1 | 3.151 |
| 6BZU | E_ARG_66  | NH2 | E_ASP_86  | OD2 | 3.506 |
| 6BZU | E_ARG_94  | NH1 | E_ASP_27  | OD1 | 3.760 |
| 6BZU | E_ARG_94  | NH1 | E_ASP_27  | OD2 | 3.069 |

|      |           |     |           |     |       |
|------|-----------|-----|-----------|-----|-------|
| 6BZU | E_ARG_94  | NH2 | E_ASP_101 | OD1 | 3.575 |
| 6BZU | E_ARG_94  | NH2 | E_ASP_101 | OD2 | 3.123 |
| 6BZU | E_LYS_143 | NZ  | E_ASP_144 | OD1 | 3.596 |
| 6BZU | E_LYS_206 | NZ  | E_ASP_208 | OD1 | 3.535 |
| 6BZU | E_LYS_206 | NZ  | E_ASP_208 | OD2 | 3.797 |
| 6BZU | F_ARG_18  | NH1 | F_ASP_76  | OD2 | 3.679 |
| 6BZU | F_ARG_18  | NH2 | F_ASP_76  | OD2 | 3.069 |
| 6BZU | F_ARG_24  | NH1 | B_ASP_76  | OD1 | 3.333 |
| 6BZU | F_ARG_24  | NH1 | B_ASP_76  | OD2 | 3.080 |
| 6BZU | F_LYS_39  | NZ  | F_ASP_81  | OD1 | 2.757 |
| 6BZU | F_LYS_39  | NZ  | F_ASP_81  | OD2 | 3.575 |
| 6BZU | F_ARG_61  | NH1 | F_ASP_82  | OD1 | 3.022 |
| 6BZU | F_ARG_61  | NH1 | F_ASP_82  | OD2 | 2.655 |
| 6BZU | F_ARG_61  | NH2 | F_ASP_82  | OD1 | 3.315 |
| 6BZU | F_LYS_149 | NZ  | F_GLU_195 | OE2 | 3.477 |
| 6BZU | F_LYS_183 | NZ  | F_GLU_187 | OE1 | 3.247 |
| 6BZU | F_LYS_183 | NZ  | F_GLU_187 | OE2 | 3.817 |
| 6BZU | F_HIS_189 | ND1 | F_ASP_151 | OD2 | 2.440 |
| 6BZU | G_ARG_38  | NH1 | G_ASP_86  | OD1 | 2.471 |
| 6BZU | G_ARG_38  | NH2 | G_GLU_46  | OE1 | 2.713 |
| 6BZU | G_ARG_38  | NH2 | G_GLU_46  | OE2 | 3.875 |
| 6BZU | G_ARG_38  | NH2 | G_ASP_86  | OD1 | 3.468 |
| 6BZU | G_ARG_64  | NH2 | H_ASP_94  | OD1 | 3.197 |
| 6BZU | G_ARG_64  | NH2 | H_ASP_94  | OD2 | 3.837 |
| 6BZU | G_ARG_66  | NH1 | G_ASP_86  | OD1 | 3.947 |
| 6BZU | G_ARG_66  | NH1 | G_ASP_86  | OD2 | 3.042 |
| 6BZU | G_ARG_66  | NH2 | G_ASP_86  | OD1 | 2.869 |
| 6BZU | G_ARG_66  | NH2 | G_ASP_86  | OD2 | 2.950 |
| 6BZU | G_ARG_94  | NH1 | G_ASP_27  | OD2 | 3.484 |
| 6BZU | G_ARG_94  | NH2 | G_ASP_101 | OD1 | 3.468 |
| 6BZU | G_ARG_94  | NH2 | G_ASP_101 | OD2 | 2.612 |
| 6BZU | G_LYS_143 | NZ  | G_ASP_144 | OD1 | 3.677 |
| 6BZU | G_LYS_206 | NZ  | G_ASP_208 | OD1 | 3.523 |
| 6BZU | G_LYS_206 | NZ  | G_ASP_208 | OD2 | 3.779 |
| 6BZU | G_LYS_209 | NZ  | H_GLU_123 | OE1 | 2.734 |
| 6BZU | G_LYS_209 | NZ  | H_GLU_123 | OE2 | 3.547 |
| 6BZU | G_LYS_210 | NZ  | G_GLU_212 | OE2 | 3.397 |
| 6BZU | H_ARG_18  | NH1 | H_ASP_76  | OD2 | 3.879 |
| 6BZU | H_ARG_18  | NH2 | H_ASP_76  | OD2 | 3.299 |
| 6BZU | H_LYS_39  | NZ  | H_ASP_81  | OD1 | 2.621 |
| 6BZU | H_LYS_39  | NZ  | H_ASP_81  | OD2 | 3.478 |
| 6BZU | H_ARG_61  | NH1 | H_ASP_82  | OD1 | 3.357 |
| 6BZU | H_ARG_61  | NH1 | H_ASP_82  | OD2 | 2.854 |
| 6BZU | H_ARG_61  | NH2 | H_ASP_82  | OD1 | 3.381 |
| 6BZU | H_LYS_149 | NZ  | H_GLU_195 | OE2 | 3.735 |
| 6BZU | H_LYS_183 | NZ  | H_GLU_187 | OE1 | 3.364 |
| 6BZU | H_LYS_183 | NZ  | H_GLU_187 | OE2 | 3.961 |
| 6BZU | H_LYS_188 | NZ  | H_ASP_185 | OD1 | 3.876 |
| 6BZV | E_ARG_38  | NH1 | E_ASP_86  | OD1 | 2.844 |
| 6BZV | E_ARG_38  | NH2 | E_GLU_46  | OE1 | 2.762 |
| 6BZV | E_ARG_38  | NH2 | E_ASP_86  | OD1 | 3.884 |
| 6BZV | E_ARG_66  | NH1 | E_ASP_86  | OD2 | 3.252 |
| 6BZV | E_ARG_66  | NH1 | C_GLU_85  | OE2 | 3.540 |
| 6BZV | E_ARG_66  | NH2 | E_ASP_86  | OD1 | 3.097 |
| 6BZV | E_ARG_66  | NH2 | E_ASP_86  | OD2 | 3.221 |
| 6BZV | E_ARG_66  | NH2 | C_GLU_85  | OE2 | 3.482 |
| 6BZV | E_ARG_94  | NH1 | E_ASP_27  | OD2 | 2.862 |
| 6BZV | E_ARG_94  | NH2 | E_ASP_101 | OD1 | 3.797 |

|      |           |     |           |     |       |
|------|-----------|-----|-----------|-----|-------|
| 6BZV | E_ARG_94  | NH2 | E_ASP_101 | OD2 | 2.904 |
| 6BZV | E_LYS_143 | NZ  | E_ASP_144 | OD1 | 3.856 |
| 6BZV | E_LYS_206 | NZ  | G_ASP_208 | OD2 | 3.271 |
| 6BZV | E_LYS_209 | NZ  | F_GLU_123 | OE1 | 3.953 |
| 6BZV | E_LYS_209 | NZ  | F_GLU_123 | OE2 | 2.713 |
| 6BZV | E_LYS_210 | NZ  | E_GLU_212 | OE2 | 2.831 |
| 6BZV | F_ARG_18  | NH2 | F_ASP_76  | OD2 | 3.890 |
| 6BZV | F_LYS_39  | NZ  | F_ASP_81  | OD1 | 3.137 |
| 6BZV | F_LYS_39  | NZ  | F_ASP_81  | OD2 | 3.795 |
| 6BZV | F_ARG_61  | NH1 | F_ASP_82  | OD1 | 3.530 |
| 6BZV | F_ARG_61  | NH1 | F_ASP_82  | OD2 | 2.932 |
| 6BZV | F_ARG_61  | NH2 | F_ASP_82  | OD1 | 3.252 |
| 6BZV | F_LYS_188 | NZ  | F_ASP_185 | OD1 | 3.910 |
| 6BZV | A_ARG_38  | NH1 | A_ASP_86  | OD1 | 2.647 |
| 6BZV | A_ARG_38  | NH2 | A_GLU_46  | OE1 | 3.008 |
| 6BZV | A_ARG_38  | NH2 | A_ASP_86  | OD1 | 3.189 |
| 6BZV | A_ARG_66  | NH1 | A_ASP_86  | OD2 | 3.345 |
| 6BZV | A_ARG_66  | NH2 | A_ASP_86  | OD1 | 3.206 |
| 6BZV | A_ARG_66  | NH2 | A_ASP_86  | OD2 | 3.333 |
| 6BZV | A_ARG_94  | NH1 | A_ASP_27  | OD2 | 2.749 |
| 6BZV | A_ARG_94  | NH2 | A_ASP_101 | OD1 | 3.799 |
| 6BZV | A_ARG_94  | NH2 | A_ASP_101 | OD2 | 2.974 |
| 6BZV | A_LYS_143 | NZ  | A_ASP_144 | OD1 | 3.960 |
| 6BZV | A_LYS_206 | NZ  | A_ASP_208 | OD1 | 3.297 |
| 6BZV | A_LYS_206 | NZ  | A_ASP_208 | OD2 | 3.789 |
| 6BZV | A_LYS_209 | NZ  | B_GLU_123 | OE1 | 2.709 |
| 6BZV | A_LYS_209 | NZ  | B_GLU_123 | OE2 | 3.439 |
| 6BZV | A_LYS_210 | NZ  | A_GLU_212 | OE2 | 2.656 |
| 6BZV | B_ARG_18  | NH2 | B_ASP_76  | OD2 | 3.495 |
| 6BZV | B_ARG_24  | NH2 | B_ASP_70  | OD1 | 3.551 |
| 6BZV | B_ARG_24  | NH2 | B_ASP_70  | OD2 | 3.558 |
| 6BZV | B_LYS_39  | NZ  | B_ASP_81  | OD1 | 2.943 |
| 6BZV | B_LYS_39  | NZ  | B_ASP_81  | OD2 | 3.840 |
| 6BZV | B_ARG_61  | NH1 | B_ASP_82  | OD1 | 2.943 |
| 6BZV | B_ARG_61  | NH1 | B_ASP_82  | OD2 | 2.669 |
| 6BZV | B_ARG_61  | NH2 | B_ASP_82  | OD1 | 3.350 |
| 6BZV | B_LYS_149 | NZ  | B_GLU_195 | OE2 | 3.685 |
| 6BZV | B_LYS_183 | NZ  | B_GLU_187 | OE1 | 3.842 |
| 6BZV | C_ARG_38  | NH1 | C_ASP_86  | OD1 | 2.657 |
| 6BZV | C_ARG_38  | NH2 | C_GLU_46  | OE1 | 3.551 |
| 6BZV | C_ARG_38  | NH2 | C_ASP_86  | OD1 | 3.055 |
| 6BZV | C_ARG_66  | NH1 | C_ASP_86  | OD2 | 3.524 |
| 6BZV | C_ARG_66  | NH2 | C_ASP_86  | OD1 | 3.405 |
| 6BZV | C_ARG_66  | NH2 | C_ASP_86  | OD2 | 3.206 |
| 6BZV | C_ARG_94  | NH1 | C_ASP_27  | OD2 | 2.994 |
| 6BZV | C_ARG_94  | NH2 | C_ASP_101 | OD1 | 3.607 |
| 6BZV | C_ARG_94  | NH2 | C_ASP_101 | OD2 | 3.021 |
| 6BZV | C_LYS_143 | NZ  | C_ASP_144 | OD1 | 3.671 |
| 6BZV | C_LYS_206 | NZ  | C_ASP_208 | OD1 | 2.715 |
| 6BZV | C_LYS_206 | NZ  | C_ASP_208 | OD2 | 3.362 |
| 6BZV | C_LYS_209 | NZ  | D_GLU_123 | OE1 | 2.619 |
| 6BZV | C_LYS_209 | NZ  | D_GLU_123 | OE2 | 2.945 |
| 6BZV | C_LYS_210 | NZ  | C_GLU_212 | OE2 | 2.891 |
| 6BZV | D_ARG_18  | NH2 | D_ASP_76  | OD2 | 3.172 |
| 6BZV | D_ARG_24  | NH2 | D_ASP_70  | OD1 | 2.988 |
| 6BZV | D_ARG_24  | NH2 | D_ASP_70  | OD2 | 3.384 |
| 6BZV | D_LYS_39  | NZ  | D_ASP_81  | OD1 | 2.720 |
| 6BZV | D_LYS_39  | NZ  | D_ASP_81  | OD2 | 3.480 |



|      |           |     |           |     |       |
|------|-----------|-----|-----------|-----|-------|
| 6BZV | D_ARG_61  | NH1 | D_ASP_82  | OD1 | 2.908 |
| 6BZV | D_ARG_61  | NH1 | D_ASP_82  | OD2 | 2.744 |
| 6BZV | D_ARG_61  | NH2 | D_GLU_79  | OE1 | 3.805 |
| 6BZV | D_ARG_61  | NH2 | D_ASP_82  | OD1 | 3.651 |
| 6BZV | D_LYS_183 | NZ  | D_GLU_187 | OE1 | 3.827 |
| 6BZV | D_LYS_183 | NZ  | D_GLU_187 | OE2 | 3.971 |
| 6BZV | G_ARG_38  | NH1 | G_ASP_86  | OD1 | 2.748 |
| 6BZV | G_ARG_38  | NH2 | G_GLU_46  | OE1 | 3.230 |
| 6BZV | G_ARG_38  | NH2 | G_ASP_86  | OD1 | 3.248 |
| 6BZV | G_ARG_66  | NH1 | G_ASP_86  | OD2 | 3.499 |
| 6BZV | G_ARG_66  | NH2 | G_ASP_86  | OD1 | 3.475 |
| 6BZV | G_ARG_66  | NH2 | G_ASP_86  | OD2 | 3.645 |
| 6BZV | G_ARG_94  | NH1 | G_ASP_27  | OD1 | 2.468 |
| 6BZV | G_ARG_94  | NH2 | G_ASP_101 | OD1 | 3.530 |
| 6BZV | G_ARG_94  | NH2 | G_ASP_101 | OD2 | 3.139 |
| 6BZV | G_LYS_143 | NZ  | G_ASP_144 | OD1 | 3.706 |
| 6BZV | G_HIS_164 | NE2 | H_ASP_167 | OD1 | 3.817 |
| 6BZV | G_LYS_209 | NZ  | H_GLU_123 | OE1 | 3.054 |
| 6BZV | G_LYS_209 | NZ  | H_GLU_123 | OE2 | 3.192 |
| 6BZV | G_LYS_210 | NZ  | G_GLU_212 | OE2 | 2.995 |
| 6BZV | H_ARG_18  | NH2 | H_ASP_76  | OD2 | 3.078 |
| 6BZV | H_LYS_39  | NZ  | H_ASP_81  | OD1 | 2.837 |
| 6BZV | H_LYS_39  | NZ  | H_ASP_81  | OD2 | 3.626 |
| 6BZV | H_ARG_61  | NH1 | H_ASP_82  | OD1 | 3.084 |
| 6BZV | H_ARG_61  | NH1 | H_ASP_82  | OD2 | 2.483 |
| 6BZV | H_ARG_61  | NH2 | H_ASP_82  | OD1 | 2.797 |
| 6BZV | H_ARG_61  | NH2 | H_ASP_82  | OD2 | 3.746 |
| 6BZV | H_LYS_103 | NZ  | H_GLU_165 | OE1 | 3.239 |
| 6BZV | H_LYS_103 | NZ  | H_GLU_165 | OE2 | 2.963 |
| 6BZV | H_LYS_149 | NZ  | H_GLU_195 | OE2 | 3.595 |
| 6BZV | H_LYS_183 | NZ  | H_GLU_187 | OE1 | 3.837 |
| 6BZV | H_LYS_183 | NZ  | H_GLU_187 | OE2 | 3.903 |
| 6BZW | C_ARG_38  | NH1 | C_ASP_86  | OD1 | 2.855 |
| 6BZW | C_ARG_38  | NH2 | C_GLU_46  | OE1 | 2.761 |
| 6BZW | C_ARG_38  | NH2 | C_GLU_46  | OE2 | 3.900 |
| 6BZW | C_ARG_38  | NH2 | C_ASP_86  | OD1 | 3.525 |
| 6BZW | C_ARG_66  | NH1 | C_ASP_86  | OD1 | 3.684 |
| 6BZW | C_ARG_66  | NH1 | C_ASP_86  | OD2 | 2.944 |
| 6BZW | C_ARG_66  | NH2 | C_ASP_86  | OD1 | 2.982 |
| 6BZW | C_ARG_66  | NH2 | C_ASP_86  | OD2 | 3.451 |
| 6BZW | C_ARG_94  | NH1 | C_ASP_27  | OD2 | 3.411 |
| 6BZW | C_ARG_94  | NH2 | C_ASP_101 | OD1 | 3.817 |
| 6BZW | C_ARG_94  | NH2 | C_ASP_101 | OD2 | 2.574 |
| 6BZW | C_LYS_143 | NZ  | C_ASP_144 | OD1 | 3.327 |
| 6BZW | C_LYS_143 | NZ  | C_ASP_144 | OD2 | 2.941 |
| 6BZW | C_LYS_209 | NZ  | D_GLU_123 | OE1 | 2.857 |
| 6BZW | C_LYS_209 | NZ  | D_GLU_123 | OE2 | 3.990 |
| 6BZW | C_LYS_210 | NZ  | C_GLU_212 | OE2 | 3.580 |
| 6BZW | D_ARG_18  | NH2 | H_GLU_93  | OE1 | 3.070 |
| 6BZW | D_LYS_39  | NZ  | D_ASP_81  | OD1 | 2.338 |
| 6BZW | D_LYS_39  | NZ  | D_ASP_81  | OD2 | 3.833 |
| 6BZW | D_ARG_61  | NH1 | D_ASP_82  | OD1 | 3.630 |
| 6BZW | D_ARG_61  | NH1 | D_ASP_82  | OD2 | 2.695 |
| 6BZW | D_ARG_61  | NH2 | D_ASP_82  | OD1 | 3.497 |
| 6BZW | D_ARG_61  | NH2 | D_ASP_82  | OD2 | 3.898 |
| 6BZW | D_LYS_149 | NZ  | D_GLU_195 | OE1 | 3.578 |
| 6BZW | D_LYS_188 | NZ  | D_ASP_185 | OD1 | 3.347 |
| 6BZW | D_HIS_189 | ND1 | D_ASP_151 | OD2 | 2.863 |

|      |           |     |           |     |       |
|------|-----------|-----|-----------|-----|-------|
| 6BZW | D_ARG_211 | NH2 | D_GLU_187 | OE1 | 2.961 |
| 6BZW | A_ARG_38  | NH1 | A_ASP_86  | OD1 | 2.806 |
| 6BZW | A_ARG_38  | NH2 | A_GLU_46  | OE1 | 2.810 |
| 6BZW | A_ARG_38  | NH2 | A_ASP_86  | OD1 | 3.534 |
| 6BZW | A_ARG_66  | NH1 | A_ASP_86  | OD1 | 3.766 |
| 6BZW | A_ARG_66  | NH1 | A_ASP_86  | OD2 | 3.088 |
| 6BZW | A_ARG_66  | NH2 | A_ASP_86  | OD1 | 2.975 |
| 6BZW | A_ARG_66  | NH2 | A_ASP_86  | OD2 | 3.224 |
| 6BZW | A_ARG_94  | NH1 | A_ASP_27  | OD2 | 3.062 |
| 6BZW | A_ARG_94  | NH2 | A_ASP_101 | OD1 | 3.805 |
| 6BZW | A_ARG_94  | NH2 | A_ASP_101 | OD2 | 2.322 |
| 6BZW | A_LYS_143 | NZ  | A_ASP_144 | OD1 | 3.396 |
| 6BZW | A_LYS_143 | NZ  | A_ASP_144 | OD2 | 2.710 |
| 6BZW | A_LYS_209 | NZ  | B_GLU_123 | OE1 | 2.988 |
| 6BZW | A_LYS_210 | NZ  | A_GLU_212 | OE2 | 3.336 |
| 6BZW | B_ARG_18  | NH2 | B_ASP_76  | OD2 | 3.990 |
| 6BZW | B_LYS_39  | NZ  | B_ASP_81  | OD1 | 2.457 |
| 6BZW | B_LYS_39  | NZ  | B_ASP_81  | OD2 | 3.775 |
| 6BZW | B_ARG_61  | NH1 | B_ASP_82  | OD1 | 3.435 |
| 6BZW | B_ARG_61  | NH1 | B_ASP_82  | OD2 | 2.481 |
| 6BZW | B_ARG_61  | NH2 | B_ASP_82  | OD1 | 2.977 |
| 6BZW | B_ARG_61  | NH2 | B_ASP_82  | OD2 | 3.551 |
| 6BZW | B_ARG_68  | NH1 | B_ASP_27C | OD2 | 3.000 |
| 6BZW | B_LYS_149 | NZ  | B_GLU_195 | OE1 | 3.533 |
| 6BZW | B_LYS_188 | NZ  | B_ASP_185 | OD1 | 3.312 |
| 6BZW | B_HIS_189 | ND1 | B_ASP_151 | OD2 | 2.735 |
| 6BZW | B_LYS_190 | NZ  | B_GLU_213 | OE2 | 3.979 |
| 6BZW | B_ARG_211 | NH2 | B_GLU_187 | OE1 | 3.195 |
| 6BZW | E_ARG_38  | NH1 | E_ASP_86  | OD1 | 2.836 |
| 6BZW | E_ARG_38  | NH2 | E_GLU_46  | OE1 | 2.758 |
| 6BZW | E_ARG_38  | NH2 | E_GLU_46  | OE2 | 3.957 |
| 6BZW | E_ARG_38  | NH2 | E_ASP_86  | OD1 | 3.594 |
| 6BZW | E_ARG_66  | NH1 | E_ASP_86  | OD1 | 3.616 |
| 6BZW | E_ARG_66  | NH1 | E_ASP_86  | OD2 | 2.872 |
| 6BZW | E_ARG_66  | NH2 | E_ASP_86  | OD1 | 2.980 |
| 6BZW | E_ARG_66  | NH2 | E_ASP_86  | OD2 | 3.348 |
| 6BZW | E_ARG_94  | NH1 | E_ASP_27  | OD2 | 3.258 |
| 6BZW | E_ARG_94  | NH2 | E_ASP_101 | OD1 | 3.737 |
| 6BZW | E_ARG_94  | NH2 | E_ASP_101 | OD2 | 2.526 |
| 6BZW | E_LYS_143 | NZ  | E_ASP_144 | OD1 | 2.783 |
| 6BZW | E_LYS_143 | NZ  | E_ASP_144 | OD2 | 3.427 |
| 6BZW | E_LYS_209 | NZ  | F_GLU_123 | OE1 | 2.583 |
| 6BZW | E_LYS_209 | NZ  | F_GLU_123 | OE2 | 3.254 |
| 6BZW | E_LYS_210 | NZ  | E_GLU_212 | OE2 | 3.361 |
| 6BZW | F_ARG_18  | NH2 | F_ASP_76  | OD2 | 3.915 |
| 6BZW | F_LYS_39  | NZ  | F_ASP_81  | OD1 | 2.665 |
| 6BZW | F_ARG_61  | NH2 | F_ASP_82  | OD1 | 2.596 |
| 6BZW | F_ARG_61  | NH2 | F_ASP_82  | OD2 | 3.915 |
| 6BZW | F_LYS_149 | NZ  | F_GLU_195 | OE1 | 3.703 |
| 6BZW | F_LYS_188 | NZ  | F_ASP_185 | OD1 | 3.561 |
| 6BZW | F_ARG_211 | NH2 | F_GLU_187 | OE1 | 3.709 |
| 6BZW | G_ARG_38  | NH1 | G_ASP_86  | OD1 | 2.636 |
| 6BZW | G_ARG_38  | NH2 | G_GLU_46  | OE1 | 3.016 |
| 6BZW | G_ARG_38  | NH2 | G_ASP_86  | OD1 | 3.345 |
| 6BZW | G_ARG_66  | NH1 | G_ASP_86  | OD1 | 3.851 |
| 6BZW | G_ARG_66  | NH1 | G_ASP_86  | OD2 | 3.048 |
| 6BZW | G_ARG_66  | NH2 | G_ASP_86  | OD1 | 2.949 |
| 6BZW | G_ARG_66  | NH2 | G_ASP_86  | OD2 | 3.330 |

|      |           |     |           |     |       |
|------|-----------|-----|-----------|-----|-------|
| 6BZW | G_ARG_94  | NH1 | G_ASP_27  | OD2 | 3.098 |
| 6BZW | G_ARG_94  | NH2 | G_ASP_101 | OD1 | 3.595 |
| 6BZW | G_ARG_94  | NH2 | G_ASP_101 | OD2 | 2.509 |
| 6BZW | G_LYS_143 | NZ  | G_ASP_144 | OD1 | 2.922 |
| 6BZW | G_LYS_143 | NZ  | G_ASP_144 | OD2 | 2.656 |
| 6BZW | G_LYS_209 | NZ  | H_GLU_123 | OE1 | 2.709 |
| 6BZW | G_LYS_209 | NZ  | H_GLU_123 | OE2 | 2.569 |
| 6BZW | H_LYS_39  | NZ  | H_ASP_81  | OD1 | 2.836 |
| 6BZW | H_ARG_61  | NH1 | H_GLU_79  | OE1 | 3.176 |
| 6BZW | H_ARG_61  | NH2 | H_GLU_79  | OE1 | 3.932 |
| 6BZW | H_ARG_61  | NH2 | H_ASP_82  | OD1 | 2.618 |
| 6BZW | H_ARG_61  | NH2 | H_ASP_82  | OD2 | 3.730 |
| 6BZW | H_LYS_149 | NZ  | H_GLU_195 | OE1 | 3.312 |
| 6BZW | H_LYS_188 | NZ  | H_ASP_185 | OD1 | 3.591 |
| 6BZW | H_LYS_190 | NZ  | H_GLU_213 | OE2 | 3.965 |
| 6BZW | H_ARG_211 | NH2 | H_GLU_187 | OE1 | 2.787 |
| 6BZY | H_ARG_38  | NH1 | H_ASP_86  | OD1 | 2.808 |
| 6BZY | H_ARG_38  | NH2 | H_GLU_46  | OE1 | 3.237 |
| 6BZY | H_ARG_38  | NH2 | H_ASP_86  | OD1 | 3.627 |
| 6BZY | H_ARG_66  | NH1 | H_ASP_86  | OD1 | 3.726 |
| 6BZY | H_ARG_66  | NH1 | H_ASP_86  | OD2 | 3.046 |
| 6BZY | H_ARG_66  | NH2 | H_ASP_86  | OD1 | 3.005 |
| 6BZY | H_ARG_66  | NH2 | H_ASP_86  | OD2 | 3.522 |
| 6BZY | L_LYS_39  | NZ  | L_ASP_81  | OD1 | 3.422 |
| 6BZY | L_LYS_39  | NZ  | L_ASP_81  | OD2 | 3.246 |
| 6BZY | L_ARG_61  | NH1 | L_GLU_79  | OE1 | 3.883 |
| 6BZY | L_ARG_61  | NH1 | L_GLU_79  | OE2 | 3.484 |
| 6BZY | L_ARG_61  | NH2 | L_GLU_79  | OE2 | 3.709 |
| 6BZY | L_ARG_61  | NH2 | L_ASP_82  | OD1 | 2.811 |
| 6BZY | L_ARG_61  | NH2 | L_ASP_82  | OD2 | 3.630 |
| 6BZY | L_LYS_92  | NZ  | L_GLU_93  | OE1 | 2.944 |
| 6BZY | L_LYS_149 | NZ  | L_GLU_195 | OE1 | 3.863 |
| 6BZY | L_LYS_149 | NZ  | L_GLU_195 | OE2 | 3.027 |
| 6BZY | L_ARG_155 | NH1 | L_GLU_185 | OE2 | 3.136 |
| 6BZY | L_ARG_155 | NH2 | L_GLU_185 | OE1 | 2.999 |
| 6BZY | L_ARG_155 | NH2 | L_GLU_185 | OE2 | 3.270 |
| 6BZY | L_LYS_183 | NZ  | L_GLU_187 | OE1 | 3.043 |
| 6BZY | L_LYS_183 | NZ  | L_GLU_187 | OE2 | 3.003 |
| 6BZY | L_HIS_189 | ND1 | L_ASP_151 | OD2 | 2.978 |
| 6BZY | L_LYS_199 | NZ  | L_ASP_110 | OD1 | 3.404 |
| 6BZY | L_LYS_199 | NZ  | L_ASP_110 | OD2 | 3.217 |
| 6C5H | H_ARG_38  | NH1 | H_ASP_86  | OD1 | 2.721 |
| 6C5H | H_ARG_38  | NH2 | H_GLU_46  | OE1 | 2.994 |
| 6C5H | H_ARG_38  | NH2 | H_ASP_86  | OD1 | 3.747 |
| 6C5H | H_ARG_66  | NH1 | H_ASP_86  | OD1 | 3.644 |
| 6C5H | H_ARG_66  | NH1 | H_ASP_86  | OD2 | 2.991 |
| 6C5H | H_ARG_66  | NH2 | H_ASP_86  | OD1 | 2.973 |
| 6C5H | H_ARG_66  | NH2 | H_ASP_86  | OD2 | 3.516 |
| 6C5H | H_LYS_75  | NZ  | H_ASP_72  | OD2 | 3.835 |
| 6C5H | H_ARG_94  | NH2 | H_ASP_100 | OD1 | 2.833 |
| 6C5H | H_ARG_94  | NH2 | H_ASP_100 | OD2 | 3.662 |
| 6C5H | H_LYS_208 | NZ  | L_GLU_123 | OE1 | 3.569 |
| 6C5H | L_ARG_61  | NH1 | L_GLU_79  | OE1 | 3.434 |
| 6C5H | L_ARG_61  | NH1 | L_GLU_79  | OE2 | 3.291 |
| 6C5H | L_ARG_61  | NH2 | L_GLU_79  | OE1 | 3.399 |
| 6C5H | L_ARG_61  | NH2 | L_GLU_81  | OE1 | 2.979 |
| 6C5H | L_ARG_61  | NH2 | L_GLU_81  | OE2 | 3.883 |
| 6C5H | L_ARG_61  | NH2 | L_ASP_82  | OD1 | 2.822 |

|      |           |     |           |     |       |
|------|-----------|-----|-----------|-----|-------|
| 6C5H | L_ARG_61  | NH2 | L_ASP_82  | OD2 | 3.827 |
| 6C5H | L_LYS_142 | NZ  | L_GLU_105 | OE1 | 3.070 |
| 6C5H | L_ARG_155 | NH1 | L_GLU_185 | OE1 | 2.690 |
| 6C5H | L_ARG_155 | NH1 | L_GLU_185 | OE2 | 3.698 |
| 6C5H | L_ARG_155 | NH2 | L_GLU_185 | OE1 | 3.395 |
| 6C5H | L_ARG_155 | NH2 | L_GLU_185 | OE2 | 2.806 |
| 6C5H | L_HIS_189 | ND1 | L_ASP_151 | OD2 | 2.883 |
| 6C5H | L_LYS_199 | NZ  | L_ASP_110 | OD1 | 3.394 |
| 6C5H | L_LYS_199 | NZ  | L_ASP_110 | OD2 | 3.049 |
| 6C5H | L_ARG_211 | NH1 | L_GLU_187 | OE2 | 3.775 |
| 6C5I | H_ARG_38  | NH1 | H_ASP_86  | OD1 | 2.831 |
| 6C5I | H_ARG_38  | NH2 | H_ASP_86  | OD1 | 3.788 |
| 6C5I | H_ARG_66  | NH1 | H_ASP_86  | OD1 | 3.709 |
| 6C5I | H_ARG_66  | NH1 | H_ASP_86  | OD2 | 3.027 |
| 6C5I | H_ARG_66  | NH2 | H_ASP_86  | OD1 | 2.746 |
| 6C5I | H_ARG_66  | NH2 | H_ASP_86  | OD2 | 3.384 |
| 6C5I | H_ARG_94  | NH2 | H_ASP_100 | OD1 | 3.126 |
| 6C5I | H_ARG_94  | NH2 | H_ASP_100 | OD2 | 3.618 |
| 6C5I | H_HIS_164 | NE2 | L_ASP_167 | OD2 | 3.802 |
| 6C5I | H_LYS_208 | NZ  | L_GLU_123 | OE1 | 3.192 |
| 6C5I | L_ARG_24  | NH2 | L_ASP_70  | OD2 | 3.159 |
| 6C5I | L_ARG_61  | NH1 | L_GLU_79  | OE2 | 3.233 |
| 6C5I | L_ARG_61  | NH2 | L_GLU_79  | OE1 | 3.749 |
| 6C5I | L_ARG_61  | NH2 | L_GLU_79  | OE2 | 3.995 |
| 6C5I | L_ARG_61  | NH2 | L_GLU_81  | OE1 | 2.811 |
| 6C5I | L_ARG_61  | NH2 | L_ASP_82  | OD1 | 2.855 |
| 6C5I | L_ARG_61  | NH2 | L_ASP_82  | OD2 | 3.717 |
| 6C5I | L_LYS_147 | NZ  | L_GLU_154 | OE1 | 2.837 |
| 6C5I | L_LYS_147 | NZ  | L_GLU_154 | OE2 | 3.916 |
| 6C5I | L_LYS_149 | NZ  | L_GLU_195 | OE2 | 3.136 |
| 6C5I | L_LYS_199 | NZ  | L_ASP_110 | OD1 | 3.935 |
| 6C5I | L_LYS_199 | NZ  | L_ASP_110 | OD2 | 3.250 |
| 6C5J | H_ARG_38  | NH1 | H_ASP_86  | OD1 | 2.836 |
| 6C5J | H_ARG_38  | NH2 | H_GLU_46  | OE1 | 3.113 |
| 6C5J | H_ARG_38  | NH2 | H_ASP_86  | OD1 | 3.867 |
| 6C5J | H_ARG_66  | NH1 | H_ASP_86  | OD1 | 3.634 |
| 6C5J | H_ARG_66  | NH1 | H_ASP_86  | OD2 | 2.729 |
| 6C5J | H_ARG_66  | NH2 | H_ASP_86  | OD1 | 2.996 |
| 6C5J | H_ARG_66  | NH2 | H_ASP_86  | OD2 | 3.388 |
| 6C5J | H_ARG_94  | NH2 | H_ASP_100 | OD1 | 2.849 |
| 6C5J | H_ARG_94  | NH2 | H_ASP_100 | OD2 | 3.422 |
| 6C5J | H_HIS_164 | ND1 | L_ASP_167 | OD1 | 3.598 |
| 6C5J | L_ARG_24  | NH1 | L_ASP_70  | OD1 | 3.086 |
| 6C5J | L_ARG_24  | NH2 | L_ASP_70  | OD1 | 3.332 |
| 6C5J | L_ARG_54  | NH1 | L_ASP_60  | OD1 | 3.010 |
| 6C5J | L_ARG_54  | NH2 | L_ASP_60  | OD1 | 3.261 |
| 6C5J | L_ARG_61  | NH1 | L_GLU_79  | OE2 | 3.828 |
| 6C5J | L_ARG_61  | NH1 | L_ASP_82  | OD1 | 3.025 |
| 6C5J | L_ARG_61  | NH1 | L_ASP_82  | OD2 | 3.858 |
| 6C5J | L_ARG_61  | NH2 | L_ASP_82  | OD1 | 3.240 |
| 6C5J | L_ARG_61  | NH2 | L_ASP_82  | OD2 | 2.681 |
| 6C5J | L_LYS_103 | NZ  | L_ASP_165 | OD1 | 2.761 |
| 6C5J | L_LYS_103 | NZ  | L_ASP_165 | OD2 | 3.775 |
| 6C5J | L_LYS_147 | NZ  | L_GLU_195 | OE1 | 4.000 |
| 6C5J | L_LYS_149 | NZ  | L_GLU_195 | OE1 | 3.633 |
| 6C5J | L_LYS_149 | NZ  | L_GLU_195 | OE2 | 3.074 |
| 6C5J | L_ARG_155 | NH1 | L_GLU_185 | OE1 | 3.663 |
| 6C5J | L_ARG_155 | NH2 | L_GLU_185 | OE1 | 3.950 |

|      |           |     |           |     |       |
|------|-----------|-----|-----------|-----|-------|
| 6C5J | L_HIS_189 | ND1 | L_ASP_151 | OD2 | 3.348 |
| 6C5J | L_HIS_189 | NE2 | L_GLU_185 | OE2 | 3.487 |
| 6C5K | H_ARG_38  | NH1 | H_ASP_86  | OD1 | 2.795 |
| 6C5K | H_ARG_38  | NH2 | H_GLU_46  | OE1 | 3.031 |
| 6C5K | H_ARG_38  | NH2 | H_ASP_86  | OD1 | 3.813 |
| 6C5K | H_ARG_66  | NH1 | H_ASP_86  | OD1 | 3.655 |
| 6C5K | H_ARG_66  | NH1 | H_ASP_86  | OD2 | 2.836 |
| 6C5K | H_ARG_66  | NH2 | H_ASP_86  | OD1 | 2.955 |
| 6C5K | H_ARG_66  | NH2 | H_ASP_86  | OD2 | 3.481 |
| 6C5K | H_LYS_75  | NZ  | H_ASP_72  | OD2 | 2.938 |
| 6C5K | H_ARG_94  | NH2 | H_ASP_100 | OD1 | 2.779 |
| 6C5K | H_ARG_94  | NH2 | H_ASP_100 | OD2 | 3.677 |
| 6C5K | A_ARG_38  | NH1 | A_ASP_86  | OD1 | 2.763 |
| 6C5K | A_ARG_38  | NH2 | A_GLU_46  | OE1 | 3.011 |
| 6C5K | A_ARG_38  | NH2 | A_ASP_86  | OD1 | 3.834 |
| 6C5K | A_LYS_43  | NZ  | A_GLU_46  | OE2 | 3.601 |
| 6C5K | A_ARG_66  | NH1 | A_ASP_86  | OD1 | 3.702 |
| 6C5K | A_ARG_66  | NH1 | A_ASP_86  | OD2 | 2.833 |
| 6C5K | A_ARG_66  | NH2 | A_ASP_86  | OD1 | 2.960 |
| 6C5K | A_ARG_66  | NH2 | A_ASP_86  | OD2 | 3.480 |
| 6C5K | A_LYS_75  | NZ  | A_ASP_72  | OD2 | 3.839 |
| 6C5K | A_ARG_94  | NH2 | A_ASP_100 | OD1 | 2.772 |
| 6C5K | A_ARG_94  | NH2 | A_ASP_100 | OD2 | 3.672 |
| 6C5K | L_ARG_61  | NH1 | L_GLU_79  | OE2 | 3.364 |
| 6C5K | L_ARG_61  | NH2 | L_GLU_79  | OE1 | 3.895 |
| 6C5K | L_ARG_61  | NH2 | L_ASP_82  | OD1 | 2.830 |
| 6C5K | L_ARG_61  | NH2 | L_ASP_82  | OD2 | 3.538 |
| 6C5K | L_LYS_142 | NZ  | L_GLU_105 | OE1 | 3.073 |
| 6C5K | L_LYS_142 | NZ  | L_GLU_105 | OE2 | 3.102 |
| 6C5K | L_ARG_155 | NH1 | L_GLU_185 | OE2 | 3.793 |
| 6C5K | L_ARG_155 | NH2 | L_GLU_185 | OE2 | 3.452 |
| 6C5K | L_HIS_189 | ND1 | L_ASP_151 | OD2 | 3.191 |
| 6C5K | L_LYS_199 | NZ  | L_ASP_110 | OD2 | 3.559 |
| 6C5K | B_ARG_61  | NH1 | B_ASP_82  | OD1 | 3.628 |
| 6C5K | B_ARG_61  | NH1 | B_ASP_82  | OD2 | 2.598 |
| 6C5K | B_ARG_61  | NH2 | B_GLU_79  | OE1 | 3.919 |
| 6C5K | B_ARG_61  | NH2 | B_ASP_82  | OD1 | 2.914 |
| 6C5K | B_ARG_61  | NH2 | B_ASP_82  | OD2 | 3.428 |
| 6C5K | B_ARG_77  | NH1 | B_ASP_60  | OD1 | 3.873 |
| 6C5K | B_ARG_77  | NH2 | B_ASP_60  | OD1 | 3.181 |
| 6C5K | B_ARG_77  | NH2 | B_ASP_60  | OD2 | 3.837 |
| 6C5K | B_LYS_142 | NZ  | B_GLU_105 | OE1 | 2.957 |
| 6C5K | B_LYS_142 | NZ  | B_GLU_105 | OE2 | 3.105 |
| 6C5K | B_LYS_147 | NZ  | B_GLU_154 | OE1 | 3.468 |
| 6C5K | B_LYS_149 | NZ  | B_GLU_195 | OE1 | 3.461 |
| 6C5K | B_LYS_149 | NZ  | B_GLU_195 | OE2 | 3.022 |
| 6C5K | B_LYS_183 | NZ  | B_GLU_187 | OE1 | 3.352 |
| 6C5K | B_LYS_183 | NZ  | B_GLU_187 | OE2 | 3.700 |
| 6C5K | B_HIS_189 | ND1 | B_ASP_151 | OD2 | 3.184 |
| 6C5K | B_LYS_199 | NZ  | B_ASP_110 | OD2 | 3.547 |
| 6C6X | A_ARG_38  | NH1 | A_ASP_86  | OD1 | 2.916 |
| 6C6X | A_ARG_38  | NH2 | A_GLU_46  | OE1 | 3.235 |
| 6C6X | A_ARG_38  | NH2 | A_ASP_86  | OD1 | 3.654 |
| 6C6X | A_ARG_66  | NH1 | A_ASP_86  | OD1 | 3.723 |
| 6C6X | A_ARG_66  | NH1 | A_ASP_86  | OD2 | 3.099 |
| 6C6X | A_ARG_66  | NH2 | A_ASP_86  | OD1 | 2.823 |
| 6C6X | A_ARG_66  | NH2 | A_ASP_86  | OD2 | 3.594 |
| 6C6X | A_LYS_75  | NZ  | A_ASP_72  | OD2 | 3.085 |

|      |           |     |           |     |       |
|------|-----------|-----|-----------|-----|-------|
| 6C6X | A_LYS_94  | NZ  | A_ASP_27  | OD1 | 3.369 |
| 6C6X | A_LYS_94  | NZ  | A_ASP_27  | OD2 | 3.236 |
| 6C6X | A_LYS_143 | NZ  | A_ASP_144 | OD1 | 3.316 |
| 6C6X | A_LYS_143 | NZ  | A_ASP_144 | OD2 | 3.281 |
| 6C6X | B_ARG_24  | NH2 | B_ASP_70  | OD2 | 3.520 |
| 6C6X | B_ARG_61  | NH1 | B_GLU_81  | OE2 | 3.777 |
| 6C6X | B_ARG_61  | NH2 | B_GLU_81  | OE2 | 2.736 |
| 6C6X | B_ARG_61  | NH2 | B_ASP_82  | OD1 | 2.804 |
| 6C6X | B_ARG_61  | NH2 | B_ASP_82  | OD2 | 3.688 |
| 6C6X | B_ARG_66  | NH1 | B_ASP_28  | OD1 | 3.798 |
| 6C6X | B_LYS_103 | NZ  | B_GLU_105 | OE1 | 3.590 |
| 6C6X | B_LYS_103 | NZ  | B_GLU_165 | OE2 | 3.918 |
| 6C6X | B_LYS_147 | NZ  | B_GLU_195 | OE2 | 3.987 |
| 6C6X | B_LYS_155 | NZ  | B_GLU_185 | OE2 | 2.799 |
| 6C6X | B_HIS_189 | ND1 | B_ASP_151 | OD2 | 3.308 |
| 6C6X | B_LYS_207 | NZ  | A_GLU_133 | OE1 | 3.861 |
| 6C6X | C_ARG_38  | NH1 | C_ASP_86  | OD1 | 2.686 |
| 6C6X | C_ARG_38  | NH2 | C_GLU_46  | OE1 | 3.038 |
| 6C6X | C_ARG_38  | NH2 | C_ASP_86  | OD1 | 3.600 |
| 6C6X | C_ARG_66  | NH1 | C_ASP_86  | OD1 | 3.306 |
| 6C6X | C_ARG_66  | NH1 | C_ASP_86  | OD2 | 3.758 |
| 6C6X | C_ARG_66  | NH2 | C_ASP_86  | OD1 | 3.273 |
| 6C6X | C_ARG_66  | NH2 | C_ASP_86  | OD2 | 2.552 |
| 6C6X | C_LYS_75  | NZ  | C_ASP_72  | OD2 | 3.346 |
| 6C6X | C_LYS_94  | NZ  | C_ASP_27  | OD1 | 3.722 |
| 6C6X | C_LYS_94  | NZ  | C_ASP_27  | OD2 | 2.313 |
| 6C6X | C_LYS_143 | NZ  | C_ASP_144 | OD1 | 3.560 |
| 6C6X | C_LYS_143 | NZ  | C_ASP_144 | OD2 | 3.637 |
| 6C6X | D_ARG_61  | NH2 | D_GLU_81  | OE2 | 3.760 |
| 6C6X | D_ARG_61  | NH2 | D_ASP_82  | OD1 | 2.628 |
| 6C6X | D_ARG_61  | NH2 | D_ASP_82  | OD2 | 3.448 |
| 6C6X | D_ARG_66  | NH1 | D_ASP_28  | OD1 | 3.243 |
| 6C6X | D_ARG_66  | NH1 | D_ASP_28  | OD2 | 3.729 |
| 6C6X | D_LYS_149 | NZ  | D_GLU_195 | OE1 | 2.932 |
| 6C6X | D_LYS_155 | NZ  | D_GLU_185 | OE2 | 3.201 |
| 6C6X | D_HIS_189 | ND1 | D_GLU_185 | OE1 | 3.992 |
| 6C6X | E_ARG_38  | NH1 | E_ASP_86  | OD1 | 2.787 |
| 6C6X | E_ARG_38  | NH2 | E_GLU_46  | OE2 | 3.116 |
| 6C6X | E_ARG_38  | NH2 | E_ASP_86  | OD1 | 3.697 |
| 6C6X | E_ARG_66  | NH1 | E_ASP_86  | OD1 | 3.910 |
| 6C6X | E_ARG_66  | NH1 | E_ASP_86  | OD2 | 3.139 |
| 6C6X | E_ARG_66  | NH2 | E_ASP_86  | OD1 | 2.977 |
| 6C6X | E_ARG_66  | NH2 | E_ASP_86  | OD2 | 3.550 |
| 6C6X | E_LYS_75  | NZ  | E_ASP_72  | OD2 | 3.750 |
| 6C6X | E_LYS_94  | NZ  | E_ASP_27  | OD1 | 3.779 |
| 6C6X | E_LYS_94  | NZ  | E_ASP_27  | OD2 | 2.090 |
| 6C6X | E_LYS_143 | NZ  | E_ASP_144 | OD1 | 3.540 |
| 6C6X | E_LYS_143 | NZ  | E_ASP_144 | OD2 | 3.461 |
| 6C6X | F_ARG_24  | NH1 | F_ASP_70  | OD1 | 3.452 |
| 6C6X | F_ARG_24  | NH1 | F_ASP_70  | OD2 | 3.656 |
| 6C6X | F_ARG_24  | NH2 | F_ASP_70  | OD2 | 3.468 |
| 6C6X | F_ARG_61  | NH2 | F_GLU_81  | OE1 | 3.978 |
| 6C6X | F_ARG_61  | NH2 | F_ASP_82  | OD1 | 2.486 |
| 6C6X | F_ARG_61  | NH2 | F_ASP_82  | OD2 | 3.255 |
| 6C6X | F_ARG_66  | NH1 | F_ASP_28  | OD1 | 3.527 |
| 6C6X | F_LYS_149 | NZ  | F_GLU_195 | OE2 | 3.170 |
| 6C6X | F_LYS_169 | NZ  | F_ASP_167 | OD1 | 3.680 |
| 6C6X | F_LYS_169 | NZ  | F_ASP_167 | OD2 | 3.672 |

|      |           |     |           |     |       |
|------|-----------|-----|-----------|-----|-------|
| 6C6X | F_LYS_169 | NZ  | F_ASP_170 | OD2 | 2.920 |
| 6C6X | F_HIS_189 | ND1 | F_ASP_151 | OD2 | 3.007 |
| 6C6X | H_ARG_38  | NH1 | H_ASP_86  | OD1 | 2.791 |
| 6C6X | H_ARG_38  | NH2 | H_GLU_46  | OE1 | 3.334 |
| 6C6X | H_ARG_38  | NH2 | H_ASP_86  | OD1 | 3.541 |
| 6C6X | H_ARG_50  | NH2 | H_ASP_58  | OD2 | 3.546 |
| 6C6X | H_LYS_64  | NZ  | H_ASP_58  | OD1 | 3.715 |
| 6C6X | H_ARG_66  | NH1 | H_ASP_86  | OD1 | 3.732 |
| 6C6X | H_ARG_66  | NH1 | H_ASP_86  | OD2 | 3.107 |
| 6C6X | H_ARG_66  | NH2 | H_ASP_86  | OD1 | 2.991 |
| 6C6X | H_ARG_66  | NH2 | H_ASP_86  | OD2 | 3.632 |
| 6C6X | H_LYS_75  | NZ  | H_ASP_72  | OD2 | 2.419 |
| 6C6X | H_LYS_143 | NZ  | H_ASP_144 | OD1 | 3.420 |
| 6C6X | H_LYS_143 | NZ  | H_ASP_144 | OD2 | 3.402 |
| 6C6X | H_ARG_210 | NH1 | H_GLU_212 | OE2 | 2.704 |
| 6C6X | H_ARG_210 | NH2 | H_GLU_212 | OE2 | 3.451 |
| 6C6X | L_ARG_24  | NH2 | L_ASP_70  | OD1 | 3.667 |
| 6C6X | L_ARG_24  | NH2 | L_ASP_70  | OD2 | 3.530 |
| 6C6X | L_ARG_61  | NH2 | L_GLU_81  | OE1 | 3.682 |
| 6C6X | L_ARG_61  | NH2 | L_ASP_82  | OD1 | 2.742 |
| 6C6X | L_ARG_61  | NH2 | L_ASP_82  | OD2 | 3.507 |
| 6C6X | L_ARG_66  | NH2 | L_ASP_28  | OD1 | 3.147 |
| 6C6X | L_ARG_66  | NH2 | L_ASP_28  | OD2 | 3.848 |
| 6C6X | L_LYS_103 | NZ  | L_GLU_165 | OE1 | 2.822 |
| 6C6X | L_LYS_103 | NZ  | L_GLU_165 | OE2 | 3.323 |
| 6C6X | L_ARG_142 | NH1 | L_GLU_105 | OE1 | 3.994 |
| 6C6X | L_LYS_149 | NZ  | L_GLU_195 | OE1 | 3.966 |
| 6C6X | L_LYS_149 | NZ  | L_GLU_195 | OE2 | 2.484 |
| 6C6X | L_HIS_189 | ND1 | L_ASP_151 | OD2 | 3.012 |
| 6C6Y | A_ARG_38  | NH1 | A_ASP_86  | OD1 | 3.064 |
| 6C6Y | A_ARG_38  | NH2 | A_GLU_46  | OE2 | 3.198 |
| 6C6Y | A_ARG_66  | NH1 | A_ASP_86  | OD2 | 3.498 |
| 6C6Y | A_ARG_66  | NH2 | A_ASP_86  | OD1 | 3.146 |
| 6C6Y | A_ARG_66  | NH2 | A_ASP_86  | OD2 | 3.520 |
| 6C6Y | A_LYS_94  | NZ  | A_ASP_27  | OD2 | 3.819 |
| 6C6Y | A_LYS_143 | NZ  | A_ASP_144 | OD1 | 3.805 |
| 6C6Y | B_ARG_24  | NH1 | B_ASP_70  | OD1 | 3.301 |
| 6C6Y | B_ARG_24  | NH2 | B_ASP_70  | OD1 | 3.031 |
| 6C6Y | B_ARG_24  | NH2 | B_ASP_70  | OD2 | 3.357 |
| 6C6Y | B_ARG_61  | NH1 | B_GLU_81  | OE1 | 3.827 |
| 6C6Y | B_ARG_61  | NH2 | B_GLU_81  | OE1 | 3.995 |
| 6C6Y | B_ARG_61  | NH2 | B_ASP_82  | OD1 | 2.452 |
| 6C6Y | B_ARG_61  | NH2 | B_ASP_82  | OD2 | 3.063 |
| 6C6Y | B_ARG_66  | NH1 | B_ASP_28  | OD1 | 2.856 |
| 6C6Y | B_LYS_103 | NZ  | B_GLU_165 | OE1 | 2.786 |
| 6C6Y | B_LYS_103 | NZ  | B_GLU_165 | OE2 | 3.365 |
| 6C6Y | B_ARG_142 | NH1 | B_GLU_165 | OE2 | 3.444 |
| 6C6Y | B_LYS_149 | NZ  | B_GLU_195 | OE1 | 3.173 |
| 6C6Y | B_LYS_149 | NZ  | B_GLU_195 | OE2 | 3.288 |
| 6C6Y | B_LYS_155 | NZ  | B_GLU_185 | OE1 | 3.980 |
| 6C6Y | B_LYS_155 | NZ  | B_GLU_185 | OE2 | 2.781 |
| 6C6Y | H_ARG_38  | NH1 | H_ASP_86  | OD1 | 3.029 |
| 6C6Y | H_ARG_38  | NH2 | H_GLU_46  | OE2 | 2.521 |
| 6C6Y | H_ARG_38  | NH2 | H_ASP_86  | OD1 | 3.913 |
| 6C6Y | H_ARG_50  | NH2 | H_ASP_58  | OD2 | 3.613 |
| 6C6Y | H_ARG_66  | NH1 | H_ASP_86  | OD1 | 3.184 |
| 6C6Y | H_ARG_66  | NH1 | H_ASP_86  | OD2 | 2.116 |
| 6C6Y | H_ARG_66  | NH2 | H_ASP_86  | OD1 | 3.133 |

|      |           |     |           |     |       |
|------|-----------|-----|-----------|-----|-------|
| 6C6Y | H_ARG_66  | NH2 | H_ASP_86  | OD2 | 3.619 |
| 6C6Y | L_ARG_24  | NH1 | L_ASP_70  | OD1 | 3.969 |
| 6C6Y | L_ARG_24  | NH1 | L_ASP_70  | OD2 | 3.418 |
| 6C6Y | L_ARG_24  | NH2 | L_ASP_70  | OD1 | 3.004 |
| 6C6Y | L_ARG_24  | NH2 | L_ASP_70  | OD2 | 2.849 |
| 6C6Y | L_ARG_61  | NH2 | L_ASP_82  | OD1 | 2.482 |
| 6C6Y | L_ARG_61  | NH2 | L_ASP_82  | OD2 | 3.036 |
| 6C6Y | L_ARG_66  | NH1 | L_ASP_28  | OD1 | 3.067 |
| 6C6Y | L_LYS_103 | NZ  | L_GLU_165 | OE1 | 2.476 |
| 6C6Y | L_ARG_142 | NH2 | L_GLU_165 | OE2 | 3.885 |
| 6C6Y | L_LYS_147 | NZ  | L_GLU_195 | OE1 | 3.059 |
| 6C6Y | L_LYS_147 | NZ  | L_GLU_195 | OE2 | 3.820 |
| 6C6Y | L_LYS_155 | NZ  | L_GLU_185 | OE2 | 3.070 |
| 6C6Y | R_LYS_400 | NZ  | L_ASP_28  | OD2 | 3.363 |
| 6C6Y | R_ARG_401 | NH2 | R_ASP_444 | OD2 | 3.769 |
| 6C6Y | R_LYS_413 | NZ  | R_GLU_382 | OE2 | 3.002 |
| 6C6Y | R_LYS_453 | NZ  | R_ASP_422 | OD2 | 3.217 |
| 6C6Y | R_LYS_502 | NZ  | R_GLU_513 | OE1 | 3.001 |
| 6C6Y | R_LYS_543 | NZ  | L_GLU_55  | OE2 | 2.973 |
| 6C6Y | R_LYS_587 | NZ  | R_GLU_382 | OE1 | 3.401 |
| 6C6Y | R_LYS_587 | NZ  | R_GLU_382 | OE2 | 2.619 |
| 6C6Y | S_LYS_400 | NZ  | B_ASP_28  | OD1 | 3.764 |
| 6C6Y | S_LYS_400 | NZ  | B_ASP_28  | OD2 | 2.712 |
| 6C6Y | S_ARG_401 | NH2 | S_ASP_444 | OD2 | 2.856 |
| 6C6Y | S_LYS_413 | NZ  | S_GLU_382 | OE2 | 3.998 |
| 6C6Y | S_LYS_453 | NZ  | S_ASP_422 | OD2 | 2.144 |
| 6C6Y | S_LYS_502 | NZ  | S_GLU_513 | OE1 | 3.472 |
| 6C6Y | S_LYS_543 | NZ  | B_GLU_55  | OE2 | 3.134 |
| 6C6Y | S_LYS_587 | NZ  | S_GLU_382 | OE1 | 3.941 |
| 6C6Y | S_LYS_587 | NZ  | S_GLU_382 | OE2 | 2.874 |
| 6C6Z | A_ARG_401 | NH2 | A_ASP_444 | OD1 | 3.459 |
| 6C6Z | A_ARG_401 | NH2 | A_ASP_444 | OD2 | 2.937 |
| 6C6Z | A_LYS_453 | NZ  | A_ASP_422 | OD1 | 3.282 |
| 6C6Z | A_LYS_453 | NZ  | A_ASP_422 | OD2 | 3.866 |
| 6C6Z | A_ARG_542 | NH1 | C_GLU_95  | OE1 | 3.387 |
| 6C6Z | A_ARG_542 | NH1 | C_GLU_95  | OE2 | 2.704 |
| 6C6Z | A_ARG_542 | NH2 | C_GLU_95  | OE1 | 2.635 |
| 6C6Z | A_ARG_542 | NH2 | C_GLU_95  | OE2 | 3.577 |
| 6C6Z | B_ARG_401 | NH2 | B_ASP_444 | OD1 | 3.464 |
| 6C6Z | B_ARG_401 | NH2 | B_ASP_444 | OD2 | 3.103 |
| 6C6Z | B_LYS_453 | NZ  | B_ASP_422 | OD2 | 2.962 |
| 6C6Z | B_LYS_502 | NZ  | B_GLU_513 | OE2 | 2.909 |
| 6C6Z | B_ARG_542 | NH1 | H_GLU_95  | OE1 | 3.238 |
| 6C6Z | B_ARG_542 | NH1 | H_GLU_95  | OE2 | 2.770 |
| 6C6Z | B_ARG_542 | NH2 | H_GLU_95  | OE1 | 2.578 |
| 6C6Z | B_ARG_542 | NH2 | H_GLU_95  | OE2 | 3.689 |
| 6C6Z | B_LYS_543 | NZ  | B_GLU_549 | OE2 | 3.799 |
| 6C6Z | C_LYS_12  | NZ  | C_GLU_10  | OE1 | 3.923 |
| 6C6Z | C_ARG_38  | NH1 | C_ASP_86  | OD1 | 2.775 |
| 6C6Z | C_ARG_38  | NH2 | C_GLU_46  | OE1 | 3.971 |
| 6C6Z | C_ARG_38  | NH2 | C_ASP_86  | OD1 | 3.678 |
| 6C6Z | C_LYS_62  | NZ  | C_GLU_46  | OE1 | 3.517 |
| 6C6Z | C_LYS_62  | NZ  | C_GLU_46  | OE2 | 2.404 |
| 6C6Z | C_ARG_66  | NH1 | C_ASP_86  | OD1 | 3.649 |
| 6C6Z | C_ARG_66  | NH1 | C_ASP_86  | OD2 | 2.887 |
| 6C6Z | C_ARG_66  | NH2 | C_ASP_86  | OD1 | 2.965 |
| 6C6Z | C_ARG_66  | NH2 | C_ASP_86  | OD2 | 3.656 |
| 6C6Z | C_LYS_143 | NZ  | C_ASP_144 | OD1 | 3.698 |



|      |           |     |           |     |       |
|------|-----------|-----|-----------|-----|-------|
| 6C6Z | C_LYS_209 | NZ  | D_GLU_123 | OE1 | 2.970 |
| 6C6Z | C_LYS_209 | NZ  | D_GLU_123 | OE2 | 3.150 |
| 6C6Z | C_LYS_214 | NZ  | D_ASP_122 | OD2 | 2.844 |
| 6C6Z | D_ARG_24  | NH2 | D_ASP_70  | OD1 | 3.771 |
| 6C6Z | D_ARG_24  | NH2 | D_ASP_70  | OD2 | 3.462 |
| 6C6Z | D_HIS_27D | NE2 | A_GLU_536 | OE1 | 2.616 |
| 6C6Z | D_LYS_39  | NZ  | D_GLU_81  | OE1 | 3.045 |
| 6C6Z | D_ARG_61  | NH1 | D_ASP_82  | OD1 | 3.547 |
| 6C6Z | D_ARG_61  | NH1 | D_ASP_82  | OD2 | 2.767 |
| 6C6Z | D_ARG_61  | NH2 | D_GLU_79  | OE2 | 3.892 |
| 6C6Z | D_ARG_61  | NH2 | D_ASP_82  | OD1 | 2.888 |
| 6C6Z | D_ARG_61  | NH2 | D_ASP_82  | OD2 | 3.519 |
| 6C6Z | D_LYS_103 | NZ  | D_GLU_105 | OE1 | 3.035 |
| 6C6Z | D_LYS_149 | NZ  | D_GLU_195 | OE2 | 3.680 |
| 6C6Z | D_LYS_183 | NZ  | D_GLU_187 | OE1 | 3.446 |
| 6C6Z | D_LYS_183 | NZ  | D_GLU_187 | OE2 | 2.362 |
| 6C6Z | H_LYS_12  | NZ  | H_GLU_10  | OE1 | 3.627 |
| 6C6Z | H_ARG_38  | NH1 | H_ASP_86  | OD1 | 2.800 |
| 6C6Z | H_ARG_38  | NH2 | H_GLU_46  | OE1 | 3.855 |
| 6C6Z | H_ARG_38  | NH2 | H_ASP_86  | OD1 | 3.819 |
| 6C6Z | H_LYS_62  | NZ  | H_GLU_46  | OE1 | 3.413 |
| 6C6Z | H_LYS_62  | NZ  | H_GLU_46  | OE2 | 2.893 |
| 6C6Z | H_ARG_66  | NH1 | H_ASP_86  | OD1 | 3.573 |
| 6C6Z | H_ARG_66  | NH1 | H_ASP_86  | OD2 | 2.784 |
| 6C6Z | H_ARG_66  | NH2 | H_ASP_86  | OD1 | 2.918 |
| 6C6Z | H_ARG_66  | NH2 | H_ASP_86  | OD2 | 3.610 |
| 6C6Z | H_LYS_143 | NZ  | H_ASP_144 | OD1 | 3.196 |
| 6C6Z | H_LYS_143 | NZ  | H_ASP_144 | OD2 | 3.107 |
| 6C6Z | H_LYS_206 | NZ  | H_ASP_208 | OD1 | 2.733 |
| 6C6Z | H_LYS_209 | NZ  | L_GLU_123 | OE1 | 3.044 |
| 6C6Z | H_LYS_209 | NZ  | L_GLU_123 | OE2 | 3.156 |
| 6C6Z | L_HIS_27D | NE2 | B_GLU_536 | OE1 | 2.931 |
| 6C6Z | L_LYS_39  | NZ  | L_GLU_81  | OE1 | 3.674 |
| 6C6Z | L_ARG_61  | NH1 | L_ASP_82  | OD1 | 3.616 |
| 6C6Z | L_ARG_61  | NH1 | L_ASP_82  | OD2 | 2.658 |
| 6C6Z | L_ARG_61  | NH2 | L_ASP_82  | OD1 | 2.969 |
| 6C6Z | L_ARG_61  | NH2 | L_ASP_82  | OD2 | 3.526 |
| 6C6Z | L_LYS_169 | NZ  | L_ASP_170 | OD2 | 3.960 |
| 6C6Z | L_LYS_183 | NZ  | L_GLU_187 | OE1 | 2.903 |
| 6C6Z | L_LYS_183 | NZ  | L_GLU_187 | OE2 | 3.197 |
| 6C6Z | L_LYS_188 | NZ  | L_ASP_185 | OD1 | 3.953 |
| 6CUJ | A_HIS_325 | NE2 | A_ASP_359 | OD2 | 3.301 |
| 6CUJ | A_ARG_337 | NH1 | A_GLU_322 | OE1 | 3.884 |
| 6CUJ | A_LYS_378 | NZ  | A_ASP_388 | OD2 | 3.300 |
| 6CUJ | B_HIS_327 | ND1 | B_ASP_359 | OD2 | 3.102 |
| 6CUJ | B_HIS_327 | NE2 | B_GLU_329 | OE2 | 2.543 |
| 6CUJ | B_HIS_327 | NE2 | B_ASP_359 | OD2 | 3.671 |
| 6CUJ | B_ARG_337 | NH1 | B_GLU_322 | OE1 | 3.772 |
| 6CUJ | B_HIS_362 | ND1 | B_ASP_359 | OD1 | 3.012 |
| 6CUJ | B_HIS_362 | ND1 | B_ASP_359 | OD2 | 2.820 |
| 6CUJ | B_LYS_404 | NZ  | A_GLU_292 | OE1 | 3.957 |
| 6DC3 | H_ARG_38  | NH1 | H_ASP_86  | OD1 | 2.959 |
| 6DC3 | H_ARG_38  | NH2 | H_GLU_46  | OE1 | 3.231 |
| 6DC3 | H_ARG_38  | NH2 | H_GLU_46  | OE2 | 3.389 |
| 6DC3 | H_ARG_66  | NH2 | H_ASP_86  | OD1 | 3.488 |
| 6DC3 | H_ARG_66  | NH2 | H_ASP_86  | OD2 | 2.922 |
| 6DC3 | H_ARG_94  | NH2 | H_ASP_101 | OD1 | 3.653 |
| 6DC3 | H_ARG_94  | NH2 | H_ASP_101 | OD2 | 2.581 |

|      |           |     |           |     |       |
|------|-----------|-----|-----------|-----|-------|
| 6DC3 | H.LYS_143 | NZ  | L.GLU_125 | OE2 | 3.101 |
| 6DC3 | H.LYS_209 | NZ  | L.GLU_124 | OE1 | 3.719 |
| 6DC3 | H.ARG_210 | NH1 | H.GLU_212 | OE2 | 3.787 |
| 6DC3 | H.ARG_210 | NH2 | H.GLU_212 | OE2 | 3.635 |
| 6DC3 | L.ARG_61  | NH1 | L.ASP_82  | OD2 | 2.982 |
| 6DC3 | L.ARG_61  | NH2 | L.ASP_82  | OD1 | 2.867 |
| 6DC3 | L.ARG_61  | NH2 | L.ASP_82  | OD2 | 2.906 |
| 6DC3 | F.ARG_49  | NH1 | F.ASP_368 | OD1 | 2.816 |
| 6DC3 | F.ARG_49  | NH1 | F.ASP_368 | OD2 | 3.848 |
| 6DC3 | F.LYS_166 | NZ  | F.GLU_163 | OE1 | 2.612 |
| 6DC3 | F.LYS_168 | NZ  | H.ASP_53  | OD2 | 2.485 |
| 6DC3 | F.LYS_176 | NZ  | F.ASP_263 | OD1 | 3.442 |
| 6DC3 | F.LYS_176 | NZ  | F.ASP_263 | OD2 | 3.080 |
| 6DC3 | F.LYS_191 | NZ  | F.GLU_60  | OE1 | 2.907 |
| 6DC3 | F.LYS_191 | NZ  | F.GLU_60  | OE2 | 3.428 |
| 6DC3 | F.LYS_196 | NZ  | F.GLU_295 | OE1 | 2.816 |
| 6DC3 | F.ARG_229 | NH1 | F.GLU_256 | OE1 | 3.821 |
| 6DC3 | F.ARG_229 | NH1 | F.GLU_256 | OE2 | 2.936 |
| 6DC3 | F.ARG_229 | NH2 | F.GLU_256 | OE1 | 2.824 |
| 6DC3 | F.ARG_229 | NH2 | F.GLU_256 | OE2 | 3.412 |
| 6DC3 | F.ARG_235 | NH2 | F.GLU_232 | OE1 | 3.589 |
| 6DC3 | F.ARG_235 | NH2 | F.GLU_232 | OE2 | 3.188 |
| 6DC3 | F.ARG_336 | NH2 | F.ASP_338 | OD1 | 3.536 |
| 6DC3 | F.ARG_336 | NH2 | F.ASP_338 | OD2 | 3.006 |
| 6DC3 | F.ARG_364 | NH1 | F.ASP_310 | OD1 | 3.283 |
| 6DC3 | F.ARG_364 | NH2 | F.ASP_310 | OD1 | 2.353 |
| 6DC3 | F.LYS_394 | NZ  | F.ASP_489 | OD1 | 2.937 |
| 6DC3 | F.LYS_433 | NZ  | F.ASP_440 | OD1 | 3.790 |
| 6DC3 | F.LYS_433 | NZ  | F.ASP_440 | OD2 | 2.911 |
| 6DC3 | F.LYS_461 | NZ  | F.ASP_448 | OD1 | 3.211 |
| 6DC3 | F.LYS_498 | NZ  | F.GLU_487 | OE2 | 3.896 |
| 6DC4 | H.HIS_35  | NE2 | H.GLU_52  | OE2 | 2.774 |
| 6DC4 | H.ARG_38  | NH1 | H.ASP_86  | OD1 | 2.825 |
| 6DC4 | H.ARG_38  | NH2 | H.GLU_46  | OE1 | 3.316 |
| 6DC4 | H.ARG_38  | NH2 | H.ASP_86  | OD1 | 3.824 |
| 6DC4 | H.LYS_62  | NZ  | H.GLU_46  | OE1 | 3.857 |
| 6DC4 | H.LYS_62  | NZ  | H.GLU_46  | OE2 | 2.772 |
| 6DC4 | H.ARG_66  | NH1 | H.ASP_86  | OD1 | 3.550 |
| 6DC4 | H.ARG_66  | NH1 | H.ASP_86  | OD2 | 2.921 |
| 6DC4 | H.ARG_66  | NH2 | H.ASP_86  | OD1 | 2.875 |
| 6DC4 | H.ARG_66  | NH2 | H.ASP_86  | OD2 | 3.553 |
| 6DC4 | H.LYS_143 | NZ  | H.ASP_144 | OD1 | 2.940 |
| 6DC4 | H.LYS_143 | NZ  | H.ASP_144 | OD2 | 2.949 |
| 6DC4 | H.LYS_209 | NZ  | L.GLU_123 | OE1 | 3.056 |
| 6DC4 | H.LYS_210 | NZ  | H.GLU_212 | OE2 | 2.245 |
| 6DC4 | L.ARG_24  | NH2 | L.ASP_70  | OD1 | 2.900 |
| 6DC4 | L.ARG_24  | NH2 | L.ASP_70  | OD2 | 3.578 |
| 6DC4 | L.ARG_61  | NH2 | L.GLU_81  | OE2 | 3.633 |
| 6DC4 | L.ARG_61  | NH2 | L.ASP_82  | OD1 | 2.855 |
| 6DC4 | L.ARG_61  | NH2 | L.ASP_82  | OD2 | 3.416 |
| 6DC5 | A.ARG_49  | NH2 | A.ASP_368 | OD1 | 3.110 |
| 6DC5 | A.LYS_85  | NZ  | A.GLU_82  | OE1 | 3.470 |
| 6DC5 | A.LYS_87  | NZ  | A.ASP_84  | OD1 | 3.601 |
| 6DC5 | A.LYS_156 | NZ  | D.GLU_463 | OE1 | 3.876 |
| 6DC5 | A.LYS_166 | NZ  | A.GLU_163 | OE1 | 3.173 |
| 6DC5 | A.LYS_166 | NZ  | A.GLU_163 | OE2 | 3.169 |
| 6DC5 | A.LYS_168 | NZ  | A.GLU_294 | OE1 | 3.265 |
| 6DC5 | A.LYS_176 | NZ  | A.ASP_263 | OD2 | 2.052 |

|      |           |     |            |     |       |
|------|-----------|-----|------------|-----|-------|
| 6DC5 | A_LYS_191 | NZ  | A_GLU_60   | OE1 | 3.950 |
| 6DC5 | A_LYS_196 | NZ  | A_ASP_200  | OD2 | 2.872 |
| 6DC5 | A_LYS_196 | NZ  | A_GLU_295  | OE1 | 2.434 |
| 6DC5 | A_LYS_196 | NZ  | A_GLU_295  | OE2 | 3.186 |
| 6DC5 | A_LYS_226 | NZ  | A_GLU_222  | OE2 | 3.817 |
| 6DC5 | A_ARG_229 | NH1 | A_GLU_256  | OE1 | 3.604 |
| 6DC5 | A_ARG_229 | NH1 | A_GLU_256  | OE2 | 2.958 |
| 6DC5 | A_ARG_229 | NH2 | A_GLU_256  | OE1 | 2.962 |
| 6DC5 | A_ARG_229 | NH2 | A_GLU_256  | OE2 | 3.782 |
| 6DC5 | A_ARG_235 | NH1 | A_GLU_232  | OE1 | 2.605 |
| 6DC5 | A_ARG_235 | NH1 | A_GLU_232  | OE2 | 2.938 |
| 6DC5 | A_ARG_336 | NH2 | A_ASP_338  | OD1 | 3.564 |
| 6DC5 | A_ARG_336 | NH2 | A_ASP_338  | OD2 | 2.679 |
| 6DC5 | A_ARG_364 | NH1 | A_ASP_310  | OD1 | 2.528 |
| 6DC5 | A_ARG_364 | NH2 | A_ASP_310  | OD1 | 3.947 |
| 6DC5 | A_LYS_394 | NZ  | A_ASP_489  | OD1 | 2.355 |
| 6DC5 | A_LYS_394 | NZ  | A_ASP_489  | OD2 | 3.843 |
| 6DC5 | A_LYS_399 | NZ  | G_GLU_497  | OE2 | 2.871 |
| 6DC5 | A_LYS_427 | NZ  | A_ASP_448  | OD1 | 3.250 |
| 6DC5 | A_LYS_427 | NZ  | A_ASP_448  | OD2 | 2.579 |
| 6DC5 | A_LYS_461 | NZ  | A_ASP_448  | OD1 | 2.319 |
| 6DC5 | A_LYS_498 | NZ  | A_GLU_487  | OE1 | 3.625 |
| 6DC5 | A_LYS_498 | NZ  | A_GLU_487  | OE2 | 2.810 |
| 6DC5 | D_LYS_42  | NZ  | D_GLU_31   | OE2 | 3.526 |
| 6DC5 | D_ARG_49  | NH2 | D_ASP_368  | OD1 | 2.868 |
| 6DC5 | D_LYS_75  | NZ  | G_GLU_218  | OE2 | 2.912 |
| 6DC5 | D_LYS_85  | NZ  | D_GLU_82   | OE1 | 3.435 |
| 6DC5 | D_LYS_166 | NZ  | D_GLU_163  | OE1 | 3.454 |
| 6DC5 | D_LYS_166 | NZ  | D_GLU_163  | OE2 | 3.601 |
| 6DC5 | D_LYS_168 | NZ  | D_GLU_294  | OE1 | 3.339 |
| 6DC5 | D_LYS_168 | NZ  | D_GLU_294  | OE2 | 3.380 |
| 6DC5 | D_LYS_176 | NZ  | D_ASP_263  | OD1 | 3.729 |
| 6DC5 | D_LYS_176 | NZ  | D_ASP_263  | OD2 | 2.442 |
| 6DC5 | D_LYS_196 | NZ  | D_ASP_200  | OD2 | 2.508 |
| 6DC5 | D_LYS_196 | NZ  | D_GLU_295  | OE1 | 2.680 |
| 6DC5 | D_LYS_196 | NZ  | D_GLU_295  | OE2 | 3.385 |
| 6DC5 | D_LYS_209 | NZ  | E_GLU_53   | OE2 | 3.142 |
| 6DC5 | D_LYS_209 | NZ  | E_ASP_100G | OD2 | 3.755 |
| 6DC5 | D_LYS_226 | NZ  | D_GLU_222  | OE2 | 3.264 |
| 6DC5 | D_ARG_229 | NH1 | D_GLU_256  | OE1 | 3.363 |
| 6DC5 | D_ARG_229 | NH1 | D_GLU_256  | OE2 | 3.131 |
| 6DC5 | D_ARG_229 | NH2 | D_GLU_256  | OE1 | 3.395 |
| 6DC5 | D_ARG_235 | NH1 | D_GLU_232  | OE1 | 3.378 |
| 6DC5 | D_ARG_235 | NH1 | D_GLU_232  | OE2 | 2.564 |
| 6DC5 | D_ARG_336 | NH2 | D_ASP_338  | OD1 | 3.496 |
| 6DC5 | D_ARG_336 | NH2 | D_ASP_338  | OD2 | 2.373 |
| 6DC5 | D_ARG_364 | NH1 | D_ASP_310  | OD1 | 2.428 |
| 6DC5 | D_ARG_364 | NH2 | D_ASP_310  | OD1 | 3.463 |
| 6DC5 | D_LYS_394 | NZ  | D_ASP_489  | OD1 | 2.520 |
| 6DC5 | D_LYS_427 | NZ  | D_ASP_448  | OD1 | 3.113 |
| 6DC5 | D_LYS_427 | NZ  | D_ASP_448  | OD2 | 2.130 |
| 6DC5 | D_LYS_433 | NZ  | D_ASP_440  | OD2 | 3.766 |
| 6DC5 | G_ARG_49  | NH2 | G_ASP_368  | OD1 | 3.771 |
| 6DC5 | G_LYS_68  | NZ  | G_GLU_66   | OE2 | 3.905 |
| 6DC5 | G_LYS_77  | NZ  | A_GLU_222  | OE2 | 3.675 |
| 6DC5 | G_LYS_85  | NZ  | G_GLU_82   | OE1 | 2.899 |
| 6DC5 | G_LYS_87  | NZ  | G_ASP_84   | OD1 | 3.393 |
| 6DC5 | G_LYS_166 | NZ  | G_GLU_163  | OE1 | 3.829 |

|      |           |     |            |     |       |
|------|-----------|-----|------------|-----|-------|
| 6DC5 | G_LYS_166 | NZ  | G_GLU_163  | OE2 | 3.728 |
| 6DC5 | G_LYS_168 | NZ  | G_GLU_294  | OE1 | 3.141 |
| 6DC5 | G_LYS_176 | NZ  | G_ASP_263  | OD1 | 3.769 |
| 6DC5 | G_LYS_176 | NZ  | G_ASP_263  | OD2 | 2.528 |
| 6DC5 | G_LYS_191 | NZ  | G_GLU_60   | OE1 | 3.637 |
| 6DC5 | G_LYS_191 | NZ  | G_GLU_60   | OE2 | 2.059 |
| 6DC5 | G_LYS_196 | NZ  | G_GLU_295  | OE1 | 3.725 |
| 6DC5 | G_LYS_196 | NZ  | G_GLU_295  | OE2 | 2.152 |
| 6DC5 | G_LYS_209 | NZ  | H_GLU_53   | OE2 | 3.533 |
| 6DC5 | G_LYS_209 | NZ  | H_ASP_100G | OD2 | 3.715 |
| 6DC5 | G_ARG_229 | NH1 | G_GLU_256  | OE1 | 3.620 |
| 6DC5 | G_ARG_229 | NH1 | G_GLU_256  | OE2 | 2.755 |
| 6DC5 | G_ARG_229 | NH2 | G_GLU_256  | OE1 | 2.678 |
| 6DC5 | G_ARG_229 | NH2 | G_GLU_256  | OE2 | 3.180 |
| 6DC5 | G_ARG_235 | NH1 | G_GLU_232  | OE1 | 3.701 |
| 6DC5 | G_ARG_235 | NH1 | G_GLU_232  | OE2 | 2.639 |
| 6DC5 | G_ARG_336 | NH2 | G_ASP_338  | OD1 | 3.302 |
| 6DC5 | G_ARG_364 | NH1 | G_ASP_310  | OD1 | 2.671 |
| 6DC5 | G_ARG_364 | NH2 | G_ASP_310  | OD1 | 2.918 |
| 6DC5 | G_LYS_399 | NZ  | D_GLU_497  | OE1 | 3.390 |
| 6DC5 | G_LYS_399 | NZ  | D_GLU_497  | OE2 | 2.804 |
| 6DC5 | G_LYS_461 | NZ  | G_ASP_448  | OD1 | 3.243 |
| 6DC5 | B_LYS_12  | NZ  | B_GLU_10   | OE1 | 3.494 |
| 6DC5 | B_HIS_35  | NE2 | B_GLU_52   | OE2 | 2.642 |
| 6DC5 | B_ARG_38  | NH1 | B_ASP_86   | OD1 | 3.077 |
| 6DC5 | B_ARG_38  | NH2 | B_GLU_46   | OE1 | 3.245 |
| 6DC5 | B_LYS_62  | NZ  | B_GLU_46   | OE2 | 3.113 |
| 6DC5 | B_ARG_66  | NH1 | B_ASP_86   | OD1 | 3.647 |
| 6DC5 | B_ARG_66  | NH1 | B_ASP_86   | OD2 | 3.361 |
| 6DC5 | B_ARG_66  | NH2 | B_ASP_86   | OD1 | 2.784 |
| 6DC5 | B_ARG_66  | NH2 | B_ASP_86   | OD2 | 3.528 |
| 6DC5 | B_LYS_143 | NZ  | B_ASP_144  | OD1 | 3.448 |
| 6DC5 | B_LYS_143 | NZ  | B_ASP_144  | OD2 | 3.641 |
| 6DC5 | B_LYS_209 | NZ  | C_GLU_123  | OE1 | 2.374 |
| 6DC5 | B_LYS_209 | NZ  | C_GLU_123  | OE2 | 3.312 |
| 6DC5 | B_LYS_210 | NZ  | B_GLU_212  | OE2 | 2.833 |
| 6DC5 | C_ARG_61  | NH2 | C_GLU_81   | OE2 | 3.401 |
| 6DC5 | C_ARG_61  | NH2 | C_ASP_82   | OD1 | 3.387 |
| 6DC5 | C_ARG_61  | NH2 | C_ASP_82   | OD2 | 3.483 |
| 6DC5 | E_LYS_12  | NZ  | E_GLU_10   | OE1 | 3.386 |
| 6DC5 | E_HIS_35  | NE2 | E_GLU_52   | OE2 | 3.002 |
| 6DC5 | E_ARG_38  | NH1 | E_ASP_86   | OD1 | 3.042 |
| 6DC5 | E_ARG_38  | NH2 | E_GLU_46   | OE1 | 3.298 |
| 6DC5 | E_LYS_62  | NZ  | E_GLU_46   | OE1 | 3.343 |
| 6DC5 | E_LYS_62  | NZ  | E_GLU_46   | OE2 | 2.685 |
| 6DC5 | E_ARG_66  | NH1 | E_ASP_86   | OD1 | 3.530 |
| 6DC5 | E_ARG_66  | NH1 | E_ASP_86   | OD2 | 3.256 |
| 6DC5 | E_ARG_66  | NH2 | E_ASP_86   | OD1 | 2.815 |
| 6DC5 | E_ARG_66  | NH2 | E_ASP_86   | OD2 | 3.601 |
| 6DC5 | E_LYS_143 | NZ  | E_ASP_144  | OD1 | 3.756 |
| 6DC5 | E_LYS_143 | NZ  | E_ASP_144  | OD2 | 3.843 |
| 6DC5 | E_LYS_209 | NZ  | F_GLU_123  | OE1 | 3.793 |
| 6DC5 | E_LYS_210 | NZ  | E_GLU_212  | OE2 | 3.622 |
| 6DC5 | F_ARG_24  | NH1 | F_ASP_70   | OD1 | 3.764 |
| 6DC5 | F_ARG_24  | NH2 | F_ASP_70   | OD1 | 2.904 |
| 6DC5 | F_ARG_24  | NH2 | F_ASP_70   | OD2 | 2.994 |
| 6DC5 | F_ARG_61  | NH2 | F_GLU_81   | OE2 | 3.917 |
| 6DC5 | F_ARG_61  | NH2 | F_ASP_82   | OD1 | 2.920 |

|      |           |     |           |     |       |
|------|-----------|-----|-----------|-----|-------|
| 6DC5 | F_ARG_61  | NH2 | F_ASP_82  | OD2 | 3.281 |
| 6DC5 | F_LYS_103 | NZ  | F_ASP_105 | OD1 | 3.853 |
| 6DC5 | F_LYS_107 | NZ  | F_GLU_17  | OE1 | 3.389 |
| 6DC5 | F_LYS_107 | NZ  | F_GLU_17  | OE2 | 3.533 |
| 6DC5 | H_HIS_35  | NE2 | H_GLU_52  | OE2 | 2.720 |
| 6DC5 | H_ARG_38  | NH1 | H_ASP_86  | OD1 | 3.016 |
| 6DC5 | H_ARG_38  | NH2 | H_GLU_46  | OE1 | 3.352 |
| 6DC5 | H_ARG_38  | NH2 | H_ASP_86  | OD1 | 3.965 |
| 6DC5 | H_LYS_62  | NZ  | H_GLU_46  | OE1 | 3.843 |
| 6DC5 | H_LYS_62  | NZ  | H_GLU_46  | OE2 | 2.697 |
| 6DC5 | H_ARG_66  | NH1 | H_ASP_86  | OD1 | 3.199 |
| 6DC5 | H_ARG_66  | NH1 | H_ASP_86  | OD2 | 2.905 |
| 6DC5 | H_ARG_66  | NH2 | H_ASP_86  | OD1 | 3.432 |
| 6DC5 | H_LYS_143 | NZ  | H_ASP_144 | OD1 | 3.438 |
| 6DC5 | H_LYS_143 | NZ  | H_ASP_    | OD2 | 3.755 |
| 6DC5 | H_LYS_    | NZ  | I_GLU_    | OE1 | 2.846 |
| 6DC5 | H_LYS_    | NZ  | I_ASP_    | OD1 | 3.400 |
| 6DC5 | H_LYS_    | NZ  | I_ASP_    | OD2 | 3.825 |
| 6DC5 | I_ARG_24  | NH1 | I_ASP_70  | OD2 | 3.681 |
| 6DC5 | I_ARG_61  | NH2 | I_ASP_82  | OD1 | 2.828 |
| 6DC5 | I_ARG_61  | NH2 | I_ASP_82  | OD2 | 3.083 |
| 6DC5 | I_LYS_107 | NZ  | I_GLU_17  | OE1 | 3.661 |
| 6DC5 | I_LYS_107 | NZ  | I_GLU_17  | OE2 | 3.133 |
| 6DC5 | I_LYS_149 | NZ  | I_GLU_195 | OE1 | 3.809 |
| 6DCV | L_ARG_18  | NH2 | L_ASP_76  | OD1 | 3.175 |
| 6DCV | L_ARG_61  | NH1 | L_ASP_82  | OD1 | 3.860 |
| 6DCV | L_ARG_61  | NH1 | L_ASP_82  | OD2 | 2.769 |
| 6DCV | L_ARG_61  | NH2 | L_ASP_82  | OD1 | 2.985 |
| 6DCV | L_ARG_61  | NH2 | L_ASP_82  | OD2 | 3.307 |
| 6DCV | L_LYS_149 | NZ  | L_GLU_195 | OE1 | 2.823 |
| 6DCV | L_LYS_149 | NZ  | L_GLU_195 | OE2 | 3.954 |
| 6DCV | L_LYS_183 | NZ  | L_GLU_187 | OE2 | 2.410 |
| 6DCV | L_LYS_188 | NZ  | L_ASP_185 | OD1 | 3.076 |
| 6DCV | L_HIS_189 | ND1 | L_ASP_151 | OD2 | 3.050 |
| 6DCV | H_ARG_12  | NH1 | H_GLU_10  | OE1 | 3.321 |
| 6DCV | H_ARG_12  | NH2 | H_GLU_10  | OE1 | 3.424 |
| 6DCV | H_LYS_43  | NZ  | L_ASP_9   | OD1 | 3.193 |
| 6DCV | H_ARG_58  | NH1 | H_ASP_56  | OD1 | 3.128 |
| 6DCV | H_ARG_58  | NH1 | H_ASP_56  | OD2 | 3.930 |
| 6DCV | H_HIS_66  | ND1 | H_ASP_86  | OD1 | 3.802 |
| 6DCV | H_HIS_66  | NE2 | H_ASP_86  | OD2 | 3.695 |
| 6DCV | H_ARG_94  | NH2 | H_ASP_101 | OD1 | 3.792 |
| 6DCV | H_ARG_94  | NH2 | H_ASP_101 | OD2 | 3.895 |
| 6DCV | H_ARG_98  | NH1 | H_ASP_96  | OD2 | 3.931 |
| 6DCV | H_ARG_98  | NH2 | H_ASP_31  | OD2 | 3.613 |
| 6DCV | H_LYS_145 | NZ  | H_ASP_146 | OD1 | 3.176 |
| 6DCV | H_LYS_145 | NZ  | H_ASP_146 | OD2 | 2.821 |
| 6DCV | H_LYS_221 | NZ  | L_GLU_123 | OE1 | 3.166 |
| 6DCV | H_ARG_222 | NH1 | H_GLU_226 | OE2 | 3.915 |
| 6DCV | A_ARG_18  | NH2 | A_ASP_76  | OD1 | 2.925 |
| 6DCV | A_ARG_61  | NH1 | A_ASP_82  | OD1 | 3.927 |
| 6DCV | A_ARG_61  | NH1 | A_ASP_82  | OD2 | 2.798 |
| 6DCV | A_ARG_61  | NH2 | A_ASP_82  | OD1 | 2.940 |
| 6DCV | A_ARG_61  | NH2 | A_ASP_82  | OD2 | 3.262 |
| 6DCV | A_LYS_149 | NZ  | A_GLU_195 | OE1 | 2.726 |
| 6DCV | A_HIS_189 | ND1 | A_ASP_151 | OD2 | 3.062 |
| 6DCV | B_ARG_12  | NH1 | B_GLU_10  | OE1 | 3.306 |
| 6DCV | B_ARG_12  | NH2 | B_GLU_10  | OE1 | 3.831 |

|      |           |     |           |     |       |
|------|-----------|-----|-----------|-----|-------|
| 6DCV | B.LYS_13  | NZ  | B.GLU_16  | OE2 | 3.930 |
| 6DCV | B.LYS_43  | NZ  | A.ASP_9   | OD1 | 3.127 |
| 6DCV | B.ARG_58  | NH1 | B.ASP_56  | OD1 | 3.719 |
| 6DCV | B.ARG_58  | NH1 | B.ASP_56  | OD2 | 3.964 |
| 6DCV | B.ARG_58  | NH2 | B.ASP_56  | OD2 | 3.300 |
| 6DCV | B.HIS_66  | NE2 | B.ASP_86  | OD1 | 2.995 |
| 6DCV | B.HIS_66  | NE2 | B.ASP_86  | OD2 | 3.037 |
| 6DCV | B.ARG_94  | NH2 | B.ASP_101 | OD1 | 3.995 |
| 6DCV | B.ARG_94  | NH2 | B.ASP_101 | OD2 | 3.590 |
| 6DCV | B.ARG_98  | NH2 | B.ASP_31  | OD2 | 3.052 |
| 6DCV | B.LYS_145 | NZ  | B.ASP_146 | OD1 | 3.023 |
| 6DCV | B.LYS_145 | NZ  | B.ASP_146 | OD2 | 2.799 |
| 6DCV | B.LYS_221 | NZ  | A.GLU_123 | OE1 | 3.096 |
| 6DCW | L.ARG_18  | NH1 | L.ASP_76  | OD1 | 3.895 |
| 6DCW | L.ARG_54  | NH2 | L.ASP_60  | OD1 | 3.555 |
| 6DCW | L.ARG_61  | NH1 | L.ASP_82  | OD1 | 3.666 |
| 6DCW | L.ARG_61  | NH1 | L.ASP_82  | OD2 | 2.742 |
| 6DCW | L.ARG_61  | NH2 | L.ASP_82  | OD1 | 2.952 |
| 6DCW | L.ARG_61  | NH2 | L.ASP_82  | OD2 | 3.481 |
| 6DCW | L.LYS_188 | NZ  | L.ASP_185 | OD1 | 2.731 |
| 6DCW | L.HIS_189 | ND1 | L.ASP_151 | OD2 | 3.503 |
| 6DCW | H.ARG_12  | NH1 | H.GLU_10  | OE1 | 3.120 |
| 6DCW | H.ARG_12  | NH2 | H.GLU_10  | OE1 | 3.789 |
| 6DCW | H.LYS_43  | NZ  | L.ASP_9   | OD1 | 3.018 |
| 6DCW | H.ARG_58  | NH2 | H.ASP_56  | OD1 | 3.918 |
| 6DCW | H.ARG_58  | NH2 | H.ASP_56  | OD2 | 2.896 |
| 6DCW | H.HIS_66  | NE2 | H.ASP_86  | OD1 | 3.111 |
| 6DCW | H.HIS_66  | NE2 | H.ASP_86  | OD2 | 2.753 |
| 6DCW | H.ARG_94  | NH2 | H.ASP_101 | OD1 | 3.488 |
| 6DCW | H.ARG_98  | NH1 | H.ASP_31  | OD2 | 3.894 |
| 6DCW | H.ARG_98  | NH2 | H.ASP_96  | OD1 | 3.809 |
| 6DCW | H.ARG_98  | NH2 | H.ASP_96  | OD2 | 3.209 |
| 6DCW | H.LYS_145 | NZ  | H.ASP_146 | OD1 | 3.440 |
| 6DCW | H.LYS_145 | NZ  | H.ASP_146 | OD2 | 3.529 |
| 6DCW | T.LYS_317 | NZ  | H.ASP_54  | OD1 | 3.849 |
| 6DCW | T.LYS_317 | NZ  | H.ASP_54  | OD2 | 2.833 |
| 6DCW | T.LYS_317 | NZ  | H.ASP_56  | OD2 | 2.597 |
| 6DDM | A.ARG_61  | NH2 | A.GLU_81  | OE2 | 2.977 |
| 6DDM | A.ARG_61  | NH2 | A.ASP_82  | OD1 | 2.747 |
| 6DDM | A.ARG_61  | NH2 | A.ASP_82  | OD2 | 3.496 |
| 6DDM | A.LYS_103 | NZ  | A.GLU_165 | OE1 | 2.802 |
| 6DDM | A.LYS_103 | NZ  | A.GLU_165 | OE2 | 3.912 |
| 6DDM | A.LYS_149 | NZ  | A.GLU_195 | OE1 | 2.933 |
| 6DDM | A.ARG_211 | NH1 | A.GLU_187 | OE1 | 3.736 |
| 6DDM | C.ARG_213 | NH2 | C.GLU_277 | OE2 | 3.529 |
| 6DDM | C.ARG_279 | NH1 | C.GLU_276 | OE1 | 2.719 |
| 6DDM | C.ARG_279 | NH2 | C.ASP_242 | OD2 | 2.805 |
| 6DDM | B.LYS_62  | NZ  | A.GLU_1   | OE1 | 3.434 |
| 6DDM | B.LYS_62  | NZ  | A.GLU_1   | OE2 | 2.992 |
| 6DDM | B.LYS_66  | NZ  | B.ASP_86  | OD1 | 3.688 |
| 6DDM | B.LYS_66  | NZ  | B.ASP_86  | OD2 | 2.870 |
| 6DDM | B.LYS_143 | NZ  | B.ASP_144 | OD1 | 3.301 |
| 6DDM | B.LYS_143 | NZ  | B.ASP_144 | OD2 | 3.964 |
| 6DDM | B.LYS_210 | NZ  | B.GLU_212 | OE2 | 3.002 |
| 6DDR | A.ARG_61  | NH2 | A.GLU_81  | OE2 | 3.323 |
| 6DDR | A.ARG_61  | NH2 | A.ASP_82  | OD1 | 2.814 |
| 6DDR | A.ARG_61  | NH2 | A.ASP_82  | OD2 | 3.435 |
| 6DDR | A.LYS_103 | NZ  | A.GLU_165 | OE1 | 2.937 |

|      |           |     |           |     |       |
|------|-----------|-----|-----------|-----|-------|
| 6DDR | A_LYS_103 | NZ  | A_GLU_165 | OE2 | 3.642 |
| 6DDR | A_LYS_149 | NZ  | A_GLU_195 | OE1 | 3.062 |
| 6DDR | A_LYS_149 | NZ  | A_GLU_195 | OE2 | 3.956 |
| 6DDR | A_HIS_189 | ND1 | A_ASP_151 | OD2 | 2.733 |
| 6DDR | A_HIS_189 | NE2 | A_ASP_185 | OD1 | 3.597 |
| 6DDR | B_LYS_38  | NZ  | B_ASP_85  | OD2 | 3.921 |
| 6DDR | B_ARG_40  | NH1 | B_ASP_85  | OD1 | 2.696 |
| 6DDR | B_ARG_40  | NH2 | B_GLU_46  | OE1 | 2.989 |
| 6DDR | B_ARG_40  | NH2 | B_ASP_85  | OD1 | 3.981 |
| 6DDR | B_LYS_66  | NZ  | B_ASP_86  | OD1 | 3.678 |
| 6DDR | B_LYS_66  | NZ  | B_ASP_86  | OD2 | 2.732 |
| 6DDR | B_LYS_143 | NZ  | B_ASP_144 | OD1 | 3.277 |
| 6DDR | B_LYS_143 | NZ  | B_ASP_144 | OD2 | 2.811 |
| 6DDR | B_LYS_209 | NZ  | A_GLU_123 | OE1 | 3.270 |
| 6DDR | B_LYS_210 | NZ  | B_GLU_212 | OE1 | 3.192 |
| 6DDR | C_ARG_213 | NH1 | C_GLU_277 | OE2 | 3.507 |
| 6DDR | C_ARG_213 | NH2 | C_GLU_277 | OE2 | 2.893 |
| 6DDR | C_HIS_248 | NE2 | C_ASP_249 | OD1 | 3.810 |
| 6DDR | C_ARG_279 | NH2 | C_ASP_242 | OD1 | 3.644 |
| 6DDR | C_ARG_279 | NH2 | C_ASP_242 | OD2 | 2.939 |
| 6DDV | B_LYS_40  | NZ  | B_GLU_85  | OE1 | 3.350 |
| 6DDV | B_LYS_62  | NZ  | B_GLU_46  | OE1 | 2.630 |
| 6DDV | B_LYS_62  | NZ  | B_GLU_46  | OE2 | 3.425 |
| 6DDV | B_ARG_64  | NH1 | B_ASP_65  | OD2 | 3.653 |
| 6DDV | B_LYS_66  | NZ  | B_ASP_86  | OD1 | 3.869 |
| 6DDV | B_LYS_66  | NZ  | B_ASP_86  | OD2 | 2.750 |
| 6DDV | B_LYS_143 | NZ  | B_ASP_144 | OD1 | 3.440 |
| 6DDV | B_LYS_143 | NZ  | B_ASP_144 | OD2 | 3.403 |
| 6DDV | B_LYS_209 | NZ  | A_GLU_123 | OE1 | 3.050 |
| 6DDV | B_LYS_209 | NZ  | A_GLU_123 | OE2 | 3.197 |
| 6DDV | B_LYS_210 | NZ  | B_GLU_212 | OE1 | 3.943 |
| 6DDV | B_LYS_210 | NZ  | B_GLU_212 | OE2 | 3.102 |
| 6DDV | C_ARG_226 | NH1 | B_ASP_31  | OD1 | 3.652 |
| 6DDV | C_ARG_226 | NH1 | B_ASP_31  | OD2 | 2.831 |
| 6DDV | C_ARG_226 | NH2 | B_ASP_31  | OD1 | 3.123 |
| 6DDV | C_ARG_226 | NH2 | B_ASP_31  | OD2 | 3.778 |
| 6DDV | C_ARG_279 | NH1 | C_GLU_276 | OE1 | 3.430 |
| 6DDV | C_ARG_279 | NH1 | C_GLU_276 | OE2 | 2.920 |
| 6DDV | C_ARG_279 | NH2 | C_ASP_242 | OD2 | 3.431 |
| 6DDV | A_LYS_50  | NZ  | C_ASP_255 | OD1 | 3.063 |
| 6DDV | A_LYS_50  | NZ  | C_ASP_255 | OD2 | 3.312 |
| 6DDV | A_ARG_61  | NH2 | A_ASP_82  | OD1 | 2.731 |
| 6DDV | A_ARG_61  | NH2 | A_ASP_82  | OD2 | 3.820 |
| 6DDV | A_LYS_103 | NZ  | A_GLU_165 | OE1 | 2.682 |
| 6DDV | A_LYS_149 | NZ  | A_GLU_195 | OE1 | 2.706 |
| 6DFG | A_LYS_168 | NZ  | A_ASP_167 | OD1 | 3.182 |
| 6DFG | A_LYS_168 | NZ  | A_ASP_167 | OD2 | 2.721 |
| 6DFG | A_LYS_229 | NZ  | A_GLU_83  | OE1 | 3.608 |
| 6DFG | A_LYS_232 | NZ  | A_GLU_267 | OE1 | 3.152 |
| 6DFG | A_LYS_232 | NZ  | A_GLU_268 | OE1 | 3.241 |
| 6DFG | A_LYS_232 | NZ  | A_GLU_268 | OE2 | 3.886 |
| 6DFG | A_LYS_282 | NZ  | A_GLU_275 | OE1 | 2.361 |
| 6DFG | A_ARG_298 | NH1 | A_GLU_381 | OE1 | 3.634 |
| 6DFG | A_ARG_298 | NH1 | A_GLU_381 | OE2 | 3.774 |
| 6DFG | A_ARG_327 | NH2 | A_ASP_325 | OD2 | 3.456 |
| 6DFG | A_ARG_476 | NH1 | A_ASP_474 | OD1 | 3.432 |
| 6DFG | A_ARG_476 | NH1 | A_ASP_474 | OD2 | 3.733 |
| 6DFG | A_ARG_480 | NH1 | A_ASP_477 | OD1 | 2.382 |

|      |           |     |           |     |       |
|------|-----------|-----|-----------|-----|-------|
| 6DFG | A_LYS_487 | NZ  | A_GLU_91  | OE2 | 2.524 |
| 6DFG | A_LYS_490 | NZ  | A_GLU_492 | OE2 | 2.373 |
| 6DFG | B_HIS_585 | ND1 | B_GLU_584 | OE1 | 3.794 |
| 6DFG | B_HIS_585 | NE2 | A_GLU_492 | OE2 | 3.210 |
| 6DFG | B_ARG_588 | NH2 | A_GLU_492 | OE1 | 2.981 |
| 6DFG | B_ARG_588 | NH2 | A_GLU_492 | OE2 | 3.149 |
| 6DFG | B_ARG_617 | NH1 | B_GLU_634 | OE1 | 3.067 |
| 6DFG | B_ARG_617 | NH1 | B_GLU_634 | OE2 | 2.965 |
| 6DFG | H_HIS_33  | NE2 | H_ASP_27  | OD1 | 3.974 |
| 6DFG | H_ARG_38  | NH1 | H_ASP_86  | OD1 | 3.005 |
| 6DFG | H_ARG_38  | NH1 | H_ASP_86  | OD2 | 3.826 |
| 6DFG | H_ARG_38  | NH2 | H_GLU_46  | OE1 | 3.689 |
| 6DFG | H_ARG_38  | NH2 | H_GLU_46  | OE2 | 3.014 |
| 6DFG | H_ARG_38  | NH2 | H_ASP_86  | OD1 | 2.880 |
| 6DFG | H_ARG_66  | NH1 | H_ASP_86  | OD2 | 3.544 |
| 6DFG | H_ARG_94  | NH1 | H_ASP_27  | OD1 | 3.807 |
| 6DFG | H_ARG_94  | NH1 | H_ASP_27  | OD2 | 3.737 |
| 6DFG | H_ARG_94  | NH2 | H_ASP_101 | OD1 | 3.688 |
| 6DFG | H_ARG_94  | NH2 | H_ASP_101 | OD2 | 2.491 |
| 6DFG | L_ARG_31  | NH1 | A_ASP_140 | OD2 | 3.569 |
| 6DFG | L_ARG_31  | NH2 | L_ASP_95  | OD1 | 3.542 |
| 6DFG | L_ARG_37  | NH1 | L_ASP_82  | OD1 | 3.979 |
| 6DFG | L_ARG_54  | NH2 | A_ASP_322 | OD2 | 3.922 |
| 6DFG | L_ARG_61  | NH1 | L_ASP_82  | OD2 | 3.243 |
| 6DFG | L_ARG_61  | NH2 | L_ASP_82  | OD2 | 3.425 |
| 6DFG | L_LYS_96  | NZ  | H_ASP_50  | OD2 | 3.294 |
| 6DFG | C_LYS_168 | NZ  | C_ASP_167 | OD1 | 3.183 |
| 6DFG | C_LYS_168 | NZ  | C_ASP_167 | OD2 | 2.721 |
| 6DFG | C_LYS_229 | NZ  | C_GLU_83  | OE1 | 3.608 |
| 6DFG | C_LYS_232 | NZ  | C_GLU_267 | OE1 | 3.151 |
| 6DFG | C_LYS_232 | NZ  | C_GLU_268 | OE1 | 3.240 |
| 6DFG | C_LYS_232 | NZ  | C_GLU_268 | OE2 | 3.886 |
| 6DFG | C_LYS_282 | NZ  | C_GLU_275 | OE1 | 2.361 |
| 6DFG | C_ARG_298 | NH1 | C_GLU_381 | OE1 | 3.635 |
| 6DFG | C_ARG_298 | NH1 | C_GLU_381 | OE2 | 3.774 |
| 6DFG | C_ARG_327 | NH2 | C_ASP_325 | OD2 | 3.457 |
| 6DFG | C_ARG_476 | NH1 | C_ASP_474 | OD1 | 3.431 |
| 6DFG | C_ARG_476 | NH1 | C_ASP_474 | OD2 | 3.733 |
| 6DFG | C_ARG_480 | NH1 | C_ASP_477 | OD1 | 2.383 |
| 6DFG | C_LYS_487 | NZ  | C_GLU_91  | OE2 | 2.525 |
| 6DFG | C_LYS_490 | NZ  | C_GLU_492 | OE2 | 2.372 |
| 6DFG | E_HIS_585 | ND1 | E_GLU_584 | OE1 | 3.793 |
| 6DFG | E_HIS_585 | NE2 | C_GLU_492 | OE2 | 3.225 |
| 6DFG | E_ARG_588 | NH2 | C_GLU_492 | OE1 | 2.984 |
| 6DFG | E_ARG_588 | NH2 | C_GLU_492 | OE2 | 3.072 |
| 6DFG | E_ARG_617 | NH1 | E_GLU_634 | OE1 | 3.067 |
| 6DFG | E_ARG_617 | NH1 | E_GLU_634 | OE2 | 2.965 |
| 6DFG | G_HIS_33  | NE2 | G_ASP_27  | OD1 | 3.974 |
| 6DFG | G_ARG_38  | NH1 | G_ASP_86  | OD1 | 3.004 |
| 6DFG | G_ARG_38  | NH1 | G_ASP_86  | OD2 | 3.826 |
| 6DFG | G_ARG_38  | NH2 | G_GLU_46  | OE1 | 3.689 |
| 6DFG | G_ARG_38  | NH2 | G_GLU_46  | OE2 | 3.013 |
| 6DFG | G_ARG_38  | NH2 | G_ASP_86  | OD1 | 2.880 |
| 6DFG | G_ARG_66  | NH1 | G_ASP_86  | OD2 | 3.543 |
| 6DFG | G_ARG_94  | NH1 | G_ASP_27  | OD1 | 3.807 |
| 6DFG | G_ARG_94  | NH1 | G_ASP_27  | OD2 | 3.738 |
| 6DFG | G_ARG_94  | NH2 | G_ASP_101 | OD1 | 3.688 |
| 6DFG | G_ARG_94  | NH2 | G_ASP_101 | OD2 | 2.492 |



|      |           |     |           |     |       |
|------|-----------|-----|-----------|-----|-------|
| 6DFG | J_ARG_31  | NH1 | C_ASP_140 | OD2 | 3.924 |
| 6DFG | J_ARG_31  | NH2 | J_ASP_95  | OD1 | 3.542 |
| 6DFG | J_ARG_37  | NH1 | J_ASP_82  | OD1 | 3.978 |
| 6DFG | J_ARG_61  | NH1 | J_ASP_82  | OD2 | 3.243 |
| 6DFG | J_ARG_61  | NH2 | J_ASP_82  | OD2 | 3.425 |
| 6DFG | J_LYS_96  | NZ  | G_ASP_50  | OD2 | 3.096 |
| 6DFG | D_LYS_168 | NZ  | D_ASP_167 | OD1 | 3.183 |
| 6DFG | D_LYS_168 | NZ  | D_ASP_167 | OD2 | 2.721 |
| 6DFG | D_LYS_229 | NZ  | D_GLU_83  | OE1 | 3.608 |
| 6DFG | D_LYS_232 | NZ  | D_GLU_267 | OE1 | 3.152 |
| 6DFG | D_LYS_232 | NZ  | D_GLU_268 | OE1 | 3.241 |
| 6DFG | D_LYS_232 | NZ  | D_GLU_268 | OE2 | 3.886 |
| 6DFG | D_LYS_282 | NZ  | D_GLU_275 | OE1 | 2.361 |
| 6DFG | D_ARG_298 | NH1 | D_GLU_381 | OE1 | 3.634 |
| 6DFG | D_ARG_298 | NH1 | D_GLU_381 | OE2 | 3.773 |
| 6DFG | D_ARG_327 | NH2 | D_ASP_325 | OD2 | 3.457 |
| 6DFG | D_ARG_476 | NH1 | D_ASP_474 | OD1 | 3.432 |
| 6DFG | D_ARG_476 | NH1 | D_ASP_474 | OD2 | 3.733 |
| 6DFG | D_ARG_480 | NH1 | D_ASP_477 | OD1 | 2.383 |
| 6DFG | D_LYS_487 | NZ  | D_GLU_91  | OE2 | 2.524 |
| 6DFG | D_LYS_490 | NZ  | D_GLU_492 | OE2 | 2.374 |
| 6DFG | F_HIS_585 | ND1 | F_GLU_584 | OE1 | 3.793 |
| 6DFG | F_HIS_585 | NE2 | D_GLU_492 | OE2 | 3.337 |
| 6DFG | F_ARG_588 | NH2 | D_GLU_492 | OE1 | 2.974 |
| 6DFG | F_ARG_588 | NH2 | D_GLU_492 | OE2 | 3.036 |
| 6DFG | F_ARG_617 | NH1 | F_GLU_634 | OE1 | 3.067 |
| 6DFG | F_ARG_617 | NH1 | F_GLU_634 | OE2 | 2.965 |
| 6DFG | I_HIS_33  | NE2 | I_ASP_27  | OD1 | 3.975 |
| 6DFG | I_ARG_38  | NH1 | I_ASP_86  | OD1 | 3.005 |
| 6DFG | I_ARG_38  | NH1 | I_ASP_86  | OD2 | 3.826 |
| 6DFG | I_ARG_38  | NH2 | I_GLU_46  | OE1 | 3.689 |
| 6DFG | I_ARG_38  | NH2 | I_GLU_46  | OE2 | 3.014 |
| 6DFG | I_ARG_38  | NH2 | I_ASP_86  | OD1 | 2.879 |
| 6DFG | I_ARG_66  | NH1 | I_ASP_86  | OD2 | 3.544 |
| 6DFG | I_ARG_94  | NH1 | I_ASP_27  | OD1 | 3.807 |
| 6DFG | I_ARG_94  | NH1 | I_ASP_27  | OD2 | 3.738 |
| 6DFG | I_ARG_94  | NH2 | I_ASP_101 | OD1 | 3.687 |
| 6DFG | I_ARG_94  | NH2 | I_ASP_101 | OD2 | 2.491 |
| 6DFG | K_ARG_31  | NH1 | D_ASP_140 | OD2 | 3.732 |
| 6DFG | K_ARG_31  | NH2 | K_ASP_95  | OD1 | 3.542 |
| 6DFG | K_ARG_37  | NH1 | K_ASP_82  | OD1 | 3.979 |
| 6DFG | K_ARG_61  | NH1 | K_ASP_82  | OD2 | 3.243 |
| 6DFG | K_ARG_61  | NH2 | K_ASP_82  | OD2 | 3.426 |
| 6DFG | K_LYS_96  | NZ  | I_ASP_50  | OD2 | 3.268 |
| 6DFH | A_LYS_46  | NZ  | A_GLU_492 | OE1 | 3.414 |
| 6DFH | A_HIS_85  | NE2 | A_GLU_87  | OE2 | 3.841 |
| 6DFH | A_LYS_137 | NZ  | L_ASP_51  | OD2 | 2.491 |
| 6DFH | A_ARG_192 | NH1 | D_GLU_164 | OE2 | 3.939 |
| 6DFH | A_HIS_216 | NE2 | A_ASP_57  | OD1 | 3.108 |
| 6DFH | A_HIS_216 | NE2 | A_ASP_57  | OD2 | 2.891 |
| 6DFH | A_LYS_227 | NZ  | A_GLU_83  | OE1 | 3.845 |
| 6DFH | A_LYS_227 | NZ  | A_GLU_83  | OE2 | 2.457 |
| 6DFH | A_LYS_232 | NZ  | A_GLU_268 | OE2 | 3.725 |
| 6DFH | A_HIS_249 | NE2 | A_GLU_482 | OE1 | 3.926 |
| 6DFH | A_LYS_282 | NZ  | A_GLU_275 | OE1 | 3.019 |
| 6DFH | A_LYS_282 | NZ  | A_GLU_275 | OE2 | 3.829 |
| 6DFH | A_LYS_351 | NZ  | A_GLU_269 | OE1 | 3.844 |
| 6DFH | A_LYS_351 | NZ  | A_GLU_269 | OE2 | 3.223 |

|      |           |     |           |     |       |
|------|-----------|-----|-----------|-----|-------|
| 6DFH | A_ARG_419 | NH1 | A_GLU_153 | OE1 | 2.923 |
| 6DFH | A_ARG_419 | NH1 | A_GLU_153 | OE2 | 3.091 |
| 6DFH | A_ARG_429 | NH2 | A_ASP_113 | OD2 | 3.911 |
| 6DFH | A_ARG_476 | NH1 | A_GLU_102 | OE1 | 3.544 |
| 6DFH | A_ARG_476 | NH1 | A_GLU_102 | OE2 | 2.438 |
| 6DFH | A_ARG_476 | NH2 | A_ASP_474 | OD2 | 3.340 |
| 6DFH | A_ARG_480 | NH1 | A_ASP_477 | OD1 | 2.443 |
| 6DFH | A_LYS_487 | NZ  | A_ASP_47  | OD1 | 3.477 |
| 6DFH | A_LYS_487 | NZ  | A_ASP_47  | OD2 | 2.691 |
| 6DFH | A_LYS_487 | NZ  | A_GLU_91  | OE2 | 3.894 |
| 6DFH | B_ARG_542 | NH1 | E_GLU_647 | OE2 | 2.777 |
| 6DFH | B_LYS_574 | NZ  | A_ASP_107 | OD1 | 3.419 |
| 6DFH | B_LYS_574 | NZ  | A_ASP_107 | OD2 | 3.383 |
| 6DFH | B_ARG_588 | NH2 | A_GLU_492 | OE1 | 3.118 |
| 6DFH | B_ARG_588 | NH2 | A_GLU_492 | OE2 | 3.874 |
| 6DFH | H_ARG_38  | NH1 | H_ASP_86  | OD1 | 3.690 |
| 6DFH | H_ARG_38  | NH1 | H_ASP_86  | OD2 | 3.393 |
| 6DFH | H_ARG_38  | NH2 | H_GLU_46  | OE1 | 3.255 |
| 6DFH | H_ARG_38  | NH2 | H_ASP_86  | OD1 | 3.023 |
| 6DFH | H_ARG_38  | NH2 | H_ASP_86  | OD2 | 3.384 |
| 6DFH | H_ARG_66  | NH2 | H_ASP_86  | OD2 | 3.900 |
| 6DFH | H_ARG_94  | NH1 | H_ASP_101 | OD2 | 3.387 |
| 6DFH | L_LYS_103 | NZ  | L_ASP_85  | OD1 | 3.975 |
| 6DFH | C_LYS_46  | NZ  | C_GLU_492 | OE1 | 3.413 |
| 6DFH | C_HIS_85  | NE2 | C_GLU_87  | OE2 | 3.840 |
| 6DFH | C_LYS_137 | NZ  | J_ASP_51  | OD2 | 2.536 |
| 6DFH | C_ARG_192 | NH1 | A_GLU_164 | OE2 | 3.905 |
| 6DFH | C_HIS_216 | NE2 | C_ASP_57  | OD1 | 3.108 |
| 6DFH | C_HIS_216 | NE2 | C_ASP_57  | OD2 | 2.892 |
| 6DFH | C_LYS_227 | NZ  | C_GLU_83  | OE1 | 3.845 |
| 6DFH | C_LYS_227 | NZ  | C_GLU_83  | OE2 | 2.456 |
| 6DFH | C_LYS_232 | NZ  | C_GLU_268 | OE2 | 3.726 |
| 6DFH | C_HIS_249 | NE2 | C_GLU_482 | OE1 | 3.927 |
| 6DFH | C_LYS_282 | NZ  | C_GLU_275 | OE1 | 3.018 |
| 6DFH | C_LYS_282 | NZ  | C_GLU_275 | OE2 | 3.829 |
| 6DFH | C_LYS_351 | NZ  | C_GLU_269 | OE1 | 3.844 |
| 6DFH | C_LYS_351 | NZ  | C_GLU_269 | OE2 | 3.223 |
| 6DFH | C_ARG_419 | NH1 | C_GLU_153 | OE1 | 2.923 |
| 6DFH | C_ARG_419 | NH1 | C_GLU_153 | OE2 | 3.092 |
| 6DFH | C_ARG_429 | NH2 | C_ASP_113 | OD2 | 3.910 |
| 6DFH | C_ARG_476 | NH1 | C_GLU_102 | OE1 | 3.543 |
| 6DFH | C_ARG_476 | NH1 | C_GLU_102 | OE2 | 2.438 |
| 6DFH | C_ARG_476 | NH2 | C_ASP_474 | OD2 | 3.339 |
| 6DFH | C_ARG_480 | NH1 | C_ASP_477 | OD1 | 2.443 |
| 6DFH | C_LYS_487 | NZ  | C_ASP_47  | OD1 | 3.476 |
| 6DFH | C_LYS_487 | NZ  | C_ASP_47  | OD2 | 2.691 |
| 6DFH | C_LYS_487 | NZ  | C_GLU_91  | OE2 | 3.893 |
| 6DFH | E_ARG_542 | NH1 | F_GLU_647 | OE2 | 2.777 |
| 6DFH | E_LYS_574 | NZ  | C_ASP_107 | OD1 | 3.423 |
| 6DFH | E_LYS_574 | NZ  | C_ASP_107 | OD2 | 3.381 |
| 6DFH | E_ARG_588 | NH2 | C_GLU_492 | OE1 | 3.158 |
| 6DFH | E_ARG_588 | NH2 | C_GLU_492 | OE2 | 3.904 |
| 6DFH | G_ARG_38  | NH1 | G_ASP_86  | OD1 | 3.690 |
| 6DFH | G_ARG_38  | NH1 | G_ASP_86  | OD2 | 3.393 |
| 6DFH | G_ARG_38  | NH2 | G_GLU_46  | OE1 | 3.255 |
| 6DFH | G_ARG_38  | NH2 | G_ASP_86  | OD1 | 3.022 |
| 6DFH | G_ARG_38  | NH2 | G_ASP_86  | OD2 | 3.383 |
| 6DFH | G_ARG_66  | NH2 | G_ASP_86  | OD2 | 3.900 |

|      |           |     |           |     |       |
|------|-----------|-----|-----------|-----|-------|
| 6DFH | G_ARG_94  | NH1 | G_ASP_101 | OD2 | 3.387 |
| 6DFH | J_LYS_103 | NZ  | J_ASP_85  | OD1 | 3.976 |
| 6DFH | D_LYS_46  | NZ  | D_GLU_492 | OE1 | 3.413 |
| 6DFH | D_HIS_85  | NE2 | D_GLU_87  | OE2 | 3.840 |
| 6DFH | D_LYS_137 | NZ  | K_ASP_51  | OD2 | 2.448 |
| 6DFH | D_ARG_192 | NH1 | C_GLU_164 | OE2 | 3.902 |
| 6DFH | D_HIS_216 | NE2 | D_ASP_57  | OD1 | 3.108 |
| 6DFH | D_HIS_216 | NE2 | D_ASP_57  | OD2 | 2.891 |
| 6DFH | D_LYS_227 | NZ  | D_GLU_83  | OE1 | 3.845 |
| 6DFH | D_LYS_227 | NZ  | D_GLU_83  | OE2 | 2.456 |
| 6DFH | D_LYS_232 | NZ  | D_GLU_268 | OE2 | 3.726 |
| 6DFH | D_HIS_249 | NE2 | D_GLU_482 | OE1 | 3.926 |
| 6DFH | D_LYS_282 | NZ  | D_GLU_275 | OE1 | 3.019 |
| 6DFH | D_LYS_282 | NZ  | D_GLU_275 | OE2 | 3.830 |
| 6DFH | D_LYS_351 | NZ  | D_GLU_269 | OE1 | 3.845 |
| 6DFH | D_LYS_351 | NZ  | D_GLU_269 | OE2 | 3.223 |
| 6DFH | D_ARG_419 | NH1 | D_GLU_153 | OE1 | 2.923 |
| 6DFH | D_ARG_419 | NH1 | D_GLU_153 | OE2 | 3.092 |
| 6DFH | D_ARG_429 | NH2 | D_ASP_113 | OD2 | 3.910 |
| 6DFH | D_ARG_476 | NH1 | D_GLU_102 | OE1 | 3.543 |
| 6DFH | D_ARG_476 | NH1 | D_GLU_102 | OE2 | 2.438 |
| 6DFH | D_ARG_476 | NH2 | D_ASP_474 | OD2 | 3.339 |
| 6DFH | D_ARG_480 | NH1 | D_ASP_477 | OD1 | 2.443 |
| 6DFH | D_LYS_487 | NZ  | D_ASP_47  | OD1 | 3.476 |
| 6DFH | D_LYS_487 | NZ  | D_ASP_47  | OD2 | 2.691 |
| 6DFH | D_LYS_487 | NZ  | D_GLU_91  | OE2 | 3.894 |
| 6DFH | F_ARG_542 | NH1 | B_GLU_647 | OE2 | 2.778 |
| 6DFH | F_LYS_574 | NZ  | D_ASP_107 | OD1 | 3.408 |
| 6DFH | F_LYS_574 | NZ  | D_ASP_107 | OD2 | 3.378 |
| 6DFH | F_ARG_588 | NH2 | D_GLU_492 | OE1 | 3.059 |
| 6DFH | F_ARG_588 | NH2 | D_GLU_492 | OE2 | 3.839 |
| 6DFH | L_ARG_38  | NH1 | L_ASP_86  | OD1 | 3.691 |
| 6DFH | L_ARG_38  | NH1 | L_ASP_86  | OD2 | 3.393 |
| 6DFH | L_ARG_38  | NH2 | L_GLU_46  | OE1 | 3.255 |
| 6DFH | L_ARG_38  | NH2 | L_ASP_86  | OD1 | 3.023 |
| 6DFH | L_ARG_38  | NH2 | L_ASP_86  | OD2 | 3.383 |
| 6DFH | L_ARG_66  | NH2 | L_ASP_86  | OD2 | 3.901 |
| 6DFH | L_ARG_94  | NH1 | L_ASP_101 | OD2 | 3.386 |
| 6DFH | K_LYS_103 | NZ  | K_ASP_85  | OD1 | 3.976 |
| 6DG2 | A_HIS_35  | NE2 | A_GLU_50  | OE1 | 2.810 |
| 6DG2 | A_ARG_40  | NH1 | A_GLU_89  | OE2 | 3.382 |
| 6DG2 | A_ARG_40  | NH2 | A_GLU_89  | OE2 | 3.578 |
| 6DG2 | A_ARG_57  | NH1 | C_GLU_50  | OE1 | 2.686 |
| 6DG2 | A_ARG_57  | NH1 | C_GLU_50  | OE2 | 3.712 |
| 6DG2 | A_ARG_57  | NH1 | C_ASP_59  | OD1 | 3.923 |
| 6DG2 | A_ARG_57  | NH2 | C_GLU_50  | OE1 | 3.412 |
| 6DG2 | A_ARG_57  | NH2 | C_GLU_50  | OE2 | 2.876 |
| 6DG2 | A_LYS_65  | NZ  | A_GLU_62  | OE1 | 2.446 |
| 6DG2 | A_LYS_65  | NZ  | A_GLU_62  | OE2 | 3.885 |
| 6DG2 | A_LYS_67  | NZ  | A_ASP_90  | OD1 | 3.375 |
| 6DG2 | A_LYS_67  | NZ  | A_ASP_90  | OD2 | 3.355 |
| 6DG2 | A_ARG_98  | NH2 | A_ASP_106 | OD1 | 3.809 |
| 6DG2 | A_ARG_98  | NH2 | A_ASP_106 | OD2 | 2.951 |
| 6DG2 | A_LYS_148 | NZ  | A_ASP_149 | OD1 | 3.488 |
| 6DG2 | A_LYS_148 | NZ  | A_ASP_149 | OD2 | 3.887 |
| 6DG2 | A_LYS_211 | NZ  | A_ASP_213 | OD1 | 2.323 |
| 6DG2 | A_LYS_211 | NZ  | A_ASP_213 | OD2 | 3.618 |
| 6DG2 | A_LYS_215 | NZ  | A_GLU_217 | OE2 | 3.590 |

|      |           |     |           |     |       |
|------|-----------|-----|-----------|-----|-------|
| 6DG2 | A_LYS_219 | NZ  | B_ASP_123 | OD1 | 3.620 |
| 6DG2 | A_LYS_219 | NZ  | B_ASP_123 | OD2 | 3.832 |
| 6DG2 | B_ARG_61  | NH1 | B_ASP_82  | OD1 | 3.334 |
| 6DG2 | B_ARG_61  | NH1 | B_ASP_82  | OD2 | 3.815 |
| 6DG2 | B_ARG_61  | NH2 | B_GLU_81  | OE1 | 3.510 |
| 6DG2 | B_ARG_61  | NH2 | B_ASP_82  | OD1 | 3.338 |
| 6DG2 | B_ARG_61  | NH2 | B_ASP_82  | OD2 | 3.953 |
| 6DG2 | B_LYS_104 | NZ  | B_GLU_166 | OE1 | 3.797 |
| 6DG2 | B_LYS_150 | NZ  | B_GLU_196 | OE1 | 3.711 |
| 6DG2 | B_LYS_150 | NZ  | B_GLU_196 | OE2 | 2.891 |
| 6DG2 | B_LYS_184 | NZ  | B_GLU_188 | OE1 | 3.697 |
| 6DG2 | B_LYS_184 | NZ  | B_GLU_188 | OE2 | 2.997 |
| 6DG2 | B_LYS_189 | NZ  | B_ASP_186 | OD1 | 2.377 |
| 6DG2 | C_HIS_35  | NE2 | C_GLU_50  | OE2 | 2.691 |
| 6DG2 | C_LYS_38  | NZ  | C_ASP_90  | OD2 | 3.933 |
| 6DG2 | C_ARG_40  | NH1 | C_GLU_89  | OE1 | 3.263 |
| 6DG2 | C_ARG_57  | NH1 | A_GLU_50  | OE1 | 3.739 |
| 6DG2 | C_ARG_57  | NH1 | A_GLU_50  | OE2 | 2.758 |
| 6DG2 | C_ARG_57  | NH1 | A_ASP_59  | OD1 | 3.719 |
| 6DG2 | C_ARG_57  | NH2 | A_GLU_50  | OE1 | 2.935 |
| 6DG2 | C_ARG_57  | NH2 | A_GLU_50  | OE2 | 3.488 |
| 6DG2 | C_LYS_63  | NZ  | C_GLU_46  | OE2 | 3.257 |
| 6DG2 | C_LYS_65  | NZ  | C_GLU_62  | OE1 | 3.990 |
| 6DG2 | C_LYS_67  | NZ  | C_ASP_90  | OD1 | 2.743 |
| 6DG2 | C_LYS_67  | NZ  | C_ASP_90  | OD2 | 3.331 |
| 6DG2 | C_ARG_98  | NH2 | C_ASP_106 | OD1 | 3.590 |
| 6DG2 | C_ARG_98  | NH2 | C_ASP_106 | OD2 | 2.787 |
| 6DG2 | C_LYS_148 | NZ  | C_ASP_149 | OD1 | 3.517 |
| 6DG2 | C_LYS_148 | NZ  | C_ASP_149 | OD2 | 3.956 |
| 6DG2 | C_LYS_215 | NZ  | C_GLU_217 | OE1 | 3.786 |
| 6DG2 | D_LYS_24  | NZ  | D_ASP_70  | OD1 | 3.383 |
| 6DG2 | D_LYS_39  | NZ  | D_GLU_81  | OE2 | 2.693 |
| 6DG2 | D_ARG_54  | NH1 | D_ASP_60  | OD1 | 3.820 |
| 6DG2 | D_ARG_54  | NH2 | D_ASP_60  | OD1 | 3.271 |
| 6DG2 | D_ARG_61  | NH2 | D_GLU_81  | OE1 | 3.822 |
| 6DG2 | D_ARG_61  | NH2 | D_ASP_82  | OD1 | 3.113 |
| 6DG2 | D_LYS_104 | NZ  | D_GLU_166 | OE1 | 2.780 |
| 6DG2 | D_LYS_150 | NZ  | D_GLU_196 | OE1 | 3.724 |
| 6DG2 | D_LYS_150 | NZ  | D_GLU_196 | OE2 | 2.441 |
| 6E62 | P_LYS_307 | NZ  | P_ASP_386 | OD2 | 3.669 |
| 6E62 | P_HIS_308 | NE2 | P_ASP_386 | OD2 | 2.759 |
| 6E62 | P_HIS_324 | NE2 | P_GLU_362 | OE1 | 3.607 |
| 6E62 | P_HIS_324 | NE2 | P_GLU_362 | OE2 | 3.765 |
| 6E62 | P_HIS_330 | NE2 | P_ASP_426 | OD1 | 2.903 |
| 6E62 | P_HIS_330 | NE2 | P_ASP_426 | OD2 | 3.266 |
| 6E62 | P_LYS_394 | NZ  | P_GLU_385 | OE2 | 3.213 |
| 6E62 | P_LYS_413 | NZ  | H_ASP_100 | OD1 | 3.190 |
| 6E62 | P_LYS_413 | NZ  | H_ASP_100 | OD2 | 2.736 |
| 6E62 | P_LYS_416 | NZ  | L_ASP_51  | OD2 | 2.614 |
| 6E62 | P_LYS_417 | NZ  | P_ASP_321 | OD1 | 2.847 |
| 6E62 | H_ARG_38  | NH1 | H_GLU_46  | OE1 | 2.901 |
| 6E62 | H_ARG_38  | NH1 | H_GLU_46  | OE2 | 3.315 |
| 6E62 | H_ARG_38  | NH2 | H_ASP_86  | OD2 | 3.041 |
| 6E62 | H_LYS_64  | NZ  | H_ASP_61  | OD1 | 3.685 |
| 6E62 | H_ARG_66  | NH1 | H_ASP_86  | OD1 | 3.196 |
| 6E62 | H_ARG_66  | NH2 | H_ASP_86  | OD1 | 2.873 |
| 6E62 | H_ARG_66  | NH2 | H_ASP_86  | OD2 | 2.687 |
| 6E62 | H_ARG_94  | NH2 | H_ASP_101 | OD2 | 2.512 |

|      |           |     |           |     |       |
|------|-----------|-----|-----------|-----|-------|
| 6E62 | H_ARG_97  | NH1 | P_ASP_347 | OD2 | 3.575 |
| 6E62 | H_ARG_97  | NH1 | H_ASP_100 | OD1 | 2.302 |
| 6E62 | H_ARG_97  | NH2 | H_ASP_100 | OD1 | 3.098 |
| 6E62 | H_LYS_143 | NZ  | L_GLU_124 | OE2 | 2.458 |
| 6E62 | H_LYS_209 | NZ  | L_GLU_123 | OE1 | 3.996 |
| 6E62 | H_LYS_209 | NZ  | L_GLU_123 | OE2 | 3.607 |
| 6E62 | H_LYS_210 | NZ  | H_GLU_212 | OE1 | 3.306 |
| 6E62 | H_LYS_210 | NZ  | H_GLU_212 | OE2 | 3.355 |
| 6E62 | L_ARG_61  | NH1 | L_ASP_82  | OD1 | 2.647 |
| 6E62 | L_ARG_61  | NH1 | L_ASP_82  | OD2 | 2.836 |
| 6E62 | L_ARG_61  | NH2 | L_ASP_82  | OD1 | 3.964 |
| 6E62 | L_LYS_110 | NZ  | L_GLU_198 | OE1 | 3.168 |
| 6E62 | L_LYS_110 | NZ  | L_GLU_198 | OE2 | 3.580 |
| 6E62 | L_HIS_188 | NE2 | L_ASP_151 | OD2 | 3.831 |
| 6E62 | A_HIS_308 | NE2 | A_ASP_386 | OD2 | 3.782 |
| 6E62 | A_HIS_324 | NE2 | A_GLU_362 | OE2 | 3.283 |
| 6E62 | A_HIS_330 | NE2 | A_ASP_426 | OD1 | 2.479 |
| 6E62 | A_HIS_330 | NE2 | A_ASP_426 | OD2 | 3.398 |
| 6E62 | A_HIS_338 | NE2 | A_GLU_333 | OE2 | 3.680 |
| 6E62 | A_LYS_394 | NZ  | A_GLU_385 | OE2 | 2.787 |
| 6E62 | A_LYS_413 | NZ  | B_ASP_100 | OD1 | 3.041 |
| 6E62 | A_LYS_413 | NZ  | B_ASP_100 | OD2 | 2.916 |
| 6E62 | A_LYS_416 | NZ  | C_ASP_51  | OD2 | 2.944 |
| 6E62 | A_LYS_417 | NZ  | A_ASP_321 | OD1 | 2.603 |
| 6E62 | B_ARG_38  | NH1 | B_GLU_46  | OE1 | 3.293 |
| 6E62 | B_ARG_38  | NH1 | B_GLU_46  | OE2 | 3.910 |
| 6E62 | B_ARG_38  | NH1 | B_ASP_86  | OD2 | 3.877 |
| 6E62 | B_ARG_38  | NH2 | B_ASP_86  | OD2 | 2.880 |
| 6E62 | B_ARG_66  | NH1 | B_ASP_86  | OD1 | 2.876 |
| 6E62 | B_ARG_66  | NH1 | B_ASP_86  | OD2 | 3.625 |
| 6E62 | B_ARG_66  | NH2 | B_ASP_86  | OD1 | 3.290 |
| 6E62 | B_ARG_66  | NH2 | B_ASP_86  | OD2 | 2.657 |
| 6E62 | B_ARG_83  | NH1 | H_GLU_1   | OE1 | 3.696 |
| 6E62 | B_ARG_83  | NH1 | H_GLU_1   | OE2 | 3.867 |
| 6E62 | B_ARG_83  | NH2 | H_GLU_1   | OE1 | 3.783 |
| 6E62 | B_ARG_83  | NH2 | H_GLU_1   | OE2 | 3.983 |
| 6E62 | B_ARG_94  | NH2 | B_ASP_101 | OD2 | 2.599 |
| 6E62 | B_ARG_97  | NH1 | B_ASP_100 | OD1 | 2.912 |
| 6E62 | B_LYS_143 | NZ  | C_GLU_124 | OE2 | 2.797 |
| 6E62 | B_LYS_210 | NZ  | B_GLU_212 | OE1 | 3.652 |
| 6E62 | B_LYS_210 | NZ  | B_GLU_212 | OE2 | 2.960 |
| 6E62 | C_ARG_54  | NH1 | C_ASP_60  | OD2 | 3.657 |
| 6E62 | C_ARG_61  | NH1 | C_ASP_82  | OD2 | 3.397 |
| 6E62 | C_ARG_61  | NH2 | C_ASP_82  | OD1 | 3.278 |
| 6E62 | C_ARG_61  | NH2 | C_ASP_82  | OD2 | 2.476 |
| 6E62 | C_LYS_103 | NZ  | C_GLU_83  | OE2 | 3.303 |
| 6E62 | C_LYS_110 | NZ  | C_GLU_198 | OE1 | 2.849 |
| 6E62 | C_LYS_110 | NZ  | C_GLU_198 | OE2 | 3.942 |
| 6E62 | C_LYS_149 | NZ  | C_GLU_203 | OE1 | 2.875 |
| 6E62 | C_LYS_149 | NZ  | C_GLU_203 | OE2 | 3.215 |
| 6E62 | C_LYS_156 | NZ  | L_GLU_81  | OE2 | 3.985 |
| 6E62 | C_HIS_188 | NE2 | C_ASP_151 | OD2 | 3.860 |
| 6E63 | P_LYS_307 | NZ  | P_ASP_386 | OD1 | 3.127 |
| 6E63 | P_LYS_307 | NZ  | P_ASP_386 | OD2 | 2.866 |
| 6E63 | P_HIS_308 | NE2 | P_ASP_386 | OD2 | 2.480 |
| 6E63 | P_HIS_330 | NE2 | P_ASP_426 | OD1 | 2.711 |
| 6E63 | P_LYS_394 | NZ  | P_GLU_385 | OE2 | 3.080 |
| 6E63 | P_LYS_413 | NZ  | H_ASP_100 | OD1 | 3.187 |

|      |           |     |           |     |       |
|------|-----------|-----|-----------|-----|-------|
| 6E63 | P.LYS_413 | NZ  | H_ASP_100 | OD2 | 2.904 |
| 6E63 | P.LYS_416 | NZ  | L_ASP_51  | OD1 | 3.564 |
| 6E63 | P.LYS_416 | NZ  | L_ASP_51  | OD2 | 2.955 |
| 6E63 | H_ARG_38  | NH1 | H_GLU_46  | OE1 | 3.318 |
| 6E63 | H_ARG_38  | NH1 | H_GLU_46  | OE2 | 3.594 |
| 6E63 | H_ARG_38  | NH2 | H_ASP_86  | OD1 | 2.939 |
| 6E63 | H_LYS_64  | NZ  | H_ASP_61  | OD1 | 2.864 |
| 6E63 | H_ARG_66  | NH1 | H_ASP_86  | OD1 | 3.558 |
| 6E63 | H_ARG_66  | NH1 | H_ASP_86  | OD2 | 2.622 |
| 6E63 | H_ARG_66  | NH2 | H_ASP_86  | OD1 | 3.266 |
| 6E63 | H_ARG_66  | NH2 | H_ASP_86  | OD2 | 3.816 |
| 6E63 | H_ARG_94  | NH2 | H_ASP_101 | OD2 | 2.922 |
| 6E63 | H_ARG_97  | NH1 | P_ASP_347 | OD2 | 3.407 |
| 6E63 | H_ARG_97  | NH2 | H_ASP_100 | OD1 | 2.600 |
| 6E63 | H_LYS_143 | NZ  | L_GLU_124 | OE2 | 2.665 |
| 6E63 | H_LYS_209 | NZ  | L_GLU_123 | OE1 | 2.498 |
| 6E63 | L_LYS_17  | NZ  | B_GLU_85  | OE1 | 3.318 |
| 6E63 | L_LYS_17  | NZ  | B_GLU_85  | OE2 | 3.250 |
| 6E63 | L_ARG_61  | NH1 | L_ASP_82  | OD1 | 3.684 |
| 6E63 | L_ARG_61  | NH1 | L_ASP_82  | OD2 | 2.729 |
| 6E63 | L_ARG_61  | NH2 | L_ASP_82  | OD1 | 2.979 |
| 6E63 | L_ARG_61  | NH2 | L_ASP_82  | OD2 | 3.405 |
| 6E63 | A_LYS_307 | NZ  | A_ASP_386 | OD2 | 3.648 |
| 6E63 | A_HIS_308 | NE2 | A_ASP_386 | OD2 | 2.820 |
| 6E63 | A_HIS_330 | NE2 | A_ASP_426 | OD1 | 2.686 |
| 6E63 | A_HIS_330 | NE2 | A_ASP_426 | OD2 | 3.540 |
| 6E63 | A_LYS_394 | NZ  | A_GLU_385 | OE2 | 2.976 |
| 6E63 | A_LYS_413 | NZ  | B_ASP_100 | OD1 | 2.369 |
| 6E63 | A_LYS_413 | NZ  | B_ASP_100 | OD2 | 3.029 |
| 6E63 | A_LYS_416 | NZ  | C_ASP_51  | OD2 | 3.236 |
| 6E63 | A_LYS_417 | NZ  | A_ASP_415 | OD2 | 3.741 |
| 6E63 | B_ARG_38  | NH1 | B_GLU_46  | OE1 | 3.240 |
| 6E63 | B_ARG_38  | NH1 | B_GLU_46  | OE2 | 3.499 |
| 6E63 | B_ARG_38  | NH1 | B_ASP_86  | OD1 | 3.761 |
| 6E63 | B_ARG_38  | NH2 | B_ASP_86  | OD1 | 2.835 |
| 6E63 | B_ARG_66  | NH1 | B_ASP_86  | OD1 | 3.865 |
| 6E63 | B_ARG_66  | NH1 | B_ASP_86  | OD2 | 2.829 |
| 6E63 | B_ARG_66  | NH2 | B_ASP_86  | OD1 | 3.527 |
| 6E63 | B_ARG_66  | NH2 | B_ASP_86  | OD2 | 3.871 |
| 6E63 | B_LYS_75  | NZ  | B_ASP_72  | OD2 | 3.854 |
| 6E63 | B_ARG_83  | NH1 | L_GLU_13  | OE1 | 3.486 |
| 6E63 | B_ARG_83  | NH1 | L_GLU_13  | OE2 | 2.814 |
| 6E63 | B_ARG_94  | NH2 | B_ASP_101 | OD2 | 2.586 |
| 6E63 | B_ARG_97  | NH1 | A_ASP_347 | OD1 | 3.859 |
| 6E63 | B_ARG_97  | NH2 | B_ASP_100 | OD2 | 2.691 |
| 6E63 | B_LYS_143 | NZ  | B_ASP_144 | OD2 | 2.985 |
| 6E63 | C_ARG_61  | NH1 | C_ASP_82  | OD1 | 3.450 |
| 6E63 | C_ARG_61  | NH1 | C_ASP_82  | OD2 | 2.361 |
| 6E63 | C_ARG_61  | NH2 | C_ASP_82  | OD1 | 3.192 |
| 6E63 | C_ARG_61  | NH2 | C_ASP_82  | OD2 | 3.567 |
| 6E63 | C_LYS_103 | NZ  | C_ASP_85  | OD1 | 3.606 |
| 6E63 | C_LYS_110 | NZ  | C_GLU_198 | OE2 | 2.744 |
| 6E63 | C_HIS_188 | ND1 | C_ASP_151 | OD1 | 2.608 |
| 6E64 | H_ARG_38  | NH1 | H_GLU_46  | OE1 | 3.189 |
| 6E64 | H_ARG_38  | NH1 | H_GLU_46  | OE2 | 3.661 |
| 6E64 | H_ARG_38  | NH1 | H_ASP_86  | OD2 | 3.741 |
| 6E64 | H_ARG_38  | NH2 | H_ASP_86  | OD2 | 2.909 |
| 6E64 | H_ARG_66  | NH1 | H_ASP_86  | OD1 | 2.379 |

|      |           |     |           |     |       |
|------|-----------|-----|-----------|-----|-------|
| 6E64 | H_ARG_66  | NH1 | H_ASP_86  | OD2 | 3.616 |
| 6E64 | H_ARG_66  | NH2 | H_ASP_86  | OD1 | 3.004 |
| 6E64 | H_ARG_66  | NH2 | H_ASP_86  | OD2 | 2.769 |
| 6E64 | H_ARG_83  | NH2 | H_GLU_85  | OE1 | 3.958 |
| 6E64 | H_ARG_94  | NH2 | H_ASP_101 | OD2 | 2.952 |
| 6E64 | H_ARG_97  | NH1 | H_ASP_100 | OD1 | 3.380 |
| 6E64 | H_ARG_97  | NH2 | H_ASP_100 | OD1 | 3.101 |
| 6E64 | H_LYS_143 | NZ  | L_GLU_124 | OE2 | 2.942 |
| 6E64 | H_LYS_209 | NZ  | L_GLU_123 | OE2 | 2.774 |
| 6E64 | H_LYS_210 | NZ  | H_GLU_212 | OE1 | 3.202 |
| 6E64 | H_LYS_210 | NZ  | H_GLU_212 | OE2 | 3.230 |
| 6E64 | L_ARG_54  | NH1 | L_ASP_60  | OD2 | 3.879 |
| 6E64 | L_ARG_61  | NH1 | L_ASP_82  | OD1 | 3.199 |
| 6E64 | L_ARG_61  | NH1 | L_ASP_82  | OD2 | 2.244 |
| 6E64 | L_ARG_61  | NH2 | L_GLU_81  | OE2 | 2.926 |
| 6E64 | L_ARG_61  | NH2 | L_ASP_82  | OD1 | 3.741 |
| 6E64 | L_LYS_110 | NZ  | L_GLU_198 | OE1 | 3.205 |
| 6E64 | L_LYS_110 | NZ  | L_GLU_198 | OE2 | 3.935 |
| 6E64 | L_LYS_149 | NZ  | L_GLU_203 | OE2 | 3.889 |
| 6E64 | A_ARG_38  | NH1 | A_GLU_46  | OE1 | 3.590 |
| 6E64 | A_ARG_38  | NH1 | A_GLU_46  | OE2 | 3.959 |
| 6E64 | A_ARG_38  | NH1 | A_ASP_86  | OD2 | 3.714 |
| 6E64 | A_ARG_38  | NH2 | A_ASP_86  | OD2 | 2.885 |
| 6E64 | A_ARG_66  | NH1 | A_ASP_86  | OD1 | 2.673 |
| 6E64 | A_ARG_66  | NH1 | A_ASP_86  | OD2 | 3.501 |
| 6E64 | A_ARG_66  | NH2 | A_ASP_86  | OD2 | 3.885 |
| 6E64 | A_ARG_94  | NH2 | A_ASP_101 | OD2 | 2.800 |
| 6E64 | A_ARG_97  | NH1 | A_ASP_100 | OD1 | 2.610 |
| 6E64 | A_LYS_209 | NZ  | B_GLU_123 | OE1 | 3.569 |
| 6E64 | A_LYS_209 | NZ  | B_GLU_123 | OE2 | 2.777 |
| 6E64 | A_LYS_210 | NZ  | A_GLU_212 | OE1 | 2.858 |
| 6E64 | B_ARG_54  | NH1 | B_ASP_60  | OD2 | 3.850 |
| 6E64 | B_ARG_61  | NH1 | B_ASP_82  | OD1 | 3.141 |
| 6E64 | B_ARG_61  | NH1 | B_ASP_82  | OD2 | 2.224 |
| 6E64 | B_ARG_61  | NH2 | B_GLU_81  | OE2 | 3.154 |
| 6E64 | B_LYS_110 | NZ  | B_GLU_198 | OE1 | 3.325 |
| 6E65 | L_ARG_61  | NH1 | L_ASP_82  | OD1 | 3.558 |
| 6E65 | L_ARG_61  | NH1 | L_ASP_82  | OD2 | 2.687 |
| 6E65 | L_ARG_61  | NH2 | L_ASP_82  | OD1 | 2.921 |
| 6E65 | L_ARG_61  | NH2 | L_ASP_82  | OD2 | 3.517 |
| 6E65 | L_LYS_110 | NZ  | L_GLU_198 | OE1 | 3.254 |
| 6E65 | L_LYS_149 | NZ  | L_GLU_203 | OE2 | 3.192 |
| 6E65 | H_ARG_38  | NH1 | H_GLU_46  | OE1 | 3.010 |
| 6E65 | H_ARG_38  | NH1 | H_GLU_46  | OE2 | 3.789 |
| 6E65 | H_ARG_38  | NH1 | H_ASP_86  | OD2 | 3.921 |
| 6E65 | H_ARG_38  | NH2 | H_ASP_86  | OD2 | 2.906 |
| 6E65 | H_LYS_64  | NZ  | H_ASP_61  | OD1 | 2.812 |
| 6E65 | H_ARG_66  | NH1 | H_ASP_86  | OD1 | 2.716 |
| 6E65 | H_ARG_66  | NH1 | H_ASP_86  | OD2 | 3.744 |
| 6E65 | H_ARG_66  | NH2 | H_ASP_86  | OD1 | 3.520 |
| 6E65 | H_ARG_66  | NH2 | H_ASP_86  | OD2 | 3.030 |
| 6E65 | H_ARG_94  | NH2 | H_ASP_101 | OD1 | 3.830 |
| 6E65 | H_ARG_94  | NH2 | H_ASP_101 | OD2 | 2.624 |
| 6E65 | H_ARG_97  | NH1 | H_ASP_100 | OD1 | 3.182 |
| 6E65 | H_ARG_97  | NH2 | H_ASP_100 | OD1 | 2.837 |
| 6E65 | H_LYS_209 | NZ  | L_GLU_123 | OE1 | 2.900 |
| 6E65 | H_LYS_209 | NZ  | L_GLU_123 | OE2 | 3.402 |
| 6E65 | H_LYS_210 | NZ  | H_GLU_212 | OE2 | 3.313 |

|      |           |     |           |     |       |
|------|-----------|-----|-----------|-----|-------|
| 6E8V | A_LYS_58  | NZ  | A_ASP_183 | OD2 | 3.383 |
| 6E8V | A_ARG_64  | NH1 | A_ASP_115 | OD1 | 3.736 |
| 6E8V | A_ARG_64  | NH1 | A_ASP_115 | OD2 | 3.862 |
| 6E8V | A_ARG_64  | NH2 | A_GLU_72  | OE1 | 2.461 |
| 6E8V | A_LYS_69  | NZ  | H_GLU_114 | OE1 | 3.919 |
| 6E8V | A_LYS_69  | NZ  | H_GLU_114 | OE2 | 3.267 |
| 6E8V | A_ARG_92  | NH1 | A_ASP_115 | OD1 | 3.628 |
| 6E8V | A_ARG_92  | NH1 | A_ASP_115 | OD2 | 2.200 |
| 6E8V | A_ARG_92  | NH2 | A_ASP_115 | OD2 | 3.895 |
| 6E8V | A_HIS_129 | NE2 | A_GLU_179 | OE1 | 3.896 |
| 6E8V | A_LYS_290 | NZ  | B_GLU_128 | OE1 | 3.297 |
| 6E8V | A_LYS_290 | NZ  | B_GLU_128 | OE2 | 3.454 |
| 6E8V | B_ARG_62  | NH2 | B_ASP_83  | OD1 | 3.866 |
| 6E8V | B_ARG_62  | NH2 | B_ASP_83  | OD2 | 3.065 |
| 6E8V | B_LYS_154 | NZ  | E_ASP_98  | OD2 | 3.855 |
| 6E8V | B_LYS_212 | NZ  | B_GLU_215 | OE2 | 3.054 |
| 6E8V | E_LYS_58  | NZ  | E_ASP_183 | OD2 | 3.769 |
| 6E8V | E_ARG_64  | NH1 | E_ASP_115 | OD1 | 3.111 |
| 6E8V | E_ARG_64  | NH2 | E_GLU_72  | OE1 | 2.694 |
| 6E8V | E_ARG_64  | NH2 | E_GLU_72  | OE2 | 3.880 |
| 6E8V | E_ARG_64  | NH2 | E_ASP_115 | OD1 | 3.985 |
| 6E8V | E_ARG_92  | NH1 | E_ASP_115 | OD1 | 2.769 |
| 6E8V | E_ARG_92  | NH1 | E_ASP_115 | OD2 | 3.085 |
| 6E8V | E_HIS_129 | NE2 | E_GLU_179 | OE2 | 3.144 |
| 6E8V | E_LYS_290 | NZ  | F_GLU_128 | OE1 | 2.548 |
| 6E8V | E_LYS_290 | NZ  | F_GLU_128 | OE2 | 3.232 |
| 6E8V | F_ARG_63  | NH1 | F_GLU_83  | OE2 | 3.510 |
| 6E8V | F_ARG_63  | NH1 | F_ASP_84  | OD1 | 3.568 |
| 6E8V | F_ARG_63  | NH2 | F_ASP_84  | OD1 | 3.073 |
| 6E8V | F_ARG_63  | NH2 | F_ASP_84  | OD2 | 2.536 |
| 6E8V | F_ARG_68  | NH2 | F_ASP_53  | OD2 | 3.856 |
| 6E8V | H_LYS_58  | NZ  | H_ASP_183 | OD2 | 3.692 |
| 6E8V | H_ARG_64  | NH1 | H_ASP_115 | OD2 | 3.761 |
| 6E8V | H_ARG_64  | NH2 | H_GLU_72  | OE1 | 3.369 |
| 6E8V | H_ARG_64  | NH2 | H_GLU_72  | OE2 | 2.811 |
| 6E8V | H_LYS_69  | NZ  | H_GLU_72  | OE2 | 3.846 |
| 6E8V | H_LYS_69  | NZ  | H_GLU_114 | OE2 | 2.887 |
| 6E8V | H_ARG_92  | NH1 | H_ASP_115 | OD1 | 3.257 |
| 6E8V | H_ARG_92  | NH1 | H_ASP_115 | OD2 | 2.227 |
| 6E8V | H_ARG_92  | NH2 | H_ASP_115 | OD2 | 3.949 |
| 6E8V | H_HIS_125 | NE2 | H_ASP_183 | OD2 | 3.568 |
| 6E8V | H_HIS_129 | NE2 | H_GLU_179 | OE2 | 2.966 |
| 6E8V | H_LYS_290 | NZ  | L_GLU_127 | OE1 | 2.706 |
| 6E8V | H_LYS_290 | NZ  | L_GLU_127 | OE2 | 2.554 |
| 6E8V | J_LYS_58  | NZ  | J_ASP_183 | OD2 | 3.273 |
| 6E8V | J_ARG_64  | NH1 | J_ASP_115 | OD2 | 3.190 |
| 6E8V | J_ARG_64  | NH2 | J_GLU_72  | OE1 | 3.098 |
| 6E8V | J_ARG_92  | NH1 | J_ASP_115 | OD1 | 2.752 |
| 6E8V | J_ARG_92  | NH1 | J_ASP_115 | OD2 | 2.685 |
| 6E8V | J_HIS_129 | NE2 | J_GLU_179 | OE2 | 3.681 |
| 6E8V | J_LYS_290 | NZ  | K_GLU_128 | OE1 | 3.173 |
| 6E8V | J_LYS_290 | NZ  | K_GLU_128 | OE2 | 2.611 |
| 6E8V | K_ARG_63  | NH1 | K_ASP_84  | OD2 | 3.865 |
| 6E8V | K_ARG_63  | NH2 | K_ASP_84  | OD1 | 2.385 |
| 6E8V | K_ARG_63  | NH2 | K_ASP_84  | OD2 | 3.106 |
| 6E8V | K_LYS_212 | NZ  | H_GLU_101 | OE1 | 3.767 |
| 6E8V | K_LYS_212 | NZ  | H_GLU_101 | OE2 | 3.490 |
| 6E8V | K_LYS_212 | NZ  | K_GLU_215 | OE1 | 3.501 |



|      |           |     |           |     |       |
|------|-----------|-----|-----------|-----|-------|
| 6E8V | L_LYS_211 | NZ  | L_GLU_214 | OE1 | 3.855 |
| 6E8V | L_LYS_211 | NZ  | L_GLU_214 | OE2 | 3.483 |
| 6E8V | O_LYS_58  | NZ  | O_ASP_183 | OD2 | 2.755 |
| 6E8V | O_ARG_64  | NH1 | O_ASP_115 | OD1 | 2.759 |
| 6E8V | O_ARG_64  | NH2 | O_GLU_72  | OE1 | 3.262 |
| 6E8V | O_ARG_64  | NH2 | O_GLU_72  | OE2 | 2.920 |
| 6E8V | O_ARG_64  | NH2 | O_ASP_115 | OD1 | 3.656 |
| 6E8V | O_ARG_92  | NH1 | O_ASP_115 | OD1 | 3.104 |
| 6E8V | O_ARG_92  | NH1 | O_ASP_115 | OD2 | 2.418 |
| 6E8V | O_ARG_92  | NH2 | O_ASP_115 | OD1 | 3.944 |
| 6E8V | O_HIS_129 | NE2 | L_ASP_61  | OD1 | 3.511 |
| 6E8V | O_HIS_129 | NE2 | O_GLU_179 | OE1 | 3.633 |
| 6E8V | O_LYS_290 | NZ  | P_GLU_128 | OE1 | 3.591 |
| 6E8V | P_ARG_56  | NH2 | P_ASP_62  | OD1 | 3.947 |
| 6E8V | P_ARG_63  | NH2 | P_ASP_84  | OD1 | 2.443 |
| 6E8V | P_ARG_63  | NH2 | P_ASP_84  | OD2 | 3.024 |
| 6E8V | P_ARG_68  | NH2 | P_ASP_53  | OD2 | 3.638 |
| 6E8V | P_LYS_171 | NZ  | P_GLU_85  | OE1 | 3.474 |
| 6E8V | P_LYS_212 | NZ  | P_GLU_215 | OE2 | 3.770 |
| 6E8V | U_ARG_64  | NH1 | U_ASP_115 | OD1 | 2.978 |
| 6E8V | U_ARG_64  | NH2 | U_GLU_72  | OE1 | 3.075 |
| 6E8V | U_ARG_64  | NH2 | U_GLU_72  | OE2 | 3.322 |
| 6E8V | U_LYS_69  | NZ  | U_GLU_72  | OE1 | 2.536 |
| 6E8V | U_ARG_92  | NH1 | U_ASP_115 | OD1 | 3.227 |
| 6E8V | U_ARG_92  | NH1 | U_ASP_115 | OD2 | 2.688 |
| 6E8V | U_LYS_290 | NZ  | V_GLU_128 | OE1 | 2.346 |
| 6E8V | U_LYS_290 | NZ  | V_GLU_128 | OE2 | 3.693 |
| 6E8V | V_ARG_63  | NH1 | V_GLU_83  | OE2 | 3.928 |
| 6E8V | V_ARG_63  | NH2 | V_ASP_84  | OD1 | 2.920 |
| 6E8V | V_ARG_63  | NH2 | V_ASP_84  | OD2 | 2.400 |
| 6E8V | V_LYS_154 | NZ  | V_GLU_199 | OE2 | 3.787 |
| 6E8V | V_LYS_212 | NZ  | V_GLU_215 | OE1 | 3.212 |
| 6E8V | Y_ARG_64  | NH1 | Y_ASP_115 | OD1 | 3.849 |
| 6E8V | Y_ARG_64  | NH1 | Y_ASP_115 | OD2 | 3.924 |
| 6E8V | Y_ARG_64  | NH2 | Y_GLU_72  | OE1 | 3.305 |
| 6E8V | Y_ARG_64  | NH2 | Y_GLU_72  | OE2 | 3.450 |
| 6E8V | Y_ARG_64  | NH2 | Y_ASP_115 | OD1 | 3.987 |
| 6E8V | Y_ARG_92  | NH1 | Y_ASP_115 | OD1 | 3.320 |
| 6E8V | Y_ARG_92  | NH1 | Y_ASP_115 | OD2 | 2.179 |
| 6E8V | Y_HIS_129 | NE2 | Y_GLU_179 | OE1 | 2.918 |
| 6E8V | Y_LYS_290 | NZ  | Z_GLU_128 | OE1 | 3.390 |
| 6E8V | Z_ARG_63  | NH1 | Z_ASP_84  | OD1 | 3.893 |
| 6E8V | Z_ARG_63  | NH2 | Z_ASP_84  | OD1 | 3.228 |
| 6E8V | Z_ARG_63  | NH2 | Z_ASP_84  | OD2 | 2.268 |
| 6E8V | Z_LYS_171 | NZ  | Z_GLU_85  | OE1 | 2.482 |
| 6E8V | Z_HIS_202 | NE2 | Z_GLU_203 | OE1 | 3.581 |
| 6E8V | Z_LYS_212 | NZ  | Z_GLU_215 | OE2 | 3.769 |
| 6E8V | c_LYS_58  | NZ  | c_ASP_183 | OD2 | 3.320 |
| 6E8V | c_ARG_64  | NH1 | c_ASP_115 | OD1 | 3.153 |
| 6E8V | c_ARG_64  | NH2 | c_GLU_72  | OE1 | 2.815 |
| 6E8V | c_ARG_64  | NH2 | c_GLU_72  | OE2 | 3.967 |
| 6E8V | c_ARG_92  | NH1 | c_ASP_115 | OD1 | 2.545 |
| 6E8V | c_ARG_92  | NH1 | c_ASP_115 | OD2 | 2.955 |
| 6E8V | c_HIS_125 | ND1 | K_ASP_62  | OD1 | 3.174 |
| 6E8V | c_HIS_125 | ND1 | K_ASP_62  | OD2 | 3.139 |
| 6E8V | c_HIS_125 | NE2 | c_ASP_183 | OD2 | 2.451 |
| 6E8V | c_HIS_129 | NE2 | c_GLU_179 | OE1 | 3.728 |
| 6E8V | c_LYS_290 | NZ  | d_GLU_128 | OE1 | 2.357 |

|      |           |     |           |     |       |
|------|-----------|-----|-----------|-----|-------|
| 6E8V | c_LYS_290 | NZ  | d_GLU_128 | OE2 | 3.486 |
| 6E8V | d_ARG_63  | NH2 | d_ASP_84  | OD1 | 3.212 |
| 6E8V | d_ARG_63  | NH2 | d_ASP_84  | OD2 | 2.255 |
| 6E8V | d_LYS_154 | NZ  | d_GLU_199 | OE1 | 2.319 |
| 6E8V | d_LYS_154 | NZ  | d_GLU_199 | OE2 | 3.282 |
| 6E9G | A_ARG_38  | NH1 | A_GLU_46  | OE1 | 3.009 |
| 6E9G | A_ARG_38  | NH1 | A_GLU_46  | OE2 | 3.865 |
| 6E9G | A_ARG_38  | NH1 | A_ASP_89  | OD1 | 3.731 |
| 6E9G | A_ARG_38  | NH2 | A_ASP_89  | OD1 | 2.942 |
| 6E9G | A_ARG_124 | NH1 | A_ASP_126 | OD1 | 3.428 |
| 6E9G | A_ARG_124 | NH1 | A_ASP_126 | OD2 | 3.623 |
| 6E9G | A_LYS_259 | NZ  | A_ASP_261 | OD1 | 3.382 |
| 6E9G | A_LYS_262 | NZ  | B_GLU_127 | OE1 | 3.021 |
| 6E9G | A_LYS_262 | NZ  | B_GLU_127 | OE2 | 3.870 |
| 6E9G | B_ARG_55  | NH1 | B_ASP_61  | OD2 | 3.166 |
| 6E9G | B_ARG_55  | NH2 | B_ASP_61  | OD1 | 3.953 |
| 6E9G | B_ARG_55  | NH2 | B_ASP_61  | OD2 | 3.935 |
| 6E9G | B_ARG_62  | NH1 | B_ASP_83  | OD1 | 3.754 |
| 6E9G | B_ARG_62  | NH2 | B_ASP_83  | OD1 | 2.216 |
| 6E9G | B_ARG_62  | NH2 | B_ASP_83  | OD2 | 3.767 |
| 6E9G | B_LYS_114 | NZ  | B_GLU_202 | OE1 | 3.419 |
| 6E9H | A_LYS_58  | NZ  | A_ASP_57  | OD2 | 3.854 |
| 6E9H | A_ARG_64  | NH1 | A_ASP_115 | OD1 | 2.780 |
| 6E9H | A_ARG_64  | NH2 | A_GLU_72  | OE1 | 3.005 |
| 6E9H | A_ARG_64  | NH2 | A_ASP_115 | OD1 | 3.589 |
| 6E9H | A_ARG_92  | NH1 | A_ASP_115 | OD1 | 3.583 |
| 6E9H | A_ARG_92  | NH1 | A_ASP_115 | OD2 | 2.997 |
| 6E9H | A_ARG_92  | NH2 | A_ASP_115 | OD1 | 3.156 |
| 6E9H | A_ARG_92  | NH2 | A_ASP_115 | OD2 | 3.683 |
| 6E9H | A_HIS_125 | NE2 | A_GLU_181 | OE2 | 3.054 |
| 6E9H | A_ARG_147 | NH2 | A_ASP_160 | OD1 | 3.058 |
| 6E9H | A_ARG_147 | NH2 | A_ASP_160 | OD2 | 3.404 |
| 6E9H | A_LYS_292 | NZ  | B_GLU_128 | OE1 | 2.895 |
| 6E9H | A_LYS_292 | NZ  | B_GLU_128 | OE2 | 3.744 |
| 6E9H | B_ARG_56  | NH1 | B_ASP_62  | OD2 | 3.861 |
| 6E9H | B_ARG_56  | NH2 | B_ASP_62  | OD2 | 3.548 |
| 6E9H | B_ARG_63  | NH1 | B_ASP_84  | OD1 | 2.804 |
| 6E9H | B_ARG_63  | NH1 | B_ASP_84  | OD2 | 3.553 |
| 6E9H | B_ARG_63  | NH2 | B_ASP_84  | OD1 | 3.448 |
| 6E9H | B_ARG_63  | NH2 | B_ASP_84  | OD2 | 2.780 |
| 6E9H | B_ARG_68  | NH2 | B_ASP_53  | OD2 | 3.674 |
| 6E9H | B_LYS_154 | NZ  | B_GLU_199 | OE1 | 3.479 |
| 6E9H | B_LYS_154 | NZ  | B_GLU_199 | OE2 | 3.530 |
| 6E9H | B_LYS_171 | NZ  | B_GLU_85  | OE1 | 2.299 |
| 6E9H | B_LYS_171 | NZ  | B_GLU_85  | OE2 | 3.752 |
| 6E9I | A_LYS_58  | NZ  | A_ASP_182 | OD2 | 3.602 |
| 6E9I | A_ARG_64  | NH1 | A_ASP_115 | OD2 | 2.633 |
| 6E9I | A_ARG_64  | NH2 | A_GLU_72  | OE2 | 3.049 |
| 6E9I | A_ARG_64  | NH2 | A_ASP_115 | OD2 | 3.483 |
| 6E9I | A_ARG_92  | NH1 | A_ASP_115 | OD1 | 3.516 |
| 6E9I | A_ARG_92  | NH1 | A_ASP_115 | OD2 | 2.842 |
| 6E9I | A_ARG_92  | NH2 | A_ASP_115 | OD1 | 3.099 |
| 6E9I | A_ARG_92  | NH2 | A_ASP_115 | OD2 | 3.725 |
| 6E9I | A_ARG_109 | NH2 | D_ASP_95  | OD1 | 3.782 |
| 6E9I | A_ARG_109 | NH2 | D_ASP_95  | OD2 | 3.931 |
| 6E9I | A_HIS_125 | NE2 | A_GLU_178 | OE2 | 3.001 |
| 6E9I | A_LYS_289 | NZ  | B_GLU_128 | OE1 | 3.746 |
| 6E9I | A_LYS_289 | NZ  | B_GLU_128 | OE2 | 2.925 |

|      |           |     |           |     |       |
|------|-----------|-----|-----------|-----|-------|
| 6E9I | B_ARG_63  | NH1 | B_ASP_84  | OD1 | 2.801 |
| 6E9I | B_ARG_63  | NH1 | B_ASP_84  | OD2 | 2.588 |
| 6E9I | B_ARG_68  | NH1 | B_ASP_53  | OD2 | 3.498 |
| 6E9I | B_LYS_171 | NZ  | B_GLU_85  | OE1 | 2.942 |
| 6E9I | C_ARG_64  | NH1 | C_ASP_115 | OD2 | 2.558 |
| 6E9I | C_ARG_64  | NH2 | C_GLU_72  | OE2 | 2.949 |
| 6E9I | C_ARG_64  | NH2 | C_ASP_115 | OD2 | 3.425 |
| 6E9I | C_ARG_92  | NH1 | C_ASP_115 | OD1 | 3.394 |
| 6E9I | C_ARG_92  | NH1 | C_ASP_115 | OD2 | 2.831 |
| 6E9I | C_ARG_92  | NH2 | C_ASP_115 | OD1 | 3.153 |
| 6E9I | C_ARG_92  | NH2 | C_ASP_115 | OD2 | 3.762 |
| 6E9I | C_HIS_125 | NE2 | C_GLU_178 | OE1 | 3.090 |
| 6E9I | C_LYS_289 | NZ  | D_GLU_128 | OE1 | 2.528 |
| 6E9I | C_LYS_289 | NZ  | D_GLU_128 | OE2 | 3.968 |
| 6E9I | D_ARG_63  | NH2 | D_ASP_84  | OD1 | 2.787 |
| 6E9I | D_ARG_63  | NH2 | D_ASP_84  | OD2 | 2.635 |
| 6E9I | D_ARG_68  | NH2 | D_ASP_53  | OD2 | 3.085 |
| 6E9I | D_LYS_115 | NZ  | D_GLU_203 | OE2 | 3.399 |
| 6E9I | D_LYS_171 | NZ  | D_GLU_85  | OE2 | 3.210 |
| 6E9I | H_LYS_58  | NZ  | H_ASP_57  | OD1 | 3.428 |
| 6E9I | H_ARG_64  | NH1 | H_ASP_115 | OD1 | 2.649 |
| 6E9I | H_ARG_64  | NH2 | H_GLU_72  | OE1 | 2.999 |
| 6E9I | H_ARG_64  | NH2 | H_ASP_115 | OD1 | 3.536 |
| 6E9I | H_LYS_69  | NZ  | H_GLU_114 | OE2 | 3.957 |
| 6E9I | H_ARG_92  | NH1 | H_ASP_115 | OD1 | 2.822 |
| 6E9I | H_ARG_92  | NH1 | H_ASP_115 | OD2 | 3.288 |
| 6E9I | H_ARG_92  | NH2 | H_ASP_115 | OD1 | 3.754 |
| 6E9I | H_ARG_92  | NH2 | H_ASP_115 | OD2 | 3.182 |
| 6E9I | H_HIS_125 | NE2 | H_GLU_178 | OE1 | 3.044 |
| 6E9I | H_LYS_289 | NZ  | L_GLU_128 | OE1 | 3.811 |
| 6E9I | H_LYS_289 | NZ  | L_GLU_128 | OE2 | 2.547 |
| 6E9I | L_ARG_56  | NH1 | L_ASP_62  | OD2 | 3.686 |
| 6E9I | L_ARG_56  | NH2 | L_ASP_62  | OD2 | 3.053 |
| 6E9I | L_ARG_63  | NH1 | L_ASP_84  | OD1 | 3.024 |
| 6E9I | L_ARG_63  | NH1 | L_ASP_84  | OD2 | 2.419 |
| 6E9I | L_ARG_63  | NH2 | L_GLU_83  | OE1 | 3.490 |
| 6E9I | L_ARG_63  | NH2 | L_ASP_84  | OD1 | 3.404 |
| 6E9I | L_ARG_68  | NH1 | L_ASP_53  | OD2 | 3.356 |
| 6E9I | L_LYS_171 | NZ  | L_GLU_85  | OE1 | 2.446 |
| 6E9K | A_LYS_32  | NZ  | A_ASP_31  | OD1 | 2.993 |
| 6E9K | A_LYS_32  | NZ  | A_ASP_31  | OD2 | 3.547 |
| 6E9K | A_ARG_38  | NH1 | A_ASP_89  | OD1 | 2.700 |
| 6E9K | A_ARG_38  | NH2 | A_GLU_46  | OE1 | 3.033 |
| 6E9K | A_ARG_38  | NH2 | A_ASP_89  | OD1 | 3.664 |
| 6E9K | A_ARG_66  | NH1 | A_ASP_89  | OD1 | 3.360 |
| 6E9K | A_ARG_66  | NH1 | A_ASP_89  | OD2 | 2.516 |
| 6E9K | A_ARG_66  | NH2 | A_ASP_89  | OD1 | 3.299 |
| 6E9K | A_ARG_66  | NH2 | A_ASP_89  | OD2 | 3.549 |
| 6E9K | A_HIS_99  | NE2 | A_GLU_146 | OE2 | 3.060 |
| 6E9K | A_ARG_103 | NH1 | A_GLU_146 | OE1 | 3.769 |
| 6E9K | A_LYS_104 | NZ  | A_ASP_143 | OD1 | 2.823 |
| 6E9K | A_LYS_104 | NZ  | A_ASP_143 | OD2 | 3.004 |
| 6E9K | A_LYS_257 | NZ  | B_GLU_128 | OE1 | 3.997 |
| 6E9K | A_LYS_257 | NZ  | B_GLU_128 | OE2 | 3.056 |
| 6E9K | B_ARG_63  | NH1 | B_ASP_84  | OD1 | 3.165 |
| 6E9K | B_ARG_63  | NH1 | B_ASP_84  | OD2 | 2.396 |
| 6E9K | B_ARG_63  | NH2 | B_ASP_84  | OD1 | 2.989 |
| 6E9K | B_ARG_63  | NH2 | B_ASP_84  | OD2 | 3.593 |

|      |           |     |           |     |       |
|------|-----------|-----|-----------|-----|-------|
| 6E9K | B.LYS_115 | NZ  | B.GLU_203 | OE1 | 3.094 |
| 6E9K | B.LYS_154 | NZ  | B.GLU_199 | OE2 | 3.249 |
| 6E9K | B.LYS_171 | NZ  | B.GLU_85  | OE1 | 2.917 |
| 6E9Q | A_ARG_38  | NH1 | A.ASP_89  | OD2 | 3.963 |
| 6E9Q | A_ARG_66  | NH1 | A.ASP_89  | OD1 | 2.868 |
| 6E9Q | A_ARG_66  | NH1 | A.ASP_89  | OD2 | 2.514 |
| 6E9Q | A.HIS_99  | NE2 | A.GLU_142 | OE1 | 3.452 |
| 6E9Q | A.LYS_101 | NZ  | A.GLU_142 | OE2 | 3.652 |
| 6E9Q | A.LYS_253 | NZ  | B.GLU_128 | OE1 | 3.048 |
| 6E9Q | A.LYS_253 | NZ  | B.GLU_128 | OE2 | 2.978 |
| 6E9Q | B_ARG_63  | NH2 | B.ASP_84  | OD1 | 2.631 |
| 6E9Q | B_ARG_63  | NH2 | B.ASP_84  | OD2 | 2.815 |
| 6E9Q | B_ARG_68  | NH2 | B.ASP_53  | OD2 | 3.543 |
| 6E9Q | B.LYS_154 | NZ  | B.GLU_199 | OE1 | 2.492 |
| 6E9Q | B.LYS_171 | NZ  | B.GLU_85  | OE1 | 2.682 |
| 6E9Q | B.LYS_171 | NZ  | B.GLU_85  | OE2 | 3.666 |
| 6E9Q | C_ARG_38  | NH1 | C.ASP_89  | OD1 | 2.493 |
| 6E9Q | C_ARG_38  | NH2 | C.GLU_46  | OE1 | 2.768 |
| 6E9Q | C_ARG_38  | NH2 | C.GLU_46  | OE2 | 3.894 |
| 6E9Q | C_ARG_38  | NH2 | C.ASP_89  | OD1 | 3.476 |
| 6E9Q | C_ARG_66  | NH1 | C.ASP_89  | OD1 | 3.542 |
| 6E9Q | C_ARG_66  | NH1 | C.ASP_89  | OD2 | 2.437 |
| 6E9Q | C_ARG_66  | NH2 | C.ASP_89  | OD1 | 3.979 |
| 6E9Q | C_ARG_66  | NH2 | C.ASP_89  | OD2 | 3.919 |
| 6E9Q | C.HIS_99  | NE2 | C.GLU_142 | OE1 | 3.707 |
| 6E9Q | C.LYS_101 | NZ  | C.GLU_142 | OE1 | 3.900 |
| 6E9Q | D_ARG_56  | NH1 | D.ASP_62  | OD2 | 3.862 |
| 6E9Q | D_ARG_63  | NH2 | D.ASP_84  | OD1 | 3.419 |
| 6E9Q | D_ARG_63  | NH2 | D.ASP_84  | OD2 | 3.605 |
| 6E9Q | D.LYS_154 | NZ  | D.GLU_199 | OE1 | 3.115 |
| 6E9Q | D.LYS_176 | NZ  | D.ASP_143 | OD1 | 3.925 |
| 6E9Q | D.LYS_193 | NZ  | D.ASP_189 | OD1 | 3.400 |
| 6E9Q | E_ARG_38  | NH1 | E.ASP_89  | OD1 | 3.733 |
| 6E9Q | E_ARG_38  | NH2 | E.GLU_46  | OE1 | 3.706 |
| 6E9Q | E_ARG_38  | NH2 | E.ASP_89  | OD1 | 2.896 |
| 6E9Q | E_ARG_66  | NH1 | E.ASP_89  | OD1 | 3.922 |
| 6E9Q | E_ARG_66  | NH1 | E.ASP_89  | OD2 | 2.529 |
| 6E9Q | E_ARG_66  | NH2 | E.ASP_89  | OD2 | 3.750 |
| 6E9Q | E.HIS_99  | NE2 | E.GLU_142 | OE2 | 3.775 |
| 6E9Q | E.LYS_253 | NZ  | F.GLU_128 | OE1 | 2.966 |
| 6E9Q | E.LYS_253 | NZ  | F.GLU_128 | OE2 | 2.802 |
| 6E9Q | F_ARG_63  | NH2 | F.ASP_84  | OD1 | 2.560 |
| 6E9Q | F_ARG_63  | NH2 | F.ASP_84  | OD2 | 3.515 |
| 6E9Q | F_ARG_68  | NH2 | F.ASP_53  | OD2 | 3.049 |
| 6E9Q | F.LYS_171 | NZ  | F.GLU_85  | OE1 | 3.068 |
| 6E9Q | G_ARG_38  | NH1 | G.ASP_89  | OD1 | 3.204 |
| 6E9Q | G_ARG_38  | NH2 | G.GLU_46  | OE1 | 2.728 |
| 6E9Q | G_ARG_38  | NH2 | G.GLU_46  | OE2 | 3.967 |
| 6E9Q | G_ARG_66  | NH1 | G.ASP_89  | OD1 | 3.146 |
| 6E9Q | G_ARG_66  | NH1 | G.ASP_89  | OD2 | 2.916 |
| 6E9Q | G_ARG_66  | NH2 | G.ASP_89  | OD1 | 3.930 |
| 6E9Q | G.HIS_99  | NE2 | G.GLU_142 | OE2 | 3.698 |
| 6E9U | A.LYS_32  | NZ  | A.ASP_159 | OD2 | 3.058 |
| 6E9U | A_ARG_38  | NH1 | A.ASP_89  | OD1 | 2.696 |
| 6E9U | A_ARG_38  | NH2 | A.GLU_46  | OE1 | 3.019 |
| 6E9U | A_ARG_38  | NH2 | A.ASP_89  | OD1 | 3.469 |
| 6E9U | A_ARG_66  | NH1 | A.ASP_89  | OD1 | 3.553 |
| 6E9U | A_ARG_66  | NH1 | A.ASP_89  | OD2 | 2.571 |

|      |           |     |           |     |       |
|------|-----------|-----|-----------|-----|-------|
| 6E9U | A_ARG_66  | NH2 | A_ASP_89  | OD1 | 3.370 |
| 6E9U | A_ARG_66  | NH2 | A_ASP_89  | OD2 | 3.619 |
| 6E9U | A_HIS_99  | NE2 | A_GLU_155 | OE2 | 3.178 |
| 6E9U | A_LYS_104 | NZ  | A_ASP_133 | OD2 | 2.359 |
| 6E9U | A_ARG_117 | NH2 | A_ASP_116 | OD1 | 3.439 |
| 6E9U | A_ARG_117 | NH2 | A_ASP_116 | OD2 | 3.943 |
| 6E9U | A_LYS_266 | NZ  | B_GLU_128 | OE1 | 2.942 |
| 6E9U | A_LYS_266 | NZ  | B_GLU_128 | OE2 | 2.747 |
| 6E9U | B_ARG_56  | NH2 | B_ASP_62  | OD2 | 3.549 |
| 6E9U | B_ARG_63  | NH2 | B_ASP_84  | OD1 | 2.519 |
| 6E9U | B_ARG_63  | NH2 | B_ASP_84  | OD2 | 3.472 |
| 6E9U | B_ARG_168 | NH2 | B_ASP_87  | OD1 | 3.330 |
| 6E9U | B_ARG_168 | NH2 | B_ASP_87  | OD2 | 3.181 |
| 6EDU | D_LYS_348 | NZ  | D_GLU_269 | OE1 | 2.947 |
| 6EDU | D_LYS_348 | NZ  | D_GLU_269 | OE2 | 3.576 |
| 6EDU | D_LYS_421 | NZ  | L_GLU_54  | OE2 | 2.920 |
| 6EDU | D_LYS_432 | NZ  | L_GLU_55  | OE1 | 3.655 |
| 6EDU | D_LYS_432 | NZ  | L_GLU_55  | OE2 | 3.439 |
| 6EDU | D_ARG_476 | NH1 | D_GLU_102 | OE1 | 3.942 |
| 6EDU | D_ARG_476 | NH1 | D_GLU_102 | OE2 | 2.435 |
| 6EDU | D_ARG_480 | NH1 | D_ASP_477 | OD1 | 2.572 |
| 6EDU | D_LYS_487 | NZ  | D_GLU_47  | OE2 | 2.857 |
| 6EDU | D_LYS_487 | NZ  | D_GLU_91  | OE2 | 3.215 |
| 6EDU | E_LYS_348 | NZ  | E_GLU_269 | OE1 | 2.948 |
| 6EDU | E_LYS_348 | NZ  | E_GLU_269 | OE2 | 3.576 |
| 6EDU | E_LYS_421 | NZ  | N_GLU_54  | OE2 | 3.004 |
| 6EDU | E_LYS_432 | NZ  | N_GLU_55  | OE1 | 3.579 |
| 6EDU | E_LYS_432 | NZ  | N_GLU_55  | OE2 | 3.398 |
| 6EDU | E_ARG_476 | NH1 | E_GLU_102 | OE1 | 3.943 |
| 6EDU | E_ARG_476 | NH1 | E_GLU_102 | OE2 | 2.436 |
| 6EDU | E_ARG_480 | NH1 | E_ASP_477 | OD1 | 2.573 |
| 6EDU | E_LYS_487 | NZ  | E_GLU_47  | OE2 | 2.857 |
| 6EDU | E_LYS_487 | NZ  | E_GLU_91  | OE2 | 3.215 |
| 6EDU | F_LYS_348 | NZ  | F_GLU_269 | OE1 | 2.947 |
| 6EDU | F_LYS_348 | NZ  | F_GLU_269 | OE2 | 3.576 |
| 6EDU | F_LYS_421 | NZ  | J_GLU_54  | OE2 | 3.064 |
| 6EDU | F_LYS_432 | NZ  | J_GLU_55  | OE1 | 3.805 |
| 6EDU | F_LYS_432 | NZ  | J_GLU_55  | OE2 | 3.577 |
| 6EDU | F_ARG_476 | NH1 | F_GLU_102 | OE1 | 3.943 |
| 6EDU | F_ARG_476 | NH1 | F_GLU_102 | OE2 | 2.437 |
| 6EDU | F_ARG_480 | NH1 | F_ASP_477 | OD1 | 2.573 |
| 6EDU | F_LYS_487 | NZ  | F_GLU_47  | OE2 | 2.856 |
| 6EDU | F_LYS_487 | NZ  | F_GLU_91  | OE2 | 3.215 |
| 6EDU | G_LYS_22  | NZ  | F_GLU_102 | OE1 | 3.040 |
| 6EDU | G_ARG_59  | NH2 | F_ASP_368 | OD1 | 3.059 |
| 6EDU | G_LYS_72  | NZ  | G_ASP_56  | OD2 | 3.829 |
| 6EDU | H_LYS_22  | NZ  | E_GLU_102 | OE1 | 3.174 |
| 6EDU | H_ARG_59  | NH2 | E_ASP_368 | OD1 | 3.166 |
| 6EDU | H_LYS_72  | NZ  | H_ASP_56  | OD2 | 3.828 |
| 6EDU | I_LYS_22  | NZ  | D_GLU_102 | OE1 | 3.053 |
| 6EDU | I_ARG_59  | NH2 | D_ASP_368 | OD1 | 3.238 |
| 6EDU | I_LYS_72  | NZ  | I_ASP_56  | OD2 | 3.828 |
| 6EDU | J_ARG_12  | NH2 | J_GLU_10  | OE2 | 2.569 |
| 6EDU | J_LYS_19  | NZ  | J_GLU_82  | OE2 | 3.419 |
| 6EDU | J_ARG_38  | NH2 | J_GLU_46  | OE1 | 2.774 |
| 6EDU | J_ARG_38  | NH2 | J_GLU_46  | OE2 | 3.579 |
| 6EDU | J_LYS_63  | NZ  | J_GLU_46  | OE1 | 3.894 |
| 6EDU | J_LYS_63  | NZ  | J_GLU_46  | OE2 | 3.217 |

|      |           |     |           |     |       |
|------|-----------|-----|-----------|-----|-------|
| 6EDU | J_ARG.67  | NH1 | J_ASP_90  | OD2 | 3.399 |
| 6EDU | J_ARG.67  | NH2 | J_ASP_90  | OD1 | 3.817 |
| 6EDU | K_ARG.63  | NH1 | K_ASP_84  | OD1 | 3.667 |
| 6EDU | K_ARG.63  | NH1 | K_ASP_84  | OD2 | 3.012 |
| 6EDU | K_ARG.63  | NH2 | K_ASP_84  | OD2 | 3.643 |
| 6EDU | L_ARG.12  | NH2 | L_GLU_10  | OE2 | 2.570 |
| 6EDU | L_LYS.19  | NZ  | L_GLU_82  | OE2 | 3.420 |
| 6EDU | L_ARG.38  | NH2 | L_GLU_46  | OE1 | 2.773 |
| 6EDU | L_ARG.38  | NH2 | L_GLU_46  | OE2 | 3.579 |
| 6EDU | L_LYS.63  | NZ  | L_GLU_46  | OE1 | 3.894 |
| 6EDU | L_LYS.63  | NZ  | L_GLU_46  | OE2 | 3.217 |
| 6EDU | L_ARG.67  | NH1 | L_ASP_90  | OD2 | 3.399 |
| 6EDU | L_ARG.67  | NH2 | L_ASP_90  | OD1 | 3.816 |
| 6EDU | M_ARG.63  | NH1 | M_ASP_84  | OD1 | 3.667 |
| 6EDU | M_ARG.63  | NH1 | M_ASP_84  | OD2 | 3.013 |
| 6EDU | M_ARG.63  | NH2 | M_ASP_84  | OD2 | 3.645 |
| 6EDU | N_ARG.12  | NH2 | N_GLU_10  | OE2 | 2.569 |
| 6EDU | N_LYS.19  | NZ  | N_GLU_82  | OE2 | 3.419 |
| 6EDU | N_ARG.38  | NH2 | N_GLU_46  | OE1 | 2.773 |
| 6EDU | N_ARG.38  | NH2 | N_GLU_46  | OE2 | 3.579 |
| 6EDU | N_LYS.63  | NZ  | N_GLU_46  | OE1 | 3.894 |
| 6EDU | N_LYS.63  | NZ  | N_GLU_46  | OE2 | 3.217 |
| 6EDU | N_ARG.67  | NH1 | N_ASP_90  | OD2 | 3.398 |
| 6EDU | N_ARG.67  | NH2 | N_ASP_90  | OD1 | 3.817 |
| 6EDU | O_ARG.63  | NH1 | O_ASP_84  | OD1 | 3.667 |
| 6EDU | O_ARG.63  | NH1 | O_ASP_84  | OD2 | 3.013 |
| 6EDU | O_ARG.63  | NH2 | O_ASP_84  | OD2 | 3.644 |
| 6EDU | P_ARG.39  | NH1 | P_ASP_93  | OD1 | 3.407 |
| 6EDU | P_ARG.39  | NH2 | P_GLU_47  | OE1 | 3.894 |
| 6EDU | P_ARG.39  | NH2 | P_GLU_47  | OE2 | 3.043 |
| 6EDU | P_ARG.66  | NH1 | P_ASP_93  | OD2 | 3.616 |
| 6EDU | P_ARG.66  | NH2 | P_ASP_93  | OD2 | 2.801 |
| 6EDU | P_LYS.87  | NZ  | P_GLU_85  | OE2 | 3.427 |
| 6EDU | P_LYS.107 | NZ  | F_GLU_91  | OE1 | 3.324 |
| 6EDU | Q_ARG.24  | NH1 | Q_ASP_71  | OD1 | 3.743 |
| 6EDU | Q_ARG.62  | NH2 | Q_GLU_82  | OE2 | 3.021 |
| 6EDU | Q_ARG.62  | NH2 | Q_ASP_83  | OD2 | 3.975 |
| 6EDU | R_ARG.39  | NH1 | R_ASP_93  | OD1 | 3.408 |
| 6EDU | R_ARG.39  | NH2 | R_GLU_47  | OE1 | 3.894 |
| 6EDU | R_ARG.39  | NH2 | R_GLU_47  | OE2 | 3.044 |
| 6EDU | R_ARG.66  | NH1 | R_ASP_93  | OD2 | 3.616 |
| 6EDU | R_ARG.66  | NH2 | R_ASP_93  | OD2 | 2.800 |
| 6EDU | R_LYS.87  | NZ  | R_GLU_85  | OE2 | 3.427 |
| 6EDU | R_LYS.107 | NZ  | D_GLU_91  | OE1 | 3.704 |
| 6EDU | S_ARG.24  | NH1 | S_ASP_71  | OD1 | 3.743 |
| 6EDU | S_ARG.62  | NH2 | S_GLU_82  | OE2 | 3.020 |
| 6EDU | S_ARG.62  | NH2 | S_ASP_83  | OD2 | 3.975 |
| 6EDU | T_ARG.39  | NH1 | T_ASP_93  | OD1 | 3.408 |
| 6EDU | T_ARG.39  | NH2 | T_GLU_47  | OE1 | 3.894 |
| 6EDU | T_ARG.39  | NH2 | T_GLU_47  | OE2 | 3.043 |
| 6EDU | T_ARG.66  | NH1 | T_ASP_93  | OD2 | 3.616 |
| 6EDU | T_ARG.66  | NH2 | T_ASP_93  | OD2 | 2.801 |
| 6EDU | T_LYS.87  | NZ  | T_GLU_85  | OE2 | 3.426 |
| 6EDU | T_LYS.107 | NZ  | E_GLU_91  | OE1 | 3.475 |
| 6EDU | U_ARG.24  | NH1 | U_ASP_71  | OD1 | 3.744 |
| 6EDU | U_ARG.62  | NH2 | U_GLU_82  | OE2 | 3.020 |
| 6EDU | U_ARG.62  | NH2 | U_ASP_83  | OD2 | 3.976 |
| 6EJG | A_LYS.116 | NZ  | A_ASP_117 | OD2 | 3.986 |

|      |           |     |           |     |       |
|------|-----------|-----|-----------|-----|-------|
| 6EJG | A_LYS_124 | NZ  | A_ASP_195 | OD1 | 3.544 |
| 6EJG | A_LYS_124 | NZ  | A_ASP_195 | OD2 | 2.697 |
| 6EJG | A_LYS_171 | NZ  | C_ASP_224 | OD2 | 3.396 |
| 6EJG | A_LYS_171 | NZ  | C_ASP_226 | OD2 | 2.901 |
| 6EJG | A_HIS_191 | NE2 | A_ASP_128 | OD1 | 3.062 |
| 6EJG | A_HIS_191 | NE2 | A_ASP_128 | OD2 | 2.636 |
| 6EJG | A_LYS_193 | NZ  | A_ASP_155 | OD1 | 3.682 |
| 6EJG | B_LYS_124 | NZ  | B_ASP_195 | OD1 | 2.725 |
| 6EJG | B_LYS_124 | NZ  | B_ASP_195 | OD2 | 3.034 |
| 6EJG | B_LYS_    | NZ  | B_ASP_    | OD2 | 3.458 |
| 6EJG | B_LYS_    | NZ  | D_ASP_    | OD1 | 3.521 |
| 6EJG | B_LYS_    | NZ  | D_ASP_    | OD2 | 2.547 |
| 6EJG | B_LYS_    | NZ  | D_ASP_    | OD2 | 2.932 |
| 6EJG | B_HIS_191 | NE2 | B_ASP_    | OD1 | 2.701 |
| 6EJG | B_HIS_191 | NE2 | B_ASP_    | OD2 | 3.241 |
| 6EJG | C_ARG_62  | NH1 | C_ASP_112 | OD1 | 3.837 |
| 6EJG | C_ARG_62  | NH2 | C_ASP_112 | OD1 | 3.201 |
| 6EJG | C_ARG_62  | NH2 | C_ASP_112 | OD2 | 3.690 |
| 6EJG | C_LYS_65  | NZ  | C_GLU_135 | OE1 | 3.179 |
| 6EJG | C_LYS_91  | NZ  | C_GLU_97  | OE1 | 3.567 |
| 6EJG | C_ARG_103 | NH1 | C_GLU_123 | OE2 | 3.023 |
| 6EJG | C_ARG_103 | NH1 | C_ASP_124 | OD2 | 3.428 |
| 6EJG | C_ARG_103 | NH2 | C_GLU_121 | OE2 | 3.520 |
| 6EJG | C_ARG_209 | NH1 | C_GLU_258 | OE1 | 3.385 |
| 6EJG | C_ARG_209 | NH1 | C_GLU_258 | OE2 | 3.605 |
| 6EJG | C_ARG_219 | NH2 | C_GLU_268 | OE1 | 2.753 |
| 6EJG | C_ARG_219 | NH2 | C_GLU_268 | OE2 | 3.078 |
| 6EJG | C_LYS_236 | NZ  | C_ASP_259 | OD1 | 3.275 |
| 6EJG | C_LYS_236 | NZ  | C_ASP_259 | OD2 | 2.696 |
| 6EJG | C_ARG_277 | NH1 | C_ASP_273 | OD1 | 3.404 |
| 6EJG | C_ARG_277 | NH1 | C_ASP_273 | OD2 | 3.492 |
| 6EJG | C_ARG_277 | NH2 | C_GLU_97  | OE1 | 3.001 |
| 6EJG | D_ARG_    | NH1 | D_ASP_    | OD1 | 2.944 |
| 6EJG | D_ARG_    | NH1 | D_ASP_    | OD2 | 3.871 |
| 6EJG | D_ARG_    | NH2 | D_ASP_    | OD1 | 3.096 |
| 6EJG | D_ARG_    | NH2 | D_ASP_    | OD2 | 3.874 |
| 6EJG | D_LYS_    | NZ  | D_GLU_    | OE1 | 2.983 |
| 6EJG | D_LYS_    | NZ  | D_GLU_    | OE2 | 3.137 |
| 6EJG | D_ARG_    | NH1 | D_GLU_    | OE2 | 3.108 |
| 6EJG | D_ARG_    | NH1 | D_ASP_    | OD2 | 3.449 |
| 6EJG | D_ARG_    | NH2 | D_ASP_    | OD1 | 2.957 |
| 6EJG | D_ARG_    | NH2 | D_ASP_    | OD2 | 3.232 |
| 6EJG | D_LYS_    | NZ  | D_ASP_    | OD1 | 3.981 |
| 6EJG | D_ARG_    | NH2 | D_GLU_    | OE1 | 2.937 |
| 6EJG | D_ARG_    | NH2 | D_GLU_    | OE2 | 3.024 |
| 6EJG | D_LYS_    | NZ  | D_ASP_    | OD1 | 3.260 |
| 6EJG | D_LYS_    | NZ  | D_ASP_    | OD2 | 2.656 |
| 6EJG | D_ARG_    | NH1 | D_ASP_    | OD1 | 3.140 |
| 6EJG | D_ARG_    | NH1 | D_ASP_    | OD2 | 3.900 |
| 6EJG | D_ARG_    | NH2 | D_GLU_    | OE1 | 3.261 |
| 6EJG | D_ARG_    | NH2 | D_GLU_    | OE2 | 3.642 |
| 6EJM | A_LYS_124 | NZ  | A_ASP_195 | OD1 | 3.195 |
| 6EJM | A_LYS_124 | NZ  | A_ASP_195 | OD2 | 2.580 |
| 6EJM | A_HIS_191 | NE2 | A_ASP_128 | OD1 | 3.203 |
| 6EJM | A_HIS_191 | NE2 | A_ASP_128 | OD2 | 2.407 |
| 6EJM | A_HIS_204 | ND1 | B_GLU_152 | OE2 | 3.786 |
| 6EJM | B_LYS_124 | NZ  | B_ASP_195 | OD1 | 2.563 |
| 6EJM | B_LYS_124 | NZ  | B_ASP_195 | OD2 | 3.251 |

|      |           |     |           |     |       |
|------|-----------|-----|-----------|-----|-------|
| 6EJM | B_HIS_191 | NE2 | B_ASP_128 | OD1 | 2.629 |
| 6EJM | B_HIS_191 | NE2 | B_ASP_128 | OD2 | 3.201 |
| 6EJM | B_LYS_193 | NZ  | B_GLU_188 | OE2 | 3.576 |
| 6EJM | H_ARG_76  | NH1 | H_GLU_84  | OE1 | 2.904 |
| 6EJM | H_ARG_76  | NH1 | H_ASP_128 | OD1 | 3.983 |
| 6EJM | H_ARG_76  | NH2 | H_ASP_128 | OD1 | 2.619 |
| 6EJM | H_ARG_105 | NH1 | H_ASP_128 | OD1 | 3.929 |
| 6EJM | H_ARG_105 | NH1 | H_ASP_128 | OD2 | 2.801 |
| 6EJM | H_ARG_105 | NH2 | H_ASP_128 | OD1 | 3.282 |
| 6EJM | H_ARG_105 | NH2 | H_ASP_128 | OD2 | 3.596 |
| 6EJM | H_LYS_114 | NZ  | H_ASP_111 | OD1 | 3.878 |
| 6EJM | H_LYS_198 | NZ  | H_ASP_249 | OD2 | 3.812 |
| 6EJM | H_ARG_225 | NH2 | H_ASP_142 | OD2 | 3.513 |
| 6EJM | H_ARG_240 | NH1 | H_GLU_258 | OE1 | 3.177 |
| 6EJM | H_ARG_240 | NH1 | H_GLU_258 | OE2 | 3.066 |
| 6EJM | H_ARG_240 | NH1 | H_GLU_260 | OE2 | 3.276 |
| 6EJM | H_ARG_240 | NH1 | H_ASP_261 | OD2 | 3.562 |
| 6EJM | H_ARG_240 | NH2 | H_ASP_261 | OD1 | 2.537 |
| 6EJM | H_ARG_240 | NH2 | H_ASP_261 | OD2 | 2.801 |
| 6EJM | L_ARG_76  | NH1 | L_GLU_84  | OE1 | 2.878 |
| 6EJM | L_ARG_76  | NH2 | L_ASP_128 | OD1 | 2.699 |
| 6EJM | L_ARG_82  | NH2 | L_GLU_84  | OE2 | 3.006 |
| 6EJM | L_ARG_105 | NH1 | L_ASP_128 | OD1 | 3.783 |
| 6EJM | L_ARG_105 | NH1 | L_ASP_128 | OD2 | 2.828 |
| 6EJM | L_ARG_105 | NH2 | L_ASP_128 | OD1 | 3.082 |
| 6EJM | L_ARG_105 | NH2 | L_ASP_128 | OD2 | 3.617 |
| 6EJM | L_ARG_225 | NH2 | L_ASP_142 | OD2 | 3.785 |
| 6EJM | L_ARG_240 | NH2 | L_ASP_261 | OD1 | 3.449 |
| 6EJM | L_ARG_240 | NH2 | L_ASP_261 | OD2 | 2.659 |
| 6EK2 | A_LYS_124 | NZ  | A_ASP_195 | OD1 | 3.535 |
| 6EK2 | A_LYS_124 | NZ  | A_ASP_195 | OD2 | 2.854 |
| 6EK2 | A_LYS_187 | NZ  | A_ASP_189 | OD1 | 3.611 |
| 6EK2 | A_HIS_191 | NE2 | A_ASP_128 | OD1 | 3.936 |
| 6EK2 | A_HIS_191 | NE2 | A_ASP_128 | OD2 | 2.649 |
| 6EK2 | B_LYS_124 | NZ  | B_ASP_195 | OD1 | 2.644 |
| 6EK2 | B_LYS_124 | NZ  | B_ASP_195 | OD2 | 3.630 |
| 6EK2 | B_LYS_144 | NZ  | B_ASP_137 | OD1 | 3.085 |
| 6EK2 | B_HIS_191 | NE2 | B_ASP_128 | OD1 | 2.602 |
| 6EK2 | B_HIS_191 | NE2 | B_ASP_128 | OD2 | 3.758 |
| 6EK2 | B_LYS_193 | NZ  | B_ASP_189 | OD1 | 3.150 |
| 6EK2 | H_LYS_188 | NZ  | H_ASP_249 | OD1 | 2.862 |
| 6EK2 | H_HIS_204 | NE2 | H_ASP_268 | OD1 | 2.734 |
| 6EK2 | H_ARG_207 | NH1 | H_GLU_215 | OE1 | 3.268 |
| 6EK2 | H_ARG_207 | NH1 | H_GLU_215 | OE2 | 3.622 |
| 6EK2 | H_ARG_207 | NH1 | H_GLU_258 | OE2 | 3.557 |
| 6EK2 | H_ARG_207 | NH2 | H_ASP_259 | OD1 | 2.945 |
| 6EK2 | H_ARG_213 | NH1 | H_GLU_215 | OE1 | 3.256 |
| 6EK2 | H_ARG_213 | NH1 | H_GLU_215 | OE2 | 3.614 |
| 6EK2 | H_ARG_236 | NH1 | H_ASP_259 | OD1 | 3.179 |
| 6EK2 | H_ARG_236 | NH1 | H_ASP_259 | OD2 | 2.190 |
| 6EK2 | H_ARG_236 | NH2 | H_GLU_258 | OE2 | 3.829 |
| 6EK2 | H_ARG_236 | NH2 | H_ASP_259 | OD1 | 3.282 |
| 6EK2 | H_ARG_236 | NH2 | H_ASP_259 | OD2 | 3.781 |
| 6EK2 | H_LYS_247 | NZ  | H_ASP_249 | OD1 | 3.816 |
| 6EK2 | H_LYS_271 | NZ  | H_ASP_222 | OD2 | 3.418 |
| 6EK2 | H_LYS_362 | NZ  | H_ASP_408 | OD2 | 3.909 |
| 6EK2 | H_ARG_370 | NH1 | A_GLU_188 | OE2 | 3.014 |
| 6EK2 | H_ARG_370 | NH2 | A_GLU_188 | OE1 | 3.920 |



|      |           |     |           |     |       |
|------|-----------|-----|-----------|-----|-------|
| 6EK2 | H_ARG_370 | NH2 | A_GLU_188 | OE2 | 3.261 |
| 6EK2 | H_ARG_399 | NH1 | H_ASP_420 | OD1 | 3.412 |
| 6EK2 | H_ARG_399 | NH1 | H_ASP_420 | OD2 | 2.682 |
| 6EK2 | H_LYS_441 | NZ  | H_GLU_443 | OE2 | 3.288 |
| 6EK2 | I_LYS_188 | NZ  | I_ASP_249 | OD1 | 2.854 |
| 6EK2 | I_HIS_204 | NE2 | I_ASP_268 | OD2 | 2.800 |
| 6EK2 | I_ARG_207 | NH1 | I_GLU_215 | OE1 | 3.248 |
| 6EK2 | I_ARG_207 | NH1 | I_GLU_215 | OE2 | 3.625 |
| 6EK2 | I_ARG_207 | NH1 | I_GLU_258 | OE2 | 3.570 |
| 6EK2 | I_ARG_207 | NH2 | I_ASP_259 | OD1 | 2.867 |
| 6EK2 | I_ARG_236 | NH1 | I_ASP_259 | OD1 | 2.843 |
| 6EK2 | I_ARG_236 | NH1 | I_ASP_259 | OD2 | 2.628 |
| 6EK2 | I_LYS_247 | NZ  | I_ASP_249 | OD1 | 3.833 |
| 6EK2 | I_LYS_271 | NZ  | I_ASP_222 | OD2 | 3.427 |
| 6EK2 | I_LYS_362 | NZ  | I_ASP_408 | OD2 | 3.921 |
| 6EK2 | I_ARG_370 | NH1 | B_GLU_188 | OE1 | 2.817 |
| 6EK2 | I_ARG_370 | NH1 | B_GLU_188 | OE2 | 3.286 |
| 6EK2 | I_ARG_370 | NH2 | B_GLU_188 | OE1 | 3.837 |
| 6EK2 | I_ARG_370 | NH2 | B_GLU_188 | OE2 | 3.095 |
| 6EK2 | I_ARG_399 | NH1 | I_ASP_420 | OD1 | 3.393 |
| 6EK2 | I_ARG_399 | NH1 | I_ASP_420 | OD2 | 2.676 |
| 6EK2 | I_LYS_441 | NZ  | I_GLU_443 | OE2 | 3.785 |
| 6EUN | A_LYS_82  | NZ  | A_GLU_77  | OE2 | 2.937 |
| 6EUN | A_LYS_87  | NZ  | B_GLU_47  | OE1 | 3.058 |
| 6EUN | A_LYS_101 | NZ  | A_ASP_105 | OD2 | 3.752 |
| 6EUN | A_LYS_107 | NZ  | C_ASP_105 | OD1 | 3.488 |
| 6EUN | A_LYS_145 | NZ  | A_GLU_148 | OE2 | 3.702 |
| 6EUN | A_LYS_167 | NZ  | C_ASP_165 | OD1 | 3.883 |
| 6EUN | B_LYS_69  | NZ  | B_ASP_59  | OD2 | 2.842 |
| 6EUN | B_LYS_82  | NZ  | B_GLU_77  | OE2 | 2.936 |
| 6EUN | B_LYS_87  | NZ  | C_GLU_47  | OE1 | 3.021 |
| 6EUN | B_LYS_101 | NZ  | B_ASP_105 | OD2 | 3.762 |
| 6EUN | B_LYS_107 | NZ  | A_ASP_105 | OD1 | 3.579 |
| 6EUN | B_LYS_145 | NZ  | B_GLU_148 | OE2 | 3.617 |
| 6EUN | C_LYS_69  | NZ  | C_ASP_59  | OD2 | 2.843 |
| 6EUN | C_LYS_82  | NZ  | C_GLU_77  | OE2 | 2.928 |
| 6EUN | C_LYS_87  | NZ  | A_GLU_47  | OE1 | 3.007 |
| 6EUN | C_LYS_101 | NZ  | C_ASP_105 | OD2 | 3.754 |
| 6EUN | C_LYS_107 | NZ  | B_ASP_105 | OD1 | 3.525 |
| 6EUN | C_LYS_145 | NZ  | C_GLU_148 | OE2 | 3.782 |
| 6EUP | A_LYS_69  | NZ  | A_ASP_59  | OD2 | 3.593 |
| 6EUP | A_LYS_87  | NZ  | B_GLU_47  | OE1 | 2.842 |
| 6EUP | A_LYS_87  | NZ  | B_ASP_79  | OD1 | 3.786 |
| 6EUP | A_LYS_107 | NZ  | C_ASP_105 | OD1 | 3.538 |
| 6EUP | A_LYS_145 | NZ  | A_GLU_148 | OE2 | 3.961 |
| 6EUP | B_LYS_69  | NZ  | B_ASP_75  | OD1 | 3.179 |
| 6EUP | B_LYS_69  | NZ  | B_ASP_75  | OD2 | 2.780 |
| 6EUP | B_LYS_87  | NZ  | C_GLU_47  | OE1 | 2.811 |
| 6EUP | B_LYS_87  | NZ  | C_ASP_79  | OD1 | 3.799 |
| 6EUP | B_LYS_107 | NZ  | A_ASP_105 | OD1 | 3.723 |
| 6EUP | C_LYS_69  | NZ  | C_ASP_59  | OD2 | 3.592 |
| 6EUP | C_LYS_87  | NZ  | A_GLU_47  | OE1 | 2.814 |
| 6EUP | C_LYS_87  | NZ  | A_ASP_79  | OD1 | 3.752 |
| 6EUP | C_LYS_107 | NZ  | B_ASP_105 | OD1 | 3.560 |
| 6EUP | C_LYS_145 | NZ  | C_GLU_148 | OE2 | 3.928 |
| 6EV1 | A_ARG_40  | NH1 | A_GLU_46  | OE1 | 3.790 |
| 6EV1 | A_ARG_40  | NH1 | A_GLU_46  | OE2 | 2.696 |
| 6EV1 | A_ARG_40  | NH2 | A_GLU_46  | OE2 | 2.910 |

|      |           |     |           |     |       |
|------|-----------|-----|-----------|-----|-------|
| 6EV1 | A_LYS_63  | NZ  | A_GLU_46  | OE1 | 3.383 |
| 6EV1 | A_LYS_67  | NZ  | A_ASP_90  | OD1 | 3.842 |
| 6EV1 | A_LYS_67  | NZ  | A_ASP_90  | OD2 | 2.754 |
| 6EV1 | A_LYS_147 | NZ  | A_ASP_148 | OD1 | 3.932 |
| 6EV1 | A_LYS_213 | NZ  | B_GLU_122 | OE1 | 3.565 |
| 6EV1 | B_HIS_33  | NE2 | B_ASP_49  | OD1 | 3.832 |
| 6EV1 | B_ARG_45  | NH1 | A_ASP_105 | OD1 | 3.400 |
| 6EV1 | B_LYS_52  | NZ  | B_ASP_49  | OD2 | 3.765 |
| 6EV1 | B_ARG_60  | NH1 | B_GLU_78  | OE1 | 3.819 |
| 6EV1 | B_ARG_60  | NH1 | B_GLU_78  | OE2 | 3.655 |
| 6EV1 | B_ARG_60  | NH2 | B_GLU_78  | OE2 | 3.561 |
| 6EV1 | B_ARG_60  | NH2 | B_GLU_80  | OE2 | 2.733 |
| 6EV1 | B_ARG_60  | NH2 | B_ASP_81  | OD1 | 3.048 |
| 6EV1 | B_ARG_60  | NH2 | B_ASP_81  | OD2 | 3.747 |
| 6EV1 | B_LYS_102 | NZ  | B_GLU_104 | OE2 | 3.444 |
| 6EV1 | B_LYS_102 | NZ  | B_GLU_164 | OE2 | 3.563 |
| 6EV1 | B_ARG_141 | NH1 | B_GLU_104 | OE1 | 3.542 |
| 6EV1 | B_ARG_141 | NH1 | B_GLU_104 | OE2 | 2.887 |
| 6EV1 | B_ARG_141 | NH2 | B_GLU_104 | OE1 | 3.560 |
| 6EV1 | B_ARG_141 | NH2 | B_GLU_104 | OE2 | 2.857 |
| 6EV1 | B_LYS_144 | NZ  | B_GLU_194 | OE2 | 3.954 |
| 6EV1 | B_LYS_148 | NZ  | B_GLU_194 | OE1 | 2.745 |
| 6EV1 | B_LYS_187 | NZ  | B_ASP_184 | OD1 | 3.196 |
| 6EV1 | C_LYS_38  | NZ  | C_GLU_89  | OE2 | 2.747 |
| 6EV1 | C_LYS_63  | NZ  | C_GLU_46  | OE1 | 3.586 |
| 6EV1 | C_LYS_63  | NZ  | C_GLU_46  | OE2 | 3.868 |
| 6EV1 | C_LYS_63  | NZ  | C_GLU_89  | OE2 | 3.610 |
| 6EV1 | C_LYS_67  | NZ  | C_ASP_90  | OD1 | 3.419 |
| 6EV1 | C_LYS_67  | NZ  | C_ASP_90  | OD2 | 2.576 |
| 6EV1 | C_LYS_147 | NZ  | C_ASP_148 | OD1 | 3.591 |
| 6EV1 | D_LYS_52  | NZ  | D_ASP_49  | OD2 | 3.936 |
| 6EV1 | D_ARG_60  | NH1 | D_GLU_78  | OE1 | 3.982 |
| 6EV1 | D_ARG_60  | NH1 | D_ASP_81  | OD1 | 2.686 |
| 6EV1 | D_ARG_60  | NH1 | D_ASP_81  | OD2 | 2.341 |
| 6EV1 | D_ARG_60  | NH2 | D_GLU_78  | OE2 | 3.908 |
| 6EV1 | D_ARG_60  | NH2 | D_GLU_80  | OE2 | 2.672 |
| 6EV1 | D_ARG_60  | NH2 | D_ASP_81  | OD1 | 3.533 |
| 6EV1 | D_LYS_102 | NZ  | D_GLU_104 | OE2 | 2.957 |
| 6EV1 | D_LYS_102 | NZ  | D_GLU_164 | OE1 | 3.066 |
| 6EV1 | D_ARG_141 | NH1 | D_GLU_104 | OE1 | 3.100 |
| 6EV1 | D_ARG_141 | NH1 | D_GLU_104 | OE2 | 2.729 |
| 6EV1 | D_ARG_141 | NH2 | D_GLU_104 | OE1 | 3.502 |
| 6EV1 | D_LYS_148 | NZ  | D_GLU_194 | OE2 | 2.419 |
| 6EV1 | D_LYS_187 | NZ  | D_ASP_184 | OD1 | 2.568 |
| 6EV1 | D_LYS_187 | NZ  | D_ASP_184 | OD2 | 3.848 |
| 6EV1 | E_ARG_40  | NH1 | E_GLU_46  | OE1 | 3.238 |
| 6EV1 | E_LYS_67  | NZ  | E_ASP_90  | OD1 | 3.136 |
| 6EV1 | E_LYS_67  | NZ  | E_ASP_90  | OD2 | 3.150 |
| 6EV1 | E_LYS_147 | NZ  | E_ASP_148 | OD1 | 3.641 |
| 6EV1 | E_LYS_147 | NZ  | E_ASP_148 | OD2 | 3.538 |
| 6EV1 | E_LYS_213 | NZ  | F_GLU_122 | OE2 | 3.696 |
| 6EV1 | E_LYS_214 | NZ  | E_GLU_216 | OE2 | 3.745 |
| 6EV1 | F_ARG_45  | NH1 | E_ASP_105 | OD1 | 3.598 |
| 6EV1 | F_LYS_52  | NZ  | F_ASP_49  | OD2 | 3.409 |
| 6EV1 | F_ARG_60  | NH1 | F_GLU_78  | OE1 | 3.963 |
| 6EV1 | F_ARG_60  | NH2 | F_GLU_80  | OE2 | 2.462 |
| 6EV1 | F_ARG_60  | NH2 | F_ASP_81  | OD1 | 2.838 |
| 6EV1 | F_ARG_60  | NH2 | F_ASP_81  | OD2 | 3.378 |

|      |           |     |           |     |       |
|------|-----------|-----|-----------|-----|-------|
| 6EV1 | F_LYS_102 | NZ  | F_GLU_104 | OE2 | 3.200 |
| 6EV1 | F_LYS_102 | NZ  | F_GLU_164 | OE1 | 3.253 |
| 6EV1 | F_LYS_102 | NZ  | F_GLU_164 | OE2 | 3.819 |
| 6EV1 | F_ARG_141 | NH1 | F_GLU_142 | OE2 | 3.956 |
| 6EV1 | F_ARG_141 | NH2 | F_GLU_104 | OE1 | 2.879 |
| 6EV1 | F_ARG_141 | NH2 | F_GLU_104 | OE2 | 2.315 |
| 6EV1 | F_LYS_148 | NZ  | F_GLU_194 | OE1 | 2.676 |
| 6EV1 | F_LYS_187 | NZ  | F_ASP_184 | OD1 | 3.320 |
| 6EV1 | F_LYS_189 | NZ  | F_GLU_212 | OE1 | 3.396 |
| 6EV1 | G_ARG_40  | NH1 | G_GLU_46  | OE1 | 3.181 |
| 6EV1 | G_LYS_63  | NZ  | G_GLU_46  | OE1 | 3.941 |
| 6EV1 | G_LYS_63  | NZ  | G_GLU_46  | OE2 | 3.486 |
| 6EV1 | G_LYS_67  | NZ  | G_ASP_90  | OD1 | 3.844 |
| 6EV1 | G_LYS_67  | NZ  | G_ASP_90  | OD2 | 3.076 |
| 6EV1 | G_LYS_213 | NZ  | H_GLU_122 | OE2 | 3.127 |
| 6EV1 | H_HIS_33  | NE2 | H_ASP_49  | OD1 | 3.831 |
| 6EV1 | H_ARG_60  | NH2 | H_GLU_80  | OE2 | 2.685 |
| 6EV1 | H_ARG_60  | NH2 | H_ASP_81  | OD1 | 3.172 |
| 6EV1 | H_ARG_60  | NH2 | H_ASP_81  | OD2 | 3.902 |
| 6EV1 | H_LYS_102 | NZ  | H_GLU_104 | OE2 | 2.463 |
| 6EV1 | H_LYS_102 | NZ  | H_GLU_164 | OE1 | 3.887 |
| 6EV1 | H_LYS_102 | NZ  | H_GLU_164 | OE2 | 3.148 |
| 6EV1 | H_ARG_141 | NH1 | H_GLU_104 | OE1 | 3.993 |
| 6EV1 | H_ARG_141 | NH2 | H_GLU_104 | OE1 | 2.709 |
| 6EV1 | H_ARG_141 | NH2 | H_GLU_104 | OE2 | 3.012 |
| 6EV1 | H_HIS_188 | ND1 | H_ASP_150 | OD2 | 3.547 |
| 6EV1 | L_ARG_40  | NH1 | L_GLU_46  | OE1 | 3.727 |
| 6EV1 | L_ARG_40  | NH1 | L_GLU_46  | OE2 | 2.502 |
| 6EV1 | L_ARG_40  | NH2 | L_GLU_46  | OE2 | 3.081 |
| 6EV1 | L_LYS_67  | NZ  | L_ASP_90  | OD1 | 3.185 |
| 6EV1 | L_LYS_67  | NZ  | L_ASP_90  | OD2 | 2.453 |
| 6EV1 | L_LYS_147 | NZ  | L_ASP_148 | OD1 | 3.802 |
| 6EV1 | L_LYS_213 | NZ  | J_GLU_122 | OE1 | 2.884 |
| 6EV1 | L_LYS_213 | NZ  | J_GLU_122 | OE2 | 3.812 |
| 6EV1 | J_ARG_45  | NH2 | L_ASP_105 | OD1 | 3.213 |
| 6EV1 | J_ARG_45  | NH2 | L_ASP_105 | OD2 | 3.457 |
| 6EV1 | J_ARG_60  | NH1 | J_GLU_78  | OE1 | 2.996 |
| 6EV1 | J_ARG_60  | NH2 | J_GLU_78  | OE1 | 2.740 |
| 6EV1 | J_ARG_60  | NH2 | J_GLU_78  | OE2 | 3.438 |
| 6EV1 | J_ARG_60  | NH2 | J_GLU_80  | OE1 | 3.708 |
| 6EV1 | J_ARG_60  | NH2 | J_ASP_81  | OD1 | 3.548 |
| 6EV1 | J_LYS_102 | NZ  | J_GLU_164 | OE1 | 3.206 |
| 6EV1 | J_LYS_102 | NZ  | J_GLU_164 | OE2 | 3.357 |
| 6EV1 | J_ARG_141 | NH1 | J_GLU_104 | OE1 | 3.574 |
| 6EV1 | J_ARG_141 | NH1 | J_GLU_104 | OE2 | 3.837 |
| 6EV1 | J_ARG_141 | NH2 | J_GLU_104 | OE1 | 3.635 |
| 6EV1 | J_ARG_141 | NH2 | J_GLU_104 | OE2 | 3.025 |
| 6EV1 | J_LYS_148 | NZ  | J_GLU_194 | OE1 | 2.568 |
| 6EV1 | J_LYS_187 | NZ  | J_ASP_184 | OD1 | 2.786 |
| 6EV1 | J_HIS_188 | ND1 | J_ASP_150 | OD2 | 3.581 |
| 6EV1 | K_LYS_67  | NZ  | K_ASP_90  | OD1 | 3.821 |
| 6EV1 | K_LYS_67  | NZ  | K_ASP_90  | OD2 | 3.131 |
| 6EV1 | K_LYS_147 | NZ  | K_ASP_148 | OD1 | 3.891 |
| 6EV1 | K_LYS_147 | NZ  | K_ASP_148 | OD2 | 3.991 |
| 6EV1 | K_HIS_168 | NE2 | L_ASP_166 | OD2 | 3.740 |
| 6EV1 | K_LYS_213 | NZ  | L_GLU_122 | OE1 | 3.450 |
| 6EV1 | L_ARG_45  | NH2 | K_ASP_105 | OD1 | 3.857 |
| 6EV1 | L_LYS_52  | NZ  | L_ASP_49  | OD2 | 3.305 |

|      |           |     |           |     |       |
|------|-----------|-----|-----------|-----|-------|
| 6EV1 | L_ARG_60  | NH1 | L_GLU_78  | OE2 | 3.656 |
| 6EV1 | L_ARG_60  | NH2 | L_GLU_80  | OE2 | 2.289 |
| 6EV1 | L_ARG_60  | NH2 | L_ASP_81  | OD1 | 3.740 |
| 6EV1 | L_LYS_102 | NZ  | L_GLU_104 | OE1 | 3.803 |
| 6EV1 | L_LYS_102 | NZ  | L_GLU_104 | OE2 | 3.397 |
| 6EV1 | L_LYS_102 | NZ  | L_GLU_164 | OE1 | 3.211 |
| 6EV1 | L_ARG_141 | NH1 | L_GLU_104 | OE1 | 3.719 |
| 6EV1 | L_LYS_148 | NZ  | L_GLU_194 | OE1 | 2.763 |
| 6EV1 | L_LYS_187 | NZ  | L_ASP_184 | OD1 | 2.439 |
| 6EV1 | L_LYS_187 | NZ  | L_ASP_184 | OD2 | 3.983 |
| 6EV2 | A_LYS_63  | NZ  | A_GLU_46  | OE2 | 3.111 |
| 6EV2 | A_LYS_65  | NZ  | A_ASP_66  | OD1 | 3.842 |
| 6EV2 | A_LYS_65  | NZ  | A_ASP_66  | OD2 | 2.879 |
| 6EV2 | A_LYS_67  | NZ  | A_ASP_90  | OD1 | 3.783 |
| 6EV2 | A_LYS_67  | NZ  | A_ASP_90  | OD2 | 2.679 |
| 6EV2 | A_LYS_147 | NZ  | A_ASP_148 | OD1 | 3.638 |
| 6EV2 | A_LYS_213 | NZ  | B_GLU_122 | OE1 | 3.442 |
| 6EV2 | B_ARG_45  | NH1 | A_ASP_105 | OD1 | 3.088 |
| 6EV2 | B_LYS_52  | NZ  | B_ASP_49  | OD2 | 3.559 |
| 6EV2 | B_ARG_60  | NH1 | B_GLU_78  | OE1 | 3.644 |
| 6EV2 | B_ARG_60  | NH1 | B_GLU_78  | OE2 | 3.977 |
| 6EV2 | B_ARG_60  | NH2 | B_GLU_80  | OE2 | 3.107 |
| 6EV2 | B_ARG_60  | NH2 | B_ASP_81  | OD1 | 2.872 |
| 6EV2 | B_ARG_60  | NH2 | B_ASP_81  | OD2 | 3.612 |
| 6EV2 | B_LYS_102 | NZ  | B_GLU_104 | OE1 | 3.573 |
| 6EV2 | B_LYS_102 | NZ  | B_GLU_164 | OE1 | 3.299 |
| 6EV2 | B_LYS_102 | NZ  | B_GLU_164 | OE2 | 3.878 |
| 6EV2 | B_ARG_141 | NH2 | B_GLU_104 | OE1 | 3.798 |
| 6EV2 | B_ARG_141 | NH2 | B_GLU_104 | OE2 | 3.715 |
| 6EV2 | B_LYS_168 | NZ  | F_GLU_78  | OE2 | 2.948 |
| 6EV2 | B_LYS_182 | NZ  | B_GLU_186 | OE2 | 3.804 |
| 6EV2 | B_HIS_188 | ND1 | B_ASP_150 | OD2 | 3.294 |
| 6EV2 | B_HIS_217 | NE2 | B_GLU_186 | OE2 | 3.191 |
| 6EV2 | C_LYS_38  | NZ  | C_GLU_46  | OE1 | 3.925 |
| 6EV2 | C_ARG_40  | NH1 | C_GLU_89  | OE1 | 2.530 |
| 6EV2 | C_ARG_40  | NH1 | C_GLU_89  | OE2 | 3.940 |
| 6EV2 | C_ARG_40  | NH2 | C_GLU_89  | OE1 | 2.841 |
| 6EV2 | C_LYS_63  | NZ  | C_GLU_46  | OE2 | 2.910 |
| 6EV2 | C_LYS_67  | NZ  | C_ASP_90  | OD1 | 3.799 |
| 6EV2 | C_LYS_67  | NZ  | C_ASP_90  | OD2 | 2.689 |
| 6EV2 | C_LYS_147 | NZ  | C_ASP_148 | OD1 | 3.909 |
| 6EV2 | C_LYS_214 | NZ  | C_GLU_216 | OE1 | 3.019 |
| 6EV2 | C_LYS_214 | NZ  | C_GLU_216 | OE2 | 3.275 |
| 6EV2 | D_LYS_44  | NZ  | C_ASP_105 | OD2 | 3.822 |
| 6EV2 | D_ARG_45  | NH1 | C_ASP_105 | OD1 | 3.142 |
| 6EV2 | D_LYS_52  | NZ  | D_ASP_49  | OD2 | 3.541 |
| 6EV2 | D_ARG_60  | NH1 | D_GLU_78  | OE1 | 3.997 |
| 6EV2 | D_ARG_60  | NH1 | D_GLU_78  | OE2 | 3.666 |
| 6EV2 | D_ARG_60  | NH2 | D_GLU_80  | OE2 | 2.969 |
| 6EV2 | D_ARG_60  | NH2 | D_ASP_81  | OD1 | 2.871 |
| 6EV2 | D_ARG_60  | NH2 | D_ASP_81  | OD2 | 3.679 |
| 6EV2 | D_LYS_102 | NZ  | D_GLU_164 | OE1 | 3.482 |
| 6EV2 | D_ARG_141 | NH2 | D_GLU_104 | OE1 | 3.236 |
| 6EV2 | D_ARG_141 | NH2 | D_GLU_104 | OE2 | 3.266 |
| 6EV2 | D_LYS_148 | NZ  | D_GLU_194 | OE1 | 3.886 |
| 6EV2 | D_LYS_148 | NZ  | D_GLU_194 | OE2 | 2.872 |
| 6EV2 | D_LYS_168 | NZ  | H_GLU_78  | OE2 | 3.198 |
| 6EV2 | D_HIS_188 | ND1 | D_ASP_150 | OD2 | 3.510 |

|      |           |     |           |     |       |
|------|-----------|-----|-----------|-----|-------|
| 6EV2 | E_ARG_40  | NH1 | E_GLU_89  | OE1 | 3.472 |
| 6EV2 | E_ARG_40  | NH1 | E_GLU_89  | OE2 | 2.763 |
| 6EV2 | E_ARG_40  | NH2 | E_GLU_89  | OE2 | 2.889 |
| 6EV2 | E_LYS_63  | NZ  | E_GLU_46  | OE1 | 3.154 |
| 6EV2 | E_LYS_63  | NZ  | E_GLU_46  | OE2 | 2.770 |
| 6EV2 | E_LYS_67  | NZ  | E_ASP_90  | OD1 | 3.680 |
| 6EV2 | E_LYS_67  | NZ  | E_ASP_90  | OD2 | 2.852 |
| 6EV2 | E_LYS_147 | NZ  | E_ASP_148 | OD1 | 2.804 |
| 6EV2 | E_LYS_147 | NZ  | E_ASP_148 | OD2 | 3.429 |
| 6EV2 | E_LYS_210 | NZ  | E_ASP_212 | OD1 | 3.724 |
| 6EV2 | E_LYS_210 | NZ  | E_ASP_212 | OD2 | 3.578 |
| 6EV2 | E_LYS_213 | NZ  | F_GLU_122 | OE1 | 3.493 |
| 6EV2 | E_LYS_214 | NZ  | E_GLU_216 | OE2 | 2.823 |
| 6EV2 | E_LYS_218 | NZ  | F_ASP_121 | OD2 | 3.835 |
| 6EV2 | F_ARG_45  | NH1 | E_ASP_105 | OD1 | 2.818 |
| 6EV2 | F_LYS_52  | NZ  | F_ASP_49  | OD2 | 3.921 |
| 6EV2 | F_ARG_60  | NH1 | F_GLU_78  | OE2 | 3.617 |
| 6EV2 | F_ARG_60  | NH2 | F_GLU_80  | OE2 | 3.106 |
| 6EV2 | F_ARG_60  | NH2 | F_ASP_81  | OD1 | 2.910 |
| 6EV2 | F_ARG_60  | NH2 | F_ASP_81  | OD2 | 3.493 |
| 6EV2 | F_LYS_102 | NZ  | F_GLU_104 | OE2 | 3.866 |
| 6EV2 | F_LYS_102 | NZ  | F_GLU_164 | OE1 | 2.823 |
| 6EV2 | F_LYS_102 | NZ  | F_GLU_164 | OE2 | 3.600 |
| 6EV2 | F_LYS_148 | NZ  | F_GLU_194 | OE1 | 2.349 |
| 6EV2 | F_LYS_168 | NZ  | B_GLU_78  | OE1 | 3.747 |
| 6EV2 | F_LYS_189 | NZ  | F_GLU_212 | OE1 | 2.964 |
| 6EV2 | F_LYS_189 | NZ  | F_GLU_212 | OE2 | 3.194 |
| 6EV2 | G_LYS_63  | NZ  | G_GLU_46  | OE2 | 2.652 |
| 6EV2 | G_LYS_67  | NZ  | G_ASP_90  | OD1 | 3.758 |
| 6EV2 | G_LYS_67  | NZ  | G_ASP_90  | OD2 | 2.774 |
| 6EV2 | G_LYS_147 | NZ  | G_ASP_148 | OD1 | 3.806 |
| 6EV2 | G_LYS_210 | NZ  | A_ASP_73  | OD1 | 3.883 |
| 6EV2 | G_LYS_210 | NZ  | A_ASP_73  | OD2 | 2.404 |
| 6EV2 | G_LYS_213 | NZ  | H_GLU_122 | OE1 | 3.330 |
| 6EV2 | G_LYS_213 | NZ  | H_GLU_122 | OE2 | 3.779 |
| 6EV2 | G_LYS_214 | NZ  | G_GLU_216 | OE2 | 2.730 |
| 6EV2 | H_ARG_45  | NH1 | G_ASP_105 | OD1 | 3.108 |
| 6EV2 | H_ARG_60  | NH1 | H_GLU_78  | OE2 | 3.921 |
| 6EV2 | H_ARG_60  | NH2 | H_GLU_80  | OE2 | 2.991 |
| 6EV2 | H_ARG_60  | NH2 | H_ASP_81  | OD1 | 3.423 |
| 6EV2 | H_ARG_60  | NH2 | H_ASP_81  | OD2 | 2.856 |
| 6EV2 | H_LYS_102 | NZ  | H_GLU_164 | OE1 | 3.383 |
| 6EV2 | H_ARG_141 | NH2 | H_GLU_104 | OE1 | 3.404 |
| 6EV2 | H_ARG_141 | NH2 | H_GLU_104 | OE2 | 2.455 |
| 6EV2 | H_LYS_148 | NZ  | H_GLU_194 | OE1 | 2.710 |
| 6EV2 | H_LYS_148 | NZ  | H_GLU_194 | OE2 | 3.785 |
| 6EV2 | H_LYS_168 | NZ  | D_GLU_78  | OE2 | 3.686 |
| 6EWB | A_ARG_241 | NH2 | A_ASP_325 | OD1 | 2.936 |
| 6EWB | A_ARG_241 | NH2 | A_ASP_325 | OD2 | 3.696 |
| 6EWB | A_LYS_248 | NZ  | A_GLU_247 | OE1 | 3.886 |
| 6EWB | A_ARG_345 | NH1 | A_GLU_376 | OE2 | 3.889 |
| 6EWB | A_HIS_347 | NE2 | A_ASP_374 | OD2 | 2.911 |
| 6EWB | A_HIS_396 | ND1 | A_ASP_391 | OD2 | 3.943 |
| 6EWB | A_ARG_435 | NH1 | A_ASP_448 | OD2 | 3.551 |
| 6EWB | A_ARG_435 | NH2 | A_ASP_450 | OD1 | 3.333 |
| 6EWB | A_ARG_435 | NH2 | A_ASP_450 | OD2 | 2.720 |
| 6EWB | A_ARG_476 | NH1 | A_ASP_518 | OD2 | 2.712 |
| 6EWB | A_ARG_476 | NH2 | A_GLU_488 | OE1 | 3.271 |

|      |           |     |           |     |       |
|------|-----------|-----|-----------|-----|-------|
| 6EWB | A_LYS_490 | NZ  | A_GLU_429 | OE2 | 3.221 |
| 6EWB | A_ARG_516 | NH2 | A_ASP_518 | OD1 | 3.815 |
| 6EWB | A_ARG_516 | NH2 | A_ASP_518 | OD2 | 3.445 |
| 6EWB | B_ARG_241 | NH2 | B_ASP_325 | OD1 | 3.075 |
| 6EWB | B_ARG_241 | NH2 | B_ASP_325 | OD2 | 3.936 |
| 6EWB | B_LYS_248 | NZ  | B_GLU_247 | OE1 | 3.679 |
| 6EWB | B_ARG_345 | NH1 | B_GLU_376 | OE2 | 3.796 |
| 6EWB | B_ARG_345 | NH2 | B_GLU_376 | OE2 | 3.815 |
| 6EWB | B_HIS_347 | ND1 | B_ASP_370 | OD1 | 3.328 |
| 6EWB | B_HIS_347 | NE2 | B_ASP_374 | OD2 | 2.654 |
| 6EWB | B_ARG_373 | NH1 | B_ASP_372 | OD2 | 3.813 |
| 6EWB | B_ARG_373 | NH2 | B_ASP_372 | OD2 | 3.329 |
| 6EWB | B_ARG_435 | NH1 | B_ASP_448 | OD2 | 3.850 |
| 6EWB | B_ARG_435 | NH1 | B_ASP_506 | OD1 | 3.944 |
| 6EWB | B_ARG_435 | NH2 | B_ASP_450 | OD1 | 3.359 |
| 6EWB | B_ARG_435 | NH2 | B_ASP_450 | OD2 | 2.788 |
| 6EWB | B_ARG_476 | NH1 | B_ASP_518 | OD2 | 2.823 |
| 6EWB | B_ARG_476 | NH2 | B_GLU_488 | OE1 | 3.165 |
| 6EWB | B_LYS_490 | NZ  | B_GLU_429 | OE2 | 3.030 |
| 6EWB | B_ARG_516 | NH2 | B_ASP_518 | OD1 | 3.365 |
| 6EWB | B_ARG_516 | NH2 | B_ASP_518 | OD2 | 2.936 |
| 6EWB | C_ARG_241 | NH2 | C_ASP_325 | OD1 | 2.915 |
| 6EWB | C_ARG_241 | NH2 | C_ASP_325 | OD2 | 3.721 |
| 6EWB | C_LYS_248 | NZ  | C_GLU_247 | OE1 | 3.894 |
| 6EWB | C_ARG_345 | NH1 | C_GLU_376 | OE2 | 3.422 |
| 6EWB | C_ARG_345 | NH2 | C_GLU_376 | OE2 | 3.471 |
| 6EWB | C_HIS_347 | ND1 | C_ASP_370 | OD1 | 3.346 |
| 6EWB | C_HIS_347 | NE2 | C_ASP_374 | OD2 | 2.797 |
| 6EWB | C_HIS_396 | ND1 | C_ASP_391 | OD2 | 3.992 |
| 6EWB | C_ARG_435 | NH1 | C_ASP_448 | OD2 | 3.511 |
| 6EWB | C_ARG_435 | NH2 | C_ASP_450 | OD1 | 3.163 |
| 6EWB | C_ARG_435 | NH2 | C_ASP_450 | OD2 | 2.800 |
| 6EWB | C_ARG_476 | NH1 | C_GLU_488 | OE1 | 2.525 |
| 6EWB | C_ARG_476 | NH2 | C_ASP_518 | OD2 | 3.985 |
| 6EWB | C_LYS_490 | NZ  | C_GLU_429 | OE1 | 3.972 |
| 6EWB | C_LYS_490 | NZ  | C_GLU_429 | OE2 | 3.084 |
| 6EWB | C_ARG_516 | NH2 | C_ASP_518 | OD1 | 3.755 |
| 6EWB | C_ARG_516 | NH2 | C_ASP_518 | OD2 | 3.482 |
| 6EWB | D_ARG_241 | NH2 | D_ASP_325 | OD1 | 3.023 |
| 6EWB | D_ARG_241 | NH2 | D_ASP_325 | OD2 | 3.955 |
| 6EWB | D_LYS_248 | NZ  | D_GLU_247 | OE1 | 3.969 |
| 6EWB | D_ARG_345 | NH1 | D_GLU_376 | OE2 | 3.830 |
| 6EWB | D_HIS_347 | ND1 | D_ASP_370 | OD1 | 3.312 |
| 6EWB | D_HIS_347 | NE2 | D_ASP_374 | OD2 | 2.724 |
| 6EWB | D_HIS_417 | NE2 | L_GLU_80  | OE2 | 3.932 |
| 6EWB | D_ARG_435 | NH1 | D_ASP_448 | OD2 | 3.638 |
| 6EWB | D_ARG_435 | NH2 | D_ASP_450 | OD1 | 3.210 |
| 6EWB | D_ARG_435 | NH2 | D_ASP_450 | OD2 | 2.891 |
| 6EWB | D_ARG_476 | NH1 | D_ASP_518 | OD2 | 2.514 |
| 6EWB | D_ARG_476 | NH2 | D_GLU_488 | OE1 | 3.217 |
| 6EWB | D_LYS_490 | NZ  | D_GLU_429 | OE2 | 2.925 |
| 6EWB | D_ARG_516 | NH2 | D_ASP_518 | OD1 | 3.559 |
| 6EWB | D_ARG_516 | NH2 | D_ASP_518 | OD2 | 3.083 |
| 6EWB | E_LYS_    | NZ  | E_ASP_    | OD1 | 3.980 |
| 6EWB | E_ARG_98  | NH1 | B_ASP_341 | OD1 | 3.977 |
| 6EWB | E_ARG_98  | NH2 | B_ASP_341 | OD1 | 3.813 |
| 6EWB | E_ARG_101 | NH1 | F_ASP_49  | OD1 | 2.895 |
| 6EWB | E_ARG_101 | NH1 | F_ASP_49  | OD2 | 3.620 |

|      |           |     |           |     |       |
|------|-----------|-----|-----------|-----|-------|
| 6EWB | F_ARG_    | NH1 | E_ASP_    | OD1 | 3.803 |
| 6EWB | F_ARG_    | NH1 | E_ASP_    | OD2 | 3.536 |
| 6EWB | F_LYS_52  | NZ  | A_ASP_448 | OD1 | 3.722 |
| 6EWB | F_LYS_52  | NZ  | A_ASP_448 | OD2 | 2.304 |
| 6EWB | F_LYS_52  | NZ  | F_ASP_49  | OD2 | 3.153 |
| 6EWB | F_ARG_    | NH1 | F_GLU_    | OE2 | 3.882 |
| 6EWB | F_ARG_    | NH2 | F_GLU_    | OE2 | 2.849 |
| 6EWB | F_ARG_    | NH2 | F_ASP_    | OD1 | 2.744 |
| 6EWB | F_ARG_    | NH2 | F_ASP_    | OD2 | 3.294 |
| 6EWB | G_ARG_40  | NH1 | G_GLU_89  | OE1 | 3.993 |
| 6EWB | G_ARG_40  | NH2 | G_GLU_89  | OE2 | 3.112 |
| 6EWB | G_LYS_63  | NZ  | G_GLU_46  | OE1 | 3.095 |
| 6EWB | G_LYS_63  | NZ  | G_GLU_46  | OE2 | 3.462 |
| 6EWB | G_LYS_67  | NZ  | G_ASP_90  | OD2 | 3.352 |
| 6EWB | G_ARG_98  | NH1 | D_ASP_341 | OD1 | 3.850 |
| 6EWB | G_ARG_98  | NH2 | D_ASP_341 | OD1 | 3.731 |
| 6EWB | G_ARG_101 | NH1 | L_ASP_49  | OD1 | 2.830 |
| 6EWB | G_ARG_101 | NH1 | L_ASP_49  | OD2 | 3.797 |
| 6EWB | H_ARG_40  | NH1 | H_GLU_89  | OE1 | 3.969 |
| 6EWB | H_LYS_67  | NZ  | H_ASP_90  | OD2 | 3.353 |
| 6EWB | H_ARG_98  | NH1 | A_ASP_341 | OD2 | 3.948 |
| 6EWB | H_ARG_98  | NH2 | A_ASP_341 | OD2 | 3.896 |
| 6EWB | H_ARG_101 | NH1 | L_ASP_49  | OD1 | 2.509 |
| 6EWB | H_ARG_101 | NH1 | L_ASP_49  | OD2 | 3.441 |
| 6EWB | H_LYS_208 | NZ  | H_ASP_210 | OD1 | 3.387 |
| 6EWB | H_LYS_208 | NZ  | H_ASP_210 | OD2 | 3.606 |
| 6EWB | L_ARG_45  | NH1 | G_ASP_104 | OD1 | 3.731 |
| 6EWB | L_ARG_45  | NH1 | G_ASP_104 | OD2 | 3.636 |
| 6EWB | L_LYS_52  | NZ  | C_ASP_448 | OD1 | 3.564 |
| 6EWB | L_LYS_52  | NZ  | C_ASP_448 | OD2 | 2.694 |
| 6EWB | L_LYS_52  | NZ  | L_ASP_49  | OD2 | 3.594 |
| 6EWB | L_ARG_60  | NH1 | L_GLU_80  | OE2 | 3.662 |
| 6EWB | L_ARG_60  | NH2 | L_GLU_80  | OE2 | 2.362 |
| 6EWB | L_ARG_60  | NH2 | L_ASP_81  | OD1 | 3.161 |
| 6EWB | L_ARG_60  | NH2 | L_ASP_81  | OD2 | 3.779 |
| 6EWB | L_LYS_148 | NZ  | L_GLU_194 | OE1 | 2.906 |
| 6EWB | L_LYS_148 | NZ  | L_GLU_194 | OE2 | 3.891 |
| 6EWB | L_HIS_188 | ND1 | L_ASP_150 | OD2 | 2.838 |
| 6EWB | J_LYS_38  | NZ  | J_ASP_90  | OD1 | 3.994 |
| 6EWB | J_ARG_98  | NH1 | C_ASP_341 | OD2 | 3.957 |
| 6EWB | J_ARG_98  | NH2 | C_ASP_341 | OD2 | 3.467 |
| 6EWB | J_ARG_101 | NH1 | K_ASP_49  | OD1 | 2.726 |
| 6EWB | J_ARG_101 | NH1 | K_ASP_49  | OD2 | 3.581 |
| 6EWB | J_LYS_211 | NZ  | K_GLU_122 | OE2 | 2.945 |
| 6EWB | K_ARG_45  | NH1 | J_ASP_104 | OD2 | 3.826 |
| 6EWB | K_LYS_52  | NZ  | D_ASP_448 | OD1 | 3.845 |
| 6EWB | K_LYS_52  | NZ  | D_ASP_448 | OD2 | 2.608 |
| 6EWB | K_LYS_52  | NZ  | K_ASP_49  | OD2 | 3.118 |
| 6EWB | K_ARG_60  | NH2 | K_GLU_80  | OE1 | 3.852 |
| 6EWB | K_ARG_60  | NH2 | K_ASP_81  | OD1 | 2.735 |
| 6EWB | K_ARG_60  | NH2 | K_ASP_81  | OD2 | 3.577 |
| 6EWB | K_LYS_141 | NZ  | K_GLU_104 | OE1 | 3.738 |
| 6EWB | K_LYS_141 | NZ  | K_GLU_104 | OE2 | 2.397 |
| 6EWB | K_LYS_198 | NZ  | K_ASP_109 | OD2 | 3.688 |
| 6EWB | L_ARG_45  | NH1 | H_ASP_104 | OD1 | 3.721 |
| 6EWB | L_ARG_45  | NH1 | H_ASP_104 | OD2 | 3.560 |
| 6EWB | L_LYS_52  | NZ  | B_ASP_448 | OD1 | 3.690 |
| 6EWB | L_LYS_52  | NZ  | B_ASP_448 | OD2 | 2.585 |

|      |           |     |           |     |       |
|------|-----------|-----|-----------|-----|-------|
| 6EWB | L_LYS_52  | NZ  | L_ASP_49  | OD2 | 3.133 |
| 6EWB | L_ARG_60  | NH1 | D_GLU_316 | OE1 | 3.251 |
| 6EWB | L_ARG_60  | NH1 | D_GLU_316 | OE2 | 3.266 |
| 6EWB | L_ARG_60  | NH2 | L_GLU_80  | OE1 | 3.300 |
| 6EWB | L_ARG_60  | NH2 | L_ASP_81  | OD1 | 2.716 |
| 6EWB | L_ARG_60  | NH2 | L_ASP_81  | OD2 | 3.315 |
| 6EWB | L_LYS_102 | NZ  | L_ASP_164 | OD2 | 3.771 |
| 6EWB | L_LYS_141 | NZ  | L_GLU_104 | OE2 | 3.049 |
| 6EWB | L_HIS_188 | ND1 | L_ASP_150 | OD1 | 3.713 |
| 6FAB | L_ARG_24  | NH1 | L_ASP_70  | OD1 | 2.789 |
| 6FAB | L_ARG_61  | NH1 | L_GLU_81  | OE2 | 3.576 |
| 6FAB | L_ARG_61  | NH2 | L_GLU_81  | OE1 | 2.864 |
| 6FAB | L_ARG_61  | NH2 | L_GLU_81  | OE2 | 2.823 |
| 6FAB | L_ARG_61  | NH2 | L_ASP_82  | OD1 | 2.715 |
| 6FAB | L_ARG_61  | NH2 | L_ASP_82  | OD2 | 3.543 |
| 6FAB | L_LYS_107 | NZ  | L_ASP_110 | OD1 | 3.024 |
| 6FAB | L_LYS_147 | NZ  | L_GLU_195 | OE2 | 3.857 |
| 6FAB | L_LYS_149 | NZ  | L_GLU_195 | OE1 | 2.545 |
| 6FAB | L_LYS_149 | NZ  | L_GLU_195 | OE2 | 2.801 |
| 6FAB | L_LYS_169 | NZ  | L_ASP_167 | OD1 | 2.717 |
| 6FAB | L_LYS_169 | NZ  | L_ASP_167 | OD2 | 2.572 |
| 6FAB | L_LYS_183 | NZ  | L_GLU_187 | OE1 | 2.518 |
| 6FAB | L_LYS_183 | NZ  | L_GLU_187 | OE2 | 2.757 |
| 6FAB | L_ARG_188 | NH1 | L_ASP_184 | OD1 | 2.649 |
| 6FAB | L_ARG_188 | NH1 | L_ASP_184 | OD2 | 3.158 |
| 6FAB | L_ARG_188 | NH2 | L_ASP_184 | OD1 | 3.720 |
| 6FAB | L_ARG_188 | NH2 | L_ASP_184 | OD2 | 2.655 |
| 6FAB | L_ARG_188 | NH2 | L_GLU_185 | OE1 | 2.879 |
| 6FAB | L_LYS_199 | NZ  | L_ASP_143 | OD1 | 2.609 |
| 6FAB | L_LYS_199 | NZ  | L_ASP_143 | OD2 | 2.563 |
| 6FAB | H_LYS_63  | NZ  | H_GLU_46  | OE1 | 2.502 |
| 6FAB | H_LYS_63  | NZ  | H_GLU_46  | OE2 | 3.193 |
| 6FAB | H_LYS_65  | NZ  | H_GLU_62  | OE1 | 2.682 |
| 6FAB | H_LYS_65  | NZ  | H_GLU_62  | OE2 | 2.720 |
| 6FAB | H_LYS_67  | NZ  | H_ASP_90  | OD1 | 3.504 |
| 6FAB | H_LYS_67  | NZ  | H_ASP_90  | OD2 | 2.658 |
| 6FAB | H_ARG_98  | NH2 | H_ASP_109 | OD1 | 3.478 |
| 6FAB | H_ARG_98  | NH2 | H_ASP_109 | OD2 | 2.734 |
| 6FAB | H_LYS_107 | NZ  | H_GLU_100 | OE2 | 3.655 |
| 6FAB | H_LYS_107 | NZ  | H_ASP_109 | OD2 | 2.865 |
| 6FAB | H_LYS_213 | NZ  | H_ASP_215 | OD1 | 3.756 |
| 6FAB | H_LYS_213 | NZ  | H_ASP_215 | OD2 | 2.836 |
| 6FAB | H_LYS_216 | NZ  | L_GLU_123 | OE1 | 2.624 |
| 6FAB | H_LYS_216 | NZ  | L_GLU_123 | OE2 | 2.770 |
| 6FAB | H_ARG_221 | NH2 | H_ASP_222 | OD1 | 2.832 |
| 6FAB | H_ARG_221 | NH2 | H_ASP_222 | OD2 | 3.565 |
| 6FAX | L_ARG_61  | NH2 | L_ASP_82  | OD1 | 2.582 |
| 6FAX | L_ARG_61  | NH2 | L_ASP_82  | OD2 | 3.227 |
| 6FAX | L_LYS_103 | NZ  | L_GLU_165 | OE1 | 3.961 |
| 6FAX | L_LYS_149 | NZ  | L_GLU_195 | OE1 | 3.174 |
| 6FAX | L_LYS_149 | NZ  | L_GLU_195 | OE2 | 3.580 |
| 6FAX | L_HIS_189 | ND1 | L_ASP_151 | OD2 | 3.031 |
| 6FAX | H_LYS_19  | NZ  | H_GLU_82  | OE1 | 3.254 |
| 6FAX | H_LYS_38  | NZ  | H_ASP_90  | OD1 | 3.375 |
| 6FAX | H_LYS_63  | NZ  | H_GLU_46  | OE1 | 3.943 |
| 6FAX | H_LYS_63  | NZ  | H_GLU_46  | OE2 | 3.507 |
| 6FAX | H_LYS_67  | NZ  | H_ASP_90  | OD2 | 3.573 |
| 6FAX | H_ARG_98  | NH2 | H_ASP_110 | OD1 | 3.912 |



|      |            |     |            |     |       |
|------|------------|-----|------------|-----|-------|
| 6FAX | H_ARG_98   | NH2 | H_ASP_110  | OD2 | 3.034 |
| 6FAX | H_ARG_104  | NH1 | H_GLU_100  | OE2 | 2.851 |
| 6FAX | H_ARG_104  | NH2 | R_GLU_21   | OE1 | 3.986 |
| 6FAX | H_LYS_152  | NZ  | H_ASP_153  | OD1 | 3.279 |
| 6FAX | H_LYS_152  | NZ  | H_ASP_153  | OD2 | 3.260 |
| 6FAX | H_HIS_173  | NE2 | L_ASP_167  | OD1 | 3.928 |
| 6FAX | H_LYS_218  | NZ  | L_GLU_123  | OE1 | 3.125 |
| 6FAX | H_LYS_218  | NZ  | L_GLU_123  | OE2 | 3.415 |
| 6FAX | R_HIS_78   | NE2 | R_GLU_74   | OE1 | 3.706 |
| 6FAX | R_HIS_78   | NE2 | R_GLU_74   | OE2 | 3.685 |
| 6FN1 | A_ARG_40   | NH1 | A_ASP_369  | OD1 | 2.632 |
| 6FN1 | A_ARG_40   | NH1 | A_ASP_369  | OD2 | 3.669 |
| 6FN1 | A_ARG_40   | NH2 | A_ASP_369  | OD1 | 3.084 |
| 6FN1 | A_HIS_152  | NE2 | A_GLU_916  | OE2 | 3.957 |
| 6FN1 | A_ARG_173  | NH2 | A_GLU_169  | OE1 | 2.871 |
| 6FN1 | A_LYS_180  | NZ  | A_ASP_176  | OD1 | 3.377 |
| 6FN1 | A_LYS_180  | NZ  | A_ASP_176  | OD2 | 3.959 |
| 6FN1 | A_LYS_212  | NZ  | A_GLU_324  | OE1 | 3.963 |
| 6FN1 | A_LYS_212  | NZ  | A_GLU_324  | OE2 | 2.762 |
| 6FN1 | A_ARG_261  | NH2 | A_ASP_804  | OD1 | 2.402 |
| 6FN1 | A_ARG_261  | NH2 | A_ASP_804  | OD2 | 3.659 |
| 6FN1 | A_ARG_275  | NH1 | A_GLU_255  | OE2 | 3.657 |
| 6FN1 | A_ARG_275  | NH1 | A_GLU_272  | OE1 | 3.157 |
| 6FN1 | A_ARG_275  | NH2 | A_GLU_255  | OE2 | 3.869 |
| 6FN1 | A_ARG_285  | NH2 | A_GLU_282  | OE2 | 2.865 |
| 6FN1 | A_HIS_517  | ND1 | A_ASP_520  | OD1 | 3.421 |
| 6FN1 | A_HIS_517  | ND1 | A_ASP_520  | OD2 | 3.421 |
| 6FN1 | A_ARG_526  | NH1 | A_GLU_525  | OE1 | 3.961 |
| 6FN1 | A_ARG_526  | NH1 | A_GLU_525  | OE2 | 2.166 |
| 6FN1 | A_ARG_546  | NH2 | A_GLU_467  | OE2 | 3.847 |
| 6FN1 | A_ARG_576  | NH2 | A_ASP_573  | OD1 | 2.465 |
| 6FN1 | A_HIS_586  | ND1 | A_GLU_555  | OE1 | 3.845 |
| 6FN1 | A_HIS_586  | NE2 | A_GLU_555  | OE2 | 3.514 |
| 6FN1 | A_ARG_587  | NH1 | A_GLU_565  | OE1 | 3.907 |
| 6FN1 | A_ARG_587  | NH2 | A_GLU_565  | OE1 | 3.568 |
| 6FN1 | A_ARG_587  | NH2 | A_GLU_565  | OE2 | 3.656 |
| 6FN1 | A_HIS_611  | ND1 | A_ASP_612  | OD1 | 3.740 |
| 6FN1 | A_ARG_740  | NH1 | A_ASP_742  | OD1 | 3.566 |
| 6FN1 | A_ARG_740  | NH1 | A_ASP_742  | OD2 | 2.936 |
| 6FN1 | A_ARG_786  | NH2 | A_GLU_706  | OE2 | 3.988 |
| 6FN1 | A_ARG_797  | NH1 | A_ASP_1018 | OD1 | 3.806 |
| 6FN1 | A_ARG_797  | NH1 | A_ASP_1018 | OD2 | 3.974 |
| 6FN1 | A_LYS_807  | NZ  | A_ASP_805  | OD1 | 3.714 |
| 6FN1 | A_ARG_816  | NH1 | A_ASP_820  | OD2 | 3.588 |
| 6FN1 | A_LYS_825  | NZ  | A_GLU_781  | OE2 | 3.696 |
| 6FN1 | A_ARG_911  | NH1 | A_GLU_492  | OE1 | 3.944 |
| 6FN1 | A_LYS_914  | NZ  | A_GLU_485  | OE2 | 3.976 |
| 6FN1 | A_LYS_966  | NZ  | A_GLU_85   | OE1 | 3.505 |
| 6FN1 | A_LYS_966  | NZ  | A_GLU_85   | OE2 | 2.563 |
| 6FN1 | A_ARG_1084 | NH2 | A_ASP_1087 | OD2 | 3.806 |
| 6FN1 | A_ARG_1137 | NH2 | A_GLU_1143 | OE1 | 3.300 |
| 6FN1 | A_ARG_1137 | NH2 | A_GLU_1143 | OE2 | 2.684 |
| 6FN1 | A_ARG_1146 | NH1 | A_GLU_1142 | OE2 | 3.522 |
| 6FN1 | A_ARG_1146 | NH2 | A_GLU_1142 | OE2 | 3.079 |
| 6FN1 | A_HIS_1154 | NE2 | A_ASP_1158 | OD1 | 3.475 |
| 6FN1 | A_HIS_1154 | NE2 | A_ASP_1158 | OD2 | 3.129 |
| 6FN1 | A_ARG_1167 | NH2 | A_ASP_1123 | OD1 | 2.431 |
| 6FN1 | A_ARG_1167 | NH2 | A_ASP_1123 | OD2 | 3.170 |

|      |            |     |            |     |       |
|------|------------|-----|------------|-----|-------|
| 6FN1 | A_ARG_1221 | NH1 | A_ASP_1218 | OD1 | 3.994 |
| 6FN1 | A_ARG_1221 | NH2 | A_ASP_1218 | OD1 | 2.327 |
| 6FN1 | B_ARG_24   | NH1 | B_ASP_75   | OD1 | 3.067 |
| 6FN1 | B_ARG_24   | NH2 | B_ASP_75   | OD1 | 3.279 |
| 6FN1 | B_ARG_59   | NH1 | B_ASP_65   | OD1 | 2.228 |
| 6FN1 | B_ARG_59   | NH2 | B_ASP_65   | OD1 | 3.826 |
| 6FN1 | B_ARG_66   | NH1 | B_GLU_84   | OE1 | 3.321 |
| 6FN1 | B_ARG_66   | NH1 | B_GLU_84   | OE2 | 3.915 |
| 6FN1 | B_ARG_66   | NH1 | B_ASP_87   | OD2 | 2.881 |
| 6FN1 | B_ARG_66   | NH2 | B_ASP_87   | OD2 | 3.217 |
| 6FN1 | B_LYS_153  | NZ  | B_GLU_160  | OE1 | 2.476 |
| 6FN1 | B_LYS_153  | NZ  | B_GLU_160  | OE2 | 3.139 |
| 6FN1 | B_LYS_189  | NZ  | B_GLU_193  | OE1 | 3.697 |
| 6FN1 | B_LYS_189  | NZ  | B_GLU_193  | OE2 | 2.359 |
| 6FN1 | B_ARG_194  | NH1 | B_GLU_191  | OE1 | 3.707 |
| 6FN1 | B_HIS_195  | ND1 | B_ASP_157  | OD2 | 2.402 |
| 6FN1 | B_HIS_195  | NE2 | B_GLU_191  | OE2 | 2.859 |
| 6FN1 | C_LYS_38   | NZ  | C_ASP_90   | OD1 | 3.638 |
| 6FN1 | C_ARG_98   | NH1 | C_ASP_110  | OD1 | 3.210 |
| 6FN1 | C_ARG_98   | NH1 | C_ASP_110  | OD2 | 2.556 |
| 6FN1 | C_ARG_98   | NH2 | C_ASP_110  | OD2 | 3.769 |
| 6FN1 | C_LYS_217  | NZ  | B_GLU_129  | OE1 | 3.462 |
| 6FN1 | C_LYS_217  | NZ  | B_GLU_129  | OE2 | 2.375 |
| 6FN4 | A_ARG_40   | NH1 | A_ASP_369  | OD1 | 3.044 |
| 6FN4 | A_ARG_40   | NH1 | A_ASP_369  | OD2 | 2.673 |
| 6FN4 | A_ARG_40   | NH2 | A_ASP_369  | OD1 | 2.550 |
| 6FN4 | A_ARG_40   | NH2 | A_ASP_369  | OD2 | 3.247 |
| 6FN4 | A_HIS_152  | NE2 | A_GLU_916  | OE2 | 3.942 |
| 6FN4 | A_ARG_173  | NH1 | A_GLU_363  | OE1 | 3.817 |
| 6FN4 | A_ARG_209  | NH1 | A_GLU_73   | OE2 | 3.499 |
| 6FN4 | A_ARG_209  | NH2 | A_GLU_73   | OE2 | 2.413 |
| 6FN4 | A_LYS_212  | NZ  | A_GLU_324  | OE2 | 3.760 |
| 6FN4 | A_ARG_261  | NH2 | A_ASP_804  | OD1 | 3.439 |
| 6FN4 | A_ARG_275  | NH1 | A_GLU_272  | OE2 | 3.706 |
| 6FN4 | A_ARG_275  | NH2 | A_GLU_255  | OE2 | 3.146 |
| 6FN4 | A_ARG_275  | NH2 | A_GLU_272  | OE1 | 2.485 |
| 6FN4 | A_ARG_275  | NH2 | A_GLU_272  | OE2 | 3.067 |
| 6FN4 | A_LYS_394  | NZ  | A_GLU_392  | OE2 | 3.872 |
| 6FN4 | A_ARG_441  | NH2 | A_ASP_444  | OD1 | 3.730 |
| 6FN4 | A_ARG_441  | NH2 | A_ASP_444  | OD2 | 3.767 |
| 6FN4 | A_ARG_458  | NH1 | A_ASP_456  | OD2 | 3.726 |
| 6FN4 | A_ARG_458  | NH2 | A_ASP_456  | OD2 | 3.316 |
| 6FN4 | A_ARG_488  | NH1 | A_GLU_485  | OE2 | 3.913 |
| 6FN4 | A_ARG_491  | NH2 | A_GLU_498  | OE1 | 3.157 |
| 6FN4 | A_ARG_576  | NH2 | A_ASP_573  | OD1 | 2.521 |
| 6FN4 | A_HIS_586  | NE2 | A_GLU_555  | OE2 | 3.330 |
| 6FN4 | A_HIS_611  | ND1 | A_ASP_612  | OD1 | 3.332 |
| 6FN4 | A_LYS_747  | NZ  | A_ASP_742  | OD1 | 2.172 |
| 6FN4 | A_LYS_747  | NZ  | A_ASP_742  | OD2 | 3.656 |
| 6FN4 | A_LYS_807  | NZ  | A_ASP_805  | OD1 | 2.940 |
| 6FN4 | A_LYS_807  | NZ  | A_ASP_805  | OD2 | 3.024 |
| 6FN4 | A_ARG_904  | NH2 | A_ASP_163  | OD2 | 3.996 |
| 6FN4 | A_ARG_911  | NH1 | A_GLU_492  | OE2 | 3.311 |
| 6FN4 | A_LYS_914  | NZ  | A_GLU_485  | OE1 | 2.840 |
| 6FN4 | A_ARG_957  | NH2 | A_GLU_107  | OE2 | 3.364 |
| 6FN4 | A_LYS_966  | NZ  | A_GLU_85   | OE2 | 2.855 |
| 6FN4 | A_HIS_1006 | ND1 | A_ASP_820  | OD2 | 3.743 |
| 6FN4 | A_ARG_1084 | NH2 | A_ASP_1087 | OD2 | 3.893 |

|      |            |     |            |     |       |
|------|------------|-----|------------|-----|-------|
| 6FN4 | A_ARG_1137 | NH2 | A_GLU_1143 | OE1 | 3.629 |
| 6FN4 | A_ARG_1137 | NH2 | A_GLU_1143 | OE2 | 3.357 |
| 6FN4 | A_HIS_1154 | ND1 | A_ASP_1158 | OD2 | 3.508 |
| 6FN4 | A_HIS_1154 | NE2 | A_ASP_1158 | OD2 | 2.806 |
| 6FN4 | A_LYS_1163 | NZ  | A_ASP_1158 | OD1 | 3.925 |
| 6FN4 | A_ARG_1221 | NH1 | A_ASP_1218 | OD1 | 3.565 |
| 6FN4 | A_ARG_1221 | NH2 | A_ASP_1218 | OD1 | 2.235 |
| 6FN4 | A_ARG_1232 | NH1 | A_GLU_1210 | OE2 | 2.338 |
| 6FN4 | B_LYS_55   | NZ  | A_ASP_743  | OD1 | 2.728 |
| 6FN4 | B_LYS_55   | NZ  | A_ASP_743  | OD2 | 3.540 |
| 6FN4 | B_ARG_59   | NH1 | B_ASP_65   | OD1 | 2.795 |
| 6FN4 | B_ARG_59   | NH2 | B_ASP_65   | OD1 | 2.360 |
| 6FN4 | B_ARG_66   | NH1 | B_GLU_84   | OE1 | 3.279 |
| 6FN4 | B_ARG_66   | NH1 | B_GLU_84   | OE2 | 3.707 |
| 6FN4 | B_ARG_66   | NH1 | B_ASP_87   | OD1 | 3.527 |
| 6FN4 | B_ARG_66   | NH1 | B_ASP_87   | OD2 | 2.589 |
| 6FN4 | B_ARG_66   | NH2 | B_ASP_87   | OD2 | 2.765 |
| 6FN4 | B_LYS_155  | NZ  | B_GLU_201  | OE2 | 2.874 |
| 6FN4 | B_HIS_195  | ND1 | B_ASP_157  | OD2 | 2.468 |
| 6FN4 | B_LYS_205  | NZ  | B_ASP_149  | OD2 | 3.164 |
| 6FN4 | C_LYS_38   | NZ  | C_ASP_90   | OD1 | 3.032 |
| 6FN4 | C_ARG_98   | NH2 | C_ASP_110  | OD2 | 2.746 |
| 6FN4 | C_LYS_217  | NZ  | B_GLU_129  | OE2 | 3.828 |
| 6FRJ | H_ARG_38   | NH1 | H_ASP_92   | OD1 | 2.898 |
| 6FRJ | H_ARG_38   | NH2 | H_GLU_46   | OE1 | 3.142 |
| 6FRJ | H_ARG_38   | NH2 | H_GLU_46   | OE2 | 3.614 |
| 6FRJ | H_ARG_38   | NH2 | H_ASP_92   | OD1 | 3.948 |
| 6FRJ | H_ARG_52   | NH1 | H_GLU_50   | OE2 | 2.771 |
| 6FRJ | H_HIS_61   | ND1 | H_GLU_50   | OE2 | 2.713 |
| 6FRJ | H_ARG_69   | NH1 | H_ASP_92   | OD1 | 3.677 |
| 6FRJ | H_ARG_69   | NH1 | H_ASP_92   | OD2 | 3.927 |
| 6FRJ | H_ARG_69   | NH2 | H_ASP_92   | OD1 | 3.557 |
| 6FRJ | H_ARG_69   | NH2 | H_ASP_92   | OD2 | 2.452 |
| 6FRJ | H_ARG_74   | NH2 | H_ASP_76   | OD1 | 3.295 |
| 6FRJ | H_ARG_89   | NH1 | H_GLU_91   | OE2 | 3.985 |
| 6FRJ | H_HIS_1051 | ND1 | H_GLU_1047 | OE2 | 3.559 |
| 6FRJ | H_ARG_1070 | NH2 | H_GLU_1090 | OE2 | 3.987 |
| 6FRJ | H_ARG_1070 | NH2 | H_ASP_1091 | OD1 | 2.809 |
| 6FRJ | H_ARG_1070 | NH2 | H_ASP_1091 | OD2 | 3.687 |
| 6GK7 | L_ARG_67   | NH1 | L_ASP_88   | OD1 | 3.869 |
| 6GK7 | L_ARG_67   | NH1 | L_ASP_88   | OD2 | 2.730 |
| 6GK7 | L_ARG_67   | NH2 | L_ASP_88   | OD1 | 3.654 |
| 6GK7 | L_ARG_67   | NH2 | L_ASP_88   | OD2 | 3.733 |
| 6GK7 | L_LYS_155  | NZ  | L_GLU_201  | OE1 | 2.758 |
| 6GK7 | L_LYS_194  | NZ  | L_ASP_191  | OD1 | 3.901 |
| 6GK7 | L_HIS_195  | ND1 | L_ASP_157  | OD2 | 3.421 |
| 6GK7 | H_ARG_12   | NH1 | H_GLU_10   | OE1 | 3.806 |
| 6GK7 | H_LYS_43   | NZ  | L_ASP_9    | OD1 | 3.203 |
| 6GK7 | H_ARG_59   | NH2 | H_ASP_57   | OD2 | 3.671 |
| 6GK7 | H_HIS_67   | NE2 | H_ASP_90   | OD1 | 2.917 |
| 6GK7 | H_HIS_67   | NE2 | H_ASP_90   | OD2 | 3.437 |
| 6GK7 | H_ARG_98   | NH2 | H_ASP_110  | OD1 | 3.856 |
| 6GK7 | H_ARG_98   | NH2 | H_ASP_110  | OD2 | 2.851 |
| 6GK7 | H_ARG_102  | NH2 | H_ASP_100  | OD1 | 3.141 |
| 6GK7 | H_LYS_152  | NZ  | H_ASP_153  | OD1 | 3.227 |
| 6GK7 | H_LYS_152  | NZ  | H_ASP_153  | OD2 | 3.445 |
| 6GK7 | H_LYS_218  | NZ  | L_GLU_129  | OE1 | 3.512 |
| 6GK7 | H_LYS_218  | NZ  | L_GLU_129  | OE2 | 3.016 |

|      |           |     |           |     |       |
|------|-----------|-----|-----------|-----|-------|
| 6GK7 | H.LYS_223 | NZ  | L.ASP_128 | OD2 | 3.231 |
| 6GK7 | A.LYS_317 | NZ  | H.ASP_55  | OD2 | 2.761 |
| 6GK7 | A.LYS_317 | NZ  | H.ASP_57  | OD2 | 2.983 |
| 6GK8 | H.ARG_38  | NH1 | H.ASP_90  | OD1 | 3.902 |
| 6GK8 | H.ARG_38  | NH2 | H.GLU_46  | OE1 | 3.059 |
| 6GK8 | H.ARG_38  | NH2 | H.GLU_46  | OE2 | 3.561 |
| 6GK8 | H.ARG_59  | NH1 | H.ASP_57  | OD1 | 3.512 |
| 6GK8 | H.ARG_59  | NH1 | H.ASP_57  | OD2 | 2.923 |
| 6GK8 | H.ARG_59  | NH2 | H.ASP_57  | OD2 | 3.871 |
| 6GK8 | H.ARG_59  | NH2 | L.ASP_65  | OD1 | 3.295 |
| 6GK8 | H.ARG_101 | NH1 | L.GLU_62  | OE2 | 2.742 |
| 6GK8 | H.ARG_101 | NH2 | L.GLU_62  | OE2 | 3.142 |
| 6GK8 | H.LYS_104 | NZ  | L.GLU_62  | OE1 | 2.762 |
| 6GK8 | H.LYS_104 | NZ  | L.GLU_62  | OE2 | 3.928 |
| 6GK8 | H.LYS_151 | NZ  | H.ASP_152 | OD1 | 3.401 |
| 6GK8 | H.LYS_151 | NZ  | H.ASP_152 | OD2 | 3.307 |
| 6GK8 | H.LYS_222 | NZ  | L.ASP_128 | OD2 | 2.761 |
| 6GK8 | L.ARG_32  | NH1 | L.GLU_57  | OE2 | 3.709 |
| 6GK8 | L.ARG_67  | NH2 | L.GLU_87  | OE1 | 3.972 |
| 6GK8 | L.ARG_67  | NH2 | L.GLU_87  | OE2 | 2.995 |
| 6GK8 | L.ARG_67  | NH2 | L.ASP_88  | OD1 | 3.077 |
| 6GK8 | L.ARG_67  | NH2 | L.ASP_88  | OD2 | 3.854 |
| 6GK8 | L.ARG_109 | NH2 | L.GLU_111 | OE1 | 3.804 |
| 6GK8 | L.ARG_148 | NH2 | L.GLU_171 | OE2 | 3.424 |
| 6GK8 | L.LYS_155 | NZ  | L.GLU_201 | OE1 | 3.754 |
| 6GK8 | L.LYS_194 | NZ  | L.ASP_191 | OD1 | 3.678 |
| 6GK8 | L.HIS_195 | ND1 | L.ASP_157 | OD2 | 2.898 |
| 6GK8 | I.LYS_67  | NZ  | H.ASP_55  | OD1 | 3.586 |
| 6GK8 | I.LYS_67  | NZ  | H.ASP_55  | OD2 | 3.183 |
| 6GK8 | I.LYS_67  | NZ  | H.ASP_57  | OD2 | 3.085 |
| 6H2Y | D.HIS_30  | ND1 | D.ASP_29  | OD2 | 2.968 |
| 6H2Y | D.LYS_74  | NZ  | D.ASP_32  | OD1 | 3.080 |
| 6H2Y | D.LYS_74  | NZ  | D.ASP_32  | OD2 | 3.146 |
| 6H2Y | D.LYS_79  | NZ  | L.ASP_52  | OD1 | 3.126 |
| 6H2Y | D.ARG_82  | NH1 | D.GLU_102 | OE1 | 3.225 |
| 6H2Y | D.HIS_110 | ND1 | D.GLU_144 | OE1 | 3.692 |
| 6H2Y | D.LYS_120 | NZ  | L.ASP_95  | OD2 | 2.910 |
| 6H2Y | D.HIS_173 | ND1 | D.GLU_188 | OE2 | 3.534 |
| 6H2Y | D.HIS_173 | NE2 | D.GLU_188 | OE2 | 3.951 |
| 6H2Y | D.ARG_186 | NH1 | D.GLU_188 | OE2 | 2.556 |
| 6H2Y | D.ARG_186 | NH2 | D.GLU_194 | OE1 | 3.470 |
| 6H2Y | D.HIS_189 | NE2 | D.GLU_188 | OE1 | 3.353 |
| 6H2Y | D.LYS_191 | NZ  | L.ASP_50  | OD2 | 2.715 |
| 6H2Y | D.ARG_236 | NH1 | D.ASP_235 | OD2 | 3.896 |
| 6H2Y | D.LYS_260 | NZ  | D.ASP_78  | OD1 | 3.223 |
| 6H2Y | D.LYS_260 | NZ  | D.ASP_78  | OD2 | 3.636 |
| 6H2Y | D.LYS_260 | NZ  | D.GLU_239 | OE2 | 3.969 |
| 6H2Y | H.ARG_38  | NH1 | H.ASP_90  | OD2 | 2.735 |
| 6H2Y | H.ARG_38  | NH2 | H.GLU_46  | OE1 | 3.600 |
| 6H2Y | H.ARG_38  | NH2 | H.ASP_90  | OD2 | 3.880 |
| 6H2Y | H.ARG_56  | NH2 | D.GLU_58  | OE1 | 3.564 |
| 6H2Y | H.ARG_56  | NH2 | D.GLU_58  | OE2 | 3.905 |
| 6H2Y | H.LYS_63  | NZ  | H.GLU_46  | OE1 | 3.969 |
| 6H2Y | H.LYS_63  | NZ  | H.GLU_46  | OE2 | 2.764 |
| 6H2Y | H.ARG_67  | NH1 | H.ASP_90  | OD1 | 2.793 |
| 6H2Y | H.ARG_67  | NH1 | H.ASP_90  | OD2 | 3.306 |
| 6H2Y | H.ARG_67  | NH2 | H.ASP_90  | OD1 | 3.797 |
| 6H2Y | H.ARG_67  | NH2 | H.ASP_90  | OD2 | 3.132 |

|      |           |     |           |     |       |
|------|-----------|-----|-----------|-----|-------|
| 6H2Y | H.LYS_215 | NZ  | L_GLU_125 | OE1 | 3.261 |
| 6H2Y | H.LYS_215 | NZ  | L_GLU_125 | OE2 | 2.865 |
| 6H2Y | L_ARG_60  | NH1 | L_ASP_81  | OD1 | 3.946 |
| 6H2Y | L_ARG_60  | NH1 | L_ASP_81  | OD2 | 2.714 |
| 6H2Y | L_ARG_60  | NH2 | L_ASP_81  | OD1 | 2.835 |
| 6H2Y | L_ARG_60  | NH2 | L_ASP_81  | OD2 | 3.155 |
| 6H2Y | L_ARG_92  | NH1 | D_ASP_166 | OD2 | 3.217 |
| 6H2Y | L_ARG_92  | NH2 | D_GLU_119 | OE1 | 3.274 |
| 6H2Y | L_ARG_92  | NH2 | D_GLU_119 | OE2 | 3.244 |
| 6H2Y | L_ARG_92  | NH2 | D_ASP_166 | OD1 | 3.891 |
| 6H2Y | L_ARG_92  | NH2 | D_ASP_166 | OD2 | 2.328 |
| 6H2Y | L.LYS_104 | NZ  | L_ASP_84  | OD1 | 2.864 |
| 6H2Y | L.LYS_104 | NZ  | L_ASP_84  | OD2 | 2.840 |
| 6H2Y | L.LYS_168 | NZ  | L_GLU_82  | OE1 | 2.735 |
| 6H2Y | L.LYS_168 | NZ  | L_GLU_82  | OE2 | 3.700 |
| 6H2Y | L.HIS_190 | ND1 | L_ASP_153 | OD2 | 3.040 |
| 6I3Z | A_HIS_73  | ND1 | A_ASP_74  | OD1 | 3.992 |
| 6I3Z | A.LYS_201 | NZ  | L_ASP_92  | OD1 | 3.556 |
| 6I3Z | A.LYS_217 | NZ  | A_ASP_207 | OD1 | 2.912 |
| 6I3Z | A.LYS_222 | NZ  | A_GLU_204 | OE1 | 2.374 |
| 6I3Z | A.LYS_222 | NZ  | A_GLU_206 | OE2 | 3.231 |
| 6I3Z | A.LYS_290 | NZ  | A_GLU_342 | OE1 | 3.811 |
| 6I3Z | A.LYS_290 | NZ  | H_ASP_33  | OD1 | 3.699 |
| 6I3Z | H_ARG_38  | NH1 | H_GLU_46  | OE2 | 3.015 |
| 6I3Z | H_ARG_38  | NH2 | H_ASP_86  | OD1 | 2.939 |
| 6I3Z | H_ARG_66  | NH1 | H_ASP_86  | OD1 | 3.907 |
| 6I3Z | H_ARG_66  | NH1 | H_ASP_86  | OD2 | 3.045 |
| 6I3Z | H_ARG_66  | NH2 | H_ASP_86  | OD1 | 3.844 |
| 6I3Z | L_ARG_53  | NH1 | A_GLU_204 | OE1 | 2.383 |
| 6I3Z | L_ARG_53  | NH1 | A_GLU_204 | OE2 | 3.516 |
| 6I3Z | L_ARG_61  | NH1 | L_GLU_81  | OE2 | 3.392 |
| 6I3Z | L_ARG_61  | NH1 | L_ASP_82  | OD1 | 3.108 |
| 6I3Z | L_ARG_61  | NH1 | L_ASP_82  | OD2 | 3.395 |
| 6I3Z | L_ARG_61  | NH2 | L_GLU_81  | OE2 | 3.127 |
| 6I3Z | L_ARG_61  | NH2 | L_ASP_82  | OD1 | 3.903 |
| 6I3Z | L_ARG_61  | NH2 | L_ASP_82  | OD2 | 3.066 |
| 6I9J | A_ARG_328 | NH1 | A_ASP_325 | OD2 | 3.806 |
| 6I9J | A_ARG_328 | NH2 | A_ASP_329 | OD1 | 3.559 |
| 6I9J | A_ARG_328 | NH2 | A_ASP_329 | OD2 | 3.170 |
| 6IAP | A.LYS_4   | NZ  | A_GLU_84  | OE1 | 3.796 |
| 6IAP | A_ARG_47  | NH1 | A_GLU_33  | OE1 | 3.554 |
| 6IAP | A_ARG_47  | NH1 | A_GLU_33  | OE2 | 2.707 |
| 6IAP | A_ARG_77  | NH1 | A_GLU_33  | OE1 | 3.589 |
| 6IAP | A_ARG_77  | NH1 | A_GLU_33  | OE2 | 2.806 |
| 6IAP | A_ARG_77  | NH2 | A_GLU_33  | OE2 | 3.449 |
| 6IAP | A_ARG_165 | NH1 | A_GLU_134 | OE1 | 2.832 |
| 6IAP | A_ARG_165 | NH1 | A_GLU_134 | OE2 | 2.932 |
| 6IAP | D_ARG_61  | NH2 | D_ASP_82  | OD1 | 2.957 |
| 6IAP | D_ARG_61  | NH2 | D_ASP_82  | OD2 | 3.990 |
| 6IAP | D_ARG_96  | NH2 | A_GLU_80  | OE1 | 3.466 |
| 6IAP | D.LYS_103 | NZ  | D_GLU_105 | OE1 | 2.801 |
| 6IAP | D.LYS_103 | NZ  | D_GLU_165 | OE1 | 3.070 |
| 6IAP | D_ARG_142 | NH1 | D_GLU_105 | OE1 | 3.560 |
| 6IAP | D.LYS_149 | NZ  | D_GLU_195 | OE2 | 3.829 |
| 6IAP | D.LYS_183 | NZ  | D_GLU_187 | OE1 | 3.913 |
| 6IAP | D.HIS_189 | ND1 | D_ASP_151 | OD2 | 3.610 |
| 6IAP | E_HIS_35  | NE2 | A_GLU_80  | OE1 | 3.445 |
| 6IAP | E_ARG_38  | NH1 | E_GLU_46  | OE1 | 3.245 |

|      |           |     |           |     |       |
|------|-----------|-----|-----------|-----|-------|
| 6IAP | E_ARG_38  | NH1 | E_ASP_90  | OD1 | 3.826 |
| 6IAP | E_ARG_38  | NH2 | E_ASP_90  | OD1 | 2.938 |
| 6IAP | E_LYS_63  | NZ  | E_GLU_46  | OE2 | 2.856 |
| 6IAP | E_ARG_67  | NH1 | E_ASP_90  | OD1 | 3.217 |
| 6IAP | E_ARG_67  | NH1 | E_ASP_90  | OD2 | 2.832 |
| 6IAP | E_ARG_98  | NH1 | E_ASP_105 | OD2 | 2.742 |
| 6IAP | E_LYS_147 | NZ  | E_ASP_148 | OD1 | 3.224 |
| 6IAP | E_LYS_147 | NZ  | E_ASP_148 | OD2 | 2.946 |
| 6IAP | H_ARG_38  | NH2 | H_GLU_46  | OE1 | 3.468 |
| 6IAP | H_LYS_65  | NZ  | H_GLU_62  | OE1 | 2.882 |
| 6IAP | H_LYS_65  | NZ  | H_GLU_62  | OE2 | 3.834 |
| 6IAP | H_ARG_87  | NH1 | H_GLU_89  | OE1 | 2.796 |
| 6IAP | H_ARG_98  | NH1 | H_ASP_108 | OD2 | 3.622 |
| 6IAP | H_ARG_99  | NH1 | H_GLU_50  | OE1 | 2.819 |
| 6IAP | H_ARG_99  | NH1 | H_GLU_50  | OE2 | 2.819 |
| 6IAP | H_ARG_99  | NH2 | A_ASP_98  | OD1 | 2.689 |
| 6IAP | H_LYS_150 | NZ  | H_ASP_151 | OD1 | 3.562 |
| 6IAP | H_LYS_150 | NZ  | H_ASP_151 | OD2 | 3.534 |
| 6IAP | H_ARG_217 | NH1 | H_GLU_219 | OE2 | 3.357 |
| 6IAP | L_ARG_24  | NH1 | L_ASP_70  | OD1 | 3.449 |
| 6IAP | L_ARG_94  | NH1 | H_GLU_50  | OE2 | 2.973 |
| 6IAP | L_ARG_94  | NH2 | A_ASP_123 | OD2 | 3.888 |
| 6IAP | L_LYS_103 | NZ  | L_GLU_105 | OE1 | 2.667 |
| 6IAP | L_LYS_126 | NZ  | L_GLU_123 | OE1 | 3.630 |
| 6IAP | L_ARG_142 | NH2 | L_GLU_143 | OE2 | 2.909 |
| 6IAP | L_LYS_149 | NZ  | L_GLU_195 | OE2 | 3.247 |
| 6IAP | L_LYS_183 | NZ  | L_GLU_187 | OE1 | 3.970 |
| 6IAP | L_HIS_189 | ND1 | L_ASP_151 | OD2 | 3.405 |
| 6JMQ | A_LYS_112 | NZ  | A_GLU_265 | OE2 | 3.737 |
| 6JMQ | A_ARG_419 | NH1 | A_GLU_426 | OE1 | 3.417 |
| 6JMQ | A_ARG_419 | NH1 | A_GLU_426 | OE2 | 2.358 |
| 6JMQ | A_ARG_419 | NH2 | A_GLU_426 | OE1 | 2.551 |
| 6JMQ | A_ARG_419 | NH2 | A_GLU_426 | OE2 | 3.223 |
| 6JMQ | B_ARG_211 | NH2 | B_ASP_540 | OD1 | 3.901 |
| 6JMQ | B_ARG_211 | NH2 | B_ASP_540 | OD2 | 3.653 |
| 6JMQ | B_LYS_298 | NZ  | B_ASP_343 | OD1 | 3.798 |
| 6JMQ | B_LYS_298 | NZ  | B_ASP_343 | OD2 | 2.773 |
| 6JMQ | B_LYS_300 | NZ  | B_ASP_249 | OD1 | 2.988 |
| 6JMQ | B_LYS_300 | NZ  | B_ASP_249 | OD2 | 3.168 |
| 6JMQ | B_ARG_313 | NH2 | B_ASP_281 | OD2 | 2.986 |
| 6JMQ | B_ARG_348 | NH1 | B_ASP_349 | OD2 | 3.884 |
| 6JMQ | B_LYS_354 | NZ  | B_ASP_355 | OD1 | 3.767 |
| 6JMQ | B_LYS_354 | NZ  | B_ASP_355 | OD2 | 3.182 |
| 6JMQ | B_ARG_374 | NH1 | B_ASP_343 | OD1 | 3.786 |
| 6JMQ | B_HIS_414 | ND1 | B_GLU_413 | OE1 | 3.881 |
| 6JMQ | B_HIS_414 | NE2 | B_GLU_413 | OE1 | 3.761 |
| 6JMQ | B_HIS_414 | NE2 | B_GLU_413 | OE2 | 3.827 |
| 6JMQ | B_LYS_510 | NZ  | B_GLU_493 | OE2 | 3.727 |
| 6JMQ | B_ARG_525 | NH1 | B_GLU_605 | OE1 | 3.564 |
| 6JMQ | B_ARG_525 | NH1 | B_GLU_605 | OE2 | 3.265 |
| 6JMQ | B_ARG_525 | NH2 | B_GLU_605 | OE1 | 2.626 |
| 6JMQ | B_ARG_525 | NH2 | B_GLU_605 | OE2 | 3.608 |
| 6JMQ | B_HIS_556 | NE2 | B_ASP_540 | OD2 | 3.806 |
| 6JMQ | B_LYS_592 | NZ  | B_GLU_610 | OE1 | 3.993 |
| 6JMQ | B_ARG_603 | NH1 | B_GLU_620 | OE1 | 2.595 |
| 6JMQ | B_ARG_603 | NH1 | B_GLU_620 | OE2 | 3.221 |
| 6JMQ | B_ARG_613 | NH1 | B_GLU_610 | OE2 | 3.252 |
| 6JMQ | B_HIS_619 | ND1 | B_ASP_571 | OD1 | 3.990 |

|      |           |     |           |     |       |
|------|-----------|-----|-----------|-----|-------|
| 6JMQ | B_ARG_625 | NH2 | B_GLU_533 | OE2 | 3.458 |
| 6JMQ | B_ARG_625 | NH2 | B_GLU_561 | OE1 | 3.849 |
| 6JMQ | C_ARG_38  | NH1 | C_ASP_89  | OD1 | 3.785 |
| 6JMQ | C_ARG_38  | NH2 | C_GLU_46  | OE1 | 2.796 |
| 6JMQ | C_ARG_38  | NH2 | C_GLU_46  | OE2 | 3.808 |
| 6JMQ | C_ARG_66  | NH1 | C_ASP_89  | OD1 | 3.398 |
| 6JMQ | C_ARG_66  | NH1 | C_ASP_89  | OD2 | 2.424 |
| 6JMQ | C_ARG_66  | NH2 | C_ASP_89  | OD1 | 3.049 |
| 6JMQ | C_ARG_66  | NH2 | C_ASP_89  | OD2 | 3.597 |
| 6JMQ | C_HIS_169 | NE2 | D_ASP_173 | OD2 | 3.860 |
| 6JMQ | C_LYS_213 | NZ  | D_GLU_129 | OE1 | 3.825 |
| 6JMQ | D_ARG_67  | NH2 | D_ASP_88  | OD1 | 2.846 |
| 6JMQ | D_ARG_67  | NH2 | D_ASP_88  | OD2 | 3.134 |
| 6JMQ | D_LYS_109 | NZ  | D_GLU_111 | OE2 | 3.564 |
| 6JMQ | D_LYS_155 | NZ  | D_GLU_160 | OE1 | 3.318 |
| 6JMQ | D_LYS_155 | NZ  | D_GLU_201 | OE1 | 2.847 |
| 6JMQ | D_LYS_155 | NZ  | D_GLU_201 | OE2 | 3.538 |
| 6JMQ | D_ARG_194 | NH2 | D_GLU_191 | OE1 | 2.521 |
| 6JMQ | D_ARG_194 | NH2 | D_GLU_191 | OE2 | 3.913 |
| 6JMQ | D_HIS_195 | ND1 | D_ASP_157 | OD1 | 3.523 |
| 6JMQ | D_HIS_195 | ND1 | D_ASP_157 | OD2 | 3.075 |
| 6JMR | E_ARG_38  | NH2 | E_GLU_46  | OE1 | 2.993 |
| 6JMR | E_ARG_66  | NH1 | E_ASP_89  | OD2 | 3.421 |
| 6JMR | E_ARG_66  | NH2 | E_ASP_89  | OD2 | 3.938 |
| 6JMR | F_LYS_152 | NZ  | F_GLU_159 | OE2 | 3.268 |
| 6JMR | F_LYS_154 | NZ  | F_GLU_200 | OE1 | 3.337 |
| 6JMR | F_LYS_154 | NZ  | F_GLU_200 | OE2 | 3.361 |
| 6JMR | F_ARG_193 | NH1 | F_ASP_189 | OD1 | 3.350 |
| 6JMR | F_ARG_193 | NH2 | F_GLU_190 | OE1 | 2.696 |
| 6JMR | F_HIS_194 | ND1 | F_ASP_156 | OD1 | 3.981 |
| 6JMR | F_HIS_194 | ND1 | F_ASP_156 | OD2 | 2.412 |
| 6JMR | F_HIS_194 | NE2 | F_GLU_190 | OE2 | 2.764 |
| 6JMR | B_ARG_211 | NH1 | B_ASP_558 | OD1 | 3.360 |
| 6JMR | B_ARG_211 | NH1 | B_ASP_558 | OD2 | 3.537 |
| 6JMR | B_ARG_211 | NH2 | B_ASP_558 | OD1 | 3.693 |
| 6JMR | B_ARG_211 | NH2 | B_ASP_558 | OD2 | 3.265 |
| 6JMR | B_LYS_255 | NZ  | B_ASP_528 | OD1 | 2.933 |
| 6JMR | B_LYS_287 | NZ  | B_ASP_291 | OD1 | 3.700 |
| 6JMR | B_LYS_287 | NZ  | B_ASP_291 | OD2 | 2.415 |
| 6JMR | B_LYS_298 | NZ  | B_ASP_343 | OD2 | 3.993 |
| 6JMR | B_LYS_300 | NZ  | B_ASP_249 | OD1 | 3.273 |
| 6JMR | B_LYS_300 | NZ  | B_ASP_249 | OD2 | 3.592 |
| 6JMR | B_ARG_303 | NH2 | B_ASP_373 | OD2 | 3.818 |
| 6JMR | B_ARG_313 | NH1 | B_ASP_281 | OD2 | 3.856 |
| 6JMR | B_ARG_313 | NH2 | B_ASP_281 | OD2 | 2.988 |
| 6JMR | B_ARG_348 | NH2 | B_ASP_307 | OD2 | 2.462 |
| 6JMR | B_LYS_354 | NZ  | B_ASP_355 | OD2 | 2.401 |
| 6JMR | B_ARG_525 | NH2 | B_GLU_605 | OE1 | 2.922 |
| 6JMR | B_ARG_603 | NH1 | B_GLU_620 | OE1 | 3.059 |
| 6JMR | B_ARG_603 | NH2 | B_GLU_620 | OE1 | 3.650 |
| 6JMR | B_HIS_619 | ND1 | B_ASP_571 | OD1 | 3.672 |
| 6JMR | C_ARG_38  | NH1 | C_ASP_89  | OD1 | 3.534 |
| 6JMR | C_ARG_38  | NH2 | C_ASP_89  | OD1 | 3.797 |
| 6JMR | C_HIS_169 | NE2 | D_ASP_173 | OD1 | 3.922 |
| 6JMR | D_ARG_67  | NH2 | D_ASP_88  | OD1 | 2.789 |
| 6JMR | D_ARG_67  | NH2 | D_ASP_88  | OD2 | 2.868 |
| 6JMR | D_LYS_113 | NZ  | D_GLU_17  | OE1 | 3.374 |
| 6JMR | D_LYS_113 | NZ  | D_GLU_17  | OE2 | 3.100 |

|      |            |     |            |     |       |
|------|------------|-----|------------|-----|-------|
| 6JMR | D_LYS_155  | NZ  | D_GLU_201  | OE1 | 3.651 |
| 6JMR | D_LYS_155  | NZ  | D_GLU_201  | OE2 | 2.757 |
| 6JMR | D_LYS_175  | NZ  | D_GLU_87   | OE1 | 3.592 |
| 6JMR | D_ARG_194  | NH1 | D_GLU_191  | OE1 | 3.814 |
| 6JMR | D_ARG_194  | NH2 | D_GLU_191  | OE1 | 2.418 |
| 6JMR | D_ARG_194  | NH2 | D_GLU_191  | OE2 | 3.613 |
| 6JMR | D_HIS_195  | ND1 | D_ASP_157  | OD2 | 3.249 |
| 6JMR | D_HIS_195  | NE2 | D_GLU_191  | OE2 | 3.086 |
| 6K4Z | A_HIS_42   | ND1 | A_GLU_38   | OE2 | 3.995 |
| 6K4Z | A_ARG_61   | NH2 | A_GLU_81   | OE2 | 3.887 |
| 6K4Z | A_ARG_61   | NH2 | A_ASP_82   | OD1 | 2.751 |
| 6K4Z | A_ARG_61   | NH2 | A_ASP_82   | OD2 | 3.412 |
| 6K4Z | A_LYS_1064 | NZ  | A_GLU_1061 | OE2 | 2.583 |
| 6K4Z | A_LYS_1066 | NZ  | A_ASP_1086 | OD1 | 3.628 |
| 6K4Z | A_LYS_1066 | NZ  | A_ASP_1086 | OD2 | 2.944 |
| 6K4Z | A_ARG_1094 | NH1 | A_ASP_1101 | OD1 | 3.902 |
| 6K4Z | A_ARG_1094 | NH1 | A_ASP_1101 | OD2 | 2.777 |
| 6K4Z | B_HIS_42   | ND1 | B_GLU_38   | OE2 | 3.400 |
| 6K4Z | B_ARG_61   | NH2 | B_GLU_81   | OE1 | 3.807 |
| 6K4Z | B_ARG_61   | NH2 | B_ASP_82   | OD1 | 2.835 |
| 6K4Z | B_ARG_61   | NH2 | B_ASP_82   | OD2 | 3.444 |
| 6K4Z | B_LYS_1064 | NZ  | B_GLU_1061 | OE1 | 3.293 |
| 6K4Z | B_LYS_1064 | NZ  | B_GLU_1061 | OE2 | 3.306 |
| 6K4Z | B_LYS_1066 | NZ  | B_ASP_1086 | OD1 | 2.977 |
| 6K4Z | B_LYS_1066 | NZ  | B_ASP_1086 | OD2 | 3.306 |
| 6K4Z | B_ARG_1094 | NH2 | B_ASP_1101 | OD1 | 3.758 |
| 6K4Z | B_ARG_1094 | NH2 | B_ASP_1101 | OD2 | 2.738 |
| 6K7O | A_LYS_5    | NZ  | A_ASP_88   | OD1 | 2.318 |
| 6K7O | A_LYS_5    | NZ  | A_ASP_88   | OD2 | 3.371 |
| 6K7O | A_ARG_36   | NH2 | A_ASP_38   | OD2 | 3.575 |
| 6K7O | A_LYS_55   | NZ  | A_GLU_53   | OE2 | 3.732 |
| 6K7O | A_LYS_55   | NZ  | H_ASP_106  | OD1 | 3.027 |
| 6K7O | A_ARG_72   | NH1 | A_GLU_40   | OE1 | 3.011 |
| 6K7O | A_ARG_72   | NH1 | A_GLU_40   | OE2 | 2.176 |
| 6K7O | A_ARG_74   | NH2 | A_GLU_40   | OE2 | 2.314 |
| 6K7O | A_ARG_78   | NH1 | L_ASP_94   | OD1 | 3.792 |
| 6K7O | A_ARG_78   | NH2 | L_ASP_94   | OD1 | 2.709 |
| 6K7O | B_ARG_39   | NH1 | B_ASP_92   | OD1 | 2.639 |
| 6K7O | B_ARG_39   | NH2 | B_GLU_47   | OE1 | 3.803 |
| 6K7O | B_ARG_39   | NH2 | B_ASP_92   | OD1 | 3.143 |
| 6K7O | B_LYS_67   | NZ  | B_ASP_64   | OD1 | 3.307 |
| 6K7O | B_ARG_69   | NH1 | B_ASP_92   | OD1 | 3.750 |
| 6K7O | B_ARG_69   | NH1 | B_ASP_92   | OD2 | 2.232 |
| 6K7O | B_ARG_69   | NH2 | B_ASP_92   | OD1 | 2.738 |
| 6K7O | B_ARG_69   | NH2 | B_ASP_92   | OD2 | 2.835 |
| 6K7O | B_ARG_100  | NH2 | B_ASP_110  | OD1 | 3.271 |
| 6K7O | B_ARG_100  | NH2 | B_ASP_110  | OD2 | 3.077 |
| 6K7O | B_LYS_152  | NZ  | B_ASP_153  | OD1 | 2.261 |
| 6K7O | B_LYS_152  | NZ  | B_ASP_153  | OD2 | 3.089 |
| 6K7O | B_LYS_218  | NZ  | C_GLU_127  | OE1 | 3.816 |
| 6K7O | B_LYS_218  | NZ  | C_GLU_127  | OE2 | 2.813 |
| 6K7O | B_LYS_219  | NZ  | B_GLU_221  | OE2 | 3.997 |
| 6K7O | B_LYS_223  | NZ  | C_ASP_126  | OD1 | 2.273 |
| 6K7O | B_LYS_223  | NZ  | C_ASP_126  | OD2 | 2.907 |
| 6K7O | C_ARG_62   | NH1 | C_GLU_82   | OE1 | 3.128 |
| 6K7O | C_ARG_62   | NH2 | C_ASP_83   | OD1 | 2.283 |
| 6K7O | C_ARG_62   | NH2 | C_ASP_83   | OD2 | 3.026 |
| 6K7O | C_LYS_107  | NZ  | C_GLU_169  | OE1 | 3.884 |



|      |           |     |           |     |       |
|------|-----------|-----|-----------|-----|-------|
| 6K7O | C_LYS_153 | NZ  | C_GLU_199 | OE1 | 2.343 |
| 6K7O | C_LYS_153 | NZ  | C_GLU_199 | OE2 | 3.740 |
| 6K7O | C_ARG_215 | NH1 | C_GLU_191 | OE1 | 3.258 |
| 6K7O | D_ARG_39  | NH1 | D_ASP_92  | OD1 | 3.691 |
| 6K7O | D_ARG_39  | NH2 | D_GLU_47  | OE1 | 3.378 |
| 6K7O | D_ARG_69  | NH1 | D_ASP_92  | OD1 | 3.540 |
| 6K7O | D_ARG_69  | NH1 | D_ASP_92  | OD2 | 3.004 |
| 6K7O | D_ARG_100 | NH1 | D_ASP_28  | OD1 | 3.508 |
| 6K7O | D_ARG_100 | NH2 | D_ASP_110 | OD1 | 3.621 |
| 6K7O | D_ARG_100 | NH2 | D_ASP_110 | OD2 | 2.219 |
| 6K7O | D_LYS_152 | NZ  | D_ASP_153 | OD1 | 2.709 |
| 6K7O | D_LYS_152 | NZ  | D_ASP_153 | OD2 | 2.488 |
| 6K7O | D_LYS_215 | NZ  | G_ASP_189 | OD2 | 2.832 |
| 6K7O | D_LYS_218 | NZ  | E_GLU_127 | OE1 | 2.290 |
| 6K7O | D_LYS_218 | NZ  | E_GLU_127 | OE2 | 3.074 |
| 6K7O | D_LYS_219 | NZ  | D_GLU_221 | OE2 | 3.309 |
| 6K7O | D_LYS_223 | NZ  | E_ASP_126 | OD1 | 3.765 |
| 6K7O | D_LYS_223 | NZ  | E_ASP_126 | OD2 | 3.552 |
| 6K7O | E_ARG_62  | NH1 | E_GLU_82  | OE1 | 3.785 |
| 6K7O | E_ARG_62  | NH2 | E_ASP_83  | OD1 | 2.379 |
| 6K7O | E_ARG_62  | NH2 | E_ASP_83  | OD2 | 2.884 |
| 6K7O | E_LYS_107 | NZ  | E_GLU_169 | OE1 | 3.682 |
| 6K7O | E_LYS_107 | NZ  | E_GLU_169 | OE2 | 3.861 |
| 6K7O | E_LYS_153 | NZ  | E_GLU_199 | OE1 | 3.571 |
| 6K7O | E_LYS_187 | NZ  | E_GLU_191 | OE1 | 3.589 |
| 6K7O | E_HIS_193 | ND1 | E_ASP_155 | OD2 | 2.222 |
| 6K7O | E_ARG_215 | NH1 | E_GLU_191 | OE1 | 3.183 |
| 6K7O | E_ARG_215 | NH1 | E_GLU_191 | OE2 | 3.052 |
| 6K7O | F_ARG_39  | NH1 | F_ASP_92  | OD1 | 3.160 |
| 6K7O | F_ARG_39  | NH2 | F_GLU_47  | OE1 | 3.541 |
| 6K7O | F_ARG_39  | NH2 | F_ASP_92  | OD1 | 3.852 |
| 6K7O | F_ARG_69  | NH2 | F_ASP_92  | OD1 | 3.334 |
| 6K7O | F_ARG_69  | NH2 | F_ASP_92  | OD2 | 2.262 |
| 6K7O | F_ARG_100 | NH2 | F_ASP_110 | OD1 | 3.367 |
| 6K7O | F_ARG_100 | NH2 | F_ASP_110 | OD2 | 2.302 |
| 6K7O | F_LYS_152 | NZ  | F_ASP_153 | OD1 | 2.970 |
| 6K7O | F_LYS_152 | NZ  | F_ASP_153 | OD2 | 3.514 |
| 6K7O | F_HIS_173 | NE2 | G_ASP_171 | OD2 | 3.941 |
| 6K7O | G_ARG_51  | NH2 | F_ASP_106 | OD2 | 3.980 |
| 6K7O | G_ARG_62  | NH2 | G_ASP_83  | OD1 | 2.886 |
| 6K7O | G_ARG_62  | NH2 | G_ASP_83  | OD2 | 2.569 |
| 6K7O | G_LYS_107 | NZ  | G_GLU_169 | OE1 | 3.132 |
| 6K7O | G_LYS_107 | NZ  | G_GLU_169 | OE2 | 2.495 |
| 6K7O | G_LYS_153 | NZ  | G_GLU_199 | OE1 | 3.412 |
| 6K7O | G_ARG_215 | NH1 | G_GLU_191 | OE1 | 2.817 |
| 6K7O | H_ARG_39  | NH1 | H_ASP_92  | OD1 | 3.037 |
| 6K7O | H_ARG_39  | NH2 | H_GLU_47  | OE2 | 3.357 |
| 6K7O | H_ARG_39  | NH2 | H_ASP_92  | OD1 | 3.458 |
| 6K7O | H_ARG_69  | NH1 | H_ASP_92  | OD1 | 3.457 |
| 6K7O | H_ARG_69  | NH1 | H_ASP_92  | OD2 | 2.161 |
| 6K7O | H_ARG_69  | NH2 | H_ASP_92  | OD1 | 3.051 |
| 6K7O | H_ARG_69  | NH2 | H_ASP_92  | OD2 | 3.302 |
| 6K7O | H_ARG_100 | NH1 | H_ASP_28  | OD1 | 3.046 |
| 6K7O | H_ARG_100 | NH1 | H_ASP_28  | OD2 | 3.800 |
| 6K7O | H_ARG_100 | NH2 | H_ASP_110 | OD1 | 3.159 |
| 6K7O | H_ARG_100 | NH2 | H_ASP_110 | OD2 | 2.559 |
| 6K7O | H_LYS_152 | NZ  | H_ASP_153 | OD1 | 3.285 |
| 6K7O | H_LYS_152 | NZ  | H_ASP_153 | OD2 | 3.072 |

|      |           |     |           |     |       |
|------|-----------|-----|-----------|-----|-------|
| 6K7O | H_HIS_173 | NE2 | L_ASP_171 | OD2 | 3.862 |
| 6K7O | H_LYS_218 | NZ  | L_GLU_127 | OE1 | 3.981 |
| 6K7O | H_LYS_219 | NZ  | H_GLU_221 | OE1 | 3.644 |
| 6K7O | H_LYS_223 | NZ  | L_ASP_126 | OD1 | 3.964 |
| 6K7O | L_ARG_62  | NH1 | L_GLU_82  | OE1 | 3.867 |
| 6K7O | L_ARG_62  | NH2 | L_ASP_83  | OD1 | 2.401 |
| 6K7O | L_ARG_62  | NH2 | L_ASP_83  | OD2 | 2.682 |
| 6K7O | L_ARG_215 | NH1 | L_GLU_191 | OE1 | 2.693 |
| 6K7O | P_LYS_5   | NZ  | P_ASP_88  | OD1 | 3.227 |
| 6K7O | P_ARG_36  | NH2 | P_ASP_38  | OD2 | 3.978 |
| 6K7O | P_LYS_55  | NZ  | B_ASP_106 | OD1 | 3.340 |
| 6K7O | P_LYS_55  | NZ  | P_GLU_53  | OE2 | 3.383 |
| 6K7O | P_ARG_72  | NH1 | P_GLU_40  | OE2 | 3.046 |
| 6K7O | P_ARG_74  | NH2 | P_GLU_40  | OE2 | 2.240 |
| 6K7O | P_ARG_78  | NH1 | C_ASP_94  | OD1 | 2.583 |
| 6K7O | P_ARG_78  | NH2 | C_ASP_94  | OD1 | 2.609 |
| 6K7O | R_LYS_5   | NZ  | R_ASP_88  | OD1 | 2.725 |
| 6K7O | R_LYS_5   | NZ  | R_ASP_88  | OD2 | 3.900 |
| 6K7O | R_LYS_55  | NZ  | F_ASP_106 | OD1 | 2.834 |
| 6K7O | R_LYS_55  | NZ  | R_GLU_53  | OE2 | 3.817 |
| 6K7O | R_ARG_72  | NH1 | R_GLU_40  | OE1 | 3.051 |
| 6K7O | R_ARG_72  | NH1 | R_GLU_40  | OE2 | 2.785 |
| 6K7O | R_ARG_74  | NH2 | R_GLU_40  | OE2 | 2.444 |
| 6K7O | Q_LYS_5   | NZ  | Q_ASP_88  | OD1 | 3.267 |
| 6K7O | Q_ARG_36  | NH2 | Q_ASP_38  | OD2 | 3.639 |
| 6K7O | Q_LYS_55  | NZ  | D_ASP_106 | OD1 | 3.172 |
| 6K7O | Q_ARG_59  | NH1 | H_GLU_221 | OE1 | 3.018 |
| 6K7O | Q_ARG_59  | NH1 | H_GLU_221 | OE2 | 3.413 |
| 6K7O | Q_ARG_59  | NH2 | H_GLU_221 | OE1 | 3.299 |
| 6K7O | Q_ARG_59  | NH2 | H_GLU_221 | OE2 | 2.855 |
| 6K7O | Q_ARG_72  | NH1 | Q_GLU_40  | OE1 | 2.910 |
| 6K7O | Q_ARG_72  | NH1 | Q_GLU_40  | OE2 | 2.362 |
| 6K7O | Q_ARG_74  | NH2 | Q_GLU_40  | OE2 | 3.223 |
| 6K7O | Q_ARG_78  | NH1 | E_ASP_94  | OD1 | 3.546 |
| 6K7O | Q_ARG_78  | NH2 | E_ASP_94  | OD1 | 2.499 |
| 6KN9 | A_HIS_112 | ND1 | A_GLU_41  | OE1 | 3.585 |
| 6KN9 | A_ARG_235 | NH2 | A_ASP_222 | OD1 | 3.857 |
| 6KN9 | A_ARG_235 | NH2 | A_ASP_222 | OD2 | 2.742 |
| 6KN9 | A_ARG_241 | NH2 | A_ASP_164 | OD1 | 3.542 |
| 6KN9 | A_ARG_241 | NH2 | A_ASP_164 | OD2 | 3.212 |
| 6KN9 | A_LYS_267 | NZ  | A_GLU_264 | OE1 | 2.822 |
| 6KN9 | A_LYS_267 | NZ  | A_GLU_264 | OE2 | 3.577 |
| 6KN9 | A_LYS_274 | NZ  | A_ASP_255 | OD2 | 3.178 |
| 6KN9 | A_LYS_274 | NZ  | A_GLU_318 | OE2 | 3.699 |
| 6KN9 | A_ARG_276 | NH2 | A_ASP_314 | OD1 | 1.972 |
| 6KN9 | A_ARG_281 | NH1 | D_ASP_111 | OD1 | 2.228 |
| 6KN9 | A_ARG_281 | NH1 | D_ASP_111 | OD2 | 3.976 |
| 6KN9 | A_LYS_288 | NZ  | A_GLU_299 | OE1 | 3.349 |
| 6KN9 | A_LYS_292 | NZ  | A_GLU_297 | OE1 | 3.199 |
| 6KN9 | A_LYS_292 | NZ  | A_GLU_297 | OE2 | 3.595 |
| 6KN9 | A_LYS_306 | NZ  | A_GLU_318 | OE1 | 3.465 |
| 6KN9 | A_LYS_309 | NZ  | A_ASP_314 | OD2 | 2.944 |
| 6KN9 | A_ARG_319 | NH2 | A_GLU_299 | OE2 | 3.969 |
| 6KN9 | A_ARG_333 | NH1 | A_ASP_330 | OD1 | 3.681 |
| 6KN9 | A_ARG_333 | NH2 | A_ASP_293 | OD2 | 3.015 |
| 6KN9 | B_ARG_241 | NH2 | B_ASP_164 | OD2 | 3.877 |
| 6KN9 | B_LYS_267 | NZ  | B_GLU_264 | OE1 | 3.093 |
| 6KN9 | B_LYS_267 | NZ  | B_GLU_264 | OE2 | 3.256 |

|      |           |     |           |     |       |
|------|-----------|-----|-----------|-----|-------|
| 6KN9 | B_LYS_274 | NZ  | B_ASP_255 | OD2 | 2.896 |
| 6KN9 | B_LYS_274 | NZ  | B_GLU_318 | OE1 | 3.770 |
| 6KN9 | B_ARG_276 | NH2 | B_ASP_314 | OD1 | 3.835 |
| 6KN9 | B_ARG_281 | NH2 | E_ASP_111 | OD1 | 2.487 |
| 6KN9 | B_ARG_281 | NH2 | E_ASP_111 | OD2 | 3.660 |
| 6KN9 | B_LYS_288 | NZ  | B_GLU_299 | OE1 | 3.279 |
| 6KN9 | B_LYS_306 | NZ  | B_GLU_318 | OE2 | 3.342 |
| 6KN9 | B_LYS_309 | NZ  | B_ASP_314 | OD2 | 2.507 |
| 6KN9 | B_LYS_313 | NZ  | B_ASP_314 | OD2 | 3.641 |
| 6KN9 | B_ARG_319 | NH1 | B_GLU_304 | OE1 | 3.890 |
| 6KN9 | B_ARG_319 | NH2 | B_GLU_304 | OE1 | 3.759 |
| 6KN9 | B_ARG_319 | NH2 | B_GLU_304 | OE2 | 3.666 |
| 6KN9 | B_ARG_333 | NH2 | B_ASP_293 | OD2 | 3.063 |
| 6KN9 | C_HIS_112 | ND1 | C_GLU_41  | OE1 | 2.327 |
| 6KN9 | C_HIS_112 | NE2 | C_ASP_107 | OD2 | 3.295 |
| 6KN9 | C_ARG_235 | NH2 | C_ASP_222 | OD1 | 3.959 |
| 6KN9 | C_ARG_235 | NH2 | C_ASP_222 | OD2 | 2.800 |
| 6KN9 | C_ARG_241 | NH2 | C_ASP_164 | OD1 | 3.385 |
| 6KN9 | C_ARG_241 | NH2 | C_ASP_164 | OD2 | 2.874 |
| 6KN9 | C_LYS_274 | NZ  | C_ASP_255 | OD2 | 3.106 |
| 6KN9 | C_LYS_274 | NZ  | C_GLU_318 | OE1 | 3.930 |
| 6KN9 | C_ARG_276 | NH2 | C_ASP_314 | OD1 | 3.434 |
| 6KN9 | C_ARG_281 | NH2 | F_ASP_111 | OD2 | 3.907 |
| 6KN9 | C_LYS_288 | NZ  | C_GLU_299 | OE1 | 3.086 |
| 6KN9 | C_LYS_288 | NZ  | C_GLU_299 | OE2 | 3.808 |
| 6KN9 | C_LYS_306 | NZ  | C_GLU_318 | OE2 | 3.670 |
| 6KN9 | C_LYS_309 | NZ  | C_ASP_314 | OD2 | 2.610 |
| 6KN9 | C_ARG_319 | NH1 | C_GLU_299 | OE2 | 3.995 |
| 6KN9 | C_ARG_333 | NH1 | C_ASP_330 | OD1 | 3.656 |
| 6KN9 | C_ARG_333 | NH2 | C_ASP_293 | OD2 | 2.842 |
| 6KN9 | D_ARG_38  | NH1 | D_ASP_90  | OD1 | 3.545 |
| 6KN9 | D_ARG_38  | NH2 | D_GLU_46  | OE1 | 2.628 |
| 6KN9 | D_ARG_38  | NH2 | D_GLU_46  | OE2 | 3.501 |
| 6KN9 | D_LYS_43  | NZ  | D_GLU_89  | OE1 | 3.952 |
| 6KN9 | D_LYS_43  | NZ  | D_GLU_89  | OE2 | 3.337 |
| 6KN9 | D_ARG_67  | NH1 | D_ASP_90  | OD1 | 3.041 |
| 6KN9 | D_ARG_67  | NH1 | D_ASP_90  | OD2 | 3.151 |
| 6KN9 | D_ARG_67  | NH2 | D_ASP_90  | OD1 | 3.897 |
| 6KN9 | D_ARG_98  | NH1 | D_ASP_111 | OD2 | 2.640 |
| 6KN9 | D_ARG_201 | NH2 | D_ASP_222 | OD1 | 2.871 |
| 6KN9 | D_ARG_201 | NH2 | D_ASP_222 | OD2 | 3.172 |
| 6KN9 | F_ARG_38  | NH1 | F_ASP_90  | OD1 | 3.168 |
| 6KN9 | F_ARG_38  | NH2 | F_GLU_46  | OE1 | 2.799 |
| 6KN9 | F_ARG_38  | NH2 | F_GLU_46  | OE2 | 3.293 |
| 6KN9 | F_ARG_98  | NH1 | F_ASP_111 | OD1 | 3.108 |
| 6KN9 | F_ARG_98  | NH1 | F_ASP_111 | OD2 | 2.892 |
| 6KN9 | F_ARG_201 | NH2 | F_ASP_222 | OD1 | 2.968 |
| 6KN9 | F_ARG_201 | NH2 | F_ASP_222 | OD2 | 3.406 |
| 6MH2 | A_LYS_149 | NZ  | A_GLU_195 | OE1 | 3.787 |
| 6MH2 | A_LYS_149 | NZ  | A_GLU_195 | OE2 | 3.621 |
| 6MH2 | B_ARG_38  | NH1 | B_ASP_90  | OD1 | 2.761 |
| 6MH2 | B_ARG_38  | NH2 | B_GLU_46  | OE1 | 3.270 |
| 6MH2 | B_ARG_38  | NH2 | B_GLU_46  | OE2 | 3.852 |
| 6MH2 | B_ARG_38  | NH2 | B_ASP_90  | OD1 | 3.946 |
| 6MH2 | B_ARG_67  | NH1 | B_ASP_90  | OD1 | 3.761 |
| 6MH2 | B_ARG_67  | NH1 | B_ASP_90  | OD2 | 2.763 |
| 6MH2 | B_ARG_67  | NH2 | B_ASP_90  | OD1 | 3.235 |
| 6MH2 | B_ARG_67  | NH2 | B_ASP_90  | OD2 | 3.604 |

|      |           |     |           |     |       |
|------|-----------|-----|-----------|-----|-------|
| 6MH2 | B.LYS_76  | NZ  | B.ASP_73  | OD2 | 3.341 |
| 6MH2 | B.ARG_98  | NH2 | B.ASP_108 | OD1 | 3.946 |
| 6MH2 | B.ARG_98  | NH2 | B.ASP_108 | OD2 | 3.214 |
| 6MH2 | B.LYS_150 | NZ  | B.ASP_151 | OD1 | 3.564 |
| 6MH2 | B.LYS_150 | NZ  | B.ASP_151 | OD2 | 3.741 |
| 6MH2 | C.ARG_61  | NH2 | C.ASP_82  | OD1 | 3.009 |
| 6MH2 | C.ARG_61  | NH2 | C.ASP_82  | OD2 | 3.516 |
| 6MH2 | C.ARG_66  | NH1 | C.ASP_28  | OD1 | 3.766 |
| 6MH2 | D.ARG_38  | NH1 | D.ASP_90  | OD1 | 2.776 |
| 6MH2 | D.ARG_38  | NH2 | D.GLU_46  | OE1 | 2.980 |
| 6MH2 | D.ARG_38  | NH2 | D.GLU_46  | OE2 | 3.596 |
| 6MH2 | D.ARG_38  | NH2 | D.ASP_90  | OD1 | 3.851 |
| 6MH2 | D.ARG_67  | NH1 | D.ASP_90  | OD1 | 3.812 |
| 6MH2 | D.ARG_67  | NH1 | D.ASP_90  | OD2 | 2.537 |
| 6MH2 | D.ARG_67  | NH2 | D.ASP_90  | OD1 | 3.255 |
| 6MH2 | D.ARG_67  | NH2 | D.ASP_90  | OD2 | 3.479 |
| 6MH2 | D.LYS_76  | NZ  | D.ASP_73  | OD2 | 3.284 |
| 6MH2 | D.ARG_98  | NH2 | D.ASP_108 | OD2 | 2.820 |
| 6MHR | D.ARG_38  | NH1 | D.ASP_89  | OD1 | 2.826 |
| 6MHR | D.ARG_38  | NH2 | D.GLU_46  | OE1 | 3.169 |
| 6MHR | D.ARG_38  | NH2 | D.GLU_46  | OE2 | 3.753 |
| 6MHR | D.ARG_38  | NH2 | D.ASP_89  | OD1 | 3.916 |
| 6MHR | D.ARG_66  | NH1 | D.ASP_89  | OD1 | 3.572 |
| 6MHR | D.ARG_66  | NH1 | D.ASP_89  | OD2 | 2.987 |
| 6MHR | D.ARG_66  | NH2 | D.ASP_89  | OD1 | 2.810 |
| 6MHR | D.ARG_66  | NH2 | D.ASP_89  | OD2 | 3.631 |
| 6MHR | D.ARG_97  | NH2 | D.ASP_109 | OD1 | 2.845 |
| 6MHR | D.ARG_97  | NH2 | D.ASP_109 | OD2 | 3.931 |
| 6MHR | D.LYS_151 | NZ  | D.ASP_152 | OD1 | 3.753 |
| 6MHR | D.LYS_151 | NZ  | D.ASP_152 | OD2 | 3.790 |
| 6MHR | E.ARG_61  | NH2 | E.ASP_82  | OD1 | 3.057 |
| 6MHR | E.ARG_61  | NH2 | E.ASP_82  | OD2 | 3.583 |
| 6MHR | E.ARG_91  | NH1 | D.GLU_50  | OE1 | 3.108 |
| 6MHR | E.ARG_91  | NH1 | D.ASP_98  | OD2 | 3.892 |
| 6MHR | E.ARG_91  | NH2 | D.GLU_50  | OE1 | 3.238 |
| 6MHR | E.ARG_91  | NH2 | D.GLU_50  | OE2 | 3.082 |
| 6MHR | E.LYS_151 | NZ  | E.GLU_197 | OE1 | 3.306 |
| 6MHR | E.LYS_151 | NZ  | E.GLU_197 | OE2 | 2.656 |
| 6MHR | A.ARG_38  | NH1 | A.ASP_89  | OD1 | 2.922 |
| 6MHR | A.ARG_38  | NH2 | A.GLU_46  | OE1 | 3.494 |
| 6MHR | A.ARG_38  | NH2 | A.ASP_89  | OD1 | 3.894 |
| 6MHR | A.ARG_66  | NH1 | A.ASP_89  | OD1 | 3.791 |
| 6MHR | A.ARG_66  | NH2 | A.ASP_89  | OD1 | 2.938 |
| 6MHR | A.ARG_66  | NH2 | A.ASP_89  | OD2 | 2.504 |
| 6MHR | A.ARG_97  | NH2 | A.ASP_109 | OD1 | 3.855 |
| 6MHR | A.ARG_97  | NH2 | A.ASP_109 | OD2 | 2.834 |
| 6MHR | A.LYS_151 | NZ  | A.ASP_152 | OD2 | 3.659 |
| 6MHR | A.LYS_217 | NZ  | B.GLU_125 | OE2 | 2.775 |
| 6MHR | B.ARG_61  | NH1 | B.ASP_82  | OD1 | 2.499 |
| 6MHR | B.ARG_61  | NH1 | B.ASP_82  | OD2 | 2.707 |
| 6MHR | B.ARG_61  | NH2 | B.GLU_81  | OE2 | 3.693 |
| 6MHR | B.ARG_91  | NH1 | A.GLU_50  | OE1 | 3.086 |
| 6MHR | B.ARG_91  | NH1 | A.GLU_50  | OE2 | 3.775 |
| 6MHR | B.ARG_91  | NH1 | A.ASP_98  | OD2 | 3.351 |
| 6MHR | B.ARG_91  | NH2 | A.GLU_50  | OE1 | 3.608 |
| 6MHR | B.ARG_91  | NH2 | A.GLU_50  | OE2 | 2.934 |
| 6MHR | F.ARG_73  | NH2 | F.ASP_87  | OD2 | 3.617 |
| 6MHR | F.ARG_75  | NH1 | F.ASP_87  | OD1 | 3.232 |

|      |           |     |           |     |       |
|------|-----------|-----|-----------|-----|-------|
| 6MHR | F_HIS_93  | ND1 | F_ASP_105 | OD1 | 2.539 |
| 6MHR | F_HIS_93  | NE2 | F_GLU_103 | OE1 | 2.711 |
| 6MHR | C_ARG_75  | NH2 | C_GLU_85  | OE2 | 2.934 |
| 6MHR | C_HIS_    | ND1 | C_ASP_    | OD1 | 2.729 |
| 6MHR | C_HIS_93  | NE2 | C_GLU_103 | OE1 | 2.688 |
| 6MHR | C_ARG_    | NH1 | C_ASP_    | OD1 | 3.364 |
| 6MHR | C_ARG_    | NH2 | C_ASP_    | OD1 | 3.177 |
| 6MI2 | A_LYS_12  | NZ  | A_GLU_16  | OE2 | 3.989 |
| 6MI2 | A_ARG_38  | NH2 | A_GLU_46  | OE1 | 2.859 |
| 6MI2 | A_ARG_38  | NH2 | A_GLU_46  | OE2 | 3.408 |
| 6MI2 | A_ARG_98  | NH2 | A_ASP_104 | OD2 | 3.122 |
| 6MI2 | B_ARG_60  | NH2 | B_ASP_81  | OD1 | 3.443 |
| 6MI2 | D_ARG_38  | NH2 | D_GLU_46  | OE1 | 2.927 |
| 6MI2 | D_ARG_38  | NH2 | D_GLU_46  | OE2 | 2.802 |
| 6MI2 | D_ARG_98  | NH2 | D_ASP_104 | OD1 | 3.789 |
| 6MI2 | D_ARG_98  | NH2 | D_ASP_104 | OD2 | 2.702 |
| 6MI2 | E_ARG_60  | NH2 | E_ASP_81  | OD1 | 2.603 |
| 6MI2 | E_ARG_60  | NH2 | E_ASP_81  | OD2 | 2.973 |
| 6MI2 | F_ARG_73  | NH2 | F_ASP_87  | OD2 | 3.773 |
| 6MI2 | F_HIS_93  | ND1 | F_ASP_105 | OD1 | 2.788 |
| 6MI2 | F_HIS_93  | ND1 | F_ASP_105 | OD2 | 3.836 |
| 6MI2 | F_HIS_93  | NE2 | F_GLU_103 | OE2 | 3.226 |
| 6MI2 | F_LYS_114 | NZ  | E_ASP_50  | OD1 | 2.776 |
| 6MI2 | F_LYS_114 | NZ  | E_ASP_50  | OD2 | 3.977 |
| 6MI2 | F_ARG_134 | NH2 | D_ASP_55  | OD2 | 3.507 |
| 6MI2 | F_ARG_134 | NH2 | F_ASP_127 | OD1 | 3.458 |
| 6MI2 | F_ARG_134 | NH2 | F_ASP_127 | OD2 | 3.809 |
| 6MI2 | C_ARG_73  | NH2 | C_ASP_87  | OD1 | 3.648 |
| 6MI2 | C_ARG_73  | NH2 | C_ASP_87  | OD2 | 2.300 |
| 6MI2 | C_HIS_93  | ND1 | C_ASP_105 | OD1 | 2.396 |
| 6MI2 | C_HIS_93  | NE2 | C_GLU_103 | OE2 | 2.977 |
| 6MI2 | C_LYS_114 | NZ  | B_ASP_50  | OD1 | 3.683 |
| 6MI2 | C_LYS_114 | NZ  | B_ASP_50  | OD2 | 2.434 |
| 6MI2 | C_ARG_134 | NH1 | C_ASP_127 | OD2 | 3.259 |
| 6MI2 | C_ARG_134 | NH2 | C_ASP_127 | OD1 | 3.569 |
| 6MI2 | C_ARG_134 | NH2 | C_ASP_127 | OD2 | 3.076 |
| 6MN7 | A_LYS_46  | NZ  | A_GLU_492 | OE1 | 3.387 |
| 6MN7 | A_LYS_46  | NZ  | A_GLU_492 | OE2 | 2.895 |
| 6MN7 | A_LYS_229 | NZ  | A_GLU_83  | OE1 | 2.957 |
| 6MN7 | A_LYS_232 | NZ  | A_GLU_268 | OE1 | 3.584 |
| 6MN7 | A_LYS_232 | NZ  | A_GLU_268 | OE2 | 2.841 |
| 6MN7 | A_LYS_282 | NZ  | A_GLU_275 | OE1 | 2.868 |
| 6MN7 | A_LYS_282 | NZ  | A_GLU_275 | OE2 | 3.561 |
| 6MN7 | A_ARG_308 | NH2 | A_GLU_164 | OE1 | 3.817 |
| 6MN7 | A_ARG_308 | NH2 | A_GLU_164 | OE2 | 3.051 |
| 6MN7 | A_LYS_351 | NZ  | A_GLU_269 | OE1 | 2.814 |
| 6MN7 | A_LYS_351 | NZ  | A_GLU_269 | OE2 | 3.423 |
| 6MN7 | A_ARG_429 | NH1 | A_ASP_113 | OD1 | 3.456 |
| 6MN7 | A_ARG_429 | NH1 | A_ASP_113 | OD2 | 2.823 |
| 6MN7 | A_ARG_429 | NH2 | A_ASP_113 | OD2 | 3.973 |
| 6MN7 | A_ARG_456 | NH2 | A_GLU_466 | OE1 | 3.736 |
| 6MN7 | A_ARG_456 | NH2 | A_GLU_466 | OE2 | 2.975 |
| 6MN7 | A_ARG_469 | NH1 | A_ASP_457 | OD1 | 2.938 |
| 6MN7 | A_ARG_469 | NH2 | A_ASP_457 | OD1 | 3.933 |
| 6MN7 | A_ARG_476 | NH1 | A_GLU_102 | OE1 | 3.017 |
| 6MN7 | A_ARG_476 | NH1 | A_GLU_102 | OE2 | 3.686 |
| 6MN7 | A_ARG_476 | NH2 | A_ASP_474 | OD2 | 2.794 |
| 6MN7 | A_ARG_480 | NH1 | A_ASP_477 | OD1 | 3.065 |

|      |           |     |           |     |       |
|------|-----------|-----|-----------|-----|-------|
| 6MN7 | A_ARG_480 | NH2 | A_ASP_477 | OD1 | 2.733 |
| 6MN7 | A_LYS_487 | NZ  | A_ASP_47  | OD1 | 3.272 |
| 6MN7 | A_LYS_487 | NZ  | A_ASP_47  | OD2 | 2.968 |
| 6MN7 | A_LYS_487 | NZ  | A_GLU_91  | OE2 | 2.917 |
| 6MN7 | B_ARG_542 | NH1 | F_GLU_647 | OE2 | 3.229 |
| 6MN7 | B_LYS_574 | NZ  | A_ASP_107 | OD1 | 3.285 |
| 6MN7 | B_LYS_574 | NZ  | A_ASP_107 | OD2 | 3.696 |
| 6MN7 | B_ARG_579 | NH2 | F_GLU_584 | OE1 | 2.844 |
| 6MN7 | B_ARG_579 | NH2 | F_GLU_584 | OE2 | 3.533 |
| 6MN7 | B_ARG_585 | NH1 | B_ASP_589 | OD1 | 3.926 |
| 6MN7 | B_ARG_585 | NH1 | B_ASP_589 | OD2 | 2.732 |
| 6MN7 | B_ARG_585 | NH2 | B_ASP_589 | OD2 | 3.591 |
| 6MN7 | B_ARG_588 | NH2 | B_GLU_584 | OE2 | 2.813 |
| 6MN7 | B_ARG_617 | NH1 | B_GLU_621 | OE2 | 2.445 |
| 6MN7 | B_ARG_617 | NH2 | B_GLU_634 | OE1 | 3.873 |
| 6MN7 | B_ARG_617 | NH2 | B_GLU_634 | OE2 | 2.744 |
| 6MN7 | C_LYS_46  | NZ  | C_GLU_492 | OE1 | 3.386 |
| 6MN7 | C_LYS_46  | NZ  | C_GLU_492 | OE2 | 2.894 |
| 6MN7 | C_LYS_229 | NZ  | C_GLU_83  | OE1 | 2.956 |
| 6MN7 | C_LYS_232 | NZ  | C_GLU_268 | OE1 | 3.583 |
| 6MN7 | C_LYS_232 | NZ  | C_GLU_268 | OE2 | 2.842 |
| 6MN7 | C_LYS_282 | NZ  | C_GLU_275 | OE1 | 2.869 |
| 6MN7 | C_LYS_282 | NZ  | C_GLU_275 | OE2 | 3.561 |
| 6MN7 | C_ARG_308 | NH2 | C_GLU_164 | OE1 | 3.817 |
| 6MN7 | C_ARG_308 | NH2 | C_GLU_164 | OE2 | 3.051 |
| 6MN7 | C_LYS_351 | NZ  | C_GLU_269 | OE1 | 2.813 |
| 6MN7 | C_LYS_351 | NZ  | C_GLU_269 | OE2 | 3.422 |
| 6MN7 | C_ARG_429 | NH1 | C_ASP_113 | OD1 | 3.457 |
| 6MN7 | C_ARG_429 | NH1 | C_ASP_113 | OD2 | 2.824 |
| 6MN7 | C_ARG_429 | NH2 | C_ASP_113 | OD2 | 3.973 |
| 6MN7 | C_ARG_456 | NH2 | C_GLU_466 | OE1 | 3.737 |
| 6MN7 | C_ARG_456 | NH2 | C_GLU_466 | OE2 | 2.976 |
| 6MN7 | C_ARG_469 | NH1 | C_ASP_457 | OD1 | 2.939 |
| 6MN7 | C_ARG_469 | NH2 | C_ASP_457 | OD1 | 3.933 |
| 6MN7 | C_ARG_476 | NH1 | C_GLU_102 | OE1 | 3.016 |
| 6MN7 | C_ARG_476 | NH1 | C_GLU_102 | OE2 | 3.686 |
| 6MN7 | C_ARG_476 | NH2 | C_ASP_474 | OD2 | 2.793 |
| 6MN7 | C_ARG_480 | NH1 | C_ASP_477 | OD1 | 3.066 |
| 6MN7 | C_ARG_480 | NH2 | C_ASP_477 | OD1 | 2.733 |
| 6MN7 | C_LYS_487 | NZ  | C_ASP_47  | OD1 | 3.273 |
| 6MN7 | C_LYS_487 | NZ  | C_ASP_47  | OD2 | 2.968 |
| 6MN7 | C_LYS_487 | NZ  | C_GLU_91  | OE2 | 2.918 |
| 6MN7 | D_LYS_46  | NZ  | D_GLU_492 | OE1 | 3.385 |
| 6MN7 | D_LYS_46  | NZ  | D_GLU_492 | OE2 | 2.893 |
| 6MN7 | D_LYS_229 | NZ  | D_GLU_83  | OE1 | 2.958 |
| 6MN7 | D_LYS_232 | NZ  | D_GLU_268 | OE1 | 3.583 |
| 6MN7 | D_LYS_232 | NZ  | D_GLU_268 | OE2 | 2.840 |
| 6MN7 | D_LYS_282 | NZ  | D_GLU_275 | OE1 | 2.869 |
| 6MN7 | D_LYS_282 | NZ  | D_GLU_275 | OE2 | 3.560 |
| 6MN7 | D_ARG_308 | NH2 | D_GLU_164 | OE1 | 3.817 |
| 6MN7 | D_ARG_308 | NH2 | D_GLU_164 | OE2 | 3.051 |
| 6MN7 | D_LYS_351 | NZ  | D_GLU_269 | OE1 | 2.813 |
| 6MN7 | D_LYS_351 | NZ  | D_GLU_269 | OE2 | 3.422 |
| 6MN7 | D_ARG_429 | NH1 | D_ASP_113 | OD1 | 3.456 |
| 6MN7 | D_ARG_429 | NH1 | D_ASP_113 | OD2 | 2.823 |
| 6MN7 | D_ARG_429 | NH2 | D_ASP_113 | OD2 | 3.972 |
| 6MN7 | D_ARG_456 | NH2 | D_GLU_466 | OE1 | 3.737 |
| 6MN7 | D_ARG_456 | NH2 | D_GLU_466 | OE2 | 2.975 |

|      |           |     |           |     |       |
|------|-----------|-----|-----------|-----|-------|
| 6MN7 | D_ARG_469 | NH1 | D_ASP_457 | OD1 | 2.938 |
| 6MN7 | D_ARG_469 | NH2 | D_ASP_457 | OD1 | 3.933 |
| 6MN7 | D_ARG_476 | NH1 | D_GLU_102 | OE1 | 3.018 |
| 6MN7 | D_ARG_476 | NH1 | D_GLU_102 | OE2 | 3.687 |
| 6MN7 | D_ARG_476 | NH2 | D_ASP_474 | OD2 | 2.795 |
| 6MN7 | D_ARG_480 | NH1 | D_ASP_477 | OD1 | 3.065 |
| 6MN7 | D_ARG_480 | NH2 | D_ASP_477 | OD1 | 2.732 |
| 6MN7 | D_LYS_487 | NZ  | D_ASP_47  | OD1 | 3.273 |
| 6MN7 | D_LYS_487 | NZ  | D_ASP_47  | OD2 | 2.968 |
| 6MN7 | D_LYS_487 | NZ  | D_GLU_91  | OE2 | 2.917 |
| 6MN7 | E_ARG_542 | NH1 | B_GLU_647 | OE2 | 3.076 |
| 6MN7 | E_LYS_574 | NZ  | C_ASP_107 | OD1 | 3.286 |
| 6MN7 | E_LYS_574 | NZ  | C_ASP_107 | OD2 | 3.697 |
| 6MN7 | E_ARG_579 | NH2 | B_GLU_584 | OE1 | 2.796 |
| 6MN7 | E_ARG_579 | NH2 | B_GLU_584 | OE2 | 3.568 |
| 6MN7 | E_ARG_585 | NH1 | E_ASP_589 | OD1 | 3.925 |
| 6MN7 | E_ARG_585 | NH1 | E_ASP_589 | OD2 | 2.731 |
| 6MN7 | E_ARG_585 | NH2 | E_ASP_589 | OD2 | 3.591 |
| 6MN7 | E_ARG_588 | NH2 | E_GLU_584 | OE2 | 2.814 |
| 6MN7 | E_ARG_617 | NH1 | E_GLU_621 | OE2 | 2.446 |
| 6MN7 | E_ARG_617 | NH2 | E_GLU_634 | OE1 | 3.873 |
| 6MN7 | E_ARG_617 | NH2 | E_GLU_634 | OE2 | 2.744 |
| 6MN7 | F_ARG_542 | NH1 | E_GLU_647 | OE2 | 3.126 |
| 6MN7 | F_LYS_574 | NZ  | D_ASP_107 | OD1 | 3.285 |
| 6MN7 | F_LYS_574 | NZ  | D_ASP_107 | OD2 | 3.696 |
| 6MN7 | F_ARG_579 | NH2 | E_GLU_584 | OE1 | 2.859 |
| 6MN7 | F_ARG_579 | NH2 | E_GLU_584 | OE2 | 3.579 |
| 6MN7 | F_ARG_585 | NH1 | F_ASP_589 | OD1 | 3.927 |
| 6MN7 | F_ARG_585 | NH1 | F_ASP_589 | OD2 | 2.734 |
| 6MN7 | F_ARG_585 | NH2 | F_ASP_589 | OD2 | 3.592 |
| 6MN7 | F_ARG_588 | NH2 | F_GLU_584 | OE2 | 2.813 |
| 6MN7 | F_ARG_617 | NH1 | F_GLU_621 | OE2 | 2.447 |
| 6MN7 | F_ARG_617 | NH2 | F_GLU_634 | OE1 | 3.873 |
| 6MN7 | F_ARG_617 | NH2 | F_GLU_634 | OE2 | 2.744 |
| 6MN7 | G_LYS_12  | NZ  | G_GLU_10  | OE1 | 3.426 |
| 6MN7 | G_ARG_38  | NH1 | G_GLU_46  | OE1 | 3.285 |
| 6MN7 | G_ARG_38  | NH1 | G_GLU_46  | OE2 | 3.559 |
| 6MN7 | G_ARG_38  | NH1 | G_ASP_89  | OD1 | 3.445 |
| 6MN7 | G_ARG_38  | NH1 | G_ASP_89  | OD2 | 3.578 |
| 6MN7 | G_ARG_38  | NH2 | G_ASP_90  | OD1 | 2.915 |
| 6MN7 | G_ARG_63  | NH1 | G_GLU_46  | OE2 | 3.497 |
| 6MN7 | G_ARG_67  | NH1 | G_ASP_90  | OD1 | 2.860 |
| 6MN7 | G_ARG_67  | NH1 | G_ASP_90  | OD2 | 2.650 |
| 6MN7 | G_ARG_67  | NH2 | G_ASP_90  | OD1 | 2.942 |
| 6MN7 | G_ARG_98  | NH1 | G_ASP_115 | OD2 | 3.898 |
| 6MN7 | G_ARG_188 | NH1 | G_GLU_208 | OE2 | 3.991 |
| 6MN7 | G_ARG_188 | NH1 | G_ASP_209 | OD1 | 2.679 |
| 6MN7 | G_ARG_188 | NH1 | G_ASP_209 | OD2 | 2.661 |
| 6MN7 | G_ARG_188 | NH2 | G_GLU_208 | OE2 | 3.728 |
| 6MN7 | G_ARG_188 | NH2 | G_ASP_209 | OD1 | 3.908 |
| 6MN7 | H_LYS_12  | NZ  | H_GLU_10  | OE1 | 3.427 |
| 6MN7 | H_ARG_38  | NH1 | H_GLU_46  | OE1 | 3.285 |
| 6MN7 | H_ARG_38  | NH1 | H_GLU_46  | OE2 | 3.557 |
| 6MN7 | H_ARG_38  | NH1 | H_ASP_89  | OD1 | 3.443 |
| 6MN7 | H_ARG_38  | NH1 | H_ASP_89  | OD2 | 3.578 |
| 6MN7 | H_ARG_38  | NH2 | H_ASP_90  | OD1 | 2.915 |
| 6MN7 | H_ARG_63  | NH1 | H_GLU_46  | OE2 | 3.498 |
| 6MN7 | H_ARG_67  | NH1 | H_ASP_90  | OD1 | 2.859 |

|      |           |     |           |     |       |
|------|-----------|-----|-----------|-----|-------|
| 6MN7 | H_ARG_67  | NH1 | H_ASP_90  | OD2 | 2.650 |
| 6MN7 | H_ARG_67  | NH2 | H_ASP_90  | OD1 | 2.942 |
| 6MN7 | H_ARG_98  | NH1 | H_ASP_115 | OD2 | 3.897 |
| 6MN7 | H_ARG_188 | NH1 | H_GLU_208 | OE2 | 3.991 |
| 6MN7 | H_ARG_188 | NH1 | H_ASP_209 | OD1 | 2.679 |
| 6MN7 | H_ARG_188 | NH1 | H_ASP_209 | OD2 | 2.663 |
| 6MN7 | H_ARG_188 | NH2 | H_GLU_208 | OE2 | 3.729 |
| 6MN7 | H_ARG_188 | NH2 | H_ASP_209 | OD1 | 3.908 |
| 6MN7 | I_LYS_12  | NZ  | I_GLU_10  | OE1 | 3.427 |
| 6MN7 | I_ARG_38  | NH1 | I_GLU_46  | OE1 | 3.285 |
| 6MN7 | I_ARG_38  | NH1 | I_GLU_46  | OE2 | 3.556 |
| 6MN7 | I_ARG_38  | NH1 | I_ASP_89  | OD1 | 3.444 |
| 6MN7 | I_ARG_38  | NH1 | I_ASP_89  | OD2 | 3.578 |
| 6MN7 | I_ARG_38  | NH2 | I_ASP_90  | OD1 | 2.915 |
| 6MN7 | I_ARG_63  | NH1 | I_GLU_46  | OE2 | 3.498 |
| 6MN7 | I_ARG_67  | NH1 | I_ASP_90  | OD1 | 2.860 |
| 6MN7 | I_ARG_67  | NH1 | I_ASP_90  | OD2 | 2.649 |
| 6MN7 | I_ARG_67  | NH2 | I_ASP_90  | OD1 | 2.942 |
| 6MN7 | I_ARG_98  | NH1 | I_ASP_115 | OD2 | 3.897 |
| 6MN7 | I_ARG_188 | NH1 | I_GLU_208 | OE2 | 3.991 |
| 6MN7 | I_ARG_188 | NH1 | I_ASP_209 | OD1 | 2.681 |
| 6MN7 | I_ARG_188 | NH1 | I_ASP_209 | OD2 | 2.663 |
| 6MN7 | I_ARG_188 | NH2 | I_GLU_208 | OE2 | 3.728 |
| 6MN7 | I_ARG_188 | NH2 | I_ASP_209 | OD1 | 3.910 |
| 6MPG | B_ARG_67  | NH1 | B_GLU_87  | OE2 | 2.287 |
| 6MPG | B_ARG_67  | NH1 | B_ASP_88  | OD1 | 3.091 |
| 6MPG | B_ARG_67  | NH1 | B_ASP_88  | OD2 | 3.303 |
| 6MPG | B_ARG_67  | NH2 | B_GLU_87  | OE2 | 3.585 |
| 6MPG | U_ARG_542 | NH2 | D_GLU_647 | OE1 | 3.141 |
| 6MPG | U_ARG_542 | NH2 | D_GLU_647 | OE2 | 2.524 |
| 6MPG | U_ARG_579 | NH2 | D_GLU_584 | OE1 | 2.488 |
| 6MPG | U_ARG_588 | NH2 | U_GLU_584 | OE2 | 2.498 |
| 6MPG | U_ARG_617 | NH1 | U_GLU_634 | OE1 | 3.224 |
| 6MPG | U_ARG_617 | NH1 | U_GLU_634 | OE2 | 3.055 |
| 6MPG | V_LYS_46  | NZ  | V_GLU_492 | OE2 | 3.793 |
| 6MPG | V_LYS_65  | NZ  | V_GLU_64  | OE2 | 2.921 |
| 6MPG | V_HIS_85  | NE2 | V_GLU_87  | OE1 | 3.725 |
| 6MPG | V_HIS_105 | NE2 | V_ASP_474 | OD1 | 3.796 |
| 6MPG | V_HIS_216 | NE2 | V_ASP_57  | OD1 | 2.756 |
| 6MPG | V_HIS_216 | NE2 | V_ASP_57  | OD2 | 3.780 |
| 6MPG | V_LYS_227 | NZ  | V_GLU_83  | OE1 | 2.744 |
| 6MPG | V_LYS_227 | NZ  | V_GLU_83  | OE2 | 3.617 |
| 6MPG | V_LYS_229 | NZ  | B_ASP_1   | OD1 | 2.776 |
| 6MPG | V_LYS_231 | NZ  | V_GLU_268 | OE1 | 2.210 |
| 6MPG | V_LYS_231 | NZ  | V_GLU_268 | OE2 | 3.773 |
| 6MPG | V_LYS_231 | NZ  | V_GLU_269 | OE1 | 3.900 |
| 6MPG | V_LYS_282 | NZ  | V_GLU_275 | OE1 | 2.926 |
| 6MPG | V_ARG_298 | NH1 | V_GLU_381 | OE1 | 3.522 |
| 6MPG | V_ARG_298 | NH1 | V_GLU_381 | OE2 | 2.978 |
| 6MPG | V_ARG_298 | NH2 | V_GLU_381 | OE1 | 3.713 |
| 6MPG | V_ARG_308 | NH1 | V_GLU_164 | OE1 | 3.822 |
| 6MPG | V_LYS_421 | NZ  | V_ASP_180 | OD1 | 3.836 |
| 6MPG | V_ARG_429 | NH1 | V_ASP_113 | OD2 | 3.831 |
| 6MPG | V_ARG_429 | NH2 | V_ASP_113 | OD1 | 3.803 |
| 6MPG | V_ARG_429 | NH2 | V_ASP_113 | OD2 | 2.191 |
| 6MPG | V_ARG_469 | NH2 | V_ASP_457 | OD2 | 3.540 |
| 6MPG | V_ARG_476 | NH1 | V_GLU_102 | OE1 | 2.983 |
| 6MPG | V_ARG_476 | NH1 | V_GLU_102 | OE2 | 2.663 |



|      |           |     |            |     |       |
|------|-----------|-----|------------|-----|-------|
| 6MPG | V_ARG_476 | NH2 | V_GLU_102  | OE1 | 3.160 |
| 6MPG | V_ARG_480 | NH1 | V_ASP_477  | OD1 | 2.648 |
| 6MPG | V_LYS_487 | NZ  | V_ASP_47   | OD1 | 2.603 |
| 6MPG | V_LYS_487 | NZ  | V_ASP_47   | OD2 | 3.288 |
| 6MPG | W_ARG_38  | NH1 | W_GLU_46   | OE2 | 3.453 |
| 6MPG | W_ARG_38  | NH1 | W_ASP_89   | OD1 | 3.905 |
| 6MPG | W_ARG_38  | NH2 | W_ASP_89   | OD1 | 2.942 |
| 6MPG | W_ARG_66  | NH2 | W_ASP_89   | OD2 | 3.660 |
| 6MPG | W_HIS_105 | NE2 | B_GLU_61   | OE2 | 3.652 |
| 6MPG | m_ARG_38  | NH1 | m_ASP_86   | OD1 | 2.924 |
| 6MPG | m_ARG_38  | NH2 | m_GLU_46   | OE1 | 3.523 |
| 6MPG | m_ARG_38  | NH2 | m_GLU_46   | OE2 | 3.688 |
| 6MPG | m_ARG_38  | NH2 | m_ASP_86   | OD1 | 3.975 |
| 6MPG | m_LYS_73  | NZ  | m_ASP_53   | OD1 | 3.849 |
| 6MPG | m_LYS_73  | NZ  | m_ASP_53   | OD2 | 2.556 |
| 6MPG | n_ARG_61  | NH1 | n_ASP_60   | OD1 | 3.630 |
| 6MPG | n_ARG_61  | NH1 | n_ASP_60   | OD2 | 3.902 |
| 6MPG | n_ARG_94  | NH1 | V_ASP_321A | OD1 | 3.878 |
| 6MPG | n_ARG_95  | NH2 | n_GLU_25   | OE2 | 3.812 |
| 6MPG | q_ARG_38  | NH1 | q_ASP_86   | OD1 | 3.717 |
| 6MPG | q_ARG_38  | NH2 | q_ASP_86   | OD1 | 3.650 |
| 6MPG | q_ARG_66  | NH1 | q_ASP_86   | OD2 | 3.786 |
| 6MPG | q_ARG_66  | NH2 | q_ASP_86   | OD1 | 3.709 |
| 6MPG | q_ARG_66  | NH2 | q_ASP_86   | OD2 | 2.196 |
| 6MPG | r_ARG_60  | NH1 | r_ASP_81   | OD2 | 3.768 |
| 6MPG | r_ARG_60  | NH2 | r_ASP_81   | OD1 | 3.488 |
| 6MPG | r_ARG_60  | NH2 | r_ASP_81   | OD2 | 2.219 |
| 6MPG | 2_LYS_46  | NZ  | 2_GLU_492  | OE2 | 3.792 |
| 6MPG | 2_LYS_65  | NZ  | 2_GLU_64   | OE2 | 2.922 |
| 6MPG | 2_HIS_85  | NE2 | 2_GLU_87   | OE1 | 3.726 |
| 6MPG | 2_HIS_105 | NE2 | 2_ASP_474  | OD1 | 3.795 |
| 6MPG | 2_HIS_216 | NE2 | 2_ASP_57   | OD1 | 2.756 |
| 6MPG | 2_HIS_216 | NE2 | 2_ASP_57   | OD2 | 3.779 |
| 6MPG | 2_LYS_227 | NZ  | 2_GLU_83   | OE1 | 2.745 |
| 6MPG | 2_LYS_227 | NZ  | 2_GLU_83   | OE2 | 3.617 |
| 6MPG | 2_LYS_229 | NZ  | 4_ASP_1    | OD1 | 2.776 |
| 6MPG | 2_LYS_231 | NZ  | 2_GLU_268  | OE1 | 2.210 |
| 6MPG | 2_LYS_231 | NZ  | 2_GLU_268  | OE2 | 3.772 |
| 6MPG | 2_LYS_231 | NZ  | 2_GLU_269  | OE1 | 3.900 |
| 6MPG | 2_LYS_282 | NZ  | 2_GLU_275  | OE1 | 2.926 |
| 6MPG | 2_ARG_298 | NH1 | 2_GLU_381  | OE1 | 3.521 |
| 6MPG | 2_ARG_298 | NH1 | 2_GLU_381  | OE2 | 2.977 |
| 6MPG | 2_ARG_298 | NH2 | 2_GLU_381  | OE1 | 3.713 |
| 6MPG | 2_ARG_308 | NH1 | 2_GLU_164  | OE1 | 3.822 |
| 6MPG | 2_LYS_421 | NZ  | 2_ASP_180  | OD1 | 3.837 |
| 6MPG | 2_ARG_429 | NH1 | 2_ASP_113  | OD2 | 3.831 |
| 6MPG | 2_ARG_429 | NH2 | 2_ASP_113  | OD1 | 3.804 |
| 6MPG | 2_ARG_429 | NH2 | 2_ASP_113  | OD2 | 2.191 |
| 6MPG | 2_ARG_469 | NH2 | 2_ASP_457  | OD2 | 3.540 |
| 6MPG | 2_ARG_476 | NH1 | 2_GLU_102  | OE1 | 2.983 |
| 6MPG | 2_ARG_476 | NH1 | 2_GLU_102  | OE2 | 2.663 |
| 6MPG | 2_ARG_476 | NH2 | 2_GLU_102  | OE1 | 3.160 |
| 6MPG | 2_ARG_480 | NH1 | 2_ASP_477  | OD1 | 2.648 |
| 6MPG | 2_LYS_487 | NZ  | 2_ASP_47   | OD1 | 2.604 |
| 6MPG | 2_LYS_487 | NZ  | 2_ASP_47   | OD2 | 3.288 |
| 6MPG | 3_ARG_38  | NH1 | 3_GLU_46   | OE2 | 3.453 |
| 6MPG | 3_ARG_38  | NH1 | 3_ASP_89   | OD1 | 3.905 |
| 6MPG | 3_ARG_38  | NH2 | 3_ASP_89   | OD1 | 2.943 |

|      |           |     |            |     |       |
|------|-----------|-----|------------|-----|-------|
| 6MPG | 3_ARG.66  | NH2 | 3_ASP.89   | OD2 | 3.660 |
| 6MPG | 3_HIS.105 | NE2 | 4_GLU.61   | OE2 | 3.651 |
| 6MPG | 4_ARG.67  | NH1 | 4_GLU.87   | OE2 | 2.288 |
| 6MPG | 4_ARG.67  | NH1 | 4_ASP.88   | OD1 | 3.090 |
| 6MPG | 4_ARG.67  | NH1 | 4_ASP.88   | OD2 | 3.302 |
| 6MPG | 4_ARG.67  | NH2 | 4_GLU.87   | OE2 | 3.586 |
| 6MPG | 5_ARG.38  | NH1 | 5_ASP.86   | OD1 | 2.924 |
| 6MPG | 5_ARG.38  | NH2 | 5_GLU.46   | OE1 | 3.523 |
| 6MPG | 5_ARG.38  | NH2 | 5_GLU.46   | OE2 | 3.688 |
| 6MPG | 5_ARG.38  | NH2 | 5_ASP.86   | OD1 | 3.975 |
| 6MPG | 5_LYS.73  | NZ  | 5_ASP.53   | OD1 | 3.850 |
| 6MPG | 5_LYS.73  | NZ  | 5_ASP.53   | OD2 | 2.557 |
| 6MPG | 6_ARG.61  | NH1 | 6_ASP.60   | OD1 | 3.630 |
| 6MPG | 6_ARG.61  | NH1 | 6_ASP.60   | OD2 | 3.902 |
| 6MPG | 6_ARG.94  | NH1 | 2_ASP.321A | OD1 | 3.878 |
| 6MPG | 6_ARG.95  | NH2 | 6_GLU.25   | OE2 | 3.812 |
| 6MPG | 7_ARG.60  | NH1 | 7_ASP.81   | OD2 | 3.768 |
| 6MPG | 7_ARG.60  | NH2 | 7_ASP.81   | OD1 | 3.488 |
| 6MPG | 7_ARG.60  | NH2 | 7_ASP.81   | OD2 | 2.218 |
| 6MPG | 8_ARG.38  | NH1 | 8_ASP.86   | OD1 | 3.717 |
| 6MPG | 8_ARG.38  | NH2 | 8_ASP.86   | OD1 | 3.651 |
| 6MPG | 8_ARG.66  | NH1 | 8_ASP.86   | OD2 | 3.787 |
| 6MPG | 8_ARG.66  | NH2 | 8_ASP.86   | OD1 | 3.708 |
| 6MPG | 8_ARG.66  | NH2 | 8_ASP.86   | OD2 | 2.195 |
| 6MPG | A_ARG.542 | NH2 | U_GLU.647  | OE1 | 3.132 |
| 6MPG | A_ARG.542 | NH2 | U_GLU.647  | OE2 | 2.525 |
| 6MPG | A_ARG.579 | NH2 | U_GLU.584  | OE1 | 2.474 |
| 6MPG | A_ARG.588 | NH2 | A_GLU.584  | OE2 | 2.498 |
| 6MPG | A_ARG.617 | NH1 | A_GLU.634  | OE1 | 3.224 |
| 6MPG | A_ARG.617 | NH1 | A_GLU.634  | OE2 | 3.054 |
| 6MPG | C_LYS.46  | NZ  | C_GLU.492  | OE2 | 3.793 |
| 6MPG | C_LYS.65  | NZ  | C_GLU.64   | OE2 | 2.921 |
| 6MPG | C_HIS.85  | NE2 | C_GLU.87   | OE1 | 3.726 |
| 6MPG | C_HIS.105 | NE2 | C_ASP.474  | OD1 | 3.796 |
| 6MPG | C_HIS.216 | NE2 | C_ASP.57   | OD1 | 2.756 |
| 6MPG | C_HIS.216 | NE2 | C_ASP.57   | OD2 | 3.780 |
| 6MPG | C_LYS.227 | NZ  | C_GLU.83   | OE1 | 2.745 |
| 6MPG | C_LYS.227 | NZ  | C_GLU.83   | OE2 | 3.617 |
| 6MPG | C_LYS.229 | NZ  | Y_ASP.1    | OD1 | 2.776 |
| 6MPG | C_LYS.231 | NZ  | C_GLU.268  | OE1 | 2.210 |
| 6MPG | C_LYS.231 | NZ  | C_GLU.268  | OE2 | 3.773 |
| 6MPG | C_LYS.231 | NZ  | C_GLU.269  | OE1 | 3.900 |
| 6MPG | C_LYS.282 | NZ  | C_GLU.275  | OE1 | 2.926 |
| 6MPG | C_ARG.298 | NH1 | C_GLU.381  | OE1 | 3.521 |
| 6MPG | C_ARG.298 | NH1 | C_GLU.381  | OE2 | 2.977 |
| 6MPG | C_ARG.298 | NH2 | C_GLU.381  | OE1 | 3.713 |
| 6MPG | C_ARG.308 | NH1 | C_GLU.164  | OE1 | 3.822 |
| 6MPG | C_LYS.421 | NZ  | C_ASP.180  | OD1 | 3.836 |
| 6MPG | C_ARG.429 | NH1 | C_ASP.113  | OD2 | 3.831 |
| 6MPG | C_ARG.429 | NH2 | C_ASP.113  | OD1 | 3.803 |
| 6MPG | C_ARG.429 | NH2 | C_ASP.113  | OD2 | 2.191 |
| 6MPG | C_ARG.469 | NH2 | C_ASP.457  | OD2 | 3.540 |
| 6MPG | C_ARG.476 | NH1 | C_GLU.102  | OE1 | 2.983 |
| 6MPG | C_ARG.476 | NH1 | C_GLU.102  | OE2 | 2.663 |
| 6MPG | C_ARG.476 | NH2 | C_GLU.102  | OE1 | 3.160 |
| 6MPG | C_ARG.480 | NH1 | C_ASP.477  | OD1 | 2.648 |
| 6MPG | C_LYS.487 | NZ  | C_ASP.47   | OD1 | 2.604 |
| 6MPG | C_LYS.487 | NZ  | C_ASP.47   | OD2 | 3.288 |

|      |           |     |            |     |       |
|------|-----------|-----|------------|-----|-------|
| 6MPG | D_ARG_542 | NH2 | A_GLU_647  | OE1 | 3.137 |
| 6MPG | D_ARG_542 | NH2 | A_GLU_647  | OE2 | 2.533 |
| 6MPG | D_ARG_579 | NH2 | A_GLU_584  | OE1 | 2.479 |
| 6MPG | D_ARG_588 | NH2 | D_GLU_584  | OE2 | 2.498 |
| 6MPG | D_ARG_617 | NH1 | D_GLU_634  | OE1 | 3.224 |
| 6MPG | D_ARG_617 | NH1 | D_GLU_634  | OE2 | 3.054 |
| 6MPG | M_ARG_38  | NH1 | M_ASP_86   | OD1 | 2.924 |
| 6MPG | M_ARG_38  | NH2 | M_GLU_46   | OE1 | 3.523 |
| 6MPG | M_ARG_38  | NH2 | M_GLU_46   | OE2 | 3.688 |
| 6MPG | M_ARG_38  | NH2 | M_ASP_86   | OD1 | 3.975 |
| 6MPG | M_LYS_73  | NZ  | M_ASP_53   | OD1 | 3.849 |
| 6MPG | M_LYS_73  | NZ  | M_ASP_53   | OD2 | 2.557 |
| 6MPG | N_ARG_61  | NH1 | N_ASP_60   | OD1 | 3.630 |
| 6MPG | N_ARG_61  | NH1 | N_ASP_60   | OD2 | 3.902 |
| 6MPG | N_ARG_94  | NH1 | C_ASP_321A | OD1 | 3.878 |
| 6MPG | N_ARG_95  | NH2 | N_GLU_25   | OE2 | 3.813 |
| 6MPG | Q_ARG_38  | NH1 | Q_ASP_86   | OD1 | 3.717 |
| 6MPG | Q_ARG_38  | NH2 | Q_ASP_86   | OD1 | 3.651 |
| 6MPG | Q_ARG_66  | NH1 | Q_ASP_86   | OD2 | 3.787 |
| 6MPG | Q_ARG_66  | NH2 | Q_ASP_86   | OD1 | 3.708 |
| 6MPG | Q_ARG_66  | NH2 | Q_ASP_86   | OD2 | 2.196 |
| 6MPG | R_ARG_60  | NH1 | R_ASP_81   | OD2 | 3.768 |
| 6MPG | R_ARG_60  | NH2 | R_ASP_81   | OD1 | 3.488 |
| 6MPG | R_ARG_60  | NH2 | R_ASP_81   | OD2 | 2.219 |
| 6MPG | X_ARG_38  | NH1 | X_GLU_46   | OE2 | 3.453 |
| 6MPG | X_ARG_38  | NH1 | X_ASP_89   | OD1 | 3.905 |
| 6MPG | X_ARG_38  | NH2 | X_ASP_89   | OD1 | 2.942 |
| 6MPG | X_ARG_66  | NH2 | X_ASP_89   | OD2 | 3.661 |
| 6MPG | X_HIS_105 | NE2 | Y_GLU_61   | OE2 | 3.651 |
| 6MPG | Y_ARG_67  | NH1 | Y_GLU_87   | OE2 | 2.288 |
| 6MPG | Y_ARG_67  | NH1 | Y_ASP_88   | OD1 | 3.090 |
| 6MPG | Y_ARG_67  | NH1 | Y_ASP_88   | OD2 | 3.302 |
| 6MPG | Y_ARG_67  | NH2 | Y_GLU_87   | OE2 | 3.586 |
| 6MPH | 1_LYS_31A | NZ  | A_GLU_87   | OE1 | 2.457 |
| 6MPH | 1_LYS_31A | NZ  | A_GLU_87   | OE2 | 3.919 |
| 6MPH | 1_ARG_38  | NH1 | 1_GLU_46   | OE1 | 3.740 |
| 6MPH | 1_ARG_38  | NH1 | 1_GLU_46   | OE2 | 2.866 |
| 6MPH | 2_ARG_61  | NH1 | 2_ASP_82   | OD1 | 3.657 |
| 6MPH | 2_ARG_96  | NH1 | 1_GLU_95   | OE1 | 3.340 |
| 6MPH | 2_ARG_96  | NH1 | 1_GLU_95   | OE2 | 2.522 |
| 6MPH | 3_LYS_31A | NZ  | B_GLU_87   | OE1 | 2.448 |
| 6MPH | 3_LYS_31A | NZ  | B_GLU_87   | OE2 | 3.973 |
| 6MPH | 3_ARG_38  | NH1 | 3_GLU_46   | OE1 | 3.744 |
| 6MPH | 3_ARG_38  | NH1 | 3_GLU_46   | OE2 | 2.935 |
| 6MPH | 4_ARG_61  | NH1 | 4_ASP_82   | OD1 | 3.637 |
| 6MPH | 4_ARG_96  | NH1 | 3_GLU_95   | OE1 | 3.339 |
| 6MPH | 4_ARG_96  | NH1 | 3_GLU_95   | OE2 | 2.507 |
| 6MPH | 6_ARG_542 | NH1 | E_GLU_647  | OE2 | 3.863 |
| 6MPH | 6_ARG_542 | NH2 | E_GLU_647  | OE1 | 3.449 |
| 6MPH | 6_ARG_542 | NH2 | E_GLU_647  | OE2 | 2.484 |
| 6MPH | 6_ARG_579 | NH2 | E_GLU_584  | OE1 | 2.833 |
| 6MPH | 6_ARG_588 | NH2 | 6_GLU_584  | OE2 | 2.677 |
| 6MPH | 6_ARG_617 | NH1 | 6_GLU_634  | OE2 | 2.791 |
| 6MPH | 6_ARG_617 | NH2 | 6_GLU_621  | OE2 | 3.365 |
| 6MPH | A_LYS_46  | NZ  | A_GLU_492  | OE2 | 3.500 |
| 6MPH | A_HIS_216 | NE2 | A_ASP_57   | OD1 | 2.758 |
| 6MPH | A_HIS_216 | NE2 | A_ASP_57   | OD2 | 3.293 |
| 6MPH | A_LYS_231 | NZ  | A_GLU_268  | OE1 | 2.566 |

|      |           |     |            |     |       |
|------|-----------|-----|------------|-----|-------|
| 6MPH | A_LYS_231 | NZ  | A_GLU_268  | OE2 | 3.911 |
| 6MPH | A_LYS_282 | NZ  | A_GLU_275  | OE1 | 3.999 |
| 6MPH | A_LYS_282 | NZ  | f_ASP_114  | OD1 | 3.470 |
| 6MPH | A_LYS_282 | NZ  | f_ASP_114  | OD2 | 3.288 |
| 6MPH | A_ARG_298 | NH1 | A_GLU_381  | OE1 | 2.662 |
| 6MPH | A_ARG_298 | NH1 | A_GLU_381  | OE2 | 3.145 |
| 6MPH | A_ARG_298 | NH2 | A_GLU_381  | OE1 | 3.543 |
| 6MPH | A_ARG_308 | NH1 | A_GLU_164  | OE2 | 3.005 |
| 6MPH | A_ARG_327 | NH2 | X_GLU_100I | OE1 | 3.876 |
| 6MPH | A_LYS_351 | NZ  | A_GLU_269  | OE1 | 3.880 |
| 6MPH | A_LYS_421 | NZ  | A_ASP_180  | OD1 | 3.919 |
| 6MPH | A_ARG_429 | NH1 | A_ASP_113  | OD1 | 3.710 |
| 6MPH | A_ARG_429 | NH1 | A_ASP_113  | OD2 | 3.111 |
| 6MPH | A_ARG_429 | NH2 | A_ASP_113  | OD1 | 3.007 |
| 6MPH | A_ARG_429 | NH2 | A_ASP_113  | OD2 | 2.937 |
| 6MPH | A_ARG_469 | NH2 | A_ASP_457  | OD2 | 3.457 |
| 6MPH | A_ARG_476 | NH1 | A_GLU_102  | OE1 | 3.188 |
| 6MPH | A_ARG_476 | NH1 | A_GLU_102  | OE2 | 2.587 |
| 6MPH | A_ARG_476 | NH2 | A_GLU_102  | OE1 | 3.380 |
| 6MPH | A_ARG_480 | NH1 | A_ASP_477  | OD1 | 2.475 |
| 6MPH | A_LYS_487 | NZ  | A_ASP_47   | OD1 | 2.599 |
| 6MPH | A_LYS_487 | NZ  | A_ASP_47   | OD2 | 3.570 |
| 6MPH | A_LYS_487 | NZ  | A_GLU_91   | OE1 | 3.931 |
| 6MPH | B_LYS_46  | NZ  | B_GLU_492  | OE2 | 3.523 |
| 6MPH | B_HIS_216 | NE2 | B_ASP_57   | OD1 | 2.681 |
| 6MPH | B_HIS_216 | NE2 | B_ASP_57   | OD2 | 3.250 |
| 6MPH | B_LYS_231 | NZ  | B_GLU_268  | OE1 | 2.562 |
| 6MPH | B_LYS_231 | NZ  | B_GLU_268  | OE2 | 3.926 |
| 6MPH | B_LYS_282 | NZ  | B_GLU_275  | OE1 | 3.947 |
| 6MPH | B_LYS_282 | NZ  | g_ASP_114  | OD1 | 3.432 |
| 6MPH | B_LYS_282 | NZ  | g_ASP_114  | OD2 | 3.289 |
| 6MPH | B_ARG_298 | NH1 | B_GLU_381  | OE1 | 2.635 |
| 6MPH | B_ARG_298 | NH1 | B_GLU_381  | OE2 | 3.103 |
| 6MPH | B_ARG_298 | NH2 | B_GLU_381  | OE1 | 3.494 |
| 6MPH | B_ARG_308 | NH1 | B_GLU_164  | OE2 | 3.028 |
| 6MPH | B_ARG_327 | NH2 | Y_GLU_100I | OE1 | 3.899 |
| 6MPH | B_LYS_351 | NZ  | B_GLU_269  | OE1 | 3.859 |
| 6MPH | B_LYS_421 | NZ  | B_ASP_180  | OD1 | 3.823 |
| 6MPH | B_ARG_429 | NH1 | B_ASP_113  | OD1 | 3.775 |
| 6MPH | B_ARG_429 | NH1 | B_ASP_113  | OD2 | 3.138 |
| 6MPH | B_ARG_429 | NH2 | B_ASP_113  | OD1 | 3.034 |
| 6MPH | B_ARG_429 | NH2 | B_ASP_113  | OD2 | 2.894 |
| 6MPH | B_ARG_469 | NH2 | B_ASP_457  | OD2 | 3.505 |
| 6MPH | B_ARG_476 | NH1 | B_GLU_102  | OE1 | 3.172 |
| 6MPH | B_ARG_476 | NH1 | B_GLU_102  | OE2 | 2.620 |
| 6MPH | B_ARG_476 | NH2 | B_GLU_102  | OE1 | 3.414 |
| 6MPH | B_ARG_480 | NH1 | B_ASP_477  | OD1 | 2.510 |
| 6MPH | B_LYS_487 | NZ  | B_ASP_47   | OD1 | 2.597 |
| 6MPH | B_LYS_487 | NZ  | B_ASP_47   | OD2 | 3.582 |
| 6MPH | B_LYS_487 | NZ  | B_GLU_91   | OE1 | 3.935 |
| 6MPH | C_LYS_46  | NZ  | C_GLU_492  | OE2 | 3.581 |
| 6MPH | C_HIS_216 | NE2 | C_ASP_57   | OD1 | 2.733 |
| 6MPH | C_HIS_216 | NE2 | C_ASP_57   | OD2 | 3.258 |
| 6MPH | C_LYS_231 | NZ  | C_GLU_268  | OE1 | 2.574 |
| 6MPH | C_LYS_231 | NZ  | C_GLU_268  | OE2 | 3.908 |
| 6MPH | C_LYS_282 | NZ  | C_GLU_275  | OE1 | 3.963 |
| 6MPH | C_LYS_282 | NZ  | Q_ASP_114  | OD1 | 3.383 |
| 6MPH | C_LYS_282 | NZ  | Q_ASP_114  | OD2 | 3.272 |

|      |           |     |            |     |       |
|------|-----------|-----|------------|-----|-------|
| 6MPH | C_ARG.298 | NH1 | C_GLU.381  | OE1 | 2.658 |
| 6MPH | C_ARG.298 | NH1 | C_GLU.381  | OE2 | 3.166 |
| 6MPH | C_ARG.298 | NH2 | C_GLU.381  | OE1 | 3.611 |
| 6MPH | C_ARG.308 | NH1 | C_GLU.164  | OE2 | 2.979 |
| 6MPH | C_ARG.327 | NH2 | M_GLU.100I | OE1 | 3.872 |
| 6MPH | C_LYS.351 | NZ  | C_GLU.269  | OE1 | 3.861 |
| 6MPH | C_LYS.421 | NZ  | C_ASP.180  | OD1 | 3.916 |
| 6MPH | C_ARG.429 | NH1 | C_ASP.113  | OD1 | 3.764 |
| 6MPH | C_ARG.429 | NH1 | C_ASP.113  | OD2 | 3.172 |
| 6MPH | C_ARG.429 | NH2 | C_ASP.113  | OD1 | 2.996 |
| 6MPH | C_ARG.429 | NH2 | C_ASP.113  | OD2 | 2.906 |
| 6MPH | C_ARG.469 | NH2 | C_ASP.457  | OD2 | 3.484 |
| 6MPH | C_ARG.476 | NH1 | C_GLU.102  | OE1 | 3.185 |
| 6MPH | C_ARG.476 | NH1 | C_GLU.102  | OE2 | 2.606 |
| 6MPH | C_ARG.476 | NH2 | C_GLU.102  | OE1 | 3.401 |
| 6MPH | C_ARG.480 | NH1 | C_ASP.477  | OD1 | 2.485 |
| 6MPH | C_LYS.487 | NZ  | C_ASP.47   | OD1 | 2.672 |
| 6MPH | C_LYS.487 | NZ  | C_ASP.47   | OD2 | 3.601 |
| 6MPH | C_LYS.487 | NZ  | C_GLU.91   | OE1 | 3.831 |
| 6MPH | D_ARG.542 | NH1 | 6_GLU.647  | OE2 | 3.853 |
| 6MPH | D_ARG.542 | NH2 | 6_GLU.647  | OE1 | 3.460 |
| 6MPH | D_ARG.542 | NH2 | 6_GLU.647  | OE2 | 2.476 |
| 6MPH | D_ARG.579 | NH2 | 6_GLU.584  | OE1 | 2.760 |
| 6MPH | D_ARG.588 | NH2 | D_GLU.584  | OE2 | 2.573 |
| 6MPH | D_ARG.617 | NH1 | D_GLU.634  | OE2 | 2.801 |
| 6MPH | D_ARG.617 | NH2 | D_GLU.621  | OE2 | 3.420 |
| 6MPH | E_ARG.542 | NH1 | D_GLU.647  | OE2 | 3.888 |
| 6MPH | E_ARG.542 | NH2 | D_GLU.647  | OE1 | 3.465 |
| 6MPH | E_ARG.542 | NH2 | D_GLU.647  | OE2 | 2.463 |
| 6MPH | E_ARG.579 | NH2 | D_GLU.584  | OE1 | 2.789 |
| 6MPH | E_ARG.588 | NH2 | E_GLU.584  | OE2 | 2.573 |
| 6MPH | E_ARG.617 | NH1 | E_GLU.634  | OE2 | 2.776 |
| 6MPH | E_ARG.617 | NH2 | E_GLU.621  | OE2 | 3.431 |
| 6MPH | H_LYS.31A | NZ  | C_GLU.87   | OE1 | 2.458 |
| 6MPH | H_LYS.31A | NZ  | C_GLU.87   | OE2 | 3.969 |
| 6MPH | H_ARG.38  | NH1 | H_GLU.46   | OE1 | 3.668 |
| 6MPH | H_ARG.38  | NH1 | H_GLU.46   | OE2 | 2.976 |
| 6MPH | L_ARG.61  | NH1 | L_ASP.82   | OD1 | 3.612 |
| 6MPH | L_ARG.96  | NH1 | H_GLU.95   | OE1 | 3.309 |
| 6MPH | L_ARG.96  | NH1 | H_GLU.95   | OE2 | 2.530 |
| 6MPH | M_ARG.38  | NH1 | M_ASP.86   | OD1 | 3.017 |
| 6MPH | M_ARG.38  | NH2 | M_GLU.46   | OE1 | 3.135 |
| 6MPH | M_ARG.38  | NH2 | M_GLU.46   | OE2 | 3.398 |
| 6MPH | M_ARG.66  | NH2 | M_ASP.86   | OD1 | 3.623 |
| 6MPH | M_LYS.73  | NZ  | M_ASP.53   | OD1 | 3.608 |
| 6MPH | M_LYS.73  | NZ  | M_ASP.53   | OD2 | 2.901 |
| 6MPH | M_LYS.96  | NZ  | M_ASP.100Q | OD2 | 3.995 |
| 6MPH | N_ARG.61  | NH1 | N_ASP.60   | OD1 | 3.566 |
| 6MPH | N_ARG.94  | NH1 | C_ASP.321A | OD1 | 3.859 |
| 6MPH | Q_ARG.38  | NH1 | Q_GLU.46   | OE1 | 3.730 |
| 6MPH | Q_ARG.38  | NH2 | Q_ASP.97   | OD1 | 3.305 |
| 6MPH | Q_ARG.67  | NH2 | Q_ASP.97   | OD1 | 3.545 |
| 6MPH | Q_ARG.67  | NH2 | Q_ASP.97   | OD2 | 3.021 |
| 6MPH | Q_ARG.72  | NH2 | C_ASP.368  | OD2 | 3.534 |
| 6MPH | R_ARG.40  | NH2 | R_GLU.103  | OE2 | 3.768 |
| 6MPH | R_ARG.61  | NH2 | R_ASP.82   | OD1 | 3.293 |
| 6MPH | R_ARG.61  | NH2 | R_ASP.82   | OD2 | 2.978 |
| 6MPH | X_ARG.38  | NH1 | X_ASP.86   | OD1 | 3.079 |

|      |          |     |            |     |       |
|------|----------|-----|------------|-----|-------|
| 6MPH | X_ARG_38 | NH2 | X_GLU_46   | OE1 | 3.140 |
| 6MPH | X_ARG_38 | NH2 | X_GLU_46   | OE2 | 3.408 |
| 6MPH | X_ARG_66 | NH2 | X_ASP_86   | OD1 | 3.580 |
| 6MPH | X_LYS_73 | NZ  | X_ASP_53   | OD1 | 3.586 |
| 6MPH | X_LYS_73 | NZ  | X_ASP_53   | OD2 | 2.898 |
| 6MPH | Y_ARG_38 | NH1 | Y_ASP_86   | OD1 | 3.102 |
| 6MPH | Y_ARG_38 | NH2 | Y_GLU_46   | OE1 | 3.155 |
| 6MPH | Y_ARG_38 | NH2 | Y_GLU_46   | OE2 | 3.384 |
| 6MPH | Y_ARG_66 | NH2 | Y_ASP_86   | OD1 | 3.575 |
| 6MPH | Y_LYS_73 | NZ  | Y_ASP_53   | OD1 | 3.614 |
| 6MPH | Y_LYS_73 | NZ  | Y_ASP_53   | OD2 | 2.911 |
| 6MPH | Z_ARG_61 | NH1 | Z_ASP_60   | OD1 | 3.627 |
| 6MPH | Z_ARG_94 | NH1 | A_ASP_321A | OD1 | 3.890 |
| 6MPH | a_ARG_61 | NH1 | a_ASP_60   | OD1 | 3.574 |
| 6MPH | a_ARG_94 | NH1 | B_ASP_321A | OD1 | 3.861 |
| 6MPH | f_ARG_38 | NH1 | f_GLU_46   | OE1 | 3.663 |
| 6MPH | f_ARG_38 | NH2 | f_ASP_97   | OD1 | 3.333 |
| 6MPH | f_ARG_67 | NH2 | f_ASP_97   | OD1 | 3.553 |
| 6MPH | f_ARG_67 | NH2 | f_ASP_97   | OD2 | 3.049 |
| 6MPH | f_ARG_72 | NH2 | A_ASP_368  | OD2 | 3.577 |
| 6MPH | g_ARG_38 | NH1 | g_GLU_46   | OE1 | 3.701 |
| 6MPH | g_ARG_38 | NH2 | g_ASP_97   | OD1 | 3.335 |
| 6MPH | g_ARG_67 | NH2 | g_ASP_97   | OD1 | 3.559 |
| 6MPH | g_ARG_67 | NH2 | g_ASP_97   | OD2 | 3.040 |
| 6MPH | g_ARG_72 | NH2 | B_ASP_368  | OD2 | 3.570 |
| 6MPH | h_ARG_40 | NH2 | h_GLU_103  | OE2 | 3.735 |
| 6MPH | h_ARG_61 | NH2 | h_ASP_82   | OD1 | 3.222 |
| 6MPH | h_ARG_61 | NH2 | h_ASP_82   | OD2 | 2.932 |
| 6MPH | i_ARG_40 | NH2 | i_GLU_103  | OE2 | 3.762 |
| 6MPH | i_ARG_61 | NH2 | i_ASP_82   | OD1 | 3.332 |
| 6MPH | i_ARG_61 | NH2 | i_ASP_82   | OD2 | 3.017 |
| 6MQC | A_ARG_   | NH1 | A_GLU_     | OE1 | 3.064 |
| 6MQC | A_ARG_   | NH1 | A_ASP_     | OD1 | 3.838 |
| 6MQC | A_ARG_   | NH2 | A_ASP_     | OD1 | 3.330 |
| 6MQC | A_ARG_   | NH2 | A_ASP_     | OD2 | 3.244 |
| 6MQC | A_ARG_   | NH1 | A_ASP_     | OD1 | 3.212 |
| 6MQC | A_ARG_   | NH1 | A_ASP_     | OD2 | 2.946 |
| 6MQC | A_ARG_   | NH1 | A_ASP_     | OD1 | 2.770 |
| 6MQC | A_ARG_   | NH1 | B_ASP_     | OD1 | 2.994 |
| 6MQC | A_ARG_   | NH2 | B_ASP_     | OD1 | 2.820 |
| 6MQC | A_ARG_   | NH2 | A_ASP_     | OD1 | 3.694 |
| 6MQC | A_ARG_   | NH2 | A_ASP_     | OD2 | 2.674 |
| 6MQC | A_ARG_   | NH1 | B_ASP_     | OD1 | 3.399 |
| 6MQC | A_ARG_   | NH1 | B_ASP_     | OD2 | 3.078 |
| 6MQC | A_ARG_   | NH1 | B_ASP_     | OD1 | 2.829 |
| 6MQC | A_ARG_   | NH2 | B_ASP_     | OD1 | 2.822 |
| 6MQC | A_ARG_   | NH2 | B_ASP_     | OD2 | 3.673 |
| 6MQC | A_ARG_   | NH2 | A_GLU_     | OE2 | 3.410 |
| 6MQC | B_ARG_   | NH1 | B_ASP_     | OD2 | 3.586 |
| 6MQC | B_LYS_   | NZ  | B_GLU_     | OE1 | 3.361 |
| 6MQC | B_ARG_   | NH1 | B_ASP_     | OD1 | 2.810 |
| 6MQC | B_ARG_   | NH1 | B_ASP_     | OD2 | 3.319 |
| 6MQC | B_ARG_   | NH2 | B_ASP_     | OD1 | 3.618 |
| 6MQC | B_ARG_   | NH2 | B_ASP_     | OD2 | 2.613 |
| 6MQC | B_LYS_   | NZ  | B_GLU_     | OE1 | 3.307 |
| 6MQC | B_HIS_   | ND1 | B_ASP_     | OD1 | 2.832 |
| 6MQC | H_ARG_   | NH1 | H_GLU_     | OE1 | 3.098 |
| 6MQC | H_ARG_   | NH1 | H_ASP_     | OD1 | 3.684 |

|      |            |     |           |     |       |
|------|------------|-----|-----------|-----|-------|
| 6MQC | H_ARG_     | NH2 | H_ASP_    | OD1 | 2.690 |
| 6MQC | H_ARG_     | NH1 | H_ASP_    | OD1 | 3.063 |
| 6MQC | H_ARG_     | NH1 | H_ASP_    | OD2 | 3.805 |
| 6MQC | H_ARG_     | NH2 | H_ASP_    | OD1 | 3.624 |
| 6MQC | H_ARG_     | NH2 | H_ASP_    | OD2 | 3.006 |
| 6MQC | H_ARG_     | NH1 | H_ASP_    | OD1 | 2.952 |
| 6MQC | H_ARG_     | NH1 | L_ASP_    | OD1 | 2.906 |
| 6MQC | H_ARG_     | NH2 | L_ASP_    | OD1 | 2.999 |
| 6MQC | H_ARG_     | NH2 | H_ASP_    | OD1 | 3.031 |
| 6MQC | H_ARG_     | NH2 | H_ASP_    | OD2 | 3.958 |
| 6MQC | H_ARG_     | NH1 | L_ASP_    | OD1 | 2.856 |
| 6MQC | H_ARG_     | NH1 | L_ASP_    | OD2 | 3.748 |
| 6MQC | H_ARG_     | NH2 | L_ASP_    | OD1 | 3.439 |
| 6MQC | H_ARG_     | NH2 | L_ASP_    | OD2 | 3.140 |
| 6MQC | H_ARG_     | NH2 | L_ASP_    | OD1 | 2.780 |
| 6MQC | H_ARG_     | NH2 | L_ASP_    | OD2 | 3.923 |
| 6MQC | H_LYS_     | NZ  | H_ASP_    | OD1 | 3.326 |
| 6MQC | L_ARG_     | NH1 | L_ASP_    | OD2 | 3.327 |
| 6MQC | L_ARG_     | NH1 | L_ASP_    | OD1 | 2.916 |
| 6MQC | L_ARG_     | NH1 | L_ASP_    | OD2 | 3.414 |
| 6MQC | L_ARG_     | NH2 | L_ASP_    | OD1 | 3.578 |
| 6MQC | L_ARG_     | NH2 | L_ASP_    | OD2 | 2.554 |
| 6MQC | L_LYS_     | NZ  | L_GLU_    | OE2 | 3.839 |
| 6MQC | L_LYS_     | NZ  | L_GLU_    | OE1 | 3.867 |
| 6MQC | L_LYS_     | NZ  | L_GLU_    | OE2 | 3.648 |
| 6MQC | L_HIS_     | ND1 | L_ASP_    | OD1 | 2.866 |
| 6MQC | L_HIS_     | NE2 | L_GLU_    | OE2 | 3.758 |
| 6MQE | B_ARG_61   | NH1 | B_GLU_81  | OE2 | 2.972 |
| 6MQE | B_ARG_61   | NH1 | B_ASP_82  | OD1 | 3.540 |
| 6MQE | B_ARG_61   | NH1 | B_ASP_82  | OD2 | 3.139 |
| 6MQE | B_ARG_61   | NH2 | B_ASP_82  | OD1 | 2.652 |
| 6MQE | B_ARG_61   | NH2 | B_ASP_82  | OD2 | 3.672 |
| 6MQE | B_LYS_103  | NZ  | B_GLU_165 | OE1 | 3.601 |
| 6MQE | B_LYS_126  | NZ  | B_GLU_122 | OE1 | 2.295 |
| 6MQE | B_LYS_147  | NZ  | B_GLU_195 | OE1 | 2.709 |
| 6MQE | B_LYS_149  | NZ  | B_GLU_195 | OE2 | 3.823 |
| 6MQE | B_LYS_155  | NZ  | B_GLU_185 | OE1 | 3.813 |
| 6MQE | B_LYS_155  | NZ  | B_GLU_185 | OE2 | 2.543 |
| 6MQE | B_HIS_189  | ND1 | B_ASP_151 | OD1 | 3.273 |
| 6MQE | B_HIS_189  | NE2 | B_GLU_185 | OE1 | 2.265 |
| 6MQE | B_HIS_189  | NE2 | B_GLU_185 | OE2 | 2.201 |
| 6MQE | A_ARG_38   | NH1 | A_GLU_46  | OE2 | 3.135 |
| 6MQE | A_ARG_38   | NH1 | A_ASP_86  | OD1 | 3.589 |
| 6MQE | A_ARG_38   | NH2 | A_ASP_86  | OD1 | 2.950 |
| 6MQE | A_ARG_66   | NH1 | A_ASP_86  | OD1 | 3.044 |
| 6MQE | A_ARG_66   | NH1 | A_ASP_86  | OD2 | 2.613 |
| 6MQE | A_ARG_66   | NH2 | A_ASP_86  | OD1 | 3.697 |
| 6MQE | A_LYS_75   | NZ  | A_ASP_72  | OD2 | 2.759 |
| 6MQE | A_LYS_75   | NZ  | A_GLU_77  | OE1 | 3.673 |
| 6MQE | A_ARG_95   | NH1 | A_ASP_101 | OD1 | 3.112 |
| 6MQE | A_ARG_95   | NH2 | B_ASP_91  | OD2 | 3.864 |
| 6MQE | A_ARG_100H | NH2 | B_ASP_91  | OD2 | 3.610 |
| 6MQE | H_ARG_38   | NH1 | H_GLU_46  | OE1 | 2.700 |
| 6MQE | H_ARG_38   | NH1 | H_GLU_46  | OE2 | 3.912 |
| 6MQE | H_ARG_38   | NH1 | H_ASP_86  | OD2 | 3.737 |
| 6MQE | H_ARG_38   | NH2 | H_ASP_86  | OD2 | 2.834 |
| 6MQE | H_ARG_66   | NH1 | H_ASP_86  | OD1 | 2.676 |
| 6MQE | H_ARG_66   | NH1 | H_ASP_86  | OD2 | 3.146 |

|      |            |     |           |     |       |
|------|------------|-----|-----------|-----|-------|
| 6MQE | H_ARG.66   | NH2 | H_ASP.86  | OD2 | 3.716 |
| 6MQE | H_LYS.71   | NZ  | H_GLU.55  | OE1 | 3.815 |
| 6MQE | H_LYS.71   | NZ  | H_GLU.55  | OE2 | 3.654 |
| 6MQE | H_ARG.95   | NH1 | H_ASP.101 | OD1 | 3.185 |
| 6MQE | H_ARG.95   | NH1 | L_ASP.91  | OD1 | 3.360 |
| 6MQE | H_ARG.95   | NH2 | L_ASP.91  | OD1 | 2.956 |
| 6MQE | H_ARG.100H | NH1 | L_ASP.91  | OD1 | 2.604 |
| 6MQE | H_ARG.100H | NH1 | L_ASP.91  | OD2 | 3.888 |
| 6MQE | H_ARG.210  | NH1 | H_GLU.212 | OE1 | 2.890 |
| 6MQE | H_ARG.210  | NH2 | H_GLU.212 | OE1 | 3.265 |
| 6MQE | L_ARG.61   | NH1 | L_ASP.82  | OD1 | 2.728 |
| 6MQE | L_ARG.61   | NH1 | L_ASP.82  | OD2 | 3.171 |
| 6MQE | L_ARG.61   | NH2 | L_ASP.82  | OD1 | 3.670 |
| 6MQE | L_ARG.61   | NH2 | L_ASP.82  | OD2 | 2.544 |
| 6MQE | L_LYS.103  | NZ  | L_GLU.165 | OE1 | 2.963 |
| 6MQE | L_LYS.103  | NZ  | L_GLU.165 | OE2 | 3.584 |
| 6MQE | L_LYS.126  | NZ  | L_ASP.123 | OD1 | 3.637 |
| 6MQE | L_LYS.155  | NZ  | A_GLU.56  | OE1 | 2.786 |
| 6MQE | L_LYS.155  | NZ  | L_GLU.185 | OE2 | 3.322 |
| 6MQE | L_HIS.189  | ND1 | L_GLU.185 | OE2 | 3.793 |
| 6MQE | L_HIS.189  | NE2 | A_GLU.56  | OE1 | 3.428 |
| 6MQE | L_HIS.189  | NE2 | A_GLU.56  | OE2 | 2.569 |
| 6MQE | L_HIS.189  | NE2 | L_GLU.185 | OE2 | 3.601 |
| 6MQM | A_ARG.38   | NH1 | A_GLU.46  | OE1 | 3.765 |
| 6MQM | A_ARG.38   | NH1 | A_GLU.46  | OE2 | 2.771 |
| 6MQM | A_ARG.38   | NH1 | A_ASP.86  | OD1 | 3.479 |
| 6MQM | A_ARG.38   | NH2 | A_ASP.86  | OD1 | 2.674 |
| 6MQM | A_ARG.66   | NH1 | A_ASP.86  | OD1 | 3.175 |
| 6MQM | A_ARG.66   | NH1 | A_ASP.86  | OD2 | 3.748 |
| 6MQM | A_ARG.66   | NH2 | A_ASP.86  | OD1 | 3.755 |
| 6MQM | A_ARG.66   | NH2 | A_ASP.86  | OD2 | 2.918 |
| 6MQM | A_ARG.94   | NH1 | A_ASP.101 | OD1 | 3.858 |
| 6MQM | A_ARG.94   | NH1 | A_ASP.101 | OD2 | 3.426 |
| 6MQM | A_ARG.94   | NH2 | A_ASP.101 | OD2 | 3.302 |
| 6MQM | A_LYS.206  | NZ  | A_ASP.208 | OD1 | 3.694 |
| 6MQM | A_LYS.206  | NZ  | A_ASP.208 | OD2 | 3.645 |
| 6MQM | A_LYS.210  | NZ  | A_GLU.212 | OE1 | 3.835 |
| 6MQM | A_LYS.210  | NZ  | A_GLU.212 | OE2 | 2.455 |
| 6MQM | B_ARG.61   | NH1 | B_ASP.82  | OD1 | 3.379 |
| 6MQM | B_ARG.61   | NH1 | B_ASP.82  | OD2 | 3.603 |
| 6MQM | B_ARG.96   | NH1 | A_GLU.95  | OE1 | 3.968 |
| 6MQM | B_ARG.96   | NH1 | A_GLU.95  | OE2 | 2.460 |
| 6MQM | B_LYS.103  | NZ  | B_GLU.165 | OE1 | 3.460 |
| 6MQM | B_LYS.103  | NZ  | B_GLU.165 | OE2 | 2.483 |
| 6MQM | B_LYS.126  | NZ  | B_GLU.122 | OE2 | 3.847 |
| 6MQM | B_LYS.149  | NZ  | B_GLU.195 | OE1 | 3.490 |
| 6MQM | D_ARG.38   | NH1 | D_GLU.46  | OE2 | 3.038 |
| 6MQM | D_ARG.38   | NH1 | D_ASP.86  | OD1 | 3.431 |
| 6MQM | D_ARG.38   | NH2 | D_ASP.86  | OD1 | 2.590 |
| 6MQM | D_ARG.66   | NH1 | D_ASP.86  | OD1 | 2.939 |
| 6MQM | D_ARG.66   | NH1 | D_ASP.86  | OD2 | 2.983 |
| 6MQM | D_ARG.66   | NH2 | D_ASP.86  | OD2 | 3.281 |
| 6MQM | D_LYS.206  | NZ  | D_ASP.208 | OD1 | 3.752 |
| 6MQM | D_LYS.210  | NZ  | D_GLU.212 | OE2 | 3.469 |
| 6MQM | E_ARG.61   | NH1 | E_ASP.82  | OD1 | 3.174 |
| 6MQM | E_ARG.61   | NH1 | E_ASP.82  | OD2 | 3.771 |
| 6MQM | E_ARG.96   | NH1 | D_GLU.95  | OE2 | 2.376 |
| 6MQM | E_LYS.103  | NZ  | E_GLU.165 | OE1 | 3.185 |



|      |           |     |           |     |       |
|------|-----------|-----|-----------|-----|-------|
| 6MQM | E_LYS_103 | NZ  | E_GLU_165 | OE2 | 2.355 |
| 6MQM | E_LYS_149 | NZ  | E_GLU_195 | OE1 | 2.638 |
| 6MQM | E_HIS_189 | NE2 | E_ASP_185 | OD1 | 3.808 |
| 6MQM | G_ARG_38  | NH1 | G_GLU_46  | OE2 | 3.081 |
| 6MQM | G_ARG_38  | NH1 | G_ASP_86  | OD1 | 3.241 |
| 6MQM | G_ARG_38  | NH2 | G_ASP_86  | OD1 | 2.432 |
| 6MQM | G_ARG_66  | NH1 | G_ASP_86  | OD1 | 3.284 |
| 6MQM | G_ARG_66  | NH1 | G_ASP_86  | OD2 | 3.321 |
| 6MQM | G_ARG_66  | NH2 | G_ASP_86  | OD2 | 2.999 |
| 6MQM | G_ARG_94  | NH2 | G_ASP_101 | OD1 | 3.791 |
| 6MQM | G_ARG_94  | NH2 | G_ASP_101 | OD2 | 2.962 |
| 6MQM | G_LYS_206 | NZ  | G_ASP_208 | OD1 | 3.377 |
| 6MQM | G_LYS_206 | NZ  | G_ASP_208 | OD2 | 3.969 |
| 6MQM | G_LYS_210 | NZ  | G_GLU_212 | OE2 | 3.739 |
| 6MQM | H_ARG_61  | NH1 | H_ASP_82  | OD1 | 3.357 |
| 6MQM | H_ARG_61  | NH1 | H_ASP_82  | OD2 | 3.698 |
| 6MQM | H_ARG_61  | NH2 | H_GLU_79  | OE2 | 3.084 |
| 6MQM | H_ARG_96  | NH1 | G_GLU_95  | OE2 | 2.480 |
| 6MQM | H_LYS_103 | NZ  | H_GLU_165 | OE1 | 2.991 |
| 6MQM | H_LYS_103 | NZ  | H_GLU_165 | OE2 | 2.468 |
| 6MQM | H_LYS_126 | NZ  | H_GLU_122 | OE2 | 3.719 |
| 6MQM | H_LYS_149 | NZ  | H_GLU_195 | OE1 | 2.676 |
| 6MQM | H_HIS_189 | ND1 | H_ASP_151 | OD1 | 3.088 |
| 6MQM | H_HIS_189 | NE2 | H_ASP_185 | OD1 | 3.777 |
| 6MQM | J_ARG_38  | NH1 | J_GLU_46  | OE2 | 3.367 |
| 6MQM | J_ARG_38  | NH1 | J_ASP_86  | OD1 | 3.218 |
| 6MQM | J_ARG_38  | NH2 | J_ASP_86  | OD1 | 2.641 |
| 6MQM | J_ARG_66  | NH1 | J_ASP_86  | OD1 | 2.986 |
| 6MQM | J_ARG_66  | NH1 | J_ASP_86  | OD2 | 3.538 |
| 6MQM | J_ARG_66  | NH2 | J_ASP_86  | OD1 | 3.738 |
| 6MQM | J_ARG_66  | NH2 | J_ASP_86  | OD2 | 2.783 |
| 6MQM | J_ARG_94  | NH1 | J_ASP_101 | OD2 | 3.348 |
| 6MQM | J_ARG_94  | NH2 | J_ASP_101 | OD2 | 2.919 |
| 6MQM | J_LYS_206 | NZ  | J_ASP_208 | OD1 | 3.651 |
| 6MQM | J_LYS_206 | NZ  | J_ASP_208 | OD2 | 3.476 |
| 6MQM | J_LYS_    | NZ  | J_GLU_    | OE2 | 3.487 |
| 6MQM | K_ARG_61  | NH1 | K_ASP_82  | OD1 | 2.973 |
| 6MQM | K_ARG_61  | NH1 | K_ASP_82  | OD2 | 3.285 |
| 6MQM | K_ARG_96  | NH1 | J_GLU_95  | OE1 | 3.782 |
| 6MQM | K_ARG_96  | NH1 | J_GLU_95  | OE2 | 2.262 |
| 6MQM | K_LYS_103 | NZ  | K_GLU_165 | OE2 | 2.763 |
| 6MQM | K_LYS_    | NZ  | K_GLU_    | OE1 | 2.452 |
| 6MQM | K_HIS_    | ND1 | K_ASP_    | OD1 | 3.413 |
| 6MQM | K_HIS_    | NE2 | K_ASP_    | OD1 | 3.837 |
| 6MQR | H_ARG_38  | NH1 | H_GLU_46  | OE1 | 3.085 |
| 6MQR | H_ARG_38  | NH1 | H_ASP_86  | OD1 | 3.945 |
| 6MQR | H_ARG_38  | NH2 | H_ASP_86  | OD1 | 2.835 |
| 6MQR | H_ARG_41  | NH2 | H_GLU_148 | OE1 | 3.805 |
| 6MQR | H_ARG_66  | NH1 | H_ASP_86  | OD1 | 3.097 |
| 6MQR | H_ARG_66  | NH1 | H_ASP_86  | OD2 | 3.599 |
| 6MQR | H_ARG_66  | NH2 | H_ASP_86  | OD1 | 3.722 |
| 6MQR | H_ARG_66  | NH2 | H_ASP_86  | OD2 | 3.135 |
| 6MQR | H_ARG_94  | NH2 | H_ASP_27  | OD2 | 3.095 |
| 6MQR | H_ARG_96  | NH1 | H_ASP_101 | OD2 | 3.599 |
| 6MQR | H_ARG_96  | NH1 | L_GLU_55  | OE1 | 2.553 |
| 6MQR | H_LYS_143 | NZ  | H_ASP_144 | OD1 | 3.883 |
| 6MQR | H_LYS_143 | NZ  | H_ASP_144 | OD2 | 3.358 |
| 6MQR | L_LYS_30  | NZ  | L_ASP_28  | OD2 | 3.556 |

|      |           |     |           |     |       |
|------|-----------|-----|-----------|-----|-------|
| 6MQR | L_ARG_46  | NH1 | H_ASP_101 | OD2 | 2.970 |
| 6MQR | L_ARG_46  | NH1 | L_GLU_55  | OE1 | 3.253 |
| 6MQR | L_ARG_46  | NH1 | L_GLU_55  | OE2 | 3.148 |
| 6MQR | L_ARG_46  | NH2 | H_GLU_95  | OE2 | 3.587 |
| 6MQR | L_ARG_46  | NH2 | H_ASP_101 | OD2 | 3.723 |
| 6MQR | L_HIS_49  | ND1 | L_GLU_55  | OE1 | 3.996 |
| 6MQR | L_HIS_49  | ND1 | L_GLU_55  | OE2 | 2.804 |
| 6MQR | L_ARG_61  | NH1 | L_GLU_81  | OE1 | 3.715 |
| 6MQR | L_ARG_61  | NH1 | L_ASP_82  | OD1 | 3.745 |
| 6MQR | L_ARG_61  | NH1 | L_ASP_82  | OD2 | 2.987 |
| 6MQR | L_LYS_126 | NZ  | L_GLU_122 | OE1 | 3.993 |
| 6MQR | L_ARG_142 | NH2 | L_GLU_161 | OE2 | 3.937 |
| 6MQR | L_LYS_149 | NZ  | L_GLU_195 | OE1 | 3.817 |
| 6MQR | L_LYS_149 | NZ  | L_GLU_195 | OE2 | 2.808 |
| 6MQR | L_LYS_155 | NZ  | L_GLU_185 | OE1 | 3.064 |
| 6MQR | L_LYS_169 | NZ  | L_ASP_167 | OD2 | 3.796 |
| 6MQR | L_HIS_189 | ND1 | L_ASP_151 | OD1 | 2.846 |
| 6MQR | L_HIS_189 | NE2 | L_GLU_185 | OE1 | 2.682 |
| 6MQR | L_HIS_189 | NE2 | L_GLU_185 | OE2 | 3.307 |
| 6MQS | A_ARG_39  | NH1 | A_ASP_91  | OD1 | 3.081 |
| 6MQS | A_ARG_39  | NH2 | A_GLU_47  | OE1 | 3.112 |
| 6MQS | A_ARG_39  | NH2 | A_ASP_91  | OD1 | 3.076 |
| 6MQS | A_LYS_44  | NZ  | B_ASP_86  | OD1 | 3.511 |
| 6MQS | A_ARG_45  | NH1 | A_GLU_47  | OE2 | 3.645 |
| 6MQS | A_ARG_45  | NH2 | A_GLU_47  | OE1 | 3.366 |
| 6MQS | A_ARG_68  | NH2 | A_ASP_91  | OD1 | 3.145 |
| 6MQS | A_ARG_68  | NH2 | A_ASP_91  | OD2 | 3.136 |
| 6MQS | A_ARG_138 | NH1 | B_GLU_214 | OE1 | 3.046 |
| 6MQS | A_ARG_138 | NH1 | B_GLU_214 | OE2 | 2.728 |
| 6MQS | A_LYS_152 | NZ  | A_ASP_153 | OD1 | 3.592 |
| 6MQS | A_LYS_218 | NZ  | B_GLU_127 | OE1 | 2.743 |
| 6MQS | A_LYS_218 | NZ  | B_GLU_127 | OE2 | 3.002 |
| 6MQS | B_LYS_54  | NZ  | B_GLU_51  | OE2 | 3.430 |
| 6MQS | B_ARG_62  | NH1 | B_ASP_83  | OD1 | 2.524 |
| 6MQS | B_ARG_62  | NH1 | B_ASP_83  | OD2 | 2.782 |
| 6MQS | B_LYS_114 | NZ  | B_GLU_202 | OE1 | 3.365 |
| 6MQS | B_LYS_114 | NZ  | B_GLU_202 | OE2 | 2.522 |
| 6MQS | B_LYS_153 | NZ  | B_GLU_207 | OE1 | 2.539 |
| 6MQS | B_LYS_153 | NZ  | B_GLU_207 | OE2 | 3.433 |
| 6MQS | B_LYS_170 | NZ  | B_GLU_106 | OE1 | 3.760 |
| 6MQS | B_LYS_175 | NZ  | B_ASP_142 | OD2 | 2.550 |
| 6MQS | B_HIS_192 | ND1 | B_ASP_155 | OD1 | 3.151 |
| 6MQS | C_ARG_39  | NH1 | C_ASP_91  | OD2 | 3.128 |
| 6MQS | C_ARG_39  | NH2 | C_GLU_47  | OE2 | 3.179 |
| 6MQS | C_ARG_39  | NH2 | C_ASP_91  | OD2 | 3.775 |
| 6MQS | C_LYS_44  | NZ  | D_ASP_86  | OD1 | 2.946 |
| 6MQS | C_ARG_68  | NH1 | C_ASP_91  | OD1 | 3.157 |
| 6MQS | C_ARG_68  | NH1 | C_ASP_91  | OD2 | 3.255 |
| 6MQS | C_ARG_138 | NH2 | D_GLU_214 | OE1 | 2.736 |
| 6MQS | C_ARG_138 | NH2 | D_GLU_214 | OE2 | 3.220 |
| 6MQS | C_LYS_152 | NZ  | D_GLU_128 | OE1 | 3.230 |
| 6MQS | C_LYS_215 | NZ  | C_ASP_217 | OD1 | 3.836 |
| 6MQS | C_LYS_215 | NZ  | C_ASP_217 | OD2 | 3.808 |
| 6MQS | C_LYS_218 | NZ  | D_GLU_127 | OE1 | 2.641 |
| 6MQS | C_LYS_218 | NZ  | D_GLU_127 | OE2 | 3.160 |
| 6MQS | D_LYS_54  | NZ  | D_GLU_51  | OE2 | 2.149 |
| 6MQS | D_ARG_55  | NH1 | D_ASP_61  | OD1 | 2.947 |
| 6MQS | D_ARG_55  | NH2 | D_ASP_61  | OD1 | 3.758 |

|      |           |     |           |     |       |
|------|-----------|-----|-----------|-----|-------|
| 6MQS | D_ARG.62  | NH1 | D_ASP.83  | OD1 | 2.603 |
| 6MQS | D_ARG.62  | NH1 | D_ASP.83  | OD2 | 3.278 |
| 6MQS | D_ARG.62  | NH2 | D_ASP.83  | OD1 | 3.570 |
| 6MQS | D_ARG.62  | NH2 | D_ASP.83  | OD2 | 2.546 |
| 6MQS | D_LYS.153 | NZ  | D_GLU.207 | OE1 | 2.843 |
| 6MQS | D_LYS.153 | NZ  | D_GLU.207 | OE2 | 3.321 |
| 6MQS | D_LYS.170 | NZ  | D_GLU.106 | OE1 | 3.583 |
| 6MQS | D_HIS.192 | ND1 | D_ASP.155 | OD1 | 2.450 |
| 6N16 | A_ARG.38  | NH1 | A_GLU.46  | OE1 | 3.309 |
| 6N16 | A_ARG.38  | NH1 | A_ASP.86  | OD1 | 3.572 |
| 6N16 | A_ARG.38  | NH2 | A_ASP.86  | OD1 | 2.610 |
| 6N16 | A_ARG.66  | NH1 | A_ASP.86  | OD1 | 3.129 |
| 6N16 | A_ARG.66  | NH1 | A_ASP.86  | OD2 | 3.512 |
| 6N16 | A_ARG.66  | NH2 | A_ASP.86  | OD1 | 3.997 |
| 6N16 | A_ARG.66  | NH2 | A_ASP.86  | OD2 | 3.156 |
| 6N16 | A_LYS.71  | NZ  | A_GLU.55  | OE2 | 3.830 |
| 6N16 | A_ARG.105 | NH1 | C_GLU.64  | OE1 | 3.566 |
| 6N16 | A_ARG.105 | NH2 | C_GLU.64  | OE1 | 3.522 |
| 6N16 | A_ARG.105 | NH2 | C_GLU.64  | OE2 | 3.717 |
| 6N16 | A_HIS.164 | NE2 | B_ASP.167 | OD2 | 3.486 |
| 6N16 | A_ARG.210 | NH2 | A_GLU.212 | OE2 | 3.118 |
| 6N16 | B_ARG.24  | NH1 | B_ASP.70  | OD1 | 3.099 |
| 6N16 | B_ARG.24  | NH2 | B_ASP.70  | OD1 | 2.017 |
| 6N16 | B_ARG.24  | NH2 | B_ASP.70  | OD2 | 3.393 |
| 6N16 | B_HIS.30E | ND1 | B_GLU.50  | OE2 | 3.843 |
| 6N16 | B_ARG.54  | NH1 | B_ASP.60  | OD1 | 2.491 |
| 6N16 | B_ARG.61  | NH1 | B_GLU.81  | OE1 | 2.899 |
| 6N16 | B_ARG.61  | NH1 | B_GLU.81  | OE2 | 3.698 |
| 6N16 | B_ARG.61  | NH1 | B_ASP.82  | OD2 | 3.838 |
| 6N16 | B_ARG.61  | NH2 | B_GLU.79  | OE1 | 3.749 |
| 6N16 | B_ARG.61  | NH2 | B_GLU.79  | OE2 | 2.925 |
| 6N16 | B_ARG.61  | NH2 | B_ASP.82  | OD1 | 2.769 |
| 6N16 | B_ARG.61  | NH2 | B_ASP.82  | OD2 | 3.263 |
| 6N16 | B_ARG.77  | NH1 | B_GLU.79  | OE1 | 3.315 |
| 6N16 | B_LYS.169 | NZ  | B_ASP.167 | OD2 | 3.870 |
| 6N16 | B_HIS.189 | ND1 | B_ASP.151 | OD1 | 3.412 |
| 6N16 | H_ARG.38  | NH1 | H_GLU.46  | OE2 | 3.288 |
| 6N16 | H_ARG.38  | NH1 | H_ASP.86  | OD1 | 3.675 |
| 6N16 | H_ARG.38  | NH2 | H_ASP.86  | OD1 | 2.691 |
| 6N16 | H_ARG.66  | NH1 | H_ASP.86  | OD1 | 3.216 |
| 6N16 | H_ARG.66  | NH1 | H_ASP.86  | OD2 | 3.793 |
| 6N16 | H_ARG.66  | NH2 | H_ASP.86  | OD1 | 3.587 |
| 6N16 | H_ARG.66  | NH2 | H_ASP.86  | OD2 | 3.090 |
| 6N16 | H_LYS.143 | NZ  | H_ASP.144 | OD1 | 3.308 |
| 6N16 | H_LYS.143 | NZ  | H_ASP.144 | OD2 | 3.890 |
| 6N16 | H_HIS.164 | NE2 | L_ASP.167 | OD1 | 3.075 |
| 6N16 | H_ARG.210 | NH1 | H_GLU.212 | OE1 | 3.730 |
| 6N16 | H_ARG.210 | NH1 | H_GLU.212 | OE2 | 3.198 |
| 6N16 | H_ARG.210 | NH2 | H_GLU.212 | OE1 | 3.203 |
| 6N16 | J_ARG.24  | NH1 | J_ASP.70  | OD1 | 2.082 |
| 6N16 | J_ARG.24  | NH1 | J_ASP.70  | OD2 | 2.995 |
| 6N16 | J_ARG.24  | NH2 | J_ASP.70  | OD1 | 2.960 |
| 6N16 | J_ARG.24  | NH2 | J_ASP.70  | OD2 | 3.355 |
| 6N16 | J_ARG.54  | NH1 | J_ASP.60  | OD1 | 2.428 |
| 6N16 | J_ARG.54  | NH2 | J_ASP.60  | OD1 | 2.646 |
| 6N16 | J_ARG.61  | NH1 | J_GLU.81  | OE2 | 3.475 |
| 6N16 | J_ARG.61  | NH1 | J_ASP.82  | OD1 | 3.146 |
| 6N16 | J_ARG.61  | NH1 | J_ASP.82  | OD2 | 3.392 |

|      |           |     |           |     |       |
|------|-----------|-----|-----------|-----|-------|
| 6N16 | J_ARG_61  | NH2 | J_GLU_79  | OE1 | 3.524 |
| 6N16 | J_ARG_77  | NH1 | J_GLU_79  | OE1 | 2.977 |
| 6N16 | J_ARG_77  | NH1 | J_GLU_79  | OE2 | 2.495 |
| 6N16 | J_HIS_189 | ND1 | J_ASP_151 | OD1 | 2.409 |
| 6N16 | J_LYS_190 | NZ  | J_ASP_151 | OD1 | 3.722 |
| 6N16 | J_LYS_190 | NZ  | J_ASP_151 | OD2 | 3.788 |
| 6N16 | K_ARG_38  | NH1 | K_GLU_46  | OE1 | 3.313 |
| 6N16 | K_ARG_38  | NH1 | K_ASP_86  | OD1 | 3.587 |
| 6N16 | K_ARG_38  | NH2 | K_ASP_86  | OD1 | 2.713 |
| 6N16 | K_ARG_66  | NH1 | K_ASP_86  | OD1 | 2.932 |
| 6N16 | K_ARG_66  | NH1 | K_ASP_86  | OD2 | 3.658 |
| 6N16 | K_ARG_66  | NH2 | K_ASP_86  | OD1 | 3.552 |
| 6N16 | K_ARG_66  | NH2 | K_ASP_86  | OD2 | 2.933 |
| 6N16 | K_LYS_71  | NZ  | K_GLU_55  | OE1 | 3.671 |
| 6N16 | K_LYS_71  | NZ  | K_GLU_55  | OE2 | 3.555 |
| 6N16 | K_ARG_105 | NH2 | H_GLU_64  | OE1 | 2.463 |
| 6N16 | K_ARG_105 | NH2 | H_GLU_64  | OE2 | 3.174 |
| 6N16 | K_ARG_210 | NH1 | K_GLU_212 | OE1 | 2.599 |
| 6N16 | K_ARG_210 | NH1 | K_GLU_212 | OE2 | 3.558 |
| 6N16 | L_ARG_54  | NH1 | L_ASP_60  | OD2 | 3.141 |
| 6N16 | L_ARG_61  | NH1 | L_ASP_82  | OD1 | 2.699 |
| 6N16 | L_ARG_61  | NH1 | L_ASP_82  | OD2 | 3.825 |
| 6N16 | L_ARG_61  | NH2 | L_GLU_79  | OE1 | 2.631 |
| 6N16 | L_ARG_61  | NH2 | L_GLU_79  | OE2 | 3.838 |
| 6N16 | L_ARG_61  | NH2 | L_GLU_81  | OE2 | 3.819 |
| 6N16 | L_ARG_61  | NH2 | L_ASP_82  | OD1 | 3.883 |
| 6N16 | L_ARG_61  | NH2 | L_ASP_82  | OD2 | 3.728 |
| 6N16 | L_ARG_77  | NH1 | L_GLU_79  | OE2 | 2.621 |
| 6N16 | L_ARG_77  | NH2 | L_GLU_79  | OE2 | 3.210 |
| 6N16 | L_LYS_103 | NZ  | L_GLU_165 | OE2 | 3.676 |
| 6N16 | L_LYS_149 | NZ  | L_GLU_195 | OE2 | 2.385 |
| 6N16 | L_LYS_155 | NZ  | L_GLU_185 | OE2 | 3.497 |
| 6N16 | L_HIS_189 | ND1 | L_ASP_151 | OD2 | 2.964 |
| 6N16 | C_ARG_38  | NH1 | C_ASP_86  | OD1 | 2.762 |
| 6N16 | C_ARG_38  | NH2 | C_GLU_46  | OE2 | 2.909 |
| 6N16 | C_ARG_38  | NH2 | C_ASP_86  | OD1 | 3.930 |
| 6N16 | C_ARG_66  | NH1 | C_ASP_86  | OD1 | 2.966 |
| 6N16 | C_ARG_66  | NH1 | C_ASP_86  | OD2 | 3.602 |
| 6N16 | C_ARG_66  | NH2 | C_ASP_86  | OD1 | 3.584 |
| 6N16 | C_ARG_66  | NH2 | C_ASP_86  | OD2 | 2.985 |
| 6N16 | C_LYS_209 | NZ  | D_ASP_123 | OD2 | 3.251 |
| 6N16 | C_ARG_210 | NH1 | C_GLU_212 | OE1 | 2.646 |
| 6N16 | C_ARG_210 | NH2 | C_GLU_212 | OE1 | 2.972 |
| 6N16 | D_ARG_24  | NH2 | D_ASP_70  | OD1 | 3.142 |
| 6N16 | D_ARG_24  | NH2 | D_ASP_70  | OD2 | 3.869 |
| 6N16 | D_ARG_54  | NH1 | D_ASP_60  | OD1 | 3.199 |
| 6N16 | D_ARG_54  | NH1 | D_ASP_60  | OD2 | 3.672 |
| 6N16 | D_ARG_54  | NH2 | D_ASP_60  | OD1 | 3.573 |
| 6N16 | D_ARG_54  | NH2 | D_ASP_60  | OD2 | 3.601 |
| 6N16 | D_ARG_61  | NH1 | D_GLU_79  | OE2 | 2.680 |
| 6N16 | D_ARG_61  | NH2 | D_GLU_79  | OE2 | 3.457 |
| 6N16 | D_ARG_77  | NH2 | D_GLU_79  | OE1 | 2.307 |
| 6N16 | D_ARG_77  | NH2 | D_GLU_79  | OE2 | 3.456 |
| 6N16 | D_LYS_103 | NZ  | D_GLU_165 | OE1 | 3.221 |
| 6N16 | D_LYS_103 | NZ  | D_GLU_165 | OE2 | 3.677 |
| 6N16 | D_LYS_126 | NZ  | D_GLU_122 | OE1 | 3.518 |
| 6N16 | D_LYS_149 | NZ  | D_GLU_195 | OE1 | 3.379 |
| 6N1V | 3_ARG_39  | NH1 | 3_ASP_91  | OD1 | 3.220 |

|      |           |     |           |     |       |
|------|-----------|-----|-----------|-----|-------|
| 6N1V | 3_ARG_39  | NH2 | 3_GLU_47  | OE1 | 2.848 |
| 6N1V | 3_ARG_39  | NH2 | 3_GLU_47  | OE2 | 2.999 |
| 6N1V | 3_LYS_44  | NZ  | 4_ASP_86  | OD1 | 3.675 |
| 6N1V | 3_LYS_44  | NZ  | 4_ASP_86  | OD2 | 2.472 |
| 6N1V | 3_LYS_44  | NZ  | 4_GLU_106 | OE1 | 3.723 |
| 6N1V | 3_ARG_45  | NH2 | 3_GLU_47  | OE1 | 3.739 |
| 6N1V | 3_ARG_138 | NH1 | 4_GLU_214 | OE1 | 2.573 |
| 6N1V | 3_ARG_138 | NH1 | 4_GLU_214 | OE2 | 3.070 |
| 6N1V | 3_ARG_138 | NH2 | 4_GLU_214 | OE2 | 3.291 |
| 6N1V | 3_LYS_152 | NZ  | 3_ASP_153 | OD2 | 3.384 |
| 6N1V | 3_LYS_218 | NZ  | 4_GLU_127 | OE1 | 3.611 |
| 6N1V | 3_ARG_219 | NH1 | 3_GLU_221 | OE1 | 3.404 |
| 6N1V | 4_LYS_54  | NZ  | 4_GLU_51  | OE1 | 3.248 |
| 6N1V | 4_ARG_62  | NH1 | 4_ASP_83  | OD1 | 3.753 |
| 6N1V | 4_ARG_62  | NH1 | 4_ASP_83  | OD2 | 3.947 |
| 6N1V | 4_LYS_114 | NZ  | 4_GLU_202 | OE1 | 3.543 |
| 6N1V | 4_LYS_114 | NZ  | 4_GLU_202 | OE2 | 2.746 |
| 6N1V | 4_LYS_153 | NZ  | 4_GLU_207 | OE1 | 3.065 |
| 6N1V | 4_LYS_153 | NZ  | 4_GLU_207 | OE2 | 3.086 |
| 6N1V | 4_LYS_170 | NZ  | 4_GLU_84  | OE1 | 2.379 |
| 6N1V | 4_LYS_175 | NZ  | 4_ASP_142 | OD1 | 3.116 |
| 6N1V | 4_LYS_175 | NZ  | 4_ASP_142 | OD2 | 2.712 |
| 6N1V | 4_HIS_192 | ND1 | 4_ASP_155 | OD1 | 3.682 |
| 6N1V | 4_HIS_192 | ND1 | 4_ASP_155 | OD2 | 2.769 |
| 6N1V | B_LYS_46  | NZ  | B_GLU_492 | OE2 | 2.855 |
| 6N1V | B_LYS_231 | NZ  | B_GLU_268 | OE1 | 3.616 |
| 6N1V | B_LYS_231 | NZ  | B_GLU_268 | OE2 | 2.737 |
| 6N1V | B_LYS_282 | NZ  | g_ASP_114 | OD2 | 3.730 |
| 6N1V | B_ARG_298 | NH1 | B_GLU_381 | OE1 | 3.416 |
| 6N1V | B_ARG_298 | NH1 | B_GLU_381 | OE2 | 3.774 |
| 6N1V | B_ARG_298 | NH2 | B_GLU_381 | OE1 | 3.507 |
| 6N1V | B_ARG_308 | NH1 | B_GLU_164 | OE1 | 3.519 |
| 6N1V | B_ARG_308 | NH1 | B_GLU_164 | OE2 | 2.477 |
| 6N1V | B_ARG_429 | NH1 | B_ASP_113 | OD2 | 3.774 |
| 6N1V | B_ARG_429 | NH2 | B_ASP_113 | OD1 | 3.650 |
| 6N1V | B_ARG_429 | NH2 | B_ASP_113 | OD2 | 2.335 |
| 6N1V | B_ARG_469 | NH1 | B_ASP_457 | OD1 | 3.545 |
| 6N1V | B_ARG_469 | NH1 | B_ASP_457 | OD2 | 2.329 |
| 6N1V | B_ARG_476 | NH1 | B_GLU_102 | OE2 | 3.982 |
| 6N1V | B_ARG_476 | NH1 | B_ASP_474 | OD2 | 3.112 |
| 6N1V | B_ARG_476 | NH2 | B_GLU_102 | OE1 | 3.903 |
| 6N1V | B_ARG_476 | NH2 | B_GLU_102 | OE2 | 3.744 |
| 6N1V | B_ARG_480 | NH1 | B_ASP_477 | OD1 | 2.992 |
| 6N1V | B_LYS_487 | NZ  | B_ASP_47  | OD2 | 2.431 |
| 6N1V | B_ARG_504 | NH2 | D_GLU_657 | OE2 | 3.905 |
| 6N1V | F_ARG_542 | NH2 | D_GLU_647 | OE1 | 3.326 |
| 6N1V | F_ARG_542 | NH2 | D_GLU_647 | OE2 | 2.831 |
| 6N1V | F_ARG_579 | NH2 | D_GLU_584 | OE1 | 3.581 |
| 6N1V | F_ARG_588 | NH2 | F_GLU_584 | OE2 | 2.394 |
| 6N1V | F_ARG_617 | NH1 | F_GLU_634 | OE1 | 2.879 |
| 6N1V | F_ARG_617 | NH1 | F_GLU_634 | OE2 | 2.871 |
| 6N1V | F_ARG_617 | NH2 | F_GLU_621 | OE1 | 3.225 |
| 6N1V | Y_ARG_38  | NH1 | Y_ASP_86  | OD1 | 2.536 |
| 6N1V | Y_ARG_38  | NH2 | Y_GLU_46  | OE1 | 3.284 |
| 6N1V | Y_ARG_66  | NH1 | Y_ASP_86  | OD2 | 3.359 |
| 6N1V | Y_ARG_66  | NH2 | Y_ASP_86  | OD1 | 3.775 |
| 6N1V | Y_ARG_66  | NH2 | Y_ASP_86  | OD2 | 3.105 |
| 6N1V | Y_LYS_73  | NZ  | Y_ASP_53  | OD1 | 3.985 |

|      |           |     |           |     |       |
|------|-----------|-----|-----------|-----|-------|
| 6N1V | Y_LYS_73  | NZ  | Y_ASP_53  | OD2 | 2.420 |
| 6N1V | a_ARG_61  | NH1 | a_ASP_60  | OD1 | 2.807 |
| 6N1V | g_LYS_19  | NZ  | g_GLU_89  | OE1 | 3.749 |
| 6N1V | g_ARG_38  | NH1 | g_GLU_46  | OE1 | 3.909 |
| 6N1V | g_ARG_38  | NH1 | g_GLU_46  | OE2 | 3.659 |
| 6N1V | g_ARG_38  | NH2 | g_ASP_97  | OD1 | 3.891 |
| 6N1V | g_ARG_72  | NH1 | B_ASP_368 | OD2 | 3.927 |
| 6N1V | g_ARG_72  | NH2 | B_ASP_368 | OD2 | 3.974 |
| 6N1V | i_ARG_61  | NH2 | i_ASP_82  | OD1 | 3.042 |
| 6N1V | i_ARG_61  | NH2 | i_ASP_82  | OD2 | 3.088 |
| 6N1V | l_ARG_39  | NH1 | l_ASP_91  | OD1 | 3.219 |
| 6N1V | l_ARG_39  | NH2 | l_GLU_47  | OE1 | 2.847 |
| 6N1V | l_ARG_39  | NH2 | l_GLU_47  | OE2 | 3.000 |
| 6N1V | l_LYS_44  | NZ  | 2_ASP_86  | OD1 | 3.676 |
| 6N1V | l_LYS_44  | NZ  | 2_ASP_86  | OD2 | 2.473 |
| 6N1V | l_LYS_44  | NZ  | 2_GLU_106 | OE1 | 3.723 |
| 6N1V | l_ARG_45  | NH2 | l_GLU_47  | OE1 | 3.739 |
| 6N1V | l_ARG_138 | NH1 | 2_GLU_214 | OE1 | 2.573 |
| 6N1V | l_ARG_138 | NH1 | 2_GLU_214 | OE2 | 3.069 |
| 6N1V | l_ARG_138 | NH2 | 2_GLU_214 | OE2 | 3.291 |
| 6N1V | l_LYS_152 | NZ  | l_ASP_153 | OD2 | 3.384 |
| 6N1V | l_LYS_218 | NZ  | 2_GLU_127 | OE1 | 3.611 |
| 6N1V | l_ARG_219 | NH1 | l_GLU_221 | OE1 | 3.404 |
| 6N1V | 2_LYS_54  | NZ  | 2_GLU_51  | OE1 | 3.247 |
| 6N1V | 2_ARG_62  | NH1 | 2_ASP_83  | OD1 | 3.752 |
| 6N1V | 2_ARG_62  | NH1 | 2_ASP_83  | OD2 | 3.947 |
| 6N1V | 2_LYS_114 | NZ  | 2_GLU_202 | OE1 | 3.543 |
| 6N1V | 2_LYS_114 | NZ  | 2_GLU_202 | OE2 | 2.746 |
| 6N1V | 2_LYS_153 | NZ  | 2_GLU_207 | OE1 | 3.064 |
| 6N1V | 2_LYS_153 | NZ  | 2_GLU_207 | OE2 | 3.086 |
| 6N1V | 2_LYS_170 | NZ  | 2_GLU_84  | OE1 | 2.379 |
| 6N1V | 2_LYS_175 | NZ  | 2_ASP_142 | OD1 | 3.116 |
| 6N1V | 2_LYS_175 | NZ  | 2_ASP_142 | OD2 | 2.712 |
| 6N1V | 2_HIS_192 | ND1 | 2_ASP_155 | OD1 | 3.682 |
| 6N1V | 2_HIS_192 | ND1 | 2_ASP_155 | OD2 | 2.769 |
| 6N1V | A_LYS_46  | NZ  | A_GLU_492 | OE2 | 2.855 |
| 6N1V | A_LYS_231 | NZ  | A_GLU_268 | OE1 | 3.617 |
| 6N1V | A_LYS_231 | NZ  | A_GLU_268 | OE2 | 2.737 |
| 6N1V | A_LYS_282 | NZ  | f_ASP_114 | OD2 | 3.729 |
| 6N1V | A_ARG_298 | NH1 | A_GLU_381 | OE1 | 3.416 |
| 6N1V | A_ARG_298 | NH1 | A_GLU_381 | OE2 | 3.774 |
| 6N1V | A_ARG_298 | NH2 | A_GLU_381 | OE1 | 3.507 |
| 6N1V | A_ARG_308 | NH1 | A_GLU_164 | OE1 | 3.518 |
| 6N1V | A_ARG_308 | NH1 | A_GLU_164 | OE2 | 2.477 |
| 6N1V | A_ARG_429 | NH1 | A_ASP_113 | OD2 | 3.775 |
| 6N1V | A_ARG_429 | NH2 | A_ASP_113 | OD1 | 3.650 |
| 6N1V | A_ARG_429 | NH2 | A_ASP_113 | OD2 | 2.336 |
| 6N1V | A_ARG_469 | NH1 | A_ASP_457 | OD1 | 3.546 |
| 6N1V | A_ARG_469 | NH1 | A_ASP_457 | OD2 | 2.329 |
| 6N1V | A_ARG_476 | NH1 | A_GLU_102 | OE2 | 3.981 |
| 6N1V | A_ARG_476 | NH1 | A_ASP_474 | OD2 | 3.112 |
| 6N1V | A_ARG_476 | NH2 | A_GLU_102 | OE1 | 3.904 |
| 6N1V | A_ARG_476 | NH2 | A_GLU_102 | OE2 | 3.744 |
| 6N1V | A_ARG_480 | NH1 | A_ASP_477 | OD1 | 2.992 |
| 6N1V | A_LYS_487 | NZ  | A_ASP_47  | OD2 | 2.431 |
| 6N1V | A_ARG_504 | NH2 | F_GLU_657 | OE2 | 3.909 |
| 6N1V | E_ARG_542 | NH2 | F_GLU_647 | OE1 | 3.328 |
| 6N1V | E_ARG_542 | NH2 | F_GLU_647 | OE2 | 2.831 |

|      |           |     |           |     |       |
|------|-----------|-----|-----------|-----|-------|
| 6N1V | E_ARG_579 | NH2 | F_GLU_584 | OE1 | 3.583 |
| 6N1V | E_ARG_588 | NH2 | E_GLU_584 | OE2 | 2.393 |
| 6N1V | E_ARG_617 | NH1 | E_GLU_634 | OE1 | 2.879 |
| 6N1V | E_ARG_617 | NH1 | E_GLU_634 | OE2 | 2.871 |
| 6N1V | E_ARG_617 | NH2 | E_GLU_621 | OE1 | 3.225 |
| 6N1V | X_ARG_38  | NH1 | X_ASP_86  | OD1 | 2.536 |
| 6N1V | X_ARG_38  | NH2 | X_GLU_46  | OE1 | 3.284 |
| 6N1V | X_ARG_66  | NH1 | X_ASP_86  | OD2 | 3.359 |
| 6N1V | X_ARG_66  | NH2 | X_ASP_86  | OD1 | 3.775 |
| 6N1V | X_ARG_66  | NH2 | X_ASP_86  | OD2 | 3.105 |
| 6N1V | X_LYS_73  | NZ  | X_ASP_53  | OD1 | 3.985 |
| 6N1V | X_LYS_73  | NZ  | X_ASP_53  | OD2 | 2.420 |
| 6N1V | Z_ARG_61  | NH1 | Z_ASP_60  | OD1 | 2.807 |
| 6N1V | f_LYS_19  | NZ  | f_GLU_89  | OE1 | 3.748 |
| 6N1V | f_ARG_38  | NH1 | f_GLU_46  | OE1 | 3.909 |
| 6N1V | f_ARG_38  | NH1 | f_GLU_46  | OE2 | 3.659 |
| 6N1V | f_ARG_38  | NH2 | f_ASP_97  | OD1 | 3.891 |
| 6N1V | f_ARG_72  | NH1 | A_ASP_368 | OD2 | 3.927 |
| 6N1V | f_ARG_72  | NH2 | A_ASP_368 | OD2 | 3.974 |
| 6N1V | h_ARG_61  | NH2 | h_ASP_82  | OD1 | 3.042 |
| 6N1V | h_ARG_61  | NH2 | h_ASP_82  | OD2 | 3.088 |
| 6N1V | C_LYS_46  | NZ  | C_GLU_492 | OE2 | 2.855 |
| 6N1V | C_LYS_231 | NZ  | C_GLU_268 | OE1 | 3.617 |
| 6N1V | C_LYS_231 | NZ  | C_GLU_268 | OE2 | 2.737 |
| 6N1V | C_LYS_282 | NZ  | Q_ASP_114 | OD2 | 3.730 |
| 6N1V | C_ARG_298 | NH1 | C_GLU_381 | OE1 | 3.416 |
| 6N1V | C_ARG_298 | NH1 | C_GLU_381 | OE2 | 3.775 |
| 6N1V | C_ARG_298 | NH2 | C_GLU_381 | OE1 | 3.507 |
| 6N1V | C_ARG_308 | NH1 | C_GLU_164 | OE1 | 3.518 |
| 6N1V | C_ARG_308 | NH1 | C_GLU_164 | OE2 | 2.477 |
| 6N1V | C_ARG_429 | NH1 | C_ASP_113 | OD2 | 3.775 |
| 6N1V | C_ARG_429 | NH2 | C_ASP_113 | OD1 | 3.651 |
| 6N1V | C_ARG_429 | NH2 | C_ASP_113 | OD2 | 2.336 |
| 6N1V | C_ARG_469 | NH1 | C_ASP_457 | OD1 | 3.545 |
| 6N1V | C_ARG_469 | NH1 | C_ASP_457 | OD2 | 2.329 |
| 6N1V | C_ARG_476 | NH1 | C_GLU_102 | OE2 | 3.982 |
| 6N1V | C_ARG_476 | NH1 | C_ASP_474 | OD2 | 3.112 |
| 6N1V | C_ARG_476 | NH2 | C_GLU_102 | OE1 | 3.904 |
| 6N1V | C_ARG_476 | NH2 | C_GLU_102 | OE2 | 3.744 |
| 6N1V | C_ARG_480 | NH1 | C_ASP_477 | OD1 | 2.992 |
| 6N1V | C_LYS_487 | NZ  | C_ASP_47  | OD2 | 2.431 |
| 6N1V | C_ARG_504 | NH2 | E_GLU_657 | OE2 | 3.907 |
| 6N1V | D_ARG_542 | NH2 | E_GLU_647 | OE1 | 3.330 |
| 6N1V | D_ARG_542 | NH2 | E_GLU_647 | OE2 | 2.832 |
| 6N1V | D_ARG_579 | NH2 | E_GLU_584 | OE1 | 3.585 |
| 6N1V | D_ARG_588 | NH2 | D_GLU_584 | OE2 | 2.394 |
| 6N1V | D_ARG_617 | NH1 | D_GLU_634 | OE1 | 2.880 |
| 6N1V | D_ARG_617 | NH1 | D_GLU_634 | OE2 | 2.871 |
| 6N1V | D_ARG_617 | NH2 | D_GLU_621 | OE1 | 3.225 |
| 6N1V | H_ARG_39  | NH1 | H_ASP_91  | OD1 | 3.220 |
| 6N1V | H_ARG_39  | NH2 | H_GLU_47  | OE1 | 2.848 |
| 6N1V | H_ARG_39  | NH2 | H_GLU_47  | OE2 | 3.000 |
| 6N1V | H_LYS_44  | NZ  | L_ASP_86  | OD1 | 3.676 |
| 6N1V | H_LYS_44  | NZ  | L_ASP_86  | OD2 | 2.472 |
| 6N1V | H_LYS_44  | NZ  | L_GLU_106 | OE1 | 3.722 |
| 6N1V | H_ARG_45  | NH2 | H_GLU_47  | OE1 | 3.739 |
| 6N1V | H_ARG_138 | NH1 | L_GLU_214 | OE1 | 2.573 |
| 6N1V | H_ARG_138 | NH1 | L_GLU_214 | OE2 | 3.069 |

|      |           |     |            |     |       |
|------|-----------|-----|------------|-----|-------|
| 6N1V | H_ARG_138 | NH2 | L_GLU_214  | OE2 | 3.291 |
| 6N1V | H_LYS_152 | NZ  | H_ASP_153  | OD2 | 3.384 |
| 6N1V | H_LYS_218 | NZ  | L_GLU_127  | OE1 | 3.611 |
| 6N1V | H_ARG_219 | NH1 | H_GLU_221  | OE1 | 3.404 |
| 6N1V | L_LYS_54  | NZ  | L_GLU_51   | OE1 | 3.248 |
| 6N1V | L_ARG_62  | NH1 | L_ASP_83   | OD1 | 3.753 |
| 6N1V | L_ARG_62  | NH1 | L_ASP_83   | OD2 | 3.947 |
| 6N1V | L_LYS_114 | NZ  | L_GLU_202  | OE1 | 3.542 |
| 6N1V | L_LYS_114 | NZ  | L_GLU_202  | OE2 | 2.746 |
| 6N1V | L_LYS_153 | NZ  | L_GLU_207  | OE1 | 3.065 |
| 6N1V | L_LYS_153 | NZ  | L_GLU_207  | OE2 | 3.087 |
| 6N1V | L_LYS_170 | NZ  | L_GLU_84   | OE1 | 2.379 |
| 6N1V | L_LYS_175 | NZ  | L_ASP_142  | OD1 | 3.116 |
| 6N1V | L_LYS_175 | NZ  | L_ASP_142  | OD2 | 2.712 |
| 6N1V | L_HIS_192 | ND1 | L_ASP_155  | OD1 | 3.682 |
| 6N1V | L_HIS_192 | ND1 | L_ASP_155  | OD2 | 2.769 |
| 6N1V | M_ARG_38  | NH1 | M_ASP_86   | OD1 | 2.536 |
| 6N1V | M_ARG_38  | NH2 | M_GLU_46   | OE1 | 3.284 |
| 6N1V | M_ARG_66  | NH1 | M_ASP_86   | OD2 | 3.359 |
| 6N1V | M_ARG_66  | NH2 | M_ASP_86   | OD1 | 3.775 |
| 6N1V | M_ARG_66  | NH2 | M_ASP_86   | OD2 | 3.105 |
| 6N1V | M_LYS_73  | NZ  | M_ASP_53   | OD1 | 3.985 |
| 6N1V | M_LYS_73  | NZ  | M_ASP_53   | OD2 | 2.420 |
| 6N1V | N_ARG_61  | NH1 | N_ASP_60   | OD1 | 2.808 |
| 6N1V | Q_LYS_19  | NZ  | Q_GLU_89   | OE1 | 3.749 |
| 6N1V | Q_ARG_38  | NH1 | Q_GLU_46   | OE1 | 3.909 |
| 6N1V | Q_ARG_38  | NH1 | Q_GLU_46   | OE2 | 3.659 |
| 6N1V | Q_ARG_38  | NH2 | Q_ASP_97   | OD1 | 3.891 |
| 6N1V | Q_ARG_72  | NH1 | C_ASP_368  | OD2 | 3.927 |
| 6N1V | Q_ARG_72  | NH2 | C_ASP_368  | OD2 | 3.975 |
| 6N1V | R_ARG_61  | NH2 | R_ASP_82   | OD1 | 3.042 |
| 6N1V | R_ARG_61  | NH2 | R_ASP_82   | OD2 | 3.088 |
| 6N1W | 2_LYS_46  | NZ  | 2_GLU_492  | OE2 | 3.928 |
| 6N1W | 2_LYS_227 | NZ  | 2_GLU_83   | OE1 | 2.543 |
| 6N1W | 2_LYS_231 | NZ  | 2_GLU_268  | OE1 | 2.454 |
| 6N1W | 2_LYS_231 | NZ  | 2_GLU_268  | OE2 | 3.957 |
| 6N1W | 2_LYS_231 | NZ  | 2_GLU_269  | OE1 | 3.998 |
| 6N1W | 2_HIS_249 | NE2 | 2_GLU_83   | OE1 | 3.939 |
| 6N1W | 2_LYS_282 | NZ  | 2_GLU_275  | OE1 | 3.006 |
| 6N1W | 2_ARG_298 | NH1 | 2_GLU_381  | OE1 | 3.635 |
| 6N1W | 2_ARG_298 | NH1 | 2_GLU_381  | OE2 | 2.558 |
| 6N1W | 2_ARG_298 | NH2 | 2_GLU_381  | OE1 | 3.709 |
| 6N1W | 2_ARG_298 | NH2 | 2_GLU_381  | OE2 | 3.969 |
| 6N1W | 2_ARG_308 | NH1 | 2_GLU_164  | OE1 | 3.421 |
| 6N1W | 2_ARG_308 | NH1 | 2_GLU_164  | OE2 | 3.903 |
| 6N1W | 2_ARG_327 | NH2 | m_GLU_100I | OE1 | 3.996 |
| 6N1W | 2_LYS_421 | NZ  | 2_ASP_180  | OD1 | 3.450 |
| 6N1W | 2_ARG_429 | NH1 | 2_ASP_113  | OD2 | 3.966 |
| 6N1W | 2_ARG_429 | NH2 | 2_ASP_113  | OD1 | 3.893 |
| 6N1W | 2_ARG_429 | NH2 | 2_ASP_113  | OD2 | 2.506 |
| 6N1W | 2_ARG_469 | NH2 | 2_ASP_457  | OD2 | 2.809 |
| 6N1W | 2_ARG_476 | NH1 | 2_GLU_102  | OE1 | 2.957 |
| 6N1W | 2_ARG_476 | NH1 | 2_GLU_102  | OE2 | 3.101 |
| 6N1W | 2_ARG_476 | NH2 | 2_GLU_102  | OE1 | 3.474 |
| 6N1W | 2_ARG_480 | NH1 | 2_ASP_477  | OD1 | 2.941 |
| 6N1W | 2_LYS_487 | NZ  | 2_ASP_47   | OD1 | 2.806 |
| 6N1W | 2_LYS_487 | NZ  | 2_ASP_47   | OD2 | 3.509 |
| 6N1W | 2_ARG_504 | NH2 | d_GLU_657  | OE2 | 3.118 |



|      |            |     |           |     |       |
|------|------------|-----|-----------|-----|-------|
| 6N1W | 3_ARG_38   | NH1 | 3_GLU_46  | OE1 | 2.665 |
| 6N1W | 3_ARG_38   | NH1 | 3_GLU_46  | OE2 | 3.250 |
| 6N1W | 3_ARG_38   | NH2 | 3_ASP_86  | OD1 | 2.625 |
| 6N1W | 3_ARG_66   | NH1 | 3_ASP_86  | OD2 | 3.781 |
| 6N1W | 3_LYS_71   | NZ  | 3_GLU_55  | OE2 | 3.265 |
| 6N1W | 3_ARG_100H | NH1 | 3_ASP_101 | OD2 | 3.227 |
| 6N1W | 3_ARG_100H | NH2 | 4_ASP_91  | OD2 | 3.241 |
| 6N1W | 4_ARG_61   | NH1 | 4_GLU_81  | OE2 | 3.361 |
| 6N1W | 4_ARG_61   | NH1 | 4_ASP_82  | OD1 | 3.254 |
| 6N1W | 4_ARG_61   | NH2 | 4_ASP_82  | OD1 | 3.059 |
| 6N1W | 4_ARG_61   | NH2 | 4_ASP_82  | OD2 | 2.679 |
| 6N1W | 5_ARG_38   | NH1 | 5_ASP_86  | OD1 | 2.691 |
| 6N1W | 5_ARG_38   | NH2 | 5_GLU_46  | OE1 | 3.484 |
| 6N1W | 5_ARG_38   | NH2 | 5_GLU_46  | OE2 | 3.816 |
| 6N1W | 5_ARG_38   | NH2 | 5_ASP_86  | OD1 | 3.929 |
| 6N1W | 5_ARG_66   | NH1 | 5_ASP_86  | OD2 | 3.620 |
| 6N1W | 5_ARG_66   | NH2 | 5_ASP_86  | OD1 | 3.504 |
| 6N1W | 5_LYS_73   | NZ  | 5_ASP_53  | OD1 | 3.480 |
| 6N1W | 5_LYS_73   | NZ  | 5_ASP_53  | OD2 | 2.933 |
| 6N1W | 7_ARG_60   | NH2 | 7_ASP_81  | OD1 | 2.923 |
| 6N1W | 7_ARG_60   | NH2 | 7_ASP_81  | OD2 | 2.939 |
| 6N1W | 8_ARG_38   | NH1 | 8_GLU_46  | OE1 | 3.713 |
| 6N1W | 8_ARG_38   | NH1 | 8_ASP_86  | OD1 | 3.761 |
| 6N1W | 8_ARG_38   | NH2 | 8_ASP_86  | OD1 | 3.294 |
| 6N1W | 8_ARG_66   | NH1 | 8_ASP_86  | OD2 | 3.879 |
| 6N1W | 8_ARG_66   | NH2 | 8_ASP_86  | OD2 | 2.655 |
| 6N1W | A_ARG_542  | NH1 | d_GLU_647 | OE1 | 3.516 |
| 6N1W | A_ARG_542  | NH1 | d_GLU_647 | OE2 | 3.474 |
| 6N1W | A_ARG_542  | NH2 | d_GLU_647 | OE1 | 2.848 |
| 6N1W | A_ARG_579  | NH2 | d_GLU_584 | OE2 | 3.464 |
| 6N1W | A_LYS_601  | NZ  | d_GLU_654 | OE1 | 3.802 |
| 6N1W | A_LYS_601  | NZ  | d_GLU_654 | OE2 | 3.060 |
| 6N1W | A_ARG_617  | NH1 | A_GLU_634 | OE2 | 3.959 |
| 6N1W | A_ARG_617  | NH2 | A_GLU_621 | OE1 | 3.529 |
| 6N1W | C_LYS_46   | NZ  | C_GLU_492 | OE2 | 3.859 |
| 6N1W | C_LYS_97   | NZ  | C_GLU_275 | OE2 | 3.973 |
| 6N1W | C_LYS_227  | NZ  | C_GLU_83  | OE1 | 2.695 |
| 6N1W | C_LYS_231  | NZ  | C_GLU_268 | OE1 | 2.473 |
| 6N1W | C_LYS_231  | NZ  | C_GLU_268 | OE2 | 3.970 |
| 6N1W | C_LYS_231  | NZ  | C_GLU_269 | OE1 | 3.984 |
| 6N1W | C_HIS_249  | NE2 | C_GLU_83  | OE1 | 3.866 |
| 6N1W | C_LYS_282  | NZ  | C_GLU_275 | OE1 | 3.039 |
| 6N1W | C_ARG_298  | NH1 | C_GLU_381 | OE1 | 3.780 |
| 6N1W | C_ARG_298  | NH1 | C_GLU_381 | OE2 | 2.649 |
| 6N1W | C_ARG_298  | NH2 | C_GLU_381 | OE1 | 3.748 |
| 6N1W | C_ARG_298  | NH2 | C_GLU_381 | OE2 | 3.927 |
| 6N1W | C_ARG_308  | NH1 | C_GLU_164 | OE1 | 3.469 |
| 6N1W | C_ARG_308  | NH1 | C_GLU_164 | OE2 | 3.901 |
| 6N1W | C_LYS_421  | NZ  | C_ASP_180 | OD1 | 3.498 |
| 6N1W | C_ARG_429  | NH1 | C_ASP_113 | OD2 | 3.958 |
| 6N1W | C_ARG_429  | NH2 | C_ASP_113 | OD1 | 3.756 |
| 6N1W | C_ARG_429  | NH2 | C_ASP_113 | OD2 | 2.445 |
| 6N1W | C_ARG_469  | NH2 | C_ASP_457 | OD2 | 2.859 |
| 6N1W | C_ARG_476  | NH1 | C_GLU_102 | OE1 | 3.094 |
| 6N1W | C_ARG_476  | NH1 | C_GLU_102 | OE2 | 3.309 |
| 6N1W | C_ARG_476  | NH2 | C_GLU_102 | OE1 | 3.512 |
| 6N1W | C_ARG_480  | NH1 | C_ASP_477 | OD1 | 2.924 |
| 6N1W | C_LYS_487  | NZ  | C_ASP_47  | OD1 | 2.763 |

|      |            |     |           |     |       |
|------|------------|-----|-----------|-----|-------|
| 6N1W | C_LYS_487  | NZ  | C_ASP_47  | OD2 | 3.509 |
| 6N1W | C_ARG_504  | NH2 | A_GLU_657 | OE2 | 3.221 |
| 6N1W | D_ARG_542  | NH1 | A_GLU_647 | OE1 | 3.273 |
| 6N1W | D_ARG_542  | NH1 | A_GLU_647 | OE2 | 3.289 |
| 6N1W | D_ARG_542  | NH2 | A_GLU_647 | OE1 | 2.942 |
| 6N1W | D_ARG_579  | NH1 | A_GLU_584 | OE1 | 3.854 |
| 6N1W | D_ARG_579  | NH2 | A_GLU_584 | OE2 | 3.567 |
| 6N1W | D_LYS_601  | NZ  | A_GLU_654 | OE1 | 3.837 |
| 6N1W | D_LYS_601  | NZ  | A_GLU_654 | OE2 | 3.044 |
| 6N1W | D_ARG_617  | NH1 | D_GLU_634 | OE2 | 3.956 |
| 6N1W | D_ARG_617  | NH2 | D_GLU_621 | OE1 | 3.541 |
| 6N1W | H_ARG_38   | NH1 | H_GLU_46  | OE1 | 2.685 |
| 6N1W | H_ARG_38   | NH1 | H_GLU_46  | OE2 | 3.187 |
| 6N1W | H_ARG_38   | NH2 | H_ASP_86  | OD1 | 2.618 |
| 6N1W | H_ARG_66   | NH1 | H_ASP_86  | OD2 | 3.806 |
| 6N1W | H_LYS_71   | NZ  | H_GLU_55  | OE2 | 3.251 |
| 6N1W | H_ARG_100H | NH1 | H_ASP_101 | OD2 | 3.211 |
| 6N1W | H_ARG_100H | NH2 | L_ASP_91  | OD2 | 3.150 |
| 6N1W | L_ARG_61   | NH1 | L_GLU_81  | OE2 | 3.442 |
| 6N1W | L_ARG_61   | NH1 | L_ASP_82  | OD1 | 3.265 |
| 6N1W | L_ARG_61   | NH2 | L_ASP_82  | OD1 | 3.076 |
| 6N1W | L_ARG_61   | NH2 | L_ASP_82  | OD2 | 2.697 |
| 6N1W | M_ARG_38   | NH1 | M_ASP_86  | OD1 | 2.569 |
| 6N1W | M_ARG_38   | NH2 | M_GLU_46  | OE1 | 3.511 |
| 6N1W | M_ARG_38   | NH2 | M_GLU_46  | OE2 | 3.792 |
| 6N1W | M_ARG_38   | NH2 | M_ASP_86  | OD1 | 3.908 |
| 6N1W | M_ARG_66   | NH1 | M_ASP_86  | OD2 | 3.739 |
| 6N1W | M_ARG_66   | NH2 | M_ASP_86  | OD1 | 3.607 |
| 6N1W | M_LYS_73   | NZ  | M_ASP_53  | OD1 | 3.504 |
| 6N1W | M_LYS_73   | NZ  | M_ASP_53  | OD2 | 2.877 |
| 6N1W | Q_ARG_38   | NH1 | Q_GLU_46  | OE1 | 3.699 |
| 6N1W | Q_ARG_38   | NH1 | Q_ASP_86  | OD1 | 3.715 |
| 6N1W | Q_ARG_38   | NH2 | Q_ASP_86  | OD1 | 3.040 |
| 6N1W | Q_ARG_66   | NH1 | Q_ASP_86  | OD2 | 3.762 |
| 6N1W | Q_ARG_66   | NH2 | Q_ASP_86  | OD2 | 2.524 |
| 6N1W | R_ARG_60   | NH2 | R_ASP_81  | OD1 | 2.849 |
| 6N1W | R_ARG_60   | NH2 | R_ASP_81  | OD2 | 2.945 |
| 6N1W | c_LYS_46   | NZ  | c_GLU_492 | OE2 | 3.862 |
| 6N1W | c_LYS_227  | NZ  | c_GLU_83  | OE1 | 2.652 |
| 6N1W | c_LYS_231  | NZ  | c_GLU_268 | OE1 | 2.434 |
| 6N1W | c_LYS_231  | NZ  | c_GLU_268 | OE2 | 3.951 |
| 6N1W | c_LYS_231  | NZ  | c_GLU_269 | OE1 | 3.890 |
| 6N1W | c_HIS_249  | NE2 | c_GLU_83  | OE1 | 3.931 |
| 6N1W | c_LYS_282  | NZ  | c_GLU_275 | OE1 | 3.038 |
| 6N1W | c_ARG_298  | NH1 | c_GLU_381 | OE1 | 3.531 |
| 6N1W | c_ARG_298  | NH1 | c_GLU_381 | OE2 | 2.444 |
| 6N1W | c_ARG_298  | NH2 | c_GLU_381 | OE1 | 3.806 |
| 6N1W | c_ARG_308  | NH1 | c_GLU_164 | OE1 | 3.441 |
| 6N1W | c_ARG_308  | NH1 | c_GLU_164 | OE2 | 3.830 |
| 6N1W | c_LYS_421  | NZ  | c_ASP_180 | OD1 | 3.813 |
| 6N1W | c_ARG_429  | NH1 | c_ASP_113 | OD2 | 3.970 |
| 6N1W | c_ARG_429  | NH2 | c_ASP_113 | OD1 | 3.958 |
| 6N1W | c_ARG_429  | NH2 | c_ASP_113 | OD2 | 2.540 |
| 6N1W | c_ARG_469  | NH2 | c_ASP_457 | OD2 | 2.886 |
| 6N1W | c_ARG_476  | NH1 | c_GLU_102 | OE1 | 2.901 |
| 6N1W | c_ARG_476  | NH1 | c_GLU_102 | OE2 | 3.038 |
| 6N1W | c_ARG_476  | NH2 | c_GLU_102 | OE1 | 3.473 |
| 6N1W | c_ARG_480  | NH1 | c_ASP_477 | OD1 | 2.867 |

|      |            |     |           |     |       |
|------|------------|-----|-----------|-----|-------|
| 6N1W | c_LYS_487  | NZ  | c_ASP_47  | OD1 | 2.950 |
| 6N1W | c_LYS_487  | NZ  | c_ASP_47  | OD2 | 3.392 |
| 6N1W | c_LYS_487  | NZ  | c_GLU_91  | OE1 | 3.967 |
| 6N1W | c_ARG_504  | NH2 | D_GLU_657 | OE2 | 3.061 |
| 6N1W | d_ARG_542  | NH1 | D_GLU_647 | OE1 | 3.482 |
| 6N1W | d_ARG_542  | NH1 | D_GLU_647 | OE2 | 3.280 |
| 6N1W | d_ARG_542  | NH2 | D_GLU_647 | OE1 | 2.854 |
| 6N1W | d_ARG_579  | NH1 | D_GLU_584 | OE1 | 3.913 |
| 6N1W | d_ARG_579  | NH2 | D_GLU_584 | OE2 | 3.653 |
| 6N1W | d_LYS_601  | NZ  | D_GLU_654 | OE1 | 3.862 |
| 6N1W | d_LYS_601  | NZ  | D_GLU_654 | OE2 | 3.082 |
| 6N1W | d_ARG_617  | NH1 | d_GLU_634 | OE2 | 3.896 |
| 6N1W | d_ARG_617  | NH2 | d_GLU_621 | OE1 | 3.678 |
| 6N1W | h_ARG_38   | NH1 | h_GLU_46  | OE1 | 2.684 |
| 6N1W | h_ARG_38   | NH1 | h_GLU_46  | OE2 | 3.228 |
| 6N1W | h_ARG_38   | NH2 | h_ASP_86  | OD1 | 2.566 |
| 6N1W | h_ARG_66   | NH1 | h_ASP_86  | OD2 | 3.765 |
| 6N1W | h_LYS_71   | NZ  | h_GLU_55  | OE2 | 3.379 |
| 6N1W | h_ARG_100H | NH1 | h_ASP_101 | OD2 | 3.191 |
| 6N1W | h_ARG_100H | NH2 | L_ASP_91  | OD2 | 3.226 |
| 6N1W | L_ARG_61   | NH1 | L_GLU_81  | OE2 | 3.471 |
| 6N1W | L_ARG_61   | NH1 | L_ASP_82  | OD1 | 3.278 |
| 6N1W | L_ARG_61   | NH2 | L_ASP_82  | OD1 | 3.046 |
| 6N1W | L_ARG_61   | NH2 | L_ASP_82  | OD2 | 2.734 |
| 6N1W | m_ARG_38   | NH1 | m_ASP_86  | OD1 | 2.662 |
| 6N1W | m_ARG_38   | NH2 | m_GLU_46  | OE1 | 3.392 |
| 6N1W | m_ARG_38   | NH2 | m_GLU_46  | OE2 | 3.730 |
| 6N1W | m_ARG_38   | NH2 | m_ASP_86  | OD1 | 3.976 |
| 6N1W | m_ARG_66   | NH1 | m_ASP_86  | OD2 | 3.631 |
| 6N1W | m_ARG_66   | NH2 | m_ASP_86  | OD1 | 3.510 |
| 6N1W | m_LYS_73   | NZ  | m_ASP_53  | OD1 | 3.489 |
| 6N1W | m_LYS_73   | NZ  | m_ASP_53  | OD2 | 2.916 |
| 6N1W | q_ARG_38   | NH1 | q_GLU_46  | OE1 | 3.649 |
| 6N1W | q_ARG_38   | NH1 | q_ASP_86  | OD1 | 3.800 |
| 6N1W | q_ARG_38   | NH2 | q_ASP_86  | OD1 | 3.194 |
| 6N1W | q_ARG_66   | NH1 | q_ASP_86  | OD2 | 3.833 |
| 6N1W | q_ARG_66   | NH2 | q_ASP_86  | OD2 | 2.511 |
| 6N1W | r_ARG_60   | NH2 | r_ASP_81  | OD1 | 2.963 |
| 6N1W | r_ARG_60   | NH2 | r_ASP_81  | OD2 | 3.033 |
| 6N5B | H_ARG_38   | NH1 | H_GLU_46  | OE1 | 3.194 |
| 6N5B | H_ARG_38   | NH1 | H_GLU_46  | OE2 | 3.841 |
| 6N5B | H_ARG_38   | NH2 | H_ASP_86  | OD1 | 3.183 |
| 6N5B | H_LYS_64   | NZ  | H_ASP_61  | OD1 | 3.760 |
| 6N5B | H_ARG_66   | NH1 | H_ASP_86  | OD1 | 3.517 |
| 6N5B | H_ARG_66   | NH1 | H_ASP_86  | OD2 | 3.589 |
| 6N5B | H_ARG_66   | NH2 | H_ASP_86  | OD2 | 3.024 |
| 6N5B | H_LYS_149  | NZ  | L_GLU_128 | OE2 | 3.031 |
| 6N5B | H_LYS_214  | NZ  | L_GLU_127 | OE2 | 3.139 |
| 6N5B | L_ARG_63   | NH2 | L_ASP_84  | OD1 | 2.528 |
| 6N5B | L_ARG_63   | NH2 | L_ASP_84  | OD2 | 3.785 |
| 6N5B | L_LYS_170  | NZ  | L_GLU_85  | OE2 | 2.862 |
| 6N5B | L_HIS_192  | ND1 | L_ASP_155 | OD2 | 3.335 |
| 6N5B | B_ARG_53   | NH1 | B_GLU_79  | OE1 | 3.394 |
| 6N5B | B_ARG_53   | NH2 | B_ASP_81  | OD1 | 3.952 |
| 6N5B | B_ARG_86   | NH2 | B_ASP_56  | OD1 | 3.915 |
| 6N5B | B_ARG_86   | NH2 | B_ASP_56  | OD2 | 2.646 |
| 6N5B | B_ARG_105  | NH2 | B_GLU_85  | OE1 | 3.089 |
| 6N5B | B_LYS_113  | NZ  | B_GLU_115 | OE1 | 3.775 |

|      |           |     |           |     |       |
|------|-----------|-----|-----------|-----|-------|
| 6N5B | B_ARG_137 | NH1 | B_ASP_73  | OD1 | 2.745 |
| 6N5B | B_ARG_137 | NH1 | B_ASP_73  | OD2 | 3.436 |
| 6N5B | B_ARG_137 | NH2 | B_ASP_142 | OD2 | 3.308 |
| 6N5B | B_ARG_172 | NH1 | B_GLU_119 | OE2 | 3.863 |
| 6N5B | B_HIS_253 | ND1 | B_GLU_119 | OE1 | 2.944 |
| 6N5B | B_LYS_255 | NZ  | B_GLU_115 | OE2 | 3.788 |
| 6N5D | A_HIS_56  | ND1 | A_ASP_85  | OD2 | 3.953 |
| 6N5D | A_ARG_57  | NH2 | A_GLU_82  | OE1 | 2.603 |
| 6N5D | A_HIS_75  | ND1 | A_ASP_73  | OD1 | 2.834 |
| 6N5D | A_HIS_75  | ND1 | A_ASP_73  | OD2 | 3.931 |
| 6N5D | A_ARG_90  | NH2 | A_ASP_60  | OD1 | 3.337 |
| 6N5D | A_ARG_90  | NH2 | A_ASP_60  | OD2 | 2.505 |
| 6N5D | A_LYS_92  | NZ  | A_ASP_271 | OD2 | 3.373 |
| 6N5D | A_ARG_109 | NH1 | A_GLU_89  | OE1 | 2.808 |
| 6N5D | A_ARG_109 | NH1 | A_GLU_89  | OE2 | 3.783 |
| 6N5D | A_LYS_176 | NZ  | A_GLU_123 | OE2 | 3.918 |
| 6N5D | A_LYS_238 | NZ  | A_ASP_175 | OD1 | 3.849 |
| 6N5D | A_LYS_238 | NZ  | A_ASP_175 | OD2 | 3.598 |
| 6N5D | A_LYS_259 | NZ  | A_GLU_119 | OE2 | 3.730 |
| 6N5D | C_ARG_38  | NH2 | C_ASP_90  | OD1 | 3.385 |
| 6N5D | C_ARG_67  | NH1 | C_ASP_90  | OD1 | 3.989 |
| 6N5D | C_ARG_67  | NH1 | C_ASP_90  | OD2 | 3.731 |
| 6N5D | C_ARG_67  | NH2 | C_ASP_90  | OD1 | 3.488 |
| 6N5D | C_ARG_67  | NH2 | C_ASP_90  | OD2 | 2.158 |
| 6N5D | C_LYS_149 | NZ  | D_GLU_127 | OE2 | 2.211 |
| 6N5D | C_LYS_212 | NZ  | C_ASP_214 | OD1 | 3.695 |
| 6N5D | C_LYS_215 | NZ  | D_GLU_126 | OE1 | 3.361 |
| 6N5D | C_LYS_215 | NZ  | D_GLU_126 | OE2 | 3.815 |
| 6N5D | C_ARG_216 | NH1 | C_GLU_218 | OE1 | 2.311 |
| 6N5D | C_ARG_216 | NH1 | C_GLU_218 | OE2 | 3.798 |
| 6N5D | C_ARG_216 | NH2 | C_GLU_218 | OE1 | 3.283 |
| 6N5D | C_ARG_216 | NH2 | C_GLU_218 | OE2 | 3.709 |
| 6N5D | B_ARG_57  | NH2 | B_GLU_82  | OE1 | 2.558 |
| 6N5D | B_ARG_57  | NH2 | B_GLU_82  | OE2 | 3.860 |
| 6N5D | B_HIS_75  | ND1 | B_ASP_73  | OD1 | 2.685 |
| 6N5D | B_HIS_75  | ND1 | B_ASP_73  | OD2 | 3.543 |
| 6N5D | B_ARG_90  | NH2 | B_ASP_60  | OD1 | 3.667 |
| 6N5D | B_ARG_90  | NH2 | B_ASP_60  | OD2 | 2.318 |
| 6N5D | B_LYS_92  | NZ  | B_ASP_271 | OD2 | 2.554 |
| 6N5D | B_ARG_109 | NH1 | B_GLU_89  | OE1 | 3.519 |
| 6N5D | B_ARG_141 | NH1 | B_ASP_77  | OD2 | 2.444 |
| 6N5D | B_LYS_176 | NZ  | B_GLU_123 | OE1 | 3.115 |
| 6N5D | B_ARG_261 | NH2 | B_GLU_119 | OE1 | 3.598 |
| 6N5D | B_ARG_269 | NH2 | B_GLU_89  | OE1 | 3.840 |
| 6N5D | B_LYS_315 | NZ  | B_GLU_41  | OE1 | 3.513 |
| 6N5D | E_ARG_38  | NH1 | E_ASP_90  | OD1 | 3.664 |
| 6N5D | E_ARG_38  | NH2 | E_GLU_46  | OE1 | 3.505 |
| 6N5D | E_ARG_38  | NH2 | E_ASP_90  | OD1 | 3.051 |
| 6N5D | E_LYS_65  | NZ  | E_ASP_62  | OD1 | 3.737 |
| 6N5D | E_ARG_67  | NH1 | E_ASP_90  | OD2 | 3.314 |
| 6N5D | E_ARG_67  | NH2 | E_ASP_90  | OD1 | 3.968 |
| 6N5D | E_ARG_67  | NH2 | E_ASP_90  | OD2 | 2.162 |
| 6N5D | E_LYS_149 | NZ  | F_GLU_127 | OE2 | 3.376 |
| 6N5D | E_LYS_212 | NZ  | E_ASP_214 | OD1 | 3.161 |
| 6N5D | E_ARG_216 | NH2 | E_GLU_218 | OE2 | 2.928 |
| 6N5D | K_HIS_56  | ND1 | K_ASP_85  | OD2 | 3.271 |
| 6N5D | K_ARG_57  | NH2 | K_GLU_82  | OE1 | 2.301 |
| 6N5D | K_HIS_75  | ND1 | K_ASP_73  | OD1 | 2.835 |

|      |           |     |           |     |       |
|------|-----------|-----|-----------|-----|-------|
| 6N5D | K_HIS_75  | ND1 | K_ASP_73  | OD2 | 3.740 |
| 6N5D | K_ARG_90  | NH2 | K_ASP_60  | OD1 | 3.759 |
| 6N5D | K_ARG_90  | NH2 | K_ASP_60  | OD2 | 3.274 |
| 6N5D | K_ARG_109 | NH1 | K_GLU_89  | OE1 | 3.561 |
| 6N5D | K_ARG_141 | NH1 | K_ASP_77  | OD2 | 3.970 |
| 6N5D | K_LYS_176 | NZ  | K_GLU_123 | OE2 | 2.488 |
| 6N5D | K_LYS_238 | NZ  | K_ASP_175 | OD1 | 2.613 |
| 6N5D | K_LYS_238 | NZ  | K_ASP_175 | OD2 | 3.291 |
| 6N5D | K_LYS_315 | NZ  | K_GLU_41  | OE1 | 2.260 |
| 6N5D | L_ARG_38  | NH1 | L_ASP_90  | OD1 | 3.927 |
| 6N5D | L_ARG_38  | NH2 | L_ASP_90  | OD1 | 3.768 |
| 6N5D | L_LYS_65  | NZ  | L_ASP_62  | OD2 | 3.222 |
| 6N5D | L_ARG_67  | NH1 | L_ASP_90  | OD1 | 3.866 |
| 6N5D | L_ARG_67  | NH1 | L_ASP_90  | OD2 | 3.353 |
| 6N5D | L_ARG_67  | NH2 | L_ASP_90  | OD1 | 3.826 |
| 6N5D | L_ARG_67  | NH2 | L_ASP_90  | OD2 | 2.288 |
| 6N5D | L_LYS_149 | NZ  | N_GLU_127 | OE2 | 2.091 |
| 6N5D | L_HIS_170 | NE2 | N_ASP_141 | OD2 | 3.244 |
| 6N5D | L_LYS_212 | NZ  | L_ASP_214 | OD1 | 2.499 |
| 6N5D | L_LYS_212 | NZ  | L_ASP_214 | OD2 | 3.450 |
| 6N5D | F_ARG_63  | NH2 | F_ASP_84  | OD1 | 3.578 |
| 6N5D | D_ARG_63  | NH2 | D_ASP_84  | OD1 | 3.736 |
| 6N5D | D_HIS_191 | ND1 | D_ASP_154 | OD1 | 3.992 |
| 6N5D | D_HIS_191 | ND1 | D_ASP_154 | OD2 | 3.059 |
| 6N5E | A_HIS_56  | NE2 | A_GLU_280 | OE2 | 3.185 |
| 6N5E | A_ARG_57  | NH2 | A_GLU_82  | OE1 | 2.937 |
| 6N5E | A_HIS_75  | ND1 | A_ASP_73  | OD1 | 2.982 |
| 6N5E | A_ARG_90  | NH2 | A_ASP_60  | OD2 | 2.862 |
| 6N5E | A_LYS_92  | NZ  | A_ASP_63  | OD1 | 3.254 |
| 6N5E | A_ARG_109 | NH2 | A_GLU_89  | OE1 | 3.038 |
| 6N5E | A_ARG_109 | NH2 | A_GLU_89  | OE2 | 3.184 |
| 6N5E | A_ARG_141 | NH1 | A_ASP_77  | OD2 | 2.455 |
| 6N5E | A_ARG_141 | NH2 | A_ASP_77  | OD2 | 3.946 |
| 6N5E | A_LYS_176 | NZ  | A_GLU_123 | OE1 | 3.715 |
| 6N5E | A_LYS_176 | NZ  | A_GLU_123 | OE2 | 2.160 |
| 6N5E | A_LYS_259 | NZ  | A_GLU_119 | OE2 | 3.507 |
| 6N5E | A_ARG_261 | NH2 | A_GLU_119 | OE1 | 3.324 |
| 6N5E | A_LYS_292 | NZ  | A_GLU_41  | OE1 | 3.523 |
| 6N5E | B_LYS_50  | NZ  | B_ASP_275 | OD2 | 3.461 |
| 6N5E | B_HIS_56  | NE2 | B_GLU_280 | OE1 | 3.340 |
| 6N5E | B_ARG_57  | NH2 | B_GLU_82  | OE1 | 3.063 |
| 6N5E | B_HIS_75  | ND1 | B_ASP_73  | OD1 | 2.687 |
| 6N5E | B_HIS_75  | ND1 | B_ASP_73  | OD2 | 3.481 |
| 6N5E | B_ARG_90  | NH2 | B_ASP_60  | OD1 | 3.444 |
| 6N5E | B_ARG_90  | NH2 | B_ASP_60  | OD2 | 2.891 |
| 6N5E | B_ARG_141 | NH1 | B_ASP_77  | OD2 | 2.583 |
| 6N5E | B_ARG_141 | NH2 | B_ASP_77  | OD2 | 3.726 |
| 6N5E | B_LYS_176 | NZ  | B_GLU_123 | OE1 | 3.977 |
| 6N5E | B_LYS_176 | NZ  | B_GLU_123 | OE2 | 2.397 |
| 6N5E | B_LYS_176 | NZ  | B_ASP_172 | OD1 | 2.910 |
| 6N5E | B_ARG_261 | NH2 | B_GLU_119 | OE1 | 3.905 |
| 6N5E | C_HIS_56  | NE2 | C_GLU_280 | OE1 | 3.055 |
| 6N5E | C_ARG_57  | NH2 | C_GLU_82  | OE1 | 3.487 |
| 6N5E | C_HIS_75  | ND1 | C_ASP_73  | OD1 | 2.463 |
| 6N5E | C_HIS_75  | ND1 | C_ASP_73  | OD2 | 3.598 |
| 6N5E | C_ARG_90  | NH2 | C_ASP_60  | OD1 | 3.875 |
| 6N5E | C_ARG_90  | NH2 | C_ASP_60  | OD2 | 3.604 |
| 6N5E | C_ARG_141 | NH1 | C_ASP_77  | OD1 | 3.061 |

|      |           |     |           |     |       |
|------|-----------|-----|-----------|-----|-------|
| 6N5E | C_ARG_141 | NH1 | C_ASP_77  | OD2 | 2.463 |
| 6N5E | C_ARG_141 | NH2 | C_ASP_77  | OD1 | 3.964 |
| 6N5E | C_LYS_176 | NZ  | C_GLU_123 | OE2 | 2.465 |
| 6N5E | C_LYS_176 | NZ  | C_ASP_172 | OD2 | 3.772 |
| 6N5E | C_ARG_207 | NH1 | C_ASP_241 | OD1 | 3.296 |
| 6N5E | C_ARG_207 | NH2 | C_ASP_241 | OD1 | 3.641 |
| 6N5E | C_LYS_259 | NZ  | C_GLU_119 | OE1 | 3.550 |
| 6N5E | C_LYS_259 | NZ  | C_GLU_119 | OE2 | 3.071 |
| 6N5E | C_ARG_261 | NH2 | C_GLU_119 | OE1 | 3.746 |
| 6N5E | H_ARG_38  | NH2 | H_ASP_89  | OD1 | 2.940 |
| 6N5E | H_ARG_44  | NH2 | H_GLU_42  | OE1 | 3.999 |
| 6N5E | H_LYS_64  | NZ  | H_ASP_61  | OD1 | 3.701 |
| 6N5E | H_ARG_66  | NH1 | H_ASP_89  | OD2 | 3.385 |
| 6N5E | H_ARG_66  | NH2 | H_ASP_89  | OD2 | 2.231 |
| 6N5E | H_LYS_214 | NZ  | H_ASP_216 | OD1 | 2.519 |
| 6N5E | H_LYS_214 | NZ  | H_ASP_216 | OD2 | 3.480 |
| 6N5E | H_LYS_217 | NZ  | I_GLU_126 | OE2 | 2.748 |
| 6N5E | H_ARG_218 | NH1 | H_GLU_220 | OE2 | 3.887 |
| 6N5E | H_ARG_218 | NH2 | H_GLU_220 | OE2 | 2.803 |
| 6N5E | E_ARG_38  | NH1 | E_ASP_89  | OD1 | 2.478 |
| 6N5E | E_ARG_38  | NH2 | E_GLU_46  | OE1 | 3.997 |
| 6N5E | E_ARG_38  | NH2 | E_ASP_89  | OD1 | 2.988 |
| 6N5E | E_LYS_64  | NZ  | E_ASP_61  | OD1 | 2.968 |
| 6N5E | E_ARG_66  | NH1 | E_ASP_89  | OD1 | 3.712 |
| 6N5E | E_ARG_66  | NH1 | E_ASP_89  | OD2 | 2.993 |
| 6N5E | E_ARG_66  | NH2 | E_ASP_89  | OD2 | 2.243 |
| 6N5E | E_ARG_75  | NH1 | E_ASP_72  | OD2 | 3.012 |
| 6N5E | E_LYS_214 | NZ  | E_ASP_216 | OD1 | 2.448 |
| 6N5E | E_LYS_214 | NZ  | E_ASP_216 | OD2 | 3.601 |
| 6N5E | E_LYS_217 | NZ  | D_GLU_126 | OE1 | 2.995 |
| 6N5E | E_LYS_217 | NZ  | D_GLU_126 | OE2 | 2.272 |
| 6N5E | E_ARG_218 | NH1 | E_GLU_220 | OE1 | 3.911 |
| 6N5E | E_ARG_218 | NH1 | E_GLU_220 | OE2 | 2.563 |
| 6N5E | E_ARG_218 | NH2 | E_GLU_220 | OE2 | 2.863 |
| 6N5E | E_LYS_222 | NZ  | D_GLU_126 | OE1 | 3.688 |
| 6N5E | G_ARG_38  | NH1 | G_GLU_46  | OE2 | 2.572 |
| 6N5E | G_ARG_38  | NH2 | G_ASP_89  | OD1 | 3.217 |
| 6N5E | G_LYS_64  | NZ  | G_ASP_61  | OD1 | 3.314 |
| 6N5E | G_LYS_64  | NZ  | G_ASP_61  | OD2 | 3.572 |
| 6N5E | G_ARG_66  | NH2 | G_ASP_89  | OD1 | 3.438 |
| 6N5E | G_ARG_66  | NH2 | G_ASP_89  | OD2 | 3.428 |
| 6N5E | G_LYS_214 | NZ  | G_ASP_216 | OD1 | 2.167 |
| 6N5E | G_LYS_217 | NZ  | F_GLU_126 | OE2 | 3.351 |
| 6N5E | I_ARG_63  | NH2 | I_GLU_83  | OE1 | 3.435 |
| 6N5E | I_ARG_63  | NH2 | I_ASP_84  | OD1 | 2.372 |
| 6N5E | I_ARG_63  | NH2 | I_ASP_84  | OD2 | 3.580 |
| 6N5E | I_LYS_189 | NZ  | I_GLU_186 | OE1 | 2.386 |
| 6N5E | F_ARG_63  | NH2 | F_GLU_83  | OE2 | 3.657 |
| 6N5E | F_ARG_63  | NH2 | F_ASP_84  | OD1 | 2.359 |
| 6N5E | F_ARG_63  | NH2 | F_ASP_84  | OD2 | 3.434 |
| 6N5E | D_ARG_63  | NH2 | D_ASP_84  | OD1 | 2.410 |
| 6N5E | D_ARG_63  | NH2 | D_ASP_84  | OD2 | 3.669 |
| 6N6B | A_ARG_118 | NH1 | A_GLU_119 | OE2 | 3.576 |
| 6N6B | A_ARG_118 | NH2 | A_GLU_119 | OE2 | 3.958 |
| 6N6B | A_ARG_118 | NH2 | A_GLU_425 | OE1 | 2.971 |
| 6N6B | A_ARG_118 | NH2 | A_GLU_425 | OE2 | 3.457 |
| 6N6B | A_LYS_128 | NZ  | A_GLU_162 | OE1 | 3.900 |
| 6N6B | A_LYS_128 | NZ  | A_GLU_162 | OE2 | 2.839 |

|      |           |     |           |     |       |
|------|-----------|-----|-----------|-----|-------|
| 6N6B | A_ARG_152 | NH2 | A_ASP_198 | OD1 | 3.511 |
| 6N6B | A_ARG_152 | NH2 | A_ASP_198 | OD2 | 3.079 |
| 6N6B | A_ARG_156 | NH1 | A_GLU_119 | OE1 | 3.104 |
| 6N6B | A_ARG_156 | NH1 | A_GLU_119 | OE2 | 3.984 |
| 6N6B | A_ARG_156 | NH2 | A_GLU_119 | OE1 | 2.722 |
| 6N6B | A_ARG_224 | NH2 | A_GLU_276 | OE2 | 2.776 |
| 6N6B | A_ARG_283 | NH2 | A_ASP_355 | OD2 | 3.221 |
| 6N6B | A_ARG_288 | NH1 | A_ASP_355 | OD1 | 3.223 |
| 6N6B | A_ARG_288 | NH1 | A_ASP_355 | OD2 | 3.540 |
| 6N6B | A_ARG_288 | NH2 | A_ASP_304 | OD1 | 3.429 |
| 6N6B | A_ARG_288 | NH2 | A_ASP_304 | OD2 | 3.339 |
| 6N6B | A_ARG_292 | NH1 | A_GLU_277 | OE1 | 2.791 |
| 6N6B | A_ARG_292 | NH1 | A_GLU_277 | OE2 | 3.678 |
| 6N6B | A_LYS_296 | NZ  | L_ASP_28  | OD1 | 3.122 |
| 6N6B | A_LYS_296 | NZ  | L_ASP_28  | OD2 | 3.000 |
| 6N6B | A_LYS_296 | NZ  | L_GLU_68  | OE2 | 2.842 |
| 6N6B | A_ARG_300 | NH1 | A_ASP_324 | OD1 | 3.902 |
| 6N6B | A_ARG_300 | NH2 | A_ASP_324 | OD1 | 3.653 |
| 6N6B | A_LYS_344 | NZ  | A_GLU_369 | OE1 | 2.725 |
| 6N6B | A_LYS_344 | NZ  | A_GLU_369 | OE2 | 3.576 |
| 6N6B | A_ARG_364 | NH1 | A_ASP_330 | OD1 | 3.580 |
| 6N6B | A_ARG_364 | NH2 | A_ASP_330 | OD1 | 3.008 |
| 6N6B | A_ARG_364 | NH2 | A_ASP_330 | OD2 | 3.328 |
| 6N6B | A_ARG_364 | NH2 | A_GLU_375 | OE2 | 3.344 |
| 6N6B | A_ARG_394 | NH2 | A_GLU_375 | OE1 | 2.841 |
| 6N6B | A_ARG_403 | NH1 | A_GLU_433 | OE1 | 3.202 |
| 6N6B | A_ARG_403 | NH2 | A_GLU_432 | OE1 | 3.164 |
| 6N6B | A_ARG_428 | NH1 | A_ASP_460 | OD2 | 3.015 |
| 6N6B | A_ARG_428 | NH2 | A_GLU_433 | OE1 | 3.667 |
| 6N6B | A_ARG_428 | NH2 | A_GLU_433 | OE2 | 2.721 |
| 6N6B | A_LYS_431 | NZ  | K_ASP_101 | OD1 | 3.959 |
| 6N6B | A_LYS_431 | NZ  | K_ASP_101 | OD2 | 3.832 |
| 6N6B | K_ARG_39  | NH1 | K_ASP_90  | OD1 | 2.897 |
| 6N6B | K_ARG_39  | NH2 | K_GLU_47  | OE2 | 2.900 |
| 6N6B | K_ARG_39  | NH2 | K_ASP_90  | OD1 | 3.537 |
| 6N6B | K_ARG_67  | NH1 | K_ASP_90  | OD1 | 3.734 |
| 6N6B | K_ARG_67  | NH1 | K_ASP_90  | OD2 | 2.854 |
| 6N6B | K_ARG_67  | NH2 | K_ASP_90  | OD1 | 3.053 |
| 6N6B | K_ARG_67  | NH2 | K_ASP_90  | OD2 | 3.660 |
| 6N6B | K_LYS_76  | NZ  | K_ASP_73  | OD2 | 3.758 |
| 6N6B | K_ARG_98  | NH2 | K_ASP_106 | OD1 | 3.697 |
| 6N6B | K_ARG_98  | NH2 | K_ASP_106 | OD2 | 3.098 |
| 6N6B | K_HIS_169 | NE2 | L_ASP_167 | OD1 | 3.738 |
| 6N6B | K_LYS_213 | NZ  | L_GLU_123 | OE1 | 2.814 |
| 6N6B | K_LYS_213 | NZ  | L_GLU_123 | OE2 | 3.044 |
| 6N6B | L_ARG_24  | NH2 | L_ASP_70  | OD1 | 3.008 |
| 6N6B | L_ARG_24  | NH2 | L_ASP_70  | OD2 | 3.990 |
| 6N6B | L_ARG_61  | NH1 | L_ASP_82  | OD1 | 3.460 |
| 6N6B | L_ARG_61  | NH1 | L_ASP_82  | OD2 | 2.694 |
| 6N6B | L_ARG_61  | NH2 | L_GLU_81  | OE1 | 3.382 |
| 6N6B | L_ARG_61  | NH2 | L_ASP_82  | OD1 | 3.002 |
| 6N6B | L_ARG_61  | NH2 | L_ASP_82  | OD2 | 3.567 |
| 6N6B | L_LYS_103 | NZ  | L_ASP_165 | OD2 | 3.902 |
| 6N6B | L_LYS_149 | NZ  | L_GLU_195 | OE2 | 2.717 |
| 6N6B | L_ARG_155 | NH1 | L_GLU_185 | OE2 | 3.590 |
| 6N6B | L_ARG_155 | NH2 | L_GLU_185 | OE1 | 3.631 |
| 6N6B | L_ARG_155 | NH2 | L_GLU_185 | OE2 | 2.832 |
| 6N6B | L_HIS_189 | ND1 | L_ASP_151 | OD2 | 3.291 |

|      |           |     |           |     |       |
|------|-----------|-----|-----------|-----|-------|
| 6NB6 | L_ARG_211 | NH1 | L_GLU_187 | OE1 | 3.717 |
| 6NB5 | H_ARG_38  | NH1 | H_ASP_92  | OD2 | 3.491 |
| 6NB5 | H_ARG_38  | NH2 | H_GLU_46  | OE1 | 2.486 |
| 6NB5 | H_ARG_50  | NH2 | H_ASP_61  | OD2 | 3.474 |
| 6NB5 | H_LYS_52  | NZ  | H_GLU_56  | OE2 | 3.363 |
| 6NB5 | H_LYS_54  | NZ  | H_ASP_76  | OD2 | 3.985 |
| 6NB5 | H_ARG_69  | NH1 | H_ASP_92  | OD1 | 2.701 |
| 6NB5 | H_ARG_69  | NH1 | H_ASP_92  | OD2 | 3.806 |
| 6NB5 | H_ARG_69  | NH2 | H_ASP_92  | OD1 | 3.650 |
| 6NB5 | H_ARG_69  | NH2 | H_ASP_92  | OD2 | 3.432 |
| 6NB5 | H_LYS_78  | NZ  | H_ASP_75  | OD2 | 3.471 |
| 6NB5 | H_LYS_157 | NZ  | H_ASP_158 | OD1 | 2.929 |
| 6NB5 | H_LYS_157 | NZ  | H_ASP_158 | OD2 | 3.584 |
| 6NB5 | H_LYS_220 | NZ  | H_ASP_222 | OD1 | 3.861 |
| 6NB5 | H_LYS_223 | NZ  | L_GLU_126 | OE1 | 3.229 |
| 6NB5 | H_LYS_223 | NZ  | L_GLU_126 | OE2 | 2.760 |
| 6NB5 | H_ARG_224 | NH2 | H_GLU_226 | OE2 | 3.546 |
| 6NB5 | L_ARG_63  | NH2 | L_ASP_84  | OD1 | 3.374 |
| 6NB5 | L_ARG_63  | NH2 | L_ASP_84  | OD2 | 3.503 |
| 6NB5 | L_LYS_68  | NZ  | L_ASP_33  | OD2 | 2.578 |
| 6NB5 | L_LYS_113 | NZ  | L_GLU_201 | OE1 | 2.506 |
| 6NB5 | L_ARG_38  | NH1 | L_ASP_92  | OD1 | 3.159 |
| 6NB5 | L_ARG_38  | NH2 | L_GLU_46  | OE1 | 2.869 |
| 6NB5 | L_ARG_38  | NH2 | L_ASP_92  | OD1 | 3.985 |
| 6NB5 | L_ARG_50  | NH1 | L_ASP_61  | OD2 | 3.493 |
| 6NB5 | L_ARG_50  | NH2 | L_ASP_61  | OD1 | 3.774 |
| 6NB5 | L_ARG_69  | NH1 | L_ASP_92  | OD1 | 2.838 |
| 6NB5 | L_ARG_69  | NH1 | L_ASP_92  | OD2 | 2.846 |
| 6NB5 | L_ARG_69  | NH2 | L_ASP_92  | OD1 | 3.249 |
| 6NB5 | L_LYS_157 | NZ  | L_ASP_158 | OD1 | 3.106 |
| 6NB5 | L_LYS_157 | NZ  | M_GLU_127 | OE2 | 3.828 |
| 6NB5 | L_LYS_223 | NZ  | M_GLU_126 | OE2 | 3.316 |
| 6NB5 | M_ARG_63  | NH1 | M_ASP_84  | OD1 | 2.715 |
| 6NB5 | M_ARG_63  | NH1 | M_ASP_84  | OD2 | 3.713 |
| 6NB5 | M_ARG_63  | NH2 | M_ASP_84  | OD1 | 3.329 |
| 6NB5 | M_ARG_63  | NH2 | M_ASP_84  | OD2 | 2.729 |
| 6NB5 | M_LYS_107 | NZ  | M_GLU_85  | OE1 | 3.669 |
| 6NB5 | M_LYS_152 | NZ  | M_GLU_206 | OE1 | 3.241 |
| 6NB5 | M_LYS_152 | NZ  | M_GLU_206 | OE2 | 3.589 |
| 6NB5 | M_ARG_192 | NH1 | M_ASP_154 | OD2 | 3.102 |
| 6NB8 | H_ARG_38  | NH1 | H_ASP_90  | OD1 | 2.818 |
| 6NB8 | H_ARG_38  | NH2 | H_ASP_90  | OD1 | 3.793 |
| 6NB8 | H_ARG_67  | NH1 | H_ASP_90  | OD1 | 3.807 |
| 6NB8 | H_ARG_67  | NH1 | H_ASP_90  | OD2 | 2.824 |
| 6NB8 | H_ARG_67  | NH2 | H_ASP_90  | OD1 | 3.012 |
| 6NB8 | H_ARG_67  | NH2 | H_ASP_90  | OD2 | 3.450 |
| 6NB8 | H_ARG_72  | NH2 | H_ASP_74  | OD1 | 3.534 |
| 6NB8 | H_LYS_157 | NZ  | H_ASP_158 | OD1 | 3.474 |
| 6NB8 | H_LYS_223 | NZ  | L_GLU_128 | OE1 | 2.783 |
| 6NB8 | H_LYS_223 | NZ  | L_GLU_128 | OE2 | 3.341 |
| 6NB8 | L_ARG_51  | NH1 | H_ASP_113 | OD1 | 2.821 |
| 6NB8 | L_ARG_51  | NH2 | H_ASP_113 | OD1 | 3.921 |
| 6NB8 | L_ARG_51  | NH2 | H_ASP_115 | OD1 | 3.423 |
| 6NB8 | L_ARG_51  | NH2 | L_ASP_60  | OD1 | 2.805 |
| 6NB8 | L_ARG_51  | NH2 | L_ASP_60  | OD2 | 3.641 |
| 6NB8 | L_ARG_66  | NH2 | L_ASP_87  | OD1 | 2.740 |
| 6NB8 | L_ARG_66  | NH2 | L_ASP_87  | OD2 | 3.561 |
| 6NB8 | L_LYS_108 | NZ  | L_GLU_170 | OE1 | 2.684 |



|      |           |     |           |     |       |
|------|-----------|-----|-----------|-----|-------|
| 6NB8 | L_LYS_108 | NZ  | L_GLU_170 | OE2 | 3.357 |
| 6NB8 | L_LYS_154 | NZ  | L_GLU_200 | OE1 | 3.899 |
| 6NB8 | L_LYS_154 | NZ  | L_GLU_200 | OE2 | 2.642 |
| 6NB8 | L_LYS_188 | NZ  | L_GLU_192 | OE1 | 3.516 |
| 6NB8 | L_LYS_188 | NZ  | L_GLU_192 | OE2 | 2.963 |
| 6NB8 | L_LYS_193 | NZ  | L_ASP_190 | OD1 | 3.067 |
| 6NB8 | L_HIS_194 | ND1 | L_ASP_156 | OD2 | 3.106 |
| 6NC2 | A_LYS_46  | NZ  | B_ASP_636 | OD1 | 3.909 |
| 6NC2 | A_ARG_59  | NH1 | A_ASP_57  | OD1 | 2.814 |
| 6NC2 | A_ARG_59  | NH1 | A_ASP_57  | OD2 | 3.348 |
| 6NC2 | A_ARG_59  | NH2 | A_ASP_57  | OD1 | 3.635 |
| 6NC2 | A_ARG_59  | NH2 | A_ASP_57  | OD2 | 2.766 |
| 6NC2 | A_LYS_155 | NZ  | A_ASP_133 | OD1 | 2.379 |
| 6NC2 | A_LYS_231 | NZ  | A_GLU_268 | OE2 | 2.886 |
| 6NC2 | A_LYS_232 | NZ  | A_GLU_269 | OE1 | 3.666 |
| 6NC2 | A_LYS_232 | NZ  | A_GLU_269 | OE2 | 2.418 |
| 6NC2 | A_LYS_282 | NZ  | A_ASP_279 | OD2 | 2.788 |
| 6NC2 | A_ARG_298 | NH1 | A_GLU_381 | OE1 | 2.865 |
| 6NC2 | A_ARG_298 | NH1 | A_GLU_381 | OE2 | 2.959 |
| 6NC2 | A_LYS_305 | NZ  | A_GLU_172 | OE1 | 2.574 |
| 6NC2 | A_LYS_305 | NZ  | A_GLU_172 | OE2 | 3.869 |
| 6NC2 | A_ARG_327 | NH2 | A_ASP_325 | OD2 | 3.126 |
| 6NC2 | A_LYS_337 | NZ  | A_GLU_293 | OE1 | 2.932 |
| 6NC2 | A_LYS_343 | NZ  | A_ASP_340 | OD1 | 3.486 |
| 6NC2 | A_LYS_348 | NZ  | A_GLU_269 | OE1 | 2.894 |
| 6NC2 | A_LYS_348 | NZ  | A_GLU_269 | OE2 | 3.758 |
| 6NC2 | A_LYS_348 | NZ  | A_GLU_351 | OE2 | 3.738 |
| 6NC2 | A_ARG_419 | NH2 | A_GLU_153 | OE2 | 3.652 |
| 6NC2 | A_LYS_421 | NZ  | A_GLU_370 | OE2 | 2.787 |
| 6NC2 | A_ARG_456 | NH2 | A_GLU_466 | OE1 | 2.887 |
| 6NC2 | A_ARG_456 | NH2 | A_GLU_466 | OE2 | 3.857 |
| 6NC2 | A_LYS_460 | NZ  | A_GLU_466 | OE1 | 3.544 |
| 6NC2 | A_ARG_476 | NH1 | A_GLU_102 | OE1 | 3.959 |
| 6NC2 | A_ARG_476 | NH1 | A_GLU_102 | OE2 | 2.882 |
| 6NC2 | A_ARG_476 | NH2 | A_ASP_474 | OD1 | 3.950 |
| 6NC2 | A_ARG_476 | NH2 | A_ASP_474 | OD2 | 2.809 |
| 6NC2 | A_ARG_480 | NH2 | A_ASP_477 | OD1 | 3.009 |
| 6NC2 | A_ARG_480 | NH2 | A_ASP_477 | OD2 | 3.559 |
| 6NC2 | A_LYS_487 | NZ  | A_GLU_47  | OE1 | 3.379 |
| 6NC2 | A_LYS_487 | NZ  | A_GLU_91  | OE1 | 3.334 |
| 6NC2 | A_LYS_490 | NZ  | A_GLU_492 | OE1 | 3.377 |
| 6NC2 | A_LYS_490 | NZ  | A_GLU_492 | OE2 | 2.629 |
| 6NC2 | A_LYS_500 | NZ  | I_ASP_664 | OD1 | 2.780 |
| 6NC2 | A_LYS_500 | NZ  | I_ASP_664 | OD2 | 3.992 |
| 6NC2 | A_ARG_503 | NH1 | B_GLU_654 | OE1 | 3.759 |
| 6NC2 | A_ARG_503 | NH1 | B_GLU_654 | OE2 | 3.172 |
| 6NC2 | B_ARG_542 | NH1 | I_GLU_647 | OE1 | 2.800 |
| 6NC2 | B_ARG_542 | NH1 | I_ASP_648 | OD1 | 3.191 |
| 6NC2 | B_ARG_542 | NH2 | I_ASP_648 | OD1 | 3.498 |
| 6NC2 | B_LYS_574 | NZ  | A_ASP_107 | OD1 | 2.510 |
| 6NC2 | B_LYS_574 | NZ  | A_ASP_107 | OD2 | 3.688 |
| 6NC2 | B_LYS_588 | NZ  | B_ASP_589 | OD1 | 2.875 |
| 6NC2 | B_LYS_617 | NZ  | B_GLU_634 | OE2 | 2.908 |
| 6NC2 | H_LYS_30  | NZ  | H_ASP_31  | OD1 | 3.266 |
| 6NC2 | H_LYS_30  | NZ  | H_ASP_31  | OD2 | 2.768 |
| 6NC2 | H_HIS_35  | NE2 | H_ASP_95  | OD1 | 2.705 |
| 6NC2 | H_ARG_38  | NH1 | H_ASP_86  | OD1 | 2.970 |
| 6NC2 | H_ARG_38  | NH2 | H_GLU_46  | OE1 | 3.107 |

|      |           |     |           |     |       |
|------|-----------|-----|-----------|-----|-------|
| 6NC2 | H_ARG_38  | NH2 | H_GLU_46  | OE2 | 3.826 |
| 6NC2 | H_ARG_66  | NH2 | H_ASP_86  | OD1 | 3.009 |
| 6NC2 | H_ARG_66  | NH2 | H_ASP_86  | OD2 | 3.729 |
| 6NC2 | H_LYS_75  | NZ  | H_ASP_72  | OD2 | 3.903 |
| 6NC2 | H_ARG_82B | NH1 | H_ASP_82A | OD2 | 2.740 |
| 6NC2 | H_ARG_83  | NH2 | H_GLU_85  | OE1 | 3.718 |
| 6NC2 | H_ARG_83  | NH2 | H_GLU_85  | OE2 | 3.237 |
| 6NC2 | H_LYS_94  | NZ  | H_ASP_101 | OD1 | 3.921 |
| 6NC2 | H_ARG_96  | NH1 | L_ASP_50  | OD1 | 3.082 |
| 6NC2 | H_ARG_96  | NH1 | L_ASP_50  | OD2 | 3.706 |
| 6NC2 | H_ARG_96  | NH2 | L_ASP_50  | OD1 | 3.892 |
| 6NC2 | H_ARG_96  | NH2 | L_ASP_50  | OD2 | 3.158 |
| 6NC2 | H_ARG_99  | NH2 | H_ASP_31  | OD1 | 3.800 |
| 6NC2 | L_LYS_30  | NZ  | L_ASP_28  | OD2 | 2.906 |
| 6NC2 | L_ARG_37  | NH1 | L_ASP_82  | OD1 | 3.215 |
| 6NC2 | L_ARG_37  | NH2 | L_GLU_45  | OE1 | 2.891 |
| 6NC2 | L_ARG_37  | NH2 | L_GLU_45  | OE2 | 3.981 |
| 6NC2 | L_LYS_42  | NZ  | L_GLU_45  | OE1 | 3.768 |
| 6NC2 | L_LYS_103 | NZ  | L_GLU_105 | OE1 | 3.671 |
| 6NC2 | C_LYS_46  | NZ  | L_ASP_636 | OD1 | 3.909 |
| 6NC2 | C_ARG_59  | NH1 | C_ASP_57  | OD1 | 2.814 |
| 6NC2 | C_ARG_59  | NH1 | C_ASP_57  | OD2 | 3.348 |
| 6NC2 | C_ARG_59  | NH2 | C_ASP_57  | OD1 | 3.635 |
| 6NC2 | C_ARG_59  | NH2 | C_ASP_57  | OD2 | 2.765 |
| 6NC2 | C_LYS_155 | NZ  | C_ASP_133 | OD1 | 2.379 |
| 6NC2 | C_LYS_231 | NZ  | C_GLU_268 | OE2 | 2.886 |
| 6NC2 | C_LYS_232 | NZ  | C_GLU_269 | OE1 | 3.666 |
| 6NC2 | C_LYS_232 | NZ  | C_GLU_269 | OE2 | 2.418 |
| 6NC2 | C_LYS_282 | NZ  | C_ASP_279 | OD2 | 2.788 |
| 6NC2 | C_ARG_298 | NH1 | C_GLU_381 | OE1 | 2.865 |
| 6NC2 | C_ARG_298 | NH1 | C_GLU_381 | OE2 | 2.960 |
| 6NC2 | C_LYS_305 | NZ  | C_GLU_172 | OE1 | 2.574 |
| 6NC2 | C_LYS_305 | NZ  | C_GLU_172 | OE2 | 3.869 |
| 6NC2 | C_ARG_327 | NH2 | C_ASP_325 | OD2 | 3.126 |
| 6NC2 | C_LYS_337 | NZ  | C_GLU_293 | OE1 | 2.932 |
| 6NC2 | C_LYS_343 | NZ  | C_ASP_340 | OD1 | 3.486 |
| 6NC2 | C_LYS_348 | NZ  | C_GLU_269 | OE1 | 2.894 |
| 6NC2 | C_LYS_348 | NZ  | C_GLU_269 | OE2 | 3.757 |
| 6NC2 | C_LYS_348 | NZ  | C_GLU_351 | OE2 | 3.738 |
| 6NC2 | C_ARG_419 | NH2 | C_GLU_153 | OE2 | 3.652 |
| 6NC2 | C_LYS_421 | NZ  | C_GLU_370 | OE2 | 2.787 |
| 6NC2 | C_ARG_456 | NH2 | C_GLU_466 | OE1 | 2.887 |
| 6NC2 | C_ARG_456 | NH2 | C_GLU_466 | OE2 | 3.857 |
| 6NC2 | C_LYS_460 | NZ  | C_GLU_466 | OE1 | 3.544 |
| 6NC2 | C_ARG_476 | NH1 | C_GLU_102 | OE1 | 3.959 |
| 6NC2 | C_ARG_476 | NH1 | C_GLU_102 | OE2 | 2.882 |
| 6NC2 | C_ARG_476 | NH2 | C_ASP_474 | OD1 | 3.950 |
| 6NC2 | C_ARG_476 | NH2 | C_ASP_474 | OD2 | 2.809 |
| 6NC2 | C_ARG_480 | NH2 | C_ASP_477 | OD1 | 3.009 |
| 6NC2 | C_ARG_480 | NH2 | C_ASP_477 | OD2 | 3.559 |
| 6NC2 | C_LYS_487 | NZ  | C_GLU_47  | OE1 | 3.379 |
| 6NC2 | C_LYS_487 | NZ  | C_GLU_91  | OE1 | 3.334 |
| 6NC2 | C_LYS_490 | NZ  | C_GLU_492 | OE1 | 3.377 |
| 6NC2 | C_LYS_490 | NZ  | C_GLU_492 | OE2 | 2.629 |
| 6NC2 | C_LYS_500 | NZ  | J_ASP_664 | OD1 | 2.780 |
| 6NC2 | C_LYS_500 | NZ  | J_ASP_664 | OD2 | 3.991 |
| 6NC2 | C_ARG_503 | NH1 | I_GLU_654 | OE1 | 3.760 |
| 6NC2 | C_ARG_503 | NH1 | I_GLU_654 | OE2 | 3.173 |

|      |           |     |           |     |       |
|------|-----------|-----|-----------|-----|-------|
| 6NC2 | L_ARG_542 | NH1 | J_GLU_647 | OE1 | 2.801 |
| 6NC2 | L_ARG_542 | NH1 | J_ASP_648 | OD1 | 3.190 |
| 6NC2 | L_ARG_542 | NH2 | J_ASP_648 | OD1 | 3.498 |
| 6NC2 | L_LYS_574 | NZ  | C_ASP_107 | OD1 | 2.510 |
| 6NC2 | L_LYS_574 | NZ  | C_ASP_107 | OD2 | 3.688 |
| 6NC2 | L_LYS_588 | NZ  | L_ASP_589 | OD1 | 2.875 |
| 6NC2 | L_LYS_617 | NZ  | L_GLU_634 | OE2 | 2.908 |
| 6NC2 | O_LYS_30  | NZ  | O_ASP_31  | OD1 | 3.267 |
| 6NC2 | O_LYS_30  | NZ  | O_ASP_31  | OD2 | 2.768 |
| 6NC2 | O_HIS_35  | NE2 | O_ASP_95  | OD1 | 2.705 |
| 6NC2 | O_ARG_38  | NH1 | O_ASP_86  | OD1 | 2.971 |
| 6NC2 | O_ARG_38  | NH2 | O_GLU_46  | OE1 | 3.107 |
| 6NC2 | O_ARG_38  | NH2 | O_GLU_46  | OE2 | 3.826 |
| 6NC2 | O_ARG_66  | NH2 | O_ASP_86  | OD1 | 3.008 |
| 6NC2 | O_ARG_66  | NH2 | O_ASP_86  | OD2 | 3.729 |
| 6NC2 | O_LYS_75  | NZ  | O_ASP_72  | OD2 | 3.903 |
| 6NC2 | O_ARG_82B | NH1 | O_ASP_82A | OD2 | 2.740 |
| 6NC2 | O_ARG_83  | NH2 | O_GLU_85  | OE1 | 3.718 |
| 6NC2 | O_ARG_83  | NH2 | O_GLU_85  | OE2 | 3.238 |
| 6NC2 | O_LYS_94  | NZ  | O_ASP_101 | OD1 | 3.921 |
| 6NC2 | O_ARG_96  | NH1 | T_ASP_50  | OD1 | 3.082 |
| 6NC2 | O_ARG_96  | NH1 | T_ASP_50  | OD2 | 3.706 |
| 6NC2 | O_ARG_96  | NH2 | T_ASP_50  | OD1 | 3.892 |
| 6NC2 | O_ARG_96  | NH2 | T_ASP_50  | OD2 | 3.158 |
| 6NC2 | O_ARG_99  | NH2 | O_ASP_31  | OD1 | 3.799 |
| 6NC2 | T_LYS_30  | NZ  | T_ASP_28  | OD2 | 2.905 |
| 6NC2 | T_ARG_37  | NH1 | T_ASP_82  | OD1 | 3.216 |
| 6NC2 | T_ARG_37  | NH2 | T_GLU_45  | OE1 | 2.891 |
| 6NC2 | T_ARG_37  | NH2 | T_GLU_45  | OE2 | 3.981 |
| 6NC2 | T_LYS_42  | NZ  | T_GLU_45  | OE1 | 3.769 |
| 6NC2 | T_LYS_103 | NZ  | T_GLU_105 | OE1 | 3.670 |
| 6NC2 | D_LYS_46  | NZ  | J_ASP_636 | OD1 | 3.909 |
| 6NC2 | D_ARG_59  | NH1 | D_ASP_57  | OD1 | 2.814 |
| 6NC2 | D_ARG_59  | NH1 | D_ASP_57  | OD2 | 3.348 |
| 6NC2 | D_ARG_59  | NH2 | D_ASP_57  | OD1 | 3.635 |
| 6NC2 | D_ARG_59  | NH2 | D_ASP_57  | OD2 | 2.766 |
| 6NC2 | D_LYS_155 | NZ  | D_ASP_133 | OD1 | 2.379 |
| 6NC2 | D_LYS_231 | NZ  | D_GLU_268 | OE2 | 2.885 |
| 6NC2 | D_LYS_232 | NZ  | D_GLU_269 | OE1 | 3.666 |
| 6NC2 | D_LYS_232 | NZ  | D_GLU_269 | OE2 | 2.418 |
| 6NC2 | D_LYS_282 | NZ  | D_ASP_279 | OD2 | 2.787 |
| 6NC2 | D_ARG_298 | NH1 | D_GLU_381 | OE1 | 2.864 |
| 6NC2 | D_ARG_298 | NH1 | D_GLU_381 | OE2 | 2.959 |
| 6NC2 | D_LYS_305 | NZ  | D_GLU_172 | OE1 | 2.575 |
| 6NC2 | D_LYS_305 | NZ  | D_GLU_172 | OE2 | 3.868 |
| 6NC2 | D_ARG_327 | NH2 | D_ASP_325 | OD2 | 3.127 |
| 6NC2 | D_LYS_337 | NZ  | D_GLU_293 | OE1 | 2.931 |
| 6NC2 | D_LYS_343 | NZ  | D_ASP_340 | OD1 | 3.486 |
| 6NC2 | D_LYS_348 | NZ  | D_GLU_269 | OE1 | 2.894 |
| 6NC2 | D_LYS_348 | NZ  | D_GLU_269 | OE2 | 3.758 |
| 6NC2 | D_LYS_348 | NZ  | D_GLU_351 | OE2 | 3.738 |
| 6NC2 | D_ARG_419 | NH2 | D_GLU_153 | OE2 | 3.652 |
| 6NC2 | D_LYS_421 | NZ  | D_GLU_370 | OE2 | 2.786 |
| 6NC2 | D_ARG_456 | NH2 | D_GLU_466 | OE1 | 2.886 |
| 6NC2 | D_ARG_456 | NH2 | D_GLU_466 | OE2 | 3.857 |
| 6NC2 | D_LYS_460 | NZ  | D_GLU_466 | OE1 | 3.544 |
| 6NC2 | D_ARG_476 | NH1 | D_GLU_102 | OE1 | 3.959 |
| 6NC2 | D_ARG_476 | NH1 | D_GLU_102 | OE2 | 2.881 |

|      |           |     |           |     |       |
|------|-----------|-----|-----------|-----|-------|
| 6NC2 | D_ARG_476 | NH2 | D_ASP_474 | OD1 | 3.950 |
| 6NC2 | D_ARG_476 | NH2 | D_ASP_474 | OD2 | 2.809 |
| 6NC2 | D_ARG_480 | NH2 | D_ASP_477 | OD1 | 3.009 |
| 6NC2 | D_ARG_480 | NH2 | D_ASP_477 | OD2 | 3.559 |
| 6NC2 | D_LYS_487 | NZ  | D_GLU_47  | OE1 | 3.379 |
| 6NC2 | D_LYS_487 | NZ  | D_GLU_91  | OE1 | 3.334 |
| 6NC2 | D_LYS_490 | NZ  | D_GLU_492 | OE1 | 3.377 |
| 6NC2 | D_LYS_490 | NZ  | D_GLU_492 | OE2 | 2.630 |
| 6NC2 | D_LYS_500 | NZ  | B_ASP_664 | OD1 | 2.780 |
| 6NC2 | D_LYS_500 | NZ  | B_ASP_664 | OD2 | 3.992 |
| 6NC2 | D_ARG_503 | NH1 | J_GLU_654 | OE1 | 3.759 |
| 6NC2 | D_ARG_503 | NH1 | J_GLU_654 | OE2 | 3.173 |
| 6NC2 | J_ARG_542 | NH1 | B_GLU_647 | OE1 | 2.800 |
| 6NC2 | J_ARG_542 | NH1 | B_ASP_648 | OD1 | 3.191 |
| 6NC2 | J_ARG_542 | NH2 | B_ASP_648 | OD1 | 3.498 |
| 6NC2 | J_LYS_574 | NZ  | D_ASP_107 | OD1 | 2.510 |
| 6NC2 | J_LYS_574 | NZ  | D_ASP_107 | OD2 | 3.688 |
| 6NC2 | J_LYS_588 | NZ  | J_ASP_589 | OD1 | 2.875 |
| 6NC2 | J_LYS_617 | NZ  | J_GLU_634 | OE2 | 2.908 |
| 6NC2 | P_LYS_30  | NZ  | P_ASP_31  | OD1 | 3.267 |
| 6NC2 | P_LYS_30  | NZ  | P_ASP_31  | OD2 | 2.768 |
| 6NC2 | P_HIS_35  | NE2 | P_ASP_95  | OD1 | 2.704 |
| 6NC2 | P_ARG_38  | NH1 | P_ASP_86  | OD1 | 2.970 |
| 6NC2 | P_ARG_38  | NH2 | P_GLU_46  | OE1 | 3.107 |
| 6NC2 | P_ARG_38  | NH2 | P_GLU_46  | OE2 | 3.826 |
| 6NC2 | P_ARG_66  | NH2 | P_ASP_86  | OD1 | 3.009 |
| 6NC2 | P_ARG_66  | NH2 | P_ASP_86  | OD2 | 3.730 |
| 6NC2 | P_LYS_75  | NZ  | P_ASP_72  | OD2 | 3.903 |
| 6NC2 | P_ARG_82B | NH1 | P_ASP_82A | OD2 | 2.740 |
| 6NC2 | P_ARG_83  | NH2 | P_GLU_85  | OE1 | 3.718 |
| 6NC2 | P_ARG_83  | NH2 | P_GLU_85  | OE2 | 3.237 |
| 6NC2 | P_LYS_94  | NZ  | P_ASP_101 | OD1 | 3.921 |
| 6NC2 | P_ARG_96  | NH1 | U_ASP_50  | OD1 | 3.083 |
| 6NC2 | P_ARG_96  | NH1 | U_ASP_50  | OD2 | 3.706 |
| 6NC2 | P_ARG_96  | NH2 | U_ASP_50  | OD1 | 3.893 |
| 6NC2 | P_ARG_96  | NH2 | U_ASP_50  | OD2 | 3.158 |
| 6NC2 | P_ARG_99  | NH2 | P_ASP_31  | OD1 | 3.800 |
| 6NC2 | U_LYS_30  | NZ  | U_ASP_28  | OD2 | 2.905 |
| 6NC2 | U_ARG_37  | NH1 | U_ASP_82  | OD1 | 3.215 |
| 6NC2 | U_ARG_37  | NH2 | U_GLU_45  | OE1 | 2.891 |
| 6NC2 | U_ARG_37  | NH2 | U_GLU_45  | OE2 | 3.981 |
| 6NC2 | U_LYS_42  | NZ  | U_GLU_45  | OE1 | 3.768 |
| 6NC2 | U_LYS_103 | NZ  | U_GLU_105 | OE1 | 3.671 |
| 6NC2 | E_LYS_46  | NZ  | K_ASP_636 | OD1 | 3.909 |
| 6NC2 | E_ARG_59  | NH1 | E_ASP_57  | OD1 | 2.814 |
| 6NC2 | E_ARG_59  | NH1 | E_ASP_57  | OD2 | 3.348 |
| 6NC2 | E_ARG_59  | NH2 | E_ASP_57  | OD1 | 3.635 |
| 6NC2 | E_ARG_59  | NH2 | E_ASP_57  | OD2 | 2.766 |
| 6NC2 | E_LYS_155 | NZ  | E_ASP_133 | OD1 | 2.379 |
| 6NC2 | E_LYS_231 | NZ  | E_GLU_268 | OE2 | 2.886 |
| 6NC2 | E_LYS_232 | NZ  | E_GLU_269 | OE1 | 3.666 |
| 6NC2 | E_LYS_232 | NZ  | E_GLU_269 | OE2 | 2.418 |
| 6NC2 | E_LYS_282 | NZ  | E_ASP_279 | OD2 | 2.788 |
| 6NC2 | E_ARG_298 | NH1 | E_GLU_381 | OE1 | 2.865 |
| 6NC2 | E_ARG_298 | NH1 | E_GLU_381 | OE2 | 2.959 |
| 6NC2 | E_LYS_305 | NZ  | E_GLU_172 | OE1 | 2.574 |
| 6NC2 | E_LYS_305 | NZ  | E_GLU_172 | OE2 | 3.869 |
| 6NC2 | E_ARG_327 | NH2 | E_ASP_325 | OD2 | 3.126 |

|      |           |     |           |     |       |
|------|-----------|-----|-----------|-----|-------|
| 6NC2 | E_LYS_337 | NZ  | E_GLU_293 | OE1 | 2.932 |
| 6NC2 | E_LYS_343 | NZ  | E_ASP_340 | OD1 | 3.486 |
| 6NC2 | E_LYS_348 | NZ  | E_GLU_269 | OE1 | 2.894 |
| 6NC2 | E_LYS_348 | NZ  | E_GLU_269 | OE2 | 3.758 |
| 6NC2 | E_LYS_348 | NZ  | E_GLU_351 | OE2 | 3.738 |
| 6NC2 | E_ARG_419 | NH2 | E_GLU_153 | OE2 | 3.652 |
| 6NC2 | E_LYS_421 | NZ  | E_GLU_370 | OE2 | 2.787 |
| 6NC2 | E_ARG_456 | NH2 | E_GLU_466 | OE1 | 2.887 |
| 6NC2 | E_ARG_456 | NH2 | E_GLU_466 | OE2 | 3.857 |
| 6NC2 | E_LYS_460 | NZ  | E_GLU_466 | OE1 | 3.544 |
| 6NC2 | E_ARG_476 | NH1 | E_GLU_102 | OE1 | 3.959 |
| 6NC2 | E_ARG_476 | NH1 | E_GLU_102 | OE2 | 2.882 |
| 6NC2 | E_ARG_476 | NH2 | E_ASP_474 | OD1 | 3.950 |
| 6NC2 | E_ARG_476 | NH2 | E_ASP_474 | OD2 | 2.809 |
| 6NC2 | E_ARG_480 | NH2 | E_ASP_477 | OD1 | 3.009 |
| 6NC2 | E_ARG_480 | NH2 | E_ASP_477 | OD2 | 3.559 |
| 6NC2 | E_LYS_487 | NZ  | E_GLU_47  | OE1 | 3.379 |
| 6NC2 | E_LYS_487 | NZ  | E_GLU_91  | OE1 | 3.334 |
| 6NC2 | E_LYS_490 | NZ  | E_GLU_492 | OE1 | 3.377 |
| 6NC2 | E_LYS_490 | NZ  | E_GLU_492 | OE2 | 2.629 |
| 6NC2 | E_LYS_500 | NZ  | M_ASP_664 | OD1 | 2.780 |
| 6NC2 | E_LYS_500 | NZ  | M_ASP_664 | OD2 | 3.992 |
| 6NC2 | E_ARG_503 | NH1 | K_GLU_654 | OE1 | 3.759 |
| 6NC2 | E_ARG_503 | NH1 | K_GLU_654 | OE2 | 3.172 |
| 6NC2 | K_ARG_542 | NH1 | M_GLU_647 | OE1 | 2.800 |
| 6NC2 | K_ARG_542 | NH1 | M_ASP_648 | OD1 | 3.191 |
| 6NC2 | K_ARG_542 | NH2 | M_ASP_648 | OD1 | 3.498 |
| 6NC2 | K_LYS_574 | NZ  | E_ASP_107 | OD1 | 2.510 |
| 6NC2 | K_LYS_574 | NZ  | E_ASP_107 | OD2 | 3.688 |
| 6NC2 | K_LYS_588 | NZ  | K_ASP_589 | OD1 | 2.875 |
| 6NC2 | K_LYS_617 | NZ  | K_GLU_634 | OE2 | 2.908 |
| 6NC2 | Q_LYS_30  | NZ  | Q_ASP_31  | OD1 | 3.266 |
| 6NC2 | Q_LYS_30  | NZ  | Q_ASP_31  | OD2 | 2.768 |
| 6NC2 | Q_HIS_35  | NE2 | Q_ASP_95  | OD1 | 2.705 |
| 6NC2 | Q_ARG_38  | NH1 | Q_ASP_86  | OD1 | 2.970 |
| 6NC2 | Q_ARG_38  | NH2 | Q_GLU_46  | OE1 | 3.107 |
| 6NC2 | Q_ARG_38  | NH2 | Q_GLU_46  | OE2 | 3.826 |
| 6NC2 | Q_ARG_66  | NH2 | Q_ASP_86  | OD1 | 3.009 |
| 6NC2 | Q_ARG_66  | NH2 | Q_ASP_86  | OD2 | 3.729 |
| 6NC2 | Q_LYS_75  | NZ  | Q_ASP_72  | OD2 | 3.903 |
| 6NC2 | Q_ARG_82B | NH1 | Q_ASP_82A | OD2 | 2.740 |
| 6NC2 | Q_ARG_83  | NH2 | Q_GLU_85  | OE1 | 3.718 |
| 6NC2 | Q_ARG_83  | NH2 | Q_GLU_85  | OE2 | 3.237 |
| 6NC2 | Q_LYS_94  | NZ  | Q_ASP_101 | OD1 | 3.921 |
| 6NC2 | Q_ARG_96  | NH1 | V_ASP_50  | OD1 | 3.082 |
| 6NC2 | Q_ARG_96  | NH1 | V_ASP_50  | OD2 | 3.706 |
| 6NC2 | Q_ARG_96  | NH2 | V_ASP_50  | OD1 | 3.892 |
| 6NC2 | Q_ARG_96  | NH2 | V_ASP_50  | OD2 | 3.158 |
| 6NC2 | Q_ARG_99  | NH2 | Q_ASP_31  | OD1 | 3.800 |
| 6NC2 | V_LYS_30  | NZ  | V_ASP_28  | OD2 | 2.906 |
| 6NC2 | V_ARG_37  | NH1 | V_ASP_82  | OD1 | 3.215 |
| 6NC2 | V_ARG_37  | NH2 | V_GLU_45  | OE1 | 2.891 |
| 6NC2 | V_ARG_37  | NH2 | V_GLU_45  | OE2 | 3.981 |
| 6NC2 | V_LYS_42  | NZ  | V_GLU_45  | OE1 | 3.768 |
| 6NC2 | V_LYS_103 | NZ  | V_GLU_105 | OE1 | 3.671 |
| 6NC2 | F_LYS_46  | NZ  | M_ASP_636 | OD1 | 3.909 |
| 6NC2 | F_ARG_59  | NH1 | F_ASP_57  | OD1 | 2.814 |
| 6NC2 | F_ARG_59  | NH1 | F_ASP_57  | OD2 | 3.348 |

|      |           |     |           |     |       |
|------|-----------|-----|-----------|-----|-------|
| 6NC2 | F_ARG_59  | NH2 | F_ASP_57  | OD1 | 3.635 |
| 6NC2 | F_ARG_59  | NH2 | F_ASP_57  | OD2 | 2.765 |
| 6NC2 | F_LYS_155 | NZ  | F_ASP_133 | OD1 | 2.379 |
| 6NC2 | F_LYS_231 | NZ  | F_GLU_268 | OE2 | 2.886 |
| 6NC2 | F_LYS_232 | NZ  | F_GLU_269 | OE1 | 3.666 |
| 6NC2 | F_LYS_232 | NZ  | F_GLU_269 | OE2 | 2.418 |
| 6NC2 | F_LYS_282 | NZ  | F_ASP_279 | OD2 | 2.788 |
| 6NC2 | F_ARG_298 | NH1 | F_GLU_381 | OE1 | 2.865 |
| 6NC2 | F_ARG_298 | NH1 | F_GLU_381 | OE2 | 2.960 |
| 6NC2 | F_LYS_305 | NZ  | F_GLU_172 | OE1 | 2.574 |
| 6NC2 | F_LYS_305 | NZ  | F_GLU_172 | OE2 | 3.869 |
| 6NC2 | F_ARG_327 | NH2 | F_ASP_325 | OD2 | 3.127 |
| 6NC2 | F_LYS_337 | NZ  | F_GLU_293 | OE1 | 2.932 |
| 6NC2 | F_LYS_343 | NZ  | F_ASP_340 | OD1 | 3.486 |
| 6NC2 | F_LYS_348 | NZ  | F_GLU_269 | OE1 | 2.894 |
| 6NC2 | F_LYS_348 | NZ  | F_GLU_269 | OE2 | 3.757 |
| 6NC2 | F_LYS_348 | NZ  | F_GLU_351 | OE2 | 3.738 |
| 6NC2 | F_ARG_419 | NH2 | F_GLU_153 | OE2 | 3.653 |
| 6NC2 | F_LYS_421 | NZ  | F_GLU_370 | OE2 | 2.787 |
| 6NC2 | F_ARG_456 | NH2 | F_GLU_466 | OE1 | 2.887 |
| 6NC2 | F_ARG_456 | NH2 | F_GLU_466 | OE2 | 3.857 |
| 6NC2 | F_LYS_460 | NZ  | F_GLU_466 | OE1 | 3.544 |
| 6NC2 | F_ARG_476 | NH1 | F_GLU_102 | OE1 | 3.959 |
| 6NC2 | F_ARG_476 | NH1 | F_GLU_102 | OE2 | 2.882 |
| 6NC2 | F_ARG_476 | NH2 | F_ASP_474 | OD1 | 3.950 |
| 6NC2 | F_ARG_476 | NH2 | F_ASP_474 | OD2 | 2.809 |
| 6NC2 | F_ARG_480 | NH2 | F_ASP_477 | OD1 | 3.009 |
| 6NC2 | F_ARG_480 | NH2 | F_ASP_477 | OD2 | 3.559 |
| 6NC2 | F_LYS_487 | NZ  | F_GLU_47  | OE1 | 3.379 |
| 6NC2 | F_LYS_487 | NZ  | F_GLU_91  | OE1 | 3.334 |
| 6NC2 | F_LYS_490 | NZ  | F_GLU_492 | OE1 | 3.377 |
| 6NC2 | F_LYS_490 | NZ  | F_GLU_492 | OE2 | 2.629 |
| 6NC2 | F_LYS_500 | NZ  | N_ASP_664 | OD1 | 2.780 |
| 6NC2 | F_LYS_500 | NZ  | N_ASP_664 | OD2 | 3.991 |
| 6NC2 | F_ARG_503 | NH1 | M_GLU_654 | OE1 | 3.759 |
| 6NC2 | F_ARG_503 | NH1 | M_GLU_654 | OE2 | 3.173 |
| 6NC2 | M_ARG_542 | NH1 | N_GLU_647 | OE1 | 2.801 |
| 6NC2 | M_ARG_542 | NH1 | N_ASP_648 | OD1 | 3.191 |
| 6NC2 | M_ARG_542 | NH2 | N_ASP_648 | OD1 | 3.498 |
| 6NC2 | M_LYS_574 | NZ  | F_ASP_107 | OD1 | 2.510 |
| 6NC2 | M_LYS_574 | NZ  | F_ASP_107 | OD2 | 3.688 |
| 6NC2 | M_LYS_588 | NZ  | M_ASP_589 | OD1 | 2.875 |
| 6NC2 | M_LYS_617 | NZ  | M_GLU_634 | OE2 | 2.907 |
| 6NC2 | R_LYS_30  | NZ  | R_ASP_31  | OD1 | 3.267 |
| 6NC2 | R_LYS_30  | NZ  | R_ASP_31  | OD2 | 2.768 |
| 6NC2 | R_HIS_35  | NE2 | R_ASP_95  | OD1 | 2.705 |
| 6NC2 | R_ARG_38  | NH1 | R_ASP_86  | OD1 | 2.970 |
| 6NC2 | R_ARG_38  | NH2 | R_GLU_46  | OE1 | 3.107 |
| 6NC2 | R_ARG_38  | NH2 | R_GLU_46  | OE2 | 3.826 |
| 6NC2 | R_ARG_66  | NH2 | R_ASP_86  | OD1 | 3.009 |
| 6NC2 | R_ARG_66  | NH2 | R_ASP_86  | OD2 | 3.729 |
| 6NC2 | R_LYS_75  | NZ  | R_ASP_72  | OD2 | 3.903 |
| 6NC2 | R_ARG_82B | NH1 | R_ASP_82A | OD2 | 2.739 |
| 6NC2 | R_ARG_83  | NH2 | R_GLU_85  | OE1 | 3.718 |
| 6NC2 | R_ARG_83  | NH2 | R_GLU_85  | OE2 | 3.238 |
| 6NC2 | R_LYS_94  | NZ  | R_ASP_101 | OD1 | 3.921 |
| 6NC2 | R_ARG_96  | NH1 | W_ASP_50  | OD1 | 3.082 |
| 6NC2 | R_ARG_96  | NH1 | W_ASP_50  | OD2 | 3.706 |

|      |           |     |           |     |       |
|------|-----------|-----|-----------|-----|-------|
| 6NC2 | R_ARG_96  | NH2 | W_ASP_50  | OD1 | 3.892 |
| 6NC2 | R_ARG_96  | NH2 | W_ASP_50  | OD2 | 3.157 |
| 6NC2 | R_ARG_99  | NH2 | R_ASP_31  | OD1 | 3.799 |
| 6NC2 | W_LYS_30  | NZ  | W_ASP_28  | OD2 | 2.905 |
| 6NC2 | W_ARG_37  | NH1 | W_ASP_82  | OD1 | 3.215 |
| 6NC2 | W_ARG_37  | NH2 | W_GLU_45  | OE1 | 2.891 |
| 6NC2 | W_ARG_37  | NH2 | W_GLU_45  | OE2 | 3.981 |
| 6NC2 | W_LYS_42  | NZ  | W_GLU_45  | OE1 | 3.769 |
| 6NC2 | W_LYS_103 | NZ  | W_GLU_105 | OE1 | 3.671 |
| 6NC2 | G_LYS_46  | NZ  | N_ASP_636 | OD1 | 3.909 |
| 6NC2 | G_ARG_59  | NH1 | G_ASP_57  | OD1 | 2.814 |
| 6NC2 | G_ARG_59  | NH1 | G_ASP_57  | OD2 | 3.348 |
| 6NC2 | G_ARG_59  | NH2 | G_ASP_57  | OD1 | 3.635 |
| 6NC2 | G_ARG_59  | NH2 | G_ASP_57  | OD2 | 2.766 |
| 6NC2 | G_LYS_155 | NZ  | G_ASP_133 | OD1 | 2.379 |
| 6NC2 | G_LYS_231 | NZ  | G_GLU_268 | OE2 | 2.886 |
| 6NC2 | G_LYS_232 | NZ  | G_GLU_269 | OE1 | 3.666 |
| 6NC2 | G_LYS_232 | NZ  | G_GLU_269 | OE2 | 2.418 |
| 6NC2 | G_LYS_282 | NZ  | G_ASP_279 | OD2 | 2.787 |
| 6NC2 | G_ARG_298 | NH1 | G_GLU_381 | OE1 | 2.864 |
| 6NC2 | G_ARG_298 | NH1 | G_GLU_381 | OE2 | 2.959 |
| 6NC2 | G_LYS_305 | NZ  | G_GLU_172 | OE1 | 2.575 |
| 6NC2 | G_LYS_305 | NZ  | G_GLU_172 | OE2 | 3.868 |
| 6NC2 | G_ARG_327 | NH2 | G_ASP_325 | OD2 | 3.127 |
| 6NC2 | G_LYS_337 | NZ  | G_GLU_293 | OE1 | 2.931 |
| 6NC2 | G_LYS_343 | NZ  | G_ASP_340 | OD1 | 3.486 |
| 6NC2 | G_LYS_348 | NZ  | G_GLU_269 | OE1 | 2.894 |
| 6NC2 | G_LYS_348 | NZ  | G_GLU_269 | OE2 | 3.758 |
| 6NC2 | G_LYS_348 | NZ  | G_GLU_351 | OE2 | 3.738 |
| 6NC2 | G_ARG_419 | NH2 | G_GLU_153 | OE2 | 3.652 |
| 6NC2 | G_LYS_421 | NZ  | G_GLU_370 | OE2 | 2.786 |
| 6NC2 | G_ARG_456 | NH2 | G_GLU_466 | OE1 | 2.887 |
| 6NC2 | G_ARG_456 | NH2 | G_GLU_466 | OE2 | 3.857 |
| 6NC2 | G_LYS_460 | NZ  | G_GLU_466 | OE1 | 3.544 |
| 6NC2 | G_ARG_476 | NH1 | G_GLU_102 | OE1 | 3.959 |
| 6NC2 | G_ARG_476 | NH1 | G_GLU_102 | OE2 | 2.881 |
| 6NC2 | G_ARG_476 | NH2 | G_ASP_474 | OD1 | 3.950 |
| 6NC2 | G_ARG_476 | NH2 | G_ASP_474 | OD2 | 2.809 |
| 6NC2 | G_ARG_480 | NH2 | G_ASP_477 | OD1 | 3.009 |
| 6NC2 | G_ARG_480 | NH2 | G_ASP_477 | OD2 | 3.559 |
| 6NC2 | G_LYS_487 | NZ  | G_GLU_47  | OE1 | 3.379 |
| 6NC2 | G_LYS_487 | NZ  | G_GLU_91  | OE1 | 3.334 |
| 6NC2 | G_LYS_490 | NZ  | G_GLU_492 | OE1 | 3.377 |
| 6NC2 | G_LYS_490 | NZ  | G_GLU_492 | OE2 | 2.630 |
| 6NC2 | G_LYS_500 | NZ  | K_ASP_664 | OD1 | 2.780 |
| 6NC2 | G_LYS_500 | NZ  | K_ASP_664 | OD2 | 3.992 |
| 6NC2 | G_ARG_503 | NH1 | N_GLU_654 | OE1 | 3.759 |
| 6NC2 | G_ARG_503 | NH1 | N_GLU_654 | OE2 | 3.173 |
| 6NC2 | N_ARG_542 | NH1 | K_GLU_647 | OE1 | 2.800 |
| 6NC2 | N_ARG_542 | NH1 | K_ASP_648 | OD1 | 3.191 |
| 6NC2 | N_ARG_542 | NH2 | K_ASP_648 | OD1 | 3.498 |
| 6NC2 | N_LYS_574 | NZ  | G_ASP_107 | OD1 | 2.510 |
| 6NC2 | N_LYS_574 | NZ  | G_ASP_107 | OD2 | 3.688 |
| 6NC2 | N_LYS_588 | NZ  | N_ASP_589 | OD1 | 2.875 |
| 6NC2 | N_LYS_617 | NZ  | N_GLU_634 | OE2 | 2.908 |
| 6NC2 | S_LYS_30  | NZ  | S_ASP_31  | OD1 | 3.267 |
| 6NC2 | S_LYS_30  | NZ  | S_ASP_31  | OD2 | 2.768 |
| 6NC2 | S_HIS_35  | NE2 | S_ASP_95  | OD1 | 2.704 |

|      |           |     |           |     |       |
|------|-----------|-----|-----------|-----|-------|
| 6NC2 | S_ARG_38  | NH1 | S_ASP_86  | OD1 | 2.970 |
| 6NC2 | S_ARG_38  | NH2 | S_GLU_46  | OE1 | 3.107 |
| 6NC2 | S_ARG_38  | NH2 | S_GLU_46  | OE2 | 3.826 |
| 6NC2 | S_ARG_66  | NH2 | S_ASP_86  | OD1 | 3.009 |
| 6NC2 | S_ARG_66  | NH2 | S_ASP_86  | OD2 | 3.730 |
| 6NC2 | S_LYS_75  | NZ  | S_ASP_72  | OD2 | 3.903 |
| 6NC2 | S_ARG_82B | NH1 | S_ASP_82A | OD2 | 2.740 |
| 6NC2 | S_ARG_83  | NH2 | S_GLU_85  | OE1 | 3.718 |
| 6NC2 | S_ARG_83  | NH2 | S_GLU_85  | OE2 | 3.237 |
| 6NC2 | S_LYS_94  | NZ  | S_ASP_101 | OD1 | 3.921 |
| 6NC2 | S_ARG_96  | NH1 | X_ASP_50  | OD1 | 3.082 |
| 6NC2 | S_ARG_96  | NH1 | X_ASP_50  | OD2 | 3.706 |
| 6NC2 | S_ARG_96  | NH2 | X_ASP_50  | OD1 | 3.892 |
| 6NC2 | S_ARG_96  | NH2 | X_ASP_50  | OD2 | 3.158 |
| 6NC2 | S_ARG_99  | NH2 | S_ASP_31  | OD1 | 3.800 |
| 6NC2 | X_LYS_30  | NZ  | X_ASP_28  | OD2 | 2.906 |
| 6NC2 | X_ARG_37  | NH1 | X_ASP_82  | OD1 | 3.215 |
| 6NC2 | X_ARG_37  | NH2 | X_GLU_45  | OE1 | 2.891 |
| 6NC2 | X_ARG_37  | NH2 | X_GLU_45  | OE2 | 3.981 |
| 6NC2 | X_LYS_42  | NZ  | X_GLU_45  | OE1 | 3.768 |
| 6NC2 | X_LYS_103 | NZ  | X_GLU_105 | OE1 | 3.671 |
| 6NC3 | A_LYS_46  | NZ  | B_ASP_636 | OD1 | 2.912 |
| 6NC3 | A_LYS_46  | NZ  | B_ASP_636 | OD2 | 3.719 |
| 6NC3 | A_HIS_72  | ND1 | A_GLU_64  | OE1 | 3.735 |
| 6NC3 | A_LYS_117 | NZ  | A_ASP_113 | OD1 | 3.847 |
| 6NC3 | A_LYS_117 | NZ  | A_ASP_113 | OD2 | 2.492 |
| 6NC3 | A_LYS_155 | NZ  | A_ASP_133 | OD1 | 2.486 |
| 6NC3 | A_LYS_168 | NZ  | A_ASP_167 | OD1 | 2.679 |
| 6NC3 | A_LYS_168 | NZ  | A_ASP_167 | OD2 | 3.249 |
| 6NC3 | A_ARG_192 | NH2 | C_ASP_167 | OD1 | 3.709 |
| 6NC3 | A_ARG_192 | NH2 | C_ASP_167 | OD2 | 3.548 |
| 6NC3 | A_LYS_231 | NZ  | A_GLU_267 | OE1 | 2.789 |
| 6NC3 | A_LYS_231 | NZ  | A_GLU_267 | OE2 | 3.511 |
| 6NC3 | A_LYS_232 | NZ  | A_GLU_269 | OE1 | 3.765 |
| 6NC3 | A_LYS_232 | NZ  | A_GLU_269 | OE2 | 2.544 |
| 6NC3 | A_HIS_249 | NE2 | A_GLU_482 | OE2 | 2.721 |
| 6NC3 | A_LYS_290 | NZ  | A_GLU_268 | OE1 | 3.516 |
| 6NC3 | A_ARG_298 | NH1 | A_GLU_381 | OE2 | 2.878 |
| 6NC3 | A_LYS_305 | NZ  | A_GLU_172 | OE1 | 2.502 |
| 6NC3 | A_LYS_305 | NZ  | A_GLU_172 | OE2 | 3.928 |
| 6NC3 | A_LYS_337 | NZ  | A_GLU_293 | OE2 | 2.661 |
| 6NC3 | A_LYS_348 | NZ  | A_GLU_351 | OE1 | 2.941 |
| 6NC3 | A_LYS_348 | NZ  | A_GLU_351 | OE2 | 3.643 |
| 6NC3 | A_LYS_421 | NZ  | A_GLU_370 | OE2 | 2.811 |
| 6NC3 | A_LYS_432 | NZ  | A_ASP_113 | OD1 | 2.553 |
| 6NC3 | A_LYS_432 | NZ  | A_ASP_113 | OD2 | 3.774 |
| 6NC3 | A_LYS_432 | NZ  | A_GLU_429 | OE1 | 3.926 |
| 6NC3 | A_ARG_456 | NH2 | A_GLU_466 | OE1 | 3.636 |
| 6NC3 | A_ARG_456 | NH2 | A_GLU_466 | OE2 | 2.864 |
| 6NC3 | A_ARG_476 | NH1 | A_GLU_102 | OE1 | 3.922 |
| 6NC3 | A_ARG_476 | NH1 | A_GLU_102 | OE2 | 3.112 |
| 6NC3 | A_ARG_476 | NH2 | A_ASP_474 | OD1 | 3.856 |
| 6NC3 | A_ARG_476 | NH2 | A_ASP_474 | OD2 | 3.033 |
| 6NC3 | A_ARG_480 | NH1 | A_ASP_477 | OD1 | 2.738 |
| 6NC3 | A_ARG_480 | NH2 | A_ASP_477 | OD1 | 3.897 |
| 6NC3 | A_LYS_487 | NZ  | A_GLU_47  | OE1 | 2.894 |
| 6NC3 | A_LYS_487 | NZ  | A_GLU_47  | OE2 | 3.821 |
| 6NC3 | A_LYS_487 | NZ  | A_GLU_91  | OE1 | 3.879 |



|      |           |     |           |     |       |
|------|-----------|-----|-----------|-----|-------|
| 6NC3 | A_ARG_503 | NH2 | B_GLU_654 | OE1 | 3.773 |
| 6NC3 | A_ARG_503 | NH2 | B_GLU_654 | OE2 | 3.161 |
| 6NC3 | B_ARG_542 | NH2 | J_GLU_647 | OE1 | 2.826 |
| 6NC3 | B_ARG_542 | NH2 | J_ASP_648 | OD1 | 2.949 |
| 6NC3 | B_ARG_542 | NH2 | J_ASP_648 | OD2 | 3.670 |
| 6NC3 | B_LYS_574 | NZ  | A_ASP_107 | OD1 | 2.582 |
| 6NC3 | B_LYS_574 | NZ  | A_ASP_107 | OD2 | 2.711 |
| 6NC3 | B_ARG_579 | NH1 | J_GLU_584 | OE2 | 3.194 |
| 6NC3 | B_ARG_585 | NH2 | A_GLU_492 | OE1 | 2.939 |
| 6NC3 | B_ARG_585 | NH2 | A_GLU_492 | OE2 | 3.498 |
| 6NC3 | B_LYS_617 | NZ  | B_GLU_634 | OE1 | 2.815 |
| 6NC3 | B_LYS_617 | NZ  | B_GLU_634 | OE2 | 3.445 |
| 6NC3 | H_LYS_12  | NZ  | H_GLU_10  | OE1 | 3.786 |
| 6NC3 | H_HIS_35  | NE2 | H_ASP_95  | OD2 | 3.813 |
| 6NC3 | H_ARG_38  | NH1 | H_ASP_86  | OD1 | 2.638 |
| 6NC3 | H_ARG_38  | NH2 | H_GLU_46  | OE1 | 2.857 |
| 6NC3 | H_ARG_38  | NH2 | H_GLU_46  | OE2 | 3.919 |
| 6NC3 | H_ARG_38  | NH2 | H_ASP_86  | OD1 | 3.489 |
| 6NC3 | H_LYS_62  | NZ  | H_GLU_46  | OE2 | 2.819 |
| 6NC3 | H_ARG_66  | NH2 | H_ASP_86  | OD1 | 3.294 |
| 6NC3 | H_ARG_66  | NH2 | H_ASP_86  | OD2 | 3.014 |
| 6NC3 | H_ARG_94  | NH1 | H_GLU_2   | OE1 | 2.960 |
| 6NC3 | H_ARG_94  | NH2 | H_GLU_2   | OE1 | 3.018 |
| 6NC3 | H_LYS_96  | NZ  | H_ASP_101 | OD1 | 3.648 |
| 6NC3 | H_LYS_96  | NZ  | H_ASP_101 | OD2 | 2.449 |
| 6NC3 | L_ARG_30  | NH2 | L_GLU_32  | OE2 | 3.023 |
| 6NC3 | L_ARG_61  | NH1 | L_GLU_81  | OE2 | 3.991 |
| 6NC3 | L_ARG_61  | NH2 | L_GLU_81  | OE2 | 3.260 |
| 6NC3 | L_ARG_61  | NH2 | L_ASP_82  | OD1 | 2.918 |
| 6NC3 | L_ARG_61  | NH2 | L_ASP_82  | OD2 | 3.280 |
| 6NC3 | L_LYS_103 | NZ  | L_GLU_105 | OE2 | 3.920 |
| 6NC3 | L_LYS_107 | NZ  | L_ASP_17  | OD2 | 2.904 |
| 6NC3 | C_LYS_46  | NZ  | L_ASP_636 | OD1 | 2.913 |
| 6NC3 | C_LYS_46  | NZ  | L_ASP_636 | OD2 | 3.719 |
| 6NC3 | C_HIS_72  | ND1 | C_GLU_64  | OE1 | 3.735 |
| 6NC3 | C_LYS_117 | NZ  | C_ASP_113 | OD1 | 3.848 |
| 6NC3 | C_LYS_117 | NZ  | C_ASP_113 | OD2 | 2.492 |
| 6NC3 | C_LYS_155 | NZ  | C_ASP_133 | OD1 | 2.487 |
| 6NC3 | C_LYS_168 | NZ  | C_ASP_167 | OD1 | 2.679 |
| 6NC3 | C_LYS_168 | NZ  | C_ASP_167 | OD2 | 3.249 |
| 6NC3 | C_ARG_192 | NH2 | D_ASP_167 | OD1 | 3.709 |
| 6NC3 | C_ARG_192 | NH2 | D_ASP_167 | OD2 | 3.548 |
| 6NC3 | C_LYS_231 | NZ  | C_GLU_267 | OE1 | 2.789 |
| 6NC3 | C_LYS_231 | NZ  | C_GLU_267 | OE2 | 3.511 |
| 6NC3 | C_LYS_232 | NZ  | C_GLU_269 | OE1 | 3.765 |
| 6NC3 | C_LYS_232 | NZ  | C_GLU_269 | OE2 | 2.544 |
| 6NC3 | C_HIS_249 | NE2 | C_GLU_482 | OE2 | 2.721 |
| 6NC3 | C_LYS_290 | NZ  | C_GLU_268 | OE1 | 3.516 |
| 6NC3 | C_ARG_298 | NH1 | C_GLU_381 | OE2 | 2.878 |
| 6NC3 | C_LYS_305 | NZ  | C_GLU_172 | OE1 | 2.502 |
| 6NC3 | C_LYS_305 | NZ  | C_GLU_172 | OE2 | 3.929 |
| 6NC3 | C_LYS_337 | NZ  | C_GLU_293 | OE2 | 2.662 |
| 6NC3 | C_LYS_348 | NZ  | C_GLU_351 | OE1 | 2.941 |
| 6NC3 | C_LYS_348 | NZ  | C_GLU_351 | OE2 | 3.643 |
| 6NC3 | C_LYS_421 | NZ  | C_GLU_370 | OE2 | 2.811 |
| 6NC3 | C_LYS_432 | NZ  | C_ASP_113 | OD1 | 2.553 |
| 6NC3 | C_LYS_432 | NZ  | C_ASP_113 | OD2 | 3.774 |
| 6NC3 | C_LYS_432 | NZ  | C_GLU_429 | OE1 | 3.927 |

|      |           |     |           |     |       |
|------|-----------|-----|-----------|-----|-------|
| 6NC3 | C_ARG_456 | NH2 | C_GLU_466 | OE1 | 3.636 |
| 6NC3 | C_ARG_456 | NH2 | C_GLU_466 | OE2 | 2.864 |
| 6NC3 | C_ARG_476 | NH1 | C_GLU_102 | OE1 | 3.922 |
| 6NC3 | C_ARG_476 | NH1 | C_GLU_102 | OE2 | 3.112 |
| 6NC3 | C_ARG_476 | NH2 | C_ASP_474 | OD1 | 3.856 |
| 6NC3 | C_ARG_476 | NH2 | C_ASP_474 | OD2 | 3.032 |
| 6NC3 | C_ARG_480 | NH1 | C_ASP_477 | OD1 | 2.738 |
| 6NC3 | C_ARG_480 | NH2 | C_ASP_477 | OD1 | 3.897 |
| 6NC3 | C_LYS_487 | NZ  | C_GLU_47  | OE1 | 2.894 |
| 6NC3 | C_LYS_487 | NZ  | C_GLU_47  | OE2 | 3.821 |
| 6NC3 | C_LYS_487 | NZ  | C_GLU_91  | OE1 | 3.878 |
| 6NC3 | C_ARG_503 | NH2 | I_GLU_654 | OE1 | 3.773 |
| 6NC3 | C_ARG_503 | NH2 | I_GLU_654 | OE2 | 3.161 |
| 6NC3 | I_ARG_542 | NH2 | B_GLU_647 | OE1 | 2.826 |
| 6NC3 | I_ARG_542 | NH2 | B_ASP_648 | OD1 | 2.949 |
| 6NC3 | I_ARG_542 | NH2 | B_ASP_648 | OD2 | 3.670 |
| 6NC3 | I_LYS_574 | NZ  | C_ASP_107 | OD1 | 2.581 |
| 6NC3 | I_LYS_574 | NZ  | C_ASP_107 | OD2 | 2.711 |
| 6NC3 | I_ARG_579 | NH1 | B_GLU_584 | OE2 | 3.194 |
| 6NC3 | I_ARG_585 | NH2 | C_GLU_492 | OE1 | 2.939 |
| 6NC3 | I_ARG_585 | NH2 | C_GLU_492 | OE2 | 3.498 |
| 6NC3 | I_LYS_617 | NZ  | I_GLU_634 | OE1 | 2.815 |
| 6NC3 | I_LYS_617 | NZ  | I_GLU_634 | OE2 | 3.445 |
| 6NC3 | O_LYS_12  | NZ  | O_GLU_10  | OE1 | 3.786 |
| 6NC3 | O_HIS_35  | NE2 | O_ASP_95  | OD2 | 3.813 |
| 6NC3 | O_ARG_38  | NH1 | O_ASP_86  | OD1 | 2.638 |
| 6NC3 | O_ARG_38  | NH2 | O_GLU_46  | OE1 | 2.857 |
| 6NC3 | O_ARG_38  | NH2 | O_GLU_46  | OE2 | 3.919 |
| 6NC3 | O_ARG_38  | NH2 | O_ASP_86  | OD1 | 3.489 |
| 6NC3 | O_LYS_62  | NZ  | O_GLU_46  | OE2 | 2.819 |
| 6NC3 | O_ARG_66  | NH2 | O_ASP_86  | OD1 | 3.294 |
| 6NC3 | O_ARG_66  | NH2 | O_ASP_86  | OD2 | 3.013 |
| 6NC3 | O_ARG_94  | NH1 | O_GLU_2   | OE1 | 2.959 |
| 6NC3 | O_ARG_94  | NH2 | O_GLU_2   | OE1 | 3.018 |
| 6NC3 | O_LYS_96  | NZ  | O_ASP_101 | OD1 | 3.647 |
| 6NC3 | O_LYS_96  | NZ  | O_ASP_101 | OD2 | 2.449 |
| 6NC3 | T_ARG_30  | NH2 | T_GLU_32  | OE2 | 3.022 |
| 6NC3 | T_ARG_61  | NH1 | T_GLU_81  | OE2 | 3.990 |
| 6NC3 | T_ARG_61  | NH2 | T_GLU_81  | OE2 | 3.260 |
| 6NC3 | T_ARG_61  | NH2 | T_ASP_82  | OD1 | 2.918 |
| 6NC3 | T_ARG_61  | NH2 | T_ASP_82  | OD2 | 3.280 |
| 6NC3 | T_LYS_103 | NZ  | T_GLU_105 | OE2 | 3.920 |
| 6NC3 | T_LYS_107 | NZ  | T_ASP_17  | OD2 | 2.904 |
| 6NC3 | D_LYS_46  | NZ  | J_ASP_636 | OD1 | 2.913 |
| 6NC3 | D_LYS_46  | NZ  | J_ASP_636 | OD2 | 3.719 |
| 6NC3 | D_HIS_72  | ND1 | D_GLU_64  | OE1 | 3.734 |
| 6NC3 | D_LYS_117 | NZ  | D_ASP_113 | OD1 | 3.848 |
| 6NC3 | D_LYS_117 | NZ  | D_ASP_113 | OD2 | 2.492 |
| 6NC3 | D_LYS_155 | NZ  | D_ASP_133 | OD1 | 2.487 |
| 6NC3 | D_LYS_168 | NZ  | D_ASP_167 | OD1 | 2.679 |
| 6NC3 | D_LYS_168 | NZ  | D_ASP_167 | OD2 | 3.249 |
| 6NC3 | D_ARG_192 | NH2 | A_ASP_167 | OD1 | 3.708 |
| 6NC3 | D_ARG_192 | NH2 | A_ASP_167 | OD2 | 3.548 |
| 6NC3 | D_LYS_231 | NZ  | D_GLU_267 | OE1 | 2.789 |
| 6NC3 | D_LYS_231 | NZ  | D_GLU_267 | OE2 | 3.510 |
| 6NC3 | D_LYS_232 | NZ  | D_GLU_269 | OE1 | 3.765 |
| 6NC3 | D_LYS_232 | NZ  | D_GLU_269 | OE2 | 2.544 |
| 6NC3 | D_HIS_249 | NE2 | D_GLU_482 | OE2 | 2.721 |

|      |           |     |           |     |       |
|------|-----------|-----|-----------|-----|-------|
| 6NC3 | D_LYS_290 | NZ  | D_GLU_268 | OE1 | 3.516 |
| 6NC3 | D_ARG_298 | NH1 | D_GLU_381 | OE2 | 2.878 |
| 6NC3 | D_LYS_305 | NZ  | D_GLU_172 | OE1 | 2.502 |
| 6NC3 | D_LYS_305 | NZ  | D_GLU_172 | OE2 | 3.929 |
| 6NC3 | D_LYS_337 | NZ  | D_GLU_293 | OE2 | 2.661 |
| 6NC3 | D_LYS_348 | NZ  | D_GLU_351 | OE1 | 2.941 |
| 6NC3 | D_LYS_348 | NZ  | D_GLU_351 | OE2 | 3.643 |
| 6NC3 | D_LYS_421 | NZ  | D_GLU_370 | OE2 | 2.811 |
| 6NC3 | D_LYS_432 | NZ  | D_ASP_113 | OD1 | 2.553 |
| 6NC3 | D_LYS_432 | NZ  | D_ASP_113 | OD2 | 3.775 |
| 6NC3 | D_LYS_432 | NZ  | D_GLU_429 | OE1 | 3.926 |
| 6NC3 | D_ARG_456 | NH2 | D_GLU_466 | OE1 | 3.636 |
| 6NC3 | D_ARG_456 | NH2 | D_GLU_466 | OE2 | 2.864 |
| 6NC3 | D_ARG_476 | NH1 | D_GLU_102 | OE1 | 3.922 |
| 6NC3 | D_ARG_476 | NH1 | D_GLU_102 | OE2 | 3.112 |
| 6NC3 | D_ARG_476 | NH2 | D_ASP_474 | OD1 | 3.856 |
| 6NC3 | D_ARG_476 | NH2 | D_ASP_474 | OD2 | 3.032 |
| 6NC3 | D_ARG_480 | NH1 | D_ASP_477 | OD1 | 2.738 |
| 6NC3 | D_ARG_480 | NH2 | D_ASP_477 | OD1 | 3.897 |
| 6NC3 | D_LYS_487 | NZ  | D_GLU_47  | OE1 | 2.894 |
| 6NC3 | D_LYS_487 | NZ  | D_GLU_47  | OE2 | 3.821 |
| 6NC3 | D_LYS_487 | NZ  | D_GLU_91  | OE1 | 3.878 |
| 6NC3 | D_ARG_503 | NH2 | J_GLU_654 | OE1 | 3.773 |
| 6NC3 | D_ARG_503 | NH2 | J_GLU_654 | OE2 | 3.160 |
| 6NC3 | J_ARG_542 | NH2 | I_GLU_647 | OE1 | 2.825 |
| 6NC3 | J_ARG_542 | NH2 | I_ASP_648 | OD1 | 2.949 |
| 6NC3 | J_ARG_542 | NH2 | I_ASP_648 | OD2 | 3.670 |
| 6NC3 | J_LYS_574 | NZ  | D_ASP_107 | OD1 | 2.581 |
| 6NC3 | J_LYS_574 | NZ  | D_ASP_107 | OD2 | 2.710 |
| 6NC3 | J_ARG_579 | NH1 | I_GLU_584 | OE2 | 3.194 |
| 6NC3 | J_ARG_585 | NH2 | D_GLU_492 | OE1 | 2.939 |
| 6NC3 | J_ARG_585 | NH2 | D_GLU_492 | OE2 | 3.498 |
| 6NC3 | J_LYS_617 | NZ  | J_GLU_634 | OE1 | 2.815 |
| 6NC3 | J_LYS_617 | NZ  | J_GLU_634 | OE2 | 3.445 |
| 6NC3 | P_LYS_12  | NZ  | P_GLU_10  | OE1 | 3.785 |
| 6NC3 | P_HIS_35  | NE2 | P_ASP_95  | OD2 | 3.813 |
| 6NC3 | P_ARG_38  | NH1 | P_ASP_86  | OD1 | 2.638 |
| 6NC3 | P_ARG_38  | NH2 | P_GLU_46  | OE1 | 2.856 |
| 6NC3 | P_ARG_38  | NH2 | P_GLU_46  | OE2 | 3.919 |
| 6NC3 | P_ARG_38  | NH2 | P_ASP_86  | OD1 | 3.489 |
| 6NC3 | P_LYS_62  | NZ  | P_GLU_46  | OE2 | 2.819 |
| 6NC3 | P_ARG_66  | NH2 | P_ASP_86  | OD1 | 3.294 |
| 6NC3 | P_ARG_66  | NH2 | P_ASP_86  | OD2 | 3.014 |
| 6NC3 | P_ARG_94  | NH1 | P_GLU_2   | OE1 | 2.959 |
| 6NC3 | P_ARG_94  | NH2 | P_GLU_2   | OE1 | 3.018 |
| 6NC3 | P_LYS_96  | NZ  | P_ASP_101 | OD1 | 3.648 |
| 6NC3 | P_LYS_96  | NZ  | P_ASP_101 | OD2 | 2.449 |
| 6NC3 | U_ARG_30  | NH2 | U_GLU_32  | OE2 | 3.022 |
| 6NC3 | U_ARG_61  | NH1 | U_GLU_81  | OE2 | 3.991 |
| 6NC3 | U_ARG_61  | NH2 | U_GLU_81  | OE2 | 3.260 |
| 6NC3 | U_ARG_61  | NH2 | U_ASP_82  | OD1 | 2.918 |
| 6NC3 | U_ARG_61  | NH2 | U_ASP_82  | OD2 | 3.280 |
| 6NC3 | U_LYS_103 | NZ  | U_GLU_105 | OE2 | 3.920 |
| 6NC3 | U_LYS_107 | NZ  | U_ASP_17  | OD2 | 2.904 |
| 6NC3 | E_LYS_46  | NZ  | K_ASP_636 | OD1 | 2.912 |
| 6NC3 | E_LYS_46  | NZ  | K_ASP_636 | OD2 | 3.719 |
| 6NC3 | E_HIS_72  | ND1 | E_GLU_64  | OE1 | 3.735 |
| 6NC3 | E_LYS_117 | NZ  | E_ASP_113 | OD1 | 3.847 |

|      |           |     |           |     |       |
|------|-----------|-----|-----------|-----|-------|
| 6NC3 | E_LYS_117 | NZ  | E_ASP_113 | OD2 | 2.492 |
| 6NC3 | E_LYS_155 | NZ  | E_ASP_133 | OD1 | 2.486 |
| 6NC3 | E_LYS_168 | NZ  | E_ASP_167 | OD1 | 2.679 |
| 6NC3 | E_LYS_168 | NZ  | E_ASP_167 | OD2 | 3.249 |
| 6NC3 | E_ARG_192 | NH2 | F_ASP_167 | OD1 | 3.709 |
| 6NC3 | E_ARG_192 | NH2 | F_ASP_167 | OD2 | 3.548 |
| 6NC3 | E_LYS_231 | NZ  | E_GLU_267 | OE1 | 2.789 |
| 6NC3 | E_LYS_231 | NZ  | E_GLU_267 | OE2 | 3.511 |
| 6NC3 | E_LYS_232 | NZ  | E_GLU_269 | OE1 | 3.765 |
| 6NC3 | E_LYS_232 | NZ  | E_GLU_269 | OE2 | 2.544 |
| 6NC3 | E_HIS_249 | NE2 | E_GLU_482 | OE2 | 2.721 |
| 6NC3 | E_LYS_290 | NZ  | E_GLU_268 | OE1 | 3.516 |
| 6NC3 | E_ARG_298 | NH1 | E_GLU_381 | OE2 | 2.878 |
| 6NC3 | E_LYS_305 | NZ  | E_GLU_172 | OE1 | 2.502 |
| 6NC3 | E_LYS_305 | NZ  | E_GLU_172 | OE2 | 3.928 |
| 6NC3 | E_LYS_337 | NZ  | E_GLU_293 | OE2 | 2.661 |
| 6NC3 | E_LYS_348 | NZ  | E_GLU_351 | OE1 | 2.941 |
| 6NC3 | E_LYS_348 | NZ  | E_GLU_351 | OE2 | 3.643 |
| 6NC3 | E_LYS_421 | NZ  | E_GLU_370 | OE2 | 2.811 |
| 6NC3 | E_LYS_432 | NZ  | E_ASP_113 | OD1 | 2.553 |
| 6NC3 | E_LYS_432 | NZ  | E_ASP_113 | OD2 | 3.774 |
| 6NC3 | E_LYS_432 | NZ  | E_GLU_429 | OE1 | 3.926 |
| 6NC3 | E_ARG_456 | NH2 | E_GLU_466 | OE1 | 3.636 |
| 6NC3 | E_ARG_456 | NH2 | E_GLU_466 | OE2 | 2.864 |
| 6NC3 | E_ARG_476 | NH1 | E_GLU_102 | OE1 | 3.922 |
| 6NC3 | E_ARG_476 | NH1 | E_GLU_102 | OE2 | 3.112 |
| 6NC3 | E_ARG_476 | NH2 | E_ASP_474 | OD1 | 3.856 |
| 6NC3 | E_ARG_476 | NH2 | E_ASP_474 | OD2 | 3.033 |
| 6NC3 | E_ARG_480 | NH1 | E_ASP_477 | OD1 | 2.738 |
| 6NC3 | E_ARG_480 | NH2 | E_ASP_477 | OD1 | 3.897 |
| 6NC3 | E_LYS_487 | NZ  | E_GLU_47  | OE1 | 2.894 |
| 6NC3 | E_LYS_487 | NZ  | E_GLU_47  | OE2 | 3.821 |
| 6NC3 | E_LYS_487 | NZ  | E_GLU_91  | OE1 | 3.879 |
| 6NC3 | E_ARG_503 | NH2 | K_GLU_654 | OE1 | 3.773 |
| 6NC3 | E_ARG_503 | NH2 | K_GLU_654 | OE2 | 3.161 |
| 6NC3 | K_ARG_542 | NH2 | N_GLU_647 | OE1 | 2.826 |
| 6NC3 | K_ARG_542 | NH2 | N_ASP_648 | OD1 | 2.949 |
| 6NC3 | K_ARG_542 | NH2 | N_ASP_648 | OD2 | 3.670 |
| 6NC3 | K_LYS_574 | NZ  | E_ASP_107 | OD1 | 2.582 |
| 6NC3 | K_LYS_574 | NZ  | E_ASP_107 | OD2 | 2.711 |
| 6NC3 | K_ARG_579 | NH1 | N_GLU_584 | OE2 | 3.194 |
| 6NC3 | K_ARG_585 | NH2 | E_GLU_492 | OE1 | 2.939 |
| 6NC3 | K_ARG_585 | NH2 | E_GLU_492 | OE2 | 3.498 |
| 6NC3 | K_LYS_617 | NZ  | K_GLU_634 | OE1 | 2.815 |
| 6NC3 | K_LYS_617 | NZ  | K_GLU_634 | OE2 | 3.445 |
| 6NC3 | Q_LYS_12  | NZ  | Q_GLU_10  | OE1 | 3.786 |
| 6NC3 | Q_HIS_35  | NE2 | Q_ASP_95  | OD2 | 3.813 |
| 6NC3 | Q_ARG_38  | NH1 | Q_ASP_86  | OD1 | 2.638 |
| 6NC3 | Q_ARG_38  | NH2 | Q_GLU_46  | OE1 | 2.857 |
| 6NC3 | Q_ARG_38  | NH2 | Q_GLU_46  | OE2 | 3.919 |
| 6NC3 | Q_ARG_38  | NH2 | Q_ASP_86  | OD1 | 3.489 |
| 6NC3 | Q_LYS_62  | NZ  | Q_GLU_46  | OE2 | 2.819 |
| 6NC3 | Q_ARG_66  | NH2 | Q_ASP_86  | OD1 | 3.294 |
| 6NC3 | Q_ARG_66  | NH2 | Q_ASP_86  | OD2 | 3.014 |
| 6NC3 | Q_ARG_94  | NH1 | Q_GLU_2   | OE1 | 2.960 |
| 6NC3 | Q_ARG_94  | NH2 | Q_GLU_2   | OE1 | 3.018 |
| 6NC3 | Q_LYS_96  | NZ  | Q_ASP_101 | OD1 | 3.648 |
| 6NC3 | Q_LYS_96  | NZ  | Q_ASP_101 | OD2 | 2.449 |

|      |           |     |           |     |       |
|------|-----------|-----|-----------|-----|-------|
| 6NC3 | V_ARG_30  | NH2 | V_GLU_32  | OE2 | 3.023 |
| 6NC3 | V_ARG_61  | NH1 | V_GLU_81  | OE2 | 3.991 |
| 6NC3 | V_ARG_61  | NH2 | V_GLU_81  | OE2 | 3.260 |
| 6NC3 | V_ARG_61  | NH2 | V_ASP_82  | OD1 | 2.918 |
| 6NC3 | V_ARG_61  | NH2 | V_ASP_82  | OD2 | 3.280 |
| 6NC3 | V_LYS_103 | NZ  | V_GLU_105 | OE2 | 3.920 |
| 6NC3 | V_LYS_107 | NZ  | V_ASP_17  | OD2 | 2.904 |
| 6NC3 | F_LYS_46  | NZ  | M_ASP_636 | OD1 | 2.913 |
| 6NC3 | F_LYS_46  | NZ  | M_ASP_636 | OD2 | 3.719 |
| 6NC3 | F_HIS_72  | ND1 | F_GLU_64  | OE1 | 3.734 |
| 6NC3 | F_LYS_117 | NZ  | F_ASP_113 | OD1 | 3.848 |
| 6NC3 | F_LYS_117 | NZ  | F_ASP_113 | OD2 | 2.492 |
| 6NC3 | F_LYS_155 | NZ  | F_ASP_133 | OD1 | 2.487 |
| 6NC3 | F_LYS_168 | NZ  | F_ASP_167 | OD1 | 2.679 |
| 6NC3 | F_LYS_168 | NZ  | F_ASP_167 | OD2 | 3.249 |
| 6NC3 | F_ARG_192 | NH2 | G_ASP_167 | OD1 | 3.709 |
| 6NC3 | F_ARG_192 | NH2 | G_ASP_167 | OD2 | 3.548 |
| 6NC3 | F_LYS_231 | NZ  | F_GLU_267 | OE1 | 2.789 |
| 6NC3 | F_LYS_231 | NZ  | F_GLU_267 | OE2 | 3.511 |
| 6NC3 | F_LYS_232 | NZ  | F_GLU_269 | OE1 | 3.765 |
| 6NC3 | F_LYS_232 | NZ  | F_GLU_269 | OE2 | 2.544 |
| 6NC3 | F_HIS_249 | NE2 | F_GLU_482 | OE2 | 2.721 |
| 6NC3 | F_LYS_290 | NZ  | F_GLU_268 | OE1 | 3.516 |
| 6NC3 | F_ARG_298 | NH1 | F_GLU_381 | OE2 | 2.878 |
| 6NC3 | F_LYS_305 | NZ  | F_GLU_172 | OE1 | 2.502 |
| 6NC3 | F_LYS_305 | NZ  | F_GLU_172 | OE2 | 3.929 |
| 6NC3 | F_LYS_337 | NZ  | F_GLU_293 | OE2 | 2.662 |
| 6NC3 | F_LYS_348 | NZ  | F_GLU_351 | OE1 | 2.941 |
| 6NC3 | F_LYS_348 | NZ  | F_GLU_351 | OE2 | 3.643 |
| 6NC3 | F_LYS_421 | NZ  | F_GLU_370 | OE2 | 2.811 |
| 6NC3 | F_LYS_432 | NZ  | F_ASP_113 | OD1 | 2.553 |
| 6NC3 | F_LYS_432 | NZ  | F_ASP_113 | OD2 | 3.774 |
| 6NC3 | F_LYS_432 | NZ  | F_GLU_429 | OE1 | 3.927 |
| 6NC3 | F_ARG_456 | NH2 | F_GLU_466 | OE1 | 3.636 |
| 6NC3 | F_ARG_456 | NH2 | F_GLU_466 | OE2 | 2.864 |
| 6NC3 | F_ARG_476 | NH1 | F_GLU_102 | OE1 | 3.922 |
| 6NC3 | F_ARG_476 | NH1 | F_GLU_102 | OE2 | 3.112 |
| 6NC3 | F_ARG_476 | NH2 | F_ASP_474 | OD1 | 3.856 |
| 6NC3 | F_ARG_476 | NH2 | F_ASP_474 | OD2 | 3.032 |
| 6NC3 | F_ARG_480 | NH1 | F_ASP_477 | OD1 | 2.738 |
| 6NC3 | F_ARG_480 | NH2 | F_ASP_477 | OD1 | 3.897 |
| 6NC3 | F_LYS_487 | NZ  | F_GLU_47  | OE1 | 2.894 |
| 6NC3 | F_LYS_487 | NZ  | F_GLU_47  | OE2 | 3.821 |
| 6NC3 | F_LYS_487 | NZ  | F_GLU_91  | OE1 | 3.878 |
| 6NC3 | F_ARG_503 | NH2 | M_GLU_654 | OE1 | 3.773 |
| 6NC3 | F_ARG_503 | NH2 | M_GLU_654 | OE2 | 3.161 |
| 6NC3 | M_ARG_542 | NH2 | K_GLU_647 | OE1 | 2.826 |
| 6NC3 | M_ARG_542 | NH2 | K_ASP_648 | OD1 | 2.949 |
| 6NC3 | M_ARG_542 | NH2 | K_ASP_648 | OD2 | 3.670 |
| 6NC3 | M_LYS_574 | NZ  | F_ASP_107 | OD1 | 2.581 |
| 6NC3 | M_LYS_574 | NZ  | F_ASP_107 | OD2 | 2.711 |
| 6NC3 | M_ARG_579 | NH1 | K_GLU_584 | OE2 | 3.194 |
| 6NC3 | M_ARG_585 | NH2 | F_GLU_492 | OE1 | 2.939 |
| 6NC3 | M_ARG_585 | NH2 | F_GLU_492 | OE2 | 3.498 |
| 6NC3 | M_LYS_617 | NZ  | M_GLU_634 | OE1 | 2.815 |
| 6NC3 | M_LYS_617 | NZ  | M_GLU_634 | OE2 | 3.445 |
| 6NC3 | R_LYS_12  | NZ  | R_GLU_10  | OE1 | 3.786 |
| 6NC3 | R_HIS_35  | NE2 | R_ASP_95  | OD2 | 3.813 |

|      |           |     |           |     |       |
|------|-----------|-----|-----------|-----|-------|
| 6NC3 | R_ARG_38  | NH1 | R_ASP_86  | OD1 | 2.638 |
| 6NC3 | R_ARG_38  | NH2 | R_GLU_46  | OE1 | 2.857 |
| 6NC3 | R_ARG_38  | NH2 | R_GLU_46  | OE2 | 3.919 |
| 6NC3 | R_ARG_38  | NH2 | R_ASP_86  | OD1 | 3.489 |
| 6NC3 | R_LYS_62  | NZ  | R_GLU_46  | OE2 | 2.819 |
| 6NC3 | R_ARG_66  | NH2 | R_ASP_86  | OD1 | 3.294 |
| 6NC3 | R_ARG_66  | NH2 | R_ASP_86  | OD2 | 3.013 |
| 6NC3 | R_ARG_94  | NH1 | R_GLU_2   | OE1 | 2.959 |
| 6NC3 | R_ARG_94  | NH2 | R_GLU_2   | OE1 | 3.018 |
| 6NC3 | R_LYS_96  | NZ  | R_ASP_101 | OD1 | 3.647 |
| 6NC3 | R_LYS_96  | NZ  | R_ASP_101 | OD2 | 2.449 |
| 6NC3 | W_ARG_30  | NH2 | W_GLU_32  | OE2 | 3.022 |
| 6NC3 | W_ARG_61  | NH1 | W_GLU_81  | OE2 | 3.990 |
| 6NC3 | W_ARG_61  | NH2 | W_GLU_81  | OE2 | 3.260 |
| 6NC3 | W_ARG_61  | NH2 | W_ASP_82  | OD1 | 2.918 |
| 6NC3 | W_ARG_61  | NH2 | W_ASP_82  | OD2 | 3.280 |
| 6NC3 | W_LYS_103 | NZ  | W_GLU_105 | OE2 | 3.920 |
| 6NC3 | W_LYS_107 | NZ  | W_ASP_17  | OD2 | 2.904 |
| 6NC3 | G_LYS_46  | NZ  | N_ASP_636 | OD1 | 2.913 |
| 6NC3 | G_LYS_46  | NZ  | N_ASP_636 | OD2 | 3.719 |
| 6NC3 | G_HIS_72  | ND1 | G_GLU_64  | OE1 | 3.735 |
| 6NC3 | G_LYS_117 | NZ  | G_ASP_113 | OD1 | 3.847 |
| 6NC3 | G_LYS_117 | NZ  | G_ASP_113 | OD2 | 2.492 |
| 6NC3 | G_LYS_155 | NZ  | G_ASP_133 | OD1 | 2.487 |
| 6NC3 | G_LYS_168 | NZ  | G_ASP_167 | OD1 | 2.679 |
| 6NC3 | G_LYS_168 | NZ  | G_ASP_167 | OD2 | 3.249 |
| 6NC3 | G_ARG_192 | NH2 | E_ASP_167 | OD1 | 3.708 |
| 6NC3 | G_ARG_192 | NH2 | E_ASP_167 | OD2 | 3.548 |
| 6NC3 | G_LYS_231 | NZ  | G_GLU_267 | OE1 | 2.789 |
| 6NC3 | G_LYS_231 | NZ  | G_GLU_267 | OE2 | 3.510 |
| 6NC3 | G_LYS_232 | NZ  | G_GLU_269 | OE1 | 3.765 |
| 6NC3 | G_LYS_232 | NZ  | G_GLU_269 | OE2 | 2.544 |
| 6NC3 | G_HIS_249 | NE2 | G_GLU_482 | OE2 | 2.721 |
| 6NC3 | G_LYS_290 | NZ  | G_GLU_268 | OE1 | 3.516 |
| 6NC3 | G_ARG_298 | NH1 | G_GLU_381 | OE2 | 2.878 |
| 6NC3 | G_LYS_305 | NZ  | G_GLU_172 | OE1 | 2.502 |
| 6NC3 | G_LYS_305 | NZ  | G_GLU_172 | OE2 | 3.929 |
| 6NC3 | G_LYS_337 | NZ  | G_GLU_293 | OE2 | 2.661 |
| 6NC3 | G_LYS_348 | NZ  | G_GLU_351 | OE1 | 2.941 |
| 6NC3 | G_LYS_348 | NZ  | G_GLU_351 | OE2 | 3.643 |
| 6NC3 | G_LYS_421 | NZ  | G_GLU_370 | OE2 | 2.811 |
| 6NC3 | G_LYS_432 | NZ  | G_ASP_113 | OD1 | 2.553 |
| 6NC3 | G_LYS_432 | NZ  | G_ASP_113 | OD2 | 3.775 |
| 6NC3 | G_LYS_432 | NZ  | G_GLU_429 | OE1 | 3.926 |
| 6NC3 | G_ARG_456 | NH2 | G_GLU_466 | OE1 | 3.636 |
| 6NC3 | G_ARG_456 | NH2 | G_GLU_466 | OE2 | 2.864 |
| 6NC3 | G_ARG_476 | NH1 | G_GLU_102 | OE1 | 3.922 |
| 6NC3 | G_ARG_476 | NH1 | G_GLU_102 | OE2 | 3.112 |
| 6NC3 | G_ARG_476 | NH2 | G_ASP_474 | OD1 | 3.856 |
| 6NC3 | G_ARG_476 | NH2 | G_ASP_474 | OD2 | 3.032 |
| 6NC3 | G_ARG_480 | NH1 | G_ASP_477 | OD1 | 2.738 |
| 6NC3 | G_ARG_480 | NH2 | G_ASP_477 | OD1 | 3.897 |
| 6NC3 | G_LYS_487 | NZ  | G_GLU_47  | OE1 | 2.894 |
| 6NC3 | G_LYS_487 | NZ  | G_GLU_47  | OE2 | 3.821 |
| 6NC3 | G_LYS_487 | NZ  | G_GLU_91  | OE1 | 3.878 |
| 6NC3 | G_ARG_503 | NH2 | N_GLU_654 | OE1 | 3.773 |
| 6NC3 | G_ARG_503 | NH2 | N_GLU_654 | OE2 | 3.160 |
| 6NC3 | N_ARG_542 | NH2 | M_GLU_647 | OE1 | 2.825 |

|      |           |     |           |     |       |
|------|-----------|-----|-----------|-----|-------|
| 6NC3 | N_ARG_542 | NH2 | M_ASP_648 | OD1 | 2.949 |
| 6NC3 | N_ARG_542 | NH2 | M_ASP_648 | OD2 | 3.670 |
| 6NC3 | N_LYS_574 | NZ  | G_ASP_107 | OD1 | 2.581 |
| 6NC3 | N_LYS_574 | NZ  | G_ASP_107 | OD2 | 2.710 |
| 6NC3 | N_ARG_579 | NH1 | M_GLU_584 | OE2 | 3.194 |
| 6NC3 | N_ARG_585 | NH2 | G_GLU_492 | OE1 | 2.939 |
| 6NC3 | N_ARG_585 | NH2 | G_GLU_492 | OE2 | 3.498 |
| 6NC3 | N_LYS_617 | NZ  | N_GLU_634 | OE1 | 2.815 |
| 6NC3 | N_LYS_617 | NZ  | N_GLU_634 | OE2 | 3.445 |
| 6NC3 | S_LYS_12  | NZ  | S_GLU_10  | OE1 | 3.785 |
| 6NC3 | S_HIS_35  | NE2 | S_ASP_95  | OD2 | 3.813 |
| 6NC3 | S_ARG_38  | NH1 | S_ASP_86  | OD1 | 2.638 |
| 6NC3 | S_ARG_38  | NH2 | S_GLU_46  | OE1 | 2.856 |
| 6NC3 | S_ARG_38  | NH2 | S_GLU_46  | OE2 | 3.919 |
| 6NC3 | S_ARG_38  | NH2 | S_ASP_86  | OD1 | 3.489 |
| 6NC3 | S_LYS_62  | NZ  | S_GLU_46  | OE2 | 2.819 |
| 6NC3 | S_ARG_66  | NH2 | S_ASP_86  | OD1 | 3.294 |
| 6NC3 | S_ARG_66  | NH2 | S_ASP_86  | OD2 | 3.014 |
| 6NC3 | S_ARG_94  | NH1 | S_GLU_2   | OE1 | 2.959 |
| 6NC3 | S_ARG_94  | NH2 | S_GLU_2   | OE1 | 3.018 |
| 6NC3 | S_LYS_96  | NZ  | S_ASP_101 | OD1 | 3.648 |
| 6NC3 | S_LYS_96  | NZ  | S_ASP_101 | OD2 | 2.449 |
| 6NC3 | X_ARG_30  | NH2 | X_GLU_32  | OE2 | 3.022 |
| 6NC3 | X_ARG_61  | NH1 | X_GLU_81  | OE2 | 3.991 |
| 6NC3 | X_ARG_61  | NH2 | X_GLU_81  | OE2 | 3.260 |
| 6NC3 | X_ARG_61  | NH2 | X_ASP_82  | OD1 | 2.918 |
| 6NC3 | X_ARG_61  | NH2 | X_ASP_82  | OD2 | 3.280 |
| 6NC3 | X_LYS_103 | NZ  | X_GLU_105 | OE2 | 3.920 |
| 6NC3 | X_LYS_107 | NZ  | X_ASP_17  | OD2 | 2.904 |
| 6NEX | L_ARG_    | NH2 | L_GLU_    | OE2 | 2.737 |
| 6NEX | L_ARG_    | NH2 | L_ASP_    | OD1 | 2.840 |
| 6NEX | L_ARG_    | NH2 | L_ASP_    | OD2 | 3.473 |
| 6NEX | L_LYS_    | NZ  | L_GLU_    | OE2 | 3.642 |
| 6NEX | H_ARG_    | NH1 | H_ASP_    | OD1 | 2.811 |
| 6NEX | H_ARG_    | NH2 | H_GLU_    | OE1 | 2.941 |
| 6NEX | H_ARG_    | NH2 | H_GLU_    | OE2 | 3.733 |
| 6NEX | H_ARG_    | NH1 | H_ASP_    | OD1 | 3.160 |
| 6NEX | H_ARG_    | NH1 | H_ASP_    | OD2 | 3.548 |
| 6NEX | H_ARG_    | NH2 | H_ASP_    | OD1 | 3.762 |
| 6NEX | H_ARG_    | NH2 | H_ASP_    | OD2 | 2.737 |
| 6NEX | H_LYS_    | NZ  | H_ASP_    | OD1 | 3.770 |
| 6NEX | H_ARG_210 | NH1 | H_GLU_212 | OE2 | 3.708 |
| 6NEX | H_ARG_210 | NH2 | H_GLU_212 | OE1 | 3.957 |
| 6NEX | H_ARG_210 | NH2 | H_GLU_212 | OE2 | 2.338 |
| 6NEX | A_ARG_    | NH2 | A_GLU_    | OE2 | 2.672 |
| 6NEX | A_ARG_    | NH2 | A_ASP_    | OD1 | 2.826 |
| 6NEX | A_ARG_    | NH2 | A_ASP_    | OD2 | 3.589 |
| 6NEX | A_LYS_    | NZ  | A_GLU_    | OE1 | 3.636 |
| 6NEX | A_LYS_    | NZ  | A_GLU_    | OE2 | 3.384 |
| 6NEX | B_ARG_    | NH1 | B_ASP_    | OD1 | 2.934 |
| 6NEX | B_ARG_    | NH2 | B_GLU_    | OE2 | 2.957 |
| 6NEX | B_ARG_    | NH2 | B_ASP_    | OD1 | 3.823 |
| 6NEX | B_LYS_    | NZ  | B_ASP_    | OD1 | 3.270 |
| 6NEX | B_ARG_    | NH1 | B_ASP_    | OD1 | 3.264 |
| 6NEX | B_ARG_    | NH1 | B_ASP_    | OD2 | 3.612 |
| 6NEX | B_ARG_    | NH2 | B_ASP_    | OD2 | 3.065 |
| 6NEX | B_ARG_    | NH1 | B_GLU_    | OE2 | 2.598 |
| 6NEX | B_LYS_    | NZ  | B_ASP_    | OD1 | 3.942 |

|      |           |     |           |     |       |
|------|-----------|-----|-----------|-----|-------|
| 6NEX | B.LYS_209 | NZ  | A_GLU_126 | OE2 | 3.298 |
| 6NF2 | A.LYS_46  | NZ  | A_GLU_492 | OE2 | 2.493 |
| 6NF2 | A.LYS_46  | NZ  | I_ASP_632 | OD2 | 2.876 |
| 6NF2 | A_HIS_216 | NE2 | A_ASP_57  | OD1 | 2.861 |
| 6NF2 | A_HIS_216 | NE2 | A_ASP_57  | OD2 | 2.990 |
| 6NF2 | A.LYS_227 | NZ  | A_GLU_83  | OE1 | 2.516 |
| 6NF2 | A.LYS_227 | NZ  | A_GLU_83  | OE2 | 3.523 |
| 6NF2 | A.LYS_282 | NZ  | A_GLU_275 | OE1 | 3.484 |
| 6NF2 | A.LYS_282 | NZ  | A_GLU_275 | OE2 | 3.921 |
| 6NF2 | A_ARG_419 | NH1 | A_GLU_153 | OE1 | 3.359 |
| 6NF2 | A_ARG_419 | NH2 | A_GLU_153 | OE1 | 3.820 |
| 6NF2 | A.LYS_421 | NZ  | A_GLU_370 | OE2 | 3.954 |
| 6NF2 | A_ARG_429 | NH1 | A_ASP_113 | OD1 | 2.605 |
| 6NF2 | A_ARG_429 | NH1 | A_ASP_113 | OD2 | 3.059 |
| 6NF2 | A_ARG_429 | NH2 | A_ASP_113 | OD1 | 3.615 |
| 6NF2 | A_ARG_456 | NH1 | A_GLU_466 | OE1 | 3.082 |
| 6NF2 | A_ARG_456 | NH1 | A_GLU_466 | OE2 | 3.859 |
| 6NF2 | A_ARG_476 | NH2 | A_ASP_474 | OD1 | 3.180 |
| 6NF2 | A.LYS_487 | NZ  | A_ASP_47  | OD1 | 2.705 |
| 6NF2 | A.LYS_487 | NZ  | A_ASP_47  | OD2 | 3.456 |
| 6NF2 | A.LYS_487 | NZ  | A_GLU_91  | OE1 | 3.205 |
| 6NF2 | A.LYS_490 | NZ  | A_GLU_492 | OE1 | 3.081 |
| 6NF2 | A_ARG_504 | NH2 | R_GLU_657 | OE2 | 3.927 |
| 6NF2 | B_ARG_579 | NH1 | I_GLU_584 | OE2 | 3.681 |
| 6NF2 | B.LYS_601 | NZ  | I_GLU_654 | OE1 | 2.983 |
| 6NF2 | B.LYS_601 | NZ  | I_GLU_654 | OE2 | 3.256 |
| 6NF2 | B_ARG_617 | NH1 | B_GLU_634 | OE1 | 3.898 |
| 6NF2 | B_ARG_617 | NH1 | B_GLU_634 | OE2 | 3.558 |
| 6NF2 | B_ARG_617 | NH2 | B_GLU_634 | OE1 | 2.451 |
| 6NF2 | B_ARG_617 | NH2 | B_GLU_634 | OE2 | 3.092 |
| 6NF2 | C.LYS_19  | NZ  | C_GLU_81  | OE2 | 3.460 |
| 6NF2 | C_ARG_38  | NH1 | C_GLU_46  | OE1 | 2.376 |
| 6NF2 | C_ARG_38  | NH2 | C_ASP_86  | OD1 | 2.835 |
| 6NF2 | C_ARG_38  | NH2 | C_ASP_86  | OD2 | 3.913 |
| 6NF2 | C_ARG_61  | NH1 | G_GLU_466 | OE1 | 3.610 |
| 6NF2 | C_ARG_61  | NH2 | G_GLU_466 | OE2 | 3.748 |
| 6NF2 | C_ARG_66  | NH2 | C_ASP_86  | OD2 | 2.541 |
| 6NF2 | C_ARG_71  | NH2 | G_ASP_368 | OD1 | 3.504 |
| 6NF2 | D_ARG_38  | NH1 | D_ASP_81  | OD2 | 3.918 |
| 6NF2 | D_ARG_52  | NH1 | D_ASP_49  | OD2 | 2.507 |
| 6NF2 | D_ARG_60  | NH1 | D_ASP_78  | OD1 | 3.451 |
| 6NF2 | D_ARG_60  | NH1 | D_ASP_78  | OD2 | 2.551 |
| 6NF2 | D_ARG_60  | NH1 | D_ASP_81  | OD1 | 3.827 |
| 6NF2 | D_ARG_60  | NH2 | D_ASP_78  | OD2 | 3.741 |
| 6NF2 | D_ARG_60  | NH2 | D_ASP_81  | OD1 | 2.673 |
| 6NF2 | E_ARG_30  | NH1 | E_ASP_53  | OD1 | 3.557 |
| 6NF2 | E_ARG_30  | NH1 | E_ASP_53  | OD2 | 3.208 |
| 6NF2 | E_ARG_30  | NH2 | E_ASP_53  | OD2 | 3.963 |
| 6NF2 | E_ARG_38  | NH2 | E_GLU_46  | OE1 | 2.920 |
| 6NF2 | F_ARG_31  | NH2 | F_ASP_92  | OD2 | 3.578 |
| 6NF2 | F_ARG_61  | NH2 | F_GLU_79  | OE1 | 2.683 |
| 6NF2 | F_ARG_61  | NH2 | F_GLU_79  | OE2 | 3.530 |
| 6NF2 | F_ARG_61  | NH2 | F_ASP_82  | OD1 | 3.710 |
| 6NF2 | F_ARG_95  | NH1 | F_GLU_25  | OE1 | 2.962 |
| 6NF2 | F_ARG_95  | NH1 | F_ASP_92  | OD2 | 3.472 |
| 6NF2 | G.LYS_46  | NZ  | B_ASP_632 | OD2 | 2.943 |
| 6NF2 | G.LYS_46  | NZ  | G_GLU_492 | OE2 | 2.493 |
| 6NF2 | G_HIS_216 | NE2 | G_ASP_57  | OD1 | 2.861 |



|      |            |     |           |     |       |
|------|------------|-----|-----------|-----|-------|
| 6NF2 | G_HIS_216  | NE2 | G_ASP_57  | OD2 | 2.990 |
| 6NF2 | G_LYS_227  | NZ  | G_GLU_83  | OE1 | 2.516 |
| 6NF2 | G_LYS_227  | NZ  | G_GLU_83  | OE2 | 3.523 |
| 6NF2 | G_LYS_282  | NZ  | G_GLU_275 | OE1 | 3.483 |
| 6NF2 | G_LYS_282  | NZ  | G_GLU_275 | OE2 | 3.920 |
| 6NF2 | G_ARG_419  | NH1 | G_GLU_153 | OE1 | 3.359 |
| 6NF2 | G_ARG_419  | NH2 | G_GLU_153 | OE1 | 3.821 |
| 6NF2 | G_LYS_421  | NZ  | G_GLU_370 | OE2 | 3.954 |
| 6NF2 | G_ARG_429  | NH1 | G_ASP_113 | OD1 | 2.606 |
| 6NF2 | G_ARG_429  | NH1 | G_ASP_113 | OD2 | 3.059 |
| 6NF2 | G_ARG_429  | NH2 | G_ASP_113 | OD1 | 3.615 |
| 6NF2 | G_ARG_456  | NH1 | G_GLU_466 | OE1 | 3.082 |
| 6NF2 | G_ARG_456  | NH1 | G_GLU_466 | OE2 | 3.857 |
| 6NF2 | G_ARG_476  | NH2 | G_ASP_474 | OD1 | 3.180 |
| 6NF2 | G_LYS_487  | NZ  | G_ASP_47  | OD1 | 2.706 |
| 6NF2 | G_LYS_487  | NZ  | G_ASP_47  | OD2 | 3.456 |
| 6NF2 | G_LYS_487  | NZ  | G_GLU_91  | OE1 | 3.206 |
| 6NF2 | G_LYS_490  | NZ  | G_GLU_492 | OE1 | 3.082 |
| 6NF2 | G_ARG_504  | NH2 | L_GLU_657 | OE2 | 3.805 |
| 6NF2 | H_LYS_13   | NZ  | H_GLU_16  | OE1 | 3.322 |
| 6NF2 | H_ARG_66   | NH1 | H_ASP_86  | OD1 | 2.849 |
| 6NF2 | H_ARG_66   | NH1 | H_ASP_86  | OD2 | 2.841 |
| 6NF2 | H_ARG_100F | NH1 | L_ASP_50  | OD2 | 2.403 |
| 6NF2 | H_ARG_100F | NH2 | L_ASP_50  | OD2 | 3.926 |
| 6NF2 | L_ARG_579  | NH1 | R_GLU_584 | OE2 | 3.624 |
| 6NF2 | L_LYS_601  | NZ  | R_GLU_654 | OE1 | 3.068 |
| 6NF2 | L_LYS_601  | NZ  | R_GLU_654 | OE2 | 3.333 |
| 6NF2 | L_ARG_617  | NH1 | L_GLU_634 | OE1 | 3.897 |
| 6NF2 | L_ARG_617  | NH1 | L_GLU_634 | OE2 | 3.558 |
| 6NF2 | L_ARG_617  | NH2 | L_GLU_634 | OE1 | 2.451 |
| 6NF2 | L_ARG_617  | NH2 | L_GLU_634 | OE2 | 3.093 |
| 6NF2 | J_ARG_30   | NH1 | J_ASP_53  | OD1 | 3.558 |
| 6NF2 | J_ARG_30   | NH1 | J_ASP_53  | OD2 | 3.207 |
| 6NF2 | J_ARG_30   | NH2 | J_ASP_53  | OD2 | 3.963 |
| 6NF2 | J_ARG_38   | NH2 | J_GLU_46  | OE1 | 2.921 |
| 6NF2 | K_ARG_31   | NH2 | K_ASP_92  | OD2 | 3.577 |
| 6NF2 | K_ARG_61   | NH2 | K_GLU_79  | OE1 | 2.684 |
| 6NF2 | K_ARG_61   | NH2 | K_GLU_79  | OE2 | 3.531 |
| 6NF2 | K_ARG_61   | NH2 | K_ASP_82  | OD1 | 3.710 |
| 6NF2 | K_ARG_95   | NH1 | K_GLU_25  | OE1 | 2.961 |
| 6NF2 | K_ARG_95   | NH1 | K_ASP_92  | OD2 | 3.471 |
| 6NF2 | L_ARG_24   | NH1 | L_ASP_70  | OD2 | 2.515 |
| 6NF2 | L_ARG_54   | NH1 | L_ASP_60  | OD1 | 3.948 |
| 6NF2 | L_ARG_54   | NH2 | L_ASP_60  | OD1 | 2.933 |
| 6NF2 | L_ARG_61   | NH1 | L_GLU_79  | OE1 | 3.691 |
| 6NF2 | L_ARG_61   | NH1 | L_GLU_79  | OE2 | 3.057 |
| 6NF2 | L_ARG_61   | NH2 | L_GLU_79  | OE1 | 3.745 |
| 6NF2 | M_ARG_38   | NH1 | M_ASP_81  | OD2 | 3.919 |
| 6NF2 | M_ARG_52   | NH1 | M_ASP_49  | OD2 | 2.507 |
| 6NF2 | M_ARG_60   | NH1 | M_ASP_78  | OD1 | 3.451 |
| 6NF2 | M_ARG_60   | NH1 | M_ASP_78  | OD2 | 2.551 |
| 6NF2 | M_ARG_60   | NH1 | M_ASP_81  | OD1 | 3.826 |
| 6NF2 | M_ARG_60   | NH2 | M_ASP_78  | OD2 | 3.741 |
| 6NF2 | M_ARG_60   | NH2 | M_ASP_81  | OD1 | 2.674 |
| 6NF2 | N_LYS_19   | NZ  | N_GLU_81  | OE2 | 3.461 |
| 6NF2 | N_ARG_38   | NH1 | N_GLU_46  | OE1 | 2.376 |
| 6NF2 | N_ARG_38   | NH2 | N_ASP_86  | OD1 | 2.835 |
| 6NF2 | N_ARG_38   | NH2 | N_ASP_86  | OD2 | 3.913 |

|      |            |     |           |     |       |
|------|------------|-----|-----------|-----|-------|
| 6NF2 | N_ARG.61   | NH1 | A_GLU_466 | OE1 | 3.592 |
| 6NF2 | N_ARG.61   | NH2 | A_GLU_466 | OE2 | 3.737 |
| 6NF2 | N_ARG.66   | NH2 | N_ASP_86  | OD2 | 2.541 |
| 6NF2 | N_ARG.71   | NH2 | A_ASP_368 | OD1 | 3.532 |
| 6NF2 | O_LYS.13   | NZ  | O_GLU_16  | OE1 | 3.322 |
| 6NF2 | O_ARG.66   | NH1 | O_ASP_86  | OD1 | 2.849 |
| 6NF2 | O_ARG.66   | NH1 | O_ASP_86  | OD2 | 2.841 |
| 6NF2 | O_ARG.100F | NH1 | P_ASP_50  | OD2 | 2.825 |
| 6NF2 | P_ARG.24   | NH1 | P_ASP_70  | OD2 | 2.514 |
| 6NF2 | P_ARG.54   | NH1 | P_ASP_60  | OD1 | 3.948 |
| 6NF2 | P_ARG.54   | NH2 | P_ASP_60  | OD1 | 2.932 |
| 6NF2 | P_ARG.61   | NH1 | P_GLU_79  | OE1 | 3.692 |
| 6NF2 | P_ARG.61   | NH1 | P_GLU_79  | OE2 | 3.058 |
| 6NF2 | P_ARG.61   | NH2 | P_GLU_79  | OE1 | 3.745 |
| 6NF2 | Q_LYS.46   | NZ  | Q_GLU_492 | OE2 | 2.491 |
| 6NF2 | Q_LYS.46   | NZ  | R_ASP_632 | OD2 | 2.912 |
| 6NF2 | Q_HIS.216  | NE2 | Q_ASP_57  | OD1 | 2.861 |
| 6NF2 | Q_HIS.216  | NE2 | Q_ASP_57  | OD2 | 2.990 |
| 6NF2 | Q_LYS.227  | NZ  | Q_GLU_83  | OE1 | 2.514 |
| 6NF2 | Q_LYS.227  | NZ  | Q_GLU_83  | OE2 | 3.524 |
| 6NF2 | Q_LYS.282  | NZ  | Q_GLU_275 | OE1 | 3.483 |
| 6NF2 | Q_LYS.282  | NZ  | Q_GLU_275 | OE2 | 3.921 |
| 6NF2 | Q_ARG.419  | NH1 | Q_GLU_153 | OE1 | 3.360 |
| 6NF2 | Q_ARG.419  | NH2 | Q_GLU_153 | OE1 | 3.820 |
| 6NF2 | Q_LYS.421  | NZ  | Q_GLU_370 | OE2 | 3.955 |
| 6NF2 | Q_ARG.429  | NH1 | Q_ASP_113 | OD1 | 2.604 |
| 6NF2 | Q_ARG.429  | NH1 | Q_ASP_113 | OD2 | 3.059 |
| 6NF2 | Q_ARG.429  | NH2 | Q_ASP_113 | OD1 | 3.616 |
| 6NF2 | Q_ARG.456  | NH1 | Q_GLU_466 | OE1 | 3.084 |
| 6NF2 | Q_ARG.456  | NH1 | Q_GLU_466 | OE2 | 3.860 |
| 6NF2 | Q_ARG.476  | NH2 | Q_ASP_474 | OD1 | 3.179 |
| 6NF2 | Q_LYS.487  | NZ  | Q_ASP_47  | OD1 | 2.706 |
| 6NF2 | Q_LYS.487  | NZ  | Q_ASP_47  | OD2 | 3.457 |
| 6NF2 | Q_LYS.487  | NZ  | Q_GLU_91  | OE1 | 3.205 |
| 6NF2 | Q_LYS.490  | NZ  | Q_GLU_492 | OE1 | 3.080 |
| 6NF2 | Q_ARG.504  | NH2 | B_GLU_657 | OE2 | 3.920 |
| 6NF2 | R_ARG.579  | NH1 | B_GLU_584 | OE2 | 3.657 |
| 6NF2 | R_LYS.601  | NZ  | B_GLU_654 | OE1 | 3.130 |
| 6NF2 | R_LYS.601  | NZ  | B_GLU_654 | OE2 | 3.363 |
| 6NF2 | R_ARG.617  | NH1 | R_GLU_634 | OE1 | 3.896 |
| 6NF2 | R_ARG.617  | NH1 | R_GLU_634 | OE2 | 3.558 |
| 6NF2 | R_ARG.617  | NH2 | R_GLU_634 | OE1 | 2.450 |
| 6NF2 | R_ARG.617  | NH2 | R_GLU_634 | OE2 | 3.092 |
| 6NF2 | S_ARG.30   | NH1 | S_ASP_53  | OD1 | 3.557 |
| 6NF2 | S_ARG.30   | NH1 | S_ASP_53  | OD2 | 3.207 |
| 6NF2 | S_ARG.30   | NH2 | S_ASP_53  | OD2 | 3.964 |
| 6NF2 | S_ARG.38   | NH2 | S_GLU_46  | OE1 | 2.919 |
| 6NF2 | T_ARG.31   | NH2 | T_ASP_92  | OD2 | 3.577 |
| 6NF2 | T_ARG.61   | NH2 | T_GLU_79  | OE1 | 2.683 |
| 6NF2 | T_ARG.61   | NH2 | T_GLU_79  | OE2 | 3.530 |
| 6NF2 | T_ARG.61   | NH2 | T_ASP_82  | OD1 | 3.710 |
| 6NF2 | T_ARG.95   | NH1 | T_GLU_25  | OE1 | 2.962 |
| 6NF2 | T_ARG.95   | NH1 | T_ASP_92  | OD2 | 3.472 |
| 6NF2 | U_ARG.38   | NH1 | U_ASP_81  | OD2 | 3.919 |
| 6NF2 | U_ARG.52   | NH1 | U_ASP_49  | OD2 | 2.509 |
| 6NF2 | U_ARG.60   | NH1 | U_ASP_78  | OD1 | 3.451 |
| 6NF2 | U_ARG.60   | NH1 | U_ASP_78  | OD2 | 2.550 |
| 6NF2 | U_ARG.60   | NH1 | U_ASP_81  | OD1 | 3.827 |

|      |            |     |           |     |       |
|------|------------|-----|-----------|-----|-------|
| 6NF2 | U_ARG_60   | NH2 | U_ASP_78  | OD2 | 3.741 |
| 6NF2 | U_ARG_60   | NH2 | U_ASP_81  | OD1 | 2.673 |
| 6NF2 | V_LYS_19   | NZ  | V_GLU_81  | OE2 | 3.461 |
| 6NF2 | V_ARG_38   | NH1 | V_GLU_46  | OE1 | 2.376 |
| 6NF2 | V_ARG_38   | NH2 | V_ASP_86  | OD1 | 2.836 |
| 6NF2 | V_ARG_38   | NH2 | V_ASP_86  | OD2 | 3.912 |
| 6NF2 | V_ARG_61   | NH1 | Q_GLU_466 | OE1 | 3.626 |
| 6NF2 | V_ARG_61   | NH2 | Q_GLU_466 | OE2 | 3.762 |
| 6NF2 | V_ARG_66   | NH2 | V_ASP_86  | OD2 | 2.542 |
| 6NF2 | V_ARG_71   | NH2 | Q_ASP_368 | OD1 | 3.511 |
| 6NF2 | W_LYS_13   | NZ  | W_GLU_16  | OE1 | 3.322 |
| 6NF2 | W_ARG_66   | NH1 | W_ASP_86  | OD1 | 2.849 |
| 6NF2 | W_ARG_66   | NH1 | W_ASP_86  | OD2 | 2.842 |
| 6NF2 | W_ARG_100F | NH1 | X_ASP_50  | OD2 | 2.242 |
| 6NF2 | W_ARG_100F | NH2 | X_ASP_50  | OD2 | 3.856 |
| 6NF2 | X_ARG_24   | NH1 | X_ASP_70  | OD2 | 2.514 |
| 6NF2 | X_ARG_54   | NH1 | X_ASP_60  | OD1 | 3.949 |
| 6NF2 | X_ARG_54   | NH2 | X_ASP_60  | OD1 | 2.932 |
| 6NF2 | X_ARG_61   | NH1 | X_GLU_79  | OE1 | 3.693 |
| 6NF2 | X_ARG_61   | NH1 | X_GLU_79  | OE2 | 3.059 |
| 6NF2 | X_ARG_61   | NH2 | X_GLU_79  | OE1 | 3.746 |
| 6NF5 | A_LYS_46   | NZ  | B_ASP_632 | OD2 | 2.410 |
| 6NF5 | A_LYS_97   | NZ  | A_GLU_275 | OE2 | 3.695 |
| 6NF5 | A_LYS_137  | NZ  | L_ASP_51  | OD2 | 2.736 |
| 6NF5 | A_LYS_168  | NZ  | A_ASP_167 | OD2 | 2.451 |
| 6NF5 | A_ARG_178  | NH2 | A_GLU_153 | OE1 | 3.939 |
| 6NF5 | A_ARG_192  | NH1 | J_GLU_164 | OE2 | 3.009 |
| 6NF5 | A_ARG_192  | NH2 | J_GLU_164 | OE2 | 3.825 |
| 6NF5 | A_LYS_229  | NZ  | A_GLU_83  | OE2 | 2.843 |
| 6NF5 | A_LYS_232  | NZ  | A_GLU_268 | OE1 | 2.483 |
| 6NF5 | A_HIS_249  | NE2 | A_GLU_482 | OE1 | 3.152 |
| 6NF5 | A_LYS_282  | NZ  | A_GLU_275 | OE1 | 3.676 |
| 6NF5 | A_LYS_421  | NZ  | A_GLU_370 | OE2 | 2.968 |
| 6NF5 | A_ARG_456  | NH1 | A_GLU_466 | OE1 | 2.887 |
| 6NF5 | A_ARG_469  | NH1 | A_ASP_457 | OD1 | 2.731 |
| 6NF5 | A_ARG_469  | NH1 | A_ASP_457 | OD2 | 2.912 |
| 6NF5 | A_ARG_476  | NH1 | A_GLU_102 | OE1 | 3.769 |
| 6NF5 | A_ARG_476  | NH1 | A_GLU_102 | OE2 | 2.949 |
| 6NF5 | A_ARG_476  | NH2 | A_ASP_474 | OD1 | 3.812 |
| 6NF5 | A_ARG_476  | NH2 | A_ASP_474 | OD2 | 2.863 |
| 6NF5 | A_ARG_480  | NH1 | A_ASP_477 | OD1 | 2.619 |
| 6NF5 | A_LYS_485  | NZ  | A_GLU_267 | OE2 | 3.474 |
| 6NF5 | A_LYS_487  | NZ  | A_ASP_47  | OD1 | 2.966 |
| 6NF5 | A_LYS_487  | NZ  | A_ASP_47  | OD2 | 2.855 |
| 6NF5 | A_LYS_487  | NZ  | A_GLU_91  | OE1 | 3.852 |
| 6NF5 | A_LYS_490  | NZ  | A_GLU_492 | OE2 | 3.881 |
| 6NF5 | B_ARG_542  | NH1 | D_GLU_647 | OE1 | 3.182 |
| 6NF5 | B_ARG_542  | NH1 | D_GLU_647 | OE2 | 3.535 |
| 6NF5 | B_ARG_542  | NH2 | D_GLU_647 | OE1 | 3.979 |
| 6NF5 | B_LYS_574  | NZ  | A_ASP_107 | OD1 | 2.887 |
| 6NF5 | B_HIS_585  | NE2 | A_GLU_492 | OE1 | 3.726 |
| 6NF5 | B_HIS_585  | NE2 | B_ASP_589 | OD1 | 3.861 |
| 6NF5 | B_HIS_585  | NE2 | B_ASP_589 | OD2 | 3.640 |
| 6NF5 | B_LYS_601  | NZ  | D_GLU_657 | OE1 | 3.026 |
| 6NF5 | B_ARG_617  | NH1 | B_GLU_634 | OE1 | 2.939 |
| 6NF5 | B_ARG_617  | NH1 | B_GLU_634 | OE2 | 3.518 |
| 6NF5 | B_ARG_617  | NH2 | B_GLU_621 | OE2 | 3.903 |
| 6NF5 | H_ARG_38   | NH1 | H_ASP_86  | OD1 | 2.711 |

|      |            |     |           |     |       |
|------|------------|-----|-----------|-----|-------|
| 6NF5 | H_ARG_38   | NH2 | H_GLU_46  | OE1 | 2.805 |
| 6NF5 | H_ARG_38   | NH2 | H_GLU_46  | OE2 | 3.660 |
| 6NF5 | H_ARG_38   | NH2 | H_ASP_86  | OD1 | 3.921 |
| 6NF5 | H_ARG_50   | NH1 | H_GLU_95  | OE1 | 3.017 |
| 6NF5 | H_ARG_66   | NH1 | H_ASP_86  | OD1 | 3.025 |
| 6NF5 | H_ARG_66   | NH1 | H_ASP_86  | OD2 | 3.679 |
| 6NF5 | H_ARG_66   | NH2 | H_ASP_86  | OD1 | 3.529 |
| 6NF5 | H_ARG_66   | NH2 | H_ASP_86  | OD2 | 2.747 |
| 6NF5 | L_ARG_61   | NH2 | L_ASP_82  | OD1 | 3.053 |
| 6NF5 | L_ARG_61   | NH2 | L_ASP_82  | OD2 | 3.487 |
| 6NF5 | L_LYS_103  | NZ  | L_ASP_85  | OD1 | 2.813 |
| 6NF5 | L_LYS_103  | NZ  | L_ASP_85  | OD2 | 3.823 |
| 6NF5 | K_ARG_38   | NH1 | K_ASP_86  | OD1 | 3.164 |
| 6NF5 | K_ARG_38   | NH2 | K_ASP_86  | OD1 | 2.934 |
| 6NF5 | K_ARG_53   | NH1 | B_ASP_659 | OD1 | 3.261 |
| 6NF5 | K_ARG_53   | NH1 | B_ASP_659 | OD2 | 3.240 |
| 6NF5 | K_ARG_53   | NH2 | B_ASP_659 | OD1 | 3.591 |
| 6NF5 | K_ARG_53   | NH2 | B_ASP_659 | OD2 | 2.651 |
| 6NF5 | K_ARG_66   | NH1 | K_ASP_86  | OD1 | 3.713 |
| 6NF5 | K_ARG_66   | NH1 | K_ASP_86  | OD2 | 2.791 |
| 6NF5 | K_ARG_66   | NH2 | K_ASP_86  | OD1 | 3.225 |
| 6NF5 | K_ARG_66   | NH2 | K_ASP_86  | OD2 | 3.737 |
| 6NF5 | K_LYS_75   | NZ  | K_ASP_72  | OD2 | 3.956 |
| 6NF5 | K_LYS_100E | NZ  | K_ASP_101 | OD1 | 3.994 |
| 6NF5 | K_LYS_100E | NZ  | K_ASP_101 | OD2 | 2.688 |
| 6NF5 | N_ARG_54   | NH2 | N_ASP_60  | OD1 | 2.562 |
| 6NF5 | N_ARG_61   | NH2 | N_ASP_82  | OD1 | 3.061 |
| 6NF5 | N_ARG_61   | NH2 | N_ASP_82  | OD2 | 3.668 |
| 6NF5 | N_ARG_103  | NH1 | N_ASP_85  | OD1 | 3.116 |
| 6NF5 | C_LYS_46   | NZ  | D_ASP_632 | OD2 | 2.410 |
| 6NF5 | C_LYS_97   | NZ  | C_GLU_275 | OE2 | 3.696 |
| 6NF5 | C_LYS_137  | NZ  | F_ASP_51  | OD2 | 2.736 |
| 6NF5 | C_LYS_168  | NZ  | C_ASP_167 | OD2 | 2.451 |
| 6NF5 | C_ARG_178  | NH2 | C_GLU_153 | OE1 | 3.938 |
| 6NF5 | C_ARG_192  | NH1 | A_GLU_164 | OE2 | 3.009 |
| 6NF5 | C_ARG_192  | NH2 | A_GLU_164 | OE2 | 3.825 |
| 6NF5 | C_LYS_229  | NZ  | C_GLU_83  | OE2 | 2.843 |
| 6NF5 | C_LYS_232  | NZ  | C_GLU_268 | OE1 | 2.483 |
| 6NF5 | C_HIS_249  | NE2 | C_GLU_482 | OE1 | 3.152 |
| 6NF5 | C_LYS_282  | NZ  | C_GLU_275 | OE1 | 3.676 |
| 6NF5 | C_LYS_421  | NZ  | C_GLU_370 | OE2 | 2.968 |
| 6NF5 | C_ARG_456  | NH1 | C_GLU_466 | OE1 | 2.887 |
| 6NF5 | C_ARG_469  | NH1 | C_ASP_457 | OD1 | 2.731 |
| 6NF5 | C_ARG_469  | NH1 | C_ASP_457 | OD2 | 2.913 |
| 6NF5 | C_ARG_476  | NH1 | C_GLU_102 | OE1 | 3.769 |
| 6NF5 | C_ARG_476  | NH1 | C_GLU_102 | OE2 | 2.949 |
| 6NF5 | C_ARG_476  | NH2 | C_ASP_474 | OD1 | 3.813 |
| 6NF5 | C_ARG_476  | NH2 | C_ASP_474 | OD2 | 2.863 |
| 6NF5 | C_ARG_480  | NH1 | C_ASP_477 | OD1 | 2.619 |
| 6NF5 | C_LYS_485  | NZ  | C_GLU_267 | OE2 | 3.473 |
| 6NF5 | C_LYS_487  | NZ  | C_ASP_47  | OD1 | 2.966 |
| 6NF5 | C_LYS_487  | NZ  | C_ASP_47  | OD2 | 2.856 |
| 6NF5 | C_LYS_487  | NZ  | C_GLU_91  | OE1 | 3.852 |
| 6NF5 | C_LYS_490  | NZ  | C_GLU_492 | OE2 | 3.881 |
| 6NF5 | D_ARG_542  | NH1 | M_GLU_647 | OE1 | 3.182 |
| 6NF5 | D_ARG_542  | NH1 | M_GLU_647 | OE2 | 3.535 |
| 6NF5 | D_ARG_542  | NH2 | M_GLU_647 | OE1 | 3.978 |
| 6NF5 | D_LYS_574  | NZ  | C_ASP_107 | OD1 | 2.887 |

|      |            |     |           |     |       |
|------|------------|-----|-----------|-----|-------|
| 6NF5 | D_HIS_585  | NE2 | C_GLU_492 | OE1 | 3.725 |
| 6NF5 | D_HIS_585  | NE2 | D_ASP_589 | OD1 | 3.861 |
| 6NF5 | D_HIS_585  | NE2 | D_ASP_589 | OD2 | 3.640 |
| 6NF5 | D_LYS_601  | NZ  | M_GLU_657 | OE1 | 3.026 |
| 6NF5 | D_ARG_617  | NH1 | D_GLU_634 | OE1 | 2.940 |
| 6NF5 | D_ARG_617  | NH1 | D_GLU_634 | OE2 | 3.518 |
| 6NF5 | D_ARG_617  | NH2 | D_GLU_621 | OE2 | 3.903 |
| 6NF5 | E_ARG_38   | NH1 | E_ASP_86  | OD1 | 2.712 |
| 6NF5 | E_ARG_38   | NH2 | E_GLU_46  | OE1 | 2.805 |
| 6NF5 | E_ARG_38   | NH2 | E_GLU_46  | OE2 | 3.659 |
| 6NF5 | E_ARG_38   | NH2 | E_ASP_86  | OD1 | 3.922 |
| 6NF5 | E_ARG_50   | NH1 | E_GLU_95  | OE1 | 3.018 |
| 6NF5 | E_ARG_66   | NH1 | E_ASP_86  | OD1 | 3.025 |
| 6NF5 | E_ARG_66   | NH1 | E_ASP_86  | OD2 | 3.680 |
| 6NF5 | E_ARG_66   | NH2 | E_ASP_86  | OD1 | 3.528 |
| 6NF5 | E_ARG_66   | NH2 | E_ASP_86  | OD2 | 2.747 |
| 6NF5 | F_ARG_61   | NH2 | F_ASP_82  | OD1 | 3.053 |
| 6NF5 | F_ARG_61   | NH2 | F_ASP_82  | OD2 | 3.487 |
| 6NF5 | F_LYS_103  | NZ  | F_ASP_85  | OD1 | 2.813 |
| 6NF5 | F_LYS_103  | NZ  | F_ASP_85  | OD2 | 3.823 |
| 6NF5 | G_ARG_38   | NH1 | G_ASP_86  | OD1 | 3.165 |
| 6NF5 | G_ARG_38   | NH2 | G_ASP_86  | OD1 | 2.935 |
| 6NF5 | G_ARG_53   | NH1 | D_ASP_659 | OD1 | 3.261 |
| 6NF5 | G_ARG_53   | NH1 | D_ASP_659 | OD2 | 3.240 |
| 6NF5 | G_ARG_53   | NH2 | D_ASP_659 | OD1 | 3.591 |
| 6NF5 | G_ARG_53   | NH2 | D_ASP_659 | OD2 | 2.651 |
| 6NF5 | G_ARG_66   | NH1 | G_ASP_86  | OD1 | 3.712 |
| 6NF5 | G_ARG_66   | NH1 | G_ASP_86  | OD2 | 2.791 |
| 6NF5 | G_ARG_66   | NH2 | G_ASP_86  | OD1 | 3.225 |
| 6NF5 | G_ARG_66   | NH2 | G_ASP_86  | OD2 | 3.738 |
| 6NF5 | G_LYS_75   | NZ  | G_ASP_72  | OD2 | 3.956 |
| 6NF5 | G_LYS_100E | NZ  | G_ASP_101 | OD1 | 3.994 |
| 6NF5 | G_LYS_100E | NZ  | G_ASP_101 | OD2 | 2.688 |
| 6NF5 | I_ARG_54   | NH2 | I_ASP_60  | OD1 | 2.564 |
| 6NF5 | I_ARG_61   | NH2 | I_ASP_82  | OD1 | 3.061 |
| 6NF5 | I_ARG_61   | NH2 | I_ASP_82  | OD2 | 3.668 |
| 6NF5 | I_ARG_103  | NH1 | I_ASP_85  | OD1 | 3.116 |
| 6NF5 | J_LYS_46   | NZ  | M_ASP_632 | OD2 | 2.410 |
| 6NF5 | J_LYS_97   | NZ  | J_GLU_275 | OE2 | 3.696 |
| 6NF5 | J_LYS_137  | NZ  | P_ASP_51  | OD2 | 2.735 |
| 6NF5 | J_LYS_168  | NZ  | J_ASP_167 | OD2 | 2.451 |
| 6NF5 | J_ARG_178  | NH2 | J_GLU_153 | OE1 | 3.938 |
| 6NF5 | J_ARG_192  | NH1 | C_GLU_164 | OE2 | 3.010 |
| 6NF5 | J_ARG_192  | NH2 | C_GLU_164 | OE2 | 3.825 |
| 6NF5 | J_LYS_229  | NZ  | J_GLU_83  | OE2 | 2.843 |
| 6NF5 | J_LYS_232  | NZ  | J_GLU_268 | OE1 | 2.482 |
| 6NF5 | J_HIS_249  | NE2 | J_GLU_482 | OE1 | 3.151 |
| 6NF5 | J_LYS_282  | NZ  | J_GLU_275 | OE1 | 3.676 |
| 6NF5 | J_LYS_421  | NZ  | J_GLU_370 | OE2 | 2.968 |
| 6NF5 | J_ARG_456  | NH1 | J_GLU_466 | OE1 | 2.887 |
| 6NF5 | J_ARG_469  | NH1 | J_ASP_457 | OD1 | 2.730 |
| 6NF5 | J_ARG_469  | NH1 | J_ASP_457 | OD2 | 2.913 |
| 6NF5 | J_ARG_476  | NH1 | J_GLU_102 | OE1 | 3.770 |
| 6NF5 | J_ARG_476  | NH1 | J_GLU_102 | OE2 | 2.949 |
| 6NF5 | J_ARG_476  | NH2 | J_ASP_474 | OD1 | 3.812 |
| 6NF5 | J_ARG_476  | NH2 | J_ASP_474 | OD2 | 2.862 |
| 6NF5 | J_ARG_480  | NH1 | J_ASP_477 | OD1 | 2.619 |
| 6NF5 | J_LYS_485  | NZ  | J_GLU_267 | OE2 | 3.474 |

|      |            |     |           |     |       |
|------|------------|-----|-----------|-----|-------|
| 6NF5 | J_LYS_487  | NZ  | J_ASP_47  | OD1 | 2.966 |
| 6NF5 | J_LYS_487  | NZ  | J_ASP_47  | OD2 | 2.856 |
| 6NF5 | J_LYS_487  | NZ  | J_GLU_91  | OE1 | 3.851 |
| 6NF5 | J_LYS_490  | NZ  | J_GLU_492 | OE2 | 3.881 |
| 6NF5 | M_ARG_542  | NH1 | B_GLU_647 | OE1 | 3.182 |
| 6NF5 | M_ARG_542  | NH1 | B_GLU_647 | OE2 | 3.534 |
| 6NF5 | M_ARG_542  | NH2 | B_GLU_647 | OE1 | 3.979 |
| 6NF5 | M_LYS_574  | NZ  | J_ASP_107 | OD1 | 2.887 |
| 6NF5 | M_HIS_585  | NE2 | J_GLU_492 | OE1 | 3.726 |
| 6NF5 | M_HIS_585  | NE2 | M_ASP_589 | OD1 | 3.860 |
| 6NF5 | M_HIS_585  | NE2 | M_ASP_589 | OD2 | 3.640 |
| 6NF5 | M_LYS_601  | NZ  | B_GLU_657 | OE1 | 3.027 |
| 6NF5 | M_ARG_617  | NH1 | M_GLU_634 | OE1 | 2.940 |
| 6NF5 | M_ARG_617  | NH1 | M_GLU_634 | OE2 | 3.518 |
| 6NF5 | M_ARG_617  | NH2 | M_GLU_621 | OE2 | 3.902 |
| 6NF5 | O_ARG_38   | NH1 | O_ASP_86  | OD1 | 2.712 |
| 6NF5 | O_ARG_38   | NH2 | O_GLU_46  | OE1 | 2.805 |
| 6NF5 | O_ARG_38   | NH2 | O_GLU_46  | OE2 | 3.659 |
| 6NF5 | O_ARG_38   | NH2 | O_ASP_86  | OD1 | 3.922 |
| 6NF5 | O_ARG_50   | NH1 | O_GLU_95  | OE1 | 3.017 |
| 6NF5 | O_ARG_66   | NH1 | O_ASP_86  | OD1 | 3.025 |
| 6NF5 | O_ARG_66   | NH1 | O_ASP_86  | OD2 | 3.680 |
| 6NF5 | O_ARG_66   | NH2 | O_ASP_86  | OD1 | 3.529 |
| 6NF5 | O_ARG_66   | NH2 | O_ASP_86  | OD2 | 2.748 |
| 6NF5 | P_ARG_61   | NH2 | P_ASP_82  | OD1 | 3.053 |
| 6NF5 | P_ARG_61   | NH2 | P_ASP_82  | OD2 | 3.487 |
| 6NF5 | P_LYS_103  | NZ  | P_ASP_85  | OD1 | 2.813 |
| 6NF5 | P_LYS_103  | NZ  | P_ASP_85  | OD2 | 3.823 |
| 6NF5 | Q_ARG_38   | NH1 | Q_ASP_86  | OD1 | 3.164 |
| 6NF5 | Q_ARG_38   | NH2 | Q_ASP_86  | OD1 | 2.933 |
| 6NF5 | Q_ARG_53   | NH1 | M_ASP_659 | OD1 | 3.262 |
| 6NF5 | Q_ARG_53   | NH1 | M_ASP_659 | OD2 | 3.240 |
| 6NF5 | Q_ARG_53   | NH2 | M_ASP_659 | OD1 | 3.591 |
| 6NF5 | Q_ARG_53   | NH2 | M_ASP_659 | OD2 | 2.650 |
| 6NF5 | Q_ARG_66   | NH1 | Q_ASP_86  | OD1 | 3.713 |
| 6NF5 | Q_ARG_66   | NH1 | Q_ASP_86  | OD2 | 2.791 |
| 6NF5 | Q_ARG_66   | NH2 | Q_ASP_86  | OD1 | 3.225 |
| 6NF5 | Q_ARG_66   | NH2 | Q_ASP_86  | OD2 | 3.737 |
| 6NF5 | Q_LYS_75   | NZ  | Q_ASP_72  | OD2 | 3.956 |
| 6NF5 | Q_LYS_100E | NZ  | Q_ASP_101 | OD1 | 3.994 |
| 6NF5 | Q_LYS_100E | NZ  | Q_ASP_101 | OD2 | 2.688 |
| 6NF5 | R_ARG_54   | NH2 | R_ASP_60  | OD1 | 2.562 |
| 6NF5 | R_ARG_61   | NH2 | R_ASP_82  | OD1 | 3.061 |
| 6NF5 | R_ARG_61   | NH2 | R_ASP_82  | OD2 | 3.667 |
| 6NF5 | R_ARG_103  | NH1 | R_ASP_85  | OD1 | 3.116 |
| 6NFC | C_ARG_38   | NH1 | C_ASP_86  | OD1 | 3.197 |
| 6NFC | C_ARG_38   | NH2 | C_ASP_86  | OD1 | 2.953 |
| 6NFC | C_LYS_43   | NZ  | C_GLU_46  | OE1 | 2.792 |
| 6NFC | C_LYS_43   | NZ  | C_GLU_46  | OE2 | 3.534 |
| 6NFC | C_ARG_53   | NH1 | I_ASP_659 | OD1 | 3.890 |
| 6NFC | C_ARG_53   | NH1 | I_ASP_659 | OD2 | 2.842 |
| 6NFC | C_ARG_53   | NH2 | I_ASP_659 | OD2 | 2.675 |
| 6NFC | C_LYS_64   | NZ  | C_ASP_61  | OD1 | 2.498 |
| 6NFC | C_ARG_66   | NH1 | C_ASP_86  | OD1 | 3.737 |
| 6NFC | C_ARG_66   | NH1 | C_ASP_86  | OD2 | 2.795 |
| 6NFC | C_ARG_66   | NH2 | C_ASP_86  | OD1 | 3.194 |
| 6NFC | C_ARG_66   | NH2 | C_ASP_86  | OD2 | 3.686 |
| 6NFC | C_LYS_100E | NZ  | C_ASP_101 | OD2 | 2.741 |

|      |           |     |           |     |       |
|------|-----------|-----|-----------|-----|-------|
| 6NFC | D_ARG_54  | NH1 | D_ASP_60  | OD1 | 3.484 |
| 6NFC | D_ARG_61  | NH1 | D_ASP_82  | OD1 | 3.021 |
| 6NFC | D_ARG_61  | NH1 | D_ASP_82  | OD2 | 3.736 |
| 6NFC | D_ARG_103 | NH2 | D_ASP_85  | OD1 | 3.716 |
| 6NFC | D_ARG_103 | NH2 | D_ASP_85  | OD2 | 3.091 |
| 6NFC | A_LYS_46  | NZ  | B_ASP_632 | OD1 | 3.913 |
| 6NFC | A_LYS_46  | NZ  | B_ASP_632 | OD2 | 2.455 |
| 6NFC | A_LYS_97  | NZ  | A_GLU_275 | OE2 | 3.627 |
| 6NFC | A_LYS_137 | NZ  | L_ASP_51  | OD2 | 2.690 |
| 6NFC | A_ARG_178 | NH2 | A_GLU_153 | OE1 | 3.848 |
| 6NFC | A_ARG_178 | NH2 | A_GLU_153 | OE2 | 3.063 |
| 6NFC | A_LYS_227 | NZ  | A_GLU_83  | OE1 | 2.893 |
| 6NFC | A_LYS_229 | NZ  | A_GLU_83  | OE2 | 2.829 |
| 6NFC | A_LYS_231 | NZ  | A_GLU_268 | OE2 | 3.327 |
| 6NFC | A_LYS_232 | NZ  | A_GLU_268 | OE1 | 3.542 |
| 6NFC | A_LYS_232 | NZ  | A_GLU_269 | OE2 | 3.983 |
| 6NFC | A_LYS_282 | NZ  | A_GLU_275 | OE1 | 3.354 |
| 6NFC | A_ARG_298 | NH2 | A_GLU_381 | OE1 | 3.053 |
| 6NFC | A_ARG_308 | NH1 | A_GLU_164 | OE2 | 2.885 |
| 6NFC | A_LYS_335 | NZ  | A_ASP_412 | OD2 | 2.571 |
| 6NFC | A_LYS_351 | NZ  | A_GLU_269 | OE1 | 3.918 |
| 6NFC | A_LYS_351 | NZ  | A_GLU_269 | OE2 | 3.924 |
| 6NFC | A_ARG_429 | NH2 | A_ASP_113 | OD2 | 3.338 |
| 6NFC | A_ARG_456 | NH2 | A_GLU_466 | OE1 | 2.989 |
| 6NFC | A_ARG_456 | NH2 | A_GLU_466 | OE2 | 3.574 |
| 6NFC | A_ARG_469 | NH2 | A_ASP_457 | OD1 | 3.689 |
| 6NFC | A_ARG_469 | NH2 | A_ASP_457 | OD2 | 3.083 |
| 6NFC | A_ARG_476 | NH1 | A_ASP_474 | OD1 | 3.258 |
| 6NFC | A_ARG_476 | NH1 | A_ASP_474 | OD2 | 3.799 |
| 6NFC | A_ARG_476 | NH2 | A_GLU_102 | OE1 | 3.757 |
| 6NFC | A_ARG_476 | NH2 | A_GLU_102 | OE2 | 3.100 |
| 6NFC | A_ARG_480 | NH1 | A_ASP_477 | OD1 | 2.962 |
| 6NFC | A_LYS_487 | NZ  | A_ASP_47  | OD1 | 2.724 |
| 6NFC | A_LYS_487 | NZ  | A_ASP_47  | OD2 | 3.863 |
| 6NFC | A_LYS_487 | NZ  | A_GLU_91  | OE1 | 3.844 |
| 6NFC | B_ARG_542 | NH1 | G_GLU_647 | OE1 | 3.297 |
| 6NFC | B_ARG_542 | NH1 | G_GLU_647 | OE2 | 3.640 |
| 6NFC | B_LYS_574 | NZ  | A_GLU_106 | OE1 | 3.608 |
| 6NFC | B_LYS_574 | NZ  | A_GLU_106 | OE2 | 2.473 |
| 6NFC | B_ARG_579 | NH2 | G_GLU_584 | OE1 | 3.071 |
| 6NFC | B_ARG_579 | NH2 | G_GLU_584 | OE2 | 3.850 |
| 6NFC | B_HIS_585 | NE2 | B_ASP_589 | OD2 | 3.555 |
| 6NFC | B_ARG_617 | NH1 | B_GLU_634 | OE1 | 2.878 |
| 6NFC | B_ARG_617 | NH1 | B_GLU_634 | OE2 | 3.440 |
| 6NFC | B_ARG_617 | NH2 | B_GLU_621 | OE2 | 2.967 |
| 6NFC | H_LYS_19  | NZ  | H_GLU_81  | OE1 | 3.943 |
| 6NFC | H_HIS_35  | NE2 | H_ASP_95  | OD2 | 2.826 |
| 6NFC | H_ARG_38  | NH1 | H_ASP_86  | OD1 | 2.925 |
| 6NFC | H_ARG_38  | NH2 | H_GLU_46  | OE1 | 2.914 |
| 6NFC | H_ARG_38  | NH2 | H_GLU_46  | OE2 | 3.729 |
| 6NFC | H_LYS_62  | NZ  | H_GLU_46  | OE2 | 3.377 |
| 6NFC | H_ARG_66  | NH2 | H_ASP_86  | OD1 | 2.882 |
| 6NFC | H_ARG_66  | NH2 | H_ASP_86  | OD2 | 3.067 |
| 6NFC | H_ARG_98  | NH2 | H_ASP_95  | OD1 | 3.740 |
| 6NFC | L_LYS_50  | NZ  | H_GLU_99  | OE1 | 3.024 |
| 6NFC | L_ARG_61  | NH1 | L_GLU_81  | OE2 | 3.132 |
| 6NFC | L_ARG_61  | NH1 | L_ASP_82  | OD1 | 3.859 |
| 6NFC | L_ARG_61  | NH1 | L_ASP_82  | OD2 | 2.905 |

|      |            |     |           |     |       |
|------|------------|-----|-----------|-----|-------|
| 6NFC | L_LYS_103  | NZ  | L_ASP_85  | OD1 | 2.838 |
| 6NFC | L_LYS_103  | NZ  | L_ASP_85  | OD2 | 3.467 |
| 6NFC | J_ARG_38   | NH1 | J_ASP_86  | OD1 | 3.229 |
| 6NFC | J_ARG_38   | NH2 | J_ASP_86  | OD1 | 2.989 |
| 6NFC | J_LYS_43   | NZ  | J_GLU_46  | OE1 | 2.802 |
| 6NFC | J_LYS_43   | NZ  | J_GLU_46  | OE2 | 3.573 |
| 6NFC | J_ARG_53   | NH1 | J_ASP_52A | OD1 | 3.966 |
| 6NFC | J_ARG_53   | NH1 | G_ASP_659 | OD1 | 3.783 |
| 6NFC | J_ARG_53   | NH1 | G_ASP_659 | OD2 | 2.774 |
| 6NFC | J_ARG_53   | NH2 | G_ASP_659 | OD2 | 2.735 |
| 6NFC | J_LYS_64   | NZ  | J_ASP_61  | OD1 | 2.518 |
| 6NFC | J_ARG_66   | NH1 | J_ASP_86  | OD1 | 3.718 |
| 6NFC | J_ARG_66   | NH1 | J_ASP_86  | OD2 | 2.782 |
| 6NFC | J_ARG_66   | NH2 | J_ASP_86  | OD1 | 3.192 |
| 6NFC | J_ARG_66   | NH2 | J_ASP_86  | OD2 | 3.698 |
| 6NFC | J_LYS_75   | NZ  | J_ASP_72  | OD2 | 2.500 |
| 6NFC | J_LYS_100E | NZ  | J_ASP_101 | OD2 | 2.686 |
| 6NFC | M_ARG_103  | NH2 | M_ASP_85  | OD1 | 3.649 |
| 6NFC | M_ARG_103  | NH2 | M_ASP_85  | OD2 | 3.061 |
| 6NFC | E_LYS_46   | NZ  | E_GLU_492 | OE1 | 2.958 |
| 6NFC | E_LYS_46   | NZ  | G_ASP_632 | OD1 | 3.927 |
| 6NFC | E_LYS_46   | NZ  | G_ASP_632 | OD2 | 2.442 |
| 6NFC | E_HIS_85   | NE2 | E_GLU_87  | OE1 | 3.993 |
| 6NFC | E_ARG_178  | NH2 | E_GLU_153 | OE1 | 3.884 |
| 6NFC | E_ARG_178  | NH2 | E_GLU_153 | OE2 | 3.098 |
| 6NFC | E_LYS_227  | NZ  | E_GLU_83  | OE1 | 2.898 |
| 6NFC | E_LYS_229  | NZ  | E_GLU_83  | OE2 | 2.894 |
| 6NFC | E_LYS_232  | NZ  | E_GLU_269 | OE2 | 3.820 |
| 6NFC | E_HIS_249  | NE2 | E_GLU_482 | OE1 | 3.961 |
| 6NFC | E_LYS_282  | NZ  | E_GLU_275 | OE1 | 2.898 |
| 6NFC | E_LYS_282  | NZ  | E_GLU_275 | OE2 | 3.574 |
| 6NFC | E_ARG_298  | NH1 | E_GLU_381 | OE2 | 3.008 |
| 6NFC | E_ARG_308  | NH1 | E_GLU_164 | OE2 | 2.931 |
| 6NFC | E_LYS_335  | NZ  | E_ASP_412 | OD1 | 3.769 |
| 6NFC | E_LYS_335  | NZ  | E_ASP_412 | OD2 | 2.805 |
| 6NFC | E_LYS_351  | NZ  | E_GLU_269 | OE2 | 3.378 |
| 6NFC | E_ARG_429  | NH2 | E_ASP_113 | OD2 | 3.262 |
| 6NFC | E_ARG_456  | NH2 | E_GLU_466 | OE1 | 2.769 |
| 6NFC | E_ARG_456  | NH2 | E_GLU_466 | OE2 | 3.322 |
| 6NFC | E_ARG_469  | NH2 | E_ASP_457 | OD1 | 3.712 |
| 6NFC | E_ARG_469  | NH2 | E_ASP_457 | OD2 | 3.034 |
| 6NFC | E_ARG_476  | NH1 | E_ASP_474 | OD1 | 3.318 |
| 6NFC | E_ARG_476  | NH1 | E_ASP_474 | OD2 | 3.890 |
| 6NFC | E_ARG_476  | NH2 | E_GLU_102 | OE1 | 3.764 |
| 6NFC | E_ARG_476  | NH2 | E_GLU_102 | OE2 | 3.083 |
| 6NFC | E_ARG_480  | NH1 | E_ASP_477 | OD1 | 2.952 |
| 6NFC | E_LYS_487  | NZ  | E_ASP_47  | OD1 | 2.725 |
| 6NFC | E_LYS_487  | NZ  | E_ASP_47  | OD2 | 3.874 |
| 6NFC | E_LYS_487  | NZ  | E_GLU_91  | OE1 | 3.818 |
| 6NFC | E_ARG_500  | NH2 | I_ASP_664 | OD1 | 2.950 |
| 6NFC | E_ARG_500  | NH2 | I_ASP_664 | OD2 | 3.747 |
| 6NFC | G_ARG_542  | NH1 | I_GLU_647 | OE1 | 3.321 |
| 6NFC | G_ARG_542  | NH1 | I_GLU_647 | OE2 | 3.884 |
| 6NFC | G_LYS_574  | NZ  | E_GLU_106 | OE1 | 3.312 |
| 6NFC | G_LYS_574  | NZ  | E_GLU_106 | OE2 | 2.741 |
| 6NFC | G_ARG_579  | NH2 | I_GLU_584 | OE1 | 3.032 |
| 6NFC | G_ARG_579  | NH2 | I_GLU_584 | OE2 | 3.885 |
| 6NFC | G_HIS_585  | NE2 | G_ASP_589 | OD2 | 3.475 |



|      |            |     |           |     |       |
|------|------------|-----|-----------|-----|-------|
| 6NFC | G_LYS_601  | NZ  | I_GLU_657 | OE1 | 2.933 |
| 6NFC | G_LYS_601  | NZ  | I_GLU_657 | OE2 | 3.730 |
| 6NFC | G_ARG_617  | NH1 | G_GLU_634 | OE1 | 3.252 |
| 6NFC | G_ARG_617  | NH1 | G_GLU_634 | OE2 | 3.637 |
| 6NFC | G_ARG_617  | NH2 | G_GLU_621 | OE2 | 3.149 |
| 6NFC | F_LYS_46   | NZ  | F_GLU_492 | OE1 | 3.791 |
| 6NFC | F_LYS_46   | NZ  | I_ASP_632 | OD1 | 3.960 |
| 6NFC | F_LYS_46   | NZ  | I_ASP_632 | OD2 | 2.474 |
| 6NFC | F_LYS_117  | NZ  | F_ASP_113 | OD1 | 3.918 |
| 6NFC | F_LYS_117  | NZ  | F_ASP_113 | OD2 | 2.461 |
| 6NFC | F_ARG_178  | NH2 | F_GLU_153 | OE1 | 3.758 |
| 6NFC | F_LYS_227  | NZ  | F_GLU_83  | OE1 | 2.903 |
| 6NFC | F_LYS_229  | NZ  | F_GLU_83  | OE2 | 2.947 |
| 6NFC | F_LYS_232  | NZ  | F_GLU_268 | OE1 | 3.618 |
| 6NFC | F_LYS_232  | NZ  | F_GLU_269 | OE2 | 3.891 |
| 6NFC | F_HIS_249  | NE2 | F_GLU_482 | OE1 | 3.968 |
| 6NFC | F_LYS_282  | NZ  | F_GLU_275 | OE1 | 2.886 |
| 6NFC | F_LYS_282  | NZ  | F_GLU_275 | OE2 | 3.568 |
| 6NFC | F_ARG_298  | NH2 | F_GLU_381 | OE1 | 3.051 |
| 6NFC | F_ARG_308  | NH1 | F_GLU_164 | OE2 | 2.946 |
| 6NFC | F_LYS_335  | NZ  | F_ASP_412 | OD2 | 2.846 |
| 6NFC | F_LYS_351  | NZ  | F_GLU_269 | OE1 | 3.913 |
| 6NFC | F_LYS_351  | NZ  | F_GLU_269 | OE2 | 3.773 |
| 6NFC | F_ARG_429  | NH1 | F_ASP_113 | OD1 | 3.014 |
| 6NFC | F_ARG_429  | NH2 | F_ASP_113 | OD1 | 2.930 |
| 6NFC | F_ARG_456  | NH2 | F_GLU_466 | OE1 | 2.974 |
| 6NFC | F_ARG_456  | NH2 | F_GLU_466 | OE2 | 3.635 |
| 6NFC | F_ARG_469  | NH2 | F_ASP_457 | OD1 | 3.660 |
| 6NFC | F_ARG_469  | NH2 | F_ASP_457 | OD2 | 3.070 |
| 6NFC | F_ARG_476  | NH1 | F_ASP_474 | OD1 | 3.311 |
| 6NFC | F_ARG_476  | NH1 | F_ASP_474 | OD2 | 3.824 |
| 6NFC | F_ARG_476  | NH2 | F_GLU_102 | OE1 | 3.903 |
| 6NFC | F_ARG_480  | NH1 | F_ASP_477 | OD1 | 2.871 |
| 6NFC | F_LYS_487  | NZ  | F_ASP_47  | OD1 | 2.719 |
| 6NFC | F_LYS_487  | NZ  | F_ASP_47  | OD2 | 3.910 |
| 6NFC | F_LYS_502  | NZ  | B_ASP_664 | OD1 | 3.023 |
| 6NFC | I_ARG_542  | NH1 | B_GLU_647 | OE1 | 3.339 |
| 6NFC | I_ARG_542  | NH1 | B_GLU_647 | OE2 | 3.856 |
| 6NFC | I_LYS_574  | NZ  | F_ASP_107 | OD1 | 2.742 |
| 6NFC | I_ARG_579  | NH2 | B_GLU_584 | OE1 | 3.222 |
| 6NFC | I_ARG_579  | NH2 | B_GLU_584 | OE2 | 3.762 |
| 6NFC | I_HIS_585  | NE2 | I_ASP_589 | OD2 | 3.720 |
| 6NFC | I_LYS_601  | NZ  | B_GLU_657 | OE1 | 3.945 |
| 6NFC | I_ARG_617  | NH1 | I_GLU_634 | OE1 | 3.726 |
| 6NFC | K_ARG_38   | NH1 | K_ASP_86  | OD1 | 3.022 |
| 6NFC | K_ARG_38   | NH2 | K_GLU_46  | OE1 | 2.916 |
| 6NFC | K_ARG_38   | NH2 | K_GLU_46  | OE2 | 3.525 |
| 6NFC | K_ARG_53   | NH1 | B_ASP_659 | OD1 | 3.915 |
| 6NFC | K_ARG_53   | NH1 | B_ASP_659 | OD2 | 2.784 |
| 6NFC | K_ARG_53   | NH2 | B_ASP_659 | OD2 | 2.738 |
| 6NFC | K_LYS_64   | NZ  | K_ASP_61  | OD1 | 3.796 |
| 6NFC | K_ARG_66   | NH1 | K_ASP_86  | OD1 | 3.739 |
| 6NFC | K_ARG_66   | NH1 | K_ASP_86  | OD2 | 2.801 |
| 6NFC | K_ARG_66   | NH2 | K_ASP_86  | OD1 | 3.263 |
| 6NFC | K_ARG_66   | NH2 | K_ASP_86  | OD2 | 3.749 |
| 6NFC | K_LYS_75   | NZ  | K_ASP_72  | OD2 | 3.979 |
| 6NFC | K_LYS_100E | NZ  | K_ASP_101 | OD2 | 2.756 |
| 6NFC | N_ARG_54   | NH1 | N_ASP_60  | OD1 | 3.576 |

|      |           |     |           |     |       |
|------|-----------|-----|-----------|-----|-------|
| 6NFC | N_ARG.61  | NH1 | N_ASP.82  | OD1 | 2.937 |
| 6NFC | N_ARG.61  | NH1 | N_ASP.82  | OD2 | 3.695 |
| 6NFC | N_ARG.103 | NH2 | N_ASP.85  | OD1 | 3.716 |
| 6NFC | N_ARG.103 | NH2 | N_ASP.85  | OD2 | 3.096 |
| 6NMR | L_ARG.24  | NH1 | L_GLU.70  | OE2 | 3.158 |
| 6NMR | L_ARG.39  | NH2 | L_GLU.81  | OE1 | 3.616 |
| 6NMR | L_ARG.61  | NH1 | L_GLU.81  | OE2 | 3.707 |
| 6NMR | L_ARG.61  | NH1 | L_ASP.82  | OD1 | 2.354 |
| 6NMR | L_ARG.61  | NH1 | L_ASP.82  | OD2 | 2.889 |
| 6NMR | L_ARG.61  | NH2 | L_GLU.81  | OE2 | 2.699 |
| 6NMR | L_ARG.61  | NH2 | L_ASP.82  | OD1 | 3.976 |
| 6NMR | L_LYS.150 | NZ  | L_GLU.196 | OE1 | 3.160 |
| 6NMR | L_HIS.190 | ND1 | L_ASP.152 | OD2 | 3.477 |
| 6NMR | L_ARG.212 | NH1 | L_GLU.188 | OE1 | 3.201 |
| 6NMR | H_ARG.38  | NH1 | H_GLU.46  | OE2 | 3.009 |
| 6NMR | H_ARG.38  | NH1 | H_ASP.88  | OD1 | 3.678 |
| 6NMR | H_ARG.38  | NH2 | H_ASP.88  | OD1 | 2.935 |
| 6NMR | H_ARG.65  | NH1 | H_ASP.88  | OD1 | 3.496 |
| 6NMR | H_ARG.65  | NH1 | H_ASP.88  | OD2 | 2.506 |
| 6NMR | H_ARG.65  | NH2 | H_ASP.88  | OD1 | 3.005 |
| 6NMR | H_ARG.65  | NH2 | H_ASP.88  | OD2 | 3.455 |
| 6NMR | H_LYS.96  | NZ  | H_ASP.108 | OD1 | 3.882 |
| 6NMR | H_LYS.96  | NZ  | H_ASP.108 | OD2 | 2.332 |
| 6NMR | H_LYS.150 | NZ  | H_ASP.151 | OD1 | 3.197 |
| 6NMR | H_LYS.150 | NZ  | H_ASP.151 | OD2 | 3.273 |
| 6NMR | H_LYS.216 | NZ  | L_GLU.124 | OE1 | 3.273 |
| 6NMR | H_LYS.216 | NZ  | L_GLU.124 | OE2 | 3.010 |
| 6NMR | H_LYS.217 | NZ  | H_GLU.219 | OE1 | 3.365 |
| 6NMR | H_LYS.217 | NZ  | H_GLU.219 | OE2 | 3.978 |
| 6NMR | S_ARG.24  | NH1 | S_ASP.10  | OD2 | 3.980 |
| 6NMR | S_ARG.24  | NH2 | S_ASP.10  | OD1 | 3.502 |
| 6NMR | S_ARG.40  | NH2 | S_GLU.47  | OE2 | 2.570 |
| 6NMR | S_ARG.46  | NH1 | S_GLU.103 | OE1 | 3.842 |
| 6NMR | S_ARG.46  | NH1 | S_GLU.103 | OE2 | 3.579 |
| 6NMR | S_ARG.46  | NH2 | S_GLU.103 | OE2 | 2.903 |
| 6NMR | S_ARG.59  | NH1 | S_ASP.85  | OD1 | 3.806 |
| 6NMR | S_ARG.59  | NH1 | S_ASP.85  | OD2 | 3.028 |
| 6NMR | S_ARG.59  | NH2 | S_ASP.85  | OD2 | 2.222 |
| 6NMR | S_ARG.69  | NH1 | L_GLU.55  | OE1 | 3.247 |
| 6NMR | S_ARG.69  | NH1 | L_GLU.55  | OE2 | 3.038 |
| 6NMR | S_ARG.69  | NH2 | L_GLU.55  | OE2 | 3.173 |
| 6NMR | B_ARG.39  | NH2 | B_GLU.81  | OE2 | 3.427 |
| 6NMR | B_ARG.61  | NH1 | B_ASP.82  | OD1 | 2.926 |
| 6NMR | B_ARG.61  | NH1 | B_ASP.82  | OD2 | 2.375 |
| 6NMR | B_ARG.61  | NH2 | B_GLU.81  | OE2 | 3.579 |
| 6NMR | B_ARG.61  | NH2 | B_ASP.82  | OD1 | 3.952 |
| 6NMR | B_LYS.189 | NZ  | B_ASP.186 | OD1 | 3.729 |
| 6NMR | B_ARG.212 | NH1 | B_GLU.188 | OE1 | 3.038 |
| 6NMR | A_ARG.38  | NH1 | A_GLU.46  | OE1 | 2.680 |
| 6NMR | A_ARG.38  | NH1 | A_GLU.87  | OE2 | 3.236 |
| 6NMR | A_ARG.38  | NH2 | A_GLU.87  | OE2 | 3.845 |
| 6NMR | A_ARG.65  | NH1 | A_ASP.88  | OD1 | 3.503 |
| 6NMR | A_ARG.65  | NH1 | A_ASP.88  | OD2 | 2.589 |
| 6NMR | A_ARG.65  | NH2 | A_ASP.88  | OD1 | 2.928 |
| 6NMR | A_ARG.65  | NH2 | A_ASP.88  | OD2 | 3.469 |
| 6NMR | A_LYS.74  | NZ  | A_ASP.71  | OD2 | 3.116 |
| 6NMR | A_LYS.150 | NZ  | A_ASP.151 | OD1 | 3.635 |
| 6NMR | A_LYS.150 | NZ  | A_ASP.151 | OD2 | 3.589 |

|      |           |     |           |     |       |
|------|-----------|-----|-----------|-----|-------|
| 6NMR | E_ARG_40  | NH1 | E_GLU_47  | OE1 | 3.843 |
| 6NMR | E_ARG_40  | NH1 | E_GLU_47  | OE2 | 3.651 |
| 6NMR | E_ARG_59  | NH1 | E_ASP_85  | OD2 | 3.106 |
| 6NMR | E_ARG_69  | NH1 | B_GLU_55  | OE1 | 2.733 |
| 6NMR | E_ARG_69  | NH1 | B_GLU_55  | OE2 | 2.469 |
| 6NMR | E_ARG_69  | NH2 | B_GLU_55  | OE1 | 2.510 |
| 6NMR | E_ARG_69  | NH2 | B_GLU_55  | OE2 | 3.637 |
| 6NMR | G_ARG_24  | NH1 | G_GLU_70  | OE2 | 3.551 |
| 6NMR | G_ARG_61  | NH1 | G_GLU_81  | OE1 | 3.642 |
| 6NMR | G_ARG_61  | NH2 | G_GLU_81  | OE1 | 3.695 |
| 6NMR | G_ARG_61  | NH2 | G_ASP_82  | OD1 | 3.089 |
| 6NMR | G_ARG_61  | NH2 | G_ASP_82  | OD2 | 3.380 |
| 6NMR | G_LYS_150 | NZ  | G_GLU_196 | OE1 | 2.752 |
| 6NMR | G_HIS_190 | ND1 | G_ASP_152 | OD2 | 3.424 |
| 6NMR | G_HIS_190 | NE2 | G_ASP_186 | OD1 | 3.299 |
| 6NMR | G_ARG_212 | NH1 | G_GLU_188 | OE1 | 3.625 |
| 6NMR | F_ARG_38  | NH1 | F_GLU_46  | OE1 | 2.763 |
| 6NMR | F_ARG_38  | NH2 | F_ASP_88  | OD1 | 3.207 |
| 6NMR | F_LYS_63  | NZ  | F_ASP_60  | OD1 | 3.920 |
| 6NMR | F_ARG_65  | NH1 | F_ASP_88  | OD2 | 3.068 |
| 6NMR | F_ARG_65  | NH2 | F_ASP_88  | OD1 | 3.379 |
| 6NMR | F_ARG_65  | NH2 | F_ASP_88  | OD2 | 3.500 |
| 6NMR | F_LYS_96  | NZ  | F_ASP_108 | OD1 | 3.703 |
| 6NMR | F_LYS_96  | NZ  | F_ASP_108 | OD2 | 2.983 |
| 6NMR | F_LYS_150 | NZ  | F_ASP_151 | OD2 | 3.277 |
| 6NMR | F_LYS_217 | NZ  | F_GLU_219 | OE1 | 3.922 |
| 6NMR | L_ARG_46  | NH1 | L_GLU_103 | OE2 | 3.225 |
| 6NMR | L_ARG_46  | NH2 | L_GLU_103 | OE2 | 3.674 |
| 6NMR | L_ARG_69  | NH1 | G_GLU_55  | OE1 | 3.183 |
| 6NMR | L_ARG_69  | NH1 | G_GLU_55  | OE2 | 2.119 |
| 6NMR | L_ARG_69  | NH1 | F_ASP_108 | OD2 | 3.629 |
| 6NMR | L_ARG_69  | NH2 | G_GLU_55  | OE1 | 2.639 |
| 6NMR | L_ARG_69  | NH2 | G_GLU_55  | OE2 | 3.327 |
| 6NMR | K_ARG_54  | NH2 | K_GLU_60  | OE2 | 3.656 |
| 6NMR | K_ARG_61  | NH1 | K_GLU_81  | OE1 | 3.042 |
| 6NMR | K_ARG_61  | NH2 | K_GLU_81  | OE1 | 3.659 |
| 6NMR | K_ARG_61  | NH2 | K_ASP_82  | OD1 | 2.679 |
| 6NMR | K_ARG_61  | NH2 | K_ASP_82  | OD2 | 3.306 |
| 6NMR | K_LYS_104 | NZ  | K_GLU_106 | OE2 | 3.287 |
| 6NMR | K_LYS_150 | NZ  | K_GLU_196 | OE1 | 3.084 |
| 6NMR | K_HIS_190 | ND1 | K_ASP_186 | OD1 | 3.859 |
| 6NMR | K_ARG_212 | NH1 | K_GLU_188 | OE2 | 3.131 |
| 6NMR | J_ARG_38  | NH1 | J_GLU_46  | OE1 | 3.889 |
| 6NMR | J_ARG_38  | NH1 | J_GLU_46  | OE2 | 3.293 |
| 6NMR | J_ARG_38  | NH1 | J_ASP_88  | OD1 | 3.807 |
| 6NMR | J_ARG_38  | NH2 | J_ASP_88  | OD1 | 2.826 |
| 6NMR | J_ARG_65  | NH1 | J_ASP_88  | OD1 | 3.631 |
| 6NMR | J_ARG_65  | NH1 | J_ASP_88  | OD2 | 2.729 |
| 6NMR | J_ARG_65  | NH2 | J_ASP_88  | OD1 | 3.014 |
| 6NMR | J_ARG_65  | NH2 | J_ASP_88  | OD2 | 3.359 |
| 6NMR | M_ARG_24  | NH1 | M_ASP_10  | OD1 | 3.002 |
| 6NMR | M_ARG_24  | NH1 | M_ASP_10  | OD2 | 3.370 |
| 6NMR | M_ARG_59  | NH1 | M_ASP_85  | OD1 | 3.222 |
| 6NMR | M_ARG_59  | NH1 | M_ASP_85  | OD2 | 2.493 |
| 6NMR | M_ARG_59  | NH2 | M_ASP_85  | OD1 | 2.536 |
| 6NMR | M_ARG_59  | NH2 | M_ASP_85  | OD2 | 3.074 |
| 6NMR | M_ARG_69  | NH1 | J_ASP_108 | OD1 | 3.945 |
| 6NMR | M_ARG_69  | NH1 | J_ASP_108 | OD2 | 3.140 |

|      |           |     |           |     |       |
|------|-----------|-----|-----------|-----|-------|
| 6NMR | M_ARG_69  | NH2 | K_GLU_55  | OE1 | 3.608 |
| 6NMR | M_ARG_69  | NH2 | J_ASP_108 | OD1 | 1.901 |
| 6NMR | M_ARG_69  | NH2 | J_ASP_108 | OD2 | 2.331 |
| 6NMS | L_ARG_24  | NH2 | L_GLU_70  | OE2 | 3.738 |
| 6NMS | L_ARG_54  | NH1 | L_ASP_60  | OD1 | 3.255 |
| 6NMS | L_ARG_61  | NH2 | L_ASP_82  | OD1 | 2.892 |
| 6NMS | L_ARG_61  | NH2 | L_ASP_82  | OD2 | 3.481 |
| 6NMS | L_ARG_94  | NH2 | S_GLU_111 | OE1 | 3.728 |
| 6NMS | L_LYS_104 | NZ  | L_GLU_166 | OE1 | 2.765 |
| 6NMS | L_LYS_104 | NZ  | L_GLU_166 | OE2 | 3.798 |
| 6NMS | L_LYS_184 | NZ  | L_GLU_188 | OE2 | 3.523 |
| 6NMS | L_LYS_189 | NZ  | L_ASP_186 | OD1 | 3.714 |
| 6NMS | L_HIS_190 | ND1 | L_ASP_152 | OD2 | 3.478 |
| 6NMS | L_ARG_212 | NH1 | L_GLU_188 | OE1 | 3.865 |
| 6NMS | H_ARG_38  | NH1 | H_ASP_90  | OD1 | 2.876 |
| 6NMS | H_ARG_38  | NH2 | H_GLU_46  | OE1 | 3.437 |
| 6NMS | H_ARG_38  | NH2 | H_GLU_46  | OE2 | 3.436 |
| 6NMS | H_ARG_67  | NH1 | H_ASP_90  | OD2 | 2.785 |
| 6NMS | H_ARG_67  | NH2 | H_ASP_90  | OD1 | 3.162 |
| 6NMS | H_ARG_67  | NH2 | H_ASP_90  | OD2 | 3.281 |
| 6NMS | H_LYS_98  | NZ  | H_ASP_107 | OD2 | 3.621 |
| 6NMS | H_ARG_104 | NH1 | H_ASP_33  | OD2 | 3.391 |
| 6NMS | H_ARG_104 | NH1 | H_GLU_99  | OE1 | 2.855 |
| 6NMS | H_ARG_104 | NH1 | H_GLU_99  | OE2 | 3.265 |
| 6NMS | H_ARG_104 | NH2 | S_GLU_111 | OE1 | 3.455 |
| 6NMS | H_ARG_104 | NH2 | S_GLU_111 | OE2 | 2.500 |
| 6NMS | H_LYS_149 | NZ  | H_ASP_150 | OD1 | 3.443 |
| 6NMS | H_LYS_149 | NZ  | H_ASP_150 | OD2 | 3.773 |
| 6NMS | H_LYS_215 | NZ  | L_GLU_124 | OE1 | 3.565 |
| 6NMS | H_LYS_215 | NZ  | L_GLU_124 | OE2 | 3.270 |
| 6NMS | H_LYS_220 | NZ  | L_GLU_214 | OE1 | 3.397 |
| 6NMS | S_LYS_11  | NZ  | H_ASP_33  | OD1 | 3.001 |
| 6NMS | S_LYS_11  | NZ  | H_GLU_99  | OE1 | 2.549 |
| 6NMS | S_ARG_40  | NH2 | S_GLU_47  | OE1 | 2.801 |
| 6NMS | S_ARG_46  | NH1 | S_GLU_103 | OE2 | 2.751 |
| 6NMS | S_ARG_46  | NH2 | S_GLU_103 | OE2 | 3.693 |
| 6NMS | S_LYS_53  | NZ  | S_ASP_101 | OD2 | 3.950 |
| 6NMS | S_HIS_56  | ND1 | A_ASP_60  | OD2 | 2.658 |
| 6NMS | S_ARG_59  | NH1 | S_ASP_85  | OD1 | 2.788 |
| 6NMS | S_ARG_59  | NH1 | S_ASP_85  | OD2 | 3.425 |
| 6NMS | S_ARG_59  | NH2 | S_ASP_85  | OD1 | 3.472 |
| 6NMS | S_ARG_59  | NH2 | S_ASP_85  | OD2 | 2.622 |
| 6NMS | A_ARG_54  | NH1 | A_ASP_60  | OD1 | 3.517 |
| 6NMS | A_ARG_61  | NH2 | A_GLU_81  | OE2 | 3.125 |
| 6NMS | A_ARG_61  | NH2 | A_ASP_82  | OD1 | 2.833 |
| 6NMS | A_ARG_61  | NH2 | A_ASP_82  | OD2 | 3.517 |
| 6NMS | A_ARG_94  | NH2 | C_GLU_111 | OE2 | 3.453 |
| 6NMS | A_LYS_104 | NZ  | A_GLU_166 | OE1 | 3.888 |
| 6NMS | A_LYS_104 | NZ  | A_GLU_166 | OE2 | 3.097 |
| 6NMS | A_LYS_189 | NZ  | A_ASP_186 | OD1 | 3.508 |
| 6NMS | A_HIS_190 | ND1 | A_ASP_152 | OD2 | 3.250 |
| 6NMS | A_ARG_212 | NH1 | A_GLU_188 | OE2 | 2.785 |
| 6NMS | B_ARG_38  | NH1 | B_ASP_90  | OD1 | 2.896 |
| 6NMS | B_ARG_38  | NH2 | B_GLU_46  | OE1 | 3.127 |
| 6NMS | B_ARG_38  | NH2 | B_GLU_46  | OE2 | 3.624 |
| 6NMS | B_ARG_67  | NH1 | B_ASP_90  | OD2 | 3.000 |
| 6NMS | B_ARG_67  | NH2 | B_ASP_90  | OD1 | 3.281 |
| 6NMS | B_ARG_67  | NH2 | B_ASP_90  | OD2 | 3.615 |

|      |           |     |           |     |       |
|------|-----------|-----|-----------|-----|-------|
| 6NMS | B_LYS_98  | NZ  | B_ASP_108 | OD2 | 3.767 |
| 6NMS | B_ARG_104 | NH1 | B_ASP_33  | OD2 | 2.846 |
| 6NMS | B_ARG_104 | NH1 | B_GLU_99  | OE1 | 2.968 |
| 6NMS | B_ARG_104 | NH1 | B_GLU_99  | OE2 | 3.409 |
| 6NMS | B_ARG_104 | NH2 | C_GLU_111 | OE1 | 2.703 |
| 6NMS | B_ARG_104 | NH2 | C_GLU_111 | OE2 | 3.000 |
| 6NMS | B_LYS_149 | NZ  | B_ASP_150 | OD1 | 3.211 |
| 6NMS | B_LYS_149 | NZ  | B_ASP_150 | OD2 | 3.461 |
| 6NMS | C_LYS_11  | NZ  | B_ASP_33  | OD2 | 3.490 |
| 6NMS | C_LYS_11  | NZ  | B_GLU_99  | OE1 | 2.892 |
| 6NMS | C_ARG_24  | NH1 | C_ASP_10  | OD1 | 2.731 |
| 6NMS | C_ARG_24  | NH1 | C_ASP_10  | OD2 | 2.859 |
| 6NMS | C_ARG_40  | NH2 | C_GLU_47  | OE1 | 2.382 |
| 6NMS | C_ARG_46  | NH1 | C_GLU_103 | OE2 | 2.805 |
| 6NMS | C_ARG_46  | NH2 | C_GLU_103 | OE2 | 3.029 |
| 6NMS | C_ARG_59  | NH1 | C_ASP_85  | OD1 | 3.855 |
| 6NMS | C_ARG_59  | NH1 | C_ASP_85  | OD2 | 3.301 |
| 6NMS | C_ARG_59  | NH2 | C_ASP_85  | OD1 | 2.480 |
| 6NMS | C_ARG_59  | NH2 | C_ASP_85  | OD2 | 3.376 |
| 6NMS | C_ARG_115 | NH1 | B_GLU_56  | OE2 | 3.579 |
| 6NMS | C_ARG_115 | NH2 | B_GLU_56  | OE2 | 2.699 |
| 6NMT | A_ARG_26  | NH1 | A_ASP_46  | OD2 | 3.596 |
| 6NMT | A_ARG_26  | NH2 | C_ASP_10  | OD1 | 3.433 |
| 6NMT | A_ARG_26  | NH2 | C_ASP_10  | OD2 | 3.182 |
| 6NMT | A_ARG_56  | NH2 | A_ASP_76  | OD1 | 3.261 |
| 6NMT | A_ARG_56  | NH2 | A_ASP_77  | OD1 | 2.770 |
| 6NMT | A_ARG_56  | NH2 | A_ASP_77  | OD2 | 3.625 |
| 6NMT | A_LYS_144 | NZ  | A_GLU_190 | OE1 | 2.725 |
| 6NMT | A_HIS_184 | ND1 | A_ASP_146 | OD2 | 2.798 |
| 6NMT | A_LYS_185 | NZ  | A_GLU_208 | OE2 | 2.842 |
| 6NMT | A_ARG_206 | NH1 | A_GLU_182 | OE1 | 3.022 |
| 6NMT | B_ARG_38  | NH1 | B_ASP_89  | OD1 | 2.805 |
| 6NMT | B_ARG_38  | NH2 | B_GLU_46  | OE1 | 2.846 |
| 6NMT | B_ARG_38  | NH2 | B_ASP_89  | OD1 | 3.887 |
| 6NMT | B_ARG_56  | NH2 | C_GLU_111 | OE2 | 3.542 |
| 6NMT | B_ARG_66  | NH1 | B_ASP_89  | OD1 | 3.742 |
| 6NMT | B_ARG_66  | NH1 | B_ASP_89  | OD2 | 2.824 |
| 6NMT | B_ARG_66  | NH2 | B_ASP_89  | OD1 | 2.986 |
| 6NMT | B_ARG_66  | NH2 | B_ASP_89  | OD2 | 3.478 |
| 6NMT | B_ARG_97  | NH2 | B_ASP_107 | OD1 | 3.422 |
| 6NMT | B_ARG_97  | NH2 | B_ASP_107 | OD2 | 2.766 |
| 6NMT | B_LYS_149 | NZ  | B_ASP_150 | OD1 | 3.170 |
| 6NMT | B_LYS_149 | NZ  | B_ASP_150 | OD2 | 2.917 |
| 6NMT | B_LYS_215 | NZ  | A_GLU_118 | OE2 | 3.496 |
| 6NMT | C_LYS_11  | NZ  | A_ASP_91  | OD1 | 2.678 |
| 6NMT | C_LYS_11  | NZ  | A_ASP_91  | OD2 | 3.319 |
| 6NMT | C_ARG_40  | NH2 | C_GLU_47  | OE2 | 2.784 |
| 6NMT | C_ARG_46  | NH1 | C_GLU_103 | OE1 | 3.083 |
| 6NMT | C_ARG_46  | NH2 | C_GLU_103 | OE1 | 3.045 |
| 6NMT | C_ARG_59  | NH1 | C_ASP_85  | OD1 | 3.125 |
| 6NMT | C_ARG_59  | NH1 | C_ASP_85  | OD2 | 3.925 |
| 6NMT | C_ARG_59  | NH2 | C_ASP_85  | OD1 | 3.454 |
| 6NMT | C_ARG_59  | NH2 | C_ASP_85  | OD2 | 2.809 |
| 6NMT | C_LYS_105 | NZ  | C_GLU_3   | OE1 | 2.957 |
| 6NMU | L_ARG_24  | NH1 | L_ASP_70  | OD1 | 3.847 |
| 6NMU | L_ARG_24  | NH1 | L_ASP_70  | OD2 | 3.464 |
| 6NMU | L_LYS_32  | NZ  | S_ASP_85  | OD1 | 3.326 |
| 6NMU | L_ARG_61  | NH1 | L_ASP_82  | OD2 | 2.822 |

|      |           |     |           |     |       |
|------|-----------|-----|-----------|-----|-------|
| 6NMU | L_ARG_61  | NH2 | L_ASP_82  | OD1 | 2.930 |
| 6NMU | L_ARG_61  | NH2 | L_ASP_82  | OD2 | 3.243 |
| 6NMU | L_LYS_150 | NZ  | L_GLU_196 | OE1 | 3.282 |
| 6NMU | L_HIS_190 | ND1 | L_ASP_152 | OD2 | 3.169 |
| 6NMU | H_ARG_13  | NH1 | H_GLU_16  | OE2 | 3.522 |
| 6NMU | H_ARG_13  | NH2 | H_GLU_16  | OE2 | 3.940 |
| 6NMU | H_ARG_38  | NH1 | H_ASP_90  | OD2 | 3.008 |
| 6NMU | H_ARG_38  | NH2 | H_GLU_46  | OE1 | 3.672 |
| 6NMU | H_ARG_38  | NH2 | H_GLU_46  | OE2 | 3.384 |
| 6NMU | H_ARG_50  | NH1 | S_GLU_47  | OE1 | 3.597 |
| 6NMU | H_ARG_50  | NH1 | S_GLU_47  | OE2 | 3.084 |
| 6NMU | H_ARG_50  | NH2 | S_GLU_47  | OE1 | 2.989 |
| 6NMU | H_ARG_50  | NH2 | S_GLU_47  | OE2 | 3.577 |
| 6NMU | H_ARG_67  | NH1 | H_ASP_90  | OD1 | 2.716 |
| 6NMU | H_ARG_67  | NH1 | H_ASP_90  | OD2 | 3.953 |
| 6NMU | H_ARG_67  | NH2 | H_ASP_90  | OD1 | 3.430 |
| 6NMU | H_ARG_67  | NH2 | H_ASP_90  | OD2 | 3.165 |
| 6NMU | H_LYS_98  | NZ  | H_ASP_107 | OD2 | 2.857 |
| 6NMU | H_LYS_149 | NZ  | H_ASP_150 | OD1 | 3.438 |
| 6NMU | S_ARG_24  | NH2 | S_ASP_10  | OD1 | 3.643 |
| 6NMU | S_ARG_24  | NH2 | S_ASP_10  | OD2 | 2.829 |
| 6NMU | S_ARG_46  | NH1 | S_GLU_103 | OE1 | 3.107 |
| 6NMU | S_ARG_46  | NH2 | S_GLU_103 | OE1 | 3.375 |
| 6NMU | S_LYS_53  | NZ  | S_ASP_101 | OD1 | 3.593 |
| 6NMU | S_LYS_53  | NZ  | S_ASP_101 | OD2 | 3.819 |
| 6NMU | S_ARG_59  | NH1 | S_ASP_85  | OD1 | 2.826 |
| 6NMU | S_ARG_59  | NH1 | S_ASP_85  | OD2 | 3.250 |
| 6NMU | S_ARG_59  | NH2 | H_ASP_101 | OD2 | 3.444 |
| 6NMU | S_ARG_59  | NH2 | S_ASP_85  | OD1 | 3.666 |
| 6NMU | S_ARG_59  | NH2 | S_ASP_85  | OD2 | 2.554 |
| 6NMU | A_LYS_32  | NZ  | C_ASP_85  | OD1 | 3.635 |
| 6NMU | A_ARG_61  | NH1 | A_ASP_82  | OD2 | 2.912 |
| 6NMU | A_ARG_61  | NH2 | A_ASP_82  | OD1 | 3.034 |
| 6NMU | A_ARG_61  | NH2 | A_ASP_82  | OD2 | 3.051 |
| 6NMU | A_ARG_98  | NH2 | A_GLU_1   | OE2 | 3.553 |
| 6NMU | B_ARG_38  | NH1 | B_ASP_90  | OD1 | 3.513 |
| 6NMU | B_ARG_38  | NH2 | B_GLU_46  | OE1 | 3.545 |
| 6NMU | B_ARG_38  | NH2 | B_GLU_46  | OE2 | 3.227 |
| 6NMU | B_ARG_50  | NH1 | C_GLU_47  | OE1 | 3.989 |
| 6NMU | B_ARG_50  | NH1 | C_GLU_47  | OE2 | 3.035 |
| 6NMU | B_ARG_50  | NH2 | C_GLU_47  | OE1 | 2.804 |
| 6NMU | B_ARG_50  | NH2 | C_GLU_47  | OE2 | 3.091 |
| 6NMU | B_ARG_67  | NH1 | B_ASP_90  | OD1 | 3.761 |
| 6NMU | B_ARG_67  | NH1 | B_ASP_90  | OD2 | 2.940 |
| 6NMU | B_ARG_67  | NH2 | B_ASP_90  | OD1 | 2.900 |
| 6NMU | B_ARG_67  | NH2 | B_ASP_90  | OD2 | 3.596 |
| 6NMU | B_LYS_98  | NZ  | B_ASP_107 | OD1 | 2.896 |
| 6NMU | B_LYS_149 | NZ  | B_ASP_150 | OD1 | 3.427 |
| 6NMU | B_LYS_149 | NZ  | B_ASP_150 | OD2 | 3.506 |
| 6NMU | B_LYS_215 | NZ  | A_GLU_124 | OE1 | 3.494 |
| 6NMU | B_LYS_215 | NZ  | A_GLU_124 | OE2 | 3.379 |
| 6NMU | B_LYS_216 | NZ  | B_GLU_218 | OE1 | 3.942 |
| 6NMU | C_ARG_24  | NH1 | C_ASP_10  | OD1 | 3.661 |
| 6NMU | C_ARG_24  | NH1 | C_ASP_10  | OD2 | 3.733 |
| 6NMU | C_ARG_24  | NH2 | C_ASP_10  | OD1 | 3.751 |
| 6NMU | C_ARG_46  | NH1 | C_GLU_103 | OE1 | 2.724 |
| 6NMU | C_ARG_46  | NH2 | C_GLU_103 | OE1 | 3.025 |
| 6NMU | C_ARG_59  | NH1 | B_ASP_101 | OD1 | 3.720 |

|      |           |     |           |     |       |
|------|-----------|-----|-----------|-----|-------|
| 6NMU | C_ARG_59  | NH1 | B_ASP_101 | OD2 | 2.808 |
| 6NMU | C_ARG_59  | NH1 | C_ASP_85  | OD2 | 3.825 |
| 6NMU | C_ARG_59  | NH2 | C_ASP_85  | OD1 | 2.746 |
| 6NMU | C_ARG_59  | NH2 | C_ASP_85  | OD2 | 3.128 |
| 6NMV | S_ARG_40  | NH2 | S_GLU_47  | OE2 | 2.928 |
| 6NMV | S_ARG_46  | NH1 | S_GLU_103 | OE1 | 2.838 |
| 6NMV | S_ARG_46  | NH1 | S_GLU_103 | OE2 | 3.875 |
| 6NMV | S_ARG_46  | NH2 | S_GLU_103 | OE1 | 3.070 |
| 6NMV | S_ARG_59  | NH1 | S_ASP_85  | OD1 | 2.912 |
| 6NMV | S_ARG_59  | NH1 | S_ASP_85  | OD2 | 3.273 |
| 6NMV | S_ARG_59  | NH2 | S_ASP_85  | OD1 | 3.839 |
| 6NMV | S_ARG_59  | NH2 | S_ASP_85  | OD2 | 2.616 |
| 6NMV | S_LYS_96  | NZ  | S_ASP_101 | OD1 | 2.456 |
| 6NMV | S_LYS_96  | NZ  | S_ASP_101 | OD2 | 3.521 |
| 6NMV | H_ARG_38  | NH1 | H_ASP_90  | OD2 | 2.817 |
| 6NMV | H_ARG_38  | NH2 | H_ASP_90  | OD2 | 3.510 |
| 6NMV | H_ARG_67  | NH1 | H_ASP_90  | OD1 | 2.934 |
| 6NMV | H_ARG_67  | NH1 | H_ASP_90  | OD2 | 3.250 |
| 6NMV | H_ARG_67  | NH2 | H_ASP_90  | OD1 | 3.025 |
| 6NMV | H_ARG_67  | NH2 | H_ASP_90  | OD2 | 2.954 |
| 6NMV | H_LYS_76  | NZ  | H_ASP_73  | OD1 | 2.991 |
| 6NMV | H_LYS_76  | NZ  | H_ASP_73  | OD2 | 2.854 |
| 6NMV | H_HIS_103 | ND1 | H_ASP_102 | OD1 | 3.753 |
| 6NMV | H_HIS_103 | ND1 | H_ASP_102 | OD2 | 3.398 |
| 6NMV | H_LYS_211 | NZ  | H_GLU_213 | OE2 | 3.838 |
| 6NMV | L_ARG_56  | NH2 | L_GLU_76  | OE1 | 3.634 |
| 6NMV | L_ARG_56  | NH2 | L_GLU_76  | OE2 | 3.096 |
| 6NMV | L_ARG_56  | NH2 | L_ASP_77  | OD1 | 2.690 |
| 6NMV | L_ARG_56  | NH2 | L_ASP_77  | OD2 | 3.240 |
| 6NMV | L_LYS_162 | NZ  | L_GLU_78  | OE2 | 3.175 |
| 6NMV | L_ARG_185 | NH1 | L_ASP_147 | OD2 | 3.022 |
| 6O9B | A_HIS_3   | ND1 | A_ASP_29  | OD1 | 3.484 |
| 6O9B | A_HIS_3   | ND1 | A_ASP_29  | OD2 | 2.647 |
| 6O9B | A_ARG_6   | NH2 | A_ASP_102 | OD1 | 3.670 |
| 6O9B | A_ARG_14  | NH1 | A_ASP_39  | OD1 | 2.811 |
| 6O9B | A_ARG_14  | NH1 | A_ASP_39  | OD2 | 3.600 |
| 6O9B | A_ARG_14  | NH2 | A_ASP_39  | OD1 | 3.638 |
| 6O9B | A_ARG_14  | NH2 | A_ASP_39  | OD2 | 2.902 |
| 6O9B | A_ARG_21  | NH2 | A_ASP_37  | OD1 | 3.576 |
| 6O9B | A_ARG_21  | NH2 | A_ASP_37  | OD2 | 2.758 |
| 6O9B | A_ARG_35  | NH1 | B_ASP_73  | OD1 | 2.773 |
| 6O9B | A_ARG_35  | NH1 | B_ASP_73  | OD2 | 3.974 |
| 6O9B | A_ARG_35  | NH2 | A_GLU_46  | OE1 | 3.894 |
| 6O9B | A_ARG_35  | NH2 | A_GLU_46  | OE2 | 3.171 |
| 6O9B | A_ARG_44  | NH1 | A_ASP_61  | OD1 | 3.041 |
| 6O9B | A_ARG_44  | NH2 | A_ASP_61  | OD1 | 3.227 |
| 6O9B | A_ARG_48  | NH2 | B_ASP_73  | OD2 | 3.479 |
| 6O9B | A_ARG_75  | NH1 | A_GLU_19  | OE2 | 3.730 |
| 6O9B | A_HIS_93  | ND1 | A_ASP_119 | OD1 | 3.532 |
| 6O9B | A_HIS_93  | ND1 | A_ASP_119 | OD2 | 2.838 |
| 6O9B | A_ARG_111 | NH1 | A_GLU_128 | OE1 | 3.371 |
| 6O9B | A_ARG_111 | NH2 | A_ASP_102 | OD2 | 3.967 |
| 6O9B | A_ARG_114 | NH1 | A_ASP_116 | OD1 | 3.450 |
| 6O9B | A_ARG_114 | NH1 | A_ASP_116 | OD2 | 2.611 |
| 6O9B | A_HIS_151 | ND1 | A_GLU_154 | OE1 | 3.521 |
| 6O9B | A_HIS_151 | ND1 | A_GLU_154 | OE2 | 3.425 |
| 6O9B | A_ARG_169 | NH1 | A_GLU_166 | OE2 | 3.051 |
| 6O9B | A_ARG_170 | NH1 | A_GLU_166 | OE1 | 3.610 |

|      |           |     |           |     |       |
|------|-----------|-----|-----------|-----|-------|
| 6O9B | A_LYS_176 | NZ  | A_GLU_173 | OE2 | 2.914 |
| 6O9B | A_ARG_181 | NH1 | A_ASP_183 | OD2 | 2.854 |
| 6O9B | A_HIS_191 | NE2 | A_GLU_254 | OE2 | 2.884 |
| 6O9B | A_HIS_192 | ND1 | B_ASP_118 | OD2 | 3.864 |
| 6O9B | A_ARG_256 | NH1 | A_GLU_253 | OE2 | 3.337 |
| 6O9B | A_ARG_256 | NH2 | A_ASP_220 | OD1 | 3.231 |
| 6O9B | A_ARG_256 | NH2 | A_ASP_220 | OD2 | 3.184 |
| 6O9B | B_ARG_65  | NH2 | B_ASP_58  | OD1 | 3.970 |
| 6O9B | B_LYS_95  | NZ  | B_GLU_94  | OE2 | 3.964 |
| 6O9B | B_ARG_101 | NH1 | B_ASP_58  | OD2 | 3.244 |
| 6O9B | C_LYS_9   | NZ  | A_ASP_116 | OD2 | 2.706 |
| 6O9C | A_HIS_3   | ND1 | A_ASP_29  | OD1 | 3.533 |
| 6O9C | A_HIS_3   | ND1 | A_ASP_29  | OD2 | 2.591 |
| 6O9C | A_ARG_14  | NH2 | A_ASP_39  | OD1 | 3.395 |
| 6O9C | A_ARG_14  | NH2 | A_ASP_39  | OD2 | 3.458 |
| 6O9C | A_ARG_21  | NH1 | A_ASP_39  | OD2 | 3.725 |
| 6O9C | A_ARG_21  | NH2 | A_ASP_37  | OD1 | 3.787 |
| 6O9C | A_ARG_21  | NH2 | A_ASP_37  | OD2 | 3.069 |
| 6O9C | A_ARG_35  | NH1 | A_ASP_37  | OD2 | 3.939 |
| 6O9C | A_ARG_35  | NH1 | B_ASP_73  | OD1 | 3.395 |
| 6O9C | A_ARG_35  | NH2 | A_GLU_46  | OE1 | 3.628 |
| 6O9C | A_ARG_35  | NH2 | A_GLU_46  | OE2 | 2.787 |
| 6O9C | A_ARG_44  | NH1 | A_ASP_61  | OD1 | 3.116 |
| 6O9C | A_ARG_44  | NH2 | A_ASP_61  | OD1 | 2.964 |
| 6O9C | A_ARG_48  | NH1 | A_GLU_46  | OE1 | 3.653 |
| 6O9C | A_ARG_48  | NH2 | A_GLU_46  | OE1 | 3.457 |
| 6O9C | A_HIS_93  | ND1 | A_ASP_119 | OD1 | 3.563 |
| 6O9C | A_HIS_93  | ND1 | A_ASP_119 | OD2 | 2.884 |
| 6O9C | A_ARG_108 | NH2 | A_ASP_106 | OD1 | 3.075 |
| 6O9C | A_ARG_111 | NH1 | A_ASP_102 | OD2 | 3.448 |
| 6O9C | A_ARG_114 | NH1 | A_ASP_116 | OD1 | 3.523 |
| 6O9C | A_ARG_114 | NH1 | A_ASP_116 | OD2 | 2.739 |
| 6O9C | A_ARG_169 | NH2 | A_GLU_166 | OE2 | 3.041 |
| 6O9C | A_ARG_170 | NH1 | A_GLU_166 | OE1 | 3.871 |
| 6O9C | A_LYS_176 | NZ  | A_GLU_173 | OE2 | 3.474 |
| 6O9C | A_HIS_191 | NE2 | A_GLU_254 | OE2 | 2.693 |
| 6O9C | A_HIS_192 | NE2 | B_ASP_118 | OD2 | 3.199 |
| 6O9C | A_ARG_202 | NH1 | B_ASP_118 | OD2 | 3.014 |
| 6O9C | A_ARG_256 | NH1 | A_ASP_220 | OD2 | 3.945 |
| 6O9C | A_ARG_256 | NH1 | A_GLU_253 | OE2 | 3.454 |
| 6O9C | A_ARG_256 | NH2 | A_ASP_220 | OD1 | 3.827 |
| 6O9C | A_ARG_256 | NH2 | A_ASP_220 | OD2 | 2.698 |
| 6O9C | B_ARG_23  | NH1 | B_ASP_79  | OD2 | 3.597 |
| 6O9C | B_LYS_26  | NZ  | A_GLU_232 | OE2 | 3.913 |
| 6O9C | B_LYS_39  | NZ  | B_GLU_36  | OE1 | 3.574 |
| 6O9C | B_ARG_65  | NH1 | B_ASP_58  | OD1 | 3.907 |
| 6O9C | B_ARG_65  | NH1 | B_GLU_67  | OE2 | 3.387 |
| 6O9C | B_ARG_101 | NH2 | B_ASP_58  | OD2 | 3.040 |
| 6O9C | C_LYS_9   | NZ  | A_ASP_77  | OD2 | 3.855 |
| 6O9C | C_LYS_9   | NZ  | A_ASP_116 | OD2 | 2.984 |
| 6OGX | C_LYS_12  | NZ  | C_GLU_10  | OE2 | 3.904 |
| 6OGX | C_ARG_38  | NH1 | C_ASP_90  | OD1 | 2.937 |
| 6OGX | C_ARG_38  | NH2 | C_GLU_46  | OE2 | 3.462 |
| 6OGX | C_ARG_67  | NH1 | C_ASP_90  | OD1 | 3.674 |
| 6OGX | C_ARG_67  | NH1 | C_ASP_90  | OD2 | 2.808 |
| 6OGX | C_ARG_67  | NH2 | C_ASP_90  | OD1 | 2.780 |
| 6OGX | C_ARG_67  | NH2 | C_ASP_90  | OD2 | 3.408 |
| 6OGX | C_ARG_101 | NH2 | C_ASP_50  | OD1 | 2.908 |



|      |           |     |           |     |       |
|------|-----------|-----|-----------|-----|-------|
| 6OGX | C_ARG_101 | NH2 | C_ASP_50  | OD2 | 3.364 |
| 6OGX | C_LYS_147 | NZ  | C_ASP_148 | OD1 | 3.403 |
| 6OGX | C_LYS_147 | NZ  | C_ASP_148 | OD2 | 3.834 |
| 6OGX | C_LYS_213 | NZ  | D_GLU_123 | OE1 | 2.791 |
| 6OGX | C_LYS_213 | NZ  | D_GLU_123 | OE2 | 3.773 |
| 6OGX | C_LYS_218 | NZ  | D_ASP_122 | OD2 | 3.785 |
| 6OGX | D_ARG_24  | NH1 | D_ASP_70  | OD1 | 2.881 |
| 6OGX | D_ARG_24  | NH2 | D_ASP_70  | OD1 | 3.409 |
| 6OGX | D_ARG_24  | NH2 | D_ASP_70  | OD2 | 3.280 |
| 6OGX | D_ARG_55  | NH2 | G_ASP_117 | OD1 | 2.990 |
| 6OGX | D_ARG_61  | NH2 | D_GLU_81  | OE1 | 3.619 |
| 6OGX | D_ARG_61  | NH2 | D_ASP_82  | OD1 | 2.844 |
| 6OGX | D_ARG_61  | NH2 | D_ASP_82  | OD2 | 3.707 |
| 6OGX | D_HIS_189 | ND1 | D_ASP_151 | OD2 | 3.260 |
| 6OGX | D_LYS_190 | NZ  | D_GLU_213 | OE1 | 3.539 |
| 6OGX | G_ARG_95  | NH1 | H_ASP_99  | OD1 | 3.462 |
| 6OGX | G_ARG_95  | NH1 | H_ASP_99  | OD2 | 2.833 |
| 6OGX | G_ARG_95  | NH2 | H_ASP_99  | OD1 | 2.923 |
| 6OGX | G_ARG_95  | NH2 | H_ASP_99  | OD2 | 3.646 |
| 6OGX | G_LYS_96  | NZ  | G_GLU_94  | OE2 | 3.997 |
| 6OGX | G_ARG_110 | NH2 | G_GLU_94  | OE1 | 3.529 |
| 6OGX | G_LYS_120 | NZ  | G_ASP_117 | OD1 | 3.499 |
| 6OGX | G_LYS_120 | NZ  | G_ASP_117 | OD2 | 3.674 |
| 6OGX | H_LYS_12  | NZ  | H_GLU_10  | OE1 | 3.316 |
| 6OGX | H_ARG_38  | NH1 | H_ASP_90  | OD2 | 2.947 |
| 6OGX | H_ARG_38  | NH2 | H_GLU_46  | OE1 | 3.229 |
| 6OGX | H_ARG_38  | NH2 | H_ASP_90  | OD2 | 3.994 |
| 6OGX | H_LYS_63  | NZ  | H_GLU_46  | OE1 | 3.798 |
| 6OGX | H_LYS_63  | NZ  | H_GLU_46  | OE2 | 2.760 |
| 6OGX | H_ARG_67  | NH1 | H_ASP_90  | OD1 | 3.110 |
| 6OGX | H_ARG_67  | NH1 | H_ASP_90  | OD2 | 3.101 |
| 6OGX | H_ARG_67  | NH2 | H_ASP_90  | OD1 | 3.614 |
| 6OGX | H_ARG_67  | NH2 | H_ASP_90  | OD2 | 2.757 |
| 6OGX | H_ARG_87  | NH2 | H_GLU_89  | OE2 | 3.153 |
| 6OGX | H_ARG_98  | NH1 | H_ASP_102 | OD1 | 3.528 |
| 6OGX | H_ARG_98  | NH1 | H_ASP_102 | OD2 | 2.722 |
| 6OGX | H_ARG_100 | NH1 | L_GLU_55  | OE1 | 3.516 |
| 6OGX | H_ARG_100 | NH1 | L_GLU_55  | OE2 | 2.787 |
| 6OGX | H_LYS_144 | NZ  | H_ASP_145 | OD1 | 3.450 |
| 6OGX | H_LYS_144 | NZ  | H_ASP_145 | OD2 | 2.902 |
| 6OGX | H_LYS_211 | NZ  | H_GLU_213 | OE1 | 2.815 |
| 6OGX | L_ARG_61  | NH2 | L_ASP_82  | OD1 | 2.857 |
| 6OGX | L_ARG_61  | NH2 | L_ASP_82  | OD2 | 3.713 |
| 6OGX | L_LYS_103 | NZ  | L_GLU_165 | OE1 | 2.789 |
| 6OGX | L_LYS_103 | NZ  | L_GLU_165 | OE2 | 3.599 |
| 6OKM | H_LYS_12  | NZ  | H_GLU_10  | OE1 | 3.648 |
| 6OKM | H_LYS_19  | NZ  | H_GLU_82  | OE2 | 3.437 |
| 6OKM | H_ARG_38  | NH1 | H_ASP_90  | OD1 | 2.918 |
| 6OKM | H_ARG_38  | NH2 | H_GLU_46  | OE1 | 3.013 |
| 6OKM | H_ARG_38  | NH2 | H_ASP_90  | OD1 | 3.782 |
| 6OKM | H_LYS_63  | NZ  | H_GLU_46  | OE1 | 3.808 |
| 6OKM | H_LYS_63  | NZ  | H_GLU_46  | OE2 | 2.757 |
| 6OKM | H_LYS_65  | NZ  | H_GLU_62  | OE2 | 2.941 |
| 6OKM | H_ARG_67  | NH1 | H_ASP_90  | OD1 | 3.731 |
| 6OKM | H_ARG_67  | NH1 | H_ASP_90  | OD2 | 2.994 |
| 6OKM | H_ARG_67  | NH2 | H_ASP_90  | OD1 | 2.792 |
| 6OKM | H_ARG_67  | NH2 | H_ASP_90  | OD2 | 3.476 |
| 6OKM | H_ARG_98  | NH1 | H_ASP_102 | OD1 | 3.580 |

|      |           |     |           |     |       |
|------|-----------|-----|-----------|-----|-------|
| 6OKM | H_ARG_98  | NH1 | H_ASP_102 | OD2 | 3.014 |
| 6OKM | H_ARG_100 | NH1 | L_GLU_55  | OE1 | 2.851 |
| 6OKM | H_LYS_144 | NZ  | H_ASP_145 | OD1 | 3.343 |
| 6OKM | H_LYS_144 | NZ  | H_ASP_145 | OD2 | 2.800 |
| 6OKM | H_HIS_165 | NE2 | L_ASP_167 | OD1 | 3.460 |
| 6OKM | H_LYS_210 | NZ  | L_GLU_123 | OE2 | 3.540 |
| 6OKM | H_LYS_211 | NZ  | H_GLU_213 | OE1 | 3.622 |
| 6OKM | H_LYS_215 | NZ  | L_ASP_122 | OD1 | 3.237 |
| 6OKM | H_LYS_215 | NZ  | L_ASP_122 | OD2 | 3.538 |
| 6OKM | L_HIS_24  | ND1 | L_ASP_70  | OD1 | 2.785 |
| 6OKM | L_HIS_24  | ND1 | L_ASP_70  | OD2 | 3.925 |
| 6OKM | L_ARG_61  | NH2 | L_GLU_81  | OE2 | 3.773 |
| 6OKM | L_ARG_61  | NH2 | L_ASP_82  | OD1 | 2.807 |
| 6OKM | L_ARG_61  | NH2 | L_ASP_82  | OD2 | 3.536 |
| 6OKM | L_ARG_142 | NH1 | L_GLU_105 | OE2 | 2.944 |
| 6OKM | L_ARG_142 | NH1 | L_GLU_165 | OE1 | 3.753 |
| 6OKM | L_ARG_142 | NH2 | L_GLU_165 | OE1 | 3.529 |
| 6OKM | L_ARG_142 | NH2 | L_GLU_165 | OE2 | 2.617 |
| 6OKM | L_LYS_145 | NZ  | L_GLU_195 | OE2 | 2.987 |
| 6OKM | L_LYS_183 | NZ  | L_GLU_187 | OE1 | 3.533 |
| 6OKM | R_HIS_44  | NE2 | R_ASP_34  | OD1 | 3.867 |
| 6OKM | R_ARG_47  | NH1 | R_ASP_34  | OD1 | 3.651 |
| 6OKM | R_LYS_82  | NZ  | R_ASP_74  | OD1 | 3.045 |
| 6OKM | R_ARG_95  | NH1 | H_ASP_99  | OD1 | 3.347 |
| 6OKM | R_ARG_95  | NH1 | H_ASP_99  | OD2 | 3.783 |
| 6OKM | R_ARG_95  | NH2 | H_ASP_99  | OD1 | 3.371 |
| 6OKM | R_ARG_95  | NH2 | H_ASP_99  | OD2 | 2.555 |
| 6OKN | A_LYS_12  | NZ  | A_GLU_10  | OE2 | 3.091 |
| 6OKN | A_ARG_38  | NH1 | A_ASP_90  | OD1 | 2.825 |
| 6OKN | A_ARG_38  | NH2 | A_GLU_46  | OE2 | 3.132 |
| 6OKN | A_LYS_63  | NZ  | A_GLU_46  | OE1 | 3.198 |
| 6OKN | A_ARG_67  | NH1 | A_ASP_90  | OD1 | 3.100 |
| 6OKN | A_ARG_67  | NH1 | A_ASP_90  | OD2 | 3.478 |
| 6OKN | A_ARG_67  | NH2 | A_ASP_90  | OD1 | 3.897 |
| 6OKN | A_ARG_67  | NH2 | A_ASP_90  | OD2 | 2.783 |
| 6OKN | A_ARG_87  | NH1 | A_GLU_89  | OE2 | 3.350 |
| 6OKN | A_ARG_101 | NH2 | A_ASP_50  | OD1 | 2.814 |
| 6OKN | A_ARG_101 | NH2 | A_ASP_50  | OD2 | 3.671 |
| 6OKN | A_LYS_210 | NZ  | A_ASP_212 | OD1 | 3.571 |
| 6OKN | A_LYS_210 | NZ  | A_ASP_212 | OD2 | 2.910 |
| 6OKN | A_LYS_213 | NZ  | B_GLU_123 | OE1 | 3.312 |
| 6OKN | A_LYS_213 | NZ  | B_GLU_123 | OE2 | 2.829 |
| 6OKN | A_LYS_214 | NZ  | A_GLU_216 | OE1 | 2.957 |
| 6OKN | B_ARG_24  | NH2 | B_ASP_70  | OD2 | 2.962 |
| 6OKN | B_ARG_61  | NH2 | B_ASP_82  | OD1 | 2.800 |
| 6OKN | B_ARG_61  | NH2 | B_ASP_82  | OD2 | 3.520 |
| 6OKN | B_LYS_103 | NZ  | B_GLU_165 | OE1 | 3.396 |
| 6OKN | B_ARG_142 | NH2 | B_GLU_165 | OE2 | 3.573 |
| 6OKN | B_LYS_149 | NZ  | B_GLU_195 | OE1 | 3.927 |
| 6OKN | B_LYS_149 | NZ  | B_GLU_195 | OE2 | 3.761 |
| 6OKN | B_LYS_183 | NZ  | B_GLU_187 | OE2 | 3.169 |
| 6OKN | B_LYS_188 | NZ  | B_ASP_185 | OD2 | 3.891 |
| 6OKN | B_HIS_189 | ND1 | B_ASP_151 | OD2 | 2.830 |
| 6OKN | C_LYS_12  | NZ  | C_GLU_10  | OE2 | 3.089 |
| 6OKN | C_LYS_19  | NZ  | C_GLU_82  | OE1 | 3.422 |
| 6OKN | C_ARG_38  | NH1 | C_ASP_90  | OD1 | 2.800 |
| 6OKN | C_ARG_38  | NH2 | C_GLU_46  | OE2 | 3.128 |
| 6OKN | C_ARG_67  | NH2 | C_ASP_90  | OD1 | 3.311 |

|      |           |     |           |     |       |
|------|-----------|-----|-----------|-----|-------|
| 6OKN | C_ARG_67  | NH2 | C_ASP_90  | OD2 | 2.765 |
| 6OKN | C_ARG_87  | NH1 | C_GLU_89  | OE2 | 3.419 |
| 6OKN | C_LYS_147 | NZ  | C_ASP_148 | OD1 | 3.408 |
| 6OKN | C_LYS_147 | NZ  | C_ASP_148 | OD2 | 3.266 |
| 6OKN | C_LYS_210 | NZ  | C_ASP_212 | OD1 | 3.569 |
| 6OKN | C_LYS_210 | NZ  | C_ASP_212 | OD2 | 2.918 |
| 6OKN | C_LYS_213 | NZ  | D_GLU_123 | OE1 | 3.356 |
| 6OKN | C_LYS_213 | NZ  | D_GLU_123 | OE2 | 2.896 |
| 6OKN | C_LYS_214 | NZ  | C_GLU_216 | OE1 | 2.949 |
| 6OKN | C_LYS_218 | NZ  | D_ASP_122 | OD2 | 3.923 |
| 6OKN | D_ARG_24  | NH2 | D_ASP_70  | OD2 | 2.953 |
| 6OKN | D_ARG_61  | NH2 | D_ASP_82  | OD1 | 2.797 |
| 6OKN | D_ARG_61  | NH2 | D_ASP_82  | OD2 | 3.516 |
| 6OKN | D_LYS_103 | NZ  | D_GLU_165 | OE1 | 3.551 |
| 6OKN | D_ARG_142 | NH1 | D_GLU_143 | OE2 | 3.897 |
| 6OKN | D_LYS_149 | NZ  | D_GLU_195 | OE1 | 2.973 |
| 6OKN | D_LYS_149 | NZ  | D_GLU_195 | OE2 | 3.725 |
| 6OKN | D_LYS_183 | NZ  | D_GLU_187 | OE2 | 3.166 |
| 6OKN | D_LYS_188 | NZ  | D_ASP_185 | OD1 | 3.552 |
| 6OKN | D_LYS_188 | NZ  | D_ASP_185 | OD2 | 2.987 |
| 6OKN | D_HIS_189 | ND1 | D_ASP_151 | OD2 | 2.861 |
| 6OKN | E_ARG_108 | NH1 | E_ASP_137 | OD1 | 3.561 |
| 6OKN | E_ARG_110 | NH1 | E_GLU_94  | OE2 | 3.361 |
| 6OKN | E_ARG_110 | NH2 | E_GLU_94  | OE2 | 3.771 |
| 6OKN | R_ARG_108 | NH2 | R_ASP_137 | OD1 | 3.846 |
| 6OKN | R_ARG_110 | NH2 | R_GLU_94  | OE2 | 3.184 |
| 6OOR | A_ARG_25  | NH1 | A_ASP_43  | OD1 | 3.325 |
| 6OOR | A_ARG_25  | NH1 | A_ASP_43  | OD2 | 3.379 |
| 6OOR | A_ARG_25  | NH2 | A_ASP_43  | OD2 | 3.436 |
| 6OOR | A_LYS_51  | NZ  | A_GLU_243 | OE1 | 2.738 |
| 6OOR | A_LYS_51  | NZ  | A_GLU_243 | OE2 | 3.127 |
| 6OOR | A_LYS_148 | NZ  | H_ASP_55  | OD2 | 3.250 |
| 6OOR | A_HIS_203 | ND1 | A_ASP_252 | OD1 | 2.639 |
| 6OOR | A_HIS_203 | ND1 | A_ASP_252 | OD2 | 3.969 |
| 6OOR | A_ARG_264 | NH2 | A_ASP_274 | OD2 | 3.670 |
| 6OOR | A_LYS_266 | NZ  | A_ASP_274 | OD2 | 2.771 |
| 6OOR | B_ARG_12  | NH2 | A_ASP_242 | OD1 | 3.946 |
| 6OOR | B_ARG_12  | NH2 | A_ASP_242 | OD2 | 2.705 |
| 6OOR | B_HIS_34  | NE2 | A_GLU_97  | OE1 | 2.803 |
| 6OOR | B_HIS_34  | NE2 | A_GLU_97  | OE2 | 3.580 |
| 6OOR | B_LYS_48  | NZ  | B_GLU_50  | OE2 | 3.789 |
| 6OOR | B_LYS_48  | NZ  | B_GLU_69  | OE2 | 3.855 |
| 6OOR | L_ARG_66  | NH2 | L_GLU_86  | OE2 | 3.235 |
| 6OOR | L_ARG_66  | NH2 | L_ASP_87  | OD1 | 2.858 |
| 6OOR | L_ARG_66  | NH2 | L_ASP_87  | OD2 | 3.400 |
| 6OOR | L_LYS_152 | NZ  | L_GLU_159 | OE2 | 3.764 |
| 6OOR | L_LYS_154 | NZ  | L_GLU_200 | OE1 | 2.808 |
| 6OOR | L_LYS_154 | NZ  | L_GLU_200 | OE2 | 3.333 |
| 6OOR | L_ARG_160 | NH2 | L_ASP_190 | OD1 | 3.044 |
| 6OOR | L_ARG_160 | NH2 | L_ASP_190 | OD2 | 3.065 |
| 6OOR | L_ARG_161 | NH2 | L_GLU_159 | OE1 | 3.906 |
| 6OOR | L_ARG_161 | NH2 | L_GLU_159 | OE2 | 3.222 |
| 6OOR | L_HIS_194 | ND1 | L_ASP_190 | OD1 | 3.947 |
| 6OOR | L_LYS_204 | NZ  | L_ASP_115 | OD1 | 3.329 |
| 6OOR | L_LYS_204 | NZ  | L_ASP_115 | OD2 | 2.404 |
| 6OOR | H_ARG_38  | NH1 | H_ASP_90  | OD1 | 3.007 |
| 6OOR | H_ARG_38  | NH2 | H_GLU_46  | OE2 | 2.874 |
| 6OOR | H_ARG_52  | NH1 | H_ASP_33  | OD2 | 2.683 |

|      |           |     |            |     |       |
|------|-----------|-----|------------|-----|-------|
| 6OOR | H_ARG_61  | NH1 | H_GLU_46   | OE1 | 3.910 |
| 6OOR | H_ARG_61  | NH2 | H_GLU_46   | OE1 | 3.595 |
| 6OOR | H_ARG_67  | NH1 | H_ASP_90   | OD1 | 3.879 |
| 6OOR | H_ARG_67  | NH2 | H_ASP_90   | OD1 | 3.229 |
| 6OOR | H_ARG_67  | NH2 | H_ASP_90   | OD2 | 2.355 |
| 6OOR | H_ARG_98  | NH2 | H_ASP_115  | OD2 | 3.198 |
| 6OOR | H_ARG_109 | NH2 | A_ASP_80   | OD1 | 2.917 |
| 6OOR | H_ARG_109 | NH2 | A_ASP_80   | OD2 | 3.352 |
| 6OOR | H_LYS_220 | NZ  | L_GLU_128  | OE1 | 2.677 |
| 6OOR | H_LYS_220 | NZ  | L_GLU_128  | OE2 | 2.872 |
| 6OSY | 2_HIS_216 | NE2 | 2_ASP_57   | OD1 | 3.190 |
| 6OSY | 2_LYS_229 | NZ  | 2_GLU_83   | OE1 | 3.622 |
| 6OSY | 2_LYS_229 | NZ  | 2_GLU_83   | OE2 | 2.450 |
| 6OSY | 2_LYS_231 | NZ  | 2_GLU_269  | OE1 | 3.698 |
| 6OSY | 2_LYS_231 | NZ  | 2_GLU_269  | OE2 | 3.406 |
| 6OSY | 2_LYS_282 | NZ  | 8_ASP_100C | OD2 | 3.941 |
| 6OSY | 2_ARG_298 | NH1 | 2_GLU_381  | OE1 | 3.961 |
| 6OSY | 2_ARG_469 | NH1 | 2_ASP_457  | OD1 | 3.797 |
| 6OSY | 2_ARG_469 | NH1 | 2_ASP_457  | OD2 | 2.471 |
| 6OSY | 2_ARG_469 | NH2 | 2_ASP_457  | OD2 | 3.905 |
| 6OSY | 2_ARG_480 | NH1 | 2_ASP_477  | OD1 | 2.969 |
| 6OSY | 2_LYS_487 | NZ  | 2_ASP_47   | OD1 | 2.484 |
| 6OSY | 2_LYS_487 | NZ  | 2_GLU_91   | OE1 | 3.279 |
| 6OSY | 5_ARG_38  | NH1 | 5_ASP_86   | OD1 | 2.426 |
| 6OSY | 5_ARG_38  | NH2 | 5_ASP_86   | OD1 | 3.798 |
| 6OSY | 5_HIS_52  | ND1 | 5_ASP_53   | OD1 | 3.541 |
| 6OSY | 5_HIS_52  | NE2 | 5_ASP_53   | OD1 | 2.927 |
| 6OSY | 5_ARG_66  | NH2 | 5_ASP_86   | OD1 | 2.765 |
| 6OSY | 5_ARG_66  | NH2 | 5_ASP_86   | OD2 | 3.200 |
| 6OSY | 6_ARG_54  | NH1 | 6_ASP_60   | OD2 | 3.135 |
| 6OSY | 6_ARG_54  | NH2 | 6_ASP_60   | OD1 | 3.545 |
| 6OSY | 6_ARG_54  | NH2 | 6_ASP_60   | OD2 | 3.739 |
| 6OSY | 6_ARG_61  | NH2 | 6_GLU_79   | OE1 | 3.562 |
| 6OSY | 6_ARG_61  | NH2 | 6_GLU_79   | OE2 | 2.945 |
| 6OSY | 7_ARG_60  | NH2 | 7_ASP_78   | OD1 | 3.680 |
| 6OSY | 7_LYS_76  | NZ  | 7_ASP_78   | OD1 | 3.618 |
| 6OSY | 8_ARG_38  | NH2 | 8_ASP_86   | OD1 | 2.575 |
| 6OSY | 8_ARG_61  | NH1 | 2_GLU_466  | OE2 | 3.827 |
| 6OSY | 8_ARG_71  | NH1 | 2_ASP_368  | OD2 | 3.948 |
| 6OSY | 8_ARG_71  | NH2 | 2_ASP_368  | OD2 | 3.279 |
| 6OSY | A_ARG_542 | NH1 | Q_GLU_647  | OE2 | 3.907 |
| 6OSY | A_ARG_542 | NH2 | Q_GLU_647  | OE1 | 3.187 |
| 6OSY | A_ARG_542 | NH2 | Q_GLU_647  | OE2 | 2.660 |
| 6OSY | A_ARG_579 | NH2 | Q_GLU_584  | OE1 | 3.706 |
| 6OSY | A_ARG_588 | NH2 | A_GLU_584  | OE2 | 3.896 |
| 6OSY | A_ARG_617 | NH1 | A_GLU_634  | OE1 | 3.782 |
| 6OSY | A_ARG_617 | NH1 | A_GLU_634  | OE2 | 2.878 |
| 6OSY | B_HIS_85  | NE2 | B_GLU_87   | OE2 | 3.796 |
| 6OSY | B_HIS_216 | NE2 | B_ASP_57   | OD1 | 3.161 |
| 6OSY | B_LYS_229 | NZ  | B_GLU_83   | OE1 | 3.600 |
| 6OSY | B_LYS_229 | NZ  | B_GLU_83   | OE2 | 2.450 |
| 6OSY | B_LYS_231 | NZ  | B_GLU_269  | OE1 | 3.715 |
| 6OSY | B_LYS_231 | NZ  | B_GLU_269  | OE2 | 3.368 |
| 6OSY | B_LYS_282 | NZ  | F_ASP_100C | OD1 | 3.567 |
| 6OSY | B_LYS_282 | NZ  | F_ASP_100C | OD2 | 3.346 |
| 6OSY | B_LYS_421 | NZ  | B_ASP_180  | OD1 | 3.951 |
| 6OSY | B_ARG_469 | NH1 | B_ASP_457  | OD1 | 3.948 |
| 6OSY | B_ARG_469 | NH1 | B_ASP_457  | OD2 | 2.695 |

|      |           |     |           |     |       |
|------|-----------|-----|-----------|-----|-------|
| 6OSY | B_ARG_469 | NH2 | B_ASP_457 | OD2 | 3.861 |
| 6OSY | B_ARG_480 | NH1 | B_ASP_477 | OD1 | 3.023 |
| 6OSY | B_LYS_487 | NZ  | B_ASP_47  | OD1 | 2.451 |
| 6OSY | B_LYS_487 | NZ  | B_GLU_91  | OE1 | 3.497 |
| 6OSY | C_ARG_38  | NH1 | C_ASP_86  | OD1 | 2.431 |
| 6OSY | C_ARG_38  | NH2 | C_ASP_86  | OD1 | 3.856 |
| 6OSY | C_HIS_52  | ND1 | C_ASP_53  | OD1 | 3.516 |
| 6OSY | C_HIS_52  | NE2 | C_ASP_53  | OD1 | 2.951 |
| 6OSY | C_ARG_66  | NH2 | C_ASP_86  | OD1 | 2.899 |
| 6OSY | C_ARG_66  | NH2 | C_ASP_86  | OD2 | 3.310 |
| 6OSY | D_ARG_54  | NH1 | D_ASP_60  | OD1 | 3.203 |
| 6OSY | D_ARG_54  | NH2 | D_ASP_60  | OD1 | 3.673 |
| 6OSY | D_ARG_54  | NH2 | D_ASP_60  | OD2 | 3.335 |
| 6OSY | D_ARG_61  | NH2 | D_GLU_79  | OE1 | 3.529 |
| 6OSY | D_ARG_61  | NH2 | D_GLU_79  | OE2 | 2.917 |
| 6OSY | E_ARG_60  | NH2 | E_ASP_78  | OD1 | 3.663 |
| 6OSY | E_LYS_76  | NZ  | E_ASP_78  | OD1 | 3.632 |
| 6OSY | F_ARG_38  | NH1 | F_ASP_86  | OD1 | 3.966 |
| 6OSY | F_ARG_38  | NH2 | F_ASP_86  | OD1 | 2.680 |
| 6OSY | F_ARG_66  | NH1 | F_ASP_86  | OD2 | 3.886 |
| 6OSY | F_ARG_71  | NH2 | B_ASP_368 | OD2 | 3.635 |
| 6OSY | G_ARG_542 | NH1 | A_GLU_647 | OE2 | 3.983 |
| 6OSY | G_ARG_542 | NH2 | A_GLU_647 | OE1 | 3.165 |
| 6OSY | G_ARG_542 | NH2 | A_GLU_647 | OE2 | 2.705 |
| 6OSY | G_ARG_579 | NH2 | A_GLU_584 | OE1 | 3.899 |
| 6OSY | G_ARG_588 | NH2 | G_GLU_584 | OE2 | 3.357 |
| 6OSY | G_ARG_617 | NH1 | G_GLU_634 | OE1 | 3.355 |
| 6OSY | G_ARG_617 | NH1 | G_GLU_634 | OE2 | 2.448 |
| 6OSY | H_ARG_38  | NH1 | H_GLU_46  | OE1 | 2.885 |
| 6OSY | H_ARG_38  | NH1 | H_GLU_46  | OE2 | 3.190 |
| 6OSY | H_ARG_38  | NH1 | H_ASP_86  | OD2 | 3.298 |
| 6OSY | H_ARG_38  | NH2 | H_ASP_86  | OD2 | 2.451 |
| 6OSY | H_ARG_66  | NH1 | H_ASP_86  | OD1 | 3.016 |
| 6OSY | H_ARG_66  | NH1 | H_ASP_86  | OD2 | 2.795 |
| 6OSY | H_ARG_66  | NH2 | H_ASP_86  | OD1 | 2.574 |
| 6OSY | H_ARG_66  | NH2 | H_ASP_86  | OD2 | 3.909 |
| 6OSY | H_ARG_96  | NH1 | L_GLU_55  | OE1 | 3.662 |
| 6OSY | H_HIS_100 | ND1 | 2_GLU_87  | OE2 | 3.031 |
| 6OSY | H_HIS_100 | NE2 | 2_GLU_87  | OE2 | 3.785 |
| 6OSY | I_ARG_38  | NH1 | I_GLU_46  | OE1 | 2.963 |
| 6OSY | I_ARG_38  | NH1 | I_GLU_46  | OE2 | 3.677 |
| 6OSY | I_ARG_38  | NH1 | I_ASP_86  | OD1 | 3.365 |
| 6OSY | I_ARG_38  | NH2 | I_ASP_86  | OD1 | 2.431 |
| 6OSY | I_ARG_66  | NH1 | I_ASP_86  | OD1 | 2.805 |
| 6OSY | I_ARG_66  | NH1 | I_ASP_86  | OD2 | 3.496 |
| 6OSY | I_ARG_66  | NH2 | I_ASP_86  | OD1 | 3.389 |
| 6OSY | I_ARG_66  | NH2 | I_ASP_86  | OD2 | 2.439 |
| 6OSY | I_ARG_96  | NH1 | J_GLU_55  | OE2 | 3.419 |
| 6OSY | I_HIS_100 | ND1 | B_GLU_87  | OE2 | 3.029 |
| 6OSY | I_HIS_100 | NE2 | B_GLU_87  | OE2 | 3.781 |
| 6OSY | J_ARG_24  | NH1 | J_GLU_70  | OE2 | 3.291 |
| 6OSY | J_LYS_30  | NZ  | J_ASP_28  | OD2 | 3.933 |
| 6OSY | J_ARG_46  | NH1 | I_ASP_101 | OD1 | 3.411 |
| 6OSY | J_ARG_46  | NH1 | I_ASP_101 | OD2 | 2.599 |
| 6OSY | J_ARG_46  | NH1 | J_GLU_55  | OE2 | 3.676 |
| 6OSY | J_ARG_61  | NH1 | J_GLU_81  | OE1 | 2.792 |
| 6OSY | J_ARG_61  | NH1 | J_ASP_82  | OD1 | 2.601 |
| 6OSY | J_ARG_61  | NH1 | J_ASP_82  | OD2 | 3.417 |

|      |           |     |            |     |       |
|------|-----------|-----|------------|-----|-------|
| 6OSY | J_ARG_61  | NH2 | J_GLU_81   | OE1 | 2.918 |
| 6OSY | K_HIS_85  | NE2 | K_GLU_87   | OE2 | 3.406 |
| 6OSY | K_HIS_216 | NE2 | K_ASP_57   | OD1 | 3.206 |
| 6OSY | K_LYS_229 | NZ  | K_GLU_83   | OE1 | 3.712 |
| 6OSY | K_LYS_229 | NZ  | K_GLU_83   | OE2 | 2.837 |
| 6OSY | K_LYS_231 | NZ  | K_GLU_269  | OE1 | 3.711 |
| 6OSY | K_LYS_231 | NZ  | K_GLU_269  | OE2 | 3.385 |
| 6OSY | K_LYS_282 | NZ  | P_ASP_100C | OD2 | 3.859 |
| 6OSY | K_LYS_421 | NZ  | K_ASP_180  | OD1 | 3.938 |
| 6OSY | K_ARG_469 | NH1 | K_ASP_457  | OD1 | 3.854 |
| 6OSY | K_ARG_469 | NH1 | K_ASP_457  | OD2 | 2.579 |
| 6OSY | K_ARG_469 | NH2 | K_ASP_457  | OD2 | 3.974 |
| 6OSY | K_ARG_480 | NH1 | K_ASP_477  | OD1 | 3.037 |
| 6OSY | K_LYS_487 | NZ  | K_ASP_47   | OD1 | 2.530 |
| 6OSY | K_LYS_487 | NZ  | K_ASP_47   | OD2 | 3.781 |
| 6OSY | K_LYS_487 | NZ  | K_GLU_91   | OE1 | 2.961 |
| 6OSY | L_ARG_24  | NH1 | L_GLU_70   | OE2 | 3.285 |
| 6OSY | L_LYS_30  | NZ  | L_ASP_28   | OD2 | 3.882 |
| 6OSY | L_ARG_46  | NH1 | H_ASP_101  | OD1 | 3.509 |
| 6OSY | L_ARG_46  | NH1 | H_ASP_101  | OD2 | 2.485 |
| 6OSY | L_ARG_46  | NH1 | L_GLU_55   | OE1 | 3.489 |
| 6OSY | L_ARG_61  | NH1 | L_GLU_81   | OE1 | 2.728 |
| 6OSY | L_ARG_61  | NH1 | L_ASP_82   | OD1 | 2.575 |
| 6OSY | L_ARG_61  | NH1 | L_ASP_82   | OD2 | 3.365 |
| 6OSY | L_ARG_61  | NH2 | L_GLU_81   | OE1 | 2.971 |
| 6OSY | M_ARG_38  | NH1 | M_ASP_86   | OD1 | 2.434 |
| 6OSY | M_ARG_38  | NH2 | M_ASP_86   | OD1 | 3.790 |
| 6OSY | M_HIS_52  | ND1 | M_ASP_53   | OD1 | 3.529 |
| 6OSY | M_HIS_52  | NE2 | M_ASP_53   | OD1 | 2.931 |
| 6OSY | M_ARG_66  | NH2 | M_ASP_86   | OD1 | 2.638 |
| 6OSY | M_ARG_66  | NH2 | M_ASP_86   | OD2 | 3.176 |
| 6OSY | N_ARG_54  | NH1 | N_ASP_60   | OD2 | 3.198 |
| 6OSY | N_ARG_54  | NH2 | N_ASP_60   | OD1 | 3.491 |
| 6OSY | N_ARG_54  | NH2 | N_ASP_60   | OD2 | 3.714 |
| 6OSY | N_ARG_61  | NH2 | N_GLU_79   | OE1 | 3.680 |
| 6OSY | N_ARG_61  | NH2 | N_GLU_79   | OE2 | 2.924 |
| 6OSY | O_ARG_60  | NH2 | O_ASP_78   | OD1 | 3.714 |
| 6OSY | O_LYS_76  | NZ  | O_ASP_78   | OD1 | 3.603 |
| 6OSY | P_ARG_38  | NH1 | P_ASP_86   | OD1 | 3.657 |
| 6OSY | P_ARG_38  | NH2 | P_ASP_86   | OD1 | 2.467 |
| 6OSY | P_ARG_66  | NH1 | P_ASP_86   | OD2 | 3.897 |
| 6OSY | P_ARG_71  | NH1 | K_ASP_368  | OD2 | 3.949 |
| 6OSY | P_ARG_71  | NH2 | K_ASP_368  | OD2 | 3.325 |
| 6OSY | Q_ARG_542 | NH1 | G_GLU_647  | OE2 | 3.913 |
| 6OSY | Q_ARG_542 | NH2 | G_GLU_647  | OE1 | 3.228 |
| 6OSY | Q_ARG_542 | NH2 | G_GLU_647  | OE2 | 2.706 |
| 6OSY | Q_ARG_617 | NH1 | Q_GLU_634  | OE1 | 3.307 |
| 6OSY | Q_ARG_617 | NH1 | Q_GLU_634  | OE2 | 2.450 |
| 6OSY | R_ARG_38  | NH1 | R_GLU_46   | OE1 | 2.894 |
| 6OSY | R_ARG_38  | NH1 | R_ASP_86   | OD1 | 3.489 |
| 6OSY | R_ARG_38  | NH2 | R_ASP_86   | OD1 | 2.425 |
| 6OSY | R_ARG_66  | NH1 | R_ASP_86   | OD1 | 3.291 |
| 6OSY | R_ARG_66  | NH1 | R_ASP_86   | OD2 | 2.545 |
| 6OSY | R_ARG_66  | NH2 | R_ASP_86   | OD1 | 3.724 |
| 6OSY | R_ARG_96  | NH1 | S_GLU_55   | OE2 | 3.423 |
| 6OSY | R_HIS_100 | ND1 | K_GLU_87   | OE1 | 3.719 |
| 6OSY | R_HIS_100 | ND1 | K_GLU_87   | OE2 | 2.905 |
| 6OSY | R_HIS_100 | NE2 | K_GLU_87   | OE1 | 3.960 |

|      |           |     |            |     |       |
|------|-----------|-----|------------|-----|-------|
| 6OSY | S_ARG_24  | NH1 | S_GLU_70   | OE2 | 3.276 |
| 6OSY | S_LYS_30  | NZ  | S_ASP_28   | OD1 | 3.818 |
| 6OSY | S_ARG_46  | NH1 | R_ASP_101  | OD1 | 3.488 |
| 6OSY | S_ARG_46  | NH1 | R_ASP_101  | OD2 | 2.503 |
| 6OSY | S_ARG_46  | NH1 | S_GLU_55   | OE2 | 3.494 |
| 6OSY | S_ARG_61  | NH1 | S_GLU_81   | OE1 | 2.746 |
| 6OSY | S_ARG_61  | NH1 | S_ASP_82   | OD1 | 3.377 |
| 6OSY | S_ARG_61  | NH1 | S_ASP_82   | OD2 | 2.556 |
| 6OSY | S_ARG_61  | NH2 | S_GLU_81   | OE1 | 2.966 |
| 6OT1 | B_ARG_542 | NH2 | D_GLU_647  | OE1 | 2.021 |
| 6OT1 | B_ARG_542 | NH2 | D_GLU_647  | OE2 | 3.827 |
| 6OT1 | B_ARG_588 | NH2 | B_GLU_584  | OE2 | 2.977 |
| 6OT1 | B_LYS_601 | NZ  | D_GLU_657  | OE1 | 3.960 |
| 6OT1 | B_LYS_601 | NZ  | D_GLU_657  | OE2 | 3.832 |
| 6OT1 | B_ARG_617 | NH1 | B_GLU_634  | OE1 | 3.167 |
| 6OT1 | B_ARG_617 | NH1 | B_GLU_634  | OE2 | 2.669 |
| 6OT1 | B_ARG_617 | NH2 | B_GLU_621  | OE1 | 3.234 |
| 6OT1 | B_ARG_617 | NH2 | B_GLU_621  | OE2 | 3.259 |
| 6OT1 | G_HIS_85  | NE2 | G_GLU_87   | OE2 | 3.938 |
| 6OT1 | G_HIS_216 | NE2 | G_ASP_57   | OD1 | 2.810 |
| 6OT1 | G_HIS_216 | NE2 | G_ASP_57   | OD2 | 3.156 |
| 6OT1 | G_LYS_229 | NZ  | G_GLU_83   | OE2 | 3.683 |
| 6OT1 | G_LYS_231 | NZ  | G_GLU_268  | OE1 | 3.079 |
| 6OT1 | G_LYS_231 | NZ  | G_GLU_268  | OE2 | 3.577 |
| 6OT1 | G_HIS_249 | NE2 | G_GLU_482  | OE1 | 3.787 |
| 6OT1 | G_LYS_282 | NZ  | G_GLU_275  | OE2 | 3.607 |
| 6OT1 | G_LYS_282 | NZ  | q_ASP_100C | OD2 | 3.404 |
| 6OT1 | G_ARG_298 | NH1 | G_GLU_381  | OE1 | 2.421 |
| 6OT1 | G_ARG_298 | NH1 | G_GLU_381  | OE2 | 3.196 |
| 6OT1 | G_ARG_327 | NH2 | m_GLU_100I | OE1 | 3.817 |
| 6OT1 | G_LYS_351 | NZ  | G_GLU_269  | OE1 | 3.548 |
| 6OT1 | G_ARG_429 | NH1 | G_ASP_113  | OD1 | 3.405 |
| 6OT1 | G_ARG_429 | NH1 | G_ASP_113  | OD2 | 2.495 |
| 6OT1 | G_ARG_469 | NH1 | G_ASP_457  | OD1 | 2.847 |
| 6OT1 | G_ARG_476 | NH1 | G_GLU_102  | OE1 | 3.389 |
| 6OT1 | G_ARG_476 | NH1 | G_ASP_474  | OD2 | 3.647 |
| 6OT1 | G_ARG_476 | NH2 | G_GLU_102  | OE1 | 3.349 |
| 6OT1 | G_ARG_476 | NH2 | G_GLU_102  | OE2 | 3.433 |
| 6OT1 | G_ARG_480 | NH1 | G_ASP_477  | OD1 | 3.354 |
| 6OT1 | G_LYS_487 | NZ  | G_ASP_47   | OD1 | 2.584 |
| 6OT1 | G_LYS_487 | NZ  | G_ASP_47   | OD2 | 3.393 |
| 6OT1 | G_LYS_487 | NZ  | G_GLU_91   | OE2 | 2.597 |
| 6OT1 | H_ARG_38  | NH2 | H_ASP_86   | OD1 | 3.494 |
| 6OT1 | H_LYS_71  | NZ  | H_GLU_55   | OE2 | 3.697 |
| 6OT1 | L_ARG_54  | NH2 | L_ASP_60   | OD2 | 3.975 |
| 6OT1 | L_ARG_61  | NH1 | L_GLU_81   | OE2 | 3.772 |
| 6OT1 | L_ARG_61  | NH2 | L_GLU_81   | OE2 | 2.479 |
| 6OT1 | m_ARG_38  | NH1 | m_ASP_86   | OD1 | 3.011 |
| 6OT1 | m_ARG_38  | NH2 | m_GLU_46   | OE1 | 2.859 |
| 6OT1 | m_ARG_38  | NH2 | m_GLU_46   | OE2 | 3.063 |
| 6OT1 | m_ARG_38  | NH2 | m_ASP_86   | OD1 | 3.767 |
| 6OT1 | m_HIS_52  | ND1 | m_ASP_53   | OD1 | 3.328 |
| 6OT1 | m_HIS_52  | NE2 | m_ASP_53   | OD1 | 3.028 |
| 6OT1 | m_ARG_66  | NH1 | m_ASP_86   | OD2 | 2.461 |
| 6OT1 | m_ARG_66  | NH2 | m_ASP_86   | OD1 | 3.460 |
| 6OT1 | m_ARG_66  | NH2 | m_ASP_86   | OD2 | 3.125 |
| 6OT1 | m_LYS_73  | NZ  | m_ASP_53   | OD2 | 3.345 |
| 6OT1 | m_LYS_96  | NZ  | m_ASP_100Q | OD1 | 3.813 |

|      |           |     |            |     |       |
|------|-----------|-----|------------|-----|-------|
| 6OT1 | m_LYS_96  | NZ  | m_ASP_100Q | OD2 | 2.475 |
| 6OT1 | n_ARG_31  | NH1 | n_ASP_92   | OD2 | 2.719 |
| 6OT1 | n_ARG_54  | NH2 | n_ASP_60   | OD1 | 3.737 |
| 6OT1 | n_ARG_54  | NH2 | n_ASP_60   | OD2 | 2.630 |
| 6OT1 | n_ARG_61  | NH1 | n_ASP_82   | OD2 | 3.959 |
| 6OT1 | n_ARG_61  | NH2 | n_GLU_79   | OE2 | 3.140 |
| 6OT1 | n_ARG_61  | NH2 | n_ASP_82   | OD1 | 3.334 |
| 6OT1 | n_ARG_61  | NH2 | n_ASP_82   | OD2 | 3.994 |
| 6OT1 | n_ARG_95  | NH2 | n_GLU_25   | OE1 | 3.478 |
| 6OT1 | q_ARG_38  | NH1 | q_ASP_86   | OD1 | 2.452 |
| 6OT1 | q_ARG_38  | NH1 | q_ASP_86   | OD2 | 3.996 |
| 6OT1 | q_ARG_38  | NH2 | q_GLU_46   | OE1 | 2.492 |
| 6OT1 | q_ARG_38  | NH2 | q_GLU_46   | OE2 | 3.367 |
| 6OT1 | q_ARG_66  | NH2 | q_ASP_86   | OD2 | 2.599 |
| 6OT1 | q_ARG_71  | NH2 | G_ASP_368  | OD2 | 3.596 |
| 6OT1 | r_LYS_24  | NZ  | r_ASP_69   | OD1 | 3.076 |
| 6OT1 | r_ARG_52  | NH2 | r_ASP_49   | OD2 | 3.108 |
| 6OT1 | r_ARG_53  | NH1 | r_ASP_59   | OD1 | 3.647 |
| 6OT1 | r_ARG_60  | NH2 | r_ASP_81   | OD1 | 3.037 |
| 6OT1 | r_ARG_60  | NH2 | r_ASP_81   | OD2 | 2.674 |
| 6OT1 | O_ARG_542 | NH2 | B_GLU_647  | OE1 | 2.048 |
| 6OT1 | O_ARG_542 | NH2 | B_GLU_647  | OE2 | 3.874 |
| 6OT1 | O_ARG_588 | NH2 | O_GLU_584  | OE2 | 2.978 |
| 6OT1 | O_LYS_601 | NZ  | B_GLU_657  | OE1 | 3.934 |
| 6OT1 | O_LYS_601 | NZ  | B_GLU_657  | OE2 | 3.759 |
| 6OT1 | O_ARG_617 | NH1 | O_GLU_634  | OE1 | 3.167 |
| 6OT1 | O_ARG_617 | NH1 | O_GLU_634  | OE2 | 2.669 |
| 6OT1 | O_ARG_617 | NH2 | O_GLU_621  | OE1 | 3.234 |
| 6OT1 | O_ARG_617 | NH2 | O_GLU_621  | OE2 | 3.261 |
| 6OT1 | E_HIS_85  | NE2 | E_GLU_87   | OE2 | 3.938 |
| 6OT1 | E_HIS_216 | NE2 | E_ASP_57   | OD1 | 2.811 |
| 6OT1 | E_HIS_216 | NE2 | E_ASP_57   | OD2 | 3.156 |
| 6OT1 | E_LYS_229 | NZ  | E_GLU_83   | OE2 | 3.683 |
| 6OT1 | E_LYS_231 | NZ  | E_GLU_268  | OE1 | 3.077 |
| 6OT1 | E_LYS_231 | NZ  | E_GLU_268  | OE2 | 3.575 |
| 6OT1 | E_HIS_249 | NE2 | E_GLU_482  | OE1 | 3.787 |
| 6OT1 | E_LYS_282 | NZ  | E_GLU_275  | OE2 | 3.608 |
| 6OT1 | E_LYS_282 | NZ  | J_ASP_100C | OD2 | 3.404 |
| 6OT1 | E_ARG_298 | NH1 | E_GLU_381  | OE1 | 2.420 |
| 6OT1 | E_ARG_298 | NH1 | E_GLU_381  | OE2 | 3.196 |
| 6OT1 | E_ARG_327 | NH2 | F_GLU_100I | OE1 | 3.817 |
| 6OT1 | E_LYS_351 | NZ  | E_GLU_269  | OE1 | 3.548 |
| 6OT1 | E_ARG_429 | NH1 | E_ASP_113  | OD1 | 3.405 |
| 6OT1 | E_ARG_429 | NH1 | E_ASP_113  | OD2 | 2.495 |
| 6OT1 | E_ARG_469 | NH1 | E_ASP_457  | OD1 | 2.847 |
| 6OT1 | E_ARG_476 | NH1 | E_GLU_102  | OE1 | 3.389 |
| 6OT1 | E_ARG_476 | NH1 | E_ASP_474  | OD2 | 3.648 |
| 6OT1 | E_ARG_476 | NH2 | E_GLU_102  | OE1 | 3.349 |
| 6OT1 | E_ARG_476 | NH2 | E_GLU_102  | OE2 | 3.433 |
| 6OT1 | E_ARG_480 | NH1 | E_ASP_477  | OD1 | 3.353 |
| 6OT1 | E_LYS_487 | NZ  | E_ASP_47   | OD1 | 2.586 |
| 6OT1 | E_LYS_487 | NZ  | E_ASP_47   | OD2 | 3.398 |
| 6OT1 | E_LYS_487 | NZ  | E_GLU_91   | OE2 | 2.596 |
| 6OT1 | A_ARG_38  | NH2 | A_ASP_86   | OD1 | 3.495 |
| 6OT1 | A_LYS_71  | NZ  | A_GLU_55   | OE2 | 3.697 |
| 6OT1 | C_ARG_54  | NH2 | C_ASP_60   | OD2 | 3.977 |
| 6OT1 | C_ARG_61  | NH1 | C_GLU_81   | OE2 | 3.768 |
| 6OT1 | C_ARG_61  | NH2 | C_GLU_81   | OE2 | 2.478 |



|      |           |     |            |     |       |
|------|-----------|-----|------------|-----|-------|
| 6OT1 | F_ARG_38  | NH1 | F_ASP_86   | OD1 | 3.011 |
| 6OT1 | F_ARG_38  | NH2 | F_GLU_46   | OE1 | 2.859 |
| 6OT1 | F_ARG_38  | NH2 | F_GLU_46   | OE2 | 3.063 |
| 6OT1 | F_ARG_38  | NH2 | F_ASP_86   | OD1 | 3.766 |
| 6OT1 | F_HIS_52  | ND1 | F_ASP_53   | OD1 | 3.327 |
| 6OT1 | F_HIS_52  | NE2 | F_ASP_53   | OD1 | 3.026 |
| 6OT1 | F_ARG_66  | NH1 | F_ASP_86   | OD2 | 2.462 |
| 6OT1 | F_ARG_66  | NH2 | F_ASP_86   | OD1 | 3.460 |
| 6OT1 | F_ARG_66  | NH2 | F_ASP_86   | OD2 | 3.125 |
| 6OT1 | F_LYS_73  | NZ  | F_ASP_53   | OD2 | 3.344 |
| 6OT1 | F_LYS_96  | NZ  | F_ASP_100Q | OD1 | 3.814 |
| 6OT1 | F_LYS_96  | NZ  | F_ASP_100Q | OD2 | 2.475 |
| 6OT1 | L_ARG_31  | NH1 | L_ASP_92   | OD2 | 2.719 |
| 6OT1 | L_ARG_54  | NH2 | L_ASP_60   | OD1 | 3.738 |
| 6OT1 | L_ARG_54  | NH2 | L_ASP_60   | OD2 | 2.630 |
| 6OT1 | L_ARG_61  | NH1 | L_ASP_82   | OD2 | 3.959 |
| 6OT1 | L_ARG_61  | NH2 | L_GLU_79   | OE2 | 3.139 |
| 6OT1 | L_ARG_61  | NH2 | L_ASP_82   | OD1 | 3.334 |
| 6OT1 | L_ARG_61  | NH2 | L_ASP_82   | OD2 | 3.993 |
| 6OT1 | L_ARG_95  | NH2 | L_GLU_25   | OE1 | 3.478 |
| 6OT1 | J_ARG_38  | NH1 | J_ASP_86   | OD1 | 2.453 |
| 6OT1 | J_ARG_38  | NH1 | J_ASP_86   | OD2 | 3.995 |
| 6OT1 | J_ARG_38  | NH2 | J_GLU_46   | OE1 | 2.492 |
| 6OT1 | J_ARG_38  | NH2 | J_GLU_46   | OE2 | 3.368 |
| 6OT1 | J_ARG_66  | NH2 | J_ASP_86   | OD2 | 2.596 |
| 6OT1 | J_ARG_71  | NH2 | E_ASP_368  | OD2 | 3.599 |
| 6OT1 | K_LYS_24  | NZ  | K_ASP_69   | OD1 | 3.078 |
| 6OT1 | K_ARG_52  | NH2 | K_ASP_49   | OD2 | 3.106 |
| 6OT1 | K_ARG_53  | NH1 | K_ASP_59   | OD1 | 3.648 |
| 6OT1 | K_ARG_60  | NH2 | K_ASP_81   | OD1 | 3.037 |
| 6OT1 | K_ARG_60  | NH2 | K_ASP_81   | OD2 | 2.675 |
| 6OT1 | D_ARG_542 | NH2 | O_GLU_647  | OE1 | 2.015 |
| 6OT1 | D_ARG_542 | NH2 | O_GLU_647  | OE2 | 3.816 |
| 6OT1 | D_ARG_588 | NH2 | D_GLU_584  | OE2 | 2.978 |
| 6OT1 | D_LYS_601 | NZ  | O_GLU_657  | OE2 | 3.900 |
| 6OT1 | D_ARG_617 | NH1 | D_GLU_634  | OE1 | 3.168 |
| 6OT1 | D_ARG_617 | NH1 | D_GLU_634  | OE2 | 2.668 |
| 6OT1 | D_ARG_617 | NH2 | D_GLU_621  | OE1 | 3.233 |
| 6OT1 | D_ARG_617 | NH2 | D_GLU_621  | OE2 | 3.260 |
| 6OT1 | P_HIS_85  | NE2 | P_GLU_87   | OE2 | 3.938 |
| 6OT1 | P_HIS_216 | NE2 | P_ASP_57   | OD1 | 2.811 |
| 6OT1 | P_HIS_216 | NE2 | P_ASP_57   | OD2 | 3.156 |
| 6OT1 | P_LYS_229 | NZ  | P_GLU_83   | OE2 | 3.683 |
| 6OT1 | P_LYS_231 | NZ  | P_GLU_268  | OE1 | 3.078 |
| 6OT1 | P_LYS_231 | NZ  | P_GLU_268  | OE2 | 3.576 |
| 6OT1 | P_HIS_249 | NE2 | P_GLU_482  | OE1 | 3.788 |
| 6OT1 | P_LYS_282 | NZ  | P_GLU_275  | OE2 | 3.608 |
| 6OT1 | P_LYS_282 | NZ  | S_ASP_100C | OD2 | 3.405 |
| 6OT1 | P_ARG_298 | NH1 | P_GLU_381  | OE1 | 2.420 |
| 6OT1 | P_ARG_298 | NH1 | P_GLU_381  | OE2 | 3.195 |
| 6OT1 | P_ARG_327 | NH2 | Q_GLU_100I | OE1 | 3.817 |
| 6OT1 | P_LYS_351 | NZ  | P_GLU_269  | OE1 | 3.548 |
| 6OT1 | P_ARG_429 | NH1 | P_ASP_113  | OD1 | 3.405 |
| 6OT1 | P_ARG_429 | NH1 | P_ASP_113  | OD2 | 2.495 |
| 6OT1 | P_ARG_469 | NH1 | P_ASP_457  | OD1 | 2.848 |
| 6OT1 | P_ARG_476 | NH1 | P_GLU_102  | OE1 | 3.390 |
| 6OT1 | P_ARG_476 | NH1 | P_ASP_474  | OD2 | 3.647 |
| 6OT1 | P_ARG_476 | NH2 | P_GLU_102  | OE1 | 3.349 |

|      |           |     |            |     |       |
|------|-----------|-----|------------|-----|-------|
| 6OT1 | P_ARG_476 | NH2 | P_GLU_102  | OE2 | 3.433 |
| 6OT1 | P_ARG_480 | NH1 | P_ASP_477  | OD1 | 3.353 |
| 6OT1 | P_LYS_487 | NZ  | P_ASP_47   | OD1 | 2.584 |
| 6OT1 | P_LYS_487 | NZ  | P_ASP_47   | OD2 | 3.393 |
| 6OT1 | P_LYS_487 | NZ  | P_GLU_91   | OE2 | 2.596 |
| 6OT1 | M_ARG_38  | NH2 | M_ASP_86   | OD1 | 3.493 |
| 6OT1 | M_LYS_71  | NZ  | M_GLU_55   | OE2 | 3.697 |
| 6OT1 | N_ARG_54  | NH2 | N_ASP_60   | OD2 | 3.974 |
| 6OT1 | N_ARG_61  | NH1 | N_GLU_81   | OE2 | 3.770 |
| 6OT1 | N_ARG_61  | NH2 | N_GLU_81   | OE2 | 2.479 |
| 6OT1 | Q_ARG_38  | NH1 | Q_ASP_86   | OD1 | 3.012 |
| 6OT1 | Q_ARG_38  | NH2 | Q_GLU_46   | OE1 | 2.859 |
| 6OT1 | Q_ARG_38  | NH2 | Q_GLU_46   | OE2 | 3.063 |
| 6OT1 | Q_ARG_38  | NH2 | Q_ASP_86   | OD1 | 3.766 |
| 6OT1 | Q_HIS_52  | ND1 | Q_ASP_53   | OD1 | 3.327 |
| 6OT1 | Q_HIS_52  | NE2 | Q_ASP_53   | OD1 | 3.026 |
| 6OT1 | Q_ARG_66  | NH1 | Q_ASP_86   | OD2 | 2.462 |
| 6OT1 | Q_ARG_66  | NH2 | Q_ASP_86   | OD1 | 3.460 |
| 6OT1 | Q_ARG_66  | NH2 | Q_ASP_86   | OD2 | 3.125 |
| 6OT1 | Q_LYS_73  | NZ  | Q_ASP_53   | OD2 | 3.344 |
| 6OT1 | Q_LYS_96  | NZ  | Q_ASP_100Q | OD1 | 3.814 |
| 6OT1 | Q_LYS_96  | NZ  | Q_ASP_100Q | OD2 | 2.476 |
| 6OT1 | R_ARG_31  | NH1 | R_ASP_92   | OD2 | 2.718 |
| 6OT1 | R_ARG_54  | NH2 | R_ASP_60   | OD1 | 3.737 |
| 6OT1 | R_ARG_54  | NH2 | R_ASP_60   | OD2 | 2.630 |
| 6OT1 | R_ARG_61  | NH1 | R_ASP_82   | OD2 | 3.960 |
| 6OT1 | R_ARG_61  | NH2 | R_GLU_79   | OE2 | 3.139 |
| 6OT1 | R_ARG_61  | NH2 | R_ASP_82   | OD1 | 3.334 |
| 6OT1 | R_ARG_61  | NH2 | R_ASP_82   | OD2 | 3.995 |
| 6OT1 | R_ARG_95  | NH2 | R_GLU_25   | OE1 | 3.477 |
| 6OT1 | S_ARG_38  | NH1 | S_ASP_86   | OD1 | 2.452 |
| 6OT1 | S_ARG_38  | NH1 | S_ASP_86   | OD2 | 3.995 |
| 6OT1 | S_ARG_38  | NH2 | S_GLU_46   | OE1 | 2.492 |
| 6OT1 | S_ARG_38  | NH2 | S_GLU_46   | OE2 | 3.367 |
| 6OT1 | S_ARG_66  | NH2 | S_ASP_86   | OD2 | 2.599 |
| 6OT1 | S_ARG_71  | NH2 | P_ASP_368  | OD2 | 3.597 |
| 6OT1 | T_LYS_24  | NZ  | T_ASP_69   | OD1 | 3.076 |
| 6OT1 | T_ARG_52  | NH2 | T_ASP_49   | OD2 | 3.107 |
| 6OT1 | T_ARG_53  | NH1 | T_ASP_59   | OD1 | 3.647 |
| 6OT1 | T_ARG_60  | NH2 | T_ASP_81   | OD1 | 3.038 |
| 6OT1 | T_ARG_60  | NH2 | T_ASP_81   | OD2 | 2.673 |
| 6P62 | A_LYS_46  | NZ  | A_ASP_632  | OD2 | 2.721 |
| 6P62 | A_LYS_97  | NZ  | A_GLU_275  | OE2 | 3.366 |
| 6P62 | A_ARG_151 | NH2 | A_ASP_140  | OD1 | 3.754 |
| 6P62 | A_LYS_168 | NZ  | B_GLU_190  | OE2 | 3.547 |
| 6P62 | A_LYS_229 | NZ  | A_GLU_83   | OE1 | 3.953 |
| 6P62 | A_LYS_229 | NZ  | A_GLU_83   | OE2 | 2.773 |
| 6P62 | A_LYS_231 | NZ  | A_GLU_267  | OE1 | 3.655 |
| 6P62 | A_LYS_232 | NZ  | A_GLU_268  | OE2 | 3.138 |
| 6P62 | A_LYS_232 | NZ  | A_GLU_269  | OE2 | 2.749 |
| 6P62 | A_HIS_249 | NE2 | A_GLU_482  | OE1 | 3.132 |
| 6P62 | A_LYS_282 | NZ  | A_GLU_275  | OE1 | 3.423 |
| 6P62 | A_ARG_298 | NH1 | A_GLU_381  | OE2 | 2.910 |
| 6P62 | A_ARG_298 | NH2 | A_GLU_381  | OE2 | 3.307 |
| 6P62 | A_LYS_335 | NZ  | A_ASP_412  | OD2 | 2.410 |
| 6P62 | A_LYS_351 | NZ  | A_GLU_269  | OE1 | 3.133 |
| 6P62 | A_LYS_421 | NZ  | A_GLU_370  | OE2 | 2.730 |
| 6P62 | A_ARG_429 | NH1 | A_ASP_113  | OD1 | 3.526 |

|      |           |     |           |     |       |
|------|-----------|-----|-----------|-----|-------|
| 6P62 | A_ARG_429 | NH1 | A_ASP_113 | OD2 | 2.935 |
| 6P62 | A_ARG_429 | NH2 | A_ASP_113 | OD1 | 2.818 |
| 6P62 | A_ARG_429 | NH2 | A_ASP_113 | OD2 | 3.695 |
| 6P62 | A_ARG_476 | NH1 | A_ASP_474 | OD1 | 3.290 |
| 6P62 | A_ARG_476 | NH1 | A_ASP_474 | OD2 | 3.909 |
| 6P62 | A_ARG_476 | NH2 | A_GLU_102 | OE1 | 3.634 |
| 6P62 | A_ARG_476 | NH2 | A_GLU_102 | OE2 | 3.089 |
| 6P62 | A_LYS_487 | NZ  | A_ASP_47  | OD1 | 3.073 |
| 6P62 | A_LYS_487 | NZ  | A_ASP_47  | OD2 | 2.842 |
| 6P62 | A_LYS_490 | NZ  | A_GLU_492 | OE2 | 3.504 |
| 6P62 | A_ARG_520 | NH2 | A_GLU_87  | OE1 | 3.537 |
| 6P62 | A_ARG_542 | NH1 | B_GLU_647 | OE1 | 2.629 |
| 6P62 | A_ARG_542 | NH1 | B_GLU_647 | OE2 | 3.985 |
| 6P62 | A_ARG_542 | NH2 | B_GLU_648 | OE2 | 3.131 |
| 6P62 | A_LYS_574 | NZ  | A_ASP_107 | OD1 | 2.481 |
| 6P62 | A_LYS_574 | NZ  | A_ASP_107 | OD2 | 3.953 |
| 6P62 | A_ARG_579 | NH1 | B_GLU_584 | OE1 | 3.453 |
| 6P62 | A_ARG_579 | NH1 | B_GLU_584 | OE2 | 2.953 |
| 6P62 | A_ARG_585 | NH2 | A_GLU_492 | OE1 | 3.953 |
| 6P62 | A_ARG_585 | NH2 | A_GLU_492 | OE2 | 2.999 |
| 6P62 | A_ARG_588 | NH1 | A_GLU_584 | OE1 | 3.660 |
| 6P62 | A_ARG_588 | NH2 | A_GLU_584 | OE1 | 3.069 |
| 6P62 | A_ARG_617 | NH1 | A_GLU_634 | OE1 | 3.708 |
| 6P62 | A_ARG_617 | NH1 | A_GLU_634 | OE2 | 3.595 |
| 6P62 | H_ARG_38  | NH1 | H_ASP_86  | OD1 | 3.041 |
| 6P62 | H_ARG_38  | NH2 | H_GLU_46  | OE1 | 2.920 |
| 6P62 | H_ARG_94  | NH2 | H_ASP_101 | OD1 | 3.646 |
| 6P62 | H_ARG_94  | NH2 | H_ASP_101 | OD2 | 2.930 |
| 6P62 | L_LYS_22  | NZ  | L_GLU_70  | OE2 | 3.542 |
| 6P62 | L_ARG_61  | NH1 | L_GLU_79  | OE2 | 3.423 |
| 6P62 | L_ARG_61  | NH1 | L_ASP_82  | OD2 | 3.764 |
| 6P62 | L_ARG_61  | NH2 | L_ASP_77  | OD2 | 2.844 |
| 6P62 | L_ARG_61  | NH2 | L_GLU_79  | OE2 | 2.955 |
| 6P62 | B_LYS_46  | NZ  | B_ASP_632 | OD2 | 2.722 |
| 6P62 | B_LYS_97  | NZ  | B_GLU_275 | OE2 | 3.366 |
| 6P62 | B_ARG_151 | NH2 | B_ASP_140 | OD1 | 3.754 |
| 6P62 | B_LYS_168 | NZ  | E_GLU_190 | OE2 | 3.547 |
| 6P62 | B_LYS_229 | NZ  | B_GLU_83  | OE1 | 3.953 |
| 6P62 | B_LYS_229 | NZ  | B_GLU_83  | OE2 | 2.774 |
| 6P62 | B_LYS_231 | NZ  | B_GLU_267 | OE1 | 3.655 |
| 6P62 | B_LYS_232 | NZ  | B_GLU_268 | OE2 | 3.139 |
| 6P62 | B_LYS_232 | NZ  | B_GLU_269 | OE2 | 2.750 |
| 6P62 | B_HIS_249 | NE2 | B_GLU_482 | OE1 | 3.131 |
| 6P62 | B_LYS_282 | NZ  | B_GLU_275 | OE1 | 3.424 |
| 6P62 | B_ARG_298 | NH1 | B_GLU_381 | OE2 | 2.910 |
| 6P62 | B_ARG_298 | NH2 | B_GLU_381 | OE2 | 3.308 |
| 6P62 | B_LYS_335 | NZ  | B_ASP_412 | OD2 | 2.410 |
| 6P62 | B_LYS_351 | NZ  | B_GLU_269 | OE1 | 3.133 |
| 6P62 | B_LYS_421 | NZ  | B_GLU_370 | OE2 | 2.731 |
| 6P62 | B_ARG_429 | NH1 | B_ASP_113 | OD1 | 3.526 |
| 6P62 | B_ARG_429 | NH1 | B_ASP_113 | OD2 | 2.934 |
| 6P62 | B_ARG_429 | NH2 | B_ASP_113 | OD1 | 2.819 |
| 6P62 | B_ARG_429 | NH2 | B_ASP_113 | OD2 | 3.695 |
| 6P62 | B_ARG_476 | NH1 | B_ASP_474 | OD1 | 3.291 |
| 6P62 | B_ARG_476 | NH1 | B_ASP_474 | OD2 | 3.909 |
| 6P62 | B_ARG_476 | NH2 | B_GLU_102 | OE1 | 3.634 |
| 6P62 | B_ARG_476 | NH2 | B_GLU_102 | OE2 | 3.089 |
| 6P62 | B_LYS_487 | NZ  | B_ASP_47  | OD1 | 3.072 |

|      |           |     |           |     |       |
|------|-----------|-----|-----------|-----|-------|
| 6P62 | B_LYS_487 | NZ  | B_ASP_47  | OD2 | 2.841 |
| 6P62 | B_LYS_490 | NZ  | B_GLU_492 | OE2 | 3.504 |
| 6P62 | B_ARG_520 | NH2 | B_GLU_87  | OE1 | 3.537 |
| 6P62 | B_ARG_542 | NH1 | E_GLU_647 | OE1 | 2.630 |
| 6P62 | B_ARG_542 | NH1 | E_GLU_647 | OE2 | 3.986 |
| 6P62 | B_ARG_542 | NH2 | E_GLU_648 | OE2 | 3.130 |
| 6P62 | B_LYS_574 | NZ  | B_ASP_107 | OD1 | 2.481 |
| 6P62 | B_LYS_574 | NZ  | B_ASP_107 | OD2 | 3.954 |
| 6P62 | B_ARG_579 | NH1 | E_GLU_584 | OE1 | 3.454 |
| 6P62 | B_ARG_579 | NH1 | E_GLU_584 | OE2 | 2.952 |
| 6P62 | B_ARG_585 | NH2 | B_GLU_492 | OE1 | 3.952 |
| 6P62 | B_ARG_585 | NH2 | B_GLU_492 | OE2 | 2.998 |
| 6P62 | B_ARG_588 | NH1 | B_GLU_584 | OE1 | 3.660 |
| 6P62 | B_ARG_588 | NH2 | B_GLU_584 | OE1 | 3.069 |
| 6P62 | B_ARG_617 | NH1 | B_GLU_634 | OE1 | 3.708 |
| 6P62 | B_ARG_617 | NH1 | B_GLU_634 | OE2 | 3.595 |
| 6P62 | C_ARG_38  | NH1 | C_ASP_86  | OD1 | 3.041 |
| 6P62 | C_ARG_38  | NH2 | C_GLU_46  | OE1 | 2.920 |
| 6P62 | C_ARG_94  | NH2 | C_ASP_101 | OD1 | 3.646 |
| 6P62 | C_ARG_94  | NH2 | C_ASP_101 | OD2 | 2.930 |
| 6P62 | D_LYS_22  | NZ  | D_GLU_70  | OE2 | 3.542 |
| 6P62 | D_ARG_61  | NH1 | D_GLU_79  | OE2 | 3.423 |
| 6P62 | D_ARG_61  | NH1 | D_ASP_82  | OD2 | 3.764 |
| 6P62 | D_ARG_61  | NH2 | D_ASP_77  | OD2 | 2.845 |
| 6P62 | D_ARG_61  | NH2 | D_GLU_79  | OE2 | 2.955 |
| 6P62 | E_LYS_46  | NZ  | E_ASP_632 | OD2 | 2.721 |
| 6P62 | E_LYS_97  | NZ  | E_GLU_275 | OE2 | 3.366 |
| 6P62 | E_ARG_151 | NH2 | E_ASP_140 | OD1 | 3.754 |
| 6P62 | E_LYS_168 | NZ  | A_GLU_190 | OE2 | 3.547 |
| 6P62 | E_LYS_229 | NZ  | E_GLU_83  | OE1 | 3.953 |
| 6P62 | E_LYS_229 | NZ  | E_GLU_83  | OE2 | 2.773 |
| 6P62 | E_LYS_231 | NZ  | E_GLU_267 | OE1 | 3.656 |
| 6P62 | E_LYS_232 | NZ  | E_GLU_268 | OE2 | 3.139 |
| 6P62 | E_LYS_232 | NZ  | E_GLU_269 | OE2 | 2.749 |
| 6P62 | E_HIS_249 | NE2 | E_GLU_482 | OE1 | 3.131 |
| 6P62 | E_LYS_282 | NZ  | E_GLU_275 | OE1 | 3.424 |
| 6P62 | E_ARG_298 | NH1 | E_GLU_381 | OE2 | 2.909 |
| 6P62 | E_ARG_298 | NH2 | E_GLU_381 | OE2 | 3.307 |
| 6P62 | E_LYS_335 | NZ  | E_ASP_412 | OD2 | 2.409 |
| 6P62 | E_LYS_351 | NZ  | E_GLU_269 | OE1 | 3.133 |
| 6P62 | E_LYS_421 | NZ  | E_GLU_370 | OE2 | 2.731 |
| 6P62 | E_ARG_429 | NH1 | E_ASP_113 | OD1 | 3.526 |
| 6P62 | E_ARG_429 | NH1 | E_ASP_113 | OD2 | 2.935 |
| 6P62 | E_ARG_429 | NH2 | E_ASP_113 | OD1 | 2.819 |
| 6P62 | E_ARG_429 | NH2 | E_ASP_113 | OD2 | 3.695 |
| 6P62 | E_ARG_476 | NH1 | E_ASP_474 | OD1 | 3.291 |
| 6P62 | E_ARG_476 | NH1 | E_ASP_474 | OD2 | 3.910 |
| 6P62 | E_ARG_476 | NH2 | E_GLU_102 | OE1 | 3.634 |
| 6P62 | E_ARG_476 | NH2 | E_GLU_102 | OE2 | 3.089 |
| 6P62 | E_LYS_487 | NZ  | E_ASP_47  | OD1 | 3.071 |
| 6P62 | E_LYS_487 | NZ  | E_ASP_47  | OD2 | 2.841 |
| 6P62 | E_LYS_490 | NZ  | E_GLU_492 | OE2 | 3.504 |
| 6P62 | E_ARG_520 | NH2 | E_GLU_87  | OE1 | 3.537 |
| 6P62 | E_ARG_542 | NH1 | A_GLU_647 | OE1 | 2.629 |
| 6P62 | E_ARG_542 | NH1 | A_GLU_647 | OE2 | 3.985 |
| 6P62 | E_ARG_542 | NH2 | A_GLU_648 | OE2 | 3.130 |
| 6P62 | E_LYS_574 | NZ  | E_ASP_107 | OD1 | 2.480 |
| 6P62 | E_LYS_574 | NZ  | E_ASP_107 | OD2 | 3.952 |

|      |            |     |            |     |       |
|------|------------|-----|------------|-----|-------|
| 6P62 | E_ARG_579  | NH1 | A_GLU_584  | OE1 | 3.453 |
| 6P62 | E_ARG_579  | NH1 | A_GLU_584  | OE2 | 2.952 |
| 6P62 | E_ARG_585  | NH2 | E_GLU_492  | OE1 | 3.953 |
| 6P62 | E_ARG_585  | NH2 | E_GLU_492  | OE2 | 2.998 |
| 6P62 | E_ARG_588  | NH1 | E_GLU_584  | OE1 | 3.660 |
| 6P62 | E_ARG_588  | NH2 | E_GLU_584  | OE1 | 3.069 |
| 6P62 | E_ARG_617  | NH1 | E_GLU_634  | OE1 | 3.708 |
| 6P62 | E_ARG_617  | NH1 | E_GLU_634  | OE2 | 3.595 |
| 6P62 | F_ARG_38   | NH1 | F_ASP_86   | OD1 | 3.041 |
| 6P62 | F_ARG_38   | NH2 | F_GLU_46   | OE1 | 2.921 |
| 6P62 | F_ARG_94   | NH2 | F_ASP_101  | OD1 | 3.646 |
| 6P62 | F_ARG_94   | NH2 | F_ASP_101  | OD2 | 2.930 |
| 6P62 | G_LYS_22   | NZ  | G_GLU_70   | OE2 | 3.542 |
| 6P62 | G_ARG_61   | NH1 | G_GLU_79   | OE2 | 3.423 |
| 6P62 | G_ARG_61   | NH1 | G_ASP_82   | OD2 | 3.763 |
| 6P62 | G_ARG_61   | NH2 | G_ASP_77   | OD2 | 2.844 |
| 6P62 | G_ARG_61   | NH2 | G_GLU_79   | OE2 | 2.955 |
| 6P65 | A_LYS_46   | NZ  | A_ASP_632  | OD2 | 2.391 |
| 6P65 | A_LYS_185D | NZ  | A_GLU_185A | OE1 | 3.592 |
| 6P65 | A_LYS_185D | NZ  | A_GLU_185A | OE2 | 3.302 |
| 6P65 | A_LYS_227  | NZ  | A_GLU_83   | OE1 | 2.949 |
| 6P65 | A_LYS_227  | NZ  | A_GLU_83   | OE2 | 3.484 |
| 6P65 | A_HIS_249  | NE2 | A_GLU_482  | OE1 | 3.021 |
| 6P65 | A_LYS_282  | NZ  | A_GLU_275  | OE1 | 2.833 |
| 6P65 | A_LYS_282  | NZ  | A_GLU_275  | OE2 | 3.523 |
| 6P65 | A_ARG_298  | NH2 | A_GLU_381  | OE1 | 3.069 |
| 6P65 | A_LYS_305  | NZ  | A_ASP_322  | OD1 | 2.972 |
| 6P65 | A_LYS_305  | NZ  | A_ASP_322  | OD2 | 2.511 |
| 6P65 | A_ARG_340  | NH2 | A_ASP_337  | OD1 | 2.733 |
| 6P65 | A_ARG_340  | NH2 | A_ASP_337  | OD2 | 3.882 |
| 6P65 | A_ARG_344  | NH1 | A_GLU_290  | OE1 | 3.426 |
| 6P65 | A_ARG_344  | NH1 | A_GLU_290  | OE2 | 3.021 |
| 6P65 | A_LYS_348  | NZ  | A_GLU_351  | OE1 | 2.894 |
| 6P65 | A_LYS_348  | NZ  | A_GLU_351  | OE2 | 3.938 |
| 6P65 | A_ARG_419  | NH2 | A_GLU_153  | OE1 | 2.875 |
| 6P65 | A_LYS_421  | NZ  | A_GLU_370  | OE2 | 2.921 |
| 6P65 | A_ARG_429  | NH1 | A_ASP_113  | OD1 | 3.603 |
| 6P65 | A_ARG_429  | NH1 | A_ASP_113  | OD2 | 2.908 |
| 6P65 | A_ARG_429  | NH2 | A_ASP_113  | OD1 | 2.815 |
| 6P65 | A_ARG_429  | NH2 | A_ASP_113  | OD2 | 3.611 |
| 6P65 | A_LYS_446  | NZ  | A_GLU_293  | OE2 | 3.260 |
| 6P65 | A_ARG_456  | NH1 | A_GLU_466  | OE1 | 3.094 |
| 6P65 | A_ARG_456  | NH1 | A_GLU_466  | OE2 | 3.849 |
| 6P65 | A_ARG_469  | NH1 | A_ASP_457  | OD2 | 2.839 |
| 6P65 | A_ARG_469  | NH2 | A_ASP_457  | OD2 | 3.804 |
| 6P65 | A_ARG_476  | NH1 | A_ASP_474  | OD1 | 3.178 |
| 6P65 | A_ARG_476  | NH1 | A_ASP_474  | OD2 | 3.851 |
| 6P65 | A_ARG_476  | NH2 | A_GLU_102  | OE1 | 3.708 |
| 6P65 | A_ARG_476  | NH2 | A_GLU_102  | OE2 | 3.051 |
| 6P65 | A_LYS_485  | NZ  | A_GLU_267  | OE2 | 2.827 |
| 6P65 | A_LYS_487  | NZ  | A_ASP_47   | OD1 | 2.922 |
| 6P65 | A_LYS_487  | NZ  | A_ASP_47   | OD2 | 2.883 |
| 6P65 | A_LYS_492  | NZ  | A_GLU_490  | OE1 | 3.434 |
| 6P65 | A_LYS_492  | NZ  | A_GLU_490  | OE2 | 2.781 |
| 6P65 | A_ARG_500  | NH1 | L_GLU_30   | OE1 | 3.144 |
| 6P65 | A_ARG_500  | NH1 | L_GLU_30   | OE2 | 3.804 |
| 6P65 | A_ARG_500  | NH2 | L_GLU_30   | OE1 | 3.741 |
| 6P65 | A_ARG_500  | NH2 | L_GLU_30   | OE2 | 2.979 |

|      |            |     |            |     |       |
|------|------------|-----|------------|-----|-------|
| 6P65 | A_ARG_542  | NH2 | B_ASP_648  | OD1 | 3.154 |
| 6P65 | A_LYS_574  | NZ  | A_ASP_107  | OD1 | 2.461 |
| 6P65 | A_LYS_574  | NZ  | A_ASP_107  | OD2 | 3.497 |
| 6P65 | A_LYS_588  | NZ  | A_GLU_584  | OE2 | 2.713 |
| 6P65 | A_LYS_617  | NZ  | A_GLU_634  | OE1 | 3.411 |
| 6P65 | A_LYS_658  | NZ  | A_GLU_654  | OE1 | 2.575 |
| 6P65 | H_ARG_38   | NH2 | H_GLU_46   | OE1 | 3.002 |
| 6P65 | H_LYS_71   | NZ  | A_GLU_87   | OE1 | 2.936 |
| 6P65 | H_LYS_71   | NZ  | A_GLU_87   | OE2 | 2.864 |
| 6P65 | H_ARG_94   | NH2 | H_ASP_33   | OD1 | 3.585 |
| 6P65 | H_ARG_94   | NH2 | H_ASP_33   | OD2 | 3.145 |
| 6P65 | H_LYS_100H | NZ  | L_ASP_50   | OD1 | 2.708 |
| 6P65 | H_LYS_100H | NZ  | L_ASP_50   | OD2 | 2.597 |
| 6P65 | L_ARG_95B  | NH2 | L_ASP_95D  | OD2 | 3.668 |
| 6P65 | B_LYS_46   | NZ  | B_ASP_632  | OD2 | 2.391 |
| 6P65 | B_LYS_185D | NZ  | B_GLU_185A | OE1 | 3.593 |
| 6P65 | B_LYS_185D | NZ  | B_GLU_185A | OE2 | 3.302 |
| 6P65 | B_LYS_227  | NZ  | B_GLU_83   | OE1 | 2.949 |
| 6P65 | B_LYS_227  | NZ  | B_GLU_83   | OE2 | 3.484 |
| 6P65 | B_HIS_249  | NE2 | B_GLU_482  | OE1 | 3.021 |
| 6P65 | B_LYS_282  | NZ  | B_GLU_275  | OE1 | 2.833 |
| 6P65 | B_LYS_282  | NZ  | B_GLU_275  | OE2 | 3.523 |
| 6P65 | B_ARG_298  | NH2 | B_GLU_381  | OE1 | 3.068 |
| 6P65 | B_LYS_305  | NZ  | B_ASP_322  | OD1 | 2.972 |
| 6P65 | B_LYS_305  | NZ  | B_ASP_322  | OD2 | 2.511 |
| 6P65 | B_ARG_340  | NH2 | B_ASP_337  | OD1 | 2.733 |
| 6P65 | B_ARG_340  | NH2 | B_ASP_337  | OD2 | 3.883 |
| 6P65 | B_ARG_344  | NH1 | B_GLU_290  | OE1 | 3.427 |
| 6P65 | B_ARG_344  | NH1 | B_GLU_290  | OE2 | 3.022 |
| 6P65 | B_LYS_348  | NZ  | B_GLU_351  | OE1 | 2.895 |
| 6P65 | B_LYS_348  | NZ  | B_GLU_351  | OE2 | 3.939 |
| 6P65 | B_ARG_419  | NH2 | B_GLU_153  | OE1 | 2.875 |
| 6P65 | B_LYS_421  | NZ  | B_GLU_370  | OE2 | 2.921 |
| 6P65 | B_ARG_429  | NH1 | B_ASP_113  | OD1 | 3.603 |
| 6P65 | B_ARG_429  | NH1 | B_ASP_113  | OD2 | 2.908 |
| 6P65 | B_ARG_429  | NH2 | B_ASP_113  | OD1 | 2.816 |
| 6P65 | B_ARG_429  | NH2 | B_ASP_113  | OD2 | 3.612 |
| 6P65 | B_LYS_446  | NZ  | B_GLU_293  | OE2 | 3.260 |
| 6P65 | B_ARG_456  | NH1 | B_GLU_466  | OE1 | 3.095 |
| 6P65 | B_ARG_456  | NH1 | B_GLU_466  | OE2 | 3.849 |
| 6P65 | B_ARG_469  | NH1 | B_ASP_457  | OD2 | 2.839 |
| 6P65 | B_ARG_469  | NH2 | B_ASP_457  | OD2 | 3.803 |
| 6P65 | B_ARG_476  | NH1 | B_ASP_474  | OD1 | 3.178 |
| 6P65 | B_ARG_476  | NH1 | B_ASP_474  | OD2 | 3.851 |
| 6P65 | B_ARG_476  | NH2 | B_GLU_102  | OE1 | 3.708 |
| 6P65 | B_ARG_476  | NH2 | B_GLU_102  | OE2 | 3.050 |
| 6P65 | B_LYS_485  | NZ  | B_GLU_267  | OE2 | 2.826 |
| 6P65 | B_LYS_487  | NZ  | B_ASP_47   | OD1 | 2.922 |
| 6P65 | B_LYS_487  | NZ  | B_ASP_47   | OD2 | 2.883 |
| 6P65 | B_LYS_492  | NZ  | B_GLU_490  | OE1 | 3.434 |
| 6P65 | B_LYS_492  | NZ  | B_GLU_490  | OE2 | 2.782 |
| 6P65 | B_ARG_500  | NH1 | D_GLU_30   | OE1 | 3.143 |
| 6P65 | B_ARG_500  | NH1 | D_GLU_30   | OE2 | 3.804 |
| 6P65 | B_ARG_500  | NH2 | D_GLU_30   | OE1 | 3.741 |
| 6P65 | B_ARG_500  | NH2 | D_GLU_30   | OE2 | 2.979 |
| 6P65 | B_ARG_542  | NH2 | E_ASP_648  | OD1 | 3.155 |
| 6P65 | B_LYS_574  | NZ  | B_ASP_107  | OD1 | 2.460 |
| 6P65 | B_LYS_574  | NZ  | B_ASP_107  | OD2 | 3.496 |

|      |            |     |            |     |       |
|------|------------|-----|------------|-----|-------|
| 6P65 | B_LYS_588  | NZ  | B_GLU_584  | OE2 | 2.714 |
| 6P65 | B_LYS_617  | NZ  | B_GLU_634  | OE1 | 3.411 |
| 6P65 | B_LYS_658  | NZ  | B_GLU_654  | OE1 | 2.576 |
| 6P65 | C_ARG_38   | NH2 | C_GLU_46   | OE1 | 3.002 |
| 6P65 | C_LYS_71   | NZ  | B_GLU_87   | OE1 | 2.936 |
| 6P65 | C_LYS_71   | NZ  | B_GLU_87   | OE2 | 2.864 |
| 6P65 | C_ARG_94   | NH2 | C_ASP_33   | OD1 | 3.585 |
| 6P65 | C_ARG_94   | NH2 | C_ASP_33   | OD2 | 3.145 |
| 6P65 | C_LYS_100H | NZ  | D_ASP_50   | OD1 | 2.708 |
| 6P65 | C_LYS_100H | NZ  | D_ASP_50   | OD2 | 2.597 |
| 6P65 | D_ARG_95B  | NH2 | D_ASP_95D  | OD2 | 3.668 |
| 6P65 | E_LYS_46   | NZ  | E_ASP_632  | OD2 | 2.391 |
| 6P65 | E_LYS_185D | NZ  | E_GLU_185A | OE1 | 3.592 |
| 6P65 | E_LYS_185D | NZ  | E_GLU_185A | OE2 | 3.302 |
| 6P65 | E_LYS_227  | NZ  | E_GLU_83   | OE1 | 2.949 |
| 6P65 | E_LYS_227  | NZ  | E_GLU_83   | OE2 | 3.484 |
| 6P65 | E_HIS_249  | NE2 | E_GLU_482  | OE1 | 3.021 |
| 6P65 | E_LYS_282  | NZ  | E_GLU_275  | OE1 | 2.834 |
| 6P65 | E_LYS_282  | NZ  | E_GLU_275  | OE2 | 3.523 |
| 6P65 | E_ARG_298  | NH2 | E_GLU_381  | OE1 | 3.068 |
| 6P65 | E_LYS_305  | NZ  | E_ASP_322  | OD1 | 2.973 |
| 6P65 | E_LYS_305  | NZ  | E_ASP_322  | OD2 | 2.510 |
| 6P65 | E_ARG_340  | NH2 | E_ASP_337  | OD1 | 2.733 |
| 6P65 | E_ARG_340  | NH2 | E_ASP_337  | OD2 | 3.883 |
| 6P65 | E_ARG_344  | NH1 | E_GLU_290  | OE1 | 3.426 |
| 6P65 | E_ARG_344  | NH1 | E_GLU_290  | OE2 | 3.021 |
| 6P65 | E_LYS_348  | NZ  | E_GLU_351  | OE1 | 2.895 |
| 6P65 | E_LYS_348  | NZ  | E_GLU_351  | OE2 | 3.939 |
| 6P65 | E_ARG_419  | NH2 | E_GLU_153  | OE1 | 2.874 |
| 6P65 | E_LYS_421  | NZ  | E_GLU_370  | OE2 | 2.921 |
| 6P65 | E_ARG_429  | NH1 | E_ASP_113  | OD1 | 3.603 |
| 6P65 | E_ARG_429  | NH1 | E_ASP_113  | OD2 | 2.907 |
| 6P65 | E_ARG_429  | NH2 | E_ASP_113  | OD1 | 2.816 |
| 6P65 | E_ARG_429  | NH2 | E_ASP_113  | OD2 | 3.611 |
| 6P65 | E_LYS_446  | NZ  | E_GLU_293  | OE2 | 3.260 |
| 6P65 | E_ARG_456  | NH1 | E_GLU_466  | OE1 | 3.094 |
| 6P65 | E_ARG_456  | NH1 | E_GLU_466  | OE2 | 3.849 |
| 6P65 | E_ARG_469  | NH1 | E_ASP_457  | OD2 | 2.839 |
| 6P65 | E_ARG_469  | NH2 | E_ASP_457  | OD2 | 3.804 |
| 6P65 | E_ARG_476  | NH1 | E_ASP_474  | OD1 | 3.178 |
| 6P65 | E_ARG_476  | NH1 | E_ASP_474  | OD2 | 3.850 |
| 6P65 | E_ARG_476  | NH2 | E_GLU_102  | OE1 | 3.708 |
| 6P65 | E_ARG_476  | NH2 | E_GLU_102  | OE2 | 3.050 |
| 6P65 | E_LYS_485  | NZ  | E_GLU_267  | OE2 | 2.828 |
| 6P65 | E_LYS_487  | NZ  | E_ASP_47   | OD1 | 2.921 |
| 6P65 | E_LYS_487  | NZ  | E_ASP_47   | OD2 | 2.883 |
| 6P65 | E_LYS_492  | NZ  | E_GLU_490  | OE1 | 3.434 |
| 6P65 | E_LYS_492  | NZ  | E_GLU_490  | OE2 | 2.782 |
| 6P65 | E_ARG_500  | NH1 | G_GLU_30   | OE1 | 3.143 |
| 6P65 | E_ARG_500  | NH1 | G_GLU_30   | OE2 | 3.804 |
| 6P65 | E_ARG_500  | NH2 | G_GLU_30   | OE1 | 3.741 |
| 6P65 | E_ARG_500  | NH2 | G_GLU_30   | OE2 | 2.979 |
| 6P65 | E_ARG_542  | NH2 | A_ASP_648  | OD1 | 3.154 |
| 6P65 | E_LYS_574  | NZ  | E_ASP_107  | OD1 | 2.460 |
| 6P65 | E_LYS_574  | NZ  | E_ASP_107  | OD2 | 3.496 |
| 6P65 | E_LYS_588  | NZ  | E_GLU_584  | OE2 | 2.714 |
| 6P65 | E_LYS_617  | NZ  | E_GLU_634  | OE1 | 3.411 |
| 6P65 | E_LYS_658  | NZ  | E_GLU_654  | OE1 | 2.576 |

|      |            |     |           |     |       |
|------|------------|-----|-----------|-----|-------|
| 6P65 | F_ARG_38   | NH2 | F_GLU_46  | OE1 | 3.002 |
| 6P65 | F_LYS_71   | NZ  | E_GLU_87  | OE1 | 2.935 |
| 6P65 | F_LYS_71   | NZ  | E_GLU_87  | OE2 | 2.865 |
| 6P65 | F_ARG_94   | NH2 | F_ASP_33  | OD1 | 3.585 |
| 6P65 | F_ARG_94   | NH2 | F_ASP_33  | OD2 | 3.145 |
| 6P65 | F_LYS_100H | NZ  | G_ASP_50  | OD1 | 2.708 |
| 6P65 | F_LYS_100H | NZ  | G_ASP_50  | OD2 | 2.596 |
| 6P65 | G_ARG_95B  | NH2 | G_ASP_95D | OD2 | 3.668 |
| 6PE8 | A_ARG_38   | NH1 | A_ASP_90  | OD1 | 3.071 |
| 6PE8 | A_ARG_38   | NH2 | A_GLU_46  | OE1 | 3.098 |
| 6PE8 | A_ARG_38   | NH2 | A_ASP_90  | OD1 | 3.704 |
| 6PE8 | A_LYS_65   | NZ  | A_ASP_62  | OD1 | 3.575 |
| 6PE8 | A_ARG_67   | NH1 | A_ASP_90  | OD1 | 3.779 |
| 6PE8 | A_ARG_67   | NH1 | A_ASP_90  | OD2 | 2.688 |
| 6PE8 | A_ARG_67   | NH2 | A_ASP_90  | OD1 | 3.147 |
| 6PE8 | A_ARG_67   | NH2 | A_ASP_90  | OD2 | 3.558 |
| 6PE8 | A_ARG_98   | NH2 | A_ASP_104 | OD2 | 2.902 |
| 6PE8 | A_LYS_212  | NZ  | B_GLU_129 | OE1 | 3.617 |
| 6PE8 | A_LYS_212  | NZ  | B_GLU_129 | OE2 | 2.921 |
| 6PE8 | A_LYS_213  | NZ  | A_GLU_215 | OE2 | 2.893 |
| 6PE8 | A_LYS_217  | NZ  | B_ASP_128 | OD2 | 3.408 |
| 6PE8 | B_LYS_24   | NZ  | B_ASP_76  | OD1 | 3.379 |
| 6PE8 | B_LYS_36   | NZ  | U_GLU_98  | OE2 | 3.943 |
| 6PE8 | B_ARG_67   | NH2 | B_ASP_88  | OD1 | 2.504 |
| 6PE8 | B_ARG_67   | NH2 | B_ASP_88  | OD2 | 3.136 |
| 6PE8 | B_LYS_109  | NZ  | B_GLU_111 | OE2 | 3.226 |
| 6PE8 | B_LYS_155  | NZ  | B_GLU_201 | OE2 | 3.818 |
| 6PE8 | B_HIS_195  | ND1 | B_ASP_157 | OD2 | 3.341 |
| 6PE8 | H_ARG_38   | NH1 | H_ASP_90  | OD1 | 3.238 |
| 6PE8 | H_ARG_38   | NH2 | H_GLU_46  | OE2 | 3.230 |
| 6PE8 | H_ARG_38   | NH2 | H_ASP_90  | OD1 | 3.857 |
| 6PE8 | H_LYS_65   | NZ  | H_ASP_62  | OD1 | 3.030 |
| 6PE8 | H_ARG_67   | NH1 | H_ASP_90  | OD1 | 3.620 |
| 6PE8 | H_ARG_67   | NH1 | H_ASP_90  | OD2 | 2.656 |
| 6PE8 | H_ARG_67   | NH2 | H_ASP_90  | OD1 | 3.125 |
| 6PE8 | H_ARG_67   | NH2 | H_ASP_90  | OD2 | 3.678 |
| 6PE8 | H_ARG_98   | NH2 | H_ASP_104 | OD1 | 3.497 |
| 6PE8 | H_ARG_98   | NH2 | H_ASP_104 | OD2 | 2.823 |
| 6PE8 | H_LYS_146  | NZ  | H_ASP_147 | OD1 | 3.006 |
| 6PE8 | H_LYS_146  | NZ  | H_ASP_147 | OD2 | 3.312 |
| 6PE8 | H_LYS_212  | NZ  | L_GLU_129 | OE1 | 2.763 |
| 6PE8 | H_LYS_212  | NZ  | L_GLU_129 | OE2 | 3.237 |
| 6PE8 | L_LYS_36   | NZ  | T_GLU_98  | OE1 | 3.975 |
| 6PE8 | L_LYS_36   | NZ  | T_GLU_98  | OE2 | 3.494 |
| 6PE8 | L_ARG_67   | NH1 | L_ASP_88  | OD1 | 2.489 |
| 6PE8 | L_ARG_67   | NH1 | L_ASP_88  | OD2 | 2.664 |
| 6PE8 | L_ARG_67   | NH2 | L_GLU_87  | OE2 | 3.818 |
| 6PE8 | L_LYS_109  | NZ  | L_GLU_171 | OE1 | 2.957 |
| 6PE8 | L_LYS_109  | NZ  | L_GLU_171 | OE2 | 3.577 |
| 6PE8 | L_HIS_195  | ND1 | L_ASP_191 | OD1 | 3.228 |
| 6PE8 | L_ARG_217  | NH1 | L_GLU_193 | OE2 | 3.407 |
| 6PE8 | T_LYS_46   | NZ  | T_GLU_66  | OE1 | 3.537 |
| 6PE8 | T_HIS_78   | NE2 | T_GLU_74  | OE2 | 3.145 |
| 6PE8 | T_LYS_81   | NZ  | T_GLU_117 | OE2 | 3.858 |
| 6PE8 | T_ARG_90   | NH1 | T_GLU_106 | OE2 | 3.299 |
| 6PE8 | T_ARG_90   | NH2 | H_ASP_62  | OD1 | 3.932 |
| 6PE8 | T_LYS_94   | NZ  | L_ASP_97  | OD1 | 2.502 |
| 6PE8 | T_LYS_94   | NZ  | L_ASP_97  | OD2 | 3.872 |



|      |           |     |           |     |       |
|------|-----------|-----|-----------|-----|-------|
| 6PE8 | T_ARG_123 | NH1 | T_ASP_140 | OD2 | 3.487 |
| 6PE8 | T_ARG_123 | NH2 | T_ASP_140 | OD2 | 3.475 |
| 6PE8 | U_HIS_78  | NE2 | U_GLU_74  | OE2 | 3.728 |
| 6PE8 | U_HIS_162 | NE2 | U_GLU_159 | OE1 | 3.858 |
| 6PE8 | U_HIS_162 | NE2 | U_GLU_159 | OE2 | 3.289 |
| 6PE9 | A_ARG_38  | NH1 | A_ASP_90  | OD1 | 2.798 |
| 6PE9 | A_ARG_38  | NH2 | A_GLU_46  | OE1 | 3.159 |
| 6PE9 | A_ARG_38  | NH2 | A_GLU_46  | OE2 | 3.251 |
| 6PE9 | A_ARG_38  | NH2 | A_ASP_90  | OD1 | 3.887 |
| 6PE9 | A_ARG_67  | NH1 | A_ASP_90  | OD1 | 3.800 |
| 6PE9 | A_ARG_67  | NH1 | A_ASP_90  | OD2 | 2.750 |
| 6PE9 | A_ARG_67  | NH2 | A_ASP_90  | OD1 | 2.777 |
| 6PE9 | A_ARG_67  | NH2 | A_ASP_90  | OD2 | 3.300 |
| 6PE9 | A_ARG_87  | NH1 | A_ASP_90  | OD1 | 3.204 |
| 6PE9 | A_ARG_98  | NH2 | A_ASP_104 | OD1 | 3.991 |
| 6PE9 | A_ARG_98  | NH2 | A_ASP_104 | OD2 | 3.023 |
| 6PE9 | A_LYS_146 | NZ  | A_ASP_147 | OD1 | 3.217 |
| 6PE9 | A_LYS_146 | NZ  | A_ASP_147 | OD2 | 3.463 |
| 6PE9 | A_LYS_212 | NZ  | B_GLU_129 | OE1 | 3.227 |
| 6PE9 | A_LYS_212 | NZ  | B_GLU_129 | OE2 | 3.311 |
| 6PE9 | A_LYS_213 | NZ  | A_GLU_215 | OE2 | 2.756 |
| 6PE9 | A_LYS_217 | NZ  | B_ASP_128 | OD1 | 3.061 |
| 6PE9 | A_LYS_217 | NZ  | B_ASP_128 | OD2 | 3.113 |
| 6PE9 | B_ARG_60  | NH2 | B_ASP_66  | OD2 | 3.733 |
| 6PE9 | B_ARG_67  | NH2 | B_GLU_87  | OE2 | 3.721 |
| 6PE9 | B_ARG_67  | NH2 | B_ASP_88  | OD1 | 2.626 |
| 6PE9 | B_ARG_67  | NH2 | B_ASP_88  | OD2 | 3.531 |
| 6PE9 | B_LYS_109 | NZ  | B_GLU_171 | OE1 | 3.224 |
| 6PE9 | B_LYS_109 | NZ  | B_GLU_171 | OE2 | 3.604 |
| 6PE9 | B_LYS_155 | NZ  | B_GLU_201 | OE1 | 2.857 |
| 6PE9 | B_LYS_155 | NZ  | B_GLU_201 | OE2 | 3.583 |
| 6PE9 | B_LYS_189 | NZ  | B_GLU_193 | OE1 | 2.706 |
| 6PE9 | B_HIS_195 | ND1 | B_ASP_157 | OD2 | 3.250 |
| 6PE9 | B_HIS_195 | NE2 | B_ASP_191 | OD1 | 3.630 |
| 6PE9 | C_LYS_13  | NZ  | U_GLU_107 | OE2 | 3.461 |
| 6PE9 | C_ARG_38  | NH1 | C_ASP_90  | OD1 | 2.834 |
| 6PE9 | C_ARG_38  | NH2 | C_GLU_46  | OE1 | 3.774 |
| 6PE9 | C_ARG_38  | NH2 | C_ASP_90  | OD1 | 3.862 |
| 6PE9 | C_ARG_67  | NH1 | C_ASP_90  | OD1 | 3.690 |
| 6PE9 | C_ARG_67  | NH1 | C_ASP_90  | OD2 | 2.701 |
| 6PE9 | C_ARG_67  | NH2 | C_ASP_90  | OD1 | 3.027 |
| 6PE9 | C_ARG_67  | NH2 | C_ASP_90  | OD2 | 3.482 |
| 6PE9 | C_ARG_87  | NH1 | C_GLU_89  | OE1 | 2.999 |
| 6PE9 | C_ARG_87  | NH2 | C_GLU_89  | OE1 | 3.050 |
| 6PE9 | C_ARG_98  | NH2 | C_ASP_104 | OD1 | 3.544 |
| 6PE9 | C_ARG_98  | NH2 | C_ASP_104 | OD2 | 2.696 |
| 6PE9 | C_LYS_212 | NZ  | D_GLU_129 | OE1 | 2.716 |
| 6PE9 | D_LYS_24  | NZ  | D_ASP_76  | OD2 | 3.066 |
| 6PE9 | D_LYS_36  | NZ  | G_GLU_98  | OE2 | 3.800 |
| 6PE9 | D_ARG_67  | NH2 | D_GLU_87  | OE2 | 3.276 |
| 6PE9 | D_ARG_67  | NH2 | D_ASP_88  | OD1 | 2.629 |
| 6PE9 | D_ARG_67  | NH2 | D_ASP_88  | OD2 | 2.960 |
| 6PE9 | D_LYS_109 | NZ  | D_GLU_111 | OE2 | 3.968 |
| 6PE9 | D_ARG_148 | NH1 | D_GLU_111 | OE1 | 3.574 |
| 6PE9 | D_ARG_148 | NH1 | D_GLU_111 | OE2 | 3.676 |
| 6PE9 | D_LYS_155 | NZ  | D_GLU_201 | OE1 | 3.155 |
| 6PE9 | D_LYS_189 | NZ  | D_GLU_193 | OE2 | 3.713 |
| 6PE9 | D_HIS_195 | ND1 | D_ASP_157 | OD2 | 3.268 |

|      |           |     |           |     |       |
|------|-----------|-----|-----------|-----|-------|
| 6PE9 | D_HIS_195 | NE2 | D_ASP_191 | OD1 | 3.868 |
| 6PE9 | D_LYS_196 | NZ  | D_GLU_219 | OE1 | 3.644 |
| 6PE9 | D_LYS_196 | NZ  | D_GLU_219 | OE2 | 3.664 |
| 6PE9 | E_LYS_13  | NZ  | G_GLU_107 | OE2 | 3.510 |
| 6PE9 | E_ARG_38  | NH1 | E_ASP_90  | OD1 | 3.156 |
| 6PE9 | E_ARG_38  | NH2 | E_GLU_46  | OE1 | 3.279 |
| 6PE9 | E_ARG_38  | NH2 | E_ASP_90  | OD1 | 3.604 |
| 6PE9 | E_LYS_65  | NZ  | E_ASP_62  | OD1 | 3.311 |
| 6PE9 | E_ARG_67  | NH1 | E_ASP_90  | OD1 | 3.553 |
| 6PE9 | E_ARG_67  | NH1 | E_ASP_90  | OD2 | 2.749 |
| 6PE9 | E_ARG_67  | NH2 | E_ASP_90  | OD1 | 2.879 |
| 6PE9 | E_ARG_67  | NH2 | E_ASP_90  | OD2 | 3.602 |
| 6PE9 | E_ARG_87  | NH1 | E_GLU_89  | OE1 | 2.875 |
| 6PE9 | E_ARG_98  | NH2 | E_ASP_104 | OD1 | 3.656 |
| 6PE9 | E_ARG_98  | NH2 | E_ASP_104 | OD2 | 2.618 |
| 6PE9 | E_LYS_212 | NZ  | F_GLU_129 | OE1 | 3.511 |
| 6PE9 | E_LYS_212 | NZ  | F_GLU_129 | OE2 | 3.915 |
| 6PE9 | F_LYS_36  | NZ  | U_GLU_98  | OE2 | 3.769 |
| 6PE9 | F_ARG_67  | NH2 | F_GLU_87  | OE2 | 3.406 |
| 6PE9 | F_ARG_67  | NH2 | F_ASP_88  | OD1 | 3.433 |
| 6PE9 | F_ARG_67  | NH2 | F_ASP_88  | OD2 | 3.747 |
| 6PE9 | F_ARG_148 | NH1 | F_GLU_149 | OE1 | 2.587 |
| 6PE9 | F_LYS_155 | NZ  | F_GLU_201 | OE1 | 2.986 |
| 6PE9 | F_LYS_189 | NZ  | F_GLU_193 | OE1 | 3.673 |
| 6PE9 | F_HIS_195 | ND1 | F_ASP_157 | OD2 | 2.583 |
| 6PE9 | F_ARG_217 | NH1 | F_GLU_193 | OE2 | 2.594 |
| 6PE9 | F_ARG_217 | NH2 | F_GLU_193 | OE2 | 3.577 |
| 6PE9 | G_ARG_73  | NH1 | J_GLU_74  | OE1 | 3.140 |
| 6PE9 | G_ARG_73  | NH2 | J_GLU_74  | OE1 | 2.423 |
| 6PE9 | G_ARG_73  | NH2 | J_GLU_74  | OE2 | 3.851 |
| 6PE9 | G_LYS_94  | NZ  | D_ASP_97  | OD1 | 2.957 |
| 6PE9 | G_HIS_110 | ND1 | G_ASP_140 | OD1 | 3.723 |
| 6PE9 | G_HIS_110 | ND1 | G_ASP_140 | OD2 | 3.419 |
| 6PE9 | G_HIS_110 | NE2 | G_ASP_140 | OD2 | 3.595 |
| 6PE9 | H_ARG_38  | NH1 | H_ASP_90  | OD1 | 2.812 |
| 6PE9 | H_ARG_38  | NH2 | H_GLU_46  | OE1 | 3.356 |
| 6PE9 | H_ARG_38  | NH2 | H_ASP_90  | OD1 | 3.422 |
| 6PE9 | H_ARG_67  | NH1 | H_ASP_90  | OD1 | 3.929 |
| 6PE9 | H_ARG_67  | NH1 | H_ASP_90  | OD2 | 2.687 |
| 6PE9 | H_ARG_67  | NH2 | H_ASP_90  | OD1 | 3.445 |
| 6PE9 | H_ARG_67  | NH2 | H_ASP_90  | OD2 | 3.625 |
| 6PE9 | H_ARG_98  | NH2 | H_ASP_104 | OD1 | 3.718 |
| 6PE9 | H_ARG_98  | NH2 | H_ASP_104 | OD2 | 3.048 |
| 6PE9 | I_LYS_29  | NZ  | U_ASP_69  | OD2 | 3.034 |
| 6PE9 | I_ARG_73  | NH1 | U_GLU_74  | OE1 | 3.681 |
| 6PE9 | I_ARG_73  | NH1 | U_GLU_74  | OE2 | 2.345 |
| 6PE9 | I_ARG_73  | NH2 | U_GLU_74  | OE2 | 3.507 |
| 6PE9 | I_LYS_    | NZ  | I_GLU_    | OE2 | 3.108 |
| 6PE9 | J_ARG_73  | NH1 | G_GLU_74  | OE1 | 3.931 |
| 6PE9 | J_ARG_73  | NH1 | G_GLU_74  | OE2 | 3.429 |
| 6PE9 | K_ARG_38  | NH1 | K_ASP_90  | OD1 | 3.525 |
| 6PE9 | K_ARG_38  | NH2 | K_GLU_46  | OE1 | 3.767 |
| 6PE9 | K_ARG_38  | NH2 | K_GLU_46  | OE2 | 3.741 |
| 6PE9 | K_LYS_65  | NZ  | K_ASP_62  | OD1 | 3.669 |
| 6PE9 | K_ARG_67  | NH1 | K_ASP_90  | OD2 | 2.819 |
| 6PE9 | K_ARG_67  | NH2 | K_ASP_90  | OD1 | 3.281 |
| 6PE9 | K_ARG_67  | NH2 | K_ASP_90  | OD2 | 2.919 |
| 6PE9 | K_ARG_98  | NH2 | K_ASP_104 | OD2 | 3.783 |

|      |           |     |           |     |       |
|------|-----------|-----|-----------|-----|-------|
| 6PE9 | L_LYS_24  | NZ  | L_ASP_76  | OD1 | 3.672 |
| 6PE9 | L_LYS_24  | NZ  | L_ASP_76  | OD2 | 3.497 |
| 6PE9 | L_ARG_67  | NH2 | L_ASP_88  | OD1 | 2.613 |
| 6PE9 | L_ARG_67  | NH2 | L_ASP_88  | OD2 | 3.007 |
| 6PE9 | L_LYS_109 | NZ  | L_GLU_111 | OE2 | 2.907 |
| 6PE9 | L_LYS_155 | NZ  | L_GLU_201 | OE1 | 3.099 |
| 6PE9 | L_LYS_155 | NZ  | L_GLU_201 | OE2 | 3.866 |
| 6PE9 | L_LYS_194 | NZ  | L_ASP_191 | OD1 | 2.988 |
| 6PE9 | L_LYS_196 | NZ  | L_GLU_219 | OE1 | 3.947 |
| 6PE9 | L_LYS_196 | NZ  | L_GLU_219 | OE2 | 3.563 |
| 6PE9 | M_LYS_24  | NZ  | M_ASP_76  | OD2 | 2.801 |
| 6PE9 | M_LYS_36  | NZ  | J_GLU_98  | OE1 | 2.716 |
| 6PE9 | M_ARG_67  | NH2 | M_GLU_87  | OE2 | 3.490 |
| 6PE9 | M_ARG_67  | NH2 | M_ASP_88  | OD1 | 2.820 |
| 6PE9 | M_ARG_67  | NH2 | M_ASP_88  | OD2 | 3.597 |
| 6PE9 | U_LYS_    | NZ  | I_ASP_    | OD2 | 3.835 |
| 6PE9 | U_LYS_    | NZ  | U_GLU_    | OE1 | 3.844 |
| 6PE9 | U_ARG_    | NH2 | I_GLU_    | OE1 | 3.379 |
| 6PE9 | U_ARG_    | NH2 | I_GLU_    | OE2 | 2.907 |
| 6PE9 | U_ARG_90  | NH2 | U_GLU_107 | OE1 | 3.607 |
| 6PE9 | U_LYS_94  | NZ  | F_ASP_97  | OD1 | 2.940 |
| 6PE9 | U_HIS_110 | ND1 | U_ASP_140 | OD1 | 3.870 |
| 6PE9 | U_HIS_110 | NE2 | U_ASP_140 | OD2 | 3.135 |
| 6PE9 | V_LYS_46  | NZ  | V_GLU_66  | OE1 | 3.793 |
| 6PE9 | V_LYS_81  | NZ  | V_ASP_100 | OD2 | 3.343 |
| 6PE9 | V_ARG_90  | NH1 | L_ASP_1   | OD1 | 3.701 |
| 6PE9 | V_ARG_90  | NH1 | V_GLU_106 | OE1 | 3.470 |
| 6PE9 | V_ARG_90  | NH1 | V_GLU_106 | OE2 | 3.555 |
| 6PE9 | V_ARG_90  | NH2 | L_ASP_1   | OD1 | 3.047 |
| 6PE9 | V_LYS_94  | NZ  | L_ASP_97  | OD1 | 3.203 |
| 6PHB | I_HIS_20  | NE2 | I_GLU_22  | OE2 | 2.552 |
| 6PHB | I_LYS_43  | NZ  | D_ASP_27  | OD2 | 2.797 |
| 6PHB | I_LYS_47  | NZ  | C_GLU_55  | OE1 | 3.460 |
| 6PHB | I_LYS_47  | NZ  | C_GLU_55  | OE2 | 3.396 |
| 6PHB | I_LYS_47  | NZ  | D_ASP_105 | OD2 | 2.626 |
| 6PHB | I_LYS_98  | NZ  | I_GLU_22  | OE1 | 3.315 |
| 6PHB | I_LYS_98  | NZ  | I_GLU_22  | OE2 | 2.997 |
| 6PHB | I_LYS_118 | NZ  | I_ASP_131 | OD1 | 2.829 |
| 6PHB | C_ARG_61  | NH2 | C_GLU_81  | OE2 | 3.398 |
| 6PHB | C_ARG_61  | NH2 | C_ASP_82  | OD1 | 2.798 |
| 6PHB | C_ARG_61  | NH2 | C_ASP_82  | OD2 | 3.548 |
| 6PHB | C_ARG_95  | NH1 | I_ASP_28  | OD2 | 3.551 |
| 6PHB | C_ARG_95  | NH1 | I_GLU_39  | OE2 | 3.728 |
| 6PHB | C_LYS_104 | NZ  | C_GLU_166 | OE2 | 2.738 |
| 6PHB | C_LYS_150 | NZ  | C_GLU_196 | OE1 | 2.587 |
| 6PHB | C_LYS_150 | NZ  | C_GLU_196 | OE2 | 3.892 |
| 6PHB | C_LYS_189 | NZ  | C_ASP_186 | OD1 | 3.064 |
| 6PHB | C_ARG_212 | NH1 | C_GLU_188 | OE1 | 3.096 |
| 6PHB | D_ARG_38  | NH1 | D_ASP_89  | OD1 | 2.792 |
| 6PHB | D_ARG_38  | NH2 | D_GLU_46  | OE1 | 3.039 |
| 6PHB | D_ARG_38  | NH2 | D_GLU_46  | OE2 | 3.983 |
| 6PHB | D_ARG_38  | NH2 | D_ASP_89  | OD1 | 3.789 |
| 6PHB | D_ARG_50  | NH1 | I_GLU_39  | OE2 | 3.791 |
| 6PHB | D_ARG_50  | NH2 | I_GLU_39  | OE2 | 2.945 |
| 6PHB | D_ARG_66  | NH1 | D_ASP_89  | OD1 | 3.229 |
| 6PHB | D_ARG_66  | NH1 | D_ASP_89  | OD2 | 3.729 |
| 6PHB | D_ARG_66  | NH2 | D_ASP_89  | OD1 | 3.250 |
| 6PHB | D_ARG_66  | NH2 | D_ASP_89  | OD2 | 2.491 |

|      |           |     |           |     |       |
|------|-----------|-----|-----------|-----|-------|
| 6PHB | D_LYS_147 | NZ  | D_ASP_148 | OD1 | 3.275 |
| 6PHB | D_LYS_147 | NZ  | D_ASP_148 | OD2 | 3.674 |
| 6PHB | D_LYS_213 | NZ  | C_GLU_124 | OE1 | 2.534 |
| 6PHB | D_LYS_213 | NZ  | C_GLU_124 | OE2 | 3.508 |
| 6PHB | E_HIS_20  | NE2 | E_GLU_22  | OE1 | 2.558 |
| 6PHB | E_LYS_43  | NZ  | B_ASP_27  | OD2 | 3.033 |
| 6PHB | E_LYS_47  | NZ  | A_GLU_55  | OE1 | 3.560 |
| 6PHB | E_LYS_47  | NZ  | A_GLU_55  | OE2 | 3.516 |
| 6PHB | E_LYS_47  | NZ  | B_ASP_105 | OD1 | 2.522 |
| 6PHB | E_LYS_98  | NZ  | E_GLU_22  | OE1 | 3.054 |
| 6PHB | E_LYS_98  | NZ  | E_GLU_22  | OE2 | 3.330 |
| 6PHB | E_LYS_118 | NZ  | E_ASP_131 | OD1 | 2.740 |
| 6PHB | E_LYS_142 | NZ  | E_GLU_145 | OE2 | 3.699 |
| 6PHB | A_ARG_61  | NH2 | A_GLU_81  | OE2 | 3.390 |
| 6PHB | A_ARG_61  | NH2 | A_ASP_82  | OD1 | 2.898 |
| 6PHB | A_ARG_61  | NH2 | A_ASP_82  | OD2 | 3.663 |
| 6PHB | A_ARG_95  | NH1 | E_ASP_28  | OD1 | 3.463 |
| 6PHB | A_ARG_95  | NH1 | E_GLU_39  | OE2 | 3.694 |
| 6PHB | A_LYS_104 | NZ  | A_GLU_166 | OE1 | 2.724 |
| 6PHB | A_LYS_150 | NZ  | A_GLU_196 | OE1 | 2.544 |
| 6PHB | A_LYS_150 | NZ  | A_GLU_196 | OE2 | 3.867 |
| 6PHB | A_LYS_189 | NZ  | A_ASP_186 | OD1 | 3.061 |
| 6PHB | A_ARG_212 | NH2 | A_GLU_188 | OE2 | 2.964 |
| 6PHB | B_ARG_38  | NH1 | B_ASP_89  | OD1 | 2.781 |
| 6PHB | B_ARG_38  | NH2 | B_GLU_46  | OE1 | 3.033 |
| 6PHB | B_ARG_38  | NH2 | B_GLU_46  | OE2 | 3.957 |
| 6PHB | B_ARG_38  | NH2 | B_ASP_89  | OD1 | 3.799 |
| 6PHB | B_ARG_50  | NH1 | E_GLU_39  | OE2 | 3.771 |
| 6PHB | B_ARG_50  | NH2 | E_GLU_39  | OE2 | 2.963 |
| 6PHB | B_ARG_66  | NH1 | B_ASP_89  | OD1 | 3.245 |
| 6PHB | B_ARG_66  | NH1 | B_ASP_89  | OD2 | 3.725 |
| 6PHB | B_ARG_66  | NH2 | B_ASP_89  | OD1 | 3.258 |
| 6PHB | B_ARG_66  | NH2 | B_ASP_89  | OD2 | 2.482 |
| 6PHB | B_LYS_147 | NZ  | B_ASP_148 | OD1 | 3.294 |
| 6PHB | B_LYS_147 | NZ  | B_ASP_148 | OD2 | 3.635 |
| 6PHB | B_LYS_213 | NZ  | A_GLU_124 | OE1 | 3.629 |
| 6PHB | B_LYS_213 | NZ  | A_GLU_124 | OE2 | 2.552 |
| 6PHC | I_LYS_2   | NZ  | A_GLU_96  | OE1 | 3.433 |
| 6PHC | I_HIS_20  | NE2 | I_GLU_22  | OE2 | 2.559 |
| 6PHC | I_LYS_40  | NZ  | I_ASP_28  | OD1 | 2.981 |
| 6PHC | I_LYS_40  | NZ  | I_ASP_28  | OD2 | 3.595 |
| 6PHC | I_LYS_98  | NZ  | I_GLU_22  | OE2 | 3.581 |
| 6PHC | I_LYS_139 | NZ  | I_ASP_6   | OD1 | 2.833 |
| 6PHC | A_ARG_38  | NH1 | A_ASP_86  | OD1 | 2.881 |
| 6PHC | A_ARG_38  | NH2 | A_GLU_46  | OE1 | 3.768 |
| 6PHC | A_ARG_38  | NH2 | A_GLU_46  | OE2 | 2.978 |
| 6PHC | A_ARG_38  | NH2 | A_ASP_86  | OD1 | 3.793 |
| 6PHC | A_LYS_64  | NZ  | A_ASP_61  | OD2 | 2.874 |
| 6PHC | A_ARG_66  | NH1 | A_ASP_86  | OD1 | 3.869 |
| 6PHC | A_ARG_66  | NH2 | A_ASP_86  | OD1 | 3.269 |
| 6PHC | A_ARG_66  | NH2 | A_ASP_86  | OD2 | 2.372 |
| 6PHC | A_ARG_94  | NH2 | A_ASP_101 | OD1 | 3.528 |
| 6PHC | A_ARG_94  | NH2 | A_ASP_101 | OD2 | 2.665 |
| 6PHC | A_LYS_143 | NZ  | A_ASP_144 | OD1 | 3.692 |
| 6PHC | A_LYS_206 | NZ  | A_ASP_208 | OD1 | 2.966 |
| 6PHC | A_LYS_206 | NZ  | A_ASP_208 | OD2 | 3.137 |
| 6PHC | A_LYS_209 | NZ  | B_GLU_122 | OE2 | 3.367 |
| 6PHC | A_LYS_210 | NZ  | A_GLU_212 | OE2 | 2.900 |

|      |           |     |           |     |       |
|------|-----------|-----|-----------|-----|-------|
| 6PHC | B_ARG_24  | NH1 | B_ASP_70  | OD1 | 3.336 |
| 6PHC | B_ARG_61  | NH1 | B_ASP_82  | OD1 | 3.307 |
| 6PHC | B_ARG_61  | NH1 | B_ASP_82  | OD2 | 2.292 |
| 6PHC | B_ARG_61  | NH2 | B_GLU_81  | OE2 | 3.528 |
| 6PHC | B_ARG_61  | NH2 | B_ASP_82  | OD1 | 3.098 |
| 6PHC | B_ARG_61  | NH2 | B_ASP_82  | OD2 | 3.416 |
| 6PHC | B_ARG_102 | NH1 | B_GLU_164 | OE1 | 2.853 |
| 6PHC | B_LYS_106 | NZ  | B_GLU_17  | OE2 | 3.611 |
| 6PHC | B_ARG_141 | NH1 | B_GLU_104 | OE1 | 3.956 |
| 6PHC | B_ARG_141 | NH2 | B_GLU_104 | OE1 | 2.662 |
| 6PHC | B_ARG_141 | NH2 | B_GLU_104 | OE2 | 2.894 |
| 6PHC | B_LYS_148 | NZ  | B_GLU_194 | OE1 | 2.588 |
| 6PHC | B_LYS_187 | NZ  | B_ASP_184 | OD1 | 3.568 |
| 6PHC | E_LYS_2   | NZ  | C_GLU_96  | OE2 | 3.166 |
| 6PHC | E_HIS_20  | NE2 | E_GLU_22  | OE2 | 2.761 |
| 6PHC | E_LYS_118 | NZ  | E_ASP_131 | OD1 | 3.884 |
| 6PHC | E_LYS_118 | NZ  | E_ASP_131 | OD2 | 3.881 |
| 6PHC | E_LYS_139 | NZ  | E_ASP_6   | OD1 | 2.752 |
| 6PHC | E_LYS_139 | NZ  | E_ASP_6   | OD2 | 3.907 |
| 6PHC | E_LYS_155 | NZ  | E_ASP_157 | OD2 | 3.939 |
| 6PHC | C_ARG_38  | NH1 | C_ASP_86  | OD1 | 2.792 |
| 6PHC | C_ARG_38  | NH2 | C_GLU_46  | OE1 | 3.747 |
| 6PHC | C_ARG_38  | NH2 | C_GLU_46  | OE2 | 2.839 |
| 6PHC | C_ARG_38  | NH2 | C_ASP_86  | OD1 | 3.865 |
| 6PHC | C_LYS_64  | NZ  | C_ASP_61  | OD1 | 3.164 |
| 6PHC | C_ARG_66  | NH2 | C_ASP_86  | OD1 | 3.190 |
| 6PHC | C_ARG_66  | NH2 | C_ASP_86  | OD2 | 2.357 |
| 6PHC | C_LYS_75  | NZ  | A_GLU_1   | OE1 | 3.102 |
| 6PHC | C_ARG_94  | NH2 | C_ASP_101 | OD1 | 3.594 |
| 6PHC | C_ARG_94  | NH2 | C_ASP_101 | OD2 | 2.564 |
| 6PHC | C_LYS_143 | NZ  | C_ASP_144 | OD1 | 3.602 |
| 6PHC | C_LYS_143 | NZ  | C_ASP_144 | OD2 | 3.997 |
| 6PHC | C_LYS_209 | NZ  | D_GLU_122 | OE2 | 3.075 |
| 6PHC | D_ARG_24  | NH1 | D_ASP_70  | OD1 | 2.338 |
| 6PHC | D_ARG_24  | NH1 | D_ASP_70  | OD2 | 2.957 |
| 6PHC | D_ARG_24  | NH2 | D_ASP_70  | OD1 | 3.768 |
| 6PHC | D_ARG_61  | NH2 | D_GLU_81  | OE2 | 3.370 |
| 6PHC | D_ARG_61  | NH2 | D_ASP_82  | OD1 | 3.166 |
| 6PHC | D_ARG_61  | NH2 | D_ASP_82  | OD2 | 3.703 |
| 6PHC | D_LYS_106 | NZ  | D_GLU_17  | OE2 | 3.862 |
| 6PHC | D_ARG_141 | NH1 | D_GLU_104 | OE1 | 3.512 |
| 6PHC | D_ARG_141 | NH1 | D_GLU_104 | OE2 | 3.995 |
| 6PHC | D_ARG_141 | NH2 | D_GLU_104 | OE1 | 3.237 |
| 6PHC | D_ARG_141 | NH2 | D_GLU_104 | OE2 | 2.397 |
| 6PHC | D_LYS_187 | NZ  | D_ASP_184 | OD1 | 3.752 |
| 6PHD | H_HIS_3   | NE2 | H_GLU_1   | OE1 | 3.723 |
| 6PHD | H_HIS_3   | NE2 | H_GLU_1   | OE2 | 3.479 |
| 6PHD | H_ARG_38  | NH1 | H_ASP_92  | OD1 | 3.022 |
| 6PHD | H_ARG_38  | NH2 | H_GLU_46  | OE1 | 3.293 |
| 6PHD | H_ARG_38  | NH2 | H_GLU_46  | OE2 | 3.635 |
| 6PHD | H_ARG_38  | NH2 | H_ASP_92  | OD1 | 3.809 |
| 6PHD | H_ARG_50  | NH1 | H_ASP_35  | OD1 | 3.977 |
| 6PHD | H_ARG_50  | NH1 | H_ASP_35  | OD2 | 3.398 |
| 6PHD | H_ARG_52  | NH1 | H_ASP_61  | OD2 | 3.597 |
| 6PHD | H_ARG_52  | NH2 | H_ASP_61  | OD2 | 3.257 |
| 6PHD | H_ARG_52  | NH2 | C_ASP_131 | OD2 | 3.559 |
| 6PHD | H_ARG_69  | NH1 | H_ASP_92  | OD1 | 3.736 |
| 6PHD | H_ARG_69  | NH1 | H_ASP_92  | OD2 | 2.629 |

|      |           |     |           |     |       |
|------|-----------|-----|-----------|-----|-------|
| 6PHD | H_ARG_69  | NH2 | H_ASP_92  | OD1 | 3.118 |
| 6PHD | H_ARG_69  | NH2 | H_ASP_92  | OD2 | 3.528 |
| 6PHD | H_ARG_74  | NH2 | H_ASP_76  | OD1 | 3.389 |
| 6PHD | H_ARG_100 | NH2 | H_ASP_116 | OD1 | 3.601 |
| 6PHD | H_ARG_100 | NH2 | H_ASP_116 | OD2 | 2.413 |
| 6PHD | H_ARG_107 | NH1 | H_GLU_106 | OE2 | 3.946 |
| 6PHD | H_LYS_158 | NZ  | L_GLU_128 | OE2 | 2.649 |
| 6PHD | H_LYS_224 | NZ  | L_GLU_127 | OE1 | 2.532 |
| 6PHD | H_LYS_224 | NZ  | L_GLU_127 | OE2 | 2.992 |
| 6PHD | H_LYS_225 | NZ  | H_GLU_227 | OE2 | 3.183 |
| 6PHD | L_ARG_61  | NH2 | L_GLU_81  | OE1 | 3.579 |
| 6PHD | L_ARG_61  | NH2 | L_ASP_82  | OD1 | 3.221 |
| 6PHD | L_ARG_61  | NH2 | L_ASP_82  | OD2 | 3.791 |
| 6PHD | L_LYS_106 | NZ  | L_ASP_85  | OD1 | 3.546 |
| 6PHD | L_LYS_114 | NZ  | L_GLU_202 | OE1 | 3.497 |
| 6PHD | L_HIS_192 | ND1 | L_ASP_155 | OD2 | 4.000 |
| 6PHD | C_ARG_11  | NH1 | C_GLU_39  | OE2 | 3.811 |
| 6PHD | C_ARG_11  | NH2 | C_GLU_39  | OE1 | 3.053 |
| 6PHD | C_ARG_11  | NH2 | C_GLU_39  | OE2 | 3.487 |
| 6PHD | C_HIS_20  | NE2 | C_GLU_22  | OE1 | 3.024 |
| 6PHD | C_LYS_90  | NZ  | C_ASP_78  | OD2 | 3.307 |
| 6PHD | C_LYS_98  | NZ  | C_GLU_22  | OE1 | 2.852 |
| 6PHD | C_LYS_98  | NZ  | C_GLU_22  | OE2 | 3.209 |
| 6PHD | C_LYS_118 | NZ  | H_ASP_109 | OD1 | 3.874 |
| 6PHD | C_LYS_118 | NZ  | C_ASP_131 | OD1 | 3.023 |
| 6PHD | C_LYS_127 | NZ  | C_ASP_124 | OD1 | 3.895 |
| 6PHD | C_LYS_135 | NZ  | L_ASP_51  | OD2 | 3.166 |
| 6PHD | C_LYS_139 | NZ  | C_ASP_6   | OD1 | 3.503 |
| 6PHD | C_LYS_148 | NZ  | C_ASP_157 | OD2 | 3.726 |
| 6PHD | C_LYS_148 | NZ  | C_ASP_160 | OD1 | 3.495 |
| 6PHF | A_ARG_12  | NH2 | A_GLU_10  | OE1 | 2.765 |
| 6PHF | A_ARG_38  | NH1 | A_ASP_90  | OD1 | 3.178 |
| 6PHF | A_ARG_38  | NH2 | A_GLU_46  | OE1 | 3.769 |
| 6PHF | A_ARG_38  | NH2 | A_GLU_89  | OE1 | 3.880 |
| 6PHF | A_ARG_38  | NH2 | A_GLU_89  | OE2 | 3.467 |
| 6PHF | A_LYS_63  | NZ  | A_GLU_46  | OE2 | 2.996 |
| 6PHF | A_LYS_63  | NZ  | C_GLU_89  | OE2 | 2.941 |
| 6PHF | A_ARG_67  | NH1 | A_ASP_90  | OD1 | 3.640 |
| 6PHF | A_ARG_67  | NH2 | A_ASP_90  | OD1 | 3.213 |
| 6PHF | A_ARG_67  | NH2 | A_ASP_90  | OD2 | 2.825 |
| 6PHF | A_ARG_87  | NH2 | A_GLU_89  | OE1 | 3.635 |
| 6PHF | A_ARG_98  | NH1 | A_ASP_108 | OD1 | 3.223 |
| 6PHF | A_ARG_98  | NH1 | A_ASP_108 | OD2 | 2.645 |
| 6PHF | A_ARG_98  | NH2 | A_ASP_108 | OD2 | 3.048 |
| 6PHF | A_LYS_150 | NZ  | B_GLU_123 | OE1 | 3.782 |
| 6PHF | A_LYS_216 | NZ  | B_GLU_122 | OE1 | 2.642 |
| 6PHF | A_LYS_216 | NZ  | B_GLU_122 | OE2 | 2.832 |
| 6PHF | G_HIS_20  | NE2 | G_GLU_22  | OE2 | 2.627 |
| 6PHF | G_LYS_72  | NZ  | G_ASP_78  | OD1 | 3.015 |
| 6PHF | G_LYS_98  | NZ  | G_GLU_22  | OE1 | 3.385 |
| 6PHF | G_LYS_98  | NZ  | G_GLU_22  | OE2 | 2.989 |
| 6PHF | G_LYS_118 | NZ  | G_ASP_131 | OD1 | 2.874 |
| 6PHF | G_LYS_130 | NZ  | A_GLU_59  | OE2 | 2.793 |
| 6PHF | G_LYS_135 | NZ  | B_ASP_48  | OD1 | 3.917 |
| 6PHF | G_LYS_135 | NZ  | B_ASP_48  | OD2 | 2.691 |
| 6PHF | G_LYS_148 | NZ  | G_ASP_160 | OD1 | 2.301 |
| 6PHF | G_LYS_148 | NZ  | G_ASP_160 | OD2 | 3.905 |
| 6PHF | B_LYS_28  | NZ  | B_ASP_89  | OD2 | 3.634 |

|      |           |     |           |     |       |
|------|-----------|-----|-----------|-----|-------|
| 6PHF | B.LYS_50  | NZ  | G_ASP_160 | OD1 | 3.948 |
| 6PHF | B.LYS_50  | NZ  | G_ASP_160 | OD2 | 3.455 |
| 6PHF | B_ARG_58  | NH1 | B_ASP_79  | OD2 | 3.097 |
| 6PHF | B_ARG_58  | NH2 | B_ASP_79  | OD1 | 3.588 |
| 6PHF | B_ARG_58  | NH2 | B_ASP_79  | OD2 | 3.661 |
| 6PHF | B.LYS_165 | NZ  | B_GLU_80  | OE1 | 2.830 |
| 6PHF | C_ARG_12  | NH2 | C_GLU_10  | OE1 | 2.671 |
| 6PHF | C_ARG_38  | NH1 | C_ASP_90  | OD1 | 3.218 |
| 6PHF | C.LYS_63  | NZ  | A_GLU_89  | OE2 | 3.050 |
| 6PHF | C.LYS_63  | NZ  | C_GLU_46  | OE2 | 3.084 |
| 6PHF | C_ARG_67  | NH2 | C_ASP_90  | OD1 | 3.179 |
| 6PHF | C_ARG_87  | NH1 | C_GLU_89  | OE1 | 3.091 |
| 6PHF | C_ARG_87  | NH2 | C_GLU_89  | OE1 | 2.353 |
| 6PHF | C_ARG_87  | NH2 | C_ASP_90  | OD1 | 3.900 |
| 6PHF | C_ARG_98  | NH2 | C_ASP_108 | OD2 | 3.438 |
| 6PHF | C.LYS_150 | NZ  | D_GLU_123 | OE2 | 2.663 |
| 6PHF | C.LYS_216 | NZ  | D_GLU_122 | OE1 | 2.759 |
| 6PHF | C.LYS_216 | NZ  | D_GLU_122 | OE2 | 3.120 |
| 6PHF | E.HIS_20  | NE2 | E_GLU_22  | OE1 | 3.442 |
| 6PHF | E.LYS_72  | NZ  | E_ASP_78  | OD1 | 3.439 |
| 6PHF | E.LYS_98  | NZ  | E_GLU_22  | OE1 | 2.929 |
| 6PHF | E.LYS_98  | NZ  | E_GLU_22  | OE2 | 3.612 |
| 6PHF | E.LYS_118 | NZ  | E_ASP_131 | OD1 | 2.864 |
| 6PHF | E.LYS_130 | NZ  | C_GLU_59  | OE2 | 2.474 |
| 6PHF | E.LYS_135 | NZ  | D_ASP_48  | OD1 | 3.909 |
| 6PHF | E.LYS_135 | NZ  | D_ASP_48  | OD2 | 2.579 |
| 6PHF | E.LYS_139 | NZ  | E_ASP_6   | OD1 | 2.802 |
| 6PHF | D.LYS_24  | NZ  | D_ASP_23  | OD1 | 3.810 |
| 6PHF | D.LYS_28  | NZ  | D_ASP_89  | OD1 | 3.365 |
| 6PHF | D_ARG_58  | NH2 | D_ASP_79  | OD1 | 2.632 |
| 6PHF | D_ARG_58  | NH2 | D_ASP_79  | OD2 | 2.899 |
| 6PHG | A_ARG_38  | NH1 | A_ASP_90  | OD1 | 2.955 |
| 6PHG | A_ARG_38  | NH2 | A_GLU_46  | OE1 | 3.239 |
| 6PHG | A_ARG_38  | NH2 | A_ASP_90  | OD1 | 3.782 |
| 6PHG | A.LYS_65  | NZ  | A_ASP_62  | OD1 | 3.774 |
| 6PHG | A_ARG_67  | NH1 | A_ASP_90  | OD1 | 3.754 |
| 6PHG | A_ARG_67  | NH1 | A_ASP_90  | OD2 | 2.801 |
| 6PHG | A_ARG_67  | NH2 | A_ASP_90  | OD1 | 2.872 |
| 6PHG | A_ARG_67  | NH2 | A_ASP_90  | OD2 | 3.428 |
| 6PHG | A.LYS_76  | NZ  | A_ASP_73  | OD2 | 3.739 |
| 6PHG | A_ARG_98  | NH2 | A_ASP_113 | OD1 | 3.705 |
| 6PHG | A_ARG_98  | NH2 | A_ASP_113 | OD2 | 2.616 |
| 6PHG | A.LYS_155 | NZ  | A_ASP_156 | OD1 | 3.341 |
| 6PHG | A.LYS_155 | NZ  | A_ASP_156 | OD2 | 2.879 |
| 6PHG | A.LYS_221 | NZ  | B_GLU_126 | OE2 | 3.079 |
| 6PHG | A.LYS_222 | NZ  | A_GLU_224 | OE1 | 3.525 |
| 6PHG | B_ARG_65  | NH1 | B_GLU_83  | OE1 | 3.253 |
| 6PHG | B_ARG_65  | NH1 | B_GLU_83  | OE2 | 3.558 |
| 6PHG | B_ARG_65  | NH2 | B_GLU_83  | OE1 | 3.939 |
| 6PHG | B_ARG_65  | NH2 | B_ASP_86  | OD1 | 2.611 |
| 6PHG | B_ARG_65  | NH2 | B_ASP_86  | OD2 | 2.992 |
| 6PHG | B_ARG_81  | NH2 | B_GLU_83  | OE2 | 2.886 |
| 6PHG | B_ARG_106 | NH1 | B_GLU_168 | OE2 | 3.259 |
| 6PHG | B.LYS_152 | NZ  | B_GLU_198 | OE1 | 3.024 |
| 6PHG | B.LYS_191 | NZ  | B_ASP_188 | OD1 | 3.125 |
| 6PHG | B_ARG_214 | NH1 | B_GLU_190 | OE1 | 3.537 |
| 6PHH | C_ARG_38  | NH1 | C_ASP_90  | OD1 | 2.886 |
| 6PHH | C_ARG_38  | NH2 | C_GLU_46  | OE1 | 3.069 |

|      |           |     |           |     |       |
|------|-----------|-----|-----------|-----|-------|
| 6PHH | C_ARG_38  | NH2 | C_GLU_46  | OE2 | 3.921 |
| 6PHH | C_ARG_38  | NH2 | C_ASP_90  | OD1 | 3.682 |
| 6PHH | C_ARG_67  | NH1 | C_ASP_90  | OD1 | 3.146 |
| 6PHH | C_ARG_67  | NH1 | C_ASP_90  | OD2 | 3.531 |
| 6PHH | C_ARG_67  | NH2 | C_ASP_90  | OD1 | 3.933 |
| 6PHH | C_ARG_67  | NH2 | C_ASP_90  | OD2 | 2.855 |
| 6PHH | C_LYS_76  | NZ  | A_GLU_1   | OE1 | 3.897 |
| 6PHH | C_ARG_98  | NH2 | C_ASP_113 | OD1 | 3.626 |
| 6PHH | C_ARG_98  | NH2 | C_ASP_113 | OD2 | 2.534 |
| 6PHH | C_LYS_155 | NZ  | C_ASP_156 | OD1 | 3.705 |
| 6PHH | D_ARG_58  | NH2 | D_ASP_64  | OD1 | 3.542 |
| 6PHH | D_ARG_65  | NH2 | D_ASP_86  | OD1 | 2.596 |
| 6PHH | D_ARG_65  | NH2 | D_ASP_86  | OD2 | 2.751 |
| 6PHH | D_ARG_106 | NH1 | D_GLU_168 | OE1 | 3.672 |
| 6PHH | D_ARG_106 | NH1 | D_GLU_168 | OE2 | 2.329 |
| 6PHH | A_ARG_38  | NH1 | A_ASP_90  | OD1 | 2.820 |
| 6PHH | A_ARG_38  | NH2 | A_GLU_46  | OE1 | 2.997 |
| 6PHH | A_ARG_38  | NH2 | A_GLU_46  | OE2 | 3.785 |
| 6PHH | A_ARG_38  | NH2 | A_ASP_90  | OD1 | 3.734 |
| 6PHH | A_LYS_65  | NZ  | A_ASP_62  | OD1 | 2.552 |
| 6PHH | A_ARG_67  | NH1 | A_ASP_90  | OD1 | 3.908 |
| 6PHH | A_ARG_67  | NH1 | A_ASP_90  | OD2 | 2.904 |
| 6PHH | A_ARG_67  | NH2 | A_ASP_90  | OD1 | 3.309 |
| 6PHH | A_ARG_67  | NH2 | A_ASP_90  | OD2 | 3.733 |
| 6PHH | A_LYS_76  | NZ  | C_GLU_1   | OE1 | 3.451 |
| 6PHH | A_ARG_98  | NH2 | A_GLU_100 | OE1 | 3.744 |
| 6PHH | A_ARG_98  | NH2 | A_ASP_113 | OD1 | 3.536 |
| 6PHH | A_ARG_98  | NH2 | A_ASP_113 | OD2 | 2.500 |
| 6PHH | A_LYS_218 | NZ  | A_ASP_220 | OD1 | 2.774 |
| 6PHH | A_LYS_218 | NZ  | A_ASP_220 | OD2 | 3.847 |
| 6PHH | A_LYS_221 | NZ  | B_GLU_126 | OE2 | 3.327 |
| 6PHH | B_ARG_24  | NH1 | B_ASP_74  | OD1 | 3.370 |
| 6PHH | B_ARG_24  | NH1 | B_ASP_74  | OD2 | 3.208 |
| 6PHH | B_ARG_24  | NH2 | B_ASP_74  | OD1 | 3.944 |
| 6PHH | B_ARG_58  | NH2 | B_ASP_64  | OD1 | 3.009 |
| 6PHH | B_ARG_65  | NH2 | B_ASP_86  | OD1 | 2.841 |
| 6PHH | B_ARG_65  | NH2 | B_ASP_86  | OD2 | 2.510 |
| 6PHH | B_ARG_106 | NH1 | B_GLU_168 | OE2 | 2.682 |
| 6PHH | B_ARG_214 | NH1 | B_GLU_190 | OE1 | 3.673 |
| 6PI7 | A_HIS_317 | NE2 | A_GLU_316 | OE1 | 3.899 |
| 6PI7 | A_HIS_320 | ND1 | A_GLU_316 | OE2 | 2.374 |
| 6PI7 | A_HIS_320 | NE2 | A_GLU_418 | OE2 | 2.831 |
| 6PI7 | A_HIS_355 | ND1 | A_ASP_358 | OD1 | 3.681 |
| 6PI7 | A_HIS_355 | ND1 | A_ASP_358 | OD2 | 2.824 |
| 6PI7 | A_ARG_372 | NH2 | A_ASP_390 | OD1 | 2.751 |
| 6PI7 | A_ARG_372 | NH2 | A_ASP_390 | OD2 | 3.246 |
| 6PI7 | A_ARG_406 | NH2 | A_ASP_408 | OD1 | 3.871 |
| 6PI7 | A_ARG_406 | NH2 | A_ASP_408 | OD2 | 2.514 |
| 6PI7 | A_ARG_423 | NH1 | A_GLU_494 | OE1 | 3.880 |
| 6PI7 | A_HIS_444 | NE2 | A_ASP_473 | OD2 | 2.887 |
| 6PI7 | A_LYS_449 | NZ  | A_ASP_447 | OD2 | 3.499 |
| 6PI7 | A_LYS_489 | NZ  | A_GLU_485 | OE1 | 2.489 |
| 6PI7 | B_ARG_62  | NH2 | B_ASP_83  | OD1 | 2.896 |
| 6PI7 | B_ARG_62  | NH2 | B_ASP_83  | OD2 | 3.659 |
| 6PI7 | B_ARG_67  | NH2 | A_GLU_345 | OE2 | 3.601 |
| 6PI7 | C_ARG_41  | NH1 | C_GLU_49  | OE1 | 3.463 |
| 6PI7 | C_ARG_41  | NH1 | C_GLU_49  | OE2 | 3.574 |
| 6PI7 | C_ARG_41  | NH1 | C_ASP_93  | OD1 | 3.486 |



|      |           |     |           |     |       |
|------|-----------|-----|-----------|-----|-------|
| 6PI7 | C_ARG_41  | NH2 | C_ASP_93  | OD1 | 3.043 |
| 6PI7 | C_ARG_70  | NH1 | C_ASP_93  | OD1 | 3.039 |
| 6PI7 | C_ARG_70  | NH1 | C_ASP_93  | OD2 | 3.416 |
| 6PI7 | C_ARG_70  | NH2 | C_ASP_93  | OD1 | 3.898 |
| 6PI7 | C_ARG_70  | NH2 | C_ASP_93  | OD2 | 3.164 |
| 6PI7 | C_ARG_101 | NH2 | C_ASP_115 | OD1 | 3.986 |
| 6PI7 | C_ARG_101 | NH2 | C_ASP_115 | OD2 | 2.837 |
| 6PI7 | C_HIS_103 | NE2 | C_ASP_115 | OD2 | 3.124 |
| 6PI7 | C_ARG_105 | NH1 | A_ASP_334 | OD1 | 2.888 |
| 6PI7 | D_HIS_317 | NE2 | D_GLU_316 | OE1 | 3.914 |
| 6PI7 | D_HIS_320 | ND1 | D_GLU_316 | OE2 | 2.372 |
| 6PI7 | D_HIS_320 | NE2 | D_GLU_418 | OE2 | 2.836 |
| 6PI7 | D_HIS_355 | ND1 | D_ASP_358 | OD2 | 3.434 |
| 6PI7 | D_ARG_372 | NH2 | D_ASP_390 | OD1 | 2.758 |
| 6PI7 | D_ARG_372 | NH2 | D_ASP_390 | OD2 | 3.271 |
| 6PI7 | D_ARG_406 | NH2 | D_ASP_408 | OD1 | 3.860 |
| 6PI7 | D_ARG_406 | NH2 | D_ASP_408 | OD2 | 2.528 |
| 6PI7 | D_ARG_423 | NH1 | D_GLU_494 | OE1 | 3.849 |
| 6PI7 | D_HIS_444 | NE2 | D_ASP_473 | OD2 | 2.883 |
| 6PI7 | D_LYS_449 | NZ  | D_ASP_447 | OD2 | 3.509 |
| 6PI7 | E_ARG_62  | NH2 | E_ASP_83  | OD1 | 2.890 |
| 6PI7 | E_ARG_62  | NH2 | E_ASP_83  | OD2 | 3.662 |
| 6PI7 | E_LYS_104 | NZ  | E_GLU_106 | OE2 | 3.467 |
| 6PI7 | E_LYS_150 | NZ  | E_GLU_196 | OE1 | 3.393 |
| 6PI7 | E_LYS_150 | NZ  | E_GLU_196 | OE2 | 3.111 |
| 6PI7 | F_ARG_41  | NH1 | F_GLU_49  | OE1 | 3.460 |
| 6PI7 | F_ARG_41  | NH1 | F_GLU_49  | OE2 | 3.581 |
| 6PI7 | F_ARG_41  | NH1 | F_ASP_93  | OD1 | 3.467 |
| 6PI7 | F_ARG_41  | NH2 | F_ASP_93  | OD1 | 3.047 |
| 6PI7 | F_ARG_70  | NH1 | F_ASP_93  | OD1 | 3.056 |
| 6PI7 | F_ARG_70  | NH1 | F_ASP_93  | OD2 | 3.386 |
| 6PI7 | F_ARG_70  | NH2 | F_ASP_93  | OD1 | 3.902 |
| 6PI7 | F_ARG_70  | NH2 | F_ASP_93  | OD2 | 3.180 |
| 6PI7 | F_ARG_101 | NH2 | F_ASP_115 | OD1 | 3.992 |
| 6PI7 | F_ARG_101 | NH2 | F_ASP_115 | OD2 | 2.859 |
| 6PI7 | F_HIS_103 | NE2 | F_ASP_115 | OD2 | 3.117 |
| 6PI7 | F_ARG_105 | NH1 | D_ASP_334 | OD1 | 3.009 |
| 6PI7 | G_ARG_4   | NH1 | A_ASP_385 | OD1 | 3.497 |
| 6PI7 | G_ARG_4   | NH1 | A_ASP_385 | OD2 | 3.823 |
| 6PI7 | G_ARG_4   | NH2 | A_ASP_385 | OD1 | 3.602 |
| 6PI7 | G_ARG_4   | NH2 | A_ASP_385 | OD2 | 3.033 |
| 6PI7 | G_ARG_6   | NH1 | A_GLU_433 | OE2 | 2.847 |
| 6PI7 | G_ARG_6   | NH1 | A_ASP_437 | OD1 | 3.619 |
| 6PI7 | G_ARG_6   | NH2 | A_ASP_437 | OD1 | 2.997 |
| 6PI7 | G_ARG_6   | NH2 | A_ASP_440 | OD2 | 2.762 |
| 6PYC | H_ARG_67  | NH2 | H_GLU_87  | OE2 | 3.339 |
| 6PYC | H_ARG_67  | NH2 | H_ASP_88  | OD1 | 3.284 |
| 6PYC | H_ARG_67  | NH2 | H_ASP_88  | OD2 | 3.903 |
| 6PYC | H_LYS_109 | NZ  | H_GLU_147 | OE1 | 3.975 |
| 6PYC | H_LYS_142 | NZ  | H_ASP_143 | OD1 | 3.360 |
| 6PYC | H_LYS_208 | NZ  | L_GLU_124 | OE1 | 2.557 |
| 6PYC | H_LYS_208 | NZ  | L_GLU_124 | OE2 | 3.571 |
| 6PYC | L_ARG_62  | NH2 | L_GLU_82  | OE1 | 3.870 |
| 6PYC | L_ARG_62  | NH2 | L_ASP_83  | OD1 | 2.885 |
| 6PYC | L_ARG_62  | NH2 | L_ASP_83  | OD2 | 3.362 |
| 6PYC | L_LYS_108 | NZ  | B_ASP_32  | OD1 | 2.949 |
| 6PYC | L_LYS_150 | NZ  | L_GLU_196 | OE1 | 3.695 |
| 6PYC | L_LYS_184 | NZ  | L_GLU_188 | OE1 | 2.615 |

|      |           |     |           |     |       |
|------|-----------|-----|-----------|-----|-------|
| 6PYC | L_LYS_189 | NZ  | L_ASP_186 | OD1 | 3.942 |
| 6PYC | A_ARG_38  | NH1 | A_ASP_90  | OD1 | 2.858 |
| 6PYC | A_ARG_38  | NH2 | A_GLU_46  | OE1 | 3.193 |
| 6PYC | A_ARG_38  | NH2 | A_GLU_46  | OE2 | 3.336 |
| 6PYC | A_LYS_67  | NZ  | A_ASP_90  | OD1 | 3.714 |
| 6PYC | A_LYS_67  | NZ  | A_ASP_90  | OD2 | 3.477 |
| 6PYC | A_ARG_99  | NH1 | B_ASP_91  | OD1 | 3.714 |
| 6PYC | B_LYS_53  | NZ  | L_GLU_17  | OE1 | 3.141 |
| 6PYC | B_LYS_53  | NZ  | L_GLU_17  | OE2 | 3.254 |
| 6PYC | B_ARG_61  | NH1 | B_GLU_81  | OE2 | 3.676 |
| 6PYC | B_ARG_61  | NH1 | B_ASP_82  | OD1 | 2.683 |
| 6PYC | B_ARG_61  | NH1 | B_ASP_82  | OD2 | 3.599 |
| 6PYC | B_LYS_149 | NZ  | B_GLU_195 | OE1 | 3.962 |
| 6PYC | B_LYS_149 | NZ  | B_GLU_195 | OE2 | 3.345 |
| 6PYC | B_ARG_155 | NH1 | B_GLU_185 | OE1 | 3.962 |
| 6PYC | B_ARG_155 | NH1 | B_GLU_185 | OE2 | 3.253 |
| 6PYC | B_ARG_155 | NH2 | B_GLU_185 | OE1 | 2.747 |
| 6PYC | B_ARG_155 | NH2 | B_GLU_185 | OE2 | 3.418 |
| 6PYC | B_ARG_188 | NH2 | B_GLU_185 | OE2 | 3.932 |
| 6PYC | B_LYS_199 | NZ  | B_ASP_110 | OD2 | 3.197 |
| 6PYD | H_ARG_38  | NH1 | H_ASP_89  | OD1 | 2.746 |
| 6PYD | H_ARG_38  | NH2 | H_GLU_46  | OE1 | 2.703 |
| 6PYD | H_ARG_38  | NH2 | H_ASP_89  | OD1 | 3.577 |
| 6PYD | H_ARG_66  | NH1 | H_ASP_89  | OD1 | 3.629 |
| 6PYD | H_ARG_66  | NH2 | H_ASP_89  | OD1 | 3.377 |
| 6PYD | H_ARG_66  | NH2 | H_ASP_89  | OD2 | 2.647 |
| 6PYD | H_ARG_97  | NH1 | H_ASP_27  | OD2 | 2.986 |
| 6PYD | H_ARG_97  | NH2 | H_ASP_105 | OD1 | 3.627 |
| 6PYD | H_ARG_97  | NH2 | H_ASP_105 | OD2 | 2.550 |
| 6PYD | H_LYS_147 | NZ  | H_ASP_148 | OD1 | 3.103 |
| 6PYD | H_LYS_147 | NZ  | H_ASP_148 | OD2 | 3.216 |
| 6PYD | H_LYS_213 | NZ  | L_GLU_127 | OE1 | 3.352 |
| 6PYD | L_ARG_24  | NH2 | L_ASP_74  | OD2 | 3.949 |
| 6PYD | L_ARG_65  | NH1 | L_GLU_83  | OE2 | 3.750 |
| 6PYD | L_ARG_65  | NH2 | L_GLU_83  | OE1 | 3.672 |
| 6PYD | L_ARG_65  | NH2 | L_GLU_85  | OE1 | 3.120 |
| 6PYD | L_ARG_65  | NH2 | L_ASP_86  | OD1 | 2.800 |
| 6PYD | L_ARG_65  | NH2 | L_ASP_86  | OD2 | 3.601 |
| 6PYD | L_LYS_107 | NZ  | L_GLU_169 | OE1 | 2.362 |
| 6PYD | L_HIS_193 | ND1 | L_ASP_155 | OD2 | 3.270 |
| 6PYD | A_ARG_38  | NH1 | A_ASP_89  | OD1 | 2.732 |
| 6PYD | A_ARG_38  | NH2 | A_GLU_46  | OE1 | 2.704 |
| 6PYD | A_ARG_38  | NH2 | A_ASP_89  | OD1 | 3.554 |
| 6PYD | A_ARG_66  | NH1 | A_ASP_89  | OD1 | 3.626 |
| 6PYD | A_ARG_66  | NH2 | A_ASP_89  | OD1 | 3.375 |
| 6PYD | A_ARG_66  | NH2 | A_ASP_89  | OD2 | 2.645 |
| 6PYD | A_ARG_97  | NH1 | A_ASP_27  | OD2 | 2.978 |
| 6PYD | A_ARG_97  | NH2 | A_ASP_105 | OD1 | 3.618 |
| 6PYD | A_ARG_97  | NH2 | A_ASP_105 | OD2 | 2.545 |
| 6PYD | A_LYS_147 | NZ  | A_ASP_148 | OD1 | 3.105 |
| 6PYD | A_LYS_147 | NZ  | A_ASP_148 | OD2 | 3.217 |
| 6PYD | A_LYS_213 | NZ  | B_GLU_127 | OE1 | 3.596 |
| 6PYD | B_ARG_24  | NH2 | B_ASP_74  | OD2 | 3.946 |
| 6PYD | B_ARG_65  | NH1 | B_GLU_83  | OE2 | 3.749 |
| 6PYD | B_ARG_65  | NH2 | B_GLU_83  | OE1 | 3.670 |
| 6PYD | B_ARG_65  | NH2 | B_GLU_85  | OE1 | 3.121 |
| 6PYD | B_ARG_65  | NH2 | B_ASP_86  | OD1 | 2.790 |
| 6PYD | B_ARG_65  | NH2 | B_ASP_86  | OD2 | 3.597 |

|      |           |     |           |     |       |
|------|-----------|-----|-----------|-----|-------|
| 6PYD | B_LYS_107 | NZ  | B_GLU_169 | OE1 | 2.353 |
| 6PYD | B_LYS_192 | NZ  | B_ASP_189 | OD1 | 3.073 |
| 6PZW | A_HIS_98  | NE2 | B_GLU_214 | OE2 | 3.848 |
| 6PZW | A_ARG_118 | NH2 | A_GLU_425 | OE1 | 3.722 |
| 6PZW | A_ARG_118 | NH2 | A_GLU_425 | OE2 | 3.231 |
| 6PZW | A_ARG_130 | NH1 | A_GLU_128 | OE2 | 2.902 |
| 6PZW | A_ARG_141 | NH1 | A_GLU_110 | OE2 | 3.585 |
| 6PZW | A_ARG_156 | NH2 | A_GLU_119 | OE2 | 2.799 |
| 6PZW | A_ARG_172 | NH2 | A_GLU_174 | OE1 | 3.990 |
| 6PZW | A_ARG_172 | NH2 | A_GLU_174 | OE2 | 3.068 |
| 6PZW | A_ARG_189 | NH2 | A_ASP_125 | OD1 | 2.667 |
| 6PZW | A_ARG_224 | NH2 | A_GLU_276 | OE2 | 3.019 |
| 6PZW | A_ARG_253 | NH1 | K_ASP_53  | OD2 | 2.854 |
| 6PZW | A_ARG_253 | NH2 | A_ASP_251 | OD1 | 3.916 |
| 6PZW | A_ARG_253 | NH2 | A_ASP_251 | OD2 | 3.037 |
| 6PZW | A_ARG_253 | NH2 | K_ASP_53  | OD2 | 2.999 |
| 6PZW | A_LYS_264 | NZ  | A_GLU_266 | OE2 | 3.655 |
| 6PZW | A_LYS_273 | NZ  | A_ASP_339 | OD1 | 2.481 |
| 6PZW | A_HIS_274 | NE2 | A_GLU_276 | OE2 | 2.952 |
| 6PZW | A_ARG_292 | NH2 | A_GLU_276 | OE1 | 2.826 |
| 6PZW | A_ARG_292 | NH2 | A_GLU_277 | OE1 | 3.803 |
| 6PZW | A_ARG_292 | NH2 | A_GLU_277 | OE2 | 3.606 |
| 6PZW | A_ARG_300 | NH2 | A_ASP_324 | OD1 | 3.849 |
| 6PZW | A_HIS_312 | ND1 | A_GLU_266 | OE1 | 2.834 |
| 6PZW | A_ARG_364 | NH1 | A_ASP_330 | OD1 | 3.531 |
| 6PZW | A_ARG_364 | NH1 | A_ASP_330 | OD2 | 3.075 |
| 6PZW | A_ARG_364 | NH2 | A_ASP_330 | OD2 | 3.882 |
| 6PZW | A_ARG_364 | NH2 | A_GLU_375 | OE2 | 3.232 |
| 6PZW | A_ARG_387 | NH1 | A_ASP_386 | OD1 | 3.540 |
| 6PZW | A_ARG_387 | NH1 | A_ASP_386 | OD2 | 2.586 |
| 6PZW | A_ARG_419 | NH1 | B_GLU_214 | OE2 | 3.897 |
| 6PZW | A_ARG_428 | NH1 | A_ASP_460 | OD2 | 2.906 |
| 6PZW | A_ARG_428 | NH2 | A_GLU_433 | OE1 | 3.580 |
| 6PZW | A_ARG_428 | NH2 | A_GLU_433 | OE2 | 3.020 |
| 6PZW | A_LYS_435 | NZ  | A_GLU_465 | OE2 | 3.897 |
| 6PZW | L_ARG_61  | NH1 | L_ASP_82  | OD1 | 3.701 |
| 6PZW | L_ARG_61  | NH1 | L_ASP_82  | OD2 | 2.929 |
| 6PZW | L_ARG_61  | NH2 | L_ASP_82  | OD1 | 2.966 |
| 6PZW | L_ARG_61  | NH2 | L_ASP_82  | OD2 | 3.633 |
| 6PZW | L_LYS_103 | NZ  | L_ASP_85  | OD1 | 2.829 |
| 6PZW | L_LYS_103 | NZ  | L_ASP_85  | OD2 | 3.336 |
| 6PZW | K_HIS_35  | NE2 | K_ASP_95  | OD2 | 2.981 |
| 6PZW | K_ARG_38  | NH1 | K_ASP_86  | OD1 | 2.818 |
| 6PZW | K_ARG_38  | NH2 | K_GLU_46  | OE1 | 3.500 |
| 6PZW | K_ARG_38  | NH2 | K_GLU_46  | OE2 | 3.095 |
| 6PZW | K_ARG_38  | NH2 | K_ASP_86  | OD1 | 3.867 |
| 6PZW | K_ARG_66  | NH1 | K_ASP_86  | OD1 | 3.642 |
| 6PZW | K_ARG_66  | NH1 | K_ASP_86  | OD2 | 2.868 |
| 6PZW | K_ARG_66  | NH2 | K_ASP_86  | OD1 | 3.050 |
| 6PZW | K_ARG_66  | NH2 | K_ASP_86  | OD2 | 3.680 |
| 6PZW | K_LYS_75  | NZ  | K_ASP_72  | OD2 | 2.805 |
| 6PZW | K_LYS_94  | NZ  | K_ASP_101 | OD2 | 2.905 |
| 6PZW | K_LYS_96  | NZ  | K_ASP_101 | OD1 | 2.573 |
| 6PZW | K_LYS_96  | NZ  | K_ASP_101 | OD2 | 3.869 |
| 6PZW | K_ARG_97  | NH2 | L_ASP_50  | OD1 | 2.825 |
| 6PZW | K_ARG_97  | NH2 | L_ASP_50  | OD2 | 3.390 |
| 6PZW | D_HIS_98  | NE2 | A_GLU_214 | OE2 | 3.848 |
| 6PZW | D_ARG_118 | NH2 | D_GLU_425 | OE1 | 3.722 |

|      |           |     |           |     |       |
|------|-----------|-----|-----------|-----|-------|
| 6PZW | D_ARG.118 | NH2 | D_GLU_425 | OE2 | 3.231 |
| 6PZW | D_ARG.130 | NH1 | D_GLU_128 | OE2 | 2.902 |
| 6PZW | D_ARG.141 | NH1 | D_GLU_110 | OE2 | 3.585 |
| 6PZW | D_ARG.156 | NH2 | D_GLU_119 | OE2 | 2.799 |
| 6PZW | D_ARG.172 | NH2 | D_GLU_174 | OE1 | 3.990 |
| 6PZW | D_ARG.172 | NH2 | D_GLU_174 | OE2 | 3.068 |
| 6PZW | D_ARG.189 | NH2 | D_ASP_125 | OD1 | 2.667 |
| 6PZW | D_ARG.224 | NH2 | D_GLU_276 | OE2 | 3.019 |
| 6PZW | D_ARG.253 | NH1 | F_ASP_53  | OD2 | 2.854 |
| 6PZW | D_ARG.253 | NH2 | D_ASP_251 | OD1 | 3.916 |
| 6PZW | D_ARG.253 | NH2 | D_ASP_251 | OD2 | 3.037 |
| 6PZW | D_ARG.253 | NH2 | F_ASP_53  | OD2 | 2.999 |
| 6PZW | D_LYS_264 | NZ  | D_GLU_266 | OE2 | 3.655 |
| 6PZW | D_LYS_273 | NZ  | D_ASP_339 | OD1 | 2.481 |
| 6PZW | D_HIS_274 | NE2 | D_GLU_276 | OE2 | 2.952 |
| 6PZW | D_ARG.292 | NH2 | D_GLU_276 | OE1 | 2.826 |
| 6PZW | D_ARG.292 | NH2 | D_GLU_277 | OE1 | 3.803 |
| 6PZW | D_ARG.292 | NH2 | D_GLU_277 | OE2 | 3.606 |
| 6PZW | D_ARG.300 | NH2 | D_ASP_324 | OD1 | 3.849 |
| 6PZW | D_HIS_312 | ND1 | D_GLU_266 | OE1 | 2.834 |
| 6PZW | D_ARG.364 | NH1 | D_ASP_330 | OD1 | 3.531 |
| 6PZW | D_ARG.364 | NH1 | D_ASP_330 | OD2 | 3.075 |
| 6PZW | D_ARG.364 | NH2 | D_ASP_330 | OD2 | 3.882 |
| 6PZW | D_ARG.364 | NH2 | D_GLU_375 | OE2 | 3.232 |
| 6PZW | D_ARG.387 | NH1 | D_ASP_386 | OD1 | 3.540 |
| 6PZW | D_ARG.387 | NH1 | D_ASP_386 | OD2 | 2.586 |
| 6PZW | D_ARG.419 | NH1 | A_GLU_214 | OE2 | 3.897 |
| 6PZW | D_ARG.428 | NH1 | D_ASP_460 | OD2 | 2.906 |
| 6PZW | D_ARG.428 | NH2 | D_GLU_433 | OE1 | 3.580 |
| 6PZW | D_ARG.428 | NH2 | D_GLU_433 | OE2 | 3.020 |
| 6PZW | D_LYS_435 | NZ  | D_GLU_465 | OE2 | 3.897 |
| 6PZW | E_ARG.61  | NH1 | E_ASP_82  | OD1 | 3.701 |
| 6PZW | E_ARG.61  | NH1 | E_ASP_82  | OD2 | 2.929 |
| 6PZW | E_ARG.61  | NH2 | E_ASP_82  | OD1 | 2.966 |
| 6PZW | E_ARG.61  | NH2 | E_ASP_82  | OD2 | 3.633 |
| 6PZW | E_LYS_103 | NZ  | E_ASP_85  | OD1 | 2.829 |
| 6PZW | E_LYS_103 | NZ  | E_ASP_85  | OD2 | 3.336 |
| 6PZW | F_HIS_35  | NE2 | F_ASP_95  | OD2 | 2.981 |
| 6PZW | F_ARG.38  | NH1 | F_ASP_86  | OD1 | 2.818 |
| 6PZW | F_ARG.38  | NH2 | F_GLU_46  | OE1 | 3.500 |
| 6PZW | F_ARG.38  | NH2 | F_GLU_46  | OE2 | 3.095 |
| 6PZW | F_ARG.38  | NH2 | F_ASP_86  | OD1 | 3.867 |
| 6PZW | F_ARG.66  | NH1 | F_ASP_86  | OD1 | 3.642 |
| 6PZW | F_ARG.66  | NH1 | F_ASP_86  | OD2 | 2.868 |
| 6PZW | F_ARG.66  | NH2 | F_ASP_86  | OD1 | 3.050 |
| 6PZW | F_ARG.66  | NH2 | F_ASP_86  | OD2 | 3.680 |
| 6PZW | F_LYS_75  | NZ  | F_ASP_72  | OD2 | 2.805 |
| 6PZW | F_LYS_94  | NZ  | F_ASP_101 | OD2 | 2.905 |
| 6PZW | F_LYS_96  | NZ  | F_ASP_101 | OD1 | 2.573 |
| 6PZW | F_LYS_96  | NZ  | F_ASP_101 | OD2 | 3.869 |
| 6PZW | F_ARG.97  | NH2 | E_ASP_50  | OD1 | 2.825 |
| 6PZW | F_ARG.97  | NH2 | E_ASP_50  | OD2 | 3.390 |
| 6PZW | G_ARG.61  | NH1 | G_ASP_82  | OD1 | 3.701 |
| 6PZW | G_ARG.61  | NH1 | G_ASP_82  | OD2 | 2.929 |
| 6PZW | G_ARG.61  | NH2 | G_ASP_82  | OD1 | 2.966 |
| 6PZW | G_ARG.61  | NH2 | G_ASP_82  | OD2 | 3.633 |
| 6PZW | G_LYS_103 | NZ  | G_ASP_85  | OD1 | 2.829 |
| 6PZW | G_LYS_103 | NZ  | G_ASP_85  | OD2 | 3.336 |

|      |           |     |           |     |       |
|------|-----------|-----|-----------|-----|-------|
| 6PZW | J_HIS_35  | NE2 | J_ASP_95  | OD2 | 2.981 |
| 6PZW | J_ARG_38  | NH1 | J_ASP_86  | OD1 | 2.818 |
| 6PZW | J_ARG_38  | NH2 | J_GLU_46  | OE1 | 3.500 |
| 6PZW | J_ARG_38  | NH2 | J_GLU_46  | OE2 | 3.095 |
| 6PZW | J_ARG_38  | NH2 | J_ASP_86  | OD1 | 3.867 |
| 6PZW | J_ARG_66  | NH1 | J_ASP_86  | OD1 | 3.642 |
| 6PZW | J_ARG_66  | NH1 | J_ASP_86  | OD2 | 2.868 |
| 6PZW | J_ARG_66  | NH2 | J_ASP_86  | OD1 | 3.050 |
| 6PZW | J_ARG_66  | NH2 | J_ASP_86  | OD2 | 3.680 |
| 6PZW | J_LYS_75  | NZ  | J_ASP_72  | OD2 | 2.805 |
| 6PZW | J_LYS_94  | NZ  | J_ASP_101 | OD2 | 2.905 |
| 6PZW | J_LYS_96  | NZ  | J_ASP_101 | OD1 | 2.573 |
| 6PZW | J_LYS_96  | NZ  | J_ASP_101 | OD2 | 3.869 |
| 6PZW | J_ARG_97  | NH2 | G_ASP_50  | OD1 | 2.825 |
| 6PZW | J_ARG_97  | NH2 | G_ASP_50  | OD2 | 3.390 |
| 6PZW | C_HIS_98  | NE2 | D_GLU_214 | OE2 | 3.848 |
| 6PZW | C_ARG_118 | NH2 | C_GLU_425 | OE1 | 3.722 |
| 6PZW | C_ARG_118 | NH2 | C_GLU_425 | OE2 | 3.231 |
| 6PZW | C_ARG_130 | NH1 | C_GLU_128 | OE2 | 2.902 |
| 6PZW | C_ARG_141 | NH1 | C_GLU_110 | OE2 | 3.585 |
| 6PZW | C_ARG_156 | NH2 | C_GLU_119 | OE2 | 2.799 |
| 6PZW | C_ARG_172 | NH2 | C_GLU_174 | OE1 | 3.990 |
| 6PZW | C_ARG_172 | NH2 | C_GLU_174 | OE2 | 3.068 |
| 6PZW | C_ARG_189 | NH2 | C_ASP_125 | OD1 | 2.667 |
| 6PZW | C_ARG_224 | NH2 | C_GLU_276 | OE2 | 3.019 |
| 6PZW | C_ARG_253 | NH1 | J_ASP_53  | OD2 | 2.854 |
| 6PZW | C_ARG_253 | NH2 | J_ASP_53  | OD2 | 2.999 |
| 6PZW | C_ARG_253 | NH2 | C_ASP_251 | OD1 | 3.916 |
| 6PZW | C_ARG_253 | NH2 | C_ASP_251 | OD2 | 3.037 |
| 6PZW | C_LYS_264 | NZ  | C_GLU_266 | OE2 | 3.655 |
| 6PZW | C_LYS_273 | NZ  | C_ASP_339 | OD1 | 2.481 |
| 6PZW | C_HIS_274 | NE2 | C_GLU_276 | OE2 | 2.952 |
| 6PZW | C_ARG_292 | NH2 | C_GLU_276 | OE1 | 2.826 |
| 6PZW | C_ARG_292 | NH2 | C_GLU_277 | OE1 | 3.803 |
| 6PZW | C_ARG_292 | NH2 | C_GLU_277 | OE2 | 3.606 |
| 6PZW | C_ARG_300 | NH2 | C_ASP_324 | OD1 | 3.849 |
| 6PZW | C_HIS_312 | ND1 | C_GLU_266 | OE1 | 2.834 |
| 6PZW | C_ARG_364 | NH1 | C_ASP_330 | OD1 | 3.531 |
| 6PZW | C_ARG_364 | NH1 | C_ASP_330 | OD2 | 3.075 |
| 6PZW | C_ARG_364 | NH2 | C_ASP_330 | OD2 | 3.882 |
| 6PZW | C_ARG_364 | NH2 | C_GLU_375 | OE2 | 3.232 |
| 6PZW | C_ARG_387 | NH1 | C_ASP_386 | OD1 | 3.540 |
| 6PZW | C_ARG_387 | NH1 | C_ASP_386 | OD2 | 2.586 |
| 6PZW | C_ARG_419 | NH1 | D_GLU_214 | OE2 | 3.897 |
| 6PZW | C_ARG_428 | NH1 | C_ASP_460 | OD2 | 2.906 |
| 6PZW | C_ARG_428 | NH2 | C_GLU_433 | OE1 | 3.580 |
| 6PZW | C_ARG_428 | NH2 | C_GLU_433 | OE2 | 3.020 |
| 6PZW | C_LYS_435 | NZ  | C_GLU_465 | OE2 | 3.897 |
| 6PZW | B_HIS_98  | NE2 | C_GLU_214 | OE2 | 3.848 |
| 6PZW | B_ARG_118 | NH2 | B_GLU_425 | OE1 | 3.722 |
| 6PZW | B_ARG_118 | NH2 | B_GLU_425 | OE2 | 3.231 |
| 6PZW | B_ARG_130 | NH1 | B_GLU_128 | OE2 | 2.902 |
| 6PZW | B_ARG_141 | NH1 | B_GLU_110 | OE2 | 3.585 |
| 6PZW | B_ARG_156 | NH2 | B_GLU_119 | OE2 | 2.799 |
| 6PZW | B_ARG_172 | NH2 | B_GLU_174 | OE1 | 3.990 |
| 6PZW | B_ARG_172 | NH2 | B_GLU_174 | OE2 | 3.068 |
| 6PZW | B_ARG_189 | NH2 | B_ASP_125 | OD1 | 2.667 |
| 6PZW | B_ARG_224 | NH2 | B_GLU_276 | OE2 | 3.019 |

|      |           |     |           |     |       |
|------|-----------|-----|-----------|-----|-------|
| 6PZW | B_ARG_253 | NH1 | H_ASP_53  | OD2 | 2.854 |
| 6PZW | B_ARG_253 | NH2 | B_ASP_251 | OD1 | 3.916 |
| 6PZW | B_ARG_253 | NH2 | B_ASP_251 | OD2 | 3.037 |
| 6PZW | B_ARG_253 | NH2 | H_ASP_53  | OD2 | 2.999 |
| 6PZW | B_LYS_264 | NZ  | B_GLU_266 | OE2 | 3.655 |
| 6PZW | B_LYS_273 | NZ  | B_ASP_339 | OD1 | 2.481 |
| 6PZW | B_HIS_274 | NE2 | B_GLU_276 | OE2 | 2.952 |
| 6PZW | B_ARG_292 | NH2 | B_GLU_276 | OE1 | 2.826 |
| 6PZW | B_ARG_292 | NH2 | B_GLU_277 | OE1 | 3.803 |
| 6PZW | B_ARG_292 | NH2 | B_GLU_277 | OE2 | 3.606 |
| 6PZW | B_ARG_300 | NH2 | B_ASP_324 | OD1 | 3.849 |
| 6PZW | B_HIS_312 | ND1 | B_GLU_266 | OE1 | 2.834 |
| 6PZW | B_ARG_364 | NH1 | B_ASP_330 | OD1 | 3.531 |
| 6PZW | B_ARG_364 | NH1 | B_ASP_330 | OD2 | 3.075 |
| 6PZW | B_ARG_364 | NH2 | B_ASP_330 | OD2 | 3.882 |
| 6PZW | B_ARG_364 | NH2 | B_GLU_375 | OE2 | 3.232 |
| 6PZW | B_ARG_387 | NH1 | B_ASP_386 | OD1 | 3.540 |
| 6PZW | B_ARG_387 | NH1 | B_ASP_386 | OD2 | 2.586 |
| 6PZW | B_ARG_419 | NH1 | C_GLU_214 | OE2 | 3.897 |
| 6PZW | B_ARG_428 | NH1 | B_ASP_460 | OD2 | 2.906 |
| 6PZW | B_ARG_428 | NH2 | B_GLU_433 | OE1 | 3.580 |
| 6PZW | B_ARG_428 | NH2 | B_GLU_433 | OE2 | 3.020 |
| 6PZW | B_LYS_435 | NZ  | B_GLU_465 | OE2 | 3.897 |
| 6PZW | L_ARG_61  | NH1 | L_ASP_82  | OD1 | 3.701 |
| 6PZW | L_ARG_61  | NH1 | L_ASP_82  | OD2 | 2.929 |
| 6PZW | L_ARG_61  | NH2 | L_ASP_82  | OD1 | 2.966 |
| 6PZW | L_ARG_61  | NH2 | L_ASP_82  | OD2 | 3.633 |
| 6PZW | L_LYS_103 | NZ  | L_ASP_85  | OD1 | 2.829 |
| 6PZW | L_LYS_103 | NZ  | L_ASP_85  | OD2 | 3.336 |
| 6PZW | H_HIS_35  | NE2 | H_ASP_95  | OD2 | 2.981 |
| 6PZW | H_ARG_38  | NH1 | H_ASP_86  | OD1 | 2.818 |
| 6PZW | H_ARG_38  | NH2 | H_GLU_46  | OE1 | 3.500 |
| 6PZW | H_ARG_38  | NH2 | H_GLU_46  | OE2 | 3.095 |
| 6PZW | H_ARG_38  | NH2 | H_ASP_86  | OD1 | 3.867 |
| 6PZW | H_ARG_66  | NH1 | H_ASP_86  | OD1 | 3.642 |
| 6PZW | H_ARG_66  | NH1 | H_ASP_86  | OD2 | 2.868 |
| 6PZW | H_ARG_66  | NH2 | H_ASP_86  | OD1 | 3.050 |
| 6PZW | H_ARG_66  | NH2 | H_ASP_86  | OD2 | 3.680 |
| 6PZW | H_LYS_75  | NZ  | H_ASP_72  | OD2 | 2.805 |
| 6PZW | H_LYS_94  | NZ  | H_ASP_101 | OD2 | 2.905 |
| 6PZW | H_LYS_96  | NZ  | H_ASP_101 | OD1 | 2.573 |
| 6PZW | H_LYS_96  | NZ  | H_ASP_101 | OD2 | 3.869 |
| 6PZW | H_ARG_97  | NH2 | L_ASP_50  | OD1 | 2.825 |
| 6PZW | H_ARG_97  | NH2 | L_ASP_50  | OD2 | 3.390 |
| 6RPS | A_HIS_34  | ND1 | A_ASP_32  | OD2 | 2.928 |
| 6RPS | A_HIS_34  | NE2 | A_ASP_36  | OD1 | 3.392 |
| 6RPS | A_HIS_34  | NE2 | B_ASP_102 | OD2 | 3.097 |
| 6RPS | A_HIS_64  | NE2 | H_ASP_54  | OD2 | 2.837 |
| 6RPS | A_HIS_96  | ND1 | A_GLU_106 | OE1 | 3.812 |
| 6RPS | A_HIS_96  | ND1 | A_GLU_106 | OE2 | 3.696 |
| 6RPS | A_HIS_96  | NE2 | A_GLU_106 | OE1 | 3.203 |
| 6RPS | A_HIS_103 | ND1 | A_ASP_102 | OD1 | 3.719 |
| 6RPS | A_HIS_107 | ND1 | A_GLU_117 | OE1 | 3.830 |
| 6RPS | A_HIS_107 | ND1 | A_GLU_117 | OE2 | 2.892 |
| 6RPS | A_HIS_119 | ND1 | A_GLU_106 | OE1 | 3.943 |
| 6RPS | A_HIS_119 | NE2 | A_GLU_117 | OE2 | 2.681 |
| 6RPS | A_LYS_170 | NZ  | H_ASP_54  | OD1 | 3.636 |
| 6RPS | A_LYS_170 | NZ  | H_ASP_54  | OD2 | 2.590 |

|      |           |     |           |     |       |
|------|-----------|-----|-----------|-----|-------|
| 6RPS | A_LYS_170 | NZ  | H_ASP_56  | OD2 | 2.821 |
| 6RPS | A_ARG_213 | NH1 | A_GLU_190 | OE1 | 3.317 |
| 6RPS | A_ARG_213 | NH1 | A_GLU_190 | OE2 | 3.527 |
| 6RPS | A_HIS_234 | ND1 | H_ASP_56  | OD2 | 3.904 |
| 6RPS | A_LYS_250 | NZ  | B_GLU_13  | OE2 | 2.734 |
| 6RPS | B_HIS_34  | ND1 | B_ASP_32  | OD2 | 2.934 |
| 6RPS | B_HIS_34  | NE2 | B_ASP_36  | OD1 | 3.758 |
| 6RPS | B_HIS_34  | NE2 | B_ASP_36  | OD2 | 3.233 |
| 6RPS | B_HIS_64  | NE2 | N_ASP_54  | OD2 | 2.859 |
| 6RPS | B_HIS_96  | ND1 | B_GLU_106 | OE1 | 3.814 |
| 6RPS | B_HIS_96  | ND1 | B_GLU_106 | OE2 | 3.680 |
| 6RPS | B_HIS_96  | NE2 | B_GLU_106 | OE1 | 3.214 |
| 6RPS | B_HIS_103 | ND1 | A_ASP_36  | OD1 | 3.129 |
| 6RPS | B_HIS_103 | ND1 | A_ASP_36  | OD2 | 3.954 |
| 6RPS | B_HIS_103 | ND1 | B_ASP_102 | OD1 | 3.019 |
| 6RPS | B_HIS_107 | ND1 | B_GLU_117 | OE1 | 3.839 |
| 6RPS | B_HIS_107 | ND1 | B_GLU_117 | OE2 | 2.888 |
| 6RPS | B_HIS_119 | ND1 | B_GLU_106 | OE1 | 3.928 |
| 6RPS | B_HIS_119 | NE2 | B_GLU_117 | OE2 | 2.683 |
| 6RPS | B_LYS_170 | NZ  | N_ASP_54  | OD1 | 3.719 |
| 6RPS | B_LYS_170 | NZ  | N_ASP_54  | OD2 | 2.644 |
| 6RPS | B_LYS_170 | NZ  | N_ASP_56  | OD2 | 2.839 |
| 6RPS | B_ARG_213 | NH1 | B_GLU_190 | OE1 | 3.106 |
| 6RPS | B_ARG_213 | NH1 | B_GLU_190 | OE2 | 3.685 |
| 6RPS | B_HIS_234 | ND1 | N_ASP_56  | OD2 | 3.922 |
| 6RPS | B_LYS_250 | NZ  | A_GLU_13  | OE2 | 2.991 |
| 6RPS | M_ARG_24  | NH1 | M_ASP_70  | OD2 | 3.891 |
| 6RPS | M_ARG_61  | NH1 | M_GLU_79  | OE1 | 3.422 |
| 6RPS | M_ARG_61  | NH1 | M_GLU_79  | OE2 | 3.489 |
| 6RPS | M_ARG_61  | NH2 | M_GLU_79  | OE1 | 3.623 |
| 6RPS | M_ARG_61  | NH2 | M_GLU_81  | OE1 | 3.600 |
| 6RPS | M_ARG_61  | NH2 | M_ASP_82  | OD1 | 2.623 |
| 6RPS | M_ARG_61  | NH2 | M_ASP_82  | OD2 | 3.076 |
| 6RPS | M_LYS_149 | NZ  | M_GLU_195 | OE1 | 3.183 |
| 6RPS | M_LYS_149 | NZ  | M_GLU_195 | OE2 | 3.364 |
| 6RPS | N_ARG_38  | NH1 | N_GLU_86  | OE2 | 2.950 |
| 6RPS | N_ARG_38  | NH2 | N_GLU_46  | OE1 | 3.142 |
| 6RPS | N_ARG_38  | NH2 | N_GLU_46  | OE2 | 3.953 |
| 6RPS | N_ARG_38  | NH2 | N_GLU_86  | OE2 | 3.241 |
| 6RPS | N_ARG_50  | NH2 | N_ASP_95  | OD2 | 3.876 |
| 6RPS | N_ARG_66  | NH1 | N_GLU_86  | OE2 | 3.240 |
| 6RPS | N_ARG_66  | NH2 | N_GLU_86  | OE1 | 2.816 |
| 6RPS | N_ARG_66  | NH2 | N_GLU_86  | OE2 | 2.704 |
| 6RPS | N_ARG_94  | NH2 | N_ASP_101 | OD2 | 3.208 |
| 6RPS | N_LYS_143 | NZ  | N_ASP_144 | OD1 | 3.314 |
| 6RPS | N_LYS_143 | NZ  | N_ASP_144 | OD2 | 3.375 |
| 6RPS | N_LYS_210 | NZ  | N_GLU_212 | OE1 | 3.241 |
| 6RPS | N_LYS_214 | NZ  | M_ASP_122 | OD1 | 3.095 |
| 6RPS | N_LYS_214 | NZ  | M_ASP_122 | OD2 | 3.107 |
| 6RPS | L_ARG_24  | NH1 | L_ASP_70  | OD2 | 3.896 |
| 6RPS | L_LYS_39  | NZ  | L_GLU_81  | OE2 | 3.206 |
| 6RPS | L_ARG_45  | NH2 | L_GLU_81  | OE2 | 3.948 |
| 6RPS | L_ARG_61  | NH1 | L_GLU_79  | OE1 | 3.428 |
| 6RPS | L_ARG_61  | NH1 | L_GLU_79  | OE2 | 3.496 |
| 6RPS | L_ARG_61  | NH2 | L_GLU_79  | OE1 | 3.620 |
| 6RPS | L_ARG_61  | NH2 | L_ASP_82  | OD1 | 2.624 |
| 6RPS | L_ARG_61  | NH2 | L_ASP_82  | OD2 | 3.082 |
| 6RPS | L_LYS_149 | NZ  | L_GLU_195 | OE1 | 3.146 |

|      |           |     |           |     |       |
|------|-----------|-----|-----------|-----|-------|
| 6RPS | L_LYS_149 | NZ  | L_GLU_195 | OE2 | 3.433 |
| 6RPS | H_ARG_38  | NH1 | H_GLU_86  | OE2 | 2.972 |
| 6RPS | H_ARG_38  | NH2 | H_GLU_46  | OE1 | 3.141 |
| 6RPS | H_ARG_38  | NH2 | H_GLU_46  | OE2 | 3.931 |
| 6RPS | H_ARG_38  | NH2 | H_GLU_86  | OE2 | 3.242 |
| 6RPS | H_ARG_50  | NH2 | H_ASP_95  | OD2 | 3.877 |
| 6RPS | H_ARG_66  | NH1 | H_GLU_86  | OE2 | 3.250 |
| 6RPS | H_ARG_66  | NH2 | H_GLU_86  | OE1 | 2.806 |
| 6RPS | H_ARG_66  | NH2 | H_GLU_86  | OE2 | 2.709 |
| 6RPS | H_ARG_94  | NH2 | H_ASP_101 | OD2 | 3.183 |
| 6RPS | H_LYS_143 | NZ  | H_ASP_144 | OD1 | 3.311 |
| 6RPS | H_LYS_143 | NZ  | H_ASP_144 | OD2 | 3.365 |
| 6RPS | H_LYS_209 | NZ  | L_GLU_123 | OE1 | 2.780 |
| 6RPS | H_LYS_209 | NZ  | L_GLU_123 | OE2 | 3.710 |
| 6RPS | H_LYS_210 | NZ  | H_GLU_212 | OE1 | 3.232 |
| 6S3T | A_HIS_48  | ND1 | A_ASP_79  | OD1 | 3.030 |
| 6S3T | A_LYS_49  | NZ  | C_GLU_158 | OE1 | 3.663 |
| 6S3T | A_ARG_66  | NH1 | A_ASP_140 | OD2 | 3.290 |
| 6S3T | A_ARG_66  | NH2 | A_ASP_140 | OD1 | 3.561 |
| 6S3T | A_ARG_66  | NH2 | A_ASP_343 | OD1 | 2.921 |
| 6S3T | A_ARG_66  | NH2 | A_ASP_343 | OD2 | 3.772 |
| 6S3T | A_LYS_90  | NZ  | A_ASP_63  | OD1 | 3.963 |
| 6S3T | A_LYS_90  | NZ  | A_ASP_63  | OD2 | 2.710 |
| 6S3T | A_LYS_110 | NZ  | A_GLU_82  | OE1 | 3.367 |
| 6S3T | A_LYS_110 | NZ  | A_GLU_82  | OE2 | 3.373 |
| 6S3T | A_ARG_141 | NH1 | A_ASP_210 | OD1 | 3.859 |
| 6S3T | A_ARG_141 | NH1 | A_ASP_210 | OD2 | 3.679 |
| 6S3T | A_ARG_141 | NH2 | A_ASP_61  | OD1 | 2.655 |
| 6S3T | A_ARG_141 | NH2 | A_ASP_61  | OD2 | 3.839 |
| 6S3T | A_LYS_148 | NZ  | A_ASP_131 | OD1 | 3.035 |
| 6S3T | A_LYS_222 | NZ  | A_GLU_158 | OE2 | 3.425 |
| 6S3T | A_LYS_222 | NZ  | A_GLU_162 | OE2 | 3.965 |
| 6S3T | A_LYS_268 | NZ  | A_GLU_308 | OE1 | 3.868 |
| 6S3T | A_LYS_306 | NZ  | A_ASP_334 | OD1 | 3.070 |
| 6S3T | A_LYS_306 | NZ  | A_ASP_334 | OD2 | 3.336 |
| 6S3T | A_LYS_327 | NZ  | A_ASP_324 | OD1 | 3.861 |
| 6S3T | A_LYS_341 | NZ  | A_ASP_140 | OD1 | 3.192 |
| 6S3T | A_ARG_355 | NH1 | A_GLU_82  | OE1 | 3.960 |
| 6S3T | A_ARG_355 | NH1 | A_GLU_82  | OE2 | 3.091 |
| 6S3T | A_ARG_366 | NH1 | A_ASP_150 | OD2 | 3.723 |
| 6S3T | A_ARG_366 | NH2 | A_ASP_150 | OD2 | 3.506 |
| 6S3T | A_LYS_383 | NZ  | A_ASP_156 | OD2 | 3.389 |
| 6S3T | B_HIS_48  | ND1 | B_ASP_79  | OD1 | 3.029 |
| 6S3T | B_LYS_49  | NZ  | L_GLU_158 | OE1 | 3.761 |
| 6S3T | B_ARG_66  | NH1 | B_ASP_140 | OD2 | 3.289 |
| 6S3T | B_ARG_66  | NH2 | B_ASP_140 | OD1 | 3.563 |
| 6S3T | B_ARG_66  | NH2 | B_ASP_343 | OD1 | 2.924 |
| 6S3T | B_ARG_66  | NH2 | B_ASP_343 | OD2 | 3.774 |
| 6S3T | B_LYS_90  | NZ  | B_ASP_63  | OD1 | 3.964 |
| 6S3T | B_LYS_90  | NZ  | B_ASP_63  | OD2 | 2.710 |
| 6S3T | B_LYS_110 | NZ  | B_GLU_82  | OE1 | 3.367 |
| 6S3T | B_LYS_110 | NZ  | B_GLU_82  | OE2 | 3.374 |
| 6S3T | B_ARG_141 | NH1 | B_ASP_210 | OD1 | 3.858 |
| 6S3T | B_ARG_141 | NH1 | B_ASP_210 | OD2 | 3.682 |
| 6S3T | B_ARG_141 | NH2 | B_ASP_61  | OD1 | 2.654 |
| 6S3T | B_ARG_141 | NH2 | B_ASP_61  | OD2 | 3.837 |
| 6S3T | B_LYS_148 | NZ  | B_ASP_131 | OD1 | 3.032 |
| 6S3T | B_LYS_175 | NZ  | B_ASP_177 | OD2 | 3.891 |



|      |           |     |           |     |       |
|------|-----------|-----|-----------|-----|-------|
| 6S3T | B.LYS_222 | NZ  | B.GLU_158 | OE2 | 3.419 |
| 6S3T | B.LYS_222 | NZ  | B.GLU_162 | OE2 | 3.964 |
| 6S3T | B.LYS_282 | NZ  | B.GLU_241 | OE2 | 3.757 |
| 6S3T | B.LYS_306 | NZ  | B.ASP_334 | OD1 | 3.070 |
| 6S3T | B.LYS_306 | NZ  | B.ASP_334 | OD2 | 3.338 |
| 6S3T | B.LYS_327 | NZ  | B.ASP_324 | OD1 | 3.858 |
| 6S3T | B.LYS_341 | NZ  | B.ASP_140 | OD1 | 3.192 |
| 6S3T | B.ARG_355 | NH1 | B.GLU_352 | OE1 | 2.881 |
| 6S3T | B.ARG_366 | NH2 | B.ASP_150 | OD2 | 3.496 |
| 6S3T | B.LYS_383 | NZ  | B.ASP_156 | OD2 | 3.383 |
| 6S3T | C.ARG_24  | NH2 | C.ASP_74  | OD1 | 3.093 |
| 6S3T | C.ARG_24  | NH2 | C.ASP_74  | OD2 | 3.742 |
| 6S3T | C.ARG_65  | NH1 | C.ASP_86  | OD1 | 3.788 |
| 6S3T | C.ARG_65  | NH1 | C.ASP_86  | OD2 | 2.683 |
| 6S3T | C.ARG_65  | NH2 | C.GLU_83  | OE1 | 3.619 |
| 6S3T | C.ARG_65  | NH2 | C.ASP_86  | OD1 | 3.107 |
| 6S3T | C.ARG_65  | NH2 | C.ASP_86  | OD2 | 3.458 |
| 6S3T | C.LYS_151 | NZ  | C.GLU_158 | OE2 | 3.956 |
| 6S3T | C.LYS_153 | NZ  | C.GLU_199 | OE2 | 2.738 |
| 6S3T | D.ARG_35  | NH1 | S.ASP_332 | OD1 | 3.467 |
| 6S3T | D.ARG_35  | NH1 | S.ASP_332 | OD2 | 2.946 |
| 6S3T | D.ARG_35  | NH2 | S.ASP_332 | OD2 | 3.071 |
| 6S3T | D.ARG_35  | NH2 | S.ASP_334 | OD1 | 3.408 |
| 6S3T | D.ARG_40  | NH1 | D.GLU_48  | OE1 | 3.019 |
| 6S3T | D.ARG_40  | NH2 | D.ASP_91  | OD2 | 3.639 |
| 6S3T | D.ARG_68  | NH1 | D.ASP_91  | OD1 | 3.381 |
| 6S3T | D.ARG_68  | NH1 | D.ASP_91  | OD2 | 3.003 |
| 6S3T | D.ARG_68  | NH2 | D.ASP_91  | OD1 | 3.560 |
| 6S3T | D.ARG_73  | NH2 | D.ASP_57  | OD2 | 3.930 |
| 6S3T | D.HIS_171 | NE2 | C.ASP_171 | OD2 | 3.832 |
| 6S3T | D.LYS_215 | NZ  | C.GLU_127 | OE1 | 2.814 |
| 6S3T | D.LYS_215 | NZ  | C.GLU_127 | OE2 | 3.990 |
| 6S3T | D.LYS_216 | NZ  | D.GLU_218 | OE2 | 3.949 |
| 6S3T | I.ARG_24  | NH2 | I.ASP_74  | OD1 | 3.090 |
| 6S3T | I.ARG_24  | NH2 | I.ASP_74  | OD2 | 3.744 |
| 6S3T | I.ARG_65  | NH1 | I.GLU_83  | OE1 | 3.576 |
| 6S3T | I.ARG_65  | NH1 | I.ASP_86  | OD1 | 3.791 |
| 6S3T | I.ARG_65  | NH1 | I.ASP_86  | OD2 | 2.684 |
| 6S3T | I.ARG_65  | NH2 | I.ASP_86  | OD1 | 3.110 |
| 6S3T | I.ARG_65  | NH2 | I.ASP_86  | OD2 | 3.459 |
| 6S3T | I.LYS_107 | NZ  | I.GLU_109 | OE2 | 3.962 |
| 6S3T | I.LYS_151 | NZ  | I.GLU_158 | OE1 | 3.422 |
| 6S3T | I.LYS_153 | NZ  | I.GLU_199 | OE2 | 2.741 |
| 6S3T | E.ARG_35  | NH1 | T.ASP_332 | OD1 | 3.561 |
| 6S3T | E.ARG_35  | NH1 | T.ASP_332 | OD2 | 3.035 |
| 6S3T | E.ARG_35  | NH2 | T.ASP_332 | OD2 | 3.163 |
| 6S3T | E.ARG_35  | NH2 | T.ASP_334 | OD1 | 3.432 |
| 6S3T | E.ARG_40  | NH1 | E.ASP_91  | OD1 | 3.668 |
| 6S3T | E.ARG_40  | NH1 | E.ASP_91  | OD2 | 3.638 |
| 6S3T | E.ARG_40  | NH2 | E.GLU_48  | OE1 | 2.851 |
| 6S3T | E.ARG_68  | NH1 | E.ASP_91  | OD1 | 3.381 |
| 6S3T | E.ARG_68  | NH1 | E.ASP_91  | OD2 | 3.005 |
| 6S3T | E.ARG_68  | NH2 | E.ASP_91  | OD1 | 3.559 |
| 6S3T | E.ARG_73  | NH2 | E.ASP_57  | OD2 | 3.938 |
| 6S3T | E.HIS_171 | NE2 | I.ASP_171 | OD2 | 3.931 |
| 6S3T | E.LYS_215 | NZ  | I.GLU_127 | OE1 | 3.013 |
| 6S3T | E.LYS_216 | NZ  | E.GLU_218 | OE2 | 3.946 |
| 6S3T | M.ARG_24  | NH2 | M.ASP_74  | OD1 | 3.084 |

|      |           |     |           |     |       |
|------|-----------|-----|-----------|-----|-------|
| 6S3T | M_ARG_24  | NH2 | M_ASP_74  | OD2 | 3.751 |
| 6S3T | M_ARG_65  | NH1 | M_GLU_83  | OE1 | 3.576 |
| 6S3T | M_ARG_65  | NH1 | M_ASP_86  | OD1 | 3.781 |
| 6S3T | M_ARG_65  | NH1 | M_ASP_86  | OD2 | 2.680 |
| 6S3T | M_ARG_65  | NH2 | M_ASP_86  | OD1 | 3.107 |
| 6S3T | M_ARG_65  | NH2 | M_ASP_86  | OD2 | 3.455 |
| 6S3T | M_LYS_151 | NZ  | M_GLU_158 | OE2 | 3.920 |
| 6S3T | M_LYS_153 | NZ  | M_GLU_199 | OE1 | 3.748 |
| 6S3T | M_LYS_153 | NZ  | M_GLU_199 | OE2 | 2.775 |
| 6S3T | N_ARG_35  | NH1 | A_ASP_332 | OD1 | 3.796 |
| 6S3T | N_ARG_35  | NH1 | A_ASP_332 | OD2 | 3.195 |
| 6S3T | N_ARG_35  | NH2 | A_ASP_332 | OD1 | 3.883 |
| 6S3T | N_ARG_35  | NH2 | A_ASP_332 | OD2 | 2.517 |
| 6S3T | N_ARG_35  | NH2 | A_ASP_334 | OD2 | 3.989 |
| 6S3T | N_ARG_40  | NH1 | N_GLU_48  | OE1 | 3.017 |
| 6S3T | N_ARG_40  | NH2 | N_ASP_91  | OD2 | 3.633 |
| 6S3T | N_ARG_68  | NH1 | N_ASP_91  | OD1 | 3.379 |
| 6S3T | N_ARG_68  | NH1 | N_ASP_91  | OD2 | 3.002 |
| 6S3T | N_ARG_68  | NH2 | N_ASP_91  | OD1 | 3.568 |
| 6S3T | N_ARG_73  | NH2 | S_GLU_44  | OE2 | 2.482 |
| 6S3T | N_HIS_171 | NE2 | M_ASP_171 | OD2 | 3.181 |
| 6S3T | N_LYS_215 | NZ  | M_GLU_127 | OE1 | 2.964 |
| 6S3T | N_LYS_215 | NZ  | M_GLU_127 | OE2 | 3.944 |
| 6S3T | N_LYS_216 | NZ  | N_GLU_218 | OE2 | 3.948 |
| 6S3T | Q_ARG_24  | NH2 | Q_ASP_74  | OD1 | 3.083 |
| 6S3T | Q_ARG_24  | NH2 | Q_ASP_74  | OD2 | 3.750 |
| 6S3T | Q_ARG_65  | NH1 | Q_GLU_83  | OE1 | 3.574 |
| 6S3T | Q_ARG_65  | NH1 | Q_ASP_86  | OD1 | 3.785 |
| 6S3T | Q_ARG_65  | NH1 | Q_ASP_86  | OD2 | 2.681 |
| 6S3T | Q_ARG_65  | NH2 | Q_ASP_86  | OD1 | 3.108 |
| 6S3T | Q_ARG_65  | NH2 | Q_ASP_86  | OD2 | 3.458 |
| 6S3T | Q_LYS_151 | NZ  | Q_GLU_199 | OE1 | 2.666 |
| 6S3T | Q_LYS_151 | NZ  | Q_GLU_199 | OE2 | 3.849 |
| 6S3T | Q_LYS_153 | NZ  | Q_GLU_199 | OE2 | 2.742 |
| 6S3T | R_ARG_35  | NH1 | B_ASP_332 | OD1 | 3.511 |
| 6S3T | R_ARG_35  | NH1 | B_ASP_332 | OD2 | 2.943 |
| 6S3T | R_ARG_35  | NH2 | B_ASP_332 | OD2 | 2.873 |
| 6S3T | R_ARG_35  | NH2 | B_ASP_334 | OD1 | 3.424 |
| 6S3T | R_ARG_40  | NH1 | R_GLU_48  | OE1 | 3.017 |
| 6S3T | R_ARG_40  | NH2 | R_ASP_91  | OD2 | 3.634 |
| 6S3T | R_ARG_68  | NH1 | R_ASP_91  | OD1 | 3.379 |
| 6S3T | R_ARG_68  | NH1 | R_ASP_91  | OD2 | 3.002 |
| 6S3T | R_ARG_68  | NH2 | R_ASP_91  | OD1 | 3.566 |
| 6S3T | R_ARG_73  | NH2 | T_GLU_44  | OE2 | 2.709 |
| 6S3T | R_HIS_171 | NE2 | Q_ASP_171 | OD2 | 3.265 |
| 6S3T | R_LYS_215 | NZ  | Q_GLU_127 | OE1 | 2.948 |
| 6S3T | R_LYS_215 | NZ  | Q_GLU_127 | OE2 | 3.831 |
| 6S3T | R_LYS_216 | NZ  | R_GLU_218 | OE2 | 3.945 |
| 6S3T | S_HIS_48  | ND1 | S_ASP_79  | OD1 | 3.027 |
| 6S3T | S_ARG_66  | NH1 | S_ASP_140 | OD2 | 3.289 |
| 6S3T | S_ARG_66  | NH2 | S_ASP_140 | OD1 | 3.557 |
| 6S3T | S_ARG_66  | NH2 | S_ASP_343 | OD1 | 2.918 |
| 6S3T | S_ARG_66  | NH2 | S_ASP_343 | OD2 | 3.764 |
| 6S3T | S_LYS_90  | NZ  | S_ASP_63  | OD1 | 3.967 |
| 6S3T | S_LYS_90  | NZ  | S_ASP_63  | OD2 | 2.710 |
| 6S3T | S_LYS_110 | NZ  | S_GLU_82  | OE2 | 3.372 |
| 6S3T | S_ARG_141 | NH1 | S_ASP_210 | OD1 | 3.860 |
| 6S3T | S_ARG_141 | NH1 | S_ASP_210 | OD2 | 3.676 |

|      |           |     |           |     |       |
|------|-----------|-----|-----------|-----|-------|
| 6S3T | S_ARG_141 | NH2 | S_ASP_61  | OD1 | 2.655 |
| 6S3T | S_ARG_141 | NH2 | S_ASP_61  | OD2 | 3.848 |
| 6S3T | S_LYS_148 | NZ  | S_ASP_131 | OD1 | 3.009 |
| 6S3T | S_LYS_175 | NZ  | S_ASP_177 | OD2 | 3.891 |
| 6S3T | S_LYS_306 | NZ  | S_ASP_334 | OD1 | 3.069 |
| 6S3T | S_LYS_306 | NZ  | S_ASP_334 | OD2 | 3.337 |
| 6S3T | S_LYS_327 | NZ  | S_ASP_324 | OD1 | 3.856 |
| 6S3T | S_LYS_341 | NZ  | S_ASP_140 | OD1 | 3.205 |
| 6S3T | S_LYS_383 | NZ  | S_ASP_156 | OD2 | 3.396 |
| 6S3T | T_HIS_48  | ND1 | T_ASP_79  | OD1 | 3.029 |
| 6S3T | T_ARG_66  | NH1 | T_ASP_140 | OD2 | 3.288 |
| 6S3T | T_ARG_66  | NH2 | T_ASP_140 | OD1 | 3.559 |
| 6S3T | T_ARG_66  | NH2 | T_ASP_343 | OD1 | 2.920 |
| 6S3T | T_ARG_66  | NH2 | T_ASP_343 | OD2 | 3.765 |
| 6S3T | T_LYS_90  | NZ  | T_ASP_63  | OD1 | 3.971 |
| 6S3T | T_LYS_90  | NZ  | T_ASP_63  | OD2 | 2.711 |
| 6S3T | T_LYS_110 | NZ  | T_GLU_82  | OE1 | 3.369 |
| 6S3T | T_LYS_110 | NZ  | T_GLU_82  | OE2 | 3.374 |
| 6S3T | T_ARG_141 | NH1 | T_ASP_210 | OD1 | 3.860 |
| 6S3T | T_ARG_141 | NH1 | T_ASP_210 | OD2 | 3.680 |
| 6S3T | T_ARG_141 | NH2 | T_ASP_61  | OD1 | 2.654 |
| 6S3T | T_ARG_141 | NH2 | T_ASP_61  | OD2 | 3.845 |
| 6S3T | T_LYS_148 | NZ  | T_ASP_131 | OD1 | 3.022 |
| 6S3T | T_LYS_175 | NZ  | T_ASP_177 | OD1 | 2.862 |
| 6S3T | T_LYS_306 | NZ  | T_ASP_334 | OD1 | 3.070 |
| 6S3T | T_LYS_306 | NZ  | T_ASP_334 | OD2 | 3.338 |
| 6S3T | T_LYS_327 | NZ  | T_ASP_324 | OD1 | 3.858 |
| 6S3T | T_LYS_341 | NZ  | T_ASP_140 | OD1 | 3.202 |
| 6S3T | T_ARG_355 | NH1 | T_GLU_82  | OE1 | 3.957 |
| 6S3T | T_ARG_355 | NH1 | T_GLU_82  | OE2 | 3.099 |
| 6S3T | T_ARG_366 | NH1 | T_GLU_370 | OE2 | 3.935 |
| 6S3T | T_LYS_383 | NZ  | T_ASP_156 | OD2 | 3.383 |
| 6U02 | A_HIS_98  | NE2 | B_GLU_214 | OE2 | 3.838 |
| 6U02 | A_ARG_118 | NH2 | A_GLU_425 | OE1 | 3.303 |
| 6U02 | A_ARG_118 | NH2 | A_GLU_425 | OE2 | 3.788 |
| 6U02 | A_ARG_130 | NH1 | A_GLU_128 | OE1 | 3.104 |
| 6U02 | A_ARG_156 | NH2 | A_GLU_119 | OE1 | 3.056 |
| 6U02 | A_ARG_172 | NH2 | A_GLU_174 | OE2 | 3.004 |
| 6U02 | A_ARG_189 | NH2 | A_ASP_125 | OD1 | 2.704 |
| 6U02 | A_ARG_209 | NH1 | J_GLU_128 | OE2 | 3.226 |
| 6U02 | A_ARG_210 | NH2 | J_ASP_412 | OD1 | 3.355 |
| 6U02 | A_ARG_210 | NH2 | J_ASP_412 | OD2 | 3.535 |
| 6U02 | A_ARG_224 | NH2 | A_GLU_276 | OE2 | 2.857 |
| 6U02 | A_ARG_253 | NH2 | A_ASP_251 | OD1 | 3.915 |
| 6U02 | A_ARG_253 | NH2 | A_ASP_251 | OD2 | 3.078 |
| 6U02 | A_LYS_264 | NZ  | A_GLU_266 | OE2 | 3.592 |
| 6U02 | A_ARG_292 | NH1 | A_GLU_276 | OE1 | 3.981 |
| 6U02 | A_ARG_292 | NH2 | A_GLU_276 | OE1 | 3.522 |
| 6U02 | A_ARG_292 | NH2 | A_GLU_277 | OE1 | 3.270 |
| 6U02 | A_ARG_292 | NH2 | A_GLU_277 | OE2 | 3.103 |
| 6U02 | A_ARG_300 | NH2 | A_ASP_324 | OD1 | 3.840 |
| 6U02 | A_HIS_312 | ND1 | A_GLU_266 | OE1 | 2.873 |
| 6U02 | A_ARG_364 | NH1 | A_ASP_330 | OD1 | 3.366 |
| 6U02 | A_ARG_364 | NH1 | A_ASP_330 | OD2 | 3.020 |
| 6U02 | A_ARG_364 | NH2 | A_ASP_330 | OD2 | 3.213 |
| 6U02 | A_ARG_364 | NH2 | A_GLU_375 | OE2 | 3.763 |
| 6U02 | A_ARG_419 | NH1 | B_GLU_214 | OE2 | 3.906 |
| 6U02 | A_ARG_428 | NH1 | A_ASP_460 | OD2 | 2.812 |

|      |           |     |           |     |       |
|------|-----------|-----|-----------|-----|-------|
| 6U02 | A_ARG_428 | NH2 | A_GLU_433 | OE1 | 3.662 |
| 6U02 | A_ARG_428 | NH2 | A_GLU_433 | OE2 | 3.046 |
| 6U02 | L_ARG_24  | NH2 | L_ASP_70  | OD1 | 2.974 |
| 6U02 | L_ARG_61  | NH2 | L_GLU_81  | OE1 | 3.909 |
| 6U02 | L_ARG_61  | NH2 | L_ASP_82  | OD1 | 2.859 |
| 6U02 | L_ARG_61  | NH2 | L_ASP_82  | OD2 | 3.591 |
| 6U02 | L_LYS_103 | NZ  | L_GLU_105 | OE2 | 3.418 |
| 6U02 | H_ARG_38  | NH1 | H_ASP_86  | OD1 | 2.942 |
| 6U02 | H_ARG_38  | NH2 | H_ASP_86  | OD1 | 3.941 |
| 6U02 | H_LYS_52  | NZ  | H_GLU_56  | OE2 | 2.823 |
| 6U02 | H_LYS_64  | NZ  | H_ASP_61  | OD1 | 2.817 |
| 6U02 | H_ARG_66  | NH1 | H_ASP_86  | OD1 | 3.307 |
| 6U02 | H_ARG_66  | NH1 | H_ASP_86  | OD2 | 3.771 |
| 6U02 | H_ARG_66  | NH2 | H_ASP_86  | OD1 | 3.561 |
| 6U02 | H_ARG_66  | NH2 | H_ASP_86  | OD2 | 2.624 |
| 6U02 | B_HIS_98  | NE2 | E_GLU_214 | OE2 | 3.839 |
| 6U02 | B_ARG_118 | NH2 | B_GLU_425 | OE1 | 3.304 |
| 6U02 | B_ARG_118 | NH2 | B_GLU_425 | OE2 | 3.788 |
| 6U02 | B_ARG_130 | NH1 | B_GLU_128 | OE1 | 3.105 |
| 6U02 | B_ARG_156 | NH2 | B_GLU_119 | OE1 | 3.056 |
| 6U02 | B_ARG_172 | NH2 | B_GLU_174 | OE2 | 3.004 |
| 6U02 | B_ARG_189 | NH2 | B_ASP_125 | OD1 | 2.703 |
| 6U02 | B_ARG_209 | NH1 | A_GLU_128 | OE2 | 3.226 |
| 6U02 | B_ARG_210 | NH2 | A_ASP_412 | OD1 | 3.355 |
| 6U02 | B_ARG_210 | NH2 | A_ASP_412 | OD2 | 3.535 |
| 6U02 | B_ARG_224 | NH2 | B_GLU_276 | OE2 | 2.857 |
| 6U02 | B_ARG_253 | NH2 | B_ASP_251 | OD1 | 3.915 |
| 6U02 | B_ARG_253 | NH2 | B_ASP_251 | OD2 | 3.077 |
| 6U02 | B_LYS_264 | NZ  | B_GLU_266 | OE2 | 3.593 |
| 6U02 | B_ARG_292 | NH1 | B_GLU_276 | OE1 | 3.982 |
| 6U02 | B_ARG_292 | NH2 | B_GLU_276 | OE1 | 3.522 |
| 6U02 | B_ARG_292 | NH2 | B_GLU_277 | OE1 | 3.270 |
| 6U02 | B_ARG_292 | NH2 | B_GLU_277 | OE2 | 3.103 |
| 6U02 | B_ARG_300 | NH2 | B_ASP_324 | OD1 | 3.839 |
| 6U02 | B_HIS_312 | ND1 | B_GLU_266 | OE1 | 2.872 |
| 6U02 | B_ARG_364 | NH1 | B_ASP_330 | OD1 | 3.367 |
| 6U02 | B_ARG_364 | NH1 | B_ASP_330 | OD2 | 3.022 |
| 6U02 | B_ARG_364 | NH2 | B_ASP_330 | OD2 | 3.214 |
| 6U02 | B_ARG_364 | NH2 | B_GLU_375 | OE2 | 3.764 |
| 6U02 | B_ARG_419 | NH1 | E_GLU_214 | OE2 | 3.906 |
| 6U02 | B_ARG_428 | NH1 | B_ASP_460 | OD2 | 2.812 |
| 6U02 | B_ARG_428 | NH2 | B_GLU_433 | OE1 | 3.662 |
| 6U02 | B_ARG_428 | NH2 | B_GLU_433 | OE2 | 3.045 |
| 6U02 | C_ARG_24  | NH2 | C_ASP_70  | OD1 | 2.974 |
| 6U02 | C_ARG_61  | NH2 | C_GLU_81  | OE1 | 3.909 |
| 6U02 | C_ARG_61  | NH2 | C_ASP_82  | OD1 | 2.859 |
| 6U02 | C_ARG_61  | NH2 | C_ASP_82  | OD2 | 3.591 |
| 6U02 | C_LYS_103 | NZ  | C_GLU_105 | OE2 | 3.418 |
| 6U02 | D_ARG_38  | NH1 | D_ASP_86  | OD1 | 2.941 |
| 6U02 | D_ARG_38  | NH2 | D_ASP_86  | OD1 | 3.942 |
| 6U02 | D_LYS_52  | NZ  | D_GLU_56  | OE2 | 2.822 |
| 6U02 | D_LYS_64  | NZ  | D_ASP_61  | OD1 | 2.818 |
| 6U02 | D_ARG_66  | NH1 | D_ASP_86  | OD1 | 3.308 |
| 6U02 | D_ARG_66  | NH1 | D_ASP_86  | OD2 | 3.771 |
| 6U02 | D_ARG_66  | NH2 | D_ASP_86  | OD1 | 3.562 |
| 6U02 | D_ARG_66  | NH2 | D_ASP_86  | OD2 | 2.624 |
| 6U02 | E_HIS_98  | NE2 | J_GLU_214 | OE2 | 3.838 |
| 6U02 | E_ARG_118 | NH2 | E_GLU_425 | OE1 | 3.304 |

|      |           |     |           |     |       |
|------|-----------|-----|-----------|-----|-------|
| 6U02 | E_ARG_118 | NH2 | E_GLU_425 | OE2 | 3.789 |
| 6U02 | E_ARG_130 | NH1 | E_GLU_128 | OE1 | 3.104 |
| 6U02 | E_ARG_156 | NH2 | E_GLU_119 | OE1 | 3.056 |
| 6U02 | E_ARG_172 | NH2 | E_GLU_174 | OE2 | 3.004 |
| 6U02 | E_ARG_189 | NH2 | E_ASP_125 | OD1 | 2.704 |
| 6U02 | E_ARG_209 | NH1 | B_GLU_128 | OE2 | 3.226 |
| 6U02 | E_ARG_210 | NH2 | B_ASP_412 | OD1 | 3.355 |
| 6U02 | E_ARG_210 | NH2 | B_ASP_412 | OD2 | 3.536 |
| 6U02 | E_ARG_224 | NH2 | E_GLU_276 | OE2 | 2.858 |
| 6U02 | E_ARG_253 | NH2 | E_ASP_251 | OD1 | 3.916 |
| 6U02 | E_ARG_253 | NH2 | E_ASP_251 | OD2 | 3.078 |
| 6U02 | E_LYS_264 | NZ  | E_GLU_266 | OE2 | 3.592 |
| 6U02 | E_ARG_292 | NH1 | E_GLU_276 | OE1 | 3.982 |
| 6U02 | E_ARG_292 | NH2 | E_GLU_276 | OE1 | 3.522 |
| 6U02 | E_ARG_292 | NH2 | E_GLU_277 | OE1 | 3.270 |
| 6U02 | E_ARG_292 | NH2 | E_GLU_277 | OE2 | 3.103 |
| 6U02 | E_ARG_300 | NH2 | E_ASP_324 | OD1 | 3.839 |
| 6U02 | E_HIS_312 | ND1 | E_GLU_266 | OE1 | 2.873 |
| 6U02 | E_ARG_364 | NH1 | E_ASP_330 | OD1 | 3.366 |
| 6U02 | E_ARG_364 | NH1 | E_ASP_330 | OD2 | 3.021 |
| 6U02 | E_ARG_364 | NH2 | E_ASP_330 | OD2 | 3.214 |
| 6U02 | E_ARG_364 | NH2 | E_GLU_375 | OE2 | 3.764 |
| 6U02 | E_ARG_419 | NH1 | J_GLU_214 | OE2 | 3.906 |
| 6U02 | E_ARG_428 | NH1 | E_ASP_460 | OD2 | 2.812 |
| 6U02 | E_ARG_428 | NH2 | E_GLU_433 | OE1 | 3.663 |
| 6U02 | E_ARG_428 | NH2 | E_GLU_433 | OE2 | 3.046 |
| 6U02 | F_ARG_24  | NH2 | F_ASP_70  | OD1 | 2.973 |
| 6U02 | F_ARG_61  | NH2 | F_GLU_81  | OE1 | 3.909 |
| 6U02 | F_ARG_61  | NH2 | F_ASP_82  | OD1 | 2.860 |
| 6U02 | F_ARG_61  | NH2 | F_ASP_82  | OD2 | 3.591 |
| 6U02 | F_LYS_103 | NZ  | F_GLU_105 | OE2 | 3.417 |
| 6U02 | G_ARG_38  | NH1 | G_ASP_86  | OD1 | 2.942 |
| 6U02 | G_ARG_38  | NH2 | G_ASP_86  | OD1 | 3.942 |
| 6U02 | G_LYS_52  | NZ  | G_GLU_56  | OE2 | 2.823 |
| 6U02 | G_LYS_64  | NZ  | G_ASP_61  | OD1 | 2.819 |
| 6U02 | G_ARG_66  | NH1 | G_ASP_86  | OD1 | 3.308 |
| 6U02 | G_ARG_66  | NH1 | G_ASP_86  | OD2 | 3.771 |
| 6U02 | G_ARG_66  | NH2 | G_ASP_86  | OD1 | 3.561 |
| 6U02 | G_ARG_66  | NH2 | G_ASP_86  | OD2 | 2.624 |
| 6U02 | J_HIS_98  | NE2 | A_GLU_214 | OE2 | 3.838 |
| 6U02 | J_ARG_118 | NH2 | J_GLU_425 | OE1 | 3.304 |
| 6U02 | J_ARG_118 | NH2 | J_GLU_425 | OE2 | 3.788 |
| 6U02 | J_ARG_130 | NH1 | J_GLU_128 | OE1 | 3.104 |
| 6U02 | J_ARG_156 | NH2 | J_GLU_119 | OE1 | 3.055 |
| 6U02 | J_ARG_172 | NH2 | J_GLU_174 | OE2 | 3.005 |
| 6U02 | J_ARG_189 | NH2 | J_ASP_125 | OD1 | 2.704 |
| 6U02 | J_ARG_209 | NH1 | E_GLU_128 | OE2 | 3.226 |
| 6U02 | J_ARG_210 | NH2 | E_ASP_412 | OD1 | 3.356 |
| 6U02 | J_ARG_210 | NH2 | E_ASP_412 | OD2 | 3.535 |
| 6U02 | J_ARG_224 | NH2 | J_GLU_276 | OE2 | 2.857 |
| 6U02 | J_ARG_253 | NH2 | J_ASP_251 | OD1 | 3.916 |
| 6U02 | J_ARG_253 | NH2 | J_ASP_251 | OD2 | 3.078 |
| 6U02 | J_LYS_264 | NZ  | J_GLU_266 | OE2 | 3.593 |
| 6U02 | J_ARG_292 | NH1 | J_GLU_276 | OE1 | 3.982 |
| 6U02 | J_ARG_292 | NH2 | J_GLU_276 | OE1 | 3.522 |
| 6U02 | J_ARG_292 | NH2 | J_GLU_277 | OE1 | 3.270 |
| 6U02 | J_ARG_292 | NH2 | J_GLU_277 | OE2 | 3.103 |
| 6U02 | J_ARG_300 | NH2 | J_ASP_324 | OD1 | 3.839 |

|      |           |     |            |     |       |
|------|-----------|-----|------------|-----|-------|
| 6U02 | J_HIS_312 | ND1 | J_GLU_266  | OE1 | 2.872 |
| 6U02 | J_ARG_364 | NH1 | J_ASP_330  | OD1 | 3.366 |
| 6U02 | J_ARG_364 | NH1 | J_ASP_330  | OD2 | 3.021 |
| 6U02 | J_ARG_364 | NH2 | J_ASP_330  | OD2 | 3.215 |
| 6U02 | J_ARG_364 | NH2 | J_GLU_375  | OE2 | 3.763 |
| 6U02 | J_ARG_419 | NH1 | A_GLU_214  | OE2 | 3.906 |
| 6U02 | J_ARG_428 | NH1 | J_ASP_460  | OD2 | 2.812 |
| 6U02 | J_ARG_428 | NH2 | J_GLU_433  | OE1 | 3.663 |
| 6U02 | J_ARG_428 | NH2 | J_GLU_433  | OE2 | 3.047 |
| 6U02 | L_ARG_24  | NH2 | L_ASP_70   | OD1 | 2.974 |
| 6U02 | L_ARG_61  | NH2 | L_GLU_81   | OE1 | 3.910 |
| 6U02 | L_ARG_61  | NH2 | L_ASP_82   | OD1 | 2.860 |
| 6U02 | L_ARG_61  | NH2 | L_ASP_82   | OD2 | 3.591 |
| 6U02 | L_LYS_103 | NZ  | L_GLU_105  | OE2 | 3.418 |
| 6U02 | K_ARG_38  | NH1 | K_ASP_86   | OD1 | 2.942 |
| 6U02 | K_ARG_38  | NH2 | K_ASP_86   | OD1 | 3.942 |
| 6U02 | K_LYS_52  | NZ  | K_GLU_56   | OE2 | 2.823 |
| 6U02 | K_LYS_64  | NZ  | K_ASP_61   | OD1 | 2.819 |
| 6U02 | K_ARG_66  | NH1 | K_ASP_86   | OD1 | 3.307 |
| 6U02 | K_ARG_66  | NH1 | K_ASP_86   | OD2 | 3.771 |
| 6U02 | K_ARG_66  | NH2 | K_ASP_86   | OD1 | 3.561 |
| 6U02 | K_ARG_66  | NH2 | K_ASP_86   | OD2 | 2.624 |
| 6U1T | H_ARG_38  | NH1 | H_ASP_90   | OD1 | 2.918 |
| 6U1T | H_ARG_38  | NH2 | H_GLU_46   | OE1 | 3.164 |
| 6U1T | H_ARG_38  | NH2 | H_ASP_90   | OD1 | 3.940 |
| 6U1T | H_ARG_67  | NH1 | H_ASP_90   | OD1 | 3.821 |
| 6U1T | H_ARG_67  | NH1 | H_ASP_90   | OD2 | 2.731 |
| 6U1T | H_ARG_67  | NH2 | H_ASP_90   | OD1 | 3.017 |
| 6U1T | H_ARG_67  | NH2 | H_ASP_90   | OD2 | 3.451 |
| 6U1T | L_ARG_61  | NH2 | L_ASP_82   | OD1 | 2.857 |
| 6U1T | L_ARG_61  | NH2 | L_ASP_82   | OD2 | 3.548 |
| 6U1T | L_LYS_142 | NZ  | L_GLU_105  | OE1 | 3.135 |
| 6U1T | L_LYS_149 | NZ  | L_GLU_195  | OE1 | 3.622 |
| 6U1T | L_LYS_149 | NZ  | L_GLU_195  | OE2 | 2.931 |
| 6U1T | L_ARG_155 | NH1 | L_GLU_185  | OE1 | 3.214 |
| 6U1T | L_ARG_155 | NH1 | L_GLU_185  | OE2 | 3.203 |
| 6U1T | L_ARG_155 | NH2 | L_GLU_185  | OE1 | 3.040 |
| 6U1T | L_HIS_189 | ND1 | L_ASP_151  | OD2 | 3.058 |
| 6U1T | L_LYS_199 | NZ  | L_ASP_110  | OD2 | 3.885 |
| 6U59 | A_LYS_34  | NZ  | B_ASP_612  | OD1 | 2.489 |
| 6U59 | A_LYS_46  | NZ  | A_GLU_492  | OE1 | 2.715 |
| 6U59 | A_LYS_170 | NZ  | A_GLU_172  | OE2 | 3.768 |
| 6U59 | A_LYS_227 | NZ  | A_GLU_83   | OE1 | 3.011 |
| 6U59 | A_LYS_227 | NZ  | A_GLU_83   | OE2 | 3.430 |
| 6U59 | A_LYS_231 | NZ  | A_GLU_268  | OE2 | 2.869 |
| 6U59 | A_HIS_249 | NE2 | A_GLU_482  | OE2 | 2.821 |
| 6U59 | A_LYS_282 | NZ  | A_ASP_279  | OD2 | 2.817 |
| 6U59 | A_ARG_298 | NH1 | A_GLU_381  | OE2 | 3.452 |
| 6U59 | A_ARG_298 | NH2 | A_GLU_381  | OE1 | 3.785 |
| 6U59 | A_ARG_298 | NH2 | A_GLU_381  | OE2 | 3.680 |
| 6U59 | A_ARG_327 | NH1 | A_ASP_148A | OD1 | 3.884 |
| 6U59 | A_ARG_327 | NH1 | A_ASP_148A | OD2 | 3.044 |
| 6U59 | A_LYS_335 | NZ  | A_GLU_408  | OE1 | 3.651 |
| 6U59 | A_ARG_337 | NH1 | A_GLU_290  | OE1 | 2.993 |
| 6U59 | A_ARG_337 | NH2 | A_GLU_290  | OE1 | 2.941 |
| 6U59 | A_LYS_356 | NZ  | A_GLU_466  | OE2 | 2.969 |
| 6U59 | A_ARG_399 | NH1 | A_ASP_401  | OD2 | 3.230 |
| 6U59 | A_ARG_419 | NH2 | A_GLU_153  | OE2 | 3.607 |

|      |           |     |            |     |       |
|------|-----------|-----|------------|-----|-------|
| 6U59 | A_LYS_421 | NZ  | A_GLU_370  | OE2 | 3.544 |
| 6U59 | A_LYS_432 | NZ  | A_ASP_113  | OD1 | 2.692 |
| 6U59 | A_LYS_432 | NZ  | A_ASP_113  | OD2 | 2.690 |
| 6U59 | A_ARG_456 | NH2 | A_GLU_466  | OE1 | 2.731 |
| 6U59 | A_ARG_456 | NH2 | A_GLU_466  | OE2 | 3.143 |
| 6U59 | A_ARG_469 | NH2 | A_ASP_457  | OD2 | 2.912 |
| 6U59 | A_ARG_476 | NH2 | A_GLU_102  | OE1 | 3.714 |
| 6U59 | A_ARG_476 | NH2 | A_GLU_102  | OE2 | 3.058 |
| 6U59 | A_ARG_480 | NH1 | A_ASP_477  | OD1 | 2.833 |
| 6U59 | A_LYS_487 | NZ  | A_GLU_47   | OE1 | 3.413 |
| 6U59 | A_LYS_487 | NZ  | A_GLU_91   | OE2 | 2.867 |
| 6U59 | A_LYS_490 | NZ  | A_GLU_492  | OE2 | 3.991 |
| 6U59 | A_ARG_504 | NH1 | I_GLU_662  | OE1 | 3.209 |
| 6U59 | A_ARG_504 | NH1 | I_GLU_662  | OE2 | 2.833 |
| 6U59 | A_ARG_504 | NH2 | I_GLU_662  | OE2 | 3.911 |
| 6U59 | B_LYS_574 | NZ  | A_ASP_107  | OD1 | 2.403 |
| 6U59 | B_ARG_579 | NH2 | I_GLU_584  | OE1 | 3.024 |
| 6U59 | B_ARG_588 | NH2 | B_GLU_584  | OE2 | 3.079 |
| 6U59 | B_LYS_617 | NZ  | B_GLU_634  | OE1 | 2.908 |
| 6U59 | B_LYS_617 | NZ  | B_GLU_634  | OE2 | 3.808 |
| 6U59 | L_ARG_28  | NH2 | L_ASP_95D  | OD2 | 3.021 |
| 6U59 | L_ARG_50  | NH1 | A_GLU_269  | OE2 | 3.175 |
| 6U59 | L_ARG_50  | NH2 | A_GLU_268  | OE1 | 2.965 |
| 6U59 | L_ARG_50  | NH2 | A_GLU_269  | OE2 | 3.221 |
| 6U59 | L_ARG_61  | NH1 | L_GLU_79   | OE1 | 3.076 |
| 6U59 | L_ARG_61  | NH1 | L_ASP_82   | OD2 | 2.866 |
| 6U59 | L_ARG_61  | NH2 | L_ASP_77   | OD2 | 3.575 |
| 6U59 | L_ARG_61  | NH2 | L_GLU_79   | OE1 | 3.931 |
| 6U59 | L_ARG_95A | NH1 | A_GLU_350  | OE2 | 3.796 |
| 6U59 | L_ARG_95A | NH2 | A_GLU_350  | OE1 | 3.217 |
| 6U59 | L_ARG_95A | NH2 | A_GLU_350  | OE2 | 3.041 |
| 6U59 | L_ARG_95A | NH2 | A_GLU_351  | OE1 | 3.921 |
| 6U59 | H_ARG_38  | NH1 | H_ASP_86   | OD1 | 2.876 |
| 6U59 | H_ARG_38  | NH2 | H_GLU_46   | OE1 | 2.785 |
| 6U59 | H_ARG_38  | NH2 | H_GLU_46   | OE2 | 3.942 |
| 6U59 | H_ARG_66  | NH1 | H_ASP_86   | OD1 | 2.903 |
| 6U59 | H_ARG_66  | NH1 | H_ASP_86   | OD2 | 3.436 |
| 6U59 | C_LYS_34  | NZ  | D_ASP_612  | OD1 | 2.489 |
| 6U59 | C_LYS_46  | NZ  | C_GLU_492  | OE1 | 2.715 |
| 6U59 | C_LYS_170 | NZ  | C_GLU_172  | OE2 | 3.768 |
| 6U59 | C_LYS_227 | NZ  | C_GLU_83   | OE1 | 3.011 |
| 6U59 | C_LYS_227 | NZ  | C_GLU_83   | OE2 | 3.430 |
| 6U59 | C_LYS_231 | NZ  | C_GLU_268  | OE2 | 2.869 |
| 6U59 | C_HIS_249 | NE2 | C_GLU_482  | OE2 | 2.820 |
| 6U59 | C_LYS_282 | NZ  | C_ASP_279  | OD2 | 2.817 |
| 6U59 | C_ARG_298 | NH1 | C_GLU_381  | OE2 | 3.453 |
| 6U59 | C_ARG_298 | NH2 | C_GLU_381  | OE1 | 3.785 |
| 6U59 | C_ARG_298 | NH2 | C_GLU_381  | OE2 | 3.680 |
| 6U59 | C_ARG_327 | NH1 | C_ASP_148A | OD1 | 3.883 |
| 6U59 | C_ARG_327 | NH1 | C_ASP_148A | OD2 | 3.044 |
| 6U59 | C_LYS_335 | NZ  | C_GLU_408  | OE1 | 3.651 |
| 6U59 | C_ARG_337 | NH1 | C_GLU_290  | OE1 | 2.993 |
| 6U59 | C_ARG_337 | NH2 | C_GLU_290  | OE1 | 2.942 |
| 6U59 | C_LYS_356 | NZ  | C_GLU_466  | OE2 | 2.969 |
| 6U59 | C_ARG_399 | NH1 | C_ASP_401  | OD2 | 3.229 |
| 6U59 | C_ARG_419 | NH2 | C_GLU_153  | OE2 | 3.607 |
| 6U59 | C_LYS_421 | NZ  | C_GLU_370  | OE2 | 3.543 |
| 6U59 | C_LYS_432 | NZ  | C_ASP_113  | OD1 | 2.692 |

|      |           |     |            |     |       |
|------|-----------|-----|------------|-----|-------|
| 6U59 | C_LYS_432 | NZ  | C_ASP_113  | OD2 | 2.691 |
| 6U59 | C_ARG_456 | NH2 | C_GLU_466  | OE1 | 2.732 |
| 6U59 | C_ARG_456 | NH2 | C_GLU_466  | OE2 | 3.144 |
| 6U59 | C_ARG_469 | NH2 | C_ASP_457  | OD2 | 2.911 |
| 6U59 | C_ARG_476 | NH2 | C_GLU_102  | OE1 | 3.714 |
| 6U59 | C_ARG_476 | NH2 | C_GLU_102  | OE2 | 3.058 |
| 6U59 | C_ARG_480 | NH1 | C_ASP_477  | OD1 | 2.832 |
| 6U59 | C_LYS_487 | NZ  | C_GLU_47   | OE1 | 3.414 |
| 6U59 | C_LYS_487 | NZ  | C_GLU_91   | OE2 | 2.866 |
| 6U59 | C_LYS_490 | NZ  | C_GLU_492  | OE2 | 3.991 |
| 6U59 | C_ARG_504 | NH1 | B_GLU_662  | OE1 | 3.208 |
| 6U59 | C_ARG_504 | NH1 | B_GLU_662  | OE2 | 2.832 |
| 6U59 | C_ARG_504 | NH2 | B_GLU_662  | OE2 | 3.910 |
| 6U59 | D_LYS_574 | NZ  | C_ASP_107  | OD1 | 2.403 |
| 6U59 | D_ARG_579 | NH2 | B_GLU_584  | OE1 | 3.024 |
| 6U59 | D_ARG_588 | NH2 | D_GLU_584  | OE2 | 3.079 |
| 6U59 | D_LYS_617 | NZ  | D_GLU_634  | OE1 | 2.908 |
| 6U59 | D_LYS_617 | NZ  | D_GLU_634  | OE2 | 3.808 |
| 6U59 | E_ARG_28  | NH2 | E_ASP_95D  | OD2 | 3.022 |
| 6U59 | E_ARG_50  | NH1 | C_GLU_269  | OE2 | 3.175 |
| 6U59 | E_ARG_50  | NH2 | C_GLU_268  | OE1 | 2.965 |
| 6U59 | E_ARG_50  | NH2 | C_GLU_269  | OE2 | 3.221 |
| 6U59 | E_ARG_61  | NH1 | E_GLU_79   | OE1 | 3.076 |
| 6U59 | E_ARG_61  | NH1 | E_ASP_82   | OD2 | 2.865 |
| 6U59 | E_ARG_61  | NH2 | E_ASP_77   | OD2 | 3.574 |
| 6U59 | E_ARG_61  | NH2 | E_GLU_79   | OE1 | 3.931 |
| 6U59 | E_ARG_95A | NH1 | C_GLU_350  | OE2 | 3.795 |
| 6U59 | E_ARG_95A | NH2 | C_GLU_350  | OE1 | 3.216 |
| 6U59 | E_ARG_95A | NH2 | C_GLU_350  | OE2 | 3.040 |
| 6U59 | E_ARG_95A | NH2 | C_GLU_351  | OE1 | 3.921 |
| 6U59 | F_ARG_38  | NH1 | F_ASP_86   | OD1 | 2.877 |
| 6U59 | F_ARG_38  | NH2 | F_GLU_46   | OE1 | 2.786 |
| 6U59 | F_ARG_38  | NH2 | F_GLU_46   | OE2 | 3.943 |
| 6U59 | F_ARG_66  | NH1 | F_ASP_86   | OD1 | 2.903 |
| 6U59 | F_ARG_66  | NH1 | F_ASP_86   | OD2 | 3.437 |
| 6U59 | G_LYS_34  | NZ  | I_ASP_612  | OD1 | 2.489 |
| 6U59 | G_LYS_46  | NZ  | G_GLU_492  | OE1 | 2.715 |
| 6U59 | G_LYS_170 | NZ  | G_GLU_172  | OE2 | 3.768 |
| 6U59 | G_LYS_227 | NZ  | G_GLU_83   | OE1 | 3.011 |
| 6U59 | G_LYS_227 | NZ  | G_GLU_83   | OE2 | 3.430 |
| 6U59 | G_LYS_231 | NZ  | G_GLU_268  | OE2 | 2.869 |
| 6U59 | G_HIS_249 | NE2 | G_GLU_482  | OE2 | 2.821 |
| 6U59 | G_LYS_282 | NZ  | G_ASP_279  | OD2 | 2.816 |
| 6U59 | G_ARG_298 | NH1 | G_GLU_381  | OE2 | 3.452 |
| 6U59 | G_ARG_298 | NH2 | G_GLU_381  | OE1 | 3.785 |
| 6U59 | G_ARG_298 | NH2 | G_GLU_381  | OE2 | 3.679 |
| 6U59 | G_ARG_327 | NH1 | G_ASP_148A | OD1 | 3.883 |
| 6U59 | G_ARG_327 | NH1 | G_ASP_148A | OD2 | 3.044 |
| 6U59 | G_LYS_335 | NZ  | G_GLU_408  | OE1 | 3.651 |
| 6U59 | G_ARG_337 | NH1 | G_GLU_290  | OE1 | 2.994 |
| 6U59 | G_ARG_337 | NH2 | G_GLU_290  | OE1 | 2.942 |
| 6U59 | G_LYS_356 | NZ  | G_GLU_466  | OE2 | 2.969 |
| 6U59 | G_ARG_399 | NH1 | G_ASP_401  | OD2 | 3.230 |
| 6U59 | G_ARG_419 | NH2 | G_GLU_153  | OE2 | 3.607 |
| 6U59 | G_LYS_421 | NZ  | G_GLU_370  | OE2 | 3.543 |
| 6U59 | G_LYS_432 | NZ  | G_ASP_113  | OD1 | 2.692 |
| 6U59 | G_LYS_432 | NZ  | G_ASP_113  | OD2 | 2.691 |
| 6U59 | G_ARG_456 | NH2 | G_GLU_466  | OE1 | 2.731 |



|      |           |     |           |     |       |
|------|-----------|-----|-----------|-----|-------|
| 6U59 | G_ARG_456 | NH2 | G_GLU_466 | OE2 | 3.144 |
| 6U59 | G_ARG_469 | NH2 | G_ASP_457 | OD2 | 2.912 |
| 6U59 | G_ARG_476 | NH2 | G_GLU_102 | OE1 | 3.714 |
| 6U59 | G_ARG_476 | NH2 | G_GLU_102 | OE2 | 3.058 |
| 6U59 | G_ARG_480 | NH1 | G_ASP_477 | OD1 | 2.833 |
| 6U59 | G_LYS_487 | NZ  | G_GLU_47  | OE1 | 3.414 |
| 6U59 | G_LYS_487 | NZ  | G_GLU_91  | OE2 | 2.866 |
| 6U59 | G_LYS_490 | NZ  | G_GLU_492 | OE2 | 3.990 |
| 6U59 | G_ARG_504 | NH1 | D_GLU_662 | OE1 | 3.209 |
| 6U59 | G_ARG_504 | NH1 | D_GLU_662 | OE2 | 2.833 |
| 6U59 | G_ARG_504 | NH2 | D_GLU_662 | OE2 | 3.910 |
| 6U59 | I_LYS_574 | NZ  | G_ASP_107 | OD1 | 2.403 |
| 6U59 | I_ARG_579 | NH2 | D_GLU_584 | OE1 | 3.025 |
| 6U59 | I_ARG_588 | NH2 | I_GLU_584 | OE2 | 3.079 |
| 6U59 | I_LYS_617 | NZ  | I_GLU_634 | OE1 | 2.907 |
| 6U59 | I_LYS_617 | NZ  | I_GLU_634 | OE2 | 3.808 |
| 6U59 | J_ARG_28  | NH2 | J_ASP_95D | OD2 | 3.022 |
| 6U59 | J_ARG_50  | NH1 | G_GLU_269 | OE2 | 3.175 |
| 6U59 | J_ARG_50  | NH2 | G_GLU_268 | OE1 | 2.965 |
| 6U59 | J_ARG_50  | NH2 | G_GLU_269 | OE2 | 3.220 |
| 6U59 | J_ARG_61  | NH1 | J_GLU_79  | OE1 | 3.077 |
| 6U59 | J_ARG_61  | NH1 | J_ASP_82  | OD2 | 2.866 |
| 6U59 | J_ARG_61  | NH2 | J_ASP_77  | OD2 | 3.574 |
| 6U59 | J_ARG_61  | NH2 | J_GLU_79  | OE1 | 3.931 |
| 6U59 | J_ARG_95A | NH1 | G_GLU_350 | OE2 | 3.796 |
| 6U59 | J_ARG_95A | NH2 | G_GLU_350 | OE1 | 3.217 |
| 6U59 | J_ARG_95A | NH2 | G_GLU_350 | OE2 | 3.041 |
| 6U59 | J_ARG_95A | NH2 | G_GLU_351 | OE1 | 3.921 |
| 6U59 | K_ARG_38  | NH1 | K_ASP_86  | OD1 | 2.876 |
| 6U59 | K_ARG_38  | NH2 | K_GLU_46  | OE1 | 2.786 |
| 6U59 | K_ARG_38  | NH2 | K_GLU_46  | OE2 | 3.943 |
| 6U59 | K_ARG_66  | NH1 | K_ASP_86  | OD1 | 2.904 |
| 6U59 | K_ARG_66  | NH1 | K_ASP_86  | OD2 | 3.437 |
| 6UG7 | L_ARG_60  | NH1 | L_GLU_78  | OE1 | 3.385 |
| 6UG7 | L_ARG_60  | NH1 | L_GLU_78  | OE2 | 3.452 |
| 6UG7 | L_ARG_60  | NH2 | L_GLU_78  | OE1 | 3.649 |
| 6UG7 | L_ARG_60  | NH2 | L_GLU_80  | OE2 | 2.876 |
| 6UG7 | L_ARG_60  | NH2 | L_ASP_81  | OD1 | 2.780 |
| 6UG7 | L_ARG_60  | NH2 | L_ASP_81  | OD2 | 3.537 |
| 6UG7 | L_LYS_148 | NZ  | L_GLU_194 | OE2 | 2.618 |
| 6UG7 | L_LYS_168 | NZ  | L_ASP_166 | OD1 | 3.206 |
| 6UG7 | L_LYS_168 | NZ  | L_ASP_166 | OD2 | 3.551 |
| 6UG7 | L_HIS_188 | ND1 | L_ASP_150 | OD2 | 3.280 |
| 6UG7 | H_ARG_38  | NH1 | H_ASP_89  | OD1 | 2.846 |
| 6UG7 | H_ARG_38  | NH2 | H_ASP_89  | OD1 | 3.706 |
| 6UG7 | H_HIS_60  | NE2 | L_GLU_1   | OE1 | 2.854 |
| 6UG7 | H_HIS_60  | NE2 | L_GLU_1   | OE2 | 3.808 |
| 6UG7 | H_ARG_66  | NH1 | H_ASP_89  | OD1 | 3.754 |
| 6UG7 | H_ARG_66  | NH1 | H_ASP_89  | OD2 | 2.880 |
| 6UG7 | H_ARG_66  | NH2 | H_ASP_89  | OD1 | 3.067 |
| 6UG7 | H_ARG_66  | NH2 | H_ASP_89  | OD2 | 3.547 |
| 6UG7 | H_LYS_147 | NZ  | H_ASP_148 | OD1 | 3.523 |
| 6UG7 | H_LYS_213 | NZ  | L_GLU_122 | OE1 | 2.927 |
| 6UG7 | H_LYS_213 | NZ  | L_GLU_122 | OE2 | 3.960 |
| 6UG7 | H_LYS_214 | NZ  | H_GLU_216 | OE1 | 3.060 |
| 6UG8 | L_ARG_60  | NH1 | L_GLU_78  | OE1 | 3.498 |
| 6UG8 | L_ARG_60  | NH2 | L_GLU_78  | OE1 | 3.557 |
| 6UG8 | L_ARG_60  | NH2 | L_GLU_80  | OE2 | 2.819 |

|      |           |     |           |     |       |
|------|-----------|-----|-----------|-----|-------|
| 6UG8 | L_ARG_60  | NH2 | L_ASP_81  | OD1 | 2.739 |
| 6UG8 | L_ARG_60  | NH2 | L_ASP_81  | OD2 | 3.504 |
| 6UG8 | L_LYS_148 | NZ  | L_GLU_194 | OE1 | 2.956 |
| 6UG8 | L_LYS_148 | NZ  | L_GLU_194 | OE2 | 3.899 |
| 6UG8 | L_HIS_188 | ND1 | L_ASP_184 | OD1 | 3.549 |
| 6UG8 | H_ARG_38  | NH1 | H_ASP_89  | OD1 | 2.810 |
| 6UG8 | H_ARG_38  | NH2 | H_GLU_46  | OE1 | 3.785 |
| 6UG8 | H_ARG_38  | NH2 | H_GLU_46  | OE2 | 2.904 |
| 6UG8 | H_ARG_38  | NH2 | H_ASP_89  | OD1 | 3.679 |
| 6UG8 | H_HIS_60  | NE2 | L_GLU_1   | OE1 | 3.688 |
| 6UG8 | H_ARG_66  | NH1 | H_ASP_89  | OD1 | 3.627 |
| 6UG8 | H_ARG_66  | NH1 | H_ASP_89  | OD2 | 2.995 |
| 6UG8 | H_ARG_66  | NH2 | H_ASP_89  | OD1 | 2.888 |
| 6UG8 | H_ARG_66  | NH2 | H_ASP_89  | OD2 | 3.572 |
| 6UG8 | H_LYS_75  | NZ  | H_ASP_72  | OD2 | 3.818 |
| 6UG8 | H_LYS_147 | NZ  | H_ASP_148 | OD1 | 3.749 |
| 6UG8 | H_LYS_147 | NZ  | H_ASP_148 | OD2 | 3.867 |
| 6UG8 | H_LYS_213 | NZ  | L_GLU_122 | OE1 | 2.779 |
| 6UG8 | H_LYS_213 | NZ  | L_GLU_122 | OE2 | 3.811 |
| 6UG8 | H_LYS_214 | NZ  | H_GLU_216 | OE1 | 3.891 |
| 6UG9 | L_ARG_60  | NH1 | L_GLU_78  | OE1 | 3.657 |
| 6UG9 | L_ARG_60  | NH2 | L_GLU_80  | OE2 | 2.753 |
| 6UG9 | L_ARG_60  | NH2 | L_ASP_81  | OD1 | 2.737 |
| 6UG9 | L_ARG_60  | NH2 | L_ASP_81  | OD2 | 3.762 |
| 6UG9 | L_LYS_102 | NZ  | L_GLU_164 | OE1 | 3.252 |
| 6UG9 | L_LYS_102 | NZ  | L_GLU_164 | OE2 | 2.915 |
| 6UG9 | L_LYS_106 | NZ  | L_GLU_17  | OE2 | 3.780 |
| 6UG9 | L_ARG_141 | NH1 | L_GLU_164 | OE2 | 3.279 |
| 6UG9 | L_ARG_141 | NH2 | L_GLU_104 | OE1 | 3.321 |
| 6UG9 | L_ARG_141 | NH2 | L_GLU_104 | OE2 | 3.680 |
| 6UG9 | L_ARG_210 | NH1 | L_GLU_186 | OE2 | 3.814 |
| 6UG9 | H_ARG_38  | NH1 | H_ASP_89  | OD1 | 2.732 |
| 6UG9 | H_ARG_38  | NH2 | H_GLU_46  | OE2 | 3.364 |
| 6UG9 | H_ARG_38  | NH2 | H_ASP_89  | OD1 | 3.514 |
| 6UG9 | H_HIS_60  | NE2 | L_GLU_1   | OE2 | 3.673 |
| 6UG9 | H_HIS_60  | NE2 | H_GLU_46  | OE1 | 3.948 |
| 6UG9 | H_ARG_66  | NH1 | H_ASP_89  | OD1 | 3.412 |
| 6UG9 | H_ARG_66  | NH1 | H_ASP_89  | OD2 | 3.392 |
| 6UG9 | H_ARG_66  | NH2 | H_ASP_89  | OD1 | 3.881 |
| 6UG9 | H_ARG_66  | NH2 | H_ASP_89  | OD2 | 2.589 |
| 6UG9 | H_LYS_147 | NZ  | H_ASP_148 | OD1 | 3.376 |
| 6UG9 | H_LYS_147 | NZ  | H_ASP_148 | OD2 | 3.331 |
| 6UG9 | H_LYS_213 | NZ  | L_GLU_122 | OE1 | 3.853 |
| 6UG9 | H_LYS_214 | NZ  | H_GLU_216 | OE2 | 3.824 |
| 6UG9 | B_LYS_52  | NZ  | B_ASP_49  | OD2 | 3.304 |
| 6UG9 | B_ARG_60  | NH2 | B_GLU_80  | OE2 | 3.597 |
| 6UG9 | B_ARG_60  | NH2 | B_ASP_81  | OD1 | 2.874 |
| 6UG9 | B_ARG_60  | NH2 | B_ASP_81  | OD2 | 3.455 |
| 6UG9 | B_LYS_102 | NZ  | B_GLU_164 | OE1 | 3.160 |
| 6UG9 | B_LYS_102 | NZ  | B_GLU_164 | OE2 | 3.546 |
| 6UG9 | B_ARG_141 | NH1 | B_GLU_104 | OE1 | 3.634 |
| 6UG9 | B_ARG_141 | NH1 | B_GLU_104 | OE2 | 3.870 |
| 6UG9 | B_LYS_148 | NZ  | B_GLU_194 | OE1 | 3.810 |
| 6UG9 | B_LYS_148 | NZ  | B_GLU_194 | OE2 | 3.615 |
| 6UG9 | B_HIS_188 | ND1 | B_ASP_150 | OD2 | 3.288 |
| 6UG9 | B_ARG_210 | NH1 | B_GLU_186 | OE1 | 3.776 |
| 6UG9 | A_ARG_38  | NH1 | A_ASP_89  | OD1 | 2.722 |
| 6UG9 | A_ARG_38  | NH2 | A_GLU_46  | OE2 | 3.287 |

|      |           |     |           |     |       |
|------|-----------|-----|-----------|-----|-------|
| 6UG9 | A_ARG_38  | NH2 | A_ASP_89  | OD1 | 3.758 |
| 6UG9 | A_HIS_60  | NE2 | B_GLU_1   | OE1 | 3.507 |
| 6UG9 | A_ARG_66  | NH1 | A_ASP_89  | OD1 | 3.675 |
| 6UG9 | A_ARG_66  | NH1 | A_ASP_89  | OD2 | 2.753 |
| 6UG9 | A_ARG_66  | NH2 | A_ASP_89  | OD1 | 3.070 |
| 6UG9 | A_ARG_66  | NH2 | A_ASP_89  | OD2 | 3.506 |
| 6UG9 | A_LYS_147 | NZ  | A_ASP_148 | OD1 | 3.442 |
| 6UG9 | A_LYS_147 | NZ  | A_ASP_148 | OD2 | 3.550 |
| 6UG9 | A_LYS_213 | NZ  | B_GLU_122 | OE1 | 2.877 |
| 6UG9 | A_LYS_214 | NZ  | A_GLU_216 | OE1 | 2.984 |
| 6UG9 | K_ARG_60  | NH1 | K_GLU_78  | OE1 | 3.075 |
| 6UG9 | K_ARG_60  | NH1 | K_GLU_78  | OE2 | 3.972 |
| 6UG9 | K_ARG_60  | NH1 | K_GLU_80  | OE2 | 3.745 |
| 6UG9 | K_ARG_60  | NH1 | K_ASP_81  | OD1 | 2.816 |
| 6UG9 | K_ARG_60  | NH1 | K_ASP_81  | OD2 | 2.993 |
| 6UG9 | K_ARG_60  | NH2 | K_GLU_78  | OE1 | 3.769 |
| 6UG9 | K_ARG_60  | NH2 | K_GLU_80  | OE2 | 2.923 |
| 6UG9 | K_LYS_102 | NZ  | K_GLU_104 | OE1 | 3.987 |
| 6UG9 | K_LYS_102 | NZ  | K_GLU_164 | OE1 | 3.455 |
| 6UG9 | K_LYS_102 | NZ  | K_GLU_164 | OE2 | 3.139 |
| 6UG9 | K_ARG_141 | NH1 | K_GLU_104 | OE1 | 3.193 |
| 6UG9 | K_ARG_141 | NH1 | K_GLU_104 | OE2 | 2.932 |
| 6UG9 | K_ARG_141 | NH2 | K_GLU_104 | OE1 | 2.602 |
| 6UG9 | K_ARG_141 | NH2 | K_GLU_104 | OE2 | 3.840 |
| 6UG9 | K_LYS_148 | NZ  | K_GLU_194 | OE1 | 3.594 |
| 6UG9 | K_LYS_148 | NZ  | K_GLU_194 | OE2 | 2.938 |
| 6UG9 | K_HIS_188 | ND1 | K_ASP_150 | OD2 | 3.205 |
| 6UG9 | K_HIS_188 | NE2 | K_ASP_184 | OD1 | 3.818 |
| 6UG9 | K_ARG_210 | NH1 | K_GLU_186 | OE2 | 3.933 |
| 6UG9 | J_ARG_38  | NH1 | J_ASP_89  | OD1 | 2.782 |
| 6UG9 | J_ARG_38  | NH2 | J_GLU_46  | OE2 | 3.597 |
| 6UG9 | J_ARG_38  | NH2 | J_ASP_89  | OD1 | 3.861 |
| 6UG9 | J_HIS_60  | NE2 | K_GLU_1   | OE1 | 3.585 |
| 6UG9 | J_ARG_66  | NH2 | J_ASP_89  | OD1 | 2.909 |
| 6UG9 | J_ARG_66  | NH2 | J_ASP_89  | OD2 | 2.772 |
| 6UG9 | J_LYS_75  | NZ  | J_ASP_72  | OD2 | 3.024 |
| 6UG9 | J_LYS_147 | NZ  | J_ASP_148 | OD1 | 3.646 |
| 6UG9 | J_LYS_213 | NZ  | K_GLU_122 | OE1 | 2.648 |
| 6UG9 | J_LYS_213 | NZ  | K_GLU_122 | OE2 | 3.296 |
| 6UG9 | J_LYS_214 | NZ  | J_GLU_216 | OE1 | 3.149 |
| 6UGA | L_HIS_33  | ND1 | L_ASP_49  | OD1 | 3.961 |
| 6UGA | L_LYS_52  | NZ  | L_ASP_49  | OD2 | 3.704 |
| 6UGA | L_ARG_60  | NH2 | L_GLU_80  | OE2 | 3.278 |
| 6UGA | L_ARG_60  | NH2 | L_ASP_81  | OD1 | 2.749 |
| 6UGA | L_ARG_60  | NH2 | L_ASP_81  | OD2 | 3.568 |
| 6UGA | L_LYS_102 | NZ  | L_GLU_104 | OE2 | 3.070 |
| 6UGA | L_LYS_148 | NZ  | L_GLU_194 | OE2 | 2.966 |
| 6UGA | L_LYS_182 | NZ  | L_GLU_186 | OE2 | 3.117 |
| 6UGA | L_HIS_188 | ND1 | L_ASP_150 | OD2 | 2.852 |
| 6UGA | H_ARG_38  | NH1 | H_ASP_89  | OD1 | 2.990 |
| 6UGA | H_ARG_38  | NH2 | H_GLU_46  | OE1 | 3.017 |
| 6UGA | H_ARG_38  | NH2 | H_ASP_89  | OD1 | 3.417 |
| 6UGA | H_HIS_60  | NE2 | L_GLU_1   | OE1 | 3.306 |
| 6UGA | H_ARG_66  | NH1 | H_ASP_89  | OD1 | 3.849 |
| 6UGA | H_ARG_66  | NH1 | H_ASP_89  | OD2 | 2.855 |
| 6UGA | H_ARG_66  | NH2 | H_ASP_89  | OD1 | 2.858 |
| 6UGA | H_ARG_66  | NH2 | H_ASP_89  | OD2 | 3.277 |
| 6UGA | H_LYS_147 | NZ  | H_ASP_148 | OD1 | 3.129 |

|      |           |     |           |     |       |
|------|-----------|-----|-----------|-----|-------|
| 6UGA | A_LYS_52  | NZ  | A_ASP_49  | OD2 | 3.881 |
| 6UGA | A_ARG_60  | NH1 | A_GLU_80  | OE1 | 3.935 |
| 6UGA | A_ARG_60  | NH2 | A_GLU_80  | OE1 | 2.878 |
| 6UGA | A_ARG_60  | NH2 | A_ASP_81  | OD1 | 2.757 |
| 6UGA | A_ARG_60  | NH2 | A_ASP_81  | OD2 | 3.485 |
| 6UGA | A_LYS_144 | NZ  | A_GLU_194 | OE1 | 3.405 |
| 6UGA | A_LYS_144 | NZ  | A_GLU_194 | OE2 | 2.645 |
| 6UGA | A_LYS_182 | NZ  | A_GLU_186 | OE2 | 3.697 |
| 6UGA | A_LYS_187 | NZ  | A_ASP_184 | OD1 | 3.052 |
| 6UGA | A_ARG_210 | NH2 | A_GLU_186 | OE1 | 3.370 |
| 6UGA | B_ARG_38  | NH1 | B_ASP_89  | OD1 | 2.951 |
| 6UGA | B_ARG_38  | NH2 | B_ASP_89  | OD1 | 3.625 |
| 6UGA | B_HIS_60  | NE2 | A_GLU_1   | OE2 | 3.932 |
| 6UGA | B_ARG_66  | NH1 | B_ASP_89  | OD1 | 3.747 |
| 6UGA | B_ARG_66  | NH1 | B_ASP_89  | OD2 | 3.050 |
| 6UGA | B_ARG_66  | NH2 | B_ASP_89  | OD1 | 3.323 |
| 6UGA | B_ARG_66  | NH2 | B_ASP_89  | OD2 | 3.833 |
| 6UGA | B_LYS_147 | NZ  | B_ASP_148 | OD1 | 3.437 |
| 6UGA | B_LYS_147 | NZ  | B_ASP_148 | OD2 | 3.600 |
| 6UGA | B_HIS_168 | NE2 | A_ASP_166 | OD1 | 3.218 |
| 6UGA | B_LYS_213 | NZ  | A_GLU_122 | OE1 | 3.352 |

Table 1: Salt bridging networks within the PDB entries of all experimentally determined antigen-antibody-related structures. In this table, a PDB file is specified with a four-letter PDB ID, except that the names of the PDB files corresponding to the single NMR structural model split from the NMR ensemble is specified with a four-letter PDB ID in addition to a hyphen followed by the single NMR structural model numeric ID, the residue naming scheme is **Chain ID\_residue name\_residue number**,  $\angle ADH$  represents the angle formed by acceptor (A), donor (D) and hydrogen (H) ( $\angle ADH$ ).

| PDB ID | Residue A | Atom A | Residue B | Atom B | Distance (Å) |
|--------|-----------|--------|-----------|--------|--------------|
| 1A14   | N.LYS_432 | NZ     | H.ASP_56  | OD1    | 3.071        |
| 1A2Y   | A.ARG_96  | NH1    | B.GLU_98  | OE1    | 2.846        |
| 1A2Y   | A.ARG_96  | NH1    | B.GLU_98  | OE2    | 3.664        |
| 1A2Y   | A.ARG_96  | NH2    | B.GLU_98  | OE1    | 3.545        |
| 1A2Y   | A.ARG_96  | NH2    | B.GLU_98  | OE2    | 2.882        |
| 1A7L   | A.LYS_219 | NZ     | B.GLU_131 | OE1    | 3.835        |
| 1A7N   | L.ARG_96  | NH1    | H.GLU_298 | OE1    | 2.957        |
| 1A7N   | L.ARG_96  | NH1    | H.GLU_298 | OE2    | 3.249        |
| 1A7N   | L.ARG_96  | NH2    | H.GLU_298 | OE2    | 3.297        |
| 1A7P   | L.ARG_96  | NH2    | H.GLU_298 | OE1    | 3.845        |
| 1A7P   | L.ARG_96  | NH2    | H.GLU_298 | OE2    | 2.867        |
| 1A7Q   | L.ARG_96  | NH1    | H.GLU_298 | OE1    | 2.615        |
| 1A7Q   | L.ARG_96  | NH1    | H.GLU_298 | OE2    | 3.239        |
| 1A7Q   | L.ARG_96  | NH2    | H.GLU_298 | OE1    | 3.431        |
| 1A7Q   | L.ARG_96  | NH2    | H.GLU_298 | OE2    | 2.621        |
| 1A7R   | L.ARG_96  | NH1    | H.GLU_298 | OE1    | 2.658        |
| 1A7R   | L.ARG_96  | NH1    | H.GLU_298 | OE2    | 3.535        |
| 1A7R   | L.ARG_96  | NH2    | H.GLU_298 | OE1    | 3.614        |
| 1A7R   | L.ARG_96  | NH2    | H.GLU_298 | OE2    | 2.905        |
| 1ADQ   | A.ARG_255 | NH2    | H.ASP_31  | OD2    | 2.929        |
| 1ADQ   | A.HIS_433 | NE2    | L.ASP_50  | OD1    | 3.394        |
| 1ADQ   | A.HIS_433 | NE2    | L.ASP_50  | OD2    | 3.883        |
| 1ADQ   | L.HIS_95B | NE2    | H.ASP_61  | OD2    | 3.425        |
| 1BJ1   | H.LYS_219 | NZ     | L.GLU_123 | OE1    | 2.948        |
| 1BJ1   | H.LYS_224 | NZ     | L.ASP_122 | OD2    | 2.691        |
| 1BJ1   | V.ARG_23  | NH1    | W.GLU_30  | OE1    | 3.305        |
| 1BJ1   | W.ARG_23  | NH1    | V.GLU_30  | OE1    | 3.351        |
| 1BLN   | B.LYS_221 | NZ     | A.GLU_123 | OE2    | 2.688        |
| 1BLN   | D.LYS_221 | NZ     | C.GLU_123 | OE2    | 2.694        |
| 1BQL   | L.LYS_44  | NZ     | H.ASP_104 | OD1    | 3.995        |
| 1BQL   | L.ARG_45  | NH2    | H.ASP_104 | OD2    | 3.212        |
| 1BQL   | H.LYS_211 | NZ     | L.GLU_121 | OE1    | 2.714        |
| 1BQL   | H.LYS_211 | NZ     | L.GLU_121 | OE2    | 2.963        |
| 1BQL   | Y.ARG_45  | NH1    | H.GLU_50  | OE1    | 3.800        |
| 1BQL   | Y.ARG_45  | NH1    | H.GLU_50  | OE2    | 2.920        |
| 1BQL   | Y.LYS_68  | NZ     | H.GLU_50  | OE1    | 3.561        |
| 1BVK   | A.ARG_96  | NH2    | B.GLU_98  | OE1    | 2.978        |
| 1BVK   | A.ARG_96  | NH2    | B.GLU_98  | OE2    | 2.932        |
| 1BVK   | D.ARG_96  | NH2    | E.GLU_98  | OE1    | 2.525        |
| 1BVK   | D.ARG_96  | NH2    | E.GLU_98  | OE2    | 2.753        |
| 1C08   | C.LYS_97  | NZ     | B.ASP_32  | OD1    | 2.620        |
| 1C08   | C.LYS_97  | NZ     | B.ASP_32  | OD2    | 3.999        |
| 1C08   | C.LYS_97  | NZ     | B.ASP_99  | OD2    | 2.365        |
| 1C12   | B.LYS_508 | NZ     | A.GLU_123 | OE2    | 3.314        |
| 1CE1   | L.ARG_94  | NH2    | H.GLU_61  | OE2    | 3.979        |
| 1CE1   | L.ARG_96  | NH1    | H.GLU_101 | OE1    | 2.707        |
| 1CE1   | L.ARG_96  | NH1    | H.GLU_101 | OE2    | 3.562        |
| 1CE1   | L.ARG_96  | NH2    | H.GLU_101 | OE1    | 3.509        |
| 1CE1   | L.ARG_96  | NH2    | H.GLU_101 | OE2    | 2.787        |
| 1CE1   | H.ARG_52  | NH2    | P.ASP_7   | OD1    | 3.481        |
| 1CE1   | H.LYS_56  | NZ     | P.ASP_7   | OD2    | 2.951        |
| 1CFS   | B.LYS_207 | NZ     | A.GLU_123 | OE1    | 3.526        |
| 1CFT   | B.LYS_207 | NZ     | A.GLU_123 | OE1    | 2.550        |
| 1CFT   | C.LYS_2   | NZ     | A.ASP_92  | OD1    | 2.682        |
| 1CG9   | A.ARG_17  | NH1    | B.ASP_35  | OD2    | 3.201        |
| 1CG9   | A.ARG_17  | NH2    | B.ASP_35  | OD1    | 3.038        |
| 1CG9   | A.ARG_17  | NH2    | B.ASP_35  | OD2    | 3.401        |

|      |            |     |            |     |       |
|------|------------|-----|------------|-----|-------|
| 1CG9 | A_ARG_48   | NH2 | B_ASP_54   | OD1 | 3.456 |
| 1CG9 | A_ARG_48   | NH2 | B_ASP_54   | OD2 | 3.762 |
| 1CG9 | A_HIS_192  | ND1 | B_ASP_99   | OD2 | 3.812 |
| 1CG9 | B_LYS_7    | NZ  | A_GLU_232  | OE1 | 3.887 |
| 1CLZ | L_LYS_207  | NZ  | H_ASP_130  | OD1 | 3.119 |
| 1CLZ | L_LYS_207  | NZ  | H_ASP_130  | OD2 | 3.445 |
| 1CLZ | H_ARG_172  | NH1 | L_ASP_170  | OD2 | 3.885 |
| 1CLZ | H_ARG_172  | NH2 | L_ASP_170  | OD2 | 3.384 |
| 1CLZ | H_LYS_221  | NZ  | L_GLU_123  | OE1 | 3.750 |
| 1CLZ | H_LYS_221  | NZ  | L_GLU_123  | OE2 | 2.509 |
| 1CZ8 | V_ARG_23   | NH1 | W_GLU_30   | OE1 | 3.162 |
| 1CZ8 | V_ARG_23   | NH1 | W_GLU_30   | OE2 | 3.558 |
| 1CZ8 | W_ARG_23   | NH1 | V_GLU_30   | OE1 | 3.011 |
| 1CZ8 | W_ARG_23   | NH1 | V_GLU_30   | OE2 | 3.663 |
| 1CZ8 | H_LYS_219  | NZ  | L_GLU_123  | OE1 | 3.027 |
| 1CZ8 | H_LYS_224  | NZ  | L_ASP_122  | OD1 | 2.846 |
| 1CZ8 | H_LYS_224  | NZ  | L_ASP_122  | OD2 | 3.185 |
| 1CZ8 | Y_LYS_219  | NZ  | X_GLU_123  | OE2 | 3.832 |
| 1DBJ | H_LYS_221  | NZ  | L_GLU_123  | OE1 | 3.386 |
| 1DBJ | H_LYS_221  | NZ  | L_GLU_123  | OE2 | 2.770 |
| 1DBK | H_HIS_172  | ND1 | L_ASP_167  | OD2 | 3.619 |
| 1DBK | H_LYS_221  | NZ  | L_GLU_123  | OE2 | 3.030 |
| 1DBM | H_LYS_221  | NZ  | L_GLU_123  | OE2 | 3.277 |
| 1DEE | A_ARG_24   | NH1 | D_GLU_1555 | OE1 | 3.510 |
| 1DEE | B_ARG_674  | NH1 | A_ASP_167  | OD2 | 3.579 |
| 1DEE | B_LYS_719  | NZ  | A_GLU_123  | OE1 | 2.730 |
| 1DEE | B_LYS_719  | NZ  | A_GLU_123  | OE2 | 3.113 |
| 1DEE | D_ARG_1519 | NH1 | G_ASP_1834 | OD1 | 3.122 |
| 1DEE | D_ARG_1519 | NH1 | G_ASP_1834 | OD2 | 3.064 |
| 1DEE | D_ARG_1519 | NH2 | G_ASP_1834 | OD1 | 3.684 |
| 1DEE | D_ARG_1519 | NH2 | G_ASP_1834 | OD2 | 2.875 |
| 1DEE | D_ARG_1674 | NH1 | C_ASP_1167 | OD2 | 3.619 |
| 1DEE | D_LYS_1719 | NZ  | C_GLU_1123 | OE1 | 3.687 |
| 1DEE | D_LYS_1719 | NZ  | C_GLU_1123 | OE2 | 2.890 |
| 1DEE | F_ARG_2519 | NH1 | H_ASP_2834 | OD1 | 3.463 |
| 1DEE | F_ARG_2519 | NH1 | H_ASP_2834 | OD2 | 2.731 |
| 1DEE | F_ARG_2519 | NH2 | H_ASP_2834 | OD1 | 3.523 |
| 1DEE | F_ARG_2519 | NH2 | H_ASP_2834 | OD2 | 3.444 |
| 1DEE | F_ARG_2674 | NH1 | E_ASP_2167 | OD2 | 3.989 |
| 1DEE | F_LYS_2719 | NZ  | E_GLU_2123 | OE1 | 2.882 |
| 1DEE | F_LYS_2719 | NZ  | E_GLU_2123 | OE2 | 3.779 |
| 1DQD | H_LYS_217  | NZ  | L_GLU_122  | OE2 | 3.953 |
| 1DQJ | B_LYS_219  | NZ  | A_GLU_123  | OE2 | 2.598 |
| 1DQJ | C_LYS_97   | NZ  | B_ASP_32   | OD2 | 2.665 |
| 1DQM | L_LYS_207  | NZ  | H_ASP_130  | OD1 | 3.491 |
| 1DQM | L_LYS_207  | NZ  | H_ASP_130  | OD2 | 3.782 |
| 1DQQ | A_LYS_49   | NZ  | B_ASP_101  | OD1 | 2.957 |
| 1DQQ | B_LYS_216  | NZ  | D_ASP_218  | OD1 | 2.965 |
| 1DQQ | B_LYS_219  | NZ  | A_GLU_123  | OE2 | 2.763 |
| 1DQQ | C_LYS_49   | NZ  | D_ASP_101  | OD1 | 3.456 |
| 1DQQ | C_LYS_49   | NZ  | D_ASP_101  | OD2 | 3.943 |
| 1DQQ | D_LYS_219  | NZ  | C_GLU_123  | OE1 | 3.088 |
| 1DVF | A_ARG_96   | NH1 | B_GLU_98   | OE1 | 2.616 |
| 1DVF | A_ARG_96   | NH1 | B_GLU_98   | OE2 | 3.746 |
| 1DVF | A_ARG_96   | NH2 | B_GLU_98   | OE1 | 3.400 |
| 1DVF | A_ARG_96   | NH2 | B_GLU_98   | OE2 | 2.958 |
| 1DVF | D_HIS_33   | NE2 | B_ASP_100  | OD1 | 3.569 |
| 1DVF | D_HIS_33   | NE2 | B_ASP_100  | OD2 | 3.052 |

|      |            |     |            |     |       |
|------|------------|-----|------------|-----|-------|
| 1DZB | A_LYS_63   | NZ  | B_GLU_89   | OE1 | 3.983 |
| 1DZB | A_LYS_67   | NZ  | B_ASP_90   | OD2 | 3.792 |
| 1DZB | X_ARG_61   | NH2 | A_ASP_256  | OD2 | 3.887 |
| 1DZB | X_LYS_73   | NZ  | A_ASP_256  | OD1 | 3.412 |
| 1DZB | X_LYS_73   | NZ  | A_ASP_256  | OD2 | 3.290 |
| 1DZB | X_ARG_112  | NH2 | A_ASP_31   | OD2 | 3.878 |
| 1DZB | Y_LYS_73   | NZ  | B_ASP_256  | OD1 | 3.559 |
| 1E4W | H_LYS_205  | NZ  | L_GLU_123  | OE1 | 3.384 |
| 1E4W | H_LYS_205  | NZ  | L_GLU_123  | OE2 | 3.066 |
| 1E4X | L_LYS_205  | NZ  | M_GLU_123  | OE1 | 2.874 |
| 1E4X | L_LYS_205  | NZ  | M_GLU_123  | OE2 | 3.751 |
| 1E4X | Q_HIS_4    | NE2 | L_ASP_98   | OD2 | 3.960 |
| 1E6J | H_LYS_215  | NZ  | L_GLU_121  | OE1 | 3.273 |
| 1E6J | H_LYS_215  | NZ  | L_GLU_121  | OE2 | 3.199 |
| 1E6O | H_LYS_215  | NZ  | L_GLU_121  | OE1 | 2.731 |
| 1E6O | H_LYS_215  | NZ  | L_GLU_121  | OE2 | 3.094 |
| 1EJO | L_HIS_2038 | NE2 | H_ASP_2603 | OD1 | 3.217 |
| 1EJO | H_ARG_2598 | NH2 | P_ASP_3143 | OD1 | 3.795 |
| 1EJO | H_ARG_2598 | NH2 | P_ASP_3143 | OD2 | 2.982 |
| 1EJO | H_LYS_2714 | NZ  | L_GLU_2127 | OE1 | 2.933 |
| 1EJO | H_LYS_2714 | NZ  | L_GLU_2127 | OE2 | 3.046 |
| 1EJO | P_ARG_3141 | NH1 | L_GLU_2027 | OE2 | 3.696 |
| 1EJO | P_ARG_3141 | NH1 | L_GLU_2097 | OE1 | 2.675 |
| 1EJO | P_ARG_3141 | NH2 | L_GLU_2027 | OE2 | 3.441 |
| 1EMT | H_LYS_63   | NZ  | L_ASP_1    | OD1 | 3.310 |
| 1EMT | H_LYS_211  | NZ  | L_GLU_123  | OE1 | 2.945 |
| 1EMT | H_LYS_211  | NZ  | L_GLU_123  | OE2 | 2.554 |
| 1ETZ | L_ARG_186  | NH1 | B_GLU_48   | OE1 | 2.771 |
| 1ETZ | L_ARG_186  | NH1 | B_GLU_48   | OE2 | 3.248 |
| 1ETZ | L_ARG_190  | NH2 | B_GLU_48   | OE2 | 3.331 |
| 1ETZ | H_LYS_156  | NZ  | L_GLU_127  | OE2 | 3.377 |
| 1ETZ | H_LYS_221  | NZ  | L_GLU_126  | OE1 | 3.184 |
| 1ETZ | A_ARG_186  | NH1 | H_GLU_45   | OE2 | 3.236 |
| 1ETZ | A_ARG_186  | NH2 | H_GLU_48   | OE1 | 3.518 |
| 1ETZ | B_LYS_156  | NZ  | A_GLU_127  | OE2 | 2.979 |
| 1ETZ | B_LYS_221  | NZ  | A_GLU_126  | OE1 | 3.572 |
| 1F11 | B_LYS_221  | NZ  | A_GLU_123  | OE2 | 3.880 |
| 1F11 | D_LYS_221  | NZ  | C_GLU_123  | OE2 | 3.786 |
| 1F4W | H_LYS_147  | NZ  | L_GLU_127  | OE2 | 2.611 |
| 1F4W | H_LYS_212  | NZ  | L_GLU_126  | OE1 | 2.614 |
| 1F4W | H_LYS_212  | NZ  | L_GLU_126  | OE2 | 2.379 |
| 1F4X | H_LYS_147  | NZ  | L_GLU_127  | OE2 | 2.699 |
| 1F4X | H_LYS_212  | NZ  | L_GLU_126  | OE1 | 2.421 |
| 1F4X | H_LYS_212  | NZ  | L_GLU_126  | OE2 | 2.990 |
| 1F4Y | H_LYS_212  | NZ  | L_GLU_126  | OE2 | 3.609 |
| 1F8T | L_ARG_96   | NH1 | H_ASP_97   | OD1 | 3.105 |
| 1F8T | L_ARG_96   | NH1 | H_ASP_97   | OD2 | 3.586 |
| 1F8T | L_ARG_96   | NH2 | H_ASP_97   | OD1 | 3.395 |
| 1F8T | L_ARG_96   | NH2 | H_ASP_97   | OD2 | 2.424 |
| 1F8T | H_LYS_221  | NZ  | L_GLU_123  | OE1 | 3.087 |
| 1F90 | L_LYS_30   | NZ  | E_GLU_4    | OE1 | 2.620 |
| 1F90 | L_LYS_30   | NZ  | E_GLU_4    | OE2 | 2.679 |
| 1F90 | L_ARG_96   | NH2 | H_ASP_97   | OD1 | 2.720 |
| 1F90 | L_ARG_96   | NH2 | H_ASP_97   | OD2 | 2.722 |
| 1F90 | H_LYS_221  | NZ  | L_GLU_123  | OE2 | 3.675 |
| 1FBI | H_LYS_63   | NZ  | L_ASP_1    | OD1 | 2.933 |
| 1FBI | H_LYS_63   | NZ  | L_ASP_1    | OD2 | 2.804 |
| 1FBI | H_LYS_217  | NZ  | L_GLU_123  | OE1 | 3.667 |

|      |           |     |           |     |       |
|------|-----------|-----|-----------|-----|-------|
| 1FBI | X_HIS_15  | ND1 | H_ASP_55  | OD1 | 3.190 |
| 1FBI | X_HIS_15  | ND1 | H_ASP_55  | OD2 | 3.649 |
| 1FBI | X_LYS_96  | NZ  | H_ASP_52  | OD2 | 2.922 |
| 1FBI | X_LYS_97  | NZ  | H_GLU_50  | OE1 | 3.586 |
| 1FBI | X_LYS_97  | NZ  | H_GLU_50  | OE2 | 2.898 |
| 1FBI | Q_LYS_63  | NZ  | P_ASP_1   | OD1 | 3.020 |
| 1FBI | Q_LYS_63  | NZ  | P_ASP_1   | OD2 | 3.850 |
| 1FBI | Y_HIS_15  | ND1 | Q_ASP_55  | OD1 | 3.335 |
| 1FBI | Y_HIS_15  | ND1 | Q_ASP_55  | OD2 | 3.838 |
| 1FBI | Y_LYS_96  | NZ  | Q_ASP_52  | OD2 | 2.727 |
| 1FBI | Y_LYS_97  | NZ  | Q_GLU_50  | OE1 | 2.828 |
| 1FBI | Y_LYS_97  | NZ  | Q_GLU_50  | OE2 | 3.159 |
| 1FCC | A_LYS_370 | NZ  | B_GLU_357 | OE2 | 2.948 |
| 1FCC | A_LYS_409 | NZ  | B_ASP_399 | OD2 | 2.859 |
| 1FCC | A_LYS_439 | NZ  | B_GLU_356 | OE1 | 3.550 |
| 1FCC | A_LYS_439 | NZ  | B_GLU_356 | OE2 | 3.522 |
| 1FCC | C_LYS_28  | NZ  | A_GLU_380 | OE1 | 2.730 |
| 1FCC | C_LYS_28  | NZ  | A_GLU_380 | OE2 | 3.982 |
| 1FCC | C_LYS_28  | NZ  | A_GLU_382 | OE1 | 3.879 |
| 1FCC | C_LYS_28  | NZ  | A_GLU_382 | OE2 | 2.866 |
| 1FCC | B_LYS_370 | NZ  | A_GLU_357 | OE2 | 2.633 |
| 1FCC | B_LYS_409 | NZ  | A_ASP_399 | OD2 | 3.360 |
| 1FCC | B_LYS_439 | NZ  | A_GLU_356 | OE1 | 3.166 |
| 1FCC | B_LYS_439 | NZ  | A_GLU_356 | OE2 | 3.295 |
| 1FCC | D_LYS_28  | NZ  | B_GLU_380 | OE1 | 2.730 |
| 1FCC | D_LYS_28  | NZ  | B_GLU_380 | OE2 | 3.982 |
| 1FCC | D_LYS_28  | NZ  | B_GLU_382 | OE1 | 3.879 |
| 1FCC | D_LYS_28  | NZ  | B_GLU_382 | OE2 | 2.865 |
| 1FDL | L_ARG_96  | NH1 | H_GLU_98  | OE1 | 3.307 |
| 1FDL | L_ARG_96  | NH1 | H_GLU_98  | OE2 | 2.802 |
| 1FDL | L_ARG_96  | NH2 | H_GLU_98  | OE1 | 2.754 |
| 1FDL | L_ARG_96  | NH2 | H_GLU_98  | OE2 | 3.656 |
| 1FDL | H_LYS_211 | NZ  | L_GLU_123 | OE1 | 2.896 |
| 1FDL | H_LYS_211 | NZ  | L_GLU_123 | OE2 | 3.291 |
| 1FJ1 | A_ARG_188 | NH2 | E_GLU_196 | OE2 | 3.475 |
| 1FJ1 | A_HIS_189 | ND1 | E_GLU_196 | OE1 | 3.723 |
| 1FJ1 | A_HIS_189 | NE2 | E_GLU_196 | OE1 | 3.502 |
| 1FJ1 | B_ARG_47  | NH1 | A_ASP_1   | OD1 | 3.251 |
| 1FJ1 | B_ARG_47  | NH2 | A_ASP_1   | OD1 | 2.492 |
| 1FJ1 | C_HIS_189 | NE2 | F_GLU_196 | OE1 | 3.808 |
| 1FJ1 | D_ARG_47  | NH1 | C_ASP_1   | OD1 | 3.296 |
| 1FJ1 | D_ARG_47  | NH2 | C_ASP_1   | OD1 | 2.800 |
| 1FRG | L_LYS_213 | NZ  | H_ASP_354 | OD1 | 3.324 |
| 1FRG | H_ARG_316 | NH1 | L_ASP_97  | OD1 | 2.879 |
| 1FRG | H_ARG_316 | NH2 | L_ASP_97  | OD1 | 3.078 |
| 1FRG | H_ARG_316 | NH2 | P_ASP_5   | OD2 | 2.959 |
| 1FRG | H_LYS_322 | NZ  | L_GLU_61  | OE1 | 2.861 |
| 1FRG | H_LYS_322 | NZ  | L_GLU_61  | OE2 | 3.997 |
| 1FRG | H_LYS_432 | NZ  | L_GLU_129 | OE1 | 3.086 |
| 1FRG | H_LYS_432 | NZ  | L_GLU_129 | OE2 | 3.769 |
| 1FUJ | A_LYS_187 | NZ  | B_GLU_97  | OE1 | 3.506 |
| 1FUJ | B_ARG_143 | NH1 | A_ASP_61  | OD2 | 3.455 |
| 1FUJ | B_LYS_187 | NZ  | A_GLU_97  | OE1 | 3.870 |
| 1FUJ | C_ARG_143 | NH2 | D_ASP_61  | OD1 | 3.394 |
| 1FUJ | C_ARG_143 | NH2 | D_ASP_61  | OD2 | 3.428 |
| 1FUJ | C_LYS_187 | NZ  | D_GLU_97  | OE2 | 2.917 |
| 1FUJ | D_HIS_147 | ND1 | C_GLU_97  | OE1 | 3.734 |
| 1FUJ | D_LYS_187 | NZ  | C_GLU_97  | OE1 | 3.930 |



|      |           |     |           |     |       |
|------|-----------|-----|-----------|-----|-------|
| 1FVD | A_ARG_18  | NH1 | C_ASP_70  | OD2 | 3.361 |
| 1FVD | B_LYS_216 | NZ  | A_GLU_123 | OE2 | 3.426 |
| 1FVD | C_ARG_18  | NH1 | A_ASP_70  | OD2 | 3.065 |
| 1FVD | D_LYS_216 | NZ  | C_GLU_123 | OE1 | 2.737 |
| 1FVE | A_ARG_18  | NH1 | C_ASP_70  | OD1 | 3.613 |
| 1FVE | A_ARG_18  | NH1 | C_ASP_70  | OD2 | 3.316 |
| 1FVE | B_LYS_216 | NZ  | A_GLU_123 | OE2 | 3.328 |
| 1G6V | K_ARG_907 | NH1 | A_GLU_187 | OE2 | 2.962 |
| 1G6V | K_ARG_909 | NH1 | A_GLU_187 | OE1 | 3.909 |
| 1G6V | K_ARG_909 | NH2 | A_GLU_187 | OE1 | 3.477 |
| 1G7H | A_ARG_96  | NH1 | B_GLU_98  | OE1 | 2.788 |
| 1G7H | A_ARG_96  | NH1 | B_GLU_98  | OE2 | 3.317 |
| 1G7H | A_ARG_96  | NH2 | B_GLU_98  | OE1 | 3.736 |
| 1G7H | A_ARG_96  | NH2 | B_GLU_98  | OE2 | 2.819 |
| 1G7I | A_ARG_96  | NH1 | B_GLU_98  | OE1 | 2.881 |
| 1G7I | A_ARG_96  | NH1 | B_GLU_98  | OE2 | 3.589 |
| 1G7I | A_ARG_96  | NH2 | B_GLU_98  | OE1 | 3.599 |
| 1G7I | A_ARG_96  | NH2 | B_GLU_98  | OE2 | 2.841 |
| 1G7J | A_ARG_96  | NH1 | B_GLU_98  | OE1 | 2.834 |
| 1G7J | A_ARG_96  | NH1 | B_GLU_98  | OE2 | 3.535 |
| 1G7J | A_ARG_96  | NH2 | B_GLU_98  | OE1 | 3.524 |
| 1G7J | A_ARG_96  | NH2 | B_GLU_98  | OE2 | 2.694 |
| 1G7L | A_ARG_96  | NH1 | B_GLU_98  | OE1 | 2.744 |
| 1G7L | A_ARG_96  | NH1 | B_GLU_98  | OE2 | 3.483 |
| 1G7L | A_ARG_96  | NH2 | B_GLU_98  | OE1 | 3.535 |
| 1G7L | A_ARG_96  | NH2 | B_GLU_98  | OE2 | 2.761 |
| 1G7M | A_ARG_96  | NH1 | B_GLU_98  | OE1 | 2.792 |
| 1G7M | A_ARG_96  | NH1 | B_GLU_98  | OE2 | 3.493 |
| 1G7M | A_ARG_96  | NH2 | B_GLU_98  | OE1 | 3.544 |
| 1G7M | A_ARG_96  | NH2 | B_GLU_98  | OE2 | 2.732 |
| 1G9M | G_ARG_419 | NH1 | H_GLU_103 | OE2 | 3.773 |
| 1G9M | G_ARG_419 | NH2 | H_GLU_103 | OE2 | 2.762 |
| 1G9M | G_ARG_419 | NH2 | H_GLU_108 | OE2 | 3.794 |
| 1G9M | C_LYS_29  | NZ  | G_ASP_279 | OD2 | 3.077 |
| 1G9M | C_ARG_59  | NH1 | G_ASP_368 | OD1 | 3.576 |
| 1G9M | C_ARG_59  | NH1 | G_ASP_368 | OD2 | 3.197 |
| 1G9M | C_ARG_59  | NH2 | G_ASP_368 | OD1 | 2.550 |
| 1G9M | C_ARG_59  | NH2 | G_ASP_368 | OD2 | 3.360 |
| 1G9N | G_ARG_419 | NH1 | H_GLU_106 | OE1 | 2.930 |
| 1G9N | G_ARG_419 | NH1 | H_GLU_106 | OE2 | 3.665 |
| 1G9N | G_ARG_419 | NH2 | H_GLU_103 | OE1 | 2.300 |
| 1G9N | G_ARG_419 | NH2 | H_GLU_106 | OE2 | 3.990 |
| 1G9N | C_LYS_35  | NZ  | G_ASP_457 | OD2 | 3.608 |
| 1G9N | C_ARG_59  | NH1 | G_ASP_368 | OD1 | 3.032 |
| 1G9N | C_ARG_59  | NH1 | G_ASP_368 | OD2 | 3.045 |
| 1G9N | C_ARG_59  | NH2 | G_ASP_368 | OD1 | 2.609 |
| 1G9N | C_ARG_59  | NH2 | G_ASP_368 | OD2 | 3.355 |
| 1G9N | H_LYS_224 | NZ  | L_GLU_125 | OE1 | 3.507 |
| 1G9N | H_LYS_224 | NZ  | L_GLU_125 | OE2 | 3.538 |
| 1G9N | H_LYS_229 | NZ  | L_ASP_124 | OD2 | 3.557 |
| 1GC1 | G_ARG_419 | NH1 | H_GLU_106 | OE1 | 2.761 |
| 1GC1 | G_ARG_419 | NH2 | H_GLU_106 | OE1 | 2.942 |
| 1GC1 | G_ARG_419 | NH2 | H_GLU_108 | OE1 | 3.887 |
| 1GC1 | G_ARG_419 | NH2 | H_GLU_108 | OE2 | 3.401 |
| 1GC1 | C_LYS_29  | NZ  | G_ASP_279 | OD1 | 2.748 |
| 1GC1 | C_ARG_59  | NH1 | G_ASP_368 | OD1 | 2.780 |
| 1GC1 | C_ARG_59  | NH1 | G_ASP_368 | OD2 | 3.645 |
| 1GC1 | C_ARG_59  | NH2 | G_ASP_368 | OD1 | 3.062 |

|      |           |     |           |     |       |
|------|-----------|-----|-----------|-----|-------|
| 1GC1 | C_ARG_59  | NH2 | G_ASP_368 | OD2 | 2.481 |
| 1GC1 | H_LYS_224 | NZ  | L_GLU_125 | OE1 | 2.581 |
| 1GC1 | H_LYS_224 | NZ  | L_GLU_125 | OE2 | 3.963 |
| 1GGB | H_ARG_58  | NH1 | L_ASP_94  | OD1 | 3.623 |
| 1GGB | H_ARG_58  | NH2 | L_ASP_94  | OD1 | 2.873 |
| 1GGB | H_LYS_221 | NZ  | L_GLU_123 | OE1 | 2.690 |
| 1GGB | H_LYS_221 | NZ  | L_GLU_123 | OE2 | 3.205 |
| 1GGC | H_ARG_58  | NH2 | L_ASP_94  | OD1 | 3.221 |
| 1GGC | H_LYS_221 | NZ  | L_GLU_123 | OE1 | 2.942 |
| 1GGI | H_ARG_58  | NH2 | L_ASP_94  | OD2 | 3.749 |
| 1GGI | H_LYS_221 | NZ  | L_GLU_123 | OE2 | 3.900 |
| 1GGI | P_LYS_312 | NZ  | H_ASP_54  | OD1 | 2.914 |
| 1GGI | P_LYS_312 | NZ  | H_ASP_54  | OD2 | 3.188 |
| 1GGI | P_LYS_312 | NZ  | H_ASP_56  | OD1 | 2.830 |
| 1GGI | P_LYS_312 | NZ  | H_ASP_56  | OD2 | 3.728 |
| 1GGI | J_ARG_58  | NH2 | M_ASP_94  | OD2 | 3.966 |
| 1GGI | J_HIS_172 | NE2 | M_ASP_167 | OD2 | 3.287 |
| 1GGI | J_LYS_221 | NZ  | M_GLU_123 | OE1 | 3.528 |
| 1GGI | J_LYS_221 | NZ  | M_GLU_123 | OE2 | 3.781 |
| 1GGI | Q_LYS_312 | NZ  | J_ASP_54  | OD1 | 3.299 |
| 1GGI | Q_LYS_312 | NZ  | J_ASP_54  | OD2 | 2.967 |
| 1GGI | Q_LYS_312 | NZ  | J_ASP_56  | OD1 | 3.964 |
| 1GGI | Q_LYS_312 | NZ  | J_ASP_56  | OD2 | 3.120 |
| 1GPO | L_LYS_54  | NZ  | H_ASP_101 | OD1 | 2.768 |
| 1GPO | L_LYS_54  | NZ  | H_ASP_101 | OD2 | 3.525 |
| 1GPO | H_LYS_208 | NZ  | L_GLU_128 | OE2 | 3.848 |
| 1GPO | M_LYS_54  | NZ  | I_ASP_101 | OD1 | 3.704 |
| 1GPO | I_LYS_208 | NZ  | M_GLU_128 | OE2 | 3.367 |
| 1HEZ | A_ARG_24  | NH1 | C_ASP_70  | OD1 | 3.567 |
| 1HEZ | A_ARG_24  | NH1 | C_ASP_70  | OD2 | 3.209 |
| 1HEZ | B_LYS_219 | NZ  | A_GLU_123 | OE1 | 2.923 |
| 1HEZ | B_LYS_219 | NZ  | A_GLU_123 | OE2 | 2.722 |
| 1HEZ | C_ARG_24  | NH1 | E_ASP_855 | OD1 | 2.717 |
| 1HEZ | C_LYS_107 | NZ  | E_ASP_867 | OD1 | 2.620 |
| 1HGD | A_LYS_27  | NZ  | B_GLU_97  | OE1 | 2.787 |
| 1HGD | A_LYS_27  | NZ  | B_GLU_97  | OE2 | 2.801 |
| 1HGD | A_ARG_109 | NH2 | B_GLU_67  | OE1 | 3.474 |
| 1HGD | A_ARG_109 | NH2 | B_GLU_67  | OE2 | 2.826 |
| 1HGD | A_LYS_238 | NZ  | F_GLU_72  | OE1 | 2.925 |
| 1HGD | A_LYS_238 | NZ  | F_GLU_72  | OE2 | 2.815 |
| 1HGD | A_ARG_269 | NH1 | B_GLU_67  | OE1 | 2.758 |
| 1HGD | A_ARG_269 | NH2 | B_GLU_67  | OE1 | 3.754 |
| 1HGD | A_LYS_299 | NZ  | B_GLU_69  | OE2 | 2.769 |
| 1HGD | A_LYS_310 | NZ  | B_ASP_86  | OD1 | 2.861 |
| 1HGD | A_LYS_310 | NZ  | B_ASP_90  | OD1 | 2.569 |
| 1HGD | A_LYS_326 | NZ  | B_GLU_15  | OE1 | 3.037 |
| 1HGD | A_LYS_326 | NZ  | B_GLU_15  | OE2 | 2.743 |
| 1HGD | B_ARG_25  | NH1 | A_GLU_325 | OE2 | 3.743 |
| 1HGD | B_ARG_25  | NH2 | A_GLU_325 | OE2 | 3.016 |
| 1HGD | B_ARG_54  | NH1 | F_GLU_97  | OE2 | 3.275 |
| 1HGD | B_ARG_54  | NH2 | F_GLU_97  | OE2 | 2.774 |
| 1HGD | B_LYS_62  | NZ  | F_ASP_86  | OD1 | 2.852 |
| 1HGD | B_LYS_62  | NZ  | F_ASP_86  | OD2 | 2.612 |
| 1HGD | B_LYS_62  | NZ  | F_ASP_90  | OD1 | 3.620 |
| 1HGD | B_LYS_62  | NZ  | F_ASP_90  | OD2 | 2.727 |
| 1HGD | B_ARG_76  | NH1 | D_GLU_74  | OE1 | 3.558 |
| 1HGD | B_ARG_76  | NH1 | D_GLU_74  | OE2 | 2.838 |
| 1HGD | B_ARG_76  | NH2 | D_GLU_74  | OE1 | 2.751 |

|      |           |     |           |     |       |
|------|-----------|-----|-----------|-----|-------|
| 1HGD | B_ARG_76  | NH2 | D_GLU_74  | OE2 | 3.529 |
| 1HGD | B_ARG_76  | NH2 | D_GLU_81  | OE1 | 2.707 |
| 1HGD | B_ARG_76  | NH2 | D_GLU_81  | OE2 | 3.498 |
| 1HGD | B_ARG_123 | NH2 | F_GLU_132 | OE1 | 3.169 |
| 1HGD | B_ARG_124 | NH2 | F_GLU_132 | OE1 | 3.011 |
| 1HGD | B_ARG_124 | NH2 | F_GLU_132 | OE2 | 3.294 |
| 1HGD | B_ARG_127 | NH1 | F_GLU_131 | OE1 | 2.471 |
| 1HGD | B_ARG_163 | NH2 | F_GLU_131 | OE1 | 2.583 |
| 1HGD | B_ARG_163 | NH2 | F_GLU_131 | OE2 | 2.596 |
| 1HGD | B_ARG_170 | NH1 | D_GLU_128 | OE1 | 3.354 |
| 1HGD | B_ARG_170 | NH1 | D_GLU_128 | OE2 | 3.628 |
| 1HGD | B_LYS_174 | NZ  | D_ASP_164 | OD1 | 2.787 |
| 1HGD | B_LYS_174 | NZ  | D_ASP_164 | OD2 | 2.517 |
| 1HGD | C_LYS_27  | NZ  | D_GLU_97  | OE1 | 2.760 |
| 1HGD | C_LYS_27  | NZ  | D_GLU_97  | OE2 | 2.799 |
| 1HGD | C_ARG_109 | NH2 | D_GLU_67  | OE1 | 3.480 |
| 1HGD | C_ARG_109 | NH2 | D_GLU_67  | OE2 | 2.867 |
| 1HGD | C_LYS_238 | NZ  | B_GLU_72  | OE1 | 2.801 |
| 1HGD | C_LYS_238 | NZ  | B_GLU_72  | OE2 | 2.746 |
| 1HGD | C_ARG_269 | NH1 | D_GLU_67  | OE1 | 2.720 |
| 1HGD | C_ARG_269 | NH2 | D_GLU_67  | OE1 | 3.733 |
| 1HGD | C_LYS_299 | NZ  | D_GLU_69  | OE2 | 2.796 |
| 1HGD | C_LYS_310 | NZ  | D_ASP_86  | OD1 | 2.878 |
| 1HGD | C_LYS_310 | NZ  | D_ASP_90  | OD1 | 2.526 |
| 1HGD | C_LYS_326 | NZ  | D_GLU_15  | OE1 | 2.784 |
| 1HGD | C_LYS_326 | NZ  | D_GLU_15  | OE2 | 3.881 |
| 1HGD | D_ARG_54  | NH1 | B_GLU_97  | OE2 | 3.293 |
| 1HGD | D_ARG_54  | NH2 | B_GLU_97  | OE2 | 2.793 |
| 1HGD | D_LYS_62  | NZ  | B_ASP_86  | OD1 | 2.884 |
| 1HGD | D_LYS_62  | NZ  | B_ASP_86  | OD2 | 2.567 |
| 1HGD | D_LYS_62  | NZ  | B_ASP_90  | OD1 | 3.576 |
| 1HGD | D_LYS_62  | NZ  | B_ASP_90  | OD2 | 2.617 |
| 1HGD | D_ARG_76  | NH1 | F_GLU_74  | OE1 | 3.379 |
| 1HGD | D_ARG_76  | NH1 | F_GLU_74  | OE2 | 2.785 |
| 1HGD | D_ARG_76  | NH2 | F_GLU_74  | OE1 | 2.687 |
| 1HGD | D_ARG_76  | NH2 | F_GLU_74  | OE2 | 3.593 |
| 1HGD | D_ARG_76  | NH2 | F_GLU_81  | OE1 | 2.649 |
| 1HGD | D_ARG_76  | NH2 | F_GLU_81  | OE2 | 3.537 |
| 1HGD | D_ARG_123 | NH2 | B_GLU_132 | OE1 | 3.120 |
| 1HGD | D_ARG_124 | NH2 | B_GLU_132 | OE1 | 2.998 |
| 1HGD | D_ARG_124 | NH2 | B_GLU_132 | OE2 | 3.261 |
| 1HGD | D_ARG_127 | NH1 | B_GLU_131 | OE1 | 2.513 |
| 1HGD | D_ARG_163 | NH2 | B_GLU_131 | OE1 | 2.583 |
| 1HGD | D_ARG_163 | NH2 | B_GLU_131 | OE2 | 2.616 |
| 1HGD | D_ARG_170 | NH1 | F_GLU_128 | OE1 | 3.487 |
| 1HGD | D_ARG_170 | NH1 | F_GLU_128 | OE2 | 3.741 |
| 1HGD | D_LYS_174 | NZ  | F_ASP_164 | OD1 | 2.806 |
| 1HGD | D_LYS_174 | NZ  | F_ASP_164 | OD2 | 2.686 |
| 1HGD | E_LYS_27  | NZ  | F_GLU_97  | OE1 | 2.794 |
| 1HGD | E_LYS_27  | NZ  | F_GLU_97  | OE2 | 2.792 |
| 1HGD | E_ARG_109 | NH2 | F_GLU_67  | OE1 | 3.474 |
| 1HGD | E_ARG_109 | NH2 | F_GLU_67  | OE2 | 2.818 |
| 1HGD | E_LYS_238 | NZ  | D_GLU_72  | OE1 | 2.872 |
| 1HGD | E_LYS_238 | NZ  | D_GLU_72  | OE2 | 2.843 |
| 1HGD | E_ARG_269 | NH1 | F_GLU_67  | OE1 | 2.732 |
| 1HGD | E_ARG_269 | NH2 | F_GLU_67  | OE1 | 3.760 |
| 1HGD | E_LYS_299 | NZ  | F_GLU_69  | OE2 | 2.767 |
| 1HGD | E_LYS_310 | NZ  | F_ASP_86  | OD1 | 2.884 |

|      |           |     |           |     |       |
|------|-----------|-----|-----------|-----|-------|
| 1HGD | E_LYS_310 | NZ  | F_ASP_90  | OD1 | 2.533 |
| 1HGD | E_LYS_326 | NZ  | F_GLU_15  | OE1 | 2.967 |
| 1HGD | E_LYS_326 | NZ  | F_GLU_15  | OE2 | 3.203 |
| 1HGD | F_ARG_54  | NH1 | D_GLU_97  | OE2 | 3.306 |
| 1HGD | F_ARG_54  | NH2 | D_GLU_97  | OE2 | 2.719 |
| 1HGD | F_LYS_62  | NZ  | D_ASP_86  | OD1 | 2.854 |
| 1HGD | F_LYS_62  | NZ  | D_ASP_86  | OD2 | 2.590 |
| 1HGD | F_LYS_62  | NZ  | D_ASP_90  | OD1 | 3.656 |
| 1HGD | F_LYS_62  | NZ  | D_ASP_90  | OD2 | 2.713 |
| 1HGD | F_HIS_64  | NE2 | D_ASP_79  | OD2 | 3.996 |
| 1HGD | F_ARG_76  | NH1 | B_GLU_74  | OE1 | 3.419 |
| 1HGD | F_ARG_76  | NH1 | B_GLU_74  | OE2 | 2.766 |
| 1HGD | F_ARG_76  | NH2 | B_GLU_74  | OE1 | 2.711 |
| 1HGD | F_ARG_76  | NH2 | B_GLU_74  | OE2 | 3.568 |
| 1HGD | F_ARG_76  | NH2 | B_GLU_81  | OE1 | 2.637 |
| 1HGD | F_ARG_76  | NH2 | B_GLU_81  | OE2 | 3.557 |
| 1HGD | F_ARG_123 | NH2 | D_GLU_132 | OE1 | 3.156 |
| 1HGD | F_ARG_124 | NH2 | D_GLU_132 | OE1 | 3.098 |
| 1HGD | F_ARG_124 | NH2 | D_GLU_132 | OE2 | 3.292 |
| 1HGD | F_ARG_127 | NH1 | D_GLU_131 | OE1 | 2.558 |
| 1HGD | F_ARG_163 | NH2 | D_GLU_131 | OE1 | 2.583 |
| 1HGD | F_ARG_163 | NH2 | D_GLU_131 | OE2 | 2.699 |
| 1HGD | F_ARG_170 | NH1 | B_GLU_128 | OE1 | 3.398 |
| 1HGD | F_ARG_170 | NH1 | B_GLU_128 | OE2 | 3.736 |
| 1HGD | F_LYS_174 | NZ  | B_ASP_164 | OD1 | 2.545 |
| 1HGD | F_LYS_174 | NZ  | B_ASP_164 | OD2 | 2.838 |
| 1HGE | A_LYS_27  | NZ  | B_GLU_97  | OE1 | 2.881 |
| 1HGE | A_LYS_27  | NZ  | B_GLU_97  | OE2 | 2.803 |
| 1HGE | A_ARG_109 | NH2 | B_GLU_67  | OE1 | 3.666 |
| 1HGE | A_ARG_109 | NH2 | B_GLU_67  | OE2 | 2.737 |
| 1HGE | A_LYS_238 | NZ  | F_GLU_72  | OE1 | 2.915 |
| 1HGE | A_LYS_238 | NZ  | F_GLU_72  | OE2 | 2.732 |
| 1HGE | A_ARG_269 | NH1 | B_GLU_67  | OE1 | 2.727 |
| 1HGE | A_ARG_269 | NH2 | B_GLU_67  | OE1 | 3.813 |
| 1HGE | A_LYS_299 | NZ  | B_GLU_69  | OE2 | 2.765 |
| 1HGE | A_LYS_310 | NZ  | B_ASP_86  | OD1 | 2.860 |
| 1HGE | A_LYS_310 | NZ  | B_ASP_90  | OD1 | 2.586 |
| 1HGE | A_LYS_310 | NZ  | B_ASP_90  | OD2 | 3.982 |
| 1HGE | A_LYS_326 | NZ  | B_GLU_15  | OE1 | 3.112 |
| 1HGE | A_LYS_326 | NZ  | B_GLU_15  | OE2 | 2.788 |
| 1HGE | B_ARG_25  | NH1 | A_GLU_325 | OE2 | 3.901 |
| 1HGE | B_ARG_25  | NH2 | A_GLU_325 | OE2 | 3.058 |
| 1HGE | B_ARG_54  | NH1 | F_GLU_97  | OE2 | 3.352 |
| 1HGE | B_ARG_54  | NH2 | F_GLU_97  | OE2 | 2.840 |
| 1HGE | B_LYS_62  | NZ  | F_ASP_86  | OD1 | 2.965 |
| 1HGE | B_LYS_62  | NZ  | F_ASP_86  | OD2 | 2.602 |
| 1HGE | B_LYS_62  | NZ  | F_ASP_90  | OD1 | 3.562 |
| 1HGE | B_LYS_62  | NZ  | F_ASP_90  | OD2 | 2.691 |
| 1HGE | B_ARG_76  | NH1 | D_GLU_74  | OE1 | 3.487 |
| 1HGE | B_ARG_76  | NH1 | D_GLU_74  | OE2 | 2.838 |
| 1HGE | B_ARG_76  | NH2 | D_GLU_74  | OE1 | 2.788 |
| 1HGE | B_ARG_76  | NH2 | D_GLU_74  | OE2 | 3.585 |
| 1HGE | B_ARG_76  | NH2 | D_GLU_81  | OE1 | 2.698 |
| 1HGE | B_ARG_76  | NH2 | D_GLU_81  | OE2 | 3.486 |
| 1HGE | B_ARG_123 | NH2 | F_GLU_132 | OE1 | 3.159 |
| 1HGE | B_ARG_124 | NH2 | F_GLU_132 | OE1 | 3.028 |
| 1HGE | B_ARG_124 | NH2 | F_GLU_132 | OE2 | 3.444 |
| 1HGE | B_ARG_127 | NH1 | F_GLU_131 | OE1 | 2.492 |

|      |           |     |           |     |       |
|------|-----------|-----|-----------|-----|-------|
| 1HGE | B_ARG_163 | NH2 | F_GLU_131 | OE1 | 2.609 |
| 1HGE | B_ARG_163 | NH2 | F_GLU_131 | OE2 | 2.622 |
| 1HGE | B_ARG_170 | NH1 | D_GLU_128 | OE1 | 3.351 |
| 1HGE | B_ARG_170 | NH1 | D_GLU_128 | OE2 | 3.595 |
| 1HGE | B_LYS_174 | NZ  | D_ASP_164 | OD1 | 2.542 |
| 1HGE | B_LYS_174 | NZ  | D_ASP_164 | OD2 | 2.784 |
| 1HGE | C_LYS_27  | NZ  | D_GLU_97  | OE1 | 2.850 |
| 1HGE | C_LYS_27  | NZ  | D_GLU_97  | OE2 | 2.792 |
| 1HGE | C_ARG_109 | NH2 | D_GLU_67  | OE1 | 3.673 |
| 1HGE | C_ARG_109 | NH2 | D_GLU_67  | OE2 | 2.784 |
| 1HGE | C_LYS_238 | NZ  | B_GLU_72  | OE1 | 2.779 |
| 1HGE | C_LYS_238 | NZ  | B_GLU_72  | OE2 | 2.668 |
| 1HGE | C_ARG_269 | NH1 | D_GLU_67  | OE1 | 2.720 |
| 1HGE | C_ARG_269 | NH2 | D_GLU_67  | OE1 | 3.811 |
| 1HGE | C_LYS_299 | NZ  | D_GLU_69  | OE2 | 2.808 |
| 1HGE | C_LYS_310 | NZ  | D_ASP_86  | OD1 | 2.890 |
| 1HGE | C_LYS_310 | NZ  | D_ASP_90  | OD1 | 2.566 |
| 1HGE | C_LYS_310 | NZ  | D_ASP_90  | OD2 | 3.955 |
| 1HGE | C_LYS_326 | NZ  | D_GLU_15  | OE1 | 2.739 |
| 1HGE | C_LYS_326 | NZ  | D_GLU_15  | OE2 | 3.731 |
| 1HGE | D_ARG_54  | NH1 | B_GLU_97  | OE2 | 3.383 |
| 1HGE | D_ARG_54  | NH2 | B_GLU_97  | OE2 | 2.866 |
| 1HGE | D_LYS_62  | NZ  | B_ASP_86  | OD1 | 3.023 |
| 1HGE | D_LYS_62  | NZ  | B_ASP_86  | OD2 | 2.550 |
| 1HGE | D_LYS_62  | NZ  | B_ASP_90  | OD1 | 3.565 |
| 1HGE | D_LYS_62  | NZ  | B_ASP_90  | OD2 | 2.627 |
| 1HGE | D_ARG_76  | NH1 | F_GLU_74  | OE1 | 3.355 |
| 1HGE | D_ARG_76  | NH1 | F_GLU_74  | OE2 | 2.783 |
| 1HGE | D_ARG_76  | NH2 | F_GLU_74  | OE1 | 2.745 |
| 1HGE | D_ARG_76  | NH2 | F_GLU_74  | OE2 | 3.636 |
| 1HGE | D_ARG_76  | NH2 | F_GLU_81  | OE1 | 2.634 |
| 1HGE | D_ARG_76  | NH2 | F_GLU_81  | OE2 | 3.497 |
| 1HGE | D_ARG_123 | NH2 | B_GLU_132 | OE1 | 3.118 |
| 1HGE | D_ARG_124 | NH2 | B_GLU_132 | OE1 | 3.002 |
| 1HGE | D_ARG_124 | NH2 | B_GLU_132 | OE2 | 3.417 |
| 1HGE | D_ARG_127 | NH1 | B_GLU_131 | OE1 | 2.524 |
| 1HGE | D_ARG_163 | NH2 | B_GLU_131 | OE1 | 2.587 |
| 1HGE | D_ARG_163 | NH2 | B_GLU_131 | OE2 | 2.600 |
| 1HGE | D_ARG_170 | NH1 | F_GLU_128 | OE1 | 3.477 |
| 1HGE | D_ARG_170 | NH1 | F_GLU_128 | OE2 | 3.701 |
| 1HGE | D_LYS_174 | NZ  | F_ASP_164 | OD1 | 2.678 |
| 1HGE | D_LYS_174 | NZ  | F_ASP_164 | OD2 | 2.785 |
| 1HGE | E_LYS_27  | NZ  | F_GLU_97  | OE1 | 2.844 |
| 1HGE | E_LYS_27  | NZ  | F_GLU_97  | OE2 | 2.791 |
| 1HGE | E_ARG_109 | NH2 | F_GLU_67  | OE1 | 3.658 |
| 1HGE | E_ARG_109 | NH2 | F_GLU_67  | OE2 | 2.776 |
| 1HGE | E_LYS_238 | NZ  | D_GLU_72  | OE1 | 2.851 |
| 1HGE | E_LYS_238 | NZ  | D_GLU_72  | OE2 | 2.740 |
| 1HGE | E_ARG_269 | NH1 | F_GLU_67  | OE1 | 2.696 |
| 1HGE | E_ARG_269 | NH2 | F_GLU_67  | OE1 | 3.784 |
| 1HGE | E_LYS_299 | NZ  | F_GLU_69  | OE2 | 2.768 |
| 1HGE | E_LYS_310 | NZ  | F_ASP_86  | OD1 | 2.863 |
| 1HGE | E_LYS_310 | NZ  | F_ASP_90  | OD1 | 2.577 |
| 1HGE | E_LYS_310 | NZ  | F_ASP_90  | OD2 | 3.952 |
| 1HGE | E_LYS_326 | NZ  | F_GLU_15  | OE1 | 2.987 |
| 1HGE | E_LYS_326 | NZ  | F_GLU_15  | OE2 | 3.095 |
| 1HGE | F_ARG_54  | NH1 | D_GLU_97  | OE2 | 3.384 |
| 1HGE | F_ARG_54  | NH2 | D_GLU_97  | OE2 | 2.800 |

|      |           |     |           |     |       |
|------|-----------|-----|-----------|-----|-------|
| 1HGE | F_LYS_62  | NZ  | D_ASP_86  | OD1 | 2.945 |
| 1HGE | F_LYS_62  | NZ  | D_ASP_86  | OD2 | 2.535 |
| 1HGE | F_LYS_62  | NZ  | D_ASP_90  | OD1 | 3.592 |
| 1HGE | F_LYS_62  | NZ  | D_ASP_90  | OD2 | 2.671 |
| 1HGE | F_ARG_76  | NH1 | B_GLU_74  | OE1 | 3.326 |
| 1HGE | F_ARG_76  | NH1 | B_GLU_74  | OE2 | 2.732 |
| 1HGE | F_ARG_76  | NH2 | B_GLU_74  | OE1 | 2.705 |
| 1HGE | F_ARG_76  | NH2 | B_GLU_74  | OE2 | 3.590 |
| 1HGE | F_ARG_76  | NH2 | B_GLU_81  | OE1 | 2.650 |
| 1HGE | F_ARG_76  | NH2 | B_GLU_81  | OE2 | 3.592 |
| 1HGE | F_ARG_123 | NH2 | D_GLU_132 | OE1 | 3.161 |
| 1HGE | F_ARG_124 | NH2 | D_GLU_132 | OE1 | 3.085 |
| 1HGE | F_ARG_124 | NH2 | D_GLU_132 | OE2 | 3.468 |
| 1HGE | F_ARG_127 | NH1 | D_GLU_131 | OE1 | 2.578 |
| 1HGE | F_ARG_163 | NH2 | D_GLU_131 | OE1 | 2.628 |
| 1HGE | F_ARG_163 | NH2 | D_GLU_131 | OE2 | 2.698 |
| 1HGE | F_ARG_170 | NH1 | B_GLU_128 | OE1 | 3.389 |
| 1HGE | F_ARG_170 | NH1 | B_GLU_128 | OE2 | 3.679 |
| 1HGE | F_LYS_174 | NZ  | B_ASP_164 | OD1 | 2.537 |
| 1HGE | F_LYS_174 | NZ  | B_ASP_164 | OD2 | 2.796 |
| 1HGF | A_LYS_27  | NZ  | B_GLU_97  | OE1 | 2.809 |
| 1HGF | A_LYS_27  | NZ  | B_GLU_97  | OE2 | 2.791 |
| 1HGF | A_ARG_109 | NH2 | B_GLU_67  | OE1 | 3.699 |
| 1HGF | A_ARG_109 | NH2 | B_GLU_67  | OE2 | 2.917 |
| 1HGF | A_LYS_238 | NZ  | F_GLU_72  | OE1 | 2.852 |
| 1HGF | A_LYS_238 | NZ  | F_GLU_72  | OE2 | 2.778 |
| 1HGF | A_ARG_269 | NH1 | B_GLU_67  | OE1 | 2.939 |
| 1HGF | A_LYS_299 | NZ  | B_GLU_69  | OE2 | 3.681 |
| 1HGF | A_LYS_310 | NZ  | B_ASP_86  | OD1 | 2.820 |
| 1HGF | A_LYS_310 | NZ  | B_ASP_90  | OD1 | 2.555 |
| 1HGF | A_LYS_310 | NZ  | B_ASP_90  | OD2 | 3.978 |
| 1HGF | A_LYS_326 | NZ  | B_GLU_15  | OE1 | 3.851 |
| 1HGF | A_LYS_326 | NZ  | B_GLU_15  | OE2 | 3.863 |
| 1HGF | B_ARG_25  | NH1 | A_GLU_325 | OE2 | 3.563 |
| 1HGF | B_ARG_25  | NH2 | A_GLU_325 | OE2 | 2.989 |
| 1HGF | B_ARG_54  | NH1 | F_GLU_97  | OE2 | 3.282 |
| 1HGF | B_ARG_54  | NH2 | F_GLU_97  | OE2 | 2.831 |
| 1HGF | B_LYS_62  | NZ  | F_ASP_86  | OD1 | 3.116 |
| 1HGF | B_LYS_62  | NZ  | F_ASP_86  | OD2 | 2.708 |
| 1HGF | B_LYS_62  | NZ  | F_ASP_90  | OD1 | 3.733 |
| 1HGF | B_LYS_62  | NZ  | F_ASP_90  | OD2 | 2.767 |
| 1HGF | B_ARG_76  | NH1 | D_GLU_74  | OE1 | 2.859 |
| 1HGF | B_ARG_76  | NH1 | D_GLU_74  | OE2 | 3.561 |
| 1HGF | B_ARG_76  | NH2 | D_GLU_74  | OE1 | 3.524 |
| 1HGF | B_ARG_76  | NH2 | D_GLU_74  | OE2 | 2.746 |
| 1HGF | B_ARG_76  | NH2 | D_GLU_81  | OE1 | 2.726 |
| 1HGF | B_ARG_76  | NH2 | D_GLU_81  | OE2 | 3.662 |
| 1HGF | B_ARG_123 | NH2 | F_GLU_132 | OE1 | 3.495 |
| 1HGF | B_ARG_124 | NH2 | F_GLU_132 | OE1 | 3.111 |
| 1HGF | B_ARG_124 | NH2 | F_GLU_132 | OE2 | 3.495 |
| 1HGF | B_ARG_127 | NH1 | F_GLU_131 | OE1 | 2.468 |
| 1HGF | B_ARG_163 | NH2 | F_GLU_131 | OE1 | 2.740 |
| 1HGF | B_ARG_163 | NH2 | F_GLU_131 | OE2 | 2.533 |
| 1HGF | B_ARG_170 | NH1 | D_GLU_128 | OE1 | 3.455 |
| 1HGF | B_ARG_170 | NH1 | D_GLU_128 | OE2 | 3.294 |
| 1HGF | B_LYS_174 | NZ  | D_ASP_164 | OD2 | 3.813 |
| 1HGF | C_LYS_27  | NZ  | D_GLU_97  | OE1 | 2.824 |
| 1HGF | C_LYS_27  | NZ  | D_GLU_97  | OE2 | 2.808 |

|      |           |     |           |     |       |
|------|-----------|-----|-----------|-----|-------|
| 1HGF | C_ARG_109 | NH2 | D_GLU_67  | OE1 | 3.698 |
| 1HGF | C_ARG_109 | NH2 | D_GLU_67  | OE2 | 2.914 |
| 1HGF | C_LYS_238 | NZ  | B_GLU_72  | OE1 | 2.746 |
| 1HGF | C_LYS_238 | NZ  | B_GLU_72  | OE2 | 2.727 |
| 1HGF | C_ARG_269 | NH1 | D_GLU_67  | OE1 | 2.900 |
| 1HGF | C_LYS_299 | NZ  | D_GLU_69  | OE2 | 3.732 |
| 1HGF | C_LYS_310 | NZ  | D_ASP_86  | OD1 | 2.839 |
| 1HGF | C_LYS_310 | NZ  | D_ASP_90  | OD1 | 2.507 |
| 1HGF | C_LYS_310 | NZ  | D_ASP_90  | OD2 | 3.941 |
| 1HGF | C_LYS_326 | NZ  | D_GLU_15  | OE1 | 3.713 |
| 1HGF | D_ARG_54  | NH1 | B_GLU_97  | OE2 | 3.314 |
| 1HGF | D_ARG_54  | NH2 | B_GLU_97  | OE2 | 2.840 |
| 1HGF | D_LYS_62  | NZ  | B_ASP_86  | OD1 | 3.122 |
| 1HGF | D_LYS_62  | NZ  | B_ASP_86  | OD2 | 2.686 |
| 1HGF | D_LYS_62  | NZ  | B_ASP_90  | OD1 | 3.703 |
| 1HGF | D_LYS_62  | NZ  | B_ASP_90  | OD2 | 2.682 |
| 1HGF | D_ARG_76  | NH1 | F_GLU_74  | OE1 | 2.790 |
| 1HGF | D_ARG_76  | NH1 | F_GLU_74  | OE2 | 3.379 |
| 1HGF | D_ARG_76  | NH2 | F_GLU_74  | OE1 | 3.594 |
| 1HGF | D_ARG_76  | NH2 | F_GLU_74  | OE2 | 2.697 |
| 1HGF | D_ARG_76  | NH2 | F_GLU_81  | OE1 | 2.644 |
| 1HGF | D_ARG_76  | NH2 | F_GLU_81  | OE2 | 3.691 |
| 1HGF | D_ARG_123 | NH2 | B_GLU_132 | OE1 | 3.407 |
| 1HGF | D_ARG_124 | NH2 | B_GLU_132 | OE1 | 3.100 |
| 1HGF | D_ARG_124 | NH2 | B_GLU_132 | OE2 | 3.442 |
| 1HGF | D_ARG_127 | NH1 | B_GLU_131 | OE1 | 2.516 |
| 1HGF | D_ARG_163 | NH2 | B_GLU_131 | OE1 | 2.704 |
| 1HGF | D_ARG_163 | NH2 | B_GLU_131 | OE2 | 2.556 |
| 1HGF | D_ARG_170 | NH1 | F_GLU_128 | OE1 | 3.604 |
| 1HGF | D_ARG_170 | NH1 | F_GLU_128 | OE2 | 3.428 |
| 1HGF | E_LYS_27  | NZ  | F_GLU_97  | OE1 | 2.793 |
| 1HGF | E_LYS_27  | NZ  | F_GLU_97  | OE2 | 2.754 |
| 1HGF | E_ARG_109 | NH2 | F_GLU_67  | OE1 | 3.694 |
| 1HGF | E_ARG_109 | NH2 | F_GLU_67  | OE2 | 2.878 |
| 1HGF | E_LYS_238 | NZ  | D_GLU_72  | OE1 | 2.831 |
| 1HGF | E_LYS_238 | NZ  | D_GLU_72  | OE2 | 2.834 |
| 1HGF | E_ARG_269 | NH1 | F_GLU_67  | OE1 | 2.906 |
| 1HGF | E_LYS_299 | NZ  | F_GLU_69  | OE2 | 3.655 |
| 1HGF | E_LYS_310 | NZ  | F_ASP_86  | OD1 | 2.832 |
| 1HGF | E_LYS_310 | NZ  | F_ASP_90  | OD1 | 2.514 |
| 1HGF | E_LYS_310 | NZ  | F_ASP_90  | OD2 | 3.973 |
| 1HGF | E_LYS_326 | NZ  | F_GLU_15  | OE1 | 3.652 |
| 1HGF | E_LYS_326 | NZ  | F_GLU_15  | OE2 | 3.771 |
| 1HGF | F_ARG_54  | NH1 | D_GLU_97  | OE2 | 3.368 |
| 1HGF | F_ARG_54  | NH2 | D_GLU_97  | OE2 | 2.791 |
| 1HGF | F_LYS_62  | NZ  | D_ASP_86  | OD1 | 3.076 |
| 1HGF | F_LYS_62  | NZ  | D_ASP_86  | OD2 | 2.672 |
| 1HGF | F_LYS_62  | NZ  | D_ASP_90  | OD1 | 3.773 |
| 1HGF | F_LYS_62  | NZ  | D_ASP_90  | OD2 | 2.752 |
| 1HGF | F_ARG_76  | NH1 | B_GLU_74  | OE1 | 2.779 |
| 1HGF | F_ARG_76  | NH1 | B_GLU_74  | OE2 | 3.420 |
| 1HGF | F_ARG_76  | NH2 | B_GLU_74  | OE1 | 3.542 |
| 1HGF | F_ARG_76  | NH2 | B_GLU_74  | OE2 | 2.707 |
| 1HGF | F_ARG_76  | NH2 | B_GLU_81  | OE1 | 2.689 |
| 1HGF | F_ARG_76  | NH2 | B_GLU_81  | OE2 | 3.716 |
| 1HGF | F_ARG_123 | NH2 | D_GLU_132 | OE1 | 3.469 |
| 1HGF | F_ARG_124 | NH2 | D_GLU_132 | OE1 | 3.198 |
| 1HGF | F_ARG_124 | NH2 | D_GLU_132 | OE2 | 3.522 |

|      |           |     |           |     |       |
|------|-----------|-----|-----------|-----|-------|
| 1HGF | F_ARG_127 | NH1 | D_GLU_131 | OE1 | 2.568 |
| 1HGF | F_ARG_163 | NH2 | D_GLU_131 | OE1 | 2.689 |
| 1HGF | F_ARG_163 | NH2 | D_GLU_131 | OE2 | 2.644 |
| 1HGF | F_ARG_170 | NH1 | B_GLU_128 | OE1 | 3.432 |
| 1HGF | F_ARG_170 | NH1 | B_GLU_128 | OE2 | 3.366 |
| 1HGF | F_LYS_174 | NZ  | B_ASP_164 | OD2 | 3.837 |
| 1HGG | A_LYS_27  | NZ  | B_GLU_97  | OE1 | 2.679 |
| 1HGG | A_LYS_27  | NZ  | B_GLU_97  | OE2 | 2.904 |
| 1HGG | A_ARG_109 | NH2 | B_GLU_67  | OE1 | 3.854 |
| 1HGG | A_ARG_109 | NH2 | B_GLU_67  | OE2 | 2.838 |
| 1HGG | A_LYS_238 | NZ  | F_GLU_72  | OE1 | 2.931 |
| 1HGG | A_LYS_238 | NZ  | F_GLU_72  | OE2 | 2.744 |
| 1HGG | A_ARG_269 | NH1 | B_GLU_67  | OE1 | 2.694 |
| 1HGG | A_ARG_269 | NH2 | B_GLU_67  | OE1 | 3.814 |
| 1HGG | A_LYS_299 | NZ  | B_GLU_69  | OE2 | 2.915 |
| 1HGG | A_LYS_310 | NZ  | B_ASP_86  | OD1 | 2.852 |
| 1HGG | A_LYS_310 | NZ  | B_ASP_90  | OD1 | 2.700 |
| 1HGG | A_LYS_310 | NZ  | B_ASP_90  | OD2 | 3.923 |
| 1HGG | A_LYS_326 | NZ  | B_GLU_15  | OE1 | 3.039 |
| 1HGG | A_LYS_326 | NZ  | B_GLU_15  | OE2 | 2.830 |
| 1HGG | B_ARG_25  | NH1 | A_GLU_325 | OE2 | 3.770 |
| 1HGG | B_ARG_25  | NH2 | A_GLU_325 | OE2 | 2.944 |
| 1HGG | B_ARG_54  | NH1 | F_GLU_97  | OE2 | 3.410 |
| 1HGG | B_ARG_54  | NH2 | F_GLU_97  | OE2 | 2.750 |
| 1HGG | B_LYS_62  | NZ  | F_ASP_86  | OD1 | 2.889 |
| 1HGG | B_LYS_62  | NZ  | F_ASP_86  | OD2 | 2.639 |
| 1HGG | B_LYS_62  | NZ  | F_ASP_90  | OD1 | 3.716 |
| 1HGG | B_LYS_62  | NZ  | F_ASP_90  | OD2 | 2.650 |
| 1HGG | B_ARG_76  | NH1 | D_GLU_74  | OE1 | 2.882 |
| 1HGG | B_ARG_76  | NH1 | D_GLU_74  | OE2 | 3.580 |
| 1HGG | B_ARG_76  | NH2 | D_GLU_74  | OE1 | 3.459 |
| 1HGG | B_ARG_76  | NH2 | D_GLU_74  | OE2 | 2.820 |
| 1HGG | B_ARG_76  | NH2 | D_GLU_81  | OE1 | 2.731 |
| 1HGG | B_ARG_76  | NH2 | D_GLU_81  | OE2 | 3.473 |
| 1HGG | B_ARG_123 | NH2 | F_GLU_132 | OE1 | 2.827 |
| 1HGG | B_ARG_124 | NH2 | F_GLU_132 | OE1 | 3.221 |
| 1HGG | B_ARG_124 | NH2 | F_GLU_132 | OE2 | 3.297 |
| 1HGG | B_ARG_127 | NH1 | F_GLU_131 | OE1 | 2.465 |
| 1HGG | B_ARG_163 | NH2 | F_GLU_131 | OE1 | 2.594 |
| 1HGG | B_ARG_163 | NH2 | F_GLU_131 | OE2 | 2.562 |
| 1HGG | B_ARG_170 | NH1 | D_GLU_128 | OE1 | 3.236 |
| 1HGG | B_ARG_170 | NH1 | D_GLU_128 | OE2 | 3.289 |
| 1HGG | B_LYS_174 | NZ  | D_ASP_164 | OD1 | 2.736 |
| 1HGG | B_LYS_174 | NZ  | D_ASP_164 | OD2 | 2.575 |
| 1HGG | C_LYS_27  | NZ  | D_GLU_97  | OE1 | 2.683 |
| 1HGG | C_LYS_27  | NZ  | D_GLU_97  | OE2 | 2.941 |
| 1HGG | C_ARG_109 | NH2 | D_GLU_67  | OE1 | 3.869 |
| 1HGG | C_ARG_109 | NH2 | D_GLU_67  | OE2 | 2.853 |
| 1HGG | C_LYS_238 | NZ  | B_GLU_72  | OE1 | 2.830 |
| 1HGG | C_LYS_238 | NZ  | B_GLU_72  | OE2 | 2.699 |
| 1HGG | C_ARG_269 | NH1 | D_GLU_67  | OE1 | 2.688 |
| 1HGG | C_ARG_269 | NH2 | D_GLU_67  | OE1 | 3.820 |
| 1HGG | C_LYS_299 | NZ  | D_GLU_69  | OE2 | 2.932 |
| 1HGG | C_LYS_310 | NZ  | D_ASP_86  | OD1 | 2.859 |
| 1HGG | C_LYS_310 | NZ  | D_ASP_90  | OD1 | 2.651 |
| 1HGG | C_LYS_310 | NZ  | D_ASP_90  | OD2 | 3.858 |
| 1HGG | C_LYS_326 | NZ  | D_GLU_15  | OE1 | 2.591 |
| 1HGG | C_LYS_326 | NZ  | D_GLU_15  | OE2 | 3.450 |



|      |           |     |           |     |       |
|------|-----------|-----|-----------|-----|-------|
| 1HGG | D_ARG.54  | NH1 | B_GLU_97  | OE2 | 3.442 |
| 1HGG | D_ARG.54  | NH2 | B_GLU_97  | OE2 | 2.764 |
| 1HGG | D_LYS.62  | NZ  | B_ASP_86  | OD1 | 2.924 |
| 1HGG | D_LYS.62  | NZ  | B_ASP_86  | OD2 | 2.567 |
| 1HGG | D_LYS.62  | NZ  | B_ASP_90  | OD1 | 3.695 |
| 1HGG | D_LYS.62  | NZ  | B_ASP_90  | OD2 | 2.575 |
| 1HGG | D_ARG.76  | NH1 | F_GLU_74  | OE1 | 2.783 |
| 1HGG | D_ARG.76  | NH1 | F_GLU_74  | OE2 | 3.379 |
| 1HGG | D_ARG.76  | NH2 | F_GLU_74  | OE1 | 3.480 |
| 1HGG | D_ARG.76  | NH2 | F_GLU_74  | OE2 | 2.737 |
| 1HGG | D_ARG.76  | NH2 | F_GLU_81  | OE1 | 2.674 |
| 1HGG | D_ARG.76  | NH2 | F_GLU_81  | OE2 | 3.521 |
| 1HGG | D_ARG.123 | NH2 | B_GLU_132 | OE1 | 2.793 |
| 1HGG | D_ARG.124 | NH2 | B_GLU_132 | OE1 | 3.241 |
| 1HGG | D_ARG.124 | NH2 | B_GLU_132 | OE2 | 3.297 |
| 1HGG | D_ARG.127 | NH1 | B_GLU_131 | OE1 | 2.475 |
| 1HGG | D_ARG.163 | NH2 | B_GLU_131 | OE1 | 2.580 |
| 1HGG | D_ARG.163 | NH2 | B_GLU_131 | OE2 | 2.598 |
| 1HGG | D_ARG.170 | NH1 | F_GLU_128 | OE1 | 3.365 |
| 1HGG | D_ARG.170 | NH1 | F_GLU_128 | OE2 | 3.390 |
| 1HGG | D_LYS.174 | NZ  | F_ASP_164 | OD1 | 2.763 |
| 1HGG | D_LYS.174 | NZ  | F_ASP_164 | OD2 | 2.711 |
| 1HGG | E_LYS.27  | NZ  | F_GLU_97  | OE1 | 2.689 |
| 1HGG | E_LYS.27  | NZ  | F_GLU_97  | OE2 | 2.909 |
| 1HGG | E_ARG.109 | NH2 | F_GLU_67  | OE1 | 3.891 |
| 1HGG | E_ARG.109 | NH2 | F_GLU_67  | OE2 | 2.876 |
| 1HGG | E_LYS.238 | NZ  | D_GLU_72  | OE1 | 2.893 |
| 1HGG | E_LYS.238 | NZ  | D_GLU_72  | OE2 | 2.782 |
| 1HGG | E_ARG.269 | NH1 | F_GLU_67  | OE1 | 2.691 |
| 1HGG | E_ARG.269 | NH2 | F_GLU_67  | OE1 | 3.830 |
| 1HGG | E_LYS.299 | NZ  | F_GLU_69  | OE2 | 2.920 |
| 1HGG | E_LYS.310 | NZ  | F_ASP_86  | OD1 | 2.871 |
| 1HGG | E_LYS.310 | NZ  | F_ASP_90  | OD1 | 2.639 |
| 1HGG | E_LYS.310 | NZ  | F_ASP_90  | OD2 | 3.900 |
| 1HGG | E_LYS.326 | NZ  | F_GLU_15  | OE1 | 2.975 |
| 1HGG | E_LYS.326 | NZ  | F_GLU_15  | OE2 | 3.000 |
| 1HGG | F_ARG.54  | NH1 | D_GLU_97  | OE2 | 3.483 |
| 1HGG | F_ARG.54  | NH2 | D_GLU_97  | OE2 | 2.727 |
| 1HGG | F_LYS.62  | NZ  | D_ASP_86  | OD1 | 2.904 |
| 1HGG | F_LYS.62  | NZ  | D_ASP_86  | OD2 | 2.582 |
| 1HGG | F_LYS.62  | NZ  | D_ASP_90  | OD1 | 3.752 |
| 1HGG | F_LYS.62  | NZ  | D_ASP_90  | OD2 | 2.595 |
| 1HGG | F_ARG.76  | NH1 | B_GLU_74  | OE1 | 2.750 |
| 1HGG | F_ARG.76  | NH1 | B_GLU_74  | OE2 | 3.432 |
| 1HGG | F_ARG.76  | NH2 | B_GLU_74  | OE1 | 3.456 |
| 1HGG | F_ARG.76  | NH2 | B_GLU_74  | OE2 | 2.786 |
| 1HGG | F_ARG.76  | NH2 | B_GLU_81  | OE1 | 2.674 |
| 1HGG | F_ARG.76  | NH2 | B_GLU_81  | OE2 | 3.545 |
| 1HGG | F_ARG.123 | NH2 | D_GLU_132 | OE1 | 2.843 |
| 1HGG | F_ARG.124 | NH2 | D_GLU_132 | OE1 | 3.317 |
| 1HGG | F_ARG.124 | NH2 | D_GLU_132 | OE2 | 3.342 |
| 1HGG | F_ARG.127 | NH1 | D_GLU_131 | OE1 | 2.523 |
| 1HGG | F_ARG.163 | NH2 | D_GLU_131 | OE1 | 2.589 |
| 1HGG | F_ARG.163 | NH2 | D_GLU_131 | OE2 | 2.640 |
| 1HGG | F_ARG.170 | NH1 | B_GLU_128 | OE1 | 3.237 |
| 1HGG | F_ARG.170 | NH1 | B_GLU_128 | OE2 | 3.354 |
| 1HGG | F_LYS.174 | NZ  | B_ASP_164 | OD1 | 2.757 |
| 1HGG | F_LYS.174 | NZ  | B_ASP_164 | OD2 | 2.547 |

|      |           |     |           |     |       |
|------|-----------|-----|-----------|-----|-------|
| 1HGH | A_LYS_27  | NZ  | B_GLU_97  | OE1 | 2.856 |
| 1HGH | A_LYS_27  | NZ  | B_GLU_97  | OE2 | 2.781 |
| 1HGH | A_ARG_109 | NH2 | B_GLU_67  | OE1 | 3.697 |
| 1HGH | A_ARG_109 | NH2 | B_GLU_67  | OE2 | 2.864 |
| 1HGH | A_LYS_238 | NZ  | F_GLU_72  | OE1 | 2.921 |
| 1HGH | A_LYS_238 | NZ  | F_GLU_72  | OE2 | 2.736 |
| 1HGH | A_ARG_269 | NH1 | B_GLU_67  | OE1 | 2.720 |
| 1HGH | A_ARG_269 | NH2 | B_GLU_67  | OE1 | 3.718 |
| 1HGH | A_LYS_299 | NZ  | B_GLU_69  | OE2 | 2.918 |
| 1HGH | A_LYS_310 | NZ  | B_ASP_86  | OD1 | 2.712 |
| 1HGH | A_LYS_310 | NZ  | B_ASP_90  | OD1 | 2.578 |
| 1HGH | A_LYS_310 | NZ  | B_ASP_90  | OD2 | 3.975 |
| 1HGH | A_LYS_326 | NZ  | B_GLU_15  | OE1 | 3.092 |
| 1HGH | A_LYS_326 | NZ  | B_GLU_15  | OE2 | 2.707 |
| 1HGH | B_ARG_25  | NH1 | A_GLU_325 | OE2 | 3.971 |
| 1HGH | B_ARG_25  | NH2 | A_GLU_325 | OE2 | 3.017 |
| 1HGH | B_ARG_54  | NH1 | F_GLU_97  | OE2 | 3.285 |
| 1HGH | B_ARG_54  | NH2 | F_GLU_97  | OE2 | 2.823 |
| 1HGH | B_LYS_62  | NZ  | F_ASP_86  | OD1 | 3.064 |
| 1HGH | B_LYS_62  | NZ  | F_ASP_86  | OD2 | 2.661 |
| 1HGH | B_LYS_62  | NZ  | F_ASP_90  | OD1 | 3.547 |
| 1HGH | B_LYS_62  | NZ  | F_ASP_90  | OD2 | 2.683 |
| 1HGH | B_ARG_76  | NH1 | D_GLU_74  | OE1 | 3.707 |
| 1HGH | B_ARG_76  | NH1 | D_GLU_74  | OE2 | 2.912 |
| 1HGH | B_ARG_76  | NH2 | D_GLU_74  | OE1 | 2.889 |
| 1HGH | B_ARG_76  | NH2 | D_GLU_74  | OE2 | 3.526 |
| 1HGH | B_ARG_76  | NH2 | D_GLU_81  | OE1 | 2.765 |
| 1HGH | B_ARG_76  | NH2 | D_GLU_81  | OE2 | 3.411 |
| 1HGH | B_ARG_123 | NH2 | F_GLU_132 | OE1 | 3.134 |
| 1HGH | B_ARG_124 | NH2 | F_GLU_132 | OE1 | 3.005 |
| 1HGH | B_ARG_124 | NH2 | F_GLU_132 | OE2 | 3.302 |
| 1HGH | B_ARG_127 | NH1 | F_GLU_131 | OE1 | 2.524 |
| 1HGH | B_ARG_163 | NH2 | F_GLU_131 | OE1 | 2.607 |
| 1HGH | B_ARG_163 | NH2 | F_GLU_131 | OE2 | 2.538 |
| 1HGH | B_ARG_170 | NH1 | D_GLU_128 | OE1 | 3.253 |
| 1HGH | B_ARG_170 | NH1 | D_GLU_128 | OE2 | 3.577 |
| 1HGH | B_LYS_174 | NZ  | D_ASP_164 | OD1 | 2.767 |
| 1HGH | B_LYS_174 | NZ  | D_ASP_164 | OD2 | 2.573 |
| 1HGH | C_LYS_27  | NZ  | D_GLU_97  | OE1 | 2.897 |
| 1HGH | C_LYS_27  | NZ  | D_GLU_97  | OE2 | 2.815 |
| 1HGH | C_ARG_109 | NH2 | D_GLU_67  | OE1 | 3.686 |
| 1HGH | C_ARG_109 | NH2 | D_GLU_67  | OE2 | 2.856 |
| 1HGH | C_LYS_238 | NZ  | B_GLU_72  | OE1 | 2.713 |
| 1HGH | C_LYS_238 | NZ  | B_GLU_72  | OE2 | 2.597 |
| 1HGH | C_ARG_269 | NH1 | D_GLU_67  | OE1 | 2.732 |
| 1HGH | C_ARG_269 | NH2 | D_GLU_67  | OE1 | 3.725 |
| 1HGH | C_LYS_299 | NZ  | D_GLU_69  | OE2 | 2.939 |
| 1HGH | C_LYS_310 | NZ  | D_ASP_86  | OD1 | 2.734 |
| 1HGH | C_LYS_310 | NZ  | D_ASP_90  | OD1 | 2.551 |
| 1HGH | C_LYS_310 | NZ  | D_ASP_90  | OD2 | 3.913 |
| 1HGH | C_LYS_326 | NZ  | D_GLU_15  | OE1 | 2.774 |
| 1HGH | C_LYS_326 | NZ  | D_GLU_15  | OE2 | 3.676 |
| 1HGH | D_ARG_54  | NH1 | B_GLU_97  | OE2 | 3.277 |
| 1HGH | D_ARG_54  | NH2 | B_GLU_97  | OE2 | 2.797 |
| 1HGH | D_LYS_62  | NZ  | B_ASP_86  | OD1 | 3.011 |
| 1HGH | D_LYS_62  | NZ  | B_ASP_86  | OD2 | 2.510 |
| 1HGH | D_LYS_62  | NZ  | B_ASP_90  | OD1 | 3.543 |
| 1HGH | D_LYS_62  | NZ  | B_ASP_90  | OD2 | 2.589 |

|      |           |     |           |     |       |
|------|-----------|-----|-----------|-----|-------|
| 1HGH | D_ARG_76  | NH1 | F_GLU_74  | OE1 | 3.430 |
| 1HGH | D_ARG_76  | NH1 | F_GLU_74  | OE2 | 2.765 |
| 1HGH | D_ARG_76  | NH2 | F_GLU_74  | OE1 | 2.747 |
| 1HGH | D_ARG_76  | NH2 | F_GLU_74  | OE2 | 3.553 |
| 1HGH | D_ARG_76  | NH2 | F_GLU_81  | OE1 | 2.698 |
| 1HGH | D_ARG_76  | NH2 | F_GLU_81  | OE2 | 3.487 |
| 1HGH | D_ARG_123 | NH2 | B_GLU_132 | OE1 | 3.141 |
| 1HGH | D_ARG_124 | NH2 | B_GLU_132 | OE1 | 3.050 |
| 1HGH | D_ARG_124 | NH2 | B_GLU_132 | OE2 | 3.354 |
| 1HGH | D_ARG_127 | NH1 | B_GLU_131 | OE1 | 2.536 |
| 1HGH | D_ARG_163 | NH2 | B_GLU_131 | OE1 | 2.609 |
| 1HGH | D_ARG_163 | NH2 | B_GLU_131 | OE2 | 2.570 |
| 1HGH | D_ARG_170 | NH1 | F_GLU_128 | OE1 | 3.352 |
| 1HGH | D_ARG_170 | NH1 | F_GLU_128 | OE2 | 3.641 |
| 1HGH | D_LYS_174 | NZ  | F_ASP_164 | OD1 | 2.863 |
| 1HGH | D_LYS_174 | NZ  | F_ASP_164 | OD2 | 2.724 |
| 1HGH | E_LYS_27  | NZ  | F_GLU_97  | OE1 | 2.917 |
| 1HGH | E_LYS_27  | NZ  | F_GLU_97  | OE2 | 2.767 |
| 1HGH | E_ARG_109 | NH2 | F_GLU_67  | OE1 | 3.698 |
| 1HGH | E_ARG_109 | NH2 | F_GLU_67  | OE2 | 2.878 |
| 1HGH | E_LYS_238 | NZ  | D_GLU_72  | OE1 | 2.870 |
| 1HGH | E_LYS_238 | NZ  | D_GLU_72  | OE2 | 2.766 |
| 1HGH | E_ARG_269 | NH1 | F_GLU_67  | OE1 | 2.705 |
| 1HGH | E_ARG_269 | NH2 | F_GLU_67  | OE1 | 3.715 |
| 1HGH | E_LYS_299 | NZ  | F_GLU_69  | OE2 | 2.896 |
| 1HGH | E_LYS_310 | NZ  | F_ASP_86  | OD1 | 2.740 |
| 1HGH | E_LYS_310 | NZ  | F_ASP_90  | OD1 | 2.571 |
| 1HGH | E_LYS_310 | NZ  | F_ASP_90  | OD2 | 3.948 |
| 1HGH | E_LYS_326 | NZ  | F_GLU_15  | OE1 | 2.900 |
| 1HGH | E_LYS_326 | NZ  | F_GLU_15  | OE2 | 3.072 |
| 1HGH | F_ARG_54  | NH1 | D_GLU_97  | OE2 | 3.293 |
| 1HGH | F_ARG_54  | NH2 | D_GLU_97  | OE2 | 2.723 |
| 1HGH | F_LYS_62  | NZ  | D_ASP_86  | OD1 | 3.012 |
| 1HGH | F_LYS_62  | NZ  | D_ASP_86  | OD2 | 2.546 |
| 1HGH | F_LYS_62  | NZ  | D_ASP_90  | OD1 | 3.612 |
| 1HGH | F_LYS_62  | NZ  | D_ASP_90  | OD2 | 2.682 |
| 1HGH | F_ARG_76  | NH1 | B_GLU_74  | OE1 | 3.509 |
| 1HGH | F_ARG_76  | NH1 | B_GLU_74  | OE2 | 2.732 |
| 1HGH | F_ARG_76  | NH2 | B_GLU_74  | OE1 | 2.780 |
| 1HGH | F_ARG_76  | NH2 | B_GLU_74  | OE2 | 3.488 |
| 1HGH | F_ARG_76  | NH2 | B_GLU_81  | OE1 | 2.709 |
| 1HGH | F_ARG_76  | NH2 | B_GLU_81  | OE2 | 3.513 |
| 1HGH | F_ARG_123 | NH2 | D_GLU_132 | OE1 | 3.148 |
| 1HGH | F_ARG_124 | NH2 | D_GLU_132 | OE1 | 3.099 |
| 1HGH | F_ARG_124 | NH2 | D_GLU_132 | OE2 | 3.356 |
| 1HGH | F_ARG_127 | NH1 | D_GLU_131 | OE1 | 2.577 |
| 1HGH | F_ARG_163 | NH2 | D_GLU_131 | OE1 | 2.600 |
| 1HGH | F_ARG_163 | NH2 | D_GLU_131 | OE2 | 2.611 |
| 1HGH | F_ARG_170 | NH1 | B_GLU_128 | OE1 | 3.225 |
| 1HGH | F_ARG_170 | NH1 | B_GLU_128 | OE2 | 3.576 |
| 1HGH | F_LYS_174 | NZ  | B_ASP_164 | OD1 | 2.776 |
| 1HGH | F_LYS_174 | NZ  | B_ASP_164 | OD2 | 2.495 |
| 1HGI | A_LYS_27  | NZ  | B_GLU_97  | OE1 | 2.940 |
| 1HGI | A_LYS_27  | NZ  | B_GLU_97  | OE2 | 2.900 |
| 1HGI | A_ARG_109 | NH2 | B_GLU_67  | OE1 | 3.638 |
| 1HGI | A_ARG_109 | NH2 | B_GLU_67  | OE2 | 2.797 |
| 1HGI | A_LYS_238 | NZ  | F_GLU_72  | OE1 | 2.849 |
| 1HGI | A_LYS_238 | NZ  | F_GLU_72  | OE2 | 2.839 |

|      |           |     |           |     |       |
|------|-----------|-----|-----------|-----|-------|
| 1HGI | A_ARG_269 | NH1 | B_GLU_67  | OE1 | 2.748 |
| 1HGI | A_ARG_269 | NH2 | B_GLU_67  | OE1 | 3.823 |
| 1HGI | A_LYS_299 | NZ  | B_GLU_69  | OE2 | 2.728 |
| 1HGI | A_LYS_310 | NZ  | B_ASP_86  | OD1 | 2.759 |
| 1HGI | A_LYS_310 | NZ  | B_ASP_90  | OD1 | 2.527 |
| 1HGI | A_LYS_326 | NZ  | B_GLU_15  | OE1 | 3.374 |
| 1HGI | A_LYS_326 | NZ  | B_GLU_15  | OE2 | 2.794 |
| 1HGI | B_ARG_25  | NH1 | A_GLU_325 | OE2 | 3.734 |
| 1HGI | B_ARG_25  | NH2 | A_GLU_325 | OE2 | 2.929 |
| 1HGI | B_ARG_54  | NH1 | F_GLU_97  | OE2 | 3.222 |
| 1HGI | B_ARG_54  | NH2 | F_GLU_97  | OE2 | 2.806 |
| 1HGI | B_LYS_62  | NZ  | F_ASP_86  | OD1 | 2.942 |
| 1HGI | B_LYS_62  | NZ  | F_ASP_86  | OD2 | 2.668 |
| 1HGI | B_LYS_62  | NZ  | F_ASP_90  | OD1 | 3.332 |
| 1HGI | B_LYS_62  | NZ  | F_ASP_90  | OD2 | 2.667 |
| 1HGI | B_ARG_76  | NH1 | D_GLU_74  | OE1 | 3.625 |
| 1HGI | B_ARG_76  | NH1 | D_GLU_74  | OE2 | 2.918 |
| 1HGI | B_ARG_76  | NH2 | D_GLU_74  | OE1 | 2.861 |
| 1HGI | B_ARG_76  | NH2 | D_GLU_74  | OE2 | 3.621 |
| 1HGI | B_ARG_76  | NH2 | D_GLU_81  | OE1 | 2.708 |
| 1HGI | B_ARG_76  | NH2 | D_GLU_81  | OE2 | 3.474 |
| 1HGI | B_ARG_123 | NH2 | F_GLU_132 | OE1 | 3.105 |
| 1HGI | B_ARG_124 | NH2 | F_GLU_132 | OE1 | 3.081 |
| 1HGI | B_ARG_124 | NH2 | F_GLU_132 | OE2 | 3.356 |
| 1HGI | B_ARG_127 | NH1 | F_GLU_131 | OE1 | 2.493 |
| 1HGI | B_ARG_163 | NH2 | F_GLU_131 | OE1 | 2.586 |
| 1HGI | B_ARG_163 | NH2 | F_GLU_131 | OE2 | 2.598 |
| 1HGI | B_ARG_170 | NH1 | D_GLU_128 | OE1 | 3.640 |
| 1HGI | B_ARG_170 | NH1 | D_GLU_128 | OE2 | 3.301 |
| 1HGI | B_LYS_174 | NZ  | D_ASP_164 | OD1 | 2.745 |
| 1HGI | B_LYS_174 | NZ  | D_ASP_164 | OD2 | 2.560 |
| 1HGI | C_LYS_27  | NZ  | D_GLU_97  | OE1 | 2.951 |
| 1HGI | C_LYS_27  | NZ  | D_GLU_97  | OE2 | 2.876 |
| 1HGI | C_ARG_109 | NH2 | D_GLU_67  | OE1 | 3.637 |
| 1HGI | C_ARG_109 | NH2 | D_GLU_67  | OE2 | 2.819 |
| 1HGI | C_LYS_238 | NZ  | B_GLU_72  | OE1 | 2.671 |
| 1HGI | C_LYS_238 | NZ  | B_GLU_72  | OE2 | 2.721 |
| 1HGI | C_ARG_269 | NH1 | D_GLU_67  | OE1 | 2.753 |
| 1HGI | C_ARG_269 | NH2 | D_GLU_67  | OE1 | 3.850 |
| 1HGI | C_LYS_299 | NZ  | D_GLU_69  | OE2 | 2.739 |
| 1HGI | C_LYS_310 | NZ  | D_ASP_86  | OD1 | 2.772 |
| 1HGI | C_LYS_310 | NZ  | D_ASP_90  | OD1 | 2.525 |
| 1HGI | C_LYS_326 | NZ  | D_GLU_15  | OE1 | 2.825 |
| 1HGI | C_LYS_326 | NZ  | D_GLU_15  | OE2 | 3.570 |
| 1HGI | D_ARG_54  | NH1 | B_GLU_97  | OE2 | 3.254 |
| 1HGI | D_ARG_54  | NH2 | B_GLU_97  | OE2 | 2.808 |
| 1HGI | D_LYS_62  | NZ  | B_ASP_86  | OD1 | 2.962 |
| 1HGI | D_LYS_62  | NZ  | B_ASP_86  | OD2 | 2.570 |
| 1HGI | D_LYS_62  | NZ  | B_ASP_90  | OD1 | 3.335 |
| 1HGI | D_LYS_62  | NZ  | B_ASP_90  | OD2 | 2.541 |
| 1HGI | D_ARG_76  | NH1 | F_GLU_74  | OE1 | 3.375 |
| 1HGI | D_ARG_76  | NH1 | F_GLU_74  | OE2 | 2.776 |
| 1HGI | D_ARG_76  | NH2 | F_GLU_74  | OE1 | 2.760 |
| 1HGI | D_ARG_76  | NH2 | F_GLU_74  | OE2 | 3.657 |
| 1HGI | D_ARG_76  | NH2 | F_GLU_81  | OE1 | 2.608 |
| 1HGI | D_ARG_76  | NH2 | F_GLU_81  | OE2 | 3.506 |
| 1HGI | D_ARG_123 | NH2 | B_GLU_132 | OE1 | 3.093 |
| 1HGI | D_ARG_124 | NH2 | B_GLU_132 | OE1 | 3.096 |

|      |           |     |           |     |       |
|------|-----------|-----|-----------|-----|-------|
| 1HGI | D_ARG_124 | NH2 | B_GLU_132 | OE2 | 3.377 |
| 1HGI | D_ARG_127 | NH1 | B_GLU_131 | OE1 | 2.513 |
| 1HGI | D_ARG_163 | NH2 | B_GLU_131 | OE1 | 2.590 |
| 1HGI | D_ARG_163 | NH2 | B_GLU_131 | OE2 | 2.616 |
| 1HGI | D_ARG_170 | NH1 | F_GLU_128 | OE1 | 3.797 |
| 1HGI | D_ARG_170 | NH1 | F_GLU_128 | OE2 | 3.417 |
| 1HGI | D_LYS_174 | NZ  | F_ASP_164 | OD1 | 2.814 |
| 1HGI | D_LYS_174 | NZ  | F_ASP_164 | OD2 | 2.727 |
| 1HGI | E_LYS_27  | NZ  | F_GLU_97  | OE1 | 2.961 |
| 1HGI | E_LYS_27  | NZ  | F_GLU_97  | OE2 | 2.862 |
| 1HGI | E_ARG_109 | NH2 | F_GLU_67  | OE1 | 3.649 |
| 1HGI | E_ARG_109 | NH2 | F_GLU_67  | OE2 | 2.781 |
| 1HGI | E_LYS_238 | NZ  | D_GLU_72  | OE1 | 2.803 |
| 1HGI | E_LYS_238 | NZ  | D_GLU_72  | OE2 | 2.859 |
| 1HGI | E_ARG_269 | NH1 | F_GLU_67  | OE1 | 2.720 |
| 1HGI | E_ARG_269 | NH2 | F_GLU_67  | OE1 | 3.815 |
| 1HGI | E_LYS_299 | NZ  | F_GLU_69  | OE2 | 2.715 |
| 1HGI | E_LYS_310 | NZ  | F_ASP_86  | OD1 | 2.757 |
| 1HGI | E_LYS_310 | NZ  | F_ASP_90  | OD1 | 2.523 |
| 1HGI | E_LYS_326 | NZ  | F_GLU_15  | OE1 | 2.882 |
| 1HGI | E_LYS_326 | NZ  | F_GLU_15  | OE2 | 3.090 |
| 1HGI | F_ARG_54  | NH1 | D_GLU_97  | OE2 | 3.254 |
| 1HGI | F_ARG_54  | NH2 | D_GLU_97  | OE2 | 2.750 |
| 1HGI | F_LYS_62  | NZ  | D_ASP_86  | OD1 | 2.884 |
| 1HGI | F_LYS_62  | NZ  | D_ASP_86  | OD2 | 2.563 |
| 1HGI | F_LYS_62  | NZ  | D_ASP_90  | OD1 | 3.358 |
| 1HGI | F_LYS_62  | NZ  | D_ASP_90  | OD2 | 2.609 |
| 1HGI | F_ARG_76  | NH1 | B_GLU_74  | OE1 | 3.420 |
| 1HGI | F_ARG_76  | NH1 | B_GLU_74  | OE2 | 2.771 |
| 1HGI | F_ARG_76  | NH2 | B_GLU_74  | OE1 | 2.763 |
| 1HGI | F_ARG_76  | NH2 | B_GLU_74  | OE2 | 3.604 |
| 1HGI | F_ARG_76  | NH2 | B_GLU_81  | OE1 | 2.645 |
| 1HGI | F_ARG_76  | NH2 | B_GLU_81  | OE2 | 3.592 |
| 1HGI | F_ARG_123 | NH2 | D_GLU_132 | OE1 | 3.144 |
| 1HGI | F_ARG_124 | NH2 | D_GLU_132 | OE1 | 3.185 |
| 1HGI | F_ARG_124 | NH2 | D_GLU_132 | OE2 | 3.386 |
| 1HGI | F_ARG_127 | NH1 | D_GLU_131 | OE1 | 2.561 |
| 1HGI | F_ARG_163 | NH2 | D_GLU_131 | OE1 | 2.567 |
| 1HGI | F_ARG_163 | NH2 | D_GLU_131 | OE2 | 2.692 |
| 1HGI | F_ARG_170 | NH1 | B_GLU_128 | OE1 | 3.621 |
| 1HGI | F_ARG_170 | NH1 | B_GLU_128 | OE2 | 3.345 |
| 1HGI | F_LYS_174 | NZ  | B_ASP_164 | OD1 | 2.789 |
| 1HGI | F_LYS_174 | NZ  | B_ASP_164 | OD2 | 2.521 |
| 1HGJ | A_LYS_27  | NZ  | B_GLU_97  | OE1 | 2.775 |
| 1HGJ | A_LYS_27  | NZ  | B_GLU_97  | OE2 | 2.807 |
| 1HGJ | A_ARG_109 | NH2 | B_GLU_67  | OE1 | 3.648 |
| 1HGJ | A_ARG_109 | NH2 | B_GLU_67  | OE2 | 2.748 |
| 1HGJ | A_LYS_238 | NZ  | F_GLU_72  | OE1 | 2.903 |
| 1HGJ | A_LYS_238 | NZ  | F_GLU_72  | OE2 | 2.788 |
| 1HGJ | A_ARG_269 | NH1 | B_GLU_67  | OE1 | 2.736 |
| 1HGJ | A_ARG_269 | NH2 | B_GLU_67  | OE1 | 3.791 |
| 1HGJ | A_LYS_299 | NZ  | B_GLU_69  | OE2 | 2.821 |
| 1HGJ | A_LYS_310 | NZ  | B_ASP_86  | OD1 | 2.922 |
| 1HGJ | A_LYS_310 | NZ  | B_ASP_90  | OD1 | 2.569 |
| 1HGJ | A_LYS_326 | NZ  | B_GLU_15  | OE1 | 3.187 |
| 1HGJ | A_LYS_326 | NZ  | B_GLU_15  | OE2 | 2.826 |
| 1HGJ | B_ARG_25  | NH1 | A_GLU_325 | OE2 | 3.775 |
| 1HGJ | B_ARG_25  | NH2 | A_GLU_325 | OE2 | 2.974 |

|      |           |     |           |     |       |
|------|-----------|-----|-----------|-----|-------|
| 1HGJ | B_ARG_54  | NH1 | F_GLU_97  | OE2 | 3.272 |
| 1HGJ | B_ARG_54  | NH2 | F_GLU_97  | OE2 | 2.774 |
| 1HGJ | B_LYS_62  | NZ  | F_ASP_86  | OD1 | 2.863 |
| 1HGJ | B_LYS_62  | NZ  | F_ASP_86  | OD2 | 2.651 |
| 1HGJ | B_LYS_62  | NZ  | F_ASP_90  | OD1 | 3.453 |
| 1HGJ | B_LYS_62  | NZ  | F_ASP_90  | OD2 | 2.738 |
| 1HGJ | B_ARG_76  | NH1 | D_GLU_74  | OE1 | 3.648 |
| 1HGJ | B_ARG_76  | NH1 | D_GLU_74  | OE2 | 2.885 |
| 1HGJ | B_ARG_76  | NH2 | D_GLU_74  | OE1 | 2.846 |
| 1HGJ | B_ARG_76  | NH2 | D_GLU_74  | OE2 | 3.547 |
| 1HGJ | B_ARG_76  | NH2 | D_GLU_81  | OE1 | 2.721 |
| 1HGJ | B_ARG_76  | NH2 | D_GLU_81  | OE2 | 3.500 |
| 1HGJ | B_ARG_123 | NH2 | F_GLU_132 | OE1 | 3.120 |
| 1HGJ | B_ARG_124 | NH2 | F_GLU_132 | OE1 | 3.095 |
| 1HGJ | B_ARG_124 | NH2 | F_GLU_132 | OE2 | 3.375 |
| 1HGJ | B_ARG_127 | NH1 | F_GLU_131 | OE1 | 2.484 |
| 1HGJ | B_ARG_163 | NH2 | F_GLU_131 | OE1 | 2.591 |
| 1HGJ | B_ARG_163 | NH2 | F_GLU_131 | OE2 | 2.571 |
| 1HGJ | B_ARG_170 | NH1 | D_GLU_128 | OE1 | 3.291 |
| 1HGJ | B_ARG_170 | NH1 | D_GLU_128 | OE2 | 3.706 |
| 1HGJ | B_LYS_174 | NZ  | D_ASP_164 | OD1 | 2.810 |
| 1HGJ | B_LYS_174 | NZ  | D_ASP_164 | OD2 | 2.550 |
| 1HGJ | C_LYS_27  | NZ  | D_GLU_97  | OE1 | 2.755 |
| 1HGJ | C_LYS_27  | NZ  | D_GLU_97  | OE2 | 2.824 |
| 1HGJ | C_ARG_109 | NH2 | D_GLU_67  | OE1 | 3.638 |
| 1HGJ | C_ARG_109 | NH2 | D_GLU_67  | OE2 | 2.758 |
| 1HGJ | C_LYS_238 | NZ  | B_GLU_72  | OE1 | 2.749 |
| 1HGJ | C_LYS_238 | NZ  | B_GLU_72  | OE2 | 2.713 |
| 1HGJ | C_ARG_269 | NH1 | D_GLU_67  | OE1 | 2.708 |
| 1HGJ | C_ARG_269 | NH2 | D_GLU_67  | OE1 | 3.781 |
| 1HGJ | C_LYS_299 | NZ  | D_GLU_69  | OE2 | 2.827 |
| 1HGJ | C_LYS_310 | NZ  | D_ASP_86  | OD1 | 2.943 |
| 1HGJ | C_LYS_310 | NZ  | D_ASP_90  | OD1 | 2.532 |
| 1HGJ | C_LYS_326 | NZ  | D_GLU_15  | OE1 | 2.911 |
| 1HGJ | C_LYS_326 | NZ  | D_GLU_15  | OE2 | 3.904 |
| 1HGJ | D_ARG_54  | NH1 | B_GLU_97  | OE2 | 3.338 |
| 1HGJ | D_ARG_54  | NH2 | B_GLU_97  | OE2 | 2.835 |
| 1HGJ | D_LYS_62  | NZ  | B_ASP_86  | OD1 | 2.910 |
| 1HGJ | D_LYS_62  | NZ  | B_ASP_86  | OD2 | 2.574 |
| 1HGJ | D_LYS_62  | NZ  | B_ASP_90  | OD1 | 3.419 |
| 1HGJ | D_LYS_62  | NZ  | B_ASP_90  | OD2 | 2.622 |
| 1HGJ | D_ARG_76  | NH1 | F_GLU_74  | OE1 | 3.424 |
| 1HGJ | D_ARG_76  | NH1 | F_GLU_74  | OE2 | 2.763 |
| 1HGJ | D_ARG_76  | NH2 | F_GLU_74  | OE1 | 2.714 |
| 1HGJ | D_ARG_76  | NH2 | F_GLU_74  | OE2 | 3.550 |
| 1HGJ | D_ARG_76  | NH2 | F_GLU_81  | OE1 | 2.684 |
| 1HGJ | D_ARG_76  | NH2 | F_GLU_81  | OE2 | 3.574 |
| 1HGJ | D_ARG_123 | NH2 | B_GLU_132 | OE1 | 3.075 |
| 1HGJ | D_ARG_124 | NH2 | B_GLU_132 | OE1 | 3.055 |
| 1HGJ | D_ARG_124 | NH2 | B_GLU_132 | OE2 | 3.342 |
| 1HGJ | D_ARG_127 | NH1 | B_GLU_131 | OE1 | 2.514 |
| 1HGJ | D_ARG_163 | NH2 | B_GLU_131 | OE1 | 2.599 |
| 1HGJ | D_ARG_163 | NH2 | B_GLU_131 | OE2 | 2.594 |
| 1HGJ | D_ARG_170 | NH1 | F_GLU_128 | OE1 | 3.405 |
| 1HGJ | D_ARG_170 | NH1 | F_GLU_128 | OE2 | 3.769 |
| 1HGJ | D_LYS_174 | NZ  | F_ASP_164 | OD1 | 2.824 |
| 1HGJ | D_LYS_174 | NZ  | F_ASP_164 | OD2 | 2.673 |
| 1HGJ | E_LYS_27  | NZ  | F_GLU_97  | OE1 | 2.779 |

|      |           |     |           |     |       |
|------|-----------|-----|-----------|-----|-------|
| 1HGJ | E_LYS_27  | NZ  | F_GLU_97  | OE2 | 2.813 |
| 1HGJ | E_ARG_109 | NH2 | F_GLU_67  | OE1 | 3.635 |
| 1HGJ | E_ARG_109 | NH2 | F_GLU_67  | OE2 | 2.759 |
| 1HGJ | E_LYS_238 | NZ  | D_GLU_72  | OE1 | 2.865 |
| 1HGJ | E_LYS_238 | NZ  | D_GLU_72  | OE2 | 2.804 |
| 1HGJ | E_ARG_269 | NH1 | F_GLU_67  | OE1 | 2.691 |
| 1HGJ | E_ARG_269 | NH2 | F_GLU_67  | OE1 | 3.759 |
| 1HGJ | E_LYS_299 | NZ  | F_GLU_69  | OE2 | 2.806 |
| 1HGJ | E_LYS_310 | NZ  | F_ASP_86  | OD1 | 2.930 |
| 1HGJ | E_LYS_310 | NZ  | F_ASP_90  | OD1 | 2.553 |
| 1HGJ | E_LYS_326 | NZ  | F_GLU_15  | OE1 | 2.874 |
| 1HGJ | E_LYS_326 | NZ  | F_GLU_15  | OE2 | 3.254 |
| 1HGJ | F_ARG_54  | NH1 | D_GLU_97  | OE2 | 3.349 |
| 1HGJ | F_ARG_54  | NH2 | D_GLU_97  | OE2 | 2.771 |
| 1HGJ | F_LYS_62  | NZ  | D_ASP_86  | OD1 | 2.846 |
| 1HGJ | F_LYS_62  | NZ  | D_ASP_86  | OD2 | 2.568 |
| 1HGJ | F_LYS_62  | NZ  | D_ASP_90  | OD1 | 3.467 |
| 1HGJ | F_LYS_62  | NZ  | D_ASP_90  | OD2 | 2.658 |
| 1HGJ | F_ARG_76  | NH1 | B_GLU_74  | OE1 | 3.383 |
| 1HGJ | F_ARG_76  | NH1 | B_GLU_74  | OE2 | 2.704 |
| 1HGJ | F_ARG_76  | NH2 | B_GLU_74  | OE1 | 2.715 |
| 1HGJ | F_ARG_76  | NH2 | B_GLU_74  | OE2 | 3.551 |
| 1HGJ | F_ARG_76  | NH2 | B_GLU_81  | OE1 | 2.654 |
| 1HGJ | F_ARG_76  | NH2 | B_GLU_81  | OE2 | 3.611 |
| 1HGJ | F_ARG_123 | NH2 | D_GLU_132 | OE1 | 3.110 |
| 1HGJ | F_ARG_124 | NH2 | D_GLU_132 | OE1 | 3.125 |
| 1HGJ | F_ARG_124 | NH2 | D_GLU_132 | OE2 | 3.360 |
| 1HGJ | F_ARG_127 | NH1 | D_GLU_131 | OE1 | 2.554 |
| 1HGJ | F_ARG_163 | NH2 | D_GLU_131 | OE1 | 2.636 |
| 1HGJ | F_ARG_163 | NH2 | D_GLU_131 | OE2 | 2.696 |
| 1HGJ | F_ARG_170 | NH1 | B_GLU_128 | OE1 | 3.311 |
| 1HGJ | F_ARG_170 | NH1 | B_GLU_128 | OE2 | 3.766 |
| 1HGJ | F_LYS_174 | NZ  | B_ASP_164 | OD1 | 2.859 |
| 1HGJ | F_LYS_174 | NZ  | B_ASP_164 | OD2 | 2.554 |
| 1HIL | A_LYS_28  | NZ  | B_ASP_99  | OD1 | 3.388 |
| 1HIL | A_LYS_28  | NZ  | B_ASP_99  | OD2 | 3.371 |
| 1HIL | A_LYS_30  | NZ  | B_ASP_99  | OD2 | 3.991 |
| 1HIL | B_ARG_95  | NH1 | A_ASP_91  | OD1 | 2.828 |
| 1HIL | B_ARG_95  | NH1 | A_ASP_91  | OD2 | 3.804 |
| 1HIL | B_ARG_95  | NH2 | A_ASP_91  | OD1 | 3.160 |
| 1HIL | B_ARG_95  | NH2 | A_ASP_91  | OD2 | 3.904 |
| 1HIL | B_HIS_172 | NE2 | A_ASP_167 | OD2 | 3.701 |
| 1HIL | B_LYS_221 | NZ  | A_GLU_123 | OE1 | 2.980 |
| 1HIL | C_LYS_28  | NZ  | D_ASP_99  | OD1 | 3.565 |
| 1HIL | C_LYS_28  | NZ  | D_ASP_99  | OD2 | 3.509 |
| 1HIL | D_ARG_95  | NH1 | C_ASP_91  | OD1 | 2.906 |
| 1HIL | D_ARG_95  | NH1 | C_ASP_91  | OD2 | 3.993 |
| 1HIL | D_ARG_95  | NH2 | C_ASP_91  | OD1 | 3.045 |
| 1HIL | D_ARG_95  | NH2 | C_ASP_91  | OD2 | 3.822 |
| 1HIL | D_LYS_221 | NZ  | C_GLU_123 | OE1 | 2.896 |
| 1HIL | D_LYS_221 | NZ  | C_GLU_123 | OE2 | 3.091 |
| 1HIM | L_ARG_95  | NH1 | H_ASP_91  | OD1 | 3.100 |
| 1HIM | L_ARG_95  | NH2 | H_ASP_91  | OD1 | 3.427 |
| 1HIM | L_ARG_95  | NH2 | P_ASP_104 | OD1 | 3.909 |
| 1HIM | L_ARG_95  | NH2 | P_ASP_104 | OD2 | 3.079 |
| 1HIM | L_LYS_221 | NZ  | H_GLU_123 | OE1 | 3.486 |
| 1HIM | L_LYS_221 | NZ  | H_GLU_123 | OE2 | 2.924 |
| 1HIM | J_LYS_28  | NZ  | M_GLU_100 | OE1 | 3.991 |

|      |           |     |           |     |       |
|------|-----------|-----|-----------|-----|-------|
| 1HIM | J_LYS_28  | NZ  | M_GLU_100 | OE2 | 3.433 |
| 1HIM | M_ARG_95  | NH1 | J_ASP_91  | OD1 | 2.854 |
| 1HIM | M_ARG_95  | NH2 | J_ASP_91  | OD1 | 3.712 |
| 1HIM | M_ARG_95  | NH2 | R_ASP_104 | OD1 | 2.834 |
| 1HIM | M_ARG_95  | NH2 | R_ASP_104 | OD2 | 3.540 |
| 1HIN | L_LYS_28  | NZ  | H_GLU_100 | OE2 | 2.975 |
| 1HIN | H_ARG_95  | NH1 | L_ASP_91  | OD1 | 3.169 |
| 1HIN | H_ARG_95  | NH1 | P_ASP_104 | OD1 | 3.889 |
| 1HIN | H_ARG_95  | NH2 | L_ASP_91  | OD1 | 2.746 |
| 1I8I | B_LYS_343 | NZ  | A_ASP_85  | OD1 | 3.777 |
| 1I8I | C_LYS_502 | NZ  | A_GLU_50  | OE1 | 3.673 |
| 1I8I | C_LYS_502 | NZ  | A_GLU_50  | OE2 | 3.232 |
| 1I8K | B_LYS_343 | NZ  | A_ASP_85  | OD1 | 3.688 |
| 1I8K | B_LYS_343 | NZ  | A_ASP_85  | OD2 | 2.833 |
| 1I8K | C_LYS_502 | NZ  | A_GLU_50  | OE1 | 3.381 |
| 1I8K | C_LYS_502 | NZ  | A_GLU_50  | OE2 | 3.653 |
| 1I8M | H_LYS_208 | NZ  | L_GLU_123 | OE1 | 2.918 |
| 1I8M | B_LYS_208 | NZ  | A_GLU_123 | OE2 | 2.887 |
| 1IC4 | Y_LYS_97  | NZ  | H_ASP_99  | OD1 | 2.657 |
| 1IC4 | Y_LYS_97  | NZ  | H_ASP_99  | OD2 | 3.938 |
| 1IC5 | Y_LYS_97  | NZ  | H_ASP_32  | OD1 | 2.694 |
| 1IFH | H_ARG_95  | NH1 | L_ASP_91  | OD1 | 2.782 |
| 1IFH | H_ARG_95  | NH2 | P_ASP_104 | OD1 | 2.974 |
| 1IFH | H_ARG_95  | NH2 | P_ASP_104 | OD2 | 2.813 |
| 1IFH | H_LYS_221 | NZ  | L_GLU_123 | OE1 | 3.267 |
| 1IFH | H_LYS_221 | NZ  | L_GLU_123 | OE2 | 2.926 |
| 1IGF | L_LYS_50  | NZ  | H_ASP_98  | OD2 | 3.036 |
| 1IGF | H_LYS_221 | NZ  | L_GLU_123 | OE1 | 3.549 |
| 1IGF | J_LYS_221 | NZ  | M_GLU_123 | OE1 | 3.800 |
| 1IGF | J_LYS_221 | NZ  | M_GLU_123 | OE2 | 3.750 |
| 1IND | H_LYS_143 | NZ  | L_GLU_127 | OE2 | 2.765 |
| 1IND | H_HIS_164 | NE2 | L_ASP_141 | OD1 | 3.891 |
| 1INE | H_LYS_143 | NZ  | L_GLU_127 | OE2 | 2.920 |
| 1INE | H_HIS_164 | NE2 | L_ASP_141 | OD2 | 3.817 |
| 1IQW | L_ARG_100 | NH2 | H_GLU_50  | OE1 | 2.572 |
| 1IQW | L_ARG_100 | NH2 | H_GLU_50  | OE2 | 2.799 |
| 1IQW | H_HIS_172 | NE2 | L_ASP_171 | OD1 | 3.594 |
| 1IT9 | L_ARG_100 | NH2 | H_GLU_50  | OE2 | 3.105 |
| 1IT9 | H_LYS_217 | NZ  | L_GLU_127 | OE1 | 3.545 |
| 1IT9 | H_LYS_217 | NZ  | L_GLU_127 | OE2 | 3.302 |
| 1J05 | H_LYS_58  | NZ  | L_ASP_94  | OD2 | 2.663 |
| 1J05 | B_LYS_58  | NZ  | A_ASP_94  | OD2 | 2.870 |
| 1J1O | Y_LYS_97  | NZ  | H_ASP_32  | OD1 | 2.636 |
| 1J1O | Y_LYS_97  | NZ  | H_ASP_32  | OD2 | 3.985 |
| 1J1O | Y_LYS_97  | NZ  | H_ASP_99  | OD1 | 3.590 |
| 1J1O | Y_LYS_97  | NZ  | H_ASP_99  | OD2 | 2.896 |
| 1J1P | Y_LYS_97  | NZ  | H_ASP_32  | OD1 | 2.700 |
| 1J1P | Y_LYS_97  | NZ  | H_ASP_99  | OD1 | 3.721 |
| 1J1P | Y_LYS_97  | NZ  | H_ASP_99  | OD2 | 2.595 |
| 1J1X | Y_LYS_97  | NZ  | H_ASP_32  | OD1 | 2.655 |
| 1J1X | Y_LYS_97  | NZ  | H_ASP_32  | OD2 | 3.935 |
| 1J1X | Y_LYS_97  | NZ  | H_ASP_99  | OD1 | 3.479 |
| 1J1X | Y_LYS_97  | NZ  | H_ASP_99  | OD2 | 2.956 |
| 1JFQ | H_LYS_516 | NZ  | L_GLU_123 | OE1 | 3.003 |
| 1JFQ | H_LYS_516 | NZ  | L_GLU_123 | OE2 | 3.095 |
| 1JHL | A_ARG_112 | NH1 | H_ASP_55  | OD1 | 3.828 |
| 1JHL | A_ARG_112 | NH1 | H_ASP_55  | OD2 | 3.112 |
| 1JHL | A_LYS_116 | NZ  | H_ASP_99  | OD1 | 3.763 |



|      |           |     |           |     |       |
|------|-----------|-----|-----------|-----|-------|
| 1JHL | A_LYS_116 | NZ  | H_ASP_99  | OD2 | 3.232 |
| 1JPS | T_LYS_201 | NZ  | H_ASP_52  | OD1 | 2.781 |
| 1JPT | H_LYS_213 | NZ  | L_GLU_123 | OE1 | 3.226 |
| 1JPT | H_LYS_213 | NZ  | L_GLU_123 | OE2 | 3.740 |
| 1JRH | I_LYS_52  | NZ  | H_ASP_54  | OD1 | 3.471 |
| 1JRH | I_LYS_52  | NZ  | H_ASP_54  | OD2 | 2.819 |
| 1JRH | I_LYS_52  | NZ  | H_ASP_56  | OD2 | 2.824 |
| 1JRH | I_ARG_84  | NH2 | L_GLU_27  | OE1 | 3.652 |
| 1JRH | I_ARG_84  | NH2 | L_GLU_27  | OE2 | 3.984 |
| 1K6Q | H_HIS_168 | NE2 | L_ASP_167 | OD1 | 3.896 |
| 1KB5 | A_ARG_93  | NH1 | B_GLU_105 | OE1 | 2.975 |
| 1KB5 | A_ARG_93  | NH1 | B_GLU_105 | OE2 | 3.412 |
| 1KB5 | A_ARG_101 | NH2 | H_ASP_98  | OD1 | 2.690 |
| 1KB5 | L_LYS_27  | NZ  | B_ASP_54  | OD1 | 3.460 |
| 1KB5 | H_ARG_96  | NH1 | A_ASP_26  | OD1 | 2.599 |
| 1KB5 | H_ARG_96  | NH1 | A_ASP_26  | OD2 | 2.834 |
| 1KB5 | H_ARG_96  | NH2 | L_GLU_56  | OE2 | 2.981 |
| 1KC5 | H_LYS_211 | NZ  | L_GLU_123 | OE2 | 2.759 |
| 1KCS | H_LYS_211 | NZ  | L_GLU_123 | OE1 | 3.340 |
| 1KCS | H_LYS_211 | NZ  | L_GLU_123 | OE2 | 2.904 |
| 1KIP | A_ARG_96  | NH1 | B_GLU_98  | OE1 | 2.773 |
| 1KIP | A_ARG_96  | NH1 | B_GLU_98  | OE2 | 3.817 |
| 1KIP | A_ARG_96  | NH2 | B_GLU_98  | OE1 | 3.280 |
| 1KIP | A_ARG_96  | NH2 | B_GLU_98  | OE2 | 2.802 |
| 1KIQ | A_ARG_96  | NH1 | B_GLU_98  | OE1 | 2.812 |
| 1KIQ | A_ARG_96  | NH1 | B_GLU_98  | OE2 | 3.589 |
| 1KIQ | A_ARG_96  | NH2 | B_GLU_98  | OE1 | 3.677 |
| 1KIQ | A_ARG_96  | NH2 | B_GLU_98  | OE2 | 2.919 |
| 1KIR | A_ARG_96  | NH1 | B_GLU_98  | OE1 | 2.757 |
| 1KIR | A_ARG_96  | NH1 | B_GLU_98  | OE2 | 3.582 |
| 1KIR | A_ARG_96  | NH2 | B_GLU_98  | OE1 | 3.625 |
| 1KIR | A_ARG_96  | NH2 | B_GLU_98  | OE2 | 2.980 |
| 1KTR | P_HIS_4   | NE2 | L_ASP_183 | OD1 | 3.445 |
| 1KTR | P_HIS_4   | NE2 | L_ASP_183 | OD2 | 2.673 |
| 1KTR | P_HIS_6   | ND1 | L_GLU_39  | OE1 | 3.223 |
| 1KTR | P_HIS_6   | ND1 | L_GLU_39  | OE2 | 2.811 |
| 1KTR | P_HIS_6   | NE2 | L_GLU_230 | OE1 | 3.040 |
| 1KTR | P_HIS_6   | NE2 | L_GLU_230 | OE2 | 3.199 |
| 1L7I | H_LYS_209 | NZ  | L_GLU_123 | OE1 | 2.718 |
| 1LK3 | A_LYS_130 | NZ  | L_ASP_1   | OD1 | 2.906 |
| 1LK3 | L_ARG_31  | NH1 | A_GLU_133 | OE1 | 2.703 |
| 1LK3 | H_LYS_23  | NZ  | L_GLU_121 | OE2 | 2.800 |
| 1LK3 | H_LYS_214 | NZ  | L_GLU_122 | OE1 | 2.517 |
| 1LK3 | B_LYS_130 | NZ  | M_ASP_1   | OD1 | 2.851 |
| 1LK3 | M_ARG_31  | NH1 | B_GLU_133 | OE1 | 2.693 |
| 1LK3 | I_LYS_63  | NZ  | M_ASP_1   | OD2 | 3.881 |
| 1LK3 | I_LYS_214 | NZ  | M_GLU_122 | OE2 | 2.753 |
| 1M7I | B_ARG_164 | NH1 | A_ASP_167 | OD2 | 3.246 |
| 1M7I | B_ARG_164 | NH1 | A_ASP_170 | OD1 | 3.912 |
| 1M7I | B_ARG_164 | NH2 | A_ASP_167 | OD2 | 2.886 |
| 1M7I | B_LYS_208 | NZ  | A_GLU_123 | OE1 | 2.546 |
| 1M7I | B_LYS_208 | NZ  | A_GLU_123 | OE2 | 3.594 |
| 1M7D | B_ARG_164 | NH1 | A_ASP_167 | OD2 | 3.313 |
| 1M7D | B_ARG_164 | NH1 | A_ASP_170 | OD1 | 3.795 |
| 1M7D | B_ARG_164 | NH2 | A_ASP_167 | OD2 | 3.482 |
| 1M7D | B_LYS_208 | NZ  | A_GLU_123 | OE1 | 2.586 |
| 1M7D | B_LYS_208 | NZ  | A_GLU_123 | OE2 | 3.420 |
| 1M7I | B_ARG_164 | NH1 | A_ASP_167 | OD2 | 3.340 |

|      |            |     |           |     |       |
|------|------------|-----|-----------|-----|-------|
| 1M7I | B_ARG_164  | NH1 | A_ASP_170 | OD1 | 3.884 |
| 1M7I | B_ARG_164  | NH2 | A_ASP_167 | OD2 | 3.473 |
| 1M7I | B_LYS_208  | NZ  | A_GLU_123 | OE1 | 3.031 |
| 1M7I | B_LYS_208  | NZ  | A_GLU_123 | OE2 | 3.016 |
| 1MFB | H_LYS_398  | NZ  | L_GLU_127 | OE2 | 2.924 |
| 1MFB | H_LYS_463  | NZ  | L_GLU_126 | OE1 | 3.780 |
| 1MFC | H_LYS_398  | NZ  | L_GLU_127 | OE2 | 2.815 |
| 1MFC | H_LYS_463  | NZ  | L_GLU_126 | OE1 | 3.807 |
| 1MHH | B_LYS_208  | NZ  | A_GLU_123 | OE2 | 3.019 |
| 1MHH | C_ARG_188  | NH1 | E_ASP_831 | OD2 | 3.196 |
| 1MHH | C_ARG_188  | NH2 | E_ASP_831 | OD2 | 3.360 |
| 1MHH | E_LYS_833  | NZ  | C_GLU_185 | OE2 | 2.489 |
| 1MHH | F_LYS_1833 | NZ  | C_GLU_17  | OE1 | 3.798 |
| 1MLB | B_LYS_211  | NZ  | A_GLU_123 | OE1 | 3.556 |
| 1MLC | E_ARG_45   | NH2 | B_GLU_50  | OE2 | 3.032 |
| 1MLC | E_ARG_68   | NH1 | B_GLU_50  | OE2 | 3.781 |
| 1MLC | E_ARG_68   | NH2 | B_GLU_35  | OE2 | 2.927 |
| 1MLC | E_ARG_68   | NH2 | B_GLU_50  | OE1 | 2.510 |
| 1MLC | E_ARG_68   | NH2 | B_GLU_50  | OE2 | 3.189 |
| 1MLC | F_ARG_45   | NH2 | D_GLU_50  | OE2 | 2.431 |
| 1MLC | F_ARG_68   | NH2 | D_GLU_35  | OE2 | 3.266 |
| 1MLC | F_ARG_68   | NH2 | D_GLU_50  | OE1 | 2.710 |
| 1MLC | F_ARG_68   | NH2 | D_GLU_50  | OE2 | 3.606 |
| 1N64 | H_LYS_208  | NZ  | L_GLU_123 | OE1 | 3.752 |
| 1NBY | B_LYS_508  | NZ  | A_GLU_123 | OE1 | 2.458 |
| 1NBY | B_LYS_508  | NZ  | A_GLU_123 | OE2 | 3.274 |
| 1NBY | C_LYS_697  | NZ  | B_ASP_332 | OD1 | 3.949 |
| 1NBY | C_LYS_697  | NZ  | B_ASP_332 | OD2 | 2.515 |
| 1NDG | B_HIS_360  | NE2 | A_ASP_1   | OD2 | 3.716 |
| 1NDG | B_LYS_519  | NZ  | A_GLU_123 | OE2 | 2.645 |
| 1NDG | C_LYS_697  | NZ  | B_ASP_332 | OD1 | 3.996 |
| 1NDG | C_LYS_697  | NZ  | B_ASP_332 | OD2 | 2.706 |
| 1NDG | C_LYS_697  | NZ  | B_ASP_399 | OD1 | 2.922 |
| 1NDG | C_LYS_697  | NZ  | B_ASP_399 | OD2 | 3.579 |
| 1NDM | B_LYS_519  | NZ  | A_GLU_123 | OE1 | 3.184 |
| 1NDM | C_LYS_697  | NZ  | B_ASP_332 | OD1 | 3.954 |
| 1NDM | C_LYS_697  | NZ  | B_ASP_332 | OD2 | 2.468 |
| 1NDM | C_LYS_697  | NZ  | B_GLU_399 | OE1 | 2.743 |
| 1NGW | H_HIS_165  | NE2 | L_ASP_167 | OD1 | 3.771 |
| 1NGW | H_LYS_210  | NZ  | L_GLU_123 | OE1 | 3.544 |
| 1NGW | H_LYS_210  | NZ  | L_GLU_123 | OE2 | 3.092 |
| 1NGW | B_HIS_165  | NE2 | A_ASP_167 | OD1 | 3.804 |
| 1NGW | B_LYS_210  | NZ  | A_GLU_123 | OE1 | 3.662 |
| 1NGW | B_LYS_210  | NZ  | A_GLU_123 | OE2 | 3.240 |
| 1NGX | B_LYS_210  | NZ  | A_GLU_123 | OE1 | 3.994 |
| 1NGX | L_LYS_45   | NZ  | H_ASP_102 | OD2 | 3.800 |
| 1NGX | H_LYS_210  | NZ  | L_GLU_123 | OE1 | 3.804 |
| 1NGY | B_LYS_215  | NZ  | A_ASP_122 | OD1 | 3.713 |
| 1NGY | B_LYS_215  | NZ  | A_ASP_122 | OD2 | 3.325 |
| 1NGZ | B_LYS_     | NZ  | A_GLU_    | OE2 | 3.517 |
| 1NLB | H_LYS_208  | NZ  | L_GLU_123 | OE1 | 3.572 |
| 1NMC | N_LYS_432  | NZ  | H_ASP_56  | OD1 | 2.750 |
| 1NMC | A_LYS_432  | NZ  | B_ASP_56  | OD1 | 2.750 |
| 1OB1 | A_ARG_61   | NH2 | F_ASP_59  | OD1 | 3.421 |
| 1OB1 | A_ARG_61   | NH2 | F_ASP_59  | OD2 | 2.223 |
| 1OB1 | B_HIS_164  | NE2 | A_ASP_166 | OD2 | 3.671 |
| 1OB1 | C_LYS_10   | NZ  | B_ASP_100 | OD1 | 2.437 |
| 1OB1 | C_LYS_80   | NZ  | D_GLU_79  | OE1 | 3.373 |

|      |            |     |            |     |       |
|------|------------|-----|------------|-----|-------|
| 1OB1 | C_LYS_80   | NZ  | D_GLU_81   | OE1 | 3.553 |
| 1OB1 | C_LYS_80   | NZ  | D_GLU_81   | OE2 | 2.714 |
| 1OB1 | D_ARG_61   | NH2 | C_ASP_59   | OD1 | 3.599 |
| 1OB1 | D_ARG_61   | NH2 | C_ASP_59   | OD2 | 2.460 |
| 1OB1 | E_ARG_98   | NH1 | F_ASP_39   | OD1 | 2.706 |
| 1OB1 | E_HIS_164  | NE2 | D_ASP_166  | OD2 | 3.790 |
| 1OB1 | F_LYS_10   | NZ  | E_ASP_100  | OD1 | 2.524 |
| 1OB1 | F_LYS_80   | NZ  | A_GLU_79   | OE1 | 3.743 |
| 1OB1 | F_LYS_80   | NZ  | A_GLU_81   | OE1 | 3.454 |
| 1OB1 | F_LYS_80   | NZ  | A_GLU_81   | OE2 | 2.796 |
| 1OB1 | F_HIS_96   | NE2 | A_GLU_79   | OE1 | 3.773 |
| 1OP9 | B_LYS_97   | NZ  | A_GLU_97   | OE1 | 2.570 |
| 1OP9 | B_ARG_101  | NH1 | A_ASP_109  | OD1 | 3.213 |
| 1OP9 | B_ARG_101  | NH1 | A_ASP_109  | OD2 | 2.829 |
| 1OP9 | B_ARG_101  | NH2 | A_ASP_109  | OD1 | 2.793 |
| 1OP9 | B_ARG_101  | NH2 | A_ASP_109  | OD2 | 3.765 |
| 1OSP | H_ARG_99   | NH1 | L_GLU_55   | OE1 | 3.970 |
| 1OSP | H_ARG_99   | NH1 | L_GLU_55   | OE2 | 2.686 |
| 1OSP | H_ARG_99   | NH2 | O_ASP_92   | OD1 | 3.355 |
| 1OSP | H_ARG_99   | NH2 | O_ASP_92   | OD2 | 2.514 |
| 1OSP | H_LYS_215  | NZ  | L_GLU_123  | OE1 | 2.783 |
| 1OSP | H_LYS_215  | NZ  | L_GLU_123  | OE2 | 3.079 |
| 1OSP | O_LYS_46   | NZ  | L_ASP_66   | OD2 | 3.087 |
| 1P2C | A_ARG_188  | NH2 | F_ASP_1518 | OD1 | 2.778 |
| 1P2C | B_LYS_511  | NZ  | A_GLU_123  | OE1 | 3.498 |
| 1P2C | C_ARG_645  | NH2 | B_GLU_350  | OE1 | 2.980 |
| 1P2C | C_ARG_668  | NH1 | B_GLU_350  | OE1 | 3.355 |
| 1P2C | C_ARG_668  | NH1 | B_GLU_350  | OE2 | 3.681 |
| 1P2C | C_ARG_668  | NH2 | B_GLU_335  | OE2 | 3.090 |
| 1P2C | C_ARG_668  | NH2 | B_GLU_350  | OE1 | 3.316 |
| 1P2C | C_ARG_668  | NH2 | B_GLU_350  | OE2 | 2.404 |
| 1P2C | E_LYS_1411 | NZ  | D_GLU_1023 | OE1 | 3.897 |
| 1P2C | F_ARG_1545 | NH2 | E_GLU_1250 | OE1 | 2.861 |
| 1P2C | F_ARG_1568 | NH1 | E_GLU_1250 | OE1 | 3.580 |
| 1P2C | F_ARG_1568 | NH1 | E_GLU_1250 | OE2 | 3.708 |
| 1P2C | F_ARG_1568 | NH2 | E_GLU_1235 | OE2 | 2.833 |
| 1P2C | F_ARG_1568 | NH2 | E_GLU_1250 | OE1 | 3.551 |
| 1P2C | F_ARG_1568 | NH2 | E_GLU_1250 | OE2 | 2.418 |
| 1P4B | P_HIS_2    | NE2 | H_ASP_65   | OD1 | 3.248 |
| 1P4B | P_HIS_2    | NE2 | H_ASP_65   | OD2 | 3.747 |
| 1P4B | P_ARG_9    | NH1 | H_ASP_137  | OD1 | 2.804 |
| 1P4B | P_ARG_9    | NH1 | H_ASP_137  | OD2 | 3.838 |
| 1P4B | P_ARG_9    | NH2 | H_ASP_137  | OD1 | 3.399 |
| 1P4B | P_ARG_9    | NH2 | H_ASP_137  | OD2 | 3.080 |
| 1P7K | H_LYS_62   | NZ  | L_GLU_1    | OE2 | 3.723 |
| 1P7K | H_LYS_208  | NZ  | L_GLU_123  | OE1 | 3.517 |
| 1P7K | H_LYS_208  | NZ  | L_GLU_123  | OE2 | 2.802 |
| 1P7K | B_LYS_62   | NZ  | A_GLU_1    | OE2 | 2.848 |
| 1PG7 | H_LYS_209  | NZ  | L_GLU_123  | OE1 | 2.828 |
| 1PG7 | H_LYS_209  | NZ  | L_GLU_123  | OE2 | 3.697 |
| 1PG7 | L_LYS_209  | NZ  | M_GLU_123  | OE1 | 2.829 |
| 1PG7 | L_LYS_209  | NZ  | M_GLU_123  | OE2 | 3.963 |
| 1PG7 | L_LYS_30   | NZ  | X_GLU_95   | OE1 | 3.476 |
| 1PG7 | L_LYS_30   | NZ  | X_GLU_95   | OE2 | 2.795 |
| 1PG7 | M_LYS_30   | NZ  | Z_GLU_95   | OE2 | 3.166 |
| 1PG7 | X_ARG_94   | NH1 | H_GLU_53   | OE1 | 3.386 |
| 1PG7 | X_ARG_94   | NH1 | H_GLU_53   | OE2 | 3.321 |
| 1PG7 | X_ARG_94   | NH2 | H_GLU_53   | OE1 | 3.937 |

|      |            |     |           |     |       |
|------|------------|-----|-----------|-----|-------|
| 1PG7 | X_ARG_94   | NH2 | H_GLU_53  | OE2 | 2.866 |
| 1PG7 | X_ARG_98   | NH2 | H_ASP_95  | OD1 | 2.990 |
| 1PG7 | X_ARG_98   | NH2 | H_ASP_95  | OD2 | 3.561 |
| 1PG7 | X_LYS_143  | NZ  | W_GLU_125 | OE2 | 2.675 |
| 1PG7 | X_HIS_164  | NE2 | W_GLU_139 | OE2 | 3.801 |
| 1PG7 | X_LYS_208  | NZ  | W_GLU_124 | OE2 | 2.927 |
| 1PG7 | Z_ARG_94   | NH1 | I_GLU_53  | OE1 | 3.259 |
| 1PG7 | Z_ARG_94   | NH1 | I_GLU_53  | OE2 | 3.931 |
| 1PG7 | Z_ARG_94   | NH2 | I_GLU_53  | OE1 | 2.918 |
| 1PG7 | Z_ARG_94   | NH2 | I_GLU_53  | OE2 | 2.525 |
| 1PG7 | Z_ARG_98   | NH2 | I_ASP_95  | OD1 | 3.168 |
| 1PG7 | Z_ARG_98   | NH2 | I_ASP_95  | OD2 | 3.781 |
| 1PG7 | Z_LYS_143  | NZ  | Y_GLU_125 | OE2 | 2.901 |
| 1PG7 | Z_LYS_208  | NZ  | Y_GLU_124 | OE2 | 3.302 |
| 1PZ5 | A_HIS_27D  | NE2 | C_ASP_2   | OD1 | 2.720 |
| 1PZ5 | B_ARG_164  | NH1 | A_ASP_167 | OD2 | 3.218 |
| 1PZ5 | B_ARG_164  | NH2 | A_ASP_167 | OD2 | 3.712 |
| 1PZ5 | B_LYS_208  | NZ  | A_GLU_123 | OE1 | 2.648 |
| 1PZ5 | B_LYS_208  | NZ  | A_GLU_123 | OE2 | 3.713 |
| 1Q9K | A_ARG_95   | NH2 | B_ASP_95  | OD1 | 3.932 |
| 1Q9K | A_ARG_95   | NH2 | B_ASP_95  | OD2 | 3.226 |
| 1Q9K | B_HIS_162  | NE2 | A_ASP_166 | OD1 | 3.847 |
| 1Q9L | B_LYS_206  | NZ  | A_GLU_122 | OE2 | 3.242 |
| 1Q9L | D_ARG_100B | NH1 | B_GLU_85  | OE1 | 3.618 |
| 1Q9L | D_ARG_100B | NH1 | B_GLU_85  | OE2 | 3.115 |
| 1Q9L | D_HIS_162  | NE2 | C_ASP_166 | OD1 | 3.172 |
| 1Q9L | A_ARG_95   | NH2 | B_ASP_95  | OD2 | 3.284 |
| 1Q9L | C_ARG_95   | NH2 | D_ASP_95  | OD2 | 3.309 |
| 1Q9O | B_ARG_100  | NH1 | A_GLU_55  | OE1 | 3.447 |
| 1Q9O | B_ARG_100  | NH1 | A_GLU_55  | OE2 | 3.466 |
| 1Q9O | B_ARG_100  | NH2 | A_GLU_55  | OE1 | 3.378 |
| 1Q9O | B_ARG_100  | NH2 | A_GLU_55  | OE2 | 2.999 |
| 1Q9O | B_LYS_206  | NZ  | A_GLU_122 | OE2 | 3.964 |
| 1Q9O | D_ARG_100  | NH1 | C_GLU_55  | OE1 | 3.493 |
| 1Q9O | D_ARG_100  | NH1 | C_GLU_55  | OE2 | 3.040 |
| 1Q9O | D_ARG_100  | NH2 | C_GLU_55  | OE1 | 3.391 |
| 1Q9O | D_ARG_100  | NH2 | C_GLU_55  | OE2 | 3.047 |
| 1Q9O | A_ARG_95   | NH2 | B_ASP_95  | OD1 | 2.958 |
| 1Q9O | A_ARG_95   | NH2 | B_ASP_95  | OD2 | 3.717 |
| 1Q9O | C_ARG_95   | NH2 | D_ASP_95  | OD1 | 3.672 |
| 1Q9O | C_ARG_95   | NH2 | D_ASP_95  | OD2 | 2.974 |
| 1Q9W | A_ARG_95   | NH2 | B_ASP_95  | OD1 | 2.949 |
| 1Q9W | A_ARG_95   | NH2 | B_ASP_95  | OD2 | 3.845 |
| 1Q9W | B_ARG_100  | NH1 | A_GLU_55  | OE1 | 2.615 |
| 1Q9W | B_ARG_100  | NH1 | A_GLU_55  | OE2 | 3.657 |
| 1Q9W | B_ARG_100  | NH2 | A_GLU_55  | OE1 | 2.891 |
| 1Q9W | B_ARG_100  | NH2 | A_GLU_55  | OE2 | 3.820 |
| 1Q9W | C_ARG_95   | NH2 | D_ASP_95  | OD1 | 2.929 |
| 1Q9W | C_ARG_95   | NH2 | D_ASP_95  | OD2 | 3.831 |
| 1Q9W | D_ARG_100  | NH1 | C_GLU_55  | OE1 | 3.356 |
| 1Q9W | D_ARG_100  | NH1 | C_GLU_55  | OE2 | 3.002 |
| 1Q9W | D_ARG_100  | NH2 | C_GLU_55  | OE1 | 3.373 |
| 1Q9W | D_ARG_100  | NH2 | C_GLU_55  | OE2 | 3.045 |
| 1QBL | H_LYS_212  | NZ  | L_GLU_123 | OE1 | 3.581 |
| 1QBM | H_LYS_212  | NZ  | L_GLU_123 | OE1 | 2.762 |
| 1QBM | H_LYS_212  | NZ  | L_GLU_123 | OE2 | 3.773 |
| 1QGC | 1_ARG_124  | NH1 | 2_ASP_41  | OD1 | 3.642 |
| 1QGC | 1_ARG_124  | NH1 | 2_ASP_41  | OD2 | 2.877 |

|      |           |     |            |     |       |
|------|-----------|-----|------------|-----|-------|
| 1QGC | 1_ARG_124 | NH2 | 2_ASP_41   | OD1 | 3.740 |
| 1QGC | 2_ARG_167 | NH2 | 3_ASP_166  | OD1 | 2.757 |
| 1QGC | 2_ARG_167 | NH2 | 3_ASP_166  | OD2 | 2.777 |
| 1QGC | A_ARG_99  | NH2 | 5_ASP_143  | OD1 | 3.483 |
| 1QGC | A_LYS_215 | NZ  | 4_GLU_127  | OE2 | 3.716 |
| 1QKZ | H_LYS_208 | NZ  | L_GLU_123  | OE2 | 2.582 |
| 1RZJ | G_ARG_419 | NH2 | H_GLU_99   | OE2 | 2.591 |
| 1RZJ | C_LYS_29  | NZ  | G_ASP_279  | OD2 | 3.209 |
| 1RZJ | C_LYS_35  | NZ  | G_ASP_457  | OD2 | 3.838 |
| 1RZJ | C_ARG_59  | NH1 | G_ASP_368  | OD1 | 3.788 |
| 1RZJ | C_ARG_59  | NH1 | G_ASP_368  | OD2 | 3.342 |
| 1RZJ | C_ARG_59  | NH2 | G_ASP_368  | OD1 | 2.531 |
| 1RZJ | C_ARG_59  | NH2 | G_ASP_368  | OD2 | 3.174 |
| 1RZJ | H_LYS_209 | NZ  | L_GLU_123  | OE1 | 3.812 |
| 1RZK | G_ARG_419 | NH1 | H_GLU_100B | OE1 | 2.999 |
| 1RZK | G_ARG_419 | NH1 | H_GLU_100B | OE2 | 3.674 |
| 1RZK | G_ARG_419 | NH2 | H_GLU_99   | OE1 | 2.292 |
| 1RZK | G_ARG_419 | NH2 | H_GLU_100B | OE2 | 3.969 |
| 1RZK | C_LYS_35  | NZ  | G_ASP_457  | OD2 | 3.741 |
| 1RZK | C_ARG_59  | NH1 | G_ASP_368  | OD1 | 3.343 |
| 1RZK | C_ARG_59  | NH1 | G_ASP_368  | OD2 | 3.154 |
| 1RZK | C_ARG_59  | NH2 | G_ASP_368  | OD1 | 2.433 |
| 1RZK | C_ARG_59  | NH2 | G_ASP_368  | OD2 | 2.977 |
| 1RZK | H_HIS_164 | NE2 | L_ASP_167  | OD1 | 3.880 |
| 1RZK | H_HIS_164 | NE2 | L_ASP_167  | OD2 | 2.505 |
| 1RZK | H_LYS_209 | NZ  | L_GLU_123  | OE1 | 3.513 |
| 1RZK | H_LYS_209 | NZ  | L_GLU_123  | OE2 | 3.584 |
| 1S5I | L_ARG_96  | NH1 | H_ASP_97   | OD1 | 3.601 |
| 1S5I | L_ARG_96  | NH2 | H_ASP_97   | OD1 | 2.496 |
| 1S5I | L_ARG_96  | NH2 | H_ASP_97   | OD2 | 2.511 |
| 1S5I | H_HIS_172 | NE2 | L_ASP_167  | OD2 | 3.741 |
| 1S5I | H_LYS_221 | NZ  | L_GLU_123  | OE2 | 3.213 |
| 1S78 | D_HIS_164 | NE2 | C_ASP_167  | OD1 | 3.839 |
| 1S78 | D_LYS_209 | NZ  | C_GLU_123  | OE1 | 3.290 |
| 1S78 | D_LYS_214 | NZ  | C_ASP_122  | OD1 | 3.484 |
| 1SM3 | H_LYS_143 | NZ  | L_GLU_124  | OE2 | 2.757 |
| 1SQ2 | L_ARG_73  | NH2 | N_ASP_93   | OD1 | 3.549 |
| 1SQ2 | L_ARG_73  | NH2 | N_ASP_93   | OD2 | 3.002 |
| 1SQ2 | N_ARG_100 | NH1 | L_ASP_52   | OD1 | 3.032 |
| 1SQ2 | N_ARG_100 | NH1 | L_ASP_52   | OD2 | 3.454 |
| 1SQ2 | N_ARG_100 | NH2 | L_ASP_52   | OD1 | 3.561 |
| 1SQ2 | N_ARG_100 | NH2 | L_ASP_52   | OD2 | 3.218 |
| 1T6V | L_ARG_73  | NH1 | N_ASP_93   | OD2 | 3.564 |
| 1T6V | L_ARG_73  | NH2 | N_ASP_93   | OD1 | 3.874 |
| 1T6V | L_ARG_73  | NH2 | N_ASP_93   | OD2 | 2.603 |
| 1T6V | N_ARG_100 | NH1 | L_ASP_52   | OD1 | 2.973 |
| 1T6V | N_ARG_100 | NH1 | L_ASP_52   | OD2 | 3.510 |
| 1T6V | N_ARG_100 | NH2 | L_ASP_52   | OD1 | 3.501 |
| 1T6V | N_ARG_100 | NH2 | L_ASP_52   | OD2 | 3.094 |
| 1T6V | M_ARG_73  | NH2 | O_ASP_93   | OD1 | 3.734 |
| 1T6V | M_ARG_73  | NH2 | O_ASP_93   | OD2 | 2.904 |
| 1T6V | M_LYS_97  | NZ  | N_ASP_106  | OD1 | 3.749 |
| 1T6V | M_LYS_97  | NZ  | N_ASP_106  | OD2 | 2.853 |
| 1T6V | O_ARG_100 | NH1 | M_ASP_52   | OD1 | 3.232 |
| 1T6V | O_ARG_100 | NH1 | M_ASP_52   | OD2 | 2.872 |
| 1T6V | O_ARG_100 | NH2 | M_ASP_52   | OD1 | 3.920 |
| 1T6V | O_ARG_100 | NH2 | M_ASP_52   | OD2 | 2.990 |
| 1TYE | A_HIS_30  | ND1 | E_ASP_429  | OD2 | 3.896 |

|      |           |     |           |     |       |
|------|-----------|-----|-----------|-----|-------|
| 1TYE | A_ARG_32  | NH1 | E_ASP_429 | OD1 | 3.657 |
| 1TYE | A_ARG_32  | NH1 | E_ASP_429 | OD2 | 2.825 |
| 1TYE | A_ARG_73  | NH1 | C_ASP_71  | OD1 | 3.528 |
| 1TYE | A_ARG_73  | NH1 | C_ASP_71  | OD2 | 3.396 |
| 1TYE | A_ARG_73  | NH2 | C_ASP_71  | OD2 | 2.714 |
| 1TYE | A_ARG_73  | NH2 | C_GLU_75  | OE1 | 3.907 |
| 1TYE | B_ARG_216 | NH1 | A_GLU_123 | OE1 | 2.702 |
| 1TYE | B_LYS_253 | NZ  | A_ASP_232 | OD2 | 3.290 |
| 1TYE | C_ARG_73  | NH1 | A_ASP_71  | OD1 | 3.491 |
| 1TYE | C_ARG_73  | NH2 | A_ASP_71  | OD1 | 3.688 |
| 1TYE | C_ARG_73  | NH2 | A_ASP_71  | OD2 | 3.197 |
| 1TYE | D_ARG_216 | NH1 | C_GLU_123 | OE1 | 2.914 |
| 1TYE | D_ARG_216 | NH1 | C_GLU_123 | OE2 | 3.969 |
| 1TYE | D_LYS_253 | NZ  | C_ASP_232 | OD2 | 3.400 |
| 1TYE | E_ARG_368 | NH2 | A_ASP_429 | OD2 | 3.921 |
| 1TYE | F_ARG_216 | NH1 | E_GLU_123 | OE1 | 2.938 |
| 1TYE | F_ARG_216 | NH1 | E_GLU_123 | OE2 | 3.244 |
| 1TYE | F_LYS_253 | NZ  | E_ASP_232 | OD2 | 3.394 |
| 1TZH | V_ARG_23  | NH1 | W_GLU_30  | OE2 | 3.100 |
| 1TZH | V_HIS_90  | NE2 | H_ASP_33  | OD1 | 2.826 |
| 1TZH | V_HIS_90  | NE2 | H_ASP_33  | OD2 | 2.524 |
| 1TZH | W_ARG_23  | NH1 | V_GLU_30  | OE1 | 3.346 |
| 1TZH | W_HIS_90  | NE2 | B_ASP_33  | OD1 | 3.121 |
| 1TZH | W_HIS_90  | NE2 | B_ASP_33  | OD2 | 2.585 |
| 1TZH | B_LYS_209 | NZ  | A_GLU_123 | OE2 | 3.903 |
| 1TZH | H_HIS_164 | NE2 | L_ASP_167 | OD1 | 3.495 |
| 1TZH | H_LYS_209 | NZ  | L_GLU_123 | OE1 | 2.754 |
| 1TZH | H_LYS_209 | NZ  | L_GLU_123 | OE2 | 3.404 |
| 1TZI | B_LYS_209 | NZ  | A_GLU_123 | OE2 | 3.786 |
| 1UA6 | H_HIS_164 | NE2 | L_ASP_167 | OD1 | 3.994 |
| 1UA6 | Y_LYS_97  | NZ  | H_ASP_32  | OD1 | 2.722 |
| 1UA6 | Y_LYS_97  | NZ  | H_ASP_99  | OD2 | 2.674 |
| 1UAC | Y_LYS_97  | NZ  | H_ASP_32  | OD1 | 2.750 |
| 1UAC | Y_LYS_97  | NZ  | H_ASP_32  | OD2 | 3.845 |
| 1UAC | Y_LYS_97  | NZ  | H_ASP_99  | OD2 | 2.749 |
| 1UCB | L_LYS_50  | NZ  | H_ASP_98  | OD1 | 3.160 |
| 1UCB | H_LYS_221 | NZ  | L_GLU_123 | OE1 | 3.128 |
| 1UJ3 | A_HIS_91  | NE2 | B_ASP_399 | OD1 | 3.708 |
| 1UJ3 | A_HIS_91  | NE2 | B_ASP_399 | OD2 | 2.884 |
| 1UJ3 | B_LYS_513 | NZ  | A_GLU_123 | OE1 | 3.554 |
| 1UJ3 | B_LYS_513 | NZ  | A_GLU_123 | OE2 | 3.075 |
| 1UJ3 | C_LYS_766 | NZ  | A_ASP_1   | OD1 | 3.997 |
| 1UJ3 | C_LYS_769 | NZ  | B_ASP_399 | OD1 | 2.791 |
| 1UJ3 | C_LYS_769 | NZ  | B_ASP_399 | OD2 | 3.372 |
| 1UJ3 | C_LYS_801 | NZ  | B_ASP_352 | OD1 | 2.774 |
| 1UJ3 | C_LYS_801 | NZ  | B_ASP_352 | OD2 | 3.632 |
| 1UWX | H_HIS_164 | NE2 | L_ASP_168 | OD2 | 3.899 |
| 1UWX | H_LYS_208 | NZ  | L_GLU_124 | OE2 | 2.744 |
| 1UWX | M_LYS_208 | NZ  | K_GLU_124 | OE2 | 2.705 |
| 1UZ6 | F_ARG_164 | NH1 | E_ASP_166 | OD1 | 3.662 |
| 1UZ6 | F_ARG_164 | NH2 | E_ASP_166 | OD1 | 3.708 |
| 1UZ6 | F_ARG_164 | NH2 | E_ASP_169 | OD2 | 3.554 |
| 1UZ6 | F_LYS_208 | NZ  | E_GLU_122 | OE1 | 3.883 |
| 1UZ6 | F_ARG_209 | NH1 | E_GLU_122 | OE2 | 3.531 |
| 1UZ6 | H_ARG_164 | NH1 | L_ASP_166 | OD1 | 3.603 |
| 1UZ6 | H_ARG_164 | NH2 | L_ASP_166 | OD1 | 3.557 |
| 1UZ6 | H_ARG_164 | NH2 | L_ASP_169 | OD2 | 3.746 |
| 1UZ6 | H_LYS_208 | NZ  | L_GLU_122 | OE1 | 3.795 |

|      |           |     |           |     |       |
|------|-----------|-----|-----------|-----|-------|
| 1UZ6 | H_ARG_209 | NH1 | L_GLU_122 | OE2 | 3.180 |
| 1UZ6 | P_ARG_164 | NH1 | M_ASP_166 | OD1 | 3.636 |
| 1UZ6 | P_ARG_164 | NH2 | M_ASP_166 | OD1 | 3.666 |
| 1UZ6 | P_ARG_164 | NH2 | M_ASP_166 | OD2 | 3.901 |
| 1UZ6 | P_ARG_164 | NH2 | M_ASP_169 | OD2 | 3.942 |
| 1UZ6 | P_LYS_208 | NZ  | M_GLU_122 | OE1 | 3.361 |
| 1UZ6 | W_ARG_164 | NH2 | V_ASP_166 | OD1 | 3.892 |
| 1UZ6 | W_LYS_208 | NZ  | V_GLU_122 | OE1 | 3.069 |
| 1UZ8 | B_ARG_164 | NH1 | A_ASP_166 | OD1 | 3.299 |
| 1UZ8 | B_ARG_164 | NH2 | A_ASP_166 | OD1 | 3.745 |
| 1UZ8 | B_ARG_164 | NH2 | A_ASP_169 | OD2 | 3.660 |
| 1UZ8 | H_ARG_164 | NH1 | L_ASP_166 | OD1 | 3.385 |
| 1UZ8 | H_ARG_164 | NH2 | L_ASP_166 | OD1 | 3.573 |
| 1UZ8 | H_ARG_164 | NH2 | L_ASP_169 | OD2 | 3.234 |
| 1V7M | L_ARG_95  | NH1 | H_GLU_50  | OE1 | 3.532 |
| 1V7M | V_ARG_98  | NH2 | H_ASP_31  | OD1 | 3.697 |
| 1V7M | M_ARG_95  | NH1 | L_GLU_50  | OE1 | 3.801 |
| 1V7M | X_ARG_98  | NH2 | L_ASP_31  | OD1 | 3.214 |
| 1V7N | L_ARG_95  | NH1 | H_GLU_50  | OE1 | 3.194 |
| 1V7N | L_ARG_107 | NH1 | O_GLU_78  | OE2 | 3.587 |
| 1V7N | L_ARG_107 | NH2 | O_GLU_78  | OE1 | 3.844 |
| 1V7N | L_ARG_107 | NH2 | O_GLU_78  | OE2 | 2.214 |
| 1V7N | H_ARG_216 | NH2 | Z_ASP_123 | OD2 | 3.997 |
| 1V7N | M_ARG_95  | NH1 | L_GLU_50  | OE1 | 2.984 |
| 1V7N | M_ARG_107 | NH1 | N_GLU_78  | OE2 | 3.960 |
| 1V7N | M_ARG_107 | NH2 | N_GLU_78  | OE1 | 3.607 |
| 1V7N | M_ARG_107 | NH2 | N_GLU_78  | OE2 | 2.132 |
| 1V7N | N_ARG_95  | NH1 | J_GLU_50  | OE1 | 3.631 |
| 1V7N | N_ARG_107 | NH2 | M_GLU_78  | OE1 | 2.980 |
| 1V7N | N_ARG_107 | NH2 | M_GLU_78  | OE2 | 2.369 |
| 1V7N | J_ARG_216 | NH2 | X_ASP_123 | OD2 | 3.982 |
| 1V7N | O_ARG_95  | NH1 | K_GLU_50  | OE1 | 2.735 |
| 1V7N | O_ARG_107 | NH1 | L_GLU_78  | OE1 | 3.650 |
| 1V7N | O_ARG_107 | NH1 | L_GLU_78  | OE2 | 3.114 |
| 1V7N | O_ARG_107 | NH2 | L_GLU_78  | OE2 | 2.402 |
| 1V7N | V_ARG_98  | NH2 | H_ASP_31  | OD1 | 3.580 |
| 1V7N | X_ARG_98  | NH2 | L_ASP_31  | OD1 | 3.389 |
| 1V7N | X_HIS_121 | ND1 | J_ASP_217 | OD1 | 2.619 |
| 1V7N | X_HIS_121 | NE2 | J_ASP_217 | OD1 | 3.422 |
| 1V7N | Y_HIS_20  | ND1 | H_ASP_217 | OD1 | 3.368 |
| 1V7N | Y_HIS_20  | ND1 | H_ASP_217 | OD2 | 3.116 |
| 1V7N | Y_HIS_20  | NE2 | H_ASP_217 | OD1 | 3.862 |
| 1V7N | Y_HIS_121 | ND1 | L_ASP_217 | OD1 | 3.108 |
| 1V7N | Z_ARG_98  | NH2 | K_ASP_31  | OD1 | 3.622 |
| 1V7N | Z_ARG_140 | NH2 | M_GLU_212 | OE1 | 3.768 |
| 1VES | A_ARG_25  | NH1 | B_ASP_4   | OD1 | 3.636 |
| 1VES | A_ARG_25  | NH1 | B_ASP_4   | OD2 | 2.836 |
| 1VES | A_ARG_25  | NH2 | B_ASP_4   | OD1 | 2.879 |
| 1VES | A_ARG_25  | NH2 | B_ASP_4   | OD2 | 3.552 |
| 1VES | B_ARG_25  | NH1 | A_ASP_4   | OD1 | 3.762 |
| 1VES | B_ARG_25  | NH1 | A_ASP_4   | OD2 | 2.782 |
| 1VES | B_ARG_25  | NH2 | A_ASP_4   | OD1 | 3.070 |
| 1VES | B_ARG_25  | NH2 | A_ASP_4   | OD2 | 3.548 |
| 1VFA | A_ARG_96  | NH1 | B_GLU_98  | OE1 | 2.794 |
| 1VFA | A_ARG_96  | NH1 | B_GLU_98  | OE2 | 3.600 |
| 1VFA | A_ARG_96  | NH2 | B_GLU_98  | OE1 | 3.537 |
| 1VFA | A_ARG_96  | NH2 | B_GLU_98  | OE2 | 2.928 |
| 1VFB | A_ARG_96  | NH1 | B_GLU_98  | OE1 | 2.821 |

|      |           |     |           |     |       |
|------|-----------|-----|-----------|-----|-------|
| 1VFB | A_ARG_96  | NH1 | B_GLU_98  | OE2 | 3.695 |
| 1VFB | A_ARG_96  | NH2 | B_GLU_98  | OE1 | 3.393 |
| 1VFB | A_ARG_96  | NH2 | B_GLU_98  | OE2 | 2.813 |
| 1W72 | A_ARG_35  | NH1 | B_ASP_53  | OD1 | 2.945 |
| 1W72 | A_ARG_48  | NH1 | B_ASP_53  | OD2 | 3.978 |
| 1W72 | A_ARG_48  | NH2 | B_ASP_53  | OD1 | 3.455 |
| 1W72 | A_ARG_48  | NH2 | B_ASP_53  | OD2 | 2.916 |
| 1W72 | A_ARG_65  | NH1 | H_ASP_30  | OD1 | 3.409 |
| 1W72 | A_ARG_65  | NH1 | H_ASP_31  | OD1 | 2.977 |
| 1W72 | A_ARG_114 | NH1 | C_ASP_3   | OD2 | 3.999 |
| 1W72 | A_LYS_146 | NZ  | L_ASP_95A | OD1 | 3.112 |
| 1W72 | A_LYS_146 | NZ  | L_ASP_95A | OD2 | 3.996 |
| 1W72 | A_ARG_156 | NH1 | C_ASP_3   | OD1 | 3.704 |
| 1W72 | A_ARG_156 | NH1 | C_ASP_3   | OD2 | 2.953 |
| 1W72 | A_ARG_163 | NH1 | C_GLU_1   | OE1 | 3.400 |
| 1W72 | A_ARG_163 | NH2 | C_GLU_1   | OE1 | 3.293 |
| 1W72 | A_ARG_163 | NH2 | C_GLU_1   | OE2 | 3.482 |
| 1W72 | A_ARG_170 | NH1 | C_GLU_1   | OE2 | 3.205 |
| 1W72 | A_ARG_170 | NH2 | C_GLU_1   | OE2 | 2.677 |
| 1W72 | A_HIS_192 | NE2 | B_ASP_98  | OD1 | 3.224 |
| 1W72 | A_HIS_192 | NE2 | B_ASP_98  | OD2 | 2.823 |
| 1W72 | B_LYS_6   | NZ  | A_GLU_232 | OE1 | 3.881 |
| 1W72 | D_ARG_35  | NH2 | E_ASP_53  | OD1 | 3.761 |
| 1W72 | D_ARG_65  | NH1 | I_ASP_30  | OD1 | 2.970 |
| 1W72 | D_ARG_65  | NH1 | I_ASP_31  | OD1 | 3.035 |
| 1W72 | D_LYS_146 | NZ  | M_ASP_95A | OD2 | 3.397 |
| 1W72 | D_ARG_156 | NH1 | F_ASP_3   | OD1 | 3.644 |
| 1W72 | D_ARG_156 | NH1 | F_ASP_3   | OD2 | 3.082 |
| 1W72 | D_ARG_163 | NH1 | F_GLU_1   | OE1 | 3.609 |
| 1W72 | D_ARG_163 | NH1 | F_GLU_1   | OE2 | 3.022 |
| 1W72 | D_HIS_192 | NE2 | E_ASP_98  | OD2 | 3.123 |
| 1W72 | E_LYS_6   | NZ  | D_GLU_232 | OE2 | 2.863 |
| 1W72 | H_LYS_145 | NZ  | L_GLU_124 | OE2 | 2.720 |
| 1W72 | H_LYS_221 | NZ  | L_GLU_123 | OE1 | 2.737 |
| 1W72 | H_LYS_221 | NZ  | L_GLU_123 | OE2 | 3.946 |
| 1W72 | I_LYS_145 | NZ  | M_GLU_124 | OE2 | 2.470 |
| 1W72 | I_LYS_228 | NZ  | M_GLU_123 | OE2 | 3.514 |
| 1W72 | M_HIS_95B | NE2 | I_ASP_61  | OD2 | 3.924 |
| 1WEJ | L_HIS_30  | ND1 | F_GLU_104 | OE1 | 2.984 |
| 1WEJ | L_HIS_30  | ND1 | F_GLU_104 | OE2 | 2.758 |
| 1WEJ | H_ARG_50  | NH1 | F_GLU_62  | OE2 | 3.319 |
| 1WEJ | H_ARG_50  | NH2 | F_GLU_62  | OE2 | 2.823 |
| 1WEJ | H_LYS_212 | NZ  | L_GLU_123 | OE2 | 3.963 |
| 1WEJ | F_LYS_60  | NZ  | H_ASP_100 | OD2 | 3.322 |
| 1XF2 | H_LYS_208 | NZ  | L_GLU_123 | OE1 | 3.369 |
| 1XF2 | H_LYS_208 | NZ  | L_GLU_123 | OE2 | 2.577 |
| 1XF2 | B_LYS_208 | NZ  | A_GLU_123 | OE2 | 2.913 |
| 1XGY | L_ARG_50  | NH2 | P_GLU_6   | OE1 | 2.621 |
| 1XGY | H_LYS_208 | NZ  | L_GLU_123 | OE2 | 3.768 |
| 1XGY | M_ARG_50  | NH2 | Q_GLU_6   | OE1 | 3.022 |
| 1XGY | I_LYS_208 | NZ  | M_GLU_123 | OE2 | 3.551 |
| 1XIW | A_ARG_80  | NH1 | D_ASP_106 | OD2 | 2.879 |
| 1XIW | A_ARG_94  | NH2 | B_GLU_7   | OE1 | 3.648 |
| 1XIW | A_ARG_94  | NH2 | B_GLU_7   | OE2 | 2.974 |
| 1XIW | B_LYS_2   | NZ  | A_ASP_42  | OD1 | 3.017 |
| 1XIW | B_LYS_2   | NZ  | A_ASP_42  | OD2 | 2.678 |
| 1XIW | C_ARG_31  | NH1 | A_ASP_86  | OD1 | 2.919 |
| 1XIW | C_ARG_31  | NH1 | A_ASP_86  | OD2 | 3.491 |



|      |            |     |            |     |       |
|------|------------|-----|------------|-----|-------|
| 1XIW | C_ARG_31   | NH2 | A_ASP_86   | OD1 | 3.709 |
| 1XIW | C_ARG_31   | NH2 | A_ASP_86   | OD2 | 2.755 |
| 1XIW | C_ARG_54   | NH1 | F_GLU_6    | OE1 | 2.951 |
| 1XIW | C_ARG_54   | NH2 | F_GLU_6    | OE1 | 3.193 |
| 1XIW | C_ARG_54   | NH2 | F_GLU_6    | OE2 | 3.073 |
| 1XIW | C_HIS_56   | ND1 | F_GLU_9    | OE1 | 3.139 |
| 1XIW | C_HIS_56   | ND1 | F_GLU_9    | OE2 | 2.963 |
| 1XIW | D_LYS_55   | NZ  | A_ASP_57   | OD1 | 3.690 |
| 1XIW | E_ARG_80   | NH1 | H_ASP_106  | OD2 | 2.741 |
| 1XIW | E_ARG_94   | NH2 | F_GLU_7    | OE2 | 3.577 |
| 1XIW | F_LYS_2    | NZ  | E_ASP_42   | OD1 | 3.079 |
| 1XIW | F_LYS_2    | NZ  | E_ASP_42   | OD2 | 3.491 |
| 1XIW | G_ARG_31   | NH1 | E_ASP_86   | OD1 | 3.076 |
| 1XIW | G_ARG_31   | NH1 | E_ASP_86   | OD2 | 3.219 |
| 1XIW | G_ARG_31   | NH2 | E_ASP_86   | OD2 | 2.817 |
| 1XIW | G_ARG_54   | NH1 | B_GLU_6    | OE1 | 2.839 |
| 1XIW | G_ARG_54   | NH2 | B_GLU_6    | OE1 | 3.146 |
| 1XIW | G_ARG_54   | NH2 | B_GLU_6    | OE2 | 3.222 |
| 1XIW | G_HIS_56   | ND1 | B_GLU_9    | OE1 | 2.509 |
| 1XIW | G_HIS_56   | ND1 | B_GLU_9    | OE2 | 3.961 |
| 1YEI | L_LYS_30   | NZ  | H_GLU_100B | OE1 | 2.979 |
| 1YEI | L_LYS_45   | NZ  | H_ASP_101  | OD1 | 2.746 |
| 1YEI | L_LYS_45   | NZ  | H_ASP_101  | OD2 | 3.891 |
| 1YEI | L_ARG_46   | NH2 | H_ASP_101  | OD1 | 3.707 |
| 1YEI | L_HIS_49   | NE2 | H_ASP_100C | OD1 | 3.542 |
| 1YEJ | L_LYS_45   | NZ  | H_ASP_101  | OD1 | 2.790 |
| 1YEJ | L_LYS_45   | NZ  | H_ASP_101  | OD2 | 3.988 |
| 1YEJ | L_ARG_46   | NH2 | H_ASP_101  | OD1 | 3.745 |
| 1YEJ | L_HIS_49   | NE2 | H_ASP_100C | OD1 | 3.536 |
| 1YEJ | L_LYS_53   | NZ  | H_ASP_100C | OD1 | 3.377 |
| 1YEJ | L_LYS_53   | NZ  | H_ASP_100C | OD2 | 3.298 |
| 1YEK | L_LYS_30   | NZ  | H_GLU_100B | OE1 | 2.464 |
| 1YEK | L_LYS_45   | NZ  | H_ASP_101  | OD1 | 2.830 |
| 1YEK | L_ARG_46   | NH2 | H_ASP_101  | OD1 | 3.853 |
| 1YEK | L_HIS_49   | NE2 | H_ASP_100C | OD1 | 3.610 |
| 1YNT | A_ARG_24   | NH1 | C_ASP_1070 | OD2 | 3.114 |
| 1YNT | A_ARG_24   | NH2 | C_ASP_1070 | OD2 | 3.728 |
| 1YNT | B_LYS_563  | NZ  | A_ASP_1    | OD1 | 2.935 |
| 1YNT | B_LYS_563  | NZ  | A_ASP_1    | OD2 | 3.384 |
| 1YNT | B_LYS_713  | NZ  | A_GLU_123  | OE1 | 3.645 |
| 1YNT | C_ARG_1024 | NH1 | A_ASP_70   | OD2 | 3.173 |
| 1YNT | C_ARG_1024 | NH2 | A_ASP_70   | OD2 | 3.802 |
| 1YNT | C_LYS_1107 | NZ  | E_GLU_869  | OE1 | 3.719 |
| 1YNT | D_LYS_1563 | NZ  | C_ASP_1001 | OD1 | 2.913 |
| 1YNT | D_LYS_1563 | NZ  | C_ASP_1001 | OD2 | 3.385 |
| 1YNT | D_LYS_1713 | NZ  | C_GLU_1123 | OE1 | 3.557 |
| 1YNT | E_LYS_824  | NZ  | A_ASP_143  | OD1 | 3.012 |
| 1YNT | E_LYS_824  | NZ  | A_ASP_143  | OD2 | 3.238 |
| 1YNT | E_LYS_833  | NZ  | A_ASP_17   | OD2 | 3.941 |
| 1YQV | L_ARG_46   | NH2 | H_ASP_101  | OD2 | 3.072 |
| 1YQV | H_LYS_221  | NZ  | L_GLU_123  | OE1 | 3.123 |
| 1YQV | H_LYS_221  | NZ  | L_GLU_123  | OE2 | 2.724 |
| 1YQV | Y_ARG_45   | NH1 | H_GLU_50   | OE1 | 3.514 |
| 1YQV | Y_ARG_45   | NH1 | H_GLU_50   | OE2 | 2.957 |
| 1YQV | Y_ARG_68   | NH1 | H_GLU_50   | OE1 | 2.746 |
| 1YQV | Y_ARG_68   | NH1 | H_GLU_50   | OE2 | 3.759 |
| 1YQV | Y_ARG_68   | NH2 | H_GLU_50   | OE1 | 3.492 |
| 1YQV | Y_ARG_68   | NH2 | H_GLU_50   | OE2 | 2.963 |

|      |            |     |             |     |       |
|------|------------|-----|-------------|-----|-------|
| 1YYL | G_ARG_419  | NH1 | H_GLU_100D  | OE2 | 3.749 |
| 1YYL | G_ARG_419  | NH2 | H_GLU_99    | OE2 | 2.852 |
| 1YYL | G_ARG_419  | NH2 | H_GLU_100D  | OE1 | 3.510 |
| 1YYL | G_ARG_419  | NH2 | H_GLU_100D  | OE2 | 2.773 |
| 1YYL | H_LYS_209  | NZ  | L_GLU_123   | OE1 | 2.745 |
| 1YYL | H_LYS_209  | NZ  | L_GLU_123   | OE2 | 3.202 |
| 1YYL | P_ARG_1419 | NH1 | R_GLU_1100B | OE1 | 3.247 |
| 1YYL | P_ARG_1419 | NH2 | R_GLU_1099  | OE1 | 2.456 |
| 1YYL | P_ARG_1419 | NH2 | R_GLU_1100D | OE1 | 3.853 |
| 1YYL | R_LYS_1201 | NZ  | H_GLU_10    | OE1 | 3.633 |
| 1YYL | R_LYS_1209 | NZ  | Q_GLU_1123  | OE2 | 3.934 |
| 1YYL | S_ARG_1009 | NH1 | P_ASP_1368  | OD2 | 3.204 |
| 1YYL | S_ARG_1009 | NH2 | P_ASP_1368  | OD2 | 2.930 |
| 1YYM | G_ARG_419  | NH2 | H_GLU_99    | OE2 | 2.868 |
| 1YYM | G_ARG_419  | NH2 | H_GLU_100D  | OE1 | 3.511 |
| 1YYM | H_LYS_209  | NZ  | L_GLU_123   | OE1 | 2.715 |
| 1YYM | H_LYS_209  | NZ  | L_GLU_123   | OE2 | 2.976 |
| 1YYM | P_ARG_1419 | NH1 | R_GLU_1100B | OE1 | 2.635 |
| 1YYM | P_ARG_1419 | NH2 | R_GLU_1099  | OE1 | 3.192 |
| 1YYM | S_ARG_1009 | NH1 | P_ASP_1368  | OD2 | 3.572 |
| 1YYM | S_ARG_1009 | NH2 | P_ASP_1368  | OD2 | 2.725 |
| 1ZEA | H_ARG_95   | NH1 | L_GLU_34    | OE1 | 2.842 |
| 1ZEA | H_ARG_95   | NH1 | L_GLU_34    | OE2 | 3.642 |
| 1ZEA | H_ARG_95   | NH2 | L_GLU_34    | OE1 | 3.613 |
| 1ZEA | H_ARG_95   | NH2 | L_GLU_34    | OE2 | 2.859 |
| 1ZEA | H_LYS_208  | NZ  | L_GLU_123   | OE2 | 2.817 |
| 2AAB | H_LYS_208  | NZ  | L_GLU_123   | OE1 | 3.545 |
| 2B2X | A_HIS_261  | NE2 | H_ASP_101   | OD2 | 3.121 |
| 2B2X | H_HIS_169  | NE2 | L_ASP_171   | OD2 | 3.832 |
| 2B2X | H_LYS_213  | NZ  | L_GLU_127   | OE1 | 2.709 |
| 2B2X | H_LYS_213  | NZ  | L_GLU_127   | OE2 | 3.416 |
| 2B2X | L_HIS_31   | NE2 | A_GLU_259   | OE2 | 3.821 |
| 2B2X | B_HIS_261  | NE2 | L_ASP_101   | OD2 | 3.107 |
| 2B2X | L_HIS_169  | NE2 | M_ASP_171   | OD2 | 3.874 |
| 2B2X | L_LYS_213  | NZ  | M_GLU_127   | OE2 | 3.245 |
| 2B2X | M_HIS_31   | NE2 | B_GLU_259   | OE2 | 3.848 |
| 2B4C | G_ARG_     | NH1 | H_ASP_      | OD2 | 3.237 |
| 2B4C | G_ARG_     | NH2 | H_ASP_      | OD2 | 2.859 |
| 2B4C | G_LYS_     | NZ  | H_ASP_      | OD2 | 2.598 |
| 2B4C | C_ARG_     | NH1 | H_GLU_      | OE2 | 3.957 |
| 2B4C | C_ARG_     | NH2 | H_GLU_      | OE2 | 3.405 |
| 2B4C | C_ARG_     | NH1 | G_ASP_      | OD1 | 2.937 |
| 2B4C | C_ARG_     | NH1 | G_ASP_      | OD2 | 3.245 |
| 2B4C | H_LYS_     | NZ  | L_GLU_      | OE1 | 3.365 |
| 2B4C | H_LYS_209  | NZ  | L_GLU_123   | OE2 | 3.837 |
| 2BDN | A_LYS_56   | NZ  | H_ASP_52    | OD1 | 2.539 |
| 2BDN | A_LYS_56   | NZ  | H_ASP_52    | OD2 | 3.792 |
| 2BDN | L_ARG_32   | NH1 | A_ASP_65    | OD1 | 3.196 |
| 2BDN | L_ARG_32   | NH1 | A_ASP_68    | OD1 | 2.578 |
| 2BDN | L_ARG_32   | NH2 | A_ASP_65    | OD1 | 2.774 |
| 2BDN | H_ARG_98   | NH1 | A_GLU_39    | OE2 | 3.155 |
| 2BDN | H_LYS_212  | NZ  | L_GLU_123   | OE2 | 3.177 |
| 2BRR | H_ARG_213  | NH1 | L_GLU_123   | OE1 | 2.600 |
| 2BRR | H_ARG_213  | NH1 | L_GLU_123   | OE2 | 3.932 |
| 2BRR | H_ARG_213  | NH2 | L_GLU_123   | OE1 | 3.110 |
| 2BRR | H_ARG_213  | NH2 | L_GLU_123   | OE2 | 3.029 |
| 2BRR | P_LYS_7    | NZ  | H_ASP_95    | OD1 | 3.067 |
| 2BRR | P_LYS_7    | NZ  | H_ASP_95    | OD2 | 2.549 |

|      |            |     |            |     |       |
|------|------------|-----|------------|-----|-------|
| 2BRR | P_HIS_11   | ND1 | Y_ASP_95   | OD2 | 2.841 |
| 2BRR | Y_LYS_208  | NZ  | X_GLU_123  | OE2 | 3.359 |
| 2BRR | Y_ARG_213  | NH1 | X_GLU_123  | OE1 | 2.523 |
| 2BRR | Y_ARG_213  | NH1 | X_GLU_123  | OE2 | 3.327 |
| 2BRR | Y_ARG_213  | NH2 | X_GLU_123  | OE1 | 3.468 |
| 2BRR | Y_ARG_213  | NH2 | X_GLU_123  | OE2 | 2.546 |
| 2DBL | H_LYS_221  | NZ  | L_GLU_123  | OE2 | 3.660 |
| 2DQC | Y_LYS_97   | NZ  | H_ASP_32   | OD1 | 2.612 |
| 2DQC | Y_LYS_97   | NZ  | H_ASP_32   | OD2 | 3.998 |
| 2DQC | Y_LYS_97   | NZ  | H_ASP_99   | OD1 | 3.500 |
| 2DQC | Y_LYS_97   | NZ  | H_ASP_99   | OD2 | 2.637 |
| 2DQD | Y_LYS_97   | NZ  | H_ASP_32   | OD1 | 2.767 |
| 2DQD | Y_LYS_97   | NZ  | H_ASP_32   | OD2 | 3.965 |
| 2DQD | Y_LYS_97   | NZ  | H_ASP_99   | OD1 | 3.334 |
| 2DQD | Y_LYS_97   | NZ  | H_ASP_99   | OD2 | 3.048 |
| 2DQE | Y_LYS_97   | NZ  | H_ASP_32   | OD1 | 2.650 |
| 2DQE | Y_LYS_97   | NZ  | H_ASP_99   | OD1 | 3.314 |
| 2DQE | Y_LYS_97   | NZ  | H_ASP_99   | OD2 | 2.899 |
| 2DQF | A_ARG_45   | NH1 | E_ASP_1    | OD2 | 3.511 |
| 2DQF | A_LYS_49   | NZ  | B_ASP_99   | OD1 | 3.470 |
| 2DQF | A_ARG_61   | NH1 | E_ASP_27   | OD1 | 3.814 |
| 2DQF | C_LYS_97   | NZ  | B_ASP_99   | OD1 | 3.543 |
| 2DQF | C_LYS_97   | NZ  | B_ASP_99   | OD2 | 2.851 |
| 2DQF | D_LYS_39   | NZ  | B_ASP_1    | OD1 | 3.005 |
| 2DQF | D_ARG_61   | NH1 | B_ASP_27   | OD1 | 3.581 |
| 2DQF | F_LYS_97   | NZ  | E_ASP_99   | OD2 | 3.165 |
| 2DQG | Y_LYS_97   | NZ  | H_ASP_32   | OD1 | 3.992 |
| 2DQG | Y_LYS_97   | NZ  | H_ASP_32   | OD2 | 2.695 |
| 2DQG | Y_LYS_97   | NZ  | H_ASP_99   | OD1 | 3.156 |
| 2DQG | Y_LYS_97   | NZ  | H_ASP_99   | OD2 | 3.019 |
| 2DQH | Y_LYS_97   | NZ  | H_ASP_32   | OD1 | 2.777 |
| 2DQH | Y_LYS_97   | NZ  | H_ASP_99   | OD1 | 3.694 |
| 2DQH | Y_LYS_97   | NZ  | H_ASP_99   | OD2 | 2.635 |
| 2DQI | L_LYS_49   | NZ  | H_ASP_99   | OD1 | 2.843 |
| 2DQI | L_LYS_49   | NZ  | H_ASP_101  | OD1 | 3.541 |
| 2DQI | L_LYS_49   | NZ  | H_ASP_101  | OD2 | 3.285 |
| 2DQI | Y_LYS_97   | NZ  | H_ASP_32   | OD1 | 2.729 |
| 2DQJ | Y_LYS_97   | NZ  | H_ASP_32   | OD1 | 2.638 |
| 2DQJ | Y_LYS_97   | NZ  | H_ASP_32   | OD2 | 3.939 |
| 2DQJ | Y_LYS_97   | NZ  | H_ASP_99   | OD1 | 3.482 |
| 2DQJ | Y_LYS_97   | NZ  | H_ASP_99   | OD2 | 2.865 |
| 2DQT | L_LYS_50   | NZ  | H_ASP_100C | OD1 | 3.056 |
| 2DQT | H_ARG_100B | NH2 | L_ASP_30   | OD1 | 3.486 |
| 2DQT | H_ARG_100B | NH2 | L_ASP_30   | OD2 | 3.745 |
| 2DQU | L_LYS_50   | NZ  | H_ASP_100C | OD1 | 2.628 |
| 2DQU | L_LYS_50   | NZ  | H_ASP_100C | OD2 | 3.616 |
| 2DQU | H_ARG_100B | NH2 | L_ASP_30   | OD2 | 2.721 |
| 2DQU | H_LYS_208  | NZ  | L_GLU_123  | OE2 | 2.915 |
| 2DQU | H_ARG_213  | NH1 | L_GLU_123  | OE1 | 3.471 |
| 2FB4 | H_LYS_148  | NZ  | L_GLU_126  | OE2 | 2.805 |
| 2FB4 | H_LYS_214  | NZ  | L_GLU_125  | OE1 | 3.053 |
| 2FB4 | H_LYS_214  | NZ  | L_GLU_125  | OE2 | 2.759 |
| 2FD6 | A_HIS_87   | ND1 | U_ASP_11   | OD2 | 3.705 |
| 2FD6 | H_HIS_98   | ND1 | L_GLU_50   | OE1 | 3.050 |
| 2FD6 | H_HIS_98   | ND1 | L_GLU_50   | OE2 | 3.997 |
| 2FD6 | H_LYS_203  | NZ  | L_GLU_122  | OE2 | 2.585 |
| 2FD6 | U_ARG_192  | NH1 | H_GLU_58   | OE2 | 2.359 |
| 2FD6 | U_ARG_192  | NH2 | H_GLU_58   | OE2 | 3.898 |

|      |           |     |           |     |       |
|------|-----------|-----|-----------|-----|-------|
| 2FR4 | H.LYS_208 | NZ  | L_GLU_123 | OE2 | 3.199 |
| 2FR4 | B.LYS_208 | NZ  | A_GLU_123 | OE1 | 2.539 |
| 2H32 | H.ARG_59  | NH1 | A_GLU_106 | OE1 | 3.937 |
| 2H32 | H.ARG_59  | NH1 | A_GLU_106 | OE2 | 3.372 |
| 2H32 | H.ARG_59  | NH2 | A_GLU_106 | OE2 | 3.412 |
| 2H9G | B.HIS_53  | ND1 | R_GLU_36  | OE2 | 3.471 |
| 2H9G | B.LYS_209 | NZ  | A_GLU_123 | OE1 | 2.713 |
| 2H9G | H.LYS_209 | NZ  | L_GLU_123 | OE1 | 2.570 |
| 2HFG | H.ARG_95  | NH2 | R_ASP_26  | OD1 | 2.783 |
| 2HFG | H.ARG_95  | NH2 | R_ASP_26  | OD2 | 3.667 |
| 2HFG | H.LYS_209 | NZ  | L_GLU_122 | OE1 | 3.336 |
| 2HFG | H.LYS_209 | NZ  | L_GLU_122 | OE2 | 2.886 |
| 2HKF | L.LYS_55  | NZ  | P_ASP_6   | OD1 | 2.651 |
| 2HKF | H.ARG_50  | NH2 | P_GLU_5   | OE1 | 3.869 |
| 2HKF | H.ARG_50  | NH2 | P_GLU_5   | OE2 | 2.886 |
| 2HKF | H.ARG_52  | NH2 | P_GLU_5   | OE1 | 3.116 |
| 2HKF | H.LYS_214 | NZ  | L_GLU_128 | OE2 | 2.891 |
| 2HMG | A.LYS_27  | NZ  | B_GLU_97  | OE1 | 2.762 |
| 2HMG | A.LYS_27  | NZ  | B_GLU_97  | OE2 | 3.001 |
| 2HMG | A.ARG_109 | NH1 | B_GLU_67  | OE1 | 3.634 |
| 2HMG | A.ARG_109 | NH1 | B_GLU_67  | OE2 | 2.959 |
| 2HMG | A.ARG_269 | NH2 | B_GLU_67  | OE1 | 2.999 |
| 2HMG | A.LYS_299 | NZ  | B_GLU_69  | OE1 | 3.169 |
| 2HMG | B.ARG_54  | NH1 | F_GLU_97  | OE1 | 2.721 |
| 2HMG | B.ARG_54  | NH2 | F_GLU_97  | OE1 | 3.280 |
| 2HMG | B.LYS_62  | NZ  | F_ASP_86  | OD1 | 3.023 |
| 2HMG | B.LYS_62  | NZ  | F_ASP_86  | OD2 | 2.718 |
| 2HMG | B.LYS_62  | NZ  | F_ASP_90  | OD1 | 3.256 |
| 2HMG | B.LYS_62  | NZ  | F_ASP_90  | OD2 | 2.780 |
| 2HMG | B.HIS_64  | NE2 | F_ASP_79  | OD2 | 3.863 |
| 2HMG | B.ARG_76  | NH1 | D_GLU_74  | OE1 | 3.508 |
| 2HMG | B.ARG_76  | NH1 | D_GLU_74  | OE2 | 2.816 |
| 2HMG | B.ARG_76  | NH1 | D_GLU_81  | OE1 | 2.774 |
| 2HMG | B.ARG_76  | NH1 | D_GLU_81  | OE2 | 3.655 |
| 2HMG | B.ARG_76  | NH2 | D_GLU_74  | OE1 | 2.915 |
| 2HMG | B.ARG_76  | NH2 | D_GLU_74  | OE2 | 3.598 |
| 2HMG | B.ARG_123 | NH1 | F_GLU_132 | OE2 | 3.122 |
| 2HMG | B.ARG_124 | NH1 | F_GLU_132 | OE1 | 3.544 |
| 2HMG | B.ARG_124 | NH1 | F_GLU_132 | OE2 | 3.040 |
| 2HMG | B.ARG_127 | NH2 | F_GLU_131 | OE1 | 2.502 |
| 2HMG | B.ARG_163 | NH1 | F_GLU_131 | OE1 | 2.668 |
| 2HMG | B.ARG_163 | NH1 | F_GLU_131 | OE2 | 2.605 |
| 2HMG | B.ARG_170 | NH1 | D_GLU_128 | OE1 | 3.860 |
| 2HMG | B.ARG_170 | NH2 | D_GLU_128 | OE1 | 2.750 |
| 2HMG | B.ARG_170 | NH2 | D_GLU_128 | OE2 | 3.837 |
| 2HMG | C.LYS_27  | NZ  | D_GLU_97  | OE1 | 2.819 |
| 2HMG | C.LYS_27  | NZ  | D_GLU_97  | OE2 | 3.060 |
| 2HMG | C.ARG_109 | NH1 | D_GLU_67  | OE1 | 3.653 |
| 2HMG | C.ARG_109 | NH1 | D_GLU_67  | OE2 | 2.947 |
| 2HMG | C.ARG_269 | NH2 | D_GLU_67  | OE1 | 2.972 |
| 2HMG | C.LYS_299 | NZ  | D_GLU_69  | OE1 | 3.147 |
| 2HMG | D.ARG_54  | NH1 | B_GLU_97  | OE1 | 2.735 |
| 2HMG | D.ARG_54  | NH2 | B_GLU_97  | OE1 | 3.312 |
| 2HMG | D.LYS_62  | NZ  | B_ASP_86  | OD1 | 3.037 |
| 2HMG | D.LYS_62  | NZ  | B_ASP_86  | OD2 | 2.683 |
| 2HMG | D.LYS_62  | NZ  | B_ASP_90  | OD1 | 3.222 |
| 2HMG | D.LYS_62  | NZ  | B_ASP_90  | OD2 | 2.673 |
| 2HMG | D.HIS_64  | NE2 | B_ASP_79  | OD2 | 3.737 |

|      |           |     |            |     |       |
|------|-----------|-----|------------|-----|-------|
| 2HMG | D_ARG_76  | NH1 | F_GLU_74   | OE1 | 3.549 |
| 2HMG | D_ARG_76  | NH1 | F_GLU_74   | OE2 | 2.731 |
| 2HMG | D_ARG_76  | NH1 | F_GLU_81   | OE1 | 2.698 |
| 2HMG | D_ARG_76  | NH1 | F_GLU_81   | OE2 | 3.690 |
| 2HMG | D_ARG_76  | NH2 | F_GLU_74   | OE1 | 2.828 |
| 2HMG | D_ARG_76  | NH2 | F_GLU_74   | OE2 | 3.390 |
| 2HMG | D_ARG_123 | NH1 | B_GLU_132  | OE2 | 3.058 |
| 2HMG | D_ARG_124 | NH1 | B_GLU_132  | OE1 | 3.508 |
| 2HMG | D_ARG_124 | NH1 | B_GLU_132  | OE2 | 3.040 |
| 2HMG | D_ARG_127 | NH2 | B_GLU_131  | OE1 | 2.517 |
| 2HMG | D_ARG_163 | NH1 | B_GLU_131  | OE1 | 2.667 |
| 2HMG | D_ARG_163 | NH1 | B_GLU_131  | OE2 | 2.648 |
| 2HMG | D_ARG_170 | NH1 | F_GLU_128  | OE1 | 3.974 |
| 2HMG | D_ARG_170 | NH2 | F_GLU_128  | OE1 | 2.843 |
| 2HMG | E_LYS_27  | NZ  | F_GLU_97   | OE1 | 2.743 |
| 2HMG | E_LYS_27  | NZ  | F_GLU_97   | OE2 | 3.029 |
| 2HMG | E_ARG_109 | NH1 | F_GLU_67   | OE1 | 3.629 |
| 2HMG | E_ARG_109 | NH1 | F_GLU_67   | OE2 | 2.891 |
| 2HMG | E_ARG_269 | NH2 | F_GLU_67   | OE1 | 2.967 |
| 2HMG | E_LYS_299 | NZ  | F_GLU_69   | OE1 | 3.127 |
| 2HMG | F_ARG_54  | NH1 | D_GLU_97   | OE1 | 2.701 |
| 2HMG | F_ARG_54  | NH2 | D_GLU_97   | OE1 | 3.310 |
| 2HMG | F_LYS_62  | NZ  | D_ASP_86   | OD1 | 2.945 |
| 2HMG | F_LYS_62  | NZ  | D_ASP_86   | OD2 | 2.624 |
| 2HMG | F_LYS_62  | NZ  | D_ASP_90   | OD1 | 3.290 |
| 2HMG | F_LYS_62  | NZ  | D_ASP_90   | OD2 | 2.741 |
| 2HMG | F_HIS_64  | NE2 | D_ASP_79   | OD2 | 3.679 |
| 2HMG | F_ARG_76  | NH1 | B_GLU_74   | OE1 | 3.499 |
| 2HMG | F_ARG_76  | NH1 | B_GLU_74   | OE2 | 2.732 |
| 2HMG | F_ARG_76  | NH1 | B_GLU_81   | OE1 | 2.710 |
| 2HMG | F_ARG_76  | NH1 | B_GLU_81   | OE2 | 3.754 |
| 2HMG | F_ARG_76  | NH2 | B_GLU_74   | OE1 | 2.743 |
| 2HMG | F_ARG_76  | NH2 | B_GLU_74   | OE2 | 3.373 |
| 2HMG | F_ARG_123 | NH1 | D_GLU_132  | OE2 | 3.112 |
| 2HMG | F_ARG_124 | NH1 | D_GLU_132  | OE1 | 3.531 |
| 2HMG | F_ARG_124 | NH1 | D_GLU_132  | OE2 | 3.090 |
| 2HMG | F_ARG_127 | NH2 | D_GLU_131  | OE1 | 2.569 |
| 2HMG | F_ARG_163 | NH1 | D_GLU_131  | OE1 | 2.672 |
| 2HMG | F_ARG_163 | NH1 | D_GLU_131  | OE2 | 2.717 |
| 2HMG | F_ARG_170 | NH1 | B_GLU_128  | OE1 | 3.849 |
| 2HMG | F_ARG_170 | NH2 | B_GLU_128  | OE1 | 2.798 |
| 2HMG | F_ARG_170 | NH2 | B_GLU_128  | OE2 | 3.855 |
| 2HRP | L_LYS_30  | NZ  | H_ASP_100B | OD2 | 3.323 |
| 2HRP | L_ARG_61  | NH1 | M_GLU_79   | OE1 | 2.692 |
| 2HRP | L_ARG_61  | NH1 | M_GLU_79   | OE2 | 2.607 |
| 2HRP | L_ARG_108 | NH1 | N_ASP_1    | OD1 | 3.613 |
| 2HRP | L_ARG_108 | NH1 | N_ASP_1    | OD2 | 2.869 |
| 2HRP | L_ARG_108 | NH2 | N_ASP_1    | OD1 | 3.306 |
| 2HRP | L_ARG_108 | NH2 | N_ASP_1    | OD2 | 3.988 |
| 2HRP | H_LYS_205 | NZ  | N_ASP_207  | OD2 | 3.339 |
| 2HRP | H_LYS_208 | NZ  | L_GLU_123  | OE1 | 2.834 |
| 2HRP | M_LYS_30  | NZ  | N_ASP_100B | OD2 | 3.922 |
| 2HRP | M_ARG_61  | NH1 | L_GLU_79   | OE1 | 2.827 |
| 2HRP | M_ARG_61  | NH1 | L_GLU_79   | OE2 | 2.489 |
| 2HRP | M_ARG_61  | NH2 | L_GLU_79   | OE1 | 3.658 |
| 2HRP | M_ARG_108 | NH1 | H_ASP_1    | OD2 | 3.449 |
| 2HRP | N_LYS_208 | NZ  | M_GLU_123  | OE1 | 2.875 |
| 2HRP | N_LYS_208 | NZ  | M_GLU_123  | OE2 | 3.117 |

|      |           |     |            |     |       |
|------|-----------|-----|------------|-----|-------|
| 2I25 | N_ARG_25  | NH1 | O_ASP_101  | OD1 | 3.459 |
| 2I25 | N_ARG_25  | NH1 | O_ASP_101  | OD2 | 3.204 |
| 2I25 | N_ARG_25  | NH2 | O_ASP_101  | OD1 | 2.762 |
| 2I25 | N_ARG_25  | NH2 | O_ASP_101  | OD2 | 3.967 |
| 2I25 | N_ARG_88  | NH2 | L_ASP_101  | OD1 | 2.875 |
| 2I25 | N_ARG_88  | NH2 | L_ASP_101  | OD2 | 3.303 |
| 2I25 | L_ARG_61  | NH2 | N_ASP_101  | OD2 | 3.227 |
| 2I25 | L_ARG_73  | NH1 | N_GLU_86   | OE1 | 3.764 |
| 2I25 | L_ARG_73  | NH1 | N_GLU_86   | OE2 | 2.771 |
| 2I25 | L_ARG_112 | NH2 | N_ASP_93   | OD1 | 2.693 |
| 2I25 | O_ARG_44  | NH2 | N_GLU_57   | OE1 | 3.011 |
| 2I25 | O_ARG_88  | NH2 | M_ASP_101  | OD1 | 2.850 |
| 2I25 | O_ARG_88  | NH2 | M_ASP_101  | OD2 | 3.440 |
| 2I25 | M_ARG_61  | NH2 | O_ASP_101  | OD2 | 2.975 |
| 2I25 | M_ARG_73  | NH1 | O_GLU_86   | OE1 | 3.850 |
| 2I25 | M_ARG_73  | NH1 | O_GLU_86   | OE2 | 2.851 |
| 2I25 | M_ARG_112 | NH1 | O_ASP_93   | OD1 | 3.660 |
| 2I25 | M_ARG_112 | NH2 | O_ASP_93   | OD1 | 3.176 |
| 2I26 | N_ARG_88  | NH2 | L_ASP_101  | OD1 | 3.268 |
| 2I26 | N_ARG_88  | NH2 | L_ASP_101  | OD2 | 3.652 |
| 2I26 | L_ARG_73  | NH1 | N_GLU_86   | OE2 | 3.511 |
| 2I26 | L_ARG_73  | NH2 | N_GLU_86   | OE1 | 3.590 |
| 2I26 | L_ARG_73  | NH2 | N_GLU_86   | OE2 | 3.542 |
| 2I26 | L_ARG_112 | NH1 | N_ASP_93   | OD2 | 3.838 |
| 2I26 | L_ARG_112 | NH2 | N_ASP_93   | OD2 | 3.391 |
| 2I26 | O_ARG_88  | NH1 | M_ASP_101  | OD1 | 2.648 |
| 2I26 | O_ARG_88  | NH1 | M_ASP_101  | OD2 | 2.840 |
| 2I26 | M_ARG_73  | NH1 | O_GLU_86   | OE1 | 2.832 |
| 2I26 | M_ARG_73  | NH1 | O_GLU_86   | OE2 | 3.677 |
| 2I26 | M_ARG_112 | NH1 | O_ASP_93   | OD2 | 3.127 |
| 2I26 | M_ARG_112 | NH2 | O_ASP_93   | OD2 | 3.198 |
| 2I26 | P_ARG_88  | NH1 | Q_ASP_101  | OD1 | 3.139 |
| 2I26 | P_ARG_88  | NH1 | Q_ASP_101  | OD2 | 3.016 |
| 2I26 | Q_ARG_61  | NH2 | P_ASP_101  | OD2 | 3.115 |
| 2I26 | Q_ARG_73  | NH1 | P_GLU_86   | OE2 | 2.623 |
| 2I26 | Q_ARG_112 | NH1 | P_ASP_93   | OD2 | 3.805 |
| 2I26 | Q_ARG_112 | NH2 | P_ASP_93   | OD2 | 3.685 |
| 2I27 | N_ARG_25  | NH2 | O_GLU_46   | OE2 | 3.350 |
| 2I5Y | G_ARG_419 | NH1 | H_GLU_100B | OE1 | 3.248 |
| 2I5Y | G_ARG_419 | NH2 | H_GLU_99   | OE2 | 3.146 |
| 2I5Y | G_ARG_419 | NH2 | H_GLU_100D | OE2 | 2.601 |
| 2I5Y | H_LYS_201 | NZ  | R_GLU_10   | OE2 | 3.615 |
| 2I5Y | H_LYS_209 | NZ  | L_GLU_123  | OE1 | 2.531 |
| 2I5Y | H_LYS_209 | NZ  | L_GLU_123  | OE2 | 3.403 |
| 2I5Y | P_ARG_419 | NH1 | R_GLU_99   | OE2 | 3.800 |
| 2I5Y | P_ARG_419 | NH1 | R_GLU_100D | OE1 | 2.563 |
| 2I5Y | P_ARG_419 | NH1 | R_GLU_100D | OE2 | 3.898 |
| 2I5Y | R_LYS_209 | NZ  | Q_GLU_123  | OE2 | 3.373 |
| 2I5Y | S_ARG_9   | NH1 | P_ASP_368  | OD2 | 2.853 |
| 2I5Y | S_ARG_9   | NH2 | P_ASP_368  | OD2 | 3.453 |
| 2I60 | G_ARG_419 | NH2 | H_GLU_99   | OE1 | 3.736 |
| 2I60 | G_ARG_419 | NH2 | H_GLU_99   | OE2 | 2.767 |
| 2I60 | G_ARG_419 | NH2 | H_GLU_100D | OE2 | 3.611 |
| 2I60 | H_LYS_209 | NZ  | L_GLU_123  | OE1 | 3.997 |
| 2I60 | P_ARG_419 | NH1 | R_GLU_100B | OE1 | 3.610 |
| 2I60 | P_ARG_419 | NH2 | R_GLU_99   | OE1 | 3.892 |
| 2I60 | R_LYS_209 | NZ  | Q_GLU_123  | OE2 | 3.485 |
| 2I60 | S_ARG_9   | NH1 | P_ASP_368  | OD2 | 3.268 |

|      |            |     |            |     |       |
|------|------------|-----|------------|-----|-------|
| 2I60 | S_ARG_9    | NH2 | P_ASP_368  | OD1 | 3.938 |
| 2I60 | S_ARG_9    | NH2 | P_ASP_368  | OD2 | 2.664 |
| 2IFF | L_LYS_44   | NZ  | H_ASP_104  | OD1 | 2.935 |
| 2IFF | L_ARG_45   | NH2 | H_ASP_104  | OD2 | 3.348 |
| 2IFF | H_LYS_211  | NZ  | L_GLU_121  | OE1 | 3.040 |
| 2IFF | H_LYS_211  | NZ  | L_GLU_121  | OE2 | 2.921 |
| 2IFF | Y_ARG_45   | NH1 | H_GLU_50   | OE1 | 3.425 |
| 2IFF | Y_ARG_45   | NH1 | H_GLU_50   | OE2 | 2.959 |
| 2IG2 | H_LYS_148  | NZ  | L_GLU_126  | OE2 | 2.854 |
| 2IG2 | H_LYS_214  | NZ  | L_GLU_125  | OE1 | 3.816 |
| 2IG2 | H_LYS_214  | NZ  | L_GLU_125  | OE2 | 2.866 |
| 2IGF | H_LYS_221  | NZ  | L_GLU_123  | OE1 | 3.203 |
| 2IGF | P_LYS_75   | NZ  | L_ASP_28   | OD1 | 3.253 |
| 2IGF | P_LYS_75   | NZ  | L_ASP_28   | OD2 | 2.849 |
| 2IGF | P_LYS_75   | NZ  | L_ASP_30   | OD2 | 3.458 |
| 2J4W | D_LYS_427  | NZ  | H_ASP_52A  | OD1 | 3.478 |
| 2J4W | D_LYS_427  | NZ  | H_ASP_52A  | OD2 | 2.864 |
| 2J4W | H_LYS_221  | NZ  | L_GLU_123  | OE1 | 3.280 |
| 2J4W | H_LYS_221  | NZ  | L_GLU_123  | OE2 | 3.313 |
| 2J5L | A_LYS_485  | NZ  | C_ASP_52A  | OD1 | 3.476 |
| 2J5L | A_LYS_485  | NZ  | C_ASP_52A  | OD2 | 3.193 |
| 2JB6 | B_LYS_216  | NZ  | A_GLU_128  | OE2 | 3.078 |
| 2JEL | L_LYS_50   | NZ  | H_GLU_98   | OE1 | 2.874 |
| 2JEL | L_LYS_50   | NZ  | P_GLU_66   | OE1 | 3.050 |
| 2JEL | L_LYS_50   | NZ  | P_GLU_66   | OE2 | 3.051 |
| 2NXY | A_ARG_419  | NH1 | D_GLU_3103 | OE2 | 3.305 |
| 2NXY | A_ARG_419  | NH2 | D_GLU_3103 | OE2 | 2.288 |
| 2NXY | B_LYS_1029 | NZ  | A_ASP_279  | OD2 | 2.892 |
| 2NXY | B_ARG_1059 | NH1 | A_ASP_368  | OD1 | 3.350 |
| 2NXY | B_ARG_1059 | NH1 | A_ASP_368  | OD2 | 2.835 |
| 2NXY | B_ARG_1059 | NH2 | A_ASP_368  | OD1 | 2.856 |
| 2NXY | B_ARG_1059 | NH2 | A_ASP_368  | OD2 | 3.647 |
| 2NXY | D_LYS_3224 | NZ  | C_GLU_2125 | OE2 | 3.113 |
| 2NXZ | A_ARG_419  | NH1 | D_GLU_3103 | OE2 | 3.647 |
| 2NXZ | A_ARG_419  | NH2 | D_GLU_3103 | OE2 | 2.536 |
| 2NXZ | B_LYS_1029 | NZ  | A_ASP_279  | OD2 | 3.046 |
| 2NXZ | B_ARG_1059 | NH1 | A_ASP_368  | OD1 | 3.623 |
| 2NXZ | B_ARG_1059 | NH1 | A_ASP_368  | OD2 | 3.029 |
| 2NXZ | B_ARG_1059 | NH2 | A_ASP_368  | OD1 | 2.916 |
| 2NXZ | B_ARG_1059 | NH2 | A_ASP_368  | OD2 | 3.612 |
| 2NXZ | D_HIS_3179 | NE2 | C_ASP_2169 | OD2 | 3.986 |
| 2NXZ | D_LYS_3224 | NZ  | C_GLU_2125 | OE1 | 3.503 |
| 2NXZ | D_LYS_3224 | NZ  | C_GLU_2125 | OE2 | 2.801 |
| 2NY0 | A_ARG_419  | NH1 | D_GLU_3103 | OE2 | 3.320 |
| 2NY0 | A_ARG_419  | NH2 | D_GLU_3103 | OE2 | 2.328 |
| 2NY0 | B_LYS_1029 | NZ  | A_ASP_279  | OD2 | 2.858 |
| 2NY0 | B_ARG_1059 | NH1 | A_ASP_368  | OD1 | 3.389 |
| 2NY0 | B_ARG_1059 | NH1 | A_ASP_368  | OD2 | 2.874 |
| 2NY0 | B_ARG_1059 | NH2 | A_ASP_368  | OD1 | 2.859 |
| 2NY0 | B_ARG_1059 | NH2 | A_ASP_368  | OD2 | 3.661 |
| 2NY0 | D_LYS_3224 | NZ  | C_GLU_2125 | OE2 | 3.518 |
| 2NY1 | A_ARG_419  | NH1 | D_GLU_3103 | OE2 | 3.396 |
| 2NY1 | A_ARG_419  | NH2 | D_GLU_3103 | OE1 | 3.789 |
| 2NY1 | A_ARG_419  | NH2 | D_GLU_3103 | OE2 | 2.363 |
| 2NY1 | B_LYS_1029 | NZ  | A_ASP_279  | OD2 | 3.031 |
| 2NY1 | B_ARG_1059 | NH1 | A_ASP_368  | OD1 | 3.481 |
| 2NY1 | B_ARG_1059 | NH1 | A_ASP_368  | OD2 | 3.131 |
| 2NY1 | B_ARG_1059 | NH2 | A_ASP_368  | OD1 | 2.526 |

|      |            |     |            |     |       |
|------|------------|-----|------------|-----|-------|
| 2NY1 | B_ARG_1059 | NH2 | A_ASP_368  | OD2 | 3.458 |
| 2NY1 | D_LYS_3224 | NZ  | C_GLU_2125 | OE1 | 3.100 |
| 2NY1 | D_LYS_3224 | NZ  | C_GLU_2125 | OE2 | 3.945 |
| 2NY2 | A_ARG_419  | NH1 | D_GLU_3103 | OE2 | 2.325 |
| 2NY2 | A_ARG_419  | NH2 | D_GLU_3103 | OE2 | 3.124 |
| 2NY2 | B_LYS_1029 | NZ  | A_ASP_279  | OD2 | 2.981 |
| 2NY2 | B_ARG_1059 | NH1 | A_ASP_368  | OD1 | 3.464 |
| 2NY2 | B_ARG_1059 | NH1 | A_ASP_368  | OD2 | 2.895 |
| 2NY2 | B_ARG_1059 | NH2 | A_ASP_368  | OD1 | 2.934 |
| 2NY2 | B_ARG_1059 | NH2 | A_ASP_368  | OD2 | 3.638 |
| 2NY2 | D_LYS_3224 | NZ  | C_GLU_2125 | OE2 | 2.721 |
| 2NY3 | A_ARG_419  | NH1 | D_GLU_3103 | OE2 | 3.671 |
| 2NY3 | A_ARG_419  | NH2 | D_GLU_3103 | OE1 | 3.681 |
| 2NY3 | A_ARG_419  | NH2 | D_GLU_3103 | OE2 | 2.058 |
| 2NY3 | B_LYS_1029 | NZ  | A_ASP_279  | OD2 | 3.124 |
| 2NY3 | B_ARG_1059 | NH1 | A_ASP_368  | OD1 | 2.775 |
| 2NY3 | B_ARG_1059 | NH1 | A_ASP_368  | OD2 | 3.550 |
| 2NY3 | B_ARG_1059 | NH2 | A_ASP_368  | OD1 | 3.449 |
| 2NY3 | B_ARG_1059 | NH2 | A_ASP_368  | OD2 | 2.862 |
| 2NY3 | D_LYS_3224 | NZ  | C_GLU_2125 | OE1 | 3.624 |
| 2NY3 | D_LYS_3224 | NZ  | C_GLU_2125 | OE2 | 2.832 |
| 2NY4 | A_ARG_419  | NH1 | D_GLU_3103 | OE2 | 3.167 |
| 2NY4 | A_ARG_419  | NH2 | D_GLU_3103 | OE2 | 2.562 |
| 2NY4 | B_LYS_1029 | NZ  | A_ASP_279  | OD2 | 3.126 |
| 2NY4 | B_ARG_1059 | NH1 | A_ASP_368  | OD1 | 3.376 |
| 2NY4 | B_ARG_1059 | NH1 | A_ASP_368  | OD2 | 2.816 |
| 2NY4 | B_ARG_1059 | NH2 | A_ASP_368  | OD1 | 2.784 |
| 2NY4 | B_ARG_1059 | NH2 | A_ASP_368  | OD2 | 3.537 |
| 2NY4 | D_LYS_3224 | NZ  | C_GLU_2125 | OE1 | 3.625 |
| 2NY4 | D_LYS_3224 | NZ  | C_GLU_2125 | OE2 | 3.179 |
| 2NY5 | G_ARG_419  | NH2 | H_GLU_3103 | OE2 | 3.818 |
| 2NY5 | C_LYS_1029 | NZ  | G_ASP_279  | OD2 | 3.358 |
| 2NY5 | C_ARG_1059 | NH1 | G_ASP_368  | OD1 | 3.253 |
| 2NY5 | C_ARG_1059 | NH1 | G_ASP_368  | OD2 | 2.656 |
| 2NY5 | C_ARG_1059 | NH2 | G_ASP_368  | OD1 | 2.825 |
| 2NY5 | C_ARG_1059 | NH2 | G_ASP_368  | OD2 | 3.554 |
| 2NY5 | H_LYS_3224 | NZ  | L_GLU_2125 | OE1 | 3.285 |
| 2NY5 | H_LYS_3224 | NZ  | L_GLU_2125 | OE2 | 3.364 |
| 2NY6 | A_ARG_419  | NH2 | D_GLU_3103 | OE1 | 3.563 |
| 2NY6 | A_ARG_419  | NH2 | D_GLU_3103 | OE2 | 2.589 |
| 2NY6 | B_LYS_1029 | NZ  | A_ASP_279  | OD2 | 3.061 |
| 2NY6 | B_ARG_1059 | NH1 | A_ASP_368  | OD1 | 2.945 |
| 2NY6 | B_ARG_1059 | NH1 | A_ASP_368  | OD2 | 2.767 |
| 2NY6 | B_ARG_1059 | NH2 | A_ASP_368  | OD1 | 3.097 |
| 2NY6 | D_LYS_3224 | NZ  | C_GLU_2125 | OE1 | 3.158 |
| 2NY6 | D_LYS_3224 | NZ  | C_GLU_2125 | OE2 | 2.701 |
| 2NY7 | H_LYS_221  | NZ  | L_GLU_123  | OE1 | 3.153 |
| 2NY7 | L_ARG_32   | NH1 | H_ASP_100F | OD2 | 2.962 |
| 2OR9 | H_ARG_53   | NH2 | P_GLU_8    | OE2 | 3.967 |
| 2OR9 | L_LYS_208  | NZ  | M_GLU_123  | OE2 | 3.803 |
| 2OSL | L_HIS_33   | NE2 | H_ASP_105  | OD1 | 3.260 |
| 2OSL | L_HIS_33   | NE2 | H_ASP_105  | OD2 | 2.885 |
| 2OSL | L_ARG_107  | NH2 | B_GLU_194  | OE2 | 3.976 |
| 2OSL | B_HIS_33   | ND1 | A_ASP_105  | OD2 | 3.615 |
| 2OSL | B_HIS_33   | NE2 | A_ASP_105  | OD2 | 3.957 |
| 2OSL | A_LYS_217  | NZ  | B_GLU_122  | OE1 | 2.793 |
| 2OTU | B_LYS_87   | NZ  | F_ASP_31   | OD1 | 3.793 |
| 2OTU | B_LYS_87   | NZ  | F_ASP_31   | OD2 | 2.711 |



|      |           |     |           |     |       |
|------|-----------|-----|-----------|-----|-------|
| 2OTU | F_ARG_100 | NH1 | E_ASP_60  | OD1 | 3.255 |
| 2OTU | F_ARG_100 | NH1 | E_ASP_60  | OD2 | 3.915 |
| 2OTU | H_ARG_44  | NH1 | C_ASP_60  | OD1 | 3.017 |
| 2OTU | H_ARG_44  | NH1 | C_ASP_60  | OD2 | 3.518 |
| 2OTU | H_ARG_44  | NH2 | C_ASP_60  | OD1 | 3.945 |
| 2OTU | H_ARG_44  | NH2 | C_ASP_60  | OD2 | 3.013 |
| 2OTU | H_LYS_87  | NZ  | D_ASP_31  | OD1 | 3.910 |
| 2OTU | H_LYS_87  | NZ  | D_ASP_31  | OD2 | 2.759 |
| 2OTW | B_LYS_87  | NZ  | D_ASP_31  | OD1 | 3.659 |
| 2OTW | B_LYS_87  | NZ  | D_ASP_31  | OD2 | 2.671 |
| 2OTW | B_ARG_100 | NH1 | A_ASP_60  | OD1 | 3.223 |
| 2OTW | B_ARG_100 | NH1 | A_ASP_60  | OD2 | 3.943 |
| 2OTW | D_ARG_100 | NH1 | C_ASP_60  | OD1 | 3.882 |
| 2OTW | D_ARG_100 | NH1 | C_ASP_60  | OD2 | 3.653 |
| 2P8L | A_HIS_96  | NE2 | C_ASP_5   | OD1 | 2.766 |
| 2P8L | B_ARG_58  | NH1 | C_GLU_3   | OE1 | 1.911 |
| 2P8L | B_ARG_58  | NH1 | C_GLU_3   | OE2 | 3.223 |
| 2P8L | B_ARG_58  | NH2 | C_GLU_3   | OE1 | 3.943 |
| 2P8L | B_ARG_95  | NH1 | C_ASP_5   | OD1 | 2.951 |
| 2P8L | B_ARG_95  | NH1 | C_ASP_5   | OD2 | 3.619 |
| 2P8L | B_ARG_95  | NH2 | C_ASP_5   | OD1 | 3.420 |
| 2P8L | B_ARG_95  | NH2 | C_ASP_5   | OD2 | 2.971 |
| 2P8L | B_ARG_96  | NH1 | A_GLU_55  | OE1 | 3.236 |
| 2P8L | B_ARG_96  | NH1 | A_GLU_55  | OE2 | 3.320 |
| 2P8L | B_ARG_96  | NH2 | A_GLU_55  | OE1 | 3.018 |
| 2P8L | B_LYS_209 | NZ  | A_GLU_123 | OE1 | 3.743 |
| 2P8L | C_LYS_6   | NZ  | B_ASP_54  | OD1 | 3.641 |
| 2P8L | C_LYS_6   | NZ  | B_ASP_54  | OD2 | 3.025 |
| 2P8L | C_LYS_6   | NZ  | B_ASP_56  | OD1 | 2.878 |
| 2P8M | A_HIS_96  | NE2 | C_ASP_3   | OD2 | 2.613 |
| 2P8M | B_ARG_1   | NH2 | A_GLU_55  | OE2 | 3.915 |
| 2P8M | B_ARG_58  | NH2 | C_GLU_1   | OE1 | 2.510 |
| 2P8M | B_ARG_95  | NH1 | C_ASP_3   | OD1 | 2.973 |
| 2P8M | B_ARG_95  | NH1 | C_ASP_3   | OD2 | 3.042 |
| 2P8M | B_ARG_95  | NH2 | C_ASP_3   | OD1 | 3.169 |
| 2P8M | B_ARG_96  | NH1 | A_GLU_55  | OE1 | 3.351 |
| 2P8M | B_ARG_96  | NH1 | A_GLU_55  | OE2 | 3.448 |
| 2P8M | B_ARG_96  | NH2 | A_GLU_55  | OE1 | 3.393 |
| 2P8M | B_LYS_209 | NZ  | A_GLU_123 | OE1 | 3.649 |
| 2P8M | C_LYS_4   | NZ  | B_ASP_54  | OD1 | 2.903 |
| 2P8M | C_LYS_4   | NZ  | B_ASP_54  | OD2 | 2.371 |
| 2P8M | C_LYS_4   | NZ  | B_ASP_56  | OD2 | 3.183 |
| 2P8P | A_HIS_96  | NE2 | C_ASP_3   | OD1 | 3.214 |
| 2P8P | B_ARG_58  | NH2 | C_GLU_1   | OE2 | 3.147 |
| 2P8P | B_ARG_95  | NH1 | C_ASP_3   | OD1 | 2.805 |
| 2P8P | B_ARG_95  | NH1 | C_ASP_3   | OD2 | 3.510 |
| 2P8P | B_ARG_95  | NH2 | C_ASP_3   | OD1 | 3.459 |
| 2P8P | B_ARG_95  | NH2 | C_ASP_3   | OD2 | 2.629 |
| 2P8P | B_ARG_96  | NH1 | A_GLU_55  | OE1 | 3.239 |
| 2P8P | B_ARG_96  | NH1 | A_GLU_55  | OE2 | 3.518 |
| 2P8P | B_ARG_96  | NH2 | A_GLU_55  | OE1 | 3.128 |
| 2P8P | B_LYS_210 | NZ  | A_GLU_123 | OE1 | 3.349 |
| 2P8P | B_LYS_210 | NZ  | A_GLU_123 | OE2 | 3.192 |
| 2P8P | C_LYS_4   | NZ  | B_ASP_54  | OD1 | 3.623 |
| 2P8P | C_LYS_4   | NZ  | B_ASP_54  | OD2 | 3.010 |
| 2P8P | C_LYS_4   | NZ  | B_ASP_56  | OD2 | 2.836 |
| 2PR4 | H_ARG_101 | NH1 | L_GLU_55  | OE1 | 3.296 |
| 2PR4 | H_ARG_101 | NH1 | L_GLU_55  | OE2 | 3.376 |

|      |           |     |            |     |       |
|------|-----------|-----|------------|-----|-------|
| 2PR4 | H_ARG_101 | NH2 | L_GLU_55   | OE1 | 3.286 |
| 2PR4 | H_LYS_228 | NZ  | L_GLU_123  | OE1 | 3.151 |
| 2Q8A | A_LYS_203 | NZ  | L_ASP_32   | OD1 | 3.044 |
| 2Q8A | A_LYS_203 | NZ  | L_ASP_32   | OD2 | 2.513 |
| 2Q8A | L_ARG_96  | NH1 | A_ASP_204  | OD1 | 2.971 |
| 2Q8A | L_ARG_96  | NH1 | A_ASP_204  | OD2 | 2.580 |
| 2Q8A | L_ARG_96  | NH2 | A_ASP_204  | OD1 | 2.882 |
| 2Q8A | L_ARG_96  | NH2 | A_ASP_204  | OD2 | 3.927 |
| 2Q8A | L_ARG_96  | NH2 | H_GLU_59   | OE2 | 3.755 |
| 2Q8A | H_HIS_35  | NE2 | A_ASP_204  | OD2 | 3.930 |
| 2Q8B | A_LYS_203 | NZ  | L_ASP_32   | OD1 | 3.779 |
| 2Q8B | A_LYS_203 | NZ  | L_ASP_32   | OD2 | 2.847 |
| 2Q8B | L_ARG_96  | NH1 | A_ASP_204  | OD1 | 3.458 |
| 2Q8B | L_ARG_96  | NH1 | A_ASP_204  | OD2 | 2.952 |
| 2Q8B | L_ARG_96  | NH2 | A_ASP_204  | OD1 | 2.667 |
| 2Q8B | L_ARG_96  | NH2 | A_ASP_204  | OD2 | 3.462 |
| 2QAD | B_ARG_59  | NH1 | A_ASP_368  | OD1 | 3.394 |
| 2QAD | B_ARG_59  | NH1 | A_ASP_368  | OD2 | 2.749 |
| 2QAD | B_ARG_59  | NH2 | A_ASP_368  | OD1 | 3.764 |
| 2QAD | C_LYS_50  | NZ  | D_GLU_100F | OE2 | 2.989 |
| 2QAD | C_LYS_55  | NZ  | D_ASP_101  | OD1 | 3.312 |
| 2QAD | C_LYS_55  | NZ  | D_ASP_101  | OD2 | 3.736 |
| 2QAD | F_ARG_59  | NH1 | E_ASP_368  | OD1 | 2.855 |
| 2QAD | F_ARG_59  | NH1 | E_ASP_368  | OD2 | 2.624 |
| 2QAD | F_ARG_59  | NH2 | E_ASP_368  | OD1 | 3.681 |
| 2QAD | G_LYS_50  | NZ  | H_GLU_100F | OE2 | 3.151 |
| 2QAD | G_LYS_55  | NZ  | H_ASP_101  | OD1 | 3.191 |
| 2QAD | G_LYS_55  | NZ  | H_ASP_101  | OD2 | 3.496 |
| 2QQN | H_LYS_209 | NZ  | L_GLU_123  | OE1 | 2.782 |
| 2QQN | H_LYS_209 | NZ  | L_GLU_123  | OE2 | 3.506 |
| 2QQN | H_LYS_214 | NZ  | L_ASP_122  | OD1 | 3.854 |
| 2R29 | A_LYS_307 | NZ  | H_ASP_99   | OD1 | 2.956 |
| 2R29 | A_LYS_307 | NZ  | L_GLU_59   | OE1 | 3.335 |
| 2R29 | A_LYS_310 | NZ  | H_ASP_52   | OD1 | 3.449 |
| 2R29 | A_LYS_310 | NZ  | H_ASP_52   | OD2 | 2.764 |
| 2R29 | H_LYS_59  | NZ  | L_ASP_98   | OD2 | 3.485 |
| 2R29 | L_ARG_54  | NH2 | H_GLU_101  | OE1 | 3.814 |
| 2R29 | L_ARG_54  | NH2 | H_GLU_101  | OE2 | 3.270 |
| 2R29 | L_LYS_107 | NZ  | H_GLU_42   | OE1 | 3.937 |
| 2R69 | A_LYS_307 | NZ  | H_ASP_99   | OD2 | 3.631 |
| 2R69 | H_LYS_59  | NZ  | L_ASP_98   | OD2 | 3.723 |
| 2R69 | H_LYS_211 | NZ  | L_GLU_127  | OE1 | 3.695 |
| 2R69 | H_LYS_211 | NZ  | L_GLU_127  | OE2 | 3.159 |
| 2R69 | L_ARG_31  | NH2 | A_GLU_311  | OE2 | 3.151 |
| 2R69 | L_ARG_54  | NH2 | H_GLU_101  | OE1 | 2.992 |
| 2R69 | L_ARG_54  | NH2 | H_GLU_101  | OE2 | 2.911 |
| 2UYL | A_ARG_101 | NH1 | B_GLU_99   | OE1 | 3.183 |
| 2UYL | A_ARG_101 | NH1 | B_GLU_99   | OE2 | 3.530 |
| 2UYL | A_ARG_101 | NH2 | B_GLU_99   | OE2 | 3.803 |
| 2UYL | M_ARG_101 | NH1 | N_GLU_99   | OE1 | 3.058 |
| 2UYL | M_ARG_101 | NH1 | N_GLU_99   | OE2 | 3.775 |
| 2UYL | M_ARG_101 | NH2 | N_GLU_99   | OE2 | 3.923 |
| 2UYL | N_HIS_170 | NE2 | M_ASP_172  | OD1 | 3.811 |
| 2UYL | V_ARG_101 | NH1 | W_GLU_99   | OE1 | 2.958 |
| 2UYL | V_ARG_101 | NH1 | W_GLU_99   | OE2 | 3.417 |
| 2UYL | V_ARG_101 | NH2 | W_GLU_99   | OE2 | 3.369 |
| 2UYL | X_ARG_101 | NH1 | Y_GLU_99   | OE1 | 2.789 |
| 2UYL | X_ARG_101 | NH1 | Y_GLU_99   | OE2 | 3.483 |

|      |           |     |           |     |       |
|------|-----------|-----|-----------|-----|-------|
| 2UYL | X_ARG_101 | NH2 | Y_GLU_99  | OE2 | 3.405 |
| 2VC2 | A_ARG_77  | NH1 | H_ASP_102 | OD1 | 3.536 |
| 2VC2 | A_ARG_77  | NH1 | H_ASP_102 | OD2 | 3.007 |
| 2VC2 | A_ARG_77  | NH2 | H_ASP_102 | OD1 | 2.794 |
| 2VC2 | A_ARG_77  | NH2 | H_ASP_102 | OD2 | 3.630 |
| 2VC2 | B_ARG_216 | NH2 | A_GLU_123 | OE2 | 3.081 |
| 2VC2 | B_LYS_253 | NZ  | A_ASP_232 | OD2 | 2.805 |
| 2VC2 | H_LYS_214 | NZ  | L_GLU_123 | OE2 | 3.240 |
| 2VDK | A_ARG_77  | NH1 | H_ASP_102 | OD1 | 3.535 |
| 2VDK | A_ARG_77  | NH1 | H_ASP_102 | OD2 | 3.168 |
| 2VDK | A_ARG_77  | NH2 | H_ASP_102 | OD1 | 2.738 |
| 2VDK | A_ARG_77  | NH2 | H_ASP_102 | OD2 | 3.673 |
| 2VDK | B_ARG_216 | NH2 | A_GLU_123 | OE2 | 3.072 |
| 2VDK | B_LYS_253 | NZ  | A_ASP_232 | OD2 | 2.921 |
| 2VDK | H_LYS_214 | NZ  | L_GLU_123 | OE2 | 3.461 |
| 2VDL | A_ARG_77  | NH1 | H_ASP_102 | OD1 | 3.566 |
| 2VDL | A_ARG_77  | NH1 | H_ASP_102 | OD2 | 3.106 |
| 2VDL | A_ARG_77  | NH2 | H_ASP_102 | OD1 | 2.722 |
| 2VDL | A_ARG_77  | NH2 | H_ASP_102 | OD2 | 3.538 |
| 2VDL | B_ARG_216 | NH2 | A_GLU_123 | OE2 | 3.160 |
| 2VDL | B_LYS_253 | NZ  | A_ASP_232 | OD2 | 2.886 |
| 2VDL | H_LYS_59  | NZ  | A_GLU_117 | OE2 | 3.964 |
| 2VDL | H_LYS_214 | NZ  | L_GLU_123 | OE2 | 3.400 |
| 2VDM | A_ARG_77  | NH1 | H_ASP_102 | OD1 | 3.512 |
| 2VDM | A_ARG_77  | NH1 | H_ASP_102 | OD2 | 3.196 |
| 2VDM | A_ARG_77  | NH2 | H_ASP_102 | OD1 | 2.762 |
| 2VDM | A_ARG_77  | NH2 | H_ASP_102 | OD2 | 3.757 |
| 2VDM | B_ARG_216 | NH2 | A_GLU_123 | OE2 | 2.982 |
| 2VDM | B_LYS_253 | NZ  | A_ASP_232 | OD2 | 3.306 |
| 2VDM | H_LYS_214 | NZ  | L_GLU_123 | OE2 | 3.334 |
| 2VDN | A_ARG_77  | NH1 | H_ASP_102 | OD1 | 3.491 |
| 2VDN | A_ARG_77  | NH1 | H_ASP_102 | OD2 | 3.169 |
| 2VDN | A_ARG_77  | NH2 | H_ASP_102 | OD1 | 2.808 |
| 2VDN | A_ARG_77  | NH2 | H_ASP_102 | OD2 | 3.762 |
| 2VDN | B_ARG_216 | NH2 | A_GLU_123 | OE2 | 2.995 |
| 2VDN | H_LYS_214 | NZ  | L_GLU_123 | OE2 | 3.685 |
| 2VDO | A_ARG_77  | NH1 | H_ASP_102 | OD1 | 3.703 |
| 2VDO | A_ARG_77  | NH1 | H_ASP_102 | OD2 | 3.042 |
| 2VDO | A_ARG_77  | NH2 | H_ASP_102 | OD1 | 2.789 |
| 2VDO | A_ARG_77  | NH2 | H_ASP_102 | OD2 | 3.375 |
| 2VDO | B_ARG_216 | NH2 | A_GLU_123 | OE2 | 3.092 |
| 2VDO | B_LYS_253 | NZ  | A_ASP_232 | OD2 | 2.836 |
| 2VDO | C_LYS_406 | NZ  | A_ASP_224 | OD1 | 2.673 |
| 2VDO | C_LYS_406 | NZ  | A_ASP_224 | OD2 | 3.263 |
| 2VDP | A_ARG_77  | NH1 | H_ASP_102 | OD1 | 3.519 |
| 2VDP | A_ARG_77  | NH1 | H_ASP_102 | OD2 | 3.089 |
| 2VDP | A_ARG_77  | NH2 | H_ASP_102 | OD1 | 2.733 |
| 2VDP | A_ARG_77  | NH2 | H_ASP_102 | OD2 | 3.585 |
| 2VDP | B_ARG_216 | NH2 | A_GLU_123 | OE2 | 3.038 |
| 2VDP | B_LYS_253 | NZ  | A_ASP_232 | OD2 | 2.914 |
| 2VDP | C_LYS_406 | NZ  | A_ASP_224 | OD1 | 2.604 |
| 2VDP | C_LYS_406 | NZ  | A_ASP_224 | OD2 | 3.297 |
| 2VDP | H_LYS_214 | NZ  | L_GLU_123 | OE2 | 3.425 |
| 2VDQ | A_ARG_77  | NH1 | H_ASP_102 | OD1 | 3.603 |
| 2VDQ | A_ARG_77  | NH1 | H_ASP_102 | OD2 | 3.057 |
| 2VDQ | A_ARG_77  | NH2 | H_ASP_102 | OD1 | 2.765 |
| 2VDQ | A_ARG_77  | NH2 | H_ASP_102 | OD2 | 3.398 |
| 2VDQ | B_ARG_216 | NH2 | A_GLU_123 | OE2 | 2.900 |

|      |           |     |           |     |       |
|------|-----------|-----|-----------|-----|-------|
| 2VDQ | B.LYS_253 | NZ  | A.ASP_232 | OD2 | 3.522 |
| 2VDQ | C.ARG_408 | NH1 | A.ASP_224 | OD1 | 3.059 |
| 2VDQ | C.ARG_408 | NH1 | A.ASP_224 | OD2 | 3.490 |
| 2VDQ | C.ARG_408 | NH2 | A.ASP_224 | OD1 | 3.054 |
| 2VDQ | C.ARG_408 | NH2 | A.ASP_224 | OD2 | 3.761 |
| 2VDQ | H.LYS_59  | NZ  | A.GLU_117 | OE2 | 3.921 |
| 2VDQ | H.LYS_214 | NZ  | L.GLU_123 | OE2 | 3.223 |
| 2VDR | A.ARG_77  | NH1 | H.ASP_102 | OD1 | 3.703 |
| 2VDR | A.ARG_77  | NH1 | H.ASP_102 | OD2 | 3.091 |
| 2VDR | A.ARG_77  | NH2 | H.ASP_102 | OD1 | 2.791 |
| 2VDR | A.ARG_77  | NH2 | H.ASP_102 | OD2 | 3.414 |
| 2VDR | B.ARG_216 | NH2 | A.GLU_123 | OE2 | 2.956 |
| 2VDR | B.LYS_253 | NZ  | A.ASP_232 | OD2 | 3.191 |
| 2VDR | C.ARG_408 | NH1 | A.ASP_224 | OD1 | 3.062 |
| 2VDR | C.ARG_408 | NH1 | A.ASP_224 | OD2 | 3.850 |
| 2VDR | C.ARG_408 | NH2 | A.ASP_224 | OD1 | 3.028 |
| 2VDR | C.ARG_408 | NH2 | A.ASP_224 | OD2 | 3.839 |
| 2VDR | H.LYS_214 | NZ  | L.GLU_123 | OE2 | 3.860 |
| 2VIR | B.LYS_    | NZ  | A.GLU_127 | OE2 | 3.017 |
| 2VIR | B.HIS_173 | NE2 | A.ASP_141 | OD1 | 3.726 |
| 2VIR | B.HIS_173 | NE2 | A.ASP_141 | OD2 | 3.076 |
| 2VIR | B.LYS_217 | NZ  | A.GLU_126 | OE2 | 3.903 |
| 2VIS | B.LYS_    | NZ  | A.GLU_127 | OE2 | 2.999 |
| 2VIS | B.HIS_173 | NE2 | A.ASP_141 | OD1 | 3.763 |
| 2VIS | B.HIS_173 | NE2 | A.ASP_141 | OD2 | 3.158 |
| 2VIS | B.LYS_217 | NZ  | A.GLU_126 | OE2 | 3.709 |
| 2VIT | B.LYS_    | NZ  | A.GLU_127 | OE2 | 2.939 |
| 2VIT | B.HIS_173 | NE2 | A.ASP_141 | OD1 | 3.614 |
| 2VIT | B.HIS_173 | NE2 | A.ASP_141 | OD2 | 3.333 |
| 2VIT | B.LYS_217 | NZ  | A.GLU_126 | OE2 | 3.872 |
| 2VIU | A.LYS_27  | NZ  | B.GLU_97  | OE1 | 3.686 |
| 2VIU | A.LYS_27  | NZ  | B.GLU_97  | OE2 | 2.721 |
| 2VIU | A.ARG_109 | NH1 | B.GLU_67  | OE1 | 3.978 |
| 2VIU | A.ARG_109 | NH1 | B.GLU_67  | OE2 | 3.053 |
| 2VIU | A.ARG_269 | NH1 | B.GLU_67  | OE1 | 2.986 |
| 2VIU | A.LYS_310 | NZ  | B.ASP_90  | OD1 | 2.868 |
| 2VXS | H.LYS_143 | NZ  | L.GLU_125 | OE2 | 2.772 |
| 2VXS | I.LYS_214 | NZ  | M.GLU_124 | OE1 | 3.186 |
| 2VXS | J.LYS_    | NZ  | N.GLU_    | OE1 | 2.922 |
| 2VXS | K.LYS_214 | NZ  | O.GLU_124 | OE1 | 3.391 |
| 2VXS | N.LYS_    | NZ  | J.ASP_    | OD2 | 3.949 |
| 2VXT | H.ARG_94  | NH2 | I.GLU_179 | OE1 | 2.816 |
| 2VXT | H.ARG_94  | NH2 | I.GLU_179 | OE2 | 3.466 |
| 2VXT | H.ARG_101 | NH1 | I.GLU_179 | OE1 | 2.914 |
| 2VXT | H.LYS_208 | NZ  | L.GLU_123 | OE2 | 2.940 |
| 2VXT | I.HIS_145 | NE2 | H.ASP_50  | OD1 | 2.753 |
| 2VXT | I.LYS_148 | NZ  | H.ASP_56  | OD2 | 2.664 |
| 2VXU | H.LYS_43  | NZ  | L.ASP_85  | OD1 | 3.097 |
| 2VXU | I.LYS_208 | NZ  | M.GLU_123 | OE1 | 2.734 |
| 2VXU | I.LYS_208 | NZ  | M.GLU_123 | OE2 | 2.893 |
| 2VXV | H.LYS_214 | NZ  | L.ASP_122 | OD1 | 3.721 |
| 2VXV | H.LYS_214 | NZ  | L.ASP_122 | OD2 | 2.868 |
| 2XZQ | H.LYS_150 | NZ  | L.GLU_127 | OE2 | 3.822 |
| 2XZQ | H.LYS_215 | NZ  | L.GLU_126 | OE2 | 2.689 |
| 2Y06 | H.LYS_215 | NZ  | L.GLU_126 | OE2 | 2.373 |
| 2Y07 | H.LYS_215 | NZ  | L.GLU_126 | OE2 | 2.390 |
| 2Y36 | H.LYS_150 | NZ  | L.GLU_127 | OE2 | 3.849 |
| 2Y36 | H.LYS_215 | NZ  | L.GLU_126 | OE2 | 2.707 |

|      |           |     |            |     |       |
|------|-----------|-----|------------|-----|-------|
| 2Y7S | A_ARG_127 | NH1 | B_GLU_118  | OE1 | 3.457 |
| 2Y7S | A_LYS_218 | NZ  | B_ASP_85   | OD1 | 3.014 |
| 2Y7S | B_ARG_41  | NH2 | A_GLU_238  | OE2 | 2.757 |
| 2YPV | A_ARG_130 | NH2 | L_ASP_92   | OD1 | 2.916 |
| 2YPV | A_LYS_219 | NZ  | H_ASP_52   | OD2 | 3.469 |
| 2YPV | A_LYS_241 | NZ  | H_ASP_99   | OD2 | 2.741 |
| 2YPV | H_LYS_214 | NZ  | L_GLU_123  | OE1 | 2.788 |
| 2YPV | H_LYS_214 | NZ  | L_GLU_123  | OE2 | 2.975 |
| 2YPV | L_ARG_50  | NH2 | A_GLU_239  | OE1 | 3.110 |
| 2YPV | L_ARG_50  | NH2 | A_GLU_239  | OE2 | 3.975 |
| 2YWY | A_LYS_48  | NZ  | B_GLU_32   | OE1 | 3.306 |
| 2YWY | A_LYS_48  | NZ  | B_GLU_32   | OE2 | 2.998 |
| 2YWY | A_LYS_61  | NZ  | B_GLU_57   | OE1 | 2.550 |
| 2YWY | A_LYS_61  | NZ  | B_GLU_57   | OE2 | 3.211 |
| 2YWY | A_LYS_82  | NZ  | C_ASP_89   | OD1 | 3.260 |
| 2YWY | B_ARG_33  | NH2 | A_GLU_32   | OE1 | 3.506 |
| 2YWY | B_LYS_48  | NZ  | A_GLU_32   | OE1 | 3.520 |
| 2YWY | B_LYS_48  | NZ  | A_GLU_32   | OE2 | 2.757 |
| 2YWY | B_LYS_61  | NZ  | A_GLU_57   | OE1 | 3.086 |
| 2YWY | C_LYS_48  | NZ  | D_GLU_32   | OE1 | 2.723 |
| 2YWY | C_LYS_48  | NZ  | D_GLU_32   | OE2 | 3.404 |
| 2YWY | C_LYS_61  | NZ  | D_GLU_57   | OE1 | 2.801 |
| 2YWY | C_LYS_61  | NZ  | D_GLU_57   | OE2 | 3.948 |
| 2YWY | D_LYS_48  | NZ  | C_GLU_32   | OE1 | 3.239 |
| 2YWY | D_LYS_48  | NZ  | C_GLU_32   | OE2 | 2.447 |
| 2YWY | D_LYS_61  | NZ  | C_GLU_57   | OE1 | 2.837 |
| 2YWY | D_LYS_61  | NZ  | C_GLU_57   | OE2 | 3.637 |
| 2ZCH | P_LYS_178 | NZ  | H_ASP_96   | OD1 | 3.502 |
| 2ZCH | P_LYS_178 | NZ  | H_ASP_96   | OD2 | 3.400 |
| 2ZCH | P_ARG_235 | NH1 | L_ASP_28   | OD2 | 2.443 |
| 2ZCH | P_ARG_235 | NH2 | L_ASP_28   | OD2 | 3.166 |
| 2ZCH | P_LYS_236 | NZ  | H_GLU_100C | OE2 | 3.089 |
| 2ZCH | H_ARG_50  | NH2 | L_ASP_94   | OD1 | 2.658 |
| 2ZCH | H_ARG_50  | NH2 | L_ASP_94   | OD2 | 2.887 |
| 2ZCH | H_LYS_208 | NZ  | L_GLU_123  | OE1 | 3.921 |
| 2ZCH | H_LYS_208 | NZ  | L_GLU_123  | OE2 | 3.396 |
| 2ZCK | P_LYS_178 | NZ  | H_ASP_96   | OD1 | 3.892 |
| 2ZCK | P_LYS_178 | NZ  | H_ASP_96   | OD2 | 3.060 |
| 2ZCK | P_ARG_236 | NH2 | L_ASP_28   | OD1 | 3.496 |
| 2ZCK | H_ARG_50  | NH2 | L_ASP_94   | OD1 | 3.095 |
| 2ZCK | H_ARG_50  | NH2 | L_ASP_94   | OD2 | 2.679 |
| 2ZCK | H_LYS_208 | NZ  | L_GLU_123  | OE2 | 2.731 |
| 2ZCL | P_LYS_178 | NZ  | H_ASP_96   | OD1 | 3.272 |
| 2ZCL | P_LYS_178 | NZ  | H_ASP_96   | OD2 | 2.771 |
| 2ZCL | P_ARG_235 | NH2 | L_ASP_28   | OD1 | 3.392 |
| 2ZCL | H_ARG_50  | NH2 | L_ASP_94   | OD1 | 3.155 |
| 2ZCL | H_ARG_50  | NH2 | L_ASP_94   | OD2 | 2.864 |
| 2ZNW | Y_LYS_97  | NZ  | A_ASP_154  | OD1 | 2.612 |
| 2ZNW | Y_LYS_97  | NZ  | A_ASP_154  | OD2 | 3.786 |
| 2ZNW | Y_LYS_97  | NZ  | A_ASP_221  | OD1 | 3.143 |
| 2ZNW | Y_LYS_97  | NZ  | A_ASP_221  | OD2 | 3.719 |
| 2ZNW | Y_LYS_116 | NZ  | B_ASP_203  | OD1 | 2.664 |
| 2ZNW | Z_LYS_97  | NZ  | B_ASP_154  | OD1 | 3.042 |
| 2ZNW | Z_LYS_97  | NZ  | B_ASP_221  | OD1 | 2.782 |
| 2ZNW | Z_LYS_97  | NZ  | B_ASP_221  | OD2 | 3.319 |
| 2ZNW | Z_LYS_116 | NZ  | A_ASP_203  | OD1 | 2.989 |
| 2ZNX | Y_LYS_97  | NZ  | A_ASP_154  | OD1 | 2.701 |
| 2ZNX | Y_LYS_97  | NZ  | A_ASP_221  | OD1 | 2.716 |

|      |           |     |           |     |       |
|------|-----------|-----|-----------|-----|-------|
| 2ZNX | Y_LYS_97  | NZ  | A_ASP_221 | OD2 | 3.355 |
| 2ZNX | Y_LYS_116 | NZ  | B_ASP_203 | OD1 | 3.871 |
| 2ZNX | Y_LYS_116 | NZ  | B_ASP_203 | OD2 | 2.956 |
| 2ZNX | B_LYS_135 | NZ  | Y_ASP_119 | OD2 | 3.744 |
| 2ZNX | Z_LYS_97  | NZ  | B_ASP_154 | OD1 | 2.804 |
| 2ZNX | Z_LYS_97  | NZ  | B_ASP_221 | OD1 | 3.005 |
| 2ZNX | Z_LYS_97  | NZ  | B_ASP_221 | OD2 | 3.520 |
| 2ZNX | Z_LYS_116 | NZ  | A_ASP_203 | OD1 | 3.699 |
| 2ZNX | Z_LYS_116 | NZ  | A_ASP_203 | OD2 | 3.427 |
| 2ZPK | L_HIS_95  | NE2 | H_ASP_62  | OD1 | 3.977 |
| 2ZPK | H_LYS_143 | NZ  | L_GLU_125 | OE2 | 2.882 |
| 2ZPK | H_LYS_208 | NZ  | L_GLU_124 | OE2 | 3.548 |
| 2ZPK | I_LYS_143 | NZ  | M_GLU_125 | OE2 | 2.672 |
| 2ZPK | I_LYS_208 | NZ  | M_GLU_124 | OE2 | 3.137 |
| 32C2 | B_LYS_214 | NZ  | A_GLU_126 | OE1 | 3.056 |
| 32C2 | B_LYS_214 | NZ  | A_GLU_126 | OE2 | 3.702 |
| 3A67 | Y_LYS_96  | NZ  | L_ASP_31  | OD1 | 2.774 |
| 3A67 | Y_LYS_96  | NZ  | L_ASP_31  | OD2 | 3.727 |
| 3A67 | Y_LYS_97  | NZ  | H_ASP_32  | OD1 | 2.657 |
| 3A67 | Y_LYS_97  | NZ  | H_ASP_99  | OD1 | 3.291 |
| 3A67 | Y_LYS_97  | NZ  | H_ASP_99  | OD2 | 2.885 |
| 3A6B | Y_LYS_96  | NZ  | L_ASP_32  | OD1 | 2.734 |
| 3A6B | Y_LYS_97  | NZ  | H_ASP_32  | OD1 | 2.700 |
| 3A6B | Y_LYS_97  | NZ  | H_ASP_32  | OD2 | 3.941 |
| 3A6B | Y_LYS_97  | NZ  | H_ASP_99  | OD1 | 2.956 |
| 3A6B | Y_LYS_97  | NZ  | H_ASP_99  | OD2 | 3.259 |
| 3A6C | Y_LYS_97  | NZ  | H_ASP_32  | OD1 | 2.672 |
| 3A6C | Y_LYS_97  | NZ  | H_ASP_32  | OD2 | 3.916 |
| 3A6C | Y_LYS_97  | NZ  | H_ASP_99  | OD1 | 2.965 |
| 3A6C | Y_LYS_97  | NZ  | H_ASP_99  | OD2 | 3.291 |
| 3B9K | H_LYS_221 | NZ  | L_GLU_123 | OE1 | 2.886 |
| 3B9K | A_LYS_13  | NZ  | B_ASP_42  | OD2 | 3.894 |
| 3B9K | B_LYS_27  | NZ  | H_ASP_32  | OD1 | 2.409 |
| 3B9K | B_ARG_77  | NH2 | L_ASP_92  | OD1 | 3.184 |
| 3B9K | B_ARG_78  | NH2 | L_ASP_92  | OD1 | 2.834 |
| 3B9K | B_LYS_103 | NZ  | A_ASP_66  | OD1 | 3.058 |
| 3B9K | D_LYS_221 | NZ  | C_GLU_123 | OE1 | 3.178 |
| 3B9K | F_LYS_27  | NZ  | D_ASP_32  | OD1 | 2.318 |
| 3B9K | F_ARG_77  | NH2 | C_ASP_92  | OD1 | 2.984 |
| 3B9K | F_ARG_78  | NH2 | C_ASP_92  | OD1 | 3.141 |
| 3B9K | F_ARG_78  | NH2 | C_ASP_92  | OD2 | 3.951 |
| 3B9K | F_LYS_103 | NZ  | E_ASP_    | OD1 | 3.044 |
| 3BDY | H_LYS_211 | NZ  | L_GLU_123 | OE2 | 2.706 |
| 3BE1 | H_ARG_50  | NH1 | A_ASP_560 | OD2 | 3.215 |
| 3BE1 | H_ARG_50  | NH2 | A_GLU_558 | OE1 | 3.092 |
| 3BE1 | H_ARG_50  | NH2 | A_GLU_558 | OE2 | 3.263 |
| 3BE1 | H_ARG_50  | NH2 | A_ASP_560 | OD1 | 3.492 |
| 3BE1 | H_ARG_50  | NH2 | A_ASP_560 | OD2 | 3.175 |
| 3BGF | S_ARG_426 | NH1 | H_ASP_56  | OD1 | 3.504 |
| 3BGF | S_ARG_426 | NH1 | H_ASP_56  | OD2 | 2.403 |
| 3BGF | S_LYS_439 | NZ  | A_ASP_480 | OD2 | 3.161 |
| 3BGF | A_LYS_439 | NZ  | S_ASP_480 | OD2 | 2.520 |
| 3BGF | H_LYS_210 | NZ  | L_GLU_123 | OE1 | 3.997 |
| 3BIK | A_ARG_113 | NH2 | B_GLU_136 | OE2 | 3.149 |
| 3BIK | A_ARG_125 | NH2 | B_GLU_136 | OE1 | 3.033 |
| 3BIK | A_ARG_125 | NH2 | B_GLU_136 | OE2 | 3.001 |
| 3BKY | H_LYS_138 | NZ  | L_GLU_212 | OE2 | 2.743 |
| 3BO8 | A_ARG_35  | NH1 | B_ASP_53  | OD1 | 3.541 |

|      |           |     |           |     |       |
|------|-----------|-----|-----------|-----|-------|
| 3BO8 | A_ARG_48  | NH1 | B_ASP_53  | OD1 | 3.101 |
| 3BO8 | A_ARG_48  | NH1 | B_ASP_53  | OD2 | 3.041 |
| 3BO8 | A_ARG_48  | NH2 | B_ASP_53  | OD1 | 3.771 |
| 3BO8 | A_ARG_48  | NH2 | B_ASP_53  | OD2 | 3.368 |
| 3BO8 | A_ARG_156 | NH1 | C_ASP_3   | OD1 | 3.842 |
| 3BO8 | A_ARG_156 | NH1 | C_ASP_3   | OD2 | 2.711 |
| 3BO8 | A_ARG_163 | NH2 | C_GLU_1   | OE1 | 3.484 |
| 3BO8 | A_ARG_163 | NH2 | C_GLU_1   | OE2 | 2.848 |
| 3BO8 | A_ARG_170 | NH1 | C_GLU_1   | OE2 | 2.801 |
| 3BO8 | A_ARG_170 | NH2 | C_GLU_1   | OE2 | 3.023 |
| 3BO8 | A_HIS_192 | NE2 | B_ASP_98  | OD1 | 3.566 |
| 3BO8 | A_HIS_192 | NE2 | B_ASP_98  | OD2 | 3.950 |
| 3BT2 | A_HIS_87  | ND1 | U_ASP_11  | OD2 | 3.629 |
| 3BT2 | H_HIS_98  | ND1 | L_GLU_50  | OE1 | 2.845 |
| 3BT2 | H_HIS_98  | ND1 | L_GLU_50  | OE2 | 2.191 |
| 3BT2 | H_HIS_98  | NE2 | L_GLU_50  | OE1 | 3.301 |
| 3BT2 | H_HIS_98  | NE2 | L_GLU_50  | OE2 | 3.904 |
| 3BT2 | H_LYS_203 | NZ  | L_GLU_122 | OE2 | 3.715 |
| 3BT2 | U_ARG_91  | NH1 | B_ASP_22  | OD1 | 3.502 |
| 3BT2 | U_ARG_91  | NH1 | B_ASP_22  | OD2 | 3.574 |
| 3BT2 | U_ARG_91  | NH2 | B_ASP_22  | OD1 | 3.066 |
| 3BT2 | U_ARG_192 | NH1 | H_GLU_58  | OE2 | 2.836 |
| 3BZ4 | A_LYS_27  | NZ  | E_ASP_1   | OD1 | 3.348 |
| 3BZ4 | A_LYS_27  | NZ  | E_ASP_1   | OD2 | 3.551 |
| 3BZ4 | A_ARG_96  | NH2 | B_GLU_50  | OE1 | 3.591 |
| 3BZ4 | A_ARG_96  | NH2 | B_GLU_50  | OE2 | 2.914 |
| 3BZ4 | B_LYS_210 | NZ  | A_GLU_123 | OE2 | 2.839 |
| 3BZ4 | C_ARG_96  | NH2 | D_GLU_50  | OE1 | 3.615 |
| 3BZ4 | C_ARG_96  | NH2 | D_GLU_50  | OE2 | 2.938 |
| 3BZ4 | D_LYS_210 | NZ  | C_GLU_123 | OE2 | 2.929 |
| 3BZ4 | E_ARG_96  | NH2 | F_GLU_50  | OE1 | 3.659 |
| 3BZ4 | E_ARG_96  | NH2 | F_GLU_50  | OE2 | 3.062 |
| 3BZ4 | F_LYS_210 | NZ  | E_GLU_123 | OE2 | 2.855 |
| 3BZ4 | G_ARG_96  | NH2 | H_GLU_50  | OE1 | 3.659 |
| 3BZ4 | G_ARG_96  | NH2 | H_GLU_50  | OE2 | 3.021 |
| 3BZ4 | G_LYS_147 | NZ  | C_GLU_154 | OE1 | 3.559 |
| 3C09 | L_HIS_93  | NE2 | D_ASP_434 | OD1 | 2.739 |
| 3C09 | L_HIS_93  | NE2 | D_ASP_434 | OD2 | 3.466 |
| 3C09 | H_ARG_57  | NH2 | D_GLU_431 | OE1 | 3.682 |
| 3C09 | A_LYS_454 | NZ  | C_ASP_100 | OD1 | 2.467 |
| 3C09 | A_LYS_463 | NZ  | B_ASP_49  | OD2 | 2.856 |
| 3C09 | B_HIS_93  | NE2 | A_ASP_434 | OD1 | 2.346 |
| 3C09 | D_LYS_454 | NZ  | H_ASP_100 | OD2 | 3.482 |
| 3C09 | D_LYS_463 | NZ  | L_ASP_49  | OD2 | 3.418 |
| 3C5S | A_ARG_96  | NH2 | B_GLU_50  | OE1 | 3.517 |
| 3C5S | A_ARG_96  | NH2 | B_GLU_50  | OE2 | 2.932 |
| 3C5S | B_LYS_210 | NZ  | A_GLU_123 | OE2 | 3.553 |
| 3C5S | C_ARG_96  | NH2 | D_GLU_50  | OE1 | 3.571 |
| 3C5S | C_ARG_96  | NH2 | D_GLU_50  | OE2 | 2.973 |
| 3C6S | A_LYS_27  | NZ  | F_GLU_61  | OE1 | 2.945 |
| 3C6S | A_ARG_96  | NH2 | B_GLU_50  | OE1 | 3.551 |
| 3C6S | A_ARG_96  | NH2 | B_GLU_50  | OE2 | 2.936 |
| 3C6S | B_LYS_210 | NZ  | A_GLU_123 | OE2 | 2.871 |
| 3C6S | C_ARG_96  | NH2 | D_GLU_50  | OE1 | 3.699 |
| 3C6S | C_ARG_96  | NH2 | D_GLU_50  | OE2 | 2.915 |
| 3C6S | D_LYS_115 | NZ  | H_GLU_85  | OE1 | 3.000 |
| 3C6S | D_LYS_115 | NZ  | H_GLU_85  | OE2 | 3.884 |
| 3C6S | D_LYS_210 | NZ  | C_GLU_123 | OE2 | 2.801 |

|      |           |     |           |     |       |
|------|-----------|-----|-----------|-----|-------|
| 3C6S | E_LYS_27  | NZ  | A_ASP_1   | OD1 | 3.387 |
| 3C6S | E_LYS_27  | NZ  | A_ASP_1   | OD2 | 3.431 |
| 3C6S | E_ARG_96  | NH2 | F_GLU_50  | OE1 | 3.703 |
| 3C6S | E_ARG_96  | NH2 | F_GLU_50  | OE2 | 3.164 |
| 3C6S | F_LYS_210 | NZ  | E_GLU_123 | OE2 | 3.016 |
| 3C6S | G_ARG_96  | NH2 | H_GLU_50  | OE1 | 3.733 |
| 3C6S | G_ARG_96  | NH2 | H_GLU_50  | OE2 | 2.958 |
| 3C6S | H_LYS_210 | NZ  | G_GLU_123 | OE2 | 2.402 |
| 3CVH | A_ARG_48  | NH1 | B_ASP_53  | OD2 | 3.820 |
| 3CVH | A_ARG_48  | NH2 | B_ASP_53  | OD2 | 2.637 |
| 3CVH | A_ARG_62  | NH1 | L_GLU_26  | OE1 | 3.514 |
| 3CVH | A_ARG_62  | NH1 | L_GLU_26  | OE2 | 3.458 |
| 3CVH | A_ARG_62  | NH2 | L_GLU_26  | OE1 | 3.664 |
| 3CVH | A_ARG_108 | NH2 | M_GLU_223 | OE2 | 3.938 |
| 3CVH | A_HIS_192 | ND1 | B_ASP_98  | OD2 | 3.410 |
| 3CVH | C_LYS_7   | NZ  | H_ASP_49  | OD1 | 3.577 |
| 3CVH | C_LYS_7   | NZ  | H_ASP_49  | OD2 | 3.552 |
| 3CVH | H_LYS_215 | NZ  | L_GLU_122 | OE2 | 2.643 |
| 3CVH | M_ARG_48  | NH1 | N_ASP_53  | OD2 | 3.601 |
| 3CVH | M_ARG_48  | NH2 | N_ASP_53  | OD2 | 2.621 |
| 3CVH | M_ARG_62  | NH1 | R_GLU_26  | OE1 | 3.418 |
| 3CVH | M_ARG_62  | NH2 | R_GLU_26  | OE1 | 3.162 |
| 3CVH | M_ARG_62  | NH2 | R_GLU_26  | OE2 | 2.706 |
| 3CVH | M_ARG_108 | NH2 | A_GLU_223 | OE1 | 3.207 |
| 3CVH | M_ARG_108 | NH2 | A_GLU_223 | OE2 | 3.250 |
| 3CVH | M_ARG_169 | NH1 | A_GLU_268 | OE2 | 3.364 |
| 3CVH | O_LYS_7   | NZ  | Q_ASP_49  | OD1 | 3.648 |
| 3CVH | O_LYS_7   | NZ  | Q_ASP_49  | OD2 | 3.052 |
| 3CVH | Q_LYS_215 | NZ  | R_GLU_122 | OE1 | 3.557 |
| 3CXD | H_ARG_52  | NH1 | P_ASP_47  | OD1 | 3.830 |
| 3CXD | H_ARG_52  | NH1 | P_ASP_47  | OD2 | 3.528 |
| 3D0L | A_HIS_96  | NE2 | C_ASP_5   | OD1 | 3.014 |
| 3D0L | B_ARG_58  | NH2 | C_GLU_3   | OE1 | 3.473 |
| 3D0L | B_ARG_58  | NH2 | C_GLU_3   | OE2 | 3.109 |
| 3D0L | B_ARG_95  | NH1 | C_ASP_5   | OD1 | 2.695 |
| 3D0L | B_ARG_95  | NH1 | C_ASP_5   | OD2 | 3.449 |
| 3D0L | B_ARG_95  | NH2 | C_ASP_5   | OD1 | 3.596 |
| 3D0L | B_ARG_95  | NH2 | C_ASP_5   | OD2 | 3.078 |
| 3D0L | B_ARG_96  | NH1 | A_GLU_55  | OE1 | 3.284 |
| 3D0L | B_ARG_96  | NH1 | A_GLU_55  | OE2 | 3.522 |
| 3D0L | B_ARG_96  | NH2 | A_GLU_55  | OE1 | 3.455 |
| 3D0L | C_LYS_6   | NZ  | B_ASP_54  | OD1 | 2.251 |
| 3D0L | C_LYS_6   | NZ  | B_ASP_54  | OD2 | 2.930 |
| 3D0L | C_LYS_6   | NZ  | B_ASP_56  | OD2 | 3.751 |
| 3D0V | A_HIS_96  | NE2 | C_ASP_5   | OD1 | 2.775 |
| 3D0V | B_ARG_58  | NH2 | C_GLU_3   | OE1 | 2.733 |
| 3D0V | B_ARG_95  | NH1 | C_ASP_5   | OD1 | 2.808 |
| 3D0V | B_ARG_95  | NH1 | C_ASP_5   | OD2 | 3.484 |
| 3D0V | B_ARG_95  | NH2 | C_ASP_5   | OD1 | 3.359 |
| 3D0V | B_ARG_95  | NH2 | C_ASP_5   | OD2 | 2.831 |
| 3D0V | B_ARG_96  | NH1 | A_GLU_55  | OE1 | 3.250 |
| 3D0V | B_ARG_96  | NH1 | A_GLU_55  | OE2 | 3.216 |
| 3D0V | B_ARG_96  | NH2 | A_GLU_55  | OE1 | 3.184 |
| 3D0V | B_LYS_209 | NZ  | A_GLU_123 | OE1 | 3.487 |
| 3D0V | C_LYS_6   | NZ  | B_ASP_54  | OD1 | 3.609 |
| 3D0V | C_LYS_6   | NZ  | B_ASP_54  | OD2 | 2.826 |
| 3D0V | C_LYS_6   | NZ  | B_ASP_56  | OD1 | 3.006 |
| 3D9A | C_LYS_697 | NZ  | H_ASP_332 | OD2 | 2.741 |



|      |           |     |           |     |       |
|------|-----------|-----|-----------|-----|-------|
| 3D9A | C.LYS_697 | NZ  | H.ASP_399 | OD1 | 2.864 |
| 3D9A | C.LYS_697 | NZ  | H.ASP_399 | OD2 | 3.300 |
| 3D9A | H.LYS_508 | NZ  | L.GLU_123 | OE1 | 3.029 |
| 3D9A | H.LYS_508 | NZ  | L.GLU_123 | OE2 | 3.809 |
| 3DRO | B.ARG_95  | NH1 | P.ASP_5   | OD1 | 3.590 |
| 3DRO | B.ARG_95  | NH1 | P.ASP_5   | OD2 | 3.370 |
| 3DRO | B.ARG_95  | NH2 | P.ASP_5   | OD2 | 3.007 |
| 3DRO | B.ARG_96  | NH2 | A.GLU_55  | OE1 | 2.727 |
| 3DRO | B.ARG_96  | NH2 | A.GLU_55  | OE2 | 3.426 |
| 3DRO | B.LYS_209 | NZ  | A.GLU_123 | OE1 | 3.782 |
| 3DRO | P.LYS_6   | NZ  | B.ASP_54  | OD1 | 2.913 |
| 3DRO | P.LYS_6   | NZ  | B.ASP_54  | OD2 | 3.775 |
| 3DRO | P.LYS_6   | NZ  | B.ASP_56  | OD1 | 3.330 |
| 3DRO | P.LYS_6   | NZ  | B.ASP_56  | OD2 | 3.868 |
| 3DRQ | A.HIS_96  | NE2 | C.ASP_5   | OD1 | 2.866 |
| 3DRQ | B.ARG_58  | NH2 | C.GLU_3   | OE1 | 3.516 |
| 3DRQ | B.ARG_95  | NH1 | C.ASP_5   | OD1 | 2.806 |
| 3DRQ | B.ARG_95  | NH1 | C.ASP_5   | OD2 | 3.209 |
| 3DRQ | B.ARG_95  | NH2 | C.ASP_5   | OD1 | 3.572 |
| 3DRQ | B.ARG_95  | NH2 | C.ASP_5   | OD2 | 2.688 |
| 3DRQ | B.ARG_96  | NH1 | A.GLU_55  | OE1 | 2.721 |
| 3DRQ | B.ARG_96  | NH1 | A.GLU_55  | OE2 | 2.397 |
| 3DRQ | B.ARG_96  | NH2 | A.GLU_55  | OE1 | 3.293 |
| 3DRQ | B.LYS_209 | NZ  | A.GLU_123 | OE1 | 3.837 |
| 3DRQ | C.LYS_6   | NZ  | B.ASP_54  | OD1 | 2.921 |
| 3DRQ | C.LYS_6   | NZ  | B.ASP_54  | OD2 | 2.342 |
| 3DRQ | C.LYS_6   | NZ  | B.ASP_56  | OD1 | 3.006 |
| 3DSF | H.ARG_52  | NH1 | P.ASP_47  | OD2 | 3.172 |
| 3EBA | B.LYS_97  | NZ  | A.GLU_97  | OE2 | 3.240 |
| 3EBA | B.ARG_101 | NH1 | A.ASP_109 | OD1 | 3.083 |
| 3EBA | B.ARG_101 | NH1 | A.ASP_109 | OD2 | 2.691 |
| 3EBA | B.ARG_101 | NH2 | A.ASP_109 | OD1 | 3.308 |
| 3EBA | B.ARG_101 | NH2 | A.ASP_109 | OD2 | 3.134 |
| 3EOA | H.LYS_217 | NZ  | L.GLU_123 | OE2 | 3.037 |
| 3EOA | I.LYS_197 | NZ  | H.ASP_55  | OD1 | 3.170 |
| 3EOA | I.LYS_197 | NZ  | H.GLU_57  | OE1 | 2.719 |
| 3EOA | I.HIS_198 | NE2 | H.GLU_57  | OE1 | 3.638 |
| 3EOA | I.HIS_198 | NE2 | H.GLU_57  | OE2 | 3.098 |
| 3EOA | B.LYS_    | NZ  | A.GLU_    | OE2 | 3.673 |
| 3EOA | J.LYS_197 | NZ  | B.ASP_55  | OD1 | 2.626 |
| 3EOA | J.LYS_197 | NZ  | B.ASP_55  | OD2 | 2.997 |
| 3EOA | J.LYS_197 | NZ  | B.GLU_57  | OE1 | 2.784 |
| 3EOA | J.HIS_198 | NE2 | B.GLU_57  | OE1 | 3.322 |
| 3EOA | J.HIS_198 | NE2 | B.GLU_57  | OE2 | 2.793 |
| 3EOB | H.LYS_217 | NZ  | L.GLU_123 | OE2 | 3.176 |
| 3EOB | I.LYS_197 | NZ  | H.GLU_57  | OE1 | 2.792 |
| 3EOB | I.LYS_197 | NZ  | H.GLU_57  | OE2 | 3.051 |
| 3EOB | I.HIS_198 | ND1 | H.GLU_57  | OE2 | 3.691 |
| 3EOB | I.HIS_198 | NE2 | H.GLU_57  | OE1 | 2.182 |
| 3EOB | I.HIS_198 | NE2 | H.GLU_57  | OE2 | 2.522 |
| 3EOB | I.HIS_264 | NE2 | J.GLU_241 | OE1 | 2.369 |
| 3EOB | I.HIS_264 | NE2 | J.GLU_241 | OE2 | 2.595 |
| 3EOB | B.LYS_    | NZ  | A.GLU_    | OE1 | 3.788 |
| 3EOB | B.LYS_    | NZ  | A.GLU_    | OE2 | 3.219 |
| 3EOB | J.LYS_197 | NZ  | B.ASP_55  | OD1 | 3.833 |
| 3EOB | J.LYS_197 | NZ  | B.GLU_57  | OE1 | 2.107 |
| 3EOB | J.LYS_197 | NZ  | B.GLU_57  | OE2 | 3.802 |
| 3EOB | J.HIS_198 | ND1 | B.GLU_57  | OE2 | 3.839 |

|      |            |     |            |     |       |
|------|------------|-----|------------|-----|-------|
| 3EOB | J_HIS_198  | NE2 | B_GLU_57   | OE1 | 2.356 |
| 3EOB | J_HIS_198  | NE2 | B_GLU_57   | OE2 | 2.609 |
| 3EOB | J_HIS_264  | NE2 | L_GLU_241  | OE1 | 2.434 |
| 3EOB | J_HIS_264  | NE2 | L_GLU_241  | OE2 | 2.722 |
| 3ESV | F_LYS_0    | NZ  | G_ASP_1054 | OD1 | 3.499 |
| 3ESV | F_LYS_0    | NZ  | G_ASP_1054 | OD2 | 2.774 |
| 3ESV | F_LYS_0    | NZ  | G_ASP_1056 | OD2 | 3.090 |
| 3ESV | G_ARG_53   | NH1 | F_ASP_1056 | OD1 | 2.802 |
| 3ESV | G_ARG_53   | NH2 | F_ASP_1056 | OD1 | 3.489 |
| 3ETB | F_ARG_24   | NH1 | G_ASP_70   | OD1 | 3.579 |
| 3ETB | F_ARG_24   | NH1 | G_ASP_70   | OD2 | 3.034 |
| 3ETB | F_ARG_24   | NH2 | G_ASP_70   | OD1 | 3.608 |
| 3ETB | F_ARG_24   | NH2 | G_ASP_70   | OD2 | 3.774 |
| 3ETB | F_ARG_30   | NH1 | J_ASP_658  | OD2 | 3.129 |
| 3ETB | F_ARG_53   | NH1 | J_GLU_654  | OE1 | 3.838 |
| 3ETB | F_ARG_53   | NH2 | J_GLU_654  | OE1 | 3.771 |
| 3ETB | F_ARG_1050 | NH2 | J_ASP_683  | OD2 | 3.114 |
| 3ETB | G_ARG_24   | NH1 | F_ASP_70   | OD1 | 3.633 |
| 3ETB | G_ARG_24   | NH1 | F_ASP_70   | OD2 | 3.127 |
| 3ETB | G_ARG_24   | NH2 | F_ASP_70   | OD1 | 3.702 |
| 3ETB | G_ARG_24   | NH2 | F_ASP_70   | OD2 | 3.878 |
| 3ETB | G_ARG_30   | NH1 | K_ASP_658  | OD2 | 3.266 |
| 3ETB | G_ARG_53   | NH2 | K_ASP_648  | OD2 | 3.972 |
| 3ETB | G_ARG_53   | NH2 | K_GLU_654  | OE1 | 3.990 |
| 3ETB | G_ARG_1050 | NH2 | K_ASP_683  | OD1 | 3.853 |
| 3ETB | G_ARG_1050 | NH2 | K_ASP_683  | OD2 | 2.796 |
| 3ETB | H_ARG_24   | NH1 | L_ASP_70   | OD1 | 3.544 |
| 3ETB | H_ARG_24   | NH1 | L_ASP_70   | OD2 | 3.118 |
| 3ETB | H_ARG_24   | NH2 | L_ASP_70   | OD1 | 3.662 |
| 3ETB | H_ARG_24   | NH2 | L_ASP_70   | OD2 | 3.905 |
| 3ETB | H_ARG_30   | NH1 | L_ASP_658  | OD1 | 3.824 |
| 3ETB | H_ARG_30   | NH1 | L_ASP_658  | OD2 | 2.913 |
| 3ETB | H_ARG_53   | NH1 | L_GLU_654  | OE1 | 3.771 |
| 3ETB | H_ARG_53   | NH2 | L_GLU_654  | OE1 | 3.669 |
| 3ETB | H_ARG_1050 | NH2 | L_ASP_683  | OD2 | 3.159 |
| 3ETB | L_ARG_24   | NH1 | H_ASP_70   | OD1 | 3.448 |
| 3ETB | L_ARG_24   | NH1 | H_ASP_70   | OD2 | 2.998 |
| 3ETB | L_ARG_24   | NH2 | H_ASP_70   | OD1 | 3.537 |
| 3ETB | L_ARG_24   | NH2 | H_ASP_70   | OD2 | 3.789 |
| 3ETB | L_ARG_30   | NH1 | M_ASP_658  | OD2 | 3.315 |
| 3ETB | L_ARG_53   | NH1 | M_GLU_654  | OE1 | 3.885 |
| 3ETB | L_ARG_53   | NH2 | M_GLU_654  | OE1 | 3.890 |
| 3ETB | L_ARG_1050 | NH2 | M_ASP_683  | OD2 | 3.093 |
| 3ETB | J_LYS_653  | NZ  | G_ASP_17   | OD1 | 2.972 |
| 3ETB | J_LYS_684  | NZ  | F_ASP_1054 | OD1 | 3.728 |
| 3ETB | J_LYS_684  | NZ  | F_ASP_1054 | OD2 | 3.401 |
| 3ETB | J_LYS_684  | NZ  | F_ASP_1056 | OD1 | 3.220 |
| 3ETB | J_LYS_684  | NZ  | F_ASP_1056 | OD2 | 3.481 |
| 3ETB | K_LYS_653  | NZ  | F_ASP_17   | OD1 | 3.083 |
| 3ETB | K_LYS_684  | NZ  | G_ASP_1054 | OD1 | 3.379 |
| 3ETB | K_LYS_684  | NZ  | G_ASP_1054 | OD2 | 3.075 |
| 3ETB | K_LYS_684  | NZ  | G_ASP_1056 | OD1 | 3.162 |
| 3ETB | K_LYS_684  | NZ  | G_ASP_1056 | OD2 | 3.578 |
| 3ETB | L_LYS_653  | NZ  | L_ASP_17   | OD1 | 2.978 |
| 3ETB | L_LYS_684  | NZ  | H_ASP_1056 | OD1 | 3.616 |
| 3ETB | L_LYS_684  | NZ  | H_ASP_1056 | OD2 | 3.187 |
| 3ETB | M_LYS_653  | NZ  | H_ASP_17   | OD1 | 3.060 |
| 3ETB | M_LYS_684  | NZ  | L_ASP_1054 | OD1 | 3.625 |

|      |           |     |            |     |       |
|------|-----------|-----|------------|-----|-------|
| 3ETB | M.LYS_684 | NZ  | L.ASP_1054 | OD2 | 3.167 |
| 3ETB | M.LYS_684 | NZ  | L.ASP_1056 | OD1 | 3.241 |
| 3ETB | M.LYS_684 | NZ  | L.ASP_1056 | OD2 | 3.478 |
| 3EYV | L.LYS_55  | NZ  | H.ASP_102  | OD2 | 3.565 |
| 3EYV | H.LYS_215 | NZ  | L.GLU_128  | OE2 | 3.627 |
| 3EYV | A.LYS_55  | NZ  | B.ASP_102  | OD2 | 3.151 |
| 3EYV | B.LYS_220 | NZ  | A.ASP_127  | OD2 | 3.402 |
| 3FMG | L.LYS_50  | NZ  | H.ASP_106  | OD1 | 3.132 |
| 3FMG | H.LYS_64  | NZ  | L.ASP_1    | OD2 | 3.241 |
| 3G3A | B.ARG_61  | NH2 | A.ASP_59   | OD2 | 3.447 |
| 3G3A | B.ARG_73  | NH1 | A.ASP_61   | OD1 | 2.630 |
| 3G3A | B.ARG_73  | NH1 | A.ASP_61   | OD2 | 3.494 |
| 3G3A | B.ARG_73  | NH2 | A.ASP_59   | OD2 | 3.260 |
| 3G3A | B.ARG_73  | NH2 | A.ASP_61   | OD1 | 3.287 |
| 3G3A | B.ARG_73  | NH2 | A.ASP_61   | OD2 | 2.479 |
| 3G3A | B.ARG_112 | NH1 | A.ASP_141  | OD1 | 3.611 |
| 3G3A | B.ARG_112 | NH1 | A.ASP_141  | OD2 | 2.906 |
| 3G3A | B.ARG_112 | NH2 | A.ASP_141  | OD1 | 2.901 |
| 3G3A | B.ARG_112 | NH2 | A.ASP_141  | OD2 | 3.689 |
| 3G3A | B.ARG_112 | NH2 | A.ASP_143  | OD2 | 3.389 |
| 3G3A | D.ARG_61  | NH1 | C.ASP_59   | OD2 | 3.676 |
| 3G3A | D.ARG_61  | NH2 | C.ASP_59   | OD1 | 3.900 |
| 3G3A | D.ARG_61  | NH2 | C.ASP_59   | OD2 | 3.137 |
| 3G3A | D.ARG_73  | NH1 | C.ASP_61   | OD1 | 3.720 |
| 3G3A | D.ARG_73  | NH1 | C.ASP_61   | OD2 | 2.705 |
| 3G3A | D.ARG_73  | NH2 | C.ASP_59   | OD2 | 2.913 |
| 3G3A | D.ARG_73  | NH2 | C.ASP_61   | OD1 | 2.638 |
| 3G3A | D.ARG_73  | NH2 | C.ASP_61   | OD2 | 3.209 |
| 3G3A | D.ARG_112 | NH1 | C.ASP_141  | OD1 | 3.483 |
| 3G3A | D.ARG_112 | NH1 | C.ASP_141  | OD2 | 2.837 |
| 3G3A | D.ARG_112 | NH2 | C.ASP_141  | OD1 | 2.752 |
| 3G3A | D.ARG_112 | NH2 | C.ASP_141  | OD2 | 3.622 |
| 3G3A | D.ARG_112 | NH2 | C.ASP_143  | OD2 | 3.602 |
| 3G3A | F.ARG_61  | NH1 | E.ASP_59   | OD2 | 3.922 |
| 3G3A | F.ARG_61  | NH2 | E.ASP_59   | OD1 | 3.681 |
| 3G3A | F.ARG_61  | NH2 | E.ASP_59   | OD2 | 2.804 |
| 3G3A | F.ARG_73  | NH1 | E.ASP_61   | OD1 | 3.367 |
| 3G3A | F.ARG_73  | NH1 | E.ASP_61   | OD2 | 2.915 |
| 3G3A | F.ARG_73  | NH2 | E.ASP_59   | OD2 | 2.686 |
| 3G3A | F.ARG_73  | NH2 | E.ASP_61   | OD1 | 2.874 |
| 3G3A | F.ARG_73  | NH2 | E.ASP_61   | OD2 | 3.960 |
| 3G3A | F.ARG_112 | NH1 | E.ASP_141  | OD1 | 3.733 |
| 3G3A | F.ARG_112 | NH1 | E.ASP_141  | OD2 | 3.195 |
| 3G3A | F.ARG_112 | NH2 | E.ASP_141  | OD1 | 3.001 |
| 3G3A | F.ARG_112 | NH2 | E.ASP_141  | OD2 | 3.839 |
| 3G3A | F.ARG_112 | NH2 | E.ASP_143  | OD2 | 3.491 |
| 3G3A | H.ARG_61  | NH2 | G.ASP_59   | OD2 | 3.367 |
| 3G3A | H.ARG_73  | NH1 | G.ASP_59   | OD2 | 3.259 |
| 3G3A | H.ARG_73  | NH2 | G.ASP_59   | OD2 | 3.473 |
| 3G3A | H.ARG_73  | NH2 | G.ASP_61   | OD1 | 2.486 |
| 3G3A | H.ARG_73  | NH2 | G.ASP_61   | OD2 | 2.698 |
| 3G3A | H.ARG_112 | NH1 | G.ASP_141  | OD1 | 3.280 |
| 3G3A | H.ARG_112 | NH1 | G.ASP_143  | OD2 | 3.578 |
| 3G3A | H.ARG_112 | NH2 | G.ASP_141  | OD1 | 3.102 |
| 3G3A | H.ARG_112 | NH2 | G.ASP_141  | OD2 | 2.609 |
| 3G3B | B.ARG_61  | NH2 | A.ASP_59   | OD1 | 3.551 |
| 3G3B | B.ARG_61  | NH2 | A.ASP_59   | OD2 | 3.590 |
| 3G3B | B.ARG_73  | NH1 | A.ASP_61   | OD1 | 2.527 |

|      |           |     |            |     |       |
|------|-----------|-----|------------|-----|-------|
| 3G3B | B_ARG_73  | NH1 | A_ASP_61   | OD2 | 3.439 |
| 3G3B | B_ARG_73  | NH2 | A_ASP_59   | OD2 | 2.967 |
| 3G3B | B_ARG_73  | NH2 | A_ASP_61   | OD1 | 3.469 |
| 3G3B | B_ARG_73  | NH2 | A_ASP_61   | OD2 | 2.765 |
| 3G3B | B_ARG_112 | NH1 | A_ASP_141  | OD1 | 3.569 |
| 3G3B | B_ARG_112 | NH1 | A_ASP_141  | OD2 | 2.625 |
| 3G3B | B_ARG_112 | NH2 | A_ASP_141  | OD1 | 2.926 |
| 3G3B | B_ARG_112 | NH2 | A_ASP_141  | OD2 | 3.538 |
| 3G3B | B_ARG_112 | NH2 | A_ASP_143  | OD2 | 3.804 |
| 3G3B | D_ARG_61  | NH2 | C_ASP_59   | OD1 | 3.954 |
| 3G3B | D_ARG_73  | NH1 | C_ASP_61   | OD1 | 2.753 |
| 3G3B | D_ARG_73  | NH1 | C_ASP_61   | OD2 | 3.824 |
| 3G3B | D_ARG_73  | NH2 | C_ASP_59   | OD2 | 3.136 |
| 3G3B | D_ARG_73  | NH2 | C_ASP_61   | OD1 | 3.224 |
| 3G3B | D_ARG_73  | NH2 | C_ASP_61   | OD2 | 2.702 |
| 3G3B | D_ARG_112 | NH1 | C_ASP_141  | OD1 | 3.812 |
| 3G3B | D_ARG_112 | NH1 | C_ASP_141  | OD2 | 2.690 |
| 3G3B | D_ARG_112 | NH2 | C_ASP_141  | OD1 | 2.826 |
| 3G3B | D_ARG_112 | NH2 | C_ASP_141  | OD2 | 3.301 |
| 3G3B | D_ARG_112 | NH2 | C_ASP_143  | OD2 | 3.656 |
| 3G3B | F_ARG_61  | NH2 | E_ASP_59   | OD2 | 3.820 |
| 3G3B | F_ARG_73  | NH1 | E_ASP_61   | OD1 | 2.535 |
| 3G3B | F_ARG_73  | NH1 | E_ASP_61   | OD2 | 3.949 |
| 3G3B | F_ARG_73  | NH2 | E_ASP_59   | OD2 | 2.812 |
| 3G3B | F_ARG_73  | NH2 | E_ASP_61   | OD1 | 3.056 |
| 3G3B | F_ARG_73  | NH2 | E_ASP_61   | OD2 | 2.934 |
| 3G3B | F_ARG_112 | NH1 | E_ASP_141  | OD2 | 2.714 |
| 3G3B | F_ARG_112 | NH2 | E_ASP_141  | OD1 | 3.020 |
| 3G3B | F_ARG_112 | NH2 | E_ASP_141  | OD2 | 3.176 |
| 3G3B | F_ARG_112 | NH2 | E_ASP_143  | OD2 | 3.737 |
| 3G3B | H_ARG_73  | NH1 | G_ASP_61   | OD1 | 2.839 |
| 3G3B | H_ARG_73  | NH1 | G_ASP_61   | OD2 | 3.791 |
| 3G3B | H_ARG_73  | NH2 | G_ASP_59   | OD2 | 2.431 |
| 3G3B | H_ARG_73  | NH2 | G_ASP_61   | OD1 | 3.464 |
| 3G3B | H_ARG_73  | NH2 | G_ASP_61   | OD2 | 2.896 |
| 3G3B | H_ARG_112 | NH1 | G_ASP_141  | OD1 | 3.676 |
| 3G3B | H_ARG_112 | NH1 | G_ASP_141  | OD2 | 2.564 |
| 3G3B | H_ARG_112 | NH2 | G_ASP_141  | OD1 | 2.813 |
| 3G3B | H_ARG_112 | NH2 | G_ASP_141  | OD2 | 3.280 |
| 3G3B | H_ARG_112 | NH2 | G_ASP_143  | OD2 | 3.506 |
| 3GGW | A_ARG_96  | NH2 | B_GLU_50   | OE1 | 3.590 |
| 3GGW | A_ARG_96  | NH2 | B_GLU_50   | OE2 | 2.762 |
| 3GGW | B_ARG_52  | NH1 | E_ASP_4    | OD2 | 3.092 |
| 3GGW | B_LYS_210 | NZ  | A_GLU_123  | OE2 | 3.208 |
| 3GGW | C_ARG_96  | NH2 | D_GLU_50   | OE1 | 3.555 |
| 3GGW | C_ARG_96  | NH2 | D_GLU_50   | OE2 | 2.962 |
| 3GGW | D_ARG_52  | NH1 | F_ASP_4    | OD2 | 3.127 |
| 3GGW | D_LYS_210 | NZ  | C_GLU_123  | OE2 | 2.871 |
| 3GGW | D_ARG_215 | NH2 | C_GLU_213  | OE1 | 3.834 |
| 3GGW | D_ARG_215 | NH2 | C_GLU_213  | OE2 | 2.618 |
| 3GHB | H_LYS_143 | NZ  | L_GLU_124  | OE2 | 2.614 |
| 3GHB | H_LYS_209 | NZ  | L_GLU_123  | OE1 | 2.751 |
| 3GHB | H_LYS_209 | NZ  | L_GLU_123  | OE2 | 3.411 |
| 3GHB | P_LYS_305 | NZ  | H_GLU_100E | OE1 | 3.508 |
| 3GHB | P_LYS_305 | NZ  | H_ASP_100F | OD2 | 3.835 |
| 3GHB | LLYS_143  | NZ  | M_GLU_124  | OE2 | 2.607 |
| 3GHB | LLYS_209  | NZ  | M_GLU_123  | OE1 | 2.988 |
| 3GHB | LLYS_209  | NZ  | M_GLU_123  | OE2 | 3.773 |

|      |           |     |            |     |       |
|------|-----------|-----|------------|-----|-------|
| 3GHB | Q_LYS_305 | NZ  | L_ASP_100F | OD1 | 3.174 |
| 3GHE | H_LYS_143 | NZ  | L_GLU_124  | OE2 | 2.684 |
| 3GHE | H_LYS_209 | NZ  | L_GLU_123  | OE1 | 2.541 |
| 3GHE | H_LYS_209 | NZ  | L_GLU_123  | OE2 | 3.149 |
| 3GHE | P_ARG_304 | NH1 | H_ASP_100A | OD1 | 3.397 |
| 3GHE | P_ARG_304 | NH2 | H_ASP_100A | OD1 | 3.243 |
| 3GHE | P_ARG_304 | NH2 | H_ASP_100A | OD2 | 3.833 |
| 3GHE | P_HIS_308 | ND1 | H_ASP_100H | OD2 | 3.415 |
| 3GHE | P_ARG_315 | NH1 | H_GLU_95   | OE1 | 3.518 |
| 3GHE | P_ARG_315 | NH1 | H_GLU_95   | OE2 | 2.720 |
| 3GHE | P_ARG_315 | NH2 | H_GLU_95   | OE2 | 3.104 |
| 3GJF | A_ARG_48  | NH2 | B_ASP_53   | OD2 | 3.786 |
| 3GJF | A_ARG_65  | NH1 | L_ASP_52   | OD1 | 3.134 |
| 3GJF | A_ARG_65  | NH1 | L_ASP_52   | OD2 | 3.382 |
| 3GJF | A_ARG_65  | NH2 | L_ASP_52   | OD1 | 2.989 |
| 3GJF | A_ARG_65  | NH2 | L_ASP_52   | OD2 | 3.338 |
| 3GJF | D_ARG_35  | NH2 | E_ASP_53   | OD1 | 3.050 |
| 3GJF | D_ARG_35  | NH2 | E_ASP_53   | OD2 | 3.940 |
| 3GJF | D_ARG_48  | NH2 | E_ASP_53   | OD1 | 3.764 |
| 3GJF | D_ARG_48  | NH2 | E_ASP_53   | OD2 | 3.452 |
| 3GJF | D_ARG_65  | NH1 | K_ASP_52   | OD1 | 3.173 |
| 3GJF | D_ARG_65  | NH1 | K_ASP_52   | OD2 | 3.530 |
| 3GJF | D_ARG_65  | NH2 | K_ASP_52   | OD1 | 3.166 |
| 3GJF | D_ARG_65  | NH2 | K_ASP_52   | OD2 | 2.445 |
| 3GJF | E_LYS_6   | NZ  | D_GLU_232  | OE1 | 3.774 |
| 3GJF | E_LYS_6   | NZ  | D_GLU_232  | OE2 | 2.502 |
| 3GJF | M_LYS_215 | NZ  | K_GLU_126  | OE1 | 3.244 |
| 3GJF | M_LYS_215 | NZ  | K_GLU_126  | OE2 | 2.553 |
| 3GNM | H_ARG_169 | NH1 | L_ASP_172  | OD1 | 3.348 |
| 3GNM | H_ARG_169 | NH2 | L_ASP_172  | OD1 | 3.542 |
| 3GNM | H_ARG_169 | NH2 | L_ASP_175  | OD1 | 3.297 |
| 3GNM | H_LYS_213 | NZ  | L_GLU_128  | OE1 | 2.721 |
| 3GNM | H_LYS_213 | NZ  | L_GLU_128  | OE2 | 3.840 |
| 3GO1 | H_LYS_209 | NZ  | L_GLU_123  | OE1 | 2.728 |
| 3GO1 | H_LYS_209 | NZ  | L_GLU_123  | OE2 | 3.471 |
| 3GO1 | P_LYS_305 | NZ  | L_ASP_51   | OD1 | 2.931 |
| 3GO1 | P_ARG_315 | NH1 | H_GLU_95   | OE2 | 3.127 |
| 3GO1 | P_ARG_315 | NH2 | H_GLU_95   | OE2 | 2.921 |
| 3GO1 | P_ARG_315 | NH2 | H_ASP_100A | OD2 | 3.393 |
| 3HAE | A_ARG_35  | NH1 | B_ASP_53   | OD1 | 3.527 |
| 3HAE | A_ARG_35  | NH1 | B_ASP_53   | OD2 | 2.844 |
| 3HAE | A_ARG_48  | NH2 | B_ASP_53   | OD2 | 3.583 |
| 3HAE | A_ARG_65  | NH1 | L_ASP_52   | OD1 | 3.495 |
| 3HAE | A_ARG_65  | NH1 | L_ASP_52   | OD2 | 2.908 |
| 3HAE | A_ARG_65  | NH2 | L_ASP_52   | OD1 | 3.452 |
| 3HAE | A_ARG_65  | NH2 | L_ASP_52   | OD2 | 3.099 |
| 3HAE | B_LYS_6   | NZ  | A_GLU_232  | OE2 | 2.622 |
| 3HAE | D_ARG_35  | NH1 | E_ASP_53   | OD1 | 3.949 |
| 3HAE | D_ARG_35  | NH1 | E_ASP_53   | OD2 | 3.963 |
| 3HAE | D_ARG_35  | NH2 | E_ASP_53   | OD1 | 3.106 |
| 3HAE | D_ARG_48  | NH2 | E_ASP_53   | OD2 | 3.593 |
| 3HAE | D_ARG_65  | NH1 | G_ASP_52   | OD1 | 3.201 |
| 3HAE | D_ARG_65  | NH2 | G_ASP_52   | OD1 | 2.885 |
| 3HAE | D_ARG_65  | NH2 | G_ASP_52   | OD2 | 3.031 |
| 3HAE | J_ARG_35  | NH2 | K_ASP_53   | OD1 | 3.520 |
| 3HAE | J_ARG_48  | NH2 | K_ASP_53   | OD1 | 3.945 |
| 3HAE | J_ARG_48  | NH2 | K_ASP_53   | OD2 | 3.051 |
| 3HAE | J_ARG_65  | NH1 | N_ASP_52   | OD1 | 3.749 |

|      |           |     |           |     |       |
|------|-----------|-----|-----------|-----|-------|
| 3HAE | J_ARG.65  | NH2 | N_ASP_52  | OD1 | 2.440 |
| 3HAE | J_ARG.65  | NH2 | N_ASP_52  | OD2 | 2.989 |
| 3HAE | P_ARG.35  | NH1 | Q_ASP_53  | OD2 | 3.921 |
| 3HAE | P_ARG.48  | NH2 | Q_ASP_53  | OD1 | 3.566 |
| 3HAE | P_ARG.48  | NH2 | Q_ASP_53  | OD2 | 2.872 |
| 3HAE | P_ARG.65  | NH1 | S_ASP_52  | OD1 | 3.579 |
| 3HAE | P_ARG.65  | NH1 | S_ASP_52  | OD2 | 3.466 |
| 3HAE | P_ARG.65  | NH2 | S_ASP_52  | OD1 | 3.120 |
| 3HAE | P_ARG.65  | NH2 | S_ASP_52  | OD2 | 2.826 |
| 3HAE | Q_LYS.6   | NZ  | P_GLU_232 | OE2 | 3.965 |
| 3HAE | N_LYS_132 | NZ  | O_ASP_150 | OD2 | 3.615 |
| 3HAE | H_LYS_215 | NZ  | L_GLU_126 | OE1 | 3.537 |
| 3HAE | H_LYS_215 | NZ  | L_GLU_126 | OE2 | 3.674 |
| 3HAE | I_LYS_215 | NZ  | G_GLU_126 | OE1 | 3.678 |
| 3HAE | O_LYS_215 | NZ  | N_GLU_126 | OE2 | 3.736 |
| 3HAE | T_LYS_215 | NZ  | S_GLU_126 | OE1 | 2.660 |
| 3HAE | T_LYS_215 | NZ  | S_GLU_126 | OE2 | 3.779 |
| 3HFM | L_HIS_34  | ND1 | H_ASP_99  | OD1 | 3.756 |
| 3HFM | L_HIS_34  | ND1 | H_ASP_99  | OD2 | 3.698 |
| 3HFM | L_LYS_49  | NZ  | H_ASP_99  | OD1 | 3.423 |
| 3HFM | H_LYS_209 | NZ  | L_GLU_123 | OE1 | 2.622 |
| 3HFM | H_ARG_213 | NH2 | L_GLU_123 | OE1 | 3.991 |
| 3HFM | Y_LYS_97  | NZ  | H_ASP_32  | OD1 | 3.609 |
| 3HI6 | H_LYS_216 | NZ  | L_GLU_122 | OE1 | 2.896 |
| 3HI6 | H_LYS_216 | NZ  | L_GLU_122 | OE2 | 3.887 |
| 3HI6 | X_LYS_216 | NZ  | Y_GLU_122 | OE1 | 3.212 |
| 3HMG | A_ARG_109 | NH1 | B_GLU_67  | OE1 | 3.372 |
| 3HMG | A_ARG_109 | NH1 | B_GLU_67  | OE2 | 2.849 |
| 3HMG | A_LYS_238 | NZ  | F_GLU_72  | OE2 | 2.747 |
| 3HMG | A_ARG_269 | NH2 | B_GLU_67  | OE1 | 2.883 |
| 3HMG | A_LYS_299 | NZ  | B_GLU_69  | OE1 | 3.233 |
| 3HMG | A_LYS_310 | NZ  | B_ASP_90  | OD1 | 2.577 |
| 3HMG | B_ARG_25  | NH1 | A_GLU_325 | OE1 | 3.777 |
| 3HMG | B_ARG_54  | NH1 | F_GLU_97  | OE1 | 2.798 |
| 3HMG | B_ARG_54  | NH2 | F_GLU_97  | OE1 | 3.127 |
| 3HMG | B_LYS_62  | NZ  | F_ASP_86  | OD1 | 2.986 |
| 3HMG | B_LYS_62  | NZ  | F_ASP_86  | OD2 | 2.761 |
| 3HMG | B_LYS_62  | NZ  | F_ASP_90  | OD1 | 3.490 |
| 3HMG | B_LYS_62  | NZ  | F_ASP_90  | OD2 | 2.774 |
| 3HMG | B_HIS_64  | NE2 | F_ASP_79  | OD1 | 3.991 |
| 3HMG | B_HIS_64  | NE2 | F_ASP_79  | OD2 | 3.618 |
| 3HMG | B_ARG_76  | NH1 | D_GLU_74  | OE1 | 3.445 |
| 3HMG | B_ARG_76  | NH1 | D_GLU_74  | OE2 | 2.823 |
| 3HMG | B_ARG_76  | NH1 | D_GLU_81  | OE1 | 2.738 |
| 3HMG | B_ARG_76  | NH1 | D_GLU_81  | OE2 | 3.615 |
| 3HMG | B_ARG_76  | NH2 | D_GLU_74  | OE1 | 2.830 |
| 3HMG | B_ARG_76  | NH2 | D_GLU_74  | OE2 | 3.630 |
| 3HMG | B_ARG_123 | NH1 | F_GLU_132 | OE2 | 3.281 |
| 3HMG | B_ARG_124 | NH1 | F_GLU_132 | OE1 | 3.422 |
| 3HMG | B_ARG_124 | NH1 | F_GLU_132 | OE2 | 3.128 |
| 3HMG | B_ARG_127 | NH2 | F_GLU_131 | OE1 | 2.404 |
| 3HMG | B_ARG_163 | NH1 | F_GLU_131 | OE1 | 2.713 |
| 3HMG | B_ARG_163 | NH1 | F_GLU_131 | OE2 | 2.661 |
| 3HMG | B_ARG_170 | NH2 | D_GLU_128 | OE1 | 3.667 |
| 3HMG | B_ARG_170 | NH2 | D_GLU_128 | OE2 | 3.704 |
| 3HMG | C_ARG_109 | NH1 | D_GLU_67  | OE1 | 3.376 |
| 3HMG | C_ARG_109 | NH1 | D_GLU_67  | OE2 | 2.842 |
| 3HMG | C_LYS_238 | NZ  | B_GLU_72  | OE2 | 2.625 |

|      |           |     |           |     |       |
|------|-----------|-----|-----------|-----|-------|
| 3HMG | C_ARG_269 | NH2 | D_GLU_67  | OE1 | 2.813 |
| 3HMG | C_LYS_299 | NZ  | D_GLU_69  | OE1 | 3.251 |
| 3HMG | C_LYS_310 | NZ  | D_ASP_90  | OD1 | 2.544 |
| 3HMG | D_ARG_54  | NH1 | B_GLU_97  | OE1 | 2.804 |
| 3HMG | D_ARG_54  | NH2 | B_GLU_97  | OE1 | 3.138 |
| 3HMG | D_LYS_62  | NZ  | B_ASP_86  | OD1 | 2.985 |
| 3HMG | D_LYS_62  | NZ  | B_ASP_86  | OD2 | 2.721 |
| 3HMG | D_LYS_62  | NZ  | B_ASP_90  | OD1 | 3.453 |
| 3HMG | D_LYS_62  | NZ  | B_ASP_90  | OD2 | 2.701 |
| 3HMG | D_HIS_64  | NE2 | B_ASP_79  | OD1 | 3.960 |
| 3HMG | D_HIS_64  | NE2 | B_ASP_79  | OD2 | 3.444 |
| 3HMG | D_ARG_76  | NH1 | F_GLU_74  | OE1 | 3.513 |
| 3HMG | D_ARG_76  | NH1 | F_GLU_74  | OE2 | 2.767 |
| 3HMG | D_ARG_76  | NH1 | F_GLU_81  | OE1 | 2.643 |
| 3HMG | D_ARG_76  | NH1 | F_GLU_81  | OE2 | 3.636 |
| 3HMG | D_ARG_76  | NH2 | F_GLU_74  | OE1 | 2.766 |
| 3HMG | D_ARG_76  | NH2 | F_GLU_74  | OE2 | 3.449 |
| 3HMG | D_ARG_123 | NH1 | B_GLU_132 | OE2 | 3.299 |
| 3HMG | D_ARG_124 | NH1 | B_GLU_132 | OE1 | 3.459 |
| 3HMG | D_ARG_124 | NH1 | B_GLU_132 | OE2 | 3.169 |
| 3HMG | D_ARG_127 | NH2 | B_GLU_131 | OE1 | 2.449 |
| 3HMG | D_ARG_163 | NH1 | B_GLU_131 | OE1 | 2.694 |
| 3HMG | D_ARG_163 | NH1 | B_GLU_131 | OE2 | 2.707 |
| 3HMG | D_ARG_170 | NH2 | F_GLU_128 | OE1 | 3.716 |
| 3HMG | D_ARG_170 | NH2 | F_GLU_128 | OE2 | 3.859 |
| 3HMG | E_ARG_109 | NH1 | F_GLU_67  | OE1 | 3.402 |
| 3HMG | E_ARG_109 | NH1 | F_GLU_67  | OE2 | 2.841 |
| 3HMG | E_LYS_238 | NZ  | D_GLU_72  | OE2 | 2.745 |
| 3HMG | E_ARG_269 | NH2 | F_GLU_67  | OE1 | 2.840 |
| 3HMG | E_LYS_299 | NZ  | F_GLU_69  | OE1 | 3.192 |
| 3HMG | E_LYS_310 | NZ  | F_ASP_90  | OD1 | 2.563 |
| 3HMG | F_ARG_25  | NH1 | E_GLU_325 | OE2 | 3.879 |
| 3HMG | F_ARG_25  | NH2 | E_GLU_325 | OE2 | 3.668 |
| 3HMG | F_ARG_54  | NH1 | D_GLU_97  | OE1 | 2.700 |
| 3HMG | F_ARG_54  | NH2 | D_GLU_97  | OE1 | 3.155 |
| 3HMG | F_LYS_62  | NZ  | D_ASP_86  | OD1 | 2.928 |
| 3HMG | F_LYS_62  | NZ  | D_ASP_86  | OD2 | 2.697 |
| 3HMG | F_LYS_62  | NZ  | D_ASP_90  | OD1 | 3.563 |
| 3HMG | F_LYS_62  | NZ  | D_ASP_90  | OD2 | 2.800 |
| 3HMG | F_HIS_64  | NE2 | D_ASP_79  | OD1 | 3.875 |
| 3HMG | F_HIS_64  | NE2 | D_ASP_79  | OD2 | 3.441 |
| 3HMG | F_ARG_76  | NH1 | B_GLU_74  | OE1 | 3.414 |
| 3HMG | F_ARG_76  | NH1 | B_GLU_74  | OE2 | 2.793 |
| 3HMG | F_ARG_76  | NH1 | B_GLU_81  | OE1 | 2.687 |
| 3HMG | F_ARG_76  | NH1 | B_GLU_81  | OE2 | 3.711 |
| 3HMG | F_ARG_76  | NH2 | B_GLU_74  | OE1 | 2.734 |
| 3HMG | F_ARG_76  | NH2 | B_GLU_74  | OE2 | 3.548 |
| 3HMG | F_ARG_123 | NH1 | D_GLU_132 | OE2 | 3.319 |
| 3HMG | F_ARG_124 | NH1 | D_GLU_132 | OE1 | 3.517 |
| 3HMG | F_ARG_124 | NH1 | D_GLU_132 | OE2 | 3.294 |
| 3HMG | F_ARG_127 | NH2 | D_GLU_131 | OE1 | 2.559 |
| 3HMG | F_ARG_163 | NH1 | D_GLU_131 | OE1 | 2.673 |
| 3HMG | F_ARG_163 | NH1 | D_GLU_131 | OE2 | 2.666 |
| 3HMG | F_ARG_170 | NH2 | B_GLU_128 | OE1 | 3.705 |
| 3HMG | F_ARG_170 | NH2 | B_GLU_128 | OE2 | 3.753 |
| 3HZK | A_ARG_95  | NH2 | B_ASP_95  | OD1 | 3.611 |
| 3HZK | A_ARG_95  | NH2 | B_ASP_95  | OD2 | 2.795 |
| 3HZK | B_LYS_207 | NZ  | A_GLU_122 | OE2 | 3.993 |

|      |           |     |            |     |       |
|------|-----------|-----|------------|-----|-------|
| 3HZM | A_ARG_95  | NH2 | B_ASP_95   | OD1 | 3.493 |
| 3HZM | A_ARG_95  | NH2 | B_ASP_95   | OD2 | 2.771 |
| 3HZM | A_ARG_95  | NH2 | B_ASP_100E | OD1 | 3.831 |
| 3HZM | B_LYS_207 | NZ  | A_GLU_122  | OE2 | 3.353 |
| 3HZV | A_ARG_95  | NH2 | B_ASP_95   | OD1 | 3.498 |
| 3HZV | A_ARG_95  | NH2 | B_ASP_95   | OD2 | 2.821 |
| 3HZV | A_ARG_95  | NH2 | B_ASP_100E | OD1 | 3.905 |
| 3HZV | B_LYS_207 | NZ  | A_GLU_122  | OE2 | 3.521 |
| 3HZY | A_ARG_95  | NH2 | B_ASP_95   | OD1 | 3.688 |
| 3HZY | A_ARG_95  | NH2 | B_ASP_95   | OD2 | 3.045 |
| 3HZY | A_ARG_95  | NH2 | B_ASP_100E | OD1 | 3.820 |
| 3HZY | B_LYS_207 | NZ  | A_GLU_122  | OE2 | 3.902 |
| 3I02 | A_ARG_95  | NH2 | B_ASP_95   | OD2 | 3.028 |
| 3I02 | C_ARG_95  | NH2 | D_ASP_95   | OD1 | 3.601 |
| 3I02 | C_ARG_95  | NH2 | D_ASP_95   | OD2 | 2.826 |
| 3I02 | D_LYS_208 | NZ  | C_GLU_122  | OE2 | 3.585 |
| 3IET | A_LYS_50  | NZ  | X_GLU_8    | OE1 | 3.701 |
| 3IET | A_LYS_50  | NZ  | X_GLU_8    | OE2 | 3.403 |
| 3IET | B_LYS_208 | NZ  | A_GLU_123  | OE1 | 3.818 |
| 3IET | D_HIS_55  | ND1 | A_ASP_143  | OD1 | 3.412 |
| 3IET | D_HIS_55  | ND1 | A_ASP_143  | OD2 | 3.385 |
| 3IET | D_LYS_208 | NZ  | C_GLU_123  | OE2 | 3.321 |
| 3IF1 | D_LYS_52B | NZ  | A_ASP_143  | OD2 | 3.658 |
| 3IF1 | D_HIS_55  | ND1 | A_ASP_143  | OD1 | 3.559 |
| 3IF1 | D_HIS_55  | ND1 | A_ASP_143  | OD2 | 3.251 |
| 3IJH | A_ARG_95  | NH2 | B_ASP_95   | OD1 | 3.392 |
| 3IJH | A_ARG_95  | NH2 | B_ASP_95   | OD2 | 2.832 |
| 3IJH | A_ARG_95  | NH2 | B_GLU_100E | OE1 | 3.920 |
| 3IJH | B_ARG_164 | NH1 | A_ASP_166  | OD1 | 3.428 |
| 3IJH | B_ARG_164 | NH2 | A_ASP_166  | OD1 | 3.938 |
| 3IJH | B_LYS_208 | NZ  | A_GLU_122  | OE1 | 2.744 |
| 3IJH | C_ARG_95  | NH2 | D_ASP_95   | OD1 | 3.394 |
| 3IJH | C_ARG_95  | NH2 | D_ASP_95   | OD2 | 2.734 |
| 3IJH | D_ARG_164 | NH1 | C_ASP_166  | OD1 | 3.593 |
| 3IJH | D_ARG_164 | NH2 | C_ASP_166  | OD1 | 3.440 |
| 3IJS | A_ARG_95  | NH2 | B_ASP_95   | OD1 | 3.603 |
| 3IJS | A_ARG_95  | NH2 | B_ASP_95   | OD2 | 3.018 |
| 3IJS | A_ARG_95  | NH2 | B_GLU_100E | OE1 | 3.734 |
| 3IJS | B_ARG_164 | NH1 | A_ASP_166  | OD1 | 3.855 |
| 3IJS | B_LYS_208 | NZ  | A_GLU_122  | OE1 | 2.963 |
| 3IJS | C_ARG_95  | NH2 | D_ASP_95   | OD1 | 3.466 |
| 3IJS | C_ARG_95  | NH2 | D_ASP_95   | OD2 | 2.795 |
| 3IJS | C_ARG_95  | NH2 | D_GLU_100E | OE1 | 3.752 |
| 3IJS | D_ARG_164 | NH1 | C_ASP_166  | OD1 | 3.815 |
| 3IJS | D_ARG_164 | NH2 | C_ASP_166  | OD1 | 3.576 |
| 3IJS | D_LYS_208 | NZ  | C_GLU_122  | OE1 | 3.219 |
| 3IJS | D_LYS_208 | NZ  | C_GLU_122  | OE2 | 2.679 |
| 3IJY | A_ARG_95  | NH2 | B_ASP_95   | OD1 | 3.420 |
| 3IJY | A_ARG_95  | NH2 | B_ASP_95   | OD2 | 2.800 |
| 3IJY | A_ARG_95  | NH2 | B_GLU_100E | OE1 | 3.751 |
| 3IJY | B_ARG_164 | NH2 | A_ASP_166  | OD1 | 3.730 |
| 3IJY | B_ARG_164 | NH2 | A_ASP_166  | OD2 | 3.693 |
| 3IJY | B_LYS_208 | NZ  | A_GLU_122  | OE1 | 2.748 |
| 3IJY | C_ARG_95  | NH2 | D_ASP_95   | OD1 | 2.992 |
| 3IJY | C_ARG_95  | NH2 | D_ASP_95   | OD2 | 2.767 |
| 3IJY | C_ARG_95  | NH2 | D_GLU_100E | OE1 | 3.905 |
| 3IJY | D_ARG_164 | NH2 | C_ASP_166  | OD1 | 3.199 |
| 3IKC | A_ARG_95  | NH2 | B_ASP_95   | OD1 | 3.326 |



|      |           |     |            |     |       |
|------|-----------|-----|------------|-----|-------|
| 3IKC | A_ARG_95  | NH2 | B_ASP_95   | OD2 | 2.867 |
| 3IKC | A_ARG_95  | NH2 | B_GLU_100E | OE1 | 3.865 |
| 3IKC | B_LYS_208 | NZ  | A_GLU_122  | OE1 | 3.042 |
| 3IKC | C_ARG_95  | NH2 | D_ASP_95   | OD1 | 3.250 |
| 3IKC | C_ARG_95  | NH2 | D_ASP_95   | OD2 | 2.670 |
| 3IKC | D_ARG_164 | NH1 | C_ASP_166  | OD1 | 3.903 |
| 3IKC | D_ARG_164 | NH2 | C_ASP_166  | OD1 | 3.107 |
| 3IU3 | A_ARG_29  | NH2 | K_ASP_6    | OD1 | 2.779 |
| 3IU3 | A_LYS_211 | NZ  | B_GLU_120  | OE1 | 2.457 |
| 3IU3 | B_ARG_90  | NH1 | K_ASP_56   | OD2 | 3.059 |
| 3IU3 | C_ARG_29  | NH1 | J_ASP_6    | OD1 | 3.038 |
| 3IU3 | C_ARG_29  | NH1 | J_ASP_6    | OD2 | 3.788 |
| 3IU3 | C_ARG_29  | NH2 | J_ASP_6    | OD1 | 3.464 |
| 3IU3 | C_LYS_211 | NZ  | D_GLU_120  | OE2 | 3.231 |
| 3IU3 | D_ARG_90  | NH2 | J_ASP_56   | OD2 | 3.101 |
| 3IU3 | H_ARG_29  | NH1 | I_ASP_6    | OD1 | 3.964 |
| 3IU3 | H_ARG_29  | NH1 | I_ASP_6    | OD2 | 3.865 |
| 3IU3 | H_ARG_29  | NH2 | I_ASP_6    | OD1 | 2.749 |
| 3IU3 | H_ARG_29  | NH2 | I_ASP_6    | OD2 | 3.378 |
| 3IU3 | H_HIS_166 | NE2 | L_ASP_164  | OD1 | 3.898 |
| 3IU3 | H_LYS_211 | NZ  | L_GLU_120  | OE2 | 3.694 |
| 3IU3 | L_ARG_29  | NH2 | I_ASP_56   | OD2 | 3.164 |
| 3IU3 | L_ARG_90  | NH2 | I_ASP_56   | OD1 | 2.806 |
| 3IU3 | L_ARG_36  | NH1 | H_ASP_55   | OD1 | 3.819 |
| 3IU3 | L_ARG_36  | NH2 | H_ASP_55   | OD1 | 3.008 |
| 3IU3 | L_ARG_36  | NH2 | H_ASP_55   | OD2 | 2.747 |
| 3J5M | A_ARG_429 | NH2 | D_ASP_74   | OD1 | 3.207 |
| 3J5M | A_ARG_429 | NH2 | D_ASP_74   | OD2 | 3.203 |
| 3J5M | D_LYS_52  | NZ  | A_ASP_474  | OD2 | 2.827 |
| 3J5M | D_ARG_64  | NH2 | A_ASP_457  | OD2 | 3.079 |
| 3J5M | D_LYS_209 | NZ  | C_GLU_123  | OE1 | 3.480 |
| 3J5M | D_LYS_209 | NZ  | C_GLU_123  | OE2 | 2.844 |
| 3J5M | D_LYS_214 | NZ  | C_ASP_122  | OD2 | 2.841 |
| 3J5M | E_ARG_429 | NH2 | H_ASP_74   | OD1 | 3.207 |
| 3J5M | E_ARG_429 | NH2 | H_ASP_74   | OD2 | 3.202 |
| 3J5M | H_LYS_52  | NZ  | E_ASP_474  | OD2 | 2.827 |
| 3J5M | H_ARG_64  | NH2 | E_ASP_457  | OD2 | 3.078 |
| 3J5M | H_LYS_209 | NZ  | G_GLU_123  | OE1 | 3.479 |
| 3J5M | H_LYS_209 | NZ  | G_GLU_123  | OE2 | 2.843 |
| 3J5M | H_LYS_214 | NZ  | G_ASP_122  | OD2 | 2.842 |
| 3J5M | L_ARG_429 | NH2 | L_ASP_74   | OD1 | 3.207 |
| 3J5M | L_ARG_429 | NH2 | L_ASP_74   | OD2 | 3.202 |
| 3J5M | L_LYS_52  | NZ  | I_ASP_474  | OD2 | 2.827 |
| 3J5M | L_ARG_64  | NH2 | I_ASP_457  | OD2 | 3.078 |
| 3J5M | L_LYS_209 | NZ  | K_GLU_123  | OE1 | 3.480 |
| 3J5M | L_LYS_209 | NZ  | K_GLU_123  | OE2 | 2.844 |
| 3J5M | L_LYS_214 | NZ  | K_ASP_122  | OD2 | 2.841 |
| 3J70 | A_ARG_64  | NH2 | B_ASP_1    | OD1 | 2.676 |
| 3J70 | A_LYS_209 | NZ  | B_GLU_123  | OE1 | 3.744 |
| 3J70 | A_LYS_209 | NZ  | B_GLU_123  | OE2 | 2.604 |
| 3J70 | C_LYS_29  | NZ  | D_ASP_279  | OD2 | 2.704 |
| 3J70 | C_ARG_59  | NH1 | D_ASP_368  | OD1 | 3.842 |
| 3J70 | C_ARG_59  | NH1 | D_ASP_368  | OD2 | 2.986 |
| 3J70 | C_ARG_59  | NH2 | D_ASP_368  | OD1 | 2.621 |
| 3J70 | C_ARG_59  | NH2 | D_ASP_368  | OD2 | 3.173 |
| 3J70 | D_ARG_146 | NH1 | C_GLU_169  | OE1 | 2.841 |
| 3J70 | D_ARG_146 | NH1 | C_GLU_169  | OE2 | 2.796 |
| 3J70 | D_ARG_146 | NH2 | C_GLU_169  | OE1 | 3.599 |

|      |           |     |           |     |       |
|------|-----------|-----|-----------|-----|-------|
| 3J70 | D_LYS_171 | NZ  | C_GLU_13  | OE1 | 3.949 |
| 3J70 | D_LYS_322 | NZ  | A_ASP_95  | OD2 | 2.908 |
| 3J70 | D_ARG_327 | NH2 | A_ASP_52  | OD2 | 3.286 |
| 3J70 | D_ARG_419 | NH1 | A_ASP_54  | OD1 | 3.985 |
| 3J70 | M_ARG_64  | NH2 | N_ASP_1   | OD1 | 2.677 |
| 3J70 | M_LYS_209 | NZ  | N_GLU_123 | OE1 | 3.744 |
| 3J70 | M_LYS_209 | NZ  | N_GLU_123 | OE2 | 2.604 |
| 3J70 | O_LYS_29  | NZ  | P_ASP_279 | OD2 | 2.704 |
| 3J70 | O_ARG_59  | NH1 | P_ASP_368 | OD1 | 3.842 |
| 3J70 | O_ARG_59  | NH1 | P_ASP_368 | OD2 | 2.986 |
| 3J70 | O_ARG_59  | NH2 | P_ASP_368 | OD1 | 2.620 |
| 3J70 | O_ARG_59  | NH2 | P_ASP_368 | OD2 | 3.173 |
| 3J70 | P_ARG_146 | NH1 | O_GLU_169 | OE1 | 2.841 |
| 3J70 | P_ARG_146 | NH1 | O_GLU_169 | OE2 | 2.796 |
| 3J70 | P_ARG_146 | NH2 | O_GLU_169 | OE1 | 3.599 |
| 3J70 | P_LYS_171 | NZ  | O_GLU_13  | OE1 | 3.948 |
| 3J70 | P_LYS_322 | NZ  | M_ASP_95  | OD2 | 2.909 |
| 3J70 | P_ARG_327 | NH2 | M_ASP_52  | OD2 | 3.286 |
| 3J70 | P_ARG_419 | NH1 | M_ASP_54  | OD1 | 3.985 |
| 3J70 | R_ARG_64  | NH2 | S_ASP_1   | OD1 | 2.677 |
| 3J70 | R_LYS_209 | NZ  | S_GLU_123 | OE1 | 3.743 |
| 3J70 | R_LYS_209 | NZ  | S_GLU_123 | OE2 | 2.603 |
| 3J70 | T_LYS_29  | NZ  | U_ASP_279 | OD2 | 2.704 |
| 3J70 | T_ARG_59  | NH1 | U_ASP_368 | OD1 | 3.842 |
| 3J70 | T_ARG_59  | NH1 | U_ASP_368 | OD2 | 2.986 |
| 3J70 | T_ARG_59  | NH2 | U_ASP_368 | OD1 | 2.621 |
| 3J70 | T_ARG_59  | NH2 | U_ASP_368 | OD2 | 3.174 |
| 3J70 | U_ARG_146 | NH1 | T_GLU_169 | OE1 | 2.840 |
| 3J70 | U_ARG_146 | NH1 | T_GLU_169 | OE2 | 2.796 |
| 3J70 | U_ARG_146 | NH2 | T_GLU_169 | OE1 | 3.599 |
| 3J70 | U_LYS_171 | NZ  | T_GLU_13  | OE1 | 3.949 |
| 3J70 | U_LYS_322 | NZ  | R_ASP_95  | OD2 | 2.909 |
| 3J70 | U_ARG_327 | NH2 | R_ASP_52  | OD2 | 3.287 |
| 3J70 | U_ARG_419 | NH1 | R_ASP_54  | OD1 | 3.985 |
| 3JCC | A_ARG_429 | NH2 | D_ASP_63  | OD2 | 3.854 |
| 3JCC | C_LYS_207 | NZ  | B_GLU_124 | OE1 | 3.629 |
| 3JCC | D_ARG_59  | NH2 | A_ASP_368 | OD1 | 2.961 |
| 3JCC | D_ARG_59  | NH2 | A_ASP_368 | OD2 | 3.986 |
| 3KS0 | H_LYS_39  | NZ  | L_GLU_40  | OE1 | 3.686 |
| 3KS0 | H_LYS_39  | NZ  | L_GLU_40  | OE2 | 2.843 |
| 3KS0 | H_LYS_147 | NZ  | L_GLU_127 | OE2 | 3.112 |
| 3KS0 | H_LYS_212 | NZ  | L_GLU_126 | OE1 | 3.920 |
| 3KS0 | H_LYS_212 | NZ  | L_GLU_126 | OE2 | 3.042 |
| 3KS0 | K_LYS_39  | NZ  | J_GLU_40  | OE1 | 3.754 |
| 3KS0 | K_LYS_39  | NZ  | J_GLU_40  | OE2 | 2.934 |
| 3KS0 | K_LYS_147 | NZ  | J_GLU_127 | OE2 | 3.169 |
| 3KS0 | K_LYS_212 | NZ  | J_GLU_126 | OE1 | 3.344 |
| 3KS0 | K_LYS_212 | NZ  | J_GLU_126 | OE2 | 2.562 |
| 3L7E | H_LYS_217 | NZ  | L_GLU_123 | OE1 | 3.175 |
| 3L7E | B_LYS_217 | NZ  | A_GLU_123 | OE1 | 2.697 |
| 3L7E | B_LYS_217 | NZ  | A_GLU_123 | OE2 | 3.970 |
| 3LZF | A_ARG_109 | NH2 | B_GLU_69  | OE1 | 3.970 |
| 3LZF | A_ARG_109 | NH2 | B_GLU_69  | OE2 | 2.555 |
| 3LZF | A_LYS_157 | NZ  | H_ASP_52  | OD1 | 3.712 |
| 3LZF | A_LYS_157 | NZ  | H_ASP_52  | OD2 | 3.952 |
| 3LZF | A_LYS_157 | NZ  | H_ASP_54  | OD2 | 2.960 |
| 3LZF | A_LYS_166 | NZ  | L_ASP_93  | OD1 | 2.890 |
| 3LZF | A_LYS_166 | NZ  | L_ASP_93  | OD2 | 2.667 |

|      |           |     |           |     |       |
|------|-----------|-----|-----------|-----|-------|
| 3LZF | A_ARG_310 | NH1 | B_ASP_90  | OD1 | 2.412 |
| 3LZF | A_ARG_310 | NH2 | B_ASP_90  | OD1 | 3.228 |
| 3LZF | B_LYS_68  | NZ  | A_GLU_110 | OE1 | 3.290 |
| 3LZF | B_LYS_68  | NZ  | A_GLU_110 | OE2 | 2.778 |
| 3LZF | H_LYS_221 | NZ  | L_GLU_123 | OE2 | 3.483 |
| 3MLR | H_LYS_129 | NZ  | L_ASP_142 | OD2 | 3.806 |
| 3MLR | H_LYS_209 | NZ  | L_GLU_127 | OE2 | 3.182 |
| 3MLR | P_LYS_304 | NZ  | H_ASP_31  | OD1 | 3.470 |
| 3MLR | P_LYS_305 | NZ  | H_ASP_54  | OD1 | 2.683 |
| 3MLR | P_LYS_305 | NZ  | H_ASP_54  | OD2 | 3.624 |
| 3MLR | P_LYS_305 | NZ  | H_ASP_56  | OD2 | 3.011 |
| 3MLS | H_LYS_73  | NZ  | I_ASP_31  | OD1 | 3.962 |
| 3MLS | H_LYS_73  | NZ  | I_ASP_31  | OD2 | 2.716 |
| 3MLS | H_LYS_73  | NZ  | I_ASP_53  | OD1 | 3.242 |
| 3MLS | H_LYS_73  | NZ  | I_ASP_53  | OD2 | 3.339 |
| 3MLS | H_LYS_117 | NZ  | J_GLU_10  | OE1 | 3.515 |
| 3MLS | H_LYS_143 | NZ  | L_GLU_128 | OE2 | 2.664 |
| 3MLS | H_LYS_209 | NZ  | L_GLU_127 | OE1 | 2.677 |
| 3MLS | P_ARG_11  | NH1 | H_GLU_99  | OE1 | 3.690 |
| 3MLS | P_ARG_11  | NH1 | H_GLU_99  | OE2 | 3.548 |
| 3MLS | P_ARG_11  | NH2 | H_GLU_99  | OE1 | 3.097 |
| 3MLS | P_ARG_11  | NH2 | H_GLU_99  | OE2 | 3.355 |
| 3MLS | P_LYS_12  | NZ  | H_ASP_54  | OD1 | 3.420 |
| 3MLS | P_LYS_12  | NZ  | H_ASP_54  | OD2 | 2.807 |
| 3MLS | P_LYS_12  | NZ  | H_ASP_56  | OD1 | 3.833 |
| 3MLS | P_LYS_12  | NZ  | H_ASP_56  | OD2 | 3.175 |
| 3MLS | I_LYS_143 | NZ  | M_GLU_128 | OE2 | 2.744 |
| 3MLS | Q_LYS_12  | NZ  | I_ASP_54  | OD1 | 2.683 |
| 3MLS | Q_LYS_12  | NZ  | I_ASP_54  | OD2 | 3.484 |
| 3MLS | Q_LYS_12  | NZ  | I_ASP_56  | OD1 | 3.650 |
| 3MLS | N_LYS_97  | NZ  | J_GLU_64  | OE2 | 3.402 |
| 3MLS | J_LYS_117 | NZ  | H_GLU_10  | OE1 | 3.984 |
| 3MLS | J_LYS_209 | NZ  | N_GLU_127 | OE2 | 3.428 |
| 3MLS | R_LYS_12  | NZ  | J_ASP_54  | OD1 | 2.569 |
| 3MLS | R_LYS_12  | NZ  | J_ASP_54  | OD2 | 3.629 |
| 3MLS | R_LYS_12  | NZ  | J_ASP_56  | OD2 | 2.975 |
| 3MLS | K_LYS_117 | NZ  | I_GLU_10  | OE1 | 3.985 |
| 3MLS | S_LYS_12  | NZ  | K_ASP_54  | OD1 | 2.573 |
| 3MLS | S_LYS_12  | NZ  | K_ASP_54  | OD2 | 3.736 |
| 3MLS | S_LYS_12  | NZ  | K_ASP_56  | OD2 | 3.122 |
| 3MLT | P_ARG_304 | NH1 | H_ASP_31  | OD1 | 2.766 |
| 3MLT | P_LYS_305 | NZ  | H_ASP_54  | OD1 | 2.503 |
| 3MLT | P_LYS_305 | NZ  | H_ASP_54  | OD2 | 3.276 |
| 3MLT | P_LYS_305 | NZ  | H_ASP_56  | OD2 | 2.482 |
| 3MLT | B_LYS_209 | NZ  | A_GLU_127 | OE2 | 3.807 |
| 3MLT | C_LYS_305 | NZ  | B_ASP_54  | OD1 | 3.099 |
| 3MLT | C_LYS_305 | NZ  | B_ASP_54  | OD2 | 3.737 |
| 3MLT | C_LYS_305 | NZ  | B_ASP_56  | OD2 | 3.095 |
| 3MLT | E_LYS_209 | NZ  | D_GLU_127 | OE2 | 3.591 |
| 3MLT | I_LYS_209 | NZ  | G_GLU_127 | OE2 | 3.669 |
| 3MLU | L_LYS_133 | NZ  | H_ASP_144 | OD2 | 3.641 |
| 3MLU | P_LYS_305 | NZ  | H_ASP_54  | OD1 | 2.586 |
| 3MLU | P_LYS_305 | NZ  | H_ASP_54  | OD2 | 3.496 |
| 3MLU | P_LYS_305 | NZ  | H_ASP_56  | OD2 | 3.684 |
| 3MLV | P_ARG_304 | NH1 | H_ASP_31  | OD1 | 3.750 |
| 3MLV | P_LYS_305 | NZ  | H_ASP_54  | OD1 | 2.508 |
| 3MLV | P_LYS_305 | NZ  | H_ASP_54  | OD2 | 3.477 |
| 3MLV | P_LYS_305 | NZ  | H_ASP_56  | OD2 | 2.918 |

|      |           |     |            |     |       |
|------|-----------|-----|------------|-----|-------|
| 3MLV | M_LYS_97  | NZ  | N_GLU_64   | OE1 | 2.901 |
| 3MLV | Q_ARG_304 | NH1 | N_GLU_99   | OE2 | 3.900 |
| 3MLV | Q_ARG_304 | NH2 | N_GLU_99   | OE2 | 3.849 |
| 3MLV | Q_LYS_305 | NZ  | N_ASP_54   | OD1 | 3.154 |
| 3MLV | Q_LYS_305 | NZ  | N_ASP_54   | OD2 | 3.686 |
| 3MLV | Q_LYS_305 | NZ  | N_ASP_56   | OD2 | 2.702 |
| 3MLW | L_ARG_50  | NH1 | H_ASP_100G | OD1 | 2.178 |
| 3MLW | L_ARG_50  | NH1 | H_ASP_100G | OD2 | 3.432 |
| 3MLW | L_LYS_129 | NZ  | H_ASP_144  | OD2 | 3.472 |
| 3MLW | H_ARG_58  | NH1 | L_ASP_95D  | OD1 | 3.535 |
| 3MLW | H_ARG_58  | NH1 | L_ASP_95D  | OD2 | 2.585 |
| 3MLW | P_LYS_303 | NZ  | H_ASP_31   | OD2 | 3.075 |
| 3MLW | P_ARG_304 | NH1 | H_ASP_31   | OD1 | 3.646 |
| 3MLW | P_LYS_305 | NZ  | H_ASP_54   | OD1 | 3.646 |
| 3MLW | P_LYS_305 | NZ  | H_ASP_54   | OD2 | 2.863 |
| 3MLW | P_LYS_305 | NZ  | H_ASP_56   | OD1 | 3.537 |
| 3MLW | P_ARG_315 | NH1 | L_ASP_93   | OD1 | 2.718 |
| 3MLW | P_ARG_315 | NH1 | L_ASP_93   | OD2 | 3.239 |
| 3MLW | M_ARG_50  | NH2 | L_ASP_100G | OD1 | 2.708 |
| 3MLW | M_ARG_50  | NH2 | L_ASP_100G | OD2 | 3.923 |
| 3MLW | L_ARG_58  | NH1 | M_ASP_95D  | OD1 | 2.653 |
| 3MLW | L_ARG_58  | NH1 | M_ASP_95D  | OD2 | 3.643 |
| 3MLW | L_LYS_209 | NZ  | M_GLU_123  | OE1 | 2.581 |
| 3MLW | L_LYS_209 | NZ  | M_GLU_123  | OE2 | 3.213 |
| 3MLW | Q_LYS_305 | NZ  | L_ASP_54   | OD2 | 3.005 |
| 3MLW | Q_LYS_305 | NZ  | L_ASP_56   | OD1 | 2.747 |
| 3MLW | Q_ARG_315 | NH1 | M_ASP_93   | OD1 | 3.021 |
| 3MLX | H_LYS_143 | NZ  | L_GLU_124  | OE2 | 3.021 |
| 3MLX | P_HIS_308 | ND1 | H_GLU_98   | OE2 | 3.800 |
| 3MLX | P_HIS_308 | NE2 | H_GLU_98   | OE2 | 3.892 |
| 3MLX | L_LYS_143 | NZ  | M_GLU_124  | OE2 | 2.608 |
| 3MLX | L_LYS_214 | NZ  | M_GLU_123  | OE1 | 3.588 |
| 3MLX | Q_HIS_308 | ND1 | L_GLU_98   | OE1 | 3.280 |
| 3MLY | H_LYS_143 | NZ  | L_GLU_124  | OE2 | 3.991 |
| 3MLY | H_LYS_214 | NZ  | L_GLU_123  | OE1 | 3.745 |
| 3MLY | P_LYS_308 | NZ  | L_GLU_50   | OE1 | 3.397 |
| 3MLY | P_LYS_308 | NZ  | L_GLU_50   | OE2 | 3.390 |
| 3MLY | L_LYS_143 | NZ  | M_GLU_124  | OE2 | 2.661 |
| 3MLY | L_LYS_214 | NZ  | M_GLU_123  | OE1 | 3.594 |
| 3MLZ | H_LYS_    | NZ  | L_GLU_     | OE1 | 3.724 |
| 3MLZ | H_LYS_    | NZ  | L_GLU_     | OE2 | 3.184 |
| 3MLZ | H_LYS_    | NZ  | L_GLU_     | OE2 | 2.805 |
| 3MLZ | H_LYS_    | NZ  | L_GLU_     | OE1 | 3.039 |
| 3MLZ | H_LYS_    | NZ  | L_GLU_     | OE2 | 3.262 |
| 3NFP | A_ARG_33  | NH1 | K_ASP_4    | OD1 | 3.227 |
| 3NFP | A_ARG_33  | NH2 | K_ASP_6    | OD1 | 3.995 |
| 3NFP | A_ARG_33  | NH2 | K_ASP_6    | OD2 | 2.804 |
| 3NFP | A_HIS_35  | NE2 | K_ASP_4    | OD1 | 3.568 |
| 3NFP | A_HIS_35  | NE2 | K_ASP_4    | OD2 | 3.384 |
| 3NFP | H_ARG_33  | NH1 | L_ASP_4    | OD2 | 2.868 |
| 3NFP | H_ARG_33  | NH2 | L_ASP_6    | OD2 | 3.531 |
| 3NFP | H_HIS_35  | NE2 | L_ASP_4    | OD1 | 3.314 |
| 3NFP | H_HIS_35  | NE2 | L_ASP_4    | OD2 | 3.660 |
| 3NFP | H_LYS_212 | NZ  | L_GLU_122  | OE1 | 3.767 |
| 3NFP | L_HIS_120 | NE2 | H_GLU_59   | OE1 | 3.799 |
| 3NFP | L_HIS_120 | NE2 | H_GLU_59   | OE2 | 3.285 |
| 3NFP | K_HIS_120 | NE2 | A_GLU_59   | OE2 | 3.393 |
| 3NGB | G_LYS_97  | NZ  | H_ASP_99   | OD2 | 3.903 |

|      |           |     |           |     |       |
|------|-----------|-----|-----------|-----|-------|
| 3NGB | H_ARG_71  | NH1 | G_ASP_368 | OD1 | 3.623 |
| 3NGB | H_ARG_71  | NH1 | G_ASP_368 | OD2 | 3.004 |
| 3NGB | H_ARG_71  | NH2 | G_ASP_368 | OD1 | 2.815 |
| 3NGB | H_ARG_71  | NH2 | G_ASP_368 | OD2 | 3.723 |
| 3NGB | H_LYS_209 | NZ  | L_GLU_125 | OE1 | 3.421 |
| 3NGB | H_LYS_209 | NZ  | L_GLU_125 | OE2 | 3.841 |
| 3NGB | A_LYS_97  | NZ  | B_ASP_99  | OD2 | 3.768 |
| 3NGB | B_ARG_71  | NH1 | A_ASP_368 | OD1 | 3.647 |
| 3NGB | B_ARG_71  | NH1 | A_ASP_368 | OD2 | 2.944 |
| 3NGB | B_ARG_71  | NH2 | A_ASP_368 | OD1 | 2.895 |
| 3NGB | B_ARG_71  | NH2 | A_ASP_368 | OD2 | 3.718 |
| 3NGB | B_LYS_209 | NZ  | C_GLU_125 | OE1 | 2.774 |
| 3NGB | B_LYS_209 | NZ  | C_GLU_125 | OE2 | 2.799 |
| 3NGB | D_LYS_97  | NZ  | E_ASP_99  | OD1 | 3.709 |
| 3NGB | E_ARG_71  | NH1 | D_ASP_368 | OD1 | 3.715 |
| 3NGB | E_ARG_71  | NH1 | D_ASP_368 | OD2 | 3.074 |
| 3NGB | E_ARG_71  | NH2 | D_ASP_368 | OD1 | 3.026 |
| 3NGB | E_ARG_71  | NH2 | D_ASP_368 | OD2 | 3.848 |
| 3NGB | E_HIS_164 | ND1 | F_ASP_169 | OD1 | 3.984 |
| 3NGB | E_LYS_    | NZ  | F_GLU_    | OE1 | 3.345 |
| 3NGB | E_LYS_    | NZ  | F_GLU_    | OE2 | 2.927 |
| 3NGB | I_LYS_97  | NZ  | J_ASP_99  | OD1 | 3.443 |
| 3NGB | J_ARG_71  | NH1 | I_ASP_368 | OD1 | 3.645 |
| 3NGB | J_ARG_71  | NH1 | I_ASP_368 | OD2 | 3.125 |
| 3NGB | J_ARG_71  | NH2 | I_ASP_368 | OD1 | 3.120 |
| 3NGB | J_LYS_209 | NZ  | K_GLU_125 | OE1 | 2.929 |
| 3NGB | J_LYS_209 | NZ  | K_GLU_125 | OE2 | 3.060 |
| 3NGB | J_LYS_214 | NZ  | K_ASP_124 | OD1 | 3.305 |
| 3NH7 | H_ARG_98  | NH1 | A_ASP_67  | OD2 | 3.819 |
| 3NH7 | H_ARG_98  | NH2 | A_ASP_67  | OD1 | 2.850 |
| 3NH7 | H_ARG_98  | NH2 | A_ASP_67  | OD2 | 2.389 |
| 3NH7 | H_ARG_100 | NH2 | A_GLU_64  | OE2 | 3.004 |
| 3NH7 | H_HIS_102 | ND1 | A_GLU_64  | OE1 | 2.378 |
| 3NH7 | H_ARG_104 | NH2 | A_GLU_81  | OE1 | 3.515 |
| 3NH7 | H_ARG_104 | NH2 | A_GLU_81  | OE2 | 2.462 |
| 3NH7 | H_LYS_216 | NZ  | L_GLU_125 | OE2 | 3.557 |
| 3NH7 | A_LYS_79  | NZ  | L_ASP_50  | OD1 | 3.333 |
| 3NH7 | A_LYS_79  | NZ  | L_ASP_50  | OD2 | 3.058 |
| 3NH7 | A_LYS_92  | NZ  | H_GLU_99  | OE1 | 3.975 |
| 3NH7 | A_LYS_92  | NZ  | H_GLU_99  | OE2 | 3.561 |
| 3NH7 | I_ARG_98  | NH1 | B_ASP_67  | OD2 | 3.924 |
| 3NH7 | I_ARG_98  | NH2 | B_ASP_67  | OD1 | 3.388 |
| 3NH7 | I_ARG_98  | NH2 | B_ASP_67  | OD2 | 2.296 |
| 3NH7 | I_ARG_100 | NH2 | B_GLU_64  | OE2 | 2.996 |
| 3NH7 | I_HIS_102 | ND1 | B_GLU_64  | OE1 | 2.707 |
| 3NH7 | I_ARG_104 | NH2 | B_GLU_81  | OE1 | 3.637 |
| 3NH7 | I_ARG_104 | NH2 | B_GLU_81  | OE2 | 2.502 |
| 3NH7 | I_LYS_216 | NZ  | M_GLU_125 | OE1 | 3.301 |
| 3NH7 | I_LYS_216 | NZ  | M_GLU_125 | OE2 | 3.320 |
| 3NH7 | B_LYS_79  | NZ  | M_ASP_50  | OD1 | 3.625 |
| 3NH7 | B_LYS_79  | NZ  | M_ASP_50  | OD2 | 2.953 |
| 3NH7 | B_LYS_92  | NZ  | I_GLU_99  | OE1 | 3.831 |
| 3NH7 | B_LYS_92  | NZ  | I_GLU_99  | OE2 | 3.683 |
| 3NH7 | J_ARG_98  | NH1 | C_ASP_67  | OD2 | 3.893 |
| 3NH7 | J_ARG_98  | NH2 | C_ASP_67  | OD1 | 3.313 |
| 3NH7 | J_ARG_98  | NH2 | C_ASP_67  | OD2 | 2.401 |
| 3NH7 | J_ARG_100 | NH2 | C_GLU_64  | OE2 | 3.173 |
| 3NH7 | J_HIS_102 | ND1 | C_GLU_64  | OE1 | 2.668 |

|      |           |     |           |     |       |
|------|-----------|-----|-----------|-----|-------|
| 3NH7 | J_ARG_104 | NH2 | C_GLU_81  | OE1 | 3.595 |
| 3NH7 | J_ARG_104 | NH2 | C_GLU_81  | OE2 | 2.634 |
| 3NH7 | J_LYS_216 | NZ  | N_GLU_125 | OE1 | 2.816 |
| 3NH7 | J_LYS_216 | NZ  | N_GLU_125 | OE2 | 3.044 |
| 3NH7 | C_LYS_79  | NZ  | N_ASP_50  | OD1 | 3.064 |
| 3NH7 | C_LYS_79  | NZ  | N_ASP_50  | OD2 | 3.315 |
| 3NH7 | C_LYS_92  | NZ  | J_GLU_99  | OE1 | 3.721 |
| 3NH7 | C_LYS_92  | NZ  | J_GLU_99  | OE2 | 3.806 |
| 3NH7 | K_ARG_98  | NH1 | D_ASP_67  | OD2 | 3.348 |
| 3NH7 | K_ARG_98  | NH2 | D_ASP_67  | OD1 | 3.350 |
| 3NH7 | K_ARG_98  | NH2 | D_ASP_67  | OD2 | 2.647 |
| 3NH7 | K_ARG_100 | NH2 | D_GLU_64  | OE2 | 3.101 |
| 3NH7 | K_HIS_102 | ND1 | D_GLU_64  | OE1 | 2.313 |
| 3NH7 | K_ARG_104 | NH2 | D_GLU_81  | OE1 | 3.830 |
| 3NH7 | K_ARG_104 | NH2 | D_GLU_81  | OE2 | 2.800 |
| 3NH7 | K_LYS_216 | NZ  | O_GLU_125 | OE1 | 3.159 |
| 3NH7 | K_LYS_216 | NZ  | O_GLU_125 | OE2 | 3.376 |
| 3NH7 | D_LYS_79  | NZ  | O_ASP_50  | OD1 | 3.661 |
| 3NH7 | D_LYS_79  | NZ  | O_ASP_50  | OD2 | 3.355 |
| 3NH7 | D_LYS_92  | NZ  | K_GLU_99  | OE1 | 3.766 |
| 3NH7 | D_LYS_92  | NZ  | K_GLU_99  | OE2 | 3.832 |
| 3NZ8 | A_HIS_164 | NE2 | B_ASP_167 | OD1 | 3.115 |
| 3NZ8 | A_LYS_208 | NZ  | B_GLU_123 | OE2 | 3.283 |
| 3NZ8 | H_LYS_208 | NZ  | L_GLU_123 | OE2 | 3.808 |
| 3O2D | L_ARG_95  | NH1 | H_GLU_95  | OE2 | 2.847 |
| 3O2D | L_ARG_95  | NH2 | H_GLU_95  | OE2 | 3.717 |
| 3O2D | H_LYS_209 | NZ  | L_GLU_122 | OE1 | 2.503 |
| 3O2D | H_LYS_209 | NZ  | L_GLU_122 | OE2 | 3.547 |
| 3O41 | H_ARG_94  | NH1 | A_GLU_191 | OE1 | 2.970 |
| 3O41 | H_ARG_94  | NH1 | A_GLU_191 | OE2 | 3.394 |
| 3O41 | H_ARG_94  | NH2 | A_GLU_191 | OE1 | 3.744 |
| 3O41 | H_ARG_94  | NH2 | A_GLU_191 | OE2 | 2.660 |
| 3O41 | H_LYS_208 | NZ  | L_GLU_123 | OE2 | 3.054 |
| 3O41 | A_LYS_208 | NZ  | B_GLU_123 | OE2 | 2.651 |
| 3O41 | P_LYS_433 | NZ  | H_ASP_54  | OD1 | 3.659 |
| 3O41 | P_LYS_433 | NZ  | H_ASP_54  | OD2 | 2.887 |
| 3O41 | P_LYS_433 | NZ  | H_ASP_56  | OD2 | 2.760 |
| 3O41 | C_LYS_433 | NZ  | A_ASP_54  | OD1 | 3.503 |
| 3O41 | C_LYS_433 | NZ  | A_ASP_54  | OD2 | 2.671 |
| 3O41 | C_LYS_433 | NZ  | A_ASP_56  | OD2 | 2.936 |
| 3O45 | H_ARG_94  | NH1 | A_GLU_191 | OE1 | 3.085 |
| 3O45 | H_ARG_94  | NH1 | A_GLU_191 | OE2 | 3.621 |
| 3O45 | H_ARG_94  | NH2 | A_GLU_191 | OE1 | 3.709 |
| 3O45 | H_ARG_94  | NH2 | A_GLU_191 | OE2 | 2.802 |
| 3O45 | H_LYS_208 | NZ  | L_GLU_123 | OE2 | 3.033 |
| 3O45 | A_LYS_208 | NZ  | B_GLU_123 | OE2 | 2.878 |
| 3O45 | P_LYS_433 | NZ  | H_ASP_54  | OD1 | 3.518 |
| 3O45 | P_LYS_433 | NZ  | H_ASP_54  | OD2 | 2.818 |
| 3O45 | P_LYS_433 | NZ  | H_ASP_56  | OD2 | 2.927 |
| 3O45 | C_LYS_433 | NZ  | A_ASP_54  | OD1 | 3.297 |
| 3O45 | C_LYS_433 | NZ  | A_ASP_54  | OD2 | 2.723 |
| 3O45 | C_LYS_433 | NZ  | A_ASP_56  | OD2 | 2.899 |
| 3OJD | B_LYS_208 | NZ  | A_GLU_123 | OE2 | 3.588 |
| 3OJD | B_ARG_213 | NH1 | A_GLU_213 | OE2 | 3.118 |
| 3OJD | B_ARG_213 | NH2 | A_GLU_213 | OE2 | 3.609 |
| 3P0Y | A_LYS_463 | NZ  | H_GLU_95  | OE2 | 2.859 |
| 3P0Y | A_LYS_465 | NZ  | H_GLU_50  | OE1 | 2.656 |
| 3P0Y | A_LYS_465 | NZ  | H_GLU_50  | OE2 | 3.845 |

|      |           |     |           |     |       |
|------|-----------|-----|-----------|-----|-------|
| 3P0Y | A_LYS_465 | NZ  | H_GLU_95  | OE1 | 2.777 |
| 3P0Y | A_LYS_465 | NZ  | H_GLU_95  | OE2 | 3.671 |
| 3P0Y | H_ARG_97  | NH1 | A_ASP_436 | OD1 | 2.876 |
| 3P0Y | H_ARG_97  | NH1 | A_ASP_436 | OD2 | 3.533 |
| 3P0Y | H_ARG_97  | NH2 | A_ASP_436 | OD1 | 3.647 |
| 3P0Y | H_ARG_97  | NH2 | A_ASP_436 | OD2 | 2.823 |
| 3P0Y | H_LYS_209 | NZ  | L_GLU_123 | OE1 | 2.674 |
| 3P0Y | H_LYS_209 | NZ  | L_GLU_123 | OE2 | 3.317 |
| 3P11 | A_ARG_441 | NH1 | H_ASP_58  | OD2 | 3.356 |
| 3P11 | A_ARG_441 | NH1 | L_GLU_94  | OE1 | 2.859 |
| 3P11 | A_ARG_441 | NH1 | L_GLU_94  | OE2 | 3.310 |
| 3P11 | A_ARG_441 | NH2 | L_GLU_94  | OE2 | 3.075 |
| 3P11 | A_LYS_466 | NZ  | H_GLU_95  | OE1 | 2.568 |
| 3P11 | A_LYS_466 | NZ  | H_GLU_95  | OE2 | 3.227 |
| 3P11 | A_HIS_467 | ND1 | H_GLU_50  | OE2 | 3.466 |
| 3P11 | A_HIS_467 | ND1 | L_GLU_94  | OE2 | 3.926 |
| 3P11 | A_HIS_467 | NE2 | H_GLU_50  | OE1 | 3.754 |
| 3P11 | A_HIS_467 | NE2 | H_GLU_50  | OE2 | 3.679 |
| 3P11 | A_HIS_467 | NE2 | H_GLU_95  | OE2 | 3.533 |
| 3PGF | L_ARG_66  | NH1 | A_GLU_309 | OE2 | 3.045 |
| 3PGF | L_ARG_66  | NH2 | A_GLU_309 | OE2 | 2.501 |
| 3PNW | B_ARG_104 | NH1 | C_GLU_599 | OE1 | 3.048 |
| 3PNW | D_ARG_25  | NH1 | J_GLU_82  | OE1 | 2.858 |
| 3PNW | D_ARG_25  | NH1 | J_GLU_82  | OE2 | 3.430 |
| 3PNW | D_ARG_25  | NH2 | J_GLU_82  | OE1 | 3.626 |
| 3PNW | D_ARG_25  | NH2 | J_GLU_82  | OE2 | 3.034 |
| 3PNW | E_ARG_104 | NH1 | F_GLU_599 | OE2 | 2.653 |
| 3PNW | H_ARG_104 | NH1 | I_GLU_599 | OE1 | 3.020 |
| 3PNW | K_ARG_104 | NH1 | L_GLU_599 | OE1 | 2.888 |
| 3PNW | K_ARG_104 | NH1 | L_GLU_599 | OE2 | 2.772 |
| 3PNW | K_ARG_104 | NH2 | L_GLU_599 | OE2 | 3.083 |
| 3PNW | Q_ARG_104 | NH1 | R_GLU_599 | OE1 | 3.284 |
| 3PNW | T_ARG_104 | NH1 | U_GLU_599 | OE2 | 2.955 |
| 3PNW | W_ARG_104 | NH2 | X_GLU_599 | OE2 | 3.113 |
| 3PP4 | H_LYS_215 | NZ  | L_GLU_128 | OE1 | 3.038 |
| 3PP4 | H_LYS_215 | NZ  | L_GLU_128 | OE2 | 2.948 |
| 3PP4 | P_LYS_175 | NZ  | H_ASP_57  | OD2 | 3.518 |
| 3Q3G | C_LYS_109 | NZ  | D_GLU_44  | OE1 | 3.620 |
| 3Q3G | D_LYS_21  | NZ  | H_GLU_202 | OE2 | 2.633 |
| 3Q3G | D_ARG_52  | NH1 | G_GLU_179 | OE2 | 3.405 |
| 3Q3G | D_ARG_52  | NH2 | G_GLU_178 | OE1 | 2.845 |
| 3Q3G | D_ARG_52  | NH2 | G_GLU_179 | OE2 | 2.628 |
| 3Q3G | D_LYS_219 | NZ  | C_GLU_129 | OE2 | 3.237 |
| 3Q3G | G_ARG_208 | NH1 | D_GLU_101 | OE1 | 3.693 |
| 3Q3G | G_ARG_208 | NH1 | D_GLU_101 | OE2 | 2.792 |
| 3Q3G | G_ARG_208 | NH2 | D_GLU_101 | OE1 | 2.994 |
| 3Q3G | G_ARG_208 | NH2 | D_GLU_101 | OE2 | 3.045 |
| 3Q3G | B_LYS_21  | NZ  | K_GLU_202 | OE2 | 2.668 |
| 3Q3G | B_ARG_52  | NH1 | E_GLU_179 | OE2 | 3.409 |
| 3Q3G | B_ARG_52  | NH2 | E_GLU_178 | OE1 | 2.858 |
| 3Q3G | B_ARG_52  | NH2 | E_GLU_179 | OE2 | 2.617 |
| 3Q3G | B_LYS_219 | NZ  | A_GLU_129 | OE2 | 3.294 |
| 3Q3G | E_ARG_208 | NH1 | B_GLU_101 | OE1 | 3.701 |
| 3Q3G | E_ARG_208 | NH1 | B_GLU_101 | OE2 | 2.888 |
| 3Q3G | E_ARG_208 | NH2 | B_GLU_101 | OE1 | 3.046 |
| 3Q3G | E_ARG_208 | NH2 | B_GLU_101 | OE2 | 3.227 |
| 3Q3G | H_ARG_52  | NH1 | I_GLU_179 | OE2 | 3.532 |
| 3Q3G | H_ARG_52  | NH2 | I_GLU_178 | OE1 | 2.972 |

|      |           |     |           |     |       |
|------|-----------|-----|-----------|-----|-------|
| 3Q3G | H_ARG_52  | NH2 | I_GLU_179 | OE2 | 2.629 |
| 3Q3G | H_LYS_61  | NZ  | I_GLU_179 | OE2 | 3.923 |
| 3Q3G | H_LYS_219 | NZ  | F_GLU_129 | OE2 | 3.319 |
| 3Q3G | I_ARG_208 | NH1 | H_GLU_101 | OE1 | 3.704 |
| 3Q3G | I_ARG_208 | NH1 | H_GLU_101 | OE2 | 2.809 |
| 3Q3G | I_ARG_208 | NH2 | H_GLU_101 | OE1 | 3.098 |
| 3Q3G | I_ARG_208 | NH2 | H_GLU_101 | OE2 | 3.125 |
| 3Q3G | J_LYS_109 | NZ  | K_GLU_44  | OE1 | 3.972 |
| 3Q3G | K_ARG_52  | NH1 | L_GLU_179 | OE2 | 3.394 |
| 3Q3G | K_ARG_52  | NH2 | L_GLU_178 | OE1 | 2.871 |
| 3Q3G | K_ARG_52  | NH2 | L_GLU_179 | OE2 | 2.626 |
| 3Q3G | K_LYS_219 | NZ  | J_GLU_129 | OE2 | 3.216 |
| 3Q3G | L_ARG_208 | NH1 | K_GLU_101 | OE1 | 3.706 |
| 3Q3G | L_ARG_208 | NH1 | K_GLU_101 | OE2 | 2.777 |
| 3Q3G | L_ARG_208 | NH2 | K_GLU_101 | OE1 | 3.099 |
| 3Q3G | L_ARG_208 | NH2 | K_GLU_101 | OE2 | 3.162 |
| 3QA3 | C_LYS_109 | NZ  | D_GLU_44  | OE1 | 3.919 |
| 3QA3 | D_LYS_21  | NZ  | B_GLU_202 | OE2 | 2.710 |
| 3QA3 | D_ARG_52  | NH1 | G_GLU_179 | OE2 | 3.492 |
| 3QA3 | D_ARG_52  | NH2 | G_GLU_178 | OE1 | 3.012 |
| 3QA3 | D_ARG_52  | NH2 | G_GLU_179 | OE2 | 2.776 |
| 3QA3 | D_LYS_61  | NZ  | G_GLU_179 | OE1 | 3.896 |
| 3QA3 | D_LYS_61  | NZ  | G_GLU_179 | OE2 | 3.867 |
| 3QA3 | D_LYS_219 | NZ  | C_GLU_129 | OE2 | 3.586 |
| 3QA3 | G_ARG_208 | NH1 | D_GLU_101 | OE1 | 3.094 |
| 3QA3 | G_ARG_208 | NH1 | D_GLU_101 | OE2 | 3.755 |
| 3QA3 | G_ARG_208 | NH2 | D_GLU_101 | OE1 | 2.802 |
| 3QA3 | G_LYS_306 | NZ  | F_GLU_61  | OE1 | 2.676 |
| 3QA3 | G_LYS_306 | NZ  | F_GLU_61  | OE2 | 3.962 |
| 3QA3 | B_ARG_52  | NH1 | E_GLU_179 | OE2 | 3.674 |
| 3QA3 | B_ARG_52  | NH2 | E_GLU_178 | OE1 | 3.139 |
| 3QA3 | B_ARG_52  | NH2 | E_GLU_179 | OE2 | 2.772 |
| 3QA3 | B_LYS_61  | NZ  | E_GLU_179 | OE1 | 3.626 |
| 3QA3 | B_LYS_61  | NZ  | E_GLU_179 | OE2 | 3.531 |
| 3QA3 | B_LYS_219 | NZ  | A_GLU_129 | OE2 | 3.689 |
| 3QA3 | E_ARG_208 | NH1 | B_GLU_101 | OE1 | 3.112 |
| 3QA3 | E_ARG_208 | NH1 | B_GLU_101 | OE2 | 3.639 |
| 3QA3 | E_ARG_208 | NH2 | B_GLU_101 | OE1 | 2.913 |
| 3QA3 | E_ARG_208 | NH2 | B_GLU_101 | OE2 | 3.978 |
| 3QA3 | H_LYS_21  | NZ  | K_GLU_202 | OE1 | 2.630 |
| 3QA3 | H_ARG_52  | NH1 | I_GLU_179 | OE2 | 3.536 |
| 3QA3 | H_ARG_52  | NH2 | I_GLU_178 | OE1 | 3.079 |
| 3QA3 | H_ARG_52  | NH2 | I_GLU_179 | OE2 | 2.753 |
| 3QA3 | H_LYS_61  | NZ  | I_GLU_179 | OE1 | 3.833 |
| 3QA3 | H_LYS_61  | NZ  | I_GLU_179 | OE2 | 3.714 |
| 3QA3 | H_LYS_219 | NZ  | F_GLU_129 | OE2 | 3.683 |
| 3QA3 | I_ARG_208 | NH1 | H_GLU_101 | OE1 | 2.952 |
| 3QA3 | I_ARG_208 | NH1 | H_GLU_101 | OE2 | 3.280 |
| 3QA3 | I_ARG_208 | NH2 | H_GLU_101 | OE1 | 2.858 |
| 3QA3 | I_ARG_208 | NH2 | H_GLU_101 | OE2 | 3.749 |
| 3QA3 | I_LYS_306 | NZ  | C_GLU_61  | OE1 | 3.836 |
| 3QA3 | J_LYS_109 | NZ  | K_GLU_44  | OE1 | 3.982 |
| 3QA3 | K_ARG_52  | NH1 | L_GLU_179 | OE2 | 3.477 |
| 3QA3 | K_ARG_52  | NH2 | L_GLU_178 | OE1 | 3.052 |
| 3QA3 | K_ARG_52  | NH2 | L_GLU_179 | OE2 | 2.734 |
| 3QA3 | K_LYS_61  | NZ  | L_GLU_179 | OE1 | 3.839 |
| 3QA3 | K_LYS_61  | NZ  | L_GLU_179 | OE2 | 3.819 |
| 3QA3 | K_LYS_219 | NZ  | J_GLU_129 | OE2 | 3.538 |



|      |           |     |           |     |       |
|------|-----------|-----|-----------|-----|-------|
| 3QA3 | L_ARG_208 | NH1 | K_GLU_101 | OE1 | 3.296 |
| 3QA3 | L_ARG_208 | NH1 | K_GLU_101 | OE2 | 3.152 |
| 3QA3 | L_ARG_208 | NH2 | K_GLU_101 | OE1 | 3.120 |
| 3QA3 | L_ARG_208 | NH2 | K_GLU_101 | OE2 | 3.548 |
| 3QG6 | A_ARG_188 | NH1 | H_ASP_86  | OD2 | 3.997 |
| 3QG6 | A_ARG_188 | NH2 | H_ASP_86  | OD1 | 3.422 |
| 3QG6 | A_HIS_189 | NE2 | H_GLU_85  | OE1 | 3.361 |
| 3QG6 | A_HIS_189 | NE2 | H_GLU_85  | OE2 | 3.215 |
| 3QG6 | B_LYS_44  | NZ  | L_ASP_151 | OD2 | 2.912 |
| 3QG6 | B_LYS_64  | NZ  | L_GLU_187 | OE1 | 3.778 |
| 3QG6 | B_LYS_221 | NZ  | A_GLU_123 | OE1 | 2.433 |
| 3QG6 | H_LYS_44  | NZ  | A_ASP_151 | OD2 | 2.924 |
| 3QG6 | H_LYS_64  | NZ  | A_GLU_187 | OE1 | 3.924 |
| 3QG6 | H_LYS_221 | NZ  | L_GLU_123 | OE1 | 2.733 |
| 3QG6 | L_HIS_189 | NE2 | B_GLU_85  | OE1 | 3.320 |
| 3QG6 | L_HIS_189 | NE2 | B_GLU_85  | OE2 | 3.623 |
| 3QG7 | H_LYS_221 | NZ  | L_GLU_123 | OE2 | 2.769 |
| 3QO1 | B_ARG_101 | NH1 | A_GLU_39  | OE1 | 3.830 |
| 3QO1 | B_ARG_101 | NH1 | A_GLU_39  | OE2 | 2.711 |
| 3QO1 | B_ARG_101 | NH2 | A_GLU_39  | OE1 | 2.782 |
| 3QO1 | B_ARG_101 | NH2 | A_GLU_39  | OE2 | 3.238 |
| 3QO1 | B_LYS_215 | NZ  | A_GLU_128 | OE1 | 3.939 |
| 3QUM | P_ARG_36  | NH1 | A_ASP_94  | OD2 | 3.603 |
| 3QUM | P_ARG_36  | NH1 | B_GLU_58  | OE1 | 3.234 |
| 3QUM | P_ARG_36  | NH1 | B_GLU_58  | OE2 | 3.373 |
| 3QUM | P_ARG_36  | NH2 | B_GLU_58  | OE1 | 3.423 |
| 3QUM | P_LYS_62  | NZ  | B_GLU_58  | OE2 | 3.762 |
| 3QUM | P_LYS_119 | NZ  | H_ASP_54  | OD1 | 2.788 |
| 3QUM | P_LYS_119 | NZ  | H_ASP_54  | OD2 | 3.700 |
| 3QUM | P_LYS_119 | NZ  | H_ASP_56  | OD2 | 3.000 |
| 3QUM | L_ARG_50  | NH2 | P_GLU_23  | OE1 | 2.715 |
| 3QUM | H_ARG_98  | NH2 | P_ASP_159 | OD1 | 3.868 |
| 3QUM | H_ARG_98  | NH2 | P_ASP_159 | OD2 | 3.474 |
| 3QUM | H_HIS_164 | NE2 | L_ASP_167 | OD1 | 3.746 |
| 3QUM | H_LYS_208 | NZ  | L_GLU_123 | OE1 | 3.317 |
| 3QUM | A_LYS_207 | NZ  | M_ASP_70  | OD2 | 3.646 |
| 3QUM | B_LYS_62  | NZ  | A_ASP_1   | OD1 | 3.967 |
| 3QUM | B_LYS_62  | NZ  | A_ASP_1   | OD2 | 3.654 |
| 3QUM | B_LYS_209 | NZ  | A_GLU_123 | OE1 | 3.994 |
| 3QUM | B_LYS_209 | NZ  | A_GLU_123 | OE2 | 2.553 |
| 3QUM | Q_LYS_119 | NZ  | K_ASP_54  | OD1 | 3.579 |
| 3QUM | Q_LYS_119 | NZ  | K_ASP_54  | OD2 | 2.557 |
| 3QUM | Q_LYS_119 | NZ  | K_ASP_56  | OD2 | 3.138 |
| 3QUM | M_ARG_24  | NH2 | B_ASP_131 | OD1 | 2.867 |
| 3QUM | M_ARG_24  | NH2 | B_ASP_131 | OD2 | 3.402 |
| 3QUM | M_ARG_50  | NH1 | Q_GLU_21  | OE2 | 3.456 |
| 3QUM | M_ARG_50  | NH2 | Q_GLU_21  | OE2 | 3.792 |
| 3QUM | K_LYS_58  | NZ  | Q_ASP_116 | OD2 | 3.811 |
| 3QUM | K_LYS_62  | NZ  | M_ASP_1   | OD1 | 2.803 |
| 3QUM | K_ARG_98  | NH2 | Q_ASP_159 | OD2 | 3.098 |
| 3QUM | K_LYS_208 | NZ  | M_GLU_123 | OE1 | 3.358 |
| 3QUM | D_ARG_97  | NH1 | C_GLU_55  | OE1 | 3.578 |
| 3QUM | D_ARG_97  | NH1 | C_GLU_55  | OE2 | 3.784 |
| 3QUM | D_ARG_97  | NH2 | Q_GLU_110 | OE2 | 3.547 |
| 3R08 | L_LYS_207 | NZ  | H_ASP_129 | OD1 | 3.653 |
| 3R08 | L_LYS_207 | NZ  | H_ASP_129 | OD2 | 2.868 |
| 3R08 | H_LYS_58  | NZ  | E_GLU_4   | OE2 | 3.175 |
| 3R08 | H_LYS_99  | NZ  | L_ASP_56  | OD2 | 3.746 |

|      |            |     |            |     |       |
|------|------------|-----|------------|-----|-------|
| 3SE8 | G_LYS_282  | NZ  | H_ASP_100C | OD2 | 3.668 |
| 3SE8 | H_ARG_71   | NH1 | G_ASP_368  | OD1 | 3.115 |
| 3SE8 | H_ARG_71   | NH1 | G_ASP_368  | OD2 | 3.763 |
| 3SE8 | H_ARG_71   | NH2 | G_ASP_368  | OD1 | 3.733 |
| 3SE8 | H_ARG_71   | NH2 | G_ASP_368  | OD2 | 2.907 |
| 3SE8 | H_LYS_209  | NZ  | L_GLU_123  | OE1 | 3.768 |
| 3SE9 | H_ARG_64   | NH1 | G_ASP_457  | OD2 | 3.853 |
| 3SE9 | H_ARG_64   | NH2 | G_ASP_457  | OD1 | 3.358 |
| 3SE9 | H_ARG_64   | NH2 | G_ASP_457  | OD2 | 3.280 |
| 3SE9 | H_ARG_71   | NH1 | G_ASP_368  | OD1 | 3.515 |
| 3SE9 | H_ARG_71   | NH1 | G_ASP_368  | OD2 | 2.768 |
| 3SE9 | H_ARG_71   | NH2 | G_ASP_368  | OD1 | 3.012 |
| 3SE9 | H_ARG_71   | NH2 | G_ASP_368  | OD2 | 3.769 |
| 3SE9 | H_LYS_209  | NZ  | L_GLU_123  | OE1 | 3.388 |
| 3SE9 | H_LYS_214  | NZ  | L_ASP_122  | OD1 | 3.332 |
| 3SGD | L_LYS_204  | NZ  | J_ASP_75   | OD1 | 3.665 |
| 3SGD | L_LYS_204  | NZ  | J_ASP_75   | OD2 | 3.246 |
| 3SGD | H_LYS_43   | NZ  | J_ASP_68   | OD1 | 3.910 |
| 3SGD | H_LYS_210  | NZ  | L_GLU_128  | OE1 | 3.898 |
| 3SGD | J_LYS_19   | NZ  | L_ASP_148  | OD1 | 3.248 |
| 3SGD | J_LYS_19   | NZ  | L_ASP_148  | OD2 | 2.952 |
| 3SKJ | L_ARG_96   | NH1 | H_GLU_100I | OE1 | 2.505 |
| 3SKJ | L_ARG_96   | NH1 | H_GLU_100I | OE2 | 2.799 |
| 3SKJ | H_HIS_31   | NE2 | E_GLU_133  | OE2 | 3.297 |
| 3SKJ | H_HIS_161  | NE2 | L_ASP_167  | OD2 | 3.763 |
| 3SKJ | H_LYS_206  | NZ  | L_GLU_123  | OE1 | 2.501 |
| 3SKJ | H_LYS_206  | NZ  | L_GLU_123  | OE2 | 3.323 |
| 3SKJ | M_ARG_96   | NH2 | L_GLU_100I | OE1 | 3.081 |
| 3SKJ | M_ARG_96   | NH2 | L_GLU_100I | OE2 | 3.831 |
| 3SKJ | L_LYS_43   | NZ  | L_ASP_1    | OD1 | 3.862 |
| 3SKJ | L_LYS_211  | NZ  | M_ASP_122  | OD2 | 3.816 |
| 3SKJ | L_LYS_211  | NZ  | M_GLU_123  | OE1 | 3.612 |
| 3SY0 | A_ARG_95   | NH2 | B_ASP_95   | OD1 | 3.609 |
| 3SY0 | A_ARG_95   | NH2 | B_ASP_95   | OD2 | 2.821 |
| 3SY0 | B_ARG_100B | NH1 | A_GLU_55   | OE1 | 2.843 |
| 3SY0 | B_ARG_100B | NH1 | A_GLU_55   | OE2 | 3.786 |
| 3SY0 | B_LYS_206  | NZ  | A_GLU_122  | OE1 | 3.980 |
| 3T4Y | A_ARG_95   | NH2 | B_ASP_95   | OD1 | 3.796 |
| 3T4Y | A_ARG_95   | NH2 | B_ASP_95   | OD2 | 2.951 |
| 3T4Y | B_ARG_100B | NH1 | A_GLU_55   | OE1 | 3.824 |
| 3T4Y | B_ARG_100B | NH1 | A_GLU_55   | OE2 | 2.840 |
| 3T4Y | B_LYS_206  | NZ  | A_GLU_122  | OE2 | 2.652 |
| 3T65 | B_ARG_100B | NH1 | A_GLU_55   | OE1 | 3.841 |
| 3T65 | B_ARG_100B | NH1 | A_GLU_55   | OE2 | 2.883 |
| 3T65 | A_ARG_95   | NH2 | B_ASP_95   | OD1 | 3.666 |
| 3T65 | A_ARG_95   | NH2 | B_ASP_95   | OD2 | 2.866 |
| 3T77 | A_ARG_95   | NH2 | B_ASP_95   | OD1 | 3.723 |
| 3T77 | A_ARG_95   | NH2 | B_ASP_95   | OD2 | 2.997 |
| 3T77 | B_ARG_100B | NH1 | A_GLU_55   | OE1 | 3.125 |
| 3T77 | B_ARG_100B | NH1 | A_GLU_55   | OE2 | 2.687 |
| 3T77 | B_LYS_206  | NZ  | A_GLU_122  | OE2 | 3.917 |
| 3THM | F_LYS_45   | NZ  | L_GLU_97   | OE2 | 3.172 |
| 3THM | F_LYS_78   | NZ  | L_ASP_52   | OD1 | 3.702 |
| 3U1S | L_HIS_27D  | NE2 | H_ASP_100B | OD2 | 2.859 |
| 3U1S | H_LYS_214  | NZ  | L_GLU_123  | OE1 | 3.475 |
| 3U2S | L_ARG_54   | NH2 | C_ASP_167  | OD1 | 3.525 |
| 3U2S | L_ARG_54   | NH2 | C_ASP_167  | OD2 | 3.282 |
| 3U2S | L_ARG_95A  | NH1 | H_ASP_61   | OD1 | 2.794 |

|      |           |     |            |     |       |
|------|-----------|-----|------------|-----|-------|
| 3U2S | L_ARG_95A | NH1 | H_ASP_61   | OD2 | 3.373 |
| 3U2S | L_ARG_95A | NH2 | H_ASP_61   | OD1 | 2.338 |
| 3U2S | L_ARG_96  | NH2 | H_GLU_95   | OE1 | 3.743 |
| 3U2S | L_ARG_96  | NH2 | H_GLU_95   | OE2 | 2.869 |
| 3U2S | L_LYS_129 | NZ  | H_ASP_144  | OD1 | 3.881 |
| 3U2S | G_ARG_168 | NH2 | H_ASP_100L | OD1 | 3.358 |
| 3U2S | G_ARG_168 | NH2 | H_ASP_100L | OD2 | 3.104 |
| 3U2S | G_LYS_171 | NZ  | H_ASP_100I | OD1 | 3.178 |
| 3U2S | A_LYS_143 | NZ  | B_GLU_124  | OE2 | 3.550 |
| 3U2S | B_ARG_95A | NH1 | A_ASP_61   | OD1 | 2.632 |
| 3U2S | B_ARG_95A | NH1 | A_ASP_61   | OD2 | 3.483 |
| 3U2S | B_ARG_95A | NH2 | A_ASP_61   | OD1 | 3.270 |
| 3U2S | B_ARG_96  | NH2 | A_GLU_95   | OE1 | 3.738 |
| 3U2S | B_ARG_96  | NH2 | A_GLU_95   | OE2 | 2.983 |
| 3U2S | C_ARG_168 | NH2 | A_ASP_100L | OD1 | 2.424 |
| 3U2S | C_ARG_168 | NH2 | A_ASP_100L | OD2 | 3.228 |
| 3U2S | C_LYS_171 | NZ  | A_ASP_100I | OD1 | 3.279 |
| 3U36 | L_LYS_89  | NZ  | H_GLU_95   | OE1 | 3.857 |
| 3U36 | L_ARG_95A | NH1 | H_ASP_61   | OD1 | 3.290 |
| 3U36 | L_ARG_95A | NH1 | H_ASP_61   | OD2 | 1.959 |
| 3U36 | L_ARG_95A | NH2 | H_ASP_61   | OD1 | 3.530 |
| 3U36 | L_ARG_95A | NH2 | H_ASP_61   | OD2 | 3.624 |
| 3U36 | L_ARG_96  | NH2 | H_GLU_95   | OE2 | 3.606 |
| 3U36 | B_LYS_89  | NZ  | A_GLU_95   | OE1 | 3.772 |
| 3U36 | B_ARG_95A | NH1 | A_ASP_61   | OD1 | 3.519 |
| 3U36 | B_ARG_95A | NH1 | A_ASP_61   | OD2 | 2.198 |
| 3U36 | B_ARG_95A | NH2 | A_ASP_61   | OD1 | 3.831 |
| 3U36 | B_ARG_95A | NH2 | A_ASP_61   | OD2 | 3.817 |
| 3U36 | B_ARG_96  | NH2 | A_GLU_95   | OE2 | 3.395 |
| 3U36 | B_LYS_129 | NZ  | A_ASP_144  | OD1 | 3.769 |
| 3U36 | D_LYS_89  | NZ  | C_GLU_95   | OE1 | 3.877 |
| 3U36 | D_ARG_95A | NH1 | C_ASP_61   | OD1 | 3.266 |
| 3U36 | D_ARG_95A | NH1 | C_ASP_61   | OD2 | 2.045 |
| 3U36 | D_ARG_95A | NH2 | C_ASP_61   | OD1 | 3.629 |
| 3U36 | D_ARG_95A | NH2 | C_ASP_61   | OD2 | 3.782 |
| 3U36 | D_ARG_96  | NH2 | C_GLU_95   | OE2 | 3.569 |
| 3U36 | F_ARG_95A | NH1 | E_ASP_61   | OD1 | 3.076 |
| 3U36 | F_ARG_95A | NH1 | E_ASP_61   | OD2 | 1.876 |
| 3U36 | F_ARG_95A | NH2 | E_ASP_61   | OD1 | 3.424 |
| 3U36 | F_ARG_95A | NH2 | E_ASP_61   | OD2 | 3.670 |
| 3U36 | F_ARG_96  | NH2 | E_GLU_95   | OE2 | 3.739 |
| 3UBX | A_ARG_39  | NH2 | B_ASP_53   | OD2 | 3.336 |
| 3UBX | A_HIS_282 | NE2 | B_ASP_98   | OD1 | 3.815 |
| 3UBX | A_HIS_282 | NE2 | B_ASP_98   | OD2 | 3.128 |
| 3UBX | B_ARG_12  | NH2 | A_ASP_242  | OD1 | 3.715 |
| 3UBX | B_ARG_12  | NH2 | A_ASP_242  | OD2 | 3.324 |
| 3UBX | D_ARG_    | NH2 | E_ASP_     | OD2 | 3.464 |
| 3UBX | D_HIS_    | NE2 | E_ASP_     | OD1 | 3.963 |
| 3UBX | D_HIS_    | NE2 | E_ASP_     | OD2 | 3.193 |
| 3UBX | E_ARG_    | NH2 | D_ASP_     | OD1 | 3.594 |
| 3UBX | E_ARG_    | NH2 | D_ASP_     | OD2 | 3.257 |
| 3UBX | E_HIS_    | ND1 | D_GLU_97   | OE1 | 3.846 |
| 3UBX | L_ARG_32  | NH2 | A_ASP_80   | OD1 | 3.479 |
| 3UBX | L_ARG_32  | NH2 | A_ASP_80   | OD2 | 3.348 |
| 3UBX | L_ARG_32  | NH2 | A_ASP_153  | OD2 | 3.795 |
| 3UBX | L_LYS_169 | NZ  | I_GLU_81   | OE1 | 3.852 |
| 3UBX | L_LYS_169 | NZ  | I_GLU_81   | OE2 | 3.096 |
| 3UBX | H_ARG_103 | NH2 | A_ASP_80   | OD1 | 2.578 |

|      |           |     |           |     |       |
|------|-----------|-----|-----------|-----|-------|
| 3UBX | H.LYS_215 | NZ  | L_GLU_123 | OE1 | 3.082 |
| 3UBX | H.LYS_215 | NZ  | L_GLU_123 | OE2 | 3.481 |
| 3UBX | L_ARG_32  | NH2 | D_ASP_80  | OD1 | 3.383 |
| 3UBX | L_ARG_32  | NH2 | D_ASP_80  | OD2 | 3.294 |
| 3UBX | L_ARG_32  | NH2 | D_ASP_153 | OD2 | 3.950 |
| 3UBX | L.LYS_169 | NZ  | L_GLU_81  | OE1 | 3.837 |
| 3UBX | L.LYS_169 | NZ  | L_GLU_81  | OE2 | 3.130 |
| 3UBX | G_ARG_103 | NH2 | D_ASP_80  | OD1 | 2.614 |
| 3UBX | G.LYS_215 | NZ  | L_GLU_123 | OE1 | 3.204 |
| 3UBX | G.LYS_215 | NZ  | L_GLU_123 | OE2 | 3.514 |
| 3UJI | H.LYS_143 | NZ  | L_GLU_124 | OE2 | 2.632 |
| 3UJI | H.LYS_209 | NZ  | L_GLU_123 | OE1 | 3.097 |
| 3UJI | H.LYS_209 | NZ  | L_GLU_123 | OE2 | 2.701 |
| 3UJI | P.LYS_305 | NZ  | H_ASP_54  | OD1 | 2.722 |
| 3UJI | P.LYS_305 | NZ  | H_ASP_54  | OD2 | 3.687 |
| 3UJI | P.LYS_305 | NZ  | H_ASP_56  | OD2 | 2.744 |
| 3UJI | P.HIS_308 | ND1 | H_GLU_98  | OE1 | 2.731 |
| 3UJI | P.HIS_308 | ND1 | H_GLU_98  | OE2 | 3.371 |
| 3UJJ | H.LYS_209 | NZ  | L_GLU_123 | OE1 | 2.859 |
| 3UJJ | H.LYS_209 | NZ  | L_GLU_123 | OE2 | 2.771 |
| 3UJJ | P.LYS_305 | NZ  | H_ASP_54  | OD1 | 3.600 |
| 3UJJ | P.LYS_305 | NZ  | H_ASP_54  | OD2 | 2.628 |
| 3UJJ | P.LYS_305 | NZ  | H_ASP_56  | OD2 | 2.857 |
| 3UJJ | P_ARG_308 | NH2 | L_GLU_50  | OE2 | 2.898 |
| 3UJT | H.LYS_143 | NZ  | M_ASP_60  | OD2 | 3.914 |
| 3UJT | H.LYS_208 | NZ  | L_GLU_123 | OE2 | 2.966 |
| 3UJT | L.HIS_164 | NE2 | M_ASP_167 | OD1 | 3.917 |
| 3UJT | L.LYS_208 | NZ  | M_GLU_123 | OE2 | 3.024 |
| 3UO1 | H.LYS_212 | NZ  | L_GLU_127 | OE2 | 2.634 |
| 3UYR | H.LYS_212 | NZ  | L_GLU_127 | OE2 | 2.869 |
| 3V4P | B_ARG_194 | NH1 | H_ASP_102 | OD1 | 2.860 |
| 3V4P | B_ARG_194 | NH1 | H_ASP_102 | OD2 | 2.764 |
| 3V4P | B_ARG_200 | NH2 | H_ASP_102 | OD1 | 3.172 |
| 3V4P | D_ARG_194 | NH1 | M_ASP_102 | OD1 | 2.738 |
| 3V4P | D_ARG_194 | NH1 | M_ASP_102 | OD2 | 2.760 |
| 3V4P | D_ARG_200 | NH2 | M_ASP_102 | OD1 | 3.233 |
| 3V4P | H.HIS_172 | ND1 | L_ASP_172 | OD2 | 3.780 |
| 3V4P | H.LYS_216 | NZ  | L_GLU_128 | OE2 | 3.270 |
| 3V4P | M.HIS_172 | ND1 | N_ASP_172 | OD2 | 3.600 |
| 3V4P | M.LYS_216 | NZ  | N_GLU_128 | OE2 | 3.408 |
| 3V4U | H.LYS_212 | NZ  | L_GLU_127 | OE2 | 2.667 |
| 3V4V | B_ARG_194 | NH1 | H_ASP_102 | OD1 | 2.874 |
| 3V4V | B_ARG_194 | NH1 | H_ASP_102 | OD2 | 3.211 |
| 3V4V | B_ARG_200 | NH2 | H_ASP_102 | OD1 | 3.237 |
| 3V4V | H.HIS_172 | ND1 | L_ASP_172 | OD1 | 3.644 |
| 3V4V | H.LYS_216 | NZ  | L_GLU_128 | OE2 | 3.607 |
| 3V4V | D_ARG_194 | NH1 | M_ASP_102 | OD1 | 2.657 |
| 3V4V | D_ARG_194 | NH1 | M_ASP_102 | OD2 | 2.923 |
| 3V4V | D_ARG_200 | NH2 | M_ASP_102 | OD1 | 3.070 |
| 3V4V | M.HIS_172 | ND1 | N_ASP_172 | OD1 | 3.594 |
| 3V4V | M.LYS_216 | NZ  | N_GLU_128 | OE2 | 3.217 |
| 3V52 | H.LYS_212 | NZ  | L_GLU_127 | OE2 | 2.929 |
| 3V6F | A.LYS_213 | NZ  | B_GLU_130 | OE1 | 3.799 |
| 3V6F | C.LYS_213 | NZ  | D_GLU_130 | OE1 | 3.956 |
| 3V6F | E.LYS_213 | NZ  | F_GLU_130 | OE1 | 3.763 |
| 3V6F | H.HIS_169 | NE2 | L_ASP_174 | OD1 | 3.656 |
| 3WIH | H.LYS_214 | NZ  | L_GLU_123 | OE2 | 3.755 |
| 3WIH | L.LYS_214 | NZ  | M_GLU_123 | OE1 | 2.678 |

|      |           |     |           |     |       |
|------|-----------|-----|-----------|-----|-------|
| 3WIH | I.LYS_214 | NZ  | M.GLU_123 | OE2 | 3.619 |
| 3WN5 | A.LYS_370 | NZ  | B.GLU_357 | OE2 | 3.815 |
| 3WN5 | A.LYS_409 | NZ  | B.ASP_399 | OD2 | 3.327 |
| 3WN5 | B.LYS_370 | NZ  | A.GLU_357 | OE1 | 3.801 |
| 3WN5 | B.LYS_409 | NZ  | A.ASP_399 | OD1 | 3.830 |
| 3WN5 | B.LYS_409 | NZ  | A.ASP_399 | OD2 | 3.511 |
| 3WN5 | C.LYS_117 | NZ  | B.ASP_265 | OD2 | 2.853 |
| 3WN5 | C.HIS_131 | NE2 | B.ASP_270 | OD1 | 3.342 |
| 3WN5 | C.HIS_131 | NE2 | B.ASP_270 | OD2 | 2.619 |
| 3WN5 | D.LYS_370 | NZ  | E.GLU_357 | OE2 | 3.279 |
| 3WN5 | D.LYS_409 | NZ  | E.ASP_399 | OD2 | 3.246 |
| 3WN5 | E.LYS_370 | NZ  | D.GLU_357 | OE1 | 3.843 |
| 3WN5 | E.LYS_409 | NZ  | D.ASP_399 | OD2 | 2.789 |
| 3WN5 | F.LYS_117 | NZ  | E.ASP_265 | OD2 | 3.157 |
| 3WN5 | F.HIS_131 | NE2 | E.ASP_270 | OD2 | 2.923 |
| 4A6Y | A.ARG_186 | NH2 | H.ASP_180 | OD2 | 3.656 |
| 4A6Y | A.ARG_190 | NH1 | H.GLU_89  | OE2 | 3.969 |
| 4A6Y | B.LYS_150 | NZ  | A.GLU_127 | OE2 | 3.258 |
| 4A6Y | H.LYS_150 | NZ  | L.GLU_127 | OE2 | 3.131 |
| 4A6Y | H.HIS_171 | NE2 | L.ASP_141 | OD1 | 3.968 |
| 4A6Y | L.ARG_190 | NH2 | B.GLU_89  | OE2 | 3.440 |
| 4AG4 | H.LYS_208 | NZ  | L.GLU_123 | OE2 | 2.708 |
| 4C83 | C.LYS_208 | NZ  | D.GLU_123 | OE1 | 2.304 |
| 4C83 | C.LYS_208 | NZ  | D.GLU_123 | OE2 | 2.598 |
| 4DAG | H.ARG_101 | NH2 | A.GLU_33  | OE1 | 3.620 |
| 4DAG | H.ARG_101 | NH2 | A.GLU_33  | OE2 | 2.107 |
| 4DAG | L.LYS_46  | NZ  | A.ASP_414 | OD1 | 3.558 |
| 4DAG | L.LYS_46  | NZ  | A.ASP_414 | OD2 | 3.550 |
| 4DGV | H.LYS_209 | NZ  | L.GLU_123 | OE1 | 2.915 |
| 4DGV | H.LYS_209 | NZ  | L.GLU_123 | OE2 | 3.422 |
| 4DGY | H.LYS_214 | NZ  | L.ASP_122 | OD1 | 3.699 |
| 4DGY | H.LYS_214 | NZ  | L.ASP_122 | OD2 | 2.517 |
| 4EBQ | H.LYS_215 | NZ  | L.GLU_123 | OE2 | 2.960 |
| 4EDW | H.LYS_209 | NZ  | L.GLU_123 | OE2 | 2.707 |
| 4EDX | W.LYS_32  | NZ  | H.ASP_58  | OD1 | 2.886 |
| 4EDX | W.LYS_32  | NZ  | H.ASP_58  | OD2 | 2.677 |
| 4EDX | A.ARG_53  | NH1 | W.GLU_11  | OE1 | 2.795 |
| 4EDX | B.LYS_221 | NZ  | A.GLU_123 | OE2 | 3.878 |
| 4EDX | V.LYS_32  | NZ  | B.ASP_58  | OD1 | 3.117 |
| 4EDX | V.LYS_32  | NZ  | B.ASP_58  | OD2 | 2.681 |
| 4EDX | V.LYS_88  | NZ  | B.ASP_54  | OD2 | 3.805 |
| 4EDX | L.ARG_53  | NH1 | V.GLU_11  | OE1 | 3.269 |
| 4EDX | H.LYS_221 | NZ  | L.GLU_123 | OE2 | 3.893 |
| 4ETQ | H.ARG_60  | NH1 | C.ASP_179 | OD1 | 3.609 |
| 4ETQ | H.ARG_60  | NH2 | C.ASP_179 | OD1 | 3.375 |
| 4ETQ | H.ARG_103 | NH1 | C.GLU_217 | OE1 | 3.862 |
| 4ETQ | H.ARG_103 | NH1 | C.GLU_217 | OE2 | 2.754 |
| 4ETQ | H.ARG_103 | NH2 | C.GLU_217 | OE2 | 2.933 |
| 4ETQ | H.LYS_215 | NZ  | L.GLU_123 | OE2 | 3.075 |
| 4ETQ | A.ARG_103 | NH1 | X.GLU_217 | OE1 | 2.753 |
| 4ETQ | A.ARG_103 | NH1 | X.GLU_217 | OE2 | 3.565 |
| 4ETQ | A.ARG_103 | NH2 | X.GLU_217 | OE1 | 2.983 |
| 4ETQ | A.ARG_103 | NH2 | X.GLU_217 | OE2 | 3.995 |
| 4ETQ | A.LYS_215 | NZ  | B.GLU_123 | OE2 | 3.774 |
| 4ETQ | X.ARG_44  | NH1 | A.GLU_56  | OE1 | 3.611 |
| 4ETQ | X.ARG_44  | NH1 | A.GLU_56  | OE2 | 3.023 |
| 4ETQ | X.LYS_108 | NZ  | A.GLU_58  | OE2 | 3.014 |
| 4ETQ | X.ARG_220 | NH1 | A.ASP_105 | OD1 | 3.937 |

|      |           |     |           |     |       |
|------|-----------|-----|-----------|-----|-------|
| 4ETQ | X_ARG.220 | NH2 | A_ASP.105 | OD1 | 2.929 |
| 4ETQ | C_ARG.44  | NH1 | H_GLU.56  | OE1 | 2.601 |
| 4ETQ | C_ARG.220 | NH1 | H_ASP.105 | OD1 | 3.872 |
| 4ETQ | C_ARG.220 | NH2 | H_ASP.105 | OD1 | 3.103 |
| 4F33 | B_LYS.215 | NZ  | A_GLU.123 | OE1 | 2.676 |
| 4F33 | B_LYS.215 | NZ  | A_GLU.123 | OE2 | 3.528 |
| 4F33 | D_LYS.215 | NZ  | C_GLU.123 | OE1 | 2.787 |
| 4F33 | D_LYS.215 | NZ  | C_GLU.123 | OE2 | 3.695 |
| 4F33 | F_LYS.212 | NZ  | D_ASP.214 | OD2 | 3.519 |
| 4F33 | F_LYS.215 | NZ  | E_GLU.123 | OE1 | 2.609 |
| 4F33 | F_LYS.215 | NZ  | E_GLU.123 | OE2 | 3.626 |
| 4F33 | H_LYS.215 | NZ  | G_GLU.123 | OE1 | 2.968 |
| 4F33 | H_LYS.215 | NZ  | G_GLU.123 | OE2 | 3.966 |
| 4F3F | A_HIS.94  | NE2 | C_GLU.18  | OE1 | 3.664 |
| 4F3F | A_HIS.94  | NE2 | C_GLU.18  | OE2 | 3.880 |
| 4F3F | C_LYS.24  | NZ  | A_ASP.50  | OD1 | 2.832 |
| 4F3F | C_LYS.24  | NZ  | A_ASP.50  | OD2 | 3.865 |
| 4FFV | A_ARG.659 | NH2 | B_GLU.242 | OE2 | 2.683 |
| 4FFV | A_HIS.755 | ND1 | B_ASP.730 | OD1 | 2.996 |
| 4FFV | B_ARG.659 | NH2 | A_GLU.242 | OE2 | 2.592 |
| 4FFV | B_HIS.755 | ND1 | A_ASP.730 | OD1 | 2.989 |
| 4FFV | B_HIS.755 | ND1 | A_ASP.730 | OD2 | 3.942 |
| 4FFV | D_LYS.54  | NZ  | B_GLU.89  | OE1 | 3.460 |
| 4FFV | D_LYS.54  | NZ  | B_GLU.89  | OE2 | 3.556 |
| 4FFV | H_LYS.54  | NZ  | A_GLU.89  | OE1 | 3.584 |
| 4FFV | H_LYS.54  | NZ  | A_GLU.89  | OE2 | 3.871 |
| 4FFV | H_HIS.168 | NE2 | L_ASP.166 | OD1 | 3.178 |
| 4FFV | H_HIS.168 | NE2 | L_ASP.166 | OD2 | 3.870 |
| 4FFW | A_ARG.659 | NH2 | B_GLU.242 | OE2 | 3.187 |
| 4FFW | A_HIS.755 | ND1 | B_ASP.730 | OD1 | 3.111 |
| 4FFW | B_ARG.659 | NH2 | A_GLU.242 | OE2 | 3.068 |
| 4FFW | D_LYS.54  | NZ  | B_GLU.89  | OE1 | 3.085 |
| 4FFW | D_LYS.54  | NZ  | B_GLU.89  | OE2 | 3.381 |
| 4FFW | H_LYS.54  | NZ  | A_GLU.89  | OE1 | 3.517 |
| 4FFW | H_LYS.54  | NZ  | A_GLU.89  | OE2 | 3.666 |
| 4FFW | H_HIS.168 | NE2 | L_ASP.166 | OD1 | 3.737 |
| 4FQH | H_LYS.143 | NZ  | L_GLU.124 | OE2 | 2.906 |
| 4FQH | H_LYS.214 | NZ  | L_GLU.123 | OE1 | 3.752 |
| 4FQH | H_LYS.214 | NZ  | L_GLU.123 | OE2 | 2.217 |
| 4FQH | A_LYS.143 | NZ  | B_GLU.124 | OE2 | 3.049 |
| 4FQH | A_LYS.214 | NZ  | B_GLU.123 | OE1 | 3.132 |
| 4FQI | A_LYS.109 | NZ  | B_GLU.69  | OE1 | 2.615 |
| 4FQI | A_LYS.109 | NZ  | B_GLU.69  | OE2 | 3.205 |
| 4FQI | A_LYS.307 | NZ  | B_GLU.64  | OE2 | 3.371 |
| 4FQI | A_LYS.310 | NZ  | B_ASP.90  | OD1 | 2.687 |
| 4FQI | A_LYS.310 | NZ  | B_ASP.90  | OD2 | 3.739 |
| 4FQI | H_LYS.143 | NZ  | L_GLU.124 | OE2 | 2.947 |
| 4G6A | C_ARG.64  | NH1 | D_ASP.94  | OD1 | 3.792 |
| 4G6A | C_ARG.64  | NH1 | D_ASP.94  | OD2 | 3.701 |
| 4G6A | C_LYS.209 | NZ  | D_GLU.123 | OE1 | 2.784 |
| 4G6A | C_LYS.209 | NZ  | D_GLU.123 | OE2 | 3.529 |
| 4G6A | D_ARG.18  | NH2 | L_GLU.27  | OE2 | 3.721 |
| 4G6A | H_ARG.64  | NH2 | L_ASP.94  | OD1 | 3.443 |
| 4G6A | H_ARG.64  | NH2 | L_ASP.94  | OD2 | 3.275 |
| 4G6A | H_LYS.209 | NZ  | L_GLU.123 | OE1 | 2.940 |
| 4G6A | H_LYS.209 | NZ  | L_GLU.123 | OE2 | 3.622 |
| 4G6F | H_LYS.143 | NZ  | L_GLU.125 | OE2 | 3.341 |
| 4G6F | H_LYS.209 | NZ  | L_GLU.124 | OE1 | 3.080 |

|      |           |     |            |     |       |
|------|-----------|-----|------------|-----|-------|
| 4G6F | H.LYS_209 | NZ  | L_GLU_124  | OE2 | 2.558 |
| 4G6F | B.LYS_143 | NZ  | D_GLU_125  | OE2 | 2.735 |
| 4G6F | B.LYS_209 | NZ  | D_GLU_124  | OE1 | 3.470 |
| 4G6F | B.LYS_209 | NZ  | D_GLU_124  | OE2 | 2.107 |
| 4G6F | L.HIS_31  | ND1 | H_GLU_100I | OE2 | 2.912 |
| 4G6F | L.ARG_91  | NH1 | H_GLU_100J | OE2 | 2.715 |
| 4G6F | L.ARG_91  | NH2 | H_GLU_100J | OE2 | 2.951 |
| 4G6F | D.HIS_31  | ND1 | B_GLU_100I | OE2 | 2.954 |
| 4G6F | D.ARG_91  | NH1 | B_GLU_100J | OE2 | 2.854 |
| 4G6F | D.ARG_91  | NH2 | B_GLU_100J | OE2 | 2.880 |
| 4G6F | D.ARG_95B | NH2 | B.ASP_58   | OD1 | 3.343 |
| 4GMT | H.HIS_164 | NE2 | L.ASP_167  | OD2 | 3.650 |
| 4GXU | A.LYS_    | NZ  | F_GLU_     | OE1 | 3.529 |
| 4GXU | A.LYS_    | NZ  | F_GLU_     | OE2 | 3.469 |
| 4GXU | A.ARG_109 | NH2 | B_GLU_69   | OE1 | 3.987 |
| 4GXU | A.ARG_109 | NH2 | B_GLU_69   | OE2 | 3.286 |
| 4GXU | A.ARG_    | NH1 | B.ASP_     | OD1 | 2.648 |
| 4GXU | A.ARG_    | NH2 | B.ASP_     | OD1 | 2.545 |
| 4GXU | B.LYS_58  | NZ  | D_GLU_97   | OE1 | 3.748 |
| 4GXU | B.LYS_68  | NZ  | A_GLU_110  | OE2 | 3.492 |
| 4GXU | B.ARG_76  | NH1 | F_GLU_74   | OE1 | 3.015 |
| 4GXU | B.ARG_76  | NH1 | F_GLU_74   | OE2 | 2.935 |
| 4GXU | B.ARG_76  | NH2 | E_GLU_107  | OE2 | 3.559 |
| 4GXU | B.ARG_76  | NH2 | F_GLU_74   | OE2 | 2.547 |
| 4GXU | B.LYS_83  | NZ  | F.ASP_85   | OD1 | 3.431 |
| 4GXU | B.LYS_83  | NZ  | F.ASP_85   | OD2 | 3.614 |
| 4GXU | B.ARG_    | NH2 | D.ASP_     | OD2 | 3.432 |
| 4GXU | B.ARG_    | NH1 | F_GLU_     | OE1 | 3.168 |
| 4GXU | B.ARG_    | NH2 | F_GLU_     | OE1 | 3.085 |
| 4GXU | B.ARG_    | NH2 | F_GLU_     | OE2 | 3.110 |
| 4GXU | C.LYS_32  | NZ  | B_GLU_57   | OE1 | 3.823 |
| 4GXU | C.LYS_32  | NZ  | B_GLU_57   | OE2 | 3.681 |
| 4GXU | C.ARG_109 | NH2 | D_GLU_69   | OE1 | 3.507 |
| 4GXU | C.ARG_109 | NH2 | D_GLU_69   | OE2 | 3.205 |
| 4GXU | C.ARG_310 | NH1 | D.ASP_90   | OD1 | 3.385 |
| 4GXU | C.ARG_310 | NH2 | D.ASP_90   | OD1 | 3.336 |
| 4GXU | D.LYS_68  | NZ  | C_GLU_110  | OE2 | 3.981 |
| 4GXU | D.ARG_76  | NH1 | B_GLU_74   | OE1 | 2.948 |
| 4GXU | D.ARG_76  | NH1 | B_GLU_74   | OE2 | 3.453 |
| 4GXU | D.ARG_76  | NH2 | A_GLU_107  | OE2 | 3.465 |
| 4GXU | D.ARG_76  | NH2 | B_GLU_74   | OE1 | 3.835 |
| 4GXU | D.ARG_76  | NH2 | B_GLU_74   | OE2 | 2.916 |
| 4GXU | D.LYS_83  | NZ  | B.ASP_85   | OD1 | 3.057 |
| 4GXU | D.LYS_83  | NZ  | B.ASP_85   | OD2 | 3.527 |
| 4GXU | D.ARG_    | NH2 | F.ASP_     | OD2 | 3.392 |
| 4GXU | D.ARG_    | NH1 | B_GLU_     | OE1 | 2.743 |
| 4GXU | D.ARG_    | NH1 | B_GLU_     | OE2 | 3.931 |
| 4GXU | D.ARG_    | NH2 | B_GLU_     | OE1 | 2.897 |
| 4GXU | D.ARG_    | NH2 | B_GLU_     | OE2 | 2.579 |
| 4GXU | E.LYS_    | NZ  | D_GLU_     | OE1 | 3.848 |
| 4GXU | E.LYS_    | NZ  | D_GLU_     | OE2 | 3.549 |
| 4GXU | E.ARG_109 | NH2 | F_GLU_69   | OE1 | 3.819 |
| 4GXU | E.ARG_109 | NH2 | F_GLU_69   | OE2 | 3.459 |
| 4GXU | E.ARG_310 | NH1 | F.ASP_90   | OD1 | 2.704 |
| 4GXU | E.ARG_310 | NH2 | F.ASP_90   | OD1 | 2.770 |
| 4GXU | F.LYS_    | NZ  | B_GLU_     | OE1 | 3.893 |
| 4GXU | F.LYS_68  | NZ  | E_GLU_110  | OE2 | 3.968 |
| 4GXU | F.ARG_76  | NH1 | D_GLU_74   | OE1 | 2.787 |

|      |          |     |           |     |       |
|------|----------|-----|-----------|-----|-------|
| 4GXU | F_ARG_76 | NH1 | D_GLU_74  | OE2 | 3.366 |
| 4GXU | F_ARG_76 | NH2 | C_GLU_107 | OE2 | 3.548 |
| 4GXU | F_ARG_76 | NH2 | D_GLU_74  | OE1 | 3.616 |
| 4GXU | F_ARG_76 | NH2 | D_GLU_74  | OE2 | 2.732 |
| 4GXU | F_LYS_83 | NZ  | D_ASP_85  | OD1 | 3.339 |
| 4GXU | F_LYS_83 | NZ  | D_ASP_85  | OD2 | 3.717 |
| 4GXU | F_ARG_   | NH2 | B_ASP_    | OD2 | 3.670 |
| 4GXU | F_ARG_   | NH1 | D_GLU_    | OE1 | 3.077 |
| 4GXU | F_ARG_   | NH2 | D_GLU_    | OE1 | 2.952 |
| 4GXU | F_ARG_   | NH2 | D_GLU_    | OE2 | 3.074 |
| 4GXU | G_LYS_   | NZ  | J_GLU_    | OE1 | 3.601 |
| 4GXU | G_LYS_   | NZ  | J_GLU_    | OE2 | 3.403 |
| 4GXU | G_ARG_   | NH2 | H_GLU_    | OE2 | 3.183 |
| 4GXU | G_ARG_   | NH1 | H_ASP_    | OD1 | 2.337 |
| 4GXU | G_ARG_   | NH2 | H_ASP_    | OD1 | 2.900 |
| 4GXU | H_LYS_   | NZ  | L_GLU_    | OE1 | 3.639 |
| 4GXU | H_LYS_   | NZ  | G_GLU_    | OE2 | 3.438 |
| 4GXU | H_ARG_   | NH1 | J_GLU_    | OE1 | 2.612 |
| 4GXU | H_ARG_   | NH1 | J_GLU_    | OE2 | 3.374 |
| 4GXU | H_ARG_   | NH2 | I_GLU_    | OE2 | 3.506 |
| 4GXU | H_ARG_   | NH2 | J_GLU_    | OE1 | 3.326 |
| 4GXU | H_ARG_   | NH2 | J_GLU_    | OE2 | 2.517 |
| 4GXU | H_LYS_   | NZ  | J_ASP_    | OD1 | 2.938 |
| 4GXU | H_LYS_   | NZ  | J_ASP_    | OD2 | 3.368 |
| 4GXU | H_ARG_   | NH2 | L_ASP_    | OD2 | 3.212 |
| 4GXU | H_ARG_   | NH1 | J_GLU_    | OE1 | 3.044 |
| 4GXU | H_ARG_   | NH2 | J_GLU_    | OE1 | 2.714 |
| 4GXU | H_ARG_   | NH2 | J_GLU_    | OE2 | 3.067 |
| 4GXU | L_LYS_   | NZ  | L_GLU_    | OE1 | 3.747 |
| 4GXU | L_LYS_   | NZ  | L_GLU_    | OE2 | 3.353 |
| 4GXU | L_ARG_   | NH2 | J_GLU_    | OE1 | 3.762 |
| 4GXU | L_ARG_   | NH2 | J_GLU_    | OE2 | 2.924 |
| 4GXU | L_ARG_   | NH1 | J_ASP_    | OD1 | 2.388 |
| 4GXU | L_ARG_   | NH2 | J_ASP_    | OD1 | 2.649 |
| 4GXU | J_LYS_   | NZ  | H_GLU_    | OE1 | 3.949 |
| 4GXU | J_LYS_   | NZ  | I_GLU_    | OE2 | 3.674 |
| 4GXU | J_ARG_   | NH1 | L_GLU_    | OE1 | 2.912 |
| 4GXU | J_ARG_   | NH1 | L_GLU_    | OE2 | 3.322 |
| 4GXU | J_ARG_   | NH2 | K_GLU_    | OE2 | 3.542 |
| 4GXU | J_ARG_   | NH2 | L_GLU_    | OE1 | 3.621 |
| 4GXU | J_ARG_   | NH2 | L_GLU_    | OE2 | 2.520 |
| 4GXU | J_LYS_   | NZ  | L_ASP_    | OD1 | 3.139 |
| 4GXU | J_LYS_   | NZ  | L_ASP_    | OD2 | 3.566 |
| 4GXU | J_ARG_   | NH2 | H_ASP_    | OD2 | 3.270 |
| 4GXU | J_ARG_   | NH1 | L_GLU_    | OE1 | 3.377 |
| 4GXU | J_ARG_   | NH2 | L_GLU_    | OE1 | 2.504 |
| 4GXU | J_ARG_   | NH2 | L_GLU_    | OE2 | 3.208 |
| 4GXU | K_LYS_   | NZ  | H_GLU_    | OE2 | 3.068 |
| 4GXU | K_ARG_   | NH2 | L_GLU_    | OE1 | 3.835 |
| 4GXU | K_ARG_   | NH2 | L_GLU_    | OE2 | 3.159 |
| 4GXU | K_ARG_   | NH1 | L_ASP_    | OD1 | 2.447 |
| 4GXU | K_ARG_   | NH2 | L_ASP_    | OD1 | 2.754 |
| 4GXU | L_LYS_   | NZ  | J_GLU_    | OE1 | 3.674 |
| 4GXU | L_LYS_   | NZ  | K_GLU_    | OE2 | 3.305 |
| 4GXU | L_ARG_   | NH1 | H_GLU_    | OE1 | 2.958 |
| 4GXU | L_ARG_   | NH1 | H_GLU_    | OE2 | 3.138 |
| 4GXU | L_ARG_   | NH2 | G_GLU_    | OE2 | 3.886 |
| 4GXU | L_ARG_   | NH2 | H_GLU_    | OE1 | 3.887 |



|      |           |     |           |     |       |
|------|-----------|-----|-----------|-----|-------|
| 4GXU | L_ARG_    | NH2 | H_GLU_    | OE2 | 2.595 |
| 4GXU | L_LYS_    | NZ  | H_ASP_    | OD1 | 2.732 |
| 4GXU | L_LYS_    | NZ  | H_ASP_    | OD2 | 3.190 |
| 4GXU | L_ARG_    | NH2 | J_ASP_    | OD2 | 3.583 |
| 4GXU | L_ARG_    | NH1 | H_GLU_    | OE1 | 3.044 |
| 4GXU | L_ARG_    | NH2 | H_GLU_    | OE1 | 2.477 |
| 4GXU | L_ARG_    | NH2 | H_GLU_    | OE2 | 3.036 |
| 4GXU | M_ARG_    | NH2 | H_GLU_    | OE2 | 3.356 |
| 4GXU | M_LYS_    | NZ  | N_GLU_    | OE2 | 2.851 |
| 4GXU | M_LYS_    | NZ  | N_GLU_    | OE1 | 3.371 |
| 4GXU | Q_LYS_143 | NZ  | R_GLU_124 | OE2 | 3.025 |
| 4GXU | Q_LYS_209 | NZ  | R_GLU_123 | OE1 | 3.619 |
| 4GXU | Q_LYS_209 | NZ  | R_GLU_123 | OE2 | 3.564 |
| 4GXV | H_LYS_143 | NZ  | L_GLU_124 | OE2 | 2.866 |
| 4GXV | H_LYS_209 | NZ  | L_GLU_123 | OE1 | 3.472 |
| 4GXV | H_LYS_209 | NZ  | L_GLU_123 | OE2 | 2.731 |
| 4GXV | I_LYS_143 | NZ  | M_GLU_124 | OE2 | 2.455 |
| 4GXV | I_LYS_209 | NZ  | M_GLU_123 | OE1 | 2.930 |
| 4GXV | I_LYS_209 | NZ  | M_GLU_123 | OE2 | 3.487 |
| 4GXX | A_LYS_32  | NZ  | D_GLU_57  | OE1 | 3.386 |
| 4GXX | A_ARG_109 | NH2 | B_GLU_69  | OE2 | 3.594 |
| 4GXX | A_ARG_310 | NH1 | B_ASP_90  | OD1 | 2.488 |
| 4GXX | A_ARG_310 | NH2 | B_ASP_90  | OD1 | 2.951 |
| 4GXX | B_LYS_58  | NZ  | F_GLU_97  | OE1 | 3.721 |
| 4GXX | B_LYS_68  | NZ  | A_GLU_110 | OE2 | 2.734 |
| 4GXX | B_ARG_76  | NH1 | D_GLU_74  | OE1 | 2.782 |
| 4GXX | B_ARG_76  | NH1 | D_GLU_74  | OE2 | 3.511 |
| 4GXX | B_ARG_76  | NH2 | C_GLU_107 | OE2 | 3.651 |
| 4GXX | B_ARG_76  | NH2 | D_GLU_74  | OE1 | 3.625 |
| 4GXX | B_ARG_76  | NH2 | D_GLU_74  | OE2 | 2.818 |
| 4GXX | B_LYS_83  | NZ  | D_ASP_85  | OD1 | 2.661 |
| 4GXX | B_LYS_83  | NZ  | D_ASP_85  | OD2 | 3.421 |
| 4GXX | B_ARG_106 | NH2 | F_ASP_109 | OD2 | 3.780 |
| 4GXX | B_ARG_116 | NH2 | D_GLU_120 | OE1 | 2.669 |
| 4GXX | C_LYS_32  | NZ  | F_GLU_57  | OE2 | 3.165 |
| 4GXX | C_ARG_109 | NH2 | D_GLU_69  | OE1 | 3.802 |
| 4GXX | C_ARG_109 | NH2 | D_GLU_69  | OE2 | 3.427 |
| 4GXX | C_ARG_310 | NH1 | D_ASP_90  | OD1 | 2.336 |
| 4GXX | C_ARG_310 | NH2 | D_ASP_86  | OD1 | 3.727 |
| 4GXX | C_ARG_310 | NH2 | D_ASP_90  | OD1 | 3.012 |
| 4GXX | D_LYS_58  | NZ  | B_GLU_97  | OE1 | 3.529 |
| 4GXX | D_LYS_68  | NZ  | C_GLU_110 | OE2 | 2.872 |
| 4GXX | D_ARG_76  | NH1 | F_GLU_74  | OE1 | 2.910 |
| 4GXX | D_ARG_76  | NH1 | F_GLU_74  | OE2 | 3.571 |
| 4GXX | D_ARG_76  | NH2 | E_GLU_107 | OE2 | 3.622 |
| 4GXX | D_ARG_76  | NH2 | F_GLU_74  | OE1 | 3.615 |
| 4GXX | D_ARG_76  | NH2 | F_GLU_74  | OE2 | 2.803 |
| 4GXX | D_LYS_83  | NZ  | F_ASP_85  | OD1 | 2.774 |
| 4GXX | D_LYS_83  | NZ  | F_ASP_85  | OD2 | 3.514 |
| 4GXX | D_ARG_106 | NH2 | B_ASP_109 | OD2 | 3.920 |
| 4GXX | D_ARG_116 | NH1 | F_GLU_120 | OE1 | 3.357 |
| 4GXX | D_ARG_116 | NH2 | F_GLU_120 | OE1 | 3.225 |
| 4GXX | D_ARG_116 | NH2 | F_GLU_120 | OE2 | 3.007 |
| 4GXX | E_LYS_32  | NZ  | B_GLU_57  | OE2 | 3.237 |
| 4GXX | E_ARG_109 | NH2 | F_GLU_69  | OE1 | 3.858 |
| 4GXX | E_ARG_109 | NH2 | F_GLU_69  | OE2 | 2.773 |
| 4GXX | E_ARG_310 | NH1 | F_ASP_90  | OD1 | 2.470 |
| 4GXX | E_ARG_310 | NH2 | F_ASP_90  | OD1 | 2.925 |

|      |           |     |           |     |       |
|------|-----------|-----|-----------|-----|-------|
| 4GXX | F_LYS_58  | NZ  | D_GLU_97  | OE1 | 3.142 |
| 4GXX | F_LYS_68  | NZ  | E_GLU_110 | OE2 | 2.982 |
| 4GXX | F_ARG_76  | NH1 | B_GLU_74  | OE1 | 2.798 |
| 4GXX | F_ARG_76  | NH1 | B_GLU_74  | OE2 | 3.572 |
| 4GXX | F_ARG_76  | NH2 | A_GLU_107 | OE2 | 3.644 |
| 4GXX | F_ARG_76  | NH2 | B_GLU_74  | OE1 | 3.566 |
| 4GXX | F_ARG_76  | NH2 | B_GLU_74  | OE2 | 2.823 |
| 4GXX | F_LYS_83  | NZ  | B_ASP_85  | OD1 | 2.859 |
| 4GXX | F_LYS_83  | NZ  | B_ASP_85  | OD2 | 3.462 |
| 4GXX | F_ARG_106 | NH2 | D_ASP_109 | OD2 | 3.576 |
| 4GXX | F_ARG_116 | NH1 | B_GLU_120 | OE1 | 2.775 |
| 4GXX | F_ARG_116 | NH1 | B_GLU_120 | OE2 | 3.643 |
| 4GXX | F_ARG_116 | NH2 | B_GLU_120 | OE1 | 3.285 |
| 4GXX | F_ARG_116 | NH2 | B_GLU_120 | OE2 | 2.552 |
| 4H8W | H_ARG_55  | NH1 | G_ASP_107 | OD1 | 3.623 |
| 4H8W | H_ARG_55  | NH1 | G_ASP_107 | OD2 | 3.025 |
| 4H8W | H_LYS_209 | NZ  | L_GLU_124 | OE1 | 2.673 |
| 4H8W | H_LYS_209 | NZ  | L_GLU_124 | OE2 | 2.808 |
| 4H8W | C_ARG_59  | NH1 | G_ASP_368 | OD1 | 2.952 |
| 4H8W | C_ARG_59  | NH1 | G_ASP_368 | OD2 | 3.318 |
| 4H8W | C_ARG_59  | NH2 | G_ASP_368 | OD1 | 3.741 |
| 4H8W | C_ARG_59  | NH2 | G_ASP_368 | OD2 | 2.611 |
| 4HF5 | A_LYS_109 | NZ  | B_GLU_69  | OE1 | 3.017 |
| 4HF5 | A_ARG_137 | NH1 | H_ASP_97  | OD2 | 2.969 |
| 4HF5 | A_ARG_137 | NH2 | H_ASP_97  | OD1 | 3.008 |
| 4HF5 | A_ARG_137 | NH2 | H_ASP_97  | OD2 | 2.797 |
| 4HF5 | A_LYS_269 | NZ  | B_GLU_69  | OE1 | 2.931 |
| 4HF5 | A_LYS_269 | NZ  | B_GLU_69  | OE2 | 3.200 |
| 4HF5 | A_LYS_307 | NZ  | B_GLU_64  | OE2 | 3.558 |
| 4HF5 | A_LYS_310 | NZ  | B_ASP_90  | OD1 | 2.877 |
| 4HF5 | B_LYS_143 | NZ  | A_ASP_11  | OD2 | 3.934 |
| 4HGK | C_LYS_65  | NZ  | B_GLU_230 | OE1 | 3.917 |
| 4HGK | C_ARG_103 | NH1 | B_GLU_230 | OE1 | 3.099 |
| 4HGK | C_ARG_103 | NH2 | B_GLU_230 | OE1 | 3.263 |
| 4HGK | C_ARG_103 | NH2 | B_GLU_230 | OE2 | 3.968 |
| 4HGK | D_LYS_65  | NZ  | A_GLU_230 | OE1 | 3.741 |
| 4HGK | D_ARG_103 | NH1 | A_GLU_230 | OE1 | 3.115 |
| 4HGK | D_ARG_103 | NH2 | A_GLU_230 | OE1 | 3.112 |
| 4HGK | D_ARG_103 | NH2 | A_GLU_230 | OE2 | 3.907 |
| 4HH9 | A_ARG_54  | NH1 | C_ASP_50  | OD2 | 3.238 |
| 4HH9 | A_ARG_54  | NH2 | C_ASP_50  | OD2 | 3.183 |
| 4HH9 | B_LYS_209 | NZ  | A_GLU_123 | OE1 | 3.274 |
| 4HH9 | B_LYS_209 | NZ  | A_GLU_123 | OE2 | 3.488 |
| 4HH9 | B_LYS_214 | NZ  | A_ASP_122 | OD1 | 3.788 |
| 4HH9 | C_ARG_54  | NH1 | A_ASP_50  | OD2 | 2.782 |
| 4HH9 | C_ARG_54  | NH2 | A_ASP_50  | OD2 | 3.752 |
| 4HH9 | D_LYS_129 | NZ  | C_GLU_213 | OE1 | 3.401 |
| 4HH9 | D_LYS_129 | NZ  | C_GLU_213 | OE2 | 3.163 |
| 4HH9 | D_LYS_209 | NZ  | C_GLU_123 | OE2 | 3.057 |
| 4HH9 | D_LYS_214 | NZ  | C_ASP_122 | OD2 | 3.367 |
| 4HHA | B_HIS_32  | ND1 | P_GLU_1   | OE1 | 4.000 |
| 4HHA | B_HIS_32  | NE2 | P_GLU_1   | OE1 | 3.076 |
| 4HHA | B_HIS_32  | NE2 | P_GLU_1   | OE2 | 2.639 |
| 4HHA | B_ARG_94  | NH1 | P_GLU_1   | OE2 | 3.723 |
| 4HHA | B_ARG_94  | NH2 | P_GLU_1   | OE2 | 3.026 |
| 4HHA | B_HIS_164 | NE2 | A_ASP_167 | OD1 | 3.917 |
| 4HHA | B_LYS_209 | NZ  | A_GLU_123 | OE2 | 2.754 |
| 4HIE | A_ARG_91  | NH2 | B_GLU_95  | OE1 | 3.457 |

|      |           |     |           |     |       |
|------|-----------|-----|-----------|-----|-------|
| 4HIE | A_ARG_91  | NH2 | B_GLU_95  | OE2 | 3.317 |
| 4HIH | A_ARG_91  | NH2 | B_GLU_95  | OE1 | 3.470 |
| 4HIH | A_ARG_91  | NH2 | B_GLU_95  | OE2 | 3.314 |
| 4HIH | B_LYS_209 | NZ  | A_GLU_123 | OE1 | 2.853 |
| 4HIH | B_LYS_209 | NZ  | A_GLU_123 | OE2 | 3.685 |
| 4HIH | C_ARG_91  | NH2 | D_GLU_95  | OE1 | 3.527 |
| 4HIH | C_ARG_91  | NH2 | D_GLU_95  | OE2 | 3.339 |
| 4HIH | D_LYS_209 | NZ  | C_GLU_123 | OE1 | 2.616 |
| 4HIH | D_LYS_209 | NZ  | C_GLU_123 | OE2 | 2.820 |
| 4HII | A_ARG_91  | NH2 | B_GLU_95  | OE1 | 3.439 |
| 4HII | A_ARG_91  | NH2 | B_GLU_95  | OE2 | 3.542 |
| 4HII | B_LYS_209 | NZ  | A_GLU_123 | OE1 | 2.845 |
| 4HII | B_LYS_209 | NZ  | A_GLU_123 | OE2 | 2.723 |
| 4HII | C_ARG_91  | NH1 | D_GLU_95  | OE2 | 3.915 |
| 4HII | C_ARG_91  | NH2 | D_GLU_95  | OE1 | 3.687 |
| 4HII | C_ARG_91  | NH2 | D_GLU_95  | OE2 | 3.380 |
| 4HIJ | A_ARG_91  | NH1 | B_GLU_95  | OE2 | 3.962 |
| 4HIJ | A_ARG_91  | NH2 | B_GLU_95  | OE1 | 3.390 |
| 4HIJ | A_ARG_91  | NH2 | B_GLU_95  | OE2 | 3.274 |
| 4HIJ | C_ARG_91  | NH2 | D_GLU_95  | OE1 | 3.772 |
| 4HIJ | C_ARG_91  | NH2 | D_GLU_95  | OE2 | 3.260 |
| 4HIJ | D_LYS_209 | NZ  | C_GLU_123 | OE2 | 3.644 |
| 4HK0 | A_LYS_222 | NZ  | B_GLU_125 | OE2 | 2.735 |
| 4HK0 | C_ARG_104 | NH2 | D_ASP_95  | OD2 | 3.573 |
| 4HK0 | D_LYS_104 | NZ  | B_ASP_50  | OD1 | 3.601 |
| 4HK0 | D_LYS_104 | NZ  | B_ASP_50  | OD2 | 2.755 |
| 4HK3 | J_LYS_222 | NZ  | N_GLU_125 | OE2 | 3.801 |
| 4HKB | J_LYS_23  | NZ  | C_ASP_73  | OD1 | 3.505 |
| 4HKB | J_ARG_72  | NH2 | A_GLU_10  | OE1 | 3.065 |
| 4HKB | J_ARG_72  | NH2 | A_GLU_10  | OE2 | 2.664 |
| 4HKB | J_LYS_222 | NZ  | N_GLU_125 | OE1 | 3.188 |
| 4HKB | J_LYS_222 | NZ  | N_GLU_125 | OE2 | 3.564 |
| 4HKB | A_ARG_72  | NH2 | C_GLU_10  | OE1 | 3.154 |
| 4HKB | A_ARG_72  | NH2 | C_GLU_10  | OE2 | 2.755 |
| 4HKB | A_LYS_156 | NZ  | B_GLU_126 | OE2 | 3.919 |
| 4HKB | A_LYS_222 | NZ  | B_GLU_125 | OE1 | 3.019 |
| 4HKB | A_LYS_222 | NZ  | B_GLU_125 | OE2 | 3.903 |
| 4HKB | C_LYS_63  | NZ  | E_ASP_89  | OD1 | 3.939 |
| 4HKB | C_LYS_63  | NZ  | E_ASP_89  | OD2 | 3.374 |
| 4HKB | C_ARG_87  | NH2 | E_ASP_90  | OD1 | 3.045 |
| 4HKB | C_ARG_87  | NH2 | E_ASP_90  | OD2 | 2.962 |
| 4HKB | C_LYS_222 | NZ  | D_GLU_125 | OE1 | 3.332 |
| 4HKB | C_LYS_222 | NZ  | D_GLU_125 | OE2 | 3.836 |
| 4HKB | E_LYS_23  | NZ  | G_ASP_73  | OD1 | 2.630 |
| 4HKB | E_LYS_63  | NZ  | C_ASP_89  | OD1 | 3.625 |
| 4HKB | E_LYS_63  | NZ  | C_ASP_89  | OD2 | 3.095 |
| 4HKB | E_ARG_72  | NH1 | I_GLU_10  | OE1 | 2.874 |
| 4HKB | E_ARG_72  | NH1 | I_GLU_10  | OE2 | 2.849 |
| 4HKB | E_ARG_87  | NH1 | C_ASP_90  | OD1 | 3.489 |
| 4HKB | E_ARG_87  | NH1 | C_ASP_90  | OD2 | 3.954 |
| 4HKB | E_ARG_87  | NH2 | C_ASP_90  | OD1 | 3.930 |
| 4HKB | E_ARG_87  | NH2 | C_ASP_90  | OD2 | 3.219 |
| 4HKB | E_LYS_222 | NZ  | F_GLU_125 | OE2 | 3.327 |
| 4HKB | G_ARG_87  | NH1 | J_ASP_90  | OD1 | 3.108 |
| 4HKB | G_ARG_87  | NH1 | J_ASP_90  | OD2 | 3.912 |
| 4HKB | G_ARG_87  | NH2 | J_ASP_90  | OD2 | 3.607 |
| 4HKB | I_ARG_72  | NH2 | G_GLU_10  | OE1 | 3.560 |
| 4HKB | I_ARG_72  | NH2 | G_GLU_10  | OE2 | 2.553 |

|      |           |     |           |     |       |
|------|-----------|-----|-----------|-----|-------|
| 4HKB | I_LYS_222 | NZ  | K_GLU_125 | OE2 | 3.211 |
| 4HKB | N_ARG_29  | NH1 | J_ASP_107 | OD1 | 3.664 |
| 4HKB | N_ARG_29  | NH1 | J_ASP_107 | OD2 | 2.469 |
| 4HKB | N_LYS_131 | NZ  | J_ASP_157 | OD2 | 3.951 |
| 4HKB | B_ARG_29  | NH1 | A_ASP_107 | OD2 | 3.659 |
| 4HKB | D_ARG_29  | NH1 | C_ASP_107 | OD2 | 3.254 |
| 4HKB | H_ARG_29  | NH1 | G_ASP_107 | OD2 | 3.325 |
| 4HKB | H_ARG_29  | NH2 | G_ASP_107 | OD2 | 3.189 |
| 4HKB | K_ARG_31  | NH1 | I_ASP_107 | OD2 | 3.242 |
| 4HKX | E_ARG_192 | NH1 | B_ASP_95  | OD2 | 3.293 |
| 4HKX | E_LYS_219 | NZ  | B_ASP_93  | OD1 | 2.877 |
| 4HKX | E_LYS_219 | NZ  | B_ASP_93  | OD2 | 3.792 |
| 4HKX | A_LYS_222 | NZ  | B_GLU_125 | OE1 | 3.981 |
| 4HKX | B_ARG_29  | NH2 | A_ASP_107 | OD2 | 3.853 |
| 4HKX | B_LYS_131 | NZ  | A_ASP_157 | OD2 | 3.310 |
| 4HLZ | A_LYS_109 | NZ  | B_GLU_69  | OE1 | 3.478 |
| 4HLZ | A_LYS_109 | NZ  | B_GLU_69  | OE2 | 2.999 |
| 4HLZ | A_LYS_310 | NZ  | B_ASP_90  | OD1 | 2.429 |
| 4HLZ | A_LYS_310 | NZ  | B_ASP_90  | OD2 | 3.948 |
| 4HLZ | B_LYS_58  | NZ  | F_GLU_97  | OE1 | 3.865 |
| 4HLZ | B_LYS_58  | NZ  | F_GLU_97  | OE2 | 3.885 |
| 4HLZ | B_ARG_76  | NH1 | D_GLU_74  | OE1 | 2.838 |
| 4HLZ | B_ARG_76  | NH1 | D_GLU_74  | OE2 | 3.993 |
| 4HLZ | B_ARG_76  | NH2 | D_GLU_74  | OE1 | 3.145 |
| 4HLZ | B_ARG_76  | NH2 | D_GLU_74  | OE2 | 2.917 |
| 4HLZ | B_LYS_83  | NZ  | D_GLU_85  | OE2 | 2.459 |
| 4HLZ | B_ARG_106 | NH2 | F_ASP_109 | OD2 | 3.278 |
| 4HLZ | B_LYS_143 | NZ  | A_ASP_11  | OD1 | 3.527 |
| 4HLZ | B_LYS_143 | NZ  | A_ASP_11  | OD2 | 3.714 |
| 4HLZ | C_ARG_32  | NH1 | F_GLU_57  | OE1 | 3.413 |
| 4HLZ | C_LYS_109 | NZ  | D_GLU_69  | OE1 | 2.904 |
| 4HLZ | C_LYS_109 | NZ  | D_GLU_69  | OE2 | 3.394 |
| 4HLZ | C_LYS_310 | NZ  | D_ASP_86  | OD2 | 2.827 |
| 4HLZ | C_LYS_310 | NZ  | D_ASP_90  | OD1 | 2.357 |
| 4HLZ | C_LYS_310 | NZ  | D_ASP_90  | OD2 | 3.459 |
| 4HLZ | D_LYS_58  | NZ  | B_GLU_97  | OE1 | 2.796 |
| 4HLZ | D_ARG_76  | NH1 | F_GLU_74  | OE1 | 3.279 |
| 4HLZ | D_ARG_76  | NH1 | F_GLU_74  | OE2 | 2.976 |
| 4HLZ | D_ARG_76  | NH2 | E_GLU_107 | OE2 | 3.277 |
| 4HLZ | D_ARG_76  | NH2 | F_GLU_74  | OE2 | 2.480 |
| 4HLZ | D_LYS_83  | NZ  | F_GLU_85  | OE2 | 2.714 |
| 4HLZ | D_ARG_106 | NH2 | B_ASP_109 | OD2 | 3.865 |
| 4HLZ | D_LYS_131 | NZ  | F_ASP_128 | OD1 | 3.317 |
| 4HLZ | E_LYS_109 | NZ  | F_GLU_69  | OE1 | 2.572 |
| 4HLZ | E_LYS_109 | NZ  | F_GLU_69  | OE2 | 3.930 |
| 4HLZ | E_LYS_310 | NZ  | F_ASP_86  | OD1 | 3.890 |
| 4HLZ | E_LYS_310 | NZ  | F_ASP_90  | OD1 | 3.800 |
| 4HLZ | F_LYS_58  | NZ  | D_GLU_97  | OE1 | 3.641 |
| 4HLZ | F_ARG_76  | NH1 | B_GLU_74  | OE1 | 3.514 |
| 4HLZ | F_ARG_76  | NH1 | B_GLU_74  | OE2 | 3.227 |
| 4HLZ | F_ARG_76  | NH2 | B_GLU_74  | OE1 | 3.962 |
| 4HLZ | F_ARG_76  | NH2 | B_GLU_74  | OE2 | 2.467 |
| 4HLZ | I_LYS_96  | NZ  | D_ASP_46  | OD1 | 2.912 |
| 4HLZ | I_LYS_96  | NZ  | D_ASP_46  | OD2 | 3.655 |
| 4HLZ | I_LYS_208 | NZ  | J_GLU_125 | OE2 | 3.495 |
| 4HLZ | I_ARG_213 | NH2 | J_GLU_125 | OE1 | 3.227 |
| 4HLZ | I_ARG_213 | NH2 | J_GLU_125 | OE2 | 3.829 |
| 4HMG | A_LYS_27  | NZ  | B_GLU_97  | OE1 | 2.795 |

|      |           |     |           |     |       |
|------|-----------|-----|-----------|-----|-------|
| 4HMG | A_LYS_27  | NZ  | B_GLU_97  | OE2 | 3.247 |
| 4HMG | A_ARG_109 | NH1 | B_GLU_67  | OE1 | 3.584 |
| 4HMG | A_ARG_109 | NH1 | B_GLU_67  | OE2 | 2.773 |
| 4HMG | A_LYS_238 | NZ  | F_GLU_72  | OE2 | 2.782 |
| 4HMG | A_ARG_269 | NH2 | B_GLU_67  | OE1 | 2.783 |
| 4HMG | A_LYS_310 | NZ  | B_ASP_90  | OD1 | 3.350 |
| 4HMG | A_LYS_310 | NZ  | B_ASP_90  | OD2 | 2.711 |
| 4HMG | B_ARG_54  | NH1 | F_GLU_97  | OE1 | 3.078 |
| 4HMG | B_ARG_54  | NH2 | E_ASP_32  | OD2 | 3.863 |
| 4HMG | B_ARG_54  | NH2 | F_GLU_97  | OE1 | 3.088 |
| 4HMG | B_LYS_62  | NZ  | F_ASP_86  | OD1 | 2.890 |
| 4HMG | B_LYS_62  | NZ  | F_ASP_86  | OD2 | 2.630 |
| 4HMG | B_LYS_62  | NZ  | F_ASP_90  | OD1 | 3.620 |
| 4HMG | B_LYS_62  | NZ  | F_ASP_90  | OD2 | 3.931 |
| 4HMG | B_HIS_64  | NE2 | F_ASP_79  | OD2 | 3.785 |
| 4HMG | B_ARG_76  | NH1 | D_GLU_74  | OE1 | 2.796 |
| 4HMG | B_ARG_76  | NH1 | D_GLU_74  | OE2 | 3.711 |
| 4HMG | B_ARG_76  | NH1 | D_GLU_81  | OE1 | 2.672 |
| 4HMG | B_ARG_76  | NH1 | D_GLU_81  | OE2 | 3.308 |
| 4HMG | B_ARG_76  | NH2 | D_GLU_74  | OE1 | 3.404 |
| 4HMG | B_ARG_76  | NH2 | D_GLU_74  | OE2 | 2.827 |
| 4HMG | B_ARG_123 | NH1 | F_GLU_132 | OE2 | 3.178 |
| 4HMG | B_ARG_124 | NH1 | F_GLU_132 | OE1 | 3.359 |
| 4HMG | B_ARG_124 | NH1 | F_GLU_132 | OE2 | 3.102 |
| 4HMG | B_ARG_127 | NH2 | F_GLU_131 | OE1 | 2.525 |
| 4HMG | B_ARG_163 | NH1 | F_GLU_131 | OE1 | 3.338 |
| 4HMG | B_ARG_163 | NH1 | F_GLU_131 | OE2 | 2.796 |
| 4HMG | B_ARG_163 | NH2 | F_GLU_131 | OE1 | 2.694 |
| 4HMG | B_ARG_163 | NH2 | F_GLU_131 | OE2 | 3.492 |
| 4HMG | B_ARG_170 | NH2 | D_GLU_128 | OE1 | 3.784 |
| 4HMG | B_ARG_170 | NH2 | D_GLU_128 | OE2 | 3.698 |
| 4HMG | C_LYS_27  | NZ  | D_GLU_97  | OE1 | 2.789 |
| 4HMG | C_LYS_27  | NZ  | D_GLU_97  | OE2 | 3.246 |
| 4HMG | C_ARG_109 | NH1 | D_GLU_67  | OE1 | 3.616 |
| 4HMG | C_ARG_109 | NH1 | D_GLU_67  | OE2 | 2.791 |
| 4HMG | C_LYS_238 | NZ  | B_GLU_72  | OE2 | 2.606 |
| 4HMG | C_ARG_269 | NH2 | D_GLU_67  | OE1 | 2.764 |
| 4HMG | C_LYS_310 | NZ  | D_ASP_90  | OD1 | 3.321 |
| 4HMG | C_LYS_310 | NZ  | D_ASP_90  | OD2 | 2.697 |
| 4HMG | C_LYS_326 | NZ  | D_GLU_15  | OE1 | 3.836 |
| 4HMG | C_LYS_326 | NZ  | D_GLU_15  | OE2 | 2.684 |
| 4HMG | D_ARG_54  | NH1 | B_GLU_97  | OE1 | 3.076 |
| 4HMG | D_ARG_54  | NH2 | A_ASP_32  | OD2 | 3.995 |
| 4HMG | D_ARG_54  | NH2 | B_GLU_97  | OE1 | 3.112 |
| 4HMG | D_LYS_62  | NZ  | B_ASP_86  | OD1 | 2.940 |
| 4HMG | D_LYS_62  | NZ  | B_ASP_86  | OD2 | 2.591 |
| 4HMG | D_LYS_62  | NZ  | B_ASP_90  | OD1 | 3.586 |
| 4HMG | D_LYS_62  | NZ  | B_ASP_90  | OD2 | 3.891 |
| 4HMG | D_HIS_64  | NE2 | B_ASP_79  | OD2 | 3.731 |
| 4HMG | D_ARG_76  | NH1 | F_GLU_74  | OE1 | 2.745 |
| 4HMG | D_ARG_76  | NH1 | F_GLU_74  | OE2 | 3.756 |
| 4HMG | D_ARG_76  | NH1 | F_GLU_81  | OE1 | 2.644 |
| 4HMG | D_ARG_76  | NH1 | F_GLU_81  | OE2 | 3.314 |
| 4HMG | D_ARG_76  | NH2 | F_GLU_74  | OE1 | 3.255 |
| 4HMG | D_ARG_76  | NH2 | F_GLU_74  | OE2 | 2.777 |
| 4HMG | D_ARG_123 | NH1 | B_GLU_132 | OE2 | 3.157 |
| 4HMG | D_ARG_124 | NH1 | B_GLU_132 | OE1 | 3.347 |
| 4HMG | D_ARG_124 | NH1 | B_GLU_132 | OE2 | 3.074 |

|      |           |     |           |     |       |
|------|-----------|-----|-----------|-----|-------|
| 4HMG | D_ARG_127 | NH2 | B_GLU_131 | OE1 | 2.541 |
| 4HMG | D_ARG_163 | NH1 | B_GLU_131 | OE1 | 3.321 |
| 4HMG | D_ARG_163 | NH1 | B_GLU_131 | OE2 | 2.801 |
| 4HMG | D_ARG_163 | NH2 | B_GLU_131 | OE1 | 2.729 |
| 4HMG | D_ARG_163 | NH2 | B_GLU_131 | OE2 | 3.526 |
| 4HMG | D_ARG_170 | NH2 | F_GLU_128 | OE1 | 3.859 |
| 4HMG | D_ARG_170 | NH2 | F_GLU_128 | OE2 | 3.829 |
| 4HMG | E_LYS_27  | NZ  | F_GLU_97  | OE1 | 2.764 |
| 4HMG | E_LYS_27  | NZ  | F_GLU_97  | OE2 | 3.247 |
| 4HMG | E_ARG_109 | NH1 | F_GLU_67  | OE1 | 3.614 |
| 4HMG | E_ARG_109 | NH1 | F_GLU_67  | OE2 | 2.773 |
| 4HMG | E_LYS_238 | NZ  | D_GLU_72  | OE2 | 2.707 |
| 4HMG | E_ARG_269 | NH2 | F_GLU_67  | OE1 | 2.739 |
| 4HMG | E_LYS_310 | NZ  | F_ASP_90  | OD1 | 3.300 |
| 4HMG | E_LYS_310 | NZ  | F_ASP_90  | OD2 | 2.685 |
| 4HMG | F_ARG_25  | NH1 | E_GLU_325 | OE1 | 3.853 |
| 4HMG | F_ARG_54  | NH1 | D_GLU_97  | OE1 | 3.052 |
| 4HMG | F_ARG_54  | NH2 | C_ASP_32  | OD2 | 3.923 |
| 4HMG | F_ARG_54  | NH2 | D_GLU_97  | OE1 | 3.130 |
| 4HMG | F_LYS_62  | NZ  | D_ASP_86  | OD1 | 2.900 |
| 4HMG | F_LYS_62  | NZ  | D_ASP_86  | OD2 | 2.597 |
| 4HMG | F_LYS_62  | NZ  | D_ASP_90  | OD1 | 3.664 |
| 4HMG | F_LYS_62  | NZ  | D_ASP_90  | OD2 | 3.951 |
| 4HMG | F_HIS_64  | NE2 | D_ASP_79  | OD2 | 3.646 |
| 4HMG | F_ARG_76  | NH1 | B_GLU_74  | OE1 | 2.714 |
| 4HMG | F_ARG_76  | NH1 | B_GLU_74  | OE2 | 3.687 |
| 4HMG | F_ARG_76  | NH1 | B_GLU_81  | OE1 | 2.651 |
| 4HMG | F_ARG_76  | NH1 | B_GLU_81  | OE2 | 3.434 |
| 4HMG | F_ARG_76  | NH2 | B_GLU_74  | OE1 | 3.281 |
| 4HMG | F_ARG_76  | NH2 | B_GLU_74  | OE2 | 2.711 |
| 4HMG | F_ARG_123 | NH1 | D_GLU_132 | OE2 | 3.178 |
| 4HMG | F_ARG_124 | NH1 | D_GLU_132 | OE1 | 3.402 |
| 4HMG | F_ARG_124 | NH1 | D_GLU_132 | OE2 | 3.132 |
| 4HMG | F_ARG_127 | NH2 | D_GLU_131 | OE1 | 2.579 |
| 4HMG | F_ARG_163 | NH1 | D_GLU_131 | OE1 | 3.299 |
| 4HMG | F_ARG_163 | NH1 | D_GLU_131 | OE2 | 2.816 |
| 4HMG | F_ARG_163 | NH2 | D_GLU_131 | OE1 | 2.752 |
| 4HMG | F_ARG_163 | NH2 | D_GLU_131 | OE2 | 3.575 |
| 4HMG | F_ARG_170 | NH2 | B_GLU_128 | OE1 | 3.815 |
| 4HMG | F_ARG_170 | NH2 | B_GLU_128 | OE2 | 3.719 |
| 4HXB | A_ARG_230 | NH2 | H_ASP_56  | OD2 | 3.246 |
| 4HXB | H_LYS_215 | NZ  | L_GLU_120 | OE2 | 3.469 |
| 4HXA | H_ARG_98  | NH1 | L_ASP_50  | OD1 | 2.959 |
| 4HXA | H_ARG_98  | NH1 | L_ASP_50  | OD2 | 3.607 |
| 4HXA | H_HIS_164 | NE2 | L_ASP_167 | OD1 | 3.601 |
| 4HXB | H_ARG_96  | NH1 | L_ASP_94  | OD1 | 3.212 |
| 4HXB | H_ARG_96  | NH1 | L_ASP_94  | OD2 | 2.665 |
| 4HXB | H_ARG_96  | NH2 | L_ASP_94  | OD1 | 2.669 |
| 4HXB | H_ARG_96  | NH2 | L_ASP_94  | OD2 | 3.708 |
| 4I2X | B_LYS_59  | NZ  | E_GLU_10  | OE2 | 3.418 |
| 4I2X | B_LYS_65  | NZ  | E_ASP_208 | OD1 | 3.256 |
| 4I2X | B_LYS_214 | NZ  | A_GLU_123 | OE2 | 3.742 |
| 4I2X | D_LYS_63  | NZ  | C_ASP_1   | OD2 | 3.656 |
| 4I2X | D_LYS_65  | NZ  | F_ASP_208 | OD1 | 3.848 |
| 4I2X | D_HIS_170 | ND1 | C_ASP_167 | OD2 | 3.958 |
| 4I2X | D_LYS_214 | NZ  | C_GLU_123 | OE2 | 3.815 |
| 4I2X | F_ARG_180 | NH1 | E_GLU_47  | OE1 | 3.834 |
| 4I3R | G_LYS_282 | NZ  | H_GLU_33  | OE1 | 3.996 |

|      |           |     |           |     |       |
|------|-----------|-----|-----------|-----|-------|
| 4I3R | G_LYS_282 | NZ  | H_GLU_33  | OE2 | 2.684 |
| 4I3R | H_ARG_64  | NH2 | G_ASP_457 | OD1 | 3.551 |
| 4I3R | H_ARG_64  | NH2 | G_ASP_457 | OD2 | 3.482 |
| 4I3R | H_ARG_71  | NH1 | G_ASP_368 | OD1 | 3.996 |
| 4I3R | H_ARG_71  | NH1 | G_ASP_368 | OD2 | 2.319 |
| 4I3R | H_ARG_71  | NH2 | G_ASP_368 | OD1 | 3.997 |
| 4I3R | H_ARG_71  | NH2 | G_ASP_368 | OD2 | 3.530 |
| 4I3R | H_LYS_209 | NZ  | L_GLU_123 | OE2 | 2.484 |
| 4I3S | G_LYS_282 | NZ  | H_GLU_33  | OE1 | 3.669 |
| 4I3S | G_LYS_282 | NZ  | H_GLU_33  | OE2 | 3.690 |
| 4I3S | H_ARG_64  | NH2 | G_ASP_457 | OD1 | 3.430 |
| 4I3S | H_ARG_64  | NH2 | G_ASP_457 | OD2 | 3.082 |
| 4I3S | H_ARG_71  | NH1 | G_ASP_368 | OD1 | 3.370 |
| 4I3S | H_ARG_71  | NH1 | G_ASP_368 | OD2 | 3.053 |
| 4I3S | H_ARG_71  | NH2 | G_ASP_368 | OD1 | 3.484 |
| 4I3S | H_LYS_209 | NZ  | L_GLU_123 | OE1 | 2.882 |
| 4JAM | H_LYS_209 | NZ  | L_GLU_123 | OE2 | 3.865 |
| 4JAM | A_LYS_209 | NZ  | B_GLU_123 | OE2 | 3.814 |
| 4JAN | H_ARG_97  | NH2 | G_ASP_368 | OD2 | 2.609 |
| 4JAN | H_ARG_97  | NH2 | G_GLU_370 | OE1 | 2.554 |
| 4JAN | H_LYS_143 | NZ  | L_GLU_124 | OE2 | 3.811 |
| 4JAN | H_LYS_209 | NZ  | L_GLU_123 | OE1 | 2.888 |
| 4JAN | L_LYS_129 | NZ  | H_ASP_144 | OD2 | 3.458 |
| 4JAN | A_ARG_97  | NH2 | L_ASP_368 | OD1 | 2.825 |
| 4JAN | A_ARG_97  | NH2 | L_ASP_368 | OD2 | 3.792 |
| 4JAN | A_ARG_97  | NH2 | L_GLU_370 | OE1 | 3.106 |
| 4JAN | A_LYS_209 | NZ  | B_GLU_123 | OE1 | 3.788 |
| 4JAN | A_LYS_209 | NZ  | B_GLU_123 | OE2 | 3.189 |
| 4JHW | F_LYS_209 | NZ  | H_ASP_101 | OD2 | 3.535 |
| 4JHW | F_LYS_209 | NZ  | L_GLU_55  | OE1 | 2.845 |
| 4JHW | F_LYS_209 | NZ  | L_GLU_55  | OE2 | 3.356 |
| 4JO1 | P_ARG_304 | NH1 | H_ASP_34  | OD1 | 3.045 |
| 4JO1 | P_ARG_304 | NH1 | H_ASP_34  | OD2 | 3.346 |
| 4JO1 | P_ARG_304 | NH2 | H_ASP_34  | OD2 | 2.892 |
| 4JO1 | Q_ARG_304 | NH1 | L_ASP_34  | OD1 | 2.949 |
| 4JO1 | Q_ARG_304 | NH1 | L_ASP_34  | OD2 | 3.344 |
| 4JO1 | Q_ARG_304 | NH2 | L_ASP_34  | OD1 | 3.946 |
| 4JO1 | Q_ARG_304 | NH2 | L_ASP_34  | OD2 | 2.878 |
| 4JO2 | P_ARG_304 | NH1 | H_ASP_34  | OD1 | 2.726 |
| 4JO2 | P_ARG_304 | NH1 | H_ASP_34  | OD2 | 3.333 |
| 4JO2 | P_ARG_304 | NH2 | H_ASP_34  | OD1 | 3.721 |
| 4JO2 | P_ARG_304 | NH2 | H_ASP_34  | OD2 | 2.854 |
| 4JO2 | Q_ARG_304 | NH1 | L_ASP_34  | OD1 | 2.965 |
| 4JO2 | Q_ARG_304 | NH1 | L_ASP_34  | OD2 | 3.252 |
| 4JO2 | Q_ARG_304 | NH2 | L_ASP_34  | OD2 | 3.328 |
| 4JO3 | H_ARG_54  | NH1 | P_GLU_321 | OE1 | 3.970 |
| 4JO3 | P_ARG_327 | NH1 | L_ASP_1   | OD1 | 2.994 |
| 4JO3 | P_ARG_327 | NH2 | L_ASP_1   | OD1 | 2.732 |
| 4JO3 | P_ARG_327 | NH2 | L_GLU_27  | OE1 | 3.272 |
| 4JO3 | P_ARG_327 | NH2 | L_GLU_27  | OE2 | 3.099 |
| 4JO3 | Q_ARG_327 | NH1 | M_ASP_1   | OD1 | 3.248 |
| 4JO3 | Q_ARG_327 | NH2 | M_ASP_1   | OD1 | 2.447 |
| 4JO3 | Q_ARG_327 | NH2 | M_ASP_1   | OD2 | 3.524 |
| 4JO3 | Q_ARG_327 | NH2 | M_GLU_27  | OE1 | 3.837 |
| 4JO3 | Q_ARG_327 | NH2 | M_GLU_27  | OE2 | 3.723 |
| 4K24 | A_LYS_46  | NZ  | U_GLU_33  | OE2 | 3.632 |
| 4K24 | A_LYS_46  | NZ  | U_GLU_36  | OE2 | 2.856 |
| 4K24 | A_HIS_87  | ND1 | U_ASP_11  | OD1 | 3.994 |

|      |            |     |           |     |       |
|------|------------|-----|-----------|-----|-------|
| 4K24 | H.LYS_62   | NZ  | L.ASP_1   | OD1 | 3.610 |
| 4K24 | H.LYS_208  | NZ  | L.GLU_123 | OE1 | 2.286 |
| 4K24 | H.LYS_208  | NZ  | L.GLU_123 | OE2 | 3.345 |
| 4K24 | U.ARG_91   | NH1 | B.ASP_22  | OD2 | 3.233 |
| 4K24 | U.ARG_91   | NH2 | B.ASP_22  | OD1 | 3.988 |
| 4K24 | U.ARG_91   | NH2 | B.ASP_22  | OD2 | 3.635 |
| 4K2U | H.LYS_     | NZ  | L.ASP_    | OD2 | 2.646 |
| 4K2U | H.LYS_     | NZ  | L.GLU_    | OE2 | 3.160 |
| 4K2U | L.LYS_     | NZ  | M.ASP_    | OD2 | 2.895 |
| 4K2U | L.ARG_     | NH1 | A.GLU_    | OE1 | 2.808 |
| 4K2U | L.ARG_     | NH1 | A.GLU_    | OE2 | 3.439 |
| 4K2U | L.ARG_     | NH2 | A.GLU_    | OE1 | 3.591 |
| 4K2U | L.ARG_     | NH2 | A.GLU_    | OE2 | 2.619 |
| 4K2U | M.ARG_     | NH1 | B.GLU_    | OE1 | 2.744 |
| 4K2U | M.ARG_     | NH1 | B.GLU_    | OE2 | 3.321 |
| 4K2U | M.ARG_     | NH2 | B.GLU_    | OE1 | 3.489 |
| 4K2U | M.ARG_     | NH2 | B.GLU_    | OE2 | 2.673 |
| 4K2U | M.HIS_     | ND1 | L.GLU_    | OE2 | 3.997 |
| 4KI5 | C.LYS_211  | NZ  | D.GLU_122 | OE2 | 2.907 |
| 4KI5 | E.LYS_217  | NZ  | F.GLU_123 | OE2 | 3.401 |
| 4KI5 | E.ARG_222  | NH1 | F.GLU_123 | OE1 | 3.106 |
| 4KI5 | E.ARG_222  | NH1 | F.GLU_123 | OE2 | 3.925 |
| 4KI5 | E.ARG_222  | NH2 | F.GLU_123 | OE1 | 3.823 |
| 4KI5 | E.ARG_222  | NH2 | F.GLU_123 | OE2 | 3.234 |
| 4KI5 | M.ARG_2215 | NH1 | C.ASP_100 | OD1 | 2.868 |
| 4KI5 | M.ARG_2215 | NH1 | C.ASP_100 | OD2 | 3.241 |
| 4KI5 | M.ARG_2215 | NH2 | C.ASP_100 | OD1 | 3.324 |
| 4KI5 | M.ARG_2215 | NH2 | C.ASP_100 | OD2 | 2.939 |
| 4KI5 | M.ARG_2215 | NH2 | C.ASP_101 | OD2 | 3.819 |
| 4KI5 | M.LYS_2227 | NZ  | E.GLU_50  | OE1 | 3.493 |
| 4KJY | A.LYS_39   | NZ  | B.ASP_100 | OD1 | 2.809 |
| 4KJY | B.ARG_53   | NH1 | A.GLU_97  | OE2 | 3.571 |
| 4KJY | B.ARG_53   | NH1 | A.GLU_106 | OE1 | 3.135 |
| 4KJY | B.ARG_69   | NH1 | A.GLU_35  | OE1 | 2.737 |
| 4KJY | B.ARG_69   | NH1 | A.GLU_35  | OE2 | 3.607 |
| 4KJY | B.ARG_69   | NH1 | A.GLU_100 | OE2 | 2.961 |
| 4KJY | B.ARG_69   | NH2 | A.GLU_35  | OE1 | 3.476 |
| 4KJY | B.ARG_69   | NH2 | A.GLU_35  | OE2 | 2.813 |
| 4KJY | B.LYS_96   | NZ  | A.GLU_97  | OE1 | 2.567 |
| 4KJY | D.ARG_40   | NH1 | A.GLU_29  | OE1 | 3.310 |
| 4KJY | D.ARG_40   | NH2 | A.GLU_29  | OE1 | 3.253 |
| 4KJY | D.ARG_40   | NH2 | A.GLU_29  | OE2 | 2.999 |
| 4KJY | D.ARG_40   | NH2 | B.GLU_70  | OE1 | 3.440 |
| 4KJY | D.ARG_53   | NH1 | C.GLU_97  | OE2 | 3.949 |
| 4KJY | D.ARG_53   | NH2 | C.GLU_104 | OE1 | 3.112 |
| 4KJY | D.ARG_53   | NH2 | C.GLU_104 | OE2 | 3.607 |
| 4KJY | D.ARG_69   | NH1 | C.GLU_35  | OE1 | 2.786 |
| 4KJY | D.ARG_69   | NH1 | C.GLU_35  | OE2 | 3.903 |
| 4KJY | D.ARG_69   | NH1 | C.GLU_100 | OE2 | 3.005 |
| 4KJY | D.ARG_69   | NH2 | C.GLU_35  | OE1 | 3.286 |
| 4KJY | D.ARG_69   | NH2 | C.GLU_35  | OE2 | 2.868 |
| 4KJY | D.LYS_96   | NZ  | C.GLU_97  | OE1 | 2.747 |
| 4KPH | L.ARG_61   | NH2 | L.GLU_85  | OE2 | 3.345 |
| 4KPH | H.LYS_208  | NZ  | L.GLU_123 | OE2 | 2.903 |
| 4KPH | L.LYS_208  | NZ  | M.GLU_123 | OE2 | 2.312 |
| 4KRL | B.ARG_30   | NH1 | A.ASP_355 | OD1 | 3.258 |
| 4KRL | B.ARG_30   | NH1 | A.ASP_355 | OD2 | 2.275 |
| 4KRL | B.ARG_30   | NH2 | A.ASP_355 | OD1 | 3.549 |



|      |           |     |           |     |       |
|------|-----------|-----|-----------|-----|-------|
| 4KRL | B_ARG_30  | NH2 | A_ASP_355 | OD2 | 3.938 |
| 4KRL | A_ARG_353 | NH1 | B_GLU_110 | OE1 | 2.654 |
| 4KRL | A_ARG_353 | NH2 | B_ASP_112 | OD1 | 3.873 |
| 4KRL | A_ARG_353 | NH2 | B_ASP_112 | OD2 | 2.978 |
| 4KRM | A_ARG_353 | NH1 | B_GLU_110 | OE1 | 2.811 |
| 4KRM | A_ARG_353 | NH2 | B_ASP_112 | OD1 | 3.965 |
| 4KRM | A_ARG_353 | NH2 | B_ASP_112 | OD2 | 2.932 |
| 4KRM | A_LYS_407 | NZ  | H_GLU_5   | OE1 | 3.498 |
| 4KRM | A_LYS_407 | NZ  | H_GLU_5   | OE2 | 3.022 |
| 4KRM | B_ARG_30  | NH1 | A_ASP_355 | OD1 | 3.162 |
| 4KRM | B_ARG_30  | NH1 | A_ASP_355 | OD2 | 2.423 |
| 4KRM | B_ARG_30  | NH2 | A_ASP_355 | OD1 | 3.525 |
| 4KRM | C_ARG_353 | NH1 | D_GLU_110 | OE1 | 2.866 |
| 4KRM | C_ARG_353 | NH2 | D_ASP_112 | OD2 | 3.218 |
| 4KRM | D_ARG_30  | NH1 | C_ASP_355 | OD1 | 3.295 |
| 4KRM | D_ARG_30  | NH1 | C_ASP_355 | OD2 | 2.452 |
| 4KRM | D_ARG_30  | NH2 | C_ASP_355 | OD1 | 3.096 |
| 4KRM | D_ARG_30  | NH2 | C_ASP_355 | OD2 | 3.699 |
| 4KRM | E_ARG_353 | NH1 | F_GLU_110 | OE1 | 2.855 |
| 4KRM | E_ARG_353 | NH2 | F_ASP_112 | OD2 | 2.965 |
| 4KRM | E_LYS_407 | NZ  | L_GLU_5   | OE1 | 3.054 |
| 4KRM | E_LYS_407 | NZ  | L_GLU_5   | OE2 | 2.995 |
| 4KRM | F_ARG_30  | NH1 | E_ASP_355 | OD1 | 3.119 |
| 4KRM | F_ARG_30  | NH1 | E_ASP_355 | OD2 | 2.396 |
| 4KRM | F_ARG_30  | NH2 | E_ASP_355 | OD1 | 3.504 |
| 4KRM | G_ARG_353 | NH1 | H_GLU_110 | OE1 | 3.021 |
| 4KRM | G_ARG_353 | NH2 | H_ASP_112 | OD2 | 3.118 |
| 4KRM | G_LYS_407 | NZ  | B_GLU_5   | OE1 | 3.493 |
| 4KRM | G_LYS_407 | NZ  | B_GLU_5   | OE2 | 2.984 |
| 4KRM | H_ARG_27  | NH1 | G_ASP_323 | OD1 | 2.688 |
| 4KRM | H_ARG_27  | NH2 | G_ASP_323 | OD1 | 3.952 |
| 4KRM | H_ARG_30  | NH1 | G_ASP_355 | OD1 | 3.358 |
| 4KRM | H_ARG_30  | NH1 | G_ASP_355 | OD2 | 2.448 |
| 4KRM | H_ARG_30  | NH2 | G_ASP_355 | OD1 | 3.423 |
| 4KRM | H_ARG_30  | NH2 | G_ASP_355 | OD2 | 3.935 |
| 4KRM | I_ARG_353 | NH1 | J_GLU_110 | OE1 | 2.862 |
| 4KRM | I_ARG_353 | NH2 | J_ASP_112 | OD2 | 2.998 |
| 4KRM | J_ARG_30  | NH1 | I_ASP_355 | OD1 | 3.164 |
| 4KRM | J_ARG_30  | NH1 | I_ASP_355 | OD2 | 2.382 |
| 4KRM | J_ARG_30  | NH2 | I_ASP_355 | OD1 | 3.707 |
| 4KRM | K_ARG_353 | NH1 | L_GLU_110 | OE1 | 2.887 |
| 4KRM | K_ARG_353 | NH1 | L_ASP_112 | OD2 | 3.973 |
| 4KRM | K_ARG_353 | NH2 | L_ASP_112 | OD2 | 2.890 |
| 4KRM | L_ARG_30  | NH1 | K_ASP_355 | OD1 | 3.487 |
| 4KRM | L_ARG_30  | NH1 | K_ASP_355 | OD2 | 2.441 |
| 4KRM | L_ARG_30  | NH2 | K_ASP_355 | OD1 | 3.452 |
| 4KRM | L_ARG_30  | NH2 | K_ASP_355 | OD2 | 3.835 |
| 4KRO | A_ARG_403 | NH2 | B_ASP_118 | OD2 | 3.168 |
| 4KRO | A_ARG_405 | NH2 | B_ASP_118 | OD1 | 3.123 |
| 4KRO | A_ARG_405 | NH2 | B_ASP_118 | OD2 | 3.849 |
| 4KRO | A_LYS_443 | NZ  | D_ASP_58  | OD1 | 2.597 |
| 4KRO | A_LYS_443 | NZ  | D_ASP_58  | OD2 | 3.457 |
| 4KRO | A_LYS_465 | NZ  | D_ASP_103 | OD2 | 2.400 |
| 4KRO | B_ARG_27  | NH1 | A_GLU_431 | OE1 | 3.073 |
| 4KRO | B_ARG_27  | NH2 | A_GLU_431 | OE1 | 3.933 |
| 4KRO | C_LYS_49  | NZ  | D_GLU_105 | OE2 | 3.247 |
| 4KRP | A_ARG_403 | NH2 | B_ASP_115 | OD2 | 3.818 |
| 4KRP | A_ARG_405 | NH1 | B_GLU_113 | OE1 | 2.923 |

|      |           |     |           |     |       |
|------|-----------|-----|-----------|-----|-------|
| 4KRP | A_ARG_405 | NH2 | B_GLU_113 | OE1 | 3.376 |
| 4KRP | A_ARG_405 | NH2 | B_ASP_115 | OD1 | 2.626 |
| 4KRP | A_LYS_443 | NZ  | D_ASP_58  | OD1 | 2.649 |
| 4KRP | A_LYS_443 | NZ  | D_ASP_58  | OD2 | 3.951 |
| 4KRP | A_LYS_465 | NZ  | D_ASP_103 | OD2 | 2.931 |
| 4KRP | B_ARG_27  | NH1 | A_GLU_431 | OE1 | 3.144 |
| 4KV5 | C_LYS_60  | NZ  | G_ASP_56  | OD2 | 3.911 |
| 4KV5 | C_LYS_60  | NZ  | G_GLU_74  | OE2 | 3.252 |
| 4KV5 | C_ARG_94  | NH1 | E_ASP_231 | OD2 | 3.776 |
| 4KV5 | D_LYS_60  | NZ  | E_GLU_74  | OE2 | 3.237 |
| 4KV5 | A_ARG_94  | NH1 | H_ASP_231 | OD2 | 3.628 |
| 4KV5 | B_LYS_60  | NZ  | H_ASP_56  | OD2 | 3.938 |
| 4KV5 | B_LYS_60  | NZ  | H_GLU_74  | OE2 | 3.524 |
| 4KXZ | A_ARG_60  | NH2 | J_GLU_74  | OE1 | 3.804 |
| 4KXZ | B_ARG_60  | NH2 | H_ASP_56  | OD1 | 3.585 |
| 4KXZ | B_ARG_60  | NH2 | H_GLU_74  | OE1 | 3.374 |
| 4KXZ | B_ARG_60  | NH2 | H_GLU_74  | OE2 | 3.199 |
| 4KXZ | D_ARG_60  | NH1 | N_GLU_74  | OE2 | 3.775 |
| 4KXZ | D_ARG_60  | NH2 | N_GLU_74  | OE2 | 2.746 |
| 4KXZ | E_ARG_60  | NH1 | Q_GLU_74  | OE1 | 3.619 |
| 4KXZ | H_HIS_219 | NE2 | Q_ASP_56  | OD2 | 3.789 |
| 4KXZ | H_HIS_223 | ND1 | Q_GLU_82  | OE1 | 3.688 |
| 4KXZ | H_HIS_223 | ND1 | Q_GLU_82  | OE2 | 3.984 |
| 4KXZ | H_HIS_223 | ND1 | L_ASP_123 | OD1 | 3.085 |
| 4KXZ | H_HIS_223 | NE2 | Q_GLU_82  | OE2 | 3.368 |
| 4KXZ | H_HIS_223 | NE2 | L_ASP_123 | OD1 | 3.457 |
| 4KXZ | J_LYS_216 | NZ  | I_GLU_124 | OE1 | 2.736 |
| 4KXZ | J_LYS_216 | NZ  | I_GLU_124 | OE2 | 3.105 |
| 4KXZ | N_HIS_219 | NE2 | J_ASP_56  | OD2 | 3.889 |
| 4KXZ | N_HIS_223 | ND1 | J_GLU_82  | OE1 | 3.240 |
| 4KXZ | N_HIS_223 | ND1 | M_ASP_123 | OD1 | 3.197 |
| 4KXZ | N_HIS_223 | NE2 | J_GLU_82  | OE1 | 3.650 |
| 4KXZ | N_HIS_223 | NE2 | J_GLU_82  | OE2 | 3.394 |
| 4KXZ | N_HIS_223 | NE2 | M_ASP_123 | OD1 | 3.310 |
| 4LQF | H_LYS_212 | NZ  | L_GLU_129 | OE1 | 2.714 |
| 4LQF | H_LYS_212 | NZ  | L_GLU_129 | OE2 | 3.879 |
| 4LQF | L_LYS_55  | NZ  | A_ASP_170 | OD2 | 2.731 |
| 4LSS | G_LYS_97  | NZ  | H_ASP_99  | OD2 | 3.791 |
| 4LSS | G_ARG_476 | NH2 | H_ASP_31  | OD1 | 3.839 |
| 4LSS | H_ARG_61  | NH2 | G_GLU_466 | OE1 | 3.951 |
| 4LSS | H_ARG_71  | NH1 | G_ASP_368 | OD1 | 3.719 |
| 4LSS | H_ARG_71  | NH1 | G_ASP_368 | OD2 | 3.126 |
| 4LSS | H_ARG_71  | NH2 | G_ASP_368 | OD1 | 3.278 |
| 4LSS | H_LYS_209 | NZ  | L_GLU_125 | OE1 | 3.429 |
| 4LSS | H_LYS_209 | NZ  | L_GLU_125 | OE2 | 3.562 |
| 4LST | G_LYS_357 | NZ  | L_GLU_1   | OE1 | 2.783 |
| 4LST | H_ARG_61  | NH1 | G_GLU_466 | OE1 | 3.812 |
| 4LST | H_ARG_61  | NH2 | G_ASP_461 | OD1 | 2.947 |
| 4LST | H_ARG_71  | NH1 | G_ASP_368 | OD1 | 3.527 |
| 4LST | H_ARG_71  | NH1 | G_ASP_368 | OD2 | 2.632 |
| 4LST | H_ARG_71  | NH2 | G_ASP_368 | OD1 | 2.939 |
| 4LST | H_ARG_71  | NH2 | G_ASP_368 | OD2 | 3.624 |
| 4LST | H_LYS_209 | NZ  | L_GLU_125 | OE2 | 3.921 |
| 4LST | H_LYS_214 | NZ  | L_ASP_124 | OD1 | 3.010 |
| 4LST | H_LYS_214 | NZ  | L_ASP_124 | OD2 | 3.020 |
| 4LU5 | H_ARG_98  | NH2 | B_ASP_168 | OD2 | 3.392 |
| 4LU5 | H_LYS_208 | NZ  | L_GLU_128 | OE1 | 3.058 |
| 4LU5 | H_LYS_208 | NZ  | L_GLU_128 | OE2 | 3.445 |

|      |           |     |           |     |       |
|------|-----------|-----|-----------|-----|-------|
| 4LU5 | L_ARG_51  | NH1 | H_ASP_101 | OD1 | 3.227 |
| 4LU5 | L_ARG_51  | NH2 | H_ASP_101 | OD1 | 2.925 |
| 4LU5 | L_ARG_98  | NH2 | A_ASP_168 | OD2 | 3.317 |
| 4LU5 | M_ARG_51  | NH1 | L_ASP_101 | OD2 | 3.086 |
| 4LU5 | M_ARG_51  | NH2 | L_ASP_101 | OD1 | 3.927 |
| 4LU5 | M_ARG_51  | NH2 | L_ASP_101 | OD2 | 2.770 |
| 4M1D | L_LYS_129 | NZ  | H_ASP_144 | OD2 | 3.436 |
| 4M1D | H_LYS_143 | NZ  | L_GLU_124 | OE2 | 2.547 |
| 4M1D | H_LYS_209 | NZ  | L_GLU_123 | OE1 | 2.798 |
| 4M1D | H_LYS_209 | NZ  | L_GLU_123 | OE2 | 2.782 |
| 4M1D | P_ARG_315 | NH2 | H_ASP_95  | OD2 | 3.175 |
| 4M1D | L_LYS_209 | NZ  | M_GLU_123 | OE1 | 3.060 |
| 4M1D | L_LYS_209 | NZ  | M_GLU_123 | OE2 | 2.485 |
| 4M1D | Q_ARG_315 | NH2 | L_ASP_95  | OD2 | 3.051 |
| 4M1G | H_LYS_213 | NZ  | L_GLU_124 | OE2 | 2.837 |
| 4M1G | H_ARG_218 | NH2 | L_GLU_124 | OE1 | 2.657 |
| 4M1G | H_ARG_218 | NH2 | L_GLU_124 | OE2 | 3.648 |
| 4M1G | A_LYS_161 | NZ  | H_ASP_31  | OD1 | 3.895 |
| 4M5Y | H_LYS_143 | NZ  | L_GLU_124 | OE2 | 2.602 |
| 4M5Y | L_LYS_143 | NZ  | M_GLU_124 | OE2 | 2.668 |
| 4M7J | H_LYS_208 | NZ  | L_GLU_123 | OE1 | 3.727 |
| 4M7J | H_LYS_208 | NZ  | L_GLU_123 | OE2 | 3.593 |
| 4M7Z | B_LYS_208 | NZ  | C_GLU_123 | OE1 | 3.318 |
| 4M7Z | B_LYS_208 | NZ  | C_GLU_123 | OE2 | 3.881 |
| 4M7Z | H_LYS_208 | NZ  | L_GLU_123 | OE1 | 3.192 |
| 4M93 | H_LYS_208 | NZ  | L_GLU_123 | OE1 | 3.795 |
| 4M93 | B_LYS_208 | NZ  | C_GLU_123 | OE1 | 3.203 |
| 4MA1 | B_LYS_5   | NZ  | F_GLU_187 | OE1 | 3.315 |
| 4MA1 | B_LYS_208 | NZ  | C_GLU_123 | OE1 | 3.857 |
| 4MA1 | H_LYS_208 | NZ  | L_GLU_123 | OE1 | 3.752 |
| 4N0Y | H_LYS_209 | NZ  | L_GLU_123 | OE1 | 2.939 |
| 4N1H | A_LYS_111 | NZ  | C_GLU_202 | OE1 | 3.097 |
| 4N1H | A_LYS_111 | NZ  | C_GLU_202 | OE2 | 2.712 |
| 4N1H | A_HIS_112 | ND1 | C_GLU_205 | OE2 | 3.407 |
| 4N1H | A_HIS_112 | NE2 | C_GLU_202 | OE1 | 2.950 |
| 4N1H | A_HIS_112 | NE2 | C_GLU_205 | OE2 | 3.971 |
| 4N1H | A_ARG_128 | NH1 | C_GLU_89  | OE1 | 3.101 |
| 4N1H | A_LYS_150 | NZ  | B_ASP_115 | OD2 | 2.748 |
| 4N1H | A_ARG_153 | NH2 | B_ASP_106 | OD1 | 3.262 |
| 4N1H | A_ARG_153 | NH2 | B_ASP_106 | OD2 | 3.262 |
| 4N1H | C_LYS_149 | NZ  | D_ASP_106 | OD1 | 3.587 |
| 4N1H | C_LYS_149 | NZ  | D_ASP_106 | OD2 | 3.735 |
| 4N1H | C_LYS_150 | NZ  | D_ASP_115 | OD1 | 3.157 |
| 4N1H | C_ARG_153 | NH2 | D_ASP_106 | OD1 | 2.772 |
| 4N1H | C_ARG_204 | NH2 | A_GLU_121 | OE2 | 3.425 |
| 4NC1 | A_ARG_133 | NH1 | D_ASP_115 | OD2 | 3.145 |
| 4NC1 | C_ARG_114 | NH1 | D_ASP_115 | OD1 | 3.051 |
| 4NC1 | C_ARG_114 | NH1 | D_ASP_115 | OD2 | 3.046 |
| 4NC1 | C_ARG_114 | NH2 | D_ASP_115 | OD1 | 2.896 |
| 4NC1 | B_ARG_133 | NH2 | C_ASP_115 | OD2 | 3.404 |
| 4NC1 | D_ARG_63  | NH1 | B_ASP_112 | OD2 | 3.125 |
| 4NC1 | D_ARG_114 | NH1 | C_ASP_115 | OD1 | 2.908 |
| 4NC1 | D_ARG_114 | NH2 | C_ASP_115 | OD1 | 2.942 |
| 4NGH | H_LYS_228 | NZ  | L_ASP_122 | OD1 | 3.887 |
| 4NIK | A_LYS_153 | NZ  | B_ASP_104 | OD1 | 3.730 |
| 4NIK | A_LYS_153 | NZ  | B_ASP_104 | OD2 | 2.794 |
| 4NIK | A_LYS_153 | NZ  | B_GLU_186 | OE2 | 2.639 |
| 4NZR | H_LYS_60  | NZ  | L_GLU_1   | OE1 | 3.647 |

|      |            |     |            |     |       |
|------|------------|-----|------------|-----|-------|
| 4NZR | H_HIS_97   | NE2 | L_GLU_50   | OE2 | 3.635 |
| 4NZR | H_HIS_98   | NE2 | L_GLU_50   | OE1 | 2.875 |
| 4NZR | H_HIS_172  | NE2 | L_ASP_167  | OD2 | 3.398 |
| 4NZR | H_LYS_221  | NZ  | L_GLU_123  | OE2 | 2.989 |
| 4NZR | M_LYS_114  | NZ  | L_GLU_17   | OE1 | 3.119 |
| 4NZR | M_ARG_384  | NH2 | L_GLU_81   | OE1 | 3.444 |
| 4NZR | M_ARG_384  | NH2 | L_GLU_81   | OE2 | 3.239 |
| 4NZR | M_ARG_457  | NH1 | H_ASP_31E  | OD1 | 2.958 |
| 4NZR | M_ARG_457  | NH1 | H_ASP_31E  | OD2 | 3.096 |
| 4NZR | M_ARG_457  | NH2 | H_ASP_31E  | OD1 | 3.746 |
| 4NZR | M_ARG_457  | NH2 | H_ASP_31E  | OD2 | 2.554 |
| 4NZT | M_ARG_99   | NH2 | L_ASP_60   | OD1 | 3.096 |
| 4NZT | M_ARG_384  | NH2 | L_GLU_81   | OE1 | 3.193 |
| 4NZT | M_ARG_384  | NH2 | L_GLU_81   | OE2 | 3.684 |
| 4NZT | H_LYS_145  | NZ  | L_GLU_124  | OE2 | 2.541 |
| 4NZU | H_LYS_100E | NZ  | L_ASP_50   | OD1 | 3.991 |
| 4NZU | H_LYS_100E | NZ  | L_ASP_50   | OD2 | 2.752 |
| 4NZU | H_LYS_221  | NZ  | L_GLU_123  | OE2 | 2.899 |
| 4O5L | H_LYS_100I | NZ  | L_ASP_93   | OD1 | 2.723 |
| 4O5L | H_LYS_100I | NZ  | L_ASP_93   | OD2 | 3.455 |
| 4OLU | G_LYS_97   | NZ  | H_ASP_100B | OD1 | 3.513 |
| 4OLU | G_LYS_97   | NZ  | H_ASP_100B | OD2 | 2.385 |
| 4OLU | H_ARG_61   | NH1 | G_GLU_466  | OE1 | 2.734 |
| 4OLU | H_ARG_71   | NH1 | G_ASP_368  | OD1 | 3.753 |
| 4OLU | H_ARG_71   | NH1 | G_ASP_368  | OD2 | 2.863 |
| 4OLU | H_ARG_71   | NH2 | G_ASP_368  | OD1 | 3.092 |
| 4OLU | H_ARG_71   | NH2 | G_ASP_368  | OD2 | 3.692 |
| 4OLU | H_LYS_209  | NZ  | L_GLU_125  | OE1 | 3.927 |
| 4OLU | H_LYS_209  | NZ  | L_GLU_125  | OE2 | 3.166 |
| 4OLV | G_LYS_97   | NZ  | H_ASP_100B | OD1 | 3.067 |
| 4OLV | G_LYS_97   | NZ  | H_ASP_100B | OD2 | 2.942 |
| 4OLV | H_ARG_61   | NH1 | G_GLU_466  | OE1 | 2.769 |
| 4OLV | H_ARG_71   | NH1 | G_ASP_368  | OD1 | 3.700 |
| 4OLV | H_ARG_71   | NH1 | G_ASP_368  | OD2 | 2.815 |
| 4OLV | H_ARG_71   | NH2 | G_ASP_368  | OD1 | 3.136 |
| 4OLV | H_ARG_71   | NH2 | G_ASP_368  | OD2 | 3.717 |
| 4OLV | H_LYS_209  | NZ  | L_GLU_125  | OE1 | 3.978 |
| 4OLV | H_LYS_209  | NZ  | L_GLU_125  | OE2 | 3.214 |
| 4OLW | G_LYS_97   | NZ  | H_ASP_100B | OD1 | 3.637 |
| 4OLW | G_LYS_97   | NZ  | H_ASP_100B | OD2 | 3.575 |
| 4OLW | H_ARG_61   | NH1 | G_GLU_466  | OE1 | 2.598 |
| 4OLW | H_ARG_61   | NH2 | G_GLU_466  | OE1 | 3.969 |
| 4OLW | H_ARG_71   | NH1 | G_ASP_368  | OD1 | 3.570 |
| 4OLW | H_ARG_71   | NH1 | G_ASP_368  | OD2 | 2.966 |
| 4OLW | H_ARG_71   | NH2 | G_ASP_368  | OD1 | 3.028 |
| 4OLW | H_ARG_71   | NH2 | G_ASP_368  | OD2 | 3.898 |
| 4OLW | H_ARG_100A | NH2 | G_GLU_106  | OE1 | 3.908 |
| 4OLW | H_LYS_209  | NZ  | L_GLU_125  | OE1 | 2.861 |
| 4OLW | H_LYS_209  | NZ  | L_GLU_125  | OE2 | 2.764 |
| 4OLW | H_LYS_214  | NZ  | L_ASP_124  | OD1 | 3.031 |
| 4OLW | H_LYS_214  | NZ  | L_ASP_124  | OD2 | 3.691 |
| 4OLX | G_LYS_97   | NZ  | H_ASP_100B | OD1 | 3.339 |
| 4OLX | G_LYS_97   | NZ  | H_ASP_100B | OD2 | 2.904 |
| 4OLX | H_ARG_61   | NH1 | G_GLU_466  | OE1 | 2.655 |
| 4OLX | H_ARG_71   | NH1 | G_ASP_368  | OD1 | 3.883 |
| 4OLX | H_ARG_71   | NH1 | G_ASP_368  | OD2 | 2.896 |
| 4OLX | H_ARG_71   | NH2 | G_ASP_368  | OD1 | 3.066 |
| 4OLX | H_ARG_71   | NH2 | G_ASP_368  | OD2 | 3.572 |

|      |            |     |            |     |       |
|------|------------|-----|------------|-----|-------|
| 4OLX | H_ARG_100A | NH2 | G_GLU_106  | OE1 | 3.646 |
| 4OLX | H_LYS_209  | NZ  | L_GLU_125  | OE2 | 3.132 |
| 4OLY | G_LYS_97   | NZ  | H_ASP_100B | OD1 | 3.240 |
| 4OLY | G_LYS_97   | NZ  | H_ASP_100B | OD2 | 2.829 |
| 4OLY | H_ARG_61   | NH1 | G_GLU_466  | OE1 | 2.641 |
| 4OLY | H_ARG_71   | NH1 | G_ASP_368  | OD1 | 3.538 |
| 4OLY | H_ARG_71   | NH1 | G_ASP_368  | OD2 | 2.816 |
| 4OLY | H_ARG_71   | NH2 | G_ASP_368  | OD1 | 3.002 |
| 4OLY | H_ARG_71   | NH2 | G_ASP_368  | OD2 | 3.765 |
| 4OLY | H_LYS_209  | NZ  | L_GLU_125  | OE1 | 3.888 |
| 4OLY | H_LYS_209  | NZ  | L_GLU_125  | OE2 | 3.336 |
| 4OLZ | G_LYS_97   | NZ  | H_ASP_100B | OD1 | 3.552 |
| 4OLZ | G_LYS_97   | NZ  | H_ASP_100B | OD2 | 3.545 |
| 4OLZ | H_ARG_61   | NH1 | G_GLU_466  | OE1 | 2.620 |
| 4OLZ | H_ARG_71   | NH1 | G_ASP_368  | OD1 | 3.472 |
| 4OLZ | H_ARG_71   | NH1 | G_ASP_368  | OD2 | 2.715 |
| 4OLZ | H_ARG_71   | NH2 | G_ASP_368  | OD1 | 2.877 |
| 4OLZ | H_ARG_71   | NH2 | G_ASP_368  | OD2 | 3.685 |
| 4OLZ | H_LYS_209  | NZ  | L_GLU_125  | OE1 | 3.703 |
| 4OLZ | H_LYS_209  | NZ  | L_GLU_125  | OE2 | 3.063 |
| 4OLZ | H_LYS_214  | NZ  | L_ASP_124  | OD1 | 3.528 |
| 4OLZ | H_LYS_214  | NZ  | L_ASP_124  | OD2 | 3.896 |
| 4OM0 | G_LYS_97   | NZ  | H_ASP_100B | OD1 | 3.843 |
| 4OM0 | G_LYS_97   | NZ  | H_ASP_100B | OD2 | 3.296 |
| 4OM0 | H_ARG_61   | NH1 | G_GLU_466  | OE1 | 2.871 |
| 4OM0 | H_ARG_71   | NH1 | G_ASP_368  | OD1 | 3.724 |
| 4OM0 | H_ARG_71   | NH1 | G_ASP_368  | OD2 | 2.771 |
| 4OM0 | H_ARG_71   | NH2 | G_ASP_368  | OD1 | 3.189 |
| 4OM0 | H_ARG_71   | NH2 | G_ASP_368  | OD2 | 3.713 |
| 4OM0 | H_LYS_209  | NZ  | L_GLU_125  | OE2 | 3.121 |
| 4OM1 | G_LYS_97   | NZ  | H_ASP_100B | OD1 | 3.927 |
| 4OM1 | G_LYS_97   | NZ  | H_ASP_100B | OD2 | 3.635 |
| 4OM1 | G_LYS_357  | NZ  | L_GLU_1    | OE2 | 3.763 |
| 4OM1 | H_ARG_71   | NH1 | G_ASP_368  | OD1 | 3.565 |
| 4OM1 | H_ARG_71   | NH1 | G_ASP_368  | OD2 | 2.752 |
| 4OM1 | H_ARG_71   | NH2 | G_ASP_368  | OD1 | 3.031 |
| 4OM1 | H_ARG_71   | NH2 | G_ASP_368  | OD2 | 3.734 |
| 4OM1 | H_LYS_209  | NZ  | L_GLU_125  | OE1 | 3.639 |
| 4OM1 | H_LYS_209  | NZ  | L_GLU_125  | OE2 | 3.008 |
| 4OT1 | H_LYS_161  | NZ  | L_GLU_127  | OE2 | 2.572 |
| 4OT1 | H_LYS_227  | NZ  | L_GLU_126  | OE1 | 2.521 |
| 4OT1 | H_LYS_227  | NZ  | L_GLU_126  | OE2 | 3.241 |
| 4OT1 | L_LYS_67   | NZ  | A_GLU_361  | OE2 | 3.026 |
| 4P9H | C_ARG_59   | NH1 | G_ASP_368  | OD1 | 2.832 |
| 4P9H | C_ARG_59   | NH1 | G_ASP_368  | OD2 | 3.395 |
| 4P9H | C_ARG_59   | NH2 | G_ASP_368  | OD1 | 3.561 |
| 4P9H | C_ARG_59   | NH2 | G_ASP_368  | OD2 | 2.514 |
| 4P9H | H_HIS_61   | NE2 | L_ASP_1    | OD2 | 3.817 |
| 4PTT | A_ARG_91   | NH2 | B_GLU_95   | OE1 | 3.477 |
| 4PTT | A_ARG_91   | NH2 | B_GLU_95   | OE2 | 3.208 |
| 4PTT | B_LYS_209  | NZ  | A_GLU_123  | OE2 | 3.476 |
| 4PTU | A_ARG_91   | NH2 | B_GLU_95   | OE1 | 3.438 |
| 4PTU | A_ARG_91   | NH2 | B_GLU_95   | OE2 | 3.334 |
| 4PTU | B_LYS_209  | NZ  | A_GLU_123  | OE1 | 3.628 |
| 4Q6I | A_LYS_49   | NZ  | B_ASP_100A | OD1 | 2.964 |
| 4Q6I | B_LYS_208  | NZ  | A_GLU_123  | OE2 | 2.822 |
| 4Q6I | C_LYS_50   | NZ  | L_GLU_93   | OE2 | 2.549 |
| 4Q6I | C_LYS_181  | NZ  | G_GLU_56   | OE1 | 2.499 |

|      |           |     |            |     |       |
|------|-----------|-----|------------|-----|-------|
| 4Q6I | D.LYS_49  | NZ  | E.ASP_100A | OD1 | 3.008 |
| 4Q6I | E.LYS_208 | NZ  | D.GLU_123  | OE2 | 3.047 |
| 4Q6I | F.LYS_49  | NZ  | G.ASP_100A | OD1 | 3.146 |
| 4Q6I | G.LYS_208 | NZ  | F.GLU_123  | OE2 | 3.409 |
| 4Q6I | H.LYS_208 | NZ  | L.GLU_123  | OE2 | 3.045 |
| 4Q6I | I.LYS_50  | NZ  | F.GLU_93   | OE2 | 2.473 |
| 4Q6I | I.LYS_181 | NZ  | H.GLU_56   | OE1 | 3.345 |
| 4Q6I | J.LYS_50  | NZ  | D.GLU_93   | OE2 | 2.666 |
| 4Q6I | K.LYS_50  | NZ  | A.GLU_93   | OE2 | 2.835 |
| 4Q6I | L.LYS_49  | NZ  | H.ASP_100A | OD1 | 3.063 |
| 4Q9B | A.ARG_309 | NH1 | B.GLU_255  | OE1 | 3.484 |
| 4Q9B | A.ARG_309 | NH1 | B.GLU_255  | OE2 | 2.912 |
| 4Q9B | A.ARG_309 | NH2 | B.GLU_255  | OE2 | 3.212 |
| 4Q9B | B.ARG_309 | NH1 | A.GLU_255  | OE1 | 3.145 |
| 4Q9B | B.ARG_309 | NH1 | A.GLU_255  | OE2 | 2.858 |
| 4QEX | A.LYS_341 | NZ  | H.ASP_53   | OD1 | 3.875 |
| 4QEX | A.ARG_422 | NH2 | H.ASP_97   | OD2 | 3.116 |
| 4QHU | B.LYS_145 | NZ  | A.GLU_126  | OE2 | 2.821 |
| 4QHU | C.HIS_29  | ND1 | D.GLU_113  | OE1 | 3.672 |
| 4QHU | C.ARG_31  | NH1 | D.GLU_113  | OE2 | 3.297 |
| 4QHU | C.ARG_31  | NH2 | D.GLU_113  | OE1 | 3.241 |
| 4QHU | C.ARG_31  | NH2 | D.GLU_113  | OE2 | 3.844 |
| 4QHU | C.ARG_39  | NH1 | L.ASP_52   | OD1 | 3.835 |
| 4QHU | C.ARG_39  | NH1 | L.ASP_52   | OD2 | 2.646 |
| 4QHU | C.ARG_55  | NH1 | L.ASP_49   | OD1 | 2.860 |
| 4QHU | C.ARG_55  | NH1 | L.ASP_49   | OD2 | 3.543 |
| 4QTI | H.LYS_217 | NZ  | L.GLU_123  | OE2 | 2.684 |
| 4QTI | U.ARG_58  | NH2 | H.ASP_103  | OD2 | 2.819 |
| 4QTI | U.ARG_89  | NH1 | H.ASP_99   | OD2 | 3.048 |
| 4QTI | U.ARG_91  | NH1 | H.ASP_99   | OD1 | 2.759 |
| 4QTI | U.ARG_91  | NH1 | H.ASP_99   | OD2 | 2.751 |
| 4QTI | U.ARG_91  | NH2 | H.ASP_99   | OD2 | 3.786 |
| 4QTI | U.ARG_116 | NH1 | H.ASP_103  | OD2 | 3.777 |
| 4QTI | U.ARG_116 | NH2 | H.ASP_103  | OD1 | 3.889 |
| 4QXG | H.LYS_213 | NZ  | L.GLU_124  | OE2 | 3.477 |
| 4R2G | F.LYS_29  | NZ  | E.ASP_279  | OD2 | 2.979 |
| 4R2G | F.ARG_59  | NH1 | E.ASP_368  | OD1 | 2.950 |
| 4R2G | F.ARG_59  | NH1 | E.ASP_368  | OD2 | 2.577 |
| 4R2G | F.ARG_59  | NH2 | E.ASP_368  | OD2 | 3.352 |
| 4R2G | Q.ARG_100 | NH2 | P.ASP_66A  | OD2 | 2.815 |
| 4R2G | Q.LYS_227 | NZ  | P.GLU_124  | OE2 | 3.083 |
| 4R2G | B.LYS_29  | NZ  | O.ASP_279  | OD2 | 3.448 |
| 4R2G | B.ARG_59  | NH1 | O.ASP_368  | OD1 | 2.838 |
| 4R2G | B.ARG_59  | NH1 | O.ASP_368  | OD2 | 3.428 |
| 4R2G | B.ARG_59  | NH2 | O.ASP_368  | OD1 | 3.471 |
| 4R2G | B.ARG_59  | NH2 | O.ASP_368  | OD2 | 2.776 |
| 4R2G | D.ARG_100 | NH2 | C.ASP_66A  | OD2 | 3.131 |
| 4R2G | D.LYS_227 | NZ  | C.GLU_124  | OE1 | 3.473 |
| 4R2G | D.LYS_227 | NZ  | C.GLU_124  | OE2 | 3.405 |
| 4R2G | H.LYS_29  | NZ  | K.ASP_279  | OD1 | 2.934 |
| 4R2G | H.ARG_59  | NH1 | K.ASP_368  | OD1 | 2.502 |
| 4R2G | H.ARG_59  | NH1 | K.ASP_368  | OD2 | 3.259 |
| 4R2G | J.ARG_100 | NH2 | L.ASP_66A  | OD2 | 3.189 |
| 4R2G | J.LYS_161 | NZ  | I.GLU_125  | OE2 | 3.537 |
| 4R2G | L.LYS_29  | NZ  | A.ASP_279  | OD1 | 3.450 |
| 4R2G | L.ARG_59  | NH1 | A.ASP_368  | OD1 | 2.642 |
| 4R2G | L.ARG_59  | NH1 | A.ASP_368  | OD2 | 2.825 |
| 4R2G | L.ARG_59  | NH2 | A.ASP_368  | OD1 | 3.793 |

|      |           |     |            |     |       |
|------|-----------|-----|------------|-----|-------|
| 4R2G | L_ARG_59  | NH2 | A_ASP_368  | OD2 | 2.422 |
| 4R2G | N_ARG_100 | NH2 | M_ASP_66A  | OD2 | 3.592 |
| 4R2G | N_LYS_161 | NZ  | M_GLU_125  | OE2 | 2.706 |
| 4R2G | O_ARG_327 | NH1 | D_GLU_100I | OE2 | 3.858 |
| 4R2G | A_ARG_327 | NH1 | N_GLU_100I | OE1 | 3.235 |
| 4R4H | B_LYS_29  | NZ  | A_ASP_279  | OD1 | 2.795 |
| 4R4H | B_ARG_59  | NH1 | A_ASP_367  | OD1 | 3.294 |
| 4R4H | B_ARG_59  | NH1 | A_ASP_367  | OD2 | 3.409 |
| 4R4H | B_ARG_59  | NH2 | A_ASP_367  | OD2 | 3.834 |
| 4R4H | H_LYS_52  | NZ  | A_ASP_78   | OD1 | 3.615 |
| 4R4H | H_LYS_    | NZ  | L_ASP_     | OD2 | 3.470 |
| 4R7D | A_LYS_214 | NZ  | B_GLU_123  | OE1 | 3.736 |
| 4R7D | B_LYS_107 | NZ  | D_ASP_9    | OD2 | 3.947 |
| 4R7D | D_LYS_18  | NZ  | B_ASP_70   | OD2 | 3.792 |
| 4R7D | D_LYS_107 | NZ  | B_ASP_9    | OD2 | 3.503 |
| 4R7D | E_LYS_214 | NZ  | F_GLU_123  | OE1 | 3.862 |
| 4R7D | E_LYS_214 | NZ  | F_GLU_123  | OE2 | 3.571 |
| 4R7D | I_HIS_169 | NE2 | J_ASP_167  | OD1 | 3.970 |
| 4R7D | J_LYS_18  | NZ  | N_ASP_70   | OD1 | 3.913 |
| 4R7D | J_ARG_24  | NH2 | N_GLU_17   | OE1 | 3.275 |
| 4R7D | J_ARG_24  | NH2 | N_GLU_17   | OE2 | 2.135 |
| 4R7D | K_HIS_169 | NE2 | L_ASP_167  | OD2 | 3.666 |
| 4R7D | K_LYS_214 | NZ  | L_GLU_123  | OE1 | 3.074 |
| 4R7D | L_LYS_49  | NZ  | K_ASP_100  | OD2 | 3.591 |
| 4R7D | M_LYS_214 | NZ  | N_GLU_123  | OE1 | 3.058 |
| 4R7D | M_LYS_214 | NZ  | N_GLU_123  | OE2 | 2.866 |
| 4R7D | N_LYS_107 | NZ  | J_ASP_9    | OD2 | 3.244 |
| 4R7D | O_LYS_214 | NZ  | P_GLU_123  | OE1 | 2.454 |
| 4R7D | O_LYS_214 | NZ  | P_GLU_123  | OE2 | 3.167 |
| 4R7N | A_LYS_214 | NZ  | B_GLU_123  | OE1 | 3.674 |
| 4R7N | A_LYS_214 | NZ  | B_GLU_123  | OE2 | 3.683 |
| 4R7N | B_ARG_24  | NH2 | J_GLU_17   | OE1 | 3.625 |
| 4R7N | B_ARG_24  | NH2 | J_GLU_17   | OE2 | 2.355 |
| 4R7N | B_LYS_107 | NZ  | J_ASP_9    | OD2 | 3.605 |
| 4R7N | C_LYS_214 | NZ  | D_GLU_123  | OE1 | 2.537 |
| 4R7N | C_LYS_214 | NZ  | D_GLU_123  | OE2 | 3.321 |
| 4R7N | D_ARG_24  | NH2 | F_GLU_17   | OE1 | 3.787 |
| 4R7N | D_ARG_24  | NH2 | F_GLU_17   | OE2 | 2.414 |
| 4R7N | D_LYS_107 | NZ  | F_ASP_9    | OD2 | 3.633 |
| 4R7N | E_HIS_169 | NE2 | F_ASP_167  | OD1 | 3.616 |
| 4R7N | E_HIS_169 | NE2 | F_ASP_167  | OD2 | 3.474 |
| 4R7N | E_LYS_214 | NZ  | F_GLU_123  | OE2 | 3.072 |
| 4R7N | F_ARG_24  | NH2 | D_GLU_17   | OE1 | 3.696 |
| 4R7N | F_ARG_24  | NH2 | D_GLU_17   | OE2 | 2.325 |
| 4R7N | F_LYS_107 | NZ  | D_ASP_9    | OD2 | 3.641 |
| 4R7N | G_LYS_214 | NZ  | H_GLU_123  | OE1 | 2.389 |
| 4R7N | G_LYS_214 | NZ  | H_GLU_123  | OE2 | 3.440 |
| 4R7N | H_ARG_24  | NH2 | L_GLU_17   | OE1 | 3.413 |
| 4R7N | H_ARG_24  | NH2 | L_GLU_17   | OE2 | 2.312 |
| 4R7N | I_LYS_214 | NZ  | J_GLU_123  | OE1 | 3.635 |
| 4R7N | I_LYS_214 | NZ  | J_GLU_123  | OE2 | 2.942 |
| 4R7N | J_ARG_24  | NH2 | B_GLU_17   | OE1 | 3.555 |
| 4R7N | J_ARG_24  | NH2 | B_GLU_17   | OE2 | 2.304 |
| 4R7N | K_LYS_214 | NZ  | L_GLU_123  | OE2 | 3.794 |
| 4R7N | L_ARG_24  | NH2 | H_GLU_17   | OE1 | 3.531 |
| 4R7N | L_ARG_24  | NH2 | H_GLU_17   | OE2 | 2.313 |
| 4R7N | N_ARG_24  | NH2 | P_GLU_17   | OE1 | 3.814 |
| 4R7N | N_ARG_24  | NH2 | P_GLU_17   | OE2 | 2.289 |

|      |           |     |           |     |       |
|------|-----------|-----|-----------|-----|-------|
| 4R7N | N.LYS_107 | NZ  | P.ASP_9   | OD2 | 3.591 |
| 4R7N | O.HIS_169 | NE2 | P.ASP_167 | OD2 | 3.725 |
| 4R7N | P.ARG_24  | NH2 | N.GLU_17  | OE1 | 3.525 |
| 4R7N | P.ARG_24  | NH2 | N.GLU_17  | OE2 | 2.277 |
| 4R7N | Q.LYS_211 | NZ  | G.ASP_213 | OD2 | 3.009 |
| 4R7N | Q.LYS_214 | NZ  | R.GLU_123 | OE1 | 3.438 |
| 4R7N | Q.LYS_214 | NZ  | R.GLU_123 | OE2 | 3.002 |
| 4R7N | R.LYS_145 | NZ  | F.ASP_93  | OD2 | 3.627 |
| 4R7N | S.LYS_214 | NZ  | T.GLU_123 | OE1 | 3.934 |
| 4R7N | S.LYS_214 | NZ  | T.GLU_123 | OE2 | 3.931 |
| 4R9Y | H.LYS_214 | NZ  | L.GLU_148 | OE2 | 2.745 |
| 4R9Y | N.LYS_    | NZ  | M.GLU_    | OE2 | 3.272 |
| 4RAU | A.LYS_95  | NZ  | C.ASP_7   | OD1 | 3.997 |
| 4RAU | A.LYS_95  | NZ  | C.ASP_7   | OD2 | 3.077 |
| 4RAU | D.LYS_95  | NZ  | F.ASP_7   | OD1 | 3.860 |
| 4RAU | G.LYS_95  | NZ  | I.ASP_7   | OD1 | 3.805 |
| 4RAU | G.LYS_95  | NZ  | I.ASP_7   | OD2 | 2.755 |
| 4RAU | K.LYS_216 | NZ  | J.GLU_125 | OE2 | 3.935 |
| 4RAU | O.ARG_49  | NH2 | X.ASP_7   | OD1 | 2.993 |
| 4RAU | O.ARG_49  | NH2 | X.ASP_7   | OD2 | 3.647 |
| 4RAU | P.LYS_    | NZ  | R.ASP_    | OD1 | 3.104 |
| 4RAU | V.LYS_95  | NZ  | X.ASP_7   | OD1 | 3.972 |
| 4RAU | V.LYS_95  | NZ  | X.ASP_7   | OD2 | 3.050 |
| 4RAU | X.ARG_49  | NH2 | O.ASP_7   | OD1 | 2.791 |
| 4RAU | X.ARG_49  | NH2 | O.ASP_7   | OD2 | 3.699 |
| 4RRP | G.LYS_214 | NZ  | A.ASP_122 | OD1 | 3.271 |
| 4RRP | G.LYS_214 | NZ  | A.ASP_122 | OD2 | 3.253 |
| 4RRP | B.ARG_61  | NH1 | Q.GLU_32  | OE1 | 3.055 |
| 4RRP | B.ARG_61  | NH1 | Q.GLU_32  | OE2 | 3.683 |
| 4RRP | B.ARG_61  | NH2 | Q.GLU_32  | OE2 | 3.637 |
| 4RRP | J.LYS_214 | NZ  | D.ASP_122 | OD1 | 3.176 |
| 4RRP | J.LYS_214 | NZ  | D.ASP_122 | OD2 | 2.924 |
| 4RRP | L.HIS_164 | NE2 | F.ASP_167 | OD1 | 3.853 |
| 4RRP | L.LYS_214 | NZ  | F.ASP_122 | OD2 | 3.247 |
| 4RRP | M.LYS_10  | NZ  | N.GLU_29  | OE1 | 3.876 |
| 4RRP | M.LYS_10  | NZ  | N.GLU_29  | OE2 | 3.237 |
| 4RRP | N.LYS_10  | NZ  | M.GLU_29  | OE1 | 3.319 |
| 4RRP | N.LYS_10  | NZ  | M.GLU_29  | OE2 | 2.389 |
| 4RRP | O.ARG_123 | NH1 | Q.ASP_54  | OD1 | 3.356 |
| 4RRP | O.ARG_123 | NH1 | Q.ASP_54  | OD2 | 3.533 |
| 4RRP | O.ARG_123 | NH2 | Q.ASP_54  | OD2 | 3.134 |
| 4RRP | O.HIS_134 | NE2 | N.GLU_121 | OE1 | 3.780 |
| 4RRP | O.HIS_134 | NE2 | N.GLU_121 | OE2 | 3.192 |
| 4RRP | O.ARG_145 | NH2 | Q.GLU_116 | OE1 | 3.921 |
| 4RRP | O.ARG_145 | NH2 | Q.GLU_116 | OE2 | 3.324 |
| 4RRP | Q.ARG_145 | NH1 | O.GLU_116 | OE2 | 3.050 |
| 4RRP | Q.ARG_145 | NH2 | O.GLU_116 | OE2 | 3.244 |
| 4TRP | H.LYS_208 | NZ  | L.GLU_129 | OE2 | 3.281 |
| 4TUK | H.LYS_208 | NZ  | L.GLU_129 | OE2 | 3.061 |
| 4TUL | H.LYS_208 | NZ  | L.GLU_129 | OE1 | 3.059 |
| 4TUL | H.LYS_208 | NZ  | L.GLU_129 | OE2 | 2.741 |
| 4TUO | A.LYS_208 | NZ  | B.GLU_129 | OE1 | 3.043 |
| 4TUO | B.LYS_153 | NZ  | C.GLU_10  | OE2 | 3.051 |
| 4TUO | C.LYS_208 | NZ  | D.GLU_129 | OE1 | 2.720 |
| 4TUO | C.LYS_208 | NZ  | D.GLU_129 | OE2 | 3.136 |
| 4U0Q | A.HIS_495 | NE2 | D.GLU_31  | OE1 | 3.802 |
| 4U0Q | A.HIS_495 | NE2 | D.GLU_31  | OE2 | 2.620 |
| 4U0Q | A.HIS_496 | ND1 | D.GLU_31  | OE1 | 3.680 |



|      |           |     |            |     |       |
|------|-----------|-----|------------|-----|-------|
| 4U0Q | B_HIS_170 | ND1 | D_GLU_172  | OE1 | 2.788 |
| 4U0Q | C_HIS_495 | ND1 | B_ASP_32   | OD2 | 3.411 |
| 4U0Q | D_HIS_170 | ND1 | B_GLU_172  | OE1 | 2.879 |
| 4U0Q | D_HIS_170 | ND1 | B_GLU_172  | OE2 | 2.959 |
| 4U0Q | D_LYS_191 | NZ  | C_GLU_362  | OE2 | 3.108 |
| 4U3X | A_HIS_106 | NE2 | B_GLU_35   | OE1 | 2.597 |
| 4U3X | A_HIS_106 | NE2 | B_GLU_35   | OE2 | 3.650 |
| 4U3X | B_ARG_61  | NH1 | A_ASP_33   | OD2 | 2.723 |
| 4U3X | B_ARG_61  | NH2 | A_ASP_33   | OD2 | 2.983 |
| 4U3X | B_ARG_112 | NH2 | A_ASP_109  | OD1 | 3.763 |
| 4U3X | B_ARG_112 | NH2 | A_ASP_109  | OD2 | 3.035 |
| 4U3X | C_HIS_106 | NE2 | D_GLU_35   | OE1 | 2.720 |
| 4U3X | C_HIS_106 | NE2 | D_GLU_35   | OE2 | 3.669 |
| 4U3X | D_ARG_61  | NH1 | C_ASP_33   | OD2 | 3.116 |
| 4U3X | D_ARG_61  | NH2 | C_ASP_33   | OD2 | 3.400 |
| 4U3X | D_ARG_112 | NH2 | C_ASP_109  | OD2 | 3.567 |
| 4U6G | H_LYS_143 | NZ  | L_GLU_125  | OE2 | 3.603 |
| 4U6G | H_LYS_209 | NZ  | L_GLU_124  | OE1 | 2.829 |
| 4U6G | H_LYS_209 | NZ  | L_GLU_124  | OE2 | 2.866 |
| 4U6G | L_HIS_31  | ND1 | H_GLU_100I | OE2 | 3.196 |
| 4U6G | L_ARG_61  | NH1 | B_GLU_81   | OE1 | 3.298 |
| 4U6G | L_ARG_91  | NH1 | H_GLU_100J | OE1 | 3.679 |
| 4U6G | L_ARG_91  | NH1 | H_GLU_100J | OE2 | 3.478 |
| 4U6G | L_ARG_91  | NH2 | H_GLU_100J | OE2 | 3.428 |
| 4U6G | A_LYS_143 | NZ  | B_GLU_125  | OE2 | 3.217 |
| 4U6G | A_LYS_201 | NZ  | H_ASP_30   | OD1 | 3.983 |
| 4U6G | A_LYS_209 | NZ  | B_GLU_124  | OE1 | 2.769 |
| 4U6G | A_LYS_209 | NZ  | B_GLU_124  | OE2 | 3.063 |
| 4U6G | B_HIS_31  | ND1 | A_GLU_100I | OE2 | 3.102 |
| 4U6G | B_ARG_91  | NH1 | A_GLU_100J | OE1 | 3.587 |
| 4U6G | B_ARG_91  | NH1 | A_GLU_100J | OE2 | 3.310 |
| 4U6G | B_ARG_91  | NH2 | A_GLU_100J | OE2 | 3.407 |
| 4U6V | H_ARG_99  | NH2 | L_GLU_55   | OE1 | 2.660 |
| 4U6V | H_ARG_99  | NH2 | L_GLU_55   | OE2 | 2.823 |
| 4U6V | H_HIS_105 | NE2 | A_ASP_183  | OD1 | 3.150 |
| 4U6V | H_HIS_105 | NE2 | A_ASP_183  | OD2 | 3.236 |
| 4U6V | H_LYS_218 | NZ  | L_GLU_122  | OE1 | 2.258 |
| 4U6V | H_LYS_218 | NZ  | L_GLU_122  | OE2 | 3.923 |
| 4U6V | A_ARG_200 | NH1 | H_ASP_56   | OD1 | 3.722 |
| 4U6V | A_ARG_200 | NH1 | H_ASP_56   | OD2 | 3.481 |
| 4U6V | A_LYS_266 | NZ  | L_ASP_93   | OD1 | 2.981 |
| 4U6V | K_ARG_99  | NH2 | M_GLU_55   | OE1 | 2.606 |
| 4U6V | K_ARG_99  | NH2 | M_GLU_55   | OE2 | 2.857 |
| 4U6V | K_HIS_105 | NE2 | B_ASP_183  | OD1 | 2.992 |
| 4U6V | K_HIS_105 | NE2 | B_ASP_183  | OD2 | 3.142 |
| 4U6V | K_LYS_218 | NZ  | M_GLU_122  | OE1 | 2.653 |
| 4U6V | B_ARG_200 | NH1 | K_ASP_56   | OD1 | 3.809 |
| 4U6V | B_ARG_200 | NH1 | K_ASP_56   | OD2 | 3.557 |
| 4U6V | B_LYS_266 | NZ  | M_ASP_93   | OD1 | 3.145 |
| 4UAO | A_ARG_317 | NH1 | C_GLU_100B | OE2 | 3.537 |
| 4UAO | A_ARG_317 | NH2 | C_GLU_100B | OE1 | 3.794 |
| 4UAO | A_ARG_317 | NH2 | C_GLU_100B | OE2 | 2.800 |
| 4UAO | C_ARG_56  | NH1 | A_GLU_81   | OE2 | 2.819 |
| 4UAO | C_ARG_56  | NH2 | A_ASP_174  | OD1 | 3.129 |
| 4UAO | C_ARG_56  | NH2 | A_ASP_174  | OD2 | 2.857 |
| 4UAO | C_ARG_95  | NH2 | A_GLU_173  | OE2 | 3.027 |
| 4UV6 | B_ARG_180 | NH2 | A_GLU_396  | OE2 | 2.784 |
| 4UV6 | B_ARG_313 | NH2 | A_GLU_60   | OE1 | 2.768 |

|      |           |     |           |     |       |
|------|-----------|-----|-----------|-----|-------|
| 4WEU | D.LYS_887 | NZ  | A_GLU_145 | OE1 | 3.143 |
| 4WEU | A_ARG_96  | NH1 | B_GLU_94  | OE1 | 3.636 |
| 4WEU | A_ARG_96  | NH1 | B_GLU_94  | OE2 | 3.058 |
| 4WEU | A_ARG_96  | NH2 | B_GLU_94  | OE1 | 2.949 |
| 4WEU | A_ARG_96  | NH2 | B_GLU_94  | OE2 | 3.852 |
| 4WEU | A_ARG_136 | NH1 | D_GLU_889 | OE1 | 2.898 |
| 4WEU | B_ARG_96  | NH1 | A_GLU_94  | OE1 | 3.754 |
| 4WEU | B_ARG_96  | NH1 | A_GLU_94  | OE2 | 2.795 |
| 4WEU | B_ARG_96  | NH2 | A_GLU_94  | OE1 | 2.707 |
| 4WEU | B_ARG_96  | NH2 | A_GLU_94  | OE2 | 3.344 |
| 4WHT | A_LYS_207 | NZ  | B_GLU_127 | OE1 | 2.607 |
| 4WHT | A_LYS_207 | NZ  | B_GLU_127 | OE2 | 3.670 |
| 4WHT | C_LYS_207 | NZ  | D_GLU_127 | OE1 | 3.293 |
| 4WHT | E_LYS_207 | NZ  | F_GLU_127 | OE1 | 3.118 |
| 4WHT | G_LYS_204 | NZ  | U_ASP_206 | OD2 | 3.854 |
| 4WHT | I_LYS_65  | NZ  | R_GLU_84  | OE2 | 3.044 |
| 4WHT | I_LYS_207 | NZ  | J_GLU_127 | OE1 | 2.774 |
| 4WHT | I_LYS_207 | NZ  | J_GLU_127 | OE2 | 3.846 |
| 4WHT | K_LYS_207 | NZ  | L_GLU_127 | OE1 | 2.813 |
| 4WHT | M_LYS_204 | NZ  | K_ASP_206 | OD2 | 2.701 |
| 4WHT | M_LYS_207 | NZ  | N_GLU_127 | OE1 | 3.186 |
| 4WHT | O_LYS_207 | NZ  | P_GLU_127 | OE1 | 3.812 |
| 4WHT | O_LYS_207 | NZ  | P_GLU_127 | OE2 | 2.822 |
| 4WHT | Q_LYS_207 | NZ  | R_GLU_127 | OE1 | 2.572 |
| 4WHT | Q_LYS_207 | NZ  | R_GLU_127 | OE2 | 3.627 |
| 4WHT | S_LYS_207 | NZ  | T_GLU_127 | OE1 | 3.197 |
| 4WHT | U_LYS_204 | NZ  | G_ASP_206 | OD2 | 3.954 |
| 4WHT | U_LYS_207 | NZ  | V_GLU_127 | OE1 | 3.622 |
| 4WHT | X_LYS_207 | NZ  | Y_GLU_127 | OE2 | 2.718 |
| 4WHT | B_LYS_111 | NZ  | J_GLU_73  | OE2 | 3.842 |
| 4WHT | D_LYS_151 | NZ  | L_GLU_191 | OE2 | 3.259 |
| 4WHT | D_LYS_187 | NZ  | I_GLU_114 | OE1 | 3.576 |
| 4WHT | D_LYS_187 | NZ  | I_GLU_114 | OE2 | 3.498 |
| 4WHT | H_ARG_66  | NH1 | Q_ASP_62  | OD2 | 3.949 |
| 4WHT | N_LYS_187 | NZ  | K_GLU_114 | OE1 | 3.270 |
| 4WHT | N_LYS_187 | NZ  | K_GLU_114 | OE2 | 3.221 |
| 4WHT | V_LYS_187 | NZ  | G_GLU_114 | OE1 | 3.353 |
| 4WHT | V_LYS_187 | NZ  | G_GLU_114 | OE2 | 3.189 |
| 4WHY | K_LYS_204 | NZ  | G_ASP_206 | OD2 | 3.182 |
| 4WHY | K_LYS_207 | NZ  | L_GLU_127 | OE1 | 3.798 |
| 4WHY | L_LYS_187 | NZ  | G_GLU_114 | OE1 | 3.275 |
| 4WHY | L_LYS_187 | NZ  | G_GLU_114 | OE2 | 3.634 |
| 4WHY | M_LYS_207 | NZ  | N_GLU_127 | OE1 | 3.795 |
| 4WHY | N_LYS_187 | NZ  | I_GLU_114 | OE1 | 2.397 |
| 4WHY | N_LYS_187 | NZ  | I_GLU_114 | OE2 | 3.551 |
| 4WUU | A_ARG_35  | NH1 | B_ASP_53  | OD1 | 3.025 |
| 4WUU | A_ARG_35  | NH1 | B_ASP_53  | OD2 | 3.278 |
| 4WUU | A_ARG_48  | NH2 | B_ASP_53  | OD1 | 3.607 |
| 4WUU | A_ARG_48  | NH2 | B_ASP_53  | OD2 | 3.368 |
| 4WUU | E_ARG_50  | NH1 | A_GLU_166 | OE2 | 3.181 |
| 4WUU | E_ARG_50  | NH2 | A_GLU_166 | OE1 | 3.839 |
| 4WUU | E_ARG_50  | NH2 | A_GLU_166 | OE2 | 2.671 |
| 4XVJ | A_ARG_1   | NH2 | L_ASP_51  | OD1 | 3.482 |
| 4YHP | P_LYS_4   | NZ  | H_ASP_62  | OD1 | 3.318 |
| 4YHP | A_LYS_222 | NZ  | B_ASP_123 | OD2 | 3.677 |
| 4YHP | Q_LYS_4   | NZ  | C_ASP_62  | OD1 | 3.313 |
| 4YHP | C_LYS_222 | NZ  | D_ASP_123 | OD1 | 3.776 |
| 4YHP | C_LYS_222 | NZ  | D_ASP_123 | OD2 | 3.442 |

|      |           |     |            |     |       |
|------|-----------|-----|------------|-----|-------|
| 4YHP | D.HIS_190 | NE2 | L_GLU_59   | OE2 | 2.478 |
| 4YHP | E.LYS_222 | NZ  | F_ASP_123  | OD1 | 3.304 |
| 4YHP | E.LYS_222 | NZ  | F_ASP_123  | OD2 | 2.842 |
| 4YHZ | H.ARG_102 | NH1 | L_ASP_52   | OD2 | 3.952 |
| 4YNY | A.LYS_166 | NZ  | B_GLU_146  | OE2 | 2.702 |
| 4YNY | C.LYS_166 | NZ  | D_GLU_146  | OE2 | 2.776 |
| 4YO0 | A.LYS_76  | NZ  | E_ASP_11   | OD1 | 3.807 |
| 4YO0 | A.LYS_76  | NZ  | E_ASP_11   | OD2 | 3.094 |
| 4YO0 | A.LYS_166 | NZ  | B_GLU_146  | OE2 | 2.816 |
| 4YO0 | C.LYS_76  | NZ  | F_GLU_10   | OE2 | 3.111 |
| 4YO0 | C.LYS_76  | NZ  | F_ASP_11   | OD1 | 3.515 |
| 4YO0 | C.LYS_76  | NZ  | F_ASP_11   | OD2 | 2.782 |
| 4YO0 | C.LYS_166 | NZ  | D_GLU_146  | OE2 | 2.660 |
| 4YO0 | C.LYS_231 | NZ  | D_GLU_145  | OE1 | 3.828 |
| 4YO0 | C.LYS_231 | NZ  | D_GLU_145  | OE2 | 3.815 |
| 4Z0X | C.LYS_446 | NZ  | A_ASP_50   | OD1 | 3.873 |
| 4Z0X | C.LYS_446 | NZ  | A_ASP_50   | OD2 | 2.440 |
| 4ZD3 | H.HIS_108 | NE2 | L_GLU_68   | OE1 | 2.549 |
| 4ZD3 | H.HIS_108 | NE2 | L_GLU_68   | OE2 | 3.986 |
| 4ZD3 | H.LYS_224 | NZ  | L_GLU_143  | OE2 | 2.997 |
| 4ZFF | A.LYS_209 | NZ  | B_GLU_123  | OE1 | 3.193 |
| 4ZFF | C.ARG_23  | NH1 | D_GLU_30   | OE1 | 3.414 |
| 4ZFF | H.LYS_209 | NZ  | L_GLU_123  | OE1 | 3.731 |
| 4ZFG | H.LYS_209 | NZ  | L_GLU_123  | OE1 | 2.808 |
| 4ZFO | F.HIS_19  | NE2 | A_GLU_50   | OE1 | 2.994 |
| 4ZFO | F.HIS_19  | NE2 | A_GLU_50   | OE2 | 3.320 |
| 4ZFO | H.ARG_39  | NH1 | L_GLU_85   | OE2 | 3.425 |
| 4ZFO | H.ARG_39  | NH2 | L_GLU_85   | OE1 | 3.703 |
| 4ZFO | H.ARG_39  | NH2 | L_GLU_85   | OE2 | 2.644 |
| 4ZFO | H.LYS_216 | NZ  | L_GLU_123  | OE2 | 3.666 |
| 4ZFO | A.ARG_39  | NH1 | B_GLU_85   | OE1 | 3.845 |
| 4ZFO | A.ARG_39  | NH2 | B_GLU_85   | OE1 | 2.855 |
| 4ZFO | A.ARG_39  | NH2 | B_GLU_85   | OE2 | 3.746 |
| 4ZFO | K.HIS_19  | NE2 | H_GLU_50   | OE1 | 2.755 |
| 4ZFO | K.HIS_19  | NE2 | H_GLU_50   | OE2 | 3.392 |
| 5A7X | A.ARG_419 | NH1 | D_GLU_100B | OE1 | 3.000 |
| 5A7X | A.ARG_419 | NH1 | D_GLU_100B | OE2 | 3.675 |
| 5A7X | A.ARG_419 | NH2 | D_GLU_99   | OE1 | 2.292 |
| 5A7X | A.ARG_419 | NH2 | D_GLU_100B | OE2 | 3.969 |
| 5A7X | B.LYS_35  | NZ  | A_ASP_457  | OD1 | 3.741 |
| 5A7X | B.ARG_59  | NH1 | A_ASP_368  | OD1 | 3.154 |
| 5A7X | B.ARG_59  | NH1 | A_ASP_368  | OD2 | 3.344 |
| 5A7X | B.ARG_59  | NH2 | A_ASP_368  | OD1 | 2.976 |
| 5A7X | B.ARG_59  | NH2 | A_ASP_368  | OD2 | 2.433 |
| 5A7X | D.HIS_164 | NE2 | C_ASP_167  | OD1 | 3.880 |
| 5A7X | D.HIS_164 | NE2 | C_ASP_167  | OD2 | 2.506 |
| 5A7X | D.LYS_209 | NZ  | C_GLU_123  | OE1 | 3.513 |
| 5A7X | D.LYS_209 | NZ  | C_GLU_123  | OE2 | 3.583 |
| 5A7X | E.ARG_419 | NH1 | H_GLU_100B | OE1 | 2.998 |
| 5A7X | E.ARG_419 | NH1 | H_GLU_100B | OE2 | 3.674 |
| 5A7X | E.ARG_419 | NH2 | H_GLU_99   | OE1 | 2.293 |
| 5A7X | E.ARG_419 | NH2 | H_GLU_100B | OE2 | 3.968 |
| 5A7X | F.LYS_35  | NZ  | E_ASP_457  | OD1 | 3.741 |
| 5A7X | F.ARG_59  | NH1 | E_ASP_368  | OD1 | 3.154 |
| 5A7X | F.ARG_59  | NH1 | E_ASP_368  | OD2 | 3.343 |
| 5A7X | F.ARG_59  | NH2 | E_ASP_368  | OD1 | 2.977 |
| 5A7X | F.ARG_59  | NH2 | E_ASP_368  | OD2 | 2.434 |
| 5A7X | H.HIS_164 | NE2 | G_ASP_167  | OD1 | 3.880 |

|      |            |     |            |     |       |
|------|------------|-----|------------|-----|-------|
| 5A7X | H_HIS_164  | NE2 | G_ASP_167  | OD2 | 2.505 |
| 5A7X | H_LYS_209  | NZ  | G_GLU_123  | OE1 | 3.512 |
| 5A7X | H_LYS_209  | NZ  | G_GLU_123  | OE2 | 3.584 |
| 5A7X | I_ARG_419  | NH1 | L_GLU_100B | OE1 | 2.999 |
| 5A7X | I_ARG_419  | NH1 | L_GLU_100B | OE2 | 3.675 |
| 5A7X | I_ARG_419  | NH2 | L_GLU_99   | OE1 | 2.293 |
| 5A7X | I_ARG_419  | NH2 | L_GLU_100B | OE2 | 3.968 |
| 5A7X | J_LYS_35   | NZ  | I_ASP_457  | OD1 | 3.740 |
| 5A7X | J_ARG_59   | NH1 | I_ASP_368  | OD1 | 3.154 |
| 5A7X | J_ARG_59   | NH1 | I_ASP_368  | OD2 | 3.344 |
| 5A7X | J_ARG_59   | NH2 | I_ASP_368  | OD1 | 2.976 |
| 5A7X | J_ARG_59   | NH2 | I_ASP_368  | OD2 | 2.433 |
| 5A7X | L_HIS_164  | NE2 | K_ASP_167  | OD1 | 3.880 |
| 5A7X | L_HIS_164  | NE2 | K_ASP_167  | OD2 | 2.504 |
| 5A7X | L_LYS_209  | NZ  | K_GLU_123  | OE1 | 3.514 |
| 5A7X | L_LYS_209  | NZ  | K_GLU_123  | OE2 | 3.585 |
| 5A8H | A_ARG_419  | NH1 | D_GLU_100B | OE1 | 2.999 |
| 5A8H | A_ARG_419  | NH1 | D_GLU_100B | OE2 | 3.674 |
| 5A8H | A_ARG_419  | NH2 | D_GLU_99   | OE1 | 2.292 |
| 5A8H | A_ARG_419  | NH2 | D_GLU_100B | OE2 | 3.968 |
| 5A8H | B_LYS_35   | NZ  | A_ASP_457  | OD1 | 3.740 |
| 5A8H | B_ARG_59   | NH1 | A_ASP_368  | OD1 | 3.154 |
| 5A8H | B_ARG_59   | NH1 | A_ASP_368  | OD2 | 3.342 |
| 5A8H | B_ARG_59   | NH2 | A_ASP_368  | OD1 | 2.977 |
| 5A8H | B_ARG_59   | NH2 | A_ASP_368  | OD2 | 2.433 |
| 5A8H | D_HIS_164  | NE2 | C_ASP_167  | OD1 | 3.880 |
| 5A8H | D_HIS_164  | NE2 | C_ASP_167  | OD2 | 2.505 |
| 5A8H | D_LYS_209  | NZ  | C_GLU_123  | OE1 | 3.514 |
| 5A8H | D_LYS_209  | NZ  | C_GLU_123  | OE2 | 3.584 |
| 5A8H | F_LYS_100  | NZ  | A_GLU_91   | OE1 | 3.015 |
| 5A8H | F_LYS_100  | NZ  | A_GLU_91   | OE2 | 3.536 |
| 5A8H | G_ARG_419  | NH1 | J_GLU_100B | OE1 | 2.998 |
| 5A8H | G_ARG_419  | NH1 | J_GLU_100B | OE2 | 3.675 |
| 5A8H | G_ARG_419  | NH2 | J_GLU_99   | OE1 | 2.292 |
| 5A8H | G_ARG_419  | NH2 | J_GLU_100B | OE2 | 3.969 |
| 5A8H | H_LYS_35   | NZ  | G_ASP_457  | OD1 | 3.741 |
| 5A8H | H_ARG_59   | NH1 | G_ASP_368  | OD1 | 3.154 |
| 5A8H | H_ARG_59   | NH1 | G_ASP_368  | OD2 | 3.343 |
| 5A8H | H_ARG_59   | NH2 | G_ASP_368  | OD1 | 2.977 |
| 5A8H | H_ARG_59   | NH2 | G_ASP_368  | OD2 | 2.433 |
| 5A8H | J_HIS_164  | NE2 | I_ASP_167  | OD1 | 3.881 |
| 5A8H | J_HIS_164  | NE2 | I_ASP_167  | OD2 | 2.505 |
| 5A8H | J_LYS_209  | NZ  | I_GLU_123  | OE1 | 3.513 |
| 5A8H | J_LYS_209  | NZ  | I_GLU_123  | OE2 | 3.584 |
| 5A8H | L_LYS_100  | NZ  | G_GLU_87   | OE1 | 2.922 |
| 5A8H | L_LYS_100  | NZ  | G_GLU_87   | OE2 | 3.552 |
| 5A8H | L_HIS_100E | NE2 | G_GLU_91   | OE2 | 3.049 |
| 5A8H | M_ARG_419  | NH1 | P_GLU_100B | OE1 | 2.999 |
| 5A8H | M_ARG_419  | NH1 | P_GLU_100B | OE2 | 3.675 |
| 5A8H | M_ARG_419  | NH2 | P_GLU_99   | OE1 | 2.292 |
| 5A8H | M_ARG_419  | NH2 | P_GLU_100B | OE2 | 3.969 |
| 5A8H | N_LYS_35   | NZ  | M_ASP_457  | OD1 | 3.741 |
| 5A8H | N_ARG_59   | NH1 | M_ASP_368  | OD1 | 3.154 |
| 5A8H | N_ARG_59   | NH1 | M_ASP_368  | OD2 | 3.343 |
| 5A8H | N_ARG_59   | NH2 | M_ASP_368  | OD1 | 2.977 |
| 5A8H | N_ARG_59   | NH2 | M_ASP_368  | OD2 | 2.433 |
| 5A8H | O_LYS_145  | NZ  | C_GLU_17   | OE1 | 3.474 |
| 5A8H | O_LYS_145  | NZ  | C_GLU_17   | OE2 | 2.123 |

|      |            |     |            |     |       |
|------|------------|-----|------------|-----|-------|
| 5A8H | P_HIS_164  | NE2 | O_ASP_167  | OD1 | 3.881 |
| 5A8H | P_HIS_164  | NE2 | O_ASP_167  | OD2 | 2.505 |
| 5A8H | P_LYS_209  | NZ  | O_GLU_123  | OE1 | 3.514 |
| 5A8H | P_LYS_209  | NZ  | O_GLU_123  | OE2 | 3.584 |
| 5A8H | R_HIS_100E | ND1 | M_GLU_87   | OE2 | 2.709 |
| 5A8H | R_HIS_100E | NE2 | M_GLU_87   | OE2 | 3.097 |
| 5AZE | L_HIS_36   | NE2 | H_GLU_105  | OE2 | 2.756 |
| 5AZE | H_LYS_137  | NZ  | L_ASP_143  | OD2 | 2.939 |
| 5AZE | H_LYS_217  | NZ  | L_GLU_128  | OE2 | 2.701 |
| 5BW7 | A_LYS_370  | NZ  | B_GLU_357  | OE2 | 3.993 |
| 5BW7 | A_LYS_409  | NZ  | B_ASP_399  | OD1 | 3.864 |
| 5BW7 | A_LYS_409  | NZ  | B_ASP_399  | OD2 | 2.990 |
| 5BW7 | B_LYS_370  | NZ  | A_GLU_357  | OE2 | 3.748 |
| 5BW7 | B_LYS_409  | NZ  | A_ASP_399  | OD1 | 3.328 |
| 5BW7 | B_LYS_409  | NZ  | A_ASP_399  | OD2 | 2.988 |
| 5BW7 | C_LYS_120  | NZ  | A_ASP_265  | OD2 | 2.730 |
| 5BW7 | C_LYS_131  | NZ  | A_GLU_269  | OE1 | 3.414 |
| 5BW7 | C_LYS_131  | NZ  | A_GLU_269  | OE2 | 2.642 |
| 5CMA | B_LYS_214  | NZ  | A_GLU_123  | OE1 | 2.706 |
| 5CMA | B_LYS_214  | NZ  | A_GLU_123  | OE2 | 3.531 |
| 5CP3 | H_LYS_207  | NZ  | A_GLU_128  | OE2 | 2.762 |
| 5CP7 | B_LYS_207  | NZ  | C_GLU_128  | OE2 | 3.335 |
| 5CP7 | C_LYS_58   | NZ  | H_ASP_1    | OD1 | 3.663 |
| 5CP7 | C_LYS_58   | NZ  | H_ASP_1    | OD2 | 3.316 |
| 5CP7 | D_LYS_207  | NZ  | E_GLU_128  | OE2 | 2.825 |
| 5CP7 | F_HIS_163  | ND1 | G_ASP_172  | OD2 | 3.652 |
| 5CP7 | F_LYS_207  | NZ  | G_GLU_128  | OE2 | 3.951 |
| 5CP7 | H_LYS_207  | NZ  | A_GLU_128  | OE2 | 3.290 |
| 5DFV | A_LYS_171  | NZ  | C_ASP_288  | OD1 | 3.582 |
| 5DFV | A_LYS_171  | NZ  | C_ASP_288  | OD2 | 2.737 |
| 5DFV | A_LYS_171  | NZ  | C_ASP_290  | OD2 | 2.874 |
| 5DFV | B_LYS_171  | NZ  | E_ASP_288  | OD1 | 3.695 |
| 5DFV | B_LYS_171  | NZ  | E_ASP_288  | OD2 | 3.653 |
| 5DFV | B_LYS_171  | NZ  | E_ASP_290  | OD2 | 2.646 |
| 5DFV | C_ARG_398  | NH2 | D_GLU_698  | OE1 | 3.277 |
| 5DFV | E_ARG_398  | NH1 | F_GLU_698  | OE2 | 3.319 |
| 5DFV | E_LYS_1094 | NZ  | F_GLU_2015 | OE1 | 3.713 |
| 5DFV | E_ARG_1099 | NH1 | F_GLU_2105 | OE2 | 3.679 |
| 5DFW | A_LYS_171  | NZ  | H_ASP_156  | OD2 | 2.691 |
| 5DFW | A_LYS_171  | NZ  | H_ASP_253  | OD1 | 2.751 |
| 5DFW | A_LYS_171  | NZ  | H_ASP_253  | OD2 | 3.799 |
| 5DFW | H_ARG_251  | NH2 | A_ASP_138  | OD1 | 3.392 |
| 5DFW | H_ARG_251  | NH2 | A_ASP_138  | OD2 | 2.698 |
| 5DFW | H_LYS_292  | NZ  | A_ASP_138  | OD1 | 3.884 |
| 5DFW | H_LYS_292  | NZ  | A_ASP_138  | OD2 | 2.950 |
| 5DFW | H_LYS_292  | NZ  | A_ASP_139  | OD1 | 3.019 |
| 5DMI | A_LYS_46   | NZ  | L_ASP_31   | OD1 | 2.761 |
| 5DMI | A_LYS_46   | NZ  | L_ASP_31   | OD2 | 3.234 |
| 5DMI | A_HIS_76   | ND1 | H_ASP_100A | OD2 | 3.977 |
| 5DMI | H_LYS_221  | NZ  | L_GLU_123  | OE2 | 3.105 |
| 5DMJ | B_ARG_83   | NH2 | G_ASP_72   | OD1 | 3.449 |
| 5DMJ | G_LYS_75   | NZ  | B_GLU_85   | OE1 | 3.187 |
| 5DWU | H_ARG_52   | NH1 | A_ASP_107  | OD1 | 3.435 |
| 5DWU | H_ARG_52   | NH1 | A_ASP_107  | OD2 | 2.568 |
| 5DWU | H_ARG_52   | NH2 | A_ASP_107  | OD1 | 2.685 |
| 5DWU | H_ARG_52   | NH2 | A_ASP_107  | OD2 | 3.250 |
| 5ERW | A_ARG_103  | NH1 | B_ASP_49   | OD2 | 2.990 |
| 5ERW | A_LYS_214  | NZ  | B_GLU_122  | OE1 | 2.490 |

|      |           |     |           |     |       |
|------|-----------|-----|-----------|-----|-------|
| 5ERW | C.LYS_446 | NZ  | B.ASP_50  | OD1 | 3.926 |
| 5ERW | C.LYS_446 | NZ  | B.ASP_50  | OD2 | 2.398 |
| 5EZI | L.ARG_120 | NH1 | H.GLU_64  | OE1 | 3.561 |
| 5EZI | L.ARG_120 | NH1 | H.GLU_64  | OE2 | 2.826 |
| 5EZJ | A.LYS_228 | NZ  | B.GLU_147 | OE1 | 3.274 |
| 5EZJ | B.ARG_120 | NH1 | A.GLU_64  | OE1 | 3.637 |
| 5EZJ | B.ARG_120 | NH1 | A.GLU_64  | OE2 | 2.843 |
| 5EZL | A.LYS_228 | NZ  | B.GLU_147 | OE1 | 3.314 |
| 5EZL | B.ARG_120 | NH1 | A.GLU_64  | OE1 | 3.901 |
| 5EZL | B.ARG_120 | NH1 | A.GLU_64  | OE2 | 2.804 |
| 5EZL | H.LYS_228 | NZ  | L.GLU_147 | OE2 | 3.445 |
| 5EZL | L.ARG_120 | NH1 | H.GLU_64  | OE1 | 3.668 |
| 5EZL | L.ARG_120 | NH1 | H.GLU_64  | OE2 | 2.626 |
| 5EZN | A.ARG_58  | NH1 | E.ASP_336 | OD2 | 3.940 |
| 5EZN | A.ARG_58  | NH2 | E.ASP_336 | OD2 | 2.479 |
| 5EZN | E.LYS_204 | NZ  | A.GLU_113 | OE1 | 2.243 |
| 5EZN | E.LYS_204 | NZ  | A.GLU_113 | OE2 | 3.142 |
| 5EZN | E.LYS_251 | NZ  | B.GLU_72  | OE2 | 3.130 |
| 5EZN | B.ARG_135 | NH1 | G.GLU_206 | OE2 | 3.927 |
| 5EZN | B.ARG_135 | NH2 | G.GLU_206 | OE2 | 3.596 |
| 5EZN | G.LYS_204 | NZ  | B.GLU_112 | OE1 | 2.749 |
| 5EZN | G.LYS_204 | NZ  | B.GLU_112 | OE2 | 3.972 |
| 5EZN | G.LYS_204 | NZ  | B.GLU_113 | OE2 | 3.260 |
| 5EZO | H.LYS_232 | NZ  | L.GLU_143 | OE1 | 3.314 |
| 5EZO | H.LYS_232 | NZ  | L.GLU_143 | OE2 | 2.456 |
| 5EZO | L.ARG_50  | NH1 | A.ASP_66  | OD1 | 3.943 |
| 5EZO | L.ARG_50  | NH1 | A.ASP_66  | OD2 | 3.721 |
| 5EZO | L.ARG_116 | NH1 | H.GLU_68  | OE1 | 3.718 |
| 5EZO | L.ARG_116 | NH1 | H.GLU_68  | OE2 | 2.774 |
| 5GGV | H.ARG_101 | NH1 | Y.GLU_97  | OE2 | 3.572 |
| 5GGV | H.LYS_221 | NZ  | L.GLU_123 | OE1 | 2.304 |
| 5GGV | H.LYS_221 | NZ  | L.GLU_123 | OE2 | 3.975 |
| 5GKR | A.LYS_143 | NZ  | B.GLU_125 | OE2 | 2.806 |
| 5GKR | A.LYS_209 | NZ  | B.GLU_124 | OE1 | 2.825 |
| 5GKR | A.LYS_209 | NZ  | B.GLU_124 | OE2 | 3.325 |
| 5GKR | B.LYS_130 | NZ  | A.ASP_144 | OD2 | 3.639 |
| 5GKR | C.LYS_143 | NZ  | D.GLU_125 | OE2 | 2.591 |
| 5GKR | C.LYS_209 | NZ  | D.GLU_124 | OE1 | 2.486 |
| 5GKR | C.LYS_209 | NZ  | D.GLU_124 | OE2 | 2.893 |
| 5GKR | D.LYS_130 | NZ  | C.ASP_144 | OD2 | 3.574 |
| 5GKS | A.LYS_    | NZ  | B.GLU_124 | OE1 | 3.518 |
| 5GKS | A.LYS_    | NZ  | B.GLU_124 | OE2 | 2.790 |
| 5GKS | B.LYS_130 | NZ  | A.ASP_144 | OD2 | 3.783 |
| 5GKS | C.LYS_    | NZ  | D.GLU_    | OE1 | 3.455 |
| 5GKS | C.LYS_    | NZ  | D.GLU_    | OE2 | 2.665 |
| 5HDQ | A.HIS_234 | ND1 | H.ASP_97  | OD2 | 3.865 |
| 5HDQ | H.LYS_95  | NZ  | A.ASP_256 | OD2 | 3.739 |
| 5HDQ | H.LYS_208 | NZ  | L.GLU_123 | OE1 | 2.947 |
| 5HMG | A.LYS_27  | NZ  | B.GLU_97  | OE1 | 2.931 |
| 5HMG | A.LYS_27  | NZ  | B.GLU_97  | OE2 | 3.005 |
| 5HMG | A.ARG_109 | NH1 | B.GLU_67  | OE1 | 2.841 |
| 5HMG | A.ARG_109 | NH1 | B.GLU_67  | OE2 | 3.185 |
| 5HMG | A.ARG_269 | NH1 | B.GLU_67  | OE1 | 3.577 |
| 5HMG | A.ARG_269 | NH2 | B.GLU_67  | OE1 | 3.220 |
| 5HMG | A.LYS_299 | NZ  | B.GLU_69  | OE1 | 3.343 |
| 5HMG | A.LYS_310 | NZ  | B.ASP_86  | OD1 | 3.434 |
| 5HMG | A.LYS_310 | NZ  | B.ASP_90  | OD1 | 2.661 |
| 5HMG | B.ARG_54  | NH1 | F.GLU_97  | OE1 | 2.843 |

|      |           |     |           |     |       |
|------|-----------|-----|-----------|-----|-------|
| 5HMG | B_ARG_54  | NH2 | F_GLU_97  | OE1 | 2.937 |
| 5HMG | B_LYS_58  | NZ  | F_GLU_97  | OE1 | 3.606 |
| 5HMG | B_LYS_58  | NZ  | F_GLU_97  | OE2 | 3.524 |
| 5HMG | B_LYS_62  | NZ  | F_ASP_86  | OD1 | 3.085 |
| 5HMG | B_LYS_62  | NZ  | F_ASP_86  | OD2 | 2.792 |
| 5HMG | B_LYS_62  | NZ  | F_ASP_90  | OD1 | 3.679 |
| 5HMG | B_LYS_62  | NZ  | F_ASP_90  | OD2 | 2.748 |
| 5HMG | B_HIS_64  | NE2 | F_ASP_79  | OD2 | 3.617 |
| 5HMG | B_ARG_76  | NH1 | D_GLU_74  | OE1 | 3.275 |
| 5HMG | B_ARG_76  | NH1 | D_GLU_74  | OE2 | 2.882 |
| 5HMG | B_ARG_76  | NH1 | D_GLU_81  | OE1 | 2.781 |
| 5HMG | B_ARG_76  | NH1 | D_GLU_81  | OE2 | 3.484 |
| 5HMG | B_ARG_76  | NH2 | D_GLU_74  | OE1 | 2.814 |
| 5HMG | B_ARG_76  | NH2 | D_GLU_74  | OE2 | 3.691 |
| 5HMG | B_ARG_123 | NH1 | F_GLU_132 | OE2 | 3.002 |
| 5HMG | B_ARG_124 | NH1 | F_GLU_132 | OE1 | 3.424 |
| 5HMG | B_ARG_124 | NH1 | F_GLU_132 | OE2 | 3.265 |
| 5HMG | B_ARG_127 | NH2 | F_GLU_131 | OE1 | 2.537 |
| 5HMG | B_ARG_163 | NH1 | F_GLU_131 | OE1 | 2.770 |
| 5HMG | B_ARG_163 | NH1 | F_GLU_131 | OE2 | 2.532 |
| 5HMG | B_ARG_170 | NH1 | D_GLU_128 | OE1 | 3.169 |
| 5HMG | B_ARG_170 | NH1 | D_GLU_128 | OE2 | 3.597 |
| 5HMG | C_LYS_27  | NZ  | D_GLU_97  | OE1 | 2.934 |
| 5HMG | C_LYS_27  | NZ  | D_GLU_97  | OE2 | 2.988 |
| 5HMG | C_ARG_109 | NH1 | D_GLU_67  | OE1 | 2.853 |
| 5HMG | C_ARG_109 | NH1 | D_GLU_67  | OE2 | 3.184 |
| 5HMG | C_ARG_269 | NH1 | D_GLU_67  | OE1 | 3.552 |
| 5HMG | C_ARG_269 | NH2 | D_GLU_67  | OE1 | 3.173 |
| 5HMG | C_LYS_299 | NZ  | D_GLU_69  | OE1 | 3.348 |
| 5HMG | C_LYS_310 | NZ  | D_ASP_86  | OD1 | 3.449 |
| 5HMG | C_LYS_310 | NZ  | D_ASP_90  | OD1 | 2.638 |
| 5HMG | D_ARG_54  | NH1 | B_GLU_97  | OE1 | 2.819 |
| 5HMG | D_ARG_54  | NH2 | B_GLU_97  | OE1 | 2.943 |
| 5HMG | D_LYS_58  | NZ  | B_GLU_97  | OE1 | 3.646 |
| 5HMG | D_LYS_58  | NZ  | B_GLU_97  | OE2 | 3.528 |
| 5HMG | D_LYS_62  | NZ  | B_ASP_86  | OD1 | 3.110 |
| 5HMG | D_LYS_62  | NZ  | B_ASP_86  | OD2 | 2.718 |
| 5HMG | D_LYS_62  | NZ  | B_ASP_90  | OD1 | 3.686 |
| 5HMG | D_LYS_62  | NZ  | B_ASP_90  | OD2 | 2.685 |
| 5HMG | D_HIS_64  | NE2 | B_ASP_79  | OD2 | 3.446 |
| 5HMG | D_ARG_76  | NH1 | F_GLU_74  | OE1 | 3.349 |
| 5HMG | D_ARG_76  | NH1 | F_GLU_74  | OE2 | 2.805 |
| 5HMG | D_ARG_76  | NH1 | F_GLU_81  | OE1 | 2.685 |
| 5HMG | D_ARG_76  | NH1 | F_GLU_81  | OE2 | 3.513 |
| 5HMG | D_ARG_76  | NH2 | F_GLU_74  | OE1 | 2.710 |
| 5HMG | D_ARG_76  | NH2 | F_GLU_74  | OE2 | 3.478 |
| 5HMG | D_ARG_123 | NH1 | B_GLU_132 | OE2 | 2.981 |
| 5HMG | D_ARG_124 | NH1 | B_GLU_132 | OE1 | 3.466 |
| 5HMG | D_ARG_124 | NH1 | B_GLU_132 | OE2 | 3.303 |
| 5HMG | D_ARG_127 | NH2 | B_GLU_131 | OE1 | 2.578 |
| 5HMG | D_ARG_163 | NH1 | B_GLU_131 | OE1 | 2.694 |
| 5HMG | D_ARG_163 | NH1 | B_GLU_131 | OE2 | 2.571 |
| 5HMG | D_ARG_170 | NH1 | F_GLU_128 | OE1 | 3.252 |
| 5HMG | D_ARG_170 | NH1 | F_GLU_128 | OE2 | 3.705 |
| 5HMG | E_LYS_27  | NZ  | F_GLU_97  | OE1 | 2.935 |
| 5HMG | E_LYS_27  | NZ  | F_GLU_97  | OE2 | 3.012 |
| 5HMG | E_ARG_109 | NH1 | F_GLU_67  | OE1 | 2.825 |
| 5HMG | E_ARG_109 | NH1 | F_GLU_67  | OE2 | 3.180 |

|      |           |     |           |     |       |
|------|-----------|-----|-----------|-----|-------|
| 5HMG | E_ARG_269 | NH1 | F_GLU_67  | OE1 | 3.584 |
| 5HMG | E_ARG_269 | NH2 | F_GLU_67  | OE1 | 3.233 |
| 5HMG | E_LYS_299 | NZ  | F_GLU_69  | OE1 | 3.318 |
| 5HMG | E_LYS_310 | NZ  | F_ASP_86  | OD1 | 3.440 |
| 5HMG | E_LYS_310 | NZ  | F_ASP_90  | OD1 | 2.621 |
| 5HMG | F_ARG_54  | NH1 | D_GLU_97  | OE1 | 2.726 |
| 5HMG | F_ARG_54  | NH2 | D_GLU_97  | OE1 | 2.912 |
| 5HMG | F_LYS_58  | NZ  | D_GLU_97  | OE1 | 3.765 |
| 5HMG | F_LYS_58  | NZ  | D_GLU_97  | OE2 | 3.593 |
| 5HMG | F_LYS_62  | NZ  | D_ASP_86  | OD1 | 3.013 |
| 5HMG | F_LYS_62  | NZ  | D_ASP_86  | OD2 | 2.694 |
| 5HMG | F_LYS_62  | NZ  | D_ASP_90  | OD1 | 3.718 |
| 5HMG | F_LYS_62  | NZ  | D_ASP_90  | OD2 | 2.750 |
| 5HMG | F_HIS_64  | NE2 | D_ASP_79  | OD1 | 3.885 |
| 5HMG | F_HIS_64  | NE2 | D_ASP_79  | OD2 | 3.364 |
| 5HMG | F_ARG_76  | NH1 | B_GLU_74  | OE1 | 3.251 |
| 5HMG | F_ARG_76  | NH1 | B_GLU_74  | OE2 | 2.826 |
| 5HMG | F_ARG_76  | NH1 | B_GLU_81  | OE1 | 2.735 |
| 5HMG | F_ARG_76  | NH1 | B_GLU_81  | OE2 | 3.601 |
| 5HMG | F_ARG_76  | NH2 | B_GLU_74  | OE1 | 2.649 |
| 5HMG | F_ARG_76  | NH2 | B_GLU_74  | OE2 | 3.569 |
| 5HMG | F_ARG_123 | NH1 | D_GLU_132 | OE2 | 2.992 |
| 5HMG | F_ARG_124 | NH1 | D_GLU_132 | OE1 | 3.514 |
| 5HMG | F_ARG_124 | NH1 | D_GLU_132 | OE2 | 3.395 |
| 5HMG | F_ARG_127 | NH2 | D_GLU_131 | OE1 | 2.609 |
| 5HMG | F_ARG_163 | NH1 | D_GLU_131 | OE1 | 2.712 |
| 5HMG | F_ARG_163 | NH1 | D_GLU_131 | OE2 | 2.596 |
| 5HMG | F_ARG_170 | NH1 | B_GLU_128 | OE1 | 3.210 |
| 5HMG | F_ARG_170 | NH1 | B_GLU_128 | OE2 | 3.530 |
| 5I76 | A_LYS_49  | NZ  | B_GLU_105 | OE1 | 3.995 |
| 5I76 | B_LYS_215 | NZ  | A_GLU_123 | OE1 | 2.731 |
| 5I76 | B_LYS_215 | NZ  | A_GLU_123 | OE2 | 2.888 |
| 5I76 | B_LYS_220 | NZ  | A_ASP_122 | OD2 | 3.474 |
| 5I76 | C_ARG_24  | NH1 | A_ASP_70  | OD1 | 3.725 |
| 5I76 | C_ARG_24  | NH1 | A_ASP_70  | OD2 | 2.949 |
| 5I76 | C_ARG_24  | NH2 | A_ASP_70  | OD1 | 3.138 |
| 5I76 | C_ARG_24  | NH2 | A_ASP_70  | OD2 | 3.394 |
| 5I76 | D_LYS_215 | NZ  | C_GLU_123 | OE1 | 2.596 |
| 5I76 | D_LYS_215 | NZ  | C_GLU_123 | OE2 | 3.738 |
| 5ITB | H_ARG_111 | NH1 | L_GLU_68  | OE1 | 3.426 |
| 5ITB | H_ARG_111 | NH2 | L_GLU_68  | OE1 | 2.856 |
| 5ITB | H_LYS_224 | NZ  | L_GLU_143 | OE1 | 3.323 |
| 5ITB | H_LYS_224 | NZ  | L_GLU_143 | OE2 | 2.099 |
| 5J3D | A_ARG_111 | NH2 | B_GLU_68  | OE1 | 3.664 |
| 5J3D | A_LYS_224 | NZ  | B_GLU_143 | OE1 | 3.390 |
| 5J3D | A_LYS_229 | NZ  | B_ASP_142 | OD1 | 3.902 |
| 5J3D | A_LYS_229 | NZ  | B_ASP_142 | OD2 | 3.196 |
| 5J3D | C_ARG_111 | NH2 | D_GLU_68  | OE1 | 3.489 |
| 5J3D | C_LYS_    | NZ  | D_GLU_    | OE1 | 3.377 |
| 5J3D | C_LYS_    | NZ  | D_ASP_    | OD1 | 2.847 |
| 5J3D | C_LYS_    | NZ  | D_ASP_    | OD2 | 2.791 |
| 5J3D | E_ARG_49  | NH2 | F_ASP_368 | OD1 | 2.801 |
| 5J3D | E_ARG_49  | NH2 | F_ASP_368 | OD2 | 3.628 |
| 5J3D | F_LYS_    | NZ  | I_GLU_    | OE2 | 3.850 |
| 5J3D | F_LYS_196 | NZ  | I_ASP_489 | OD1 | 2.634 |
| 5J3D | F_LYS_196 | NZ  | I_ASP_489 | OD2 | 3.067 |
| 5J3D | F_ARG_235 | NH1 | I_GLU_232 | OE1 | 3.071 |
| 5J3D | F_ARG_235 | NH1 | I_GLU_232 | OE2 | 2.514 |



|      |           |     |            |     |       |
|------|-----------|-----|------------|-----|-------|
| 5J3D | F_LYS_272 | NZ  | B_ASP_56   | OD2 | 3.606 |
| 5J3D | F_LYS_399 | NZ  | K_ASP_392  | OD1 | 3.567 |
| 5J3D | F_LYS_470 | NZ  | J_GLU_60   | OE1 | 3.190 |
| 5J3D | F_LYS_470 | NZ  | J_GLU_60   | OE2 | 3.891 |
| 5J3D | G_ARG_49  | NH2 | I_ASP_368  | OD1 | 3.151 |
| 5J3D | H_ARG_111 | NH2 | L_GLU_68   | OE1 | 3.466 |
| 5J3D | H_LYS_224 | NZ  | L_GLU_143  | OE1 | 3.364 |
| 5J3D | H_LYS_    | NZ  | L_ASP_     | OD1 | 3.352 |
| 5J3D | H_LYS_    | NZ  | L_ASP_     | OD2 | 3.692 |
| 5J3D | I_LYS_    | NZ  | K_GLU_     | OE1 | 3.226 |
| 5J3D | I_LYS_    | NZ  | K_GLU_     | OE2 | 3.914 |
| 5J3D | I_LYS_196 | NZ  | K_ASP_489  | OD1 | 2.833 |
| 5J3D | I_LYS_196 | NZ  | K_ASP_489  | OD2 | 3.027 |
| 5J3D | I_ARG_235 | NH1 | K_GLU_232  | OE1 | 3.110 |
| 5J3D | I_ARG_235 | NH1 | K_GLU_232  | OE2 | 2.664 |
| 5J3D | I_LYS_272 | NZ  | D_ASP_56   | OD2 | 3.795 |
| 5J3D | I_LYS_399 | NZ  | F_ASP_392  | OD1 | 3.746 |
| 5J3D | I_LYS_470 | NZ  | E_GLU_60   | OE1 | 3.634 |
| 5J3D | I_LYS_470 | NZ  | E_GLU_60   | OE2 | 3.872 |
| 5J3D | J_ARG_49  | NH2 | K_ASP_368  | OD1 | 3.049 |
| 5J3D | J_ARG_49  | NH2 | K_ASP_368  | OD2 | 3.898 |
| 5J3D | J_LYS_87  | NZ  | K_GLU_294  | OE1 | 3.791 |
| 5J3D | K_LYS_    | NZ  | F_GLU_     | OE1 | 2.905 |
| 5J3D | K_LYS_196 | NZ  | F_ASP_489  | OD1 | 2.822 |
| 5J3D | K_LYS_196 | NZ  | F_ASP_489  | OD2 | 3.022 |
| 5J3D | K_ARG_235 | NH1 | F_GLU_232  | OE1 | 2.445 |
| 5J3D | K_ARG_235 | NH1 | F_GLU_232  | OE2 | 2.683 |
| 5J3D | K_ARG_235 | NH2 | F_GLU_232  | OE2 | 3.814 |
| 5J3D | K_LYS_399 | NZ  | I_ASP_392  | OD1 | 3.598 |
| 5J3D | K_LYS_470 | NZ  | G_GLU_60   | OE1 | 3.953 |
| 5JO5 | H_LYS_143 | NZ  | L_GLU_124  | OE2 | 2.459 |
| 5JO5 | H_LYS_209 | NZ  | L_GLU_     | OE2 | 2.531 |
| 5JO5 | L_ARG_91  | NH1 | H_GLU_100J | OE2 | 3.301 |
| 5JO5 | L_ARG_91  | NH2 | H_GLU_100J | OE2 | 2.691 |
| 5JO5 | L_ARG_95B | NH2 | H_ASP_58   | OD1 | 3.439 |
| 5JO5 | A_LYS_143 | NZ  | B_GLU_124  | OE2 | 2.618 |
| 5JO5 | A_LYS_209 | NZ  | B_GLU_123  | OE2 | 2.545 |
| 5JO5 | B_ARG_91  | NH1 | A_GLU_100J | OE2 | 3.353 |
| 5JO5 | B_ARG_91  | NH2 | A_GLU_100J | OE2 | 3.038 |
| 5JO5 | C_LYS_143 | NZ  | D_GLU_124  | OE2 | 2.788 |
| 5JO5 | C_LYS_209 | NZ  | D_GLU_123  | OE2 | 2.583 |
| 5JO5 | D_ARG_91  | NH1 | C_GLU_100J | OE2 | 3.302 |
| 5JO5 | D_ARG_91  | NH2 | C_GLU_100J | OE2 | 3.077 |
| 5JO5 | D_ARG_95B | NH2 | C_ASP_58   | OD1 | 3.978 |
| 5JO5 | E_LYS_143 | NZ  | F_GLU_124  | OE2 | 2.545 |
| 5JO5 | E_LYS_209 | NZ  | F_GLU_123  | OE2 | 2.567 |
| 5JO5 | F_ARG_91  | NH1 | E_GLU_100J | OE2 | 3.369 |
| 5JO5 | F_ARG_91  | NH2 | E_GLU_100J | OE2 | 2.722 |
| 5JO5 | F_ARG_95B | NH2 | E_ASP_58   | OD1 | 3.518 |
| 5JOF | H_LYS_212 | NZ  | L_GLU_123  | OE2 | 3.883 |
| 5JOF | H_LYS_217 | NZ  | L_ASP_122  | OD2 | 3.165 |
| 5JOF | A_LYS_209 | NZ  | B_GLU_123  | OE1 | 3.449 |
| 5JOF | A_LYS_209 | NZ  | B_GLU_123  | OE2 | 3.809 |
| 5JOF | B_ARG_24  | NH1 | C_ASP_99   | OD1 | 2.692 |
| 5JOF | B_ARG_24  | NH1 | C_ASP_99   | OD2 | 3.960 |
| 5JOF | C_ARG_94  | NH1 | B_GLU_1    | OE2 | 2.653 |
| 5JOF | C_ARG_94  | NH2 | B_GLU_1    | OE2 | 3.195 |
| 5JOF | C_LYS_214 | NZ  | D_ASP_122  | OD2 | 3.772 |

|      |           |     |            |     |       |
|------|-----------|-----|------------|-----|-------|
| 5JOF | C_LYS_214 | NZ  | D_GLU_123  | OE1 | 2.987 |
| 5JOF | C_LYS_214 | NZ  | D_GLU_123  | OE2 | 3.631 |
| 5JOF | E_LYS_209 | NZ  | F_GLU_123  | OE1 | 2.331 |
| 5JOF | E_LYS_209 | NZ  | F_GLU_123  | OE2 | 3.588 |
| 5JOF | E_LYS_214 | NZ  | F_ASP_122  | OD2 | 3.802 |
| 5JR1 | H_HIS_164 | NE2 | L_ASP_139  | OD1 | 3.232 |
| 5JR1 | H_HIS_164 | NE2 | L_ASP_139  | OD2 | 3.168 |
| 5JR1 | L_HIS_31  | ND1 | H_ASP_100  | OD2 | 3.496 |
| 5JR1 | L_HIS_31  | ND1 | H_GLU_100I | OE2 | 3.149 |
| 5JR1 | L_ARG_95B | NH1 | H_ASP_58   | OD1 | 3.367 |
| 5JR1 | L_ARG_95B | NH1 | H_ASP_58   | OD2 | 3.787 |
| 5JR1 | L_ARG_95B | NH2 | H_ASP_58   | OD1 | 3.502 |
| 5JR1 | L_ARG_95B | NH2 | H_ASP_58   | OD2 | 2.474 |
| 5JUE | H_LYS_208 | NZ  | L_GLU_123  | OE1 | 2.809 |
| 5JUE | H_LYS_208 | NZ  | L_GLU_123  | OE2 | 2.812 |
| 5JXA | H_LYS_209 | NZ  | L_GLU_123  | OE1 | 3.277 |
| 5JXA | H_LYS_214 | NZ  | L_ASP_122  | OD1 | 2.755 |
| 5JXA | H_LYS_214 | NZ  | L_ASP_122  | OD2 | 3.275 |
| 5KZP | H_LYS_224 | NZ  | L_ASP_122  | OD2 | 3.852 |
| 5KZP | E_ARG_65  | NH2 | K_GLU_1    | OE2 | 3.580 |
| 5KZP | E_LYS_219 | NZ  | L_GLU_123  | OE1 | 2.944 |
| 5KZP | E_LYS_219 | NZ  | L_GLU_123  | OE2 | 2.510 |
| 5KZP | F_LYS_139 | NZ  | J_GLU_213  | OE2 | 2.615 |
| 5KZP | G_LYS_219 | NZ  | K_GLU_123  | OE2 | 3.381 |
| 5LDN | H_LYS_    | NZ  | L_GLU_     | OE1 | 3.019 |
| 5MO9 | H_LYS_212 | NZ  | L_GLU_128  | OE2 | 3.509 |
| 5MO9 | L_LYS_55  | NZ  | X_GLU_371  | OE2 | 2.811 |
| 5MO9 | X_LYS_364 | NZ  | H_GLU_33   | OE2 | 2.799 |
| 5MO9 | X_LYS_364 | NZ  | H_ASP_52   | OD1 | 3.966 |
| 5N4J | L_ARG_38  | NH1 | H_ASP_100  | OD1 | 2.794 |
| 5N4J | L_ARG_38  | NH1 | H_ASP_100  | OD2 | 3.589 |
| 5N4J | H_LYS_210 | NZ  | L_GLU_131  | OE1 | 2.936 |
| 5N4J | H_LYS_210 | NZ  | L_GLU_131  | OE2 | 3.282 |
| 5N7W | A_LYS_149 | NZ  | B_GLU_126  | OE2 | 2.961 |
| 5N7W | A_LYS_215 | NZ  | B_GLU_125  | OE1 | 2.755 |
| 5N7W | A_LYS_215 | NZ  | B_GLU_125  | OE2 | 3.335 |
| 5N7W | H_LYS_149 | NZ  | L_GLU_126  | OE2 | 2.605 |
| 5NPH | H_LYS_215 | NZ  | L_GLU_123  | OE2 | 2.787 |
| 5NPH | L_LYS_93  | NZ  | A_GLU_533  | OE1 | 3.679 |
| 5NPI | A_HIS_181 | NE2 | B_GLU_10   | OE1 | 3.570 |
| 5NPI | A_HIS_181 | NE2 | B_GLU_10   | OE2 | 3.750 |
| 5NPI | B_HIS_181 | NE2 | A_GLU_10   | OE1 | 3.757 |
| 5NPI | B_HIS_181 | NE2 | A_GLU_10   | OE2 | 3.882 |
| 5NPI | B_LYS_233 | NZ  | E_GLU_533  | OE1 | 3.924 |
| 5NPJ | A_HIS_181 | NE2 | B_GLU_10   | OE1 | 3.540 |
| 5NPJ | A_HIS_181 | NE2 | B_GLU_10   | OE2 | 3.793 |
| 5NPJ | B_HIS_181 | NE2 | A_GLU_10   | OE1 | 3.734 |
| 5NPJ | B_HIS_181 | NE2 | A_GLU_10   | OE2 | 3.967 |
| 5NST | A_ARG_39  | NH1 | C_GLU_81   | OE1 | 3.260 |
| 5NST | A_ARG_39  | NH1 | C_GLU_81   | OE2 | 3.263 |
| 5NST | A_ARG_39  | NH2 | C_GLU_81   | OE1 | 3.038 |
| 5NST | B_LYS_345 | NZ  | A_GLU_123  | OE1 | 3.069 |
| 5NST | C_ARG_39  | NH1 | A_GLU_81   | OE1 | 3.247 |
| 5NST | C_ARG_39  | NH1 | A_GLU_81   | OE2 | 3.139 |
| 5NST | C_ARG_39  | NH2 | A_GLU_81   | OE1 | 3.004 |
| 5NST | D_LYS_345 | NZ  | C_GLU_123  | OE2 | 3.272 |
| 5NUZ | A_ARG_95  | NH1 | C_ASP_114  | OD1 | 3.502 |
| 5NUZ | A_ARG_95  | NH1 | C_ASP_114  | OD2 | 2.701 |

|      |           |     |           |     |       |
|------|-----------|-----|-----------|-----|-------|
| 5NUZ | A_ARG_95  | NH2 | C_ASP_114 | OD1 | 2.822 |
| 5NUZ | A_ARG_95  | NH2 | C_ASP_114 | OD2 | 3.585 |
| 5NUZ | A_LYS_208 | NZ  | B_GLU_123 | OE1 | 3.889 |
| 5NUZ | A_LYS_208 | NZ  | B_GLU_123 | OE2 | 2.684 |
| 5NUZ | H_ARG_95  | NH1 | D_ASP_114 | OD1 | 3.679 |
| 5NUZ | H_ARG_95  | NH1 | D_ASP_114 | OD2 | 2.753 |
| 5NUZ | H_ARG_95  | NH2 | D_ASP_114 | OD1 | 2.850 |
| 5NUZ | H_ARG_95  | NH2 | D_ASP_114 | OD2 | 3.470 |
| 5NUZ | H_LYS_208 | NZ  | L_GLU_123 | OE2 | 2.982 |
| 5NUZ | B_ARG_61  | NH2 | L_GLU_79  | OE1 | 3.072 |
| 5NUZ | B_ARG_61  | NH2 | L_GLU_79  | OE2 | 3.676 |
| 5NUZ | C_LYS_211 | NZ  | A_ASP_54  | OD1 | 3.758 |
| 5NUZ | C_LYS_211 | NZ  | A_ASP_54  | OD2 | 3.058 |
| 5NUZ | C_LYS_211 | NZ  | A_ASP_56  | OD2 | 2.861 |
| 5NUZ | L_ARG_61  | NH2 | B_GLU_79  | OE1 | 3.765 |
| 5NUZ | L_ARG_61  | NH2 | B_GLU_79  | OE2 | 2.966 |
| 5NUZ | D_LYS_211 | NZ  | H_ASP_54  | OD1 | 3.910 |
| 5NUZ | D_LYS_211 | NZ  | H_ASP_54  | OD2 | 3.105 |
| 5NUZ | D_LYS_211 | NZ  | H_ASP_56  | OD2 | 2.803 |
| 5O14 | A_LYS_185 | NZ  | H_ASP_55  | OD1 | 3.249 |
| 5O14 | A_LYS_185 | NZ  | H_ASP_55  | OD2 | 2.764 |
| 5O14 | A_LYS_185 | NZ  | H_ASP_57  | OD2 | 2.802 |
| 5O14 | A_ARG_204 | NH1 | B_GLU_218 | OE1 | 3.625 |
| 5O14 | B_LYS_185 | NZ  | C_ASP_55  | OD1 | 3.234 |
| 5O14 | B_LYS_185 | NZ  | C_ASP_55  | OD2 | 2.720 |
| 5O14 | B_LYS_185 | NZ  | C_ASP_57  | OD2 | 2.736 |
| 5O14 | C_ARG_54  | NH2 | B_ASP_161 | OD1 | 2.870 |
| 5O14 | C_ARG_54  | NH2 | B_ASP_161 | OD2 | 3.505 |
| 5O14 | C_LYS_218 | NZ  | D_GLU_124 | OE1 | 3.107 |
| 5O14 | D_ARG_18  | NH1 | A_GLU_218 | OE1 | 3.301 |
| 5O14 | H_ARG_54  | NH1 | A_ASP_161 | OD1 | 2.861 |
| 5O14 | H_ARG_54  | NH1 | A_ASP_161 | OD2 | 3.283 |
| 5O14 | H_ARG_59  | NH1 | L_ASP_94  | OD1 | 3.733 |
| 5O14 | H_ARG_59  | NH1 | L_ASP_94  | OD2 | 3.698 |
| 5O1R | A_ARG_339 | NH1 | H_ASP_100 | OD1 | 3.968 |
| 5O1R | A_ARG_339 | NH1 | H_ASP_100 | OD2 | 3.203 |
| 5O1R | B_ARG_339 | NH1 | I_ASP_100 | OD1 | 3.595 |
| 5O1R | B_ARG_339 | NH1 | I_ASP_100 | OD2 | 2.991 |
| 5OLM | A_HIS_0   | NE2 | B_GLU_97  | OE1 | 2.769 |
| 5OLM | A_HIS_0   | NE2 | B_GLU_97  | OE2 | 2.598 |
| 5OLM | A_ARG_6   | NH2 | B_GLU_82  | OE1 | 3.071 |
| 5OLM | B_HIS_0   | NE2 | A_GLU_97  | OE1 | 2.741 |
| 5OLM | B_HIS_0   | NE2 | A_GLU_97  | OE2 | 3.001 |
| 5OLM | B_ARG_6   | NH2 | A_GLU_82  | OE2 | 2.559 |
| 5OPY | H_LYS_212 | NZ  | L_GLU_123 | OE2 | 3.578 |
| 5T6P | A_LYS_58  | NZ  | F_ASP_3   | OD2 | 1.997 |
| 5T6P | A_LYS_174 | NZ  | C_GLU_128 | OE2 | 3.605 |
| 5T6P | C_ARG_55  | NH1 | E_ASP_3   | OD2 | 3.191 |
| 5T6P | C_LYS_58  | NZ  | E_ASP_3   | OD2 | 2.925 |
| 5T6P | E_ARG_5   | NH2 | C_GLU_39  | OE1 | 3.351 |
| 5T6P | E_ARG_5   | NH2 | C_GLU_39  | OE2 | 2.626 |
| 5T6P | F_ARG_5   | NH2 | A_GLU_39  | OE1 | 3.661 |
| 5T6P | F_ARG_5   | NH2 | A_GLU_39  | OE2 | 2.718 |
| 5T78 | A_LYS_58  | NZ  | F_ASP_3   | OD1 | 2.579 |
| 5T78 | A_LYS_58  | NZ  | F_ASP_3   | OD2 | 3.334 |
| 5T78 | F_ARG_5   | NH1 | A_GLU_39  | OE1 | 2.678 |
| 5T78 | F_ARG_5   | NH1 | A_GLU_39  | OE2 | 2.480 |
| 5T78 | C_ARG_55  | NH2 | E_ASP_3   | OD1 | 3.685 |

|      |           |     |           |     |       |
|------|-----------|-----|-----------|-----|-------|
| 5T78 | C.LYS_58  | NZ  | E.ASP_3   | OD1 | 2.753 |
| 5T78 | C.LYS_58  | NZ  | E.ASP_3   | OD2 | 2.872 |
| 5T78 | D.LYS_211 | NZ  | C.GLU_128 | OE1 | 3.376 |
| 5T78 | E.ARG_5   | NH1 | C.GLU_39  | OE1 | 2.693 |
| 5T78 | E.ARG_5   | NH1 | C.GLU_39  | OE2 | 2.664 |
| 5TIH | A.LYS_66  | NZ  | L.ASP_92  | OD1 | 3.482 |
| 5TIH | H.HIS_35  | NE2 | A.ASP_69  | OD1 | 2.973 |
| 5TIH | H.HIS_35  | NE2 | A.ASP_69  | OD2 | 3.535 |
| 5TIH | H.ARG_100 | NH2 | A.ASP_69  | OD1 | 3.080 |
| 5TIH | H.ARG_101 | NH2 | A.GLU_119 | OE1 | 3.357 |
| 5TIH | H.ARG_101 | NH2 | A.GLU_119 | OE2 | 3.359 |
| 5TIK | A.HIS_3   | ND1 | D.GLU_9   | OE2 | 3.832 |
| 5TIK | A.HIS_3   | NE2 | B.GLU_9   | OE2 | 3.597 |
| 5TIK | B.HIS_3   | NE2 | A.GLU_9   | OE1 | 3.627 |
| 5TIK | B.HIS_3   | NE2 | A.GLU_9   | OE2 | 3.175 |
| 5TIK | B.HIS_3   | NE2 | C.GLU_9   | OE1 | 3.296 |
| 5TIK | B.HIS_3   | NE2 | C.GLU_9   | OE2 | 3.823 |
| 5TIK | B.LYS_290 | NZ  | A.GLU_281 | OE1 | 3.703 |
| 5TIK | C.HIS_3   | NE2 | B.GLU_9   | OE1 | 2.908 |
| 5TIK | C.ARG_29  | NH2 | B.ASP_259 | OD2 | 3.311 |
| 5TIK | D.HIS_3   | NE2 | A.GLU_9   | OE1 | 2.950 |
| 5TIK | D.HIS_3   | NE2 | A.GLU_9   | OE2 | 2.918 |
| 5TL5 | H.ARG_50  | NH1 | L.ASP_98  | OD1 | 2.887 |
| 5TL5 | H.ARG_50  | NH1 | L.ASP_98  | OD2 | 3.532 |
| 5TL5 | H.ARG_50  | NH2 | L.ASP_98  | OD1 | 3.785 |
| 5TL5 | H.ARG_50  | NH2 | L.ASP_98  | OD2 | 2.933 |
| 5TL5 | H.LYS_216 | NZ  | L.GLU_127 | OE1 | 3.027 |
| 5TL5 | H.LYS_216 | NZ  | L.GLU_127 | OE2 | 3.571 |
| 5TL5 | A.LYS_17  | NZ  | H.ASP_55  | OD1 | 3.610 |
| 5TL5 | A.LYS_17  | NZ  | H.ASP_55  | OD2 | 2.637 |
| 5TL5 | A.LYS_17  | NZ  | H.ASP_57  | OD1 | 2.990 |
| 5TL5 | A.HIS_36  | NE2 | H.ASP_104 | OD1 | 3.017 |
| 5TL5 | A.HIS_36  | NE2 | H.ASP_104 | OD2 | 2.947 |
| 5TL5 | A.ARG_37  | NH2 | H.ASP_104 | OD2 | 2.895 |
| 5TLJ | B.ARG_50  | NH1 | A.ASP_98  | OD1 | 2.672 |
| 5TLJ | B.ARG_50  | NH1 | A.ASP_98  | OD2 | 3.926 |
| 5TLJ | D.ARG_100 | NH1 | X.ASP_43  | OD2 | 3.396 |
| 5TLJ | D.ARG_100 | NH2 | C.GLU_59  | OE1 | 2.703 |
| 5TLJ | D.ARG_100 | NH2 | C.GLU_59  | OE2 | 3.403 |
| 5TLJ | D.ARG_100 | NH2 | X.ASP_43  | OD2 | 3.844 |
| 5TLJ | F.ARG_50  | NH1 | E.ASP_98  | OD1 | 3.689 |
| 5TLJ | F.ARG_50  | NH1 | E.ASP_98  | OD2 | 2.897 |
| 5TLJ | F.ARG_50  | NH2 | E.ASP_98  | OD1 | 3.671 |
| 5TLJ | F.ARG_50  | NH2 | E.ASP_98  | OD2 | 3.575 |
| 5TLJ | F.HIS_171 | ND1 | E.ASP_171 | OD1 | 3.892 |
| 5TLJ | F.HIS_171 | NE2 | E.ASP_171 | OD2 | 3.411 |
| 5TLJ | H.ARG_100 | NH2 | G.GLU_59  | OE1 | 2.761 |
| 5TLJ | X.LYS_17  | NZ  | B.ASP_57  | OD2 | 3.053 |
| 5TLJ | X.HIS_36  | NE2 | B.ASP_104 | OD1 | 3.121 |
| 5TLJ | X.HIS_36  | NE2 | B.ASP_104 | OD2 | 2.886 |
| 5TLK | B.ARG_50  | NH1 | A.ASP_98  | OD1 | 3.277 |
| 5TLK | B.ARG_50  | NH1 | A.ASP_98  | OD2 | 2.898 |
| 5TLK | B.ARG_50  | NH2 | A.ASP_98  | OD1 | 2.923 |
| 5TLK | B.LYS_216 | NZ  | A.GLU_127 | OE1 | 3.067 |
| 5TLK | B.LYS_216 | NZ  | A.GLU_127 | OE2 | 3.588 |
| 5TLK | C.ARG_57  | NH2 | X.ASP_43  | OD1 | 3.384 |
| 5TLK | D.ARG_100 | NH1 | X.ASP_43  | OD2 | 2.904 |
| 5TLK | D.ARG_100 | NH2 | C.GLU_59  | OE1 | 2.708 |

|      |            |     |           |     |       |
|------|------------|-----|-----------|-----|-------|
| 5TLK | D_ARG_100  | NH2 | C_GLU_59  | OE2 | 3.299 |
| 5TLK | D_ARG_100  | NH2 | X_ASP_43  | OD2 | 3.882 |
| 5TLK | F_ARG_50   | NH1 | E_ASP_98  | OD1 | 3.086 |
| 5TLK | F_ARG_50   | NH1 | E_ASP_98  | OD2 | 3.224 |
| 5TLK | F_ARG_50   | NH2 | E_ASP_98  | OD1 | 2.767 |
| 5TLK | F_ARG_50   | NH2 | E_ASP_98  | OD2 | 3.943 |
| 5TLK | G_ARG_33   | NH1 | Y_GLU_24  | OE2 | 3.993 |
| 5TLK | G_ARG_33   | NH2 | Y_GLU_24  | OE2 | 3.475 |
| 5TLK | H_ARG_100  | NH1 | G_GLU_59  | OE1 | 3.531 |
| 5TLK | H_ARG_100  | NH1 | Y_ASP_43  | OD2 | 3.423 |
| 5TLK | H_ARG_100  | NH2 | G_GLU_59  | OE1 | 2.787 |
| 5TLK | H_ARG_100  | NH2 | G_GLU_59  | OE2 | 3.306 |
| 5TLK | H_LYS_213  | NZ  | G_GLU_127 | OE1 | 3.569 |
| 5TLK | X_LYS_17   | NZ  | B_ASP_55  | OD1 | 3.914 |
| 5TLK | X_LYS_17   | NZ  | B_ASP_55  | OD2 | 3.018 |
| 5TLK | X_LYS_17   | NZ  | B_ASP_57  | OD2 | 3.114 |
| 5TLK | X_HIS_36   | NE2 | B_ASP_104 | OD1 | 3.010 |
| 5TLK | X_HIS_36   | NE2 | B_ASP_104 | OD2 | 2.891 |
| 5TLK | X_ARG_37   | NH2 | B_ASP_104 | OD1 | 2.703 |
| 5TLK | Y_LYS_17   | NZ  | F_ASP_55  | OD1 | 3.581 |
| 5TLK | Y_LYS_17   | NZ  | F_ASP_55  | OD2 | 3.170 |
| 5TLK | Y_LYS_17   | NZ  | F_ASP_57  | OD2 | 3.380 |
| 5TLK | Y_HIS_36   | NE2 | F_ASP_104 | OD1 | 3.198 |
| 5TLK | Y_HIS_36   | NE2 | F_ASP_104 | OD2 | 2.793 |
| 5TLK | Y_ARG_37   | NH2 | F_ASP_104 | OD1 | 3.616 |
| 5TRU | h_HIS_169  | NE2 | L_ASP_168 | OD2 | 3.995 |
| 5TZ2 | H_ARG_101  | NH1 | C_ASP_46  | OD2 | 3.182 |
| 5TZ2 | H_HIS_105  | NE2 | C_ASP_51  | OD1 | 2.798 |
| 5TZ2 | H_HIS_105  | NE2 | C_ASP_51  | OD2 | 2.654 |
| 5TZ2 | C_LYS_56   | NZ  | H_ASP_55  | OD1 | 3.222 |
| 5TZ2 | C_LYS_56   | NZ  | H_ASP_55  | OD2 | 2.489 |
| 5TZ2 | C_LYS_56   | NZ  | H_ASP_57  | OD2 | 3.354 |
| 5TZT | B_ARG_82   | NH2 | H_ASP_31  | OD1 | 2.783 |
| 5TZT | B_ARG_82   | NH2 | H_ASP_31  | OD2 | 3.806 |
| 5TZT | A_HIS_102  | ND1 | D_GLU_104 | OE2 | 3.803 |
| 5TZT | L_LYS_55   | NZ  | C_GLU_104 | OE1 | 3.704 |
| 5TZT | L_LYS_55   | NZ  | C_GLU_104 | OE2 | 2.899 |
| 5TZT | H_HIS_102  | ND1 | C_GLU_104 | OE1 | 2.856 |
| 5TZU | L_LYS_49   | NZ  | C_ASP_51  | OD1 | 3.523 |
| 5TZU | L_LYS_49   | NZ  | C_ASP_51  | OD2 | 2.772 |
| 5TZU | L_ARG_96   | NH1 | C_GLU_104 | OE1 | 3.230 |
| 5TZU | L_ARG_96   | NH1 | C_GLU_104 | OE2 | 3.808 |
| 5TZU | L_ARG_96   | NH2 | C_GLU_104 | OE1 | 2.901 |
| 5TZU | H_LYS_214  | NZ  | L_GLU_123 | OE1 | 2.584 |
| 5TZU | H_LYS_214  | NZ  | L_GLU_123 | OE2 | 3.416 |
| 5TZU | C_LYS_39   | NZ  | L_ASP_31  | OD1 | 3.076 |
| 5TZU | C_LYS_39   | NZ  | L_ASP_31  | OD2 | 2.978 |
| 5U3J | H_ARG_52A  | NH1 | A_ASP_674 | OD1 | 3.805 |
| 5U3J | H_ARG_52A  | NH1 | A_ASP_674 | OD2 | 3.646 |
| 5U3J | H_ARG_52A  | NH2 | A_ASP_674 | OD2 | 3.216 |
| 5U3J | H_LYS_52C  | NZ  | A_ASP_674 | OD1 | 3.151 |
| 5U3J | H_LYS_52C  | NZ  | A_ASP_674 | OD2 | 3.836 |
| 5U3J | H_LYS_209  | NZ  | L_GLU_123 | OE1 | 3.171 |
| 5U3J | H_LYS_209  | NZ  | L_GLU_123 | OE2 | 2.412 |
| 5U3N | H_ARG_52A  | NH1 | A_ASP_674 | OD2 | 2.997 |
| 5U3N | H_ARG_52A  | NH2 | A_ASP_674 | OD1 | 3.173 |
| 5U3N | H_ARG_52A  | NH2 | A_ASP_674 | OD2 | 3.047 |
| 5U3N | H_ARG_100B | NH1 | L_ASP_31  | OD1 | 3.593 |

|      |            |     |            |     |       |
|------|------------|-----|------------|-----|-------|
| 5U3N | H_ARG_100B | NH1 | L_ASP_31   | OD2 | 2.967 |
| 5U3N | H_ARG_100B | NH2 | L_ASP_31   | OD1 | 2.974 |
| 5U3N | H_ARG_100B | NH2 | L_ASP_31   | OD2 | 3.816 |
| 5U3N | H_LYS_209  | NZ  | L_GLU_123  | OE1 | 3.254 |
| 5U3N | L_LYS_30   | NZ  | H_GLU_100E | OE1 | 3.899 |
| 5U3N | L_ARG_55   | NH2 | H_ASP_101  | OD1 | 3.682 |
| 5U3N | L_ARG_55   | NH2 | H_ASP_101  | OD2 | 2.901 |
| 5UCB | L_ARG_66   | NH2 | B_ASP_51   | OD1 | 2.894 |
| 5UCB | B_ARG_144  | NH2 | L_ASP_91   | OD1 | 2.844 |
| 5UCB | B_ARG_144  | NH2 | L_ASP_91   | OD2 | 3.495 |
| 5UEA | X_LYS_10   | NZ  | D_GLU_29   | OE1 | 3.740 |
| 5UEA | X_LYS_10   | NZ  | D_GLU_29   | OE2 | 2.855 |
| 5UEA | X_LYS_71   | NZ  | D_GLU_29   | OE2 | 3.320 |
| 5UEA | D_LYS_10   | NZ  | X_GLU_29   | OE1 | 3.485 |
| 5UEA | D_LYS_10   | NZ  | X_GLU_29   | OE2 | 2.490 |
| 5UEA | D_LYS_70   | NZ  | X_GLU_29   | OE2 | 3.861 |
| 5UEK | A_ARG_145  | NH2 | L_ASP_91   | OD1 | 2.787 |
| 5UEK | A_ARG_145  | NH2 | L_ASP_91   | OD2 | 3.426 |
| 5UEK | L_ARG_66   | NH2 | A_ASP_52   | OD1 | 2.873 |
| 5UG0 | A_ARG_106  | NH1 | B_GLU_69   | OE1 | 3.096 |
| 5UG0 | A_ARG_106  | NH1 | B_GLU_69   | OE2 | 3.964 |
| 5UG0 | A_ARG_106  | NH2 | B_GLU_69   | OE1 | 3.415 |
| 5UG0 | A_ARG_106  | NH2 | B_GLU_69   | OE2 | 3.059 |
| 5UG0 | A_LYS_222  | NZ  | D_ASP_107  | OD2 | 3.472 |
| 5UG0 | A_ARG_311  | NH1 | B_ASP_90   | OD1 | 2.840 |
| 5UG0 | A_ARG_311  | NH2 | B_ASP_86   | OD1 | 2.770 |
| 5UG0 | A_ARG_311  | NH2 | B_ASP_90   | OD1 | 3.313 |
| 5UG0 | B_LYS_68   | NZ  | A_GLU_107  | OE2 | 3.009 |
| 5UG0 | D_ARG_100  | NH1 | A_ASP_190  | OD1 | 3.522 |
| 5UG0 | D_ARG_100  | NH1 | A_ASP_190  | OD2 | 3.877 |
| 5UG0 | D_HIS_178  | NE2 | C_ASP_169  | OD2 | 3.490 |
| 5UG0 | D_LYS_223  | NZ  | C_GLU_125  | OE2 | 3.392 |
| 5UJZ | A_ARG_106  | NH1 | B_GLU_569  | OE2 | 3.797 |
| 5UJZ | A_ARG_106  | NH2 | B_GLU_569  | OE1 | 3.958 |
| 5UJZ | A_ARG_106  | NH2 | B_GLU_569  | OE2 | 3.070 |
| 5UJZ | A_ARG_311  | NH1 | B_ASP_586  | OD1 | 3.689 |
| 5UJZ | A_ARG_311  | NH1 | B_ASP_590  | OD1 | 3.217 |
| 5UJZ | A_ARG_311  | NH1 | B_ASP_590  | OD2 | 3.955 |
| 5UJZ | A_ARG_311  | NH2 | B_ASP_586  | OD1 | 2.782 |
| 5UJZ | B_LYS_558  | NZ  | F_GLU_597  | OE1 | 3.688 |
| 5UJZ | B_LYS_558  | NZ  | F_GLU_597  | OE2 | 3.874 |
| 5UJZ | B_ARG_576  | NH1 | D_GLU_574  | OE1 | 3.986 |
| 5UJZ | B_ARG_576  | NH1 | D_GLU_574  | OE2 | 3.042 |
| 5UJZ | B_ARG_576  | NH2 | C_GLU_104  | OE2 | 3.168 |
| 5UJZ | B_LYS_583  | NZ  | D_ASP_585  | OD1 | 3.717 |
| 5UJZ | B_ARG_606  | NH2 | F_ASP_609  | OD2 | 2.744 |
| 5UJZ | B_LYS_643  | NZ  | A_GLU_4    | OE1 | 2.954 |
| 5UJZ | B_LYS_643  | NZ  | A_ASP_5    | OD1 | 2.763 |
| 5UJZ | B_LYS_643  | NZ  | A_ASP_5    | OD2 | 3.863 |
| 5UJZ | C_ARG_106  | NH1 | D_GLU_569  | OE2 | 3.872 |
| 5UJZ | C_ARG_106  | NH2 | D_GLU_569  | OE2 | 3.260 |
| 5UJZ | C_ARG_311  | NH1 | D_ASP_586  | OD1 | 3.865 |
| 5UJZ | C_ARG_311  | NH1 | D_ASP_590  | OD1 | 3.148 |
| 5UJZ | C_ARG_311  | NH1 | D_ASP_590  | OD2 | 3.998 |
| 5UJZ | C_ARG_311  | NH2 | D_ASP_586  | OD1 | 2.921 |
| 5UJZ | D_LYS_558  | NZ  | B_GLU_597  | OE1 | 3.772 |
| 5UJZ | D_LYS_572  | NZ  | E_GLU_238  | OE1 | 3.910 |
| 5UJZ | D_ARG_576  | NH1 | F_GLU_574  | OE1 | 3.863 |

|      |           |     |           |     |       |
|------|-----------|-----|-----------|-----|-------|
| 5UJZ | D_ARG_576 | NH1 | F_GLU_574 | OE2 | 2.716 |
| 5UJZ | D_ARG_576 | NH2 | E_GLU_104 | OE2 | 3.170 |
| 5UJZ | D_LYS_583 | NZ  | F_ASP_585 | OD1 | 3.807 |
| 5UJZ | D_ARG_606 | NH2 | B_ASP_609 | OD2 | 2.766 |
| 5UJZ | D_LYS_643 | NZ  | C_GLU_4   | OE1 | 3.185 |
| 5UJZ | D_LYS_643 | NZ  | C_ASP_5   | OD1 | 2.519 |
| 5UJZ | D_LYS_643 | NZ  | C_ASP_5   | OD2 | 3.642 |
| 5UJZ | E_ARG_106 | NH2 | F_GLU_569 | OE2 | 3.361 |
| 5UJZ | E_ARG_311 | NH1 | F_ASP_586 | OD1 | 3.477 |
| 5UJZ | E_ARG_311 | NH1 | F_ASP_590 | OD1 | 3.629 |
| 5UJZ | E_ARG_311 | NH2 | F_ASP_586 | OD1 | 2.793 |
| 5UJZ | F_ARG_576 | NH1 | B_GLU_574 | OE1 | 3.655 |
| 5UJZ | F_ARG_576 | NH1 | B_GLU_574 | OE2 | 2.847 |
| 5UJZ | F_ARG_576 | NH2 | A_GLU_104 | OE2 | 3.211 |
| 5UJZ | F_LYS_583 | NZ  | B_ASP_585 | OD1 | 3.548 |
| 5UJZ | F_ARG_606 | NH2 | D_ASP_609 | OD2 | 2.609 |
| 5UJZ | F_LYS_643 | NZ  | E_GLU_4   | OE1 | 3.009 |
| 5UJZ | F_LYS_643 | NZ  | E_ASP_5   | OD1 | 2.882 |
| 5UJZ | F_LYS_643 | NZ  | E_ASP_5   | OD2 | 3.935 |
| 5UJZ | G_ARG_225 | NH1 | A_ASP_190 | OD1 | 3.090 |
| 5UJZ | G_ARG_225 | NH1 | A_ASP_190 | OD2 | 3.996 |
| 5UJZ | G_ARG_225 | NH2 | A_ASP_190 | OD1 | 3.715 |
| 5UJZ | G_ARG_225 | NH2 | A_ASP_190 | OD2 | 3.410 |
| 5UJZ | H_ARG_225 | NH1 | C_ASP_190 | OD1 | 3.041 |
| 5UJZ | H_ARG_225 | NH2 | C_ASP_190 | OD1 | 3.552 |
| 5UJZ | H_ARG_225 | NH2 | C_ASP_190 | OD2 | 3.366 |
| 5UJZ | I_ARG_225 | NH1 | E_ASP_190 | OD1 | 3.119 |
| 5UJZ | I_ARG_225 | NH1 | E_ASP_190 | OD2 | 3.970 |
| 5UJZ | I_ARG_225 | NH2 | E_ASP_190 | OD1 | 3.713 |
| 5UJZ | I_ARG_225 | NH2 | E_ASP_190 | OD2 | 3.347 |
| 5UK0 | A_ARG_106 | NH1 | B_GLU_569 | OE2 | 3.967 |
| 5UK0 | A_ARG_106 | NH2 | B_GLU_569 | OE2 | 3.244 |
| 5UK0 | A_ARG_220 | NH2 | C_ASP_241 | OD1 | 3.711 |
| 5UK0 | A_ARG_220 | NH2 | C_ASP_241 | OD2 | 3.819 |
| 5UK0 | A_ARG_311 | NH1 | B_ASP_590 | OD1 | 3.139 |
| 5UK0 | A_ARG_311 | NH1 | B_ASP_590 | OD2 | 3.961 |
| 5UK0 | A_ARG_311 | NH2 | B_ASP_586 | OD1 | 3.197 |
| 5UK0 | B_LYS_558 | NZ  | F_GLU_597 | OE1 | 3.717 |
| 5UK0 | B_LYS_568 | NZ  | A_GLU_107 | OE2 | 3.962 |
| 5UK0 | B_ARG_576 | NH1 | D_GLU_574 | OE1 | 2.500 |
| 5UK0 | B_ARG_576 | NH1 | D_GLU_574 | OE2 | 3.431 |
| 5UK0 | B_ARG_576 | NH2 | C_GLU_104 | OE2 | 3.446 |
| 5UK0 | B_ARG_576 | NH2 | D_GLU_574 | OE1 | 3.430 |
| 5UK0 | B_ARG_576 | NH2 | D_GLU_574 | OE2 | 3.016 |
| 5UK0 | B_ARG_606 | NH2 | F_ASP_609 | OD2 | 2.765 |
| 5UK0 | B_LYS_643 | NZ  | A_GLU_4   | OE1 | 2.724 |
| 5UK0 | B_LYS_643 | NZ  | A_ASP_5   | OD1 | 2.705 |
| 5UK0 | B_LYS_643 | NZ  | A_ASP_5   | OD2 | 3.831 |
| 5UK0 | C_ARG_106 | NH1 | D_GLU_569 | OE2 | 3.998 |
| 5UK0 | C_ARG_106 | NH2 | D_GLU_569 | OE2 | 3.213 |
| 5UK0 | C_ARG_220 | NH2 | E_ASP_241 | OD1 | 3.755 |
| 5UK0 | C_ARG_220 | NH2 | E_ASP_241 | OD2 | 3.891 |
| 5UK0 | C_ARG_311 | NH1 | D_ASP_586 | OD1 | 3.901 |
| 5UK0 | C_ARG_311 | NH1 | D_ASP_590 | OD1 | 3.110 |
| 5UK0 | C_ARG_311 | NH1 | D_ASP_590 | OD2 | 3.851 |
| 5UK0 | C_ARG_311 | NH2 | D_ASP_586 | OD1 | 2.981 |
| 5UK0 | D_LYS_558 | NZ  | B_GLU_597 | OE1 | 3.800 |
| 5UK0 | D_LYS_572 | NZ  | E_GLU_238 | OE1 | 3.723 |

|      |           |     |           |     |       |
|------|-----------|-----|-----------|-----|-------|
| 5UK0 | D_ARG_576 | NH1 | F_GLU_574 | OE1 | 2.823 |
| 5UK0 | D_ARG_576 | NH1 | F_GLU_574 | OE2 | 3.743 |
| 5UK0 | D_ARG_576 | NH2 | E_GLU_104 | OE2 | 3.003 |
| 5UK0 | D_ARG_576 | NH2 | F_GLU_574 | OE1 | 3.596 |
| 5UK0 | D_ARG_576 | NH2 | F_GLU_574 | OE2 | 3.278 |
| 5UK0 | D_ARG_606 | NH2 | B_ASP_609 | OD2 | 2.683 |
| 5UK0 | D_LYS_643 | NZ  | C_GLU_4   | OE1 | 2.844 |
| 5UK0 | D_LYS_643 | NZ  | C_ASP_5   | OD1 | 2.693 |
| 5UK0 | D_LYS_643 | NZ  | C_ASP_5   | OD2 | 3.673 |
| 5UK0 | E_ARG_106 | NH1 | F_GLU_569 | OE2 | 3.924 |
| 5UK0 | E_ARG_106 | NH2 | F_GLU_569 | OE2 | 3.130 |
| 5UK0 | E_ARG_220 | NH2 | A_ASP_241 | OD1 | 3.703 |
| 5UK0 | E_ARG_220 | NH2 | A_ASP_241 | OD2 | 3.860 |
| 5UK0 | E_ARG_311 | NH1 | F_ASP_586 | OD1 | 3.927 |
| 5UK0 | E_ARG_311 | NH1 | F_ASP_590 | OD1 | 3.174 |
| 5UK0 | E_ARG_311 | NH1 | F_ASP_590 | OD2 | 3.882 |
| 5UK0 | E_ARG_311 | NH2 | F_ASP_586 | OD1 | 3.095 |
| 5UK0 | F_LYS_558 | NZ  | D_GLU_597 | OE1 | 3.758 |
| 5UK0 | F_LYS_568 | NZ  | E_GLU_107 | OE2 | 3.989 |
| 5UK0 | F_LYS_572 | NZ  | A_GLU_238 | OE1 | 3.995 |
| 5UK0 | F_ARG_576 | NH1 | B_GLU_574 | OE1 | 2.515 |
| 5UK0 | F_ARG_576 | NH1 | B_GLU_574 | OE2 | 3.607 |
| 5UK0 | F_ARG_576 | NH2 | A_GLU_104 | OE2 | 3.281 |
| 5UK0 | F_ARG_576 | NH2 | B_GLU_574 | OE1 | 3.248 |
| 5UK0 | F_ARG_576 | NH2 | B_GLU_574 | OE2 | 3.003 |
| 5UK0 | F_ARG_606 | NH2 | D_ASP_609 | OD2 | 2.740 |
| 5UK0 | F_LYS_643 | NZ  | E_GLU_4   | OE1 | 2.987 |
| 5UK0 | F_LYS_643 | NZ  | E_ASP_5   | OD1 | 2.694 |
| 5UK0 | F_LYS_643 | NZ  | E_ASP_5   | OD2 | 3.721 |
| 5UK0 | G_ARG_225 | NH1 | A_ASP_190 | OD1 | 3.056 |
| 5UK0 | G_ARG_225 | NH1 | A_ASP_190 | OD2 | 3.844 |
| 5UK0 | G_ARG_225 | NH2 | A_ASP_190 | OD1 | 3.909 |
| 5UK0 | G_ARG_225 | NH2 | A_ASP_190 | OD2 | 3.442 |
| 5UK0 | H_ARG_225 | NH1 | C_ASP_190 | OD1 | 3.008 |
| 5UK0 | H_ARG_225 | NH1 | C_ASP_190 | OD2 | 3.873 |
| 5UK0 | H_ARG_225 | NH2 | C_ASP_190 | OD1 | 3.782 |
| 5UK0 | H_ARG_225 | NH2 | C_ASP_190 | OD2 | 3.377 |
| 5UK0 | I_ARG_225 | NH1 | E_ASP_190 | OD1 | 3.078 |
| 5UK0 | I_ARG_225 | NH1 | E_ASP_190 | OD2 | 3.875 |
| 5UK0 | I_ARG_225 | NH2 | E_ASP_190 | OD1 | 3.886 |
| 5UK0 | I_ARG_225 | NH2 | E_ASP_190 | OD2 | 3.433 |
| 5UK1 | A_ARG_106 | NH1 | B_GLU_569 | OE2 | 3.892 |
| 5UK1 | A_ARG_106 | NH2 | B_GLU_569 | OE2 | 2.755 |
| 5UK1 | A_ARG_311 | NH1 | B_ASP_590 | OD1 | 2.545 |
| 5UK1 | A_ARG_311 | NH1 | B_ASP_590 | OD2 | 3.367 |
| 5UK1 | A_ARG_311 | NH2 | B_ASP_586 | OD1 | 3.117 |
| 5UK1 | B_LYS_558 | NZ  | F_GLU_597 | OE1 | 3.470 |
| 5UK1 | B_ARG_576 | NH1 | D_GLU_574 | OE1 | 3.845 |
| 5UK1 | B_ARG_576 | NH1 | D_GLU_574 | OE2 | 3.273 |
| 5UK1 | B_ARG_576 | NH2 | C_GLU_104 | OE2 | 2.839 |
| 5UK1 | B_ARG_606 | NH2 | F_ASP_609 | OD2 | 3.320 |
| 5UK1 | B_LYS_643 | NZ  | A_GLU_4   | OE1 | 2.898 |
| 5UK1 | B_LYS_643 | NZ  | A_ASP_5   | OD1 | 2.632 |
| 5UK1 | B_LYS_643 | NZ  | A_ASP_5   | OD2 | 3.703 |
| 5UK1 | C_ARG_106 | NH2 | D_GLU_569 | OE2 | 3.108 |
| 5UK1 | C_ARG_311 | NH1 | D_ASP_590 | OD1 | 2.901 |
| 5UK1 | C_ARG_311 | NH1 | D_ASP_590 | OD2 | 3.798 |
| 5UK1 | C_ARG_311 | NH2 | D_ASP_586 | OD1 | 3.261 |



|      |           |     |           |     |       |
|------|-----------|-----|-----------|-----|-------|
| 5UK1 | D_LYS_558 | NZ  | B_GLU_597 | OE1 | 3.543 |
| 5UK1 | D_ARG_576 | NH1 | F_GLU_574 | OE1 | 3.490 |
| 5UK1 | D_ARG_576 | NH1 | F_GLU_574 | OE2 | 3.058 |
| 5UK1 | D_ARG_576 | NH2 | E_GLU_104 | OE2 | 3.186 |
| 5UK1 | D_ARG_606 | NH2 | B_ASP_609 | OD2 | 3.177 |
| 5UK1 | D_LYS_643 | NZ  | C_GLU_4   | OE1 | 3.015 |
| 5UK1 | D_LYS_643 | NZ  | C_ASP_5   | OD1 | 2.615 |
| 5UK1 | D_LYS_643 | NZ  | C_ASP_5   | OD2 | 3.806 |
| 5UK1 | E_ARG_106 | NH2 | F_GLU_569 | OE2 | 2.991 |
| 5UK1 | E_ARG_311 | NH1 | F_ASP_590 | OD1 | 2.696 |
| 5UK1 | E_ARG_311 | NH1 | F_ASP_590 | OD2 | 3.637 |
| 5UK1 | E_ARG_311 | NH2 | F_ASP_586 | OD1 | 3.291 |
| 5UK1 | F_LYS_558 | NZ  | D_GLU_597 | OE1 | 3.566 |
| 5UK1 | F_ARG_576 | NH1 | B_GLU_574 | OE1 | 3.570 |
| 5UK1 | F_ARG_576 | NH1 | B_GLU_574 | OE2 | 3.065 |
| 5UK1 | F_ARG_576 | NH2 | A_GLU_104 | OE2 | 3.295 |
| 5UK1 | F_ARG_606 | NH2 | D_ASP_609 | OD2 | 3.182 |
| 5UK1 | F_LYS_643 | NZ  | E_GLU_4   | OE1 | 3.024 |
| 5UK1 | F_LYS_643 | NZ  | E_ASP_5   | OD1 | 2.503 |
| 5UK1 | F_LYS_643 | NZ  | E_ASP_5   | OD2 | 3.650 |
| 5UK1 | G_ARG_225 | NH1 | A_ASP_190 | OD1 | 2.887 |
| 5UK1 | G_ARG_225 | NH1 | A_ASP_190 | OD2 | 3.709 |
| 5UK1 | G_ARG_225 | NH2 | A_ASP_190 | OD1 | 3.956 |
| 5UK1 | G_ARG_225 | NH2 | A_ASP_190 | OD2 | 3.555 |
| 5UK1 | H_ARG_225 | NH1 | C_ASP_190 | OD1 | 2.683 |
| 5UK1 | H_ARG_225 | NH1 | C_ASP_190 | OD2 | 3.511 |
| 5UK1 | H_ARG_225 | NH2 | C_ASP_190 | OD1 | 3.809 |
| 5UK1 | H_ARG_225 | NH2 | C_ASP_190 | OD2 | 3.346 |
| 5UK1 | I_ARG_225 | NH1 | E_ASP_190 | OD1 | 2.885 |
| 5UK1 | I_ARG_225 | NH1 | E_ASP_190 | OD2 | 3.789 |
| 5UK1 | I_ARG_225 | NH2 | E_ASP_190 | OD1 | 3.888 |
| 5UK1 | I_ARG_225 | NH2 | E_ASP_190 | OD2 | 3.567 |
| 5UK2 | A_ARG_106 | NH1 | B_GLU_569 | OE2 | 3.935 |
| 5UK2 | A_ARG_106 | NH2 | B_GLU_569 | OE2 | 2.216 |
| 5UK2 | A_ARG_311 | NH1 | B_ASP_586 | OD1 | 3.877 |
| 5UK2 | A_ARG_311 | NH1 | B_ASP_590 | OD1 | 2.946 |
| 5UK2 | A_ARG_311 | NH1 | B_ASP_590 | OD2 | 3.729 |
| 5UK2 | A_ARG_311 | NH2 | B_ASP_586 | OD1 | 3.044 |
| 5UK2 | B_LYS_558 | NZ  | F_GLU_597 | OE1 | 3.672 |
| 5UK2 | B_LYS_568 | NZ  | A_GLU_107 | OE1 | 3.896 |
| 5UK2 | B_ARG_576 | NH1 | D_GLU_574 | OE1 | 3.949 |
| 5UK2 | B_ARG_576 | NH1 | D_GLU_574 | OE2 | 2.806 |
| 5UK2 | B_ARG_576 | NH2 | C_GLU_104 | OE2 | 3.501 |
| 5UK2 | B_LYS_583 | NZ  | D_ASP_585 | OD1 | 3.241 |
| 5UK2 | B_LYS_583 | NZ  | D_ASP_585 | OD2 | 3.954 |
| 5UK2 | B_ARG_606 | NH2 | F_ASP_609 | OD2 | 2.779 |
| 5UK2 | B_LYS_643 | NZ  | A_GLU_4   | OE1 | 3.076 |
| 5UK2 | B_LYS_643 | NZ  | A_ASP_5   | OD1 | 2.565 |
| 5UK2 | B_LYS_643 | NZ  | A_ASP_5   | OD2 | 3.717 |
| 5UK2 | C_ARG_106 | NH1 | D_GLU_569 | OE2 | 3.977 |
| 5UK2 | C_ARG_106 | NH2 | D_GLU_569 | OE2 | 2.287 |
| 5UK2 | C_ARG_311 | NH1 | D_ASP_586 | OD1 | 3.894 |
| 5UK2 | C_ARG_311 | NH1 | D_ASP_590 | OD1 | 2.932 |
| 5UK2 | C_ARG_311 | NH1 | D_ASP_590 | OD2 | 3.727 |
| 5UK2 | C_ARG_311 | NH2 | D_ASP_586 | OD1 | 3.043 |
| 5UK2 | D_LYS_558 | NZ  | B_GLU_597 | OE1 | 3.518 |
| 5UK2 | D_LYS_558 | NZ  | B_GLU_597 | OE2 | 3.929 |
| 5UK2 | D_LYS_568 | NZ  | C_GLU_107 | OE1 | 3.830 |

|      |           |     |           |     |       |
|------|-----------|-----|-----------|-----|-------|
| 5UK2 | D_ARG_576 | NH1 | F_GLU_574 | OE1 | 3.823 |
| 5UK2 | D_ARG_576 | NH1 | F_GLU_574 | OE2 | 2.724 |
| 5UK2 | D_ARG_576 | NH2 | E_GLU_104 | OE2 | 3.539 |
| 5UK2 | D_LYS_583 | NZ  | F_ASP_585 | OD1 | 3.067 |
| 5UK2 | D_LYS_583 | NZ  | F_ASP_585 | OD2 | 3.783 |
| 5UK2 | D_ARG_606 | NH2 | B_ASP_609 | OD2 | 2.604 |
| 5UK2 | D_LYS_643 | NZ  | C_GLU_4   | OE1 | 3.112 |
| 5UK2 | D_LYS_643 | NZ  | C_ASP_5   | OD1 | 2.525 |
| 5UK2 | D_LYS_643 | NZ  | C_ASP_5   | OD2 | 3.631 |
| 5UK2 | E_ARG_106 | NH1 | F_GLU_569 | OE2 | 3.948 |
| 5UK2 | E_ARG_106 | NH2 | F_GLU_569 | OE2 | 2.300 |
| 5UK2 | E_ARG_311 | NH1 | F_ASP_586 | OD1 | 3.963 |
| 5UK2 | E_ARG_311 | NH1 | F_ASP_590 | OD1 | 2.962 |
| 5UK2 | E_ARG_311 | NH1 | F_ASP_590 | OD2 | 3.800 |
| 5UK2 | E_ARG_311 | NH2 | F_ASP_586 | OD1 | 3.154 |
| 5UK2 | F_LYS_558 | NZ  | D_GLU_597 | OE1 | 3.583 |
| 5UK2 | F_LYS_558 | NZ  | D_GLU_597 | OE2 | 3.900 |
| 5UK2 | F_LYS_568 | NZ  | E_GLU_107 | OE1 | 3.789 |
| 5UK2 | F_ARG_576 | NH1 | B_GLU_574 | OE1 | 3.881 |
| 5UK2 | F_ARG_576 | NH1 | B_GLU_574 | OE2 | 2.699 |
| 5UK2 | F_ARG_576 | NH2 | A_GLU_104 | OE2 | 3.688 |
| 5UK2 | F_LYS_583 | NZ  | B_ASP_585 | OD1 | 3.058 |
| 5UK2 | F_LYS_583 | NZ  | B_ASP_585 | OD2 | 3.745 |
| 5UK2 | F_ARG_606 | NH2 | D_ASP_609 | OD2 | 2.605 |
| 5UK2 | F_LYS_643 | NZ  | E_GLU_4   | OE1 | 3.293 |
| 5UK2 | F_LYS_643 | NZ  | E_ASP_5   | OD1 | 2.450 |
| 5UK2 | F_LYS_643 | NZ  | E_ASP_5   | OD2 | 3.677 |
| 5UK2 | G_ARG_225 | NH1 | A_ASP_190 | OD1 | 2.979 |
| 5UK2 | G_ARG_225 | NH1 | A_ASP_190 | OD2 | 3.894 |
| 5UK2 | G_ARG_225 | NH2 | A_ASP_190 | OD1 | 3.206 |
| 5UK2 | G_ARG_225 | NH2 | A_ASP_190 | OD2 | 2.785 |
| 5UK2 | H_ARG_225 | NH1 | C_ASP_190 | OD1 | 3.085 |
| 5UK2 | H_ARG_225 | NH2 | C_ASP_190 | OD1 | 3.195 |
| 5UK2 | H_ARG_225 | NH2 | C_ASP_190 | OD2 | 2.865 |
| 5UK2 | I_ARG_225 | NH1 | E_ASP_190 | OD1 | 2.888 |
| 5UK2 | I_ARG_225 | NH1 | E_ASP_190 | OD2 | 3.869 |
| 5UK2 | I_ARG_225 | NH2 | E_ASP_190 | OD1 | 3.014 |
| 5UK2 | I_ARG_225 | NH2 | E_ASP_190 | OD2 | 2.625 |
| 5UR8 | A_ARG_59  | NH1 | B_ASP_95  | OD1 | 3.084 |
| 5UR8 | A_ARG_59  | NH1 | B_ASP_95  | OD2 | 3.357 |
| 5UR8 | A_LYS_138 | NZ  | B_GLU_215 | OE2 | 2.961 |
| 5VL3 | Q_HIS_213 | NE2 | H_GLU_58  | OE2 | 3.352 |
| 5VL3 | R_ARG_120 | NH2 | T_GLU_54  | OE2 | 3.782 |
| 5VL3 | R_LYS_127 | NZ  | T_GLU_54  | OE1 | 2.927 |
| 5VL3 | R_LYS_127 | NZ  | T_GLU_122 | OE1 | 2.999 |
| 5VL3 | R_HIS_213 | NE2 | A_GLU_58  | OE2 | 3.157 |
| 5VL3 | S_HIS_213 | NE2 | C_GLU_58  | OE2 | 3.140 |
| 5VL3 | T_LYS_127 | NZ  | R_GLU_54  | OE1 | 3.658 |
| 5VL3 | T_LYS_127 | NZ  | R_GLU_122 | OE1 | 3.863 |
| 5VL3 | T_HIS_213 | NE2 | E_GLU_58  | OE2 | 3.636 |
| 5VL3 | A_ARG_53  | NH2 | R_ASP_232 | OD1 | 3.883 |
| 5VL3 | A_ARG_53  | NH2 | R_ASP_232 | OD2 | 3.340 |
| 5VL3 | A_ARG_95  | NH1 | R_GLU_179 | OE1 | 3.121 |
| 5VL3 | A_ARG_95  | NH1 | R_GLU_179 | OE2 | 3.607 |
| 5VL3 | A_ARG_95  | NH2 | R_GLU_179 | OE2 | 3.046 |
| 5VL3 | A_LYS_210 | NZ  | B_GLU_124 | OE2 | 3.976 |
| 5VL3 | C_ARG_53  | NH2 | S_ASP_232 | OD2 | 3.370 |
| 5VL3 | C_ARG_95  | NH1 | S_GLU_179 | OE1 | 3.505 |

|      |           |     |           |     |       |
|------|-----------|-----|-----------|-----|-------|
| 5VL3 | C_ARG_95  | NH1 | S_GLU_179 | OE2 | 3.184 |
| 5VL3 | C_ARG_95  | NH2 | S_GLU_179 | OE2 | 3.815 |
| 5VL3 | E_ARG_53  | NH2 | T_ASP_232 | OD1 | 3.852 |
| 5VL3 | E_ARG_53  | NH2 | T_ASP_232 | OD2 | 3.470 |
| 5VL3 | E_ARG_95  | NH1 | T_GLU_179 | OE1 | 2.688 |
| 5VL3 | E_ARG_95  | NH1 | T_GLU_179 | OE2 | 2.993 |
| 5VL3 | E_ARG_95  | NH2 | T_GLU_179 | OE2 | 3.079 |
| 5VL3 | E_LYS_210 | NZ  | F_GLU_    | OE2 | 3.778 |
| 5VL3 | E_LYS_    | NZ  | F_ASP_    | OD2 | 3.984 |
| 5VL3 | H_ARG_53  | NH2 | Q_ASP_232 | OD1 | 3.950 |
| 5VL3 | H_ARG_53  | NH2 | Q_ASP_232 | OD2 | 3.411 |
| 5VL3 | H_ARG_95  | NH1 | Q_GLU_179 | OE1 | 3.431 |
| 5VL3 | H_ARG_95  | NH1 | Q_GLU_179 | OE2 | 3.819 |
| 5VL3 | H_ARG_95  | NH2 | Q_GLU_179 | OE2 | 3.149 |
| 5VL3 | L_ARG_18  | NH2 | R_GLU_36  | OE2 | 3.892 |
| 5VN8 | G_LYS_34  | NZ  | A_ASP_612 | OD1 | 3.263 |
| 5VN8 | G_LYS_46  | NZ  | A_GLU_632 | OE1 | 3.416 |
| 5VN8 | G_LYS_46  | NZ  | A_GLU_632 | OE2 | 2.866 |
| 5VN8 | A_ARG_542 | NH2 | C_GLU_647 | OE2 | 2.749 |
| 5VN8 | A_ARG_579 | NH1 | C_GLU_584 | OE1 | 3.931 |
| 5VN8 | H_ARG_28  | NH1 | G_ASP_457 | OD1 | 2.893 |
| 5VN8 | L_HIS_49  | ND1 | H_ASP_101 | OD1 | 3.097 |
| 5VN8 | D_LYS_34  | NZ  | B_ASP_612 | OD1 | 3.397 |
| 5VN8 | D_LYS_46  | NZ  | B_GLU_632 | OE1 | 3.407 |
| 5VN8 | D_LYS_46  | NZ  | B_GLU_632 | OE2 | 2.853 |
| 5VN8 | B_ARG_542 | NH2 | A_GLU_647 | OE1 | 3.985 |
| 5VN8 | B_ARG_542 | NH2 | A_GLU_647 | OE2 | 2.712 |
| 5VN8 | B_ARG_579 | NH1 | A_GLU_584 | OE1 | 3.986 |
| 5VN8 | F_ARG_28  | NH1 | D_ASP_457 | OD1 | 2.808 |
| 5VN8 | J_HIS_49  | ND1 | F_ASP_101 | OD1 | 3.213 |
| 5VN8 | E_LYS_34  | NZ  | C_ASP_612 | OD1 | 3.266 |
| 5VN8 | E_LYS_46  | NZ  | C_GLU_632 | OE1 | 3.380 |
| 5VN8 | E_LYS_46  | NZ  | C_GLU_632 | OE2 | 2.776 |
| 5VN8 | C_ARG_542 | NH2 | B_GLU_647 | OE2 | 2.738 |
| 5VN8 | C_ARG_579 | NH1 | B_GLU_584 | OE1 | 3.772 |
| 5VN8 | I_ARG_28  | NH1 | E_ASP_457 | OD1 | 3.234 |
| 5VN8 | K_HIS_49  | ND1 | I_ASP_101 | OD1 | 3.072 |
| 5VN8 | K_HIS_49  | NE2 | I_ASP_101 | OD1 | 3.981 |
| 5VXJ | B_ARG_19  | NH2 | A_ASP_97  | OD1 | 2.652 |
| 5VXJ | B_ARG_50  | NH1 | I_GLU_200 | OE1 | 2.921 |
| 5VXJ | B_ARG_50  | NH2 | I_GLU_200 | OE1 | 3.757 |
| 5VXJ | B_LYS_76  | NZ  | A_GLU_122 | OE1 | 2.874 |
| 5VXJ | B_HIS_80  | NE2 | A_ASP_144 | OD1 | 3.165 |
| 5VXJ | B_HIS_80  | NE2 | A_ASP_144 | OD2 | 3.364 |
| 5VXJ | D_ARG_19  | NH1 | C_ASP_97  | OD1 | 3.252 |
| 5VXJ | D_ARG_50  | NH1 | E_GLU_200 | OE1 | 3.721 |
| 5VXJ | D_ARG_50  | NH2 | E_GLU_200 | OE1 | 3.781 |
| 5VXJ | D_LYS_76  | NZ  | C_GLU_122 | OE1 | 3.854 |
| 5VXJ | D_HIS_80  | NE2 | C_ASP_144 | OD1 | 3.067 |
| 5VXJ | D_HIS_80  | NE2 | C_ASP_144 | OD2 | 3.196 |
| 5VXJ | E_LYS_137 | NZ  | F_ASP_73  | OD1 | 3.543 |
| 5VXJ | E_LYS_137 | NZ  | F_ASP_73  | OD2 | 2.771 |
| 5VXJ | F_ARG_19  | NH2 | E_ASP_97  | OD1 | 2.921 |
| 5VXJ | F_ARG_50  | NH1 | G_GLU_200 | OE1 | 3.576 |
| 5VXJ | F_ARG_50  | NH2 | G_GLU_200 | OE1 | 2.702 |
| 5VXJ | F_LYS_76  | NZ  | E_GLU_122 | OE1 | 3.693 |
| 5VXJ | F_HIS_80  | NE2 | E_ASP_144 | OD1 | 3.009 |
| 5VXJ | F_HIS_80  | NE2 | E_ASP_144 | OD2 | 3.134 |

|      |            |     |            |     |       |
|------|------------|-----|------------|-----|-------|
| 5VXJ | G_LYS_137  | NZ  | H_ASP_73   | OD1 | 3.131 |
| 5VXJ | G_LYS_137  | NZ  | H_ASP_73   | OD2 | 2.336 |
| 5VXJ | H_ARG_19   | NH2 | G_ASP_97   | OD1 | 2.467 |
| 5VXJ | H_LYS_76   | NZ  | G_ASP_124  | OD2 | 3.951 |
| 5VXJ | H_HIS_80   | NE2 | G_ASP_144  | OD1 | 3.186 |
| 5VXJ | H_HIS_80   | NE2 | G_ASP_144  | OD2 | 3.321 |
| 5VXJ | I_LYS_137  | NZ  | J_ASP_73   | OD1 | 3.804 |
| 5VXJ | I_LYS_137  | NZ  | J_ASP_73   | OD2 | 2.902 |
| 5VXJ | J_ARG_19   | NH2 | I_ASP_97   | OD1 | 2.772 |
| 5VXJ | J_LYS_76   | NZ  | I_GLU_122  | OE2 | 2.338 |
| 5VXJ | J_HIS_80   | NE2 | I_ASP_144  | OD1 | 3.036 |
| 5VXJ | J_HIS_80   | NE2 | I_ASP_144  | OD2 | 3.151 |
| 5VXL | A_LYS_205  | NZ  | B_ASP_52   | OD2 | 2.998 |
| 5VXL | B_ARG_102  | NH1 | A_GLU_201  | OE1 | 3.097 |
| 5VXL | B_ARG_102  | NH2 | A_GLU_201  | OE1 | 3.202 |
| 5VXL | B_ARG_102  | NH2 | A_GLU_201  | OE2 | 2.871 |
| 5VXM | A_LYS_205  | NZ  | B_ASP_53   | OD1 | 3.221 |
| 5VXM | A_LYS_205  | NZ  | B_ASP_53   | OD2 | 3.090 |
| 5VXM | B_ARG_59   | NH2 | A_GLU_201  | OE1 | 3.364 |
| 5VXR | H_LYS_214  | NZ  | L_GLU_123  | OE2 | 2.932 |
| 5VZR | H_LYS_219  | NZ  | L_GLU_123  | OE2 | 3.208 |
| 5VZR | L_ARG_96   | NH2 | H_ASP_100C | OD2 | 3.042 |
| 5VZR | A_LYS_219  | NZ  | B_GLU_123  | OE1 | 3.381 |
| 5VZR | B_ARG_96   | NH2 | A_ASP_100C | OD2 | 2.983 |
| 5W9H | A_ARG_758  | NH1 | p_ASP_740  | OD1 | 3.106 |
| 5W9H | A_ARG_1113 | NH2 | D_GLU_1105 | OE1 | 3.583 |
| 5W9H | A_ARG_1179 | NH2 | B_ASP_31   | OD1 | 2.752 |
| 5W9H | C_ARG_96   | NH1 | B_ASP_100C | OD2 | 2.859 |
| 5W9H | C_ARG_96   | NH2 | A_GLU_1183 | OE1 | 3.871 |
| 5W9H | C_ARG_96   | NH2 | A_GLU_1183 | OE2 | 2.827 |
| 5W9H | C_ARG_96   | NH2 | B_ASP_100C | OD2 | 2.885 |
| 5W9H | D_ARG_1113 | NH1 | G_GLU_1105 | OE1 | 3.247 |
| 5W9H | F_ARG_96   | NH1 | E_ASP_100C | OD2 | 2.830 |
| 5W9H | F_ARG_96   | NH2 | E_ASP_100C | OD2 | 2.948 |
| 5W9H | G_ARG_758  | NH1 | r_ASP_740  | OD1 | 2.922 |
| 5W9H | G_ARG_1113 | NH2 | A_GLU_1105 | OE1 | 3.110 |
| 5W9H | G_ARG_1179 | NH2 | H_ASP_31   | OD1 | 2.809 |
| 5W9H | I_ARG_96   | NH1 | H_ASP_100C | OD2 | 2.791 |
| 5W9H | I_ARG_96   | NH2 | G_GLU_1183 | OE2 | 2.911 |
| 5W9H | I_ARG_96   | NH2 | H_ASP_100C | OD2 | 2.950 |
| 5W9H | p_HIS_681  | NE2 | D_ASP_910  | OD1 | 2.819 |
| 5W9H | p_HIS_681  | NE2 | D_ASP_910  | OD2 | 3.760 |
| 5W9H | r_HIS_681  | NE2 | A_ASP_910  | OD1 | 2.850 |
| 5W9H | r_HIS_681  | NE2 | A_ASP_910  | OD2 | 3.840 |
| 5W9I | A_ARG_758  | NH1 | B_ASP_740  | OD1 | 2.830 |
| 5W9I | A_ARG_847  | NH1 | F_ASP_726  | OD1 | 3.733 |
| 5W9I | A_ARG_847  | NH1 | F_ASP_726  | OD2 | 2.884 |
| 5W9I | A_ARG_1113 | NH2 | I_GLU_1105 | OE2 | 2.773 |
| 5W9I | A_ARG_1179 | NH2 | C_ASP_31   | OD1 | 2.834 |
| 5W9I | B_HIS_681  | NE2 | I_ASP_910  | OD1 | 2.801 |
| 5W9I | B_HIS_681  | NE2 | I_ASP_910  | OD2 | 3.893 |
| 5W9I | D_ARG_96   | NH1 | C_ASP_100C | OD2 | 2.837 |
| 5W9I | D_ARG_96   | NH2 | A_GLU_1183 | OE2 | 2.862 |
| 5W9I | D_ARG_96   | NH2 | C_ASP_100C | OD2 | 2.920 |
| 5W9I | E_ARG_758  | NH1 | F_ASP_740  | OD1 | 2.820 |
| 5W9I | E_ARG_847  | NH1 | J_ASP_726  | OD1 | 3.709 |
| 5W9I | E_ARG_847  | NH1 | J_ASP_726  | OD2 | 2.881 |
| 5W9I | E_ARG_1179 | NH2 | G_ASP_31   | OD1 | 2.831 |

|      |            |     |            |     |       |
|------|------------|-----|------------|-----|-------|
| 5W9I | F_HIS_681  | NE2 | A_ASP_910  | OD1 | 2.878 |
| 5W9I | F_HIS_681  | NE2 | A_ASP_910  | OD2 | 3.982 |
| 5W9I | H_ARG_96   | NH1 | G_ASP_100C | OD2 | 2.856 |
| 5W9I | H_ARG_96   | NH2 | E_GLU_1183 | OE2 | 2.871 |
| 5W9I | H_ARG_96   | NH2 | G_ASP_100C | OD2 | 2.925 |
| 5W9I | I_ARG_758  | NH1 | J_ASP_740  | OD1 | 2.804 |
| 5W9I | I_ARG_847  | NH1 | B_ASP_726  | OD1 | 3.716 |
| 5W9I | I_ARG_847  | NH1 | B_ASP_726  | OD2 | 2.881 |
| 5W9I | I_ARG_1113 | NH2 | E_GLU_1105 | OE2 | 2.821 |
| 5W9I | I_ARG_1179 | NH2 | K_ASP_31   | OD1 | 2.785 |
| 5W9I | J_HIS_681  | NE2 | E_ASP_910  | OD1 | 2.832 |
| 5W9I | L_ARG_96   | NH1 | K_ASP_100C | OD2 | 2.856 |
| 5W9I | L_ARG_96   | NH2 | I_GLU_1183 | OE2 | 2.872 |
| 5W9I | L_ARG_96   | NH2 | K_ASP_100C | OD2 | 2.922 |
| 5W9J | D_ARG_1113 | NH2 | G_GLU_1105 | OE1 | 3.627 |
| 5W9J | D_ARG_1113 | NH2 | G_GLU_1105 | OE2 | 2.779 |
| 5W9J | F_ARG_96   | NH1 | E_ASP_100C | OD1 | 3.873 |
| 5W9J | F_ARG_96   | NH1 | E_ASP_100C | OD2 | 3.469 |
| 5W9J | A_ARG_1113 | NH2 | D_GLU_1105 | OE1 | 3.626 |
| 5W9J | A_ARG_1113 | NH2 | D_GLU_1105 | OE2 | 2.778 |
| 5W9J | C_ARG_96   | NH1 | B_ASP_100C | OD1 | 3.873 |
| 5W9J | C_ARG_96   | NH1 | B_ASP_100C | OD2 | 3.470 |
| 5W9J | G_ARG_1113 | NH2 | A_GLU_1105 | OE1 | 3.626 |
| 5W9J | G_ARG_1113 | NH2 | A_GLU_1105 | OE2 | 2.777 |
| 5W9J | I_ARG_96   | NH1 | H_ASP_100C | OD1 | 3.873 |
| 5W9J | I_ARG_96   | NH1 | H_ASP_100C | OD2 | 3.470 |
| 5W9K | A_ARG_758  | NH1 | J_ASP_740  | OD1 | 3.054 |
| 5W9K | A_ARG_1113 | NH2 | D_GLU_1105 | OE1 | 3.698 |
| 5W9K | C_ARG_96   | NH1 | B_ASP_100C | OD2 | 2.822 |
| 5W9K | C_ARG_96   | NH2 | A_GLU_1183 | OE1 | 3.683 |
| 5W9K | C_ARG_96   | NH2 | B_ASP_100C | OD2 | 3.420 |
| 5W9K | D_ARG_847  | NH2 | A_GLU_1017 | OE2 | 3.108 |
| 5W9K | D_ARG_1113 | NH1 | G_GLU_1105 | OE2 | 3.336 |
| 5W9K | F_ARG_96   | NH1 | E_ASP_100C | OD2 | 2.856 |
| 5W9K | F_ARG_96   | NH2 | D_GLU_1183 | OE2 | 3.059 |
| 5W9K | F_ARG_96   | NH2 | E_ASP_100C | OD2 | 3.317 |
| 5W9K | G_ARG_758  | NH1 | L_ASP_740  | OD1 | 3.028 |
| 5W9K | G_ARG_758  | NH2 | L_ASP_740  | OD1 | 3.483 |
| 5W9K | G_ARG_847  | NH1 | K_ASP_726  | OD2 | 3.336 |
| 5W9K | G_ARG_1113 | NH2 | A_GLU_1105 | OE2 | 3.565 |
| 5W9K | I_ARG_96   | NH1 | H_ASP_100C | OD2 | 2.828 |
| 5W9K | I_ARG_96   | NH2 | G_GLU_1183 | OE2 | 3.651 |
| 5W9K | I_ARG_96   | NH2 | H_ASP_100C | OD2 | 3.553 |
| 5W9K | J_HIS_681  | NE2 | D_ASP_910  | OD1 | 2.963 |
| 5W9K | J_ARG_700  | NH2 | A_GLU_756  | OE2 | 2.841 |
| 5W9K | L_HIS_681  | NE2 | A_ASP_910  | OD1 | 3.027 |
| 5W9K | L_HIS_681  | NE2 | A_ASP_910  | OD2 | 3.875 |
| 5W9K | L_ARG_700  | NH2 | G_GLU_756  | OE2 | 2.893 |
| 5W9L | A_ARG_758  | NH1 | B_ASP_740  | OD1 | 2.964 |
| 5W9L | A_ARG_758  | NH2 | B_ASP_740  | OD1 | 3.858 |
| 5W9L | A_ARG_1113 | NH2 | D_GLU_1105 | OE1 | 3.448 |
| 5W9L | A_ARG_1113 | NH2 | D_GLU_1105 | OE2 | 2.879 |
| 5W9L | F_ARG_96   | NH1 | E_ASP_100C | OD2 | 3.246 |
| 5W9L | F_ARG_96   | NH2 | D_GLU_1183 | OE2 | 2.643 |
| 5W9L | F_ARG_96   | NH2 | E_ASP_100C | OD2 | 3.370 |
| 5W9L | G_ARG_758  | NH1 | J_ASP_740  | OD1 | 2.859 |
| 5W9L | G_ARG_758  | NH2 | J_ASP_740  | OD1 | 3.792 |
| 5W9L | G_ARG_1179 | NH2 | H_ASP_31   | OD1 | 2.753 |

|      |            |     |            |     |       |
|------|------------|-----|------------|-----|-------|
| 5W9L | L_ARG.96   | NH1 | H_ASP.100C | OD2 | 2.945 |
| 5W9L | L_ARG.96   | NH2 | H_ASP.100C | OD2 | 2.982 |
| 5W9L | B_HIS.681  | NE2 | D_ASP.910  | OD1 | 2.803 |
| 5W9L | B_HIS.681  | NE2 | D_ASP.910  | OD2 | 3.795 |
| 5W9L | B_ARG.700  | NH1 | A_GLU.756  | OE2 | 2.893 |
| 5W9L | J_HIS.681  | NE2 | A_ASP.910  | OD1 | 2.810 |
| 5W9L | J_HIS.681  | NE2 | A_ASP.910  | OD2 | 3.815 |
| 5W9M | A_ARG.758  | NH1 | E_ASP.740  | OD1 | 2.862 |
| 5W9M | A_ARG.758  | NH2 | E_ASP.740  | OD1 | 2.970 |
| 5W9M | A_ARG.847  | NH1 | J_ASP.726  | OD2 | 3.850 |
| 5W9M | C_ARG.96   | NH1 | B_ASP.100C | OD2 | 2.894 |
| 5W9M | C_ARG.96   | NH2 | A_GLU.1183 | OE2 | 2.938 |
| 5W9M | C_ARG.96   | NH2 | B_ASP.100C | OD2 | 2.940 |
| 5W9M | D_ARG.847  | NH1 | A_GLU.1017 | OE2 | 3.300 |
| 5W9M | D_ARG.847  | NH2 | A_GLU.1017 | OE2 | 3.532 |
| 5W9M | G_ARG.758  | NH1 | J_ASP.740  | OD1 | 2.816 |
| 5W9M | G_ARG.758  | NH2 | J_ASP.740  | OD1 | 3.407 |
| 5W9M | G_ARG.1113 | NH2 | A_GLU.1105 | OE1 | 3.823 |
| 5W9M | G_ARG.1113 | NH2 | A_GLU.1105 | OE2 | 2.800 |
| 5W9M | G_ARG.1179 | NH1 | H_ASP.31   | OD1 | 3.713 |
| 5W9M | L_ARG.96   | NH1 | H_ASP.100C | OD2 | 2.840 |
| 5W9M | L_ARG.96   | NH2 | G_GLU.1183 | OE2 | 2.957 |
| 5W9M | L_ARG.96   | NH2 | H_ASP.100C | OD2 | 3.363 |
| 5W9M | E_HIS.681  | NE2 | D_ASP.910  | OD1 | 2.869 |
| 5W9M | E_HIS.681  | NE2 | D_ASP.910  | OD2 | 3.974 |
| 5W9M | E_ARG.700  | NH2 | A_GLU.756  | OE1 | 3.024 |
| 5W9M | E_ARG.700  | NH2 | A_GLU.756  | OE2 | 3.469 |
| 5W9M | F_HIS.681  | NE2 | G_ASP.910  | OD1 | 2.934 |
| 5W9M | F_HIS.681  | NE2 | G_ASP.910  | OD2 | 3.892 |
| 5W9M | J_HIS.681  | NE2 | A_ASP.910  | OD1 | 3.021 |
| 5W9N | A_ARG.758  | NH1 | H_ASP.740  | OD1 | 3.061 |
| 5W9N | A_ARG.758  | NH2 | H_ASP.740  | OD1 | 3.534 |
| 5W9N | C_ARG.96   | NH1 | B_ASP.100C | OD2 | 2.860 |
| 5W9N | C_ARG.96   | NH2 | A_GLU.1183 | OE2 | 2.942 |
| 5W9N | C_ARG.96   | NH2 | B_ASP.100C | OD2 | 3.629 |
| 5W9N | F_ARG.96   | NH1 | E_ASP.100C | OD2 | 2.898 |
| 5W9N | F_ARG.96   | NH2 | D_GLU.1183 | OE2 | 3.465 |
| 5W9N | F_ARG.96   | NH2 | E_ASP.100C | OD2 | 3.359 |
| 5W9N | G_ARG.758  | NH1 | J_ASP.740  | OD1 | 2.883 |
| 5W9N | G_ARG.758  | NH2 | J_ASP.740  | OD1 | 3.992 |
| 5W9N | G_ARG.1113 | NH2 | A_GLU.1105 | OE1 | 3.089 |
| 5W9N | H_HIS.681  | NE2 | D_ASP.910  | OD1 | 2.909 |
| 5W9N | H_HIS.681  | NE2 | D_ASP.910  | OD2 | 3.885 |
| 5W9N | J_HIS.681  | NE2 | A_ASP.910  | OD1 | 2.923 |
| 5W9N | J_HIS.681  | NE2 | A_ASP.910  | OD2 | 3.770 |
| 5W9O | A_ARG.758  | NH1 | J_ASP.740  | OD1 | 2.989 |
| 5W9O | A_ARG.1113 | NH2 | D_GLU.1105 | OE1 | 3.178 |
| 5W9O | A_ARG.1179 | NH2 | B_ASP.31   | OD1 | 2.796 |
| 5W9O | C_ARG.96   | NH1 | B_ASP.100C | OD2 | 3.180 |
| 5W9O | C_ARG.96   | NH2 | B_ASP.100C | OD2 | 2.879 |
| 5W9O | D_ARG.847  | NH1 | J_ASP.726  | OD2 | 2.979 |
| 5W9O | D_ARG.1113 | NH1 | G_GLU.1105 | OE1 | 3.664 |
| 5W9O | F_ARG.96   | NH1 | E_ASP.100C | OD2 | 2.799 |
| 5W9O | F_ARG.96   | NH2 | D_GLU.1183 | OE2 | 3.799 |
| 5W9O | F_ARG.96   | NH2 | E_ASP.100C | OD2 | 3.255 |
| 5W9O | G_ARG.758  | NH1 | L_ASP.740  | OD1 | 2.934 |
| 5W9O | G_ARG.847  | NH1 | K_ASP.726  | OD2 | 3.097 |
| 5W9O | G_ARG.1179 | NH2 | H_ASP.31   | OD1 | 2.843 |

|      |            |     |            |     |       |
|------|------------|-----|------------|-----|-------|
| 5W9O | L_ARG_96   | NH1 | H_ASP_100C | OD2 | 3.979 |
| 5W9O | L_ARG_96   | NH2 | G_GLU_1183 | OE2 | 2.715 |
| 5W9O | L_ARG_96   | NH2 | H_ASP_100C | OD2 | 3.993 |
| 5W9O | J_HIS_681  | NE2 | D_ASP_910  | OD1 | 2.932 |
| 5W9O | J_ARG_700  | NH2 | A_GLU_756  | OE1 | 3.931 |
| 5W9O | J_ARG_700  | NH2 | A_GLU_756  | OE2 | 2.914 |
| 5W9O | L_HIS_681  | NE2 | A_ASP_910  | OD1 | 3.028 |
| 5W9O | L_HIS_681  | NE2 | A_ASP_910  | OD2 | 3.886 |
| 5W9P | J_ARG_758  | NH2 | A_ASP_740  | OD1 | 2.970 |
| 5W9P | J_ARG_847  | NH1 | C_ASP_726  | OD1 | 3.573 |
| 5W9P | J_ARG_847  | NH1 | C_ASP_726  | OD2 | 2.973 |
| 5W9P | J_ARG_1113 | NH2 | H_GLU_1105 | OE1 | 3.990 |
| 5W9P | J_ARG_1113 | NH2 | H_GLU_1105 | OE2 | 2.796 |
| 5W9P | J_ARG_1179 | NH2 | F_ASP_31   | OD1 | 2.888 |
| 5W9P | A_HIS_681  | NE2 | H_ASP_910  | OD1 | 3.149 |
| 5W9P | A_HIS_681  | NE2 | H_ASP_910  | OD2 | 3.352 |
| 5W9P | A_ARG_691  | NH2 | H_GLU_818  | OE2 | 2.969 |
| 5W9P | A_ARG_700  | NH2 | J_GLU_756  | OE2 | 2.978 |
| 5W9P | G_ARG_1212 | NH1 | J_GLU_1183 | OE2 | 3.421 |
| 5W9P | G_ARG_1212 | NH2 | J_GLU_1183 | OE2 | 2.921 |
| 5W9P | G_ARG_1212 | NH2 | F_ASP_100C | OD2 | 2.848 |
| 5W9P | B_ARG_758  | NH2 | C_ASP_740  | OD1 | 2.971 |
| 5W9P | B_ARG_847  | NH1 | I_ASP_726  | OD1 | 3.572 |
| 5W9P | B_ARG_847  | NH1 | I_ASP_726  | OD2 | 2.973 |
| 5W9P | B_ARG_1113 | NH2 | J_GLU_1105 | OE1 | 3.989 |
| 5W9P | B_ARG_1113 | NH2 | J_GLU_1105 | OE2 | 2.795 |
| 5W9P | B_ARG_1179 | NH2 | D_ASP_31   | OD1 | 2.887 |
| 5W9P | C_HIS_681  | NE2 | J_ASP_910  | OD1 | 3.149 |
| 5W9P | C_HIS_681  | NE2 | J_ASP_910  | OD2 | 3.352 |
| 5W9P | C_ARG_691  | NH2 | J_GLU_818  | OE2 | 2.970 |
| 5W9P | C_ARG_700  | NH2 | B_GLU_756  | OE2 | 2.978 |
| 5W9P | E_ARG_1212 | NH1 | B_GLU_1183 | OE2 | 3.420 |
| 5W9P | E_ARG_1212 | NH2 | B_GLU_1183 | OE2 | 2.920 |
| 5W9P | E_ARG_1212 | NH2 | D_ASP_100C | OD2 | 2.848 |
| 5W9P | H_ARG_758  | NH2 | I_ASP_740  | OD1 | 2.969 |
| 5W9P | H_ARG_847  | NH1 | A_ASP_726  | OD1 | 3.572 |
| 5W9P | H_ARG_847  | NH1 | A_ASP_726  | OD2 | 2.973 |
| 5W9P | H_ARG_1113 | NH2 | B_GLU_1105 | OE1 | 3.989 |
| 5W9P | H_ARG_1113 | NH2 | B_GLU_1105 | OE2 | 2.795 |
| 5W9P | H_ARG_1179 | NH2 | K_ASP_31   | OD1 | 2.888 |
| 5W9P | I_HIS_681  | NE2 | B_ASP_910  | OD1 | 3.149 |
| 5W9P | I_HIS_681  | NE2 | B_ASP_910  | OD2 | 3.352 |
| 5W9P | I_ARG_691  | NH2 | B_GLU_818  | OE2 | 2.970 |
| 5W9P | I_ARG_700  | NH2 | H_GLU_756  | OE2 | 2.977 |
| 5W9P | L_ARG_1212 | NH1 | H_GLU_1183 | OE2 | 3.420 |
| 5W9P | L_ARG_1212 | NH2 | H_GLU_1183 | OE2 | 2.921 |
| 5W9P | L_ARG_1212 | NH2 | K_ASP_100C | OD2 | 2.848 |
| 5WK4 | D_ARG_29   | NH2 | E_ASP_36   | OD1 | 3.168 |
| 5WK4 | D_ARG_29   | NH2 | E_ASP_36   | OD2 | 3.056 |
| 5WK4 | D_ARG_101  | NH2 | E_ASP_50   | OD2 | 3.021 |
| 5WK4 | A_HIS_174  | NE2 | D_GLU_65   | OE2 | 2.738 |
| 5WK4 | B_ARG_29   | NH2 | C_ASP_36   | OD1 | 3.257 |
| 5WK4 | B_ARG_29   | NH2 | C_ASP_36   | OD2 | 2.944 |
| 5WK4 | B_ARG_101  | NH1 | C_ASP_50   | OD2 | 3.997 |
| 5WK4 | B_ARG_101  | NH2 | C_ASP_50   | OD2 | 2.811 |
| 5WK4 | C_ARG_29   | NH2 | B_ASP_36   | OD1 | 3.196 |
| 5WK4 | C_ARG_29   | NH2 | B_ASP_36   | OD2 | 3.146 |
| 5WK4 | C_ARG_101  | NH1 | B_ASP_50   | OD2 | 3.840 |

|      |            |     |           |     |       |
|------|------------|-----|-----------|-----|-------|
| 5WK4 | C_ARG_101  | NH2 | B_ASP_50  | OD2 | 2.874 |
| 5WK4 | E_ARG_29   | NH2 | D_ASP_36  | OD1 | 3.889 |
| 5WK4 | E_ARG_101  | NH2 | D_ASP_50  | OD2 | 2.922 |
| 5WKQ | A_ARG_135  | NH1 | B_ASP_212 | OD1 | 3.924 |
| 5WKQ | A_ARG_135  | NH2 | B_ASP_212 | OD1 | 3.057 |
| 5WKQ | B_HIS_207  | ND1 | A_GLU_131 | OE1 | 3.383 |
| 5WKQ | B_HIS_207  | ND1 | A_GLU_131 | OE2 | 2.652 |
| 5WNA | H_LYS_220  | NZ  | L_GLU_122 | OE2 | 3.667 |
| 5WNA | H_LYS_225  | NZ  | L_ASP_121 | OD1 | 3.706 |
| 5WNA | L_LYS_39   | NZ  | D_GLU_81  | OE1 | 2.898 |
| 5WNA | L_LYS_39   | NZ  | D_GLU_81  | OE2 | 2.887 |
| 5WNA | C_LYS_220  | NZ  | D_GLU_122 | OE2 | 3.567 |
| 5WNA | D_LYS_39   | NZ  | L_GLU_81  | OE1 | 3.744 |
| 5WNB | H_LYS_140  | NZ  | L_GLU_212 | OE1 | 3.467 |
| 5WNB | H_LYS_140  | NZ  | L_GLU_212 | OE2 | 3.708 |
| 5WNB | L_ARG_61   | NH1 | M_GLU_79  | OE2 | 3.612 |
| 5XBM | A_LYS_205  | NZ  | B_ASP_139 | OD1 | 3.654 |
| 5XBM | B_LYS_217  | NZ  | A_GLU_121 | OE1 | 2.614 |
| 5XBM | B_LYS_217  | NZ  | A_GLU_121 | OE2 | 3.625 |
| 5XBM | E_LYS_217  | NZ  | D_GLU_121 | OE2 | 3.463 |
| 5XBM | F_ARG_77   | NH1 | D_ASP_31  | OD1 | 3.188 |
| 5XBM | F_ARG_77   | NH2 | D_ASP_31  | OD1 | 3.156 |
| 5XBM | F_ARG_77   | NH2 | D_ASP_31  | OD2 | 3.938 |
| 5XBM | F_LYS_161  | NZ  | C_GLU_154 | OE2 | 3.149 |
| 5XCQ | A_LYS_13   | NZ  | B_ASP_154 | OD1 | 3.910 |
| 5XCQ | B_LYS_144  | NZ  | A_GLU_142 | OE1 | 3.005 |
| 5XCQ | B_LYS_144  | NZ  | A_GLU_142 | OE2 | 2.931 |
| 5XCR | A_LYS_13   | NZ  | B_ASP_154 | OD1 | 3.316 |
| 5XCR | A_LYS_13   | NZ  | B_ASP_154 | OD2 | 2.938 |
| 5XCR | A_ARG_147  | NH2 | B_GLU_135 | OE2 | 3.104 |
| 5XCR | A_LYS_149  | NZ  | B_ASP_41  | OD1 | 2.692 |
| 5XCR | A_LYS_149  | NZ  | B_ASP_41  | OD2 | 3.682 |
| 5XCR | A_LYS_153  | NZ  | B_ASP_41  | OD1 | 3.567 |
| 5XCR | A_LYS_153  | NZ  | B_ASP_41  | OD2 | 3.385 |
| 5XCR | B_LYS_144  | NZ  | A_GLU_142 | OE1 | 2.665 |
| 5XCR | B_LYS_144  | NZ  | A_GLU_142 | OE2 | 3.686 |
| 5XCR | D_LYS_149  | NZ  | E_ASP_41  | OD1 | 2.596 |
| 5XCR | D_LYS_149  | NZ  | E_ASP_41  | OD2 | 3.537 |
| 5XCR | D_LYS_149  | NZ  | E_GLU_137 | OE1 | 2.552 |
| 5XCR | D_LYS_149  | NZ  | E_GLU_137 | OE2 | 3.483 |
| 5XCR | D_ARG_154  | NH2 | E_ASP_131 | OD1 | 2.972 |
| 5XCR | E_LYS_144  | NZ  | D_GLU_142 | OE1 | 2.644 |
| 5XCR | E_LYS_144  | NZ  | D_GLU_142 | OE2 | 3.385 |
| 5XCS | A_LYS_43   | NZ  | B_GLU_140 | OE2 | 2.517 |
| 5XCS | A_ARG_95   | NH1 | B_ASP_91  | OD1 | 2.738 |
| 5XCS | A_ARG_95   | NH1 | B_ASP_91  | OD2 | 3.741 |
| 5XCS | A_ARG_95   | NH2 | B_ASP_91  | OD1 | 3.421 |
| 5XCS | A_ARG_95   | NH2 | C_ASP_7   | OD1 | 3.700 |
| 5XCS | A_ARG_95   | NH2 | C_ASP_7   | OD2 | 2.872 |
| 5XCS | A_LYS_100A | NZ  | B_GLU_55  | OE1 | 2.609 |
| 5XCS | A_LYS_100A | NZ  | B_GLU_55  | OE2 | 3.239 |
| 5XCS | A_LYS_149  | NZ  | B_GLU_137 | OE1 | 3.069 |
| 5XCS | A_LYS_149  | NZ  | B_GLU_137 | OE2 | 3.874 |
| 5XCS | B_HIS_94   | NE2 | C_ASP_7   | OD2 | 3.772 |
| 5XCS | B_LYS_144  | NZ  | A_GLU_142 | OE1 | 3.111 |
| 5XCS | B_LYS_144  | NZ  | A_GLU_142 | OE2 | 3.511 |
| 5XCS | B_ARG_149  | NH1 | A_ASP_136 | OD1 | 2.816 |
| 5XCT | B_LYS_144  | NZ  | A_GLU_142 | OE1 | 2.822 |



|      |            |     |           |     |       |
|------|------------|-----|-----------|-----|-------|
| 5XCT | B.LYS_144  | NZ  | A_GLU_142 | OE2 | 3.117 |
| 5XCU | A.LYS_13   | NZ  | B_ASP_154 | OD2 | 3.098 |
| 5XCU | A_ARG_95   | NH1 | B_ASP_91  | OD1 | 2.822 |
| 5XCU | A_ARG_95   | NH1 | B_ASP_91  | OD2 | 3.880 |
| 5XCU | A_ARG_95   | NH2 | B_ASP_91  | OD1 | 3.668 |
| 5XCU | A_ARG_95   | NH2 | C_ASP_7   | OD1 | 3.592 |
| 5XCU | A_ARG_95   | NH2 | C_ASP_7   | OD2 | 2.664 |
| 5XCU | A_LYS_100A | NZ  | B_GLU_55  | OE1 | 3.292 |
| 5XCU | A_LYS_100A | NZ  | B_GLU_55  | OE2 | 3.457 |
| 5XCU | A_LYS_149  | NZ  | B_GLU_137 | OE1 | 3.142 |
| 5XCU | A_LYS_149  | NZ  | B_GLU_137 | OE2 | 3.674 |
| 5XCU | B_HIS_94   | NE2 | C_ASP_7   | OD2 | 3.530 |
| 5XCU | B_ARG_142  | NH2 | D_GLU_100 | OE1 | 3.626 |
| 5XCU | B_ARG_142  | NH2 | D_GLU_100 | OE2 | 3.496 |
| 5XCU | B.LYS_144  | NZ  | A_GLU_142 | OE1 | 2.843 |
| 5XCU | B.LYS_144  | NZ  | A_GLU_142 | OE2 | 2.719 |
| 5XCU | B_ARG_149  | NH2 | A_ASP_136 | OD1 | 3.520 |
| 5XCU | D.LYS_13   | NZ  | E_ASP_154 | OD2 | 2.965 |
| 5XCU | D_ARG_52A  | NH1 | A_GLU_144 | OE1 | 3.014 |
| 5XCU | D_ARG_52A  | NH1 | A_GLU_144 | OE2 | 3.323 |
| 5XCU | D_ARG_52A  | NH2 | A_GLU_144 | OE2 | 3.086 |
| 5XCU | D_ARG_95   | NH1 | E_ASP_91  | OD1 | 2.736 |
| 5XCU | D_ARG_95   | NH1 | E_ASP_91  | OD2 | 3.660 |
| 5XCU | D_ARG_95   | NH2 | E_ASP_91  | OD1 | 3.272 |
| 5XCU | D_ARG_95   | NH2 | F_ASP_7   | OD1 | 3.878 |
| 5XCU | D_ARG_95   | NH2 | F_ASP_7   | OD2 | 3.169 |
| 5XCU | D_LYS_100A | NZ  | E_GLU_55  | OE1 | 3.852 |
| 5XCU | D_LYS_100A | NZ  | E_GLU_55  | OE2 | 2.994 |
| 5XCU | D_LYS_149  | NZ  | E_GLU_137 | OE1 | 2.785 |
| 5XCU | D_LYS_149  | NZ  | E_GLU_137 | OE2 | 3.293 |
| 5XCU | E.LYS_30F  | NZ  | B_GLU_139 | OE1 | 2.662 |
| 5XCU | E.LYS_30F  | NZ  | B_GLU_139 | OE2 | 3.287 |
| 5XCU | E_HIS_94   | NE2 | F_ASP_7   | OD2 | 3.551 |
| 5XCU | E_ARG_142  | NH2 | D_GLU_140 | OE2 | 3.967 |
| 5XCU | E.LYS_144  | NZ  | D_GLU_142 | OE1 | 3.438 |
| 5XCU | E.LYS_144  | NZ  | D_GLU_142 | OE2 | 2.648 |
| 5XCV | A.LYS_56   | NZ  | C_GLU_10  | OE2 | 3.165 |
| 5XCV | A.LYS_56   | NZ  | C_ASP_11  | OD1 | 3.842 |
| 5XCV | A.LYS_56   | NZ  | C_ASP_11  | OD2 | 2.877 |
| 5XCV | A_ARG_131  | NH1 | D_GLU_142 | OE2 | 2.857 |
| 5XCV | A_ARG_131  | NH2 | D_GLU_142 | OE2 | 3.651 |
| 5XCV | A.LYS_149  | NZ  | B_GLU_137 | OE1 | 3.135 |
| 5XCV | A.LYS_149  | NZ  | B_GLU_137 | OE2 | 2.706 |
| 5XCV | A_ARG_154  | NH2 | B_ASP_131 | OD1 | 2.532 |
| 5XCV | B.LYS_144  | NZ  | A_GLU_142 | OE1 | 2.798 |
| 5XCV | B.LYS_144  | NZ  | A_GLU_142 | OE2 | 3.295 |
| 5XCV | B_ARG_149  | NH2 | A_ASP_136 | OD1 | 3.863 |
| 5XCV | B_ARG_149  | NH2 | A_ASP_136 | OD2 | 3.941 |
| 5XCV | D_ARG_131  | NH1 | A_GLU_142 | OE2 | 2.791 |
| 5XCV | D_ARG_131  | NH2 | A_GLU_142 | OE2 | 3.693 |
| 5XCV | D.LYS_149  | NZ  | E_GLU_137 | OE1 | 2.622 |
| 5XCV | D.LYS_149  | NZ  | E_GLU_137 | OE2 | 3.565 |
| 5XCV | D.LYS_153  | NZ  | E_GLU_40  | OE2 | 3.944 |
| 5XCV | E.LYS_144  | NZ  | D_GLU_142 | OE1 | 2.798 |
| 5XCV | E.LYS_144  | NZ  | D_GLU_142 | OE2 | 3.738 |
| 5XRT | A.LYS_27   | NZ  | B_GLU_97  | OE2 | 3.178 |
| 5XRT | A_ARG_109  | NH1 | B_GLU_67  | OE2 | 3.059 |
| 5XRT | A_ARG_109  | NH2 | B_GLU_67  | OE2 | 3.511 |

|      |           |     |           |     |       |
|------|-----------|-----|-----------|-----|-------|
| 5XRT | A_LYS_238 | NZ  | F_GLU_72  | OE1 | 3.452 |
| 5XRT | A_LYS_238 | NZ  | F_GLU_72  | OE2 | 2.683 |
| 5XRT | A_ARG_269 | NH1 | B_GLU_67  | OE1 | 3.465 |
| 5XRT | A_ARG_307 | NH1 | F_ASP_90  | OD2 | 3.867 |
| 5XRT | A_ARG_307 | NH2 | F_ASP_90  | OD2 | 3.590 |
| 5XRT | A_LYS_310 | NZ  | B_ASP_90  | OD1 | 2.844 |
| 5XRT | A_LYS_326 | NZ  | B_GLU_11  | OE1 | 2.808 |
| 5XRT | A_LYS_326 | NZ  | B_GLU_11  | OE2 | 2.925 |
| 5XRT | B_ARG_54  | NH1 | F_GLU_97  | OE2 | 3.836 |
| 5XRT | B_ARG_54  | NH2 | F_GLU_97  | OE2 | 2.767 |
| 5XRT | B_LYS_62  | NZ  | F_ASP_86  | OD1 | 3.336 |
| 5XRT | B_LYS_62  | NZ  | F_ASP_86  | OD2 | 2.617 |
| 5XRT | B_LYS_62  | NZ  | F_ASP_90  | OD1 | 3.654 |
| 5XRT | B_LYS_62  | NZ  | F_ASP_90  | OD2 | 2.589 |
| 5XRT | B_HIS_64  | NE2 | F_ASP_79  | OD2 | 3.582 |
| 5XRT | B_ARG_76  | NH1 | D_GLU_74  | OE1 | 3.704 |
| 5XRT | B_ARG_76  | NH1 | D_GLU_74  | OE2 | 3.032 |
| 5XRT | B_ARG_76  | NH2 | D_GLU_74  | OE1 | 2.984 |
| 5XRT | B_ARG_76  | NH2 | D_GLU_74  | OE2 | 3.801 |
| 5XRT | B_ARG_76  | NH2 | D_GLU_81  | OE1 | 2.864 |
| 5XRT | B_ARG_76  | NH2 | D_GLU_81  | OE2 | 3.722 |
| 5XRT | B_ARG_123 | NH2 | F_ASP_132 | OD2 | 3.663 |
| 5XRT | B_ARG_124 | NH1 | F_ASP_132 | OD2 | 2.812 |
| 5XRT | B_ARG_127 | NH2 | F_GLU_131 | OE1 | 3.103 |
| 5XRT | B_ARG_163 | NH1 | F_GLU_131 | OE1 | 3.194 |
| 5XRT | B_ARG_163 | NH1 | F_GLU_131 | OE2 | 3.563 |
| 5XRT | B_ARG_163 | NH2 | F_GLU_131 | OE1 | 3.596 |
| 5XRT | B_ARG_163 | NH2 | F_GLU_131 | OE2 | 2.598 |
| 5XRT | B_ARG_170 | NH2 | D_GLU_128 | OE1 | 3.449 |
| 5XRT | B_ARG_170 | NH2 | D_GLU_128 | OE2 | 3.578 |
| 5XRT | C_LYS_27  | NZ  | D_GLU_97  | OE1 | 3.926 |
| 5XRT | C_LYS_27  | NZ  | D_GLU_97  | OE2 | 3.340 |
| 5XRT | C_ARG_109 | NH1 | D_GLU_67  | OE2 | 2.932 |
| 5XRT | C_LYS_238 | NZ  | B_GLU_72  | OE2 | 3.031 |
| 5XRT | C_ARG_269 | NH1 | D_GLU_67  | OE1 | 3.251 |
| 5XRT | C_ARG_307 | NH2 | B_ASP_90  | OD2 | 3.134 |
| 5XRT | C_LYS_310 | NZ  | D_ASP_90  | OD1 | 3.206 |
| 5XRT | C_LYS_310 | NZ  | D_ASP_90  | OD2 | 3.892 |
| 5XRT | D_ARG_54  | NH2 | B_GLU_97  | OE2 | 3.066 |
| 5XRT | D_LYS_62  | NZ  | B_ASP_86  | OD1 | 3.579 |
| 5XRT | D_LYS_62  | NZ  | B_ASP_86  | OD2 | 3.058 |
| 5XRT | D_LYS_62  | NZ  | B_ASP_90  | OD1 | 3.574 |
| 5XRT | D_LYS_62  | NZ  | B_ASP_90  | OD2 | 2.797 |
| 5XRT | D_HIS_64  | NE2 | B_ASP_79  | OD2 | 3.856 |
| 5XRT | D_ARG_76  | NH1 | F_GLU_74  | OE1 | 3.338 |
| 5XRT | D_ARG_76  | NH1 | F_GLU_74  | OE2 | 2.885 |
| 5XRT | D_ARG_76  | NH2 | F_GLU_74  | OE1 | 2.652 |
| 5XRT | D_ARG_76  | NH2 | F_GLU_74  | OE2 | 3.749 |
| 5XRT | D_ARG_76  | NH2 | F_GLU_81  | OE1 | 2.506 |
| 5XRT | D_ARG_76  | NH2 | F_GLU_81  | OE2 | 3.677 |
| 5XRT | D_ARG_123 | NH2 | B_ASP_132 | OD2 | 3.975 |
| 5XRT | D_ARG_124 | NH1 | B_ASP_132 | OD1 | 3.986 |
| 5XRT | D_ARG_124 | NH1 | B_ASP_132 | OD2 | 2.717 |
| 5XRT | D_ARG_127 | NH2 | B_GLU_131 | OE1 | 2.649 |
| 5XRT | D_ARG_163 | NH1 | B_GLU_131 | OE1 | 3.152 |
| 5XRT | D_ARG_163 | NH1 | B_GLU_131 | OE2 | 3.070 |
| 5XRT | D_ARG_163 | NH2 | B_GLU_131 | OE1 | 3.267 |
| 5XRT | D_ARG_163 | NH2 | B_GLU_131 | OE2 | 2.951 |

|      |           |     |           |     |       |
|------|-----------|-----|-----------|-----|-------|
| 5XRT | D_ARG_170 | NH2 | F_GLU_128 | OE1 | 2.950 |
| 5XRT | D_ARG_170 | NH2 | F_GLU_128 | OE2 | 3.791 |
| 5XRT | E_LYS_27  | NZ  | F_GLU_97  | OE1 | 3.896 |
| 5XRT | E_LYS_27  | NZ  | F_GLU_97  | OE2 | 3.675 |
| 5XRT | E_ARG_109 | NH1 | F_GLU_67  | OE2 | 2.719 |
| 5XRT | E_ARG_109 | NH2 | F_GLU_67  | OE2 | 3.732 |
| 5XRT | E_LYS_238 | NZ  | D_GLU_72  | OE2 | 3.742 |
| 5XRT | E_ARG_269 | NH1 | F_GLU_67  | OE1 | 2.954 |
| 5XRT | E_ARG_269 | NH1 | F_GLU_67  | OE2 | 3.996 |
| 5XRT | E_ARG_307 | NH1 | D_ASP_90  | OD2 | 3.580 |
| 5XRT | E_ARG_307 | NH2 | D_ASP_90  | OD2 | 3.837 |
| 5XRT | E_LYS_310 | NZ  | F_ASP_90  | OD1 | 3.115 |
| 5XRT | E_LYS_326 | NZ  | F_GLU_11  | OE1 | 3.300 |
| 5XRT | F_ARG_54  | NH2 | D_GLU_97  | OE2 | 3.005 |
| 5XRT | F_LYS_62  | NZ  | D_ASP_86  | OD1 | 3.549 |
| 5XRT | F_LYS_62  | NZ  | D_ASP_86  | OD2 | 2.499 |
| 5XRT | F_LYS_62  | NZ  | D_ASP_90  | OD1 | 3.666 |
| 5XRT | F_LYS_62  | NZ  | D_ASP_90  | OD2 | 2.972 |
| 5XRT | F_HIS_64  | NE2 | D_ASP_79  | OD2 | 3.194 |
| 5XRT | F_ARG_76  | NH1 | B_GLU_74  | OE1 | 3.311 |
| 5XRT | F_ARG_76  | NH1 | B_GLU_74  | OE2 | 3.105 |
| 5XRT | F_ARG_76  | NH2 | B_GLU_74  | OE1 | 2.768 |
| 5XRT | F_ARG_76  | NH2 | B_GLU_74  | OE2 | 3.989 |
| 5XRT | F_ARG_76  | NH2 | B_GLU_81  | OE1 | 2.869 |
| 5XRT | F_ARG_76  | NH2 | B_GLU_81  | OE2 | 3.812 |
| 5XRT | F_ARG_124 | NH1 | D_ASP_132 | OD2 | 3.024 |
| 5XRT | F_ARG_127 | NH2 | D_GLU_131 | OE1 | 2.415 |
| 5XRT | F_ARG_163 | NH1 | D_GLU_131 | OE1 | 3.516 |
| 5XRT | F_ARG_163 | NH2 | D_GLU_131 | OE1 | 3.296 |
| 5XRT | F_ARG_163 | NH2 | D_GLU_131 | OE2 | 2.611 |
| 5XRT | F_ARG_170 | NH2 | B_GLU_128 | OE1 | 3.475 |
| 5XRT | F_ARG_170 | NH2 | B_GLU_128 | OE2 | 3.657 |
| 5XRT | F_LYS_174 | NZ  | B_ASP_160 | OD1 | 3.902 |
| 5XRT | G_LYS_27  | NZ  | H_GLU_97  | OE2 | 3.228 |
| 5XRT | G_LYS_82  | NZ  | E_GLU_119 | OE1 | 3.805 |
| 5XRT | G_ARG_109 | NH1 | H_GLU_67  | OE1 | 3.826 |
| 5XRT | G_ARG_109 | NH1 | H_GLU_67  | OE2 | 2.804 |
| 5XRT | G_ARG_269 | NH1 | H_GLU_67  | OE1 | 3.306 |
| 5XRT | G_LYS_299 | NZ  | H_GLU_69  | OE2 | 3.918 |
| 5XRT | G_LYS_310 | NZ  | H_ASP_90  | OD1 | 2.955 |
| 5XWD | A_ARG_353 | NH2 | D_ASP_96  | OD2 | 3.335 |
| 5XWD | A_HIS_409 | NE2 | H_ASP_108 | OD2 | 2.707 |
| 5XWD | A_LYS_443 | NZ  | D_ASP_51  | OD2 | 2.907 |
| 5XWD | A_LYS_465 | NZ  | D_ASP_53  | OD2 | 3.314 |
| 5YC5 | A_LYS_409 | NZ  | B_ASP_399 | OD1 | 3.635 |
| 5YC5 | A_LYS_409 | NZ  | B_ASP_399 | OD2 | 2.875 |
| 5YC5 | A_LYS_439 | NZ  | B_ASP_356 | OD1 | 3.309 |
| 5YC5 | B_LYS_409 | NZ  | A_ASP_399 | OD1 | 3.731 |
| 5YC5 | B_LYS_409 | NZ  | A_ASP_399 | OD2 | 2.920 |
| 5YC5 | C_LYS_120 | NZ  | A_ASP_265 | OD2 | 2.563 |
| 5YC5 | C_LYS_131 | NZ  | A_GLU_269 | OE1 | 3.549 |
| 5YC5 | C_LYS_131 | NZ  | A_GLU_269 | OE2 | 2.940 |
| 5ZV3 | A_LYS_67  | NZ  | H_ASP_54  | OD1 | 3.656 |
| 5ZV3 | A_LYS_67  | NZ  | H_ASP_54  | OD2 | 2.636 |
| 5ZV3 | A_LYS_67  | NZ  | H_ASP_56  | OD2 | 3.213 |
| 5ZV3 | H_ARG_58  | NH2 | A_ASP_65  | OD1 | 3.187 |
| 5ZV3 | H_ARG_97  | NH1 | A_GLU_62  | OE2 | 3.412 |
| 5ZV3 | H_ARG_97  | NH2 | A_GLU_62  | OE1 | 3.676 |

|      |           |     |           |     |       |
|------|-----------|-----|-----------|-----|-------|
| 5ZV3 | H_ARG_97  | NH2 | A_GLU_62  | OE2 | 3.134 |
| 5ZV3 | H_LYS_100 | NZ  | A_GLU_62  | OE1 | 2.715 |
| 5ZV3 | H_LYS_209 | NZ  | L_GLU_123 | OE1 | 3.860 |
| 6A3V | E_ARG_193 | NH1 | C_ASP_184 | OD1 | 3.333 |
| 6A3V | I_ARG_193 | NH1 | K_ASP_184 | OD1 | 3.791 |
| 6A3V | U_ARG_193 | NH1 | W_ASP_184 | OD1 | 2.218 |
| 6A3V | U_ARG_193 | NH1 | W_ASP_184 | OD2 | 3.282 |
| 6A3V | U_ARG_193 | NH2 | W_ASP_184 | OD1 | 3.966 |
| 6A3V | U_ARG_193 | NH2 | W_ASP_184 | OD2 | 3.892 |
| 6A3W | C_LYS_107 | NZ  | E_ASP_30  | OD2 | 3.465 |
| 6A3W | C_LYS_114 | NZ  | B_ASP_51  | OD2 | 2.835 |
| 6A3W | C_ARG_134 | NH2 | A_ASP_55  | OD2 | 3.122 |
| 6A3W | D_LYS_43  | NZ  | K_ASP_26  | OD1 | 2.407 |
| 6A3W | D_LYS_43  | NZ  | K_ASP_26  | OD2 | 3.696 |
| 6A3W | F_LYS_114 | NZ  | E_ASP_51  | OD2 | 2.834 |
| 6A3W | F_ARG_134 | NH2 | D_ASP_55  | OD1 | 3.962 |
| 6A3W | F_ARG_134 | NH2 | D_ASP_55  | OD2 | 2.895 |
| 6A3W | I_LYS_114 | NZ  | H_ASP_51  | OD2 | 2.757 |
| 6A3W | I_LYS_115 | NZ  | L_ASP_119 | OD1 | 3.708 |
| 6A3W | I_LYS_115 | NZ  | L_ASP_119 | OD2 | 3.946 |
| 6A3W | I_ARG_134 | NH2 | G_ASP_55  | OD1 | 3.740 |
| 6A3W | I_ARG_134 | NH2 | G_ASP_55  | OD2 | 2.630 |
| 6A3W | I_ARG_154 | NH1 | E_ASP_26  | OD1 | 2.965 |
| 6A3W | I_ARG_154 | NH2 | E_ASP_26  | OD1 | 3.042 |
| 6A3W | L_LYS_107 | NZ  | H_ASP_30  | OD1 | 3.282 |
| 6A3W | L_LYS_107 | NZ  | H_ASP_30  | OD2 | 2.525 |
| 6A3W | L_LYS_114 | NZ  | K_ASP_51  | OD2 | 2.893 |
| 6A3W | L_ARG_134 | NH2 | J_ASP_55  | OD1 | 3.749 |
| 6A3W | L_ARG_134 | NH2 | J_ASP_55  | OD2 | 2.496 |
| 6A76 | H_LYS_213 | NZ  | L_GLU_123 | OE1 | 3.460 |
| 6A77 | A_ARG_67  | NH1 | H_GLU_97  | OE1 | 2.680 |
| 6A77 | A_ARG_67  | NH2 | H_GLU_97  | OE1 | 3.115 |
| 6A77 | A_ARG_67  | NH2 | H_GLU_97  | OE2 | 3.032 |
| 6A78 | A_LYS_57  | NZ  | H_GLU_97  | OE1 | 3.795 |
| 6A78 | I_LYS_63  | NZ  | B_ASP_23  | OD1 | 3.699 |
| 6A79 | B_ARG_67  | NH1 | I_GLU_97  | OE2 | 3.582 |
| 6AL5 | A_LYS_155 | NZ  | H_GLU_74  | OE1 | 3.542 |
| 6AL5 | A_LYS_220 | NZ  | H_ASP_55  | OD1 | 3.389 |
| 6AL5 | A_LYS_220 | NZ  | H_ASP_55  | OD2 | 2.832 |
| 6AL5 | A_LYS_220 | NZ  | H_ASP_57  | OD2 | 3.301 |
| 6AL5 | H_ARG_106 | NH2 | L_ASP_54  | OD1 | 3.142 |
| 6AL5 | H_ARG_106 | NH2 | L_ASP_54  | OD2 | 3.298 |
| 6AL5 | H_LYS_220 | NZ  | L_GLU_127 | OE1 | 3.220 |
| 6AND | H_LYS_209 | NZ  | L_GLU_123 | OE1 | 2.684 |
| 6AND | H_LYS_209 | NZ  | L_GLU_123 | OE2 | 3.876 |
| 6AND | L_LYS_50  | NZ  | H_ASP_100 | OD1 | 3.188 |
| 6ANI | H_LYS_209 | NZ  | L_GLU_123 | OE1 | 2.397 |
| 6ANI | I_LYS_209 | NZ  | M_GLU_123 | OE2 | 3.950 |
| 6AQ7 | H_HIS_34  | NE2 | A_GLU_199 | OE1 | 3.934 |
| 6AQ7 | H_HIS_34  | NE2 | A_GLU_199 | OE2 | 2.717 |
| 6AQ7 | H_ARG_49  | NH1 | A_GLU_199 | OE2 | 2.744 |
| 6AQ7 | H_LYS_209 | NZ  | L_GLU_127 | OE2 | 2.651 |
| 6ATT | H_LYS_217 | NZ  | L_GLU_129 | OE1 | 3.069 |
| 6ATT | H_LYS_222 | NZ  | L_ASP_128 | OD1 | 2.688 |
| 6ATT | L_ARG_32  | NH1 | A_GLU_216 | OE1 | 2.742 |
| 6AZZ | F_LYS_209 | NZ  | E_GLU_124 | OE2 | 3.461 |
| 6AZZ | E_ARG_77  | NH1 | B_GLU_79  | OE2 | 3.685 |
| 6AZZ | E_ARG_77  | NH2 | B_GLU_79  | OE1 | 3.407 |

|      |            |     |           |     |       |
|------|------------|-----|-----------|-----|-------|
| 6AZZ | E_ARG_77   | NH2 | B_GLU_79  | OE2 | 3.489 |
| 6AZZ | E_LYS_130  | NZ  | F_ASP_144 | OD2 | 3.330 |
| 6AZZ | C_LYS_209  | NZ  | B_GLU_124 | OE1 | 3.784 |
| 6AZZ | C_LYS_209  | NZ  | B_GLU_124 | OE2 | 2.655 |
| 6AZZ | B_LYS_130  | NZ  | C_ASP_144 | OD2 | 3.121 |
| 6AZZ | A_LYS_90   | NZ  | B_ASP_51  | OD1 | 3.552 |
| 6AZZ | A_LYS_90   | NZ  | B_ASP_51  | OD2 | 2.501 |
| 6AZZ | A_LYS_108  | NZ  | B_ASP_53  | OD2 | 3.868 |
| 6AZZ | D_LYS_90   | NZ  | E_ASP_51  | OD1 | 3.639 |
| 6AZZ | D_LYS_90   | NZ  | E_ASP_51  | OD2 | 2.901 |
| 6B08 | C_LYS_143  | NZ  | B_GLU_125 | OE2 | 2.599 |
| 6B08 | A_LYS_90   | NZ  | B_ASP_51  | OD1 | 2.529 |
| 6B08 | A_LYS_90   | NZ  | B_ASP_51  | OD2 | 3.708 |
| 6B0E | B_HIS_164  | ND1 | A_ASP_167 | OD2 | 3.677 |
| 6B0E | E_LYS_155  | NZ  | B_ASP_98  | OD2 | 3.864 |
| 6B0G | D_ARG_100B | NH1 | C_ASP_91  | OD2 | 3.003 |
| 6B0G | D_ARG_100B | NH2 | C_ASP_91  | OD2 | 3.130 |
| 6B0G | D_LYS_214  | NZ  | C_GLU_123 | OE2 | 3.176 |
| 6B0G | E_LYS_155  | NZ  | D_ASP_98  | OD2 | 2.837 |
| 6BE2 | H_LYS_154  | NZ  | L_GLU_129 | OE2 | 2.747 |
| 6BE2 | L_LYS_49   | NZ  | H_GLU_108 | OE2 | 2.828 |
| 6BE2 | L_ARG_100  | NH2 | H_ASP_98  | OD1 | 2.914 |
| 6BE3 | H_LYS_154  | NZ  | L_GLU_129 | OE2 | 2.742 |
| 6BE3 | H_LYS_220  | NZ  | L_GLU_128 | OE1 | 3.265 |
| 6BE3 | H_LYS_220  | NZ  | L_GLU_128 | OE2 | 2.896 |
| 6BE3 | L_LYS_49   | NZ  | H_GLU_108 | OE2 | 2.860 |
| 6BE3 | L_ARG_100  | NH2 | H_ASP_98  | OD1 | 3.147 |
| 6BE3 | L_ARG_100  | NH2 | H_ASP_109 | OD1 | 3.865 |
| 6BE4 | H_LYS_154  | NZ  | L_GLU_129 | OE1 | 2.824 |
| 6BE4 | L_ARG_100  | NH2 | H_ASP_98  | OD1 | 3.253 |
| 6BE4 | L_ARG_100  | NH2 | H_ASP_109 | OD1 | 3.926 |
| 6BIT | I_HIS_35   | NE2 | H_GLU_54  | OE1 | 3.340 |
| 6BIT | I_ARG_50   | NH2 | H_ASP_100 | OD1 | 3.331 |
| 6BIT | I_ARG_50   | NH2 | H_ASP_101 | OD1 | 3.135 |
| 6BIT | I_ARG_50   | NH2 | H_ASP_101 | OD2 | 3.871 |
| 6BIT | I_LYS_59   | NZ  | H_ASP_100 | OD1 | 3.680 |
| 6BIT | I_LYS_208  | NZ  | K_GLU_123 | OE2 | 3.567 |
| 6BIT | I_ARG_213  | NH1 | L_ASP_143 | OD1 | 3.423 |
| 6BIT | K_ARG_96   | NH1 | H_GLU_54  | OE1 | 3.223 |
| 6BIT | K_ARG_96   | NH2 | H_GLU_54  | OE1 | 2.904 |
| 6BIT | K_ARG_96   | NH2 | H_GLU_54  | OE2 | 3.687 |
| 6BIT | H_LYS_53   | NZ  | I_ASP_52  | OD1 | 3.518 |
| 6BIT | H_LYS_53   | NZ  | I_GLU_54  | OE1 | 2.817 |
| 6BIT | H_LYS_96   | NZ  | I_ASP_52  | OD2 | 2.786 |
| 6BIT | H_LYS_96   | NZ  | I_ASP_55  | OD1 | 3.426 |
| 6BIT | H_LYS_96   | NZ  | I_ASP_55  | OD2 | 2.655 |
| 6BIT | H_LYS_96   | NZ  | I_GLU_57  | OE1 | 2.771 |
| 6BIT | J_HIS_35   | NE2 | G_GLU_54  | OE1 | 3.221 |
| 6BIT | J_ARG_50   | NH2 | G_ASP_100 | OD1 | 3.724 |
| 6BIT | J_ARG_50   | NH2 | G_ASP_101 | OD1 | 3.330 |
| 6BIT | J_LYS_208  | NZ  | L_GLU_123 | OE2 | 3.539 |
| 6BIT | L_ARG_96   | NH1 | G_GLU_54  | OE1 | 3.007 |
| 6BIT | L_ARG_96   | NH2 | G_GLU_54  | OE1 | 2.768 |
| 6BIT | L_ARG_96   | NH2 | G_GLU_54  | OE2 | 3.419 |
| 6BIT | G_LYS_53   | NZ  | J_ASP_52  | OD1 | 2.843 |
| 6BIT | G_LYS_53   | NZ  | J_ASP_52  | OD2 | 3.656 |
| 6BIT | G_LYS_53   | NZ  | J_GLU_54  | OE1 | 2.681 |
| 6BIT | G_LYS_96   | NZ  | J_ASP_52  | OD2 | 2.719 |

|      |           |     |           |     |       |
|------|-----------|-----|-----------|-----|-------|
| 6BIT | G.LYS_96  | NZ  | J_ASP_55  | OD1 | 3.165 |
| 6BIT | G.LYS_96  | NZ  | J_ASP_55  | OD2 | 2.701 |
| 6BIT | G.LYS_96  | NZ  | J_GLU_57  | OE2 | 2.943 |
| 6BXA | A_ARG_37  | NH1 | C_GLU_101 | OE1 | 3.957 |
| 6BXA | A_ARG_37  | NH1 | C_GLU_101 | OE2 | 3.920 |
| 6BXA | A_ARG_37  | NH2 | C_GLU_101 | OE1 | 3.689 |
| 6BXA | A_ARG_37  | NH2 | C_GLU_101 | OE2 | 2.525 |
| 6BXA | A_LYS_77  | NZ  | C_ASP_34  | OD2 | 2.860 |
| 6BXA | A_LYS_102 | NZ  | C_ASP_34  | OD1 | 2.955 |
| 6BXA | A_LYS_184 | NZ  | B_ASP_133 | OD2 | 2.709 |
| 6BXA | B_ARG_37  | NH2 | D_GLU_101 | OE1 | 3.840 |
| 6BXA | B_ARG_37  | NH2 | D_GLU_101 | OE2 | 2.839 |
| 6BXA | B_LYS_77  | NZ  | D_ASP_34  | OD1 | 2.907 |
| 6BXA | B_LYS_102 | NZ  | D_ASP_34  | OD2 | 3.845 |
| 6BXA | B_LYS_184 | NZ  | A_ASP_133 | OD2 | 2.771 |
| 6BXC | A_LYS_184 | NZ  | C_ASP_34  | OD2 | 3.851 |
| 6BXC | A_HIS_198 | NE2 | D_GLU_65  | OE2 | 3.317 |
| 6BXC | B_LYS_159 | NZ  | D_ASP_34  | OD2 | 3.891 |
| 6BXC | B_LYS_182 | NZ  | D_GLU_81  | OE2 | 3.361 |
| 6BXC | B_LYS_184 | NZ  | D_ASP_34  | OD2 | 3.547 |
| 6BXE | A_HIS_125 | NE2 | B_GLU_81  | OE2 | 2.552 |
| 6BXE | B_HIS_125 | NE2 | A_GLU_81  | OE2 | 3.833 |
| 6BZU | A_ARG_64  | NH2 | B_ASP_94  | OD1 | 3.703 |
| 6BZU | A_LYS_209 | NZ  | B_GLU_123 | OE2 | 3.980 |
| 6BZU | B_ARG_18  | NH2 | F_ASP_70  | OD2 | 2.642 |
| 6BZU | B_ARG_24  | NH1 | F_ASP_76  | OD1 | 3.597 |
| 6BZU | B_ARG_24  | NH1 | F_ASP_76  | OD2 | 2.861 |
| 6BZU | C_ARG_64  | NH2 | D_ASP_94  | OD1 | 3.618 |
| 6BZU | E_ARG_64  | NH2 | F_ASP_94  | OD1 | 3.701 |
| 6BZU | F_ARG_24  | NH1 | B_ASP_76  | OD1 | 3.333 |
| 6BZU | F_ARG_24  | NH1 | B_ASP_76  | OD2 | 3.080 |
| 6BZU | G_ARG_64  | NH2 | H_ASP_94  | OD1 | 3.197 |
| 6BZU | G_ARG_64  | NH2 | H_ASP_94  | OD2 | 3.837 |
| 6BZU | G_LYS_209 | NZ  | H_GLU_123 | OE1 | 2.734 |
| 6BZU | G_LYS_209 | NZ  | H_GLU_123 | OE2 | 3.547 |
| 6BZV | E_ARG_66  | NH1 | C_GLU_85  | OE2 | 3.540 |
| 6BZV | E_ARG_66  | NH2 | C_GLU_85  | OE2 | 3.482 |
| 6BZV | E_LYS_206 | NZ  | G_ASP_208 | OD2 | 3.271 |
| 6BZV | E_LYS_209 | NZ  | F_GLU_123 | OE1 | 3.953 |
| 6BZV | E_LYS_209 | NZ  | F_GLU_123 | OE2 | 2.713 |
| 6BZV | A_LYS_209 | NZ  | B_GLU_123 | OE1 | 2.709 |
| 6BZV | A_LYS_209 | NZ  | B_GLU_123 | OE2 | 3.439 |
| 6BZV | C_LYS_209 | NZ  | D_GLU_123 | OE1 | 2.619 |
| 6BZV | C_LYS_209 | NZ  | D_GLU_123 | OE2 | 2.945 |
| 6BZV | G_HIS_164 | NE2 | H_ASP_167 | OD1 | 3.817 |
| 6BZV | G_LYS_209 | NZ  | H_GLU_123 | OE1 | 3.054 |
| 6BZV | G_LYS_209 | NZ  | H_GLU_123 | OE2 | 3.192 |
| 6BZW | C_LYS_209 | NZ  | D_GLU_123 | OE1 | 2.857 |
| 6BZW | C_LYS_209 | NZ  | D_GLU_123 | OE2 | 3.990 |
| 6BZW | D_ARG_18  | NH2 | H_GLU_93  | OE1 | 3.070 |
| 6BZW | A_LYS_209 | NZ  | B_GLU_123 | OE1 | 2.988 |
| 6BZW | E_LYS_209 | NZ  | F_GLU_123 | OE1 | 2.583 |
| 6BZW | E_LYS_209 | NZ  | F_GLU_123 | OE2 | 3.254 |
| 6BZW | G_LYS_209 | NZ  | H_GLU_123 | OE1 | 2.709 |
| 6BZW | G_LYS_209 | NZ  | H_GLU_123 | OE2 | 2.569 |
| 6C5H | H_LYS_208 | NZ  | L_GLU_123 | OE1 | 3.569 |
| 6C5I | H_HIS_164 | NE2 | L_ASP_167 | OD2 | 3.802 |
| 6C5I | H_LYS_208 | NZ  | L_GLU_123 | OE1 | 3.192 |

|      |           |     |            |     |       |
|------|-----------|-----|------------|-----|-------|
| 6C5J | H_HIS_164 | ND1 | L_ASP_167  | OD1 | 3.598 |
| 6C6X | B_LYS_207 | NZ  | A_GLU_133  | OE1 | 3.861 |
| 6C6Y | R_LYS_400 | NZ  | L_ASP_28   | OD2 | 3.363 |
| 6C6Y | R_LYS_543 | NZ  | L_GLU_55   | OE2 | 2.973 |
| 6C6Y | S_LYS_400 | NZ  | B_ASP_28   | OD1 | 3.764 |
| 6C6Y | S_LYS_400 | NZ  | B_ASP_28   | OD2 | 2.712 |
| 6C6Y | S_LYS_543 | NZ  | B_GLU_55   | OE2 | 3.134 |
| 6C6Z | A_ARG_542 | NH1 | C_GLU_95   | OE1 | 3.387 |
| 6C6Z | A_ARG_542 | NH1 | C_GLU_95   | OE2 | 2.704 |
| 6C6Z | A_ARG_542 | NH2 | C_GLU_95   | OE1 | 2.635 |
| 6C6Z | A_ARG_542 | NH2 | C_GLU_95   | OE2 | 3.577 |
| 6C6Z | B_ARG_542 | NH1 | H_GLU_95   | OE1 | 3.238 |
| 6C6Z | B_ARG_542 | NH1 | H_GLU_95   | OE2 | 2.770 |
| 6C6Z | B_ARG_542 | NH2 | H_GLU_95   | OE1 | 2.578 |
| 6C6Z | B_ARG_542 | NH2 | H_GLU_95   | OE2 | 3.689 |
| 6C6Z | C_LYS_209 | NZ  | D_GLU_123  | OE1 | 2.970 |
| 6C6Z | C_LYS_209 | NZ  | D_GLU_123  | OE2 | 3.150 |
| 6C6Z | C_LYS_214 | NZ  | D_ASP_122  | OD2 | 2.844 |
| 6C6Z | D_HIS_27D | NE2 | A_GLU_536  | OE1 | 2.616 |
| 6C6Z | H_LYS_209 | NZ  | L_GLU_123  | OE1 | 3.044 |
| 6C6Z | H_LYS_209 | NZ  | L_GLU_123  | OE2 | 3.156 |
| 6C6Z | L_HIS_27D | NE2 | B_GLU_536  | OE1 | 2.931 |
| 6CUJ | B_LYS_404 | NZ  | A_GLU_292  | OE1 | 3.957 |
| 6DC3 | H_LYS_143 | NZ  | L_GLU_125  | OE2 | 3.101 |
| 6DC3 | H_LYS_209 | NZ  | L_GLU_124  | OE1 | 3.719 |
| 6DC3 | F_LYS_168 | NZ  | H_ASP_53   | OD2 | 2.485 |
| 6DC4 | H_LYS_209 | NZ  | L_GLU_123  | OE1 | 3.056 |
| 6DC5 | A_LYS_156 | NZ  | D_GLU_463  | OE1 | 3.876 |
| 6DC5 | A_LYS_399 | NZ  | G_GLU_497  | OE2 | 2.871 |
| 6DC5 | D_LYS_75  | NZ  | G_GLU_218  | OE2 | 2.912 |
| 6DC5 | D_LYS_209 | NZ  | E_GLU_53   | OE2 | 3.142 |
| 6DC5 | D_LYS_209 | NZ  | E_ASP_100G | OD2 | 3.755 |
| 6DC5 | G_LYS_77  | NZ  | A_GLU_222  | OE2 | 3.675 |
| 6DC5 | G_LYS_209 | NZ  | H_GLU_53   | OE2 | 3.533 |
| 6DC5 | G_LYS_209 | NZ  | H_ASP_100G | OD2 | 3.715 |
| 6DC5 | G_LYS_399 | NZ  | D_GLU_497  | OE1 | 3.390 |
| 6DC5 | G_LYS_399 | NZ  | D_GLU_497  | OE2 | 2.804 |
| 6DC5 | B_LYS_209 | NZ  | C_GLU_123  | OE1 | 2.374 |
| 6DC5 | B_LYS_209 | NZ  | C_GLU_123  | OE2 | 3.312 |
| 6DC5 | E_LYS_209 | NZ  | F_GLU_123  | OE1 | 3.793 |
| 6DC5 | H_LYS_    | NZ  | I_GLU_     | OE1 | 2.846 |
| 6DC5 | H_LYS_    | NZ  | I_ASP_     | OD1 | 3.400 |
| 6DC5 | H_LYS_    | NZ  | I_ASP_     | OD2 | 3.825 |
| 6DCV | H_LYS_43  | NZ  | L_ASP_9    | OD1 | 3.193 |
| 6DCV | H_LYS_221 | NZ  | L_GLU_123  | OE1 | 3.166 |
| 6DCV | B_LYS_43  | NZ  | A_ASP_9    | OD1 | 3.127 |
| 6DCV | B_LYS_221 | NZ  | A_GLU_123  | OE1 | 3.096 |
| 6DCW | H_LYS_43  | NZ  | L_ASP_9    | OD1 | 3.018 |
| 6DCW | T_LYS_317 | NZ  | H_ASP_54   | OD1 | 3.849 |
| 6DCW | T_LYS_317 | NZ  | H_ASP_54   | OD2 | 2.833 |
| 6DCW | T_LYS_317 | NZ  | H_ASP_56   | OD2 | 2.597 |
| 6DDM | B_LYS_62  | NZ  | A_GLU_1    | OE1 | 3.434 |
| 6DDM | B_LYS_62  | NZ  | A_GLU_1    | OE2 | 2.992 |
| 6DDR | B_LYS_209 | NZ  | A_GLU_123  | OE1 | 3.270 |
| 6DDV | B_LYS_209 | NZ  | A_GLU_123  | OE1 | 3.050 |
| 6DDV | B_LYS_209 | NZ  | A_GLU_123  | OE2 | 3.197 |
| 6DDV | C_ARG_226 | NH1 | B_ASP_31   | OD1 | 3.652 |
| 6DDV | C_ARG_226 | NH1 | B_ASP_31   | OD2 | 2.831 |

|      |           |     |           |     |       |
|------|-----------|-----|-----------|-----|-------|
| 6DDV | C_ARG_226 | NH2 | B_ASP_31  | OD1 | 3.123 |
| 6DDV | C_ARG_226 | NH2 | B_ASP_31  | OD2 | 3.778 |
| 6DDV | A_LYS_50  | NZ  | C_ASP_255 | OD1 | 3.063 |
| 6DDV | A_LYS_50  | NZ  | C_ASP_255 | OD2 | 3.312 |
| 6DFG | B_HIS_585 | NE2 | A_GLU_492 | OE2 | 3.210 |
| 6DFG | B_ARG_588 | NH2 | A_GLU_492 | OE1 | 2.981 |
| 6DFG | B_ARG_588 | NH2 | A_GLU_492 | OE2 | 3.149 |
| 6DFG | L_ARG_31  | NH1 | A_ASP_140 | OD2 | 3.569 |
| 6DFG | L_ARG_54  | NH2 | A_ASP_322 | OD2 | 3.922 |
| 6DFG | L_LYS_96  | NZ  | H_ASP_50  | OD2 | 3.294 |
| 6DFG | E_HIS_585 | NE2 | C_GLU_492 | OE2 | 3.225 |
| 6DFG | E_ARG_588 | NH2 | C_GLU_492 | OE1 | 2.984 |
| 6DFG | E_ARG_588 | NH2 | C_GLU_492 | OE2 | 3.072 |
| 6DFG | J_ARG_31  | NH1 | C_ASP_140 | OD2 | 3.924 |
| 6DFG | J_LYS_96  | NZ  | G_ASP_50  | OD2 | 3.096 |
| 6DFG | F_HIS_585 | NE2 | D_GLU_492 | OE2 | 3.337 |
| 6DFG | F_ARG_588 | NH2 | D_GLU_492 | OE1 | 2.974 |
| 6DFG | F_ARG_588 | NH2 | D_GLU_492 | OE2 | 3.036 |
| 6DFG | K_ARG_31  | NH1 | D_ASP_140 | OD2 | 3.732 |
| 6DFG | K_LYS_96  | NZ  | I_ASP_50  | OD2 | 3.268 |
| 6DFH | A_LYS_137 | NZ  | L_ASP_51  | OD2 | 2.491 |
| 6DFH | A_ARG_192 | NH1 | D_GLU_164 | OE2 | 3.939 |
| 6DFH | B_ARG_542 | NH1 | E_GLU_647 | OE2 | 2.777 |
| 6DFH | B_LYS_574 | NZ  | A_ASP_107 | OD1 | 3.419 |
| 6DFH | B_LYS_574 | NZ  | A_ASP_107 | OD2 | 3.383 |
| 6DFH | B_ARG_588 | NH2 | A_GLU_492 | OE1 | 3.118 |
| 6DFH | B_ARG_588 | NH2 | A_GLU_492 | OE2 | 3.874 |
| 6DFH | C_LYS_137 | NZ  | J_ASP_51  | OD2 | 2.536 |
| 6DFH | C_ARG_192 | NH1 | A_GLU_164 | OE2 | 3.905 |
| 6DFH | E_ARG_542 | NH1 | F_GLU_647 | OE2 | 2.777 |
| 6DFH | E_LYS_574 | NZ  | C_ASP_107 | OD1 | 3.423 |
| 6DFH | E_LYS_574 | NZ  | C_ASP_107 | OD2 | 3.381 |
| 6DFH | E_ARG_588 | NH2 | C_GLU_492 | OE1 | 3.158 |
| 6DFH | E_ARG_588 | NH2 | C_GLU_492 | OE2 | 3.904 |
| 6DFH | D_LYS_137 | NZ  | K_ASP_51  | OD2 | 2.448 |
| 6DFH | D_ARG_192 | NH1 | C_GLU_164 | OE2 | 3.902 |
| 6DFH | F_ARG_542 | NH1 | B_GLU_647 | OE2 | 2.778 |
| 6DFH | F_LYS_574 | NZ  | D_ASP_107 | OD1 | 3.408 |
| 6DFH | F_LYS_574 | NZ  | D_ASP_107 | OD2 | 3.378 |
| 6DFH | F_ARG_588 | NH2 | D_GLU_492 | OE1 | 3.059 |
| 6DFH | F_ARG_588 | NH2 | D_GLU_492 | OE2 | 3.839 |
| 6DG2 | A_ARG_57  | NH1 | C_GLU_50  | OE1 | 2.686 |
| 6DG2 | A_ARG_57  | NH1 | C_GLU_50  | OE2 | 3.712 |
| 6DG2 | A_ARG_57  | NH1 | C_ASP_59  | OD1 | 3.923 |
| 6DG2 | A_ARG_57  | NH2 | C_GLU_50  | OE1 | 3.412 |
| 6DG2 | A_ARG_57  | NH2 | C_GLU_50  | OE2 | 2.876 |
| 6DG2 | A_LYS_219 | NZ  | B_ASP_123 | OD1 | 3.620 |
| 6DG2 | A_LYS_219 | NZ  | B_ASP_123 | OD2 | 3.832 |
| 6DG2 | C_ARG_57  | NH1 | A_GLU_50  | OE1 | 3.739 |
| 6DG2 | C_ARG_57  | NH1 | A_GLU_50  | OE2 | 2.758 |
| 6DG2 | C_ARG_57  | NH1 | A_ASP_59  | OD1 | 3.719 |
| 6DG2 | C_ARG_57  | NH2 | A_GLU_50  | OE1 | 2.935 |
| 6DG2 | C_ARG_57  | NH2 | A_GLU_50  | OE2 | 3.488 |
| 6E62 | P_LYS_413 | NZ  | H_ASP_100 | OD1 | 3.190 |
| 6E62 | P_LYS_413 | NZ  | H_ASP_100 | OD2 | 2.736 |
| 6E62 | P_LYS_416 | NZ  | L_ASP_51  | OD2 | 2.614 |
| 6E62 | H_ARG_97  | NH1 | P_ASP_347 | OD2 | 3.575 |
| 6E62 | H_LYS_143 | NZ  | L_GLU_124 | OE2 | 2.458 |



|      |           |     |           |     |       |
|------|-----------|-----|-----------|-----|-------|
| 6E62 | H.LYS_209 | NZ  | L_GLU_123 | OE1 | 3.996 |
| 6E62 | H.LYS_209 | NZ  | L_GLU_123 | OE2 | 3.607 |
| 6E62 | A.LYS_413 | NZ  | B_ASP_100 | OD1 | 3.041 |
| 6E62 | A.LYS_413 | NZ  | B_ASP_100 | OD2 | 2.916 |
| 6E62 | A.LYS_416 | NZ  | C_ASP_51  | OD2 | 2.944 |
| 6E62 | B_ARG_83  | NH1 | H_GLU_1   | OE1 | 3.696 |
| 6E62 | B_ARG_83  | NH1 | H_GLU_1   | OE2 | 3.867 |
| 6E62 | B_ARG_83  | NH2 | H_GLU_1   | OE1 | 3.783 |
| 6E62 | B_ARG_83  | NH2 | H_GLU_1   | OE2 | 3.983 |
| 6E62 | B.LYS_143 | NZ  | C_GLU_124 | OE2 | 2.797 |
| 6E62 | C.LYS_156 | NZ  | L_GLU_81  | OE2 | 3.985 |
| 6E63 | P.LYS_413 | NZ  | H_ASP_100 | OD1 | 3.187 |
| 6E63 | P.LYS_413 | NZ  | H_ASP_100 | OD2 | 2.904 |
| 6E63 | P.LYS_416 | NZ  | L_ASP_51  | OD1 | 3.564 |
| 6E63 | P.LYS_416 | NZ  | L_ASP_51  | OD2 | 2.955 |
| 6E63 | H_ARG_97  | NH1 | P_ASP_347 | OD2 | 3.407 |
| 6E63 | H.LYS_143 | NZ  | L_GLU_124 | OE2 | 2.665 |
| 6E63 | H.LYS_209 | NZ  | L_GLU_123 | OE1 | 2.498 |
| 6E63 | L.LYS_17  | NZ  | B_GLU_85  | OE1 | 3.318 |
| 6E63 | L.LYS_17  | NZ  | B_GLU_85  | OE2 | 3.250 |
| 6E63 | A.LYS_413 | NZ  | B_ASP_100 | OD1 | 2.369 |
| 6E63 | A.LYS_413 | NZ  | B_ASP_100 | OD2 | 3.029 |
| 6E63 | A.LYS_416 | NZ  | C_ASP_51  | OD2 | 3.236 |
| 6E63 | B_ARG_83  | NH1 | L_GLU_13  | OE1 | 3.486 |
| 6E63 | B_ARG_83  | NH1 | L_GLU_13  | OE2 | 2.814 |
| 6E63 | B_ARG_97  | NH1 | A_ASP_347 | OD1 | 3.859 |
| 6E64 | H.LYS_143 | NZ  | L_GLU_124 | OE2 | 2.942 |
| 6E64 | H.LYS_209 | NZ  | L_GLU_123 | OE2 | 2.774 |
| 6E64 | A.LYS_209 | NZ  | B_GLU_123 | OE1 | 3.569 |
| 6E64 | A.LYS_209 | NZ  | B_GLU_123 | OE2 | 2.777 |
| 6E65 | H.LYS_209 | NZ  | L_GLU_123 | OE1 | 2.900 |
| 6E65 | H.LYS_209 | NZ  | L_GLU_123 | OE2 | 3.402 |
| 6E8V | A.LYS_69  | NZ  | H_GLU_114 | OE1 | 3.919 |
| 6E8V | A.LYS_69  | NZ  | H_GLU_114 | OE2 | 3.267 |
| 6E8V | A.LYS_290 | NZ  | B_GLU_128 | OE1 | 3.297 |
| 6E8V | A.LYS_290 | NZ  | B_GLU_128 | OE2 | 3.454 |
| 6E8V | B.LYS_154 | NZ  | E_ASP_98  | OD2 | 3.855 |
| 6E8V | E.LYS_290 | NZ  | F_GLU_128 | OE1 | 2.548 |
| 6E8V | E.LYS_290 | NZ  | F_GLU_128 | OE2 | 3.232 |
| 6E8V | H.LYS_290 | NZ  | L_GLU_127 | OE1 | 2.706 |
| 6E8V | H.LYS_290 | NZ  | L_GLU_127 | OE2 | 2.554 |
| 6E8V | J.LYS_290 | NZ  | K_GLU_128 | OE1 | 3.173 |
| 6E8V | J.LYS_290 | NZ  | K_GLU_128 | OE2 | 2.611 |
| 6E8V | K.LYS_212 | NZ  | H_GLU_101 | OE1 | 3.767 |
| 6E8V | K.LYS_212 | NZ  | H_GLU_101 | OE2 | 3.490 |
| 6E8V | O.HIS_129 | NE2 | L_ASP_61  | OD1 | 3.511 |
| 6E8V | O.LYS_290 | NZ  | P_GLU_128 | OE1 | 3.591 |
| 6E8V | U.LYS_290 | NZ  | V_GLU_128 | OE1 | 2.346 |
| 6E8V | U.LYS_290 | NZ  | V_GLU_128 | OE2 | 3.693 |
| 6E8V | Y.LYS_290 | NZ  | Z_GLU_128 | OE1 | 3.390 |
| 6E8V | c.HIS_125 | ND1 | K_ASP_62  | OD1 | 3.174 |
| 6E8V | c.HIS_125 | ND1 | K_ASP_62  | OD2 | 3.139 |
| 6E8V | c.LYS_290 | NZ  | d_GLU_128 | OE1 | 2.357 |
| 6E8V | c.LYS_290 | NZ  | d_GLU_128 | OE2 | 3.486 |
| 6E9G | A.LYS_262 | NZ  | B_GLU_127 | OE1 | 3.021 |
| 6E9G | A.LYS_262 | NZ  | B_GLU_127 | OE2 | 3.870 |
| 6E9H | A.LYS_292 | NZ  | B_GLU_128 | OE1 | 2.895 |
| 6E9H | A.LYS_292 | NZ  | B_GLU_128 | OE2 | 3.744 |

|      |           |     |           |     |       |
|------|-----------|-----|-----------|-----|-------|
| 6E9I | A_ARG_109 | NH2 | D_ASP_95  | OD1 | 3.782 |
| 6E9I | A_ARG_109 | NH2 | D_ASP_95  | OD2 | 3.931 |
| 6E9I | A_LYS_289 | NZ  | B_GLU_128 | OE1 | 3.746 |
| 6E9I | A_LYS_289 | NZ  | B_GLU_128 | OE2 | 2.925 |
| 6E9I | C_LYS_289 | NZ  | D_GLU_128 | OE1 | 2.528 |
| 6E9I | C_LYS_289 | NZ  | D_GLU_128 | OE2 | 3.968 |
| 6E9I | H_LYS_289 | NZ  | L_GLU_128 | OE1 | 3.811 |
| 6E9I | H_LYS_289 | NZ  | L_GLU_128 | OE2 | 2.547 |
| 6E9K | A_LYS_257 | NZ  | B_GLU_128 | OE1 | 3.997 |
| 6E9K | A_LYS_257 | NZ  | B_GLU_128 | OE2 | 3.056 |
| 6E9Q | A_LYS_253 | NZ  | B_GLU_128 | OE1 | 3.048 |
| 6E9Q | A_LYS_253 | NZ  | B_GLU_128 | OE2 | 2.978 |
| 6E9Q | E_LYS_253 | NZ  | F_GLU_128 | OE1 | 2.966 |
| 6E9Q | E_LYS_253 | NZ  | F_GLU_128 | OE2 | 2.802 |
| 6E9U | A_LYS_266 | NZ  | B_GLU_128 | OE1 | 2.942 |
| 6E9U | A_LYS_266 | NZ  | B_GLU_128 | OE2 | 2.747 |
| 6EDU | D_LYS_421 | NZ  | L_GLU_54  | OE2 | 2.920 |
| 6EDU | D_LYS_432 | NZ  | L_GLU_55  | OE1 | 3.655 |
| 6EDU | D_LYS_432 | NZ  | L_GLU_55  | OE2 | 3.439 |
| 6EDU | E_LYS_421 | NZ  | N_GLU_54  | OE2 | 3.004 |
| 6EDU | E_LYS_432 | NZ  | N_GLU_55  | OE1 | 3.579 |
| 6EDU | E_LYS_432 | NZ  | N_GLU_55  | OE2 | 3.398 |
| 6EDU | F_LYS_421 | NZ  | J_GLU_54  | OE2 | 3.064 |
| 6EDU | F_LYS_432 | NZ  | J_GLU_55  | OE1 | 3.805 |
| 6EDU | F_LYS_432 | NZ  | J_GLU_55  | OE2 | 3.577 |
| 6EDU | G_LYS_22  | NZ  | F_GLU_102 | OE1 | 3.040 |
| 6EDU | G_ARG_59  | NH2 | F_ASP_368 | OD1 | 3.059 |
| 6EDU | H_LYS_22  | NZ  | E_GLU_102 | OE1 | 3.174 |
| 6EDU | H_ARG_59  | NH2 | E_ASP_368 | OD1 | 3.166 |
| 6EDU | I_LYS_22  | NZ  | D_GLU_102 | OE1 | 3.053 |
| 6EDU | I_ARG_59  | NH2 | D_ASP_368 | OD1 | 3.238 |
| 6EDU | P_LYS_107 | NZ  | F_GLU_91  | OE1 | 3.324 |
| 6EDU | R_LYS_107 | NZ  | D_GLU_91  | OE1 | 3.704 |
| 6EDU | T_LYS_107 | NZ  | E_GLU_91  | OE1 | 3.475 |
| 6EJG | A_LYS_171 | NZ  | C_ASP_224 | OD2 | 3.396 |
| 6EJG | A_LYS_171 | NZ  | C_ASP_226 | OD2 | 2.901 |
| 6EJG | B_LYS_    | NZ  | D_ASP_    | OD1 | 3.521 |
| 6EJG | B_LYS_    | NZ  | D_ASP_    | OD2 | 2.547 |
| 6EJG | B_LYS_    | NZ  | D_ASP_    | OD2 | 2.932 |
| 6EJM | A_HIS_204 | ND1 | B_GLU_152 | OE2 | 3.786 |
| 6EK2 | H_ARG_370 | NH1 | A_GLU_188 | OE2 | 3.014 |
| 6EK2 | H_ARG_370 | NH2 | A_GLU_188 | OE1 | 3.920 |
| 6EK2 | H_ARG_370 | NH2 | A_GLU_188 | OE2 | 3.261 |
| 6EK2 | I_ARG_370 | NH1 | B_GLU_188 | OE1 | 2.817 |
| 6EK2 | I_ARG_370 | NH1 | B_GLU_188 | OE2 | 3.286 |
| 6EK2 | I_ARG_370 | NH2 | B_GLU_188 | OE1 | 3.837 |
| 6EK2 | I_ARG_370 | NH2 | B_GLU_188 | OE2 | 3.095 |
| 6EUN | A_LYS_87  | NZ  | B_GLU_47  | OE1 | 3.058 |
| 6EUN | A_LYS_107 | NZ  | C_ASP_105 | OD1 | 3.488 |
| 6EUN | A_LYS_167 | NZ  | C_ASP_165 | OD1 | 3.883 |
| 6EUN | B_LYS_87  | NZ  | C_GLU_47  | OE1 | 3.021 |
| 6EUN | B_LYS_107 | NZ  | A_ASP_105 | OD1 | 3.579 |
| 6EUN | C_LYS_87  | NZ  | A_GLU_47  | OE1 | 3.007 |
| 6EUN | C_LYS_107 | NZ  | B_ASP_105 | OD1 | 3.525 |
| 6EUP | A_LYS_87  | NZ  | B_GLU_47  | OE1 | 2.842 |
| 6EUP | A_LYS_87  | NZ  | B_ASP_79  | OD1 | 3.786 |
| 6EUP | A_LYS_107 | NZ  | C_ASP_105 | OD1 | 3.538 |
| 6EUP | B_LYS_87  | NZ  | C_GLU_47  | OE1 | 2.811 |

|      |           |     |           |     |       |
|------|-----------|-----|-----------|-----|-------|
| 6EUP | B.LYS_87  | NZ  | C_ASP_79  | OD1 | 3.799 |
| 6EUP | B.LYS_107 | NZ  | A_ASP_105 | OD1 | 3.723 |
| 6EUP | C.LYS_87  | NZ  | A_GLU_47  | OE1 | 2.814 |
| 6EUP | C.LYS_87  | NZ  | A_ASP_79  | OD1 | 3.752 |
| 6EUP | C.LYS_107 | NZ  | B_ASP_105 | OD1 | 3.560 |
| 6EV1 | A.LYS_213 | NZ  | B_GLU_122 | OE1 | 3.565 |
| 6EV1 | B_ARG_45  | NH1 | A_ASP_105 | OD1 | 3.400 |
| 6EV1 | E.LYS_213 | NZ  | F_GLU_122 | OE2 | 3.696 |
| 6EV1 | F_ARG_45  | NH1 | E_ASP_105 | OD1 | 3.598 |
| 6EV1 | G.LYS_213 | NZ  | H_GLU_122 | OE2 | 3.127 |
| 6EV1 | I.LYS_213 | NZ  | J_GLU_122 | OE1 | 2.884 |
| 6EV1 | I.LYS_213 | NZ  | J_GLU_122 | OE2 | 3.812 |
| 6EV1 | J_ARG_45  | NH2 | I_ASP_105 | OD1 | 3.213 |
| 6EV1 | J_ARG_45  | NH2 | I_ASP_105 | OD2 | 3.457 |
| 6EV1 | K_HIS_168 | NE2 | L_ASP_166 | OD2 | 3.740 |
| 6EV1 | K.LYS_213 | NZ  | L_GLU_122 | OE1 | 3.450 |
| 6EV1 | L_ARG_45  | NH2 | K_ASP_105 | OD1 | 3.857 |
| 6EV2 | A.LYS_213 | NZ  | B_GLU_122 | OE1 | 3.442 |
| 6EV2 | B_ARG_45  | NH1 | A_ASP_105 | OD1 | 3.088 |
| 6EV2 | B.LYS_168 | NZ  | F_GLU_78  | OE2 | 2.948 |
| 6EV2 | D.LYS_44  | NZ  | C_ASP_105 | OD2 | 3.822 |
| 6EV2 | D_ARG_45  | NH1 | C_ASP_105 | OD1 | 3.142 |
| 6EV2 | D.LYS_168 | NZ  | H_GLU_78  | OE2 | 3.198 |
| 6EV2 | E.LYS_213 | NZ  | F_GLU_122 | OE1 | 3.493 |
| 6EV2 | E.LYS_218 | NZ  | F_ASP_121 | OD2 | 3.835 |
| 6EV2 | F_ARG_45  | NH1 | E_ASP_105 | OD1 | 2.818 |
| 6EV2 | F.LYS_168 | NZ  | B_GLU_78  | OE1 | 3.747 |
| 6EV2 | G.LYS_210 | NZ  | A_ASP_73  | OD1 | 3.883 |
| 6EV2 | G.LYS_210 | NZ  | A_ASP_73  | OD2 | 2.404 |
| 6EV2 | G.LYS_213 | NZ  | H_GLU_122 | OE1 | 3.330 |
| 6EV2 | G.LYS_213 | NZ  | H_GLU_122 | OE2 | 3.779 |
| 6EV2 | H_ARG_45  | NH1 | G_ASP_105 | OD1 | 3.108 |
| 6EV2 | H.LYS_168 | NZ  | D_GLU_78  | OE2 | 3.686 |
| 6EWB | D.HIS_417 | NE2 | L_GLU_80  | OE2 | 3.932 |
| 6EWB | E_ARG_98  | NH1 | B_ASP_341 | OD1 | 3.977 |
| 6EWB | E_ARG_98  | NH2 | B_ASP_341 | OD1 | 3.813 |
| 6EWB | E_ARG_101 | NH1 | F_ASP_49  | OD1 | 2.895 |
| 6EWB | E_ARG_101 | NH1 | F_ASP_49  | OD2 | 3.620 |
| 6EWB | F_ARG_    | NH1 | E_ASP_    | OD1 | 3.803 |
| 6EWB | F_ARG_    | NH1 | E_ASP_    | OD2 | 3.536 |
| 6EWB | F.LYS_52  | NZ  | A_ASP_448 | OD1 | 3.722 |
| 6EWB | F.LYS_52  | NZ  | A_ASP_448 | OD2 | 2.304 |
| 6EWB | G_ARG_98  | NH1 | D_ASP_341 | OD1 | 3.850 |
| 6EWB | G_ARG_98  | NH2 | D_ASP_341 | OD1 | 3.731 |
| 6EWB | G_ARG_101 | NH1 | I_ASP_49  | OD1 | 2.830 |
| 6EWB | G_ARG_101 | NH1 | I_ASP_49  | OD2 | 3.797 |
| 6EWB | H_ARG_98  | NH1 | A_ASP_341 | OD2 | 3.948 |
| 6EWB | H_ARG_98  | NH2 | A_ASP_341 | OD2 | 3.896 |
| 6EWB | H_ARG_101 | NH1 | L_ASP_49  | OD1 | 2.509 |
| 6EWB | H_ARG_101 | NH1 | L_ASP_49  | OD2 | 3.441 |
| 6EWB | I_ARG_45  | NH1 | G_ASP_104 | OD1 | 3.731 |
| 6EWB | I_ARG_45  | NH1 | G_ASP_104 | OD2 | 3.636 |
| 6EWB | I.LYS_52  | NZ  | C_ASP_448 | OD1 | 3.564 |
| 6EWB | I.LYS_52  | NZ  | C_ASP_448 | OD2 | 2.694 |
| 6EWB | J_ARG_98  | NH1 | C_ASP_341 | OD2 | 3.957 |
| 6EWB | J_ARG_98  | NH2 | C_ASP_341 | OD2 | 3.467 |
| 6EWB | J_ARG_101 | NH1 | K_ASP_49  | OD1 | 2.726 |
| 6EWB | J_ARG_101 | NH1 | K_ASP_49  | OD2 | 3.581 |

|      |           |     |           |     |       |
|------|-----------|-----|-----------|-----|-------|
| 6EWB | J_LYS_211 | NZ  | K_GLU_122 | OE2 | 2.945 |
| 6EWB | K_ARG_45  | NH1 | J_ASP_104 | OD2 | 3.826 |
| 6EWB | K_LYS_52  | NZ  | D_ASP_448 | OD1 | 3.845 |
| 6EWB | K_LYS_52  | NZ  | D_ASP_448 | OD2 | 2.608 |
| 6EWB | L_ARG_45  | NH1 | H_ASP_104 | OD1 | 3.721 |
| 6EWB | L_ARG_45  | NH1 | H_ASP_104 | OD2 | 3.560 |
| 6EWB | L_LYS_52  | NZ  | B_ASP_448 | OD1 | 3.690 |
| 6EWB | L_LYS_52  | NZ  | B_ASP_448 | OD2 | 2.585 |
| 6EWB | L_ARG_60  | NH1 | D_GLU_316 | OE1 | 3.251 |
| 6EWB | L_ARG_60  | NH1 | D_GLU_316 | OE2 | 3.266 |
| 6FAB | H_LYS_216 | NZ  | L_GLU_123 | OE1 | 2.624 |
| 6FAB | H_LYS_216 | NZ  | L_GLU_123 | OE2 | 2.770 |
| 6FAX | H_ARG_104 | NH2 | R_GLU_21  | OE1 | 3.986 |
| 6FAX | H_HIS_173 | NE2 | L_ASP_167 | OD1 | 3.928 |
| 6FAX | H_LYS_218 | NZ  | L_GLU_123 | OE1 | 3.125 |
| 6FAX | H_LYS_218 | NZ  | L_GLU_123 | OE2 | 3.415 |
| 6FN1 | C_LYS_217 | NZ  | B_GLU_129 | OE1 | 3.462 |
| 6FN1 | C_LYS_217 | NZ  | B_GLU_129 | OE2 | 2.375 |
| 6FN4 | B_LYS_55  | NZ  | A_ASP_743 | OD1 | 2.728 |
| 6FN4 | B_LYS_55  | NZ  | A_ASP_743 | OD2 | 3.540 |
| 6FN4 | C_LYS_217 | NZ  | B_GLU_129 | OE2 | 3.828 |
| 6GK7 | H_LYS_43  | NZ  | L_ASP_9   | OD1 | 3.203 |
| 6GK7 | H_LYS_218 | NZ  | L_GLU_129 | OE1 | 3.512 |
| 6GK7 | H_LYS_218 | NZ  | L_GLU_129 | OE2 | 3.016 |
| 6GK7 | H_LYS_223 | NZ  | L_ASP_128 | OD2 | 3.231 |
| 6GK7 | A_LYS_317 | NZ  | H_ASP_55  | OD2 | 2.761 |
| 6GK7 | A_LYS_317 | NZ  | H_ASP_57  | OD2 | 2.983 |
| 6GK8 | H_ARG_59  | NH2 | L_ASP_65  | OD1 | 3.295 |
| 6GK8 | H_ARG_101 | NH1 | L_GLU_62  | OE2 | 2.742 |
| 6GK8 | H_ARG_101 | NH2 | L_GLU_62  | OE2 | 3.142 |
| 6GK8 | H_LYS_104 | NZ  | L_GLU_62  | OE1 | 2.762 |
| 6GK8 | H_LYS_104 | NZ  | L_GLU_62  | OE2 | 3.928 |
| 6GK8 | H_LYS_222 | NZ  | L_ASP_128 | OD2 | 2.761 |
| 6GK8 | L_ARG_32  | NH1 | L_GLU_57  | OE2 | 3.709 |
| 6GK8 | L_LYS_67  | NZ  | H_ASP_55  | OD1 | 3.586 |
| 6GK8 | L_LYS_67  | NZ  | H_ASP_55  | OD2 | 3.183 |
| 6GK8 | L_LYS_67  | NZ  | H_ASP_57  | OD2 | 3.085 |
| 6H2Y | D_LYS_79  | NZ  | L_ASP_52  | OD1 | 3.126 |
| 6H2Y | D_LYS_120 | NZ  | L_ASP_95  | OD2 | 2.910 |
| 6H2Y | D_LYS_191 | NZ  | L_ASP_50  | OD2 | 2.715 |
| 6H2Y | H_ARG_56  | NH2 | D_GLU_58  | OE1 | 3.564 |
| 6H2Y | H_ARG_56  | NH2 | D_GLU_58  | OE2 | 3.905 |
| 6H2Y | H_LYS_215 | NZ  | L_GLU_125 | OE1 | 3.261 |
| 6H2Y | H_LYS_215 | NZ  | L_GLU_125 | OE2 | 2.865 |
| 6H2Y | L_ARG_92  | NH1 | D_ASP_166 | OD2 | 3.217 |
| 6H2Y | L_ARG_92  | NH2 | D_GLU_119 | OE1 | 3.274 |
| 6H2Y | L_ARG_92  | NH2 | D_GLU_119 | OE2 | 3.244 |
| 6H2Y | L_ARG_92  | NH2 | D_ASP_166 | OD1 | 3.891 |
| 6H2Y | L_ARG_92  | NH2 | D_ASP_166 | OD2 | 2.328 |
| 6I3Z | A_LYS_201 | NZ  | L_ASP_92  | OD1 | 3.556 |
| 6I3Z | A_LYS_290 | NZ  | H_ASP_33  | OD1 | 3.699 |
| 6I3Z | L_ARG_53  | NH1 | A_GLU_204 | OE1 | 2.383 |
| 6I3Z | L_ARG_53  | NH1 | A_GLU_204 | OE2 | 3.516 |
| 6IAP | D_ARG_96  | NH2 | A_GLU_80  | OE1 | 3.466 |
| 6IAP | E_HIS_35  | NE2 | A_GLU_80  | OE1 | 3.445 |
| 6IAP | H_ARG_99  | NH2 | A_ASP_98  | OD1 | 2.689 |
| 6IAP | L_ARG_94  | NH1 | H_GLU_50  | OE2 | 2.973 |
| 6IAP | L_ARG_94  | NH2 | A_ASP_123 | OD2 | 3.888 |

|      |           |     |           |     |       |
|------|-----------|-----|-----------|-----|-------|
| 6JMQ | C.HIS_169 | NE2 | D.ASP_173 | OD2 | 3.860 |
| 6JMQ | C.LYS_213 | NZ  | D.GLU_129 | OE1 | 3.825 |
| 6JMR | C.HIS_169 | NE2 | D.ASP_173 | OD1 | 3.922 |
| 6K7O | A.LYS_55  | NZ  | H.ASP_106 | OD1 | 3.027 |
| 6K7O | A.ARG_78  | NH1 | L.ASP_94  | OD1 | 3.792 |
| 6K7O | A.ARG_78  | NH2 | L.ASP_94  | OD1 | 2.709 |
| 6K7O | B.LYS_218 | NZ  | C.GLU_127 | OE1 | 3.816 |
| 6K7O | B.LYS_218 | NZ  | C.GLU_127 | OE2 | 2.813 |
| 6K7O | B.LYS_223 | NZ  | C.ASP_126 | OD1 | 2.273 |
| 6K7O | B.LYS_223 | NZ  | C.ASP_126 | OD2 | 2.907 |
| 6K7O | D.LYS_215 | NZ  | G.ASP_189 | OD2 | 2.832 |
| 6K7O | D.LYS_218 | NZ  | E.GLU_127 | OE1 | 2.290 |
| 6K7O | D.LYS_218 | NZ  | E.GLU_127 | OE2 | 3.074 |
| 6K7O | D.LYS_223 | NZ  | E.ASP_126 | OD1 | 3.765 |
| 6K7O | D.LYS_223 | NZ  | E.ASP_126 | OD2 | 3.552 |
| 6K7O | F.HIS_173 | NE2 | G.ASP_171 | OD2 | 3.941 |
| 6K7O | G.ARG_51  | NH2 | F.ASP_106 | OD2 | 3.980 |
| 6K7O | H.HIS_173 | NE2 | L.ASP_171 | OD2 | 3.862 |
| 6K7O | H.LYS_218 | NZ  | L.GLU_127 | OE1 | 3.981 |
| 6K7O | H.LYS_223 | NZ  | L.ASP_126 | OD1 | 3.964 |
| 6K7O | P.LYS_55  | NZ  | B.ASP_106 | OD1 | 3.340 |
| 6K7O | P.ARG_78  | NH1 | C.ASP_94  | OD1 | 2.583 |
| 6K7O | P.ARG_78  | NH2 | C.ASP_94  | OD1 | 2.609 |
| 6K7O | R.LYS_55  | NZ  | F.ASP_106 | OD1 | 2.834 |
| 6K7O | Q.LYS_55  | NZ  | D.ASP_106 | OD1 | 3.172 |
| 6K7O | Q.ARG_59  | NH1 | H.GLU_221 | OE1 | 3.018 |
| 6K7O | Q.ARG_59  | NH1 | H.GLU_221 | OE2 | 3.413 |
| 6K7O | Q.ARG_59  | NH2 | H.GLU_221 | OE1 | 3.299 |
| 6K7O | Q.ARG_59  | NH2 | H.GLU_221 | OE2 | 2.855 |
| 6K7O | Q.ARG_78  | NH1 | E.ASP_94  | OD1 | 3.546 |
| 6K7O | Q.ARG_78  | NH2 | E.ASP_94  | OD1 | 2.499 |
| 6KN9 | A.ARG_281 | NH1 | D.ASP_111 | OD1 | 2.228 |
| 6KN9 | A.ARG_281 | NH1 | D.ASP_111 | OD2 | 3.976 |
| 6KN9 | B.ARG_281 | NH2 | E.ASP_111 | OD1 | 2.487 |
| 6KN9 | B.ARG_281 | NH2 | E.ASP_111 | OD2 | 3.660 |
| 6KN9 | C.ARG_281 | NH2 | F.ASP_111 | OD2 | 3.907 |
| 6MHR | E.ARG_91  | NH1 | D.GLU_50  | OE1 | 3.108 |
| 6MHR | E.ARG_91  | NH1 | D.ASP_98  | OD2 | 3.892 |
| 6MHR | E.ARG_91  | NH2 | D.GLU_50  | OE1 | 3.238 |
| 6MHR | E.ARG_91  | NH2 | D.GLU_50  | OE2 | 3.082 |
| 6MHR | A.LYS_217 | NZ  | B.GLU_125 | OE2 | 2.775 |
| 6MHR | B.ARG_91  | NH1 | A.GLU_50  | OE1 | 3.086 |
| 6MHR | B.ARG_91  | NH1 | A.GLU_50  | OE2 | 3.775 |
| 6MHR | B.ARG_91  | NH1 | A.ASP_98  | OD2 | 3.351 |
| 6MHR | B.ARG_91  | NH2 | A.GLU_50  | OE1 | 3.608 |
| 6MHR | B.ARG_91  | NH2 | A.GLU_50  | OE2 | 2.934 |
| 6MI2 | F.LYS_114 | NZ  | E.ASP_50  | OD1 | 2.776 |
| 6MI2 | F.LYS_114 | NZ  | E.ASP_50  | OD2 | 3.977 |
| 6MI2 | F.ARG_134 | NH2 | D.ASP_55  | OD2 | 3.507 |
| 6MI2 | C.LYS_114 | NZ  | B.ASP_50  | OD1 | 3.683 |
| 6MI2 | C.LYS_114 | NZ  | B.ASP_50  | OD2 | 2.434 |
| 6MN7 | B.ARG_542 | NH1 | F.GLU_647 | OE2 | 3.229 |
| 6MN7 | B.LYS_574 | NZ  | A.ASP_107 | OD1 | 3.285 |
| 6MN7 | B.LYS_574 | NZ  | A.ASP_107 | OD2 | 3.696 |
| 6MN7 | B.ARG_579 | NH2 | F.GLU_584 | OE1 | 2.844 |
| 6MN7 | B.ARG_579 | NH2 | F.GLU_584 | OE2 | 3.533 |
| 6MN7 | E.ARG_542 | NH1 | B.GLU_647 | OE2 | 3.076 |
| 6MN7 | E.LYS_574 | NZ  | C.ASP_107 | OD1 | 3.286 |

|      |           |     |            |     |       |
|------|-----------|-----|------------|-----|-------|
| 6MN7 | E_LYS_574 | NZ  | C_ASP_107  | OD2 | 3.697 |
| 6MN7 | E_ARG_579 | NH2 | B_GLU_584  | OE1 | 2.796 |
| 6MN7 | E_ARG_579 | NH2 | B_GLU_584  | OE2 | 3.568 |
| 6MN7 | F_ARG_542 | NH1 | E_GLU_647  | OE2 | 3.126 |
| 6MN7 | F_LYS_574 | NZ  | D_ASP_107  | OD1 | 3.285 |
| 6MN7 | F_LYS_574 | NZ  | D_ASP_107  | OD2 | 3.696 |
| 6MN7 | F_ARG_579 | NH2 | E_GLU_584  | OE1 | 2.859 |
| 6MN7 | F_ARG_579 | NH2 | E_GLU_584  | OE2 | 3.579 |
| 6MPG | U_ARG_542 | NH2 | D_GLU_647  | OE1 | 3.141 |
| 6MPG | U_ARG_542 | NH2 | D_GLU_647  | OE2 | 2.524 |
| 6MPG | U_ARG_579 | NH2 | D_GLU_584  | OE1 | 2.488 |
| 6MPG | V_LYS_229 | NZ  | B_ASP_1    | OD1 | 2.776 |
| 6MPG | W_HIS_105 | NE2 | B_GLU_61   | OE2 | 3.652 |
| 6MPG | n_ARG_94  | NH1 | V_ASP_321A | OD1 | 3.878 |
| 6MPG | 2_LYS_229 | NZ  | 4_ASP_1    | OD1 | 2.776 |
| 6MPG | 3_HIS_105 | NE2 | 4_GLU_61   | OE2 | 3.651 |
| 6MPG | 6_ARG_94  | NH1 | 2_ASP_321A | OD1 | 3.878 |
| 6MPG | A_ARG_542 | NH2 | U_GLU_647  | OE1 | 3.132 |
| 6MPG | A_ARG_542 | NH2 | U_GLU_647  | OE2 | 2.525 |
| 6MPG | A_ARG_579 | NH2 | U_GLU_584  | OE1 | 2.474 |
| 6MPG | C_LYS_229 | NZ  | Y_ASP_1    | OD1 | 2.776 |
| 6MPG | D_ARG_542 | NH2 | A_GLU_647  | OE1 | 3.137 |
| 6MPG | D_ARG_542 | NH2 | A_GLU_647  | OE2 | 2.533 |
| 6MPG | D_ARG_579 | NH2 | A_GLU_584  | OE1 | 2.479 |
| 6MPG | N_ARG_94  | NH1 | C_ASP_321A | OD1 | 3.878 |
| 6MPG | X_HIS_105 | NE2 | Y_GLU_61   | OE2 | 3.651 |
| 6MPH | 1_LYS_31A | NZ  | A_GLU_87   | OE1 | 2.457 |
| 6MPH | 1_LYS_31A | NZ  | A_GLU_87   | OE2 | 3.919 |
| 6MPH | 2_ARG_96  | NH1 | 1_GLU_95   | OE1 | 3.340 |
| 6MPH | 2_ARG_96  | NH1 | 1_GLU_95   | OE2 | 2.522 |
| 6MPH | 3_LYS_31A | NZ  | B_GLU_87   | OE1 | 2.448 |
| 6MPH | 3_LYS_31A | NZ  | B_GLU_87   | OE2 | 3.973 |
| 6MPH | 4_ARG_96  | NH1 | 3_GLU_95   | OE1 | 3.339 |
| 6MPH | 4_ARG_96  | NH1 | 3_GLU_95   | OE2 | 2.507 |
| 6MPH | 6_ARG_542 | NH1 | E_GLU_647  | OE2 | 3.863 |
| 6MPH | 6_ARG_542 | NH2 | E_GLU_647  | OE1 | 3.449 |
| 6MPH | 6_ARG_542 | NH2 | E_GLU_647  | OE2 | 2.484 |
| 6MPH | 6_ARG_579 | NH2 | E_GLU_584  | OE1 | 2.833 |
| 6MPH | A_LYS_282 | NZ  | f_ASP_114  | OD1 | 3.470 |
| 6MPH | A_LYS_282 | NZ  | f_ASP_114  | OD2 | 3.288 |
| 6MPH | A_ARG_327 | NH2 | X_GLU_100I | OE1 | 3.876 |
| 6MPH | B_LYS_282 | NZ  | g_ASP_114  | OD1 | 3.432 |
| 6MPH | B_LYS_282 | NZ  | g_ASP_114  | OD2 | 3.289 |
| 6MPH | B_ARG_327 | NH2 | Y_GLU_100I | OE1 | 3.899 |
| 6MPH | C_LYS_282 | NZ  | Q_ASP_114  | OD1 | 3.383 |
| 6MPH | C_LYS_282 | NZ  | Q_ASP_114  | OD2 | 3.272 |
| 6MPH | C_ARG_327 | NH2 | M_GLU_100I | OE1 | 3.872 |
| 6MPH | D_ARG_542 | NH1 | 6_GLU_647  | OE2 | 3.853 |
| 6MPH | D_ARG_542 | NH2 | 6_GLU_647  | OE1 | 3.460 |
| 6MPH | D_ARG_542 | NH2 | 6_GLU_647  | OE2 | 2.476 |
| 6MPH | D_ARG_579 | NH2 | 6_GLU_584  | OE1 | 2.760 |
| 6MPH | E_ARG_542 | NH1 | D_GLU_647  | OE2 | 3.888 |
| 6MPH | E_ARG_542 | NH2 | D_GLU_647  | OE1 | 3.465 |
| 6MPH | E_ARG_542 | NH2 | D_GLU_647  | OE2 | 2.463 |
| 6MPH | E_ARG_579 | NH2 | D_GLU_584  | OE1 | 2.789 |
| 6MPH | H_LYS_31A | NZ  | C_GLU_87   | OE1 | 2.458 |
| 6MPH | H_LYS_31A | NZ  | C_GLU_87   | OE2 | 3.969 |
| 6MPH | L_ARG_96  | NH1 | H_GLU_95   | OE1 | 3.309 |

|      |            |     |            |     |       |
|------|------------|-----|------------|-----|-------|
| 6MPH | L_ARG_96   | NH1 | H_GLU_95   | OE2 | 2.530 |
| 6MPH | N_ARG_94   | NH1 | C_ASP_321A | OD1 | 3.859 |
| 6MPH | Q_ARG_72   | NH2 | C_ASP_368  | OD2 | 3.534 |
| 6MPH | Z_ARG_94   | NH1 | A_ASP_321A | OD1 | 3.890 |
| 6MPH | a_ARG_94   | NH1 | B_ASP_321A | OD1 | 3.861 |
| 6MPH | f_ARG_72   | NH2 | A_ASP_368  | OD2 | 3.577 |
| 6MPH | g_ARG_72   | NH2 | B_ASP_368  | OD2 | 3.570 |
| 6MQC | A_ARG_     | NH1 | B_ASP_     | OD1 | 2.994 |
| 6MQC | A_ARG_     | NH2 | B_ASP_     | OD1 | 2.820 |
| 6MQC | A_ARG_     | NH1 | B_ASP_     | OD1 | 3.399 |
| 6MQC | A_ARG_     | NH1 | B_ASP_     | OD2 | 3.078 |
| 6MQC | A_ARG_     | NH1 | B_ASP_     | OD1 | 2.829 |
| 6MQC | A_ARG_     | NH2 | B_ASP_     | OD1 | 2.822 |
| 6MQC | A_ARG_     | NH2 | B_ASP_     | OD2 | 3.673 |
| 6MQC | H_ARG_     | NH1 | L_ASP_     | OD1 | 2.906 |
| 6MQC | H_ARG_     | NH2 | L_ASP_     | OD1 | 2.999 |
| 6MQC | H_ARG_     | NH1 | L_ASP_     | OD1 | 2.856 |
| 6MQC | H_ARG_     | NH1 | L_ASP_     | OD2 | 3.748 |
| 6MQC | H_ARG_     | NH2 | L_ASP_     | OD1 | 3.439 |
| 6MQC | H_ARG_     | NH2 | L_ASP_     | OD2 | 3.140 |
| 6MQC | H_ARG_     | NH2 | L_ASP_     | OD1 | 2.780 |
| 6MQC | H_ARG_     | NH2 | L_ASP_     | OD2 | 3.923 |
| 6MQE | A_ARG_95   | NH2 | B_ASP_91   | OD2 | 3.864 |
| 6MQE | A_ARG_100H | NH2 | B_ASP_91   | OD2 | 3.610 |
| 6MQE | H_ARG_95   | NH1 | L_ASP_91   | OD1 | 3.360 |
| 6MQE | H_ARG_95   | NH2 | L_ASP_91   | OD1 | 2.956 |
| 6MQE | H_ARG_100H | NH1 | L_ASP_91   | OD1 | 2.604 |
| 6MQE | H_ARG_100H | NH1 | L_ASP_91   | OD2 | 3.888 |
| 6MQE | L_LYS_155  | NZ  | A_GLU_56   | OE1 | 2.786 |
| 6MQE | L_HIS_189  | NE2 | A_GLU_56   | OE1 | 3.428 |
| 6MQE | L_HIS_189  | NE2 | A_GLU_56   | OE2 | 2.569 |
| 6MQM | B_ARG_96   | NH1 | A_GLU_95   | OE1 | 3.968 |
| 6MQM | B_ARG_96   | NH1 | A_GLU_95   | OE2 | 2.460 |
| 6MQM | E_ARG_96   | NH1 | D_GLU_95   | OE2 | 2.376 |
| 6MQM | H_ARG_96   | NH1 | G_GLU_95   | OE2 | 2.480 |
| 6MQM | K_ARG_96   | NH1 | J_GLU_95   | OE1 | 3.782 |
| 6MQM | K_ARG_96   | NH1 | J_GLU_95   | OE2 | 2.262 |
| 6MQR | H_ARG_96   | NH1 | L_GLU_55   | OE1 | 2.553 |
| 6MQR | L_ARG_46   | NH1 | H_ASP_101  | OD2 | 2.970 |
| 6MQR | L_ARG_46   | NH2 | H_GLU_95   | OE2 | 3.587 |
| 6MQR | L_ARG_46   | NH2 | H_ASP_101  | OD2 | 3.723 |
| 6MQS | A_LYS_44   | NZ  | B_ASP_86   | OD1 | 3.511 |
| 6MQS | A_ARG_138  | NH1 | B_GLU_214  | OE1 | 3.046 |
| 6MQS | A_ARG_138  | NH1 | B_GLU_214  | OE2 | 2.728 |
| 6MQS | A_LYS_218  | NZ  | B_GLU_127  | OE1 | 2.743 |
| 6MQS | A_LYS_218  | NZ  | B_GLU_127  | OE2 | 3.002 |
| 6MQS | C_LYS_44   | NZ  | D_ASP_86   | OD1 | 2.946 |
| 6MQS | C_ARG_138  | NH2 | D_GLU_214  | OE1 | 2.736 |
| 6MQS | C_ARG_138  | NH2 | D_GLU_214  | OE2 | 3.220 |
| 6MQS | C_LYS_152  | NZ  | D_GLU_128  | OE1 | 3.230 |
| 6MQS | C_LYS_218  | NZ  | D_GLU_127  | OE1 | 2.641 |
| 6MQS | C_LYS_218  | NZ  | D_GLU_127  | OE2 | 3.160 |
| 6N16 | A_ARG_105  | NH1 | C_GLU_64   | OE1 | 3.566 |
| 6N16 | A_ARG_105  | NH2 | C_GLU_64   | OE1 | 3.522 |
| 6N16 | A_ARG_105  | NH2 | C_GLU_64   | OE2 | 3.717 |
| 6N16 | A_HIS_164  | NE2 | B_ASP_167  | OD2 | 3.486 |
| 6N16 | H_HIS_164  | NE2 | L_ASP_167  | OD1 | 3.075 |
| 6N16 | K_ARG_105  | NH2 | H_GLU_64   | OE1 | 2.463 |

|      |            |     |            |     |       |
|------|------------|-----|------------|-----|-------|
| 6N16 | K_ARG_105  | NH2 | H_GLU_64   | OE2 | 3.174 |
| 6N16 | C_LYS_209  | NZ  | D_ASP_123  | OD2 | 3.251 |
| 6N1V | 3_LYS_44   | NZ  | 4_ASP_86   | OD1 | 3.675 |
| 6N1V | 3_LYS_44   | NZ  | 4_ASP_86   | OD2 | 2.472 |
| 6N1V | 3_LYS_44   | NZ  | 4_GLU_106  | OE1 | 3.723 |
| 6N1V | 3_ARG_138  | NH1 | 4_GLU_214  | OE1 | 2.573 |
| 6N1V | 3_ARG_138  | NH1 | 4_GLU_214  | OE2 | 3.070 |
| 6N1V | 3_ARG_138  | NH2 | 4_GLU_214  | OE2 | 3.291 |
| 6N1V | 3_LYS_218  | NZ  | 4_GLU_127  | OE1 | 3.611 |
| 6N1V | B_LYS_282  | NZ  | g_ASP_114  | OD2 | 3.730 |
| 6N1V | B_ARG_504  | NH2 | D_GLU_657  | OE2 | 3.905 |
| 6N1V | F_ARG_542  | NH2 | D_GLU_647  | OE1 | 3.326 |
| 6N1V | F_ARG_542  | NH2 | D_GLU_647  | OE2 | 2.831 |
| 6N1V | F_ARG_579  | NH2 | D_GLU_584  | OE1 | 3.581 |
| 6N1V | g_ARG_72   | NH1 | B_ASP_368  | OD2 | 3.927 |
| 6N1V | g_ARG_72   | NH2 | B_ASP_368  | OD2 | 3.974 |
| 6N1V | 1_LYS_44   | NZ  | 2_ASP_86   | OD1 | 3.676 |
| 6N1V | 1_LYS_44   | NZ  | 2_ASP_86   | OD2 | 2.473 |
| 6N1V | 1_LYS_44   | NZ  | 2_GLU_106  | OE1 | 3.723 |
| 6N1V | 1_ARG_138  | NH1 | 2_GLU_214  | OE1 | 2.573 |
| 6N1V | 1_ARG_138  | NH1 | 2_GLU_214  | OE2 | 3.069 |
| 6N1V | 1_ARG_138  | NH2 | 2_GLU_214  | OE2 | 3.291 |
| 6N1V | 1_LYS_218  | NZ  | 2_GLU_127  | OE1 | 3.611 |
| 6N1V | A_LYS_282  | NZ  | f_ASP_114  | OD2 | 3.729 |
| 6N1V | A_ARG_504  | NH2 | F_GLU_657  | OE2 | 3.909 |
| 6N1V | E_ARG_542  | NH2 | F_GLU_647  | OE1 | 3.328 |
| 6N1V | E_ARG_542  | NH2 | F_GLU_647  | OE2 | 2.831 |
| 6N1V | E_ARG_579  | NH2 | F_GLU_584  | OE1 | 3.583 |
| 6N1V | f_ARG_72   | NH1 | A_ASP_368  | OD2 | 3.927 |
| 6N1V | f_ARG_72   | NH2 | A_ASP_368  | OD2 | 3.974 |
| 6N1V | C_LYS_282  | NZ  | Q_ASP_114  | OD2 | 3.730 |
| 6N1V | C_ARG_504  | NH2 | E_GLU_657  | OE2 | 3.907 |
| 6N1V | D_ARG_542  | NH2 | E_GLU_647  | OE1 | 3.330 |
| 6N1V | D_ARG_542  | NH2 | E_GLU_647  | OE2 | 2.832 |
| 6N1V | D_ARG_579  | NH2 | E_GLU_584  | OE1 | 3.585 |
| 6N1V | H_LYS_44   | NZ  | L_ASP_86   | OD1 | 3.676 |
| 6N1V | H_LYS_44   | NZ  | L_ASP_86   | OD2 | 2.472 |
| 6N1V | H_LYS_44   | NZ  | L_GLU_106  | OE1 | 3.722 |
| 6N1V | H_ARG_138  | NH1 | L_GLU_214  | OE1 | 2.573 |
| 6N1V | H_ARG_138  | NH1 | L_GLU_214  | OE2 | 3.069 |
| 6N1V | H_ARG_138  | NH2 | L_GLU_214  | OE2 | 3.291 |
| 6N1V | H_LYS_218  | NZ  | L_GLU_127  | OE1 | 3.611 |
| 6N1V | Q_ARG_72   | NH1 | C_ASP_368  | OD2 | 3.927 |
| 6N1V | Q_ARG_72   | NH2 | C_ASP_368  | OD2 | 3.975 |
| 6N1W | 2_ARG_327  | NH2 | m_GLU_100I | OE1 | 3.996 |
| 6N1W | 2_ARG_504  | NH2 | d_GLU_657  | OE2 | 3.118 |
| 6N1W | 3_ARG_100H | NH2 | 4_ASP_91   | OD2 | 3.241 |
| 6N1W | A_ARG_542  | NH1 | d_GLU_647  | OE1 | 3.516 |
| 6N1W | A_ARG_542  | NH1 | d_GLU_647  | OE2 | 3.474 |
| 6N1W | A_ARG_542  | NH2 | d_GLU_647  | OE1 | 2.848 |
| 6N1W | A_ARG_579  | NH2 | d_GLU_584  | OE2 | 3.464 |
| 6N1W | A_LYS_601  | NZ  | d_GLU_654  | OE1 | 3.802 |
| 6N1W | A_LYS_601  | NZ  | d_GLU_654  | OE2 | 3.060 |
| 6N1W | C_ARG_504  | NH2 | A_GLU_657  | OE2 | 3.221 |
| 6N1W | D_ARG_542  | NH1 | A_GLU_647  | OE1 | 3.273 |
| 6N1W | D_ARG_542  | NH1 | A_GLU_647  | OE2 | 3.289 |
| 6N1W | D_ARG_542  | NH2 | A_GLU_647  | OE1 | 2.942 |
| 6N1W | D_ARG_579  | NH1 | A_GLU_584  | OE1 | 3.854 |



|      |            |     |           |     |       |
|------|------------|-----|-----------|-----|-------|
| 6N1W | D_ARG_579  | NH2 | A_GLU_584 | OE2 | 3.567 |
| 6N1W | D_LYS_601  | NZ  | A_GLU_654 | OE1 | 3.837 |
| 6N1W | D_LYS_601  | NZ  | A_GLU_654 | OE2 | 3.044 |
| 6N1W | H_ARG_100H | NH2 | L_ASP_91  | OD2 | 3.150 |
| 6N1W | c_ARG_504  | NH2 | D_GLU_657 | OE2 | 3.061 |
| 6N1W | d_ARG_542  | NH1 | D_GLU_647 | OE1 | 3.482 |
| 6N1W | d_ARG_542  | NH1 | D_GLU_647 | OE2 | 3.280 |
| 6N1W | d_ARG_542  | NH2 | D_GLU_647 | OE1 | 2.854 |
| 6N1W | d_ARG_579  | NH1 | D_GLU_584 | OE1 | 3.913 |
| 6N1W | d_ARG_579  | NH2 | D_GLU_584 | OE2 | 3.653 |
| 6N1W | d_LYS_601  | NZ  | D_GLU_654 | OE1 | 3.862 |
| 6N1W | d_LYS_601  | NZ  | D_GLU_654 | OE2 | 3.082 |
| 6N1W | h_ARG_100H | NH2 | L_ASP_91  | OD2 | 3.226 |
| 6N5B | H_LYS_149  | NZ  | L_GLU_128 | OE2 | 3.031 |
| 6N5B | H_LYS_214  | NZ  | L_GLU_127 | OE2 | 3.139 |
| 6N5D | C_LYS_149  | NZ  | D_GLU_127 | OE2 | 2.211 |
| 6N5D | C_LYS_215  | NZ  | D_GLU_126 | OE1 | 3.361 |
| 6N5D | C_LYS_215  | NZ  | D_GLU_126 | OE2 | 3.815 |
| 6N5D | E_LYS_149  | NZ  | F_GLU_127 | OE2 | 3.376 |
| 6N5D | L_LYS_149  | NZ  | N_GLU_127 | OE2 | 2.091 |
| 6N5D | L_HIS_170  | NE2 | N_ASP_141 | OD2 | 3.244 |
| 6N5E | H_LYS_217  | NZ  | L_GLU_126 | OE2 | 2.748 |
| 6N5E | E_LYS_217  | NZ  | D_GLU_126 | OE1 | 2.995 |
| 6N5E | E_LYS_217  | NZ  | D_GLU_126 | OE2 | 2.272 |
| 6N5E | E_LYS_222  | NZ  | D_GLU_126 | OE1 | 3.688 |
| 6N5E | G_LYS_217  | NZ  | F_GLU_126 | OE2 | 3.351 |
| 6N6B | A_LYS_296  | NZ  | L_ASP_28  | OD1 | 3.122 |
| 6N6B | A_LYS_296  | NZ  | L_ASP_28  | OD2 | 3.000 |
| 6N6B | A_LYS_296  | NZ  | L_GLU_68  | OE2 | 2.842 |
| 6N6B | A_LYS_431  | NZ  | K_ASP_101 | OD1 | 3.959 |
| 6N6B | A_LYS_431  | NZ  | K_ASP_101 | OD2 | 3.832 |
| 6N6B | K_HIS_169  | NE2 | L_ASP_167 | OD1 | 3.738 |
| 6N6B | K_LYS_213  | NZ  | L_GLU_123 | OE1 | 2.814 |
| 6N6B | K_LYS_213  | NZ  | L_GLU_123 | OE2 | 3.044 |
| 6NB5 | H_LYS_223  | NZ  | L_GLU_126 | OE1 | 3.229 |
| 6NB5 | H_LYS_223  | NZ  | L_GLU_126 | OE2 | 2.760 |
| 6NB5 | I_LYS_157  | NZ  | M_GLU_127 | OE2 | 3.828 |
| 6NB5 | I_LYS_223  | NZ  | M_GLU_126 | OE2 | 3.316 |
| 6NB8 | H_LYS_223  | NZ  | L_GLU_128 | OE1 | 2.783 |
| 6NB8 | H_LYS_223  | NZ  | L_GLU_128 | OE2 | 3.341 |
| 6NB8 | L_ARG_51   | NH1 | H_ASP_113 | OD1 | 2.821 |
| 6NB8 | L_ARG_51   | NH2 | H_ASP_113 | OD1 | 3.921 |
| 6NB8 | L_ARG_51   | NH2 | H_ASP_115 | OD1 | 3.423 |
| 6NC2 | A_LYS_46   | NZ  | B_ASP_636 | OD1 | 3.909 |
| 6NC2 | A_LYS_500  | NZ  | L_ASP_664 | OD1 | 2.780 |
| 6NC2 | A_LYS_500  | NZ  | L_ASP_664 | OD2 | 3.992 |
| 6NC2 | A_ARG_503  | NH1 | B_GLU_654 | OE1 | 3.759 |
| 6NC2 | A_ARG_503  | NH1 | B_GLU_654 | OE2 | 3.172 |
| 6NC2 | B_ARG_542  | NH1 | L_GLU_647 | OE1 | 2.800 |
| 6NC2 | B_ARG_542  | NH1 | L_ASP_648 | OD1 | 3.191 |
| 6NC2 | B_ARG_542  | NH2 | L_ASP_648 | OD1 | 3.498 |
| 6NC2 | B_LYS_574  | NZ  | A_ASP_107 | OD1 | 2.510 |
| 6NC2 | B_LYS_574  | NZ  | A_ASP_107 | OD2 | 3.688 |
| 6NC2 | H_ARG_96   | NH1 | L_ASP_50  | OD1 | 3.082 |
| 6NC2 | H_ARG_96   | NH1 | L_ASP_50  | OD2 | 3.706 |
| 6NC2 | H_ARG_96   | NH2 | L_ASP_50  | OD1 | 3.892 |
| 6NC2 | H_ARG_96   | NH2 | L_ASP_50  | OD2 | 3.158 |
| 6NC2 | C_LYS_46   | NZ  | L_ASP_636 | OD1 | 3.909 |

|      |           |     |           |     |       |
|------|-----------|-----|-----------|-----|-------|
| 6NC2 | C_LYS_500 | NZ  | J_ASP_664 | OD1 | 2.780 |
| 6NC2 | C_LYS_500 | NZ  | J_ASP_664 | OD2 | 3.991 |
| 6NC2 | C_ARG_503 | NH1 | I_GLU_654 | OE1 | 3.760 |
| 6NC2 | C_ARG_503 | NH1 | I_GLU_654 | OE2 | 3.173 |
| 6NC2 | I_ARG_542 | NH1 | J_GLU_647 | OE1 | 2.801 |
| 6NC2 | I_ARG_542 | NH1 | J_ASP_648 | OD1 | 3.190 |
| 6NC2 | I_ARG_542 | NH2 | J_ASP_648 | OD1 | 3.498 |
| 6NC2 | I_LYS_574 | NZ  | C_ASP_107 | OD1 | 2.510 |
| 6NC2 | I_LYS_574 | NZ  | C_ASP_107 | OD2 | 3.688 |
| 6NC2 | O_ARG_96  | NH1 | T_ASP_50  | OD1 | 3.082 |
| 6NC2 | O_ARG_96  | NH1 | T_ASP_50  | OD2 | 3.706 |
| 6NC2 | O_ARG_96  | NH2 | T_ASP_50  | OD1 | 3.892 |
| 6NC2 | O_ARG_96  | NH2 | T_ASP_50  | OD2 | 3.158 |
| 6NC2 | D_LYS_46  | NZ  | J_ASP_636 | OD1 | 3.909 |
| 6NC2 | D_LYS_500 | NZ  | B_ASP_664 | OD1 | 2.780 |
| 6NC2 | D_LYS_500 | NZ  | B_ASP_664 | OD2 | 3.992 |
| 6NC2 | D_ARG_503 | NH1 | J_GLU_654 | OE1 | 3.759 |
| 6NC2 | D_ARG_503 | NH1 | J_GLU_654 | OE2 | 3.173 |
| 6NC2 | J_ARG_542 | NH1 | B_GLU_647 | OE1 | 2.800 |
| 6NC2 | J_ARG_542 | NH1 | B_ASP_648 | OD1 | 3.191 |
| 6NC2 | J_ARG_542 | NH2 | B_ASP_648 | OD1 | 3.498 |
| 6NC2 | J_LYS_574 | NZ  | D_ASP_107 | OD1 | 2.510 |
| 6NC2 | J_LYS_574 | NZ  | D_ASP_107 | OD2 | 3.688 |
| 6NC2 | P_ARG_96  | NH1 | U_ASP_50  | OD1 | 3.083 |
| 6NC2 | P_ARG_96  | NH1 | U_ASP_50  | OD2 | 3.706 |
| 6NC2 | P_ARG_96  | NH2 | U_ASP_50  | OD1 | 3.893 |
| 6NC2 | P_ARG_96  | NH2 | U_ASP_50  | OD2 | 3.158 |
| 6NC2 | E_LYS_46  | NZ  | K_ASP_636 | OD1 | 3.909 |
| 6NC2 | E_LYS_500 | NZ  | M_ASP_664 | OD1 | 2.780 |
| 6NC2 | E_LYS_500 | NZ  | M_ASP_664 | OD2 | 3.992 |
| 6NC2 | E_ARG_503 | NH1 | K_GLU_654 | OE1 | 3.759 |
| 6NC2 | E_ARG_503 | NH1 | K_GLU_654 | OE2 | 3.172 |
| 6NC2 | K_ARG_542 | NH1 | M_GLU_647 | OE1 | 2.800 |
| 6NC2 | K_ARG_542 | NH1 | M_ASP_648 | OD1 | 3.191 |
| 6NC2 | K_ARG_542 | NH2 | M_ASP_648 | OD1 | 3.498 |
| 6NC2 | K_LYS_574 | NZ  | E_ASP_107 | OD1 | 2.510 |
| 6NC2 | K_LYS_574 | NZ  | E_ASP_107 | OD2 | 3.688 |
| 6NC2 | Q_ARG_96  | NH1 | V_ASP_50  | OD1 | 3.082 |
| 6NC2 | Q_ARG_96  | NH1 | V_ASP_50  | OD2 | 3.706 |
| 6NC2 | Q_ARG_96  | NH2 | V_ASP_50  | OD1 | 3.892 |
| 6NC2 | Q_ARG_96  | NH2 | V_ASP_50  | OD2 | 3.158 |
| 6NC2 | F_LYS_46  | NZ  | M_ASP_636 | OD1 | 3.909 |
| 6NC2 | F_LYS_500 | NZ  | N_ASP_664 | OD1 | 2.780 |
| 6NC2 | F_LYS_500 | NZ  | N_ASP_664 | OD2 | 3.991 |
| 6NC2 | F_ARG_503 | NH1 | M_GLU_654 | OE1 | 3.759 |
| 6NC2 | F_ARG_503 | NH1 | M_GLU_654 | OE2 | 3.173 |
| 6NC2 | M_ARG_542 | NH1 | N_GLU_647 | OE1 | 2.801 |
| 6NC2 | M_ARG_542 | NH1 | N_ASP_648 | OD1 | 3.191 |
| 6NC2 | M_ARG_542 | NH2 | N_ASP_648 | OD1 | 3.498 |
| 6NC2 | M_LYS_574 | NZ  | F_ASP_107 | OD1 | 2.510 |
| 6NC2 | M_LYS_574 | NZ  | F_ASP_107 | OD2 | 3.688 |
| 6NC2 | R_ARG_96  | NH1 | W_ASP_50  | OD1 | 3.082 |
| 6NC2 | R_ARG_96  | NH1 | W_ASP_50  | OD2 | 3.706 |
| 6NC2 | R_ARG_96  | NH2 | W_ASP_50  | OD1 | 3.892 |
| 6NC2 | R_ARG_96  | NH2 | W_ASP_50  | OD2 | 3.157 |
| 6NC2 | G_LYS_46  | NZ  | N_ASP_636 | OD1 | 3.909 |
| 6NC2 | G_LYS_500 | NZ  | K_ASP_664 | OD1 | 2.780 |
| 6NC2 | G_LYS_500 | NZ  | K_ASP_664 | OD2 | 3.992 |

|      |           |     |           |     |       |
|------|-----------|-----|-----------|-----|-------|
| 6NC2 | G_ARG_503 | NH1 | N_GLU_654 | OE1 | 3.759 |
| 6NC2 | G_ARG_503 | NH1 | N_GLU_654 | OE2 | 3.173 |
| 6NC2 | N_ARG_542 | NH1 | K_GLU_647 | OE1 | 2.800 |
| 6NC2 | N_ARG_542 | NH1 | K_ASP_648 | OD1 | 3.191 |
| 6NC2 | N_ARG_542 | NH2 | K_ASP_648 | OD1 | 3.498 |
| 6NC2 | N_LYS_574 | NZ  | G_ASP_107 | OD1 | 2.510 |
| 6NC2 | N_LYS_574 | NZ  | G_ASP_107 | OD2 | 3.688 |
| 6NC2 | S_ARG_96  | NH1 | X_ASP_50  | OD1 | 3.082 |
| 6NC2 | S_ARG_96  | NH1 | X_ASP_50  | OD2 | 3.706 |
| 6NC2 | S_ARG_96  | NH2 | X_ASP_50  | OD1 | 3.892 |
| 6NC2 | S_ARG_96  | NH2 | X_ASP_50  | OD2 | 3.158 |
| 6NC3 | A_LYS_46  | NZ  | B_ASP_636 | OD1 | 2.912 |
| 6NC3 | A_LYS_46  | NZ  | B_ASP_636 | OD2 | 3.719 |
| 6NC3 | A_ARG_192 | NH2 | C_ASP_167 | OD1 | 3.709 |
| 6NC3 | A_ARG_192 | NH2 | C_ASP_167 | OD2 | 3.548 |
| 6NC3 | A_ARG_503 | NH2 | B_GLU_654 | OE1 | 3.773 |
| 6NC3 | A_ARG_503 | NH2 | B_GLU_654 | OE2 | 3.161 |
| 6NC3 | B_ARG_542 | NH2 | J_GLU_647 | OE1 | 2.826 |
| 6NC3 | B_ARG_542 | NH2 | J_ASP_648 | OD1 | 2.949 |
| 6NC3 | B_ARG_542 | NH2 | J_ASP_648 | OD2 | 3.670 |
| 6NC3 | B_LYS_574 | NZ  | A_ASP_107 | OD1 | 2.582 |
| 6NC3 | B_LYS_574 | NZ  | A_ASP_107 | OD2 | 2.711 |
| 6NC3 | B_ARG_579 | NH1 | J_GLU_584 | OE2 | 3.194 |
| 6NC3 | B_ARG_585 | NH2 | A_GLU_492 | OE1 | 2.939 |
| 6NC3 | B_ARG_585 | NH2 | A_GLU_492 | OE2 | 3.498 |
| 6NC3 | C_LYS_46  | NZ  | I_ASP_636 | OD1 | 2.913 |
| 6NC3 | C_LYS_46  | NZ  | I_ASP_636 | OD2 | 3.719 |
| 6NC3 | C_ARG_192 | NH2 | D_ASP_167 | OD1 | 3.709 |
| 6NC3 | C_ARG_192 | NH2 | D_ASP_167 | OD2 | 3.548 |
| 6NC3 | C_ARG_503 | NH2 | I_GLU_654 | OE1 | 3.773 |
| 6NC3 | C_ARG_503 | NH2 | I_GLU_654 | OE2 | 3.161 |
| 6NC3 | I_ARG_542 | NH2 | B_GLU_647 | OE1 | 2.826 |
| 6NC3 | I_ARG_542 | NH2 | B_ASP_648 | OD1 | 2.949 |
| 6NC3 | I_ARG_542 | NH2 | B_ASP_648 | OD2 | 3.670 |
| 6NC3 | I_LYS_574 | NZ  | C_ASP_107 | OD1 | 2.581 |
| 6NC3 | I_LYS_574 | NZ  | C_ASP_107 | OD2 | 2.711 |
| 6NC3 | I_ARG_579 | NH1 | B_GLU_584 | OE2 | 3.194 |
| 6NC3 | I_ARG_585 | NH2 | C_GLU_492 | OE1 | 2.939 |
| 6NC3 | I_ARG_585 | NH2 | C_GLU_492 | OE2 | 3.498 |
| 6NC3 | D_LYS_46  | NZ  | J_ASP_636 | OD1 | 2.913 |
| 6NC3 | D_LYS_46  | NZ  | J_ASP_636 | OD2 | 3.719 |
| 6NC3 | D_ARG_192 | NH2 | A_ASP_167 | OD1 | 3.708 |
| 6NC3 | D_ARG_192 | NH2 | A_ASP_167 | OD2 | 3.548 |
| 6NC3 | D_ARG_503 | NH2 | J_GLU_654 | OE1 | 3.773 |
| 6NC3 | D_ARG_503 | NH2 | J_GLU_654 | OE2 | 3.160 |
| 6NC3 | J_ARG_542 | NH2 | I_GLU_647 | OE1 | 2.825 |
| 6NC3 | J_ARG_542 | NH2 | I_ASP_648 | OD1 | 2.949 |
| 6NC3 | J_ARG_542 | NH2 | I_ASP_648 | OD2 | 3.670 |
| 6NC3 | J_LYS_574 | NZ  | D_ASP_107 | OD1 | 2.581 |
| 6NC3 | J_LYS_574 | NZ  | D_ASP_107 | OD2 | 2.710 |
| 6NC3 | J_ARG_579 | NH1 | I_GLU_584 | OE2 | 3.194 |
| 6NC3 | J_ARG_585 | NH2 | D_GLU_492 | OE1 | 2.939 |
| 6NC3 | J_ARG_585 | NH2 | D_GLU_492 | OE2 | 3.498 |
| 6NC3 | E_LYS_46  | NZ  | K_ASP_636 | OD1 | 2.912 |
| 6NC3 | E_LYS_46  | NZ  | K_ASP_636 | OD2 | 3.719 |
| 6NC3 | E_ARG_192 | NH2 | F_ASP_167 | OD1 | 3.709 |
| 6NC3 | E_ARG_192 | NH2 | F_ASP_167 | OD2 | 3.548 |
| 6NC3 | E_ARG_503 | NH2 | K_GLU_654 | OE1 | 3.773 |

|      |            |     |           |     |       |
|------|------------|-----|-----------|-----|-------|
| 6NC3 | E_ARG_503  | NH2 | K_GLU_654 | OE2 | 3.161 |
| 6NC3 | K_ARG_542  | NH2 | N_GLU_647 | OE1 | 2.826 |
| 6NC3 | K_ARG_542  | NH2 | N_ASP_648 | OD1 | 2.949 |
| 6NC3 | K_ARG_542  | NH2 | N_ASP_648 | OD2 | 3.670 |
| 6NC3 | K_LYS_574  | NZ  | E_ASP_107 | OD1 | 2.582 |
| 6NC3 | K_LYS_574  | NZ  | E_ASP_107 | OD2 | 2.711 |
| 6NC3 | K_ARG_579  | NH1 | N_GLU_584 | OE2 | 3.194 |
| 6NC3 | K_ARG_585  | NH2 | E_GLU_492 | OE1 | 2.939 |
| 6NC3 | K_ARG_585  | NH2 | E_GLU_492 | OE2 | 3.498 |
| 6NC3 | F_LYS_46   | NZ  | M_ASP_636 | OD1 | 2.913 |
| 6NC3 | F_LYS_46   | NZ  | M_ASP_636 | OD2 | 3.719 |
| 6NC3 | F_ARG_192  | NH2 | G_ASP_167 | OD1 | 3.709 |
| 6NC3 | F_ARG_192  | NH2 | G_ASP_167 | OD2 | 3.548 |
| 6NC3 | F_ARG_503  | NH2 | M_GLU_654 | OE1 | 3.773 |
| 6NC3 | F_ARG_503  | NH2 | M_GLU_654 | OE2 | 3.161 |
| 6NC3 | M_ARG_542  | NH2 | K_GLU_647 | OE1 | 2.826 |
| 6NC3 | M_ARG_542  | NH2 | K_ASP_648 | OD1 | 2.949 |
| 6NC3 | M_ARG_542  | NH2 | K_ASP_648 | OD2 | 3.670 |
| 6NC3 | M_LYS_574  | NZ  | F_ASP_107 | OD1 | 2.581 |
| 6NC3 | M_LYS_574  | NZ  | F_ASP_107 | OD2 | 2.711 |
| 6NC3 | M_ARG_579  | NH1 | K_GLU_584 | OE2 | 3.194 |
| 6NC3 | M_ARG_585  | NH2 | F_GLU_492 | OE1 | 2.939 |
| 6NC3 | M_ARG_585  | NH2 | F_GLU_492 | OE2 | 3.498 |
| 6NC3 | G_LYS_46   | NZ  | N_ASP_636 | OD1 | 2.913 |
| 6NC3 | G_LYS_46   | NZ  | N_ASP_636 | OD2 | 3.719 |
| 6NC3 | G_ARG_192  | NH2 | E_ASP_167 | OD1 | 3.708 |
| 6NC3 | G_ARG_192  | NH2 | E_ASP_167 | OD2 | 3.548 |
| 6NC3 | G_ARG_503  | NH2 | N_GLU_654 | OE1 | 3.773 |
| 6NC3 | G_ARG_503  | NH2 | N_GLU_654 | OE2 | 3.160 |
| 6NC3 | N_ARG_542  | NH2 | M_GLU_647 | OE1 | 2.825 |
| 6NC3 | N_ARG_542  | NH2 | M_ASP_648 | OD1 | 2.949 |
| 6NC3 | N_ARG_542  | NH2 | M_ASP_648 | OD2 | 3.670 |
| 6NC3 | N_LYS_574  | NZ  | G_ASP_107 | OD1 | 2.581 |
| 6NC3 | N_LYS_574  | NZ  | G_ASP_107 | OD2 | 2.710 |
| 6NC3 | N_ARG_579  | NH1 | M_GLU_584 | OE2 | 3.194 |
| 6NC3 | N_ARG_585  | NH2 | G_GLU_492 | OE1 | 2.939 |
| 6NC3 | N_ARG_585  | NH2 | G_GLU_492 | OE2 | 3.498 |
| 6NEX | B_LYS_209  | NZ  | A_GLU_126 | OE2 | 3.298 |
| 6NF2 | A_LYS_46   | NZ  | L_ASP_632 | OD2 | 2.876 |
| 6NF2 | A_ARG_504  | NH2 | R_GLU_657 | OE2 | 3.927 |
| 6NF2 | B_ARG_579  | NH1 | L_GLU_584 | OE2 | 3.681 |
| 6NF2 | B_LYS_601  | NZ  | L_GLU_654 | OE1 | 2.983 |
| 6NF2 | B_LYS_601  | NZ  | L_GLU_654 | OE2 | 3.256 |
| 6NF2 | C_ARG_61   | NH1 | G_GLU_466 | OE1 | 3.610 |
| 6NF2 | C_ARG_61   | NH2 | G_GLU_466 | OE2 | 3.748 |
| 6NF2 | C_ARG_71   | NH2 | G_ASP_368 | OD1 | 3.504 |
| 6NF2 | G_LYS_46   | NZ  | B_ASP_632 | OD2 | 2.943 |
| 6NF2 | G_ARG_504  | NH2 | L_GLU_657 | OE2 | 3.805 |
| 6NF2 | H_ARG_100F | NH1 | L_ASP_50  | OD2 | 2.403 |
| 6NF2 | H_ARG_100F | NH2 | L_ASP_50  | OD2 | 3.926 |
| 6NF2 | I_ARG_579  | NH1 | R_GLU_584 | OE2 | 3.624 |
| 6NF2 | I_LYS_601  | NZ  | R_GLU_654 | OE1 | 3.068 |
| 6NF2 | I_LYS_601  | NZ  | R_GLU_654 | OE2 | 3.333 |
| 6NF2 | N_ARG_61   | NH1 | A_GLU_466 | OE1 | 3.592 |
| 6NF2 | N_ARG_61   | NH2 | A_GLU_466 | OE2 | 3.737 |
| 6NF2 | N_ARG_71   | NH2 | A_ASP_368 | OD1 | 3.532 |
| 6NF2 | O_ARG_100F | NH1 | P_ASP_50  | OD2 | 2.825 |
| 6NF2 | Q_LYS_46   | NZ  | R_ASP_632 | OD2 | 2.912 |

|      |            |     |           |     |       |
|------|------------|-----|-----------|-----|-------|
| 6NF2 | Q_ARG_504  | NH2 | B_GLU_657 | OE2 | 3.920 |
| 6NF2 | R_ARG_579  | NH1 | B_GLU_584 | OE2 | 3.657 |
| 6NF2 | R_LYS_601  | NZ  | B_GLU_654 | OE1 | 3.130 |
| 6NF2 | R_LYS_601  | NZ  | B_GLU_654 | OE2 | 3.363 |
| 6NF2 | V_ARG_61   | NH1 | Q_GLU_466 | OE1 | 3.626 |
| 6NF2 | V_ARG_61   | NH2 | Q_GLU_466 | OE2 | 3.762 |
| 6NF2 | V_ARG_71   | NH2 | Q_ASP_368 | OD1 | 3.511 |
| 6NF2 | W_ARG_100F | NH1 | X_ASP_50  | OD2 | 2.242 |
| 6NF2 | W_ARG_100F | NH2 | X_ASP_50  | OD2 | 3.856 |
| 6NF5 | A_LYS_46   | NZ  | B_ASP_632 | OD2 | 2.410 |
| 6NF5 | A_LYS_137  | NZ  | L_ASP_51  | OD2 | 2.736 |
| 6NF5 | A_ARG_192  | NH1 | J_GLU_164 | OE2 | 3.009 |
| 6NF5 | A_ARG_192  | NH2 | J_GLU_164 | OE2 | 3.825 |
| 6NF5 | B_ARG_542  | NH1 | D_GLU_647 | OE1 | 3.182 |
| 6NF5 | B_ARG_542  | NH1 | D_GLU_647 | OE2 | 3.535 |
| 6NF5 | B_ARG_542  | NH2 | D_GLU_647 | OE1 | 3.979 |
| 6NF5 | B_LYS_574  | NZ  | A_ASP_107 | OD1 | 2.887 |
| 6NF5 | B_HIS_585  | NE2 | A_GLU_492 | OE1 | 3.726 |
| 6NF5 | B_LYS_601  | NZ  | D_GLU_657 | OE1 | 3.026 |
| 6NF5 | K_ARG_53   | NH1 | B_ASP_659 | OD1 | 3.261 |
| 6NF5 | K_ARG_53   | NH1 | B_ASP_659 | OD2 | 3.240 |
| 6NF5 | K_ARG_53   | NH2 | B_ASP_659 | OD1 | 3.591 |
| 6NF5 | K_ARG_53   | NH2 | B_ASP_659 | OD2 | 2.651 |
| 6NF5 | C_LYS_46   | NZ  | D_ASP_632 | OD2 | 2.410 |
| 6NF5 | C_LYS_137  | NZ  | F_ASP_51  | OD2 | 2.736 |
| 6NF5 | C_ARG_192  | NH1 | A_GLU_164 | OE2 | 3.009 |
| 6NF5 | C_ARG_192  | NH2 | A_GLU_164 | OE2 | 3.825 |
| 6NF5 | D_ARG_542  | NH1 | M_GLU_647 | OE1 | 3.182 |
| 6NF5 | D_ARG_542  | NH1 | M_GLU_647 | OE2 | 3.535 |
| 6NF5 | D_ARG_542  | NH2 | M_GLU_647 | OE1 | 3.978 |
| 6NF5 | D_LYS_574  | NZ  | C_ASP_107 | OD1 | 2.887 |
| 6NF5 | D_HIS_585  | NE2 | C_GLU_492 | OE1 | 3.725 |
| 6NF5 | D_LYS_601  | NZ  | M_GLU_657 | OE1 | 3.026 |
| 6NF5 | G_ARG_53   | NH1 | D_ASP_659 | OD1 | 3.261 |
| 6NF5 | G_ARG_53   | NH1 | D_ASP_659 | OD2 | 3.240 |
| 6NF5 | G_ARG_53   | NH2 | D_ASP_659 | OD1 | 3.591 |
| 6NF5 | G_ARG_53   | NH2 | D_ASP_659 | OD2 | 2.651 |
| 6NF5 | J_LYS_46   | NZ  | M_ASP_632 | OD2 | 2.410 |
| 6NF5 | J_LYS_137  | NZ  | P_ASP_51  | OD2 | 2.735 |
| 6NF5 | J_ARG_192  | NH1 | C_GLU_164 | OE2 | 3.010 |
| 6NF5 | J_ARG_192  | NH2 | C_GLU_164 | OE2 | 3.825 |
| 6NF5 | M_ARG_542  | NH1 | B_GLU_647 | OE1 | 3.182 |
| 6NF5 | M_ARG_542  | NH1 | B_GLU_647 | OE2 | 3.534 |
| 6NF5 | M_ARG_542  | NH2 | B_GLU_647 | OE1 | 3.979 |
| 6NF5 | M_LYS_574  | NZ  | J_ASP_107 | OD1 | 2.887 |
| 6NF5 | M_HIS_585  | NE2 | J_GLU_492 | OE1 | 3.726 |
| 6NF5 | M_LYS_601  | NZ  | B_GLU_657 | OE1 | 3.027 |
| 6NF5 | Q_ARG_53   | NH1 | M_ASP_659 | OD1 | 3.262 |
| 6NF5 | Q_ARG_53   | NH1 | M_ASP_659 | OD2 | 3.240 |
| 6NF5 | Q_ARG_53   | NH2 | M_ASP_659 | OD1 | 3.591 |
| 6NF5 | Q_ARG_53   | NH2 | M_ASP_659 | OD2 | 2.650 |
| 6NFC | C_ARG_53   | NH1 | I_ASP_659 | OD1 | 3.890 |
| 6NFC | C_ARG_53   | NH1 | I_ASP_659 | OD2 | 2.842 |
| 6NFC | C_ARG_53   | NH2 | I_ASP_659 | OD2 | 2.675 |
| 6NFC | A_LYS_46   | NZ  | B_ASP_632 | OD1 | 3.913 |
| 6NFC | A_LYS_46   | NZ  | B_ASP_632 | OD2 | 2.455 |
| 6NFC | A_LYS_137  | NZ  | L_ASP_51  | OD2 | 2.690 |
| 6NFC | B_ARG_542  | NH1 | G_GLU_647 | OE1 | 3.297 |

|      |           |     |           |     |       |
|------|-----------|-----|-----------|-----|-------|
| 6NFC | B_ARG_542 | NH1 | G_GLU_647 | OE2 | 3.640 |
| 6NFC | B_LYS_574 | NZ  | A_GLU_106 | OE1 | 3.608 |
| 6NFC | B_LYS_574 | NZ  | A_GLU_106 | OE2 | 2.473 |
| 6NFC | B_ARG_579 | NH2 | G_GLU_584 | OE1 | 3.071 |
| 6NFC | B_ARG_579 | NH2 | G_GLU_584 | OE2 | 3.850 |
| 6NFC | L_LYS_50  | NZ  | H_GLU_99  | OE1 | 3.024 |
| 6NFC | J_ARG_53  | NH1 | G_ASP_659 | OD1 | 3.783 |
| 6NFC | J_ARG_53  | NH1 | G_ASP_659 | OD2 | 2.774 |
| 6NFC | J_ARG_53  | NH2 | G_ASP_659 | OD2 | 2.735 |
| 6NFC | E_LYS_46  | NZ  | G_ASP_632 | OD1 | 3.927 |
| 6NFC | E_LYS_46  | NZ  | G_ASP_632 | OD2 | 2.442 |
| 6NFC | E_ARG_500 | NH2 | I_ASP_664 | OD1 | 2.950 |
| 6NFC | E_ARG_500 | NH2 | I_ASP_664 | OD2 | 3.747 |
| 6NFC | G_ARG_542 | NH1 | I_GLU_647 | OE1 | 3.321 |
| 6NFC | G_ARG_542 | NH1 | I_GLU_647 | OE2 | 3.884 |
| 6NFC | G_LYS_574 | NZ  | E_GLU_106 | OE1 | 3.312 |
| 6NFC | G_LYS_574 | NZ  | E_GLU_106 | OE2 | 2.741 |
| 6NFC | G_ARG_579 | NH2 | I_GLU_584 | OE1 | 3.032 |
| 6NFC | G_ARG_579 | NH2 | I_GLU_584 | OE2 | 3.885 |
| 6NFC | G_LYS_601 | NZ  | I_GLU_657 | OE1 | 2.933 |
| 6NFC | G_LYS_601 | NZ  | I_GLU_657 | OE2 | 3.730 |
| 6NFC | F_LYS_46  | NZ  | I_ASP_632 | OD1 | 3.960 |
| 6NFC | F_LYS_46  | NZ  | I_ASP_632 | OD2 | 2.474 |
| 6NFC | F_LYS_502 | NZ  | B_ASP_664 | OD1 | 3.023 |
| 6NFC | I_ARG_542 | NH1 | B_GLU_647 | OE1 | 3.339 |
| 6NFC | I_ARG_542 | NH1 | B_GLU_647 | OE2 | 3.856 |
| 6NFC | I_LYS_574 | NZ  | F_ASP_107 | OD1 | 2.742 |
| 6NFC | I_ARG_579 | NH2 | B_GLU_584 | OE1 | 3.222 |
| 6NFC | I_ARG_579 | NH2 | B_GLU_584 | OE2 | 3.762 |
| 6NFC | I_LYS_601 | NZ  | B_GLU_657 | OE1 | 3.945 |
| 6NFC | K_ARG_53  | NH1 | B_ASP_659 | OD1 | 3.915 |
| 6NFC | K_ARG_53  | NH1 | B_ASP_659 | OD2 | 2.784 |
| 6NFC | K_ARG_53  | NH2 | B_ASP_659 | OD2 | 2.738 |
| 6NMR | H_LYS_216 | NZ  | L_GLU_124 | OE1 | 3.273 |
| 6NMR | H_LYS_216 | NZ  | L_GLU_124 | OE2 | 3.010 |
| 6NMR | S_ARG_69  | NH1 | L_GLU_55  | OE1 | 3.247 |
| 6NMR | S_ARG_69  | NH1 | L_GLU_55  | OE2 | 3.038 |
| 6NMR | S_ARG_69  | NH2 | L_GLU_55  | OE2 | 3.173 |
| 6NMR | E_ARG_69  | NH1 | B_GLU_55  | OE1 | 2.733 |
| 6NMR | E_ARG_69  | NH1 | B_GLU_55  | OE2 | 2.469 |
| 6NMR | E_ARG_69  | NH2 | B_GLU_55  | OE1 | 2.510 |
| 6NMR | E_ARG_69  | NH2 | B_GLU_55  | OE2 | 3.637 |
| 6NMR | I_ARG_69  | NH1 | G_GLU_55  | OE1 | 3.183 |
| 6NMR | I_ARG_69  | NH1 | G_GLU_55  | OE2 | 2.119 |
| 6NMR | I_ARG_69  | NH1 | F_ASP_108 | OD2 | 3.629 |
| 6NMR | I_ARG_69  | NH2 | G_GLU_55  | OE1 | 2.639 |
| 6NMR | I_ARG_69  | NH2 | G_GLU_55  | OE2 | 3.327 |
| 6NMR | M_ARG_69  | NH1 | J_ASP_108 | OD1 | 3.945 |
| 6NMR | M_ARG_69  | NH1 | J_ASP_108 | OD2 | 3.140 |
| 6NMR | M_ARG_69  | NH2 | K_GLU_55  | OE1 | 3.608 |
| 6NMR | M_ARG_69  | NH2 | J_ASP_108 | OD1 | 1.901 |
| 6NMR | M_ARG_69  | NH2 | J_ASP_108 | OD2 | 2.331 |
| 6NMS | L_ARG_94  | NH2 | S_GLU_111 | OE1 | 3.728 |
| 6NMS | H_ARG_104 | NH2 | S_GLU_111 | OE1 | 3.455 |
| 6NMS | H_ARG_104 | NH2 | S_GLU_111 | OE2 | 2.500 |
| 6NMS | H_LYS_215 | NZ  | L_GLU_124 | OE1 | 3.565 |
| 6NMS | H_LYS_215 | NZ  | L_GLU_124 | OE2 | 3.270 |
| 6NMS | H_LYS_220 | NZ  | L_GLU_214 | OE1 | 3.397 |

|      |           |     |           |     |       |
|------|-----------|-----|-----------|-----|-------|
| 6NMS | S_LYS_11  | NZ  | H_ASP_33  | OD1 | 3.001 |
| 6NMS | S_LYS_11  | NZ  | H_GLU_99  | OE1 | 2.549 |
| 6NMS | S_HIS_56  | ND1 | A_ASP_60  | OD2 | 2.658 |
| 6NMS | A_ARG_94  | NH2 | C_GLU_111 | OE2 | 3.453 |
| 6NMS | B_ARG_104 | NH2 | C_GLU_111 | OE1 | 2.703 |
| 6NMS | B_ARG_104 | NH2 | C_GLU_111 | OE2 | 3.000 |
| 6NMS | C_LYS_11  | NZ  | B_ASP_33  | OD2 | 3.490 |
| 6NMS | C_LYS_11  | NZ  | B_GLU_99  | OE1 | 2.892 |
| 6NMS | C_ARG_115 | NH1 | B_GLU_56  | OE2 | 3.579 |
| 6NMS | C_ARG_115 | NH2 | B_GLU_56  | OE2 | 2.699 |
| 6NMT | A_ARG_26  | NH2 | C_ASP_10  | OD1 | 3.433 |
| 6NMT | A_ARG_26  | NH2 | C_ASP_10  | OD2 | 3.182 |
| 6NMT | B_ARG_56  | NH2 | C_GLU_111 | OE2 | 3.542 |
| 6NMT | B_LYS_215 | NZ  | A_GLU_118 | OE2 | 3.496 |
| 6NMT | C_LYS_11  | NZ  | A_ASP_91  | OD1 | 2.678 |
| 6NMT | C_LYS_11  | NZ  | A_ASP_91  | OD2 | 3.319 |
| 6NMU | L_LYS_32  | NZ  | S_ASP_85  | OD1 | 3.326 |
| 6NMU | H_ARG_50  | NH1 | S_GLU_47  | OE1 | 3.597 |
| 6NMU | H_ARG_50  | NH1 | S_GLU_47  | OE2 | 3.084 |
| 6NMU | H_ARG_50  | NH2 | S_GLU_47  | OE1 | 2.989 |
| 6NMU | H_ARG_50  | NH2 | S_GLU_47  | OE2 | 3.577 |
| 6NMU | S_ARG_59  | NH2 | H_ASP_101 | OD2 | 3.444 |
| 6NMU | A_LYS_32  | NZ  | C_ASP_85  | OD1 | 3.635 |
| 6NMU | B_ARG_50  | NH1 | C_GLU_47  | OE1 | 3.989 |
| 6NMU | B_ARG_50  | NH1 | C_GLU_47  | OE2 | 3.035 |
| 6NMU | B_ARG_50  | NH2 | C_GLU_47  | OE1 | 2.804 |
| 6NMU | B_ARG_50  | NH2 | C_GLU_47  | OE2 | 3.091 |
| 6NMU | B_LYS_215 | NZ  | A_GLU_124 | OE1 | 3.494 |
| 6NMU | B_LYS_215 | NZ  | A_GLU_124 | OE2 | 3.379 |
| 6NMU | C_ARG_59  | NH1 | B_ASP_101 | OD1 | 3.720 |
| 6NMU | C_ARG_59  | NH1 | B_ASP_101 | OD2 | 2.808 |
| 6O9B | A_ARG_35  | NH1 | B_ASP_73  | OD1 | 2.773 |
| 6O9B | A_ARG_35  | NH1 | B_ASP_73  | OD2 | 3.974 |
| 6O9B | A_ARG_48  | NH2 | B_ASP_73  | OD2 | 3.479 |
| 6O9B | A_HIS_192 | ND1 | B_ASP_118 | OD2 | 3.864 |
| 6O9B | C_LYS_9   | NZ  | A_ASP_116 | OD2 | 2.706 |
| 6O9C | A_ARG_35  | NH1 | B_ASP_73  | OD1 | 3.395 |
| 6O9C | A_HIS_192 | NE2 | B_ASP_118 | OD2 | 3.199 |
| 6O9C | A_ARG_202 | NH1 | B_ASP_118 | OD2 | 3.014 |
| 6O9C | B_LYS_26  | NZ  | A_GLU_232 | OE2 | 3.913 |
| 6O9C | C_LYS_9   | NZ  | A_ASP_77  | OD2 | 3.855 |
| 6O9C | C_LYS_9   | NZ  | A_ASP_116 | OD2 | 2.984 |
| 6OGX | C_LYS_213 | NZ  | D_GLU_123 | OE1 | 2.791 |
| 6OGX | C_LYS_213 | NZ  | D_GLU_123 | OE2 | 3.773 |
| 6OGX | C_LYS_218 | NZ  | D_ASP_122 | OD2 | 3.785 |
| 6OGX | D_ARG_55  | NH2 | G_ASP_117 | OD1 | 2.990 |
| 6OGX | G_ARG_95  | NH1 | H_ASP_99  | OD1 | 3.462 |
| 6OGX | G_ARG_95  | NH1 | H_ASP_99  | OD2 | 2.833 |
| 6OGX | G_ARG_95  | NH2 | H_ASP_99  | OD1 | 2.923 |
| 6OGX | G_ARG_95  | NH2 | H_ASP_99  | OD2 | 3.646 |
| 6OGX | H_ARG_100 | NH1 | L_GLU_55  | OE1 | 3.516 |
| 6OGX | H_ARG_100 | NH1 | L_GLU_55  | OE2 | 2.787 |
| 6OKM | H_ARG_100 | NH1 | L_GLU_55  | OE1 | 2.851 |
| 6OKM | H_HIS_165 | NE2 | L_ASP_167 | OD1 | 3.460 |
| 6OKM | H_LYS_210 | NZ  | L_GLU_123 | OE2 | 3.540 |
| 6OKM | H_LYS_215 | NZ  | L_ASP_122 | OD1 | 3.237 |
| 6OKM | H_LYS_215 | NZ  | L_ASP_122 | OD2 | 3.538 |
| 6OKM | R_ARG_95  | NH1 | H_ASP_99  | OD1 | 3.347 |

|      |           |     |            |     |       |
|------|-----------|-----|------------|-----|-------|
| 6OKM | R_ARG_95  | NH1 | H_ASP_99   | OD2 | 3.783 |
| 6OKM | R_ARG_95  | NH2 | H_ASP_99   | OD1 | 3.371 |
| 6OKM | R_ARG_95  | NH2 | H_ASP_99   | OD2 | 2.555 |
| 6OKN | A_LYS_213 | NZ  | B_GLU_123  | OE1 | 3.312 |
| 6OKN | A_LYS_213 | NZ  | B_GLU_123  | OE2 | 2.829 |
| 6OKN | C_LYS_213 | NZ  | D_GLU_123  | OE1 | 3.356 |
| 6OKN | C_LYS_213 | NZ  | D_GLU_123  | OE2 | 2.896 |
| 6OKN | C_LYS_218 | NZ  | D_ASP_122  | OD2 | 3.923 |
| 6OOR | A_LYS_148 | NZ  | H_ASP_55   | OD2 | 3.250 |
| 6OOR | B_ARG_12  | NH2 | A_ASP_242  | OD1 | 3.946 |
| 6OOR | B_ARG_12  | NH2 | A_ASP_242  | OD2 | 2.705 |
| 6OOR | B_HIS_34  | NE2 | A_GLU_97   | OE1 | 2.803 |
| 6OOR | B_HIS_34  | NE2 | A_GLU_97   | OE2 | 3.580 |
| 6OOR | H_ARG_109 | NH2 | A_ASP_80   | OD1 | 2.917 |
| 6OOR | H_ARG_109 | NH2 | A_ASP_80   | OD2 | 3.352 |
| 6OOR | H_LYS_220 | NZ  | L_GLU_128  | OE1 | 2.677 |
| 6OOR | H_LYS_220 | NZ  | L_GLU_128  | OE2 | 2.872 |
| 6OSY | 2_LYS_282 | NZ  | 8_ASP_100C | OD2 | 3.941 |
| 6OSY | 8_ARG_61  | NH1 | 2_GLU_466  | OE2 | 3.827 |
| 6OSY | 8_ARG_71  | NH1 | 2_ASP_368  | OD2 | 3.948 |
| 6OSY | 8_ARG_71  | NH2 | 2_ASP_368  | OD2 | 3.279 |
| 6OSY | A_ARG_542 | NH1 | Q_GLU_647  | OE2 | 3.907 |
| 6OSY | A_ARG_542 | NH2 | Q_GLU_647  | OE1 | 3.187 |
| 6OSY | A_ARG_542 | NH2 | Q_GLU_647  | OE2 | 2.660 |
| 6OSY | A_ARG_579 | NH2 | Q_GLU_584  | OE1 | 3.706 |
| 6OSY | B_LYS_282 | NZ  | F_ASP_100C | OD1 | 3.567 |
| 6OSY | B_LYS_282 | NZ  | F_ASP_100C | OD2 | 3.346 |
| 6OSY | F_ARG_71  | NH2 | B_ASP_368  | OD2 | 3.635 |
| 6OSY | G_ARG_542 | NH1 | A_GLU_647  | OE2 | 3.983 |
| 6OSY | G_ARG_542 | NH2 | A_GLU_647  | OE1 | 3.165 |
| 6OSY | G_ARG_542 | NH2 | A_GLU_647  | OE2 | 2.705 |
| 6OSY | G_ARG_579 | NH2 | A_GLU_584  | OE1 | 3.899 |
| 6OSY | H_ARG_96  | NH1 | L_GLU_55   | OE1 | 3.662 |
| 6OSY | H_HIS_100 | ND1 | 2_GLU_87   | OE2 | 3.031 |
| 6OSY | H_HIS_100 | NE2 | 2_GLU_87   | OE2 | 3.785 |
| 6OSY | I_ARG_96  | NH1 | J_GLU_55   | OE2 | 3.419 |
| 6OSY | I_HIS_100 | ND1 | B_GLU_87   | OE2 | 3.029 |
| 6OSY | I_HIS_100 | NE2 | B_GLU_87   | OE2 | 3.781 |
| 6OSY | J_ARG_46  | NH1 | I_ASP_101  | OD1 | 3.411 |
| 6OSY | J_ARG_46  | NH1 | I_ASP_101  | OD2 | 2.599 |
| 6OSY | K_LYS_282 | NZ  | P_ASP_100C | OD2 | 3.859 |
| 6OSY | L_ARG_46  | NH1 | H_ASP_101  | OD1 | 3.509 |
| 6OSY | L_ARG_46  | NH1 | H_ASP_101  | OD2 | 2.485 |
| 6OSY | P_ARG_71  | NH1 | K_ASP_368  | OD2 | 3.949 |
| 6OSY | P_ARG_71  | NH2 | K_ASP_368  | OD2 | 3.325 |
| 6OSY | Q_ARG_542 | NH1 | G_GLU_647  | OE2 | 3.913 |
| 6OSY | Q_ARG_542 | NH2 | G_GLU_647  | OE1 | 3.228 |
| 6OSY | Q_ARG_542 | NH2 | G_GLU_647  | OE2 | 2.706 |
| 6OSY | R_ARG_96  | NH1 | S_GLU_55   | OE2 | 3.423 |
| 6OSY | R_HIS_100 | ND1 | K_GLU_87   | OE1 | 3.719 |
| 6OSY | R_HIS_100 | ND1 | K_GLU_87   | OE2 | 2.905 |
| 6OSY | R_HIS_100 | NE2 | K_GLU_87   | OE1 | 3.960 |
| 6OSY | S_ARG_46  | NH1 | R_ASP_101  | OD1 | 3.488 |
| 6OSY | S_ARG_46  | NH1 | R_ASP_101  | OD2 | 2.503 |
| 6OT1 | B_ARG_542 | NH2 | D_GLU_647  | OE1 | 2.021 |
| 6OT1 | B_ARG_542 | NH2 | D_GLU_647  | OE2 | 3.827 |
| 6OT1 | B_LYS_601 | NZ  | D_GLU_657  | OE1 | 3.960 |
| 6OT1 | B_LYS_601 | NZ  | D_GLU_657  | OE2 | 3.832 |



|      |            |     |            |     |       |
|------|------------|-----|------------|-----|-------|
| 6OT1 | G_LYS_282  | NZ  | q-ASP_100C | OD2 | 3.404 |
| 6OT1 | G_ARG_327  | NH2 | m_GLU_100I | OE1 | 3.817 |
| 6OT1 | q_ARG_71   | NH2 | G_ASP_368  | OD2 | 3.596 |
| 6OT1 | O_ARG_542  | NH2 | B_GLU_647  | OE1 | 2.048 |
| 6OT1 | O_ARG_542  | NH2 | B_GLU_647  | OE2 | 3.874 |
| 6OT1 | O_LYS_601  | NZ  | B_GLU_657  | OE1 | 3.934 |
| 6OT1 | O_LYS_601  | NZ  | B_GLU_657  | OE2 | 3.759 |
| 6OT1 | E_LYS_282  | NZ  | J_ASP_100C | OD2 | 3.404 |
| 6OT1 | E_ARG_327  | NH2 | F_GLU_100I | OE1 | 3.817 |
| 6OT1 | J_ARG_71   | NH2 | E_ASP_368  | OD2 | 3.599 |
| 6OT1 | D_ARG_542  | NH2 | O_GLU_647  | OE1 | 2.015 |
| 6OT1 | D_ARG_542  | NH2 | O_GLU_647  | OE2 | 3.816 |
| 6OT1 | D_LYS_601  | NZ  | O_GLU_657  | OE2 | 3.900 |
| 6OT1 | P_LYS_282  | NZ  | S_ASP_100C | OD2 | 3.405 |
| 6OT1 | P_ARG_327  | NH2 | Q_GLU_100I | OE1 | 3.817 |
| 6OT1 | S_ARG_71   | NH2 | P_ASP_368  | OD2 | 3.597 |
| 6P62 | A_LYS_168  | NZ  | B_GLU_190  | OE2 | 3.547 |
| 6P62 | A_ARG_542  | NH1 | B_GLU_647  | OE1 | 2.629 |
| 6P62 | A_ARG_542  | NH1 | B_GLU_647  | OE2 | 3.985 |
| 6P62 | A_ARG_542  | NH2 | B_GLU_648  | OE2 | 3.131 |
| 6P62 | A_ARG_579  | NH1 | B_GLU_584  | OE1 | 3.453 |
| 6P62 | A_ARG_579  | NH1 | B_GLU_584  | OE2 | 2.953 |
| 6P62 | B_LYS_168  | NZ  | E_GLU_190  | OE2 | 3.547 |
| 6P62 | B_ARG_542  | NH1 | E_GLU_647  | OE1 | 2.630 |
| 6P62 | B_ARG_542  | NH1 | E_GLU_647  | OE2 | 3.986 |
| 6P62 | B_ARG_542  | NH2 | E_GLU_648  | OE2 | 3.130 |
| 6P62 | B_ARG_579  | NH1 | E_GLU_584  | OE1 | 3.454 |
| 6P62 | B_ARG_579  | NH1 | E_GLU_584  | OE2 | 2.952 |
| 6P62 | E_LYS_168  | NZ  | A_GLU_190  | OE2 | 3.547 |
| 6P62 | E_ARG_542  | NH1 | A_GLU_647  | OE1 | 2.629 |
| 6P62 | E_ARG_542  | NH1 | A_GLU_647  | OE2 | 3.985 |
| 6P62 | E_ARG_542  | NH2 | A_GLU_648  | OE2 | 3.130 |
| 6P62 | E_ARG_579  | NH1 | A_GLU_584  | OE1 | 3.453 |
| 6P62 | E_ARG_579  | NH1 | A_GLU_584  | OE2 | 2.952 |
| 6P65 | A_ARG_500  | NH1 | L_GLU_30   | OE1 | 3.144 |
| 6P65 | A_ARG_500  | NH1 | L_GLU_30   | OE2 | 3.804 |
| 6P65 | A_ARG_500  | NH2 | L_GLU_30   | OE1 | 3.741 |
| 6P65 | A_ARG_500  | NH2 | L_GLU_30   | OE2 | 2.979 |
| 6P65 | A_ARG_542  | NH2 | B_ASP_648  | OD1 | 3.154 |
| 6P65 | H_LYS_71   | NZ  | A_GLU_87   | OE1 | 2.936 |
| 6P65 | H_LYS_71   | NZ  | A_GLU_87   | OE2 | 2.864 |
| 6P65 | H_LYS_100H | NZ  | L_ASP_50   | OD1 | 2.708 |
| 6P65 | H_LYS_100H | NZ  | L_ASP_50   | OD2 | 2.597 |
| 6P65 | B_ARG_500  | NH1 | D_GLU_30   | OE1 | 3.143 |
| 6P65 | B_ARG_500  | NH1 | D_GLU_30   | OE2 | 3.804 |
| 6P65 | B_ARG_500  | NH2 | D_GLU_30   | OE1 | 3.741 |
| 6P65 | B_ARG_500  | NH2 | D_GLU_30   | OE2 | 2.979 |
| 6P65 | B_ARG_542  | NH2 | E_ASP_648  | OD1 | 3.155 |
| 6P65 | C_LYS_71   | NZ  | B_GLU_87   | OE1 | 2.936 |
| 6P65 | C_LYS_71   | NZ  | B_GLU_87   | OE2 | 2.864 |
| 6P65 | C_LYS_100H | NZ  | D_ASP_50   | OD1 | 2.708 |
| 6P65 | C_LYS_100H | NZ  | D_ASP_50   | OD2 | 2.597 |
| 6P65 | E_ARG_500  | NH1 | G_GLU_30   | OE1 | 3.143 |
| 6P65 | E_ARG_500  | NH1 | G_GLU_30   | OE2 | 3.804 |
| 6P65 | E_ARG_500  | NH2 | G_GLU_30   | OE1 | 3.741 |
| 6P65 | E_ARG_500  | NH2 | G_GLU_30   | OE2 | 2.979 |
| 6P65 | E_ARG_542  | NH2 | A_ASP_648  | OD1 | 3.154 |
| 6P65 | F_LYS_71   | NZ  | E_GLU_87   | OE1 | 2.935 |

|      |            |     |           |     |       |
|------|------------|-----|-----------|-----|-------|
| 6P65 | F_LYS_71   | NZ  | E_GLU_87  | OE2 | 2.865 |
| 6P65 | F_LYS_100H | NZ  | G_ASP_50  | OD1 | 2.708 |
| 6P65 | F_LYS_100H | NZ  | G_ASP_50  | OD2 | 2.596 |
| 6PE8 | A_LYS_212  | NZ  | B_GLU_129 | OE1 | 3.617 |
| 6PE8 | A_LYS_212  | NZ  | B_GLU_129 | OE2 | 2.921 |
| 6PE8 | A_LYS_217  | NZ  | B_ASP_128 | OD2 | 3.408 |
| 6PE8 | B_LYS_36   | NZ  | U_GLU_98  | OE2 | 3.943 |
| 6PE8 | H_LYS_212  | NZ  | L_GLU_129 | OE1 | 2.763 |
| 6PE8 | H_LYS_212  | NZ  | L_GLU_129 | OE2 | 3.237 |
| 6PE8 | L_LYS_36   | NZ  | T_GLU_98  | OE1 | 3.975 |
| 6PE8 | L_LYS_36   | NZ  | T_GLU_98  | OE2 | 3.494 |
| 6PE8 | T_ARG_90   | NH2 | H_ASP_62  | OD1 | 3.932 |
| 6PE8 | T_LYS_94   | NZ  | L_ASP_97  | OD1 | 2.502 |
| 6PE8 | T_LYS_94   | NZ  | L_ASP_97  | OD2 | 3.872 |
| 6PE9 | A_LYS_212  | NZ  | B_GLU_129 | OE1 | 3.227 |
| 6PE9 | A_LYS_212  | NZ  | B_GLU_129 | OE2 | 3.311 |
| 6PE9 | A_LYS_217  | NZ  | B_ASP_128 | OD1 | 3.061 |
| 6PE9 | A_LYS_217  | NZ  | B_ASP_128 | OD2 | 3.113 |
| 6PE9 | C_LYS_13   | NZ  | U_GLU_107 | OE2 | 3.461 |
| 6PE9 | C_LYS_212  | NZ  | D_GLU_129 | OE1 | 2.716 |
| 6PE9 | D_LYS_36   | NZ  | G_GLU_98  | OE2 | 3.800 |
| 6PE9 | E_LYS_13   | NZ  | G_GLU_107 | OE2 | 3.510 |
| 6PE9 | E_LYS_212  | NZ  | F_GLU_129 | OE1 | 3.511 |
| 6PE9 | E_LYS_212  | NZ  | F_GLU_129 | OE2 | 3.915 |
| 6PE9 | F_LYS_36   | NZ  | U_GLU_98  | OE2 | 3.769 |
| 6PE9 | G_ARG_73   | NH1 | J_GLU_74  | OE1 | 3.140 |
| 6PE9 | G_ARG_73   | NH2 | J_GLU_74  | OE1 | 2.423 |
| 6PE9 | G_ARG_73   | NH2 | J_GLU_74  | OE2 | 3.851 |
| 6PE9 | G_LYS_94   | NZ  | D_ASP_97  | OD1 | 2.957 |
| 6PE9 | I_LYS_29   | NZ  | U_ASP_69  | OD2 | 3.034 |
| 6PE9 | I_ARG_73   | NH1 | U_GLU_74  | OE1 | 3.681 |
| 6PE9 | I_ARG_73   | NH1 | U_GLU_74  | OE2 | 2.345 |
| 6PE9 | I_ARG_73   | NH2 | U_GLU_74  | OE2 | 3.507 |
| 6PE9 | J_ARG_73   | NH1 | G_GLU_74  | OE1 | 3.931 |
| 6PE9 | J_ARG_73   | NH1 | G_GLU_74  | OE2 | 3.429 |
| 6PE9 | M_LYS_36   | NZ  | J_GLU_98  | OE1 | 2.716 |
| 6PE9 | U_LYS_     | NZ  | L_ASP_    | OD2 | 3.835 |
| 6PE9 | U_ARG_     | NH2 | I_GLU_    | OE1 | 3.379 |
| 6PE9 | U_ARG_     | NH2 | I_GLU_    | OE2 | 2.907 |
| 6PE9 | U_LYS_94   | NZ  | F_ASP_97  | OD1 | 2.940 |
| 6PE9 | V_ARG_90   | NH1 | L_ASP_1   | OD1 | 3.701 |
| 6PE9 | V_ARG_90   | NH2 | L_ASP_1   | OD1 | 3.047 |
| 6PE9 | V_LYS_94   | NZ  | L_ASP_97  | OD1 | 3.203 |
| 6PHB | I_LYS_43   | NZ  | D_ASP_27  | OD2 | 2.797 |
| 6PHB | I_LYS_47   | NZ  | C_GLU_55  | OE1 | 3.460 |
| 6PHB | I_LYS_47   | NZ  | C_GLU_55  | OE2 | 3.396 |
| 6PHB | I_LYS_47   | NZ  | D_ASP_105 | OD2 | 2.626 |
| 6PHB | C_ARG_95   | NH1 | L_ASP_28  | OD2 | 3.551 |
| 6PHB | C_ARG_95   | NH1 | I_GLU_39  | OE2 | 3.728 |
| 6PHB | D_ARG_50   | NH1 | I_GLU_39  | OE2 | 3.791 |
| 6PHB | D_ARG_50   | NH2 | I_GLU_39  | OE2 | 2.945 |
| 6PHB | D_LYS_213  | NZ  | C_GLU_124 | OE1 | 2.534 |
| 6PHB | D_LYS_213  | NZ  | C_GLU_124 | OE2 | 3.508 |
| 6PHB | E_LYS_43   | NZ  | B_ASP_27  | OD2 | 3.033 |
| 6PHB | E_LYS_47   | NZ  | A_GLU_55  | OE1 | 3.560 |
| 6PHB | E_LYS_47   | NZ  | A_GLU_55  | OE2 | 3.516 |
| 6PHB | E_LYS_47   | NZ  | B_ASP_105 | OD1 | 2.522 |
| 6PHB | A_ARG_95   | NH1 | E_ASP_28  | OD1 | 3.463 |

|      |           |     |           |     |       |
|------|-----------|-----|-----------|-----|-------|
| 6PHB | A_ARG_95  | NH1 | E_GLU_39  | OE2 | 3.694 |
| 6PHB | B_ARG_50  | NH1 | E_GLU_39  | OE2 | 3.771 |
| 6PHB | B_ARG_50  | NH2 | E_GLU_39  | OE2 | 2.963 |
| 6PHB | B_LYS_213 | NZ  | A_GLU_124 | OE1 | 3.629 |
| 6PHB | B_LYS_213 | NZ  | A_GLU_124 | OE2 | 2.552 |
| 6PHC | I_LYS_2   | NZ  | A_GLU_96  | OE1 | 3.433 |
| 6PHC | A_LYS_209 | NZ  | B_GLU_122 | OE2 | 3.367 |
| 6PHC | E_LYS_2   | NZ  | C_GLU_96  | OE2 | 3.166 |
| 6PHC | C_LYS_75  | NZ  | A_GLU_1   | OE1 | 3.102 |
| 6PHC | C_LYS_209 | NZ  | D_GLU_122 | OE2 | 3.075 |
| 6PHD | H_ARG_52  | NH2 | C_ASP_131 | OD2 | 3.559 |
| 6PHD | H_LYS_158 | NZ  | L_GLU_128 | OE2 | 2.649 |
| 6PHD | H_LYS_224 | NZ  | L_GLU_127 | OE1 | 2.532 |
| 6PHD | H_LYS_224 | NZ  | L_GLU_127 | OE2 | 2.992 |
| 6PHD | C_LYS_118 | NZ  | H_ASP_109 | OD1 | 3.874 |
| 6PHD | C_LYS_135 | NZ  | L_ASP_51  | OD2 | 3.166 |
| 6PHF | A_LYS_63  | NZ  | C_GLU_89  | OE2 | 2.941 |
| 6PHF | A_LYS_150 | NZ  | B_GLU_123 | OE1 | 3.782 |
| 6PHF | A_LYS_216 | NZ  | B_GLU_122 | OE1 | 2.642 |
| 6PHF | A_LYS_216 | NZ  | B_GLU_122 | OE2 | 2.832 |
| 6PHF | G_LYS_130 | NZ  | A_GLU_59  | OE2 | 2.793 |
| 6PHF | G_LYS_135 | NZ  | B_ASP_48  | OD1 | 3.917 |
| 6PHF | G_LYS_135 | NZ  | B_ASP_48  | OD2 | 2.691 |
| 6PHF | B_LYS_50  | NZ  | G_ASP_160 | OD1 | 3.948 |
| 6PHF | B_LYS_50  | NZ  | G_ASP_160 | OD2 | 3.455 |
| 6PHF | C_LYS_63  | NZ  | A_GLU_89  | OE2 | 3.050 |
| 6PHF | C_LYS_150 | NZ  | D_GLU_123 | OE2 | 2.663 |
| 6PHF | C_LYS_216 | NZ  | D_GLU_122 | OE1 | 2.759 |
| 6PHF | C_LYS_216 | NZ  | D_GLU_122 | OE2 | 3.120 |
| 6PHF | E_LYS_130 | NZ  | C_GLU_59  | OE2 | 2.474 |
| 6PHF | E_LYS_135 | NZ  | D_ASP_48  | OD1 | 3.909 |
| 6PHF | E_LYS_135 | NZ  | D_ASP_48  | OD2 | 2.579 |
| 6PHG | A_LYS_221 | NZ  | B_GLU_126 | OE2 | 3.079 |
| 6PHH | C_LYS_76  | NZ  | A_GLU_1   | OE1 | 3.897 |
| 6PHH | A_LYS_76  | NZ  | C_GLU_1   | OE1 | 3.451 |
| 6PHH | A_LYS_221 | NZ  | B_GLU_126 | OE2 | 3.327 |
| 6PI7 | B_ARG_67  | NH2 | A_GLU_345 | OE2 | 3.601 |
| 6PI7 | C_ARG_105 | NH1 | A_ASP_334 | OD1 | 2.888 |
| 6PI7 | F_ARG_105 | NH1 | D_ASP_334 | OD1 | 3.009 |
| 6PI7 | G_ARG_4   | NH1 | A_ASP_385 | OD1 | 3.497 |
| 6PI7 | G_ARG_4   | NH1 | A_ASP_385 | OD2 | 3.823 |
| 6PI7 | G_ARG_4   | NH2 | A_ASP_385 | OD1 | 3.602 |
| 6PI7 | G_ARG_4   | NH2 | A_ASP_385 | OD2 | 3.033 |
| 6PI7 | G_ARG_6   | NH1 | A_GLU_433 | OE2 | 2.847 |
| 6PI7 | G_ARG_6   | NH1 | A_ASP_437 | OD1 | 3.619 |
| 6PI7 | G_ARG_6   | NH2 | A_ASP_437 | OD1 | 2.997 |
| 6PI7 | G_ARG_6   | NH2 | A_ASP_440 | OD2 | 2.762 |
| 6PYC | H_LYS_208 | NZ  | L_GLU_124 | OE1 | 2.557 |
| 6PYC | H_LYS_208 | NZ  | L_GLU_124 | OE2 | 3.571 |
| 6PYC | L_LYS_108 | NZ  | B_ASP_32  | OD1 | 2.949 |
| 6PYC | A_ARG_99  | NH1 | B_ASP_91  | OD1 | 3.714 |
| 6PYC | B_LYS_53  | NZ  | L_GLU_17  | OE1 | 3.141 |
| 6PYC | B_LYS_53  | NZ  | L_GLU_17  | OE2 | 3.254 |
| 6PYD | H_LYS_213 | NZ  | L_GLU_127 | OE1 | 3.352 |
| 6PYD | A_LYS_213 | NZ  | B_GLU_127 | OE1 | 3.596 |
| 6PZW | A_HIS_98  | NE2 | B_GLU_214 | OE2 | 3.848 |
| 6PZW | A_ARG_253 | NH1 | K_ASP_53  | OD2 | 2.854 |
| 6PZW | A_ARG_253 | NH2 | K_ASP_53  | OD2 | 2.999 |

|      |           |     |           |     |       |
|------|-----------|-----|-----------|-----|-------|
| 6PZW | A_ARG_419 | NH1 | B_GLU_214 | OE2 | 3.897 |
| 6PZW | K_ARG_97  | NH2 | L ASP_50  | OD1 | 2.825 |
| 6PZW | K_ARG_97  | NH2 | L ASP_50  | OD2 | 3.390 |
| 6PZW | D_HIS_98  | NE2 | A_GLU_214 | OE2 | 3.848 |
| 6PZW | D_ARG_253 | NH1 | F ASP_53  | OD2 | 2.854 |
| 6PZW | D_ARG_253 | NH2 | F ASP_53  | OD2 | 2.999 |
| 6PZW | D_ARG_419 | NH1 | A_GLU_214 | OE2 | 3.897 |
| 6PZW | F_ARG_97  | NH2 | E ASP_50  | OD1 | 2.825 |
| 6PZW | F_ARG_97  | NH2 | E ASP_50  | OD2 | 3.390 |
| 6PZW | J_ARG_97  | NH2 | G ASP_50  | OD1 | 2.825 |
| 6PZW | J_ARG_97  | NH2 | G ASP_50  | OD2 | 3.390 |
| 6PZW | C_HIS_98  | NE2 | D_GLU_214 | OE2 | 3.848 |
| 6PZW | C_ARG_253 | NH1 | J ASP_53  | OD2 | 2.854 |
| 6PZW | C_ARG_253 | NH2 | J ASP_53  | OD2 | 2.999 |
| 6PZW | C_ARG_419 | NH1 | D_GLU_214 | OE2 | 3.897 |
| 6PZW | B_HIS_98  | NE2 | C_GLU_214 | OE2 | 3.848 |
| 6PZW | B_ARG_253 | NH1 | H ASP_53  | OD2 | 2.854 |
| 6PZW | B_ARG_253 | NH2 | H ASP_53  | OD2 | 2.999 |
| 6PZW | B_ARG_419 | NH1 | C_GLU_214 | OE2 | 3.897 |
| 6PZW | H_ARG_97  | NH2 | L ASP_50  | OD1 | 2.825 |
| 6PZW | H_ARG_97  | NH2 | L ASP_50  | OD2 | 3.390 |
| 6RPS | A_HIS_34  | NE2 | B ASP_102 | OD2 | 3.097 |
| 6RPS | A_HIS_64  | NE2 | H ASP_54  | OD2 | 2.837 |
| 6RPS | A_LYS_170 | NZ  | H ASP_54  | OD1 | 3.636 |
| 6RPS | A_LYS_170 | NZ  | H ASP_54  | OD2 | 2.590 |
| 6RPS | A_LYS_170 | NZ  | H ASP_56  | OD2 | 2.821 |
| 6RPS | A_HIS_234 | ND1 | H ASP_56  | OD2 | 3.904 |
| 6RPS | A_LYS_250 | NZ  | B_GLU_13  | OE2 | 2.734 |
| 6RPS | B_HIS_64  | NE2 | N ASP_54  | OD2 | 2.859 |
| 6RPS | B_HIS_103 | ND1 | A ASP_36  | OD1 | 3.129 |
| 6RPS | B_HIS_103 | ND1 | A ASP_36  | OD2 | 3.954 |
| 6RPS | B_LYS_170 | NZ  | N ASP_54  | OD1 | 3.719 |
| 6RPS | B_LYS_170 | NZ  | N ASP_54  | OD2 | 2.644 |
| 6RPS | B_LYS_170 | NZ  | N ASP_56  | OD2 | 2.839 |
| 6RPS | B_HIS_234 | ND1 | N ASP_56  | OD2 | 3.922 |
| 6RPS | B_LYS_250 | NZ  | A_GLU_13  | OE2 | 2.991 |
| 6RPS | N_LYS_214 | NZ  | M ASP_122 | OD1 | 3.095 |
| 6RPS | N_LYS_214 | NZ  | M ASP_122 | OD2 | 3.107 |
| 6RPS | H_LYS_209 | NZ  | L_GLU_123 | OE1 | 2.780 |
| 6RPS | H_LYS_209 | NZ  | L_GLU_123 | OE2 | 3.710 |
| 6S3T | A_LYS_49  | NZ  | C_GLU_158 | OE1 | 3.663 |
| 6S3T | B_LYS_49  | NZ  | L_GLU_158 | OE1 | 3.761 |
| 6S3T | D_ARG_35  | NH1 | S ASP_332 | OD1 | 3.467 |
| 6S3T | D_ARG_35  | NH1 | S ASP_332 | OD2 | 2.946 |
| 6S3T | D_ARG_35  | NH2 | S ASP_332 | OD2 | 3.071 |
| 6S3T | D_ARG_35  | NH2 | S ASP_334 | OD1 | 3.408 |
| 6S3T | D_HIS_171 | NE2 | C ASP_171 | OD2 | 3.832 |
| 6S3T | D_LYS_215 | NZ  | C_GLU_127 | OE1 | 2.814 |
| 6S3T | D_LYS_215 | NZ  | C_GLU_127 | OE2 | 3.990 |
| 6S3T | E_ARG_35  | NH1 | T ASP_332 | OD1 | 3.561 |
| 6S3T | E_ARG_35  | NH1 | T ASP_332 | OD2 | 3.035 |
| 6S3T | E_ARG_35  | NH2 | T ASP_332 | OD2 | 3.163 |
| 6S3T | E_ARG_35  | NH2 | T ASP_334 | OD1 | 3.432 |
| 6S3T | E_HIS_171 | NE2 | I ASP_171 | OD2 | 3.931 |
| 6S3T | E_LYS_215 | NZ  | L_GLU_127 | OE1 | 3.013 |
| 6S3T | N_ARG_35  | NH1 | A ASP_332 | OD1 | 3.796 |
| 6S3T | N_ARG_35  | NH1 | A ASP_332 | OD2 | 3.195 |
| 6S3T | N_ARG_35  | NH2 | A ASP_332 | OD1 | 3.883 |

|      |           |     |           |     |       |
|------|-----------|-----|-----------|-----|-------|
| 6S3T | N_ARG_35  | NH2 | A_ASP_332 | OD2 | 2.517 |
| 6S3T | N_ARG_35  | NH2 | A_ASP_334 | OD2 | 3.989 |
| 6S3T | N_ARG_73  | NH2 | S_GLU_44  | OE2 | 2.482 |
| 6S3T | N_HIS_171 | NE2 | M_ASP_171 | OD2 | 3.181 |
| 6S3T | N_LYS_215 | NZ  | M_GLU_127 | OE1 | 2.964 |
| 6S3T | N_LYS_215 | NZ  | M_GLU_127 | OE2 | 3.944 |
| 6S3T | R_ARG_35  | NH1 | B_ASP_332 | OD1 | 3.511 |
| 6S3T | R_ARG_35  | NH1 | B_ASP_332 | OD2 | 2.943 |
| 6S3T | R_ARG_35  | NH2 | B_ASP_332 | OD2 | 2.873 |
| 6S3T | R_ARG_35  | NH2 | B_ASP_334 | OD1 | 3.424 |
| 6S3T | R_ARG_73  | NH2 | T_GLU_44  | OE2 | 2.709 |
| 6S3T | R_HIS_171 | NE2 | Q_ASP_171 | OD2 | 3.265 |
| 6S3T | R_LYS_215 | NZ  | Q_GLU_127 | OE1 | 2.948 |
| 6S3T | R_LYS_215 | NZ  | Q_GLU_127 | OE2 | 3.831 |
| 6U02 | A_HIS_98  | NE2 | B_GLU_214 | OE2 | 3.838 |
| 6U02 | A_ARG_209 | NH1 | J_GLU_128 | OE2 | 3.226 |
| 6U02 | A_ARG_210 | NH2 | J_ASP_412 | OD1 | 3.355 |
| 6U02 | A_ARG_210 | NH2 | J_ASP_412 | OD2 | 3.535 |
| 6U02 | A_ARG_419 | NH1 | B_GLU_214 | OE2 | 3.906 |
| 6U02 | B_HIS_98  | NE2 | E_GLU_214 | OE2 | 3.839 |
| 6U02 | B_ARG_209 | NH1 | A_GLU_128 | OE2 | 3.226 |
| 6U02 | B_ARG_210 | NH2 | A_ASP_412 | OD1 | 3.355 |
| 6U02 | B_ARG_210 | NH2 | A_ASP_412 | OD2 | 3.535 |
| 6U02 | B_ARG_419 | NH1 | E_GLU_214 | OE2 | 3.906 |
| 6U02 | E_HIS_98  | NE2 | J_GLU_214 | OE2 | 3.838 |
| 6U02 | E_ARG_209 | NH1 | B_GLU_128 | OE2 | 3.226 |
| 6U02 | E_ARG_210 | NH2 | B_ASP_412 | OD1 | 3.355 |
| 6U02 | E_ARG_210 | NH2 | B_ASP_412 | OD2 | 3.536 |
| 6U02 | E_ARG_419 | NH1 | J_GLU_214 | OE2 | 3.906 |
| 6U02 | J_HIS_98  | NE2 | A_GLU_214 | OE2 | 3.838 |
| 6U02 | J_ARG_209 | NH1 | E_GLU_128 | OE2 | 3.226 |
| 6U02 | J_ARG_210 | NH2 | E_ASP_412 | OD1 | 3.356 |
| 6U02 | J_ARG_210 | NH2 | E_ASP_412 | OD2 | 3.535 |
| 6U02 | J_ARG_419 | NH1 | A_GLU_214 | OE2 | 3.906 |
| 6U59 | A_LYS_34  | NZ  | B_ASP_612 | OD1 | 2.489 |
| 6U59 | A_ARG_504 | NH1 | I_GLU_662 | OE1 | 3.209 |
| 6U59 | A_ARG_504 | NH1 | I_GLU_662 | OE2 | 2.833 |
| 6U59 | A_ARG_504 | NH2 | I_GLU_662 | OE2 | 3.911 |
| 6U59 | B_LYS_574 | NZ  | A_ASP_107 | OD1 | 2.403 |
| 6U59 | B_ARG_579 | NH2 | I_GLU_584 | OE1 | 3.024 |
| 6U59 | L_ARG_50  | NH1 | A_GLU_269 | OE2 | 3.175 |
| 6U59 | L_ARG_50  | NH2 | A_GLU_268 | OE1 | 2.965 |
| 6U59 | L_ARG_50  | NH2 | A_GLU_269 | OE2 | 3.221 |
| 6U59 | L_ARG_95A | NH1 | A_GLU_350 | OE2 | 3.796 |
| 6U59 | L_ARG_95A | NH2 | A_GLU_350 | OE1 | 3.217 |
| 6U59 | L_ARG_95A | NH2 | A_GLU_350 | OE2 | 3.041 |
| 6U59 | L_ARG_95A | NH2 | A_GLU_351 | OE1 | 3.921 |
| 6U59 | C_LYS_34  | NZ  | D_ASP_612 | OD1 | 2.489 |
| 6U59 | C_ARG_504 | NH1 | B_GLU_662 | OE1 | 3.208 |
| 6U59 | C_ARG_504 | NH1 | B_GLU_662 | OE2 | 2.832 |
| 6U59 | C_ARG_504 | NH2 | B_GLU_662 | OE2 | 3.910 |
| 6U59 | D_LYS_574 | NZ  | C_ASP_107 | OD1 | 2.403 |
| 6U59 | D_ARG_579 | NH2 | B_GLU_584 | OE1 | 3.024 |
| 6U59 | E_ARG_50  | NH1 | C_GLU_269 | OE2 | 3.175 |
| 6U59 | E_ARG_50  | NH2 | C_GLU_268 | OE1 | 2.965 |
| 6U59 | E_ARG_50  | NH2 | C_GLU_269 | OE2 | 3.221 |
| 6U59 | E_ARG_95A | NH1 | C_GLU_350 | OE2 | 3.795 |
| 6U59 | E_ARG_95A | NH2 | C_GLU_350 | OE1 | 3.216 |

|      |           |     |           |     |       |
|------|-----------|-----|-----------|-----|-------|
| 6U59 | E_ARG_95A | NH2 | C_GLU_350 | OE2 | 3.040 |
| 6U59 | E_ARG_95A | NH2 | C_GLU_351 | OE1 | 3.921 |
| 6U59 | G_LYS_34  | NZ  | I_ASP_612 | OD1 | 2.489 |
| 6U59 | G_ARG_504 | NH1 | D_GLU_662 | OE1 | 3.209 |
| 6U59 | G_ARG_504 | NH1 | D_GLU_662 | OE2 | 2.833 |
| 6U59 | G_ARG_504 | NH2 | D_GLU_662 | OE2 | 3.910 |
| 6U59 | I_LYS_574 | NZ  | G_ASP_107 | OD1 | 2.403 |
| 6U59 | I_ARG_579 | NH2 | D_GLU_584 | OE1 | 3.025 |
| 6U59 | J_ARG_50  | NH1 | G_GLU_269 | OE2 | 3.175 |
| 6U59 | J_ARG_50  | NH2 | G_GLU_268 | OE1 | 2.965 |
| 6U59 | J_ARG_50  | NH2 | G_GLU_269 | OE2 | 3.220 |
| 6U59 | J_ARG_95A | NH1 | G_GLU_350 | OE2 | 3.796 |
| 6U59 | J_ARG_95A | NH2 | G_GLU_350 | OE1 | 3.217 |
| 6U59 | J_ARG_95A | NH2 | G_GLU_350 | OE2 | 3.041 |
| 6U59 | J_ARG_95A | NH2 | G_GLU_351 | OE1 | 3.921 |
| 6UG7 | H_HIS_60  | NE2 | L_GLU_1   | OE1 | 2.854 |
| 6UG7 | H_HIS_60  | NE2 | L_GLU_1   | OE2 | 3.808 |
| 6UG7 | H_LYS_213 | NZ  | L_GLU_122 | OE1 | 2.927 |
| 6UG7 | H_LYS_213 | NZ  | L_GLU_122 | OE2 | 3.960 |
| 6UG8 | H_HIS_60  | NE2 | L_GLU_1   | OE1 | 3.688 |
| 6UG8 | H_LYS_213 | NZ  | L_GLU_122 | OE1 | 2.779 |
| 6UG8 | H_LYS_213 | NZ  | L_GLU_122 | OE2 | 3.811 |
| 6UG9 | H_HIS_60  | NE2 | L_GLU_1   | OE2 | 3.673 |
| 6UG9 | H_LYS_213 | NZ  | L_GLU_122 | OE1 | 3.853 |
| 6UG9 | A_HIS_60  | NE2 | B_GLU_1   | OE1 | 3.507 |
| 6UG9 | A_LYS_213 | NZ  | B_GLU_122 | OE1 | 2.877 |
| 6UG9 | J_HIS_60  | NE2 | K_GLU_1   | OE1 | 3.585 |
| 6UG9 | J_LYS_213 | NZ  | K_GLU_122 | OE1 | 2.648 |
| 6UG9 | J_LYS_213 | NZ  | K_GLU_122 | OE2 | 3.296 |
| 6UGA | H_HIS_60  | NE2 | L_GLU_1   | OE1 | 3.306 |
| 6UGA | B_HIS_60  | NE2 | A_GLU_1   | OE2 | 3.932 |
| 6UGA | B_HIS_168 | NE2 | A_ASP_166 | OD1 | 3.218 |
| 6UGA | B_LYS_213 | NZ  | A_GLU_122 | OE1 | 3.352 |

Table 2: Interfacial salt bridging networks within the PDB entries of all experimentally determined antigen-antibody-related structures. In this table, a PDB file is specified with a four-letter PDB ID, except that the names of the PDB files corresponding to the single NMR structural model split from the NMR ensemble is specified with a four-letter PDB ID in addition to a hyphen followed by the single NMR structural model numeric ID, the residue naming scheme is **Chain ID\_residue name\_residue number**,  $\angle ADH$  represents the angle formed by acceptor (A), donor (D) and hydrogen (H) ( $\angle ADH$ ).

| Count | Residue A | Residue B |
|-------|-----------|-----------|
| 1945  | ARG61     | ASP82     |
| 1576  | ARG66     | ASP86     |
| 1226  | ARG38     | GLU46     |
| 902   | ARG67     | ASP90     |
| 811   | ARG38     | ASP86     |
| 539   | LYS149    | GLU195    |
| 512   | ARG61     | GLU79     |
| 486   | ARG61     | GLU81     |
| 429   | ARG94     | ASP101    |
| 380   | ARG24     | ASP70     |
| 373   | ARG155    | GLU185    |
| 367   | ARG66     | ASP89     |
| 347   | ARG38     | ASP90     |
| 304   | HIS189    | ASP151    |
| 267   | ARG       | ASP       |
| 262   | LYS183    | GLU187    |
| 245   | LYS143    | ASP144    |
| 222   | ARG60     | ASP81     |
| 217   | LYS199    | ASP110    |
| 200   | ARG       | GLU       |
| 200   | LYS67     | ASP90     |
| 191   | ARG38     | ASP89     |
| 185   | LYS       | GLU       |
| 178   | ARG76     | GLU74     |
| 177   | ARG125    | ASP119    |
| 173   | LYS209    | GLU123    |
| 171   | ARG66     | ASP87     |
| 160   | ARG63     | ASP84     |
| 157   | ARG456    | GLU466    |
| 156   | LYS103    | GLU165    |
| 153   | ARG476    | GLU102    |
| 149   | LYS63     | GLU46     |
| 141   | ARG469    | ASP457    |
| 138   | LYS62     | GLU46     |
| 138   | LYS66     | ASP86     |
| 131   | ARG476    | ASP474    |
| 128   | LYS103    | GLU105    |
| 122   | ARG480    | ASP477    |
| 117   | ARG261    | GLU119    |
| 116   | ARG170    | GLU128    |
| 114   | ARG69     | ASP92     |
| 113   | LYS1      | GLU7      |
| 111   | LYS148    | GLU194    |
| 111   | ARG54     | ASP60     |
| 109   | LYS210    | GLU212    |
| 107   | LYS       | ASP       |
| 106   | LYS487    | ASP47     |
| 105   | ARG109    | GLU89     |
| 105   | LYS282    | GLU275    |
| 103   | LYS147    | GLU154    |
| 101   | ARG65     | ASP86     |
| 101   | ARG54     | ASP78     |
| 100   | LYS487    | GLU91     |
| 98    | ARG298    | GLU381    |
| 98    | ARG62     | ASP83     |
| 97    | ARG429    | ASP113    |
| 94    | ARG141    | ASP77     |

|    |         |         |
|----|---------|---------|
| 92 | LYS75   | ASP72   |
| 88 | ARG542  | GLU647  |
| 88 | ARG59   | ASP368  |
| 87 | ARG90   | ASP60   |
| 87 | ARG123  | GLU120  |
| 86 | HIS75   | ASP73   |
| 86 | LYS207  | GLU381  |
| 86 | ARG83   | GLU85   |
| 83 | ARG163  | GLU131  |
| 83 | HIS189  | GLU185  |
| 83 | ARG211  | GLU187  |
| 82 | LYS348  | GLU351  |
| 81 | HIS249  | GLU482  |
| 80 | ARG71   | ASP368  |
| 80 | LYS208  | GLU123  |
| 76 | LYS68   | GLU85   |
| 76 | ARG57   | GLU82   |
| 75 | ARG54   | ASP77   |
| 75 | ARG66   | GLU84   |
| 75 | ARG109  | GLU67   |
| 74 | LYS64   | ASP61   |
| 74 | LYS348  | GLU269  |
| 73 | LYS142  | GLU105  |
| 73 | ARG60   | GLU78   |
| 73 | ARG24   | ASP75   |
| 72 | LYS62   | ASP90   |
| 72 | ARG76   | GLU81   |
| 72 | LYS117  | GLU114  |
| 72 | LYS62   | ASP86   |
| 72 | ARG1113 | GLU1105 |
| 71 | ARG96   | GLU98   |
| 71 | ARG617  | GLU634  |
| 70 | ARG54   | GLU97   |
| 70 | LYS24   | ASP70   |
| 70 | LYS27   | GLU97   |
| 69 | LYS65   | ASP62   |
| 69 | LYS188  | ASP185  |
| 69 | ARG67   | ASP88   |
| 68 | ARG98   | ASP100  |
| 67 | LYS39   | ASP81   |
| 66 | LYS153  | GLU199  |
| 66 | ARG124  | GLU132  |
| 65 | LYS264  | ASP85   |
| 65 | LYS39   | GLU81   |
| 65 | ARG61   | ASP48   |
| 63 | LYS292  | ASP291  |
| 62 | LYS103  | ASP85   |
| 62 | ARG188  | GLU185  |
| 61 | ARG60   | GLU80   |
| 60 | ARG39   | ASP90   |
| 60 | ARG54   | GLU57   |
| 60 | ARG269  | GLU67   |
| 59 | LYS124  | ASP195  |
| 59 | LYS103  | ASP165  |
| 59 | HIS188  | ASP150  |
| 59 | LYS310  | ASP90   |
| 59 | LYS176  | GLU123  |
| 59 | ARG39   | GLU47   |



|    |         |         |
|----|---------|---------|
| 58 | HIS191  | ASP128  |
| 58 | ARG40   | GLU89   |
| 57 | LYS12   | GLU10   |
| 56 | ARG154  | GLU184  |
| 55 | LYS574  | ASP107  |
| 54 | ARG159  | ASP189  |
| 54 | LYS221  | GLU123  |
| 53 | ARG98   | ASP108  |
| 53 | ARG59   | ASP85   |
| 53 | LYS206  | ASP208  |
| 52 | LYS238  | GLU72   |
| 52 | LYS214  | GLU123  |
| 51 | LYS231  | GLU268  |
| 51 | LYS147  | ASP148  |
| 51 | ARG210  | GLU212  |
| 51 | ARG629  | ASP644  |
| 50 | LYS46   | GLU492  |
| 50 | ARG14   | ASP39   |
| 50 | ARG106  | GLU85   |
| 49 | ARG70   | ASP93   |
| 49 | ARG579  | GLU584  |
| 49 | ARG188  | ASP184  |
| 49 | LYS801  | ASP843  |
| 48 | ARG68   | ASP91   |
| 47 | ARG98   | ASP105  |
| 47 | LYS51   | GLU103  |
| 47 | ARG95   | ASP95   |
| 46 | ARG401  | ASP444  |
| 46 | LYS76   | ASP73   |
| 46 | ARG225  | ASP190  |
| 46 | ARG66   | GLU86   |
| 45 | ARG64   | ASP86   |
| 44 | ARG96   | ASP100C |
| 44 | LYS155  | GLU201  |
| 43 | LYS326  | GLU15   |
| 43 | LYS50   | ASP275  |
| 43 | HIS159  | ASP160  |
| 43 | ARG58   | ASP56   |
| 43 | LYS150  | GLU196  |
| 42 | LYS227  | GLU83   |
| 42 | ARG141  | GLU104  |
| 42 | LYS107  | GLU17   |
| 41 | LYS807  | GLU818  |
| 41 | ARG98   | ASP109  |
| 41 | LYS182  | GLU186  |
| 41 | LYS150  | ASP151  |
| 41 | LYS154  | GLU200  |
| 40 | HIS     | ASP     |
| 40 | LYS1102 | GLU793  |
| 40 | LYS64   | GLU61   |
| 39 | ARG40   | GLU46   |
| 39 | ARG92   | ASP115  |
| 39 | ARG65   | ASP88   |
| 39 | ARG71   | ASP73   |
| 39 | ARG416  | GLU388  |
| 39 | ARG235  | GLU188  |
| 39 | LYS198  | ASP109  |
| 39 | HIS1020 | ASP1024 |

|    |         |         |
|----|---------|---------|
| 38 | LYS29   | GLU85   |
| 38 | ARG170  | GLU131  |
| 38 | LYS174  | ASP164  |
| 38 | ARG87   | GLU89   |
| 37 | LYS97   | ASP99   |
| 37 | ARG142  | GLU105  |
| 37 | LYS490  | GLU492  |
| 36 | ARG127  | GLU131  |
| 36 | ARG67   | GLU87   |
| 36 | ARG77   | ASP102  |
| 36 | LYS73   | ASP53   |
| 36 | ARG1054 | ASP1078 |
| 36 | ARG887  | ASP892  |
| 36 | ARG160  | GLU190  |
| 35 | ARG62   | GLU82   |
| 35 | ARG1059 | ASP368  |
| 35 | ARG3067 | ASP3090 |
| 35 | ARG841  | GLU1090 |
| 35 | LYS151  | GLU197  |
| 35 | ARG59   | ASP57   |
| 34 | HIS75   | ASP63   |
| 34 | HIS681  | ASP910  |
| 34 | ARG40   | GLU48   |
| 34 | LYS169  | ASP167  |
| 34 | LYS315  | GLU41   |
| 34 | LYS149  | ASP150  |
| 34 | HIS194  | ASP156  |
| 34 | ARG364  | ASP330  |
| 34 | HIS183  | GLU190  |
| 34 | ARG52   | GLU50   |
| 34 | LYS94   | ASP101  |
| 33 | ARG38   | ASP92   |
| 33 | ARG123  | GLU132  |
| 33 | HIS216  | ASP57   |
| 33 | ARG153  | GLU150  |
| 33 | LYS205  | ASP116  |
| 33 | ARG77   | GLU79   |
| 32 | LYS357  | GLU466  |
| 32 | ARG97   | ASP104  |
| 32 | LYS816  | ASP1064 |
| 32 | ARG46   | ASP55   |
| 32 | ARG119  | ASP54   |
| 32 | LYS232  | GLU269  |
| 31 | LYS299  | GLU69   |
| 31 | ARG124  | GLU120  |
| 31 | LYS487  | GLU47   |
| 31 | ARG82A  | GLU81   |
| 31 | HIS35   | GLU50   |
| 31 | LYS147  | GLU195  |
| 31 | ARG847  | ASP844  |
| 31 | ARG229  | GLU256  |
| 31 | LYS229  | GLU83   |
| 31 | LYS151  | ASP152  |
| 31 | ARG208  | GLU101  |
| 30 | HIS93   | ASP119  |
| 30 | LYS502  | GLU513  |
| 30 | ARG21   | ASP37   |
| 30 | HIS61   | GLU52   |

|    |         |         |
|----|---------|---------|
| 30 | HIS35   | ASP95   |
| 30 | ARG576  | GLU574  |
| 30 | LYS66   | ASP51   |
| 30 | ARG112  | ASP141  |
| 30 | ARG73   | ASP61   |
| 30 | HIS164  | ASP167  |
| 30 | HIS35   | GLU95   |
| 30 | ARG262  | GLU175  |
| 29 | HIS66   | GLU64   |
| 29 | LYS102  | GLU104  |
| 29 | LYS110  | GLU198  |
| 29 | LYS187  | GLU191  |
| 29 | LYS148  | ASP149  |
| 29 | LYS152  | ASP153  |
| 29 | LYS97   | ASP32   |
| 29 | LYS95   | ASP100C |
| 28 | LYS351  | GLU269  |
| 28 | LYS143  | GLU124  |
| 28 | LYS52   | ASP49   |
| 28 | ARG46   | GLU103  |
| 27 | ARG422  | ASP24   |
| 27 | ARG6    | ASP102  |
| 27 | HIS     | GLU     |
| 27 | LYS142  | GLU252  |
| 27 | ARG31   | ASP100A |
| 27 | LYS102  | GLU164  |
| 27 | ARG335  | ASP326  |
| 27 | ARG542  | ASP648  |
| 27 | LYS617  | GLU634  |
| 27 | LYS421  | GLU370  |
| 27 | ARG308  | GLU164  |
| 27 | ARG95   | ASP91   |
| 26 | ARG41   | GLU49   |
| 26 | LYS310  | ASP86   |
| 26 | LYS8    | GLU119  |
| 26 | LYS476  | GLU102  |
| 26 | ARG1058 | GLU1013 |
| 26 | ARG588  | GLU584  |
| 26 | LYS43   | GLU46   |
| 26 | ARG104  | ASP102  |
| 26 | LYS97   | GLU275  |
| 26 | ARG41   | ASP93   |
| 26 | LYS99   | GLU32   |
| 26 | ARG170  | GLU55   |
| 25 | ARG106A | ASP85   |
| 25 | ARG214  | ASP179  |
| 25 | ARG56   | GLU38   |
| 25 | ARG321  | GLU31   |
| 25 | LYS728  | ASP726  |
| 25 | ARG24   | GLU70   |
| 25 | LYS65   | GLU62   |
| 25 | ARG30   | ASP355  |
| 25 | LYS104  | ASP84   |
| 25 | HIS189  | ASP185  |
| 25 | ARG758  | ASP740  |
| 25 | ARG40   | GLU85   |
| 25 | ARG190  | ASP24   |
| 24 | HIS27D  | ASP28   |

|    |        |         |
|----|--------|---------|
| 24 | LYS214 | ASP122  |
| 24 | ARG419 | GLU153  |
| 24 | ARG118 | GLU425  |
| 24 | ARG98  | ASP104  |
| 24 | ARG98  | ASP107  |
| 24 | LYS643 | ASP5    |
| 24 | LYS218 | ASP220  |
| 24 | ARG503 | GLU654  |
| 24 | LYS136 | ASP153  |
| 24 | HIS54  | GLU52   |
| 24 | LYS337 | GLU293  |
| 24 | LYS204 | ASP206  |
| 24 | LYS121 | GLU429  |
| 24 | LYS305 | GLU172  |
| 24 | LYS209 | GLU211  |
| 24 | ARG96  | GLU55   |
| 24 | ARG96  | GLU50   |
| 24 | HIS274 | ASP270  |
| 24 | ARG163 | GLU171  |
| 24 | ARG96  | ASP50   |
| 24 | LYS143 | ASP145  |
| 24 | ARG164 | ASP166  |
| 24 | ARG428 | GLU433  |
| 24 | ARG12  | GLU10   |
| 24 | ARG52  | GLU58   |
| 24 | ARG292 | GLU277  |
| 24 | HIS255 | ASP217  |
| 23 | ARG149 | ASP77   |
| 23 | LYS159 | ASP224  |
| 23 | ARG419 | GLU100B |
| 23 | ARG201 | ASP224  |
| 23 | ARG98  | ASP106  |
| 23 | LYS231 | GLU267  |
| 23 | ARG311 | ASP590  |
| 23 | ARG18  | ASP76   |
| 23 | ARG165 | ASP163  |
| 23 | ARG617 | GLU621  |
| 23 | HIS194 | GLU32   |
| 23 | LYS302 | ASP233  |
| 23 | HIS195 | ASP157  |
| 23 | LYS146 | GLU153  |
| 23 | ARG65  | GLU83   |
| 23 | LYS96  | ASP101  |
| 23 | LYS53  | ASP50   |
| 23 | LYS38  | ASP90   |
| 23 | LYS779 | GLU1148 |
| 23 | LYS209 | GLU125  |
| 23 | LYS232 | GLU268  |
| 23 | ARG153 | GLU120  |
| 23 | ARG24  | ASP74   |
| 23 | LYS27  | GLU93   |
| 22 | LYS104 | GLU166  |
| 22 | ARG50  | ASP58   |
| 22 | LYS98  | GLU22   |
| 22 | ARG48  | ASP53   |
| 22 | ARG63  | GLU83   |
| 22 | LYS215 | GLU123  |
| 22 | ARG95A | ASP61   |

|    |         |         |
|----|---------|---------|
| 22 | ARG65   | ASP52   |
| 22 | ARG134  | ASP153  |
| 22 | ARG694  | ASP343  |
| 22 | ARG40   | ASP91   |
| 22 | ARG94   | GLU96   |
| 22 | HIS3    | ASP29   |
| 22 | ARG165  | GLU123  |
| 22 | LYS187  | ASP155  |
| 22 | ARG106  | GLU569  |
| 22 | ARG52   | GLU56   |
| 22 | LYS144  | ASP145  |
| 21 | ARG94   | ASP27   |
| 21 | ARG161  | GLU191  |
| 21 | ARG96   | ASP101  |
| 21 | LYS168  | ASP167  |
| 21 | ARG53   | ASP659  |
| 21 | ARG334  | ASP330  |
| 21 | LYS188  | GLU192  |
| 21 | ARG100  | ASP109  |
| 21 | LYS13   | ASP18   |
| 21 | ARG64   | ASP115  |
| 21 | HIS190  | ASP152  |
| 21 | LYS205  | ASP207  |
| 21 | ARG327  | GLU283  |
| 21 | ARG223  | ASP104  |
| 21 | LYS338  | GLU430  |
| 21 | ARG25   | ASP4    |
| 21 | LYS185  | GLU189  |
| 21 | LYS204  | ASP115  |
| 20 | ARG91   | GLU95   |
| 20 | ARG266  | ASP289  |
| 20 | ARG96   | GLU95   |
| 20 | ARG82   | GLU42   |
| 20 | LYS238  | ASP175  |
| 20 | ARG98   | ASP110  |
| 20 | ARG311  | ASP586  |
| 20 | ARG38   | GLU89   |
| 20 | LYS203  | ASP114  |
| 20 | HIS1138 | GLU793  |
| 20 | LYS187  | ASP184  |
| 20 | HIS107  | ASP105  |
| 20 | ARG2061 | ASP2082 |
| 20 | ARG55   | ASP73   |
| 20 | ARG50   | GLU100J |
| 20 | LYS210  | GLU123  |
| 20 | HIS64   | ASP79   |
| 20 | ARG1057 | ASP1053 |
| 19 | ARG188  | ASP211  |
| 19 | HIS24   | ASP70   |
| 19 | LYS12   | GLU16   |
| 19 | ARG100  | GLU55   |
| 19 | ARG62   | GLU46   |
| 19 | LYS110  | ASP83   |
| 19 | ARG61   | GLU46   |
| 19 | LYS145  | ASP146  |
| 19 | ARG74   | ASP97   |
| 19 | ARG73   | ASP87   |
| 19 | ARG57   | ASP59   |

|    |         |         |
|----|---------|---------|
| 19 | LYS305  | ASP54   |
| 19 | ARG23   | ASP71   |
| 19 | LYS142  | ASP143  |
| 19 | HIS193  | ASP189  |
| 19 | LYS113  | GLU17   |
| 19 | ARG82   | GLU46   |
| 19 | ARG95   | ASP5    |
| 19 | ARG103  | ASP85   |
| 19 | ARG64   | GLU72   |
| 19 | ARG35   | GLU46   |
| 19 | ARG403  | GLU376  |
| 19 | ARG366  | ASP389  |
| 19 | ARG74   | ASP76   |
| 19 | ARG108  | GLU105  |
| 19 | ARG419  | GLU3103 |
| 19 | LYS183  | ASP184  |
| 19 | ARG81   | GLU57   |
| 19 | ARG266  | ASP260  |
| 19 | LYS213  | GLU122  |
| 19 | LYS212  | ASP214  |
| 18 | LYS407  | ASP434  |
| 18 | ARG24   | GLU17   |
| 18 | ARG66   | ASP28   |
| 18 | ARG585  | GLU492  |
| 18 | LYS3158 | ASP3159 |
| 18 | ARG91   | GLU100J |
| 18 | LYS144  | GLU142  |
| 18 | LYS57   | ASP55   |
| 18 | LYS110  | ASP108  |
| 18 | LYS27   | ASP92   |
| 18 | LYS432  | ASP113  |
| 18 | ARG1061 | ASP1082 |
| 18 | ARG25   | GLU325  |
| 18 | ARG3038 | ASP3090 |
| 18 | ARG50   | ASP98   |
| 18 | ARG58   | GLU13   |
| 18 | LYS58   | GLU61   |
| 18 | LYS149  | GLU203  |
| 18 | LYS209  | GLU124  |
| 18 | LYS46   | ASP632  |
| 18 | LYS153  | GLU207  |
| 18 | ARG55   | ASP61   |
| 18 | ARG2    | ASP4    |
| 18 | ARG44   | ASP61   |
| 18 | LYS46   | ASP636  |
| 18 | ARG235  | ASP24   |
| 18 | ARG24   | ASP71   |
| 18 | HIS188  | GLU184  |
| 18 | ARG3031 | ASP3105 |
| 17 | ARG37   | ASP82   |
| 17 | LYS168  | ASP166  |
| 17 | LYS113  | GLU201  |
| 17 | ARG404  | GLU364  |
| 17 | ARG98   | ASP114  |
| 17 | HIS57   | ASP102  |
| 17 | LYS207  | GLU127  |
| 17 | ARG99   | ASP108  |
| 17 | ARG61   | GLU466  |

|    |         |         |
|----|---------|---------|
| 17 | ARG235  | GLU232  |
| 17 | ARG215  | GLU217  |
| 17 | LYS1066 | ASP1086 |
| 17 | ARG427  | ASP498  |
| 17 | LYS149  | GLU156  |
| 17 | HIS193  | ASP155  |
| 17 | ARG102  | ASP100  |
| 17 | ARG156  | GLU119  |
| 17 | LYS1174 | GLU1183 |
| 17 | LYS72   | ASP109  |
| 17 | ARG364  | ASP310  |
| 16 | ARG100  | ASP52   |
| 16 | ARG63   | GLU46   |
| 16 | LYS248  | GLU380  |
| 16 | ARG37   | GLU45   |
| 16 | ARG614  | GLU605  |
| 16 | ARG52   | GLU179  |
| 16 | ARG67   | GLU89   |
| 16 | HIS188  | ASP151  |
| 16 | ARG87   | ASP90   |
| 16 | LYS97   | ASP100B |
| 16 | HIS191  | ASP153  |
| 16 | ARG847  | ASP726  |
| 16 | LYS71   | GLU55   |
| 16 | ARG172  | GLU174  |
| 16 | ARG96   | GLU1183 |
| 16 | HIS78   | GLU74   |
| 16 | ARG224  | GLU276  |
| 16 | ARG561  | ASP557  |
| 16 | ARG411  | ASP106  |
| 16 | ARG68   | ASP66   |
| 16 | LYS51   | GLU57   |
| 16 | ARG220  | GLU258  |
| 16 | LYS38   | ASP86   |
| 16 | ARG61   | ASP59   |
| 16 | ARG253  | ASP251  |
| 16 | LYS92   | GLU93   |
| 16 | ARG190  | ASP714  |
| 16 | ARG86   | ASP109  |
| 16 | ARG192  | GLU198  |
| 16 | ARG300  | ASP324  |
| 15 | LYS222  | GLU226  |
| 15 | LYS779  | ASP771  |
| 15 | LYS3224 | GLU2125 |
| 15 | LYS117  | ASP113  |
| 15 | ARG50   | GLU97   |
| 15 | ARG155  | ASP143  |
| 15 | LYS282  | ASP279  |
| 15 | ARG40   | GLU47   |
| 15 | LYS171  | GLU169  |
| 15 | HIS93   | GLU103  |
| 15 | ARG163  | ASP214  |
| 15 | ARG3038 | GLU3046 |
| 15 | ARG336  | ASP338  |
| 15 | ARG24   | ASP10   |
| 15 | ARG83   | ASP85   |
| 15 | ARG51   | ASP60   |
| 15 | LYS354  | GLU356  |

|    |         |         |
|----|---------|---------|
| 15 | ARG45   | ASP62   |
| 15 | LYS118  | ASP131  |
| 15 | ARG419  | GLU99   |
| 15 | ARG96   | ASP16   |
| 15 | ARG187  | GLU184  |
| 15 | LYS159  | ASP160  |
| 15 | LYS153  | GLU160  |
| 15 | ARG256  | ASP220  |
| 15 | ARG159  | GLU189  |
| 15 | LYS409  | ASP399  |
| 15 | LYS68   | ASP91   |
| 15 | LYS153  | ASP154  |
| 15 | HIS20   | GLU22   |
| 15 | HIS192  | ASP155  |
| 15 | LYS162  | ASP142  |
| 15 | ARG196  | GLU155  |
| 15 | LYS190  | GLU213  |
| 14 | ARG304  | ASP34   |
| 14 | ARG50   | GLU78   |
| 14 | ARG194  | ASP217  |
| 14 | LYS106  | GLU168  |
| 14 | HIS191  | GLU254  |
| 14 | LYS19   | GLU82   |
| 14 | ARG130  | GLU92   |
| 14 | LYS109  | GLU17   |
| 14 | ARG108  | ASP170  |
| 14 | LYS215  | GLU126  |
| 14 | ARG38   | GLU85   |
| 14 | LYS3    | GLU5    |
| 14 | ARG65   | GLU85   |
| 14 | LYS320  | GLU333  |
| 14 | ARG75   | ASP98   |
| 14 | HIS94   | ASP101  |
| 14 | ARG216  | GLU123  |
| 14 | HIS66   | ASP86   |
| 14 | LYS58   | GLU97   |
| 14 | ARG211  | GLU132  |
| 14 | ARG35   | ASP53   |
| 14 | ARG75   | GLU19   |
| 14 | LYS1029 | GLU1085 |
| 14 | HIS189  | ASP152  |
| 14 | LYS158  | ASP159  |
| 14 | LYS30   | ASP31   |
| 14 | LYS665  | GLU357  |
| 14 | LYS558  | GLU597  |
| 13 | LYS66   | GLU63   |
| 13 | LYS69   | ASP92   |
| 13 | ARG25   | ASP71   |
| 13 | LYS152  | GLU198  |
| 13 | ARG96   | GLU298  |
| 13 | ARG31   | ASP33   |
| 13 | ARG210  | GLU186  |
| 13 | ARG199  | ASP187  |
| 13 | ARG35   | ASP332  |
| 13 | LYS114  | GLU202  |
| 13 | LYS587  | GLU382  |
| 13 | ARG89   | GLU91   |
| 13 | ARG83   | ASP86   |



|    |         |         |
|----|---------|---------|
| 13 | ARG239  | ASP113  |
| 13 | HIS191  | ASP154  |
| 13 | LYS171  | GLU85   |
| 13 | LYS143  | GLU125  |
| 13 | ARG153  | GLU157  |
| 13 | LYS203  | ASP254  |
| 13 | LYS139  | ASP6    |
| 13 | ARG130  | GLU128  |
| 13 | LYS31   | ASP30   |
| 13 | ARG142  | GLU165  |
| 13 | LYS83   | GLU85   |
| 13 | LYS86   | GLU90   |
| 13 | LYS38   | GLU46   |
| 13 | HIS208  | GLU238  |
| 13 | ARG116  | GLU120  |
| 13 | ARG208  | ASP241  |
| 13 | LYS216  | GLU218  |
| 13 | LYS214  | GLU216  |
| 13 | LYS16   | GLU79   |
| 13 | ARG138  | GLU214  |
| 13 | ARG75   | GLU78   |
| 13 | LYS219  | GLU123  |
| 13 | LYS189  | ASP186  |
| 13 | ARG134  | ASP127  |
| 13 | ARG39   | ASP45   |
| 13 | ARG109  | GLU69   |
| 12 | ARG500  | GLU30   |
| 12 | ARG614  | GLU367  |
| 12 | LYS144  | GLU148  |
| 12 | ARG310  | ASP90   |
| 12 | LYS231  | GLU269  |
| 12 | ARG1177 | ASP1198 |
| 12 | LYS88   | GLU75   |
| 12 | ARG100  | ASP58   |
| 12 | ARG201  | ASP222  |
| 12 | ARG95   | GLU179  |
| 12 | LYS50   | GLU77   |
| 12 | ARG215  | GLU191  |
| 12 | ARG73   | ASP96   |
| 12 | ARG72   | ASP93   |
| 12 | LYS643  | GLU4    |
| 12 | HIS255  | ASP158  |
| 12 | LYS149  | GLU137  |
| 12 | LYS601  | GLU654  |
| 12 | HIS312  | GLU266  |
| 12 | ARG94   | ASP100  |
| 12 | ARG94   | ASP102  |
| 12 | ARG232  | ASP242  |
| 12 | ARG101  | GLU99   |
| 12 | ARG94   | GLU2    |
| 12 | LYS174  | GLU116  |
| 12 | LYS661  | GLU647  |
| 12 | LYS217  | GLU221  |
| 12 | ARG11   | GLU39   |
| 12 | LYS218  | GLU127  |
| 12 | ARG337  | GLU290  |
| 12 | ARG98   | ASP67   |
| 12 | ARG36   | ASP88   |

|    |         |         |
|----|---------|---------|
| 12 | ARG360  | GLU358  |
| 12 | ARG1179 | ASP31   |
| 12 | ARG75   | ASP87   |
| 12 | HIS52   | ASP53   |
| 12 | ARG46   | ASP101  |
| 12 | LYS582  | ASP586  |
| 12 | ARG364  | GLU375  |
| 12 | ARG60   | ASP78   |
| 12 | HIS35   | ASP100C |
| 12 | ARG367  | ASP390  |
| 12 | ARG172  | GLU180  |
| 12 | ARG96   | ASP108  |
| 12 | ARG428  | ASP460  |
| 12 | LYS496  | GLU536  |
| 12 | ARG606  | ASP609  |
| 12 | HIS394  | GLU397  |
| 12 | LYS83   | ASP85   |
| 12 | ARG61   | ASP60   |
| 12 | ARG192  | ASP167  |
| 12 | HIS85   | GLU87   |
| 12 | LYS500  | ASP664  |
| 12 | HIS81   | ASP80   |
| 12 | ARG292  | GLU276  |
| 12 | ARG670  | GLU671  |
| 12 | HIS255  | ASP259  |
| 12 | LYS623  | GLU632  |
| 12 | ARG659  | ASP661  |
| 12 | ARG399  | GLU390  |
| 12 | ARG841  | ASP844  |
| 12 | ARG54   | ASP56   |
| 12 | LYS1021 | GLU793  |
| 12 | ARG588  | GLU492  |
| 12 | ARG134  | GLU150  |
| 12 | ARG59   | ASP65   |
| 12 | LYS114  | GLU116  |
| 12 | LYS155  | ASP133  |
| 12 | LYS290  | GLU128  |
| 12 | ARG305  | ASP329  |
| 12 | ARG629  | GLU376  |
| 12 | LYS167  | GLU83   |
| 12 | ARG69   | GLU55   |
| 12 | ARG576  | GLU104  |
| 12 | LYS151  | GLU147  |
| 12 | LYS643  | GLU529  |
| 12 | LYS107  | GLU169  |
| 11 | LYS13   | GLU16   |
| 11 | ARG75   | GLU85   |
| 11 | ARG19   | GLU81   |
| 11 | LYS148  | GLU111  |
| 11 | LYS222  | GLU125  |
| 11 | LYS90   | ASP63   |
| 11 | LYS253  | ASP232  |
| 11 | LYS169  | ASP170  |
| 11 | ARG55   | ASP309  |
| 11 | ARG379  | ASP211  |
| 11 | LYS184  | GLU188  |
| 11 | LYS151  | GLU158  |
| 11 | ARG98   | GLU50   |

|    |         |         |
|----|---------|---------|
| 11 | HIS244  | ASP113  |
| 11 | LYS208  | GLU122  |
| 11 | LYS10   | GLU25   |
| 11 | LYS390  | ASP393  |
| 11 | ARG60   | ASP66   |
| 11 | LYS152  | GLU159  |
| 11 | LYS169  | GLU85   |
| 11 | ARG127  | ASP160  |
| 11 | HIS217  | ASP104  |
| 11 | ARG189  | ASP125  |
| 11 | LYS29   | ASP279  |
| 11 | ARG187  | ASP183  |
| 11 | LYS343  | GLU347  |
| 11 | ARG104  | ASP107  |
| 11 | LYS201  | ASP112  |
| 11 | ARG105  | ASP71   |
| 11 | ARG49   | ASP368  |
| 11 | LYS53   | GLU50   |
| 11 | LYS421  | ASP180  |
| 11 | ARG73   | ASP71   |
| 11 | LYS601  | GLU657  |
| 11 | ARG412  | GLU299  |
| 11 | ARG142  | GLU103  |
| 11 | ARG19   | ASP81   |
| 11 | LYS1062 | GLU1046 |
| 11 | LYS543  | GLU549  |
| 11 | ARG98   | ASP111  |
| 11 | LYS197  | GLU201  |
| 11 | HIS55   | ASP73   |
| 11 | HIS93   | ASP105  |
| 11 | HIS27   | GLU85   |
| 11 | LYS62   | ASP46   |
| 11 | LYS209  | GLU206  |
| 11 | LYS215  | GLU217  |
| 11 | ARG84   | ASP108  |
| 11 | ARG279  | GLU268  |
| 11 | LYS213  | GLU123  |
| 11 | LYS212  | GLU129  |
| 11 | ARG280  | ASP230  |
| 11 | HIS102  | GLU101  |
| 11 | ARG269  | GLU252  |
| 11 | LYS298  | GLU297  |
| 11 | HIS30   | GLU136  |
| 11 | LYS413  | GLU382  |
| 11 | ARG107  | GLU78   |
| 10 | ARG1024 | ASP1069 |
| 10 | ARG39   | GLU81   |
| 10 | ARG97   | ASP100  |
| 10 | ARG81   | ASP104  |
| 10 | LYS30   | ASP28   |
| 10 | ARG146  | GLU169  |
| 10 | LYS485  | GLU267  |
| 10 | ARG96   | GLU94   |
| 10 | ARG199  | ASP220  |
| 10 | ARG213  | GLU123  |
| 10 | ARG34   | ASP39   |
| 10 | LYS187  | GLU114  |
| 10 | ARG98   | ASP102  |

|    |         |         |
|----|---------|---------|
| 10 | ARG44   | GLU42   |
| 10 | ARG700  | GLU756  |
| 10 | ARG181  | ASP174  |
| 10 | LYS24   | ASP76   |
| 10 | LYS97   | ASP101  |
| 10 | ARG238  | GLU246  |
| 10 | ARG98   | ASP115  |
| 10 | HIS3063 | GLU3046 |
| 10 | LYS79   | ASP76   |
| 10 | ARG5    | GLU7    |
| 10 | ARG105  | GLU103  |
| 10 | LYS305  | ASP56   |
| 10 | LYS208  | GLU238  |
| 10 | ARG55   | GLU57   |
| 10 | HIS80   | ASP144  |
| 10 | LYS196  | ASP261  |
| 10 | LYS66   | GLU31   |
| 10 | LYS174  | GLU119  |
| 10 | ARG100  | ASP110  |
| 10 | ARG108  | ASP106  |
| 10 | ARG255  | ASP249  |
| 10 | LYS169  | GLU81   |
| 10 | LYS45   | ASP41   |
| 10 | ARG40   | ASP92   |
| 10 | ARG338  | ASP389  |
| 10 | HIS190  | ASP153  |
| 10 | HIS198  | GLU57   |
| 10 | ARG327  | ASP325  |
| 10 | ARG477  | GLU485  |
| 10 | ARG111  | GLU128  |
| 10 | ARG1094 | ASP1101 |
| 10 | ARG73   | GLU86   |
| 10 | LYS350  | ASP395  |
| 10 | LYS107  | ASP17   |
| 10 | LYS24   | ASP75   |
| 10 | ARG297  | ASP304  |
| 10 | LYS211  | GLU123  |
| 10 | ARG208  | GLU178  |
| 10 | ARG205  | ASP226  |
| 10 | ARG353  | ASP112  |
| 10 | LYS6    | ASP54   |
| 10 | ARG84   | GLU82   |
| 10 | ARG211  | GLU213  |
| 10 | LYS412  | GLU365  |
| 10 | LYS65   | ASP6    |
| 10 | LYS67   | ASP28   |
| 10 | ARG100  | ASP100B |
| 10 | ARG64   | ASP457  |
| 10 | ARG95   | ASP99   |
| 10 | LYS155  | GLU185  |
| 10 | LYS264  | GLU266  |
| 10 | LYS665  | GLU666  |
| 10 | ARG212  | GLU188  |
| 10 | ARG101  | ASP50   |
| 10 | ARG66   | GLU85   |
| 10 | LYS211  | ASP213  |
| 10 | ARG3050 | GLU3101 |
| 10 | ARG91   | ASP113  |

|    |         |         |
|----|---------|---------|
| 10 | ARG127  | GLU112  |
| 10 | ARG91   | GLU60   |
| 10 | LYS216  | ASP218  |
| 10 | LYS46   | ASP62   |
| 10 | ARG238  | ASP289  |
| 10 | HIS86   | ASP84   |
| 10 | LYS151  | GLU199  |
| 10 | ARG88   | ASP101  |
| 10 | ARG249  | GLU187  |
| 10 | ARG109  | GLU65   |
| 10 | ARG53   | ASP254  |
| 9  | LYS102  | ASP164  |
| 9  | ARG61   | ASP81   |
| 9  | HIS585  | ASP589  |
| 9  | ARG96   | ASP97   |
| 9  | LYS52   | GLU30   |
| 9  | ARG45   | ASP105  |
| 9  | ARG95   | GLU25   |
| 9  | ARG101  | ASP97   |
| 9  | HIS35   | ASP99   |
| 9  | LYS65   | ASP59   |
| 9  | ARG30   | ASP53   |
| 9  | ARG585  | ASP589  |
| 9  | ARG53   | ASP31   |
| 9  | ARG209  | GLU174  |
| 9  | LYS583  | ASP585  |
| 9  | LYS217  | GLU219  |
| 9  | ARG192  | GLU164  |
| 9  | LYS35   | ASP457  |
| 9  | ARG327  | GLU100I |
| 9  | LYS19   | GLU81   |
| 9  | ARG230  | ASP134  |
| 9  | HIS134  | ASP118  |
| 9  | LYS109  | GLU69   |
| 9  | ARG135  | ASP96   |
| 9  | LYS58   | GLU57   |
| 9  | ARG3084 | GLU3082 |
| 9  | ARG181  | ASP183  |
| 9  | ARG2061 | GLU2081 |
| 9  | HIS3    | GLU9    |
| 9  | LYS282  | ASP114  |
| 9  | LYS218  | GLU220  |
| 9  | HIS56   | GLU280  |
| 9  | HIS3117 | GLU3001 |
| 9  | LYS90   | GLU85   |
| 9  | ARG82   | GLU89   |
| 9  | HIS345  | GLU137  |
| 9  | LYS1008 | GLU1119 |
| 9  | ARG156  | GLU186  |
| 9  | ARG23   | GLU30   |
| 9  | ARG38   | ASP77   |
| 9  | LYS551  | GLU603  |
| 9  | LYS144  | ASP138  |
| 9  | HIS33   | ASP49   |
| 9  | ARG207  | ASP241  |
| 9  | HIS58   | GLU50   |
| 9  | LYS144  | GLU107  |
| 9  | ARG73   | GLU201  |

|   |         |         |
|---|---------|---------|
| 9 | ARG338  | GLU346  |
| 9 | LYS155  | ASP156  |
| 9 | LYS205  | ASP166  |
| 9 | LYS168  | GLU82   |
| 9 | LYS214  | ASP216  |
| 9 | HIS280  | ASP278  |
| 9 | ARG209  | GLU211  |
| 9 | ARG41   | ASP38   |
| 9 | ARG42   | ASP40   |
| 9 | ARG68   | GLU50   |
| 9 | ARG104  | GLU599  |
| 9 | ARG19   | ASP80   |
| 9 | LYS1171 | GLU1169 |
| 9 | ARG103  | GLU100  |
| 9 | ARG193  | ASP189  |
| 9 | ARG112  | ASP93   |
| 9 | ARG72   | ASP368  |
| 9 | ARG100D | ASP100B |
| 9 | LYS85   | GLU87   |
| 9 | LYS85   | GLU82   |
| 9 | LYS212  | GLU126  |
| 9 | ARG73   | ASP59   |
| 9 | HIS96   | GLU106  |
| 9 | ARG504  | GLU662  |
| 9 | LYS94   | ASP97   |
| 9 | LYS109  | GLU89   |
| 9 | ARG504  | GLU657  |
| 9 | LYS305  | GLU308  |
| 9 | LYS108  | GLU170  |
| 9 | LYS1029 | ASP279  |
| 9 | ARG130  | ASP105  |
| 9 | ARG95A  | GLU350  |
| 9 | ARG64   | ASP94   |
| 9 | LYS100E | ASP101  |
| 9 | HIS160  | ASP158  |
| 9 | ARG188  | ASP209  |
| 9 | LYS61   | GLU179  |
| 9 | ARG56   | ASP62   |
| 8 | ARG334  | GLU337  |
| 8 | ARG598  | ASP596  |
| 8 | LYS44   | ASP86   |
| 8 | ARG98   | ASP35   |
| 8 | HIS192  | ASP154  |
| 8 | LYS166  | GLU163  |
| 8 | ARG316  | GLU669  |
| 8 | HIS36   | ASP104  |
| 8 | ARG96   | GLU65   |
| 8 | LYS601  | GLU607  |
| 8 | LYS637  | GLU641  |
| 8 | ARG134  | ASP55   |
| 8 | HIS238  | GLU243  |
| 8 | HIS224  | GLU156  |
| 8 | ARG419  | ASP325  |
| 8 | ARG354  | ASP114  |
| 8 | ARG253  | ASP53   |
| 8 | ARG21   | ASP39   |
| 8 | ARG141  | GLU164  |
| 8 | ARG100  | GLU59   |

|   |         |         |
|---|---------|---------|
| 8 | ARG189  | ASP151  |
| 8 | ARG419  | GLU100D |
| 8 | ARG68   | ASP53   |
| 8 | ARG98   | ASP31   |
| 8 | HIS377  | ASP453  |
| 8 | HIS293  | ASP289  |
| 8 | LYS117  | ASP124  |
| 8 | LYS2190 | ASP2187 |
| 8 | ARG98   | ASP101  |
| 8 | ARG81   | ASP38   |
| 8 | ARG195  | GLU192  |
| 8 | ARG98   | ASP113  |
| 8 | ARG72   | ASP74   |
| 8 | LYS79   | ASP50   |
| 8 | LYS180  | ASP244  |
| 8 | LYS152  | ASP119  |
| 8 | ARG317  | GLU315  |
| 8 | LYS24   | ASP74   |
| 8 | HIS36   | ASP102  |
| 8 | ARG94   | ASP106  |
| 8 | ARG52   | GLU178  |
| 8 | ARG80   | GLU44   |
| 8 | ARG178  | GLU153  |
| 8 | LYS684  | ASP1056 |
| 8 | ARG39   | ASP84   |
| 8 | ARG43   | GLU51   |
| 8 | LYS413  | ASP100  |
| 8 | ARG230  | ASP132  |
| 8 | ARG120  | GLU64   |
| 8 | ARG94   | ASP117  |
| 8 | LYS208  | GLU124  |
| 8 | ARG97   | ASP105  |
| 8 | ARG527  | GLU436  |
| 8 | ARG400  | GLU64   |
| 8 | ARG101  | ASP117  |
| 8 | ARG241  | ASP325  |
| 8 | ARG378  | ASP422  |
| 8 | ARG435  | ASP450  |
| 8 | ARG63   | GLU81   |
| 8 | LYS306  | ASP334  |
| 8 | ARG52   | ASP104  |
| 8 | LYS330  | ASP361  |
| 8 | HIS741  | ASP709  |
| 8 | ARG480  | ASP474  |
| 8 | ARG66   | ASP343  |
| 8 | ARG157  | GLU161  |
| 8 | LYS215  | GLU127  |
| 8 | ARG419  | GLU214  |
| 8 | ARG69   | GLU35   |
| 8 | LYS217  | GLU123  |
| 8 | ARG181  | ASP184  |
| 8 | ARG66   | ASP140  |
| 8 | LYS68   | GLU110  |
| 8 | LYS104  | GLU106  |
| 8 | ARG370  | ASP666  |
| 8 | LYS73   | ASP55   |
| 8 | HIS96   | GLU100A |
| 8 | ARG31   | ASP92   |

|   |         |         |
|---|---------|---------|
| 8 | ARG121  | ASP189  |
| 8 | LYS455  | GLU489  |
| 8 | ARG101  | ASP109  |
| 8 | ARG141  | ASP61   |
| 8 | HIS181  | GLU10   |
| 8 | ARG288  | GLU316  |
| 8 | LYS10   | GLU29   |
| 8 | HIS32   | GLU50   |
| 8 | ARG94   | GLU191  |
| 8 | HIS60   | GLU1    |
| 8 | HIS66   | ASP61   |
| 8 | ARG94   | ASP100D |
| 8 | LYS372  | GLU397  |
| 8 | HIS553  | GLU425  |
| 8 | ARG94   | GLU53   |
| 8 | ARG65   | ASP62   |
| 8 | ARG45   | GLU50   |
| 8 | LYS216  | GLU125  |
| 8 | ARG57   | GLU50   |
| 8 | LYS147  | GLU193  |
| 8 | ARG2024 | GLU2070 |
| 8 | ARG26   | ASP27   |
| 8 | LYS163  | GLU246  |
| 8 | ARG400  | GLU397  |
| 8 | ARG73   | GLU74   |
| 8 | ARG50   | GLU47   |
| 8 | ARG170  | ASP128  |
| 8 | ARG152  | ASP149  |
| 8 | ARG94   | ASP96   |
| 8 | LYS166  | GLU83   |
| 8 | ARG141  | ASP210  |
| 8 | LYS219  | GLU129  |
| 8 | ARG45   | GLU47   |
| 8 | ARG95B  | ASP1    |
| 8 | ARG96   | ASP204  |
| 8 | ARG98   | ASP341  |
| 8 | ARG255  | GLU145  |
| 8 | ARG72   | GLU10   |
| 8 | ARG344  | GLU153  |
| 8 | ARG669  | ASP671  |
| 8 | LYS282  | ASP100C |
| 8 | HIS274  | GLU276  |
| 8 | HIS99   | GLU73   |
| 8 | ARG227  | GLU232  |
| 8 | ARG384  | GLU386  |
| 8 | ARG98   | GLU6    |
| 8 | LYS235  | GLU262  |
| 8 | ARG117  | GLU113  |
| 8 | ARG410  | GLU383  |
| 8 | LYS154  | ASP155  |
| 8 | LYS52   | ASP448  |
| 8 | ARG194  | ASP102  |
| 8 | LYS181  | GLU185  |
| 8 | HIS2191 | ASP2153 |
| 8 | ARG105  | ASP128  |
| 8 | LYS152  | GLU206  |
| 8 | ARG82   | GLU84   |
| 8 | LYS105  | ASP167  |



|   |         |        |
|---|---------|--------|
| 8 | ARG332  | GLU357 |
| 8 | ARG387  | ASP386 |
| 8 | ARG867  | ASP890 |
| 8 | ARG154  | ASP184 |
| 8 | ARG101  | ASP49  |
| 8 | ARG64   | ASP87  |
| 8 | LYS176  | ASP263 |
| 8 | LYS136  | GLU150 |
| 8 | ARG542  | GLU95  |
| 8 | ARG516  | ASP518 |
| 8 | ARG69   | ASP16  |
| 8 | LYS154  | GLU199 |
| 8 | HIS109  | ASP108 |
| 8 | ARG46   | GLU44  |
| 8 | ARG344  | ASP401 |
| 8 | LYS88   | ASP71  |
| 8 | LYS81   | ASP104 |
| 8 | LYS186  | GLU190 |
| 8 | LYS92   | GLU99  |
| 8 | ARG127  | ASP159 |
| 8 | ARG160  | ASP211 |
| 8 | ARG112  | ASP143 |
| 8 | ARG29   | ASP6   |
| 8 | ARG97   | ASP50  |
| 8 | LYS54   | GLU89  |
| 8 | LYS48   | GLU32  |
| 8 | ARG36   | GLU44  |
| 8 | ARG85   | ASP106 |
| 8 | ARG164  | ASP167 |
| 8 | HIS98   | GLU214 |
| 8 | LYS12   | ASP54  |
| 8 | ARG216  | GLU218 |
| 8 | ARG210  | ASP412 |
| 8 | ARG196  | GLU162 |
| 8 | ARG51   | ASP50  |
| 8 | ARG27   | GLU157 |
| 8 | LYS433  | ASP54  |
| 8 | ARG95B  | ASP58  |
| 8 | LYS126  | GLU88  |
| 8 | ARG5    | GLU39  |
| 8 | ARG408  | ASP224 |
| 8 | LYS189  | GLU193 |
| 8 | ARG100B | GLU55  |
| 8 | LYS146  | ASP147 |
| 8 | ARG95   | ASP114 |
| 8 | ARG55   | ASP53  |
| 8 | ARG104  | GLU81  |
| 8 | LYS370  | GLU357 |
| 8 | LYS72   | ASP56  |
| 8 | HIS56   | ASP85  |
| 8 | ARG218  | GLU220 |
| 8 | ARG94   | ASP32  |
| 8 | ARG725  | ASP719 |
| 8 | LYS97   | ASP221 |
| 7 | LYS220  | GLU222 |
| 7 | HIS110  | ASP140 |
| 7 | ARG205  | GLU223 |
| 7 | HIS141  | GLU70  |

|   |         |         |
|---|---------|---------|
| 7 | ARG200  | ASP182  |
| 7 | LYS110  | GLU82   |
| 7 | LYS214  | ASP124  |
| 7 | ARG95   | ASP104  |
| 7 | ARG58   | ASP54   |
| 7 | HIS98   | GLU50   |
| 7 | ARG217  | GLU193  |
| 7 | ARG304  | GLU436  |
| 7 | ARG48   | GLU46   |
| 7 | LYS216  | GLU122  |
| 7 | ARG88   | ASP90   |
| 7 | ARG73   | ASP93   |
| 7 | LYS2151 | GLU2197 |
| 7 | LYS173  | GLU219  |
| 7 | LYS157  | ASP166  |
| 7 | LYS232  | GLU351  |
| 7 | LYS196  | GLU295  |
| 7 | LYS149  | GLU138  |
| 7 | HIS129  | GLU179  |
| 7 | ARG141  | GLU110  |
| 7 | HIS58   | ASP76   |
| 7 | ARG90   | ASP49   |
| 7 | LYS219  | GLU227  |
| 7 | ARG53   | GLU654  |
| 7 | ARG44   | GLU46   |
| 7 | LYS19   | ASP82   |
| 7 | LYS207  | ASP209  |
| 7 | ARG370  | ASP369  |
| 7 | LYS159  | ASP193  |
| 7 | ARG204  | GLU125  |
| 7 | ARG44   | ASP42   |
| 7 | LYS102  | GLU46   |
| 7 | ARG390  | ASP369  |
| 7 | LYS317  | ASP312  |
| 7 | LYS210  | ASP212  |
| 7 | ARG221  | GLU223  |
| 7 | LYS59   | ASP63   |
| 7 | ARG179  | GLU209  |
| 7 | ARG39   | ASP92   |
| 7 | ARG204  | ASP233  |
| 7 | LYS668  | ASP355  |
| 7 | LYS175  | ASP142  |
| 7 | LYS175  | GLU84   |
| 7 | LYS82   | ASP86   |
| 7 | ARG57   | ASP109  |
| 7 | ARG865  | ASP888  |
| 7 | LYS326  | GLU325  |
| 7 | ARG39   | ASP91   |
| 7 | LYS109  | ASP171  |
| 7 | ARG87   | ASP89   |
| 7 | LYS107  | ASP9    |
| 7 | LYS94   | ASP27   |
| 7 | ARG108  | ASP59   |
| 7 | HIS172  | ASP167  |
| 7 | LYS44   | GLU86   |
| 7 | LYS1183 | GLU1187 |
| 7 | ARG31   | ASP86   |
| 7 | ARG76   | GLU107  |

|   |         |         |
|---|---------|---------|
| 7 | LYS30   | ASP91   |
| 7 | LYS123  | GLU132  |
| 7 | ARG176  | GLU174  |
| 7 | LYS150  | GLU204  |
| 7 | LYS217  | GLU126  |
| 7 | ARG157  | ASP179  |
| 7 | ARG53   | ASP232  |
| 7 | HIS79   | ASP81   |
| 7 | ARG29   | ASP36   |
| 7 | ARG194  | GLU191  |
| 7 | HIS3    | GLU1    |
| 7 | LYS463  | ASP436  |
| 7 | LYS106  | GLU17   |
| 7 | LYS209  | GLU127  |
| 7 | ARG31   | ASP93   |
| 7 | ARG199  | GLU217  |
| 7 | ARG161  | ASP208  |
| 7 | ARG118  | GLU119  |
| 7 | LYS149  | ASP145  |
| 7 | ARG427  | GLU397  |
| 7 | ARG45   | GLU53   |
| 7 | LYS46   | ASP56   |
| 7 | HIS100  | GLU87   |
| 7 | LYS99   | ASP34   |
| 7 | LYS205  | GLU308  |
| 7 | ARG95   | ASP3    |
| 7 | LYS606  | GLU505  |
| 7 | ARG45   | GLU42   |
| 7 | ARG66   | GLU28   |
| 7 | LYS63   | ASP1    |
| 7 | ARG25   | GLU42   |
| 7 | LYS121  | GLU118  |
| 7 | LYS137  | ASP51   |
| 7 | HIS330  | ASP426  |
| 7 | HIS394  | ASP369  |
| 7 | ARG29   | ASP107  |
| 7 | LYS96   | ASP100Q |
| 7 | ARG370  | GLU188  |
| 7 | ARG112  | ASP121  |
| 7 | ARG1066 | ASP1086 |
| 7 | HIS228  | ASP226  |
| 7 | ARG1061 | GLU1081 |
| 7 | LYS111  | GLU199  |
| 7 | ARG838  | GLU846  |
| 7 | ARG72   | GLU40   |
| 7 | ARG505  | GLU549  |
| 7 | HIS377  | GLU424  |
| 7 | LYS104  | ASP80   |
| 7 | ARG100  | ASP98   |
| 7 | ARG103  | GLU217  |
| 7 | ARG98   | GLU100  |
| 7 | ARG103  | GLU105  |
| 7 | ARG62   | ASP60   |
| 7 | LYS356  | GLU466  |
| 7 | ARG123  | ASP140  |
| 7 | HIS19   | ASP16   |
| 7 | ARG45   | ASP104  |
| 7 | ARG40   | ASP369  |

|   |         |         |
|---|---------|---------|
| 7 | LYS208  | GLU129  |
| 7 | LYS59   | GLU56   |
| 7 | LYS61   | GLU57   |
| 7 | ARG255  | ASP133  |
| 7 | LYS95   | ASP7    |
| 7 | LYS335  | ASP412  |
| 7 | LYS42   | GLU45   |
| 7 | LYS213  | GLU215  |
| 7 | LYS63   | GLU89   |
| 7 | LYS140  | ASP136  |
| 7 | ARG163  | GLU1    |
| 7 | ARG582  | ASP606  |
| 7 | LYS212  | GLU123  |
| 7 | ARG67   | GLU65   |
| 7 | LYS697  | ASP332  |
| 7 | ARG91   | GLU50   |
| 7 | ARG480  | GLU102  |
| 7 | HIS162  | GLU159  |
| 7 | LYS275  | ASP272  |
| 7 | HIS151  | GLU154  |
| 7 | ARG172  | ASP224  |
| 7 | ARG107  | GLU84   |
| 7 | ARG154  | ASP177  |
| 7 | ARG58   | GLU3    |
| 7 | LYS207  | GLU204  |
| 7 | ARG353  | GLU110  |
| 6 | ARG139  | GLU160  |
| 6 | LYS460  | GLU466  |
| 6 | LYS222  | GLU224  |
| 6 | ARG228  | GLU234  |
| 6 | ARG156  | ASP3    |
| 6 | ARG144  | GLU146  |
| 6 | LYS178  | ASP96   |
| 6 | ARG50   | ASP95   |
| 6 | LYS116  | GLU113  |
| 6 | LYS492  | GLU490  |
| 6 | ARG250  | ASP378  |
| 6 | ARG96   | ASP103  |
| 6 | LYS341  | ASP173  |
| 6 | LYS180  | GLU182  |
| 6 | HIS171  | ASP171  |
| 6 | ARG345  | GLU376  |
| 6 | ARG72   | GLU92   |
| 6 | ARG191  | ASP153  |
| 6 | LYS40   | ASP92   |
| 6 | LYS185D | GLU185A |
| 6 | ARG284  | ASP224  |
| 6 | ARG114  | ASP116  |
| 6 | ARG45   | ASP97   |
| 6 | LYS209  | GLU122  |
| 6 | LYS277  | GLU281  |
| 6 | HIS75   | ASP72   |
| 6 | HIS56   | GLU408  |
| 6 | HIS33   | ASP97   |
| 6 | ARG463  | GLU457  |
| 6 | LYS215  | ASP217  |
| 6 | HIS160  | GLU175  |
| 6 | ARG27   | GLU93   |

|   |         |         |
|---|---------|---------|
| 6 | HIS223  | GLU82   |
| 6 | LYS432  | GLU429  |
| 6 | HIS268  | GLU294  |
| 6 | ARG194  | ASP190  |
| 6 | LYS58   | ASP183  |
| 6 | LYS290  | GLU268  |
| 6 | ARG348  | ASP356  |
| 6 | LYS137  | ASP73   |
| 6 | LYS653  | GLU650  |
| 6 | LYS189  | GLU160  |
| 6 | ARG163  | GLU128  |
| 6 | HIS72   | GLU64   |
| 6 | LYS317  | ASP340  |
| 6 | HIS49   | ASP55   |
| 6 | ARG100  | ASP60   |
| 6 | LYS631  | GLU639  |
| 6 | ARG256  | GLU253  |
| 6 | ARG50   | GLU200  |
| 6 | ARG188  | GLU208  |
| 6 | ARG71   | GLU55   |
| 6 | LYS684  | ASP1054 |
| 6 | HIS190  | ASP186  |
| 6 | ARG67   | GLU85   |
| 6 | ARG97   | ASP112  |
| 6 | ARG31   | ASP102  |
| 6 | LYS28   | GLU83   |
| 6 | LYS407  | ASP361  |
| 6 | LYS192  | ASP189  |
| 6 | LYS84   | GLU44   |
| 6 | ARG39   | GLU85   |
| 6 | HIS103  | GLU137  |
| 6 | ARG1212 | GLU1183 |
| 6 | LYS214  | GLU212  |
| 6 | LYS590  | GLU576  |
| 6 | HIS189  | GLU154  |
| 6 | ARG222  | GLU226  |
| 6 | ARG182  | ASP169  |
| 6 | ARG73   | GLU30   |
| 6 | ARG220  | ASP241  |
| 6 | ARG18   | ASP39   |
| 6 | ARG485  | GLU383  |
| 6 | LYS90   | ASP51   |
| 6 | LYS46   | GLU632  |
| 6 | LYS87   | GLU47   |
| 6 | HIS285  | GLU283  |
| 6 | LYS3225 | GLU3227 |
| 6 | ARG227  | ASP131  |
| 6 | LYS127  | GLU124  |
| 6 | LYS2185 | GLU2189 |
| 6 | ARG123  | GLU203  |
| 6 | HIS192  | ASP98   |
| 6 | LYS110  | ASP55   |
| 6 | LYS53   | ASP52   |
| 6 | HIS42   | GLU38   |
| 6 | ARG99   | ASP100  |
| 6 | ARG106  | GLU177  |
| 6 | LYS148  | GLU152  |
| 6 | ARG316  | ASP236  |

|   |         |         |
|---|---------|---------|
| 6 | LYS191  | GLU60   |
| 6 | ARG1070 | ASP1091 |
| 6 | LYS151  | GLU179  |
| 6 | LYS201  | ASP199  |
| 6 | LYS107  | GLU64   |
| 6 | LYS305  | ASP322  |
| 6 | LYS197  | GLU57   |
| 6 | LYS112  | GLU200  |
| 6 | ARG78   | ASP94   |
| 6 | ARG199  | GLU219  |
| 6 | LYS208  | ASP210  |
| 6 | ARG166  | ASP143  |
| 6 | LYS59   | ASP57   |
| 6 | LYS313  | GLU296  |
| 6 | LYS407  | GLU5    |
| 6 | ARG691  | ASP343  |
| 6 | LYS31A  | GLU87   |
| 6 | ARG100H | ASP91   |
| 6 | LYS17   | ASP55   |
| 6 | ARG64   | ASP61   |
| 6 | ARG107  | ASP114  |
| 6 | LYS52   | GLU56   |
| 6 | LYS196  | ASP489  |
| 6 | LYS432  | GLU55   |
| 6 | ARG27   | GLU151  |
| 6 | ARG143  | GLU145  |
| 6 | HIS169  | ASP167  |
| 6 | LYS71   | ASP55   |
| 6 | ARG74   | GLU83   |
| 6 | LYS216  | GLU123  |
| 6 | ARG61   | GLU37   |
| 6 | ARG38   | ASP97   |
| 6 | ARG57   | GLU65   |
| 6 | ARG57   | GLU69   |
| 6 | LYS64   | ASP58   |
| 6 | HIS107  | GLU117  |
| 6 | ARG2    | ASP26   |
| 6 | ARG66   | ASP93   |
| 6 | ARG95   | GLU100E |
| 6 | ARG99   | GLU55   |
| 6 | LYS107  | ASP105  |
| 6 | ARG142  | GLU143  |
| 6 | LYS100  | GLU162  |
| 6 | ARG121  | ASP37   |
| 6 | ARG52   | ASP49   |
| 6 | ARG156  | GLU154  |
| 6 | LYS82A  | GLU81   |
| 6 | ARG124  | ASP89   |
| 6 | LYS178  | GLU180  |
| 6 | ARG80   | GLU92   |
| 6 | LYS5    | ASP88   |
| 6 | LYS71   | GLU87   |
| 6 | ARG185  | ASP159  |
| 6 | ARG327  | ASP148A |
| 6 | LYS243  | GLU153  |
| 6 | HIS90   | ASP62   |
| 6 | ARG103  | GLU230  |
| 6 | ARG52A  | ASP674  |

|   |         |         |
|---|---------|---------|
| 6 | ARG372  | GLU403  |
| 6 | ARG94   | ASP321A |
| 6 | LYS256  | GLU267  |
| 6 | LYS254  | ASP71   |
| 6 | HIS173  | ASP141  |
| 6 | ARG20   | GLU24   |
| 6 | HIS162  | ASP226  |
| 6 | ARG429  | ASP74   |
| 6 | ARG62   | GLU26   |
| 6 | ARG82B  | ASP82A  |
| 6 | LYS533  | GLU455  |
| 6 | LYS289  | GLU128  |
| 6 | ARG54   | GLU6    |
| 6 | ARG236  | ASP259  |
| 6 | ARG94   | ASP33   |
| 6 | LYS6    | ASP56   |
| 6 | LYS152  | GLU200  |
| 6 | ARG659  | GLU661  |
| 6 | ARG91   | ASP22   |
| 6 | ARG95   | GLU50   |
| 6 | ARG98   | ASP95   |
| 6 | ARG37   | GLU101  |
| 6 | LYS291  | ASP287  |
| 6 | HIS110  | GLU36   |
| 6 | ARG229  | ASP282  |
| 6 | ARG340  | ASP337  |
| 6 | ARG67   | ASP97   |
| 6 | LYS87   | ASP31   |
| 6 | LYS64   | GLU47   |
| 6 | ARG50   | ASP94   |
| 6 | LYS108  | GLU110  |
| 6 | ARG191  | ASP214  |
| 6 | ARG143  | GLU106  |
| 6 | LYS58   | ASP3    |
| 6 | ARG193  | ASP184  |
| 6 | LYS100A | GLU55   |
| 6 | LYS588  | ASP589  |
| 6 | ARG96   | GLU54   |
| 6 | HIS67   | ASP249  |
| 6 | ARG38   | ASP36   |
| 6 | HIS87   | ASP105  |
| 6 | ARG61   | ASP77   |
| 6 | HIS70   | ASP74   |
| 6 | LYS36   | GLU98   |
| 6 | LYS100H | ASP50   |
| 6 | ARG50   | GLU269  |
| 6 | HIS51   | ASP52   |
| 6 | LYS213  | GLU127  |
| 6 | HIS80   | GLU90   |
| 6 | ARG308  | ASP327  |
| 6 | ARG249  | GLU381  |
| 6 | LYS176  | ASP172  |
| 6 | HIS585  | GLU492  |
| 6 | LYS347  | GLU383  |
| 6 | LYS273  | ASP339  |
| 6 | ARG30   | GLU32   |
| 6 | LYS116  | ASP203  |
| 6 | ARG204  | ASP142  |

|   |         |         |
|---|---------|---------|
| 6 | LYS555  | ASP546  |
| 6 | ARG523  | GLU531  |
| 6 | LYS34   | ASP612  |
| 6 | HIS362  | ASP359  |
| 6 | HIS104  | ASP79   |
| 6 | LYS343  | ASP340  |
| 6 | ARG99   | ASP31   |
| 6 | ARG95   | ASP7    |
| 6 | ARG344  | GLU290  |
| 6 | LYS6    | GLU232  |
| 6 | ARG145  | GLU108  |
| 6 | LYS155  | ASP193  |
| 6 | HIS334  | GLU320  |
| 6 | HIS217  | GLU219  |
| 6 | ARG56   | ASP77   |
| 6 | ARG112  | ASP198  |
| 6 | ARG293  | ASP294  |
| 6 | LYS334  | GLU337  |
| 6 | HIS208  | ASP213  |
| 6 | ARG239  | GLU243  |
| 6 | ARG66   | ASP62   |
| 6 | LYS153  | GLU201  |
| 6 | ARG499  | ASP537  |
| 6 | HIS100F | ASP100G |
| 6 | ARG60   | GLU74   |
| 6 | LYS213  | GLU124  |
| 6 | ARG62   | GLU60   |
| 6 | ARG402  | ASP329  |
| 6 | ARG200  | ASP74   |
| 6 | ARG1083 | ASP1085 |
| 6 | LYS27   | GLU230  |
| 5 | LYS77   | GLU79   |
| 5 | ARG37   | GLU81   |
| 5 | LYS41   | ASP76   |
| 5 | LYS43   | ASP85   |
| 5 | LYS665  | GLU662  |
| 5 | ARG33   | ASP35   |
| 5 | ARG108  | ASP1    |
| 5 | ARG315  | GLU95   |
| 5 | ARG309  | GLU255  |
| 5 | ARG9    | ASP368  |
| 5 | ARG77   | ASP100  |
| 5 | HIS26   | ASP22   |
| 5 | LYS212  | GLU215  |
| 5 | LYS243  | GLU245  |
| 5 | ARG465  | GLU438  |
| 5 | LYS157  | ASP161  |
| 5 | ARG19   | ASP97   |
| 5 | LYS306  | GLU303  |
| 5 | LYS453  | ASP422  |
| 5 | HIS47   | ASP63   |
| 5 | ARG31   | ASP27   |
| 5 | ARG240  | ASP261  |
| 5 | ARG38   | ASP88   |
| 5 | LYS140  | GLU103  |
| 5 | LYS371  | GLU345  |
| 5 | LYS173  | ASP190  |
| 5 | LYS26   | ASP23   |



|   |         |         |
|---|---------|---------|
| 5 | LYS380  | ASP589  |
| 5 | ARG327  | ASP1    |
| 5 | LYS182  | ASP183  |
| 5 | LYS193  | ASP155  |
| 5 | LYS224  | GLU143  |
| 5 | ARG1050 | ASP683  |
| 5 | ARG52   | ASP32   |
| 5 | LYS219  | GLU221  |
| 5 | ARG81   | ASP102  |
| 5 | ARG100F | ASP50   |
| 5 | ARG244  | ASP276  |
| 5 | LYS90   | ASP78   |
| 5 | ARG58   | ASP79   |
| 5 | LYS237  | GLU78   |
| 5 | ARG18   | ASP70   |
| 5 | ARG31   | ASP100L |
| 5 | LYS146  | GLU194  |
| 5 | ARG52   | GLU60   |
| 5 | ARG75   | GLU95   |
| 5 | ARG427  | ASP392  |
| 5 | LYS53   | ASP276  |
| 5 | LYS367  | ASP390  |
| 5 | HIS108  | ASP20   |
| 5 | ARG281  | ASP111  |
| 5 | HIS327  | GLU341  |
| 5 | LYS54   | GLU51   |
| 5 | LYS64   | ASP65   |
| 5 | LYS161  | ASP272  |
| 5 | ARG105  | GLU64   |
| 5 | LYS126  | GLU122  |
| 5 | ARG97   | ASP103  |
| 5 | ARG75   | ASP72   |
| 5 | ARG219  | GLU221  |
| 5 | HIS188  | ASP184  |
| 5 | ARG97   | ASP77   |
| 5 | HIS134  | GLU119  |
| 5 | ARG305  | GLU312  |
| 5 | ARG3031 | GLU3103 |
| 5 | LYS129  | ASP144  |
| 5 | LYS69   | ASP26   |
| 5 | ARG463  | ASP465  |
| 5 | LYS13   | ASP154  |
| 5 | LYS49   | GLU55   |
| 5 | ARG525  | GLU605  |
| 5 | ARG419  | GLU106  |
| 5 | ARG430  | ASP411  |
| 5 | HIS308  | GLU98   |
| 5 | ARG69   | ASP108  |
| 5 | ARG128  | GLU256  |
| 5 | LYS336  | ASP79   |
| 5 | LYS60   | GLU46   |
| 5 | LYS222  | ASP123  |
| 5 | LYS301  | ASP324  |
| 5 | LYS490  | GLU429  |
| 5 | LYS38   | GLU89   |
| 5 | LYS207  | GLU128  |
| 5 | ARG77   | ASP60   |
| 5 | LYS188  | GLU105  |

|   |        |        |
|---|--------|--------|
| 5 | LYS67  | GLU64  |
| 5 | HIS143 | GLU183 |
| 5 | ARG142 | GLU139 |
| 5 | LYS101 | ASP163 |
| 5 | LYS145 | GLU148 |
| 5 | LYS32  | GLU57  |
| 5 | LYS216 | GLU128 |
| 5 | LYS43  | GLU45  |
| 5 | ARG91  | ASP432 |
| 5 | HIS597 | ASP608 |
| 5 | ARG234 | ASP231 |
| 5 | LYS63  | GLU75  |
| 5 | ARG551 | ASP716 |
| 5 | LYS291 | GLU288 |
| 5 | LYS206 | GLU122 |
| 5 | LYS498 | GLU487 |
| 5 | ARG100 | ASP43  |
| 5 | HIS128 | GLU183 |
| 5 | LYS83  | ASP87  |
| 5 | ARG192 | ASP188 |
| 5 | ARG52  | ASP115 |
| 5 | LYS223 | ASP126 |
| 5 | LYS92  | ASP271 |
| 5 | ARG46  | GLU55  |
| 5 | LYS15  | GLU111 |
| 5 | LYS45  | ASP101 |
| 5 | ARG46  | ASP42  |
| 5 | LYS568 | GLU107 |
| 5 | HIS187 | ASP149 |
| 5 | ARG43  | ASP98  |
| 5 | ARG78  | ASP84  |
| 5 | ARG280 | GLU274 |
| 5 | ARG155 | GLU195 |
| 5 | ARG263 | GLU174 |
| 5 | ARG524 | GLU425 |
| 5 | LYS236 | ASP275 |
| 5 | LYS168 | GLU294 |
| 5 | ARG315 | ASP24  |
| 5 | LYS78  | ASP75  |
| 5 | LYS269 | GLU89  |
| 5 | LYS38  | ASP80  |
| 5 | LYS142 | GLU145 |
| 5 | ARG45  | ASP38  |
| 5 | ARG123 | ASP120 |
| 5 | ARG31  | ASP66A |
| 5 | LYS259 | GLU119 |
| 5 | LYS171 | ASP138 |
| 5 | LYS470 | GLU60  |
| 5 | ARG38  | GLU47  |
| 5 | ARG51  | ASP101 |
| 5 | LYS190 | ASP151 |
| 5 | ARG309 | GLU295 |
| 5 | ARG53  | ASP50  |
| 5 | ARG53  | ASP59  |
| 5 | LYS115 | GLU203 |
| 5 | LYS39  | ASP83  |
| 5 | LYS37  | GLU35  |
| 5 | ARG58  | ASP94  |

|   |          |         |
|---|----------|---------|
| 5 | ARG111   | GLU68   |
| 5 | LYS416   | ASP51   |
| 5 | ARG117   | ASP183  |
| 5 | LYS229   | GLU231  |
| 5 | LYS49    | ASP101  |
| 5 | HIS681   | GLU680  |
| 5 | ARG241   | ASP164  |
| 5 | HIS75    | ASP92   |
| 5 | ARG88    | GLU86   |
| 5 | LYS97    | ASP154  |
| 5 | LYS284   | GLU281  |
| 5 | ARG121   | GLU188  |
| 5 | ARG139   | GLU102  |
| 5 | ARG469   | GLU362  |
| 5 | LYS116   | ASP117  |
| 5 | LYS44    | ASP45   |
| 5 | ARG307   | ASP90   |
| 5 | LYS68    | ASP65   |
| 5 | LYS239   | GLU150  |
| 5 | ARG164   | ASP169  |
| 5 | ARG114   | ASP115  |
| 5 | LYS19    | GLU16   |
| 5 | ARG25    | ASP22   |
| 5 | ARG313   | GLU314  |
| 5 | LYS207   | ASP208  |
| 5 | LYS131   | GLU139  |
| 5 | LYS27    | ASP32   |
| 5 | LYS96    | ASP31   |
| 5 | ARG145   | ASP124  |
| 5 | HIS31    | GLU100I |
| 5 | ARG30    | ASP658  |
| 5 | ARG106   | ASP109  |
| 5 | LYS154   | GLU151  |
| 5 | LYS130   | ASP144  |
| 5 | LYS508   | GLU123  |
| 5 | LYS12    | ASP56   |
| 5 | LYS31    | ASP92   |
| 5 | HIS168   | ASP166  |
| 5 | LYS50    | GLU52   |
| 5 | LYS211   | GLU213  |
| 5 | LYS203   | GLU207  |
| 4 | ARG1095B | ASP1001 |
| 4 | ARG66    | ASP     |
| 4 | LYS149   | ASP41   |
| 4 | ARG61    | ASP84   |
| 4 | ARG100B  | ASP31   |
| 4 | HIS288   | GLU153  |
| 4 | ARG1568  | GLU1250 |
| 4 | HIS377   | ASP387  |
| 4 | LYS215   | ASP122  |
| 4 | ARG69    | ASP65   |
| 4 | HIS105   | GLU60   |
| 4 | ARG348   | GLU488  |
| 4 | LYS28    | GLU380  |
| 4 | LYS28    | GLU382  |
| 4 | LYS170   | GLU172  |
| 4 | ARG234   | ASP104  |
| 4 | ARG457   | ASP31E  |

|   |        |        |
|---|--------|--------|
| 4 | LYS69  | GLU114 |
| 4 | ARG335 | ASP301 |
| 4 | ARG21  | ASP45  |
| 4 | ARG97  | ASP106 |
| 4 | ARG100 | GLU64  |
| 4 | LYS25  | GLU55  |
| 4 | LYS181 | GLU167 |
| 4 | ARG205 | GLU225 |
| 4 | ARG96  | ASP94  |
| 4 | HIS191 | ASP187 |
| 4 | HIS32  | ASP31  |
| 4 | ARG413 | GLU367 |
| 4 | LYS486 | GLU239 |
| 4 | LYS197 | ASP108 |
| 4 | LYS147 | GLU127 |
| 4 | HIS347 | ASP374 |
| 4 | HIS105 | ASP183 |
| 4 | HIS203 | ASP136 |
| 4 | ARG316 | ASP314 |
| 4 | LYS166 | GLU146 |
| 4 | LYS127 | ASP124 |
| 4 | ARG705 | ASP728 |
| 4 | ARG77  | GLU21  |
| 4 | LYS205 | GLU70  |
| 4 | ARG37  | ASP89  |
| 4 | LYS500 | ASP485 |
| 4 | LYS17  | GLU71  |
| 4 | HIS209 | ASP171 |
| 4 | ARG106 | GLU69  |
| 4 | ARG603 | GLU620 |
| 4 | ARG226 | ASP31  |
| 4 | HIS60  | ASP59  |
| 4 | ARG200 | ASP223 |
| 4 | LYS96  | ASP55  |
| 4 | LYS296 | GLU364 |
| 4 | ARG281 | GLU278 |
| 4 | HIS78  | ASP69  |
| 4 | ARG54  | GLU92  |
| 4 | ARG207 | GLU215 |
| 4 | ARG213 | GLU190 |
| 4 | LYS433 | ASP440 |
| 4 | ARG103 | ASP113 |
| 4 | ARG106 | ASP168 |
| 4 | LYS216 | GLU127 |
| 4 | LYS76  | ASP11  |
| 4 | LYS100 | ASP112 |
| 4 | ARG253 | ASP276 |
| 4 | LYS341 | GLU545 |
| 4 | ARG222 | GLU192 |
| 4 | ARG41  | ASP106 |
| 4 | LYS98  | ASP109 |
| 4 | ARG41  | ASP108 |
| 4 | ARG52  | ASP58  |
| 4 | LYS123 | GLU255 |
| 4 | ARG279 | ASP242 |
| 4 | LYS204 | GLU113 |
| 4 | LYS383 | ASP156 |
| 4 | ARG398 | ASP408 |

|   |         |         |
|---|---------|---------|
| 4 | ARG61   | ASP33   |
| 4 | ARG200  | ASP56   |
| 4 | ARG240  | GLU238  |
| 4 | LYS679  | GLU625  |
| 4 | ARG342  | ASP385  |
| 4 | ARG104  | GLU110  |
| 4 | LYS135  | ASP48   |
| 4 | ARG239  | ASP277  |
| 4 | LYS50   | GLU93   |
| 4 | ARG95   | GLU34   |
| 4 | ARG335  | ASP412  |
| 4 | ARG399  | ASP420  |
| 4 | ARG384  | ASP361  |
| 4 | LYS221  | GLU223  |
| 4 | HIS4    | ASP7    |
| 4 | ARG30   | GLU73   |
| 4 | ARG54   | ASP161  |
| 4 | HIS160  | ASP108  |
| 4 | ARG213  | ASP209  |
| 4 | HIS1042 | GLU1038 |
| 4 | ARG1065 | ASP1088 |
| 4 | HIS192  | ASP194  |
| 4 | HIS33   | GLU31   |
| 4 | ARG659  | GLU242  |
| 4 | LYS63   | ASP89   |
| 4 | ARG83   | GLU1    |
| 4 | HIS195  | GLU191  |
| 4 | LYS104  | GLU46   |
| 4 | HIS53   | GLU64   |
| 4 | ARG125  | GLU159  |
| 4 | ARG349  | ASP414  |
| 4 | LYS19   | ASP80   |
| 4 | ARG35   | ASP37   |
| 4 | ARG181  | GLU183  |
| 4 | ARG101  | ASP115  |
| 4 | HIS143  | GLU141  |
| 4 | ARG97   | ASP436  |
| 4 | LYS427  | ASP448  |
| 4 | ARG730  | GLU727  |
| 4 | ARG67   | GLU97   |
| 4 | ARG130  | ASP148  |
| 4 | LYS185  | ASP55   |
| 4 | ARG99   | GLU162  |
| 4 | LYS103  | ASP164  |
| 4 | LYS7    | ASP10   |
| 4 | ARG31   | ASP105  |
| 4 | LYS98   | ASP34   |
| 4 | LYS205  | GLU123  |
| 4 | LYS146  | GLU192  |
| 4 | ARG151  | GLU155  |
| 4 | ARG94   | ASP103  |
| 4 | LYS97   | ASP106  |
| 4 | ARG98   | ASP112  |
| 4 | LYS205  | ASP259  |
| 4 | ARG419  | GLU426  |
| 4 | LYS52   | GLU33   |
| 4 | HIS1154 | ASP1158 |
| 4 | ARG348  | GLU450  |

|   |        |         |
|---|--------|---------|
| 4 | LYS397 | ASP396  |
| 4 | HIS194 | GLU190  |
| 4 | HIS63  | GLU46   |
| 4 | LYS119 | ASP21   |
| 4 | HIS15  | ASP55   |
| 4 | ARG560 | ASP488  |
| 4 | ARG552 | GLU550  |
| 4 | LYS406 | ASP106  |
| 4 | LYS181 | GLU215  |
| 4 | LYS167 | GLU169  |
| 4 | LYS43  | GLU85   |
| 4 | ARG322 | GLU25   |
| 4 | ARG9   | ASP137  |
| 4 | ARG98  | ASP103  |
| 4 | LYS443 | ASP447  |
| 4 | ARG94  | GLU1    |
| 4 | ARG303 | ASP301  |
| 4 | LYS423 | ASP358  |
| 4 | LYS339 | GLU336  |
| 4 | ARG97  | ASP111  |
| 4 | ARG104 | GLU111  |
| 4 | LYS329 | GLU333  |
| 4 | ARG414 | GLU367  |
| 4 | HIS20  | GLU157  |
| 4 | ARG96  | GLU100I |
| 4 | LYS62  | GLU1    |
| 4 | LYS218 | GLU261  |
| 4 | HIS172 | ASP172  |
| 4 | LYS557 | ASP560  |
| 4 | LYS31  | GLU20   |
| 4 | LYS212 | GLU127  |
| 4 | ARG90  | GLU49   |
| 4 | LYS49  | ASP100A |
| 4 | LYS247 | ASP251  |
| 4 | ARG100 | ASP104  |
| 4 | LYS208 | GLU128  |
| 4 | LYS192 | ASP160  |
| 4 | ARG337 | GLU333  |
| 4 | LYS435 | GLU465  |
| 4 | ARG236 | ASP44   |
| 4 | LYS461 | ASP448  |
| 4 | HIS99  | GLU142  |
| 4 | ARG6   | GLU100  |
| 4 | LYS224 | GLU125  |
| 4 | ARG99  | ASP111  |
| 4 | ARG99  | ASP114  |
| 4 | LYS307 | ASP386  |
| 4 | HIS274 | ASP179  |
| 4 | LYS230 | ASP274  |
| 4 | ARG190 | ASP152  |
| 4 | ARG76  | GLU78   |
| 4 | ARG46  | GLU102  |
| 4 | LYS215 | GLU121  |
| 4 | HIS90  | ASP33   |
| 4 | ARG106 | GLU168  |
| 4 | ARG101 | GLU60   |
| 4 | ARG43  | GLU46   |
| 4 | LYS150 | GLU127  |

|   |         |         |
|---|---------|---------|
| 4 | LYS189  | GLU212  |
| 4 | ARG25   | ASP43   |
| 4 | ARG2598 | ASP2603 |
| 4 | ARG160  | GLU168  |
| 4 | ARG41   | GLU165  |
| 4 | ARG38   | GLU87   |
| 4 | ARG38   | GLU86   |
| 4 | ARG536  | GLU457  |
| 4 | LYS1149 | GLU1195 |
| 4 | LYS83   | ASP86   |
| 4 | ARG6    | GLU98   |
| 4 | ARG214  | GLU190  |
| 4 | ARG941  | ASP362  |
| 4 | ARG52   | ASP107  |
| 4 | ARG155  | GLU152  |
| 4 | ARG54   | GLU59   |
| 4 | ARG12   | ASP242  |
| 4 | ARG668  | GLU350  |
| 4 | LYS99   | ASP103  |
| 4 | ARG209  | GLU128  |
| 4 | ARG499  | ASP489  |
| 4 | LYS3    | GLU1    |
| 4 | LYS124  | ASP122  |
| 4 | HIS71   | GLU21   |
| 4 | ARG1009 | ASP1368 |
| 4 | HIS308  | ASP386  |
| 4 | HIS196  | GLU192  |
| 4 | LYS995  | ASP868  |
| 4 | LYS208  | ASP206  |
| 4 | ARG99   | ASP109  |
| 4 | LYS17   | ASP57   |
| 4 | ARG99   | ASP104  |
| 4 | LYS215  | GLU128  |
| 4 | ARG40   | GLU182  |
| 4 | LYS215  | GLU125  |
| 4 | LYS215  | GLU124  |
| 4 | LYS392  | ASP349  |
| 4 | ARG190  | GLU188  |
| 4 | ARG216  | ASP217  |
| 4 | HIS0    | GLU97   |
| 4 | LYS217  | GLU129  |
| 4 | LYS653  | ASP17   |
| 4 | ARG476  | ASP518  |
| 4 | ARG536  | ASP534  |
| 4 | LYS69   | ASP29   |
| 4 | HIS184  | GLU231  |
| 4 | ARG186  | GLU189  |
| 4 | ARG95   | ASP95D  |
| 4 | ARG852  | GLU849  |
| 4 | ARG97   | ASP52   |
| 4 | HIS111  | ASP23   |
| 4 | ARG2519 | ASP2834 |
| 4 | HIS689  | GLU672  |
| 4 | ARG50   | ASP100G |
| 4 | LYS96   | ASP52   |
| 4 | LYS168  | GLU78   |
| 4 | ARG50   | GLU39   |
| 4 | ARG220  | ASP105  |

|   |         |         |
|---|---------|---------|
| 4 | ARG259  | ASP134  |
| 4 | ARG111  | ASP102  |
| 4 | HIS106  | GLU35   |
| 4 | ARG110  | GLU450  |
| 4 | ARG334  | GLU302  |
| 4 | HIS705  | ASP709  |
| 4 | HIS33   | ASP105  |
| 4 | LYS253  | ASP71   |
| 4 | LYS157  | ASP158  |
| 4 | ARG44   | GLU86   |
| 4 | LYS597  | ASP679  |
| 4 | ARG348  | ASP405  |
| 4 | ARG284  | ASP307  |
| 4 | HIS377  | ASP379  |
| 4 | LYS210  | GLU160  |
| 4 | HIS48   | ASP79   |
| 4 | ARG24   | ASP76   |
| 4 | ARG104  | GLU99   |
| 4 | ARG32   | ASP80   |
| 4 | HIS28   | GLU130  |
| 4 | ARG200  | ASP102  |
| 4 | LYS199  | ASP143  |
| 4 | LYS4    | ASP54   |
| 4 | LYS394  | ASP489  |
| 4 | ARG1519 | ASP1834 |
| 4 | LYS119  | ASP54   |
| 4 | HIS597  | GLU704  |
| 4 | ARG111  | ASP114  |
| 4 | LYS502  | GLU50   |
| 4 | HIS103  | ASP102  |
| 4 | LYS613  | GLU609  |
| 4 | LYS191  | ASP194  |
| 4 | ARG477  | GLU481  |
| 4 | ARG54   | GLU60   |
| 4 | ARG52A  | ASP53   |
| 4 | LYS34   | ASP93   |
| 4 | LYS216  | GLU124  |
| 4 | ARG11   | GLU99   |
| 4 | LYS111  | GLU2    |
| 4 | ARG358  | ASP333  |
| 4 | LYS323  | GLU358  |
| 4 | ARG213  | GLU218  |
| 4 | ARG363  | ASP106  |
| 4 | ARG168  | ASP100L |
| 4 | LYS80   | GLU81   |
| 4 | LYS109  | GLU44   |
| 4 | ARG507  | GLU524  |
| 4 | LYS118  | GLU111  |
| 4 | ARG4    | GLU25   |
| 4 | HIS274  | ASP237  |
| 4 | ARG74   | GLU40   |
| 4 | LYS103  | ASP83   |
| 4 | ARG380  | GLU383  |
| 4 | ARG58   | ASP95D  |
| 4 | HIS452  | GLU450  |
| 4 | ARG1221 | ASP1218 |
| 4 | LYS206  | ASP199  |
| 4 | ARG153  | GLU183  |



|   |         |         |
|---|---------|---------|
| 4 | LYS191  | ASP159  |
| 4 | ARG56   | ASP75   |
| 4 | LYS697  | ASP399  |
| 4 | ARG35   | ASP334  |
| 4 | LYS193  | GLU188  |
| 4 | ARG56   | ASP227  |
| 4 | HIS42   | GLU140  |
| 4 | LYS2041 | GLU2087 |
| 4 | ARG104  | ASP100  |
| 4 | LYS327  | ASP324  |
| 4 | HIS9    | ASP13   |
| 4 | LYS312  | ASP56   |
| 4 | LYS312  | ASP54   |
| 4 | ARG95   | GLU97   |
| 4 | HIS189  | GLU85   |
| 4 | LYS51   | GLU243  |
| 4 | LYS439  | ASP480  |
| 4 | ARG283  | GLU256  |
| 4 | ARG162  | GLU192  |
| 4 | LYS251  | ASP164  |
| 4 | ARG624  | ASP621  |
| 4 | LYS96   | ASP100  |
| 4 | LYS80   | ASP72   |
| 4 | ARG21   | GLU92   |
| 4 | HIS264  | GLU241  |
| 4 | ARG58   | GLU62   |
| 4 | LYS196  | GLU219  |
| 4 | ARG88   | GLU112  |
| 4 | ARG96   | GLU101  |
| 4 | ARG436  | ASP432  |
| 4 | ARG439  | GLU377  |
| 4 | LYS288  | GLU299  |
| 4 | LYS141  | GLU124  |
| 4 | ARG339  | ASP100  |
| 4 | ARG147  | GLU110  |
| 4 | LYS43   | ASP9    |
| 4 | LYS274  | GLU294  |
| 4 | LYS148  | ASP131  |
| 4 | LYS281  | ASP282  |
| 4 | ARG222  | GLU123  |
| 4 | ARG171  | GLU140  |
| 4 | ARG532  | ASP534  |
| 4 | LYS79   | ASP80   |
| 4 | LYS220  | GLU128  |
| 4 | ARG36   | GLU6    |
| 4 | LYS341  | ASP140  |
| 4 | LYS211  | GLU121  |
| 4 | LYS157  | ASP153  |
| 4 | HIS193  | GLU202  |
| 4 | LYS574  | GLU106  |
| 4 | HIS55   | ASP143  |
| 4 | LYS41   | GLU56   |
| 4 | ARG384  | GLU81   |
| 4 | LYS249  | ASP250  |
| 4 | LYS441  | ASP461  |
| 4 | LYS2    | ASP42   |
| 4 | LYS131  | GLU269  |
| 4 | LYS439  | GLU356  |

|   |         |         |
|---|---------|---------|
| 4 | ARG108  | GLU450  |
| 4 | ARG49   | ASP7    |
| 4 | LYS21   | GLU202  |
| 4 | HIS240  | GLU168  |
| 4 | LYS311  | ASP322  |
| 4 | LYS170  | ASP54   |
| 4 | ARG2215 | ASP100  |
| 4 | HIS187  | ASP183  |
| 4 | ARG40   | ASP97   |
| 4 | ARG40   | ASP96   |
| 4 | ARG184  | ASP254  |
| 4 | LYS4    | GLU15   |
| 4 | LYS211  | ASP54   |
| 4 | ARG435  | ASP448  |
| 4 | ARG406  | ASP408  |
| 4 | LYS386  | GLU351  |
| 4 | ARG98   | ASP238  |
| 4 | ARG401  | GLU373  |
| 4 | ARG101  | GLU39   |
| 4 | LYS447  | ASP407  |
| 4 | ARG97   | GLU50   |
| 4 | ARG101  | ASP31   |
| 4 | ARG684  | ASP710  |
| 4 | LYS111  | GLU197  |
| 4 | LYS54   | ASP76   |
| 4 | HIS41   | ASP12   |
| 4 | LYS213  | ASP215  |
| 4 | HIS223  | ASP123  |
| 4 | ARG68   | ASP74   |
| 4 | ARG104  | ASP120  |
| 4 | LYS247  | GLU263  |
| 4 | HIS186  | ASP148  |
| 4 | LYS141  | GLU104  |
| 4 | HIS434  | GLU432  |
| 4 | ARG416  | GLU464  |
| 4 | LYS171  | ASP288  |
| 4 | LYS44   | ASP276  |
| 4 | LYS394  | GLU385  |
| 4 | HIS95C  | ASP92   |
| 4 | LYS282  | GLU33   |
| 4 | LYS27   | ASP1    |
| 4 | ARG127  | ASP145  |
| 4 | ARG429  | ASP408  |
| 4 | ARG13   | GLU16   |
| 4 | HIS32   | ASP97   |
| 4 | LYS171  | ASP137  |
| 4 | ARG1137 | GLU1143 |
| 4 | HIS755  | ASP730  |
| 4 | ARG567  | ASP590  |
| 4 | HIS377  | GLU425  |
| 4 | ARG94   | GLU68   |
| 4 | LYS230  | GLU129  |
| 4 | LYS574  | ASP375  |
| 4 | LYS284  | ASP312  |
| 4 | ARG54   | GLU101  |
| 4 | ARG110  | GLU85   |
| 4 | ARG170  | GLU1    |
| 4 | ARG366  | ASP386  |

|   |         |         |
|---|---------|---------|
| 4 | LYS330  | GLU360  |
| 4 | LYS214  | GLU125  |
| 4 | ARG11   | ASP38   |
| 4 | LYS436  | ASP440  |
| 4 | LYS207  | GLU122  |
| 4 | ARG143  | ASP154  |
| 4 | ARG339  | GLU322  |
| 4 | LYS168  | ASP169  |
| 4 | ARG201  | GLU221  |
| 4 | LYS149  | GLU163  |
| 4 | LYS97   | GLU50   |
| 4 | LYS76   | GLU122  |
| 4 | LYS289  | GLU313  |
| 4 | ARG100  | ASP111  |
| 4 | HIS100G | GLU95   |
| 4 | ARG54   | ASP50   |
| 4 | ARG124  | ASP132  |
| 4 | ARG136  | GLU134  |
| 4 | ARG97   | ASP27   |
| 4 | ARG384  | GLU360  |
| 4 | LYS114  | ASP50   |
| 4 | LYS114  | ASP51   |
| 4 | HIS35   | ASP4    |
| 4 | HIS553  | ASP387  |
| 4 | LYS32   | ASP58   |
| 4 | LYS176  | GLU173  |
| 4 | ARG379  | ASP330  |
| 4 | LYS253  | GLU128  |
| 4 | ARG495  | ASP429  |
| 4 | HIS49   | ASP101  |
| 4 | ARG251  | GLU351  |
| 4 | ARG184  | ASP63   |
| 4 | ARG35   | GLU32   |
| 4 | LYS181  | GLU173  |
| 4 | LYS47   | GLU55   |
| 4 | HIS29   | ASP12   |
| 4 | ARG135  | GLU206  |
| 4 | LYS491  | GLU495  |
| 4 | ARG110  | GLU94   |
| 4 | ARG213  | GLU189  |
| 4 | HIS28   | ASP138  |
| 4 | ARG235  | ASP222  |
| 4 | ARG100  | ASP66A  |
| 4 | ARG275  | GLU272  |
| 4 | ARG171  | ASP173  |
| 4 | ARG484  | ASP408  |
| 4 | ARG98   | ASP72   |
| 4 | LYS1207 | GLU1381 |
| 4 | ARG302  | GLU305  |
| 4 | LYS633  | ASP634  |
| 4 | LYS402  | GLU404  |
| 4 | LYS55   | ASP101  |
| 4 | LYS55   | ASP106  |
| 4 | ARG511  | ASP509  |
| 4 | HIS274  | ASP278  |
| 4 | LYS248  | GLU247  |
| 4 | HIS100  | ASP96   |
| 4 | HIS19   | GLU50   |

|   |         |         |
|---|---------|---------|
| 4 | HIS102  | GLU64   |
| 4 | LYS28   | ASP99   |
| 4 | ARG276  | ASP273  |
| 4 | ARG63   | GLU138  |
| 4 | LYS406  | ASP224  |
| 4 | ARG66   | GLU83   |
| 4 | ARG128  | ASP103  |
| 4 | ARG336  | GLU333  |
| 4 | ARG44   | ASP60   |
| 4 | LYS96   | ASP108  |
| 4 | ARG25   | GLU82   |
| 4 | LYS300  | ASP249  |
| 4 | LYS187  | GLU97   |
| 4 | ARG149  | ASP136  |
| 4 | ARG211  | ASP558  |
| 4 | HIS35   | ASP33   |
| 4 | ARG131  | GLU142  |
| 4 | ARG354  | GLU404  |
| 4 | ARG128  | ASP124  |
| 4 | ARG152  | GLU150  |
| 4 | HIS68   | ASP21   |
| 4 | LYS203  | ASP32   |
| 4 | ARG99   | ASP53   |
| 4 | ARG59   | GLU221  |
| 4 | ARG86   | ASP107  |
| 4 | ARG3087 | ASP3089 |
| 4 | LYS161  | ASP146  |
| 4 | LYS47   | GLU54   |
| 4 | LYS23   | ASP69   |
| 4 | ARG80   | GLU35   |
| 4 | ARG25   | ASP101  |
| 4 | LYS513  | ASP557  |
| 4 | LYS446  | ASP50   |
| 4 | ARG316  | ASP295  |
| 4 | LYS207  | ASP130  |
| 4 | ARG313  | GLU310  |
| 4 | ARG550  | GLU527  |
| 4 | ARG25   | ASP27   |
| 4 | LYS145  | GLU143  |
| 4 | HIS35   | GLU52   |
| 4 | HIS35   | ASP98   |
| 4 | LYS39   | GLU40   |
| 4 | LYS532  | GLU535  |
| 4 | ARG97   | ASP109  |
| 4 | LYS157  | GLU160  |
| 4 | LYS665  | ASP355  |
| 4 | LYS433  | ASP56   |
| 4 | LYS267  | GLU264  |
| 4 | HIS142  | ASP143  |
| 4 | LYS179  | GLU181  |
| 4 | ARG50   | GLU57   |
| 4 | ARG75   | GLU71   |
| 4 | LYS224  | ASP122  |
| 4 | HIS96   | ASP5    |
| 4 | LYS62   | ASP83   |
| 4 | ARG147  | GLU142  |
| 4 | LYS62   | ASP1    |
| 4 | LYS233  | ASP237  |

|   |        |        |
|---|--------|--------|
| 4 | LYS69  | ASP59  |
| 4 | ARG145 | GLU116 |
| 4 | ARG484 | ASP405 |
| 4 | LYS197 | ASP55  |
| 4 | ARG162 | ASP90  |
| 4 | HIS56  | GLU9   |
| 4 | ARG398 | ASP394 |
| 4 | LYS138 | ASP169 |
| 4 | ARG118 | GLU12  |
| 4 | ARG102 | ASP92  |
| 4 | ARG476 | GLU488 |
| 4 | LYS443 | ASP58  |
| 4 | ARG327 | GLU27  |
| 4 | HIS573 | ASP567 |
| 4 | ARG107 | ASP169 |
| 4 | ARG24  | GLU3   |
| 4 | ARG250 | GLU437 |
| 4 | ARG66  | GLU88  |
| 4 | ARG355 | GLU82  |
| 4 | ARG257 | GLU153 |
| 4 | LYS109 | GLU171 |
| 4 | LYS221 | GLU126 |
| 4 | ARG4   | ASP385 |
| 4 | ARG52  | GLU49  |
| 4 | LYS66  | ASP89  |
| 4 | ARG514 | GLU531 |
| 4 | LYS347 | GLU299 |
| 4 | LYS109 | GLU111 |
| 4 | HIS242 | GLU243 |
| 4 | ARG372 | ASP390 |
| 4 | LYS7   | ASP49  |
| 4 | LYS55  | GLU59  |
| 4 | ARG47  | ASP1   |
| 4 | HIS213 | GLU58  |
| 3 | LYS213 | GLU130 |
| 3 | ARG319 | GLU304 |
| 3 | ARG40  | ASP68  |
| 3 | ARG88  | GLU61  |
| 3 | ARG304 | ASP31  |
| 3 | LYS76  | GLU85  |
| 3 | ARG315 | ASP93  |
| 3 | ARG50  | ASP61  |
| 3 | LYS175 | GLU174 |
| 3 | ARG220 | GLU221 |
| 3 | ARG143 | ASP61  |
| 3 | ARG170 | GLU166 |
| 3 | LYS67  | ASP64  |
| 3 | ARG97  | ASP32  |
| 3 | LYS72  | ASP69  |
| 3 | LYS287 | GLU273 |
| 3 | ARG221 | GLU218 |
| 3 | LYS245 | ASP242 |
| 3 | LYS155 | ASP157 |
| 3 | LYS260 | ASP232 |
| 3 | HIS123 | ASP106 |
| 3 | HIS105 | GLU61  |
| 3 | LYS127 | ASP123 |
| 3 | LYS161 | GLU149 |

|   |         |         |
|---|---------|---------|
| 3 | LYS200  | ASP111  |
| 3 | HIS35   | GLU33   |
| 3 | ARG97   | ASP368  |
| 3 | LYS50   | ASP100C |
| 3 | ARG219  | GLU197  |
| 3 | LYS84   | GLU86   |
| 3 | HIS20   | ASP217  |
| 3 | LYS74   | ASP56   |
| 3 | LYS326  | GLU11   |
| 3 | ARG50   | GLU95   |
| 3 | LYS309  | ASP314  |
| 3 | ARG100  | ASP28   |
| 3 | ARG     | ASP70   |
| 3 | ARG1024 | ASP1070 |
| 3 | LYS96   | ASP50   |
| 3 | HIS414  | GLU391  |
| 3 | ARG186  | GLU48   |
| 3 | ARG255  | GLU162  |
| 3 | LYS192  | ASP137  |
| 3 | LYS87   | ASP90   |
| 3 | ARG97   | GLU62   |
| 3 | LYS103  | GLU83   |
| 3 | ARG100  | GLU50   |
| 3 | ARG90   | ASP56   |
| 3 | ARG61   | ASP101  |
| 3 | ARG101  | GLU55   |
| 3 | ARG192  | GLU58   |
| 3 | HIS189  | GLU196  |
| 3 | LYS201  | ASP200  |
| 3 | HIS61   | GLU50   |
| 3 | HIS260  | ASP262  |
| 3 | LYS164  | ASP85   |
| 3 | LYS126  | ASP122  |
| 3 | LYS98   | ASP107  |
| 3 | LYS204  | GLU112  |
| 3 | LYS104  | GLU3    |
| 3 | ARG119  | GLU83   |
| 3 | LYS73   | ASP256  |
| 3 | LYS572  | GLU238  |
| 3 | ARG92   | ASP166  |
| 3 | HIS134  | ASP133  |
| 3 | ARG102  | GLU201  |
| 3 | ARG65   | ASP59   |
| 3 | ARG59   | ASP102  |
| 3 | ARG171  | ASP138  |
| 3 | ARG909  | ASP912  |
| 3 | ARG275  | GLU255  |
| 3 | LYS354  | ASP355  |
| 3 | ARG74   | ASP58   |
| 3 | LYS306  | GLU318  |
| 3 | HIS347  | ASP370  |
| 3 | HIS19   | GLU15   |
| 3 | ARG38   | ASP81   |
| 3 | HIS119  | GLU117  |
| 3 | LYS232  | ASP253  |
| 3 | LYS125  | GLU122  |
| 3 | LYS30   | GLU95   |
| 3 | ARG1055 | GLU1085 |

|   |         |         |
|---|---------|---------|
| 3 | LYS2091 | ASP2002 |
| 3 | LYS143  | ASP11   |
| 3 | HIS106  | GLU102  |
| 3 | ARG107  | ASP17   |
| 3 | LYS154  | GLU129  |
| 3 | HIS34   | ASP36   |
| 3 | ARG847  | GLU1017 |
| 3 | LYS45   | ASP97   |
| 3 | ARG37   | GLU46   |
| 3 | LYS101  | ASP105  |
| 3 | LYS107  | GLU91   |
| 3 | LYS298  | ASP343  |
| 3 | LYS421  | GLU145  |
| 3 | ARG209  | GLU354  |
| 3 | ARG193  | GLU190  |
| 3 | HIS152  | GLU125  |
| 3 | ARG42   | GLU91   |
| 3 | LYS347  | GLU312  |
| 3 | LYS142  | GLU249  |
| 3 | LYS142  | GLU247  |
| 3 | ARG419  | GLU103  |
| 3 | LYS74   | ASP71   |
| 3 | LYS212  | GLU230  |
| 3 | LYS121  | ASP113  |
| 3 | LYS154  | GLU208  |
| 3 | HIS586  | GLU555  |
| 3 | HIS104  | ASP105  |
| 3 | HIS108  | ASP106  |
| 3 | LYS175  | ASP177  |
| 3 | ARG151  | ASP140  |
| 3 | ARG50   | ASP275  |
| 3 | LYS227  | GLU188  |
| 3 | ARG182  | ASP180  |
| 3 | HIS113  | GLU129  |
| 3 | LYS48   | ASP35   |
| 3 | HIS195  | ASP191  |
| 3 | ARG203  | ASP177  |
| 3 | LYS76   | ASP78   |
| 3 | HIS467  | GLU50   |
| 3 | LYS149  | GLU127  |
| 3 | LYS148  | ASP160  |
| 3 | ARG94   | GLU7    |
| 3 | ARG97   | ASP110  |
| 3 | ARG163  | ASP162  |
| 3 | HIS324  | GLU362  |
| 3 | ARG75   | ASP65   |
| 3 | LYS274  | GLU318  |
| 3 | ARG419  | ASP54   |
| 3 | ARG111  | GLU102  |
| 3 | ARG41   | GLU90   |
| 3 | HIS27   | GLU1    |
| 3 | LYS223  | ASP134  |
| 3 | ARG50   | GLU100I |
| 3 | LYS120  | ASP740  |
| 3 | LYS99   | GLU96   |
| 3 | HIS125  | GLU178  |
| 3 | ARG62   | GLU80   |
| 3 | ARG31   | GLU113  |

|   |         |         |
|---|---------|---------|
| 3 | HIS87   | ASP11   |
| 3 | LYS22   | GLU102  |
| 3 | HIS96   | ASP97   |
| 3 | LYS217  | ASP128  |
| 3 | LYS87   | GLU89   |
| 3 | ARG176  | ASP150  |
| 3 | LYS306  | GLU61   |
| 3 | LYS279  | GLU244  |
| 3 | LYS30   | GLU54   |
| 3 | LYS88   | GLU85   |
| 3 | ARG1070 | GLU1090 |
| 3 | ARG172  | GLU123  |
| 3 | ARG50   | ASP560  |
| 3 | LYS384  | GLU306  |
| 3 | ARG277  | GLU275  |
| 3 | LYS326  | GLU322  |
| 3 | LYS287  | GLU290  |
| 3 | ARG1567 | ASP1590 |
| 3 | ARG50   | GLU166  |
| 3 | HIS164  | ASP162  |
| 3 | ARG2    | ASP74   |
| 3 | HIS134  | GLU148  |
| 3 | ARG40   | GLU29   |
| 3 | LYS103  | ASP105  |
| 3 | ARG54   | ASP32   |
| 3 | ARG27   | GLU431  |
| 3 | LYS146  | GLU202  |
| 3 | LYS218  | GLU122  |
| 3 | ARG108  | GLU223  |
| 3 | LYS121  | ASP137  |
| 3 | ARG2024 | ASP2070 |
| 3 | LYS127  | GLU122  |
| 3 | LYS83   | GLU36   |
| 3 | ARG104  | GLU166  |
| 3 | ARG213  | ASP214  |
| 3 | ARG76   | ASP54   |
| 3 | LYS69   | GLU72   |
| 3 | LYS399  | GLU497  |
| 3 | ARG213  | GLU277  |
| 3 | ARG97   | GLU27   |
| 3 | HIS19   | ASP24   |
| 3 | LYS415  | ASP378  |
| 3 | LYS22   | GLU70   |
| 3 | ARG59   | ASP367  |
| 3 | HIS32   | GLU1    |
| 3 | ARG198  | GLU152  |
| 3 | ARG198  | GLU150  |
| 3 | ARG327  | ASP52   |
| 3 | ARG155  | ASP185  |
| 3 | LYS80   | ASP84   |
| 3 | LYS144  | GLU194  |
| 3 | LYS229  | ASP1    |
| 3 | ARG37   | ASP104  |
| 3 | HIS33   | ASP27   |
| 3 | HIS164  | GLU166  |
| 3 | LYS150  | GLU202  |
| 3 | LYS212  | GLU324  |
| 3 | LYS232  | GLU267  |



|   |         |         |
|---|---------|---------|
| 3 | ARG28   | ASP26   |
| 3 | ARG62   | ASP112  |
| 3 | ARG67   | GLU25   |
| 3 | HIS205  | ASP220  |
| 3 | LYS36   | GLU32   |
| 3 | LYS807  | ASP805  |
| 3 | LYS201  | ASP196  |
| 3 | LYS221  | GLU189  |
| 3 | ARG419  | GLU108  |
| 3 | LYS49   | GLU240  |
| 3 | LYS107  | ASP30   |
| 3 | ARG103  | GLU165  |
| 3 | LYS350  | GLU347  |
| 3 | LYS228  | GLU147  |
| 3 | HIS76   | ASP92   |
| 3 | LYS1064 | GLU1061 |
| 3 | LYS443  | GLU422  |
| 3 | ARG95A  | GLU351  |
| 3 | LYS77   | ASP53   |
| 3 | ARG294  | GLU285  |
| 3 | ARG75   | ASP97   |
| 3 | ARG31   | ASP95   |
| 3 | HIS155  | GLU152  |
| 3 | LYS399  | ASP392  |
| 3 | LYS697  | GLU694  |
| 3 | LYS12   | GLU57   |
| 3 | ARG2566 | ASP2589 |
| 3 | LYS71   | GLU25   |
| 3 | ARG77   | GLU33   |
| 3 | LYS87   | ASP79   |
| 3 | LYS585  | ASP563  |
| 3 | LYS446  | GLU293  |
| 3 | LYS46   | ASP44   |
| 3 | HIS120  | GLU59   |
| 3 | LYS203  | GLU255  |
| 3 | LYS217  | GLU121  |
| 3 | LYS52   | GLU55   |
| 3 | LYS63   | ASP61   |
| 3 | ARG95   | GLU413  |
| 3 | LYS610  | GLU703  |
| 3 | ARG29   | ASP26   |
| 3 | ARG91   | ASP99   |
| 3 | ARG71   | ASP72   |
| 3 | ARG110  | GLU108  |
| 3 | HIS618  | GLU716  |
| 3 | ARG430  | ASP408  |
| 3 | LYS49   | GLU53   |
| 3 | ARG313  | ASP281  |
| 3 | ARG142  | GLU135  |
| 3 | LYS81   | GLU59   |
| 3 | HIS34   | ASP52   |
| 3 | ARG123  | ASP132  |
| 3 | LYS130  | GLU132  |
| 3 | HIS355  | ASP358  |
| 3 | ARG1099 | GLU1097 |
| 3 | LYS65   | GLU64   |
| 3 | ARG44   | GLU56   |
| 3 | ARG97   | ASP347  |

|   |         |         |
|---|---------|---------|
| 3 | LYS98   | GLU32   |
| 3 | ARG113  | ASP116  |
| 3 | ARG14   | ASP17   |
| 3 | LYS53   | ASP101  |
| 3 | HIS31   | ASP28   |
| 3 | ARG61   | GLU32   |
| 3 | ARG59   | ASP101  |
| 3 | ARG304  | ASP100A |
| 3 | LYS65   | ASP88   |
| 3 | ARG838  | GLU887  |
| 3 | HIS110  | GLU106  |
| 3 | ARG36   | ASP38   |
| 3 | HIS585  | GLU584  |
| 3 | ARG30   | ASP93   |
| 3 | ARG124  | ASP41   |
| 3 | LYS128  | ASP190  |
| 3 | ARG124  | ASP216  |
| 3 | ARG78   | ASP92   |
| 3 | ARG354  | GLU379  |
| 3 | ARG267  | ASP41   |
| 3 | ARG276  | ASP314  |
| 3 | ARG8    | ASP106  |
| 3 | ARG520  | GLU87   |
| 3 | ARG587  | GLU565  |
| 3 | ARG74   | GLU76   |
| 3 | ARG52   | ASP47   |
| 3 | LYS556  | GLU755  |
| 3 | ARG169  | GLU166  |
| 3 | LYS54   | ASP101  |
| 3 | LYS274  | ASP255  |
| 3 | LYS21   | ASP23   |
| 3 | ARG60   | ASP55   |
| 3 | ARG103  | GLU29   |
| 3 | ARG1094 | ASP1024 |
| 3 | HIS49   | ASP100C |
| 3 | ARG85   | GLU105  |
| 3 | LYS225  | ASP296  |
| 3 | ARG1031 | GLU1099 |
| 3 | LYS292  | GLU133  |
| 3 | ARG36   | ASP55   |
| 3 | ARG102  | ASP67   |
| 3 | LYS400  | ASP28   |
| 3 | LYS19   | GLU89   |
| 3 | LYS211  | GLU120  |
| 3 | LYS343  | ASP85   |
| 3 | HIS257  | GLU264  |
| 3 | ARG64   | ASP1    |
| 3 | LYS182  | ASP165  |
| 3 | LYS130  | GLU150  |
| 3 | ARG91   | ASP50   |
| 3 | HIS121  | ASP217  |
| 3 | ARG61   | ASP79   |
| 3 | HIS52A  | GLU52B  |
| 3 | ARG30   | GLU37   |
| 3 | HIS120  | ASP106  |
| 3 | HIS1051 | GLU1047 |
| 3 | HIS105  | ASP474  |
| 3 | LYS60   | GLU74   |

|   |         |         |
|---|---------|---------|
| 3 | ARG209  | ASP324  |
| 3 | ARG95   | ASP100E |
| 3 | HIS27   | ASP25   |
| 3 | LYS50   | ASP30   |
| 3 | ARG172  | GLU149  |
| 3 | HIS192  | ASP125  |
| 3 | HIS108  | GLU50   |
| 3 | LYS43   | GLU64   |
| 3 | HIS43   | GLU46   |
| 3 | ARG469  | GLU477  |
| 3 | ARG31   | ASP94   |
| 3 | LYS49   | ASP99   |
| 3 | LYS306  | GLU322  |
| 3 | ARG229  | GLU231  |
| 3 | HIS211  | ASP253  |
| 3 | ARG366  | ASP150  |
| 3 | ARG105  | GLU71   |
| 3 | ARG17   | ASP35   |
| 3 | LYS171  | GLU87   |
| 3 | LYS169  | GLU215  |
| 3 | ARG31   | ASP140  |
| 3 | LYS50   | ASP254  |
| 3 | HIS42   | ASP41   |
| 3 | ARG932  | ASP89   |
| 3 | LYS280  | GLU304  |
| 3 | ARG211  | GLU189  |
| 3 | ARG100H | ASP101  |
| 3 | ARG50   | GLU268  |
| 3 | HIS249  | GLU83   |
| 3 | LYS87   | GLU85   |
| 3 | ARG69   | GLU77   |
| 3 | HIS560  | GLU537  |
| 3 | ARG98   | ASP96   |
| 3 | ARG542  | GLU648  |
| 3 | LYS322  | GLU333  |
| 3 | ARG153  | ASP106  |
| 3 | LYS189  | ASP358  |
| 3 | LYS126  | GLU123  |
| 3 | LYS28   | GLU100  |
| 3 | ARG90   | GLU106  |
| 3 | LYS293  | GLU295  |
| 3 | ARG95B  | ASP95D  |
| 3 | LYS214  | GLU122  |
| 3 | LYS360  | GLU362  |
| 3 | LYS170  | GLU84   |
| 3 | ARG50   | GLU101  |
| 3 | LYS190  | ASP158  |
| 3 | LYS73   | GLU166  |
| 3 | ARG2567 | ASP2590 |
| 3 | ARG28   | ASP457  |
| 3 | LYS335  | GLU408  |
| 3 | LYS1035 | GLU1039 |
| 3 | LYS100  | ASP124  |
| 3 | ARG217  | GLU219  |
| 3 | LYS1219 | GLU1221 |
| 3 | LYS149  | GLU154  |
| 3 | LYS145  | GLU124  |
| 3 | LYS     | GLU127  |

|   |         |         |
|---|---------|---------|
| 3 | LYS223  | GLU126  |
| 3 | ARG95   | ASP92   |
| 3 | ARG1038 | ASP1086 |
| 3 | LYS175  | GLU94   |
| 3 | ARG68   | GLU65   |
| 3 | LYS176  | GLU177  |
| 3 | ARG317  | GLU100B |
| 3 | ARG334  | GLU184  |
| 3 | HIS70   | GLU21   |
| 3 | LYS144  | ASP137  |
| 3 | ARG50   | ASP101  |
| 3 | HIS203  | ASP252  |
| 3 | ARG337  | GLU340  |
| 3 | ARG112  | ASP109  |
| 3 | HIS170  | GLU172  |
| 3 | ARG49   | ASP52   |
| 3 | ARG36   | GLU58   |
| 3 | LYS55   | ASP35   |
| 3 | LYS24   | ASP69   |
| 3 | HIS220  | GLU218  |
| 3 | LYS174  | ASP171  |
| 3 | ARG77   | ASP31   |
| 3 | ARG123  | ASP54   |
| 3 | LYS227  | GLU124  |
| 3 | LYS363  | GLU346  |
| 3 | LYS123  | GLU185  |
| 3 | ARG1155 | GLU1185 |
| 3 | ARG691  | GLU818  |
| 3 | LYS72   | ASP71   |
| 3 | ARG194  | ASP156  |
| 3 | ARG100  | GLU113  |
| 3 | LYS58   | ASP57   |
| 3 | ARG100B | ASP30   |
| 3 | LYS391  | ASP134  |
| 3 | HIS1042 | ASP1041 |
| 3 | LYS3012 | GLU3010 |
| 3 | LYS247  | GLU249  |
| 3 | LYS344  | GLU340  |
| 3 | ARG52   | GLU61   |
| 3 | ARG204  | ASP149  |
| 3 | ARG59   | GLU106  |
| 3 | ARG120  | GLU123  |
| 3 | ARG82A  | ASP65   |
| 3 | LYS588  | GLU584  |
| 3 | ARG399  | ASP401  |
| 3 | ARG102  | ASP108  |
| 3 | ARG705  | GLU725  |
| 3 | ARG66   | ASP51   |
| 3 | LYS89   | GLU95   |
| 3 | ARG705  | GLU727  |
| 3 | HIS394  | ASP392  |
| 3 | LYS168  | GLU190  |
| 3 | ARG1212 | ASP100C |
| 3 | LYS52   | ASP474  |
| 3 | ARG52A  | GLU144  |
| 3 | HIS1189 | ASP1151 |
| 3 | LYS432  | ASP56   |
| 3 | ARG87   | GLU65   |

|   |         |         |
|---|---------|---------|
| 3 | LYS44   | GLU106  |
| 3 | HIS84   | ASP105  |
| 3 | LYS146  | ASP95A  |
| 3 | ARG304  | GLU286  |
| 3 | ARG441  | GLU94   |
| 3 | ARG56   | GLU76   |
| 3 | ARG261  | ASP804  |
| 3 | ARG204  | GLU196  |
| 3 | ARG279  | GLU276  |
| 3 | ARG333  | ASP293  |
| 3 | ARG28   | ASP95D  |
| 3 | ARG117  | ASP45   |
| 3 | LYS105  | GLU3    |
| 3 | ARG106  | GLU100  |
| 3 | LYS171  | GLU13   |
| 3 | ARG144  | GLU167  |
| 3 | ARG35   | ASP73   |
| 3 | ARG32   | ASP28   |
| 3 | LYS159  | GLU168  |
| 3 | LYS658  | GLU654  |
| 3 | HIS327  | ASP359  |
| 3 | ARG1476 | ASP1474 |
| 3 | ARG96   | GLU104  |
| 3 | HIS94   | ASP7    |
| 3 | LYS1021 | GLU1017 |
| 3 | HIS240  | ASP282  |
| 3 | LYS194  | ASP191  |
| 3 | HIS53   | ASP54   |
| 3 | ARG90   | GLU92   |
| 3 | HIS165  | ASP167  |
| 3 | ARG137  | ASP97   |
| 3 | ARG33   | ASP6    |
| 3 | ARG235  | ASP28   |
| 3 | LYS117  | GLU10   |
| 3 | LYS40   | GLU85   |
| 3 | ARG98   | ASP159  |
| 3 | LYS94   | ASP102  |
| 3 | ARG225  | ASP233  |
| 3 | HIS325  | ASP359  |
| 3 | ARG141  | ASP146  |
| 3 | ARG40   | GLU103  |
| 3 | LYS322  | ASP95   |
| 3 | ARG39   | ASP93   |
| 3 | ARG1038 | GLU1046 |
| 3 | ARG164  | ASP170  |
| 3 | HIS414  | GLU413  |
| 3 | ARG164  | ASP179  |
| 3 | HIS44   | GLU40   |
| 3 | LYS143  | ASP29   |
| 3 | ARG33   | ASP27   |
| 3 | LYS103  | ASP233  |
| 3 | HIS131  | ASP270  |
| 3 | LYS137  | ASP124  |
| 3 | HIS86   | ASP88   |
| 3 | LYS421  | GLU54   |
| 3 | ARG1456 | GLU1466 |
| 3 | LYS417  | GLU358  |
| 3 | ARG74   | ASP72   |

|   |         |         |
|---|---------|---------|
| 3 | LYS966  | GLU85   |
| 3 | HIS93   | ASP434  |
| 3 | ARG50   | GLU49   |
| 3 | ARG310  | GLU376  |
| 3 | LYS82   | GLU77   |
| 3 | ARG145  | ASP234  |
| 3 | LYS156  | ASP191  |
| 3 | LYS107  | GLU84   |
| 3 | LYS55   | GLU53   |
| 3 | ARG76   | ASP128  |
| 2 | ARG85   | ASP110  |
| 2 | HIS282  | ASP98   |
| 2 | LYS102  | ASP169  |
| 2 | LYS290  | GLU127  |
| 2 | ARG54   | GLU77   |
| 2 | ARG441  | ASP454  |
| 2 | HIS191  | ASP     |
| 2 | ARG315  | ASP95   |
| 2 | ARG100A | GLU106  |
| 2 | LYS1142 | GLU1105 |
| 2 | LYS345  | GLU123  |
| 2 | LYS174  | ASP172  |
| 2 | LYS40   | GLU90   |
| 2 | LYS153  | ASP104  |
| 2 | LYS449  | ASP447  |
| 2 | LYS216  | ASP113  |
| 2 | LYS914  | GLU485  |
| 2 | LYS191  | ASP188  |
| 2 | LYS35   | ASP50   |
| 2 | LYS44   | ASP89   |
| 2 | HIS30   | GLU104  |
| 2 | LYS391  | ASP393  |
| 2 | LYS13   | GLU17   |
| 2 | LYS30   | GLU4    |
| 2 | LYS49   | GLU105  |
| 2 | LYS101  | GLU103  |
| 2 | LYS232  | ASP230  |
| 2 | HIS50   | ASP264  |
| 2 | LYS49   | GLU108  |
| 2 | ARG31   | GLU133  |
| 2 | ARG2537 | ASP2589 |
| 2 | LYS2663 | ASP2669 |
| 2 | ARG97   | ASP107  |
| 2 | ARG207  | GLU258  |
| 2 | ARG277  | ASP273  |
| 2 | ARG106  | ASP116  |
| 2 | HIS84   | GLU82   |
| 2 | LYS287  | GLU301  |
| 2 | LYS239  | ASP240  |
| 2 | LYS64   | GLU187  |
| 2 | ARG73   | GLU288  |
| 2 | LYS110  | GLU100  |
| 2 | LYS46   | GLU44   |
| 2 | ARG311  | ASP90   |
| 2 | ARG526  | GLU525  |
| 2 | ARG144  | GLU142  |
| 2 | ARG144  | GLU141  |
| 2 | LYS1357 | GLU1466 |

|   |         |         |
|---|---------|---------|
| 2 | ARG145  | ASP91   |
| 2 | ARG216  | GLU231  |
| 2 | LYS78   | ASP90   |
| 2 | HIS50   | GLU95   |
| 2 | LYS205  | ASP219  |
| 2 | ARG338  | ASP390  |
| 2 | ARG106  | GLU129  |
| 2 | LYS206  | ASP212  |
| 2 | ARG437  | GLU438  |
| 2 | ARG120  | ASP216  |
| 2 | LYS107  | ASP89   |
| 2 | HIS53   | GLU52   |
| 2 | ARG271  | GLU257  |
| 2 | LYS81   | ASP100  |
| 2 | ARG194  | GLU216  |
| 2 | LYS212  | ASP203  |
| 2 | ARG160  | ASP190  |
| 2 | ARG506  | ASP482  |
| 2 | HIS288  | ASP257  |
| 2 | LYS490  | GLU49   |
| 2 | LYS107  | ASP109  |
| 2 | ARG40   | ASP336  |
| 2 | LYS120  | ASP117  |
| 2 | LYS40   | ASP38   |
| 2 | HIS489  | GLU168  |
| 2 | ARG65   | ASP66   |
| 2 | LYS3    | ASP1    |
| 2 | LYS287  | ASP291  |
| 2 | ARG53   | GLU104  |
| 2 | ARG135E | ASP133E |
| 2 | LYS117  | ASP118  |
| 2 | LYS312  | GLU282  |
| 2 | LYS156  | ASP188  |
| 2 | LYS431  | ASP101  |
| 2 | ARG101  | GLU33   |
| 2 | LYS25   | ASP4    |
| 2 | ARG423  | ASP162  |
| 2 | ARG124  | ASP126  |
| 2 | ARG441  | ASP444  |
| 2 | LYS11   | ASP91   |
| 2 | LYS96   | GLU57   |
| 2 | HIS35   | ASP69   |
| 2 | LYS44   | GLU46   |
| 2 | LYS266  | GLU128  |
| 2 | ARG95   | ASP28   |
| 2 | ARG98   | ASP100A |
| 2 | ARG1167 | ASP1123 |
| 2 | LYS198  | ASP163  |
| 2 | LYS219  | ASP123  |
| 2 | ARG84   | GLU60   |
| 2 | LYS76   | GLU1    |
| 2 | LYS769  | ASP399  |
| 2 | ARG58   | GLU69   |
| 2 | ARG162  | ASP166  |
| 2 | ARG103  | ASP101  |
| 2 | ARG167  | ASP166  |
| 2 | ARG93   | GLU105  |
| 2 | LYS13   | GLU63   |

|   |         |         |
|---|---------|---------|
| 2 | LYS93   | ASP116  |
| 2 | ARG98   | ASP27   |
| 2 | LYS269  | GLU69   |
| 2 | LYS204  | ASP75   |
| 2 | ARG53   | GLU11   |
| 2 | LYS69   | ASP75   |
| 2 | LYS65   | ASP66   |
| 2 | LYS262  | GLU266  |
| 2 | HIS24   | GLU10   |
| 2 | ARG92   | ASP87   |
| 2 | LYS102  | ASP84   |
| 2 | LYS242  | GLU214  |
| 2 | HIS133  | ASP117  |
| 2 | LYS2    | GLU96   |
| 2 | ARG213  | GLU125  |
| 2 | ARG1538 | GLU1546 |
| 2 | LYS316  | GLU302  |
| 2 | HIS204  | GLU203  |
| 2 | LYS14   | GLU11   |
| 2 | LYS14   | ASP25   |
| 2 | ARG51   | ASP113  |
| 2 | LYS6    | GLU38   |
| 2 | ARG63   | ASP83   |
| 2 | HIS21   | GLU27   |
| 2 | LYS147  | GLU111  |
| 2 | LYS231  | GLU145  |
| 2 | LYS218  | GLU123  |
| 2 | LYS191  | GLU214  |
| 2 | HIS361  | GLU359  |
| 2 | ARG1587 | GLU1589 |
| 2 | ARG38   | ASP     |
| 2 | LYS140  | GLU212  |
| 2 | ARG18   | GLU85   |
| 2 | ARG513  | GLU541  |
| 2 | LYS131  | ASP157  |
| 2 | LYS261  | GLU83A  |
| 2 | LYS623  | ASP621  |
| 2 | HIS874  | GLU869  |
| 2 | LYS205  | ASP53   |
| 2 | ARG106  | ASP54   |
| 2 | ARG95   | ASP26   |
| 2 | ARG398  | ASP405  |
| 2 | ARG1024 | ASP70   |
| 2 | ARG2097 | ASP2001 |
| 2 | ARG398  | ASP400  |
| 2 | ARG398  | ASP409  |
| 2 | LYS70   | ASP72   |
| 2 | HIS73   | ASP72   |
| 2 | ARG112  | GLU98   |
| 2 | LYS308  | GLU50   |
| 2 | LYS99   | GLU33   |
| 2 | LYS     | GLU195  |
| 2 | LYS327  | ASP331  |
| 2 | HIS213  | ASP175  |
| 2 | ARG107  | GLU17   |
| 2 | LYS357  | ASP464  |
| 2 | LYS44   | ASP104  |
| 2 | HIS566  | ASP553  |



|   |         |         |
|---|---------|---------|
| 2 | ARG50   | GLU62   |
| 2 | LYS95   | ASP92   |
| 2 | ARG     | ASP82   |
| 2 | HIS194  | ASP190  |
| 2 | ARG65   | ASP58   |
| 2 | LYS100  | GLU91   |
| 2 | ARG140  | GLU117  |
| 2 | ARG97   | GLU95   |
| 2 | ARG167  | GLU164  |
| 2 | ARG168  | ASP214  |
| 2 | LYS177  | GLU180  |
| 2 | ARG255  | GLU119  |
| 2 | ARG171  | GLU73   |
| 2 | LYS177  | GLU219  |
| 2 | LYS255  | ASP259  |
| 2 | LYS115  | GLU85   |
| 2 | LYS156  | GLU127  |
| 2 | LYS310  | ASP52   |
| 2 | ARG106  | ASP17   |
| 2 | ARG49   | GLU88   |
| 2 | ARG144  | ASP91   |
| 2 | ARG98   | ASP50   |
| 2 | LYS52C  | ASP674  |
| 2 | LYS40   | GLU76   |
| 2 | LYS39   | GLU42   |
| 2 | ARG287  | GLU235  |
| 2 | ARG54   | ASP167  |
| 2 | HIS81   | GLU77   |
| 2 | LYS311  | ASP285  |
| 2 | HIS87   | GLU166  |
| 2 | ARG161  | GLU159  |
| 2 | ARG50   | GLU5    |
| 2 | ARG197  | ASP218  |
| 2 | LYS105  | GLU17   |
| 2 | LYS250  | GLU13   |
| 2 | LYS441  | GLU443  |
| 2 | LYS232  | GLU143  |
| 2 | ARG50   | ASP100  |
| 2 | ARG264  | ASP274  |
| 2 | ARG155  | ASP201  |
| 2 | ARG90   | ASP1    |
| 2 | LYS80   | GLU79   |
| 2 | LYS189  | ASP190  |
| 2 | ARG1298 | ASP1300 |
| 2 | LYS41   | ASP46   |
| 2 | ARG188  | ASP831  |
| 2 | LYS514  | GLU541  |
| 2 | ARG553  | ASP107  |
| 2 | LYS14   | ASP18   |
| 2 | LYS212  | GLU101  |
| 2 | ARG1469 | ASP1457 |
| 2 | ARG405  | ASP118  |
| 2 | HIS152  | GLU916  |
| 2 | LYS129  | GLU213  |
| 2 | ARG101  | GLU119  |
| 2 | ARG277  | GLU250  |
| 2 | ARG50   | ASP35   |
| 2 | LYS105  | GLU85   |

|   |         |         |
|---|---------|---------|
| 2 | ARG27   | ASP323  |
| 2 | ARG582  | GLU605  |
| 2 | LYS219  | ASP93   |
| 2 | ARG136  | GLU145  |
| 2 | LYS161  | GLU125  |
| 2 | LYS98   | ASP111  |
| 2 | ARG28   | ASP93   |
| 2 | LYS368  | ASP227  |
| 2 | HIS94   | GLU18   |
| 2 | LYS745  | ASP907  |
| 2 | ARG10   | ASP255  |
| 2 | LYS344  | GLU369  |
| 2 | LYS73   | GLU45   |
| 2 | HIS34   | ASP32   |
| 2 | LYS37   | GLU45   |
| 2 | LYS369  | ASP352  |
| 2 | ARG101  | ASP113  |
| 2 | LYS50   | GLU66   |
| 2 | ARG373  | ASP372  |
| 2 | LYS185  | ASP57   |
| 2 | LYS41   | GLU39   |
| 2 | ARG407  | ASP435  |
| 2 | ARG32   | ASP65   |
| 2 | ARG294  | ASP368  |
| 2 | ARG59   | ASP80   |
| 2 | ARG1099 | ASP1101 |
| 2 | LYS240  | GLU217  |
| 2 | LYS120  | ASP265  |
| 2 | LYS100  | GLU87   |
| 2 | LYS184  | ASP211  |
| 2 | ARG269  | ASP217  |
| 2 | LYS357  | GLU464  |
| 2 | ARG38   | ASP100  |
| 2 | LYS387  | ASP386  |
| 2 | HIS47   | GLU45   |
| 2 | ARG73   | GLU44   |
| 2 | LYS466  | GLU95   |
| 2 | ARG538  | ASP590  |
| 2 | ARG151  | GLU154  |
| 2 | LYS152  | ASP127  |
| 2 | ARG98   | ASP119  |
| 2 | LYS50   | ASP98   |
| 2 | LYS224  | GLU127  |
| 2 | LYS40   | GLU47   |
| 2 | LYS150  | GLU123  |
| 2 | HIS32   | ASP102  |
| 2 | ARG193  | GLU274  |
| 2 | LYS93   | GLU3    |
| 2 | ARG45   | GLU111  |
| 2 | ARG838  | ASP890  |
| 2 | ARG84   | GLU45   |
| 2 | LYS7    | ASP80   |
| 2 | ARG385  | ASP324  |
| 2 | HIS273  | ASP275  |
| 2 | ARG213  | GLU213  |
| 2 | HIS198  | GLU199  |
| 2 | LYS122  | ASP216  |
| 2 | LYS141  | GLU172  |

|   |         |         |
|---|---------|---------|
| 2 | LYS104  | GLU62   |
| 2 | ARG337  | GLU322  |
| 2 | ARG466  | ASP458  |
| 2 | HIS4    | ASP183  |
| 2 | ARG42   | GLU7    |
| 2 | LYS26   | ASP108  |
| 2 | ARG94   | GLU179  |
| 2 | ARG48   | ASP54   |
| 2 | HIS125  | ASP62   |
| 2 | LYS43   | GLU89   |
| 2 | ARG261  | GLU279  |
| 2 | LYS149  | GLU126  |
| 2 | LYS75   | GLU74   |
| 2 | LYS419  | GLU451  |
| 2 | LYS527  | ASP525  |
| 2 | ARG32   | ASP153  |
| 2 | ARG184  | ASP147  |
| 2 | LYS266  | ASP93   |
| 2 | LYS225  | ASP227  |
| 2 | ARG228  | GLU118  |
| 2 | ARG104  | ASP33   |
| 2 | ARG216  | ASP123  |
| 2 | ARG135  | ASP212  |
| 2 | HIS100E | GLU87   |
| 2 | ARG316  | ASP97   |
| 2 | ARG93   | GLU95   |
| 2 | LYS162  | ASP168  |
| 2 | ARG116  | GLU68   |
| 2 | ARG39   | ASP81   |
| 2 | LYS145  | GLU161  |
| 2 | HIS320  | GLU418  |
| 2 | LYS2149 | GLU2195 |
| 2 | ARG179  | ASP37   |
| 2 | LYS82   | GLU102  |
| 2 | ARG107  | GLU104  |
| 2 | HIS102  | GLU104  |
| 2 | HIS619  | ASP571  |
| 2 | ARG740  | ASP742  |
| 2 | LYS30   | ASP100B |
| 2 | LYS222  | GLU158  |
| 2 | LYS333  | GLU331  |
| 2 | HIS121  | ASP119  |
| 2 | LYS18   | ASP70   |
| 2 | LYS340  | GLU318  |
| 2 | ARG24   | ASP131  |
| 2 | ARG109  | ASP80   |
| 2 | LYS613  | ASP618  |
| 2 | LYS265  | GLU243  |
| 2 | LYS139  | GLU137  |
| 2 | LYS73   | ASP72   |
| 2 | ARG1476 | GLU1102 |
| 2 | ARG59   | ASP94   |
| 2 | LYS44   | ASP151  |
| 2 | LYS157  | ASP160  |
| 2 | ARG911  | GLU492  |
| 2 | ARG1    | ASP101  |
| 2 | ARG219  | ASP220  |
| 2 | LYS50   | ASP160  |

|   |         |         |
|---|---------|---------|
| 2 | LYS85   | ASP108  |
| 2 | LYS62   | GLU80   |
| 2 | HIS81   | GLU64   |
| 2 | LYS66   | GLU26   |
| 2 | LYS317  | ASP54   |
| 2 | HIS171  | GLU185  |
| 2 | ARG341  | GLU322  |
| 2 | HIS317  | GLU316  |
| 2 | ARG485  | GLU450  |
| 2 | LYS65   | GLU230  |
| 2 | HIS611  | ASP612  |
| 2 | ARG147  | GLU144  |
| 2 | LYS31   | GLU27   |
| 2 | LYS100E | ASP50   |
| 2 | ARG48   | GLU32   |
| 2 | LYS60   | GLU29   |
| 2 | ARG154  | ASP131  |
| 2 | ARG838  | ASP888  |
| 2 | HIS119  | GLU106  |
| 2 | ARG2065 | ASP2086 |
| 2 | ARG2065 | ASP2085 |
| 2 | LYS170  | ASP180  |
| 2 | ARG53   | GLU204  |
| 2 | ARG97   | GLU55   |
| 2 | LYS210  | ASP207  |
| 2 | LYS2598 | ASP2609 |
| 2 | LYS441  | GLU465  |
| 2 | HIS108  | ASP116  |
| 2 | ARG112  | ASP174  |
| 2 | ARG109  | ASP95   |
| 2 | LYS302  | ASP305  |
| 2 | ARG99   | ASP110  |
| 2 | LYS434  | GLU465  |
| 2 | LYS11   | GLU99   |
| 2 | LYS66   | ASP63   |
| 2 | ARG410  | GLU438  |
| 2 | ARG65   | ASP31   |
| 2 | LYS106  | GLU108  |
| 2 | LYS186  | GLU102  |
| 2 | ARG125  | GLU136  |
| 2 | HIS115  | GLU1    |
| 2 | LYS41   | GLU106  |
| 2 | HIS288  | ASP177  |
| 2 | ARG101  | GLU62   |
| 2 | ARG329  | GLU330  |
| 2 | LYS304  | GLU307  |
| 2 | ARG45   | ASP42   |
| 2 | ARG218  | GLU215  |
| 2 | HIS125  | GLU81   |
| 2 | LYS1719 | GLU1123 |
| 2 | LYS117  | ASP265  |
| 2 | LYS649  | GLU700  |
| 2 | LYS189  | GLU186  |
| 2 | ARG2538 | GLU2546 |
| 2 | ARG209  | GLU73   |
| 2 | ARG97   | ASP102  |
| 2 | LYS47   | ASP105  |
| 2 | ARG95   | GLU8    |

|   |         |         |
|---|---------|---------|
| 2 | ARG661  | ASP648  |
| 2 | LYS267  | GLU178  |
| 2 | LYS292  | ASP138  |
| 2 | ARG186  | GLU158  |
| 2 | LYS378  | ASP362  |
| 2 | ARG65   | GLU96   |
| 2 | LYS336  | ASP333  |
| 2 | ARG3141 | GLU2027 |
| 2 | LYS189  | GLU268  |
| 2 | LYS121  | GLU17   |
| 2 | LYS24   | ASP50   |
| 2 | LYS114  | GLU17   |
| 2 | ARG99   | ASP100R |
| 2 | ARG476  | ASP473  |
| 2 | HIS34   | ASP99   |
| 2 | HIS87   | GLU85   |
| 2 | ARG219  | ASP232  |
| 2 | ARG2543 | GLU2545 |
| 2 | ARG110  | GLU125  |
| 2 | LYS209  | ASP211  |
| 2 | LYS271  | ASP185  |
| 2 | LYS163  | ASP169  |
| 2 | ARG339  | ASP356  |
| 2 | ARG47   | GLU33   |
| 2 | LYS497  | GLU582  |
| 2 | LYS127  | GLU129  |
| 2 | ARG134  | GLU127  |
| 2 | LYS67   | ASP55   |
| 2 | LYS32   | ASP31   |
| 2 | LYS143  | GLU128  |
| 2 | ARG155  | GLU153  |
| 2 | ARG50   | GLU6    |
| 2 | LYS180  | ASP176  |
| 2 | ARG455  | GLU466  |
| 2 | ARG82   | GLU581  |
| 2 | LYS2183 | GLU2187 |
| 2 | LYS172  | GLU170  |
| 2 | ARG456  | GLU429  |
| 2 | HIS9    | GLU6    |
| 2 | ARG84   | GLU27   |
| 2 | HIS287  | ASP289  |
| 2 | ARG100  | ASP116  |
| 2 | LYS266  | ASP274  |
| 2 | LYS222  | GLU162  |
| 2 | LYS1095 | GLU1097 |
| 2 | ARG95   | ASP101  |
| 2 | ARG190  | GLU89   |
| 2 | LYS107  | GLU109  |
| 2 | HIS192  | ASP118  |
| 2 | HIS558  | ASP101  |
| 2 | LYS104  | ASP50   |
| 2 | ARG167  | GLU159  |
| 2 | ARG2598 | ASP3143 |
| 2 | LYS39   | GLU90   |
| 2 | LYS13   | GLU121  |
| 2 | LYS96   | GLU97   |
| 2 | LYS10   | ASP100  |
| 2 | HIS2    | GLU5    |

|   |         |         |
|---|---------|---------|
| 2 | ARG80   | ASP106  |
| 2 | LYS215  | GLU122  |
| 2 | ARG3    | GLU93   |
| 2 | LYS292  | GLU297  |
| 2 | LYS719  | GLU741  |
| 2 | LYS54   | ASP31   |
| 2 | HIS6    | GLU39   |
| 2 | ARG125  | GLU127  |
| 2 | ARG1598 | ASP1606 |
| 2 | LYS217  | GLU127  |
| 2 | LYS212  | GLU214  |
| 2 | LYS728  | GLU666  |
| 2 | ARG246  | GLU227  |
| 2 | HIS63   | GLU84   |
| 2 | ARG209  | GLU122  |
| 2 | ARG77   | ASP92   |
| 2 | ARG1084 | ASP1087 |
| 2 | LYS143  | GLU127  |
| 2 | LYS217  | GLU122  |
| 2 | HIS105  | GLU86   |
| 2 | ARG100B | GLU85   |
| 2 | LYS46   | ASP414  |
| 2 | LYS398  | GLU127  |
| 2 | ARG115  | GLU56   |
| 2 | ARG94   | ASP95   |
| 2 | HIS53   | GLU51   |
| 2 | HIS314  | GLU290  |
| 2 | LYS65   | ASP113  |
| 2 | LYS514  | ASP516  |
| 2 | ARG209  | GLU258  |
| 2 | ARG296  | GLU288  |
| 2 | HIS169  | ASP171  |
| 2 | ARG191  | ASP263  |
| 2 | LYS1348 | GLU1351 |
| 2 | ARG119  | ASP121  |
| 2 | ARG114  | GLU78   |
| 2 | LYS209  | GLU55   |
| 2 | LYS225  | ASP165  |
| 2 | LYS221  | ASP172  |
| 2 | ARG194  | GLU190  |
| 2 | LYS246  | ASP242  |
| 2 | HIS54   | GLU55   |
| 2 | HIS108  | GLU68   |
| 2 | LYS39   | ASP31   |
| 2 | ARG96   | GLU97   |
| 2 | LYS463  | ASP49   |
| 2 | LYS188  | ASP249  |
| 2 | LYS121  | ASP122  |
| 2 | LYS10   | GLU35   |
| 2 | ARG39   | ASP52   |
| 2 | ARG94   | ASP231  |
| 2 | ARG61   | ASP27   |
| 2 | HIS517  | ASP520  |
| 2 | HIS32   | GLU27   |
| 2 | LYS96   | GLU101  |
| 2 | ARG227  | ASP101  |
| 2 | ARG52   | ASP4    |
| 2 | ARG242  | ASP240  |

|   |         |         |
|---|---------|---------|
| 2 | ARG281  | GLU229  |
| 2 | ARG426  | ASP56   |
| 2 | HIS261  | ASP101  |
| 2 | HIS115  | ASP99   |
| 2 | HIS320  | GLU316  |
| 2 | LYS170  | GLU106  |
| 2 | ARG497  | GLU495  |
| 2 | LYS53   | GLU63   |
| 2 | HIS327  | GLU329  |
| 2 | HIS27D  | GLU536  |
| 2 | ARG149  | ASP171  |
| 2 | HIS99   | ASP120  |
| 2 | LYS77   | ASP34   |
| 2 | LYS222  | ASP128  |
| 2 | LYS2719 | GLU2123 |
| 2 | HIS120  | ASP4    |
| 2 | LYS49   | ASP51   |
| 2 | HIS234  | ASP56   |
| 2 | LYS313  | ASP27   |
| 2 | LYS223  | GLU128  |
| 2 | ARG134  | GLU167  |
| 2 | HIS104  | ASP135  |
| 2 | LYS198  | ASP68   |
| 2 | HIS444  | ASP473  |
| 2 | LYS260  | ASP78   |
| 2 | LYS193  | ASP189  |
| 2 | ARG184  | ASP272  |
| 2 | LYS35   | ASP31   |
| 2 | HIS2705 | ASP2720 |
| 2 | LYS262  | GLU127  |
| 2 | LYS2154 | GLU2252 |
| 2 | LYS30   | GLU35   |
| 2 | HIS33   | ASP100  |
| 2 | LYS247  | ASP249  |
| 2 | HIS393  | ASP349  |
| 2 | LYS60   | ASP56   |
| 2 | LYS519  | GLU123  |
| 2 | HIS427  | ASP162  |
| 2 | LYS169  | ASP223  |
| 2 | ARG28   | GLU31   |
| 2 | LYS97   | GLU97   |
| 2 | LYS240  | ASP256  |
| 2 | LYS375  | GLU308  |
| 2 | HIS196  | GLU236  |
| 2 | ARG319  | GLU322  |
| 2 | LYS663  | ASP669  |
| 2 | ARG438  | GLU426  |
| 2 | HIS164  | ASP139  |
| 2 | ARG288  | ASP355  |
| 2 | LYS463  | GLU126  |
| 2 | LYS148  | GLU126  |
| 2 | HIS67   | ASP90   |
| 2 | ARG86   | ASP88   |
| 2 | ARG339  | ASP336  |
| 2 | ARG458  | ASP456  |
| 2 | LYS63   | ASP65   |
| 2 | LYS67   | GLU69   |
| 2 | ARG169  | GLU167  |

|   |         |          |
|---|---------|----------|
| 2 | LYS36   | GLU280   |
| 2 | ARG304  | GLU99    |
| 2 | LYS28   | ASP89    |
| 2 | ARG1419 | GLU1100B |
| 2 | ARG91   | ASP98    |
| 2 | LYS62   | GLU45    |
| 2 | LYS184  | ASP34    |
| 2 | LYS41   | GLU78    |
| 2 | HIS35   | GLU54    |
| 2 | HIS159  | GLU158   |
| 2 | ARG1419 | GLU1099  |
| 2 | LYS102  | ASP34    |
| 2 | ARG35   | ASP92    |
| 2 | LYS320  | ASP311   |
| 2 | LYS222  | GLU104   |
| 2 | LYS51   | ASP44    |
| 2 | HIS173  | GLU188   |
| 2 | LYS59   | ASP98    |
| 2 | HIS1249 | GLU1482  |
| 2 | ARG152  | ASP151   |
| 2 | ARG76   | GLU84    |
| 2 | ARG10   | GLU6     |
| 2 | ARG83   | GLU13    |
| 2 | LYS202  | ASP187   |
| 2 | LYS4    | ASP56    |
| 2 | HIS134  | GLU121   |
| 2 | LYS1103 | GLU1165  |
| 2 | LYS107  | GLU67    |
| 2 | LYS119  | ASP56    |
| 2 | LYS119  | GLU255   |
| 2 | ARG56   | ASP174   |
| 2 | LYS75   | ASP28    |
| 2 | LYS153  | ASP41    |
| 2 | ARG66   | ASP83    |
| 2 | ARG213  | GLU215   |
| 2 | ARG     | GLU46    |
| 2 | ARG668  | ASP666   |
| 2 | LYS437  | GLU381   |
| 2 | LYS317  | ASP280   |
| 2 | ARG69   | GLU100   |
| 2 | LYS305  | ASP321   |
| 2 | ARG53   | GLU97    |
| 2 | LYS100I | ASP93    |
| 2 | ARG207  | ASP197   |
| 2 | LYS563  | ASP1     |
| 2 | LYS193  | ASP190   |
| 2 | ARG354  | GLU358   |
| 2 | ARG315  | GLU317   |
| 2 | LYS364  | GLU361   |
| 2 | LYS53   | GLU17    |
| 2 | HIS125  | ASP183   |
| 2 | LYS123  | GLU120   |
| 2 | LYS138  | ASP45    |
| 2 | LYS52   | ASP100I  |
| 2 | LYS97   | GLU64    |
| 2 | LYS85   | GLU250   |
| 2 | LYS105  | GLU167   |
| 2 | LYS65   | ASP208   |



|   |         |         |
|---|---------|---------|
| 2 | LYS862  | ASP529  |
| 2 | ARG2304 | ASP2233 |
| 2 | LYS206  | GLU123  |
| 2 | ARG363  | ASP923  |
| 2 | LYS1    | GLU5    |
| 2 | LYS1282 | GLU1275 |
| 2 | LYS145  | GLU17   |
| 2 | ARG116  | ASP182  |
| 2 | LYS109  | GLU106  |
| 2 | ARG77   | ASP78   |
| 2 | ARG278  | ASP275  |
| 2 | ARG107  | ASP108  |
| 2 | LYS100A | ASP99   |
| 2 | ARG92   | GLU119  |
| 2 | LYS52   | GLU49   |
| 2 | LYS98   | ASP113  |
| 2 | LYS305  | ASP100F |
| 2 | HIS396  | ASP391  |
| 2 | ARG51   | ASP57   |
| 2 | LYS197  | ASP194  |
| 2 | ARG251  | ASP276  |
| 2 | ARG416  | ASP412  |
| 2 | LYS272  | ASP56   |
| 2 | ARG463  | ASP444  |
| 2 | LYS83   | ASP80   |
| 2 | LYS199  | ASP201  |
| 2 | LYS119  | GLU120  |
| 2 | ARG53   | ASP1056 |
| 2 | ARG37   | ASP39   |
| 2 | LYS140  | ASP141  |
| 2 | LYS     | GLU119  |
| 2 | LYS362  | ASP408  |
| 2 | LYS163  | ASP162  |
| 2 | LYS193  | ASP205  |
| 2 | ARG95   | GLU95   |
| 2 | LYS181  | ASP37   |
| 2 | HIS291  | ASP228  |
| 2 | ARG99   | GLU50   |
| 2 | ARG99   | GLU58   |
| 2 | ARG68   | GLU35   |
| 2 | ARG18   | ASP80   |
| 2 | LYS166  | ASP93   |
| 2 | ARG601  | ASP587  |
| 2 | ARG94   | ASP92   |
| 2 | LYS4    | ASP62   |
| 2 | LYS143  | GLU106  |
| 2 | LYS146  | GLU109  |
| 2 | ARG204  | GLU258  |
| 2 | ARG81   | GLU101  |
| 2 | ARG97   | GLU370  |
| 2 | LYS73   | ASP57   |
| 2 | ARG105  | ASP334  |
| 2 | LYS80   | GLU73   |
| 2 | LYS302  | ASP265  |
| 2 | LYS11   | GLU27   |
| 2 | LYS252  | ASP249  |
| 2 | ARG55   | ASP3    |
| 2 | LYS115  | ASP119  |

|   |         |         |
|---|---------|---------|
| 2 | LYS236  | ASP240  |
| 2 | ARG94   | GLU111  |
| 2 | LYS824  | ASP143  |
| 2 | LYS130  | ASP1    |
| 2 | LYS56   | ASP55   |
| 2 | ARG60   | ASP58   |
| 2 | HIS34   | GLU97   |
| 2 | ARG93   | GLU64   |
| 2 | LYS454  | ASP100  |
| 2 | LYS30F  | GLU139  |
| 2 | LYS164  | GLU236  |
| 2 | ARG53   | GLU59   |
| 2 | ARG109  | GLU125  |
| 2 | ARG148  | GLU111  |
| 2 | ARG99   | ASP92   |
| 2 | LYS149  | GLU72   |
| 2 | LYS17   | GLU85   |
| 2 | ARG99   | GLU52B  |
| 2 | ARG237  | ASP255  |
| 2 | ARG101  | ASP116  |
| 2 | LYS205  | GLU156  |
| 2 | ARG545  | ASP391  |
| 2 | LYS346  | GLU382  |
| 2 | ARG80   | ASP101  |
| 2 | LYS207  | GLU380  |
| 2 | LYS123  | ASP185  |
| 2 | ARG221  | ASP242  |
| 2 | ARG63   | ASP115  |
| 2 | LYS211  | GLU127  |
| 2 | ARG746  | GLU743  |
| 2 | ARG145  | GLU141  |
| 2 | ARG675  | GLU920  |
| 2 | LYS79   | ASP35   |
| 2 | ARG82   | ASP31   |
| 2 | LYS245  | GLU213  |
| 2 | LYS49   | GLU158  |
| 2 | ARG444  | ASP454  |
| 2 | HIS204  | ASP268  |
| 2 | ARG576  | ASP573  |
| 2 | LYS149  | GLU206  |
| 2 | LYS13   | GLU107  |
| 2 | LYS19   | ASP148  |
| 2 | ARG215  | GLU213  |
| 2 | LYS271  | ASP222  |
| 2 | LYS139  | GLU142  |
| 2 | LYS116  | ASP120  |
| 2 | LYS24   | GLU22   |
| 2 | LYS516  | GLU123  |
| 2 | LYS256  | ASP367  |
| 2 | LYS32   | ASP85   |
| 2 | LYS2665 | GLU2704 |
| 2 | LYS357  | GLU1    |
| 2 | ARG319  | GLU299  |
| 2 | ARG67   | ASP27   |
| 2 | LYS155  | GLU160  |
| 2 | LYS465  | ASP103  |
| 2 | ARG454  | ASP412  |
| 2 | LYS273  | ASP255  |

|   |          |          |
|---|----------|----------|
| 2 | LYS171   | ASP290   |
| 2 | ARG160   | GLU158   |
| 2 | LYS307   | ASP99    |
| 2 | ARG1031  | ASP1100A |
| 2 | LYS251   | ASP157   |
| 2 | LYS58    | ASP1     |
| 2 | ARG372   | GLU358   |
| 2 | LYS171   | ASP100I  |
| 2 | ARG211   | GLU199   |
| 2 | ARG86    | ASP56    |
| 2 | LYS292   | GLU128   |
| 2 | LYS53    | GLU54    |
| 2 | LYS7     | ASP95    |
| 2 | ARG59    | ASP95    |
| 2 | LYS747   | ASP742   |
| 2 | LYS465   | GLU95    |
| 2 | ARG221   | ASP222   |
| 2 | ARG56    | GLU58    |
| 2 | ARG397   | ASP401   |
| 2 | LYS513   | GLU123   |
| 2 | LYS1714  | GLU1716  |
| 2 | ARG3     | ASP6     |
| 2 | LYS360   | ASP63    |
| 2 | LYS218   | ASP122   |
| 2 | ARG262   | GLU      |
| 2 | HIS898   | ASP725   |
| 2 | LYS167   | ASP165   |
| 2 | LYS117   | GLU211   |
| 2 | LYS181   | GLU56    |
| 2 | LYS9     | ASP116   |
| 2 | LYS378   | ASP375   |
| 2 | ARG190   | ASP186   |
| 2 | LYS138   | ASP62    |
| 2 | ARG98    | GLU95    |
| 2 | LYS48    | ASP94    |
| 2 | LYS196   | ASP200   |
| 2 | HIS173   | ASP171   |
| 2 | LYS722   | ASP778   |
| 2 | ARG1050  | GLU1097  |
| 2 | ARG1082A | GLU1081  |
| 2 | ARG221   | ASP306   |
| 2 | ARG240   | GLU258   |
| 2 | ARG393   | ASP390   |
| 2 | ARG36    | GLU38    |
| 2 | LYS58    | ASP94    |
| 2 | ARG101   | ASP111   |
| 2 | HIS103   | ASP115   |
| 2 | ARG797   | ASP1018  |
| 2 | LYS46    | ASP31    |
| 2 | ARG221   | GLU241   |
| 2 | HIS31    | GLU259   |
| 2 | ARG423   | GLU494   |
| 2 | LYS37    | ASP89    |
| 2 | LYS129   | ASP105   |
| 2 | ARG58    | ASP336   |
| 2 | ARG444   | GLU452   |
| 2 | ARG427   | GLU495   |
| 2 | HIS164   | ASP166   |

|   |         |         |
|---|---------|---------|
| 2 | HIS169  | ASP173  |
| 2 | ARG116  | ASP103  |
| 2 | LYS343  | GLU171  |
| 2 | ARG485  | ASP488  |
| 2 | HIS38   | ASP56   |
| 2 | ARG219  | GLU268  |
| 2 | LYS127  | GLU54   |
| 2 | LYS9    | GLU26   |
| 2 | ARG168  | ASP87   |
| 2 | LYS257  | GLU128  |
| 2 | LYS104  | ASP143  |
| 2 | LYS199  | GLU276  |
| 2 | LYS50   | ASP255  |
| 2 | HIS218  | GLU120  |
| 2 | HIS105  | ASP51   |
| 2 | ARG1146 | GLU1142 |
| 2 | ARG302  | ASP300  |
| 2 | LYS     | GLU139  |
| 2 | ARG281  | ASP246  |
| 2 | LYS247  | GLU266  |
| 2 | LYS30   | GLU100B |
| 2 | HIS112  | GLU205  |
| 2 | ARG193  | ASP155  |
| 2 | LYS343  | GLU395  |
| 2 | LYS209  | ASP100G |
| 2 | LYS98   | ASP49   |
| 2 | LYS56   | ASP11   |
| 2 | ARG198  | GLU67   |
| 2 | ARG117  | ASP116  |
| 2 | LYS598  | ASP609  |
| 2 | HIS219  | ASP56   |
| 2 | HIS495  | GLU31   |
| 2 | HIS107  | ASP138  |
| 2 | LYS211  | GLU122  |
| 2 | LYS67   | ASP54   |
| 2 | ARG60   | GLU316  |
| 2 | LYS173  | ASP171  |
| 2 | ARG52   | ASP61   |
| 2 | LYS130  | GLU59   |
| 2 | HIS174  | ASP169  |
| 2 | LYS101  | GLU142  |
| 2 | ARG158  | ASP211  |
| 2 | LYS86   | GLU93   |
| 2 | ARG65   | ASP30   |
| 2 | LYS304  | GLU301  |
| 2 | ARG62   | GLU78   |
| 2 | LYS229  | ASP142  |
| 2 | ARG160  | ASP165  |
| 2 | ARG6    | ASP437  |
| 2 | LYS224  | ASP295  |
| 2 | HIS378  | GLU381  |
| 2 | ARG53   | ASP105  |
| 2 | LYS150  | ASP115  |
| 2 | LYS157  | ASP52   |
| 2 | HIS95B  | ASP61   |
| 2 | ARG142  | GLU100  |
| 2 | ARG98   | ASP168  |
| 2 | HIS91   | ASP399  |

|   |         |         |
|---|---------|---------|
| 2 | ARG89   | ASP75   |
| 2 | ARG301  | GLU302  |
| 2 | ARG190  | GLU189  |
| 2 | ARG33   | GLU24   |
| 2 | LYS188  | ASP159  |
| 2 | ARG398  | GLU698  |
| 2 | LYS209  | GLU212  |
| 2 | LYS214  | GLU124  |
| 2 | LYS214  | GLU126  |
| 2 | ARG101  | ASP58   |
| 2 | LYS531  | GLU535  |
| 2 | LYS235  | ASP231  |
| 2 | ARG79   | GLU81   |
| 2 | HIS34   | GLU199  |
| 2 | ARG2159 | GLU2189 |
| 2 | LYS52   | ASP54   |
| 2 | LYS190  | GLU425  |
| 2 | LYS172  | ASP139  |
| 2 | ARG82   | GLU79   |
| 2 | LYS207  | GLU123  |
| 2 | ARG102  | ASP41   |
| 2 | ARG95   | GLU93   |
| 2 | ARG117  | GLU106  |
| 2 | LYS149  | ASP106  |
| 2 | LYS485  | ASP52A  |
| 2 | HIS30   | ASP28   |
| 2 | LYS190  | ASP152  |
| 2 | LYS176  | ASP143  |
| 2 | LYS225  | ASP135  |
| 2 | LYS40   | ASP28   |
| 2 | ARG103  | ASP80   |
| 2 | LYS289  | GLU311  |
| 2 | ARG961  | ASP982  |
| 2 | ARG37   | ASP64   |
| 2 | LYS58   | ASP62   |
| 2 | ARG251  | ASP138  |
| 2 | ARG144  | GLU107  |
| 2 | ARG280  | GLU227  |
| 2 | LYS     | GLU124  |
| 2 | LYS120  | GLU89   |
| 2 | HIS103  | ASP36   |
| 2 | LYS61   | GLU146  |
| 2 | LYS220  | GLU122  |
| 2 | ARG100B | ASP91   |
| 2 | ARG437  | ASP442  |
| 2 | ARG310  | ASP307  |
| 2 | HIS1051 | ASP1050 |
| 2 | ARG1038 | ASP1088 |
| 2 | ARG169  | ASP172  |
| 2 | HIS489  | GLU239  |
| 2 | ARG61   | ASP58   |
| 2 | ARG1538 | ASP1590 |
| 2 | ARG308  | ASP304  |
| 2 | LYS162  | GLU131  |
| 2 | ARG133  | ASP115  |
| 2 | HIS236  | GLU126  |
| 2 | ARG152  | ASP198  |
| 2 | ARG94   | ASP63   |

|   |        |        |
|---|--------|--------|
| 2 | HIS433 | GLU436 |
| 2 | ARG160 | GLU285 |
| 2 | ARG225 | ASP142 |
| 2 | LYS29  | GLU28  |
| 2 | ARG285 | GLU237 |
| 2 | ARG64  | GLU26  |
| 2 | LYS300 | GLU229 |
| 2 | LYS82  | GLU46  |
| 2 | LYS210 | GLU131 |
| 2 | LYS56  | ASP52  |
| 2 | LYS55  | GLU104 |
| 2 | LYS46  | GLU66  |
| 2 | ARG55  | ASP101 |
| 2 | ARG61  | ASP    |
| 2 | ARG55  | ASP107 |
| 2 | ARG245 | ASP148 |
| 2 | LYS284 | ASP309 |
| 2 | LYS164 | GLU158 |
| 2 | ARG137 | ASP73  |
| 2 | ARG6   | GLU82  |
| 2 | LYS59  | GLU117 |
| 2 | LYS310 | ASP230 |
| 2 | ARG207 | ASP259 |
| 2 | ARG235 | ASP224 |
| 2 | ARG308 | GLU310 |
| 2 | ARG97  | GLU1   |
| 2 | LYS427 | ASP52A |
| 2 | ARG96  | ASP26  |
| 2 | ARG270 | ASP178 |
| 2 | ARG445 | GLU442 |
| 2 | LYS59  | GLU57  |
| 2 | HIS198 | ASP143 |
| 2 | HIS67  | GLU76  |
| 2 | LYS68  | ASP92  |
| 2 | LYS305 | GLU318 |
| 2 | ARG32  | GLU57  |
| 2 | LYS321 | ASP318 |
| 2 | HIS341 | GLU85  |
| 2 | HIS49  | GLU55  |
| 2 | LYS343 | ASP350 |
| 2 | HIS207 | GLU131 |
| 2 | LYS203 | ASP324 |
| 2 | LYS43  | ASP27  |
| 2 | LYS43  | ASP26  |
| 2 | ARG154 | ASP26  |
| 2 | ARG69  | GLU27  |
| 2 | ARG932 | GLU630 |
| 2 | LYS432 | GLU129 |
| 2 | ARG234 | ASP272 |
| 2 | LYS23  | ASP73  |
| 2 | LYS111 | GLU202 |
| 2 | ARG311 | GLU136 |
| 2 | HIS6   | GLU230 |
| 2 | ARG165 | GLU134 |
| 2 | LYS87  | ASP84  |
| 2 | ARG107 | ASP113 |
| 2 | LYS227 | GLU126 |
| 2 | LYS55  | ASP743 |

|   |         |         |
|---|---------|---------|
| 2 | LYS213  | GLU128  |
| 2 | HIS164  | ASP141  |
| 2 | LYS74   | ASP32   |
| 2 | LYS207  | ASP129  |
| 2 | LYS210  | ASP73   |
| 2 | LYS417  | ASP321  |
| 2 | LYS130  | ASP165  |
| 2 | ARG405  | GLU113  |
| 2 | LYS4    | ASP77   |
| 2 | LYS1348 | GLU1269 |
| 2 | LYS203  | GLU206  |
| 2 | ARG95   | GLU39   |
| 2 | LYS58   | ASP56   |
| 2 | ARG73   | ASP57   |
| 2 | LYS97   | ASP33   |
| 2 | LYS50   | GLU8    |
| 2 | ARG500  | ASP664  |
| 2 | ARG186  | ASP182  |
| 2 | LYS1199 | ASP1110 |
| 2 | LYS51   | GLU289  |
| 2 | ARG266  | GLU259  |
| 2 | HIS174  | GLU128  |
| 2 | HIS123  | ASP264  |
| 2 | LYS147  | GLU175  |
| 2 | LYS97   | GLU52B  |
| 2 | LYS13   | ASP83   |
| 2 | LYS228  | GLU123  |
| 2 | LYS1    | GLU92   |
| 2 | LYS175  | ASP182  |
| 2 | ARG97   | GLU113  |
| 2 | LYS215  | ASP194  |
| 2 | ARG100  | ASP107  |
| 2 | ARG147  | ASP160  |
| 2 | ARG99   | ASP107  |
| 2 | HIS84   | GLU163  |
| 2 | HIS157  | ASP106  |
| 2 | HIS62   | GLU46   |
| 2 | ARG68   | ASP27C  |
| 2 | LYS96   | ASP46   |
| 2 | ARG82   | ASP127  |
| 2 | ARG50   | GLU21   |
| 2 | LYS1848 | GLU1845 |
| 2 | ARG188  | ASP86   |
| 2 | LYS543  | GLU55   |
| 2 | ARG140  | GLU152  |
| 2 | ARG288  | ASP304  |
| 2 | ARG2    | GLU16   |
| 2 | ARG381  | GLU162  |
| 2 | HIS162  | ASP166  |
| 2 | LYS505  | ASP501  |
| 2 | LYS2714 | GLU2127 |
| 2 | ARG167  | ASP339  |
| 2 | LYS66   | GLU85   |
| 2 | LYS242  | GLU261  |
| 2 | ARG66   | GLU309  |
| 2 | LYS262  | GLU83   |
| 2 | LYS0    | ASP1054 |
| 2 | LYS1663 | ASP1669 |

|   |         |         |
|---|---------|---------|
| 2 | LYS18   | GLU15   |
| 2 | LYS1563 | ASP1001 |
| 2 | LYS68   | ASP66   |
| 2 | HIS170  | GLU168  |
| 2 | ARG58   | ASP64   |
| 2 | ARG40   | ASP85   |
| 2 | HIS15   | ASP87   |
| 2 | LYS55   | ASP102  |
| 2 | LYS296  | ASP28   |
| 2 | ARG163  | ASP166  |
| 2 | LYS50   | GLU100F |
| 2 | HIS133  | ASP45   |
| 2 | ARG909  | GLU187  |
| 2 | ARG93   | ASP101  |
| 2 | ARG55   | ASP49   |
| 2 | LYS5    | GLU3    |
| 2 | LYS1038 | ASP1086 |
| 2 | ARG598  | ASP606  |
| 2 | ARG8    | GLU27   |
| 2 | ARG328  | ASP329  |
| 2 | ARG     | GLU81   |
| 2 | HIS84   | GLU100  |
| 2 | LYS222  | ASP225  |
| 2 | HIS193  | GLU189  |
| 2 | ARG175  | ASP171  |
| 2 | ARG172  | ASP170  |
| 2 | ARG237  | GLU285  |
| 2 | ARG250  | GLU268  |
| 2 | LYS67   | GLU89   |
| 2 | LYS251  | GLU253  |
| 2 | LYS593  | ASP570  |
| 2 | ARG24   | ASP69   |
| 2 | LYS155  | ASP98   |
| 2 | ARG116  | ASP125  |
| 2 | LYS363  | ASP361  |
| 2 | ARG26   | ASP10   |
| 2 | LYS186  | GLU236  |
| 2 | LYS19   | GLU10   |
| 2 | LYS9    | GLU24   |
| 2 | LYS128  | GLU162  |
| 2 | LYS41   | GLU97   |
| 2 | LYS190  | GLU187  |
| 2 | LYS122  | ASP178  |
| 2 | LYS114  | GLU95   |
| 2 | ARG218  | GLU124  |
| 2 | LYS714  | GLU716  |
| 2 | LYS427  | ASP362  |
| 2 | LYS719  | GLU123  |
| 2 | LYS226  | GLU222  |
| 2 | HIS189  | GLU56   |
| 2 | LYS202  | ASP113  |
| 2 | LYS148  | GLU155  |
| 2 | LYS143  | GLU29   |
| 2 | LYS801  | ASP352  |
| 2 | LYS157  | GLU168  |
| 2 | HIS96   | ASP3    |
| 2 | HIS209  | ASP205  |
| 2 | HIS64   | ASP54   |



|   |         |         |
|---|---------|---------|
| 2 | LYS50   | GLU28   |
| 2 | ARG56   | ASP108  |
| 2 | ARG50   | GLU239  |
| 2 | ARG47   | ASP45   |
| 2 | LYS50   | GLU275  |
| 2 | LYS153  | GLU150  |
| 2 | ARG33   | GLU135  |
| 2 | ARG50   | GLU59   |
| 2 | ARG112  | ASP55   |
| 2 | LYS225  | GLU227  |
| 2 | ARG66   | ASP64   |
| 2 | HIS738  | ASP682  |
| 2 | LYS1598 | ASP1609 |
| 2 | ARG169  | GLU118  |
| 2 | HIS433  | ASP50   |
| 2 | LYS465  | GLU50   |
| 2 | HIS171  | GLU175  |
| 2 | LYS307  | GLU64   |
| 2 | LYS51   | GLU16   |
| 2 | LYS171  | ASP253  |
| 2 | LYS259  | GLU116C |
| 2 | ARG333  | ASP330  |
| 2 | LYS1210 | GLU1212 |
| 2 | ARG211  | ASP540  |
| 2 | ARG33   | ASP4    |
| 2 | HIS149  | ASP146  |
| 2 | LYS213  | GLU129  |
| 2 | LYS220  | ASP55   |
| 2 | ARG184  | ASP152  |
| 2 | ARG100  | ASP190  |
| 2 | ARG24   | ASP1070 |
| 2 | LYS211  | ASP56   |
| 2 | HIS225  | ASP222  |
| 2 | ARG292  | GLU272  |
| 2 | ARG103  | ASP165  |
| 2 | ARG24   | ASP99   |
| 2 | ARG99   | ASP27   |
| 2 | LYS63   | GLU65   |
| 2 | HIS567  | GLU544  |
| 2 | ARG1625 | ASP1619 |
| 2 | ARG212  | GLU214  |
| 2 | ARG58   | GLU1    |
| 2 | LYS326  | ASP270  |
| 2 | LYS203  | GLU122  |
| 2 | LYS53   | ASP100C |
| 2 | ARG32   | ASP429  |
| 2 | LYS20   | ASP18   |
| 2 | HIS112  | GLU41   |
| 2 | LYS184  | ASP133  |
| 2 | ARG106  | ASP102  |
| 2 | ARG221  | GLU288  |
| 2 | ARG87   | GLU148  |
| 2 | ARG117  | GLU72   |
| 2 | ARG50   | GLU558  |
| 2 | LYS73   | ASP31   |
| 2 | ARG45   | ASP100  |
| 2 | LYS447  | ASP448  |
| 2 | LYS218  | GLU129  |

|   |         |         |
|---|---------|---------|
| 2 | LYS183  | ASP151  |
| 2 | ARG50   | ASP66   |
| 2 | LYS665  | GLU704  |
| 2 | LYS41   | GLU83   |
| 2 | LYS11   | ASP33   |
| 2 | ARG100B | GLU100E |
| 2 | LYS27   | GLU98   |
| 2 | ARG398  | ASP866  |
| 2 | LYS116  | ASP99   |
| 2 | LYS148  | GLU145  |
| 2 | ARG114  | GLU11   |
| 2 | ARG60   | ASP179  |
| 2 | ARG1109 | ASP1112 |
| 2 | LYS151  | GLU205  |
| 2 | HIS123  | GLU189  |
| 2 | HIS30   | ASP92   |
| 2 | HIS2    | ASP65   |
| 2 | LYS209  | GLU53   |
| 2 | LYS72   | ASP78   |
| 2 | LYS322  | GLU61   |
| 2 | HIS928  | ASP639  |
| 2 | HIS197  | ASP142  |
| 2 | LYS356  | GLU412  |
| 2 | LYS218  | GLU216  |
| 2 | ARG222  | ASP233  |
| 2 | LYS170  | ASP56   |
| 2 | LYS145  | GLU193  |
| 2 | LYS145  | GLU195  |
| 2 | LYS878  | ASP867  |
| 2 | ARG95   | ASP100A |
| 2 | ARG105  | GLU113  |
| 2 | LYS211  | GLU215  |
| 2 | LYS211  | GLU214  |
| 2 | ARG65   | ASP     |
| 2 | HIS126  | ASP128  |
| 2 | LYS370  | GLU420  |
| 2 | LYS236  | ASP259  |
| 2 | LYS89   | GLU72   |
| 2 | LYS573  | GLU394  |
| 2 | ARG108  | ASP137  |
| 2 | LYS55   | GLU52   |
| 2 | ARG74   | GLU110  |
| 1 | LYS184  | ASP146  |
| 1 | ARG155  | ASP157  |
| 1 | LYS205  | GLU465  |
| 1 | HIS34   | ASP102  |
| 1 | LYS9    | ASP77   |
| 1 | ARG351  | GLU379  |
| 1 | ARG57   | GLU431  |
| 1 | HIS35   | ASP50   |
| 1 | LYS510  | GLU493  |
| 1 | LYS249  | GLU247  |
| 1 | ARG242  | GLU236  |
| 1 | ARG123  | GLU116  |
| 1 | LYS44   | ASP61   |
| 1 | LYS222  | GLU227  |
| 1 | LYS219  | ASP130  |
| 1 | LYS     | ASP23   |

|   |         |         |
|---|---------|---------|
| 1 | ARG345  | ASP341  |
| 1 | LYS175  | GLU178  |
| 1 | LYS2227 | GLU50   |
| 1 | LYS     | ASP76   |
| 1 | HIS594  | ASP588  |
| 1 | ARG98   | ASP39   |
| 1 | ARG538  | GLU546  |
| 1 | LYS58   | ASP182  |
| 1 | LYS1090 | GLU1085 |
| 1 | ARG400  | ASP422  |
| 1 | ARG31   | GLU311  |
| 1 | LYS295  | GLU291  |
| 1 | LYS212  | GLU128  |
| 1 | LYS185  | GLU208  |
| 1 | LYS379  | GLU359  |
| 1 | ARG433  | GLU516  |
| 1 | LYS176  | GLU66   |
| 1 | ARG25   | GLU68   |
| 1 | LYS187  | ASP316  |
| 1 | LYS50   | ASP111  |
| 1 | ARG41   | GLU148  |
| 1 | LYS30   | ASP29   |
| 1 | HIS51   | GLU50   |
| 1 | LYS290  | ASP33   |
| 1 | ARG49   | GLU199  |
| 1 | ARG668  | GLU335  |
| 1 | LYS79   | ASP52   |
| 1 | HIS486  | GLU565  |
| 1 | LYS82   | GLU119  |
| 1 | ARG52   | GLU5    |
| 1 | LYS75   | GLU218  |
| 1 | LYS162  | ASP163  |
| 1 | LYS410  | ASP434  |
| 1 | LYS463  | GLU95   |
| 1 | ARG50   | ASP59   |
| 1 | ARG73   | GLU75   |
| 1 | ARG18   | GLU93   |
| 1 | LYS42   | GLU31   |
| 1 | ARG186  | ASP180  |
| 1 | LYS122  | ASP116  |
| 1 | HIS26   | ASP25   |
| 1 | ARG37   | ASP88   |
| 1 | HIS3245 | GLU3243 |
| 1 | ARG57   | ASP43   |
| 1 | LYS27   | GLU61   |
| 1 | ARG180  | GLU47   |
| 1 | LYS45   | GLU83   |
| 1 | LYS45   | GLU81   |
| 1 | ARG184  | GLU145  |
| 1 | LYS45   | GLU87   |
| 1 | HIS189  | GLU188  |
| 1 | LYS241  | ASP99   |
| 1 | LYS218  | GLU187  |
| 1 | HIS198  | GLU65   |
| 1 | LYS109  | GLU107  |
| 1 | ARG1099 | GLU2105 |
| 1 | LYS15   | ASP14   |
| 1 | HIS98   | ASP31   |

|   |         |         |
|---|---------|---------|
| 1 | ARG18   | ASP17   |
| 1 | ARG58   | ASP103  |
| 1 | LYS26   | ASP30   |
| 1 | HIS99   | GLU146  |
| 1 | HIS61   | ASP1    |
| 1 | LYS152  | GLU128  |
| 1 | HIS50   | GLU189  |
| 1 | ARG53   | GLU106  |
| 1 | ARG44   | ASP87   |
| 1 | LYS106  | ASP17   |
| 1 | ARG144  | ASP119  |
| 1 | LYS193  | GLU208  |
| 1 | LYS288  | ASP32   |
| 1 | LYS118  | ASP109  |
| 1 | ARG130  | ASP92   |
| 1 | LYS153  | GLU186  |
| 1 | LYS62   | GLU58   |
| 1 | HIS43   | GLU89   |
| 1 | ARG186  | GLU45   |
| 1 | ARG54   | ASP322  |
| 1 | HIS221  | ASP232  |
| 1 | ARG120  | GLU54   |
| 1 | ARG140  | GLU212  |
| 1 | ARG213  | ASP124  |
| 1 | LYS341  | ASP53   |
| 1 | LYS648  | GLU662  |
| 1 | LYS84   | GLU99   |
| 1 | LYS112  | ASP54   |
| 1 | LYS44   | GLU42   |
| 1 | LYS59   | GLU10   |
| 1 | LYS180  | GLU184  |
| 1 | LYS76   | GLU53   |
| 1 | ARG100A | GLU100N |
| 1 | ARG152  | GLU303  |
| 1 | HIS335  | ASP399  |
| 1 | ARG180  | ASP169  |
| 1 | HIS59   | ASP57   |
| 1 | LYS193  | ASP116  |
| 1 | HIS133  | GLU118  |
| 1 | LYS175  | GLU146  |
| 1 | LYS44   | ASP90   |
| 1 | LYS207  | GLU49   |
| 1 | ARG157  | GLU187  |
| 1 | ARG31   | GLU30   |
| 1 | ARG587  | GLU589  |
| 1 | LYS100  | GLU62   |
| 1 | ARG236  | GLU258  |
| 1 | HIS57   | ASP59   |
| 1 | HIS417  | GLU80   |
| 1 | ARG141  | GLU160  |
| 1 | LYS103  | GLU85   |
| 1 | LYS262  | GLU265  |
| 1 | ARG27   | GLU1    |
| 1 | ARG24   | ASP855  |
| 1 | ARG19   | GLU82   |
| 1 | ARG19   | GLU83   |
| 1 | LYS222  | GLU126  |
| 1 | LYS155  | GLU56   |

|   |         |         |
|---|---------|---------|
| 1 | LYS43   | ASP1    |
| 1 | HIS164  | ASP169  |
| 1 | HIS236  | ASP125  |
| 1 | HIS99   | GLU155  |
| 1 | ARG101  | ASP98   |
| 1 | ARG17   | ASP39   |
| 1 | HIS248  | ASP249  |
| 1 | LYS255  | ASP528  |
| 1 | LYS174  | ASP175  |
| 1 | LYS125  | ASP193  |
| 1 | ARG99   | ASP143  |
| 1 | ARG236  | ASP235  |
| 1 | ARG56   | GLU111  |
| 1 | ARG374  | ASP343  |
| 1 | LYS96   | GLU94   |
| 1 | LYS672  | GLU674  |
| 1 | ARG146  | ASP133  |
| 1 | ARG105  | GLU85   |
| 1 | LYS140  | GLU100  |
| 1 | ARG2674 | ASP2167 |
| 1 | ARG126  | GLU81   |
| 1 | LYS98   | ASP108  |
| 1 | LYS98   | ASP100  |
| 1 | HIS112  | ASP107  |
| 1 | ARG40   | GLU70   |
| 1 | LYS119  | ASP116  |
| 1 | ARG2825 | GLU2822 |
| 1 | LYS372  | ASP369  |
| 1 | ARG35   | ASP29   |
| 1 | LYS348  | ASP269  |
| 1 | LYS282  | ASP275  |
| 1 | ARG101  | GLU179  |
| 1 | LYS     | GLU75   |
| 1 | ARG209  | GLU185  |
| 1 | LYS439  | ASP356  |
| 1 | LYS157  | ASP54   |
| 1 | ARG514  | GLU516  |
| 1 | HIS73   | ASP74   |
| 1 | ARG25   | ASP76   |
| 1 | LYS1576 | ASP1573 |
| 1 | LYS113  | GLU115  |
| 1 | ARG491  | GLU498  |
| 1 | LYS159  | ASP180  |
| 1 | ARG169  | ASP170  |
| 1 | LYS257  | ASP41   |
| 1 | LYS69   | ASP67   |
| 1 | ARG169  | ASP175  |
| 1 | LYS130  | ASP87   |
| 1 | LYS313  | ASP309  |
| 1 | HIS95   | ASP62   |
| 1 | LYS394  | GLU392  |
| 1 | LYS50   | GLU98   |
| 1 | LYS3231 | GLU3229 |
| 1 | LYS181  | GLU77   |
| 1 | LYS220  | ASP122  |
| 1 | ARG348  | ASP349  |
| 1 | LYS120  | ASP95   |
| 1 | ARG66   | ASP52   |

|   |         |         |
|---|---------|---------|
| 1 | HIS108  | GLU35   |
| 1 | ARG148  | GLU149  |
| 1 | LYS32   | ASP159  |
| 1 | LYS307  | GLU59   |
| 1 | ARG44   | GLU61   |
| 1 | HIS184  | ASP146  |
| 1 | LYS108  | GLU17   |
| 1 | LYS129  | GLU131  |
| 1 | LYS156  | GLU126  |
| 1 | ARG77   | GLU73   |
| 1 | ARG128  | GLU343  |
| 1 | ARG207  | GLU209  |
| 1 | LYS39   | GLU46   |
| 1 | LYS262  | ASP175  |
| 1 | LYS222  | GLU206  |
| 1 | ARG103  | GLU123  |
| 1 | LYS68   | GLU66   |
| 1 | HIS317  | GLU368  |
| 1 | ARG53   | ASP52A  |
| 1 | ARG82   | ASP65   |
| 1 | ARG51   | ASP115  |
| 1 | LYS132  | GLU27   |
| 1 | ARG90   | ASP62   |
| 1 | ARG194  | ASP191  |
| 1 | LYS42   | ASP37   |
| 1 | ARG225  | GLU227  |
| 1 | LYS1107 | ASP1017 |
| 1 | ARG21   | ASP23   |
| 1 | LYS125  | GLU121  |
| 1 | LYS168  | ASP53   |
| 1 | ARG373  | GLU575  |
| 1 | LYS65   | GLU84   |
| 1 | ARG313  | GLU60   |
| 1 | LYS214  | GLU148  |
| 1 | ARG72   | ASP77   |
| 1 | LYS149  | GLU195B |
| 1 | ARG277  | ASP32   |
| 1 | LYS155  | GLU74   |
| 1 | HIS496  | GLU31   |
| 1 | LYS42   | GLU97   |
| 1 | ARG76   | GLU59   |
| 1 | LYS13   | GLU113  |
| 1 | LYS43   | ASP68   |
| 1 | HIS51   | GLU74   |
| 1 | LYS133  | ASP144  |
| 1 | LYS3    | ASP59   |
| 1 | LYS17   | GLU72   |
| 1 | ARG106  | GLU103  |
| 1 | LYS215  | GLU118  |
| 1 | HIS27D  | ASP100B |
| 1 | LYS103  | ASP66   |
| 1 | LYS198  | ASP142  |
| 1 | HIS95   | ASP92   |
| 1 | ARG103  | ASP124  |
| 1 | LYS389  | GLU393  |
| 1 | HIS110  | GLU144  |
| 1 | LYS105  | GLU83   |
| 1 | HIS30   | ASP429  |

|   |         |         |
|---|---------|---------|
| 1 | ARG282  | GLU286  |
| 1 | LYS86   | ASP83   |
| 1 | ARG     | GLU187  |
| 1 | ARG441  | ASP58   |
| 1 | LYS161  | GLU127  |
| 1 | LYS290  | ASP278  |
| 1 | LYS204  | GLU115  |
| 1 | LYS467  | GLU80   |
| 1 | LYS874  | ASP871  |
| 1 | ARG35   | ASP39   |
| 1 | LYS106  | ASP85   |
| 1 | ARG55   | ASP80   |
| 1 | ARG32   | GLU216  |
| 1 | ARG310  | ASP86   |
| 1 | LYS43   | ASP86   |
| 1 | LYS157  | GLU127  |
| 1 | LYS105  | ASP103  |
| 1 | LYS82   | ASP144  |
| 1 | LYS313  | ASP317  |
| 1 | LYS59   | GLU101  |
| 1 | ARG1674 | ASP1167 |
| 1 | LYS50   | GLU68   |
| 1 | ARG224  | GLU226  |
| 1 | ARG32   | ASP68   |
| 1 | LYS887  | GLU145  |
| 1 | ARG316  | ASP5    |
| 1 | ARG353  | ASP96   |
| 1 | HIS275  | GLU272  |
| 1 | LYS489  | GLU485  |
| 1 | LYS7    | ASP11   |
| 1 | LYS646  | GLU662  |
| 1 | LYS175  | ASP176  |
| 1 | LYS15   | GLU24   |
| 1 | LYS127  | ASP189  |
| 1 | ARG204  | GLU121  |
| 1 | ARG48   | GLU73   |
| 1 | LYS70   | GLU29   |
| 1 | LYS833  | ASP17   |
| 1 | LYS428  | ASP390  |
| 1 | LYS1232 | GLU1351 |
| 1 | ARG45   | ASP1    |
| 1 | LYS114  | ASP111  |
| 1 | LYS90   | GLU92   |
| 1 | ARG213  | ASP143  |
| 1 | HIS338  | GLU333  |
| 1 | ARG196  | ASP148  |
| 1 | LYS191  | ASP50   |
| 1 | ARG246  | GLU240  |
| 1 | HIS119  | ASP116  |
| 1 | HIS80   | ASP73   |
| 1 | LYS59   | GLU37   |
| 1 | LYS76   | GLU72   |
| 1 | HIS32   | ASP100  |
| 1 | LYS68   | ASP33   |
| 1 | LYS168  | GLU238  |
| 1 | LYS174  | GLU89   |
| 1 | ARG142  | GLU161  |
| 1 | ARG179  | GLU77   |

|   |         |         |
|---|---------|---------|
| 1 | LYS93   | GLU27   |
| 1 | ARG82   | ASP71   |
| 1 | LYS111  | GLU73   |
| 1 | ARG674  | ASP167  |
| 1 | LYS220  | GLU214  |
| 1 | LYS317  | ASP314  |
| 1 | LYS113  | ASP171  |
| 1 | ARG247  | GLU188  |
| 1 | LYS175  | ASP98   |
| 1 | HIS192  | ASP188  |
| 1 | LYS114  | ASP173  |
| 1 | ARG304  | ASP306  |
| 1 | LYS189  | ASP184  |
| 1 | LYS20   | ASP58   |
| 1 | LYS75   | GLU77   |
| 1 | ARG255  | ASP307  |
| 1 | LYS487  | ASP92   |
| 1 | ARG64   | ASP65   |
| 1 | LYS282  | GLU241  |
| 1 | ARG101  | GLU97   |
| 1 | ARG126  | ASP125  |
| 1 | HIS30E  | GLU50   |
| 1 | LYS80   | GLU581  |
| 1 | LYS71   | GLU29   |
| 1 | LYS143  | ASP60   |
| 1 | LYS135  | ASP51   |
| 1 | LYS196  | GLU60   |
| 1 | ARG625  | GLU533  |
| 1 | LYS105  | GLU187  |
| 1 | LYS105  | GLU188  |
| 1 | LYS76   | ASP71   |
| 1 | ARG226  | GLU212  |
| 1 | ARG44   | GLU57   |
| 1 | LYS231  | GLU129  |
| 1 | LYS255  | GLU115  |
| 1 | HIS556  | ASP540  |
| 1 | LYS187  | ASP189  |
| 1 | LYS330  | ASP307  |
| 1 | ARG75   | ASP123  |
| 1 | HIS161  | ASP167  |
| 1 | LYS33   | GLU76   |
| 1 | LYS19   | ASP78   |
| 1 | ARG2209 | ASP2187 |
| 1 | LYS109  | ASP107  |
| 1 | LYS343  | GLU405  |
| 1 | LYS1411 | GLU1023 |
| 1 | ARG223  | GLU225  |
| 1 | ARG11   | GLU26   |
| 1 | LYS49   | ASP100  |
| 1 | LYS148  | ASP170  |
| 1 | LYS64   | ASP     |
| 1 | LYS199  | GLU110  |
| 1 | HIS1705 | ASP1720 |
| 1 | LYS259  | ASP261  |
| 1 | LYS76   | ASP124  |
| 1 | LYS90   | GLU273  |
| 1 | ARG39   | ASP53   |
| 1 | ARG31   | ASP107  |



|   |         |         |
|---|---------|---------|
| 1 | ARG8    | GLU6    |
| 1 | LYS75   | GLU1    |
| 1 | ARG95   | ASP100C |
| 1 | HIS125  | GLU181  |
| 1 | LYS107  | GLU42   |
| 1 | HIS4    | ASP19   |
| 1 | ARG121  | ASP119  |
| 1 | HIS217  | GLU186  |
| 1 | LYS364  | GLU33   |
| 1 | ARG332  | ASP328  |
| 1 | LYS56   | ASP57   |
| 1 | ARG403  | GLU431  |
| 1 | LYS127  | ASP154  |
| 1 | LYS62   | GLU85   |
| 1 | ARG308  | GLU50   |
| 1 | LYS317  | ASP55   |
| 1 | ARG50   | GLU100C |
| 1 | LYS372  | ASP370  |
| 1 | ARG65   | GLU1    |
| 1 | HIS172  | ASP171  |
| 1 | HIS76   | GLU74   |
| 1 | LYS82   | ASP89   |
| 1 | LYS130  | GLU85   |
| 1 | LYS713  | GLU123  |
| 1 | ARG94   | ASP119  |
| 1 | LYS102  | GLU79   |
| 1 | LYS102  | GLU78   |
| 1 | LYS59   | ASP100  |
| 1 | LYS63   | GLU105  |
| 1 | LYS1501 | GLU1507 |
| 1 | LYS1713 | GLU1123 |
| 1 | ARG61   | GLU85   |
| 1 | ARG62   | GLU85   |
| 1 | LYS353  | GLU273  |
| 1 | LYS40   | GLU55   |
| 1 | LYS305  | ASP51   |
| 1 | LYS243  | GLU260  |
| 1 | LYS303  | GLU296  |
| 1 | ARG114  | ASP92   |
| 1 | HIS705  | ASP720  |
| 1 | LYS77   | ASP74   |
| 1 | ARG41   | GLU238  |
| 1 | LYS1263 | GLU1246 |
| 1 | ARG204  | GLU218  |
| 1 | ARG111  | ASP126  |
| 1 | LYS236  | GLU100C |
| 1 | ARG172  | GLU119  |
| 1 | ARG83   | GLU81   |
| 1 | LYS135  | ASP119  |
| 1 | LYS30   | ASP99   |
| 1 | ARG100B | ASP101  |
| 1 | LYS208  | GLU125  |
| 1 | ARG137  | ASP142  |
| 1 | ARG350  | ASP397  |
| 1 | LYS237  | ASP232  |
| 1 | ARG186  | ASP187  |
| 1 | LYS217  | ASP122  |
| 1 | LYS175  | ASP81   |

|   |         |         |
|---|---------|---------|
| 1 | LYS222  | ASP107  |
| 1 | HIS202  | GLU203  |
| 1 | HIS346  | ASP344  |
| 1 | LYS254  | GLU251  |
| 1 | LYS128  | ASP124  |
| 1 | HIS58   | ASP56   |
| 1 | ARG670  | GLU204  |
| 1 | LYS250  | GLU276  |
| 1 | LYS66   | ASP92   |
| 1 | ARG102  | GLU164  |
| 1 | ARG61   | ASP461  |
| 1 | ARG202  | ASP118  |
| 1 | LYS170  | GLU139  |
| 1 | LYS94   | GLU77   |
| 1 | ARG255  | GLU263  |
| 1 | LYS427  | GLU435  |
| 1 | ARG89   | ASP99   |
| 1 | LYS322  | ASP323  |
| 1 | LYS88   | GLU92   |
| 1 | LYS233  | GLU235  |
| 1 | ARG74   | ASP80   |
| 1 | LYS42   | GLU39   |
| 1 | ARG101  | ASP120  |
| 1 | ARG503  | ASP513  |
| 1 | LYS88   | GLU86   |
| 1 | ARG109  | GLU111  |
| 1 | LYS132  | GLU144  |
| 1 | LYS57   | GLU97   |
| 1 | LYS250  | GLU381  |
| 1 | HIS100E | GLU91   |
| 1 | LYS138  | GLU215  |
| 1 | ARG36   | ASP94   |
| 1 | LYS305  | GLU100E |
| 1 | LYS69   | GLU4    |
| 1 | LYS79   | GLU75   |
| 1 | ARG6    | ASP30   |
| 1 | LYS46   | ASP66   |
| 1 | LYS46   | ASP63   |
| 1 | HIS74   | ASP77   |
| 1 | LYS109  | GLU147  |
| 1 | ARG219  | GLU222  |
| 1 | HIS25   | GLU77   |
| 1 | ARG961  | GLU981  |
| 1 | HIS189  | ASP     |
| 1 | HIS35   | ASP204  |
| 1 | ARG924  | ASP970  |
| 1 | LYS95   | GLU94   |
| 1 | ARG131  | ASP116  |
| 1 | LYS143  | GLU88   |
| 1 | LYS221  | GLU225  |
| 1 | LYS189  | GLU188  |
| 1 | HIS28   | ASP27   |
| 1 | ARG29   | ASP307  |
| 1 | LYS400  | ASP397  |
| 1 | LYS244  | GLU242  |
| 1 | LYS99   | GLU61   |
| 1 | ARG22   | ASP70   |
| 1 | HIS3179 | ASP2169 |

|   |         |         |
|---|---------|---------|
| 1 | LYS292  | ASP139  |
| 1 | LYS573  | ASP577  |
| 1 | LYS39   | GLU36   |
| 1 | ARG188  | ASP1518 |
| 1 | ARG63   | GLU82   |
| 1 | LYS3019 | GLU3082 |
| 1 | LYS144  | GLU190  |
| 1 | ARG2537 | GLU2545 |
| 1 | ARG112  | ASP31   |
| 1 | LYS351  | GLU343  |
| 1 | ARG266  | GLU264  |
| 1 | HIS145  | ASP50   |
| 1 | LYS139  | GLU213  |
| 1 | ARG2543 | GLU2541 |
| 1 | LYS218  | GLU124  |
| 1 | ARG255  | GLU124  |
| 1 | HIS172  | ASP169  |
| 1 | LYS483  | ASP910  |
| 1 | LYS56   | GLU10   |
| 1 | LYS268  | GLU308  |
| 1 | ARG230  | ASP56   |
| 1 | LYS411  | ASP408  |
| 1 | LYS1100 | ASP1101 |
| 1 | LYS292  | GLU41   |
| 1 | LYS759  | ASP780  |
| 1 | LYS155  | GLU151  |
| 1 | LYS2565 | ASP2562 |
| 1 | ARG115  | GLU146  |
| 1 | HIS360  | ASP1    |
| 1 | LYS586  | ASP74   |
| 1 | HIS192  | ASP99   |
| 1 | ARG192  | ASP189  |
| 1 | LYS43   | GLU140  |
| 1 | ARG33   | ASP56   |
| 1 | ARG97   | GLU110  |
| 1 | LYS99   | ASP102  |
| 1 | LYS18   | GLU165  |
| 1 | LYS174  | GLU86   |
| 1 | ARG65   | ASP85   |
| 1 | LYS186  | GLU232  |
| 1 | LYS82   | ASP79   |
| 1 | LYS107  | GLU100  |
| 1 | ARG355  | GLU352  |
| 1 | LYS82   | ASP74   |
| 1 | ARG60   | ASP61   |
| 1 | HIS107  | ASP85   |
| 1 | ARG48   | ASP73   |
| 1 | ARG315  | ASP100A |
| 1 | LYS205  | ASP52   |
| 1 | ARG142  | GLU140  |
| 1 | HIS104  | ASP121  |
| 1 | LYS175  | GLU87   |
| 1 | LYS5    | GLU187  |
| 1 | LYS95   | ASP256  |
| 1 | LYS4    | GLU57   |
| 1 | LYS39   | GLU97   |
| 1 | ARG136  | GLU889  |
| 1 | HIS113  | ASP102  |

|   |         |         |
|---|---------|---------|
| 1 | LYS536  | ASP531  |
| 1 | ARG185  | GLU313  |
| 1 | LYS209  | ASP101  |
| 1 | ARG61   | ASP256  |
| 1 | LYS215  | GLU120  |
| 1 | ARG23   | ASP79   |
| 1 | HIS204  | GLU152  |
| 1 | ARG957  | GLU107  |
| 1 | ARG240  | GLU260  |
| 1 | ARG65   | GLU67   |
| 1 | LYS362  | ASP363  |
| 1 | LYS116  | GLU120  |
| 1 | HIS96   | GLU79   |
| 1 | LYS440  | ASP447  |
| 1 | LYS217  | GLU125  |
| 1 | LYS217  | GLU128  |
| 1 | HIS166  | ASP164  |
| 1 | LYS194  | GLU217  |
| 1 | LYS296  | ASP294  |
| 1 | HIS27D  | ASP2    |
| 1 | ARG104  | GLU21   |
| 1 | ARG50   | ASP72   |
| 1 | ARG94   | ASP97   |
| 1 | LYS3074 | ASP3056 |
| 1 | LYS152  | GLU153  |
| 1 | LYS228  | GLU238  |
| 1 | HIS169  | ASP174  |
| 1 | ARG52   | ASP131  |
| 1 | LYS228  | GLU230  |
| 1 | ARG128  | GLU89   |
| 1 | LYS16   | GLU116  |
| 1 | LYS99   | ASP56   |
| 1 | ARG114  | GLU77   |
| 1 | ARG186  | GLU188  |
| 1 | ARG18   | GLU27   |
| 1 | LYS24   | ASP23   |
| 1 | ARG852  | GLU845  |
| 1 | LYS198  | ASP249  |
| 1 | LYS39   | ASP33   |
| 1 | ARG35   | ASP87   |
| 1 | LYS171  | ASP226  |
| 1 | LYS435  | GLU413  |
| 1 | LYS4    | GLU84   |
| 1 | ARG97   | ASP53   |
| 1 | LYS29   | ASP69   |
| 1 | LYS169  | GLU239  |
| 1 | HIS308  | ASP100H |
| 1 | LYS127  | ASP139  |
| 1 | ARG57   | ASP96   |
| 1 | LYS100  | GLU102  |
| 1 | ARG45   | GLU81   |
| 1 | LYS205  | ASP139  |
| 1 | ARG469  | ASP473  |
| 1 | LYS137  | ASP143  |
| 1 | ARG422  | ASP97   |
| 1 | LYS478  | ASP377  |
| 1 | LYS50   | ASP60   |
| 1 | ARG1111 | GLU1087 |

|   |         |         |
|---|---------|---------|
| 1 | ARG47   | ASP34   |
| 1 | HIS163  | ASP172  |
| 1 | LYS129  | ASP142  |
| 1 | ARG904  | ASP163  |
| 1 | ARG1568 | GLU1235 |
| 1 | LYS181  | ASP205  |
| 1 | HIS36   | GLU105  |
| 1 | HIS70   | GLU77   |
| 1 | ARG372  | ASP369  |
| 1 | ARG38   | ASP46   |
| 1 | ARG59   | GLU201  |
| 1 | ARG113  | GLU136  |
| 1 | ARG100  | ASP30   |
| 1 | LYS833  | GLU185  |
| 1 | LYS2187 | ASP2188 |
| 1 | ARG81   | GLU83   |
| 1 | LYS208  | GLU210  |
| 1 | LYS46   | GLU36   |
| 1 | LYS87   | GLU294  |
| 1 | HIS97   | GLU50   |
| 1 | ARG301  | GLU293  |
| 1 | LYS240  | ASP208  |
| 1 | LYS108  | ASP170  |
| 1 | ARG189  | ASP185  |
| 1 | HIS230  | GLU181  |
| 1 | ARG438  | ASP396  |
| 1 | ARG157  | GLU155  |
| 1 | ARG157  | GLU154  |
| 1 | ARG338  | ASP386  |
| 1 | ARG79   | ASP85   |
| 1 | LYS269  | GLU347  |
| 1 | LYS35   | ASP32   |
| 1 | HIS113  | ASP115  |
| 1 | LYS52   | ASP55   |
| 1 | HIS60   | GLU46   |
| 1 | ARG147  | GLU135  |
| 1 | HIS44   | ASP34   |
| 1 | LYS38   | GLU85   |
| 1 | LYS227  | ASP225  |
| 1 | LYS201  | ASP30   |
| 1 | LYS156  | GLU463  |
| 1 | LYS170  | GLU83   |
| 1 | HIS129  | ASP61   |
| 1 | ARG265  | ASP231  |
| 1 | LYS147  | GLU145  |
| 1 | ARG94   | ASP123  |
| 1 | LYS174  | GLU220  |
| 1 | ARG522  | GLU401  |
| 1 | LYS504  | ASP368  |
| 1 | LYS212  | GLU208  |
| 1 | ARG538  | ASP394  |
| 1 | HIS56   | ASP54   |
| 1 | LYS219  | ASP52   |
| 1 | LYS165  | GLU246  |
| 1 | ARG329  | ASP386  |
| 1 | LYS412  | GLU409  |
| 1 | ARG480  | ASP99   |
| 1 | LYS46   | ASP47   |

|   |         |          |
|---|---------|----------|
| 1 | LYS131  | ASP128   |
| 1 | ARG77   | ASP61    |
| 1 | HIS31   | ASP100   |
| 1 | LYS52B  | ASP143   |
| 1 | ARG1    | GLU55    |
| 1 | LYS220  | ASP57    |
| 1 | ARG53   | GLU79    |
| 1 | HIS52   | GLU87    |
| 1 | ARG128  | ASP190   |
| 1 | ARG86   | ASP89    |
| 1 | ARG114  | ASP3     |
| 1 | LYS263  | GLU265   |
| 1 | LYS104  | GLU101   |
| 1 | ARG     | GLU357   |
| 1 | LYS172  | GLU116   |
| 1 | LYS313  | ASP314   |
| 1 | LYS58   | GLU4     |
| 1 | ARG454  | ASP411   |
| 1 | LYS1487 | GLU1091  |
| 1 | ARG1419 | GLU1100D |
| 1 | ARG454  | ASP408   |
| 1 | LYS210  | GLU      |
| 1 | LYS280  | GLU278   |
| 1 | LYS344  | GLU338   |
| 1 | ARG110  | GLU109   |
| 1 | ARG95G  | GLU218   |
| 1 | ARG107  | GLU83    |
| 1 | LYS68   | GLU107   |
| 1 | ARG68   | GLU85    |
| 1 | ARG78   | GLU80    |
| 1 | LYS97   | ASP252   |
| 1 | LYS107  | ASP169   |
| 1 | LYS159  | ASP156   |
| 1 | ARG403  | ASP118   |
| 1 | LYS92   | ASP28    |
| 1 | LYS684  | ASP652   |
| 1 | LYS201  | ASP92    |
| 1 | LYS162  | GLU78    |
| 1 | LYS220  | ASP245   |
| 1 | LYS164  | ASP160   |
| 1 | ARG307  | GLU314   |
| 1 | HIS34   | ASP50    |
| 1 | ARG277  | GLU97    |
| 1 | LYS140  | GLU75    |
| 1 | LYS25   | GLU28    |
| 1 | LYS502  | ASP664   |
| 1 | ARG113  | GLU58    |
| 1 | ARG73   | ASP38    |
| 1 | HIS147  | GLU97    |
| 1 | HIS170  | ASP141   |
| 1 | ARG476  | ASP31    |
| 1 | LYS103  | GLU128   |
| 1 | LYS207  | ASP70    |
| 1 | LYS14   | GLU27    |
| 1 | LYS2107 | ASP2169  |
| 1 | ARG248  | ASP224   |
| 1 | LYS27   | ASP54    |
| 1 | LYS103  | ASP      |

|   |         |         |
|---|---------|---------|
| 1 | ARG63   | ASP44   |
| 1 | LYS186  | ASP188  |
| 1 | ARG111  | ASP116  |
| 1 | ARG2142 | GLU2165 |
| 1 | ARG82   | ASP39   |
| 1 | ARG6    | GLU433  |
| 1 | LYS171  | ASP224  |
| 1 | LYS175  | ASP57   |
| 1 | LYS159  | ASP34   |
| 1 | LYS81   | GLU69   |
| 1 | HIS40   | ASP58   |
| 1 | HIS2189 | ASP2151 |
| 1 | LYS303  | ASP31   |
| 1 | ARG101  | ASP46   |
| 1 | ARG24   | GLU1555 |
| 1 | LYS840  | GLU838  |
| 1 | ARG190  | GLU48   |
| 1 | LYS129  | GLU122  |
| 1 | LYS126  | ASP123  |
| 1 | ARG95   | GLU173  |
| 1 | LYS1209 | GLU1123 |
| 1 | LYS365  | ASP364  |
| 1 | LYS43   | GLU42   |
| 1 | ARG107  | GLU194  |
| 1 | LYS45   | ASP102  |
| 1 | ARG56   | GLU153  |
| 1 | LYS26   | GLU5    |
| 1 | LYS118  | GLU117  |
| 1 | LYS110  | GLU199  |
| 1 | LYS138  | GLU212  |
| 1 | ARG3051 | ASP3078 |
| 1 | HIS31   | ASP96   |
| 1 | ARG458  | GLU454  |
| 1 | ARG304  | GLU302  |
| 1 | ARG405  | ASP115  |
| 1 | ARG53   | ASP81   |
| 1 | LYS78   | ASP52   |
| 1 | ARG2103 | GLU2079 |
| 1 | ARG38   | ASP91   |
| 1 | HIS467  | GLU95   |
| 1 | HIS467  | GLU94   |
| 1 | LYS148  | ASP56   |
| 1 | LYS862  | ASP526  |
| 1 | LYS148  | ASP55   |
| 1 | ARG252  | ASP224  |
| 1 | ARG237  | GLU184  |
| 1 | ARG63   | GLU71   |
| 1 | ARG98   | GLU1    |
| 1 | LYS76   | GLU10   |
| 1 | ARG50   | GLU58   |
| 1 | LYS26   | GLU232  |
| 1 | HIS205  | ASP201  |
| 1 | LYS99   | GLU91   |
| 1 | LYS99   | GLU93   |
| 1 | ARG7    | GLU9    |
| 1 | LYS1099 | ASP1010 |
| 1 | HIS247  | ASP249  |
| 1 | ARG546  | GLU467  |

|   |         |         |
|---|---------|---------|
| 1 | ARG46   | GLU95   |
| 1 | LYS223  | ASP128  |
| 1 | LYS17   | ASP75   |
| 1 | LYS100  | ASP97   |
| 1 | ARG438  | GLU427  |
| 1 | ARG85   | GLU61   |
| 1 | ARG188  | GLU187  |
| 1 | ARG1480 | ASP1477 |
| 1 | ARG94   | GLU100B |
| 1 | LYS2    | ASP92   |
| 1 | LYS251  | GLU72   |
| 1 | LYS108  | ASP32   |
| 1 | LYS615  | GLU624  |
| 1 | ARG53   | GLU8    |
| 1 | ARG158  | GLU188  |
| 1 | LYS125  | GLU130  |
| 1 | ARG368  | ASP429  |
| 1 | LYS     | ASP276  |
| 1 | ARG64   | ASP116  |
| 1 | LYS221  | ASP222  |
| 1 | LYS317  | ASP56   |
| 1 | ARG52   | ASP7    |
| 1 | LYS65   | GLU135  |
| 1 | LYS1201 | GLU10   |
| 1 | LYS151  | GLU154  |
| 1 | LYS191  | GLU362  |
| 1 | LYS174  | GLU128  |
| 1 | LYS146  | GLU104  |
| 1 | HIS29   | GLU113  |
| 1 | LYS43   | GLU91   |
| 1 | LYS80   | ASP71   |
| 1 | ARG114  | GLU116  |
| 1 | LYS378  | ASP388  |
| 1 | HIS35   | GLU99   |
| 1 | LYS75   | ASP30   |
| 1 | ARG102  | GLU40   |
| 1 | ARG99   | ASP98   |
| 1 | HIS196  | ASP141  |
| 1 | LYS186  | ASP195  |
| 1 | ARG71   | ASP31   |
| 1 | ARG907  | GLU187  |
| 1 | ARG125  | GLU101  |
| 1 | LYS388  | GLU422  |
| 1 | LYS153  | GLU40   |
| 1 | LYS149  | GLU128  |
| 1 | LYS229  | ASP124  |
| 1 | ARG35   | GLU43   |
| 1 | LYS106  | GLU121  |
| 1 | LYS50   | GLU230  |
| 1 | LYS290  | GLU342  |
| 1 | HIS173  | ASP167  |
| 1 | LYS131  | GLU128  |
| 1 | ARG60   | ASP56   |
| 1 | ARG40   | ASP89   |
| 1 | ARG634  | GLU630  |
| 1 | LYS294  | ASP290  |
| 1 | LYS141  | ASP142  |
| 1 | LYS98   | ASP52   |



|   |         |         |
|---|---------|---------|
| 1 | ARG25   | GLU46   |
| 1 | ARG32   | ASP100F |
| 1 | LYS1049 | GLU1095 |
| 1 | LYS96   | ASP32   |
| 1 | LYS169  | GLU171  |
| 1 | ARG166  | ASP167  |
| 1 | ARG74   | GLU78   |
| 1 | LYS56   | ASP7    |
| 1 | LYS825  | GLU781  |
| 1 | ARG377  | ASP379  |
| 1 | ARG99   | ASP91   |
| 1 | ARG122  | GLU119  |
| 1 | LYS278  | ASP274  |
| 1 | ARG403  | ASP115  |
| 1 | LYS55   | ASP170  |
| 1 | LYS77   | GLU222  |
| 1 | ARG507  | GLU511  |
| 1 | ARG323  | GLU311  |
| 1 | LYS174  | ASP121  |
| 1 | LYS188  | GLU123  |
| 1 | LYS102  | ASP104  |
| 1 | ARG403  | GLU433  |
| 1 | LYS366  | GLU362  |
| 1 | LYS38   | ASP92   |
| 1 | ARG430  | ASP425  |
| 1 | ARG303  | ASP373  |
| 1 | LYS108  | ASP53   |
| 1 | LYS112  | GLU265  |
| 1 | HIS32   | ASP96   |
| 1 | LYS220  | GLU127  |
| 1 | HIS253  | GLU119  |
| 1 | LYS296  | GLU68   |
| 1 | ARG78   | ASP61   |
| 1 | LYS149  | GLU193  |
| 1 | LYS69   | ASP70   |
| 1 | LYS139  | GLU143  |
| 1 | LYS211  | GLU128  |
| 1 | LYS107  | ASP110  |
| 1 | HIS197  | GLU198  |
| 1 | LYS104  | ASP133  |
| 1 | ARG50   | GLU53   |
| 1 | ARG103  | GLU121  |
| 1 | ARG169  | ASP257  |
| 1 | LYS208  | GLU     |
| 1 | LYS145  | GLU126  |
| 1 | ARG294  | GLU361  |
| 1 | LYS16   | ASP13   |
| 1 | LYS359  | GLU356  |
| 1 | LYS215  | GLU213  |
| 1 | LYS766  | ASP1    |
| 1 | ARG29   | ASP56   |
| 1 | HIS54   | GLU68   |
| 1 | ARG188  | GLU196  |
| 1 | LYS190  | ASP187  |
| 1 | ARG330  | ASP328  |
| 1 | LYS206  | GLU204  |
| 1 | LYS215  | GLU265  |
| 1 | LYS2036 | ASP2089 |

|   |         |         |
|---|---------|---------|
| 1 | HIS178  | ASP169  |
| 1 | ARG22   | GLU74   |
| 1 | ARG100  | ASP31   |
| 1 | ARG30   | GLU39   |
| 1 | ARG42   | GLU48   |
| 1 | ARG59   | GLU79   |
| 1 | HIS11   | ASP95   |
| 1 | LYS173  | ASP140  |
| 1 | LYS155  | ASP185  |
| 1 | ARG299  | ASP304  |
| 1 | LYS2153 | GLU2199 |
| 1 | LYS86   | GLU88   |
| 1 | LYS87   | GLU90   |
| 1 | LYS154  | ASP152  |
| 1 | ARG94   | GLU75   |
| 1 | LYS122  | GLU84   |
| 1 | HIS343  | GLU341  |
| 1 | LYS62   | GLU33   |
| 1 | HIS200  | GLU201  |
| 1 | ARG459  | GLU445  |
| 1 | LYS46   | GLU62   |
| 1 | LYS414  | GLU329  |
| 1 | ARG193  | ASP183  |
| 1 | LYS574  | ASP346  |
| 1 | ARG2215 | ASP101  |
| 1 | LYS3169 | ASP3214 |
| 1 | LYS218  | ASP121  |
| 1 | LYS220  | ASP222  |
| 1 | ARG198  | ASP204  |
| 1 | LYS88   | ASP54   |
| 1 | LYS46   | GLU33   |
| 1 | LYS218  | ASP85   |
| 1 | ARG311  | ASP86   |
| 1 | LYS155  | ASP152  |
| 1 | LYS132  | ASP150  |
| 1 | LYS166  | GLU320  |
| 1 | ARG173  | GLU363  |
| 1 | LYS233  | GLU533  |
| 1 | ARG8    | ASP4    |
| 1 | LYS58   | ASP116  |
| 1 | LYS301  | GLU296  |
| 1 | LYS156  | GLU81   |
| 1 | ARG74   | ASP77   |
| 1 | LYS149  | GLU293  |
| 1 | ARG79   | GLU77   |
| 1 | HIS56   | ASP60   |
| 1 | ARG99   | ASP60   |
| 1 | ARG101  | GLU103  |
| 1 | ARG148  | GLU171  |
| 1 | LYS67   | GLU361  |
| 1 | ARG185  | ASP147  |
| 1 | LYS55   | ASP57   |
| 1 | ARG180  | GLU210  |
| 1 | HIS145  | GLU148  |
| 1 | ARG82   | GLU354  |
| 1 | LYS156  | ASP157  |
| 1 | LYS104  | ASP166  |
| 1 | ARG91   | GLU92   |

|   |         |         |
|---|---------|---------|
| 1 | LYS181  | GLU186  |
| 1 | ARG102  | ASP52   |
| 1 | ARG212  | GLU164  |
| 1 | ARG2065 | GLU2083 |
| 1 | ARG164  | GLU174  |
| 1 | LYS39   | ASP46   |
| 1 | LYS209  | GLU126  |
| 1 | LYS60   | ASP100  |
| 1 | LYS19   | ASP18   |
| 1 | ARG49   | ASP71   |
| 1 | ARG120  | GLU146  |
| 1 | HIS164  | ASP168  |
| 1 | LYS364  | ASP52   |
| 1 | LYS158  | GLU220  |
| 1 | HIS173  | ASP174  |
| 1 | ARG158  | GLU166  |
| 1 | LYS238  | ASP291  |
| 1 | ARG2141 | GLU2100 |
| 1 | ARG171  | GLU4    |
| 1 | LYS225  | ASP121  |
| 1 | ARG2538 | ASP2590 |
| 1 | LYS108  | GLU105  |
| 1 | ARG98   | GLU39   |
| 1 | HIS100  | GLU98   |
| 1 | ARG146  | GLU109  |
| 1 | LYS217  | ASP207  |
| 1 | HIS106  | GLU6    |
| 1 | LYS310  | GLU308  |
| 1 | LYS7    | GLU232  |
| 1 | LYS55   | ASP6    |
| 1 | ARG104  | ASP122  |
| 1 | LYS     | GLU131  |
| 1 | HIS53   | GLU88   |
| 1 | LYS174  | ASP141  |
| 1 | ARG3141 | GLU2097 |
| 1 | LYS53   | GLU59   |
| 1 | HIS129  | ASP62   |
| 1 | LYS143  | ASP     |
| 1 | LYS30   | GLU100E |
| 1 | HIS112  | GLU202  |
| 1 | ARG285  | GLU282  |
| 1 | ARG1    | ASP51   |
| 1 | LYS36   | ASP88   |
| 1 | ARG104  | ASP95   |
| 1 | ARG141  | GLU142  |
| 1 | LYS64   | ASP1    |
| 1 | ARG52   | ASP33   |
| 1 | ARG394  | GLU375  |
| 1 | ARG212  | GLU217  |
| 1 | ARG104  | GLU100  |
| 1 | LYS365  | ASP362  |
| 1 | LYS312  | GLU345  |
| 1 | LYS465  | ASP53   |
| 1 | ARG18   | GLU218  |
| 1 | LYS228  | ASP230  |
| 1 | LYS33   | GLU63   |
| 1 | LYS173  | ASP170  |
| 1 | LYS192  | ASP217  |

|   |         |         |
|---|---------|---------|
| 1 | ARG31   | GLU103  |
| 1 | LYS215  | ASP189  |
| 1 | ARG59   | ASP16   |
| 1 | HIS66   | ASP96   |
| 1 | LYS117  | ASP144  |
| 1 | ARG198  | ASP142  |
| 1 | ARG131  | GLU422  |
| 1 | ARG27   | ASP23   |
| 1 | ARG56   | GLU81   |
| 1 | HIS1006 | ASP820  |
| 1 | ARG94   | GLU61   |
| 1 | ARG53   | GLU56   |
| 1 | LYS167  | ASP83   |
| 1 | ARG786  | GLU706  |
| 1 | HIS31   | GLU133  |
| 1 | HIS2245 | GLU2243 |
| 1 | LYS214  | GLU127  |
| 1 | LYS304  | GLU306  |
| 1 | LYS92   | ASP63   |
| 1 | LYS82   | ASP84   |
| 1 | ARG235  | GLU236  |
| 1 | LYS122  | GLU220  |
| 1 | LYS161  | ASP31   |
| 1 | ARG236  | ASP28   |
| 1 | LYS69   | GLU74   |
| 1 | LYS240  | ASP241  |
| 1 | HIS214  | GLU210  |
| 1 | HIS248  | GLU239  |
| 1 | HIS928  | ASP636  |
| 1 | HIS332  | ASP280  |
| 1 | ARG429  | ASP63   |
| 1 | ARG192  | ASP95   |
| 1 | ARG62   | GLU38   |
| 1 | LYS148  | ASP157  |
| 1 | LYS55   | GLU371  |
| 1 | LYS214  | GLU128  |
| 1 | ARG159  | ASP161  |
| 1 | LYS153  | GLU10   |
| 1 | ARG51   | ASP106  |
| 1 | LYS48   | GLU50   |
| 1 | ARG100  | ASP93   |
| 1 | ARG90   | GLU107  |
| 1 | LYS52   | ASP53   |
| 1 | LYS52   | ASP56   |
| 1 | LYS170  | GLU85   |
| 1 | ARG18   | GLU36   |
| 1 | LYS207  | GLU124  |
| 1 | LYS511  | GLU123  |
| 1 | ARG355  | GLU324  |
| 1 | ARG67   | GLU345  |
| 1 | HIS30   | ASP29   |
| 1 | LYS1267 | ASP1290 |
| 1 | ARG126  | ASP152  |
| 1 | HIS204  | ASP200  |
| 1 | ARG513  | GLU483  |
| 1 | LYS63   | ASP23   |
| 1 | LYS166  | GLU129  |
| 1 | ARG203  | ASP235  |

|   |         |         |
|---|---------|---------|
| 1 | LYS307  | GLU327  |
| 1 | ARG120  | ASP148  |
| 1 | LYS72   | GLU76   |
| 1 | ARG397  | ASP332  |
| 1 | LYS158  | GLU128  |
| 1 | ARG357  | ASP122  |
| 1 | LYS213  | ASP354  |
| 1 | HIS52   | ASP31G  |
| 1 | LYS23   | ASP50   |
| 1 | LYS310  | GLU376  |
| 1 | LYS186  | GLU183  |
| 1 | LYS201  | GLU10   |
| 1 | LYS210  | GLU128  |
| 1 | ARG103  | GLU146  |
| 1 | LYS133A | GLU131  |
| 1 | ARG366  | GLU370  |
| 1 | HIS76   | ASP100A |
| 1 | LYS290  | GLU281  |
| 1 | LYS391  | ASP388  |
| 1 | LYS205  | ASP149  |
| 1 | LYS185  | ASP182  |
| 1 | LYS108  | GLU88   |
| 1 | HIS209  | ASP221  |
| 1 | ARG255  | ASP31   |
| 1 | LYS50   | ASP100  |
| 1 | LYS683  | GLU911  |
| 1 | ARG645  | GLU350  |
| 1 | ARG447  | GLU442  |
| 1 | LYS1665 | GLU1704 |
| 1 | HIS170  | ASP172  |
| 1 | ARG159  | GLU158  |
| 1 | ARG2051 | ASP2078 |
| 1 | ARG96   | GLU59   |
| 1 | ARG96   | GLU56   |
| 1 | LYS39   | ASP100  |
| 1 | ARG625  | GLU561  |
| 1 | HIS2038 | ASP2603 |
| 1 | ARG100  | ASP69   |
| 1 | LYS357  | ASP461  |
| 1 | HIS495  | ASP32   |
| 1 | ARG153  | ASP115  |
| 1 | ARG269  | GLU89   |
| 1 | LYS165  | GLU162  |
| 1 | HIS184  | GLU216  |
| 1 | ARG337  | GLU341  |
| 1 | ARG63   | ASP112  |
| 1 | LYS182  | GLU81   |
| 1 | LYS50   | GLU99   |
| 1 | ARG198  | GLU118  |
| 1 | ARG33   | GLU32   |
| 1 | HIS403  | GLU401  |
| 1 | ARG100D | ASP100A |
| 1 | ARG1545 | GLU1250 |
| 1 | LYS44   | ASP105  |
| 1 | LYS2115 | ASP2014 |
| 1 | HIS45   | ASP43   |
| 1 | ARG1232 | GLU1210 |
| 1 | ARG46   | GLU48   |

|   |         |         |
|---|---------|---------|
| 1 | ARG871  | GLU920  |
| 1 | ARG435  | ASP506  |
| 1 | LYS223  | GLU125  |
| 1 | ARG20   | ASP15   |
| 1 | ARG192  | ASP154  |
| 1 | LYS75   | GLU85   |
| 1 | LYS52   | ASP48   |
| 1 | LYS1103 | GLU1083 |
| 1 | LYS67   | ASP57   |
| 1 | ARG350  | GLU370  |
| 1 | LYS209  | ASP123  |
| 1 | LYS207  | GLU133  |
| 1 | LYS220  | ASP127  |
| 1 | LYS172  | ASP129  |
| 1 | HIS15   | GLU14   |
| 1 | LYS538  | ASP590  |
| 1 | LYS165  | GLU216  |
| 1 | LYS381  | ASP254  |
| 1 | LYS129  | ASP127  |
| 1 | LYS213  | ASP181  |
| 1 | ARG54   | GLU321  |
| 1 | LYS21   | ASP69   |
| 1 | LYS42   | GLU44   |
| 1 | LYS885  | GLU887  |
| 1 | LYS238  | GLU293  |
| 1 | LYS54   | ASP51   |
| 1 | LYS115  | ASP173  |
| 1 | LYS145  | GLU152  |
| 1 | ARG169  | GLU268  |
| 1 | ARG77   | GLU99   |
| 1 | ARG29   | GLU50   |
| 1 | LYS592  | GLU610  |
| 1 | LYS697  | GLU399  |
| 1 | HIS     | GLU97   |
| 1 | HIS409  | ASP108  |
| 1 | LYS419  | GLU420  |
| 1 | LYS212  | GLU122  |
| 1 | HIS4    | ASP98   |
| 1 | HIS3246 | ASP3147 |
| 1 | LYS1107 | GLU869  |
| 1 | LYS210  | GLU124  |
| 1 | LYS107  | ASP867  |
| 1 | ARG283  | ASP355  |
| 1 | LYS806  | GLU808  |
| 1 | LYS1565 | ASP1562 |
| 1 | ARG356  | ASP300  |
| 1 | HIS102  | ASP111  |
| 1 | HIS381  | ASP375  |
| 1 | HIS52A  | ASP33   |
| 1 | ARG308  | ASP285  |
| 1 | ARG926  | ASP639  |
| 1 | LYS175  | GLU176  |
| 1 | LYS260  | GLU233  |
| 1 | LYS344  | GLU290  |
| 1 | HIS115  | GLU112  |
| 1 | LYS171  | ASP156  |
| 1 | LYS63   | ASP60   |
| 1 | HIS170  | ASP167  |

|   |         |         |
|---|---------|---------|
| 1 | LYS13   | ASP42   |
| 1 | HIS164  | GLU139  |
| 1 | ARG50   | GLU23   |
| 1 | LYS1833 | GLU17   |
| 1 | LYS219  | GLU131  |
| 1 | ARG56   | GLU99   |
| 1 | ARG145  | ASP136  |
| 1 | ARG27D  | ASP70   |
| 1 | ARG41   | ASP70   |
| 1 | ARG87   | GLU63   |
| 1 | ARG168  | GLU154  |
| 1 | LYS43   | GLU36   |
| 1 | LYS0    | ASP1056 |
| 1 | LYS154  | ASP98   |
| 1 | ARG97   | ASP100A |
| 1 | LYS67   | ASP56   |
| 1 | LYS72   | GLU70   |
| 1 | HIS420  | ASP396  |
| 1 | ARG58   | ASP65   |
| 1 | ARG188  | ASP185  |
| 1 | ARG26   | ASP46   |
| 1 | LYS201  | ASP52   |
| 1 | LYS1007 | ASP1010 |
| 1 | LYS61   | GLU44   |
| 1 | ARG58   | GLU56   |
| 1 | HIS215  | GLU216  |
| 1 | LYS317  | ASP57   |
| 1 | ARG349  | GLU269  |
| 1 | ARG180  | GLU396  |
| 1 | ARG103  | GLU61   |
| 1 | ARG587  | ASP590  |
| 1 | LYS189  | ASP151  |
| 1 | LYS167  | GLU164  |
| 1 | HIS171  | ASP141  |
| 1 | LYS1538 | ASP1590 |
| 1 | ARG23   | ASP19   |
| 1 | ARG43   | GLU15   |
| 1 | LYS174  | ASP160  |
| 1 | ARG103  | ASP49   |
| 1 | LYS23   | GLU121  |
| 1 | LYS485  | ASP493  |
| 1 | HIS134  | ASP98   |
| 1 | LYS81   | GLU117  |
| 1 | HIS90   | ASP93   |
| 1 | LYS88   | GLU81   |
| 1 | ARG363  | ASP359  |
| 1 | LYS67   | GLU80   |
| 1 | ARG33   | ASP53   |
| 1 | HIS193  | ASP156  |
| 1 | LYS1097 | GLU1275 |
| 1 | HIS223  | GLU212  |
| 1 | ARG216  | GLU214  |
| 1 | LYS476  | GLU472  |
| 1 | LYS1143 | ASP1144 |
| 1 | HIS123  | ASP121  |
| 1 | ARG76   | ASP73   |
| 1 | LYS304  | ASP31   |
| 1 | LYS101  | GLU1    |

|   |         |         |
|---|---------|---------|
| 1 | ARG106  | GLU108  |
| 1 | ARG122  | ASP120  |
| 1 | ARG95   | ASP254  |
| 1 | ARG39   | ASP37   |
| 1 | LYS161  | GLU165  |
| 1 | ARG     | ASP134  |
| 1 | LYS1094 | GLU2015 |
| 1 | HIS102  | GLU1    |
| 1 | LYS114  | GLU93   |
| 1 | LYS115  | GLU220  |
| 1 | LYS366  | GLU320  |
| 1 | ARG816  | ASP820  |
| 1 | LYS209  | GLU     |
| 1 | ARG186  | GLU194  |
| 1 | ARG449  | GLU452  |
| 1 | ARG1561 | ASP1548 |
| 1 | LYS113  | GLU123  |
| 1 | LYS222  | GLU204  |
| 1 | LYS91   | GLU97   |
| 1 | ARG728  | ASP729  |
| 1 | ARG328  | ASP325  |
| 1 | LYS333  | GLU367  |
| 1 | LYS60   | GLU1    |
| 1 | HIS143  | GLU106  |
| 1 | LYS228  | ASP122  |
| 1 | ARG53   | ASP648  |
| 1 | LYS417  | ASP415  |
| 1 | LYS165  | GLU80   |
| 1 | LYS171  | ASP169  |
| 1 | LYS1121 | GLU1429 |
| 1 | HIS1089 | ASP1051 |
| 1 | LYS144  | ASP142  |
| 1 | ARG340  | GLU389  |
| 1 | ARG50   | ASP52   |
| 1 | LYS225  | GLU229  |
| 1 | HIS100C | ASP100B |
| 1 | ARG     | ASP53   |
| 1 | LYS15   | GLU61   |
| 1 | ARG127  | GLU118  |
| 1 | ARG469  | ASP456  |
| 1 | LYS32   | GLU30   |
| 1 | HIS234  | ASP97   |
| 1 | LYS369  | GLU371  |
| 1 | LYS183  | ASP228  |
| 1 | LYS574  | ASP348  |
| 1 | LYS62   | ASP60   |
| 1 | ARG2105 | GLU2107 |
| 1 | ARG3    | ASP59   |
| 1 | LYS52   | ASP78   |
| 1 | LYS3115 | ASP3014 |
| 1 | HIS169  | ASP168  |
| 1 | ARG96   | GLU80   |
| 1 | ARG242  | GLU228  |
| 1 | ARG613  | GLU610  |
| 1 | HIS174  | GLU65   |
| 1 | LYS2039 | GLU2087 |
| 1 | ARG107  | GLU106  |
| 1 | HIS2246 | ASP2147 |



|   |         |         |
|---|---------|---------|
| 1 | LYS145  | ASP93   |
| 1 | HIS67   | GLU50   |
| 1 | LYS143  | ASP173  |
| 1 | ARG188  | ASP151  |
| 1 | LYS39   | ASP1    |
| 1 | ARG62   | GLU63   |
| 1 | ARG173  | GLU169  |
| 1 | ARG83   | ASP72   |
| 1 | ARG55   | ASP117  |
| 1 | LYS190  | GLU186  |
| 1 | ARG212  | GLU210  |
| 1 | ARG56   | GLU64   |
| 1 | ARG31   | GLU106  |
| 1 | ARG192  | ASP194  |
| 1 | LYS181  | ASP180  |
| 1 | HIS36   | ASP154  |
| 1 | HIS26   | ASP146  |
| 1 | LYS133  | GLU128  |
| 1 | ARG212  | ASP210  |
| 1 | LYS68   | GLU50   |
| 1 | LYS16   | ASP132  |
| 1 | ARG9    | GLU6    |
| 1 | LYS35   | GLU156  |
| 1 | LYS404  | GLU292  |
| 1 | LYS108  | GLU58   |
| 1 | LYS2231 | GLU2229 |
| 1 | LYS48   | GLU69   |
| 1 | ARG612  | GLU609  |
| 1 | LYS48   | GLU62   |
| 1 | LYS211  | ASP122  |
| 1 | LYS50   | ASP106  |
| 1 | ARG2587 | GLU2589 |
| 1 | HIS3    | GLU333  |
| 1 | HIS653  | GLU649  |
| 1 | ARG31   | ASP37   |
| 1 | ARG163  | ASP177  |
| 1 | LYS198  | GLU196  |
| 1 | LYS615  | GLU698  |
| 1 | ARG202  | GLU229  |
| 1 | LYS564  | GLU366  |
| 1 | ARG94   | GLU50   |
| 1 | HIS53   | GLU36   |
| 1 | ARG82   | GLU102  |
| 1 | ARG403  | GLU432  |
| 1 | LYS375  | GLU400  |
| 1 | LYS41   | GLU175  |
| 1 | LYS38   | ASP85   |
| 1 | LYS161  | GLU154  |
| 1 | LYS93   | GLU533  |
| 1 | LYS260  | GLU239  |
| 1 | LYS132  | GLU219  |
| 1 | LYS11   | GLU9    |
| 1 | LYS2169 | ASP2214 |
| 1 | LYS151  | GLU191  |
| 1 | LYS45   | GLU97   |
| 1 | ARG488  | GLU485  |
| 1 | HIS35   | GLU80   |
| 1 | ARG802  | ASP526  |

|   |         |         |
|---|---------|---------|
| 1 | LYS1188 | ASP1185 |
| 1 | LYS107  | GLU85   |
| 1 | LYS203  | ASP147  |
| 1 | LYS189  | GLU155  |
| 1 | ARG348  | ASP307  |
| 1 | ARG206  | GLU182  |
| 1 | ARG497  | GLU510  |
| 1 | ARG56   | ASP76   |
| 1 | ARG3141 | GLU3100 |
| 1 | ARG56   | ASP100  |
| 1 | LYS443  | ASP51   |
| 1 | ARG402  | GLU373  |
| 1 | LYS293  | GLU288  |
| 1 | HIS168  | ASP167  |
| 1 | HIS33   | ASP52   |
| 1 | ARG134  | GLU165  |
| 1 | LYS63   | GLU64   |
| 1 | ARG428  | GLU425  |
| 1 | HIS111  | GLU108  |
| 1 | LYS250  | ASP179  |
| 1 | ARG29   | ASP259  |
| 1 | LYS27   | ASP26   |
| 1 | LYS27   | ASP25   |
| 1 | ARG6    | ASP440  |
| 1 | LYS1163 | ASP1158 |
| 1 | HIS190  | GLU59   |

Table 3: Counting of side chain salt bridging networks within the PDB entries of all experimentally determined antigen-antibody-related structures. In this table, the residue naming scheme is **Chain ID\_residue name\_residue number**.

| Count | Residue A | Residue B |
|-------|-----------|-----------|
| 178   | ARG76     | GLU74     |
| 173   | LYS209    | GLU123    |
| 88    | ARG542    | GLU647    |
| 88    | ARG59     | ASP368    |
| 83    | ARG163    | GLU131    |
| 80    | LYS208    | GLU123    |
| 80    | ARG71     | ASP368    |
| 75    | ARG109    | GLU67     |
| 74    | ARG170    | GLU128    |
| 72    | LYS62     | ASP90     |
| 72    | ARG76     | GLU81     |
| 72    | LYS62     | ASP86     |
| 70    | ARG54     | GLU97     |
| 68    | LYS27     | GLU97     |
| 66    | ARG124    | GLU132    |
| 60    | ARG269    | GLU67     |
| 59    | LYS310    | ASP90     |
| 56    | ARG96     | GLU98     |
| 54    | LYS221    | GLU123    |
| 52    | ARG       | GLU       |
| 52    | LYS238    | GLU72     |
| 52    | LYS214    | GLU123    |
| 49    | ARG579    | GLU584    |

|    |         |         |
|----|---------|---------|
| 47 | ARG95   | ASP95   |
| 46 | ARG225  | ASP190  |
| 44 | ARG96   | ASP100C |
| 43 | LYS326  | GLU15   |
| 43 | LYS574  | ASP107  |
| 42 | LYS     | GLU     |
| 38 | ARG     | ASP     |
| 38 | LYS174  | ASP164  |
| 37 | LYS97   | ASP99   |
| 36 | ARG77   | ASP102  |
| 36 | ARG127  | GLU131  |
| 35 | ARG1059 | ASP368  |
| 34 | HIS681  | ASP910  |
| 33 | ARG123  | GLU132  |
| 31 | LYS299  | GLU69   |
| 31 | ARG208  | GLU101  |
| 30 | ARG576  | GLU574  |
| 30 | ARG112  | ASP141  |
| 30 | ARG73   | ASP61   |
| 30 | HIS164  | ASP167  |
| 29 | LYS97   | ASP32   |
| 28 | LYS143  | GLU124  |
| 27 | ARG1113 | GLU1105 |
| 27 | ARG95   | ASP91   |
| 27 | ARG542  | ASP648  |
| 26 | LYS310  | ASP86   |
| 25 | ARG30   | ASP355  |
| 25 | ARG758  | ASP740  |
| 24 | LYS214  | ASP122  |
| 24 | ARG503  | GLU654  |
| 24 | ARG96   | GLU55   |
| 24 | ARG96   | GLU50   |
| 24 | LYS643  | ASP5    |
| 24 | ARG96   | ASP50   |
| 24 | ARG164  | ASP166  |
| 23 | ARG419  | GLU100B |
| 23 | LYS209  | GLU125  |
| 23 | LYS     | ASP     |
| 23 | ARG311  | ASP590  |
| 22 | ARG48   | ASP53   |
| 22 | ARG95A  | ASP61   |
| 22 | LYS215  | GLU123  |
| 22 | ARG106  | GLU569  |
| 22 | ARG65   | ASP52   |
| 22 | ARG24   | ASP70   |
| 21 | ARG53   | ASP659  |
| 20 | ARG91   | GLU95   |
| 20 | ARG96   | GLU95   |
| 20 | ARG311  | ASP586  |
| 20 | LYS210  | GLU123  |
| 20 | HIS64   | ASP79   |
| 19 | ARG100  | GLU55   |
| 19 | LYS305  | ASP54   |
| 19 | ARG95   | ASP5    |
| 19 | ARG419  | GLU3103 |
| 19 | LYS213  | GLU122  |
| 18 | LYS144  | GLU142  |
| 18 | ARG24   | GLU17   |

|    |         |         |
|----|---------|---------|
| 18 | ARG91   | GLU100J |
| 18 | ARG25   | GLU325  |
| 18 | LYS209  | GLU124  |
| 18 | LYS46   | ASP636  |
| 17 | ARG61   | GLU466  |
| 17 | LYS207  | GLU127  |
| 17 | ARG50   | ASP98   |
| 16 | ARG52   | GLU179  |
| 16 | ARG847  | ASP726  |
| 16 | ARG96   | GLU1183 |
| 16 | ARG61   | ASP59   |
| 16 | LYS97   | ASP100B |
| 15 | LYS3224 | GLU2125 |
| 15 | ARG419  | GLU99   |
| 15 | LYS409  | ASP399  |
| 14 | ARG304  | ASP34   |
| 14 | LYS215  | GLU126  |
| 14 | LYS558  | GLU597  |
| 14 | ARG216  | GLU123  |
| 14 | LYS58   | GLU97   |
| 14 | ARG35   | ASP53   |
| 13 | ARG96   | GLU298  |
| 13 | LYS143  | GLU125  |
| 13 | ARG35   | ASP332  |
| 13 | LYS219  | GLU123  |
| 13 | ARG138  | GLU214  |
| 13 | ARG109  | GLU69   |
| 12 | LYS290  | GLU128  |
| 12 | ARG100  | ASP52   |
| 12 | ARG585  | GLU492  |
| 12 | ARG310  | ASP90   |
| 12 | LYS500  | ASP664  |
| 12 | LYS643  | GLU4    |
| 12 | LYS149  | GLU137  |
| 12 | LYS601  | GLU654  |
| 12 | ARG101  | GLU99   |
| 12 | LYS218  | GLU127  |
| 12 | ARG98   | ASP67   |
| 12 | ARG46   | ASP101  |
| 12 | ARG95   | GLU179  |
| 12 | LYS83   | ASP85   |
| 12 | ARG192  | ASP167  |
| 12 | ARG606  | ASP609  |
| 12 | ARG576  | GLU104  |
| 12 | ARG588  | GLU492  |
| 12 | ARG1179 | ASP31   |
| 12 | ARG500  | GLU30   |
| 12 | ARG69   | GLU55   |
| 12 | LYS46   | ASP632  |
| 11 | LYS253  | ASP232  |
| 11 | LYS208  | GLU122  |
| 11 | LYS222  | GLU125  |
| 11 | LYS601  | GLU657  |
| 11 | LYS29   | ASP279  |
| 11 | LYS213  | GLU123  |
| 11 | LYS212  | GLU129  |
| 11 | ARG107  | GLU78   |
| 10 | ARG213  | GLU123  |

|    |         |         |
|----|---------|---------|
| 10 | LYS187  | GLU114  |
| 10 | ARG61   | GLU79   |
| 10 | ARG700  | GLU756  |
| 10 | LYS305  | ASP56   |
| 10 | HIS80   | ASP144  |
| 10 | HIS198  | GLU57   |
| 10 | ARG73   | GLU86   |
| 10 | ARG353  | ASP112  |
| 10 | LYS6    | ASP54   |
| 10 | LYS211  | GLU123  |
| 10 | ARG64   | ASP457  |
| 10 | ARG88   | ASP101  |
| 9  | ARG96   | ASP97   |
| 9  | ARG192  | GLU164  |
| 9  | ARG146  | GLU169  |
| 9  | LYS583  | ASP585  |
| 9  | LYS35   | ASP457  |
| 9  | ARG87   | ASP90   |
| 9  | ARG104  | GLU599  |
| 9  | LYS109  | GLU69   |
| 9  | HIS3    | GLU9    |
| 9  | ARG95A  | GLU350  |
| 9  | LYS282  | ASP114  |
| 9  | ARG23   | GLU30   |
| 9  | ARG327  | GLU100I |
| 9  | LYS1029 | ASP279  |
| 9  | ARG68   | GLU50   |
| 9  | ARG112  | ASP93   |
| 9  | ARG72   | ASP368  |
| 9  | ARG64   | ASP94   |
| 9  | LYS212  | GLU126  |
| 9  | ARG73   | ASP59   |
| 9  | ARG504  | GLU662  |
| 9  | ARG504  | GLU657  |
| 9  | ARG45   | ASP105  |
| 9  | LYS61   | GLU179  |
| 8  | LYS44   | ASP86   |
| 8  | HIS36   | ASP104  |
| 8  | ARG73   | GLU74   |
| 8  | ARG134  | ASP55   |
| 8  | ARG96   | GLU94   |
| 8  | ARG253  | ASP53   |
| 8  | ARG100  | GLU59   |
| 8  | ARG419  | GLU100D |
| 8  | LYS52   | ASP448  |
| 8  | LYS79   | ASP50   |
| 8  | ARG52   | GLU178  |
| 8  | LYS684  | ASP1056 |
| 8  | LYS282  | ASP100C |
| 8  | ARG94   | GLU53   |
| 8  | ARG120  | GLU64   |
| 8  | LYS208  | GLU124  |
| 8  | LYS48   | GLU32   |
| 8  | ARG94   | GLU191  |
| 8  | LYS215  | GLU127  |
| 8  | LYS217  | GLU123  |
| 8  | LYS68   | GLU110  |
| 8  | ARG101  | ASP109  |

|   |         |        |
|---|---------|--------|
| 8 | HIS181  | GLU10  |
| 8 | ARG210  | ASP412 |
| 8 | ARG100B | GLU55  |
| 8 | HIS60   | GLU1   |
| 8 | ARG116  | GLU120 |
| 8 | ARG419  | GLU214 |
| 8 | ARG45   | GLU50  |
| 8 | LYS216  | GLU125 |
| 8 | ARG112  | ASP143 |
| 8 | ARG97   | ASP50  |
| 8 | ARG29   | ASP6   |
| 8 | ARG96   | ASP204 |
| 8 | ARG98   | ASP341 |
| 8 | ARG72   | GLU10  |
| 8 | ARG95   | ASP99  |
| 8 | ARG194  | ASP102 |
| 8 | ARG69   | GLU35  |
| 8 | ARG101  | ASP49  |
| 8 | ARG57   | GLU50  |
| 8 | ARG542  | GLU95  |
| 8 | HIS98   | GLU214 |
| 8 | LYS92   | GLU99  |
| 8 | ARG25   | ASP4   |
| 8 | LYS413  | ASP100 |
| 8 | LYS54   | GLU89  |
| 8 | ARG164  | ASP167 |
| 8 | LYS433  | ASP54  |
| 8 | ARG95B  | ASP58  |
| 8 | ARG5    | GLU39  |
| 8 | ARG408  | ASP224 |
| 8 | LYS219  | GLU129 |
| 8 | LYS10   | GLU29  |
| 8 | ARG104  | GLU81  |
| 8 | LYS370  | GLU357 |
| 8 | LYS12   | ASP54  |
| 8 | ARG95   | ASP114 |
| 8 | ARG50   | GLU47  |
| 8 | LYS97   | ASP221 |
| 7 | LYS214  | ASP124 |
| 7 | ARG95   | ASP104 |
| 7 | HIS98   | GLU50  |
| 7 | ARG73   | ASP93  |
| 7 | ARG53   | GLU654 |
| 7 | LYS208  | GLU129 |
| 7 | LYS137  | ASP51  |
| 7 | ARG370  | GLU188 |
| 7 | LYS63   | ASP1   |
| 7 | ARG31   | ASP86  |
| 7 | LYS217  | GLU126 |
| 7 | ARG29   | ASP36  |
| 7 | LYS209  | GLU127 |
| 7 | LYS216  | GLU122 |
| 7 | ARG95   | ASP3   |
| 7 | ARG53   | ASP232 |
| 7 | ARG353  | GLU110 |
| 7 | ARG235  | GLU232 |
| 7 | ARG76   | GLU107 |
| 7 | ARG103  | GLU217 |

|   |         |         |
|---|---------|---------|
| 7 | HIS100  | GLU87   |
| 7 | LYS61   | GLU57   |
| 7 | LYS95   | ASP7    |
| 7 | ARG163  | GLU1    |
| 7 | LYS212  | GLU123  |
| 7 | LYS697  | ASP332  |
| 7 | ARG91   | GLU50   |
| 7 | ARG29   | ASP107  |
| 7 | ARG58   | GLU3    |
| 7 | ARG45   | ASP104  |
| 7 | LYS107  | ASP9    |
| 6 | ARG39   | GLU81   |
| 6 | ARG39   | GLU85   |
| 6 | ARG156  | ASP3    |
| 6 | LYS100A | GLU55   |
| 6 | LYS178  | ASP96   |
| 6 | LYS107  | ASP105  |
| 6 | HIS171  | ASP171  |
| 6 | ARG50   | GLU269  |
| 6 | HIS223  | GLU82   |
| 6 | ARG73   | ASP71   |
| 6 | LYS137  | ASP73   |
| 6 | ARG100  | ASP60   |
| 6 | ARG50   | GLU200  |
| 6 | LYS684  | ASP1054 |
| 6 | ARG220  | ASP241  |
| 6 | LYS90   | ASP51   |
| 6 | LYS46   | GLU632  |
| 6 | HIS192  | ASP98   |
| 6 | LYS17   | ASP55   |
| 6 | LYS197  | GLU57   |
| 6 | LYS209  | GLU122  |
| 6 | LYS407  | GLU5    |
| 6 | LYS87   | ASP31   |
| 6 | LYS196  | ASP489  |
| 6 | HIS169  | ASP167  |
| 6 | LYS216  | GLU123  |
| 6 | LYS71   | GLU87   |
| 6 | ARG78   | ASP94   |
| 6 | LYS87   | GLU47   |
| 6 | ARG95   | ASP7    |
| 6 | ARG95   | GLU100E |
| 6 | ARG99   | GLU55   |
| 6 | ARG103  | GLU230  |
| 6 | ARG52A  | ASP674  |
| 6 | ARG94   | ASP321A |
| 6 | HIS173  | ASP141  |
| 6 | ARG429  | ASP74   |
| 6 | ARG62   | GLU26   |
| 6 | ARG100H | ASP91   |
| 6 | ARG54   | GLU6    |
| 6 | LYS6    | ASP56   |
| 6 | ARG91   | ASP22   |
| 6 | ARG95   | GLU50   |
| 6 | LYS36   | GLU98   |
| 6 | ARG1212 | GLU1183 |
| 6 | ARG50   | ASP94   |
| 6 | LYS58   | ASP3    |

|   |         |         |
|---|---------|---------|
| 6 | ARG193  | ASP184  |
| 6 | ARG96   | GLU54   |
| 6 | LYS432  | GLU55   |
| 6 | LYS100H | ASP50   |
| 6 | ARG101  | ASP50   |
| 6 | HIS585  | GLU492  |
| 6 | LYS116  | ASP203  |
| 6 | LYS34   | ASP612  |
| 6 | LYS6    | GLU232  |
| 6 | ARG37   | GLU101  |
| 6 | LYS213  | GLU127  |
| 6 | ARG60   | GLU74   |
| 6 | LYS213  | GLU124  |
| 6 | LYS289  | GLU128  |
| 6 | LYS31A  | GLU87   |
| 5 | ARG98   | ASP31   |
| 5 | ARG108  | ASP1    |
| 5 | ARG315  | GLU95   |
| 5 | ARG309  | GLU255  |
| 5 | ARG100  | ASP43   |
| 5 | ARG307  | ASP90   |
| 5 | ARG1050 | ASP683  |
| 5 | ARG18   | ASP70   |
| 5 | LYS206  | GLU122  |
| 5 | LYS13   | ASP154  |
| 5 | ARG9    | ASP368  |
| 5 | HIS172  | ASP167  |
| 5 | LYS224  | GLU143  |
| 5 | ARG100F | ASP50   |
| 5 | LYS129  | ASP144  |
| 5 | ARG281  | ASP111  |
| 5 | ARG419  | GLU106  |
| 5 | ARG69   | ASP108  |
| 5 | LYS222  | ASP123  |
| 5 | LYS32   | GLU57   |
| 5 | LYS216  | GLU128  |
| 5 | HIS308  | GLU98   |
| 5 | LYS45   | ASP101  |
| 5 | LYS223  | ASP126  |
| 5 | LYS568  | GLU107  |
| 5 | ARG105  | GLU64   |
| 5 | ARG111  | GLU68   |
| 5 | ARG327  | ASP1    |
| 5 | ARG49   | ASP368  |
| 5 | LYS470  | GLU60   |
| 5 | ARG51   | ASP101  |
| 5 | LYS207  | GLU128  |
| 5 | ARG58   | ASP94   |
| 5 | LYS416  | ASP51   |
| 5 | LYS49   | ASP101  |
| 5 | ARG19   | ASP97   |
| 5 | LYS97   | ASP154  |
| 5 | LYS94   | ASP97   |
| 5 | ARG164  | ASP169  |
| 5 | ARG114  | ASP115  |
| 5 | HIS31   | GLU100I |
| 5 | ARG30   | ASP658  |
| 5 | ARG106  | ASP109  |



|   |         |         |
|---|---------|---------|
| 5 | LYS130  | ASP144  |
| 5 | LYS508  | GLU123  |
| 5 | LYS12   | ASP56   |
| 5 | HIS168  | ASP166  |
| 4 | LYS149  | ASP41   |
| 4 | ARG1568 | GLU1250 |
| 4 | LYS215  | ASP122  |
| 4 | LYS28   | GLU380  |
| 4 | LYS28   | GLU382  |
| 4 | ARG100  | GLU64   |
| 4 | ARG96   | ASP94   |
| 4 | LYS147  | GLU127  |
| 4 | HIS105  | ASP183  |
| 4 | ARG4    | ASP385  |
| 4 | LYS96   | ASP52   |
| 4 | LYS96   | ASP55   |
| 4 | LYS43   | ASP9    |
| 4 | ARG384  | GLU81   |
| 4 | LYS76   | ASP11   |
| 4 | ARG200  | ASP56   |
| 4 | ARG104  | GLU111  |
| 4 | ARG168  | ASP100L |
| 4 | LYS50   | GLU93   |
| 4 | HIS102  | GLU64   |
| 4 | ARG95   | GLU34   |
| 4 | ARG124  | ASP132  |
| 4 | LYS39   | GLU40   |
| 4 | ARG54   | ASP161  |
| 4 | HIS755  | ASP730  |
| 4 | ARG659  | GLU242  |
| 4 | LYS166  | GLU146  |
| 4 | LYS63   | ASP89   |
| 4 | ARG83   | GLU1    |
| 4 | ARG339  | ASP100  |
| 4 | ARG97   | ASP436  |
| 4 | ARG67   | GLU97   |
| 4 | LYS76   | GLU122  |
| 4 | HIS19   | GLU50   |
| 4 | LYS205  | GLU123  |
| 4 | LYS224  | GLU125  |
| 4 | HIS264  | GLU241  |
| 4 | ARG50   | ASP100G |
| 4 | HIS15   | ASP55   |
| 4 | ARG145  | GLU116  |
| 4 | ARG9    | ASP137  |
| 4 | ARG1009 | ASP1368 |
| 4 | ARG94   | GLU1    |
| 4 | ARG96   | GLU100I |
| 4 | LYS62   | GLU1    |
| 4 | HIS172  | ASP172  |
| 4 | LYS49   | ASP100A |
| 4 | LYS253  | GLU128  |
| 4 | LYS208  | GLU128  |
| 4 | ARG25   | GLU82   |
| 4 | LYS203  | ASP32   |
| 4 | ARG2215 | ASP100  |
| 4 | LYS215  | GLU121  |
| 4 | HIS90   | ASP33   |

|   |         |         |
|---|---------|---------|
| 4 | LYS150  | GLU127  |
| 4 | ARG226  | ASP31   |
| 4 | ARG61   | ASP33   |
| 4 | ARG52   | ASP107  |
| 4 | ARG12   | ASP242  |
| 4 | ARG668  | GLU350  |
| 4 | LYS215  | GLU128  |
| 4 | LYS215  | GLU125  |
| 4 | LYS215  | GLU124  |
| 4 | ARG209  | GLU128  |
| 4 | HIS0    | GLU97   |
| 4 | LYS217  | GLU129  |
| 4 | LYS653  | ASP17   |
| 4 | LYS17   | ASP57   |
| 4 | LYS169  | GLU81   |
| 4 | ARG2519 | ASP2834 |
| 4 | ARG49   | ASP7    |
| 4 | ARG220  | ASP105  |
| 4 | HIS106  | GLU35   |
| 4 | HIS96   | ASP5    |
| 4 | ARG32   | ASP80   |
| 4 | ARG327  | GLU27   |
| 4 | LYS4    | ASP54   |
| 4 | ARG1519 | ASP1834 |
| 4 | LYS119  | ASP54   |
| 4 | ARG457  | ASP31E  |
| 4 | LYS502  | GLU50   |
| 4 | ARG96   | GLU101  |
| 4 | LYS204  | ASP206  |
| 4 | LYS216  | GLU127  |
| 4 | LYS216  | GLU124  |
| 4 | LYS80   | GLU81   |
| 4 | LYS109  | GLU44   |
| 4 | LYS185  | ASP55   |
| 4 | ARG58   | ASP95D  |
| 4 | LYS697  | ASP399  |
| 4 | ARG35   | ASP334  |
| 4 | LYS312  | ASP56   |
| 4 | LYS312  | ASP54   |
| 4 | HIS189  | GLU85   |
| 4 | LYS168  | GLU78   |
| 4 | HIS33   | ASP105  |
| 4 | ARG222  | GLU123  |
| 4 | LYS170  | ASP54   |
| 4 | HIS55   | ASP143  |
| 4 | ARG59   | GLU221  |
| 4 | ARG170  | GLU1    |
| 4 | LYS2    | ASP42   |
| 4 | LYS131  | GLU269  |
| 4 | LYS439  | GLU356  |
| 4 | ARG106  | GLU69   |
| 4 | LYS21   | GLU202  |
| 4 | ARG101  | GLU39   |
| 4 | HIS223  | ASP123  |
| 4 | LYS171  | ASP288  |
| 4 | LYS211  | GLU121  |
| 4 | LYS282  | GLU33   |
| 4 | LYS27   | ASP1    |

|   |         |         |
|---|---------|---------|
| 4 | ARG131  | GLU142  |
| 4 | ARG98   | ASP95   |
| 4 | ARG54   | GLU101  |
| 4 | LYS214  | GLU125  |
| 4 | LYS207  | GLU122  |
| 4 | ARG11   | GLU99   |
| 4 | LYS97   | GLU50   |
| 4 | ARG54   | ASP50   |
| 4 | LYS220  | GLU128  |
| 4 | LYS114  | ASP50   |
| 4 | LYS114  | ASP51   |
| 4 | HIS35   | ASP4    |
| 4 | LYS32   | ASP58   |
| 4 | ARG50   | GLU39   |
| 4 | HIS49   | ASP101  |
| 4 | ARG100  | ASP66A  |
| 4 | LYS55   | ASP101  |
| 4 | LYS55   | ASP106  |
| 4 | LYS28   | ASP99   |
| 4 | LYS406  | ASP224  |
| 4 | ARG100B | ASP31   |
| 4 | LYS212  | GLU127  |
| 4 | ARG44   | ASP60   |
| 4 | LYS187  | GLU97   |
| 4 | ARG149  | ASP136  |
| 4 | LYS47   | GLU55   |
| 4 | ARG25   | ASP101  |
| 4 | LYS446  | ASP50   |
| 4 | LYS207  | ASP130  |
| 4 | LYS433  | ASP56   |
| 4 | ARG200  | ASP102  |
| 4 | LYS224  | ASP122  |
| 4 | LYS135  | ASP48   |
| 4 | LYS574  | GLU106  |
| 4 | LYS62   | ASP1    |
| 4 | LYS211  | ASP54   |
| 4 | HIS56   | GLU9    |
| 4 | ARG24   | ASP76   |
| 4 | LYS221  | GLU126  |
| 4 | LYS197  | ASP55   |
| 4 | LYS443  | ASP58   |
| 4 | LYS7    | ASP49   |
| 4 | ARG47   | ASP1    |
| 4 | HIS213  | GLU58   |
| 3 | ARG304  | ASP31   |
| 3 | ARG315  | ASP93   |
| 3 | ARG143  | ASP61   |
| 3 | ARG97   | ASP368  |
| 3 | LYS50   | ASP100C |
| 3 | HIS20   | ASP217  |
| 3 | LYS326  | GLU11   |
| 3 | LYS107  | GLU91   |
| 3 | LYS96   | ASP50   |
| 3 | ARG186  | GLU48   |
| 3 | ARG97   | GLU62   |
| 3 | ARG100  | GLU50   |
| 3 | ARG90   | ASP56   |
| 3 | ARG61   | ASP101  |

|   |        |         |
|---|--------|---------|
| 3 | HIS189 | GLU196  |
| 3 | LYS73  | ASP256  |
| 3 | LYS572 | GLU238  |
| 3 | ARG108 | GLU223  |
| 3 | LYS168 | GLU190  |
| 3 | ARG50  | ASP101  |
| 3 | LYS143 | ASP11   |
| 3 | ARG50  | GLU166  |
| 3 | LYS154 | GLU129  |
| 3 | ARG847 | GLU1017 |
| 3 | LYS204 | GLU113  |
| 3 | LYS229 | ASP1    |
| 3 | ARG95A | GLU351  |
| 3 | ARG44  | GLU56   |
| 3 | LYS149 | GLU127  |
| 3 | ARG94  | GLU7    |
| 3 | ARG419 | ASP54   |
| 3 | ARG95  | ASP100E |
| 3 | HIS87  | ASP11   |
| 3 | LYS217 | ASP128  |
| 3 | LYS52  | ASP474  |
| 3 | LYS39  | GLU81   |
| 3 | LYS306 | GLU61   |
| 3 | ARG317 | GLU100B |
| 3 | ARG50  | ASP560  |
| 3 | ARG40  | GLU29   |
| 3 | ARG54  | ASP32   |
| 3 | ARG192 | GLU58   |
| 3 | LYS218 | GLU122  |
| 3 | LYS399 | GLU497  |
| 3 | LYS53  | ASP52   |
| 3 | HIS32  | GLU1    |
| 3 | ARG123 | ASP54   |
| 3 | ARG327 | ASP52   |
| 3 | ARG37  | ASP104  |
| 3 | ARG419 | GLU103  |
| 3 | ARG419 | GLU108  |
| 3 | LYS107 | ASP30   |
| 3 | LYS228 | GLU147  |
| 3 | LYS22  | GLU102  |
| 3 | ARG52A | GLU144  |
| 3 | LYS223 | GLU126  |
| 3 | ARG542 | GLU648  |
| 3 | LYS399 | ASP392  |
| 3 | ARG28  | ASP457  |
| 3 | LYS87  | ASP79   |
| 3 | HIS120 | GLU59   |
| 3 | LYS217 | GLU121  |
| 3 | ARG91  | ASP99   |
| 3 | ARG31  | ASP140  |
| 3 | HIS467 | GLU50   |
| 3 | LYS213 | GLU130  |
| 3 | ARG61  | GLU32   |
| 3 | ARG59  | ASP101  |
| 3 | ARG304 | ASP100A |
| 3 | ARG92  | ASP166  |
| 3 | ARG124 | ASP41   |
| 3 | ARG78  | ASP92   |

|   |         |         |
|---|---------|---------|
| 3 | ARG52   | ASP47   |
| 3 | LYS54   | ASP101  |
| 3 | ARG96   | GLU104  |
| 3 | HIS49   | ASP100C |
| 3 | ARG101  | GLU55   |
| 3 | HIS165  | ASP167  |
| 3 | ARG36   | ASP55   |
| 3 | LYS400  | ASP28   |
| 3 | LYS30   | GLU95   |
| 3 | LYS211  | GLU120  |
| 3 | HIS121  | ASP217  |
| 3 | ARG235  | ASP28   |
| 3 | LYS60   | GLU74   |
| 3 | ARG137  | ASP97   |
| 3 | LYS49   | ASP99   |
| 3 | ARG17   | ASP35   |
| 3 | ARG50   | GLU268  |
| 3 | ARG77   | GLU79   |
| 3 | ARG27   | GLU431  |
| 3 | ARG153  | ASP106  |
| 3 | ARG64   | ASP1    |
| 3 | LYS28   | GLU100  |
| 3 | LYS214  | GLU122  |
| 3 | ARG100  | ASP98   |
| 3 | LYS145  | GLU124  |
| 3 | LYS     | GLU127  |
| 3 | ARG112  | ASP109  |
| 3 | HIS170  | GLU172  |
| 3 | ARG36   | GLU58   |
| 3 | ARG77   | ASP31   |
| 3 | LYS227  | GLU124  |
| 3 | ARG691  | GLU818  |
| 3 | ARG100B | ASP30   |
| 3 | ARG59   | GLU106  |
| 3 | LYS89   | GLU95   |
| 3 | ARG1212 | ASP100C |
| 3 | LYS432  | ASP56   |
| 3 | LYS44   | GLU106  |
| 3 | LYS146  | ASP95A  |
| 3 | ARG31   | GLU113  |
| 3 | ARG97   | ASP347  |
| 3 | LYS171  | GLU13   |
| 3 | ARG35   | ASP73   |
| 3 | HIS94   | ASP7    |
| 3 | LYS343  | ASP85   |
| 3 | ARG33   | ASP6    |
| 3 | ARG59   | ASP367  |
| 3 | LYS117  | GLU10   |
| 3 | ARG98   | ASP159  |
| 3 | LYS322  | ASP95   |
| 3 | ARG102  | GLU201  |
| 3 | ARG164  | ASP170  |
| 3 | HIS131  | ASP270  |
| 3 | LYS63   | GLU89   |
| 3 | HIS105  | GLU61   |
| 3 | ARG441  | GLU94   |
| 3 | LYS421  | GLU54   |
| 3 | HIS93   | ASP434  |

|   |         |        |
|---|---------|--------|
| 2 | HIS282  | ASP98  |
| 2 | LYS290  | GLU127 |
| 2 | HIS     | ASP    |
| 2 | ARG315  | ASP95  |
| 2 | ARG50   | ASP100 |
| 2 | LYS345  | GLU123 |
| 2 | HIS30   | GLU104 |
| 2 | LYS69   | GLU114 |
| 2 | LYS30   | GLU4   |
| 2 | LYS49   | GLU105 |
| 2 | LYS49   | GLU108 |
| 2 | ARG31   | GLU133 |
| 2 | ARG144  | ASP91  |
| 2 | HIS94   | GLU18  |
| 2 | LYS64   | GLU187 |
| 2 | HIS108  | GLU68  |
| 2 | LYS153  | ASP104 |
| 2 | ARG39   | ASP52  |
| 2 | ARG53   | GLU104 |
| 2 | LYS127  | GLU54  |
| 2 | LYS11   | GLU99  |
| 2 | LYS56   | ASP11  |
| 2 | ARG94   | ASP231 |
| 2 | LYS11   | ASP91  |
| 2 | HIS35   | ASP69  |
| 2 | ARG304  | GLU99  |
| 2 | ARG95   | ASP28  |
| 2 | LYS219  | ASP123 |
| 2 | LYS769  | ASP399 |
| 2 | ARG167  | ASP166 |
| 2 | ARG93   | GLU105 |
| 2 | ARG53   | GLU11  |
| 2 | ARG60   | GLU316 |
| 2 | LYS2    | GLU96  |
| 2 | ARG213  | GLU125 |
| 2 | LYS17   | GLU85  |
| 2 | LYS129  | GLU213 |
| 2 | LYS50   | ASP160 |
| 2 | LYS231  | GLU145 |
| 2 | LYS140  | GLU212 |
| 2 | LYS131  | ASP157 |
| 2 | LYS257  | GLU128 |
| 2 | ARG56   | GLU58  |
| 2 | ARG106  | ASP54  |
| 2 | ARG95   | ASP26  |
| 2 | ARG1024 | ASP70  |
| 2 | ARG169  | ASP172 |
| 2 | LYS44   | ASP104 |
| 2 | ARG50   | GLU62  |
| 2 | LYS100  | GLU91  |
| 2 | ARG95   | GLU39  |
| 2 | LYS96   | ASP46  |
| 2 | LYS115  | GLU85  |
| 2 | LYS156  | GLU127 |
| 2 | LYS310  | ASP52  |
| 2 | LYS52C  | ASP674 |
| 2 | LYS205  | ASP53  |
| 2 | ARG54   | ASP167 |

|   |         |         |
|---|---------|---------|
| 2 | LYS80   | GLU79   |
| 2 | ARG188  | ASP831  |
| 2 | HIS103  | ASP36   |
| 2 | ARG27   | ASP323  |
| 2 | LYS219  | ASP93   |
| 2 | LYS204  | GLU112  |
| 2 | LYS161  | GLU125  |
| 2 | HIS207  | GLU131  |
| 2 | LYS50   | GLU66   |
| 2 | ARG32   | ASP65   |
| 2 | ARG32   | ASP153  |
| 2 | LYS120  | ASP265  |
| 2 | LYS100  | GLU87   |
| 2 | ARG24   | ASP131  |
| 2 | LYS97   | ASP106  |
| 2 | LYS224  | GLU127  |
| 2 | ARG213  | GLU213  |
| 2 | LYS104  | GLU62   |
| 2 | HIS4    | ASP183  |
| 2 | LYS266  | ASP93   |
| 2 | ARG32   | GLU57   |
| 2 | ARG216  | ASP123  |
| 2 | ARG135  | ASP212  |
| 2 | ARG100B | ASP91   |
| 2 | HIS100E | GLU87   |
| 2 | ARG316  | ASP97   |
| 2 | ARG116  | GLU68   |
| 2 | LYS149  | GLU126  |
| 2 | HIS105  | ASP51   |
| 2 | LYS115  | ASP119  |
| 2 | ARG109  | ASP80   |
| 2 | LYS431  | ASP101  |
| 2 | ARG59   | ASP95   |
| 2 | ARG59   | ASP94   |
| 2 | ARG57   | ASP59   |
| 2 | LYS210  | ASP73   |
| 2 | ARG6    | GLU82   |
| 2 | ARG142  | GLU100  |
| 2 | ARG398  | GLU698  |
| 2 | LYS65   | GLU230  |
| 2 | LYS466  | GLU95   |
| 2 | LYS100E | ASP50   |
| 2 | LYS49   | ASP51   |
| 2 | ARG100  | ASP109  |
| 2 | ARG53   | GLU204  |
| 2 | ARG97   | GLU55   |
| 2 | ARG92   | GLU119  |
| 2 | LYS155  | ASP98   |
| 2 | LYS50   | ASP98   |
| 2 | HIS125  | ASP62   |
| 2 | ARG50   | GLU239  |
| 2 | ARG125  | GLU136  |
| 2 | HIS125  | GLU81   |
| 2 | LYS1719 | GLU1123 |
| 2 | LYS117  | ASP265  |
| 2 | LYS150  | GLU123  |
| 2 | ARG109  | ASP95   |
| 2 | LYS47   | ASP105  |

|   |         |         |
|---|---------|---------|
| 2 | LYS292  | ASP138  |
| 2 | LYS44   | ASP151  |
| 2 | ARG3141 | GLU2027 |
| 2 | LYS203  | GLU122  |
| 2 | LYS24   | ASP50   |
| 2 | HIS34   | ASP99   |
| 2 | LYS218  | GLU129  |
| 2 | LYS218  | GLU123  |
| 2 | LYS127  | GLU122  |
| 2 | ARG50   | GLU5    |
| 2 | ARG50   | GLU6    |
| 2 | LYS232  | GLU143  |
| 2 | ARG84   | GLU27   |
| 2 | ARG94   | GLU179  |
| 2 | ARG190  | GLU89   |
| 2 | LYS30   | ASP100B |
| 2 | LYS104  | ASP50   |
| 2 | ARG2598 | ASP3143 |
| 2 | ARG154  | ASP131  |
| 2 | LYS10   | ASP100  |
| 2 | ARG80   | ASP106  |
| 2 | LYS215  | GLU122  |
| 2 | HIS6    | GLU39   |
| 2 | ARG209  | GLU122  |
| 2 | ARG77   | ASP92   |
| 2 | LYS143  | GLU127  |
| 2 | LYS217  | GLU122  |
| 2 | LYS217  | GLU127  |
| 2 | ARG100B | GLU85   |
| 2 | LYS398  | GLU127  |
| 2 | LYS143  | GLU128  |
| 2 | ARG115  | GLU56   |
| 2 | HIS169  | ASP173  |
| 2 | HIS169  | ASP171  |
| 2 | ARG48   | ASP54   |
| 2 | LYS209  | GLU55   |
| 2 | LYS209  | GLU53   |
| 2 | LYS39   | ASP31   |
| 2 | LYS463  | ASP49   |
| 2 | ARG61   | ASP27   |
| 2 | LYS166  | ASP93   |
| 2 | LYS73   | ASP53   |
| 2 | ARG426  | ASP56   |
| 2 | HIS27D  | GLU536  |
| 2 | ARG98   | ASP50   |
| 2 | LYS222  | ASP128  |
| 2 | LYS2719 | GLU2123 |
| 2 | HIS234  | ASP56   |
| 2 | LYS130  | GLU59   |
| 2 | LYS223  | GLU128  |
| 2 | LYS262  | GLU127  |
| 2 | LYS60   | ASP56   |
| 2 | LYS519  | GLU123  |
| 2 | LYS719  | GLU123  |
| 2 | LYS97   | GLU97   |
| 2 | LYS43   | ASP27   |
| 2 | LYS43   | ASP26   |
| 2 | HIS164  | ASP139  |



|   |         |          |
|---|---------|----------|
| 2 | LYS463  | GLU126   |
| 2 | LYS148  | GLU126   |
| 2 | LYS96   | GLU57    |
| 2 | ARG1419 | GLU1100B |
| 2 | ARG91   | ASP98    |
| 2 | ARG26   | ASP10    |
| 2 | HIS35   | GLU54    |
| 2 | HIS96   | ASP3     |
| 2 | ARG1419 | GLU1099  |
| 2 | LYS102  | ASP34    |
| 2 | LYS171  | ASP253   |
| 2 | ARG69   | GLU100   |
| 2 | LYS11   | ASP33    |
| 2 | ARG83   | GLU13    |
| 2 | LYS4    | ASP56    |
| 2 | LYS119  | ASP56    |
| 2 | LYS75   | ASP28    |
| 2 | LYS153  | ASP41    |
| 2 | ARG82   | ASP31    |
| 2 | LYS130  | ASP1     |
| 2 | LYS204  | ASP75    |
| 2 | ARG53   | GLU97    |
| 2 | LYS100I | ASP93    |
| 2 | LYS563  | ASP1     |
| 2 | LYS292  | GLU128   |
| 2 | ARG405  | ASP118   |
| 2 | LYS97   | GLU64    |
| 2 | LYS65   | ASP208   |
| 2 | LYS185  | ASP57    |
| 2 | LYS53   | GLU17    |
| 2 | LYS206  | GLU123   |
| 2 | LYS145  | GLU17    |
| 2 | LYS305  | ASP100F  |
| 2 | LYS272  | ASP56    |
| 2 | ARG53   | ASP1056  |
| 2 | ARG95   | GLU95    |
| 2 | LYS439  | ASP480   |
| 2 | ARG68   | GLU35    |
| 2 | ARG52   | ASP4     |
| 2 | LYS4    | ASP62    |
| 2 | HIS173  | ASP171   |
| 2 | LYS77   | ASP34    |
| 2 | ARG97   | GLU370   |
| 2 | HIS33   | ASP100   |
| 2 | ARG105  | ASP334   |
| 2 | ARG55   | ASP3     |
| 2 | LYS184  | ASP133   |
| 2 | HIS134  | GLU121   |
| 2 | LYS824  | ASP143   |
| 2 | HIS34   | GLU97    |
| 2 | LYS454  | ASP100   |
| 2 | LYS30F  | GLU139   |
| 2 | ARG311  | ASP90    |
| 2 | ARG99   | ASP92    |
| 2 | LYS170  | ASP56    |
| 2 | LYS19   | ASP148   |
| 2 | ARG215  | GLU213   |
| 2 | LYS211  | GLU127   |

|   |         |         |
|---|---------|---------|
| 2 | LYS211  | GLU122  |
| 2 | LYS516  | GLU123  |
| 2 | ARG145  | ASP91   |
| 2 | ARG123  | ASP132  |
| 2 | LYS357  | GLU1    |
| 2 | LYS465  | ASP103  |
| 2 | LYS171  | ASP290  |
| 2 | LYS46   | ASP414  |
| 2 | LYS307  | ASP99   |
| 2 | LYS171  | ASP100I |
| 2 | LYS53   | GLU54   |
| 2 | ARG38   | ASP100  |
| 2 | LYS7    | ASP95   |
| 2 | LYS181  | GLU56   |
| 2 | LYS465  | GLU95   |
| 2 | LYS513  | GLU123  |
| 2 | LYS218  | ASP122  |
| 2 | ARG24   | ASP1070 |
| 2 | ARG51   | ASP113  |
| 2 | LYS58   | ASP94   |
| 2 | ARG100A | GLU106  |
| 2 | LYS46   | ASP31   |
| 2 | HIS31   | GLU259  |
| 2 | ARG101  | GLU33   |
| 2 | ARG58   | ASP336  |
| 2 | ARG154  | ASP26   |
| 2 | HIS164  | ASP166  |
| 2 | ARG116  | ASP103  |
| 2 | LYS50   | ASP255  |
| 2 | LYS250  | GLU13   |
| 2 | LYS269  | GLU69   |
| 2 | LYS212  | GLU101  |
| 2 | ARG101  | GLU119  |
| 2 | LYS30   | GLU100B |
| 2 | HIS112  | GLU205  |
| 2 | LYS209  | ASP100G |
| 2 | ARG90   | ASP1    |
| 2 | HIS219  | ASP56   |
| 2 | HIS495  | GLU31   |
| 2 | LYS83   | GLU85   |
| 2 | LYS18   | ASP70   |
| 2 | ARG65   | ASP30   |
| 2 | ARG65   | ASP31   |
| 2 | LYS229  | ASP142  |
| 2 | ARG6    | ASP437  |
| 2 | LYS150  | ASP115  |
| 2 | LYS157  | ASP52   |
| 2 | HIS95B  | ASP61   |
| 2 | HIS192  | ASP118  |
| 2 | ARG98   | ASP168  |
| 2 | HIS91   | ASP399  |
| 2 | ARG33   | GLU24   |
| 2 | LYS214  | GLU124  |
| 2 | LYS214  | GLU126  |
| 2 | HIS261  | ASP101  |
| 2 | LYS52   | ASP54   |
| 2 | LYS207  | GLU123  |
| 2 | LYS59   | ASP98   |

|   |         |         |
|---|---------|---------|
| 2 | LYS149  | ASP106  |
| 2 | LYS485  | ASP52A  |
| 2 | LYS96   | GLU97   |
| 2 | ARG103  | ASP80   |
| 2 | ARG251  | ASP138  |
| 2 | LYS     | GLU124  |
| 2 | LYS220  | GLU122  |
| 2 | LYS58   | ASP1    |
| 2 | ARG133  | ASP115  |
| 2 | LYS76   | GLU1    |
| 2 | LYS13   | GLU107  |
| 2 | LYS56   | ASP55   |
| 2 | LYS56   | ASP52   |
| 2 | ARG55   | ASP101  |
| 2 | ARG55   | ASP107  |
| 2 | ARG135  | GLU206  |
| 2 | LYS59   | GLU117  |
| 2 | LYS55   | GLU104  |
| 2 | LYS427  | ASP52A  |
| 2 | ARG96   | ASP26   |
| 2 | LYS55   | ASP102  |
| 2 | LYS432  | GLU129  |
| 2 | LYS23   | ASP73   |
| 2 | LYS111  | GLU202  |
| 2 | HIS6    | GLU230  |
| 2 | LYS227  | GLU126  |
| 2 | LYS55   | ASP743  |
| 2 | LYS213  | GLU128  |
| 2 | HIS164  | ASP141  |
| 2 | LYS207  | ASP129  |
| 2 | ARG405  | GLU113  |
| 2 | ARG66   | GLU85   |
| 2 | ARG73   | GLU44   |
| 2 | LYS210  | GLU131  |
| 2 | LYS50   | GLU8    |
| 2 | ARG500  | ASP664  |
| 2 | LYS228  | GLU123  |
| 2 | LYS266  | GLU128  |
| 2 | LYS308  | GLU50   |
| 2 | ARG50   | GLU21   |
| 2 | LYS49   | GLU158  |
| 2 | ARG188  | ASP86   |
| 2 | LYS184  | ASP34   |
| 2 | HIS162  | ASP166  |
| 2 | LYS2714 | GLU2127 |
| 2 | ARG66   | GLU309  |
| 2 | LYS0    | ASP1054 |
| 2 | LYS1563 | ASP1001 |
| 2 | LYS67   | ASP54   |
| 2 | LYS67   | ASP55   |
| 2 | HIS102  | GLU104  |
| 2 | LYS50   | GLU100F |
| 2 | ARG909  | GLU187  |
| 2 | LYS317  | ASP54   |
| 2 | ARG55   | ASP49   |
| 2 | ARG101  | GLU62   |
| 2 | HIS34   | GLU199  |
| 2 | ARG172  | ASP170  |

|   |        |         |
|---|--------|---------|
| 2 | LYS9   | ASP116  |
| 2 | ARG218 | GLU124  |
| 2 | HIS189 | GLU56   |
| 2 | HIS64  | ASP54   |
| 2 | LYS801 | ASP352  |
| 2 | ARG56  | ASP174  |
| 2 | ARG112 | ASP55   |
| 2 | LYS27  | ASP32   |
| 2 | LYS296 | ASP28   |
| 2 | HIS433 | ASP50   |
| 2 | LYS465 | GLU50   |
| 2 | LYS307 | GLU64   |
| 2 | LYS96  | ASP31   |
| 2 | ARG33  | ASP4    |
| 2 | LYS220 | ASP55   |
| 2 | ARG100 | ASP190  |
| 2 | LYS211 | ASP56   |
| 2 | ARG24  | ASP99   |
| 2 | ARG58  | GLU1    |
| 2 | ARG94  | GLU111  |
| 2 | LYS53  | ASP100C |
| 2 | ARG32  | ASP429  |
| 2 | ARG50  | GLU558  |
| 2 | LYS73  | ASP31   |
| 2 | ARG50  | ASP66   |
| 2 | LYS116 | ASP99   |
| 2 | ARG60  | ASP179  |
| 2 | HIS2   | ASP65   |
| 2 | LYS322 | GLU61   |
| 2 | LYS543 | GLU55   |
| 2 | LYS32  | ASP85   |
| 1 | LYS9   | ASP77   |
| 1 | ARG57  | GLU431  |
| 1 | HIS    | GLU97   |
| 1 | LYS153 | GLU186  |
| 1 | LYS155 | GLU56   |
| 1 | ARG98  | ASP39   |
| 1 | HIS178 | ASP169  |
| 1 | LYS120 | ASP95   |
| 1 | ARG31  | GLU311  |
| 1 | LYS212 | GLU128  |
| 1 | ARG90  | ASP62   |
| 1 | LYS43  | ASP85   |
| 1 | LYS290 | ASP33   |
| 1 | ARG49  | GLU199  |
| 1 | LYS201 | ASP92   |
| 1 | ARG46  | GLU95   |
| 1 | ARG52  | GLU5    |
| 1 | LYS75  | GLU218  |
| 1 | LYS463 | GLU95   |
| 1 | ARG73  | GLU75   |
| 1 | ARG18  | GLU93   |
| 1 | ARG39  | ASP53   |
| 1 | LYS108 | ASP32   |
| 1 | LYS27  | GLU61   |
| 1 | ARG32  | GLU216  |
| 1 | LYS66  | ASP92   |
| 1 | LYS364 | ASP52   |

|   |         |         |
|---|---------|---------|
| 1 | ARG58   | ASP103  |
| 1 | ARG53   | GLU106  |
| 1 | ARG130  | ASP92   |
| 1 | LYS62   | GLU58   |
| 1 | ARG186  | GLU45   |
| 1 | ARG120  | GLU54   |
| 1 | ARG140  | GLU212  |
| 1 | LYS341  | ASP53   |
| 1 | ARG94   | ASP123  |
| 1 | LYS59   | GLU10   |
| 1 | LYS209  | ASP123  |
| 1 | LYS191  | GLU362  |
| 1 | LYS43   | ASP1    |
| 1 | LYS222  | GLU126  |
| 1 | ARG101  | ASP98   |
| 1 | LYS2227 | GLU50   |
| 1 | ARG97   | GLU110  |
| 1 | ARG99   | ASP143  |
| 1 | HIS     | GLU     |
| 1 | ARG67   | GLU345  |
| 1 | ARG2674 | ASP2167 |
| 1 | ARG40   | GLU70   |
| 1 | LYS161  | GLU127  |
| 1 | ARG101  | GLU179  |
| 1 | LYS95   | ASP256  |
| 1 | LYS77   | GLU222  |
| 1 | LYS157  | ASP54   |
| 1 | HIS29   | GLU113  |
| 1 | ARG169  | ASP175  |
| 1 | HIS95   | ASP62   |
| 1 | ARG313  | GLU60   |
| 1 | LYS50   | GLU98   |
| 1 | LYS50   | GLU99   |
| 1 | LYS220  | ASP127  |
| 1 | LYS220  | ASP122  |
| 1 | ARG6    | ASP440  |
| 1 | LYS156  | GLU126  |
| 1 | LYS56   | GLU10   |
| 1 | LYS205  | ASP52   |
| 1 | ARG96   | GLU80   |
| 1 | HIS495  | ASP32   |
| 1 | HIS234  | ASP97   |
| 1 | ARG180  | GLU47   |
| 1 | LYS214  | GLU148  |
| 1 | LYS155  | GLU74   |
| 1 | HIS496  | GLU31   |
| 1 | LYS79   | ASP52   |
| 1 | LYS82   | GLU119  |
| 1 | LYS43   | ASP68   |
| 1 | LYS133  | ASP144  |
| 1 | LYS215  | GLU118  |
| 1 | ARG41   | GLU238  |
| 1 | ARG441  | ASP58   |
| 1 | LYS157  | GLU127  |
| 1 | ARG1674 | ASP1167 |
| 1 | ARG353  | ASP96   |
| 1 | ARG32   | ASP68   |
| 1 | ARG316  | ASP5    |

|   |         |         |
|---|---------|---------|
| 1 | LYS70   | GLU29   |
| 1 | ARG57   | ASP43   |
| 1 | LYS833  | ASP17   |
| 1 | ARG31   | ASP107  |
| 1 | ARG45   | ASP1    |
| 1 | ARG213  | ASP143  |
| 1 | LYS0    | ASP1056 |
| 1 | LYS156  | GLU463  |
| 1 | ARG56   | GLU111  |
| 1 | LYS43   | GLU140  |
| 1 | LYS111  | GLU73   |
| 1 | ARG674  | ASP167  |
| 1 | ARG100  | ASP69   |
| 1 | LYS209  | ASP101  |
| 1 | ARG101  | GLU97   |
| 1 | LYS143  | ASP60   |
| 1 | LYS502  | ASP664  |
| 1 | ARG44   | GLU57   |
| 1 | HIS161  | ASP167  |
| 1 | LYS1411 | GLU1023 |
| 1 | LYS149  | GLU128  |
| 1 | ARG29   | ASP56   |
| 1 | LYS75   | GLU1    |
| 1 | LYS107  | GLU42   |
| 1 | ARG308  | GLU50   |
| 1 | LYS317  | ASP55   |
| 1 | ARG18   | GLU218  |
| 1 | HIS172  | ASP171  |
| 1 | LYS82   | ASP89   |
| 1 | LYS713  | GLU123  |
| 1 | LYS59   | ASP100  |
| 1 | LYS1713 | GLU1123 |
| 1 | LYS305  | ASP51   |
| 1 | ARG204  | GLU218  |
| 1 | LYS236  | GLU100C |
| 1 | LYS135  | ASP119  |
| 1 | LYS208  | GLU125  |
| 1 | LYS217  | ASP122  |
| 1 | LYS222  | ASP107  |
| 1 | ARG61   | ASP461  |
| 1 | ARG202  | ASP118  |
| 1 | ARG89   | ASP99   |
| 1 | ARG2215 | ASP101  |
| 1 | HIS100E | GLU91   |
| 1 | ARG36   | ASP94   |
| 1 | LYS305  | GLU100E |
| 1 | LYS46   | ASP66   |
| 1 | ARG104  | ASP95   |
| 1 | LYS152  | GLU128  |
| 1 | HIS3179 | ASP2169 |
| 1 | LYS292  | ASP139  |
| 1 | ARG188  | ASP1518 |
| 1 | ARG112  | ASP31   |
| 1 | LYS114  | GLU17   |
| 1 | LYS100  | GLU62   |
| 1 | HIS145  | ASP50   |
| 1 | LYS139  | GLU213  |
| 1 | LYS218  | GLU124  |

|   |         |          |
|---|---------|----------|
| 1 | LYS2    | ASP92    |
| 1 | ARG230  | ASP56    |
| 1 | LYS76   | GLU10    |
| 1 | HIS360  | ASP1     |
| 1 | HIS192  | ASP99    |
| 1 | ARG204  | GLU121   |
| 1 | ARG48   | ASP73    |
| 1 | ARG315  | ASP100A  |
| 1 | ARG142  | GLU140   |
| 1 | LYS5    | GLU187   |
| 1 | LYS364  | GLU33    |
| 1 | LYS30   | ASP99    |
| 1 | ARG61   | ASP256   |
| 1 | LYS215  | GLU120   |
| 1 | LYS147  | GLU154   |
| 1 | HIS204  | GLU152   |
| 1 | HIS96   | GLU79    |
| 1 | LYS217  | GLU125   |
| 1 | LYS217  | GLU128   |
| 1 | HIS166  | ASP164   |
| 1 | HIS27D  | ASP2     |
| 1 | ARG104  | GLU21    |
| 1 | LYS129  | ASP142   |
| 1 | LYS118  | ASP109   |
| 1 | HIS169  | ASP174   |
| 1 | ARG128  | GLU89    |
| 1 | LYS99   | ASP56    |
| 1 | LYS171  | ASP224   |
| 1 | LYS171  | ASP226   |
| 1 | HIS308  | ASP100H  |
| 1 | LYS205  | ASP139   |
| 1 | ARG52   | ASP7     |
| 1 | LYS137  | ASP143   |
| 1 | ARG422  | ASP97    |
| 1 | HIS163  | ASP172   |
| 1 | ARG1568 | GLU1235  |
| 1 | ARG113  | GLU136   |
| 1 | LYS46   | GLU36    |
| 1 | LYS46   | GLU33    |
| 1 | LYS87   | GLU294   |
| 1 | LYS223  | GLU125   |
| 1 | ARG147  | GLU135   |
| 1 | LYS201  | ASP30    |
| 1 | HIS129  | ASP61    |
| 1 | HIS417  | GLU80    |
| 1 | LYS219  | ASP52    |
| 1 | LYS71   | GLU29    |
| 1 | LYS131  | ASP128   |
| 1 | HIS31   | ASP100   |
| 1 | ARG1    | GLU55    |
| 1 | LYS220  | ASP57    |
| 1 | ARG114  | ASP3     |
| 1 | ARG1419 | GLU1100D |
| 1 | LYS76   | ASP124   |
| 1 | LYS210  | GLU      |
| 1 | LYS68   | GLU107   |
| 1 | LYS60   | GLU1     |
| 1 | ARG403  | ASP115   |

|   |         |         |
|---|---------|---------|
| 1 | HIS169  | ASP168  |
| 1 | ARG136  | GLU889  |
| 1 | LYS93   | GLU533  |
| 1 | HIS173  | ASP167  |
| 1 | HIS147  | GLU97   |
| 1 | ARG476  | ASP31   |
| 1 | LYS207  | ASP70   |
| 1 | LYS27   | ASP54   |
| 1 | ARG668  | GLU335  |
| 1 | LYS241  | ASP99   |
| 1 | ARG94   | GLU50   |
| 1 | LYS175  | ASP57   |
| 1 | LYS159  | ASP34   |
| 1 | LYS303  | ASP31   |
| 1 | ARG24   | GLU1555 |
| 1 | ARG190  | GLU48   |
| 1 | LYS135  | ASP51   |
| 1 | ARG95   | GLU173  |
| 1 | LYS1209 | GLU1123 |
| 1 | LYS65   | GLU84   |
| 1 | LYS168  | ASP53   |
| 1 | LYS138  | GLU212  |
| 1 | LYS138  | GLU215  |
| 1 | ARG405  | ASP115  |
| 1 | LYS78   | ASP52   |
| 1 | HIS467  | GLU95   |
| 1 | HIS467  | GLU94   |
| 1 | HIS27D  | ASP100B |
| 1 | LYS57   | GLU97   |
| 1 | LYS145  | GLU126  |
| 1 | LYS13   | ASP42   |
| 1 | ARG368  | ASP429  |
| 1 | HIS198  | GLU65   |
| 1 | ARG52   | ASP131  |
| 1 | LYS1201 | GLU10   |
| 1 | LYS174  | GLU128  |
| 1 | LYS75   | ASP30   |
| 1 | LYS205  | ASP207  |
| 1 | ARG907  | GLU187  |
| 1 | LYS153  | GLU40   |
| 1 | LYS229  | ASP124  |
| 1 | LYS210  | GLU124  |
| 1 | ARG60   | ASP56   |
| 1 | LYS45   | ASP102  |
| 1 | ARG25   | GLU46   |
| 1 | ARG32   | ASP100F |
| 1 | LYS223  | ASP128  |
| 1 | LYS56   | ASP7    |
| 1 | ARG99   | ASP98   |
| 1 | ARG99   | ASP91   |
| 1 | LYS55   | ASP170  |
| 1 | LYS108  | ASP53   |
| 1 | LYS296  | GLU68   |
| 1 | LYS465  | ASP53   |
| 1 | LYS211  | GLU128  |
| 1 | LYS766  | ASP1    |
| 1 | ARG188  | GLU196  |
| 1 | LYS887  | GLU145  |



|   |         |         |
|---|---------|---------|
| 1 | HIS11   | ASP95   |
| 1 | LYS833  | GLU185  |
| 1 | LYS218  | ASP121  |
| 1 | LYS88   | ASP54   |
| 1 | LYS251  | GLU72   |
| 1 | LYS218  | ASP85   |
| 1 | LYS167  | ASP165  |
| 1 | LYS148  | ASP56   |
| 1 | ARG311  | ASP86   |
| 1 | LYS132  | ASP150  |
| 1 | LYS233  | GLU533  |
| 1 | LYS58   | ASP116  |
| 1 | LYS156  | GLU81   |
| 1 | ARG99   | ASP60   |
| 1 | HIS34   | ASP102  |
| 1 | LYS67   | GLU361  |
| 1 | LYS55   | ASP57   |
| 1 | ARG1099 | GLU2105 |
| 1 | ARG51   | ASP115  |
| 1 | ARG102  | ASP52   |
| 1 | LYS209  | GLU126  |
| 1 | LYS60   | ASP100  |
| 1 | LYS103  | ASP66   |
| 1 | ARG24   | ASP855  |
| 1 | HIS164  | ASP168  |
| 1 | HIS164  | ASP169  |
| 1 | LYS225  | ASP121  |
| 1 | ARG98   | GLU39   |
| 1 | HIS35   | GLU80   |
| 1 | LYS7    | GLU232  |
| 1 | LYS55   | ASP6    |
| 1 | ARG3141 | GLU2097 |
| 1 | LYS30   | GLU100E |
| 1 | HIS112  | GLU202  |
| 1 | ARG1    | ASP51   |
| 1 | LYS26   | GLU232  |
| 1 | LYS191  | ASP50   |
| 1 | LYS64   | ASP1    |
| 1 | LYS215  | ASP189  |
| 1 | ARG94   | GLU61   |
| 1 | HIS31   | GLU133  |
| 1 | HIS56   | ASP60   |
| 1 | ARG55   | ASP117  |
| 1 | LYS161  | ASP31   |
| 1 | ARG236  | ASP28   |
| 1 | ARG429  | ASP63   |
| 1 | ARG192  | ASP95   |
| 1 | LYS55   | GLU371  |
| 1 | LYS214  | GLU128  |
| 1 | LYS29   | ASP69   |
| 1 | LYS214  | GLU127  |
| 1 | HIS36   | GLU105  |
| 1 | ARG51   | ASP106  |
| 1 | LYS67   | ASP90   |
| 1 | LYS52   | ASP56   |
| 1 | ARG18   | GLU36   |
| 1 | LYS207  | GLU124  |
| 1 | LYS511  | GLU123  |

|   |         |         |
|---|---------|---------|
| 1 | LYS52B  | ASP143  |
| 1 | LYS103  | ASP     |
| 1 | ARG101  | ASP46   |
| 1 | ARG107  | GLU194  |
| 1 | LYS63   | ASP23   |
| 1 | ARG59   | GLU201  |
| 1 | LYS158  | GLU128  |
| 1 | LYS213  | ASP354  |
| 1 | LYS201  | GLU10   |
| 1 | LYS210  | GLU128  |
| 1 | LYS220  | GLU127  |
| 1 | ARG255  | ASP31   |
| 1 | LYS50   | ASP100  |
| 1 | ARG645  | GLU350  |
| 1 | HIS170  | ASP172  |
| 1 | ARG59   | ASP65   |
| 1 | LYS56   | ASP57   |
| 1 | ARG96   | GLU59   |
| 1 | ARG96   | GLU56   |
| 1 | LYS39   | ASP100  |
| 1 | HIS2038 | ASP2603 |
| 1 | LYS290  | GLU281  |
| 1 | ARG63   | ASP112  |
| 1 | LYS182  | GLU81   |
| 1 | ARG33   | GLU32   |
| 1 | ARG1545 | GLU1250 |
| 1 | LYS44   | ASP105  |
| 1 | ARG169  | GLU268  |
| 1 | LYS75   | GLU85   |
| 1 | LYS67   | ASP56   |
| 1 | LYS67   | ASP57   |
| 1 | LYS49   | ASP100  |
| 1 | LYS207  | GLU133  |
| 1 | ARG54   | GLU321  |
| 1 | LYS697  | GLU399  |
| 1 | HIS409  | ASP108  |
| 1 | LYS212  | GLU122  |
| 1 | LYS211  | ASP213  |
| 1 | HIS4    | ASP98   |
| 1 | LYS1107 | GLU869  |
| 1 | ARG186  | ASP180  |
| 1 | LYS107  | ASP867  |
| 1 | HIS61   | ASP1    |
| 1 | HIS30   | ASP429  |
| 1 | LYS171  | ASP156  |
| 1 | HIS170  | ASP167  |
| 1 | HIS164  | GLU139  |
| 1 | LYS307  | GLU59   |
| 1 | ARG50   | GLU23   |
| 1 | ARG66   | ASP51   |
| 1 | ARG66   | ASP52   |
| 1 | LYS1833 | GLU17   |
| 1 | LYS219  | GLU131  |
| 1 | LYS108  | GLU58   |
| 1 | LYS154  | ASP98   |
| 1 | ARG54   | ASP322  |
| 1 | ARG58   | ASP65   |
| 1 | LYS201  | ASP52   |

|   |         |         |
|---|---------|---------|
| 1 | ARG61   | GLU81   |
| 1 | ARG61   | GLU85   |
| 1 | ARG18   | GLU27   |
| 1 | LYS317  | ASP57   |
| 1 | LYS317  | ASP56   |
| 1 | ARG180  | GLU396  |
| 1 | LYS52   | ASP78   |
| 1 | HIS171  | ASP141  |
| 1 | LYS174  | ASP160  |
| 1 | ARG103  | ASP49   |
| 1 | LYS23   | GLU121  |
| 1 | ARG29   | ASP259  |
| 1 | LYS212  | ASP214  |
| 1 | LYS304  | ASP31   |
| 1 | LYS153  | GLU10   |
| 1 | LYS1094 | GLU2015 |
| 1 | LYS209  | GLU     |
| 1 | LYS58   | GLU4    |
| 1 | ARG6    | GLU433  |
| 1 | LYS228  | ASP122  |
| 1 | ARG53   | ASP648  |
| 1 | HIS97   | GLU50   |
| 1 | ARG66   | ASP62   |
| 1 | ARG53   | GLU8    |
| 1 | ARG127  | GLU118  |
| 1 | ARG56   | GLU81   |
| 1 | LYS96   | ASP32   |
| 1 | ARG403  | ASP118  |
| 1 | LYS220  | GLU214  |
| 1 | LYS213  | GLU129  |
| 1 | HIS174  | GLU65   |
| 1 | LYS145  | ASP93   |
| 1 | LYS39   | ASP1    |
| 1 | ARG65   | GLU1    |
| 1 | ARG83   | ASP72   |
| 1 | LYS216  | ASP218  |
| 1 | LYS68   | GLU50   |
| 1 | HIS76   | ASP100A |
| 1 | LYS211  | ASP122  |
| 1 | LYS50   | ASP106  |
| 1 | LYS148  | ASP55   |
| 1 | HIS53   | GLU36   |
| 1 | LYS206  | ASP208  |
| 1 | LYS161  | GLU154  |
| 1 | LYS151  | GLU191  |
| 1 | LYS45   | GLU97   |
| 1 | HIS35   | ASP204  |
| 1 | LYS439  | ASP356  |
| 1 | ARG310  | ASP86   |
| 1 | HIS168  | ASP167  |
| 1 | LYS404  | GLU292  |
| 1 | LYS443  | ASP51   |
| 1 | HIS170  | ASP141  |
| 1 | HIS190  | GLU59   |

---

Table 4: Counting of interfacial side chain salt bridging networks within the PDB entries of all experimentally determined antigen-antibody-related structures. In this table, the residue naming scheme is **Chain ID\_residue name\_residue number**.

| PDB      | Acceptor (A)   | Donor (D)      | Hydrogen (H)    | D-A (Å) | H-A (Å) | $\angle ADH(^{\circ})$ |
|----------|----------------|----------------|-----------------|---------|---------|------------------------|
| 1A14.PDB | O, H_SER_25    | N, H_GLN_3     | H, H_GLN_3      | 2.77    | 1.89    | 21.99                  |
| 1A14.PDB | OG, H_SER_25   | NE2, H_GLN_5   | HE21, H_GLN_5   | 2.94    | 2.02    | 15.87                  |
| 1A14.PDB | O, H_TYR_90    | NE2, H_GLN_6   | HE21, H_GLN_6   | 2.72    | 1.83    | 18.57                  |
| 1A14.PDB | O, H_THR_108   | N, H_GLU_10    | H, H_GLU_10     | 2.84    | 1.94    | 19.84                  |
| 1A14.PDB | O, H_THR_110   | N, H_VAL_12    | H, H_VAL_12     | 2.96    | 2.06    | 20.79                  |
| 1A14.PDB | O, H_LEU_82C   | N, H_GLY_15    | H, H_GLY_15     | 2.91    | 2.08    | 27.09                  |
| 1A14.PDB | O, H_GLN_5     | N, H_LYS_23    | H, H_LYS_23     | 2.75    | 1.80    | 7.95                   |
| 1A14.PDB | O, H_ASN_76    | N, H_ALA_24    | H, H_ALA_24     | 2.78    | 1.85    | 14.53                  |
| 1A14.PDB | O, H_THR_28    | N, H_ASN_31    | H, H_ASN_31     | 2.81    | 1.88    | 13.65                  |
| 1A14.PDB | O, H_PHE_51    | N, H_MET_34    | H, H_MET_34     | 2.88    | 1.94    | 13.17                  |
| 1A14.PDB | O, H_ALA_93    | N, H_TYR_35    | H, H_TYR_35     | 2.86    | 1.93    | 13.77                  |
| 1A14.PDB | O, H_TYR_91    | N, H_VAL_37    | H, H_VAL_37     | 2.95    | 2.02    | 16.35                  |
| 1A14.PDB | O, H_GLU_46    | N, H_LYS_38    | H, H_LYS_38     | 2.72    | 1.78    | 11.05                  |
| 1A14.PDB | OE1, L_GLN_38  | NE2, H_GLN_39  | HE21, H_GLN_39  | 2.62    | 1.69    | 9.24                   |
| 1A14.PDB | O, H_SER_40    | N, H_GLN_43    | H, H_GLN_43     | 2.91    | 2.06    | 24.59                  |
| 1A14.PDB | O, H_TRP_36    | N, H_ILE_48    | H, H_ILE_48     | 2.85    | 1.93    | 16.00                  |
| 1A14.PDB | O, H_SER_58    | N, H_ILE_50    | H, H_ILE_50     | 2.72    | 1.81    | 16.55                  |
| 1A14.PDB | O, H_MET_34    | N, H_PHE_51    | H, H_PHE_51     | 2.91    | 2.00    | 17.30                  |
| 1A14.PDB | O, H_ASP_56    | N, H_TYR_52    | H, H_TYR_52     | 2.91    | 1.96    | 11.43                  |
| 1A14.PDB | OD1, H_ASN_54  | N, H_ASP_56    | H, H_ASP_56     | 2.82    | 2.01    | 27.91                  |
| 1A14.PDB | O, H_ILE_48    | N, H_ASN_60    | H, H_ASN_60     | 2.52    | 1.70    | 23.11                  |
| 1A14.PDB | O, H_TRP_47    | ND2, H_ASN_60  | HD22, H_ASN_60  | 2.76    | 1.87    | 19.57                  |
| 1A14.PDB | O, H_PHE_63    | N, H_ALA_67    | H, H_ALA_67     | 2.95    | 1.99    | 5.88                   |
| 1A14.PDB | OH, H_TYR_59   | N, H_LEU_69    | H, H_LEU_69     | 2.81    | 1.86    | 9.44                   |
| 1A14.PDB | O, H_THR_77    | N, H_ASP_72    | H, H_ASP_72     | 2.72    | 1.79    | 11.50                  |
| 1A14.PDB | OD2, H_ASP_72  | N, H_SER_75    | H, H_SER_75     | 2.80    | 1.92    | 19.95                  |
| 1A14.PDB | OG1, H_THR_77  | OG, H_SER_75   | HG, H_SER_75    | 2.86    | 2.04    | 27.11                  |
| 1A14.PDB | O, H_ASP_72    | N, H_THR_77    | H, H_THR_77     | 2.99    | 2.04    | 11.91                  |
| 1A14.PDB | O, H_CYS_22    | N, H_ALA_78    | H, H_ALA_78     | 2.74    | 1.87    | 21.95                  |
| 1A14.PDB | O, H_MET_20    | N, H_MET_80    | H, H_MET_80     | 2.96    | 2.07    | 20.70                  |
| 1A14.PDB | OE2, H_GLU_85  | OG, H_SER_84   | HG, H_SER_84    | 2.91    | 1.99    | 12.42                  |
| 1A14.PDB | O, H_THR_83    | N, H_ASP_86    | H, H_ASP_86     | 2.92    | 1.98    | 13.36                  |
| 1A14.PDB | O, H_TYR_102   | N, H_ARG_94    | H, H_ARG_94     | 2.71    | 1.83    | 20.03                  |
| 1A14.PDB | OD2, H_ASP_101 | NH2, H_ARG_94  | HH21, H_ARG_94  | 2.75    | 1.83    | 16.91                  |
| 1A14.PDB | O, H_GLY_97    | N, H_ARG_100   | H, H_ARG_100    | 2.82    | 1.90    | 14.18                  |
| 1A14.PDB | OH, L_TYR_36   | N, H_PHE_100E  | H, H_PHE_100E   | 2.73    | 1.81    | 13.85                  |
| 1A14.PDB | OE1, H_GLN_6   | N, H_GLY_106   | H, H_GLY_106    | 2.85    | 1.98    | 22.46                  |
| 1A14.PDB | O, H_ALA_88    | N, H_VAL_109   | H, H_VAL_109    | 2.80    | 1.86    | 11.06                  |
| 1A14.PDB | O, H_GLU_10    | N, H_THR_110   | H, H_THR_110    | 2.78    | 1.95    | 26.41                  |
| 1A14.PDB | O, H_GLU_10    | OG1, H_THR_110 | HG1, H_THR_110  | 2.94    | 1.99    | 6.65                   |
| 1A14.PDB | OG, H_SER_87   | N, H_VAL_111   | H, H_VAL_111    | 2.68    | 1.82    | 20.55                  |
| 1E6J.PDB | O, H_TYR_94    | NE2, H_GLN_6   | HE22, H_GLN_6   | 2.85    | 1.90    | 10.79                  |
| 1E6J.PDB | O, H_GLN_6     | NE2, H_GLN_112 | HE22, H_GLN_112 | 2.88    | 2.04    | 26.17                  |
| 1E6J.PDB | O, L_TYR_85    | NE2, L_GLN_6   | HE22, L_GLN_6   | 2.85    | 1.96    | 20.67                  |
| 1E6J.PDB | OH, L_TYR_85   | NE2, L_GLN_36  | HE21, L_GLN_36  | 2.83    | 1.87    | 8.49                   |
| 1E6J.PDB | OE1, H_GLN_39  | NE2, L_GLN_37  | HE22, L_GLN_37  | 2.69    | 1.84    | 23.98                  |
| 1E6J.PDB | OG, L_SER_129  | NE2, L_GLN_122 | HE22, L_GLN_122 | 2.94    | 2.00    | 13.76                  |
| 1E6J.PDB | O, L_ILE_104   | NE2, L_GLN_164 | HE22, L_GLN_164 | 2.87    | 1.92    | 11.35                  |
| 1E6J.PDB | O, P_GLU_159   | NE2, P_GLN_155 | HE21, P_GLN_155 | 2.82    | 1.93    | 20.03                  |
| 1F3R.PDB | O, A_ASN_68    | N, A_TYR_72    | H, A_TYR_72     | 2.96    | 1.94    | 7.79                   |
| 1F3R.PDB | O, B_ASN_230   | OH, A_TYR_72   | HH, A_TYR_72    | 2.67    | 1.70    | 2.56                   |
| 1F3R.PDB | O, B_THR_21    | N, B_SER_7     | H, B_SER_7      | 2.87    | 1.87    | 9.61                   |
| 1F3R.PDB | O, B_LEU_85    | N, B_SER_15    | H, B_SER_15     | 2.82    | 1.79    | 2.70                   |
| 1F3R.PDB | OD1, B_ASN_83  | OG1, B_THR_17  | HG1, B_THR_17   | 2.73    | 1.80    | 13.32                  |
| 1F3R.PDB | O, B_LEU_80    | N, B_LEU_20    | H, B_LEU_20     | 2.98    | 2.06    | 21.36                  |
| 1F3R.PDB | O, B_VAL_78    | N, B_CYS_22    | H, B_CYS_22     | 2.90    | 1.88    | 6.63                   |
| 1F3R.PDB | O, B_ASN_76    | N, B_VAL_24    | H, B_VAL_24     | 2.91    | 1.89    | 6.46                   |

|          |                |                |                 |      |      |       |
|----------|----------------|----------------|-----------------|------|------|-------|
| 1F3R.PDB | O, B_SER_28    | OG, B_SER_31   | HG, B_SER_31    | 2.64 | 1.68 | 8.32  |
| 1F3R.PDB | O, B_THR_96    | N, B_SER_35    | H, B_SER_35     | 2.97 | 1.94 | 2.64  |
| 1F3R.PDB | O, B_GLY_49    | N, B_TRP_36    | H, B_TRP_36     | 2.92 | 1.90 | 3.05  |
| 1F3R.PDB | O, B_THR_90    | N, B_SER_41    | H, B_SER_41     | 2.88 | 1.87 | 9.24  |
| 1F3R.PDB | O, B_ARG_38    | N, B_GLU_46    | H, B_GLU_46     | 2.92 | 1.91 | 7.52  |
| 1F3R.PDB | O, B_TRP_36    | N, B_MET_48    | H, B_MET_48     | 2.89 | 1.95 | 18.67 |
| 1F3R.PDB | O, B_ALA_58    | N, B_ARG_50    | H, B_ARG_50     | 2.87 | 1.86 | 10.08 |
| 1F3R.PDB | O, A_GLY_70    | NH2, B_ARG_50  | HH21, B_ARG_50  | 2.81 | 1.79 | 6.29  |
| 1F3R.PDB | O, B_TYR_100   | OH, B_TYR_53   | HH, B_TYR_53    | 2.66 | 1.70 | 6.56  |
| 1F3R.PDB | O, B_LEU_67    | OH, B_TYR_59   | HH, B_TYR_59    | 2.69 | 1.77 | 15.53 |
| 1F3R.PDB | O, B_TRP_47    | ND2, B_ASN_60  | HD21, B_ASN_60  | 2.98 | 1.99 | 12.26 |
| 1F3R.PDB | NE1, A_TRP_67  | OG, B_SER_61   | HG, B_SER_61    | 2.86 | 1.89 | 6.31  |
| 1F3R.PDB | O, B_GLN_77    | N, B_ASP_72    | H, B_ASP_72     | 2.95 | 1.93 | 8.00  |
| 1F3R.PDB | O, B_SER_70    | N, B_PHE_79    | H, B_PHE_79     | 2.87 | 1.91 | 16.42 |
| 1F3R.PDB | O, B_LEU_20    | N, B_LEU_80    | H, B_LEU_80     | 2.97 | 1.97 | 11.86 |
| 1F3R.PDB | O, B_SER_68    | N, B_LYS_81    | H, B_LYS_81     | 3.00 | 2.04 | 17.31 |
| 1F3R.PDB | O, B_LEU_18    | N, B_MET_82    | H, B_MET_82     | 2.89 | 1.88 | 9.85  |
| 1F3R.PDB | O, B_ARG_66    | N, B_ASN_83    | H, B_ASN_83     | 2.93 | 1.91 | 7.12  |
| 1F3R.PDB | O, B_ASP_89    | OH, B_TYR_93   | HH, B_TYR_93    | 2.65 | 1.76 | 18.66 |
| 1F3R.PDB | O, B_VAL_37    | N, B_TYR_94    | H, B_TYR_94     | 2.86 | 1.87 | 13.22 |
| 1F3R.PDB | O, B_SER_35    | N, B_THR_96    | H, B_THR_96     | 2.85 | 1.83 | 6.85  |
| 1F3R.PDB | O, B_PHE_112   | N, B_ARG_97    | H, B_ARG_97     | 2.97 | 1.94 | 0.13  |
| 1F3R.PDB | O, B_TYR_109   | N, B_LEU_99    | H, B_LEU_99     | 2.82 | 1.80 | 6.09  |
| 1F3R.PDB | O, B_LEU_105   | OH, B_TYR_100  | HH, B_TYR_100   | 2.81 | 1.87 | 9.55  |
| 1F3R.PDB | O, B_ARG_97    | N, B_ASP_111   | H, B_ASP_111    | 3.00 | 1.99 | 8.87  |
| 1F3R.PDB | OD2, B_ASP_111 | N, B_PHE_112   | H, B_PHE_112    | 2.95 | 1.99 | 17.02 |
| 1F3R.PDB | O, B_CYS_95    | N, B_GLY_114   | H, B_GLY_114    | 2.93 | 1.91 | 8.69  |
| 1F3R.PDB | O, B_GLY_91    | N, B_VAL_119   | H, B_VAL_119    | 2.99 | 2.03 | 17.54 |
| 1F3R.PDB | O, B_GLY_10    | N, B_THR_120   | H, B_THR_120    | 2.83 | 1.81 | 7.39  |
| 1F3R.PDB | O, B_ASN_257   | N, B_LEU_142   | H, B_LEU_142    | 2.85 | 1.82 | 6.57  |
| 1F3R.PDB | O, B_LYS_162   | OG1, B_THR_143 | HG1, B_THR_143  | 2.81 | 1.98 | 25.43 |
| 1F3R.PDB | O, B_TYR_224   | NE2, B_GLN_144 | HE22, B_GLN_144 | 2.91 | 1.91 | 11.14 |
| 1F3R.PDB | O, B_SER_160   | N, B_SER_145   | H, B_SER_145    | 2.97 | 1.94 | 2.29  |
| 1F3R.PDB | O, B_GLY_238   | OG, B_SER_147  | HG, B_SER_147   | 2.70 | 1.74 | 5.62  |
| 1F3R.PDB | O, B_LEU_216   | N, B_GLY_154   | H, B_GLY_154    | 2.96 | 1.97 | 13.26 |
| 1F3R.PDB | OG1, B_THR_212 | OG1, B_THR_158 | HG1, B_THR_158  | 2.80 | 1.87 | 11.10 |
| 1F3R.PDB | O, B_LEU_211   | N, B_LEU_159   | H, B_LEU_159    | 2.93 | 1.90 | 5.82  |
| 1F3R.PDB | O, B_SER_145   | N, B_SER_160   | H, B_SER_160    | 2.85 | 1.84 | 8.61  |
| 1F3R.PDB | O, B_TYR_209   | N, B_CYS_161   | H, B_CYS_161    | 2.83 | 1.82 | 9.85  |
| 1F3R.PDB | O, B_THR_143   | N, B_LYS_162   | H, B_LYS_162    | 2.92 | 1.94 | 14.43 |
| 1F3R.PDB | O, A_ILE_75    | OH, B_TYR_170  | HH, B_TYR_170   | 2.72 | 1.77 | 10.88 |
| 1F3R.PDB | O, B_ILE_186   | N, B_TRP_173   | H, B_TRP_173    | 2.96 | 1.95 | 8.06  |
| 1F3R.PDB | O, B_PHE_225   | N, B_TYR_174   | H, B_TYR_174    | 2.93 | 1.90 | 0.94  |
| 1F3R.PDB | O, B_LYS_183   | N, B_GLN_175   | H, B_GLN_175    | 2.88 | 1.90 | 13.28 |
| 1F3R.PDB | O, B_THR_223   | N, B_GLN_176   | H, B_GLN_176    | 2.93 | 1.91 | 6.88  |
| 1F3R.PDB | O, B_TRP_173   | N, B_LEU_185   | H, B_LEU_185    | 2.95 | 2.01 | 19.35 |
| 1F3R.PDB | O, B_SER_191   | N, B_TYR_187   | H, B_TYR_187    | 2.91 | 1.92 | 11.97 |
| 1F3R.PDB | O, B_LEU_171   | N, B_THR_189   | H, B_THR_189    | 2.92 | 1.94 | 15.09 |
| 1F3R.PDB | O, B_ASN_169   | OG1, B_THR_189 | HG1, B_THR_189  | 2.78 | 1.86 | 13.97 |
| 1F3R.PDB | O, B_ASN_188   | N, B_ASN_190   | H, B_ASN_190    | 2.99 | 2.10 | 24.68 |
| 1F3R.PDB | O, B_ASN_190   | OG, B_SER_191  | HG, B_SER_191   | 2.83 | 1.89 | 11.19 |
| 1F3R.PDB | O, B_PRO_197   | N, B_ARG_199   | H, B_ARG_199    | 2.94 | 2.05 | 24.65 |
| 1F3R.PDB | OD1, B_ASP_220 | NH1, B_ARG_199 | HH12, B_ARG_199 | 2.89 | 1.98 | 22.15 |
| 1F3R.PDB | O, B_THR_210   | N, B_SER_203   | H, B_SER_203    | 2.88 | 1.86 | 4.33  |
| 1F3R.PDB | O, B_ASN_168   | N, B_GLY_206   | H, B_GLY_206    | 2.87 | 1.85 | 8.80  |
| 1F3R.PDB | O, B_CYS_161   | N, B_TYR_209   | H, B_TYR_209    | 2.98 | 1.97 | 8.84  |
| 1F3R.PDB | O, B_GLY_206   | OH, B_TYR_209  | HH, B_TYR_209   | 2.72 | 1.77 | 8.74  |
| 1F3R.PDB | O, B_SER_203   | N, B_THR_210   | H, B_THR_210    | 2.89 | 1.91 | 14.26 |

|          |                |                |                 |      |      |       |
|----------|----------------|----------------|-----------------|------|------|-------|
| 1F3R.PDB | O, B_SER.203   | OG1, B_THR.210 | HG1, B_THR.210  | 2.67 | 1.72 | 9.35  |
| 1F3R.PDB | O, B_LEU.159   | N, B_LEU.211   | H, B_LEU.211    | 2.96 | 1.94 | 7.42  |
| 1F3R.PDB | O, B_VAL.157   | N, B_ILE.213   | H, B_ILE.213    | 2.95 | 1.95 | 11.15 |
| 1F3R.PDB | O, B_ARG.199   | OG, B_SER.214  | HG, B_SER.214   | 2.60 | 1.65 | 8.60  |
| 1F3R.PDB | OG, B_SER.214  | N, B_SER.215   | H, B_SER.215    | 2.99 | 2.14 | 28.78 |
| 1F3R.PDB | OE1, B_GLN.217 | OG, B_SER.215  | HG, B_SER.215   | 2.66 | 1.72 | 13.57 |
| 1F3R.PDB | O, B_GLN.217   | N, B_ASP.220   | H, B_ASP.220    | 2.93 | 1.97 | 17.91 |
| 1F3R.PDB | O, B_GLN.176   | N, B_THR.223   | H, B_THR.223    | 2.88 | 1.86 | 6.84  |
| 1F3R.PDB | O, B_THR.239   | OG1, B_THR.223 | HG1, B_THR.223  | 2.65 | 1.69 | 5.79  |
| 1F3R.PDB | O, B_ASP.220   | OH, B_TYR.224  | HH, B_TYR.224   | 2.64 | 1.71 | 12.61 |
| 1F3R.PDB | O, B_TYR.174   | N, B_PHE.225   | H, B_PHE.225    | 2.92 | 1.99 | 20.78 |
| 1F3R.PDB | O, B_ALA.172   | N, B_TYR.227   | H, B_TYR.227    | 3.00 | 2.00 | 11.62 |
| 1F3R.PDB | NE1, B_TRP.47  | OH, B_TYR.227  | HH, B_TYR.227   | 2.99 | 2.20 | 29.73 |
| 1F3R.PDB | O, B_TYR.170   | N, B_TYR.229   | H, B_TYR.229    | 2.94 | 1.91 | 4.24  |
| 1F3R.PDB | OD1, B_ASN.188 | OH, B_TYR.229  | HH, B_TYR.229   | 2.66 | 1.70 | 7.44  |
| 1F3R.PDB | OD1, B_ASN.231 | N, B_GLY.232   | H, B_GLY.232    | 2.89 | 1.87 | 6.19  |
| 1F3R.PDB | O, A_ASP.71    | OH, B_TYR.233  | HH, B_TYR.233   | 2.71 | 1.89 | 25.38 |
| 1F3R.PDB | OE1, B_GLN.144 | N, B_GLY.238   | H, B_GLY.238    | 2.97 | 1.99 | 15.42 |
| 1F3R.PDB | O, B_SER.147   | N, B_LYS.240   | H, B_LYS.240    | 2.89 | 1.86 | 4.01  |
| 1F3R.PDB | O, B_LEU.149   | OE2, B_GLU.242 | HE2, B_GLU.242  | 2.59 | 1.65 | 10.05 |
| 1F3R.PDB | O, B_LEU.243   | NE2, B_GLN.248 | HE21, B_GLN.248 | 2.97 | 2.01 | 16.74 |
| 1F3R.PDB | O, B_GLY.136   | N, B_ILE.251   | H, B_ILE.251    | 2.88 | 1.88 | 10.81 |
| 1F3R.PDB | O, B_SER.41    | OE2, B_GLU.253 | HE2, B_GLU.253  | 2.63 | 1.68 | 6.51  |
| 1F3R.PDB | O, B_ASP.139   | N, B_ASP.255   | H, B_ASP.255    | 2.95 | 1.95 | 13.03 |
| 1HCV.PDB | O, A_THR.110   | N, A_VAL.12    | H, A_VAL.12     | 2.93 | 2.02 | 18.33 |
| 1HCV.PDB | O, A_SER.112   | N, A_ALA.14    | H, A_ALA.14     | 2.93 | 2.13 | 29.46 |
| 1HCV.PDB | O, A_LEU.82C   | N, A_GLY.15    | H, A_GLY.15     | 2.71 | 1.79 | 13.54 |
| 1HCV.PDB | O, A_GLN.13    | N, A_GLY.16    | H, A_GLY.16     | 2.86 | 1.94 | 16.16 |
| 1HCV.PDB | O, A_MET.82    | N, A_LEU.18    | H, A_LEU.18     | 2.92 | 1.99 | 16.49 |
| 1HCV.PDB | O, A_LEU.80    | N, A_LEU.20    | H, A_LEU.20     | 2.95 | 1.97 | 7.19  |
| 1HCV.PDB | O, A_SER.7     | N, A_SER.21    | H, A_SER.21     | 2.87 | 1.92 | 9.29  |
| 1HCV.PDB | O, A_VAL.78    | N, A_CYS.22    | H, A_CYS.22     | 2.90 | 2.03 | 23.01 |
| 1HCV.PDB | O, A_GLN.5     | N, A_ALA.23    | H, A_ALA.23     | 2.91 | 1.94 | 8.72  |
| 1HCV.PDB | O, A_LYS.76    | N, A_ALA.24    | H, A_ALA.24     | 2.84 | 1.87 | 5.65  |
| 1HCV.PDB | O, A_GLY.95    | N, A_ASP.33    | H, A_ASP.33     | 2.78 | 1.82 | 4.32  |
| 1HCV.PDB | O, A_ILE.51    | N, A_MET.34    | H, A_MET.34     | 2.93 | 1.96 | 6.74  |
| 1HCV.PDB | O, A_GLY.93    | N, A_GLY.35    | H, A_GLY.35     | 2.81 | 1.88 | 14.94 |
| 1HCV.PDB | O, A_ALA.49    | N, A_TRP.36    | H, A_TRP.36     | 2.79 | 1.84 | 9.16  |
| 1HCV.PDB | O, A_THR.91    | N, A_PHE.37    | H, A_PHE.37     | 2.79 | 1.88 | 17.50 |
| 1HCV.PDB | O, A_GLU.46    | N, A_ARG.38    | H, A_ARG.38     | 2.85 | 1.92 | 14.14 |
| 1HCV.PDB | OE2, A_GLU.46  | NE, A_ARG.38   | HE, A_ARG.38    | 2.98 | 2.01 | 4.47  |
| 1HCV.PDB | OH, A_TYR.90   | NH1, A_ARG.38  | HH11, A_ARG.38  | 2.93 | 1.98 | 14.34 |
| 1HCV.PDB | OD1, A_ASP.86  | NH1, A_ARG.38  | HH12, A_ARG.38  | 2.86 | 1.90 | 11.61 |
| 1HCV.PDB | O, A_VAL.89    | N, A_GLN.39    | H, A_GLN.39     | 2.97 | 2.07 | 19.93 |
| 1HCV.PDB | O, A_LYS.43    | NE2, A_GLN.39  | HE22, A_GLN.39  | 2.89 | 1.95 | 12.02 |
| 1HCV.PDB | O, A_ALA.40    | N, A_LYS.43    | H, A_LYS.43     | 2.92 | 2.01 | 18.86 |
| 1HCV.PDB | O, A_ARG.38    | N, A_GLU.46    | H, A_GLU.46     | 2.84 | 1.93 | 16.72 |
| 1HCV.PDB | O, A_TRP.36    | N, A_VAL.48    | H, A_VAL.48     | 2.86 | 1.95 | 18.09 |
| 1HCV.PDB | O, A_MET.34    | N, A_ILE.51    | H, A_ILE.51     | 2.83 | 1.91 | 16.34 |
| 1HCV.PDB | O, A_ARG.56    | N, A_ASN.52    | H, A_ASN.52     | 2.98 | 2.06 | 16.59 |
| 1HCV.PDB | O, A_ASN.52    | N, A_ALA.55    | H, A_ALA.55     | 2.92 | 2.11 | 28.15 |
| 1HCV.PDB | O, A_TYR.59    | NE, A_ARG.64   | HE, A_ARG.64    | 2.96 | 2.11 | 24.27 |
| 1HCV.PDB | O, A_TYR.59    | NH2, A_ARG.64  | HH21, A_ARG.64  | 2.85 | 1.95 | 21.66 |
| 1HCV.PDB | O, A_VAL.63    | N, A_ARG.66    | H, A_ARG.66     | 2.97 | 2.05 | 16.00 |
| 1HCV.PDB | O, A_GLN.81    | N, A_THR.68    | H, A_THR.68     | 2.89 | 1.97 | 16.73 |
| 1HCV.PDB | OH, A_TYR.59   | N, A_ILE.69    | H, A_ILE.69     | 2.86 | 1.90 | 7.83  |
| 1HCV.PDB | O, A_TRP.52A   | NE, A_ARG.71   | HE, A_ARG.71    | 2.79 | 1.83 | 3.79  |
| 1HCV.PDB | O, A_THR.77    | N, A_ASP.72    | H, A_ASP.72     | 2.82 | 1.84 | 2.73  |

|          |                |               |                |      |      |       |
|----------|----------------|---------------|----------------|------|------|-------|
| 1HCV.PDB | OD1, A_ASP_72  | N, A_LYS_75   | H, A_LYS_75    | 2.94 | 2.05 | 18.63 |
| 1HCV.PDB | O, A_CYS_22    | N, A_VAL_78   | H, A_VAL_78    | 2.93 | 1.97 | 8.95  |
| 1HCV.PDB | O, A_SER_70    | N, A_TYR_79   | H, A_TYR_79    | 2.83 | 1.88 | 10.07 |
| 1HCV.PDB | O, A_LEU_20    | N, A_LEU_80   | H, A_LEU_80    | 2.95 | 2.00 | 12.10 |
| 1HCV.PDB | O, A_THR_68    | N, A_GLN_81   | H, A_GLN_81    | 2.77 | 1.81 | 7.49  |
| 1HCV.PDB | O, A_LEU_18    | N, A_MET_82   | H, A_MET_82    | 2.84 | 1.89 | 10.75 |
| 1HCV.PDB | OD2, A_ASP_86  | N, A_LYS_83   | H, A_LYS_83    | 2.81 | 1.93 | 18.86 |
| 1HCV.PDB | O, A_LYS_83    | N, A_ASP_86   | H, A_ASP_86    | 2.78 | 1.84 | 11.83 |
| 1HCV.PDB | O, A_THR_107   | N, A_TYR_90   | H, A_TYR_90    | 2.77 | 1.82 | 10.83 |
| 1HCV.PDB | O, A_ASP_86    | OH, A_TYR_90  | HH, A_TYR_90   | 2.78 | 1.82 | 4.95  |
| 1HCV.PDB | O, A_PHE_37    | N, A_THR_91   | H, A_THR_91    | 2.79 | 1.83 | 10.98 |
| 1HCV.PDB | OE2, A_GLU_6   | N, A_CYS_92   | H, A_CYS_92    | 2.92 | 1.93 | 9.32  |
| 1HCV.PDB | O, A_GLY_35    | N, A_GLY_93   | H, A_GLY_93    | 2.87 | 1.92 | 15.71 |
| 1HCV.PDB | O, A_ALA_94    | N, A_ASP_101  | H, A_ASP_101   | 2.95 | 2.03 | 16.44 |
| 1HCV.PDB | O, A_CYS_92    | N, A_GLY_104  | H, A_GLY_104   | 2.85 | 1.98 | 21.84 |
| 1HCV.PDB | OE2, A_GLU_6   | N, A_GLY_106  | H, A_GLY_106   | 2.97 | 2.18 | 29.00 |
| 1HCV.PDB | O, A_TYR_90    | N, A_THR_107  | H, A_THR_107   | 2.83 | 1.98 | 25.29 |
| 1HCV.PDB | O, A_GLY_10    | N, A_THR_110  | H, A_THR_110   | 2.96 | 1.98 | 5.57  |
| 1HGD.PDB | O, B_ILE_140   | N, A_ALA_11   | H, A_ALA_11    | 2.90 | 2.03 | 23.17 |
| 1HGD.PDB | O, B_PHE_138   | N, A_LEU_13   | H, A_LEU_13    | 2.95 | 2.00 | 13.08 |
| 1HGD.PDB | O, B_ARG_25    | N, A_CYS_14   | H, A_CYS_14    | 2.89 | 1.92 | 6.63  |
| 1HGD.PDB | O, B_GLY_136   | N, A_LEU_15   | H, A_LEU_15    | 2.87 | 1.90 | 8.68  |
| 1HGD.PDB | O, B_GLY_23    | N, A_GLY_16   | H, A_GLY_16    | 2.93 | 2.02 | 18.64 |
| 1HGD.PDB | O, A_HIS_18    | ND1, A_HIS_17 | HD1, A_HIS_17  | 2.93 | 2.05 | 21.54 |
| 1HGD.PDB | O, B_TRP_21    | N, A_HIS_18   | H, A_HIS_18    | 2.86 | 2.01 | 24.44 |
| 1HGD.PDB | OD1, A_ASN_322 | N, A_VAL_20   | H, A_VAL_20    | 2.77 | 1.82 | 9.61  |
| 1HGD.PDB | O, A_VAL_36    | N, A_THR_24   | H, A_THR_24    | 2.85 | 1.96 | 19.97 |
| 1HGD.PDB | O, A_ILE_34    | N, A_VAL_26   | H, A_VAL_26    | 2.82 | 1.91 | 17.04 |
| 1HGD.PDB | OE2, B_GLU_97  | NZ, A_LYS_27  | HZ1, A_LYS_27  | 2.80 | 1.78 | 9.95  |
| 1HGD.PDB | O, A_VAL_26    | N, A_ILE_34   | H, A_ILE_34    | 2.88 | 1.94 | 11.85 |
| 1HGD.PDB | O, A_THR_24    | N, A_VAL_36   | H, A_VAL_36    | 2.80 | 1.84 | 8.97  |
| 1HGD.PDB | O, A_MET_320   | N, A_THR_37   | H, A_THR_37    | 2.84 | 1.87 | 4.46  |
| 1HGD.PDB | O, A_LEU_316   | N, A_THR_40   | H, A_THR_40    | 2.81 | 1.96 | 24.53 |
| 1HGD.PDB | O, A_LEU_314   | N, A_LEU_42   | H, A_LEU_42    | 2.82 | 1.97 | 25.11 |
| 1HGD.PDB | O, A_PHE_294   | N, A_GLN_44   | H, A_GLN_44    | 2.82 | 1.85 | 6.79  |
| 1HGD.PDB | O, A_SER_46    | NE2, A_GLN_44 | HE22, A_GLN_44 | 2.87 | 1.99 | 21.11 |
| 1HGD.PDB | OD2, A_ASP_275 | NZ, A_LYS_50  | HZ1, A_LYS_50  | 2.70 | 1.79 | 23.99 |
| 1HGD.PDB | O, A_PRO_273   | N, A_ILE_51   | H, A_ILE_51    | 2.81 | 1.86 | 10.46 |
| 1HGD.PDB | O, A_ASP_275   | N, A_ASN_53   | H, A_ASN_53    | 2.82 | 1.93 | 20.82 |
| 1HGD.PDB | OD2, A_ASP_85  | N, A_ARG_57   | H, A_ARG_57    | 2.86 | 1.92 | 12.52 |
| 1HGD.PDB | O, A_THR_83    | NE, A_ARG_57  | HE, A_ARG_57   | 2.79 | 1.82 | 8.87  |
| 1HGD.PDB | O, A_LEU_86    | N, A_LEU_59   | H, A_LEU_59    | 2.85 | 1.91 | 13.74 |
| 1HGD.PDB | O, A_VAL_88    | N, A_GLY_61   | H, A_GLY_61    | 2.95 | 2.09 | 23.46 |
| 1HGD.PDB | OD1, A_ASP_60  | N, A_ILE_62   | H, A_ILE_62    | 2.87 | 1.95 | 16.02 |
| 1HGD.PDB | O, A_GLY_61    | N, A_CYS_64   | H, A_CYS_64    | 2.88 | 1.96 | 16.57 |
| 1HGD.PDB | OE2, A_GLU_89  | N, A_LEU_66   | H, A_LEU_66    | 2.99 | 2.02 | 7.24  |
| 1HGD.PDB | O, A_LEU_66    | N, A_LEU_70   | H, A_LEU_70    | 2.89 | 2.00 | 21.06 |
| 1HGD.PDB | O, A_ILE_67    | N, A_LEU_71   | H, A_LEU_71    | 2.83 | 1.86 | 7.61  |
| 1HGD.PDB | O, A_ASP_68    | N, A_GLY_72   | H, A_GLY_72    | 2.86 | 1.93 | 13.78 |
| 1HGD.PDB | OD1, A_ASP_73  | N, A_HIS_75   | H, A_HIS_75    | 2.94 | 2.08 | 23.98 |
| 1HGD.PDB | OD1, A_ASP_73  | ND1, A_HIS_75 | HD1, A_HIS_75  | 2.82 | 1.92 | 19.21 |
| 1HGD.PDB | O, A_ASP_63    | NE2, A_HIS_75 | HE2, A_HIS_75  | 2.89 | 1.98 | 18.26 |
| 1HGD.PDB | O, A_ASP_73    | N, A_CYS_76   | H, A_CYS_76    | 2.82 | 1.87 | 12.30 |
| 1HGD.PDB | O, A_PRO_74    | N, A_ASP_77   | H, A_ASP_77    | 2.96 | 2.01 | 12.30 |
| 1HGD.PDB | OE1, A_GLU_82  | N, A_THR_83   | H, A_THR_83    | 2.91 | 2.00 | 18.21 |
| 1HGD.PDB | O, A_ARG_57    | N, A_ASP_85   | H, A_ASP_85    | 2.78 | 1.87 | 17.48 |
| 1HGD.PDB | O, A_LEU_59    | N, A_VAL_88   | H, A_VAL_88    | 2.92 | 1.95 | 5.25  |
| 1HGD.PDB | O, A_MET_268   | N, A_GLU_89   | H, A_GLU_89    | 2.76 | 1.82 | 11.67 |



|          |                |                |                 |      |      |       |
|----------|----------------|----------------|-----------------|------|------|-------|
| 1HGD.PDB | OD1, A_ASP_60  | NE, A_ARG_90   | HE, A_ARG_90    | 2.88 | 1.91 | 7.55  |
| 1HGD.PDB | O, A_SER_270   | NH1, A_ARG_90  | HH11, A_ARG_90  | 2.66 | 1.79 | 24.65 |
| 1HGD.PDB | O, A_ALA_272   | NH1, A_ARG_90  | HH12, A_ARG_90  | 2.63 | 1.70 | 17.53 |
| 1HGD.PDB | OD2, A_ASP_60  | NH2, A_ARG_90  | HH21, A_ARG_90  | 2.80 | 1.82 | 10.07 |
| 1HGD.PDB | OD1, A_ASP_271 | N, A_SER_91    | H, A_SER_91     | 2.89 | 1.92 | 6.25  |
| 1HGD.PDB | OD1, A_ASP_271 | OG, A_SER_91   | HG, A_SER_91    | 2.93 | 2.12 | 28.00 |
| 1HGD.PDB | OD2, A_ASP_271 | OG, A_SER_91   | HG, A_SER_91    | 2.81 | 1.91 | 17.78 |
| 1HGD.PDB | OD2, A_ASP_68  | OG, A_SER_95   | HG, A_SER_95    | 2.92 | 1.99 | 16.11 |
| 1HGD.PDB | OD2, A_ASP_73  | N, A_ASN_96    | H, A_ASN_96     | 2.94 | 1.97 | 9.87  |
| 1HGD.PDB | OD1, A_ASP_68  | OH, A_TYR_100  | HH, A_TYR_100   | 2.88 | 1.90 | 0.98  |
| 1HGD.PDB | OD2, A_ASP_104 | OG, A_SER_107  | HG, A_SER_107   | 2.86 | 1.96 | 19.52 |
| 1HGD.PDB | O, A_TYR_105   | N, A_ARG_109   | H, A_ARG_109    | 2.82 | 1.85 | 4.81  |
| 1HGD.PDB | OE2, B_GLU_67  | NH2, A_ARG_109 | HH21, A_ARG_109 | 2.83 | 1.84 | 13.41 |
| 1HGD.PDB | OD2, F_ASP_79  | OG, A_SER_110  | HG, A_SER_110   | 2.92 | 1.96 | 11.03 |
| 1HGD.PDB | O, A_SER_107   | N, A_LEU_111   | H, A_LEU_111    | 2.89 | 1.94 | 11.30 |
| 1HGD.PDB | O, A_LEU_108   | N, A_VAL_112   | H, A_VAL_112    | 2.97 | 2.01 | 7.23  |
| 1HGD.PDB | O, A_ARG_109   | N, A_ALA_113   | H, A_ALA_113    | 2.92 | 2.01 | 17.77 |
| 1HGD.PDB | O, A_SER_110   | N, A_SER_114   | H, A_SER_114    | 2.96 | 2.05 | 17.15 |
| 1HGD.PDB | OE2, A_GLU_119 | OG1, A_THR_117 | HG1, A_THR_117  | 2.87 | 1.92 | 9.92  |
| 1HGD.PDB | O, A_GLU_82    | N, A_LEU_118   | H, A_LEU_118    | 2.91 | 1.98 | 15.32 |
| 1HGD.PDB | O, A_TYR_257   | N, A_ILE_121   | H, A_ILE_121    | 2.85 | 1.89 | 7.79  |
| 1HGD.PDB | O, A_ARG_255   | N, A_GLU_123   | H, A_GLU_123    | 2.91 | 1.96 | 11.30 |
| 1HGD.PDB | O, A_THR_155   | N, A_THR_131   | H, A_THR_131    | 2.76 | 1.86 | 18.36 |
| 1HGD.PDB | OD1, A_ASN_152 | N, A_ASN_133   | H, A_ASN_133    | 2.80 | 1.88 | 15.39 |
| 1HGD.PDB | O, A_GLY_146   | N, A_SER_136   | H, A_SER_136    | 2.72 | 1.80 | 14.38 |
| 1HGD.PDB | O, A_GLY_144   | NZ, A_LYS_140  | HZ1, A_LYS_140  | 2.72 | 1.75 | 16.12 |
| 1HGD.PDB | OD1, A_ASN_137 | NZ, A_LYS_140  | HZ2, A_LYS_140  | 2.76 | 1.82 | 19.96 |
| 1HGD.PDB | OD2, A_ASP_77  | NE, A_ARG_141  | HE, A_ARG_141   | 2.80 | 1.97 | 26.87 |
| 1HGD.PDB | O, A_PHE_147   | NH1, A_ARG_141 | HH12, A_ARG_141 | 2.57 | 1.62 | 14.73 |
| 1HGD.PDB | OD1, A_ASP_77  | NH2, A_ARG_141 | HH21, A_ARG_141 | 2.86 | 1.95 | 21.98 |
| 1HGD.PDB | OD2, A_ASP_77  | NH2, A_ARG_141 | HH21, A_ARG_141 | 2.74 | 1.86 | 23.87 |
| 1HGD.PDB | O, A_GLY_72    | NH2, A_ARG_141 | HH22, A_ARG_141 | 2.95 | 1.97 | 11.26 |
| 1HGD.PDB | O, A_SER_136   | N, A_GLY_146   | H, A_GLY_146    | 2.96 | 2.04 | 13.96 |
| 1HGD.PDB | O, A_GLY_72    | N, A_SER_149   | H, A_SER_149    | 2.84 | 1.94 | 17.77 |
| 1HGD.PDB | O, A_ALA_253   | N, A_ASN_152   | H, A_ASN_152    | 2.80 | 1.94 | 23.17 |
| 1HGD.PDB | OH, A_TYR_195  | NE1, A_TRP_153 | HE1, A_TRP_153  | 2.81 | 1.92 | 20.45 |
| 1HGD.PDB | O, A_LEU_194   | N, A_LYS_156   | H, A_LYS_156    | 2.95 | 2.06 | 19.92 |
| 1HGD.PDB | O, A_SER_193   | NZ, A_LYS_156  | HZ2, A_LYS_156  | 2.80 | 1.80 | 13.32 |
| 1HGD.PDB | O, A_SER_247   | N, A_LEU_164   | H, A_LEU_164    | 2.66 | 1.83 | 25.34 |
| 1HGD.PDB | O, A_ILE_245   | N, A_VAL_166   | H, A_VAL_166    | 2.93 | 1.97 | 10.28 |
| 1HGD.PDB | O, A_LEU_243   | OG1, A_THR_167 | HG1, A_THR_167  | 2.93 | 2.00 | 13.12 |
| 1HGD.PDB | O, A_LEU_243   | N, A_MET_168   | H, A_MET_168    | 2.89 | 1.96 | 14.94 |
| 1HGD.PDB | O, A_ASP_241   | N, A_ASN_170   | H, A_ASN_170    | 2.96 | 1.98 | 6.23  |
| 1HGD.PDB | O, A_PHE_174   | ND2, A_ASN_170 | HD21, A_ASN_170 | 2.82 | 1.87 | 11.30 |
| 1HGD.PDB | O, A_VAL_237   | ND2, A_ASN_170 | HD22, A_ASN_170 | 2.83 | 2.02 | 27.43 |
| 1HGD.PDB | O, A_VAL_237   | N, A_LYS_176   | H, A_LYS_176    | 2.97 | 2.05 | 17.24 |
| 1HGD.PDB | OE2, A_GLU_123 | NZ, A_LYS_176  | HZ2, A_LYS_176  | 2.69 | 1.80 | 25.20 |
| 1HGD.PDB | O, A_THR_235   | N, A_TYR_178   | H, A_TYR_178    | 2.79 | 1.82 | 5.26  |
| 1HGD.PDB | OE1, A_GLU_123 | OH, A_TYR_178  | HH, A_TYR_178   | 2.75 | 1.82 | 12.48 |
| 1HGD.PDB | OG1, A_THR_235 | NE1, A_TRP_180 | HE1, A_TRP_180  | 2.94 | 1.95 | 4.39  |
| 1HGD.PDB | O, A_ASN_250   | N, A_HIS_183   | H, A_HIS_183    | 2.86 | 1.94 | 16.37 |
| 1HGD.PDB | O, A_ARG_229   | N, A_HIS_184   | H, A_HIS_184    | 2.80 | 1.84 | 6.46  |
| 1HGD.PDB | OG, A_SER_231  | NE2, A_HIS_184 | HE2, A_HIS_184  | 2.78 | 1.93 | 25.06 |
| 1HGD.PDB | OE1, A_GLU_190 | N, A_SER_186   | H, A_SER_186    | 2.93 | 1.98 | 11.85 |
| 1HGD.PDB | OG1, A_THR_187 | N, A_GLU_190   | H, A_GLU_190    | 2.88 | 1.93 | 10.33 |
| 1HGD.PDB | O, A_GLN_197   | NE2, A_GLN_191 | HE22, A_GLN_191 | 2.88 | 1.95 | 15.50 |
| 1HGD.PDB | O, A_ASN_188   | OG1, A_THR_192 | HG1, A_THR_192  | 2.99 | 2.04 | 7.10  |
| 1HGD.PDB | O, A_GLN_189   | N, A_SER_193   | H, A_SER_193    | 2.80 | 1.83 | 3.68  |

|          |                |                |                 |      |      |       |
|----------|----------------|----------------|-----------------|------|------|-------|
| 1HGD.PDB | O, A_GLU_190   | N, A_LEU_194   | H, A_LEU_194    | 2.97 | 2.01 | 9.56  |
| 1HGD.PDB | O, A_GLN_191   | N, A_TYR_195   | H, A_TYR_195    | 2.77 | 1.82 | 9.83  |
| 1HGD.PDB | O, A_TYR_161   | NE2, A_GLN_197 | HE21, A_GLN_197 | 2.91 | 1.96 | 11.57 |
| 1HGD.PDB | O, A_ASN_248   | NE2, A_GLN_197 | HE22, A_GLN_197 | 2.95 | 2.02 | 15.49 |
| 1HGD.PDB | OD1, A_ASN_246 | NH2, A_ARG_201 | HH21, A_ARG_201 | 2.59 | 1.75 | 26.83 |
| 1HGD.PDB | O, A_ILE_213   | N, A_VAL_202   | H, A_VAL_202    | 3.00 | 2.02 | 5.97  |
| 1HGD.PDB | O, A_ASN_246   | N, A_THR_203   | H, A_THR_203    | 2.83 | 1.91 | 16.65 |
| 1HGD.PDB | O, A_GLN_211   | N, A_VAL_204   | H, A_VAL_204    | 2.85 | 1.94 | 18.50 |
| 1HGD.PDB | O, A_SER_209   | N, A_THR_206   | H, A_THR_206    | 2.89 | 1.92 | 7.99  |
| 1HGD.PDB | OD1, A_ASP_241 | N, A_ARG_207   | H, A_ARG_207    | 2.92 | 1.95 | 8.05  |
| 1HGD.PDB | OG1, A_THR_206 | OG, A_SER_209  | HG, A_SER_209   | 2.90 | 1.96 | 11.12 |
| 1HGD.PDB | OD1, E_ASP_101 | NE2, A_GLN_210 | HE22, A_GLN_210 | 3.00 | 2.15 | 26.33 |
| 1HGD.PDB | O, A_VAL_204   | N, A_GLN_211   | H, A_GLN_211    | 2.82 | 1.90 | 17.10 |
| 1HGD.PDB | OG1, A_THR_203 | OG1, A_THR_212 | HG1, A_THR_212  | 2.90 | 1.94 | 6.68  |
| 1HGD.PDB | O, A_VAL_202   | N, A_ILE_213   | H, A_ILE_213    | 2.87 | 1.94 | 15.45 |
| 1HGD.PDB | OE1, C_GLN_210 | NH2, A_ARG_220 | HH21, A_ARG_220 | 2.78 | 1.86 | 19.99 |
| 1HGD.PDB | O, A_ASN_216   | NH2, A_ARG_220 | HH22, A_ARG_220 | 2.74 | 1.85 | 22.34 |
| 1HGD.PDB | O, A_LEU_226   | N, A_VAL_223   | H, A_VAL_223    | 2.88 | 1.93 | 9.40  |
| 1HGD.PDB | O, A_CYS_97    | NE, A_ARG_224  | HE, A_ARG_224   | 2.82 | 1.98 | 25.92 |
| 1HGD.PDB | O, A_CYS_97    | NH2, A_ARG_224 | HH21, A_ARG_224 | 2.84 | 1.96 | 24.52 |
| 1HGD.PDB | O, A_VAL_223   | N, A_LEU_226   | H, A_LEU_226    | 2.93 | 1.98 | 11.82 |
| 1HGD.PDB | OE2, A_GLU_190 | OG, A_SER_228  | HG, A_SER_228   | 2.98 | 2.00 | 5.61  |
| 1HGD.PDB | O, A_SER_228   | NH1, A_ARG_229 | HH11, A_ARG_229 | 2.71 | 1.76 | 17.21 |
| 1HGD.PDB | O, A_PRO_221   | NH2, A_ARG_229 | HH22, A_ARG_229 | 2.60 | 1.67 | 16.74 |
| 1HGD.PDB | OD1, A_ASP_101 | OG, A_SER_231  | HG, A_SER_231   | 2.84 | 1.88 | 8.92  |
| 1HGD.PDB | O, A_ASP_101   | N, A_ILE_232   | H, A_ILE_232    | 2.89 | 1.95 | 14.22 |
| 1HGD.PDB | O, A_TRP_180   | N, A_TYR_233   | H, A_TYR_233    | 2.92 | 1.95 | 10.20 |
| 1HGD.PDB | O, A_TYR_178   | N, A_THR_235   | H, A_THR_235    | 2.88 | 1.99 | 20.72 |
| 1HGD.PDB | O, A_LYS_176   | N, A_VAL_237   | H, A_VAL_237    | 2.78 | 1.85 | 14.71 |
| 1HGD.PDB | O, F_SER_71    | NZ, A_LYS_238  | HZ2, A_LYS_238  | 2.63 | 1.73 | 23.20 |
| 1HGD.PDB | OE1, F_GLU_72  | NZ, A_LYS_238  | HZ3, A_LYS_238  | 2.93 | 1.92 | 13.44 |
| 1HGD.PDB | O, A_ASN_170   | N, A_GLY_240   | H, A_GLY_240    | 2.86 | 1.99 | 22.42 |
| 1HGD.PDB | O, A_LYS_238   | N, A_ASP_241   | H, A_ASP_241    | 2.97 | 2.03 | 13.82 |
| 1HGD.PDB | OD1, A_ASP_241 | N, A_VAL_242   | H, A_VAL_242    | 2.76 | 1.95 | 27.32 |
| 1HGD.PDB | O, A_MET_168   | N, A_LEU_243   | H, A_LEU_243    | 2.90 | 1.93 | 5.35  |
| 1HGD.PDB | O, A_SER_205   | N, A_VAL_244   | H, A_VAL_244    | 2.96 | 2.02 | 12.84 |
| 1HGD.PDB | O, A_VAL_166   | N, A_ILE_245   | H, A_ILE_245    | 2.91 | 1.97 | 12.42 |
| 1HGD.PDB | O, A_THR_203   | N, A_ASN_246   | H, A_ASN_246    | 2.92 | 1.96 | 6.49  |
| 1HGD.PDB | OD1, A_ASN_165 | ND2, A_ASN_246 | HD22, A_ASN_246 | 2.92 | 1.97 | 12.69 |
| 1HGD.PDB | O, A_LEU_164   | N, A_SER_247   | H, A_SER_247    | 2.92 | 2.01 | 18.72 |
| 1HGD.PDB | O, A_SER_199   | ND2, A_ASN_248 | HD21, A_ASN_248 | 3.00 | 2.19 | 29.63 |
| 1HGD.PDB | OE1, A_GLN_191 | ND2, A_ASN_250 | HD21, A_ASN_250 | 2.94 | 1.98 | 9.96  |
| 1HGD.PDB | O, A_HIS_183   | ND2, A_ASN_250 | HD22, A_ASN_250 | 2.85 | 1.91 | 14.80 |
| 1HGD.PDB | O, A_ASN_152   | N, A_ALA_253   | H, A_ALA_253    | 2.86 | 1.95 | 18.07 |
| 1HGD.PDB | OD1, A_ASN_133 | NH2, A_ARG_255 | HH22, A_ARG_255 | 2.53 | 1.69 | 26.82 |
| 1HGD.PDB | O, A_ILE_121   | N, A_TYR_257   | H, A_TYR_257    | 2.95 | 2.09 | 24.12 |
| 1HGD.PDB | O, A_LEU_177   | N, A_PHE_258   | H, A_PHE_258    | 2.93 | 1.97 | 8.57  |
| 1HGD.PDB | OE2, A_GLU_119 | NH1, A_ARG_261 | HH12, A_ARG_261 | 2.65 | 1.81 | 27.93 |
| 1HGD.PDB | OE1, A_GLU_119 | NH2, A_ARG_261 | HH22, A_ARG_261 | 2.88 | 1.97 | 22.77 |
| 1HGD.PDB | OD2, A_ASP_85  | NZ, A_LYS_264  | HZ3, A_LYS_264  | 2.85 | 1.86 | 16.67 |
| 1HGD.PDB | O, A_PHE_87    | N, A_MET_268   | H, A_MET_268    | 2.83 | 1.94 | 19.49 |
| 1HGD.PDB | O, A_PRO_284   | OG, A_SER_270  | HG, A_SER_270   | 2.85 | 1.89 | 8.52  |
| 1HGD.PDB | OG, A_SER_270  | N, A_ALA_272   | H, A_ALA_272    | 2.92 | 1.98 | 12.23 |
| 1HGD.PDB | O, A_ILE_51    | N, A_ASP_275   | H, A_ASP_275    | 2.87 | 1.97 | 19.56 |
| 1HGD.PDB | OD1, A_ASP_275 | N, A_THR_276   | H, A_THR_276    | 2.83 | 1.98 | 24.15 |
| 1HGD.PDB | O, A_ASN_54    | N, A_SER_279   | H, A_SER_279    | 2.79 | 1.86 | 14.12 |
| 1HGD.PDB | O, A_TYR_302   | N, A_ILE_282   | H, A_ILE_282    | 2.86 | 1.91 | 10.03 |
| 1HGD.PDB | O, A_THR_283   | N, A_GLY_286   | H, A_GLY_286    | 2.82 | 1.91 | 15.39 |

|          |                |                |                 |      |      |       |
|----------|----------------|----------------|-----------------|------|------|-------|
| 1HGD.PDB | O, A_LYS_50    | N, A_SER_287   | H, A_SER_287    | 2.87 | 1.90 | 3.72  |
| 1HGD.PDB | O, A_ALA_304   | ND2, A_ASN_290 | HD22, A_ASN_290 | 2.80 | 1.90 | 19.37 |
| 1HGD.PDB | OE1, A_GLN_44  | NZ, A_LYS_292  | HZ1, A_LYS_292  | 2.71 | 1.70 | 11.58 |
| 1HGD.PDB | OD2, A_ASP_291 | NZ, A_LYS_292  | HZ3, A_LYS_292  | 2.78 | 1.85 | 22.68 |
| 1HGD.PDB | O, A_LYS_307   | N, A_GLN_295   | H, A_GLN_295    | 2.79 | 1.92 | 22.70 |
| 1HGD.PDB | O, A_ASN_298   | NE2, A_GLN_295 | HE21, A_GLN_295 | 2.79 | 1.82 | 3.80  |
| 1HGD.PDB | O, A_GLN_44    | N, A_ASN_296   | H, A_ASN_296    | 2.83 | 1.90 | 14.13 |
| 1HGD.PDB | OE1, A_GLN_295 | N, A_VAL_297   | H, A_VAL_297    | 2.66 | 1.88 | 29.86 |
| 1HGD.PDB | OD1, A_ASN_285 | ND2, A_ASN_298 | HD22, A_ASN_298 | 2.98 | 2.04 | 13.52 |
| 1HGD.PDB | O, B_LYS_68    | NZ, A_LYS_299  | HZ2, A_LYS_299  | 2.96 | 1.95 | 12.60 |
| 1HGD.PDB | OD1, A_ASN_298 | N, A_ILE_300   | H, A_ILE_300    | 2.94 | 2.01 | 15.36 |
| 1HGD.PDB | O, A_ILE_282   | N, A_TYR_302   | H, A_TYR_302    | 2.90 | 2.05 | 25.49 |
| 1HGD.PDB | O, B_LYS_62    | N, A_GLY_303   | H, A_GLY_303    | 2.91 | 1.96 | 9.72  |
| 1HGD.PDB | O, A_GLN_295   | N, A_VAL_309   | H, A_VAL_309    | 2.97 | 2.17 | 29.89 |
| 1HGD.PDB | OG, B_SER_93   | N, A_LYS_310   | H, A_LYS_310    | 2.92 | 1.97 | 11.29 |
| 1HGD.PDB | OE2, A_GLU_41  | N, A_LEU_314   | H, A_LEU_314    | 2.80 | 1.88 | 15.00 |
| 1HGD.PDB | OE1, A_GLU_41  | NZ, A_LYS_315  | HZ3, A_LYS_315  | 2.76 | 1.81 | 20.40 |
| 1HGD.PDB | O, A_THR_40    | N, A_LEU_316   | H, A_LEU_316    | 2.77 | 1.84 | 12.70 |
| 1HGD.PDB | OD1, B_ASN_104 | N, A_ALA_317   | H, A_ALA_317    | 2.78 | 1.85 | 14.55 |
| 1HGD.PDB | O, A_ASN_38    | N, A_THR_318   | H, A_THR_318    | 2.93 | 2.00 | 15.92 |
| 1HGD.PDB | O, A_VAL_20    | ND2, A_ASN_322 | HD21, A_ASN_322 | 2.87 | 1.96 | 17.38 |
| 1HGD.PDB | OE2, A_GLU_35  | ND2, A_ASN_322 | HD22, A_ASN_322 | 2.84 | 1.97 | 23.40 |
| 1HGD.PDB | O, A_PRO_21    | NE2, A_GLN_327 | HE22, A_GLN_327 | 2.81 | 1.92 | 20.13 |
| 1HGD.PDB | OD2, B_ASP_112 | N, B_GLY_1     | H2, B_GLY_1     | 2.82 | 1.82 | 14.61 |
| 1HGD.PDB | OD1, B_ASP_109 | N, B_LEU_2     | H, B_LEU_2      | 2.82 | 1.95 | 22.22 |
| 1HGD.PDB | OD2, B_ASP_112 | N, B_PHE_3     | H, B_PHE_3      | 2.80 | 1.98 | 27.04 |
| 1HGD.PDB | OD2, B_ASP_112 | N, B_GLY_4     | H, B_GLY_4      | 2.93 | 2.05 | 20.30 |
| 1HGD.PDB | OD1, B_ASP_112 | N, B_ALA_5     | H, B_ALA_5      | 2.88 | 1.99 | 20.94 |
| 1HGD.PDB | O, B_GLY_4     | N, B_PHE_9     | H, B_PHE_9      | 2.78 | 1.84 | 12.99 |
| 1HGD.PDB | O, B_GLY_13    | ND2, B_ASN_12  | HD22, B_ASN_12  | 2.80 | 1.93 | 22.87 |
| 1HGD.PDB | O, A_VAL_323   | N, B_GLY_13    | H, B_GLY_13     | 2.71 | 1.77 | 11.58 |
| 1HGD.PDB | O, A_HIS_17    | N, B_TRP_14    | H, B_TRP_14     | 2.85 | 1.93 | 15.85 |
| 1HGD.PDB | OG1, B_THR_41  | N, B_TRP_21    | H, B_TRP_21     | 2.86 | 1.96 | 18.16 |
| 1HGD.PDB | O, A_GLY_16    | N, B_GLY_23    | H, B_GLY_23     | 2.92 | 1.99 | 15.76 |
| 1HGD.PDB | O, B_ALA_35    | N, B_PHE_24    | H, B_PHE_24     | 2.78 | 1.82 | 5.68  |
| 1HGD.PDB | O, A_CYS_14    | N, B_ARG_25    | H, B_ARG_25     | 2.96 | 2.02 | 13.01 |
| 1HGD.PDB | OE1, B_GLN_34  | NE, B_ARG_25   | HE, B_ARG_25    | 2.65 | 1.77 | 20.51 |
| 1HGD.PDB | O, B_GLY_33    | N, B_HIS_26    | H, B_HIS_26     | 2.63 | 1.81 | 26.83 |
| 1HGD.PDB | O, B_GLY_31    | N, B_ASN_28    | H, B_ASN_28     | 2.74 | 1.82 | 15.78 |
| 1HGD.PDB | O, B_HIS_26    | N, B_GLY_33    | H, B_GLY_33     | 2.76 | 1.88 | 21.28 |
| 1HGD.PDB | O, B_TYR_22    | N, B_ASP_37    | H, B_ASP_37     | 2.70 | 1.77 | 14.05 |
| 1HGD.PDB | OD2, B_ASP_37  | N, B_SER_40    | H, B_SER_40     | 2.90 | 1.95 | 12.27 |
| 1HGD.PDB | O, B_ASP_37    | OG1, B_THR_41  | HG1, B_THR_41   | 2.77 | 1.84 | 15.28 |
| 1HGD.PDB | O, B_LEU_38    | N, B_GLN_42    | H, B_GLN_42     | 2.99 | 2.05 | 13.49 |
| 1HGD.PDB | OD1, B_ASP_46  | NE2, B_GLN_42  | HE22, B_GLN_42  | 2.84 | 1.95 | 20.63 |
| 1HGD.PDB | O, B_LYS_39    | N, B_ALA_43    | H, B_ALA_43     | 2.96 | 2.04 | 16.02 |
| 1HGD.PDB | O, B_SER_40    | N, B_ALA_44    | H, B_ALA_44     | 2.96 | 1.99 | 5.57  |
| 1HGD.PDB | O, B_THR_41    | N, B_ILE_45    | H, B_ILE_45     | 2.90 | 1.93 | 6.90  |
| 1HGD.PDB | O, B_GLN_42    | N, B_ASP_46    | H, B_ASP_46     | 2.81 | 1.84 | 1.31  |
| 1HGD.PDB | O, B_ALA_43    | NE2, B_GLN_47  | HE22, B_GLN_47  | 2.89 | 1.99 | 19.00 |
| 1HGD.PDB | O, B_ILE_45    | N, B_ASN_49    | H, B_ASN_49     | 2.87 | 1.93 | 13.87 |
| 1HGD.PDB | O, B_ASP_46    | N, B_GLY_50    | H, B_GLY_50     | 2.87 | 1.98 | 20.63 |
| 1HGD.PDB | OG1, B_THR_107 | NZ, B_LYS_51   | HZ1, B_LYS_51   | 2.96 | 1.97 | 16.32 |
| 1HGD.PDB | OE1, B_GLU_103 | NZ, B_LYS_51   | HZ2, B_LYS_51   | 2.73 | 1.71 | 9.93  |
| 1HGD.PDB | ND1, B_HIS_106 | NZ, B_LYS_51   | HZ3, B_LYS_51   | 2.75 | 1.79 | 17.84 |
| 1HGD.PDB | O, B_ILE_48    | N, B_LEU_52    | H, B_LEU_52     | 2.92 | 2.00 | 15.14 |
| 1HGD.PDB | O, B_ASN_49    | N, B_ASN_53    | H, B_ASN_53     | 2.88 | 1.92 | 9.70  |
| 1HGD.PDB | OE1, B_GLU_57  | NH1, B_ARG_54  | HH11, B_ARG_54  | 2.86 | 1.87 | 11.55 |

|          |                |                |                 |      |      |       |
|----------|----------------|----------------|-----------------|------|------|-------|
| 1HGD.PDB | OE2, F_GLU_97  | NH2, B_ARG_54  | HH22, B_ARG_54  | 2.77 | 1.80 | 12.79 |
| 1HGD.PDB | OE2, B_GLU_61  | NZ, B_LYS_58   | HZ2, B_LYS_58   | 2.91 | 1.88 | 11.49 |
| 1HGD.PDB | OD2, F_ASP_86  | NZ, B_LYS_62   | HZ1, B_LYS_62   | 2.61 | 1.78 | 29.53 |
| 1HGD.PDB | OD2, F_ASP_90  | NZ, B_LYS_62   | HZ3, B_LYS_62   | 2.73 | 1.84 | 25.56 |
| 1HGD.PDB | OG, A_SER_110  | NE2, B_HIS_64  | HE2, B_HIS_64   | 2.96 | 2.01 | 12.34 |
| 1HGD.PDB | O, A_LYS_299   | NZ, B_LYS_68   | HZ1, B_LYS_68   | 2.92 | 1.90 | 10.17 |
| 1HGD.PDB | OE2, B_GLU_85  | NZ, B_LYS_68   | HZ2, B_LYS_68   | 2.76 | 1.74 | 9.73  |
| 1HGD.PDB | OG, C_SER_107  | N, B_ARG_76    | H, B_ARG_76     | 2.80 | 1.86 | 12.47 |
| 1HGD.PDB | OE2, D_GLU_81  | NE, B_ARG_76   | HE, B_ARG_76    | 2.88 | 1.91 | 8.67  |
| 1HGD.PDB | OE2, D_GLU_74  | NH1, B_ARG_76  | HH12, B_ARG_76  | 2.84 | 1.82 | 2.51  |
| 1HGD.PDB | OE1, D_GLU_81  | NH2, B_ARG_76  | HH21, B_ARG_76  | 2.71 | 1.71 | 6.80  |
| 1HGD.PDB | OE1, D_GLU_74  | NH2, B_ARG_76  | HH22, B_ARG_76  | 2.75 | 1.75 | 3.21  |
| 1HGD.PDB | OE1, B_GLU_74  | NE2, B_GLN_78  | HE22, B_GLN_78  | 2.92 | 1.97 | 11.55 |
| 1HGD.PDB | O, B_GLY_75    | N, B_ASP_79    | H, B_ASP_79     | 2.93 | 1.97 | 10.45 |
| 1HGD.PDB | O, B_GLN_78    | N, B_LYS_82    | H, B_LYS_82     | 2.98 | 2.01 | 8.27  |
| 1HGD.PDB | O, B_ASP_79    | N, B_TYR_83    | H, B_TYR_83     | 2.92 | 1.98 | 12.82 |
| 1HGD.PDB | OE1, D_GLU_85  | OH, B_TYR_83   | HH, B_TYR_83    | 2.65 | 1.81 | 23.27 |
| 1HGD.PDB | O, B_LEU_80    | N, B_VAL_84    | H, B_VAL_84     | 2.91 | 1.93 | 4.90  |
| 1HGD.PDB | O, B_LYS_82    | N, B_ASP_86    | H, B_ASP_86     | 2.94 | 1.97 | 5.83  |
| 1HGD.PDB | O, B_TYR_83    | N, B_THR_87    | H, B_THR_87     | 2.89 | 1.93 | 10.17 |
| 1HGD.PDB | O, B_VAL_84    | N, B_LYS_88    | H, B_LYS_88     | 2.91 | 1.99 | 16.72 |
| 1HGD.PDB | OH, F_TYR_83   | NZ, B_LYS_88   | HZ1, B_LYS_88   | 2.76 | 1.72 | 5.59  |
| 1HGD.PDB | O, B_GLU_85    | N, B_ILE_89    | H, B_ILE_89     | 2.85 | 1.88 | 3.45  |
| 1HGD.PDB | O, B_LYS_88    | N, B_TRP_92    | H, B_TRP_92     | 2.96 | 1.98 | 5.21  |
| 1HGD.PDB | O, B_ILE_89    | N, B_SER_93    | H, B_SER_93     | 2.89 | 1.98 | 17.56 |
| 1HGD.PDB | O, B_ILE_89    | OG, B_SER_93   | HG, B_SER_93    | 2.80 | 1.87 | 12.12 |
| 1HGD.PDB | O, B_ASP_90    | N, B_TYR_94    | H, B_TYR_94     | 2.87 | 1.95 | 15.58 |
| 1HGD.PDB | O, B_TRP_92    | N, B_ALA_96    | H, B_ALA_96     | 2.88 | 1.94 | 15.13 |
| 1HGD.PDB | O, B_SER_93    | N, B_GLU_97    | H, B_GLU_97     | 2.98 | 2.02 | 8.64  |
| 1HGD.PDB | O, B_TYR_94    | N, B_LEU_98    | H, B_LEU_98     | 2.95 | 1.97 | 4.16  |
| 1HGD.PDB | O, B_ASN_95    | N, B_LEU_99    | H, B_LEU_99     | 2.94 | 2.03 | 17.77 |
| 1HGD.PDB | O, B_LEU_98    | N, B_LEU_102   | H, B_LEU_102    | 3.00 | 2.02 | 4.33  |
| 1HGD.PDB | O, B_LEU_99    | N, B_GLU_103   | H, B_GLU_103    | 2.95 | 1.99 | 9.69  |
| 1HGD.PDB | O, B_VAL_100   | N, B_ASN_104   | H, B_ASN_104    | 2.89 | 1.92 | 9.01  |
| 1HGD.PDB | O, A_LYS_27    | ND2, B_ASN_104 | HD22, B_ASN_104 | 2.94 | 1.98 | 9.01  |
| 1HGD.PDB | O, B_LEU_102   | N, B_HIS_106   | H, B_HIS_106    | 2.93 | 1.96 | 7.40  |
| 1HGD.PDB | O, B_GLU_103   | N, B_THR_107   | H, B_THR_107    | 2.77 | 1.89 | 20.47 |
| 1HGD.PDB | O, B_ASN_104   | N, B_ILE_108   | H, B_ILE_108    | 2.98 | 2.01 | 9.27  |
| 1HGD.PDB | O, B_HIS_106   | N, B_LEU_110   | H, B_LEU_110    | 2.82 | 1.87 | 10.47 |
| 1HGD.PDB | O, B_THR_107   | OG1, B_THR_111 | HG1, B_THR_111  | 2.97 | 2.00 | 4.65  |
| 1HGD.PDB | O, B_ASP_109   | N, B_SER_113   | H, B_SER_113    | 2.81 | 1.86 | 10.44 |
| 1HGD.PDB | O, F_LEU_2     | OG, B_SER_113  | HG, B_SER_113   | 2.69 | 1.91 | 29.59 |
| 1HGD.PDB | O, B_SER_113   | N, B_LYS_117   | H, B_LYS_117    | 2.72 | 1.85 | 22.52 |
| 1HGD.PDB | O, B_MET_115   | N, B_PHE_119   | H, B_PHE_119    | 3.00 | 2.05 | 11.89 |
| 1HGD.PDB | O, B_ASN_116   | N, B_GLU_120   | H, B_GLU_120    | 2.91 | 1.94 | 4.94  |
| 1HGD.PDB | O, B_LYS_117   | N, B_LYS_121   | H, B_LYS_121    | 2.92 | 2.03 | 20.84 |
| 1HGD.PDB | O, B_PHE_119   | N, B_ARG_123   | H, B_ARG_123    | 2.95 | 1.99 | 8.27  |
| 1HGD.PDB | OE2, B_GLU_120 | NH1, B_ARG_123 | HH11, B_ARG_123 | 2.79 | 1.91 | 24.17 |
| 1HGD.PDB | O, B_GLU_120   | N, B_ARG_124   | H, B_ARG_124    | 2.97 | 2.00 | 6.65  |
| 1HGD.PDB | OE1, F_GLU_132 | NE, B_ARG_124  | HE, B_ARG_124   | 2.83 | 2.02 | 28.17 |
| 1HGD.PDB | OE2, F_GLU_132 | NE, B_ARG_124  | HE, B_ARG_124   | 2.88 | 2.01 | 22.00 |
| 1HGD.PDB | O, B_HIS_159   | ND2, B_ASN_129 | HD21, B_ASN_129 | 2.97 | 2.01 | 9.55  |
| 1HGD.PDB | OH, B_TYR_157  | ND2, B_ASN_129 | HD22, B_ASN_129 | 2.78 | 1.83 | 11.22 |
| 1HGD.PDB | O, B_LYS_139   | N, B_GLU_131   | H, B_GLU_131    | 2.96 | 2.05 | 17.87 |
| 1HGD.PDB | O, B_CYS_137   | N, B_MET_133   | H, B_MET_133    | 2.86 | 1.91 | 11.95 |
| 1HGD.PDB | O, A_LEU_13    | N, B_PHE_138   | H, B_PHE_138    | 2.71 | 1.82 | 20.20 |
| 1HGD.PDB | O, B_GLU_131   | N, B_LYS_139   | H, B_LYS_139    | 2.85 | 1.91 | 12.79 |
| 1HGD.PDB | O, A_ALA_11    | N, B_ILE_140   | H, B_ILE_140    | 2.81 | 1.89 | 16.38 |

|          |                |                |                 |      |      |       |
|----------|----------------|----------------|-----------------|------|------|-------|
| 1HGD.PDB | O, B_ASN_129   | N, B_TYR_141   | H, B_TYR_141    | 2.94 | 2.01 | 16.23 |
| 1HGD.PDB | O, B_LYS_143   | ND1, B_HIS_142 | HD1, B_HIS_142  | 2.98 | 2.08 | 18.98 |
| 1HGD.PDB | OE2, B_GLU_165 | N, B_LYS_143   | H, B_LYS_143    | 2.93 | 1.99 | 13.81 |
| 1HGD.PDB | O, B_ASP_145   | N, B_ILE_149   | H, B_ILE_149    | 2.84 | 1.89 | 10.47 |
| 1HGD.PDB | O, B_ASN_146   | N, B_GLU_150   | H, B_GLU_150    | 2.92 | 1.97 | 11.35 |
| 1HGD.PDB | O, B_ALA_147   | N, B_SER_151   | H, B_SER_151    | 2.92 | 2.06 | 22.74 |
| 1HGD.PDB | O, B_CYS_148   | OG, B_SER_151  | HG, B_SER_151   | 2.66 | 1.81 | 21.47 |
| 1HGD.PDB | O, B_GLU_150   | N, B_ASN_154   | H, B_ASN_154    | 2.80 | 1.83 | 3.48  |
| 1HGD.PDB | OE2, B_GLU_150 | ND2, B_ASN_154 | HD21, B_ASN_154 | 2.98 | 2.09 | 22.34 |
| 1HGD.PDB | O, B_SER_151   | N, B_THR_156   | H, B_THR_156    | 2.74 | 1.92 | 27.01 |
| 1HGD.PDB | OD1, B_ASN_154 | OG1, B_THR_156 | HG1, B_THR_156  | 2.75 | 1.84 | 16.14 |
| 1HGD.PDB | OD1, B_ASP_158 | N, B_ASP_160   | H, B_ASP_160    | 2.88 | 2.02 | 24.02 |
| 1HGD.PDB | O, B_HIS_159   | N, B_TYR_162   | H, B_TYR_162    | 2.92 | 2.06 | 23.47 |
| 1HGD.PDB | O, F_ARG_170   | NH1, B_ARG_163 | HH12, B_ARG_163 | 2.75 | 1.79 | 14.15 |
| 1HGD.PDB | O, B_TYR_162   | N, B_ALA_166   | H, B_ALA_166    | 2.93 | 1.95 | 5.06  |
| 1HGD.PDB | O, B_ARG_163   | N, B_LEU_167   | H, B_LEU_167    | 2.77 | 1.81 | 7.70  |
| 1HGD.PDB | O, B_ASP_164   | N, B_ASN_168   | H, B_ASN_168    | 2.97 | 2.02 | 11.42 |
| 1HGD.PDB | O, B_GLU_165   | ND2, B_ASN_169 | HD22, B_ASN_169 | 2.96 | 2.00 | 8.67  |
| 1HGD.PDB | O, B_ALA_166   | N, B_ARG_170   | H, B_ARG_170    | 2.80 | 1.92 | 20.27 |
| 1HGD.PDB | O, B_GLU_128   | NE, B_ARG_170  | HE, B_ARG_170   | 2.73 | 1.86 | 22.68 |
| 1HGD.PDB | OE2, B_GLU_131 | NH1, B_ARG_170 | HH11, B_ARG_170 | 2.78 | 1.79 | 7.42  |
| 1HGD.PDB | O, B_LEU_167   | N, B_PHE_171   | H, B_PHE_171    | 2.95 | 2.04 | 17.43 |
| 1HGD.PDB | O, D_ILE_140   | N, C_ALA_11    | H, C_ALA_11     | 2.91 | 2.01 | 19.96 |
| 1HGD.PDB | O, D_GLN_27    | N, C_THR_12    | H, C_THR_12     | 2.92 | 1.96 | 10.52 |
| 1HGD.PDB | O, D_PHE_138   | N, C_LEU_13    | H, C_LEU_13     | 2.98 | 2.02 | 9.60  |
| 1HGD.PDB | O, D_ARG_25    | N, C_CYS_14    | H, C_CYS_14     | 2.74 | 1.84 | 19.68 |
| 1HGD.PDB | O, D_GLY_136   | N, C_LEU_15    | H, C_LEU_15     | 2.88 | 1.91 | 5.44  |
| 1HGD.PDB | O, D_GLY_23    | N, C_GLY_16    | H, C_GLY_16     | 2.97 | 2.07 | 19.04 |
| 1HGD.PDB | O, C_HIS_18    | ND1, C_HIS_17  | HD1, C_HIS_17   | 2.93 | 2.06 | 23.26 |
| 1HGD.PDB | O, D_TRP_21    | N, C_HIS_18    | H, C_HIS_18     | 2.85 | 1.99 | 23.00 |
| 1HGD.PDB | OD1, C_ASN_322 | N, C_VAL_20    | H, C_VAL_20     | 2.80 | 1.83 | 3.81  |
| 1HGD.PDB | O, C_VAL_36    | N, C_THR_24    | H, C_THR_24     | 2.84 | 1.91 | 15.31 |
| 1HGD.PDB | O, C_ILE_34    | N, C_VAL_26    | H, C_VAL_26     | 2.82 | 1.89 | 14.49 |
| 1HGD.PDB | OE2, D_GLU_97  | NZ, C_LYS_27   | HZ1, C_LYS_27   | 2.80 | 1.77 | 7.54  |
| 1HGD.PDB | O, C_VAL_26    | N, C_ILE_34    | H, C_ILE_34     | 2.89 | 1.94 | 12.21 |
| 1HGD.PDB | O, C_THR_24    | N, C_VAL_36    | H, C_VAL_36     | 2.79 | 1.83 | 9.80  |
| 1HGD.PDB | O, C_MET_320   | N, C_THR_37    | H, C_THR_37     | 2.88 | 1.90 | 4.85  |
| 1HGD.PDB | O, C_LEU_316   | N, C_THR_40    | H, C_THR_40     | 2.84 | 1.97 | 22.14 |
| 1HGD.PDB | O, C_LEU_314   | N, C_LEU_42    | H, C_LEU_42     | 2.78 | 1.93 | 24.47 |
| 1HGD.PDB | O, C_PHE_294   | N, C_GLN_44    | H, C_GLN_44     | 2.79 | 1.83 | 6.90  |
| 1HGD.PDB | O, C_SER_46    | NE2, C_GLN_44  | HE22, C_GLN_44  | 2.85 | 1.96 | 21.38 |
| 1HGD.PDB | O, C_ASN_285   | OG, C_SER_47   | HG, C_SER_47    | 2.81 | 1.90 | 15.43 |
| 1HGD.PDB | OD2, C_ASP_275 | NZ, C_LYS_50   | HZ1, C_LYS_50   | 2.66 | 1.78 | 25.77 |
| 1HGD.PDB | O, C_PRO_273   | N, C_ILE_51    | H, C_ILE_51     | 2.78 | 1.83 | 8.71  |
| 1HGD.PDB | O, C_ASP_275   | N, C_ASN_53    | H, C_ASN_53     | 2.80 | 1.94 | 23.81 |
| 1HGD.PDB | OD2, C_ASP_85  | N, C_ARG_57    | H, C_ARG_57     | 2.85 | 1.91 | 10.75 |
| 1HGD.PDB | O, C_THR_83    | NE, C_ARG_57   | HE, C_ARG_57    | 2.80 | 1.83 | 7.46  |
| 1HGD.PDB | O, C_LEU_86    | N, C_LEU_59    | H, C_LEU_59     | 2.86 | 1.91 | 11.22 |
| 1HGD.PDB | O, C_VAL_88    | N, C_GLY_61    | H, C_GLY_61     | 2.98 | 2.11 | 22.39 |
| 1HGD.PDB | OD1, C_ASP_60  | N, C_ILE_62    | H, C_ILE_62     | 2.86 | 1.95 | 16.63 |
| 1HGD.PDB | O, C_GLY_61    | N, C_CYS_64    | H, C_CYS_64     | 2.87 | 1.95 | 15.76 |
| 1HGD.PDB | OE2, C_GLU_89  | N, C_LEU_66    | H, C_LEU_66     | 2.99 | 2.02 | 7.77  |
| 1HGD.PDB | O, C_LEU_66    | N, C_LEU_70    | H, C_LEU_70     | 2.88 | 2.00 | 21.00 |
| 1HGD.PDB | O, C_ILE_67    | N, C_LEU_71    | H, C_LEU_71     | 2.81 | 1.86 | 10.52 |
| 1HGD.PDB | O, C_ASP_68    | N, C_GLY_72    | H, C_GLY_72     | 2.84 | 1.91 | 15.63 |
| 1HGD.PDB | OD1, C_ASP_73  | N, C_HIS_75    | H, C_HIS_75     | 2.89 | 2.01 | 22.22 |
| 1HGD.PDB | OD1, C_ASP_73  | ND1, C_HIS_75  | HD1, C_HIS_75   | 2.77 | 1.87 | 19.67 |
| 1HGD.PDB | O, C_ASP_63    | NE2, C_HIS_75  | HE2, C_HIS_75   | 2.86 | 1.94 | 17.12 |

|          |                |                |                 |      |      |       |
|----------|----------------|----------------|-----------------|------|------|-------|
| 1HGD.PDB | O, C_ASP_73    | N, C_CYS_76    | H, C_CYS_76     | 2.80 | 1.86 | 11.97 |
| 1HGD.PDB | O, C_PRO_74    | N, C_ASP_77    | H, C_ASP_77     | 2.94 | 1.99 | 12.51 |
| 1HGD.PDB | O, C_ARG_57    | N, C_ASP_85    | H, C_ASP_85     | 2.79 | 1.90 | 19.56 |
| 1HGD.PDB | O, C_LEU_59    | N, C_VAL_88    | H, C_VAL_88     | 2.93 | 1.95 | 4.90  |
| 1HGD.PDB | O, C_MET_268   | N, C_GLU_89    | H, C_GLU_89     | 2.78 | 1.84 | 12.72 |
| 1HGD.PDB | OD1, C_ASP_60  | NE, C_ARG_90   | HE, C_ARG_90    | 2.86 | 1.89 | 9.66  |
| 1HGD.PDB | O, C_SER_270   | NH1, C_ARG_90  | HH11, C_ARG_90  | 2.68 | 1.81 | 24.44 |
| 1HGD.PDB | O, C_ALA_272   | NH1, C_ARG_90  | HH12, C_ARG_90  | 2.62 | 1.70 | 17.91 |
| 1HGD.PDB | OD2, C_ASP_60  | NH2, C_ARG_90  | HH21, C_ARG_90  | 2.78 | 1.79 | 10.49 |
| 1HGD.PDB | OD1, C_ASP_271 | N, C_SER_91    | H, C_SER_91     | 2.89 | 1.92 | 5.66  |
| 1HGD.PDB | OD1, C_ASP_271 | OG, C_SER_91   | HG, C_SER_91    | 2.93 | 2.11 | 26.93 |
| 1HGD.PDB | OD2, C_ASP_271 | OG, C_SER_91   | HG, C_SER_91    | 2.86 | 1.96 | 18.80 |
| 1HGD.PDB | OD2, C_ASP_68  | OG, C_SER_95   | HG, C_SER_95    | 2.88 | 1.96 | 15.18 |
| 1HGD.PDB | OD2, C_ASP_73  | N, C_ASN_96    | H, C_ASN_96     | 2.93 | 1.97 | 11.12 |
| 1HGD.PDB | OD1, C_ASP_68  | OH, C_TYR_100  | HH, C_TYR_100   | 2.89 | 1.96 | 14.39 |
| 1HGD.PDB | OD2, C_ASP_104 | OG, C_SER_107  | HG, C_SER_107   | 2.91 | 2.00 | 17.92 |
| 1HGD.PDB | O, C_TYR_105   | N, C_ARG_109   | H, C_ARG_109    | 2.82 | 1.85 | 5.75  |
| 1HGD.PDB | OE2, D_GLU_67  | NH2, C_ARG_109 | HH21, C_ARG_109 | 2.87 | 1.88 | 13.44 |
| 1HGD.PDB | OD2, B_ASP_79  | OG, C_SER_110  | HG, C_SER_110   | 2.73 | 1.84 | 19.59 |
| 1HGD.PDB | O, C_SER_107   | N, C_LEU_111   | H, C_LEU_111    | 2.87 | 1.93 | 12.86 |
| 1HGD.PDB | O, C_ARG_109   | N, C_ALA_113   | H, C_ALA_113    | 2.95 | 2.03 | 17.38 |
| 1HGD.PDB | OE2, C_GLU_119 | OG1, C_THR_117 | HG1, C_THR_117  | 2.86 | 1.93 | 10.42 |
| 1HGD.PDB | O, C_GLU_82    | N, C_LEU_118   | H, C_LEU_118    | 2.89 | 1.96 | 15.85 |
| 1HGD.PDB | O, C_TYR_257   | N, C_ILE_121   | H, C_ILE_121    | 2.88 | 1.91 | 7.92  |
| 1HGD.PDB | O, C_ARG_255   | N, C_GLU_123   | H, C_GLU_123    | 2.91 | 1.95 | 11.07 |
| 1HGD.PDB | O, C_THR_155   | N, C_THR_131   | H, C_THR_131    | 2.77 | 1.87 | 18.56 |
| 1HGD.PDB | OD1, C_ASN_152 | N, C_ASN_133   | H, C_ASN_133    | 2.82 | 1.89 | 13.60 |
| 1HGD.PDB | O, C_GLY_146   | N, C_SER_136   | H, C_SER_136    | 2.73 | 1.81 | 14.22 |
| 1HGD.PDB | O, C_GLY_144   | NZ, C_LYS_140  | HZ1, C_LYS_140  | 2.66 | 1.71 | 18.26 |
| 1HGD.PDB | OD1, C_ASN_137 | NZ, C_LYS_140  | HZ2, C_LYS_140  | 2.78 | 1.84 | 20.52 |
| 1HGD.PDB | OD2, C_ASP_77  | NE, C_ARG_141  | HE, C_ARG_141   | 2.80 | 1.97 | 27.06 |
| 1HGD.PDB | O, C_PHE_147   | NH1, C_ARG_141 | HH12, C_ARG_141 | 2.57 | 1.62 | 14.51 |
| 1HGD.PDB | OD1, C_ASP_77  | NH2, C_ARG_141 | HH21, C_ARG_141 | 2.87 | 1.96 | 21.76 |
| 1HGD.PDB | OD2, C_ASP_77  | NH2, C_ARG_141 | HH21, C_ARG_141 | 2.75 | 1.86 | 23.93 |
| 1HGD.PDB | O, C_GLY_72    | NH2, C_ARG_141 | HH22, C_ARG_141 | 2.96 | 1.99 | 11.64 |
| 1HGD.PDB | OD1, C_ASN_137 | OG, C_SER_145  | HG, C_SER_145   | 2.98 | 2.13 | 22.87 |
| 1HGD.PDB | O, C_SER_136   | N, C_GLY_146   | H, C_GLY_146    | 2.97 | 2.04 | 13.75 |
| 1HGD.PDB | O, C_GLY_72    | N, C_SER_149   | H, C_SER_149    | 2.83 | 1.92 | 17.38 |
| 1HGD.PDB | O, C_ALA_253   | N, C_ASN_152   | H, C_ASN_152    | 2.78 | 1.92 | 22.70 |
| 1HGD.PDB | OH, C_TYR_195  | NE1, C_TRP_153 | HE1, C_TRP_153  | 2.80 | 1.95 | 24.25 |
| 1HGD.PDB | O, C_LEU_194   | N, C_LYS_156   | H, C_LYS_156    | 2.95 | 2.05 | 20.33 |
| 1HGD.PDB | O, C_SER_247   | N, C_LEU_164   | H, C_LEU_164    | 2.68 | 1.84 | 25.44 |
| 1HGD.PDB | O, C_ILE_245   | N, C_VAL_166   | H, C_VAL_166    | 2.92 | 1.97 | 10.65 |
| 1HGD.PDB | O, C_LEU_243   | OG1, C_THR_167 | HG1, C_THR_167  | 2.91 | 2.00 | 16.96 |
| 1HGD.PDB | O, C_LEU_243   | N, C_MET_168   | H, C_MET_168    | 2.93 | 2.00 | 16.08 |
| 1HGD.PDB | O, C_ASP_241   | N, C_ASN_170   | H, C_ASN_170    | 2.92 | 1.95 | 7.54  |
| 1HGD.PDB | O, C_PHE_174   | ND2, C_ASN_170 | HD21, C_ASN_170 | 2.81 | 1.86 | 10.36 |
| 1HGD.PDB | O, C_VAL_237   | ND2, C_ASN_170 | HD22, C_ASN_170 | 2.83 | 2.02 | 27.86 |
| 1HGD.PDB | O, C_VAL_237   | N, C_LYS_176   | H, C_LYS_176    | 2.96 | 2.03 | 15.89 |
| 1HGD.PDB | OE2, C_GLU_123 | NZ, C_LYS_176  | HZ2, C_LYS_176  | 2.69 | 1.80 | 25.35 |
| 1HGD.PDB | O, C_THR_235   | N, C_TYR_178   | H, C_TYR_178    | 2.78 | 1.82 | 3.58  |
| 1HGD.PDB | OE1, C_GLU_123 | OH, C_TYR_178  | HH, C_TYR_178   | 2.73 | 1.80 | 13.21 |
| 1HGD.PDB | OG1, C_THR_235 | NE1, C_TRP_180 | HE1, C_TRP_180  | 2.91 | 1.93 | 2.97  |
| 1HGD.PDB | O, C_ASN_250   | N, C_HIS_183   | H, C_HIS_183    | 2.86 | 1.94 | 17.04 |
| 1HGD.PDB | O, C_ARG_229   | N, C_HIS_184   | H, C_HIS_184    | 2.84 | 1.87 | 6.25  |
| 1HGD.PDB | OG, C_SER_231  | NE2, C_HIS_184 | HE2, C_HIS_184  | 2.75 | 1.91 | 25.20 |
| 1HGD.PDB | OE1, C_GLU_190 | N, C_SER_186   | H, C_SER_186    | 2.94 | 1.99 | 11.52 |
| 1HGD.PDB | OG1, C_THR_187 | N, C_GLU_190   | H, C_GLU_190    | 2.91 | 1.96 | 11.66 |

|          |                |                |                 |      |      |       |
|----------|----------------|----------------|-----------------|------|------|-------|
| 1HGD.PDB | OD1, C_ASN_250 | NE2, C_GLN_191 | HE21, C_GLN_191 | 2.98 | 2.02 | 9.43  |
| 1HGD.PDB | O, C_GLN_197   | NE2, C_GLN_191 | HE22, C_GLN_191 | 2.89 | 1.96 | 15.69 |
| 1HGD.PDB | O, C_GLN_189   | OG1, C_THR_192 | HG1, C_THR_192  | 2.81 | 1.97 | 23.75 |
| 1HGD.PDB | O, C_GLN_189   | N, C_SER_193   | H, C_SER_193    | 2.79 | 1.85 | 12.90 |
| 1HGD.PDB | O, C_GLN_191   | N, C_TYR_195   | H, C_TYR_195    | 2.80 | 1.85 | 11.05 |
| 1HGD.PDB | O, C_TYR_161   | NE2, C_GLN_197 | HE21, C_GLN_197 | 2.91 | 1.96 | 11.66 |
| 1HGD.PDB | O, C_ASN_248   | NE2, C_GLN_197 | HE22, C_GLN_197 | 2.97 | 2.05 | 15.65 |
| 1HGD.PDB | OD1, C_ASN_246 | NH2, C_ARG_201 | HH21, C_ARG_201 | 2.60 | 1.77 | 27.30 |
| 1HGD.PDB | O, C_ILE_213   | N, C_VAL_202   | H, C_VAL_202    | 3.00 | 2.04 | 9.35  |
| 1HGD.PDB | O, C_ASN_246   | N, C_THR_203   | H, C_THR_203    | 2.89 | 1.94 | 12.58 |
| 1HGD.PDB | OG1, C_THR_212 | OG1, C_THR_203 | HG1, C_THR_203  | 2.89 | 1.96 | 13.30 |
| 1HGD.PDB | O, C_GLN_211   | N, C_VAL_204   | H, C_VAL_204    | 2.87 | 1.96 | 17.77 |
| 1HGD.PDB | O, C_SER_209   | N, C_THR_206   | H, C_THR_206    | 2.90 | 1.94 | 8.48  |
| 1HGD.PDB | OD1, C_ASP_241 | N, C_ARG_207   | H, C_ARG_207    | 2.91 | 1.95 | 9.04  |
| 1HGD.PDB | OD2, C_ASP_241 | NE, C_ARG_208  | HE, C_ARG_208   | 2.97 | 2.08 | 21.42 |
| 1HGD.PDB | OG1, C_THR_206 | OG, C_SER_209  | HG, C_SER_209   | 2.92 | 1.98 | 10.99 |
| 1HGD.PDB | OD1, A_ASP_101 | NE2, C_GLN_210 | HE22, C_GLN_210 | 2.97 | 2.13 | 27.21 |
| 1HGD.PDB | O, C_VAL_204   | N, C_GLN_211   | H, C_GLN_211    | 2.82 | 1.89 | 16.07 |
| 1HGD.PDB | O, C_VAL_202   | N, C_ILE_213   | H, C_ILE_213    | 2.87 | 1.94 | 15.07 |
| 1HGD.PDB | O, C_ASN_216   | NH1, C_ARG_220 | HH12, C_ARG_220 | 2.88 | 2.06 | 29.71 |
| 1HGD.PDB | OE1, E_GLN_210 | NH2, C_ARG_220 | HH21, C_ARG_220 | 2.69 | 1.80 | 23.00 |
| 1HGD.PDB | O, C_ASN_216   | NH2, C_ARG_220 | HH22, C_ARG_220 | 2.74 | 1.85 | 22.78 |
| 1HGD.PDB | O, C_LEU_226   | N, C_VAL_223   | H, C_VAL_223    | 2.86 | 1.90 | 8.93  |
| 1HGD.PDB | O, C_CYS_97    | NE, C_ARG_224  | HE, C_ARG_224   | 2.81 | 1.97 | 26.63 |
| 1HGD.PDB | O, C_CYS_97    | NH2, C_ARG_224 | HH21, C_ARG_224 | 2.83 | 1.96 | 24.41 |
| 1HGD.PDB | O, C_VAL_223   | N, C_LEU_226   | H, C_LEU_226    | 2.96 | 2.01 | 12.56 |
| 1HGD.PDB | OE2, C_GLU_190 | OG, C_SER_228  | HG, C_SER_228   | 3.00 | 2.02 | 4.69  |
| 1HGD.PDB | O, C_SER_228   | NH1, C_ARG_229 | HH11, C_ARG_229 | 2.69 | 1.75 | 17.13 |
| 1HGD.PDB | O, C_PRO_221   | NH2, C_ARG_229 | HH22, C_ARG_229 | 2.59 | 1.67 | 18.22 |
| 1HGD.PDB | OD1, C_ASP_101 | OG, C_SER_231  | HG, C_SER_231   | 2.87 | 1.90 | 8.39  |
| 1HGD.PDB | O, C_ASP_101   | N, C_ILE_232   | H, C_ILE_232    | 2.91 | 1.97 | 13.69 |
| 1HGD.PDB | O, C_TRP_180   | N, C_TYR_233   | H, C_TYR_233    | 2.92 | 1.96 | 10.09 |
| 1HGD.PDB | O, C_TYR_178   | N, C_THR_235   | H, C_THR_235    | 2.86 | 1.97 | 20.86 |
| 1HGD.PDB | O, C_LYS_176   | N, C_VAL_237   | H, C_VAL_237    | 2.76 | 1.84 | 16.40 |
| 1HGD.PDB | OE1, B_GLU_72  | NZ, C_LYS_238  | HZ1, C_LYS_238  | 2.80 | 1.83 | 17.68 |
| 1HGD.PDB | O, B_SER_71    | NZ, C_LYS_238  | HZ3, C_LYS_238  | 2.57 | 1.67 | 23.33 |
| 1HGD.PDB | O, C_ASN_170   | N, C_GLY_240   | H, C_GLY_240    | 2.86 | 1.98 | 22.33 |
| 1HGD.PDB | O, C_LYS_238   | N, C_ASP_241   | H, C_ASP_241    | 2.97 | 2.04 | 14.16 |
| 1HGD.PDB | OD1, C_ASP_241 | N, C_VAL_242   | H, C_VAL_242    | 2.79 | 1.97 | 27.05 |
| 1HGD.PDB | O, C_MET_168   | N, C_LEU_243   | H, C_LEU_243    | 2.90 | 1.93 | 5.78  |
| 1HGD.PDB | O, C_SER_205   | N, C_VAL_244   | H, C_VAL_244    | 2.99 | 2.03 | 11.79 |
| 1HGD.PDB | O, C_VAL_166   | N, C_ILE_245   | H, C_ILE_245    | 2.96 | 2.02 | 13.67 |
| 1HGD.PDB | O, C_THR_203   | N, C_ASN_246   | H, C_ASN_246    | 2.93 | 1.96 | 5.65  |
| 1HGD.PDB | OD1, C_ASN_165 | ND2, C_ASN_246 | HD22, C_ASN_246 | 2.91 | 1.96 | 13.56 |
| 1HGD.PDB | O, C_LEU_164   | N, C_SER_247   | H, C_SER_247    | 2.95 | 2.05 | 18.82 |
| 1HGD.PDB | OE1, C_GLN_191 | ND2, C_ASN_250 | HD21, C_ASN_250 | 2.90 | 1.95 | 10.99 |
| 1HGD.PDB | O, C_HIS_183   | ND2, C_ASN_250 | HD22, C_ASN_250 | 2.89 | 1.96 | 14.74 |
| 1HGD.PDB | O, C_ASN_152   | N, C_ALA_253   | H, C_ALA_253    | 2.86 | 1.97 | 19.68 |
| 1HGD.PDB | OD1, C_ASN_133 | NH2, C_ARG_255 | HH22, C_ARG_255 | 2.52 | 1.69 | 27.35 |
| 1HGD.PDB | O, C_ILE_121   | N, C_TYR_257   | H, C_TYR_257    | 2.92 | 2.07 | 24.63 |
| 1HGD.PDB | O, C_LEU_177   | N, C_PHE_258   | H, C_PHE_258    | 2.93 | 1.97 | 8.49  |
| 1HGD.PDB | OE2, C_GLU_119 | NH1, C_ARG_261 | HH12, C_ARG_261 | 2.66 | 1.83 | 27.96 |
| 1HGD.PDB | OE1, C_GLU_119 | NH2, C_ARG_261 | HH22, C_ARG_261 | 2.90 | 2.00 | 23.32 |
| 1HGD.PDB | OD2, C_ASP_85  | NZ, C_LYS_264  | HZ3, C_LYS_264  | 2.82 | 1.84 | 16.88 |
| 1HGD.PDB | O, C_PHE_87    | N, C_MET_268   | H, C_MET_268    | 2.82 | 1.92 | 19.58 |
| 1HGD.PDB | O, C_PRO_284   | OG, C_SER_270  | HG, C_SER_270   | 2.86 | 1.93 | 14.34 |
| 1HGD.PDB | OG, C_SER_270  | N, C_ALA_272   | H, C_ALA_272    | 2.88 | 1.93 | 11.04 |
| 1HGD.PDB | O, C_ILE_51    | N, C_ASP_275   | H, C_ASP_275    | 2.89 | 2.02 | 21.61 |

|          |                |                |                 |      |      |       |
|----------|----------------|----------------|-----------------|------|------|-------|
| 1HGD.PDB | OD1, C_ASP_275 | N, C_THR_276   | H, C_THR_276    | 2.82 | 1.97 | 24.34 |
| 1HGD.PDB | O, C_ASN_54    | N, C_SER_279   | H, C_SER_279    | 2.80 | 1.87 | 14.30 |
| 1HGD.PDB | O, C_TYR_302   | N, C_ILE_282   | H, C_ILE_282    | 2.89 | 1.91 | 5.26  |
| 1HGD.PDB | O, C_THR_283   | N, C_GLY_286   | H, C_GLY_286    | 2.83 | 1.91 | 15.19 |
| 1HGD.PDB | O, C_LYS_50    | N, C_SER_287   | H, C_SER_287    | 2.85 | 1.88 | 6.04  |
| 1HGD.PDB | O, C_ALA_304   | ND2, C_ASN_290 | HD22, C_ASN_290 | 2.83 | 1.94 | 20.74 |
| 1HGD.PDB | OE1, C_GLN_44  | NZ, C_LYS_292  | HZ1, C_LYS_292  | 2.73 | 1.73 | 12.00 |
| 1HGD.PDB | OD2, C_ASP_291 | NZ, C_LYS_292  | HZ3, C_LYS_292  | 2.79 | 1.88 | 23.81 |
| 1HGD.PDB | O, C_LYS_307   | N, C_GLN_295   | H, C_GLN_295    | 2.80 | 1.93 | 22.24 |
| 1HGD.PDB | O, C_ASN_298   | NE2, C_GLN_295 | HE21, C_GLN_295 | 2.78 | 1.81 | 6.87  |
| 1HGD.PDB | O, C_GLN_44    | N, C_ASN_296   | H, C_ASN_296    | 2.84 | 1.92 | 15.89 |
| 1HGD.PDB | OE1, C_GLN_295 | N, C_VAL_297   | H, C_VAL_297    | 2.67 | 1.87 | 28.66 |
| 1HGD.PDB | OD1, C_ASN_285 | ND2, C_ASN_298 | HD22, C_ASN_298 | 2.96 | 2.02 | 13.09 |
| 1HGD.PDB | O, D_LYS_68    | NZ, C_LYS_299  | HZ2, C_LYS_299  | 2.97 | 1.97 | 13.11 |
| 1HGD.PDB | OD1, C_ASN_298 | N, C_ILE_300   | H, C_ILE_300    | 2.91 | 2.01 | 18.95 |
| 1HGD.PDB | O, C_ILE_282   | N, C_TYR_302   | H, C_TYR_302    | 2.86 | 2.02 | 25.59 |
| 1HGD.PDB | O, D_LYS_62    | N, C_GLY_303   | H, C_GLY_303    | 2.92 | 1.97 | 11.11 |
| 1HGD.PDB | O, C_GLN_295   | N, C_VAL_309   | H, C_VAL_309    | 2.96 | 2.15 | 29.17 |
| 1HGD.PDB | OG, D_SER_93   | N, C_LYS_310   | H, C_LYS_310    | 2.96 | 2.01 | 12.70 |
| 1HGD.PDB | OE2, C_GLU_41  | N, C_LEU_314   | H, C_LEU_314    | 2.81 | 1.88 | 14.84 |
| 1HGD.PDB | OE1, C_GLU_41  | NZ, C_LYS_315  | HZ3, C_LYS_315  | 2.78 | 1.84 | 20.99 |
| 1HGD.PDB | O, C_THR_40    | N, C_LEU_316   | H, C_LEU_316    | 2.76 | 1.82 | 12.19 |
| 1HGD.PDB | OD1, D_ASN_104 | N, C_ALA_317   | H, C_ALA_317    | 2.76 | 1.81 | 11.23 |
| 1HGD.PDB | O, C_ASN_38    | N, C_THR_318   | H, C_THR_318    | 2.95 | 2.04 | 17.98 |
| 1HGD.PDB | O, C_VAL_20    | ND2, C_ASN_322 | HD21, C_ASN_322 | 2.90 | 1.99 | 17.62 |
| 1HGD.PDB | OE2, C_GLU_35  | ND2, C_ASN_322 | HD22, C_ASN_322 | 2.83 | 1.94 | 21.17 |
| 1HGD.PDB | OE1, D_GLU_15  | NZ, C_LYS_326  | HZ1, C_LYS_326  | 2.78 | 1.77 | 11.96 |
| 1HGD.PDB | OXT, C_THR_328 | NE2, C_GLN_327 | HE22, C_GLN_327 | 2.97 | 2.03 | 15.01 |
| 1HGD.PDB | OD2, D_ASP_112 | N, D_GLY_1     | H2, D_GLY_1     | 2.80 | 1.80 | 13.51 |
| 1HGD.PDB | OD1, D_ASP_109 | N, D_LEU_2     | H, D_LEU_2      | 2.86 | 1.98 | 21.55 |
| 1HGD.PDB | OD2, D_ASP_112 | N, D_PHE_3     | H, D_PHE_3      | 2.84 | 2.05 | 29.38 |
| 1HGD.PDB | OD2, D_ASP_112 | N, D_GLY_4     | H, D_GLY_4      | 2.94 | 2.04 | 18.50 |
| 1HGD.PDB | OD1, D_ASP_112 | N, D_ALA_5     | H, D_ALA_5      | 2.90 | 2.02 | 22.02 |
| 1HGD.PDB | O, D_GLY_4     | N, D_PHE_9     | H, D_PHE_9      | 2.79 | 1.85 | 14.03 |
| 1HGD.PDB | O, D_GLY_13    | ND2, D_ASN_12  | HD22, D_ASN_12  | 2.84 | 1.96 | 21.33 |
| 1HGD.PDB | O, C_VAL_323   | N, D_GLY_13    | H, D_GLY_13     | 2.70 | 1.78 | 14.49 |
| 1HGD.PDB | O, C_HIS_17    | N, D_TRP_14    | H, D_TRP_14     | 2.85 | 1.91 | 13.36 |
| 1HGD.PDB | OG1, D_THR_41  | N, D_TRP_21    | H, D_TRP_21     | 2.90 | 2.00 | 19.11 |
| 1HGD.PDB | O, C_GLY_16    | N, D_GLY_23    | H, D_GLY_23     | 2.93 | 2.01 | 16.45 |
| 1HGD.PDB | O, D_ALA_35    | N, D_PHE_24    | H, D_PHE_24     | 2.81 | 1.84 | 5.01  |
| 1HGD.PDB | O, C_CYS_14    | N, D_ARG_25    | H, D_ARG_25     | 2.91 | 1.95 | 9.92  |
| 1HGD.PDB | OE1, D_GLN_34  | NE, D_ARG_25   | HE, D_ARG_25    | 2.61 | 1.77 | 24.43 |
| 1HGD.PDB | O, D_GLY_33    | N, D_HIS_26    | H, D_HIS_26     | 2.84 | 1.92 | 15.70 |
| 1HGD.PDB | O, C_THR_12    | N, D_GLN_27    | H, D_GLN_27     | 2.91 | 1.98 | 16.00 |
| 1HGD.PDB | O, D_GLY_31    | N, D_ASN_28    | H, D_ASN_28     | 2.90 | 1.95 | 12.05 |
| 1HGD.PDB | OD1, D_ASN_146 | ND2, D_ASN_28  | HD21, D_ASN_28  | 3.00 | 2.03 | 9.16  |
| 1HGD.PDB | O, D_PHE_24    | N, D_ALA_35    | H, D_ALA_35     | 2.79 | 1.99 | 28.44 |
| 1HGD.PDB | O, D_TYR_22    | N, D_ASP_37    | H, D_ASP_37     | 2.70 | 1.79 | 16.23 |
| 1HGD.PDB | OD2, D_ASP_37  | N, D_SER_40    | H, D_SER_40     | 2.91 | 1.96 | 11.03 |
| 1HGD.PDB | OD2, D_ASP_37  | OG, D_SER_40   | HG, D_SER_40    | 2.86 | 1.96 | 18.80 |
| 1HGD.PDB | O, D_ASP_37    | OG1, D_THR_41  | HG1, D_THR_41   | 2.74 | 1.83 | 16.22 |
| 1HGD.PDB | O, D_LEU_38    | N, D_GLN_42    | H, D_GLN_42     | 2.97 | 2.03 | 13.89 |
| 1HGD.PDB | OD1, D_ASP_46  | NE2, D_GLN_42  | HE22, D_GLN_42  | 2.84 | 1.95 | 20.82 |
| 1HGD.PDB | O, D_LYS_39    | N, D_ALA_43    | H, D_ALA_43     | 2.97 | 2.02 | 11.21 |
| 1HGD.PDB | O, D_SER_40    | N, D_ALA_44    | H, D_ALA_44     | 2.97 | 2.00 | 5.30  |
| 1HGD.PDB | O, D_THR_41    | N, D_ILE_45    | H, D_ILE_45     | 2.92 | 1.97 | 10.66 |
| 1HGD.PDB | O, D_GLN_42    | N, D_ASP_46    | H, D_ASP_46     | 2.81 | 1.84 | 5.79  |
| 1HGD.PDB | O, D_ALA_43    | NE2, D_GLN_47  | HE22, D_GLN_47  | 2.86 | 1.96 | 18.91 |



|          |                |                |                 |      |      |       |
|----------|----------------|----------------|-----------------|------|------|-------|
| 1HGD.PDB | O, D_ILE_45    | N, D_ASN_49    | H, D_ASN_49     | 2.87 | 1.93 | 14.90 |
| 1HGD.PDB | O, D_ASP_46    | N, D_GLY_50    | H, D_GLY_50     | 2.89 | 1.97 | 17.25 |
| 1HGD.PDB | OG1, D_THR_107 | NZ, D_LYS_51   | HZ1, D_LYS_51   | 2.96 | 1.98 | 16.97 |
| 1HGD.PDB | OE1, D_GLU_103 | NZ, D_LYS_51   | HZ2, D_LYS_51   | 2.74 | 1.72 | 8.47  |
| 1HGD.PDB | ND1, D_HIS_106 | NZ, D_LYS_51   | HZ3, D_LYS_51   | 2.74 | 1.78 | 16.91 |
| 1HGD.PDB | O, D_ILE_48    | N, D_LEU_52    | H, D_LEU_52     | 2.95 | 2.04 | 18.99 |
| 1HGD.PDB | O, D_ASN_49    | N, D_ASN_53    | H, D_ASN_53     | 2.85 | 1.90 | 9.27  |
| 1HGD.PDB | O, A_THR_28    | NE, D_ARG_54   | HE, D_ARG_54    | 3.00 | 2.06 | 13.94 |
| 1HGD.PDB | OE1, D_GLU_57  | NH1, D_ARG_54  | HH11, D_ARG_54  | 2.85 | 1.86 | 12.06 |
| 1HGD.PDB | OE2, B_GLU_97  | NH2, D_ARG_54  | HH22, D_ARG_54  | 2.79 | 1.82 | 13.03 |
| 1HGD.PDB | OE2, D_GLU_61  | NZ, D_LYS_58   | HZ2, D_LYS_58   | 2.90 | 1.87 | 10.86 |
| 1HGD.PDB | OD2, B_ASP_90  | NZ, D_LYS_62   | HZ3, D_LYS_62   | 2.62 | 1.79 | 29.99 |
| 1HGD.PDB | OG, C_SER_110  | NE2, D_HIS_64  | HE2, D_HIS_64   | 2.96 | 1.98 | 5.65  |
| 1HGD.PDB | O, C_LYS_299   | NZ, D_LYS_68   | HZ1, D_LYS_68   | 2.93 | 1.92 | 12.36 |
| 1HGD.PDB | OE2, D_GLU_85  | NZ, D_LYS_68   | HZ2, D_LYS_68   | 2.78 | 1.76 | 10.92 |
| 1HGD.PDB | OG, E_SER_107  | N, D_ARG_76    | H, D_ARG_76     | 2.86 | 1.90 | 9.40  |
| 1HGD.PDB | OE2, F_GLU_81  | NE, D_ARG_76   | HE, D_ARG_76    | 2.83 | 1.87 | 10.56 |
| 1HGD.PDB | OE2, F_GLU_74  | NH1, D_ARG_76  | HH12, D_ARG_76  | 2.78 | 1.77 | 3.14  |
| 1HGD.PDB | OE1, F_GLU_81  | NH2, D_ARG_76  | HH21, D_ARG_76  | 2.65 | 1.67 | 9.42  |
| 1HGD.PDB | OE1, F_GLU_74  | NH2, D_ARG_76  | HH22, D_ARG_76  | 2.69 | 1.70 | 6.24  |
| 1HGD.PDB | OE1, D_GLU_74  | NE2, D_GLN_78  | HE22, D_GLN_78  | 2.94 | 1.97 | 10.43 |
| 1HGD.PDB | O, D_GLY_75    | N, D_ASP_79    | H, D_ASP_79     | 2.94 | 1.98 | 9.81  |
| 1HGD.PDB | O, D_GLN_78    | N, D_LYS_82    | H, D_LYS_82     | 2.95 | 1.98 | 5.44  |
| 1HGD.PDB | O, D_ASP_79    | N, D_TYR_83    | H, D_TYR_83     | 2.91 | 1.98 | 15.53 |
| 1HGD.PDB | OE1, F_GLU_85  | OH, D_TYR_83   | HH, D_TYR_83    | 2.57 | 1.79 | 29.87 |
| 1HGD.PDB | O, D_LEU_80    | N, D_VAL_84    | H, D_VAL_84     | 2.86 | 1.89 | 6.82  |
| 1HGD.PDB | O, D_LYS_82    | N, D_ASP_86    | H, D_ASP_86     | 2.94 | 1.97 | 2.92  |
| 1HGD.PDB | O, D_TYR_83    | N, D_THR_87    | H, D_THR_87     | 2.90 | 1.95 | 11.15 |
| 1HGD.PDB | O, D_VAL_84    | N, D_LYS_88    | H, D_LYS_88     | 2.90 | 2.00 | 19.38 |
| 1HGD.PDB | OH, B_TYR_83   | NZ, D_LYS_88   | HZ1, D_LYS_88   | 2.76 | 1.72 | 5.75  |
| 1HGD.PDB | O, D_GLU_85    | N, D_ILE_89    | H, D_ILE_89     | 2.85 | 1.88 | 3.25  |
| 1HGD.PDB | O, D_LYS_88    | N, D_TRP_92    | H, D_TRP_92     | 2.93 | 1.96 | 4.18  |
| 1HGD.PDB | O, D_ILE_89    | N, D_SER_93    | H, D_SER_93     | 2.87 | 1.96 | 17.31 |
| 1HGD.PDB | O, D_ILE_89    | OG, D_SER_93   | HG, D_SER_93    | 2.77 | 1.86 | 16.92 |
| 1HGD.PDB | O, D_ASP_90    | N, D_TYR_94    | H, D_TYR_94     | 2.87 | 1.97 | 18.94 |
| 1HGD.PDB | O, D_TRP_92    | N, D_ALA_96    | H, D_ALA_96     | 2.89 | 1.94 | 12.43 |
| 1HGD.PDB | O, D_TYR_94    | N, D_LEU_98    | H, D_LEU_98     | 2.91 | 1.95 | 7.12  |
| 1HGD.PDB | O, D_ASN_95    | N, D_LEU_99    | H, D_LEU_99     | 2.95 | 2.03 | 17.99 |
| 1HGD.PDB | O, D_LEU_98    | N, D_LEU_102   | H, D_LEU_102    | 2.99 | 2.01 | 6.26  |
| 1HGD.PDB | O, D_LEU_99    | N, D_GLU_103   | H, D_GLU_103    | 2.96 | 2.00 | 10.90 |
| 1HGD.PDB | O, D_VAL_100   | N, D_ASN_104   | H, D_ASN_104    | 2.84 | 1.88 | 8.49  |
| 1HGD.PDB | O, C_LYS_27    | ND2, D_ASN_104 | HD22, D_ASN_104 | 2.96 | 2.00 | 10.74 |
| 1HGD.PDB | O, D_LEU_102   | N, D_HIS_106   | H, D_HIS_106    | 2.92 | 1.96 | 8.43  |
| 1HGD.PDB | O, D_GLU_103   | N, D_THR_107   | H, D_THR_107    | 2.81 | 1.91 | 18.55 |
| 1HGD.PDB | O, D_ASN_104   | N, D_ILE_108   | H, D_ILE_108    | 2.99 | 2.03 | 8.56  |
| 1HGD.PDB | O, D_HIS_106   | N, D_LEU_110   | H, D_LEU_110    | 2.82 | 1.88 | 11.88 |
| 1HGD.PDB | O, D_ASP_109   | N, D_SER_113   | H, D_SER_113    | 2.84 | 1.89 | 12.44 |
| 1HGD.PDB | O, D_SER_113   | N, D_LYS_117   | H, D_LYS_117    | 2.74 | 1.87 | 21.85 |
| 1HGD.PDB | O, D_MET_115   | N, D_PHE_119   | H, D_PHE_119    | 2.99 | 2.05 | 13.34 |
| 1HGD.PDB | O, D_ASN_116   | N, D_GLU_120   | H, D_GLU_120    | 2.89 | 1.91 | 1.87  |
| 1HGD.PDB | O, D_LYS_117   | N, D_LYS_121   | H, D_LYS_121    | 2.92 | 2.02 | 19.68 |
| 1HGD.PDB | O, D_PHE_119   | N, D_ARG_123   | H, D_ARG_123    | 2.95 | 1.99 | 11.55 |
| 1HGD.PDB | OE2, D_GLU_120 | NH1, D_ARG_123 | HH11, D_ARG_123 | 2.80 | 1.92 | 24.08 |
| 1HGD.PDB | O, D_GLU_120   | N, D_ARG_124   | H, D_ARG_124    | 2.98 | 2.01 | 7.42  |
| 1HGD.PDB | OE1, B_GLU_132 | NE, D_ARG_124  | HE, D_ARG_124   | 2.80 | 2.01 | 29.31 |
| 1HGD.PDB | OE2, B_GLU_132 | NE, D_ARG_124  | HE, D_ARG_124   | 2.82 | 1.95 | 21.73 |
| 1HGD.PDB | O, D_HIS_159   | ND2, D_ASN_129 | HD21, D_ASN_129 | 2.95 | 1.98 | 9.02  |
| 1HGD.PDB | OH, D_TYR_157  | ND2, D_ASN_129 | HD22, D_ASN_129 | 2.79 | 1.82 | 6.93  |

|          |                |                |                 |      |      |       |
|----------|----------------|----------------|-----------------|------|------|-------|
| 1HGD.PDB | O, D_CYS_137   | N, D_MET_133   | H, D_MET_133    | 2.89 | 1.94 | 11.36 |
| 1HGD.PDB | O, C_LEU_13    | N, D_PHE_138   | H, D_PHE_138    | 2.74 | 1.85 | 19.25 |
| 1HGD.PDB | O, D_GLU_131   | N, D_LYS_139   | H, D_LYS_139    | 2.83 | 1.88 | 9.21  |
| 1HGD.PDB | O, C_ALA_11    | N, D_ILE_140   | H, D_ILE_140    | 2.85 | 1.94 | 17.95 |
| 1HGD.PDB | O, D_ASN_129   | N, D_TYR_141   | H, D_TYR_141    | 2.95 | 2.00 | 12.47 |
| 1HGD.PDB | O, D_LYS_143   | ND1, D_HIS_142 | HD1, D_HIS_142  | 2.95 | 2.07 | 22.42 |
| 1HGD.PDB | OE2, D_GLU_165 | N, D_LYS_143   | H, D_LYS_143    | 2.98 | 2.08 | 20.43 |
| 1HGD.PDB | OE2, D_GLU_30  | N, D_ASN_146   | H, D_ASN_146    | 2.83 | 1.93 | 17.92 |
| 1HGD.PDB | O, D_ASP_145   | N, D_ILE_149   | H, D_ILE_149    | 2.88 | 1.92 | 11.10 |
| 1HGD.PDB | O, D_ASN_146   | N, D_GLU_150   | H, D_GLU_150    | 2.93 | 2.00 | 14.93 |
| 1HGD.PDB | O, D_ALA_147   | N, D_SER_151   | H, D_SER_151    | 2.95 | 2.03 | 16.03 |
| 1HGD.PDB | O, D_CYS_148   | OG, D_SER_151  | HG, D_SER_151   | 2.69 | 1.83 | 21.65 |
| 1HGD.PDB | O, D_GLU_150   | N, D_ASN_154   | H, D_ASN_154    | 2.80 | 1.83 | 6.06  |
| 1HGD.PDB | OE2, D_GLU_150 | ND2, D_ASN_154 | HD21, D_ASN_154 | 2.88 | 2.05 | 27.54 |
| 1HGD.PDB | OD1, D_ASN_154 | OG1, D_THR_156 | HG1, D_THR_156  | 2.79 | 1.83 | 8.53  |
| 1HGD.PDB | NE2, D_HIS_142 | OH, D_TYR_157  | HH, D_TYR_157   | 2.78 | 1.89 | 18.65 |
| 1HGD.PDB | OD1, D_ASP_158 | N, D_ASP_160   | H, D_ASP_160    | 2.88 | 2.02 | 23.43 |
| 1HGD.PDB | O, D_HIS_159   | N, D_TYR_162   | H, D_TYR_162    | 2.96 | 2.10 | 23.77 |
| 1HGD.PDB | O, B_ARG_170   | NH1, D_ARG_163 | HH12, D_ARG_163 | 2.77 | 1.79 | 12.64 |
| 1HGD.PDB | O, D_TYR_162   | N, D_ALA_166   | H, D_ALA_166    | 2.92 | 1.95 | 4.89  |
| 1HGD.PDB | O, D_ARG_163   | N, D_LEU_167   | H, D_LEU_167    | 2.76 | 1.80 | 8.07  |
| 1HGD.PDB | O, D_ASP_164   | N, D_ASN_168   | H, D_ASN_168    | 2.96 | 2.00 | 8.71  |
| 1HGD.PDB | O, D_GLU_165   | ND2, D_ASN_169 | HD22, D_ASN_169 | 2.94 | 1.98 | 8.39  |
| 1HGD.PDB | O, D_ALA_166   | N, D_ARG_170   | H, D_ARG_170    | 2.81 | 1.93 | 20.44 |
| 1HGD.PDB | O, D_GLU_128   | NE, D_ARG_170  | HE, D_ARG_170   | 2.73 | 1.86 | 22.22 |
| 1HGD.PDB | OE2, D_GLU_131 | NH1, D_ARG_170 | HH11, D_ARG_170 | 2.77 | 1.78 | 7.65  |
| 1HGD.PDB | O, D_LEU_167   | N, D_PHE_171   | H, D_PHE_171    | 2.96 | 2.02 | 14.05 |
| 1HGD.PDB | O, F_ILE_140   | N, E_ALA_11    | H, E_ALA_11     | 2.92 | 2.03 | 20.36 |
| 1HGD.PDB | O, F_GLN_27    | N, E_THR_12    | H, E_THR_12     | 2.97 | 2.03 | 14.03 |
| 1HGD.PDB | O, F_PHE_138   | N, E_LEU_13    | H, E_LEU_13     | 2.98 | 2.02 | 11.10 |
| 1HGD.PDB | O, F_ARG_25    | N, E_CYS_14    | H, E_CYS_14     | 2.65 | 1.79 | 21.42 |
| 1HGD.PDB | O, F_GLY_136   | N, E_LEU_15    | H, E_LEU_15     | 2.85 | 1.88 | 5.88  |
| 1HGD.PDB | O, F_GLY_23    | N, E_GLY_16    | H, E_GLY_16     | 2.93 | 2.04 | 20.98 |
| 1HGD.PDB | O, E_HIS_18    | ND1, E_HIS_17  | HD1, E_HIS_17   | 2.90 | 2.05 | 24.96 |
| 1HGD.PDB | O, F_TRP_21    | N, E_HIS_18    | H, E_HIS_18     | 2.83 | 1.98 | 25.03 |
| 1HGD.PDB | OD1, E_ASN_322 | N, E_VAL_20    | H, E_VAL_20     | 2.79 | 1.83 | 7.78  |
| 1HGD.PDB | O, E_VAL_36    | N, E_THR_24    | H, E_THR_24     | 2.83 | 1.94 | 19.94 |
| 1HGD.PDB | O, E_ILE_34    | N, E_VAL_26    | H, E_VAL_26     | 2.83 | 1.90 | 15.73 |
| 1HGD.PDB | OE2, F_GLU_97  | NZ, E_LYS_27   | HZ1, E_LYS_27   | 2.79 | 1.77 | 8.77  |
| 1HGD.PDB | O, E_VAL_26    | N, E_ILE_34    | H, E_ILE_34     | 2.86 | 1.91 | 10.68 |
| 1HGD.PDB | O, E_THR_24    | N, E_VAL_36    | H, E_VAL_36     | 2.80 | 1.85 | 11.38 |
| 1HGD.PDB | O, E_MET_320   | N, E_THR_37    | H, E_THR_37     | 2.88 | 1.91 | 4.25  |
| 1HGD.PDB | O, E_LEU_316   | N, E_THR_40    | H, E_THR_40     | 2.82 | 1.95 | 22.86 |
| 1HGD.PDB | O, E_LEU_314   | N, E_LEU_42    | H, E_LEU_42     | 2.82 | 1.94 | 21.92 |
| 1HGD.PDB | O, E_PHE_294   | N, E_GLN_44    | H, E_GLN_44     | 2.85 | 1.88 | 5.47  |
| 1HGD.PDB | O, E_SER_46    | NE2, E_GLN_44  | HE22, E_GLN_44  | 2.85 | 1.97 | 21.62 |
| 1HGD.PDB | O, E_ASN_285   | OG, E_SER_47   | HG, E_SER_47    | 2.85 | 1.99 | 21.23 |
| 1HGD.PDB | OD2, E_ASP_275 | NZ, E_LYS_50   | HZ1, E_LYS_50   | 2.69 | 1.80 | 25.14 |
| 1HGD.PDB | O, E_PRO_273   | N, E_ILE_51    | H, E_ILE_51     | 2.79 | 1.84 | 10.59 |
| 1HGD.PDB | O, E_ASP_275   | N, E_ASN_53    | H, E_ASN_53     | 2.81 | 1.95 | 23.64 |
| 1HGD.PDB | OD2, E_ASP_85  | N, E_ARG_57    | H, E_ARG_57     | 2.85 | 1.91 | 12.33 |
| 1HGD.PDB | O, E_THR_83    | NE, E_ARG_57   | HE, E_ARG_57    | 2.81 | 1.84 | 7.04  |
| 1HGD.PDB | O, E_LEU_86    | N, E_LEU_59    | H, E_LEU_59     | 2.86 | 1.91 | 10.61 |
| 1HGD.PDB | O, E_VAL_88    | N, E_GLY_61    | H, E_GLY_61     | 2.96 | 2.07 | 21.18 |
| 1HGD.PDB | OD1, E_ASP_60  | N, E_ILE_62    | H, E_ILE_62     | 2.88 | 1.95 | 15.04 |
| 1HGD.PDB | O, E_GLY_61    | N, E_CYS_64    | H, E_CYS_64     | 2.89 | 1.98 | 17.49 |
| 1HGD.PDB | OE2, E_GLU_89  | N, E_LEU_66    | H, E_LEU_66     | 2.97 | 1.99 | 5.61  |
| 1HGD.PDB | O, E_LEU_66    | N, E_LEU_70    | H, E_LEU_70     | 2.90 | 2.02 | 20.74 |

|          |                |                |                 |      |      |       |
|----------|----------------|----------------|-----------------|------|------|-------|
| 1HGD.PDB | O, E_ILE_67    | N, E_LEU_71    | H, E_LEU_71     | 2.80 | 1.84 | 6.52  |
| 1HGD.PDB | O, E_ASP_68    | N, E_GLY_72    | H, E_GLY_72     | 2.91 | 1.98 | 15.31 |
| 1HGD.PDB | OD1, E_ASP_73  | N, E_HIS_75    | H, E_HIS_75     | 2.96 | 2.07 | 21.14 |
| 1HGD.PDB | OD1, E_ASP_73  | ND1, E_HIS_75  | HD1, E_HIS_75   | 2.79 | 1.88 | 18.25 |
| 1HGD.PDB | O, E_ASP_63    | NE2, E_HIS_75  | HE2, E_HIS_75   | 2.89 | 1.97 | 16.27 |
| 1HGD.PDB | O, E_ASP_73    | N, E_CYS_76    | H, E_CYS_76     | 2.81 | 1.87 | 13.32 |
| 1HGD.PDB | O, E_PRO_74    | N, E_ASP_77    | H, E_ASP_77     | 2.91 | 1.96 | 10.31 |
| 1HGD.PDB | O, E_ARG_57    | N, E_ASP_85    | H, E_ASP_85     | 2.78 | 1.89 | 18.76 |
| 1HGD.PDB | O, E_LEU_59    | N, E_VAL_88    | H, E_VAL_88     | 2.91 | 1.94 | 5.45  |
| 1HGD.PDB | O, E_MET_268   | N, E_GLU_89    | H, E_GLU_89     | 2.76 | 1.82 | 11.82 |
| 1HGD.PDB | OD1, E_ASP_60  | NE, E_ARG_90   | HE, E_ARG_90    | 2.88 | 1.91 | 7.90  |
| 1HGD.PDB | O, E_SER_270   | NH1, E_ARG_90  | HH11, E_ARG_90  | 2.66 | 1.80 | 24.67 |
| 1HGD.PDB | O, E_ALA_272   | NH1, E_ARG_90  | HH12, E_ARG_90  | 2.60 | 1.68 | 18.53 |
| 1HGD.PDB | OD2, E_ASP_60  | NH2, E_ARG_90  | HH21, E_ARG_90  | 2.82 | 1.83 | 10.15 |
| 1HGD.PDB | OD1, E_ASP_271 | N, E_SER_91    | H, E_SER_91     | 2.88 | 1.92 | 9.41  |
| 1HGD.PDB | OD1, E_ASP_271 | OG, E_SER_91   | HG, E_SER_91    | 2.94 | 2.13 | 28.39 |
| 1HGD.PDB | OD2, E_ASP_271 | OG, E_SER_91   | HG, E_SER_91    | 2.84 | 1.93 | 17.47 |
| 1HGD.PDB | OD2, E_ASP_68  | OG, E_SER_95   | HG, E_SER_95    | 2.91 | 1.98 | 14.66 |
| 1HGD.PDB | OD2, E_ASP_73  | N, E_ASN_96    | H, E_ASN_96     | 2.95 | 1.99 | 11.30 |
| 1HGD.PDB | OD1, E_ASP_68  | OH, E_TYR_100  | HH, E_TYR_100   | 2.86 | 1.93 | 14.06 |
| 1HGD.PDB | OD2, E_ASP_104 | OG, E_SER_107  | HG, E_SER_107   | 2.90 | 1.98 | 16.44 |
| 1HGD.PDB | O, E_TYR_105   | N, E_ARG_109   | H, E_ARG_109    | 2.86 | 1.88 | 0.77  |
| 1HGD.PDB | OE2, E_GLU_67  | NH2, E_ARG_109 | HH21, E_ARG_109 | 2.82 | 1.85 | 14.73 |
| 1HGD.PDB | OD2, E_ASP_79  | OG, E_SER_110  | HG, E_SER_110   | 2.81 | 1.89 | 15.50 |
| 1HGD.PDB | O, E_SER_107   | N, E_LEU_111   | H, E_LEU_111    | 2.92 | 1.96 | 10.24 |
| 1HGD.PDB | O, E_LEU_108   | N, E_VAL_112   | H, E_VAL_112    | 2.98 | 2.02 | 7.44  |
| 1HGD.PDB | O, E_ARG_109   | N, E_ALA_113   | H, E_ALA_113    | 2.92 | 2.02 | 18.83 |
| 1HGD.PDB | O, E_SER_110   | N, E_SER_114   | H, E_SER_114    | 2.98 | 2.03 | 12.50 |
| 1HGD.PDB | OE2, E_GLU_119 | OG1, E_THR_117 | HG1, E_THR_117  | 2.90 | 1.95 | 9.79  |
| 1HGD.PDB | O, E_GLU_82    | N, E_LEU_118   | H, E_LEU_118    | 2.92 | 1.99 | 15.84 |
| 1HGD.PDB | O, E_TYR_257   | N, E_ILE_121   | H, E_ILE_121    | 2.87 | 1.90 | 6.59  |
| 1HGD.PDB | O, E_ARG_255   | N, E_GLU_123   | H, E_GLU_123    | 2.92 | 1.97 | 11.75 |
| 1HGD.PDB | O, E_THR_155   | N, E_THR_131   | H, E_THR_131    | 2.76 | 1.86 | 18.28 |
| 1HGD.PDB | OD1, E_ASN_152 | N, E_ASN_133   | H, E_ASN_133    | 2.85 | 1.91 | 14.28 |
| 1HGD.PDB | O, E_GLY_146   | N, E_SER_136   | H, E_SER_136    | 2.73 | 1.79 | 12.16 |
| 1HGD.PDB | O, E_GLY_144   | NZ, E_LYS_140  | HZ1, E_LYS_140  | 2.69 | 1.72 | 15.78 |
| 1HGD.PDB | OD1, E_ASN_137 | NZ, E_LYS_140  | HZ2, E_LYS_140  | 2.79 | 1.84 | 19.51 |
| 1HGD.PDB | OD2, E_ASP_77  | NE, E_ARG_141  | HE, E_ARG_141   | 2.82 | 1.98 | 26.95 |
| 1HGD.PDB | O, E_PHE_147   | NH1, E_ARG_141 | HH12, E_ARG_141 | 2.57 | 1.63 | 15.28 |
| 1HGD.PDB | OD1, E_ASP_77  | NH2, E_ARG_141 | HH21, E_ARG_141 | 2.88 | 1.95 | 21.13 |
| 1HGD.PDB | OD2, E_ASP_77  | NH2, E_ARG_141 | HH21, E_ARG_141 | 2.75 | 1.86 | 24.62 |
| 1HGD.PDB | O, E_GLY_72    | NH2, E_ARG_141 | HH22, E_ARG_141 | 2.94 | 1.97 | 11.68 |
| 1HGD.PDB | O, E_SER_136   | N, E_GLY_146   | H, E_GLY_146    | 2.97 | 2.03 | 13.31 |
| 1HGD.PDB | O, E_GLY_72    | N, E_SER_149   | H, E_SER_149    | 2.84 | 1.94 | 18.94 |
| 1HGD.PDB | O, E_ALA_253   | N, E_ASN_152   | H, E_ASN_152    | 2.83 | 1.97 | 23.36 |
| 1HGD.PDB | OH, E_TYR_195  | NE1, E_TRP_153 | HE1, E_TRP_153  | 2.82 | 1.91 | 19.17 |
| 1HGD.PDB | O, E_LEU_194   | N, E_LYS_156   | H, E_LYS_156    | 2.96 | 2.06 | 18.57 |
| 1HGD.PDB | O, E_SER_193   | NZ, E_LYS_156  | HZ2, E_LYS_156  | 2.80 | 1.84 | 19.27 |
| 1HGD.PDB | O, E_SER_247   | N, E_LEU_164   | H, E_LEU_164    | 2.67 | 1.83 | 24.46 |
| 1HGD.PDB | O, E_ILE_245   | N, E_VAL_166   | H, E_VAL_166    | 2.95 | 1.99 | 10.02 |
| 1HGD.PDB | O, E_LEU_243   | OG1, E_THR_167 | HG1, E_THR_167  | 2.95 | 2.08 | 21.06 |
| 1HGD.PDB | O, E_LEU_243   | N, E_MET_168   | H, E_MET_168    | 2.92 | 1.99 | 16.02 |
| 1HGD.PDB | O, E_ASP_241   | N, E_ASN_170   | H, E_ASN_170    | 2.93 | 1.96 | 7.59  |
| 1HGD.PDB | O, E_PHE_174   | ND2, E_ASN_170 | HD21, E_ASN_170 | 2.84 | 1.88 | 9.66  |
| 1HGD.PDB | O, E_VAL_237   | ND2, E_ASN_170 | HD22, E_ASN_170 | 2.82 | 2.02 | 28.84 |
| 1HGD.PDB | O, E_VAL_237   | N, E_LYS_176   | H, E_LYS_176    | 2.95 | 2.02 | 16.27 |
| 1HGD.PDB | OE2, E_GLU_123 | NZ, E_LYS_176  | HZ2, E_LYS_176  | 2.69 | 1.80 | 25.12 |
| 1HGD.PDB | O, E_THR_235   | N, E_TYR_178   | H, E_TYR_178    | 2.82 | 1.85 | 5.66  |

|          |                |                |                 |      |      |       |
|----------|----------------|----------------|-----------------|------|------|-------|
| 1HGD.PDB | OE1, E_GLU_123 | OH, E_TYR_178  | HH, E_TYR_178   | 2.75 | 1.83 | 13.46 |
| 1HGD.PDB | OG1, E_THR_235 | NE1, E_TRP_180 | HE1, E_TRP_180  | 2.93 | 1.94 | 3.75  |
| 1HGD.PDB | O, E_ASN_250   | N, E_HIS_183   | H, E_HIS_183    | 2.87 | 1.97 | 19.16 |
| 1HGD.PDB | O, E_ARG_229   | N, E_HIS_184   | H, E_HIS_184    | 2.83 | 1.87 | 8.20  |
| 1HGD.PDB | OG, E_SER_231  | NE2, E_HIS_184 | HE2, E_HIS_184  | 2.80 | 1.95 | 25.42 |
| 1HGD.PDB | OE1, E_GLU_190 | N, E_SER_186   | H, E_SER_186    | 2.91 | 1.96 | 11.07 |
| 1HGD.PDB | OG1, E_THR_187 | N, E_GLU_190   | H, E_GLU_190    | 2.91 | 1.97 | 13.39 |
| 1HGD.PDB | O, E_GLN_197   | NE2, E_GLN_191 | HE22, E_GLN_191 | 2.89 | 1.97 | 15.90 |
| 1HGD.PDB | O, E_ASN_188   | OG1, E_THR_192 | HG1, E_THR_192  | 2.98 | 2.03 | 7.22  |
| 1HGD.PDB | O, E_GLN_189   | N, E_SER_193   | H, E_SER_193    | 2.81 | 1.84 | 3.50  |
| 1HGD.PDB | O, E_GLU_190   | N, E_LEU_194   | H, E_LEU_194    | 2.98 | 2.02 | 10.79 |
| 1HGD.PDB | O, E_GLN_191   | N, E_TYR_195   | H, E_TYR_195    | 2.77 | 1.82 | 10.72 |
| 1HGD.PDB | O, E_TYR_161   | NE2, E_GLN_197 | HE21, E_GLN_197 | 2.91 | 1.96 | 10.54 |
| 1HGD.PDB | O, E_ASN_248   | NE2, E_GLN_197 | HE22, E_GLN_197 | 2.95 | 2.02 | 14.25 |
| 1HGD.PDB | OD1, E_ASN_246 | NH2, E_ARG_201 | HH21, E_ARG_201 | 2.60 | 1.77 | 27.54 |
| 1HGD.PDB | O, E_ASN_246   | N, E_THR_203   | H, E_THR_203    | 2.88 | 1.92 | 8.43  |
| 1HGD.PDB | OG1, E_THR_212 | OG1, E_THR_203 | HG1, E_THR_203  | 2.93 | 1.99 | 12.22 |
| 1HGD.PDB | O, E_GLN_211   | N, E_VAL_204   | H, E_VAL_204    | 2.87 | 1.96 | 17.47 |
| 1HGD.PDB | O, E_SER_209   | N, E_THR_206   | H, E_THR_206    | 2.95 | 1.99 | 8.08  |
| 1HGD.PDB | OD1, E_ASP_241 | N, E_ARG_207   | H, E_ARG_207    | 2.90 | 1.93 | 8.79  |
| 1HGD.PDB | OG1, E_THR_206 | OG, E_SER_209  | HG, E_SER_209   | 2.91 | 1.97 | 11.26 |
| 1HGD.PDB | OD1, C_ASP_101 | NE2, E_GLN_210 | HE22, E_GLN_210 | 2.98 | 2.14 | 27.07 |
| 1HGD.PDB | O, E_VAL_204   | N, E_GLN_211   | H, E_GLN_211    | 2.82 | 1.90 | 15.66 |
| 1HGD.PDB | O, E_VAL_202   | N, E_ILE_213   | H, E_ILE_213    | 2.89 | 1.96 | 14.67 |
| 1HGD.PDB | O, E_ASN_216   | NH1, E_ARG_220 | HH12, E_ARG_220 | 2.89 | 2.08 | 29.65 |
| 1HGD.PDB | OE1, A_GLN_210 | NH2, E_ARG_220 | HH21, E_ARG_220 | 2.77 | 1.90 | 25.11 |
| 1HGD.PDB | O, E_ASN_216   | NH2, E_ARG_220 | HH22, E_ARG_220 | 2.74 | 1.86 | 23.30 |
| 1HGD.PDB | O, E_LEU_226   | N, E_VAL_223   | H, E_VAL_223    | 2.87 | 1.91 | 7.72  |
| 1HGD.PDB | O, E_CYS_97    | NE, E_ARG_224  | HE, E_ARG_224   | 2.84 | 2.00 | 26.20 |
| 1HGD.PDB | O, E_CYS_97    | NH2, E_ARG_224 | HH21, E_ARG_224 | 2.84 | 1.97 | 24.48 |
| 1HGD.PDB | O, E_VAL_223   | N, E_LEU_226   | H, E_LEU_226    | 2.93 | 1.99 | 12.03 |
| 1HGD.PDB | OE2, E_GLU_190 | OG, E_SER_228  | HG, E_SER_228   | 2.96 | 1.98 | 4.78  |
| 1HGD.PDB | O, E_SER_228   | NH1, E_ARG_229 | HH11, E_ARG_229 | 2.70 | 1.76 | 17.46 |
| 1HGD.PDB | O, E_PRO_221   | NH2, E_ARG_229 | HH22, E_ARG_229 | 2.58 | 1.65 | 17.47 |
| 1HGD.PDB | OD1, E_ASP_101 | OG, E_SER_231  | HG, E_SER_231   | 2.85 | 1.91 | 13.25 |
| 1HGD.PDB | O, E_ASP_101   | N, E_ILE_232   | H, E_ILE_232    | 2.91 | 1.98 | 14.92 |
| 1HGD.PDB | O, E_TRP_180   | N, E_TYR_233   | H, E_TYR_233    | 2.93 | 1.97 | 9.20  |
| 1HGD.PDB | O, E_TYR_178   | N, E_THR_235   | H, E_THR_235    | 2.86 | 1.97 | 20.35 |
| 1HGD.PDB | O, E_LYS_176   | N, E_VAL_237   | H, E_VAL_237    | 2.77 | 1.86 | 16.39 |
| 1HGD.PDB | O, D_SER_71    | NZ, E_LYS_238  | HZ2, E_LYS_238  | 2.73 | 1.80 | 21.39 |
| 1HGD.PDB | OE1, D_GLU_72  | NZ, E_LYS_238  | HZ3, E_LYS_238  | 2.87 | 1.86 | 13.40 |
| 1HGD.PDB | O, E_ASN_170   | N, E_GLY_240   | H, E_GLY_240    | 2.89 | 2.02 | 22.44 |
| 1HGD.PDB | O, E_LYS_238   | N, E_ASP_241   | H, E_ASP_241    | 2.96 | 2.03 | 13.52 |
| 1HGD.PDB | OD1, E_ASP_241 | N, E_VAL_242   | H, E_VAL_242    | 2.79 | 1.95 | 26.27 |
| 1HGD.PDB | O, E_MET_168   | N, E_LEU_243   | H, E_LEU_243    | 2.89 | 1.92 | 5.48  |
| 1HGD.PDB | O, E_VAL_166   | N, E_ILE_245   | H, E_ILE_245    | 2.95 | 2.01 | 13.26 |
| 1HGD.PDB | O, E_THR_203   | N, E_ASN_246   | H, E_ASN_246    | 2.94 | 1.96 | 4.93  |
| 1HGD.PDB | OD1, E_ASN_165 | ND2, E_ASN_246 | HD22, E_ASN_246 | 2.91 | 1.96 | 12.66 |
| 1HGD.PDB | O, E_LEU_164   | N, E_SER_247   | H, E_SER_247    | 2.95 | 2.04 | 18.22 |
| 1HGD.PDB | OE1, E_GLN_191 | ND2, E_ASN_250 | HD21, E_ASN_250 | 2.95 | 1.99 | 9.92  |
| 1HGD.PDB | O, E_HIS_183   | ND2, E_ASN_250 | HD22, E_ASN_250 | 2.86 | 1.93 | 15.05 |
| 1HGD.PDB | O, E_ASN_152   | N, E_ALA_253   | H, E_ALA_253    | 2.88 | 1.99 | 19.87 |
| 1HGD.PDB | OD1, E_ASN_133 | NH2, E_ARG_255 | HH22, E_ARG_255 | 2.52 | 1.69 | 27.28 |
| 1HGD.PDB | O, E_ILE_121   | N, E_TYR_257   | H, E_TYR_257    | 2.94 | 2.11 | 26.29 |
| 1HGD.PDB | O, E_LEU_177   | N, E_PHE_258   | H, E_PHE_258    | 2.92 | 1.95 | 7.16  |
| 1HGD.PDB | OE2, E_GLU_119 | NH1, E_ARG_261 | HH12, E_ARG_261 | 2.64 | 1.81 | 27.92 |
| 1HGD.PDB | OE1, E_GLU_119 | NH2, E_ARG_261 | HH22, E_ARG_261 | 2.88 | 1.97 | 22.94 |
| 1HGD.PDB | OD2, E_ASP_85  | NZ, E_LYS_264  | HZ3, E_LYS_264  | 2.87 | 1.88 | 16.50 |

|          |                |                |                 |      |      |       |
|----------|----------------|----------------|-----------------|------|------|-------|
| 1HGD.PDB | O, E_PHE.87    | N, E_MET.268   | H, E_MET.268    | 2.81 | 1.92 | 20.02 |
| 1HGD.PDB | O, E_PRO.284   | OG, E_SER.270  | HG, E_SER.270   | 2.87 | 1.93 | 12.39 |
| 1HGD.PDB | OG, E_SER.270  | N, E_ALA.272   | H, E_ALA.272    | 2.92 | 1.98 | 12.12 |
| 1HGD.PDB | O, E_ILE.51    | N, E_ASP.275   | H, E_ASP.275    | 2.91 | 2.01 | 19.96 |
| 1HGD.PDB | OD1, E_ASP.275 | N, E_THR.276   | H, E_THR.276    | 2.81 | 1.96 | 24.15 |
| 1HGD.PDB | O, E_ASN.54    | N, E_SER.279   | H, E_SER.279    | 2.80 | 1.87 | 14.43 |
| 1HGD.PDB | O, E_TYR.302   | N, E_ILE.282   | H, E_ILE.282    | 2.87 | 1.90 | 8.73  |
| 1HGD.PDB | O, E_THR.283   | N, E_GLY.286   | H, E_GLY.286    | 2.82 | 1.89 | 12.51 |
| 1HGD.PDB | O, E_LYS.50    | N, E_SER.287   | H, E_SER.287    | 2.87 | 1.90 | 5.78  |
| 1HGD.PDB | O, E_ALA.304   | ND2, E_ASN.290 | HD22, E_ASN.290 | 2.83 | 1.94 | 19.46 |
| 1HGD.PDB | OE1, E_GLN.44  | NZ, E_LYS.292  | HZ1, E_LYS.292  | 2.70 | 1.70 | 12.87 |
| 1HGD.PDB | OD2, E_ASP.291 | NZ, E_LYS.292  | HZ3, E_LYS.292  | 2.83 | 1.91 | 23.60 |
| 1HGD.PDB | O, E_LYS.307   | N, E_GLN.295   | H, E_GLN.295    | 2.78 | 1.92 | 23.12 |
| 1HGD.PDB | O, E_ASN.298   | NE2, E_GLN.295 | HE21, E_GLN.295 | 2.76 | 1.79 | 7.00  |
| 1HGD.PDB | O, E_GLN.44    | N, E_ASN.296   | H, E_ASN.296    | 2.84 | 1.90 | 13.14 |
| 1HGD.PDB | OE1, E_GLN.295 | N, E_VAL.297   | H, E_VAL.297    | 2.67 | 1.86 | 28.12 |
| 1HGD.PDB | OD1, E_ASN.285 | ND2, E_ASN.298 | HD22, E_ASN.298 | 2.95 | 2.01 | 14.15 |
| 1HGD.PDB | O, F_LYS.68    | NZ, E_LYS.299  | HZ1, E_LYS.299  | 2.98 | 1.98 | 14.54 |
| 1HGD.PDB | OD1, E_ASN.298 | N, E_ILE.300   | H, E_ILE.300    | 2.90 | 1.99 | 17.71 |
| 1HGD.PDB | O, E_ILE.282   | N, E_TYR.302   | H, E_TYR.302    | 2.88 | 2.05 | 26.69 |
| 1HGD.PDB | O, E_LYS.264   | OH, E_TYR.302  | HH, E_TYR.302   | 2.65 | 1.86 | 28.82 |
| 1HGD.PDB | O, F_LYS.62    | N, E_GLY.303   | H, E_GLY.303    | 2.94 | 1.98 | 8.87  |
| 1HGD.PDB | O, E_GLN.295   | N, E_VAL.309   | H, E_VAL.309    | 2.96 | 2.15 | 28.43 |
| 1HGD.PDB | OG, F_SER.93   | N, E_LYS.310   | H, E_LYS.310    | 2.95 | 2.00 | 12.05 |
| 1HGD.PDB | OE2, E_GLU.41  | N, E_LEU.314   | H, E_LEU.314    | 2.81 | 1.89 | 15.95 |
| 1HGD.PDB | OE1, E_GLU.41  | NZ, E_LYS.315  | HZ3, E_LYS.315  | 2.76 | 1.83 | 22.10 |
| 1HGD.PDB | O, E_THR.40    | N, E_LEU.316   | H, E_LEU.316    | 2.76 | 1.83 | 14.34 |
| 1HGD.PDB | OD1, F_ASN.104 | N, E_ALA.317   | H, E_ALA.317    | 2.79 | 1.84 | 10.01 |
| 1HGD.PDB | O, E_ASN.38    | N, E_THR.318   | H, E_THR.318    | 2.97 | 2.03 | 14.24 |
| 1HGD.PDB | O, E_VAL.20    | ND2, E_ASN.322 | HD21, E_ASN.322 | 2.90 | 2.00 | 18.79 |
| 1HGD.PDB | OE2, E_GLU.35  | ND2, E_ASN.322 | HD22, E_ASN.322 | 2.82 | 1.95 | 23.13 |
| 1HGD.PDB | OE2, F_GLU.15  | N, E_GLU.325   | H, E_GLU.325    | 2.91 | 2.10 | 28.29 |
| 1HGD.PDB | O, E_GLN.327   | NZ, E_LYS.326  | HZ1, E_LYS.326  | 2.81 | 1.89 | 22.57 |
| 1HGD.PDB | OE1, F_GLU.15  | NZ, E_LYS.326  | HZ3, E_LYS.326  | 2.97 | 1.97 | 16.19 |
| 1HGD.PDB | O, E_LYS.326   | NE2, E_GLN.327 | HE22, E_GLN.327 | 2.85 | 1.95 | 19.55 |
| 1HGD.PDB | OD2, F_ASP.112 | N, F_GLY.1     | H2, F_GLY.1     | 2.81 | 1.81 | 13.59 |
| 1HGD.PDB | OD1, F_ASP.109 | N, F_LEU.2     | H, F_LEU.2      | 2.86 | 1.96 | 19.63 |
| 1HGD.PDB | OD2, F_ASP.112 | N, F_PHE.3     | H, F_PHE.3      | 2.81 | 2.02 | 29.56 |
| 1HGD.PDB | OD2, F_ASP.112 | N, F_GLY.4     | H, F_GLY.4      | 2.92 | 2.06 | 23.22 |
| 1HGD.PDB | OD1, F_ASP.112 | N, F_ALA.5     | H, F_ALA.5      | 2.89 | 2.02 | 22.37 |
| 1HGD.PDB | O, F_GLY.4     | N, F_PHE.9     | H, F_PHE.9      | 2.78 | 1.84 | 12.30 |
| 1HGD.PDB | O, F_GLY.13    | ND2, F_ASN.12  | HD22, F_ASN.12  | 2.80 | 1.95 | 24.70 |
| 1HGD.PDB | O, E_VAL.323   | N, F_GLY.13    | H, F_GLY.13     | 2.71 | 1.79 | 15.38 |
| 1HGD.PDB | O, E_HIS.17    | N, F_TRP.14    | H, F_TRP.14     | 2.87 | 1.92 | 12.04 |
| 1HGD.PDB | OG1, F_THR.41  | N, F_TRP.21    | H, F_TRP.21     | 2.87 | 1.95 | 16.02 |
| 1HGD.PDB | O, E_GLY.16    | N, F_GLY.23    | H, F_GLY.23     | 2.91 | 2.00 | 17.89 |
| 1HGD.PDB | O, F_ALA.35    | N, F_PHE.24    | H, F_PHE.24     | 2.81 | 1.84 | 4.26  |
| 1HGD.PDB | O, E_CYS.14    | N, F_ARG.25    | H, F_ARG.25     | 2.88 | 1.94 | 13.26 |
| 1HGD.PDB | OE1, F_GLN.34  | NE, F_ARG.25   | HE, F_ARG.25    | 2.93 | 2.07 | 24.69 |
| 1HGD.PDB | OE1, F_GLN.34  | NH2, F_ARG.25  | HH21, F_ARG.25  | 2.80 | 1.89 | 20.31 |
| 1HGD.PDB | O, F_GLY.33    | N, F_HIS.26    | H, F_HIS.26     | 2.91 | 2.03 | 21.54 |
| 1HGD.PDB | O, E_THR.12    | N, F_GLN.27    | H, F_GLN.27     | 2.97 | 2.04 | 16.25 |
| 1HGD.PDB | O, F_GLY.31    | N, F_ASN.28    | H, F_ASN.28     | 2.78 | 1.85 | 13.40 |
| 1HGD.PDB | OD1, F_ASN.146 | ND2, F_ASN.28  | HD21, F_ASN.28  | 2.81 | 1.89 | 15.27 |
| 1HGD.PDB | O, F_CYS.144   | ND2, F_ASN.28  | HD22, F_ASN.28  | 2.83 | 1.93 | 18.14 |
| 1HGD.PDB | O, F_HIS.26    | N, F_GLY.33    | H, F_GLY.33     | 2.97 | 2.11 | 23.75 |
| 1HGD.PDB | O, F_PHE.24    | N, F_ALA.35    | H, F_ALA.35     | 2.78 | 1.98 | 28.59 |
| 1HGD.PDB | O, F_TYR.22    | N, F_ASP.37    | H, F_ASP.37     | 2.69 | 1.77 | 12.88 |

|          |                |                |                 |      |      |       |
|----------|----------------|----------------|-----------------|------|------|-------|
| 1HGD.PDB | OD2, F_ASP_37  | N, F_SER_40    | H, F_SER_40     | 2.92 | 1.96 | 9.75  |
| 1HGD.PDB | OD2, F_ASP_37  | OG, F_SER_40   | HG, F_SER_40    | 2.84 | 1.98 | 23.42 |
| 1HGD.PDB | O, F_ASP_37    | OG1, F_THR_41  | HG1, F_THR_41   | 2.75 | 1.88 | 21.07 |
| 1HGD.PDB | O, F_LEU_38    | N, F_GLN_42    | H, F_GLN_42     | 2.93 | 2.03 | 18.28 |
| 1HGD.PDB | OD1, F_ASP_46  | NE2, F_GLN_42  | HE22, F_GLN_42  | 2.83 | 1.94 | 21.51 |
| 1HGD.PDB | O, F_LYS_39    | N, F_ALA_43    | H, F_ALA_43     | 2.93 | 1.98 | 11.56 |
| 1HGD.PDB | O, F_SER_40    | N, F_ALA_44    | H, F_ALA_44     | 2.97 | 1.99 | 2.55  |
| 1HGD.PDB | O, F_THR_41    | N, F_ILE_45    | H, F_ILE_45     | 2.91 | 1.96 | 10.99 |
| 1HGD.PDB | O, F_GLN_42    | N, F_ASP_46    | H, F_ASP_46     | 2.80 | 1.82 | 0.60  |
| 1HGD.PDB | O, F_ALA_43    | NE2, F_GLN_47  | HE22, F_GLN_47  | 2.90 | 2.01 | 20.21 |
| 1HGD.PDB | O, F_ILE_45    | N, F_ASN_49    | H, F_ASN_49     | 2.84 | 1.94 | 18.12 |
| 1HGD.PDB | O, F_ASP_46    | N, F_GLY_50    | H, F_GLY_50     | 2.84 | 1.95 | 20.14 |
| 1HGD.PDB | OE1, F_GLU_103 | NZ, F_LYS_51   | HZ2, F_LYS_51   | 2.72 | 1.70 | 8.28  |
| 1HGD.PDB | ND1, F_HIS_106 | NZ, F_LYS_51   | HZ3, F_LYS_51   | 2.73 | 1.76 | 16.89 |
| 1HGD.PDB | O, F_ILE_48    | N, F_LEU_52    | H, F_LEU_52     | 2.94 | 2.02 | 16.22 |
| 1HGD.PDB | O, F_ASN_49    | N, F_ASN_53    | H, F_ASN_53     | 2.85 | 1.92 | 14.75 |
| 1HGD.PDB | OE1, F_GLU_57  | NH1, F_ARG_54  | HH11, F_ARG_54  | 2.86 | 1.85 | 10.37 |
| 1HGD.PDB | OE2, D_GLU_97  | NH2, F_ARG_54  | HH22, F_ARG_54  | 2.72 | 1.75 | 12.85 |
| 1HGD.PDB | OE2, F_GLU_61  | NZ, F_LYS_58   | HZ2, F_LYS_58   | 2.92 | 1.89 | 10.22 |
| 1HGD.PDB | OD2, D_ASP_90  | NZ, F_LYS_62   | HZ3, F_LYS_62   | 2.71 | 1.86 | 28.09 |
| 1HGD.PDB | OG, E_SER_110  | NE2, F_HIS_64  | HE2, F_HIS_64   | 2.95 | 1.98 | 9.92  |
| 1HGD.PDB | O, E_LYS_299   | NZ, F_LYS_68   | HZ1, F_LYS_68   | 2.97 | 1.94 | 5.85  |
| 1HGD.PDB | OE2, F_GLU_85  | NZ, F_LYS_68   | HZ2, F_LYS_68   | 2.72 | 1.77 | 19.94 |
| 1HGD.PDB | OG, A_SER_107  | N, F_ARG_76    | H, F_ARG_76     | 2.82 | 1.86 | 9.34  |
| 1HGD.PDB | OE2, B_GLU_81  | NE, F_ARG_76   | HE, F_ARG_76    | 2.86 | 1.90 | 10.66 |
| 1HGD.PDB | OE2, B_GLU_74  | NH1, F_ARG_76  | HH12, F_ARG_76  | 2.77 | 1.75 | 1.42  |
| 1HGD.PDB | OE1, B_GLU_81  | NH2, F_ARG_76  | HH21, F_ARG_76  | 2.64 | 1.65 | 5.37  |
| 1HGD.PDB | OE1, B_GLU_74  | NH2, F_ARG_76  | HH22, F_ARG_76  | 2.71 | 1.72 | 7.42  |
| 1HGD.PDB | OE1, F_GLU_74  | NE2, F_GLN_78  | HE22, F_GLN_78  | 2.96 | 1.99 | 9.91  |
| 1HGD.PDB | O, F_GLY_75    | N, F_ASP_79    | H, F_ASP_79     | 2.93 | 1.98 | 10.55 |
| 1HGD.PDB | O, F_GLN_78    | N, F_LYS_82    | H, F_LYS_82     | 2.98 | 2.01 | 9.35  |
| 1HGD.PDB | O, F_ASP_79    | N, F_TYR_83    | H, F_TYR_83     | 2.93 | 1.99 | 14.99 |
| 1HGD.PDB | OE1, B_GLU_85  | OH, F_TYR_83   | HH, F_TYR_83    | 2.53 | 1.75 | 27.84 |
| 1HGD.PDB | O, F_LEU_80    | N, F_VAL_84    | H, F_VAL_84     | 2.89 | 1.92 | 3.19  |
| 1HGD.PDB | O, F_LYS_82    | N, F_ASP_86    | H, F_ASP_86     | 2.94 | 1.97 | 9.39  |
| 1HGD.PDB | O, F_TYR_83    | N, F_THR_87    | H, F_THR_87     | 2.90 | 1.96 | 11.94 |
| 1HGD.PDB | O, F_VAL_84    | N, F_LYS_88    | H, F_LYS_88     | 2.92 | 1.96 | 11.08 |
| 1HGD.PDB | OH, D_TYR_83   | NZ, F_LYS_88   | HZ1, F_LYS_88   | 2.67 | 1.66 | 8.83  |
| 1HGD.PDB | O, F_GLU_85    | N, F_ILE_89    | H, F_ILE_89     | 2.88 | 1.90 | 4.38  |
| 1HGD.PDB | O, F_LYS_88    | N, F_TRP_92    | H, F_TRP_92     | 2.95 | 1.98 | 4.36  |
| 1HGD.PDB | O, F_ILE_89    | N, F_SER_93    | H, F_SER_93     | 2.85 | 1.95 | 19.01 |
| 1HGD.PDB | O, F_ILE_89    | OG, F_SER_93   | HG, F_SER_93    | 2.82 | 1.88 | 12.37 |
| 1HGD.PDB | O, F_ASP_90    | N, F_TYR_94    | H, F_TYR_94     | 2.87 | 1.95 | 17.83 |
| 1HGD.PDB | O, F_TRP_92    | N, F_ALA_96    | H, F_ALA_96     | 2.93 | 1.99 | 13.63 |
| 1HGD.PDB | O, F_SER_93    | N, F_GLU_97    | H, F_GLU_97     | 2.98 | 2.03 | 11.78 |
| 1HGD.PDB | O, F_TYR_94    | N, F_LEU_98    | H, F_LEU_98     | 2.95 | 1.97 | 4.49  |
| 1HGD.PDB | O, F_ASN_95    | N, F_LEU_99    | H, F_LEU_99     | 2.94 | 2.01 | 15.31 |
| 1HGD.PDB | O, F_LEU_99    | N, F_GLU_103   | H, F_GLU_103    | 2.96 | 2.00 | 11.56 |
| 1HGD.PDB | O, F_VAL_100   | N, F_ASN_104   | H, F_ASN_104    | 2.88 | 1.92 | 8.65  |
| 1HGD.PDB | O, E_LYS_27    | ND2, F_ASN_104 | HD22, F_ASN_104 | 2.95 | 1.99 | 8.95  |
| 1HGD.PDB | O, F_LEU_102   | N, F_HIS_106   | H, F_HIS_106    | 2.94 | 1.97 | 6.97  |
| 1HGD.PDB | O, F_GLU_103   | N, F_THR_107   | H, F_THR_107    | 2.81 | 1.90 | 17.76 |
| 1HGD.PDB | O, F_ASN_104   | N, F_ILE_108   | H, F_ILE_108    | 2.98 | 2.03 | 11.71 |
| 1HGD.PDB | O, F_HIS_106   | N, F_LEU_110   | H, F_LEU_110    | 2.80 | 1.85 | 9.01  |
| 1HGD.PDB | O, F_ASP_109   | N, F_SER_113   | H, F_SER_113    | 2.83 | 1.87 | 7.95  |
| 1HGD.PDB | O, D_LEU_2     | OG, F_SER_113  | HG, F_SER_113   | 2.74 | 1.91 | 25.98 |
| 1HGD.PDB | O, F_SER_113   | N, F_LYS_117   | H, F_LYS_117    | 2.74 | 1.84 | 18.35 |
| 1HGD.PDB | O, F_MET_115   | N, F_PHE_119   | H, F_PHE_119    | 3.00 | 2.07 | 16.22 |

|          |                |                |                 |      |      |       |
|----------|----------------|----------------|-----------------|------|------|-------|
| 1HGD.PDB | O, F_ASN.116   | N, F_GLU.120   | H, F_GLU.120    | 2.89 | 1.91 | 4.65  |
| 1HGD.PDB | O, F_LYS.117   | N, F_LYS.121   | H, F_LYS.121    | 2.95 | 2.02 | 15.04 |
| 1HGD.PDB | O, F_PHE.119   | N, F_ARG.123   | H, F_ARG.123    | 2.94 | 2.00 | 14.04 |
| 1HGD.PDB | OE2, F_GLU.120 | NH1, F_ARG.123 | HH11, F_ARG.123 | 2.77 | 1.88 | 23.82 |
| 1HGD.PDB | O, F_GLU.120   | N, F_ARG.124   | H, F_ARG.124    | 2.95 | 1.97 | 3.23  |
| 1HGD.PDB | OE1, D_GLU.132 | NE, F_ARG.124  | HE, F_ARG.124   | 2.96 | 2.14 | 28.71 |
| 1HGD.PDB | OE2, D_GLU.132 | NE, F_ARG.124  | HE, F_ARG.124   | 2.94 | 2.05 | 20.84 |
| 1HGD.PDB | O, F_HIS.159   | ND2, F_ASN.129 | HD21, F_ASN.129 | 2.96 | 2.01 | 10.95 |
| 1HGD.PDB | OH, F_TYR.157  | ND2, F_ASN.129 | HD22, F_ASN.129 | 2.80 | 1.85 | 12.13 |
| 1HGD.PDB | O, F_LYS.139   | N, F_GLU.131   | H, F_GLU.131    | 2.97 | 2.05 | 16.87 |
| 1HGD.PDB | O, F_CYS.137   | N, F_MET.133   | H, F_MET.133    | 2.88 | 1.93 | 10.80 |
| 1HGD.PDB | O, E_LEU.13    | N, F_PHE.138   | H, F_PHE.138    | 2.72 | 1.85 | 21.62 |
| 1HGD.PDB | O, F_GLU.131   | N, F_LYS.139   | H, F_LYS.139    | 2.85 | 1.89 | 9.90  |
| 1HGD.PDB | O, E_ALA.11    | N, F_ILE.140   | H, F_ILE.140    | 2.82 | 1.92 | 18.45 |
| 1HGD.PDB | O, F_ASN.129   | N, F_TYR.141   | H, F_TYR.141    | 2.97 | 2.05 | 16.46 |
| 1HGD.PDB | OE2, F_GLU.165 | N, F_LYS.143   | H, F_LYS.143    | 2.96 | 2.04 | 17.35 |
| 1HGD.PDB | O, F_ASP.145   | N, F_ILE.149   | H, F_ILE.149    | 2.86 | 1.91 | 11.09 |
| 1HGD.PDB | O, F_ASN.146   | N, F_GLU.150   | H, F_GLU.150    | 2.91 | 1.98 | 15.29 |
| 1HGD.PDB | O, F_ALA.147   | N, F_SER.151   | H, F_SER.151    | 2.97 | 2.10 | 22.90 |
| 1HGD.PDB | O, F_CYS.148   | OG, F_SER.151  | HG, F_SER.151   | 2.68 | 1.83 | 22.68 |
| 1HGD.PDB | O, F_GLU.150   | N, F_ASN.154   | H, F_ASN.154    | 2.77 | 1.80 | 3.19  |
| 1HGD.PDB | OD1, F_ASP.158 | N, F_ASP.160   | H, F_ASP.160    | 2.93 | 2.09 | 25.30 |
| 1HGD.PDB | O, F_HIS.159   | N, F_TYR.162   | H, F_TYR.162    | 2.96 | 2.06 | 19.25 |
| 1HGD.PDB | O, D_ARG.170   | NH1, F_ARG.163 | HH12, F_ARG.163 | 2.94 | 1.98 | 14.11 |
| 1HGD.PDB | O, F_TYR.162   | N, F_ALA.166   | H, F_ALA.166    | 2.95 | 1.98 | 6.51  |
| 1HGD.PDB | O, F_ARG.163   | N, F_LEU.167   | H, F_LEU.167    | 2.76 | 1.80 | 7.00  |
| 1HGD.PDB | O, F_ASP.164   | N, F_ASN.168   | H, F_ASN.168    | 2.95 | 1.99 | 8.58  |
| 1HGD.PDB | O, F_GLU.165   | ND2, F_ASN.169 | HD22, F_ASN.169 | 3.00 | 2.04 | 9.28  |
| 1HGD.PDB | O, F_ALA.166   | N, F_ARG.170   | H, F_ARG.170    | 2.83 | 1.97 | 23.51 |
| 1HGD.PDB | O, F_GLU.128   | NE, F_ARG.170  | HE, F_ARG.170   | 2.72 | 1.86 | 23.45 |
| 1HGD.PDB | OE2, F_GLU.131 | NH1, F_ARG.170 | HH11, F_ARG.170 | 2.76 | 1.77 | 6.97  |
| 1HGD.PDB | O, F_LEU.167   | N, F_PHE.171   | H, F_PHE.171    | 2.98 | 2.05 | 14.52 |
| 1HGE.PDB | O, B_ILE.140   | N, A_ALA.11    | H, A_ALA.11     | 2.81 | 1.93 | 21.75 |
| 1HGE.PDB | O, B_PHE.138   | N, A_LEU.13    | H, A_LEU.13     | 2.99 | 2.04 | 13.41 |
| 1HGE.PDB | O, B_ARG.25    | N, A_CYS.14    | H, A_CYS.14     | 2.88 | 1.92 | 6.83  |
| 1HGE.PDB | O, B_GLY.136   | N, A_LEU.15    | H, A_LEU.15     | 2.86 | 1.90 | 7.71  |
| 1HGE.PDB | O, B_GLY.23    | N, A_GLY.16    | H, A_GLY.16     | 2.95 | 2.03 | 17.76 |
| 1HGE.PDB | O, A_HIS.18    | ND1, A_HIS.17  | HD1, A_HIS.17   | 2.99 | 2.09 | 20.69 |
| 1HGE.PDB | O, B_TRP.21    | N, A_HIS.18    | H, A_HIS.18     | 2.85 | 1.97 | 21.20 |
| 1HGE.PDB | OD1, A_ASN.322 | N, A_VAL.20    | H, A_VAL.20     | 2.78 | 1.83 | 11.31 |
| 1HGE.PDB | O, A_VAL.36    | N, A_THR.24    | H, A_THR.24     | 2.84 | 1.95 | 19.98 |
| 1HGE.PDB | O, A_ILE.34    | N, A_VAL.26    | H, A_VAL.26     | 2.81 | 1.88 | 13.67 |
| 1HGE.PDB | OE2, B_GLU.97  | NZ, A_LYS.27   | HZ1, A_LYS.27   | 2.80 | 1.78 | 10.14 |
| 1HGE.PDB | O, A_VAL.26    | N, A_ILE.34    | H, A_ILE.34     | 2.90 | 1.96 | 12.32 |
| 1HGE.PDB | O, A_THR.24    | N, A_VAL.36    | H, A_VAL.36     | 2.80 | 1.84 | 9.48  |
| 1HGE.PDB | O, A_MET.320   | N, A_THR.37    | H, A_THR.37     | 2.86 | 1.89 | 5.71  |
| 1HGE.PDB | O, A_LEU.316   | N, A_THR.40    | H, A_THR.40     | 2.78 | 1.95 | 26.07 |
| 1HGE.PDB | O, A_LEU.314   | N, A_LEU.42    | H, A_LEU.42     | 2.81 | 1.99 | 27.51 |
| 1HGE.PDB | O, A_PHE.294   | N, A_GLN.44    | H, A_GLN.44     | 2.80 | 1.84 | 7.08  |
| 1HGE.PDB | O, A_SER.46    | NE2, A_GLN.44  | HE22, A_GLN.44  | 2.87 | 1.99 | 22.46 |
| 1HGE.PDB | OD2, A_ASP.275 | NZ, A_LYS.50   | HZ1, A_LYS.50   | 2.75 | 1.80 | 21.09 |
| 1HGE.PDB | O, A_PRO.273   | N, A_ILE.51    | H, A_ILE.51     | 2.81 | 1.86 | 12.28 |
| 1HGE.PDB | O, A_ASP.275   | N, A_ASN.53    | H, A_ASN.53     | 2.79 | 1.91 | 21.52 |
| 1HGE.PDB | OD2, A_ASP.85  | N, A_ARG.57    | H, A_ARG.57     | 2.92 | 1.99 | 13.17 |
| 1HGE.PDB | O, A_THR.83    | NE, A_ARG.57   | HE, A_ARG.57    | 2.79 | 1.83 | 9.22  |
| 1HGE.PDB | O, A_LEU.86    | N, A_LEU.59    | H, A_LEU.59     | 2.90 | 1.96 | 12.31 |
| 1HGE.PDB | O, A_VAL.88    | N, A_GLY.61    | H, A_GLY.61     | 2.97 | 2.14 | 26.58 |
| 1HGE.PDB | OD1, A_ASP.60  | N, A_ILE.62    | H, A_ILE.62     | 2.87 | 1.94 | 14.68 |

|          |                |                |                 |      |      |       |
|----------|----------------|----------------|-----------------|------|------|-------|
| 1HGE.PDB | O, A_GLY_61    | N, A_CYS_64    | H, A_CYS_64     | 2.85 | 1.93 | 16.81 |
| 1HGE.PDB | O, A_LEU_66    | N, A_LEU_70    | H, A_LEU_70     | 2.85 | 1.96 | 19.99 |
| 1HGE.PDB | O, A_ILE_67    | N, A_LEU_71    | H, A_LEU_71     | 2.84 | 1.88 | 8.15  |
| 1HGE.PDB | O, A_ASP_68    | N, A_GLY_72    | H, A_GLY_72     | 2.86 | 1.94 | 15.74 |
| 1HGE.PDB | OD1, A_ASP_73  | ND1, A_HIS_75  | HD1, A_HIS_75   | 2.80 | 1.89 | 17.62 |
| 1HGE.PDB | O, A_ASP_63    | NE2, A_HIS_75  | HE2, A_HIS_75   | 2.86 | 1.95 | 18.71 |
| 1HGE.PDB | O, A_ASP_73    | N, A_CYS_76    | H, A_CYS_76     | 2.78 | 1.83 | 10.81 |
| 1HGE.PDB | O, A_PRO_74    | N, A_ASP_77    | H, A_ASP_77     | 2.92 | 1.97 | 11.94 |
| 1HGE.PDB | O, A_CYS_76    | N, A_PHE_79    | H, A_PHE_79     | 3.00 | 2.02 | 2.98  |
| 1HGE.PDB | OE1, A_GLU_82  | N, A_THR_83    | H, A_THR_83     | 2.93 | 2.04 | 19.92 |
| 1HGE.PDB | O, A_ARG_57    | N, A_ASP_85    | H, A_ASP_85     | 2.80 | 1.89 | 17.89 |
| 1HGE.PDB | O, A_LEU_59    | N, A_VAL_88    | H, A_VAL_88     | 2.95 | 1.98 | 5.20  |
| 1HGE.PDB | O, A_MET_268   | N, A_GLU_89    | H, A_GLU_89     | 2.78 | 1.83 | 9.22  |
| 1HGE.PDB | OD1, A_ASP_60  | NE, A_ARG_90   | HE, A_ARG_90    | 2.85 | 1.89 | 7.94  |
| 1HGE.PDB | O, A_SER_270   | NH1, A_ARG_90  | HH11, A_ARG_90  | 2.62 | 1.75 | 23.79 |
| 1HGE.PDB | O, A_ALA_272   | NH1, A_ARG_90  | HH12, A_ARG_90  | 2.62 | 1.69 | 16.06 |
| 1HGE.PDB | OD2, A_ASP_60  | NH2, A_ARG_90  | HH21, A_ARG_90  | 2.79 | 1.80 | 8.90  |
| 1HGE.PDB | OD1, A_ASP_271 | N, A_SER_91    | H, A_SER_91     | 2.91 | 1.94 | 6.37  |
| 1HGE.PDB | OD2, A_ASP_271 | OG, A_SER_91   | HG, A_SER_91    | 2.81 | 1.90 | 18.10 |
| 1HGE.PDB | OD2, A_ASP_68  | OG, A_SER_95   | HG, A_SER_95    | 2.90 | 1.97 | 15.50 |
| 1HGE.PDB | OD2, A_ASP_73  | N, A_ASN_96    | H, A_ASN_96     | 2.90 | 1.93 | 6.89  |
| 1HGE.PDB | OD1, A_ASP_68  | OH, A_TYR_100  | HH, A_TYR_100   | 2.91 | 1.93 | 2.88  |
| 1HGE.PDB | O, A_ILE_230   | N, A_ASP_101   | H, A_ASP_101    | 3.00 | 2.11 | 21.52 |
| 1HGE.PDB | OD2, A_ASP_104 | OG, A_SER_107  | HG, A_SER_107   | 2.86 | 1.94 | 16.59 |
| 1HGE.PDB | O, A_TYR_105   | N, A_ARG_109   | H, A_ARG_109    | 2.83 | 1.86 | 3.58  |
| 1HGE.PDB | OE2, B_GLU_67  | NH2, A_ARG_109 | HH21, A_ARG_109 | 2.74 | 1.75 | 12.19 |
| 1HGE.PDB | OD2, F_ASP_79  | OG, A_SER_110  | HG, A_SER_110   | 2.90 | 1.95 | 11.19 |
| 1HGE.PDB | O, A_SER_107   | N, A_LEU_111   | H, A_LEU_111    | 2.85 | 1.87 | 2.87  |
| 1HGE.PDB | O, A_LEU_108   | N, A_VAL_112   | H, A_VAL_112    | 2.99 | 2.03 | 8.13  |
| 1HGE.PDB | O, A_ARG_109   | N, A_ALA_113   | H, A_ALA_113    | 2.94 | 2.03 | 18.27 |
| 1HGE.PDB | O, A_SER_110   | N, A_SER_114   | H, A_SER_114    | 2.87 | 1.96 | 18.01 |
| 1HGE.PDB | OE2, A_GLU_119 | OG1, A_THR_117 | HG1, A_THR_117  | 2.90 | 1.95 | 8.88  |
| 1HGE.PDB | O, A_GLU_82    | N, A_LEU_118   | H, A_LEU_118    | 2.96 | 2.03 | 16.11 |
| 1HGE.PDB | O, A_TYR_257   | N, A_ILE_121   | H, A_ILE_121    | 2.88 | 1.91 | 6.47  |
| 1HGE.PDB | O, A_ARG_255   | N, A_GLU_123   | H, A_GLU_123    | 2.93 | 1.98 | 10.93 |
| 1HGE.PDB | O, A_THR_155   | N, A_THR_131   | H, A_THR_131    | 2.74 | 1.84 | 18.66 |
| 1HGE.PDB | OD1, A_ASN_152 | N, A_ASN_133   | H, A_ASN_133    | 2.88 | 1.96 | 16.29 |
| 1HGE.PDB | O, A_TRP_153   | N, A_GLY_134   | H, A_GLY_134    | 2.96 | 2.06 | 19.55 |
| 1HGE.PDB | O, A_GLY_146   | N, A_SER_136   | H, A_SER_136    | 2.83 | 1.88 | 10.81 |
| 1HGE.PDB | OG, A_SER_136  | N, A_ALA_138   | H, A_ALA_138    | 2.95 | 2.01 | 13.95 |
| 1HGE.PDB | O, A_GLY_144   | NZ, A_LYS_140  | HZ1, A_LYS_140  | 2.75 | 1.77 | 16.24 |
| 1HGE.PDB | OD1, A_ASN_137 | NZ, A_LYS_140  | HZ2, A_LYS_140  | 2.81 | 1.83 | 16.67 |
| 1HGE.PDB | OD2, A_ASP_77  | NE, A_ARG_141  | HE, A_ARG_141   | 2.81 | 1.97 | 26.71 |
| 1HGE.PDB | O, A_PHE_147   | NH1, A_ARG_141 | HH12, A_ARG_141 | 2.55 | 1.62 | 16.38 |
| 1HGE.PDB | OD1, A_ASP_77  | NH2, A_ARG_141 | HH21, A_ARG_141 | 2.89 | 1.98 | 21.76 |
| 1HGE.PDB | OD2, A_ASP_77  | NH2, A_ARG_141 | HH21, A_ARG_141 | 2.75 | 1.86 | 23.90 |
| 1HGE.PDB | O, A_GLY_72    | NH2, A_ARG_141 | HH22, A_ARG_141 | 2.93 | 1.96 | 12.25 |
| 1HGE.PDB | O, A_GLY_72    | N, A_SER_149   | H, A_SER_149    | 2.83 | 1.92 | 17.48 |
| 1HGE.PDB | O, A_ALA_253   | N, A_ASN_152   | H, A_ASN_152    | 2.79 | 1.91 | 21.99 |
| 1HGE.PDB | OH, A_TYR_195  | NE1, A_TRP_153 | HE1, A_TRP_153  | 2.88 | 1.99 | 20.14 |
| 1HGE.PDB | O, A_LEU_194   | N, A_LYS_156   | H, A_LYS_156    | 2.98 | 2.08 | 19.15 |
| 1HGE.PDB | O, A_SER_193   | NZ, A_LYS_156  | HZ2, A_LYS_156  | 2.68 | 1.68 | 12.99 |
| 1HGE.PDB | O, A_THR_160   | N, A_SER_157   | H, A_SER_157    | 2.99 | 2.09 | 20.22 |
| 1HGE.PDB | O, A_SER_247   | N, A_LEU_164   | H, A_LEU_164    | 2.68 | 1.85 | 26.14 |
| 1HGE.PDB | O, A_ILE_245   | N, A_VAL_166   | H, A_VAL_166    | 2.88 | 1.93 | 12.18 |
| 1HGE.PDB | O, A_LEU_243   | OG1, A_THR_167 | HG1, A_THR_167  | 2.88 | 1.97 | 16.07 |
| 1HGE.PDB | O, A_LEU_243   | N, A_MET_168   | H, A_MET_168    | 2.92 | 1.99 | 15.75 |
| 1HGE.PDB | O, A_ASP_241   | N, A_ASN_170   | H, A_ASN_170    | 2.93 | 1.96 | 5.62  |



|          |                |                |                 |      |      |       |
|----------|----------------|----------------|-----------------|------|------|-------|
| 1HGE.PDB | O, A_PHE.174   | ND2, A_ASN.170 | HD21, A_ASN.170 | 2.84 | 1.88 | 9.34  |
| 1HGE.PDB | O, A_VAL.237   | ND2, A_ASN.170 | HD22, A_ASN.170 | 2.86 | 2.05 | 28.37 |
| 1HGE.PDB | O, A_VAL.237   | N, A_LYS.176   | H, A_LYS.176    | 2.98 | 2.05 | 15.51 |
| 1HGE.PDB | OE2, A_GLU.123 | NZ, A_LYS.176  | HZ1, A_LYS.176  | 2.71 | 1.79 | 22.78 |
| 1HGE.PDB | O, A_THR.235   | N, A_TYR.178   | H, A_TYR.178    | 2.82 | 1.86 | 5.77  |
| 1HGE.PDB | OE1, A_GLU.123 | OH, A_TYR.178  | HH, A_TYR.178   | 2.75 | 1.82 | 10.80 |
| 1HGE.PDB | O, A_TYR.233   | N, A_TRP.180   | H, A_TRP.180    | 2.99 | 2.02 | 8.32  |
| 1HGE.PDB | OG1, A_THR.235 | NE1, A_TRP.180 | HE1, A_TRP.180  | 2.92 | 1.93 | 3.33  |
| 1HGE.PDB | O, A_ASN.250   | N, A_HIS.183   | H, A_HIS.183    | 2.92 | 2.01 | 18.32 |
| 1HGE.PDB | O, A_ARG.229   | N, A_HIS.184   | H, A_HIS.184    | 2.86 | 1.90 | 8.10  |
| 1HGE.PDB | OG, A_SER.231  | NE2, A_HIS.184 | HE2, A_HIS.184  | 2.72 | 1.88 | 25.40 |
| 1HGE.PDB | OG1, A_THR.187 | N, A_GLU.190   | H, A_GLU.190    | 2.97 | 2.02 | 10.04 |
| 1HGE.PDB | O, A_GLN.197   | NE2, A_GLN.191 | HE22, A_GLN.191 | 2.96 | 2.04 | 16.90 |
| 1HGE.PDB | O, A_ASN.188   | OG1, A_THR.192 | HG1, A_THR.192  | 3.00 | 2.04 | 5.15  |
| 1HGE.PDB | O, A_GLN.189   | N, A_SER.193   | H, A_SER.193    | 2.84 | 1.87 | 3.05  |
| 1HGE.PDB | O, A_GLU.190   | N, A_LEU.194   | H, A_LEU.194    | 2.96 | 1.99 | 8.69  |
| 1HGE.PDB | O, A_GLN.191   | N, A_TYR.195   | H, A_TYR.195    | 2.77 | 1.82 | 9.81  |
| 1HGE.PDB | O, A_TYR.161   | NE2, A_GLN.197 | HE21, A_GLN.197 | 2.88 | 1.93 | 11.11 |
| 1HGE.PDB | O, A_ASN.248   | NE2, A_GLN.197 | HE22, A_GLN.197 | 2.92 | 1.99 | 15.44 |
| 1HGE.PDB | OD1, A_ASN.246 | NH2, A_ARG.201 | HH21, A_ARG.201 | 2.60 | 1.73 | 24.24 |
| 1HGE.PDB | O, A_ILE.213   | N, A_VAL.202   | H, A_VAL.202    | 2.96 | 1.99 | 9.62  |
| 1HGE.PDB | O, A_ASN.246   | N, A_THR.203   | H, A_THR.203    | 2.84 | 1.92 | 16.80 |
| 1HGE.PDB | O, A_GLN.211   | N, A_VAL.204   | H, A_VAL.204    | 2.83 | 1.93 | 18.95 |
| 1HGE.PDB | O, A_SER.209   | N, A_THR.206   | H, A_THR.206    | 2.97 | 2.00 | 7.75  |
| 1HGE.PDB | OD1, A_ASP.241 | N, A_ARG.207   | H, A_ARG.207    | 2.90 | 1.93 | 8.60  |
| 1HGE.PDB | OG1, A_THR.206 | OG, A_SER.209  | HG, A_SER.209   | 2.97 | 2.03 | 10.25 |
| 1HGE.PDB | OD1, E_ASP.101 | NE2, A_GLN.210 | HE22, A_GLN.210 | 2.91 | 2.05 | 24.48 |
| 1HGE.PDB | O, A_VAL.204   | N, A_GLN.211   | H, A_GLN.211    | 2.84 | 1.93 | 17.53 |
| 1HGE.PDB | OG1, A_THR.203 | OG1, A_THR.212 | HG1, A_THR.212  | 2.85 | 1.89 | 3.04  |
| 1HGE.PDB | O, A_VAL.202   | N, A_ILE.213   | H, A_ILE.213    | 2.83 | 1.91 | 16.11 |
| 1HGE.PDB | OE1, C_GLN.210 | NH2, A_ARG.220 | HH21, A_ARG.220 | 2.71 | 1.78 | 19.14 |
| 1HGE.PDB | O, A_ASN.216   | NH2, A_ARG.220 | HH22, A_ARG.220 | 2.65 | 1.77 | 22.20 |
| 1HGE.PDB | O, A_LEU.226   | N, A_VAL.223   | H, A_VAL.223    | 2.87 | 1.92 | 10.90 |
| 1HGE.PDB | O, A_CYS.97    | NE, A_ARG.224  | HE, A_ARG.224   | 2.88 | 2.06 | 27.84 |
| 1HGE.PDB | O, A_CYS.97    | NH2, A_ARG.224 | HH21, A_ARG.224 | 2.81 | 1.91 | 22.36 |
| 1HGE.PDB | O, A_VAL.223   | N, A_LEU.226   | H, A_LEU.226    | 2.91 | 1.96 | 11.44 |
| 1HGE.PDB | O, A_SER.228   | NH1, A_ARG.229 | HH11, A_ARG.229 | 2.68 | 1.74 | 17.50 |
| 1HGE.PDB | O, A_PRO.221   | NH2, A_ARG.229 | HH22, A_ARG.229 | 2.64 | 1.68 | 14.09 |
| 1HGE.PDB | OD1, A_ASP.101 | OG, A_SER.231  | HG, A_SER.231   | 2.85 | 1.89 | 7.16  |
| 1HGE.PDB | O, A_ASP.101   | N, A_ILE.232   | H, A_ILE.232    | 2.93 | 2.00 | 16.40 |
| 1HGE.PDB | O, A_TRP.180   | N, A_TYR.233   | H, A_TYR.233    | 2.87 | 1.90 | 8.23  |
| 1HGE.PDB | O, A_TYR.178   | N, A_THR.235   | H, A_THR.235    | 2.87 | 1.97 | 18.03 |
| 1HGE.PDB | O, A_LYS.176   | N, A_VAL.237   | H, A_VAL.237    | 2.80 | 1.88 | 15.84 |
| 1HGE.PDB | O, F_SER.71    | NZ, A_LYS.238  | HZ2, A_LYS.238  | 2.67 | 1.73 | 19.84 |
| 1HGE.PDB | OE1, F_GLU.72  | NZ, A_LYS.238  | HZ3, A_LYS.238  | 2.91 | 1.89 | 11.73 |
| 1HGE.PDB | O, A_ASN.170   | N, A_GLY.240   | H, A_GLY.240    | 2.86 | 1.99 | 22.30 |
| 1HGE.PDB | O, A_LYS.238   | N, A_ASP.241   | H, A_ASP.241    | 2.94 | 2.01 | 14.08 |
| 1HGE.PDB | OD1, A_ASP.241 | N, A_VAL.242   | H, A_VAL.242    | 2.76 | 1.94 | 27.44 |
| 1HGE.PDB | O, A_MET.168   | N, A_LEU.243   | H, A_LEU.243    | 2.90 | 1.93 | 4.25  |
| 1HGE.PDB | O, A_SER.205   | N, A_VAL.244   | H, A_VAL.244    | 2.95 | 2.01 | 13.31 |
| 1HGE.PDB | O, A_VAL.166   | N, A_ILE.245   | H, A_ILE.245    | 2.85 | 1.92 | 14.45 |
| 1HGE.PDB | O, A_THR.203   | N, A_ASN.246   | H, A_ASN.246    | 2.90 | 1.93 | 7.70  |
| 1HGE.PDB | OD1, A_ASN.165 | ND2, A_ASN.246 | HD22, A_ASN.246 | 2.88 | 1.94 | 13.15 |
| 1HGE.PDB | O, A_LEU.164   | N, A_SER.247   | H, A_SER.247    | 2.96 | 2.05 | 18.81 |
| 1HGE.PDB | OE1, A_GLN.191 | ND2, A_ASN.250 | HD21, A_ASN.250 | 2.94 | 1.97 | 8.25  |
| 1HGE.PDB | O, A_HIS.183   | ND2, A_ASN.250 | HD22, A_ASN.250 | 2.88 | 1.92 | 10.41 |
| 1HGE.PDB | O, A_ASN.152   | N, A_ALA.253   | H, A_ALA.253    | 2.86 | 1.98 | 21.30 |
| 1HGE.PDB | OD1, A_ASN.133 | NH2, A_ARG.255 | HH22, A_ARG.255 | 2.48 | 1.67 | 28.93 |

|          |                |                |                 |      |      |       |
|----------|----------------|----------------|-----------------|------|------|-------|
| 1HGE.PDB | O, A_LEU_177   | N, A_PHE_258   | H, A_PHE_258    | 2.96 | 1.99 | 5.50  |
| 1HGE.PDB | OE2, A_GLU_119 | NH1, A_ARG_261 | HH12, A_ARG_261 | 2.64 | 1.81 | 27.97 |
| 1HGE.PDB | OE1, A_GLU_119 | NH2, A_ARG_261 | HH22, A_ARG_261 | 2.84 | 1.95 | 24.23 |
| 1HGE.PDB | OD2, A_ASP_85  | NZ, A_LYS_264  | HZ3, A_LYS_264  | 2.77 | 1.79 | 16.96 |
| 1HGE.PDB | O, A_PHE_87    | N, A_MET_268   | H, A_MET_268    | 2.82 | 1.93 | 21.12 |
| 1HGE.PDB | O, A_PRO_284   | OG, A_SER_270  | HG, A_SER_270   | 2.79 | 1.85 | 11.32 |
| 1HGE.PDB | OG, A_SER_270  | N, A_ALA_272   | H, A_ALA_272    | 2.96 | 2.01 | 11.61 |
| 1HGE.PDB | O, A_ILE_51    | N, A_ASP_275   | H, A_ASP_275    | 2.94 | 2.05 | 20.45 |
| 1HGE.PDB | OD1, A_ASP_275 | N, A_THR_276   | H, A_THR_276    | 2.79 | 1.94 | 23.69 |
| 1HGE.PDB | O, A_ASN_54    | N, A_SER_279   | H, A_SER_279    | 2.78 | 1.85 | 13.75 |
| 1HGE.PDB | O, A_TYR_302   | N, A_ILE_282   | H, A_ILE_282    | 2.91 | 1.94 | 8.25  |
| 1HGE.PDB | O, A_THR_283   | N, A_GLY_286   | H, A_GLY_286    | 2.83 | 1.90 | 13.31 |
| 1HGE.PDB | O, A_LYS_50    | N, A_SER_287   | H, A_SER_287    | 2.88 | 1.91 | 2.15  |
| 1HGE.PDB | O, A_ALA_304   | ND2, A_ASN_290 | HD22, A_ASN_290 | 2.81 | 1.91 | 18.81 |
| 1HGE.PDB | OE1, A_GLN_44  | NZ, A_LYS_292  | HZ1, A_LYS_292  | 2.69 | 1.69 | 12.67 |
| 1HGE.PDB | OD2, A_ASP_291 | NZ, A_LYS_292  | HZ3, A_LYS_292  | 2.82 | 1.86 | 19.03 |
| 1HGE.PDB | O, A_LYS_307   | N, A_GLN_295   | H, A_GLN_295    | 2.84 | 1.95 | 20.46 |
| 1HGE.PDB | O, A_ASN_298   | NE2, A_GLN_295 | HE21, A_GLN_295 | 2.75 | 1.79 | 6.17  |
| 1HGE.PDB | O, A_GLN_44    | N, A_ASN_296   | H, A_ASN_296    | 2.80 | 1.87 | 13.84 |
| 1HGE.PDB | OE1, A_GLN_295 | N, A_VAL_297   | H, A_VAL_297    | 2.67 | 1.87 | 28.35 |
| 1HGE.PDB | O, B_LYS_68    | NZ, A_LYS_299  | HZ2, A_LYS_299  | 2.95 | 1.93 | 10.27 |
| 1HGE.PDB | OD1, A_ASN_298 | N, A_ILE_300   | H, A_ILE_300    | 2.94 | 2.01 | 15.45 |
| 1HGE.PDB | O, A_ILE_282   | N, A_TYR_302   | H, A_TYR_302    | 2.95 | 2.08 | 23.09 |
| 1HGE.PDB | O, B_LYS_62    | N, A_GLY_303   | H, A_GLY_303    | 2.95 | 1.98 | 8.88  |
| 1HGE.PDB | OG, B_SER_93   | N, A_LYS_310   | H, A_LYS_310    | 2.91 | 1.95 | 10.06 |
| 1HGE.PDB | OE2, A_GLU_41  | N, A_LEU_314   | H, A_LEU_314    | 2.82 | 1.89 | 14.30 |
| 1HGE.PDB | OE1, A_GLU_41  | NZ, A_LYS_315  | HZ3, A_LYS_315  | 2.82 | 1.87 | 21.00 |
| 1HGE.PDB | O, A_THR_40    | N, A_LEU_316   | H, A_LEU_316    | 2.80 | 1.85 | 10.41 |
| 1HGE.PDB | OD1, B_ASN_104 | N, A_ALA_317   | H, A_ALA_317    | 2.72 | 1.81 | 16.15 |
| 1HGE.PDB | O, A_ASN_38    | N, A_THR_318   | H, A_THR_318    | 2.85 | 1.93 | 17.18 |
| 1HGE.PDB | O, A_VAL_20    | ND2, A_ASN_322 | HD21, A_ASN_322 | 2.93 | 2.01 | 15.29 |
| 1HGE.PDB | OE2, A_GLU_35  | ND2, A_ASN_322 | HD22, A_ASN_322 | 2.88 | 1.99 | 21.26 |
| 1HGE.PDB | OE1, A_GLU_325 | NZ, A_LYS_326  | HZ3, A_LYS_326  | 2.85 | 1.86 | 15.04 |
| 1HGE.PDB | O, A_PRO_21    | NE2, A_GLN_327 | HE22, A_GLN_327 | 2.79 | 1.93 | 23.89 |
| 1HGE.PDB | OD2, B_ASP_112 | N, B_GLY_1     | H2, B_GLY_1     | 2.79 | 1.81 | 15.88 |
| 1HGE.PDB | OD1, B_ASP_109 | N, B_LEU_2     | H, B_LEU_2      | 2.80 | 1.92 | 21.49 |
| 1HGE.PDB | OD2, B_ASP_112 | N, B_PHE_3     | H, B_PHE_3      | 2.74 | 1.95 | 29.38 |
| 1HGE.PDB | OD2, B_ASP_112 | N, B_GLY_4     | H, B_GLY_4      | 2.91 | 2.02 | 19.87 |
| 1HGE.PDB | OD1, B_ASP_112 | N, B_ALA_5     | H, B_ALA_5      | 2.93 | 2.03 | 18.95 |
| 1HGE.PDB | O, B_GLY_4     | N, B_PHE_9     | H, B_PHE_9      | 2.82 | 1.87 | 12.40 |
| 1HGE.PDB | O, B_GLY_13    | ND2, B_ASN_12  | HD22, B_ASN_12  | 2.77 | 1.94 | 25.78 |
| 1HGE.PDB | O, A_VAL_323   | N, B_GLY_13    | H, B_GLY_13     | 2.72 | 1.79 | 12.30 |
| 1HGE.PDB | O, A_HIS_17    | N, B_TRP_14    | H, B_TRP_14     | 2.85 | 1.92 | 15.18 |
| 1HGE.PDB | OG1, B_THR_41  | N, B_TRP_21    | H, B_TRP_21     | 2.88 | 1.97 | 18.39 |
| 1HGE.PDB | O, A_GLY_16    | N, B_GLY_23    | H, B_GLY_23     | 2.92 | 2.01 | 18.67 |
| 1HGE.PDB | O, B_ALA_35    | N, B_PHE_24    | H, B_PHE_24     | 2.78 | 1.82 | 3.34  |
| 1HGE.PDB | O, A_CYS_14    | N, B_ARG_25    | H, B_ARG_25     | 3.00 | 2.06 | 13.87 |
| 1HGE.PDB | OE1, B_GLN_34  | NE, B_ARG_25   | HE, B_ARG_25    | 2.59 | 1.77 | 25.60 |
| 1HGE.PDB | O, B_GLY_33    | N, B_HIS_26    | H, B_HIS_26     | 2.68 | 1.83 | 22.72 |
| 1HGE.PDB | OG1, B_THR_32  | NE2, B_GLN_27  | HE22, B_GLN_27  | 2.99 | 2.08 | 18.28 |
| 1HGE.PDB | O, B_GLY_31    | N, B_ASN_28    | H, B_ASN_28     | 2.82 | 1.91 | 16.99 |
| 1HGE.PDB | O, B_ASN_28    | N, B_GLY_31    | H, B_GLY_31     | 3.00 | 2.09 | 18.25 |
| 1HGE.PDB | O, B_HIS_26    | N, B_GLY_33    | H, B_GLY_33     | 2.86 | 1.95 | 17.40 |
| 1HGE.PDB | O, B_TYR_22    | N, B_ASP_37    | H, B_ASP_37     | 2.72 | 1.79 | 12.23 |
| 1HGE.PDB | OD2, B_ASP_37  | N, B_SER_40    | H, B_SER_40     | 2.87 | 1.91 | 9.83  |
| 1HGE.PDB | O, B_ASP_37    | OG1, B_THR_41  | HG1, B_THR_41   | 2.70 | 1.82 | 19.30 |
| 1HGE.PDB | O, B_LEU_38    | N, B_GLN_42    | H, B_GLN_42     | 2.86 | 1.93 | 14.86 |
| 1HGE.PDB | OD1, B_ASP_46  | NE2, B_GLN_42  | HE22, B_GLN_42  | 2.87 | 1.96 | 19.05 |

|          |                |                |                 |      |      |       |
|----------|----------------|----------------|-----------------|------|------|-------|
| 1HGE.PDB | O, B_LYS_39    | N, B_ALA_43    | H, B_ALA_43     | 2.94 | 2.00 | 12.81 |
| 1HGE.PDB | O, B_SER_40    | N, B_ALA_44    | H, B_ALA_44     | 2.93 | 1.95 | 3.59  |
| 1HGE.PDB | O, B_GLN_42    | N, B_ASP_46    | H, B_ASP_46     | 2.81 | 1.84 | 1.45  |
| 1HGE.PDB | O, B_ALA_43    | NE2, B_GLN_47  | HE22, B_GLN_47  | 2.88 | 1.96 | 16.21 |
| 1HGE.PDB | O, B_ILE_45    | N, B_ASN_49    | H, B_ASN_49     | 2.85 | 1.89 | 11.27 |
| 1HGE.PDB | O, B_ASP_46    | N, B_GLY_50    | H, B_GLY_50     | 2.84 | 1.93 | 18.21 |
| 1HGE.PDB | OG1, B_THR_107 | NZ, B_LYS_51   | HZ1, B_LYS_51   | 2.97 | 1.99 | 17.16 |
| 1HGE.PDB | OE1, B_GLU_103 | NZ, B_LYS_51   | HZ2, B_LYS_51   | 2.76 | 1.73 | 6.92  |
| 1HGE.PDB | ND1, B_HIS_106 | NZ, B_LYS_51   | HZ3, B_LYS_51   | 2.73 | 1.78 | 18.14 |
| 1HGE.PDB | O, B_ILE_48    | N, B_LEU_52    | H, B_LEU_52     | 2.84 | 1.93 | 16.73 |
| 1HGE.PDB | O, B_ASN_49    | N, B_ASN_53    | H, B_ASN_53     | 2.78 | 1.86 | 14.52 |
| 1HGE.PDB | OE1, B_GLU_57  | NH1, B_ARG_54  | HH11, B_ARG_54  | 2.83 | 1.84 | 12.19 |
| 1HGE.PDB | OE2, F_GLU_97  | NH2, B_ARG_54  | HH22, B_ARG_54  | 2.84 | 1.86 | 12.76 |
| 1HGE.PDB | OD2, F_ASP_86  | NZ, B_LYS_62   | HZ1, B_LYS_62   | 2.60 | 1.76 | 28.82 |
| 1HGE.PDB | OD2, F_ASP_90  | NZ, B_LYS_62   | HZ3, B_LYS_62   | 2.69 | 1.82 | 26.81 |
| 1HGE.PDB | OG, A_SER_110  | NE2, B_HIS_64  | HE2, B_HIS_64   | 2.97 | 2.02 | 12.36 |
| 1HGE.PDB | O, B_PHE_63    | NE2, B_GLN_65  | HE22, B_GLN_65  | 2.99 | 2.02 | 6.59  |
| 1HGE.PDB | O, A_LYS_299   | NZ, B_LYS_68   | HZ1, B_LYS_68   | 2.93 | 1.92 | 11.15 |
| 1HGE.PDB | OE2, B_GLU_85  | NZ, B_LYS_68   | HZ2, B_LYS_68   | 2.78 | 1.76 | 9.50  |
| 1HGE.PDB | OG, C_SER_107  | N, B_ARG_76    | H, B_ARG_76     | 2.82 | 1.86 | 9.28  |
| 1HGE.PDB | OE2, D_GLU_81  | NE, B_ARG_76   | HE, B_ARG_76    | 2.87 | 1.91 | 11.56 |
| 1HGE.PDB | OE2, D_GLU_74  | NH1, B_ARG_76  | HH12, B_ARG_76  | 2.84 | 1.83 | 5.81  |
| 1HGE.PDB | OE1, D_GLU_81  | NH2, B_ARG_76  | HH21, B_ARG_76  | 2.70 | 1.70 | 6.45  |
| 1HGE.PDB | OE1, D_GLU_74  | NH2, B_ARG_76  | HH22, B_ARG_76  | 2.79 | 1.79 | 3.91  |
| 1HGE.PDB | OE1, B_GLU_74  | NE2, B_GLN_78  | HE22, B_GLN_78  | 2.97 | 2.00 | 7.88  |
| 1HGE.PDB | O, B_GLY_75    | N, B_ASP_79    | H, B_ASP_79     | 2.91 | 1.96 | 12.34 |
| 1HGE.PDB | O, B_ILE_77    | N, B_GLU_81    | H, B_GLU_81     | 2.94 | 1.98 | 9.95  |
| 1HGE.PDB | O, B_ASP_79    | N, B_TYR_83    | H, B_TYR_83     | 2.93 | 2.00 | 15.72 |
| 1HGE.PDB | OE1, D_GLU_85  | OH, B_TYR_83   | HH, B_TYR_83    | 2.65 | 1.81 | 24.86 |
| 1HGE.PDB | O, B_LEU_80    | N, B_VAL_84    | H, B_VAL_84     | 2.83 | 1.87 | 9.05  |
| 1HGE.PDB | O, B_LYS_82    | N, B_ASP_86    | H, B_ASP_86     | 2.93 | 1.97 | 10.28 |
| 1HGE.PDB | O, B_TYR_83    | N, B_THR_87    | H, B_THR_87     | 2.93 | 1.97 | 8.81  |
| 1HGE.PDB | O, B_VAL_84    | N, B_LYS_88    | H, B_LYS_88     | 2.94 | 2.02 | 16.73 |
| 1HGE.PDB | OH, F_TYR_83   | NZ, B_LYS_88   | HZ1, B_LYS_88   | 2.75 | 1.71 | 5.62  |
| 1HGE.PDB | O, B_GLU_85    | N, B_ILE_89    | H, B_ILE_89     | 2.88 | 1.90 | 4.71  |
| 1HGE.PDB | O, B_LYS_88    | N, B_TRP_92    | H, B_TRP_92     | 2.97 | 1.99 | 5.16  |
| 1HGE.PDB | O, B_ILE_89    | N, B_SER_93    | H, B_SER_93     | 2.85 | 1.95 | 18.50 |
| 1HGE.PDB | O, B_ILE_89    | OG, B_SER_93   | HG, B_SER_93    | 2.88 | 1.95 | 13.07 |
| 1HGE.PDB | O, B_ASP_90    | N, B_TYR_94    | H, B_TYR_94     | 2.86 | 1.94 | 16.10 |
| 1HGE.PDB | O, B_TRP_92    | N, B_ALA_96    | H, B_ALA_96     | 2.95 | 2.01 | 14.83 |
| 1HGE.PDB | O, B_TYR_94    | N, B_LEU_98    | H, B_LEU_98     | 2.99 | 2.01 | 4.40  |
| 1HGE.PDB | O, B_ASN_95    | N, B_LEU_99    | H, B_LEU_99     | 2.90 | 1.98 | 15.69 |
| 1HGE.PDB | O, B_LEU_98    | N, B_LEU_102   | H, B_LEU_102    | 2.96 | 1.99 | 5.20  |
| 1HGE.PDB | O, B_LEU_99    | N, B_GLU_103   | H, B_GLU_103    | 2.88 | 1.92 | 7.57  |
| 1HGE.PDB | O, B_VAL_100   | N, B_ASN_104   | H, B_ASN_104    | 2.90 | 1.95 | 12.33 |
| 1HGE.PDB | O, A_LYS_27    | ND2, B_ASN_104 | HD22, B_ASN_104 | 2.93 | 1.97 | 10.25 |
| 1HGE.PDB | O, B_LEU_102   | N, B_HIS_106   | H, B_HIS_106    | 2.92 | 1.96 | 11.10 |
| 1HGE.PDB | O, B_GLU_103   | N, B_THR_107   | H, B_THR_107    | 2.81 | 1.94 | 21.77 |
| 1HGE.PDB | O, B_ASN_104   | N, B_ILE_108   | H, B_ILE_108    | 2.89 | 1.93 | 10.01 |
| 1HGE.PDB | O, B_HIS_106   | N, B_LEU_110   | H, B_LEU_110    | 2.83 | 1.87 | 9.77  |
| 1HGE.PDB | O, B_THR_107   | OG1, B_THR_111 | HG1, B_THR_111  | 2.88 | 1.91 | 3.54  |
| 1HGE.PDB | O, B_ASP_109   | N, B_SER_113   | H, B_SER_113    | 2.82 | 1.87 | 9.66  |
| 1HGE.PDB | O, B_LEU_110   | N, B_GLU_114   | H, B_GLU_114    | 2.93 | 1.98 | 10.47 |
| 1HGE.PDB | O, B_ASP_112   | N, B_ASN_116   | H, B_ASN_116    | 2.97 | 2.00 | 6.50  |
| 1HGE.PDB | O, B_SER_113   | N, B_LYS_117   | H, B_LYS_117    | 2.76 | 1.88 | 21.74 |
| 1HGE.PDB | O, B_GLU_114   | N, B_LEU_118   | H, B_LEU_118    | 2.98 | 2.03 | 12.99 |
| 1HGE.PDB | O, B_MET_115   | N, B_PHE_119   | H, B_PHE_119    | 3.00 | 2.05 | 11.74 |
| 1HGE.PDB | O, B_ASN_116   | N, B_GLU_120   | H, B_GLU_120    | 2.94 | 1.96 | 5.48  |

|          |                |                |                 |      |      |       |
|----------|----------------|----------------|-----------------|------|------|-------|
| 1HGE.PDB | O, B_LYS_117   | N, B_LYS_121   | H, B_LYS_121    | 2.93 | 2.04 | 20.65 |
| 1HGE.PDB | O, B_PHE_119   | N, B_ARG_123   | H, B_ARG_123    | 2.92 | 1.95 | 6.37  |
| 1HGE.PDB | OE2, B_GLU_120 | NH1, B_ARG_123 | HH11, B_ARG_123 | 2.84 | 1.95 | 23.29 |
| 1HGE.PDB | O, B_GLU_120   | N, B_ARG_124   | H, B_ARG_124    | 2.99 | 2.03 | 10.10 |
| 1HGE.PDB | OE1, F_GLU_132 | NE, B_ARG_124  | HE, B_ARG_124   | 2.80 | 1.98 | 27.36 |
| 1HGE.PDB | OE2, F_GLU_132 | NE, B_ARG_124  | HE, B_ARG_124   | 2.94 | 2.06 | 21.65 |
| 1HGE.PDB | O, B_LEU_126   | N, B_ASN_129   | H, B_ASN_129    | 2.92 | 1.98 | 14.64 |
| 1HGE.PDB | O, B_HIS_159   | ND2, B_ASN_129 | HD21, B_ASN_129 | 2.96 | 2.01 | 10.21 |
| 1HGE.PDB | OH, B_TYR_157  | ND2, B_ASN_129 | HD22, B_ASN_129 | 2.79 | 1.85 | 12.68 |
| 1HGE.PDB | O, B_LYS_139   | N, B_GLU_131   | H, B_GLU_131    | 2.95 | 2.03 | 17.07 |
| 1HGE.PDB | O, B_CYS_137   | N, B_MET_133   | H, B_MET_133    | 2.86 | 1.91 | 11.42 |
| 1HGE.PDB | O, A_LEU_13    | N, B_PHE_138   | H, B_PHE_138    | 2.71 | 1.84 | 21.33 |
| 1HGE.PDB | O, B_GLU_131   | N, B_LYS_139   | H, B_LYS_139    | 2.81 | 1.88 | 12.91 |
| 1HGE.PDB | O, A_ALA_11    | N, B_ILE_140   | H, B_ILE_140    | 2.75 | 1.86 | 18.72 |
| 1HGE.PDB | O, B_ASN_129   | N, B_TYR_141   | H, B_TYR_141    | 2.86 | 1.94 | 15.94 |
| 1HGE.PDB | OD2, B_ASP_145 | NZ, B_LYS_143  | HZ1, B_LYS_143  | 2.79 | 1.94 | 29.42 |
| 1HGE.PDB | OE1, B_GLU_30  | N, B_ASN_146   | H, B_ASN_146    | 2.97 | 2.02 | 12.34 |
| 1HGE.PDB | O, B_ASP_145   | N, B_ILE_149   | H, B_ILE_149    | 2.91 | 1.95 | 10.07 |
| 1HGE.PDB | O, B_ASN_146   | N, B_GLU_150   | H, B_GLU_150    | 2.95 | 2.00 | 12.08 |
| 1HGE.PDB | O, B_ALA_147   | N, B_SER_151   | H, B_SER_151    | 2.90 | 2.05 | 24.74 |
| 1HGE.PDB | O, B_CYS_148   | OG, B_SER_151  | HG, B_SER_151   | 2.68 | 1.83 | 21.90 |
| 1HGE.PDB | O, B_GLU_150   | N, B_ASN_154   | H, B_ASN_154    | 2.81 | 1.84 | 3.57  |
| 1HGE.PDB | OE2, B_GLU_150 | ND2, B_ASN_154 | HD21, B_ASN_154 | 2.93 | 2.05 | 22.48 |
| 1HGE.PDB | O, B_SER_151   | N, B_THR_156   | H, B_THR_156    | 2.73 | 1.90 | 26.23 |
| 1HGE.PDB | OD1, B_ASN_154 | OG1, B_THR_156 | HG1, B_THR_156  | 2.71 | 1.82 | 17.99 |
| 1HGE.PDB | OD1, B_ASP_158 | N, B_ASP_160   | H, B_ASP_160    | 2.83 | 1.98 | 24.58 |
| 1HGE.PDB | O, B_HIS_159   | N, B_TYR_162   | H, B_TYR_162    | 2.90 | 2.00 | 20.06 |
| 1HGE.PDB | O, F_ARG_170   | NH1, B_ARG_163 | HH12, B_ARG_163 | 2.78 | 1.81 | 13.88 |
| 1HGE.PDB | O, B_TYR_162   | N, B_ALA_166   | H, B_ALA_166    | 2.88 | 1.91 | 5.46  |
| 1HGE.PDB | O, B_ARG_163   | N, B_LEU_167   | H, B_LEU_167    | 2.76 | 1.81 | 10.04 |
| 1HGE.PDB | O, B_ALA_166   | N, B_ARG_170   | H, B_ARG_170    | 2.82 | 1.95 | 21.77 |
| 1HGE.PDB | O, B_GLU_128   | NE, B_ARG_170  | HE, B_ARG_170   | 2.74 | 1.87 | 22.54 |
| 1HGE.PDB | OE2, B_GLU_131 | NH1, B_ARG_170 | HH11, B_ARG_170 | 2.80 | 1.80 | 6.47  |
| 1HGE.PDB | O, B_LEU_167   | N, B_PHE_171   | H, B_PHE_171    | 2.90 | 1.98 | 16.40 |
| 1HGE.PDB | O, D_ILE_140   | N, C_ALA_11    | H, C_ALA_11     | 2.80 | 1.91 | 19.98 |
| 1HGE.PDB | O, D_PHE_138   | N, C_LEU_13    | H, C_LEU_13     | 2.99 | 2.04 | 12.20 |
| 1HGE.PDB | O, D_ARG_25    | N, C_CYS_14    | H, C_CYS_14     | 2.73 | 1.82 | 16.85 |
| 1HGE.PDB | O, D_GLY_136   | N, C_LEU_15    | H, C_LEU_15     | 2.89 | 1.92 | 5.03  |
| 1HGE.PDB | O, D_GLY_23    | N, C_GLY_16    | H, C_GLY_16     | 2.98 | 2.07 | 18.60 |
| 1HGE.PDB | O, C_HIS_18    | ND1, C_HIS_17  | HD1, C_HIS_17   | 3.00 | 2.12 | 21.91 |
| 1HGE.PDB | O, D_TRP_21    | N, C_HIS_18    | H, C_HIS_18     | 2.85 | 1.96 | 19.89 |
| 1HGE.PDB | OD1, C_ASN_322 | N, C_VAL_20    | H, C_VAL_20     | 2.80 | 1.84 | 8.99  |
| 1HGE.PDB | O, C_VAL_36    | N, C_THR_24    | H, C_THR_24     | 2.83 | 1.91 | 16.33 |
| 1HGE.PDB | O, C_ILE_34    | N, C_VAL_26    | H, C_VAL_26     | 2.82 | 1.87 | 10.60 |
| 1HGE.PDB | OE2, D_GLU_97  | NZ, C_LYS_27   | HZ1, C_LYS_27   | 2.79 | 1.77 | 8.74  |
| 1HGE.PDB | O, C_VAL_26    | N, C_ILE_34    | H, C_ILE_34     | 2.90 | 1.95 | 12.39 |
| 1HGE.PDB | O, C_THR_24    | N, C_VAL_36    | H, C_VAL_36     | 2.79 | 1.83 | 9.59  |
| 1HGE.PDB | O, C_MET_320   | N, C_THR_37    | H, C_THR_37     | 2.87 | 1.90 | 5.65  |
| 1HGE.PDB | O, C_LEU_316   | N, C_THR_40    | H, C_THR_40     | 2.80 | 1.96 | 24.94 |
| 1HGE.PDB | O, C_LEU_314   | N, C_LEU_42    | H, C_LEU_42     | 2.79 | 1.97 | 26.99 |
| 1HGE.PDB | O, C_PHE_294   | N, C_GLN_44    | H, C_GLN_44     | 2.81 | 1.85 | 7.78  |
| 1HGE.PDB | O, C_SER_46    | NE2, C_GLN_44  | HE22, C_GLN_44  | 2.87 | 1.98 | 21.20 |
| 1HGE.PDB | O, C_ASN_285   | OG, C_SER_47   | HG, C_SER_47    | 2.85 | 1.92 | 13.60 |
| 1HGE.PDB | OG1, C_THR_48  | N, C_LYS_50    | H, C_LYS_50     | 2.99 | 2.04 | 10.77 |
| 1HGE.PDB | OD2, C_ASP_275 | NZ, C_LYS_50   | HZ1, C_LYS_50   | 2.70 | 1.77 | 22.15 |
| 1HGE.PDB | O, C_PRO_273   | N, C_ILE_51    | H, C_ILE_51     | 2.80 | 1.85 | 11.79 |
| 1HGE.PDB | O, C_ASP_275   | N, C_ASN_53    | H, C_ASN_53     | 2.75 | 1.91 | 24.79 |
| 1HGE.PDB | OD2, C_ASP_85  | N, C_ARG_57    | H, C_ARG_57     | 2.90 | 1.96 | 11.88 |

|          |                |                |                 |      |      |       |
|----------|----------------|----------------|-----------------|------|------|-------|
| 1HGE.PDB | O, C_THR_83    | NE, C_ARG_57   | HE, C_ARG_57    | 2.79 | 1.83 | 9.16  |
| 1HGE.PDB | O, C_LEU_86    | N, C_LEU_59    | H, C_LEU_59     | 2.93 | 1.97 | 10.15 |
| 1HGE.PDB | O, C_VAL_88    | N, C_GLY_61    | H, C_GLY_61     | 2.98 | 2.14 | 25.88 |
| 1HGE.PDB | OD1, C_ASP_60  | N, C_ILE_62    | H, C_ILE_62     | 2.86 | 1.94 | 15.66 |
| 1HGE.PDB | O, C_GLY_61    | N, C_CYS_64    | H, C_CYS_64     | 2.85 | 1.93 | 16.26 |
| 1HGE.PDB | O, C_LEU_66    | N, C_LEU_70    | H, C_LEU_70     | 2.86 | 1.97 | 20.20 |
| 1HGE.PDB | O, C_ILE_67    | N, C_LEU_71    | H, C_LEU_71     | 2.82 | 1.86 | 10.15 |
| 1HGE.PDB | O, C_ASP_68    | N, C_GLY_72    | H, C_GLY_72     | 2.84 | 1.92 | 16.44 |
| 1HGE.PDB | OD1, C_ASP_73  | ND1, C_HIS_75  | HD1, C_HIS_75   | 2.76 | 1.85 | 18.20 |
| 1HGE.PDB | O, C_ASP_63    | NE2, C_HIS_75  | HE2, C_HIS_75   | 2.82 | 1.90 | 17.58 |
| 1HGE.PDB | O, C_ASP_73    | N, C_CYS_76    | H, C_CYS_76     | 2.77 | 1.82 | 10.67 |
| 1HGE.PDB | O, C_PRO_74    | N, C_ASP_77    | H, C_ASP_77     | 2.88 | 1.93 | 11.27 |
| 1HGE.PDB | O, C_CYS_76    | N, C_PHE_79    | H, C_PHE_79     | 2.99 | 2.01 | 4.04  |
| 1HGE.PDB | O, C_ARG_57    | N, C_ASP_85    | H, C_ASP_85     | 2.79 | 1.90 | 19.22 |
| 1HGE.PDB | O, C_LEU_59    | N, C_VAL_88    | H, C_VAL_88     | 2.96 | 1.98 | 5.43  |
| 1HGE.PDB | O, C_MET_268   | N, C_GLU_89    | H, C_GLU_89     | 2.78 | 1.83 | 10.28 |
| 1HGE.PDB | OD1, C_ASP_60  | NE, C_ARG_90   | HE, C_ARG_90    | 2.84 | 1.88 | 10.34 |
| 1HGE.PDB | O, C_SER_270   | NH1, C_ARG_90  | HH11, C_ARG_90  | 2.64 | 1.77 | 24.86 |
| 1HGE.PDB | O, C_ALA_272   | NH1, C_ARG_90  | HH12, C_ARG_90  | 2.61 | 1.68 | 16.52 |
| 1HGE.PDB | OD2, C_ASP_60  | NH2, C_ARG_90  | HH21, C_ARG_90  | 2.77 | 1.78 | 9.61  |
| 1HGE.PDB | OD1, C_ASP_271 | N, C_SER_91    | H, C_SER_91     | 2.89 | 1.92 | 5.94  |
| 1HGE.PDB | OD2, C_ASP_271 | OG, C_SER_91   | HG, C_SER_91    | 2.80 | 1.91 | 19.19 |
| 1HGE.PDB | OD2, C_ASP_68  | OG, C_SER_95   | HG, C_SER_95    | 2.88 | 1.95 | 14.90 |
| 1HGE.PDB | OD2, C_ASP_73  | N, C_ASN_96    | H, C_ASN_96     | 2.89 | 1.91 | 7.72  |
| 1HGE.PDB | OD1, C_ASP_68  | OH, C_TYR_100  | HH, C_TYR_100   | 2.89 | 1.97 | 15.01 |
| 1HGE.PDB | O, C_ILE_230   | N, C_ASP_101   | H, C_ASP_101    | 2.99 | 2.10 | 21.29 |
| 1HGE.PDB | OD2, C_ASP_104 | OG, C_SER_107  | HG, C_SER_107   | 2.88 | 1.96 | 15.70 |
| 1HGE.PDB | O, C_TYR_105   | N, C_ARG_109   | H, C_ARG_109    | 2.82 | 1.85 | 4.05  |
| 1HGE.PDB | OE2, D_GLU_67  | NH2, C_ARG_109 | HH21, C_ARG_109 | 2.78 | 1.79 | 11.19 |
| 1HGE.PDB | OD2, B_ASP_79  | OG, C_SER_110  | HG, C_SER_110   | 2.78 | 1.86 | 15.09 |
| 1HGE.PDB | O, C_SER_107   | N, C_LEU_111   | H, C_LEU_111    | 2.85 | 1.88 | 4.99  |
| 1HGE.PDB | O, C_ARG_109   | N, C_ALA_113   | H, C_ALA_113    | 2.95 | 2.04 | 18.55 |
| 1HGE.PDB | O, C_SER_110   | N, C_SER_114   | H, C_SER_114    | 2.89 | 1.95 | 14.50 |
| 1HGE.PDB | OE2, C_GLU_119 | OG1, C_THR_117 | HG1, C_THR_117  | 2.89 | 1.94 | 9.29  |
| 1HGE.PDB | O, C_GLU_82    | N, C_LEU_118   | H, C_LEU_118    | 2.97 | 2.03 | 15.52 |
| 1HGE.PDB | O, C_TYR_257   | N, C_ILE_121   | H, C_ILE_121    | 2.88 | 1.91 | 6.31  |
| 1HGE.PDB | O, C_ARG_255   | N, C_GLU_123   | H, C_GLU_123    | 2.94 | 1.98 | 10.94 |
| 1HGE.PDB | O, C_THR_155   | N, C_THR_131   | H, C_THR_131    | 2.77 | 1.87 | 18.82 |
| 1HGE.PDB | OD1, C_ASN_152 | N, C_ASN_133   | H, C_ASN_133    | 2.88 | 1.96 | 16.12 |
| 1HGE.PDB | O, C_TRP_153   | N, C_GLY_134   | H, C_GLY_134    | 2.94 | 2.05 | 19.45 |
| 1HGE.PDB | O, C_GLY_146   | N, C_SER_136   | H, C_SER_136    | 2.85 | 1.90 | 10.46 |
| 1HGE.PDB | OG, C_SER_136  | N, C_ALA_138   | H, C_ALA_138    | 2.96 | 2.02 | 13.07 |
| 1HGE.PDB | O, C_GLY_144   | NZ, C_LYS_140  | HZ1, C_LYS_140  | 2.72 | 1.75 | 17.13 |
| 1HGE.PDB | OD1, C_ASN_137 | NZ, C_LYS_140  | HZ2, C_LYS_140  | 2.83 | 1.86 | 16.66 |
| 1HGE.PDB | OD2, C_ASP_77  | NE, C_ARG_141  | HE, C_ARG_141   | 2.80 | 1.97 | 26.96 |
| 1HGE.PDB | O, C_PHE_147   | NH1, C_ARG_141 | HH12, C_ARG_141 | 2.55 | 1.62 | 15.87 |
| 1HGE.PDB | OD1, C_ASP_77  | NH2, C_ARG_141 | HH21, C_ARG_141 | 2.88 | 1.96 | 21.42 |
| 1HGE.PDB | OD2, C_ASP_77  | NH2, C_ARG_141 | HH21, C_ARG_141 | 2.74 | 1.86 | 24.30 |
| 1HGE.PDB | O, C_GLY_72    | NH2, C_ARG_141 | HH22, C_ARG_141 | 2.91 | 1.94 | 12.79 |
| 1HGE.PDB | O, C_GLY_72    | N, C_SER_149   | H, C_SER_149    | 2.84 | 1.92 | 17.14 |
| 1HGE.PDB | O, C_ALA_253   | N, C_ASN_152   | H, C_ASN_152    | 2.77 | 1.90 | 22.09 |
| 1HGE.PDB | OH, C_TYR_195  | NE1, C_TRP_153 | HE1, C_TRP_153  | 2.85 | 1.98 | 22.78 |
| 1HGE.PDB | O, C_LEU_194   | N, C_LYS_156   | H, C_LYS_156    | 2.97 | 2.07 | 19.03 |
| 1HGE.PDB | O, C_THR_160   | N, C_SER_157   | H, C_SER_157    | 2.96 | 2.05 | 18.03 |
| 1HGE.PDB | O, C_SER_247   | N, C_LEU_164   | H, C_LEU_164    | 2.70 | 1.87 | 25.69 |
| 1HGE.PDB | O, C_ILE_245   | N, C_VAL_166   | H, C_VAL_166    | 2.88 | 1.93 | 12.26 |
| 1HGE.PDB | O, C_LEU_243   | OG1, C_THR_167 | HG1, C_THR_167  | 2.89 | 2.00 | 19.24 |
| 1HGE.PDB | O, C_LEU_243   | N, C_MET_168   | H, C_MET_168    | 2.95 | 2.03 | 16.73 |

|          |                |                |                 |      |      |       |
|----------|----------------|----------------|-----------------|------|------|-------|
| 1HGE.PDB | O, C_ASP_241   | N, C_ASN_170   | H, C_ASN_170    | 2.90 | 1.92 | 6.43  |
| 1HGE.PDB | O, C_PHE_174   | ND2, C_ASN_170 | HD21, C_ASN_170 | 2.84 | 1.87 | 8.31  |
| 1HGE.PDB | O, C_VAL_237   | ND2, C_ASN_170 | HD22, C_ASN_170 | 2.85 | 2.06 | 29.16 |
| 1HGE.PDB | O, C_VAL_237   | N, C_LYS_176   | H, C_LYS_176    | 2.96 | 2.03 | 15.33 |
| 1HGE.PDB | OE2, C_GLU_123 | NZ, C_LYS_176  | HZ1, C_LYS_176  | 2.71 | 1.80 | 23.44 |
| 1HGE.PDB | O, C_PHE_258   | N, C_LEU_177   | H, C_LEU_177    | 2.95 | 1.98 | 5.56  |
| 1HGE.PDB | O, C_THR_235   | N, C_TYR_178   | H, C_TYR_178    | 2.82 | 1.85 | 5.01  |
| 1HGE.PDB | OE1, C_GLU_123 | OH, C_TYR_178  | HH, C_TYR_178   | 2.73 | 1.80 | 12.29 |
| 1HGE.PDB | OG1, C_THR_235 | NE1, C_TRP_180 | HE1, C_TRP_180  | 2.92 | 1.93 | 1.68  |
| 1HGE.PDB | O, C_ASN_250   | N, C_HIS_183   | H, C_HIS_183    | 2.90 | 2.00 | 18.95 |
| 1HGE.PDB | O, C_ARG_229   | N, C_HIS_184   | H, C_HIS_184    | 2.88 | 1.92 | 7.36  |
| 1HGE.PDB | OG, C_SER_231  | NE2, C_HIS_184 | HE2, C_HIS_184  | 2.71 | 1.87 | 25.48 |
| 1HGE.PDB | OG1, C_THR_187 | N, C_GLU_190   | H, C_GLU_190    | 2.99 | 2.05 | 11.81 |
| 1HGE.PDB | OD1, C_ASN_250 | NE2, C_GLN_191 | HE21, C_GLN_191 | 3.00 | 2.03 | 7.73  |
| 1HGE.PDB | O, C_GLN_197   | NE2, C_GLN_191 | HE22, C_GLN_191 | 2.95 | 2.03 | 16.39 |
| 1HGE.PDB | O, C_GLN_189   | OG1, C_THR_192 | HG1, C_THR_192  | 2.80 | 1.94 | 21.49 |
| 1HGE.PDB | O, C_GLN_189   | N, C_SER_193   | H, C_SER_193    | 2.84 | 1.90 | 12.38 |
| 1HGE.PDB | O, C_GLU_190   | N, C_LEU_194   | H, C_LEU_194    | 3.00 | 2.03 | 8.39  |
| 1HGE.PDB | O, C_GLN_191   | N, C_TYR_195   | H, C_TYR_195    | 2.79 | 1.84 | 10.35 |
| 1HGE.PDB | O, C_TYR_161   | NE2, C_GLN_197 | HE21, C_GLN_197 | 2.87 | 1.92 | 10.94 |
| 1HGE.PDB | O, C_ASN_248   | NE2, C_GLN_197 | HE22, C_GLN_197 | 2.96 | 2.03 | 16.11 |
| 1HGE.PDB | OD1, C_ASN_246 | NH2, C_ARG_201 | HH21, C_ARG_201 | 2.62 | 1.75 | 24.53 |
| 1HGE.PDB | O, C_ILE_213   | N, C_VAL_202   | H, C_VAL_202    | 2.99 | 2.05 | 14.11 |
| 1HGE.PDB | O, C_ASN_246   | N, C_THR_203   | H, C_THR_203    | 2.91 | 1.96 | 12.23 |
| 1HGE.PDB | OG1, C_THR_212 | OG1, C_THR_203 | HG1, C_THR_203  | 2.89 | 1.94 | 9.07  |
| 1HGE.PDB | O, C_GLN_211   | N, C_VAL_204   | H, C_VAL_204    | 2.84 | 1.94 | 18.37 |
| 1HGE.PDB | O, C_SER_209   | N, C_THR_206   | H, C_THR_206    | 2.97 | 2.00 | 8.35  |
| 1HGE.PDB | OD1, C_ASP_241 | N, C_ARG_207   | H, C_ARG_207    | 2.89 | 1.93 | 9.60  |
| 1HGE.PDB | OG1, C_THR_206 | OG1, C_SER_209 | HG, C_SER_209   | 2.98 | 2.03 | 9.68  |
| 1HGE.PDB | OD1, A_ASP_101 | NE2, C_GLN_210 | HE22, C_GLN_210 | 2.93 | 2.07 | 24.92 |
| 1HGE.PDB | O, C_VAL_204   | N, C_GLN_211   | H, C_GLN_211    | 2.83 | 1.91 | 16.68 |
| 1HGE.PDB | O, C_VAL_202   | N, C_ILE_213   | H, C_ILE_213    | 2.84 | 1.91 | 15.11 |
| 1HGE.PDB | ND1, C_HIS_184 | N, C_ASN_216   | H, C_ASN_216    | 2.76 | 1.97 | 29.84 |
| 1HGE.PDB | OE1, E_GLN_210 | NH2, C_ARG_220 | HH21, C_ARG_220 | 2.64 | 1.76 | 23.09 |
| 1HGE.PDB | O, C_ASN_216   | NH2, C_ARG_220 | HH22, C_ARG_220 | 2.68 | 1.79 | 22.17 |
| 1HGE.PDB | O, C_LEU_226   | N, C_VAL_223   | H, C_VAL_223    | 2.85 | 1.89 | 10.14 |
| 1HGE.PDB | O, C_CYS_97    | NE, C_ARG_224  | HE, C_ARG_224   | 2.86 | 2.04 | 28.35 |
| 1HGE.PDB | O, C_CYS_97    | NH2, C_ARG_224 | HH21, C_ARG_224 | 2.80 | 1.90 | 22.90 |
| 1HGE.PDB | O, C_VAL_223   | N, C_LEU_226   | H, C_LEU_226    | 2.92 | 1.98 | 11.69 |
| 1HGE.PDB | O, C_SER_228   | NH1, C_ARG_229 | HH11, C_ARG_229 | 2.66 | 1.73 | 17.65 |
| 1HGE.PDB | O, C_PRO_221   | NH2, C_ARG_229 | HH22, C_ARG_229 | 2.66 | 1.70 | 14.45 |
| 1HGE.PDB | OD1, C_ASP_101 | OG, C_SER_231  | HG, C_SER_231   | 2.89 | 1.93 | 7.03  |
| 1HGE.PDB | O, C_ASP_101   | N, C_ILE_232   | H, C_ILE_232    | 2.94 | 2.01 | 16.06 |
| 1HGE.PDB | O, C_TRP_180   | N, C_TYR_233   | H, C_TYR_233    | 2.87 | 1.91 | 8.74  |
| 1HGE.PDB | O, C_TYR_178   | N, C_THR_235   | H, C_THR_235    | 2.86 | 1.95 | 17.72 |
| 1HGE.PDB | O, C_LYS_176   | N, C_VAL_237   | H, C_VAL_237    | 2.76 | 1.86 | 18.21 |
| 1HGE.PDB | OE1, B_GLU_72  | NZ, C_LYS_238  | HZ1, C_LYS_238  | 2.78 | 1.80 | 16.75 |
| 1HGE.PDB | O, B_SER_71    | NZ, C_LYS_238  | HZ3, C_LYS_238  | 2.65 | 1.71 | 19.56 |
| 1HGE.PDB | O, C_ASN_170   | N, C_GLY_240   | H, C_GLY_240    | 2.86 | 1.99 | 22.04 |
| 1HGE.PDB | O, C_LYS_238   | N, C_ASP_241   | H, C_ASP_241    | 2.92 | 1.99 | 14.19 |
| 1HGE.PDB | OD1, C_ASP_241 | N, C_VAL_242   | H, C_VAL_242    | 2.80 | 1.97 | 26.99 |
| 1HGE.PDB | O, C_MET_168   | N, C_LEU_243   | H, C_LEU_243    | 2.92 | 1.94 | 4.20  |
| 1HGE.PDB | O, C_SER_205   | N, C_VAL_244   | H, C_VAL_244    | 2.96 | 2.01 | 12.41 |
| 1HGE.PDB | O, C_VAL_166   | N, C_ILE_245   | H, C_ILE_245    | 2.89 | 1.96 | 15.45 |
| 1HGE.PDB | O, C_THR_203   | N, C_ASN_246   | H, C_ASN_246    | 2.90 | 1.93 | 6.52  |
| 1HGE.PDB | OD1, C_ASN_165 | ND2, C_ASN_246 | HD22, C_ASN_246 | 2.89 | 1.94 | 13.09 |
| 1HGE.PDB | O, C_LEU_164   | N, C_SER_247   | H, C_SER_247    | 2.96 | 2.05 | 18.85 |
| 1HGE.PDB | O, C_ARG_201   | OG, C_SER_247  | HG, C_SER_247   | 2.74 | 1.95 | 29.12 |

|          |                |                |                 |      |      |       |
|----------|----------------|----------------|-----------------|------|------|-------|
| 1HGE.PDB | OE1, C_GLN_191 | ND2, C_ASN_250 | HD21, C_ASN_250 | 2.89 | 1.93 | 9.19  |
| 1HGE.PDB | O, C_HIS_183   | ND2, C_ASN_250 | HD22, C_ASN_250 | 2.90 | 1.94 | 11.40 |
| 1HGE.PDB | O, C_ASN_152   | N, C_ALA_253   | H, C_ALA_253    | 2.88 | 2.01 | 23.02 |
| 1HGE.PDB | OD1, C_ASN_133 | NH2, C_ARG_255 | HH22, C_ARG_255 | 2.48 | 1.68 | 29.46 |
| 1HGE.PDB | O, C_ILE_121   | N, C_TYR_257   | H, C_TYR_257    | 2.98 | 2.14 | 25.04 |
| 1HGE.PDB | O, C_LEU_177   | N, C_PHE_258   | H, C_PHE_258    | 2.95 | 1.97 | 4.47  |
| 1HGE.PDB | OE2, C_GLU_119 | NH1, C_ARG_261 | HH12, C_ARG_261 | 2.65 | 1.82 | 27.69 |
| 1HGE.PDB | OE1, C_GLU_119 | NH2, C_ARG_261 | HH22, C_ARG_261 | 2.84 | 1.95 | 24.41 |
| 1HGE.PDB | OD2, C_ASP_85  | NZ, C_LYS_264  | HZ3, C_LYS_264  | 2.77 | 1.79 | 16.79 |
| 1HGE.PDB | O, C_PHE_87    | N, C_MET_268   | H, C_MET_268    | 2.81 | 1.93 | 20.65 |
| 1HGE.PDB | O, C_PRO_284   | OG, C_SER_270  | HG, C_SER_270   | 2.77 | 1.85 | 14.90 |
| 1HGE.PDB | OG, C_SER_270  | N, C_ALA_272   | H, C_ALA_272    | 2.95 | 2.00 | 10.98 |
| 1HGE.PDB | O, C_ILE_51    | N, C_ASP_275   | H, C_ASP_275    | 2.98 | 2.09 | 21.88 |
| 1HGE.PDB | OD1, C_ASP_275 | N, C_THR_276   | H, C_THR_276    | 2.79 | 1.93 | 23.11 |
| 1HGE.PDB | O, C_ASN_54    | N, C_SER_279   | H, C_SER_279    | 2.78 | 1.85 | 13.73 |
| 1HGE.PDB | O, C_TYR_302   | N, C_ILE_282   | H, C_ILE_282    | 2.90 | 1.93 | 4.89  |
| 1HGE.PDB | O, C_THR_283   | N, C_GLY_286   | H, C_GLY_286    | 2.85 | 1.91 | 13.86 |
| 1HGE.PDB | O, C_LYS_50    | N, C_SER_287   | H, C_SER_287    | 2.85 | 1.88 | 3.50  |
| 1HGE.PDB | O, C_ALA_304   | ND2, C_ASN_290 | HD22, C_ASN_290 | 2.82 | 1.93 | 19.75 |
| 1HGE.PDB | OE1, C_GLN_44  | NZ, C_LYS_292  | HZ1, C_LYS_292  | 2.72 | 1.72 | 12.77 |
| 1HGE.PDB | OD2, C_ASP_291 | NZ, C_LYS_292  | HZ3, C_LYS_292  | 2.84 | 1.88 | 19.72 |
| 1HGE.PDB | O, C_LYS_307   | N, C_GLN_295   | H, C_GLN_295    | 2.83 | 1.94 | 20.43 |
| 1HGE.PDB | O, C_ASN_298   | NE2, C_GLN_295 | HE21, C_GLN_295 | 2.74 | 1.79 | 8.05  |
| 1HGE.PDB | O, C_GLN_44    | N, C_ASN_296   | H, C_ASN_296    | 2.82 | 1.89 | 15.19 |
| 1HGE.PDB | OE1, C_GLN_295 | N, C_VAL_297   | H, C_VAL_297    | 2.70 | 1.88 | 26.95 |
| 1HGE.PDB | OD1, C_ASN_285 | ND2, C_ASN_298 | HD22, C_ASN_298 | 2.99 | 2.05 | 12.60 |
| 1HGE.PDB | O, D_LYS_68    | NZ, C_LYS_299  | HZ2, C_LYS_299  | 2.96 | 1.94 | 10.83 |
| 1HGE.PDB | OD1, C_ASN_298 | N, C_ILE_300   | H, C_ILE_300    | 2.91 | 2.01 | 19.01 |
| 1HGE.PDB | O, C_ILE_282   | N, C_TYR_302   | H, C_TYR_302    | 2.93 | 2.07 | 24.01 |
| 1HGE.PDB | O, C_LYS_264   | OH, C_TYR_302  | HH, C_TYR_302   | 2.65 | 1.87 | 29.65 |
| 1HGE.PDB | O, D_LYS_62    | N, C_GLY_303   | H, C_GLY_303    | 2.94 | 1.98 | 10.89 |
| 1HGE.PDB | OG, D_SER_93   | N, C_LYS_310   | H, C_LYS_310    | 2.92 | 1.96 | 11.23 |
| 1HGE.PDB | OE2, C_GLU_41  | N, C_LEU_314   | H, C_LEU_314    | 2.83 | 1.89 | 13.54 |
| 1HGE.PDB | OE1, C_GLU_41  | NZ, C_LYS_315  | HZ3, C_LYS_315  | 2.82 | 1.88 | 21.70 |
| 1HGE.PDB | O, C_THR_40    | N, C_LEU_316   | H, C_LEU_316    | 2.80 | 1.84 | 9.83  |
| 1HGE.PDB | OD1, D_ASN_104 | N, C_ALA_317   | H, C_ALA_317    | 2.73 | 1.80 | 14.37 |
| 1HGE.PDB | O, C_ASN_38    | N, C_THR_318   | H, C_THR_318    | 2.85 | 1.95 | 18.88 |
| 1HGE.PDB | O, C_VAL_20    | ND2, C_ASN_322 | HD21, C_ASN_322 | 2.96 | 2.03 | 15.20 |
| 1HGE.PDB | OE2, C_GLU_35  | ND2, C_ASN_322 | HD22, C_ASN_322 | 2.89 | 2.00 | 20.86 |
| 1HGE.PDB | OE1, D_GLU_15  | NZ, C_LYS_326  | HZ1, C_LYS_326  | 2.74 | 1.73 | 12.73 |
| 1HGE.PDB | OXT, C_THR_328 | NE2, C_GLN_327 | HE22, C_GLN_327 | 2.97 | 2.01 | 12.27 |
| 1HGE.PDB | OD2, D_ASP_112 | N, D_GLY_1     | H2, D_GLY_1     | 2.75 | 1.76 | 15.00 |
| 1HGE.PDB | OD1, D_ASP_109 | N, D_LEU_2     | H, D_LEU_2      | 2.82 | 1.93 | 20.06 |
| 1HGE.PDB | OD2, D_ASP_112 | N, D_PHE_3     | H, D_PHE_3      | 2.80 | 2.00 | 29.38 |
| 1HGE.PDB | OD2, D_ASP_112 | N, D_GLY_4     | H, D_GLY_4      | 2.92 | 2.03 | 19.66 |
| 1HGE.PDB | OD1, D_ASP_112 | N, D_ALA_5     | H, D_ALA_5      | 2.94 | 2.04 | 19.74 |
| 1HGE.PDB | O, D_GLY_4     | N, D_PHE_9     | H, D_PHE_9      | 2.82 | 1.88 | 13.73 |
| 1HGE.PDB | O, D_GLY_13    | ND2, D_ASN_12  | HD22, D_ASN_12  | 2.81 | 1.95 | 23.47 |
| 1HGE.PDB | O, C_VAL_323   | N, D_GLY_13    | H, D_GLY_13     | 2.71 | 1.79 | 14.79 |
| 1HGE.PDB | O, C_HIS_17    | N, D_TRP_14    | H, D_TRP_14     | 2.88 | 1.94 | 13.07 |
| 1HGE.PDB | OG1, D_THR_41  | N, D_TRP_21    | H, D_TRP_21     | 2.86 | 1.96 | 18.92 |
| 1HGE.PDB | O, C_GLY_16    | N, D_GLY_23    | H, D_GLY_23     | 2.94 | 2.04 | 19.95 |
| 1HGE.PDB | O, D_ALA_35    | N, D_PHE_24    | H, D_PHE_24     | 2.84 | 1.86 | 3.41  |
| 1HGE.PDB | O, C_CYS_14    | N, D_ARG_25    | H, D_ARG_25     | 2.94 | 1.98 | 9.40  |
| 1HGE.PDB | OE1, D_GLN_34  | NE, D_ARG_25   | HE, D_ARG_25    | 2.56 | 1.76 | 28.50 |
| 1HGE.PDB | O, D_GLY_33    | N, D_HIS_26    | H, D_HIS_26     | 2.85 | 1.95 | 19.13 |
| 1HGE.PDB | O, C_THR_12    | N, D_GLN_27    | H, D_GLN_27     | 2.86 | 1.95 | 18.04 |
| 1HGE.PDB | O, D_GLY_31    | N, D_ASN_28    | H, D_ASN_28     | 2.82 | 1.88 | 13.03 |

|          |                |                |                 |      |      |       |
|----------|----------------|----------------|-----------------|------|------|-------|
| 1HGE.PDB | OD1, D_ASN_28  | N, D_GLU_30    | H, D_GLU_30     | 2.96 | 2.16 | 29.70 |
| 1HGE.PDB | O, D_ASN_28    | N, D_GLY_31    | H, D_GLY_31     | 2.97 | 2.06 | 18.30 |
| 1HGE.PDB | O, D_PHE_24    | N, D_ALA_35    | H, D_ALA_35     | 2.79 | 1.99 | 28.92 |
| 1HGE.PDB | O, D_TYR_22    | N, D_ASP_37    | H, D_ASP_37     | 2.72 | 1.80 | 13.99 |
| 1HGE.PDB | OD2, D_ASP_37  | N, D_SER_40    | H, D_SER_40     | 2.88 | 1.92 | 10.60 |
| 1HGE.PDB | OD2, D_ASP_37  | OG, D_SER_40   | HG, D_SER_40    | 2.78 | 1.93 | 24.10 |
| 1HGE.PDB | O, D_ASP_37    | OG1, D_THR_41  | HG1, D_THR_41   | 2.71 | 1.83 | 19.19 |
| 1HGE.PDB | O, D_LEU_38    | N, D_GLN_42    | H, D_GLN_42     | 2.87 | 1.94 | 14.92 |
| 1HGE.PDB | OD1, D_ASP_46  | NE2, D_GLN_42  | HE22, D_GLN_42  | 2.87 | 1.96 | 19.33 |
| 1HGE.PDB | O, D_LYS_39    | N, D_ALA_43    | H, D_ALA_43     | 2.95 | 2.00 | 11.25 |
| 1HGE.PDB | O, D_SER_40    | N, D_ALA_44    | H, D_ALA_44     | 2.93 | 1.96 | 3.43  |
| 1HGE.PDB | O, D_GLN_42    | N, D_ASP_46    | H, D_ASP_46     | 2.80 | 1.83 | 3.78  |
| 1HGE.PDB | OE2, D_GLU_114 | NE2, D_GLN_47  | HE21, D_GLN_47  | 2.99 | 2.06 | 16.53 |
| 1HGE.PDB | O, D_ALA_43    | NE2, D_GLN_47  | HE22, D_GLN_47  | 2.87 | 1.96 | 16.48 |
| 1HGE.PDB | O, D_ILE_45    | N, D_ASN_49    | H, D_ASN_49     | 2.89 | 1.94 | 10.31 |
| 1HGE.PDB | O, D_ASP_46    | N, D_GLY_50    | H, D_GLY_50     | 2.85 | 1.93 | 16.23 |
| 1HGE.PDB | OG1, D_THR_107 | NZ, D_LYS_51   | HZ1, D_LYS_51   | 2.96 | 1.98 | 16.83 |
| 1HGE.PDB | OE1, D_GLU_103 | NZ, D_LYS_51   | HZ2, D_LYS_51   | 2.76 | 1.73 | 6.47  |
| 1HGE.PDB | ND1, D_HIS_106 | NZ, D_LYS_51   | HZ3, D_LYS_51   | 2.77 | 1.82 | 18.39 |
| 1HGE.PDB | O, D_ILE_48    | N, D_LEU_52    | H, D_LEU_52     | 2.84 | 1.95 | 19.97 |
| 1HGE.PDB | O, D_ASN_49    | N, D_ASN_53    | H, D_ASN_53     | 2.80 | 1.87 | 13.93 |
| 1HGE.PDB | OE1, D_GLU_57  | NH1, D_ARG_54  | HH11, D_ARG_54  | 2.82 | 1.84 | 12.42 |
| 1HGE.PDB | OE2, D_GLU_97  | NH2, D_ARG_54  | HH22, D_ARG_54  | 2.87 | 1.89 | 12.82 |
| 1HGE.PDB | OG, C_SER_110  | NE2, D_HIS_64  | HE2, D_HIS_64   | 2.96 | 1.98 | 6.23  |
| 1HGE.PDB | O, C_LYS_299   | NZ, D_LYS_68   | HZ1, D_LYS_68   | 2.92 | 1.91 | 12.00 |
| 1HGE.PDB | OE2, D_GLU_85  | NZ, D_LYS_68   | HZ2, D_LYS_68   | 2.80 | 1.78 | 10.75 |
| 1HGE.PDB | OG, E_SER_107  | N, D_ARG_76    | H, D_ARG_76     | 2.87 | 1.90 | 6.58  |
| 1HGE.PDB | OE2, F_GLU_81  | NE, D_ARG_76   | HE, D_ARG_76    | 2.79 | 1.85 | 14.06 |
| 1HGE.PDB | OE2, F_GLU_74  | NH1, D_ARG_76  | HH12, D_ARG_76  | 2.78 | 1.78 | 7.91  |
| 1HGE.PDB | OE1, F_GLU_81  | NH2, D_ARG_76  | HH21, D_ARG_76  | 2.63 | 1.67 | 11.36 |
| 1HGE.PDB | OE1, F_GLU_74  | NH2, D_ARG_76  | HH22, D_ARG_76  | 2.74 | 1.75 | 7.04  |
| 1HGE.PDB | OE1, D_GLU_74  | NE2, D_GLN_78  | HE22, D_GLN_78  | 2.96 | 1.99 | 8.03  |
| 1HGE.PDB | O, D_GLY_75    | N, D_ASP_79    | H, D_ASP_79     | 2.95 | 2.00 | 12.34 |
| 1HGE.PDB | O, D_ILE_77    | N, D_GLU_81    | H, D_GLU_81     | 2.96 | 2.00 | 10.54 |
| 1HGE.PDB | O, D_ASP_79    | N, D_TYR_83    | H, D_TYR_83     | 2.91 | 1.99 | 16.75 |
| 1HGE.PDB | OE1, F_GLU_85  | OH, D_TYR_83   | HH, D_TYR_83    | 2.58 | 1.80 | 29.40 |
| 1HGE.PDB | O, D_LEU_80    | N, D_VAL_84    | H, D_VAL_84     | 2.82 | 1.87 | 12.05 |
| 1HGE.PDB | O, D_LYS_82    | N, D_ASP_86    | H, D_ASP_86     | 2.94 | 1.98 | 8.49  |
| 1HGE.PDB | O, D_TYR_83    | N, D_THR_87    | H, D_THR_87     | 2.92 | 1.95 | 7.61  |
| 1HGE.PDB | O, D_VAL_84    | N, D_LYS_88    | H, D_LYS_88     | 2.93 | 2.04 | 19.95 |
| 1HGE.PDB | OH, B_TYR_83   | NZ, D_LYS_88   | HZ1, D_LYS_88   | 2.71 | 1.68 | 6.52  |
| 1HGE.PDB | O, D_GLU_85    | N, D_ILE_89    | H, D_ILE_89     | 2.88 | 1.90 | 2.66  |
| 1HGE.PDB | O, D_LYS_88    | N, D_TRP_92    | H, D_TRP_92     | 2.96 | 1.98 | 4.29  |
| 1HGE.PDB | O, D_ILE_89    | N, D_SER_93    | H, D_SER_93     | 2.83 | 1.92 | 17.54 |
| 1HGE.PDB | O, D_ILE_89    | OG, D_SER_93   | HG, D_SER_93    | 2.86 | 1.94 | 14.79 |
| 1HGE.PDB | O, D_ASP_90    | N, D_TYR_94    | H, D_TYR_94     | 2.87 | 1.96 | 18.12 |
| 1HGE.PDB | O, D_TRP_92    | N, D_ALA_96    | H, D_ALA_96     | 2.95 | 2.01 | 13.60 |
| 1HGE.PDB | O, D_TYR_94    | N, D_LEU_98    | H, D_LEU_98     | 2.96 | 1.98 | 4.20  |
| 1HGE.PDB | O, D_ASN_95    | N, D_LEU_99    | H, D_LEU_99     | 2.91 | 1.98 | 15.66 |
| 1HGE.PDB | O, D_LEU_98    | N, D_LEU_102   | H, D_LEU_102    | 2.98 | 2.00 | 6.37  |
| 1HGE.PDB | O, D_LEU_99    | N, D_GLU_103   | H, D_GLU_103    | 2.91 | 1.94 | 7.56  |
| 1HGE.PDB | O, D_VAL_100   | N, D_ASN_104   | H, D_ASN_104    | 2.91 | 1.96 | 12.51 |
| 1HGE.PDB | O, C_LYS_27    | ND2, D_ASN_104 | HD22, D_ASN_104 | 2.96 | 2.00 | 10.88 |
| 1HGE.PDB | O, D_LEU_102   | N, D_HIS_106   | H, D_HIS_106    | 2.92 | 1.97 | 11.35 |
| 1HGE.PDB | O, D_GLU_103   | N, D_THR_107   | H, D_THR_107    | 2.85 | 1.96 | 20.31 |
| 1HGE.PDB | O, D_ASN_104   | N, D_ILE_108   | H, D_ILE_108    | 2.91 | 1.95 | 9.12  |
| 1HGE.PDB | O, D_HIS_106   | N, D_LEU_110   | H, D_LEU_110    | 2.80 | 1.85 | 9.79  |
| 1HGE.PDB | O, D_THR_107   | OG1, D_THR_111 | HG1, D_THR_111  | 2.87 | 1.91 | 5.65  |



|          |                |                |                 |      |      |       |
|----------|----------------|----------------|-----------------|------|------|-------|
| 1HGE.PDB | O, D_ASP_109   | N, D_SER_113   | H, D_SER_113    | 2.84 | 1.89 | 10.30 |
| 1HGE.PDB | O, D_LEU_110   | N, D_GLU_114   | H, D_GLU_114    | 2.93 | 1.97 | 9.88  |
| 1HGE.PDB | O, D_ASP_112   | N, D_ASN_116   | H, D_ASN_116    | 2.98 | 2.01 | 8.80  |
| 1HGE.PDB | O, D_SER_113   | N, D_LYS_117   | H, D_LYS_117    | 2.78 | 1.90 | 20.87 |
| 1HGE.PDB | O, D_MET_115   | N, D_PHE_119   | H, D_PHE_119    | 3.00 | 2.05 | 13.31 |
| 1HGE.PDB | O, D_ASN_116   | N, D_GLU_120   | H, D_GLU_120    | 2.94 | 1.96 | 2.22  |
| 1HGE.PDB | O, D_LYS_117   | N, D_LYS_121   | H, D_LYS_121    | 2.93 | 2.03 | 20.11 |
| 1HGE.PDB | O, D_PHE_119   | N, D_ARG_123   | H, D_ARG_123    | 2.91 | 1.95 | 8.55  |
| 1HGE.PDB | OE2, D_GLU_120 | NH1, D_ARG_123 | HH11, D_ARG_123 | 2.83 | 1.93 | 23.01 |
| 1HGE.PDB | O, D_GLU_120   | N, D_ARG_124   | H, D_ARG_124    | 3.00 | 2.04 | 10.14 |
| 1HGE.PDB | OE1, B_GLU_132 | NE, D_ARG_124  | HE, D_ARG_124   | 2.78 | 1.98 | 28.90 |
| 1HGE.PDB | OE2, B_GLU_132 | NE, D_ARG_124  | HE, D_ARG_124   | 2.90 | 2.01 | 20.41 |
| 1HGE.PDB | O, D_LEU_126   | N, D_ASN_129   | H, D_ASN_129    | 2.94 | 1.99 | 12.91 |
| 1HGE.PDB | O, D_HIS_159   | ND2, D_ASN_129 | HD21, D_ASN_129 | 2.92 | 1.97 | 10.53 |
| 1HGE.PDB | OH, D_TYR_157  | ND2, D_ASN_129 | HD22, D_ASN_129 | 2.81 | 1.85 | 9.24  |
| 1HGE.PDB | O, D_LYS_139   | N, D_GLU_131   | H, D_GLU_131    | 2.97 | 2.05 | 17.56 |
| 1HGE.PDB | O, D_CYS_137   | N, D_MET_133   | H, D_MET_133    | 2.89 | 1.93 | 10.58 |
| 1HGE.PDB | O, C_LEU_13    | N, D_PHE_138   | H, D_PHE_138    | 2.74 | 1.87 | 21.30 |
| 1HGE.PDB | O, D_GLU_131   | N, D_LYS_139   | H, D_LYS_139    | 2.81 | 1.87 | 11.30 |
| 1HGE.PDB | O, C_ALA_11    | N, D_ILE_140   | H, D_ILE_140    | 2.78 | 1.88 | 18.97 |
| 1HGE.PDB | O, D_ASN_129   | N, D_TYR_141   | H, D_TYR_141    | 2.89 | 1.95 | 13.56 |
| 1HGE.PDB | OE2, D_GLU_30  | N, D_ASN_146   | H, D_ASN_146    | 2.83 | 1.92 | 17.98 |
| 1HGE.PDB | O, D_ASP_145   | N, D_ILE_149   | H, D_ILE_149    | 2.93 | 1.97 | 9.93  |
| 1HGE.PDB | O, D_ASN_146   | N, D_GLU_150   | H, D_GLU_150    | 2.95 | 2.02 | 14.34 |
| 1HGE.PDB | O, D_ALA_147   | N, D_SER_151   | H, D_SER_151    | 2.92 | 2.03 | 19.70 |
| 1HGE.PDB | O, D_CYS_148   | OG, D_SER_151  | HG, D_SER_151   | 2.69 | 1.84 | 22.52 |
| 1HGE.PDB | O, D_GLU_150   | N, D_ASN_154   | H, D_ASN_154    | 2.82 | 1.85 | 7.63  |
| 1HGE.PDB | O, D_SER_151   | N, D_THR_156   | H, D_THR_156    | 2.75 | 1.94 | 27.92 |
| 1HGE.PDB | OD1, D_ASN_154 | OG1, D_THR_156 | HG1, D_THR_156  | 2.74 | 1.81 | 12.51 |
| 1HGE.PDB | NE2, D_HIS_142 | OH, D_TYR_157  | HH, D_TYR_157   | 2.73 | 1.86 | 21.01 |
| 1HGE.PDB | OD1, D_ASP_158 | N, D_ASP_160   | H, D_ASP_160    | 2.84 | 1.98 | 23.52 |
| 1HGE.PDB | O, D_HIS_159   | N, D_TYR_162   | H, D_TYR_162    | 2.91 | 2.02 | 20.55 |
| 1HGE.PDB | O, D_ASP_160   | N, D_ARG_163   | H, D_ARG_163    | 2.99 | 2.03 | 9.92  |
| 1HGE.PDB | O, B_ARG_170   | NH1, D_ARG_163 | HH12, D_ARG_163 | 2.79 | 1.82 | 14.16 |
| 1HGE.PDB | O, D_TYR_162   | N, D_ALA_166   | H, D_ALA_166    | 2.87 | 1.90 | 5.91  |
| 1HGE.PDB | O, D_ARG_163   | N, D_LEU_167   | H, D_LEU_167    | 2.73 | 1.80 | 11.73 |
| 1HGE.PDB | O, D_ALA_166   | N, D_ARG_170   | H, D_ARG_170    | 2.84 | 1.97 | 22.00 |
| 1HGE.PDB | O, D_GLU_128   | NE, D_ARG_170  | HE, D_ARG_170   | 2.74 | 1.87 | 22.62 |
| 1HGE.PDB | OE2, D_GLU_131 | NH1, D_ARG_170 | HH11, D_ARG_170 | 2.79 | 1.79 | 6.83  |
| 1HGE.PDB | O, D_LEU_167   | N, D_PHE_171   | H, D_PHE_171    | 2.89 | 1.96 | 14.77 |
| 1HGE.PDB | O, F_ILE_140   | N, E_ALA_11    | H, E_ALA_11     | 2.82 | 1.93 | 19.79 |
| 1HGE.PDB | O, F_GLN_27    | N, E_THR_12    | H, E_THR_12     | 2.91 | 1.97 | 12.43 |
| 1HGE.PDB | O, F_PHE_138   | N, E_LEU_13    | H, E_LEU_13     | 2.98 | 2.03 | 12.93 |
| 1HGE.PDB | O, F_ARG_25    | N, E_CYS_14    | H, E_CYS_14     | 2.61 | 1.80 | 26.88 |
| 1HGE.PDB | O, F_GLY_136   | N, E_LEU_15    | H, E_LEU_15     | 2.88 | 1.90 | 5.56  |
| 1HGE.PDB | O, F_GLY_23    | N, E_GLY_16    | H, E_GLY_16     | 2.95 | 2.06 | 19.95 |
| 1HGE.PDB | O, E_HIS_18    | ND1, E_HIS_17  | HD1, E_HIS_17   | 2.98 | 2.10 | 22.18 |
| 1HGE.PDB | O, F_TRP_21    | N, E_HIS_18    | H, E_HIS_18     | 2.85 | 1.97 | 21.43 |
| 1HGE.PDB | OD1, E_ASN_322 | N, E_VAL_20    | H, E_VAL_20     | 2.81 | 1.86 | 11.30 |
| 1HGE.PDB | O, E_VAL_36    | N, E_THR_24    | H, E_THR_24     | 2.83 | 1.94 | 19.47 |
| 1HGE.PDB | O, E_ILE_34    | N, E_VAL_26    | H, E_VAL_26     | 2.83 | 1.88 | 11.74 |
| 1HGE.PDB | OE2, F_GLU_97  | NZ, E_LYS_27   | HZ1, E_LYS_27   | 2.79 | 1.77 | 9.75  |
| 1HGE.PDB | O, E_LYS_27    | OG1, E_THR_28  | HG1, E_THR_28   | 2.99 | 2.20 | 29.66 |
| 1HGE.PDB | O, E_VAL_26    | N, E_ILE_34    | H, E_ILE_34     | 2.89 | 1.94 | 12.30 |
| 1HGE.PDB | O, E_THR_24    | N, E_VAL_36    | H, E_VAL_36     | 2.81 | 1.85 | 9.59  |
| 1HGE.PDB | O, E_MET_320   | N, E_THR_37    | H, E_THR_37     | 2.89 | 1.91 | 5.80  |
| 1HGE.PDB | O, E_LEU_316   | N, E_THR_40    | H, E_THR_40     | 2.78 | 1.93 | 24.64 |
| 1HGE.PDB | O, E_LEU_314   | N, E_LEU_42    | H, E_LEU_42     | 2.80 | 1.97 | 26.27 |

|          |                |                |                 |      |      |       |
|----------|----------------|----------------|-----------------|------|------|-------|
| 1HGE.PDB | O, E_PHE.294   | N, E_GLN.44    | H, E_GLN.44     | 2.81 | 1.85 | 6.62  |
| 1HGE.PDB | O, E_SER.46    | NE2, E_GLN.44  | HE22, E_GLN.44  | 2.85 | 1.98 | 22.39 |
| 1HGE.PDB | O, E_ASN.285   | OG, E_SER.47   | HG, E_SER.47    | 2.87 | 1.96 | 16.37 |
| 1HGE.PDB | OD2, E_ASP.275 | NZ, E_LYS.50   | HZ1, E_LYS.50   | 2.73 | 1.80 | 21.86 |
| 1HGE.PDB | O, E_PRO.273   | N, E_ILE.51    | H, E_ILE.51     | 2.78 | 1.85 | 13.53 |
| 1HGE.PDB | O, E_ASP.275   | N, E_ASN.53    | H, E_ASN.53     | 2.78 | 1.91 | 23.30 |
| 1HGE.PDB | OD2, E_ASP.85  | N, E_ARG.57    | H, E_ARG.57     | 2.91 | 1.97 | 12.45 |
| 1HGE.PDB | O, E_THR.83    | NE, E_ARG.57   | HE, E_ARG.57    | 2.83 | 1.86 | 9.17  |
| 1HGE.PDB | O, E_LEU.86    | N, E_LEU.59    | H, E_LEU.59     | 2.93 | 1.97 | 10.59 |
| 1HGE.PDB | O, E_VAL.88    | N, E_GLY.61    | H, E_GLY.61     | 2.95 | 2.10 | 25.32 |
| 1HGE.PDB | OD1, E_ASP.60  | N, E_ILE.62    | H, E_ILE.62     | 2.86 | 1.93 | 15.29 |
| 1HGE.PDB | O, E_GLY.61    | N, E_CYS.64    | H, E_CYS.64     | 2.87 | 1.96 | 17.48 |
| 1HGE.PDB | O, E_LEU.66    | N, E_LEU.70    | H, E_LEU.70     | 2.86 | 1.97 | 20.45 |
| 1HGE.PDB | O, E_ILE.67    | N, E_LEU.71    | H, E_LEU.71     | 2.83 | 1.87 | 6.72  |
| 1HGE.PDB | O, E_ASP.68    | N, E_GLY.72    | H, E_GLY.72     | 2.87 | 1.96 | 17.08 |
| 1HGE.PDB | OD1, E_ASP.73  | ND1, E_HIS.75  | HD1, E_HIS.75   | 2.77 | 1.85 | 16.90 |
| 1HGE.PDB | O, E_ASP.63    | NE2, E_HIS.75  | HE2, E_HIS.75   | 2.86 | 1.94 | 17.47 |
| 1HGE.PDB | O, E_ASP.73    | N, E_CYS.76    | H, E_CYS.76     | 2.76 | 1.81 | 11.37 |
| 1HGE.PDB | O, E_PRO.74    | N, E_ASP.77    | H, E_ASP.77     | 2.86 | 1.91 | 10.86 |
| 1HGE.PDB | O, E_CYS.76    | N, E_PHE.79    | H, E_PHE.79     | 2.97 | 1.99 | 3.02  |
| 1HGE.PDB | OE1, E_GLU.82  | N, E_THR.83    | H, E_THR.83     | 2.88 | 1.98 | 19.27 |
| 1HGE.PDB | O, E_ARG.57    | N, E_ASP.85    | H, E_ASP.85     | 2.78 | 1.89 | 19.36 |
| 1HGE.PDB | O, E_LEU.59    | N, E_VAL.88    | H, E_VAL.88     | 2.96 | 1.98 | 5.16  |
| 1HGE.PDB | O, E_MET.268   | N, E_GLU.89    | H, E_GLU.89     | 2.77 | 1.81 | 8.69  |
| 1HGE.PDB | OD1, E_ASP.60  | NE, E_ARG.90   | HE, E_ARG.90    | 2.88 | 1.91 | 8.59  |
| 1HGE.PDB | O, E_SER.270   | NH1, E_ARG.90  | HH11, E_ARG.90  | 2.63 | 1.77 | 25.17 |
| 1HGE.PDB | O, E_ALA.272   | NH1, E_ARG.90  | HH12, E_ARG.90  | 2.61 | 1.68 | 16.51 |
| 1HGE.PDB | OD2, E_ASP.60  | NH2, E_ARG.90  | HH21, E_ARG.90  | 2.80 | 1.80 | 8.94  |
| 1HGE.PDB | OD1, E_ASP.271 | N, E_SER.91    | H, E_SER.91     | 2.89 | 1.92 | 7.24  |
| 1HGE.PDB | OD2, E_ASP.271 | OG, E_SER.91   | HG, E_SER.91    | 2.83 | 1.92 | 17.26 |
| 1HGE.PDB | OD2, E_ASP.68  | OG, E_SER.95   | HG, E_SER.95    | 2.91 | 1.97 | 13.28 |
| 1HGE.PDB | OD2, E_ASP.73  | N, E_ASN.96    | H, E_ASN.96     | 2.90 | 1.94 | 8.49  |
| 1HGE.PDB | OD1, E_ASP.68  | OH, E_TYR.100  | HH, E_TYR.100   | 2.88 | 1.95 | 14.25 |
| 1HGE.PDB | OD2, E_ASP.104 | OG, E_SER.107  | HG, E_SER.107   | 2.86 | 1.93 | 15.15 |
| 1HGE.PDB | O, E_TYR.105   | N, E_ARG.109   | H, E_ARG.109    | 2.86 | 1.88 | 1.80  |
| 1HGE.PDB | OE2, F_GLU.67  | NH2, E_ARG.109 | HH21, E_ARG.109 | 2.78 | 1.79 | 11.63 |
| 1HGE.PDB | OD2, D_ASP.79  | OG, E_SER.110  | HG, E_SER.110   | 2.82 | 1.89 | 14.19 |
| 1HGE.PDB | O, E_SER.107   | N, E_LEU.111   | H, E_LEU.111    | 2.87 | 1.89 | 3.10  |
| 1HGE.PDB | O, E_ARG.109   | N, E_ALA.113   | H, E_ALA.113    | 2.93 | 2.03 | 20.07 |
| 1HGE.PDB | O, E_SER.110   | N, E_SER.114   | H, E_SER.114    | 2.88 | 1.93 | 13.24 |
| 1HGE.PDB | OE2, E_GLU.119 | OG1, E_THR.117 | HG1, E_THR.117  | 2.93 | 1.97 | 8.29  |
| 1HGE.PDB | O, E_GLU.82    | N, E_LEU.118   | H, E_LEU.118    | 2.98 | 2.05 | 15.39 |
| 1HGE.PDB | O, E_TYR.257   | N, E_ILE.121   | H, E_ILE.121    | 2.89 | 1.92 | 6.39  |
| 1HGE.PDB | O, E_ARG.255   | N, E_GLU.123   | H, E_GLU.123    | 2.92 | 1.96 | 10.72 |
| 1HGE.PDB | O, E_THR.155   | N, E_THR.131   | H, E_THR.131    | 2.77 | 1.88 | 19.94 |
| 1HGE.PDB | OD1, E_ASN.152 | N, E_ASN.133   | H, E_ASN.133    | 2.90 | 1.97 | 15.58 |
| 1HGE.PDB | O, E_TRP.153   | N, E_GLY.134   | H, E_GLY.134    | 2.95 | 2.06 | 19.92 |
| 1HGE.PDB | O, E_GLY.146   | N, E_SER.136   | H, E_SER.136    | 2.84 | 1.87 | 9.56  |
| 1HGE.PDB | OG, E_SER.136  | N, E_ALA.138   | H, E_ALA.138    | 2.99 | 2.05 | 13.25 |
| 1HGE.PDB | O, E_GLY.144   | NZ, E_LYS.140  | HZ1, E_LYS.140  | 2.71 | 1.74 | 16.73 |
| 1HGE.PDB | OD1, E_ASN.137 | NZ, E_LYS.140  | HZ2, E_LYS.140  | 2.84 | 1.86 | 16.83 |
| 1HGE.PDB | OD2, E_ASP.77  | NE, E_ARG.141  | HE, E_ARG.141   | 2.80 | 1.96 | 26.48 |
| 1HGE.PDB | O, E_PHE.147   | NH1, E_ARG.141 | HH12, E_ARG.141 | 2.55 | 1.62 | 17.30 |
| 1HGE.PDB | OD1, E_ASP.77  | NH2, E_ARG.141 | HH21, E_ARG.141 | 2.91 | 2.00 | 21.55 |
| 1HGE.PDB | OD2, E_ASP.77  | NH2, E_ARG.141 | HH21, E_ARG.141 | 2.75 | 1.87 | 24.36 |
| 1HGE.PDB | O, E_GLY.72    | NH2, E_ARG.141 | HH22, E_ARG.141 | 2.92 | 1.95 | 12.66 |
| 1HGE.PDB | O, E_GLY.72    | N, E_SER.149   | H, E_SER.149    | 2.84 | 1.93 | 17.58 |
| 1HGE.PDB | OD1, E_ASP.77  | OG, E_SER.149  | HG, E_SER.149   | 2.99 | 2.14 | 24.93 |

|          |                |                |                 |      |      |       |
|----------|----------------|----------------|-----------------|------|------|-------|
| 1HGE.PDB | O, E_ALA_253   | N, E_ASN_152   | H, E_ASN_152    | 2.82 | 1.95 | 22.18 |
| 1HGE.PDB | OH, E_TYR_195  | NE1, E_TRP_153 | HE1, E_TRP_153  | 2.90 | 1.99 | 18.82 |
| 1HGE.PDB | O, E_LEU_194   | N, E_LYS_156   | H, E_LYS_156    | 2.96 | 2.06 | 18.56 |
| 1HGE.PDB | O, E_SER_193   | NZ, E_LYS_156  | HZ2, E_LYS_156  | 2.79 | 1.81 | 17.51 |
| 1HGE.PDB | O, E_THR_160   | N, E_SER_157   | H, E_SER_157    | 2.99 | 2.08 | 19.06 |
| 1HGE.PDB | O, E_SER_247   | N, E_LEU_164   | H, E_LEU_164    | 2.69 | 1.86 | 25.19 |
| 1HGE.PDB | O, E_ILE_245   | N, E_VAL_166   | H, E_VAL_166    | 2.91 | 1.96 | 12.45 |
| 1HGE.PDB | O, E_LEU_243   | OG1, E_THR_167 | HG1, E_THR_167  | 2.92 | 2.05 | 21.37 |
| 1HGE.PDB | O, E_LEU_243   | N, E_MET_168   | H, E_MET_168    | 2.94 | 2.02 | 16.59 |
| 1HGE.PDB | O, E_ASP_241   | N, E_ASN_170   | H, E_ASN_170    | 2.92 | 1.94 | 6.42  |
| 1HGE.PDB | O, E_PHE_174   | ND2, E_ASN_170 | HD21, E_ASN_170 | 2.85 | 1.88 | 8.67  |
| 1HGE.PDB | O, E_VAL_237   | ND2, E_ASN_170 | HD22, E_ASN_170 | 2.84 | 2.05 | 29.41 |
| 1HGE.PDB | O, E_VAL_237   | N, E_LYS_176   | H, E_LYS_176    | 2.97 | 2.04 | 15.22 |
| 1HGE.PDB | OE2, E_GLU_123 | NZ, E_LYS_176  | HZ1, E_LYS_176  | 2.73 | 1.81 | 23.24 |
| 1HGE.PDB | O, E_PHE_258   | N, E_LEU_177   | H, E_LEU_177    | 2.99 | 2.02 | 5.44  |
| 1HGE.PDB | O, E_THR_235   | N, E_TYR_178   | H, E_TYR_178    | 2.85 | 1.89 | 6.94  |
| 1HGE.PDB | OE1, E_GLU_123 | OH, E_TYR_178  | HH, E_TYR_178   | 2.75 | 1.82 | 12.06 |
| 1HGE.PDB | O, E_TYR_233   | N, E_TRP_180   | H, E_TRP_180    | 2.98 | 2.01 | 9.33  |
| 1HGE.PDB | OG1, E_THR_235 | NE1, E_TRP_180 | HE1, E_TRP_180  | 2.93 | 1.94 | 2.48  |
| 1HGE.PDB | O, E_ASN_250   | N, E_HIS_183   | H, E_HIS_183    | 2.93 | 2.02 | 18.57 |
| 1HGE.PDB | O, E_ARG_229   | N, E_HIS_184   | H, E_HIS_184    | 2.91 | 1.95 | 9.81  |
| 1HGE.PDB | OG, E_SER_231  | NE2, E_HIS_184 | HE2, E_HIS_184  | 2.75 | 1.91 | 25.72 |
| 1HGE.PDB | OG1, E_THR_187 | N, E_GLU_190   | H, E_GLU_190    | 3.00 | 2.05 | 12.79 |
| 1HGE.PDB | O, E_GLN_197   | NE2, E_GLN_191 | HE22, E_GLN_191 | 2.96 | 2.04 | 16.74 |
| 1HGE.PDB | O, E_GLN_189   | N, E_SER_193   | H, E_SER_193    | 2.85 | 1.87 | 3.50  |
| 1HGE.PDB | O, E_GLU_190   | N, E_LEU_194   | H, E_LEU_194    | 2.96 | 2.00 | 9.57  |
| 1HGE.PDB | O, E_GLN_191   | N, E_TYR_195   | H, E_TYR_195    | 2.77 | 1.82 | 10.43 |
| 1HGE.PDB | O, E_TYR_161   | NE2, E_GLN_197 | HE21, E_GLN_197 | 2.88 | 1.92 | 10.46 |
| 1HGE.PDB | O, E_ASN_248   | NE2, E_GLN_197 | HE22, E_GLN_197 | 2.96 | 2.02 | 14.87 |
| 1HGE.PDB | OD1, E_ASN_246 | NH2, E_ARG_201 | HH21, E_ARG_201 | 2.61 | 1.75 | 25.36 |
| 1HGE.PDB | O, E_ILE_213   | N, E_VAL_202   | H, E_VAL_202    | 2.98 | 2.03 | 12.89 |
| 1HGE.PDB | O, E_ASN_246   | N, E_THR_203   | H, E_THR_203    | 2.89 | 1.93 | 9.46  |
| 1HGE.PDB | OG1, E_THR_212 | OG1, E_THR_203 | HG1, E_THR_203  | 2.89 | 1.95 | 10.14 |
| 1HGE.PDB | O, E_GLN_211   | N, E_VAL_204   | H, E_VAL_204    | 2.86 | 1.96 | 18.79 |
| 1HGE.PDB | OD1, E_ASP_241 | N, E_ARG_207   | H, E_ARG_207    | 2.88 | 1.92 | 9.18  |
| 1HGE.PDB | OG1, E_THR_206 | OG, E_SER_209  | HG, E_SER_209   | 2.98 | 2.04 | 10.06 |
| 1HGE.PDB | OD1, C_ASP_101 | NE2, E_GLN_210 | HE22, E_GLN_210 | 2.89 | 2.04 | 25.02 |
| 1HGE.PDB | O, E_VAL_204   | N, E_GLN_211   | H, E_GLN_211    | 2.84 | 1.92 | 15.49 |
| 1HGE.PDB | O, E_VAL_202   | N, E_ILE_213   | H, E_ILE_213    | 2.85 | 1.92 | 15.02 |
| 1HGE.PDB | ND1, E_HIS_184 | N, E_ASN_216   | H, E_ASN_216    | 2.79 | 1.98 | 28.16 |
| 1HGE.PDB | OE1, A_GLN_210 | NH2, E_ARG_220 | HH21, E_ARG_220 | 2.74 | 1.87 | 25.04 |
| 1HGE.PDB | O, E_ASN_216   | NH2, E_ARG_220 | HH22, E_ARG_220 | 2.66 | 1.79 | 23.30 |
| 1HGE.PDB | O, E_LEU_226   | N, E_VAL_223   | H, E_VAL_223    | 2.87 | 1.91 | 9.50  |
| 1HGE.PDB | O, E_CYS_97    | NE, E_ARG_224  | HE, E_ARG_224   | 2.88 | 2.06 | 27.97 |
| 1HGE.PDB | O, E_CYS_97    | NH2, E_ARG_224 | HH21, E_ARG_224 | 2.81 | 1.92 | 22.85 |
| 1HGE.PDB | O, E_VAL_223   | N, E_LEU_226   | H, E_LEU_226    | 2.92 | 1.97 | 11.57 |
| 1HGE.PDB | O, E_SER_228   | NH1, E_ARG_229 | HH11, E_ARG_229 | 2.68 | 1.75 | 17.61 |
| 1HGE.PDB | O, E_PRO_221   | NH2, E_ARG_229 | HH22, E_ARG_229 | 2.62 | 1.67 | 14.07 |
| 1HGE.PDB | OD1, E_ASP_101 | OG, E_SER_231  | HG, E_SER_231   | 2.87 | 1.92 | 12.10 |
| 1HGE.PDB | O, E_ASP_101   | N, E_ILE_232   | H, E_ILE_232    | 2.95 | 2.02 | 16.05 |
| 1HGE.PDB | O, E_TRP_180   | N, E_TYR_233   | H, E_TYR_233    | 2.88 | 1.91 | 8.62  |
| 1HGE.PDB | O, E_TYR_178   | N, E_THR_235   | H, E_THR_235    | 2.87 | 1.96 | 17.45 |
| 1HGE.PDB | O, E_LYS_176   | N, E_VAL_237   | H, E_VAL_237    | 2.79 | 1.88 | 17.98 |
| 1HGE.PDB | O, D_SER_71    | NZ, E_LYS_238  | HZ2, E_LYS_238  | 2.75 | 1.79 | 18.19 |
| 1HGE.PDB | OE1, D_GLU_72  | NZ, E_LYS_238  | HZ3, E_LYS_238  | 2.85 | 1.84 | 12.25 |
| 1HGE.PDB | O, E_ASN_170   | N, E_GLY_240   | H, E_GLY_240    | 2.89 | 2.02 | 22.60 |
| 1HGE.PDB | O, E_LYS_238   | N, E_ASP_241   | H, E_ASP_241    | 2.92 | 1.99 | 13.81 |
| 1HGE.PDB | OD1, E_ASP_241 | N, E_VAL_242   | H, E_VAL_242    | 2.79 | 1.97 | 26.69 |

|          |                |                |                 |      |      |       |
|----------|----------------|----------------|-----------------|------|------|-------|
| 1HGE.PDB | O, E_MET_168   | N, E_LEU_243   | H, E_LEU_243    | 2.88 | 1.91 | 4.05  |
| 1HGE.PDB | O, E_SER_205   | N, E_VAL_244   | H, E_VAL_244    | 2.98 | 2.03 | 12.64 |
| 1HGE.PDB | O, E_VAL_166   | N, E_ILE_245   | H, E_ILE_245    | 2.88 | 1.95 | 14.55 |
| 1HGE.PDB | O, E_THR_203   | N, E_ASN_246   | H, E_ASN_246    | 2.93 | 1.96 | 6.89  |
| 1HGE.PDB | OD1, E_ASN_165 | ND2, E_ASN_246 | HD22, E_ASN_246 | 2.88 | 1.93 | 12.25 |
| 1HGE.PDB | O, E_LEU_164   | N, E_SER_247   | H, E_SER_247    | 2.96 | 2.05 | 17.92 |
| 1HGE.PDB | O, E_ARG_201   | OG, E_SER_247  | HG, E_SER_247   | 2.74 | 1.94 | 28.66 |
| 1HGE.PDB | OE1, E_GLN_191 | ND2, E_ASN_250 | HD21, E_ASN_250 | 2.94 | 1.97 | 8.28  |
| 1HGE.PDB | O, E_HIS_183   | ND2, E_ASN_250 | HD22, E_ASN_250 | 2.89 | 1.94 | 10.81 |
| 1HGE.PDB | O, E_ASN_152   | N, E_ALA_253   | H, E_ALA_253    | 2.87 | 2.00 | 21.77 |
| 1HGE.PDB | OD1, E_ASN_133 | NH2, E_ARG_255 | HH22, E_ARG_255 | 2.49 | 1.68 | 28.65 |
| 1HGE.PDB | O, E_ILE_121   | N, E_TYR_257   | H, E_TYR_257    | 3.00 | 2.15 | 25.48 |
| 1HGE.PDB | O, E_LEU_177   | N, E_PHE_258   | H, E_PHE_258    | 2.95 | 1.98 | 4.40  |
| 1HGE.PDB | OE2, E_GLU_119 | NH1, E_ARG_261 | HH12, E_ARG_261 | 2.65 | 1.81 | 27.82 |
| 1HGE.PDB | OE1, E_GLU_119 | NH2, E_ARG_261 | HH22, E_ARG_261 | 2.83 | 1.95 | 24.52 |
| 1HGE.PDB | OD2, E_ASP_85  | NZ, E_LYS_264  | HZ3, E_LYS_264  | 2.81 | 1.83 | 16.30 |
| 1HGE.PDB | O, E_PHE_87    | N, E_MET_268   | H, E_MET_268    | 2.79 | 1.90 | 20.72 |
| 1HGE.PDB | O, E_PRO_284   | OG, E_SER_270  | HG, E_SER_270   | 2.79 | 1.86 | 13.35 |
| 1HGE.PDB | OG, E_SER_270  | N, E_ALA_272   | H, E_ALA_272    | 2.97 | 2.02 | 11.52 |
| 1HGE.PDB | O, E_ILE_51    | N, E_ASP_275   | H, E_ASP_275    | 2.97 | 2.07 | 20.34 |
| 1HGE.PDB | OD1, E_ASP_275 | N, E_THR_276   | H, E_THR_276    | 2.78 | 1.93 | 23.65 |
| 1HGE.PDB | O, E_ASN_54    | N, E_SER_279   | H, E_SER_279    | 2.80 | 1.87 | 14.21 |
| 1HGE.PDB | O, E_TYR_302   | N, E_ILE_282   | H, E_ILE_282    | 2.89 | 1.92 | 7.96  |
| 1HGE.PDB | O, E_THR_283   | N, E_GLY_286   | H, E_GLY_286    | 2.82 | 1.88 | 11.76 |
| 1HGE.PDB | O, E_LYS_50    | N, E_SER_287   | H, E_SER_287    | 2.88 | 1.91 | 4.05  |
| 1HGE.PDB | O, E_ALA_304   | ND2, E_ASN_290 | HD22, E_ASN_290 | 2.85 | 1.96 | 19.63 |
| 1HGE.PDB | OE1, E_GLN_44  | NZ, E_LYS_292  | HZ1, E_LYS_292  | 2.72 | 1.72 | 11.93 |
| 1HGE.PDB | OD2, E_ASP_291 | NZ, E_LYS_292  | HZ3, E_LYS_292  | 2.84 | 1.89 | 19.87 |
| 1HGE.PDB | O, E_LYS_307   | N, E_GLN_295   | H, E_GLN_295    | 2.82 | 1.93 | 20.26 |
| 1HGE.PDB | O, E_ASN_298   | NE2, E_GLN_295 | HE21, E_GLN_295 | 2.75 | 1.80 | 8.98  |
| 1HGE.PDB | O, E_GLN_44    | N, E_ASN_296   | H, E_ASN_296    | 2.82 | 1.88 | 13.69 |
| 1HGE.PDB | OE1, E_GLN_295 | N, E_VAL_297   | H, E_VAL_297    | 2.67 | 1.86 | 27.79 |
| 1HGE.PDB | OD1, E_ASN_285 | ND2, E_ASN_298 | HD22, E_ASN_298 | 2.98 | 2.04 | 13.10 |
| 1HGE.PDB | O, F_LYS_68    | NZ, E_LYS_299  | HZ2, E_LYS_299  | 2.95 | 1.93 | 11.73 |
| 1HGE.PDB | OD1, E_ASN_298 | N, E_ILE_300   | H, E_ILE_300    | 2.89 | 1.97 | 16.82 |
| 1HGE.PDB | O, E_ILE_282   | N, E_TYR_302   | H, E_TYR_302    | 2.94 | 2.07 | 23.45 |
| 1HGE.PDB | O, F_LYS_62    | N, E_GLY_303   | H, E_GLY_303    | 2.95 | 1.98 | 8.29  |
| 1HGE.PDB | OG, F_SER_93   | N, E_LYS_310   | H, E_LYS_310    | 2.93 | 1.97 | 10.15 |
| 1HGE.PDB | OD1, F_ASP_86  | NZ, E_LYS_310  | HZ3, E_LYS_310  | 2.86 | 2.02 | 29.64 |
| 1HGE.PDB | OE2, E_GLU_41  | N, E_LEU_314   | H, E_LEU_314    | 2.81 | 1.89 | 15.15 |
| 1HGE.PDB | OE1, E_GLU_41  | NZ, E_LYS_315  | HZ3, E_LYS_315  | 2.80 | 1.87 | 22.54 |
| 1HGE.PDB | O, E_THR_40    | N, E_LEU_316   | H, E_LEU_316    | 2.80 | 1.85 | 9.95  |
| 1HGE.PDB | OD1, F_ASN_104 | N, E_ALA_317   | H, E_ALA_317    | 2.73 | 1.80 | 13.22 |
| 1HGE.PDB | O, E_ASN_38    | N, E_THR_318   | H, E_THR_318    | 2.85 | 1.93 | 15.97 |
| 1HGE.PDB | O, E_VAL_20    | ND2, E_ASN_322 | HD21, E_ASN_322 | 2.99 | 2.07 | 17.11 |
| 1HGE.PDB | OE2, E_GLU_35  | ND2, E_ASN_322 | HD22, E_ASN_322 | 2.87 | 1.98 | 21.90 |
| 1HGE.PDB | O, E_GLN_327   | NZ, E_LYS_326  | HZ1, E_LYS_326  | 2.74 | 1.86 | 25.33 |
| 1HGE.PDB | OE1, F_GLU_15  | NZ, E_LYS_326  | HZ3, E_LYS_326  | 2.99 | 2.00 | 17.08 |
| 1HGE.PDB | O, E_LYS_326   | NE2, E_GLN_327 | HE22, E_GLN_327 | 2.76 | 1.89 | 22.95 |
| 1HGE.PDB | OD2, F_ASP_112 | N, F_GLY_1     | H2, F_GLY_1     | 2.78 | 1.80 | 14.95 |
| 1HGE.PDB | OD1, F_ASP_109 | N, F_LEU_2     | H, F_LEU_2      | 2.80 | 1.91 | 20.53 |
| 1HGE.PDB | OD2, F_ASP_112 | N, F_GLY_4     | H, F_GLY_4      | 2.92 | 2.04 | 21.78 |
| 1HGE.PDB | OD1, F_ASP_112 | N, F_ALA_5     | H, F_ALA_5      | 2.92 | 2.02 | 19.47 |
| 1HGE.PDB | O, F_GLY_4     | N, F_PHE_9     | H, F_PHE_9      | 2.81 | 1.87 | 11.92 |
| 1HGE.PDB | O, F_GLY_13    | ND2, F_ASN_12  | HD22, F_ASN_12  | 2.79 | 1.96 | 26.47 |
| 1HGE.PDB | O, E_VAL_323   | N, F_GLY_13    | H, F_GLY_13     | 2.72 | 1.79 | 12.93 |
| 1HGE.PDB | O, E_HIS_17    | N, F_TRP_14    | H, F_TRP_14     | 2.85 | 1.91 | 12.63 |
| 1HGE.PDB | OG1, F_THR_41  | N, F_TRP_21    | H, F_TRP_21     | 2.88 | 1.97 | 17.81 |

|          |                |               |                |      |      |       |
|----------|----------------|---------------|----------------|------|------|-------|
| 1HGE.PDB | O, E_GLY_16    | N, F_GLY_23   | H, F_GLY_23    | 2.91 | 2.01 | 19.90 |
| 1HGE.PDB | O, F_ALA_35    | N, F_PHE_24   | H, F_PHE_24    | 2.82 | 1.85 | 3.58  |
| 1HGE.PDB | O, E_CYS_14    | N, F_ARG_25   | H, F_ARG_25    | 2.88 | 1.93 | 12.79 |
| 1HGE.PDB | OE1, F_GLN_34  | NE, F_ARG_25  | HE, F_ARG_25   | 2.92 | 2.07 | 24.83 |
| 1HGE.PDB | OE1, F_GLN_34  | NH2, F_ARG_25 | HH21, F_ARG_25 | 2.81 | 1.90 | 20.25 |
| 1HGE.PDB | O, F_GLY_33    | N, F_HIS_26   | H, F_HIS_26    | 2.96 | 2.07 | 20.60 |
| 1HGE.PDB | O, E_THR_12    | N, F_GLN_27   | H, F_GLN_27    | 2.82 | 1.90 | 16.16 |
| 1HGE.PDB | O, F_GLY_31    | N, F_ASN_28   | H, F_ASN_28    | 2.84 | 1.88 | 9.14  |
| 1HGE.PDB | OD1, F_ASN_146 | ND2, F_ASN_28 | HD21, F_ASN_28 | 2.81 | 1.89 | 15.75 |
| 1HGE.PDB | O, F_CYS_144   | ND2, F_ASN_28 | HD22, F_ASN_28 | 2.90 | 1.97 | 14.42 |
| 1HGE.PDB | O, F_ASN_28    | N, F_GLY_31   | H, F_GLY_31    | 2.92 | 2.08 | 25.93 |
| 1HGE.PDB | O, F_PHE_24    | N, F_ALA_35   | H, F_ALA_35    | 2.77 | 1.97 | 29.32 |
| 1HGE.PDB | O, F_TYR_22    | N, F_ASP_37   | H, F_ASP_37    | 2.73 | 1.79 | 11.31 |
| 1HGE.PDB | OD2, F_ASP_37  | N, F_SER_40   | H, F_SER_40    | 2.89 | 1.93 | 8.53  |
| 1HGE.PDB | OD2, F_ASP_37  | OG, F_SER_40  | HG, F_SER_40   | 2.76 | 1.94 | 26.96 |
| 1HGE.PDB | O, F_ASP_37    | OG1, F_THR_41 | HG1, F_THR_41  | 2.69 | 1.84 | 22.88 |
| 1HGE.PDB | O, F_LEU_38    | N, F_GLN_42   | H, F_GLN_42    | 2.83 | 1.92 | 17.33 |
| 1HGE.PDB | OD1, F_ASP_46  | NE2, F_GLN_42 | HE22, F_GLN_42 | 2.86 | 1.96 | 19.38 |
| 1HGE.PDB | O, F_LYS_39    | N, F_ALA_43   | H, F_ALA_43    | 2.93 | 1.98 | 9.94  |
| 1HGE.PDB | O, F_SER_40    | N, F_ALA_44   | H, F_ALA_44    | 2.92 | 1.94 | 4.84  |
| 1HGE.PDB | O, F_GLN_42    | N, F_ASP_46   | H, F_ASP_46    | 2.81 | 1.84 | 1.16  |
| 1HGE.PDB | OE2, F_GLU_114 | NE2, F_GLN_47 | HE21, F_GLN_47 | 3.00 | 2.09 | 17.78 |
| 1HGE.PDB | O, F_ALA_43    | NE2, F_GLN_47 | HE22, F_GLN_47 | 2.91 | 2.00 | 18.24 |
| 1HGE.PDB | O, F_ILE_45    | N, F_ASN_49   | H, F_ASN_49    | 2.83 | 1.89 | 13.28 |
| 1HGE.PDB | O, F_ASP_46    | N, F_GLY_50   | H, F_GLY_50    | 2.83 | 1.91 | 17.15 |
| 1HGE.PDB | OG1, F_THR_107 | NZ, F_LYS_51  | HZ1, F_LYS_51  | 2.97 | 2.00 | 18.12 |
| 1HGE.PDB | OE1, F_GLU_103 | NZ, F_LYS_51  | HZ2, F_LYS_51  | 2.77 | 1.74 | 6.40  |
| 1HGE.PDB | ND1, F_HIS_106 | NZ, F_LYS_51  | HZ3, F_LYS_51  | 2.74 | 1.79 | 17.89 |
| 1HGE.PDB | O, F_ILE_48    | N, F_LEU_52   | H, F_LEU_52    | 2.89 | 1.97 | 17.49 |
| 1HGE.PDB | O, F_ASN_49    | N, F_ASN_53   | H, F_ASN_53    | 2.78 | 1.88 | 17.70 |
| 1HGE.PDB | OE1, F_GLU_57  | NH1, F_ARG_54 | HH11, F_ARG_54 | 2.82 | 1.83 | 11.59 |
| 1HGE.PDB | OE2, D_GLU_97  | NH2, F_ARG_54 | HH22, F_ARG_54 | 2.80 | 1.82 | 12.52 |
| 1HGE.PDB | OD2, D_ASP_90  | NZ, F_LYS_62  | HZ2, F_LYS_62  | 2.67 | 1.83 | 29.15 |
| 1HGE.PDB | OG, E_SER_110  | NE2, F_HIS_64 | HE2, F_HIS_64  | 2.94 | 1.97 | 9.11  |
| 1HGE.PDB | O, E_LYS_299   | NZ, F_LYS_68  | HZ1, F_LYS_68  | 2.97 | 1.93 | 4.62  |
| 1HGE.PDB | OE2, F_GLU_85  | NZ, F_LYS_68  | HZ2, F_LYS_68  | 2.75 | 1.78 | 18.51 |
| 1HGE.PDB | OG, A_SER_107  | N, F_ARG_76   | H, F_ARG_76    | 2.81 | 1.83 | 4.38  |
| 1HGE.PDB | OE2, B_GLU_81  | NE, F_ARG_76  | HE, F_ARG_76   | 2.85 | 1.89 | 11.64 |
| 1HGE.PDB | OE2, B_GLU_74  | NH1, F_ARG_76 | HH12, F_ARG_76 | 2.73 | 1.73 | 6.19  |
| 1HGE.PDB | OE1, B_GLU_81  | NH2, F_ARG_76 | HH21, F_ARG_76 | 2.65 | 1.66 | 5.51  |
| 1HGE.PDB | OE1, B_GLU_74  | NH2, F_ARG_76 | HH22, F_ARG_76 | 2.70 | 1.73 | 9.07  |
| 1HGE.PDB | OE1, F_GLU_74  | NE2, F_GLN_78 | HE22, F_GLN_78 | 2.96 | 1.99 | 8.87  |
| 1HGE.PDB | O, F_GLY_75    | N, F_ASP_79   | H, F_ASP_79    | 2.92 | 1.98 | 13.37 |
| 1HGE.PDB | O, F_ILE_77    | N, F_GLU_81   | H, F_GLU_81    | 2.95 | 1.99 | 8.53  |
| 1HGE.PDB | O, F_ASP_79    | N, F_TYR_83   | H, F_TYR_83    | 2.94 | 2.02 | 17.09 |
| 1HGE.PDB | OE1, B_GLU_85  | OH, F_TYR_83  | HH, F_TYR_83   | 2.51 | 1.76 | 30.00 |
| 1HGE.PDB | O, F_LEU_80    | N, F_VAL_84   | H, F_VAL_84    | 2.83 | 1.87 | 8.33  |
| 1HGE.PDB | O, F_LYS_82    | N, F_ASP_86   | H, F_ASP_86    | 2.92 | 1.97 | 11.17 |
| 1HGE.PDB | O, F_TYR_83    | N, F_THR_87   | H, F_THR_87    | 2.93 | 1.97 | 9.90  |
| 1HGE.PDB | O, F_VAL_84    | N, F_LYS_88   | H, F_LYS_88    | 2.95 | 2.01 | 12.83 |
| 1HGE.PDB | OH, D_TYR_83   | NZ, F_LYS_88  | HZ1, F_LYS_88  | 2.67 | 1.65 | 8.34  |
| 1HGE.PDB | O, F_GLU_85    | N, F_ILE_89   | H, F_ILE_89    | 2.92 | 1.94 | 4.91  |
| 1HGE.PDB | O, F_LYS_88    | N, F_TRP_92   | H, F_TRP_92    | 2.97 | 2.00 | 5.01  |
| 1HGE.PDB | O, F_ILE_89    | N, F_SER_93   | H, F_SER_93    | 2.84 | 1.93 | 17.22 |
| 1HGE.PDB | O, F_ILE_89    | OG, F_SER_93  | HG, F_SER_93   | 2.85 | 1.93 | 13.60 |
| 1HGE.PDB | O, F_ASP_90    | N, F_TYR_94   | H, F_TYR_94    | 2.85 | 1.93 | 16.45 |
| 1HGE.PDB | O, F_TYR_94    | N, F_LEU_98   | H, F_LEU_98    | 2.97 | 1.99 | 3.80  |
| 1HGE.PDB | O, F_ASN_95    | N, F_LEU_99   | H, F_LEU_99    | 2.92 | 1.99 | 14.65 |

|          |                |                |                 |      |      |       |
|----------|----------------|----------------|-----------------|------|------|-------|
| 1HGE.PDB | O, F_LEU_98    | N, F_LEU_102   | H, F_LEU_102    | 2.96 | 1.98 | 4.54  |
| 1HGE.PDB | O, F_LEU_99    | N, F_GLU_103   | H, F_GLU_103    | 2.90 | 1.93 | 9.01  |
| 1HGE.PDB | O, F_VAL_100   | N, F_ASN_104   | H, F_ASN_104    | 2.88 | 1.94 | 12.72 |
| 1HGE.PDB | O, E_LYS_27    | ND2, F_ASN_104 | HD22, F_ASN_104 | 2.94 | 1.99 | 10.01 |
| 1HGE.PDB | O, F_LEU_102   | N, F_HIS_106   | H, F_HIS_106    | 2.93 | 1.98 | 10.60 |
| 1HGE.PDB | O, F_GLU_103   | N, F_THR_107   | H, F_THR_107    | 2.85 | 1.95 | 19.04 |
| 1HGE.PDB | O, F_ASN_104   | N, F_ILE_108   | H, F_ILE_108    | 2.91 | 1.95 | 10.63 |
| 1HGE.PDB | O, F_HIS_106   | N, F_LEU_110   | H, F_LEU_110    | 2.81 | 1.84 | 7.77  |
| 1HGE.PDB | O, F_THR_107   | OG1, F_THR_111 | HG1, F_THR_111  | 2.90 | 1.93 | 1.70  |
| 1HGE.PDB | O, F_ASP_109   | N, F_SER_113   | H, F_SER_113    | 2.83 | 1.87 | 8.23  |
| 1HGE.PDB | O, F_LEU_110   | N, F_GLU_114   | H, F_GLU_114    | 2.90 | 1.94 | 9.48  |
| 1HGE.PDB | O, F_SER_113   | N, F_LYS_117   | H, F_LYS_117    | 2.79 | 1.89 | 18.58 |
| 1HGE.PDB | O, F_GLU_114   | N, F_LEU_118   | H, F_LEU_118    | 2.97 | 2.01 | 10.63 |
| 1HGE.PDB | O, F_ASN_116   | N, F_GLU_120   | H, F_GLU_120    | 2.93 | 1.96 | 5.04  |
| 1HGE.PDB | O, F_LYS_117   | N, F_LYS_121   | H, F_LYS_121    | 2.93 | 2.01 | 16.80 |
| 1HGE.PDB | O, F_PHE_119   | N, F_ARG_123   | H, F_ARG_123    | 2.92 | 1.96 | 9.49  |
| 1HGE.PDB | OE2, F_GLU_120 | NH1, F_ARG_123 | HH11, F_ARG_123 | 2.81 | 1.92 | 23.28 |
| 1HGE.PDB | O, F_GLU_120   | N, F_ARG_124   | H, F_ARG_124    | 2.97 | 2.00 | 7.42  |
| 1HGE.PDB | OE1, D_GLU_132 | NE, F_ARG_124  | HE, F_ARG_124   | 2.92 | 2.09 | 27.36 |
| 1HGE.PDB | O, F_LEU_126   | N, F_ASN_129   | H, F_ASN_129    | 2.94 | 2.00 | 13.52 |
| 1HGE.PDB | O, F_HIS_159   | ND2, F_ASN_129 | HD21, F_ASN_129 | 2.95 | 2.00 | 10.63 |
| 1HGE.PDB | OH, F_TYR_157  | ND2, F_ASN_129 | HD22, F_ASN_129 | 2.80 | 1.87 | 15.30 |
| 1HGE.PDB | O, F_LYS_139   | N, F_GLU_131   | H, F_GLU_131    | 2.96 | 2.04 | 15.90 |
| 1HGE.PDB | O, F_CYS_137   | N, F_MET_133   | H, F_MET_133    | 2.88 | 1.92 | 10.66 |
| 1HGE.PDB | O, E_LEU_13    | N, F_PHE_138   | H, F_PHE_138    | 2.73 | 1.86 | 22.03 |
| 1HGE.PDB | O, F_GLU_131   | N, F_LYS_139   | H, F_LYS_139    | 2.82 | 1.86 | 10.37 |
| 1HGE.PDB | O, E_ALA_11    | N, F_ILE_140   | H, F_ILE_140    | 2.75 | 1.87 | 19.65 |
| 1HGE.PDB | O, F_ASN_129   | N, F_TYR_141   | H, F_TYR_141    | 2.90 | 1.98 | 16.42 |
| 1HGE.PDB | O, F_ASP_145   | N, F_ILE_149   | H, F_ILE_149    | 2.91 | 1.95 | 10.01 |
| 1HGE.PDB | O, F_ASN_146   | N, F_GLU_150   | H, F_GLU_150    | 2.93 | 1.99 | 14.06 |
| 1HGE.PDB | O, F_ALA_147   | N, F_SER_151   | H, F_SER_151    | 2.92 | 2.06 | 23.67 |
| 1HGE.PDB | O, F_CYS_148   | OG, F_SER_151  | HG, F_SER_151   | 2.68 | 1.84 | 23.64 |
| 1HGE.PDB | O, F_GLU_150   | N, F_ASN_154   | H, F_ASN_154    | 2.79 | 1.81 | 1.42  |
| 1HGE.PDB | OD1, F_ASP_158 | N, F_ASP_160   | H, F_ASP_160    | 2.88 | 2.02 | 24.16 |
| 1HGE.PDB | O, F_HIS_159   | N, F_TYR_162   | H, F_TYR_162    | 2.92 | 2.01 | 17.85 |
| 1HGE.PDB | O, D_ARG_170   | NH1, F_ARG_163 | HH12, F_ARG_163 | 2.95 | 1.99 | 14.32 |
| 1HGE.PDB | O, F_TYR_162   | N, F_ALA_166   | H, F_ALA_166    | 2.88 | 1.91 | 5.83  |
| 1HGE.PDB | O, F_ARG_163   | N, F_LEU_167   | H, F_LEU_167    | 2.74 | 1.79 | 10.43 |
| 1HGE.PDB | O, F_ALA_166   | N, F_ARG_170   | H, F_ARG_170    | 2.84 | 1.99 | 23.33 |
| 1HGE.PDB | O, F_GLU_128   | NE, F_ARG_170  | HE, F_ARG_170   | 2.74 | 1.87 | 22.99 |
| 1HGE.PDB | OE2, F_GLU_131 | NH1, F_ARG_170 | HH11, F_ARG_170 | 2.78 | 1.79 | 6.04  |
| 1HGE.PDB | O, F_LEU_167   | N, F_PHE_171   | H, F_PHE_171    | 2.91 | 1.98 | 14.72 |
| 1HGF.PDB | O, B_ILE_140   | N, A_ALA_11    | H, A_ALA_11     | 2.90 | 2.03 | 22.48 |
| 1HGF.PDB | O, B_PHE_138   | N, A_LEU_13    | H, A_LEU_13     | 2.96 | 1.99 | 8.07  |
| 1HGF.PDB | O, B_ARG_25    | N, A_CYS_14    | H, A_CYS_14     | 2.98 | 2.02 | 8.89  |
| 1HGF.PDB | O, B_GLY_136   | N, A_LEU_15    | H, A_LEU_15     | 2.92 | 1.95 | 7.83  |
| 1HGF.PDB | O, B_GLY_23    | N, A_GLY_16    | H, A_GLY_16     | 2.92 | 2.03 | 19.80 |
| 1HGF.PDB | O, B_TRP_21    | N, A_HIS_18    | H, A_HIS_18     | 2.92 | 2.01 | 18.08 |
| 1HGF.PDB | OD1, A_ASN_322 | N, A_VAL_20    | H, A_VAL_20     | 2.80 | 1.83 | 7.05  |
| 1HGF.PDB | O, A_VAL_36    | N, A_THR_24    | H, A_THR_24     | 2.86 | 1.98 | 20.85 |
| 1HGF.PDB | O, A_ILE_34    | N, A_VAL_26    | H, A_VAL_26     | 2.85 | 1.90 | 12.10 |
| 1HGF.PDB | OE2, B_GLU_97  | NZ, A_LYS_27   | HZ1, A_LYS_27   | 2.79 | 1.86 | 21.55 |
| 1HGF.PDB | O, A_ASP_31    | N, A_THR_28    | H, A_THR_28     | 2.70 | 1.89 | 28.68 |
| 1HGF.PDB | O, A_VAL_26    | N, A_ILE_34    | H, A_ILE_34     | 2.96 | 2.01 | 12.92 |
| 1HGF.PDB | O, A_THR_24    | N, A_VAL_36    | H, A_VAL_36     | 2.81 | 1.84 | 5.89  |
| 1HGF.PDB | O, A_MET_320   | N, A_THR_37    | H, A_THR_37     | 2.89 | 1.91 | 4.82  |
| 1HGF.PDB | O, A_LEU_316   | N, A_THR_40    | H, A_THR_40     | 2.76 | 1.85 | 17.44 |
| 1HGF.PDB | O, A_LEU_314   | N, A_LEU_42    | H, A_LEU_42     | 2.79 | 1.94 | 25.04 |

|          |                |                |                 |      |      |       |
|----------|----------------|----------------|-----------------|------|------|-------|
| 1HGF.PDB | O, A_PHE_294   | N, A_GLN_44    | H, A_GLN_44     | 2.99 | 2.01 | 3.16  |
| 1HGF.PDB | O, A_SER_46    | NE2, A_GLN_44  | HE21, A_GLN_44  | 2.84 | 1.96 | 21.79 |
| 1HGF.PDB | OD2, A_ASP_275 | NZ, A_LYS_50   | HZ2, A_LYS_50   | 2.91 | 1.91 | 15.13 |
| 1HGF.PDB | O, A_PRO_273   | N, A_ILE_51    | H, A_ILE_51     | 2.77 | 1.81 | 8.80  |
| 1HGF.PDB | O, A_ASP_275   | N, A_ASN_53    | H, A_ASN_53     | 2.88 | 1.94 | 13.18 |
| 1HGF.PDB | OD2, A_ASP_85  | N, A_ARG_57    | H, A_ARG_57     | 2.93 | 1.98 | 11.29 |
| 1HGF.PDB | O, A_THR_83    | NE, A_ARG_57   | HE, A_ARG_57    | 2.79 | 1.82 | 4.94  |
| 1HGF.PDB | O, A_LEU_86    | N, A_LEU_59    | H, A_LEU_59     | 2.87 | 1.93 | 13.63 |
| 1HGF.PDB | OD1, A_ASP_60  | N, A_ILE_62    | H, A_ILE_62     | 2.92 | 1.97 | 12.05 |
| 1HGF.PDB | O, A_GLY_61    | N, A_CYS_64    | H, A_CYS_64     | 2.90 | 1.96 | 15.17 |
| 1HGF.PDB | O, A_LEU_66    | N, A_LEU_70    | H, A_LEU_70     | 2.80 | 1.89 | 17.51 |
| 1HGF.PDB | O, A_ILE_67    | N, A_LEU_71    | H, A_LEU_71     | 2.92 | 1.94 | 5.50  |
| 1HGF.PDB | O, A_ASP_68    | N, A_GLY_72    | H, A_GLY_72     | 2.85 | 1.95 | 18.27 |
| 1HGF.PDB | OD1, A_ASP_73  | N, A_HIS_75    | H, A_HIS_75     | 2.98 | 2.09 | 20.20 |
| 1HGF.PDB | OD1, A_ASP_73  | ND1, A_HIS_75  | HD1, A_HIS_75   | 2.84 | 1.91 | 15.59 |
| 1HGF.PDB | O, A_ASP_63    | NE2, A_HIS_75  | HE2, A_HIS_75   | 2.88 | 1.95 | 16.02 |
| 1HGF.PDB | O, A_ASP_73    | N, A_CYS_76    | H, A_CYS_76     | 2.81 | 1.89 | 15.96 |
| 1HGF.PDB | O, A_PRO_74    | N, A_ASP_77    | H, A_ASP_77     | 2.94 | 1.99 | 11.05 |
| 1HGF.PDB | O, A_CYS_76    | N, A_PHE_79    | H, A_PHE_79     | 2.97 | 2.00 | 8.63  |
| 1HGF.PDB | OE1, A_GLU_82  | N, A_THR_83    | H, A_THR_83     | 2.98 | 2.09 | 20.75 |
| 1HGF.PDB | O, A_ARG_57    | N, A_ASP_85    | H, A_ASP_85     | 2.83 | 1.91 | 16.22 |
| 1HGF.PDB | O, A_MET_268   | N, A_GLU_89    | H, A_GLU_89     | 2.80 | 1.87 | 13.08 |
| 1HGF.PDB | OD1, A_ASP_60  | NE, A_ARG_90   | HE, A_ARG_90    | 2.77 | 1.85 | 16.11 |
| 1HGF.PDB | O, A_SER_270   | NH1, A_ARG_90  | HH11, A_ARG_90  | 2.64 | 1.79 | 25.97 |
| 1HGF.PDB | O, A_ALA_272   | NH1, A_ARG_90  | HH12, A_ARG_90  | 2.67 | 1.74 | 16.70 |
| 1HGF.PDB | OD2, A_ASP_60  | NH2, A_ARG_90  | HH21, A_ARG_90  | 2.84 | 1.84 | 8.73  |
| 1HGF.PDB | OD1, A_ASP_271 | N, A_SER_91    | H, A_SER_91     | 2.96 | 1.99 | 10.09 |
| 1HGF.PDB | OD2, A_ASP_271 | OG, A_SER_91   | HG, A_SER_91    | 2.85 | 1.91 | 12.59 |
| 1HGF.PDB | OD2, A_ASP_73  | N, A_ASN_96    | H, A_ASN_96     | 2.89 | 1.95 | 14.63 |
| 1HGF.PDB | O, A_ILE_230   | N, A_ASP_101   | H, A_ASP_101    | 2.99 | 2.15 | 25.68 |
| 1HGF.PDB | OD2, A_ASP_104 | OG, A_SER_107  | HG, A_SER_107   | 2.89 | 1.97 | 16.55 |
| 1HGF.PDB | O, A_TYR_105   | N, A_ARG_109   | H, A_ARG_109    | 2.87 | 1.89 | 3.75  |
| 1HGF.PDB | OE2, B_GLU_67  | NH2, A_ARG_109 | HH21, A_ARG_109 | 2.92 | 1.92 | 10.51 |
| 1HGF.PDB | OD2, F_ASP_79  | OG, A_SER_110  | HG, A_SER_110   | 2.82 | 1.90 | 15.87 |
| 1HGF.PDB | O, A_SER_107   | N, A_LEU_111   | H, A_LEU_111    | 2.96 | 2.00 | 9.75  |
| 1HGF.PDB | O, A_LEU_108   | N, A_VAL_112   | H, A_VAL_112    | 2.99 | 2.02 | 7.62  |
| 1HGF.PDB | O, A_ARG_109   | N, A_ALA_113   | H, A_ALA_113    | 2.92 | 2.00 | 16.71 |
| 1HGF.PDB | O, A_SER_110   | N, A_SER_114   | H, A_SER_114    | 2.94 | 2.06 | 21.84 |
| 1HGF.PDB | OE2, A_GLU_119 | OG1, A_THR_117 | HG1, A_THR_117  | 2.95 | 1.98 | 3.95  |
| 1HGF.PDB | O, A_GLU_82    | N, A_LEU_118   | H, A_LEU_118    | 2.98 | 2.00 | 4.41  |
| 1HGF.PDB | O, A_TYR_257   | N, A_ILE_121   | H, A_ILE_121    | 2.82 | 1.84 | 1.82  |
| 1HGF.PDB | O, A_ARG_255   | N, A_GLU_123   | H, A_GLU_123    | 2.84 | 1.88 | 9.80  |
| 1HGF.PDB | O, A_THR_155   | N, A_THR_131   | H, A_THR_131    | 2.73 | 1.79 | 9.00  |
| 1HGF.PDB | O, A_LYS_156   | OG1, A_THR_131 | HG1, A_THR_131  | 2.73 | 1.79 | 7.60  |
| 1HGF.PDB | ND2, A_ASN_152 | NE2, A_GLN_132 | HE21, A_GLN_132 | 2.94 | 2.00 | 10.26 |
| 1HGF.PDB | OD1, A_ASN_152 | N, A_ASN_133   | H, A_ASN_133    | 2.91 | 1.97 | 13.50 |
| 1HGF.PDB | O, A_TRP_153   | N, A_GLY_134   | H, A_GLY_134    | 3.00 | 2.07 | 15.59 |
| 1HGF.PDB | O, A_GLY_146   | N, A_SER_136   | H, A_SER_136    | 2.70 | 1.84 | 23.70 |
| 1HGF.PDB | O, A_GLY_144   | NZ, A_LYS_140  | HZ2, A_LYS_140  | 2.83 | 1.99 | 29.88 |
| 1HGF.PDB | O, A_GLY_144   | N, A_ARG_141   | H, A_ARG_141    | 2.92 | 2.09 | 26.49 |
| 1HGF.PDB | OD2, A_ASP_77  | NE, A_ARG_141  | HE, A_ARG_141   | 2.91 | 2.06 | 25.46 |
| 1HGF.PDB | O, A_PHE_147   | NH1, A_ARG_141 | HH12, A_ARG_141 | 2.58 | 1.65 | 16.41 |
| 1HGF.PDB | OD1, A_ASP_77  | NH2, A_ARG_141 | HH21, A_ARG_141 | 2.84 | 1.97 | 26.05 |
| 1HGF.PDB | OD2, A_ASP_77  | NH2, A_ARG_141 | HH21, A_ARG_141 | 2.78 | 1.86 | 20.91 |
| 1HGF.PDB | O, A_SER_136   | N, A_GLY_146   | H, A_GLY_146    | 2.98 | 2.14 | 25.61 |
| 1HGF.PDB | O, A_GLY_72    | N, A_SER_149   | H, A_SER_149    | 2.87 | 1.95 | 15.87 |
| 1HGF.PDB | O, A_ALA_253   | N, A_ASN_152   | H, A_ASN_152    | 2.85 | 1.95 | 19.48 |
| 1HGF.PDB | OH, A_TYR_195  | NE1, A_TRP_153 | HE1, A_TRP_153  | 2.84 | 1.90 | 13.02 |

|          |                |                |                 |      |      |       |
|----------|----------------|----------------|-----------------|------|------|-------|
| 1HGF.PDB | O, A_THR_131   | N, A_THR_155   | H, A_THR_155    | 2.99 | 2.03 | 10.01 |
| 1HGF.PDB | O, A_LEU_194   | N, A_LYS_156   | H, A_LYS_156    | 2.84 | 1.97 | 22.10 |
| 1HGF.PDB | O, A_THR_160   | N, A_SER_157   | H, A_SER_157    | 3.00 | 2.11 | 20.90 |
| 1HGF.PDB | O, A_SER_247   | N, A_LEU_164   | H, A_LEU_164    | 2.70 | 1.86 | 25.60 |
| 1HGF.PDB | O, A_ILE_245   | N, A_VAL_166   | H, A_VAL_166    | 2.89 | 1.93 | 10.88 |
| 1HGF.PDB | O, A_LEU_243   | N, A_MET_168   | H, A_MET_168    | 3.00 | 2.06 | 14.85 |
| 1HGF.PDB | O, A_ASP_241   | N, A_ASN_170   | H, A_ASN_170    | 2.88 | 1.90 | 0.71  |
| 1HGF.PDB | O, A_PHE_174   | ND2, A_ASN_170 | HD22, A_ASN_170 | 2.75 | 1.81 | 11.59 |
| 1HGF.PDB | O, A_VAL_237   | N, A_LYS_176   | H, A_LYS_176    | 2.94 | 2.04 | 19.01 |
| 1HGF.PDB | OE2, A_GLU_123 | NZ, A_LYS_176  | HZ1, A_LYS_176  | 2.72 | 1.80 | 23.85 |
| 1HGF.PDB | O, A_THR_235   | N, A_TYR_178   | H, A_TYR_178    | 2.82 | 1.85 | 7.11  |
| 1HGF.PDB | OG1, A_THR_235 | NE1, A_TRP_180 | HE1, A_TRP_180  | 2.87 | 1.89 | 5.46  |
| 1HGF.PDB | O, A_ASN_250   | N, A_HIS_183   | H, A_HIS_183    | 2.77 | 1.92 | 24.91 |
| 1HGF.PDB | OH, A_TYR_98   | NE2, A_HIS_183 | HE2, A_HIS_183  | 2.90 | 1.98 | 15.32 |
| 1HGF.PDB | O, A_ARG_229   | N, A_HIS_184   | H, A_HIS_184    | 2.84 | 1.88 | 9.30  |
| 1HGF.PDB | OG, A_SER_231  | NE2, A_HIS_184 | HE2, A_HIS_184  | 2.68 | 1.88 | 29.05 |
| 1HGF.PDB | OD1, A_ASN_250 | NE2, A_GLN_191 | HE22, A_GLN_191 | 2.90 | 1.94 | 8.27  |
| 1HGF.PDB | O, A_ASN_188   | N, A_THR_192   | H, A_THR_192    | 2.96 | 2.06 | 18.82 |
| 1HGF.PDB | O, A_GLN_189   | N, A_SER_193   | H, A_SER_193    | 2.83 | 1.90 | 13.84 |
| 1HGF.PDB | O, A_GLU_190   | N, A_LEU_194   | H, A_LEU_194    | 2.93 | 1.96 | 8.30  |
| 1HGF.PDB | O, A_GLN_191   | N, A_TYR_195   | H, A_TYR_195    | 2.75 | 1.81 | 10.35 |
| 1HGF.PDB | O, A_TYR_195   | N, A_GLN_197   | H, A_GLN_197    | 2.73 | 1.94 | 29.33 |
| 1HGF.PDB | O, A_ASN_248   | NE2, A_GLN_197 | HE21, A_GLN_197 | 2.87 | 2.00 | 23.13 |
| 1HGF.PDB | O, A_TYR_161   | NE2, A_GLN_197 | HE22, A_GLN_197 | 2.98 | 2.03 | 11.50 |
| 1HGF.PDB | O, A_ILE_213   | N, A_VAL_202   | H, A_VAL_202    | 2.99 | 2.02 | 6.97  |
| 1HGF.PDB | O, A_ASN_246   | N, A_THR_203   | H, A_THR_203    | 2.96 | 2.06 | 19.01 |
| 1HGF.PDB | O, A_GLN_211   | N, A_VAL_204   | H, A_VAL_204    | 2.92 | 1.99 | 15.84 |
| 1HGF.PDB | O, A_SER_209   | N, A_THR_206   | H, A_THR_206    | 2.95 | 2.03 | 15.35 |
| 1HGF.PDB | OD1, A_ASP_241 | N, A_ARG_207   | H, A_ARG_207    | 2.92 | 1.95 | 7.62  |
| 1HGF.PDB | O, A_VAL_204   | N, A_GLN_211   | H, A_GLN_211    | 2.87 | 1.98 | 21.25 |
| 1HGF.PDB | OG1, A_THR_203 | OG1, A_THR_212 | HG1, A_THR_212  | 2.83 | 1.91 | 15.11 |
| 1HGF.PDB | O, A_VAL_202   | N, A_ILE_213   | H, A_ILE_213    | 2.85 | 1.94 | 17.93 |
| 1HGF.PDB | ND1, A_HIS_184 | N, A_ASN_216   | H, A_ASN_216    | 2.73 | 1.89 | 25.27 |
| 1HGF.PDB | OE1, C_GLN_210 | NH2, A_ARG_220 | HH21, A_ARG_220 | 2.64 | 1.76 | 23.62 |
| 1HGF.PDB | O, A_ASN_216   | NH2, A_ARG_220 | HH22, A_ARG_220 | 2.77 | 1.87 | 21.15 |
| 1HGF.PDB | O, A_LEU_226   | N, A_VAL_223   | H, A_VAL_223    | 2.86 | 1.91 | 11.57 |
| 1HGF.PDB | O, A_CYS_97    | NE, A_ARG_224  | HE, A_ARG_224   | 2.81 | 1.94 | 23.65 |
| 1HGF.PDB | O, A_CYS_97    | NH2, A_ARG_224 | HH21, A_ARG_224 | 2.95 | 2.11 | 27.74 |
| 1HGF.PDB | O, A_VAL_223   | N, A_LEU_226   | H, A_LEU_226    | 2.93 | 1.98 | 11.09 |
| 1HGF.PDB | O, A_SER_228   | NH1, A_ARG_229 | HH11, A_ARG_229 | 2.75 | 1.83 | 19.84 |
| 1HGF.PDB | O, A_PRO_221   | NH2, A_ARG_229 | HH22, A_ARG_229 | 2.63 | 1.68 | 15.15 |
| 1HGF.PDB | O, A_PRO_99    | N, A_ILE_230   | H, A_ILE_230    | 2.95 | 2.09 | 24.07 |
| 1HGF.PDB | OD1, A_ASP_101 | OG, A_SER_231  | HG, A_SER_231   | 2.83 | 1.87 | 7.29  |
| 1HGF.PDB | O, A_ASP_101   | N, A_ILE_232   | H, A_ILE_232    | 2.89 | 1.95 | 14.12 |
| 1HGF.PDB | O, A_TRP_180   | N, A_TYR_233   | H, A_TYR_233    | 2.93 | 1.97 | 10.39 |
| 1HGF.PDB | O, A_TYR_178   | N, A_THR_235   | H, A_THR_235    | 2.85 | 1.97 | 21.16 |
| 1HGF.PDB | O, A_LYS_176   | N, A_VAL_237   | H, A_VAL_237    | 2.78 | 1.84 | 14.11 |
| 1HGF.PDB | OE1, F_GLU_72  | NZ, A_LYS_238  | HZ2, A_LYS_238  | 2.85 | 1.85 | 14.58 |
| 1HGF.PDB | O, F_SER_71    | NZ, A_LYS_238  | HZ3, A_LYS_238  | 2.63 | 1.67 | 16.71 |
| 1HGF.PDB | O, A_ASN_170   | N, A_GLY_240   | H, A_GLY_240    | 2.91 | 2.09 | 27.97 |
| 1HGF.PDB | O, A_MET_168   | N, A_LEU_243   | H, A_LEU_243    | 2.94 | 1.98 | 7.98  |
| 1HGF.PDB | O, A_SER_205   | N, A_VAL_244   | H, A_VAL_244    | 2.89 | 1.97 | 15.63 |
| 1HGF.PDB | O, A_VAL_166   | N, A_ILE_245   | H, A_ILE_245    | 2.94 | 2.01 | 15.58 |
| 1HGF.PDB | O, A_THR_203   | N, A_ASN_246   | H, A_ASN_246    | 2.92 | 1.96 | 10.40 |
| 1HGF.PDB | OD1, A_ASN_165 | ND2, A_ASN_246 | HD21, A_ASN_246 | 2.93 | 2.03 | 19.92 |
| 1HGF.PDB | O, A_LEU_164   | N, A_SER_247   | H, A_SER_247    | 2.90 | 2.00 | 19.06 |
| 1HGF.PDB | OG, A_SER_247  | N, A_GLY_249   | H, A_GLY_249    | 2.99 | 2.00 | 4.05  |
| 1HGF.PDB | O, A_HIS_183   | ND2, A_ASN_250 | HD21, A_ASN_250 | 2.77 | 1.81 | 6.63  |



|          |                |                |                 |      |      |       |
|----------|----------------|----------------|-----------------|------|------|-------|
| 1HGF.PDB | OE1, A_GLN_191 | ND2, A_ASN_250 | HD22, A_ASN_250 | 2.86 | 1.90 | 9.57  |
| 1HGF.PDB | O, A_ASN_152   | N, A_ALA_253   | H, A_ALA_253    | 2.98 | 2.05 | 15.63 |
| 1HGF.PDB | OD1, A_ASN_133 | NH2, A_ARG_255 | HH22, A_ARG_255 | 2.49 | 1.67 | 28.52 |
| 1HGF.PDB | O, A_LEU_177   | N, A_PHE_258   | H, A_PHE_258    | 2.98 | 2.01 | 4.56  |
| 1HGF.PDB | OE1, A_GLU_119 | NH2, A_ARG_261 | HH22, A_ARG_261 | 2.74 | 1.90 | 27.76 |
| 1HGF.PDB | O, A_PHE_87    | N, A_MET_268   | H, A_MET_268    | 2.93 | 2.03 | 19.50 |
| 1HGF.PDB | O, A_PRO_284   | OG, A_SER_270  | HG, A_SER_270   | 2.80 | 1.83 | 2.11  |
| 1HGF.PDB | OG, A_SER_270  | N, A_ALA_272   | H, A_ALA_272    | 2.94 | 2.02 | 16.24 |
| 1HGF.PDB | O, A_ILE_51    | N, A_ASP_275   | H, A_ASP_275    | 2.90 | 2.00 | 18.80 |
| 1HGF.PDB | OD1, A_ASP_275 | N, A_THR_276   | H, A_THR_276    | 2.77 | 1.92 | 24.49 |
| 1HGF.PDB | O, A_ASN_54    | N, A_SER_279   | H, A_SER_279    | 2.78 | 1.84 | 13.06 |
| 1HGF.PDB | O, A_TYR_302   | N, A_ILE_282   | H, A_ILE_282    | 2.94 | 1.97 | 5.53  |
| 1HGF.PDB | O, A_THR_283   | N, A_GLY_286   | H, A_GLY_286    | 2.80 | 1.86 | 12.05 |
| 1HGF.PDB | O, A_LYS_50    | N, A_SER_287   | H, A_SER_287    | 2.81 | 1.89 | 15.58 |
| 1HGF.PDB | O, A_ALA_304   | ND2, A_ASN_290 | HD21, A_ASN_290 | 2.79 | 1.88 | 15.92 |
| 1HGF.PDB | OE1, A_GLN_44  | NZ, A_LYS_292  | HZ1, A_LYS_292  | 2.87 | 1.83 | 0.68  |
| 1HGF.PDB | OD1, A_ASP_291 | NZ, A_LYS_292  | HZ2, A_LYS_292  | 2.86 | 1.83 | 8.47  |
| 1HGF.PDB | O, A_LYS_307   | N, A_GLN_295   | H, A_GLN_295    | 2.82 | 1.98 | 25.98 |
| 1HGF.PDB | O, A_ASN_298   | NE2, A_GLN_295 | HE22, A_GLN_295 | 2.74 | 1.81 | 14.12 |
| 1HGF.PDB | O, A_GLN_44    | N, A_ASN_296   | H, A_ASN_296    | 2.86 | 1.90 | 9.96  |
| 1HGF.PDB | OD1, A_ASN_298 | N, A_ILE_300   | H, A_ILE_300    | 2.89 | 2.00 | 19.34 |
| 1HGF.PDB | O, A_ILE_282   | N, A_TYR_302   | H, A_TYR_302    | 2.80 | 1.95 | 24.99 |
| 1HGF.PDB | O, B_LYS_62    | N, A_GLY_303   | H, A_GLY_303    | 2.90 | 1.93 | 4.88  |
| 1HGF.PDB | O, A_GLN_295   | N, A_VAL_309   | H, A_VAL_309    | 2.94 | 2.08 | 24.38 |
| 1HGF.PDB | OG, B_SER_93   | N, A_LYS_310   | H, A_LYS_310    | 2.89 | 1.97 | 16.03 |
| 1HGF.PDB | OE1, A_GLU_41  | OG1, A_THR_313 | HG1, A_THR_313  | 2.68 | 1.87 | 27.57 |
| 1HGF.PDB | OE2, A_GLU_41  | N, A_LEU_314   | H, A_LEU_314    | 2.78 | 1.85 | 12.25 |
| 1HGF.PDB | OG1, A_THR_313 | NZ, A_LYS_315  | HZ2, A_LYS_315  | 2.95 | 2.00 | 20.61 |
| 1HGF.PDB | O, A_THR_40    | N, A_LEU_316   | H, A_LEU_316    | 2.77 | 1.84 | 13.98 |
| 1HGF.PDB | OD1, B_ASN_104 | N, A_ALA_317   | H, A_ALA_317    | 2.74 | 1.82 | 15.07 |
| 1HGF.PDB | O, A_ASN_38    | N, A_THR_318   | H, A_THR_318    | 2.85 | 1.92 | 14.74 |
| 1HGF.PDB | OE2, A_GLU_35  | ND2, A_ASN_322 | HD21, A_ASN_322 | 2.76 | 1.93 | 26.44 |
| 1HGF.PDB | O, A_VAL_20    | ND2, A_ASN_322 | HD22, A_ASN_322 | 2.95 | 2.02 | 15.09 |
| 1HGF.PDB | O, A_PRO_21    | NE2, A_GLN_327 | HE21, A_GLN_327 | 2.80 | 2.01 | 29.67 |
| 1HGF.PDB | OD2, B_ASP_112 | N, B_GLY_1     | H1, B_GLY_1     | 2.90 | 1.93 | 18.51 |
| 1HGF.PDB | OD1, B_ASP_109 | N, B_LEU_2     | H, B_LEU_2      | 2.91 | 2.01 | 19.54 |
| 1HGF.PDB | OD2, B_ASP_112 | N, B_PHE_3     | H, B_PHE_3      | 2.80 | 1.99 | 27.59 |
| 1HGF.PDB | OD2, B_ASP_112 | N, B_GLY_4     | H, B_GLY_4      | 2.97 | 2.05 | 16.11 |
| 1HGF.PDB | OD1, B_ASP_112 | N, B_ALA_5     | H, B_ALA_5      | 2.98 | 2.10 | 21.76 |
| 1HGF.PDB | O, B_GLY_4     | N, B_PHE_9     | H, B_PHE_9      | 2.80 | 1.88 | 14.94 |
| 1HGF.PDB | O, B_GLY_13    | ND2, B_ASN_12  | HD21, B_ASN_12  | 2.79 | 1.93 | 22.97 |
| 1HGF.PDB | O, A_VAL_323   | N, B_GLY_13    | H, B_GLY_13     | 2.74 | 1.86 | 21.47 |
| 1HGF.PDB | O, A_HIS_17    | N, B_TRP_14    | H, B_TRP_14     | 2.87 | 1.97 | 19.18 |
| 1HGF.PDB | OG1, B_THR_41  | N, B_TRP_21    | H, B_TRP_21     | 2.88 | 1.96 | 17.54 |
| 1HGF.PDB | O, B_ALA_35    | N, B_PHE_24    | H, B_PHE_24     | 2.83 | 1.86 | 5.03  |
| 1HGF.PDB | O, A_CYS_14    | N, B_ARG_25    | H, B_ARG_25     | 2.97 | 2.03 | 13.73 |
| 1HGF.PDB | OE1, B_GLN_34  | NE, B_ARG_25   | HE, B_ARG_25    | 2.64 | 1.77 | 20.89 |
| 1HGF.PDB | OE1, B_GLN_34  | NH2, B_ARG_25  | HH21, B_ARG_25  | 2.81 | 1.99 | 28.67 |
| 1HGF.PDB | OE2, A_GLU_325 | NH2, B_ARG_25  | HH22, B_ARG_25  | 2.99 | 2.04 | 16.52 |
| 1HGF.PDB | O, B_GLY_31    | N, B_ASN_28    | H, B_ASN_28     | 2.76 | 1.82 | 13.38 |
| 1HGF.PDB | O, B_TYR_22    | N, B_ASP_37    | H, B_ASP_37     | 2.72 | 1.76 | 1.26  |
| 1HGF.PDB | OD2, B_ASP_37  | N, B_SER_40    | H, B_SER_40     | 2.89 | 1.91 | 1.46  |
| 1HGF.PDB | O, B_ASP_37    | OG1, B_THR_41  | HG1, B_THR_41   | 2.68 | 1.88 | 27.80 |
| 1HGF.PDB | O, B_LEU_38    | N, B_GLN_42    | H, B_GLN_42     | 2.87 | 1.93 | 12.73 |
| 1HGF.PDB | OD1, B_ASP_46  | NE2, B_GLN_42  | HE21, B_GLN_42  | 2.87 | 1.99 | 22.40 |
| 1HGF.PDB | O, B_LYS_39    | N, B_ALA_43    | H, B_ALA_43     | 2.92 | 1.97 | 11.63 |
| 1HGF.PDB | O, B_SER_40    | N, B_ALA_44    | H, B_ALA_44     | 2.94 | 1.96 | 4.26  |
| 1HGF.PDB | O, B_GLN_42    | N, B_ASP_46    | H, B_ASP_46     | 2.81 | 1.84 | 4.31  |

|          |                |                |                 |      |      |       |
|----------|----------------|----------------|-----------------|------|------|-------|
| 1HGF.PDB | O, B_ALA_43    | NE2, B_GLN_47  | HE21, B_GLN_47  | 2.89 | 1.94 | 12.17 |
| 1HGF.PDB | O, B_ILE_45    | N, B_ASN_49    | H, B_ASN_49     | 2.90 | 1.97 | 14.22 |
| 1HGF.PDB | O, B_ASP_46    | N, B_GLY_50    | H, B_GLY_50     | 2.85 | 1.93 | 16.88 |
| 1HGF.PDB | O, B_GLN_47    | N, B_LYS_51    | H, B_LYS_51     | 2.96 | 2.00 | 10.44 |
| 1HGF.PDB | OE1, B_GLU_103 | NZ, B_LYS_51   | HZ1, B_LYS_51   | 2.74 | 1.70 | 5.26  |
| 1HGF.PDB | ND1, B_HIS_106 | NZ, B_LYS_51   | HZ3, B_LYS_51   | 2.67 | 1.72 | 18.38 |
| 1HGF.PDB | O, B_ILE_48    | N, B_LEU_52    | H, B_LEU_52     | 2.92 | 2.01 | 17.60 |
| 1HGF.PDB | O, B_ASN_49    | N, B_ASN_53    | H, B_ASN_53     | 2.84 | 1.91 | 14.80 |
| 1HGF.PDB | O, E_THR_28    | NE, B_ARG_54   | HE, B_ARG_54    | 2.92 | 1.94 | 6.13  |
| 1HGF.PDB | OE2, F_GLU_97  | NH2, B_ARG_54  | HH22, B_ARG_54  | 2.83 | 1.86 | 13.50 |
| 1HGF.PDB | OD2, F_ASP_86  | NZ, B_LYS_62   | HZ2, B_LYS_62   | 2.71 | 1.70 | 11.44 |
| 1HGF.PDB | OD2, F_ASP_90  | NZ, B_LYS_62   | HZ3, B_LYS_62   | 2.77 | 1.82 | 20.37 |
| 1HGF.PDB | OG, A_SER_266  | ND1, B_HIS_64  | HD1, B_HIS_64   | 2.66 | 1.79 | 20.68 |
| 1HGF.PDB | OG, A_SER_110  | NE2, B_HIS_64  | HE2, B_HIS_64   | 2.89 | 1.92 | 10.70 |
| 1HGF.PDB | O, B_PHE_63    | NE2, B_GLN_65  | HE21, B_GLN_65  | 2.92 | 1.95 | 7.46  |
| 1HGF.PDB | OE2, B_GLU_85  | NZ, B_LYS_68   | HZ1, B_LYS_68   | 2.67 | 1.75 | 22.44 |
| 1HGF.PDB | O, A_LYS_299   | NZ, B_LYS_68   | HZ2, B_LYS_68   | 2.93 | 1.89 | 4.53  |
| 1HGF.PDB | OG, C_SER_107  | N, B_ARG_76    | H, B_ARG_76     | 2.84 | 1.90 | 13.38 |
| 1HGF.PDB | OE2, D_GLU_81  | NE, B_ARG_76   | HE, B_ARG_76    | 2.92 | 1.92 | 2.47  |
| 1HGF.PDB | OE1, D_GLU_74  | NH1, B_ARG_76  | HH12, B_ARG_76  | 2.86 | 1.84 | 3.80  |
| 1HGF.PDB | OE1, D_GLU_81  | NH2, B_ARG_76  | HH21, B_ARG_76  | 2.73 | 1.74 | 10.29 |
| 1HGF.PDB | OE2, D_GLU_74  | NH2, B_ARG_76  | HH22, B_ARG_76  | 2.75 | 1.74 | 3.91  |
| 1HGF.PDB | O, B_GLY_75    | N, B_ASP_79    | H, B_ASP_79     | 2.96 | 2.00 | 9.52  |
| 1HGF.PDB | O, B_ILE_77    | N, B_GLU_81    | H, B_GLU_81     | 2.94 | 1.98 | 10.87 |
| 1HGF.PDB | O, B_GLN_78    | N, B_LYS_82    | H, B_LYS_82     | 3.00 | 2.09 | 18.29 |
| 1HGF.PDB | OE1, D_GLU_85  | OH, B_TYR_83   | HH, B_TYR_83    | 2.57 | 1.80 | 29.66 |
| 1HGF.PDB | O, B_LEU_80    | N, B_VAL_84    | H, B_VAL_84     | 2.91 | 1.98 | 14.24 |
| 1HGF.PDB | O, B_LYS_82    | N, B_ASP_86    | H, B_ASP_86     | 2.93 | 1.99 | 11.73 |
| 1HGF.PDB | O, B_TYR_83    | N, B_THR_87    | H, B_THR_87     | 2.99 | 2.04 | 12.38 |
| 1HGF.PDB | O, B_VAL_84    | N, B_LYS_88    | H, B_LYS_88     | 2.93 | 2.07 | 23.33 |
| 1HGF.PDB | OH, F_TYR_83   | NZ, B_LYS_88   | HZ1, B_LYS_88   | 2.72 | 1.70 | 9.91  |
| 1HGF.PDB | O, B_GLU_85    | N, B_ILE_89    | H, B_ILE_89     | 2.93 | 1.96 | 7.36  |
| 1HGF.PDB | O, B_LYS_88    | N, B_TRP_92    | H, B_TRP_92     | 2.91 | 1.95 | 10.80 |
| 1HGF.PDB | O, B_ILE_89    | N, B_SER_93    | H, B_SER_93     | 2.91 | 2.02 | 20.72 |
| 1HGF.PDB | O, B_ILE_89    | OG, B_SER_93   | HG, B_SER_93    | 2.78 | 1.94 | 24.66 |
| 1HGF.PDB | O, B_ASP_90    | N, B_TYR_94    | H, B_TYR_94     | 3.00 | 2.07 | 16.60 |
| 1HGF.PDB | O, B_TRP_92    | N, B_ALA_96    | H, B_ALA_96     | 2.98 | 2.04 | 14.15 |
| 1HGF.PDB | O, B_TYR_94    | N, B_LEU_98    | H, B_LEU_98     | 2.94 | 1.99 | 11.23 |
| 1HGF.PDB | O, B_ASN_95    | N, B_LEU_99    | H, B_LEU_99     | 3.00 | 2.03 | 11.07 |
| 1HGF.PDB | O, B_LEU_98    | N, B_LEU_102   | H, B_LEU_102    | 2.98 | 2.01 | 7.33  |
| 1HGF.PDB | O, B_LEU_99    | N, B_GLU_103   | H, B_GLU_103    | 2.91 | 1.94 | 8.79  |
| 1HGF.PDB | O, B_VAL_100   | N, B_ASN_104   | H, B_ASN_104    | 2.86 | 1.91 | 12.70 |
| 1HGF.PDB | O, A_LYS_27    | ND2, B_ASN_104 | HD21, B_ASN_104 | 2.88 | 1.94 | 13.97 |
| 1HGF.PDB | O, B_LEU_102   | N, B_HIS_106   | H, B_HIS_106    | 2.90 | 1.94 | 9.48  |
| 1HGF.PDB | O, B_GLU_103   | N, B_THR_107   | H, B_THR_107    | 2.84 | 1.94 | 18.07 |
| 1HGF.PDB | O, B_ASN_104   | N, B_ILE_108   | H, B_ILE_108    | 2.93 | 1.99 | 13.61 |
| 1HGF.PDB | O, B_HIS_106   | N, B_LEU_110   | H, B_LEU_110    | 2.78 | 1.84 | 12.67 |
| 1HGF.PDB | O, B_ASP_109   | N, B_SER_113   | H, B_SER_113    | 2.79 | 1.85 | 13.76 |
| 1HGF.PDB | O, F_LEU_2     | OG, B_SER_113  | HG, B_SER_113   | 2.68 | 1.90 | 29.80 |
| 1HGF.PDB | O, B_SER_113   | N, B_LYS_117   | H, B_LYS_117    | 2.74 | 1.85 | 20.16 |
| 1HGF.PDB | O, B_GLU_114   | N, B_LEU_118   | H, B_LEU_118    | 2.99 | 2.05 | 15.07 |
| 1HGF.PDB | O, B_MET_115   | N, B_PHE_119   | H, B_PHE_119    | 2.97 | 2.01 | 9.96  |
| 1HGF.PDB | O, B_ASN_116   | N, B_GLU_120   | H, B_GLU_120    | 2.92 | 1.94 | 1.95  |
| 1HGF.PDB | OE2, B_GLU_120 | NH1, B_ARG_123 | HH11, B_ARG_123 | 2.78 | 1.93 | 26.74 |
| 1HGF.PDB | O, B_GLU_120   | N, B_ARG_124   | H, B_ARG_124    | 2.96 | 2.04 | 16.03 |
| 1HGF.PDB | OE1, F_GLU_132 | NE, B_ARG_124  | HE, B_ARG_124   | 2.80 | 1.86 | 13.00 |
| 1HGF.PDB | OH, B_TYR_157  | ND2, B_ASN_129 | HD21, B_ASN_129 | 2.81 | 1.86 | 11.58 |
| 1HGF.PDB | O, B_HIS_159   | ND2, B_ASN_129 | HD22, B_ASN_129 | 2.97 | 2.06 | 17.16 |

|          |                |                |                 |      |      |       |
|----------|----------------|----------------|-----------------|------|------|-------|
| 1HGF.PDB | O, B_LYS_139   | N, B_GLU_131   | H, B_GLU_131    | 2.94 | 2.04 | 19.21 |
| 1HGF.PDB | O, B_CYS_137   | N, B_MET_133   | H, B_MET_133    | 2.88 | 1.93 | 11.45 |
| 1HGF.PDB | O, A_LEU_13    | N, B_PHE_138   | H, B_PHE_138    | 2.73 | 1.88 | 23.58 |
| 1HGF.PDB | O, B_GLU_131   | N, B_LYS_139   | H, B_LYS_139    | 2.85 | 1.91 | 11.21 |
| 1HGF.PDB | O, A_ALA_11    | N, B_ILE_140   | H, B_ILE_140    | 2.80 | 1.87 | 14.66 |
| 1HGF.PDB | O, B_ASN_129   | N, B_TYR_141   | H, B_TYR_141    | 2.87 | 1.93 | 12.99 |
| 1HGF.PDB | OD2, B_ASP_145 | N, B_ALA_147   | H, B_ALA_147    | 2.86 | 1.98 | 21.48 |
| 1HGF.PDB | O, B_ASP_145   | N, B_ILE_149   | H, B_ILE_149    | 2.90 | 1.94 | 9.97  |
| 1HGF.PDB | O, B_ASN_146   | N, B_GLU_150   | H, B_GLU_150    | 2.94 | 1.99 | 11.66 |
| 1HGF.PDB | O, B_ALA_147   | N, B_SER_151   | H, B_SER_151    | 2.85 | 2.06 | 29.61 |
| 1HGF.PDB | O, B_CYS_148   | OG, B_SER_151  | HG, B_SER_151   | 2.68 | 1.81 | 19.96 |
| 1HGF.PDB | O, B_GLU_150   | N, B_ASN_154   | H, B_ASN_154    | 2.87 | 1.89 | 5.04  |
| 1HGF.PDB | O, B_SER_151   | N, B_THR_156   | H, B_THR_156    | 2.77 | 1.91 | 23.09 |
| 1HGF.PDB | OD1, B_ASN_154 | OG1, B_THR_156 | HG1, B_THR_156  | 2.68 | 1.80 | 19.09 |
| 1HGF.PDB | OD1, B_ASP_158 | N, B_ASP_160   | H, B_ASP_160    | 2.97 | 2.10 | 23.68 |
| 1HGF.PDB | O, B_HIS_159   | N, B_TYR_162   | H, B_TYR_162    | 2.85 | 2.05 | 29.20 |
| 1HGF.PDB | O, F_ARG_170   | NH1, B_ARG_163 | HH12, B_ARG_163 | 2.79 | 1.78 | 1.27  |
| 1HGF.PDB | OE1, F_GLU_131 | NH2, B_ARG_163 | HH21, B_ARG_163 | 2.74 | 1.86 | 24.20 |
| 1HGF.PDB | O, B_TYR_162   | N, B_ALA_166   | H, B_ALA_166    | 2.86 | 1.89 | 4.35  |
| 1HGF.PDB | O, B_ARG_163   | N, B_LEU_167   | H, B_LEU_167    | 2.79 | 1.83 | 5.57  |
| 1HGF.PDB | O, B_GLU_165   | ND2, B_ASN_169 | HD21, B_ASN_169 | 3.00 | 2.06 | 13.38 |
| 1HGF.PDB | O, B_ALA_166   | N, B_ARG_170   | H, B_ARG_170    | 2.82 | 1.94 | 21.74 |
| 1HGF.PDB | O, B_GLU_128   | NE, B_ARG_170  | HE, B_ARG_170   | 2.78 | 1.88 | 20.28 |
| 1HGF.PDB | OE2, B_GLU_131 | NH1, B_ARG_170 | HH11, B_ARG_170 | 2.84 | 1.84 | 5.96  |
| 1HGF.PDB | O, B_LEU_167   | N, B_PHE_171   | H, B_PHE_171    | 2.90 | 1.97 | 15.47 |
| 1HGF.PDB | O, D_ILE_140   | N, C_ALA_11    | H, C_ALA_11     | 2.89 | 2.00 | 20.42 |
| 1HGF.PDB | O, D_GLN_27    | N, C_THR_12    | H, C_THR_12     | 2.90 | 1.96 | 12.68 |
| 1HGF.PDB | O, D_PHE_138   | N, C_LEU_13    | H, C_LEU_13     | 2.97 | 1.99 | 7.01  |
| 1HGF.PDB | O, D_ARG_25    | N, C_CYS_14    | H, C_CYS_14     | 2.79 | 1.86 | 15.57 |
| 1HGF.PDB | O, D_GLY_136   | N, C_LEU_15    | H, C_LEU_15     | 2.95 | 1.97 | 3.72  |
| 1HGF.PDB | O, D_GLY_23    | N, C_GLY_16    | H, C_GLY_16     | 2.95 | 2.05 | 18.06 |
| 1HGF.PDB | O, D_TRP_21    | N, C_HIS_18    | H, C_HIS_18     | 2.91 | 2.01 | 18.40 |
| 1HGF.PDB | OD1, C_ASN_322 | N, C_VAL_20    | H, C_VAL_20     | 2.80 | 1.83 | 2.80  |
| 1HGF.PDB | O, C_VAL_36    | N, C_THR_24    | H, C_THR_24     | 2.88 | 1.97 | 16.83 |
| 1HGF.PDB | O, C_ILE_34    | N, C_VAL_26    | H, C_VAL_26     | 2.85 | 1.90 | 10.38 |
| 1HGF.PDB | OE2, D_GLU_97  | NZ, C_LYS_27   | HZ1, C_LYS_27   | 2.81 | 1.85 | 19.93 |
| 1HGF.PDB | O, C_ASP_31    | N, C_THR_28    | H, C_THR_28     | 2.69 | 1.91 | 29.80 |
| 1HGF.PDB | O, C_VAL_26    | N, C_ILE_34    | H, C_ILE_34     | 2.94 | 1.99 | 12.34 |
| 1HGF.PDB | O, C_THR_24    | N, C_VAL_36    | H, C_VAL_36     | 2.81 | 1.85 | 7.51  |
| 1HGF.PDB | O, C_MET_320   | N, C_THR_37    | H, C_THR_37     | 2.93 | 1.95 | 5.43  |
| 1HGF.PDB | O, C_LEU_316   | N, C_THR_40    | H, C_THR_40     | 2.80 | 1.89 | 17.62 |
| 1HGF.PDB | O, C_LEU_314   | N, C_LEU_42    | H, C_LEU_42     | 2.77 | 1.92 | 23.28 |
| 1HGF.PDB | O, C_PHE_294   | N, C_GLN_44    | H, C_GLN_44     | 2.95 | 1.98 | 8.35  |
| 1HGF.PDB | O, C_SER_46    | NE2, C_GLN_44  | HE21, C_GLN_44  | 2.83 | 1.96 | 22.13 |
| 1HGF.PDB | O, C_ASN_285   | OG, C_SER_47   | HG, C_SER_47    | 2.88 | 1.94 | 10.85 |
| 1HGF.PDB | OD2, C_ASP_275 | NZ, C_LYS_50   | HZ2, C_LYS_50   | 2.88 | 1.87 | 13.71 |
| 1HGF.PDB | O, C_PRO_273   | N, C_ILE_51    | H, C_ILE_51     | 2.76 | 1.80 | 7.14  |
| 1HGF.PDB | O, C_ASP_275   | N, C_ASN_53    | H, C_ASN_53     | 2.87 | 1.97 | 19.35 |
| 1HGF.PDB | OD2, C_ASP_85  | N, C_ARG_57    | H, C_ARG_57     | 2.92 | 1.96 | 10.20 |
| 1HGF.PDB | O, C_THR_83    | NE, C_ARG_57   | HE, C_ARG_57    | 2.76 | 1.82 | 12.66 |
| 1HGF.PDB | O, C_LEU_86    | N, C_LEU_59    | H, C_LEU_59     | 2.88 | 1.92 | 8.76  |
| 1HGF.PDB | O, C_VAL_88    | N, C_GLY_61    | H, C_GLY_61     | 2.99 | 2.18 | 28.94 |
| 1HGF.PDB | OD1, C_ASP_60  | N, C_ILE_62    | H, C_ILE_62     | 2.90 | 1.96 | 13.08 |
| 1HGF.PDB | O, C_GLY_61    | N, C_CYS_64    | H, C_CYS_64     | 2.89 | 1.95 | 14.15 |
| 1HGF.PDB | O, C_THR_65    | N, C_ALA_69    | H, C_ALA_69     | 2.99 | 2.03 | 9.48  |
| 1HGF.PDB | O, C_LEU_66    | N, C_LEU_70    | H, C_LEU_70     | 2.84 | 1.91 | 15.42 |
| 1HGF.PDB | O, C_ILE_67    | N, C_LEU_71    | H, C_LEU_71     | 2.90 | 1.93 | 5.47  |
| 1HGF.PDB | O, C_ASP_68    | N, C_GLY_72    | H, C_GLY_72     | 2.81 | 1.92 | 21.42 |

|          |                |                |                 |      |      |       |
|----------|----------------|----------------|-----------------|------|------|-------|
| 1HGF.PDB | OD1, C_ASP_73  | N, C_HIS_75    | H, C_HIS_75     | 2.97 | 2.06 | 19.07 |
| 1HGF.PDB | OD1, C_ASP_73  | ND1, C_HIS_75  | HD1, C_HIS_75   | 2.84 | 1.90 | 12.73 |
| 1HGF.PDB | O, C_ASP_63    | NE2, C_HIS_75  | HE2, C_HIS_75   | 2.86 | 1.91 | 13.30 |
| 1HGF.PDB | O, C_ASP_73    | N, C_CYS_76    | H, C_CYS_76     | 2.82 | 1.90 | 14.90 |
| 1HGF.PDB | O, C_PRO_74    | N, C_ASP_77    | H, C_ASP_77     | 2.92 | 1.97 | 11.55 |
| 1HGF.PDB | O, C_CYS_76    | N, C_PHE_79    | H, C_PHE_79     | 2.95 | 1.98 | 6.66  |
| 1HGF.PDB | OE1, C_GLU_82  | N, C_THR_83    | H, C_THR_83     | 2.95 | 2.02 | 15.89 |
| 1HGF.PDB | O, C_ARG_57    | N, C_ASP_85    | H, C_ASP_85     | 2.80 | 1.92 | 20.17 |
| 1HGF.PDB | O, C_MET_268   | N, C_GLU_89    | H, C_GLU_89     | 2.83 | 1.88 | 10.14 |
| 1HGF.PDB | OD1, C_ASP_60  | NE, C_ARG_90   | HE, C_ARG_90    | 2.76 | 1.85 | 16.46 |
| 1HGF.PDB | O, C_SER_270   | NH1, C_ARG_90  | HH11, C_ARG_90  | 2.67 | 1.81 | 25.78 |
| 1HGF.PDB | O, C_ALA_272   | NH1, C_ARG_90  | HH12, C_ARG_90  | 2.65 | 1.72 | 16.33 |
| 1HGF.PDB | OD2, C_ASP_60  | NH2, C_ARG_90  | HH21, C_ARG_90  | 2.84 | 1.85 | 9.99  |
| 1HGF.PDB | OD1, C_ASP_271 | N, C_SER_91    | H, C_SER_91     | 2.94 | 1.98 | 10.16 |
| 1HGF.PDB | OD1, C_ASP_271 | OG, C_SER_91   | HG, C_SER_91    | 2.91 | 2.11 | 29.01 |
| 1HGF.PDB | OD2, C_ASP_271 | OG, C_SER_91   | HG, C_SER_91    | 2.86 | 1.95 | 16.65 |
| 1HGF.PDB | OD2, C_ASP_73  | N, C_ASN_96    | H, C_ASN_96     | 2.88 | 1.95 | 14.97 |
| 1HGF.PDB | SG, C_CYS_97   | N, C_TYR_98    | H, C_TYR_98     | 2.99 | 2.15 | 25.59 |
| 1HGF.PDB | OD1, C_ASP_68  | OH, C_TYR_100  | HH, C_TYR_100   | 2.97 | 2.03 | 12.15 |
| 1HGF.PDB | O, C_ILE_230   | N, C_ASP_101   | H, C_ASP_101    | 2.99 | 2.16 | 26.80 |
| 1HGF.PDB | OD2, C_ASP_104 | OG, C_SER_107  | HG, C_SER_107   | 2.91 | 1.98 | 14.76 |
| 1HGF.PDB | O, C_TYR_105   | N, C_ARG_109   | H, C_ARG_109    | 2.87 | 1.90 | 5.89  |
| 1HGF.PDB | OE2, D_GLU_67  | NH2, C_ARG_109 | HH21, C_ARG_109 | 2.91 | 1.92 | 11.49 |
| 1HGF.PDB | OD2, B_ASP_79  | OG, C_SER_110  | HG, C_SER_110   | 2.69 | 1.85 | 25.37 |
| 1HGF.PDB | O, C_SER_107   | N, C_LEU_111   | H, C_LEU_111    | 2.95 | 2.00 | 12.48 |
| 1HGF.PDB | O, C_ARG_109   | N, C_ALA_113   | H, C_ALA_113    | 2.94 | 2.02 | 17.14 |
| 1HGF.PDB | O, C_SER_110   | N, C_SER_114   | H, C_SER_114    | 2.95 | 2.04 | 18.89 |
| 1HGF.PDB | O, C_VAL_112   | N, C_GLY_116   | H, C_GLY_116    | 3.00 | 2.03 | 6.34  |
| 1HGF.PDB | OE2, C_GLU_119 | OG1, C_THR_117 | HG1, C_THR_117  | 2.97 | 2.00 | 2.16  |
| 1HGF.PDB | O, C_GLU_82    | N, C_LEU_118   | H, C_LEU_118    | 2.97 | 2.00 | 8.06  |
| 1HGF.PDB | OD1, C_ASN_81  | N, C_PHE_120   | H, C_PHE_120    | 3.00 | 2.07 | 15.52 |
| 1HGF.PDB | O, C_TYR_257   | N, C_ILE_121   | H, C_ILE_121    | 2.83 | 1.85 | 1.84  |
| 1HGF.PDB | O, C_ARG_255   | N, C_GLU_123   | H, C_GLU_123    | 2.86 | 1.90 | 9.31  |
| 1HGF.PDB | O, C_THR_155   | N, C_THR_131   | H, C_THR_131    | 2.75 | 1.81 | 11.67 |
| 1HGF.PDB | ND2, C_ASN_152 | NE2, C_GLN_132 | HE21, C_GLN_132 | 2.94 | 2.00 | 12.42 |
| 1HGF.PDB | OD1, C_ASN_152 | N, C_ASN_133   | H, C_ASN_133    | 2.91 | 1.95 | 9.50  |
| 1HGF.PDB | O, C_TRP_153   | N, C_GLY_134   | H, C_GLY_134    | 2.99 | 2.07 | 16.29 |
| 1HGF.PDB | O, C_GLY_146   | N, C_SER_136   | H, C_SER_136    | 2.71 | 1.85 | 23.34 |
| 1HGF.PDB | O, C_GLY_144   | N, C_ARG_141   | H, C_ARG_141    | 2.89 | 2.08 | 28.20 |
| 1HGF.PDB | OD2, C_ASP_77  | NE, C_ARG_141  | HE, C_ARG_141   | 2.91 | 2.05 | 25.56 |
| 1HGF.PDB | O, C_PHE_147   | NH1, C_ARG_141 | HH12, C_ARG_141 | 2.59 | 1.66 | 16.99 |
| 1HGF.PDB | OD1, C_ASP_77  | NH2, C_ARG_141 | HH21, C_ARG_141 | 2.84 | 1.98 | 26.48 |
| 1HGF.PDB | OD2, C_ASP_77  | NH2, C_ARG_141 | HH21, C_ARG_141 | 2.79 | 1.86 | 20.63 |
| 1HGF.PDB | O, C_SER_136   | N, C_GLY_146   | H, C_GLY_146    | 2.99 | 2.14 | 25.31 |
| 1HGF.PDB | O, C_GLY_72    | N, C_SER_149   | H, C_SER_149    | 2.87 | 1.95 | 17.40 |
| 1HGF.PDB | O, C_ALA_253   | N, C_ASN_152   | H, C_ASN_152    | 2.81 | 1.90 | 18.05 |
| 1HGF.PDB | OH, C_TYR_195  | NE1, C_TRP_153 | HE1, C_TRP_153  | 2.82 | 1.92 | 18.47 |
| 1HGF.PDB | O, C_LEU_194   | N, C_LYS_156   | H, C_LYS_156    | 2.86 | 2.00 | 23.97 |
| 1HGF.PDB | O, C_THR_160   | N, C_SER_157   | H, C_SER_157    | 2.96 | 2.07 | 20.42 |
| 1HGF.PDB | O, C_SER_247   | N, C_LEU_164   | H, C_LEU_164    | 2.70 | 1.88 | 26.53 |
| 1HGF.PDB | O, C_ILE_245   | N, C_VAL_166   | H, C_VAL_166    | 2.89 | 1.93 | 11.49 |
| 1HGF.PDB | O, C_LEU_243   | OG1, C_THR_167 | HG1, C_THR_167  | 2.95 | 2.01 | 11.60 |
| 1HGF.PDB | O, C_ASP_241   | N, C_ASN_170   | H, C_ASN_170    | 2.84 | 1.87 | 6.38  |
| 1HGF.PDB | O, C_PHE_174   | ND2, C_ASN_170 | HD22, C_ASN_170 | 2.74 | 1.80 | 12.05 |
| 1HGF.PDB | O, C_VAL_237   | N, C_LYS_176   | H, C_LYS_176    | 2.93 | 1.99 | 14.60 |
| 1HGF.PDB | OE2, C_GLU_123 | NZ, C_LYS_176  | HZ1, C_LYS_176  | 2.72 | 1.80 | 22.47 |
| 1HGF.PDB | O, C_THR_235   | N, C_TYR_178   | H, C_TYR_178    | 2.78 | 1.81 | 4.50  |
| 1HGF.PDB | OG1, C_THR_235 | NE1, C_TRP_180 | HE1, C_TRP_180  | 2.86 | 1.88 | 3.91  |

|          |                |                |                 |      |      |       |
|----------|----------------|----------------|-----------------|------|------|-------|
| 1HGF.PDB | O, C_ASN_250   | N, C_HIS_183   | H, C_HIS_183    | 2.79 | 1.92 | 22.35 |
| 1HGF.PDB | OH, C_TYR_98   | NE2, C_HIS_183 | HE2, C_HIS_183  | 2.89 | 1.99 | 18.89 |
| 1HGF.PDB | O, C_ARG_229   | N, C_HIS_184   | H, C_HIS_184    | 2.87 | 1.90 | 8.03  |
| 1HGF.PDB | OG, C_SER_231  | NE2, C_HIS_184 | HE2, C_HIS_184  | 2.67 | 1.86 | 27.83 |
| 1HGF.PDB | OD1, C_ASN_250 | NE2, C_GLN_191 | HE22, C_GLN_191 | 2.91 | 1.94 | 7.66  |
| 1HGF.PDB | O, C_ASN_188   | N, C_THR_192   | H, C_THR_192    | 2.94 | 2.00 | 14.19 |
| 1HGF.PDB | O, C_GLN_189   | OG1, C_THR_192 | HG1, C_THR_192  | 2.86 | 2.05 | 27.70 |
| 1HGF.PDB | O, C_GLN_189   | N, C_SER_193   | H, C_SER_193    | 2.81 | 1.91 | 19.71 |
| 1HGF.PDB | O, C_GLU_190   | N, C_LEU_194   | H, C_LEU_194    | 2.96 | 2.00 | 9.41  |
| 1HGF.PDB | O, C_GLN_191   | N, C_TYR_195   | H, C_TYR_195    | 2.79 | 1.84 | 10.04 |
| 1HGF.PDB | O, C_ASN_248   | NE2, C_GLN_197 | HE21, C_GLN_197 | 2.92 | 2.05 | 22.87 |
| 1HGF.PDB | O, C_TYR_161   | NE2, C_GLN_197 | HE22, C_GLN_197 | 2.98 | 2.03 | 10.03 |
| 1HGF.PDB | OG1, C_THR_212 | OG1, C_THR_203 | HG1, C_THR_203  | 2.82 | 1.90 | 14.76 |
| 1HGF.PDB | O, C_GLN_211   | N, C_VAL_204   | H, C_VAL_204    | 2.93 | 2.00 | 14.76 |
| 1HGF.PDB | O, C_SER_209   | N, C_THR_206   | H, C_THR_206    | 2.97 | 2.04 | 14.71 |
| 1HGF.PDB | OD1, C_ASP_241 | N, C_ARG_207   | H, C_ARG_207    | 2.91 | 1.95 | 9.01  |
| 1HGF.PDB | O, C_VAL_204   | N, C_GLN_211   | H, C_GLN_211    | 2.84 | 1.94 | 18.99 |
| 1HGF.PDB | O, C_VAL_202   | N, C_ILE_213   | H, C_ILE_213    | 2.85 | 1.95 | 18.52 |
| 1HGF.PDB | ND1, C_HIS_184 | N, C_ASN_216   | H, C_ASN_216    | 2.71 | 1.89 | 26.19 |
| 1HGF.PDB | O, C_ASN_216   | NH1, C_ARG_220 | HH12, C_ARG_220 | 2.97 | 2.15 | 29.93 |
| 1HGF.PDB | OE1, E_GLN_210 | NH2, C_ARG_220 | HH21, C_ARG_220 | 2.56 | 1.72 | 26.72 |
| 1HGF.PDB | O, C_ASN_216   | NH2, C_ARG_220 | HH22, C_ARG_220 | 2.74 | 1.84 | 20.57 |
| 1HGF.PDB | O, C_LEU_226   | N, C_VAL_223   | H, C_VAL_223    | 2.83 | 1.89 | 12.06 |
| 1HGF.PDB | O, C_CYS_97    | NE, C_ARG_224  | HE, C_ARG_224   | 2.75 | 1.89 | 23.47 |
| 1HGF.PDB | O, C_CYS_97    | NH2, C_ARG_224 | HH21, C_ARG_224 | 2.93 | 2.09 | 27.24 |
| 1HGF.PDB | O, C_VAL_223   | N, C_LEU_226   | H, C_LEU_226    | 2.93 | 1.99 | 12.10 |
| 1HGF.PDB | O, C_SER_228   | NH1, C_ARG_229 | HH11, C_ARG_229 | 2.74 | 1.82 | 20.52 |
| 1HGF.PDB | O, C_PRO_221   | NH2, C_ARG_229 | HH22, C_ARG_229 | 2.64 | 1.70 | 16.37 |
| 1HGF.PDB | O, C_PRO_99    | N, C_ILE_230   | H, C_ILE_230    | 2.97 | 2.09 | 21.38 |
| 1HGF.PDB | OD1, C_ASP_101 | OG, C_SER_231  | HG, C_SER_231   | 2.86 | 1.89 | 4.34  |
| 1HGF.PDB | O, C_ASP_101   | N, C_ILE_232   | H, C_ILE_232    | 2.92 | 1.98 | 14.28 |
| 1HGF.PDB | O, C_TRP_180   | N, C_TYR_233   | H, C_TYR_233    | 2.92 | 1.97 | 12.47 |
| 1HGF.PDB | O, C_TYR_178   | N, C_THR_235   | H, C_THR_235    | 2.83 | 1.96 | 22.49 |
| 1HGF.PDB | O, C_LYS_176   | N, C_VAL_237   | H, C_VAL_237    | 2.78 | 1.86 | 15.74 |
| 1HGF.PDB | OE1, B_GLU_72  | NZ, C_LYS_238  | HZ2, C_LYS_238  | 2.75 | 1.78 | 18.48 |
| 1HGF.PDB | O, B_SER_71    | NZ, C_LYS_238  | HZ3, C_LYS_238  | 2.61 | 1.62 | 12.67 |
| 1HGF.PDB | O, C_ASN_170   | N, C_GLY_240   | H, C_GLY_240    | 2.91 | 2.11 | 29.28 |
| 1HGF.PDB | O, C_LYS_238   | N, C_ASP_241   | H, C_ASP_241    | 2.98 | 2.06 | 15.29 |
| 1HGF.PDB | O, C_MET_168   | N, C_LEU_243   | H, C_LEU_243    | 2.96 | 1.99 | 7.32  |
| 1HGF.PDB | O, C_SER_205   | N, C_VAL_244   | H, C_VAL_244    | 2.94 | 1.99 | 13.35 |
| 1HGF.PDB | O, C_VAL_166   | N, C_ILE_245   | H, C_ILE_245    | 2.97 | 2.05 | 16.82 |
| 1HGF.PDB | O, C_THR_203   | N, C_ASN_246   | H, C_ASN_246    | 2.92 | 1.97 | 10.97 |
| 1HGF.PDB | OD1, C_ASN_165 | ND2, C_ASN_246 | HD21, C_ASN_246 | 2.93 | 2.04 | 21.38 |
| 1HGF.PDB | O, C_LEU_164   | N, C_SER_247   | H, C_SER_247    | 2.93 | 2.02 | 18.68 |
| 1HGF.PDB | OG, C_SER_247  | N, C_GLY_249   | H, C_GLY_249    | 2.99 | 2.02 | 6.95  |
| 1HGF.PDB | O, C_HIS_183   | ND2, C_ASN_250 | HD21, C_ASN_250 | 2.81 | 1.85 | 7.16  |
| 1HGF.PDB | OE1, C_GLN_191 | ND2, C_ASN_250 | HD22, C_ASN_250 | 2.84 | 1.89 | 10.62 |
| 1HGF.PDB | O, C_ASN_152   | N, C_ALA_253   | H, C_ALA_253    | 2.97 | 2.05 | 17.09 |
| 1HGF.PDB | OD1, C_ASN_133 | NH2, C_ARG_255 | HH22, C_ARG_255 | 2.47 | 1.67 | 28.90 |
| 1HGF.PDB | O, C_ILE_121   | N, C_TYR_257   | H, C_TYR_257    | 2.98 | 2.13 | 24.91 |
| 1HGF.PDB | O, C_LEU_177   | N, C_PHE_258   | H, C_PHE_258    | 3.00 | 2.02 | 5.00  |
| 1HGF.PDB | OE1, C_GLU_119 | NH2, C_ARG_261 | HH22, C_ARG_261 | 2.72 | 1.88 | 28.14 |
| 1HGF.PDB | O, C_PHE_87    | N, C_MET_268   | H, C_MET_268    | 2.91 | 1.98 | 16.01 |
| 1HGF.PDB | OG, C_SER_270  | N, C_ALA_272   | H, C_ALA_272    | 2.93 | 2.02 | 16.95 |
| 1HGF.PDB | O, C_ILE_51    | N, C_ASP_275   | H, C_ASP_275    | 2.92 | 2.05 | 22.55 |
| 1HGF.PDB | OD1, C_ASP_275 | N, C_THR_276   | H, C_THR_276    | 2.75 | 1.92 | 25.58 |
| 1HGF.PDB | O, C_ASN_54    | N, C_SER_279   | H, C_SER_279    | 2.77 | 1.83 | 12.02 |
| 1HGF.PDB | O, C_TYR_302   | N, C_ILE_282   | H, C_ILE_282    | 2.94 | 1.96 | 4.09  |

|          |                |                |                 |      |      |       |
|----------|----------------|----------------|-----------------|------|------|-------|
| 1HGF.PDB | O, C_THR_283   | N, C_GLY_286   | H, C_GLY_286    | 2.80 | 1.85 | 9.72  |
| 1HGF.PDB | O, C_LYS_50    | N, C_SER_287   | H, C_SER_287    | 2.77 | 1.82 | 8.64  |
| 1HGF.PDB | O, C_ALA_304   | ND2, C_ASN_290 | HD21, C_ASN_290 | 2.81 | 1.90 | 17.53 |
| 1HGF.PDB | OE1, C_GLN_44  | NZ, C_LYS_292  | HZ1, C_LYS_292  | 2.89 | 1.84 | 2.00  |
| 1HGF.PDB | OD1, C_ASP_291 | NZ, C_LYS_292  | HZ2, C_LYS_292  | 2.88 | 1.85 | 8.89  |
| 1HGF.PDB | O, C_LYS_307   | N, C_GLN_295   | H, C_GLN_295    | 2.79 | 1.95 | 25.63 |
| 1HGF.PDB | O, C_ASN_298   | NE2, C_GLN_295 | HE22, C_GLN_295 | 2.74 | 1.82 | 15.41 |
| 1HGF.PDB | O, C_GLN_44    | N, C_ASN_296   | H, C_ASN_296    | 2.86 | 1.91 | 11.96 |
| 1HGF.PDB | OD1, C_ASN_298 | N, C_ILE_300   | H, C_ILE_300    | 2.86 | 2.02 | 25.28 |
| 1HGF.PDB | O, C_ILE_282   | N, C_TYR_302   | H, C_TYR_302    | 2.79 | 1.95 | 25.47 |
| 1HGF.PDB | O, D_LYS_62    | N, C_GLY_303   | H, C_GLY_303    | 2.91 | 1.95 | 8.09  |
| 1HGF.PDB | O, C_GLN_295   | N, C_VAL_309   | H, C_VAL_309    | 2.90 | 2.02 | 21.20 |
| 1HGF.PDB | OG, D_SER_93   | N, C_LYS_310   | H, C_LYS_310    | 2.89 | 1.98 | 17.69 |
| 1HGF.PDB | OE1, C_GLU_41  | OG1, C_THR_313 | HG1, C_THR_313  | 2.66 | 1.87 | 29.10 |
| 1HGF.PDB | OE2, C_GLU_41  | N, C_LEU_314   | H, C_LEU_314    | 2.78 | 1.84 | 12.61 |
| 1HGF.PDB | OG1, C_THR_313 | NZ, C_LYS_315  | HZ2, C_LYS_315  | 2.92 | 1.98 | 21.54 |
| 1HGF.PDB | O, C_THR_40    | N, C_LEU_316   | H, C_LEU_316    | 2.78 | 1.85 | 14.66 |
| 1HGF.PDB | OD1, D_ASN_104 | N, C_ALA_317   | H, C_ALA_317    | 2.78 | 1.83 | 11.25 |
| 1HGF.PDB | O, C_ASN_38    | N, C_THR_318   | H, C_THR_318    | 2.88 | 1.93 | 11.29 |
| 1HGF.PDB | OE2, C_GLU_35  | ND2, C_ASN_322 | HD21, C_ASN_322 | 2.77 | 1.93 | 25.57 |
| 1HGF.PDB | O, C_VAL_20    | ND2, C_ASN_322 | HD22, C_ASN_322 | 2.97 | 2.05 | 15.45 |
| 1HGF.PDB | OXT, C_THR_328 | NE2, C_GLN_327 | HE21, C_GLN_327 | 2.93 | 2.09 | 26.28 |
| 1HGF.PDB | OD2, D_ASP_112 | N, D_GLY_1     | H1, D_GLY_1     | 2.88 | 1.90 | 17.37 |
| 1HGF.PDB | OD1, D_ASP_109 | N, D_LEU_2     | H, D_LEU_2      | 2.92 | 2.02 | 20.08 |
| 1HGF.PDB | O, D_GLY_4     | N, D_PHE_9     | H, D_PHE_9      | 2.80 | 1.88 | 16.46 |
| 1HGF.PDB | O, D_GLY_13    | ND2, D_ASN_12  | HD21, D_ASN_12  | 2.79 | 1.92 | 22.00 |
| 1HGF.PDB | O, C_VAL_323   | N, D_GLY_13    | H, D_GLY_13     | 2.72 | 1.85 | 21.39 |
| 1HGF.PDB | O, C_HIS_17    | N, D_TRP_14    | H, D_TRP_14     | 2.87 | 1.96 | 16.75 |
| 1HGF.PDB | OG1, D_THR_41  | N, D_TRP_21    | H, D_TRP_21     | 2.91 | 2.00 | 17.91 |
| 1HGF.PDB | O, D_ALA_35    | N, D_PHE_24    | H, D_PHE_24     | 2.85 | 1.87 | 3.45  |
| 1HGF.PDB | O, C_CYS_14    | N, D_ARG_25    | H, D_ARG_25     | 2.90 | 1.93 | 7.59  |
| 1HGF.PDB | OE1, D_GLN_34  | NE, D_ARG_25   | HE, D_ARG_25    | 2.69 | 1.78 | 17.17 |
| 1HGF.PDB | O, D_GLY_33    | N, D_HIS_26    | H, D_HIS_26     | 2.88 | 2.02 | 23.62 |
| 1HGF.PDB | O, C_THR_12    | N, D_GLN_27    | H, D_GLN_27     | 2.86 | 1.94 | 17.23 |
| 1HGF.PDB | O, D_GLY_31    | N, D_ASN_28    | H, D_ASN_28     | 2.96 | 1.98 | 6.01  |
| 1HGF.PDB | OD1, D_ASN_146 | ND2, D_ASN_28  | HD22, D_ASN_28  | 2.89 | 1.97 | 17.31 |
| 1HGF.PDB | O, D_ASN_28    | N, D_GLY_31    | H, D_GLY_31     | 2.88 | 1.99 | 19.79 |
| 1HGF.PDB | O, D_HIS_26    | N, D_GLY_33    | H, D_GLY_33     | 2.97 | 2.16 | 28.69 |
| 1HGF.PDB | O, D_PHE_24    | N, D_ALA_35    | H, D_ALA_35     | 2.78 | 1.98 | 29.25 |
| 1HGF.PDB | O, D_TYR_22    | N, D_ASP_37    | H, D_ASP_37     | 2.72 | 1.76 | 4.61  |
| 1HGF.PDB | OD2, D_ASP_37  | N, D_SER_40    | H, D_SER_40     | 2.90 | 1.92 | 1.16  |
| 1HGF.PDB | OD2, D_ASP_37  | OG, D_SER_40   | HG, D_SER_40    | 2.85 | 1.95 | 18.29 |
| 1HGF.PDB | O, D_ASP_37    | OG1, D_THR_41  | HG1, D_THR_41   | 2.68 | 1.81 | 21.66 |
| 1HGF.PDB | O, D_LEU_38    | N, D_GLN_42    | H, D_GLN_42     | 2.88 | 1.96 | 16.52 |
| 1HGF.PDB | OD1, D_ASP_46  | NE2, D_GLN_42  | HE21, D_GLN_42  | 2.85 | 1.97 | 22.40 |
| 1HGF.PDB | O, D_LYS_39    | N, D_ALA_43    | H, D_ALA_43     | 2.92 | 1.96 | 7.79  |
| 1HGF.PDB | O, D_SER_40    | N, D_ALA_44    | H, D_ALA_44     | 2.95 | 1.98 | 3.84  |
| 1HGF.PDB | O, D_GLN_42    | N, D_ASP_46    | H, D_ASP_46     | 2.80 | 1.83 | 2.08  |
| 1HGF.PDB | O, D_ALA_43    | NE2, D_GLN_47  | HE21, D_GLN_47  | 2.88 | 1.93 | 11.54 |
| 1HGF.PDB | O, D_ILE_45    | N, D_ASN_49    | H, D_ASN_49     | 2.91 | 1.99 | 16.85 |
| 1HGF.PDB | O, D_ASP_46    | N, D_GLY_50    | H, D_GLY_50     | 2.87 | 1.93 | 13.85 |
| 1HGF.PDB | O, D_GLN_47    | N, D_LYS_51    | H, D_LYS_51     | 2.95 | 1.98 | 9.03  |
| 1HGF.PDB | OE1, D_GLU_103 | NZ, D_LYS_51   | HZ1, D_LYS_51   | 2.74 | 1.71 | 5.53  |
| 1HGF.PDB | ND1, D_HIS_106 | NZ, D_LYS_51   | HZ3, D_LYS_51   | 2.69 | 1.73 | 17.89 |
| 1HGF.PDB | O, D_ILE_48    | N, D_LEU_52    | H, D_LEU_52     | 2.91 | 2.04 | 22.13 |
| 1HGF.PDB | O, D_ASN_49    | N, D_ASN_53    | H, D_ASN_53     | 2.86 | 1.92 | 13.32 |
| 1HGF.PDB | O, A_THR_28    | NE, D_ARG_54   | HE, D_ARG_54    | 2.88 | 1.90 | 8.46  |
| 1HGF.PDB | OE2, B_GLU_97  | NH2, D_ARG_54  | HH22, D_ARG_54  | 2.84 | 1.86 | 12.74 |

|          |                |                |                 |      |      |       |
|----------|----------------|----------------|-----------------|------|------|-------|
| 1HGF.PDB | OD2, B_ASP_86  | NZ, D_LYS_62   | HZ2, D_LYS_62   | 2.69 | 1.69 | 13.49 |
| 1HGF.PDB | OD2, B_ASP_90  | NZ, D_LYS_62   | HZ3, D_LYS_62   | 2.68 | 1.77 | 22.81 |
| 1HGF.PDB | OG, C_SER_266  | ND1, D_HIS_64  | HD1, D_HIS_64   | 2.64 | 1.83 | 27.58 |
| 1HGF.PDB | OG, C_SER_110  | NE2, D_HIS_64  | HE2, D_HIS_64   | 2.90 | 1.92 | 7.33  |
| 1HGF.PDB | O, D_PHE_63    | NE2, D_GLN_65  | HE21, D_GLN_65  | 2.97 | 2.00 | 7.06  |
| 1HGF.PDB | OE2, D_GLU_85  | NZ, D_LYS_68   | HZ1, D_LYS_68   | 2.73 | 1.78 | 19.48 |
| 1HGF.PDB | O, C_LYS_299   | NZ, D_LYS_68   | HZ2, D_LYS_68   | 2.93 | 1.89 | 4.98  |
| 1HGF.PDB | OG, E_SER_107  | N, D_ARG_76    | H, D_ARG_76     | 2.91 | 1.94 | 7.76  |
| 1HGF.PDB | OE2, F_GLU_81  | NE, D_ARG_76   | HE, D_ARG_76    | 2.82 | 1.85 | 5.34  |
| 1HGF.PDB | OE1, F_GLU_74  | NH1, D_ARG_76  | HH12, D_ARG_76  | 2.79 | 1.78 | 3.81  |
| 1HGF.PDB | OE1, F_GLU_81  | NH2, D_ARG_76  | HH21, D_ARG_76  | 2.64 | 1.68 | 12.43 |
| 1HGF.PDB | OE2, F_GLU_74  | NH2, D_ARG_76  | HH22, D_ARG_76  | 2.70 | 1.71 | 7.38  |
| 1HGF.PDB | O, D_GLY_75    | N, D_ASP_79    | H, D_ASP_79     | 2.98 | 2.03 | 12.51 |
| 1HGF.PDB | O, D_ILE_77    | N, D_GLU_81    | H, D_GLU_81     | 2.96 | 2.00 | 8.84  |
| 1HGF.PDB | O, D_GLN_78    | N, D_LYS_82    | H, D_LYS_82     | 2.96 | 2.03 | 15.61 |
| 1HGF.PDB | O, D_ASP_79    | N, D_TYR_83    | H, D_TYR_83     | 2.99 | 2.06 | 16.44 |
| 1HGF.PDB | OE1, F_GLU_85  | OH, D_TYR_83   | HH, D_TYR_83    | 2.58 | 1.80 | 29.87 |
| 1HGF.PDB | O, D_LEU_80    | N, D_VAL_84    | H, D_VAL_84     | 2.89 | 1.96 | 15.53 |
| 1HGF.PDB | O, D_LYS_82    | N, D_ASP_86    | H, D_ASP_86     | 2.88 | 1.93 | 10.60 |
| 1HGF.PDB | O, D_TYR_83    | N, D_THR_87    | H, D_THR_87     | 2.98 | 2.05 | 15.57 |
| 1HGF.PDB | O, D_VAL_84    | N, D_LYS_88    | H, D_LYS_88     | 2.92 | 2.03 | 20.52 |
| 1HGF.PDB | OH, B_TYR_83   | NZ, D_LYS_88   | HZ1, D_LYS_88   | 2.68 | 1.69 | 13.85 |
| 1HGF.PDB | O, D_GLU_85    | N, D_ILE_89    | H, D_ILE_89     | 2.92 | 1.94 | 5.05  |
| 1HGF.PDB | O, D_LYS_88    | N, D_TRP_92    | H, D_TRP_92     | 2.90 | 1.93 | 7.06  |
| 1HGF.PDB | O, D_ILE_89    | N, D_SER_93    | H, D_SER_93     | 2.93 | 2.03 | 18.97 |
| 1HGF.PDB | O, D_ILE_89    | OG, D_SER_93   | HG, D_SER_93    | 2.79 | 1.87 | 14.25 |
| 1HGF.PDB | O, D_ASP_90    | N, D_TYR_94    | H, D_TYR_94     | 2.98 | 2.09 | 20.66 |
| 1HGF.PDB | O, D_TRP_92    | N, D_ALA_96    | H, D_ALA_96     | 2.99 | 2.03 | 9.70  |
| 1HGF.PDB | O, D_TYR_94    | N, D_LEU_98    | H, D_LEU_98     | 2.90 | 1.96 | 13.51 |
| 1HGF.PDB | O, D_ASN_95    | N, D_LEU_99    | H, D_LEU_99     | 2.97 | 2.01 | 11.18 |
| 1HGF.PDB | O, D_LEU_98    | N, D_LEU_102   | H, D_LEU_102    | 2.98 | 2.02 | 11.36 |
| 1HGF.PDB | O, D_LEU_99    | N, D_GLU_103   | H, D_GLU_103    | 2.92 | 1.96 | 10.07 |
| 1HGF.PDB | O, D_VAL_100   | N, D_ASN_104   | H, D_ASN_104    | 2.84 | 1.89 | 11.66 |
| 1HGF.PDB | O, C_LYS_27    | ND2, D_ASN_104 | HD21, D_ASN_104 | 2.89 | 1.96 | 15.72 |
| 1HGF.PDB | O, D_LEU_102   | N, D_HIS_106   | H, D_HIS_106    | 2.92 | 1.97 | 11.28 |
| 1HGF.PDB | O, D_GLU_103   | N, D_THR_107   | H, D_THR_107    | 2.85 | 1.92 | 13.38 |
| 1HGF.PDB | O, D_ASN_104   | N, D_ILE_108   | H, D_ILE_108    | 2.97 | 2.03 | 13.33 |
| 1HGF.PDB | O, D_HIS_106   | N, D_LEU_110   | H, D_LEU_110    | 2.77 | 1.83 | 11.73 |
| 1HGF.PDB | O, D_ASP_109   | N, D_SER_113   | H, D_SER_113    | 2.82 | 1.90 | 15.73 |
| 1HGF.PDB | O, D_SER_113   | N, D_LYS_117   | H, D_LYS_117    | 2.74 | 1.83 | 18.58 |
| 1HGF.PDB | O, D_MET_115   | N, D_PHE_119   | H, D_PHE_119    | 2.96 | 2.01 | 11.81 |
| 1HGF.PDB | O, D_ASN_116   | N, D_GLU_120   | H, D_GLU_120    | 2.90 | 1.92 | 4.93  |
| 1HGF.PDB | O, D_PHE_119   | N, D_ARG_123   | H, D_ARG_123    | 3.00 | 2.03 | 9.49  |
| 1HGF.PDB | OE2, D_GLU_120 | NH1, D_ARG_123 | HH11, D_ARG_123 | 2.79 | 1.92 | 25.71 |
| 1HGF.PDB | O, D_GLU_120   | N, D_ARG_124   | H, D_ARG_124    | 2.96 | 2.04 | 16.78 |
| 1HGF.PDB | OE1, B_GLU_132 | NE, D_ARG_124  | HE, D_ARG_124   | 2.79 | 1.88 | 16.40 |
| 1HGF.PDB | OH, D_TYR_157  | ND2, D_ASN_129 | HD21, D_ASN_129 | 2.81 | 1.84 | 5.39  |
| 1HGF.PDB | O, D_HIS_159   | ND2, D_ASN_129 | HD22, D_ASN_129 | 2.94 | 2.01 | 14.46 |
| 1HGF.PDB | O, D_LYS_139   | N, D_GLU_131   | H, D_GLU_131    | 2.98 | 2.08 | 19.93 |
| 1HGF.PDB | O, D_CYS_137   | N, D_MET_133   | H, D_MET_133    | 2.92 | 1.96 | 10.87 |
| 1HGF.PDB | OD1, D_ASN_135 | N, D_CYS_137   | H, D_CYS_137    | 2.83 | 1.95 | 20.45 |
| 1HGF.PDB | O, C_LEU_13    | N, D_PHE_138   | H, D_PHE_138    | 2.75 | 1.91 | 24.76 |
| 1HGF.PDB | O, D_GLU_131   | N, D_LYS_139   | H, D_LYS_139    | 2.83 | 1.88 | 9.91  |
| 1HGF.PDB | O, C_ALA_11    | N, D_ILE_140   | H, D_ILE_140    | 2.82 | 1.90 | 15.68 |
| 1HGF.PDB | O, D_ASN_129   | N, D_TYR_141   | H, D_TYR_141    | 2.87 | 1.92 | 10.75 |
| 1HGF.PDB | OG, D_SER_29   | NZ, D_LYS_143  | HZ1, D_LYS_143  | 2.83 | 1.89 | 20.16 |
| 1HGF.PDB | OE2, D_GLU_30  | N, D_ASN_146   | H, D_ASN_146    | 2.80 | 1.88 | 14.92 |
| 1HGF.PDB | OD2, D_ASP_145 | N, D_ALA_147   | H, D_ALA_147    | 2.87 | 2.00 | 23.24 |

|          |                |                |                 |      |      |       |
|----------|----------------|----------------|-----------------|------|------|-------|
| 1HGF.PDB | O, D_ASP_145   | N, D_ILE_149   | H, D_ILE_149    | 2.93 | 1.97 | 10.46 |
| 1HGF.PDB | O, D_ASN_146   | N, D_GLU_150   | H, D_GLU_150    | 2.94 | 2.01 | 15.42 |
| 1HGF.PDB | O, D_ALA_147   | N, D_SER_151   | H, D_SER_151    | 2.89 | 2.02 | 22.93 |
| 1HGF.PDB | O, D_CYS_148   | OG, D_SER_151  | HG, D_SER_151   | 2.73 | 1.81 | 12.37 |
| 1HGF.PDB | O, D_GLU_150   | N, D_ASN_154   | H, D_ASN_154    | 2.87 | 1.89 | 5.22  |
| 1HGF.PDB | O, D_SER_151   | N, D_THR_156   | H, D_THR_156    | 2.79 | 1.97 | 26.84 |
| 1HGF.PDB | OD1, D_ASN_154 | OG1, D_THR_156 | HG1, D_THR_156  | 2.72 | 1.80 | 12.72 |
| 1HGF.PDB | NE2, D_HIS_142 | OH, D_TYR_157  | HH, D_TYR_157   | 2.72 | 1.85 | 19.75 |
| 1HGF.PDB | OD1, D_ASP_158 | N, D_ASP_160   | H, D_ASP_160    | 3.00 | 2.13 | 23.50 |
| 1HGF.PDB | O, D_HIS_159   | N, D_TYR_162   | H, D_TYR_162    | 2.89 | 2.08 | 29.06 |
| 1HGF.PDB | O, D_ASP_160   | N, D_ARG_163   | H, D_ARG_163    | 3.00 | 2.09 | 17.80 |
| 1HGF.PDB | O, B_ARG_170   | NH1, D_ARG_163 | HH12, D_ARG_163 | 2.84 | 1.83 | 3.71  |
| 1HGF.PDB | OE1, B_GLU_131 | NH2, D_ARG_163 | HH21, D_ARG_163 | 2.70 | 1.83 | 24.43 |
| 1HGF.PDB | O, D_TYR_162   | N, D_ALA_166   | H, D_ALA_166    | 2.86 | 1.89 | 3.57  |
| 1HGF.PDB | O, D_ARG_163   | N, D_LEU_167   | H, D_LEU_167    | 2.79 | 1.83 | 4.62  |
| 1HGF.PDB | O, D_GLU_165   | ND2, D_ASN_169 | HD21, D_ASN_169 | 2.97 | 2.03 | 11.99 |
| 1HGF.PDB | O, D_ALA_166   | N, D_ARG_170   | H, D_ARG_170    | 2.84 | 1.97 | 21.75 |
| 1HGF.PDB | O, D_GLU_128   | NE, D_ARG_170  | HE, D_ARG_170   | 2.76 | 1.87 | 20.27 |
| 1HGF.PDB | OE2, D_GLU_131 | NH1, D_ARG_170 | HH11, D_ARG_170 | 2.84 | 1.84 | 5.29  |
| 1HGF.PDB | O, D_LEU_167   | N, D_PHE_171   | H, D_PHE_171    | 2.90 | 1.96 | 12.84 |
| 1HGF.PDB | O, F_ILE_140   | N, E_ALA_11    | H, E_ALA_11     | 2.95 | 2.06 | 20.63 |
| 1HGF.PDB | O, F_GLN_27    | N, E_THR_12    | H, E_THR_12     | 2.87 | 1.93 | 12.24 |
| 1HGF.PDB | O, F_PHE_138   | N, E_LEU_13    | H, E_LEU_13     | 2.96 | 1.99 | 8.43  |
| 1HGF.PDB | O, F_ARG_25    | N, E_CYS_14    | H, E_CYS_14     | 2.65 | 1.83 | 26.13 |
| 1HGF.PDB | O, F_GLY_136   | N, E_LEU_15    | H, E_LEU_15     | 2.91 | 1.93 | 3.45  |
| 1HGF.PDB | O, F_GLY_23    | N, E_GLY_16    | H, E_GLY_16     | 2.94 | 2.06 | 22.45 |
| 1HGF.PDB | O, E_HIS_18    | ND1, E_HIS_17  | HD1, E_HIS_17   | 2.99 | 2.14 | 25.53 |
| 1HGF.PDB | O, F_TRP_21    | N, E_HIS_18    | H, E_HIS_18     | 2.91 | 2.00 | 17.81 |
| 1HGF.PDB | OD1, E_ASN_322 | N, E_VAL_20    | H, E_VAL_20     | 2.80 | 1.82 | 2.55  |
| 1HGF.PDB | O, E_VAL_36    | N, E_THR_24    | H, E_THR_24     | 2.87 | 1.98 | 19.96 |
| 1HGF.PDB | O, E_ILE_34    | N, E_VAL_26    | H, E_VAL_26     | 2.89 | 1.93 | 10.60 |
| 1HGF.PDB | OE2, F_GLU_97  | NZ, E_LYS_27   | HZ1, E_LYS_27   | 2.75 | 1.83 | 22.30 |
| 1HGF.PDB | O, E_VAL_26    | N, E_ILE_34    | H, E_ILE_34     | 2.94 | 1.98 | 10.18 |
| 1HGF.PDB | O, E_THR_24    | N, E_VAL_36    | H, E_VAL_36     | 2.81 | 1.85 | 7.38  |
| 1HGF.PDB | O, E_MET_320   | N, E_THR_37    | H, E_THR_37     | 2.91 | 1.94 | 5.79  |
| 1HGF.PDB | O, E_LEU_316   | N, E_THR_40    | H, E_THR_40     | 2.78 | 1.86 | 16.07 |
| 1HGF.PDB | O, E_LEU_314   | N, E_LEU_42    | H, E_LEU_42     | 2.78 | 1.90 | 19.77 |
| 1HGF.PDB | O, E_PHE_294   | N, E_GLN_44    | H, E_GLN_44     | 2.96 | 1.98 | 3.65  |
| 1HGF.PDB | O, E_SER_46    | NE2, E_GLN_44  | HE21, E_GLN_44  | 2.83 | 1.95 | 21.77 |
| 1HGF.PDB | O, E_ASN_285   | OG, E_SER_47   | HG, E_SER_47    | 2.86 | 1.95 | 16.70 |
| 1HGF.PDB | OD2, E_ASP_275 | NZ, E_LYS_50   | HZ2, E_LYS_50   | 2.90 | 1.90 | 14.56 |
| 1HGF.PDB | O, E_PRO_273   | N, E_ILE_51    | H, E_ILE_51     | 2.76 | 1.81 | 9.83  |
| 1HGF.PDB | O, E_ASP_275   | N, E_ASN_53    | H, E_ASN_53     | 2.89 | 1.97 | 17.56 |
| 1HGF.PDB | OD2, E_ASP_85  | N, E_ARG_57    | H, E_ARG_57     | 2.93 | 1.98 | 11.47 |
| 1HGF.PDB | O, E_THR_83    | NE, E_ARG_57   | HE, E_ARG_57    | 2.82 | 1.86 | 10.06 |
| 1HGF.PDB | O, E_LEU_86    | N, E_LEU_59    | H, E_LEU_59     | 2.87 | 1.91 | 9.41  |
| 1HGF.PDB | OD1, E_ASP_60  | N, E_ILE_62    | H, E_ILE_62     | 2.91 | 1.96 | 11.31 |
| 1HGF.PDB | O, E_GLY_61    | N, E_CYS_64    | H, E_CYS_64     | 2.88 | 1.96 | 16.75 |
| 1HGF.PDB | O, E_THR_65    | N, E_ALA_69    | H, E_ALA_69     | 3.00 | 2.07 | 14.88 |
| 1HGF.PDB | O, E_LEU_66    | N, E_LEU_70    | H, E_LEU_70     | 2.82 | 1.89 | 15.13 |
| 1HGF.PDB | O, E_ILE_67    | N, E_LEU_71    | H, E_LEU_71     | 2.91 | 1.95 | 6.47  |
| 1HGF.PDB | O, E_ASP_68    | N, E_GLY_72    | H, E_GLY_72     | 2.87 | 1.99 | 21.64 |
| 1HGF.PDB | OD1, E_ASP_73  | ND1, E_HIS_75  | HD1, E_HIS_75   | 2.85 | 1.91 | 12.17 |
| 1HGF.PDB | O, E_ASP_63    | NE2, E_HIS_75  | HE2, E_HIS_75   | 2.89 | 1.94 | 12.08 |
| 1HGF.PDB | O, E_ASP_73    | N, E_CYS_76    | H, E_CYS_76     | 2.81 | 1.88 | 15.29 |
| 1HGF.PDB | O, E_PRO_74    | N, E_ASP_77    | H, E_ASP_77     | 2.90 | 1.94 | 7.27  |
| 1HGF.PDB | O, E_CYS_76    | N, E_PHE_79    | H, E_PHE_79     | 2.95 | 1.97 | 5.01  |
| 1HGF.PDB | O, E_ARG_57    | N, E_ASP_85    | H, E_ASP_85     | 2.81 | 1.92 | 19.34 |



|          |                |                |                 |      |      |       |
|----------|----------------|----------------|-----------------|------|------|-------|
| 1HGF.PDB | O, E_MET_268   | N, E_GLU_89    | H, E_GLU_89     | 2.79 | 1.84 | 8.93  |
| 1HGF.PDB | OD1, E_ASP_60  | NE, E_ARG_90   | HE, E_ARG_90    | 2.80 | 1.85 | 10.51 |
| 1HGF.PDB | O, E_SER_270   | NH1, E_ARG_90  | HH11, E_ARG_90  | 2.63 | 1.77 | 25.28 |
| 1HGF.PDB | O, E_ALA_272   | NH1, E_ARG_90  | HH12, E_ARG_90  | 2.66 | 1.73 | 17.47 |
| 1HGF.PDB | OD2, E_ASP_60  | NH2, E_ARG_90  | HH21, E_ARG_90  | 2.88 | 1.89 | 10.22 |
| 1HGF.PDB | OD1, E_ASP_271 | N, E_SER_91    | H, E_SER_91     | 2.94 | 1.98 | 11.41 |
| 1HGF.PDB | OD2, E_ASP_73  | N, E_ASN_96    | H, E_ASN_96     | 2.93 | 1.99 | 16.05 |
| 1HGF.PDB | OD2, E_ASP_104 | OG, E_SER_107  | HG, E_SER_107   | 2.88 | 1.94 | 12.45 |
| 1HGF.PDB | O, E_TYR_105   | N, E_ARG_109   | H, E_ARG_109    | 2.91 | 1.93 | 1.03  |
| 1HGF.PDB | OE2, E_GLU_67  | NH2, E_ARG_109 | HH21, E_ARG_109 | 2.88 | 1.88 | 11.28 |
| 1HGF.PDB | OD2, E_ASP_79  | OG, E_SER_110  | HG, E_SER_110   | 2.78 | 1.90 | 21.69 |
| 1HGF.PDB | O, E_SER_107   | N, E_LEU_111   | H, E_LEU_111    | 2.99 | 2.02 | 8.11  |
| 1HGF.PDB | O, E_ARG_109   | N, E_ALA_113   | H, E_ALA_113    | 2.91 | 2.02 | 19.90 |
| 1HGF.PDB | O, E_SER_110   | N, E_SER_114   | H, E_SER_114    | 2.94 | 2.02 | 16.55 |
| 1HGF.PDB | OE2, E_GLU_119 | OG1, E_THR_117 | HG1, E_THR_117  | 2.96 | 1.99 | 6.08  |
| 1HGF.PDB | O, E_TYR_257   | N, E_ILE_121   | H, E_ILE_121    | 2.83 | 1.86 | 2.31  |
| 1HGF.PDB | O, E_ARG_255   | N, E_GLU_123   | H, E_GLU_123    | 2.87 | 1.92 | 11.49 |
| 1HGF.PDB | O, E_GLU_123   | N, E_PHE_125   | H, E_PHE_125    | 2.96 | 2.16 | 29.94 |
| 1HGF.PDB | O, E_THR_155   | N, E_THR_131   | H, E_THR_131    | 2.77 | 1.83 | 12.18 |
| 1HGF.PDB | ND2, E_ASN_152 | NE2, E_GLN_132 | HE21, E_GLN_132 | 2.95 | 2.01 | 11.55 |
| 1HGF.PDB | OD1, E_ASN_152 | N, E_ASN_133   | H, E_ASN_133    | 2.94 | 1.99 | 11.33 |
| 1HGF.PDB | O, E_TRP_153   | N, E_GLY_134   | H, E_GLY_134    | 2.99 | 2.07 | 16.55 |
| 1HGF.PDB | O, E_GLY_146   | N, E_SER_136   | H, E_SER_136    | 2.71 | 1.82 | 20.23 |
| 1HGF.PDB | OD2, E_ASP_77  | NE, E_ARG_141  | HE, E_ARG_141   | 2.92 | 2.06 | 25.46 |
| 1HGF.PDB | O, E_PHE_147   | NH1, E_ARG_141 | HH12, E_ARG_141 | 2.60 | 1.67 | 17.74 |
| 1HGF.PDB | OD1, E_ASP_77  | NH2, E_ARG_141 | HH21, E_ARG_141 | 2.83 | 1.96 | 25.41 |
| 1HGF.PDB | OD2, E_ASP_77  | NH2, E_ARG_141 | HH21, E_ARG_141 | 2.77 | 1.86 | 21.24 |
| 1HGF.PDB | O, E_SER_136   | N, E_GLY_146   | H, E_GLY_146    | 2.98 | 2.12 | 24.01 |
| 1HGF.PDB | O, E_GLY_72    | N, E_SER_149   | H, E_SER_149    | 2.88 | 1.98 | 19.21 |
| 1HGF.PDB | O, E_ALA_253   | N, E_ASN_152   | H, E_ASN_152    | 2.87 | 1.95 | 17.97 |
| 1HGF.PDB | OH, E_TYR_195  | NE1, E_TRP_153 | HE1, E_TRP_153  | 2.83 | 1.89 | 12.15 |
| 1HGF.PDB | O, E_LEU_194   | N, E_LYS_156   | H, E_LYS_156    | 2.87 | 1.98 | 19.42 |
| 1HGF.PDB | O, E_THR_160   | N, E_SER_157   | H, E_SER_157    | 2.99 | 2.11 | 21.85 |
| 1HGF.PDB | O, E_SER_247   | N, E_LEU_164   | H, E_LEU_164    | 2.72 | 1.84 | 21.47 |
| 1HGF.PDB | O, E_ILE_245   | N, E_VAL_166   | H, E_VAL_166    | 2.90 | 1.96 | 13.03 |
| 1HGF.PDB | O, E_ASP_241   | N, E_ASN_170   | H, E_ASN_170    | 2.87 | 1.90 | 4.85  |
| 1HGF.PDB | O, E_PHE_174   | ND2, E_ASN_170 | HD22, E_ASN_170 | 2.77 | 1.82 | 9.34  |
| 1HGF.PDB | O, E_VAL_237   | N, E_LYS_176   | H, E_LYS_176    | 2.92 | 1.99 | 15.75 |
| 1HGF.PDB | OE2, E_GLU_123 | NZ, E_LYS_176  | HZ1, E_LYS_176  | 2.76 | 1.80 | 18.44 |
| 1HGF.PDB | O, E_THR_235   | N, E_TYR_178   | H, E_TYR_178    | 2.83 | 1.85 | 2.97  |
| 1HGF.PDB | OE1, E_GLU_123 | OH, E_TYR_178  | HH, E_TYR_178   | 2.88 | 1.93 | 11.71 |
| 1HGF.PDB | OG1, E_THR_235 | NE1, E_TRP_180 | HE1, E_TRP_180  | 2.85 | 1.87 | 2.94  |
| 1HGF.PDB | O, E_ASN_250   | N, E_HIS_183   | H, E_HIS_183    | 2.80 | 1.96 | 25.59 |
| 1HGF.PDB | OH, E_TYR_98   | NE2, E_HIS_183 | HE2, E_HIS_183  | 2.91 | 1.99 | 15.99 |
| 1HGF.PDB | O, E_ARG_229   | N, E_HIS_184   | H, E_HIS_184    | 2.88 | 1.94 | 13.07 |
| 1HGF.PDB | OG, E_SER_231  | NE2, E_HIS_184 | HE2, E_HIS_184  | 2.70 | 1.89 | 28.56 |
| 1HGF.PDB | OD1, E_ASN_250 | NE2, E_GLN_191 | HE22, E_GLN_191 | 2.96 | 1.99 | 7.90  |
| 1HGF.PDB | O, E_ASN_188   | N, E_THR_192   | H, E_THR_192    | 2.94 | 2.01 | 14.37 |
| 1HGF.PDB | O, E_GLN_189   | N, E_SER_193   | H, E_SER_193    | 2.83 | 1.90 | 13.82 |
| 1HGF.PDB | O, E_GLU_190   | N, E_LEU_194   | H, E_LEU_194    | 2.94 | 1.99 | 12.89 |
| 1HGF.PDB | O, E_GLN_191   | N, E_TYR_195   | H, E_TYR_195    | 2.77 | 1.83 | 10.66 |
| 1HGF.PDB | O, E_ASN_248   | NE2, E_GLN_197 | HE21, E_GLN_197 | 2.89 | 2.01 | 21.02 |
| 1HGF.PDB | O, E_TYR_161   | NE2, E_GLN_197 | HE22, E_GLN_197 | 2.98 | 2.02 | 7.72  |
| 1HGF.PDB | O, E_ASN_246   | N, E_THR_203   | H, E_THR_203    | 2.97 | 2.01 | 9.92  |
| 1HGF.PDB | OG1, E_THR_212 | OG1, E_THR_203 | HG1, E_THR_203  | 2.89 | 1.95 | 9.70  |
| 1HGF.PDB | O, E_GLN_211   | N, E_VAL_204   | H, E_VAL_204    | 2.94 | 2.02 | 15.91 |
| 1HGF.PDB | OD1, E_ASP_241 | N, E_ARG_207   | H, E_ARG_207    | 2.90 | 1.94 | 9.22  |
| 1HGF.PDB | O, E_VAL_204   | N, E_GLN_211   | H, E_GLN_211    | 2.86 | 1.97 | 20.41 |

|          |                |                |                 |      |      |       |
|----------|----------------|----------------|-----------------|------|------|-------|
| 1HGF.PDB | O, E_VAL_202   | N, E_ILE_213   | H, E_ILE_213    | 2.88 | 1.97 | 17.74 |
| 1HGF.PDB | ND1, E_HIS_184 | N, E_ASN_216   | H, E_ASN_216    | 2.74 | 1.89 | 23.44 |
| 1HGF.PDB | O, E_ASN_216   | NH1, E_ARG_220 | HH12, E_ARG_220 | 2.97 | 2.15 | 29.37 |
| 1HGF.PDB | OE1, A_GLN_210 | NH2, E_ARG_220 | HH21, E_ARG_220 | 2.65 | 1.79 | 25.97 |
| 1HGF.PDB | O, E_ASN_216   | NH2, E_ARG_220 | HH22, E_ARG_220 | 2.76 | 1.86 | 21.47 |
| 1HGF.PDB | O, E_LEU_226   | N, E_VAL_223   | H, E_VAL_223    | 2.85 | 1.89 | 8.19  |
| 1HGF.PDB | O, E_CYS_97    | NE, E_ARG_224  | HE, E_ARG_224   | 2.78 | 1.93 | 24.07 |
| 1HGF.PDB | O, E_CYS_97    | NH2, E_ARG_224 | HH21, E_ARG_224 | 2.92 | 2.07 | 26.92 |
| 1HGF.PDB | O, E_VAL_223   | N, E_LEU_226   | H, E_LEU_226    | 2.92 | 1.97 | 10.75 |
| 1HGF.PDB | O, E_SER_228   | NH1, E_ARG_229 | HH11, E_ARG_229 | 2.73 | 1.81 | 20.22 |
| 1HGF.PDB | O, E_PRO_221   | NH2, E_ARG_229 | HH22, E_ARG_229 | 2.63 | 1.68 | 15.58 |
| 1HGF.PDB | O, E_PRO_99    | N, E_ILE_230   | H, E_ILE_230    | 2.96 | 2.12 | 25.49 |
| 1HGF.PDB | OD1, E_ASP_101 | OG, E_SER_231  | HG, E_SER_231   | 2.82 | 1.90 | 15.36 |
| 1HGF.PDB | O, E_ASP_101   | N, E_ILE_232   | H, E_ILE_232    | 2.91 | 1.98 | 14.67 |
| 1HGF.PDB | O, E_TRP_180   | N, E_TYR_233   | H, E_TYR_233    | 2.95 | 1.99 | 9.60  |
| 1HGF.PDB | O, E_TYR_178   | N, E_THR_235   | H, E_THR_235    | 2.86 | 1.98 | 21.39 |
| 1HGF.PDB | O, E_LYS_176   | N, E_VAL_237   | H, E_VAL_237    | 2.79 | 1.87 | 16.02 |
| 1HGF.PDB | OE1, D_GLU_72  | NZ, E_LYS_238  | HZ2, E_LYS_238  | 2.83 | 1.84 | 16.42 |
| 1HGF.PDB | O, D_SER_71    | NZ, E_LYS_238  | HZ3, E_LYS_238  | 2.74 | 1.75 | 13.85 |
| 1HGF.PDB | O, E_ASN_170   | N, E_GLY_240   | H, E_GLY_240    | 2.92 | 2.12 | 29.34 |
| 1HGF.PDB | O, E_LYS_238   | N, E_ASP_241   | H, E_ASP_241    | 2.98 | 2.04 | 13.06 |
| 1HGF.PDB | OD1, E_ASP_241 | N, E_VAL_242   | H, E_VAL_242    | 2.72 | 1.93 | 29.38 |
| 1HGF.PDB | O, E_MET_168   | N, E_LEU_243   | H, E_LEU_243    | 2.94 | 1.97 | 6.95  |
| 1HGF.PDB | O, E_SER_205   | N, E_VAL_244   | H, E_VAL_244    | 2.94 | 1.98 | 11.07 |
| 1HGF.PDB | O, E_VAL_166   | N, E_ILE_245   | H, E_ILE_245    | 2.96 | 2.03 | 15.13 |
| 1HGF.PDB | O, E_THR_203   | N, E_ASN_246   | H, E_ASN_246    | 2.93 | 1.96 | 7.07  |
| 1HGF.PDB | OD1, E_ASN_165 | ND2, E_ASN_246 | HD21, E_ASN_246 | 2.93 | 2.02 | 19.67 |
| 1HGF.PDB | O, E_LEU_164   | N, E_SER_247   | H, E_SER_247    | 2.91 | 2.00 | 17.82 |
| 1HGF.PDB | O, E_ARG_201   | OG, E_SER_247  | HG, E_SER_247   | 2.77 | 1.98 | 29.79 |
| 1HGF.PDB | OG, E_SER_247  | N, E_GLY_249   | H, E_GLY_249    | 3.00 | 2.01 | 1.54  |
| 1HGF.PDB | O, E_HIS_183   | ND2, E_ASN_250 | HD21, E_ASN_250 | 2.78 | 1.81 | 7.40  |
| 1HGF.PDB | OE1, E_GLN_191 | ND2, E_ASN_250 | HD22, E_ASN_250 | 2.87 | 1.91 | 8.14  |
| 1HGF.PDB | O, E_ASN_152   | N, E_ALA_253   | H, E_ALA_253    | 2.95 | 2.04 | 17.49 |
| 1HGF.PDB | OD1, E_ASN_133 | NH2, E_ARG_255 | HH22, E_ARG_255 | 2.47 | 1.67 | 29.09 |
| 1HGF.PDB | O, E_ILE_121   | N, E_TYR_257   | H, E_TYR_257    | 2.99 | 2.17 | 27.08 |
| 1HGF.PDB | O, E_LEU_177   | N, E_PHE_258   | H, E_PHE_258    | 2.97 | 1.99 | 6.56  |
| 1HGF.PDB | OE1, E_GLU_119 | NH2, E_ARG_261 | HH22, E_ARG_261 | 2.73 | 1.89 | 28.16 |
| 1HGF.PDB | O, E_PHE_87    | N, E_MET_268   | H, E_MET_268    | 2.88 | 1.97 | 18.30 |
| 1HGF.PDB | O, E_PRO_284   | OG, E_SER_270  | HG, E_SER_270   | 2.78 | 1.84 | 9.58  |
| 1HGF.PDB | OG, E_SER_270  | N, E_ALA_272   | H, E_ALA_272    | 2.96 | 2.02 | 14.55 |
| 1HGF.PDB | O, E_ILE_51    | N, E_ASP_275   | H, E_ASP_275    | 2.91 | 2.03 | 21.67 |
| 1HGF.PDB | OD1, E_ASP_275 | N, E_THR_276   | H, E_THR_276    | 2.76 | 1.89 | 22.50 |
| 1HGF.PDB | O, E_ASN_54    | N, E_SER_279   | H, E_SER_279    | 2.78 | 1.83 | 11.19 |
| 1HGF.PDB | O, E_TYR_302   | N, E_ILE_282   | H, E_ILE_282    | 2.94 | 1.96 | 6.32  |
| 1HGF.PDB | O, E_THR_283   | N, E_GLY_286   | H, E_GLY_286    | 2.80 | 1.84 | 8.27  |
| 1HGF.PDB | O, E_LYS_50    | N, E_SER_287   | H, E_SER_287    | 2.79 | 1.82 | 5.70  |
| 1HGF.PDB | O, E_ALA_304   | ND2, E_ASN_290 | HD21, E_ASN_290 | 2.83 | 1.91 | 16.09 |
| 1HGF.PDB | OE1, E_GLN_44  | NZ, E_LYS_292  | HZ1, E_LYS_292  | 2.90 | 1.86 | 1.40  |
| 1HGF.PDB | OD1, E_ASP_291 | NZ, E_LYS_292  | HZ2, E_LYS_292  | 2.87 | 1.84 | 9.03  |
| 1HGF.PDB | O, E_LYS_307   | N, E_GLN_295   | H, E_GLN_295    | 2.82 | 1.98 | 25.22 |
| 1HGF.PDB | O, E_ASN_298   | NE2, E_GLN_295 | HE22, E_GLN_295 | 2.75 | 1.83 | 15.52 |
| 1HGF.PDB | O, E_GLN_44    | N, E_ASN_296   | H, E_ASN_296    | 2.89 | 1.94 | 10.75 |
| 1HGF.PDB | OD1, E_ASN_298 | N, E_ILE_300   | H, E_ILE_300    | 2.86 | 1.98 | 21.35 |
| 1HGF.PDB | O, E_ILE_282   | N, E_TYR_302   | H, E_TYR_302    | 2.78 | 1.95 | 26.52 |
| 1HGF.PDB | O, F_LYS_62    | N, E_GLY_303   | H, E_GLY_303    | 2.90 | 1.93 | 6.18  |
| 1HGF.PDB | O, E_GLN_295   | N, E_VAL_309   | H, E_VAL_309    | 2.93 | 2.06 | 22.44 |
| 1HGF.PDB | OG, F_SER_93   | N, E_LYS_310   | H, E_LYS_310    | 2.86 | 1.93 | 14.59 |
| 1HGF.PDB | OE1, E_GLU_41  | OG1, E_THR_313 | HG1, E_THR_313  | 2.68 | 1.89 | 29.15 |

|          |                |                |                 |      |      |       |
|----------|----------------|----------------|-----------------|------|------|-------|
| 1HGF.PDB | OE2, E_GLU_41  | N, E_LEU_314   | H, E_LEU_314    | 2.77 | 1.85 | 15.04 |
| 1HGF.PDB | OG1, E_THR_313 | NZ, E_LYS_315  | HZ2, E_LYS_315  | 2.94 | 2.00 | 21.30 |
| 1HGF.PDB | O, E_THR_40    | N, E_LEU_316   | H, E_LEU_316    | 2.76 | 1.85 | 16.85 |
| 1HGF.PDB | OD1, F_ASN_104 | N, E_ALA_317   | H, E_ALA_317    | 2.72 | 1.78 | 10.77 |
| 1HGF.PDB | O, E_ASN_38    | N, E_THR_318   | H, E_THR_318    | 2.90 | 1.95 | 12.98 |
| 1HGF.PDB | OE2, E_GLU_35  | ND2, E_ASN_322 | HD21, E_ASN_322 | 2.77 | 1.93 | 26.11 |
| 1HGF.PDB | O, E_VAL_20    | ND2, E_ASN_322 | HD22, E_ASN_322 | 2.96 | 2.04 | 16.53 |
| 1HGF.PDB | O, E_GLN_327   | NZ, E_LYS_326  | HZ2, E_LYS_326  | 2.70 | 1.74 | 17.93 |
| 1HGF.PDB | O, E_LYS_326   | NE2, E_GLN_327 | HE21, E_GLN_327 | 2.79 | 1.87 | 16.74 |
| 1HGF.PDB | OD2, F_ASP_112 | N, F_GLY_1     | H1, F_GLY_1     | 2.89 | 1.91 | 17.14 |
| 1HGF.PDB | OD1, F_ASP_109 | N, F_LEU_2     | H, F_LEU_2      | 2.91 | 2.00 | 18.77 |
| 1HGF.PDB | OD2, F_ASP_112 | N, F_GLY_4     | H, F_GLY_4      | 2.97 | 2.08 | 20.30 |
| 1HGF.PDB | OD1, F_ASP_112 | N, F_ALA_5     | H, F_ALA_5      | 2.98 | 2.11 | 23.47 |
| 1HGF.PDB | O, F_GLY_4     | N, F_PHE_9     | H, F_PHE_9      | 2.81 | 1.86 | 10.76 |
| 1HGF.PDB | O, F_GLY_13    | ND2, F_ASN_12  | HD21, F_ASN_12  | 2.77 | 1.93 | 24.90 |
| 1HGF.PDB | O, E_VAL_323   | N, F_GLY_13    | H, F_GLY_13     | 2.75 | 1.85 | 19.07 |
| 1HGF.PDB | O, E_HIS_17    | N, F_TRP_14    | H, F_TRP_14     | 2.87 | 1.96 | 16.52 |
| 1HGF.PDB | OG1, F_THR_41  | N, F_TRP_21    | H, F_TRP_21     | 2.91 | 1.99 | 16.39 |
| 1HGF.PDB | O, F_ALA_35    | N, F_PHE_24    | H, F_PHE_24     | 2.84 | 1.87 | 3.09  |
| 1HGF.PDB | O, E_CYS_14    | N, F_ARG_25    | H, F_ARG_25     | 2.91 | 1.94 | 8.25  |
| 1HGF.PDB | OE1, F_GLN_34  | NE, F_ARG_25   | HE, F_ARG_25    | 2.89 | 2.02 | 23.18 |
| 1HGF.PDB | OE1, F_GLN_34  | NH2, F_ARG_25  | HH21, F_ARG_25  | 2.91 | 2.03 | 24.46 |
| 1HGF.PDB | O, E_THR_12    | N, F_GLN_27    | H, F_GLN_27     | 3.00 | 2.08 | 17.91 |
| 1HGF.PDB | O, F_GLY_31    | N, F_ASN_28    | H, F_ASN_28     | 2.88 | 1.94 | 13.45 |
| 1HGF.PDB | O, F_CYS_144   | ND2, F_ASN_28  | HD21, F_ASN_28  | 2.81 | 1.91 | 20.19 |
| 1HGF.PDB | OD1, F_ASN_146 | ND2, F_ASN_28  | HD22, F_ASN_28  | 2.88 | 2.02 | 23.75 |
| 1HGF.PDB | O, F_ASN_28    | N, F_GLY_31    | H, F_GLY_31     | 2.91 | 2.04 | 22.35 |
| 1HGF.PDB | O, F_PHE_24    | N, F_ALA_35    | H, F_ALA_35     | 2.75 | 1.95 | 28.87 |
| 1HGF.PDB | O, F_TYR_22    | N, F_ASP_37    | H, F_ASP_37     | 2.72 | 1.77 | 3.63  |
| 1HGF.PDB | OD2, F_ASP_37  | N, F_SER_40    | H, F_SER_40     | 2.90 | 1.92 | 3.34  |
| 1HGF.PDB | O, F_ASP_37    | OG1, F_THR_41  | HG1, F_THR_41   | 2.65 | 1.82 | 24.28 |
| 1HGF.PDB | O, F_LEU_38    | N, F_GLN_42    | H, F_GLN_42     | 2.83 | 1.96 | 21.43 |
| 1HGF.PDB | OD1, F_ASP_46  | NE2, F_GLN_42  | HE21, F_GLN_42  | 2.86 | 1.99 | 23.71 |
| 1HGF.PDB | O, F_LYS_39    | N, F_ALA_43    | H, F_ALA_43     | 2.91 | 1.95 | 8.37  |
| 1HGF.PDB | O, F_SER_40    | N, F_ALA_44    | H, F_ALA_44     | 2.92 | 1.95 | 0.99  |
| 1HGF.PDB | O, F_GLN_42    | N, F_ASP_46    | H, F_ASP_46     | 2.79 | 1.83 | 7.98  |
| 1HGF.PDB | O, F_ALA_43    | NE2, F_GLN_47  | HE21, F_GLN_47  | 2.92 | 1.97 | 13.01 |
| 1HGF.PDB | O, F_ILE_45    | N, F_ASN_49    | H, F_ASN_49     | 2.88 | 1.99 | 20.58 |
| 1HGF.PDB | O, F_ASP_46    | N, F_GLY_50    | H, F_GLY_50     | 2.83 | 1.92 | 17.00 |
| 1HGF.PDB | O, F_GLN_47    | N, F_LYS_51    | H, F_LYS_51     | 2.95 | 1.98 | 4.87  |
| 1HGF.PDB | OE1, F_GLU_103 | NZ, F_LYS_51   | HZ1, F_LYS_51   | 2.72 | 1.69 | 6.79  |
| 1HGF.PDB | ND1, F_HIS_106 | NZ, F_LYS_51   | HZ3, F_LYS_51   | 2.66 | 1.70 | 17.89 |
| 1HGF.PDB | O, F_ILE_48    | N, F_LEU_52    | H, F_LEU_52     | 2.92 | 2.02 | 18.86 |
| 1HGF.PDB | O, F_ASN_49    | N, F_ASN_53    | H, F_ASN_53     | 2.83 | 1.96 | 22.00 |
| 1HGF.PDB | OE2, D_GLU_97  | NH2, F_ARG_54  | HH22, F_ARG_54  | 2.79 | 1.81 | 11.74 |
| 1HGF.PDB | OD2, D_ASP_86  | NZ, F_LYS_62   | HZ2, F_LYS_62   | 2.67 | 1.68 | 13.64 |
| 1HGF.PDB | OD2, D_ASP_90  | NZ, F_LYS_62   | HZ3, F_LYS_62   | 2.75 | 1.81 | 20.23 |
| 1HGF.PDB | OG, E_SER_266  | ND1, F_HIS_64  | HD1, F_HIS_64   | 2.65 | 1.77 | 20.25 |
| 1HGF.PDB | OG, E_SER_110  | NE2, F_HIS_64  | HE2, F_HIS_64   | 2.89 | 1.92 | 9.46  |
| 1HGF.PDB | O, F_PHE_63    | NE2, F_GLN_65  | HE21, F_GLN_65  | 2.97 | 2.00 | 6.66  |
| 1HGF.PDB | OE2, F_GLU_85  | NZ, F_LYS_68   | HZ1, F_LYS_68   | 2.64 | 1.77 | 26.62 |
| 1HGF.PDB | O, E_LYS_299   | NZ, F_LYS_68   | HZ2, F_LYS_68   | 2.97 | 1.95 | 8.70  |
| 1HGF.PDB | OG, A_SER_107  | N, F_ARG_76    | H, F_ARG_76     | 2.83 | 1.87 | 9.12  |
| 1HGF.PDB | OE2, B_GLU_81  | NE, F_ARG_76   | HE, F_ARG_76    | 2.86 | 1.88 | 5.84  |
| 1HGF.PDB | OE1, B_GLU_74  | NH1, F_ARG_76  | HH12, F_ARG_76  | 2.78 | 1.77 | 1.59  |
| 1HGF.PDB | OE1, B_GLU_81  | NH2, F_ARG_76  | HH21, F_ARG_76  | 2.69 | 1.70 | 7.61  |
| 1HGF.PDB | OE2, B_GLU_74  | NH2, F_ARG_76  | HH22, F_ARG_76  | 2.71 | 1.73 | 8.88  |
| 1HGF.PDB | O, F_GLY_75    | N, F_ASP_79    | H, F_ASP_79     | 2.99 | 2.05 | 14.09 |

|          |                |                |                 |      |      |       |
|----------|----------------|----------------|-----------------|------|------|-------|
| 1HGF.PDB | O, F_ILE_77    | N, F_GLU_81    | H, F_GLU_81     | 2.97 | 2.01 | 7.31  |
| 1HGF.PDB | O, F_GLN_78    | N, F_LYS_82    | H, F_LYS_82     | 2.99 | 2.12 | 23.13 |
| 1HGF.PDB | O, F_ASP_79    | N, F_TYR_83    | H, F_TYR_83     | 2.99 | 2.06 | 15.58 |
| 1HGF.PDB | O, F_LEU_80    | N, F_VAL_84    | H, F_VAL_84     | 2.90 | 1.94 | 9.23  |
| 1HGF.PDB | O, F_LYS_82    | N, F_ASP_86    | H, F_ASP_86     | 2.91 | 2.00 | 17.05 |
| 1HGF.PDB | O, F_TYR_83    | N, F_THR_87    | H, F_THR_87     | 2.99 | 2.06 | 14.57 |
| 1HGF.PDB | O, F_VAL_84    | N, F_LYS_88    | H, F_LYS_88     | 2.93 | 1.98 | 10.82 |
| 1HGF.PDB | OH, D_TYR_83   | NZ, F_LYS_88   | HZ1, F_LYS_88   | 2.55 | 1.63 | 21.75 |
| 1HGF.PDB | O, F_GLU_85    | N, F_ILE_89    | H, F_ILE_89     | 2.95 | 2.00 | 10.35 |
| 1HGF.PDB | O, F_LYS_88    | N, F_TRP_92    | H, F_TRP_92     | 2.92 | 1.96 | 8.47  |
| 1HGF.PDB | O, F_ILE_89    | N, F_SER_93    | H, F_SER_93     | 2.89 | 2.01 | 22.68 |
| 1HGF.PDB | O, F_ASP_90    | N, F_TYR_94    | H, F_TYR_94     | 2.99 | 2.08 | 18.84 |
| 1HGF.PDB | O, F_TRP_92    | N, F_ALA_96    | H, F_ALA_96     | 3.00 | 2.04 | 10.19 |
| 1HGF.PDB | O, F_TYR_94    | N, F_LEU_98    | H, F_LEU_98     | 2.95 | 2.00 | 11.08 |
| 1HGF.PDB | O, F_ASN_95    | N, F_LEU_99    | H, F_LEU_99     | 2.97 | 2.00 | 8.54  |
| 1HGF.PDB | O, F_LEU_98    | N, F_LEU_102   | H, F_LEU_102    | 2.99 | 2.02 | 4.18  |
| 1HGF.PDB | O, F_LEU_99    | N, F_GLU_103   | H, F_GLU_103    | 2.91 | 1.96 | 12.29 |
| 1HGF.PDB | O, F_VAL_100   | N, F_ASN_104   | H, F_ASN_104    | 2.82 | 1.88 | 14.39 |
| 1HGF.PDB | O, E_LYS_27    | ND2, F_ASN_104 | HD21, F_ASN_104 | 2.91 | 1.99 | 15.12 |
| 1HGF.PDB | O, F_LEU_102   | N, F_HIS_106   | H, F_HIS_106    | 2.96 | 1.99 | 6.92  |
| 1HGF.PDB | O, F_GLU_103   | N, F_THR_107   | H, F_THR_107    | 2.86 | 1.92 | 13.75 |
| 1HGF.PDB | O, F_ASN_104   | N, F_ILE_108   | H, F_ILE_108    | 2.95 | 2.03 | 17.77 |
| 1HGF.PDB | O, F_HIS_106   | N, F_LEU_110   | H, F_LEU_110    | 2.80 | 1.84 | 8.75  |
| 1HGF.PDB | O, F_ASP_109   | N, F_SER_113   | H, F_SER_113    | 2.83 | 1.88 | 9.86  |
| 1HGF.PDB | O, D_LEU_2     | OG, F_SER_113  | HG, F_SER_113   | 2.73 | 1.92 | 27.40 |
| 1HGF.PDB | O, F_SER_113   | N, F_LYS_117   | H, F_LYS_117    | 2.77 | 1.85 | 14.47 |
| 1HGF.PDB | O, F_GLU_114   | N, F_LEU_118   | H, F_LEU_118    | 2.99 | 2.05 | 13.43 |
| 1HGF.PDB | O, F_MET_115   | N, F_PHE_119   | H, F_PHE_119    | 2.96 | 2.03 | 15.65 |
| 1HGF.PDB | O, F_ASN_116   | N, F_GLU_120   | H, F_GLU_120    | 2.89 | 1.91 | 2.90  |
| 1HGF.PDB | O, F_PHE_119   | N, F_ARG_123   | H, F_ARG_123    | 2.99 | 2.04 | 11.96 |
| 1HGF.PDB | OE2, F_GLU_120 | NH1, F_ARG_123 | HH11, F_ARG_123 | 2.79 | 1.92 | 25.30 |
| 1HGF.PDB | O, F_GLU_120   | N, F_ARG_124   | H, F_ARG_124    | 2.94 | 1.99 | 12.33 |
| 1HGF.PDB | OE1, D_GLU_132 | NE, F_ARG_124  | HE, F_ARG_124   | 2.90 | 1.96 | 15.73 |
| 1HGF.PDB | OH, F_TYR_157  | ND2, F_ASN_129 | HD21, F_ASN_129 | 2.83 | 1.89 | 13.44 |
| 1HGF.PDB | O, F_HIS_159   | ND2, F_ASN_129 | HD22, F_ASN_129 | 2.96 | 2.06 | 18.90 |
| 1HGF.PDB | O, F_LYS_139   | N, F_GLU_131   | H, F_GLU_131    | 2.97 | 2.06 | 18.31 |
| 1HGF.PDB | O, F_CYS_137   | N, F_MET_133   | H, F_MET_133    | 2.91 | 1.96 | 10.70 |
| 1HGF.PDB | O, E_LEU_13    | N, F_PHE_138   | H, F_PHE_138    | 2.75 | 1.92 | 26.04 |
| 1HGF.PDB | O, F_GLU_131   | N, F_LYS_139   | H, F_LYS_139    | 2.85 | 1.90 | 10.44 |
| 1HGF.PDB | O, E_ALA_11    | N, F_ILE_140   | H, F_ILE_140    | 2.82 | 1.90 | 16.36 |
| 1HGF.PDB | O, F_ASN_129   | N, F_TYR_141   | H, F_TYR_141    | 2.91 | 1.97 | 14.31 |
| 1HGF.PDB | OD2, F_ASP_145 | N, F_ALA_147   | H, F_ALA_147    | 2.85 | 1.95 | 18.91 |
| 1HGF.PDB | O, F_ASP_145   | N, F_ILE_149   | H, F_ILE_149    | 2.92 | 1.96 | 9.99  |
| 1HGF.PDB | O, F_ASN_146   | N, F_GLU_150   | H, F_GLU_150    | 2.92 | 2.01 | 16.83 |
| 1HGF.PDB | O, F_GLU_150   | N, F_ASN_154   | H, F_ASN_154    | 2.85 | 1.95 | 19.47 |
| 1HGF.PDB | O, F_SER_151   | N, F_THR_156   | H, F_THR_156    | 2.79 | 1.97 | 27.62 |
| 1HGF.PDB | O, F_HIS_159   | N, F_TYR_162   | H, F_TYR_162    | 2.90 | 2.05 | 24.52 |
| 1HGF.PDB | OE1, D_GLU_131 | NH2, F_ARG_163 | HH21, F_ARG_163 | 2.69 | 1.84 | 27.00 |
| 1HGF.PDB | O, F_TYR_162   | N, F_ALA_166   | H, F_ALA_166    | 2.88 | 1.92 | 7.02  |
| 1HGF.PDB | O, F_ARG_163   | N, F_LEU_167   | H, F_LEU_167    | 2.80 | 1.84 | 8.02  |
| 1HGF.PDB | O, F_GLU_165   | ND2, F_ASN_169 | HD21, F_ASN_169 | 3.00 | 2.05 | 10.68 |
| 1HGF.PDB | O, F_ALA_166   | N, F_ARG_170   | H, F_ARG_170    | 2.86 | 2.02 | 25.68 |
| 1HGF.PDB | O, F_GLU_128   | NE, F_ARG_170  | HE, F_ARG_170   | 2.79 | 1.90 | 20.12 |
| 1HGF.PDB | OE2, F_GLU_131 | NH1, F_ARG_170 | HH11, F_ARG_170 | 2.85 | 1.84 | 3.96  |
| 1HGF.PDB | O, F_LEU_167   | N, F_PHE_171   | H, F_PHE_171    | 2.90 | 1.96 | 11.83 |
| 1HGG.PDB | O, B_ILE_140   | N, A_ALA_11    | H, A_ALA_11     | 2.90 | 1.98 | 16.87 |
| 1HGG.PDB | O, B_PHE_138   | N, A_LEU_13    | H, A_LEU_13     | 2.97 | 2.01 | 10.10 |
| 1HGG.PDB | O, B_ARG_25    | N, A_CYS_14    | H, A_CYS_14     | 2.92 | 1.97 | 11.02 |

|          |                |                |                 |      |      |       |
|----------|----------------|----------------|-----------------|------|------|-------|
| 1HGG.PDB | O, B_GLY_136   | N, A_LEU_15    | H, A_LEU_15     | 2.86 | 1.89 | 7.78  |
| 1HGG.PDB | O, B_GLY_23    | N, A_GLY_16    | H, A_GLY_16     | 2.90 | 2.00 | 20.11 |
| 1HGG.PDB | O, B_TRP_21    | N, A_HIS_18    | H, A_HIS_18     | 2.90 | 1.99 | 17.50 |
| 1HGG.PDB | OD1, A_ASN_322 | N, A_VAL_20    | H, A_VAL_20     | 2.82 | 1.84 | 4.55  |
| 1HGG.PDB | O, A_VAL_36    | N, A_THR_24    | H, A_THR_24     | 2.85 | 1.98 | 22.87 |
| 1HGG.PDB | O, A_ILE_34    | N, A_VAL_26    | H, A_VAL_26     | 2.77 | 1.83 | 12.78 |
| 1HGG.PDB | OE2, B_GLU_97  | NZ, A_LYS_27   | HZ1, A_LYS_27   | 2.90 | 1.87 | 9.15  |
| 1HGG.PDB | O, A_VAL_26    | N, A_ILE_34    | H, A_ILE_34     | 2.94 | 2.01 | 14.94 |
| 1HGG.PDB | O, A_THR_24    | N, A_VAL_36    | H, A_VAL_36     | 2.80 | 1.84 | 7.79  |
| 1HGG.PDB | O, A_MET_320   | N, A_THR_37    | H, A_THR_37     | 2.90 | 1.93 | 7.41  |
| 1HGG.PDB | O, A_LEU_316   | N, A_THR_40    | H, A_THR_40     | 2.81 | 1.95 | 23.35 |
| 1HGG.PDB | O, A_LEU_314   | N, A_LEU_42    | H, A_LEU_42     | 2.87 | 2.00 | 23.31 |
| 1HGG.PDB | O, A_PHE_294   | N, A_GLN_44    | H, A_GLN_44     | 2.82 | 1.86 | 8.73  |
| 1HGG.PDB | OD2, A_ASP_275 | NZ, A_LYS_50   | HZ1, A_LYS_50   | 2.71 | 1.78 | 22.40 |
| 1HGG.PDB | O, A_PRO_273   | N, A_ILE_51    | H, A_ILE_51     | 2.76 | 1.80 | 7.18  |
| 1HGG.PDB | O, A_ASP_275   | N, A_ASN_53    | H, A_ASN_53     | 2.78 | 1.93 | 24.69 |
| 1HGG.PDB | OD2, A_ASP_85  | N, A_ARG_57    | H, A_ARG_57     | 2.88 | 1.93 | 11.04 |
| 1HGG.PDB | O, A_THR_83    | NE, A_ARG_57   | HE, A_ARG_57    | 2.76 | 1.79 | 4.99  |
| 1HGG.PDB | O, A_LEU_86    | N, A_LEU_59    | H, A_LEU_59     | 2.94 | 1.98 | 9.64  |
| 1HGG.PDB | O, A_VAL_88    | N, A_GLY_61    | H, A_GLY_61     | 2.99 | 2.14 | 24.72 |
| 1HGG.PDB | OD1, A_ASP_60  | N, A_ILE_62    | H, A_ILE_62     | 2.86 | 1.94 | 14.24 |
| 1HGG.PDB | O, A_GLY_61    | N, A_CYS_64    | H, A_CYS_64     | 2.94 | 2.01 | 15.60 |
| 1HGG.PDB | O, A_LEU_66    | N, A_LEU_70    | H, A_LEU_70     | 2.85 | 1.95 | 18.25 |
| 1HGG.PDB | O, A_ILE_67    | N, A_LEU_71    | H, A_LEU_71     | 2.83 | 1.86 | 6.13  |
| 1HGG.PDB | O, A_ASP_68    | N, A_GLY_72    | H, A_GLY_72     | 2.84 | 1.93 | 17.70 |
| 1HGG.PDB | OD1, A_ASP_73  | N, A_HIS_75    | H, A_HIS_75     | 2.97 | 2.06 | 18.51 |
| 1HGG.PDB | OD1, A_ASP_73  | ND1, A_HIS_75  | HD1, A_HIS_75   | 2.77 | 1.87 | 17.99 |
| 1HGG.PDB | O, A_ASP_63    | NE2, A_HIS_75  | HE2, A_HIS_75   | 2.83 | 1.88 | 12.09 |
| 1HGG.PDB | O, A_ASP_73    | N, A_CYS_76    | H, A_CYS_76     | 2.73 | 1.81 | 15.45 |
| 1HGG.PDB | O, A_PRO_74    | N, A_ASP_77    | H, A_ASP_77     | 2.92 | 1.97 | 11.68 |
| 1HGG.PDB | O, A_CYS_76    | N, A_PHE_79    | H, A_PHE_79     | 2.99 | 2.02 | 6.69  |
| 1HGG.PDB | O, A_PHE_79    | N, A_GLU_82    | H, A_GLU_82     | 3.00 | 2.09 | 17.80 |
| 1HGG.PDB | O, A_ARG_57    | N, A_ASP_85    | H, A_ASP_85     | 2.86 | 1.95 | 17.16 |
| 1HGG.PDB | O, A_SER_266   | N, A_PHE_87    | H, A_PHE_87     | 2.98 | 2.05 | 14.85 |
| 1HGG.PDB | O, A_LEU_59    | N, A_VAL_88    | H, A_VAL_88     | 2.95 | 1.98 | 7.50  |
| 1HGG.PDB | O, A_MET_268   | N, A_GLU_89    | H, A_GLU_89     | 2.80 | 1.85 | 11.55 |
| 1HGG.PDB | OD1, A_ASP_60  | NE, A_ARG_90   | HE, A_ARG_90    | 2.94 | 1.96 | 6.92  |
| 1HGG.PDB | O, A_SER_270   | NH1, A_ARG_90  | HH11, A_ARG_90  | 2.63 | 1.77 | 25.03 |
| 1HGG.PDB | O, A_ALA_272   | NH1, A_ARG_90  | HH12, A_ARG_90  | 2.66 | 1.75 | 18.96 |
| 1HGG.PDB | OD2, A_ASP_60  | NH2, A_ARG_90  | HH21, A_ARG_90  | 2.79 | 1.81 | 10.63 |
| 1HGG.PDB | OD1, A_ASP_271 | N, A_SER_91    | H, A_SER_91     | 2.92 | 1.99 | 16.08 |
| 1HGG.PDB | OD1, A_ASP_271 | OG, A_SER_91   | HG, A_SER_91    | 2.86 | 2.03 | 25.78 |
| 1HGG.PDB | OD2, A_ASP_271 | OG, A_SER_91   | HG, A_SER_91    | 2.85 | 1.97 | 21.46 |
| 1HGG.PDB | O, A_ASP_63    | N, A_PHE_94    | H, A_PHE_94     | 3.00 | 2.04 | 11.56 |
| 1HGG.PDB | OD2, A_ASP_68  | OG, A_SER_95   | HG, A_SER_95    | 2.94 | 1.99 | 11.26 |
| 1HGG.PDB | OD2, A_ASP_73  | N, A_ASN_96    | H, A_ASN_96     | 2.86 | 1.92 | 13.44 |
| 1HGG.PDB | SG, A_CYS_97   | N, A_TYR_98    | H, A_TYR_98     | 2.99 | 2.16 | 26.19 |
| 1HGG.PDB | OD1, A_ASP_68  | OH, A_TYR_100  | HH, A_TYR_100   | 2.94 | 1.99 | 11.28 |
| 1HGG.PDB | O, A_ILE_230   | N, A_ASP_101   | H, A_ASP_101    | 2.99 | 2.10 | 21.45 |
| 1HGG.PDB | OD1, A_ASP_104 | N, A_SER_107   | H, A_SER_107    | 2.91 | 2.03 | 21.37 |
| 1HGG.PDB | OD2, A_ASP_104 | OG, A_SER_107  | HG, A_SER_107   | 2.84 | 1.92 | 16.45 |
| 1HGG.PDB | O, A_TYR_105   | N, A_ARG_109   | H, A_ARG_109    | 2.79 | 1.82 | 3.79  |
| 1HGG.PDB | OE2, B_GLU_67  | NH2, A_ARG_109 | HH21, A_ARG_109 | 2.84 | 1.86 | 14.43 |
| 1HGG.PDB | OD2, F_ASP_79  | OG, A_SER_110  | HG, A_SER_110   | 2.88 | 1.95 | 14.29 |
| 1HGG.PDB | O, A_SER_107   | N, A_LEU_111   | H, A_LEU_111    | 2.81 | 1.85 | 7.66  |
| 1HGG.PDB | O, A_ARG_109   | N, A_ALA_113   | H, A_ALA_113    | 2.89 | 1.98 | 17.55 |
| 1HGG.PDB | O, A_SER_110   | N, A_SER_114   | H, A_SER_114    | 2.94 | 2.01 | 15.84 |
| 1HGG.PDB | OE2, A_GLU_119 | OG1, A_THR_117 | HG1, A_THR_117  | 2.88 | 1.93 | 9.58  |

|          |                |                |                 |      |      |       |
|----------|----------------|----------------|-----------------|------|------|-------|
| 1HGG.PDB | O, A_TYR_257   | N, A_ILE_121   | H, A_ILE_121    | 2.89 | 1.92 | 8.73  |
| 1HGG.PDB | O, A_ARG_255   | N, A_GLU_123   | H, A_GLU_123    | 2.94 | 2.00 | 13.79 |
| 1HGG.PDB | O, A_THR_155   | N, A_THR_131   | H, A_THR_131    | 2.73 | 1.83 | 17.36 |
| 1HGG.PDB | OD1, A_ASN_152 | N, A_ASN_133   | H, A_ASN_133    | 2.89 | 1.97 | 16.60 |
| 1HGG.PDB | O, A_GLY_146   | N, A_SER_136   | H, A_SER_136    | 2.76 | 1.85 | 17.88 |
| 1HGG.PDB | OG, A_SER_136  | N, A_ALA_138   | H, A_ALA_138    | 2.88 | 1.92 | 8.65  |
| 1HGG.PDB | O, A_GLY_144   | NZ, A_LYS_140  | HZ1, A_LYS_140  | 2.89 | 1.90 | 15.38 |
| 1HGG.PDB | OD1, A_ASN_137 | NZ, A_LYS_140  | HZ2, A_LYS_140  | 2.76 | 1.76 | 13.87 |
| 1HGG.PDB | OD2, A_ASP_77  | NE, A_ARG_141  | HE, A_ARG_141   | 2.89 | 2.07 | 28.91 |
| 1HGG.PDB | O, A_PHE_147   | NH1, A_ARG_141 | HH12, A_ARG_141 | 2.49 | 1.65 | 25.86 |
| 1HGG.PDB | OD1, A_ASP_77  | NH2, A_ARG_141 | HH21, A_ARG_141 | 2.76 | 1.85 | 22.03 |
| 1HGG.PDB | OD2, A_ASP_77  | NH2, A_ARG_141 | HH21, A_ARG_141 | 2.76 | 1.87 | 24.00 |
| 1HGG.PDB | O, A_GLY_72    | NH2, A_ARG_141 | HH22, A_ARG_141 | 2.92 | 1.93 | 7.80  |
| 1HGG.PDB | O, A_SER_136   | N, A_GLY_146   | H, A_GLY_146    | 2.98 | 2.09 | 20.80 |
| 1HGG.PDB | O, A_GLY_72    | N, A_SER_149   | H, A_SER_149    | 2.90 | 1.98 | 16.68 |
| 1HGG.PDB | O, A_ALA_253   | N, A_ASN_152   | H, A_ASN_152    | 2.72 | 1.87 | 24.29 |
| 1HGG.PDB | OH, A_TYR_195  | NE1, A_TRP_153 | HE1, A_TRP_153  | 2.91 | 1.96 | 13.96 |
| 1HGG.PDB | O, A_THR_131   | N, A_THR_155   | H, A_THR_155    | 2.93 | 1.99 | 12.97 |
| 1HGG.PDB | O, A_LEU_194   | N, A_LYS_156   | H, A_LYS_156    | 2.97 | 2.08 | 20.53 |
| 1HGG.PDB | O, A_SER_193   | NZ, A_LYS_156  | HZ2, A_LYS_156  | 2.65 | 1.69 | 18.25 |
| 1HGG.PDB | O, A_THR_160   | N, A_SER_157   | H, A_SER_157    | 2.97 | 2.06 | 18.87 |
| 1HGG.PDB | O, A_ILE_245   | N, A_VAL_166   | H, A_VAL_166    | 2.87 | 1.91 | 9.82  |
| 1HGG.PDB | O, A_LEU_243   | OG1, A_THR_167 | HG1, A_THR_167  | 2.86 | 1.98 | 20.98 |
| 1HGG.PDB | O, A_LEU_243   | N, A_MET_168   | H, A_MET_168    | 2.89 | 1.96 | 15.80 |
| 1HGG.PDB | O, A_ASP_241   | N, A_ASN_170   | H, A_ASN_170    | 2.91 | 1.93 | 5.10  |
| 1HGG.PDB | O, A_PHE_174   | ND2, A_ASN_170 | HD21, A_ASN_170 | 2.81 | 1.87 | 12.89 |
| 1HGG.PDB | O, A_VAL_237   | ND2, A_ASN_170 | HD22, A_ASN_170 | 2.85 | 1.98 | 22.66 |
| 1HGG.PDB | O, A_VAL_237   | N, A_LYS_176   | H, A_LYS_176    | 2.93 | 1.99 | 14.07 |
| 1HGG.PDB | OE2, A_GLU_123 | NZ, A_LYS_176  | HZ1, A_LYS_176  | 2.65 | 1.77 | 25.92 |
| 1HGG.PDB | O, A_THR_235   | N, A_TYR_178   | H, A_TYR_178    | 2.78 | 1.81 | 6.55  |
| 1HGG.PDB | OE1, A_GLU_123 | OH, A_TYR_178  | HH, A_TYR_178   | 2.78 | 1.83 | 8.16  |
| 1HGG.PDB | OG1, A_THR_235 | NE1, A_TRP_180 | HE1, A_TRP_180  | 2.92 | 1.93 | 2.35  |
| 1HGG.PDB | O, A_ASN_250   | N, A_HIS_183   | H, A_HIS_183    | 2.79 | 1.91 | 21.79 |
| 1HGG.PDB | O, A_ARG_229   | N, A_HIS_184   | H, A_HIS_184    | 2.85 | 1.88 | 5.64  |
| 1HGG.PDB | OG, A_SER_231  | NE2, A_HIS_184 | HE2, A_HIS_184  | 2.80 | 1.92 | 21.87 |
| 1HGG.PDB | OG1, A_THR_187 | N, A_GLU_190   | H, A_GLU_190    | 2.84 | 1.88 | 9.16  |
| 1HGG.PDB | O, A_THR_187   | N, A_GLN_191   | H, A_GLN_191    | 3.00 | 2.05 | 11.25 |
| 1HGG.PDB | O, A_GLN_197   | NE2, A_GLN_191 | HE22, A_GLN_191 | 2.89 | 1.99 | 19.48 |
| 1HGG.PDB | O, A_ASN_188   | OG1, A_THR_192 | HG1, A_THR_192  | 2.94 | 2.01 | 12.14 |
| 1HGG.PDB | O, A_GLN_189   | N, A_SER_193   | H, A_SER_193    | 2.84 | 1.87 | 5.56  |
| 1HGG.PDB | O, A_GLN_189   | OG, A_SER_193  | HG, A_SER_193   | 2.70 | 1.82 | 19.80 |
| 1HGG.PDB | O, A_GLU_190   | N, A_LEU_194   | H, A_LEU_194    | 2.99 | 2.04 | 11.68 |
| 1HGG.PDB | O, A_GLN_191   | N, A_TYR_195   | H, A_TYR_195    | 2.81 | 1.87 | 11.54 |
| 1HGG.PDB | O, A_THR_192   | N, A_VAL_196   | H, A_VAL_196    | 2.94 | 2.12 | 27.19 |
| 1HGG.PDB | O, A_TYR_161   | NE2, A_GLN_197 | HE21, A_GLN_197 | 2.91 | 1.94 | 6.31  |
| 1HGG.PDB | O, A_ASN_248   | NE2, A_GLN_197 | HE22, A_GLN_197 | 2.93 | 2.04 | 20.44 |
| 1HGG.PDB | OD1, A_ASN_246 | NH2, A_ARG_201 | HH21, A_ARG_201 | 2.65 | 1.72 | 18.81 |
| 1HGG.PDB | O, A_ILE_213   | N, A_VAL_202   | H, A_VAL_202    | 2.91 | 1.94 | 9.19  |
| 1HGG.PDB | O, A_ASN_246   | N, A_THR_203   | H, A_THR_203    | 2.82 | 1.89 | 14.13 |
| 1HGG.PDB | O, A_GLN_211   | N, A_VAL_204   | H, A_VAL_204    | 2.88 | 1.97 | 18.00 |
| 1HGG.PDB | O, A_SER_209   | N, A_THR_206   | H, A_THR_206    | 2.97 | 2.00 | 7.26  |
| 1HGG.PDB | OD1, A_ASP_241 | N, A_ARG_207   | H, A_ARG_207    | 2.89 | 1.94 | 12.62 |
| 1HGG.PDB | OD2, A_ASP_241 | NE, A_ARG_208  | HE, A_ARG_208   | 2.96 | 2.06 | 20.34 |
| 1HGG.PDB | OG1, A_THR_206 | OG, A_SER_209  | HG, A_SER_209   | 2.95 | 2.03 | 14.98 |
| 1HGG.PDB | OD1, E_ASP_101 | NE2, A_GLN_210 | HE22, A_GLN_210 | 2.99 | 2.07 | 17.95 |
| 1HGG.PDB | O, A_VAL_204   | N, A_GLN_211   | H, A_GLN_211    | 2.83 | 1.92 | 18.11 |
| 1HGG.PDB | OG1, A_THR_203 | OG1, A_THR_212 | HG1, A_THR_212  | 2.88 | 1.92 | 6.20  |
| 1HGG.PDB | O, A_VAL_202   | N, A_ILE_213   | H, A_ILE_213    | 2.82 | 1.90 | 15.67 |

|          |                |                |                 |      |      |       |
|----------|----------------|----------------|-----------------|------|------|-------|
| 1HGG.PDB | OE1, C_GLN_210 | NH2, A_ARG_220 | HH21, A_ARG_220 | 2.73 | 1.78 | 15.93 |
| 1HGG.PDB | O, A_ASN_216   | NH2, A_ARG_220 | HH22, A_ARG_220 | 2.70 | 1.79 | 20.31 |
| 1HGG.PDB | O, A_LEU_226   | N, A_VAL_223   | H, A_VAL_223    | 2.90 | 1.94 | 11.61 |
| 1HGG.PDB | O, A_CYS_97    | NE, A_ARG_224  | HE, A_ARG_224   | 2.79 | 1.96 | 26.10 |
| 1HGG.PDB | O, A_CYS_97    | NH2, A_ARG_224 | HH21, A_ARG_224 | 2.82 | 1.96 | 25.99 |
| 1HGG.PDB | O, A_VAL_223   | N, A_LEU_226   | H, A_LEU_226    | 2.95 | 2.01 | 13.46 |
| 1HGG.PDB | O, A_SER_228   | NH1, A_ARG_229 | HH11, A_ARG_229 | 2.74 | 1.81 | 18.53 |
| 1HGG.PDB | O, A_PRO_221   | NH2, A_ARG_229 | HH22, A_ARG_229 | 2.60 | 1.67 | 16.87 |
| 1HGG.PDB | OD1, A_ASP_101 | OG, A_SER_231  | HG, A_SER_231   | 2.88 | 1.92 | 8.82  |
| 1HGG.PDB | O, A_ASP_101   | N, A_ILE_232   | H, A_ILE_232    | 2.92 | 2.00 | 16.64 |
| 1HGG.PDB | O, A_TRP_180   | N, A_TYR_233   | H, A_TYR_233    | 2.89 | 1.93 | 10.84 |
| 1HGG.PDB | O, A_TYR_178   | N, A_THR_235   | H, A_THR_235    | 2.90 | 2.00 | 18.55 |
| 1HGG.PDB | O, A_LYS_176   | N, A_VAL_237   | H, A_VAL_237    | 2.81 | 1.85 | 9.01  |
| 1HGG.PDB | O, F_SER_71    | NZ, A_LYS_238  | HZ2, A_LYS_238  | 2.70 | 1.77 | 20.55 |
| 1HGG.PDB | OE1, F_GLU_72  | NZ, A_LYS_238  | HZ3, A_LYS_238  | 2.93 | 1.93 | 14.31 |
| 1HGG.PDB | OE2, F_GLU_72  | NZ, A_LYS_238  | HZ3, A_LYS_238  | 2.74 | 1.91 | 29.92 |
| 1HGG.PDB | O, A_ASN_170   | N, A_GLY_240   | H, A_GLY_240    | 2.85 | 1.99 | 23.50 |
| 1HGG.PDB | O, A_LYS_238   | N, A_ASP_241   | H, A_ASP_241    | 2.97 | 2.05 | 16.90 |
| 1HGG.PDB | OD1, A_ASP_241 | N, A_VAL_242   | H, A_VAL_242    | 2.79 | 1.98 | 28.57 |
| 1HGG.PDB | O, A_MET_168   | N, A_LEU_243   | H, A_LEU_243    | 2.88 | 1.91 | 4.58  |
| 1HGG.PDB | O, A_SER_205   | N, A_VAL_244   | H, A_VAL_244    | 2.92 | 1.98 | 13.47 |
| 1HGG.PDB | O, A_VAL_166   | N, A_ILE_245   | H, A_ILE_245    | 2.93 | 2.00 | 14.39 |
| 1HGG.PDB | O, A_THR_203   | N, A_ASN_246   | H, A_ASN_246    | 2.89 | 1.94 | 11.24 |
| 1HGG.PDB | OD1, A_ASN_165 | ND2, A_ASN_246 | HD22, A_ASN_246 | 2.90 | 1.98 | 17.02 |
| 1HGG.PDB | O, A_LEU_164   | N, A_SER_247   | H, A_SER_247    | 2.90 | 1.99 | 18.81 |
| 1HGG.PDB | OE1, A_GLN_191 | ND2, A_ASN_250 | HD21, A_ASN_250 | 2.92 | 1.96 | 11.11 |
| 1HGG.PDB | O, A_HIS_183   | ND2, A_ASN_250 | HD22, A_ASN_250 | 2.85 | 1.89 | 9.48  |
| 1HGG.PDB | O, A_ASN_152   | N, A_ALA_253   | H, A_ALA_253    | 2.86 | 1.94 | 16.70 |
| 1HGG.PDB | OD1, A_ASN_133 | NH2, A_ARG_255 | HH22, A_ARG_255 | 2.52 | 1.66 | 24.50 |
| 1HGG.PDB | O, A_ILE_121   | N, A_TYR_257   | H, A_TYR_257    | 2.96 | 2.12 | 25.89 |
| 1HGG.PDB | O, A_LEU_177   | N, A_PHE_258   | H, A_PHE_258    | 2.95 | 2.01 | 12.69 |
| 1HGG.PDB | OG, A_SER_115  | N, A_ARG_261   | H, A_ARG_261    | 2.99 | 2.03 | 11.53 |
| 1HGG.PDB | OE2, A_GLU_119 | NH1, A_ARG_261 | HH12, A_ARG_261 | 2.68 | 1.87 | 29.79 |
| 1HGG.PDB | OE1, A_GLU_119 | NH2, A_ARG_261 | HH22, A_ARG_261 | 2.74 | 1.88 | 26.75 |
| 1HGG.PDB | OH, A_TYR_302  | NZ, A_LYS_264  | HZ1, A_LYS_264  | 2.93 | 1.98 | 19.58 |
| 1HGG.PDB | ND1, A_HIS_56  | NZ, A_LYS_264  | HZ2, A_LYS_264  | 2.66 | 1.73 | 19.87 |
| 1HGG.PDB | OD2, A_ASP_85  | NZ, A_LYS_264  | HZ3, A_LYS_264  | 2.83 | 1.83 | 12.74 |
| 1HGG.PDB | O, A_PHE_87    | N, A_MET_268   | H, A_MET_268    | 2.85 | 1.96 | 20.36 |
| 1HGG.PDB | OE1, B_GLU_67  | NH1, A_ARG_269 | HH12, A_ARG_269 | 2.69 | 1.86 | 28.34 |
| 1HGG.PDB | O, A_PRO_284   | OG, A_SER_270  | HG, A_SER_270   | 2.78 | 1.86 | 15.49 |
| 1HGG.PDB | OG, A_SER_270  | N, A_ALA_272   | H, A_ALA_272    | 2.95 | 2.00 | 11.38 |
| 1HGG.PDB | O, A_ILE_51    | N, A_ASP_275   | H, A_ASP_275    | 2.83 | 1.95 | 21.40 |
| 1HGG.PDB | OD1, A_ASP_275 | N, A_THR_276   | H, A_THR_276    | 2.80 | 1.95 | 24.62 |
| 1HGG.PDB | O, A_ASN_54    | N, A_SER_279   | H, A_SER_279    | 2.79 | 1.85 | 12.05 |
| 1HGG.PDB | O, A_TYR_302   | N, A_ILE_282   | H, A_ILE_282    | 2.87 | 1.93 | 13.76 |
| 1HGG.PDB | O, A_THR_283   | N, A_GLY_286   | H, A_GLY_286    | 2.80 | 1.86 | 11.09 |
| 1HGG.PDB | O, A_LYS_50    | N, A_SER_287   | H, A_SER_287    | 2.87 | 1.90 | 6.27  |
| 1HGG.PDB | O, A_ALA_304   | ND2, A_ASN_290 | HD22, A_ASN_290 | 2.86 | 1.98 | 20.93 |
| 1HGG.PDB | OE1, A_GLN_44  | NZ, A_LYS_292  | HZ1, A_LYS_292  | 2.74 | 1.73 | 11.51 |
| 1HGG.PDB | OD2, A_ASP_291 | NZ, A_LYS_292  | HZ3, A_LYS_292  | 2.77 | 1.90 | 27.56 |
| 1HGG.PDB | O, A_LYS_307   | N, A_GLN_295   | H, A_GLN_295    | 2.78 | 1.90 | 20.19 |
| 1HGG.PDB | O, A_ASN_298   | NE2, A_GLN_295 | HE21, A_GLN_295 | 2.82 | 1.86 | 7.25  |
| 1HGG.PDB | O, A_GLN_44    | N, A_ASN_296   | H, A_ASN_296    | 2.89 | 1.94 | 10.48 |
| 1HGG.PDB | OD1, A_ASN_285 | ND2, A_ASN_298 | HD22, A_ASN_298 | 2.97 | 2.01 | 11.28 |
| 1HGG.PDB | O, B_LYS_68    | NZ, A_LYS_299  | HZ1, A_LYS_299  | 2.91 | 1.88 | 9.16  |
| 1HGG.PDB | OD1, A_ASN_298 | N, A_ILE_300   | H, A_ILE_300    | 2.88 | 1.94 | 13.01 |
| 1HGG.PDB | O, A_ILE_282   | N, A_TYR_302   | H, A_TYR_302    | 2.82 | 1.93 | 21.11 |
| 1HGG.PDB | O, A_LYS_264   | OH, A_TYR_302  | HH, A_TYR_302   | 2.68 | 1.87 | 27.38 |

|          |                |                |                 |      |      |       |
|----------|----------------|----------------|-----------------|------|------|-------|
| 1HGG.PDB | O, B_LYS_62    | N, A_GLY_303   | H, A_GLY_303    | 2.91 | 1.94 | 6.06  |
| 1HGG.PDB | O, A_GLN_295   | N, A_VAL_309   | H, A_VAL_309    | 2.91 | 2.09 | 27.06 |
| 1HGG.PDB | OG, B_SER_93   | N, A_LYS_310   | H, A_LYS_310    | 2.89 | 1.96 | 14.59 |
| 1HGG.PDB | OD1, B_ASP_90  | NZ, A_LYS_310  | HZ2, A_LYS_310  | 2.70 | 1.74 | 18.08 |
| 1HGG.PDB | OE2, A_GLU_41  | N, A_LEU_314   | H, A_LEU_314    | 2.82 | 1.91 | 16.70 |
| 1HGG.PDB | OE1, A_GLU_41  | NZ, A_LYS_315  | HZ3, A_LYS_315  | 2.73 | 1.81 | 23.14 |
| 1HGG.PDB | O, A_THR_40    | N, A_LEU_316   | H, A_LEU_316    | 2.77 | 1.85 | 15.18 |
| 1HGG.PDB | OD1, B_ASN_104 | N, A_ALA_317   | H, A_ALA_317    | 2.79 | 1.88 | 16.20 |
| 1HGG.PDB | O, A_ASN_38    | N, A_THR_318   | H, A_THR_318    | 2.90 | 1.97 | 14.69 |
| 1HGG.PDB | O, A_VAL_20    | ND2, A_ASN_322 | HD21, A_ASN_322 | 2.85 | 1.93 | 15.64 |
| 1HGG.PDB | OE2, A_GLU_35  | ND2, A_ASN_322 | HD22, A_ASN_322 | 2.81 | 1.95 | 25.01 |
| 1HGG.PDB | OE2, B_GLU_15  | NZ, A_LYS_326  | HZ1, A_LYS_326  | 2.83 | 1.89 | 21.04 |
| 1HGG.PDB | OE1, A_GLU_325 | NZ, A_LYS_326  | HZ3, A_LYS_326  | 2.82 | 1.86 | 18.51 |
| 1HGG.PDB | OD2, B_ASP_112 | N, B_GLY_1     | H2, B_GLY_1     | 2.70 | 1.71 | 13.07 |
| 1HGG.PDB | OD1, B_ASP_109 | N, B_LEU_2     | H, B_LEU_2      | 2.95 | 2.05 | 19.45 |
| 1HGG.PDB | OD2, B_ASP_112 | N, B_PHE_3     | H, B_PHE_3      | 2.84 | 2.02 | 27.93 |
| 1HGG.PDB | OD2, B_ASP_112 | N, B_GLY_4     | H, B_GLY_4      | 2.94 | 2.03 | 17.01 |
| 1HGG.PDB | OD1, B_ASP_112 | N, B_ALA_5     | H, B_ALA_5      | 2.91 | 2.04 | 23.33 |
| 1HGG.PDB | O, B_GLY_4     | N, B_PHE_9     | H, B_PHE_9      | 2.76 | 1.84 | 15.80 |
| 1HGG.PDB | O, A_VAL_323   | N, B_GLY_13    | H, B_GLY_13     | 2.71 | 1.78 | 13.00 |
| 1HGG.PDB | O, A_HIS_17    | N, B_TRP_14    | H, B_TRP_14     | 2.79 | 1.88 | 17.76 |
| 1HGG.PDB | OG1, B_THR_41  | N, B_TRP_21    | H, B_TRP_21     | 2.85 | 1.90 | 11.01 |
| 1HGG.PDB | O, A_GLY_16    | N, B_GLY_23    | H, B_GLY_23     | 2.99 | 2.09 | 20.32 |
| 1HGG.PDB | O, B_ALA_35    | N, B_PHE_24    | H, B_PHE_24     | 2.82 | 1.86 | 7.34  |
| 1HGG.PDB | OE1, B_GLN_34  | NE, B_ARG_25   | HE, B_ARG_25    | 2.80 | 1.89 | 18.36 |
| 1HGG.PDB | OE1, B_GLN_34  | NH2, B_ARG_25  | HH21, B_ARG_25  | 2.91 | 2.04 | 24.97 |
| 1HGG.PDB | OE2, A_GLU_325 | NH2, B_ARG_25  | HH22, B_ARG_25  | 2.94 | 1.96 | 12.23 |
| 1HGG.PDB | O, B_GLY_33    | N, B_HIS_26    | H, B_HIS_26     | 2.74 | 1.85 | 19.00 |
| 1HGG.PDB | O, B_GLY_31    | N, B_ASN_28    | H, B_ASN_28     | 2.71 | 1.77 | 11.36 |
| 1HGG.PDB | O, B_ASN_28    | N, B_GLY_31    | H, B_GLY_31     | 2.90 | 1.97 | 14.90 |
| 1HGG.PDB | O, B_PHE_24    | N, B_ALA_35    | H, B_ALA_35     | 2.88 | 2.07 | 28.80 |
| 1HGG.PDB | O, B_TYR_22    | N, B_ASP_37    | H, B_ASP_37     | 2.72 | 1.76 | 2.83  |
| 1HGG.PDB | OD2, B_ASP_37  | N, B_SER_40    | H, B_SER_40     | 2.85 | 1.90 | 11.78 |
| 1HGG.PDB | OD2, B_ASP_37  | OG, B_SER_40   | HG, B_SER_40    | 2.80 | 1.93 | 21.69 |
| 1HGG.PDB | O, B_ASP_37    | OG1, B_THR_41  | HG1, B_THR_41   | 2.72 | 1.82 | 17.56 |
| 1HGG.PDB | O, B_LEU_38    | N, B_GLN_42    | H, B_GLN_42     | 2.94 | 1.99 | 12.08 |
| 1HGG.PDB | OD1, B_ASP_46  | NE2, B_GLN_42  | HE22, B_GLN_42  | 2.83 | 1.95 | 21.37 |
| 1HGG.PDB | O, B_LYS_39    | N, B_ALA_43    | H, B_ALA_43     | 2.99 | 2.02 | 7.45  |
| 1HGG.PDB | O, B_SER_40    | N, B_ALA_44    | H, B_ALA_44     | 2.94 | 1.96 | 2.17  |
| 1HGG.PDB | O, B_THR_41    | N, B_ILE_45    | H, B_ILE_45     | 2.95 | 2.02 | 15.56 |
| 1HGG.PDB | O, B_GLN_42    | N, B_ASP_46    | H, B_ASP_46     | 2.79 | 1.82 | 3.46  |
| 1HGG.PDB | OE2, B_GLU_114 | NE2, B_GLN_47  | HE21, B_GLN_47  | 2.96 | 2.05 | 17.92 |
| 1HGG.PDB | O, B_ALA_43    | NE2, B_GLN_47  | HE22, B_GLN_47  | 2.97 | 2.06 | 17.51 |
| 1HGG.PDB | O, B_ILE_45    | N, B_ASN_49    | H, B_ASN_49     | 2.86 | 1.94 | 16.30 |
| 1HGG.PDB | O, B_ASP_46    | N, B_GLY_50    | H, B_GLY_50     | 2.92 | 2.06 | 23.80 |
| 1HGG.PDB | O, B_GLN_47    | N, B_LYS_51    | H, B_LYS_51     | 2.94 | 1.96 | 0.16  |
| 1HGG.PDB | OG1, B_THR_107 | NZ, B_LYS_51   | HZ1, B_LYS_51   | 2.97 | 2.00 | 18.19 |
| 1HGG.PDB | OE1, B_GLU_103 | NZ, B_LYS_51   | HZ2, B_LYS_51   | 2.76 | 1.73 | 5.86  |
| 1HGG.PDB | ND1, B_HIS_106 | NZ, B_LYS_51   | HZ3, B_LYS_51   | 2.77 | 1.79 | 14.96 |
| 1HGG.PDB | O, B_ILE_48    | N, B_LEU_52    | H, B_LEU_52     | 2.89 | 1.99 | 19.12 |
| 1HGG.PDB | O, B_ASN_49    | N, B_ASN_53    | H, B_ASN_53     | 2.89 | 1.99 | 19.14 |
| 1HGG.PDB | O, E_THR_28    | NE, B_ARG_54   | HE, B_ARG_54    | 2.94 | 1.97 | 7.82  |
| 1HGG.PDB | OE1, B_GLU_57  | NH1, B_ARG_54  | HH11, B_ARG_54  | 2.86 | 1.86 | 11.23 |
| 1HGG.PDB | OE2, F_GLU_97  | NH2, B_ARG_54  | HH22, B_ARG_54  | 2.75 | 1.76 | 9.96  |
| 1HGG.PDB | OE2, B_GLU_61  | NZ, B_LYS_58   | HZ3, B_LYS_58   | 2.94 | 1.92 | 12.53 |
| 1HGG.PDB | OD2, F_ASP_90  | NZ, B_LYS_62   | HZ2, B_LYS_62   | 2.65 | 1.82 | 29.87 |
| 1HGG.PDB | OD2, F_ASP_86  | NZ, B_LYS_62   | HZ3, B_LYS_62   | 2.64 | 1.73 | 23.35 |
| 1HGG.PDB | OG, A_SER_110  | NE2, B_HIS_64  | HE2, B_HIS_64   | 2.90 | 1.96 | 14.63 |



|          |                |                |                 |      |      |       |
|----------|----------------|----------------|-----------------|------|------|-------|
| 1HGG.PDB | O, B.PHE.63    | NE2, B.GLN.65  | HE22, B.GLN.65  | 2.94 | 1.96 | 4.34  |
| 1HGG.PDB | O, A.LYS.299   | NZ, B.LYS.68   | HZ1, B.LYS.68   | 2.86 | 1.83 | 9.73  |
| 1HGG.PDB | OE2, B.GLU.85  | NZ, B.LYS.68   | HZ2, B.LYS.68   | 2.75 | 1.72 | 7.06  |
| 1HGG.PDB | OE2, B.GLU.72  | OG, B.SER.71   | HG, B.SER.71    | 2.84 | 2.03 | 27.31 |
| 1HGG.PDB | OG, C.SER.107  | N, B.ARG.76    | H, B.ARG.76     | 2.77 | 1.82 | 10.45 |
| 1HGG.PDB | OE2, D.GLU.81  | NE, B.ARG.76   | HE, B.ARG.76    | 2.94 | 1.96 | 10.47 |
| 1HGG.PDB | OE1, D.GLU.74  | NH1, B.ARG.76  | HH12, B.ARG.76  | 2.88 | 1.89 | 10.69 |
| 1HGG.PDB | OE1, D.GLU.81  | NH2, B.ARG.76  | HH21, B.ARG.76  | 2.73 | 1.73 | 5.91  |
| 1HGG.PDB | OE2, D.GLU.74  | NH2, B.ARG.76  | HH22, B.ARG.76  | 2.82 | 1.82 | 7.26  |
| 1HGG.PDB | O, B.GLY.75    | N, B.ASP.79    | H, B.ASP.79     | 2.85 | 1.93 | 16.05 |
| 1HGG.PDB | OE1, D.GLU.85  | OH, B.TYR.83   | HH, B.TYR.83    | 2.68 | 1.80 | 19.99 |
| 1HGG.PDB | O, B.LEU.80    | N, B.VAL.84    | H, B.VAL.84     | 2.87 | 1.91 | 8.71  |
| 1HGG.PDB | O, B.LYS.82    | N, B.ASP.86    | H, B.ASP.86     | 2.95 | 2.00 | 10.58 |
| 1HGG.PDB | O, B.TYR.83    | N, B.THR.87    | H, B.THR.87     | 2.90 | 1.95 | 10.43 |
| 1HGG.PDB | O, B.VAL.84    | N, B.LYS.88    | H, B.LYS.88     | 2.87 | 2.00 | 23.09 |
| 1HGG.PDB | OH, F.TYR.83   | NZ, B.LYS.88   | HZ1, B.LYS.88   | 2.77 | 1.73 | 5.14  |
| 1HGG.PDB | O, B.GLU.85    | N, B.ILE.89    | H, B.ILE.89     | 2.84 | 1.88 | 8.66  |
| 1HGG.PDB | O, B.LYS.88    | N, B.TRP.92    | H, B.TRP.92     | 2.93 | 1.96 | 6.86  |
| 1HGG.PDB | O, B.ILE.89    | N, B.SER.93    | H, B.SER.93     | 2.84 | 1.95 | 20.72 |
| 1HGG.PDB | O, B.ILE.89    | OG, B.SER.93   | HG, B.SER.93    | 2.79 | 1.89 | 17.30 |
| 1HGG.PDB | O, B.ASP.90    | N, B.TYR.94    | H, B.TYR.94     | 2.97 | 2.04 | 15.33 |
| 1HGG.PDB | O, B.TRP.92    | N, B.ALA.96    | H, B.ALA.96     | 2.98 | 2.05 | 15.46 |
| 1HGG.PDB | O, B.TYR.94    | N, B.LEU.98    | H, B.LEU.98     | 2.95 | 2.00 | 9.66  |
| 1HGG.PDB | O, B.ASN.95    | N, B.LEU.99    | H, B.LEU.99     | 2.89 | 1.99 | 18.59 |
| 1HGG.PDB | O, B.ALA.96    | N, B.VAL.100   | H, B.VAL.100    | 2.98 | 2.01 | 8.53  |
| 1HGG.PDB | O, B.LEU.98    | N, B.LEU.102   | H, B.LEU.102    | 2.92 | 1.98 | 12.12 |
| 1HGG.PDB | O, B.VAL.100   | N, B.ASN.104   | H, B.ASN.104    | 2.85 | 1.94 | 17.67 |
| 1HGG.PDB | O, A.LYS.27    | ND2, B.ASN.104 | HD22, B.ASN.104 | 2.88 | 1.95 | 14.60 |
| 1HGG.PDB | O, B.LEU.102   | N, B.HIS.106   | H, B.HIS.106    | 2.96 | 2.00 | 9.47  |
| 1HGG.PDB | O, B.GLU.103   | N, B.THR.107   | H, B.THR.107    | 2.81 | 1.95 | 23.40 |
| 1HGG.PDB | O, B.HIS.106   | N, B.LEU.110   | H, B.LEU.110    | 2.81 | 1.86 | 11.06 |
| 1HGG.PDB | O, B.THR.107   | N, B.THR.111   | H, B.THR.111    | 2.99 | 2.04 | 11.06 |
| 1HGG.PDB | O, B.THR.107   | OG1, B.THR.111 | HG1, B.THR.111  | 2.84 | 1.91 | 11.39 |
| 1HGG.PDB | O, B.ASP.109   | N, B.SER.113   | H, B.SER.113    | 2.78 | 1.86 | 16.47 |
| 1HGG.PDB | O, B.SER.113   | N, B.LYS.117   | H, B.LYS.117    | 2.73 | 1.85 | 21.24 |
| 1HGG.PDB | O, B.GLU.114   | N, B.LEU.118   | H, B.LEU.118    | 2.99 | 2.06 | 15.73 |
| 1HGG.PDB | O, B.MET.115   | N, B.PHE.119   | H, B.PHE.119    | 3.00 | 2.05 | 12.47 |
| 1HGG.PDB | O, B.ASN.116   | N, B.GLU.120   | H, B.GLU.120    | 2.95 | 1.97 | 4.00  |
| 1HGG.PDB | O, B.LYS.117   | N, B.LYS.121   | H, B.LYS.121    | 2.90 | 2.02 | 20.57 |
| 1HGG.PDB | O, B.LEU.118   | N, B.THR.122   | H, B.THR.122    | 2.96 | 1.98 | 6.92  |
| 1HGG.PDB | O, B.PHE.119   | N, B.ARG.123   | H, B.ARG.123    | 2.91 | 1.95 | 9.73  |
| 1HGG.PDB | OE2, B.GLU.120 | NH1, B.ARG.123 | HH11, B.ARG.123 | 2.73 | 1.87 | 25.50 |
| 1HGG.PDB | O, B.GLU.120   | N, B.ARG.124   | H, B.ARG.124    | 2.98 | 2.01 | 8.72  |
| 1HGG.PDB | OE1, F.GLU.132 | NE, B.ARG.124  | HE, B.ARG.124   | 2.84 | 1.98 | 22.96 |
| 1HGG.PDB | OE2, F.GLU.132 | NE, B.ARG.124  | HE, B.ARG.124   | 2.81 | 1.98 | 25.54 |
| 1HGG.PDB | O, B.HIS.159   | ND2, B.ASN.129 | HD21, B.ASN.129 | 2.98 | 2.03 | 11.68 |
| 1HGG.PDB | OH, B.TYR.157  | ND2, B.ASN.129 | HD22, B.ASN.129 | 2.80 | 1.86 | 13.18 |
| 1HGG.PDB | O, B.LYS.139   | N, B.GLU.131   | H, B.GLU.131    | 2.96 | 2.02 | 13.20 |
| 1HGG.PDB | O, B.CYS.137   | N, B.MET.133   | H, B.MET.133    | 2.89 | 1.98 | 18.42 |
| 1HGG.PDB | O, A.LEU.13    | N, B.PHE.138   | H, B.PHE.138    | 2.70 | 1.86 | 24.49 |
| 1HGG.PDB | O, B.GLU.131   | N, B.LYS.139   | H, B.LYS.139    | 2.86 | 1.90 | 8.51  |
| 1HGG.PDB | O, A.ALA.11    | N, B.ILE.140   | H, B.ILE.140    | 2.77 | 1.86 | 18.05 |
| 1HGG.PDB | O, B.ASN.129   | N, B.TYR.141   | H, B.TYR.141    | 2.90 | 1.92 | 3.10  |
| 1HGG.PDB | OE2, B.GLU.165 | N, B.LYS.143   | H, B.LYS.143    | 2.97 | 2.08 | 21.83 |
| 1HGG.PDB | OD1, B.ASP.145 | N, B.ALA.147   | H, B.ALA.147    | 2.99 | 2.19 | 29.06 |
| 1HGG.PDB | O, B.ASP.145   | N, B.ILE.149   | H, B.ILE.149    | 2.94 | 1.98 | 9.40  |
| 1HGG.PDB | O, B.ASN.146   | N, B.GLU.150   | H, B.GLU.150    | 2.89 | 1.95 | 12.57 |
| 1HGG.PDB | O, B.ALA.147   | N, B.SER.151   | H, B.SER.151    | 2.85 | 1.98 | 22.55 |

|          |                |                |                 |      |      |       |
|----------|----------------|----------------|-----------------|------|------|-------|
| 1HGG.PDB | O, B_CYS_148   | OG, B_SER_151  | HG, B_SER_151   | 2.71 | 1.85 | 21.43 |
| 1HGG.PDB | O, B_GLU_150   | N, B_ASN_154   | H, B_ASN_154    | 2.84 | 1.87 | 3.20  |
| 1HGG.PDB | O, B_SER_151   | N, B_THR_156   | H, B_THR_156    | 2.76 | 1.93 | 25.42 |
| 1HGG.PDB | OD1, B_ASN_154 | OG1, B_THR_156 | HG1, B_THR_156  | 2.71 | 1.81 | 17.64 |
| 1HGG.PDB | OD1, B_ASP_158 | N, B_ASP_160   | H, B_ASP_160    | 2.97 | 2.06 | 18.02 |
| 1HGG.PDB | O, B_HIS_159   | N, B_TYR_162   | H, B_TYR_162    | 2.94 | 2.02 | 17.18 |
| 1HGG.PDB | O, B_ASP_160   | N, B_ARG_163   | H, B_ARG_163    | 2.91 | 1.94 | 6.47  |
| 1HGG.PDB | O, F_ARG_170   | NH1, B_ARG_163 | HH12, B_ARG_163 | 2.76 | 1.82 | 18.13 |
| 1HGG.PDB | O, B_TYR_162   | N, B_ALA_166   | H, B_ALA_166    | 2.87 | 1.91 | 8.33  |
| 1HGG.PDB | O, B_ARG_163   | N, B_LEU_167   | H, B_LEU_167    | 2.76 | 1.83 | 12.88 |
| 1HGG.PDB | O, B_ALA_166   | N, B_ARG_170   | H, B_ARG_170    | 2.86 | 1.99 | 22.15 |
| 1HGG.PDB | O, B_GLU_128   | NE, B_ARG_170  | HE, B_ARG_170   | 2.71 | 1.86 | 24.52 |
| 1HGG.PDB | OE2, B_GLU_131 | NH1, B_ARG_170 | HH11, B_ARG_170 | 2.85 | 1.85 | 6.28  |
| 1HGG.PDB | O, B_LEU_167   | N, B_PHE_171   | H, B_PHE_171    | 2.94 | 1.99 | 10.53 |
| 1HGG.PDB | O, D_ILE_140   | N, C_ALA_11    | H, C_ALA_11     | 2.88 | 1.96 | 16.67 |
| 1HGG.PDB | O, D_PHE_138   | N, C_LEU_13    | H, C_LEU_13     | 3.00 | 2.04 | 10.72 |
| 1HGG.PDB | O, D_ARG_25    | N, C_CYS_14    | H, C_CYS_14     | 2.73 | 1.80 | 13.70 |
| 1HGG.PDB | O, D_GLY_136   | N, C_LEU_15    | H, C_LEU_15     | 2.90 | 1.94 | 8.49  |
| 1HGG.PDB | O, D_GLY_23    | N, C_GLY_16    | H, C_GLY_16     | 2.91 | 2.01 | 20.14 |
| 1HGG.PDB | O, D_TRP_21    | N, C_HIS_18    | H, C_HIS_18     | 2.90 | 2.00 | 17.75 |
| 1HGG.PDB | OD1, C_ASN_322 | N, C_VAL_20    | H, C_VAL_20     | 2.83 | 1.86 | 5.96  |
| 1HGG.PDB | O, C_VAL_36    | N, C_THR_24    | H, C_THR_24     | 2.85 | 1.97 | 21.07 |
| 1HGG.PDB | O, C_ILE_34    | N, C_VAL_26    | H, C_VAL_26     | 2.78 | 1.85 | 13.27 |
| 1HGG.PDB | OE2, D_GLU_97  | NZ, C_LYS_27   | HZ1, C_LYS_27   | 2.94 | 1.91 | 8.28  |
| 1HGG.PDB | O, C_VAL_26    | N, C_ILE_34    | H, C_ILE_34     | 2.94 | 2.00 | 14.30 |
| 1HGG.PDB | O, C_THR_24    | N, C_VAL_36    | H, C_VAL_36     | 2.78 | 1.83 | 9.33  |
| 1HGG.PDB | O, C_MET_320   | N, C_THR_37    | H, C_THR_37     | 2.95 | 1.98 | 6.39  |
| 1HGG.PDB | O, C_LEU_316   | N, C_THR_40    | H, C_THR_40     | 2.80 | 1.94 | 23.65 |
| 1HGG.PDB | O, C_LEU_314   | N, C_LEU_42    | H, C_LEU_42     | 2.84 | 1.98 | 23.25 |
| 1HGG.PDB | O, C_PHE_294   | N, C_GLN_44    | H, C_GLN_44     | 2.77 | 1.82 | 9.57  |
| 1HGG.PDB | O, C_ASN_285   | OG, C_SER_47   | HG, C_SER_47    | 2.86 | 1.92 | 11.28 |
| 1HGG.PDB | OD2, C_ASP_275 | NZ, C_LYS_50   | HZ1, C_LYS_50   | 2.68 | 1.77 | 23.74 |
| 1HGG.PDB | O, C_PRO_273   | N, C_ILE_51    | H, C_ILE_51     | 2.76 | 1.81 | 7.91  |
| 1HGG.PDB | O, C_ASP_275   | N, C_ASN_53    | H, C_ASN_53     | 2.74 | 1.92 | 26.97 |
| 1HGG.PDB | OD2, C_ASP_85  | N, C_ARG_57    | H, C_ARG_57     | 2.86 | 1.92 | 11.42 |
| 1HGG.PDB | O, C_THR_83    | NE, C_ARG_57   | HE, C_ARG_57    | 2.73 | 1.76 | 4.62  |
| 1HGG.PDB | OE1, C_GLU_82  | NH2, C_ARG_57  | HH21, C_ARG_57  | 2.59 | 1.77 | 28.22 |
| 1HGG.PDB | O, C_LEU_86    | N, C_LEU_59    | H, C_LEU_59     | 2.91 | 1.94 | 7.95  |
| 1HGG.PDB | O, C_VAL_88    | N, C_GLY_61    | H, C_GLY_61     | 2.96 | 2.11 | 24.97 |
| 1HGG.PDB | OD1, C_ASP_60  | N, C_ILE_62    | H, C_ILE_62     | 2.85 | 1.92 | 14.37 |
| 1HGG.PDB | O, C_GLY_61    | N, C_CYS_64    | H, C_CYS_64     | 2.95 | 2.02 | 15.64 |
| 1HGG.PDB | O, C_LEU_66    | N, C_LEU_70    | H, C_LEU_70     | 2.88 | 1.98 | 18.83 |
| 1HGG.PDB | O, C_ILE_67    | N, C_LEU_71    | H, C_LEU_71     | 2.81 | 1.85 | 6.57  |
| 1HGG.PDB | O, C_ASP_68    | N, C_GLY_72    | H, C_GLY_72     | 2.83 | 1.91 | 16.32 |
| 1HGG.PDB | OD1, C_ASP_73  | N, C_HIS_75    | H, C_HIS_75     | 2.95 | 2.04 | 19.03 |
| 1HGG.PDB | OD1, C_ASP_73  | ND1, C_HIS_75  | HD1, C_HIS_75   | 2.72 | 1.84 | 20.87 |
| 1HGG.PDB | O, C_ASP_63    | NE2, C_HIS_75  | HE2, C_HIS_75   | 2.81 | 1.85 | 11.39 |
| 1HGG.PDB | O, C_ASP_73    | N, C_CYS_76    | H, C_CYS_76     | 2.75 | 1.83 | 14.81 |
| 1HGG.PDB | O, C_PRO_74    | N, C_ASP_77    | H, C_ASP_77     | 2.88 | 1.94 | 12.22 |
| 1HGG.PDB | O, C_PHE_79    | N, C_GLU_82    | H, C_GLU_82     | 2.98 | 2.06 | 16.43 |
| 1HGG.PDB | O, C_ARG_57    | N, C_ASP_85    | H, C_ASP_85     | 2.82 | 1.92 | 18.11 |
| 1HGG.PDB | O, C_LEU_59    | N, C_VAL_88    | H, C_VAL_88     | 2.94 | 1.97 | 7.31  |
| 1HGG.PDB | O, C_MET_268   | N, C_GLU_89    | H, C_GLU_89     | 2.84 | 1.90 | 11.81 |
| 1HGG.PDB | OD1, C_ASP_60  | NE, C_ARG_90   | HE, C_ARG_90    | 2.93 | 1.95 | 8.71  |
| 1HGG.PDB | O, C_SER_270   | NH1, C_ARG_90  | HH11, C_ARG_90  | 2.63 | 1.77 | 25.40 |
| 1HGG.PDB | O, C_ALA_272   | NH1, C_ARG_90  | HH12, C_ARG_90  | 2.64 | 1.73 | 19.40 |
| 1HGG.PDB | OD2, C_ASP_60  | NH2, C_ARG_90  | HH21, C_ARG_90  | 2.79 | 1.80 | 9.72  |
| 1HGG.PDB | OD1, C_ASP_271 | N, C_SER_91    | H, C_SER_91     | 2.91 | 1.98 | 14.77 |

|          |                |                |                 |      |      |       |
|----------|----------------|----------------|-----------------|------|------|-------|
| 1HGG.PDB | OD1, C_ASP_271 | OG, C_SER_91   | HG, C_SER_91    | 2.89 | 2.06 | 25.85 |
| 1HGG.PDB | OD2, C_ASP_271 | OG, C_SER_91   | HG, C_SER_91    | 2.90 | 2.02 | 21.44 |
| 1HGG.PDB | O, C_ASP_63    | N, C_PHE_94    | H, C_PHE_94     | 2.99 | 2.03 | 11.00 |
| 1HGG.PDB | OD2, C_ASP_68  | OG, C_SER_95   | HG, C_SER_95    | 2.90 | 1.95 | 11.80 |
| 1HGG.PDB | OD2, C_ASP_73  | N, C_ASN_96    | H, C_ASN_96     | 2.84 | 1.91 | 15.44 |
| 1HGG.PDB | SG, C_CYS_97   | N, C_TYR_98    | H, C_TYR_98     | 2.98 | 2.13 | 24.49 |
| 1HGG.PDB | OD1, C_ASP_68  | OH, C_TYR_100  | HH, C_TYR_100   | 2.93 | 1.98 | 11.50 |
| 1HGG.PDB | O, C_ILE_230   | N, C_ASP_101   | H, C_ASP_101    | 2.95 | 2.06 | 21.39 |
| 1HGG.PDB | OD1, C_ASP_104 | N, C_SER_107   | H, C_SER_107    | 2.96 | 2.07 | 20.96 |
| 1HGG.PDB | OD2, C_ASP_104 | OG, C_SER_107  | HG, C_SER_107   | 2.88 | 1.95 | 15.82 |
| 1HGG.PDB | O, C_TYR_105   | N, C_ARG_109   | H, C_ARG_109    | 2.77 | 1.80 | 4.85  |
| 1HGG.PDB | OE2, D_GLU_67  | NH2, C_ARG_109 | HH21, C_ARG_109 | 2.85 | 1.88 | 14.56 |
| 1HGG.PDB | OD2, B_ASP_79  | OG, C_SER_110  | HG, C_SER_110   | 2.76 | 1.86 | 17.83 |
| 1HGG.PDB | O, C_SER_107   | N, C_LEU_111   | H, C_LEU_111    | 2.84 | 1.88 | 8.80  |
| 1HGG.PDB | O, C_ARG_109   | N, C_ALA_113   | H, C_ALA_113    | 2.92 | 2.01 | 17.55 |
| 1HGG.PDB | O, C_SER_110   | N, C_SER_114   | H, C_SER_114    | 2.96 | 2.00 | 11.10 |
| 1HGG.PDB | OE2, C_GLU_119 | OG1, C_THR_117 | HG1, C_THR_117  | 2.92 | 1.97 | 8.69  |
| 1HGG.PDB | O, C_GLU_82    | N, C_LEU_118   | H, C_LEU_118    | 2.98 | 2.02 | 11.62 |
| 1HGG.PDB | O, C_TYR_257   | N, C_ILE_121   | H, C_ILE_121    | 2.89 | 1.93 | 9.59  |
| 1HGG.PDB | O, C_ARG_255   | N, C_GLU_123   | H, C_GLU_123    | 2.97 | 2.02 | 13.93 |
| 1HGG.PDB | O, C_THR_155   | N, C_THR_131   | H, C_THR_131    | 2.76 | 1.85 | 16.88 |
| 1HGG.PDB | OD1, C_ASN_152 | N, C_ASN_133   | H, C_ASN_133    | 2.89 | 1.97 | 17.25 |
| 1HGG.PDB | O, C_GLY_146   | N, C_SER_136   | H, C_SER_136    | 2.76 | 1.84 | 16.68 |
| 1HGG.PDB | OG, C_SER_136  | N, C_ALA_138   | H, C_ALA_138    | 2.90 | 1.94 | 8.35  |
| 1HGG.PDB | O, C_GLY_144   | NZ, C_LYS_140  | HZ1, C_LYS_140  | 2.87 | 1.89 | 15.96 |
| 1HGG.PDB | OD1, C_ASN_137 | NZ, C_LYS_140  | HZ2, C_LYS_140  | 2.78 | 1.78 | 13.21 |
| 1HGG.PDB | OD2, C_ASP_77  | NE, C_ARG_141  | HE, C_ARG_141   | 2.87 | 2.06 | 29.23 |
| 1HGG.PDB | O, C_PHE_147   | NH1, C_ARG_141 | HH12, C_ARG_141 | 2.49 | 1.65 | 25.79 |
| 1HGG.PDB | OD1, C_ASP_77  | NH2, C_ARG_141 | HH21, C_ARG_141 | 2.76 | 1.85 | 22.10 |
| 1HGG.PDB | OD2, C_ASP_77  | NH2, C_ARG_141 | HH21, C_ARG_141 | 2.74 | 1.86 | 24.28 |
| 1HGG.PDB | O, C_GLY_72    | NH2, C_ARG_141 | HH22, C_ARG_141 | 2.93 | 1.94 | 7.19  |
| 1HGG.PDB | OD1, C_ASN_137 | OG, C_SER_145  | HG, C_SER_145   | 2.90 | 2.03 | 20.82 |
| 1HGG.PDB | O, C_SER_136   | N, C_GLY_146   | H, C_GLY_146    | 2.99 | 2.11 | 21.11 |
| 1HGG.PDB | O, C_GLY_72    | N, C_SER_149   | H, C_SER_149    | 2.87 | 1.95 | 15.72 |
| 1HGG.PDB | O, C_ALA_253   | N, C_ASN_152   | H, C_ASN_152    | 2.70 | 1.87 | 25.79 |
| 1HGG.PDB | OH, C_TYR_195  | NE1, C_TRP_153 | HE1, C_TRP_153  | 2.90 | 1.98 | 17.08 |
| 1HGG.PDB | O, C_THR_131   | N, C_THR_155   | H, C_THR_155    | 2.97 | 2.01 | 10.26 |
| 1HGG.PDB | O, C_LEU_194   | N, C_LYS_156   | H, C_LYS_156    | 2.96 | 2.09 | 22.28 |
| 1HGG.PDB | O, C_THR_160   | N, C_SER_157   | H, C_SER_157    | 2.94 | 2.03 | 17.38 |
| 1HGG.PDB | O, C_ILE_245   | N, C_VAL_166   | H, C_VAL_166    | 2.88 | 1.92 | 11.02 |
| 1HGG.PDB | O, C_LEU_243   | OG1, C_THR_167 | HG1, C_THR_167  | 2.88 | 1.99 | 19.69 |
| 1HGG.PDB | O, C_LEU_243   | N, C_MET_168   | H, C_MET_168    | 2.95 | 2.02 | 15.96 |
| 1HGG.PDB | O, C_ASP_241   | N, C_ASN_170   | H, C_ASN_170    | 2.87 | 1.89 | 5.24  |
| 1HGG.PDB | O, C_PHE_174   | ND2, C_ASN_170 | HD21, C_ASN_170 | 2.80 | 1.86 | 12.52 |
| 1HGG.PDB | O, C_VAL_237   | ND2, C_ASN_170 | HD22, C_ASN_170 | 2.86 | 2.00 | 22.88 |
| 1HGG.PDB | O, C_VAL_237   | N, C_LYS_176   | H, C_LYS_176    | 2.90 | 1.97 | 14.96 |
| 1HGG.PDB | OE2, C_GLU_123 | NZ, C_LYS_176  | HZ1, C_LYS_176  | 2.63 | 1.76 | 26.89 |
| 1HGG.PDB | O, C_PHE_258   | N, C_LEU_177   | H, C_LEU_177    | 2.95 | 1.99 | 9.21  |
| 1HGG.PDB | O, C_THR_235   | N, C_TYR_178   | H, C_TYR_178    | 2.76 | 1.80 | 6.43  |
| 1HGG.PDB | OE1, C_GLU_123 | OH, C_TYR_178  | HH, C_TYR_178   | 2.78 | 1.82 | 5.18  |
| 1HGG.PDB | OG1, C_THR_235 | NE1, C_TRP_180 | HE1, C_TRP_180  | 2.92 | 1.93 | 1.99  |
| 1HGG.PDB | O, C_ASN_250   | N, C_HIS_183   | H, C_HIS_183    | 2.79 | 1.93 | 23.13 |
| 1HGG.PDB | O, C_ARG_229   | N, C_HIS_184   | H, C_HIS_184    | 2.88 | 1.91 | 4.45  |
| 1HGG.PDB | OG, C_SER_231  | NE2, C_HIS_184 | HE2, C_HIS_184  | 2.79 | 1.91 | 21.48 |
| 1HGG.PDB | OG1, C_THR_187 | N, C_GLU_190   | H, C_GLU_190    | 2.85 | 1.91 | 12.50 |
| 1HGG.PDB | OD1, C_ASN_250 | NE2, C_GLN_191 | HE21, C_GLN_191 | 2.95 | 1.99 | 11.16 |
| 1HGG.PDB | O, C_GLN_197   | NE2, C_GLN_191 | HE22, C_GLN_191 | 2.91 | 2.02 | 19.58 |
| 1HGG.PDB | O, C_GLN_189   | OG1, C_THR_192 | HG1, C_THR_192  | 2.78 | 1.95 | 25.67 |

|          |                |                |                 |      |      |       |
|----------|----------------|----------------|-----------------|------|------|-------|
| 1HGG.PDB | O, C_GLN_189   | N, C_SER_193   | H, C_SER_193    | 2.82 | 1.90 | 15.79 |
| 1HGG.PDB | O, C_GLN_191   | N, C_TYR_195   | H, C_TYR_195    | 2.84 | 1.90 | 11.98 |
| 1HGG.PDB | O, C_THR_192   | N, C_VAL_196   | H, C_VAL_196    | 2.94 | 2.12 | 27.31 |
| 1HGG.PDB | O, C_TYR_161   | NE2, C_GLN_197 | HE21, C_GLN_197 | 2.93 | 1.96 | 5.46  |
| 1HGG.PDB | O, C_ASN_248   | NE2, C_GLN_197 | HE22, C_GLN_197 | 2.96 | 2.07 | 20.53 |
| 1HGG.PDB | OD1, C_ASN_246 | NH2, C_ARG_201 | HH21, C_ARG_201 | 2.66 | 1.74 | 19.39 |
| 1HGG.PDB | O, C_ILE_213   | N, C_VAL_202   | H, C_VAL_202    | 2.95 | 2.00 | 11.94 |
| 1HGG.PDB | O, C_ASN_246   | N, C_THR_203   | H, C_THR_203    | 2.86 | 1.90 | 8.48  |
| 1HGG.PDB | OG1, C_THR_212 | OG1, C_THR_203 | HG1, C_THR_203  | 2.83 | 1.91 | 13.70 |
| 1HGG.PDB | O, C_GLN_211   | N, C_VAL_204   | H, C_VAL_204    | 2.89 | 1.98 | 18.00 |
| 1HGG.PDB | O, C_SER_209   | N, C_THR_206   | H, C_THR_206    | 2.98 | 2.01 | 7.02  |
| 1HGG.PDB | OD1, C_ASP_241 | N, C_ARG_207   | H, C_ARG_207    | 2.89 | 1.95 | 13.44 |
| 1HGG.PDB | OD2, C_ASP_241 | NE, C_ARG_208  | HE, C_ARG_208   | 2.93 | 2.03 | 20.59 |
| 1HGG.PDB | OG1, C_THR_206 | OG, C_SER_209  | HG, C_SER_209   | 2.99 | 2.06 | 14.06 |
| 1HGG.PDB | O, C_VAL_204   | N, C_GLN_211   | H, C_GLN_211    | 2.82 | 1.90 | 16.88 |
| 1HGG.PDB | O, C_VAL_202   | N, C_ILE_213   | H, C_ILE_213    | 2.82 | 1.89 | 15.37 |
| 1HGG.PDB | OE1, E_GLN_210 | NH2, C_ARG_220 | HH21, C_ARG_220 | 2.61 | 1.71 | 21.26 |
| 1HGG.PDB | O, C_ASN_216   | NH2, C_ARG_220 | HH22, C_ARG_220 | 2.71 | 1.81 | 20.71 |
| 1HGG.PDB | O, C_LEU_226   | N, C_VAL_223   | H, C_VAL_223    | 2.85 | 1.90 | 10.41 |
| 1HGG.PDB | O, C_CYS_97    | NE, C_ARG_224  | HE, C_ARG_224   | 2.77 | 1.94 | 26.89 |
| 1HGG.PDB | O, C_CYS_97    | NH2, C_ARG_224 | HH21, C_ARG_224 | 2.80 | 1.94 | 26.26 |
| 1HGG.PDB | O, C_VAL_223   | N, C_LEU_226   | H, C_LEU_226    | 2.98 | 2.05 | 14.11 |
| 1HGG.PDB | O, C_ARG_220   | OG, C_SER_227  | HG, C_SER_227   | 2.93 | 1.98 | 9.94  |
| 1HGG.PDB | O, C_SER_228   | NH1, C_ARG_229 | HH11, C_ARG_229 | 2.73 | 1.79 | 17.88 |
| 1HGG.PDB | O, C_PRO_221   | NH2, C_ARG_229 | HH22, C_ARG_229 | 2.58 | 1.66 | 18.11 |
| 1HGG.PDB | OD1, C_ASP_101 | OG, C_SER_231  | HG, C_SER_231   | 2.91 | 1.95 | 9.20  |
| 1HGG.PDB | O, C_ASP_101   | N, C_ILE_232   | H, C_ILE_232    | 2.94 | 2.02 | 16.10 |
| 1HGG.PDB | O, C_TRP_180   | N, C_TYR_233   | H, C_TYR_233    | 2.88 | 1.93 | 12.54 |
| 1HGG.PDB | O, C_TYR_178   | N, C_THR_235   | H, C_THR_235    | 2.88 | 1.98 | 19.07 |
| 1HGG.PDB | O, C_LYS_176   | N, C_VAL_237   | H, C_VAL_237    | 2.77 | 1.82 | 10.57 |
| 1HGG.PDB | OE1, B_GLU_72  | NZ, C_LYS_238  | HZ1, C_LYS_238  | 2.83 | 1.86 | 17.18 |
| 1HGG.PDB | OE2, B_GLU_72  | NZ, C_LYS_238  | HZ1, C_LYS_238  | 2.70 | 1.87 | 29.85 |
| 1HGG.PDB | O, B_SER_71    | NZ, C_LYS_238  | HZ3, C_LYS_238  | 2.64 | 1.71 | 20.39 |
| 1HGG.PDB | O, C_ASN_170   | N, C_GLY_240   | H, C_GLY_240    | 2.87 | 2.00 | 22.99 |
| 1HGG.PDB | O, C_LYS_238   | N, C_ASP_241   | H, C_ASP_241    | 2.94 | 2.02 | 16.73 |
| 1HGG.PDB | OD1, C_ASP_241 | N, C_VAL_242   | H, C_VAL_242    | 2.79 | 1.98 | 28.74 |
| 1HGG.PDB | O, C_MET_168   | N, C_LEU_243   | H, C_LEU_243    | 2.90 | 1.93 | 4.41  |
| 1HGG.PDB | O, C_SER_205   | N, C_VAL_244   | H, C_VAL_244    | 2.94 | 1.99 | 13.16 |
| 1HGG.PDB | O, C_VAL_166   | N, C_ILE_245   | H, C_ILE_245    | 2.96 | 2.03 | 15.63 |
| 1HGG.PDB | O, C_THR_203   | N, C_ASN_246   | H, C_ASN_246    | 2.89 | 1.94 | 11.37 |
| 1HGG.PDB | OD1, C_ASN_165 | ND2, C_ASN_246 | HD22, C_ASN_246 | 2.88 | 1.97 | 17.94 |
| 1HGG.PDB | O, C_LEU_164   | N, C_SER_247   | H, C_SER_247    | 2.93 | 2.03 | 18.95 |
| 1HGG.PDB | OE1, C_GLN_191 | ND2, C_ASN_250 | HD21, C_ASN_250 | 2.88 | 1.93 | 11.32 |
| 1HGG.PDB | O, C_HIS_183   | ND2, C_ASN_250 | HD22, C_ASN_250 | 2.88 | 1.92 | 9.88  |
| 1HGG.PDB | O, C_ASN_152   | N, C_ALA_253   | H, C_ALA_253    | 2.89 | 1.98 | 18.52 |
| 1HGG.PDB | OD1, C_ASN_133 | NH2, C_ARG_255 | HH22, C_ARG_255 | 2.54 | 1.68 | 24.43 |
| 1HGG.PDB | O, C_ILE_121   | N, C_TYR_257   | H, C_TYR_257    | 2.94 | 2.10 | 25.61 |
| 1HGG.PDB | O, C_LEU_177   | N, C_PHE_258   | H, C_PHE_258    | 2.95 | 2.00 | 12.32 |
| 1HGG.PDB | OG, C_SER_115  | N, C_ARG_261   | H, C_ARG_261    | 2.98 | 2.02 | 10.79 |
| 1HGG.PDB | OE2, C_GLU_119 | NH1, C_ARG_261 | HH12, C_ARG_261 | 2.67 | 1.86 | 29.79 |
| 1HGG.PDB | OE1, C_GLU_119 | NH2, C_ARG_261 | HH22, C_ARG_261 | 2.73 | 1.87 | 26.76 |
| 1HGG.PDB | OH, C_TYR_302  | NZ, C_LYS_264  | HZ1, C_LYS_264  | 2.88 | 1.92 | 18.77 |
| 1HGG.PDB | ND1, C_HIS_56  | NZ, C_LYS_264  | HZ2, C_LYS_264  | 2.66 | 1.73 | 19.57 |
| 1HGG.PDB | OD2, C_ASP_85  | NZ, C_LYS_264  | HZ3, C_LYS_264  | 2.85 | 1.83 | 11.83 |
| 1HGG.PDB | O, C_PHE_87    | N, C_MET_268   | H, C_MET_268    | 2.84 | 1.93 | 18.75 |
| 1HGG.PDB | OE1, D_GLU_67  | NH1, C_ARG_269 | HH12, C_ARG_269 | 2.69 | 1.85 | 27.75 |
| 1HGG.PDB | O, C_PRO_284   | OG, C_SER_270  | HG, C_SER_270   | 2.81 | 1.87 | 12.03 |
| 1HGG.PDB | OG, C_SER_270  | N, C_ALA_272   | H, C_ALA_272    | 2.94 | 2.00 | 11.74 |

|          |                |                |                 |      |      |       |
|----------|----------------|----------------|-----------------|------|------|-------|
| 1HGG.PDB | O, C_ILE_51    | N, C_ASP_275   | H, C_ASP_275    | 2.84 | 1.97 | 21.56 |
| 1HGG.PDB | OD1, C_ASP_275 | N, C_THR_276   | H, C_THR_276    | 2.78 | 1.93 | 24.05 |
| 1HGG.PDB | O, C_ASN_54    | N, C_SER_279   | H, C_SER_279    | 2.77 | 1.82 | 11.28 |
| 1HGG.PDB | O, C_TYR_302   | N, C_ILE_282   | H, C_ILE_282    | 2.90 | 1.95 | 12.03 |
| 1HGG.PDB | O, C_THR_283   | N, C_GLY_286   | H, C_GLY_286    | 2.78 | 1.84 | 12.37 |
| 1HGG.PDB | O, C_LYS_50    | N, C_SER_287   | H, C_SER_287    | 2.83 | 1.87 | 6.69  |
| 1HGG.PDB | O, C_ALA_304   | ND2, C_ASN_290 | HD22, C_ASN_290 | 2.88 | 2.00 | 21.32 |
| 1HGG.PDB | OE1, C_GLN_44  | NZ, C_LYS_292  | HZ1, C_LYS_292  | 2.77 | 1.76 | 11.69 |
| 1HGG.PDB | OD2, C_ASP_291 | NZ, C_LYS_292  | HZ3, C_LYS_292  | 2.78 | 1.91 | 27.51 |
| 1HGG.PDB | O, C_LYS_307   | N, C_GLN_295   | H, C_GLN_295    | 2.80 | 1.92 | 20.69 |
| 1HGG.PDB | O, C_ASN_298   | NE2, C_GLN_295 | HE21, C_GLN_295 | 2.82 | 1.85 | 7.30  |
| 1HGG.PDB | O, C_GLN_44    | N, C_ASN_296   | H, C_ASN_296    | 2.86 | 1.91 | 11.10 |
| 1HGG.PDB | OD1, C_ASN_285 | ND2, C_ASN_298 | HD22, C_ASN_298 | 2.95 | 2.00 | 10.88 |
| 1HGG.PDB | O, D_LYS_68    | NZ, C_LYS_299  | HZ1, C_LYS_299  | 2.94 | 1.91 | 9.55  |
| 1HGG.PDB | OD1, C_ASN_298 | N, C_ILE_300   | H, C_ILE_300    | 2.84 | 1.92 | 15.94 |
| 1HGG.PDB | O, C_ILE_282   | N, C_TYR_302   | H, C_TYR_302    | 2.82 | 1.94 | 22.26 |
| 1HGG.PDB | O, C_LYS_264   | OH, C_TYR_302  | HH, C_TYR_302   | 2.69 | 1.86 | 25.98 |
| 1HGG.PDB | O, D_LYS_62    | N, C_GLY_303   | H, C_GLY_303    | 2.91 | 1.94 | 5.10  |
| 1HGG.PDB | O, C_GLN_295   | N, C_VAL_309   | H, C_VAL_309    | 2.92 | 2.09 | 26.95 |
| 1HGG.PDB | OG, D_SER_93   | N, C_LYS_310   | H, C_LYS_310    | 2.89 | 1.96 | 14.95 |
| 1HGG.PDB | OD1, D_ASP_90  | NZ, C_LYS_310  | HZ2, C_LYS_310  | 2.65 | 1.73 | 21.74 |
| 1HGG.PDB | OE2, C_GLU_41  | N, C_LEU_314   | H, C_LEU_314    | 2.79 | 1.88 | 17.71 |
| 1HGG.PDB | OE1, C_GLU_41  | NZ, C_LYS_315  | HZ3, C_LYS_315  | 2.73 | 1.82 | 23.48 |
| 1HGG.PDB | O, C_THR_40    | N, C_LEU_316   | H, C_LEU_316    | 2.76 | 1.85 | 16.07 |
| 1HGG.PDB | OD1, D_ASN_104 | N, C_ALA_317   | H, C_ALA_317    | 2.78 | 1.87 | 17.02 |
| 1HGG.PDB | O, C_ASN_38    | N, C_THR_318   | H, C_THR_318    | 2.91 | 1.99 | 16.68 |
| 1HGG.PDB | O, C_VAL_20    | ND2, C_ASN_322 | HD21, C_ASN_322 | 2.89 | 1.97 | 16.73 |
| 1HGG.PDB | OE2, C_GLU_35  | ND2, C_ASN_322 | HD22, C_ASN_322 | 2.82 | 1.96 | 24.18 |
| 1HGG.PDB | OXT, C_THR_328 | NE2, C_GLN_327 | HE22, C_GLN_327 | 2.99 | 2.05 | 16.22 |
| 1HGG.PDB | OD2, D_ASP_112 | N, D_GLY_1     | H2, D_GLY_1     | 2.72 | 1.72 | 12.91 |
| 1HGG.PDB | OD1, D_ASP_109 | N, D_LEU_2     | H, D_LEU_2      | 2.98 | 2.06 | 18.06 |
| 1HGG.PDB | OD2, D_ASP_112 | N, D_PHE_3     | H, D_PHE_3      | 2.89 | 2.07 | 26.93 |
| 1HGG.PDB | OD2, D_ASP_112 | N, D_GLY_4     | H, D_GLY_4      | 2.95 | 2.04 | 17.54 |
| 1HGG.PDB | OD1, D_ASP_112 | N, D_ALA_5     | H, D_ALA_5      | 2.93 | 2.07 | 23.70 |
| 1HGG.PDB | O, D_GLY_4     | N, D_PHE_9     | H, D_PHE_9      | 2.79 | 1.86 | 14.01 |
| 1HGG.PDB | O, C_VAL_323   | N, D_GLY_13    | H, D_GLY_13     | 2.71 | 1.79 | 13.39 |
| 1HGG.PDB | O, C_HIS_17    | N, D_TRP_14    | H, D_TRP_14     | 2.80 | 1.89 | 17.21 |
| 1HGG.PDB | OG1, D_THR_41  | N, D_TRP_21    | H, D_TRP_21     | 2.88 | 1.93 | 11.49 |
| 1HGG.PDB | O, C_GLY_16    | N, D_GLY_23    | H, D_GLY_23     | 2.99 | 2.09 | 20.18 |
| 1HGG.PDB | O, D_ALA_35    | N, D_PHE_24    | H, D_PHE_24     | 2.85 | 1.88 | 4.85  |
| 1HGG.PDB | O, C_CYS_14    | N, D_ARG_25    | H, D_ARG_25     | 2.94 | 1.98 | 8.24  |
| 1HGG.PDB | OE1, D_GLN_34  | NE, D_ARG_25   | HE, D_ARG_25    | 2.69 | 1.81 | 20.51 |
| 1HGG.PDB | OE1, D_GLN_34  | NH2, D_ARG_25  | HH21, D_ARG_25  | 2.92 | 2.08 | 27.66 |
| 1HGG.PDB | O, D_GLY_33    | N, D_HIS_26    | H, D_HIS_26     | 2.93 | 2.01 | 17.07 |
| 1HGG.PDB | O, D_GLY_31    | N, D_ASN_28    | H, D_ASN_28     | 2.87 | 1.91 | 10.16 |
| 1HGG.PDB | OD1, D_ASN_146 | ND2, D_ASN_28  | HD21, D_ASN_28  | 2.95 | 1.98 | 8.75  |
| 1HGG.PDB | O, D_HIS_26    | N, D_GLY_33    | H, D_GLY_33     | 2.99 | 2.09 | 19.19 |
| 1HGG.PDB | O, D_PHE_24    | N, D_ALA_35    | H, D_ALA_35     | 2.88 | 2.07 | 28.42 |
| 1HGG.PDB | O, D_TYR_22    | N, D_ASP_37    | H, D_ASP_37     | 2.74 | 1.77 | 2.87  |
| 1HGG.PDB | OD2, D_ASP_37  | N, D_SER_40    | H, D_SER_40     | 2.86 | 1.92 | 11.90 |
| 1HGG.PDB | OD2, D_ASP_37  | OG, D_SER_40   | HG, D_SER_40    | 2.77 | 1.93 | 24.58 |
| 1HGG.PDB | O, D_ASP_37    | OG1, D_THR_41  | HG1, D_THR_41   | 2.70 | 1.81 | 19.22 |
| 1HGG.PDB | O, D_LEU_38    | N, D_GLN_42    | H, D_GLN_42     | 2.95 | 2.02 | 14.26 |
| 1HGG.PDB | OD1, D_ASP_46  | NE2, D_GLN_42  | HE22, D_GLN_42  | 2.85 | 1.96 | 21.08 |
| 1HGG.PDB | O, D_LYS_39    | N, D_ALA_43    | H, D_ALA_43     | 2.99 | 2.03 | 8.86  |
| 1HGG.PDB | O, D_SER_40    | N, D_ALA_44    | H, D_ALA_44     | 2.95 | 1.97 | 1.83  |
| 1HGG.PDB | O, D_THR_41    | N, D_ILE_45    | H, D_ILE_45     | 2.97 | 2.03 | 14.64 |
| 1HGG.PDB | O, D_GLN_42    | N, D_ASP_46    | H, D_ASP_46     | 2.77 | 1.81 | 4.12  |

|          |                |                |                 |      |      |       |
|----------|----------------|----------------|-----------------|------|------|-------|
| 1HGG.PDB | OE2, D_GLU_114 | NE2, D_GLN_47  | HE21, D_GLN_47  | 2.97 | 2.05 | 17.17 |
| 1HGG.PDB | O, D_ALA_43    | NE2, D_GLN_47  | HE22, D_GLN_47  | 2.95 | 2.03 | 16.72 |
| 1HGG.PDB | O, D_ILE_45    | N, D_ASN_49    | H, D_ASN_49     | 2.86 | 1.93 | 14.78 |
| 1HGG.PDB | O, D_ASP_46    | N, D_GLY_50    | H, D_GLY_50     | 2.93 | 2.07 | 23.90 |
| 1HGG.PDB | O, D_GLN_47    | N, D_LYS_51    | H, D_LYS_51     | 2.93 | 1.95 | 0.82  |
| 1HGG.PDB | OG1, D_THR_107 | NZ, D_LYS_51   | HZ1, D_LYS_51   | 2.98 | 2.00 | 17.66 |
| 1HGG.PDB | OE1, D_GLU_103 | NZ, D_LYS_51   | HZ2, D_LYS_51   | 2.77 | 1.73 | 6.39  |
| 1HGG.PDB | ND1, D_HIS_106 | NZ, D_LYS_51   | HZ3, D_LYS_51   | 2.76 | 1.78 | 15.09 |
| 1HGG.PDB | O, D_ILE_48    | N, D_LEU_52    | H, D_LEU_52     | 2.86 | 1.96 | 19.21 |
| 1HGG.PDB | O, D_ASN_49    | N, D_ASN_53    | H, D_ASN_53     | 2.89 | 1.99 | 19.47 |
| 1HGG.PDB | O, A_THR_28    | NE, D_ARG_54   | HE, D_ARG_54    | 2.88 | 1.91 | 8.15  |
| 1HGG.PDB | OE1, D_GLU_57  | NH1, D_ARG_54  | HH11, D_ARG_54  | 2.86 | 1.86 | 11.12 |
| 1HGG.PDB | OE2, B_GLU_97  | NH2, D_ARG_54  | HH22, D_ARG_54  | 2.76 | 1.78 | 10.56 |
| 1HGG.PDB | O, D_ASN_53    | N, D_ILE_56    | H, D_ILE_56     | 2.92 | 2.12 | 28.93 |
| 1HGG.PDB | OE2, D_GLU_61  | NZ, D_LYS_58   | HZ3, D_LYS_58   | 2.91 | 1.89 | 12.30 |
| 1HGG.PDB | OG, C_SER_110  | NE2, D_HIS_64  | HE2, D_HIS_64   | 2.86 | 1.90 | 9.42  |
| 1HGG.PDB | O, D_PHE_63    | NE2, D_GLN_65  | HE22, D_GLN_65  | 2.97 | 2.00 | 6.28  |
| 1HGG.PDB | O, C_LYS_299   | NZ, D_LYS_68   | HZ1, D_LYS_68   | 2.84 | 1.83 | 12.46 |
| 1HGG.PDB | OE2, D_GLU_85  | NZ, D_LYS_68   | HZ2, D_LYS_68   | 2.77 | 1.74 | 6.59  |
| 1HGG.PDB | OE2, D_GLU_72  | OG, D_SER_71   | HG, D_SER_71    | 2.82 | 2.00 | 26.77 |
| 1HGG.PDB | OG, E_SER_107  | N, D_ARG_76    | H, D_ARG_76     | 2.84 | 1.88 | 7.98  |
| 1HGG.PDB | OE2, F_GLU_81  | NE, D_ARG_76   | HE, D_ARG_76    | 2.86 | 1.89 | 9.57  |
| 1HGG.PDB | OE1, F_GLU_74  | NH1, D_ARG_76  | HH12, D_ARG_76  | 2.78 | 1.80 | 12.10 |
| 1HGG.PDB | OE1, F_GLU_81  | NH2, D_ARG_76  | HH21, D_ARG_76  | 2.67 | 1.68 | 6.66  |
| 1HGG.PDB | OE2, F_GLU_74  | NH2, D_ARG_76  | HH22, D_ARG_76  | 2.74 | 1.75 | 9.29  |
| 1HGG.PDB | O, D_GLY_75    | N, D_ASP_79    | H, D_ASP_79     | 2.89 | 1.95 | 14.50 |
| 1HGG.PDB | OE1, F_GLU_85  | OH, D_TYR_83   | HH, D_TYR_83    | 2.59 | 1.78 | 26.83 |
| 1HGG.PDB | O, D_LEU_80    | N, D_VAL_84    | H, D_VAL_84     | 2.86 | 1.90 | 9.21  |
| 1HGG.PDB | O, D_LYS_82    | N, D_ASP_86    | H, D_ASP_86     | 2.98 | 2.01 | 8.40  |
| 1HGG.PDB | O, D_TYR_83    | N, D_THR_87    | H, D_THR_87     | 2.88 | 1.92 | 7.85  |
| 1HGG.PDB | O, D_VAL_84    | N, D_LYS_88    | H, D_LYS_88     | 2.88 | 2.03 | 24.81 |
| 1HGG.PDB | OH, B_TYR_83   | NZ, D_LYS_88   | HZ1, D_LYS_88   | 2.73 | 1.70 | 8.35  |
| 1HGG.PDB | O, D_GLU_85    | N, D_ILE_89    | H, D_ILE_89     | 2.83 | 1.87 | 9.71  |
| 1HGG.PDB | O, D_LYS_88    | N, D_TRP_92    | H, D_TRP_92     | 2.89 | 1.92 | 6.21  |
| 1HGG.PDB | O, D_ILE_89    | N, D_SER_93    | H, D_SER_93     | 2.82 | 1.94 | 21.49 |
| 1HGG.PDB | O, D_ILE_89    | OG, D_SER_93   | HG, D_SER_93    | 2.77 | 1.87 | 18.00 |
| 1HGG.PDB | O, D_ASP_90    | N, D_TYR_94    | H, D_TYR_94     | 2.96 | 2.03 | 15.50 |
| 1HGG.PDB | O, D_TRP_92    | N, D_ALA_96    | H, D_ALA_96     | 3.00 | 2.06 | 15.10 |
| 1HGG.PDB | O, D_TYR_94    | N, D_LEU_98    | H, D_LEU_98     | 2.95 | 1.99 | 9.12  |
| 1HGG.PDB | O, D_ASN_95    | N, D_LEU_99    | H, D_LEU_99     | 2.88 | 1.98 | 19.51 |
| 1HGG.PDB | O, D_ALA_96    | N, D_VAL_100   | H, D_VAL_100    | 2.99 | 2.02 | 8.75  |
| 1HGG.PDB | O, D_LEU_98    | N, D_LEU_102   | H, D_LEU_102    | 2.93 | 1.97 | 11.16 |
| 1HGG.PDB | O, D_VAL_100   | N, D_ASN_104   | H, D_ASN_104    | 2.84 | 1.93 | 18.38 |
| 1HGG.PDB | O, C_LYS_27    | ND2, D_ASN_104 | HD22, D_ASN_104 | 2.86 | 1.93 | 13.53 |
| 1HGG.PDB | O, D_LEU_102   | N, D_HIS_106   | H, D_HIS_106    | 2.95 | 2.00 | 11.00 |
| 1HGG.PDB | O, D_GLU_103   | N, D_THR_107   | H, D_THR_107    | 2.82 | 1.97 | 24.04 |
| 1HGG.PDB | O, D_HIS_106   | N, D_LEU_110   | H, D_LEU_110    | 2.77 | 1.83 | 11.18 |
| 1HGG.PDB | O, D_THR_107   | N, D_THR_111   | H, D_THR_111    | 2.98 | 2.03 | 10.32 |
| 1HGG.PDB | O, D_THR_107   | OG1, D_THR_111 | HG1, D_THR_111  | 2.86 | 1.91 | 10.45 |
| 1HGG.PDB | O, D_ASP_109   | N, D_SER_113   | H, D_SER_113    | 2.78 | 1.86 | 15.73 |
| 1HGG.PDB | O, D_ASP_112   | N, D_ASN_116   | H, D_ASN_116    | 3.00 | 2.01 | 4.28  |
| 1HGG.PDB | O, D_SER_113   | N, D_LYS_117   | H, D_LYS_117    | 2.76 | 1.87 | 19.86 |
| 1HGG.PDB | O, D_ASN_116   | N, D_GLU_120   | H, D_GLU_120    | 2.94 | 1.96 | 4.15  |
| 1HGG.PDB | O, D_LYS_117   | N, D_LYS_121   | H, D_LYS_121    | 2.89 | 1.99 | 19.16 |
| 1HGG.PDB | O, D_LEU_118   | N, D_THR_122   | H, D_THR_122    | 2.95 | 1.98 | 8.05  |
| 1HGG.PDB | O, D_PHE_119   | N, D_ARG_123   | H, D_ARG_123    | 2.95 | 1.99 | 9.23  |
| 1HGG.PDB | OE2, D_GLU_120 | NH1, D_ARG_123 | HH11, D_ARG_123 | 2.73 | 1.87 | 25.59 |
| 1HGG.PDB | O, D_GLU_120   | N, D_ARG_124   | H, D_ARG_124    | 2.99 | 2.02 | 7.97  |

|          |                |                |                 |      |      |       |
|----------|----------------|----------------|-----------------|------|------|-------|
| 1HGG.PDB | OE1, B_GLU_132 | NE, D_ARG_124  | HE, D_ARG_124   | 2.86 | 2.00 | 22.57 |
| 1HGG.PDB | OE2, B_GLU_132 | NE, D_ARG_124  | HE, D_ARG_124   | 2.78 | 1.96 | 26.12 |
| 1HGG.PDB | O, D_HIS_159   | ND2, D_ASN_129 | HD21, D_ASN_129 | 2.94 | 1.99 | 11.72 |
| 1HGG.PDB | OH, D_TYR_157  | ND2, D_ASN_129 | HD22, D_ASN_129 | 2.80 | 1.84 | 10.50 |
| 1HGG.PDB | O, D_LYS_139   | N, D_GLU_131   | H, D_GLU_131    | 2.99 | 2.04 | 13.39 |
| 1HGG.PDB | O, D_CYS_137   | N, D_MET_133   | H, D_MET_133    | 2.90 | 1.98 | 17.30 |
| 1HGG.PDB | OD1, D_ASN_135 | N, D_CYS_137   | H, D_CYS_137    | 3.00 | 2.10 | 19.46 |
| 1HGG.PDB | O, C_LEU_13    | N, D_PHE_138   | H, D_PHE_138    | 2.73 | 1.88 | 23.87 |
| 1HGG.PDB | O, D_GLU_131   | N, D_LYS_139   | H, D_LYS_139    | 2.86 | 1.90 | 10.04 |
| 1HGG.PDB | O, C_ALA_11    | N, D_ILE_140   | H, D_ILE_140    | 2.80 | 1.89 | 17.21 |
| 1HGG.PDB | O, D_ASN_129   | N, D_TYR_141   | H, D_TYR_141    | 2.89 | 1.92 | 4.81  |
| 1HGG.PDB | OE2, D_GLU_30  | N, D_ASN_146   | H, D_ASN_146    | 2.84 | 1.92 | 15.86 |
| 1HGG.PDB | O, D_ASP_145   | N, D_ILE_149   | H, D_ILE_149    | 2.98 | 2.02 | 9.24  |
| 1HGG.PDB | O, D_ASN_146   | N, D_GLU_150   | H, D_GLU_150    | 2.89 | 1.95 | 13.07 |
| 1HGG.PDB | O, D_ALA_147   | N, D_SER_151   | H, D_SER_151    | 2.89 | 2.01 | 20.94 |
| 1HGG.PDB | O, D_CYS_148   | OG, D_SER_151  | HG, D_SER_151   | 2.72 | 1.85 | 20.20 |
| 1HGG.PDB | O, D_GLU_150   | N, D_ASN_154   | H, D_ASN_154    | 2.84 | 1.87 | 4.45  |
| 1HGG.PDB | O, D_SER_151   | N, D_THR_156   | H, D_THR_156    | 2.78 | 1.93 | 25.02 |
| 1HGG.PDB | OD1, D_ASN_154 | OG1, D_THR_156 | HG1, D_THR_156  | 2.73 | 1.82 | 15.46 |
| 1HGG.PDB | NE2, D_HIS_142 | OH, D_TYR_157  | HH, D_TYR_157   | 2.72 | 1.85 | 20.87 |
| 1HGG.PDB | OD1, D_ASP_158 | N, D_ASP_160   | H, D_ASP_160    | 2.97 | 2.05 | 17.87 |
| 1HGG.PDB | O, D_HIS_159   | N, D_TYR_162   | H, D_TYR_162    | 2.93 | 2.01 | 16.79 |
| 1HGG.PDB | O, D_ASP_160   | N, D_ARG_163   | H, D_ARG_163    | 2.89 | 1.92 | 6.62  |
| 1HGG.PDB | O, B_ARG_170   | NH1, D_ARG_163 | HH12, D_ARG_163 | 2.79 | 1.85 | 17.60 |
| 1HGG.PDB | O, D_TYR_162   | N, D_ALA_166   | H, D_ALA_166    | 2.86 | 1.90 | 8.06  |
| 1HGG.PDB | O, D_ARG_163   | N, D_LEU_167   | H, D_LEU_167    | 2.77 | 1.84 | 14.60 |
| 1HGG.PDB | O, D_ALA_166   | N, D_ARG_170   | H, D_ARG_170    | 2.87 | 2.00 | 22.89 |
| 1HGG.PDB | O, D_GLU_128   | NE, D_ARG_170  | HE, D_ARG_170   | 2.70 | 1.85 | 24.63 |
| 1HGG.PDB | OE2, D_GLU_131 | NH1, D_ARG_170 | HH11, D_ARG_170 | 2.85 | 1.86 | 6.70  |
| 1HGG.PDB | O, D_LEU_167   | N, D_PHE_171   | H, D_PHE_171    | 2.94 | 1.98 | 10.64 |
| 1HGG.PDB | O, F_ILE_140   | N, E_ALA_11    | H, E_ALA_11     | 2.91 | 1.98 | 15.76 |
| 1HGG.PDB | O, F_GLN_27    | N, E_THR_12    | H, E_THR_12     | 2.92 | 1.99 | 15.18 |
| 1HGG.PDB | O, F_PHE_138   | N, E_LEU_13    | H, E_LEU_13     | 2.97 | 2.01 | 11.10 |
| 1HGG.PDB | O, F_ARG_25    | N, E_CYS_14    | H, E_CYS_14     | 2.71 | 1.83 | 19.57 |
| 1HGG.PDB | O, F_GLY_136   | N, E_LEU_15    | H, E_LEU_15     | 2.87 | 1.90 | 6.84  |
| 1HGG.PDB | O, F_GLY_23    | N, E_GLY_16    | H, E_GLY_16     | 2.91 | 2.01 | 19.19 |
| 1HGG.PDB | O, F_TRP_21    | N, E_HIS_18    | H, E_HIS_18     | 2.89 | 1.99 | 18.05 |
| 1HGG.PDB | OD1, E_ASN_322 | N, E_VAL_20    | H, E_VAL_20     | 2.81 | 1.84 | 7.14  |
| 1HGG.PDB | O, E_VAL_36    | N, E_THR_24    | H, E_THR_24     | 2.86 | 1.99 | 23.32 |
| 1HGG.PDB | O, E_ILE_34    | N, E_VAL_26    | H, E_VAL_26     | 2.80 | 1.86 | 12.97 |
| 1HGG.PDB | OE2, F_GLU_97  | NZ, E_LYS_27   | HZ1, E_LYS_27   | 2.91 | 1.88 | 8.89  |
| 1HGG.PDB | O, E_VAL_26    | N, E_ILE_34    | H, E_ILE_34     | 2.91 | 1.98 | 15.06 |
| 1HGG.PDB | O, E_THR_24    | N, E_VAL_36    | H, E_VAL_36     | 2.79 | 1.84 | 9.17  |
| 1HGG.PDB | O, E_MET_320   | N, E_THR_37    | H, E_THR_37     | 2.93 | 1.96 | 8.79  |
| 1HGG.PDB | O, E_LEU_316   | N, E_THR_40    | H, E_THR_40     | 2.83 | 1.96 | 23.13 |
| 1HGG.PDB | O, E_LEU_314   | N, E_LEU_42    | H, E_LEU_42     | 2.84 | 1.97 | 22.62 |
| 1HGG.PDB | O, E_PHE_294   | N, E_GLN_44    | H, E_GLN_44     | 2.82 | 1.86 | 8.10  |
| 1HGG.PDB | O, E_ASN_285   | OG, E_SER_47   | HG, E_SER_47    | 2.85 | 1.92 | 11.49 |
| 1HGG.PDB | OD2, E_ASP_275 | NZ, E_LYS_50   | HZ1, E_LYS_50   | 2.68 | 1.77 | 24.10 |
| 1HGG.PDB | O, E_PRO_273   | N, E_ILE_51    | H, E_ILE_51     | 2.76 | 1.80 | 7.93  |
| 1HGG.PDB | O, E_ASP_275   | N, E_ASN_53    | H, E_ASN_53     | 2.76 | 1.93 | 26.21 |
| 1HGG.PDB | OD2, E_ASP_85  | N, E_ARG_57    | H, E_ARG_57     | 2.88 | 1.93 | 10.58 |
| 1HGG.PDB | O, E_THR_83    | NE, E_ARG_57   | HE, E_ARG_57    | 2.76 | 1.79 | 2.44  |
| 1HGG.PDB | O, E_LEU_86    | N, E_LEU_59    | H, E_LEU_59     | 2.92 | 1.95 | 8.87  |
| 1HGG.PDB | O, E_VAL_88    | N, E_GLY_61    | H, E_GLY_61     | 2.97 | 2.12 | 24.82 |
| 1HGG.PDB | OD1, E_ASP_60  | N, E_ILE_62    | H, E_ILE_62     | 2.87 | 1.94 | 14.20 |
| 1HGG.PDB | O, E_GLY_61    | N, E_CYS_64    | H, E_CYS_64     | 2.97 | 2.05 | 16.18 |
| 1HGG.PDB | O, E_LEU_66    | N, E_LEU_70    | H, E_LEU_70     | 2.87 | 1.97 | 18.30 |

|          |                |                |                 |      |      |       |
|----------|----------------|----------------|-----------------|------|------|-------|
| 1HGG.PDB | O, E_ILE.67    | N, E_LEU.71    | H, E_LEU.71     | 2.81 | 1.85 | 7.87  |
| 1HGG.PDB | O, E_ASP.68    | N, E_GLY.72    | H, E_GLY.72     | 2.86 | 1.95 | 17.48 |
| 1HGG.PDB | OD1, E_ASP.73  | ND1, E_HIS.75  | HD1, E_HIS.75   | 2.75 | 1.85 | 17.34 |
| 1HGG.PDB | O, E_ASP.63    | NE2, E_HIS.75  | HE2, E_HIS.75   | 2.82 | 1.87 | 11.87 |
| 1HGG.PDB | O, E_ASP.73    | N, E_CYS.76    | H, E_CYS.76     | 2.74 | 1.82 | 15.22 |
| 1HGG.PDB | O, E_PRO.74    | N, E_ASP.77    | H, E_ASP.77     | 2.89 | 1.94 | 11.95 |
| 1HGG.PDB | O, E_PHE.79    | N, E_GLU.82    | H, E_GLU.82     | 3.00 | 2.09 | 17.70 |
| 1HGG.PDB | OE1, E_GLU.82  | N, E_THR.83    | H, E_THR.83     | 2.96 | 2.07 | 21.15 |
| 1HGG.PDB | O, E_ARG.57    | N, E_ASP.85    | H, E_ASP.85     | 2.82 | 1.91 | 18.08 |
| 1HGG.PDB | O, E_LEU.59    | N, E_VAL.88    | H, E_VAL.88     | 2.92 | 1.95 | 6.94  |
| 1HGG.PDB | O, E_MET.268   | N, E_GLU.89    | H, E_GLU.89     | 2.82 | 1.88 | 11.27 |
| 1HGG.PDB | OD1, E_ASP.60  | NE, E_ARG.90   | HE, E_ARG.90    | 2.91 | 1.94 | 9.27  |
| 1HGG.PDB | O, E_SER.270   | NH1, E_ARG.90  | HH11, E_ARG.90  | 2.66 | 1.80 | 25.54 |
| 1HGG.PDB | O, E_ALA.272   | NH1, E_ARG.90  | HH12, E_ARG.90  | 2.63 | 1.72 | 18.75 |
| 1HGG.PDB | OD2, E_ASP.60  | NH2, E_ARG.90  | HH21, E_ARG.90  | 2.83 | 1.84 | 9.64  |
| 1HGG.PDB | OD1, E_ASP.271 | N, E_SER.91    | H, E_SER.91     | 2.89 | 1.97 | 16.48 |
| 1HGG.PDB | OD1, E_ASP.271 | OG, E_SER.91   | HG, E_SER.91    | 2.92 | 2.07 | 24.79 |
| 1HGG.PDB | OD2, E_ASP.271 | OG, E_SER.91   | HG, E_SER.91    | 2.93 | 2.06 | 22.08 |
| 1HGG.PDB | O, E_ASP.63    | N, E_PHE.94    | H, E_PHE.94     | 3.00 | 2.05 | 12.31 |
| 1HGG.PDB | OD2, E_ASP.68  | OG, E_SER.95   | HG, E_SER.95    | 2.93 | 1.98 | 13.19 |
| 1HGG.PDB | OD2, E_ASP.73  | N, E_ASN.96    | H, E_ASN.96     | 2.88 | 1.94 | 14.23 |
| 1HGG.PDB | SG, E_CYS.97   | N, E_TYR.98    | H, E_TYR.98     | 2.97 | 2.12 | 24.47 |
| 1HGG.PDB | OD1, E_ASP.68  | OH, E_TYR.100  | HH, E_TYR.100   | 2.92 | 1.96 | 10.90 |
| 1HGG.PDB | O, E_ILE.230   | N, E_ASP.101   | H, E_ASP.101    | 2.99 | 2.10 | 20.87 |
| 1HGG.PDB | OD1, E_ASP.104 | N, E_SER.107   | H, E_SER.107    | 2.92 | 2.04 | 21.12 |
| 1HGG.PDB | OD2, E_ASP.104 | OG, E_SER.107  | HG, E_SER.107   | 2.85 | 1.93 | 15.56 |
| 1HGG.PDB | O, E_ASP.104   | N, E_LEU.108   | H, E_LEU.108    | 2.97 | 2.01 | 9.00  |
| 1HGG.PDB | O, E_TYR.105   | N, E_ARG.109   | H, E_ARG.109    | 2.81 | 1.84 | 2.88  |
| 1HGG.PDB | OE2, E_GLU.67  | NH2, E_ARG.109 | HH21, E_ARG.109 | 2.88 | 1.90 | 14.20 |
| 1HGG.PDB | OD2, E_ASP.79  | OG, E_SER.110  | HG, E_SER.110   | 2.79 | 1.88 | 16.48 |
| 1HGG.PDB | O, E_SER.107   | N, E_LEU.111   | H, E_LEU.111    | 2.86 | 1.89 | 6.99  |
| 1HGG.PDB | O, E_ARG.109   | N, E_ALA.113   | H, E_ALA.113    | 2.89 | 1.98 | 18.53 |
| 1HGG.PDB | O, E_SER.110   | N, E_SER.114   | H, E_SER.114    | 2.92 | 1.95 | 9.29  |
| 1HGG.PDB | OE2, E_GLU.119 | OG1, E_THR.117 | HG1, E_THR.117  | 2.95 | 1.99 | 7.33  |
| 1HGG.PDB | O, E_TYR.257   | N, E_ILE.121   | H, E_ILE.121    | 2.88 | 1.93 | 10.40 |
| 1HGG.PDB | O, E_ARG.255   | N, E_GLU.123   | H, E_GLU.123    | 2.93 | 1.99 | 13.52 |
| 1HGG.PDB | O, E_THR.155   | N, E_THR.131   | H, E_THR.131    | 2.74 | 1.86 | 19.96 |
| 1HGG.PDB | OD1, E_ASN.152 | N, E_ASN.133   | H, E_ASN.133    | 2.93 | 2.01 | 17.35 |
| 1HGG.PDB | O, E_GLY.146   | N, E_SER.136   | H, E_SER.136    | 2.75 | 1.83 | 16.47 |
| 1HGG.PDB | OG, E_SER.136  | N, E_ALA.138   | H, E_ALA.138    | 2.92 | 1.95 | 8.13  |
| 1HGG.PDB | O, E_GLY.144   | NZ, E_LYS.140  | HZ1, E_LYS.140  | 2.88 | 1.90 | 15.75 |
| 1HGG.PDB | OD1, E_ASN.137 | NZ, E_LYS.140  | HZ2, E_LYS.140  | 2.76 | 1.76 | 13.40 |
| 1HGG.PDB | OD2, E_ASP.77  | NE, E_ARG.141  | HE, E_ARG.141   | 2.90 | 2.09 | 29.10 |
| 1HGG.PDB | O, E_PHE.147   | NH1, E_ARG.141 | HH12, E_ARG.141 | 2.48 | 1.65 | 26.20 |
| 1HGG.PDB | OD1, E_ASP.77  | NH2, E_ARG.141 | HH21, E_ARG.141 | 2.80 | 1.90 | 22.17 |
| 1HGG.PDB | OD2, E_ASP.77  | NH2, E_ARG.141 | HH21, E_ARG.141 | 2.74 | 1.86 | 23.74 |
| 1HGG.PDB | O, E_GLY.72    | NH2, E_ARG.141 | HH22, E_ARG.141 | 2.91 | 1.92 | 8.01  |
| 1HGG.PDB | OD1, E_ASN.137 | OG, E_SER.145  | HG, E_SER.145   | 2.95 | 2.08 | 20.42 |
| 1HGG.PDB | O, E_SER.136   | N, E_GLY.146   | H, E_GLY.146    | 2.98 | 2.09 | 20.70 |
| 1HGG.PDB | O, E_GLY.72    | N, E_SER.149   | H, E_SER.149    | 2.94 | 2.02 | 16.43 |
| 1HGG.PDB | O, E_ALA.253   | N, E_ASN.152   | H, E_ASN.152    | 2.76 | 1.91 | 24.30 |
| 1HGG.PDB | OH, E_TYR.195  | NE1, E_TRP.153 | HE1, E_TRP.153  | 2.91 | 1.97 | 14.69 |
| 1HGG.PDB | O, E_LEU.194   | N, E_LYS.156   | H, E_LYS.156    | 2.96 | 2.09 | 22.38 |
| 1HGG.PDB | O, E_SER.193   | NZ, E_LYS.156  | HZ2, E_LYS.156  | 2.92 | 2.00 | 22.42 |
| 1HGG.PDB | O, E_THR.160   | N, E_SER.157   | H, E_SER.157    | 2.97 | 2.06 | 18.55 |
| 1HGG.PDB | O, E_ILE.245   | N, E_VAL.166   | H, E_VAL.166    | 2.88 | 1.92 | 9.84  |
| 1HGG.PDB | O, E_LEU.243   | OG1, E_THR.167 | HG1, E_THR.167  | 2.89 | 2.02 | 20.67 |
| 1HGG.PDB | O, E_LEU.243   | N, E_MET.168   | H, E_MET.168    | 2.91 | 1.99 | 16.43 |



|          |                |                |                 |      |      |       |
|----------|----------------|----------------|-----------------|------|------|-------|
| 1HGG.PDB | O, E_ASP_241   | N, E_ASN_170   | H, E_ASN_170    | 2.89 | 1.91 | 4.36  |
| 1HGG.PDB | O, E_PHE_174   | ND2, E_ASN_170 | HD21, E_ASN_170 | 2.83 | 1.89 | 11.99 |
| 1HGG.PDB | O, E_VAL_237   | ND2, E_ASN_170 | HD22, E_ASN_170 | 2.85 | 1.99 | 23.32 |
| 1HGG.PDB | O, E_VAL_237   | N, E_LYS_176   | H, E_LYS_176    | 2.89 | 1.95 | 13.18 |
| 1HGG.PDB | OE2, E_GLU_123 | NZ, E_LYS_176  | HZ1, E_LYS_176  | 2.65 | 1.78 | 26.50 |
| 1HGG.PDB | O, E_THR_235   | N, E_TYR_178   | H, E_TYR_178    | 2.81 | 1.85 | 6.71  |
| 1HGG.PDB | OE1, E_GLU_123 | OH, E_TYR_178  | HH, E_TYR_178   | 2.80 | 1.84 | 8.47  |
| 1HGG.PDB | OG1, E_THR_235 | NE1, E_TRP_180 | HE1, E_TRP_180  | 2.93 | 1.94 | 2.01  |
| 1HGG.PDB | O, E_ASN_250   | N, E_HIS_183   | H, E_HIS_183    | 2.79 | 1.92 | 22.01 |
| 1HGG.PDB | O, E_ARG_229   | N, E_HIS_184   | H, E_HIS_184    | 2.88 | 1.92 | 7.25  |
| 1HGG.PDB | OG, E_SER_231  | NE2, E_HIS_184 | HE2, E_HIS_184  | 2.81 | 1.94 | 22.49 |
| 1HGG.PDB | OG1, E_THR_187 | N, E_GLU_190   | H, E_GLU_190    | 2.87 | 1.93 | 12.79 |
| 1HGG.PDB | O, E_GLN_197   | NE2, E_GLN_191 | HE22, E_GLN_191 | 2.91 | 2.01 | 19.48 |
| 1HGG.PDB | O, E_ASN_188   | OG1, E_THR_192 | HG1, E_THR_192  | 2.94 | 1.99 | 8.04  |
| 1HGG.PDB | O, E_GLN_189   | N, E_SER_193   | H, E_SER_193    | 2.85 | 1.88 | 6.48  |
| 1HGG.PDB | O, E_GLN_191   | N, E_TYR_195   | H, E_TYR_195    | 2.82 | 1.87 | 11.82 |
| 1HGG.PDB | O, E_THR_192   | N, E_VAL_196   | H, E_VAL_196    | 2.95 | 2.13 | 27.67 |
| 1HGG.PDB | O, E_TYR_161   | NE2, E_GLN_197 | HE21, E_GLN_197 | 2.93 | 1.96 | 5.53  |
| 1HGG.PDB | O, E_ASN_248   | NE2, E_GLN_197 | HE22, E_GLN_197 | 2.94 | 2.04 | 19.72 |
| 1HGG.PDB | OD1, E_ASN_246 | NH2, E_ARG_201 | HH21, E_ARG_201 | 2.66 | 1.74 | 20.08 |
| 1HGG.PDB | O, E_ILE_213   | N, E_VAL_202   | H, E_VAL_202    | 2.94 | 1.98 | 10.96 |
| 1HGG.PDB | O, E_ASN_246   | N, E_THR_203   | H, E_THR_203    | 2.86 | 1.89 | 5.92  |
| 1HGG.PDB | OG1, E_THR_212 | OG1, E_THR_203 | HG1, E_THR_203  | 2.88 | 1.95 | 13.34 |
| 1HGG.PDB | O, E_GLN_211   | N, E_VAL_204   | H, E_VAL_204    | 2.86 | 1.96 | 18.23 |
| 1HGG.PDB | OD1, E_ASP_241 | N, E_ARG_207   | H, E_ARG_207    | 2.89 | 1.94 | 12.68 |
| 1HGG.PDB | OD2, E_ASP_241 | NE, E_ARG_208  | HE, E_ARG_208   | 2.96 | 2.05 | 19.90 |
| 1HGG.PDB | OG1, E_THR_206 | OG, E_SER_209  | HG, E_SER_209   | 2.99 | 2.07 | 14.54 |
| 1HGG.PDB | OD1, E_ASP_101 | NE2, E_GLN_210 | HE22, E_GLN_210 | 2.96 | 2.04 | 17.70 |
| 1HGG.PDB | O, E_VAL_204   | N, E_GLN_211   | H, E_GLN_211    | 2.83 | 1.91 | 15.52 |
| 1HGG.PDB | O, E_VAL_202   | N, E_ILE_213   | H, E_ILE_213    | 2.83 | 1.91 | 15.44 |
| 1HGG.PDB | OE1, E_GLN_210 | NH2, E_ARG_220 | HH21, E_ARG_220 | 2.72 | 1.80 | 20.26 |
| 1HGG.PDB | O, E_ASN_216   | NH2, E_ARG_220 | HH22, E_ARG_220 | 2.70 | 1.80 | 21.11 |
| 1HGG.PDB | O, E_LEU_226   | N, E_VAL_223   | H, E_VAL_223    | 2.87 | 1.91 | 9.88  |
| 1HGG.PDB | O, E_CYS_97    | NE, E_ARG_224  | HE, E_ARG_224   | 2.79 | 1.95 | 26.52 |
| 1HGG.PDB | O, E_CYS_97    | NH2, E_ARG_224 | HH21, E_ARG_224 | 2.81 | 1.95 | 25.91 |
| 1HGG.PDB | O, E_VAL_223   | N, E_LEU_226   | H, E_LEU_226    | 2.99 | 2.06 | 14.12 |
| 1HGG.PDB | O, E_ARG_220   | OG, E_SER_227  | HG, E_SER_227   | 2.91 | 1.97 | 11.08 |
| 1HGG.PDB | O, E_SER_228   | NH1, E_ARG_229 | HH11, E_ARG_229 | 2.74 | 1.81 | 18.43 |
| 1HGG.PDB | O, E_PRO_221   | NH2, E_ARG_229 | HH22, E_ARG_229 | 2.61 | 1.67 | 16.25 |
| 1HGG.PDB | O, E_ILE_182   | N, E_SER_231   | H, E_SER_231    | 3.00 | 2.12 | 21.85 |
| 1HGG.PDB | OD1, E_ASP_101 | OG, E_SER_231  | HG, E_SER_231   | 2.91 | 1.96 | 10.31 |
| 1HGG.PDB | O, E_ASP_101   | N, E_ILE_232   | H, E_ILE_232    | 2.93 | 2.00 | 14.76 |
| 1HGG.PDB | O, E_TRP_180   | N, E_TYR_233   | H, E_TYR_233    | 2.93 | 1.97 | 11.34 |
| 1HGG.PDB | O, E_TYR_178   | N, E_THR_235   | H, E_THR_235    | 2.90 | 2.00 | 18.66 |
| 1HGG.PDB | O, E_LYS_176   | N, E_VAL_237   | H, E_VAL_237    | 2.79 | 1.84 | 9.36  |
| 1HGG.PDB | OE1, E_GLU_72  | NZ, E_LYS_238  | HZ1, E_LYS_238  | 2.89 | 1.89 | 13.93 |
| 1HGG.PDB | O, E_SER_71    | NZ, E_LYS_238  | HZ3, E_LYS_238  | 2.80 | 1.86 | 20.00 |
| 1HGG.PDB | O, E_ASN_170   | N, E_GLY_240   | H, E_GLY_240    | 2.86 | 1.99 | 23.07 |
| 1HGG.PDB | O, E_LYS_238   | N, E_ASP_241   | H, E_ASP_241    | 2.93 | 2.02 | 17.28 |
| 1HGG.PDB | OD1, E_ASP_241 | N, E_VAL_242   | H, E_VAL_242    | 2.79 | 1.99 | 28.45 |
| 1HGG.PDB | O, E_MET_168   | N, E_LEU_243   | H, E_LEU_243    | 2.88 | 1.91 | 4.89  |
| 1HGG.PDB | O, E_SER_205   | N, E_VAL_244   | H, E_VAL_244    | 2.93 | 1.99 | 13.01 |
| 1HGG.PDB | O, E_VAL_166   | N, E_ILE_245   | H, E_ILE_245    | 2.98 | 2.06 | 15.80 |
| 1HGG.PDB | O, E_THR_203   | N, E_ASN_246   | H, E_ASN_246    | 2.92 | 1.97 | 11.38 |
| 1HGG.PDB | OD1, E_ASN_165 | ND2, E_ASN_246 | HD22, E_ASN_246 | 2.88 | 1.96 | 17.66 |
| 1HGG.PDB | O, E_LEU_164   | N, E_SER_247   | H, E_SER_247    | 2.92 | 2.01 | 18.12 |
| 1HGG.PDB | OE1, E_GLN_191 | ND2, E_ASN_250 | HD21, E_ASN_250 | 2.89 | 1.94 | 10.20 |
| 1HGG.PDB | O, E_HIS_183   | ND2, E_ASN_250 | HD22, E_ASN_250 | 2.88 | 1.93 | 10.21 |

|          |                |                |                 |      |      |       |
|----------|----------------|----------------|-----------------|------|------|-------|
| 1HGG.PDB | O, E_ASN_152   | N, E_ALA_253   | H, E_ALA_253    | 2.90 | 1.98 | 17.67 |
| 1HGG.PDB | OD1, E_ASN_133 | NH2, E_ARG_255 | HH22, E_ARG_255 | 2.55 | 1.68 | 24.24 |
| 1HGG.PDB | O, E_ILE_121   | N, E_TYR_257   | H, E_TYR_257    | 2.94 | 2.10 | 26.15 |
| 1HGG.PDB | O, E_LEU_177   | N, E_PHE_258   | H, E_PHE_258    | 2.94 | 2.00 | 12.72 |
| 1HGG.PDB | OG, E_SER_115  | N, E_ARG_261   | H, E_ARG_261    | 2.99 | 2.04 | 12.07 |
| 1HGG.PDB | OE2, E_GLU_119 | NH1, E_ARG_261 | HH12, E_ARG_261 | 2.69 | 1.87 | 29.29 |
| 1HGG.PDB | OE1, E_GLU_119 | NH2, E_ARG_261 | HH22, E_ARG_261 | 2.74 | 1.88 | 26.67 |
| 1HGG.PDB | OH, E_TYR_302  | NZ, E_LYS_264  | HZ1, E_LYS_264  | 2.90 | 1.93 | 18.14 |
| 1HGG.PDB | ND1, E_HIS_56  | NZ, E_LYS_264  | HZ2, E_LYS_264  | 2.66 | 1.73 | 20.09 |
| 1HGG.PDB | OD2, E_ASP_85  | NZ, E_LYS_264  | HZ3, E_LYS_264  | 2.85 | 1.83 | 11.84 |
| 1HGG.PDB | O, E_PHE_87    | N, E_MET_268   | H, E_MET_268    | 2.81 | 1.91 | 19.55 |
| 1HGG.PDB | OE1, F_GLU_67  | NH1, E_ARG_269 | HH12, E_ARG_269 | 2.69 | 1.85 | 27.32 |
| 1HGG.PDB | O, E_PRO_284   | OG, E_SER_270  | HG, E_SER_270   | 2.76 | 1.85 | 15.69 |
| 1HGG.PDB | OG, E_SER_270  | N, E_ALA_272   | H, E_ALA_272    | 2.95 | 2.00 | 11.61 |
| 1HGG.PDB | O, E_ILE_51    | N, E_ASP_275   | H, E_ASP_275    | 2.87 | 1.99 | 21.60 |
| 1HGG.PDB | OD1, E_ASP_275 | N, E_THR_276   | H, E_THR_276    | 2.79 | 1.94 | 24.39 |
| 1HGG.PDB | O, E_ASN_54    | N, E_SER_279   | H, E_SER_279    | 2.79 | 1.84 | 11.36 |
| 1HGG.PDB | O, E_TYR_302   | N, E_ILE_282   | H, E_ILE_282    | 2.87 | 1.92 | 10.52 |
| 1HGG.PDB | O, E_THR_283   | N, E_GLY_286   | H, E_GLY_286    | 2.79 | 1.84 | 9.62  |
| 1HGG.PDB | O, E_LYS_50    | N, E_SER_287   | H, E_SER_287    | 2.89 | 1.92 | 6.20  |
| 1HGG.PDB | O, E_ALA_304   | ND2, E_ASN_290 | HD22, E_ASN_290 | 2.87 | 2.00 | 21.60 |
| 1HGG.PDB | OE1, E_GLN_44  | NZ, E_LYS_292  | HZ1, E_LYS_292  | 2.77 | 1.75 | 10.61 |
| 1HGG.PDB | OD2, E_ASP_291 | NZ, E_LYS_292  | HZ3, E_LYS_292  | 2.76 | 1.90 | 27.94 |
| 1HGG.PDB | O, E_LYS_307   | N, E_GLN_295   | H, E_GLN_295    | 2.79 | 1.91 | 20.65 |
| 1HGG.PDB | O, E_ASN_298   | NE2, E_GLN_295 | HE21, E_GLN_295 | 2.79 | 1.83 | 8.95  |
| 1HGG.PDB | O, E_GLN_44    | N, E_ASN_296   | H, E_ASN_296    | 2.89 | 1.93 | 10.60 |
| 1HGG.PDB | OD1, E_ASN_285 | ND2, E_ASN_298 | HD22, E_ASN_298 | 2.95 | 2.00 | 11.31 |
| 1HGG.PDB | O, F_LYS_68    | NZ, E_LYS_299  | HZ1, E_LYS_299  | 2.93 | 1.91 | 9.86  |
| 1HGG.PDB | OD1, E_ASN_298 | N, E_ILE_300   | H, E_ILE_300    | 2.82 | 1.91 | 16.92 |
| 1HGG.PDB | O, E_ILE_282   | N, E_TYR_302   | H, E_TYR_302    | 2.82 | 1.94 | 21.27 |
| 1HGG.PDB | O, E_LYS_264   | OH, E_TYR_302  | HH, E_TYR_302   | 2.63 | 1.84 | 28.99 |
| 1HGG.PDB | O, F_LYS_62    | N, E_GLY_303   | H, E_GLY_303    | 2.92 | 1.95 | 6.71  |
| 1HGG.PDB | O, E_GLN_295   | N, E_VAL_309   | H, E_VAL_309    | 2.89 | 2.05 | 25.47 |
| 1HGG.PDB | OG, F_SER_93   | N, E_LYS_310   | H, E_LYS_310    | 2.89 | 1.95 | 15.34 |
| 1HGG.PDB | OD1, F_ASP_90  | NZ, E_LYS_310  | HZ2, E_LYS_310  | 2.64 | 1.72 | 22.12 |
| 1HGG.PDB | OE2, E_GLU_41  | N, E_LEU_314   | H, E_LEU_314    | 2.79 | 1.89 | 17.95 |
| 1HGG.PDB | OE1, E_GLU_41  | NZ, E_LYS_315  | HZ3, E_LYS_315  | 2.68 | 1.80 | 26.22 |
| 1HGG.PDB | O, E_THR_40    | N, E_LEU_316   | H, E_LEU_316    | 2.77 | 1.85 | 15.13 |
| 1HGG.PDB | OD1, F_ASN_104 | N, E_ALA_317   | H, E_ALA_317    | 2.80 | 1.89 | 16.99 |
| 1HGG.PDB | O, E_ASN_38    | N, E_THR_318   | H, E_THR_318    | 2.92 | 1.99 | 14.27 |
| 1HGG.PDB | O, E_VAL_20    | ND2, E_ASN_322 | HD21, E_ASN_322 | 2.88 | 1.96 | 16.01 |
| 1HGG.PDB | OE2, E_GLU_35  | ND2, E_ASN_322 | HD22, E_ASN_322 | 2.79 | 1.94 | 25.02 |
| 1HGG.PDB | OE2, F_GLU_15  | N, E_GLU_325   | H, E_GLU_325    | 2.88 | 2.08 | 28.79 |
| 1HGG.PDB | O, E_GLN_327   | NZ, E_LYS_326  | HZ1, E_LYS_326  | 2.71 | 1.82 | 24.99 |
| 1HGG.PDB | OE1, F_GLU_15  | NZ, E_LYS_326  | HZ3, E_LYS_326  | 2.98 | 1.97 | 15.13 |
| 1HGG.PDB | O, E_LYS_326   | NE2, E_GLN_327 | HE22, E_GLN_327 | 2.77 | 1.84 | 14.97 |
| 1HGG.PDB | OD2, F_ASP_112 | N, F_GLY_1     | H2, F_GLY_1     | 2.68 | 1.70 | 14.41 |
| 1HGG.PDB | OD1, F_ASP_109 | N, F_LEU_2     | H, F_LEU_2      | 2.94 | 2.03 | 18.76 |
| 1HGG.PDB | OD2, F_ASP_112 | N, F_PHE_3     | H, F_PHE_3      | 2.87 | 2.05 | 27.28 |
| 1HGG.PDB | OD2, F_ASP_112 | N, F_GLY_4     | H, F_GLY_4      | 2.93 | 2.02 | 17.67 |
| 1HGG.PDB | OD1, F_ASP_112 | N, F_ALA_5     | H, F_ALA_5      | 2.93 | 2.06 | 23.45 |
| 1HGG.PDB | O, F_GLY_4     | N, F_PHE_9     | H, F_PHE_9      | 2.76 | 1.83 | 14.86 |
| 1HGG.PDB | O, E_VAL_323   | N, F_GLY_13    | H, F_GLY_13     | 2.73 | 1.78 | 9.21  |
| 1HGG.PDB | O, E_HIS_17    | N, F_TRP_14    | H, F_TRP_14     | 2.81 | 1.90 | 18.17 |
| 1HGG.PDB | OG1, F_THR_41  | N, F_TRP_21    | H, F_TRP_21     | 2.87 | 1.92 | 11.28 |
| 1HGG.PDB | O, E_GLY_16    | N, F_GLY_23    | H, F_GLY_23     | 2.97 | 2.08 | 20.37 |
| 1HGG.PDB | O, F_ALA_35    | N, F_PHE_24    | H, F_PHE_24     | 2.85 | 1.88 | 5.77  |
| 1HGG.PDB | O, E_CYS_14    | N, F_ARG_25    | H, F_ARG_25     | 2.99 | 2.04 | 12.72 |

|          |                |                |                 |      |      |       |
|----------|----------------|----------------|-----------------|------|------|-------|
| 1HGG.PDB | O, F_GLY_33    | N, F_HIS_26    | H, F_HIS_26     | 2.87 | 1.99 | 21.57 |
| 1HGG.PDB | O, E_THR_12    | N, F_GLN_27    | H, F_GLN_27     | 2.98 | 2.05 | 15.41 |
| 1HGG.PDB | O, F_GLY_31    | N, F_ASN_28    | H, F_ASN_28     | 2.80 | 1.85 | 12.20 |
| 1HGG.PDB | O, F_CYS_144   | ND2, F_ASN_28  | HD22, F_ASN_28  | 2.83 | 1.93 | 18.95 |
| 1HGG.PDB | O, F_PHE_24    | N, F_ALA_35    | H, F_ALA_35     | 2.83 | 2.02 | 27.51 |
| 1HGG.PDB | O, F_TYR_22    | N, F_ASP_37    | H, F_ASP_37     | 2.73 | 1.77 | 4.79  |
| 1HGG.PDB | OD2, F_ASP_37  | N, F_SER_40    | H, F_SER_40     | 2.88 | 1.93 | 12.27 |
| 1HGG.PDB | OD2, F_ASP_37  | OG, F_SER_40   | HG, F_SER_40    | 2.74 | 1.92 | 26.19 |
| 1HGG.PDB | O, F_ASP_37    | OG1, F_THR_41  | HG1, F_THR_41   | 2.71 | 1.82 | 18.81 |
| 1HGG.PDB | O, F_LEU_38    | N, F_GLN_42    | H, F_GLN_42     | 2.91 | 1.98 | 13.94 |
| 1HGG.PDB | OD1, F_ASP_46  | NE2, F_GLN_42  | HE22, F_GLN_42  | 2.82 | 1.94 | 21.99 |
| 1HGG.PDB | O, F_LYS_39    | N, F_ALA_43    | H, F_ALA_43     | 2.96 | 1.99 | 8.07  |
| 1HGG.PDB | O, F_SER_40    | N, F_ALA_44    | H, F_ALA_44     | 2.94 | 1.96 | 1.69  |
| 1HGG.PDB | O, F_THR_41    | N, F_ILE_45    | H, F_ILE_45     | 2.95 | 2.01 | 14.67 |
| 1HGG.PDB | O, F_GLN_42    | N, F_ASP_46    | H, F_ASP_46     | 2.77 | 1.80 | 0.61  |
| 1HGG.PDB | OE2, F_GLU_114 | NE2, F_GLN_47  | HE21, F_GLN_47  | 2.97 | 2.06 | 18.05 |
| 1HGG.PDB | O, F_ALA_43    | NE2, F_GLN_47  | HE22, F_GLN_47  | 2.99 | 2.07 | 16.84 |
| 1HGG.PDB | O, F_ILE_45    | N, F_ASN_49    | H, F_ASN_49     | 2.83 | 1.91 | 16.15 |
| 1HGG.PDB | O, F_ASP_46    | N, F_GLY_50    | H, F_GLY_50     | 2.91 | 2.04 | 23.57 |
| 1HGG.PDB | O, F_GLN_47    | N, F_LYS_51    | H, F_LYS_51     | 2.91 | 1.93 | 0.37  |
| 1HGG.PDB | OG1, F_THR_107 | NZ, F_LYS_51   | HZ1, F_LYS_51   | 2.98 | 2.02 | 18.55 |
| 1HGG.PDB | OE1, F_GLU_103 | NZ, F_LYS_51   | HZ2, F_LYS_51   | 2.79 | 1.76 | 6.25  |
| 1HGG.PDB | ND1, F_HIS_106 | NZ, F_LYS_51   | HZ3, F_LYS_51   | 2.72 | 1.74 | 15.22 |
| 1HGG.PDB | O, F_ILE_48    | N, F_LEU_52    | H, F_LEU_52     | 2.90 | 2.00 | 18.64 |
| 1HGG.PDB | O, F_ASN_49    | N, F_ASN_53    | H, F_ASN_53     | 2.88 | 1.99 | 19.93 |
| 1HGG.PDB | OE1, F_GLU_57  | NH1, F_ARG_54  | HH11, F_ARG_54  | 2.85 | 1.85 | 10.83 |
| 1HGG.PDB | OE2, D_GLU_97  | NH2, F_ARG_54  | HH22, F_ARG_54  | 2.73 | 1.74 | 10.16 |
| 1HGG.PDB | O, F_ASN_53    | N, F_ILE_56    | H, F_ILE_56     | 2.96 | 2.16 | 29.26 |
| 1HGG.PDB | OE2, F_GLU_61  | NZ, F_LYS_58   | HZ3, F_LYS_58   | 2.94 | 1.92 | 12.48 |
| 1HGG.PDB | OD2, D_ASP_86  | NZ, F_LYS_62   | HZ3, F_LYS_62   | 2.58 | 1.75 | 29.01 |
| 1HGG.PDB | OG, E_SER_110  | NE2, F_HIS_64  | HE2, F_HIS_64   | 2.87 | 1.91 | 10.03 |
| 1HGG.PDB | O, F_PHE_63    | NE2, F_GLN_65  | HE22, F_GLN_65  | 2.98 | 2.01 | 5.05  |
| 1HGG.PDB | O, E_LYS_299   | NZ, F_LYS_68   | HZ1, F_LYS_68   | 2.85 | 1.83 | 8.63  |
| 1HGG.PDB | OE2, F_GLU_85  | NZ, F_LYS_68   | HZ2, F_LYS_68   | 2.75 | 1.74 | 10.05 |
| 1HGG.PDB | OE2, F_GLU_72  | OG, F_SER_71   | HG, F_SER_71    | 2.86 | 2.03 | 26.49 |
| 1HGG.PDB | OG, A_SER_107  | N, F_ARG_76    | H, F_ARG_76     | 2.79 | 1.82 | 4.90  |
| 1HGG.PDB | OE2, B_GLU_81  | NE, F_ARG_76   | HE, F_ARG_76    | 2.88 | 1.92 | 11.44 |
| 1HGG.PDB | OE1, B_GLU_74  | NH1, F_ARG_76  | HH12, F_ARG_76  | 2.75 | 1.76 | 9.13  |
| 1HGG.PDB | OE1, B_GLU_81  | NH2, F_ARG_76  | HH21, F_ARG_76  | 2.67 | 1.68 | 1.99  |
| 1HGG.PDB | OE2, B_GLU_74  | NH2, F_ARG_76  | HH22, F_ARG_76  | 2.79 | 1.81 | 10.64 |
| 1HGG.PDB | O, F_GLY_75    | N, F_ASP_79    | H, F_ASP_79     | 2.85 | 1.92 | 13.80 |
| 1HGG.PDB | O, F_LEU_80    | N, F_VAL_84    | H, F_VAL_84     | 2.86 | 1.90 | 9.26  |
| 1HGG.PDB | O, F_LYS_82    | N, F_ASP_86    | H, F_ASP_86     | 2.94 | 1.98 | 10.58 |
| 1HGG.PDB | O, F_TYR_83    | N, F_THR_87    | H, F_THR_87     | 2.89 | 1.95 | 12.08 |
| 1HGG.PDB | O, F_VAL_84    | N, F_LYS_88    | H, F_LYS_88     | 2.90 | 2.00 | 19.38 |
| 1HGG.PDB | OH, D_TYR_83   | NZ, F_LYS_88   | HZ1, F_LYS_88   | 2.68 | 1.67 | 10.46 |
| 1HGG.PDB | O, F_GLU_85    | N, F_ILE_89    | H, F_ILE_89     | 2.87 | 1.91 | 8.62  |
| 1HGG.PDB | O, F_LYS_88    | N, F_TRP_92    | H, F_TRP_92     | 2.93 | 1.97 | 10.23 |
| 1HGG.PDB | O, F_ILE_89    | N, F_SER_93    | H, F_SER_93     | 2.82 | 1.93 | 20.13 |
| 1HGG.PDB | O, F_ILE_89    | OG, F_SER_93   | HG, F_SER_93    | 2.82 | 1.91 | 16.61 |
| 1HGG.PDB | O, F_ASP_90    | N, F_TYR_94    | H, F_TYR_94     | 2.98 | 2.04 | 13.91 |
| 1HGG.PDB | O, F_TYR_94    | N, F_LEU_98    | H, F_LEU_98     | 2.96 | 1.99 | 8.41  |
| 1HGG.PDB | O, F_ASN_95    | N, F_LEU_99    | H, F_LEU_99     | 2.87 | 1.98 | 19.54 |
| 1HGG.PDB | O, F_LEU_98    | N, F_LEU_102   | H, F_LEU_102    | 2.91 | 1.95 | 11.26 |
| 1HGG.PDB | O, F_VAL_100   | N, F_ASN_104   | H, F_ASN_104    | 2.83 | 1.90 | 15.88 |
| 1HGG.PDB | O, E_LYS_27    | ND2, F_ASN_104 | HD22, F_ASN_104 | 2.91 | 1.98 | 14.98 |
| 1HGG.PDB | O, F_LEU_102   | N, F_HIS_106   | H, F_HIS_106    | 2.95 | 2.00 | 11.41 |
| 1HGG.PDB | O, F_GLU_103   | N, F_THR_107   | H, F_THR_107    | 2.84 | 1.97 | 22.50 |

|          |                |                |                 |      |      |       |
|----------|----------------|----------------|-----------------|------|------|-------|
| 1HGG.PDB | O, F_HIS_106   | N, F_LEU_110   | H, F_LEU_110    | 2.81 | 1.85 | 10.10 |
| 1HGG.PDB | O, F_THR_107   | N, F_THR_111   | H, F_THR_111    | 2.97 | 2.01 | 8.66  |
| 1HGG.PDB | O, F_THR_107   | OG1, F_THR_111 | HG1, F_THR_111  | 2.90 | 1.95 | 9.89  |
| 1HGG.PDB | O, F_ASP_109   | N, F_SER_113   | H, F_SER_113    | 2.78 | 1.87 | 15.88 |
| 1HGG.PDB | O, F_ASP_112   | N, F_ASN_116   | H, F_ASN_116    | 2.99 | 2.01 | 3.50  |
| 1HGG.PDB | O, F_SER_113   | N, F_LYS_117   | H, F_LYS_117    | 2.76 | 1.88 | 19.98 |
| 1HGG.PDB | O, F_ASN_116   | N, F_GLU_120   | H, F_GLU_120    | 2.92 | 1.95 | 3.79  |
| 1HGG.PDB | O, F_LYS_117   | N, F_LYS_121   | H, F_LYS_121    | 2.87 | 1.96 | 17.48 |
| 1HGG.PDB | O, F_LEU_118   | N, F_THR_122   | H, F_THR_122    | 2.98 | 2.04 | 13.60 |
| 1HGG.PDB | O, F_PHE_119   | N, F_ARG_123   | H, F_ARG_123    | 2.90 | 1.95 | 11.29 |
| 1HGG.PDB | OE2, F_GLU_120 | NH1, F_ARG_123 | HH11, F_ARG_123 | 2.72 | 1.86 | 25.68 |
| 1HGG.PDB | O, F_GLU_120   | N, F_ARG_124   | H, F_ARG_124    | 2.96 | 1.99 | 8.37  |
| 1HGG.PDB | OE1, D_GLU_132 | NE, F_ARG_124  | HE, F_ARG_124   | 2.96 | 2.09 | 22.59 |
| 1HGG.PDB | OE2, D_GLU_132 | NE, F_ARG_124  | HE, F_ARG_124   | 2.87 | 2.01 | 24.00 |
| 1HGG.PDB | O, F_HIS_159   | ND2, F_ASN_129 | HD21, F_ASN_129 | 2.99 | 2.04 | 11.15 |
| 1HGG.PDB | OH, F_TYR_157  | ND2, F_ASN_129 | HD22, F_ASN_129 | 2.79 | 1.86 | 14.20 |
| 1HGG.PDB | O, F_LYS_139   | N, F_GLU_131   | H, F_GLU_131    | 2.96 | 2.01 | 12.55 |
| 1HGG.PDB | O, F_CYS_137   | N, F_MET_133   | H, F_MET_133    | 2.88 | 1.96 | 16.91 |
| 1HGG.PDB | O, E_LEU_13    | N, F_PHE_138   | H, F_PHE_138    | 2.72 | 1.87 | 23.38 |
| 1HGG.PDB | O, F_GLU_131   | N, F_LYS_139   | H, F_LYS_139    | 2.84 | 1.88 | 8.34  |
| 1HGG.PDB | O, E_ALA_11    | N, F_ILE_140   | H, F_ILE_140    | 2.79 | 1.89 | 17.86 |
| 1HGG.PDB | O, F_ASN_129   | N, F_TYR_141   | H, F_TYR_141    | 2.91 | 1.94 | 4.20  |
| 1HGG.PDB | OE2, F_GLU_165 | N, F_LYS_143   | H, F_LYS_143    | 2.98 | 2.11 | 23.38 |
| 1HGG.PDB | OE2, F_GLU_30  | N, F_ASN_146   | H, F_ASN_146    | 2.87 | 1.90 | 7.26  |
| 1HGG.PDB | OD1, F_ASP_145 | N, F_ALA_147   | H, F_ALA_147    | 2.98 | 2.17 | 28.99 |
| 1HGG.PDB | O, F_ASP_145   | N, F_ILE_149   | H, F_ILE_149    | 2.98 | 2.02 | 9.29  |
| 1HGG.PDB | O, F_ASN_146   | N, F_GLU_150   | H, F_GLU_150    | 2.88 | 1.93 | 11.94 |
| 1HGG.PDB | O, F_ALA_147   | N, F_SER_151   | H, F_SER_151    | 2.86 | 1.99 | 21.94 |
| 1HGG.PDB | O, F_CYS_148   | OG, F_SER_151  | HG, F_SER_151   | 2.70 | 1.85 | 23.21 |
| 1HGG.PDB | O, F_GLU_150   | N, F_ASN_154   | H, F_ASN_154    | 2.81 | 1.84 | 3.77  |
| 1HGG.PDB | O, F_HIS_159   | N, F_TYR_162   | H, F_TYR_162    | 2.96 | 2.05 | 18.31 |
| 1HGG.PDB | O, F_ASP_160   | N, F_ARG_163   | H, F_ARG_163    | 2.93 | 1.96 | 6.26  |
| 1HGG.PDB | O, D_ARG_170   | NH1, F_ARG_163 | HH12, F_ARG_163 | 2.94 | 2.00 | 17.69 |
| 1HGG.PDB | O, F_TYR_162   | N, F_ALA_166   | H, F_ALA_166    | 2.88 | 1.92 | 7.73  |
| 1HGG.PDB | O, F_ARG_163   | N, F_LEU_167   | H, F_LEU_167    | 2.76 | 1.84 | 14.20 |
| 1HGG.PDB | O, F_ALA_166   | N, F_ARG_170   | H, F_ARG_170    | 2.89 | 2.02 | 22.61 |
| 1HGG.PDB | O, F_GLU_128   | NE, F_ARG_170  | HE, F_ARG_170   | 2.70 | 1.85 | 24.72 |
| 1HGG.PDB | OE2, F_GLU_131 | NH1, F_ARG_170 | HH11, F_ARG_170 | 2.84 | 1.84 | 6.38  |
| 1HGG.PDB | O, F_LEU_167   | N, F_PHE_171   | H, F_PHE_171    | 2.94 | 1.99 | 11.68 |
| 1HGH.PDB | O, B_ILE_140   | N, A_ALA_11    | H, A_ALA_11     | 2.91 | 2.03 | 21.75 |
| 1HGH.PDB | O, B_PHE_138   | N, A_LEU_13    | H, A_LEU_13     | 2.96 | 1.99 | 9.24  |
| 1HGH.PDB | O, B_ARG_25    | N, A_CYS_14    | H, A_CYS_14     | 2.90 | 1.93 | 6.13  |
| 1HGH.PDB | O, B_GLY_136   | N, A_LEU_15    | H, A_LEU_15     | 2.89 | 1.92 | 5.59  |
| 1HGH.PDB | O, B_GLY_23    | N, A_GLY_16    | H, A_GLY_16     | 2.92 | 2.07 | 24.71 |
| 1HGH.PDB | O, B_TRP_21    | N, A_HIS_18    | H, A_HIS_18     | 2.92 | 2.03 | 20.10 |
| 1HGH.PDB | OD1, A_ASN_322 | N, A_VAL_20    | H, A_VAL_20     | 2.77 | 1.82 | 11.72 |
| 1HGH.PDB | O, A_VAL_36    | N, A_THR_24    | H, A_THR_24     | 2.85 | 1.96 | 20.21 |
| 1HGH.PDB | O, A_ILE_34    | N, A_VAL_26    | H, A_VAL_26     | 2.81 | 1.89 | 15.81 |
| 1HGH.PDB | OE2, B_GLU_97  | NZ, A_LYS_27   | HZ1, A_LYS_27   | 2.78 | 1.76 | 9.03  |
| 1HGH.PDB | O, A_ASP_31    | N, A_THR_28    | H, A_THR_28     | 2.74 | 1.91 | 26.60 |
| 1HGH.PDB | O, A_VAL_26    | N, A_ILE_34    | H, A_ILE_34     | 2.88 | 1.93 | 10.35 |
| 1HGH.PDB | O, A_THR_24    | N, A_VAL_36    | H, A_VAL_36     | 2.78 | 1.83 | 9.24  |
| 1HGH.PDB | O, A_MET_320   | N, A_THR_37    | H, A_THR_37     | 2.90 | 1.93 | 5.37  |
| 1HGH.PDB | O, A_LEU_316   | N, A_THR_40    | H, A_THR_40     | 2.78 | 1.95 | 25.57 |
| 1HGH.PDB | O, A_LEU_314   | N, A_LEU_42    | H, A_LEU_42     | 2.85 | 1.99 | 23.14 |
| 1HGH.PDB | O, A_PHE_294   | N, A_GLN_44    | H, A_GLN_44     | 2.90 | 1.92 | 4.45  |
| 1HGH.PDB | O, A_SER_46    | NE2, A_GLN_44  | HE22, A_GLN_44  | 2.81 | 1.96 | 24.37 |
| 1HGH.PDB | OD2, A_ASP_275 | NZ, A_LYS_50   | HZ1, A_LYS_50   | 2.79 | 1.83 | 19.36 |

|          |                |                |                 |      |      |       |
|----------|----------------|----------------|-----------------|------|------|-------|
| 1HGH.PDB | O, A_PRO_273   | N, A_ILE_51    | H, A_ILE_51     | 2.82 | 1.89 | 14.41 |
| 1HGH.PDB | O, A_ASP_275   | N, A_ASN_53    | H, A_ASN_53     | 2.86 | 1.97 | 20.86 |
| 1HGH.PDB | O, A_GLU_280   | NE2, A_HIS_56  | HE2, A_HIS_56   | 2.98 | 2.02 | 10.58 |
| 1HGH.PDB | OD2, A_ASP_85  | N, A_ARG_57    | H, A_ARG_57     | 2.81 | 1.91 | 18.42 |
| 1HGH.PDB | O, A_THR_83    | NE, A_ARG_57   | HE, A_ARG_57    | 2.77 | 1.81 | 8.25  |
| 1HGH.PDB | O, A_LEU_86    | N, A_LEU_59    | H, A_LEU_59     | 2.96 | 2.03 | 13.96 |
| 1HGH.PDB | O, A_VAL_88    | N, A_GLY_61    | H, A_GLY_61     | 2.98 | 2.14 | 25.31 |
| 1HGH.PDB | OD1, A_ASP_60  | N, A_ILE_62    | H, A_ILE_62     | 2.86 | 1.93 | 13.55 |
| 1HGH.PDB | O, A_GLY_61    | N, A_CYS_64    | H, A_CYS_64     | 2.88 | 1.98 | 19.17 |
| 1HGH.PDB | OE2, A_GLU_89  | N, A_LEU_66    | H, A_LEU_66     | 2.90 | 1.95 | 10.87 |
| 1HGH.PDB | O, A_LEU_66    | N, A_LEU_70    | H, A_LEU_70     | 2.83 | 1.95 | 21.65 |
| 1HGH.PDB | O, A_ILE_67    | N, A_LEU_71    | H, A_LEU_71     | 2.79 | 1.83 | 6.52  |
| 1HGH.PDB | O, A_ASP_68    | N, A_GLY_72    | H, A_GLY_72     | 2.91 | 1.99 | 15.72 |
| 1HGH.PDB | OD1, A_ASP_73  | ND1, A_HIS_75  | HD1, A_HIS_75   | 2.74 | 1.85 | 19.20 |
| 1HGH.PDB | O, A_ASP_63    | NE2, A_HIS_75  | HE2, A_HIS_75   | 2.75 | 1.84 | 17.13 |
| 1HGH.PDB | O, A_ASP_73    | N, A_CYS_76    | H, A_CYS_76     | 2.78 | 1.88 | 17.74 |
| 1HGH.PDB | O, A_PRO_74    | N, A_ASP_77    | H, A_ASP_77     | 2.92 | 1.95 | 6.24  |
| 1HGH.PDB | O, A_PHE_79    | N, A_GLU_82    | H, A_GLU_82     | 2.94 | 2.02 | 16.23 |
| 1HGH.PDB | OE1, A_GLU_82  | N, A_THR_83    | H, A_THR_83     | 2.95 | 2.06 | 20.13 |
| 1HGH.PDB | O, A_ARG_57    | N, A_ASP_85    | H, A_ASP_85     | 2.82 | 1.89 | 15.27 |
| 1HGH.PDB | O, A_MET_268   | N, A_GLU_89    | H, A_GLU_89     | 2.83 | 1.89 | 11.77 |
| 1HGH.PDB | OD1, A_ASP_60  | NE, A_ARG_90   | HE, A_ARG_90    | 2.85 | 1.88 | 8.50  |
| 1HGH.PDB | O, A_SER_270   | NH1, A_ARG_90  | HH11, A_ARG_90  | 2.64 | 1.77 | 24.75 |
| 1HGH.PDB | O, A_ALA_272   | NH1, A_ARG_90  | HH12, A_ARG_90  | 2.63 | 1.72 | 19.06 |
| 1HGH.PDB | OD2, A_ASP_60  | NH2, A_ARG_90  | HH21, A_ARG_90  | 2.79 | 1.80 | 9.33  |
| 1HGH.PDB | OD1, A_ASP_271 | N, A_SER_91    | H, A_SER_91     | 2.85 | 1.90 | 11.89 |
| 1HGH.PDB | OD2, A_ASP_271 | OG, A_SER_91   | HG, A_SER_91    | 2.76 | 1.89 | 21.30 |
| 1HGH.PDB | OD2, A_ASP_68  | OG, A_SER_95   | HG, A_SER_95    | 2.83 | 1.95 | 21.96 |
| 1HGH.PDB | OD2, A_ASP_73  | N, A_ASN_96    | H, A_ASN_96     | 2.91 | 1.94 | 7.26  |
| 1HGH.PDB | OD1, A_ASP_68  | OH, A_TYR_100  | HH, A_TYR_100   | 2.95 | 2.07 | 21.37 |
| 1HGH.PDB | O, A_ILE_230   | N, A_ASP_101   | H, A_ASP_101    | 2.93 | 2.05 | 22.44 |
| 1HGH.PDB | OD2, A_ASP_104 | OG, A_SER_107  | HG, A_SER_107   | 2.88 | 1.94 | 14.34 |
| 1HGH.PDB | O, A_TYR_105   | N, A_ARG_109   | H, A_ARG_109    | 2.84 | 1.87 | 3.70  |
| 1HGH.PDB | OE2, B_GLU_67  | NH2, A_ARG_109 | HH21, A_ARG_109 | 2.86 | 1.88 | 13.48 |
| 1HGH.PDB | OD2, F_ASP_79  | OG, A_SER_110  | HG, A_SER_110   | 2.97 | 2.01 | 11.65 |
| 1HGH.PDB | O, A_SER_107   | N, A_LEU_111   | H, A_LEU_111    | 2.86 | 1.91 | 11.39 |
| 1HGH.PDB | O, A_LEU_108   | N, A_VAL_112   | H, A_VAL_112    | 2.97 | 2.00 | 6.33  |
| 1HGH.PDB | O, A_ARG_109   | N, A_ALA_113   | H, A_ALA_113    | 2.87 | 1.97 | 18.74 |
| 1HGH.PDB | O, A_SER_110   | N, A_SER_114   | H, A_SER_114    | 2.97 | 2.06 | 18.17 |
| 1HGH.PDB | OE2, A_GLU_119 | OG1, A_THR_117 | HG1, A_THR_117  | 2.86 | 1.91 | 8.00  |
| 1HGH.PDB | O, A_GLU_82    | N, A_LEU_118   | H, A_LEU_118    | 2.97 | 2.03 | 14.27 |
| 1HGH.PDB | O, A_TYR_257   | N, A_ILE_121   | H, A_ILE_121    | 2.88 | 1.93 | 10.50 |
| 1HGH.PDB | O, A_ARG_255   | N, A_GLU_123   | H, A_GLU_123    | 2.86 | 1.91 | 11.35 |
| 1HGH.PDB | O, A_THR_155   | N, A_THR_131   | H, A_THR_131    | 2.70 | 1.82 | 20.96 |
| 1HGH.PDB | O, A_LYS_156   | OG1, A_THR_131 | HG1, A_THR_131  | 2.65 | 1.86 | 28.53 |
| 1HGH.PDB | OD1, A_ASN_152 | N, A_ASN_133   | H, A_ASN_133    | 2.91 | 2.01 | 19.83 |
| 1HGH.PDB | O, A_TRP_153   | N, A_GLY_134   | H, A_GLY_134    | 2.97 | 2.05 | 15.71 |
| 1HGH.PDB | O, A_GLY_146   | N, A_SER_136   | H, A_SER_136    | 2.71 | 1.82 | 19.78 |
| 1HGH.PDB | OG, A_SER_136  | N, A_ALA_138   | H, A_ALA_138    | 2.92 | 1.99 | 15.62 |
| 1HGH.PDB | O, A_GLY_144   | NZ, A_LYS_140  | HZ1, A_LYS_140  | 2.88 | 1.90 | 16.19 |
| 1HGH.PDB | OD1, A_ASN_137 | NZ, A_LYS_140  | HZ2, A_LYS_140  | 2.74 | 1.73 | 12.09 |
| 1HGH.PDB | OD2, A_ASP_77  | NE, A_ARG_141  | HE, A_ARG_141   | 2.85 | 2.03 | 27.72 |
| 1HGH.PDB | O, A_PHE_147   | NH1, A_ARG_141 | HH12, A_ARG_141 | 2.57 | 1.64 | 17.56 |
| 1HGH.PDB | OD1, A_ASP_77  | NH2, A_ARG_141 | HH21, A_ARG_141 | 2.86 | 1.95 | 21.78 |
| 1HGH.PDB | OD2, A_ASP_77  | NH2, A_ARG_141 | HH21, A_ARG_141 | 2.74 | 1.85 | 23.60 |
| 1HGH.PDB | O, A_GLY_72    | NH2, A_ARG_141 | HH22, A_ARG_141 | 2.97 | 1.99 | 11.22 |
| 1HGH.PDB | O, A_SER_136   | N, A_GLY_146   | H, A_GLY_146    | 2.94 | 1.99 | 12.07 |
| 1HGH.PDB | O, A_GLY_72    | N, A_SER_149   | H, A_SER_149    | 2.87 | 1.96 | 17.76 |

|          |                |                |                 |      |      |       |
|----------|----------------|----------------|-----------------|------|------|-------|
| 1HGH.PDB | O, A_ALA_253   | N, A_ASN_152   | H, A_ASN_152    | 2.72 | 1.90 | 27.60 |
| 1HGH.PDB | OH, A_TYR_195  | NE1, A_TRP_153 | HE1, A_TRP_153  | 2.96 | 2.05 | 18.96 |
| 1HGH.PDB | O, A_THR_131   | N, A_THR_155   | H, A_THR_155    | 2.98 | 2.04 | 12.93 |
| 1HGH.PDB | O, A_LEU_194   | N, A_LYS_156   | H, A_LYS_156    | 2.93 | 1.99 | 14.05 |
| 1HGH.PDB | O, A_SER_193   | NZ, A_LYS_156  | HZ2, A_LYS_156  | 2.80 | 1.78 | 10.99 |
| 1HGH.PDB | O, A_THR_160   | N, A_SER_157   | H, A_SER_157    | 2.94 | 2.03 | 18.60 |
| 1HGH.PDB | O, A_SER_247   | N, A_LEU_164   | H, A_LEU_164    | 2.69 | 1.86 | 25.54 |
| 1HGH.PDB | O, A_ILE_245   | N, A_VAL_166   | H, A_VAL_166    | 2.85 | 1.89 | 11.06 |
| 1HGH.PDB | O, A_LEU_243   | OG1, A_THR_167 | HG1, A_THR_167  | 2.91 | 1.96 | 8.56  |
| 1HGH.PDB | O, A_LEU_243   | N, A_MET_168   | H, A_MET_168    | 2.82 | 1.89 | 14.71 |
| 1HGH.PDB | O, A_ASP_241   | N, A_ASN_170   | H, A_ASN_170    | 2.96 | 1.99 | 7.35  |
| 1HGH.PDB | O, A_PHE_174   | ND2, A_ASN_170 | HD21, A_ASN_170 | 2.81 | 1.86 | 12.55 |
| 1HGH.PDB | O, A_VAL_237   | ND2, A_ASN_170 | HD22, A_ASN_170 | 2.88 | 2.03 | 25.05 |
| 1HGH.PDB | O, A_VAL_237   | N, A_LYS_176   | H, A_LYS_176    | 3.00 | 2.06 | 14.88 |
| 1HGH.PDB | OE2, A_GLU_123 | NZ, A_LYS_176  | HZ1, A_LYS_176  | 2.68 | 1.79 | 24.70 |
| 1HGH.PDB | O, A_PHE_258   | N, A_LEU_177   | H, A_LEU_177    | 2.99 | 2.01 | 5.13  |
| 1HGH.PDB | O, A_THR_235   | N, A_TYR_178   | H, A_TYR_178    | 2.85 | 1.88 | 6.04  |
| 1HGH.PDB | OE1, A_GLU_123 | OH, A_TYR_178  | HH, A_TYR_178   | 2.75 | 1.81 | 10.37 |
| 1HGH.PDB | OG1, A_THR_235 | NE1, A_TRP_180 | HE1, A_TRP_180  | 2.89 | 1.90 | 1.65  |
| 1HGH.PDB | O, A_ASN_250   | N, A_HIS_183   | H, A_HIS_183    | 2.85 | 1.97 | 21.49 |
| 1HGH.PDB | O, A_ARG_229   | N, A_HIS_184   | H, A_HIS_184    | 2.86 | 1.93 | 14.05 |
| 1HGH.PDB | OG, A_SER_231  | NE2, A_HIS_184 | HE2, A_HIS_184  | 2.74 | 1.90 | 25.48 |
| 1HGH.PDB | OG1, A_THR_187 | N, A_GLU_190   | H, A_GLU_190    | 2.92 | 1.98 | 12.65 |
| 1HGH.PDB | O, A_THR_187   | N, A_GLN_191   | H, A_GLN_191    | 2.99 | 2.03 | 10.21 |
| 1HGH.PDB | OD1, A_ASN_250 | NE2, A_GLN_191 | HE21, A_GLN_191 | 2.96 | 2.00 | 8.72  |
| 1HGH.PDB | O, A_GLN_197   | NE2, A_GLN_191 | HE22, A_GLN_191 | 2.95 | 2.00 | 12.41 |
| 1HGH.PDB | O, A_GLN_189   | N, A_SER_193   | H, A_SER_193    | 2.92 | 1.94 | 4.94  |
| 1HGH.PDB | O, A_GLN_189   | OG, A_SER_193  | HG, A_SER_193   | 2.79 | 2.00 | 29.43 |
| 1HGH.PDB | O, A_GLU_190   | N, A_LEU_194   | H, A_LEU_194    | 2.95 | 1.99 | 10.19 |
| 1HGH.PDB | O, A_GLN_191   | N, A_TYR_195   | H, A_TYR_195    | 2.79 | 1.83 | 8.10  |
| 1HGH.PDB | O, A_TYR_161   | NE2, A_GLN_197 | HE21, A_GLN_197 | 2.92 | 1.97 | 11.79 |
| 1HGH.PDB | O, A_ASN_248   | NE2, A_GLN_197 | HE22, A_GLN_197 | 2.87 | 1.96 | 16.95 |
| 1HGH.PDB | OD1, A_ASN_246 | NH2, A_ARG_201 | HH21, A_ARG_201 | 2.63 | 1.71 | 19.32 |
| 1HGH.PDB | O, A_ILE_213   | N, A_VAL_202   | H, A_VAL_202    | 2.95 | 2.00 | 12.25 |
| 1HGH.PDB | O, A_ASN_246   | N, A_THR_203   | H, A_THR_203    | 2.81 | 1.89 | 15.97 |
| 1HGH.PDB | O, A_GLN_211   | N, A_VAL_204   | H, A_VAL_204    | 2.84 | 1.93 | 17.60 |
| 1HGH.PDB | O, A_SER_209   | N, A_THR_206   | H, A_THR_206    | 2.88 | 1.91 | 6.84  |
| 1HGH.PDB | OD1, A_ASP_241 | N, A_ARG_207   | H, A_ARG_207    | 2.88 | 1.92 | 8.24  |
| 1HGH.PDB | OG1, A_THR_206 | OG, A_SER_209  | HG, A_SER_209   | 2.93 | 1.98 | 8.14  |
| 1HGH.PDB | OD1, E_ASP_101 | NE2, A_GLN_210 | HE22, A_GLN_210 | 2.97 | 2.14 | 27.61 |
| 1HGH.PDB | O, A_VAL_204   | N, A_GLN_211   | H, A_GLN_211    | 2.88 | 1.95 | 14.72 |
| 1HGH.PDB | OG1, A_THR_203 | OG1, A_THR_212 | HG1, A_THR_212  | 2.93 | 1.98 | 7.92  |
| 1HGH.PDB | O, A_VAL_202   | N, A_ILE_213   | H, A_ILE_213    | 2.89 | 1.95 | 14.76 |
| 1HGH.PDB | ND1, A_HIS_184 | N, A_ASN_216   | H, A_ASN_216    | 2.75 | 1.96 | 29.57 |
| 1HGH.PDB | OE1, C_GLN_210 | NH2, A_ARG_220 | HH21, A_ARG_220 | 2.66 | 1.73 | 18.15 |
| 1HGH.PDB | O, A_ASN_216   | NH2, A_ARG_220 | HH22, A_ARG_220 | 2.69 | 1.79 | 20.62 |
| 1HGH.PDB | O, A_LEU_226   | N, A_VAL_223   | H, A_VAL_223    | 2.87 | 1.91 | 10.54 |
| 1HGH.PDB | O, A_CYS_97    | NE, A_ARG_224  | HE, A_ARG_224   | 2.80 | 1.97 | 26.34 |
| 1HGH.PDB | O, A_CYS_97    | NH2, A_ARG_224 | HH21, A_ARG_224 | 2.81 | 1.94 | 24.94 |
| 1HGH.PDB | O, A_VAL_223   | N, A_LEU_226   | H, A_LEU_226    | 2.81 | 1.89 | 14.05 |
| 1HGH.PDB | O, A_SER_228   | NH1, A_ARG_229 | HH11, A_ARG_229 | 2.68 | 1.73 | 15.83 |
| 1HGH.PDB | O, A_PRO_221   | NH2, A_ARG_229 | HH22, A_ARG_229 | 2.59 | 1.64 | 14.22 |
| 1HGH.PDB | OD1, A_ASP_101 | OG, A_SER_231  | HG, A_SER_231   | 2.86 | 1.91 | 11.01 |
| 1HGH.PDB | O, A_ASP_101   | N, A_ILE_232   | H, A_ILE_232    | 2.88 | 1.97 | 18.41 |
| 1HGH.PDB | O, A_TRP_180   | N, A_TYR_233   | H, A_TYR_233    | 2.88 | 1.92 | 10.18 |
| 1HGH.PDB | O, A_TYR_178   | N, A_THR_235   | H, A_THR_235    | 2.91 | 2.01 | 18.50 |
| 1HGH.PDB | O, A_LYS_176   | N, A_VAL_237   | H, A_VAL_237    | 2.76 | 1.84 | 16.06 |
| 1HGH.PDB | O, F_SER_71    | NZ, A_LYS_238  | HZ2, A_LYS_238  | 2.69 | 1.74 | 19.56 |

|          |                |                |                 |      |      |       |
|----------|----------------|----------------|-----------------|------|------|-------|
| 1HGH.PDB | OE1, F_GLU_72  | NZ, A_LYS_238  | HZ3, A_LYS_238  | 2.92 | 1.93 | 15.64 |
| 1HGH.PDB | O, A_ASN_170   | N, A_GLY_240   | H, A_GLY_240    | 2.92 | 2.05 | 22.76 |
| 1HGH.PDB | O, A_LYS_238   | N, A_ASP_241   | H, A_ASP_241    | 2.96 | 2.03 | 14.77 |
| 1HGH.PDB | OD1, A_ASP_241 | N, A_VAL_242   | H, A_VAL_242    | 2.75 | 1.93 | 27.28 |
| 1HGH.PDB | O, A_MET_168   | N, A_LEU_243   | H, A_LEU_243    | 2.84 | 1.87 | 3.34  |
| 1HGH.PDB | O, A_SER_205   | N, A_VAL_244   | H, A_VAL_244    | 2.95 | 2.00 | 12.06 |
| 1HGH.PDB | O, A_VAL_166   | N, A_ILE_245   | H, A_ILE_245    | 2.85 | 1.91 | 12.74 |
| 1HGH.PDB | O, A_THR_203   | N, A_ASN_246   | H, A_ASN_246    | 2.92 | 1.96 | 9.76  |
| 1HGH.PDB | OD1, A_ASN_165 | ND2, A_ASN_246 | HD22, A_ASN_246 | 2.95 | 1.98 | 10.57 |
| 1HGH.PDB | O, A_LEU_164   | N, A_SER_247   | H, A_SER_247    | 2.89 | 1.97 | 17.06 |
| 1HGH.PDB | OE1, A_GLN_191 | ND2, A_ASN_250 | HD21, A_ASN_250 | 2.87 | 1.90 | 5.96  |
| 1HGH.PDB | O, A_HIS_183   | ND2, A_ASN_250 | HD22, A_ASN_250 | 2.85 | 1.88 | 6.67  |
| 1HGH.PDB | O, A_GLY_181   | N, A_ILE_252   | H, A_ILE_252    | 2.94 | 1.99 | 11.06 |
| 1HGH.PDB | O, A_ASN_152   | N, A_ALA_253   | H, A_ALA_253    | 2.83 | 1.93 | 19.98 |
| 1HGH.PDB | O, A_ILE_121   | N, A_TYR_257   | H, A_TYR_257    | 3.00 | 2.13 | 23.55 |
| 1HGH.PDB | O, A_LEU_177   | N, A_PHE_258   | H, A_PHE_258    | 2.88 | 1.93 | 9.88  |
| 1HGH.PDB | OG, A_SER_115  | N, A_ARG_261   | H, A_ARG_261    | 2.95 | 1.99 | 11.60 |
| 1HGH.PDB | OE2, A_GLU_119 | NH1, A_ARG_261 | HH12, A_ARG_261 | 2.62 | 1.81 | 29.53 |
| 1HGH.PDB | OE1, A_GLU_119 | NH2, A_ARG_261 | HH22, A_ARG_261 | 2.87 | 1.97 | 23.64 |
| 1HGH.PDB | OD2, A_ASP_85  | NZ, A_LYS_264  | HZ3, A_LYS_264  | 2.81 | 1.82 | 15.33 |
| 1HGH.PDB | O, A_PHE_87    | N, A_MET_268   | H, A_MET_268    | 2.83 | 1.97 | 23.14 |
| 1HGH.PDB | O, A_GLU_89    | N, A_SER_270   | H, A_SER_270    | 3.00 | 2.03 | 9.88  |
| 1HGH.PDB | O, A_PRO_284   | OG, A_SER_270  | HG, A_SER_270   | 2.79 | 1.85 | 11.64 |
| 1HGH.PDB | OG, A_SER_270  | N, A_ALA_272   | H, A_ALA_272    | 2.97 | 2.03 | 13.38 |
| 1HGH.PDB | O, A_ILE_51    | N, A_ASP_275   | H, A_ASP_275    | 2.90 | 1.99 | 17.90 |
| 1HGH.PDB | OD1, A_ASP_275 | N, A_THR_276   | H, A_THR_276    | 2.83 | 1.96 | 22.54 |
| 1HGH.PDB | O, A_ASN_54    | N, A_SER_279   | H, A_SER_279    | 2.78 | 1.84 | 12.84 |
| 1HGH.PDB | O, A_TYR_302   | N, A_ILE_282   | H, A_ILE_282    | 2.85 | 1.90 | 11.45 |
| 1HGH.PDB | O, A_THR_283   | N, A_GLY_286   | H, A_GLY_286    | 2.81 | 1.91 | 17.80 |
| 1HGH.PDB | O, A_LYS_50    | N, A_SER_287   | H, A_SER_287    | 2.92 | 1.95 | 4.60  |
| 1HGH.PDB | O, A_ALA_304   | ND2, A_ASN_290 | HD22, A_ASN_290 | 2.87 | 1.97 | 19.64 |
| 1HGH.PDB | OE1, A_GLN_44  | NZ, A_LYS_292  | HZ1, A_LYS_292  | 2.68 | 1.67 | 11.56 |
| 1HGH.PDB | OD2, A_ASP_291 | NZ, A_LYS_292  | HZ3, A_LYS_292  | 2.82 | 1.85 | 18.01 |
| 1HGH.PDB | O, A_LYS_307   | N, A_GLN_295   | H, A_GLN_295    | 2.87 | 1.98 | 21.43 |
| 1HGH.PDB | O, A_ASN_298   | NE2, A_GLN_295 | HE21, A_GLN_295 | 2.73 | 1.78 | 8.62  |
| 1HGH.PDB | O, A_GLN_44    | N, A_ASN_296   | H, A_ASN_296    | 2.92 | 1.96 | 9.49  |
| 1HGH.PDB | O, B_LYS_68    | NZ, A_LYS_299  | HZ1, A_LYS_299  | 2.98 | 1.97 | 13.59 |
| 1HGH.PDB | OD1, A_ASN_298 | N, A_ILE_300   | H, A_ILE_300    | 2.92 | 1.97 | 10.82 |
| 1HGH.PDB | O, A_ILE_282   | N, A_TYR_302   | H, A_TYR_302    | 2.84 | 2.02 | 27.55 |
| 1HGH.PDB | O, A_LYS_264   | OH, A_TYR_302  | HH, A_TYR_302   | 2.68 | 1.89 | 29.18 |
| 1HGH.PDB | O, B_LYS_62    | N, A_GLY_303   | H, A_GLY_303    | 3.00 | 2.03 | 6.35  |
| 1HGH.PDB | O, A_GLN_295   | N, A_VAL_309   | H, A_VAL_309    | 2.94 | 2.11 | 27.12 |
| 1HGH.PDB | OG, B_SER_93   | N, A_LYS_310   | H, A_LYS_310    | 2.90 | 1.94 | 8.41  |
| 1HGH.PDB | OD1, B_ASP_86  | NZ, A_LYS_310  | HZ2, A_LYS_310  | 2.71 | 1.84 | 27.09 |
| 1HGH.PDB | OE2, A_GLU_41  | N, A_LEU_314   | H, A_LEU_314    | 2.82 | 1.88 | 12.85 |
| 1HGH.PDB | OE1, A_GLU_41  | NZ, A_LYS_315  | HZ3, A_LYS_315  | 2.87 | 1.90 | 18.83 |
| 1HGH.PDB | O, A_THR_40    | N, A_LEU_316   | H, A_LEU_316    | 2.77 | 1.84 | 14.60 |
| 1HGH.PDB | OD1, B_ASN_104 | N, A_ALA_317   | H, A_ALA_317    | 2.74 | 1.80 | 10.38 |
| 1HGH.PDB | O, A_ASN_38    | N, A_THR_318   | H, A_THR_318    | 2.93 | 1.99 | 13.50 |
| 1HGH.PDB | N, A_GLU_35    | N, A_ASN_322   | H, A_ASN_322    | 2.96 | 1.98 | 2.64  |
| 1HGH.PDB | O, A_VAL_20    | ND2, A_ASN_322 | HD21, A_ASN_322 | 2.83 | 1.91 | 15.77 |
| 1HGH.PDB | OE2, A_GLU_35  | ND2, A_ASN_322 | HD22, A_ASN_322 | 2.83 | 1.93 | 20.02 |
| 1HGH.PDB | OE1, A_GLU_325 | NZ, A_LYS_326  | HZ3, A_LYS_326  | 2.84 | 1.87 | 17.61 |
| 1HGH.PDB | O, A_PRO_21    | NE2, A_GLN_327 | HE22, A_GLN_327 | 2.76 | 1.93 | 26.05 |
| 1HGH.PDB | OD2, B_ASP_112 | N, B_GLY_1     | H2, B_GLY_1     | 2.83 | 1.83 | 12.80 |
| 1HGH.PDB | OD1, B_ASP_109 | N, B_LEU_2     | H, B_LEU_2      | 2.87 | 1.94 | 15.91 |
| 1HGH.PDB | OD2, B_ASP_112 | N, B_PHE_3     | H, B_PHE_3      | 2.80 | 1.99 | 28.74 |
| 1HGH.PDB | OD2, B_ASP_112 | N, B_GLY_4     | H, B_GLY_4      | 2.97 | 2.08 | 20.13 |

|          |                |               |                |      |      |       |
|----------|----------------|---------------|----------------|------|------|-------|
| 1HGH.PDB | OD1, B_ASP_112 | N, B_ALA_5    | H, B_ALA_5     | 2.90 | 2.00 | 18.43 |
| 1HGH.PDB | O, B_GLY_4     | N, B_PHE_9    | H, B_PHE_9     | 2.83 | 1.90 | 13.47 |
| 1HGH.PDB | O, B_GLY_13    | ND2, B_ASN_12 | HD22, B_ASN_12 | 2.81 | 1.93 | 21.84 |
| 1HGH.PDB | O, A_VAL_323   | N, B_GLY_13   | H, B_GLY_13    | 2.69 | 1.78 | 16.40 |
| 1HGH.PDB | O, A_HIS_17    | N, B_TRP_14   | H, B_TRP_14    | 2.80 | 1.87 | 14.18 |
| 1HGH.PDB | OG1, B_THR_41  | N, B_TRP_21   | H, B_TRP_21    | 2.88 | 1.96 | 16.52 |
| 1HGH.PDB | O, A_GLY_16    | N, B_GLY_23   | H, B_GLY_23    | 2.92 | 2.01 | 18.42 |
| 1HGH.PDB | O, B_ALA_35    | N, B_PHE_24   | H, B_PHE_24    | 2.84 | 1.87 | 5.30  |
| 1HGH.PDB | O, A_CYS_14    | N, B_ARG_25   | H, B_ARG_25    | 2.97 | 2.02 | 12.29 |
| 1HGH.PDB | OE1, B_GLN_34  | NE, B_ARG_25  | HE, B_ARG_25   | 2.67 | 1.79 | 21.37 |
| 1HGH.PDB | OE1, B_GLN_34  | NH2, B_ARG_25 | HH21, B_ARG_25 | 2.91 | 2.10 | 29.24 |
| 1HGH.PDB | O, B_GLY_33    | N, B_HIS_26   | H, B_HIS_26    | 2.69 | 1.85 | 24.63 |
| 1HGH.PDB | O, B_GLY_31    | N, B_ASN_28   | H, B_ASN_28    | 2.77 | 1.84 | 14.31 |
| 1HGH.PDB | O, B_ASN_28    | N, B_GLY_31   | H, B_GLY_31    | 2.97 | 2.09 | 21.15 |
| 1HGH.PDB | O, B_HIS_26    | N, B_GLY_33   | H, B_GLY_33    | 2.87 | 1.95 | 17.09 |
| 1HGH.PDB | O, B_PHE_24    | N, B_ALA_35   | H, B_ALA_35    | 2.82 | 2.00 | 27.92 |
| 1HGH.PDB | O, B_TYR_22    | N, B_ASP_37   | H, B_ASP_37    | 2.71 | 1.77 | 10.18 |
| 1HGH.PDB | OD2, B_ASP_37  | N, B_SER_40   | H, B_SER_40    | 2.86 | 1.90 | 7.81  |
| 1HGH.PDB | O, B_ASP_37    | OG1, B_THR_41 | HG1, B_THR_41  | 2.73 | 1.82 | 16.31 |
| 1HGH.PDB | O, B_LEU_38    | N, B_GLN_42   | H, B_GLN_42    | 2.96 | 2.02 | 13.86 |
| 1HGH.PDB | OD1, B_ASP_46  | NE2, B_GLN_42 | HE22, B_GLN_42 | 2.86 | 1.97 | 20.47 |
| 1HGH.PDB | O, B_LYS_39    | N, B_ALA_43   | H, B_ALA_43    | 2.95 | 2.01 | 14.38 |
| 1HGH.PDB | O, B_SER_40    | N, B_ALA_44   | H, B_ALA_44    | 2.94 | 1.96 | 4.02  |
| 1HGH.PDB | O, B_THR_41    | N, B_ILE_45   | H, B_ILE_45    | 2.92 | 1.98 | 12.98 |
| 1HGH.PDB | O, B_GLN_42    | N, B_ASP_46   | H, B_ASP_46    | 2.79 | 1.82 | 1.49  |
| 1HGH.PDB | O, B_ALA_43    | NE2, B_GLN_47 | HE22, B_GLN_47 | 2.86 | 1.96 | 17.99 |
| 1HGH.PDB | O, B_ILE_45    | N, B_ASN_49   | H, B_ASN_49    | 2.86 | 1.93 | 14.26 |
| 1HGH.PDB | O, B_ASP_46    | N, B_GLY_50   | H, B_GLY_50    | 2.92 | 2.02 | 19.62 |
| 1HGH.PDB | O, B_GLN_47    | N, B_LYS_51   | H, B_LYS_51    | 2.97 | 2.01 | 11.02 |
| 1HGH.PDB | OE1, B_GLU_103 | NZ, B_LYS_51  | HZ1, B_LYS_51  | 2.79 | 1.76 | 7.63  |
| 1HGH.PDB | ND1, B_HIS_106 | NZ, B_LYS_51  | HZ2, B_LYS_51  | 2.80 | 1.85 | 18.51 |
| 1HGH.PDB | OG1, B_THR_107 | NZ, B_LYS_51  | HZ3, B_LYS_51  | 2.89 | 1.91 | 15.99 |
| 1HGH.PDB | O, B_ILE_48    | N, B_LEU_52   | H, B_LEU_52    | 2.93 | 2.02 | 17.94 |
| 1HGH.PDB | O, B_ASN_49    | N, B_ASN_53   | H, B_ASN_53    | 2.82 | 1.92 | 18.53 |
| 1HGH.PDB | OE1, B_GLU_57  | NH1, B_ARG_54 | HH11, B_ARG_54 | 2.86 | 1.87 | 11.36 |
| 1HGH.PDB | OE2, F_GLU_97  | NH2, B_ARG_54 | HH22, B_ARG_54 | 2.82 | 1.86 | 15.60 |
| 1HGH.PDB | OD2, F_ASP_86  | NZ, B_LYS_62  | HZ1, B_LYS_62  | 2.66 | 1.80 | 27.71 |
| 1HGH.PDB | OD2, F_ASP_90  | NZ, B_LYS_62  | HZ3, B_LYS_62  | 2.68 | 1.82 | 27.13 |
| 1HGH.PDB | OG, A_SER_110  | NE2, B_HIS_64 | HE2, B_HIS_64  | 2.87 | 1.91 | 11.96 |
| 1HGH.PDB | O, B_PHE_63    | NE2, B_GLN_65 | HE22, B_GLN_65 | 2.98 | 2.01 | 7.37  |
| 1HGH.PDB | O, A_LYS_299   | NZ, B_LYS_68  | HZ1, B_LYS_68  | 2.89 | 1.86 | 6.42  |
| 1HGH.PDB | OE2, B_GLU_85  | NZ, B_LYS_68  | HZ2, B_LYS_68  | 2.73 | 1.71 | 6.94  |
| 1HGH.PDB | OG, C_SER_107  | N, B_ARG_76   | H, B_ARG_76    | 2.88 | 1.92 | 9.13  |
| 1HGH.PDB | OE2, D_GLU_81  | NE, B_ARG_76  | HE, B_ARG_76   | 2.87 | 1.90 | 9.70  |
| 1HGH.PDB | OE2, D_GLU_74  | NH1, B_ARG_76 | HH12, B_ARG_76 | 2.91 | 1.90 | 8.45  |
| 1HGH.PDB | OE1, D_GLU_81  | NH2, B_ARG_76 | HH21, B_ARG_76 | 2.77 | 1.76 | 5.47  |
| 1HGH.PDB | OE1, D_GLU_74  | NH2, B_ARG_76 | HH22, B_ARG_76 | 2.89 | 1.87 | 2.83  |
| 1HGH.PDB | O, B_GLU_72    | NE2, B_GLN_78 | HE21, B_GLN_78 | 2.94 | 1.96 | 7.72  |
| 1HGH.PDB | OE1, B_GLU_74  | NE2, B_GLN_78 | HE22, B_GLN_78 | 2.91 | 1.95 | 10.12 |
| 1HGH.PDB | O, B_GLY_75    | N, B_ASP_79   | H, B_ASP_79    | 2.86 | 1.93 | 16.21 |
| 1HGH.PDB | O, B_ASP_79    | N, B_TYR_83   | H, B_TYR_83    | 2.90 | 2.00 | 19.79 |
| 1HGH.PDB | OE1, D_GLU_85  | OH, B_TYR_83  | HH, B_TYR_83   | 2.69 | 1.84 | 23.96 |
| 1HGH.PDB | O, B_LEU_80    | N, B_VAL_84   | H, B_VAL_84    | 2.72 | 1.80 | 14.22 |
| 1HGH.PDB | O, B_LYS_82    | N, B_ASP_86   | H, B_ASP_86    | 2.94 | 2.00 | 12.60 |
| 1HGH.PDB | OH, F_TYR_83   | NZ, B_LYS_88  | HZ1, B_LYS_88  | 2.74 | 1.71 | 7.44  |
| 1HGH.PDB | O, B_GLU_85    | N, B_ILE_89   | H, B_ILE_89    | 2.85 | 1.87 | 2.68  |
| 1HGH.PDB | O, B_LYS_88    | N, B_TRP_92   | H, B_TRP_92    | 2.92 | 1.94 | 4.60  |
| 1HGH.PDB | O, B_ILE_89    | N, B_SER_93   | H, B_SER_93    | 2.91 | 2.02 | 21.18 |



|          |                |                |                 |      |      |       |
|----------|----------------|----------------|-----------------|------|------|-------|
| 1HGH.PDB | O, B_ILE_89    | OG, B_SER_93   | HG, B_SER_93    | 2.79 | 1.87 | 15.47 |
| 1HGH.PDB | O, B_ASP_90    | N, B_TYR_94    | H, B_TYR_94     | 2.88 | 1.97 | 17.78 |
| 1HGH.PDB | O, B_LEU_91    | N, B_ASN_95    | H, B_ASN_95     | 3.00 | 2.02 | 1.45  |
| 1HGH.PDB | O, B_TRP_92    | N, B_ALA_96    | H, B_ALA_96     | 2.97 | 2.04 | 15.59 |
| 1HGH.PDB | O, B_TYR_94    | N, B_LEU_98    | H, B_LEU_98     | 2.93 | 1.96 | 5.82  |
| 1HGH.PDB | O, B_ASN_95    | N, B_LEU_99    | H, B_LEU_99     | 2.94 | 2.02 | 15.77 |
| 1HGH.PDB | O, B_VAL_100   | N, B_ASN_104   | H, B_ASN_104    | 2.89 | 1.94 | 12.26 |
| 1HGH.PDB | O, A_LYS_27    | ND2, B_ASN_104 | HD22, B_ASN_104 | 2.88 | 1.93 | 11.07 |
| 1HGH.PDB | O, B_LEU_102   | N, B_HIS_106   | H, B_HIS_106    | 2.96 | 1.99 | 8.01  |
| 1HGH.PDB | O, B_GLU_103   | N, B_THR_107   | H, B_THR_107    | 2.84 | 1.93 | 17.70 |
| 1HGH.PDB | O, B_HIS_106   | N, B_LEU_110   | H, B_LEU_110    | 2.80 | 1.84 | 8.73  |
| 1HGH.PDB | O, B_THR_107   | OG1, B_THR_111 | HG1, B_THR_111  | 2.85 | 1.90 | 7.42  |
| 1HGH.PDB | O, B_ASP_109   | N, B_SER_113   | H, B_SER_113    | 2.77 | 1.82 | 9.55  |
| 1HGH.PDB | O, B_ASP_112   | N, B_ASN_116   | H, B_ASN_116    | 3.00 | 2.02 | 6.31  |
| 1HGH.PDB | O, B_SER_113   | N, B_LYS_117   | H, B_LYS_117    | 2.71 | 1.89 | 26.84 |
| 1HGH.PDB | O, B_GLU_114   | N, B_LEU_118   | H, B_LEU_118    | 2.99 | 2.02 | 7.88  |
| 1HGH.PDB | O, B_ASN_116   | N, B_GLU_120   | H, B_GLU_120    | 2.94 | 1.96 | 2.10  |
| 1HGH.PDB | O, B_LYS_117   | N, B_LYS_121   | H, B_LYS_121    | 2.86 | 1.96 | 18.76 |
| 1HGH.PDB | O, B_LEU_118   | N, B_THR_122   | H, B_THR_122    | 2.99 | 2.01 | 4.84  |
| 1HGH.PDB | O, B_PHE_119   | N, B_ARG_123   | H, B_ARG_123    | 2.90 | 1.94 | 9.49  |
| 1HGH.PDB | OE2, B_GLU_120 | NH1, B_ARG_123 | HH11, B_ARG_123 | 2.74 | 1.85 | 22.74 |
| 1HGH.PDB | O, B_GLU_120   | N, B_ARG_124   | H, B_ARG_124    | 2.98 | 2.02 | 10.15 |
| 1HGH.PDB | OE1, F_GLU_132 | NE, B_ARG_124  | HE, B_ARG_124   | 2.76 | 1.94 | 26.47 |
| 1HGH.PDB | OE2, F_GLU_132 | NE, B_ARG_124  | HE, B_ARG_124   | 2.83 | 1.98 | 23.62 |
| 1HGH.PDB | O, B_LEU_126   | N, B_ASN_129   | H, B_ASN_129    | 2.97 | 2.04 | 14.58 |
| 1HGH.PDB | OH, B_TYR_157  | ND2, B_ASN_129 | HD22, B_ASN_129 | 2.83 | 1.87 | 11.09 |
| 1HGH.PDB | O, B_LYS_139   | N, B_GLU_131   | H, B_GLU_131    | 2.93 | 2.01 | 16.63 |
| 1HGH.PDB | O, B_CYS_137   | N, B_MET_133   | H, B_MET_133    | 2.84 | 1.90 | 13.58 |
| 1HGH.PDB | O, A_LEU_13    | N, B_PHE_138   | H, B_PHE_138    | 2.71 | 1.82 | 19.17 |
| 1HGH.PDB | O, B_GLU_131   | N, B_LYS_139   | H, B_LYS_139    | 2.85 | 1.89 | 6.05  |
| 1HGH.PDB | O, A_ALA_11    | N, B_ILE_140   | H, B_ILE_140    | 2.77 | 1.85 | 16.34 |
| 1HGH.PDB | O, B_ASN_129   | N, B_TYR_141   | H, B_TYR_141    | 2.84 | 1.90 | 13.40 |
| 1HGH.PDB | O, B_ILE_140   | N, B_HIS_142   | H, B_HIS_142    | 3.00 | 2.21 | 29.95 |
| 1HGH.PDB | OE2, B_GLU_165 | N, B_LYS_143   | H, B_LYS_143    | 2.98 | 2.03 | 13.49 |
| 1HGH.PDB | OE1, B_GLU_30  | N, B_ASN_146   | H, B_ASN_146    | 2.90 | 1.99 | 19.37 |
| 1HGH.PDB | O, B_ASP_145   | N, B_ILE_149   | H, B_ILE_149    | 2.89 | 1.93 | 10.45 |
| 1HGH.PDB | O, B_ASN_146   | N, B_GLU_150   | H, B_GLU_150    | 2.91 | 1.99 | 15.45 |
| 1HGH.PDB | O, B_ALA_147   | N, B_SER_151   | H, B_SER_151    | 2.92 | 2.08 | 25.20 |
| 1HGH.PDB | O, B_CYS_148   | OG, B_SER_151  | HG, B_SER_151   | 2.72 | 1.85 | 19.70 |
| 1HGH.PDB | O, B_GLU_150   | N, B_ASN_154   | H, B_ASN_154    | 2.82 | 1.84 | 0.36  |
| 1HGH.PDB | OE2, B_GLU_150 | ND2, B_ASN_154 | HD21, B_ASN_154 | 2.97 | 2.10 | 23.74 |
| 1HGH.PDB | O, B_SER_151   | N, B_THR_156   | H, B_THR_156    | 2.77 | 1.95 | 26.55 |
| 1HGH.PDB | OD1, B_ASN_154 | OG1, B_THR_156 | HG1, B_THR_156  | 2.66 | 1.78 | 19.28 |
| 1HGH.PDB | OD1, B_ASP_158 | N, B_ASP_160   | H, B_ASP_160    | 2.94 | 2.06 | 21.76 |
| 1HGH.PDB | O, B_HIS_159   | N, B_TYR_162   | H, B_TYR_162    | 2.90 | 2.01 | 20.57 |
| 1HGH.PDB | O, F_ARG_170   | NH1, B_ARG_163 | HH12, B_ARG_163 | 2.69 | 1.71 | 10.72 |
| 1HGH.PDB | O, B_TYR_162   | N, B_ALA_166   | H, B_ALA_166    | 2.89 | 1.91 | 4.63  |
| 1HGH.PDB | O, B_ARG_163   | N, B_LEU_167   | H, B_LEU_167    | 2.82 | 1.86 | 7.93  |
| 1HGH.PDB | O, B_GLU_165   | ND2, B_ASN_169 | HD22, B_ASN_169 | 2.96 | 1.99 | 6.61  |
| 1HGH.PDB | O, B_ALA_166   | N, B_ARG_170   | H, B_ARG_170    | 2.78 | 1.91 | 21.64 |
| 1HGH.PDB | O, B_GLU_128   | NE, B_ARG_170  | HE, B_ARG_170   | 2.74 | 1.88 | 23.26 |
| 1HGH.PDB | OE2, B_GLU_131 | NH1, B_ARG_170 | HH11, B_ARG_170 | 2.83 | 1.83 | 5.81  |
| 1HGH.PDB | O, B_LEU_167   | N, B_PHE_171   | H, B_PHE_171    | 2.96 | 2.03 | 15.44 |
| 1HGH.PDB | O, D_ILE_140   | N, C_ALA_11    | H, C_ALA_11     | 2.90 | 2.02 | 21.17 |
| 1HGH.PDB | O, D_GLN_27    | N, C_THR_12    | H, C_THR_12     | 2.94 | 1.99 | 10.37 |
| 1HGH.PDB | O, D_PHE_138   | N, C_LEU_13    | H, C_LEU_13     | 2.98 | 2.01 | 8.63  |
| 1HGH.PDB | O, D_ARG_25    | N, C_CYS_14    | H, C_CYS_14     | 2.74 | 1.80 | 11.01 |
| 1HGH.PDB | O, D_GLY_136   | N, C_LEU_15    | H, C_LEU_15     | 2.92 | 1.95 | 6.34  |

|          |                |                |                 |      |      |       |
|----------|----------------|----------------|-----------------|------|------|-------|
| 1HGH.PDB | O, D_GLY_23    | N, C_GLY_16    | H, C_GLY_16     | 2.95 | 2.08 | 23.40 |
| 1HGH.PDB | O, D_TRP_21    | N, C_HIS_18    | H, C_HIS_18     | 2.93 | 2.04 | 20.66 |
| 1HGH.PDB | OD1, C_ASN_322 | N, C_VAL_20    | H, C_VAL_20     | 2.77 | 1.84 | 13.32 |
| 1HGH.PDB | O, C_VAL_36    | N, C_THR_24    | H, C_THR_24     | 2.84 | 1.94 | 18.88 |
| 1HGH.PDB | O, C_ILE_34    | N, C_VAL_26    | H, C_VAL_26     | 2.81 | 1.89 | 15.19 |
| 1HGH.PDB | OE2, D_GLU_97  | NZ, C_LYS_27   | HZ1, C_LYS_27   | 2.82 | 1.78 | 7.61  |
| 1HGH.PDB | O, C_ASP_31    | N, C_THR_28    | H, C_THR_28     | 2.72 | 1.89 | 26.38 |
| 1HGH.PDB | O, C_VAL_26    | N, C_ILE_34    | H, C_ILE_34     | 2.87 | 1.91 | 10.12 |
| 1HGH.PDB | O, C_THR_24    | N, C_VAL_36    | H, C_VAL_36     | 2.79 | 1.83 | 8.93  |
| 1HGH.PDB | O, C_MET_320   | N, C_THR_37    | H, C_THR_37     | 2.94 | 1.96 | 4.71  |
| 1HGH.PDB | O, C_LEU_316   | N, C_THR_40    | H, C_THR_40     | 2.84 | 2.01 | 25.77 |
| 1HGH.PDB | O, C_LEU_314   | N, C_LEU_42    | H, C_LEU_42     | 2.83 | 1.98 | 24.51 |
| 1HGH.PDB | O, C_PHE_294   | N, C_GLN_44    | H, C_GLN_44     | 2.92 | 1.94 | 4.18  |
| 1HGH.PDB | O, C_SER_46    | NE2, C_GLN_44  | HE22, C_GLN_44  | 2.81 | 1.95 | 23.93 |
| 1HGH.PDB | O, C_ASN_285   | OG, C_SER_47   | HG, C_SER_47    | 2.78 | 1.85 | 12.35 |
| 1HGH.PDB | OD2, C_ASP_275 | NZ, C_LYS_50   | HZ1, C_LYS_50   | 2.77 | 1.81 | 19.74 |
| 1HGH.PDB | O, C_PRO_273   | N, C_ILE_51    | H, C_ILE_51     | 2.79 | 1.88 | 17.33 |
| 1HGH.PDB | O, C_ASP_275   | N, C_ASN_53    | H, C_ASN_53     | 2.82 | 1.92 | 18.86 |
| 1HGH.PDB | O, C_GLU_280   | NE2, C_HIS_56  | HE2, C_HIS_56   | 2.96 | 2.00 | 11.12 |
| 1HGH.PDB | OD2, C_ASP_85  | N, C_ARG_57    | H, C_ARG_57     | 2.82 | 1.94 | 21.49 |
| 1HGH.PDB | O, C_THR_83    | NE, C_ARG_57   | HE, C_ARG_57    | 2.74 | 1.79 | 9.49  |
| 1HGH.PDB | O, C_LEU_86    | N, C_LEU_59    | H, C_LEU_59     | 2.97 | 2.04 | 15.48 |
| 1HGH.PDB | O, C_VAL_88    | N, C_GLY_61    | H, C_GLY_61     | 2.96 | 2.15 | 28.24 |
| 1HGH.PDB | OD1, C_ASP_60  | N, C_ILE_62    | H, C_ILE_62     | 2.88 | 1.94 | 12.53 |
| 1HGH.PDB | O, C_GLY_61    | N, C_CYS_64    | H, C_CYS_64     | 2.87 | 1.98 | 20.97 |
| 1HGH.PDB | OE2, C_GLU_89  | N, C_LEU_66    | H, C_LEU_66     | 2.91 | 1.94 | 8.58  |
| 1HGH.PDB | O, C_LEU_66    | N, C_LEU_70    | H, C_LEU_70     | 2.86 | 2.00 | 23.48 |
| 1HGH.PDB | O, C_ILE_67    | N, C_LEU_71    | H, C_LEU_71     | 2.80 | 1.84 | 8.28  |
| 1HGH.PDB | O, C_ASP_68    | N, C_GLY_72    | H, C_GLY_72     | 2.90 | 1.96 | 13.34 |
| 1HGH.PDB | OD1, C_ASP_73  | ND1, C_HIS_75  | HD1, C_HIS_75   | 2.71 | 1.84 | 22.23 |
| 1HGH.PDB | O, C_ASP_63    | NE2, C_HIS_75  | HE2, C_HIS_75   | 2.74 | 1.84 | 19.08 |
| 1HGH.PDB | O, C_ASP_73    | N, C_CYS_76    | H, C_CYS_76     | 2.76 | 1.88 | 21.08 |
| 1HGH.PDB | O, C_PRO_74    | N, C_ASP_77    | H, C_ASP_77     | 2.92 | 1.94 | 6.05  |
| 1HGH.PDB | O, C_CYS_76    | N, C_PHE_79    | H, C_PHE_79     | 2.99 | 2.01 | 3.05  |
| 1HGH.PDB | O, C_PHE_79    | N, C_GLU_82    | H, C_GLU_82     | 2.96 | 2.04 | 15.86 |
| 1HGH.PDB | OE1, C_GLU_82  | N, C_THR_83    | H, C_THR_83     | 2.89 | 2.00 | 20.79 |
| 1HGH.PDB | O, C_ARG_57    | N, C_ASP_85    | H, C_ASP_85     | 2.82 | 1.87 | 10.67 |
| 1HGH.PDB | O, C_MET_268   | N, C_GLU_89    | H, C_GLU_89     | 2.85 | 1.91 | 11.22 |
| 1HGH.PDB | OD1, C_ASP_60  | NE, C_ARG_90   | HE, C_ARG_90    | 2.80 | 1.87 | 15.44 |
| 1HGH.PDB | O, C_SER_270   | NH1, C_ARG_90  | HH11, C_ARG_90  | 2.64 | 1.80 | 26.46 |
| 1HGH.PDB | O, C_ALA_272   | NH1, C_ARG_90  | HH12, C_ARG_90  | 2.63 | 1.73 | 20.12 |
| 1HGH.PDB | OD2, C_ASP_60  | NH2, C_ARG_90  | HH21, C_ARG_90  | 2.76 | 1.77 | 8.79  |
| 1HGH.PDB | OD1, C_ASP_271 | N, C_SER_91    | H, C_SER_91     | 2.85 | 1.89 | 10.15 |
| 1HGH.PDB | OD2, C_ASP_271 | OG, C_SER_91   | HG, C_SER_91    | 2.80 | 1.87 | 12.62 |
| 1HGH.PDB | OD2, C_ASP_68  | OG, C_SER_95   | HG, C_SER_95    | 2.83 | 1.92 | 18.04 |
| 1HGH.PDB | OD2, C_ASP_73  | N, C_ASN_96    | H, C_ASN_96     | 2.88 | 1.92 | 9.38  |
| 1HGH.PDB | OD1, C_ASP_68  | OH, C_TYR_100  | HH, C_TYR_100   | 2.94 | 2.01 | 15.20 |
| 1HGH.PDB | O, C_ILE_230   | N, C_ASP_101   | H, C_ASP_101    | 2.88 | 2.00 | 21.91 |
| 1HGH.PDB | OD2, C_ASP_104 | OG, C_SER_107  | HG, C_SER_107   | 2.88 | 1.96 | 17.02 |
| 1HGH.PDB | O, C_TYR_105   | N, C_ARG_109   | H, C_ARG_109    | 2.83 | 1.86 | 3.16  |
| 1HGH.PDB | OE2, D_GLU_67  | NH2, C_ARG_109 | HH21, C_ARG_109 | 2.86 | 1.88 | 13.66 |
| 1HGH.PDB | OD2, B_ASP_79  | OG, C_SER_110  | HG, C_SER_110   | 2.78 | 1.85 | 13.87 |
| 1HGH.PDB | O, C_SER_107   | N, C_LEU_111   | H, C_LEU_111    | 2.85 | 1.90 | 10.01 |
| 1HGH.PDB | O, C_ARG_109   | N, C_ALA_113   | H, C_ALA_113    | 2.90 | 1.99 | 17.86 |
| 1HGH.PDB | O, C_SER_110   | N, C_SER_114   | H, C_SER_114    | 2.98 | 2.02 | 11.21 |
| 1HGH.PDB | OE2, C_GLU_119 | OG1, C_THR_117 | HG1, C_THR_117  | 2.87 | 1.92 | 8.14  |
| 1HGH.PDB | O, C_GLU_82    | N, C_LEU_118   | H, C_LEU_118    | 2.94 | 1.98 | 9.54  |
| 1HGH.PDB | O, C_TYR_257   | N, C_ILE_121   | H, C_ILE_121    | 2.91 | 1.96 | 13.11 |

|          |                |                |                 |      |      |       |
|----------|----------------|----------------|-----------------|------|------|-------|
| 1HGH.PDB | O, C_ARG_255   | N, C_GLU_123   | H, C_GLU_123    | 2.84 | 1.89 | 11.27 |
| 1HGH.PDB | O, C_THR_155   | N, C_THR_131   | H, C_THR_131    | 2.73 | 1.84 | 19.41 |
| 1HGH.PDB | OD1, C_ASN_152 | N, C_ASN_133   | H, C_ASN_133    | 2.88 | 2.02 | 23.07 |
| 1HGH.PDB | O, C_TRP_153   | N, C_GLY_134   | H, C_GLY_134    | 3.00 | 2.07 | 15.16 |
| 1HGH.PDB | O, C_GLY_146   | N, C_SER_136   | H, C_SER_136    | 2.72 | 1.83 | 18.30 |
| 1HGH.PDB | OG, C_SER_136  | N, C_ALA_138   | H, C_ALA_138    | 2.92 | 2.02 | 18.99 |
| 1HGH.PDB | O, C_GLY_144   | NZ, C_LYS_140  | HZ1, C_LYS_140  | 2.84 | 1.87 | 16.40 |
| 1HGH.PDB | OD1, C_ASN_137 | NZ, C_LYS_140  | HZ2, C_LYS_140  | 2.76 | 1.74 | 10.11 |
| 1HGH.PDB | OD2, C_ASP_77  | NE, C_ARG_141  | HE, C_ARG_141   | 2.85 | 2.02 | 26.86 |
| 1HGH.PDB | O, C_PHE_147   | NH1, C_ARG_141 | HH12, C_ARG_141 | 2.56 | 1.64 | 18.32 |
| 1HGH.PDB | OD1, C_ASP_77  | NH2, C_ARG_141 | HH21, C_ARG_141 | 2.88 | 1.98 | 22.59 |
| 1HGH.PDB | OD2, C_ASP_77  | NH2, C_ARG_141 | HH21, C_ARG_141 | 2.75 | 1.86 | 23.43 |
| 1HGH.PDB | O, C_GLY_72    | NH2, C_ARG_141 | HH22, C_ARG_141 | 2.92 | 1.95 | 11.58 |
| 1HGH.PDB | OD1, C_ASN_137 | OG, C_SER_145  | HG, C_SER_145   | 2.89 | 2.04 | 23.42 |
| 1HGH.PDB | O, C_SER_136   | N, C_GLY_146   | H, C_GLY_146    | 2.94 | 2.00 | 12.32 |
| 1HGH.PDB | O, C_GLY_72    | N, C_SER_149   | H, C_SER_149    | 2.86 | 1.93 | 14.59 |
| 1HGH.PDB | OH, C_TYR_195  | NE1, C_TRP_153 | HE1, C_TRP_153  | 2.92 | 2.00 | 17.94 |
| 1HGH.PDB | O, C_LEU_194   | N, C_LYS_156   | H, C_LYS_156    | 2.95 | 2.02 | 15.17 |
| 1HGH.PDB | O, C_THR_160   | N, C_SER_157   | H, C_SER_157    | 2.91 | 1.98 | 14.73 |
| 1HGH.PDB | O, C_SER_247   | N, C_LEU_164   | H, C_LEU_164    | 2.74 | 1.91 | 26.14 |
| 1HGH.PDB | O, C_ILE_245   | N, C_VAL_166   | H, C_VAL_166    | 2.84 | 1.89 | 12.07 |
| 1HGH.PDB | O, C_LEU_243   | OG1, C_THR_167 | HG1, C_THR_167  | 2.87 | 1.97 | 18.05 |
| 1HGH.PDB | O, C_LEU_243   | N, C_MET_168   | H, C_MET_168    | 2.84 | 1.91 | 14.36 |
| 1HGH.PDB | O, C_ASP_241   | N, C_ASN_170   | H, C_ASN_170    | 2.92 | 1.95 | 6.13  |
| 1HGH.PDB | O, C_PHE_174   | ND2, C_ASN_170 | HD21, C_ASN_170 | 2.82 | 1.87 | 11.99 |
| 1HGH.PDB | O, C_VAL_237   | ND2, C_ASN_170 | HD22, C_ASN_170 | 2.87 | 2.05 | 26.77 |
| 1HGH.PDB | O, C_VAL_237   | N, C_LYS_176   | H, C_LYS_176    | 2.98 | 2.08 | 18.97 |
| 1HGH.PDB | OE2, C_GLU_123 | NZ, C_LYS_176  | HZ1, C_LYS_176  | 2.65 | 1.80 | 28.51 |
| 1HGH.PDB | O, C_PHE_258   | N, C_LEU_177   | H, C_LEU_177    | 2.96 | 1.98 | 4.25  |
| 1HGH.PDB | O, C_THR_235   | N, C_TYR_178   | H, C_TYR_178    | 2.84 | 1.89 | 11.44 |
| 1HGH.PDB | OE1, C_GLU_123 | OH, C_TYR_178  | HH, C_TYR_178   | 2.74 | 1.81 | 11.36 |
| 1HGH.PDB | OG1, C_THR_235 | NE1, C_TRP_180 | HE1, C_TRP_180  | 2.88 | 1.89 | 0.71  |
| 1HGH.PDB | O, C_ASN_250   | N, C_HIS_183   | H, C_HIS_183    | 2.86 | 2.01 | 24.69 |
| 1HGH.PDB | O, C_ARG_229   | N, C_HIS_184   | H, C_HIS_184    | 2.88 | 1.93 | 10.57 |
| 1HGH.PDB | OG, C_SER_231  | NE2, C_HIS_184 | HE2, C_HIS_184  | 2.77 | 1.92 | 24.69 |
| 1HGH.PDB | OG1, C_THR_187 | N, C_GLU_190   | H, C_GLU_190    | 2.94 | 2.00 | 12.64 |
| 1HGH.PDB | OD1, C_ASN_250 | NE2, C_GLN_191 | HE21, C_GLN_191 | 2.95 | 1.99 | 9.46  |
| 1HGH.PDB | O, C_GLN_197   | NE2, C_GLN_191 | HE22, C_GLN_191 | 2.94 | 1.99 | 11.67 |
| 1HGH.PDB | O, C_GLN_189   | OG1, C_THR_192 | HG1, C_THR_192  | 2.82 | 1.90 | 13.51 |
| 1HGH.PDB | O, C_GLN_189   | N, C_SER_193   | H, C_SER_193    | 2.90 | 1.95 | 11.34 |
| 1HGH.PDB | O, C_GLU_190   | N, C_LEU_194   | H, C_LEU_194    | 2.97 | 1.99 | 6.33  |
| 1HGH.PDB | O, C_GLN_191   | N, C_TYR_195   | H, C_TYR_195    | 2.80 | 1.84 | 8.79  |
| 1HGH.PDB | O, C_TYR_195   | N, C_GLN_197   | H, C_GLN_197    | 2.68 | 1.90 | 29.95 |
| 1HGH.PDB | O, C_TYR_161   | NE2, C_GLN_197 | HE21, C_GLN_197 | 2.92 | 1.98 | 11.92 |
| 1HGH.PDB | O, C_ASN_248   | NE2, C_GLN_197 | HE22, C_GLN_197 | 2.88 | 1.96 | 16.62 |
| 1HGH.PDB | OD1, C_ASN_246 | NH2, C_ARG_201 | HH21, C_ARG_201 | 2.65 | 1.73 | 20.02 |
| 1HGH.PDB | O, C_ILE_213   | N, C_VAL_202   | H, C_VAL_202    | 2.96 | 2.02 | 14.06 |
| 1HGH.PDB | O, C_ASN_246   | N, C_THR_203   | H, C_THR_203    | 2.85 | 1.89 | 9.27  |
| 1HGH.PDB | OG1, C_THR_212 | OG1, C_THR_203 | HG1, C_THR_203  | 2.92 | 1.98 | 11.43 |
| 1HGH.PDB | O, C_GLN_211   | N, C_VAL_204   | H, C_VAL_204    | 2.86 | 1.95 | 18.48 |
| 1HGH.PDB | O, C_SER_209   | N, C_THR_206   | H, C_THR_206    | 2.88 | 1.91 | 6.25  |
| 1HGH.PDB | OD1, C_ASP_241 | N, C_ARG_207   | H, C_ARG_207    | 2.87 | 1.91 | 10.07 |
| 1HGH.PDB | OD2, C_ASP_241 | NE, C_ARG_208  | HE, C_ARG_208   | 2.97 | 2.08 | 22.63 |
| 1HGH.PDB | OG1, C_THR_206 | OG, C_SER_209  | HG, C_SER_209   | 2.95 | 2.00 | 8.11  |
| 1HGH.PDB | OD1, A_ASP_101 | NE2, C_GLN_210 | HE22, C_GLN_210 | 2.93 | 2.07 | 24.87 |
| 1HGH.PDB | O, C_VAL_204   | N, C_GLN_211   | H, C_GLN_211    | 2.87 | 1.94 | 15.75 |
| 1HGH.PDB | O, C_VAL_202   | N, C_ILE_213   | H, C_ILE_213    | 2.87 | 1.94 | 14.37 |
| 1HGH.PDB | ND1, C_HIS_184 | N, C_ASN_216   | H, C_ASN_216    | 2.74 | 1.94 | 28.49 |

|          |                |                |                 |      |      |       |
|----------|----------------|----------------|-----------------|------|------|-------|
| 1HGH.PDB | O, C_ASN_216   | NH1, C_ARG_220 | HH12, C_ARG_220 | 2.90 | 2.08 | 29.68 |
| 1HGH.PDB | OE1, E_GLN_210 | NH2, C_ARG_220 | HH21, C_ARG_220 | 2.57 | 1.72 | 26.03 |
| 1HGH.PDB | O, C_ASN_216   | NH2, C_ARG_220 | HH22, C_ARG_220 | 2.69 | 1.80 | 21.79 |
| 1HGH.PDB | O, C_LEU_226   | N, C_VAL_223   | H, C_VAL_223    | 2.85 | 1.88 | 8.82  |
| 1HGH.PDB | O, C_CYS_97    | NE, C_ARG_224  | HE, C_ARG_224   | 2.79 | 1.97 | 28.26 |
| 1HGH.PDB | O, C_CYS_97    | NH2, C_ARG_224 | HH21, C_ARG_224 | 2.81 | 1.96 | 27.50 |
| 1HGH.PDB | O, C_VAL_223   | N, C_LEU_226   | H, C_LEU_226    | 2.85 | 1.93 | 15.63 |
| 1HGH.PDB | O, C_ARG_220   | OG, C_SER_227  | HG, C_SER_227   | 2.97 | 2.04 | 13.65 |
| 1HGH.PDB | O, C_SER_228   | NH1, C_ARG_229 | HH11, C_ARG_229 | 2.65 | 1.70 | 16.09 |
| 1HGH.PDB | O, C_PRO_221   | NH2, C_ARG_229 | HH22, C_ARG_229 | 2.62 | 1.66 | 13.46 |
| 1HGH.PDB | OD1, C_ASP_101 | OG, C_SER_231  | HG, C_SER_231   | 2.86 | 1.92 | 12.68 |
| 1HGH.PDB | O, C_ASP_101   | N, C_ILE_232   | H, C_ILE_232    | 2.90 | 1.98 | 16.86 |
| 1HGH.PDB | O, C_TRP_180   | N, C_TYR_233   | H, C_TYR_233    | 2.89 | 1.92 | 6.98  |
| 1HGH.PDB | O, C_TYR_178   | N, C_THR_235   | H, C_THR_235    | 2.90 | 1.98 | 17.23 |
| 1HGH.PDB | O, C_LYS_176   | N, C_VAL_237   | H, C_VAL_237    | 2.74 | 1.82 | 16.60 |
| 1HGH.PDB | OE1, B_GLU_72  | NZ, C_LYS_238  | HZ1, C_LYS_238  | 2.71 | 1.80 | 22.72 |
| 1HGH.PDB | O, B_SER_71    | NZ, C_LYS_238  | HZ3, C_LYS_238  | 2.68 | 1.75 | 20.57 |
| 1HGH.PDB | O, C_ASN_170   | N, C_GLY_240   | H, C_GLY_240    | 2.92 | 2.04 | 20.96 |
| 1HGH.PDB | O, C_LYS_238   | N, C_ASP_241   | H, C_ASP_241    | 2.93 | 1.99 | 14.39 |
| 1HGH.PDB | OD1, C_ASP_241 | N, C_VAL_242   | H, C_VAL_242    | 2.78 | 1.96 | 27.73 |
| 1HGH.PDB | O, C_MET_168   | N, C_LEU_243   | H, C_LEU_243    | 2.86 | 1.89 | 2.64  |
| 1HGH.PDB | O, C_SER_205   | N, C_VAL_244   | H, C_VAL_244    | 2.96 | 2.02 | 14.40 |
| 1HGH.PDB | O, C_VAL_166   | N, C_ILE_245   | H, C_ILE_245    | 2.87 | 1.93 | 13.03 |
| 1HGH.PDB | O, C_THR_203   | N, C_ASN_246   | H, C_ASN_246    | 2.89 | 1.95 | 12.42 |
| 1HGH.PDB | OD1, C_ASN_165 | ND2, C_ASN_246 | HD22, C_ASN_246 | 2.97 | 2.00 | 10.03 |
| 1HGH.PDB | O, C_LEU_164   | N, C_SER_247   | H, C_SER_247    | 2.91 | 2.00 | 17.54 |
| 1HGH.PDB | O, C_ARG_201   | OG, C_SER_247  | HG, C_SER_247   | 2.73 | 1.94 | 29.65 |
| 1HGH.PDB | OE1, C_GLN_191 | ND2, C_ASN_250 | HD21, C_ASN_250 | 2.86 | 1.89 | 6.98  |
| 1HGH.PDB | O, C_HIS_183   | ND2, C_ASN_250 | HD22, C_ASN_250 | 2.87 | 1.90 | 8.13  |
| 1HGH.PDB | O, C_GLY_181   | N, C_ILE_252   | H, C_ILE_252    | 2.97 | 2.02 | 11.25 |
| 1HGH.PDB | O, C_ASN_152   | N, C_ALA_253   | H, C_ALA_253    | 2.87 | 2.00 | 22.06 |
| 1HGH.PDB | O, C_ILE_121   | N, C_TYR_257   | H, C_TYR_257    | 2.97 | 2.09 | 21.43 |
| 1HGH.PDB | O, C_LEU_177   | N, C_PHE_258   | H, C_PHE_258    | 2.89 | 1.95 | 13.32 |
| 1HGH.PDB | O, C_GLU_119   | N, C_LYS_259   | H, C_LYS_259    | 2.98 | 2.10 | 21.28 |
| 1HGH.PDB | OG, C_SER_115  | N, C_ARG_261   | H, C_ARG_261    | 2.95 | 2.00 | 12.02 |
| 1HGH.PDB | OE2, C_GLU_119 | NH1, C_ARG_261 | HH12, C_ARG_261 | 2.64 | 1.82 | 29.37 |
| 1HGH.PDB | OE1, C_GLU_119 | NH2, C_ARG_261 | HH22, C_ARG_261 | 2.85 | 1.97 | 24.44 |
| 1HGH.PDB | OD2, C_ASP_85  | NZ, C_LYS_264  | HZ3, C_LYS_264  | 2.79 | 1.81 | 15.90 |
| 1HGH.PDB | O, C_PHE_87    | N, C_MET_268   | H, C_MET_268    | 2.82 | 1.96 | 23.69 |
| 1HGH.PDB | O, C_GLU_89    | N, C_SER_270   | H, C_SER_270    | 2.99 | 2.02 | 9.99  |
| 1HGH.PDB | O, C_PRO_284   | OG, C_SER_270  | HG, C_SER_270   | 2.79 | 1.83 | 6.01  |
| 1HGH.PDB | OG, C_SER_270  | N, C_ALA_272   | H, C_ALA_272    | 2.92 | 1.99 | 14.61 |
| 1HGH.PDB | O, C_ILE_51    | N, C_ASP_275   | H, C_ASP_275    | 2.92 | 1.99 | 15.40 |
| 1HGH.PDB | OD1, C_ASP_275 | N, C_THR_276   | H, C_THR_276    | 2.82 | 1.95 | 22.45 |
| 1HGH.PDB | O, C_ASN_54    | N, C_SER_279   | H, C_SER_279    | 2.78 | 1.84 | 13.60 |
| 1HGH.PDB | O, C_TYR_302   | N, C_ILE_282   | H, C_ILE_282    | 2.88 | 1.95 | 15.61 |
| 1HGH.PDB | O, C_THR_283   | N, C_GLY_286   | H, C_GLY_286    | 2.83 | 1.94 | 19.20 |
| 1HGH.PDB | O, C_LYS_50    | N, C_SER_287   | H, C_SER_287    | 2.85 | 1.88 | 2.68  |
| 1HGH.PDB | O, C_ALA_304   | ND2, C_ASN_290 | HD22, C_ASN_290 | 2.89 | 2.00 | 20.66 |
| 1HGH.PDB | OE1, C_GLN_44  | NZ, C_LYS_292  | HZ1, C_LYS_292  | 2.68 | 1.68 | 11.00 |
| 1HGH.PDB | OD2, C_ASP_291 | NZ, C_LYS_292  | HZ3, C_LYS_292  | 2.82 | 1.84 | 17.38 |
| 1HGH.PDB | O, C_LYS_307   | N, C_GLN_295   | H, C_GLN_295    | 2.85 | 2.00 | 24.78 |
| 1HGH.PDB | O, C_ASN_298   | NE2, C_GLN_295 | HE21, C_GLN_295 | 2.73 | 1.77 | 6.42  |
| 1HGH.PDB | O, C_GLN_44    | N, C_ASN_296   | H, C_ASN_296    | 2.89 | 1.94 | 9.83  |
| 1HGH.PDB | OD1, C_ASN_285 | ND2, C_ASN_298 | HD22, C_ASN_298 | 2.99 | 2.06 | 14.92 |
| 1HGH.PDB | OD1, C_ASN_298 | N, C_ILE_300   | H, C_ILE_300    | 2.90 | 1.96 | 12.51 |
| 1HGH.PDB | O, C_ILE_282   | N, C_TYR_302   | H, C_TYR_302    | 2.82 | 1.98 | 25.76 |
| 1HGH.PDB | O, C_GLN_295   | N, C_VAL_309   | H, C_VAL_309    | 2.93 | 2.12 | 28.37 |

|          |                |                |                 |      |      |       |
|----------|----------------|----------------|-----------------|------|------|-------|
| 1HGH.PDB | OG, D_SER_93   | N, C_LYS_310   | H, C_LYS_310    | 2.93 | 1.96 | 8.29  |
| 1HGH.PDB | OD1, D_ASP_86  | NZ, C_LYS_310  | HZ2, C_LYS_310  | 2.73 | 1.85 | 26.20 |
| 1HGH.PDB | OE2, C_GLU_41  | N, C_LEU_314   | H, C_LEU_314    | 2.81 | 1.86 | 11.11 |
| 1HGH.PDB | OE1, C_GLU_41  | NZ, C_LYS_315  | HZ3, C_LYS_315  | 2.87 | 1.91 | 19.47 |
| 1HGH.PDB | O, C_THR_40    | N, C_LEU_316   | H, C_LEU_316    | 2.77 | 1.83 | 12.11 |
| 1HGH.PDB | OD1, D_ASN_104 | N, C_ALA_317   | H, C_ALA_317    | 2.74 | 1.81 | 14.42 |
| 1HGH.PDB | O, C_ASN_38    | N, C_THR_318   | H, C_THR_318    | 2.94 | 1.99 | 12.96 |
| 1HGH.PDB | O, C_GLU_35    | N, C_ASN_322   | H, C_ASN_322    | 2.96 | 1.98 | 1.89  |
| 1HGH.PDB | O, C_VAL_20    | ND2, C_ASN_322 | HD21, C_ASN_322 | 2.84 | 1.92 | 16.39 |
| 1HGH.PDB | OE2, C_GLU_35  | ND2, C_ASN_322 | HD22, C_ASN_322 | 2.82 | 1.91 | 18.57 |
| 1HGH.PDB | OE1, D_GLU_15  | NZ, C_LYS_326  | HZ1, C_LYS_326  | 2.77 | 1.75 | 11.00 |
| 1HGH.PDB | OXT, C_THR_328 | NE2, C_GLN_327 | HE22, C_GLN_327 | 2.93 | 1.99 | 14.57 |
| 1HGH.PDB | OD2, D_ASP_112 | N, D_GLY_1     | H2, D_GLY_1     | 2.82 | 1.82 | 12.93 |
| 1HGH.PDB | OD1, D_ASP_109 | N, D_LEU_2     | H, D_LEU_2      | 2.90 | 1.96 | 14.04 |
| 1HGH.PDB | OD2, D_ASP_112 | N, D_PHE_3     | H, D_PHE_3      | 2.83 | 2.03 | 28.69 |
| 1HGH.PDB | OD2, D_ASP_112 | N, D_GLY_4     | H, D_GLY_4      | 2.96 | 2.09 | 21.45 |
| 1HGH.PDB | OD1, D_ASP_112 | N, D_ALA_5     | H, D_ALA_5      | 2.95 | 2.04 | 18.20 |
| 1HGH.PDB | O, D_GLY_4     | N, D_PHE_9     | H, D_PHE_9      | 2.82 | 1.88 | 12.35 |
| 1HGH.PDB | O, D_GLY_13    | ND2, D_ASN_12  | HD22, D_ASN_12  | 2.83 | 1.93 | 18.16 |
| 1HGH.PDB | O, C_VAL_323   | N, D_GLY_13    | H, D_GLY_13     | 2.68 | 1.77 | 15.36 |
| 1HGH.PDB | O, C_HIS_17    | N, D_TRP_14    | H, D_TRP_14     | 2.80 | 1.87 | 13.64 |
| 1HGH.PDB | OG1, D_THR_41  | N, D_TRP_21    | H, D_TRP_21     | 2.88 | 1.96 | 16.44 |
| 1HGH.PDB | O, C_GLY_16    | N, D_GLY_23    | H, D_GLY_23     | 2.92 | 2.01 | 18.18 |
| 1HGH.PDB | O, D_ALA_35    | N, D_PHE_24    | H, D_PHE_24     | 2.87 | 1.90 | 5.65  |
| 1HGH.PDB | O, C_CYS_14    | N, D_ARG_25    | H, D_ARG_25     | 2.90 | 1.94 | 10.42 |
| 1HGH.PDB | OE1, D_GLN_34  | NE, D_ARG_25   | HE, D_ARG_25    | 2.91 | 1.96 | 12.36 |
| 1HGH.PDB | O, D_GLY_33    | N, D_HIS_26    | H, D_HIS_26     | 2.85 | 1.94 | 18.22 |
| 1HGH.PDB | O, C_THR_12    | N, D_GLN_27    | H, D_GLN_27     | 2.91 | 1.98 | 14.85 |
| 1HGH.PDB | O, D_GLY_31    | N, D_ASN_28    | H, D_ASN_28     | 2.93 | 1.97 | 10.70 |
| 1HGH.PDB | OD1, D_ASN_28  | N, D_GLU_30    | H, D_GLU_30     | 2.88 | 2.06 | 26.85 |
| 1HGH.PDB | O, D_HIS_26    | N, D_GLY_33    | H, D_GLY_33     | 2.86 | 2.05 | 27.85 |
| 1HGH.PDB | O, D_PHE_24    | N, D_ALA_35    | H, D_ALA_35     | 2.81 | 1.99 | 27.43 |
| 1HGH.PDB | O, D_TYR_22    | N, D_ASP_37    | H, D_ASP_37     | 2.72 | 1.78 | 9.80  |
| 1HGH.PDB | OD2, D_ASP_37  | N, D_SER_40    | H, D_SER_40     | 2.86 | 1.91 | 10.58 |
| 1HGH.PDB | OD2, D_ASP_37  | OG, D_SER_40   | HG, D_SER_40    | 2.74 | 1.93 | 27.28 |
| 1HGH.PDB | O, D_ASP_37    | OG1, D_THR_41  | HG1, D_THR_41   | 2.73 | 1.83 | 18.40 |
| 1HGH.PDB | O, D_LEU_38    | N, D_GLN_42    | H, D_GLN_42     | 2.92 | 1.99 | 14.71 |
| 1HGH.PDB | OD1, D_ASP_46  | NE2, D_GLN_42  | HE22, D_GLN_42  | 2.87 | 1.96 | 19.71 |
| 1HGH.PDB | O, D_LYS_39    | N, D_ALA_43    | H, D_ALA_43     | 2.95 | 2.04 | 17.64 |
| 1HGH.PDB | O, D_SER_40    | N, D_ALA_44    | H, D_ALA_44     | 2.94 | 1.96 | 3.83  |
| 1HGH.PDB | O, D_THR_41    | N, D_ILE_45    | H, D_ILE_45     | 2.94 | 1.99 | 10.18 |
| 1HGH.PDB | O, D_GLN_42    | N, D_ASP_46    | H, D_ASP_46     | 2.79 | 1.82 | 1.60  |
| 1HGH.PDB | O, D_ALA_43    | NE2, D_GLN_47  | HE22, D_GLN_47  | 2.84 | 1.94 | 17.94 |
| 1HGH.PDB | O, D_ILE_45    | N, D_ASN_49    | H, D_ASN_49     | 2.88 | 1.92 | 10.54 |
| 1HGH.PDB | O, D_ASP_46    | N, D_GLY_50    | H, D_GLY_50     | 2.97 | 2.07 | 20.28 |
| 1HGH.PDB | O, D_GLN_47    | N, D_LYS_51    | H, D_LYS_51     | 2.96 | 2.00 | 10.33 |
| 1HGH.PDB | OE1, D_GLU_103 | NZ, D_LYS_51   | HZ1, D_LYS_51   | 2.74 | 1.72 | 7.43  |
| 1HGH.PDB | ND1, D_HIS_106 | NZ, D_LYS_51   | HZ2, D_LYS_51   | 2.80 | 1.84 | 18.41 |
| 1HGH.PDB | OG1, D_THR_107 | NZ, D_LYS_51   | HZ3, D_LYS_51   | 2.90 | 1.93 | 16.98 |
| 1HGH.PDB | O, D_ILE_48    | N, D_LEU_52    | H, D_LEU_52     | 2.94 | 2.02 | 16.46 |
| 1HGH.PDB | O, D_ASN_49    | N, D_ASN_53    | H, D_ASN_53     | 2.80 | 1.89 | 17.97 |
| 1HGH.PDB | O, A_THR_28    | NE, D_ARG_54   | HE, D_ARG_54    | 2.96 | 1.98 | 3.97  |
| 1HGH.PDB | OE1, D_GLU_57  | NH1, D_ARG_54  | HH11, D_ARG_54  | 2.86 | 1.86 | 11.45 |
| 1HGH.PDB | OE2, B_GLU_97  | NH2, D_ARG_54  | HH22, D_ARG_54  | 2.80 | 1.85 | 16.64 |
| 1HGH.PDB | OG, C_SER_110  | NE2, D_HIS_64  | HE2, D_HIS_64   | 2.84 | 1.88 | 10.18 |
| 1HGH.PDB | O, C_LYS_299   | NZ, D_LYS_68   | HZ1, D_LYS_68   | 2.88 | 1.85 | 6.67  |
| 1HGH.PDB | OE2, D_GLU_85  | NZ, D_LYS_68   | HZ2, D_LYS_68   | 2.75 | 1.73 | 9.37  |
| 1HGH.PDB | OG, E_SER_107  | N, D_ARG_76    | H, D_ARG_76     | 2.91 | 1.94 | 8.23  |

|          |                |                |                 |      |      |       |
|----------|----------------|----------------|-----------------|------|------|-------|
| 1HGH.PDB | OE2, F_GLU_81  | NE, D_ARG_76   | HE, D_ARG_76    | 2.79 | 1.84 | 10.45 |
| 1HGH.PDB | OE2, F_GLU_74  | NH1, D_ARG_76  | HH12, D_ARG_76  | 2.77 | 1.77 | 10.38 |
| 1HGH.PDB | OE1, F_GLU_81  | NH2, D_ARG_76  | HH21, D_ARG_76  | 2.70 | 1.70 | 6.41  |
| 1HGH.PDB | OE1, F_GLU_74  | NH2, D_ARG_76  | HH22, D_ARG_76  | 2.75 | 1.75 | 5.88  |
| 1HGH.PDB | O, D_GLU_72    | NE2, D_GLN_78  | HE21, D_GLN_78  | 2.93 | 1.96 | 8.18  |
| 1HGH.PDB | OE1, D_GLU_74  | NE2, D_GLN_78  | HE22, D_GLN_78  | 2.92 | 1.96 | 9.79  |
| 1HGH.PDB | O, D_GLY_75    | N, D_ASP_79    | H, D_ASP_79     | 2.84 | 1.88 | 10.94 |
| 1HGH.PDB | O, D_ASP_79    | N, D_TYR_83    | H, D_TYR_83     | 2.86 | 1.93 | 15.47 |
| 1HGH.PDB | OE1, F_GLU_85  | OH, D_TYR_83   | HH, D_TYR_83    | 2.59 | 1.81 | 29.86 |
| 1HGH.PDB | O, D_LEU_80    | N, D_VAL_84    | H, D_VAL_84     | 2.71 | 1.80 | 16.30 |
| 1HGH.PDB | O, D_LYS_82    | N, D_ASP_86    | H, D_ASP_86     | 2.95 | 1.99 | 9.46  |
| 1HGH.PDB | O, D_VAL_84    | N, D_LYS_88    | H, D_LYS_88     | 2.98 | 2.09 | 19.67 |
| 1HGH.PDB | OH, B_TYR_83   | NZ, D_LYS_88   | HZ1, D_LYS_88   | 2.66 | 1.64 | 7.83  |
| 1HGH.PDB | O, D_GLU_85    | N, D_ILE_89    | H, D_ILE_89     | 2.85 | 1.88 | 5.79  |
| 1HGH.PDB | O, D_LYS_88    | N, D_TRP_92    | H, D_TRP_92     | 2.90 | 1.92 | 5.72  |
| 1HGH.PDB | O, D_ILE_89    | N, D_SER_93    | H, D_SER_93     | 2.89 | 1.99 | 19.16 |
| 1HGH.PDB | O, D_ILE_89    | OG, D_SER_93   | HG, D_SER_93    | 2.76 | 1.84 | 13.71 |
| 1HGH.PDB | O, D_ASP_90    | N, D_TYR_94    | H, D_TYR_94     | 2.86 | 1.93 | 14.89 |
| 1HGH.PDB | O, D_LEU_91    | N, D_ASN_95    | H, D_ASN_95     | 3.00 | 2.01 | 2.40  |
| 1HGH.PDB | O, D_TRP_92    | N, D_ALA_96    | H, D_ALA_96     | 2.97 | 2.07 | 19.88 |
| 1HGH.PDB | O, D_TYR_94    | N, D_LEU_98    | H, D_LEU_98     | 2.95 | 1.98 | 4.96  |
| 1HGH.PDB | O, D_ASN_95    | N, D_LEU_99    | H, D_LEU_99     | 2.96 | 2.05 | 17.05 |
| 1HGH.PDB | O, D_VAL_100   | N, D_ASN_104   | H, D_ASN_104    | 2.87 | 1.94 | 14.58 |
| 1HGH.PDB | O, C_LYS_27    | ND2, D_ASN_104 | HD22, D_ASN_104 | 2.89 | 1.94 | 11.70 |
| 1HGH.PDB | O, D_LEU_102   | N, D_HIS_106   | H, D_HIS_106    | 2.95 | 1.98 | 8.89  |
| 1HGH.PDB | O, D_GLU_103   | N, D_THR_107   | H, D_THR_107    | 2.84 | 1.94 | 18.36 |
| 1HGH.PDB | O, D_HIS_106   | N, D_LEU_110   | H, D_LEU_110    | 2.82 | 1.86 | 9.68  |
| 1HGH.PDB | O, D_THR_107   | OG1, D_THR_111 | HG1, D_THR_111  | 2.89 | 1.92 | 2.49  |
| 1HGH.PDB | O, D_ASP_109   | N, D_SER_113   | H, D_SER_113    | 2.77 | 1.82 | 8.06  |
| 1HGH.PDB | O, D_ASP_112   | N, D_ASN_116   | H, D_ASN_116    | 2.96 | 1.98 | 6.25  |
| 1HGH.PDB | O, D_SER_113   | N, D_LYS_117   | H, D_LYS_117    | 2.75 | 1.92 | 25.56 |
| 1HGH.PDB | O, D_GLU_114   | N, D_LEU_118   | H, D_LEU_118    | 3.00 | 2.03 | 9.32  |
| 1HGH.PDB | O, D_ASN_116   | N, D_GLU_120   | H, D_GLU_120    | 2.93 | 1.95 | 1.97  |
| 1HGH.PDB | O, D_LYS_117   | N, D_LYS_121   | H, D_LYS_121    | 2.85 | 1.95 | 19.21 |
| 1HGH.PDB | O, D_LEU_118   | N, D_THR_122   | H, D_THR_122    | 2.98 | 2.00 | 5.78  |
| 1HGH.PDB | O, D_PHE_119   | N, D_ARG_123   | H, D_ARG_123    | 2.89 | 1.93 | 8.77  |
| 1HGH.PDB | OE2, D_GLU_120 | NH1, D_ARG_123 | HH11, D_ARG_123 | 2.77 | 1.87 | 22.36 |
| 1HGH.PDB | OE1, B_GLU_132 | NE, D_ARG_124  | HE, D_ARG_124   | 2.80 | 1.98 | 26.35 |
| 1HGH.PDB | OE2, B_GLU_132 | NE, D_ARG_124  | HE, D_ARG_124   | 2.84 | 1.99 | 23.38 |
| 1HGH.PDB | O, D_LEU_126   | N, D_ASN_129   | H, D_ASN_129    | 2.98 | 2.04 | 13.91 |
| 1HGH.PDB | O, D_HIS_159   | ND2, D_ASN_129 | HD21, D_ASN_129 | 2.99 | 2.06 | 14.65 |
| 1HGH.PDB | OH, D_TYR_157  | ND2, D_ASN_129 | HD22, D_ASN_129 | 2.83 | 1.87 | 7.67  |
| 1HGH.PDB | O, D_LYS_139   | N, D_GLU_131   | H, D_GLU_131    | 2.96 | 2.04 | 16.55 |
| 1HGH.PDB | O, D_CYS_137   | N, D_MET_133   | H, D_MET_133    | 2.85 | 1.91 | 13.04 |
| 1HGH.PDB | OD1, D_ASN_135 | N, D_CYS_137   | H, D_CYS_137    | 2.95 | 2.05 | 19.26 |
| 1HGH.PDB | O, C_LEU_13    | N, D_PHE_138   | H, D_PHE_138    | 2.75 | 1.85 | 18.05 |
| 1HGH.PDB | O, D_GLU_131   | N, D_LYS_139   | H, D_LYS_139    | 2.80 | 1.84 | 6.99  |
| 1HGH.PDB | O, C_ALA_11    | N, D_ILE_140   | H, D_ILE_140    | 2.83 | 1.90 | 15.57 |
| 1HGH.PDB | O, D_ASN_129   | N, D_TYR_141   | H, D_TYR_141    | 2.84 | 1.91 | 14.49 |
| 1HGH.PDB | OE2, D_GLU_30  | N, D_ASN_146   | H, D_ASN_146    | 2.90 | 1.97 | 15.32 |
| 1HGH.PDB | O, D_ASP_145   | N, D_ILE_149   | H, D_ILE_149    | 2.92 | 1.97 | 10.33 |
| 1HGH.PDB | O, D_ASN_146   | N, D_GLU_150   | H, D_GLU_150    | 2.92 | 1.99 | 14.54 |
| 1HGH.PDB | O, D_ALA_147   | N, D_SER_151   | H, D_SER_151    | 2.94 | 2.07 | 23.02 |
| 1HGH.PDB | O, D_CYS_148   | OG, D_SER_151  | HG, D_SER_151   | 2.73 | 1.84 | 17.19 |
| 1HGH.PDB | O, D_GLU_150   | N, D_ASN_154   | H, D_ASN_154    | 2.82 | 1.84 | 3.73  |
| 1HGH.PDB | O, D_SER_151   | N, D_THR_156   | H, D_THR_156    | 2.80 | 1.97 | 26.19 |
| 1HGH.PDB | OD1, D_ASN_154 | OG1, D_THR_156 | HG1, D_THR_156  | 2.69 | 1.80 | 16.96 |
| 1HGH.PDB | NE2, D_HIS_142 | OH, D_TYR_157  | HH, D_TYR_157   | 2.68 | 1.87 | 26.02 |

|          |                |                |                 |      |      |       |
|----------|----------------|----------------|-----------------|------|------|-------|
| 1HGH.PDB | OD1, D_ASP_158 | N, D_ASP_160   | H, D_ASP_160    | 2.94 | 2.07 | 22.26 |
| 1HGH.PDB | O, D_HIS_159   | N, D_TYR_162   | H, D_TYR_162    | 2.94 | 2.06 | 20.90 |
| 1HGH.PDB | O, B_ARG_170   | NH1, D_ARG_163 | HH12, D_ARG_163 | 2.75 | 1.77 | 10.76 |
| 1HGH.PDB | O, D_TYR_162   | N, D_ALA_166   | H, D_ALA_166    | 2.89 | 1.92 | 5.05  |
| 1HGH.PDB | O, D_ARG_163   | N, D_LEU_167   | H, D_LEU_167    | 2.82 | 1.86 | 8.99  |
| 1HGH.PDB | O, D_ASP_164   | N, D_ASN_168   | H, D_ASN_168    | 2.99 | 2.02 | 7.50  |
| 1HGH.PDB | O, D_GLU_165   | ND2, D_ASN_169 | HD22, D_ASN_169 | 2.97 | 2.00 | 7.05  |
| 1HGH.PDB | O, D_ALA_166   | N, D_ARG_170   | H, D_ARG_170    | 2.80 | 1.93 | 21.90 |
| 1HGH.PDB | O, D_GLU_128   | NE, D_ARG_170  | HE, D_ARG_170   | 2.74 | 1.87 | 23.06 |
| 1HGH.PDB | OE2, D_GLU_131 | NH1, D_ARG_170 | HH11, D_ARG_170 | 2.83 | 1.83 | 5.85  |
| 1HGH.PDB | O, D_LEU_167   | N, D_PHE_171   | H, D_PHE_171    | 2.95 | 2.02 | 15.80 |
| 1HGH.PDB | O, F_ILE_140   | N, E_ALA_11    | H, E_ALA_11     | 2.92 | 2.02 | 19.53 |
| 1HGH.PDB | O, F_PHE_138   | N, E_LEU_13    | H, E_LEU_13     | 2.96 | 1.99 | 9.34  |
| 1HGH.PDB | O, F_ARG_25    | N, E_CYS_14    | H, E_CYS_14     | 2.64 | 1.78 | 21.59 |
| 1HGH.PDB | O, F_GLY_136   | N, E_LEU_15    | H, E_LEU_15     | 2.90 | 1.93 | 5.74  |
| 1HGH.PDB | O, F_GLY_23    | N, E_GLY_16    | H, E_GLY_16     | 2.92 | 2.05 | 22.72 |
| 1HGH.PDB | O, E_HIS_18    | ND1, E_HIS_17  | HD1, E_HIS_17   | 2.99 | 2.08 | 18.51 |
| 1HGH.PDB | O, F_TRP_21    | N, E_HIS_18    | H, E_HIS_18     | 2.92 | 2.03 | 19.54 |
| 1HGH.PDB | OD1, E_ASN_322 | N, E_VAL_20    | H, E_VAL_20     | 2.74 | 1.82 | 16.04 |
| 1HGH.PDB | O, E_VAL_36    | N, E_THR_24    | H, E_THR_24     | 2.82 | 1.93 | 20.03 |
| 1HGH.PDB | O, E_ILE_34    | N, E_VAL_26    | H, E_VAL_26     | 2.82 | 1.88 | 13.02 |
| 1HGH.PDB | OE2, F_GLU_97  | NZ, E_LYS_27   | HZ1, E_LYS_27   | 2.77 | 1.74 | 8.08  |
| 1HGH.PDB | O, E_ASP_31    | N, E_THR_28    | H, E_THR_28     | 2.77 | 1.94 | 26.92 |
| 1HGH.PDB | O, E_VAL_26    | N, E_ILE_34    | H, E_ILE_34     | 2.87 | 1.92 | 12.72 |
| 1HGH.PDB | O, E_THR_24    | N, E_VAL_36    | H, E_VAL_36     | 2.79 | 1.83 | 5.74  |
| 1HGH.PDB | O, E_MET_320   | N, E_THR_37    | H, E_THR_37     | 2.91 | 1.94 | 5.98  |
| 1HGH.PDB | O, E_LEU_316   | N, E_THR_40    | H, E_THR_40     | 2.81 | 1.97 | 25.58 |
| 1HGH.PDB | O, E_LEU_314   | N, E_LEU_42    | H, E_LEU_42     | 2.86 | 1.99 | 23.51 |
| 1HGH.PDB | O, E_PHE_294   | N, E_GLN_44    | H, E_GLN_44     | 2.90 | 1.92 | 3.60  |
| 1HGH.PDB | O, E_SER_46    | NE2, E_GLN_44  | HE22, E_GLN_44  | 2.79 | 1.94 | 24.07 |
| 1HGH.PDB | O, E_ASN_285   | OG, E_SER_47   | HG, E_SER_47    | 2.82 | 1.86 | 5.68  |
| 1HGH.PDB | OD2, E_ASP_275 | NZ, E_LYS_50   | HZ1, E_LYS_50   | 2.78 | 1.83 | 20.38 |
| 1HGH.PDB | O, E_PRO_273   | N, E_ILE_51    | H, E_ILE_51     | 2.79 | 1.86 | 14.05 |
| 1HGH.PDB | O, E_ASP_275   | N, E_ASN_53    | H, E_ASN_53     | 2.84 | 1.95 | 20.03 |
| 1HGH.PDB | O, E_GLU_280   | NE2, E_HIS_56  | HE2, E_HIS_56   | 3.00 | 2.04 | 11.75 |
| 1HGH.PDB | OD2, E_ASP_85  | N, E_ARG_57    | H, E_ARG_57     | 2.80 | 1.92 | 20.20 |
| 1HGH.PDB | O, E_THR_83    | NE, E_ARG_57   | HE, E_ARG_57    | 2.76 | 1.81 | 9.61  |
| 1HGH.PDB | O, E_LEU_86    | N, E_LEU_59    | H, E_LEU_59     | 2.94 | 2.02 | 16.24 |
| 1HGH.PDB | O, E_VAL_88    | N, E_GLY_61    | H, E_GLY_61     | 2.97 | 2.17 | 29.53 |
| 1HGH.PDB | OD1, E_ASP_60  | N, E_ILE_62    | H, E_ILE_62     | 2.88 | 1.95 | 12.63 |
| 1HGH.PDB | O, E_GLY_61    | N, E_CYS_64    | H, E_CYS_64     | 2.91 | 2.01 | 19.21 |
| 1HGH.PDB | OE2, E_GLU_89  | N, E_LEU_66    | H, E_LEU_66     | 2.90 | 1.94 | 8.52  |
| 1HGH.PDB | O, E_LEU_66    | N, E_LEU_70    | H, E_LEU_70     | 2.83 | 1.96 | 22.59 |
| 1HGH.PDB | O, E_ILE_67    | N, E_LEU_71    | H, E_LEU_71     | 2.80 | 1.85 | 10.15 |
| 1HGH.PDB | O, E_ASP_68    | N, E_GLY_72    | H, E_GLY_72     | 2.92 | 1.98 | 13.98 |
| 1HGH.PDB | OD1, E_ASP_73  | ND1, E_HIS_75  | HD1, E_HIS_75   | 2.70 | 1.83 | 21.52 |
| 1HGH.PDB | O, E_ASP_63    | NE2, E_HIS_75  | HE2, E_HIS_75   | 2.76 | 1.85 | 18.40 |
| 1HGH.PDB | O, E_ASP_73    | N, E_CYS_76    | H, E_CYS_76     | 2.77 | 1.88 | 19.19 |
| 1HGH.PDB | O, E_PRO_74    | N, E_ASP_77    | H, E_ASP_77     | 2.89 | 1.93 | 8.73  |
| 1HGH.PDB | O, E_CYS_76    | N, E_PHE_79    | H, E_PHE_79     | 2.99 | 2.02 | 3.39  |
| 1HGH.PDB | O, E_PHE_79    | N, E_GLU_82    | H, E_GLU_82     | 2.96 | 2.03 | 14.49 |
| 1HGH.PDB | OE1, E_GLU_82  | N, E_THR_83    | H, E_THR_83     | 2.87 | 2.01 | 22.92 |
| 1HGH.PDB | O, E_ARG_57    | N, E_ASP_85    | H, E_ASP_85     | 2.80 | 1.87 | 13.06 |
| 1HGH.PDB | O, E_MET_268   | N, E_GLU_89    | H, E_GLU_89     | 2.80 | 1.86 | 11.55 |
| 1HGH.PDB | OD1, E_ASP_60  | NE, E_ARG_90   | HE, E_ARG_90    | 2.82 | 1.87 | 13.57 |
| 1HGH.PDB | O, E_SER_270   | NH1, E_ARG_90  | HH11, E_ARG_90  | 2.65 | 1.80 | 26.29 |
| 1HGH.PDB | O, E_ALA_272   | NH1, E_ARG_90  | HH12, E_ARG_90  | 2.63 | 1.72 | 19.05 |
| 1HGH.PDB | OD2, E_ASP_60  | NH2, E_ARG_90  | HH21, E_ARG_90  | 2.82 | 1.82 | 8.69  |

|          |                |                |                 |      |      |       |
|----------|----------------|----------------|-----------------|------|------|-------|
| 1HGH.PDB | OD1, E_ASP_271 | N, E_SER_91    | H, E_SER_91     | 2.82 | 1.87 | 11.20 |
| 1HGH.PDB | OD2, E_ASP_271 | OG, E_SER_91   | HG, E_SER_91    | 2.81 | 1.88 | 14.87 |
| 1HGH.PDB | OD2, E_ASP_68  | OG, E_SER_95   | HG, E_SER_95    | 2.88 | 1.94 | 13.28 |
| 1HGH.PDB | OD2, E_ASP_73  | N, E_ASN_96    | H, E_ASN_96     | 2.91 | 1.94 | 6.86  |
| 1HGH.PDB | OD1, E_ASP_68  | OH, E_TYR_100  | HH, E_TYR_100   | 2.91 | 1.97 | 12.96 |
| 1HGH.PDB | O, E_ILE_230   | N, E_ASP_101   | H, E_ASP_101    | 2.92 | 2.05 | 22.42 |
| 1HGH.PDB | OD2, E_ASP_104 | OG, E_SER_107  | HG, E_SER_107   | 2.88 | 1.97 | 18.12 |
| 1HGH.PDB | O, E_TYR_105   | N, E_ARG_109   | H, E_ARG_109    | 2.86 | 1.89 | 4.60  |
| 1HGH.PDB | OE2, F_GLU_67  | NH2, E_ARG_109 | HH21, E_ARG_109 | 2.88 | 1.90 | 13.56 |
| 1HGH.PDB | OD2, D_ASP_79  | OG, E_SER_110  | HG, E_SER_110   | 2.90 | 1.94 | 9.49  |
| 1HGH.PDB | O, E_SER_107   | N, E_LEU_111   | H, E_LEU_111    | 2.88 | 1.93 | 12.85 |
| 1HGH.PDB | O, E_ARG_109   | N, E_ALA_113   | H, E_ALA_113    | 2.87 | 1.96 | 17.46 |
| 1HGH.PDB | O, E_SER_110   | N, E_SER_114   | H, E_SER_114    | 2.96 | 2.00 | 10.70 |
| 1HGH.PDB | OE2, E_GLU_119 | OG1, E_THR_117 | HG1, E_THR_117  | 2.88 | 1.94 | 11.16 |
| 1HGH.PDB | O, E_GLU_82    | N, E_LEU_118   | H, E_LEU_118    | 2.97 | 2.01 | 10.67 |
| 1HGH.PDB | O, E_TYR_257   | N, E_ILE_121   | H, E_ILE_121    | 2.91 | 1.96 | 12.67 |
| 1HGH.PDB | O, E_ARG_255   | N, E_GLU_123   | H, E_GLU_123    | 2.88 | 1.92 | 10.98 |
| 1HGH.PDB | O, E_THR_155   | N, E_THR_131   | H, E_THR_131    | 2.72 | 1.85 | 21.27 |
| 1HGH.PDB | OD1, E_ASN_152 | N, E_ASN_133   | H, E_ASN_133    | 2.90 | 2.03 | 22.25 |
| 1HGH.PDB | O, E_TRP_153   | N, E_GLY_134   | H, E_GLY_134    | 2.97 | 2.04 | 15.57 |
| 1HGH.PDB | O, E_GLY_146   | N, E_SER_136   | H, E_SER_136    | 2.72 | 1.83 | 19.86 |
| 1HGH.PDB | OG, E_SER_136  | N, E_ALA_138   | H, E_ALA_138    | 2.95 | 2.04 | 18.21 |
| 1HGH.PDB | O, E_GLY_144   | NZ, E_LYS_140  | HZ1, E_LYS_140  | 2.90 | 1.92 | 16.43 |
| 1HGH.PDB | OD1, E_ASN_137 | NZ, E_LYS_140  | HZ2, E_LYS_140  | 2.75 | 1.75 | 11.91 |
| 1HGH.PDB | OD2, E_ASP_77  | NE, E_ARG_141  | HE, E_ARG_141   | 2.85 | 2.01 | 27.16 |
| 1HGH.PDB | O, E_PHE_147   | NH1, E_ARG_141 | HH12, E_ARG_141 | 2.56 | 1.64 | 18.71 |
| 1HGH.PDB | OD1, E_ASP_77  | NH2, E_ARG_141 | HH21, E_ARG_141 | 2.89 | 1.99 | 22.46 |
| 1HGH.PDB | OD2, E_ASP_77  | NH2, E_ARG_141 | HH21, E_ARG_141 | 2.74 | 1.84 | 23.25 |
| 1HGH.PDB | O, E_GLY_72    | NH2, E_ARG_141 | HH22, E_ARG_141 | 2.94 | 1.96 | 11.25 |
| 1HGH.PDB | OD1, E_ASN_137 | OG, E_SER_145  | HG, E_SER_145   | 2.98 | 2.07 | 15.03 |
| 1HGH.PDB | O, E_SER_136   | N, E_GLY_146   | H, E_GLY_146    | 2.94 | 1.99 | 13.35 |
| 1HGH.PDB | O, E_GLY_72    | N, E_SER_149   | H, E_SER_149    | 2.91 | 1.97 | 14.68 |
| 1HGH.PDB | O, E_ALA_253   | N, E_ASN_152   | H, E_ASN_152    | 2.75 | 1.96 | 29.93 |
| 1HGH.PDB | OH, E_TYR_195  | NE1, E_TRP_153 | HE1, E_TRP_153  | 2.94 | 2.03 | 18.49 |
| 1HGH.PDB | O, E_LEU_194   | N, E_LYS_156   | H, E_LYS_156    | 2.95 | 2.04 | 17.92 |
| 1HGH.PDB | O, E_SER_193   | NZ, E_LYS_156  | HZ2, E_LYS_156  | 2.74 | 1.77 | 17.07 |
| 1HGH.PDB | O, E_THR_160   | N, E_SER_157   | H, E_SER_157    | 2.95 | 2.02 | 16.56 |
| 1HGH.PDB | O, E_SER_247   | N, E_LEU_164   | H, E_LEU_164    | 2.73 | 1.90 | 26.43 |
| 1HGH.PDB | O, E_ILE_245   | N, E_VAL_166   | H, E_VAL_166    | 2.87 | 1.94 | 14.01 |
| 1HGH.PDB | O, E_LEU_243   | OG1, E_THR_167 | HG1, E_THR_167  | 2.95 | 2.02 | 14.19 |
| 1HGH.PDB | O, E_LEU_243   | N, E_MET_168   | H, E_MET_168    | 2.85 | 1.92 | 14.04 |
| 1HGH.PDB | O, E_ASP_241   | N, E_ASN_170   | H, E_ASN_170    | 2.95 | 1.97 | 5.59  |
| 1HGH.PDB | O, E_PHE_174   | ND2, E_ASN_170 | HD21, E_ASN_170 | 2.82 | 1.88 | 12.75 |
| 1HGH.PDB | O, E_VAL_237   | ND2, E_ASN_170 | HD22, E_ASN_170 | 2.89 | 2.06 | 25.88 |
| 1HGH.PDB | O, E_VAL_237   | N, E_LYS_176   | H, E_LYS_176    | 2.98 | 2.06 | 17.00 |
| 1HGH.PDB | OE2, E_GLU_123 | NZ, E_LYS_176  | HZ1, E_LYS_176  | 2.69 | 1.82 | 26.87 |
| 1HGH.PDB | O, E_PHE_258   | N, E_LEU_177   | H, E_LEU_177    | 2.97 | 2.00 | 4.18  |
| 1HGH.PDB | O, E_THR_235   | N, E_TYR_178   | H, E_TYR_178    | 2.86 | 1.90 | 10.67 |
| 1HGH.PDB | OE1, E_GLU_123 | OH, E_TYR_178  | HH, E_TYR_178   | 2.77 | 1.82 | 8.79  |
| 1HGH.PDB | OG1, E_THR_235 | NE1, E_TRP_180 | HE1, E_TRP_180  | 2.88 | 1.89 | 0.99  |
| 1HGH.PDB | O, E_ASN_250   | N, E_HIS_183   | H, E_HIS_183    | 2.86 | 1.99 | 21.99 |
| 1HGH.PDB | O, E_ARG_229   | N, E_HIS_184   | H, E_HIS_184    | 2.88 | 1.94 | 12.21 |
| 1HGH.PDB | OG, E_SER_231  | NE2, E_HIS_184 | HE2, E_HIS_184  | 2.78 | 1.93 | 25.10 |
| 1HGH.PDB | OG1, E_THR_187 | N, E_GLU_190   | H, E_GLU_190    | 2.95 | 2.00 | 11.05 |
| 1HGH.PDB | OD1, E_ASN_250 | NE2, E_GLN_191 | HE21, E_GLN_191 | 2.99 | 2.02 | 8.22  |
| 1HGH.PDB | O, E_GLN_197   | NE2, E_GLN_191 | HE22, E_GLN_191 | 2.93 | 1.98 | 11.58 |
| 1HGH.PDB | O, E_GLN_189   | N, E_SER_193   | H, E_SER_193    | 2.93 | 1.94 | 3.87  |
| 1HGH.PDB | O, E_GLU_190   | N, E_LEU_194   | H, E_LEU_194    | 2.96 | 1.97 | 5.03  |



|          |                |                |                 |      |      |       |
|----------|----------------|----------------|-----------------|------|------|-------|
| 1HGH.PDB | O, E_GLN_191   | N, E_TYR_195   | H, E_TYR_195    | 2.79 | 1.83 | 8.93  |
| 1HGH.PDB | O, E_TYR_195   | N, E_GLN_197   | H, E_GLN_197    | 2.65 | 1.86 | 29.33 |
| 1HGH.PDB | O, E_TYR_161   | NE2, E_GLN_197 | HE21, E_GLN_197 | 2.94 | 1.99 | 11.18 |
| 1HGH.PDB | O, E_ASN_248   | NE2, E_GLN_197 | HE22, E_GLN_197 | 2.86 | 1.94 | 17.19 |
| 1HGH.PDB | OD1, E_ASN_246 | NH2, E_ARG_201 | HH21, E_ARG_201 | 2.64 | 1.73 | 21.41 |
| 1HGH.PDB | O, E_ILE_213   | N, E_VAL_202   | H, E_VAL_202    | 2.96 | 2.00 | 10.60 |
| 1HGH.PDB | O, E_ASN_246   | N, E_THR_203   | H, E_THR_203    | 2.87 | 1.91 | 9.98  |
| 1HGH.PDB | OG1, E_THR_212 | OG1, E_THR_203 | HG1, E_THR_203  | 2.98 | 2.08 | 17.30 |
| 1HGH.PDB | O, E_GLN_211   | N, E_VAL_204   | H, E_VAL_204    | 2.87 | 1.97 | 20.15 |
| 1HGH.PDB | O, E_SER_209   | N, E_THR_206   | H, E_THR_206    | 2.92 | 1.96 | 6.97  |
| 1HGH.PDB | OD1, E_ASP_241 | N, E_ARG_207   | H, E_ARG_207    | 2.86 | 1.90 | 9.49  |
| 1HGH.PDB | OG1, E_THR_206 | OG, E_SER_209  | HG, E_SER_209   | 2.95 | 2.00 | 8.64  |
| 1HGH.PDB | OD1, C_ASP_101 | NE2, E_GLN_210 | HE22, E_GLN_210 | 2.95 | 2.09 | 25.33 |
| 1HGH.PDB | O, E_VAL_204   | N, E_GLN_211   | H, E_GLN_211    | 2.89 | 1.95 | 12.74 |
| 1HGH.PDB | O, E_VAL_202   | N, E_ILE_213   | H, E_ILE_213    | 2.90 | 1.97 | 14.56 |
| 1HGH.PDB | ND1, E_HIS_184 | N, E_ASN_216   | H, E_ASN_216    | 2.77 | 1.96 | 27.61 |
| 1HGH.PDB | OE1, A_GLN_210 | NH2, E_ARG_220 | HH21, E_ARG_220 | 2.68 | 1.79 | 22.30 |
| 1HGH.PDB | O, E_ASN_216   | NH2, E_ARG_220 | HH22, E_ARG_220 | 2.67 | 1.78 | 21.90 |
| 1HGH.PDB | O, E_LEU_226   | N, E_VAL_223   | H, E_VAL_223    | 2.86 | 1.90 | 9.88  |
| 1HGH.PDB | O, E_CYS_97    | NE, E_ARG_224  | HE, E_ARG_224   | 2.82 | 1.98 | 26.83 |
| 1HGH.PDB | O, E_CYS_97    | NH2, E_ARG_224 | HH21, E_ARG_224 | 2.83 | 1.97 | 26.23 |
| 1HGH.PDB | O, E_VAL_223   | N, E_LEU_226   | H, E_LEU_226    | 2.83 | 1.91 | 14.82 |
| 1HGH.PDB | O, E_ARG_220   | OG, E_SER_227  | HG, E_SER_227   | 2.98 | 2.06 | 16.39 |
| 1HGH.PDB | O, E_SER_228   | NH1, E_ARG_229 | HH11, E_ARG_229 | 2.68 | 1.73 | 16.77 |
| 1HGH.PDB | O, E_PRO_221   | NH2, E_ARG_229 | HH22, E_ARG_229 | 2.59 | 1.64 | 14.71 |
| 1HGH.PDB | OD1, E_ASP_101 | OG, E_SER_231  | HG, E_SER_231   | 2.86 | 1.91 | 11.78 |
| 1HGH.PDB | O, E_ASP_101   | N, E_ILE_232   | H, E_ILE_232    | 2.89 | 1.97 | 15.99 |
| 1HGH.PDB | O, E_TRP_180   | N, E_TYR_233   | H, E_TYR_233    | 2.91 | 1.95 | 8.91  |
| 1HGH.PDB | O, E_TYR_178   | N, E_THR_235   | H, E_THR_235    | 2.90 | 1.99 | 17.41 |
| 1HGH.PDB | O, E_LYS_176   | N, E_VAL_237   | H, E_VAL_237    | 2.74 | 1.82 | 15.90 |
| 1HGH.PDB | O, D_SER_71    | NZ, E_LYS_238  | HZ2, E_LYS_238  | 2.84 | 1.88 | 19.22 |
| 1HGH.PDB | OE1, D_GLU_72  | NZ, E_LYS_238  | HZ3, E_LYS_238  | 2.87 | 1.88 | 15.42 |
| 1HGH.PDB | O, E_ASN_170   | N, E_GLY_240   | H, E_GLY_240    | 2.93 | 2.05 | 21.68 |
| 1HGH.PDB | O, E_LYS_238   | N, E_ASP_241   | H, E_ASP_241    | 2.93 | 2.01 | 15.54 |
| 1HGH.PDB | OD1, E_ASP_241 | N, E_VAL_242   | H, E_VAL_242    | 2.78 | 1.96 | 27.21 |
| 1HGH.PDB | O, E_MET_168   | N, E_LEU_243   | H, E_LEU_243    | 2.84 | 1.87 | 3.13  |
| 1HGH.PDB | O, E_SER_205   | N, E_VAL_244   | H, E_VAL_244    | 2.97 | 2.03 | 14.34 |
| 1HGH.PDB | O, E_VAL_166   | N, E_ILE_245   | H, E_ILE_245    | 2.86 | 1.92 | 13.73 |
| 1HGH.PDB | O, E_THR_203   | N, E_ASN_246   | H, E_ASN_246    | 2.93 | 2.00 | 14.46 |
| 1HGH.PDB | OD1, E_ASN_165 | ND2, E_ASN_246 | HD22, E_ASN_246 | 2.98 | 2.01 | 10.13 |
| 1HGH.PDB | O, E_LEU_164   | N, E_SER_247   | H, E_SER_247    | 2.90 | 1.99 | 17.74 |
| 1HGH.PDB | OE1, E_GLN_191 | ND2, E_ASN_250 | HD21, E_ASN_250 | 2.89 | 1.92 | 6.88  |
| 1HGH.PDB | O, E_HIS_183   | ND2, E_ASN_250 | HD22, E_ASN_250 | 2.85 | 1.88 | 7.17  |
| 1HGH.PDB | O, E_GLY_181   | N, E_ILE_252   | H, E_ILE_252    | 2.96 | 2.00 | 10.43 |
| 1HGH.PDB | O, E_ASN_152   | N, E_ALA_253   | H, E_ALA_253    | 2.86 | 1.96 | 18.53 |
| 1HGH.PDB | O, E_ILE_121   | N, E_TYR_257   | H, E_TYR_257    | 2.97 | 2.09 | 21.21 |
| 1HGH.PDB | O, E_LEU_177   | N, E_PHE_258   | H, E_PHE_258    | 2.87 | 1.92 | 12.22 |
| 1HGH.PDB | OG, E_SER_115  | N, E_ARG_261   | H, E_ARG_261    | 2.96 | 2.00 | 11.47 |
| 1HGH.PDB | OE2, E_GLU_119 | NH1, E_ARG_261 | HH12, E_ARG_261 | 2.63 | 1.81 | 29.30 |
| 1HGH.PDB | OE1, E_GLU_119 | NH2, E_ARG_261 | HH22, E_ARG_261 | 2.85 | 1.96 | 24.42 |
| 1HGH.PDB | OD2, E_ASP_85  | NZ, E_LYS_264  | HZ3, E_LYS_264  | 2.81 | 1.82 | 14.94 |
| 1HGH.PDB | O, E_PHE_87    | N, E_MET_268   | H, E_MET_268    | 2.82 | 1.95 | 22.70 |
| 1HGH.PDB | OE1, F_GLU_67  | NH1, E_ARG_269 | HH12, E_ARG_269 | 2.71 | 1.88 | 29.19 |
| 1HGH.PDB | O, E_GLU_89    | N, E_SER_270   | H, E_SER_270    | 2.97 | 2.01 | 10.37 |
| 1HGH.PDB | O, E_PRO_284   | OG, E_SER_270  | HG, E_SER_270   | 2.79 | 1.83 | 6.34  |
| 1HGH.PDB | OG, E_SER_270  | N, E_ALA_272   | H, E_ALA_272    | 2.93 | 2.00 | 13.96 |
| 1HGH.PDB | O, E_ILE_51    | N, E_ASP_275   | H, E_ASP_275    | 2.89 | 1.98 | 17.07 |
| 1HGH.PDB | OD1, E_ASP_275 | N, E_THR_276   | H, E_THR_276    | 2.81 | 1.94 | 22.67 |

|          |                |                |                 |      |      |       |
|----------|----------------|----------------|-----------------|------|------|-------|
| 1HGH.PDB | O, E_ASN_54    | N, E_SER_279   | H, E_SER_279    | 2.79 | 1.85 | 12.96 |
| 1HGH.PDB | O, E_TYR_302   | N, E_ILE_282   | H, E_ILE_282    | 2.90 | 1.96 | 14.02 |
| 1HGH.PDB | O, E_THR_283   | N, E_GLY_286   | H, E_GLY_286    | 2.82 | 1.92 | 18.13 |
| 1HGH.PDB | O, E_LYS_50    | N, E_SER_287   | H, E_SER_287    | 2.89 | 1.92 | 2.42  |
| 1HGH.PDB | O, E_ALA_304   | ND2, E_ASN_290 | HD22, E_ASN_290 | 2.86 | 1.98 | 20.69 |
| 1HGH.PDB | OE1, E_GLN_44  | NZ, E_LYS_292  | HZ1, E_LYS_292  | 2.67 | 1.66 | 10.24 |
| 1HGH.PDB | OD2, E_ASP_291 | NZ, E_LYS_292  | HZ3, E_LYS_292  | 2.84 | 1.86 | 17.36 |
| 1HGH.PDB | O, E_LYS_307   | N, E_GLN_295   | H, E_GLN_295    | 2.84 | 1.97 | 22.67 |
| 1HGH.PDB | O, E_ASN_298   | NE2, E_GLN_295 | HE21, E_GLN_295 | 2.75 | 1.79 | 8.52  |
| 1HGH.PDB | O, E_GLN_44    | N, E_ASN_296   | H, E_ASN_296    | 2.90 | 1.94 | 9.06  |
| 1HGH.PDB | OD1, E_ASN_298 | N, E_ILE_300   | H, E_ILE_300    | 2.92 | 1.98 | 13.95 |
| 1HGH.PDB | O, E_ILE_282   | N, E_TYR_302   | H, E_TYR_302    | 2.84 | 2.00 | 26.34 |
| 1HGH.PDB | O, F_LYS_62    | N, E_GLY_303   | H, E_GLY_303    | 2.98 | 2.01 | 7.92  |
| 1HGH.PDB | O, E_PRO_293   | N, E_LYS_307   | H, E_LYS_307    | 3.00 | 2.03 | 9.04  |
| 1HGH.PDB | O, E_GLN_295   | N, E_VAL_309   | H, E_VAL_309    | 2.91 | 2.07 | 25.95 |
| 1HGH.PDB | OG, F_SER_93   | N, E_LYS_310   | H, E_LYS_310    | 2.93 | 1.97 | 10.42 |
| 1HGH.PDB | OD1, F_ASP_86  | NZ, E_LYS_310  | HZ2, E_LYS_310  | 2.74 | 1.87 | 26.77 |
| 1HGH.PDB | O, F_SER_93    | NE2, E_GLN_311 | HE21, E_GLN_311 | 2.99 | 2.02 | 4.65  |
| 1HGH.PDB | OE2, E_GLU_41  | N, E_LEU_314   | H, E_LEU_314    | 2.81 | 1.87 | 11.19 |
| 1HGH.PDB | OE1, E_GLU_41  | NZ, E_LYS_315  | HZ3, E_LYS_315  | 2.85 | 1.89 | 19.70 |
| 1HGH.PDB | O, E_THR_40    | N, E_LEU_316   | H, E_LEU_316    | 2.77 | 1.82 | 9.99  |
| 1HGH.PDB | OD1, F_ASN_104 | N, E_ALA_317   | H, E_ALA_317    | 2.75 | 1.81 | 11.69 |
| 1HGH.PDB | O, E_ASN_38    | N, E_THR_318   | H, E_THR_318    | 2.95 | 2.00 | 12.19 |
| 1HGH.PDB | O, E_GLU_35    | N, E_ASN_322   | H, E_ASN_322    | 2.96 | 1.98 | 2.25  |
| 1HGH.PDB | O, E_VAL_20    | ND2, E_ASN_322 | HD21, E_ASN_322 | 2.82 | 1.91 | 16.60 |
| 1HGH.PDB | OE2, E_GLU_35  | ND2, E_ASN_322 | HD22, E_ASN_322 | 2.80 | 1.90 | 19.14 |
| 1HGH.PDB | OE2, F_GLU_15  | N, E_GLU_325   | H, E_GLU_325    | 2.97 | 2.16 | 28.37 |
| 1HGH.PDB | O, E_GLN_327   | NZ, E_LYS_326  | HZ1, E_LYS_326  | 2.85 | 1.92 | 22.31 |
| 1HGH.PDB | OE1, F_GLU_15  | NZ, E_LYS_326  | HZ3, E_LYS_326  | 2.90 | 1.89 | 12.96 |
| 1HGH.PDB | O, E_LYS_326   | NE2, E_GLN_327 | HE22, E_GLN_327 | 2.81 | 1.89 | 16.48 |
| 1HGH.PDB | OD2, F_ASP_112 | N, F_GLY_1     | H2, F_GLY_1     | 2.82 | 1.82 | 13.22 |
| 1HGH.PDB | OD1, F_ASP_109 | N, F_LEU_2     | H, F_LEU_2      | 2.91 | 1.98 | 15.54 |
| 1HGH.PDB | OD2, F_ASP_112 | N, F_PHE_3     | H, F_PHE_3      | 2.80 | 2.01 | 28.96 |
| 1HGH.PDB | OD2, F_ASP_112 | N, F_GLY_4     | H, F_GLY_4      | 2.95 | 2.06 | 19.48 |
| 1HGH.PDB | OD1, F_ASP_112 | N, F_ALA_5     | H, F_ALA_5      | 2.92 | 2.00 | 17.34 |
| 1HGH.PDB | O, F_GLY_4     | N, F_PHE_9     | H, F_PHE_9      | 2.86 | 1.91 | 12.98 |
| 1HGH.PDB | O, F_GLY_13    | ND2, F_ASN_12  | HD22, F_ASN_12  | 2.80 | 1.92 | 21.14 |
| 1HGH.PDB | O, E_VAL_323   | N, F_GLY_13    | H, F_GLY_13     | 2.70 | 1.77 | 11.97 |
| 1HGH.PDB | O, E_HIS_17    | N, F_TRP_14    | H, F_TRP_14     | 2.81 | 1.87 | 12.50 |
| 1HGH.PDB | OG1, F_THR_41  | N, F_TRP_21    | H, F_TRP_21     | 2.88 | 1.96 | 16.20 |
| 1HGH.PDB | O, E_GLY_16    | N, F_GLY_23    | H, F_GLY_23     | 2.91 | 2.00 | 17.53 |
| 1HGH.PDB | O, F_ALA_35    | N, F_PHE_24    | H, F_PHE_24     | 2.86 | 1.89 | 4.90  |
| 1HGH.PDB | O, E_CYS_14    | N, F_ARG_25    | H, F_ARG_25     | 2.90 | 1.98 | 16.77 |
| 1HGH.PDB | OE1, F_GLN_34  | NH2, F_ARG_25  | HH21, F_ARG_25  | 2.92 | 2.03 | 23.48 |
| 1HGH.PDB | O, F_GLY_33    | N, F_HIS_26    | H, F_HIS_26     | 2.90 | 2.03 | 21.65 |
| 1HGH.PDB | O, E_THR_12    | N, F_GLN_27    | H, F_GLN_27     | 2.91 | 2.03 | 20.46 |
| 1HGH.PDB | O, F_GLY_31    | N, F_ASN_28    | H, F_ASN_28     | 2.72 | 1.81 | 16.52 |
| 1HGH.PDB | OD1, F_ASN_146 | ND2, F_ASN_28  | HD21, F_ASN_28  | 2.91 | 1.96 | 12.69 |
| 1HGH.PDB | O, F_CYS_144   | ND2, F_ASN_28  | HD22, F_ASN_28  | 2.96 | 2.10 | 23.78 |
| 1HGH.PDB | O, F_PHE_24    | N, F_ALA_35    | H, F_ALA_35     | 2.81 | 2.00 | 28.47 |
| 1HGH.PDB | O, F_TYR_22    | N, F_ASP_37    | H, F_ASP_37     | 2.69 | 1.76 | 12.03 |
| 1HGH.PDB | OD2, F_ASP_37  | N, F_SER_40    | H, F_SER_40     | 2.86 | 1.90 | 9.36  |
| 1HGH.PDB | OD2, F_ASP_37  | OG, F_SER_40   | HG, F_SER_40    | 2.73 | 1.92 | 26.94 |
| 1HGH.PDB | O, F_ASP_37    | OG1, F_THR_41  | HG1, F_THR_41   | 2.73 | 1.82 | 16.92 |
| 1HGH.PDB | O, F_LEU_38    | N, F_GLN_42    | H, F_GLN_42     | 2.93 | 1.99 | 14.39 |
| 1HGH.PDB | OD1, F_ASP_46  | NE2, F_GLN_42  | HE22, F_GLN_42  | 2.85 | 1.95 | 20.25 |
| 1HGH.PDB | O, F_LYS_39    | N, F_ALA_43    | H, F_ALA_43     | 2.92 | 1.99 | 14.06 |
| 1HGH.PDB | O, F_SER_40    | N, F_ALA_44    | H, F_ALA_44     | 2.94 | 1.96 | 3.72  |

|          |                |                |                 |      |      |       |
|----------|----------------|----------------|-----------------|------|------|-------|
| 1HGH.PDB | O, F_THR_41    | N, F_ILE_45    | H, F_ILE_45     | 2.94 | 2.00 | 13.08 |
| 1HGH.PDB | O, F_GLN_42    | N, F_ASP_46    | H, F_ASP_46     | 2.77 | 1.80 | 1.50  |
| 1HGH.PDB | OE2, F_GLU_114 | NE2, F_GLN_47  | HE21, F_GLN_47  | 2.99 | 2.08 | 19.28 |
| 1HGH.PDB | O, F_ALA_43    | NE2, F_GLN_47  | HE22, F_GLN_47  | 2.86 | 1.96 | 18.47 |
| 1HGH.PDB | O, F_ILE_45    | N, F_ASN_49    | H, F_ASN_49     | 2.86 | 1.91 | 11.74 |
| 1HGH.PDB | O, F_ASP_46    | N, F_GLY_50    | H, F_GLY_50     | 2.93 | 2.01 | 18.13 |
| 1HGH.PDB | O, F_GLN_47    | N, F_LYS_51    | H, F_LYS_51     | 2.95 | 2.01 | 12.39 |
| 1HGH.PDB | OE1, F_GLU_103 | NZ, F_LYS_51   | HZ1, F_LYS_51   | 2.75 | 1.72 | 7.02  |
| 1HGH.PDB | ND1, F_HIS_106 | NZ, F_LYS_51   | HZ2, F_LYS_51   | 2.77 | 1.82 | 19.11 |
| 1HGH.PDB | OG1, F_THR_107 | NZ, F_LYS_51   | HZ3, F_LYS_51   | 2.93 | 1.96 | 17.40 |
| 1HGH.PDB | O, F_ILE_48    | N, F_LEU_52    | H, F_LEU_52     | 2.94 | 2.03 | 18.13 |
| 1HGH.PDB | O, F_ASN_49    | N, F_ASN_53    | H, F_ASN_53     | 2.82 | 1.91 | 17.65 |
| 1HGH.PDB | OE1, F_GLU_57  | NH1, F_ARG_54  | HH11, F_ARG_54  | 2.88 | 1.88 | 10.86 |
| 1HGH.PDB | OE2, D_GLU_97  | NH2, F_ARG_54  | HH22, F_ARG_54  | 2.72 | 1.77 | 15.67 |
| 1HGH.PDB | OD2, D_ASP_90  | NZ, F_LYS_62   | HZ2, F_LYS_62   | 2.68 | 1.83 | 28.02 |
| 1HGH.PDB | OG, E_SER_110  | NE2, F_HIS_64  | HE2, F_HIS_64   | 2.87 | 1.91 | 9.23  |
| 1HGH.PDB | O, E_LYS_299   | NZ, F_LYS_68   | HZ1, F_LYS_68   | 2.91 | 1.87 | 1.37  |
| 1HGH.PDB | OE2, F_GLU_85  | NZ, F_LYS_68   | HZ2, F_LYS_68   | 2.73 | 1.74 | 15.07 |
| 1HGH.PDB | OG, A_SER_107  | N, F_ARG_76    | H, F_ARG_76     | 2.80 | 1.83 | 4.45  |
| 1HGH.PDB | OE2, B_GLU_81  | NE, F_ARG_76   | HE, F_ARG_76    | 2.84 | 1.87 | 10.72 |
| 1HGH.PDB | OE2, B_GLU_74  | NH1, F_ARG_76  | HH12, F_ARG_76  | 2.73 | 1.73 | 5.34  |
| 1HGH.PDB | OE1, B_GLU_81  | NH2, F_ARG_76  | HH21, F_ARG_76  | 2.71 | 1.70 | 1.21  |
| 1HGH.PDB | OE1, B_GLU_74  | NH2, F_ARG_76  | HH22, F_ARG_76  | 2.78 | 1.78 | 7.19  |
| 1HGH.PDB | O, F_GLU_72    | NE2, F_GLN_78  | HE21, F_GLN_78  | 2.90 | 1.94 | 9.41  |
| 1HGH.PDB | OE1, F_GLU_74  | NE2, F_GLN_78  | HE22, F_GLN_78  | 2.92 | 1.95 | 8.97  |
| 1HGH.PDB | O, F_GLY_75    | N, F_ASP_79    | H, F_ASP_79     | 2.84 | 1.89 | 11.67 |
| 1HGH.PDB | O, F_ASP_79    | N, F_TYR_83    | H, F_TYR_83     | 2.85 | 1.92 | 14.40 |
| 1HGH.PDB | OE1, B_GLU_85  | OH, F_TYR_83   | HH, F_TYR_83    | 2.53 | 1.74 | 27.23 |
| 1HGH.PDB | O, F_LEU_80    | N, F_VAL_84    | H, F_VAL_84     | 2.73 | 1.81 | 14.79 |
| 1HGH.PDB | O, F_LYS_82    | N, F_ASP_86    | H, F_ASP_86     | 2.93 | 1.98 | 9.76  |
| 1HGH.PDB | OH, D_TYR_83   | NZ, F_LYS_88   | HZ1, F_LYS_88   | 2.65 | 1.63 | 9.88  |
| 1HGH.PDB | O, F_GLU_85    | N, F_ILE_89    | H, F_ILE_89     | 2.87 | 1.89 | 5.28  |
| 1HGH.PDB | O, F_LYS_88    | N, F_TRP_92    | H, F_TRP_92     | 2.94 | 1.97 | 7.63  |
| 1HGH.PDB | O, F_ILE_89    | N, F_SER_93    | H, F_SER_93     | 2.86 | 1.97 | 18.83 |
| 1HGH.PDB | O, F_ILE_89    | OG, F_SER_93   | HG, F_SER_93    | 2.78 | 1.88 | 16.61 |
| 1HGH.PDB | O, F_ASP_90    | N, F_TYR_94    | H, F_TYR_94     | 2.84 | 1.92 | 15.99 |
| 1HGH.PDB | O, F_LEU_91    | N, F_ASN_95    | H, F_ASN_95     | 3.00 | 2.02 | 3.46  |
| 1HGH.PDB | O, F_TRP_92    | N, F_ALA_96    | H, F_ALA_96     | 2.98 | 2.07 | 17.48 |
| 1HGH.PDB | O, F_TYR_94    | N, F_LEU_98    | H, F_LEU_98     | 2.95 | 1.97 | 6.50  |
| 1HGH.PDB | O, F_ASN_95    | N, F_LEU_99    | H, F_LEU_99     | 2.94 | 2.05 | 19.69 |
| 1HGH.PDB | O, F_LEU_98    | N, F_LEU_102   | H, F_LEU_102    | 3.00 | 2.02 | 4.44  |
| 1HGH.PDB | O, F_VAL_100   | N, F_ASN_104   | H, F_ASN_104    | 2.88 | 1.93 | 12.02 |
| 1HGH.PDB | O, E_LYS_27    | ND2, F_ASN_104 | HD22, F_ASN_104 | 2.90 | 1.95 | 12.28 |
| 1HGH.PDB | O, F_LEU_102   | N, F_HIS_106   | H, F_HIS_106    | 2.96 | 2.00 | 11.13 |
| 1HGH.PDB | O, F_GLU_103   | N, F_THR_107   | H, F_THR_107    | 2.86 | 1.95 | 17.81 |
| 1HGH.PDB | O, F_HIS_106   | N, F_LEU_110   | H, F_LEU_110    | 2.81 | 1.86 | 10.81 |
| 1HGH.PDB | O, F_THR_107   | OG1, F_THR_111 | HG1, F_THR_111  | 2.90 | 1.94 | 2.05  |
| 1HGH.PDB | O, F_ASP_109   | N, F_SER_113   | H, F_SER_113    | 2.77 | 1.83 | 10.08 |
| 1HGH.PDB | O, F_ASP_112   | N, F_ASN_116   | H, F_ASN_116    | 2.97 | 1.99 | 5.76  |
| 1HGH.PDB | O, F_SER_113   | N, F_LYS_117   | H, F_LYS_117    | 2.73 | 1.90 | 25.90 |
| 1HGH.PDB | O, F_GLU_114   | N, F_LEU_118   | H, F_LEU_118    | 2.99 | 2.02 | 8.75  |
| 1HGH.PDB | O, F_ASN_116   | N, F_GLU_120   | H, F_GLU_120    | 2.90 | 1.92 | 2.56  |
| 1HGH.PDB | O, F_LYS_117   | N, F_LYS_121   | H, F_LYS_121    | 2.86 | 1.95 | 17.55 |
| 1HGH.PDB | O, F_LEU_118   | N, F_THR_122   | H, F_THR_122    | 3.00 | 2.04 | 9.77  |
| 1HGH.PDB | O, F_PHE_119   | N, F_ARG_123   | H, F_ARG_123    | 2.88 | 1.91 | 8.40  |
| 1HGH.PDB | OE2, F_GLU_120 | NH1, F_ARG_123 | HH11, F_ARG_123 | 2.74 | 1.84 | 22.63 |
| 1HGH.PDB | O, F_GLU_120   | N, F_ARG_124   | H, F_ARG_124    | 2.97 | 2.00 | 8.45  |
| 1HGH.PDB | OE1, D_GLU_132 | NE, F_ARG_124  | HE, F_ARG_124   | 2.89 | 2.06 | 26.55 |

|          |                |                |                 |      |      |       |
|----------|----------------|----------------|-----------------|------|------|-------|
| 1HGH.PDB | OE2, D_GLU_132 | NE, F_ARG_124  | HE, F_ARG_124   | 2.92 | 2.03 | 21.52 |
| 1HGH.PDB | O, F_LEU_126   | N, F_ASN_129   | H, F_ASN_129    | 2.97 | 2.04 | 14.05 |
| 1HGH.PDB | OH, F_TYR_157  | ND2, F_ASN_129 | HD22, F_ASN_129 | 2.82 | 1.88 | 14.11 |
| 1HGH.PDB | O, F_LYS_139   | N, F_GLU_131   | H, F_GLU_131    | 2.96 | 2.04 | 16.53 |
| 1HGH.PDB | O, F_CYS_137   | N, F_MET_133   | H, F_MET_133    | 2.86 | 1.92 | 14.22 |
| 1HGH.PDB | O, E_LEU_13    | N, F_PHE_138   | H, F_PHE_138    | 2.71 | 1.82 | 18.02 |
| 1HGH.PDB | O, F_GLU_131   | N, F_LYS_139   | H, F_LYS_139    | 2.82 | 1.86 | 5.73  |
| 1HGH.PDB | O, E_ALA_11    | N, F_ILE_140   | H, F_ILE_140    | 2.79 | 1.87 | 15.45 |
| 1HGH.PDB | O, F_ASN_129   | N, F_TYR_141   | H, F_TYR_141    | 2.86 | 1.92 | 14.36 |
| 1HGH.PDB | OE2, F_GLU_165 | N, F_LYS_143   | H, F_LYS_143    | 2.98 | 2.04 | 16.16 |
| 1HGH.PDB | O, F_ASP_145   | N, F_ILE_149   | H, F_ILE_149    | 2.90 | 1.94 | 10.21 |
| 1HGH.PDB | O, F_ASN_146   | N, F_GLU_150   | H, F_GLU_150    | 2.92 | 1.99 | 14.40 |
| 1HGH.PDB | O, F_ALA_147   | N, F_SER_151   | H, F_SER_151    | 2.95 | 2.08 | 22.59 |
| 1HGH.PDB | O, F_CYS_148   | OG, F_SER_151  | HG, F_SER_151   | 2.76 | 1.89 | 20.46 |
| 1HGH.PDB | O, F_GLU_150   | N, F_ASN_154   | H, F_ASN_154    | 2.79 | 1.82 | 2.73  |
| 1HGH.PDB | OD1, F_ASP_158 | N, F_ASP_160   | H, F_ASP_160    | 2.98 | 2.10 | 21.90 |
| 1HGH.PDB | O, F_HIS_159   | N, F_TYR_162   | H, F_TYR_162    | 2.95 | 2.07 | 22.27 |
| 1HGH.PDB | O, D_ARG_170   | NH1, F_ARG_163 | HH12, F_ARG_163 | 2.89 | 1.90 | 10.67 |
| 1HGH.PDB | O, F_TYR_162   | N, F_ALA_166   | H, F_ALA_166    | 2.94 | 1.96 | 4.91  |
| 1HGH.PDB | O, F_ARG_163   | N, F_LEU_167   | H, F_LEU_167    | 2.82 | 1.86 | 8.96  |
| 1HGH.PDB | O, F_GLU_165   | ND2, F_ASN_169 | HD22, F_ASN_169 | 2.99 | 2.03 | 7.50  |
| 1HGH.PDB | O, F_ALA_166   | N, F_ARG_170   | H, F_ARG_170    | 2.83 | 1.95 | 20.78 |
| 1HGH.PDB | O, F_GLU_128   | NE, F_ARG_170  | HE, F_ARG_170   | 2.76 | 1.89 | 22.46 |
| 1HGH.PDB | OE2, F_GLU_131 | NH1, F_ARG_170 | HH11, F_ARG_170 | 2.84 | 1.84 | 5.40  |
| 1HGH.PDB | O, F_LEU_167   | N, F_PHE_171   | H, F_PHE_171    | 2.96 | 2.05 | 17.03 |
| 1HGI.PDB | O, B_ILE_140   | N, A_ALA_11    | H, A_ALA_11     | 2.84 | 1.92 | 15.59 |
| 1HGI.PDB | O, B_PHE_138   | N, A_LEU_13    | H, A_LEU_13     | 3.00 | 2.03 | 9.98  |
| 1HGI.PDB | O, B_ARG_25    | N, A_CYS_14    | H, A_CYS_14     | 2.96 | 2.03 | 15.50 |
| 1HGI.PDB | O, B_GLY_136   | N, A_LEU_15    | H, A_LEU_15     | 2.93 | 1.96 | 7.25  |
| 1HGI.PDB | O, B_GLY_23    | N, A_GLY_16    | H, A_GLY_16     | 2.98 | 2.12 | 23.40 |
| 1HGI.PDB | O, A_HIS_18    | ND1, A_HIS_17  | HD1, A_HIS_17   | 2.95 | 2.05 | 20.26 |
| 1HGI.PDB | O, B_TRP_21    | N, A_HIS_18    | H, A_HIS_18     | 2.89 | 1.98 | 18.40 |
| 1HGI.PDB | OD1, A_ASN_322 | N, A_VAL_20    | H, A_VAL_20     | 2.77 | 1.82 | 10.44 |
| 1HGI.PDB | O, A_VAL_36    | N, A_THR_24    | H, A_THR_24     | 2.83 | 1.89 | 12.49 |
| 1HGI.PDB | O, A_ILE_34    | N, A_VAL_26    | H, A_VAL_26     | 2.77 | 1.82 | 9.67  |
| 1HGI.PDB | OE2, B_GLU_97  | NZ, A_LYS_27   | HZ1, A_LYS_27   | 2.90 | 1.86 | 7.66  |
| 1HGI.PDB | O, A_ASP_31    | N, A_THR_28    | H, A_THR_28     | 2.78 | 1.96 | 27.36 |
| 1HGI.PDB | O, A_VAL_26    | N, A_ILE_34    | H, A_ILE_34     | 2.91 | 2.01 | 18.80 |
| 1HGI.PDB | O, A_THR_24    | N, A_VAL_36    | H, A_VAL_36     | 2.78 | 1.82 | 5.76  |
| 1HGI.PDB | O, A_MET_320   | N, A_THR_37    | H, A_THR_37     | 2.84 | 1.88 | 8.46  |
| 1HGI.PDB | O, A_LEU_316   | N, A_THR_40    | H, A_THR_40     | 2.88 | 2.01 | 22.14 |
| 1HGI.PDB | O, A_LEU_314   | N, A_LEU_42    | H, A_LEU_42     | 2.85 | 1.98 | 22.93 |
| 1HGI.PDB | OE2, A_GLU_41  | N, A_VAL_43    | H, A_VAL_43     | 2.99 | 2.05 | 14.68 |
| 1HGI.PDB | O, A_PHE_294   | N, A_GLN_44    | H, A_GLN_44     | 2.83 | 1.87 | 6.80  |
| 1HGI.PDB | O, A_SER_46    | NE2, A_GLN_44  | HE22, A_GLN_44  | 2.80 | 1.99 | 27.53 |
| 1HGI.PDB | OD2, A_ASP_275 | NZ, A_LYS_50   | HZ1, A_LYS_50   | 2.71 | 1.78 | 22.79 |
| 1HGI.PDB | O, A_PRO_273   | N, A_ILE_51    | H, A_ILE_51     | 2.80 | 1.85 | 10.62 |
| 1HGI.PDB | O, A_ASP_275   | N, A_ASN_53    | H, A_ASN_53     | 2.87 | 2.01 | 23.36 |
| 1HGI.PDB | O, A_GLU_280   | NE2, A_HIS_56  | HE2, A_HIS_56   | 2.99 | 2.05 | 14.61 |
| 1HGI.PDB | OD2, A_ASP_85  | N, A_ARG_57    | H, A_ARG_57     | 2.87 | 1.92 | 11.71 |
| 1HGI.PDB | O, A_THR_83    | NE, A_ARG_57   | HE, A_ARG_57    | 2.85 | 1.87 | 3.06  |
| 1HGI.PDB | O, A_LEU_86    | N, A_LEU_59    | H, A_LEU_59     | 2.86 | 1.91 | 10.36 |
| 1HGI.PDB | O, A_VAL_88    | N, A_GLY_61    | H, A_GLY_61     | 2.97 | 2.12 | 24.22 |
| 1HGI.PDB | OD1, A_ASP_60  | N, A_ILE_62    | H, A_ILE_62     | 2.84 | 1.91 | 13.27 |
| 1HGI.PDB | O, A_GLY_61    | N, A_CYS_64    | H, A_CYS_64     | 2.89 | 1.98 | 18.14 |
| 1HGI.PDB | OE2, A_GLU_89  | N, A_LEU_66    | H, A_LEU_66     | 3.00 | 2.06 | 15.37 |
| 1HGI.PDB | O, A_LEU_66    | N, A_LEU_70    | H, A_LEU_70     | 2.81 | 1.92 | 20.22 |
| 1HGI.PDB | O, A_ILE_67    | N, A_LEU_71    | H, A_LEU_71     | 2.84 | 1.88 | 6.23  |

|          |                |                |                 |      |      |       |
|----------|----------------|----------------|-----------------|------|------|-------|
| 1HGI.PDB | O, A_ASP_68    | N, A_GLY_72    | H, A_GLY_72     | 2.79 | 1.85 | 12.70 |
| 1HGI.PDB | OD1, A_ASP_73  | ND1, A_HIS_75  | HD1, A_HIS_75   | 2.90 | 1.96 | 15.34 |
| 1HGI.PDB | O, A_ASP_63    | NE2, A_HIS_75  | HE2, A_HIS_75   | 2.84 | 1.90 | 14.11 |
| 1HGI.PDB | O, A_ASP_73    | N, A_CYS_76    | H, A_CYS_76     | 2.75 | 1.84 | 16.03 |
| 1HGI.PDB | O, A_PRO_74    | N, A_ASP_77    | H, A_ASP_77     | 2.94 | 1.98 | 10.08 |
| 1HGI.PDB | O, A_CYS_76    | N, A_PHE_79    | H, A_PHE_79     | 2.96 | 1.99 | 3.40  |
| 1HGI.PDB | OE1, A_GLU_82  | N, A_THR_83    | H, A_THR_83     | 2.96 | 2.07 | 20.90 |
| 1HGI.PDB | O, A_ARG_57    | N, A_ASP_85    | H, A_ASP_85     | 2.81 | 1.90 | 17.53 |
| 1HGI.PDB | O, A_MET_268   | N, A_GLU_89    | H, A_GLU_89     | 2.81 | 1.85 | 7.54  |
| 1HGI.PDB | OD1, A_ASP_60  | NE, A_ARG_90   | HE, A_ARG_90    | 2.89 | 1.91 | 4.93  |
| 1HGI.PDB | O, A_SER_270   | NH1, A_ARG_90  | HH11, A_ARG_90  | 2.65 | 1.78 | 23.88 |
| 1HGI.PDB | O, A_ALA_272   | NH1, A_ARG_90  | HH12, A_ARG_90  | 2.62 | 1.72 | 20.22 |
| 1HGI.PDB | OD2, A_ASP_60  | NH2, A_ARG_90  | HH21, A_ARG_90  | 2.83 | 1.85 | 11.60 |
| 1HGI.PDB | OD1, A_ASP_271 | N, A_SER_91    | H, A_SER_91     | 2.91 | 1.95 | 10.73 |
| 1HGI.PDB | OD1, A_ASP_271 | OG, A_SER_91   | HG, A_SER_91    | 2.93 | 2.10 | 25.86 |
| 1HGI.PDB | OD2, A_ASP_271 | OG, A_SER_91   | HG, A_SER_91    | 2.80 | 1.92 | 20.51 |
| 1HGI.PDB | OD2, A_ASP_68  | OG, A_SER_95   | HG, A_SER_95    | 2.89 | 1.96 | 14.00 |
| 1HGI.PDB | OD2, A_ASP_73  | N, A_ASN_96    | H, A_ASN_96     | 2.87 | 1.92 | 13.04 |
| 1HGI.PDB | OD1, A_ASP_68  | OH, A_TYR_100  | HH, A_TYR_100   | 2.99 | 2.05 | 13.08 |
| 1HGI.PDB | OD2, A_ASP_104 | OG, A_SER_107  | HG, A_SER_107   | 2.89 | 1.96 | 15.23 |
| 1HGI.PDB | O, A_TYR_105   | N, A_ARG_109   | H, A_ARG_109    | 2.86 | 1.88 | 3.08  |
| 1HGI.PDB | OE2, B_GLU_67  | NH2, A_ARG_109 | HH21, A_ARG_109 | 2.80 | 1.81 | 13.24 |
| 1HGI.PDB | O, A_SER_107   | N, A_LEU_111   | H, A_LEU_111    | 2.85 | 1.89 | 7.63  |
| 1HGI.PDB | O, A_LEU_108   | N, A_VAL_112   | H, A_VAL_112    | 2.97 | 1.99 | 2.18  |
| 1HGI.PDB | O, A_ARG_109   | N, A_ALA_113   | H, A_ALA_113    | 2.95 | 2.04 | 17.40 |
| 1HGI.PDB | O, A_SER_110   | N, A_SER_114   | H, A_SER_114    | 2.94 | 2.06 | 20.96 |
| 1HGI.PDB | OE2, A_GLU_119 | OG1, A_THR_117 | HG1, A_THR_117  | 2.93 | 2.01 | 15.43 |
| 1HGI.PDB | O, A_GLU_82    | N, A_LEU_118   | H, A_LEU_118    | 2.94 | 2.01 | 15.84 |
| 1HGI.PDB | O, A_TYR_257   | N, A_ILE_121   | H, A_ILE_121    | 2.92 | 1.95 | 6.91  |
| 1HGI.PDB | O, A_ARG_255   | N, A_GLU_123   | H, A_GLU_123    | 2.88 | 1.93 | 11.84 |
| 1HGI.PDB | O, A_THR_155   | N, A_THR_131   | H, A_THR_131    | 2.73 | 1.85 | 20.63 |
| 1HGI.PDB | OD1, A_ASN_152 | N, A_ASN_133   | H, A_ASN_133    | 2.84 | 1.92 | 17.02 |
| 1HGI.PDB | O, A_GLY_146   | N, A_SER_136   | H, A_SER_136    | 2.75 | 1.87 | 20.99 |
| 1HGI.PDB | OG, A_SER_136  | N, A_ALA_138   | H, A_ALA_138    | 2.84 | 1.93 | 17.99 |
| 1HGI.PDB | O, A_GLY_144   | NZ, A_LYS_140  | HZ1, A_LYS_140  | 2.89 | 1.92 | 16.20 |
| 1HGI.PDB | OD1, A_ASN_137 | NZ, A_LYS_140  | HZ2, A_LYS_140  | 2.79 | 1.79 | 13.01 |
| 1HGI.PDB | OD2, A_ASP_77  | NE, A_ARG_141  | HE, A_ARG_141   | 2.82 | 2.01 | 29.43 |
| 1HGI.PDB | O, A_PHE_147   | NH1, A_ARG_141 | HH12, A_ARG_141 | 2.56 | 1.66 | 20.36 |
| 1HGI.PDB | OD1, A_ASP_77  | NH2, A_ARG_141 | HH21, A_ARG_141 | 2.93 | 2.01 | 20.43 |
| 1HGI.PDB | OD2, A_ASP_77  | NH2, A_ARG_141 | HH21, A_ARG_141 | 2.69 | 1.82 | 24.99 |
| 1HGI.PDB | O, A_GLY_72    | NH2, A_ARG_141 | HH22, A_ARG_141 | 3.00 | 2.01 | 9.22  |
| 1HGI.PDB | O, A_SER_136   | N, A_GLY_146   | H, A_GLY_146    | 2.98 | 2.04 | 14.64 |
| 1HGI.PDB | O, A_GLY_72    | N, A_SER_149   | H, A_SER_149    | 2.91 | 1.98 | 15.28 |
| 1HGI.PDB | O, A_ALA_253   | N, A_ASN_152   | H, A_ASN_152    | 2.76 | 1.90 | 23.60 |
| 1HGI.PDB | OH, A_TYR_195  | NE1, A_TRP_153 | HE1, A_TRP_153  | 2.87 | 1.98 | 21.02 |
| 1HGI.PDB | O, A_THR_131   | N, A_THR_155   | H, A_THR_155    | 2.95 | 1.99 | 10.46 |
| 1HGI.PDB | O, A_LEU_194   | N, A_LYS_156   | H, A_LYS_156    | 2.87 | 1.97 | 18.02 |
| 1HGI.PDB | O, A_SER_193   | NZ, A_LYS_156  | HZ2, A_LYS_156  | 2.75 | 1.76 | 15.14 |
| 1HGI.PDB | O, A_THR_160   | N, A_SER_157   | H, A_SER_157    | 2.90 | 2.01 | 20.69 |
| 1HGI.PDB | OG1, A_THR_131 | OG, A_SER_157  | HG, A_SER_157   | 2.97 | 2.02 | 9.12  |
| 1HGI.PDB | O, A_SER_247   | N, A_LEU_164   | H, A_LEU_164    | 2.71 | 1.88 | 25.60 |
| 1HGI.PDB | O, A_ILE_245   | N, A_VAL_166   | H, A_VAL_166    | 2.88 | 1.93 | 12.13 |
| 1HGI.PDB | O, A_LEU_243   | OG1, A_THR_167 | HG1, A_THR_167  | 2.87 | 2.00 | 20.84 |
| 1HGI.PDB | O, A_LEU_243   | N, A_MET_168   | H, A_MET_168    | 2.94 | 2.01 | 15.31 |
| 1HGI.PDB | O, A_ASP_241   | N, A_ASN_170   | H, A_ASN_170    | 2.98 | 2.00 | 3.78  |
| 1HGI.PDB | O, A_PHE_174   | ND2, A_ASN_170 | HD21, A_ASN_170 | 2.83 | 1.88 | 13.11 |
| 1HGI.PDB | O, A_VAL_237   | ND2, A_ASN_170 | HD22, A_ASN_170 | 2.97 | 2.11 | 23.66 |
| 1HGI.PDB | O, A_VAL_237   | N, A_LYS_176   | H, A_LYS_176    | 2.96 | 2.02 | 13.33 |

|          |                |                |                 |      |      |       |
|----------|----------------|----------------|-----------------|------|------|-------|
| 1HGI.PDB | OE2, A_GLU_123 | NZ, A_LYS_176  | HZ1, A_LYS_176  | 2.68 | 1.79 | 25.50 |
| 1HGI.PDB | O, A_THR_235   | N, A_TYR_178   | H, A_TYR_178    | 2.83 | 1.86 | 3.17  |
| 1HGI.PDB | OE1, A_GLU_123 | OH, A_TYR_178  | HH, A_TYR_178   | 2.78 | 1.82 | 7.33  |
| 1HGI.PDB | OG1, A_THR_235 | NE1, A_TRP_180 | HE1, A_TRP_180  | 2.85 | 1.87 | 3.02  |
| 1HGI.PDB | O, A_ILE_252   | N, A_GLY_181   | H, A_GLY_181    | 2.99 | 2.17 | 27.41 |
| 1HGI.PDB | O, A_ASN_250   | N, A_HIS_183   | H, A_HIS_183    | 2.91 | 2.02 | 20.40 |
| 1HGI.PDB | O, A_ARG_229   | N, A_HIS_184   | H, A_HIS_184    | 2.87 | 1.91 | 8.12  |
| 1HGI.PDB | OG, A_SER_231  | NE2, A_HIS_184 | HE2, A_HIS_184  | 2.81 | 1.93 | 22.19 |
| 1HGI.PDB | OE1, A_GLU_190 | N, A_SER_186   | H, A_SER_186    | 2.97 | 2.07 | 20.08 |
| 1HGI.PDB | OD1, A_ASN_250 | NE2, A_GLN_191 | HE21, A_GLN_191 | 2.93 | 1.97 | 11.19 |
| 1HGI.PDB | O, A_GLN_197   | NE2, A_GLN_191 | HE22, A_GLN_191 | 2.94 | 1.98 | 10.63 |
| 1HGI.PDB | O, A_ASN_188   | N, A_THR_192   | H, A_THR_192    | 2.97 | 2.03 | 12.91 |
| 1HGI.PDB | O, A_ASN_188   | OG1, A_THR_192 | HG1, A_THR_192  | 2.95 | 1.99 | 5.36  |
| 1HGI.PDB | O, A_GLN_189   | N, A_SER_193   | H, A_SER_193    | 2.83 | 1.86 | 5.01  |
| 1HGI.PDB | O, A_GLN_191   | N, A_TYR_195   | H, A_TYR_195    | 2.74 | 1.78 | 5.84  |
| 1HGI.PDB | O, A_TYR_161   | NE2, A_GLN_197 | HE21, A_GLN_197 | 2.98 | 2.02 | 10.94 |
| 1HGI.PDB | O, A_ASN_248   | NE2, A_GLN_197 | HE22, A_GLN_197 | 2.92 | 2.01 | 18.40 |
| 1HGI.PDB | OD1, A_ASN_246 | NH2, A_ARG_201 | HH21, A_ARG_201 | 2.54 | 1.71 | 26.99 |
| 1HGI.PDB | O, A_ILE_213   | N, A_VAL_202   | H, A_VAL_202    | 2.93 | 1.95 | 5.55  |
| 1HGI.PDB | O, A_ASN_246   | N, A_THR_203   | H, A_THR_203    | 2.85 | 1.91 | 12.85 |
| 1HGI.PDB | O, A_GLN_211   | N, A_VAL_204   | H, A_VAL_204    | 2.83 | 1.91 | 15.32 |
| 1HGI.PDB | O, A_VAL_244   | N, A_SER_205   | H, A_SER_205    | 2.95 | 2.02 | 15.55 |
| 1HGI.PDB | O, A_SER_209   | N, A_THR_206   | H, A_THR_206    | 2.90 | 1.93 | 7.39  |
| 1HGI.PDB | OD1, A_ASP_241 | N, A_ARG_207   | H, A_ARG_207    | 2.92 | 1.95 | 9.91  |
| 1HGI.PDB | OD2, A_ASP_241 | NE, A_ARG_208  | HE, A_ARG_208   | 2.96 | 2.05 | 19.55 |
| 1HGI.PDB | O, A_VAL_204   | N, A_GLN_211   | H, A_GLN_211    | 2.90 | 1.98 | 16.08 |
| 1HGI.PDB | OG1, A_THR_203 | OG1, A_THR_212 | HG1, A_THR_212  | 2.96 | 2.00 | 2.15  |
| 1HGI.PDB | O, A_VAL_202   | N, A_ILE_213   | H, A_ILE_213    | 2.83 | 1.91 | 15.65 |
| 1HGI.PDB | OE1, C_GLN_210 | NH2, A_ARG_220 | HH21, A_ARG_220 | 2.65 | 1.73 | 18.55 |
| 1HGI.PDB | O, A_ASN_216   | NH2, A_ARG_220 | HH22, A_ARG_220 | 2.69 | 1.79 | 20.57 |
| 1HGI.PDB | O, A_LEU_226   | N, A_VAL_223   | H, A_VAL_223    | 2.88 | 1.91 | 8.35  |
| 1HGI.PDB | O, A_CYS_97    | NE, A_ARG_224  | HE, A_ARG_224   | 2.78 | 1.93 | 25.49 |
| 1HGI.PDB | O, A_CYS_97    | NH2, A_ARG_224 | HH21, A_ARG_224 | 2.83 | 1.97 | 25.33 |
| 1HGI.PDB | O, A_VAL_223   | N, A_LEU_226   | H, A_LEU_226    | 2.93 | 2.00 | 15.45 |
| 1HGI.PDB | O, A_SER_228   | NH1, A_ARG_229 | HH11, A_ARG_229 | 2.68 | 1.75 | 18.52 |
| 1HGI.PDB | O, A_PRO_221   | NH2, A_ARG_229 | HH22, A_ARG_229 | 2.62 | 1.67 | 14.70 |
| 1HGI.PDB | O, A_PRO_99    | N, A_ILE_230   | H, A_ILE_230    | 2.99 | 2.15 | 25.83 |
| 1HGI.PDB | O, A_ILE_182   | N, A_SER_231   | H, A_SER_231    | 2.99 | 2.14 | 24.63 |
| 1HGI.PDB | OD1, A_ASP_101 | OG, A_SER_231  | HG, A_SER_231   | 2.96 | 2.01 | 11.74 |
| 1HGI.PDB | O, A_ASP_101   | N, A_ILE_232   | H, A_ILE_232    | 2.92 | 1.99 | 15.11 |
| 1HGI.PDB | O, A_TRP_180   | N, A_TYR_233   | H, A_TYR_233    | 2.89 | 1.92 | 9.03  |
| 1HGI.PDB | O, A_TYR_178   | N, A_THR_235   | H, A_THR_235    | 2.82 | 1.93 | 19.14 |
| 1HGI.PDB | O, A_LYS_176   | N, A_VAL_237   | H, A_VAL_237    | 2.80 | 1.86 | 12.56 |
| 1HGI.PDB | O, F_SER_71    | NZ, A_LYS_238  | HZ2, A_LYS_238  | 2.65 | 1.80 | 28.67 |
| 1HGI.PDB | OE1, F_GLU_72  | NZ, A_LYS_238  | HZ3, A_LYS_238  | 2.85 | 1.85 | 15.00 |
| 1HGI.PDB | O, A_ASN_170   | N, A_GLY_240   | H, A_GLY_240    | 2.91 | 2.07 | 25.35 |
| 1HGI.PDB | OD1, A_ASP_241 | N, A_VAL_242   | H, A_VAL_242    | 2.74 | 1.94 | 29.06 |
| 1HGI.PDB | O, A_MET_168   | N, A_LEU_243   | H, A_LEU_243    | 2.93 | 1.96 | 6.54  |
| 1HGI.PDB | O, A_SER_205   | N, A_VAL_244   | H, A_VAL_244    | 2.95 | 2.00 | 12.56 |
| 1HGI.PDB | O, A_VAL_166   | N, A_ILE_245   | H, A_ILE_245    | 2.98 | 2.04 | 14.27 |
| 1HGI.PDB | O, A_THR_203   | N, A_ASN_246   | H, A_ASN_246    | 2.86 | 1.93 | 15.27 |
| 1HGI.PDB | O, A_LEU_164   | N, A_SER_247   | H, A_SER_247    | 2.86 | 1.96 | 18.93 |
| 1HGI.PDB | O, A_ARG_201   | OG, A_SER_247  | HG, A_SER_247   | 2.80 | 2.00 | 29.04 |
| 1HGI.PDB | OE1, A_GLN_191 | ND2, A_ASN_250 | HD21, A_ASN_250 | 2.89 | 1.93 | 10.00 |
| 1HGI.PDB | O, A_HIS_183   | ND2, A_ASN_250 | HD22, A_ASN_250 | 2.85 | 1.88 | 5.42  |
| 1HGI.PDB | O, A_GLY_181   | N, A_ILE_252   | H, A_ILE_252    | 2.93 | 1.97 | 10.35 |
| 1HGI.PDB | O, A_ASN_152   | N, A_ALA_253   | H, A_ALA_253    | 2.80 | 1.92 | 21.29 |
| 1HGI.PDB | O, A_LEU_177   | N, A_PHE_258   | H, A_PHE_258    | 2.93 | 1.97 | 9.46  |

|          |                |                |                 |      |      |       |
|----------|----------------|----------------|-----------------|------|------|-------|
| 1HGI.PDB | OE2, A_GLU_119 | NH1, A_ARG_261 | HH12, A_ARG_261 | 2.66 | 1.83 | 28.46 |
| 1HGI.PDB | OE1, A_GLU_119 | NH2, A_ARG_261 | HH22, A_ARG_261 | 2.85 | 1.99 | 27.12 |
| 1HGI.PDB | OD2, A_ASP_85  | NZ, A_LYS_264  | HZ3, A_LYS_264  | 2.82 | 1.85 | 17.23 |
| 1HGI.PDB | O, A_PHE_87    | N, A_MET_268   | H, A_MET_268    | 2.89 | 2.01 | 22.03 |
| 1HGI.PDB | O, A_PRO_284   | OG, A_SER_270  | HG, A_SER_270   | 2.81 | 1.87 | 11.59 |
| 1HGI.PDB | OG, A_SER_270  | N, A_ALA_272   | H, A_ALA_272    | 2.98 | 2.03 | 12.37 |
| 1HGI.PDB | O, A_ILE_51    | N, A_ASP_275   | H, A_ASP_275    | 2.92 | 2.02 | 19.41 |
| 1HGI.PDB | OD1, A_ASP_275 | N, A_THR_276   | H, A_THR_276    | 2.85 | 2.00 | 24.58 |
| 1HGI.PDB | O, A_ASN_54    | N, A_SER_279   | H, A_SER_279    | 2.79 | 1.86 | 13.88 |
| 1HGI.PDB | O, A_TYR_302   | N, A_ILE_282   | H, A_ILE_282    | 2.88 | 1.92 | 8.64  |
| 1HGI.PDB | O, A_THR_283   | N, A_GLY_286   | H, A_GLY_286    | 2.81 | 1.89 | 14.79 |
| 1HGI.PDB | O, A_LYS_50    | N, A_SER_287   | H, A_SER_287    | 2.89 | 1.91 | 3.39  |
| 1HGI.PDB | O, A_ALA_304   | ND2, A_ASN_290 | HD22, A_ASN_290 | 2.73 | 1.85 | 20.49 |
| 1HGI.PDB | OE1, A_GLN_44  | NZ, A_LYS_292  | HZ1, A_LYS_292  | 2.74 | 1.74 | 11.73 |
| 1HGI.PDB | OD2, A_ASP_291 | NZ, A_LYS_292  | HZ3, A_LYS_292  | 2.81 | 1.89 | 23.33 |
| 1HGI.PDB | O, A_LYS_307   | N, A_GLN_295   | H, A_GLN_295    | 2.85 | 1.96 | 20.30 |
| 1HGI.PDB | O, A_ASN_298   | NE2, A_GLN_295 | HE21, A_GLN_295 | 2.82 | 1.86 | 9.08  |
| 1HGI.PDB | O, A_GLN_44    | N, A_ASN_296   | H, A_ASN_296    | 2.91 | 1.97 | 13.42 |
| 1HGI.PDB | OE1, A_GLN_295 | N, A_VAL_297   | H, A_VAL_297    | 2.73 | 1.93 | 28.60 |
| 1HGI.PDB | OD1, A_ASN_298 | N, A_ILE_300   | H, A_ILE_300    | 2.93 | 1.98 | 12.80 |
| 1HGI.PDB | O, A_ILE_282   | N, A_TYR_302   | H, A_TYR_302    | 2.98 | 2.09 | 21.95 |
| 1HGI.PDB | O, A_LYS_264   | OH, A_TYR_302  | HH, A_TYR_302   | 2.75 | 1.94 | 27.71 |
| 1HGI.PDB | O, B_LYS_62    | N, A_GLY_303   | H, A_GLY_303    | 2.96 | 1.99 | 7.07  |
| 1HGI.PDB | O, A_GLN_295   | N, A_VAL_309   | H, A_VAL_309    | 2.99 | 2.14 | 25.08 |
| 1HGI.PDB | OG, B_SER_93   | N, A_LYS_310   | H, A_LYS_310    | 2.98 | 2.05 | 15.58 |
| 1HGI.PDB | OD1, B_ASP_86  | NZ, A_LYS_310  | HZ3, A_LYS_310  | 2.76 | 1.92 | 29.34 |
| 1HGI.PDB | OE2, A_GLU_41  | N, A_LEU_314   | H, A_LEU_314    | 2.86 | 1.90 | 8.56  |
| 1HGI.PDB | OE1, A_GLU_41  | NZ, A_LYS_315  | HZ3, A_LYS_315  | 2.77 | 1.82 | 19.86 |
| 1HGI.PDB | O, A_THR_40    | N, A_LEU_316   | H, A_LEU_316    | 2.86 | 1.94 | 16.90 |
| 1HGI.PDB | OD1, B_ASN_104 | N, A_ALA_317   | H, A_ALA_317    | 2.74 | 1.83 | 15.76 |
| 1HGI.PDB | O, A_ASN_38    | N, A_THR_318   | H, A_THR_318    | 2.82 | 1.93 | 19.87 |
| 1HGI.PDB | O, A_VAL_20    | ND2, A_ASN_322 | HD21, A_ASN_322 | 2.87 | 1.93 | 13.77 |
| 1HGI.PDB | OE2, A_GLU_35  | ND2, A_ASN_322 | HD22, A_ASN_322 | 2.93 | 1.97 | 12.34 |
| 1HGI.PDB | OE2, B_GLU_15  | NZ, A_LYS_326  | HZ1, A_LYS_326  | 2.79 | 1.93 | 27.33 |
| 1HGI.PDB | OE1, A_GLU_325 | NZ, A_LYS_326  | HZ3, A_LYS_326  | 2.91 | 1.94 | 17.77 |
| 1HGI.PDB | OE1, B_GLU_15  | N, A_THR_328   | H, A_THR_328    | 2.87 | 1.93 | 12.65 |
| 1HGI.PDB | OD2, B_ASP_112 | N, B_GLY_1     | H2, B_GLY_1     | 2.79 | 1.78 | 11.80 |
| 1HGI.PDB | OD1, B_ASP_109 | N, B_LEU_2     | H, B_LEU_2      | 2.89 | 1.95 | 13.58 |
| 1HGI.PDB | OD2, B_ASP_112 | N, B_PHE_3     | H, B_PHE_3      | 2.82 | 2.00 | 27.10 |
| 1HGI.PDB | OD2, B_ASP_112 | N, B_GLY_4     | H, B_GLY_4      | 2.93 | 2.02 | 17.65 |
| 1HGI.PDB | OD1, B_ASP_112 | N, B_ALA_5     | H, B_ALA_5      | 2.82 | 1.90 | 16.18 |
| 1HGI.PDB | O, B_GLY_4     | N, B_PHE_9     | H, B_PHE_9      | 2.84 | 1.90 | 12.47 |
| 1HGI.PDB | O, B_GLY_13    | ND2, B_ASN_12  | HD22, B_ASN_12  | 2.81 | 1.91 | 19.43 |
| 1HGI.PDB | O, A_VAL_323   | N, B_GLY_13    | H, B_GLY_13     | 2.68 | 1.79 | 18.45 |
| 1HGI.PDB | O, A_HIS_17    | N, B_TRP_14    | H, B_TRP_14     | 2.78 | 1.88 | 17.65 |
| 1HGI.PDB | OG1, B_THR_41  | N, B_TRP_21    | H, B_TRP_21     | 2.98 | 2.13 | 25.10 |
| 1HGI.PDB | O, A_GLY_16    | N, B_GLY_23    | H, B_GLY_23     | 2.97 | 2.06 | 17.58 |
| 1HGI.PDB | O, B_ALA_35    | N, B_PHE_24    | H, B_PHE_24     | 2.80 | 1.84 | 7.18  |
| 1HGI.PDB | OE1, B_GLN_34  | NE, B_ARG_25   | HE, B_ARG_25    | 2.60 | 1.78 | 26.17 |
| 1HGI.PDB | OE1, B_GLN_34  | NH2, B_ARG_25  | HH21, B_ARG_25  | 2.75 | 1.92 | 27.98 |
| 1HGI.PDB | OE2, A_GLU_325 | NH2, B_ARG_25  | HH22, B_ARG_25  | 2.93 | 1.95 | 13.46 |
| 1HGI.PDB | O, B_GLY_33    | N, B_HIS_26    | H, B_HIS_26     | 2.73 | 1.82 | 16.37 |
| 1HGI.PDB | O, B_GLY_31    | N, B_ASN_28    | H, B_ASN_28     | 2.73 | 1.84 | 19.89 |
| 1HGI.PDB | O, B_ASN_28    | N, B_GLY_31    | H, B_GLY_31     | 2.85 | 2.01 | 25.49 |
| 1HGI.PDB | O, B_PHE_24    | N, B_ALA_35    | H, B_ALA_35     | 2.80 | 2.01 | 29.31 |
| 1HGI.PDB | O, B_TYR_22    | N, B_ASP_37    | H, B_ASP_37     | 2.70 | 1.78 | 14.64 |
| 1HGI.PDB | OD2, B_ASP_37  | N, B_SER_40    | H, B_SER_40     | 2.90 | 1.93 | 5.57  |
| 1HGI.PDB | O, B_ASP_37    | OG1, B_THR_41  | HG1, B_THR_41   | 2.74 | 1.83 | 15.44 |

|          |                |                |                 |      |      |       |
|----------|----------------|----------------|-----------------|------|------|-------|
| 1HGI.PDB | OD1, B_ASP_46  | NE2, B_GLN_42  | HE22, B_GLN_42  | 2.89 | 2.02 | 23.36 |
| 1HGI.PDB | O, B_SER_40    | N, B_ALA_44    | H, B_ALA_44     | 2.95 | 1.97 | 3.32  |
| 1HGI.PDB | O, B_THR_41    | N, B_ILE_45    | H, B_ILE_45     | 2.96 | 2.03 | 14.49 |
| 1HGI.PDB | O, B_GLN_42    | N, B_ASP_46    | H, B_ASP_46     | 2.71 | 1.76 | 6.05  |
| 1HGI.PDB | O, B_ALA_43    | NE2, B_GLN_47  | HE22, B_GLN_47  | 2.94 | 2.02 | 16.15 |
| 1HGI.PDB | O, B_ILE_45    | N, B_ASN_49    | H, B_ASN_49     | 2.87 | 1.98 | 20.49 |
| 1HGI.PDB | O, B_ASP_46    | N, B_GLY_50    | H, B_GLY_50     | 2.94 | 2.01 | 16.14 |
| 1HGI.PDB | O, B_GLN_47    | N, B_LYS_51    | H, B_LYS_51     | 3.00 | 2.02 | 5.35  |
| 1HGI.PDB | OG1, B_THR_107 | NZ, B_LYS_51   | HZ1, B_LYS_51   | 2.96 | 1.97 | 15.88 |
| 1HGI.PDB | OE1, B_GLU_103 | NZ, B_LYS_51   | HZ2, B_LYS_51   | 2.82 | 1.78 | 6.88  |
| 1HGI.PDB | ND1, B_HIS_106 | NZ, B_LYS_51   | HZ3, B_LYS_51   | 2.81 | 1.87 | 19.52 |
| 1HGI.PDB | O, B_ILE_48    | N, B_LEU_52    | H, B_LEU_52     | 2.94 | 2.01 | 15.10 |
| 1HGI.PDB | O, B_ASN_49    | N, B_ASN_53    | H, B_ASN_53     | 2.79 | 1.92 | 22.20 |
| 1HGI.PDB | O, E_THR_28    | NE, B_ARG_54   | HE, B_ARG_54    | 2.88 | 1.92 | 10.21 |
| 1HGI.PDB | OE1, B_GLU_57  | NH1, B_ARG_54  | HH11, B_ARG_54  | 2.86 | 1.87 | 11.02 |
| 1HGI.PDB | OE2, F_GLU_97  | NH2, B_ARG_54  | HH22, B_ARG_54  | 2.81 | 1.84 | 14.63 |
| 1HGI.PDB | OD2, F_ASP_86  | NZ, B_LYS_62   | HZ1, B_LYS_62   | 2.67 | 1.78 | 25.75 |
| 1HGI.PDB | OG, A_SER_110  | NE2, B_HIS_64  | HE2, B_HIS_64   | 2.87 | 1.89 | 8.13  |
| 1HGI.PDB | O, B_PHE_63    | NE2, B_GLN_65  | HE22, B_GLN_65  | 2.93 | 1.95 | 3.70  |
| 1HGI.PDB | O, A_LYS_299   | NZ, B_LYS_68   | HZ1, B_LYS_68   | 2.81 | 1.78 | 9.15  |
| 1HGI.PDB | OE2, B_GLU_85  | NZ, B_LYS_68   | HZ2, B_LYS_68   | 2.79 | 1.75 | 2.13  |
| 1HGI.PDB | OG, C_SER_107  | N, B_ARG_76    | H, B_ARG_76     | 2.85 | 1.90 | 10.66 |
| 1HGI.PDB | OE2, D_GLU_81  | NE, B_ARG_76   | HE, B_ARG_76    | 2.86 | 1.89 | 7.04  |
| 1HGI.PDB | OE2, D_GLU_74  | NH1, B_ARG_76  | HH12, B_ARG_76  | 2.92 | 1.89 | 1.72  |
| 1HGI.PDB | OE1, D_GLU_81  | NH2, B_ARG_76  | HH21, B_ARG_76  | 2.71 | 1.72 | 8.42  |
| 1HGI.PDB | OE1, D_GLU_74  | NH2, B_ARG_76  | HH22, B_ARG_76  | 2.86 | 1.86 | 6.93  |
| 1HGI.PDB | O, B_GLU_72    | NE2, B_GLN_78  | HE21, B_GLN_78  | 2.96 | 1.98 | 5.26  |
| 1HGI.PDB | OE1, B_GLU_74  | NE2, B_GLN_78  | HE22, B_GLN_78  | 2.94 | 1.97 | 8.23  |
| 1HGI.PDB | O, B_ASP_79    | N, B_TYR_83    | H, B_TYR_83     | 2.91 | 2.00 | 18.32 |
| 1HGI.PDB | OE1, D_GLU_85  | OH, B_TYR_83   | HH, B_TYR_83    | 2.78 | 1.84 | 13.46 |
| 1HGI.PDB | O, B_LEU_80    | N, B_VAL_84    | H, B_VAL_84     | 2.75 | 1.83 | 14.22 |
| 1HGI.PDB | O, B_LYS_82    | N, B_ASP_86    | H, B_ASP_86     | 2.90 | 1.94 | 10.51 |
| 1HGI.PDB | O, B_TYR_83    | N, B_THR_87    | H, B_THR_87     | 2.96 | 2.01 | 11.07 |
| 1HGI.PDB | OH, F_TYR_83   | NZ, B_LYS_88   | HZ1, B_LYS_88   | 2.65 | 1.64 | 9.94  |
| 1HGI.PDB | O, B_GLU_85    | N, B_ILE_89    | H, B_ILE_89     | 2.86 | 1.89 | 9.56  |
| 1HGI.PDB | O, B_LYS_88    | N, B_TRP_92    | H, B_TRP_92     | 2.97 | 1.99 | 6.73  |
| 1HGI.PDB | O, B_ILE_89    | N, B_SER_93    | H, B_SER_93     | 2.87 | 1.94 | 14.62 |
| 1HGI.PDB | O, B_ILE_89    | OG, B_SER_93   | HG, B_SER_93    | 2.83 | 1.94 | 18.39 |
| 1HGI.PDB | O, B_ASP_90    | N, B_TYR_94    | H, B_TYR_94     | 2.94 | 2.02 | 16.85 |
| 1HGI.PDB | O, B_TRP_92    | N, B_ALA_96    | H, B_ALA_96     | 2.90 | 1.95 | 10.47 |
| 1HGI.PDB | O, B_TYR_94    | N, B_LEU_98    | H, B_LEU_98     | 2.90 | 1.94 | 9.73  |
| 1HGI.PDB | O, B_ASN_95    | N, B_LEU_99    | H, B_LEU_99     | 2.85 | 1.96 | 19.61 |
| 1HGI.PDB | O, B_ALA_96    | N, B_VAL_100   | H, B_VAL_100    | 2.99 | 2.03 | 8.76  |
| 1HGI.PDB | O, B_LEU_98    | N, B_LEU_102   | H, B_LEU_102    | 2.99 | 2.01 | 3.39  |
| 1HGI.PDB | O, B_LEU_99    | N, B_GLU_103   | H, B_GLU_103    | 2.93 | 1.96 | 7.47  |
| 1HGI.PDB | O, B_VAL_100   | N, B_ASN_104   | H, B_ASN_104    | 2.87 | 1.90 | 6.79  |
| 1HGI.PDB | O, A_LYS_27    | ND2, B_ASN_104 | HD22, B_ASN_104 | 2.86 | 1.90 | 10.00 |
| 1HGI.PDB | O, B_LEU_102   | N, B_HIS_106   | H, B_HIS_106    | 2.92 | 1.98 | 15.03 |
| 1HGI.PDB | O, B_GLU_103   | N, B_THR_107   | H, B_THR_107    | 2.76 | 1.89 | 21.30 |
| 1HGI.PDB | O, B_ASN_104   | N, B_ILE_108   | H, B_ILE_108    | 2.93 | 1.97 | 9.63  |
| 1HGI.PDB | O, B_HIS_106   | N, B_LEU_110   | H, B_LEU_110    | 2.81 | 1.86 | 12.25 |
| 1HGI.PDB | O, B_THR_107   | OG1, B_THR_111 | HG1, B_THR_111  | 2.94 | 1.97 | 3.25  |
| 1HGI.PDB | O, B_ASP_109   | N, B_SER_113   | H, B_SER_113    | 2.80 | 1.86 | 12.43 |
| 1HGI.PDB | O, F_LEU_2     | OG, B_SER_113  | HG, B_SER_113   | 2.77 | 1.90 | 22.05 |
| 1HGI.PDB | O, B_LEU_110   | N, B_GLU_114   | H, B_GLU_114    | 2.95 | 1.99 | 9.30  |
| 1HGI.PDB | O, B_ASP_112   | N, B_ASN_116   | H, B_ASN_116    | 2.96 | 2.02 | 13.43 |
| 1HGI.PDB | O, B_SER_113   | N, B_LYS_117   | H, B_LYS_117    | 2.68 | 1.82 | 23.27 |
| 1HGI.PDB | O, B_ASN_116   | N, B_GLU_120   | H, B_GLU_120    | 2.93 | 1.95 | 4.31  |



|          |                |                |                 |      |      |       |
|----------|----------------|----------------|-----------------|------|------|-------|
| 1HGI.PDB | O, B_LYS_117   | N, B_LYS_121   | H, B_LYS_121    | 2.92 | 2.00 | 16.22 |
| 1HGI.PDB | OE2, B_GLU_120 | NH1, B_ARG_123 | HH11, B_ARG_123 | 2.84 | 1.97 | 25.22 |
| 1HGI.PDB | O, B_GLU_120   | N, B_ARG_124   | H, B_ARG_124    | 2.91 | 1.93 | 5.01  |
| 1HGI.PDB | OE1, F_GLU_132 | NE, B_ARG_124  | HE, B_ARG_124   | 2.81 | 1.96 | 23.50 |
| 1HGI.PDB | OE2, F_GLU_132 | NE, B_ARG_124  | HE, B_ARG_124   | 2.86 | 2.02 | 24.92 |
| 1HGI.PDB | O, B_LEU_126   | N, B_ASN_129   | H, B_ASN_129    | 2.99 | 2.06 | 15.00 |
| 1HGI.PDB | O, B_HIS_159   | ND2, B_ASN_129 | HD21, B_ASN_129 | 3.00 | 2.06 | 13.30 |
| 1HGI.PDB | OH, B_TYR_157  | ND2, B_ASN_129 | HD22, B_ASN_129 | 2.81 | 1.86 | 9.72  |
| 1HGI.PDB | O, B_LYS_139   | N, B_GLU_131   | H, B_GLU_131    | 2.91 | 1.98 | 14.55 |
| 1HGI.PDB | O, B_CYS_137   | N, B_MET_133   | H, B_MET_133    | 2.81 | 1.88 | 13.30 |
| 1HGI.PDB | O, A_LEU_13    | N, B_PHE_138   | H, B_PHE_138    | 2.74 | 1.89 | 23.78 |
| 1HGI.PDB | O, B_GLU_131   | N, B_LYS_139   | H, B_LYS_139    | 2.82 | 1.86 | 8.55  |
| 1HGI.PDB | O, A_ALA_11    | N, B_ILE_140   | H, B_ILE_140    | 2.77 | 1.87 | 18.46 |
| 1HGI.PDB | O, B_ASN_129   | N, B_TYR_141   | H, B_TYR_141    | 2.82 | 1.85 | 4.69  |
| 1HGI.PDB | OE2, B_GLU_165 | N, B_LYS_143   | H, B_LYS_143    | 2.87 | 1.93 | 14.38 |
| 1HGI.PDB | OE1, B_GLU_30  | N, B_ASN_146   | H, B_ASN_146    | 2.95 | 2.07 | 23.02 |
| 1HGI.PDB | O, B_ASP_145   | N, B_ILE_149   | H, B_ILE_149    | 2.90 | 1.94 | 7.96  |
| 1HGI.PDB | O, B_ASN_146   | N, B_GLU_150   | H, B_GLU_150    | 2.83 | 1.92 | 17.44 |
| 1HGI.PDB | O, B_ALA_147   | N, B_SER_151   | H, B_SER_151    | 2.90 | 2.01 | 20.08 |
| 1HGI.PDB | O, B_CYS_148   | OG, B_SER_151  | HG, B_SER_151   | 2.68 | 1.84 | 23.42 |
| 1HGI.PDB | O, B_GLU_150   | N, B_ASN_154   | H, B_ASN_154    | 2.81 | 1.83 | 1.94  |
| 1HGI.PDB | OE2, B_GLU_150 | ND2, B_ASN_154 | HD21, B_ASN_154 | 2.84 | 2.01 | 27.47 |
| 1HGI.PDB | O, B_SER_151   | N, B_THR_156   | H, B_THR_156    | 2.77 | 1.94 | 25.73 |
| 1HGI.PDB | OD1, B_ASN_154 | OG1, B_THR_156 | HG1, B_THR_156  | 2.64 | 1.78 | 21.15 |
| 1HGI.PDB | O, B_HIS_159   | N, B_TYR_162   | H, B_TYR_162    | 2.88 | 2.01 | 22.48 |
| 1HGI.PDB | O, F_ARG_170   | NH1, B_ARG_163 | HH12, B_ARG_163 | 2.73 | 1.76 | 13.86 |
| 1HGI.PDB | O, B_TYR_162   | N, B_ALA_166   | H, B_ALA_166    | 2.86 | 1.88 | 1.82  |
| 1HGI.PDB | O, B_ARG_163   | N, B_LEU_167   | H, B_LEU_167    | 2.77 | 1.81 | 5.67  |
| 1HGI.PDB | O, B_ALA_166   | N, B_ARG_170   | H, B_ARG_170    | 2.78 | 1.90 | 21.33 |
| 1HGI.PDB | O, B_GLU_128   | NE, B_ARG_170  | HE, B_ARG_170   | 2.72 | 1.88 | 25.72 |
| 1HGI.PDB | OE2, B_GLU_131 | NH1, B_ARG_170 | HH11, B_ARG_170 | 2.77 | 1.77 | 6.54  |
| 1HGI.PDB | O, B_LEU_167   | N, B_PHE_171   | H, B_PHE_171    | 2.90 | 1.96 | 12.85 |
| 1HGI.PDB | O, D_ILE_140   | N, C_ALA_11    | H, C_ALA_11     | 2.86 | 1.93 | 15.33 |
| 1HGI.PDB | O, D_GLN_27    | N, C_THR_12    | H, C_THR_12     | 2.98 | 2.01 | 4.69  |
| 1HGI.PDB | O, D_PHE_138   | N, C_LEU_13    | H, C_LEU_13     | 2.99 | 2.03 | 9.93  |
| 1HGI.PDB | O, D_ARG_25    | N, C_CYS_14    | H, C_CYS_14     | 2.67 | 1.83 | 24.75 |
| 1HGI.PDB | O, D_GLY_136   | N, C_LEU_15    | H, C_LEU_15     | 2.95 | 1.98 | 7.51  |
| 1HGI.PDB | O, D_GLY_23    | N, C_GLY_16    | H, C_GLY_16     | 2.99 | 2.12 | 22.96 |
| 1HGI.PDB | O, C_HIS_18    | ND1, C_HIS_17  | HD1, C_HIS_17   | 2.96 | 2.07 | 20.32 |
| 1HGI.PDB | O, D_TRP_21    | N, C_HIS_18    | H, C_HIS_18     | 2.88 | 1.97 | 18.12 |
| 1HGI.PDB | OD1, C_ASN_322 | N, C_VAL_20    | H, C_VAL_20     | 2.78 | 1.82 | 9.40  |
| 1HGI.PDB | O, C_VAL_36    | N, C_THR_24    | H, C_THR_24     | 2.85 | 1.90 | 11.53 |
| 1HGI.PDB | O, C_ILE_34    | N, C_VAL_26    | H, C_VAL_26     | 2.78 | 1.84 | 11.07 |
| 1HGI.PDB | OE2, D_GLU_97  | NZ, C_LYS_27   | HZ1, C_LYS_27   | 2.88 | 1.83 | 6.58  |
| 1HGI.PDB | O, C_ASP_31    | N, C_THR_28    | H, C_THR_28     | 2.76 | 1.94 | 27.36 |
| 1HGI.PDB | O, C_VAL_26    | N, C_ILE_34    | H, C_ILE_34     | 2.92 | 2.01 | 18.98 |
| 1HGI.PDB | O, C_THR_24    | N, C_VAL_36    | H, C_VAL_36     | 2.78 | 1.82 | 7.09  |
| 1HGI.PDB | O, C_MET_320   | N, C_THR_37    | H, C_THR_37     | 2.89 | 1.92 | 7.75  |
| 1HGI.PDB | O, C_LEU_316   | N, C_THR_40    | H, C_THR_40     | 2.92 | 2.04 | 21.59 |
| 1HGI.PDB | O, C_LEU_314   | N, C_LEU_42    | H, C_LEU_42     | 2.81 | 1.95 | 23.61 |
| 1HGI.PDB | OE2, C_GLU_41  | N, C_VAL_43    | H, C_VAL_43     | 2.99 | 2.05 | 14.73 |
| 1HGI.PDB | O, C_PHE_294   | N, C_GLN_44    | H, C_GLN_44     | 2.82 | 1.86 | 6.96  |
| 1HGI.PDB | O, C_SER_46    | NE2, C_GLN_44  | HE22, C_GLN_44  | 2.83 | 2.00 | 26.47 |
| 1HGI.PDB | O, C_ASN_285   | OG, C_SER_47   | HG, C_SER_47    | 2.79 | 1.92 | 20.46 |
| 1HGI.PDB | OD2, C_ASP_275 | NZ, C_LYS_50   | HZ1, C_LYS_50   | 2.68 | 1.77 | 23.91 |
| 1HGI.PDB | O, C_PRO_273   | N, C_ILE_51    | H, C_ILE_51     | 2.79 | 1.84 | 11.72 |
| 1HGI.PDB | O, C_ASP_275   | N, C_ASN_53    | H, C_ASN_53     | 2.84 | 1.98 | 23.59 |
| 1HGI.PDB | O, C_GLU_280   | NE2, C_HIS_56  | HE2, C_HIS_56   | 3.00 | 2.06 | 15.07 |

|          |                |                |                 |      |      |       |
|----------|----------------|----------------|-----------------|------|------|-------|
| 1HGI.PDB | OD2, C_ASP_85  | N, C_ARG_57    | H, C_ARG_57     | 2.85 | 1.91 | 11.94 |
| 1HGI.PDB | O, C_THR_83    | NE, C_ARG_57   | HE, C_ARG_57    | 2.81 | 1.84 | 5.65  |
| 1HGI.PDB | O, C_LEU_86    | N, C_LEU_59    | H, C_LEU_59     | 2.86 | 1.90 | 10.05 |
| 1HGI.PDB | O, C_VAL_88    | N, C_GLY_61    | H, C_GLY_61     | 2.94 | 2.11 | 25.94 |
| 1HGI.PDB | OD1, C_ASP_60  | N, C_ILE_62    | H, C_ILE_62     | 2.85 | 1.91 | 12.59 |
| 1HGI.PDB | O, C_GLY_61    | N, C_CYS_64    | H, C_CYS_64     | 2.89 | 1.99 | 19.13 |
| 1HGI.PDB | O, C_LEU_66    | N, C_LEU_70    | H, C_LEU_70     | 2.83 | 1.94 | 20.67 |
| 1HGI.PDB | O, C_ILE_67    | N, C_LEU_71    | H, C_LEU_71     | 2.84 | 1.87 | 6.00  |
| 1HGI.PDB | O, C_ASP_68    | N, C_GLY_72    | H, C_GLY_72     | 2.79 | 1.85 | 12.61 |
| 1HGI.PDB | OD1, C_ASP_73  | ND1, C_HIS_75  | HD1, C_HIS_75   | 2.88 | 1.94 | 15.46 |
| 1HGI.PDB | O, C_ASP_63    | NE2, C_HIS_75  | HE2, C_HIS_75   | 2.82 | 1.88 | 14.02 |
| 1HGI.PDB | O, C_ASP_73    | N, C_CYS_76    | H, C_CYS_76     | 2.75 | 1.84 | 16.01 |
| 1HGI.PDB | O, C_PRO_74    | N, C_ASP_77    | H, C_ASP_77     | 2.91 | 1.96 | 10.58 |
| 1HGI.PDB | O, C_CYS_76    | N, C_PHE_79    | H, C_PHE_79     | 2.94 | 1.96 | 2.92  |
| 1HGI.PDB | OE1, C_GLU_82  | N, C_THR_83    | H, C_THR_83     | 2.93 | 2.02 | 17.21 |
| 1HGI.PDB | O, C_ARG_57    | N, C_ASP_85    | H, C_ASP_85     | 2.81 | 1.91 | 18.21 |
| 1HGI.PDB | O, C_MET_268   | N, C_GLU_89    | H, C_GLU_89     | 2.80 | 1.84 | 7.26  |
| 1HGI.PDB | OD1, C_ASP_60  | NE, C_ARG_90   | HE, C_ARG_90    | 2.83 | 1.88 | 11.13 |
| 1HGI.PDB | O, C_SER_270   | NH1, C_ARG_90  | HH11, C_ARG_90  | 2.67 | 1.81 | 25.47 |
| 1HGI.PDB | O, C_ALA_272   | NH1, C_ARG_90  | HH12, C_ARG_90  | 2.60 | 1.70 | 21.36 |
| 1HGI.PDB | OD2, C_ASP_60  | NH2, C_ARG_90  | HH21, C_ARG_90  | 2.77 | 1.79 | 11.02 |
| 1HGI.PDB | OD1, C_ASP_271 | N, C_SER_91    | H, C_SER_91     | 2.90 | 1.94 | 8.90  |
| 1HGI.PDB | OD1, C_ASP_271 | OG, C_SER_91   | HG, C_SER_91    | 2.95 | 2.13 | 27.22 |
| 1HGI.PDB | OD2, C_ASP_271 | OG, C_SER_91   | HG, C_SER_91    | 2.83 | 1.94 | 19.64 |
| 1HGI.PDB | OD2, C_ASP_68  | OG, C_SER_95   | HG, C_SER_95    | 2.89 | 1.96 | 14.85 |
| 1HGI.PDB | OD2, C_ASP_73  | N, C_ASN_96    | H, C_ASN_96     | 2.88 | 1.93 | 14.25 |
| 1HGI.PDB | OD1, C_ASP_68  | OH, C_TYR_100  | HH, C_TYR_100   | 2.94 | 1.99 | 10.92 |
| 1HGI.PDB | OD2, C_ASP_104 | OG, C_SER_107  | HG, C_SER_107   | 2.90 | 1.96 | 13.90 |
| 1HGI.PDB | O, C_TYR_105   | N, C_ARG_109   | H, C_ARG_109    | 2.86 | 1.89 | 3.57  |
| 1HGI.PDB | OE2, D_GLU_67  | NH2, C_ARG_109 | HH21, C_ARG_109 | 2.82 | 1.84 | 15.02 |
| 1HGI.PDB | OD2, B_ASP_79  | OG, C_SER_110  | HG, C_SER_110   | 2.85 | 1.90 | 11.29 |
| 1HGI.PDB | O, C_SER_107   | N, C_LEU_111   | H, C_LEU_111    | 2.85 | 1.89 | 7.56  |
| 1HGI.PDB | O, C_LEU_108   | N, C_VAL_112   | H, C_VAL_112    | 3.00 | 2.02 | 3.49  |
| 1HGI.PDB | O, C_ARG_109   | N, C_ALA_113   | H, C_ALA_113    | 2.96 | 2.06 | 18.71 |
| 1HGI.PDB | O, C_SER_110   | N, C_SER_114   | H, C_SER_114    | 2.95 | 2.00 | 13.25 |
| 1HGI.PDB | OE2, C_GLU_119 | OG1, C_THR_117 | HG1, C_THR_117  | 2.95 | 2.03 | 14.67 |
| 1HGI.PDB | O, C_GLU_82    | N, C_LEU_118   | H, C_LEU_118    | 2.88 | 1.95 | 16.18 |
| 1HGI.PDB | O, C_TYR_257   | N, C_ILE_121   | H, C_ILE_121    | 2.94 | 1.97 | 6.04  |
| 1HGI.PDB | O, C_ARG_255   | N, C_GLU_123   | H, C_GLU_123    | 2.89 | 1.94 | 11.68 |
| 1HGI.PDB | O, C_THR_155   | N, C_THR_131   | H, C_THR_131    | 2.76 | 1.87 | 19.24 |
| 1HGI.PDB | OD1, C_ASN_152 | N, C_ASN_133   | H, C_ASN_133    | 2.83 | 1.91 | 16.95 |
| 1HGI.PDB | O, C_GLY_146   | N, C_SER_136   | H, C_SER_136    | 2.76 | 1.88 | 20.67 |
| 1HGI.PDB | OG, C_SER_136  | N, C_ALA_138   | H, C_ALA_138    | 2.86 | 1.95 | 18.03 |
| 1HGI.PDB | O, C_GLY_144   | NZ, C_LYS_140  | HZ1, C_LYS_140  | 2.86 | 1.89 | 16.83 |
| 1HGI.PDB | OD1, C_ASN_137 | NZ, C_LYS_140  | HZ2, C_LYS_140  | 2.83 | 1.83 | 12.62 |
| 1HGI.PDB | OD2, C_ASP_77  | NE, C_ARG_141  | HE, C_ARG_141   | 2.83 | 2.02 | 29.40 |
| 1HGI.PDB | O, C_PHE_147   | NH1, C_ARG_141 | HH12, C_ARG_141 | 2.56 | 1.65 | 20.19 |
| 1HGI.PDB | OD1, C_ASP_77  | NH2, C_ARG_141 | HH21, C_ARG_141 | 2.93 | 2.01 | 20.50 |
| 1HGI.PDB | OD2, C_ASP_77  | NH2, C_ARG_141 | HH21, C_ARG_141 | 2.70 | 1.83 | 25.10 |
| 1HGI.PDB | O, C_GLY_72    | NH2, C_ARG_141 | HH22, C_ARG_141 | 2.97 | 1.99 | 9.60  |
| 1HGI.PDB | O, C_SER_136   | N, C_GLY_146   | H, C_GLY_146    | 2.99 | 2.05 | 14.57 |
| 1HGI.PDB | O, C_GLY_72    | N, C_SER_149   | H, C_SER_149    | 2.90 | 1.97 | 15.40 |
| 1HGI.PDB | O, C_ALA_253   | N, C_ASN_152   | H, C_ASN_152    | 2.73 | 1.88 | 24.43 |
| 1HGI.PDB | OH, C_TYR_195  | NE1, C_TRP_153 | HE1, C_TRP_153  | 2.82 | 1.96 | 22.98 |
| 1HGI.PDB | O, C_LEU_194   | N, C_LYS_156   | H, C_LYS_156    | 2.88 | 1.99 | 20.12 |
| 1HGI.PDB | O, C_THR_160   | N, C_SER_157   | H, C_SER_157    | 2.87 | 1.98 | 19.55 |
| 1HGI.PDB | O, C_SER_247   | N, C_LEU_164   | H, C_LEU_164    | 2.73 | 1.90 | 26.15 |
| 1HGI.PDB | O, C_ILE_245   | N, C_VAL_166   | H, C_VAL_166    | 2.88 | 1.93 | 12.15 |

|          |                |                |                 |      |      |       |
|----------|----------------|----------------|-----------------|------|------|-------|
| 1HGI.PDB | O, C_LEU_243   | OG1, C_THR_167 | HG1, C_THR_167  | 2.85 | 1.95 | 18.23 |
| 1HGI.PDB | O, C_LEU_243   | N, C_MET_168   | H, C_MET_168    | 2.97 | 2.05 | 16.15 |
| 1HGI.PDB | O, C_ASP_241   | N, C_ASN_170   | H, C_ASN_170    | 2.92 | 1.94 | 4.90  |
| 1HGI.PDB | O, C_PHE_174   | ND2, C_ASN_170 | HD21, C_ASN_170 | 2.83 | 1.88 | 12.32 |
| 1HGI.PDB | O, C_VAL_237   | ND2, C_ASN_170 | HD22, C_ASN_170 | 2.96 | 2.10 | 24.31 |
| 1HGI.PDB | O, C_VAL_237   | N, C_LYS_176   | H, C_LYS_176    | 2.94 | 2.00 | 13.35 |
| 1HGI.PDB | OE2, C_GLU_123 | NZ, C_LYS_176  | HZ1, C_LYS_176  | 2.68 | 1.80 | 26.11 |
| 1HGI.PDB | O, C_PHE_258   | N, C_LEU_177   | H, C_LEU_177    | 2.96 | 1.99 | 8.81  |
| 1HGI.PDB | O, C_THR_235   | N, C_TYR_178   | H, C_TYR_178    | 2.82 | 1.85 | 3.86  |
| 1HGI.PDB | OE1, C_GLU_123 | OH, C_TYR_178  | HH, C_TYR_178   | 2.75 | 1.80 | 7.25  |
| 1HGI.PDB | OG1, C_THR_235 | NE1, C_TRP_180 | HE1, C_TRP_180  | 2.84 | 1.86 | 3.22  |
| 1HGI.PDB | O, C_ILE_252   | N, C_GLY_181   | H, C_GLY_181    | 2.98 | 2.16 | 27.47 |
| 1HGI.PDB | O, C_ASN_250   | N, C_HIS_183   | H, C_HIS_183    | 2.91 | 2.02 | 20.05 |
| 1HGI.PDB | O, C_ARG_229   | N, C_HIS_184   | H, C_HIS_184    | 2.89 | 1.92 | 8.40  |
| 1HGI.PDB | OG, C_SER_231  | NE2, C_HIS_184 | HE2, C_HIS_184  | 2.81 | 1.93 | 22.34 |
| 1HGI.PDB | OE1, C_GLU_190 | N, C_SER_186   | H, C_SER_186    | 3.00 | 2.10 | 20.23 |
| 1HGI.PDB | OD1, C_ASN_250 | NE2, C_GLN_191 | HE21, C_GLN_191 | 2.86 | 1.91 | 10.94 |
| 1HGI.PDB | O, C_GLN_197   | NE2, C_GLN_191 | HE22, C_GLN_191 | 2.97 | 2.02 | 11.67 |
| 1HGI.PDB | O, C_ASN_188   | N, C_THR_192   | H, C_THR_192    | 2.98 | 2.00 | 5.60  |
| 1HGI.PDB | O, C_GLN_189   | OG1, C_THR_192 | HG1, C_THR_192  | 2.81 | 1.90 | 15.34 |
| 1HGI.PDB | O, C_GLN_189   | N, C_SER_193   | H, C_SER_193    | 2.84 | 1.90 | 13.29 |
| 1HGI.PDB | O, C_GLN_191   | N, C_TYR_195   | H, C_TYR_195    | 2.76 | 1.80 | 7.13  |
| 1HGI.PDB | O, C_TYR_161   | NE2, C_GLN_197 | HE21, C_GLN_197 | 2.96 | 2.01 | 11.19 |
| 1HGI.PDB | O, C_ASN_248   | NE2, C_GLN_197 | HE22, C_GLN_197 | 2.92 | 2.02 | 18.87 |
| 1HGI.PDB | OD1, C_ASN_246 | NH2, C_ARG_201 | HH21, C_ARG_201 | 2.55 | 1.72 | 27.61 |
| 1HGI.PDB | O, C_ILE_213   | N, C_VAL_202   | H, C_VAL_202    | 2.94 | 1.98 | 9.08  |
| 1HGI.PDB | O, C_ASN_246   | N, C_THR_203   | H, C_THR_203    | 2.86 | 1.89 | 7.88  |
| 1HGI.PDB | OG1, C_THR_212 | OG1, C_THR_203 | HG1, C_THR_203  | 2.94 | 2.00 | 11.06 |
| 1HGI.PDB | O, C_GLN_211   | N, C_VAL_204   | H, C_VAL_204    | 2.84 | 1.92 | 15.35 |
| 1HGI.PDB | O, C_VAL_244   | N, C_SER_205   | H, C_SER_205    | 2.96 | 2.05 | 17.13 |
| 1HGI.PDB | O, C_SER_209   | N, C_THR_206   | H, C_THR_206    | 2.90 | 1.93 | 7.31  |
| 1HGI.PDB | OD1, C_ASP_241 | N, C_ARG_207   | H, C_ARG_207    | 2.90 | 1.95 | 10.96 |
| 1HGI.PDB | OD2, C_ASP_241 | NE, C_ARG_208  | HE, C_ARG_208   | 2.92 | 2.01 | 19.66 |
| 1HGI.PDB | O, C_VAL_204   | N, C_GLN_211   | H, C_GLN_211    | 2.87 | 1.93 | 14.30 |
| 1HGI.PDB | O, C_VAL_202   | N, C_ILE_213   | H, C_ILE_213    | 2.82 | 1.89 | 14.72 |
| 1HGI.PDB | O, C_ASN_216   | NH1, C_ARG_220 | HH12, C_ARG_220 | 2.89 | 2.08 | 29.98 |
| 1HGI.PDB | OE1, E_GLN_210 | NH2, C_ARG_220 | HH21, C_ARG_220 | 2.62 | 1.75 | 23.70 |
| 1HGI.PDB | O, C_ASN_216   | NH2, C_ARG_220 | HH22, C_ARG_220 | 2.69 | 1.79 | 20.70 |
| 1HGI.PDB | O, C_LEU_226   | N, C_VAL_223   | H, C_VAL_223    | 2.85 | 1.88 | 6.86  |
| 1HGI.PDB | O, C_CYS_97    | NE, C_ARG_224  | HE, C_ARG_224   | 2.75 | 1.92 | 26.67 |
| 1HGI.PDB | O, C_CYS_97    | NH2, C_ARG_224 | HH21, C_ARG_224 | 2.83 | 1.98 | 26.45 |
| 1HGI.PDB | O, C_VAL_223   | N, C_LEU_226   | H, C_LEU_226    | 2.94 | 2.02 | 16.27 |
| 1HGI.PDB | O, C_SER_228   | NH1, C_ARG_229 | HH11, C_ARG_229 | 2.65 | 1.73 | 19.05 |
| 1HGI.PDB | O, C_PRO_221   | NH2, C_ARG_229 | HH22, C_ARG_229 | 2.65 | 1.69 | 14.06 |
| 1HGI.PDB | OD1, C_ASP_101 | OG, C_SER_231  | HG, C_SER_231   | 2.97 | 2.02 | 12.14 |
| 1HGI.PDB | O, C_ASP_101   | N, C_ILE_232   | H, C_ILE_232    | 2.92 | 1.98 | 14.17 |
| 1HGI.PDB | O, C_TRP_180   | N, C_TYR_233   | H, C_TYR_233    | 2.88 | 1.92 | 9.12  |
| 1HGI.PDB | O, C_TYR_178   | N, C_THR_235   | H, C_THR_235    | 2.81 | 1.91 | 19.71 |
| 1HGI.PDB | O, C_LYS_176   | N, C_VAL_237   | H, C_VAL_237    | 2.80 | 1.87 | 14.88 |
| 1HGI.PDB | OE1, B_GLU_72  | NZ, C_LYS_238  | HZ1, C_LYS_238  | 2.67 | 1.77 | 23.68 |
| 1HGI.PDB | O, B_SER_71    | NZ, C_LYS_238  | HZ3, C_LYS_238  | 2.57 | 1.73 | 28.43 |
| 1HGI.PDB | O, C_ASN_170   | N, C_GLY_240   | H, C_GLY_240    | 2.88 | 2.03 | 25.25 |
| 1HGI.PDB | OD1, C_ASP_241 | N, C_VAL_242   | H, C_VAL_242    | 2.77 | 1.97 | 28.83 |
| 1HGI.PDB | O, C_MET_168   | N, C_LEU_243   | H, C_LEU_243    | 2.92 | 1.95 | 6.19  |
| 1HGI.PDB | O, C_SER_205   | N, C_VAL_244   | H, C_VAL_244    | 2.97 | 2.02 | 12.13 |
| 1HGI.PDB | O, C_VAL_166   | N, C_ILE_245   | H, C_ILE_245    | 2.97 | 2.04 | 14.87 |
| 1HGI.PDB | O, C_THR_203   | N, C_ASN_246   | H, C_ASN_246    | 2.85 | 1.92 | 14.46 |
| 1HGI.PDB | O, C_LEU_164   | N, C_SER_247   | H, C_SER_247    | 2.86 | 1.95 | 18.44 |

|          |                |                |                 |      |      |       |
|----------|----------------|----------------|-----------------|------|------|-------|
| 1HGI.PDB | O, C_ARG_201   | OG, C_SER_247  | HG, C_SER_247   | 2.81 | 2.01 | 28.50 |
| 1HGI.PDB | OE1, C_GLN_191 | ND2, C_ASN_250 | HD21, C_ASN_250 | 2.87 | 1.92 | 11.00 |
| 1HGI.PDB | O, C_HIS_183   | ND2, C_ASN_250 | HD22, C_ASN_250 | 2.85 | 1.88 | 5.75  |
| 1HGI.PDB | O, C_ASN_152   | N, C_ALA_253   | H, C_ALA_253    | 2.82 | 1.96 | 22.89 |
| 1HGI.PDB | O, C_ILE_121   | N, C_TYR_257   | H, C_TYR_257    | 2.97 | 2.10 | 23.39 |
| 1HGI.PDB | O, C_LEU_177   | N, C_PHE_258   | H, C_PHE_258    | 2.92 | 1.96 | 9.71  |
| 1HGI.PDB | OE2, C_GLU_119 | NH1, C_ARG_261 | HH12, C_ARG_261 | 2.66 | 1.84 | 29.01 |
| 1HGI.PDB | OE1, C_GLU_119 | NH2, C_ARG_261 | HH22, C_ARG_261 | 2.84 | 1.99 | 27.78 |
| 1HGI.PDB | OD2, C_ASP_85  | NZ, C_LYS_264  | HZ3, C_LYS_264  | 2.83 | 1.86 | 17.28 |
| 1HGI.PDB | O, C_PHE_87    | N, C_MET_268   | H, C_MET_268    | 2.86 | 1.97 | 20.48 |
| 1HGI.PDB | O, C_PRO_284   | OG, C_SER_270  | HG, C_SER_270   | 2.81 | 1.86 | 9.17  |
| 1HGI.PDB | OG, C_SER_270  | N, C_ALA_272   | H, C_ALA_272    | 2.97 | 2.03 | 11.96 |
| 1HGI.PDB | O, C_ILE_51    | N, C_ASP_275   | H, C_ASP_275    | 2.97 | 2.06 | 19.21 |
| 1HGI.PDB | OD1, C_ASP_275 | N, C_THR_276   | H, C_THR_276    | 2.80 | 1.96 | 24.61 |
| 1HGI.PDB | O, C_ASN_54    | N, C_SER_279   | H, C_SER_279    | 2.76 | 1.83 | 13.77 |
| 1HGI.PDB | O, C_TYR_302   | N, C_ILE_282   | H, C_ILE_282    | 2.89 | 1.93 | 9.00  |
| 1HGI.PDB | O, C_THR_283   | N, C_GLY_286   | H, C_GLY_286    | 2.81 | 1.89 | 16.23 |
| 1HGI.PDB | O, C_LYS_50    | N, C_SER_287   | H, C_SER_287    | 2.84 | 1.87 | 3.21  |
| 1HGI.PDB | O, C_ALA_304   | ND2, C_ASN_290 | HD22, C_ASN_290 | 2.76 | 1.88 | 20.58 |
| 1HGI.PDB | OE1, C_GLN_44  | NZ, C_LYS_292  | HZ1, C_LYS_292  | 2.75 | 1.75 | 12.02 |
| 1HGI.PDB | OD2, C_ASP_291 | NZ, C_LYS_292  | HZ3, C_LYS_292  | 2.82 | 1.90 | 23.36 |
| 1HGI.PDB | O, C_LYS_307   | N, C_GLN_295   | H, C_GLN_295    | 2.80 | 1.92 | 20.79 |
| 1HGI.PDB | O, C_ASN_298   | NE2, C_GLN_295 | HE21, C_GLN_295 | 2.79 | 1.83 | 9.85  |
| 1HGI.PDB | O, C_GLN_44    | N, C_ASN_296   | H, C_ASN_296    | 2.86 | 1.93 | 14.90 |
| 1HGI.PDB | OE1, C_GLN_295 | N, C_VAL_297   | H, C_VAL_297    | 2.80 | 1.98 | 27.59 |
| 1HGI.PDB | OD1, C_ASN_285 | ND2, C_ASN_298 | HD22, C_ASN_298 | 3.00 | 2.03 | 7.73  |
| 1HGI.PDB | OD1, C_ASN_298 | N, C_ILE_300   | H, C_ILE_300    | 2.91 | 2.01 | 18.61 |
| 1HGI.PDB | O, C_ILE_282   | N, C_TYR_302   | H, C_TYR_302    | 2.94 | 2.06 | 21.76 |
| 1HGI.PDB | O, C_LYS_264   | OH, C_TYR_302  | HH, C_TYR_302   | 2.75 | 1.95 | 27.81 |
| 1HGI.PDB | O, D_LYS_62    | N, C_GLY_303   | H, C_GLY_303    | 2.97 | 2.00 | 7.92  |
| 1HGI.PDB | O, C_PRO_293   | N, C_LYS_307   | H, C_LYS_307    | 2.99 | 2.03 | 8.70  |
| 1HGI.PDB | O, C_GLN_295   | N, C_VAL_309   | H, C_VAL_309    | 2.93 | 2.08 | 24.45 |
| 1HGI.PDB | OD1, D_ASP_86  | NZ, C_LYS_310  | HZ3, C_LYS_310  | 2.77 | 1.93 | 29.51 |
| 1HGI.PDB | OE2, C_GLU_41  | N, C_LEU_314   | H, C_LEU_314    | 2.83 | 1.87 | 8.52  |
| 1HGI.PDB | OE1, C_GLU_41  | NZ, C_LYS_315  | HZ3, C_LYS_315  | 2.75 | 1.80 | 20.43 |
| 1HGI.PDB | O, C_THR_40    | N, C_LEU_316   | H, C_LEU_316    | 2.83 | 1.90 | 15.29 |
| 1HGI.PDB | OD1, D_ASN_104 | N, C_ALA_317   | H, C_ALA_317    | 2.74 | 1.83 | 16.29 |
| 1HGI.PDB | O, C_ASN_38    | N, C_THR_318   | H, C_THR_318    | 2.87 | 1.98 | 20.30 |
| 1HGI.PDB | O, C_VAL_20    | ND2, C_ASN_322 | HD21, C_ASN_322 | 2.87 | 1.94 | 14.86 |
| 1HGI.PDB | OE2, C_GLU_35  | ND2, C_ASN_322 | HD22, C_ASN_322 | 2.90 | 1.95 | 11.70 |
| 1HGI.PDB | OE1, D_GLU_15  | NZ, C_LYS_326  | HZ1, C_LYS_326  | 2.83 | 1.84 | 16.25 |
| 1HGI.PDB | OD2, D_ASP_112 | N, D_GLY_1     | H1, D_GLY_1     | 2.77 | 1.76 | 11.64 |
| 1HGI.PDB | OD1, D_ASP_109 | N, D_LEU_2     | H, D_LEU_2      | 2.92 | 1.97 | 13.20 |
| 1HGI.PDB | OD2, D_ASP_112 | N, D_PHE_3     | H, D_PHE_3      | 2.88 | 2.06 | 26.84 |
| 1HGI.PDB | OD2, D_ASP_112 | N, D_GLY_4     | H, D_GLY_4      | 2.95 | 2.06 | 19.72 |
| 1HGI.PDB | OD1, D_ASP_112 | N, D_ALA_5     | H, D_ALA_5      | 2.82 | 1.91 | 16.74 |
| 1HGI.PDB | O, D_GLY_4     | N, D_PHE_9     | H, D_PHE_9      | 2.83 | 1.89 | 12.42 |
| 1HGI.PDB | O, D_GLY_13    | ND2, D_ASN_12  | HD22, D_ASN_12  | 2.80 | 1.89 | 16.05 |
| 1HGI.PDB | O, C_VAL_323   | N, D_GLY_13    | H, D_GLY_13     | 2.65 | 1.77 | 19.23 |
| 1HGI.PDB | O, C_HIS_17    | N, D_TRP_14    | H, D_TRP_14     | 2.83 | 1.92 | 16.86 |
| 1HGI.PDB | OG1, D_THR_41  | N, D_TRP_21    | H, D_TRP_21     | 2.98 | 2.14 | 26.03 |
| 1HGI.PDB | O, C_GLY_16    | N, D_GLY_23    | H, D_GLY_23     | 2.94 | 2.02 | 16.89 |
| 1HGI.PDB | O, D_ALA_35    | N, D_PHE_24    | H, D_PHE_24     | 2.82 | 1.86 | 6.63  |
| 1HGI.PDB | O, C_CYS_14    | N, D_ARG_25    | H, D_ARG_25     | 2.88 | 1.94 | 13.44 |
| 1HGI.PDB | OE1, D_GLN_34  | NE, D_ARG_25   | HE, D_ARG_25    | 2.62 | 1.78 | 23.70 |
| 1HGI.PDB | O, D_GLY_33    | N, D_HIS_26    | H, D_HIS_26     | 2.88 | 1.93 | 11.28 |
| 1HGI.PDB | O, C_THR_12    | N, D_GLN_27    | H, D_GLN_27     | 2.95 | 2.00 | 13.47 |
| 1HGI.PDB | O, D_GLY_31    | N, D_ASN_28    | H, D_ASN_28     | 2.97 | 2.06 | 18.59 |

|          |                |                |                 |      |      |       |
|----------|----------------|----------------|-----------------|------|------|-------|
| 1HGI.PDB | OD1, D_ASN_146 | ND2, D_ASN_28  | HD21, D_ASN_28  | 2.93 | 1.98 | 12.39 |
| 1HGI.PDB | OD1, D_ASN_28  | N, D_GLU_30    | H, D_GLU_30     | 2.83 | 1.95 | 21.69 |
| 1HGI.PDB | O, D_HIS_26    | N, D_GLY_33    | H, D_GLY_33     | 2.99 | 2.10 | 20.01 |
| 1HGI.PDB | O, D_PHE_24    | N, D_ALA_35    | H, D_ALA_35     | 2.80 | 1.98 | 27.73 |
| 1HGI.PDB | O, D_TYR_22    | N, D_ASP_37    | H, D_ASP_37     | 2.72 | 1.78 | 11.42 |
| 1HGI.PDB | OD2, D_ASP_37  | N, D_SER_40    | H, D_SER_40     | 2.89 | 1.92 | 6.59  |
| 1HGI.PDB | OD2, D_ASP_37  | OG, D_SER_40   | HG, D_SER_40    | 2.78 | 1.93 | 23.19 |
| 1HGI.PDB | O, D_ASP_37    | OG1, D_THR_41  | HG1, D_THR_41   | 2.73 | 1.82 | 16.18 |
| 1HGI.PDB | OD1, D_ASP_46  | NE2, D_GLN_42  | HE22, D_GLN_42  | 2.88 | 2.01 | 23.38 |
| 1HGI.PDB | O, D_SER_40    | N, D_ALA_44    | H, D_ALA_44     | 2.93 | 1.95 | 3.19  |
| 1HGI.PDB | O, D_THR_41    | N, D_ILE_45    | H, D_ILE_45     | 2.97 | 2.03 | 13.52 |
| 1HGI.PDB | O, D_GLN_42    | N, D_ASP_46    | H, D_ASP_46     | 2.71 | 1.76 | 6.20  |
| 1HGI.PDB | O, D_ALA_43    | NE2, D_GLN_47  | HE22, D_GLN_47  | 2.88 | 1.96 | 16.19 |
| 1HGI.PDB | O, D_ILE_45    | N, D_ASN_49    | H, D_ASN_49     | 2.89 | 1.98 | 17.77 |
| 1HGI.PDB | O, D_ASP_46    | N, D_GLY_50    | H, D_GLY_50     | 2.98 | 2.04 | 15.66 |
| 1HGI.PDB | O, D_GLN_47    | N, D_LYS_51    | H, D_LYS_51     | 2.98 | 2.01 | 5.63  |
| 1HGI.PDB | OE1, D_GLU_103 | NZ, D_LYS_51   | HZ2, D_LYS_51   | 2.81 | 1.77 | 5.89  |
| 1HGI.PDB | ND1, D_HIS_106 | NZ, D_LYS_51   | HZ3, D_LYS_51   | 2.78 | 1.83 | 18.78 |
| 1HGI.PDB | O, D_ILE_48    | N, D_LEU_52    | H, D_LEU_52     | 2.93 | 2.01 | 16.44 |
| 1HGI.PDB | O, D_ASN_49    | N, D_ASN_53    | H, D_ASN_53     | 2.77 | 1.91 | 22.51 |
| 1HGI.PDB | O, A_THR_28    | NE, D_ARG_54   | HE, D_ARG_54    | 2.83 | 1.87 | 10.21 |
| 1HGI.PDB | OE1, D_GLU_57  | NH1, D_ARG_54  | HH11, D_ARG_54  | 2.85 | 1.86 | 11.80 |
| 1HGI.PDB | OE2, B_GLU_97  | NH2, D_ARG_54  | HH22, D_ARG_54  | 2.81 | 1.85 | 15.40 |
| 1HGI.PDB | OE2, D_GLU_61  | NZ, D_LYS_58   | HZ2, D_LYS_58   | 3.00 | 2.01 | 17.14 |
| 1HGI.PDB | OG, C_SER_110  | NE2, D_HIS_64  | HE2, D_HIS_64   | 2.83 | 1.85 | 2.78  |
| 1HGI.PDB | O, D_PHE_63    | NE2, D_GLN_65  | HE22, D_GLN_65  | 2.98 | 2.00 | 3.57  |
| 1HGI.PDB | O, C_LYS_299   | NZ, D_LYS_68   | HZ1, D_LYS_68   | 2.79 | 1.78 | 10.55 |
| 1HGI.PDB | OE2, D_GLU_85  | NZ, D_LYS_68   | HZ2, D_LYS_68   | 2.81 | 1.76 | 2.16  |
| 1HGI.PDB | OG, E_SER_107  | N, D_ARG_76    | H, D_ARG_76     | 2.89 | 1.92 | 9.17  |
| 1HGI.PDB | OE2, F_GLU_81  | NE, D_ARG_76   | HE, D_ARG_76    | 2.80 | 1.82 | 5.40  |
| 1HGI.PDB | OE2, F_GLU_74  | NH1, D_ARG_76  | HH12, D_ARG_76  | 2.78 | 1.76 | 4.18  |
| 1HGI.PDB | OE1, F_GLU_81  | NH2, D_ARG_76  | HH21, D_ARG_76  | 2.61 | 1.67 | 15.38 |
| 1HGI.PDB | OE1, F_GLU_74  | NH2, D_ARG_76  | HH22, D_ARG_76  | 2.76 | 1.77 | 8.75  |
| 1HGI.PDB | O, D_GLU_72    | NE2, D_GLN_78  | HE21, D_GLN_78  | 2.97 | 2.00 | 4.85  |
| 1HGI.PDB | OE1, D_GLU_74  | NE2, D_GLN_78  | HE22, D_GLN_78  | 2.92 | 1.95 | 8.47  |
| 1HGI.PDB | O, D_ASP_79    | N, D_TYR_83    | H, D_TYR_83     | 2.89 | 2.00 | 19.78 |
| 1HGI.PDB | OE1, F_GLU_85  | OH, D_TYR_83   | HH, D_TYR_83    | 2.69 | 1.81 | 20.41 |
| 1HGI.PDB | O, D_LEU_80    | N, D_VAL_84    | H, D_VAL_84     | 2.72 | 1.83 | 17.89 |
| 1HGI.PDB | O, D_LYS_82    | N, D_ASP_86    | H, D_ASP_86     | 2.90 | 1.94 | 8.30  |
| 1HGI.PDB | O, D_TYR_83    | N, D_THR_87    | H, D_THR_87     | 2.92 | 1.96 | 7.87  |
| 1HGI.PDB | OH, B_TYR_83   | NZ, D_LYS_88   | HZ1, D_LYS_88   | 2.66 | 1.64 | 7.30  |
| 1HGI.PDB | O, D_GLU_85    | N, D_ILE_89    | H, D_ILE_89     | 2.88 | 1.92 | 10.07 |
| 1HGI.PDB | O, D_ASP_86    | N, D_ASP_90    | H, D_ASP_90     | 2.97 | 2.00 | 6.24  |
| 1HGI.PDB | O, D_LYS_88    | N, D_TRP_92    | H, D_TRP_92     | 2.97 | 2.00 | 6.54  |
| 1HGI.PDB | O, D_ILE_89    | N, D_SER_93    | H, D_SER_93     | 2.87 | 1.94 | 14.13 |
| 1HGI.PDB | O, D_ILE_89    | OG, D_SER_93   | HG, D_SER_93    | 2.80 | 1.92 | 19.66 |
| 1HGI.PDB | O, D_ASP_90    | N, D_TYR_94    | H, D_TYR_94     | 2.93 | 2.00 | 16.49 |
| 1HGI.PDB | O, D_TRP_92    | N, D_ALA_96    | H, D_ALA_96     | 2.93 | 1.97 | 9.70  |
| 1HGI.PDB | O, D_TYR_94    | N, D_LEU_98    | H, D_LEU_98     | 2.90 | 1.94 | 9.34  |
| 1HGI.PDB | O, D_ASN_95    | N, D_LEU_99    | H, D_LEU_99     | 2.84 | 1.96 | 21.05 |
| 1HGI.PDB | O, D_LEU_98    | N, D_LEU_102   | H, D_LEU_102    | 2.99 | 2.02 | 4.46  |
| 1HGI.PDB | O, D_LEU_99    | N, D_GLU_103   | H, D_GLU_103    | 2.97 | 2.00 | 7.39  |
| 1HGI.PDB | O, D_VAL_100   | N, D_ASN_104   | H, D_ASN_104    | 2.87 | 1.91 | 10.16 |
| 1HGI.PDB | O, C_LYS_27    | ND2, D_ASN_104 | HD22, D_ASN_104 | 2.83 | 1.88 | 11.60 |
| 1HGI.PDB | O, D_LEU_102   | N, D_HIS_106   | H, D_HIS_106    | 2.93 | 2.00 | 15.62 |
| 1HGI.PDB | O, D_GLU_103   | N, D_THR_107   | H, D_THR_107    | 2.78 | 1.91 | 22.01 |
| 1HGI.PDB | O, D_ASN_104   | N, D_ILE_108   | H, D_ILE_108    | 2.95 | 2.00 | 10.44 |
| 1HGI.PDB | O, D_HIS_106   | N, D_LEU_110   | H, D_LEU_110    | 2.81 | 1.86 | 10.24 |

|          |                |                |                 |      |      |       |
|----------|----------------|----------------|-----------------|------|------|-------|
| 1HGI.PDB | O, D_THR_107   | OG1, D_THR_111 | HG1, D_THR_111  | 2.94 | 1.97 | 4.08  |
| 1HGI.PDB | O, D_ASP_109   | N, D_SER_113   | H, D_SER_113    | 2.82 | 1.87 | 9.43  |
| 1HGI.PDB | O, B_LEU_2     | OG, D_SER_113  | HG, D_SER_113   | 2.77 | 1.91 | 22.96 |
| 1HGI.PDB | O, D_LEU_110   | N, D_GLU_114   | H, D_GLU_114    | 2.96 | 2.00 | 9.06  |
| 1HGI.PDB | O, D_ASP_112   | N, D_ASN_116   | H, D_ASN_116    | 2.95 | 2.00 | 13.00 |
| 1HGI.PDB | O, D_SER_113   | N, D_LYS_117   | H, D_LYS_117    | 2.70 | 1.83 | 21.74 |
| 1HGI.PDB | O, D_ASN_116   | N, D_GLU_120   | H, D_GLU_120    | 2.92 | 1.95 | 4.03  |
| 1HGI.PDB | O, D_LYS_117   | N, D_LYS_121   | H, D_LYS_121    | 2.93 | 2.00 | 15.48 |
| 1HGI.PDB | OE2, D_GLU_120 | NH1, D_ARG_123 | HH11, D_ARG_123 | 2.83 | 1.97 | 25.69 |
| 1HGI.PDB | O, D_GLU_120   | N, D_ARG_124   | H, D_ARG_124    | 2.93 | 1.95 | 3.12  |
| 1HGI.PDB | OE1, B_GLU_132 | NE, D_ARG_124  | HE, D_ARG_124   | 2.84 | 1.98 | 23.95 |
| 1HGI.PDB | OE2, B_GLU_132 | NE, D_ARG_124  | HE, D_ARG_124   | 2.88 | 2.03 | 24.96 |
| 1HGI.PDB | O, D_LEU_126   | N, D_ASN_129   | H, D_ASN_129    | 3.00 | 2.06 | 14.34 |
| 1HGI.PDB | O, D_HIS_159   | ND2, D_ASN_129 | HD21, D_ASN_129 | 2.99 | 2.04 | 12.91 |
| 1HGI.PDB | OH, D_TYR_157  | ND2, D_ASN_129 | HD22, D_ASN_129 | 2.81 | 1.84 | 5.40  |
| 1HGI.PDB | O, D_LYS_139   | N, D_GLU_131   | H, D_GLU_131    | 2.93 | 2.00 | 14.77 |
| 1HGI.PDB | O, D_CYS_137   | N, D_MET_133   | H, D_MET_133    | 2.81 | 1.87 | 12.15 |
| 1HGI.PDB | OD1, D_ASN_135 | N, D_CYS_137   | H, D_CYS_137    | 2.87 | 1.99 | 20.31 |
| 1HGI.PDB | O, C_LEU_13    | N, D_PHE_138   | H, D_PHE_138    | 2.79 | 1.92 | 22.46 |
| 1HGI.PDB | O, D_GLU_131   | N, D_LYS_139   | H, D_LYS_139    | 2.79 | 1.84 | 9.37  |
| 1HGI.PDB | O, C_ALA_11    | N, D_ILE_140   | H, D_ILE_140    | 2.81 | 1.91 | 18.30 |
| 1HGI.PDB | O, D_ASN_129   | N, D_TYR_141   | H, D_TYR_141    | 2.85 | 1.88 | 4.18  |
| 1HGI.PDB | OE2, D_GLU_165 | N, D_LYS_143   | H, D_LYS_143    | 2.89 | 1.96 | 16.92 |
| 1HGI.PDB | OE2, D_GLU_30  | N, D_ASN_146   | H, D_ASN_146    | 2.90 | 1.95 | 12.47 |
| 1HGI.PDB | O, D_ASP_145   | N, D_ILE_149   | H, D_ILE_149    | 2.94 | 1.98 | 8.42  |
| 1HGI.PDB | O, D_ASN_146   | N, D_GLU_150   | H, D_GLU_150    | 2.83 | 1.93 | 18.07 |
| 1HGI.PDB | O, D_ALA_147   | N, D_SER_151   | H, D_SER_151    | 2.92 | 2.00 | 16.50 |
| 1HGI.PDB | O, D_CYS_148   | OG, D_SER_151  | HG, D_SER_151   | 2.71 | 1.85 | 21.05 |
| 1HGI.PDB | O, D_GLU_150   | N, D_ASN_154   | H, D_ASN_154    | 2.81 | 1.83 | 1.56  |
| 1HGI.PDB | O, D_SER_151   | N, D_THR_156   | H, D_THR_156    | 2.80 | 1.97 | 25.47 |
| 1HGI.PDB | OD1, D_ASN_154 | OG1, D_THR_156 | HG1, D_THR_156  | 2.68 | 1.79 | 17.62 |
| 1HGI.PDB | NE2, D_HIS_142 | OH, D_TYR_157  | HH, D_TYR_157   | 2.72 | 1.85 | 20.80 |
| 1HGI.PDB | O, D_HIS_159   | N, D_TYR_162   | H, D_TYR_162    | 2.90 | 2.02 | 21.56 |
| 1HGI.PDB | O, B_ARG_170   | NH1, D_ARG_163 | HH12, D_ARG_163 | 2.80 | 1.83 | 13.94 |
| 1HGI.PDB | O, D_TYR_162   | N, D_ALA_166   | H, D_ALA_166    | 2.86 | 1.89 | 1.04  |
| 1HGI.PDB | O, D_ARG_163   | N, D_LEU_167   | H, D_LEU_167    | 2.77 | 1.81 | 6.36  |
| 1HGI.PDB | O, D_ALA_166   | N, D_ARG_170   | H, D_ARG_170    | 2.80 | 1.93 | 22.25 |
| 1HGI.PDB | O, D_GLU_128   | NE, D_ARG_170  | HE, D_ARG_170   | 2.72 | 1.87 | 25.38 |
| 1HGI.PDB | OE2, D_GLU_131 | NH1, D_ARG_170 | HH11, D_ARG_170 | 2.77 | 1.78 | 6.80  |
| 1HGI.PDB | O, D_LEU_167   | N, D_PHE_171   | H, D_PHE_171    | 2.90 | 1.96 | 13.08 |
| 1HGI.PDB | O, F_ILE_140   | N, E_ALA_11    | H, E_ALA_11     | 2.89 | 1.95 | 14.83 |
| 1HGI.PDB | O, F_GLN_27    | N, E_THR_12    | H, E_THR_12     | 2.94 | 2.00 | 13.31 |
| 1HGI.PDB | O, F_PHE_138   | N, E_LEU_13    | H, E_LEU_13     | 2.97 | 2.02 | 11.46 |
| 1HGI.PDB | O, F_ARG_25    | N, E_CYS_14    | H, E_CYS_14     | 2.66 | 1.84 | 26.53 |
| 1HGI.PDB | O, F_GLY_136   | N, E_LEU_15    | H, E_LEU_15     | 2.92 | 1.95 | 6.28  |
| 1HGI.PDB | O, F_GLY_23    | N, E_GLY_16    | H, E_GLY_16     | 2.99 | 2.12 | 22.78 |
| 1HGI.PDB | O, E_HIS_18    | ND1, E_HIS_17  | HD1, E_HIS_17   | 2.91 | 2.01 | 19.98 |
| 1HGI.PDB | O, F_TRP_21    | N, E_HIS_18    | H, E_HIS_18     | 2.89 | 1.99 | 19.14 |
| 1HGI.PDB | OD1, E_ASN_322 | N, E_VAL_20    | H, E_VAL_20     | 2.75 | 1.81 | 12.01 |
| 1HGI.PDB | O, E_VAL_36    | N, E_THR_24    | H, E_THR_24     | 2.83 | 1.90 | 13.27 |
| 1HGI.PDB | O, E_ILE_34    | N, E_VAL_26    | H, E_VAL_26     | 2.80 | 1.85 | 10.53 |
| 1HGI.PDB | OE2, F_GLU_97  | NZ, E_LYS_27   | HZ1, E_LYS_27   | 2.86 | 1.82 | 7.44  |
| 1HGI.PDB | O, E_ASP_31    | N, E_THR_28    | H, E_THR_28     | 2.81 | 2.00 | 28.11 |
| 1HGI.PDB | O, E_VAL_26    | N, E_ILE_34    | H, E_ILE_34     | 2.91 | 2.01 | 19.08 |
| 1HGI.PDB | O, E_THR_24    | N, E_VAL_36    | H, E_VAL_36     | 2.78 | 1.82 | 6.19  |
| 1HGI.PDB | O, E_MET_320   | N, E_THR_37    | H, E_THR_37     | 2.83 | 1.86 | 7.80  |
| 1HGI.PDB | O, E_LEU_316   | N, E_THR_40    | H, E_THR_40     | 2.86 | 1.98 | 21.93 |
| 1HGI.PDB | O, E_LEU_314   | N, E_LEU_42    | H, E_LEU_42     | 2.82 | 1.95 | 22.62 |

|          |                |                |                 |      |      |       |
|----------|----------------|----------------|-----------------|------|------|-------|
| 1HGI.PDB | O, E_PHE_294   | N, E_GLN_44    | H, E_GLN_44     | 2.83 | 1.86 | 6.11  |
| 1HGI.PDB | O, E_SER_46    | NE2, E_GLN_44  | HE22, E_GLN_44  | 2.78 | 1.97 | 27.44 |
| 1HGI.PDB | O, E_ASN_285   | OG, E_SER_47   | HG, E_SER_47    | 2.82 | 1.91 | 15.52 |
| 1HGI.PDB | OD2, E_ASP_275 | NZ, E_LYS_50   | HZ1, E_LYS_50   | 2.70 | 1.78 | 22.89 |
| 1HGI.PDB | O, E_PRO_273   | N, E_ILE_51    | H, E_ILE_51     | 2.78 | 1.83 | 10.95 |
| 1HGI.PDB | O, E_ASP_275   | N, E_ASN_53    | H, E_ASN_53     | 2.86 | 2.00 | 23.91 |
| 1HGI.PDB | O, E_GLU_280   | NE2, E_HIS_56  | HE2, E_HIS_56   | 3.00 | 2.06 | 15.06 |
| 1HGI.PDB | OD2, E_ASP_85  | N, E_ARG_57    | H, E_ARG_57     | 2.84 | 1.90 | 11.96 |
| 1HGI.PDB | O, E_THR_83    | NE, E_ARG_57   | HE, E_ARG_57    | 2.81 | 1.83 | 5.10  |
| 1HGI.PDB | O, E_LEU_86    | N, E_LEU_59    | H, E_LEU_59     | 2.85 | 1.89 | 9.90  |
| 1HGI.PDB | O, E_VAL_88    | N, E_GLY_61    | H, E_GLY_61     | 2.94 | 2.11 | 26.55 |
| 1HGI.PDB | OD1, E_ASP_60  | N, E_ILE_62    | H, E_ILE_62     | 2.85 | 1.91 | 12.99 |
| 1HGI.PDB | O, E_GLY_61    | N, E_CYS_64    | H, E_CYS_64     | 2.89 | 1.99 | 18.65 |
| 1HGI.PDB | OE2, E_GLU_89  | N, E_LEU_66    | H, E_LEU_66     | 2.99 | 2.04 | 13.34 |
| 1HGI.PDB | O, E_LEU_66    | N, E_LEU_70    | H, E_LEU_70     | 2.83 | 1.95 | 21.53 |
| 1HGI.PDB | O, E_ILE_67    | N, E_LEU_71    | H, E_LEU_71     | 2.87 | 1.90 | 5.23  |
| 1HGI.PDB | O, E_ASP_68    | N, E_GLY_72    | H, E_GLY_72     | 2.81 | 1.87 | 13.53 |
| 1HGI.PDB | OD1, E_ASP_73  | ND1, E_HIS_75  | HD1, E_HIS_75   | 2.87 | 1.94 | 15.26 |
| 1HGI.PDB | O, E_ASP_63    | NE2, E_HIS_75  | HE2, E_HIS_75   | 2.82 | 1.88 | 13.89 |
| 1HGI.PDB | O, E_ASP_73    | N, E_CYS_76    | H, E_CYS_76     | 2.75 | 1.83 | 16.25 |
| 1HGI.PDB | O, E_PRO_74    | N, E_ASP_77    | H, E_ASP_77     | 2.91 | 1.96 | 9.76  |
| 1HGI.PDB | O, E_CYS_76    | N, E_PHE_79    | H, E_PHE_79     | 2.93 | 1.96 | 3.56  |
| 1HGI.PDB | OE1, E_GLU_82  | N, E_THR_83    | H, E_THR_83     | 2.89 | 2.00 | 21.36 |
| 1HGI.PDB | O, E_ARG_57    | N, E_ASP_85    | H, E_ASP_85     | 2.76 | 1.87 | 19.11 |
| 1HGI.PDB | O, E_MET_268   | N, E_GLU_89    | H, E_GLU_89     | 2.77 | 1.81 | 7.27  |
| 1HGI.PDB | OD1, E_ASP_60  | NE, E_ARG_90   | HE, E_ARG_90    | 2.89 | 1.92 | 8.33  |
| 1HGI.PDB | O, E_SER_270   | NH1, E_ARG_90  | HH11, E_ARG_90  | 2.67 | 1.80 | 24.87 |
| 1HGI.PDB | O, E_ALA_272   | NH1, E_ARG_90  | HH12, E_ARG_90  | 2.58 | 1.69 | 21.42 |
| 1HGI.PDB | OD2, E_ASP_60  | NH2, E_ARG_90  | HH21, E_ARG_90  | 2.84 | 1.85 | 10.04 |
| 1HGI.PDB | OD1, E_ASP_271 | N, E_SER_91    | H, E_SER_91     | 2.90 | 1.95 | 11.41 |
| 1HGI.PDB | OD1, E_ASP_271 | OG, E_SER_91   | HG, E_SER_91    | 2.94 | 2.11 | 26.21 |
| 1HGI.PDB | OD2, E_ASP_271 | OG, E_SER_91   | HG, E_SER_91    | 2.82 | 1.93 | 20.43 |
| 1HGI.PDB | OD2, E_ASP_68  | OG, E_SER_95   | HG, E_SER_95    | 2.90 | 1.96 | 13.54 |
| 1HGI.PDB | OD2, E_ASP_73  | N, E_ASN_96    | H, E_ASN_96     | 2.90 | 1.96 | 13.19 |
| 1HGI.PDB | OD1, E_ASP_68  | OH, E_TYR_100  | HH, E_TYR_100   | 2.94 | 1.98 | 8.32  |
| 1HGI.PDB | OD2, E_ASP_104 | OG, E_SER_107  | HG, E_SER_107   | 2.91 | 1.98 | 14.52 |
| 1HGI.PDB | O, E_TYR_105   | N, E_ARG_109   | H, E_ARG_109    | 2.90 | 1.93 | 4.30  |
| 1HGI.PDB | OE2, E_GLU_67  | NH2, E_ARG_109 | HH21, E_ARG_109 | 2.78 | 1.80 | 14.37 |
| 1HGI.PDB | OD2, E_ASP_79  | OG, E_SER_110  | HG, E_SER_110   | 2.90 | 1.94 | 10.08 |
| 1HGI.PDB | O, E_SER_107   | N, E_LEU_111   | H, E_LEU_111    | 2.87 | 1.91 | 6.91  |
| 1HGI.PDB | O, E_LEU_108   | N, E_VAL_112   | H, E_VAL_112    | 2.97 | 1.99 | 3.20  |
| 1HGI.PDB | O, E_ARG_109   | N, E_ALA_113   | H, E_ALA_113    | 2.98 | 2.07 | 18.10 |
| 1HGI.PDB | O, E_SER_110   | N, E_SER_114   | H, E_SER_114    | 2.94 | 2.00 | 13.83 |
| 1HGI.PDB | OE2, E_GLU_119 | OG1, E_THR_117 | HG1, E_THR_117  | 2.98 | 2.05 | 12.54 |
| 1HGI.PDB | O, E_GLU_82    | N, E_LEU_118   | H, E_LEU_118    | 2.91 | 1.97 | 15.20 |
| 1HGI.PDB | O, E_TYR_257   | N, E_ILE_121   | H, E_ILE_121    | 2.92 | 1.95 | 7.25  |
| 1HGI.PDB | O, E_ARG_255   | N, E_GLU_123   | H, E_GLU_123    | 2.89 | 1.94 | 11.77 |
| 1HGI.PDB | O, E_THR_155   | N, E_THR_131   | H, E_THR_131    | 2.77 | 1.89 | 21.32 |
| 1HGI.PDB | OD1, E_ASN_152 | N, E_ASN_133   | H, E_ASN_133    | 2.84 | 1.93 | 17.00 |
| 1HGI.PDB | O, E_GLY_146   | N, E_SER_136   | H, E_SER_136    | 2.77 | 1.88 | 19.62 |
| 1HGI.PDB | OG, E_SER_136  | N, E_ALA_138   | H, E_ALA_138    | 2.87 | 1.96 | 18.10 |
| 1HGI.PDB | O, E_GLY_144   | NZ, E_LYS_140  | HZ1, E_LYS_140  | 2.89 | 1.92 | 16.40 |
| 1HGI.PDB | OD1, E_ASN_137 | NZ, E_LYS_140  | HZ2, E_LYS_140  | 2.83 | 1.82 | 12.93 |
| 1HGI.PDB | OD2, E_ASP_77  | NE, E_ARG_141  | HE, E_ARG_141   | 2.83 | 2.01 | 29.05 |
| 1HGI.PDB | O, E_PHE_147   | NH1, E_ARG_141 | HH12, E_ARG_141 | 2.55 | 1.65 | 20.15 |
| 1HGI.PDB | OD1, E_ASP_77  | NH2, E_ARG_141 | HH21, E_ARG_141 | 2.94 | 2.01 | 20.45 |
| 1HGI.PDB | OD2, E_ASP_77  | NH2, E_ARG_141 | HH21, E_ARG_141 | 2.70 | 1.83 | 24.80 |
| 1HGI.PDB | O, E_GLY_72    | NH2, E_ARG_141 | HH22, E_ARG_141 | 2.98 | 2.00 | 9.93  |

|          |                |                |                 |      |      |       |
|----------|----------------|----------------|-----------------|------|------|-------|
| 1HGI.PDB | OD1, E_ASN_137 | OG, E_SER_145  | HG, E_SER_145   | 2.92 | 2.15 | 29.94 |
| 1HGI.PDB | O, E_SER_136   | N, E_GLY_146   | H, E_GLY_146    | 2.98 | 2.04 | 14.06 |
| 1HGI.PDB | O, E_GLY_72    | N, E_SER_149   | H, E_SER_149    | 2.92 | 1.99 | 15.35 |
| 1HGI.PDB | O, E_ALA_253   | N, E_ASN_152   | H, E_ASN_152    | 2.77 | 1.92 | 24.49 |
| 1HGI.PDB | OH, E_TYR_195  | NE1, E_TRP_153 | HE1, E_TRP_153  | 2.87 | 1.98 | 20.67 |
| 1HGI.PDB | O, E_LEU_194   | N, E_LYS_156   | H, E_LYS_156    | 2.89 | 2.00 | 19.98 |
| 1HGI.PDB | O, E_SER_193   | NZ, E_LYS_156  | HZ2, E_LYS_156  | 2.74 | 1.75 | 15.56 |
| 1HGI.PDB | O, E_THR_160   | N, E_SER_157   | H, E_SER_157    | 2.90 | 2.00 | 19.80 |
| 1HGI.PDB | O, E_SER_247   | N, E_LEU_164   | H, E_LEU_164    | 2.73 | 1.89 | 25.21 |
| 1HGI.PDB | O, E_ILE_245   | N, E_VAL_166   | H, E_VAL_166    | 2.92 | 1.98 | 12.27 |
| 1HGI.PDB | O, E_LEU_243   | OG1, E_THR_167 | HG1, E_THR_167  | 2.89 | 2.00 | 19.18 |
| 1HGI.PDB | O, E_LEU_243   | N, E_MET_168   | H, E_MET_168    | 2.98 | 2.05 | 15.68 |
| 1HGI.PDB | O, E_ASP_241   | N, E_ASN_170   | H, E_ASN_170    | 2.96 | 1.98 | 4.05  |
| 1HGI.PDB | O, E_PHE_174   | ND2, E_ASN_170 | HD21, E_ASN_170 | 2.85 | 1.90 | 12.31 |
| 1HGI.PDB | O, E_VAL_237   | ND2, E_ASN_170 | HD22, E_ASN_170 | 2.95 | 2.11 | 25.03 |
| 1HGI.PDB | O, E_VAL_237   | N, E_LYS_176   | H, E_LYS_176    | 2.94 | 2.00 | 12.53 |
| 1HGI.PDB | OE2, E_GLU_123 | NZ, E_LYS_176  | HZ1, E_LYS_176  | 2.69 | 1.80 | 25.89 |
| 1HGI.PDB | O, E_PHE_258   | N, E_LEU_177   | H, E_LEU_177    | 2.98 | 2.01 | 8.00  |
| 1HGI.PDB | O, E_THR_235   | N, E_TYR_178   | H, E_TYR_178    | 2.83 | 1.86 | 3.40  |
| 1HGI.PDB | OE1, E_GLU_123 | OH, E_TYR_178  | HH, E_TYR_178   | 2.77 | 1.82 | 8.27  |
| 1HGI.PDB | OG1, E_THR_235 | NE1, E_TRP_180 | HE1, E_TRP_180  | 2.85 | 1.87 | 2.03  |
| 1HGI.PDB | O, E_ASN_250   | N, E_HIS_183   | H, E_HIS_183    | 2.94 | 2.04 | 20.19 |
| 1HGI.PDB | O, E_ARG_229   | N, E_HIS_184   | H, E_HIS_184    | 2.89 | 1.93 | 8.27  |
| 1HGI.PDB | OG, E_SER_231  | NE2, E_HIS_184 | HE2, E_HIS_184  | 2.81 | 1.95 | 23.57 |
| 1HGI.PDB | OD1, E_ASN_250 | NE2, E_GLN_191 | HE21, E_GLN_191 | 2.93 | 1.97 | 10.64 |
| 1HGI.PDB | O, E_GLN_197   | NE2, E_GLN_191 | HE22, E_GLN_191 | 2.95 | 1.99 | 10.71 |
| 1HGI.PDB | O, E_ASN_188   | N, E_THR_192   | H, E_THR_192    | 2.98 | 2.03 | 12.25 |
| 1HGI.PDB | O, E_ASN_188   | OG1, E_THR_192 | HG1, E_THR_192  | 2.95 | 1.99 | 2.99  |
| 1HGI.PDB | O, E_GLN_189   | N, E_SER_193   | H, E_SER_193    | 2.85 | 1.88 | 3.98  |
| 1HGI.PDB | O, E_GLN_191   | N, E_TYR_195   | H, E_TYR_195    | 2.76 | 1.80 | 5.82  |
| 1HGI.PDB | O, E_TYR_161   | NE2, E_GLN_197 | HE21, E_GLN_197 | 3.00 | 2.04 | 10.17 |
| 1HGI.PDB | O, E_ASN_248   | NE2, E_GLN_197 | HE22, E_GLN_197 | 2.91 | 2.00 | 18.24 |
| 1HGI.PDB | OD1, E_ASN_246 | NH2, E_ARG_201 | HH21, E_ARG_201 | 2.57 | 1.74 | 27.51 |
| 1HGI.PDB | O, E_ILE_213   | N, E_VAL_202   | H, E_VAL_202    | 2.95 | 1.98 | 8.47  |
| 1HGI.PDB | O, E_ASN_246   | N, E_THR_203   | H, E_THR_203    | 2.89 | 1.92 | 4.39  |
| 1HGI.PDB | O, E_GLN_211   | N, E_VAL_204   | H, E_VAL_204    | 2.85 | 1.92 | 15.24 |
| 1HGI.PDB | O, E_VAL_244   | N, E_SER_205   | H, E_SER_205    | 2.97 | 2.05 | 16.25 |
| 1HGI.PDB | O, E_SER_209   | N, E_THR_206   | H, E_THR_206    | 2.94 | 1.97 | 8.14  |
| 1HGI.PDB | OD1, E_ASP_241 | N, E_ARG_207   | H, E_ARG_207    | 2.91 | 1.95 | 10.57 |
| 1HGI.PDB | OD2, E_ASP_241 | NE, E_ARG_208  | HE, E_ARG_208   | 2.98 | 2.07 | 19.52 |
| 1HGI.PDB | O, E_VAL_204   | N, E_GLN_211   | H, E_GLN_211    | 2.91 | 1.97 | 13.40 |
| 1HGI.PDB | O, E_VAL_202   | N, E_ILE_213   | H, E_ILE_213    | 2.85 | 1.92 | 15.12 |
| 1HGI.PDB | ND1, E_HIS_184 | N, E_ASN_216   | H, E_ASN_216    | 2.74 | 1.94 | 28.99 |
| 1HGI.PDB | O, E_ASN_216   | NH1, E_ARG_220 | HH12, E_ARG_220 | 2.87 | 2.06 | 29.75 |
| 1HGI.PDB | OE1, A_GLN_210 | NH2, E_ARG_220 | HH21, E_ARG_220 | 2.69 | 1.80 | 23.03 |
| 1HGI.PDB | O, E_ASN_216   | NH2, E_ARG_220 | HH22, E_ARG_220 | 2.70 | 1.80 | 21.47 |
| 1HGI.PDB | O, E_LEU_226   | N, E_VAL_223   | H, E_VAL_223    | 2.88 | 1.90 | 5.13  |
| 1HGI.PDB | O, E_CYS_97    | NE, E_ARG_224  | HE, E_ARG_224   | 2.81 | 1.97 | 26.09 |
| 1HGI.PDB | O, E_CYS_97    | NH2, E_ARG_224 | HH21, E_ARG_224 | 2.85 | 1.99 | 25.73 |
| 1HGI.PDB | O, E_VAL_223   | N, E_LEU_226   | H, E_LEU_226    | 2.93 | 2.00 | 15.87 |
| 1HGI.PDB | O, E_SER_228   | NH1, E_ARG_229 | HH11, E_ARG_229 | 2.68 | 1.75 | 18.51 |
| 1HGI.PDB | O, E_PRO_221   | NH2, E_ARG_229 | HH22, E_ARG_229 | 2.66 | 1.70 | 13.51 |
| 1HGI.PDB | OD1, E_ASP_101 | OG, E_SER_231  | HG, E_SER_231   | 2.99 | 2.05 | 12.53 |
| 1HGI.PDB | O, E_ASP_101   | N, E_ILE_232   | H, E_ILE_232    | 2.94 | 2.00 | 13.40 |
| 1HGI.PDB | O, E_TRP_180   | N, E_TYR_233   | H, E_TYR_233    | 2.90 | 1.93 | 7.29  |
| 1HGI.PDB | O, E_TYR_178   | N, E_THR_235   | H, E_THR_235    | 2.82 | 1.92 | 19.31 |
| 1HGI.PDB | O, E_LYS_176   | N, E_VAL_237   | H, E_VAL_237    | 2.80 | 1.86 | 13.21 |
| 1HGI.PDB | O, D_SER_71    | NZ, E_LYS_238  | HZ2, E_LYS_238  | 2.75 | 1.87 | 26.62 |



|          |                |                |                 |      |      |       |
|----------|----------------|----------------|-----------------|------|------|-------|
| 1HGI.PDB | OE1, D_GLU_72  | NZ, E_LYS_238  | HZ3, E_LYS_238  | 2.80 | 1.81 | 15.90 |
| 1HGI.PDB | O, E_ASN_170   | N, E_GLY_240   | H, E_GLY_240    | 2.90 | 2.05 | 25.02 |
| 1HGI.PDB | OD1, E_ASP_241 | N, E_VAL_242   | H, E_VAL_242    | 2.76 | 1.96 | 28.65 |
| 1HGI.PDB | O, E_MET_168   | N, E_LEU_243   | H, E_LEU_243    | 2.92 | 1.95 | 5.56  |
| 1HGI.PDB | O, E_SER_205   | N, E_VAL_244   | H, E_VAL_244    | 2.99 | 2.04 | 11.95 |
| 1HGI.PDB | O, E_THR_203   | N, E_ASN_246   | H, E_ASN_246    | 2.86 | 1.93 | 15.06 |
| 1HGI.PDB | O, E_LEU_164   | N, E_SER_247   | H, E_SER_247    | 2.89 | 1.98 | 17.96 |
| 1HGI.PDB | O, E_ARG_201   | OG, E_SER_247  | HG, E_SER_247   | 2.86 | 2.05 | 28.14 |
| 1HGI.PDB | OE1, E_GLN_191 | ND2, E_ASN_250 | HD21, E_ASN_250 | 2.90 | 1.94 | 10.02 |
| 1HGI.PDB | O, E_HIS_183   | ND2, E_ASN_250 | HD22, E_ASN_250 | 2.84 | 1.87 | 6.39  |
| 1HGI.PDB | O, E_ASN_152   | N, E_ALA_253   | H, E_ALA_253    | 2.82 | 1.94 | 21.84 |
| 1HGI.PDB | O, E_ILE_121   | N, E_TYR_257   | H, E_TYR_257    | 2.96 | 2.09 | 22.80 |
| 1HGI.PDB | O, E_LEU_177   | N, E_PHE_258   | H, E_PHE_258    | 2.90 | 1.94 | 8.58  |
| 1HGI.PDB | OE2, E_GLU_119 | NH1, E_ARG_261 | HH12, E_ARG_261 | 2.65 | 1.83 | 28.50 |
| 1HGI.PDB | OE1, E_GLU_119 | NH2, E_ARG_261 | HH22, E_ARG_261 | 2.84 | 1.99 | 27.52 |
| 1HGI.PDB | OD2, E_ASP_85  | NZ, E_LYS_264  | HZ3, E_LYS_264  | 2.86 | 1.87 | 16.39 |
| 1HGI.PDB | O, E_ASP_85    | N, E_SER_266   | H, E_SER_266    | 2.99 | 2.14 | 25.54 |
| 1HGI.PDB | O, E_PHE_87    | N, E_MET_268   | H, E_MET_268    | 2.85 | 1.97 | 21.63 |
| 1HGI.PDB | O, E_PRO_284   | OG, E_SER_270  | HG, E_SER_270   | 2.79 | 1.85 | 10.23 |
| 1HGI.PDB | OG, E_SER_270  | N, E_ALA_272   | H, E_ALA_272    | 2.98 | 2.03 | 12.01 |
| 1HGI.PDB | O, E_ILE_51    | N, E_ASP_275   | H, E_ASP_275    | 2.93 | 2.03 | 19.68 |
| 1HGI.PDB | OD1, E_ASP_275 | N, E_THR_276   | H, E_THR_276    | 2.83 | 1.98 | 25.02 |
| 1HGI.PDB | O, E_ASN_54    | N, E_SER_279   | H, E_SER_279    | 2.79 | 1.86 | 14.40 |
| 1HGI.PDB | O, E_TYR_302   | N, E_ILE_282   | H, E_ILE_282    | 2.87 | 1.91 | 9.87  |
| 1HGI.PDB | O, E_THR_283   | N, E_GLY_286   | H, E_GLY_286    | 2.80 | 1.87 | 13.74 |
| 1HGI.PDB | O, E_LYS_50    | N, E_SER_287   | H, E_SER_287    | 2.85 | 1.88 | 3.05  |
| 1HGI.PDB | O, E_ALA_304   | ND2, E_ASN_290 | HD22, E_ASN_290 | 2.75 | 1.86 | 20.40 |
| 1HGI.PDB | OE1, E_GLN_44  | NZ, E_LYS_292  | HZ1, E_LYS_292  | 2.73 | 1.72 | 12.13 |
| 1HGI.PDB | OD2, E_ASP_291 | NZ, E_LYS_292  | HZ3, E_LYS_292  | 2.87 | 1.94 | 23.09 |
| 1HGI.PDB | O, E_LYS_307   | N, E_GLN_295   | H, E_GLN_295    | 2.79 | 1.91 | 21.81 |
| 1HGI.PDB | O, E_ASN_298   | NE2, E_GLN_295 | HE21, E_GLN_295 | 2.78 | 1.83 | 10.67 |
| 1HGI.PDB | O, E_GLN_44    | N, E_ASN_296   | H, E_ASN_296    | 2.87 | 1.95 | 15.01 |
| 1HGI.PDB | OE1, E_GLN_295 | N, E_VAL_297   | H, E_VAL_297    | 2.74 | 1.92 | 27.74 |
| 1HGI.PDB | OD1, E_ASN_285 | ND2, E_ASN_298 | HD22, E_ASN_298 | 2.97 | 2.00 | 7.97  |
| 1HGI.PDB | OD1, E_ASN_298 | N, E_ILE_300   | H, E_ILE_300    | 2.91 | 1.99 | 17.07 |
| 1HGI.PDB | O, E_ILE_282   | N, E_TYR_302   | H, E_TYR_302    | 2.94 | 2.05 | 21.12 |
| 1HGI.PDB | O, E_LYS_264   | OH, E_TYR_302  | HH, E_TYR_302   | 2.73 | 1.93 | 27.81 |
| 1HGI.PDB | O, F_LYS_62    | N, E_GLY_303   | H, E_GLY_303    | 2.93 | 1.96 | 6.65  |
| 1HGI.PDB | O, E_PRO_293   | N, E_LYS_307   | H, E_LYS_307    | 2.98 | 2.02 | 9.39  |
| 1HGI.PDB | O, E_GLN_295   | N, E_VAL_309   | H, E_VAL_309    | 2.93 | 2.07 | 24.14 |
| 1HGI.PDB | OG, F_SER_93   | N, E_LYS_310   | H, E_LYS_310    | 2.99 | 2.05 | 13.79 |
| 1HGI.PDB | OD1, F_ASP_86  | NZ, E_LYS_310  | HZ3, E_LYS_310  | 2.76 | 1.91 | 29.16 |
| 1HGI.PDB | OE2, E_GLU_41  | N, E_LEU_314   | H, E_LEU_314    | 2.84 | 1.88 | 8.62  |
| 1HGI.PDB | OE1, E_GLU_41  | NZ, E_LYS_315  | HZ3, E_LYS_315  | 2.74 | 1.81 | 21.50 |
| 1HGI.PDB | O, E_THR_40    | N, E_LEU_316   | H, E_LEU_316    | 2.81 | 1.89 | 15.98 |
| 1HGI.PDB | OD1, F_ASN_104 | N, E_ALA_317   | H, E_ALA_317    | 2.72 | 1.81 | 15.78 |
| 1HGI.PDB | O, E_ASN_38    | N, E_THR_318   | H, E_THR_318    | 2.88 | 1.97 | 18.20 |
| 1HGI.PDB | O, E_VAL_20    | ND2, E_ASN_322 | HD21, E_ASN_322 | 2.90 | 1.97 | 15.71 |
| 1HGI.PDB | OE2, E_GLU_35  | ND2, E_ASN_322 | HD22, E_ASN_322 | 2.92 | 1.96 | 12.59 |
| 1HGI.PDB | O, E_GLN_327   | NZ, E_LYS_326  | HZ1, E_LYS_326  | 2.69 | 1.77 | 22.48 |
| 1HGI.PDB | OE1, F_GLU_15  | NZ, E_LYS_326  | HZ3, E_LYS_326  | 2.88 | 1.86 | 11.05 |
| 1HGI.PDB | O, E_LYS_326   | NE2, E_GLN_327 | HE22, E_GLN_327 | 2.82 | 1.87 | 11.22 |
| 1HGI.PDB | OD2, F_ASP_112 | N, F_GLY_1     | H1, F_GLY_1     | 2.78 | 1.77 | 11.25 |
| 1HGI.PDB | OD1, F_ASP_109 | N, F_LEU_2     | H, F_LEU_2      | 2.91 | 1.97 | 13.16 |
| 1HGI.PDB | OD2, F_ASP_112 | N, F_PHE_3     | H, F_PHE_3      | 2.84 | 2.03 | 27.46 |
| 1HGI.PDB | OD2, F_ASP_112 | N, F_GLY_4     | H, F_GLY_4      | 2.93 | 2.03 | 18.14 |
| 1HGI.PDB | OD1, F_ASP_112 | N, F_ALA_5     | H, F_ALA_5      | 2.81 | 1.90 | 16.38 |
| 1HGI.PDB | O, F_GLY_4     | N, F_PHE_9     | H, F_PHE_9      | 2.85 | 1.90 | 11.24 |

|          |                |               |                |      |      |       |
|----------|----------------|---------------|----------------|------|------|-------|
| 1HGI.PDB | O, F_GLY_13    | ND2, F_ASN_12 | HD22, F_ASN_12 | 2.79 | 1.91 | 21.41 |
| 1HGI.PDB | O, E_VAL_323   | N, F_GLY_13   | H, F_GLY_13    | 2.66 | 1.77 | 18.62 |
| 1HGI.PDB | O, E_HIS_17    | N, F_TRP_14   | H, F_TRP_14    | 2.84 | 1.93 | 16.42 |
| 1HGI.PDB | OG1, F_THR_41  | N, F_TRP_21   | H, F_TRP_21    | 2.99 | 2.14 | 24.96 |
| 1HGI.PDB | O, E_GLY_16    | N, F_GLY_23   | H, F_GLY_23    | 2.97 | 2.05 | 16.89 |
| 1HGI.PDB | O, F_ALA_35    | N, F_PHE_24   | H, F_PHE_24    | 2.82 | 1.85 | 6.25  |
| 1HGI.PDB | O, E_CYS_14    | N, F_ARG_25   | H, F_ARG_25    | 2.91 | 2.04 | 22.96 |
| 1HGI.PDB | OE1, F_GLN_34  | NH2, F_ARG_25 | HH21, F_ARG_25 | 2.91 | 1.98 | 18.85 |
| 1HGI.PDB | O, F_GLY_33    | N, F_HIS_26   | H, F_HIS_26    | 2.85 | 1.94 | 17.98 |
| 1HGI.PDB | O, E_THR_12    | N, F_GLN_27   | H, F_GLN_27    | 2.93 | 1.99 | 14.92 |
| 1HGI.PDB | O, F_GLY_31    | N, F_ASN_28   | H, F_ASN_28    | 2.87 | 1.90 | 8.27  |
| 1HGI.PDB | OD1, F_ASN_146 | ND2, F_ASN_28 | HD21, F_ASN_28 | 2.93 | 2.01 | 16.48 |
| 1HGI.PDB | O, F_CYS_144   | ND2, F_ASN_28 | HD22, F_ASN_28 | 3.00 | 2.14 | 23.86 |
| 1HGI.PDB | O, F_PHE_24    | N, F_ALA_35   | H, F_ALA_35    | 2.77 | 1.97 | 29.03 |
| 1HGI.PDB | O, F_TYR_22    | N, F_ASP_37   | H, F_ASP_37    | 2.70 | 1.78 | 13.02 |
| 1HGI.PDB | OD2, F_ASP_37  | N, F_SER_40   | H, F_SER_40    | 2.93 | 1.96 | 6.56  |
| 1HGI.PDB | OD2, F_ASP_37  | OG, F_SER_40  | HG, F_SER_40   | 2.76 | 1.92 | 24.70 |
| 1HGI.PDB | O, F_ASP_37    | OG1, F_THR_41 | HG1, F_THR_41  | 2.70 | 1.81 | 18.66 |
| 1HGI.PDB | O, F_LEU_38    | N, F_GLN_42   | H, F_GLN_42    | 3.00 | 2.08 | 17.54 |
| 1HGI.PDB | OD1, F_ASP_46  | NE2, F_GLN_42 | HE22, F_GLN_42 | 2.86 | 1.99 | 23.93 |
| 1HGI.PDB | O, F_LYS_39    | N, F_ALA_43   | H, F_ALA_43    | 2.96 | 2.00 | 7.28  |
| 1HGI.PDB | O, F_SER_40    | N, F_ALA_44   | H, F_ALA_44    | 2.94 | 1.96 | 3.55  |
| 1HGI.PDB | O, F_THR_41    | N, F_ILE_45   | H, F_ILE_45    | 2.94 | 2.00 | 13.26 |
| 1HGI.PDB | O, F_GLN_42    | N, F_ASP_46   | H, F_ASP_46    | 2.71 | 1.76 | 8.22  |
| 1HGI.PDB | O, F_ALA_43    | NE2, F_GLN_47 | HE22, F_GLN_47 | 2.92 | 1.99 | 15.42 |
| 1HGI.PDB | O, F_ILE_45    | N, F_ASN_49   | H, F_ASN_49    | 2.88 | 1.98 | 19.70 |
| 1HGI.PDB | O, F_ASP_46    | N, F_GLY_50   | H, F_GLY_50    | 2.94 | 2.01 | 15.37 |
| 1HGI.PDB | OE1, F_GLU_103 | NZ, F_LYS_51  | HZ2, F_LYS_51  | 2.80 | 1.76 | 5.82  |
| 1HGI.PDB | ND1, F_HIS_106 | NZ, F_LYS_51  | HZ3, F_LYS_51  | 2.75 | 1.80 | 19.60 |
| 1HGI.PDB | O, F_ILE_48    | N, F_LEU_52   | H, F_LEU_52    | 2.96 | 2.03 | 15.82 |
| 1HGI.PDB | O, F_ASN_49    | N, F_ASN_53   | H, F_ASN_53    | 2.80 | 1.95 | 24.38 |
| 1HGI.PDB | O, C_THR_28    | NE, F_ARG_54  | HE, F_ARG_54   | 2.95 | 1.99 | 9.70  |
| 1HGI.PDB | OE1, F_GLU_57  | NH1, F_ARG_54 | HH11, F_ARG_54 | 2.83 | 1.84 | 11.68 |
| 1HGI.PDB | OE2, D_GLU_97  | NH2, F_ARG_54 | HH22, F_ARG_54 | 2.75 | 1.79 | 14.82 |
| 1HGI.PDB | OG, E_SER_110  | NE2, F_HIS_64 | HE2, F_HIS_64  | 2.84 | 1.87 | 3.62  |
| 1HGI.PDB | O, E_LYS_299   | NZ, F_LYS_68  | HZ1, F_LYS_68  | 2.80 | 1.76 | 2.37  |
| 1HGI.PDB | OE2, F_GLU_85  | NZ, F_LYS_68  | HZ2, F_LYS_68  | 2.74 | 1.72 | 8.70  |
| 1HGI.PDB | OG, A_SER_107  | N, F_ARG_76   | H, F_ARG_76    | 2.79 | 1.83 | 7.22  |
| 1HGI.PDB | OE2, B_GLU_81  | NE, F_ARG_76  | HE, F_ARG_76   | 2.85 | 1.88 | 7.37  |
| 1HGI.PDB | OE2, B_GLU_74  | NH1, F_ARG_76 | HH12, F_ARG_76 | 2.77 | 1.76 | 3.93  |
| 1HGI.PDB | OE1, B_GLU_81  | NH2, F_ARG_76 | HH21, F_ARG_76 | 2.64 | 1.66 | 4.79  |
| 1HGI.PDB | OE1, B_GLU_74  | NH2, F_ARG_76 | HH22, F_ARG_76 | 2.76 | 1.78 | 10.40 |
| 1HGI.PDB | O, F_GLU_72    | NE2, F_GLN_78 | HE21, F_GLN_78 | 2.93 | 1.96 | 6.67  |
| 1HGI.PDB | OE1, F_GLU_74  | NE2, F_GLN_78 | HE22, F_GLN_78 | 2.95 | 1.98 | 8.40  |
| 1HGI.PDB | O, F_ASP_79    | N, F_TYR_83   | H, F_TYR_83    | 2.90 | 1.99 | 17.92 |
| 1HGI.PDB | OE1, B_GLU_85  | OH, F_TYR_83  | HH, F_TYR_83   | 2.58 | 1.75 | 24.06 |
| 1HGI.PDB | O, F_LEU_80    | N, F_VAL_84   | H, F_VAL_84    | 2.77 | 1.86 | 16.15 |
| 1HGI.PDB | O, F_LYS_82    | N, F_ASP_86   | H, F_ASP_86    | 2.91 | 1.96 | 11.16 |
| 1HGI.PDB | O, F_TYR_83    | N, F_THR_87   | H, F_THR_87    | 2.92 | 1.97 | 10.81 |
| 1HGI.PDB | OH, D_TYR_83   | NZ, F_LYS_88  | HZ1, F_LYS_88  | 2.61 | 1.62 | 12.49 |
| 1HGI.PDB | O, F_GLU_85    | N, F_ILE_89   | H, F_ILE_89    | 2.88 | 1.92 | 9.04  |
| 1HGI.PDB | O, F_LYS_88    | N, F_TRP_92   | H, F_TRP_92    | 2.96 | 1.99 | 7.36  |
| 1HGI.PDB | O, F_ILE_89    | N, F_SER_93   | H, F_SER_93    | 2.88 | 1.94 | 13.75 |
| 1HGI.PDB | O, F_ILE_89    | OG, F_SER_93  | HG, F_SER_93   | 2.83 | 1.94 | 18.22 |
| 1HGI.PDB | O, F_ASP_90    | N, F_TYR_94   | H, F_TYR_94    | 2.93 | 2.00 | 16.36 |
| 1HGI.PDB | O, F_TRP_92    | N, F_ALA_96   | H, F_ALA_96    | 2.93 | 1.97 | 9.62  |
| 1HGI.PDB | O, F_TYR_94    | N, F_LEU_98   | H, F_LEU_98    | 2.91 | 1.95 | 9.75  |
| 1HGI.PDB | O, F_ASN_95    | N, F_LEU_99   | H, F_LEU_99    | 2.85 | 1.97 | 20.80 |

|          |                |                |                 |      |      |       |
|----------|----------------|----------------|-----------------|------|------|-------|
| 1HGI.PDB | O, F_LEU_99    | N, F_GLU_103   | H, F_GLU_103    | 2.93 | 1.96 | 7.51  |
| 1HGI.PDB | O, F_VAL_100   | N, F_ASN_104   | H, F_ASN_104    | 2.86 | 1.89 | 6.57  |
| 1HGI.PDB | O, E_LYS_27    | ND2, F_ASN_104 | HD22, F_ASN_104 | 2.88 | 1.93 | 10.77 |
| 1HGI.PDB | O, F_LEU_102   | N, F_HIS_106   | H, F_HIS_106    | 2.94 | 2.01 | 16.17 |
| 1HGI.PDB | O, F_GLU_103   | N, F_THR_107   | H, F_THR_107    | 2.77 | 1.88 | 20.29 |
| 1HGI.PDB | O, F_ASN_104   | N, F_ILE_108   | H, F_ILE_108    | 2.98 | 2.02 | 10.32 |
| 1HGI.PDB | O, F_HIS_106   | N, F_LEU_110   | H, F_LEU_110    | 2.83 | 1.87 | 10.55 |
| 1HGI.PDB | O, F_THR_107   | OG1, F_THR_111 | HG1, F_THR_111  | 2.97 | 2.00 | 2.90  |
| 1HGI.PDB | O, F_ASP_109   | N, F_SER_113   | H, F_SER_113    | 2.84 | 1.88 | 8.44  |
| 1HGI.PDB | O, D_LEU_2     | OG, F_SER_113  | HG, F_SER_113   | 2.78 | 1.94 | 24.17 |
| 1HGI.PDB | O, F_LEU_110   | N, F_GLU_114   | H, F_GLU_114    | 2.93 | 1.97 | 9.47  |
| 1HGI.PDB | O, F_THR_111   | N, F_MET_115   | H, F_MET_115    | 3.00 | 2.05 | 12.25 |
| 1HGI.PDB | O, F_ASP_112   | N, F_ASN_116   | H, F_ASN_116    | 2.97 | 2.03 | 13.76 |
| 1HGI.PDB | O, F_SER_113   | N, F_LYS_117   | H, F_LYS_117    | 2.72 | 1.85 | 21.38 |
| 1HGI.PDB | O, F_GLU_114   | N, F_LEU_118   | H, F_LEU_118    | 2.97 | 2.00 | 4.23  |
| 1HGI.PDB | O, F_ASN_116   | N, F_GLU_120   | H, F_GLU_120    | 2.90 | 1.92 | 4.14  |
| 1HGI.PDB | O, F_LYS_117   | N, F_LYS_121   | H, F_LYS_121    | 2.95 | 2.01 | 14.18 |
| 1HGI.PDB | O, F_LEU_118   | OG1, F_THR_122 | HG1, F_THR_122  | 2.94 | 1.99 | 9.77  |
| 1HGI.PDB | OE2, F_GLU_120 | NH1, F_ARG_123 | HH11, F_ARG_123 | 2.81 | 1.95 | 25.91 |
| 1HGI.PDB | O, F_GLU_120   | N, F_ARG_124   | H, F_ARG_124    | 2.91 | 1.93 | 3.14  |
| 1HGI.PDB | OE1, D_GLU_132 | NE, F_ARG_124  | HE, F_ARG_124   | 2.96 | 2.09 | 23.50 |
| 1HGI.PDB | OE2, D_GLU_132 | NE, F_ARG_124  | HE, F_ARG_124   | 2.96 | 2.09 | 23.34 |
| 1HGI.PDB | O, F_LEU_126   | N, F_ASN_129   | H, F_ASN_129    | 2.99 | 2.06 | 14.77 |
| 1HGI.PDB | OH, F_TYR_157  | ND2, F_ASN_129 | HD22, F_ASN_129 | 2.81 | 1.86 | 11.53 |
| 1HGI.PDB | O, F_LYS_139   | N, F_GLU_131   | H, F_GLU_131    | 2.91 | 1.97 | 13.98 |
| 1HGI.PDB | O, F_CYS_137   | N, F_MET_133   | H, F_MET_133    | 2.82 | 1.88 | 11.89 |
| 1HGI.PDB | O, E_LEU_13    | N, F_PHE_138   | H, F_PHE_138    | 2.75 | 1.89 | 22.82 |
| 1HGI.PDB | O, F_GLU_131   | N, F_LYS_139   | H, F_LYS_139    | 2.80 | 1.85 | 8.12  |
| 1HGI.PDB | O, E_ALA_11    | N, F_ILE_140   | H, F_ILE_140    | 2.78 | 1.89 | 18.92 |
| 1HGI.PDB | O, F_ASN_129   | N, F_TYR_141   | H, F_TYR_141    | 2.85 | 1.88 | 5.59  |
| 1HGI.PDB | OE2, F_GLU_165 | N, F_LYS_143   | H, F_LYS_143    | 2.88 | 1.95 | 16.12 |
| 1HGI.PDB | OE1, F_GLU_30  | N, F_ASN_146   | H, F_ASN_146    | 2.87 | 1.93 | 13.21 |
| 1HGI.PDB | O, F_ASP_145   | N, F_ILE_149   | H, F_ILE_149    | 2.92 | 1.96 | 7.67  |
| 1HGI.PDB | O, F_ASN_146   | N, F_GLU_150   | H, F_GLU_150    | 2.82 | 1.91 | 17.13 |
| 1HGI.PDB | O, F_ALA_147   | N, F_SER_151   | H, F_SER_151    | 2.94 | 2.03 | 17.96 |
| 1HGI.PDB | O, F_CYS_148   | OG, F_SER_151  | HG, F_SER_151   | 2.72 | 1.86 | 20.78 |
| 1HGI.PDB | O, F_GLU_150   | N, F_ASN_154   | H, F_ASN_154    | 2.78 | 1.81 | 2.53  |
| 1HGI.PDB | O, F_HIS_159   | N, F_TYR_162   | H, F_TYR_162    | 2.91 | 2.05 | 22.85 |
| 1HGI.PDB | O, D_ARG_170   | NH1, F_ARG_163 | HH12, F_ARG_163 | 2.92 | 1.95 | 13.55 |
| 1HGI.PDB | OE2, D_GLU_131 | NH2, F_ARG_163 | HH22, F_ARG_163 | 2.69 | 1.85 | 26.81 |
| 1HGI.PDB | O, F_TYR_162   | N, F_ALA_166   | H, F_ALA_166    | 2.89 | 1.91 | 1.45  |
| 1HGI.PDB | O, F_ARG_163   | N, F_LEU_167   | H, F_LEU_167    | 2.78 | 1.81 | 5.41  |
| 1HGI.PDB | O, F_ALA_166   | N, F_ARG_170   | H, F_ARG_170    | 2.82 | 1.95 | 21.63 |
| 1HGI.PDB | O, F_GLU_128   | NE, F_ARG_170  | HE, F_ARG_170   | 2.73 | 1.88 | 25.04 |
| 1HGI.PDB | OE2, F_GLU_131 | NH1, F_ARG_170 | HH11, F_ARG_170 | 2.75 | 1.76 | 6.67  |
| 1HGI.PDB | O, F_LEU_167   | N, F_PHE_171   | H, F_PHE_171    | 2.92 | 1.98 | 13.87 |
| 1HGJ.PDB | O, B_ILE_140   | N, A_ALA_11    | H, A_ALA_11     | 2.85 | 1.95 | 18.97 |
| 1HGJ.PDB | O, B_PHE_138   | N, A_LEU_13    | H, A_LEU_13     | 2.97 | 2.00 | 8.62  |
| 1HGJ.PDB | O, B_ARG_25    | N, A_CYS_14    | H, A_CYS_14     | 2.88 | 1.94 | 12.89 |
| 1HGJ.PDB | O, B_GLY_136   | N, A_LEU_15    | H, A_LEU_15     | 2.93 | 1.95 | 2.37  |
| 1HGJ.PDB | O, B_GLY_23    | N, A_GLY_16    | H, A_GLY_16     | 2.86 | 1.96 | 18.97 |
| 1HGJ.PDB | O, A_HIS_18    | ND1, A_HIS_17  | HD1, A_HIS_17   | 2.94 | 2.07 | 22.50 |
| 1HGJ.PDB | O, B_TRP_21    | N, A_HIS_18    | H, A_HIS_18     | 2.85 | 1.98 | 21.54 |
| 1HGJ.PDB | OD1, A_ASN_322 | N, A_VAL_20    | H, A_VAL_20     | 2.76 | 1.81 | 10.35 |
| 1HGJ.PDB | O, A_VAL_36    | N, A_THR_24    | H, A_THR_24     | 2.86 | 1.95 | 16.84 |
| 1HGJ.PDB | O, A_ILE_34    | N, A_VAL_26    | H, A_VAL_26     | 2.80 | 1.86 | 12.04 |
| 1HGJ.PDB | OE2, B_GLU_97  | NZ, A_LYS_27   | HZ1, A_LYS_27   | 2.81 | 1.78 | 9.30  |
| 1HGJ.PDB | O, A_ASP_31    | N, A_THR_28    | H, A_THR_28     | 2.73 | 1.88 | 24.26 |

|          |                |                |                 |      |      |       |
|----------|----------------|----------------|-----------------|------|------|-------|
| 1HGJ.PDB | O, A_VAL_26    | N, A_ILE_34    | H, A_ILE_34     | 2.90 | 1.95 | 11.45 |
| 1HGJ.PDB | O, A_THR_24    | N, A_VAL_36    | H, A_VAL_36     | 2.81 | 1.84 | 5.48  |
| 1HGJ.PDB | O, A_MET_320   | N, A_THR_37    | H, A_THR_37     | 2.87 | 1.90 | 7.32  |
| 1HGJ.PDB | O, A_LEU_316   | N, A_THR_40    | H, A_THR_40     | 2.84 | 2.00 | 24.78 |
| 1HGJ.PDB | O, A_LEU_314   | N, A_LEU_42    | H, A_LEU_42     | 2.83 | 1.95 | 21.41 |
| 1HGJ.PDB | O, A_PHE_294   | N, A_GLN_44    | H, A_GLN_44     | 2.83 | 1.86 | 6.97  |
| 1HGJ.PDB | O, A_SER_46    | NE2, A_GLN_44  | HE22, A_GLN_44  | 2.92 | 2.02 | 20.25 |
| 1HGJ.PDB | OD2, A_ASP_275 | NZ, A_LYS_50   | HZ1, A_LYS_50   | 2.74 | 1.82 | 22.91 |
| 1HGJ.PDB | O, A_PRO_273   | N, A_ILE_51    | H, A_ILE_51     | 2.86 | 1.90 | 9.76  |
| 1HGJ.PDB | O, A_ASP_275   | N, A_ASN_53    | H, A_ASN_53     | 2.80 | 1.95 | 24.33 |
| 1HGJ.PDB | O, A_GLU_280   | NE2, A_HIS_56  | HE2, A_HIS_56   | 2.97 | 2.05 | 17.77 |
| 1HGJ.PDB | OD2, A_ASP_85  | N, A_ARG_57    | H, A_ARG_57     | 2.86 | 1.92 | 12.38 |
| 1HGJ.PDB | O, A_THR_83    | NE, A_ARG_57   | HE, A_ARG_57    | 2.77 | 1.80 | 8.03  |
| 1HGJ.PDB | O, A_LEU_86    | N, A_LEU_59    | H, A_LEU_59     | 2.86 | 1.91 | 11.37 |
| 1HGJ.PDB | O, A_VAL_88    | N, A_GLY_61    | H, A_GLY_61     | 2.97 | 2.09 | 22.25 |
| 1HGJ.PDB | OD1, A_ASP_60  | N, A_ILE_62    | H, A_ILE_62     | 2.87 | 1.94 | 15.09 |
| 1HGJ.PDB | O, A_GLY_61    | N, A_CYS_64    | H, A_CYS_64     | 2.89 | 1.97 | 17.07 |
| 1HGJ.PDB | O, A_LEU_66    | N, A_LEU_70    | H, A_LEU_70     | 2.88 | 1.99 | 19.66 |
| 1HGJ.PDB | O, A_ILE_67    | N, A_LEU_71    | H, A_LEU_71     | 2.83 | 1.87 | 6.71  |
| 1HGJ.PDB | O, A_ASP_68    | N, A_GLY_72    | H, A_GLY_72     | 2.88 | 1.97 | 18.26 |
| 1HGJ.PDB | OD1, A_ASP_73  | N, A_HIS_75    | H, A_HIS_75     | 2.98 | 2.07 | 18.75 |
| 1HGJ.PDB | OD1, A_ASP_73  | ND1, A_HIS_75  | HD1, A_HIS_75   | 2.83 | 1.91 | 17.40 |
| 1HGJ.PDB | O, A_ASP_63    | NE2, A_HIS_75  | HE2, A_HIS_75   | 2.85 | 1.95 | 19.40 |
| 1HGJ.PDB | O, A_ASP_73    | N, A_CYS_76    | H, A_CYS_76     | 2.78 | 1.84 | 13.08 |
| 1HGJ.PDB | O, A_PRO_74    | N, A_ASP_77    | H, A_ASP_77     | 2.97 | 2.01 | 11.14 |
| 1HGJ.PDB | O, A_ARG_57    | N, A_ASP_85    | H, A_ASP_85     | 2.81 | 1.89 | 16.54 |
| 1HGJ.PDB | O, A_LEU_59    | N, A_VAL_88    | H, A_VAL_88     | 2.98 | 2.01 | 7.07  |
| 1HGJ.PDB | O, A_MET_268   | N, A_GLU_89    | H, A_GLU_89     | 2.79 | 1.84 | 8.85  |
| 1HGJ.PDB | OD1, A_ASP_60  | NE, A_ARG_90   | HE, A_ARG_90    | 2.88 | 1.91 | 7.56  |
| 1HGJ.PDB | O, A_SER_270   | NH1, A_ARG_90  | HH11, A_ARG_90  | 2.70 | 1.81 | 23.07 |
| 1HGJ.PDB | O, A_ALA_272   | NH1, A_ARG_90  | HH12, A_ARG_90  | 2.62 | 1.70 | 17.78 |
| 1HGJ.PDB | OD2, A_ASP_60  | NH2, A_ARG_90  | HH21, A_ARG_90  | 2.81 | 1.82 | 10.05 |
| 1HGJ.PDB | OD1, A_ASP_271 | N, A_SER_91    | H, A_SER_91     | 2.92 | 1.95 | 7.81  |
| 1HGJ.PDB | OD1, A_ASP_271 | OG, A_SER_91   | HG, A_SER_91    | 2.98 | 2.13 | 24.27 |
| 1HGJ.PDB | OD2, A_ASP_271 | OG, A_SER_91   | HG, A_SER_91    | 2.78 | 1.90 | 20.01 |
| 1HGJ.PDB | OD2, A_ASP_68  | OG, A_SER_95   | HG, A_SER_95    | 2.95 | 2.05 | 19.19 |
| 1HGJ.PDB | OD2, A_ASP_73  | N, A_ASN_96    | H, A_ASN_96     | 2.89 | 1.93 | 9.91  |
| 1HGJ.PDB | O, A_ILE_230   | N, A_ASP_101   | H, A_ASP_101    | 2.95 | 2.08 | 23.05 |
| 1HGJ.PDB | OD2, A_ASP_104 | OG, A_SER_107  | HG, A_SER_107   | 2.84 | 1.95 | 18.85 |
| 1HGJ.PDB | O, A_TYR_105   | N, A_ARG_109   | H, A_ARG_109    | 2.84 | 1.86 | 2.92  |
| 1HGJ.PDB | OE2, B_GLU_67  | NH2, A_ARG_109 | HH21, A_ARG_109 | 2.75 | 1.77 | 12.07 |
| 1HGJ.PDB | OD2, F_ASP_79  | OG, A_SER_110  | HG, A_SER_110   | 2.94 | 1.98 | 10.39 |
| 1HGJ.PDB | O, A_SER_107   | N, A_LEU_111   | H, A_LEU_111    | 2.86 | 1.89 | 5.37  |
| 1HGJ.PDB | O, A_ARG_109   | N, A_ALA_113   | H, A_ALA_113    | 2.93 | 2.03 | 18.98 |
| 1HGJ.PDB | O, A_SER_110   | N, A_SER_114   | H, A_SER_114    | 2.89 | 1.97 | 15.80 |
| 1HGJ.PDB | OE2, A_GLU_119 | OG1, A_THR_117 | HG1, A_THR_117  | 2.87 | 1.94 | 12.44 |
| 1HGJ.PDB | O, A_GLU_82    | N, A_LEU_118   | H, A_LEU_118    | 2.93 | 2.00 | 16.05 |
| 1HGJ.PDB | O, A_TYR_257   | N, A_ILE_121   | H, A_ILE_121    | 2.85 | 1.88 | 7.23  |
| 1HGJ.PDB | O, A_ARG_255   | N, A_GLU_123   | H, A_GLU_123    | 2.94 | 1.98 | 10.39 |
| 1HGJ.PDB | O, A_THR_155   | N, A_THR_131   | H, A_THR_131    | 2.71 | 1.83 | 19.42 |
| 1HGJ.PDB | OD1, A_ASN_152 | N, A_ASN_133   | H, A_ASN_133    | 2.86 | 1.94 | 16.50 |
| 1HGJ.PDB | O, A_GLY_146   | N, A_SER_136   | H, A_SER_136    | 2.74 | 1.85 | 19.18 |
| 1HGJ.PDB | OG, A_SER_136  | N, A_ALA_138   | H, A_ALA_138    | 2.90 | 1.96 | 14.29 |
| 1HGJ.PDB | O, A_GLY_144   | NZ, A_LYS_140  | HZ1, A_LYS_140  | 2.76 | 1.78 | 16.23 |
| 1HGJ.PDB | OD1, A_ASN_137 | NZ, A_LYS_140  | HZ2, A_LYS_140  | 2.70 | 1.70 | 13.62 |
| 1HGJ.PDB | OD2, A_ASP_77  | NE, A_ARG_141  | HE, A_ARG_141   | 2.82 | 1.99 | 27.09 |
| 1HGJ.PDB | O, A_PHE_147   | NH1, A_ARG_141 | HH12, A_ARG_141 | 2.55 | 1.62 | 16.97 |
| 1HGJ.PDB | OD1, A_ASP_77  | NH2, A_ARG_141 | HH21, A_ARG_141 | 2.82 | 1.90 | 21.48 |

|          |                |                |                 |      |      |       |
|----------|----------------|----------------|-----------------|------|------|-------|
| 1HGJ.PDB | OD2, A_ASP_77  | NH2, A_ARG_141 | HH21, A_ARG_141 | 2.75 | 1.86 | 24.28 |
| 1HGJ.PDB | O, A_GLY_72    | NH2, A_ARG_141 | HH22, A_ARG_141 | 2.89 | 1.91 | 10.49 |
| 1HGJ.PDB | O, A_SER_136   | N, A_GLY_146   | H, A_GLY_146    | 2.92 | 1.99 | 15.16 |
| 1HGJ.PDB | O, A_GLY_72    | N, A_SER_149   | H, A_SER_149    | 2.81 | 1.92 | 19.89 |
| 1HGJ.PDB | O, A_ALA_253   | N, A_ASN_152   | H, A_ASN_152    | 2.77 | 1.94 | 25.94 |
| 1HGJ.PDB | OH, A_TYR_195  | NE1, A_TRP_153 | HE1, A_TRP_153  | 2.85 | 1.94 | 18.91 |
| 1HGJ.PDB | O, A_THR_131   | N, A_THR_155   | H, A_THR_155    | 2.98 | 2.03 | 13.10 |
| 1HGJ.PDB | O, A_LEU_194   | N, A_LYS_156   | H, A_LYS_156    | 2.96 | 2.04 | 16.82 |
| 1HGJ.PDB | O, A_SER_193   | NZ, A_LYS_156  | HZ2, A_LYS_156  | 2.76 | 1.77 | 15.28 |
| 1HGJ.PDB | O, A_SER_247   | N, A_LEU_164   | H, A_LEU_164    | 2.71 | 1.86 | 23.94 |
| 1HGJ.PDB | O, A_ILE_245   | N, A_VAL_166   | H, A_VAL_166    | 2.96 | 2.01 | 11.11 |
| 1HGJ.PDB | O, A_LEU_243   | OG1, A_THR_167 | HG1, A_THR_167  | 2.95 | 2.00 | 7.14  |
| 1HGJ.PDB | O, A_LEU_243   | N, A_MET_168   | H, A_MET_168    | 2.88 | 1.96 | 15.85 |
| 1HGJ.PDB | O, A_ASP_241   | N, A_ASN_170   | H, A_ASN_170    | 2.94 | 1.97 | 10.04 |
| 1HGJ.PDB | O, A_PHE_174   | ND2, A_ASN_170 | HD21, A_ASN_170 | 2.85 | 1.90 | 10.43 |
| 1HGJ.PDB | O, A_VAL_237   | ND2, A_ASN_170 | HD22, A_ASN_170 | 2.88 | 2.05 | 26.57 |
| 1HGJ.PDB | O, A_VAL_237   | N, A_LYS_176   | H, A_LYS_176    | 2.93 | 1.99 | 13.19 |
| 1HGJ.PDB | OE2, A_GLU_123 | NZ, A_LYS_176  | HZ1, A_LYS_176  | 2.68 | 1.78 | 24.65 |
| 1HGJ.PDB | O, A_THR_235   | N, A_TYR_178   | H, A_TYR_178    | 2.81 | 1.83 | 1.66  |
| 1HGJ.PDB | OE1, A_GLU_123 | OH, A_TYR_178  | HH, A_TYR_178   | 2.79 | 1.84 | 8.91  |
| 1HGJ.PDB | OG1, A_THR_235 | NE1, A_TRP_180 | HE1, A_TRP_180  | 2.92 | 1.93 | 4.44  |
| 1HGJ.PDB | O, A_ASN_250   | N, A_HIS_183   | H, A_HIS_183    | 2.90 | 1.98 | 16.84 |
| 1HGJ.PDB | O, A_ARG_229   | N, A_HIS_184   | H, A_HIS_184    | 2.83 | 1.87 | 9.59  |
| 1HGJ.PDB | OG, A_SER_231  | NE2, A_HIS_184 | HE2, A_HIS_184  | 2.75 | 1.92 | 26.36 |
| 1HGJ.PDB | OG1, A_THR_187 | N, A_GLU_190   | H, A_GLU_190    | 2.88 | 1.93 | 10.33 |
| 1HGJ.PDB | O, A_GLN_197   | NE2, A_GLN_191 | HE22, A_GLN_191 | 2.90 | 1.98 | 16.92 |
| 1HGJ.PDB | O, A_ASN_188   | OG1, A_THR_192 | HG1, A_THR_192  | 2.97 | 2.01 | 7.08  |
| 1HGJ.PDB | O, A_GLN_189   | N, A_SER_193   | H, A_SER_193    | 2.85 | 1.87 | 2.99  |
| 1HGJ.PDB | O, A_GLU_190   | N, A_LEU_194   | H, A_LEU_194    | 2.97 | 2.00 | 9.61  |
| 1HGJ.PDB | O, A_GLN_191   | N, A_TYR_195   | H, A_TYR_195    | 2.80 | 1.85 | 9.60  |
| 1HGJ.PDB | O, A_TYR_161   | NE2, A_GLN_197 | HE21, A_GLN_197 | 2.87 | 1.93 | 12.14 |
| 1HGJ.PDB | O, A_ASN_248   | NE2, A_GLN_197 | HE22, A_GLN_197 | 2.87 | 1.94 | 14.83 |
| 1HGJ.PDB | OD1, A_ASN_246 | NH2, A_ARG_201 | HH21, A_ARG_201 | 2.58 | 1.73 | 25.49 |
| 1HGJ.PDB | O, A_ILE_213   | N, A_VAL_202   | H, A_VAL_202    | 2.97 | 2.02 | 12.20 |
| 1HGJ.PDB | O, A_ASN_246   | N, A_THR_203   | H, A_THR_203    | 2.90 | 1.99 | 17.82 |
| 1HGJ.PDB | O, A_GLN_211   | N, A_VAL_204   | H, A_VAL_204    | 2.83 | 1.93 | 18.94 |
| 1HGJ.PDB | O, A_SER_209   | N, A_THR_206   | H, A_THR_206    | 2.89 | 1.93 | 8.74  |
| 1HGJ.PDB | OD1, A_ASP_241 | N, A_ARG_207   | H, A_ARG_207    | 2.88 | 1.92 | 9.03  |
| 1HGJ.PDB | OG1, A_THR_206 | OG, A_SER_209  | HG, A_SER_209   | 3.00 | 2.04 | 8.15  |
| 1HGJ.PDB | O, A_VAL_204   | N, A_GLN_211   | H, A_GLN_211    | 2.91 | 2.00 | 17.89 |
| 1HGJ.PDB | OG1, A_THR_203 | OG1, A_THR_212 | HG1, A_THR_212  | 2.89 | 1.93 | 3.12  |
| 1HGJ.PDB | O, A_VAL_202   | N, A_ILE_213   | H, A_ILE_213    | 2.84 | 1.92 | 16.69 |
| 1HGJ.PDB | OE1, C_GLN_210 | NH2, A_ARG_220 | HH21, A_ARG_220 | 2.67 | 1.78 | 22.50 |
| 1HGJ.PDB | O, A_ASN_216   | NH2, A_ARG_220 | HH22, A_ARG_220 | 2.78 | 1.89 | 22.30 |
| 1HGJ.PDB | O, A_LEU_226   | N, A_VAL_223   | H, A_VAL_223    | 2.84 | 1.88 | 10.14 |
| 1HGJ.PDB | O, A_CYS_97    | NE, A_ARG_224  | HE, A_ARG_224   | 2.80 | 1.95 | 24.47 |
| 1HGJ.PDB | O, A_CYS_97    | NH2, A_ARG_224 | HH21, A_ARG_224 | 2.93 | 2.07 | 26.25 |
| 1HGJ.PDB | O, A_VAL_223   | N, A_LEU_226   | H, A_LEU_226    | 2.91 | 1.97 | 13.14 |
| 1HGJ.PDB | O, A_SER_228   | NH1, A_ARG_229 | HH11, A_ARG_229 | 2.72 | 1.77 | 16.65 |
| 1HGJ.PDB | O, A_PRO_221   | NH2, A_ARG_229 | HH22, A_ARG_229 | 2.62 | 1.66 | 13.73 |
| 1HGJ.PDB | OD1, A_ASP_101 | OG, A_SER_231  | HG, A_SER_231   | 2.87 | 1.91 | 9.73  |
| 1HGJ.PDB | O, A_ASP_101   | N, A_ILE_232   | H, A_ILE_232    | 2.86 | 1.94 | 17.01 |
| 1HGJ.PDB | O, A_TRP_180   | N, A_TYR_233   | H, A_TYR_233    | 2.94 | 1.96 | 7.60  |
| 1HGJ.PDB | O, A_TYR_178   | N, A_THR_235   | H, A_THR_235    | 2.91 | 2.02 | 19.93 |
| 1HGJ.PDB | O, A_LYS_176   | N, A_VAL_237   | H, A_VAL_237    | 2.80 | 1.86 | 14.26 |
| 1HGJ.PDB | O, F_SER_71    | NZ, A_LYS_238  | HZ2, A_LYS_238  | 2.62 | 1.72 | 23.44 |
| 1HGJ.PDB | OE1, F_GLU_72  | NZ, A_LYS_238  | HZ3, A_LYS_238  | 2.90 | 1.90 | 13.91 |
| 1HGJ.PDB | O, A_ASN_170   | N, A_GLY_240   | H, A_GLY_240    | 2.83 | 1.97 | 23.20 |

|          |                |                |                 |      |      |       |
|----------|----------------|----------------|-----------------|------|------|-------|
| 1HGJ.PDB | OD1, A_ASP_241 | N, A_VAL_242   | H, A_VAL_242    | 2.77 | 1.93 | 25.51 |
| 1HGJ.PDB | O, A_MET_168   | N, A_LEU_243   | H, A_LEU_243    | 2.93 | 1.96 | 5.60  |
| 1HGJ.PDB | O, A_SER_205   | N, A_VAL_244   | H, A_VAL_244    | 2.98 | 2.03 | 12.76 |
| 1HGJ.PDB | O, A_VAL_166   | N, A_ILE_245   | H, A_ILE_245    | 2.88 | 1.93 | 13.19 |
| 1HGJ.PDB | O, A_THR_203   | N, A_ASN_246   | H, A_ASN_246    | 2.93 | 1.96 | 5.50  |
| 1HGJ.PDB | OD1, A_ASN_165 | ND2, A_ASN_246 | HD22, A_ASN_246 | 2.91 | 1.95 | 11.26 |
| 1HGJ.PDB | O, A_LEU_164   | N, A_SER_247   | H, A_SER_247    | 2.91 | 2.00 | 18.09 |
| 1HGJ.PDB | O, A_HIS_183   | ND2, A_ASN_250 | HD22, A_ASN_250 | 2.81 | 1.86 | 11.47 |
| 1HGJ.PDB | O, A_GLY_181   | N, A_ILE_252   | H, A_ILE_252    | 2.95 | 1.99 | 11.10 |
| 1HGJ.PDB | O, A_ASN_152   | N, A_ALA_253   | H, A_ALA_253    | 2.89 | 2.00 | 20.87 |
| 1HGJ.PDB | OD1, A_ASN_133 | NH2, A_ARG_255 | HH22, A_ARG_255 | 2.53 | 1.70 | 27.52 |
| 1HGJ.PDB | O, A_ILE_121   | N, A_TYR_257   | H, A_TYR_257    | 2.95 | 2.11 | 25.99 |
| 1HGJ.PDB | O, A_LEU_177   | N, A_PHE_258   | H, A_PHE_258    | 2.93 | 1.97 | 8.17  |
| 1HGJ.PDB | OG, A_SER_115  | N, A_ARG_261   | H, A_ARG_261    | 2.93 | 1.99 | 14.40 |
| 1HGJ.PDB | OE2, A_GLU_119 | NH1, A_ARG_261 | HH12, A_ARG_261 | 2.65 | 1.82 | 28.35 |
| 1HGJ.PDB | OE1, A_GLU_119 | NH2, A_ARG_261 | HH22, A_ARG_261 | 2.90 | 1.99 | 23.18 |
| 1HGJ.PDB | OD2, A_ASP_85  | NZ, A_LYS_264  | HZ3, A_LYS_264  | 2.84 | 1.85 | 15.53 |
| 1HGJ.PDB | O, A_PHE_87    | N, A_MET_268   | H, A_MET_268    | 2.87 | 1.96 | 18.47 |
| 1HGJ.PDB | O, A_PRO_284   | OG, A_SER_270  | HG, A_SER_270   | 2.82 | 1.88 | 11.71 |
| 1HGJ.PDB | OG, A_SER_270  | N, A_ALA_272   | H, A_ALA_272    | 2.99 | 2.05 | 13.78 |
| 1HGJ.PDB | O, A_ILE_51    | N, A_ASP_275   | H, A_ASP_275    | 2.92 | 2.02 | 19.32 |
| 1HGJ.PDB | OD1, A_ASP_275 | N, A_THR_276   | H, A_THR_276    | 2.81 | 1.96 | 23.63 |
| 1HGJ.PDB | O, A_ASN_54    | N, A_SER_279   | H, A_SER_279    | 2.81 | 1.88 | 14.91 |
| 1HGJ.PDB | O, A_TYR_302   | N, A_ILE_282   | H, A_ILE_282    | 2.92 | 1.95 | 7.78  |
| 1HGJ.PDB | O, A_THR_283   | N, A_GLY_286   | H, A_GLY_286    | 2.78 | 1.86 | 14.62 |
| 1HGJ.PDB | O, A_LYS_50    | N, A_SER_287   | H, A_SER_287    | 2.84 | 1.87 | 6.72  |
| 1HGJ.PDB | O, A_ALA_304   | ND2, A_ASN_290 | HD22, A_ASN_290 | 2.82 | 1.91 | 18.14 |
| 1HGJ.PDB | OE1, A_GLN_44  | NZ, A_LYS_292  | HZ1, A_LYS_292  | 2.71 | 1.70 | 11.30 |
| 1HGJ.PDB | OD2, A_ASP_291 | NZ, A_LYS_292  | HZ3, A_LYS_292  | 2.80 | 1.82 | 17.27 |
| 1HGJ.PDB | O, A_LYS_307   | N, A_GLN_295   | H, A_GLN_295    | 2.89 | 1.99 | 19.47 |
| 1HGJ.PDB | O, A_ASN_298   | NE2, A_GLN_295 | HE21, A_GLN_295 | 2.78 | 1.82 | 8.78  |
| 1HGJ.PDB | O, A_GLN_44    | N, A_ASN_296   | H, A_ASN_296    | 2.84 | 1.91 | 14.48 |
| 1HGJ.PDB | OE1, A_GLN_295 | N, A_VAL_297   | H, A_VAL_297    | 2.74 | 1.95 | 29.44 |
| 1HGJ.PDB | O, B_LYS_68    | NZ, A_LYS_299  | HZ2, A_LYS_299  | 2.95 | 1.96 | 14.91 |
| 1HGJ.PDB | OD1, A_ASN_298 | N, A_ILE_300   | H, A_ILE_300    | 2.86 | 1.95 | 16.95 |
| 1HGJ.PDB | O, A_ILE_282   | N, A_TYR_302   | H, A_TYR_302    | 2.88 | 2.05 | 26.62 |
| 1HGJ.PDB | O, A_LYS_264   | OH, A_TYR_302  | HH, A_TYR_302   | 2.66 | 1.88 | 29.88 |
| 1HGJ.PDB | O, B_LYS_62    | N, A_GLY_303   | H, A_GLY_303    | 2.93 | 1.97 | 8.41  |
| 1HGJ.PDB | O, A_GLN_295   | N, A_VAL_309   | H, A_VAL_309    | 2.92 | 2.10 | 27.87 |
| 1HGJ.PDB | OE2, A_GLU_41  | N, A_LEU_314   | H, A_LEU_314    | 2.79 | 1.86 | 13.81 |
| 1HGJ.PDB | OE1, A_GLU_41  | NZ, A_LYS_315  | HZ3, A_LYS_315  | 2.85 | 1.90 | 20.12 |
| 1HGJ.PDB | O, A_THR_40    | N, A_LEU_316   | H, A_LEU_316    | 2.80 | 1.86 | 11.89 |
| 1HGJ.PDB | OD1, B_ASN_104 | N, A_ALA_317   | H, A_ALA_317    | 2.74 | 1.81 | 13.01 |
| 1HGJ.PDB | O, A_ASN_38    | N, A_THR_318   | H, A_THR_318    | 2.86 | 1.94 | 16.91 |
| 1HGJ.PDB | O, A_VAL_20    | ND2, A_ASN_322 | HD21, A_ASN_322 | 2.87 | 1.93 | 14.22 |
| 1HGJ.PDB | OE2, A_GLU_35  | ND2, A_ASN_322 | HD22, A_ASN_322 | 2.88 | 1.99 | 20.96 |
| 1HGJ.PDB | OE1, A_GLU_325 | NZ, A_LYS_326  | HZ3, A_LYS_326  | 2.92 | 1.93 | 15.95 |
| 1HGJ.PDB | O, A_PRO_21    | NE2, A_GLN_327 | HE22, A_GLN_327 | 2.76 | 1.91 | 24.52 |
| 1HGJ.PDB | OE1, B_GLU_15  | N, A_THR_328   | H, A_THR_328    | 2.99 | 2.03 | 9.44  |
| 1HGJ.PDB | OD2, B_ASP_112 | N, B_GLY_1     | H2, B_GLY_1     | 2.78 | 1.79 | 13.86 |
| 1HGJ.PDB | OD1, B_ASP_109 | N, B_LEU_2     | H, B_LEU_2      | 2.86 | 1.98 | 21.89 |
| 1HGJ.PDB | OD2, B_ASP_112 | N, B_PHE_3     | H, B_PHE_3      | 2.78 | 1.97 | 28.02 |
| 1HGJ.PDB | OD2, B_ASP_112 | N, B_GLY_4     | H, B_GLY_4      | 2.88 | 1.96 | 16.60 |
| 1HGJ.PDB | OD1, B_ASP_112 | N, B_ALA_5     | H, B_ALA_5      | 2.84 | 1.99 | 24.18 |
| 1HGJ.PDB | OD1, B_ASP_112 | N, B_ILE_6     | H, B_ILE_6      | 3.00 | 2.08 | 16.65 |
| 1HGJ.PDB | O, B_GLY_4     | N, B_PHE_9     | H, B_PHE_9      | 2.78 | 1.85 | 13.96 |
| 1HGJ.PDB | O, B_GLY_13    | ND2, B_ASN_12  | HD22, B_ASN_12  | 2.87 | 1.99 | 21.80 |
| 1HGJ.PDB | O, A_VAL_323   | N, B_GLY_13    | H, B_GLY_13     | 2.69 | 1.76 | 11.68 |

|          |                |               |                |      |      |       |
|----------|----------------|---------------|----------------|------|------|-------|
| 1HGJ.PDB | O, A_HIS_17    | N, B_TRP_14   | H, B_TRP_14    | 2.84 | 1.89 | 12.22 |
| 1HGJ.PDB | OG1, B_THR_41  | N, B_TRP_21   | H, B_TRP_21    | 2.94 | 2.02 | 16.97 |
| 1HGJ.PDB | O, A_GLY_16    | N, B_GLY_23   | H, B_GLY_23    | 2.94 | 2.02 | 17.07 |
| 1HGJ.PDB | O, B_ALA_35    | N, B_PHE_24   | H, B_PHE_24    | 2.82 | 1.86 | 8.22  |
| 1HGJ.PDB | O, A_CYS_14    | N, B_ARG_25   | H, B_ARG_25    | 2.98 | 2.05 | 15.51 |
| 1HGJ.PDB | OE1, B_GLN_34  | NE, B_ARG_25  | HE, B_ARG_25   | 2.57 | 1.79 | 29.34 |
| 1HGJ.PDB | OE2, A_GLU_325 | NH2, B_ARG_25 | HH22, B_ARG_25 | 2.97 | 2.01 | 15.94 |
| 1HGJ.PDB | O, B_GLY_33    | N, B_HIS_26   | H, B_HIS_26    | 2.69 | 1.82 | 21.72 |
| 1HGJ.PDB | O, B_GLY_31    | N, B_ASN_28   | H, B_ASN_28    | 2.73 | 1.80 | 14.27 |
| 1HGJ.PDB | O, B_ASN_28    | N, B_GLY_31   | H, B_GLY_31    | 2.95 | 2.06 | 20.54 |
| 1HGJ.PDB | O, B_HIS_26    | N, B_GLY_33   | H, B_GLY_33    | 2.91 | 1.99 | 16.91 |
| 1HGJ.PDB | O, B_PHE_24    | N, B_ALA_35   | H, B_ALA_35    | 2.77 | 1.91 | 23.35 |
| 1HGJ.PDB | O, B_TYR_22    | N, B_ASP_37   | H, B_ASP_37    | 2.68 | 1.76 | 13.66 |
| 1HGJ.PDB | OD2, B_ASP_37  | N, B_SER_40   | H, B_SER_40    | 2.93 | 1.96 | 8.36  |
| 1HGJ.PDB | O, B_ASP_37    | OG1, B_THR_41 | HG1, B_THR_41  | 2.75 | 1.82 | 13.86 |
| 1HGJ.PDB | O, B_LEU_38    | N, B_GLN_42   | H, B_GLN_42    | 2.95 | 2.02 | 15.28 |
| 1HGJ.PDB | OD1, B_ASP_46  | NE2, B_GLN_42 | HE22, B_GLN_42 | 2.81 | 1.92 | 21.14 |
| 1HGJ.PDB | O, B_LYS_39    | N, B_ALA_43   | H, B_ALA_43    | 2.97 | 2.02 | 10.62 |
| 1HGJ.PDB | O, B_SER_40    | N, B_ALA_44   | H, B_ALA_44    | 2.96 | 1.98 | 1.15  |
| 1HGJ.PDB | O, B_THR_41    | N, B_ILE_45   | H, B_ILE_45    | 2.88 | 1.92 | 10.00 |
| 1HGJ.PDB | O, B_GLN_42    | N, B_ASP_46   | H, B_ASP_46    | 2.77 | 1.81 | 2.39  |
| 1HGJ.PDB | OE2, B_GLU_114 | NE2, B_GLN_47 | HE21, B_GLN_47 | 2.96 | 2.05 | 17.93 |
| 1HGJ.PDB | O, B_ALA_43    | NE2, B_GLN_47 | HE22, B_GLN_47 | 2.92 | 2.04 | 21.05 |
| 1HGJ.PDB | O, B_ILE_45    | N, B_ASN_49   | H, B_ASN_49    | 2.87 | 1.94 | 16.22 |
| 1HGJ.PDB | O, B_ASP_46    | N, B_GLY_50   | H, B_GLY_50    | 2.84 | 1.96 | 21.96 |
| 1HGJ.PDB | OG1, B_THR_107 | NZ, B_LYS_51  | HZ1, B_LYS_51  | 2.96 | 1.99 | 17.76 |
| 1HGJ.PDB | OE1, B_GLU_103 | NZ, B_LYS_51  | HZ2, B_LYS_51  | 2.78 | 1.74 | 6.16  |
| 1HGJ.PDB | ND1, B_HIS_106 | NZ, B_LYS_51  | HZ3, B_LYS_51  | 2.79 | 1.82 | 16.46 |
| 1HGJ.PDB | O, B_ILE_48    | N, B_LEU_52   | H, B_LEU_52    | 2.87 | 1.97 | 17.59 |
| 1HGJ.PDB | O, B_ASN_49    | N, B_ASN_53   | H, B_ASN_53    | 2.88 | 1.95 | 13.58 |
| 1HGJ.PDB | O, E_THR_28    | NE, B_ARG_54  | HE, B_ARG_54   | 3.00 | 2.04 | 10.82 |
| 1HGJ.PDB | OE1, B_GLU_57  | NH1, B_ARG_54 | HH11, B_ARG_54 | 2.87 | 1.87 | 9.43  |
| 1HGJ.PDB | OE2, F_GLU_97  | NH2, B_ARG_54 | HH22, B_ARG_54 | 2.77 | 1.81 | 15.09 |
| 1HGJ.PDB | OD2, F_ASP_86  | NZ, B_LYS_62  | HZ1, B_LYS_62  | 2.65 | 1.75 | 23.55 |
| 1HGJ.PDB | OD2, F_ASP_90  | NZ, B_LYS_62  | HZ3, B_LYS_62  | 2.74 | 1.89 | 28.52 |
| 1HGJ.PDB | OG, A_SER_110  | NE2, B_HIS_64 | HE2, B_HIS_64  | 2.89 | 1.93 | 11.21 |
| 1HGJ.PDB | O, A_LYS_299   | NZ, B_LYS_68  | HZ1, B_LYS_68  | 2.90 | 1.89 | 11.39 |
| 1HGJ.PDB | OE2, B_GLU_85  | NZ, B_LYS_68  | HZ2, B_LYS_68  | 2.78 | 1.76 | 8.72  |
| 1HGJ.PDB | OG, C_SER_107  | N, B_ARG_76   | H, B_ARG_76    | 2.84 | 1.89 | 10.24 |
| 1HGJ.PDB | OE2, D_GLU_81  | NE, B_ARG_76  | HE, B_ARG_76   | 2.90 | 1.93 | 10.80 |
| 1HGJ.PDB | OE2, D_GLU_74  | NH1, B_ARG_76 | HH12, B_ARG_76 | 2.88 | 1.87 | 5.28  |
| 1HGJ.PDB | OE1, D_GLU_81  | NH2, B_ARG_76 | HH21, B_ARG_76 | 2.72 | 1.72 | 3.64  |
| 1HGJ.PDB | OE1, D_GLU_74  | NH2, B_ARG_76 | HH22, B_ARG_76 | 2.85 | 1.84 | 3.19  |
| 1HGJ.PDB | OE1, B_GLU_74  | NE2, B_GLN_78 | HE22, B_GLN_78 | 2.90 | 1.95 | 12.93 |
| 1HGJ.PDB | O, B_GLY_75    | N, B_ASP_79   | H, B_ASP_79    | 2.93 | 2.00 | 14.44 |
| 1HGJ.PDB | O, B_ILE_77    | N, B_GLU_81   | H, B_GLU_81    | 2.99 | 2.02 | 6.22  |
| 1HGJ.PDB | O, B_GLN_78    | N, B_LYS_82   | H, B_LYS_82    | 2.95 | 1.99 | 7.96  |
| 1HGJ.PDB | O, B_ASP_79    | N, B_TYR_83   | H, B_TYR_83    | 2.84 | 1.90 | 13.83 |
| 1HGJ.PDB | OE1, D_GLU_85  | OH, B_TYR_83  | HH, B_TYR_83   | 2.67 | 1.83 | 24.12 |
| 1HGJ.PDB | O, B_LEU_80    | N, B_VAL_84   | H, B_VAL_84    | 2.83 | 1.86 | 5.05  |
| 1HGJ.PDB | O, B_LYS_82    | N, B_ASP_86   | H, B_ASP_86    | 2.93 | 1.98 | 11.14 |
| 1HGJ.PDB | O, B_TYR_83    | N, B_THR_87   | H, B_THR_87    | 2.88 | 1.94 | 13.57 |
| 1HGJ.PDB | O, B_VAL_84    | N, B_LYS_88   | H, B_LYS_88    | 2.97 | 2.03 | 12.68 |
| 1HGJ.PDB | OH, F_TYR_83   | NZ, B_LYS_88  | HZ1, B_LYS_88  | 2.78 | 1.75 | 7.42  |
| 1HGJ.PDB | O, B_GLU_85    | N, B_ILE_89   | H, B_ILE_89    | 2.86 | 1.88 | 2.57  |
| 1HGJ.PDB | O, B_LYS_88    | N, B_TRP_92   | H, B_TRP_92    | 2.95 | 1.97 | 4.34  |
| 1HGJ.PDB | O, B_ILE_89    | N, B_SER_93   | H, B_SER_93    | 2.84 | 1.96 | 21.34 |
| 1HGJ.PDB | O, B_ILE_89    | OG, B_SER_93  | HG, B_SER_93   | 2.85 | 1.94 | 16.10 |

|          |                |                |                 |      |      |       |
|----------|----------------|----------------|-----------------|------|------|-------|
| 1HGJ.PDB | O, B_ASP_90    | N, B_TYR_94    | H, B_TYR_94     | 2.84 | 1.94 | 19.37 |
| 1HGJ.PDB | O, B_TRP_92    | N, B_ALA_96    | H, B_ALA_96     | 2.98 | 2.03 | 11.55 |
| 1HGJ.PDB | O, B_TYR_94    | N, B_LEU_98    | H, B_LEU_98     | 2.96 | 1.99 | 5.51  |
| 1HGJ.PDB | O, B_ASN_95    | N, B_LEU_99    | H, B_LEU_99     | 2.87 | 1.95 | 16.33 |
| 1HGJ.PDB | O, B_LEU_98    | N, B_LEU_102   | H, B_LEU_102    | 2.95 | 1.98 | 7.34  |
| 1HGJ.PDB | O, B_LEU_99    | N, B_GLU_103   | H, B_GLU_103    | 2.95 | 1.99 | 9.27  |
| 1HGJ.PDB | O, B_VAL_100   | N, B_ASN_104   | H, B_ASN_104    | 2.84 | 1.88 | 10.60 |
| 1HGJ.PDB | O, A_LYS_27    | ND2, B_ASN_104 | HD22, B_ASN_104 | 2.89 | 1.94 | 10.52 |
| 1HGJ.PDB | O, B_LEU_102   | N, B_HIS_106   | H, B_HIS_106    | 2.93 | 1.97 | 8.51  |
| 1HGJ.PDB | O, B_GLU_103   | N, B_THR_107   | H, B_THR_107    | 2.83 | 1.93 | 19.44 |
| 1HGJ.PDB | O, B_HIS_106   | N, B_LEU_110   | H, B_LEU_110    | 2.81 | 1.85 | 8.24  |
| 1HGJ.PDB | O, B_THR_107   | OG1, B_THR_111 | HG1, B_THR_111  | 2.81 | 1.92 | 19.54 |
| 1HGJ.PDB | O, B_ASP_109   | N, B_SER_113   | H, B_SER_113    | 2.79 | 1.83 | 7.83  |
| 1HGJ.PDB | O, F_LEU_2     | OG, B_SER_113  | HG, B_SER_113   | 2.74 | 1.91 | 25.16 |
| 1HGJ.PDB | O, B_LEU_110   | N, B_GLU_114   | H, B_GLU_114    | 2.95 | 1.99 | 10.32 |
| 1HGJ.PDB | O, B_ASP_112   | N, B_ASN_116   | H, B_ASN_116    | 2.97 | 2.01 | 9.78  |
| 1HGJ.PDB | O, B_SER_113   | N, B_LYS_117   | H, B_LYS_117    | 2.71 | 1.84 | 21.48 |
| 1HGJ.PDB | O, B_GLU_114   | N, B_LEU_118   | H, B_LEU_118    | 2.97 | 2.01 | 9.85  |
| 1HGJ.PDB | O, B_ASN_116   | N, B_GLU_120   | H, B_GLU_120    | 2.95 | 1.98 | 2.37  |
| 1HGJ.PDB | O, B_LYS_117   | N, B_LYS_121   | H, B_LYS_121    | 2.92 | 2.02 | 19.46 |
| 1HGJ.PDB | O, B_PHE_119   | N, B_ARG_123   | H, B_ARG_123    | 2.95 | 1.98 | 8.48  |
| 1HGJ.PDB | OE2, B_GLU_120 | NH1, B_ARG_123 | HH11, B_ARG_123 | 2.74 | 1.86 | 23.95 |
| 1HGJ.PDB | OE1, F_GLU_132 | NE, B_ARG_124  | HE, B_ARG_124   | 2.82 | 2.00 | 27.29 |
| 1HGJ.PDB | OE2, F_GLU_132 | NE, B_ARG_124  | HE, B_ARG_124   | 2.91 | 2.02 | 20.91 |
| 1HGJ.PDB | O, B_HIS_159   | ND2, B_ASN_129 | HD21, B_ASN_129 | 2.96 | 2.00 | 9.85  |
| 1HGJ.PDB | OH, B_TYR_157  | ND2, B_ASN_129 | HD22, B_ASN_129 | 2.77 | 1.84 | 15.18 |
| 1HGJ.PDB | O, B_LYS_139   | N, B_GLU_131   | H, B_GLU_131    | 2.92 | 1.98 | 12.78 |
| 1HGJ.PDB | O, B_CYS_137   | N, B_MET_133   | H, B_MET_133    | 2.85 | 1.92 | 15.10 |
| 1HGJ.PDB | O, A_LEU_13    | N, B_PHE_138   | H, B_PHE_138    | 2.71 | 1.86 | 23.78 |
| 1HGJ.PDB | O, B_GLU_131   | N, B_LYS_139   | H, B_LYS_139    | 2.83 | 1.87 | 8.18  |
| 1HGJ.PDB | O, A_ALA_11    | N, B_ILE_140   | H, B_ILE_140    | 2.77 | 1.86 | 16.77 |
| 1HGJ.PDB | O, B_ASN_129   | N, B_TYR_141   | H, B_TYR_141    | 2.93 | 1.98 | 12.18 |
| 1HGJ.PDB | OE2, B_GLU_165 | N, B_LYS_143   | H, B_LYS_143    | 2.97 | 2.02 | 13.21 |
| 1HGJ.PDB | OE1, B_GLU_30  | N, B_ASN_146   | H, B_ASN_146    | 2.90 | 1.96 | 14.42 |
| 1HGJ.PDB | O, B_ASP_145   | N, B_ILE_149   | H, B_ILE_149    | 2.89 | 1.94 | 10.22 |
| 1HGJ.PDB | O, B_ASN_146   | N, B_GLU_150   | H, B_GLU_150    | 2.88 | 1.95 | 15.40 |
| 1HGJ.PDB | O, B_ALA_147   | N, B_SER_151   | H, B_SER_151    | 2.86 | 1.97 | 19.97 |
| 1HGJ.PDB | O, B_CYS_148   | OG, B_SER_151  | HG, B_SER_151   | 2.69 | 1.85 | 23.77 |
| 1HGJ.PDB | O, B_GLU_150   | N, B_ASN_154   | H, B_ASN_154    | 2.80 | 1.82 | 1.74  |
| 1HGJ.PDB | OE2, B_GLU_150 | ND2, B_ASN_154 | HD21, B_ASN_154 | 2.81 | 2.00 | 28.55 |
| 1HGJ.PDB | O, B_SER_151   | N, B_THR_156   | H, B_THR_156    | 2.71 | 1.89 | 26.64 |
| 1HGJ.PDB | OD1, B_ASN_154 | OG1, B_THR_156 | HG1, B_THR_156  | 2.67 | 1.80 | 19.98 |
| 1HGJ.PDB | OD1, B_ASP_158 | N, B_ASP_160   | H, B_ASP_160    | 2.91 | 2.05 | 23.96 |
| 1HGJ.PDB | O, B_HIS_159   | N, B_TYR_162   | H, B_TYR_162    | 2.94 | 2.06 | 21.10 |
| 1HGJ.PDB | O, F_ARG_170   | NH1, B_ARG_163 | HH12, B_ARG_163 | 2.72 | 1.75 | 12.61 |
| 1HGJ.PDB | O, B_TYR_162   | N, B_ALA_166   | H, B_ALA_166    | 2.86 | 1.89 | 2.61  |
| 1HGJ.PDB | O, B_ARG_163   | N, B_LEU_167   | H, B_LEU_167    | 2.77 | 1.81 | 8.42  |
| 1HGJ.PDB | O, B_ALA_166   | N, B_ARG_170   | H, B_ARG_170    | 2.83 | 1.95 | 21.36 |
| 1HGJ.PDB | O, B_GLU_128   | NE, B_ARG_170  | HE, B_ARG_170   | 2.79 | 1.92 | 22.95 |
| 1HGJ.PDB | OE2, B_GLU_131 | NH1, B_ARG_170 | HH11, B_ARG_170 | 2.80 | 1.80 | 6.39  |
| 1HGJ.PDB | O, B_LEU_167   | N, B_PHE_171   | H, B_PHE_171    | 2.93 | 2.01 | 16.69 |
| 1HGJ.PDB | O, D_ILE_140   | N, C_ALA_11    | H, C_ALA_11     | 2.85 | 1.95 | 19.06 |
| 1HGJ.PDB | O, D_GLN_27    | N, C_THR_12    | H, C_THR_12     | 2.99 | 2.03 | 8.05  |
| 1HGJ.PDB | O, D_PHE_138   | N, C_LEU_13    | H, C_LEU_13     | 2.99 | 2.02 | 7.89  |
| 1HGJ.PDB | O, D_ARG_25    | N, C_CYS_14    | H, C_CYS_14     | 2.76 | 1.85 | 16.80 |
| 1HGJ.PDB | O, D_GLY_136   | N, C_LEU_15    | H, C_LEU_15     | 2.95 | 1.97 | 3.95  |
| 1HGJ.PDB | O, D_GLY_23    | N, C_GLY_16    | H, C_GLY_16     | 2.89 | 1.98 | 18.54 |
| 1HGJ.PDB | O, C_HIS_18    | ND1, C_HIS_17  | HD1, C_HIS_17   | 2.94 | 2.08 | 23.78 |



|          |                |                |                 |      |      |       |
|----------|----------------|----------------|-----------------|------|------|-------|
| 1HGJ.PDB | O, D_TRP_21    | N, C_HIS_18    | H, C_HIS_18     | 2.86 | 1.97 | 20.63 |
| 1HGJ.PDB | OD1, C_ASN_322 | N, C_VAL_20    | H, C_VAL_20     | 2.78 | 1.82 | 9.76  |
| 1HGJ.PDB | O, C_VAL_36    | N, C_THR_24    | H, C_THR_24     | 2.86 | 1.93 | 13.58 |
| 1HGJ.PDB | O, C_ILE_34    | N, C_VAL_26    | H, C_VAL_26     | 2.80 | 1.85 | 11.08 |
| 1HGJ.PDB | OE2, D_GLU_97  | NZ, C_LYS_27   | HZ1, C_LYS_27   | 2.82 | 1.80 | 8.63  |
| 1HGJ.PDB | O, C_ASP_31    | N, C_THR_28    | H, C_THR_28     | 2.73 | 1.88 | 23.51 |
| 1HGJ.PDB | O, C_VAL_26    | N, C_ILE_34    | H, C_ILE_34     | 2.90 | 1.95 | 12.50 |
| 1HGJ.PDB | O, C_THR_24    | N, C_VAL_36    | H, C_VAL_36     | 2.82 | 1.85 | 5.74  |
| 1HGJ.PDB | O, C_MET_320   | N, C_THR_37    | H, C_THR_37     | 2.89 | 1.92 | 6.83  |
| 1HGJ.PDB | O, C_LEU_316   | N, C_THR_40    | H, C_THR_40     | 2.90 | 2.05 | 25.12 |
| 1HGJ.PDB | O, C_LEU_314   | N, C_LEU_42    | H, C_LEU_42     | 2.80 | 1.93 | 22.39 |
| 1HGJ.PDB | O, C_PHE_294   | N, C_GLN_44    | H, C_GLN_44     | 2.82 | 1.85 | 7.42  |
| 1HGJ.PDB | O, C_SER_46    | NE2, C_GLN_44  | HE22, C_GLN_44  | 2.90 | 2.00 | 19.73 |
| 1HGJ.PDB | O, C_ASN_285   | OG, C_SER_47   | HG, C_SER_47    | 2.83 | 1.92 | 15.29 |
| 1HGJ.PDB | OD2, C_ASP_275 | NZ, C_LYS_50   | HZ1, C_LYS_50   | 2.74 | 1.82 | 22.76 |
| 1HGJ.PDB | O, C_PRO_273   | N, C_ILE_51    | H, C_ILE_51     | 2.85 | 1.89 | 9.03  |
| 1HGJ.PDB | O, C_ASP_275   | N, C_ASN_53    | H, C_ASN_53     | 2.78 | 1.94 | 25.31 |
| 1HGJ.PDB | O, C_GLU_280   | NE2, C_HIS_56  | HE2, C_HIS_56   | 2.97 | 2.05 | 17.85 |
| 1HGJ.PDB | OD2, C_ASP_85  | N, C_ARG_57    | H, C_ARG_57     | 2.84 | 1.90 | 12.58 |
| 1HGJ.PDB | O, C_THR_83    | NE, C_ARG_57   | HE, C_ARG_57    | 2.76 | 1.80 | 8.04  |
| 1HGJ.PDB | O, C_LEU_86    | N, C_LEU_59    | H, C_LEU_59     | 2.87 | 1.92 | 10.21 |
| 1HGJ.PDB | O, C_VAL_88    | N, C_GLY_61    | H, C_GLY_61     | 2.97 | 2.10 | 22.49 |
| 1HGJ.PDB | OD1, C_ASP_60  | N, C_ILE_62    | H, C_ILE_62     | 2.85 | 1.93 | 15.07 |
| 1HGJ.PDB | O, C_GLY_61    | N, C_CYS_64    | H, C_CYS_64     | 2.87 | 1.96 | 17.46 |
| 1HGJ.PDB | O, C_LEU_66    | N, C_LEU_70    | H, C_LEU_70     | 2.89 | 2.00 | 19.99 |
| 1HGJ.PDB | O, C_ILE_67    | N, C_LEU_71    | H, C_LEU_71     | 2.82 | 1.86 | 8.52  |
| 1HGJ.PDB | O, C_ASP_68    | N, C_GLY_72    | H, C_GLY_72     | 2.86 | 1.96 | 18.14 |
| 1HGJ.PDB | OD1, C_ASP_73  | N, C_HIS_75    | H, C_HIS_75     | 2.96 | 2.05 | 18.04 |
| 1HGJ.PDB | OD1, C_ASP_73  | ND1, C_HIS_75  | HD1, C_HIS_75   | 2.80 | 1.89 | 17.49 |
| 1HGJ.PDB | O, C_ASP_63    | NE2, C_HIS_75  | HE2, C_HIS_75   | 2.82 | 1.92 | 19.39 |
| 1HGJ.PDB | O, C_ASP_73    | N, C_CYS_76    | H, C_CYS_76     | 2.78 | 1.84 | 12.95 |
| 1HGJ.PDB | O, C_PRO_74    | N, C_ASP_77    | H, C_ASP_77     | 2.96 | 2.00 | 11.06 |
| 1HGJ.PDB | O, C_ARG_57    | N, C_ASP_85    | H, C_ASP_85     | 2.81 | 1.90 | 16.89 |
| 1HGJ.PDB | O, C_LEU_59    | N, C_VAL_88    | H, C_VAL_88     | 2.97 | 2.00 | 6.49  |
| 1HGJ.PDB | O, C_MET_268   | N, C_GLU_89    | H, C_GLU_89     | 2.80 | 1.85 | 10.39 |
| 1HGJ.PDB | OD1, C_ASP_60  | NE, C_ARG_90   | HE, C_ARG_90    | 2.88 | 1.91 | 9.03  |
| 1HGJ.PDB | O, C_SER_270   | NH1, C_ARG_90  | HH11, C_ARG_90  | 2.68 | 1.80 | 24.07 |
| 1HGJ.PDB | O, C_ALA_272   | NH1, C_ARG_90  | HH12, C_ARG_90  | 2.62 | 1.70 | 18.50 |
| 1HGJ.PDB | OD2, C_ASP_60  | NH2, C_ARG_90  | HH21, C_ARG_90  | 2.78 | 1.79 | 9.66  |
| 1HGJ.PDB | OD1, C_ASP_271 | N, C_SER_91    | H, C_SER_91     | 2.92 | 1.95 | 7.70  |
| 1HGJ.PDB | OD1, C_ASP_271 | OG, C_SER_91   | HG, C_SER_91    | 2.99 | 2.16 | 26.38 |
| 1HGJ.PDB | OD2, C_ASP_271 | OG, C_SER_91   | HG, C_SER_91    | 2.81 | 1.92 | 18.67 |
| 1HGJ.PDB | OD2, C_ASP_68  | OG, C_SER_95   | HG, C_SER_95    | 2.93 | 1.99 | 14.68 |
| 1HGJ.PDB | OD2, C_ASP_73  | N, C_ASN_96    | H, C_ASN_96     | 2.87 | 1.92 | 11.70 |
| 1HGJ.PDB | OD1, C_ASP_68  | OH, C_TYR_100  | HH, C_TYR_100   | 2.88 | 1.95 | 14.58 |
| 1HGJ.PDB | O, C_ILE_230   | N, C_ASP_101   | H, C_ASP_101    | 2.91 | 2.04 | 23.02 |
| 1HGJ.PDB | OD2, C_ASP_104 | OG, C_SER_107  | HG, C_SER_107   | 2.90 | 1.99 | 17.96 |
| 1HGJ.PDB | O, C_TYR_105   | N, C_ARG_109   | H, C_ARG_109    | 2.82 | 1.85 | 3.87  |
| 1HGJ.PDB | OE2, D_GLU_67  | NH2, C_ARG_109 | HH21, C_ARG_109 | 2.76 | 1.78 | 13.33 |
| 1HGJ.PDB | OD2, B_ASP_79  | OG, C_SER_110  | HG, C_SER_110   | 2.79 | 1.87 | 14.95 |
| 1HGJ.PDB | O, C_SER_107   | N, C_LEU_111   | H, C_LEU_111    | 2.85 | 1.89 | 7.06  |
| 1HGJ.PDB | O, C_ARG_109   | N, C_ALA_113   | H, C_ALA_113    | 2.95 | 2.06 | 19.71 |
| 1HGJ.PDB | O, C_SER_110   | N, C_SER_114   | H, C_SER_114    | 2.92 | 1.97 | 12.30 |
| 1HGJ.PDB | OE2, C_GLU_119 | OG1, C_THR_117 | HG1, C_THR_117  | 2.88 | 1.94 | 11.85 |
| 1HGJ.PDB | O, C_GLU_82    | N, C_LEU_118   | H, C_LEU_118    | 2.91 | 1.97 | 15.15 |
| 1HGJ.PDB | O, C_TYR_257   | N, C_ILE_121   | H, C_ILE_121    | 2.86 | 1.89 | 7.41  |
| 1HGJ.PDB | O, C_ARG_255   | N, C_GLU_123   | H, C_GLU_123    | 2.93 | 1.97 | 10.38 |
| 1HGJ.PDB | O, C_THR_155   | N, C_THR_131   | H, C_THR_131    | 2.74 | 1.84 | 18.58 |

|          |                |                |                 |      |      |       |
|----------|----------------|----------------|-----------------|------|------|-------|
| 1HGJ.PDB | OD1, C_ASN_152 | N, C_ASN_133   | H, C_ASN_133    | 2.86 | 1.94 | 15.99 |
| 1HGJ.PDB | O, C_GLY_146   | N, C_SER_136   | H, C_SER_136    | 2.75 | 1.85 | 18.24 |
| 1HGJ.PDB | OG, C_SER_136  | N, C_ALA_138   | H, C_ALA_138    | 2.91 | 1.97 | 13.65 |
| 1HGJ.PDB | O, C_GLY_144   | NZ, C_LYS_140  | HZ1, C_LYS_140  | 2.72 | 1.76 | 17.33 |
| 1HGJ.PDB | OD1, C_ASN_137 | NZ, C_LYS_140  | HZ2, C_LYS_140  | 2.71 | 1.72 | 13.24 |
| 1HGJ.PDB | OD2, C_ASP_77  | NE, C_ARG_141  | HE, C_ARG_141   | 2.82 | 1.99 | 27.42 |
| 1HGJ.PDB | O, C_PHE_147   | NH1, C_ARG_141 | HH12, C_ARG_141 | 2.55 | 1.62 | 17.29 |
| 1HGJ.PDB | OD1, C_ASP_77  | NH2, C_ARG_141 | HH21, C_ARG_141 | 2.81 | 1.89 | 21.37 |
| 1HGJ.PDB | OD2, C_ASP_77  | NH2, C_ARG_141 | HH21, C_ARG_141 | 2.74 | 1.86 | 24.47 |
| 1HGJ.PDB | O, C_GLY_72    | NH2, C_ARG_141 | HH22, C_ARG_141 | 2.89 | 1.91 | 10.48 |
| 1HGJ.PDB | OD1, C_ASN_137 | OG, C_SER_145  | HG, C_SER_145   | 2.92 | 2.08 | 24.33 |
| 1HGJ.PDB | O, C_SER_136   | N, C_GLY_146   | H, C_GLY_146    | 2.93 | 2.00 | 15.25 |
| 1HGJ.PDB | O, C_GLY_72    | N, C_SER_149   | H, C_SER_149    | 2.81 | 1.91 | 18.87 |
| 1HGJ.PDB | O, C_ALA_253   | N, C_ASN_152   | H, C_ASN_152    | 2.77 | 1.94 | 26.39 |
| 1HGJ.PDB | OH, C_TYR_195  | NE1, C_TRP_153 | HE1, C_TRP_153  | 2.84 | 1.96 | 21.72 |
| 1HGJ.PDB | O, C_THR_131   | N, C_THR_155   | H, C_THR_155    | 2.99 | 2.03 | 9.79  |
| 1HGJ.PDB | O, C_LEU_194   | N, C_LYS_156   | H, C_LYS_156    | 2.97 | 2.05 | 16.86 |
| 1HGJ.PDB | O, C_SER_247   | N, C_LEU_164   | H, C_LEU_164    | 2.72 | 1.87 | 24.03 |
| 1HGJ.PDB | O, C_ILE_245   | N, C_VAL_166   | H, C_VAL_166    | 2.96 | 2.01 | 10.78 |
| 1HGJ.PDB | O, C_LEU_243   | OG1, C_THR_167 | HG1, C_THR_167  | 2.93 | 2.04 | 19.65 |
| 1HGJ.PDB | O, C_LEU_243   | N, C_MET_168   | H, C_MET_168    | 2.91 | 1.99 | 17.19 |
| 1HGJ.PDB | O, C_ASP_241   | N, C_ASN_170   | H, C_ASN_170    | 2.89 | 1.92 | 9.78  |
| 1HGJ.PDB | O, C_PHE_174   | ND2, C_ASN_170 | HD21, C_ASN_170 | 2.84 | 1.88 | 9.63  |
| 1HGJ.PDB | O, C_VAL_237   | ND2, C_ASN_170 | HD22, C_ASN_170 | 2.87 | 2.05 | 26.94 |
| 1HGJ.PDB | O, C_VAL_237   | N, C_LYS_176   | H, C_LYS_176    | 2.90 | 1.97 | 14.44 |
| 1HGJ.PDB | OE2, C_GLU_123 | NZ, C_LYS_176  | HZ1, C_LYS_176  | 2.69 | 1.80 | 24.96 |
| 1HGJ.PDB | O, C_PHE_258   | N, C_LEU_177   | H, C_LEU_177    | 2.97 | 2.00 | 6.71  |
| 1HGJ.PDB | O, C_THR_235   | N, C_TYR_178   | H, C_TYR_178    | 2.79 | 1.83 | 4.13  |
| 1HGJ.PDB | OE1, C_GLU_123 | OH, C_TYR_178  | HH, C_TYR_178   | 2.77 | 1.82 | 8.51  |
| 1HGJ.PDB | OG1, C_THR_235 | NE1, C_TRP_180 | HE1, C_TRP_180  | 2.91 | 1.92 | 4.72  |
| 1HGJ.PDB | O, C_ASN_250   | N, C_HIS_183   | H, C_HIS_183    | 2.91 | 2.00 | 17.12 |
| 1HGJ.PDB | O, C_ARG_229   | N, C_HIS_184   | H, C_HIS_184    | 2.88 | 1.92 | 8.64  |
| 1HGJ.PDB | OG, C_SER_231  | NE2, C_HIS_184 | HE2, C_HIS_184  | 2.74 | 1.91 | 26.34 |
| 1HGJ.PDB | OG1, C_THR_187 | N, C_GLU_190   | H, C_GLU_190    | 2.91 | 1.96 | 12.15 |
| 1HGJ.PDB | OD1, C_ASN_250 | NE2, C_GLN_191 | HE21, C_GLN_191 | 2.99 | 2.02 | 8.22  |
| 1HGJ.PDB | O, C_GLN_197   | NE2, C_GLN_191 | HE22, C_GLN_191 | 2.89 | 1.97 | 17.35 |
| 1HGJ.PDB | O, C_GLN_189   | OG1, C_THR_192 | HG1, C_THR_192  | 2.84 | 1.97 | 20.14 |
| 1HGJ.PDB | O, C_GLN_189   | N, C_SER_193   | H, C_SER_193    | 2.85 | 1.90 | 9.95  |
| 1HGJ.PDB | O, C_GLN_191   | N, C_TYR_195   | H, C_TYR_195    | 2.82 | 1.86 | 10.13 |
| 1HGJ.PDB | O, C_TYR_161   | NE2, C_GLN_197 | HE21, C_GLN_197 | 2.90 | 1.95 | 11.26 |
| 1HGJ.PDB | O, C_ASN_248   | NE2, C_GLN_197 | HE22, C_GLN_197 | 2.87 | 1.94 | 15.42 |
| 1HGJ.PDB | OD1, C_ASN_246 | NH2, C_ARG_201 | HH21, C_ARG_201 | 2.59 | 1.74 | 25.86 |
| 1HGJ.PDB | O, C_ILE_213   | N, C_VAL_202   | H, C_VAL_202    | 2.99 | 2.07 | 16.15 |
| 1HGJ.PDB | O, C_ASN_246   | N, C_THR_203   | H, C_THR_203    | 2.94 | 2.00 | 13.61 |
| 1HGJ.PDB | OG1, C_THR_212 | OG1, C_THR_203 | HG1, C_THR_203  | 2.89 | 1.94 | 9.95  |
| 1HGJ.PDB | O, C_GLN_211   | N, C_VAL_204   | H, C_VAL_204    | 2.83 | 1.93 | 19.04 |
| 1HGJ.PDB | O, C_SER_209   | N, C_THR_206   | H, C_THR_206    | 2.91 | 1.95 | 8.75  |
| 1HGJ.PDB | OD1, C_ASP_241 | N, C_ARG_207   | H, C_ARG_207    | 2.88 | 1.92 | 10.11 |
| 1HGJ.PDB | O, C_VAL_204   | N, C_GLN_211   | H, C_GLN_211    | 2.90 | 1.98 | 16.77 |
| 1HGJ.PDB | O, C_VAL_202   | N, C_ILE_213   | H, C_ILE_213    | 2.84 | 1.92 | 15.65 |
| 1HGJ.PDB | O, C_ASN_216   | NH1, C_ARG_220 | HH12, C_ARG_220 | 2.91 | 2.10 | 29.44 |
| 1HGJ.PDB | OE1, E_GLN_210 | NH2, C_ARG_220 | HH21, C_ARG_220 | 2.66 | 1.82 | 26.85 |
| 1HGJ.PDB | O, C_ASN_216   | NH2, C_ARG_220 | HH22, C_ARG_220 | 2.76 | 1.88 | 22.85 |
| 1HGJ.PDB | O, C_LEU_226   | N, C_VAL_223   | H, C_VAL_223    | 2.82 | 1.86 | 9.59  |
| 1HGJ.PDB | O, C_CYS_97    | NE, C_ARG_224  | HE, C_ARG_224   | 2.77 | 1.91 | 24.59 |
| 1HGJ.PDB | O, C_CYS_97    | NH2, C_ARG_224 | HH21, C_ARG_224 | 2.94 | 2.09 | 27.65 |
| 1HGJ.PDB | O, C_VAL_223   | N, C_LEU_226   | H, C_LEU_226    | 2.93 | 1.99 | 13.69 |
| 1HGJ.PDB | O, C_SER_228   | NH1, C_ARG_229 | HH11, C_ARG_229 | 2.68 | 1.74 | 16.79 |

|          |                |                |                 |      |      |       |
|----------|----------------|----------------|-----------------|------|------|-------|
| 1HGJ.PDB | O, C_PRO_221   | NH2, C_ARG_229 | HH22, C_ARG_229 | 2.63 | 1.67 | 13.79 |
| 1HGJ.PDB | OD1, C_ASP_101 | OG, C_SER_231  | HG, C_SER_231   | 2.91 | 1.95 | 9.37  |
| 1HGJ.PDB | O, C_ASP_101   | N, C_ILE_232   | H, C_ILE_232    | 2.88 | 1.96 | 16.46 |
| 1HGJ.PDB | O, C_TRP_180   | N, C_TYR_233   | H, C_TYR_233    | 2.93 | 1.96 | 7.62  |
| 1HGJ.PDB | O, C_TYR_178   | N, C_THR_235   | H, C_THR_235    | 2.88 | 1.98 | 19.28 |
| 1HGJ.PDB | O, C_LYS_176   | N, C_VAL_237   | H, C_VAL_237    | 2.78 | 1.87 | 16.51 |
| 1HGJ.PDB | OE1, B_GLU_72  | NZ, C_LYS_238  | HZ1, C_LYS_238  | 2.75 | 1.79 | 18.67 |
| 1HGJ.PDB | O, B_SER_71    | NZ, C_LYS_238  | HZ3, C_LYS_238  | 2.55 | 1.67 | 24.42 |
| 1HGJ.PDB | O, C_ASN_170   | N, C_GLY_240   | H, C_GLY_240    | 2.83 | 1.96 | 22.49 |
| 1HGJ.PDB | O, C_LYS_238   | N, C_ASP_241   | H, C_ASP_241    | 3.00 | 2.07 | 14.48 |
| 1HGJ.PDB | OD1, C_ASP_241 | N, C_VAL_242   | H, C_VAL_242    | 2.79 | 1.95 | 25.43 |
| 1HGJ.PDB | O, C_MET_168   | N, C_LEU_243   | H, C_LEU_243    | 2.93 | 1.95 | 4.94  |
| 1HGJ.PDB | O, C_SER_205   | N, C_VAL_244   | H, C_VAL_244    | 2.99 | 2.04 | 12.22 |
| 1HGJ.PDB | O, C_VAL_166   | N, C_ILE_245   | H, C_ILE_245    | 2.91 | 1.98 | 14.47 |
| 1HGJ.PDB | O, C_THR_203   | N, C_ASN_246   | H, C_ASN_246    | 2.94 | 1.97 | 6.29  |
| 1HGJ.PDB | OD1, C_ASN_165 | ND2, C_ASN_246 | HD22, C_ASN_246 | 2.89 | 1.93 | 12.15 |
| 1HGJ.PDB | O, C_LEU_164   | N, C_SER_247   | H, C_SER_247    | 2.92 | 2.00 | 17.46 |
| 1HGJ.PDB | O, C_HIS_183   | ND2, C_ASN_250 | HD22, C_ASN_250 | 2.86 | 1.91 | 11.73 |
| 1HGJ.PDB | O, C_GLY_181   | N, C_ILE_252   | H, C_ILE_252    | 3.00 | 2.04 | 10.63 |
| 1HGJ.PDB | O, C_ASN_152   | N, C_ALA_253   | H, C_ALA_253    | 2.89 | 2.00 | 20.86 |
| 1HGJ.PDB | OD1, C_ASN_133 | NH2, C_ARG_255 | HH22, C_ARG_255 | 2.54 | 1.71 | 27.08 |
| 1HGJ.PDB | O, C_ILE_121   | N, C_TYR_257   | H, C_TYR_257    | 2.90 | 2.06 | 24.92 |
| 1HGJ.PDB | O, C_LEU_177   | N, C_PHE_258   | H, C_PHE_258    | 2.92 | 1.95 | 7.10  |
| 1HGJ.PDB | OG, C_SER_115  | N, C_ARG_261   | H, C_ARG_261    | 2.96 | 2.02 | 14.08 |
| 1HGJ.PDB | OE2, C_GLU_119 | NH1, C_ARG_261 | HH12, C_ARG_261 | 2.65 | 1.83 | 28.56 |
| 1HGJ.PDB | OE1, C_GLU_119 | NH2, C_ARG_261 | HH22, C_ARG_261 | 2.92 | 2.03 | 23.97 |
| 1HGJ.PDB | OD2, C_ASP_85  | NZ, C_LYS_264  | HZ3, C_LYS_264  | 2.82 | 1.83 | 14.94 |
| 1HGJ.PDB | O, C_PHE_87    | N, C_MET_268   | H, C_MET_268    | 2.85 | 1.94 | 18.47 |
| 1HGJ.PDB | O, C_PRO_284   | OG, C_SER_270  | HG, C_SER_270   | 2.82 | 1.88 | 11.05 |
| 1HGJ.PDB | O, C_ILE_51    | N, C_ASP_275   | H, C_ASP_275    | 2.97 | 2.06 | 19.32 |
| 1HGJ.PDB | OD1, C_ASP_275 | N, C_THR_276   | H, C_THR_276    | 2.79 | 1.94 | 23.72 |
| 1HGJ.PDB | O, C_ASN_54    | N, C_SER_279   | H, C_SER_279    | 2.79 | 1.87 | 15.26 |
| 1HGJ.PDB | O, C_TYR_302   | N, C_ILE_282   | H, C_ILE_282    | 2.92 | 1.95 | 6.05  |
| 1HGJ.PDB | O, C_THR_283   | N, C_GLY_286   | H, C_GLY_286    | 2.79 | 1.87 | 14.96 |
| 1HGJ.PDB | O, C_LYS_50    | N, C_SER_287   | H, C_SER_287    | 2.81 | 1.85 | 7.28  |
| 1HGJ.PDB | O, C_ALA_304   | ND2, C_ASN_290 | HD22, C_ASN_290 | 2.84 | 1.93 | 18.26 |
| 1HGJ.PDB | OE1, C_GLN_44  | NZ, C_LYS_292  | HZ1, C_LYS_292  | 2.73 | 1.72 | 10.59 |
| 1HGJ.PDB | OD2, C_ASP_291 | NZ, C_LYS_292  | HZ3, C_LYS_292  | 2.82 | 1.84 | 16.66 |
| 1HGJ.PDB | O, C_LYS_307   | N, C_GLN_295   | H, C_GLN_295    | 2.91 | 2.01 | 20.39 |
| 1HGJ.PDB | O, C_ASN_298   | NE2, C_GLN_295 | HE21, C_GLN_295 | 2.78 | 1.83 | 8.19  |
| 1HGJ.PDB | O, C_GLN_44    | N, C_ASN_296   | H, C_ASN_296    | 2.84 | 1.91 | 13.62 |
| 1HGJ.PDB | OE1, C_GLN_295 | N, C_VAL_297   | H, C_VAL_297    | 2.75 | 1.95 | 28.92 |
| 1HGJ.PDB | O, D_LYS_68    | NZ, C_LYS_299  | HZ2, C_LYS_299  | 2.96 | 1.96 | 14.80 |
| 1HGJ.PDB | OD1, C_ASN_298 | N, C_ILE_300   | H, C_ILE_300    | 2.82 | 1.93 | 19.65 |
| 1HGJ.PDB | O, C_ILE_282   | N, C_TYR_302   | H, C_TYR_302    | 2.87 | 2.05 | 27.80 |
| 1HGJ.PDB | O, C_LYS_264   | OH, C_TYR_302  | HH, C_TYR_302   | 2.65 | 1.87 | 29.71 |
| 1HGJ.PDB | O, D_LYS_62    | N, C_GLY_303   | H, C_GLY_303    | 2.93 | 1.98 | 10.54 |
| 1HGJ.PDB | O, C_GLN_295   | N, C_VAL_309   | H, C_VAL_309    | 2.88 | 2.06 | 26.91 |
| 1HGJ.PDB | OG, D_SER_93   | N, C_LYS_310   | H, C_LYS_310    | 3.00 | 2.04 | 11.61 |
| 1HGJ.PDB | OD1, D_ASP_86  | NZ, C_LYS_310  | HZ3, C_LYS_310  | 2.94 | 2.10 | 29.37 |
| 1HGJ.PDB | OE2, C_GLU_41  | N, C_LEU_314   | H, C_LEU_314    | 2.78 | 1.85 | 13.27 |
| 1HGJ.PDB | OE1, C_GLU_41  | NZ, C_LYS_315  | HZ3, C_LYS_315  | 2.86 | 1.91 | 20.22 |
| 1HGJ.PDB | O, C_THR_40    | N, C_LEU_316   | H, C_LEU_316    | 2.82 | 1.87 | 11.05 |
| 1HGJ.PDB | OD1, D_ASN_104 | N, C_ALA_317   | H, C_ALA_317    | 2.74 | 1.82 | 13.77 |
| 1HGJ.PDB | O, C_ASN_38    | N, C_THR_318   | H, C_THR_318    | 2.92 | 2.00 | 16.68 |
| 1HGJ.PDB | O, C_VAL_20    | ND2, C_ASN_322 | HD21, C_ASN_322 | 2.87 | 1.94 | 14.85 |
| 1HGJ.PDB | OE2, C_GLU_35  | ND2, C_ASN_322 | HD22, C_ASN_322 | 2.88 | 1.97 | 19.99 |
| 1HGJ.PDB | OE1, D_GLU_15  | NZ, C_LYS_326  | HZ1, C_LYS_326  | 2.91 | 1.86 | 5.48  |

|          |                |               |                |      |      |       |
|----------|----------------|---------------|----------------|------|------|-------|
| 1HGJ.PDB | OD2, D_ASP_112 | N, D_GLY_1    | H2, D_GLY_1    | 2.78 | 1.78 | 13.54 |
| 1HGJ.PDB | OD1, D_ASP_109 | N, D_LEU_2    | H, D_LEU_2     | 2.88 | 1.99 | 20.57 |
| 1HGJ.PDB | OD2, D_ASP_112 | N, D_PHE_3    | H, D_PHE_3     | 2.81 | 2.00 | 27.45 |
| 1HGJ.PDB | OD2, D_ASP_112 | N, D_GLY_4    | H, D_GLY_4     | 2.87 | 1.96 | 16.53 |
| 1HGJ.PDB | OD1, D_ASP_112 | N, D_ALA_5    | H, D_ALA_5     | 2.85 | 1.99 | 23.99 |
| 1HGJ.PDB | O, D_GLY_4     | N, D_PHE_9    | H, D_PHE_9     | 2.80 | 1.87 | 14.24 |
| 1HGJ.PDB | O, D_GLY_13    | ND2, D_ASN_12 | HD22, D_ASN_12 | 2.90 | 2.01 | 19.14 |
| 1HGJ.PDB | O, C_VAL_323   | N, D_GLY_13   | H, D_GLY_13    | 2.70 | 1.77 | 13.01 |
| 1HGJ.PDB | O, C_HIS_17    | N, D_TRP_14   | H, D_TRP_14    | 2.84 | 1.88 | 10.47 |
| 1HGJ.PDB | OG1, D_THR_41  | N, D_TRP_21   | H, D_TRP_21    | 2.94 | 2.03 | 16.88 |
| 1HGJ.PDB | O, C_GLY_16    | N, D_GLY_23   | H, D_GLY_23    | 2.95 | 2.03 | 16.60 |
| 1HGJ.PDB | O, D_ALA_35    | N, D_PHE_24   | H, D_PHE_24    | 2.84 | 1.87 | 6.75  |
| 1HGJ.PDB | O, C_CYS_14    | N, D_ARG_25   | H, D_ARG_25    | 2.96 | 2.03 | 15.69 |
| 1HGJ.PDB | OE1, D_GLN_34  | NE, D_ARG_25  | HE, D_ARG_25   | 2.65 | 1.80 | 23.08 |
| 1HGJ.PDB | O, D_GLY_33    | N, D_HIS_26   | H, D_HIS_26    | 2.87 | 1.95 | 17.26 |
| 1HGJ.PDB | O, C_THR_12    | N, D_GLN_27   | H, D_GLN_27    | 2.96 | 2.04 | 16.68 |
| 1HGJ.PDB | O, D_GLY_31    | N, D_ASN_28   | H, D_ASN_28    | 2.92 | 1.97 | 10.77 |
| 1HGJ.PDB | OD1, D_ASN_146 | ND2, D_ASN_28 | HD21, D_ASN_28 | 2.98 | 2.03 | 11.81 |
| 1HGJ.PDB | OD1, D_ASN_28  | N, D_GLU_30   | H, D_GLU_30    | 2.82 | 1.99 | 26.55 |
| 1HGJ.PDB | O, D_HIS_26    | N, D_GLY_33   | H, D_GLY_33    | 2.97 | 2.10 | 23.23 |
| 1HGJ.PDB | O, D_PHE_24    | N, D_ALA_35   | H, D_ALA_35    | 2.80 | 1.92 | 21.75 |
| 1HGJ.PDB | O, D_TYR_22    | N, D_ASP_37   | H, D_ASP_37    | 2.70 | 1.76 | 11.08 |
| 1HGJ.PDB | OD2, D_ASP_37  | N, D_SER_40   | H, D_SER_40    | 2.95 | 1.99 | 9.26  |
| 1HGJ.PDB | OD2, D_ASP_37  | OG, D_SER_40  | HG, D_SER_40   | 2.82 | 1.96 | 22.49 |
| 1HGJ.PDB | O, D_ASP_37    | OG1, D_THR_41 | HG1, D_THR_41  | 2.76 | 1.85 | 16.95 |
| 1HGJ.PDB | O, D_LEU_38    | N, D_GLN_42   | H, D_GLN_42    | 2.96 | 2.03 | 15.57 |
| 1HGJ.PDB | OD1, D_ASP_46  | NE2, D_GLN_42 | HE22, D_GLN_42 | 2.81 | 1.92 | 21.12 |
| 1HGJ.PDB | O, D_LYS_39    | N, D_ALA_43   | H, D_ALA_43    | 2.97 | 2.01 | 10.81 |
| 1HGJ.PDB | O, D_SER_40    | N, D_ALA_44   | H, D_ALA_44    | 2.97 | 1.99 | 1.97  |
| 1HGJ.PDB | O, D_THR_41    | N, D_ILE_45   | H, D_ILE_45    | 2.89 | 1.93 | 10.07 |
| 1HGJ.PDB | O, D_GLN_42    | N, D_ASP_46   | H, D_ASP_46    | 2.76 | 1.79 | 4.41  |
| 1HGJ.PDB | OE2, D_GLU_114 | NE2, D_GLN_47 | HE21, D_GLN_47 | 2.94 | 2.03 | 18.44 |
| 1HGJ.PDB | O, D_ALA_43    | NE2, D_GLN_47 | HE22, D_GLN_47 | 2.90 | 2.02 | 20.80 |
| 1HGJ.PDB | O, D_ILE_45    | N, D_ASN_49   | H, D_ASN_49    | 2.90 | 1.96 | 15.06 |
| 1HGJ.PDB | O, D_ASP_46    | N, D_GLY_50   | H, D_GLY_50    | 2.88 | 2.00 | 21.98 |
| 1HGJ.PDB | OG1, D_THR_107 | NZ, D_LYS_51  | HZ1, D_LYS_51  | 2.97 | 1.99 | 16.18 |
| 1HGJ.PDB | OE1, D_GLU_103 | NZ, D_LYS_51  | HZ2, D_LYS_51  | 2.80 | 1.76 | 6.89  |
| 1HGJ.PDB | ND1, D_HIS_106 | NZ, D_LYS_51  | HZ3, D_LYS_51  | 2.79 | 1.82 | 16.80 |
| 1HGJ.PDB | O, D_ILE_48    | N, D_LEU_52   | H, D_LEU_52    | 2.89 | 1.98 | 17.52 |
| 1HGJ.PDB | O, D_ASN_49    | N, D_ASN_53   | H, D_ASN_53    | 2.86 | 1.92 | 13.12 |
| 1HGJ.PDB | O, A_THR_28    | NE, D_ARG_54  | HE, D_ARG_54   | 2.94 | 1.98 | 10.71 |
| 1HGJ.PDB | OE1, D_GLU_57  | NH1, D_ARG_54 | HH11, D_ARG_54 | 2.87 | 1.86 | 9.17  |
| 1HGJ.PDB | OE2, B_GLU_97  | NH2, D_ARG_54 | HH22, D_ARG_54 | 2.84 | 1.88 | 15.58 |
| 1HGJ.PDB | OG, C_SER_110  | NE2, D_HIS_64 | HE2, D_HIS_64  | 2.89 | 1.91 | 5.59  |
| 1HGJ.PDB | O, C_LYS_299   | NZ, D_LYS_68  | HZ1, D_LYS_68  | 2.93 | 1.91 | 11.63 |
| 1HGJ.PDB | OE2, D_GLU_85  | NZ, D_LYS_68  | HZ2, D_LYS_68  | 2.82 | 1.80 | 11.23 |
| 1HGJ.PDB | OG, E_SER_107  | N, D_ARG_76   | H, D_ARG_76    | 2.86 | 1.90 | 9.67  |
| 1HGJ.PDB | OE2, F_GLU_81  | NE, D_ARG_76  | HE, D_ARG_76   | 2.85 | 1.89 | 10.87 |
| 1HGJ.PDB | OE2, F_GLU_74  | NH1, D_ARG_76 | HH12, D_ARG_76 | 2.76 | 1.76 | 7.89  |
| 1HGJ.PDB | OE1, F_GLU_81  | NH2, D_ARG_76 | HH21, D_ARG_76 | 2.68 | 1.69 | 5.65  |
| 1HGJ.PDB | OE1, F_GLU_74  | NH2, D_ARG_76 | HH22, D_ARG_76 | 2.71 | 1.72 | 5.59  |
| 1HGJ.PDB | OE1, D_GLU_74  | NE2, D_GLN_78 | HE22, D_GLN_78 | 2.88 | 1.94 | 14.79 |
| 1HGJ.PDB | O, D_GLY_75    | N, D_ASP_79   | H, D_ASP_79    | 2.96 | 2.02 | 12.85 |
| 1HGJ.PDB | O, D_GLN_78    | N, D_LYS_82   | H, D_LYS_82    | 2.93 | 1.96 | 6.74  |
| 1HGJ.PDB | O, D_ASP_79    | N, D_TYR_83   | H, D_TYR_83    | 2.85 | 1.90 | 12.33 |
| 1HGJ.PDB | OE1, F_GLU_85  | OH, D_TYR_83  | HH, D_TYR_83   | 2.63 | 1.81 | 25.72 |
| 1HGJ.PDB | O, D_LEU_80    | N, D_VAL_84   | H, D_VAL_84    | 2.81 | 1.84 | 7.09  |
| 1HGJ.PDB | O, D_LYS_82    | N, D_ASP_86   | H, D_ASP_86    | 2.93 | 1.96 | 7.56  |

|          |                |                |                 |      |      |       |
|----------|----------------|----------------|-----------------|------|------|-------|
| 1HGJ.PDB | O, D_TYR_83    | N, D_THR_87    | H, D_THR_87     | 2.89 | 1.94 | 10.26 |
| 1HGJ.PDB | O, D_VAL_84    | N, D_LYS_88    | H, D_LYS_88     | 2.98 | 2.07 | 17.30 |
| 1HGJ.PDB | OH, B_TYR_83   | NZ, D_LYS_88   | HZ1, D_LYS_88   | 2.75 | 1.72 | 7.31  |
| 1HGJ.PDB | O, D_GLU_85    | N, D_ILE_89    | H, D_ILE_89     | 2.85 | 1.88 | 2.88  |
| 1HGJ.PDB | O, D_LYS_88    | N, D_TRP_92    | H, D_TRP_92     | 2.93 | 1.96 | 4.62  |
| 1HGJ.PDB | O, D_ILE_89    | N, D_SER_93    | H, D_SER_93     | 2.81 | 1.94 | 21.33 |
| 1HGJ.PDB | O, D_ILE_89    | OG, D_SER_93   | HG, D_SER_93    | 2.87 | 1.95 | 15.74 |
| 1HGJ.PDB | O, D_ASP_90    | N, D_TYR_94    | H, D_TYR_94     | 2.84 | 1.94 | 18.59 |
| 1HGJ.PDB | O, D_LEU_91    | N, D_ASN_95    | H, D_ASN_95     | 2.98 | 2.00 | 5.61  |
| 1HGJ.PDB | O, D_TYR_94    | N, D_LEU_98    | H, D_LEU_98     | 2.94 | 1.97 | 5.79  |
| 1HGJ.PDB | O, D_ASN_95    | N, D_LEU_99    | H, D_LEU_99     | 2.89 | 1.98 | 17.69 |
| 1HGJ.PDB | O, D_LEU_98    | N, D_LEU_102   | H, D_LEU_102    | 2.94 | 1.98 | 8.88  |
| 1HGJ.PDB | O, D_LEU_99    | N, D_GLU_103   | H, D_GLU_103    | 2.96 | 1.99 | 8.34  |
| 1HGJ.PDB | O, D_VAL_100   | N, D_ASN_104   | H, D_ASN_104    | 2.80 | 1.86 | 13.01 |
| 1HGJ.PDB | O, C_LYS_27    | ND2, D_ASN_104 | HD22, D_ASN_104 | 2.90 | 1.94 | 10.67 |
| 1HGJ.PDB | O, D_LEU_102   | N, D_HIS_106   | H, D_HIS_106    | 2.93 | 1.97 | 8.46  |
| 1HGJ.PDB | O, D_GLU_103   | N, D_THR_107   | H, D_THR_107    | 2.85 | 1.96 | 20.31 |
| 1HGJ.PDB | N, D_HIS_106   | N, D_LEU_110   | H, D_LEU_110    | 2.79 | 1.83 | 9.65  |
| 1HGJ.PDB | O, D_THR_107   | OG1, D_THR_111 | HG1, D_THR_111  | 2.84 | 1.88 | 5.73  |
| 1HGJ.PDB | O, D_ASP_109   | N, D_SER_113   | H, D_SER_113    | 2.82 | 1.86 | 7.21  |
| 1HGJ.PDB | O, B_LEU_2     | OG, D_SER_113  | HG, D_SER_113   | 2.68 | 1.87 | 27.58 |
| 1HGJ.PDB | O, D_LEU_110   | N, D_GLU_114   | H, D_GLU_114    | 2.94 | 1.99 | 11.05 |
| 1HGJ.PDB | O, D_ASP_112   | N, D_ASN_116   | H, D_ASN_116    | 2.97 | 2.01 | 9.82  |
| 1HGJ.PDB | O, D_SER_113   | N, D_LYS_117   | H, D_LYS_117    | 2.74 | 1.86 | 21.58 |
| 1HGJ.PDB | O, D_GLU_114   | N, D_LEU_118   | H, D_LEU_118    | 2.99 | 2.04 | 11.08 |
| 1HGJ.PDB | O, D_ASN_116   | N, D_GLU_120   | H, D_GLU_120    | 2.94 | 1.96 | 1.58  |
| 1HGJ.PDB | O, D_LYS_117   | N, D_LYS_121   | H, D_LYS_121    | 2.92 | 2.02 | 18.90 |
| 1HGJ.PDB | O, D_PHE_119   | N, D_ARG_123   | H, D_ARG_123    | 2.94 | 1.98 | 8.81  |
| 1HGJ.PDB | OE2, D_GLU_120 | NH1, D_ARG_123 | HH11, D_ARG_123 | 2.74 | 1.85 | 23.39 |
| 1HGJ.PDB | OE1, B_GLU_132 | NE, D_ARG_124  | HE, D_ARG_124   | 2.80 | 1.98 | 27.33 |
| 1HGJ.PDB | OE2, B_GLU_132 | NE, D_ARG_124  | HE, D_ARG_124   | 2.87 | 2.00 | 21.99 |
| 1HGJ.PDB | OH, B_TYR_141  | NH1, D_ARG_127 | HH12, D_ARG_127 | 2.99 | 2.02 | 12.89 |
| 1HGJ.PDB | O, D_HIS_159   | ND2, D_ASN_129 | HD21, D_ASN_129 | 2.95 | 1.99 | 10.63 |
| 1HGJ.PDB | OH, D_TYR_157  | ND2, D_ASN_129 | HD22, D_ASN_129 | 2.79 | 1.84 | 10.20 |
| 1HGJ.PDB | O, D_LYS_139   | N, D_GLU_131   | H, D_GLU_131    | 2.95 | 2.01 | 13.86 |
| 1HGJ.PDB | O, D_CYS_137   | N, D_MET_133   | H, D_MET_133    | 2.85 | 1.92 | 14.74 |
| 1HGJ.PDB | OD1, D_ASN_135 | N, D_CYS_137   | H, D_CYS_137    | 2.89 | 1.99 | 19.26 |
| 1HGJ.PDB | O, C_LEU_13    | N, D_PHE_138   | H, D_PHE_138    | 2.74 | 1.87 | 22.25 |
| 1HGJ.PDB | O, D_GLU_131   | N, D_LYS_139   | H, D_LYS_139    | 2.81 | 1.86 | 10.15 |
| 1HGJ.PDB | O, C_ALA_11    | N, D_ILE_140   | H, D_ILE_140    | 2.80 | 1.87 | 15.19 |
| 1HGJ.PDB | O, D_ASN_129   | N, D_TYR_141   | H, D_TYR_141    | 2.96 | 2.02 | 12.67 |
| 1HGJ.PDB | OE2, D_GLU_30  | N, D_ASN_146   | H, D_ASN_146    | 2.86 | 1.92 | 14.29 |
| 1HGJ.PDB | O, D_ASP_145   | N, D_ILE_149   | H, D_ILE_149    | 2.91 | 1.96 | 10.44 |
| 1HGJ.PDB | O, D_ASN_146   | N, D_GLU_150   | H, D_GLU_150    | 2.91 | 1.98 | 15.92 |
| 1HGJ.PDB | O, D_ALA_147   | N, D_SER_151   | H, D_SER_151    | 2.90 | 1.98 | 17.07 |
| 1HGJ.PDB | O, D_CYS_148   | OG, D_SER_151  | HG, D_SER_151   | 2.70 | 1.86 | 22.84 |
| 1HGJ.PDB | O, D_GLU_150   | N, D_ASN_154   | H, D_ASN_154    | 2.80 | 1.83 | 5.11  |
| 1HGJ.PDB | O, D_SER_151   | N, D_THR_156   | H, D_THR_156    | 2.73 | 1.90 | 25.93 |
| 1HGJ.PDB | OD1, D_ASN_154 | OG1, D_THR_156 | HG1, D_THR_156  | 2.71 | 1.81 | 16.75 |
| 1HGJ.PDB | NE2, D_HIS_142 | OH, D_TYR_157  | HH, D_TYR_157   | 2.78 | 1.88 | 18.06 |
| 1HGJ.PDB | OD1, D_ASP_158 | N, D_ASP_160   | H, D_ASP_160    | 2.92 | 2.05 | 23.79 |
| 1HGJ.PDB | O, D_HIS_159   | N, D_TYR_162   | H, D_TYR_162    | 2.94 | 2.05 | 20.16 |
| 1HGJ.PDB | O, B_ARG_170   | NH1, D_ARG_163 | HH12, D_ARG_163 | 2.74 | 1.76 | 11.80 |
| 1HGJ.PDB | O, D_TYR_162   | N, D_ALA_166   | H, D_ALA_166    | 2.85 | 1.88 | 3.22  |
| 1HGJ.PDB | O, D_ARG_163   | N, D_LEU_167   | H, D_LEU_167    | 2.76 | 1.82 | 10.09 |
| 1HGJ.PDB | O, D_ASP_164   | N, D_ASN_168   | H, D_ASN_168    | 3.00 | 2.04 | 9.26  |
| 1HGJ.PDB | O, D_ALA_166   | N, D_ARG_170   | H, D_ARG_170    | 2.83 | 1.97 | 22.68 |
| 1HGJ.PDB | O, D_GLU_128   | NE, D_ARG_170  | HE, D_ARG_170   | 2.77 | 1.90 | 22.62 |

|          |                |                |                 |      |      |       |
|----------|----------------|----------------|-----------------|------|------|-------|
| 1HGJ.PDB | OE2, D_GLU_131 | NH1, D_ARG_170 | HH11, D_ARG_170 | 2.79 | 1.80 | 6.55  |
| 1HGJ.PDB | O, D_LEU_167   | N, D_PHE_171   | H, D_PHE_171    | 2.92 | 2.00 | 16.37 |
| 1HGJ.PDB | O, F_ILE_140   | N, E_ALA_11    | H, E_ALA_11     | 2.86 | 1.96 | 18.18 |
| 1HGJ.PDB | O, F_GLN_27    | N, E_THR_12    | H, E_THR_12     | 2.93 | 2.00 | 15.55 |
| 1HGJ.PDB | O, F_PHE_138   | N, E_LEU_13    | H, E_LEU_13     | 2.96 | 1.99 | 8.56  |
| 1HGJ.PDB | O, F_ARG_25    | N, E_CYS_14    | H, E_CYS_14     | 2.66 | 1.82 | 24.90 |
| 1HGJ.PDB | O, F_GLY_136   | N, E_LEU_15    | H, E_LEU_15     | 2.91 | 1.94 | 3.68  |
| 1HGJ.PDB | O, F_GLY_23    | N, E_GLY_16    | H, E_GLY_16     | 2.87 | 1.96 | 18.32 |
| 1HGJ.PDB | O, E_HIS_18    | ND1, E_HIS_17  | HD1, E_HIS_17   | 2.90 | 2.02 | 21.78 |
| 1HGJ.PDB | O, F_TRP_21    | N, E_HIS_18    | H, E_HIS_18     | 2.83 | 1.96 | 22.19 |
| 1HGJ.PDB | OD1, E_ASN_322 | N, E_VAL_20    | H, E_VAL_20     | 2.78 | 1.83 | 10.50 |
| 1HGJ.PDB | O, E_VAL_36    | N, E_THR_24    | H, E_THR_24     | 2.85 | 1.93 | 16.11 |
| 1HGJ.PDB | O, E_ILE_34    | N, E_VAL_26    | H, E_VAL_26     | 2.82 | 1.87 | 11.16 |
| 1HGJ.PDB | OE2, F_GLU_97  | NZ, E_LYS_27   | HZ1, E_LYS_27   | 2.81 | 1.79 | 8.50  |
| 1HGJ.PDB | O, E_ASP_31    | N, E_THR_28    | H, E_THR_28     | 2.74 | 1.89 | 24.59 |
| 1HGJ.PDB | O, E_VAL_26    | N, E_ILE_34    | H, E_ILE_34     | 2.87 | 1.93 | 12.94 |
| 1HGJ.PDB | O, E_THR_24    | N, E_VAL_36    | H, E_VAL_36     | 2.82 | 1.85 | 5.68  |
| 1HGJ.PDB | O, E_MET_320   | N, E_THR_37    | H, E_THR_37     | 2.86 | 1.90 | 7.27  |
| 1HGJ.PDB | O, E_LEU_316   | N, E_THR_40    | H, E_THR_40     | 2.85 | 2.00 | 25.13 |
| 1HGJ.PDB | O, E_LEU_314   | N, E_LEU_42    | H, E_LEU_42     | 2.82 | 1.95 | 22.41 |
| 1HGJ.PDB | O, E_PHE_294   | N, E_GLN_44    | H, E_GLN_44     | 2.85 | 1.88 | 6.55  |
| 1HGJ.PDB | O, E_SER_46    | NE2, E_GLN_44  | HE22, E_GLN_44  | 2.90 | 2.00 | 19.51 |
| 1HGJ.PDB | O, E_ASN_285   | OG, E_SER_47   | HG, E_SER_47    | 2.83 | 1.92 | 15.25 |
| 1HGJ.PDB | OD2, E_ASP_275 | NZ, E_LYS_50   | HZ1, E_LYS_50   | 2.74 | 1.82 | 22.90 |
| 1HGJ.PDB | O, E_PRO_273   | N, E_ILE_51    | H, E_ILE_51     | 2.84 | 1.88 | 9.36  |
| 1HGJ.PDB | O, E_ASP_275   | N, E_ASN_53    | H, E_ASN_53     | 2.80 | 1.95 | 24.30 |
| 1HGJ.PDB | O, E_GLU_280   | NE2, E_HIS_56  | HE2, E_HIS_56   | 2.98 | 2.06 | 17.67 |
| 1HGJ.PDB | OD2, E_ASP_85  | N, E_ARG_57    | H, E_ARG_57     | 2.82 | 1.89 | 13.47 |
| 1HGJ.PDB | O, E_THR_83    | NE, E_ARG_57   | HE, E_ARG_57    | 2.78 | 1.81 | 7.69  |
| 1HGJ.PDB | O, E_LEU_86    | N, E_LEU_59    | H, E_LEU_59     | 2.87 | 1.91 | 10.09 |
| 1HGJ.PDB | O, E_VAL_88    | N, E_GLY_61    | H, E_GLY_61     | 2.97 | 2.10 | 22.60 |
| 1HGJ.PDB | OD1, E_ASP_60  | N, E_ILE_62    | H, E_ILE_62     | 2.86 | 1.94 | 15.40 |
| 1HGJ.PDB | O, E_GLY_61    | N, E_CYS_64    | H, E_CYS_64     | 2.90 | 1.99 | 17.47 |
| 1HGJ.PDB | O, E_LEU_66    | N, E_LEU_70    | H, E_LEU_70     | 2.91 | 2.02 | 20.49 |
| 1HGJ.PDB | O, E_ILE_67    | N, E_LEU_71    | H, E_LEU_71     | 2.82 | 1.86 | 7.76  |
| 1HGJ.PDB | O, E_ASP_68    | N, E_GLY_72    | H, E_GLY_72     | 2.90 | 1.99 | 18.41 |
| 1HGJ.PDB | OD1, E_ASP_73  | ND1, E_HIS_75  | HD1, E_HIS_75   | 2.80 | 1.88 | 17.19 |
| 1HGJ.PDB | O, E_ASP_63    | NE2, E_HIS_75  | HE2, E_HIS_75   | 2.86 | 1.95 | 19.12 |
| 1HGJ.PDB | O, E_ASP_73    | N, E_CYS_76    | H, E_CYS_76     | 2.76 | 1.82 | 13.01 |
| 1HGJ.PDB | O, E_PRO_74    | N, E_ASP_77    | H, E_ASP_77     | 2.93 | 1.97 | 10.57 |
| 1HGJ.PDB | O, E_CYS_76    | N, E_PHE_79    | H, E_PHE_79     | 2.99 | 2.02 | 4.96  |
| 1HGJ.PDB | O, E_ARG_57    | N, E_ASP_85    | H, E_ASP_85     | 2.80 | 1.90 | 17.59 |
| 1HGJ.PDB | O, E_LEU_59    | N, E_VAL_88    | H, E_VAL_88     | 2.98 | 2.01 | 5.78  |
| 1HGJ.PDB | O, E_MET_268   | N, E_GLU_89    | H, E_GLU_89     | 2.79 | 1.83 | 9.12  |
| 1HGJ.PDB | OD1, E_ASP_60  | NE, E_ARG_90   | HE, E_ARG_90    | 2.91 | 1.94 | 8.87  |
| 1HGJ.PDB | O, E_SER_270   | NH1, E_ARG_90  | HH11, E_ARG_90  | 2.71 | 1.84 | 24.06 |
| 1HGJ.PDB | O, E_ALA_272   | NH1, E_ARG_90  | HH12, E_ARG_90  | 2.60 | 1.68 | 18.01 |
| 1HGJ.PDB | OD2, E_ASP_60  | NH2, E_ARG_90  | HH21, E_ARG_90  | 2.83 | 1.83 | 8.62  |
| 1HGJ.PDB | OD1, E_ASP_271 | N, E_SER_91    | H, E_SER_91     | 2.91 | 1.94 | 8.21  |
| 1HGJ.PDB | OD1, E_ASP_271 | OG, E_SER_91   | HG, E_SER_91    | 2.99 | 2.15 | 25.95 |
| 1HGJ.PDB | OD2, E_ASP_271 | OG, E_SER_91   | HG, E_SER_91    | 2.82 | 1.92 | 18.47 |
| 1HGJ.PDB | OD2, E_ASP_68  | OG, E_SER_95   | HG, E_SER_95    | 2.94 | 2.00 | 13.81 |
| 1HGJ.PDB | OD2, E_ASP_73  | N, E_ASN_96    | H, E_ASN_96     | 2.91 | 1.95 | 10.69 |
| 1HGJ.PDB | OD1, E_ASP_68  | OH, E_TYR_100  | HH, E_TYR_100   | 2.88 | 1.94 | 12.28 |
| 1HGJ.PDB | O, E_ILE_230   | N, E_ASP_101   | H, E_ASP_101    | 2.96 | 2.10 | 23.29 |
| 1HGJ.PDB | OD2, E_ASP_104 | OG, E_SER_107  | HG, E_SER_107   | 2.85 | 1.94 | 18.67 |
| 1HGJ.PDB | O, E_TYR_105   | N, E_ARG_109   | H, E_ARG_109    | 2.87 | 1.90 | 3.75  |
| 1HGJ.PDB | OE2, F_GLU_67  | NH2, E_ARG_109 | HH21, E_ARG_109 | 2.76 | 1.77 | 12.82 |

|          |                |                |                 |      |      |       |
|----------|----------------|----------------|-----------------|------|------|-------|
| 1HGJ.PDB | OD2, D_ASP_79  | OG, E_SER_110  | HG, E_SER_110   | 2.79 | 1.87 | 15.96 |
| 1HGJ.PDB | O, E_SER_107   | N, E_LEU_111   | H, E_LEU_111    | 2.87 | 1.90 | 6.50  |
| 1HGJ.PDB | O, E_ARG_109   | N, E_ALA_113   | H, E_ALA_113    | 2.94 | 2.05 | 20.26 |
| 1HGJ.PDB | O, E_SER_110   | N, E_SER_114   | H, E_SER_114    | 2.90 | 1.95 | 11.85 |
| 1HGJ.PDB | OE2, E_GLU_119 | OG1, E_THR_117 | HG1, E_THR_117  | 2.91 | 1.96 | 10.96 |
| 1HGJ.PDB | O, E_GLU_82    | N, E_LEU_118   | H, E_LEU_118    | 2.93 | 2.00 | 15.98 |
| 1HGJ.PDB | O, E_TYR_257   | N, E_ILE_121   | H, E_ILE_121    | 2.86 | 1.90 | 7.59  |
| 1HGJ.PDB | O, E_ARG_255   | N, E_GLU_123   | H, E_GLU_123    | 2.95 | 1.98 | 9.79  |
| 1HGJ.PDB | O, E_THR_155   | N, E_THR_131   | H, E_THR_131    | 2.73 | 1.86 | 21.20 |
| 1HGJ.PDB | OD1, E_ASN_152 | N, E_ASN_133   | H, E_ASN_133    | 2.87 | 1.94 | 15.99 |
| 1HGJ.PDB | O, E_GLY_146   | N, E_SER_136   | H, E_SER_136    | 2.74 | 1.83 | 17.73 |
| 1HGJ.PDB | OG, E_SER_136  | N, E_ALA_138   | H, E_ALA_138    | 2.94 | 2.00 | 14.03 |
| 1HGJ.PDB | O, E_GLY_144   | NZ, E_LYS_140  | HZ1, E_LYS_140  | 2.75 | 1.78 | 16.45 |
| 1HGJ.PDB | OD1, E_ASN_137 | NZ, E_LYS_140  | HZ2, E_LYS_140  | 2.71 | 1.72 | 13.56 |
| 1HGJ.PDB | OD2, E_ASP_77  | NE, E_ARG_141  | HE, E_ARG_141   | 2.84 | 2.00 | 27.31 |
| 1HGJ.PDB | O, E_PHE_147   | NH1, E_ARG_141 | HH12, E_ARG_141 | 2.54 | 1.62 | 17.41 |
| 1HGJ.PDB | OD1, E_ASP_77  | NH2, E_ARG_141 | HH21, E_ARG_141 | 2.84 | 1.92 | 21.35 |
| 1HGJ.PDB | OD2, E_ASP_77  | NH2, E_ARG_141 | HH21, E_ARG_141 | 2.75 | 1.86 | 24.32 |
| 1HGJ.PDB | O, E_GLY_72    | NH2, E_ARG_141 | HH22, E_ARG_141 | 2.88 | 1.90 | 10.71 |
| 1HGJ.PDB | OD1, E_ASN_137 | OG, E_SER_145  | HG, E_SER_145   | 2.96 | 2.12 | 24.46 |
| 1HGJ.PDB | O, E_SER_136   | N, E_GLY_146   | H, E_GLY_146    | 2.92 | 1.99 | 15.20 |
| 1HGJ.PDB | O, E_GLY_72    | N, E_SER_149   | H, E_SER_149    | 2.83 | 1.94 | 19.83 |
| 1HGJ.PDB | O, E_ALA_253   | N, E_ASN_152   | H, E_ASN_152    | 2.81 | 1.98 | 26.27 |
| 1HGJ.PDB | OH, E_TYR_195  | NE1, E_TRP_153 | HE1, E_TRP_153  | 2.83 | 1.93 | 19.26 |
| 1HGJ.PDB | O, E_LEU_194   | N, E_LYS_156   | H, E_LYS_156    | 2.96 | 2.04 | 16.52 |
| 1HGJ.PDB | O, E_SER_193   | NZ, E_LYS_156  | HZ2, E_LYS_156  | 2.72 | 1.80 | 21.90 |
| 1HGJ.PDB | O, E_SER_247   | N, E_LEU_164   | H, E_LEU_164    | 2.72 | 1.87 | 23.95 |
| 1HGJ.PDB | O, E_ILE_245   | N, E_VAL_166   | H, E_VAL_166    | 2.99 | 2.04 | 11.20 |
| 1HGJ.PDB | O, E_LEU_243   | OG1, E_THR_167 | HG1, E_THR_167  | 2.97 | 2.09 | 21.09 |
| 1HGJ.PDB | O, E_LEU_243   | N, E_MET_168   | H, E_MET_168    | 2.90 | 1.98 | 16.52 |
| 1HGJ.PDB | O, E_ASP_241   | N, E_ASN_170   | H, E_ASN_170    | 2.90 | 1.94 | 11.02 |
| 1HGJ.PDB | O, E_PHE_174   | ND2, E_ASN_170 | HD21, E_ASN_170 | 2.85 | 1.90 | 10.04 |
| 1HGJ.PDB | O, E_VAL_237   | ND2, E_ASN_170 | HD22, E_ASN_170 | 2.87 | 2.05 | 27.43 |
| 1HGJ.PDB | O, E_VAL_237   | N, E_LYS_176   | H, E_LYS_176    | 2.91 | 1.97 | 13.40 |
| 1HGJ.PDB | OE2, E_GLU_123 | NZ, E_LYS_176  | HZ1, E_LYS_176  | 2.69 | 1.80 | 25.95 |
| 1HGJ.PDB | O, E_PHE_258   | N, E_LEU_177   | H, E_LEU_177    | 2.99 | 2.02 | 6.31  |
| 1HGJ.PDB | O, E_THR_235   | N, E_TYR_178   | H, E_TYR_178    | 2.83 | 1.86 | 3.63  |
| 1HGJ.PDB | OE1, E_GLU_123 | OH, E_TYR_178  | HH, E_TYR_178   | 2.77 | 1.83 | 11.08 |
| 1HGJ.PDB | OG1, E_THR_235 | NE1, E_TRP_180 | HE1, E_TRP_180  | 2.94 | 1.96 | 4.45  |
| 1HGJ.PDB | O, E_ASN_250   | N, E_HIS_183   | H, E_HIS_183    | 2.92 | 2.00 | 17.04 |
| 1HGJ.PDB | O, E_ARG_229   | N, E_HIS_184   | H, E_HIS_184    | 2.87 | 1.92 | 10.49 |
| 1HGJ.PDB | OG, E_SER_231  | NE2, E_HIS_184 | HE2, E_HIS_184  | 2.75 | 1.92 | 26.56 |
| 1HGJ.PDB | OG1, E_THR_187 | N, E_GLU_190   | H, E_GLU_190    | 2.90 | 1.96 | 12.58 |
| 1HGJ.PDB | O, E_GLN_197   | NE2, E_GLN_191 | HE22, E_GLN_191 | 2.91 | 1.99 | 17.51 |
| 1HGJ.PDB | O, E_ASN_188   | OG1, E_THR_192 | HG1, E_THR_192  | 2.94 | 1.98 | 6.07  |
| 1HGJ.PDB | O, E_GLN_189   | N, E_SER_193   | H, E_SER_193    | 2.85 | 1.87 | 2.13  |
| 1HGJ.PDB | O, E_GLU_190   | N, E_LEU_194   | H, E_LEU_194    | 2.97 | 2.00 | 9.20  |
| 1HGJ.PDB | O, E_GLN_191   | N, E_TYR_195   | H, E_TYR_195    | 2.80 | 1.85 | 9.91  |
| 1HGJ.PDB | O, E_TYR_195   | N, E_GLN_197   | H, E_GLN_197    | 2.71 | 1.92 | 29.63 |
| 1HGJ.PDB | O, E_TYR_161   | NE2, E_GLN_197 | HE21, E_GLN_197 | 2.91 | 1.96 | 10.54 |
| 1HGJ.PDB | O, E_ASN_248   | NE2, E_GLN_197 | HE22, E_GLN_197 | 2.87 | 1.94 | 14.62 |
| 1HGJ.PDB | OD1, E_ASN_246 | NH2, E_ARG_201 | HH21, E_ARG_201 | 2.59 | 1.74 | 26.30 |
| 1HGJ.PDB | O, E_ILE_213   | N, E_VAL_202   | H, E_VAL_202    | 3.00 | 2.07 | 14.91 |
| 1HGJ.PDB | O, E_ASN_246   | N, E_THR_203   | H, E_THR_203    | 2.93 | 1.98 | 11.44 |
| 1HGJ.PDB | OG1, E_THR_212 | OG1, E_THR_203 | HG1, E_THR_203  | 2.93 | 1.99 | 12.00 |
| 1HGJ.PDB | O, E_GLN_211   | N, E_VAL_204   | H, E_VAL_204    | 2.84 | 1.94 | 19.22 |
| 1HGJ.PDB | O, E_SER_209   | N, E_THR_206   | H, E_THR_206    | 2.94 | 1.97 | 8.33  |
| 1HGJ.PDB | OD1, E_ASP_241 | N, E_ARG_207   | H, E_ARG_207    | 2.88 | 1.92 | 9.33  |

|          |                |                |                 |      |      |       |
|----------|----------------|----------------|-----------------|------|------|-------|
| 1HGJ.PDB | OD1, C_ASP_101 | NE2, E_GLN_210 | HE22, E_GLN_210 | 2.94 | 2.10 | 26.45 |
| 1HGJ.PDB | O, E_VAL_204   | N, E_GLN_211   | H, E_GLN_211    | 2.90 | 1.97 | 16.00 |
| 1HGJ.PDB | O, E_VAL_202   | N, E_ILE_213   | H, E_ILE_213    | 2.86 | 1.94 | 15.90 |
| 1HGJ.PDB | OE1, A_GLN_210 | NH2, E_ARG_220 | HH21, E_ARG_220 | 2.69 | 1.86 | 28.41 |
| 1HGJ.PDB | O, E_ASN_216   | NH2, E_ARG_220 | HH22, E_ARG_220 | 2.77 | 1.90 | 23.93 |
| 1HGJ.PDB | O, E_LEU_226   | N, E_VAL_223   | H, E_VAL_223    | 2.82 | 1.86 | 9.44  |
| 1HGJ.PDB | O, E_CYS_97    | NE, E_ARG_224  | HE, E_ARG_224   | 2.81 | 1.96 | 24.68 |
| 1HGJ.PDB | O, E_CYS_97    | NH2, E_ARG_224 | HH21, E_ARG_224 | 2.94 | 2.09 | 27.02 |
| 1HGJ.PDB | O, E_VAL_223   | N, E_LEU_226   | H, E_LEU_226    | 2.92 | 1.98 | 13.32 |
| 1HGJ.PDB | O, E_SER_228   | NH1, E_ARG_229 | HH11, E_ARG_229 | 2.73 | 1.78 | 16.61 |
| 1HGJ.PDB | O, E_PRO_221   | NH2, E_ARG_229 | HH22, E_ARG_229 | 2.62 | 1.66 | 13.20 |
| 1HGJ.PDB | OD1, E_ASP_101 | OG, E_SER_231  | HG, E_SER_231   | 2.90 | 1.95 | 11.36 |
| 1HGJ.PDB | O, E_ASP_101   | N, E_ILE_232   | H, E_ILE_232    | 2.88 | 1.96 | 15.95 |
| 1HGJ.PDB | O, E_TRP_180   | N, E_TYR_233   | H, E_TYR_233    | 2.94 | 1.97 | 6.84  |
| 1HGJ.PDB | O, E_TYR_178   | N, E_THR_235   | H, E_THR_235    | 2.90 | 2.00 | 19.30 |
| 1HGJ.PDB | O, E_LYS_176   | N, E_VAL_237   | H, E_VAL_237    | 2.80 | 1.88 | 15.33 |
| 1HGJ.PDB | O, D_SER_71    | NZ, E_LYS_238  | HZ2, E_LYS_238  | 2.65 | 1.73 | 22.71 |
| 1HGJ.PDB | OE1, D_GLU_72  | NZ, E_LYS_238  | HZ3, E_LYS_238  | 2.87 | 1.86 | 13.82 |
| 1HGJ.PDB | O, E_ASN_170   | N, E_GLY_240   | H, E_GLY_240    | 2.85 | 1.98 | 22.38 |
| 1HGJ.PDB | OD1, E_ASP_241 | N, E_VAL_242   | H, E_VAL_242    | 2.79 | 1.95 | 25.35 |
| 1HGJ.PDB | O, E_MET_168   | N, E_LEU_243   | H, E_LEU_243    | 2.92 | 1.95 | 5.02  |
| 1HGJ.PDB | O, E_VAL_166   | N, E_ILE_245   | H, E_ILE_245    | 2.90 | 1.96 | 13.71 |
| 1HGJ.PDB | O, E_THR_203   | N, E_ASN_246   | H, E_ASN_246    | 2.96 | 1.99 | 5.52  |
| 1HGJ.PDB | OD1, E_ASN_165 | ND2, E_ASN_246 | HD22, E_ASN_246 | 2.89 | 1.94 | 11.88 |
| 1HGJ.PDB | O, E_LEU_164   | N, E_SER_247   | H, E_SER_247    | 2.94 | 2.02 | 17.47 |
| 1HGJ.PDB | O, E_HIS_183   | ND2, E_ASN_250 | HD22, E_ASN_250 | 2.83 | 1.88 | 12.22 |
| 1HGJ.PDB | O, E_ASN_152   | N, E_ALA_253   | H, E_ALA_253    | 2.89 | 2.00 | 20.06 |
| 1HGJ.PDB | OD1, E_ASN_133 | NH2, E_ARG_255 | HH22, E_ARG_255 | 2.55 | 1.71 | 26.62 |
| 1HGJ.PDB | O, E_ILE_121   | N, E_TYR_257   | H, E_TYR_257    | 2.92 | 2.08 | 25.41 |
| 1HGJ.PDB | O, E_LEU_177   | N, E_PHE_258   | H, E_PHE_258    | 2.92 | 1.95 | 7.34  |
| 1HGJ.PDB | OG, E_SER_115  | N, E_ARG_261   | H, E_ARG_261    | 2.94 | 2.00 | 14.60 |
| 1HGJ.PDB | OE2, E_GLU_119 | NH1, E_ARG_261 | HH12, E_ARG_261 | 2.65 | 1.82 | 28.15 |
| 1HGJ.PDB | OE1, E_GLU_119 | NH2, E_ARG_261 | HH22, E_ARG_261 | 2.91 | 2.01 | 23.66 |
| 1HGJ.PDB | OD2, E_ASP_85  | NZ, E_LYS_264  | HZ3, E_LYS_264  | 2.86 | 1.86 | 15.01 |
| 1HGJ.PDB | O, E_PHE_87    | N, E_MET_268   | H, E_MET_268    | 2.83 | 1.92 | 18.18 |
| 1HGJ.PDB | O, E_PRO_284   | OG, E_SER_270  | HG, E_SER_270   | 2.82 | 1.88 | 11.49 |
| 1HGJ.PDB | OG, E_SER_270  | N, E_ALA_272   | H, E_ALA_272    | 2.99 | 2.05 | 12.84 |
| 1HGJ.PDB | O, E_ILE_51    | N, E_ASP_275   | H, E_ASP_275    | 2.93 | 2.03 | 19.50 |
| 1HGJ.PDB | OD1, E_ASP_275 | N, E_THR_276   | H, E_THR_276    | 2.79 | 1.94 | 24.04 |
| 1HGJ.PDB | O, E_ASN_54    | N, E_SER_279   | H, E_SER_279    | 2.81 | 1.88 | 14.80 |
| 1HGJ.PDB | O, E_TYR_302   | N, E_ILE_282   | H, E_ILE_282    | 2.91 | 1.94 | 6.79  |
| 1HGJ.PDB | O, E_THR_283   | N, E_GLY_286   | H, E_GLY_286    | 2.81 | 1.88 | 13.99 |
| 1HGJ.PDB | O, E_LYS_50    | N, E_SER_287   | H, E_SER_287    | 2.83 | 1.86 | 7.05  |
| 1HGJ.PDB | O, E_ALA_304   | ND2, E_ASN_290 | HD22, E_ASN_290 | 2.82 | 1.92 | 17.80 |
| 1HGJ.PDB | OE1, E_GLN_44  | NZ, E_LYS_292  | HZ1, E_LYS_292  | 2.72 | 1.70 | 10.33 |
| 1HGJ.PDB | OD2, E_ASP_291 | NZ, E_LYS_292  | HZ3, E_LYS_292  | 2.83 | 1.86 | 17.49 |
| 1HGJ.PDB | O, E_LYS_307   | N, E_GLN_295   | H, E_GLN_295    | 2.87 | 1.98 | 20.11 |
| 1HGJ.PDB | O, E_ASN_298   | NE2, E_GLN_295 | HE21, E_GLN_295 | 2.74 | 1.78 | 8.06  |
| 1HGJ.PDB | O, E_GLN_44    | N, E_ASN_296   | H, E_ASN_296    | 2.84 | 1.90 | 13.41 |
| 1HGJ.PDB | OE1, E_GLN_295 | N, E_VAL_297   | H, E_VAL_297    | 2.70 | 1.91 | 29.61 |
| 1HGJ.PDB | O, F_LYS_68    | NZ, E_LYS_299  | HZ1, E_LYS_299  | 2.94 | 1.95 | 15.31 |
| 1HGJ.PDB | OD1, E_ASN_298 | N, E_ILE_300   | H, E_ILE_300    | 2.84 | 1.96 | 20.15 |
| 1HGJ.PDB | O, E_ILE_282   | N, E_TYR_302   | H, E_TYR_302    | 2.88 | 2.04 | 26.30 |
| 1HGJ.PDB | O, E_LYS_264   | OH, E_TYR_302  | HH, E_TYR_302   | 2.66 | 1.88 | 29.67 |
| 1HGJ.PDB | O, F_LYS_62    | N, E_GLY_303   | H, E_GLY_303    | 2.92 | 1.96 | 9.12  |
| 1HGJ.PDB | O, E_GLN_295   | N, E_VAL_309   | H, E_VAL_309    | 2.91 | 2.08 | 26.42 |
| 1HGJ.PDB | OG, F_SER_93   | N, E_LYS_310   | H, E_LYS_310    | 2.99 | 2.03 | 10.38 |
| 1HGJ.PDB | OD1, F_ASP_86  | NZ, E_LYS_310  | HZ3, E_LYS_310  | 2.93 | 2.08 | 29.22 |



|          |                |                |                 |      |      |       |
|----------|----------------|----------------|-----------------|------|------|-------|
| 1HGJ.PDB | OE2, E_GLU_41  | N, E_LEU_314   | H, E_LEU_314    | 2.79 | 1.86 | 13.14 |
| 1HGJ.PDB | OE1, E_GLU_41  | NZ, E_LYS_315  | HZ3, E_LYS_315  | 2.86 | 1.91 | 20.65 |
| 1HGJ.PDB | O, E_THR_40    | N, E_LEU_316   | H, E_LEU_316    | 2.79 | 1.84 | 10.66 |
| 1HGJ.PDB | OD1, F_ASN_104 | N, E_ALA_317   | H, E_ALA_317    | 2.73 | 1.80 | 11.35 |
| 1HGJ.PDB | O, E_ASN_38    | N, E_THR_318   | H, E_THR_318    | 2.91 | 1.98 | 16.58 |
| 1HGJ.PDB | O, E_VAL_20    | ND2, E_ASN_322 | HD21, E_ASN_322 | 2.87 | 1.94 | 14.58 |
| 1HGJ.PDB | OE2, E_GLU_35  | ND2, E_ASN_322 | HD22, E_ASN_322 | 2.86 | 1.96 | 20.74 |
| 1HGJ.PDB | OE2, F_GLU_15  | N, E_GLU_325   | H, E_GLU_325    | 2.88 | 2.08 | 29.65 |
| 1HGJ.PDB | O, E_GLN_327   | NZ, E_LYS_326  | HZ1, E_LYS_326  | 2.81 | 1.90 | 23.82 |
| 1HGJ.PDB | OE1, F_GLU_15  | NZ, E_LYS_326  | HZ3, E_LYS_326  | 2.87 | 1.86 | 12.83 |
| 1HGJ.PDB | O, E_LYS_326   | NE2, E_GLN_327 | HE22, E_GLN_327 | 2.82 | 1.90 | 17.58 |
| 1HGJ.PDB | OD2, F_ASP_112 | N, F_GLY_1     | H2, F_GLY_1     | 2.75 | 1.76 | 14.31 |
| 1HGJ.PDB | OD1, F_ASP_109 | N, F_LEU_2     | H, F_LEU_2      | 2.87 | 1.99 | 21.90 |
| 1HGJ.PDB | OD2, F_ASP_112 | N, F_PHE_3     | H, F_PHE_3      | 2.83 | 2.02 | 27.46 |
| 1HGJ.PDB | OD2, F_ASP_112 | N, F_GLY_4     | H, F_GLY_4      | 2.87 | 1.95 | 16.24 |
| 1HGJ.PDB | OD1, F_ASP_112 | N, F_ALA_5     | H, F_ALA_5      | 2.84 | 1.98 | 23.38 |
| 1HGJ.PDB | OD1, F_ASP_112 | N, F_ILE_6     | H, F_ILE_6      | 3.00 | 2.08 | 18.28 |
| 1HGJ.PDB | O, F_GLY_4     | N, F_PHE_9     | H, F_PHE_9      | 2.79 | 1.86 | 13.96 |
| 1HGJ.PDB | O, F_GLY_13    | ND2, F_ASN_12  | HD22, F_ASN_12  | 2.89 | 2.02 | 22.28 |
| 1HGJ.PDB | O, E_VAL_323   | N, F_GLY_13    | H, F_GLY_13     | 2.69 | 1.76 | 10.96 |
| 1HGJ.PDB | O, E_HIS_17    | N, F_TRP_14    | H, F_TRP_14     | 2.84 | 1.89 | 11.67 |
| 1HGJ.PDB | OG1, F_THR_41  | N, F_TRP_21    | H, F_TRP_21     | 2.96 | 2.04 | 16.61 |
| 1HGJ.PDB | O, E_GLY_16    | N, F_GLY_23    | H, F_GLY_23     | 2.93 | 2.01 | 16.90 |
| 1HGJ.PDB | O, F_ALA_35    | N, F_PHE_24    | H, F_PHE_24     | 2.82 | 1.85 | 6.05  |
| 1HGJ.PDB | O, E_CYS_14    | N, F_ARG_25    | H, F_ARG_25     | 2.87 | 1.99 | 20.85 |
| 1HGJ.PDB | OE1, F_GLN_34  | NE, F_ARG_25   | HE, F_ARG_25    | 2.86 | 2.05 | 28.42 |
| 1HGJ.PDB | OE1, F_GLN_34  | NH2, F_ARG_25  | HH21, F_ARG_25  | 2.64 | 1.73 | 20.69 |
| 1HGJ.PDB | O, F_GLY_33    | N, F_HIS_26    | H, F_HIS_26     | 2.93 | 2.04 | 19.59 |
| 1HGJ.PDB | O, E_THR_12    | N, F_GLN_27    | H, F_GLN_27     | 2.89 | 1.97 | 15.73 |
| 1HGJ.PDB | O, F_GLY_31    | N, F_ASN_28    | H, F_ASN_28     | 2.76 | 1.81 | 11.08 |
| 1HGJ.PDB | OD1, F_ASN_146 | ND2, F_ASN_28  | HD21, F_ASN_28  | 2.81 | 1.89 | 16.64 |
| 1HGJ.PDB | O, F_CYS_144   | ND2, F_ASN_28  | HD22, F_ASN_28  | 2.86 | 1.94 | 16.87 |
| 1HGJ.PDB | O, F_PHE_24    | N, F_ALA_35    | H, F_ALA_35     | 2.77 | 1.91 | 22.75 |
| 1HGJ.PDB | O, F_TYR_22    | N, F_ASP_37    | H, F_ASP_37     | 2.70 | 1.77 | 12.58 |
| 1HGJ.PDB | OD2, F_ASP_37  | N, F_SER_40    | H, F_SER_40     | 2.96 | 1.99 | 8.62  |
| 1HGJ.PDB | OD2, F_ASP_37  | OG, F_SER_40   | HG, F_SER_40    | 2.80 | 1.95 | 24.06 |
| 1HGJ.PDB | O, F_ASP_37    | OG1, F_THR_41  | HG1, F_THR_41   | 2.72 | 1.84 | 19.21 |
| 1HGJ.PDB | O, F_LEU_38    | N, F_GLN_42    | H, F_GLN_42     | 2.93 | 2.00 | 15.35 |
| 1HGJ.PDB | OD1, F_ASP_46  | NE2, F_GLN_42  | HE22, F_GLN_42  | 2.80 | 1.92 | 21.18 |
| 1HGJ.PDB | O, F_LYS_39    | N, F_ALA_43    | H, F_ALA_43     | 2.93 | 1.97 | 8.45  |
| 1HGJ.PDB | O, F_SER_40    | N, F_ALA_44    | H, F_ALA_44     | 2.96 | 1.98 | 2.14  |
| 1HGJ.PDB | O, F_THR_41    | N, F_ILE_45    | H, F_ILE_45     | 2.88 | 1.94 | 11.66 |
| 1HGJ.PDB | O, F_GLN_42    | N, F_ASP_46    | H, F_ASP_46     | 2.77 | 1.80 | 2.95  |
| 1HGJ.PDB | OE2, F_GLU_114 | NE2, F_GLN_47  | HE21, F_GLN_47  | 2.95 | 2.04 | 18.06 |
| 1HGJ.PDB | O, F_ALA_43    | NE2, F_GLN_47  | HE22, F_GLN_47  | 2.95 | 2.07 | 21.45 |
| 1HGJ.PDB | O, F_ILE_45    | N, F_ASN_49    | H, F_ASN_49     | 2.87 | 1.94 | 15.82 |
| 1HGJ.PDB | O, F_ASP_46    | N, F_GLY_50    | H, F_GLY_50     | 2.83 | 1.94 | 20.73 |
| 1HGJ.PDB | OE1, F_GLU_103 | NZ, F_LYS_51   | HZ2, F_LYS_51   | 2.79 | 1.75 | 5.77  |
| 1HGJ.PDB | ND1, F_HIS_106 | NZ, F_LYS_51   | HZ3, F_LYS_51   | 2.75 | 1.79 | 17.21 |
| 1HGJ.PDB | O, F_ILE_48    | N, F_LEU_52    | H, F_LEU_52     | 2.90 | 1.98 | 16.71 |
| 1HGJ.PDB | O, F_ASN_49    | N, F_ASN_53    | H, F_ASN_53     | 2.87 | 1.94 | 13.91 |
| 1HGJ.PDB | OE1, F_GLU_57  | NH1, F_ARG_54  | HH11, F_ARG_54  | 2.86 | 1.86 | 9.70  |
| 1HGJ.PDB | OE2, D_GLU_97  | NH2, F_ARG_54  | HH22, F_ARG_54  | 2.77 | 1.81 | 14.54 |
| 1HGJ.PDB | OG, E_SER_110  | NE2, F_HIS_64  | HE2, F_HIS_64   | 2.90 | 1.93 | 7.02  |
| 1HGJ.PDB | O, E_LYS_299   | NZ, F_LYS_68   | HZ1, F_LYS_68   | 2.93 | 1.90 | 4.77  |
| 1HGJ.PDB | OE2, F_GLU_85  | NZ, F_LYS_68   | HZ2, F_LYS_68   | 2.74 | 1.77 | 18.09 |
| 1HGJ.PDB | OG, A_SER_107  | N, F_ARG_76    | H, F_ARG_76     | 2.85 | 1.88 | 6.29  |
| 1HGJ.PDB | OE2, B_GLU_81  | NE, F_ARG_76   | HE, F_ARG_76    | 2.85 | 1.89 | 12.57 |

|          |                |                |                 |      |      |       |
|----------|----------------|----------------|-----------------|------|------|-------|
| 1HGJ.PDB | OE2, B_GLU_74  | NH1, F_ARG_76  | HH12, F_ARG_76  | 2.70 | 1.70 | 4.55  |
| 1HGJ.PDB | OE1, B_GLU_81  | NH2, F_ARG_76  | HH21, F_ARG_76  | 2.65 | 1.66 | 2.84  |
| 1HGJ.PDB | OE1, B_GLU_74  | NH2, F_ARG_76  | HH22, F_ARG_76  | 2.72 | 1.73 | 7.95  |
| 1HGJ.PDB | OE1, F_GLU_74  | NE2, F_GLN_78  | HE22, F_GLN_78  | 2.92 | 1.97 | 13.10 |
| 1HGJ.PDB | O, F_GLY_75    | N, F_ASP_79    | H, F_ASP_79     | 2.96 | 2.02 | 12.63 |
| 1HGJ.PDB | O, F_GLN_78    | N, F_LYS_82    | H, F_LYS_82     | 2.96 | 1.99 | 6.52  |
| 1HGJ.PDB | O, F_ASP_79    | N, F_TYR_83    | H, F_TYR_83     | 2.83 | 1.89 | 13.63 |
| 1HGJ.PDB | OE1, B_GLU_85  | OH, F_TYR_83   | HH, F_TYR_83    | 2.53 | 1.75 | 28.54 |
| 1HGJ.PDB | O, F_LEU_80    | N, F_VAL_84    | H, F_VAL_84     | 2.82 | 1.86 | 7.45  |
| 1HGJ.PDB | O, F_LYS_82    | N, F_ASP_86    | H, F_ASP_86     | 2.93 | 1.97 | 9.90  |
| 1HGJ.PDB | O, F_TYR_83    | N, F_THR_87    | H, F_THR_87     | 2.88 | 1.95 | 13.71 |
| 1HGJ.PDB | O, F_VAL_84    | N, F_LYS_88    | H, F_LYS_88     | 2.98 | 2.03 | 12.44 |
| 1HGJ.PDB | OH, D_TYR_83   | NZ, F_LYS_88   | HZ1, F_LYS_88   | 2.70 | 1.68 | 8.19  |
| 1HGJ.PDB | O, F_GLU_85    | N, F_ILE_89    | H, F_ILE_89     | 2.86 | 1.88 | 2.87  |
| 1HGJ.PDB | O, F_LYS_88    | N, F_TRP_92    | H, F_TRP_92     | 2.93 | 1.96 | 5.23  |
| 1HGJ.PDB | O, F_ILE_89    | N, F_SER_93    | H, F_SER_93     | 2.83 | 1.94 | 19.77 |
| 1HGJ.PDB | O, F_ILE_89    | OG, F_SER_93   | HG, F_SER_93    | 2.86 | 1.95 | 15.80 |
| 1HGJ.PDB | O, F_ASP_90    | N, F_TYR_94    | H, F_TYR_94     | 2.83 | 1.93 | 19.07 |
| 1HGJ.PDB | O, F_TYR_94    | N, F_LEU_98    | H, F_LEU_98     | 2.95 | 1.98 | 6.19  |
| 1HGJ.PDB | O, F_ASN_95    | N, F_LEU_99    | H, F_LEU_99     | 2.87 | 1.97 | 18.16 |
| 1HGJ.PDB | O, F_LEU_98    | N, F_LEU_102   | H, F_LEU_102    | 2.95 | 1.98 | 8.07  |
| 1HGJ.PDB | O, F_LEU_99    | N, F_GLU_103   | H, F_GLU_103    | 2.95 | 1.99 | 9.09  |
| 1HGJ.PDB | O, F_VAL_100   | N, F_ASN_104   | H, F_ASN_104    | 2.81 | 1.86 | 11.07 |
| 1HGJ.PDB | O, E_LYS_27    | ND2, F_ASN_104 | HD22, F_ASN_104 | 2.91 | 1.96 | 11.78 |
| 1HGJ.PDB | O, F_LEU_102   | N, F_HIS_106   | H, F_HIS_106    | 2.94 | 1.98 | 8.79  |
| 1HGJ.PDB | O, F_GLU_103   | N, F_THR_107   | H, F_THR_107    | 2.86 | 1.95 | 17.68 |
| 1HGJ.PDB | O, F_HIS_106   | N, F_LEU_110   | H, F_LEU_110    | 2.80 | 1.84 | 7.98  |
| 1HGJ.PDB | O, F_THR_107   | OG1, F_THR_111 | HG1, F_THR_111  | 2.89 | 1.92 | 1.87  |
| 1HGJ.PDB | O, F_ASP_109   | N, F_SER_113   | H, F_SER_113    | 2.81 | 1.84 | 6.27  |
| 1HGJ.PDB | O, D_LEU_2     | OG, F_SER_113  | HG, F_SER_113   | 2.74 | 1.92 | 26.51 |
| 1HGJ.PDB | O, F_LEU_110   | N, F_GLU_114   | H, F_GLU_114    | 2.93 | 1.97 | 10.83 |
| 1HGJ.PDB | O, F_ASP_112   | N, F_ASN_116   | H, F_ASN_116    | 2.99 | 2.03 | 9.83  |
| 1HGJ.PDB | O, F_SER_113   | N, F_LYS_117   | H, F_LYS_117    | 2.74 | 1.86 | 21.34 |
| 1HGJ.PDB | O, F_GLU_114   | N, F_LEU_118   | H, F_LEU_118    | 2.96 | 2.00 | 9.84  |
| 1HGJ.PDB | O, F_ASN_116   | N, F_GLU_120   | H, F_GLU_120    | 2.93 | 1.95 | 2.43  |
| 1HGJ.PDB | O, F_LYS_117   | N, F_LYS_121   | H, F_LYS_121    | 2.95 | 2.03 | 16.46 |
| 1HGJ.PDB | O, F_PHE_119   | N, F_ARG_123   | H, F_ARG_123    | 2.92 | 1.97 | 10.33 |
| 1HGJ.PDB | OE2, F_GLU_120 | NH1, F_ARG_123 | HH11, F_ARG_123 | 2.73 | 1.86 | 24.44 |
| 1HGJ.PDB | OE1, D_GLU_132 | NE, F_ARG_124  | HE, F_ARG_124   | 2.92 | 2.09 | 27.65 |
| 1HGJ.PDB | OE2, D_GLU_132 | NE, F_ARG_124  | HE, F_ARG_124   | 2.96 | 2.06 | 20.98 |
| 1HGJ.PDB | O, F_HIS_159   | ND2, F_ASN_129 | HD21, F_ASN_129 | 2.97 | 2.01 | 8.92  |
| 1HGJ.PDB | OH, F_TYR_157  | ND2, F_ASN_129 | HD22, F_ASN_129 | 2.75 | 1.85 | 17.65 |
| 1HGJ.PDB | O, F_LYS_139   | N, F_GLU_131   | H, F_GLU_131    | 2.94 | 1.99 | 12.85 |
| 1HGJ.PDB | O, F_CYS_137   | N, F_MET_133   | H, F_MET_133    | 2.84 | 1.91 | 14.51 |
| 1HGJ.PDB | OD1, F_ASN_135 | N, F_CYS_137   | H, F_CYS_137    | 2.98 | 2.16 | 26.53 |
| 1HGJ.PDB | O, E_LEU_13    | N, F_PHE_138   | H, F_PHE_138    | 2.73 | 1.87 | 22.18 |
| 1HGJ.PDB | O, F_GLU_131   | N, F_LYS_139   | H, F_LYS_139    | 2.81 | 1.86 | 9.38  |
| 1HGJ.PDB | O, E_ALA_11    | N, F_ILE_140   | H, F_ILE_140    | 2.78 | 1.87 | 17.89 |
| 1HGJ.PDB | O, F_ASN_129   | N, F_TYR_141   | H, F_TYR_141    | 2.96 | 2.03 | 14.20 |
| 1HGJ.PDB | OE2, F_GLU_165 | N, F_LYS_143   | H, F_LYS_143    | 2.99 | 2.05 | 14.57 |
| 1HGJ.PDB | O, F_ASP_145   | N, F_ILE_149   | H, F_ILE_149    | 2.90 | 1.95 | 10.28 |
| 1HGJ.PDB | O, F_ASN_146   | N, F_GLU_150   | H, F_GLU_150    | 2.89 | 1.95 | 14.81 |
| 1HGJ.PDB | O, F_ALA_147   | N, F_SER_151   | H, F_SER_151    | 2.90 | 2.00 | 18.77 |
| 1HGJ.PDB | O, F_CYS_148   | OG, F_SER_151  | HG, F_SER_151   | 2.72 | 1.92 | 27.65 |
| 1HGJ.PDB | O, F_GLU_150   | N, F_ASN_154   | H, F_ASN_154    | 2.78 | 1.81 | 1.94  |
| 1HGJ.PDB | OD1, F_ASP_158 | N, F_ASP_160   | H, F_ASP_160    | 2.95 | 2.08 | 23.42 |
| 1HGJ.PDB | O, F_HIS_159   | N, F_TYR_162   | H, F_TYR_162    | 2.96 | 2.07 | 20.30 |
| 1HGJ.PDB | O, D_ARG_170   | NH1, F_ARG_163 | HH12, F_ARG_163 | 2.89 | 1.91 | 11.37 |

|          |                |                |                 |      |      |       |
|----------|----------------|----------------|-----------------|------|------|-------|
| 1HGJ.PDB | O, F_TYR_162   | N, F_ALA_166   | H, F_ALA_166    | 2.89 | 1.92 | 3.44  |
| 1HGJ.PDB | O, F_ARG_163   | N, F_LEU_167   | H, F_LEU_167    | 2.76 | 1.81 | 9.28  |
| 1HGJ.PDB | O, F_ASP_164   | N, F_ASN_168   | H, F_ASN_168    | 2.99 | 2.03 | 9.70  |
| 1HGJ.PDB | O, F_ALA_166   | N, F_ARG_170   | H, F_ARG_170    | 2.86 | 1.98 | 21.69 |
| 1HGJ.PDB | O, F_GLU_128   | NE, F_ARG_170  | HE, F_ARG_170   | 2.77 | 1.90 | 22.39 |
| 1HGJ.PDB | OE2, F_GLU_131 | NH1, F_ARG_170 | HH11, F_ARG_170 | 2.79 | 1.80 | 6.77  |
| 1HGJ.PDB | O, F_LEU_167   | N, F_PHE_171   | H, F_PHE_171    | 2.94 | 2.02 | 16.73 |
| 1OSP.PDB | OG, L_SER_26   | N, L_GLN_3     | H, L_GLN_3      | 2.70 | 1.79 | 13.92 |
| 1OSP.PDB | O, L_LYS_24    | N, L_SER_5     | H, L_SER_5      | 2.66 | 1.74 | 13.88 |
| 1OSP.PDB | O, L_TYR_86    | NE2, L_GLN_6   | HE21, L_GLN_6   | 2.96 | 2.00 | 8.59  |
| 1OSP.PDB | O, L_LYS_103   | N, L_PHE_11    | H, L_PHE_11     | 2.89 | 1.98 | 18.16 |
| 1OSP.PDB | O, L_GLU_105   | N, L_VAL_13    | H, L_VAL_13     | 2.80 | 1.85 | 11.83 |
| 1OSP.PDB | O, L_LEU_78    | N, L_GLY_16    | H, L_GLY_16     | 2.67 | 1.75 | 12.23 |
| 1OSP.PDB | OD1, L_ASP_17  | N, L_ARG_18    | H, L_ARG_18     | 2.90 | 2.10 | 29.03 |
| 1OSP.PDB | O, L_ILE_75    | N, L_VAL_19    | H, L_VAL_19     | 2.73 | 1.79 | 10.56 |
| 1OSP.PDB | O, L_LEU_73    | N, L_ILE_21    | H, L_ILE_21     | 2.79 | 1.84 | 10.88 |
| 1OSP.PDB | O, L_TYR_71    | N, L_CYS_23    | H, L_CYS_23     | 2.71 | 1.82 | 18.30 |
| 1OSP.PDB | O, L_SER_5     | N, L_LYS_24    | H, L_LYS_24     | 2.95 | 2.04 | 17.66 |
| 1OSP.PDB | OH, L_TYR_71   | N, L_SER_31    | H, L_SER_31     | 2.95 | 2.08 | 22.39 |
| 1OSP.PDB | O, L_TYR_30    | NH1, L_ARG_32  | HH11, L_ARG_32  | 2.63 | 1.69 | 15.15 |
| 1OSP.PDB | O, O_LYS_44    | NH1, L_ARG_32  | HH12, L_ARG_32  | 2.98 | 2.09 | 22.73 |
| 1OSP.PDB | O, O_SER_43    | NH2, L_ARG_32  | HH22, L_ARG_32  | 2.91 | 1.93 | 9.19  |
| 1OSP.PDB | O, L_SER_31    | N, L_LEU_33    | H, L_LEU_33     | 2.98 | 2.14 | 25.04 |
| 1OSP.PDB | O, L_GLN_89    | N, L_ALA_34    | H, L_ALA_34     | 2.77 | 1.82 | 10.76 |
| 1OSP.PDB | O, L_ILE_48    | N, L_TRP_35    | H, L_TRP_35     | 2.95 | 2.03 | 16.19 |
| 1OSP.PDB | O, L_PHE_87    | N, L_TYR_36    | H, L_TYR_36     | 2.75 | 1.89 | 22.90 |
| 1OSP.PDB | OE1, L_GLN_89  | OH, L_TYR_36   | HH, L_TYR_36    | 2.81 | 1.86 | 10.05 |
| 1OSP.PDB | O, L_ARG_45    | N, L_GLN_37    | H, L_GLN_37     | 2.92 | 1.98 | 13.78 |
| 1OSP.PDB | O, L_THR_85    | N, L_GLN_38    | H, L_GLN_38     | 2.68 | 1.77 | 15.79 |
| 1OSP.PDB | O, L_ASN_42    | NE2, L_GLN_38  | HE22, L_GLN_38  | 2.84 | 1.91 | 14.33 |
| 1OSP.PDB | O, L_GLN_37    | N, L_ARG_45    | H, L_ARG_45     | 2.71 | 1.86 | 23.84 |
| 1OSP.PDB | O, L_TRP_35    | N, L_LEU_47    | H, L_LEU_47     | 2.77 | 1.81 | 8.27  |
| 1OSP.PDB | O, L_SER_53    | N, L_SER_49    | H, L_SER_49     | 2.83 | 1.86 | 5.93  |
| 1OSP.PDB | OH, L_TYR_91   | N, L_GLY_50    | H, L_GLY_50     | 2.94 | 2.04 | 18.66 |
| 1OSP.PDB | O, L_LEU_33    | N, L_ALA_51    | H, L_ALA_51     | 2.85 | 1.96 | 19.10 |
| 1OSP.PDB | O, L_GLY_50    | N, L_THR_52    | H, L_THR_52     | 2.84 | 2.01 | 25.88 |
| 1OSP.PDB | O, L_SER_49    | N, L_SER_53    | H, L_SER_53     | 2.91 | 2.11 | 29.67 |
| 1OSP.PDB | O, L_LEU_47    | N, L_GLU_55    | H, L_GLU_55     | 2.98 | 2.09 | 21.52 |
| 1OSP.PDB | O, L_LEU_46    | NE1, L_TRP_57  | HE1, L_TRP_57   | 2.86 | 1.90 | 10.61 |
| 1OSP.PDB | O, L_SER_74    | N, L_SER_63    | H, L_SER_63     | 2.92 | 2.11 | 28.83 |
| 1OSP.PDB | O, L_THR_72    | N, L_SER_65    | H, L_SER_65     | 2.98 | 2.07 | 17.30 |
| 1OSP.PDB | O, L_CYS_23    | N, L_TYR_71    | H, L_TYR_71     | 2.86 | 1.98 | 20.08 |
| 1OSP.PDB | O, L_ILE_21    | N, L_LEU_73    | H, L_LEU_73     | 2.87 | 1.98 | 20.14 |
| 1OSP.PDB | O, L_SER_63    | N, L_SER_74    | H, L_SER_74     | 2.74 | 1.79 | 7.99  |
| 1OSP.PDB | O, L_VAL_19    | N, L_ILE_75    | H, L_ILE_75     | 2.84 | 1.89 | 12.51 |
| 1OSP.PDB | O, L_ASP_17    | N, L_LEU_78    | H, L_LEU_78     | 2.81 | 1.87 | 13.11 |
| 1OSP.PDB | O, L_GLN_79    | N, L_ASP_82    | H, L_ASP_82     | 2.86 | 1.91 | 11.93 |
| 1OSP.PDB | O, L_GLN_38    | N, L_THR_85    | H, L_THR_85     | 2.92 | 1.95 | 4.18  |
| 1OSP.PDB | O, L_THR_102   | N, L_TYR_86    | H, L_TYR_86     | 2.89 | 1.93 | 8.08  |
| 1OSP.PDB | O, L_ASP_82    | OH, L_TYR_86   | HH, L_TYR_86    | 2.85 | 1.91 | 12.11 |
| 1OSP.PDB | O, L_TYR_36    | N, L_PHE_87    | H, L_PHE_87     | 2.96 | 2.01 | 13.11 |
| 1OSP.PDB | O, L_ALA_34    | N, L_GLN_89    | H, L_GLN_89     | 2.85 | 2.04 | 28.87 |
| 1OSP.PDB | O, L_GLN_90    | NE2, L_GLN_89  | HE22, L_GLN_89  | 2.86 | 2.00 | 23.53 |
| 1OSP.PDB | O, L_THR_97    | N, L_GLN_90    | H, L_GLN_90     | 2.93 | 2.01 | 16.17 |
| 1OSP.PDB | O, L_SER_93    | NE2, L_GLN_90  | HE21, L_GLN_90  | 2.98 | 2.01 | 7.86  |
| 1OSP.PDB | OG1, L_THR_97  | NE2, L_GLN_90  | HE22, L_GLN_90  | 3.00 | 2.06 | 15.72 |
| 1OSP.PDB | O, L_ARG_32    | N, L_TYR_91    | H, L_TYR_91     | 2.95 | 1.99 | 9.54  |
| 1OSP.PDB | OE1, L_GLN_90  | N, L_TRP_92    | H, L_TRP_92     | 2.79 | 1.98 | 27.96 |

|          |                |                |                 |      |      |       |
|----------|----------------|----------------|-----------------|------|------|-------|
| 1OSP.PDB | O, L_CYS_88    | N, L_GLY_99    | H, L_GLY_99     | 2.75 | 1.80 | 9.69  |
| 1OSP.PDB | OE1, L_GLN_6   | N, L_GLY_101   | H, L_GLY_101    | 2.85 | 1.99 | 22.93 |
| 1OSP.PDB | O, L_TYR_86    | N, L_THR_102   | H, L_THR_102    | 2.94 | 2.02 | 17.58 |
| 1OSP.PDB | O, L_SER_8     | OG1, L_THR_102 | HG1, L_THR_102  | 2.69 | 1.79 | 17.03 |
| 1OSP.PDB | O, L_SER_9     | N, L_LYS_103   | H, L_LYS_103    | 2.69 | 1.74 | 5.66  |
| 1OSP.PDB | O, L_ALA_84    | N, L_LEU_104   | H, L_LEU_104    | 2.92 | 2.02 | 18.72 |
| 1OSP.PDB | O, L_PHE_11    | N, L_GLU_105   | H, L_GLU_105    | 2.91 | 2.04 | 22.49 |
| 1OSP.PDB | OE1, L_GLN_166 | N, L_ILE_106   | H, L_ILE_106    | 2.92 | 1.96 | 10.71 |
| 1OSP.PDB | O, L_VAL_13    | N, L_LYS_107   | H, L_LYS_107    | 2.80 | 1.92 | 21.29 |
| 1OSP.PDB | O, L_ALA_109   | NE, L_ARG_108  | HE, L_ARG_108   | 2.74 | 1.82 | 13.78 |
| 1OSP.PDB | O, L ASP_170   | NH1, L_ARG_108 | HH11, L_ARG_108 | 2.91 | 1.95 | 11.72 |
| 1OSP.PDB | O, L_TYR_140   | N, L_ALA_111   | H, L_ALA_111    | 2.99 | 2.03 | 8.54  |
| 1OSP.PDB | O, L ASN_137   | N, L_THR_114   | H, L_THR_114    | 2.83 | 1.86 | 3.43  |
| 1OSP.PDB | O, L_PHE_135   | N, L_SER_116   | H, L_SER_116    | 2.91 | 2.00 | 18.69 |
| 1OSP.PDB | O, L_VAL_133   | N, L_PHE_118   | H, L_PHE_118    | 2.70 | 1.85 | 23.89 |
| 1OSP.PDB | O, L_SER_122   | N, L_THR_126   | H, L_THR_126    | 2.83 | 1.95 | 20.51 |
| 1OSP.PDB | O, L_SER_122   | OG1, L_THR_126 | HG1, L_THR_126  | 2.68 | 1.79 | 17.62 |
| 1OSP.PDB | O, L_LEU_125   | N, L_GLY_128   | H, L_GLY_128    | 2.89 | 1.98 | 18.00 |
| 1OSP.PDB | OE1, L_GLN_124 | N, L_SER_131   | H, L_SER_131    | 2.84 | 2.03 | 28.15 |
| 1OSP.PDB | O, L_LEU_179   | N, L_VAL_132   | H, L_VAL_132    | 2.99 | 2.03 | 9.27  |
| 1OSP.PDB | O, L_PHE_118   | N, L_VAL_133   | H, L_VAL_133    | 2.94 | 1.99 | 10.25 |
| 1OSP.PDB | O, L_SER_177   | N, L_CYS_134   | H, L_CYS_134    | 2.87 | 1.96 | 17.37 |
| 1OSP.PDB | O, L_SER_116   | N, L_PHE_135   | H, L_PHE_135    | 2.92 | 2.02 | 19.40 |
| 1OSP.PDB | O, L_MET_175   | N, L_LEU_136   | H, L_LEU_136    | 2.84 | 1.89 | 10.42 |
| 1OSP.PDB | O, L_THR_114   | N, L ASN_137   | H, L ASN_137    | 2.82 | 1.87 | 10.96 |
| 1OSP.PDB | O, L_TYR_173   | N, L_PHE_139   | H, L_PHE_139    | 2.82 | 1.85 | 4.99  |
| 1OSP.PDB | OE1, L_GLU_105 | OH, L_TYR_140  | HH, L_TYR_140   | 2.90 | 2.03 | 21.23 |
| 1OSP.PDB | O, L_THR_197   | N, L ASN_145   | H, L ASN_145    | 2.93 | 2.05 | 21.16 |
| 1OSP.PDB | O, L_GLU_195   | N, L_LYS_147   | H, L_LYS_147    | 2.84 | 1.90 | 13.83 |
| 1OSP.PDB | OG, L_SER_177  | NE1, L_TRP_148 | HE1, L_TRP_148  | 2.94 | 1.97 | 6.03  |
| 1OSP.PDB | O, L_THR_193   | N, L_LYS_149   | H, L_LYS_149    | 2.86 | 1.89 | 5.27  |
| 1OSP.PDB | O, L_SER_153   | N, L_ILE_150   | H, L_ILE_150    | 2.73 | 1.84 | 20.13 |
| 1OSP.PDB | O, L_SER_191   | N, L ASP_151   | H, L ASP_151    | 2.90 | 1.94 | 7.97  |
| 1OSP.PDB | O, L_TRP_148   | N, L_ARG_155   | H, L_ARG_155    | 2.67 | 1.85 | 27.49 |
| 1OSP.PDB | O, L_SER_176   | N, L_SER_162   | H, L_SER_162    | 2.90 | 1.97 | 13.57 |
| 1OSP.PDB | O, L_ILE_106   | NE2, L_GLN_166 | HE21, L_GLN_166 | 2.72 | 1.85 | 21.90 |
| 1OSP.PDB | OD1, L ASP_167 | N, L_LYS_169   | H, L_LYS_169    | 2.91 | 2.06 | 23.22 |
| 1OSP.PDB | OD1, L ASP_167 | N, L ASP_170   | H, L ASP_170    | 2.97 | 2.06 | 17.28 |
| 1OSP.PDB | OD1, L ASP_170 | N, L_THR_172   | H, L_THR_172    | 2.93 | 1.99 | 11.17 |
| 1OSP.PDB | O, L_PHE_139   | N, L_TYR_173   | H, L_TYR_173    | 2.78 | 1.85 | 13.38 |
| 1OSP.PDB | O, L_LEU_136   | N, L_MET_175   | H, L_MET_175    | 2.90 | 2.00 | 19.13 |
| 1OSP.PDB | O, L_SER_162   | N, L_SER_176   | H, L_SER_176    | 2.94 | 1.99 | 10.89 |
| 1OSP.PDB | O, L_CYS_134   | N, L_SER_177   | H, L_SER_177    | 2.92 | 1.98 | 13.57 |
| 1OSP.PDB | O, L_LEU_160   | N, L_THR_178   | H, L_THR_178    | 2.95 | 1.99 | 8.96  |
| 1OSP.PDB | O, L_VAL_132   | N, L_LEU_179   | H, L_LEU_179    | 2.86 | 1.89 | 6.54  |
| 1OSP.PDB | O, L_GLY_158   | N, L_THR_180   | H, L_THR_180    | 2.81 | 1.87 | 11.29 |
| 1OSP.PDB | OG, L_SER_131  | OG1, L_THR_180 | HG1, L_THR_180  | 2.85 | 1.92 | 11.66 |
| 1OSP.PDB | O, L_ALA_130   | N, L_LEU_181   | H, L_LEU_181    | 2.78 | 1.82 | 7.56  |
| 1OSP.PDB | O, L_GLY_128   | N, L_LYS_183   | H, L_LYS_183    | 2.85 | 1.89 | 9.20  |
| 1OSP.PDB | O, L_THR_182   | N, L_TYR_186   | H, L_TYR_186    | 2.97 | 2.01 | 7.10  |
| 1OSP.PDB | O, L_LYS_183   | N, L_GLU_187   | H, L_GLU_187    | 2.92 | 1.97 | 10.78 |
| 1OSP.PDB | O, L_GLU_185   | N, L_ARG_188   | H, L_ARG_188    | 2.88 | 2.00 | 21.14 |
| 1OSP.PDB | O, L_PHE_209   | N, L_TYR_192   | H, L_TYR_192    | 2.89 | 1.92 | 5.15  |
| 1OSP.PDB | O, L_LYS_207   | N, L_CYS_194   | H, L_CYS_194    | 3.00 | 2.06 | 13.98 |
| 1OSP.PDB | O, L_LYS_147   | N, L_GLU_195   | H, L_GLU_195    | 2.86 | 1.93 | 14.83 |
| 1OSP.PDB | O, L_ILE_205   | N, L_ALA_196   | H, L_ALA_196    | 2.74 | 1.78 | 0.99  |
| 1OSP.PDB | O, L ASN_145   | N, L_THR_197   | H, L_THR_197    | 2.74 | 1.79 | 7.28  |
| 1OSP.PDB | OD2, L ASP_110 | NZ, L_LYS_199  | HZ3, L_LYS_199  | 2.64 | 1.82 | 29.88 |

|          |                |               |                |      |      |       |
|----------|----------------|---------------|----------------|------|------|-------|
| 1OSP.PDB | O, L_ALA_196   | N, L_ILE_205  | H, L_ILE_205   | 2.88 | 2.01 | 22.87 |
| 1OSP.PDB | O, L_TYR_192   | N, L_PHE_209  | H, L_PHE_209   | 2.99 | 2.09 | 20.05 |
| 1OSP.PDB | O, L_ASN_190   | N, L_ARG_211  | H, L_ARG_211   | 2.57 | 1.73 | 22.30 |
| 1OSP.PDB | OD1, L_ASN_190 | N, L_ASN_212  | H, L_ASN_212   | 2.63 | 1.70 | 14.44 |
| 1OSP.PDB | O, H_THR_25    | N, H_GLN_3    | H, H_GLN_3     | 2.84 | 1.98 | 24.33 |
| 1OSP.PDB | O, H_THR_21    | N, H_SER_7    | H, H_SER_7     | 2.81 | 1.95 | 22.81 |
| 1OSP.PDB | O, H_THR_117   | N, H_VAL_12   | H, H_VAL_12    | 2.94 | 2.00 | 13.37 |
| 1OSP.PDB | O, H_VAL_85    | N, H_SER_15   | H, H_SER_15    | 2.92 | 1.95 | 6.64  |
| 1OSP.PDB | O, H_LYS_13    | N, H_GLN_16   | H, H_GLN_16    | 3.00 | 2.09 | 18.64 |
| 1OSP.PDB | OD1, H_ASN_83  | OG1, H_THR_17 | HG1, H_THR_17  | 2.79 | 1.95 | 24.49 |
| 1OSP.PDB | O, H_LEU_82    | N, H_LEU_18   | H, H_LEU_18    | 2.68 | 1.78 | 16.36 |
| 1OSP.PDB | O, H_LEU_80    | N, H_LEU_20   | H, H_LEU_20    | 2.94 | 1.99 | 11.52 |
| 1OSP.PDB | O, H_SER_7     | N, H_THR_21   | H, H_THR_21    | 2.82 | 1.88 | 11.48 |
| 1OSP.PDB | O, H_TYR_78    | N, H_CYS_22   | H, H_CYS_22    | 2.86 | 1.91 | 11.66 |
| 1OSP.PDB | O, H_GLN_5     | N, H_SER_23   | H, H_SER_23    | 2.89 | 1.92 | 6.27  |
| 1OSP.PDB | O, H_GLN_3     | N, H_THR_25   | H, H_THR_25    | 2.88 | 1.93 | 10.50 |
| 1OSP.PDB | OD1, H_ASN_76  | N, H_ILE_29   | H, H_ILE_29    | 2.92 | 1.99 | 15.63 |
| 1OSP.PDB | O, H_ILE_51    | N, H_TRP_34   | H, H_TRP_34    | 2.95 | 1.99 | 10.12 |
| 1OSP.PDB | O, H_SER_31    | NE1, H_TRP_34 | HE1, H_TRP_34  | 2.85 | 1.98 | 23.03 |
| 1OSP.PDB | O, H_ALA_96    | N, H_ASP_35   | H, H_ASP_35    | 2.77 | 1.81 | 7.66  |
| 1OSP.PDB | O, H_GLY_49    | N, H_TRP_36   | H, H_TRP_36    | 2.89 | 2.03 | 23.14 |
| 1OSP.PDB | O, H_TYR_94    | N, H_ILE_37   | H, H_ILE_37    | 2.84 | 1.87 | 8.13  |
| 1OSP.PDB | O, H_GLU_46    | N, H_ARG_38   | H, H_ARG_38    | 2.95 | 1.99 | 11.63 |
| 1OSP.PDB | OE1, H_GLU_46  | NH1, H_ARG_38 | HH11, H_ARG_38 | 2.77 | 1.80 | 9.20  |
| 1OSP.PDB | OH, H_TYR_93   | NH2, H_ARG_38 | HH21, H_ARG_38 | 2.83 | 1.87 | 12.82 |
| 1OSP.PDB | OD1, H_ASP_89  | NH2, H_ARG_38 | HH22, H_ARG_38 | 2.83 | 1.91 | 19.07 |
| 1OSP.PDB | O, H_THR_92    | N, H_LYS_39   | H, H_LYS_39    | 2.72 | 1.83 | 19.36 |
| 1OSP.PDB | O, H_LYS_44    | N, H_PHE_40   | H, H_PHE_40    | 2.72 | 1.83 | 18.74 |
| 1OSP.PDB | O, H_PHE_40    | N, H_ASN_43   | H, H_ASN_43    | 2.74 | 1.91 | 24.90 |
| 1OSP.PDB | O, H_ARG_38    | N, H_GLU_46   | H, H_GLU_46    | 2.94 | 2.08 | 24.27 |
| 1OSP.PDB | O, H_TRP_36    | N, H_MET_48   | H, H_MET_48    | 2.82 | 1.92 | 18.56 |
| 1OSP.PDB | O, H_TRP_34    | N, H_ILE_51   | H, H_ILE_51    | 2.94 | 2.01 | 16.05 |
| 1OSP.PDB | O, H_GLY_56    | N, H_ARG_52   | H, H_ARG_52    | 2.70 | 1.82 | 20.54 |
| 1OSP.PDB | O, H_ARG_52    | N, H_GLY_55   | H, H_GLY_55    | 2.98 | 2.16 | 28.05 |
| 1OSP.PDB | O, H_MET_48    | N, H_ASN_60   | H, H_ASN_60    | 2.81 | 1.84 | 4.94  |
| 1OSP.PDB | O, H_PHE_47    | ND2, H_ASN_60 | HD22, H_ASN_60 | 2.80 | 1.84 | 6.91  |
| 1OSP.PDB | OD1, H_ASN_60  | N, H_SER_62   | H, H_SER_62    | 2.92 | 1.99 | 15.17 |
| 1OSP.PDB | OD2, L_ASP_1   | OG, H_SER_62  | HG, H_SER_62   | 2.98 | 2.17 | 26.53 |
| 1OSP.PDB | O, H_GLN_81    | N, H_SER_68   | H, H_SER_68    | 2.92 | 2.02 | 18.77 |
| 1OSP.PDB | OH, H_TYR_59   | N, H_ILE_69   | H, H_ILE_69    | 2.83 | 1.90 | 13.21 |
| 1OSP.PDB | O, H_HIS_77    | N, H_ASP_72   | H, H_ASP_72    | 2.76 | 1.83 | 13.63 |
| 1OSP.PDB | OD1, H_ASP_72  | N, H_LYS_75   | H, H_LYS_75    | 2.98 | 2.11 | 21.21 |
| 1OSP.PDB | O, H_GLU_27    | ND2, H_ASN_76 | HD21, H_ASN_76 | 2.87 | 1.93 | 13.17 |
| 1OSP.PDB | O, H_VAL_24    | ND2, H_ASN_76 | HD22, H_ASN_76 | 2.88 | 1.97 | 18.51 |
| 1OSP.PDB | O, H_ASN_76    | ND1, H_HIS_77 | HD1, H_HIS_77  | 2.92 | 1.96 | 10.26 |
| 1OSP.PDB | O, H_THR_70    | N, H_TYR_79   | H, H_TYR_79    | 2.78 | 1.83 | 9.64  |
| 1OSP.PDB | O, H_SER_68    | N, H_GLN_81   | H, H_GLN_81    | 2.98 | 2.10 | 21.73 |
| 1OSP.PDB | O, H_LEU_18    | N, H_LEU_82   | H, H_LEU_82    | 2.92 | 1.99 | 15.92 |
| 1OSP.PDB | O, H_GLN_16    | N, H_VAL_85   | H, H_VAL_85    | 2.82 | 1.85 | 6.22  |
| 1OSP.PDB | OD2, H_ASP_89  | N, H_VAL_86   | H, H_VAL_86    | 2.80 | 1.88 | 11.59 |
| 1OSP.PDB | O, H_VAL_86    | N, H_ASP_89   | H, H_ASP_89    | 2.89 | 1.96 | 13.81 |
| 1OSP.PDB | O, H_THR_114   | N, H_TYR_93   | H, H_TYR_93    | 2.83 | 1.88 | 11.95 |
| 1OSP.PDB | O, H_ASP_89    | OH, H_TYR_93  | HH, H_TYR_93   | 2.70 | 1.77 | 11.96 |
| 1OSP.PDB | O, H_ILE_37    | N, H_TYR_94   | H, H_TYR_94    | 2.68 | 1.76 | 13.41 |
| 1OSP.PDB | OE2, H_GLU_6   | N, H_CYS_95   | H, H_CYS_95    | 2.95 | 2.01 | 11.90 |
| 1OSP.PDB | O, H_PHE_109   | N, H_ARG_97   | H, H_ARG_97    | 2.87 | 1.96 | 17.07 |
| 1OSP.PDB | O, H_PHE_33    | N, H_SER_98   | H, H_SER_98    | 2.89 | 1.95 | 12.66 |
| 1OSP.PDB | O, H_GLY_106   | N, H_ARG_99   | H, H_ARG_99    | 2.65 | 1.77 | 20.05 |

|          |                |                |                |      |      |       |
|----------|----------------|----------------|----------------|------|------|-------|
| 1OSP.PDB | OG, H_SER_105  | N, H_ASP_100   | H, H_ASP_100   | 2.96 | 2.05 | 15.15 |
| 1OSP.PDB | O, O_ASP_93    | N, H_TYR_101   | H, H_TYR_101   | 2.96 | 2.00 | 9.88  |
| 1OSP.PDB | OH, L_TYR_36   | N, H_PHE_107   | H, H_PHE_107   | 2.90 | 1.92 | 4.68  |
| 1OSP.PDB | O, H_PHE_107   | NE1, H_TRP_110 | HE1, H_TRP_110 | 2.73 | 1.93 | 28.89 |
| 1OSP.PDB | OE1, H_GLU_6   | N, H_GLY_113   | H, H_GLY_113   | 2.71 | 1.88 | 24.91 |
| 1OSP.PDB | O, H_ALA_91    | N, H_VAL_116   | H, H_VAL_116   | 2.85 | 1.88 | 5.20  |
| 1OSP.PDB | O, H_SER_10    | N, H_THR_117   | H, H_THR_117   | 2.78 | 1.82 | 8.67  |
| 1OSP.PDB | O, H_LYS_150   | N, H_SER_127   | H, H_SER_127   | 2.92 | 1.96 | 10.41 |
| 1OSP.PDB | O, H_LEU_148   | N, H_TYR_129   | H, H_TYR_129   | 2.81 | 1.85 | 8.10  |
| 1OSP.PDB | O, H_GLY_146   | N, H_LEU_131   | H, H_LEU_131   | 2.76 | 1.84 | 15.39 |
| 1OSP.PDB | O, H_VAL_190   | N, H_VAL_143   | H, H_VAL_143   | 2.73 | 1.81 | 13.86 |
| 1OSP.PDB | O, H_VAL_188   | N, H_LEU_145   | H, H_LEU_145   | 2.82 | 1.87 | 9.83  |
| 1OSP.PDB | O, H_LEU_131   | N, H_GLY_146   | H, H_GLY_146   | 2.94 | 2.07 | 22.39 |
| 1OSP.PDB | O, H_SER_186   | N, H_CYS_147   | H, H_CYS_147   | 3.00 | 2.12 | 21.82 |
| 1OSP.PDB | O, H_TYR_129   | N, H_LEU_148   | H, H_LEU_148   | 2.83 | 1.89 | 14.70 |
| 1OSP.PDB | O, H_MET_184   | N, H_VAL_149   | H, H_VAL_149   | 2.83 | 1.86 | 7.67  |
| 1OSP.PDB | O, H_SER_127   | N, H_LYS_150   | H, H_LYS_150   | 2.86 | 1.89 | 5.15  |
| 1OSP.PDB | O, H_THR_124   | N, H_PHE_153   | H, H_PHE_153   | 2.99 | 2.11 | 20.08 |
| 1OSP.PDB | OE1, H_GLU_155 | N, H_SER_156   | H, H_SER_156   | 2.82 | 1.96 | 21.80 |
| 1OSP.PDB | O, H_SER_203   | N, H_THR_160   | H, H_THR_160   | 2.81 | 1.86 | 11.32 |
| 1OSP.PDB | OG, H_SER_186  | NE1, H_TRP_161 | HE1, H_TRP_161 | 2.94 | 1.96 | 6.92  |
| 1OSP.PDB | O, H_SER_187   | N, H_HIS_171   | H, H_HIS_171   | 2.90 | 1.95 | 12.27 |
| 1OSP.PDB | O, H_SER_185   | N, H_PHE_173   | H, H_PHE_173   | 2.83 | 1.89 | 14.13 |
| 1OSP.PDB | O, H_LEU_181   | N, H_GLN_178   | H, H_GLN_178   | 2.99 | 2.02 | 8.47  |
| 1OSP.PDB | O, H_TYR_152   | N, H_TYR_182   | H, H_TYR_182   | 2.70 | 1.78 | 13.65 |
| 1OSP.PDB | O, H_VAL_149   | N, H_MET_184   | H, H_MET_184   | 2.88 | 1.94 | 12.78 |
| 1OSP.PDB | OG, L_SER_176  | OG, H_SER_185  | HG, H_SER_185  | 2.74 | 1.91 | 24.72 |
| 1OSP.PDB | O, H_HIS_171   | N, H_SER_187   | H, H_SER_187   | 2.79 | 1.91 | 19.94 |
| 1OSP.PDB | O, H_LEU_145   | N, H_VAL_188   | H, H_VAL_188   | 2.91 | 1.95 | 10.57 |
| 1OSP.PDB | O, H_SER_169   | N, H_THR_189   | H, H_THR_189   | 2.97 | 2.10 | 22.89 |
| 1OSP.PDB | O, H_VAL_143   | N, H_VAL_190   | H, H_VAL_190   | 2.87 | 1.94 | 15.00 |
| 1OSP.PDB | O, H_SER_141   | N, H_SER_192   | H, H_SER_192   | 2.75 | 1.80 | 9.03  |
| 1OSP.PDB | O, H_PRO_191   | N, H_THR_194   | H, H_THR_194   | 2.85 | 1.95 | 18.47 |
| 1OSP.PDB | O, H_PRO_191   | OG1, H_THR_194 | HG1, H_THR_194 | 2.70 | 1.91 | 28.34 |
| 1OSP.PDB | O, H_ASN_162   | N, H_THR_201   | H, H_THR_201   | 2.71 | 1.81 | 16.91 |
| 1OSP.PDB | O, H_LYS_215   | N, H_CYS_202   | H, H_CYS_202   | 2.91 | 1.95 | 9.86  |
| 1OSP.PDB | O, H_THR_160   | N, H_SER_203   | H, H_SER_203   | 2.69 | 1.78 | 14.42 |
| 1OSP.PDB | O, H_VAL_213   | N, H_VAL_204   | H, H_VAL_204   | 2.76 | 1.80 | 5.73  |
| 1OSP.PDB | O, H_THR_158   | N, H_ALA_205   | H, H_ALA_205   | 2.97 | 2.01 | 9.69  |
| 1OSP.PDB | O, H_THR_211   | N, H_HIS_206   | H, H_HIS_206   | 2.87 | 1.90 | 7.50  |
| 1OSP.PDB | OG, H_SER_209  | ND1, H_HIS_206 | HD1, H_HIS_206 | 2.73 | 1.88 | 25.05 |
| 1OSP.PDB | O, H_PRO_154   | NE2, H_HIS_206 | HE2, H_HIS_206 | 2.71 | 1.78 | 13.27 |
| 1OSP.PDB | O, H_PRO_207   | N, H_SER_210   | H, H_SER_210   | 2.91 | 1.98 | 12.92 |
| 1OSP.PDB | O, H_VAL_204   | N, H_VAL_213   | H, H_VAL_213   | 2.78 | 1.87 | 17.04 |
| 1OSP.PDB | O, H_CYS_202   | N, H_LYS_215   | H, H_LYS_215   | 2.75 | 1.83 | 14.50 |
| 1OSP.PDB | OE1, L_GLU_123 | NZ, H_LYS_215  | HZ2, H_LYS_215 | 2.78 | 1.85 | 20.53 |
| 1OSP.PDB | O, H_VAL_200   | N, H_LEU_217   | H, H_LEU_217   | 2.88 | 1.93 | 11.66 |
| 1OSP.PDB | O, O_ASP_25    | OG, O_SER_29   | HG, O_SER_29   | 2.96 | 2.06 | 17.60 |
| 1OSP.PDB | O, O_VAL_42    | N, O_VAL_30    | H, O_VAL_30    | 2.74 | 1.80 | 11.57 |
| 1OSP.PDB | O, O_VAL_40    | N, O_VAL_32    | H, O_VAL_32    | 2.79 | 1.86 | 14.04 |
| 1OSP.PDB | O, O_MET_38    | N, O_LEU_34    | H, O_LEU_34    | 2.77 | 1.93 | 25.21 |
| 1OSP.PDB | OD1, O_ASP_33  | NZ, O_LYS_39   | HZ2, O_LYS_39  | 2.81 | 1.85 | 17.76 |
| 1OSP.PDB | O, O_VAL_32    | N, O_VAL_40    | H, O_VAL_40    | 2.85 | 1.95 | 18.60 |
| 1OSP.PDB | O, O_ILE_55    | N, O_LEU_41    | H, O_LEU_41    | 2.73 | 1.77 | 2.80  |
| 1OSP.PDB | O, O_VAL_30    | N, O_VAL_42    | H, O_VAL_42    | 2.79 | 1.83 | 5.03  |
| 1OSP.PDB | O, O_LYS_51    | N, O_ASN_47    | H, O_ASN_47    | 2.68 | 1.74 | 7.05  |
| 1OSP.PDB | OD1, O_ASN_47  | N, O_ASP_49    | H, O_ASP_49    | 2.77 | 1.90 | 22.03 |
| 1OSP.PDB | O, O_ASN_47    | N, O_GLY_50    | H, O_GLY_50    | 2.81 | 1.86 | 10.63 |

|          |                |                |                 |      |      |       |
|----------|----------------|----------------|-----------------|------|------|-------|
| 1OSP.PDB | OD1, O_ASN_47  | N, O_LYS_51    | H, O_LYS_51     | 2.98 | 2.06 | 16.48 |
| 1OSP.PDB | O, O_SER_67    | N, O_TYR_52    | H, O_TYR_52     | 2.69 | 1.80 | 18.76 |
| 1OSP.PDB | OG, O_SER_43   | N, O_ASP_53    | H, O_ASP_53     | 2.84 | 1.87 | 5.15  |
| 1OSP.PDB | O, O_GLY_65    | N, O_LEU_54    | H, O_LEU_54     | 2.75 | 1.89 | 23.21 |
| 1OSP.PDB | O, O_LEU_61    | N, O_VAL_58    | H, O_VAL_58     | 2.83 | 1.87 | 9.77  |
| 1OSP.PDB | O, O_ALA_56    | N, O_LEU_63    | H, O_LEU_63     | 2.76 | 1.81 | 6.30  |
| 1OSP.PDB | O, O_GLU_77    | N, O_LYS_64    | H, O_LYS_64     | 2.80 | 1.86 | 12.67 |
| 1OSP.PDB | O, O_TYR_52    | N, O_SER_67    | H, O_SER_67     | 2.91 | 2.05 | 23.91 |
| 1OSP.PDB | O, O_LEU_88    | N, O_LEU_76    | H, O_LEU_76     | 2.81 | 1.86 | 9.34  |
| 1OSP.PDB | O, O_LYS_64    | N, O_GLU_77    | H, O_GLU_77     | 2.89 | 2.01 | 22.35 |
| 1OSP.PDB | O, O_VAL_86    | N, O_GLY_78    | H, O_GLY_78     | 2.92 | 2.04 | 22.03 |
| 1OSP.PDB | O, O_CYS_84    | N, O_LYS_80    | H, O_LYS_80     | 2.88 | 1.91 | 7.18  |
| 1OSP.PDB | O, O_LYS_80    | N, O_LYS_83    | H, O_LYS_83     | 2.97 | 2.11 | 23.34 |
| 1OSP.PDB | OD1, O_ASP_82  | N, O_CYS_84    | H, O_CYS_84     | 2.94 | 2.02 | 12.85 |
| 1OSP.PDB | O, O_GLY_78    | N, O_VAL_86    | H, O_VAL_86     | 2.78 | 1.82 | 7.53  |
| 1OSP.PDB | O, O_GLU_100   | N, O_LYS_87    | H, O_LYS_87     | 2.83 | 1.86 | 6.51  |
| 1OSP.PDB | O, O_LEU_76    | N, O_LEU_88    | H, O_LEU_88     | 2.85 | 1.88 | 3.67  |
| 1OSP.PDB | O, O_THR_98    | N, O_THR_89    | H, O_THR_89     | 2.87 | 1.91 | 8.56  |
| 1OSP.PDB | O, O_GLY_74    | N, O_ILE_90    | H, O_ILE_90     | 2.80 | 1.83 | 2.30  |
| 1OSP.PDB | O, O_GLN_96    | N, O_SER_91    | H, O_SER_91     | 2.90 | 1.92 | 4.64  |
| 1OSP.PDB | O, O_SER_91    | N, O_LEU_94    | H, O_LEU_94     | 2.77 | 1.86 | 16.57 |
| 1OSP.PDB | O, O_THR_115   | N, O_THR_97    | H, O_THR_97     | 2.95 | 2.01 | 13.77 |
| 1OSP.PDB | O, O_THR_89    | N, O_THR_98    | H, O_THR_98     | 2.94 | 2.04 | 19.56 |
| 1OSP.PDB | O, O_LYS_113   | N, O_LEU_99    | H, O_LEU_99     | 2.95 | 1.99 | 7.52  |
| 1OSP.PDB | O, O_LYS_87    | N, O_GLU_100   | H, O_GLU_100    | 2.86 | 1.89 | 3.85  |
| 1OSP.PDB | O, O_LYS_85    | N, O_PHE_102   | H, O_PHE_102    | 2.73 | 1.77 | 4.67  |
| 1OSP.PDB | O, O_THR_108   | N, O_LYS_103   | H, O_LYS_103    | 2.81 | 1.88 | 14.70 |
| 1OSP.PDB | O, O_LYS_103   | N, O_GLY_106   | H, O_GLY_106    | 2.79 | 1.88 | 17.21 |
| 1OSP.PDB | O, O_VAL_101   | N, O_VAL_110   | H, O_VAL_110    | 2.84 | 1.89 | 11.58 |
| 1OSP.PDB | O, O_GLU_124   | N, O_LYS_112   | H, O_LYS_112    | 2.97 | 2.14 | 27.43 |
| 1OSP.PDB | O, O_LEU_99    | N, O_LYS_113   | H, O_LYS_113    | 2.94 | 1.98 | 9.26  |
| 1OSP.PDB | O, O_THR_122   | N, O_VAL_114   | H, O_VAL_114    | 2.91 | 1.95 | 10.05 |
| 1OSP.PDB | O, O_THR_97    | N, O_THR_115   | H, O_THR_115    | 2.93 | 1.98 | 12.74 |
| 1OSP.PDB | O, O_SER_120   | N, O_SER_116   | H, O_SER_116    | 2.84 | 1.87 | 6.23  |
| 1OSP.PDB | O, O_GLY_95    | N, O_LYS_117   | H, O_LYS_117    | 2.85 | 2.02 | 26.58 |
| 1OSP.PDB | O, O_SER_116   | N, O_LYS_119   | H, O_LYS_119    | 3.00 | 2.13 | 23.54 |
| 1OSP.PDB | OD1, O_ASP_118 | N, O_SER_120   | H, O_SER_120    | 2.97 | 2.05 | 14.24 |
| 1OSP.PDB | O, O_THR_138   | N, O_SER_121   | H, O_SER_121    | 2.84 | 1.93 | 17.68 |
| 1OSP.PDB | O, O_VAL_114   | N, O_THR_122   | H, O_THR_122    | 2.89 | 1.97 | 16.41 |
| 1OSP.PDB | O, O_ILE_136   | N, O_GLU_123   | H, O_GLU_123    | 2.84 | 1.88 | 8.73  |
| 1OSP.PDB | O, O_LYS_112   | N, O_GLU_124   | H, O_GLU_124    | 2.76 | 1.80 | 4.84  |
| 1OSP.PDB | O, O_GLU_134   | N, O_LYS_125   | H, O_LYS_125    | 2.97 | 2.02 | 11.11 |
| 1OSP.PDB | O, O_GLU_131   | N, O_ASN_127   | H, O_ASN_127    | 2.72 | 1.91 | 28.14 |
| 1OSP.PDB | OD1, O_ASN_127 | N, O_LYS_129   | H, O_LYS_129    | 2.89 | 2.06 | 25.72 |
| 1OSP.PDB | O, O_ASN_127   | N, O_GLY_130   | H, O_GLY_130    | 2.88 | 1.93 | 10.26 |
| 1OSP.PDB | OD1, O_ASN_127 | N, O_GLU_131   | H, O_GLU_131    | 2.98 | 2.04 | 13.29 |
| 1OSP.PDB | O, O_LYS_125   | N, O_SER_133   | H, O_SER_133    | 2.75 | 1.83 | 15.11 |
| 1OSP.PDB | O, O_TYR_147   | N, O_LYS_135   | H, O_LYS_135    | 2.89 | 1.94 | 12.24 |
| 1OSP.PDB | O, O_GLU_123   | N, O_ILE_136   | H, O_ILE_136    | 2.91 | 1.99 | 16.85 |
| 1OSP.PDB | O, O_LEU_145   | N, O_ILE_137   | H, O_ILE_137    | 2.93 | 1.95 | 4.82  |
| 1OSP.PDB | O, O_SER_121   | N, O_THR_138   | H, O_THR_138    | 2.76 | 1.86 | 18.89 |
| 1OSP.PDB | O, O_THR_143   | N, O_ARG_139   | H, O_ARG_139    | 2.90 | 1.93 | 8.66  |
| 1OSP.PDB | OG1, O_THR_143 | NH1, O_ARG_139 | HH11, O_ARG_139 | 2.73 | 1.78 | 14.74 |
| 1OSP.PDB | OE2, O_GLU_160 | NH2, O_ARG_139 | HH22, O_ARG_139 | 2.96 | 2.05 | 19.95 |
| 1OSP.PDB | O, O_ARG_139   | N, O_GLY_142   | H, O_GLY_142    | 2.82 | 1.89 | 14.20 |
| 1OSP.PDB | O, O_VAL_161   | N, O_ARG_144   | H, O_ARG_144    | 2.86 | 1.92 | 11.75 |
| 1OSP.PDB | O, O_LYS_159   | N, O_GLU_146   | H, O_GLU_146    | 2.74 | 1.79 | 9.08  |
| 1OSP.PDB | O, O_LYS_135   | N, O_TYR_147   | H, O_TYR_147    | 2.76 | 1.82 | 11.54 |

|          |                |                |                 |      |      |       |
|----------|----------------|----------------|-----------------|------|------|-------|
| 1OSP.PDB | O, O_SER_155   | N, O_LYS_151   | H, O_LYS_151    | 2.82 | 1.90 | 16.12 |
| 1OSP.PDB | O, O_LYS_151   | N, O_GLY_154   | H, O_GLY_154    | 3.00 | 2.15 | 24.39 |
| 1OSP.PDB | O, O_THR_148   | N, O_LYS_157   | H, O_LYS_157    | 2.96 | 2.06 | 18.52 |
| 1OSP.PDB | O, O_GLU_146   | N, O_LYS_159   | H, O_LYS_159    | 2.90 | 2.10 | 29.35 |
| 1OSP.PDB | O, O_LEU_167   | N, O_GLU_160   | H, O_GLU_160    | 2.80 | 1.84 | 8.36  |
| 1OSP.PDB | O, O_ARG_144   | N, O_VAL_161   | H, O_VAL_161    | 2.67 | 1.80 | 21.27 |
| 1OSP.PDB | O, O_TYR_165   | N, O_LEU_162   | H, O_LEU_162    | 2.97 | 2.08 | 19.74 |
| 1OSP.PDB | O, O_GLU_160   | N, O_LEU_167   | H, O_LEU_167    | 2.98 | 2.02 | 8.76  |
| 1OSP.PDB | O, O_THR_177   | N, O_THR_170   | H, O_THR_170    | 2.94 | 2.08 | 23.59 |
| 1OSP.PDB | O, O_GLY_156   | N, O_LEU_171   | H, O_LEU_171    | 2.97 | 2.15 | 28.04 |
| 1OSP.PDB | O, O_ILE_191   | N, O_THR_176   | H, O_THR_176    | 2.77 | 1.81 | 7.44  |
| 1OSP.PDB | O, O_THR_170   | N, O_THR_177   | H, O_THR_177    | 2.90 | 1.94 | 8.28  |
| 1OSP.PDB | O, O_LYS_189   | N, O_LEU_178   | H, O_LEU_178    | 2.85 | 1.91 | 12.14 |
| 1OSP.PDB | O, O_GLU_168   | N, O_VAL_179   | H, O_VAL_179    | 2.80 | 1.83 | 5.32  |
| 1OSP.PDB | O, O_LEU_187   | N, O_VAL_180   | H, O_VAL_180    | 2.82 | 1.89 | 14.25 |
| 1OSP.PDB | O, O_GLU_182   | N, O_VAL_185   | H, O_VAL_185    | 2.98 | 2.06 | 16.93 |
| 1OSP.PDB | O, O_ASN_202   | N, O_THR_186   | H, O_THR_186    | 2.75 | 1.80 | 6.91  |
| 1OSP.PDB | O, O_VAL_180   | N, O_LEU_187   | H, O_LEU_187    | 2.73 | 1.77 | 7.01  |
| 1OSP.PDB | O, O_GLU_200   | N, O_SER_188   | H, O_SER_188    | 2.94 | 1.96 | 4.07  |
| 1OSP.PDB | O, O_LEU_178   | N, O_LYS_189   | H, O_LYS_189    | 2.81 | 1.84 | 6.92  |
| 1OSP.PDB | OE1, O_GLU_160 | NZ, O_LYS_189  | HZ1, O_LYS_189  | 2.95 | 1.93 | 9.44  |
| 1OSP.PDB | O, O_SER_198   | N, O_ASN_190   | H, O_ASN_190    | 2.85 | 1.88 | 7.09  |
| 1OSP.PDB | OG, O_SER_198  | ND2, O_ASN_190 | HD22, O_ASN_190 | 2.97 | 2.02 | 11.75 |
| 1OSP.PDB | O, O_THR_176   | N, O_ILE_191   | H, O_ILE_191    | 2.86 | 1.92 | 14.23 |
| 1OSP.PDB | O, O_GLU_196   | N, O_SER_192   | H, O_SER_192    | 2.84 | 1.90 | 12.51 |
| 1OSP.PDB | O, O_SER_192   | N, O_GLY_195   | H, O_GLY_195    | 2.80 | 1.87 | 14.11 |
| 1OSP.PDB | O, O_THR_186   | N, O_ASN_202   | H, O_ASN_202    | 2.98 | 2.04 | 13.31 |
| 1OSP.PDB | O, O_THR_184   | N, O_THR_204   | H, O_THR_204    | 2.90 | 1.95 | 13.33 |
| 1OSP.PDB | OD1, O_ASP_203 | N, O_ASP_205   | H, O_ASP_205    | 2.93 | 2.02 | 16.29 |
| 1OSP.PDB | O, O_SER_207   | N, O_THR_210   | H, O_THR_210    | 2.99 | 2.05 | 13.36 |
| 1OSP.PDB | OD2, O_ASP_203 | N, O_LYS_212   | H, O_LYS_212    | 2.91 | 1.95 | 1.32  |
| 1OSP.PDB | O, O_THR_210   | NZ, O_LYS_212  | HZ1, O_LYS_212  | 2.94 | 1.97 | 16.29 |
| 1OSP.PDB | O, O_THR_224   | N, O_ALA_215   | H, O_ALA_215    | 2.95 | 2.06 | 20.55 |
| 1OSP.PDB | O, O_THR_222   | N, O_ASN_217   | H, O_ASN_217    | 2.94 | 2.00 | 14.86 |
| 1OSP.PDB | O, O_SER_218   | N, O_SER_221   | H, O_SER_221    | 2.93 | 2.08 | 24.26 |
| 1OSP.PDB | O, O_LEU_235   | N, O_LEU_223   | H, O_LEU_223    | 2.82 | 1.86 | 8.38  |
| 1OSP.PDB | O, O_ALA_215   | N, O_THR_224   | H, O_THR_224    | 2.90 | 1.97 | 14.17 |
| 1OSP.PDB | OD1, O_ASP_234 | OG1, O_THR_224 | HG1, O_THR_224  | 2.71 | 1.92 | 27.50 |
| 1OSP.PDB | O, O_LYS_233   | N, O_ILE_225   | H, O_ILE_225    | 2.88 | 1.93 | 10.58 |
| 1OSP.PDB | O, O_THR_213   | N, O_THR_226   | H, O_THR_226    | 2.78 | 1.85 | 13.98 |
| 1OSP.PDB | O, O_LYS_230   | N, O_VAL_227   | H, O_VAL_227    | 2.89 | 1.96 | 15.17 |
| 1OSP.PDB | O, O_VAL_227   | N, O_LYS_230   | H, O_LYS_230    | 2.93 | 2.00 | 15.15 |
| 1OSP.PDB | O, O_SER_250   | NZ, O_LYS_230  | HZ1, O_LYS_230  | 2.95 | 1.95 | 11.76 |
| 1OSP.PDB | O, O_ILE_225   | N, O_THR_232   | H, O_THR_232    | 2.81 | 1.85 | 8.22  |
| 1OSP.PDB | O, O_GLN_246   | N, O_ASP_234   | H, O_ASP_234    | 2.97 | 2.05 | 16.64 |
| 1OSP.PDB | O, O_LEU_223   | N, O_LEU_235   | H, O_LEU_235    | 2.73 | 1.78 | 7.98  |
| 1OSP.PDB | O, O_THR_244   | N, O_VAL_236   | H, O_VAL_236    | 2.90 | 1.94 | 9.91  |
| 1OSP.PDB | O, O_SER_221   | N, O_PHE_237   | H, O_PHE_237    | 2.91 | 1.92 | 1.81  |
| 1OSP.PDB | O, O_VAL_236   | N, O_THR_244   | H, O_THR_244    | 2.91 | 2.01 | 19.80 |
| 1OSP.PDB | O, O_VAL_260   | N, O_VAL_245   | H, O_VAL_245    | 2.75 | 1.81 | 11.28 |
| 1OSP.PDB | O, O_GLU_256   | NE2, O_GLN_246 | HE22, O_GLN_246 | 2.92 | 1.95 | 7.48  |
| 1OSP.PDB | O, O_THR_232   | N, O_TYR_248   | H, O_TYR_248    | 2.90 | 2.01 | 20.77 |
| 1OSP.PDB | OD1, O_ASP_234 | OH, O_TYR_248  | HH, O_TYR_248   | 2.73 | 1.90 | 24.06 |
| 1OSP.PDB | O, O_LYS_254   | N, O_ASP_249   | H, O_ASP_249    | 2.87 | 1.94 | 14.75 |
| 1OSP.PDB | O, O_ASP_249   | N, O_GLY_252   | H, O_GLY_252    | 2.85 | 1.98 | 21.02 |
| 1OSP.PDB | OD2, O_ASP_249 | N, O_LYS_254   | H, O_LYS_254    | 2.80 | 1.86 | 5.31  |
| 1OSP.PDB | O, O_GLN_247   | N, O_GLU_256   | H, O_GLU_256    | 2.93 | 1.98 | 13.89 |
| 1OSP.PDB | O, O_VAL_245   | N, O_VAL_260   | H, O_VAL_260    | 2.77 | 1.81 | 5.97  |



|          |                |                |                 |      |      |       |
|----------|----------------|----------------|-----------------|------|------|-------|
| 1OSP.PDB | O, O_ILE_243   | N, O_ILE_262   | H, O_ILE_262    | 2.80 | 1.83 | 3.81  |
| 1OSP.PDB | OE1, O_GLU_267 | N, O_THR_263   | H, O_THR_263    | 2.83 | 1.90 | 11.29 |
| 1OSP.PDB | O, O_ASP_266   | N, O_ASN_270   | H, O_ASN_270    | 2.79 | 1.90 | 19.11 |
| 1PSK.PDB | O, L_TYR_85    | NE2, L_GLN_6   | HE21, L_GLN_6   | 2.81 | 1.89 | 16.29 |
| 1PSK.PDB | O, L_LYS_102   | N, L_MET_11    | H, L_MET_11     | 2.72 | 1.89 | 26.00 |
| 1PSK.PDB | O, L_GLU_104   | N, L_ALA_13    | H, L_ALA_13     | 2.83 | 1.92 | 17.43 |
| 1PSK.PDB | O, L_MET_77    | N, L_GLY_16    | H, L_GLY_16     | 2.73 | 1.77 | 6.44  |
| 1PSK.PDB | O, L_ILE_74    | N, L_VAL_19    | H, L_VAL_19     | 2.88 | 2.00 | 21.06 |
| 1PSK.PDB | O, L_LEU_72    | N, L_ILE_21    | H, L_ILE_21     | 2.81 | 1.98 | 26.09 |
| 1PSK.PDB | O, L_SER_7     | N, L_THR_22    | H, L_THR_22     | 2.98 | 2.05 | 14.20 |
| 1PSK.PDB | O, L_TYR_70    | N, L_CYS_23    | H, L_CYS_23     | 2.74 | 1.94 | 28.83 |
| 1PSK.PDB | O, L_THR_68    | N, L_ALA_25    | H, L_ALA_25     | 2.80 | 1.83 | 4.30  |
| 1PSK.PDB | O, L_VAL_3     | N, L_SER_26    | H, L_SER_26     | 2.84 | 1.92 | 15.77 |
| 1PSK.PDB | O, L_GLN_88    | N, L_HIS_33    | H, L_HIS_33     | 2.77 | 1.93 | 24.90 |
| 1PSK.PDB | O, L_ILE_47    | N, L_TRP_34    | H, L_TRP_34     | 2.73 | 1.83 | 16.95 |
| 1PSK.PDB | O, L_TYR_86    | N, L_PHE_35    | H, L_PHE_35     | 2.70 | 1.82 | 20.29 |
| 1PSK.PDB | O, L_LYS_44    | N, L_GLN_36    | H, L_GLN_36     | 2.74 | 1.81 | 13.25 |
| 1PSK.PDB | O, L_THR_41    | NE2, L_GLN_37  | HE22, L_GLN_37  | 2.64 | 1.76 | 19.44 |
| 1PSK.PDB | O, L_GLU_80    | NZ, L_LYS_38   | HZ2, L_LYS_38   | 2.69 | 1.82 | 26.34 |
| 1PSK.PDB | O, L_LYS_38    | N, L_THR_41    | H, L_THR_41     | 2.90 | 1.99 | 18.24 |
| 1PSK.PDB | O, L_TRP_34    | N, L_TRP_46    | H, L_TRP_46     | 2.75 | 1.83 | 15.53 |
| 1PSK.PDB | O, L_THR_52    | N, L_TYR_48    | H, L_TYR_48     | 2.90 | 2.05 | 25.41 |
| 1PSK.PDB | O, L_ILE_32    | N, L_THR_50    | H, L_THR_50     | 2.83 | 2.01 | 27.59 |
| 1PSK.PDB | O, L_SER_49    | N, L_SER_51    | H, L_SER_51     | 2.81 | 1.95 | 22.62 |
| 1PSK.PDB | O, L_SER_71    | N, L_SER_64    | H, L_SER_64     | 2.93 | 2.00 | 15.47 |
| 1PSK.PDB | O, L_SER_69    | N, L_SER_66    | H, L_SER_66     | 2.87 | 2.04 | 26.16 |
| 1PSK.PDB | O, L_CYS_23    | N, L_TYR_70    | H, L_TYR_70     | 2.88 | 1.92 | 9.26  |
| 1PSK.PDB | O, L_SER_64    | N, L_SER_71    | H, L_SER_71     | 2.83 | 1.87 | 10.56 |
| 1PSK.PDB | O, L_ILE_21    | N, L_LEU_72    | H, L_LEU_72     | 2.84 | 1.87 | 7.12  |
| 1PSK.PDB | O, L_VAL_19    | N, L_ILE_74    | H, L_ILE_74     | 2.66 | 1.77 | 18.08 |
| 1PSK.PDB | O, L_ARG_60    | N, L_SER_75    | H, L_SER_75     | 2.95 | 2.02 | 15.07 |
| 1PSK.PDB | O, L_GLU_17    | N, L_MET_77    | H, L_MET_77     | 2.56 | 1.73 | 24.40 |
| 1PSK.PDB | O, L_THR_101   | N, L_TYR_85    | H, L_TYR_85     | 2.97 | 2.05 | 16.35 |
| 1PSK.PDB | O, L_PHE_35    | N, L_TYR_86    | H, L_TYR_86     | 2.89 | 2.04 | 24.71 |
| 1PSK.PDB | OE1, L_GLN_6   | N, L_CYS_87    | H, L_CYS_87     | 2.90 | 2.04 | 23.69 |
| 1PSK.PDB | O, L_HIS_33    | N, L_GLN_88    | H, L_GLN_88     | 2.64 | 1.77 | 19.96 |
| 1PSK.PDB | O, L_ALA_9     | N, L_LYS_102   | H, L_LYS_102    | 2.79 | 1.82 | 7.68  |
| 1PSK.PDB | O, L_ALA_83    | N, L_LEU_103   | H, L_LEU_103    | 2.67 | 1.77 | 17.39 |
| 1PSK.PDB | O, L_MET_11    | N, L_GLU_104   | H, L_GLU_104    | 2.63 | 1.81 | 26.11 |
| 1PSK.PDB | O, L_ALA_13    | N, L_LYS_106   | H, L_LYS_106    | 2.86 | 1.91 | 10.19 |
| 1PSK.PDB | O, L_ALA_108   | NE, L_ARG_107  | HE, L_ARG_107   | 2.69 | 1.87 | 26.11 |
| 1PSK.PDB | O, L_ASP_169   | NH1, L_ARG_107 | HH11, L_ARG_107 | 2.89 | 1.94 | 13.94 |
| 1PSK.PDB | O, L_ALA_108   | NH2, L_ARG_107 | HH21, L_ARG_107 | 2.77 | 1.96 | 29.27 |
| 1PSK.PDB | O, L_TYR_139   | N, L_ALA_110   | H, L_ALA_110    | 2.80 | 1.90 | 19.51 |
| 1PSK.PDB | O, L_ASN_136   | N, L_THR_113   | H, L_THR_113    | 2.79 | 1.85 | 11.43 |
| 1PSK.PDB | O, L_SER_120   | N, L_LEU_124   | H, L_LEU_124    | 2.82 | 1.86 | 7.62  |
| 1PSK.PDB | O, L_SER_121   | N, L_THR_125   | H, L_THR_125    | 2.73 | 1.80 | 12.63 |
| 1PSK.PDB | O, L_SER_121   | OG1, L_THR_125 | HG1, L_THR_125  | 2.84 | 1.90 | 10.36 |
| 1PSK.PDB | O, L_GLU_122   | OG, L_SER_126  | HG, L_SER_126   | 2.94 | 2.08 | 22.24 |
| 1PSK.PDB | O, L_LEU_180   | N, L_ALA_129   | H, L_ALA_129    | 2.84 | 1.94 | 18.85 |
| 1PSK.PDB | O, L_LEU_178   | N, L_VAL_131   | H, L_VAL_131    | 2.87 | 2.03 | 25.59 |
| 1PSK.PDB | OG, L_SER_173  | N, L_ASN_137   | H, L_ASN_137    | 2.92 | 1.98 | 12.28 |
| 1PSK.PDB | O, L_TYR_172   | N, L_PHE_138   | H, L_PHE_138    | 2.85 | 1.88 | 6.49  |
| 1PSK.PDB | O, L_GLU_194   | N, L_LYS_146   | H, L_LYS_146    | 2.97 | 2.01 | 10.09 |
| 1PSK.PDB | OG, L_SER_176  | NE1, L_TRP_147 | HE1, L_TRP_147  | 2.73 | 1.78 | 10.14 |
| 1PSK.PDB | O, L_THR_192   | N, L_LYS_148   | H, L_LYS_148    | 2.68 | 1.78 | 17.05 |
| 1PSK.PDB | O, L_SER_152   | N, L_ILE_149   | H, L_ILE_149    | 2.76 | 1.81 | 9.00  |
| 1PSK.PDB | O, L_SER_190   | N, L_ASP_150   | H, L_ASP_150    | 2.82 | 1.85 | 2.71  |

|          |                |                |                 |      |      |       |
|----------|----------------|----------------|-----------------|------|------|-------|
| 1PSK.PDB | O, L_ILE_149   | N, L_SER_152   | H, L_SER_152    | 2.78 | 1.90 | 20.78 |
| 1PSK.PDB | OE1, L_GLN_155 | N, L_ASN_156   | H, L_ASN_156    | 2.98 | 2.05 | 13.77 |
| 1PSK.PDB | O, L_THR_177   | N, L_LEU_159   | H, L_LEU_159    | 2.87 | 2.02 | 24.21 |
| 1PSK.PDB | O, H_PRO_168   | OG, L_SER_161  | HG, L_SER_161   | 2.76 | 1.90 | 22.64 |
| 1PSK.PDB | O, L_ILE_105   | NE2, L_GLN_165 | HE21, L_GLN_165 | 2.92 | 2.00 | 17.26 |
| 1PSK.PDB | O, L_THR_171   | N, L_ASP_166   | H, L_ASP_166    | 2.81 | 1.87 | 10.96 |
| 1PSK.PDB | OD2, L_ASP_166 | N, L_ASP_169   | H, L_ASP_169    | 2.99 | 2.04 | 7.95  |
| 1PSK.PDB | O, L_PHE_138   | N, L_TYR_172   | H, L_TYR_172    | 2.85 | 1.92 | 14.74 |
| 1PSK.PDB | O, L_LEU_135   | N, L_MET_174   | H, L_MET_174    | 2.76 | 1.79 | 2.98  |
| 1PSK.PDB | O, L_CYS_133   | N, L_SER_176   | H, L_SER_176    | 2.88 | 1.92 | 9.72  |
| 1PSK.PDB | OD1, L_ASN_160 | OG, L_SER_176  | HG, L_SER_176   | 2.79 | 1.87 | 14.99 |
| 1PSK.PDB | O, L_GLY_157   | N, L_THR_179   | H, L_THR_179    | 2.95 | 2.12 | 26.59 |
| 1PSK.PDB | O, L_ALA_129   | N, L_LEU_180   | H, L_LEU_180    | 2.80 | 1.83 | 2.82  |
| 1PSK.PDB | O, L_THR_181   | N, L_TYR_185   | H, L_TYR_185    | 2.95 | 2.01 | 13.19 |
| 1PSK.PDB | O, L_LYS_182   | N, L_GLU_186   | H, L_GLU_186    | 2.95 | 1.99 | 9.74  |
| 1PSK.PDB | O, L_PHE_208   | N, L_TYR_191   | H, L_TYR_191    | 2.94 | 1.97 | 6.75  |
| 1PSK.PDB | O, L_LYS_148   | N, L_THR_192   | H, L_THR_192    | 2.84 | 1.87 | 6.81  |
| 1PSK.PDB | O, L_LYS_146   | N, L_GLU_194   | H, L_GLU_194    | 2.94 | 2.02 | 16.13 |
| 1PSK.PDB | O, L_ILE_204   | N, L_ALA_195   | H, L_ALA_195    | 2.94 | 2.01 | 15.37 |
| 1PSK.PDB | O, L_ASN_144   | N, L_THR_196   | H, L_THR_196    | 2.65 | 1.83 | 27.50 |
| 1PSK.PDB | O, L_TYR_191   | N, L_PHE_208   | H, L_PHE_208    | 2.94 | 2.02 | 17.53 |
| 1PSK.PDB | O, L_ASN_189   | N, L_ARG_210   | H, L_ARG_210    | 2.72 | 1.78 | 9.08  |
| 1PSK.PDB | O, L_HIS_188   | NH1, L_ARG_210 | HH11, L_ARG_210 | 2.85 | 1.95 | 20.39 |
| 1PSK.PDB | O, H_TYR_94    | NE2, H_GLN_6   | HE21, H_GLN_6   | 2.75 | 1.83 | 14.83 |
| 1PSK.PDB | O, H_THR_109   | N, H_GLU_10    | H, H_GLU_10     | 2.94 | 2.04 | 19.11 |
| 1PSK.PDB | O, H_THR_111   | N, H_VAL_12    | H, H_VAL_12     | 2.75 | 1.86 | 19.89 |
| 1PSK.PDB | O, H_LYS_13    | N, H_ALA_16    | H, H_ALA_16     | 2.98 | 2.05 | 15.84 |
| 1PSK.PDB | O, H_LEU_83    | N, H_VAL_18    | H, H_VAL_18     | 2.94 | 2.01 | 16.46 |
| 1PSK.PDB | OG, H_SER_7    | N, H_SER_21    | H, H_SER_21     | 2.91 | 1.95 | 7.05  |
| 1PSK.PDB | O, H_THR_77    | N, H_THR_24    | H, H_THR_24     | 2.84 | 1.91 | 14.03 |
| 1PSK.PDB | O, H_THR_97    | N, H_HIS_35    | H, H_HIS_35     | 2.81 | 1.88 | 13.42 |
| 1PSK.PDB | NE1, H_TRP_47  | ND1, H_HIS_35  | HD1, H_HIS_35   | 2.92 | 2.03 | 20.19 |
| 1PSK.PDB | O, H_TYR_95    | N, H_VAL_37    | H, H_VAL_37     | 2.78 | 1.85 | 13.12 |
| 1PSK.PDB | O, H_GLU_46    | N, H_LYS_38    | H, H_LYS_38     | 2.74 | 1.81 | 11.82 |
| 1PSK.PDB | O, H_VAL_93    | N, H_GLN_39    | H, H_GLN_39     | 2.70 | 1.83 | 20.61 |
| 1PSK.PDB | O, H_SER_40    | NE2, H_GLN_39  | HE22, H_GLN_39  | 2.98 | 2.06 | 16.51 |
| 1PSK.PDB | O, H_SER_44    | N, H_SER_40    | H, H_SER_40     | 2.86 | 1.90 | 10.36 |
| 1PSK.PDB | O, H_LYS_38    | N, H_GLU_46    | H, H_GLU_46     | 2.72 | 1.82 | 17.92 |
| 1PSK.PDB | O, H_TRP_36    | N, H_ILE_48    | H, H_ILE_48     | 2.97 | 2.07 | 18.37 |
| 1PSK.PDB | O, H_ASN_59    | N, H_ASP_50    | H, H_ASP_50     | 2.89 | 1.96 | 16.23 |
| 1PSK.PDB | O, H_GLY_57    | N, H_ASN_52    | H, H_ASN_52     | 2.75 | 1.93 | 27.30 |
| 1PSK.PDB | O, H_PRO_53    | N, H_ASN_55    | H, H_ASN_55     | 2.75 | 1.87 | 20.51 |
| 1PSK.PDB | O, H_PRO_53    | ND2, H_ASN_55  | HD22, H_ASN_55  | 2.76 | 1.94 | 26.77 |
| 1PSK.PDB | O, H_ILE_48    | N, H_ASN_61    | H, H_ASN_61     | 2.93 | 2.02 | 18.42 |
| 1PSK.PDB | O, H_TRP_47    | ND2, H_ASN_61  | HD22, H_ASN_61  | 2.88 | 1.97 | 18.24 |
| 1PSK.PDB | OD1, H_ASN_61  | N, H_LYS_63    | H, H_LYS_63     | 2.93 | 2.01 | 16.11 |
| 1PSK.PDB | O, H_PHE_64    | N, H_ALA_68    | H, H_ALA_68     | 2.83 | 1.93 | 18.74 |
| 1PSK.PDB | OH, H_TYR_60   | N, H_LEU_70    | H, H_LEU_70     | 2.73 | 1.84 | 18.80 |
| 1PSK.PDB | O, H_THR_78    | N, H_HIS_73    | H, H_HIS_73     | 2.82 | 2.01 | 28.97 |
| 1PSK.PDB | OG1, H_THR_78  | OG, H_SER_76   | HG, H_SER_76    | 2.94 | 2.03 | 16.27 |
| 1PSK.PDB | O, H_THR_71    | N, H_TYR_80    | H, H_TYR_80     | 2.94 | 2.09 | 24.76 |
| 1PSK.PDB | O, H_VAL_18    | N, H_LEU_83    | H, H_LEU_83     | 2.81 | 1.85 | 9.28  |
| 1PSK.PDB | OD2, H_ASP_90  | N, H_THR_87    | H, H_THR_87     | 2.99 | 2.12 | 22.62 |
| 1PSK.PDB | O, H_THR_87    | N, H_ASP_90    | H, H_ASP_90     | 2.83 | 1.90 | 13.61 |
| 1PSK.PDB | O, H_SER_88    | OG, H_SER_91   | HG, H_SER_91    | 2.90 | 1.97 | 12.52 |
| 1PSK.PDB | O, H_GLN_39    | N, H_VAL_93    | H, H_VAL_93     | 2.97 | 1.99 | 0.74  |
| 1PSK.PDB | O, H_THR_108   | N, H_TYR_94    | H, H_TYR_94     | 2.81 | 1.89 | 15.61 |
| 1PSK.PDB | O, H_ASP_90    | OH, H_TYR_94   | HH, H_TYR_94    | 2.77 | 1.87 | 17.15 |

|             |                |                |                |      |      |       |
|-------------|----------------|----------------|----------------|------|------|-------|
| 1PSK.PDB    | O, H_VAL_37    | N, H_TYR_95    | H, H_TYR_95    | 2.95 | 1.97 | 7.17  |
| 1PSK.PDB    | O, H_HIS_35    | N, H_THR_97    | H, H_THR_97    | 2.81 | 1.92 | 20.68 |
| 1PSK.PDB    | O, H_TYR_103   | N, H_SER_98    | H, H_SER_98    | 2.80 | 1.88 | 15.11 |
| 1PSK.PDB    | OH, H_TYR_27   | OG, H_SER_98   | HG, H_SER_98   | 2.95 | 2.06 | 19.06 |
| 1PSK.PDB    | O, H_TYR_94    | N, H_THR_108   | H, H_THR_108   | 2.86 | 2.00 | 23.11 |
| 1PSK.PDB    | O, H_SER_7     | OG1, H_THR_108 | HG1, H_THR_108 | 2.62 | 1.79 | 24.94 |
| 1PSK.PDB    | O, H_ALA_92    | N, H_LEU_110   | H, H_LEU_110   | 2.97 | 2.02 | 12.06 |
| 1PSK.PDB    | O, H_GLU_10    | N, H_THR_111   | H, H_THR_111   | 2.77 | 1.82 | 9.08  |
| 1PSK.PDB    | O, H_LYS_144   | N, H_SER_121   | H, H_SER_121   | 2.81 | 1.84 | 4.61  |
| 1PSK.PDB    | O, H_LEU_142   | N, H_TYR_123   | H, H_TYR_123   | 2.75 | 1.89 | 23.66 |
| 1PSK.PDB    | O, H_GLY_140   | N, H_LEU_125   | H, H_LEU_125   | 2.83 | 1.96 | 22.70 |
| 1PSK.PDB    | O, H_VAL_182   | N, H_LEU_139   | H, H_LEU_139   | 2.94 | 1.97 | 6.89  |
| 1PSK.PDB    | O, H_SER_180   | N, H_CYS_141   | H, H_CYS_141   | 2.84 | 1.96 | 21.90 |
| 1PSK.PDB    | O, H_TYR_123   | N, H_LEU_142   | H, H_LEU_142   | 2.94 | 1.96 | 5.65  |
| 1PSK.PDB    | O, H_LEU_178   | N, H_VAL_143   | H, H_VAL_143   | 2.80 | 1.85 | 10.99 |
| 1PSK.PDB    | O, H_SER_121   | N, H_LYS_144   | H, H_LYS_144   | 2.73 | 1.77 | 7.35  |
| 1PSK.PDB    | O, H_LEU_175   | N, H_GLN_172   | H, H_GLN_172   | 2.99 | 2.02 | 7.12  |
| 1PSK.PDB    | O, H_TYR_146   | N, H_TYR_176   | H, H_TYR_176   | 2.73 | 1.77 | 6.58  |
| 1PSK.PDB    | O, H_VAL_170   | N, H_THR_177   | H, H_THR_177   | 3.00 | 2.15 | 24.71 |
| 1PSK.PDB    | O, H_HIS_165   | N, H_SER_181   | H, H_SER_181   | 2.93 | 1.97 | 9.97  |
| 1PSK.PDB    | O, H_GLY_163   | N, H_THR_183   | H, H_THR_183   | 2.96 | 2.11 | 24.27 |
| 1PSK.PDB    | O, H_VAL_137   | N, H_VAL_184   | H, H_VAL_184   | 2.80 | 1.88 | 17.57 |
| 1PSK.PDB    | O, H_THR_188   | N, H_GLN_192   | H, H_GLN_192   | 2.60 | 1.80 | 26.98 |
| 1PSK.PDB    | OD1, H_ASN_156 | N, H_THR_195   | H, H_THR_195   | 2.91 | 1.95 | 9.28  |
| 1PSK.PDB    | O, H_THR_154   | N, H_ASN_197   | H, H_ASN_197   | 2.76 | 1.83 | 13.92 |
| 1PSK.PDB    | O, H_LYS_206   | N, H_VAL_198   | H, H_VAL_198   | 2.73 | 1.84 | 18.50 |
| 1PSK.PDB    | O, H_HIS_200   | N, H_SER_204   | H, H_SER_204   | 2.75 | 1.84 | 15.81 |
| 1PSK.PDB    | O, H_VAL_198   | N, H_LYS_206   | H, H_LYS_206   | 2.77 | 1.84 | 13.06 |
| 1PSK.PDB    | O, H_PRO_120   | NZ, H_LYS_206  | HZ1, H_LYS_206 | 2.63 | 1.80 | 29.01 |
| 1R21-1.PDB  | O, A_ARG_96    | N, A_VAL_8     | H, A_VAL_8     | 2.92 | 2.11 | 28.07 |
| 1R21-1.PDB  | O, A_ILE_51    | N, A_CYS_27    | H, A_CYS_27    | 2.73 | 1.80 | 13.77 |
| 1R21-1.PDB  | O, A_CYS_49    | N, A_PHE_29    | H, A_PHE_29    | 2.63 | 1.76 | 21.39 |
| 1R21-1.PDB  | O, A_GLY_32    | N, A_CYS_35    | H, A_CYS_35    | 2.97 | 2.04 | 15.31 |
| 1R21-1.PDB  | O, A_LEU_28    | N, A_ILE_37    | H, A_ILE_37    | 2.58 | 1.63 | 11.44 |
| 1R21-1.PDB  | O, A_CYS_27    | N, A_ILE_51    | H, A_ILE_51    | 2.59 | 1.74 | 23.78 |
| 1R21-1.PDB  | O, A_ILE_59    | N, A_GLU_52    | H, A_GLU_52    | 2.42 | 1.47 | 10.01 |
| 1R21-1.PDB  | O, A_SER_25    | N, A_ILE_53    | H, A_ILE_53    | 2.91 | 2.02 | 20.16 |
| 1R21-1.PDB  | O, A_GLU_57    | N, A_HIS_54    | H, A_HIS_54    | 2.41 | 1.54 | 20.64 |
| 1R21-1.PDB  | O, A_GLU_52    | N, A_ILE_59    | H, A_ILE_59    | 2.67 | 1.74 | 15.06 |
| 1R21-1.PDB  | OG1, A_THR_69  | ND2, A_ASN_62  | HD21, A_ASN_62 | 2.86 | 1.99 | 21.79 |
| 1R21-1.PDB  | ND2, A_ASN_62  | N, A_THR_69    | H, A_THR_69    | 2.75 | 1.81 | 12.35 |
| 1R21-1.PDB  | O, A_THR_89    | N, A_GLN_70    | H, A_GLN_70    | 2.50 | 1.71 | 28.49 |
| 1R21-1.PDB  | O, A_SER_74    | N, A_VAL_71    | H, A_VAL_71    | 2.82 | 1.84 | 3.74  |
| 1R21-1.PDB  | O, A_VAL_87    | N, A_ASN_72    | H, A_ASN_72    | 2.95 | 2.00 | 10.39 |
| 1R21-1.PDB  | O, A_VAL_71    | N, A_SER_74    | H, A_SER_74    | 2.47 | 1.61 | 23.41 |
| 1R21-1.PDB  | OD2, A_ASP_86  | N, A_LYS_83    | H, A_LYS_83    | 2.35 | 1.40 | 9.85  |
| 1R21-1.PDB  | O, A_TYR_97    | N, A_GLY_85    | H, A_GLY_85    | 2.98 | 2.05 | 14.93 |
| 1R21-1.PDB  | O, A_PHE_95    | N, A_ILE_88    | H, A_ILE_88    | 2.64 | 1.67 | 7.14  |
| 1R21-1.PDB  | O, A_GLN_70    | N, A_THR_89    | H, A_THR_89    | 2.52 | 1.55 | 4.70  |
| 1R21-1.PDB  | O, A_ARG_93    | N, A_ILE_90    | H, A_ILE_90    | 2.76 | 1.81 | 12.04 |
| 1R21-1.PDB  | O, A_ILE_88    | N, A_PHE_95    | H, A_PHE_95    | 2.52 | 1.55 | 6.84  |
| 1R21-1.PDB  | O, A_VAL_8     | N, A_ARG_96    | H, A_ARG_96    | 2.54 | 1.67 | 21.94 |
| 1R21-1.PDB  | O, A_ARG_6     | N, A_GLU_98    | H, A_GLU_98    | 2.97 | 1.99 | 7.38  |
| 1R21-1.PDB  | ND1, A_HIS_84  | N, A_ASN_99    | H, A_ASN_99    | 2.78 | 1.83 | 11.23 |
| 1R21-10.PDB | O, A_PHE_20    | N, A_LEU_7     | H, A_LEU_7     | 2.54 | 1.63 | 17.03 |
| 1R21-10.PDB | O, A_ARG_96    | N, A_VAL_8     | H, A_VAL_8     | 2.88 | 1.97 | 16.93 |
| 1R21-10.PDB | O, A_PRO_18    | N, A_THR_9     | H, A_THR_9     | 2.64 | 1.77 | 22.03 |
| 1R21-10.PDB | O, A_ARG_5     | N, A_LEU_22    | H, A_LEU_22    | 2.90 | 2.07 | 26.17 |

|             |               |               |                |      |      |       |
|-------------|---------------|---------------|----------------|------|------|-------|
| 1R21-10.PDB | O, A_ILE.51   | N, A_CYS.27   | H, A_CYS.27    | 2.90 | 1.97 | 15.62 |
| 1R21-10.PDB | O, A_CYS.49   | N, A_PHE.29   | H, A_PHE.29    | 2.63 | 1.76 | 20.96 |
| 1R21-10.PDB | O, A_LEU.28   | N, A_ILE.37   | H, A_ILE.37    | 2.61 | 1.66 | 11.11 |
| 1R21-10.PDB | O, A_GLY.30   | N, A_ILE.39   | H, A_ILE.39    | 2.86 | 1.97 | 19.93 |
| 1R21-10.PDB | O, A_LEU.41   | N, A_VAL.44   | H, A_VAL.44    | 2.90 | 2.09 | 27.66 |
| 1R21-10.PDB | O, A_CYS.27   | N, A_ILE.51   | H, A_ILE.51    | 2.67 | 1.79 | 22.06 |
| 1R21-10.PDB | O, A_ILE.59   | N, A_GLU.52   | H, A_GLU.52    | 2.49 | 1.61 | 19.99 |
| 1R21-10.PDB | O, A_GLU.57   | N, A_HIS.54   | H, A_HIS.54    | 2.63 | 1.74 | 19.91 |
| 1R21-10.PDB | O, A_GLU.52   | N, A_ILE.59   | H, A_ILE.59    | 2.58 | 1.65 | 14.41 |
| 1R21-10.PDB | O, A_VAL.80   | N, A_LEU.60   | H, A_LEU.60    | 2.98 | 2.07 | 18.84 |
| 1R21-10.PDB | OG1, A_THR.69 | ND2, A_ASN.62 | HD21, A_ASN.62 | 2.90 | 2.06 | 25.22 |
| 1R21-10.PDB | ND2, A_ASN.62 | N, A_THR.69   | H, A_THR.69    | 2.86 | 1.92 | 14.24 |
| 1R21-10.PDB | O, A_SER.74   | N, A_VAL.71   | H, A_VAL.71    | 2.72 | 1.74 | 5.16  |
| 1R21-10.PDB | O, A_VAL.87   | N, A_ASN.72   | H, A_ASN.72    | 2.98 | 2.03 | 12.85 |
| 1R21-10.PDB | O, A_VAL.71   | N, A_SER.74   | H, A_SER.74    | 2.40 | 1.47 | 14.75 |
| 1R21-10.PDB | O, A_THR.69   | N, A_ILE.76   | H, A_ILE.76    | 2.93 | 2.09 | 24.54 |
| 1R21-10.PDB | O, A_ALA.58   | N, A_LEU.82   | H, A_LEU.82    | 2.93 | 2.12 | 28.18 |
| 1R21-10.PDB | OD2, A_ASP.86 | N, A_LYS.83   | H, A_LYS.83    | 2.34 | 1.37 | 8.83  |
| 1R21-10.PDB | O, A_TYR.97   | N, A_GLY.85   | H, A_GLY.85    | 2.85 | 2.03 | 27.50 |
| 1R21-10.PDB | O, A_LYS.83   | N, A_ASP.86   | H, A_ASP.86    | 2.93 | 2.10 | 26.57 |
| 1R21-10.PDB | O, A_PHE.95   | N, A_ILE.88   | H, A_ILE.88    | 2.55 | 1.60 | 10.99 |
| 1R21-10.PDB | O, A_GLN.70   | N, A_THR.89   | H, A_THR.89    | 2.70 | 1.75 | 9.37  |
| 1R21-10.PDB | O, A_ARG.93   | N, A_ILE.90   | H, A_ILE.90    | 2.66 | 1.70 | 9.59  |
| 1R21-10.PDB | O, A_ILE.88   | N, A_PHE.95   | H, A_PHE.95    | 2.60 | 1.73 | 21.06 |
| 1R21-10.PDB | O, A_VAL.8    | N, A_ARG.96   | H, A_ARG.96    | 2.52 | 1.64 | 21.43 |
| 1R21-10.PDB | ND1, A_HIS.84 | N, A_ASN.99   | H, A_ASN.99    | 2.77 | 1.80 | 7.83  |
| 1R21-11.PDB | O, A_LEU.7    | N, A_PHE.20   | H, A_PHE.20    | 2.62 | 1.83 | 29.77 |
| 1R21-11.PDB | O, A_ILE.51   | N, A_CYS.27   | H, A_CYS.27    | 2.93 | 1.97 | 9.94  |
| 1R21-11.PDB | O, A_CYS.49   | N, A_PHE.29   | H, A_PHE.29    | 2.82 | 1.94 | 21.59 |
| 1R21-11.PDB | O, A_LEU.28   | N, A_ILE.37   | H, A_ILE.37    | 2.67 | 1.76 | 16.89 |
| 1R21-11.PDB | O, A_GLY.30   | N, A_ILE.39   | H, A_ILE.39    | 2.89 | 1.99 | 18.61 |
| 1R21-11.PDB | O, A_LEU.41   | N, A_VAL.44   | H, A_VAL.44    | 2.87 | 2.01 | 24.14 |
| 1R21-11.PDB | O, A_CYS.27   | N, A_ILE.51   | H, A_ILE.51    | 2.91 | 2.09 | 27.62 |
| 1R21-11.PDB | O, A_ILE.59   | N, A_GLU.52   | H, A_GLU.52    | 2.50 | 1.54 | 7.92  |
| 1R21-11.PDB | O, A_GLU.57   | N, A_HIS.54   | H, A_HIS.54    | 2.47 | 1.52 | 11.34 |
| 1R21-11.PDB | O, A_GLU.52   | N, A_ILE.59   | H, A_ILE.59    | 2.50 | 1.53 | 7.38  |
| 1R21-11.PDB | O, A_LYS.50   | N, A_HIS.61   | H, A_HIS.61    | 2.34 | 1.55 | 28.69 |
| 1R21-11.PDB | OG, A_SER.64  | ND2, A_ASN.62 | HD22, A_ASN.62 | 2.35 | 1.48 | 21.77 |
| 1R21-11.PDB | ND2, A_ASN.62 | N, A_THR.69   | H, A_THR.69    | 2.87 | 1.91 | 9.38  |
| 1R21-11.PDB | O, A_THR.89   | N, A_GLN.70   | H, A_GLN.70    | 2.52 | 1.62 | 18.25 |
| 1R21-11.PDB | O, A_VAL.71   | N, A_SER.74   | H, A_SER.74    | 2.43 | 1.53 | 18.84 |
| 1R21-11.PDB | O, A_VAL.71   | OG, A_SER.74  | HG, A_SER.74   | 2.65 | 1.87 | 28.98 |
| 1R21-11.PDB | N, A_GLY.85   | ND1, A_HIS.84 | HD1, A_HIS.84  | 2.62 | 1.77 | 24.61 |
| 1R21-11.PDB | O, A_LYS.83   | N, A_ASP.86   | H, A_ASP.86    | 2.93 | 2.08 | 25.03 |
| 1R21-11.PDB | O, A_PHE.95   | N, A_ILE.88   | H, A_ILE.88    | 2.49 | 1.58 | 17.48 |
| 1R21-11.PDB | O, A_GLN.70   | N, A_THR.89   | H, A_THR.89    | 2.50 | 1.53 | 3.27  |
| 1R21-11.PDB | O, A_ARG.93   | N, A_ILE.90   | H, A_ILE.90    | 2.78 | 1.90 | 20.94 |
| 1R21-11.PDB | O, A_ILE.88   | N, A_PHE.95   | H, A_PHE.95    | 2.50 | 1.61 | 19.58 |
| 1R21-11.PDB | O, A_VAL.8    | N, A_ARG.96   | H, A_ARG.96    | 2.62 | 1.79 | 25.65 |
| 1R21-11.PDB | O, A_ASP.86   | N, A_TYR.97   | H, A_TYR.97    | 2.89 | 1.91 | 5.12  |
| 1R21-12.PDB | O, A_HIS.54   | NH1, A_ARG.5  | HH12, A_ARG.5  | 2.35 | 1.46 | 20.98 |
| 1R21-12.PDB | O, A_ASP.16   | N, A_LYS.11   | H, A_LYS.11    | 2.75 | 1.92 | 26.57 |
| 1R21-12.PDB | O, A_LEU.7    | N, A_PHE.20   | H, A_PHE.20    | 2.75 | 1.93 | 26.79 |
| 1R21-12.PDB | O, A_ILE.51   | N, A_CYS.27   | H, A_CYS.27    | 2.63 | 1.69 | 14.10 |
| 1R21-12.PDB | O, A_CYS.49   | N, A_PHE.29   | H, A_PHE.29    | 2.60 | 1.71 | 19.44 |
| 1R21-12.PDB | O, A_LEU.28   | N, A_ILE.37   | H, A_ILE.37    | 2.57 | 1.63 | 12.93 |
| 1R21-12.PDB | O, A_LEU.41   | N, A_VAL.44   | H, A_VAL.44    | 2.87 | 2.03 | 25.37 |
| 1R21-12.PDB | O, A_CYS.27   | N, A_ILE.51   | H, A_ILE.51    | 2.54 | 1.72 | 26.76 |

|             |               |               |                |      |      |       |
|-------------|---------------|---------------|----------------|------|------|-------|
| 1R21-12.PDB | O, A_ILE_59   | N, A_GLU_52   | H, A_GLU_52    | 2.50 | 1.60 | 18.41 |
| 1R21-12.PDB | O, A_SER_25   | N, A_ILE_53   | H, A_ILE_53    | 2.75 | 1.90 | 23.58 |
| 1R21-12.PDB | O, A_GLU_57   | N, A_HIS_54   | H, A_HIS_54    | 2.53 | 1.59 | 12.83 |
| 1R21-12.PDB | O, A_GLU_52   | N, A_ILE_59   | H, A_ILE_59    | 2.53 | 1.55 | 3.06  |
| 1R21-12.PDB | OD1, A_ASN_67 | OG1, A_THR_66 | HG1, A_THR_66  | 2.34 | 1.38 | 3.67  |
| 1R21-12.PDB | ND2, A_ASN_62 | N, A_THR_69   | H, A_THR_69    | 2.95 | 1.98 | 4.80  |
| 1R21-12.PDB | O, A_SER_74   | N, A_VAL_71   | H, A_VAL_71    | 2.74 | 1.76 | 4.25  |
| 1R21-12.PDB | O, A_VAL_87   | N, A_ASN_72   | H, A_ASN_72    | 2.97 | 2.02 | 11.55 |
| 1R21-12.PDB | O, A_VAL_71   | N, A_SER_74   | H, A_SER_74    | 2.46 | 1.58 | 19.54 |
| 1R21-12.PDB | O, A_TYR_97   | N, A_GLY_85   | H, A_GLY_85    | 2.87 | 2.02 | 24.88 |
| 1R21-12.PDB | O, A_PHE_95   | N, A_ILE_88   | H, A_ILE_88    | 2.84 | 1.89 | 12.15 |
| 1R21-12.PDB | O, A_GLN_70   | N, A_THR_89   | H, A_THR_89    | 2.50 | 1.53 | 5.45  |
| 1R21-12.PDB | O, A_ARG_93   | N, A_ILE_90   | H, A_ILE_90    | 2.66 | 1.75 | 17.37 |
| 1R21-12.PDB | O, A_ILE_88   | N, A_PHE_95   | H, A_PHE_95    | 2.61 | 1.63 | 4.84  |
| 1R21-12.PDB | O, A_VAL_8    | N, A_ARG_96   | H, A_ARG_96    | 2.92 | 2.06 | 24.15 |
| 1R21-12.PDB | ND1, A_HIS_84 | N, A_ASN_99   | H, A_ASN_99    | 2.78 | 1.81 | 6.29  |
| 1R21-13.PDB | O, A_PHE_20   | N, A_LEU_7    | H, A_LEU_7     | 2.91 | 1.96 | 10.96 |
| 1R21-13.PDB | O, A_LEU_7    | N, A_PHE_20   | H, A_PHE_20    | 2.60 | 1.77 | 25.97 |
| 1R21-13.PDB | O, A_ILE_51   | N, A_CYS_27   | H, A_CYS_27    | 2.75 | 1.81 | 13.78 |
| 1R21-13.PDB | O, A_CYS_49   | N, A_PHE_29   | H, A_PHE_29    | 2.85 | 1.88 | 7.67  |
| 1R21-13.PDB | O, A_GLY_32   | N, A_CYS_35   | H, A_CYS_35    | 2.95 | 2.05 | 19.20 |
| 1R21-13.PDB | O, A_LEU_28   | N, A_ILE_37   | H, A_ILE_37    | 2.62 | 1.65 | 8.44  |
| 1R21-13.PDB | OG, A_SER_45  | N, A_GLN_47   | H, A_GLN_47    | 2.99 | 2.17 | 27.24 |
| 1R21-13.PDB | O, A_CYS_27   | N, A_ILE_51   | H, A_ILE_51    | 2.43 | 1.49 | 12.20 |
| 1R21-13.PDB | O, A_ILE_59   | N, A_GLU_52   | H, A_GLU_52    | 2.43 | 1.54 | 19.61 |
| 1R21-13.PDB | O, A_GLU_57   | N, A_HIS_54   | H, A_HIS_54    | 2.39 | 1.45 | 12.69 |
| 1R21-13.PDB | O, A_GLU_52   | N, A_ILE_59   | H, A_ILE_59    | 2.60 | 1.64 | 9.03  |
| 1R21-13.PDB | O, A_LYS_50   | N, A_HIS_61   | H, A_HIS_61    | 2.72 | 1.77 | 12.00 |
| 1R21-13.PDB | OG1, A_THR_69 | ND2, A_ASN_62 | HD22, A_ASN_62 | 2.50 | 1.62 | 19.65 |
| 1R21-13.PDB | O, A_HIS_48   | N, A_PHE_63   | H, A_PHE_63    | 2.98 | 2.08 | 19.86 |
| 1R21-13.PDB | O, A_HIS_48   | N, A_SER_64   | H, A_SER_64    | 3.00 | 2.09 | 18.58 |
| 1R21-13.PDB | O, A_THR_89   | N, A_GLN_70   | H, A_GLN_70    | 2.61 | 1.74 | 22.03 |
| 1R21-13.PDB | O, A_SER_74   | N, A_VAL_71   | H, A_VAL_71    | 2.72 | 1.81 | 16.96 |
| 1R21-13.PDB | O, A_VAL_71   | N, A_SER_74   | H, A_SER_74    | 2.42 | 1.47 | 9.86  |
| 1R21-13.PDB | O, A_PHE_95   | N, A_ILE_88   | H, A_ILE_88    | 2.49 | 1.53 | 9.17  |
| 1R21-13.PDB | O, A_GLN_70   | N, A_THR_89   | H, A_THR_89    | 2.84 | 1.88 | 8.15  |
| 1R21-13.PDB | O, A_ARG_93   | N, A_ILE_90   | H, A_ILE_90    | 2.77 | 1.79 | 2.62  |
| 1R21-13.PDB | O, A_ILE_88   | N, A_PHE_95   | H, A_PHE_95    | 2.53 | 1.57 | 8.67  |
| 1R21-13.PDB | O, A_VAL_8    | N, A_ARG_96   | H, A_ARG_96    | 2.67 | 1.79 | 21.65 |
| 1R21-13.PDB | ND1, A_HIS_84 | N, A_ASN_99   | H, A_ASN_99    | 2.75 | 1.78 | 6.35  |
| 1R21-13.PDB | OH, A_TYR_97  | ND2, A_ASN_99 | HD21, A_ASN_99 | 2.51 | 1.54 | 7.69  |
| 1R21-14.PDB | O, A_LYS_11   | N, A_GLY_14   | H, A_GLY_14    | 2.87 | 1.98 | 19.78 |
| 1R21-14.PDB | O, A_LEU_7    | N, A_PHE_20   | H, A_PHE_20    | 2.54 | 1.58 | 9.83  |
| 1R21-14.PDB | O, A_ILE_51   | N, A_CYS_27   | H, A_CYS_27    | 2.51 | 1.56 | 10.89 |
| 1R21-14.PDB | O, A_CYS_49   | N, A_PHE_29   | H, A_PHE_29    | 2.67 | 1.74 | 15.50 |
| 1R21-14.PDB | O, A_LEU_28   | N, A_ILE_37   | H, A_ILE_37    | 2.59 | 1.64 | 10.66 |
| 1R21-14.PDB | O, A_GLY_30   | N, A_ILE_39   | H, A_ILE_39    | 2.98 | 2.01 | 7.49  |
| 1R21-14.PDB | O, A_CYS_27   | N, A_ILE_51   | H, A_ILE_51    | 2.41 | 1.51 | 18.34 |
| 1R21-14.PDB | O, A_ILE_59   | N, A_GLU_52   | H, A_GLU_52    | 2.40 | 1.49 | 17.73 |
| 1R21-14.PDB | O, A_GLU_57   | N, A_HIS_54   | H, A_HIS_54    | 2.54 | 1.66 | 20.37 |
| 1R21-14.PDB | O, A_GLU_52   | N, A_ILE_59   | H, A_ILE_59    | 2.44 | 1.48 | 8.49  |
| 1R21-14.PDB | OG1, A_THR_69 | ND2, A_ASN_62 | HD21, A_ASN_62 | 2.52 | 1.57 | 12.09 |
| 1R21-14.PDB | ND2, A_ASN_62 | N, A_THR_69   | H, A_THR_69    | 2.79 | 1.90 | 20.15 |
| 1R21-14.PDB | O, A_SER_74   | N, A_VAL_71   | H, A_VAL_71    | 2.76 | 1.80 | 9.73  |
| 1R21-14.PDB | O, A_VAL_71   | N, A_SER_74   | H, A_SER_74    | 2.68 | 1.86 | 26.85 |
| 1R21-14.PDB | O, A_THR_69   | N, A_ILE_76   | H, A_ILE_76    | 2.74 | 1.79 | 12.00 |
| 1R21-14.PDB | OE1, A_GLU_57 | NE, A_ARG_81  | HE, A_ARG_81   | 2.82 | 2.02 | 29.06 |
| 1R21-14.PDB | OE2, A_GLU_57 | NH2, A_ARG_81 | HH21, A_ARG_81 | 2.46 | 1.50 | 12.90 |

|             |               |               |                |      |      |       |
|-------------|---------------|---------------|----------------|------|------|-------|
| 1R21-14.PDB | O, A_LYS_83   | N, A_ASP_86   | H, A_ASP_86    | 2.90 | 2.01 | 20.84 |
| 1R21-14.PDB | O, A_PHE_95   | N, A_ILE_88   | H, A_ILE_88    | 2.88 | 1.96 | 15.69 |
| 1R21-14.PDB | O, A_GLN_70   | N, A_THR_89   | H, A_THR_89    | 2.35 | 1.46 | 19.02 |
| 1R21-14.PDB | O, A_ARG_93   | N, A_ILE_90   | H, A_ILE_90    | 2.73 | 1.76 | 5.94  |
| 1R21-14.PDB | O, A_ILE_88   | N, A_PHE_95   | H, A_PHE_95    | 2.68 | 1.71 | 6.73  |
| 1R21-14.PDB | O, A_VAL_8    | N, A_ARG_96   | H, A_ARG_96    | 2.64 | 1.79 | 24.33 |
| 1R21-14.PDB | ND1, A_HIS_84 | N, A_ASN_99   | H, A_ASN_99    | 2.72 | 1.75 | 7.22  |
| 1R21-14.PDB | OH, A_TYR_97  | ND2, A_ASN_99 | HD22, A_ASN_99 | 2.66 | 1.70 | 8.32  |
| 1R21-14.PDB | O, A_THR_4    | N, A_GLU_100  | H, A_GLU_100   | 2.70 | 1.78 | 16.06 |
| 1R21-15.PDB | O, A_ARG_96   | N, A_VAL_8    | H, A_VAL_8     | 2.88 | 1.93 | 10.65 |
| 1R21-15.PDB | O, A_SER_13   | N, A_VAL_15   | H, A_VAL_15    | 2.35 | 1.44 | 16.35 |
| 1R21-15.PDB | O, A_LEU_7    | N, A_PHE_20   | H, A_PHE_20    | 2.72 | 1.80 | 16.28 |
| 1R21-15.PDB | O, A_ILE_51   | N, A_CYS_27   | H, A_CYS_27    | 2.61 | 1.66 | 12.03 |
| 1R21-15.PDB | O, A_CYS_49   | N, A_PHE_29   | H, A_PHE_29    | 2.69 | 1.83 | 22.46 |
| 1R21-15.PDB | O, A_LEU_28   | N, A_ILE_37   | H, A_ILE_37    | 2.63 | 1.74 | 19.85 |
| 1R21-15.PDB | O, A_GLY_30   | N, A_ILE_39   | H, A_ILE_39    | 2.35 | 1.52 | 25.02 |
| 1R21-15.PDB | O, A_LEU_41   | N, A_VAL_44   | H, A_VAL_44    | 2.84 | 1.98 | 24.12 |
| 1R21-15.PDB | O, A_CYS_27   | N, A_ILE_51   | H, A_ILE_51    | 2.47 | 1.55 | 15.28 |
| 1R21-15.PDB | O, A_ILE_59   | N, A_GLU_52   | H, A_GLU_52    | 2.51 | 1.64 | 21.23 |
| 1R21-15.PDB | O, A_SER_25   | N, A_ILE_53   | H, A_ILE_53    | 2.58 | 1.68 | 18.87 |
| 1R21-15.PDB | O, A_GLU_57   | N, A_HIS_54   | H, A_HIS_54    | 2.77 | 1.90 | 21.35 |
| 1R21-15.PDB | O, A_GLU_52   | N, A_ILE_59   | H, A_ILE_59    | 2.58 | 1.61 | 8.20  |
| 1R21-15.PDB | ND2, A_ASN_62 | N, A_THR_69   | H, A_THR_69    | 2.81 | 1.84 | 7.15  |
| 1R21-15.PDB | O, A_THR_89   | N, A_GLN_70   | H, A_GLN_70    | 2.43 | 1.52 | 17.31 |
| 1R21-15.PDB | O, A_SER_74   | N, A_VAL_71   | H, A_VAL_71    | 2.74 | 1.76 | 5.74  |
| 1R21-15.PDB | O, A_VAL_87   | N, A_ASN_72   | H, A_ASN_72    | 2.86 | 1.91 | 10.94 |
| 1R21-15.PDB | O, A_VAL_71   | N, A_SER_74   | H, A_SER_74    | 2.38 | 1.51 | 21.59 |
| 1R21-15.PDB | O, A_LYS_83   | N, A_ASP_86   | H, A_ASP_86    | 2.97 | 2.11 | 23.04 |
| 1R21-15.PDB | O, A_PHE_95   | N, A_ILE_88   | H, A_ILE_88    | 2.57 | 1.60 | 8.14  |
| 1R21-15.PDB | O, A_GLN_70   | N, A_THR_89   | H, A_THR_89    | 2.38 | 1.41 | 5.21  |
| 1R21-15.PDB | O, A_ARG_93   | N, A_ILE_90   | H, A_ILE_90    | 2.86 | 1.91 | 12.34 |
| 1R21-15.PDB | O, A_ILE_88   | N, A_PHE_95   | H, A_PHE_95    | 2.57 | 1.60 | 6.79  |
| 1R21-15.PDB | O, A_VAL_8    | N, A_ARG_96   | H, A_ARG_96    | 2.52 | 1.57 | 12.45 |
| 1R21-15.PDB | O, A_ASP_86   | N, A_TYR_97   | H, A_TYR_97    | 2.93 | 1.95 | 3.90  |
| 1R21-15.PDB | ND1, A_HIS_84 | N, A_ASN_99   | H, A_ASN_99    | 2.69 | 1.85 | 25.22 |
| 1R21-16.PDB | O, A_GLN_56   | NH2, A_ARG_5  | HH22, A_ARG_5  | 2.34 | 1.43 | 18.03 |
| 1R21-16.PDB | O, A_PRO_18   | N, A_THR_9    | H, A_THR_9     | 2.87 | 1.96 | 17.95 |
| 1R21-16.PDB | O, A_LEU_7    | N, A_PHE_20   | H, A_PHE_20    | 2.79 | 1.90 | 20.16 |
| 1R21-16.PDB | O, A_ILE_51   | N, A_CYS_27   | H, A_CYS_27    | 2.97 | 2.01 | 9.41  |
| 1R21-16.PDB | O, A_CYS_49   | N, A_PHE_29   | H, A_PHE_29    | 2.70 | 1.82 | 20.83 |
| 1R21-16.PDB | O, A_LEU_28   | N, A_ILE_37   | H, A_ILE_37    | 2.64 | 1.66 | 6.75  |
| 1R21-16.PDB | O, A_GLY_30   | N, A_ILE_39   | H, A_ILE_39    | 2.92 | 2.04 | 21.29 |
| 1R21-16.PDB | O, A_LEU_41   | N, A_VAL_44   | H, A_VAL_44    | 2.78 | 1.86 | 16.48 |
| 1R21-16.PDB | N, A_LYS_50   | SG, A_CYS_49  | HG, A_CYS_49   | 2.71 | 1.94 | 29.78 |
| 1R21-16.PDB | O, A_CYS_27   | N, A_ILE_51   | H, A_ILE_51    | 2.66 | 1.76 | 18.43 |
| 1R21-16.PDB | O, A_ILE_59   | N, A_GLU_52   | H, A_GLU_52    | 2.35 | 1.42 | 13.61 |
| 1R21-16.PDB | O, A_GLU_57   | N, A_HIS_54   | H, A_HIS_54    | 2.48 | 1.61 | 21.21 |
| 1R21-16.PDB | O, A_GLU_52   | N, A_ILE_59   | H, A_ILE_59    | 2.45 | 1.49 | 8.62  |
| 1R21-16.PDB | O, A_LYS_50   | N, A_HIS_61   | H, A_HIS_61    | 2.79 | 1.86 | 14.54 |
| 1R21-16.PDB | O, A_ASN_67   | OG, A_SER_64  | HG, A_SER_64   | 2.30 | 1.47 | 23.15 |
| 1R21-16.PDB | ND2, A_ASN_62 | N, A_THR_69   | H, A_THR_69    | 2.78 | 1.82 | 9.93  |
| 1R21-16.PDB | O, A_THR_89   | N, A_GLN_70   | H, A_GLN_70    | 2.50 | 1.67 | 25.41 |
| 1R21-16.PDB | O, A_SER_74   | N, A_VAL_71   | H, A_VAL_71    | 2.80 | 1.83 | 8.69  |
| 1R21-16.PDB | O, A_VAL_87   | N, A_ASN_72   | H, A_ASN_72    | 2.98 | 2.02 | 10.53 |
| 1R21-16.PDB | O, A_VAL_71   | N, A_SER_74   | H, A_SER_74    | 2.44 | 1.53 | 16.98 |
| 1R21-16.PDB | OE1, A_GLU_57 | NE, A_ARG_81  | HE, A_ARG_81   | 2.43 | 1.60 | 25.79 |
| 1R21-16.PDB | OD2, A_ASP_86 | N, A_LYS_83   | H, A_LYS_83    | 2.35 | 1.45 | 17.98 |
| 1R21-16.PDB | O, A_PHE_95   | N, A_ILE_88   | H, A_ILE_88    | 2.63 | 1.69 | 13.56 |

|             |                |               |                |      |      |       |
|-------------|----------------|---------------|----------------|------|------|-------|
| 1R21-16.PDB | O, A_GLN_70    | N, A_THR_89   | H, A_THR_89    | 2.63 | 1.67 | 7.81  |
| 1R21-16.PDB | O, A_ARG_93    | N, A_ILE_90   | H, A_ILE_90    | 2.81 | 1.86 | 12.00 |
| 1R21-16.PDB | O, A_ILE_88    | N, A_PHE_95   | H, A_PHE_95    | 2.55 | 1.60 | 9.47  |
| 1R21-16.PDB | O, A_VAL_8     | N, A_ARG_96   | H, A_ARG_96    | 2.56 | 1.67 | 20.20 |
| 1R21-16.PDB | ND1, A_HIS_84  | N, A_ASN_99   | H, A_ASN_99    | 2.73 | 1.80 | 13.70 |
| 1R21-17.PDB | ND2, A_ASN_99  | NE, A_ARG_5   | HE, A_ARG_5    | 2.79 | 1.84 | 10.87 |
| 1R21-17.PDB | O, A_MET_1     | NH2, A_ARG_6  | HH21, A_ARG_6  | 2.74 | 1.87 | 24.11 |
| 1R21-17.PDB | O, A_LYS_11    | N, A_GLY_14   | H, A_GLY_14    | 2.90 | 2.08 | 27.87 |
| 1R21-17.PDB | O, A_ILE_51    | N, A_CYS_27   | H, A_CYS_27    | 2.92 | 1.99 | 13.70 |
| 1R21-17.PDB | O, A_CYS_49    | N, A_PHE_29   | H, A_PHE_29    | 2.53 | 1.61 | 15.83 |
| 1R21-17.PDB | O, A_LEU_28    | N, A_ILE_37   | H, A_ILE_37    | 2.62 | 1.67 | 11.05 |
| 1R21-17.PDB | O, A_LEU_41    | N, A_VAL_44   | H, A_VAL_44    | 2.81 | 1.91 | 19.33 |
| 1R21-17.PDB | N, A_LYS_50    | SG, A_CYS_49  | HG, A_CYS_49   | 2.88 | 2.09 | 29.10 |
| 1R21-17.PDB | O, A_CYS_27    | N, A_ILE_51   | H, A_ILE_51    | 2.65 | 1.79 | 22.63 |
| 1R21-17.PDB | O, A_ILE_59    | N, A_GLU_52   | H, A_GLU_52    | 2.52 | 1.59 | 14.29 |
| 1R21-17.PDB | O, A_GLU_57    | N, A_HIS_54   | H, A_HIS_54    | 2.65 | 1.75 | 18.68 |
| 1R21-17.PDB | OH, A_TYR_97   | N, A_ALA_58   | H, A_ALA_58    | 2.72 | 1.89 | 26.01 |
| 1R21-17.PDB | O, A_GLU_52    | N, A_ILE_59   | H, A_ILE_59    | 2.54 | 1.61 | 14.09 |
| 1R21-17.PDB | ND2, A_ASN_62  | N, A_THR_69   | H, A_THR_69    | 2.79 | 1.83 | 10.71 |
| 1R21-17.PDB | O, A_THR_89    | N, A_GLN_70   | H, A_GLN_70    | 2.59 | 1.75 | 25.37 |
| 1R21-17.PDB | O, A_SER_74    | N, A_VAL_71   | H, A_VAL_71    | 2.94 | 1.96 | 5.72  |
| 1R21-17.PDB | O, A_VAL_71    | N, A_SER_74   | H, A_SER_74    | 2.46 | 1.58 | 20.03 |
| 1R21-17.PDB | OD2, A_ASP_86  | N, A_LYS_83   | H, A_LYS_83    | 2.55 | 1.59 | 9.81  |
| 1R21-17.PDB | O, A_LYS_83    | N, A_ASP_86   | H, A_ASP_86    | 2.89 | 2.09 | 28.87 |
| 1R21-17.PDB | O, A_GLN_70    | N, A_THR_89   | H, A_THR_89    | 2.44 | 1.48 | 5.59  |
| 1R21-17.PDB | OG1, A_SER_94  | OG1, A_THR_89 | HG1, A_THR_89  | 2.85 | 1.94 | 16.35 |
| 1R21-17.PDB | O, A_ARG_93    | N, A_ILE_90   | H, A_ILE_90    | 2.85 | 1.87 | 5.40  |
| 1R21-17.PDB | O, A_ILE_88    | N, A_PHE_95   | H, A_PHE_95    | 2.73 | 1.78 | 13.00 |
| 1R21-17.PDB | O, A_VAL_8     | N, A_ARG_96   | H, A_ARG_96    | 2.69 | 1.78 | 16.86 |
| 1R21-17.PDB | ND1, A_HIS_84  | N, A_ASN_99   | H, A_ASN_99    | 2.76 | 1.87 | 19.62 |
| 1R21-18.PDB | O, A_ARG_96    | N, A_VAL_8    | H, A_VAL_8     | 2.73 | 1.79 | 13.70 |
| 1R21-18.PDB | O, A_LEU_7     | N, A_PHE_20   | H, A_PHE_20    | 2.72 | 1.86 | 23.59 |
| 1R21-18.PDB | O, A_ILE_51    | N, A_CYS_27   | H, A_CYS_27    | 2.72 | 1.82 | 18.54 |
| 1R21-18.PDB | O, A_CYS_49    | N, A_PHE_29   | H, A_PHE_29    | 2.70 | 1.85 | 23.94 |
| 1R21-18.PDB | O, A_LEU_28    | N, A_ILE_37   | H, A_ILE_37    | 2.69 | 1.74 | 12.20 |
| 1R21-18.PDB | O, A_LEU_41    | N, A_VAL_44   | H, A_VAL_44    | 2.84 | 2.03 | 28.77 |
| 1R21-18.PDB | O, A_CYS_27    | N, A_ILE_51   | H, A_ILE_51    | 2.61 | 1.76 | 24.32 |
| 1R21-18.PDB | O, A_ILE_59    | N, A_GLU_52   | H, A_GLU_52    | 2.43 | 1.48 | 11.54 |
| 1R21-18.PDB | O, A_GLU_57    | N, A_HIS_54   | H, A_HIS_54    | 2.49 | 1.54 | 10.72 |
| 1R21-18.PDB | O, A_GLU_52    | N, A_ILE_59   | H, A_ILE_59    | 2.56 | 1.66 | 18.64 |
| 1R21-18.PDB | OD1, A_ASN_67  | OG1, A_THR_66 | HG1, A_THR_66  | 2.60 | 1.66 | 10.07 |
| 1R21-18.PDB | ND2, A_ASN_62  | N, A_THR_69   | H, A_THR_69    | 2.83 | 1.90 | 12.87 |
| 1R21-18.PDB | O, A_THR_89    | N, A_GLN_70   | H, A_GLN_70    | 2.37 | 1.53 | 24.51 |
| 1R21-18.PDB | O, A_SER_74    | N, A_VAL_71   | H, A_VAL_71    | 2.79 | 1.82 | 9.69  |
| 1R21-18.PDB | O, A_VAL_71    | N, A_SER_74   | H, A_SER_74    | 2.46 | 1.62 | 24.85 |
| 1R21-18.PDB | OE2, A_GLU_100 | NE2, A_HIS_84 | HE2, A_HIS_84  | 2.44 | 1.60 | 25.14 |
| 1R21-18.PDB | O, A_PHE_95    | N, A_ILE_88   | H, A_ILE_88    | 2.60 | 1.64 | 8.44  |
| 1R21-18.PDB | O, A_GLN_70    | N, A_THR_89   | H, A_THR_89    | 2.43 | 1.45 | 2.51  |
| 1R21-18.PDB | O, A_ARG_93    | N, A_ILE_90   | H, A_ILE_90    | 2.78 | 1.81 | 6.62  |
| 1R21-18.PDB | O, A_ILE_88    | N, A_PHE_95   | H, A_PHE_95    | 2.57 | 1.60 | 5.68  |
| 1R21-18.PDB | O, A_VAL_8     | N, A_ARG_96   | H, A_ARG_96    | 2.51 | 1.63 | 20.84 |
| 1R21-18.PDB | ND1, A_HIS_84  | N, A_ASN_99   | H, A_ASN_99    | 2.90 | 1.93 | 9.14  |
| 1R21-19.PDB | O, A_ARG_96    | N, A_VAL_8    | H, A_VAL_8     | 2.99 | 2.07 | 17.19 |
| 1R21-19.PDB | O, A_LEU_7     | N, A_PHE_20   | H, A_PHE_20    | 2.60 | 1.69 | 17.39 |
| 1R21-19.PDB | O, A_ILE_51    | N, A_CYS_27   | H, A_CYS_27    | 2.92 | 1.99 | 15.89 |
| 1R21-19.PDB | O, A_CYS_49    | N, A_PHE_29   | H, A_PHE_29    | 2.60 | 1.72 | 21.65 |
| 1R21-19.PDB | O, A_LEU_28    | N, A_ILE_37   | H, A_ILE_37    | 2.59 | 1.64 | 12.32 |
| 1R21-19.PDB | OE2, A_GLU_34  | NE2, A_GLN_47 | HE21, A_GLN_47 | 2.80 | 1.93 | 22.82 |

|             |               |               |                |      |      |       |
|-------------|---------------|---------------|----------------|------|------|-------|
| 1R21-19.PDB | O, A_CYS_27   | N, A_ILE_51   | H, A_ILE_51    | 2.77 | 1.98 | 29.09 |
| 1R21-19.PDB | O, A_ILE_59   | N, A_GLU_52   | H, A_GLU_52    | 2.43 | 1.48 | 11.27 |
| 1R21-19.PDB | O, A_GLU_57   | N, A_HIS_54   | H, A_HIS_54    | 2.56 | 1.64 | 15.53 |
| 1R21-19.PDB | OH, A_TYR_97  | N, A_ALA_58   | H, A_ALA_58    | 2.88 | 2.06 | 27.15 |
| 1R21-19.PDB | O, A_GLU_52   | N, A_ILE_59   | H, A_ILE_59    | 2.44 | 1.53 | 17.22 |
| 1R21-19.PDB | OG1, A_THR_69 | ND2, A_ASN_62 | HD21, A_ASN_62 | 2.83 | 2.03 | 29.57 |
| 1R21-19.PDB | ND2, A_ASN_62 | N, A_THR_69   | H, A_THR_69    | 2.67 | 1.78 | 19.68 |
| 1R21-19.PDB | O, A_THR_89   | N, A_GLN_70   | H, A_GLN_70    | 2.64 | 1.78 | 22.36 |
| 1R21-19.PDB | O, A_SER_74   | N, A_VAL_71   | H, A_VAL_71    | 2.64 | 1.69 | 11.33 |
| 1R21-19.PDB | O, A_VAL_71   | N, A_SER_74   | H, A_SER_74    | 2.48 | 1.59 | 19.12 |
| 1R21-19.PDB | O, A_THR_69   | N, A_ILE_76   | H, A_ILE_76    | 2.76 | 1.93 | 26.34 |
| 1R21-19.PDB | O, A_LYS_83   | N, A_ASP_86   | H, A_ASP_86    | 2.90 | 2.02 | 21.05 |
| 1R21-19.PDB | O, A_PHE_95   | N, A_ILE_88   | H, A_ILE_88    | 2.84 | 1.95 | 19.79 |
| 1R21-19.PDB | O, A_GLN_70   | N, A_THR_89   | H, A_THR_89    | 2.66 | 1.69 | 6.71  |
| 1R21-19.PDB | O, A_ARG_93   | N, A_ILE_90   | H, A_ILE_90    | 2.72 | 1.76 | 8.86  |
| 1R21-19.PDB | O, A_ILE_88   | N, A_PHE_95   | H, A_PHE_95    | 2.54 | 1.63 | 17.83 |
| 1R21-19.PDB | O, A_VAL_8    | N, A_ARG_96   | H, A_ARG_96    | 2.59 | 1.69 | 17.99 |
| 1R21-19.PDB | ND1, A_HIS_84 | N, A_ASN_99   | H, A_ASN_99    | 2.84 | 1.89 | 10.70 |
| 1R21-2.PDB  | N, A_ARG_5    | OG1, A_THR_4  | HG1, A_THR_4   | 2.74 | 1.85 | 17.56 |
| 1R21-2.PDB  | O, A_PHE_20   | N, A_LEU_7    | H, A_LEU_7     | 2.95 | 1.98 | 8.03  |
| 1R21-2.PDB  | O, A_LEU_7    | N, A_PHE_20   | H, A_PHE_20    | 2.59 | 1.74 | 24.59 |
| 1R21-2.PDB  | O, A_CYS_49   | N, A_PHE_29   | H, A_PHE_29    | 2.72 | 1.83 | 19.71 |
| 1R21-2.PDB  | O, A_LEU_28   | N, A_ILE_37   | H, A_ILE_37    | 2.57 | 1.60 | 6.95  |
| 1R21-2.PDB  | OE2, A_GLU_34 | NE2, A_GLN_47 | HE21, A_GLN_47 | 2.62 | 1.65 | 7.42  |
| 1R21-2.PDB  | O, A_CYS_27   | N, A_ILE_51   | H, A_ILE_51    | 2.67 | 1.82 | 25.05 |
| 1R21-2.PDB  | O, A_ILE_59   | N, A_GLU_52   | H, A_GLU_52    | 2.42 | 1.55 | 22.16 |
| 1R21-2.PDB  | O, A_GLU_57   | N, A_HIS_54   | H, A_HIS_54    | 2.50 | 1.69 | 27.80 |
| 1R21-2.PDB  | O, A_GLU_52   | N, A_ILE_59   | H, A_ILE_59    | 2.46 | 1.49 | 3.05  |
| 1R21-2.PDB  | OG1, A_THR_69 | ND2, A_ASN_62 | HD21, A_ASN_62 | 2.81 | 1.92 | 20.56 |
| 1R21-2.PDB  | OG, A_SER_64  | ND2, A_ASN_62 | HD22, A_ASN_62 | 2.42 | 1.53 | 18.22 |
| 1R21-2.PDB  | ND2, A_ASN_62 | N, A_THR_69   | H, A_THR_69    | 2.76 | 1.81 | 12.74 |
| 1R21-2.PDB  | O, A_THR_89   | N, A_GLN_70   | H, A_GLN_70    | 2.51 | 1.65 | 23.32 |
| 1R21-2.PDB  | O, A_VAL_87   | N, A_ASN_72   | H, A_ASN_72    | 2.97 | 2.02 | 10.02 |
| 1R21-2.PDB  | O, A_VAL_71   | N, A_SER_74   | H, A_SER_74    | 2.58 | 1.65 | 14.58 |
| 1R21-2.PDB  | OD2, A_ASP_86 | N, A_LYS_83   | H, A_LYS_83    | 2.34 | 1.53 | 27.15 |
| 1R21-2.PDB  | O, A_TYR_97   | N, A_GLY_85   | H, A_GLY_85    | 2.88 | 2.06 | 27.73 |
| 1R21-2.PDB  | O, A_PHE_95   | N, A_ILE_88   | H, A_ILE_88    | 2.71 | 1.73 | 6.39  |
| 1R21-2.PDB  | O, A_GLN_70   | N, A_THR_89   | H, A_THR_89    | 2.55 | 1.58 | 6.68  |
| 1R21-2.PDB  | OG, A_SER_94  | OG1, A_THR_89 | HG1, A_THR_89  | 2.98 | 2.02 | 6.58  |
| 1R21-2.PDB  | N, A_ARG_93   | N, A_ILE_90   | H, A_ILE_90    | 2.82 | 1.89 | 14.80 |
| 1R21-2.PDB  | O, A_ILE_88   | N, A_PHE_95   | H, A_PHE_95    | 2.61 | 1.65 | 9.22  |
| 1R21-2.PDB  | O, A_VAL_8    | N, A_ARG_96   | H, A_ARG_96    | 2.61 | 1.75 | 22.96 |
| 1R21-2.PDB  | OD2, A_ASP_16 | NH1, A_ARG_96 | HH12, A_ARG_96 | 2.71 | 1.87 | 26.03 |
| 1R21-2.PDB  | ND1, A_HIS_84 | N, A_ASN_99   | H, A_ASN_99    | 2.71 | 1.73 | 1.63  |
| 1R21-20.PDB | O, A_PHE_20   | N, A_LEU_7    | H, A_LEU_7     | 2.89 | 1.97 | 16.40 |
| 1R21-20.PDB | O, A_LEU_7    | N, A_PHE_20   | H, A_PHE_20    | 2.54 | 1.59 | 11.23 |
| 1R21-20.PDB | O, A_ILE_51   | N, A_CYS_27   | H, A_CYS_27    | 2.71 | 1.75 | 9.33  |
| 1R21-20.PDB | O, A_CYS_49   | N, A_PHE_29   | H, A_PHE_29    | 2.67 | 1.77 | 18.32 |
| 1R21-20.PDB | O, A_LEU_28   | N, A_ILE_37   | H, A_ILE_37    | 2.61 | 1.64 | 6.85  |
| 1R21-20.PDB | N, A_LYS_46   | OG, A_SER_45  | HG, A_SER_45   | 2.70 | 1.79 | 15.25 |
| 1R21-20.PDB | O, A_CYS_27   | N, A_ILE_51   | H, A_ILE_51    | 2.42 | 1.58 | 23.81 |
| 1R21-20.PDB | O, A_ILE_59   | N, A_GLU_52   | H, A_GLU_52    | 2.32 | 1.45 | 21.34 |
| 1R21-20.PDB | O, A_GLU_57   | N, A_HIS_54   | H, A_HIS_54    | 2.45 | 1.51 | 12.30 |
| 1R21-20.PDB | O, A_GLU_52   | N, A_ILE_59   | H, A_ILE_59    | 2.48 | 1.51 | 4.91  |
| 1R21-20.PDB | O, A_VAL_80   | N, A_LEU_60   | H, A_LEU_60    | 2.94 | 1.97 | 6.46  |
| 1R21-20.PDB | O, A_LYS_50   | N, A_HIS_61   | H, A_HIS_61    | 2.71 | 1.83 | 20.97 |
| 1R21-20.PDB | ND2, A_ASN_62 | N, A_THR_69   | H, A_THR_69    | 2.81 | 1.85 | 8.55  |
| 1R21-20.PDB | O, A_THR_89   | N, A_GLN_70   | H, A_GLN_70    | 2.55 | 1.71 | 24.95 |



|             |               |               |                |      |      |       |
|-------------|---------------|---------------|----------------|------|------|-------|
| 1R21-20.PDB | O, A_VAL_87   | N, A_ASN_72   | H, A_ASN_72    | 2.84 | 1.89 | 10.53 |
| 1R21-20.PDB | O, A_VAL_71   | N, A_SER_74   | H, A_SER_74    | 2.53 | 1.62 | 17.33 |
| 1R21-20.PDB | O, A_VAL_71   | OG, A_SER_74  | HG, A_SER_74   | 2.49 | 1.70 | 27.88 |
| 1R21-20.PDB | O, A_PHE_95   | N, A_ILE_88   | H, A_ILE_88    | 2.46 | 1.49 | 5.80  |
| 1R21-20.PDB | O, A_GLN_70   | N, A_THR_89   | H, A_THR_89    | 2.46 | 1.50 | 7.24  |
| 1R21-20.PDB | O, A_ARG_93   | N, A_ILE_90   | H, A_ILE_90    | 2.66 | 1.69 | 6.47  |
| 1R21-20.PDB | O, A_ILE_88   | N, A_PHE_95   | H, A_PHE_95    | 2.54 | 1.58 | 8.65  |
| 1R21-20.PDB | O, A_VAL_8    | N, A_ARG_96   | H, A_ARG_96    | 2.64 | 1.79 | 24.11 |
| 1R21-20.PDB | ND1, A_HIS_84 | N, A_ASN_99   | H, A_ASN_99    | 2.96 | 2.01 | 12.19 |
| 1R21-21.PDB | O, A_PHE_20   | N, A_LEU_7    | H, A_LEU_7     | 2.96 | 2.07 | 20.84 |
| 1R21-21.PDB | O, A_ARG_96   | N, A_VAL_8    | H, A_VAL_8     | 2.59 | 1.62 | 4.25  |
| 1R21-21.PDB | O, A_LEU_7    | N, A_PHE_20   | H, A_PHE_20    | 2.61 | 1.64 | 5.69  |
| 1R21-21.PDB | O, A_ILE_51   | N, A_CYS_27   | H, A_CYS_27    | 2.91 | 1.95 | 10.90 |
| 1R21-21.PDB | O, A_CYS_49   | N, A_PHE_29   | H, A_PHE_29    | 2.68 | 1.81 | 22.17 |
| 1R21-21.PDB | O, A_LEU_28   | N, A_ILE_37   | H, A_ILE_37    | 2.56 | 1.62 | 13.05 |
| 1R21-21.PDB | O, A_LEU_41   | N, A_VAL_44   | H, A_VAL_44    | 2.91 | 2.06 | 24.25 |
| 1R21-21.PDB | O, A_CYS_27   | N, A_ILE_51   | H, A_ILE_51    | 2.73 | 1.89 | 24.96 |
| 1R21-21.PDB | O, A_ILE_59   | N, A_GLU_52   | H, A_GLU_52    | 2.35 | 1.50 | 22.81 |
| 1R21-21.PDB | O, A_GLU_57   | N, A_HIS_54   | H, A_HIS_54    | 2.92 | 1.97 | 10.24 |
| 1R21-21.PDB | O, A_GLU_52   | N, A_ILE_59   | H, A_ILE_59    | 2.54 | 1.70 | 24.70 |
| 1R21-21.PDB | ND2, A_ASN_62 | N, A_THR_69   | H, A_THR_69    | 2.75 | 1.85 | 18.29 |
| 1R21-21.PDB | O, A_THR_89   | N, A_GLN_70   | H, A_GLN_70    | 2.65 | 1.74 | 16.82 |
| 1R21-21.PDB | O, A_SER_74   | N, A_VAL_71   | H, A_VAL_71    | 2.64 | 1.68 | 10.54 |
| 1R21-21.PDB | O, A_VAL_87   | N, A_ASN_72   | H, A_ASN_72    | 2.70 | 1.73 | 7.44  |
| 1R21-21.PDB | O, A_VAL_71   | N, A_SER_74   | H, A_SER_74    | 2.70 | 1.91 | 29.55 |
| 1R21-21.PDB | OD2, A_ASP_86 | N, A_LYS_83   | H, A_LYS_83    | 2.35 | 1.45 | 17.97 |
| 1R21-21.PDB | OD1, A_ASN_72 | N, A_VAL_87   | H, A_VAL_87    | 2.99 | 2.03 | 10.40 |
| 1R21-21.PDB | O, A_PHE_95   | N, A_ILE_88   | H, A_ILE_88    | 2.42 | 1.51 | 16.26 |
| 1R21-21.PDB | O, A_GLN_70   | N, A_THR_89   | H, A_THR_89    | 2.52 | 1.56 | 6.68  |
| 1R21-21.PDB | O, A_ARG_93   | N, A_ILE_90   | H, A_ILE_90    | 2.78 | 1.92 | 23.35 |
| 1R21-21.PDB | O, A_ILE_88   | N, A_PHE_95   | H, A_PHE_95    | 2.32 | 1.44 | 19.20 |
| 1R21-21.PDB | O, A_VAL_8    | N, A_ARG_96   | H, A_ARG_96    | 2.40 | 1.50 | 17.53 |
| 1R21-21.PDB | ND1, A_HIS_84 | N, A_ASN_99   | H, A_ASN_99    | 2.69 | 1.78 | 18.43 |
| 1R21-22.PDB | O, A_LYS_11   | N, A_GLY_14   | H, A_GLY_14    | 2.92 | 1.99 | 15.41 |
| 1R21-22.PDB | OD1, A_ASP_16 | N, A_GLY_17   | H, A_GLY_17    | 2.32 | 1.45 | 19.59 |
| 1R21-22.PDB | O, A_LEU_7    | N, A_PHE_20   | H, A_PHE_20    | 2.61 | 1.65 | 9.53  |
| 1R21-22.PDB | O, A_ILE_51   | N, A_CYS_27   | H, A_CYS_27    | 2.87 | 1.96 | 17.01 |
| 1R21-22.PDB | O, A_CYS_49   | N, A_PHE_29   | H, A_PHE_29    | 2.60 | 1.70 | 18.19 |
| 1R21-22.PDB | O, A_VAL_44   | NH1, A_ARG_31 | HH11, A_ARG_31 | 2.32 | 1.43 | 20.44 |
| 1R21-22.PDB | O, A_LEU_28   | N, A_ILE_37   | H, A_ILE_37    | 2.50 | 1.57 | 14.67 |
| 1R21-22.PDB | O, A_GLY_30   | N, A_ILE_39   | H, A_ILE_39    | 2.87 | 1.93 | 13.15 |
| 1R21-22.PDB | O, A_CYS_27   | N, A_ILE_51   | H, A_ILE_51    | 2.68 | 1.88 | 28.33 |
| 1R21-22.PDB | O, A_ILE_59   | N, A_GLU_52   | H, A_GLU_52    | 2.35 | 1.46 | 18.95 |
| 1R21-22.PDB | O, A_SER_25   | N, A_ILE_53   | H, A_ILE_53    | 2.75 | 1.92 | 25.97 |
| 1R21-22.PDB | O, A_GLU_57   | N, A_HIS_54   | H, A_HIS_54    | 2.43 | 1.49 | 13.42 |
| 1R21-22.PDB | O, A_GLU_52   | N, A_ILE_59   | H, A_ILE_59    | 2.51 | 1.56 | 11.28 |
| 1R21-22.PDB | OG, A_SER_64  | ND2, A_ASN_62 | HD22, A_ASN_62 | 2.37 | 1.45 | 16.21 |
| 1R21-22.PDB | ND2, A_ASN_62 | N, A_THR_69   | H, A_THR_69    | 2.75 | 1.81 | 13.92 |
| 1R21-22.PDB | O, A_THR_89   | N, A_GLN_70   | H, A_GLN_70    | 2.39 | 1.49 | 18.52 |
| 1R21-22.PDB | O, A_SER_74   | N, A_VAL_71   | H, A_VAL_71    | 2.73 | 1.76 | 7.13  |
| 1R21-22.PDB | O, A_VAL_71   | N, A_SER_74   | H, A_SER_74    | 2.40 | 1.54 | 22.50 |
| 1R21-22.PDB | OD2, A_ASP_86 | N, A_LYS_83   | H, A_LYS_83    | 2.34 | 1.47 | 21.74 |
| 1R21-22.PDB | O, A_TYR_97   | N, A_GLY_85   | H, A_GLY_85    | 2.95 | 2.10 | 24.40 |
| 1R21-22.PDB | O, A_PHE_95   | N, A_ILE_88   | H, A_ILE_88    | 2.63 | 1.67 | 6.98  |
| 1R21-22.PDB | O, A_GLN_70   | N, A_THR_89   | H, A_THR_89    | 2.41 | 1.52 | 18.90 |
| 1R21-22.PDB | O, A_ARG_93   | N, A_ILE_90   | H, A_ILE_90    | 2.74 | 1.77 | 6.10  |
| 1R21-22.PDB | O, A_ILE_88   | N, A_PHE_95   | H, A_PHE_95    | 2.64 | 1.72 | 15.76 |
| 1R21-22.PDB | O, A_VAL_8    | N, A_ARG_96   | H, A_ARG_96    | 2.37 | 1.47 | 18.14 |

|             |               |               |                |      |      |       |
|-------------|---------------|---------------|----------------|------|------|-------|
| 1R21-22.PDB | O, A_ASP_86   | N, A_TYR_97   | H, A_TYR_97    | 2.99 | 2.03 | 9.81  |
| 1R21-22.PDB | ND1, A_HIS_84 | N, A_ASN_99   | H, A_ASN_99    | 2.84 | 1.90 | 14.56 |
| 1R21-23.PDB | O, A_ARG_96   | N, A_VAL_8    | H, A_VAL_8     | 2.86 | 1.92 | 13.31 |
| 1R21-23.PDB | O, A_CYS_49   | N, A_PHE_29   | H, A_PHE_29    | 2.64 | 1.75 | 19.18 |
| 1R21-23.PDB | O, A_LEU_28   | N, A_ILE_37   | H, A_ILE_37    | 2.58 | 1.62 | 9.88  |
| 1R21-23.PDB | O, A_CYS_27   | N, A_ILE_51   | H, A_ILE_51    | 2.71 | 1.91 | 29.18 |
| 1R21-23.PDB | O, A_SER_25   | N, A_ILE_53   | H, A_ILE_53    | 2.69 | 1.85 | 24.46 |
| 1R21-23.PDB | O, A_GLU_57   | N, A_HIS_54   | H, A_HIS_54    | 2.99 | 2.01 | 4.94  |
| 1R21-23.PDB | ND1, A_HIS_54 | N, A_GLU_57   | H, A_GLU_57    | 2.90 | 2.03 | 23.13 |
| 1R21-23.PDB | O, A_GLU_52   | N, A_ILE_59   | H, A_ILE_59    | 2.62 | 1.77 | 23.57 |
| 1R21-23.PDB | ND2, A_ASN_62 | N, A_THR_69   | H, A_THR_69    | 2.86 | 1.89 | 7.90  |
| 1R21-23.PDB | O, A_VAL_71   | N, A_SER_74   | H, A_SER_74    | 2.40 | 1.48 | 15.27 |
| 1R21-23.PDB | OE1, A_GLU_57 | NE, A_ARG_81  | HE, A_ARG_81   | 2.65 | 1.70 | 11.54 |
| 1R21-23.PDB | OD2, A_ASP_86 | N, A_LYS_83   | H, A_LYS_83    | 2.56 | 1.66 | 17.59 |
| 1R21-23.PDB | O, A_PHE_95   | N, A_ILE_88   | H, A_ILE_88    | 2.67 | 1.71 | 9.77  |
| 1R21-23.PDB | O, A_GLN_70   | N, A_THR_89   | H, A_THR_89    | 2.44 | 1.47 | 4.21  |
| 1R21-23.PDB | O, A_ARG_93   | N, A_ILE_90   | H, A_ILE_90    | 2.77 | 1.83 | 11.81 |
| 1R21-23.PDB | O, A_ILE_88   | N, A_PHE_95   | H, A_PHE_95    | 2.62 | 1.66 | 9.26  |
| 1R21-23.PDB | O, A_VAL_8    | N, A_ARG_96   | H, A_ARG_96    | 2.53 | 1.67 | 22.54 |
| 1R21-23.PDB | ND1, A_HIS_84 | N, A_ASN_99   | H, A_ASN_99    | 2.78 | 1.83 | 12.42 |
| 1R21-3.PDB  | O, A_PRO_18   | N, A_THR_9    | H, A_THR_9     | 2.75 | 1.82 | 15.55 |
| 1R21-3.PDB  | OD1, A_ASP_16 | NE2, A_HIS_19 | HE2, A_HIS_19  | 2.71 | 1.85 | 23.51 |
| 1R21-3.PDB  | O, A_LEU_7    | N, A_PHE_20   | H, A_PHE_20    | 2.81 | 2.01 | 29.61 |
| 1R21-3.PDB  | O, A_ILE_51   | N, A_CYS_27   | H, A_CYS_27    | 2.79 | 1.88 | 18.32 |
| 1R21-3.PDB  | O, A_CYS_49   | N, A_PHE_29   | H, A_PHE_29    | 2.76 | 1.82 | 13.22 |
| 1R21-3.PDB  | O, A_LEU_28   | N, A_ILE_37   | H, A_ILE_37    | 2.65 | 1.72 | 14.66 |
| 1R21-3.PDB  | O, A_GLY_30   | N, A_ILE_39   | H, A_ILE_39    | 2.90 | 1.94 | 10.95 |
| 1R21-3.PDB  | OE2, A_GLU_34 | NE2, A_GLN_47 | HE22, A_GLN_47 | 2.72 | 1.92 | 29.24 |
| 1R21-3.PDB  | O, A_ILE_59   | N, A_GLU_52   | H, A_GLU_52    | 2.41 | 1.46 | 10.14 |
| 1R21-3.PDB  | O, A_SER_25   | N, A_ILE_53   | H, A_ILE_53    | 2.44 | 1.55 | 19.50 |
| 1R21-3.PDB  | O, A_GLU_57   | N, A_HIS_54   | H, A_HIS_54    | 2.46 | 1.55 | 16.84 |
| 1R21-3.PDB  | O, A_GLU_52   | N, A_ILE_59   | H, A_ILE_59    | 2.65 | 1.70 | 10.74 |
| 1R21-3.PDB  | O, A_LYS_50   | N, A_HIS_61   | H, A_HIS_61    | 2.72 | 1.91 | 28.48 |
| 1R21-3.PDB  | OG1, A_THR_69 | ND2, A_ASN_62 | HD21, A_ASN_62 | 2.87 | 2.01 | 23.40 |
| 1R21-3.PDB  | O, A_HIS_48   | N, A_PHE_63   | H, A_PHE_63    | 2.66 | 1.74 | 15.84 |
| 1R21-3.PDB  | ND2, A_ASN_62 | N, A_THR_69   | H, A_THR_69    | 2.80 | 1.85 | 9.14  |
| 1R21-3.PDB  | O, A_SER_74   | N, A_VAL_71   | H, A_VAL_71    | 2.76 | 1.79 | 6.23  |
| 1R21-3.PDB  | O, A_VAL_87   | N, A_ASN_72   | H, A_ASN_72    | 2.81 | 1.87 | 12.50 |
| 1R21-3.PDB  | O, A_VAL_71   | N, A_SER_74   | H, A_SER_74    | 2.52 | 1.65 | 22.26 |
| 1R21-3.PDB  | O, A_PHE_95   | N, A_ILE_88   | H, A_ILE_88    | 2.38 | 1.42 | 9.04  |
| 1R21-3.PDB  | O, A_GLN_70   | N, A_THR_89   | H, A_THR_89    | 2.58 | 1.62 | 7.30  |
| 1R21-3.PDB  | O, A_ARG_93   | N, A_ILE_90   | H, A_ILE_90    | 2.88 | 1.98 | 18.52 |
| 1R21-3.PDB  | O, A_ILE_88   | N, A_PHE_95   | H, A_PHE_95    | 2.49 | 1.52 | 2.60  |
| 1R21-3.PDB  | O, A_VAL_8    | N, A_ARG_96   | H, A_ARG_96    | 2.86 | 1.93 | 15.31 |
| 1R21-3.PDB  | ND1, A_HIS_84 | N, A_ASN_99   | H, A_ASN_99    | 2.73 | 1.81 | 16.46 |
| 1R21-4.PDB  | O, A_GLN_56   | NH2, A_ARG_5  | HH21, A_ARG_5  | 2.90 | 2.09 | 29.83 |
| 1R21-4.PDB  | O, A_LEU_7    | N, A_PHE_20   | H, A_PHE_20    | 2.67 | 1.82 | 24.01 |
| 1R21-4.PDB  | O, A_ILE_51   | N, A_CYS_27   | H, A_CYS_27    | 2.66 | 1.75 | 17.27 |
| 1R21-4.PDB  | O, A_CYS_49   | N, A_PHE_29   | H, A_PHE_29    | 2.65 | 1.73 | 16.15 |
| 1R21-4.PDB  | O, A_LEU_28   | N, A_ILE_37   | H, A_ILE_37    | 2.58 | 1.63 | 11.12 |
| 1R21-4.PDB  | O, A_GLY_30   | N, A_ILE_39   | H, A_ILE_39    | 2.96 | 2.02 | 14.09 |
| 1R21-4.PDB  | O, A_LEU_41   | N, A_VAL_44   | H, A_VAL_44    | 2.78 | 1.93 | 24.60 |
| 1R21-4.PDB  | O, A_CYS_27   | N, A_ILE_51   | H, A_ILE_51    | 2.64 | 1.83 | 27.83 |
| 1R21-4.PDB  | O, A_ILE_59   | N, A_GLU_52   | H, A_GLU_52    | 2.49 | 1.57 | 16.14 |
| 1R21-4.PDB  | O, A_SER_25   | N, A_ILE_53   | H, A_ILE_53    | 2.85 | 2.00 | 24.05 |
| 1R21-4.PDB  | N, A_GLU_55   | ND1, A_HIS_54 | HD1, A_HIS_54  | 2.58 | 1.78 | 28.52 |
| 1R21-4.PDB  | O, A_GLU_52   | N, A_ILE_59   | H, A_ILE_59    | 2.59 | 1.66 | 14.45 |
| 1R21-4.PDB  | OD1, A_ASN_67 | OG1, A_THR_66 | HG1, A_THR_66  | 2.40 | 1.45 | 5.76  |

|            |               |               |                |      |      |       |
|------------|---------------|---------------|----------------|------|------|-------|
| 1R21-4.PDB | ND2, A_ASN_62 | N, A_THR_69   | H, A_THR_69    | 2.80 | 1.85 | 11.39 |
| 1R21-4.PDB | O, A_THR_89   | N, A_GLN_70   | H, A_GLN_70    | 2.55 | 1.67 | 20.25 |
| 1R21-4.PDB | O, A_SER_74   | N, A_VAL_71   | H, A_VAL_71    | 2.68 | 1.77 | 17.57 |
| 1R21-4.PDB | O, A_VAL_71   | N, A_SER_74   | H, A_SER_74    | 2.43 | 1.52 | 16.62 |
| 1R21-4.PDB | OE1, A_GLU_57 | NE, A_ARG_81  | HE, A_ARG_81   | 2.76 | 1.87 | 19.46 |
| 1R21-4.PDB | OE1, A_GLU_57 | NH2, A_ARG_81 | HH21, A_ARG_81 | 2.93 | 2.10 | 27.48 |
| 1R21-4.PDB | OD2, A_ASP_86 | N, A_LYS_83   | H, A_LYS_83    | 2.52 | 1.72 | 28.30 |
| 1R21-4.PDB | O, A_PHE_95   | N, A_ILE_88   | H, A_ILE_88    | 2.41 | 1.51 | 17.89 |
| 1R21-4.PDB | O, A_GLN_70   | N, A_THR_89   | H, A_THR_89    | 2.59 | 1.62 | 4.11  |
| 1R21-4.PDB | O, A_ARG_93   | N, A_ILE_90   | H, A_ILE_90    | 2.76 | 1.91 | 24.78 |
| 1R21-4.PDB | O, A_ILE_88   | N, A_PHE_95   | H, A_PHE_95    | 2.36 | 1.44 | 14.85 |
| 1R21-4.PDB | ND1, A_HIS_84 | N, A_ASN_99   | H, A_ASN_99    | 2.80 | 1.85 | 12.02 |
| 1R21-5.PDB | O, A_VAL_15   | N, A_LYS_11   | H, A_LYS_11    | 2.78 | 1.94 | 24.72 |
| 1R21-5.PDB | O, A_LYS_11   | N, A_GLY_14   | H, A_GLY_14    | 2.58 | 1.71 | 22.29 |
| 1R21-5.PDB | O, A_LEU_7    | N, A_PHE_20   | H, A_PHE_20    | 2.74 | 1.95 | 29.42 |
| 1R21-5.PDB | O, A_ILE_51   | N, A_CYS_27   | H, A_CYS_27    | 2.96 | 2.03 | 16.24 |
| 1R21-5.PDB | O, A_CYS_49   | N, A_PHE_29   | H, A_PHE_29    | 2.56 | 1.68 | 20.60 |
| 1R21-5.PDB | O, A_GLY_32   | N, A_CYS_35   | H, A_CYS_35    | 3.00 | 2.10 | 20.00 |
| 1R21-5.PDB | O, A_LEU_28   | N, A_ILE_37   | H, A_ILE_37    | 2.63 | 1.66 | 7.71  |
| 1R21-5.PDB | O, A_CYS_27   | N, A_ILE_51   | H, A_ILE_51    | 2.67 | 1.84 | 25.60 |
| 1R21-5.PDB | O, A_ILE_59   | N, A_GLU_52   | H, A_GLU_52    | 2.45 | 1.51 | 13.28 |
| 1R21-5.PDB | O, A_SER_25   | N, A_ILE_53   | H, A_ILE_53    | 2.88 | 2.00 | 20.92 |
| 1R21-5.PDB | O, A_GLU_57   | N, A_HIS_54   | H, A_HIS_54    | 2.45 | 1.55 | 17.67 |
| 1R21-5.PDB | O, A_GLU_52   | N, A_ILE_59   | H, A_ILE_59    | 2.73 | 1.80 | 15.41 |
| 1R21-5.PDB | OG1, A_THR_69 | ND2, A_ASN_62 | HD22, A_ASN_62 | 2.62 | 1.75 | 21.48 |
| 1R21-5.PDB | O, A_THR_89   | N, A_GLN_70   | H, A_GLN_70    | 2.61 | 1.83 | 29.99 |
| 1R21-5.PDB | O, A_VAL_87   | N, A_ASN_72   | H, A_ASN_72    | 2.99 | 2.02 | 8.39  |
| 1R21-5.PDB | O, A_VAL_71   | N, A_SER_74   | H, A_SER_74    | 2.41 | 1.47 | 13.31 |
| 1R21-5.PDB | OD2, A_ASP_86 | N, A_LYS_83   | H, A_LYS_83    | 2.31 | 1.52 | 27.57 |
| 1R21-5.PDB | O, A_PHE_95   | N, A_ILE_88   | H, A_ILE_88    | 2.66 | 1.72 | 14.09 |
| 1R21-5.PDB | O, A_GLN_70   | N, A_THR_89   | H, A_THR_89    | 2.73 | 1.76 | 5.33  |
| 1R21-5.PDB | O, A_ARG_93   | N, A_ILE_90   | H, A_ILE_90    | 2.64 | 1.71 | 14.23 |
| 1R21-5.PDB | O, A_ILE_88   | N, A_PHE_95   | H, A_PHE_95    | 2.55 | 1.58 | 4.54  |
| 1R21-5.PDB | O, A_VAL_8    | N, A_ARG_96   | H, A_ARG_96    | 2.68 | 1.85 | 26.28 |
| 1R21-5.PDB | ND1, A_HIS_84 | N, A_ASN_99   | H, A_ASN_99    | 2.79 | 1.81 | 1.91  |
| 1R21-6.PDB | O, A_LEU_7    | N, A_PHE_20   | H, A_PHE_20    | 2.66 | 1.77 | 20.35 |
| 1R21-6.PDB | O, A_CYS_49   | N, A_PHE_29   | H, A_PHE_29    | 2.75 | 1.83 | 16.30 |
| 1R21-6.PDB | O, A_LEU_28   | N, A_ILE_37   | H, A_ILE_37    | 2.59 | 1.63 | 9.82  |
| 1R21-6.PDB | O, A_GLY_30   | N, A_ILE_39   | H, A_ILE_39    | 2.91 | 2.07 | 25.97 |
| 1R21-6.PDB | O, A_LEU_41   | N, A_VAL_44   | H, A_VAL_44    | 2.95 | 2.04 | 17.93 |
| 1R21-6.PDB | N, A_LYS_50   | SG, A_CYS_49  | HG, A_CYS_49   | 2.71 | 1.89 | 25.56 |
| 1R21-6.PDB | O, A_CYS_27   | N, A_ILE_51   | H, A_ILE_51    | 2.75 | 1.91 | 25.39 |
| 1R21-6.PDB | O, A_ILE_59   | N, A_GLU_52   | H, A_GLU_52    | 2.40 | 1.53 | 21.67 |
| 1R21-6.PDB | O, A_GLU_57   | N, A_HIS_54   | H, A_HIS_54    | 2.79 | 1.89 | 19.06 |
| 1R21-6.PDB | O, A_GLU_52   | N, A_ILE_59   | H, A_ILE_59    | 2.58 | 1.61 | 5.50  |
| 1R21-6.PDB | OG1, A_THR_69 | ND2, A_ASN_62 | HD21, A_ASN_62 | 2.81 | 1.95 | 22.23 |
| 1R21-6.PDB | OD1, A_ASN_67 | OG1, A_THR_66 | HG1, A_THR_66  | 2.30 | 1.42 | 18.29 |
| 1R21-6.PDB | ND2, A_ASN_62 | N, A_THR_69   | H, A_THR_69    | 2.77 | 1.82 | 9.89  |
| 1R21-6.PDB | O, A_THR_89   | N, A_GLN_70   | H, A_GLN_70    | 2.74 | 1.83 | 16.28 |
| 1R21-6.PDB | O, A_SER_74   | N, A_VAL_71   | H, A_VAL_71    | 2.71 | 1.73 | 5.25  |
| 1R21-6.PDB | O, A_VAL_87   | N, A_ASN_72   | H, A_ASN_72    | 2.81 | 1.83 | 4.97  |
| 1R21-6.PDB | O, A_VAL_71   | N, A_SER_74   | H, A_SER_74    | 2.47 | 1.57 | 18.72 |
| 1R21-6.PDB | O, A_TYR_97   | N, A_GLY_85   | H, A_GLY_85    | 2.85 | 1.98 | 22.19 |
| 1R21-6.PDB | O, A_PHE_95   | N, A_ILE_88   | H, A_ILE_88    | 2.58 | 1.60 | 5.92  |
| 1R21-6.PDB | O, A_GLN_70   | N, A_THR_89   | H, A_THR_89    | 2.72 | 1.76 | 7.04  |
| 1R21-6.PDB | O, A_ARG_93   | N, A_ILE_90   | H, A_ILE_90    | 2.73 | 1.78 | 11.89 |
| 1R21-6.PDB | O, A_ILE_88   | N, A_PHE_95   | H, A_PHE_95    | 2.50 | 1.55 | 9.80  |
| 1R21-6.PDB | O, A_VAL_8    | N, A_ARG_96   | H, A_ARG_96    | 2.94 | 2.02 | 15.77 |

|            |               |               |               |      |      |       |
|------------|---------------|---------------|---------------|------|------|-------|
| 1R21-6.PDB | ND1, A_HIS_84 | N, A_ASN_99   | H, A_ASN_99   | 2.78 | 1.82 | 10.56 |
| 1R21-6.PDB | O, A_THR_4    | N, A_GLU_100  | H, A_GLU_100  | 2.69 | 1.89 | 28.90 |
| 1R21-7.PDB | O, A_ARG_96   | N, A_VAL_8    | H, A_VAL_8    | 2.93 | 2.00 | 14.50 |
| 1R21-7.PDB | O, A_SER_94   | N, A_ILE_10   | H, A_ILE_10   | 2.75 | 1.83 | 17.27 |
| 1R21-7.PDB | O, A_LEU_7    | N, A_PHE_20   | H, A_PHE_20   | 2.62 | 1.73 | 19.92 |
| 1R21-7.PDB | O, A_ILE_51   | N, A_CYS_27   | H, A_CYS_27   | 2.70 | 1.75 | 13.12 |
| 1R21-7.PDB | O, A_CYS_49   | N, A_PHE_29   | H, A_PHE_29   | 2.69 | 1.79 | 18.19 |
| 1R21-7.PDB | O, A_LEU_28   | N, A_ILE_37   | H, A_ILE_37   | 2.66 | 1.71 | 12.73 |
| 1R21-7.PDB | O, A_GLY_30   | N, A_ILE_39   | H, A_ILE_39   | 2.93 | 2.03 | 19.31 |
| 1R21-7.PDB | O, A_CYS_27   | N, A_ILE_51   | H, A_ILE_51   | 2.59 | 1.76 | 25.78 |
| 1R21-7.PDB | O, A_ILE_59   | N, A_GLU_52   | H, A_GLU_52   | 2.42 | 1.57 | 22.98 |
| 1R21-7.PDB | O, A_SER_25   | N, A_ILE_53   | H, A_ILE_53   | 2.58 | 1.70 | 20.39 |
| 1R21-7.PDB | O, A_GLU_57   | N, A_HIS_54   | H, A_HIS_54   | 2.55 | 1.59 | 6.66  |
| 1R21-7.PDB | O, A_GLU_52   | N, A_ILE_59   | H, A_ILE_59   | 2.51 | 1.62 | 19.11 |
| 1R21-7.PDB | OD1, A_ASN_67 | OG1, A_THR_66 | HG1, A_THR_66 | 2.91 | 2.05 | 21.54 |
| 1R21-7.PDB | ND2, A_ASN_62 | N, A_THR_69   | H, A_THR_69   | 2.80 | 1.87 | 14.50 |
| 1R21-7.PDB | O, A_THR_89   | N, A_GLN_70   | H, A_GLN_70   | 2.81 | 2.02 | 29.36 |
| 1R21-7.PDB | O, A_SER_74   | N, A_VAL_71   | H, A_VAL_71   | 2.67 | 1.70 | 5.32  |
| 1R21-7.PDB | O, A_VAL_71   | N, A_SER_74   | H, A_SER_74   | 2.40 | 1.46 | 12.46 |
| 1R21-7.PDB | O, A_PHE_95   | N, A_ILE_88   | H, A_ILE_88   | 2.42 | 1.50 | 16.16 |
| 1R21-7.PDB | O, A_GLN_70   | N, A_THR_89   | H, A_THR_89   | 2.72 | 1.75 | 6.96  |
| 1R21-7.PDB | O, A_ARG_93   | N, A_ILE_90   | H, A_ILE_90   | 2.79 | 1.96 | 26.27 |
| 1R21-7.PDB | O, A_ILE_88   | N, A_PHE_95   | H, A_PHE_95   | 2.39 | 1.47 | 15.58 |
| 1R21-7.PDB | O, A_VAL_8    | N, A_ARG_96   | H, A_ARG_96   | 2.62 | 1.75 | 22.19 |
| 1R21-7.PDB | O, A_ASP_86   | N, A_TYR_97   | H, A_TYR_97   | 2.95 | 1.97 | 3.22  |
| 1R21-7.PDB | ND1, A_HIS_84 | N, A_ASN_99   | H, A_ASN_99   | 2.74 | 1.77 | 3.18  |
| 1R21-7.PDB | O, A_THR_4    | N, A_GLU_100  | H, A_GLU_100  | 2.96 | 1.98 | 1.07  |
| 1R21-8.PDB | O, A_LEU_7    | N, A_PHE_20   | H, A_PHE_20   | 2.64 | 1.67 | 5.83  |
| 1R21-8.PDB | O, A_ILE_51   | N, A_CYS_27   | H, A_CYS_27   | 2.97 | 2.06 | 18.29 |
| 1R21-8.PDB | O, A_CYS_49   | N, A_PHE_29   | H, A_PHE_29   | 2.74 | 1.82 | 17.14 |
| 1R21-8.PDB | O, A_GLY_32   | N, A_CYS_35   | H, A_CYS_35   | 2.97 | 2.06 | 17.41 |
| 1R21-8.PDB | O, A_LEU_28   | N, A_ILE_37   | H, A_ILE_37   | 2.56 | 1.64 | 16.71 |
| 1R21-8.PDB | O, A_CYS_27   | N, A_ILE_51   | H, A_ILE_51   | 2.90 | 2.08 | 27.50 |
| 1R21-8.PDB | O, A_ILE_59   | N, A_GLU_52   | H, A_GLU_52   | 2.39 | 1.51 | 20.05 |
| 1R21-8.PDB | O, A_SER_25   | N, A_ILE_53   | H, A_ILE_53   | 2.86 | 1.97 | 19.70 |
| 1R21-8.PDB | O, A_GLU_57   | N, A_HIS_54   | H, A_HIS_54   | 2.63 | 1.73 | 17.57 |
| 1R21-8.PDB | O, A_GLU_52   | N, A_ILE_59   | H, A_ILE_59   | 2.67 | 1.74 | 13.79 |
| 1R21-8.PDB | O, A_HIS_48   | N, A_PHE_63   | H, A_PHE_63   | 2.95 | 1.99 | 8.40  |
| 1R21-8.PDB | ND2, A_ASN_62 | N, A_THR_69   | H, A_THR_69   | 2.77 | 1.82 | 11.69 |
| 1R21-8.PDB | O, A_THR_89   | N, A_GLN_70   | H, A_GLN_70   | 2.54 | 1.69 | 23.06 |
| 1R21-8.PDB | O, A_SER_74   | N, A_VAL_71   | H, A_VAL_71   | 2.87 | 1.96 | 17.78 |
| 1R21-8.PDB | O, A_VAL_87   | N, A_ASN_72   | H, A_ASN_72   | 2.79 | 1.84 | 10.06 |
| 1R21-8.PDB | O, A_VAL_71   | N, A_SER_74   | H, A_SER_74   | 2.39 | 1.49 | 18.17 |
| 1R21-8.PDB | OD2, A_ASP_86 | N, A_LYS_83   | H, A_LYS_83   | 2.70 | 1.83 | 21.74 |
| 1R21-8.PDB | O, A_LYS_83   | N, A_ASP_86   | H, A_ASP_86   | 2.99 | 2.13 | 23.27 |
| 1R21-8.PDB | O, A_PHE_95   | N, A_ILE_88   | H, A_ILE_88   | 2.50 | 1.64 | 22.70 |
| 1R21-8.PDB | O, A_GLN_70   | N, A_THR_89   | H, A_THR_89   | 2.52 | 1.55 | 4.58  |
| 1R21-8.PDB | O, A_ARG_93   | N, A_ILE_90   | H, A_ILE_90   | 2.80 | 1.96 | 25.17 |
| 1R21-8.PDB | O, A_ILE_88   | N, A_PHE_95   | H, A_PHE_95   | 2.40 | 1.51 | 18.62 |
| 1R21-8.PDB | O, A_VAL_8    | N, A_ARG_96   | H, A_ARG_96   | 2.59 | 1.64 | 10.89 |
| 1R21-8.PDB | ND1, A_HIS_84 | N, A_ASN_99   | H, A_ASN_99   | 2.79 | 1.82 | 9.29  |
| 1R21-9.PDB | O, A_ARG_96   | N, A_VAL_8    | H, A_VAL_8    | 2.95 | 2.02 | 15.16 |
| 1R21-9.PDB | O, A_VAL_15   | N, A_LYS_11   | H, A_LYS_11   | 2.46 | 1.54 | 16.41 |
| 1R21-9.PDB | O, A_LYS_11   | N, A_GLY_14   | H, A_GLY_14   | 2.77 | 1.83 | 13.31 |
| 1R21-9.PDB | O, A_THR_9    | N, A_GLY_17   | H, A_GLY_17   | 2.92 | 2.09 | 26.43 |
| 1R21-9.PDB | O, A_LEU_7    | N, A_PHE_20   | H, A_PHE_20   | 2.73 | 1.90 | 26.46 |
| 1R21-9.PDB | O, A_ILE_51   | N, A_CYS_27   | H, A_CYS_27   | 2.80 | 1.95 | 24.06 |
| 1R21-9.PDB | O, A_CYS_49   | N, A_PHE_29   | H, A_PHE_29   | 2.58 | 1.68 | 18.54 |

|             |               |               |                |      |      |       |
|-------------|---------------|---------------|----------------|------|------|-------|
| 1R21-9.PDB  | O, A_LEU_28   | N, A_ILE_37   | H, A_ILE_37    | 2.61 | 1.66 | 11.75 |
| 1R21-9.PDB  | O, A_GLY_30   | N, A_ILE_39   | H, A_ILE_39    | 2.95 | 2.00 | 11.86 |
| 1R21-9.PDB  | O, A_CYS_27   | N, A_ILE_51   | H, A_ILE_51    | 2.58 | 1.76 | 26.53 |
| 1R21-9.PDB  | O, A_ILE_59   | N, A_GLU_52   | H, A_GLU_52    | 2.41 | 1.49 | 15.40 |
| 1R21-9.PDB  | O, A_GLU_57   | N, A_HIS_54   | H, A_HIS_54    | 2.39 | 1.49 | 17.88 |
| 1R21-9.PDB  | O, A_GLU_52   | N, A_ILE_59   | H, A_ILE_59    | 2.53 | 1.64 | 19.17 |
| 1R21-9.PDB  | OG1, A_THR_69 | ND2, A_ASN_62 | HD21, A_ASN_62 | 2.59 | 1.65 | 13.02 |
| 1R21-9.PDB  | ND2, A_ASN_62 | N, A_THR_69   | H, A_THR_69    | 2.80 | 1.88 | 16.74 |
| 1R21-9.PDB  | O, A_THR_89   | N, A_GLN_70   | H, A_GLN_70    | 2.54 | 1.65 | 19.35 |
| 1R21-9.PDB  | O, A_SER_74   | N, A_VAL_71   | H, A_VAL_71    | 2.88 | 1.97 | 18.35 |
| 1R21-9.PDB  | O, A_VAL_71   | N, A_SER_74   | H, A_SER_74    | 2.82 | 1.99 | 26.19 |
| 1R21-9.PDB  | O, A_LYS_83   | N, A_ASP_86   | H, A_ASP_86    | 2.95 | 2.09 | 23.46 |
| 1R21-9.PDB  | O, A_PHE_95   | N, A_ILE_88   | H, A_ILE_88    | 2.79 | 1.83 | 9.96  |
| 1R21-9.PDB  | O, A_GLN_70   | N, A_THR_89   | H, A_THR_89    | 2.38 | 1.46 | 15.43 |
| 1R21-9.PDB  | O, A_ARG_93   | N, A_ILE_90   | H, A_ILE_90    | 2.76 | 1.79 | 6.89  |
| 1R21-9.PDB  | O, A_ILE_88   | N, A_PHE_95   | H, A_PHE_95    | 2.67 | 1.69 | 5.04  |
| 1R21-9.PDB  | O, A_VAL_8    | N, A_ARG_96   | H, A_ARG_96    | 2.57 | 1.73 | 25.04 |
| 1R21-9.PDB  | ND1, A_HIS_84 | N, A_ASN_99   | H, A_ASN_99    | 2.74 | 1.83 | 17.89 |
| 1S4H-8.PDB  | OE1, A_GLU_2  | N, A_GLU_1    | H3, A_GLU_1    | 3.00 | 2.12 | 26.52 |
| 1S4J-1.PDB  | O, A_MET_7    | N, A_SER_3    | H, A_SER_3     | 2.68 | 1.88 | 28.39 |
| 1S4J-10.PDB | O, A_MET_7    | N, A_SER_3    | H, A_SER_3     | 2.70 | 1.89 | 28.31 |
| 1S4J-10.PDB | OD2, A_ASP_5  | N, A_LEU_11   | H, A_LEU_11    | 2.97 | 2.11 | 23.51 |
| 1S4J-11.PDB | O, A_MET_7    | N, A_SER_3    | H, A_SER_3     | 2.71 | 1.88 | 26.65 |
| 1S4J-12.PDB | O, A_MET_7    | N, A_SER_3    | H, A_SER_3     | 2.58 | 1.69 | 19.82 |
| 1S4J-14.PDB | O, A_MET_7    | N, A_SER_3    | H, A_SER_3     | 2.62 | 1.79 | 26.02 |
| 1S4J-14.PDB | OD2, A_ASP_5  | N, A_LEU_11   | H, A_LEU_11    | 2.83 | 2.00 | 26.13 |
| 1S4J-15.PDB | O, A_MET_7    | N, A_SER_3    | H, A_SER_3     | 2.73 | 1.91 | 26.73 |
| 1S4J-16.PDB | O, A_MET_7    | N, A_SER_3    | H, A_SER_3     | 2.76 | 1.95 | 28.49 |
| 1S4J-17.PDB | O, A_MET_7    | N, A_SER_3    | H, A_SER_3     | 2.73 | 1.90 | 26.91 |
| 1S4J-18.PDB | O, A_MET_7    | N, A_SER_3    | H, A_SER_3     | 2.72 | 1.86 | 23.67 |
| 1S4J-19.PDB | O, A_MET_7    | N, A_SER_3    | H, A_SER_3     | 2.72 | 1.87 | 24.36 |
| 1S4J-2.PDB  | O, A_MET_7    | N, A_SER_3    | H, A_SER_3     | 2.72 | 1.90 | 26.68 |
| 1S4J-20.PDB | O, A_MET_7    | N, A_SER_3    | H, A_SER_3     | 2.77 | 1.95 | 27.92 |
| 1S4J-20.PDB | O, A_GLY_10   | N, A_PHE_12   | H, A_PHE_12    | 2.84 | 1.99 | 23.23 |
| 1S4J-3.PDB  | O, A_MET_7    | N, A_SER_3    | H, A_SER_3     | 2.75 | 1.93 | 27.51 |
| 1S4J-5.PDB  | O, A_MET_7    | N, A_SER_3    | H, A_SER_3     | 2.72 | 1.90 | 26.53 |
| 1S4J-6.PDB  | O, A_MET_7    | N, A_SER_3    | H, A_SER_3     | 2.73 | 1.90 | 26.66 |
| 1S4J-7.PDB  | O, A_MET_7    | N, A_SER_3    | H, A_SER_3     | 2.73 | 1.90 | 26.44 |
| 1S4J-8.PDB  | O, A_MET_7    | N, A_SER_3    | H, A_SER_3     | 2.73 | 1.90 | 26.61 |
| 1S4J-9.PDB  | O, A_MET_7    | N, A_SER_3    | H, A_SER_3     | 2.64 | 1.83 | 27.37 |
| 1S4J-9.PDB  | OD2, A_ASP_5  | N, A_LEU_11   | H, A_LEU_11    | 2.83 | 2.00 | 25.25 |
| 1TOR-5.PDB  | O, A_ASN_2    | N, A_ASP_5    | H, A_ASP_5     | 2.95 | 2.03 | 21.29 |
| 1TOS-2.PDB  | O, A_ASN_2    | N, A_ASP_5    | H, A_ASP_5     | 2.88 | 1.98 | 23.42 |
| 1VFB.PDB    | OG, A_SER_26  | N, A_VAL_3    | H, A_VAL_3     | 2.94 | 1.97 | 6.30  |
| 1VFB.PDB    | O, A_ARG_24   | N, A_THR_5    | H, A_THR_5     | 2.90 | 1.93 | 5.77  |
| 1VFB.PDB    | O, A_THR_22   | N, A_SER_7    | H, A_SER_7     | 2.99 | 2.11 | 22.15 |
| 1VFB.PDB    | O, A_LYS_103  | N, A_LEU_11   | H, A_LEU_11    | 2.94 | 2.05 | 20.26 |
| 1VFB.PDB    | O, A_GLU_105  | N, A_ALA_13   | H, A_ALA_13    | 2.80 | 1.93 | 21.73 |
| 1VFB.PDB    | O, A_LEU_78   | N, A_GLY_16   | H, A_GLY_16    | 2.82 | 1.99 | 26.99 |
| 1VFB.PDB    | O, A_LEU_73   | N, A_ILE_21   | H, A_ILE_21    | 2.85 | 1.95 | 18.65 |
| 1VFB.PDB    | O, A_SER_7    | N, A_THR_22   | H, A_THR_22    | 2.95 | 1.97 | 3.77  |
| 1VFB.PDB    | O, A_TYR_71   | N, A_CYS_23   | H, A_CYS_23    | 2.89 | 1.95 | 12.19 |
| 1VFB.PDB    | O, A_THR_5    | N, A_ARG_24   | H, A_ARG_24    | 2.86 | 1.97 | 19.64 |
| 1VFB.PDB    | O, A_THR_69   | N, A_ALA_25   | H, A_ALA_25    | 2.80 | 1.83 | 9.00  |
| 1VFB.PDB    | OD1, A_ASN_28 | N, A_HIS_30   | H, A_HIS_30    | 2.87 | 2.03 | 25.94 |
| 1VFB.PDB    | O, A_GLN_89   | N, A_ALA_34   | H, A_ALA_34    | 2.86 | 1.95 | 17.31 |
| 1VFB.PDB    | O, A_VAL_48   | N, A_TRP_35   | H, A_TRP_35    | 2.90 | 1.96 | 12.47 |
| 1VFB.PDB    | O, A_TYR_87   | N, A_TYR_36   | H, A_TYR_36    | 2.90 | 1.97 | 14.82 |

|          |                |                |                |      |      |       |
|----------|----------------|----------------|----------------|------|------|-------|
| 1VFB.PDB | OE1, A_GLN_89  | OH, A_TYR_36   | HH, A_TYR_36   | 2.84 | 2.00 | 25.31 |
| 1VFB.PDB | O, A_GLN_45    | N, A_GLN_37    | H, A_GLN_37    | 2.94 | 2.00 | 11.43 |
| 1VFB.PDB | O, A_SER_85    | N, A_GLN_38    | H, A_GLN_38    | 2.78 | 1.86 | 16.10 |
| 1VFB.PDB | O, A_LYS_42    | NE2, A_GLN_38  | HE22, A_GLN_38 | 2.95 | 2.03 | 15.93 |
| 1VFB.PDB | O, A_LYS_39    | N, A_LYS_42    | H, A_LYS_42    | 2.94 | 2.06 | 21.86 |
| 1VFB.PDB | O, A_GLN_37    | N, A_GLN_45    | H, A_GLN_45    | 2.83 | 1.94 | 20.43 |
| 1VFB.PDB | O, A_TRP_35    | N, A_LEU_47    | H, A_LEU_47    | 2.87 | 1.94 | 14.84 |
| 1VFB.PDB | O, A_THR_53    | N, A_TYR_49    | H, A_TYR_49    | 2.88 | 1.94 | 13.56 |
| 1VFB.PDB | O, A_TYR_49    | N, A_THR_53    | H, A_THR_53    | 2.96 | 2.04 | 16.01 |
| 1VFB.PDB | O, A_LEU_47    | N, A_ALA_55    | H, A_ALA_55    | 2.84 | 1.93 | 17.83 |
| 1VFB.PDB | OD2, A ASP_82  | NE, A_ARG_61   | HE, A_ARG_61   | 2.88 | 1.96 | 15.15 |
| 1VFB.PDB | OD1, A ASP_82  | NH2, A_ARG_61  | HH21, A_ARG_61 | 2.85 | 1.87 | 9.42  |
| 1VFB.PDB | O, A_LYS_74    | N, A_SER_63    | H, A_SER_63    | 2.88 | 1.93 | 11.55 |
| 1VFB.PDB | O, A_SER_72    | N, A_SER_65    | H, A_SER_65    | 2.96 | 2.03 | 16.59 |
| 1VFB.PDB | O, A_CYS_23    | N, A_TYR_71    | H, A_TYR_71    | 2.90 | 2.02 | 21.95 |
| 1VFB.PDB | O, A_GLY_68    | OH, A_TYR_71   | HH, A_TYR_71   | 2.83 | 1.87 | 7.60  |
| 1VFB.PDB | O, A_SER_65    | N, A_SER_72    | H, A_SER_72    | 2.93 | 1.97 | 9.57  |
| 1VFB.PDB | O, A_ILE_21    | N, A_LEU_73    | H, A_LEU_73    | 2.93 | 1.98 | 10.05 |
| 1VFB.PDB | O, A_SER_63    | N, A_LYS_74    | H, A_LYS_74    | 2.78 | 1.85 | 14.93 |
| 1VFB.PDB | O, A_VAL_19    | N, A_ILE_75    | H, A_ILE_75    | 3.00 | 2.05 | 11.89 |
| 1VFB.PDB | O, A_ARG_61    | N, A_ASN_76    | H, A_ASN_76    | 2.94 | 1.97 | 4.92  |
| 1VFB.PDB | O, A_GLU_17    | N, A_LEU_78    | H, A_LEU_78    | 2.98 | 2.01 | 6.59  |
| 1VFB.PDB | OD2, A ASP_82  | N, A_GLN_79    | H, A_GLN_79    | 2.99 | 2.09 | 19.33 |
| 1VFB.PDB | O, A_GLN_79    | N, A ASP_82    | H, A ASP_82    | 2.90 | 1.94 | 8.94  |
| 1VFB.PDB | O, A_GLN_38    | N, A_SER_85    | H, A_SER_85    | 2.92 | 1.96 | 9.01  |
| 1VFB.PDB | O, A_THR_102   | N, A_TYR_86    | H, A_TYR_86    | 2.97 | 2.09 | 22.04 |
| 1VFB.PDB | O, A ASP_82    | OH, A_TYR_86   | HH, A_TYR_86   | 2.70 | 1.75 | 6.61  |
| 1VFB.PDB | O, A_ALA_34    | N, A_GLN_89    | H, A_GLN_89    | 2.89 | 2.00 | 22.07 |
| 1VFB.PDB | O, A_TYR_32    | N, A_PHE_91    | H, A_PHE_91    | 2.82 | 1.88 | 13.65 |
| 1VFB.PDB | OE1, C_GLN_121 | N, A_SER_93    | H, A_SER_93    | 2.89 | 1.92 | 8.17  |
| 1VFB.PDB | OE1, B_GLU_98  | NH1, A_ARG_96  | HH12, A_ARG_96 | 2.82 | 1.84 | 8.38  |
| 1VFB.PDB | OE2, B_GLU_98  | NH2, A_ARG_96  | HH22, A_ARG_96 | 2.81 | 1.85 | 10.74 |
| 1VFB.PDB | O, A_CYS_88    | N, A_GLY_99    | H, A_GLY_99    | 2.78 | 1.86 | 15.50 |
| 1VFB.PDB | O, A_TYR_86    | N, A_THR_102   | H, A_THR_102   | 2.95 | 2.08 | 22.50 |
| 1VFB.PDB | O, A_PRO_8     | OG1, A_THR_102 | HG1, A_THR_102 | 2.77 | 1.85 | 14.39 |
| 1VFB.PDB | O, A_ALA_9     | N, A_LYS_103   | H, A_LYS_103   | 2.90 | 1.93 | 7.79  |
| 1VFB.PDB | O, A_GLY_84    | N, A_LEU_104   | H, A_LEU_104   | 2.88 | 1.91 | 5.85  |
| 1VFB.PDB | O, A_LEU_11    | N, A_GLU_105   | H, A_GLU_105   | 2.89 | 1.94 | 12.21 |
| 1VFB.PDB | O, B_SER_25    | N, B_GLN_3     | H, B_GLN_3     | 2.88 | 1.92 | 9.87  |
| 1VFB.PDB | O, B_THR_23    | N, B_GLN_5     | H, B_GLN_5     | 2.98 | 2.10 | 21.16 |
| 1VFB.PDB | O, B_THR_21    | N, B_SER_7     | H, B_SER_7     | 2.85 | 2.00 | 24.61 |
| 1VFB.PDB | O, B_PRO_9     | N, B_LEU_11    | H, B_LEU_11    | 2.92 | 2.13 | 29.55 |
| 1VFB.PDB | OE1, B_GLN_16  | N, B_ALA_13    | H, B_ALA_13    | 2.78 | 1.85 | 14.74 |
| 1VFB.PDB | O, B_ALA_13    | N, B_GLN_16    | H, B_GLN_16    | 2.90 | 1.97 | 15.84 |
| 1VFB.PDB | O, B_MET_82    | N, B_LEU_18    | H, B_LEU_18    | 2.72 | 1.87 | 23.78 |
| 1VFB.PDB | O, B_LEU_80    | N, B_ILE_20    | H, B_ILE_20    | 2.91 | 2.00 | 17.66 |
| 1VFB.PDB | O, B_SER_7     | N, B_THR_21    | H, B_THR_21    | 2.89 | 1.93 | 9.84  |
| 1VFB.PDB | O, B_VAL_78    | N, B_CYS_22    | H, B_CYS_22    | 2.86 | 1.89 | 3.27  |
| 1VFB.PDB | O, B_GLN_5     | N, B_THR_23    | H, B_THR_23    | 2.86 | 1.92 | 12.65 |
| 1VFB.PDB | O, B_SER_76    | N, B_VAL_24    | H, B_VAL_24    | 2.97 | 2.00 | 3.39  |
| 1VFB.PDB | O, B_GLN_3     | N, B_SER_25    | H, B_SER_25    | 2.93 | 2.07 | 23.55 |
| 1VFB.PDB | OG, B_SER_28   | OG1, B_THR_30  | HG1, B_THR_30  | 2.97 | 2.08 | 19.82 |
| 1VFB.PDB | O, B_ILE_51    | N, B_VAL_34    | H, B_VAL_34    | 2.91 | 2.01 | 18.80 |
| 1VFB.PDB | O, B_ALA_96    | N, B_ASN_35    | H, B_ASN_35    | 2.89 | 1.92 | 5.93  |
| 1VFB.PDB | OE1, B_GLU_98  | ND2, B_ASN_35  | HD21, B_ASN_35 | 2.85 | 2.00 | 23.37 |
| 1VFB.PDB | O, B_GLY_49    | N, B_TRP_36    | H, B_TRP_36    | 2.96 | 2.02 | 15.17 |
| 1VFB.PDB | O, B_TYR_94    | N, B_VAL_37    | H, B_VAL_37    | 2.92 | 1.95 | 9.63  |
| 1VFB.PDB | O, B_GLU_46    | N, B_ARG_38    | H, B_ARG_38    | 2.89 | 1.95 | 14.15 |

|          |                |                |                 |      |      |       |
|----------|----------------|----------------|-----------------|------|------|-------|
| 1VFB.PDB | OD1, B.ASP_89  | NH1, B.ARG_38  | HH12, B.ARG_38  | 3.00 | 2.07 | 17.31 |
| 1VFB.PDB | O, B.ARG_92    | N, B.GLN_39    | H, B.GLN_39     | 2.82 | 1.90 | 16.49 |
| 1VFB.PDB | OE1, A.GLN_38  | NE2, B.GLN_39  | HE21, B.GLN_39  | 2.95 | 1.98 | 8.04  |
| 1VFB.PDB | O, B.LYS_43    | NE2, B.GLN_39  | HE22, B.GLN_39  | 2.95 | 2.05 | 19.96 |
| 1VFB.PDB | O, B.PRO_40    | N, B.LYS_43    | H, B.LYS_43     | 2.85 | 1.98 | 21.72 |
| 1VFB.PDB | O, B.ARG_38    | N, B.GLU_46    | H, B.GLU_46     | 2.84 | 1.96 | 21.55 |
| 1VFB.PDB | OD1, B.ASN_35  | NE1, B.TRP_47  | HE1, B.TRP_47   | 2.80 | 1.83 | 5.78  |
| 1VFB.PDB | O, B.TRP_36    | N, B.LEU_48    | H, B.LEU_48     | 2.92 | 1.98 | 13.84 |
| 1VFB.PDB | O, B.ASP_58    | N, B.MET_50    | H, B.MET_50     | 2.89 | 1.97 | 17.18 |
| 1VFB.PDB | O, B.ASN_56    | N, B.TRP_52    | H, B.TRP_52     | 2.90 | 1.95 | 9.28  |
| 1VFB.PDB | O, B.TRP_52    | N, B.GLY_55    | H, B.GLY_55     | 2.85 | 1.92 | 14.57 |
| 1VFB.PDB | O, B.LEU_48    | N, B.ASN_60    | H, B.ASN_60     | 2.94 | 1.98 | 8.25  |
| 1VFB.PDB | O, B.TRP_47    | ND2, B.ASN_60  | HD22, B.ASN_60  | 2.87 | 1.90 | 6.16  |
| 1VFB.PDB | OD1, B.ASN_60  | N, B.ALA_62    | H, B.ALA_62     | 2.90 | 2.08 | 27.74 |
| 1VFB.PDB | O, B.LEU_63    | N, B.ARG_66    | H, B.ARG_66     | 2.99 | 2.04 | 12.74 |
| 1VFB.PDB | OD2, B.ASP_89  | NH1, B.ARG_66  | HH12, B.ARG_66  | 2.89 | 1.97 | 19.13 |
| 1VFB.PDB | OD1, B.ASP_89  | NH2, B.ARG_66  | HH22, B.ARG_66  | 2.93 | 1.93 | 3.85  |
| 1VFB.PDB | O, B.LYS_81    | N, B.SER_68    | H, B.SER_68     | 2.97 | 2.10 | 22.66 |
| 1VFB.PDB | OH, B.TYR_59   | N, B.ILE_69    | H, B.ILE_69     | 2.97 | 2.01 | 7.63  |
| 1VFB.PDB | OD1, B.ASN_73  | NZ, B.LYS_71   | HZ1, B.LYS_71   | 2.93 | 2.08 | 28.65 |
| 1VFB.PDB | O, B.GLY_53    | NZ, B.LYS_71   | HZ3, B.LYS_71   | 2.92 | 2.04 | 25.68 |
| 1VFB.PDB | O, B.GLN_77    | N, B.ASP_72    | H, B.ASP_72     | 2.85 | 1.88 | 5.90  |
| 1VFB.PDB | O, B.CYS_22    | N, B.VAL_78    | H, B.VAL_78     | 2.96 | 2.07 | 20.13 |
| 1VFB.PDB | O, B.SER_70    | N, B.PHE_79    | H, B.PHE_79     | 2.82 | 1.89 | 14.11 |
| 1VFB.PDB | O, B.SER_68    | N, B.LYS_81    | H, B.LYS_81     | 2.78 | 1.89 | 20.09 |
| 1VFB.PDB | OG, B.SER_70   | NZ, B.LYS_81   | HZ2, B.LYS_81   | 2.92 | 2.05 | 26.58 |
| 1VFB.PDB | O, B.LEU_18    | N, B.MET_82    | H, B.MET_82     | 2.84 | 1.92 | 15.27 |
| 1VFB.PDB | OD1, B.ASN_83  | OG, B.SER_84   | HG, B.SER_84    | 2.99 | 2.04 | 8.51  |
| 1VFB.PDB | OD2, B.ASP_89  | N, B.HIS_86    | H, B.HIS_86     | 3.00 | 2.17 | 27.32 |
| 1VFB.PDB | O, B.THR_87    | OG1, B.THR_90  | HG1, B.THR_90   | 2.90 | 1.94 | 9.38  |
| 1VFB.PDB | O, B.GLN_39    | N, B.ARG_92    | H, B.ARG_92     | 2.99 | 2.02 | 2.81  |
| 1VFB.PDB | O, B.THR_110   | N, B.TYR_93    | H, B.TYR_93     | 2.83 | 1.90 | 15.51 |
| 1VFB.PDB | OE2, B.GLU_6   | N, B.CYS_95    | H, B.CYS_95     | 2.85 | 2.00 | 23.74 |
| 1VFB.PDB | O, B.ASN_35    | N, B.ALA_96    | H, B.ALA_96     | 2.98 | 2.12 | 24.00 |
| 1VFB.PDB | O, B.TYR_105   | N, B.ARG_97    | H, B.ARG_97     | 2.78 | 1.93 | 24.54 |
| 1VFB.PDB | OD1, B.ASP_104 | NE, B.ARG_97   | HE, B.ARG_97    | 2.99 | 2.02 | 4.50  |
| 1VFB.PDB | OD2, B.ASP_104 | NH2, B.ARG_97  | HH21, B.ARG_97  | 2.86 | 1.87 | 3.52  |
| 1VFB.PDB | O, B.GLY_33    | N, B.GLU_98    | H, B.GLU_98     | 2.83 | 1.86 | 4.19  |
| 1VFB.PDB | O, B.ARG_102   | N, B.ARG_99    | H, B.ARG_99     | 2.95 | 2.00 | 10.93 |
| 1VFB.PDB | O, B.ASP_100   | NH1, B.ARG_102 | HH11, B.ARG_102 | 3.00 | 2.15 | 26.78 |
| 1VFB.PDB | O, C.GLY_22    | NH1, B.ARG_102 | HH12, B.ARG_102 | 2.82 | 1.90 | 18.81 |
| 1VFB.PDB | O, B.CYS_95    | N, B.GLY_107   | H, B.GLY_107    | 2.97 | 2.01 | 8.78  |
| 1VFB.PDB | OE1, B.GLU_6   | N, B.GLY_109   | H, B.GLY_109    | 2.89 | 1.99 | 17.04 |
| 1VFB.PDB | O, B.TYR_93    | N, B.THR_110   | H, B.THR_110    | 2.94 | 2.04 | 19.36 |
| 1VFB.PDB | O, B.ALA_91    | N, B.LEU_112   | H, B.LEU_112    | 2.81 | 1.84 | 5.13  |
| 1VFB.PDB | O, B.GLY_10    | N, B.THR_113   | H, B.THR_113    | 2.88 | 1.92 | 9.03  |
| 1VFB.PDB | OG1, B.THR_90  | N, B.VAL_114   | H, B.VAL_114    | 2.95 | 1.97 | 3.76  |
| 1VFB.PDB | O, B.VAL_12    | N, B.SER_115   | H, B.SER_115    | 2.89 | 1.92 | 7.04  |
| 1VFB.PDB | OG1, C.THR_40  | N, C.LYS_1     | H1, C.LYS_1     | 2.88 | 1.92 | 18.01 |
| 1VFB.PDB | O, C.PHE_38    | N, C.PHE_3     | H, C.PHE_3      | 2.97 | 2.01 | 11.57 |
| 1VFB.PDB | O, C.ARG_5     | N, C.ALA_9     | H, C.ALA_9      | 2.93 | 1.95 | 4.49  |
| 1VFB.PDB | O, C.CYS_6     | N, C.ALA_10    | H, C.ALA_10     | 2.92 | 1.95 | 7.61  |
| 1VFB.PDB | O, C.LEU_8     | N, C.MET_12    | H, C.MET_12     | 2.84 | 1.91 | 15.62 |
| 1VFB.PDB | O, C.ALA_9     | N, C.LYS_13    | H, C.LYS_13     | 2.90 | 1.96 | 13.16 |
| 1VFB.PDB | O, C.ALA_11    | ND1, C.HIS_15  | HD1, C.HIS_15   | 2.83 | 1.90 | 15.15 |
| 1VFB.PDB | OG1, C.THR_89  | NE2, C.HIS_15  | HE2, C.HIS_15   | 2.84 | 1.94 | 19.37 |
| 1VFB.PDB | O, C.ASN_19    | N, C.GLY_22    | H, C.GLY_22     | 2.99 | 2.09 | 19.97 |
| 1VFB.PDB | O, C.TYR_20    | N, C.TYR_23    | H, C.TYR_23     | 2.95 | 1.99 | 10.86 |

|            |                |                |                 |      |      |       |
|------------|----------------|----------------|-----------------|------|------|-------|
| 1VFB.PDB   | OD2, B_ASP_100 | N, C_SER_24    | H, C_SER_24     | 2.91 | 2.09 | 27.47 |
| 1VFB.PDB   | O, C_GLY_26    | N, C_CYS_30    | H, C_CYS_30     | 2.84 | 1.96 | 21.71 |
| 1VFB.PDB   | O, C_ASN_27    | N, C_ALA_31    | H, C_ALA_31     | 2.91 | 1.97 | 11.60 |
| 1VFB.PDB   | O, C_ALA_31    | N, C_GLU_35    | H, C_GLU_35     | 2.82 | 1.95 | 22.11 |
| 1VFB.PDB   | O, C_ALA_32    | N, C_SER_36    | H, C_SER_36     | 2.95 | 2.06 | 19.79 |
| 1VFB.PDB   | O, C_ILE_55    | OG, C_SER_36   | HG, C_SER_36    | 2.79 | 1.88 | 15.77 |
| 1VFB.PDB   | O, C_LYS_1     | N, C_THR_40    | H, C_THR_40     | 2.90 | 1.95 | 9.98  |
| 1VFB.PDB   | OE1, C_GLN_41  | OG1, C_THR_40  | HG1, C_THR_40   | 2.88 | 1.98 | 18.75 |
| 1VFB.PDB   | OD1, C_ASN_39  | N, C_GLN_41    | H, C_GLN_41     | 2.92 | 2.01 | 18.23 |
| 1VFB.PDB   | O, C_LEU_84    | NE2, C_GLN_41  | HE21, C_GLN_41  | 2.78 | 1.99 | 29.59 |
| 1VFB.PDB   | O, C_ASP_52    | N, C_ASN_44    | H, C_ASN_44     | 2.91 | 2.02 | 19.92 |
| 1VFB.PDB   | O, C_SER_50    | ND2, C_ASN_46  | HD22, C_ASN_46  | 2.86 | 1.97 | 19.52 |
| 1VFB.PDB   | O, C_ASN_46    | N, C_ASP_48    | H, C_ASP_48     | 2.84 | 1.95 | 20.51 |
| 1VFB.PDB   | OG, C_SER_60   | N, C_THR_51    | H, C_THR_51     | 2.85 | 1.89 | 9.75  |
| 1VFB.PDB   | O, C_ASN_44    | N, C_ASP_52    | H, C_ASP_52     | 2.77 | 1.89 | 21.40 |
| 1VFB.PDB   | O, C_ILE_58    | N, C_TYR_53    | H, C_TYR_53     | 2.84 | 1.91 | 14.87 |
| 1VFB.PDB   | O, C_ALA_42    | N, C_GLY_54    | H, C_GLY_54     | 2.75 | 1.87 | 21.13 |
| 1VFB.PDB   | O, C_GLY_54    | NE2, C_GLN_57  | HE22, C_GLN_57  | 2.80 | 1.83 | 6.26  |
| 1VFB.PDB   | OG1, C_THR_69  | OG, C_SER_60   | HG, C_SER_60    | 2.78 | 1.84 | 10.98 |
| 1VFB.PDB   | O, C_PRO_70    | NE, C_ARG_61   | HE, C_ARG_61    | 2.72 | 1.91 | 27.72 |
| 1VFB.PDB   | O, C_ILE_78    | N, C_ASN_65    | H, C_ASN_65     | 2.88 | 1.94 | 12.38 |
| 1VFB.PDB   | O, C_SER_60    | OG, C_SER_72   | HG, C_SER_72    | 2.95 | 1.99 | 6.61  |
| 1VFB.PDB   | O, C_ARG_61    | N, C_ARG_73    | H, C_ARG_73     | 2.84 | 1.87 | 6.21  |
| 1VFB.PDB   | O, C_TRP_62    | N, C_LEU_75    | H, C_LEU_75     | 2.82 | 1.88 | 12.22 |
| 1VFB.PDB   | O, C_TRP_63    | N, C_CYS_76    | H, C_CYS_76     | 2.88 | 1.99 | 20.44 |
| 1VFB.PDB   | O, C_ASN_74    | N, C_ASN_77    | H, C_ASN_77     | 2.92 | 2.10 | 27.67 |
| 1VFB.PDB   | O, C_ASN_65    | N, C_CYS_80    | H, C_CYS_80     | 2.95 | 1.99 | 9.67  |
| 1VFB.PDB   | O, C_PRO_79    | N, C_ALA_82    | H, C_ALA_82     | 2.89 | 1.99 | 18.39 |
| 1VFB.PDB   | O, C_ILE_88    | N, C_VAL_92    | H, C_VAL_92     | 2.91 | 2.06 | 24.26 |
| 1VFB.PDB   | O, C_THR_89    | N, C_ASN_93    | H, C_ASN_93     | 2.88 | 1.92 | 8.98  |
| 1VFB.PDB   | O, C_VAL_92    | N, C_LYS_96    | H, C_LYS_96     | 2.88 | 1.94 | 14.28 |
| 1VFB.PDB   | O, C_ALA_95    | N, C_VAL_99    | H, C_VAL_99     | 2.93 | 2.05 | 20.53 |
| 1VFB.PDB   | O, C_ASP_101   | N, C_GLY_104   | H, C_GLY_104    | 2.99 | 2.10 | 19.98 |
| 1VFB.PDB   | O, C_LEU_56    | NE1, C_TRP_108 | HE1, C_TRP_108  | 2.75 | 1.86 | 21.02 |
| 1VFB.PDB   | OD1, C_ASN_27  | NE1, C_TRP_111 | HE1, C_TRP_111  | 2.95 | 2.01 | 14.04 |
| 1VFB.PDB   | O, C_VAL_109   | N, C_ASN_113   | H, C_ASN_113    | 2.97 | 2.00 | 6.92  |
| 1VFB.PDB   | O, C_ALA_110   | N, C_ARG_114   | H, C_ARG_114    | 2.73 | 1.86 | 21.81 |
| 1VFB.PDB   | O, C_TRP_111   | N, C_CYS_115   | H, C_CYS_115    | 2.84 | 1.99 | 24.09 |
| 1VFB.PDB   | O, C_TRP_111   | N, C_LYS_116   | H, C_LYS_116    | 2.81 | 1.93 | 20.73 |
| 1VFB.PDB   | O, C_CYS_115   | N, C_THR_118   | H, C_THR_118    | 2.99 | 2.13 | 23.03 |
| 1VFB.PDB   | O, C_CYS_115   | OG1, C_THR_118 | HG1, C_THR_118  | 2.73 | 1.80 | 11.89 |
| 1VFB.PDB   | O, C_THR_118   | N, C_VAL_120   | H, C_VAL_120    | 2.89 | 2.08 | 27.51 |
| 1VFB.PDB   | O, A_PHE_91    | NE2, C_GLN_121 | HE21, C_GLN_121 | 2.82 | 1.88 | 14.37 |
| 1VFB.PDB   | O, C_GLN_121   | N, C_ILE_124   | H, C_ILE_124    | 2.94 | 2.00 | 13.68 |
| 1VFB.PDB   | OE1, C_GLN_121 | NH1, C_ARG_125 | HH11, C_ARG_125 | 2.96 | 2.02 | 16.36 |
| 2MKL-1.PDB | O, C_VAL_32    | N, C_SER_8     | H, C_SER_8      | 2.87 | 1.94 | 15.13 |
| 2MKL-1.PDB | O, C_GLU_30    | N, C_SER_10    | H, C_SER_10     | 2.78 | 1.81 | 7.07  |
| 2MKL-1.PDB | O, C_VAL_28    | N, C_LEU_12    | H, C_LEU_12     | 2.85 | 1.96 | 21.36 |
| 2MKL-1.PDB | OXT, C_ALA_105 | NZ, C_LYS_13   | HZ3, C_LYS_13   | 2.65 | 1.63 | 10.83 |
| 2MKL-1.PDB | OD1, C_ASP_80  | OG1, C_THR_21  | HG1, C_THR_21   | 2.65 | 1.79 | 22.35 |
| 2MKL-1.PDB | OD2, C_ASP_80  | NE2, C_GLN_22  | HE21, C_GLN_22  | 2.86 | 1.96 | 18.61 |
| 2MKL-1.PDB | O, C_VAL_74    | OG1, C_THR_24  | HG1, C_THR_24   | 2.53 | 1.57 | 5.32  |
| 2MKL-1.PDB | O, C_LEU_72    | N, C_ILE_27    | H, C_ILE_27     | 2.90 | 1.93 | 8.25  |
| 2MKL-1.PDB | O, C_SER_70    | N, C_CYS_29    | H, C_CYS_29     | 2.74 | 1.79 | 13.45 |
| 2MKL-1.PDB | O, C_SER_10    | N, C_GLU_30    | H, C_GLU_30     | 2.74 | 1.77 | 7.68  |
| 2MKL-1.PDB | O, C_ILE_68    | N, C_ILE_31    | H, C_ILE_31     | 2.71 | 1.73 | 3.33  |
| 2MKL-1.PDB | O, C_SER_8     | N, C_VAL_32    | H, C_VAL_32     | 2.86 | 1.94 | 16.02 |
| 2MKL-1.PDB | O, C_SER_66    | N, C_TYR_33    | H, C_TYR_33     | 2.96 | 2.02 | 12.76 |



|             |               |               |                |      |      |       |
|-------------|---------------|---------------|----------------|------|------|-------|
| 2MKL-1.PDB  | O, C_GLU_90   | N, C_LYS_40   | H, C_LYS_40    | 2.75 | 1.77 | 6.32  |
| 2MKL-1.PDB  | O, C_LEU_88   | N, C_PHE_42   | H, C_PHE_42    | 2.83 | 1.96 | 23.06 |
| 2MKL-1.PDB  | O, C_VAL_86   | N, C_GLN_44   | H, C_GLN_44    | 2.98 | 2.06 | 17.99 |
| 2MKL-1.PDB  | O, C_VAL_48   | N, C_VAL_45   | H, C_VAL_45    | 2.89 | 1.93 | 11.14 |
| 2MKL-1.PDB  | O, C_VAL_45   | N, C_VAL_48   | H, C_VAL_48    | 2.85 | 1.96 | 20.78 |
| 2MKL-1.PDB  | O, C_TRP_43   | NH1, C_ARG_50 | HH11, C_ARG_50 | 2.73 | 1.80 | 17.42 |
| 2MKL-1.PDB  | O, C_LYS_71   | N, C_GLU_55   | H, C_GLU_55    | 2.87 | 2.01 | 24.71 |
| 2MKL-1.PDB  | O, C_VAL_69   | N, C_GLN_57   | H, C_GLN_57    | 2.76 | 1.79 | 7.63  |
| 2MKL-1.PDB  | O, C_THR_67   | N, C_GLU_60   | H, C_GLU_60    | 2.78 | 1.84 | 14.09 |
| 2MKL-1.PDB  | O, C_LYS_65   | N, C_SER_62   | H, C_SER_62    | 2.90 | 1.94 | 10.66 |
| 2MKL-1.PDB  | O, C_SER_62   | N, C_LYS_65   | H, C_LYS_65    | 2.95 | 2.06 | 20.90 |
| 2MKL-1.PDB  | OG, C_SER_34  | NZ, C_LYS_65  | HZ2, C_LYS_65  | 2.81 | 1.84 | 16.47 |
| 2MKL-1.PDB  | O, C_TYR_33   | N, C_SER_66   | H, C_SER_66    | 2.85 | 2.01 | 24.96 |
| 2MKL-1.PDB  | O, C_GLU_60   | N, C_THR_67   | H, C_THR_67    | 2.81 | 1.89 | 17.79 |
| 2MKL-1.PDB  | O, C_ILE_31   | N, C_ILE_68   | H, C_ILE_68    | 2.81 | 1.84 | 9.32  |
| 2MKL-1.PDB  | O, C_CYS_29   | N, C_SER_70   | H, C_SER_70    | 2.78 | 1.84 | 15.75 |
| 2MKL-1.PDB  | O, C_GLU_55   | N, C_LYS_71   | H, C_LYS_71    | 2.94 | 2.02 | 16.84 |
| 2MKL-1.PDB  | O, C_ILE_27   | N, C_LEU_72   | H, C_LEU_72    | 2.65 | 1.82 | 25.39 |
| 2MKL-1.PDB  | O, C_GLY_53   | N, C_LYS_73   | H, C_LYS_73    | 2.72 | 1.81 | 18.13 |
| 2MKL-1.PDB  | O, C_ALA_25   | NZ, C_LYS_73  | HZ3, C_LYS_73  | 2.77 | 1.77 | 11.66 |
| 2MKL-1.PDB  | O, C_ALA_76   | N, C_ASP_80   | H, C_ASP_80    | 2.69 | 1.74 | 10.81 |
| 2MKL-1.PDB  | O, C_GLU_78   | N, C_SER_81   | H, C_SER_81    | 2.94 | 2.13 | 29.26 |
| 2MKL-1.PDB  | O, C_TRP_79   | N, C_GLY_82   | H, C_GLY_82    | 2.98 | 2.06 | 17.42 |
| 2MKL-1.PDB  | OE1, C_GLU_78 | OG1, C_THR_83 | HG1, C_THR_83  | 2.66 | 1.70 | 8.48  |
| 2MKL-1.PDB  | O, C_ALA_100  | N, C_CYS_87   | H, C_CYS_87    | 2.70 | 1.74 | 9.85  |
| 2MKL-1.PDB  | O, C_PHE_42   | N, C_LEU_88   | H, C_LEU_88    | 2.74 | 1.76 | 6.64  |
| 2MKL-1.PDB  | O, C_VAL_98   | N, C_VAL_89   | H, C_VAL_89    | 2.86 | 1.96 | 19.19 |
| 2MKL-1.PDB  | O, C_LYS_40   | N, C_GLU_90   | H, C_GLU_90    | 2.85 | 1.91 | 13.13 |
| 2MKL-1.PDB  | OD2, C_ASP_91 | N, C_GLU_93   | H, C_GLU_93    | 2.91 | 2.06 | 25.41 |
| 2MKL-1.PDB  | O, C_ASP_91   | N, C_LEU_94   | H, C_LEU_94    | 2.97 | 2.04 | 16.30 |
| 2MKL-1.PDB  | O, C_CYS_87   | N, C_ALA_100  | H, C_ALA_100   | 2.87 | 2.07 | 29.58 |
| 2MKL-1.PDB  | O, C_TYR_85   | N, C_ILE_102  | H, C_ILE_102   | 2.75 | 1.93 | 27.29 |
| 2MKL-1.PDB  | OD1, C_ASP_80 | NZ, C_LYS_104 | HZ1, C_LYS_104 | 2.72 | 1.78 | 20.43 |
| 2MKL-1.PDB  | O, C_ASP_80   | NZ, C_LYS_104 | HZ3, C_LYS_104 | 2.71 | 1.81 | 23.71 |
| 2MKL-10.PDB | O, C_VAL_32   | N, C_SER_8    | H, C_SER_8     | 2.91 | 1.92 | 0.91  |
| 2MKL-10.PDB | O, C_GLU_30   | N, C_SER_10   | H, C_SER_10    | 2.77 | 1.80 | 6.96  |
| 2MKL-10.PDB | O, C_VAL_28   | N, C_LEU_12   | H, C_LEU_12    | 2.68 | 1.71 | 4.93  |
| 2MKL-10.PDB | O, C_PRO_15   | NE2, C_GLN_22 | HE21, C_GLN_22 | 2.70 | 1.72 | 5.44  |
| 2MKL-10.PDB | O, C_LEU_72   | OG1, C_THR_26 | HG1, C_THR_26  | 2.68 | 1.73 | 10.60 |
| 2MKL-10.PDB | O, C_LEU_72   | N, C_ILE_27   | H, C_ILE_27    | 2.84 | 2.02 | 27.43 |
| 2MKL-10.PDB | O, C_LEU_12   | N, C_VAL_28   | H, C_VAL_28    | 2.99 | 2.05 | 14.29 |
| 2MKL-10.PDB | O, C_SER_70   | N, C_CYS_29   | H, C_CYS_29    | 2.68 | 1.70 | 4.32  |
| 2MKL-10.PDB | O, C_SER_10   | N, C_GLU_30   | H, C_GLU_30    | 2.73 | 1.81 | 16.56 |
| 2MKL-10.PDB | O, C_SER_8    | N, C_VAL_32   | H, C_VAL_32    | 2.77 | 1.79 | 4.04  |
| 2MKL-10.PDB | O, C_SER_66   | N, C_TYR_33   | H, C_TYR_33    | 2.97 | 2.01 | 10.13 |
| 2MKL-10.PDB | OD1, C_ASP_91 | N, C_GLU_37   | H, C_GLU_37    | 2.80 | 1.93 | 22.75 |
| 2MKL-10.PDB | O, C_GLU_90   | N, C_LYS_40   | H, C_LYS_40    | 2.92 | 1.97 | 11.19 |
| 2MKL-10.PDB | OE2, C_GLU_90 | NZ, C_LYS_40  | HZ2, C_LYS_40  | 2.58 | 1.67 | 23.06 |
| 2MKL-10.PDB | O, C_LEU_88   | N, C_PHE_42   | H, C_PHE_42    | 2.92 | 1.94 | 6.40  |
| 2MKL-10.PDB | O, C_VAL_48   | N, C_VAL_45   | H, C_VAL_45    | 2.84 | 1.89 | 12.91 |
| 2MKL-10.PDB | O, C_VAL_45   | N, C_VAL_48   | H, C_VAL_48    | 2.85 | 2.01 | 25.64 |
| 2MKL-10.PDB | O, C_LYS_71   | N, C_GLU_55   | H, C_GLU_55    | 2.68 | 1.75 | 14.91 |
| 2MKL-10.PDB | O, C_VAL_69   | N, C_GLN_57   | H, C_GLN_57    | 2.86 | 1.90 | 10.97 |
| 2MKL-10.PDB | O, C_THR_67   | N, C_GLU_60   | H, C_GLU_60    | 2.97 | 2.01 | 8.51  |
| 2MKL-10.PDB | O, C_SER_62   | N, C_LYS_65   | H, C_LYS_65    | 2.88 | 1.95 | 14.30 |
| 2MKL-10.PDB | O, C_TYR_33   | N, C_SER_66   | H, C_SER_66    | 2.72 | 1.86 | 23.25 |
| 2MKL-10.PDB | OG, C_SER_62  | OG1, C_THR_67 | HG1, C_THR_67  | 2.83 | 1.88 | 6.13  |
| 2MKL-10.PDB | O, C_CYS_29   | N, C_SER_70   | H, C_SER_70    | 2.83 | 1.85 | 7.06  |

|             |                |               |                |      |      |       |
|-------------|----------------|---------------|----------------|------|------|-------|
| 2MKL-10.PDB | O, C_GLU_55    | N, C_LYS_71   | H, C_LYS_71    | 2.73 | 1.76 | 7.85  |
| 2MKL-10.PDB | O, C_ILE_27    | N, C_LEU_72   | H, C_LEU_72    | 2.69 | 1.71 | 7.54  |
| 2MKL-10.PDB | O, C_GLY_53    | N, C_LYS_73   | H, C_LYS_73    | 2.74 | 1.76 | 5.67  |
| 2MKL-10.PDB | O, C_ALA_76    | N, C_ASP_80   | H, C_ASP_80    | 2.74 | 1.79 | 12.95 |
| 2MKL-10.PDB | O, C_GLU_78    | N, C_SER_81   | H, C_SER_81    | 2.92 | 2.10 | 27.95 |
| 2MKL-10.PDB | O, C_TRP_79    | N, C_GLY_82   | H, C_GLY_82    | 2.95 | 2.02 | 15.81 |
| 2MKL-10.PDB | O, C_ALA_100   | N, C_CYS_87   | H, C_CYS_87    | 2.74 | 1.76 | 5.71  |
| 2MKL-10.PDB | O, C_PHE_42    | N, C_LEU_88   | H, C_LEU_88    | 2.71 | 1.75 | 9.91  |
| 2MKL-10.PDB | O, C_VAL_98    | N, C_VAL_89   | H, C_VAL_89    | 2.70 | 1.81 | 20.27 |
| 2MKL-10.PDB | O, C_LYS_40    | N, C_GLU_90   | H, C_GLU_90    | 2.78 | 1.93 | 24.87 |
| 2MKL-10.PDB | OD2, C_ASP_91  | N, C_GLU_93   | H, C_GLU_93    | 2.71 | 1.82 | 20.62 |
| 2MKL-10.PDB | O, C_VAL_89    | N, C_VAL_98   | H, C_VAL_98    | 2.95 | 1.97 | 2.47  |
| 2MKL-10.PDB | O, C_CYS_87    | N, C_ALA_100  | H, C_ALA_100   | 2.90 | 2.06 | 26.13 |
| 2MKL-10.PDB | O, C_TYR_85    | N, C_ILE_102  | H, C_ILE_102   | 2.78 | 1.86 | 16.84 |
| 2MKL-10.PDB | OXT, C_ALA_105 | NZ, C_LYS_104 | HZ3, C_LYS_104 | 2.68 | 1.72 | 17.77 |
| 2MKL-2.PDB  | OD1, C_ASP_6   | N, C_GLY_2    | H, C_GLY_2     | 2.76 | 1.77 | 3.72  |
| 2MKL-2.PDB  | O, C_ARG_3     | N, C_THR_5    | H, C_THR_5     | 2.70 | 1.90 | 29.18 |
| 2MKL-2.PDB  | O, C_VAL_32    | N, C_SER_8    | H, C_SER_8     | 2.91 | 1.93 | 2.96  |
| 2MKL-2.PDB  | O, C_GLU_30    | N, C_SER_10   | H, C_SER_10    | 2.85 | 1.91 | 14.14 |
| 2MKL-2.PDB  | O, C_VAL_28    | N, C_LEU_12   | H, C_LEU_12    | 2.67 | 1.73 | 13.23 |
| 2MKL-2.PDB  | OXT, C_ALA_105 | NZ, C_LYS_13  | HZ3, C_LYS_13  | 2.61 | 1.67 | 20.57 |
| 2MKL-2.PDB  | O, C_PRO_14    | N, C_PHE_16   | H, C_PHE_16    | 2.68 | 1.84 | 24.86 |
| 2MKL-2.PDB  | O, C_THR_24    | N, C_THR_26   | H, C_THR_26    | 2.87 | 2.01 | 23.54 |
| 2MKL-2.PDB  | O, C_LEU_72    | OG1, C_THR_26 | HG1, C_THR_26  | 2.63 | 1.69 | 10.64 |
| 2MKL-2.PDB  | O, C_LEU_72    | N, C_ILE_27   | H, C_ILE_27    | 2.90 | 2.08 | 27.91 |
| 2MKL-2.PDB  | O, C_SER_70    | N, C_CYS_29   | H, C_CYS_29    | 2.73 | 1.79 | 13.27 |
| 2MKL-2.PDB  | O, C_SER_10    | N, C_GLU_30   | H, C_GLU_30    | 2.88 | 1.96 | 17.58 |
| 2MKL-2.PDB  | O, C_ILE_68    | N, C_ILE_31   | H, C_ILE_31    | 2.87 | 1.90 | 7.16  |
| 2MKL-2.PDB  | O, C_SER_8     | N, C_VAL_32   | H, C_VAL_32    | 2.78 | 1.81 | 9.22  |
| 2MKL-2.PDB  | O, C_SER_66    | N, C_TYR_33   | H, C_TYR_33    | 2.94 | 2.00 | 12.67 |
| 2MKL-2.PDB  | OD1, C_ASP_35  | OG, C_SER_34  | HG, C_SER_34   | 2.77 | 1.81 | 5.76  |
| 2MKL-2.PDB  | O, C_GLU_90    | N, C_LYS_40   | H, C_LYS_40    | 2.89 | 1.95 | 12.75 |
| 2MKL-2.PDB  | O, C_LEU_88    | N, C_PHE_42   | H, C_PHE_42    | 2.81 | 1.85 | 8.44  |
| 2MKL-2.PDB  | O, C_VAL_48    | N, C_VAL_45   | H, C_VAL_45    | 2.78 | 1.87 | 17.34 |
| 2MKL-2.PDB  | O, C_VAL_45    | N, C_VAL_48   | H, C_VAL_48    | 2.84 | 2.02 | 27.01 |
| 2MKL-2.PDB  | OH, C_TYR_85   | NH1, C_ARG_50 | HH11, C_ARG_50 | 2.66 | 1.70 | 14.67 |
| 2MKL-2.PDB  | OE2, C_GLU_78  | NH1, C_ARG_50 | HH12, C_ARG_50 | 2.73 | 1.79 | 17.34 |
| 2MKL-2.PDB  | O, C_LYS_71    | N, C_GLU_55   | H, C_GLU_55    | 2.70 | 1.82 | 21.14 |
| 2MKL-2.PDB  | O, C_THR_67    | N, C_GLU_60   | H, C_GLU_60    | 2.77 | 1.81 | 9.91  |
| 2MKL-2.PDB  | O, C_SER_62    | N, C_LYS_65   | H, C_LYS_65    | 2.89 | 2.03 | 23.66 |
| 2MKL-2.PDB  | O, C_TYR_33    | N, C_SER_66   | H, C_SER_66    | 2.85 | 2.01 | 26.03 |
| 2MKL-2.PDB  | O, C_GLU_60    | N, C_THR_67   | H, C_THR_67    | 2.83 | 1.98 | 24.85 |
| 2MKL-2.PDB  | O, C_ILE_31    | N, C_ILE_68   | H, C_ILE_68    | 2.88 | 1.91 | 9.29  |
| 2MKL-2.PDB  | O, C_CYS_29    | N, C_SER_70   | H, C_SER_70    | 2.83 | 1.87 | 10.79 |
| 2MKL-2.PDB  | O, C_GLU_55    | N, C_LYS_71   | H, C_LYS_71    | 2.73 | 1.79 | 13.88 |
| 2MKL-2.PDB  | OE1, C_GLU_55  | NZ, C_LYS_71  | HZ1, C_LYS_71  | 2.72 | 1.71 | 11.97 |
| 2MKL-2.PDB  | O, C_ILE_27    | N, C_LEU_72   | H, C_LEU_72    | 2.68 | 1.70 | 2.15  |
| 2MKL-2.PDB  | O, C_GLY_53    | N, C_LYS_73   | H, C_LYS_73    | 2.69 | 1.73 | 8.58  |
| 2MKL-2.PDB  | O, C_ALA_76    | N, C_ASP_80   | H, C_ASP_80    | 2.99 | 2.07 | 17.02 |
| 2MKL-2.PDB  | O, C_SER_77    | OG, C_SER_81  | HG, C_SER_81   | 2.59 | 1.64 | 9.12  |
| 2MKL-2.PDB  | O, C_TRP_79    | N, C_GLY_82   | H, C_GLY_82    | 2.99 | 2.06 | 16.33 |
| 2MKL-2.PDB  | OD1, C_ASN_46  | OG1, C_THR_83 | HG1, C_THR_83  | 2.72 | 1.91 | 26.52 |
| 2MKL-2.PDB  | O, C_GLN_44    | N, C_VAL_86   | H, C_VAL_86    | 2.87 | 1.99 | 21.54 |
| 2MKL-2.PDB  | O, C_ALA_100   | N, C_CYS_87   | H, C_CYS_87    | 2.71 | 1.74 | 6.36  |
| 2MKL-2.PDB  | O, C_PHE_42    | N, C_LEU_88   | H, C_LEU_88    | 2.70 | 1.72 | 2.99  |
| 2MKL-2.PDB  | O, C_VAL_98    | N, C_VAL_89   | H, C_VAL_89    | 2.79 | 1.88 | 17.49 |
| 2MKL-2.PDB  | OD2, C_ASP_91  | N, C_GLU_93   | H, C_GLU_93    | 2.95 | 2.05 | 18.82 |
| 2MKL-2.PDB  | O, C_ASP_91    | N, C_LEU_94   | H, C_LEU_94    | 2.91 | 2.01 | 20.37 |

|            |                |               |                |      |      |       |
|------------|----------------|---------------|----------------|------|------|-------|
| 2MKL-2.PDB | O, C_VAL_89    | N, C_VAL_98   | H, C_VAL_98    | 2.92 | 1.98 | 13.93 |
| 2MKL-2.PDB | O, C_CYS_87    | N, C_ALA_100  | H, C_ALA_100   | 2.93 | 2.10 | 27.00 |
| 2MKL-2.PDB | O, C_TYR_85    | OG, C_SER_101 | HG, C_SER_101  | 2.98 | 2.03 | 8.67  |
| 2MKL-2.PDB | O, C_TYR_85    | N, C_ILE_102  | H, C_ILE_102   | 2.79 | 1.86 | 15.51 |
| 2MKL-3.PDB | OE1, C_GLU_93  | NH1, C_ARG_3  | HH12, C_ARG_3  | 2.68 | 1.70 | 11.24 |
| 2MKL-3.PDB | O, C_VAL_32    | N, C_SER_8    | H, C_SER_8     | 2.88 | 1.97 | 17.61 |
| 2MKL-3.PDB | O, C_GLU_30    | N, C_SER_10   | H, C_SER_10    | 2.89 | 1.92 | 6.89  |
| 2MKL-3.PDB | O, C_VAL_28    | N, C_LEU_12   | H, C_LEU_12    | 2.65 | 1.67 | 5.19  |
| 2MKL-3.PDB | OXT, C_ALA_105 | NZ, C_LYS_13  | HZ1, C_LYS_13  | 2.67 | 1.72 | 19.52 |
| 2MKL-3.PDB | O, C_TRP_20    | OG1, C_THR_21 | HG1, C_THR_21  | 2.91 | 1.97 | 13.27 |
| 2MKL-3.PDB | O, C_THR_24    | N, C_THR_26   | H, C_THR_26    | 2.76 | 1.91 | 24.64 |
| 2MKL-3.PDB | O, C_LEU_72    | OG1, C_THR_26 | HG1, C_THR_26  | 2.58 | 1.64 | 12.96 |
| 2MKL-3.PDB | O, C_SER_70    | N, C_CYS_29   | H, C_CYS_29    | 2.68 | 1.74 | 12.62 |
| 2MKL-3.PDB | O, C_SER_10    | N, C_GLU_30   | H, C_GLU_30    | 2.90 | 1.95 | 12.95 |
| 2MKL-3.PDB | O, C_ILE_68    | N, C_ILE_31   | H, C_ILE_31    | 2.92 | 1.94 | 7.65  |
| 2MKL-3.PDB | O, C_SER_8     | N, C_VAL_32   | H, C_VAL_32    | 2.84 | 1.90 | 14.60 |
| 2MKL-3.PDB | O, C_SER_66    | N, C_TYR_33   | H, C_TYR_33    | 2.81 | 1.86 | 12.33 |
| 2MKL-3.PDB | OD1, C_ASP_91  | N, C_GLU_37   | H, C_GLU_37    | 2.74 | 1.89 | 24.66 |
| 2MKL-3.PDB | O, C_GLU_90    | N, C_LYS_40   | H, C_LYS_40    | 2.97 | 1.99 | 6.05  |
| 2MKL-3.PDB | O, C_LEU_88    | N, C_PHE_42   | H, C_PHE_42    | 2.73 | 1.79 | 14.89 |
| 2MKL-3.PDB | OE2, C_GLU_84  | N, C_GLY_47   | H, C_GLY_47    | 2.89 | 2.08 | 28.18 |
| 2MKL-3.PDB | O, C_VAL_45    | N, C_VAL_48   | H, C_VAL_48    | 2.92 | 2.02 | 19.65 |
| 2MKL-3.PDB | O, C_LYS_71    | N, C_GLU_55   | H, C_GLU_55    | 2.68 | 1.79 | 20.49 |
| 2MKL-3.PDB | O, C_VAL_69    | N, C_GLN_57   | H, C_GLN_57    | 2.76 | 1.79 | 7.77  |
| 2MKL-3.PDB | O, C_GLY_63    | NE1, C_TRP_61 | HE1, C_TRP_61  | 2.71 | 1.80 | 19.18 |
| 2MKL-3.PDB | O, C_LYS_65    | N, C_SER_62   | H, C_SER_62    | 2.68 | 1.70 | 4.43  |
| 2MKL-3.PDB | O, C_SER_62    | N, C_LYS_65   | H, C_LYS_65    | 2.91 | 1.97 | 14.37 |
| 2MKL-3.PDB | OG, C_SER_34   | NZ, C_LYS_65  | HZ3, C_LYS_65  | 2.80 | 1.76 | 6.92  |
| 2MKL-3.PDB | O, C_TYR_33    | N, C_SER_66   | H, C_SER_66    | 2.69 | 1.79 | 19.81 |
| 2MKL-3.PDB | O, C_GLU_60    | N, C_THR_67   | H, C_THR_67    | 2.89 | 1.96 | 15.80 |
| 2MKL-3.PDB | O, C_ILE_31    | N, C_ILE_68   | H, C_ILE_68    | 2.71 | 1.77 | 14.66 |
| 2MKL-3.PDB | O, C_CYS_29    | N, C_SER_70   | H, C_SER_70    | 2.78 | 1.85 | 15.96 |
| 2MKL-3.PDB | O, C_GLU_55    | N, C_LYS_71   | H, C_LYS_71    | 2.82 | 1.90 | 15.66 |
| 2MKL-3.PDB | OE2, C_GLU_55  | NZ, C_LYS_71  | HZ1, C_LYS_71  | 2.64 | 1.59 | 1.73  |
| 2MKL-3.PDB | OG1, C_THR_26  | NZ, C_LYS_71  | HZ3, C_LYS_71  | 2.86 | 1.95 | 23.23 |
| 2MKL-3.PDB | O, C_ILE_27    | N, C_LEU_72   | H, C_LEU_72    | 2.71 | 1.73 | 2.63  |
| 2MKL-3.PDB | O, C_GLY_53    | N, C_LYS_73   | H, C_LYS_73    | 2.74 | 1.75 | 3.68  |
| 2MKL-3.PDB | O, C_ALA_76    | N, C_ASP_80   | H, C_ASP_80    | 2.72 | 1.79 | 14.15 |
| 2MKL-3.PDB | O, C_GLU_78    | N, C_SER_81   | H, C_SER_81    | 2.92 | 2.06 | 23.97 |
| 2MKL-3.PDB | O, C_TRP_79    | N, C_GLY_82   | H, C_GLY_82    | 2.95 | 2.01 | 14.70 |
| 2MKL-3.PDB | OD1, C_ASN_46  | OG1, C_THR_83 | HG1, C_THR_83  | 2.91 | 1.97 | 11.57 |
| 2MKL-3.PDB | O, C_ALA_100   | N, C_CYS_87   | H, C_CYS_87    | 2.69 | 1.73 | 11.27 |
| 2MKL-3.PDB | O, C_PHE_42    | N, C_LEU_88   | H, C_LEU_88    | 2.93 | 2.02 | 18.64 |
| 2MKL-3.PDB | O, C_VAL_98    | N, C_VAL_89   | H, C_VAL_89    | 2.70 | 1.79 | 17.71 |
| 2MKL-3.PDB | O, C_LYS_40    | N, C_GLU_90   | H, C_GLU_90    | 2.89 | 1.98 | 17.88 |
| 2MKL-3.PDB | OD2, C_ASP_91  | N, C_GLU_93   | H, C_GLU_93    | 2.68 | 1.74 | 15.47 |
| 2MKL-3.PDB | O, C_ASP_91    | N, C_LEU_94   | H, C_LEU_94    | 2.96 | 2.02 | 14.82 |
| 2MKL-3.PDB | O, C_VAL_89    | N, C_VAL_98   | H, C_VAL_98    | 2.70 | 1.73 | 7.23  |
| 2MKL-3.PDB | O, C_TYR_85    | N, C_ILE_102  | H, C_ILE_102   | 2.70 | 1.82 | 21.56 |
| 2MKL-3.PDB | OD1, C_ASP_80  | NZ, C_LYS_104 | HZ2, C_LYS_104 | 2.61 | 1.56 | 1.39  |
| 2MKL-4.PDB | OD1, C_ASP_6   | N, C_GLY_2    | H, C_GLY_2     | 2.67 | 1.68 | 4.84  |
| 2MKL-4.PDB | O, C_VAL_32    | N, C_SER_8    | H, C_SER_8     | 2.78 | 1.82 | 11.31 |
| 2MKL-4.PDB | O, C_GLU_30    | N, C_SER_10   | H, C_SER_10    | 2.90 | 2.00 | 20.41 |
| 2MKL-4.PDB | O, C_VAL_28    | N, C_LEU_12   | H, C_LEU_12    | 2.69 | 1.71 | 3.92  |
| 2MKL-4.PDB | O, C_ALA_105   | NZ, C_LYS_13  | HZ1, C_LYS_13  | 2.63 | 1.64 | 14.05 |
| 2MKL-4.PDB | OE1, C_GLU_17  | NE1, C_TRP_20 | HE1, C_TRP_20  | 2.69 | 1.70 | 6.61  |
| 2MKL-4.PDB | O, C_THR_24    | N, C_THR_26   | H, C_THR_26    | 2.90 | 2.07 | 26.74 |
| 2MKL-4.PDB | O, C_LEU_72    | OG1, C_THR_26 | HG1, C_THR_26  | 2.72 | 1.81 | 15.12 |

|            |               |               |                |      |      |       |
|------------|---------------|---------------|----------------|------|------|-------|
| 2MKL-4.PDB | O, C_SER.70   | N, C_CYS.29   | H, C_CYS.29    | 2.72 | 1.78 | 13.99 |
| 2MKL-4.PDB | O, C_SER.10   | N, C_GLU.30   | H, C_GLU.30    | 2.82 | 1.87 | 12.27 |
| 2MKL-4.PDB | O, C_ILE.68   | N, C_ILE.31   | H, C_ILE.31    | 2.81 | 1.83 | 5.53  |
| 2MKL-4.PDB | O, C_SER.8    | N, C_VAL.32   | H, C_VAL.32    | 2.75 | 1.77 | 3.26  |
| 2MKL-4.PDB | O, C_SER.66   | N, C_TYR.33   | H, C_TYR.33    | 2.94 | 1.97 | 7.56  |
| 2MKL-4.PDB | O, C_SER.64   | OG, C_SER.34  | HG, C_SER.34   | 2.77 | 1.80 | 1.75  |
| 2MKL-4.PDB | OE1, C_GLU.37 | ND2, C_ASN.38 | HD21, C_ASN.38 | 2.75 | 1.84 | 18.89 |
| 2MKL-4.PDB | O, C_LEU.88   | N, C_PHE.42   | H, C_PHE.42    | 2.69 | 1.73 | 9.14  |
| 2MKL-4.PDB | O, C_VAL.48   | N, C_VAL.45   | H, C_VAL.45    | 2.71 | 1.78 | 15.12 |
| 2MKL-4.PDB | OE1, C_GLU.84 | ND2, C_ASN.46 | HD21, C_ASN.46 | 2.79 | 1.87 | 17.49 |
| 2MKL-4.PDB | O, C_VAL.45   | N, C_VAL.48   | H, C_VAL.48    | 2.77 | 1.89 | 22.69 |
| 2MKL-4.PDB | OH, C_TYR.85  | NE, C_ARG.50  | HE, C_ARG.50   | 2.95 | 2.07 | 22.98 |
| 2MKL-4.PDB | OE1, C_GLU.78 | NH2, C_ARG.50 | HH21, C_ARG.50 | 2.70 | 1.74 | 15.78 |
| 2MKL-4.PDB | O, C_LYS.71   | N, C_GLU.55   | H, C_GLU.55    | 2.71 | 1.81 | 18.61 |
| 2MKL-4.PDB | O, C_VAL.69   | N, C_GLN.57   | H, C_GLN.57    | 2.73 | 1.78 | 11.53 |
| 2MKL-4.PDB | O, C_SER.62   | N, C_LYS.65   | H, C_LYS.65    | 2.84 | 1.85 | 4.44  |
| 2MKL-4.PDB | O, C_TYR.33   | N, C_SER.66   | H, C_SER.66    | 2.69 | 1.77 | 16.96 |
| 2MKL-4.PDB | O, C_ILE.31   | N, C_ILE.68   | H, C_ILE.68    | 2.81 | 1.88 | 14.11 |
| 2MKL-4.PDB | O, C_CYS.29   | N, C_SER.70   | H, C_SER.70    | 2.73 | 1.81 | 16.08 |
| 2MKL-4.PDB | O, C_GLU.55   | N, C_LYS.71   | H, C_LYS.71    | 2.71 | 1.78 | 13.91 |
| 2MKL-4.PDB | OE2, C_GLU.55 | NZ, C_LYS.71  | HZ1, C_LYS.71  | 2.65 | 1.66 | 15.29 |
| 2MKL-4.PDB | O, C_ILE.27   | N, C_LEU.72   | H, C_LEU.72    | 2.71 | 1.73 | 8.37  |
| 2MKL-4.PDB | O, C_GLY.53   | N, C_LYS.73   | H, C_LYS.73    | 2.76 | 1.78 | 6.24  |
| 2MKL-4.PDB | OE1, C_GLU.78 | N, C_MET.75   | H, C_MET.75    | 2.82 | 1.87 | 13.55 |
| 2MKL-4.PDB | O, C_ALA.76   | N, C_ASP.80   | H, C_ASP.80    | 2.90 | 2.02 | 21.07 |
| 2MKL-4.PDB | O, C_TRP.79   | N, C_GLY.82   | H, C_GLY.82    | 2.93 | 2.03 | 19.45 |
| 2MKL-4.PDB | O, C_ALA.100  | N, C_CYS.87   | H, C_CYS.87    | 2.67 | 1.71 | 9.36  |
| 2MKL-4.PDB | O, C_PHE.42   | N, C_LEU.88   | H, C_LEU.88    | 2.83 | 2.00 | 27.21 |
| 2MKL-4.PDB | O, C_VAL.98   | N, C_VAL.89   | H, C_VAL.89    | 2.69 | 1.75 | 13.90 |
| 2MKL-4.PDB | O, C_LYS.40   | N, C_GLU.90   | H, C_GLU.90    | 2.95 | 1.97 | 6.05  |
| 2MKL-4.PDB | OD2, C_ASP.91 | N, C_GLU.93   | H, C_GLU.93    | 2.83 | 1.95 | 21.47 |
| 2MKL-4.PDB | O, C_VAL.89   | N, C_VAL.98   | H, C_VAL.98    | 2.84 | 1.87 | 7.29  |
| 2MKL-4.PDB | O, C_TYR.85   | N, C_ILE.102  | H, C_ILE.102   | 2.72 | 1.78 | 13.87 |
| 2MKL-5.PDB | OG1, C_THR.5  | NE2, C_GLN.4  | HE21, C_GLN.4  | 2.80 | 1.92 | 21.71 |
| 2MKL-5.PDB | O, C_VAL.32   | N, C_SER.8    | H, C_SER.8     | 2.85 | 1.89 | 10.14 |
| 2MKL-5.PDB | O, C_GLU.30   | N, C_SER.10   | H, C_SER.10    | 2.70 | 1.73 | 5.85  |
| 2MKL-5.PDB | O, C_VAL.28   | N, C_LEU.12   | H, C_LEU.12    | 2.69 | 1.72 | 7.27  |
| 2MKL-5.PDB | O, C_ALA.105  | NZ, C_LYS.13  | HZ2, C_LYS.13  | 2.70 | 1.67 | 8.50  |
| 2MKL-5.PDB | O, C_LEU.72   | N, C_ILE.27   | H, C_ILE.27    | 2.84 | 2.03 | 28.89 |
| 2MKL-5.PDB | O, C_SER.70   | N, C_CYS.29   | H, C_CYS.29    | 2.69 | 1.72 | 7.41  |
| 2MKL-5.PDB | O, C_SER.10   | N, C_GLU.30   | H, C_GLU.30    | 2.79 | 1.82 | 7.58  |
| 2MKL-5.PDB | O, C_ILE.68   | N, C_ILE.31   | H, C_ILE.31    | 2.79 | 1.81 | 2.50  |
| 2MKL-5.PDB | O, C_SER.8    | N, C_VAL.32   | H, C_VAL.32    | 2.80 | 1.83 | 9.41  |
| 2MKL-5.PDB | O, C_SER.66   | N, C_TYR.33   | H, C_TYR.33    | 2.93 | 1.97 | 10.84 |
| 2MKL-5.PDB | OD1, C_ASP.35 | OG, C_SER.34  | HG, C_SER.34   | 2.85 | 1.91 | 12.30 |
| 2MKL-5.PDB | O, C_GLU.90   | N, C_LYS.40   | H, C_LYS.40    | 2.94 | 1.96 | 3.61  |
| 2MKL-5.PDB | O, C_LEU.88   | N, C_PHE.42   | H, C_PHE.42    | 2.90 | 1.95 | 11.88 |
| 2MKL-5.PDB | O, C_VAL.48   | N, C_VAL.45   | H, C_VAL.45    | 2.81 | 1.90 | 17.99 |
| 2MKL-5.PDB | O, C_VAL.45   | N, C_VAL.48   | H, C_VAL.48    | 2.85 | 1.99 | 24.39 |
| 2MKL-5.PDB | OE1, C_GLU.78 | NH2, C_ARG.50 | HH22, C_ARG.50 | 2.76 | 1.81 | 16.18 |
| 2MKL-5.PDB | O, C_LYS.71   | N, C_GLU.55   | H, C_GLU.55    | 2.78 | 1.82 | 12.33 |
| 2MKL-5.PDB | O, C_VAL.69   | N, C_GLN.57   | H, C_GLN.57    | 2.78 | 1.80 | 6.57  |
| 2MKL-5.PDB | O, C_THR.67   | N, C_GLU.60   | H, C_GLU.60    | 2.84 | 1.94 | 20.40 |
| 2MKL-5.PDB | O, C_SER.62   | N, C_SER.64   | H, C_SER.64    | 2.53 | 1.70 | 25.66 |
| 2MKL-5.PDB | OD2, C_ASP.6  | NZ, C_LYS.65  | HZ2, C_LYS.65  | 2.68 | 1.69 | 14.66 |
| 2MKL-5.PDB | O, C_TYR.33   | N, C_SER.66   | H, C_SER.66    | 2.80 | 1.91 | 20.20 |
| 2MKL-5.PDB | O, C_ILE.31   | N, C_ILE.68   | H, C_ILE.68    | 2.76 | 1.80 | 8.71  |
| 2MKL-5.PDB | O, C_CYS.29   | N, C_SER.70   | H, C_SER.70    | 2.77 | 1.81 | 10.20 |

|            |                |               |                |      |      |       |
|------------|----------------|---------------|----------------|------|------|-------|
| 2MKL-5.PDB | O, C_GLU_55    | N, C_LYS_71   | H, C_LYS_71    | 2.74 | 1.78 | 6.80  |
| 2MKL-5.PDB | O, C_ILE_27    | N, C_LEU_72   | H, C_LEU_72    | 2.68 | 1.70 | 3.69  |
| 2MKL-5.PDB | O, C_GLY_53    | N, C_LYS_73   | H, C_LYS_73    | 2.68 | 1.72 | 8.29  |
| 2MKL-5.PDB | O, C_ALA_76    | N, C_ASP_80   | H, C_ASP_80    | 2.74 | 1.77 | 7.96  |
| 2MKL-5.PDB | O, C_TRP_79    | N, C_GLY_82   | H, C_GLY_82    | 2.89 | 1.97 | 17.29 |
| 2MKL-5.PDB | OE2, C_GLU_78  | OG1, C_THR_83 | HG1, C_THR_83  | 2.81 | 1.87 | 12.01 |
| 2MKL-5.PDB | O, C_ALA_100   | N, C_CYS_87   | H, C_CYS_87    | 2.72 | 1.76 | 9.78  |
| 2MKL-5.PDB | O, C_PHE_42    | N, C_LEU_88   | H, C_LEU_88    | 2.71 | 1.74 | 7.08  |
| 2MKL-5.PDB | O, C_VAL_98    | N, C_VAL_89   | H, C_VAL_89    | 2.71 | 1.78 | 15.68 |
| 2MKL-5.PDB | OD2, C_ASP_91  | N, C_GLU_93   | H, C_GLU_93    | 2.93 | 2.06 | 22.91 |
| 2MKL-5.PDB | O, C_VAL_89    | N, C_VAL_98   | H, C_VAL_98    | 2.95 | 1.98 | 7.21  |
| 2MKL-5.PDB | O, C_CYS_87    | N, C_ALA_100  | H, C_ALA_100   | 2.91 | 2.10 | 28.19 |
| 2MKL-5.PDB | O, C_TYR_85    | N, C_ILE_102  | H, C_ILE_102   | 2.65 | 1.75 | 17.77 |
| 2MKL-5.PDB | OXT, C_ALA_105 | NZ, C_LYS_104 | HZ2, C_LYS_104 | 2.74 | 1.74 | 13.81 |
| 2MKL-6.PDB | O, C_VAL_32    | N, C_SER_8    | H, C_SER_8     | 2.70 | 1.80 | 19.33 |
| 2MKL-6.PDB | O, C_VAL_28    | N, C_LEU_12   | H, C_LEU_12    | 2.64 | 1.67 | 9.36  |
| 2MKL-6.PDB | OXT, C_ALA_105 | NZ, C_LYS_13  | HZ2, C_LYS_13  | 2.64 | 1.69 | 18.78 |
| 2MKL-6.PDB | OE2, C_GLU_17  | NZ, C_LYS_13  | HZ3, C_LYS_13  | 2.63 | 1.59 | 5.83  |
| 2MKL-6.PDB | O, C_VAL_74    | OG1, C_THR_24 | HG1, C_THR_24  | 2.63 | 1.68 | 6.20  |
| 2MKL-6.PDB | O, C_LEU_72    | N, C_ILE_27   | H, C_ILE_27    | 2.81 | 1.83 | 4.74  |
| 2MKL-6.PDB | O, C_SER_70    | N, C_CYS_29   | H, C_CYS_29    | 2.68 | 1.72 | 9.63  |
| 2MKL-6.PDB | O, C_SER_10    | N, C_GLU_30   | H, C_GLU_30    | 2.74 | 1.79 | 11.80 |
| 2MKL-6.PDB | O, C_SER_8     | N, C_VAL_32   | H, C_VAL_32    | 2.94 | 1.99 | 13.64 |
| 2MKL-6.PDB | O, C_SER_66    | N, C_TYR_33   | H, C_TYR_33    | 2.94 | 1.99 | 12.36 |
| 2MKL-6.PDB | OD2, C_ASP_91  | N, C_GLU_37   | H, C_GLU_37    | 2.93 | 1.96 | 8.54  |
| 2MKL-6.PDB | O, C_GLU_90    | N, C_LYS_40   | H, C_LYS_40    | 2.93 | 1.96 | 4.64  |
| 2MKL-6.PDB | O, C_LEU_88    | N, C_PHE_42   | H, C_PHE_42    | 2.84 | 1.91 | 15.28 |
| 2MKL-6.PDB | O, C_GLY_47    | NE2, C_GLN_44 | HE21, C_GLN_44 | 2.88 | 2.02 | 23.44 |
| 2MKL-6.PDB | O, C_VAL_48    | N, C_VAL_45   | H, C_VAL_45    | 2.83 | 1.89 | 14.07 |
| 2MKL-6.PDB | OE1, C_GLU_84  | ND2, C_ASN_46 | HD21, C_ASN_46 | 2.90 | 1.97 | 15.36 |
| 2MKL-6.PDB | O, C_VAL_45    | N, C_VAL_48   | H, C_VAL_48    | 2.91 | 2.02 | 21.18 |
| 2MKL-6.PDB | OE2, C_GLU_78  | NH2, C_ARG_50 | HH22, C_ARG_50 | 2.72 | 1.70 | 3.73  |
| 2MKL-6.PDB | O, C_LYS_71    | N, C_GLU_55   | H, C_GLU_55    | 2.82 | 1.99 | 26.45 |
| 2MKL-6.PDB | O, C_VAL_69    | N, C_GLN_57   | H, C_GLN_57    | 2.71 | 1.75 | 9.51  |
| 2MKL-6.PDB | O, C_THR_67    | N, C_GLU_60   | H, C_GLU_60    | 2.83 | 1.87 | 9.90  |
| 2MKL-6.PDB | O, C_LYS_65    | N, C_SER_62   | H, C_SER_62    | 2.99 | 2.02 | 8.78  |
| 2MKL-6.PDB | O, C_SER_62    | N, C_LYS_65   | H, C_LYS_65    | 2.93 | 2.00 | 16.12 |
| 2MKL-6.PDB | OD2, C_ASP_6   | NZ, C_LYS_65  | HZ3, C_LYS_65  | 2.59 | 1.63 | 17.95 |
| 2MKL-6.PDB | O, C_TYR_33    | N, C_SER_66   | H, C_SER_66    | 2.80 | 1.88 | 16.03 |
| 2MKL-6.PDB | O, C_GLU_60    | N, C_THR_67   | H, C_THR_67    | 2.90 | 2.10 | 28.48 |
| 2MKL-6.PDB | O, C_ILE_31    | N, C_ILE_68   | H, C_ILE_68    | 2.89 | 1.92 | 9.05  |
| 2MKL-6.PDB | O, C_CYS_29    | N, C_SER_70   | H, C_SER_70    | 2.88 | 1.94 | 13.67 |
| 2MKL-6.PDB | O, C_GLU_55    | N, C_LYS_71   | H, C_LYS_71    | 2.76 | 1.80 | 10.17 |
| 2MKL-6.PDB | OE2, C_GLU_55  | NZ, C_LYS_71  | HZ1, C_LYS_71  | 2.70 | 1.72 | 16.34 |
| 2MKL-6.PDB | O, C_ILE_27    | N, C_LEU_72   | H, C_LEU_72    | 2.65 | 1.75 | 19.43 |
| 2MKL-6.PDB | O, C_GLY_53    | N, C_LYS_73   | H, C_LYS_73    | 2.75 | 1.77 | 6.62  |
| 2MKL-6.PDB | O, C_ALA_76    | N, C_ASP_80   | H, C_ASP_80    | 2.70 | 1.73 | 7.99  |
| 2MKL-6.PDB | O, C_TRP_79    | N, C_GLY_82   | H, C_GLY_82    | 2.93 | 2.02 | 19.18 |
| 2MKL-6.PDB | OD1, C_ASN_46  | OG1, C_THR_83 | HG1, C_THR_83  | 2.65 | 1.71 | 11.83 |
| 2MKL-6.PDB | O, C_ALA_100   | N, C_CYS_87   | H, C_CYS_87    | 2.74 | 1.76 | 5.40  |
| 2MKL-6.PDB | O, C_PHE_42    | N, C_LEU_88   | H, C_LEU_88    | 2.76 | 1.79 | 7.22  |
| 2MKL-6.PDB | O, C_VAL_98    | N, C_VAL_89   | H, C_VAL_89    | 2.69 | 1.77 | 16.78 |
| 2MKL-6.PDB | O, C_VAL_89    | N, C_VAL_98   | H, C_VAL_98    | 2.99 | 2.01 | 1.37  |
| 2MKL-6.PDB | O, C_CYS_87    | N, C_ALA_100  | H, C_ALA_100   | 2.94 | 2.11 | 26.98 |
| 2MKL-6.PDB | O, C_TYR_85    | N, C_ILE_102  | H, C_ILE_102   | 2.75 | 1.80 | 12.64 |
| 2MKL-6.PDB | OD1, C_ASP_80  | NZ, C_LYS_104 | HZ1, C_LYS_104 | 2.64 | 1.71 | 20.84 |
| 2MKL-7.PDB | OD1, C_ASP_6   | NE, C_ARG_3   | HE, C_ARG_3    | 2.80 | 1.90 | 20.83 |
| 2MKL-7.PDB | OD2, C_ASP_6   | NE, C_ARG_3   | HE, C_ARG_3    | 2.95 | 2.13 | 27.86 |

|            |               |               |                |      |      |       |
|------------|---------------|---------------|----------------|------|------|-------|
| 2MKL-7.PDB | OD2, C_ASP_6  | NH2, C_ARG_3  | HH21, C_ARG_3  | 2.72 | 1.79 | 18.49 |
| 2MKL-7.PDB | O, C_GLY_2    | N, C_GLN_4    | H, C_GLN_4     | 2.91 | 2.07 | 25.29 |
| 2MKL-7.PDB | O, C_VAL_32   | N, C_SER_8    | H, C_SER_8     | 2.86 | 1.92 | 13.37 |
| 2MKL-7.PDB | O, C_GLU_30   | N, C_SER_10   | H, C_SER_10    | 2.76 | 1.78 | 0.59  |
| 2MKL-7.PDB | O, C_VAL_28   | N, C_LEU_12   | H, C_LEU_12    | 2.69 | 1.70 | 3.11  |
| 2MKL-7.PDB | O, C_PRO_14   | N, C_PHE_16   | H, C_PHE_16    | 2.65 | 1.73 | 16.96 |
| 2MKL-7.PDB | O, C_PHE_16   | N, C_GLU_18   | H, C_GLU_18    | 2.58 | 1.74 | 25.12 |
| 2MKL-7.PDB | O, C_PHE_16   | N, C_TRP_20   | H, C_TRP_20    | 2.98 | 2.12 | 23.41 |
| 2MKL-7.PDB | O, C_GLN_22   | N, C_THR_24   | H, C_THR_24    | 2.67 | 1.86 | 27.69 |
| 2MKL-7.PDB | O, C_LEU_72   | OG1, C_THR_26 | HG1, C_THR_26  | 2.61 | 1.71 | 16.80 |
| 2MKL-7.PDB | O, C_LEU_72   | N, C_ILE_27   | H, C_ILE_27    | 2.83 | 2.01 | 27.24 |
| 2MKL-7.PDB | O, C_SER_70   | N, C_CYS_29   | H, C_CYS_29    | 2.71 | 1.75 | 8.90  |
| 2MKL-7.PDB | O, C_SER_10   | N, C_GLU_30   | H, C_GLU_30    | 2.79 | 1.83 | 10.18 |
| 2MKL-7.PDB | O, C_ILE_68   | N, C_ILE_31   | H, C_ILE_31    | 2.98 | 2.00 | 2.29  |
| 2MKL-7.PDB | O, C_SER_8    | N, C_VAL_32   | H, C_VAL_32    | 2.74 | 1.76 | 3.52  |
| 2MKL-7.PDB | O, C_SER_66   | N, C_TYR_33   | H, C_TYR_33    | 2.95 | 2.00 | 12.03 |
| 2MKL-7.PDB | O, C_SER_64   | OG, C_SER_34  | HG, C_SER_34   | 2.66 | 1.69 | 4.53  |
| 2MKL-7.PDB | O, C_LEU_88   | N, C_PHE_42   | H, C_PHE_42    | 2.87 | 1.89 | 4.70  |
| 2MKL-7.PDB | O, C_VAL_45   | N, C_VAL_48   | H, C_VAL_48    | 2.96 | 2.07 | 20.95 |
| 2MKL-7.PDB | O, C_VAL_54   | NZ, C_LYS_52  | HZ1, C_LYS_52  | 2.71 | 1.68 | 7.22  |
| 2MKL-7.PDB | O, C_LYS_71   | N, C_GLU_55   | H, C_GLU_55    | 2.76 | 1.91 | 24.53 |
| 2MKL-7.PDB | O, C_VAL_69   | N, C_GLN_57   | H, C_GLN_57    | 2.73 | 1.77 | 10.49 |
| 2MKL-7.PDB | O, C_THR_67   | N, C_GLU_60   | H, C_GLU_60    | 2.81 | 1.87 | 13.84 |
| 2MKL-7.PDB | OE1, C_GLU_60 | N, C_TRP_61   | H, C_TRP_61    | 2.86 | 1.94 | 17.90 |
| 2MKL-7.PDB | O, C_LYS_65   | N, C_SER_62   | H, C_SER_62    | 2.88 | 1.90 | 4.45  |
| 2MKL-7.PDB | O, C_SER_62   | N, C_LYS_65   | H, C_LYS_65    | 2.88 | 1.96 | 16.75 |
| 2MKL-7.PDB | OD1, C_ASP_6  | NZ, C_LYS_65  | HZ2, C_LYS_65  | 2.61 | 1.57 | 4.07  |
| 2MKL-7.PDB | O, C_TYR_33   | N, C_SER_66   | H, C_SER_66    | 2.78 | 1.94 | 25.87 |
| 2MKL-7.PDB | O, C_GLU_60   | N, C_THR_67   | H, C_THR_67    | 2.69 | 1.81 | 21.94 |
| 2MKL-7.PDB | O, C_ILE_31   | N, C_ILE_68   | H, C_ILE_68    | 2.96 | 1.98 | 7.22  |
| 2MKL-7.PDB | O, C_CYS_29   | N, C_SER_70   | H, C_SER_70    | 2.75 | 1.80 | 11.18 |
| 2MKL-7.PDB | O, C_GLU_55   | N, C_LYS_71   | H, C_LYS_71    | 2.75 | 1.91 | 24.82 |
| 2MKL-7.PDB | O, C_ILE_27   | N, C_LEU_72   | H, C_LEU_72    | 2.67 | 1.73 | 13.09 |
| 2MKL-7.PDB | O, C_GLY_53   | N, C_LYS_73   | H, C_LYS_73    | 2.80 | 1.82 | 6.40  |
| 2MKL-7.PDB | OG1, C_THR_24 | NZ, C_LYS_73  | HZ1, C_LYS_73  | 2.79 | 1.84 | 19.74 |
| 2MKL-7.PDB | O, C_ALA_76   | N, C_ASP_80   | H, C_ASP_80    | 2.73 | 1.79 | 13.61 |
| 2MKL-7.PDB | O, C_GLU_78   | N, C_SER_81   | H, C_SER_81    | 2.92 | 2.09 | 26.88 |
| 2MKL-7.PDB | O, C_TRP_79   | N, C_GLY_82   | H, C_GLY_82    | 2.96 | 2.03 | 15.54 |
| 2MKL-7.PDB | OE2, C_GLU_78 | OG1, C_THR_83 | HG1, C_THR_83  | 2.59 | 1.64 | 9.74  |
| 2MKL-7.PDB | O, C_ALA_100  | N, C_CYS_87   | H, C_CYS_87    | 2.73 | 1.75 | 2.91  |
| 2MKL-7.PDB | O, C_PHE_42   | N, C_LEU_88   | H, C_LEU_88    | 2.67 | 1.75 | 17.26 |
| 2MKL-7.PDB | O, C_VAL_98   | N, C_VAL_89   | H, C_VAL_89    | 2.85 | 1.96 | 20.95 |
| 2MKL-7.PDB | OD2, C_ASP_91 | N, C_GLU_93   | H, C_GLU_93    | 2.83 | 1.89 | 14.21 |
| 2MKL-7.PDB | O, C_VAL_89   | N, C_VAL_98   | H, C_VAL_98    | 2.92 | 1.95 | 4.26  |
| 2MKL-7.PDB | O, C_CYS_87   | N, C_ALA_100  | H, C_ALA_100   | 2.86 | 2.03 | 26.56 |
| 2MKL-7.PDB | O, C_TYR_85   | N, C_ILE_102  | H, C_ILE_102   | 2.82 | 1.93 | 20.79 |
| 2MKL-7.PDB | O, C_ALA_105  | NZ, C_LYS_104 | HZ3, C_LYS_104 | 2.60 | 1.63 | 17.04 |
| 2MKL-8.PDB | O, C_VAL_32   | N, C_SER_8    | H, C_SER_8     | 2.76 | 1.79 | 7.90  |
| 2MKL-8.PDB | O, C_GLU_30   | N, C_SER_10   | H, C_SER_10    | 2.88 | 1.92 | 12.44 |
| 2MKL-8.PDB | O, C_VAL_28   | N, C_LEU_12   | H, C_LEU_12    | 2.63 | 1.65 | 4.98  |
| 2MKL-8.PDB | O, C_ALA_105  | NZ, C_LYS_13  | HZ2, C_LYS_13  | 2.61 | 1.57 | 5.41  |
| 2MKL-8.PDB | OE2, C_GLU_17 | N, C_GLU_18   | H, C_GLU_18    | 2.97 | 2.09 | 21.14 |
| 2MKL-8.PDB | O, C_LEU_72   | OG1, C_THR_26 | HG1, C_THR_26  | 2.97 | 2.06 | 16.54 |
| 2MKL-8.PDB | O, C_LEU_72   | N, C_ILE_27   | H, C_ILE_27    | 2.76 | 1.84 | 17.21 |
| 2MKL-8.PDB | O, C_SER_70   | N, C_CYS_29   | H, C_CYS_29    | 2.80 | 1.87 | 15.66 |
| 2MKL-8.PDB | O, C_SER_10   | N, C_GLU_30   | H, C_GLU_30    | 2.74 | 1.81 | 16.35 |
| 2MKL-8.PDB | O, C_ILE_68   | N, C_ILE_31   | H, C_ILE_31    | 2.87 | 1.90 | 7.35  |
| 2MKL-8.PDB | O, C_SER_8    | N, C_VAL_32   | H, C_VAL_32    | 2.73 | 1.75 | 6.64  |

|            |               |                |                 |      |      |       |
|------------|---------------|----------------|-----------------|------|------|-------|
| 2MKL-8.PDB | O, C_SER_64   | OG, C_SER_34   | HG, C_SER_34    | 2.72 | 1.87 | 22.15 |
| 2MKL-8.PDB | OD2, C_ASP_91 | N, C_ASN_38    | H, C_ASN_38     | 2.62 | 1.64 | 4.38  |
| 2MKL-8.PDB | O, C_GLU_37   | ND2, C_ASN_38  | HD21, C_ASN_38  | 2.58 | 1.65 | 16.81 |
| 2MKL-8.PDB | O, C_LEU_88   | N, C_PHE_42    | H, C_PHE_42     | 2.73 | 1.76 | 7.97  |
| 2MKL-8.PDB | OG, C_SER_70  | NE1, C_TRP_43  | HE1, C_TRP_43   | 2.82 | 1.83 | 2.10  |
| 2MKL-8.PDB | O, C_VAL_86   | N, C_GLN_44    | H, C_GLN_44     | 3.00 | 2.07 | 16.25 |
| 2MKL-8.PDB | O, C_VAL_48   | N, C_VAL_45    | H, C_VAL_45     | 2.73 | 1.82 | 17.50 |
| 2MKL-8.PDB | O, C_VAL_45   | N, C_VAL_48    | H, C_VAL_48     | 2.98 | 2.08 | 19.95 |
| 2MKL-8.PDB | OE2, C_GLU_78 | NH1, C_ARG_50  | HH12, C_ARG_50  | 2.63 | 1.62 | 3.58  |
| 2MKL-8.PDB | O, C_LYS_73   | NH2, C_ARG_50  | HH21, C_ARG_50  | 2.93 | 1.96 | 12.60 |
| 2MKL-8.PDB | O, C_GLU_49   | NZ, C_LYS_51   | HZ2, C_LYS_51   | 2.93 | 1.94 | 14.57 |
| 2MKL-8.PDB | O, C_LYS_71   | N, C_GLU_55    | H, C_GLU_55     | 2.75 | 1.82 | 14.98 |
| 2MKL-8.PDB | O, C_VAL_69   | N, C_GLN_57    | H, C_GLN_57     | 2.96 | 2.01 | 12.37 |
| 2MKL-8.PDB | O, C_THR_67   | N, C_GLU_60    | H, C_GLU_60     | 2.98 | 2.10 | 22.35 |
| 2MKL-8.PDB | O, C_SER_62   | N, C_LYS_65    | H, C_LYS_65     | 2.98 | 2.01 | 8.55  |
| 2MKL-8.PDB | OD2, C_ASP_6  | NZ, C_LYS_65   | HZ3, C_LYS_65   | 2.64 | 1.68 | 18.41 |
| 2MKL-8.PDB | O, C_TYR_33   | N, C_SER_66    | H, C_SER_66     | 2.73 | 1.81 | 16.99 |
| 2MKL-8.PDB | O, C_ILE_31   | N, C_ILE_68    | H, C_ILE_68     | 2.80 | 1.84 | 10.07 |
| 2MKL-8.PDB | O, C_CYS_29   | N, C_SER_70    | H, C_SER_70     | 2.86 | 1.88 | 5.47  |
| 2MKL-8.PDB | O, C_GLU_55   | N, C_LYS_71    | H, C_LYS_71     | 2.77 | 1.80 | 6.52  |
| 2MKL-8.PDB | O, C_ILE_27   | N, C_LEU_72    | H, C_LEU_72     | 2.69 | 1.74 | 12.28 |
| 2MKL-8.PDB | O, C_GLY_53   | N, C_LYS_73    | H, C_LYS_73     | 2.71 | 1.74 | 7.49  |
| 2MKL-8.PDB | O, C_ALA_25   | N, C_VAL_74    | H, C_VAL_74     | 2.97 | 2.03 | 14.41 |
| 2MKL-8.PDB | OE1, C_GLU_78 | N, C_MET_75    | H, C_MET_75     | 2.72 | 1.76 | 9.33  |
| 2MKL-8.PDB | O, C_ALA_76   | N, C_ASP_80    | H, C_ASP_80     | 2.65 | 1.71 | 13.15 |
| 2MKL-8.PDB | O, C_GLU_78   | N, C_SER_81    | H, C_SER_81     | 2.97 | 2.14 | 27.36 |
| 2MKL-8.PDB | O, C_SER_77   | OG, C_SER_81   | HG, C_SER_81    | 2.56 | 1.60 | 6.14  |
| 2MKL-8.PDB | O, C_TRP_79   | N, C_GLY_82    | H, C_GLY_82     | 2.98 | 2.06 | 16.79 |
| 2MKL-8.PDB | O, C_ALA_100  | N, C_CYS_87    | H, C_CYS_87     | 2.71 | 1.76 | 12.28 |
| 2MKL-8.PDB | O, C_PHE_42   | N, C_LEU_88    | H, C_LEU_88     | 2.77 | 1.80 | 5.62  |
| 2MKL-8.PDB | O, C_LYS_40   | N, C_GLU_90    | H, C_GLU_90     | 2.83 | 1.87 | 9.17  |
| 2MKL-8.PDB | OD1, C_ASP_91 | N, C_GLU_93    | H, C_GLU_93     | 2.62 | 1.67 | 12.30 |
| 2MKL-8.PDB | O, C_CYS_87   | N, C_ALA_100   | H, C_ALA_100    | 2.89 | 2.08 | 28.20 |
| 2MKL-8.PDB | O, C_TYR_85   | N, C_ILE_102   | H, C_ILE_102    | 2.83 | 1.93 | 19.99 |
| 2MKL-8.PDB | O, C_GLY_82   | NH1, C_ARG_103 | HH11, C_ARG_103 | 2.70 | 1.75 | 16.11 |
| 2MKL-8.PDB | OD1, C_ASP_80 | NZ, C_LYS_104  | HZ1, C_LYS_104  | 2.61 | 1.59 | 9.01  |
| 2MKL-9.PDB | OG1, C_THR_96 | N, C_MET_1     | H2, C_MET_1     | 2.76 | 1.75 | 11.34 |
| 2MKL-9.PDB | O, C_VAL_9    | OG, C_SER_10   | HG, C_SER_10    | 2.88 | 1.94 | 11.21 |
| 2MKL-9.PDB | O, C_VAL_28   | N, C_LEU_12    | H, C_LEU_12     | 2.61 | 1.63 | 7.07  |
| 2MKL-9.PDB | O, C_THR_24   | N, C_THR_26    | H, C_THR_26     | 2.89 | 2.03 | 23.40 |
| 2MKL-9.PDB | O, C_LEU_72   | OG1, C_THR_26  | HG1, C_THR_26   | 2.65 | 1.69 | 6.28  |
| 2MKL-9.PDB | O, C_LEU_72   | N, C_ILE_27    | H, C_ILE_27     | 2.89 | 2.04 | 24.93 |
| 2MKL-9.PDB | O, C_SER_70   | N, C_CYS_29    | H, C_CYS_29     | 2.74 | 1.78 | 9.84  |
| 2MKL-9.PDB | O, C_SER_10   | N, C_GLU_30    | H, C_GLU_30     | 2.88 | 1.91 | 6.77  |
| 2MKL-9.PDB | O, C_ILE_68   | N, C_ILE_31    | H, C_ILE_31     | 2.89 | 1.92 | 7.18  |
| 2MKL-9.PDB | O, C_SER_8    | N, C_VAL_32    | H, C_VAL_32     | 2.76 | 1.81 | 11.14 |
| 2MKL-9.PDB | O, C_SER_66   | N, C_TYR_33    | H, C_TYR_33     | 2.98 | 2.04 | 15.18 |
| 2MKL-9.PDB | O, C_LEU_88   | N, C_PHE_42    | H, C_PHE_42     | 2.92 | 1.99 | 16.26 |
| 2MKL-9.PDB | O, C_GLY_47   | NE2, C_GLN_44  | HE21, C_GLN_44  | 2.91 | 2.11 | 28.91 |
| 2MKL-9.PDB | O, C_VAL_48   | N, C_VAL_45    | H, C_VAL_45     | 2.81 | 1.87 | 13.63 |
| 2MKL-9.PDB | O, C_VAL_45   | N, C_VAL_48    | H, C_VAL_48     | 2.87 | 2.01 | 23.76 |
| 2MKL-9.PDB | OE2, C_GLU_78 | NH2, C_ARG_50  | HH22, C_ARG_50  | 2.68 | 1.69 | 8.63  |
| 2MKL-9.PDB | O, C_LYS_71   | N, C_GLU_55    | H, C_GLU_55     | 2.70 | 1.82 | 21.75 |
| 2MKL-9.PDB | O, C_THR_67   | N, C_GLU_60    | H, C_GLU_60     | 2.71 | 1.77 | 13.93 |
| 2MKL-9.PDB | O, C_LYS_65   | N, C_SER_62    | H, C_SER_62     | 2.85 | 1.92 | 15.49 |
| 2MKL-9.PDB | O, C_SER_62   | N, C_LYS_65    | H, C_LYS_65     | 2.77 | 1.83 | 13.89 |
| 2MKL-9.PDB | OD2, C_ASP_6  | NZ, C_LYS_65   | HZ2, C_LYS_65   | 2.75 | 1.71 | 7.05  |
| 2MKL-9.PDB | O, C_ILE_31   | N, C_ILE_68    | H, C_ILE_68     | 2.77 | 1.81 | 8.93  |

|            |                |                |                 |      |      |       |
|------------|----------------|----------------|-----------------|------|------|-------|
| 2MKL-9.PDB | O, C_CYS_29    | N, C_SER_70    | H, C_SER_70     | 2.85 | 1.87 | 7.34  |
| 2MKL-9.PDB | O, C_GLU_55    | N, C_LYS_71    | H, C_LYS_71     | 2.73 | 1.77 | 9.92  |
| 2MKL-9.PDB | O, C_ILE_27    | N, C_LEU_72    | H, C_LEU_72     | 2.68 | 1.70 | 5.96  |
| 2MKL-9.PDB | O, C_GLY_53    | N, C_LYS_73    | H, C_LYS_73     | 2.69 | 1.71 | 1.06  |
| 2MKL-9.PDB | O, C_ALA_76    | N, C_ASP_80    | H, C_ASP_80     | 2.94 | 2.03 | 18.41 |
| 2MKL-9.PDB | O, C_GLU_78    | N, C_SER_81    | H, C_SER_81     | 2.94 | 2.11 | 27.71 |
| 2MKL-9.PDB | O, C_TRP_79    | N, C_GLY_82    | H, C_GLY_82     | 2.94 | 2.01 | 15.71 |
| 2MKL-9.PDB | O, C_ALA_100   | N, C_CYS_87    | H, C_CYS_87     | 2.71 | 1.74 | 7.57  |
| 2MKL-9.PDB | O, C_PHE_42    | N, C_LEU_88    | H, C_LEU_88     | 2.76 | 1.77 | 3.30  |
| 2MKL-9.PDB | O, C_VAL_98    | N, C_VAL_89    | H, C_VAL_89     | 2.84 | 1.93 | 17.52 |
| 2MKL-9.PDB | OE2, C_GLU_37  | OG, C_SER_92   | HG, C_SER_92    | 3.00 | 2.20 | 28.49 |
| 2MKL-9.PDB | O, C_ASP_91    | N, C_LEU_94    | H, C_LEU_94     | 2.98 | 2.06 | 17.03 |
| 2MKL-9.PDB | O, C_CYS_87    | N, C_ALA_100   | H, C_ALA_100    | 2.97 | 2.14 | 27.19 |
| 2MKL-9.PDB | O, C_TYR_85    | OG, C_SER_101  | HG, C_SER_101   | 2.85 | 1.92 | 13.62 |
| 2MKL-9.PDB | O, C_TYR_85    | N, C_ILE_102   | H, C_ILE_102    | 2.74 | 1.79 | 13.03 |
| 2RLL.PDB   | O, A_PRO_8     | N, A_ASP_11    | H, A_ASP_11     | 2.97 | 2.17 | 28.89 |
| 3SE8.PDB   | OE2, G_GLU_91  | NE1, G_TRP_45  | HE1, G_TRP_45   | 2.78 | 2.03 | 24.08 |
| 3SE8.PDB   | OE1, G_GLN_103 | N, G_LEU_52    | H, G_LEU_52     | 2.91 | 2.05 | 3.20  |
| 3SE8.PDB   | O, G_HIS_216   | N, G_ALA_55    | H, G_ALA_55     | 2.90 | 2.11 | 20.01 |
| 3SE8.PDB   | O, G_VAL_75    | N, G_SER_56    | H, G_SER_56     | 2.97 | 2.22 | 24.79 |
| 3SE8.PDB   | OD1, G_ASN_67  | N, G_LYS_59    | H, G_LYS_59     | 2.79 | 1.96 | 12.33 |
| 3SE8.PDB   | O, G_SER_209   | N, G_VAL_65    | H, G_VAL_65     | 2.99 | 2.15 | 12.16 |
| 3SE8.PDB   | OE2, G_GLU_64  | N, G_HIS_66    | H, G_HIS_66     | 2.94 | 2.09 | 3.80  |
| 3SE8.PDB   | OE2, G_GLU_64  | ND1, G_HIS_66  | HD1, G_HIS_66   | 2.82 | 1.98 | 11.41 |
| 3SE8.PDB   | OE1, G_GLU_64  | N, G_ASN_67    | H, G_ASN_67     | 2.93 | 2.14 | 18.64 |
| 3SE8.PDB   | OE1, G_GLU_64  | ND2, G_ASN_67  | HD22, G_ASN_67  | 2.82 | 2.00 | 14.84 |
| 3SE8.PDB   | O, G_HIS_66    | N, G_ALA_70    | H, G_ALA_70     | 2.99 | 2.14 | 6.51  |
| 3SE8.PDB   | O, G_ASN_67    | N, G_THR_71    | H, G_THR_71     | 2.92 | 2.13 | 19.42 |
| 3SE8.PDB   | O, G_ALA_70    | N, G_CYS_74    | H, G_CYS_74     | 2.70 | 1.91 | 18.43 |
| 3SE8.PDB   | O, G_CYS_54    | N, G_VAL_75    | H, G_VAL_75     | 2.88 | 2.07 | 16.86 |
| 3SE8.PDB   | OD1, G_ASP_78  | N, G_ASN_80    | H, G_ASN_80     | 2.97 | 2.17 | 18.12 |
| 3SE8.PDB   | O, G_SER_244   | N, G_ILE_84    | H, G_ILE_84     | 2.94 | 2.12 | 14.64 |
| 3SE8.PDB   | O, G_VAL_242   | N, G_LEU_86    | H, G_LEU_86     | 2.80 | 1.94 | 0.64  |
| 3SE8.PDB   | O, G_CYS_239   | N, G_GLU_91    | H, G_GLU_91     | 2.91 | 2.11 | 18.25 |
| 3SE8.PDB   | O, G_GLY_237   | N, G_PHE_93    | H, G_PHE_93     | 2.87 | 2.06 | 15.53 |
| 3SE8.PDB   | O, G_GLY_235   | N, G_MET_95    | H, G_MET_95     | 2.80 | 1.96 | 10.44 |
| 3SE8.PDB   | O, G_ASN_94    | N, G_LYS_97    | H, G_LYS_97     | 2.95 | 2.11 | 10.82 |
| 3SE8.PDB   | O, G_ASN_98    | N, G_VAL_101   | H, G_VAL_101    | 2.85 | 2.03 | 14.99 |
| 3SE8.PDB   | O, G_THR_50    | NE2, G_GLN_103 | HE21, G_GLN_103 | 2.73 | 1.97 | 22.93 |
| 3SE8.PDB   | OD1, G_ASN_99  | NE2, G_GLN_103 | HE22, G_GLN_103 | 2.99 | 2.17 | 14.68 |
| 3SE8.PDB   | O, G_VAL_101   | N, G_GLN_105   | H, G_GLN_105    | 2.96 | 2.12 | 10.76 |
| 3SE8.PDB   | O, G_MET_104   | N, G_VAL_108   | H, G_VAL_108    | 2.93 | 2.11 | 15.74 |
| 3SE8.PDB   | O, G_GLN_105   | N, G_ILE_109   | H, G_ILE_109    | 2.97 | 2.12 | 7.19  |
| 3SE8.PDB   | O, G_GLU_106   | N, G_SER_110   | H, G_SER_110    | 2.87 | 2.05 | 13.15 |
| 3SE8.PDB   | O, G_ASP_107   | N, G_LEU_111   | H, G_LEU_111    | 2.87 | 2.07 | 18.28 |
| 3SE8.PDB   | O, G_VAL_108   | N, G_TRP_112   | H, G_TRP_112    | 2.94 | 2.10 | 9.73  |
| 3SE8.PDB   | O, G_ILE_109   | N, G_ASP_113   | H, G_ASP_113    | 2.91 | 2.13 | 20.04 |
| 3SE8.PDB   | O, G_TRP_112   | N, G_LEU_116   | H, G_LEU_116    | 2.87 | 2.03 | 11.15 |
| 3SE8.PDB   | O, G_ILE_201   | N, G_LYS_121   | H, G_LYS_121    | 2.84 | 2.08 | 23.60 |
| 3SE8.PDB   | O, G_GLN_432   | N, G_LEU_122   | H, G_LEU_122    | 2.84 | 1.98 | 3.70  |
| 3SE8.PDB   | OE2, G_GLU_381 | NZ, G_LYS_207  | HZ2, G_LYS_207  | 2.74 | 1.86 | 4.82  |
| 3SE8.PDB   | OE2, G_GLU_64  | N, G_ASP_211   | H, G_ASP_211    | 2.86 | 2.06 | 17.85 |
| 3SE8.PDB   | O, G_ILE_251   | N, G_ILE_215   | H, G_ILE_215    | 2.86 | 2.03 | 14.34 |
| 3SE8.PDB   | O, G_ALA_55    | N, G_HIS_216   | H, G_HIS_216    | 2.88 | 2.03 | 9.08  |
| 3SE8.PDB   | O, G_THR_248   | ND1, G_HIS_216 | HD1, G_HIS_216  | 2.90 | 2.07 | 13.28 |
| 3SE8.PDB   | O, G_PHE_53    | N, G_CYS_218   | H, G_CYS_218    | 2.89 | 2.13 | 22.85 |
| 3SE8.PDB   | O, G_VAL_489   | N, G_VAL_224   | H, G_VAL_224    | 2.98 | 2.17 | 16.77 |
| 3SE8.PDB   | O, G_LYS_487   | N, G_LEU_226   | H, G_LEU_226    | 2.72 | 1.91 | 15.99 |



|          |                |                |                 |      |      |       |
|----------|----------------|----------------|-----------------|------|------|-------|
| 3SE8.PDB | O, G_SER_243   | N, G_LYS_227   | H, G_LYS_227    | 2.80 | 1.97 | 12.53 |
| 3SE8.PDB | O, G_LYS_485   | N, G_CYS_228   | H, G_CYS_228    | 2.74 | 1.93 | 16.67 |
| 3SE8.PDB | O, G_ASN_241   | N, G_ASN_229   | H, G_ASN_229    | 2.73 | 1.90 | 11.23 |
| 3SE8.PDB | O, G_GLU_91    | N, G_CYS_239   | H, G_CYS_239    | 2.59 | 1.79 | 18.72 |
| 3SE8.PDB | OD2, G_ASP_230 | N, G_LYS_240   | H, G_LYS_240    | 2.98 | 2.13 | 6.94  |
| 3SE8.PDB | OD1, G_ASP_230 | N, G_ASN_241   | H, G_ASN_241    | 2.67 | 1.87 | 17.74 |
| 3SE8.PDB | O, G_LYS_227   | N, G_SER_243   | H, G_SER_243    | 2.97 | 2.15 | 15.16 |
| 3SE8.PDB | OE2, G_GLU_83  | OG, G_SER_243  | HG, G_SER_243   | 2.64 | 1.83 | 7.57  |
| 3SE8.PDB | O, G_ILE_84    | N, G_SER_244   | H, G_SER_244    | 2.68 | 1.89 | 18.10 |
| 3SE8.PDB | O, G_ILE_225   | N, G_VAL_245   | H, G_VAL_245    | 2.90 | 2.07 | 10.51 |
| 3SE8.PDB | O, G_TYR_217   | N, G_THR_248   | H, G_THR_248    | 2.72 | 1.92 | 16.92 |
| 3SE8.PDB | OH, G_TYR_486  | ND1, G_HIS_249 | HD1, G_HIS_249  | 2.64 | 1.81 | 12.83 |
| 3SE8.PDB | OE1, G_GLU_482 | NE2, G_HIS_249 | HE2, G_HIS_249  | 3.00 | 2.16 | 9.93  |
| 3SE8.PDB | O, G_ILE_215   | N, G_ILE_251   | H, G_ILE_251    | 2.96 | 2.12 | 9.55  |
| 3SE8.PDB | O, G_HIS_375   | N, G_THR_257   | H, G_THR_257    | 2.97 | 2.23 | 26.05 |
| 3SE8.PDB | O, G_THR_257   | N, G_LEU_259   | H, G_LEU_259    | 2.81 | 2.06 | 25.63 |
| 3SE8.PDB | O, G_GLY_451   | N, G_LEU_260   | H, G_LEU_260    | 2.87 | 2.03 | 11.95 |
| 3SE8.PDB | O, G_ASN_448   | N, G_ASN_262   | H, G_ASN_262    | 2.71 | 1.88 | 12.07 |
| 3SE8.PDB | OE2, G_GLU_482 | N, G_SER_264   | H, G_SER_264    | 2.73 | 1.91 | 13.91 |
| 3SE8.PDB | O, G_LEU_288   | N, G_ALA_266   | H, G_ALA_266    | 2.78 | 2.00 | 20.85 |
| 3SE8.PDB | O, G_ILE_285   | N, G_ARG_273   | H, G_ARG_273    | 2.79 | 1.98 | 16.42 |
| 3SE8.PDB | O, G_PHE_233   | NH2, G_ARG_273 | HH22, G_ARG_273 | 2.82 | 2.02 | 18.59 |
| 3SE8.PDB | O, G_ASN_276   | N, G_ASN_279   | H, G_ASN_279    | 2.78 | 1.96 | 14.69 |
| 3SE8.PDB | OD1, G_ASN_279 | N, G_ALA_281   | H, G_ALA_281    | 2.86 | 2.06 | 17.39 |
| 3SE8.PDB | O, G_LEU_454   | N, G_ILE_284   | H, G_ILE_284    | 2.84 | 1.98 | 2.93  |
| 3SE8.PDB | O, G_ARG_273   | N, G_ILE_285   | H, G_ILE_285    | 2.70 | 1.87 | 12.33 |
| 3SE8.PDB | O, G_ILE_452   | N, G_VAL_286   | H, G_VAL_286    | 2.88 | 2.04 | 10.30 |
| 3SE8.PDB | O, G_ILE_271   | N, G_HIS_287   | H, G_HIS_287    | 2.82 | 1.96 | 3.43  |
| 3SE8.PDB | O, G_SER_264   | NE2, G_HIS_287 | HE2, G_HIS_287  | 2.67 | 1.83 | 10.99 |
| 3SE8.PDB | O, G_SER_447   | N, G_ILE_294   | H, G_ILE_294    | 2.75 | 1.94 | 17.22 |
| 3SE8.PDB | O, G_GLU_332   | N, G_ASN_295   | H, G_ASN_295    | 2.93 | 2.13 | 18.46 |
| 3SE8.PDB | O, G_TYR_330   | N, G_THR_297   | H, G_THR_297    | 2.85 | 2.02 | 13.88 |
| 3SE8.PDB | O, G_ILE_443   | N, G_ARG_298   | H, G_ARG_298    | 2.74 | 1.91 | 12.06 |
| 3SE8.PDB | O, G_ILE_326   | NH1, G_ARG_298 | HH11, G_ARG_298 | 2.83 | 2.00 | 11.83 |
| 3SE8.PDB | O, G_GLY_441   | NH2, G_ARG_298 | HH21, G_ARG_298 | 2.55 | 1.70 | 4.64  |
| 3SE8.PDB | O, G_ILE_439   | NH2, G_ARG_298 | HH22, G_ARG_298 | 2.90 | 2.10 | 18.34 |
| 3SE8.PDB | O, G_CYS_418   | N, G_ALA_329   | H, G_ALA_329    | 2.90 | 2.06 | 11.88 |
| 3SE8.PDB | O, G_LEU_416   | N, G_CYS_331   | H, G_CYS_331    | 2.98 | 2.19 | 20.31 |
| 3SE8.PDB | O, G_ASN_295   | N, G_GLU_332   | H, G_GLU_332    | 2.74 | 1.92 | 15.11 |
| 3SE8.PDB | O, G_ILE_414   | N, G_ILE_333   | H, G_ILE_333    | 2.90 | 2.08 | 15.80 |
| 3SE8.PDB | O, G_GLY_412   | N, G_GLY_335   | H, G_GLY_335    | 2.61 | 1.86 | 25.24 |
| 3SE8.PDB | OD1, G_ASN_334 | N, G_LYS_337   | H, G_LYS_337    | 2.85 | 2.02 | 13.75 |
| 3SE8.PDB | O, G_ASN_334   | N, G_TRP_338   | H, G_TRP_338    | 2.85 | 2.04 | 16.18 |
| 3SE8.PDB | O, G_LEU_390   | NE1, G_TRP_338 | HE1, G_TRP_338  | 2.58 | 1.76 | 15.13 |
| 3SE8.PDB | O, G_GLY_335   | N, G_ASN_339   | H, G_ASN_339    | 2.74 | 1.88 | 4.81  |
| 3SE8.PDB | O, G_TRP_338   | N, G_LEU_342   | H, G_LEU_342    | 2.77 | 1.94 | 11.71 |
| 3SE8.PDB | O, G_VAL_341   | N, G_VAL_345   | H, G_VAL_345    | 2.89 | 2.13 | 23.16 |
| 3SE8.PDB | O, G_LEU_342   | N, G_THR_346   | H, G_THR_346    | 2.94 | 2.12 | 14.67 |
| 3SE8.PDB | O, G_LYS_343   | OG1, G_THR_346 | HG1, G_THR_346  | 2.65 | 1.92 | 23.05 |
| 3SE8.PDB | O, G_LYS_343   | N, G_GLU_347   | H, G_GLU_347    | 3.00 | 2.22 | 21.50 |
| 3SE8.PDB | O, G_GLN_344   | N, G_LYS_348   | H, G_LYS_348    | 2.99 | 2.19 | 18.12 |
| 3SE8.PDB | OE2, G_GLU_269 | NZ, G_LYS_348  | HZ1, G_LYS_348  | 2.90 | 2.14 | 25.94 |
| 3SE8.PDB | OE1, G_GLU_351 | NZ, G_LYS_348  | HZ3, G_LYS_348  | 2.96 | 2.10 | 14.00 |
| 3SE8.PDB | O, G_VAL_345   | N, G_LEU_349   | H, G_LEU_349    | 2.94 | 2.12 | 15.13 |
| 3SE8.PDB | O, G_LYS_350   | N, G_ASN_355   | H, G_ASN_355    | 2.97 | 2.13 | 9.29  |
| 3SE8.PDB | O, G_PHE_353   | N, G_LYS_357   | H, G_LYS_357    | 2.81 | 1.95 | 2.88  |
| 3SE8.PDB | OD1, G_ASN_393 | N, G_PHE_361   | H, G_PHE_361    | 2.89 | 2.04 | 5.90  |
| 3SE8.PDB | O, G_PHE_468   | N, G_GLN_362   | H, G_GLN_362    | 2.83 | 2.01 | 15.06 |

|          |                |                |                 |      |      |       |
|----------|----------------|----------------|-----------------|------|------|-------|
| 3SE8.PDB | O, H_TRP_54    | N, G_ASP_368   | H, G_ASP_368    | 2.75 | 1.91 | 10.72 |
| 3SE8.PDB | O, G_LEU_369   | N, G_MET_373   | H, G_MET_373    | 3.00 | 2.23 | 22.44 |
| 3SE8.PDB | O, G_CYS_385   | N, G_HIS_374   | H, G_HIS_374    | 2.81 | 2.03 | 21.55 |
| 3SE8.PDB | O, G_THR_257   | ND1, G_HIS_374 | HD1, G_HIS_374  | 2.91 | 2.06 | 7.53  |
| 3SE8.PDB | O, G_PHE_383   | ND1, G_HIS_375 | HD1, G_HIS_375  | 2.96 | 2.19 | 22.53 |
| 3SE8.PDB | O, G_GLU_381   | N, G_CYS_378   | H, G_CYS_378    | 2.90 | 2.12 | 21.09 |
| 3SE8.PDB | O, G_CYS_378   | N, G_GLU_381   | H, G_GLU_381    | 2.88 | 2.03 | 7.72  |
| 3SE8.PDB | O, G_PHE_376   | N, G_PHE_383   | H, G_PHE_383    | 2.77 | 1.95 | 13.43 |
| 3SE8.PDB | O, G_HIS_374   | N, G_CYS_385   | H, G_CYS_385    | 2.80 | 1.98 | 13.95 |
| 3SE8.PDB | OD1, G_ASN_386 | N, G_THR_388   | H, G_THR_388    | 2.94 | 2.09 | 9.87  |
| 3SE8.PDB | O, G_THR_387   | N, G_LEU_390   | H, G_LEU_390    | 2.83 | 2.03 | 19.01 |
| 3SE8.PDB | O, G_PHE_361   | ND2, G_ASN_393 | HD22, G_ASN_393 | 2.82 | 1.99 | 12.21 |
| 3SE8.PDB | OD1, G_ASN_392 | N, G_THR_394   | H, G_THR_394    | 2.97 | 2.24 | 26.64 |
| 3SE8.PDB | O, G_ILE_333   | N, G_ILE_414   | H, G_ILE_414    | 2.79 | 2.00 | 18.93 |
| 3SE8.PDB | O, G_CYS_331   | N, G_LEU_416   | H, G_LEU_416    | 2.80 | 2.05 | 24.46 |
| 3SE8.PDB | O, G_ALA_329   | N, G_CYS_418   | H, G_CYS_418    | 2.89 | 2.04 | 8.98  |
| 3SE8.PDB | O, G_TYR_384   | N, G_LYS_419   | H, G_LYS_419    | 2.92 | 2.14 | 22.08 |
| 3SE8.PDB | O, G_ARG_327   | N, G_ILE_420   | H, G_ILE_420    | 2.82 | 2.00 | 14.23 |
| 3SE8.PDB | O, G_ALA_433   | N, G_ILE_424   | H, G_ILE_424    | 2.88 | 2.06 | 14.47 |
| 3SE8.PDB | OE2, G_GLU_370 | N, G_ASN_425   | H, G_ASN_425    | 2.74 | 1.89 | 6.23  |
| 3SE8.PDB | O, G_GLY_431   | N, G_MET_426   | H, G_MET_426    | 2.76 | 1.90 | 1.16  |
| 3SE8.PDB | O, G_MET_426   | N, G_GLY_429   | H, G_GLY_429    | 2.90 | 2.07 | 12.32 |
| 3SE8.PDB | O, G_ILE_424   | N, G_ALA_433   | H, G_ALA_433    | 2.84 | 2.01 | 13.80 |
| 3SE8.PDB | O, G_VAL_120   | N, G_MET_434   | H, G_MET_434    | 2.89 | 2.08 | 16.32 |
| 3SE8.PDB | O, G_GLN_422   | N, G_TYR_435   | H, G_TYR_435    | 2.70 | 1.89 | 15.98 |
| 3SE8.PDB | OD1, G_ASN_295 | ND2, G_ASN_444 | HD21, G_ASN_444 | 2.87 | 2.12 | 25.11 |
| 3SE8.PDB | OG1, G_THR_297 | ND2, G_ASN_444 | HD22, G_ASN_444 | 2.77 | 1.99 | 20.73 |
| 3SE8.PDB | O, G_ILE_294   | N, G_SER_447   | H, G_SER_447    | 2.93 | 2.10 | 11.64 |
| 3SE8.PDB | O, G_LEU_260   | N, G_THR_450   | H, G_THR_450    | 2.91 | 2.08 | 13.27 |
| 3SE8.PDB | O, G_VAL_286   | N, G_ILE_452   | H, G_ILE_452    | 3.00 | 2.20 | 19.52 |
| 3SE8.PDB | O, G_GLN_258   | N, G_LEU_453   | H, G_LEU_453    | 2.85 | 2.00 | 5.65  |
| 3SE8.PDB | O, G_ILE_284   | N, G_LEU_454   | H, G_LEU_454    | 2.99 | 2.16 | 13.70 |
| 3SE8.PDB | O, G_ARG_469   | N, G_THR_455   | H, G_THR_455    | 2.90 | 2.07 | 11.48 |
| 3SE8.PDB | O, G_THR_467   | N, G_ASP_457   | H, G_ASP_457    | 2.94 | 2.11 | 12.90 |
| 3SE8.PDB | OE2, L_GLU_96  | N, G_GLY_459   | H, G_GLY_459    | 2.81 | 1.99 | 15.35 |
| 3SE8.PDB | O, G_THR_358   | N, G_GLU_466   | H, G_GLU_466    | 2.85 | 2.09 | 22.90 |
| 3SE8.PDB | O, G_ILE_360   | N, G_PHE_468   | H, G_PHE_468    | 2.81 | 2.00 | 17.29 |
| 3SE8.PDB | O, G_THR_455   | N, G_ARG_469   | H, G_ARG_469    | 2.91 | 2.11 | 19.07 |
| 3SE8.PDB | OD2, G_ASP_457 | NE, G_ARG_469  | HE, G_ARG_469   | 2.90 | 2.06 | 8.93  |
| 3SE8.PDB | O, G_PRO_363   | NH1, G_ARG_469 | HH11, G_ARG_469 | 2.85 | 2.03 | 15.65 |
| 3SE8.PDB | OD1, G_ASP_457 | NH2, G_ARG_469 | HH21, G_ARG_469 | 2.93 | 2.11 | 16.29 |
| 3SE8.PDB | O, G_ASN_474   | N, G_ASP_477   | H, G_ASP_477    | 2.86 | 2.03 | 13.09 |
| 3SE8.PDB | OE1, G_GLN_105 | NE1, G_TRP_479 | HE1, G_TRP_479  | 2.68 | 1.92 | 22.70 |
| 3SE8.PDB | O, G_LYS_476   | N, G_ARG_480   | H, G_ARG_480    | 2.90 | 2.07 | 12.50 |
| 3SE8.PDB | O, G_ASP_477   | N, G_SER_481   | H, G_SER_481    | 2.99 | 2.24 | 26.03 |
| 3SE8.PDB | O, G_TRP_479   | N, G_LEU_483   | H, G_LEU_483    | 2.88 | 2.12 | 23.01 |
| 3SE8.PDB | O, G_LEU_226   | N, G_LYS_487   | H, G_LYS_487    | 2.94 | 2.15 | 19.58 |
| 3SE8.PDB | OE1, G_GLU_91  | NZ, G_LYS_487  | HZ1, G_LYS_487  | 2.58 | 1.77 | 20.55 |
| 3SE8.PDB | OD1, G_ASP_47  | NZ, G_LYS_487  | HZ2, G_LYS_487  | 2.90 | 2.08 | 19.02 |
| 3SE8.PDB | O, G_ASN_92    | NZ, G_LYS_487  | HZ3, G_LYS_487  | 2.95 | 2.08 | 10.80 |
| 3SE8.PDB | O, G_VAL_224   | N, G_VAL_489   | H, G_VAL_489    | 2.91 | 2.06 | 7.65  |
| 3SE8.PDB | O, G_LYS_46    | N, G_GLN_490   | H, G_GLN_490    | 2.88 | 2.05 | 12.76 |
| 3SE8.PDB | O, H_SER_25    | N, H_GLN_3     | H, H_GLN_3      | 2.90 | 2.11 | 20.10 |
| 3SE8.PDB | O, H_ARG_23    | N, H_VAL_5     | H, H_VAL_5      | 2.88 | 2.06 | 15.74 |
| 3SE8.PDB | OE1, H_GLN_105 | N, H_GLN_6     | H, H_GLN_6      | 2.87 | 2.02 | 5.14  |
| 3SE8.PDB | O, H_TYR_90    | NE2, H_GLN_6   | HE22, H_GLN_6   | 2.89 | 2.04 | 7.71  |
| 3SE8.PDB | O, H_VAL_110   | N, H_LYS_12    | H, H_LYS_12     | 2.75 | 1.91 | 10.56 |
| 3SE8.PDB | O, H_LEU_82C   | N, H_GLY_15    | H, H_GLY_15     | 2.89 | 2.09 | 17.72 |

|          |                |               |                |      |      |       |
|----------|----------------|---------------|----------------|------|------|-------|
| 3SE8.PDB | O, H_THR_13    | N, H_SER_16   | H, H_SER_16    | 2.97 | 2.16 | 15.50 |
| 3SE8.PDB | O, H_PHE_82    | N, H_VAL_18   | H, H_VAL_18    | 2.79 | 1.98 | 16.37 |
| 3SE8.PDB | O, H_MET_80    | N, H_ILE_20   | H, H_ILE_20    | 2.76 | 1.91 | 7.97  |
| 3SE8.PDB | O, H_ALA_78    | N, H_CYS_22   | H, H_CYS_22    | 2.72 | 2.02 | 29.24 |
| 3SE8.PDB | O, H_VAL_5     | N, H_ARG_23   | H, H_ARG_23    | 2.79 | 1.98 | 14.71 |
| 3SE8.PDB | O, H_GLY_76G   | N, H_ALA_24   | H, H_ALA_24    | 2.79 | 1.93 | 5.97  |
| 3SE8.PDB | O, H_GLN_3     | N, H_SER_25   | H, H_SER_25    | 2.94 | 2.16 | 21.94 |
| 3SE8.PDB | O, H_ASP_76E   | N, H_PHE_29   | H, H_PHE_29    | 2.78 | 1.95 | 13.33 |
| 3SE8.PDB | O, H_ILE_51    | N, H_ILE_34   | H, H_ILE_34    | 3.00 | 2.20 | 18.68 |
| 3SE8.PDB | O, H_VAL_93    | N, H_HIS_35   | H, H_HIS_35    | 2.89 | 2.07 | 13.75 |
| 3SE8.PDB | O, H_GLY_49    | N, H_TRP_36   | H, H_TRP_36    | 2.94 | 2.13 | 16.16 |
| 3SE8.PDB | O, H_PHE_91    | N, H_VAL_37   | H, H_VAL_37    | 2.86 | 2.04 | 15.75 |
| 3SE8.PDB | O, H_GLU_46    | N, H_ARG_38   | H, H_ARG_38    | 2.88 | 2.04 | 10.56 |
| 3SE8.PDB | OE1, H_GLU_46  | NH1, H_ARG_38 | HH11, H_ARG_38 | 2.64 | 1.78 | 1.94  |
| 3SE8.PDB | OH, H_TYR_90   | NH2, H_ARG_38 | HH21, H_ARG_38 | 2.79 | 1.95 | 9.66  |
| 3SE8.PDB | OD1, H_ASP_86  | NH2, H_ARG_38 | HH22, H_ARG_38 | 2.67 | 1.83 | 8.41  |
| 3SE8.PDB | O, H_GLU_89    | N, H_LEU_39   | H, H_LEU_39    | 2.83 | 1.99 | 10.37 |
| 3SE8.PDB | O, H_GLY_44    | N, H_ILE_40   | H, H_ILE_40    | 2.78 | 1.93 | 4.45  |
| 3SE8.PDB | O, H_ILE_40    | N, H_LYS_43   | H, H_LYS_43    | 2.97 | 2.13 | 10.43 |
| 3SE8.PDB | O, H_ILE_40    | N, H_GLY_44   | H, H_GLY_44    | 2.89 | 2.10 | 18.47 |
| 3SE8.PDB | O, H_ARG_38    | N, H_GLU_46   | H, H_GLU_46    | 2.75 | 1.95 | 18.36 |
| 3SE8.PDB | O, H_TRP_36    | N, H_ILE_48   | H, H_ILE_48    | 2.84 | 1.99 | 6.89  |
| 3SE8.PDB | O, H_SER_58    | N, H_TRP_50   | H, H_TRP_50    | 2.96 | 2.22 | 26.23 |
| 3SE8.PDB | OD1, G_ASN_280 | NE1, H_TRP_50 | HE1, H_TRP_50  | 3.00 | 2.21 | 20.49 |
| 3SE8.PDB | O, H_ILE_34    | N, H_ILE_51   | H, H_ILE_51    | 2.93 | 2.15 | 20.77 |
| 3SE8.PDB | O, H_ALA_56    | N, H_LYS_52   | H, H_LYS_52    | 2.80 | 1.97 | 14.43 |
| 3SE8.PDB | O, G_GLY_473   | NE1, H_TRP_54 | HE1, H_TRP_54  | 2.82 | 1.98 | 10.03 |
| 3SE8.PDB | O, H_ILE_48    | N, H_ALA_60   | H, H_ALA_60    | 2.88 | 2.02 | 4.64  |
| 3SE8.PDB | O, G_GLY_458   | N, H_ARG_61   | H, H_ARG_61    | 2.91 | 2.08 | 12.24 |
| 3SE8.PDB | OE2, H_GLU_46  | NE2, H_GLN_62 | HE21, H_GLN_62 | 2.91 | 2.06 | 7.60  |
| 3SE8.PDB | O, H_ALA_60    | N, H_LEU_63   | H, H_LEU_63    | 2.83 | 1.99 | 9.80  |
| 3SE8.PDB | OD1, G_ASP_457 | NE2, H_GLN_64 | HE22, H_GLN_64 | 2.94 | 2.12 | 14.23 |
| 3SE8.PDB | O, H_LEU_63    | N, H_ARG_66   | H, H_ARG_66    | 2.92 | 2.10 | 15.21 |
| 3SE8.PDB | OD2, H_ASP_86  | NH2, H_ARG_66 | HH22, H_ARG_66 | 2.60 | 1.84 | 23.72 |
| 3SE8.PDB | O, H_GLU_81    | N, H_SER_68   | H, H_SER_68    | 2.93 | 2.16 | 21.80 |
| 3SE8.PDB | OH, H_TYR_59   | N, H_MET_69   | H, H_MET_69    | 2.92 | 2.08 | 11.45 |
| 3SE8.PDB | O, H_PRO_52A   | NE, H_ARG_71  | HE, H_ARG_71   | 2.71 | 2.00 | 28.51 |
| 3SE8.PDB | OD2, G_ASP_368 | NH2, H_ARG_71 | HH22, H_ARG_71 | 2.91 | 2.05 | 6.24  |
| 3SE8.PDB | O, H_VAL_77    | N, H_GLN_72   | H, H_GLN_72    | 2.77 | 1.96 | 16.92 |
| 3SE8.PDB | O, H_ASP_76C   | OG, H_SER_74  | HG, H_SER_74   | 2.69 | 1.89 | 9.03  |
| 3SE8.PDB | O, H_GLN_72    | N, H_VAL_77   | H, H_VAL_77    | 2.77 | 1.94 | 13.20 |
| 3SE8.PDB | O, H_CYS_22    | N, H_ALA_78   | H, H_ALA_78    | 2.93 | 2.10 | 11.74 |
| 3SE8.PDB | O, H_THR_70    | N, H_TYR_79   | H, H_TYR_79    | 2.81 | 1.96 | 9.20  |
| 3SE8.PDB | O, H_ILE_20    | N, H_MET_80   | H, H_MET_80    | 2.83 | 2.02 | 15.19 |
| 3SE8.PDB | O, H_SER_68    | N, H_GLU_81   | H, H_GLU_81    | 2.84 | 2.00 | 11.16 |
| 3SE8.PDB | O, H_VAL_18    | N, H_PHE_82   | H, H_PHE_82    | 2.77 | 1.96 | 15.74 |
| 3SE8.PDB | O, H_ARG_66    | N, H_SER_82A  | H, H_SER_82A   | 2.80 | 2.01 | 18.90 |
| 3SE8.PDB | OD2, H_ASP_86  | N, H_THR_83   | H, H_THR_83    | 2.93 | 2.13 | 19.14 |
| 3SE8.PDB | O, H_THR_83    | N, H_ASP_86   | H, H_ASP_86    | 2.81 | 1.97 | 9.27  |
| 3SE8.PDB | O, H_PRO_84    | N, H_THR_87   | H, H_THR_87    | 2.98 | 2.14 | 8.29  |
| 3SE8.PDB | O, H_THR_107   | N, H_TYR_90   | H, H_TYR_90    | 2.78 | 1.92 | 6.22  |
| 3SE8.PDB | O, H_VAL_37    | N, H_PHE_91   | H, H_PHE_91    | 2.68 | 1.83 | 4.53  |
| 3SE8.PDB | O, H_HIS_35    | N, H_VAL_93   | H, H_VAL_93    | 2.86 | 2.07 | 20.12 |
| 3SE8.PDB | O, H_TYR_102   | N, H_ARG_94   | H, H_ARG_94    | 2.96 | 2.18 | 21.24 |
| 3SE8.PDB | O, H_ARG_95    | NE, H_ARG_94  | HE, H_ARG_94   | 2.79 | 1.97 | 14.73 |
| 3SE8.PDB | OH, L_TYR_36   | N, H_TRP_100F | H, H_TRP_100F  | 2.89 | 2.04 | 6.32  |
| 3SE8.PDB | O, H_CYS_92    | N, H_CYS_104  | H, H_CYS_104   | 2.93 | 2.08 | 5.94  |
| 3SE8.PDB | O, H_TYR_90    | N, H_THR_107  | H, H_THR_107   | 2.73 | 1.94 | 19.33 |

|          |                |                |                 |      |      |       |
|----------|----------------|----------------|-----------------|------|------|-------|
| 3SE8.PDB | O, H_ALA_88    | N, H_VAL_109   | H, H_VAL_109    | 2.95 | 2.10 | 5.90  |
| 3SE8.PDB | O, H_LYS_12    | N, H_SER_112   | H, H_SER_112    | 2.88 | 2.11 | 21.39 |
| 3SE8.PDB | OG, H_SER_112  | N, H_ALA_114   | H, H_ALA_114    | 2.93 | 2.08 | 8.21  |
| 3SE8.PDB | O, H_PHE_146   | N, H_LYS_117   | H, H_LYS_117    | 2.70 | 1.88 | 13.27 |
| 3SE8.PDB | O, H_ASP_144   | NZ, H_LYS_117  | HZ2, H_LYS_117  | 2.77 | 2.03 | 28.12 |
| 3SE8.PDB | O, H_LYS_143   | N, H_SER_120   | H, H_SER_120    | 2.76 | 1.96 | 18.99 |
| 3SE8.PDB | O, H_LEU_141   | N, H_PHE_122   | H, H_PHE_122    | 2.84 | 2.01 | 11.61 |
| 3SE8.PDB | O, H_GLY_139   | N, H_LEU_124   | H, H_LEU_124    | 2.75 | 1.90 | 4.08  |
| 3SE8.PDB | O, H_VAL_184   | N, H_ALA_136   | H, H_ALA_136    | 2.84 | 2.00 | 9.22  |
| 3SE8.PDB | O, H_LEU_124   | N, H_GLY_139   | H, H_GLY_139    | 2.85 | 2.13 | 28.46 |
| 3SE8.PDB | O, H_SER_180   | N, H_CYS_140   | H, H_CYS_140    | 2.74 | 1.94 | 18.37 |
| 3SE8.PDB | O, H_PHE_122   | N, H_LEU_141   | H, H_LEU_141    | 2.66 | 1.82 | 9.87  |
| 3SE8.PDB | O, H_LEU_178   | N, H_VAL_142   | H, H_VAL_142    | 2.68 | 1.85 | 13.60 |
| 3SE8.PDB | O, H_SER_120   | N, H_LYS_143   | H, H_LYS_143    | 2.76 | 1.90 | 5.34  |
| 3SE8.PDB | O, H_LYS_117   | N, H_PHE_146   | H, H_PHE_146    | 2.83 | 2.03 | 17.73 |
| 3SE8.PDB | O, H_ASN_199   | N, H_THR_151   | H, H_THR_151    | 2.89 | 2.07 | 15.54 |
| 3SE8.PDB | O, H_ASN_197   | N, H_SER_153   | H, H_SER_153    | 2.93 | 2.14 | 19.75 |
| 3SE8.PDB | OG, H_SER_180  | NE1, H_TRP_154 | HE1, H_TRP_154  | 2.94 | 2.09 | 7.62  |
| 3SE8.PDB | O, H_ILE_195   | N, H_ASN_155   | H, H_ASN_155    | 2.71 | 1.87 | 10.52 |
| 3SE8.PDB | OD1, H_ASN_197 | N, H_SER_156   | H, H_SER_156    | 2.66 | 1.83 | 13.48 |
| 3SE8.PDB | O, H_TRP_154   | N, H_GLY_157   | H, H_GLY_157    | 2.82 | 2.03 | 19.36 |
| 3SE8.PDB | O, H_VAL_181   | N, H_HIS_164   | H, H_HIS_164    | 2.78 | 1.96 | 13.60 |
| 3SE8.PDB | O, H_SER_179   | N, H_PHE_166   | H, H_PHE_166    | 2.99 | 2.15 | 9.97  |
| 3SE8.PDB | O, H_SER_177   | N, H_VAL_169   | H, H_VAL_169    | 2.82 | 1.98 | 12.77 |
| 3SE8.PDB | O, H_LEU_175   | N, H_GLN_171   | H, H_GLN_171    | 2.92 | 2.07 | 8.88  |
| 3SE8.PDB | OD1, H_ASP_144 | NE2, H_GLN_171 | HE22, H_GLN_171 | 2.79 | 1.98 | 16.20 |
| 3SE8.PDB | O, H_GLN_171   | N, H_GLY_174   | H, H_GLY_174    | 2.99 | 2.14 | 9.14  |
| 3SE8.PDB | O, H_TYR_145   | N, H_TYR_176   | H, H_TYR_176    | 2.78 | 1.96 | 14.03 |
| 3SE8.PDB | O, H_VAL_169   | N, H_SER_177   | H, H_SER_177    | 2.95 | 2.22 | 27.00 |
| 3SE8.PDB | O, H_VAL_142   | N, H_LEU_178   | H, H_LEU_178    | 2.89 | 2.07 | 14.62 |
| 3SE8.PDB | O, H_CYS_140   | N, H_SER_180   | H, H_SER_180    | 2.90 | 2.08 | 15.09 |
| 3SE8.PDB | O, H_HIS_164   | N, H_VAL_181   | H, H_VAL_181    | 2.92 | 2.09 | 11.34 |
| 3SE8.PDB | O, H_LEU_138   | N, H_VAL_182   | H, H_VAL_182    | 2.88 | 2.09 | 19.86 |
| 3SE8.PDB | O, H_ALA_136   | N, H_VAL_184   | H, H_VAL_184    | 2.91 | 2.10 | 16.13 |
| 3SE8.PDB | O, H_SER_188   | N, H_GLN_192   | H, H_GLN_192    | 2.74 | 1.90 | 10.09 |
| 3SE8.PDB | OD1, H_ASN_155 | N, H_ILE_195   | H, H_ILE_195    | 2.81 | 2.01 | 16.89 |
| 3SE8.PDB | O, H_LYS_209   | N, H_CYS_196   | H, H_CYS_196    | 2.96 | 2.16 | 17.85 |
| 3SE8.PDB | O, H_SER_153   | N, H_ASN_197   | H, H_ASN_197    | 2.75 | 1.91 | 9.58  |
| 3SE8.PDB | O, H_VAL_207   | N, H_VAL_198   | H, H_VAL_198    | 2.77 | 1.92 | 5.89  |
| 3SE8.PDB | O, H_THR_151   | N, H_ASN_199   | H, H_ASN_199    | 2.84 | 2.01 | 12.61 |
| 3SE8.PDB | O, H_THR_205   | N, H_HIS_200   | H, H_HIS_200    | 2.70 | 1.84 | 5.53  |
| 3SE8.PDB | OG, H_SER_203  | ND1, H_HIS_200 | HD1, H_HIS_200  | 2.45 | 1.61 | 10.75 |
| 3SE8.PDB | O, H_PRO_147   | NE2, H_HIS_200 | HE2, H_HIS_200  | 2.78 | 1.97 | 17.41 |
| 3SE8.PDB | O, H_LYS_201   | N, H_ASN_204   | H, H_ASN_204    | 2.85 | 2.06 | 18.91 |
| 3SE8.PDB | O, H_HIS_200   | N, H_THR_205   | H, H_THR_205    | 2.88 | 2.03 | 7.09  |
| 3SE8.PDB | O, H_VAL_198   | N, H_VAL_207   | H, H_VAL_207    | 2.80 | 1.98 | 15.00 |
| 3SE8.PDB | O, H_CYS_196   | N, H_LYS_209   | H, H_LYS_209    | 2.95 | 2.10 | 10.01 |
| 3SE8.PDB | O, H_TYR_194   | N, H_VAL_211   | H, H_VAL_211    | 2.83 | 1.97 | 6.68  |
| 3SE8.PDB | OG, L_SER_26   | N, L_VAL_3     | H, L_VAL_3      | 2.82 | 1.96 | 2.57  |
| 3SE8.PDB | O, L_LYS_24    | N, L_THR_5     | H, L_THR_5      | 2.89 | 2.05 | 11.05 |
| 3SE8.PDB | O, L_TYR_86    | NE2, L_GLN_6   | HE22, L_GLN_6   | 2.87 | 2.04 | 13.32 |
| 3SE8.PDB | O, L_GLU_103   | N, L_LEU_11    | H, L_LEU_11     | 2.80 | 1.97 | 11.47 |
| 3SE8.PDB | OE1, L_GLU_17  | N, L_SER_14    | H, L_SER_14     | 2.71 | 1.87 | 8.08  |
| 3SE8.PDB | O, L_LEU_78    | N, L_GLY_16    | H, L_GLY_16     | 2.93 | 2.19 | 25.85 |
| 3SE8.PDB | O, L_ILE_75    | N, L_ALA_19    | H, L_ALA_19     | 2.95 | 2.15 | 18.92 |
| 3SE8.PDB | O, L_LEU_73    | N, L_LEU_21    | H, L_LEU_21     | 2.86 | 2.04 | 13.81 |
| 3SE8.PDB | O, L_SER_7     | N, L_PHE_22    | H, L_PHE_22     | 2.87 | 2.02 | 8.84  |
| 3SE8.PDB | O, L_PHE_71    | N, L_CYS_23    | H, L_CYS_23     | 2.82 | 2.00 | 14.57 |

|          |                |                |                 |      |      |       |
|----------|----------------|----------------|-----------------|------|------|-------|
| 3SE8.PDB | O, L_THR_5     | N, L_LYS_24    | H, L_LYS_24     | 2.96 | 2.11 | 8.02  |
| 3SE8.PDB | OD1, L_ASP_70  | NZ, L_LYS_24   | HZ3, L_LYS_24   | 2.62 | 1.80 | 18.41 |
| 3SE8.PDB | O, L_THR_69    | N, L_ALA_25    | H, L_ALA_25     | 2.86 | 2.08 | 21.04 |
| 3SE8.PDB | OG1, L_THR_51  | N, L_MET_33    | H, L_MET_33     | 2.91 | 2.13 | 21.08 |
| 3SE8.PDB | O, L_ILE_48    | N, L_TRP_35    | H, L_TRP_35     | 2.90 | 2.11 | 18.66 |
| 3SE8.PDB | O, L_TYR_87    | N, L_TYR_36    | H, L_TYR_36     | 2.80 | 1.98 | 13.67 |
| 3SE8.PDB | O, L_ARG_45    | N, L_GLN_37    | H, L_GLN_37     | 2.76 | 1.94 | 13.35 |
| 3SE8.PDB | OH, L_TYR_86   | NE2, L_GLN_37  | HE21, L_GLN_37  | 2.98 | 2.15 | 12.85 |
| 3SE8.PDB | O, L_VAL_85    | N, L_LYS_38    | H, L_LYS_38     | 2.76 | 1.91 | 8.80  |
| 3SE8.PDB | O, L_ARG_39    | N, L_GLN_42    | H, L_GLN_42     | 2.97 | 2.15 | 14.92 |
| 3SE8.PDB | O, L_GLN_37    | N, L_ARG_45    | H, L_ARG_45     | 2.81 | 2.02 | 18.98 |
| 3SE8.PDB | O, L_TRP_35    | N, L_LEU_47    | H, L_LEU_47     | 2.85 | 1.99 | 4.76  |
| 3SE8.PDB | O, L_ARG_53    | N, L_TYR_49    | H, L_TYR_49     | 2.85 | 2.04 | 17.02 |
| 3SE8.PDB | O, L_MET_33    | N, L_THR_51    | H, L_THR_51     | 2.77 | 1.98 | 19.97 |
| 3SE8.PDB | O, L_ASP_50    | N, L_SER_52    | H, L_SER_52     | 2.85 | 2.14 | 29.05 |
| 3SE8.PDB | O, L_TYR_49    | N, L_ARG_53    | H, L_ARG_53     | 2.91 | 2.09 | 16.37 |
| 3SE8.PDB | OD2, L_ASP_50  | NE, L_ARG_53   | HE, L_ARG_53    | 2.87 | 2.02 | 8.47  |
| 3SE8.PDB | O, L_VAL_58    | NH1, L_ARG_54  | HH11, L_ARG_54  | 2.73 | 1.98 | 24.33 |
| 3SE8.PDB | O, L_LEU_47    | N, L_ALA_55    | H, L_ALA_55     | 2.80 | 1.97 | 13.40 |
| 3SE8.PDB | OE1, H_GLN_101 | N, L_SER_56    | H, L_SER_56     | 2.97 | 2.12 | 7.63  |
| 3SE8.PDB | OD2, L_ASP_82  | NE, L_ARG_61   | HE, L_ARG_61    | 2.91 | 2.18 | 26.35 |
| 3SE8.PDB | OD1, L_ASP_82  | NH2, L_ARG_61  | HH21, L_ARG_61  | 2.77 | 1.91 | 2.48  |
| 3SE8.PDB | O, L_THR_74    | N, L_VAL_63    | H, L_VAL_63     | 2.77 | 1.99 | 20.80 |
| 3SE8.PDB | O, L_ASP_70    | N, L_SER_67    | H, L_SER_67     | 2.93 | 2.14 | 19.36 |
| 3SE8.PDB | O, L_CYS_23    | N, L_PHE_71    | H, L_PHE_71     | 2.87 | 2.10 | 23.31 |
| 3SE8.PDB | O, L_SER_65    | N, L_PHE_72    | H, L_PHE_72     | 2.87 | 2.05 | 15.57 |
| 3SE8.PDB | O, L_LEU_21    | N, L_LEU_73    | H, L_LEU_73     | 2.88 | 2.10 | 20.44 |
| 3SE8.PDB | O, L_VAL_63    | N, L_THR_74    | H, L_THR_74     | 2.77 | 1.92 | 5.55  |
| 3SE8.PDB | O, L_ALA_19    | N, L_ILE_75    | H, L_ILE_75     | 2.87 | 2.05 | 14.86 |
| 3SE8.PDB | O, L_ARG_61    | N, L_ASN_76    | H, L_ASN_76     | 2.80 | 1.97 | 11.69 |
| 3SE8.PDB | O, L_GLU_17    | N, L_LEU_78    | H, L_LEU_78     | 2.85 | 2.02 | 13.66 |
| 3SE8.PDB | OD2, L_ASP_82  | N, L_ASP_79    | H, L_ASP_79     | 2.69 | 1.83 | 4.70  |
| 3SE8.PDB | OD2, L_ASP_79  | N, L_GLU_81    | H, L_GLU_81     | 2.90 | 2.04 | 2.10  |
| 3SE8.PDB | O, L_ASP_79    | N, L_ASP_82    | H, L_ASP_82     | 2.84 | 2.00 | 9.57  |
| 3SE8.PDB | O, L_SER_102   | N, L_TYR_86    | H, L_TYR_86     | 2.84 | 2.02 | 14.87 |
| 3SE8.PDB | O, L_TYR_36    | N, L_TYR_87    | H, L_TYR_87     | 2.95 | 2.14 | 16.13 |
| 3SE8.PDB | O, L_THR_34    | N, L_GLN_89    | H, L_GLN_89     | 2.91 | 2.20 | 29.11 |
| 3SE8.PDB | O, L_PHE_97    | N, L_GLN_90    | H, L_GLN_90     | 2.96 | 2.20 | 22.66 |
| 3SE8.PDB | O, L_GLN_90    | N, L_PHE_97    | H, L_PHE_97     | 2.91 | 2.07 | 11.26 |
| 3SE8.PDB | O, L_CYS_88    | N, L_GLY_99    | H, L_GLY_99     | 2.90 | 2.07 | 12.93 |
| 3SE8.PDB | OE1, L_GLN_6   | N, L_GLY_101   | H, L_GLY_101    | 2.82 | 2.11 | 29.29 |
| 3SE8.PDB | O, L_TYR_86    | N, L_SER_102   | H, L_SER_102    | 2.87 | 2.06 | 17.39 |
| 3SE8.PDB | O, L_GLY_9     | N, L_GLU_103   | H, L_GLU_103    | 2.90 | 2.06 | 7.87  |
| 3SE8.PDB | O, L_ALA_84    | N, L_LEU_104   | H, L_LEU_104    | 2.85 | 2.00 | 5.96  |
| 3SE8.PDB | O, L_LEU_11    | N, L_GLU_105   | H, L_GLU_105    | 2.77 | 1.92 | 5.93  |
| 3SE8.PDB | O, L_LEU_13    | N, L_HIS_107   | H, L_HIS_107    | 2.81 | 1.97 | 8.56  |
| 3SE8.PDB | O, L_THR_109   | NE, L_ARG_108  | HE, L_ARG_108   | 2.88 | 2.04 | 10.14 |
| 3SE8.PDB | O, L_ASP_170   | NH1, L_ARG_108 | HH11, L_ARG_108 | 2.96 | 2.12 | 9.70  |
| 3SE8.PDB | O, L_TYR_140   | N, L_ALA_111   | H, L_ALA_111    | 2.78 | 1.95 | 13.81 |
| 3SE8.PDB | O, L_LEU_135   | N, L_PHE_116   | H, L_PHE_116    | 2.96 | 2.16 | 19.15 |
| 3SE8.PDB | O, L_VAL_133   | N, L_PHE_118   | H, L_PHE_118    | 2.81 | 2.01 | 18.69 |
| 3SE8.PDB | OG, L_SER_131  | NE2, L_GLN_124 | HE22, L_GLN_124 | 2.53 | 1.70 | 11.07 |
| 3SE8.PDB | O, L_ASP_122   | N, L_LYS_126   | H, L_LYS_126    | 2.78 | 1.93 | 8.17  |
| 3SE8.PDB | O, L_GLN_124   | N, L_SER_127   | H, L_SER_127    | 2.84 | 2.04 | 18.54 |
| 3SE8.PDB | O, L_LEU_125   | N, L_GLY_128   | H, L_GLY_128    | 2.82 | 1.97 | 6.06  |
| 3SE8.PDB | O, L_LEU_181   | N, L_ALA_130   | H, L_ALA_130    | 2.63 | 1.79 | 9.50  |
| 3SE8.PDB | OE1, L_GLN_124 | N, L_SER_131   | H, L_SER_131    | 2.86 | 2.08 | 21.14 |
| 3SE8.PDB | O, L_LEU_179   | N, L_VAL_132   | H, L_VAL_132    | 2.81 | 1.96 | 9.07  |

|          |                |                |                 |      |      |       |
|----------|----------------|----------------|-----------------|------|------|-------|
| 3SE8.PDB | O, L.SER.177   | N, L.CYS.134   | H, L.CYS.134    | 2.82 | 1.99 | 11.76 |
| 3SE8.PDB | O, L.PHE.116   | N, L.LEU.135   | H, L.LEU.135    | 2.83 | 2.00 | 13.84 |
| 3SE8.PDB | O, L.LEU.175   | N, L.LEU.136   | H, L.LEU.136    | 2.76 | 1.91 | 3.24  |
| 3SE8.PDB | O, L.SER.114   | N, L.ASN.137   | H, L.ASN.137    | 2.82 | 1.98 | 11.18 |
| 3SE8.PDB | O, L.TYR.173   | N, L.PHE.139   | H, L.PHE.139    | 2.79 | 1.99 | 16.94 |
| 3SE8.PDB | O, L.ALA.111   | N, L.TYR.140   | H, L.TYR.140    | 2.99 | 2.17 | 14.53 |
| 3SE8.PDB | OE2, L.GLU.103 | NH2, L.ARG.142 | HH22, L.ARG.142 | 2.84 | 2.00 | 11.39 |
| 3SE8.PDB | O, L.THR.197   | N, L.LYS.145   | H, L.LYS.145    | 2.99 | 2.15 | 9.49  |
| 3SE8.PDB | O, L.GLU.195   | N, L.GLN.147   | H, L.GLN.147    | 2.92 | 2.09 | 11.46 |
| 3SE8.PDB | OE1, L.GLU.195 | NE2, L.GLN.147 | HE21, L.GLN.147 | 2.66 | 1.93 | 26.32 |
| 3SE8.PDB | OG, L.SER.177  | NE1, L.TRP.148 | HE1, L.TRP.148  | 2.88 | 2.08 | 18.18 |
| 3SE8.PDB | O, L.ALA.193   | N, L.LYS.149   | H, L.LYS.149    | 2.82 | 1.98 | 10.28 |
| 3SE8.PDB | O, L.ALA.153   | N, L.VAL.150   | H, L.VAL.150    | 2.96 | 2.16 | 18.37 |
| 3SE8.PDB | O, L.VAL.191   | N, L.ASP.151   | H, L.ASP.151    | 2.77 | 1.95 | 13.90 |
| 3SE8.PDB | O, L.TRP.148   | N, L.GLN.155   | H, L.GLN.155    | 2.82 | 1.99 | 12.31 |
| 3SE8.PDB | O, L.ALA.153   | NE2, L.GLN.155 | HE21, L.GLN.155 | 2.94 | 2.12 | 14.25 |
| 3SE8.PDB | O, L.SER.176   | N, L.SER.162   | H, L.SER.162    | 2.99 | 2.21 | 20.46 |
| 3SE8.PDB | O, H.PRO.167   | OG, L.SER.162  | HG, L.SER.162   | 2.71 | 1.98 | 23.05 |
| 3SE8.PDB | O, L.SER.174   | N, L.THR.164   | H, L.THR.164    | 2.92 | 2.10 | 13.88 |
| 3SE8.PDB | O, L.SER.171   | NE2, L.GLN.166 | HE21, L.GLN.166 | 2.94 | 2.11 | 13.32 |
| 3SE8.PDB | O, L.VAL.106   | NE2, L.GLN.166 | HE22, L.GLN.166 | 2.84 | 2.02 | 15.85 |
| 3SE8.PDB | O, L.THR.172   | N, L.ASP.167   | H, L.ASP.167    | 2.84 | 1.99 | 3.58  |
| 3SE8.PDB | OD2, L.ASP.167 | N, L.LYS.169   | H, L.LYS.169    | 2.88 | 2.07 | 16.82 |
| 3SE8.PDB | OD2, L.ASP.167 | N, L.ASP.170   | H, L.ASP.170    | 2.87 | 2.05 | 15.65 |
| 3SE8.PDB | OD1, L.ASP.170 | N, L.THR.172   | H, L.THR.172    | 2.93 | 2.11 | 15.74 |
| 3SE8.PDB | OD1, L.ASP.170 | OG1, L.THR.172 | HG1, L.THR.172  | 2.49 | 1.68 | 7.38  |
| 3SE8.PDB | O, L.PHE.139   | N, L.TYR.173   | H, L.TYR.173    | 2.84 | 2.00 | 11.94 |
| 3SE8.PDB | OG1, L.THR.164 | N, L.SER.174   | H, L.SER.174    | 2.99 | 2.17 | 15.57 |
| 3SE8.PDB | O, L.LEU.136   | N, L.LEU.175   | H, L.LEU.175    | 2.83 | 2.02 | 17.07 |
| 3SE8.PDB | O, L.SER.162   | N, L.SER.176   | H, L.SER.176    | 2.98 | 2.17 | 16.25 |
| 3SE8.PDB | O, L.CYS.134   | N, L.SER.177   | H, L.SER.177    | 2.87 | 2.05 | 14.69 |
| 3SE8.PDB | O, L.GLN.160   | N, L.THR.178   | H, L.THR.178    | 2.92 | 2.11 | 17.07 |
| 3SE8.PDB | O, L.VAL.132   | N, L.LEU.179   | H, L.LEU.179    | 2.77 | 2.01 | 22.55 |
| 3SE8.PDB | O, L.ASN.158   | N, L.THR.180   | H, L.THR.180    | 2.97 | 2.13 | 11.98 |
| 3SE8.PDB | O, L.ALA.130   | N, L.LEU.181   | H, L.LEU.181    | 2.83 | 1.98 | 9.00  |
| 3SE8.PDB | O, L.GLY.128   | N, L.LYS.183   | H, L.LYS.183    | 2.93 | 2.10 | 13.14 |
| 3SE8.PDB | O, L.SER.182   | N, L.TYR.186   | H, L.TYR.186    | 2.84 | 2.00 | 10.56 |
| 3SE8.PDB | O, L.LYS.183   | N, L.GLU.187   | H, L.GLU.187    | 2.94 | 2.13 | 17.20 |
| 3SE8.PDB | OD1, L.ASP.151 | N, L.VAL.191   | H, L.VAL.191    | 2.92 | 2.06 | 1.84  |
| 3SE8.PDB | O, L.PHE.209   | N, L.TYR.192   | H, L.TYR.192    | 2.97 | 2.12 | 6.17  |
| 3SE8.PDB | O, L.LYS.149   | N, L.ALA.193   | H, L.ALA.193    | 2.91 | 2.16 | 23.94 |
| 3SE8.PDB | O, L.LYS.207   | N, L.CYS.194   | H, L.CYS.194    | 2.97 | 2.16 | 16.78 |
| 3SE8.PDB | O, L.GLN.147   | N, L.GLU.195   | H, L.GLU.195    | 2.83 | 1.99 | 10.05 |
| 3SE8.PDB | O, L.VAL.205   | N, L.VAL.196   | H, L.VAL.196    | 2.74 | 1.90 | 10.53 |
| 3SE8.PDB | O, L.LYS.145   | N, L.THR.197   | H, L.THR.197    | 2.83 | 2.01 | 13.35 |
| 3SE8.PDB | O, L.PRO.141   | NE2, L.HIS.198 | HE2, L.HIS.198  | 2.98 | 2.16 | 13.12 |
| 3SE8.PDB | ND1, L.HIS.198 | N, L.GLY.200   | H, L.GLY.200    | 2.98 | 2.13 | 8.19  |
| 3SE8.PDB | O, L.HIS.198   | N, L.LEU.201   | H, L.LEU.201    | 2.88 | 2.03 | 8.01  |
| 3SE8.PDB | O, L.VAL.196   | N, L.VAL.205   | H, L.VAL.205    | 2.94 | 2.17 | 21.99 |
| 3SE8.PDB | O, L.TYR.192   | N, L.PHE.209   | H, L.PHE.209    | 2.99 | 2.20 | 20.60 |
| 3SE8.PDB | O, L.LYS.190   | N, L.ARG.211   | H, L.ARG.211    | 2.70 | 1.88 | 14.42 |
| 3SE8.PDB | O, L.HIS.189   | NE, L.ARG.211  | HE, L.ARG.211   | 2.74 | 1.90 | 11.40 |
| 3SE9.PDB | OE1, G.GLN.103 | N, G.LEU.52    | H, G.LEU.52     | 2.89 | 2.03 | 2.17  |
| 3SE9.PDB | O, G.CYS.218   | N, G.PHE.53    | H, G.PHE.53     | 2.97 | 2.17 | 17.99 |
| 3SE9.PDB | O, G.HIS.216   | N, G.ALA.55    | H, G.ALA.55     | 2.87 | 2.11 | 23.70 |
| 3SE9.PDB | O, G.VAL.75    | N, G.SER.56    | H, G.SER.56     | 2.93 | 2.15 | 21.60 |
| 3SE9.PDB | OG, G.SER.56   | N, G.ALA.58    | H, G.ALA.58     | 2.98 | 2.14 | 10.37 |
| 3SE9.PDB | OD1, G.ASN.67  | N, G.LYS.59    | H, G.LYS.59     | 2.90 | 2.07 | 12.58 |

|          |                |                |                 |      |      |       |
|----------|----------------|----------------|-----------------|------|------|-------|
| 3SE9.PDB | OE2, G_GLU_62  | N, G_GLU_64    | H, G_GLU_64     | 2.88 | 2.04 | 11.06 |
| 3SE9.PDB | O, G_SER_209   | N, G_VAL_65    | H, G_VAL_65     | 2.97 | 2.18 | 19.43 |
| 3SE9.PDB | OE2, G_GLU_64  | ND1, G_HIS_66  | HD1, G_HIS_66   | 2.73 | 1.88 | 8.47  |
| 3SE9.PDB | OE1, G_GLU_64  | N, G_ASN_67    | H, G_ASN_67     | 2.81 | 1.99 | 14.35 |
| 3SE9.PDB | OE1, G_GLU_64  | ND2, G_ASN_67  | HD21, G_ASN_67  | 2.83 | 2.01 | 14.03 |
| 3SE9.PDB | O, G_VAL_65    | N, G_TRP_69    | H, G_TRP_69     | 2.98 | 2.13 | 9.76  |
| 3SE9.PDB | O, G_HIS_66    | N, G_ALA_70    | H, G_ALA_70     | 2.90 | 2.08 | 14.89 |
| 3SE9.PDB | O, G_ASN_67    | N, G_THR_71    | H, G_THR_71     | 2.96 | 2.22 | 26.00 |
| 3SE9.PDB | O, G_TRP_69    | N, G_ALA_73    | H, G_ALA_73     | 2.87 | 2.02 | 9.06  |
| 3SE9.PDB | O, G_ALA_70    | N, G_CYS_74    | H, G_CYS_74     | 2.89 | 2.10 | 19.93 |
| 3SE9.PDB | O, G_CYS_54    | N, G_VAL_75    | H, G_VAL_75     | 2.97 | 2.15 | 14.48 |
| 3SE9.PDB | OD2, G_ASP_78  | N, G_ASN_80    | H, G_ASN_80     | 2.89 | 2.12 | 23.01 |
| 3SE9.PDB | O, G_SER_244   | N, G_ILE_84    | H, G_ILE_84     | 2.90 | 2.12 | 20.23 |
| 3SE9.PDB | O, G_VAL_242   | N, G_LEU_86    | H, G_LEU_86     | 2.84 | 1.98 | 4.71  |
| 3SE9.PDB | O, G_GLY_237   | N, G_PHE_93    | H, G_PHE_93     | 2.80 | 1.98 | 13.97 |
| 3SE9.PDB | O, G_GLY_235   | N, G_MET_95    | H, G_MET_95     | 2.84 | 2.07 | 22.25 |
| 3SE9.PDB | O, G_ASN_98    | N, G_VAL_101   | H, G_VAL_101    | 2.89 | 2.09 | 18.37 |
| 3SE9.PDB | OD1, G_ASN_99  | NE2, G_GLN_103 | HE21, G_GLN_103 | 2.75 | 1.96 | 19.57 |
| 3SE9.PDB | O, G_THR_50    | NE2, G_GLN_103 | HE22, G_GLN_103 | 2.73 | 1.94 | 19.46 |
| 3SE9.PDB | O, G_VAL_101   | N, G_GLN_105   | H, G_GLN_105    | 2.94 | 2.12 | 13.43 |
| 3SE9.PDB | O, G_MET_104   | N, G_VAL_108   | H, G_VAL_108    | 2.99 | 2.15 | 12.10 |
| 3SE9.PDB | O, G_GLN_105   | N, G_ILE_109   | H, G_ILE_109    | 2.94 | 2.09 | 6.88  |
| 3SE9.PDB | O, G_GLU_106   | N, G_SER_110   | H, G_SER_110    | 2.94 | 2.14 | 17.70 |
| 3SE9.PDB | O, G_ASP_107   | N, G_LEU_111   | H, G_LEU_111    | 2.78 | 1.94 | 10.68 |
| 3SE9.PDB | O, G_VAL_108   | N, G_TRP_112   | H, G_TRP_112    | 2.98 | 2.14 | 9.89  |
| 3SE9.PDB | O, G_ILE_109   | N, G_ASP_113   | H, G_ASP_113    | 2.94 | 2.20 | 25.93 |
| 3SE9.PDB | O, G_TRP_112   | N, G_LEU_116   | H, G_LEU_116    | 2.84 | 2.03 | 15.60 |
| 3SE9.PDB | O, G_ILE_201   | N, G_LYS_121   | H, G_LYS_121    | 2.90 | 2.06 | 12.24 |
| 3SE9.PDB | OE1, G_GLN_117 | NZ, G_LYS_121  | HZ3, G_LYS_121  | 2.58 | 1.83 | 27.32 |
| 3SE9.PDB | O, G_GLN_432   | N, G_LEU_122   | H, G_LEU_122    | 2.88 | 2.03 | 6.48  |
| 3SE9.PDB | O, G_LYS_121   | N, G_ILE_201   | H, G_ILE_201    | 2.95 | 2.11 | 10.92 |
| 3SE9.PDB | O, G_PRO_437   | NZ, G_LYS_207  | HZ2, G_LYS_207  | 2.83 | 2.09 | 27.83 |
| 3SE9.PDB | OE2, G_GLU_64  | N, G_ASP_211   | H, G_ASP_211    | 2.75 | 1.90 | 8.78  |
| 3SE9.PDB | O, G_ILE_251   | N, G_ILE_215   | H, G_ILE_215    | 2.82 | 1.98 | 12.02 |
| 3SE9.PDB | O, G_ALA_55    | N, G_HIS_216   | H, G_HIS_216    | 2.77 | 1.91 | 2.26  |
| 3SE9.PDB | OG1, G_THR_248 | N, G_TYR_217   | H, G_TYR_217    | 2.95 | 2.09 | 2.54  |
| 3SE9.PDB | O, G_PHE_53    | N, G_CYS_218   | H, G_CYS_218    | 2.85 | 2.07 | 20.62 |
| 3SE9.PDB | O, G_VAL_489   | N, G_VAL_224   | H, G_VAL_224    | 2.98 | 2.16 | 15.19 |
| 3SE9.PDB | O, G_LYS_487   | N, G_LEU_226   | H, G_LEU_226    | 2.88 | 2.08 | 18.00 |
| 3SE9.PDB | O, G_SER_243   | N, G_LYS_227   | H, G_LYS_227    | 2.60 | 1.80 | 16.43 |
| 3SE9.PDB | O, G_LYS_485   | N, G_CYS_228   | H, G_CYS_228    | 2.85 | 2.03 | 14.69 |
| 3SE9.PDB | O, G_ASN_241   | N, G_ASN_229   | H, G_ASN_229    | 2.78 | 1.96 | 14.08 |
| 3SE9.PDB | O, G_PHE_93    | N, G_GLY_237   | H, G_GLY_237    | 2.96 | 2.25 | 29.34 |
| 3SE9.PDB | O, G_GLU_91    | N, G_CYS_239   | H, G_CYS_239    | 2.74 | 2.00 | 26.00 |
| 3SE9.PDB | OD2, G_ASP_230 | N, G_LYS_240   | H, G_LYS_240    | 2.84 | 2.00 | 11.61 |
| 3SE9.PDB | OD1, G_ASP_230 | N, G_ASN_241   | H, G_ASN_241    | 2.75 | 2.01 | 25.57 |
| 3SE9.PDB | O, G_LYS_227   | N, G_SER_243   | H, G_SER_243    | 2.98 | 2.15 | 13.38 |
| 3SE9.PDB | OE2, G_GLU_83  | OG, G_SER_243  | HG, G_SER_243   | 2.65 | 1.89 | 17.63 |
| 3SE9.PDB | O, G_ILE_84    | N, G_SER_244   | H, G_SER_244    | 2.82 | 2.02 | 19.32 |
| 3SE9.PDB | O, G_ILE_225   | N, G_VAL_245   | H, G_VAL_245    | 2.83 | 2.01 | 13.24 |
| 3SE9.PDB | O, G_TYR_217   | N, G_THR_248   | H, G_THR_248    | 2.73 | 1.92 | 16.59 |
| 3SE9.PDB | OH, G_TYR_486  | ND1, G_HIS_249 | HD1, G_HIS_249  | 2.73 | 1.91 | 13.84 |
| 3SE9.PDB | O, G_ILE_215   | N, G_ILE_251   | H, G_ILE_251    | 2.80 | 1.94 | 2.64  |
| 3SE9.PDB | O, G_LYS_252   | N, G_VAL_254   | H, G_VAL_254    | 2.91 | 2.20 | 29.72 |
| 3SE9.PDB | O, G_HIS_375   | N, G_THR_257   | H, G_THR_257    | 3.00 | 2.26 | 26.89 |
| 3SE9.PDB | O, G_GLU_370   | OG1, G_THR_257 | HG1, G_THR_257  | 2.66 | 1.88 | 15.46 |
| 3SE9.PDB | O, G_ILE_371   | NE2, G_GLN_258 | HE22, G_GLN_258 | 2.86 | 2.01 | 8.57  |
| 3SE9.PDB | O, G_THR_257   | N, G_LEU_259   | H, G_LEU_259    | 2.60 | 1.87 | 26.09 |

|          |                |                |                 |      |      |       |
|----------|----------------|----------------|-----------------|------|------|-------|
| 3SE9.PDB | O, G_GLY_451   | N, G_LEU_260   | H, G_LEU_260    | 2.95 | 2.15 | 18.25 |
| 3SE9.PDB | O, G_ASN_448   | N, G_ASN_262   | H, G_ASN_262    | 2.69 | 1.86 | 13.26 |
| 3SE9.PDB | OE2, G_GLU_482 | N, G_SER_264   | H, G_SER_264    | 2.65 | 1.82 | 11.12 |
| 3SE9.PDB | O, G_LEU_288   | N, G_ALA_266   | H, G_ALA_266    | 2.85 | 2.12 | 26.29 |
| 3SE9.PDB | O, G_ILE_285   | N, G_ARG_273   | H, G_ARG_273    | 2.81 | 2.03 | 21.22 |
| 3SE9.PDB | O, G_ASN_276   | N, G_ASN_279   | H, G_ASN_279    | 2.76 | 1.96 | 18.81 |
| 3SE9.PDB | OD1, G_ASN_279 | N, G_ALA_281   | H, G_ALA_281    | 2.99 | 2.19 | 18.54 |
| 3SE9.PDB | O, G_ASN_279   | N, G_LYS_282   | H, G_LYS_282    | 2.89 | 2.04 | 7.99  |
| 3SE9.PDB | O, G_LEU_454   | N, G_ILE_284   | H, G_ILE_284    | 2.90 | 2.04 | 2.40  |
| 3SE9.PDB | O, G_ARG_273   | N, G_ILE_285   | H, G_ILE_285    | 2.83 | 1.99 | 11.82 |
| 3SE9.PDB | O, G_ILE_452   | N, G_VAL_286   | H, G_VAL_286    | 2.83 | 1.98 | 5.93  |
| 3SE9.PDB | O, G_ILE_271   | N, G_HIS_287   | H, G_HIS_287    | 2.81 | 1.96 | 6.79  |
| 3SE9.PDB | O, G_SER_264   | NE2, G_HIS_287 | HE2, G_HIS_287  | 2.74 | 1.92 | 14.77 |
| 3SE9.PDB | O, G_THR_450   | N, G_LEU_288   | H, G_LEU_288    | 3.00 | 2.19 | 16.95 |
| 3SE9.PDB | O, G_SER_447   | N, G_ILE_294   | H, G_ILE_294    | 2.94 | 2.13 | 15.34 |
| 3SE9.PDB | O, G_GLU_332   | N, G_ASN_295   | H, G_ASN_295    | 2.88 | 2.07 | 17.19 |
| 3SE9.PDB | O, G_TYR_330   | N, G_THR_297   | H, G_THR_297    | 2.76 | 1.95 | 15.38 |
| 3SE9.PDB | O, G_ILE_443   | N, G_ARG_298   | H, G_ARG_298    | 2.81 | 1.99 | 16.03 |
| 3SE9.PDB | O, G_ILE_326   | NH1, G_ARG_298 | HH11, G_ARG_298 | 2.73 | 1.91 | 14.56 |
| 3SE9.PDB | O, G_GLY_441   | NH2, G_ARG_298 | HH21, G_ARG_298 | 2.64 | 1.78 | 1.00  |
| 3SE9.PDB | O, G_ILE_439   | NH2, G_ARG_298 | HH22, G_ARG_298 | 2.74 | 1.95 | 20.11 |
| 3SE9.PDB | OD1, G_ASP_325 | N, G_ARG_327   | H, G_ARG_327    | 2.97 | 2.13 | 12.25 |
| 3SE9.PDB | OE1, G_GLN_422 | NH1, G_ARG_327 | HH11, G_ARG_327 | 2.62 | 1.84 | 19.91 |
| 3SE9.PDB | O, G_THR_297   | N, G_TYR_330   | H, G_TYR_330    | 2.97 | 2.18 | 20.21 |
| 3SE9.PDB | O, G_LEU_416   | N, G_CYS_331   | H, G_CYS_331    | 2.98 | 2.20 | 20.74 |
| 3SE9.PDB | O, G_ASN_295   | N, G_GLU_332   | H, G_GLU_332    | 2.81 | 1.99 | 12.99 |
| 3SE9.PDB | O, G_ILE_414   | N, G_ILE_333   | H, G_ILE_333    | 2.98 | 2.19 | 19.45 |
| 3SE9.PDB | O, G_ASN_334   | N, G_TRP_338   | H, G_TRP_338    | 2.98 | 2.12 | 4.45  |
| 3SE9.PDB | O, G_LEU_390   | NE1, G_TRP_338 | HE1, G_TRP_338  | 2.40 | 1.59 | 15.54 |
| 3SE9.PDB | O, G_GLY_335   | N, G_ASN_339   | H, G_ASN_339    | 2.97 | 2.13 | 11.25 |
| 3SE9.PDB | O, G_TRP_338   | N, G_LEU_342   | H, G_LEU_342    | 2.95 | 2.13 | 14.49 |
| 3SE9.PDB | O, G_ASN_339   | N, G_LYS_343   | H, G_LYS_343    | 2.90 | 2.16 | 25.67 |
| 3SE9.PDB | O, G_VAL_341   | N, G_VAL_345   | H, G_VAL_345    | 2.84 | 2.07 | 22.06 |
| 3SE9.PDB | O, G_GLN_344   | N, G_LYS_348   | H, G_LYS_348    | 2.93 | 2.17 | 23.65 |
| 3SE9.PDB | O, G_VAL_345   | N, G_LEU_349   | H, G_LEU_349    | 2.90 | 2.08 | 13.64 |
| 3SE9.PDB | O, G_THR_346   | N, G_LYS_350   | H, G_LYS_350    | 2.84 | 2.03 | 16.44 |
| 3SE9.PDB | O, G_LEU_349   | N, G_HIS_352   | H, G_HIS_352    | 2.89 | 2.18 | 29.71 |
| 3SE9.PDB | O, G_LYS_350   | N, G_ASN_355   | H, G_ASN_355    | 2.78 | 1.99 | 18.73 |
| 3SE9.PDB | O, G_PHE_353   | N, G_LYS_357   | H, G_LYS_357    | 2.82 | 1.98 | 9.00  |
| 3SE9.PDB | O, G_GLU_466   | N, G_ILE_360   | H, G_ILE_360    | 2.86 | 2.07 | 19.89 |
| 3SE9.PDB | OD1, G_ASN_393 | N, G_PHE_361   | H, G_PHE_361    | 2.87 | 2.02 | 7.09  |
| 3SE9.PDB | O, G_PHE_468   | N, G_GLN_362   | H, G_GLN_362    | 2.86 | 2.06 | 18.17 |
| 3SE9.PDB | O, G_PHE_361   | NE2, G_GLN_362 | HE22, G_GLN_362 | 2.61 | 1.80 | 15.95 |
| 3SE9.PDB | O, H_THR_53    | N, G_ASP_368   | H, G_ASP_368    | 2.97 | 2.15 | 15.24 |
| 3SE9.PDB | O, G_ASP_368   | N, G_ILE_371   | H, G_ILE_371    | 2.96 | 2.14 | 15.47 |
| 3SE9.PDB | O, G_ASP_368   | N, G_THR_372   | H, G_THR_372    | 2.96 | 2.15 | 17.04 |
| 3SE9.PDB | O, G_CYS_385   | N, G_HIS_374   | H, G_HIS_374    | 2.80 | 2.04 | 23.10 |
| 3SE9.PDB | O, G_THR_257   | ND1, G_HIS_374 | HD1, G_HIS_374  | 2.94 | 2.14 | 18.49 |
| 3SE9.PDB | O, G_GLU_381   | N, G_CYS_378   | H, G_CYS_378    | 2.81 | 2.03 | 21.46 |
| 3SE9.PDB | O, G_CYS_378   | N, G_GLU_381   | H, G_GLU_381    | 2.91 | 2.07 | 11.74 |
| 3SE9.PDB | O, G_PHE_376   | N, G_PHE_383   | H, G_PHE_383    | 2.77 | 1.93 | 9.82  |
| 3SE9.PDB | O, G_LYS_419   | N, G_TYR_384   | H, G_TYR_384    | 2.88 | 2.12 | 23.39 |
| 3SE9.PDB | O, G_HIS_374   | N, G_CYS_385   | H, G_CYS_385    | 2.82 | 2.01 | 16.28 |
| 3SE9.PDB | OD1, G_ASN_386 | N, G_THR_388   | H, G_THR_388    | 2.98 | 2.13 | 7.03  |
| 3SE9.PDB | O, G_THR_415   | NE2, G_GLN_389 | HE21, G_GLN_389 | 2.67 | 1.89 | 20.77 |
| 3SE9.PDB | O, G_THR_387   | N, G_LEU_390   | H, G_LEU_390    | 2.79 | 2.00 | 19.51 |
| 3SE9.PDB | O, G_PHE_361   | ND2, G_ASN_393 | HD21, G_ASN_393 | 2.74 | 1.88 | 3.74  |
| 3SE9.PDB | O, G_ILE_333   | N, G_ILE_414   | H, G_ILE_414    | 2.79 | 1.93 | 6.04  |



|          |                |                |                 |      |      |       |
|----------|----------------|----------------|-----------------|------|------|-------|
| 3SE9.PDB | O, G_CYS_331   | N, G_LEU_416   | H, G_LEU_416    | 2.86 | 2.03 | 11.55 |
| 3SE9.PDB | O, G_ALA_329   | N, G_CYS_418   | H, G_CYS_418    | 2.84 | 2.00 | 9.75  |
| 3SE9.PDB | O, G_TYR_384   | N, G_LYS_419   | H, G_LYS_419    | 2.88 | 2.10 | 21.78 |
| 3SE9.PDB | O, G_ARG_327   | N, G_ILE_420   | H, G_ILE_420    | 2.87 | 2.06 | 16.89 |
| 3SE9.PDB | O, G_ALA_433   | N, G_ILE_424   | H, G_ILE_424    | 2.96 | 2.14 | 15.31 |
| 3SE9.PDB | OE2, G_GLU_370 | N, G_ASN_425   | H, G_ASN_425    | 2.82 | 1.97 | 7.07  |
| 3SE9.PDB | OE1, G_GLU_370 | ND2, G_ASN_425 | HD21, G_ASN_425 | 2.86 | 2.02 | 9.78  |
| 3SE9.PDB | O, G_GLY_431   | N, G_MET_426   | H, G_MET_426    | 2.79 | 1.93 | 2.68  |
| 3SE9.PDB | O, G_MET_426   | N, G_GLY_429   | H, G_GLY_429    | 2.72 | 1.88 | 8.66  |
| 3SE9.PDB | O, G_ILE_424   | N, G_ALA_433   | H, G_ALA_433    | 2.93 | 2.10 | 11.85 |
| 3SE9.PDB | O, G_VAL_120   | N, G_MET_434   | H, G_MET_434    | 2.93 | 2.19 | 26.00 |
| 3SE9.PDB | O, G_GLN_422   | N, G_TYR_435   | H, G_TYR_435    | 2.67 | 1.86 | 16.15 |
| 3SE9.PDB | O, G_ARG_298   | N, G_ILE_443   | H, G_ILE_443    | 2.97 | 2.13 | 10.43 |
| 3SE9.PDB | OD1, G_ASN_295 | ND2, G_ASN_444 | HD21, G_ASN_444 | 2.93 | 2.17 | 24.18 |
| 3SE9.PDB | OG1, G_THR_297 | ND2, G_ASN_444 | HD22, G_ASN_444 | 2.97 | 2.23 | 26.41 |
| 3SE9.PDB | O, G_ILE_294   | N, G_SER_447   | H, G_SER_447    | 2.99 | 2.16 | 12.03 |
| 3SE9.PDB | O, G_VAL_292   | N, G_ILE_449   | H, G_ILE_449    | 2.90 | 2.05 | 8.11  |
| 3SE9.PDB | O, G_VAL_286   | N, G_ILE_452   | H, G_ILE_452    | 2.96 | 2.20 | 22.66 |
| 3SE9.PDB | O, G_GLN_258   | N, G_LEU_453   | H, G_LEU_453    | 2.91 | 2.06 | 4.64  |
| 3SE9.PDB | O, G_ILE_284   | N, G_LEU_454   | H, G_LEU_454    | 2.88 | 2.08 | 17.98 |
| 3SE9.PDB | O, G_ARG_469   | N, G_THR_455   | H, G_THR_455    | 2.88 | 2.05 | 12.96 |
| 3SE9.PDB | OE2, G_GLU_466 | NH1, G_ARG_456 | HH11, G_ARG_456 | 2.71 | 1.88 | 12.87 |
| 3SE9.PDB | O, G_THR_467   | N, G_ASP_457   | H, G_ASP_457    | 2.81 | 1.96 | 8.69  |
| 3SE9.PDB | O, G_THR_358   | N, G_GLU_466   | H, G_GLU_466    | 2.63 | 1.83 | 17.35 |
| 3SE9.PDB | O, G_ILE_360   | N, G_PHE_468   | H, G_PHE_468    | 2.76 | 1.94 | 14.82 |
| 3SE9.PDB | O, G_THR_455   | N, G_ARG_469   | H, G_ARG_469    | 2.95 | 2.15 | 17.67 |
| 3SE9.PDB | O, G_LEU_453   | N, G_GLY_471   | H, G_GLY_471    | 2.80 | 2.02 | 20.51 |
| 3SE9.PDB | OE1, G_GLN_105 | NE1, G_TRP_479 | HE1, G_TRP_479  | 2.69 | 1.89 | 17.56 |
| 3SE9.PDB | O, G_LYS_476   | N, G_ARG_480   | H, G_ARG_480    | 2.94 | 2.14 | 18.76 |
| 3SE9.PDB | O, G_ASP_477   | N, G_SER_481   | H, G_SER_481    | 2.99 | 2.25 | 26.30 |
| 3SE9.PDB | O, G_TRP_479   | N, G_LEU_483   | H, G_LEU_483    | 2.82 | 2.04 | 21.47 |
| 3SE9.PDB | O, G_LEU_483   | N, G_TYR_486   | H, G_TYR_486    | 2.94 | 2.11 | 13.26 |
| 3SE9.PDB | O, G_ASN_92    | NZ, G_LYS_487  | HZ2, G_LYS_487  | 2.93 | 2.06 | 7.72  |
| 3SE9.PDB | OE1, G_GLU_91  | NZ, G_LYS_487  | HZ3, G_LYS_487  | 2.63 | 1.86 | 24.78 |
| 3SE9.PDB | O, G_VAL_224   | N, G_VAL_489   | H, G_VAL_489    | 2.96 | 2.10 | 4.39  |
| 3SE9.PDB | O, G_LYS_46    | N, G_GLN_490   | H, G_GLN_490    | 2.80 | 1.98 | 15.13 |
| 3SE9.PDB | O, G_GLY_222   | N, G_ILE_491   | H, G_ILE_491    | 2.99 | 2.20 | 21.02 |
| 3SE9.PDB | O, G_VAL_44    | N, G_GLU_492   | H, G_GLU_492    | 2.87 | 2.09 | 21.24 |
| 3SE9.PDB | O, H_TRP_23    | N, H_VAL_5     | H, H_VAL_5      | 2.93 | 2.09 | 11.74 |
| 3SE9.PDB | O, H_TYR_90    | NE2, H_GLN_6   | HE21, H_GLN_6   | 2.96 | 2.10 | 4.89  |
| 3SE9.PDB | O, H_LEU_108   | N, H_GLY_10    | H, H_GLY_10     | 2.94 | 2.16 | 21.74 |
| 3SE9.PDB | O, H_VAL_110   | N, H_LYS_12    | H, H_LYS_12     | 2.90 | 2.09 | 15.31 |
| 3SE9.PDB | O, H_LEU_82C   | N, H_GLY_15    | H, H_GLY_15     | 2.64 | 1.84 | 17.68 |
| 3SE9.PDB | O, H_ILE_82    | N, H_VAL_18    | H, H_VAL_18     | 2.83 | 2.05 | 20.43 |
| 3SE9.PDB | OD1, H_ASP_81  | NE, H_ARG_19   | HE, H_ARG_19    | 2.75 | 1.91 | 10.76 |
| 3SE9.PDB | O, H_MET_80    | N, H_VAL_20    | H, H_VAL_20     | 2.85 | 2.01 | 10.21 |
| 3SE9.PDB | OG, H_SER_7    | N, H_SER_21    | H, H_SER_21     | 2.77 | 1.92 | 7.84  |
| 3SE9.PDB | O, H_VAL_5     | N, H_TRP_23    | H, H_TRP_23     | 2.93 | 2.15 | 21.94 |
| 3SE9.PDB | O, H_SER_25    | N, H_PHE_29    | H, H_PHE_29     | 2.88 | 2.03 | 6.53  |
| 3SE9.PDB | O, H_GLU_26    | N, H_GLU_30    | H, H_GLU_30     | 2.87 | 2.05 | 15.53 |
| 3SE9.PDB | O, H_GLN_95    | N, H_GLU_33    | H, H_GLU_33     | 2.91 | 2.13 | 21.88 |
| 3SE9.PDB | O, H_VAL_51    | N, H_ILE_35    | H, H_ILE_35     | 2.94 | 2.15 | 19.12 |
| 3SE9.PDB | O, H_ALA_93    | N, H_HIS_35A   | H, H_HIS_35A    | 2.77 | 1.93 | 10.56 |
| 3SE9.PDB | O, H_GLY_49    | N, H_TRP_36    | H, H_TRP_36     | 2.93 | 2.09 | 11.34 |
| 3SE9.PDB | O, H_PHE_91    | N, H_VAL_37    | H, H_VAL_37     | 2.94 | 2.12 | 14.35 |
| 3SE9.PDB | O, H_GLU_46    | N, H_ARG_38    | H, H_ARG_38     | 2.93 | 2.12 | 16.03 |
| 3SE9.PDB | OH, H_TYR_90   | NH1, H_ARG_38  | HH11, H_ARG_38  | 2.99 | 2.21 | 21.73 |
| 3SE9.PDB | OD1, H_ASP_86  | NH1, H_ARG_38  | HH12, H_ARG_38  | 2.86 | 2.03 | 12.66 |

|          |                |                 |                  |      |      |       |
|----------|----------------|-----------------|------------------|------|------|-------|
| 3SE9.PDB | O, H_THR_89    | N, H_GLN_39     | H, H_GLN_39      | 2.91 | 2.10 | 16.25 |
| 3SE9.PDB | O, H_GLN_43    | NE2, H_GLN_39   | HE21, H_GLN_39   | 2.88 | 2.07 | 16.30 |
| 3SE9.PDB | O, H_ALA_40    | N, H_GLN_43     | H, H_GLN_43      | 2.88 | 2.07 | 16.77 |
| 3SE9.PDB | O, H_ARG_38    | N, H_GLU_46     | H, H_GLU_46      | 2.90 | 2.11 | 20.67 |
| 3SE9.PDB | O, H_TRP_36    | N, H_ILE_48     | H, H_ILE_48      | 2.76 | 1.91 | 8.76  |
| 3SE9.PDB | O, H_ASN_57    | N, H_TRP_50     | H, H_TRP_50      | 2.97 | 2.24 | 26.24 |
| 3SE9.PDB | OD1, G_ASN_280 | NE1, H_TRP_50   | HE1, H_TRP_50    | 2.86 | 2.03 | 11.46 |
| 3SE9.PDB | O, H_ALA_55    | N, H_LYS_52     | H, H_LYS_52      | 2.82 | 2.02 | 18.64 |
| 3SE9.PDB | O, H_GLU_33    | N, H_THR_52A    | H, H_THR_52A     | 2.97 | 2.15 | 15.80 |
| 3SE9.PDB | O, H_LYS_52    | N, H_GLY_54     | H, H_GLY_54      | 2.87 | 2.11 | 23.24 |
| 3SE9.PDB | O, G_ARG_456   | ND2, H_ASN_57   | HD22, H_ASN_57   | 2.82 | 1.98 | 10.42 |
| 3SE9.PDB | O, H_ILE_48    | N, H_GLY_59     | H, H_GLY_59      | 2.88 | 2.11 | 22.31 |
| 3SE9.PDB | O, H_SER_60    | N, H_ARG_64     | H, H_ARG_64      | 2.81 | 1.98 | 12.96 |
| 3SE9.PDB | OG, G_SER_365  | NH1, H_ARG_64   | HH11, H_ARG_64   | 2.81 | 2.04 | 21.79 |
| 3SE9.PDB | O, H_PRO_61    | N, H_GLN_65     | H, H_GLN_65      | 2.78 | 2.04 | 25.46 |
| 3SE9.PDB | O, H_ASP_62    | N, H_ARG_66     | H, H_ARG_66      | 2.94 | 2.23 | 28.48 |
| 3SE9.PDB | OD2, H_ASP_86  | NH2, H_ARG_66   | HH22, H_ARG_66   | 2.37 | 1.62 | 23.34 |
| 3SE9.PDB | O, H_PHE_63    | N, H_VAL_67     | H, H_VAL_67      | 2.84 | 2.04 | 18.39 |
| 3SE9.PDB | O, H_ASP_81    | N, H_SER_68     | H, H_SER_68      | 2.86 | 2.04 | 15.98 |
| 3SE9.PDB | O, H_THR_52A   | NE, H_ARG_71    | HE, H_ARG_71     | 2.71 | 1.89 | 14.64 |
| 3SE9.PDB | OD2, G_ASP_368 | NH1, H_ARG_71   | HH12, H_ARG_71   | 2.77 | 1.92 | 7.25  |
| 3SE9.PDB | O, H_THR_77    | N, H_ASP_72     | H, H_ASP_72      | 2.80 | 1.97 | 12.39 |
| 3SE9.PDB | O, G_GLY_429   | NH1, H_ARG_73   | HH12, H_ARG_73   | 2.99 | 2.23 | 23.32 |
| 3SE9.PDB | O, H_LEU_75    | OG1, H_THR_77   | HG1, H_THR_77    | 2.67 | 1.90 | 16.77 |
| 3SE9.PDB | O, H_CYS_22    | N, H_ALA_78     | H, H_ALA_78      | 2.72 | 1.89 | 13.13 |
| 3SE9.PDB | O, H_THR_70    | N, H_HIS_79     | H, H_HIS_79      | 2.97 | 2.14 | 11.35 |
| 3SE9.PDB | OG, H_SER_21   | ND1, H_HIS_79   | HD1, H_HIS_79    | 2.69 | 1.93 | 23.16 |
| 3SE9.PDB | O, H_VAL_20    | N, H_MET_80     | H, H_MET_80      | 2.71 | 1.86 | 8.21  |
| 3SE9.PDB | O, H_SER_68    | N, H_ASP_81     | H, H_ASP_81      | 2.93 | 2.09 | 10.84 |
| 3SE9.PDB | O, H_VAL_18    | N, H_ILE_82     | H, H_ILE_82      | 2.83 | 2.01 | 14.83 |
| 3SE9.PDB | OG, H_SER_68   | NH1, H_ARG_82A  | HH12, H_ARG_82A  | 2.84 | 2.02 | 15.25 |
| 3SE9.PDB | OD2, H_ASP_86  | N, H_THR_83     | H, H_THR_83      | 2.88 | 2.05 | 13.61 |
| 3SE9.PDB | O, H_THR_83    | N, H_ASP_86     | H, H_ASP_86      | 2.95 | 2.11 | 10.53 |
| 3SE9.PDB | O, H_GLN_39    | N, H_THR_89     | H, H_THR_89      | 2.98 | 2.19 | 19.31 |
| 3SE9.PDB | O, H_THR_107   | N, H_TYR_90     | H, H_TYR_90      | 2.82 | 1.97 | 6.56  |
| 3SE9.PDB | O, H_VAL_37    | N, H_PHE_91     | H, H_PHE_91      | 2.71 | 1.86 | 7.71  |
| 3SE9.PDB | OE1, H_GLN_6   | N, H_CYS_92     | H, H_CYS_92      | 2.90 | 2.06 | 12.06 |
| 3SE9.PDB | O, H_HIS_35A   | N, H_ALA_93     | H, H_ALA_93      | 2.82 | 2.09 | 27.40 |
| 3SE9.PDB | O, H_LEU_102   | N, H_ARG_94     | H, H_ARG_94      | 2.99 | 2.16 | 14.50 |
| 3SE9.PDB | OD1, H_ASP_101 | NH2, H_ARG_94   | HH21, H_ARG_94   | 2.74 | 1.90 | 10.49 |
| 3SE9.PDB | O, H_LEU_34    | N, H_GLN_95     | H, H_GLN_95      | 2.93 | 2.08 | 7.14  |
| 3SE9.PDB | OH, H_TYR_100E | NE2, H_GLN_100B | HE22, H_GLN_100B | 2.88 | 2.05 | 12.80 |
| 3SE9.PDB | OD1, G_ASN_279 | NE1, H_TRP_100D | HE1, H_TRP_100D  | 2.86 | 2.13 | 26.83 |
| 3SE9.PDB | OH, L_TYR_36   | N, H_PHE_100F   | H, H_PHE_100F    | 2.88 | 2.05 | 11.59 |
| 3SE9.PDB | O, H_CYS_92    | N, H_GLY_104    | H, H_GLY_104     | 2.87 | 2.02 | 7.22  |
| 3SE9.PDB | O, H_GLN_6     | NH2, H_ARG_105  | HH21, H_ARG_105  | 2.67 | 1.92 | 23.91 |
| 3SE9.PDB | O, H_TYR_90    | N, H_THR_107    | H, H_THR_107     | 2.73 | 1.92 | 16.56 |
| 3SE9.PDB | OG, H_SER_9    | N, H_LEU_108    | H, H_LEU_108     | 2.69 | 1.93 | 23.13 |
| 3SE9.PDB | O, H_ALA_88    | N, H_ILE_109    | H, H_ILE_109     | 2.93 | 2.07 | 6.87  |
| 3SE9.PDB | OG1, H_THR_87  | N, H_VAL_111    | H, H_VAL_111     | 2.93 | 2.08 | 7.05  |
| 3SE9.PDB | OG, H_SER_112  | N, H_ALA_114    | H, H_ALA_114     | 2.96 | 2.13 | 12.08 |
| 3SE9.PDB | O, H_PHE_146   | N, H_LYS_117    | H, H_LYS_117     | 2.71 | 1.88 | 12.05 |
| 3SE9.PDB | O, H_ASP_144   | NZ, H_LYS_117   | HZ2, H_LYS_117   | 2.71 | 1.95 | 26.51 |
| 3SE9.PDB | O, H_LYS_143   | N, H_SER_120    | H, H_SER_120     | 2.94 | 2.18 | 23.30 |
| 3SE9.PDB | O, H_LEU_141   | N, H_PHE_122    | H, H_PHE_122     | 2.83 | 1.99 | 10.34 |
| 3SE9.PDB | O, H_GLY_139   | N, H_LEU_124    | H, H_LEU_124     | 2.72 | 1.86 | 7.35  |
| 3SE9.PDB | O, H_VAL_184   | N, H_ALA_136    | H, H_ALA_136     | 2.58 | 1.73 | 7.05  |
| 3SE9.PDB | O, H_VAL_182   | N, H_LEU_138    | H, H_LEU_138     | 2.98 | 2.14 | 9.89  |

|          |                |                |                 |      |      |       |
|----------|----------------|----------------|-----------------|------|------|-------|
| 3SE9.PDB | O, H_SER_180   | N, H_CYS_140   | H, H_CYS_140    | 2.81 | 2.02 | 19.42 |
| 3SE9.PDB | O, H_PHE_122   | N, H_LEU_141   | H, H_LEU_141    | 2.71 | 1.87 | 9.85  |
| 3SE9.PDB | O, H_LEU_178   | N, H_VAL_142   | H, H_VAL_142    | 2.67 | 1.83 | 9.14  |
| 3SE9.PDB | O, H_SER_120   | N, H_LYS_143   | H, H_LYS_143    | 2.81 | 1.96 | 4.58  |
| 3SE9.PDB | O, H_LYS_117   | N, H_PHE_146   | H, H_PHE_146    | 2.83 | 2.04 | 19.01 |
| 3SE9.PDB | O, H_ASN_199   | N, H_THR_151   | H, H_THR_151    | 2.82 | 2.01 | 15.51 |
| 3SE9.PDB | OG, H_SER_180  | NE1, H_TRP_154 | HE1, H_TRP_154  | 2.83 | 2.00 | 12.34 |
| 3SE9.PDB | O, H_ILE_195   | N, H_ASN_155   | H, H_ASN_155    | 2.72 | 1.88 | 10.78 |
| 3SE9.PDB | OD1, H_ASN_197 | N, H_SER_156   | H, H_SER_156    | 2.63 | 1.82 | 16.31 |
| 3SE9.PDB | O, H_TRP_154   | N, H_GLY_157   | H, H_GLY_157    | 2.94 | 2.17 | 22.03 |
| 3SE9.PDB | O, H_VAL_181   | N, H_HIS_164   | H, H_HIS_164    | 2.79 | 1.95 | 10.78 |
| 3SE9.PDB | OD1, L_ASN_138 | NE2, H_HIS_164 | HE2, H_HIS_164  | 2.87 | 2.10 | 22.18 |
| 3SE9.PDB | O, H_SER_179   | N, H_PHE_166   | H, H_PHE_166    | 2.83 | 1.98 | 8.83  |
| 3SE9.PDB | O, H_SER_177   | N, H_VAL_169   | H, H_VAL_169    | 2.79 | 1.97 | 15.38 |
| 3SE9.PDB | O, H_LEU_175   | N, H_GLN_171   | H, H_GLN_171    | 2.88 | 2.03 | 9.89  |
| 3SE9.PDB | OD1, H_ASP_144 | NE2, H_GLN_171 | HE22, H_GLN_171 | 2.70 | 1.89 | 15.22 |
| 3SE9.PDB | O, H_GLN_171   | N, H_GLY_174   | H, H_GLY_174    | 2.82 | 1.98 | 10.33 |
| 3SE9.PDB | O, H_TYR_145   | N, H_TYR_176   | H, H_TYR_176    | 2.80 | 1.95 | 9.52  |
| 3SE9.PDB | O, H_VAL_169   | N, H_SER_177   | H, H_SER_177    | 2.92 | 2.11 | 17.68 |
| 3SE9.PDB | O, H_VAL_142   | N, H_LEU_178   | H, H_LEU_178    | 2.84 | 2.05 | 18.79 |
| 3SE9.PDB | O, H_HIS_164   | N, H_VAL_181   | H, H_VAL_181    | 2.77 | 1.93 | 11.77 |
| 3SE9.PDB | O, H_LEU_138   | N, H_VAL_182   | H, H_VAL_182    | 2.73 | 1.91 | 15.41 |
| 3SE9.PDB | O, H_ALA_136   | N, H_VAL_184   | H, H_VAL_184    | 2.65 | 1.82 | 11.73 |
| 3SE9.PDB | O, H_GLY_134   | N, H_SER_186   | H, H_SER_186    | 2.77 | 1.92 | 8.30  |
| 3SE9.PDB | O, H_PRO_185   | N, H_SER_188   | H, H_SER_188    | 2.84 | 2.03 | 16.03 |
| 3SE9.PDB | OD1, H_ASN_155 | N, H_ILE_195   | H, H_ILE_195    | 2.88 | 2.07 | 17.09 |
| 3SE9.PDB | O, H_SER_153   | N, H_ASN_197   | H, H_ASN_197    | 2.68 | 1.83 | 7.88  |
| 3SE9.PDB | OD1, H_ASP_208 | ND2, H_ASN_197 | HD21, H_ASN_197 | 2.90 | 2.07 | 13.74 |
| 3SE9.PDB | O, H_VAL_207   | N, H_VAL_198   | H, H_VAL_198    | 2.67 | 1.81 | 3.24  |
| 3SE9.PDB | O, H_THR_151   | N, H_ASN_199   | H, H_ASN_199    | 2.88 | 2.05 | 12.73 |
| 3SE9.PDB | O, H_THR_205   | N, H_HIS_200   | H, H_HIS_200    | 2.70 | 1.85 | 4.09  |
| 3SE9.PDB | OG, H_SER_203  | ND1, H_HIS_200 | HD1, H_HIS_200  | 2.68 | 1.84 | 9.59  |
| 3SE9.PDB | O, H_PRO_147   | NE2, H_HIS_200 | HE2, H_HIS_200  | 2.74 | 1.92 | 15.55 |
| 3SE9.PDB | O, H_LYS_201   | N, H_ASN_204   | H, H_ASN_204    | 2.85 | 2.04 | 15.88 |
| 3SE9.PDB | O, H_VAL_198   | N, H_VAL_207   | H, H_VAL_207    | 2.76 | 1.95 | 16.29 |
| 3SE9.PDB | O, H_CYS_196   | N, H_LYS_209   | H, H_LYS_209    | 2.96 | 2.13 | 12.56 |
| 3SE9.PDB | O, H_TYR_194   | N, H_VAL_211   | H, H_VAL_211    | 2.84 | 1.98 | 5.32  |
| 3SE9.PDB | OE1, L_GLN_100 | N, L_GLN_6     | H, L_GLN_6      | 2.87 | 2.05 | 13.27 |
| 3SE9.PDB | O, L_TYR_86    | NE2, L_GLN_6   | HE21, L_GLN_6   | 2.65 | 1.87 | 19.42 |
| 3SE9.PDB | O, L_SER_22    | N, L_SER_7     | H, L_SER_7      | 2.91 | 2.10 | 15.22 |
| 3SE9.PDB | O, L_ARG_103   | N, L_LEU_11    | H, L_LEU_11     | 2.81 | 2.03 | 20.07 |
| 3SE9.PDB | OE2, L_GLU_17  | N, L_SER_14    | H, L_SER_14     | 2.75 | 1.90 | 8.71  |
| 3SE9.PDB | O, L_MET_78    | N, L_GLY_16    | H, L_GLY_16     | 2.86 | 2.12 | 26.24 |
| 3SE9.PDB | O, L_SER_14    | N, L_GLU_17    | H, L_GLU_17     | 3.00 | 2.15 | 9.67  |
| 3SE9.PDB | O, L_ILE_75    | N, L_ALA_19    | H, L_ALA_19     | 2.75 | 1.95 | 18.77 |
| 3SE9.PDB | O, L_LEU_73    | N, L_LEU_21    | H, L_LEU_21     | 2.92 | 2.06 | 4.08  |
| 3SE9.PDB | O, L_SER_7     | N, L_SER_22    | H, L_SER_22     | 2.90 | 2.04 | 6.45  |
| 3SE9.PDB | O, L_TYR_71    | N, L_CYS_23    | H, L_CYS_23     | 2.61 | 1.79 | 13.38 |
| 3SE9.PDB | O, L_THR_5     | N, L_THR_24    | H, L_THR_24     | 2.87 | 2.04 | 10.61 |
| 3SE9.PDB | O, L_VAL_3     | N, L_ALA_26    | H, L_ALA_26     | 2.84 | 2.01 | 13.56 |
| 3SE9.PDB | OH, L_TYR_71   | N, L_GLY_31    | H, L_GLY_31     | 2.83 | 1.99 | 8.85  |
| 3SE9.PDB | O, L_GLN_89    | N, L_THR_34    | H, L_THR_34     | 2.89 | 2.12 | 22.07 |
| 3SE9.PDB | O, L_ILE_48    | N, L_TRP_35    | H, L_TRP_35     | 2.92 | 2.14 | 20.82 |
| 3SE9.PDB | O, L_TYR_87    | N, L_TYR_36    | H, L_TYR_36     | 2.80 | 1.96 | 11.38 |
| 3SE9.PDB | O, L_LYS_45    | N, L_GLN_37    | H, L_GLN_37     | 2.89 | 2.10 | 19.91 |
| 3SE9.PDB | O, L_ARG_85    | N, L_LYS_38    | H, L_LYS_38     | 2.86 | 2.11 | 24.20 |
| 3SE9.PDB | O, L_GLN_42    | NZ, L_LYS_38   | HZ2, L_LYS_38   | 2.69 | 1.95 | 28.64 |
| 3SE9.PDB | O, L_GLU_81    | NZ, L_LYS_39   | HZ3, L_LYS_39   | 2.86 | 2.10 | 26.41 |

|          |                |                |                 |      |      |       |
|----------|----------------|----------------|-----------------|------|------|-------|
| 3SE9.PDB | O, L_GLN_37    | N, L_LYS_45    | H, L_LYS_45     | 2.78 | 1.95 | 13.05 |
| 3SE9.PDB | O, L_TRP_35    | N, L_LEU_47    | H, L_LEU_47     | 2.87 | 2.05 | 13.50 |
| 3SE9.PDB | O, L_LYS_53    | N, L_PHE_49    | H, L_PHE_49     | 2.83 | 2.01 | 14.47 |
| 3SE9.PDB | O, L_MET_33    | N, L_THR_51    | H, L_THR_51     | 2.85 | 2.05 | 18.27 |
| 3SE9.PDB | O, L_ALA_50    | N, L_SER_52    | H, L_SER_52     | 2.77 | 2.03 | 26.37 |
| 3SE9.PDB | O, L_PHE_49    | N, L_LYS_53    | H, L_LYS_53     | 2.88 | 2.12 | 23.41 |
| 3SE9.PDB | O, L_THR_74    | N, L_SER_63    | H, L_SER_63     | 2.83 | 2.02 | 16.49 |
| 3SE9.PDB | O, L_GLY_68    | NE2, L_GLN_66  | HE21, L_GLN_66  | 2.85 | 2.01 | 10.87 |
| 3SE9.PDB | O, L_GLN_70    | N, L_PHE_67    | H, L_PHE_67     | 2.77 | 1.98 | 19.75 |
| 3SE9.PDB | O, L_PHE_67    | N, L_GLN_70    | H, L_GLN_70     | 2.81 | 1.99 | 14.85 |
| 3SE9.PDB | O, L_CYS_23    | N, L_TYR_71    | H, L_TYR_71     | 2.90 | 2.05 | 8.86  |
| 3SE9.PDB | O, L_SER_65    | N, L_THR_72    | H, L_THR_72     | 2.92 | 2.08 | 10.66 |
| 3SE9.PDB | O, L_LEU_21    | N, L_LEU_73    | H, L_LEU_73     | 2.70 | 1.90 | 17.14 |
| 3SE9.PDB | O, L_SER_63    | N, L_THR_74    | H, L_THR_74     | 2.72 | 1.87 | 5.98  |
| 3SE9.PDB | O, L_GLU_17    | N, L_MET_78    | H, L_MET_78     | 2.89 | 2.06 | 12.71 |
| 3SE9.PDB | OD2, L_ASP_82  | N, L_GLU_79    | H, L_GLU_79     | 2.83 | 1.97 | 2.91  |
| 3SE9.PDB | O, L_GLU_79    | N, L_ASP_82    | H, L_ASP_82     | 2.98 | 2.15 | 13.63 |
| 3SE9.PDB | O, L_THR_102   | N, L_TYR_86    | H, L_TYR_86     | 2.81 | 2.08 | 27.06 |
| 3SE9.PDB | O, L_THR_34    | N, L_GLN_89    | H, L_GLN_89     | 2.81 | 2.01 | 18.78 |
| 3SE9.PDB | O, L_LEU_91    | NE2, L_GLN_89  | HE22, L_GLN_89  | 2.88 | 2.12 | 24.17 |
| 3SE9.PDB | O, L_PHE_97    | N, L_GLN_90    | H, L_GLN_90     | 2.90 | 2.18 | 28.93 |
| 3SE9.PDB | O, L_SER_27    | NE2, L_GLN_90  | HE21, L_GLN_90  | 2.99 | 2.17 | 16.35 |
| 3SE9.PDB | O, L_CYS_88    | N, L_GLY_99    | H, L_GLY_99     | 2.80 | 1.97 | 11.46 |
| 3SE9.PDB | O, L_TYR_86    | N, L_THR_102   | H, L_THR_102    | 2.76 | 1.99 | 22.12 |
| 3SE9.PDB | O, L_ALA_84    | N, L_LEU_104   | H, L_LEU_104    | 2.90 | 2.05 | 7.67  |
| 3SE9.PDB | O, L_LEU_11    | N, L_GLU_105   | H, L_GLU_105    | 2.83 | 2.02 | 16.12 |
| 3SE9.PDB | OE1, L_GLN_166 | N, L_ILE_106   | H, L_ILE_106    | 2.83 | 2.02 | 16.05 |
| 3SE9.PDB | O, L_LEU_13    | N, L_ARG_107   | H, L_ARG_107    | 2.82 | 1.98 | 9.67  |
| 3SE9.PDB | O, L_TYR_140   | N, L_ALA_111   | H, L_ALA_111    | 2.91 | 2.10 | 17.28 |
| 3SE9.PDB | O, L_VAL_133   | N, L_PHE_118   | H, L_PHE_118    | 2.77 | 1.97 | 18.18 |
| 3SE9.PDB | OG, L_SER_131  | NE2, L_GLN_124 | HE21, L_GLN_124 | 2.87 | 2.02 | 8.09  |
| 3SE9.PDB | O, L_GLN_124   | N, L_SER_127   | H, L_SER_127    | 2.85 | 2.11 | 25.81 |
| 3SE9.PDB | O, L_LEU_125   | N, L_GLY_128   | H, L_GLY_128    | 2.77 | 1.93 | 7.72  |
| 3SE9.PDB | O, L_LEU_181   | N, L_ALA_130   | H, L_ALA_130    | 2.85 | 2.00 | 6.88  |
| 3SE9.PDB | O, L_LEU_179   | N, L_VAL_132   | H, L_VAL_132    | 2.65 | 1.81 | 8.60  |
| 3SE9.PDB | O, L_SER_177   | N, L_CYS_134   | H, L_CYS_134    | 2.87 | 2.03 | 11.55 |
| 3SE9.PDB | O, L_PHE_116   | N, L_LEU_135   | H, L_LEU_135    | 2.83 | 2.01 | 13.22 |
| 3SE9.PDB | O, L_LEU_175   | N, L_LEU_136   | H, L_LEU_136    | 2.80 | 1.94 | 5.67  |
| 3SE9.PDB | O, L_SER_114   | N, L_ASN_137   | H, L_ASN_137    | 2.87 | 2.06 | 16.53 |
| 3SE9.PDB | OG, L_SER_174  | N, L_ASN_138   | H, L_ASN_138    | 2.87 | 2.02 | 6.61  |
| 3SE9.PDB | O, L_TYR_173   | N, L_PHE_139   | H, L_PHE_139    | 2.71 | 1.88 | 11.74 |
| 3SE9.PDB | O, L_ALA_111   | N, L_TYR_140   | H, L_TYR_140    | 2.97 | 2.14 | 13.63 |
| 3SE9.PDB | O, L_GLU_195   | N, L_GLN_147   | H, L_GLN_147    | 2.88 | 2.05 | 13.30 |
| 3SE9.PDB | OG, L_SER_177  | NE1, L_TRP_148 | HE1, L_TRP_148  | 2.88 | 2.05 | 13.01 |
| 3SE9.PDB | O, L_ALA_193   | N, L_LYS_149   | H, L_LYS_149    | 2.85 | 2.03 | 13.91 |
| 3SE9.PDB | O, L_ALA_153   | N, L_VAL_150   | H, L_VAL_150    | 2.92 | 2.10 | 13.17 |
| 3SE9.PDB | O, L_VAL_191   | N, L_ASP_151   | H, L_ASP_151    | 2.74 | 1.91 | 13.52 |
| 3SE9.PDB | O, L_VAL_150   | N, L_ALA_153   | H, L_ALA_153    | 2.87 | 2.02 | 9.15  |
| 3SE9.PDB | O, L_TRP_148   | N, L_GLN_155   | H, L_GLN_155    | 3.00 | 2.16 | 10.91 |
| 3SE9.PDB | O, L_THR_178   | N, L_GLN_160   | H, L_GLN_160    | 2.99 | 2.20 | 19.65 |
| 3SE9.PDB | O, L_SER_176   | N, L_SER_162   | H, L_SER_162    | 2.81 | 2.05 | 22.68 |
| 3SE9.PDB | O, H_PRO_167   | OG, L_SER_162  | HG, L_SER_162   | 2.60 | 1.89 | 25.20 |
| 3SE9.PDB | O, L_SER_174   | N, L_THR_164   | H, L_THR_164    | 2.97 | 2.14 | 12.76 |
| 3SE9.PDB | O, L_ILE_106   | NE2, L_GLN_166 | HE21, L_GLN_166 | 2.82 | 2.03 | 19.63 |
| 3SE9.PDB | O, L_SER_171   | NE2, L_GLN_166 | HE22, L_GLN_166 | 2.91 | 2.08 | 11.92 |
| 3SE9.PDB | O, L_THR_172   | N, L_ASP_167   | H, L_ASP_167    | 2.88 | 2.05 | 12.43 |
| 3SE9.PDB | OD2, L_ASP_167 | N, L_LYS_169   | H, L_LYS_169    | 2.73 | 1.98 | 24.54 |
| 3SE9.PDB | OD2, L_ASP_167 | N, L_ASP_170   | H, L_ASP_170    | 2.87 | 2.10 | 21.70 |

|          |                |                |                |      |      |       |
|----------|----------------|----------------|----------------|------|------|-------|
| 3SE9.PDB | OD1, L_ASP_170 | OG1, L_THR_172 | HG1, L_THR_172 | 2.48 | 1.71 | 16.29 |
| 3SE9.PDB | O, L_PHE_139   | N, L_TYR_173   | H, L_TYR_173   | 2.70 | 1.86 | 11.73 |
| 3SE9.PDB | O, L_LEU_136   | N, L_LEU_175   | H, L_LEU_175   | 2.79 | 1.97 | 15.48 |
| 3SE9.PDB | O, L_SER_162   | N, L_SER_176   | H, L_SER_176   | 2.85 | 2.02 | 11.18 |
| 3SE9.PDB | O, L_CYS_134   | N, L_SER_177   | H, L_SER_177   | 2.95 | 2.11 | 11.27 |
| 3SE9.PDB | O, L_GLN_160   | N, L_THR_178   | H, L_THR_178   | 2.80 | 1.96 | 9.46  |
| 3SE9.PDB | O, L_VAL_132   | N, L_LEU_179   | H, L_LEU_179   | 2.70 | 1.87 | 12.38 |
| 3SE9.PDB | O, L_ASN_158   | N, L_THR_180   | H, L_THR_180   | 3.00 | 2.16 | 11.07 |
| 3SE9.PDB | O, L_ALA_130   | N, L_LEU_181   | H, L_LEU_181   | 2.86 | 2.02 | 11.27 |
| 3SE9.PDB | O, L_GLY_128   | N, L_LYS_183   | H, L_LYS_183   | 2.82 | 2.01 | 15.80 |
| 3SE9.PDB | OE1, L_GLU_187 | NZ, L_LYS_183  | HZ3, L_LYS_183 | 2.82 | 2.09 | 29.82 |
| 3SE9.PDB | O, L_LYS_183   | N, L_GLU_187   | H, L_GLU_187   | 2.93 | 2.13 | 19.51 |
| 3SE9.PDB | OD2, L_ASP_151 | ND1, L_HIS_189 | HD1, L_HIS_189 | 2.89 | 2.18 | 29.99 |
| 3SE9.PDB | OD1, L_ASP_151 | N, L_VAL_191   | H, L_VAL_191   | 2.92 | 2.06 | 1.45  |
| 3SE9.PDB | O, L_PHE_209   | N, L_TYR_192   | H, L_TYR_192   | 2.96 | 2.10 | 3.54  |
| 3SE9.PDB | O, L_LYS_149   | N, L_ALA_193   | H, L_ALA_193   | 2.83 | 2.03 | 17.72 |
| 3SE9.PDB | O, L_LYS_207   | N, L_CYS_194   | H, L_CYS_194   | 2.79 | 1.94 | 6.54  |
| 3SE9.PDB | O, L_GLN_147   | N, L_GLU_195   | H, L_GLU_195   | 2.78 | 1.93 | 8.55  |
| 3SE9.PDB | O, L_VAL_205   | N, L_VAL_196   | H, L_VAL_196   | 2.74 | 1.90 | 9.26  |
| 3SE9.PDB | O, L_LYS_145   | N, L_THR_197   | H, L_THR_197   | 2.89 | 2.05 | 9.75  |
| 3SE9.PDB | ND1, L_HIS_198 | N, L_GLY_200   | H, L_GLY_200   | 3.00 | 2.16 | 11.89 |
| 3SE9.PDB | O, L_HIS_198   | N, L_LEU_201   | H, L_LEU_201   | 2.74 | 1.90 | 9.36  |
| 3SE9.PDB | O, L_VAL_196   | N, L_VAL_205   | H, L_VAL_205   | 2.96 | 2.24 | 27.95 |
| 3SE9.PDB | O, L_CYS_194   | N, L_LYS_207   | H, L_LYS_207   | 2.92 | 2.12 | 17.78 |
| 3SE9.PDB | O, L_TYR_192   | N, L_PHE_209   | H, L_PHE_209   | 2.89 | 2.14 | 24.10 |
| 3SE9.PDB | O, L_LYS_190   | N, L_ARG_211   | H, L_ARG_211   | 2.77 | 1.94 | 11.39 |
| 3THM.PDB | N, L_VAL_3     | OG, L_SER_2    | HG, L_SER_2    | 2.83 | 2.12 | 25.75 |
| 3THM.PDB | OG, L_SER_2    | N, L_LEU_4     | H, L_LEU_4     | 2.87 | 2.06 | 16.74 |
| 3THM.PDB | O, L_SER_23    | N, L_THR_5     | H, L_THR_5     | 2.87 | 2.03 | 10.68 |
| 3THM.PDB | O, L_TYR_87    | NE2, L_GLN_6   | HE21, L_GLN_6  | 2.88 | 2.03 | 6.32  |
| 3THM.PDB | OE1, L_GLU_12  | N, L_ALA_13    | H, L_ALA_13    | 2.70 | 1.91 | 19.84 |
| 3THM.PDB | O, L_LEU_79    | N, L_ARG_15    | H, L_ARG_15    | 2.74 | 1.88 | 4.28  |
| 3THM.PDB | O, L_LEU_74    | N, L_ILE_20    | H, L_ILE_20    | 2.80 | 1.96 | 9.35  |
| 3THM.PDB | O, L_THR_5     | N, L_SER_23    | H, L_SER_23    | 2.90 | 2.09 | 16.08 |
| 3THM.PDB | O, L_THR_70    | N, L_GLY_24    | H, L_GLY_24    | 2.84 | 2.07 | 23.10 |
| 3THM.PDB | OD1, L_ASN_28  | N, L_ASN_25    | H, L_ASN_25    | 2.96 | 2.18 | 18.32 |
| 3THM.PDB | OD1, L_ASP_93  | ND2, L_ASN_28  | HD21, L_ASN_28 | 2.85 | 2.01 | 9.28  |
| 3THM.PDB | OD1, L_ASN_28  | N, L_ILE_29    | H, L_ILE_29    | 2.67 | 1.87 | 18.36 |
| 3THM.PDB | O, L_ASN_25    | N, L_GLY_30    | H, L_GLY_30    | 2.96 | 2.12 | 9.14  |
| 3THM.PDB | O, L_ASN_28    | N, L_TYR_32    | H, L_TYR_32    | 2.89 | 2.11 | 20.74 |
| 3THM.PDB | OD2, L_ASP_52  | N, L_VAL_34    | H, L_VAL_34    | 2.76 | 2.01 | 24.28 |
| 3THM.PDB | O, L_SER_90    | N, L_ASN_35    | H, L_ASN_35    | 2.89 | 2.07 | 14.41 |
| 3THM.PDB | O, H_ALA_117   | ND2, L_ASN_35  | HD21, L_ASN_35 | 2.77 | 1.97 | 17.79 |
| 3THM.PDB | O, L_ILE_49    | N, L_TRP_36    | H, L_TRP_36    | 2.81 | 1.98 | 12.62 |
| 3THM.PDB | O, L_TYR_88    | N, L_TYR_37    | H, L_TYR_37    | 2.84 | 2.02 | 14.79 |
| 3THM.PDB | O, L_LYS_46    | N, L_GLN_38    | H, L_GLN_38    | 2.87 | 2.08 | 19.68 |
| 3THM.PDB | OH, L_TYR_87   | NE2, L_GLN_38  | HE21, L_GLN_38 | 2.86 | 2.05 | 16.36 |
| 3THM.PDB | O, L_ASP_86    | N, L_GLN_39    | H, L_GLN_39    | 2.67 | 1.81 | 4.75  |
| 3THM.PDB | O, L_LEU_40    | N, L_LYS_43    | H, L_LYS_43    | 2.88 | 2.04 | 10.22 |
| 3THM.PDB | O, L_GLN_38    | N, L_LYS_46    | H, L_LYS_46    | 2.84 | 2.05 | 18.96 |
| 3THM.PDB | O, L_TRP_36    | N, L_LEU_48    | H, L_LEU_48    | 2.82 | 1.98 | 12.51 |
| 3THM.PDB | O, L_LEU_54    | N, L_TYR_50    | H, L_TYR_50    | 2.87 | 2.06 | 17.25 |
| 3THM.PDB | OD1, L_ASN_35  | N, L_SER_51    | H, L_SER_51    | 2.98 | 2.18 | 17.87 |
| 3THM.PDB | O, L_VAL_34    | N, L_ASP_52    | H, L_ASP_52    | 2.82 | 1.98 | 11.63 |
| 3THM.PDB | O, L_ASP_61    | NH2, L_ARG_55  | HH21, L_ARG_55 | 2.95 | 2.23 | 28.54 |
| 3THM.PDB | OD1, L_ASP_83  | NE, L_ARG_62   | HE, L_ARG_62   | 2.86 | 2.03 | 12.52 |
| 3THM.PDB | OD2, L_ASP_83  | NH2, L_ARG_62  | HH21, L_ARG_62 | 2.63 | 1.79 | 10.74 |
| 3THM.PDB | O, L_ALA_75    | N, L_SER_64    | H, L_SER_64    | 2.96 | 2.14 | 13.06 |

|          |                |                |                 |      |      |       |
|----------|----------------|----------------|-----------------|------|------|-------|
| 3THM.PDB | O, L.SER.73    | N, L.SER.66    | H, L.SER.66     | 2.95 | 2.17 | 20.65 |
| 3THM.PDB | O, L.THR.71    | N, L.SER.68    | H, L.SER.68     | 2.93 | 2.09 | 7.96  |
| 3THM.PDB | O, L.SER.68    | N, L.THR.71    | H, L.THR.71     | 2.94 | 2.09 | 5.15  |
| 3THM.PDB | O, L.CYS.22    | N, L.ALA.72    | H, L.ALA.72     | 2.80 | 1.98 | 14.59 |
| 3THM.PDB | O, L.SER.66    | N, L.SER.73    | H, L.SER.73     | 2.76 | 1.91 | 7.29  |
| 3THM.PDB | O, L.ILE.20    | N, L.LEU.74    | H, L.LEU.74     | 2.97 | 2.15 | 14.37 |
| 3THM.PDB | O, L.SER.64    | N, L.ALA.75    | H, L.ALA.75     | 2.82 | 2.00 | 15.44 |
| 3THM.PDB | O, L.VAL.18    | N, L.ILE.76    | H, L.ILE.76     | 2.90 | 2.07 | 11.54 |
| 3THM.PDB | OD2, L.ASP.78  | NH1, L.ARG.77  | HH11, L.ARG.77  | 2.79 | 2.00 | 19.01 |
| 3THM.PDB | O, L.GLN.16    | N, L.LEU.79    | H, L.LEU.79     | 2.98 | 2.13 | 4.45  |
| 3THM.PDB | OD1, L.ASP.83  | N, L.LEU.80    | H, L.LEU.80     | 2.94 | 2.09 | 0.76  |
| 3THM.PDB | O, L.LEU.80    | N, L.ASP.83    | H, L.ASP.83     | 2.90 | 2.06 | 10.43 |
| 3THM.PDB | O, L.GLN.39    | N, L.ASP.86    | H, L.ASP.86     | 2.98 | 2.17 | 16.25 |
| 3THM.PDB | O, L.THR.105   | N, L.TYR.87    | H, L.TYR.87     | 2.83 | 2.01 | 15.92 |
| 3THM.PDB | O, L.TYR.37    | N, L.TYR.88    | H, L.TYR.88     | 2.90 | 2.08 | 14.37 |
| 3THM.PDB | O, L.SER.27    | N, L.ASP.94    | H, L.ASP.94     | 2.91 | 2.10 | 16.82 |
| 3THM.PDB | OD2, L.ASP.93  | N, L.THR.95    | H, L.THR.95     | 2.93 | 2.14 | 20.81 |
| 3THM.PDB | OD2, L.ASP.93  | N, L.LEU.96    | H, L.LEU.96     | 2.88 | 2.03 | 8.57  |
| 3THM.PDB | O, L.THR.91    | N, L.VAL.100   | H, L.VAL.100    | 2.85 | 2.00 | 6.96  |
| 3THM.PDB | O, L.CYS.89    | N, L.GLY.102   | H, L.GLY.102    | 2.91 | 2.09 | 13.69 |
| 3THM.PDB | O, L.TYR.87    | N, L.THR.105   | H, L.THR.105    | 2.90 | 2.14 | 23.36 |
| 3THM.PDB | O, L.PRO.8     | N, L.LYS.106   | H, L.LYS.106    | 2.93 | 2.09 | 11.49 |
| 3THM.PDB | O, L.ALA.85    | N, L.VAL.107   | H, L.VAL.107    | 2.85 | 2.01 | 9.33  |
| 3THM.PDB | OE1, L.GLU.84  | N, L.VAL.109   | H, L.VAL.109    | 2.88 | 2.08 | 17.71 |
| 3THM.PDB | O, L.GLU.12    | N, L.LEU.110   | H, L.LEU.110    | 2.93 | 2.10 | 11.26 |
| 3THM.PDB | OH, L.TYR.144  | N, L.GLY.111   | H, L.GLY.111    | 2.94 | 2.13 | 15.64 |
| 3THM.PDB | O, L.TYR.144   | N, L.ALA.115   | H, L.ALA.115    | 2.97 | 2.15 | 12.90 |
| 3THM.PDB | O, L.SER.141   | N, L.SER.118   | H, L.SER.118    | 2.88 | 2.05 | 12.08 |
| 3THM.PDB | O, L.LEU.139   | N, L.THR.120   | H, L.THR.120    | 2.88 | 2.06 | 14.03 |
| 3THM.PDB | O, L.VAL.137   | N, L.PHE.122   | H, L.PHE.122    | 2.87 | 2.03 | 12.38 |
| 3THM.PDB | O, L.LEU.129   | N, L.ASN.132   | H, L.ASN.132    | 2.78 | 1.99 | 19.66 |
| 3THM.PDB | OE1, L.GLU.128 | N, L.THR.135   | H, L.THR.135    | 2.71 | 1.92 | 18.59 |
| 3THM.PDB | O, L.LEU.182   | N, L.LEU.136   | H, L.LEU.136    | 2.87 | 2.02 | 9.82  |
| 3THM.PDB | O, L.SER.180   | N, L.CYS.138   | H, L.CYS.138    | 2.84 | 1.98 | 5.42  |
| 3THM.PDB | O, L.THR.120   | N, L.LEU.139   | H, L.LEU.139    | 2.76 | 1.90 | 6.56  |
| 3THM.PDB | O, L.ALA.178   | N, L.ILE.140   | H, L.ILE.140    | 2.89 | 2.15 | 25.14 |
| 3THM.PDB | O, L.SER.118   | N, L.SER.141   | H, L.SER.141    | 2.99 | 2.18 | 16.95 |
| 3THM.PDB | O, L.THR.200   | N, L.THR.149   | H, L.THR.149    | 2.96 | 2.13 | 13.40 |
| 3THM.PDB | O, L.GLN.198   | N, L.ALA.151   | H, L.ALA.151    | 2.90 | 2.07 | 13.36 |
| 3THM.PDB | OG, L.SER.180  | NE1, L.TRP.152 | HE1, L.TRP.152  | 2.84 | 1.99 | 7.64  |
| 3THM.PDB | O, L.SER.196   | N, L.LYS.153   | H, L.LYS.153    | 2.89 | 2.09 | 18.48 |
| 3THM.PDB | O, L.SER.157   | N, L.ALA.154   | H, L.ALA.154    | 2.77 | 1.99 | 21.42 |
| 3THM.PDB | O, L.SER.194   | N, L.ASP.155   | H, L.ASP.155    | 2.71 | 1.86 | 0.53  |
| 3THM.PDB | O, L.ALA.154   | N, L.SER.157   | H, L.SER.157    | 2.85 | 2.02 | 12.03 |
| 3THM.PDB | O, L.TYR.181   | N, L.GLU.164   | H, L.GLU.164    | 2.88 | 2.07 | 15.71 |
| 3THM.PDB | O, L.SER.179   | N, L.THR.166   | H, L.THR.166    | 2.84 | 2.02 | 13.98 |
| 3THM.PDB | O, L.ALA.177   | N, L.SER.169   | H, L.SER.169    | 2.84 | 2.02 | 15.98 |
| 3THM.PDB | O, L.LYS.175   | N, L.GLN.171   | H, L.GLN.171    | 2.63 | 1.80 | 12.05 |
| 3THM.PDB | OD1, L.ASP.142 | NE2, L.GLN.171 | HE22, L.GLN.171 | 2.87 | 2.03 | 8.80  |
| 3THM.PDB | O, L.GLN.171   | N, L.ASN.174   | H, L.ASN.174    | 2.95 | 2.14 | 16.29 |
| 3THM.PDB | OD1, L.ASN.173 | N, L.LYS.175   | H, L.LYS.175    | 2.86 | 2.05 | 16.58 |
| 3THM.PDB | O, L.SER.169   | N, L.ALA.177   | H, L.ALA.177    | 2.84 | 2.05 | 18.78 |
| 3THM.PDB | O, L.ILE.140   | N, L.ALA.178   | H, L.ALA.178    | 2.72 | 1.90 | 14.30 |
| 3THM.PDB | OG1, L.THR.166 | N, L.SER.179   | H, L.SER.179    | 2.86 | 2.02 | 12.53 |
| 3THM.PDB | O, L.CYS.138   | N, L.SER.180   | H, L.SER.180    | 2.89 | 2.07 | 15.30 |
| 3THM.PDB | O, L.GLU.164   | N, L.TYR.181   | H, L.TYR.181    | 2.72 | 1.88 | 12.14 |
| 3THM.PDB | O, L.GLY.162   | N, L.SER.183   | H, L.SER.183    | 2.89 | 2.05 | 9.19  |
| 3THM.PDB | O, L.ALA.134   | N, L.LEU.184   | H, L.LEU.184    | 2.75 | 1.90 | 5.72  |

|          |                |                |                |      |      |       |
|----------|----------------|----------------|----------------|------|------|-------|
| 3THM.PDB | OD1, L_ASP_155 | ND1, L_HIS_192 | HD1, L_HIS_192 | 2.84 | 1.98 | 0.83  |
| 3THM.PDB | O, L_LYS_153   | N, L_SER_196   | H, L_SER_196   | 2.82 | 2.02 | 17.68 |
| 3THM.PDB | O, L_LYS_208   | N, L_CYS_197   | H, L_CYS_197   | 2.89 | 2.14 | 23.69 |
| 3THM.PDB | O, L_ALA_151   | N, L_GLN_198   | H, L_GLN_198   | 2.69 | 1.85 | 10.52 |
| 3THM.PDB | O, L_VAL_206   | N, L_VAL_199   | H, L_VAL_199   | 2.87 | 2.03 | 11.90 |
| 3THM.PDB | O, L_THR_149   | N, L_THR_200   | H, L_THR_200   | 2.80 | 1.94 | 5.73  |
| 3THM.PDB | OG1, L_THR_205 | OG1, L_THR_200 | HG1, L_THR_200 | 2.83 | 2.04 | 14.40 |
| 3THM.PDB | O, L_SER_204   | N, L_HIS_201   | H, L_HIS_201   | 2.89 | 2.07 | 13.82 |
| 3THM.PDB | O, L_PRO_145   | NE2, L_HIS_201 | HE2, L_HIS_201 | 2.93 | 2.13 | 17.58 |
| 3THM.PDB | O, L_CYS_197   | N, L_LYS_208   | H, L_LYS_208   | 3.00 | 2.18 | 15.53 |
| 3THM.PDB | O, L_TYR_195   | N, L_VAL_210   | H, L_VAL_210   | 2.99 | 2.18 | 15.60 |
| 3THM.PDB | O, H_THR_21    | N, H_SER_7     | H, H_SER_7     | 2.99 | 2.26 | 26.55 |
| 3THM.PDB | O, H_PRO_9     | N, H_LEU_11    | H, H_LEU_11    | 2.71 | 1.97 | 25.47 |
| 3THM.PDB | O, H_THR_129   | N, H_VAL_12    | H, H_VAL_12    | 2.92 | 2.10 | 14.43 |
| 3THM.PDB | O, H_VAL_92    | N, H_SER_15    | H, H_SER_15    | 2.84 | 2.00 | 9.85  |
| 3THM.PDB | O, H_LEU_89    | N, H_LEU_18    | H, H_LEU_18    | 2.73 | 1.90 | 12.52 |
| 3THM.PDB | O, H_LEU_87    | N, H_LEU_20    | H, H_LEU_20    | 2.81 | 1.97 | 10.10 |
| 3THM.PDB | O, H_VAL_85    | N, H_CYS_22    | H, H_CYS_22    | 2.69 | 1.90 | 18.57 |
| 3THM.PDB | O, H_GLN_5     | N, H_THR_23    | H, H_THR_23    | 2.91 | 2.06 | 9.33  |
| 3THM.PDB | O, H_ASN_83    | N, H_VAL_24    | H, H_VAL_24    | 2.95 | 2.09 | 5.07  |
| 3THM.PDB | O, H_GLN_3     | N, H_SER_25    | H, H_SER_25    | 2.97 | 2.14 | 12.04 |
| 3THM.PDB | OD1, H_ASN_83  | N, H_ILE_29    | H, H_ILE_29    | 2.98 | 2.13 | 8.25  |
| 3THM.PDB | O, H_TYR_55    | N, H_TYR_34    | H, H_TYR_34    | 2.87 | 2.06 | 17.59 |
| 3THM.PDB | O, H_ILE_53    | N, H_GLY_36    | H, H_GLY_36    | 2.90 | 2.14 | 23.00 |
| 3THM.PDB | O, H_ALA_103   | N, H_VAL_37    | H, H_VAL_37    | 2.92 | 2.10 | 13.94 |
| 3THM.PDB | O, H_TYR_101   | N, H_VAL_39    | H, H_VAL_39    | 2.92 | 2.10 | 14.86 |
| 3THM.PDB | O, H_GLU_48    | N, H_ARG_40    | H, H_ARG_40    | 2.87 | 2.07 | 18.62 |
| 3THM.PDB | OE1, H_GLU_48  | NE, H_ARG_40   | HE, H_ARG_40   | 2.92 | 2.11 | 16.36 |
| 3THM.PDB | OD1, H_ASP_96  | NH1, H_ARG_40  | HH12, H_ARG_40 | 2.76 | 1.92 | 9.45  |
| 3THM.PDB | O, H_LEU_99    | N, H_GLN_41    | H, H_GLN_41    | 2.75 | 1.96 | 19.23 |
| 3THM.PDB | OE1, L_GLN_39  | NE2, H_GLN_41  | HE22, H_GLN_41 | 2.98 | 2.14 | 9.35  |
| 3THM.PDB | O, H_SER_42    | N, H_LYS_45    | H, H_LYS_45    | 2.83 | 2.00 | 12.10 |
| 3THM.PDB | O, H_ARG_40    | N, H_GLU_48    | H, H_GLU_48    | 2.98 | 2.23 | 24.84 |
| 3THM.PDB | OG, H_SER_52   | NE1, H_TRP_49  | HE1, H_TRP_49  | 2.98 | 2.27 | 29.23 |
| 3THM.PDB | O, H_TRP_38    | N, H_VAL_50    | H, H_VAL_50    | 2.78 | 1.93 | 5.54  |
| 3THM.PDB | O, H_GLY_36    | N, H_ILE_53    | H, H_ILE_53    | 2.92 | 2.11 | 15.71 |
| 3THM.PDB | O, H_SER_63    | N, H_ALA_54    | H, H_ALA_54    | 2.85 | 2.03 | 14.59 |
| 3THM.PDB | O, H_TYR_34    | N, H_TYR_55    | H, H_TYR_55    | 2.70 | 1.86 | 8.19  |
| 3THM.PDB | O, H_SER_61    | N, H_ARG_56    | H, H_ARG_56    | 2.79 | 1.94 | 3.04  |
| 3THM.PDB | O, H_TRP_49    | ND2, H_ASN_67  | HD21, H_ASN_67 | 2.99 | 2.17 | 14.54 |
| 3THM.PDB | OD1, H_ASN_67  | N, H_SER_69    | H, H_SER_69    | 2.88 | 2.04 | 9.73  |
| 3THM.PDB | O, H_PRO_68    | N, H_LYS_71    | H, H_LYS_71    | 2.99 | 2.15 | 9.73  |
| 3THM.PDB | O, H_LEU_70    | N, H_ARG_73    | H, H_ARG_73    | 2.98 | 2.17 | 16.28 |
| 3THM.PDB | O, H_THR_90    | NH1, H_ARG_73  | HH11, H_ARG_73 | 2.99 | 2.22 | 21.63 |
| 3THM.PDB | OD1, H_ASP_96  | NH2, H_ARG_73  | HH22, H_ARG_73 | 2.91 | 2.05 | 3.20  |
| 3THM.PDB | O, H_ARG_88    | N, H_THR_75    | H, H_THR_75    | 2.81 | 1.99 | 15.03 |
| 3THM.PDB | OH, H_TYR_66   | N, H_VAL_76    | H, H_VAL_76    | 2.75 | 1.94 | 15.65 |
| 3THM.PDB | O, H_GLN_84    | N, H_ASP_79    | H, H_ASP_79    | 2.81 | 1.97 | 8.52  |
| 3THM.PDB | O, H_ALA_27    | ND2, H_ASN_83  | HD21, H_ASN_83 | 2.72 | 1.92 | 17.02 |
| 3THM.PDB | O, H_VAL_24    | ND2, H_ASN_83  | HD22, H_ASN_83 | 2.73 | 1.93 | 16.56 |
| 3THM.PDB | O, H_CYS_22    | N, H_VAL_85    | H, H_VAL_85    | 2.95 | 2.13 | 13.75 |
| 3THM.PDB | O, H_SER_77    | N, H_SER_86    | H, H_SER_86    | 2.75 | 1.94 | 17.86 |
| 3THM.PDB | O, H_LEU_20    | N, H_LEU_87    | H, H_LEU_87    | 2.98 | 2.17 | 15.66 |
| 3THM.PDB | O, H_THR_75    | N, H_ARG_88    | H, H_ARG_88    | 2.85 | 2.03 | 14.81 |
| 3THM.PDB | O, H_LEU_18    | N, H_LEU_89    | H, H_LEU_89    | 2.80 | 2.02 | 20.86 |
| 3THM.PDB | O, H_ARG_73    | N, H_THR_90    | H, H_THR_90    | 2.97 | 2.15 | 16.37 |
| 3THM.PDB | OD2, H_ASP_96  | N, H_THR_93    | H, H_THR_93    | 2.92 | 2.12 | 16.99 |
| 3THM.PDB | O, H_THR_93    | N, H_ASP_96    | H, H_ASP_96    | 2.87 | 2.02 | 6.72  |

|          |                |                |                 |      |      |       |
|----------|----------------|----------------|-----------------|------|------|-------|
| 3THM.PDB | O, H_VAL_128   | N, H_ALA_98    | H, H_ALA_98     | 2.97 | 2.18 | 20.37 |
| 3THM.PDB | O, H_GLN_41    | N, H_LEU_99    | H, H_LEU_99     | 2.82 | 2.04 | 20.70 |
| 3THM.PDB | O, H_THR_126   | N, H_TYR_100   | H, H_TYR_100    | 2.79 | 1.94 | 6.57  |
| 3THM.PDB | O, H_VAL_39    | N, H_TYR_101   | H, H_TYR_101    | 2.82 | 1.97 | 6.69  |
| 3THM.PDB | OE2, H_GLU_6   | N, H_CYS_102   | H, H_CYS_102    | 2.91 | 2.11 | 17.93 |
| 3THM.PDB | O, H_VAL_37    | N, H_ALA_103   | H, H_ALA_103    | 2.92 | 2.15 | 22.20 |
| 3THM.PDB | O, H_VAL_121   | N, H_ARG_104   | H, H_ARG_104    | 2.93 | 2.16 | 22.36 |
| 3THM.PDB | OD1, H_ASP_120 | NE, H_ARG_104  | HE, H_ARG_104   | 2.94 | 2.10 | 9.96  |
| 3THM.PDB | OD2, H_ASP_120 | NH2, H_ARG_104 | HH21, H_ARG_104 | 2.75 | 2.00 | 25.31 |
| 3THM.PDB | O, H_TYR_35    | N, H_ARG_105   | H, H_ARG_105    | 2.94 | 2.12 | 13.20 |
| 3THM.PDB | O, F_CYS_43    | NH1, H_ARG_105 | HH12, H_ARG_105 | 2.85 | 2.05 | 18.46 |
| 3THM.PDB | O, H_ALA_118   | N, H_GLN_106   | H, H_GLN_106    | 2.92 | 2.09 | 11.12 |
| 3THM.PDB | O, H_TRP_116   | N, H_LEU_108   | H, H_LEU_108    | 2.87 | 2.01 | 4.97  |
| 3THM.PDB | O, H_TYR_114   | N, H_ASP_110   | H, H_ASP_110    | 2.97 | 2.20 | 22.11 |
| 3THM.PDB | OD2, H_ASP_110 | N, H_THR_112   | H, H_THR_112    | 2.71 | 1.90 | 15.44 |
| 3THM.PDB | OD2, H_ASP_110 | OG1, H_THR_112 | HG1, H_THR_112  | 2.76 | 1.95 | 7.38  |
| 3THM.PDB | OD1, H_ASP_109 | NE2, H_GLN_115 | HE21, H_GLN_115 | 2.80 | 1.96 | 11.40 |
| 3THM.PDB | O, H_CYS_102   | N, H_GLY_123   | H, H_GLY_123    | 2.94 | 2.12 | 14.27 |
| 3THM.PDB | OE1, H_GLU_6   | N, H_GLY_125   | H, H_GLY_125    | 2.63 | 1.81 | 15.46 |
| 3THM.PDB | O, H_TYR_100   | N, H_THR_126   | H, H_THR_126    | 2.88 | 2.07 | 16.47 |
| 3THM.PDB | O, H_ALA_98    | N, H_VAL_128   | H, H_VAL_128    | 2.86 | 2.04 | 14.39 |
| 3THM.PDB | O, H_GLY_10    | N, H_THR_129   | H, H_THR_129    | 2.91 | 2.10 | 17.08 |
| 3THM.PDB | OG1, H_THR_97  | N, H_VAL_130   | H, H_VAL_130    | 2.80 | 1.94 | 1.61  |
| 3THM.PDB | O, H_VAL_12    | N, H_SER_131   | H, H_SER_131    | 2.82 | 2.03 | 20.60 |
| 3THM.PDB | OG, H_SER_131  | N, H_ALA_133   | H, H_ALA_133    | 2.89 | 2.06 | 13.32 |
| 3THM.PDB | O, H_PHE_165   | N, H_LYS_136   | H, H_LYS_136    | 2.85 | 2.08 | 21.01 |
| 3THM.PDB | O, H_LYS_162   | N, H_SER_139   | H, H_SER_139    | 2.99 | 2.21 | 21.41 |
| 3THM.PDB | O, H_LEU_160   | N, H_PHE_141   | H, H_PHE_141    | 2.90 | 2.07 | 13.94 |
| 3THM.PDB | O, H_GLY_158   | N, H_LEU_143   | H, H_LEU_143    | 2.66 | 1.82 | 10.00 |
| 3THM.PDB | O, H_LEU_143   | N, H_GLY_158   | H, H_GLY_158    | 2.93 | 2.12 | 16.47 |
| 3THM.PDB | O, H_SER_199   | N, H_ACYS_159  | H, H_ACYS_159   | 2.87 | 2.09 | 19.75 |
| 3THM.PDB | O, H_SER_199   | N, H_BCYS_159  | H, H_BCYS_159   | 2.93 | 2.18 | 25.13 |
| 3THM.PDB | O, H_PHE_141   | N, H_LEU_160   | H, H_LEU_160    | 2.78 | 1.98 | 17.74 |
| 3THM.PDB | O, H_LEU_197   | N, H_VAL_161   | H, H_VAL_161    | 2.77 | 1.93 | 8.59  |
| 3THM.PDB | O, H_SER_139   | N, H_LYS_162   | H, H_LYS_162    | 2.85 | 2.00 | 5.79  |
| 3THM.PDB | OG, L_SER_183  | NZ, H_LYS_162  | HZ1, H_LYS_162  | 2.77 | 1.97 | 21.34 |
| 3THM.PDB | OG1, L_THR_135 | NZ, H_LYS_162  | HZ2, H_LYS_162  | 2.85 | 2.02 | 17.75 |
| 3THM.PDB | OG, H_SER_196  | N, H_ASP_163   | H, H_ASP_163    | 2.90 | 2.06 | 10.60 |
| 3THM.PDB | O, H_TYR_195   | N, H_TYR_164   | H, H_TYR_164    | 2.87 | 2.08 | 20.27 |
| 3THM.PDB | OG, H_SER_199  | NE1, H_TRP_173 | HE1, H_TRP_173  | 3.00 | 2.15 | 7.78  |
| 3THM.PDB | O, H_ILE_214   | N, H_ASN_174   | H, H_ASN_174    | 2.65 | 1.83 | 15.08 |
| 3THM.PDB | OD1, H_ASN_216 | N, H_SER_175   | H, H_SER_175    | 2.77 | 2.04 | 26.97 |
| 3THM.PDB | O, H_TRP_173   | N, H_GLY_176   | H, H_GLY_176    | 2.79 | 2.00 | 19.31 |
| 3THM.PDB | O, H_ASN_174   | N, H_ALA_177   | H, H_ALA_177    | 2.93 | 2.12 | 16.59 |
| 3THM.PDB | O, H_VAL_200   | N, H_HIS_183   | H, H_HIS_183    | 2.68 | 1.84 | 8.83  |
| 3THM.PDB | O, H_SER_198   | N, H_PHE_185   | H, H_PHE_185    | 2.88 | 2.05 | 11.29 |
| 3THM.PDB | O, H_SER_196   | N, H_VAL_188   | H, H_VAL_188    | 2.78 | 2.06 | 27.88 |
| 3THM.PDB | O, H_LEU_194   | N, H_GLN_190   | H, H_GLN_190    | 2.87 | 2.07 | 17.50 |
| 3THM.PDB | O, H_GLN_190   | N, H_GLY_193   | H, H_GLY_193    | 2.85 | 2.01 | 11.86 |
| 3THM.PDB | O, H_TYR_164   | N, H_TYR_195   | H, H_TYR_195    | 2.86 | 2.01 | 9.29  |
| 3THM.PDB | O, H_VAL_188   | N, H_SER_196   | H, H_SER_196    | 2.94 | 2.15 | 19.84 |
| 3THM.PDB | O, H_VAL_161   | N, H_LEU_197   | H, H_LEU_197    | 2.93 | 2.14 | 18.92 |
| 3THM.PDB | O, H_HIS_183   | N, H_VAL_200   | H, H_VAL_200    | 2.86 | 2.01 | 9.19  |
| 3THM.PDB | O, H_LEU_157   | N, H_VAL_201   | H, H_VAL_201    | 2.69 | 1.85 | 11.90 |
| 3THM.PDB | O, H_GLY_181   | N, H_THR_202   | H, H_THR_202    | 3.00 | 2.19 | 16.64 |
| 3THM.PDB | O, H_PRO_204   | N, H_SER_207   | H, H_SER_207    | 2.96 | 2.23 | 27.46 |
| 3THM.PDB | O, H_SER_207   | N, H_GLN_211   | H, H_GLN_211    | 2.68 | 1.84 | 9.21  |
| 3THM.PDB | OD1, H_ASN_174 | N, H_ILE_214   | H, H_ILE_214    | 2.87 | 2.13 | 26.27 |



|          |                |                |                 |      |      |       |
|----------|----------------|----------------|-----------------|------|------|-------|
| 3THM.PDB | O, H_LYS_228   | N, H_CYS_215   | H, H_CYS_215    | 2.84 | 2.07 | 22.53 |
| 3THM.PDB | O, H_SER_172   | N, H_ASN_216   | H, H_ASN_216    | 2.73 | 1.89 | 10.25 |
| 3THM.PDB | OD1, H_ASP_227 | ND2, H_ASN_216 | HD22, H_ASN_216 | 2.86 | 2.03 | 14.19 |
| 3THM.PDB | O, H_VAL_226   | N, H_VAL_217   | H, H_VAL_217    | 2.70 | 1.86 | 9.29  |
| 3THM.PDB | O, H_THR_170   | N, H_ASN_218   | H, H_ASN_218    | 2.97 | 2.15 | 14.77 |
| 3THM.PDB | O, H_THR_224   | N, H_HIS_219   | H, H_HIS_219    | 2.94 | 2.09 | 7.91  |
| 3THM.PDB | OG, H_SER_222  | ND1, H_HIS_219 | HD1, H_HIS_219  | 2.82 | 2.08 | 24.90 |
| 3THM.PDB | O, H_PRO_166   | NE2, H_HIS_219 | HE2, H_HIS_219  | 2.71 | 1.87 | 10.58 |
| 3THM.PDB | O, H_LYS_220   | N, H_ASN_223   | H, H_ASN_223    | 2.76 | 2.01 | 25.66 |
| 3THM.PDB | O, H_VAL_217   | N, H_VAL_226   | H, H_VAL_226    | 2.74 | 1.90 | 11.00 |
| 3THM.PDB | O, H_CYS_215   | N, H_LYS_228   | H, H_LYS_228    | 2.89 | 2.06 | 14.00 |
| 3THM.PDB | O, H_TYR_213   | N, H_VAL_230   | H, H_VAL_230    | 2.80 | 1.96 | 9.90  |
| 3THM.PDB | OD2, F_ASP_56  | ND1, F_HIS_38  | HD1, F_HIS_38   | 2.77 | 1.98 | 19.59 |
| 3THM.PDB | O, F_GLY_40    | N, F_CYS_43    | H, F_CYS_43     | 2.96 | 2.13 | 13.45 |
| 3THM.PDB | OE2, F_GLU_63  | N, F_HIS_44    | H, F_HIS_44     | 2.86 | 2.00 | 4.98  |
| 3THM.PDB | OH, H_TYR_35   | ND1, F_HIS_44  | HD1, F_HIS_44   | 2.69 | 1.83 | 5.98  |
| 3THM.PDB | OG, H_SER_63   | NE2, F_HIS_44  | HE2, F_HIS_44   | 2.83 | 2.07 | 23.36 |
| 3THM.PDB | OE1, F_GLU_63  | N, F_LYS_45    | H, F_LYS_45     | 2.81 | 1.99 | 14.79 |
| 3THM.PDB | O, F_HIS_80    | N, F_CYS_47    | H, F_CYS_47     | 2.76 | 1.92 | 10.08 |
| 3THM.PDB | OG1, F_THR_76  | N, F_GLY_50    | H, F_GLY_50     | 2.93 | 2.22 | 29.13 |
| 3THM.PDB | O, F_VAL_67    | N, F_ARG_52    | H, F_ARG_52     | 2.76 | 2.01 | 24.49 |
| 3THM.PDB | O, F_ASP_65    | N, F_ALA_54    | H, F_ALA_54     | 2.91 | 2.11 | 18.55 |
| 3THM.PDB | OG1, F_THR_58  | N, F_GLY_61    | H, F_GLY_61     | 2.96 | 2.22 | 26.61 |
| 3THM.PDB | O, F_ARG_52    | N, F_VAL_67    | H, F_VAL_67     | 2.78 | 1.94 | 11.01 |
| 3THM.PDB | O, F_GLY_50    | N, F_CYS_69    | H, F_CYS_69     | 2.95 | 2.13 | 14.13 |
| 3THM.PDB | O, F_GLN_70    | N, F_LYS_73    | H, F_LYS_73     | 2.88 | 2.05 | 12.43 |
| 3THM.PDB | O, F_GLN_70    | N, F_GLU_74    | H, F_GLU_74     | 2.89 | 2.05 | 11.11 |
| 3THM.PDB | O, F_ARG_86    | N, F_TYR_75    | H, F_TYR_75     | 2.78 | 2.03 | 24.45 |
| 3THM.PDB | O, F_ARG_105   | N, F_THR_76    | H, F_THR_76     | 2.94 | 2.15 | 19.85 |
| 3THM.PDB | O, L_SER_51    | NZ, F_LYS_78   | HZ2, F_LYS_78   | 3.00 | 2.15 | 15.09 |
| 3THM.PDB | O, F_GLU_51    | NE2, F_HIS_80  | HE2, F_HIS_80   | 2.76 | 1.91 | 6.66  |
| 3THM.PDB | O, F_TYR_75    | N, F_ARG_86    | H, F_ARG_86     | 2.77 | 1.94 | 13.51 |
| 3THM.PDB | O, F_LYS_73    | N, F_CYS_88    | H, F_CYS_88     | 2.79 | 1.94 | 5.08  |
| 3THM.PDB | OD1, F_ASN_108 | N, F_ARG_89    | H, F_ARG_89     | 2.64 | 1.87 | 22.68 |
| 3THM.PDB | O, F_GLN_107   | N, F_THR_104   | H, F_THR_104    | 2.82 | 1.99 | 12.71 |
| 3TJE.PDB | OG, L_SER_2    | N, L_LEU_4     | H, L_LEU_4      | 2.98 | 2.19 | 19.51 |
| 3TJE.PDB | O, L_SER_23    | N, L_THR_5     | H, L_THR_5      | 2.89 | 2.05 | 11.59 |
| 3TJE.PDB | O, L_TYR_87    | NE2, L_GLN_6   | HE21, L_GLN_6   | 2.84 | 2.01 | 11.61 |
| 3TJE.PDB | O, L_LYS_106   | N, L_VAL_10    | H, L_VAL_10     | 2.95 | 2.15 | 17.08 |
| 3TJE.PDB | OE1, L_GLU_12  | N, L_ALA_13    | H, L_ALA_13     | 2.73 | 1.95 | 20.14 |
| 3TJE.PDB | O, L_LEU_79    | N, L_ARG_15    | H, L_ARG_15     | 2.84 | 2.01 | 13.10 |
| 3TJE.PDB | O, L_LEU_74    | N, L_ILE_20    | H, L_ILE_20     | 2.71 | 1.88 | 13.42 |
| 3TJE.PDB | O, L_THR_5     | N, L_SER_23    | H, L_SER_23     | 2.97 | 2.17 | 18.20 |
| 3TJE.PDB | O, L_THR_70    | N, L_GLY_24    | H, L_GLY_24     | 2.81 | 1.98 | 12.07 |
| 3TJE.PDB | OD1, L_ASN_28  | N, L_ASN_25    | H, L_ASN_25     | 2.88 | 2.06 | 15.65 |
| 3TJE.PDB | OD1, L_ASN_25  | N, L_PHE_27    | H, L_PHE_27     | 2.67 | 1.88 | 19.71 |
| 3TJE.PDB | OD1, L_ASP_93  | ND2, L_ASN_28  | HD21, L_ASN_28  | 2.73 | 1.89 | 10.95 |
| 3TJE.PDB | OD1, L_ASN_28  | N, L_ILE_29    | H, L_ILE_29     | 2.67 | 1.87 | 18.78 |
| 3TJE.PDB | O, L_ASN_25    | N, L_GLY_30    | H, L_GLY_30     | 2.98 | 2.19 | 18.64 |
| 3TJE.PDB | O, L_ASN_28    | N, L_ARG_31    | H, L_ARG_31     | 2.87 | 2.03 | 11.14 |
| 3TJE.PDB | OD1, L_ASP_94  | NH1, L_ARG_31  | HH11, L_ARG_31  | 2.81 | 2.04 | 22.49 |
| 3TJE.PDB | O, L_ASN_28    | N, L_TYR_32    | H, L_TYR_32     | 2.86 | 2.10 | 23.81 |
| 3TJE.PDB | OD1, L_ASN_52  | N, L_VAL_34    | H, L_VAL_34     | 2.85 | 2.02 | 12.87 |
| 3TJE.PDB | O, L_SER_90    | N, L_ASN_35    | H, L_ASN_35     | 2.92 | 2.09 | 12.93 |
| 3TJE.PDB | O, H_ALA_117   | ND2, L_ASN_35  | HD21, L_ASN_35  | 2.81 | 2.01 | 17.88 |
| 3TJE.PDB | O, L_ILE_49    | N, L_TRP_36    | H, L_TRP_36     | 2.75 | 1.91 | 11.08 |
| 3TJE.PDB | O, L_TYR_88    | N, L_TYR_37    | H, L_TYR_37     | 2.81 | 1.99 | 14.58 |
| 3TJE.PDB | O, L_LYS_46    | N, L_GLN_38    | H, L_GLN_38     | 2.87 | 2.07 | 18.73 |

|          |                |                |                |      |      |       |
|----------|----------------|----------------|----------------|------|------|-------|
| 3TJE.PDB | OH, L_TYR_87   | NE2, L_GLN_38  | HE21, L_GLN_38 | 2.91 | 2.10 | 17.00 |
| 3TJE.PDB | O, L_ASP_86    | N, L_GLN_39    | H, L_GLN_39    | 2.75 | 1.92 | 11.44 |
| 3TJE.PDB | O, L_LYS_43    | NE2, L_GLN_39  | HE21, L_GLN_39 | 2.96 | 2.17 | 20.11 |
| 3TJE.PDB | O, L_LEU_40    | N, L_LYS_43    | H, L_LYS_43    | 2.81 | 1.96 | 7.60  |
| 3TJE.PDB | O, L_GLN_38    | N, L_LYS_46    | H, L_LYS_46    | 2.89 | 2.11 | 21.83 |
| 3TJE.PDB | O, L_TRP_36    | N, L_LEU_48    | H, L_LEU_48    | 2.96 | 2.15 | 16.44 |
| 3TJE.PDB | O, L_LEU_54    | N, L_TYR_50    | H, L_TYR_50    | 2.88 | 2.07 | 15.46 |
| 3TJE.PDB | O, L_VAL_34    | N, L_ASN_52    | H, L_ASN_52    | 2.84 | 2.00 | 11.32 |
| 3TJE.PDB | O, L_TYR_51    | N, L_ASN_53    | H, L_ASN_53    | 2.85 | 2.14 | 29.08 |
| 3TJE.PDB | O, L_TYR_50    | N, L_LEU_54    | H, L_LEU_54    | 2.99 | 2.17 | 16.15 |
| 3TJE.PDB | O, L_PHE_63    | NH1, L_ARG_55  | HH11, L_ARG_55 | 2.88 | 2.12 | 23.88 |
| 3TJE.PDB | OD2, L_ASP_83  | NH1, L_ARG_62  | HH12, L_ARG_62 | 2.77 | 1.98 | 19.25 |
| 3TJE.PDB | OD1, L_ASP_83  | NH2, L_ARG_62  | HH22, L_ARG_62 | 2.87 | 2.01 | 3.19  |
| 3TJE.PDB | O, L_SER_73    | N, L_SER_66    | H, L_SER_66    | 2.91 | 2.14 | 21.13 |
| 3TJE.PDB | O, L_BSER_73   | N, L_SER_66    | H, L_SER_66    | 2.91 | 2.13 | 20.97 |
| 3TJE.PDB | O, L_TYR_32    | NZ, L_LYS_67   | HZ2, L_LYS_67  | 2.82 | 2.02 | 22.26 |
| 3TJE.PDB | O, L_SER_71    | N, L_SER_68    | H, L_SER_68    | 2.88 | 2.03 | 8.39  |
| 3TJE.PDB | O, L_SER_68    | N, L_SER_71    | H, L_SER_71    | 2.99 | 2.15 | 8.41  |
| 3TJE.PDB | O, L_CYS_22    | N, L_ALA_72    | H, L_ALA_72    | 2.87 | 2.04 | 13.56 |
| 3TJE.PDB | O, L_SER_66    | N, L_ASER_73   | H, L_ASER_73   | 2.83 | 2.04 | 18.54 |
| 3TJE.PDB | O, L_SER_66    | N, L_BSER_73   | H, L_BSER_73   | 2.85 | 2.06 | 19.36 |
| 3TJE.PDB | O, L_ILE_20    | N, L_LEU_74    | H, L_LEU_74    | 2.94 | 2.12 | 13.68 |
| 3TJE.PDB | O, L_SER_64    | N, L_ALA_75    | H, L_ALA_75    | 2.88 | 2.03 | 9.17  |
| 3TJE.PDB | O, L_VAL_18    | N, L_ILE_76    | H, L_ILE_76    | 2.93 | 2.11 | 14.42 |
| 3TJE.PDB | OD2, L_ASP_78  | NH1, L_ARG_77  | HH11, L_ARG_77 | 2.74 | 1.93 | 16.91 |
| 3TJE.PDB | O, L_GLN_16    | N, L_LEU_79    | H, L_LEU_79    | 2.98 | 2.14 | 10.89 |
| 3TJE.PDB | OD2, L_ASP_83  | N, L_LEU_80    | H, L_LEU_80    | 2.81 | 1.96 | 7.20  |
| 3TJE.PDB | O, L_LEU_80    | N, L_ASP_83    | H, L_ASP_83    | 2.88 | 2.03 | 9.91  |
| 3TJE.PDB | O, L_THR_105   | N, L_TYR_87    | H, L_TYR_87    | 2.92 | 2.12 | 18.00 |
| 3TJE.PDB | O, L_TYR_37    | N, L_TYR_88    | H, L_TYR_88    | 2.91 | 2.09 | 14.23 |
| 3TJE.PDB | O, L_PRO_33    | OG1, L_THR_91  | HG1, L_THR_91  | 2.76 | 2.04 | 23.18 |
| 3TJE.PDB | O, L_GLY_98    | N, L_ASP_93    | H, L_ASP_93    | 2.88 | 2.03 | 9.26  |
| 3TJE.PDB | O, L_PHE_27    | N, L_ASP_94    | H, L_ASP_94    | 2.94 | 2.09 | 6.58  |
| 3TJE.PDB | OD2, L_ASP_93  | N, L_LEU_96    | H, L_LEU_96    | 2.80 | 2.01 | 19.19 |
| 3TJE.PDB | O, L_THR_91    | N, L_VAL_100   | H, L_VAL_100   | 2.77 | 1.92 | 9.60  |
| 3TJE.PDB | O, L_CYS_89    | N, L_GLY_102   | H, L_GLY_102   | 2.86 | 2.05 | 17.43 |
| 3TJE.PDB | O, L_TYR_87    | N, L_THR_105   | H, L_THR_105   | 2.85 | 2.08 | 21.91 |
| 3TJE.PDB | O, L_PRO_7     | OG1, L_THR_105 | HG1, L_THR_105 | 2.71 | 1.92 | 11.71 |
| 3TJE.PDB | O, L_PRO_8     | N, L_LYS_106   | H, L_LYS_106   | 2.83 | 1.98 | 10.06 |
| 3TJE.PDB | O, L_ALA_85    | N, L_VAL_107   | H, L_VAL_107   | 2.95 | 2.10 | 8.53  |
| 3TJE.PDB | OE2, L_GLU_84  | N, L_VAL_109   | H, L_VAL_109   | 2.88 | 2.05 | 12.54 |
| 3TJE.PDB | O, L_GLU_12    | N, L_LEU_110   | H, L_LEU_110   | 2.90 | 2.08 | 14.25 |
| 3TJE.PDB | OH, L_TYR_144  | N, L_GLY_111   | H, L_GLY_111   | 2.92 | 2.12 | 17.61 |
| 3TJE.PDB | O, L_TYR_144   | N, L_ALA_115   | H, L_ALA_115   | 2.80 | 2.00 | 16.96 |
| 3TJE.PDB | O, L_SER_141   | N, L_SER_118   | H, L_SER_118   | 2.91 | 2.14 | 22.45 |
| 3TJE.PDB | O, L_LEU_139   | N, L_THR_120   | H, L_THR_120   | 2.96 | 2.12 | 10.98 |
| 3TJE.PDB | O, L_VAL_137   | N, L_PHE_122   | H, L_PHE_122   | 2.77 | 1.92 | 8.56  |
| 3TJE.PDB | O, L_LEU_129   | N, L_ASN_132   | H, L_ASN_132   | 2.97 | 2.15 | 16.34 |
| 3TJE.PDB | OE2, L_GLU_128 | OG1, L_THR_135 | HG1, L_THR_135 | 2.52 | 1.76 | 18.95 |
| 3TJE.PDB | O, L_LEU_182   | N, L_LEU_136   | H, L_LEU_136   | 2.82 | 1.99 | 11.01 |
| 3TJE.PDB | O, L_SER_180   | N, L_CYS_138   | H, L_CYS_138   | 2.78 | 1.93 | 6.24  |
| 3TJE.PDB | O, L_THR_120   | N, L_LEU_139   | H, L_LEU_139   | 2.87 | 2.03 | 10.47 |
| 3TJE.PDB | O, L_ALA_178   | N, L_ILE_140   | H, L_ILE_140   | 2.83 | 2.07 | 23.88 |
| 3TJE.PDB | OE1, L_GLN_171 | N, L_ASP_142   | H, L_ASP_142   | 2.90 | 2.05 | 8.27  |
| 3TJE.PDB | O, L_ALA_115   | N, L_TYR_144   | H, L_TYR_144   | 2.95 | 2.16 | 19.36 |
| 3TJE.PDB | O, L_THR_200   | N, L_THR_149   | H, L_THR_149   | 2.90 | 2.10 | 17.11 |
| 3TJE.PDB | O, L_GLN_198   | N, L_ALA_151   | H, L_ALA_151   | 2.89 | 2.08 | 16.72 |
| 3TJE.PDB | OG, L_SER_180  | NE1, L_TRP_152 | HE1, L_TRP_152 | 2.95 | 2.10 | 8.91  |

|          |                |                |                 |      |      |       |
|----------|----------------|----------------|-----------------|------|------|-------|
| 3TJE.PDB | O, L.SER.157   | N, L.ALA.154   | H, L.ALA.154    | 2.87 | 2.03 | 11.03 |
| 3TJE.PDB | O, L.SER.194   | N, L.ASP.155   | H, L.ASP.155    | 2.88 | 2.03 | 6.45  |
| 3TJE.PDB | O, L.ALA.154   | N, L.SER.157   | H, L.SER.157    | 2.84 | 2.00 | 9.67  |
| 3TJE.PDB | O, L.SER.179   | N, L.THR.166   | H, L.THR.166    | 2.85 | 2.03 | 14.19 |
| 3TJE.PDB | O, L.ALA.177   | N, L.SER.169   | H, L.SER.169    | 2.80 | 1.99 | 16.63 |
| 3TJE.PDB | O, L.LYS.175   | N, L.GLN.171   | H, L.GLN.171    | 2.71 | 1.85 | 3.49  |
| 3TJE.PDB | OD1, L.ASP.142 | NE2, L.GLN.171 | HE21, L.GLN.171 | 2.80 | 1.98 | 15.09 |
| 3TJE.PDB | O, L.GLN.171   | N, L.ASN.174   | H, L.ASN.174    | 2.96 | 2.12 | 11.80 |
| 3TJE.PDB | OD1, L.ASN.173 | N, L.LYS.175   | H, L.LYS.175    | 2.90 | 2.05 | 7.85  |
| 3TJE.PDB | O, L.PHE.143   | N, L.TYR.176   | H, L.TYR.176    | 2.84 | 2.01 | 10.88 |
| 3TJE.PDB | O, L.SER.169   | N, L.ALA.177   | H, L.ALA.177    | 2.94 | 2.12 | 14.89 |
| 3TJE.PDB | O, L.ILE.140   | N, L.ALA.178   | H, L.ALA.178    | 2.67 | 1.87 | 18.00 |
| 3TJE.PDB | OG1, L.THR.166 | N, L.SER.179   | H, L.SER.179    | 2.90 | 2.10 | 18.20 |
| 3TJE.PDB | O, L.CYS.138   | N, L.SER.180   | H, L.SER.180    | 2.89 | 2.09 | 17.42 |
| 3TJE.PDB | O, L.GLU.164   | N, L.TYR.181   | H, L.TYR.181    | 2.81 | 1.99 | 15.18 |
| 3TJE.PDB | O, L.LEU.136   | N, L.LEU.182   | H, L.LEU.182    | 2.96 | 2.15 | 16.77 |
| 3TJE.PDB | O, L.GLY.162   | N, L.SER.183   | H, L.SER.183    | 2.95 | 2.11 | 9.60  |
| 3TJE.PDB | O, L.ALA.134   | N, L.LEU.184   | H, L.LEU.184    | 2.91 | 2.06 | 5.00  |
| 3TJE.PDB | OG1, L.THR.185 | N, L.GLN.188   | H, L.GLN.188    | 2.93 | 2.09 | 10.43 |
| 3TJE.PDB | O, L.THR.185   | N, L.TRP.189   | H, L.TRP.189    | 2.96 | 2.12 | 11.25 |
| 3TJE.PDB | O, L.VAL.210   | N, L.TYR.195   | H, L.TYR.195    | 2.89 | 2.08 | 15.12 |
| 3TJE.PDB | O, L.LYS.153   | N, L.SER.196   | H, L.SER.196    | 2.96 | 2.16 | 17.59 |
| 3TJE.PDB | O, L.LYS.208   | N, L.CYS.197   | H, L.CYS.197    | 2.95 | 2.14 | 16.29 |
| 3TJE.PDB | O, L.ALA.151   | N, L.GLN.198   | H, L.GLN.198    | 2.79 | 1.94 | 4.13  |
| 3TJE.PDB | O, L.VAL.206   | N, L.VAL.199   | H, L.VAL.199    | 2.84 | 2.01 | 12.78 |
| 3TJE.PDB | O, L.THR.149   | N, L.THR.200   | H, L.THR.200    | 2.81 | 1.96 | 9.64  |
| 3TJE.PDB | OG1, L.THR.205 | OG1, L.THR.200 | HG1, L.THR.200  | 2.75 | 1.97 | 15.90 |
| 3TJE.PDB | O, L.SER.204   | N, L.HIS.201   | H, L.HIS.201    | 2.96 | 2.13 | 12.24 |
| 3TJE.PDB | O, L.PRO.145   | NE2, L.HIS.201 | HE2, L.HIS.201  | 2.93 | 2.12 | 17.78 |
| 3TJE.PDB | O, L.TYR.195   | N, L.VAL.210   | H, L.VAL.210    | 2.98 | 2.16 | 15.92 |
| 3TJE.PDB | O, H.SER.25    | N, H.GLN.3     | H, H.GLN.3      | 2.88 | 2.06 | 14.24 |
| 3TJE.PDB | O, H.THR.21    | N, H.SER.7     | H, H.SER.7      | 2.87 | 2.11 | 23.93 |
| 3TJE.PDB | O, H.THR.129   | N, H.VAL.12    | H, H.VAL.12     | 2.84 | 2.01 | 13.76 |
| 3TJE.PDB | O, H.VAL.92    | N, H.SER.15    | H, H.SER.15     | 2.99 | 2.17 | 15.06 |
| 3TJE.PDB | O, H.LEU.89    | N, H.LEU.18    | H, H.LEU.18     | 2.80 | 1.97 | 12.54 |
| 3TJE.PDB | O, H.LEU.87    | N, H.LEU.20    | H, H.LEU.20     | 2.91 | 2.09 | 15.75 |
| 3TJE.PDB | O, H.SER.7     | N, H.THR.21    | H, H.THR.21     | 2.91 | 2.07 | 9.29  |
| 3TJE.PDB | O, H.VAL.85    | N, H.CYS.22    | H, H.CYS.22     | 2.64 | 1.80 | 12.14 |
| 3TJE.PDB | O, H.GLN.5     | N, H.THR.23    | H, H.THR.23     | 2.80 | 1.95 | 6.62  |
| 3TJE.PDB | O, H.ASN.83    | N, H.VAL.24    | H, H.VAL.24     | 2.83 | 1.97 | 5.09  |
| 3TJE.PDB | O, H.GLN.3     | N, H.SER.25    | H, H.SER.25     | 2.89 | 2.05 | 10.07 |
| 3TJE.PDB | OD1, H.ASN.83  | N, H.ILE.29    | H, H.ILE.29     | 2.95 | 2.10 | 5.57  |
| 3TJE.PDB | O, H.TYR.55    | N, H.TYR.34    | H, H.TYR.34     | 2.89 | 2.10 | 20.67 |
| 3TJE.PDB | O, H.ILE.53    | N, H.GLY.36    | H, H.GLY.36     | 2.94 | 2.15 | 19.40 |
| 3TJE.PDB | O, H.ALA.103   | N, H.VAL.37    | H, H.VAL.37     | 2.90 | 2.07 | 11.42 |
| 3TJE.PDB | O, H.TYR.101   | N, H.VAL.39    | H, H.VAL.39     | 2.86 | 2.03 | 12.06 |
| 3TJE.PDB | O, H.GLU.48    | N, H.ARG.40    | H, H.ARG.40     | 2.80 | 1.98 | 14.17 |
| 3TJE.PDB | OE1, H.GLU.48  | NE, H.ARG.40   | HE, H.ARG.40    | 2.72 | 1.90 | 14.58 |
| 3TJE.PDB | OD1, H.ASP.96  | NH1, H.ARG.40  | HH12, H.ARG.40  | 2.84 | 2.01 | 12.94 |
| 3TJE.PDB | O, H.LEU.99    | N, H.GLN.41    | H, H.GLN.41     | 2.86 | 2.14 | 27.68 |
| 3TJE.PDB | OE1, L.GLN.39  | NE2, H.GLN.41  | HE21, H.GLN.41  | 2.98 | 2.15 | 10.85 |
| 3TJE.PDB | O, H.LYS.45    | NE2, H.GLN.41  | HE22, H.GLN.41  | 2.99 | 2.23 | 24.37 |
| 3TJE.PDB | O, H.SER.42    | N, H.LYS.45    | H, H.LYS.45     | 2.68 | 1.88 | 17.77 |
| 3TJE.PDB | O, H.ARG.40    | N, H.GLU.48    | H, H.GLU.48     | 2.85 | 2.11 | 26.04 |
| 3TJE.PDB | O, H.TRP.38    | N, H.VAL.50    | H, H.VAL.50     | 2.78 | 1.93 | 6.45  |
| 3TJE.PDB | O, H.GLY.36    | N, H.ILE.53    | H, H.ILE.53     | 2.93 | 2.12 | 17.64 |
| 3TJE.PDB | O, H.SER.63    | N, H.ALA.54    | H, H.ALA.54     | 2.78 | 1.96 | 13.18 |
| 3TJE.PDB | O, H.TYR.34    | N, H.TYR.55    | H, H.TYR.55     | 2.89 | 2.08 | 16.16 |

|          |                |                |                 |      |      |       |
|----------|----------------|----------------|-----------------|------|------|-------|
| 3TJE.PDB | O, H_SER_61    | N, H_ARG_56    | H, H_ARG_56     | 2.85 | 1.99 | 1.86  |
| 3TJE.PDB | O, H_ALA_54    | N, H_SER_63    | H, H_SER_63     | 2.78 | 2.05 | 26.84 |
| 3TJE.PDB | O, H_VAL_50    | N, H_ASN_67    | H, H_ASN_67     | 2.97 | 2.11 | 4.12  |
| 3TJE.PDB | O, H_TRP_49    | ND2, H_ASN_67  | HD21, H_ASN_67  | 2.89 | 2.04 | 7.41  |
| 3TJE.PDB | OD1, H_ASN_67  | N, H_SER_69    | H, H_SER_69     | 2.97 | 2.12 | 5.43  |
| 3TJE.PDB | O, H_LEU_70    | N, H_ARG_73    | H, H_ARG_73     | 2.89 | 2.05 | 11.17 |
| 3TJE.PDB | OD2, H_ASP_96  | NH1, H_ARG_73  | HH12, H_ARG_73  | 2.84 | 2.09 | 24.31 |
| 3TJE.PDB | OD1, H_ASP_96  | NH2, H_ARG_73  | HH22, H_ARG_73  | 2.94 | 2.09 | 3.77  |
| 3TJE.PDB | O, H_ARG_88    | N, H_THR_75    | H, H_THR_75     | 2.86 | 2.06 | 17.69 |
| 3TJE.PDB | OH, H_TYR_66   | N, H_VAL_76    | H, H_VAL_76     | 2.78 | 1.97 | 16.41 |
| 3TJE.PDB | O, H_GLN_84    | N, H_ASP_79    | H, H_ASP_79     | 2.90 | 2.07 | 12.81 |
| 3TJE.PDB | OD2, H_ASP_79  | OG, H_SER_81   | HG, H_SER_81    | 2.85 | 2.15 | 27.35 |
| 3TJE.PDB | O, H_ALA_27    | ND2, H_ASN_83  | HD21, H_ASN_83  | 2.68 | 1.91 | 21.50 |
| 3TJE.PDB | O, H_VAL_24    | ND2, H_ASN_83  | HD22, H_ASN_83  | 2.83 | 2.02 | 14.94 |
| 3TJE.PDB | O, H_CYS_22    | N, H_VAL_85    | H, H_VAL_85     | 2.88 | 2.08 | 16.90 |
| 3TJE.PDB | O, H_SER_77    | N, H_SER_86    | H, H_SER_86     | 2.83 | 2.01 | 15.98 |
| 3TJE.PDB | O, H_LEU_20    | N, H_LEU_87    | H, H_LEU_87     | 2.94 | 2.13 | 16.25 |
| 3TJE.PDB | O, H_THR_75    | N, H_ARG_88    | H, H_ARG_88     | 2.86 | 2.03 | 13.96 |
| 3TJE.PDB | O, H_LEU_18    | N, H_LEU_89    | H, H_LEU_89     | 2.84 | 2.02 | 14.49 |
| 3TJE.PDB | O, H_ARG_73    | N, H_THR_90    | H, H_THR_90     | 2.85 | 2.04 | 16.07 |
| 3TJE.PDB | O, H_THR_93    | N, H_ASP_96    | H, H_ASP_96     | 2.94 | 2.10 | 9.54  |
| 3TJE.PDB | O, H_GLN_41    | N, H_LEU_99    | H, H_LEU_99     | 2.74 | 1.92 | 14.43 |
| 3TJE.PDB | O, H_THR_126   | N, H_TYR_100   | H, H_TYR_100    | 2.79 | 1.93 | 2.67  |
| 3TJE.PDB | O, H_VAL_39    | N, H_TYR_101   | H, H_TYR_101    | 2.77 | 1.93 | 10.43 |
| 3TJE.PDB | OE2, H_GLU_6   | N, H_CYS_102   | H, H_CYS_102    | 2.72 | 1.91 | 15.94 |
| 3TJE.PDB | O, H_VAL_121   | N, H_ARG_104   | H, H_ARG_104    | 2.91 | 2.13 | 21.28 |
| 3TJE.PDB | OD1, H_ASP_120 | NE, H_ARG_104  | HE, H_ARG_104   | 2.87 | 2.06 | 15.55 |
| 3TJE.PDB | OD2, H_ASP_120 | NH2, H_ARG_104 | HH21, H_ARG_104 | 2.68 | 1.96 | 27.63 |
| 3TJE.PDB | O, H_TYR_35    | N, H_ARG_105   | H, H_ARG_105    | 2.94 | 2.12 | 13.39 |
| 3TJE.PDB | O, F_CYS_43    | NH1, H_ARG_105 | HH12, H_ARG_105 | 2.85 | 2.08 | 23.11 |
| 3TJE.PDB | O, H_ALA_118   | N, H_GLN_106   | H, H_GLN_106    | 2.87 | 2.03 | 10.40 |
| 3TJE.PDB | O, H_TRP_116   | N, H_LEU_108   | H, H_LEU_108    | 2.87 | 2.02 | 4.86  |
| 3TJE.PDB | O, H_TYR_114   | N, H_ASP_110   | H, H_ASP_110    | 2.92 | 2.19 | 27.17 |
| 3TJE.PDB | OD2, H_ASP_110 | N, H_THR_112   | H, H_THR_112    | 3.00 | 2.17 | 12.16 |
| 3TJE.PDB | O, H_LEU_108   | N, H_TRP_116   | H, H_TRP_116    | 3.00 | 2.21 | 20.70 |
| 3TJE.PDB | OH, L_TYR_37   | N, H_PHE_119   | H, H_PHE_119    | 2.96 | 2.10 | 4.74  |
| 3TJE.PDB | O, H_CYS_102   | N, H_GLY_123   | H, H_GLY_123    | 2.82 | 2.01 | 17.20 |
| 3TJE.PDB | OE1, H_GLU_6   | N, H_GLY_125   | H, H_GLY_125    | 2.75 | 1.92 | 11.39 |
| 3TJE.PDB | O, H_TYR_100   | N, H_THR_126   | H, H_THR_126    | 2.90 | 2.10 | 17.97 |
| 3TJE.PDB | O, H_ALA_98    | N, H_VAL_128   | H, H_VAL_128    | 2.90 | 2.08 | 14.31 |
| 3TJE.PDB | O, H_GLY_10    | N, H_THR_129   | H, H_THR_129    | 2.80 | 1.96 | 9.76  |
| 3TJE.PDB | O, H_VAL_12    | N, H_SER_131   | H, H_SER_131    | 3.00 | 2.24 | 24.52 |
| 3TJE.PDB | O, H_PHE_165   | N, H_LYS_136   | H, H_LYS_136    | 2.83 | 2.02 | 16.58 |
| 3TJE.PDB | O, H_ASP_163   | NZ, H_LYS_136  | HZ2, H_LYS_136  | 2.77 | 1.97 | 20.93 |
| 3TJE.PDB | O, H_LEU_160   | N, H_PHE_141   | H, H_PHE_141    | 2.88 | 2.04 | 12.24 |
| 3TJE.PDB | O, H_GLY_158   | N, H_LEU_143   | H, H_LEU_143    | 2.57 | 1.72 | 7.54  |
| 3TJE.PDB | O, H_VAL_203   | N, H_ALA_155   | H, H_ALA_155    | 2.69 | 1.91 | 20.72 |
| 3TJE.PDB | O, H_LEU_143   | N, H_GLY_158   | H, H_GLY_158    | 2.85 | 2.05 | 18.58 |
| 3TJE.PDB | O, H_SER_199   | N, H_CYS_159   | H, H_CYS_159    | 2.99 | 2.22 | 22.42 |
| 3TJE.PDB | O, H_PHE_141   | N, H_LEU_160   | H, H_LEU_160    | 2.79 | 1.97 | 14.71 |
| 3TJE.PDB | O, H_LEU_197   | N, H_VAL_161   | H, H_VAL_161    | 2.81 | 1.97 | 8.46  |
| 3TJE.PDB | O, H_SER_139   | N, H_ALYS_162  | H, H_ALYS_162   | 2.77 | 1.93 | 9.67  |
| 3TJE.PDB | O, H_SER_139   | N, H_BLYS_162  | H, H_BLYS_162   | 2.78 | 1.95 | 10.83 |
| 3TJE.PDB | N, H_ALYS_162  | N, H_BLYS_162  | H, H_BLYS_162   | 0.01 | 0.85 | 29.33 |
| 3TJE.PDB | O, H_TYR_195   | N, H_TYR_164   | H, H_TYR_164    | 2.92 | 2.13 | 20.02 |
| 3TJE.PDB | OG, H_SER_199  | NE1, H_TRP_173 | HE1, H_TRP_173  | 2.95 | 2.10 | 8.21  |
| 3TJE.PDB | O, H_ILE_214   | N, H_ASN_174   | H, H_ASN_174    | 2.64 | 1.81 | 12.80 |
| 3TJE.PDB | O, H_THR_212   | ND2, H_ASN_174 | HD21, H_ASN_174 | 2.99 | 2.18 | 18.13 |

|          |                |                |                 |      |      |       |
|----------|----------------|----------------|-----------------|------|------|-------|
| 3TJE.PDB | OD1, H.ASN.216 | N, H.SER.175   | H, H.SER.175    | 2.79 | 2.01 | 20.02 |
| 3TJE.PDB | O, H.TRP.173   | N, H.GLY.176   | H, H.GLY.176    | 2.73 | 1.90 | 13.59 |
| 3TJE.PDB | O, H.VAL.200   | N, H.HIS.183   | H, H.HIS.183    | 2.76 | 1.93 | 13.04 |
| 3TJE.PDB | O, H.SER.198   | N, H.PHE.185   | H, H.PHE.185    | 2.93 | 2.09 | 11.93 |
| 3TJE.PDB | O, H.SER.196   | N, H.VAL.188   | H, H.VAL.188    | 2.92 | 2.13 | 19.94 |
| 3TJE.PDB | O, H.LEU.194   | N, H.GLN.190   | H, H.GLN.190    | 2.89 | 2.03 | 2.73  |
| 3TJE.PDB | OD1, H.ASP.163 | NE2, H.GLN.190 | HE21, H.GLN.190 | 2.74 | 1.93 | 16.43 |
| 3TJE.PDB | O, H.LEU.194   | NE2, H.GLN.190 | HE22, H.GLN.190 | 2.91 | 2.07 | 10.67 |
| 3TJE.PDB | O, H.GLN.190   | N, H.GLY.193   | H, H.GLY.193    | 2.82 | 1.99 | 10.97 |
| 3TJE.PDB | O, H.TYR.164   | N, H.TYR.195   | H, H.TYR.195    | 2.85 | 2.00 | 9.32  |
| 3TJE.PDB | O, H.HIS.183   | N, H.VAL.200   | H, H.VAL.200    | 2.82 | 2.00 | 16.33 |
| 3TJE.PDB | O, H.LEU.157   | N, H.VAL.201   | H, H.VAL.201    | 2.89 | 2.05 | 10.36 |
| 3TJE.PDB | O, H.ALA.155   | N, H.VAL.203   | H, H.VAL.203    | 2.94 | 2.10 | 10.75 |
| 3TJE.PDB | O, H.GLY.153   | N, H.SER.205   | H, H.SER.205    | 2.57 | 1.73 | 10.17 |
| 3TJE.PDB | OD1, H.ASN.174 | N, H.ILE.214   | H, H.ILE.214    | 2.72 | 1.92 | 17.15 |
| 3TJE.PDB | O, H.SER.172   | N, H.ASN.216   | H, H.ASN.216    | 2.85 | 2.03 | 15.86 |
| 3TJE.PDB | OD1, H.ASP.227 | ND2, H.ASN.216 | HD22, H.ASN.216 | 2.79 | 1.98 | 17.28 |
| 3TJE.PDB | O, H.VAL.226   | N, H.VAL.217   | H, H.VAL.217    | 2.75 | 1.89 | 4.56  |
| 3TJE.PDB | O, H.THR.170   | N, H.AASN.218  | H, H.AASN.218   | 2.99 | 2.16 | 12.40 |
| 3TJE.PDB | O, H.THR.170   | N, H.BASN.218  | H, H.BASN.218   | 2.97 | 2.14 | 13.28 |
| 3TJE.PDB | O, H.PRO.166   | NE2, H.HIS.219 | HE2, H.HIS.219  | 2.74 | 1.90 | 8.90  |
| 3TJE.PDB | O, H.LYS.220   | N, H.ASN.223   | H, H.ASN.223    | 2.92 | 2.10 | 14.79 |
| 3TJE.PDB | OG1, H.SER.222 | OG1, H.THR.224 | HG1, H.THR.224  | 2.65 | 1.92 | 22.20 |
| 3TJE.PDB | O, H.VAL.217   | N, H.VAL.226   | H, H.VAL.226    | 2.85 | 2.02 | 13.83 |
| 3TJE.PDB | O, H.CYS.215   | N, H.LYS.228   | H, H.LYS.228    | 2.90 | 2.09 | 15.61 |
| 3TJE.PDB | O, H.TYR.213   | N, H.VAL.230   | H, H.VAL.230    | 2.88 | 2.03 | 8.45  |
| 3TJE.PDB | O, F.GLY.40    | N, F.CYS.43    | H, F.CYS.43     | 2.88 | 2.06 | 15.38 |
| 3TJE.PDB | OE2, F.GLU.63  | N, F.HIS.44    | H, F.HIS.44     | 2.91 | 2.05 | 1.72  |
| 3TJE.PDB | OH, H.TYR.35   | ND1, F.HIS.44  | HD1, F.HIS.44   | 2.56 | 1.70 | 3.69  |
| 3TJE.PDB | OE1, F.GLU.63  | N, F.LYS.45    | H, F.LYS.45     | 2.91 | 2.10 | 15.27 |
| 3TJE.PDB | O, F.HIS.80    | N, F.CYS.47    | H, F.CYS.47     | 2.82 | 1.98 | 10.44 |
| 3TJE.PDB | OG1, F.THR.76  | N, F.GLY.50    | H, F.GLY.50     | 2.74 | 2.01 | 27.76 |
| 3TJE.PDB | O, F.VAL.67    | N, F.ARG.52    | H, F.ARG.52     | 2.89 | 2.17 | 27.83 |
| 3TJE.PDB | O, F.SER.82    | N, F.LYS.53    | H, F.LYS.53     | 2.94 | 2.10 | 9.60  |
| 3TJE.PDB | O, F.ASP.65    | N, F.ALA.54    | H, F.ALA.54     | 2.88 | 2.07 | 15.43 |
| 3TJE.PDB | O, F.ARG.52    | N, F.VAL.67    | H, F.VAL.67     | 2.77 | 1.94 | 11.91 |
| 3TJE.PDB | O, F.GLY.50    | N, F.CYS.69    | H, F.CYS.69     | 2.96 | 2.12 | 10.65 |
| 3TJE.PDB | O, F.GLN.70    | N, F.LYS.73    | H, F.LYS.73     | 2.97 | 2.14 | 11.31 |
| 3TJE.PDB | O, F.GLN.70    | N, F.GLU.74    | H, F.GLU.74     | 2.91 | 2.06 | 7.91  |
| 3TJE.PDB | O, F.ARG.86    | N, F.TYR.75    | H, F.TYR.75     | 2.68 | 1.90 | 20.37 |
| 3TJE.PDB | O, F.ARG.105   | N, F.THR.76    | H, F.THR.76     | 2.92 | 2.12 | 18.47 |
| 3TJE.PDB | O, F.GLU.51    | NE2, F.HIS.80  | HE2, F.HIS.80   | 2.72 | 1.86 | 5.72  |
| 3TJE.PDB | O, F.TYR.75    | N, F.ARG.86    | H, F.ARG.86     | 2.68 | 1.83 | 6.97  |
| 3TJE.PDB | O, F.LYS.73    | N, F.CYS.88    | H, F.CYS.88     | 2.78 | 1.92 | 5.80  |
| 3TJE.PDB | OD1, F.ASN.108 | N, F.AARG.89   | H, F.AARG.89    | 2.87 | 2.04 | 11.64 |
| 3TJE.PDB | OD1, F.ASN.108 | N, F.BARG.89   | H, F.BARG.89    | 2.83 | 1.98 | 7.34  |
| 3TJE.PDB | OD1, F.ASP.92  | N, F.GLY.94    | H, F.GLY.94     | 2.84 | 2.05 | 19.77 |
| 3TJE.PDB | O, F.ASP.92    | N, F.HIS.95    | H, F.HIS.95     | 2.97 | 2.16 | 18.09 |
| 3TJE.PDB | O, F.GLU.93    | N, F.GLY.96    | H, F.GLY.96     | 2.71 | 1.88 | 12.35 |
| 3TJE.PDB | O, F.ARG.112   | N, F.GLU.98    | H, F.GLU.98     | 2.94 | 2.15 | 19.49 |
| 3TJE.PDB | O, F.LYS.110   | N, F.GLU.100   | H, F.GLU.100    | 2.61 | 1.76 | 9.32  |
| 3TJE.PDB | O, F.GLN.107   | N, F.THR.104   | H, F.THR.104    | 2.82 | 1.98 | 10.85 |
| 3TJE.PDB | O, F.ILE.101   | N, F.LYS.110   | H, F.LYS.110    | 2.83 | 1.99 | 9.81  |
| 3TJE.PDB | OE2, F.GLU.98  | NE, F.ARG.112  | HE, F.ARG.112   | 2.97 | 2.20 | 22.98 |
| 3TJE.PDB | O, F.GLY.96    | N, F.LYS.114   | H, F.LYS.114    | 2.92 | 2.14 | 21.07 |
| 3TJE.PDB | O, F.LYS.114   | N, F.PHE.117   | H, F.PHE.117    | 2.97 | 2.13 | 10.64 |
| 3TJE.PDB | O, F.ASP.128   | N, F.PHE.118   | H, F.PHE.118    | 2.93 | 2.18 | 24.79 |
| 3TJE.PDB | O, F.HIS.95    | N, F.CYS.127   | H, F.CYS.127    | 2.92 | 2.09 | 13.51 |

|          |               |               |                |      |      |       |
|----------|---------------|---------------|----------------|------|------|-------|
| 3U2S.PDB | O, H_SER_25   | N, H_ARG_3    | H, H_ARG_3     | 2.89 | 2.07 | 15.49 |
| 3U2S.PDB | O, H_SER_21   | N, H_SER_7    | H, H_SER_7     | 2.84 | 2.05 | 19.48 |
| 3U2S.PDB | O, H_THR_110  | N, H_VAL_12   | H, H_VAL_12    | 2.86 | 2.03 | 11.16 |
| 3U2S.PDB | O, H_LEU_82C  | N, H_GLY_15   | H, H_GLY_15    | 2.74 | 1.93 | 16.73 |
| 3U2S.PDB | O, H_MET_82   | N, H_LEU_18   | H, H_LEU_18    | 2.81 | 2.03 | 20.52 |
| 3U2S.PDB | O, H_LEU_80   | N, H_LEU_20   | H, H_LEU_20    | 2.85 | 2.03 | 14.92 |
| 3U2S.PDB | O, H_SER_7    | N, H_SER_21   | H, H_SER_21    | 2.93 | 2.09 | 10.95 |
| 3U2S.PDB | O, H_VAL_5    | N, H_ALA_23   | H, H_ALA_23    | 2.92 | 2.11 | 16.83 |
| 3U2S.PDB | O, H_ASP_76   | N, H_ALA_24   | H, H_ALA_24    | 2.96 | 2.10 | 4.40  |
| 3U2S.PDB | O, H_ASP_100L | NE, H_ARG_31  | HE, H_ARG_31   | 2.89 | 2.12 | 21.23 |
| 3U2S.PDB | O, H_ASP_100L | NH2, H_ARG_31 | HH21, H_ARG_31 | 2.93 | 2.18 | 24.99 |
| 3U2S.PDB | O, H_VAL_93   | N, H_HIS_35   | H, H_HIS_35    | 2.77 | 1.93 | 11.33 |
| 3U2S.PDB | OE1, H_GLU_95 | NE2, H_HIS_35 | HE2, H_HIS_35  | 2.64 | 1.80 | 11.05 |
| 3U2S.PDB | O, H_ALA_49   | N, H_TRP_36   | H, H_TRP_36    | 2.96 | 2.24 | 28.24 |
| 3U2S.PDB | O, H_TYR_79   | NE1, H_TRP_36 | HE1, H_TRP_36  | 2.98 | 2.22 | 24.67 |
| 3U2S.PDB | O, H_PHE_91   | N, H_VAL_37   | H, H_VAL_37    | 2.97 | 2.15 | 14.01 |
| 3U2S.PDB | O, H_GLU_46   | N, H_ARG_38   | H, H_ARG_38    | 2.90 | 2.05 | 8.68  |
| 3U2S.PDB | OE2, H_GLU_46 | NE, H_ARG_38  | HE, H_ARG_38   | 2.80 | 2.01 | 18.34 |
| 3U2S.PDB | OD1, H_ASP_86 | NH1, H_ARG_38 | HH12, H_ARG_38 | 2.84 | 2.00 | 11.28 |
| 3U2S.PDB | OE2, H_GLU_46 | NH2, H_ARG_38 | HH21, H_ARG_38 | 2.92 | 2.18 | 25.81 |
| 3U2S.PDB | O, H_THR_89   | N, H_GLN_39   | H, H_GLN_39    | 2.85 | 2.11 | 25.60 |
| 3U2S.PDB | OE1, H_GLN_38 | NE2, H_GLN_39 | HE22, H_GLN_39 | 2.89 | 2.04 | 8.55  |
| 3U2S.PDB | O, H_ALA_40   | N, H_GLN_43   | H, H_GLN_43    | 2.91 | 2.10 | 16.74 |
| 3U2S.PDB | O, H_ARG_38   | N, H_GLU_46   | H, H_GLU_46    | 2.82 | 2.01 | 17.41 |
| 3U2S.PDB | O, H_TRP_36   | N, H_VAL_48   | H, H_VAL_48    | 2.95 | 2.12 | 14.22 |
| 3U2S.PDB | O, H_TYR_58   | N, H_PHE_50   | H, H_PHE_50    | 2.96 | 2.16 | 17.41 |
| 3U2S.PDB | O, H_MET_34   | N, H_ILE_51   | H, H_ILE_51    | 2.86 | 2.05 | 16.44 |
| 3U2S.PDB | O, H_GLU_56   | N, H_LYS_52   | H, H_LYS_52    | 2.94 | 2.08 | 3.51  |
| 3U2S.PDB | O, H_PHE_100J | OH, H_TYR_52A | HH, H_TYR_52A  | 2.62 | 1.87 | 20.61 |
| 3U2S.PDB | O, H_LYS_52   | N, H_GLY_54   | H, H_GLY_54    | 2.83 | 2.01 | 14.33 |
| 3U2S.PDB | O, H_PHE_50   | N, H_TYR_58   | H, H_TYR_58    | 2.91 | 2.10 | 17.46 |
| 3U2S.PDB | O, H_VAL_48   | N, H_ALA_60   | H, H_ALA_60    | 2.97 | 2.15 | 15.16 |
| 3U2S.PDB | OE1, H_GLU_46 | OG, H_SER_62  | HG, H_SER_62   | 2.75 | 1.94 | 7.42  |
| 3U2S.PDB | O, H_VAL_63   | N, H_ARG_66   | H, H_ARG_66    | 2.80 | 2.00 | 17.44 |
| 3U2S.PDB | OD2, H_ASP_86 | NH1, H_ARG_66 | HH12, H_ARG_66 | 2.53 | 1.74 | 19.65 |
| 3U2S.PDB | OD1, H_ASP_86 | NH2, H_ARG_66 | HH22, H_ARG_66 | 2.93 | 2.08 | 7.53  |
| 3U2S.PDB | O, H_VAL_63   | N, H_LEU_67   | H, H_LEU_67    | 2.93 | 2.08 | 6.74  |
| 3U2S.PDB | O, H_GLN_81   | N, H_SER_68   | H, H_SER_68    | 2.87 | 2.07 | 17.94 |
| 3U2S.PDB | OD1, H_ASN_73 | NE, H_ARG_71  | HE, H_ARG_71   | 2.77 | 1.98 | 19.66 |
| 3U2S.PDB | O, H_GLN_32   | NH1, H_ARG_71 | HH12, H_ARG_71 | 2.91 | 2.17 | 26.10 |
| 3U2S.PDB | O, H_THR_77   | N, H_ASP_72   | H, H_ASP_72    | 2.85 | 2.01 | 9.05  |
| 3U2S.PDB | O, H_TYR_52A  | ND2, H_ASN_73 | HD22, H_ASN_73 | 2.99 | 2.13 | 6.14  |
| 3U2S.PDB | O, H_LYS_75   | OG1, H_THR_77 | HG1, H_THR_77  | 2.81 | 2.01 | 11.82 |
| 3U2S.PDB | O, H_CYS_22   | N, H_LEU_78   | H, H_LEU_78    | 2.95 | 2.13 | 14.49 |
| 3U2S.PDB | O, H_SER_70   | N, H_TYR_79   | H, H_TYR_79    | 2.84 | 1.99 | 5.70  |
| 3U2S.PDB | O, H_LEU_20   | N, H_LEU_80   | H, H_LEU_80    | 2.94 | 2.14 | 17.83 |
| 3U2S.PDB | O, H_SER_68   | N, H_GLN_81   | H, H_GLN_81    | 2.80 | 1.98 | 14.94 |
| 3U2S.PDB | O, H_LEU_18   | N, H_MET_82   | H, H_MET_82    | 2.77 | 1.95 | 13.17 |
| 3U2S.PDB | O, H_ARG_66   | N, H_ASN_82A  | H, H_ASN_82A   | 2.84 | 2.00 | 7.73  |
| 3U2S.PDB | OD2, H_ASP_86 | N, H_ARG_83   | H, H_ARG_83    | 2.90 | 2.08 | 14.43 |
| 3U2S.PDB | O, H_ARG_83   | N, H_ASP_86   | H, H_ASP_86    | 2.86 | 2.02 | 10.14 |
| 3U2S.PDB | O, H_VAL_84   | N, H_THR_87   | H, H_THR_87    | 2.92 | 2.08 | 10.30 |
| 3U2S.PDB | O, H_VAL_109  | N, H_ALA_88   | H, H_ALA_88    | 2.93 | 2.20 | 26.51 |
| 3U2S.PDB | O, H_GLN_39   | N, H_THR_89   | H, H_THR_89    | 2.92 | 2.16 | 23.30 |
| 3U2S.PDB | O, H_THR_107  | N, H_TYR_90   | H, H_TYR_90    | 2.86 | 2.02 | 9.16  |
| 3U2S.PDB | O, H_VAL_37   | N, H_PHE_91   | H, H_PHE_91    | 2.69 | 1.83 | 4.03  |
| 3U2S.PDB | OE2, H_GLU_6  | N, H_CYS_92   | H, H_CYS_92    | 2.82 | 1.99 | 11.94 |
| 3U2S.PDB | O, H_HIS_35   | N, H_VAL_93   | H, H_VAL_93    | 2.98 | 2.21 | 22.76 |

|          |                 |                |                 |      |      |       |
|----------|-----------------|----------------|-----------------|------|------|-------|
| 3U2S.PDB | O, H_VAL_102    | N, H_ARG_94    | H, H_ARG_94     | 2.86 | 2.04 | 14.82 |
| 3U2S.PDB | OD1, H_ASP_101  | NE, H_ARG_94   | HE, H_ARG_94    | 2.95 | 2.09 | 2.87  |
| 3U2S.PDB | OD2, H_ASP_101  | NH2, H_ARG_94  | HH21, H_ARG_94  | 2.85 | 2.03 | 14.60 |
| 3U2S.PDB | O, H_TYR_100S   | N, H_ALA_96    | H, H_ALA_96     | 2.80 | 1.96 | 10.51 |
| 3U2S.PDB | O, H_TYR_100E   | N, H_ARG_100B  | H, H_ARG_100B   | 2.95 | 2.16 | 20.33 |
| 3U2S.PDB | O, H_ARG_100B   | N, H_TYR_100E  | H, H_TYR_100E   | 2.87 | 2.03 | 10.02 |
| 3U2S.PDB | O, H_GLY_100M   | N, H_ASP_100I  | H, H_ASP_100I   | 2.85 | 2.06 | 18.58 |
| 3U2S.PDB | OD1, H_ASP_100I | N, H_PHE_100J  | H, H_PHE_100J   | 2.74 | 2.00 | 25.64 |
| 3U2S.PDB | O, H_ARG_31     | N, H_TYR_100N  | H, H_TYR_100N   | 2.93 | 2.08 | 7.40  |
| 3U2S.PDB | O, H_GLY_98     | N, H_TYR_100O  | H, H_TYR_100O   | 2.86 | 2.13 | 27.57 |
| 3U2S.PDB | O, H_ALA_96     | N, H_TYR_100Q  | H, H_TYR_100Q   | 2.80 | 1.95 | 7.01  |
| 3U2S.PDB | OH, L_TYR_36    | N, H_MET_100T  | H, H_MET_100T   | 2.95 | 2.15 | 18.41 |
| 3U2S.PDB | OE1, H_GLU_6    | N, H_GLY_106   | H, H_GLY_106    | 2.86 | 2.05 | 16.47 |
| 3U2S.PDB | O, H_TYR_90     | N, H_THR_107   | H, H_THR_107    | 2.97 | 2.17 | 19.03 |
| 3U2S.PDB | O, H_ALA_88     | N, H_VAL_109   | H, H_VAL_109    | 2.87 | 2.02 | 6.55  |
| 3U2S.PDB | O, H_GLY_10     | N, H_THR_110   | H, H_THR_110    | 2.97 | 2.13 | 11.00 |
| 3U2S.PDB | OG1, H_THR_87   | N, H_VAL_111   | H, H_VAL_111    | 2.85 | 1.99 | 5.74  |
| 3U2S.PDB | O, H_VAL_12     | N, H_SER_112   | H, H_SER_112    | 2.94 | 2.12 | 13.79 |
| 3U2S.PDB | OG, H_SER_112   | N, H_ALA_114   | H, H_ALA_114    | 2.87 | 2.03 | 9.67  |
| 3U2S.PDB | O, H_PHE_146    | N, H_LYS_117   | H, H_LYS_117    | 2.83 | 1.99 | 11.04 |
| 3U2S.PDB | O, H_ASP_144    | NZ, H_LYS_117  | HZ2, H_LYS_117  | 2.56 | 1.71 | 13.65 |
| 3U2S.PDB | O, H_LYS_143    | N, H_SER_120   | H, H_SER_120    | 2.85 | 2.04 | 16.72 |
| 3U2S.PDB | O, H_LEU_141    | N, H_PHE_122   | H, H_PHE_122    | 2.95 | 2.11 | 11.99 |
| 3U2S.PDB | O, H_GLY_139    | N, H_LEU_124   | H, H_LEU_124    | 2.81 | 1.97 | 10.93 |
| 3U2S.PDB | O, H_VAL_184    | N, H_ALA_136   | H, H_ALA_136    | 2.85 | 2.04 | 17.15 |
| 3U2S.PDB | O, H_SER_180    | N, H_CYS_140   | H, H_CYS_140    | 2.86 | 2.06 | 19.17 |
| 3U2S.PDB | O, H_PHE_122    | N, H_LEU_141   | H, H_LEU_141    | 2.84 | 2.00 | 10.39 |
| 3U2S.PDB | O, H_LEU_178    | N, H_VAL_142   | H, H_VAL_142    | 2.75 | 1.92 | 11.05 |
| 3U2S.PDB | O, H_SER_120    | N, H_LYS_143   | H, H_LYS_143    | 2.79 | 1.93 | 5.65  |
| 3U2S.PDB | O, H_LYS_117    | N, H_PHE_146   | H, H_PHE_146    | 2.94 | 2.13 | 15.74 |
| 3U2S.PDB | O, H_ASN_199    | N, H_THR_151   | H, H_THR_151    | 2.99 | 2.18 | 16.40 |
| 3U2S.PDB | O, H_ASN_197    | N, H_SER_153   | H, H_SER_153    | 2.95 | 2.14 | 16.70 |
| 3U2S.PDB | OG, H_SER_180   | NE1, H_TRP_154 | HE1, H_TRP_154  | 2.93 | 2.08 | 7.46  |
| 3U2S.PDB | O, H_ILE_195    | N, H_ASN_155   | H, H_ASN_155    | 2.79 | 1.95 | 11.05 |
| 3U2S.PDB | OD1, H_ASN_197  | N, H_SER_156   | H, H_SER_156    | 2.71 | 1.93 | 20.75 |
| 3U2S.PDB | O, H_TRP_154    | N, H_GLY_157   | H, H_GLY_157    | 2.86 | 2.13 | 26.48 |
| 3U2S.PDB | O, H_ASN_155    | N, H_ALA_158   | H, H_ALA_158    | 2.95 | 2.09 | 5.38  |
| 3U2S.PDB | O, H_VAL_181    | N, H_HIS_164   | H, H_HIS_164    | 2.77 | 1.95 | 14.28 |
| 3U2S.PDB | OG, L_SER_165   | NE2, H_HIS_164 | HE2, H_HIS_164  | 2.93 | 2.12 | 16.97 |
| 3U2S.PDB | O, H_SER_179    | N, H_PHE_166   | H, H_PHE_166    | 2.88 | 2.02 | 1.67  |
| 3U2S.PDB | O, H_SER_177    | N, H_VAL_169   | H, H_VAL_169    | 2.82 | 2.01 | 16.07 |
| 3U2S.PDB | O, H_LEU_175    | NE2, H_GLN_171 | HE21, H_GLN_171 | 2.97 | 2.11 | 6.21  |
| 3U2S.PDB | OD2, H_ASP_144  | NE2, H_GLN_171 | HE22, H_GLN_171 | 2.87 | 2.09 | 20.57 |
| 3U2S.PDB | O, H_GLN_171    | N, H_GLY_174   | H, H_GLY_174    | 2.90 | 2.05 | 6.90  |
| 3U2S.PDB | O, H_TYR_145    | N, H_TYR_176   | H, H_TYR_176    | 2.78 | 1.93 | 7.16  |
| 3U2S.PDB | O, H_VAL_169    | N, H_SER_177   | H, H_SER_177    | 2.99 | 2.22 | 22.23 |
| 3U2S.PDB | O, H_VAL_142    | N, H_LEU_178   | H, H_LEU_178    | 2.92 | 2.13 | 19.87 |
| 3U2S.PDB | O, H_CYS_140    | N, H_SER_180   | H, H_SER_180    | 2.96 | 2.15 | 15.32 |
| 3U2S.PDB | O, H_HIS_164    | N, H_VAL_181   | H, H_VAL_181    | 2.88 | 2.05 | 12.91 |
| 3U2S.PDB | O, H_LEU_138    | N, H_VAL_182   | H, H_VAL_182    | 2.85 | 2.03 | 14.42 |
| 3U2S.PDB | O, H_ALA_136    | N, H_VAL_184   | H, H_VAL_184    | 2.90 | 2.07 | 11.08 |
| 3U2S.PDB | O, H_PRO_185    | N, H_SER_188   | H, H_SER_188    | 2.91 | 2.12 | 19.48 |
| 3U2S.PDB | O, H_SER_188    | N, H_GLN_192   | H, H_GLN_192    | 2.76 | 1.90 | 4.37  |
| 3U2S.PDB | OD1, H_ASN_155  | N, H_ILE_195   | H, H_ILE_195    | 2.89 | 2.08 | 16.84 |
| 3U2S.PDB | O, H_LYS_209    | N, H_CYS_196   | H, H_CYS_196    | 2.96 | 2.19 | 21.56 |
| 3U2S.PDB | O, H_SER_153    | N, H_ASN_197   | H, H_ASN_197    | 2.74 | 1.90 | 9.86  |
| 3U2S.PDB | OD2, H_ASP_208  | ND2, H_ASN_197 | HD21, H_ASN_197 | 2.76 | 1.92 | 10.02 |
| 3U2S.PDB | O, H_VAL_207    | N, H_VAL_198   | H, H_VAL_198    | 2.74 | 1.88 | 1.51  |

|          |                |                |                |      |      |       |
|----------|----------------|----------------|----------------|------|------|-------|
| 3U2S.PDB | O, H_THR_151   | N, H_ASN_199   | H, H_ASN_199   | 2.98 | 2.15 | 13.83 |
| 3U2S.PDB | O, H_THR_205   | N, H_HIS_200   | H, H_HIS_200   | 2.86 | 2.01 | 7.91  |
| 3U2S.PDB | OG, H_SER_203  | ND1, H_HIS_200 | HD1, H_HIS_200 | 2.77 | 1.92 | 6.39  |
| 3U2S.PDB | O, H_PRO_147   | NE2, H_HIS_200 | HE2, H_HIS_200 | 2.63 | 1.80 | 12.76 |
| 3U2S.PDB | O, H_LYS_201   | N, H_ASN_204   | H, H_ASN_204   | 2.93 | 2.10 | 12.81 |
| 3U2S.PDB | O, H_VAL_198   | N, H_VAL_207   | H, H_VAL_207   | 2.81 | 1.98 | 12.69 |
| 3U2S.PDB | O, H_CYS_196   | N, H_LYS_209   | H, H_LYS_209   | 2.98 | 2.15 | 13.52 |
| 3U2S.PDB | O, H_TYR_194   | N, H_VAL_211   | H, H_VAL_211   | 2.76 | 1.91 | 7.74  |
| 3U2S.PDB | O, L_GLN_24    | N, L_THR_5     | H, L_THR_5     | 2.92 | 2.09 | 11.98 |
| 3U2S.PDB | O, L_TYR_86    | NE2, L_GLN_6   | HE22, L_GLN_6  | 2.90 | 2.07 | 12.85 |
| 3U2S.PDB | O, L_LYS_103   | N, L_VAL_11    | H, L_VAL_11    | 2.95 | 2.14 | 17.04 |
| 3U2S.PDB | O, L_LEU_78    | N, L_GLY_16    | H, L_GLY_16    | 2.87 | 2.09 | 21.13 |
| 3U2S.PDB | O, L_ILE_75    | N, L_ILE_19    | H, L_ILE_19    | 3.00 | 2.19 | 17.55 |
| 3U2S.PDB | OG1, L_THR_74  | OG1, L_THR_20  | HG1, L_THR_20  | 2.83 | 2.11 | 23.78 |
| 3U2S.PDB | O, L_LEU_73    | N, L_ILE_21    | H, L_ILE_21    | 2.80 | 1.99 | 15.96 |
| 3U2S.PDB | O, L_THR_5     | N, L_GLN_24    | H, L_GLN_24    | 2.89 | 2.07 | 13.09 |
| 3U2S.PDB | O, L_ASN_69    | N, L_GLY_25    | H, L_GLY_25    | 2.76 | 1.90 | 2.23  |
| 3U2S.PDB | OD1, L_ASP_27B | N, L_THR_26    | H, L_THR_26    | 2.75 | 1.92 | 10.72 |
| 3U2S.PDB | OD2, L_ASP_27B | OG1, L_THR_26  | HG1, L_THR_26  | 2.86 | 2.11 | 19.40 |
| 3U2S.PDB | OD1, L_ASP_27B | N, L_VAL_27C   | H, L_VAL_27C   | 2.60 | 1.80 | 17.74 |
| 3U2S.PDB | O, L_THR_26    | N, L_GLY_28    | H, L_GLY_28    | 2.91 | 2.07 | 11.04 |
| 3U2S.PDB | O, L_ASP_27B   | N, L_GLY_29    | H, L_GLY_29    | 2.99 | 2.17 | 15.01 |
| 3U2S.PDB | O, L_LYS_89    | N, L_SER_34    | H, L_SER_34    | 2.88 | 2.09 | 20.40 |
| 3U2S.PDB | O, L_ILE_48    | N, L_TRP_35    | H, L_TRP_35    | 2.79 | 1.99 | 17.98 |
| 3U2S.PDB | O, L_TYR_87    | N, L_TYR_36    | H, L_TYR_36    | 2.86 | 2.11 | 24.00 |
| 3U2S.PDB | O, L_LYS_45    | N, L_GLN_37    | H, L_GLN_37    | 2.86 | 2.04 | 13.48 |
| 3U2S.PDB | OH, L_TYR_86   | NE2, L_GLN_37  | HE21, L_GLN_37 | 2.82 | 1.97 | 2.95  |
| 3U2S.PDB | O, L_ASP_85    | N, L_GLN_38    | H, L_GLN_38    | 2.74 | 1.95 | 19.17 |
| 3U2S.PDB | O, L_LYS_42    | NE2, L_GLN_38  | HE21, L_GLN_38 | 2.89 | 2.06 | 12.72 |
| 3U2S.PDB | OE1, H_GLN_39  | NE2, L_GLN_38  | HE22, L_GLN_38 | 2.91 | 2.09 | 13.75 |
| 3U2S.PDB | O, L_GLN_37    | N, L_LYS_45    | H, L_LYS_45    | 2.88 | 2.16 | 27.52 |
| 3U2S.PDB | O, L_TRP_35    | N, L_VAL_47    | H, L_VAL_47    | 2.82 | 1.99 | 13.03 |
| 3U2S.PDB | O, L_LYS_53    | N, L_TYR_49    | H, L_TYR_49    | 2.89 | 2.08 | 17.33 |
| 3U2S.PDB | O, L_VAL_33    | N, L_VAL_51    | H, L_VAL_51    | 2.83 | 1.98 | 6.67  |
| 3U2S.PDB | O, L_ASP_50    | N, L_SER_52    | H, L_SER_52    | 2.90 | 2.20 | 29.99 |
| 3U2S.PDB | O, L_TYR_49    | N, L_LYS_53    | H, L_LYS_53    | 2.86 | 2.03 | 13.95 |
| 3U2S.PDB | OD2, L_ASP_50  | NZ, L_LYS_53   | HZ2, L_LYS_53  | 2.84 | 1.96 | 4.63  |
| 3U2S.PDB | O, L_PHE_62    | NH1, L_ARG_54  | HH11, L_ARG_54 | 2.99 | 2.19 | 18.54 |
| 3U2S.PDB | OD2, C_ASP_167 | ND2, L_ASN_60  | HD22, L_ASN_60 | 2.90 | 2.14 | 22.76 |
| 3U2S.PDB | OD2, L_ASP_82  | NH1, L_ARG_61  | HH12, L_ARG_61 | 2.86 | 2.09 | 21.77 |
| 3U2S.PDB | OD1, L_ASP_82  | NH2, L_ARG_61  | HH22, L_ARG_61 | 2.97 | 2.11 | 4.14  |
| 3U2S.PDB | O, L_THR_74    | N, L_SER_63    | H, L_SER_63    | 2.98 | 2.16 | 15.11 |
| 3U2S.PDB | O, L_SER_72    | N, L_SER_65    | H, L_SER_65    | 2.99 | 2.19 | 18.65 |
| 3U2S.PDB | OE2, L_GLU_31  | NZ, L_LYS_66   | HZ1, L_LYS_66  | 2.99 | 2.15 | 15.69 |
| 3U2S.PDB | O, L_VAL_27C   | NZ, L_LYS_66   | HZ3, L_LYS_66  | 2.87 | 2.07 | 20.96 |
| 3U2S.PDB | O, L_THR_70    | N, L_SER_67    | H, L_SER_67    | 2.98 | 2.14 | 11.28 |
| 3U2S.PDB | O, L_CYS_23    | N, L_ALA_71    | H, L_ALA_71    | 2.87 | 2.04 | 13.61 |
| 3U2S.PDB | O, L_SER_65    | N, L_SER_72    | H, L_SER_72    | 2.80 | 1.98 | 13.45 |
| 3U2S.PDB | O, L_ILE_21    | N, L_LEU_73    | H, L_LEU_73    | 2.88 | 2.06 | 14.21 |
| 3U2S.PDB | O, L_SER_63    | N, L_THR_74    | H, L_THR_74    | 2.87 | 2.03 | 10.26 |
| 3U2S.PDB | O, L_ILE_19    | N, L_ILE_75    | H, L_ILE_75    | 2.92 | 2.10 | 15.07 |
| 3U2S.PDB | O, L_GLN_17    | N, L_LEU_78    | H, L_LEU_78    | 2.99 | 2.15 | 10.36 |
| 3U2S.PDB | OD2, L_ASP_82  | N, L_GLN_79    | H, L_GLN_79    | 2.81 | 1.96 | 8.38  |
| 3U2S.PDB | O, L_GLN_79    | N, L_ASP_82    | H, L_ASP_82    | 2.92 | 2.07 | 8.13  |
| 3U2S.PDB | O, L_GLN_38    | N, L_ASP_85    | H, L_ASP_85    | 2.89 | 2.05 | 8.81  |
| 3U2S.PDB | O, L_THR_102   | N, L_TYR_86    | H, L_TYR_86    | 2.77 | 1.96 | 15.94 |
| 3U2S.PDB | OE1, L_GLN_6   | N, L_CYS_88    | H, L_CYS_88    | 2.99 | 2.16 | 12.72 |
| 3U2S.PDB | O, L_ARG_95A   | N, L_THR_92    | H, L_THR_92    | 2.99 | 2.23 | 24.29 |



|          |                |                |                 |      |      |       |
|----------|----------------|----------------|-----------------|------|------|-------|
| 3U2S.PDB | O, L_THR_92    | N, L_ARG_95    | H, L_ARG_95     | 2.97 | 2.16 | 16.66 |
| 3U2S.PDB | OD1, H_ASP_61  | NH2, L_ARG_95A | HH22, L_ARG_95A | 2.34 | 1.58 | 22.53 |
| 3U2S.PDB | OE2, H_GLU_95  | NH2, L_ARG_96  | HH21, L_ARG_96  | 2.87 | 2.05 | 15.72 |
| 3U2S.PDB | O, L_CYS_88    | N, L_GLY_99    | H, L_GLY_99     | 2.79 | 1.97 | 14.65 |
| 3U2S.PDB | O, L_TYR_86    | N, L_THR_102   | H, L_THR_102    | 2.76 | 2.00 | 23.00 |
| 3U2S.PDB | O, L_PRO_7     | OG1, L_THR_102 | HG1, L_THR_102  | 2.63 | 1.82 | 4.45  |
| 3U2S.PDB | O, L_ALA_8     | N, L_LYS_103   | H, L_LYS_103    | 2.97 | 2.12 | 6.71  |
| 3U2S.PDB | O, L_GLY_84    | N, L_LEU_104   | H, L_LEU_104    | 2.88 | 2.02 | 5.05  |
| 3U2S.PDB | O, L_VAL_11    | N, L_THR_105   | H, L_THR_105    | 2.95 | 2.13 | 14.49 |
| 3U2S.PDB | OE1, L_GLU_83  | N, L_VAL_106   | H, L_VAL_106    | 2.89 | 2.07 | 15.38 |
| 3U2S.PDB | O, L_GLY_13    | N, L_LEU_106A  | H, L_LEU_106A   | 2.94 | 2.12 | 14.62 |
| 3U2S.PDB | O, L_TYR_140   | N, L_ALA_111   | H, L_ALA_111    | 2.82 | 1.98 | 11.85 |
| 3U2S.PDB | O, L_SER_137   | N, L_SER_114   | H, L_SER_114    | 2.77 | 1.94 | 12.77 |
| 3U2S.PDB | O, L_LEU_135   | N, L_THR_116   | H, L_THR_116    | 2.87 | 2.04 | 11.07 |
| 3U2S.PDB | O, L_VAL_133   | N, L_PHE_118   | H, L_PHE_118    | 2.76 | 1.92 | 9.67  |
| 3U2S.PDB | O, L_SER_122   | N, L_GLN_126   | H, L_GLN_126    | 2.90 | 2.12 | 21.06 |
| 3U2S.PDB | O, L_GLU_124   | N, L_ALA_127   | H, L_ALA_127    | 2.91 | 2.17 | 26.56 |
| 3U2S.PDB | O, L_LEU_125   | N, L_ASN_128   | H, L_ASN_128    | 2.96 | 2.14 | 16.25 |
| 3U2S.PDB | OE2, L_GLU_124 | OG1, L_THR_131 | HG1, L_THR_131  | 2.54 | 1.83 | 25.31 |
| 3U2S.PDB | O, L_LEU_178   | N, L_LEU_132   | H, L_LEU_132    | 2.88 | 2.05 | 12.78 |
| 3U2S.PDB | O, L_SER_176   | N, L_CYS_134   | H, L_CYS_134    | 2.76 | 1.90 | 1.60  |
| 3U2S.PDB | O, L_THR_116   | N, L_LEU_135   | H, L_LEU_135    | 2.74 | 1.89 | 1.47  |
| 3U2S.PDB | O, L_ALA_174   | N, L_ILE_136   | H, L_ILE_136    | 2.84 | 2.02 | 15.96 |
| 3U2S.PDB | O, L_SER_114   | N, L_SER_137   | H, L_SER_137    | 2.84 | 2.03 | 17.34 |
| 3U2S.PDB | OE1, L_GLN_167 | N, L_ASP_138   | H, L_ASP_138    | 2.90 | 2.06 | 11.00 |
| 3U2S.PDB | O, L_ALA_111   | N, L_TYR_140   | H, L_TYR_140    | 2.92 | 2.12 | 18.95 |
| 3U2S.PDB | O, L_PRO_141   | N, L_ALA_143   | H, L_ALA_143    | 2.92 | 2.21 | 29.24 |
| 3U2S.PDB | O, L_THR_196   | N, L_THR_145   | H, L_THR_145    | 2.91 | 2.08 | 11.19 |
| 3U2S.PDB | O, L_GLN_194   | N, L_ALA_147   | H, L_ALA_147    | 2.84 | 2.02 | 14.58 |
| 3U2S.PDB | OG, L_SER_176  | NE1, L_TRP_148 | HE1, L_TRP_148  | 2.93 | 2.09 | 11.15 |
| 3U2S.PDB | O, L_SER_192   | N, L_LYS_149   | H, L_LYS_149    | 2.92 | 2.14 | 21.71 |
| 3U2S.PDB | O, L_SER_153   | N, L_ALA_150   | H, L_ALA_150    | 2.77 | 2.00 | 21.57 |
| 3U2S.PDB | O, L_SER_190   | N, L_ASP_151   | H, L_ASP_151    | 2.62 | 1.78 | 11.93 |
| 3U2S.PDB | O, L_TRP_148   | N, L_VAL_155   | H, L_VAL_155    | 2.98 | 2.16 | 15.40 |
| 3U2S.PDB | O, L_SER_175   | N, L_THR_162   | H, L_THR_162    | 2.82 | 2.00 | 14.91 |
| 3U2S.PDB | O, L_ALA_173   | N, L_SER_165   | H, L_SER_165    | 2.74 | 1.91 | 13.98 |
| 3U2S.PDB | O, L_LYS_171   | N, L_GLN_167   | H, L_GLN_167    | 2.73 | 1.88 | 8.55  |
| 3U2S.PDB | OD1, L_ASP_138 | NE2, L_GLN_167 | HE22, L_GLN_167 | 2.82 | 2.00 | 15.99 |
| 3U2S.PDB | OD1, L_ASP_138 | ND2, L_ASN_169 | HD22, L_ASN_169 | 2.92 | 2.10 | 15.30 |
| 3U2S.PDB | O, L_GLN_167   | N, L_ASN_170   | H, L_ASN_170    | 2.88 | 2.04 | 11.78 |
| 3U2S.PDB | OD1, L_ASN_169 | N, L_LYS_171   | H, L_LYS_171    | 2.91 | 2.07 | 8.70  |
| 3U2S.PDB | O, L_PHE_139   | N, L_TYR_172   | H, L_TYR_172    | 2.84 | 2.05 | 19.75 |
| 3U2S.PDB | O, L_SER_165   | N, L_ALA_173   | H, L_ALA_173    | 2.93 | 2.10 | 13.60 |
| 3U2S.PDB | O, L_ILE_136   | N, L_ALA_174   | H, L_ALA_174    | 2.74 | 1.97 | 22.21 |
| 3U2S.PDB | OG1, L_THR_162 | N, L_SER_175   | H, L_SER_175    | 2.92 | 2.13 | 19.21 |
| 3U2S.PDB | O, L_CYS_134   | N, L_SER_176   | H, L_SER_176    | 2.86 | 2.05 | 17.04 |
| 3U2S.PDB | O, L_GLU_160   | N, L_TYR_177   | H, L_TYR_177    | 2.73 | 1.94 | 18.58 |
| 3U2S.PDB | O, L_GLY_158   | N, L_SER_179   | H, L_SER_179    | 2.88 | 2.05 | 11.87 |
| 3U2S.PDB | O, L_ALA_130   | N, L_LEU_180   | H, L_LEU_180    | 2.86 | 2.01 | 7.38  |
| 3U2S.PDB | OE1, L_GLN_184 | N, L_THR_181   | H, L_THR_181    | 2.99 | 2.19 | 18.35 |
| 3U2S.PDB | O, L_VAL_206   | N, L_TYR_191   | H, L_TYR_191    | 2.95 | 2.11 | 11.29 |
| 3U2S.PDB | O, L_LYS_149   | N, L_SER_192   | H, L_SER_192    | 2.91 | 2.11 | 17.67 |
| 3U2S.PDB | O, L_ALA_147   | N, L_GLN_194   | H, L_GLN_194    | 2.75 | 1.91 | 11.28 |
| 3U2S.PDB | O, L_VAL_202   | N, L_VAL_195   | H, L_VAL_195    | 2.80 | 1.94 | 3.08  |
| 3U2S.PDB | O, L_THR_145   | N, L_THR_196   | H, L_THR_196    | 2.78 | 1.97 | 15.99 |
| 3U2S.PDB | OG1, L_THR_201 | OG1, L_THR_196 | HG1, L_THR_196  | 2.99 | 2.20 | 12.41 |
| 3U2S.PDB | O, L_SER_200   | N, L_HIS_197   | H, L_HIS_197    | 2.83 | 1.99 | 8.72  |
| 3U2S.PDB | O, L_PRO_141   | NE2, L_HIS_197 | HE2, L_HIS_197  | 2.95 | 2.17 | 20.02 |

|          |                |                |                 |      |      |       |
|----------|----------------|----------------|-----------------|------|------|-------|
| 3U2S.PDB | O, L_HIS_197   | N, L_SER_200   | H, L_SER_200    | 2.95 | 2.10 | 9.03  |
| 3U2S.PDB | O, L_VAL_195   | N, L_VAL_202   | H, L_VAL_202    | 2.82 | 1.99 | 11.70 |
| 3U2S.PDB | O, L_VAL_115   | NZ, L_LYS_204  | HZ2, L_LYS_204  | 2.85 | 2.09 | 26.22 |
| 3U2S.PDB | O, L_TYR_191   | N, L_VAL_206   | H, L_VAL_206    | 2.98 | 2.18 | 18.28 |
| 3U2S.PDB | O, G_THR_201   | N, G_PHE_121   | H, G_PHE_121    | 2.70 | 1.87 | 12.95 |
| 3U2S.PDB | O, G_PHE_235   | N, G_ALA_124   | H, G_ALA_124    | 2.87 | 2.04 | 12.10 |
| 3U2S.PDB | O, G_GLN_197   | N, G_ALA_125   | H, G_ALA_125    | 2.88 | 2.10 | 21.74 |
| 3U2S.PDB | O, G_VAL_237   | N, G_CYS_126   | H, G_CYS_126    | 2.73 | 1.95 | 20.04 |
| 3U2S.PDB | O, G_SER_195   | N, G_VAL_127   | H, G_VAL_127    | 2.86 | 2.06 | 17.61 |
| 3U2S.PDB | O, G_LEU_193   | N, G_LEU_129   | H, G_LEU_129    | 2.74 | 1.88 | 2.50  |
| 3U2S.PDB | O, G_TYR_191   | N, G_CYS_131   | H, G_CYS_131    | 2.75 | 1.91 | 8.80  |
| 3U2S.PDB | O, G_HIS_156   | N, G_THR_132   | H, G_THR_132    | 2.82 | 2.00 | 14.90 |
| 3U2S.PDB | O, G_PHE_176   | N, G_LYS_155   | H, G_LYS_155    | 2.81 | 1.97 | 9.94  |
| 3U2S.PDB | O, G_ALA_174   | N, G_CYS_157   | H, G_CYS_157    | 2.84 | 2.08 | 23.82 |
| 3U2S.PDB | O, G_GLN_170   | N, G_ILE_161   | H, G_ILE_161    | 2.99 | 2.16 | 11.12 |
| 3U2S.PDB | O, H_ASN_100F  | N, G_LYS_169   | H, G_LYS_169    | 2.84 | 1.99 | 7.68  |
| 3U2S.PDB | O, G_ILE_161   | N, G_GLN_170   | H, G_GLN_170    | 2.91 | 2.11 | 17.48 |
| 3U2S.PDB | O, G_PHE_159   | N, G_VAL_172   | H, G_VAL_172    | 2.63 | 1.79 | 10.86 |
| 3U2S.PDB | OH, H_TYR_100K | ND2, G_ASN_173 | HD21, G_ASN_173 | 2.97 | 2.13 | 8.87  |
| 3U2S.PDB | O, G_LYS_155   | N, G_PHE_176   | H, G_PHE_176    | 2.95 | 2.13 | 15.03 |
| 3U2S.PDB | O, G_CYS_131   | N, G_TYR_191   | H, G_TYR_191    | 2.70 | 1.86 | 8.47  |
| 3U2S.PDB | O, G_LEU_129   | N, G_LEU_193   | H, G_LEU_193    | 2.86 | 2.06 | 17.04 |
| 3U2S.PDB | O, G_VAL_127   | N, G_SER_195   | H, G_SER_195    | 2.90 | 2.06 | 10.61 |
| 3U2S.PDB | O, G_ALA_125   | N, G_GLN_197   | H, G_GLN_197    | 2.97 | 2.17 | 17.81 |
| 3U2S.PDB | O, G_ALA_209   | N, G_PHE_213   | H, G_PHE_213    | 2.92 | 2.06 | 4.30  |
| 3U2S.PDB | O, G_ALA_210   | N, G_LYS_214   | H, G_LYS_214    | 2.72 | 1.91 | 16.83 |
| 3U2S.PDB | O, G_VAL_212   | N, G_TYR_216   | H, G_TYR_216    | 2.98 | 2.15 | 13.12 |
| 3U2S.PDB | O, G_LYS_214   | N, G_ASN_218   | H, G_ASN_218    | 2.94 | 2.11 | 12.77 |
| 3U2S.PDB | O, G_GLN_215   | N, G_ASP_219   | H, G_ASP_219    | 2.86 | 2.06 | 18.20 |
| 3U2S.PDB | O, G_THR_232   | OG1, G_THR_234 | HG1, G_THR_234  | 2.83 | 2.05 | 16.75 |
| 3U2S.PDB | O, G_LYS_122   | N, G_PHE_235   | H, G_PHE_235    | 2.85 | 2.08 | 22.39 |
| 3U2S.PDB | O, G_THR_227   | N, G_THR_236   | H, G_THR_236    | 2.90 | 2.11 | 19.48 |
| 3U2S.PDB | O, G_ALA_124   | N, G_VAL_237   | H, G_VAL_237    | 2.94 | 2.12 | 15.29 |
| 3U2S.PDB | O, G_CYS_126   | N, G_GLU_239   | H, G_GLU_239    | 2.92 | 2.11 | 16.99 |
| 3U2S.PDB | O, A_SER_25    | N, A_ARG_3     | H, A_ARG_3      | 2.90 | 2.11 | 19.62 |
| 3U2S.PDB | O, A_ALA_23    | N, A_VAL_5     | H, A_VAL_5      | 2.99 | 2.20 | 19.87 |
| 3U2S.PDB | O, A_SER_21    | N, A_SER_7     | H, A_SER_7      | 2.83 | 2.05 | 20.30 |
| 3U2S.PDB | O, A_THR_110   | N, A_VAL_12    | H, A_VAL_12     | 2.89 | 2.06 | 13.20 |
| 3U2S.PDB | O, A_LEU_82C   | N, A_GLY_15    | H, A_GLY_15     | 2.82 | 2.05 | 22.09 |
| 3U2S.PDB | O, A_MET_82    | N, A_LEU_18    | H, A_LEU_18     | 2.86 | 2.07 | 19.99 |
| 3U2S.PDB | OE1, A_GLN_81  | NH1, A_ARG_19  | HH11, A_ARG_19  | 2.87 | 2.10 | 22.03 |
| 3U2S.PDB | O, A_LEU_80    | N, A_LEU_20    | H, A_LEU_20     | 2.84 | 2.01 | 14.35 |
| 3U2S.PDB | O, A_SER_7     | N, A_SER_21    | H, A_SER_21     | 2.96 | 2.12 | 10.61 |
| 3U2S.PDB | O, A_VAL_5     | N, A_ALA_23    | H, A_ALA_23     | 2.92 | 2.09 | 13.34 |
| 3U2S.PDB | O, A_ASP_76    | N, A_ALA_24    | H, A_ALA_24     | 2.97 | 2.11 | 3.15  |
| 3U2S.PDB | O, A_ARG_3     | N, A_SER_25    | H, A_SER_25     | 2.95 | 2.14 | 17.02 |
| 3U2S.PDB | O, A_ASP_100L  | NE, A_ARG_31   | HE, A_ARG_31    | 2.88 | 2.08 | 17.86 |
| 3U2S.PDB | O, A_VAL_93    | N, A_HIS_35    | H, A_HIS_35     | 2.73 | 1.90 | 11.49 |
| 3U2S.PDB | OE1, A_GLU_95  | NE2, A_HIS_35  | HE2, A_HIS_35   | 2.70 | 1.86 | 8.94  |
| 3U2S.PDB | O, A_ALA_49    | N, A_TRP_36    | H, A_TRP_36     | 3.00 | 2.25 | 25.82 |
| 3U2S.PDB | O, A_TYR_79    | NE1, A_TRP_36  | HE1, A_TRP_36   | 2.96 | 2.23 | 27.73 |
| 3U2S.PDB | O, A_PHE_91    | N, A_VAL_37    | H, A_VAL_37     | 2.92 | 2.09 | 14.10 |
| 3U2S.PDB | O, A_GLU_46    | N, A_ARG_38    | H, A_ARG_38     | 2.87 | 2.03 | 8.46  |
| 3U2S.PDB | OE2, A_GLU_46  | NE, A_ARG_38   | HE, A_ARG_38    | 2.74 | 1.98 | 23.65 |
| 3U2S.PDB | OH, A_TYR_90   | NH1, A_ARG_38  | HH11, A_ARG_38  | 2.88 | 2.07 | 17.44 |
| 3U2S.PDB | OD1, A_ASP_86  | NH1, A_ARG_38  | HH12, A_ARG_38  | 2.89 | 2.04 | 8.28  |
| 3U2S.PDB | OE2, A_GLU_46  | NH2, A_ARG_38  | HH21, A_ARG_38  | 2.90 | 2.18 | 27.83 |
| 3U2S.PDB | O, A_THR_89    | N, A_GLN_39    | H, A_GLN_39     | 2.91 | 2.16 | 24.75 |

|          |                 |               |                |      |      |       |
|----------|-----------------|---------------|----------------|------|------|-------|
| 3U2S.PDB | OE1, B_GLN_38   | NE2, A_GLN_39 | HE22, A_GLN_39 | 2.92 | 2.07 | 7.34  |
| 3U2S.PDB | O, A_ALA_40     | N, A_GLN_43   | H, A_GLN_43    | 2.87 | 2.06 | 15.56 |
| 3U2S.PDB | O, A_ARG_38     | N, A_GLU_46   | H, A_GLU_46    | 2.76 | 1.99 | 21.51 |
| 3U2S.PDB | O, A_TYR_58     | N, A_PHE_50   | H, A_PHE_50    | 2.89 | 2.09 | 18.19 |
| 3U2S.PDB | O, A_MET_34     | N, A_ILE_51   | H, A_ILE_51    | 2.92 | 2.12 | 18.53 |
| 3U2S.PDB | O, A_GLU_56     | N, A_LYS_52   | H, A_LYS_52    | 2.97 | 2.12 | 7.01  |
| 3U2S.PDB | O, A_PHE_100J   | OH, A_TYR_52A | HH, A_TYR_52A  | 2.59 | 1.88 | 24.42 |
| 3U2S.PDB | O, A_LYS_52     | N, A_GLY_54   | H, A_GLY_54    | 2.87 | 2.03 | 9.21  |
| 3U2S.PDB | OD2, A_ASP_53   | N, A_SER_55   | H, A_SER_55    | 2.98 | 2.16 | 14.39 |
| 3U2S.PDB | O, A_PHE_50     | N, A_TYR_58   | H, A_TYR_58    | 2.79 | 1.96 | 13.05 |
| 3U2S.PDB | O, A_VAL_48     | N, A_ALA_60   | H, A_ALA_60    | 2.95 | 2.13 | 13.20 |
| 3U2S.PDB | O, A_VAL_63     | N, A_ARG_66   | H, A_ARG_66    | 2.73 | 1.88 | 9.69  |
| 3U2S.PDB | OD2, A_ASP_86   | NH1, A_ARG_66 | HH12, A_ARG_66 | 2.48 | 1.66 | 13.42 |
| 3U2S.PDB | O, A_VAL_63     | N, A_LEU_67   | H, A_LEU_67    | 2.90 | 2.05 | 9.26  |
| 3U2S.PDB | O, A_GLN_81     | N, A_SER_68   | H, A_SER_68    | 2.85 | 2.08 | 21.35 |
| 3U2S.PDB | OD1, A_ASN_73   | NE, A_ARG_71  | HE, A_ARG_71   | 2.81 | 2.03 | 20.92 |
| 3U2S.PDB | O, A_GLN_32     | NH1, A_ARG_71 | HH12, A_ARG_71 | 2.95 | 2.21 | 26.35 |
| 3U2S.PDB | O, A_THR_77     | N, A_ASP_72   | H, A_ASP_72    | 2.91 | 2.06 | 7.19  |
| 3U2S.PDB | O, A_TYR_52A    | ND2, A_ASN_73 | HD22, A_ASN_73 | 2.92 | 2.06 | 5.19  |
| 3U2S.PDB | O, A_LYS_75     | OG1, A_THR_77 | HG1, A_THR_77  | 2.85 | 2.08 | 17.09 |
| 3U2S.PDB | O, A_CYS_22     | N, A_LEU_78   | H, A_LEU_78    | 2.91 | 2.12 | 18.34 |
| 3U2S.PDB | O, A_SER_70     | N, A_TYR_79   | H, A_TYR_79    | 2.82 | 1.97 | 5.95  |
| 3U2S.PDB | O, A_LEU_20     | N, A_LEU_80   | H, A_LEU_80    | 2.92 | 2.11 | 16.81 |
| 3U2S.PDB | O, A_SER_68     | N, A_GLN_81   | H, A_GLN_81    | 2.79 | 1.96 | 12.01 |
| 3U2S.PDB | O, A_LEU_18     | N, A_MET_82   | H, A_MET_82    | 2.72 | 1.90 | 13.43 |
| 3U2S.PDB | O, A_ARG_66     | N, A_ASN_82A  | H, A_ASN_82A   | 2.72 | 1.94 | 20.65 |
| 3U2S.PDB | OD2, A_ASP_86   | N, A_ARG_83   | H, A_ARG_83    | 2.76 | 1.95 | 16.59 |
| 3U2S.PDB | OE1, A_GLU_85   | NH1, A_ARG_83 | HH11, A_ARG_83 | 2.91 | 2.14 | 21.39 |
| 3U2S.PDB | O, A_ARG_83     | N, A_ASP_86   | H, A_ASP_86    | 2.84 | 2.01 | 13.57 |
| 3U2S.PDB | O, A_VAL_84     | N, A_THR_87   | H, A_THR_87    | 2.99 | 2.15 | 12.03 |
| 3U2S.PDB | O, A_VAL_84     | OG1, A_THR_87 | HG1, A_THR_87  | 2.79 | 2.12 | 29.92 |
| 3U2S.PDB | O, A_GLN_39     | N, A_THR_89   | H, A_THR_89    | 2.88 | 2.07 | 17.15 |
| 3U2S.PDB | O, A_THR_107    | N, A_TYR_90   | H, A_TYR_90    | 2.83 | 1.98 | 6.95  |
| 3U2S.PDB | O, A_VAL_37     | N, A_PHE_91   | H, A_PHE_91    | 2.67 | 1.82 | 6.67  |
| 3U2S.PDB | OE2, A_GLU_6    | N, A_CYS_92   | H, A_CYS_92    | 2.72 | 1.89 | 13.80 |
| 3U2S.PDB | O, A_HIS_35     | N, A_VAL_93   | H, A_VAL_93    | 2.96 | 2.18 | 20.19 |
| 3U2S.PDB | O, A_VAL_102    | N, A_ARG_94   | H, A_ARG_94    | 2.84 | 2.03 | 15.63 |
| 3U2S.PDB | OD1, A_ASP_101  | NE, A_ARG_94  | HE, A_ARG_94   | 2.84 | 1.98 | 4.74  |
| 3U2S.PDB | OD2, A_ASP_101  | NH2, A_ARG_94 | HH21, A_ARG_94 | 2.90 | 2.12 | 20.79 |
| 3U2S.PDB | O, A_TYR_100S   | N, A_ALA_96   | H, A_ALA_96    | 2.80 | 1.96 | 10.95 |
| 3U2S.PDB | O, A_TYR_100E   | N, A_ARG_100B | H, A_ARG_100B  | 2.98 | 2.15 | 11.35 |
| 3U2S.PDB | O, A_ARG_100B   | N, A_TYR_100E | H, A_TYR_100E  | 2.79 | 1.94 | 7.07  |
| 3U2S.PDB | O, C_ASP_167    | N, A_ASN_100F | H, A_ASN_100F  | 2.97 | 2.14 | 14.21 |
| 3U2S.PDB | O, A_GLY_100M   | N, A_ASP_100I | H, A_ASP_100I  | 2.82 | 1.97 | 9.87  |
| 3U2S.PDB | OD1, A_ASP_100I | N, A_PHE_100J | H, A_PHE_100J  | 2.78 | 2.05 | 27.11 |
| 3U2S.PDB | O, A_ARG_31     | N, A_TYR_100N | H, A_TYR_100N  | 2.94 | 2.09 | 8.42  |
| 3U2S.PDB | O, A_GLY_98     | N, A_TYR_100O | H, A_TYR_100O  | 2.92 | 2.19 | 26.39 |
| 3U2S.PDB | O, A_ALA_96     | N, A_TYR_100Q | H, A_TYR_100Q  | 2.75 | 1.90 | 9.19  |
| 3U2S.PDB | OE1, A_GLU_6    | N, A_GLY_106  | H, A_GLY_106   | 2.86 | 2.06 | 17.09 |
| 3U2S.PDB | O, A_TYR_90     | N, A_THR_107  | H, A_THR_107   | 2.98 | 2.19 | 19.53 |
| 3U2S.PDB | O, A_ALA_88     | N, A_VAL_109  | H, A_VAL_109   | 2.92 | 2.07 | 4.29  |
| 3U2S.PDB | O, A_GLY_10     | N, A_THR_110  | H, A_THR_110   | 2.86 | 2.01 | 7.11  |
| 3U2S.PDB | OG1, A_THR_87   | N, A_VAL_111  | H, A_VAL_111   | 2.87 | 2.02 | 8.59  |
| 3U2S.PDB | O, A_VAL_12     | N, A_SER_112  | H, A_SER_112   | 2.92 | 2.11 | 15.36 |
| 3U2S.PDB | O, A_PHE_146    | N, A_LYS_117  | H, A_LYS_117   | 2.83 | 2.02 | 16.74 |
| 3U2S.PDB | O, A_ASP_144    | NZ, A_LYS_117 | HZ2, A_LYS_117 | 2.78 | 2.05 | 29.01 |
| 3U2S.PDB | O, A_LYS_143    | N, A_SER_120  | H, A_SER_120   | 2.88 | 2.06 | 14.03 |
| 3U2S.PDB | O, A_GLY_139    | N, A_LEU_124  | H, A_LEU_124   | 2.65 | 1.84 | 16.74 |

|          |                |                |                 |      |      |       |
|----------|----------------|----------------|-----------------|------|------|-------|
| 3U2S.PDB | O, A_LEU_124   | N, A_GLY_139   | H, A_GLY_139    | 2.96 | 2.16 | 18.70 |
| 3U2S.PDB | O, A_SER_180   | N, A_CYS_140   | H, A_CYS_140    | 2.75 | 1.94 | 16.77 |
| 3U2S.PDB | O, A_PHE_122   | N, A_LEU_141   | H, A_LEU_141    | 2.88 | 2.03 | 7.64  |
| 3U2S.PDB | O, A_LEU_178   | N, A_VAL_142   | H, A_VAL_142    | 2.79 | 1.98 | 17.03 |
| 3U2S.PDB | O, A_SER_120   | N, A_LYS_143   | H, A_LYS_143    | 2.78 | 1.92 | 1.74  |
| 3U2S.PDB | OG1, B_THR_131 | NZ, A_LYS_143  | HZ2, A_LYS_143  | 2.41 | 1.67 | 27.35 |
| 3U2S.PDB | O, A_TYR_176   | N, A_TYR_145   | H, A_TYR_145    | 2.98 | 2.17 | 17.16 |
| 3U2S.PDB | O, A_LYS_117   | N, A_PHE_146   | H, A_PHE_146    | 2.95 | 2.17 | 21.41 |
| 3U2S.PDB | O, A_ASN_199   | N, A_THR_151   | H, A_THR_151    | 2.98 | 2.16 | 15.19 |
| 3U2S.PDB | O, A_ILE_195   | N, A_ASN_155   | H, A_ASN_155    | 2.78 | 1.93 | 7.52  |
| 3U2S.PDB | O, A_VAL_181   | N, A_HIS_164   | H, A_HIS_164    | 2.87 | 2.03 | 10.09 |
| 3U2S.PDB | O, A_SER_179   | N, A_PHE_166   | H, A_PHE_166    | 2.98 | 2.12 | 5.94  |
| 3U2S.PDB | O, A_SER_177   | N, A_VAL_169   | H, A_VAL_169    | 2.72 | 1.90 | 14.55 |
| 3U2S.PDB | OD2, A_ASP_144 | NE2, A_GLN_171 | HE22, A_GLN_171 | 2.82 | 1.98 | 10.06 |
| 3U2S.PDB | O, A_GLN_171   | N, A_GLY_174   | H, A_GLY_174    | 2.97 | 2.11 | 5.23  |
| 3U2S.PDB | O, A_TYR_145   | N, A_TYR_176   | H, A_TYR_176    | 2.71 | 1.86 | 5.46  |
| 3U2S.PDB | O, A_VAL_169   | N, A_SER_177   | H, A_SER_177    | 2.96 | 2.16 | 18.03 |
| 3U2S.PDB | O, A_VAL_142   | N, A_LEU_178   | H, A_LEU_178    | 2.98 | 2.19 | 18.64 |
| 3U2S.PDB | O, A_CYS_140   | N, A_SER_180   | H, A_SER_180    | 2.98 | 2.18 | 18.33 |
| 3U2S.PDB | O, A_LEU_138   | N, A_VAL_182   | H, A_VAL_182    | 2.84 | 2.04 | 17.50 |
| 3U2S.PDB | O, A_GLY_162   | N, A_THR_183   | H, A_THR_183    | 2.90 | 2.11 | 19.30 |
| 3U2S.PDB | O, A_SER_153   | N, A_ASN_197   | H, A_ASN_197    | 2.76 | 1.95 | 14.90 |
| 3U2S.PDB | O, A_VAL_207   | N, A_VAL_198   | H, A_VAL_198    | 2.76 | 1.93 | 12.35 |
| 3U2S.PDB | O, A_THR_151   | N, A_ASN_199   | H, A_ASN_199    | 2.98 | 2.16 | 15.76 |
| 3U2S.PDB | O, A_THR_205   | N, A_HIS_200   | H, A_HIS_200    | 2.74 | 1.90 | 9.41  |
| 3U2S.PDB | OG, A_SER_203  | ND1, A_HIS_200 | HD1, A_HIS_200  | 2.63 | 1.78 | 5.16  |
| 3U2S.PDB | O, A_PRO_147   | NE2, A_HIS_200 | HE2, A_HIS_200  | 2.75 | 1.94 | 15.51 |
| 3U2S.PDB | O, A_VAL_198   | N, A_VAL_207   | H, A_VAL_207    | 2.82 | 1.98 | 12.41 |
| 3U2S.PDB | O, A_TYR_194   | N, A_VAL_211   | H, A_VAL_211    | 2.94 | 2.09 | 7.62  |
| 3U2S.PDB | O, B_GLN_24    | N, B_THR_5     | H, B_THR_5      | 2.92 | 2.09 | 11.05 |
| 3U2S.PDB | O, B_TYR_86    | NE2, B_GLN_6   | HE22, B_GLN_6   | 2.85 | 2.02 | 13.19 |
| 3U2S.PDB | O, B_LYS_103   | N, B_VAL_11    | H, B_VAL_11     | 2.85 | 2.04 | 16.11 |
| 3U2S.PDB | OE1, B_GLN_17  | N, B_SER_14    | H, B_SER_14     | 2.92 | 2.13 | 20.55 |
| 3U2S.PDB | O, B_LEU_78    | N, B_GLY_16    | H, B_GLY_16     | 2.87 | 2.07 | 17.65 |
| 3U2S.PDB | O, B_ILE_75    | N, B_ILE_19    | H, B_ILE_19     | 2.93 | 2.15 | 21.26 |
| 3U2S.PDB | OG1, B_THR_74  | OG1, B_THR_20  | HG1, B_THR_20   | 2.88 | 2.16 | 24.36 |
| 3U2S.PDB | O, B_LEU_73    | N, B_ILE_21    | H, B_ILE_21     | 2.82 | 2.00 | 14.83 |
| 3U2S.PDB | O, B_THR_5     | N, B_GLN_24    | H, B_GLN_24     | 2.91 | 2.09 | 15.35 |
| 3U2S.PDB | O, B_ASN_69    | N, B_GLY_25    | H, B_GLY_25     | 2.73 | 1.88 | 3.63  |
| 3U2S.PDB | OD1, B_ASP_27B | N, B_THR_26    | H, B_THR_26     | 2.84 | 2.02 | 14.26 |
| 3U2S.PDB | OD2, B_ASP_27B | OG1, B_THR_26  | HG1, B_THR_26   | 2.89 | 2.14 | 20.81 |
| 3U2S.PDB | OD1, B_ASP_27B | N, B_VAL_27C   | H, B_VAL_27C    | 2.70 | 1.91 | 19.64 |
| 3U2S.PDB | O, B_THR_26    | N, B_GLY_28    | H, B_GLY_28     | 2.91 | 2.08 | 12.42 |
| 3U2S.PDB | O, B_ASP_27B   | N, B_GLY_29    | H, B_GLY_29     | 2.89 | 2.05 | 10.78 |
| 3U2S.PDB | O, B_LYS_89    | N, B_SER_34    | H, B_SER_34     | 2.84 | 2.04 | 18.48 |
| 3U2S.PDB | O, B_ILE_48    | N, B_TRP_35    | H, B_TRP_35     | 2.89 | 2.10 | 19.01 |
| 3U2S.PDB | O, B_TYR_87    | N, B_TYR_36    | H, B_TYR_36     | 2.89 | 2.14 | 24.66 |
| 3U2S.PDB | O, B_LYS_45    | N, B_GLN_37    | H, B_GLN_37     | 2.82 | 2.00 | 13.80 |
| 3U2S.PDB | OH, B_TYR_86   | NE2, B_GLN_37  | HE21, B_GLN_37  | 2.88 | 2.02 | 1.18  |
| 3U2S.PDB | O, B_ASP_85    | N, B_GLN_38    | H, B_GLN_38     | 2.78 | 1.98 | 17.35 |
| 3U2S.PDB | O, B_LYS_42    | NE2, B_GLN_38  | HE21, B_GLN_38  | 2.90 | 2.07 | 13.31 |
| 3U2S.PDB | OE1, A_GLN_39  | NE2, B_GLN_38  | HE22, B_GLN_38  | 2.92 | 2.08 | 10.61 |
| 3U2S.PDB | O, B_GLN_37    | N, B_LYS_45    | H, B_LYS_45     | 2.81 | 2.08 | 26.63 |
| 3U2S.PDB | O, B_TRP_35    | N, B_VAL_47    | H, B_VAL_47     | 2.86 | 2.02 | 10.13 |
| 3U2S.PDB | O, B_LYS_53    | N, B_TYR_49    | H, B_TYR_49     | 2.92 | 2.11 | 17.26 |
| 3U2S.PDB | O, B_VAL_33    | N, B_VAL_51    | H, B_VAL_51     | 2.86 | 2.01 | 7.74  |
| 3U2S.PDB | O, B_ASP_50    | N, B_SER_52    | H, B_SER_52     | 2.89 | 2.18 | 28.89 |
| 3U2S.PDB | O, B_TYR_49    | N, B_LYS_53    | H, B_LYS_53     | 2.90 | 2.09 | 16.83 |

|          |                |                |                 |      |      |       |
|----------|----------------|----------------|-----------------|------|------|-------|
| 3U2S.PDB | OD2, B.ASP_50  | NZ, B.LYS_53   | HZ2, B.LYS_53   | 2.75 | 1.88 | 8.80  |
| 3U2S.PDB | O, B.VAL_58    | NH1, B.ARG_54  | HH11, B.ARG_54  | 2.92 | 2.11 | 16.82 |
| 3U2S.PDB | O, B.SER_76    | NH1, B.ARG_61  | HH11, B.ARG_61  | 2.99 | 2.17 | 14.44 |
| 3U2S.PDB | OD2, B.ASP_82  | NH1, B.ARG_61  | HH12, B.ARG_61  | 2.78 | 1.98 | 19.10 |
| 3U2S.PDB | OD1, B.ASP_82  | NH2, B.ARG_61  | HH22, B.ARG_61  | 2.93 | 2.07 | 0.82  |
| 3U2S.PDB | O, B.VAL_27C   | NZ, B.LYS_66   | HZ3, B.LYS_66   | 2.85 | 2.03 | 18.40 |
| 3U2S.PDB | O, B.THR_70    | N, B.SER_67    | H, B.SER_67     | 2.96 | 2.13 | 11.57 |
| 3U2S.PDB | O, B.CYS_23    | N, B.ALA_71    | H, B.ALA_71     | 2.85 | 2.05 | 17.45 |
| 3U2S.PDB | O, B.SER_65    | N, B.SER_72    | H, B.SER_72     | 2.89 | 2.07 | 15.07 |
| 3U2S.PDB | O, B.ILE_21    | N, B.LEU_73    | H, B.LEU_73     | 2.90 | 2.08 | 14.34 |
| 3U2S.PDB | O, B.SER_63    | N, B.THR_74    | H, B.THR_74     | 2.87 | 2.04 | 12.52 |
| 3U2S.PDB | O, B.ILE_19    | N, B.ILE_75    | H, B.ILE_75     | 2.92 | 2.11 | 16.75 |
| 3U2S.PDB | O, B.ARG_61    | N, B.SER_76    | H, B.SER_76     | 2.95 | 2.11 | 12.03 |
| 3U2S.PDB | O, B.GLN_17    | N, B.LEU_78    | H, B.LEU_78     | 2.82 | 1.97 | 8.22  |
| 3U2S.PDB | OD2, B.ASP_82  | N, B.GLN_79    | H, B.GLN_79     | 2.84 | 2.01 | 11.59 |
| 3U2S.PDB | OG1, H.THR_160 | N, B.ALA_80    | H, B.ALA_80     | 2.90 | 2.08 | 14.44 |
| 3U2S.PDB | O, B.GLN_79    | N, B.ASP_82    | H, B.ASP_82     | 2.90 | 2.05 | 8.49  |
| 3U2S.PDB | O, B.ALA_80    | N, B.GLU_83    | H, B.GLU_83     | 2.99 | 2.13 | 4.82  |
| 3U2S.PDB | O, B.THR_102   | N, B.TYR_86    | H, B.TYR_86     | 2.83 | 2.04 | 18.67 |
| 3U2S.PDB | O, B.ARG_95A   | N, B.THR_92    | H, B.THR_92     | 2.98 | 2.24 | 26.76 |
| 3U2S.PDB | O, B.THR_92    | N, B.ARG_95    | H, B.ARG_95     | 2.98 | 2.15 | 13.06 |
| 3U2S.PDB | OD1, A.ASP_61  | NH1, B.ARG_95A | HH12, B.ARG_95A | 2.63 | 1.91 | 26.97 |
| 3U2S.PDB | OE2, A.GLU_95  | NH2, B.ARG_96  | HH21, B.ARG_96  | 2.98 | 2.16 | 13.77 |
| 3U2S.PDB | O, B.CYS_88    | N, B.GLY_99    | H, B.GLY_99     | 2.84 | 2.02 | 13.65 |
| 3U2S.PDB | O, B.TYR_86    | N, B.THR_102   | H, B.THR_102    | 2.88 | 2.13 | 24.78 |
| 3U2S.PDB | O, B.PRO_7     | OG1, B.THR_102 | HG1, B.THR_102  | 2.64 | 1.82 | 5.54  |
| 3U2S.PDB | O, B.GLY_84    | N, B.LEU_104   | H, B.LEU_104    | 2.79 | 1.94 | 4.02  |
| 3U2S.PDB | O, B.VAL_11    | N, B.THR_105   | H, B.THR_105    | 2.99 | 2.17 | 14.21 |
| 3U2S.PDB | OH, B.TYR_140  | N, B.GLY_107   | H, B.GLY_107    | 2.85 | 2.06 | 20.14 |
| 3U2S.PDB | O, B.TYR_140   | N, B.ALA_111   | H, B.ALA_111    | 2.98 | 2.14 | 10.58 |
| 3U2S.PDB | O, B.SER_137   | N, B.SER_114   | H, B.SER_114    | 2.93 | 2.10 | 13.38 |
| 3U2S.PDB | O, B.LEU_135   | N, B.THR_116   | H, B.THR_116    | 2.97 | 2.16 | 15.84 |
| 3U2S.PDB | O, B.VAL_133   | N, B.PHE_118   | H, B.PHE_118    | 2.87 | 2.04 | 12.26 |
| 3U2S.PDB | O, B.LEU_125   | N, B.ASN_128   | H, B.ASN_128    | 2.97 | 2.18 | 18.83 |
| 3U2S.PDB | O, B.SER_176   | N, B.CYS_134   | H, B.CYS_134    | 2.86 | 2.01 | 7.06  |
| 3U2S.PDB | O, B.THR_116   | N, B.LEU_135   | H, B.LEU_135    | 2.78 | 1.93 | 5.65  |
| 3U2S.PDB | O, B.ALA_174   | N, B.ILE_136   | H, B.ILE_136    | 2.93 | 2.14 | 18.97 |
| 3U2S.PDB | O, B.SER_114   | N, B.SER_137   | H, B.SER_137    | 2.99 | 2.19 | 18.33 |
| 3U2S.PDB | OE1, B.GLN_167 | N, B.ASP_138   | H, B.ASP_138    | 2.95 | 2.17 | 20.82 |
| 3U2S.PDB | O, B.ALA_111   | N, B.TYR_140   | H, B.TYR_140    | 2.94 | 2.14 | 17.27 |
| 3U2S.PDB | O, B.PRO_141   | N, B.ALA_143   | H, B.ALA_143    | 3.00 | 2.29 | 29.69 |
| 3U2S.PDB | O, B.GLN_194   | N, B.ALA_147   | H, B.ALA_147    | 2.93 | 2.10 | 11.92 |
| 3U2S.PDB | OG, B.SER_176  | NE1, B.TRP_148 | HE1, B.TRP_148  | 2.87 | 2.03 | 9.65  |
| 3U2S.PDB | O, B.SER_190   | N, B.ASP_151   | H, B.ASP_151    | 2.76 | 1.91 | 5.32  |
| 3U2S.PDB | O, B.TRP_148   | N, B.VAL_155   | H, B.VAL_155    | 2.92 | 2.16 | 22.91 |
| 3U2S.PDB | O, B.TYR_177   | N, B.GLU_160   | H, B.GLU_160    | 2.79 | 1.97 | 13.97 |
| 3U2S.PDB | O, B.SER_175   | N, B.THR_162   | H, B.THR_162    | 2.92 | 2.09 | 12.18 |
| 3U2S.PDB | O, B.ALA_173   | N, B.SER_165   | H, B.SER_165    | 2.94 | 2.13 | 16.38 |
| 3U2S.PDB | O, B.LYS_171   | N, B.GLN_167   | H, B.GLN_167    | 2.56 | 1.71 | 7.13  |
| 3U2S.PDB | OD1, B.ASN_169 | NE2, B.GLN_167 | HE21, B.GLN_167 | 2.93 | 2.16 | 22.14 |
| 3U2S.PDB | OD1, B.ASP_138 | NE2, B.GLN_167 | HE22, B.GLN_167 | 2.75 | 1.90 | 7.18  |
| 3U2S.PDB | OD1, B.ASN_169 | N, B.LYS_171   | H, B.LYS_171    | 2.90 | 2.06 | 11.66 |
| 3U2S.PDB | O, B.PHE_139   | N, B.TYR_172   | H, B.TYR_172    | 2.94 | 2.14 | 18.70 |
| 3U2S.PDB | O, B.SER_165   | N, B.ALA_173   | H, B.ALA_173    | 2.91 | 2.10 | 18.16 |
| 3U2S.PDB | O, B.ILE_136   | N, B.ALA_174   | H, B.ALA_174    | 2.80 | 1.97 | 12.77 |
| 3U2S.PDB | O, B.CYS_134   | N, B.SER_176   | H, B.SER_176    | 2.86 | 2.06 | 18.58 |
| 3U2S.PDB | O, B.GLU_160   | N, B.TYR_177   | H, B.TYR_177    | 2.64 | 1.81 | 12.56 |
| 3U2S.PDB | O, B.GLY_158   | N, B.SER_179   | H, B.SER_179    | 2.87 | 2.03 | 11.48 |

|          |                |                |                |      |      |       |
|----------|----------------|----------------|----------------|------|------|-------|
| 3U2S.PDB | O, B_ALA_130   | N, B_LEU_180   | H, B_LEU_180   | 2.96 | 2.11 | 5.53  |
| 3U2S.PDB | O, B_PRO_182   | N, B_LYS_186   | H, B_LYS_186   | 2.96 | 2.16 | 17.55 |
| 3U2S.PDB | OD1, B_ASP_151 | N, B_SER_190   | H, B_SER_190   | 2.97 | 2.20 | 22.59 |
| 3U2S.PDB | O, B_VAL_206   | N, B_TYR_191   | H, B_TYR_191   | 2.92 | 2.10 | 13.48 |
| 3U2S.PDB | O, B_LYS_149   | N, B_SER_192   | H, B_SER_192   | 2.99 | 2.21 | 20.57 |
| 3U2S.PDB | O, B_LYS_204   | N, B_CYS_193   | H, B_CYS_193   | 2.92 | 2.14 | 21.01 |
| 3U2S.PDB | O, B_ALA_147   | N, B_GLN_194   | H, B_GLN_194   | 2.80 | 1.97 | 13.29 |
| 3U2S.PDB | O, B_VAL_202   | N, B_VAL_195   | H, B_VAL_195   | 2.78 | 1.93 | 3.68  |
| 3U2S.PDB | O, B_THR_145   | N, B_THR_196   | H, B_THR_196   | 2.86 | 2.00 | 5.33  |
| 3U2S.PDB | OG1, B_THR_201 | OG1, B_THR_196 | HG1, B_THR_196 | 2.79 | 1.99 | 11.66 |
| 3U2S.PDB | O, B_SER_200   | N, B_HIS_197   | H, B_HIS_197   | 2.90 | 2.05 | 7.61  |
| 3U2S.PDB | O, B_PRO_141   | NE2, B_HIS_197 | HE2, B_HIS_197 | 2.83 | 2.07 | 23.66 |
| 3U2S.PDB | O, B_HIS_197   | N, B_SER_200   | H, B_SER_200   | 2.92 | 2.07 | 5.55  |
| 3U2S.PDB | O, B_VAL_195   | N, B_VAL_202   | H, B_VAL_202   | 2.72 | 1.88 | 10.92 |
| 3U2S.PDB | O, B_TYR_191   | N, B_VAL_206   | H, B_VAL_206   | 2.88 | 2.06 | 14.38 |
| 3U2S.PDB | O, C_THR_201   | N, C_PHE_121   | H, C_PHE_121   | 2.92 | 2.06 | 2.96  |
| 3U2S.PDB | O, C_LYS_233   | N, C_LYS_122   | H, C_LYS_122   | 2.76 | 1.94 | 13.22 |
| 3U2S.PDB | O, C_THR_199   | N, C_LEU_123   | H, C_LEU_123   | 2.83 | 2.01 | 15.42 |
| 3U2S.PDB | O, C_PHE_235   | N, C_ALA_124   | H, C_ALA_124   | 2.96 | 2.15 | 16.72 |
| 3U2S.PDB | O, C_GLN_197   | N, C_ALA_125   | H, C_ALA_125   | 2.97 | 2.18 | 19.36 |
| 3U2S.PDB | O, C_VAL_237   | N, C_CYS_126   | H, C_CYS_126   | 2.89 | 2.18 | 29.45 |
| 3U2S.PDB | O, C_SER_195   | N, C_VAL_127   | H, C_VAL_127   | 2.78 | 2.00 | 19.73 |
| 3U2S.PDB | O, C_LEU_193   | N, C_LEU_129   | H, C_LEU_129   | 2.58 | 1.72 | 4.21  |
| 3U2S.PDB | O, C_SER_158   | N, C_ALA_130   | H, C_ALA_130   | 2.91 | 2.07 | 10.47 |
| 3U2S.PDB | O, C_TYR_191   | N, C_CYS_131   | H, C_CYS_131   | 2.97 | 2.14 | 13.58 |
| 3U2S.PDB | O, C_HIS_156   | N, C_THR_132   | H, C_THR_132   | 2.87 | 2.10 | 22.75 |
| 3U2S.PDB | O, C_PHE_176   | N, C_LYS_155   | H, C_LYS_155   | 2.92 | 2.08 | 9.76  |
| 3U2S.PDB | O, C_ALA_174   | N, C_CYS_157   | H, C_CYS_157   | 2.85 | 2.01 | 11.36 |
| 3U2S.PDB | O, C_GLN_170   | N, C_ILE_161   | H, C_ILE_161   | 2.98 | 2.15 | 12.25 |
| 3U2S.PDB | OG1, C_THR_163 | N, C_VAL_165   | H, C_VAL_165   | 2.97 | 2.12 | 10.44 |
| 3U2S.PDB | O, A_ASN_100F  | N, C_LYS_169   | H, C_LYS_169   | 2.91 | 2.08 | 13.24 |
| 3U2S.PDB | O, C_ILE_161   | N, C_GLN_170   | H, C_GLN_170   | 2.89 | 2.09 | 17.25 |
| 3U2S.PDB | O, C_PHE_159   | N, C_VAL_172   | H, C_VAL_172   | 2.73 | 1.89 | 10.39 |
| 3U2S.PDB | O, C_LYS_155   | N, C_PHE_176   | H, C_PHE_176   | 2.99 | 2.16 | 12.58 |
| 3U2S.PDB | O, C_CYS_131   | N, C_TYR_191   | H, C_TYR_191   | 2.87 | 2.05 | 15.43 |
| 3U2S.PDB | O, C_LEU_129   | N, C_LEU_193   | H, C_LEU_193   | 2.96 | 2.21 | 25.28 |
| 3U2S.PDB | O, C_VAL_127   | N, C_SER_195   | H, C_SER_195   | 2.88 | 2.02 | 5.76  |
| 3U2S.PDB | O, C_ALA_125   | N, C_GLN_197   | H, C_GLN_197   | 2.93 | 2.12 | 15.95 |
| 3U2S.PDB | O, C_LEU_123   | N, C_THR_199   | H, C_THR_199   | 2.87 | 2.07 | 18.73 |
| 3U2S.PDB | O, C_ALA_206   | N, C_ALA_210   | H, C_ALA_210   | 2.93 | 2.14 | 20.34 |
| 3U2S.PDB | O, C_THR_232   | OG1, C_THR_234 | HG1, C_THR_234 | 2.76 | 1.97 | 14.48 |
| 3U2S.PDB | O, C_LYS_122   | N, C_PHE_235   | H, C_PHE_235   | 2.66 | 1.87 | 18.30 |
| 3U2S.PDB | O, C_THR_227   | N, C_THR_236   | H, C_THR_236   | 2.92 | 2.14 | 20.62 |
| 3U2S.PDB | O, C_ALA_124   | N, C_VAL_237   | H, C_VAL_237   | 2.99 | 2.14 | 7.85  |
| 3UYR.PDB | O, H_THR_23    | N, H_VAL_5     | H, H_VAL_5     | 2.87 | 2.05 | 15.70 |
| 3UYR.PDB | O, H_SER_21    | N, H_SER_7     | H, H_SER_7     | 2.82 | 2.03 | 20.07 |
| 3UYR.PDB | O, H_THR_112   | N, H_GLY_10    | H, H_GLY_10    | 2.77 | 1.94 | 13.13 |
| 3UYR.PDB | O, H_THR_114   | N, H_VAL_12    | H, H_VAL_12    | 2.88 | 2.07 | 16.54 |
| 3UYR.PDB | O, H_LEU_86    | N, H_GLY_15    | H, H_GLY_15    | 2.68 | 1.86 | 14.42 |
| 3UYR.PDB | O, H_MET_83    | N, H_MET_18    | H, H_MET_18    | 2.83 | 2.00 | 14.86 |
| 3UYR.PDB | O, H_LEU_81    | N, H_LEU_20    | H, H_LEU_20    | 2.86 | 2.03 | 15.99 |
| 3UYR.PDB | OG, H_SER_7    | N, H_SER_21    | H, H_SER_21    | 2.96 | 2.12 | 9.95  |
| 3UYR.PDB | O, H_VAL_5     | N, H_THR_23    | H, H_THR_23    | 2.80 | 1.98 | 14.92 |
| 3UYR.PDB | O, H_THR_28    | N, H_ASP_31    | H, H_ASP_31    | 2.78 | 1.97 | 17.10 |
| 3UYR.PDB | O, H_ILE_51    | N, H_MET_34    | H, H_MET_34    | 2.92 | 2.09 | 17.05 |
| 3UYR.PDB | O, H_ALA_97    | N, H_ALA_35    | H, H_ALA_35    | 2.83 | 2.02 | 16.97 |
| 3UYR.PDB | O, H_ALA_49    | N, H_TRP_36    | H, H_TRP_36    | 2.81 | 2.00 | 15.63 |
| 3UYR.PDB | O, H_TYR_95    | N, H_VAL_37    | H, H_VAL_37    | 2.95 | 2.10 | 10.85 |

|          |                |               |                |      |      |       |
|----------|----------------|---------------|----------------|------|------|-------|
| 3UYR.PDB | O, H_GLU_46    | N, H_ARG_38   | H, H_ARG_38    | 2.89 | 2.05 | 12.16 |
| 3UYR.PDB | OE1, H_GLU_46  | NE, H_ARG_38  | HE, H_ARG_38   | 2.84 | 2.03 | 16.92 |
| 3UYR.PDB | O, H_THR_93    | N, H_GLN_39   | H, H_GLN_39    | 2.74 | 1.95 | 18.61 |
| 3UYR.PDB | O, H_ARG_38    | N, H_GLU_46   | H, H_GLU_46    | 2.90 | 2.11 | 20.15 |
| 3UYR.PDB | OD1, H_ASN_50  | NE1, H_TRP_47 | HE1, H_TRP_47  | 2.95 | 2.18 | 22.72 |
| 3UYR.PDB | O, H_TRP_36    | N, H_VAL_48   | H, H_VAL_48    | 2.89 | 2.08 | 15.29 |
| 3UYR.PDB | O, H_TYR_59    | N, H_ASN_50   | H, H_ASN_50    | 2.85 | 2.06 | 20.39 |
| 3UYR.PDB | O, H_MET_34    | N, H_ILE_51   | H, H_ILE_51    | 2.84 | 2.04 | 20.05 |
| 3UYR.PDB | OD1, H_ASP_54  | N, H_SER_56   | H, H_SER_56    | 3.00 | 2.18 | 14.88 |
| 3UYR.PDB | O, H_ASN_50    | N, H_TYR_59   | H, H_TYR_59    | 2.85 | 2.02 | 13.64 |
| 3UYR.PDB | O, H_VAL_48    | N, H_LEU_61   | H, H_LEU_61    | 2.98 | 2.13 | 7.86  |
| 3UYR.PDB | O, H_ASP_62    | N, H_LYS_65   | H, H_LYS_65    | 2.99 | 2.13 | 4.39  |
| 3UYR.PDB | O, H_LEU_64    | N, H_ARG_67   | H, H_ARG_67    | 2.98 | 2.13 | 8.99  |
| 3UYR.PDB | O, H_SER_84    | NH1, H_ARG_67 | HH11, H_ARG_67 | 2.94 | 2.14 | 18.03 |
| 3UYR.PDB | O, H_GLN_82    | N, H_ILE_69   | H, H_ILE_69    | 2.76 | 1.97 | 19.91 |
| 3UYR.PDB | OH, H_TYR_60   | N, H_ILE_70   | H, H_ILE_70    | 2.89 | 2.08 | 16.21 |
| 3UYR.PDB | O, H_TYR_32    | NH1, H_ARG_72 | HH12, H_ARG_72 | 2.89 | 2.11 | 20.18 |
| 3UYR.PDB | O, H_ILE_78    | N, H_ASP_73   | H, H_ASP_73    | 2.70 | 1.96 | 26.09 |
| 3UYR.PDB | OD1, H_ASP_73  | N, H_ALA_75   | H, H_ALA_75    | 3.00 | 2.29 | 29.64 |
| 3UYR.PDB | O, H_ASP_73    | N, H_ILE_78   | H, H_ILE_78    | 2.94 | 2.08 | 11.87 |
| 3UYR.PDB | O, H_CYS_22    | N, H_LEU_79   | H, H_LEU_79    | 2.83 | 1.98 | 6.29  |
| 3UYR.PDB | O, H_SER_71    | N, H_TYR_80   | H, H_TYR_80    | 2.75 | 1.91 | 7.16  |
| 3UYR.PDB | O, H_LEU_20    | N, H_LEU_81   | H, H_LEU_81    | 2.86 | 2.02 | 12.02 |
| 3UYR.PDB | O, H_ILE_69    | N, H_GLN_82   | H, H_GLN_82    | 2.78 | 1.98 | 18.27 |
| 3UYR.PDB | O, H_MET_18    | N, H_MET_83   | H, H_MET_83    | 2.76 | 1.93 | 11.89 |
| 3UYR.PDB | O, H_SER_16    | N, H_LEU_86   | H, H_LEU_86    | 2.97 | 2.14 | 12.64 |
| 3UYR.PDB | O, H_SER_85    | NH1, H_ARG_87 | HH11, H_ARG_87 | 2.82 | 2.10 | 28.67 |
| 3UYR.PDB | O, H_ARG_87    | N, H_ASP_90   | H, H_ASP_90    | 2.99 | 2.14 | 6.54  |
| 3UYR.PDB | O, H_VAL_113   | N, H_ALA_92   | H, H_ALA_92    | 2.99 | 2.22 | 22.62 |
| 3UYR.PDB | O, H_GLN_39    | N, H_THR_93   | H, H_THR_93    | 2.87 | 2.02 | 7.65  |
| 3UYR.PDB | O, H_THR_111   | N, H_TYR_94   | H, H_TYR_94    | 2.77 | 1.93 | 7.70  |
| 3UYR.PDB | O, H_VAL_37    | N, H_TYR_95   | H, H_TYR_95    | 2.76 | 1.92 | 4.33  |
| 3UYR.PDB | OE2, H_GLU_6   | N, H_CYS_96   | H, H_CYS_96    | 2.87 | 2.06 | 15.59 |
| 3UYR.PDB | O, H_ALA_35    | N, H_ALA_97   | H, H_ALA_97    | 2.87 | 2.05 | 15.28 |
| 3UYR.PDB | O, H_VAL_106   | N, H_ARG_98   | H, H_ARG_98    | 2.80 | 2.00 | 18.41 |
| 3UYR.PDB | OD1, H_ASP_105 | NE, H_ARG_98  | HE, H_ARG_98   | 2.98 | 2.16 | 14.38 |
| 3UYR.PDB | OD2, H_ASP_105 | NH2, H_ARG_98 | HH21, H_ARG_98 | 2.92 | 2.07 | 8.84  |
| 3UYR.PDB | O, H_TYR_103   | N, H_THR_100  | H, H_THR_100   | 2.82 | 1.97 | 9.07  |
| 3UYR.PDB | OE1, P_GLN_48  | N, H_ASN_101  | H, H_ASN_101   | 2.90 | 2.08 | 14.57 |
| 3UYR.PDB | O, H_THR_100   | N, H_TYR_103  | H, H_TYR_103   | 2.94 | 2.08 | 4.35  |
| 3UYR.PDB | OH, L_TYR_41   | N, H_LEU_104  | H, H_LEU_104   | 2.91 | 2.05 | 4.02  |
| 3UYR.PDB | O, H_CYS_96    | N, H_GLY_108  | H, H_GLY_108   | 2.80 | 1.99 | 17.37 |
| 3UYR.PDB | O, H_TYR_94    | N, H_THR_111  | H, H_THR_111   | 2.80 | 2.01 | 19.20 |
| 3UYR.PDB | O, H_ALA_92    | N, H_VAL_113  | H, H_VAL_113   | 2.86 | 2.03 | 11.74 |
| 3UYR.PDB | O, H_GLY_10    | N, H_THR_114  | H, H_THR_114   | 2.91 | 2.06 | 9.85  |
| 3UYR.PDB | OG1, H_THR_91  | N, H_VAL_115  | H, H_VAL_115   | 2.95 | 2.09 | 4.97  |
| 3UYR.PDB | O, H_VAL_12    | N, H_SER_116  | H, H_SER_116   | 2.87 | 2.10 | 23.24 |
| 3UYR.PDB | O, H_PHE_150   | N, H_THR_121  | H, H_THR_121   | 2.88 | 2.05 | 13.74 |
| 3UYR.PDB | O, H_LYS_147   | N, H_SER_124  | H, H_SER_124   | 2.80 | 1.96 | 9.50  |
| 3UYR.PDB | O, H_LEU_145   | N, H_TYR_126  | H, H_TYR_126   | 2.81 | 1.98 | 12.02 |
| 3UYR.PDB | O, H_GLY_143   | N, H_LEU_128  | H, H_LEU_128   | 2.77 | 1.99 | 20.76 |
| 3UYR.PDB | O, H_VAL_187   | N, H_VAL_140  | H, H_VAL_140   | 2.79 | 1.98 | 16.70 |
| 3UYR.PDB | O, H_VAL_185   | N, H_LEU_142  | H, H_LEU_142   | 2.82 | 1.97 | 8.16  |
| 3UYR.PDB | O, H_LEU_128   | N, H_GLY_143  | H, H_GLY_143   | 2.84 | 2.04 | 17.93 |
| 3UYR.PDB | O, H_SER_183   | N, H_CYS_144  | H, H_CYS_144   | 2.83 | 2.03 | 18.84 |
| 3UYR.PDB | O, H_TYR_126   | N, H_LEU_145  | H, H_LEU_145   | 2.83 | 1.98 | 9.31  |
| 3UYR.PDB | O, H_MET_181   | N, H_VAL_146  | H, H_VAL_146   | 2.78 | 1.94 | 7.21  |
| 3UYR.PDB | O, H_SER_124   | N, H_LYS_147  | H, H_LYS_147   | 2.85 | 2.00 | 9.15  |

|          |                |                |                 |      |      |       |
|----------|----------------|----------------|-----------------|------|------|-------|
| 3UYR.PDB | O, H_THR_121   | N, H_PHE_150   | H, H_PHE_150    | 2.94 | 2.13 | 17.37 |
| 3UYR.PDB | O, H_ALA_202   | N, H_THR_155   | H, H_THR_155    | 2.91 | 2.09 | 17.68 |
| 3UYR.PDB | O, H_SER_200   | N, H_THR_157   | H, H_THR_157    | 2.85 | 2.03 | 15.50 |
| 3UYR.PDB | OG, H_SER_183  | NE1, H_TRP_158 | HE1, H_TRP_158  | 2.93 | 2.08 | 7.42  |
| 3UYR.PDB | O, H_THR_198   | N, H_ASN_159   | H, H_ASN_159    | 2.85 | 2.00 | 6.81  |
| 3UYR.PDB | O, H_THR_196   | ND2, H_ASN_159 | HD21, H_ASN_159 | 2.99 | 2.16 | 12.25 |
| 3UYR.PDB | O, H_SER_184   | N, H_HIS_168   | H, H_HIS_168    | 2.82 | 2.01 | 16.83 |
| 3UYR.PDB | O, H_SER_182   | N, H_PHE_170   | H, H_PHE_170    | 2.87 | 2.01 | 1.94  |
| 3UYR.PDB | O, H_THR_180   | N, H_LEU_173   | H, H_LEU_173    | 2.80 | 1.98 | 14.35 |
| 3UYR.PDB | O, H_LEU_178   | N, H_GLU_175   | H, H_GLU_175    | 2.86 | 2.02 | 11.60 |
| 3UYR.PDB | O, H_TYR_149   | N, H_TYR_179   | H, H_TYR_179    | 2.88 | 2.02 | 4.66  |
| 3UYR.PDB | O, H_LEU_173   | N, H_THR_180   | H, H_THR_180    | 2.85 | 2.02 | 14.69 |
| 3UYR.PDB | O, H_VAL_146   | N, H_MET_181   | H, H_MET_181    | 2.84 | 2.01 | 13.98 |
| 3UYR.PDB | O, H_CYS_144   | N, H_SER_183   | H, H_SER_183    | 2.93 | 2.11 | 17.38 |
| 3UYR.PDB | O, H_HIS_168   | N, H_SER_184   | H, H_SER_184    | 2.81 | 2.00 | 15.83 |
| 3UYR.PDB | O, H_LEU_142   | N, H_VAL_185   | H, H_VAL_185    | 2.88 | 2.04 | 12.88 |
| 3UYR.PDB | O, H_VAL_140   | N, H_VAL_187   | H, H_VAL_187    | 2.92 | 2.09 | 16.07 |
| 3UYR.PDB | O, H_SER_138   | N, H_SER_189   | H, H_SER_189    | 2.93 | 2.08 | 7.47  |
| 3UYR.PDB | O, H_THR_191   | N, H_GLN_195   | H, H_GLN_195    | 2.89 | 2.08 | 16.64 |
| 3UYR.PDB | OD1, H_ASN_159 | N, H_THR_198   | H, H_THR_198    | 2.89 | 2.14 | 25.42 |
| 3UYR.PDB | O, H_LYS_212   | N, H_CYS_199   | H, H_CYS_199    | 2.82 | 2.04 | 21.76 |
| 3UYR.PDB | O, H_THR_157   | N, H_SER_200   | H, H_SER_200    | 2.77 | 1.94 | 8.80  |
| 3UYR.PDB | O, H_VAL_210   | N, H_VAL_201   | H, H_VAL_201    | 2.74 | 1.93 | 14.32 |
| 3UYR.PDB | O, H_THR_155   | N, H_ALA_202   | H, H_ALA_202    | 2.84 | 2.00 | 11.25 |
| 3UYR.PDB | O, H_THR_208   | N, H_HIS_203   | H, H_HIS_203    | 2.84 | 2.01 | 11.63 |
| 3UYR.PDB | OG, H_SER_206  | ND1, H_HIS_203 | HD1, H_HIS_203  | 2.81 | 2.06 | 24.47 |
| 3UYR.PDB | O, H_PRO_151   | NE2, H_HIS_203 | HE2, H_HIS_203  | 2.78 | 1.95 | 12.82 |
| 3UYR.PDB | O, H_PRO_204   | N, H_SER_207   | H, H_SER_207    | 2.93 | 2.11 | 16.45 |
| 3UYR.PDB | O, H_SER_206   | OG1, H_THR_208 | HG1, H_THR_208  | 2.92 | 2.11 | 9.83  |
| 3UYR.PDB | O, H_VAL_201   | N, H_VAL_210   | H, H_VAL_210    | 2.82 | 2.01 | 15.56 |
| 3UYR.PDB | O, H_CYS_199   | N, H_LYS_212   | H, H_LYS_212    | 2.72 | 1.97 | 24.25 |
| 3UYR.PDB | OE2, L_GLU_127 | NZ, H_LYS_212  | HZ3, H_LYS_212  | 2.87 | 2.08 | 23.12 |
| 3UYR.PDB | O, H_VAL_197   | N, H_LEU_214   | H, H_LEU_214    | 2.84 | 1.98 | 4.90  |
| 3UYR.PDB | OG, L_SER_26   | N, L_VAL_3     | H, L_VAL_3      | 2.88 | 2.07 | 15.64 |
| 3UYR.PDB | O, L_ARG_24    | N, L_THR_5     | H, L_THR_5      | 2.82 | 1.98 | 11.17 |
| 3UYR.PDB | O, L_TYR_91    | NE2, L_GLN_6   | HE21, L_GLN_6   | 2.91 | 2.06 | 4.88  |
| 3UYR.PDB | O, L_SER_22    | N, L_THR_7     | H, L_THR_7      | 2.88 | 2.05 | 13.60 |
| 3UYR.PDB | O, L_LYS_107   | N, L_LEU_11    | H, L_LEU_11     | 2.78 | 1.95 | 12.54 |
| 3UYR.PDB | O, L_GLU_109   | N, L_VAL_13    | H, L_VAL_13     | 2.83 | 2.02 | 17.58 |
| 3UYR.PDB | O, L_VAL_83    | N, L_GLY_16    | H, L_GLY_16     | 2.85 | 2.01 | 12.40 |
| 3UYR.PDB | O, L_ILE_80    | N, L_ALA_19    | H, L_ALA_19     | 2.80 | 1.98 | 15.31 |
| 3UYR.PDB | O, L_LEU_78    | N, L_ILE_21    | H, L_ILE_21     | 2.80 | 1.97 | 13.25 |
| 3UYR.PDB | O, L_THR_7     | N, L_SER_22    | H, L_SER_22     | 2.80 | 1.95 | 7.59  |
| 3UYR.PDB | O, L_PHE_76    | N, L_CYS_23    | H, L_CYS_23     | 2.89 | 2.03 | 7.24  |
| 3UYR.PDB | O, L_THR_5     | N, L_ARG_24    | H, L_ARG_24     | 2.90 | 2.05 | 9.82  |
| 3UYR.PDB | O, L_THR_74    | N, L_SER_25    | H, L_SER_25     | 2.93 | 2.14 | 19.27 |
| 3UYR.PDB | O, L_GLY_73    | N, L_LEU_29    | H, L_LEU_29     | 2.94 | 2.10 | 10.63 |
| 3UYR.PDB | O, L_ASN_35    | N, L_HIS_31    | H, L_HIS_31     | 2.79 | 1.96 | 11.60 |
| 3UYR.PDB | O, P_PRO_50    | NE2, L_HIS_31  | HE2, L_HIS_31   | 2.91 | 2.13 | 21.00 |
| 3UYR.PDB | O, L_HIS_31    | N, L_GLY_34    | H, L_GLY_34     | 2.88 | 2.04 | 11.36 |
| 3UYR.PDB | OD1, L_ASN_33  | N, L_ASN_35    | H, L_ASN_35     | 2.92 | 2.06 | 4.57  |
| 3UYR.PDB | O, L_SER_94    | N, L_HIS_39    | H, L_HIS_39     | 2.84 | 2.01 | 14.97 |
| 3UYR.PDB | O, L_ILE_53    | N, L_TRP_40    | H, L_TRP_40     | 2.74 | 1.91 | 12.06 |
| 3UYR.PDB | O, L_PHE_92    | N, L_TYR_41    | H, L_TYR_41     | 2.85 | 1.99 | 7.67  |
| 3UYR.PDB | O, L_ASN_50    | N, L_LEU_42    | H, L_LEU_42     | 2.87 | 2.07 | 16.83 |
| 3UYR.PDB | O, L_VAL_90    | N, L_GLN_43    | H, L_GLN_43     | 2.80 | 1.95 | 5.26  |
| 3UYR.PDB | O, L_LEU_42    | N, L_ASN_50    | H, L_ASN_50     | 2.86 | 2.10 | 23.14 |
| 3UYR.PDB | O, L_TRP_40    | N, L_LEU_52    | H, L_LEU_52     | 2.84 | 2.01 | 12.79 |



|          |                |                |                 |      |      |       |
|----------|----------------|----------------|-----------------|------|------|-------|
| 3UYR.PDB | O, L_ASN_58    | N, L_TYR_54    | H, L_TYR_54     | 2.84 | 2.05 | 19.87 |
| 3UYR.PDB | O, L_LEU_38    | N, L_VAL_56    | H, L_VAL_56     | 2.77 | 1.91 | 6.14  |
| 3UYR.PDB | O, L_LYS_55    | N, L_SER_57    | H, L_SER_57     | 2.83 | 2.11 | 28.35 |
| 3UYR.PDB | O, L_TYR_54    | N, L_ASN_58    | H, L_ASN_58     | 3.00 | 2.19 | 16.78 |
| 3UYR.PDB | O, L_LEU_52    | N, L_PHE_60    | H, L_PHE_60     | 2.97 | 2.11 | 3.95  |
| 3UYR.PDB | O, L_PHE_60    | N, L_VAL_63    | H, L_VAL_63     | 2.97 | 2.12 | 9.01  |
| 3UYR.PDB | OD2, L_ASP_87  | NH1, L_ARG_66  | HH12, L_ARG_66  | 2.92 | 2.12 | 17.99 |
| 3UYR.PDB | O, L_LYS_79    | N, L_SER_68    | H, L_SER_68     | 2.85 | 2.02 | 11.95 |
| 3UYR.PDB | O, L_THR_77    | N, L_SER_70    | H, L_SER_70     | 2.85 | 2.05 | 19.01 |
| 3UYR.PDB | O, L_ASP_75    | N, L_SER_72    | H, L_SER_72     | 2.90 | 2.11 | 22.40 |
| 3UYR.PDB | O, L_SER_72    | N, L_ASP_75    | H, L_ASP_75     | 2.99 | 2.11 | 2.04  |
| 3UYR.PDB | O, L_CYS_23    | N, L_PHE_76    | H, L_PHE_76     | 2.88 | 2.06 | 17.75 |
| 3UYR.PDB | O, L_SER_70    | N, L_THR_77    | H, L_THR_77     | 2.91 | 2.06 | 11.18 |
| 3UYR.PDB | O, L_ILE_21    | N, L_LEU_78    | H, L_LEU_78     | 2.85 | 2.02 | 13.64 |
| 3UYR.PDB | O, L_SER_68    | N, L_LYS_79    | H, L_LYS_79     | 2.81 | 1.95 | 3.66  |
| 3UYR.PDB | O, L_ALA_19    | N, L_ILE_80    | H, L_ILE_80     | 2.83 | 2.00 | 12.62 |
| 3UYR.PDB | O, L_ARG_66    | N, L_SER_81    | H, L_SER_81     | 2.98 | 2.14 | 10.19 |
| 3UYR.PDB | O, L_ASP_17    | N, L_VAL_83    | H, L_VAL_83     | 2.95 | 2.10 | 8.86  |
| 3UYR.PDB | OD2, L_ASP_87  | N, L_GLU_84    | H, L_GLU_84     | 2.89 | 2.03 | 6.75  |
| 3UYR.PDB | O, L_GLU_84    | N, L_ASP_87    | H, L_ASP_87     | 2.87 | 2.03 | 9.35  |
| 3UYR.PDB | O, L_GLN_43    | N, L_VAL_90    | H, L_VAL_90     | 2.88 | 2.03 | 9.40  |
| 3UYR.PDB | O, L_THR_106   | N, L_TYR_91    | H, L_TYR_91     | 2.84 | 1.99 | 8.33  |
| 3UYR.PDB | O, L_TYR_41    | N, L_PHE_92    | H, L_PHE_92     | 2.86 | 2.03 | 13.68 |
| 3UYR.PDB | OE1, L_GLN_6   | N, L_CYS_93    | H, L_CYS_93     | 3.00 | 2.19 | 17.32 |
| 3UYR.PDB | O, L_HIS_39    | N, L_SER_94    | H, L_SER_94     | 2.83 | 2.06 | 23.28 |
| 3UYR.PDB | O, L_THR_101   | N, L_GLN_95    | H, L_GLN_95     | 2.94 | 2.12 | 15.68 |
| 3UYR.PDB | O, L_TYR_37    | N, L_SER_96    | H, L_SER_96     | 2.94 | 2.15 | 18.38 |
| 3UYR.PDB | OE1, L_GLN_95  | N, L_HIS_98    | H, L_HIS_98     | 2.95 | 2.09 | 2.48  |
| 3UYR.PDB | O, L_SER_28    | NE2, L_HIS_98  | HE2, L_HIS_98   | 2.88 | 2.05 | 12.63 |
| 3UYR.PDB | O, L_CYS_93    | N, L_GLY_103   | H, L_GLY_103    | 2.78 | 1.93 | 6.25  |
| 3UYR.PDB | O, L_TYR_91    | N, L_THR_106   | H, L_THR_106    | 2.84 | 2.03 | 18.62 |
| 3UYR.PDB | O, L_GLY_89    | N, L_LEU_108   | H, L_LEU_108    | 2.94 | 2.13 | 16.80 |
| 3UYR.PDB | O, L_LEU_11    | N, L_GLU_109   | H, L_GLU_109    | 2.82 | 1.97 | 7.29  |
| 3UYR.PDB | OE1, L_GLN_170 | N, L_ILE_110   | H, L_ILE_110    | 2.98 | 2.14 | 10.85 |
| 3UYR.PDB | O, L_VAL_13    | N, L_LYS_111   | H, L_LYS_111    | 2.91 | 2.06 | 8.31  |
| 3UYR.PDB | O, L_ALA_113   | NE, L_ARG_112  | HE, L_ARG_112   | 2.77 | 1.91 | 2.87  |
| 3UYR.PDB | O, L_ASP_174   | NH1, L_ARG_112 | HH11, L_ARG_112 | 2.84 | 2.02 | 14.52 |
| 3UYR.PDB | O, L_TYR_144   | N, L_ALA_115   | H, L_ALA_115    | 2.82 | 2.03 | 20.71 |
| 3UYR.PDB | O, L_ASN_141   | N, L_THR_118   | H, L_THR_118    | 2.86 | 2.01 | 9.08  |
| 3UYR.PDB | O, L_PHE_139   | N, L_SER_120   | H, L_SER_120    | 2.86 | 2.03 | 15.20 |
| 3UYR.PDB | O, L_VAL_137   | N, L_PHE_122   | H, L_PHE_122    | 2.78 | 2.00 | 21.33 |
| 3UYR.PDB | OG, L_SER_135  | NE2, L_GLN_128 | HE22, L_GLN_128 | 2.97 | 2.12 | 5.23  |
| 3UYR.PDB | O, L_SER_126   | N, L_THR_130   | H, L_THR_130    | 2.82 | 2.00 | 15.78 |
| 3UYR.PDB | O, L_GLN_128   | N, L_SER_131   | H, L_SER_131    | 2.96 | 2.14 | 14.42 |
| 3UYR.PDB | O, L_LEU_185   | N, L_ALA_134   | H, L_ALA_134    | 2.87 | 2.07 | 19.29 |
| 3UYR.PDB | OE1, L_GLN_128 | N, L_SER_135   | H, L_SER_135    | 2.90 | 2.07 | 13.80 |
| 3UYR.PDB | O, L_LEU_183   | N, L_VAL_136   | H, L_VAL_136    | 2.80 | 1.97 | 12.38 |
| 3UYR.PDB | O, L_PHE_122   | N, L_VAL_137   | H, L_VAL_137    | 2.95 | 2.10 | 12.15 |
| 3UYR.PDB | O, L_SER_181   | N, L_CYS_138   | H, L_CYS_138    | 2.83 | 1.98 | 8.48  |
| 3UYR.PDB | O, L_SER_120   | N, L_PHE_139   | H, L_PHE_139    | 2.80 | 2.03 | 23.03 |
| 3UYR.PDB | O, L_MET_179   | N, L_LEU_140   | H, L_LEU_140    | 2.85 | 1.99 | 0.89  |
| 3UYR.PDB | O, L_THR_118   | N, L_ASN_141   | H, L_ASN_141    | 2.83 | 1.99 | 11.90 |
| 3UYR.PDB | OG, L_SER_178  | N, L_ASN_142   | H, L_ASN_142    | 2.99 | 2.15 | 11.11 |
| 3UYR.PDB | O, L_TYR_177   | N, L_PHE_143   | H, L_PHE_143    | 2.85 | 2.04 | 16.59 |
| 3UYR.PDB | O, L_ALA_115   | N, L_TYR_144   | H, L_TYR_144    | 2.91 | 2.10 | 16.84 |
| 3UYR.PDB | O, L_THR_201   | N, L_ASN_149   | H, L_ASN_149    | 2.86 | 2.00 | 8.27  |
| 3UYR.PDB | O, L_GLU_199   | N, L_LYS_151   | H, L_LYS_151    | 2.82 | 2.00 | 15.42 |
| 3UYR.PDB | O, L_THR_197   | N, L_LYS_153   | H, L_LYS_153    | 2.84 | 2.01 | 13.66 |

|          |                |                |                 |      |      |       |
|----------|----------------|----------------|-----------------|------|------|-------|
| 3UYR.PDB | O, L.SER.157   | N, L.ILE.154   | H, L.ILE.154    | 2.87 | 2.03 | 11.53 |
| 3UYR.PDB | O, L.SER.195   | N, L.ASP.155   | H, L.ASP.155    | 2.87 | 2.05 | 15.34 |
| 3UYR.PDB | O, L.ILE.154   | N, L.SER.157   | H, L.SER.157    | 2.89 | 2.05 | 8.75  |
| 3UYR.PDB | O, L.THR.182   | N, L.LEU.164   | H, L.LEU.164    | 2.83 | 2.00 | 12.39 |
| 3UYR.PDB | O, L.SER.180   | N, L.SER.166   | H, L.SER.166    | 2.84 | 2.01 | 13.00 |
| 3UYR.PDB | O, H.PRO.171   | OG, L.SER.166  | HG, L.SER.166   | 2.72 | 1.97 | 20.46 |
| 3UYR.PDB | O, L.SER.178   | N, L.THR.168   | H, L.THR.168    | 2.87 | 2.04 | 12.69 |
| 3UYR.PDB | O, L.ILE.110   | NE2, L.GLN.170 | HE21, L.GLN.170 | 2.74 | 1.92 | 14.96 |
| 3UYR.PDB | O, L.SER.175   | NE2, L.GLN.170 | HE22, L.GLN.170 | 2.95 | 2.10 | 7.23  |
| 3UYR.PDB | O, L.THR.176   | N, L.ASP.171   | H, L.ASP.171    | 2.94 | 2.09 | 6.43  |
| 3UYR.PDB | OD1, L.ASP.174 | OG1, L.THR.176 | HG1, L.THR.176  | 2.78 | 1.97 | 7.90  |
| 3UYR.PDB | O, L.PHE.143   | N, L.TYR.177   | H, L.TYR.177    | 2.87 | 2.01 | 4.97  |
| 3UYR.PDB | O, L.LEU.140   | N, L.MET.179   | H, L.MET.179    | 2.90 | 2.09 | 17.57 |
| 3UYR.PDB | O, L.SER.166   | N, L.SER.180   | H, L.SER.180    | 2.83 | 2.01 | 15.72 |
| 3UYR.PDB | O, L.CYS.138   | N, L.SER.181   | H, L.SER.181    | 2.84 | 1.99 | 8.90  |
| 3UYR.PDB | O, L.LEU.164   | N, L.THR.182   | H, L.THR.182    | 2.82 | 1.99 | 13.16 |
| 3UYR.PDB | O, L.VAL.136   | N, L.LEU.183   | H, L.LEU.183    | 2.83 | 1.99 | 11.27 |
| 3UYR.PDB | O, L.ALA.134   | N, L.LEU.185   | H, L.LEU.185    | 2.79 | 1.94 | 5.06  |
| 3UYR.PDB | O, L.THR.186   | N, L.TYR.190   | H, L.TYR.190    | 2.96 | 2.12 | 12.41 |
| 3UYR.PDB | O, L.LYS.187   | N, L.GLU.191   | H, L.GLU.191    | 2.81 | 2.00 | 16.98 |
| 3UYR.PDB | OD2, L.ASP.155 | ND1, L.HIS.193 | HD1, L.HIS.193  | 2.93 | 2.16 | 21.52 |
| 3UYR.PDB | ND2, L.ASN.216 | ND2, L.ASN.194 | HD22, L.ASN.194 | 2.90 | 2.18 | 28.48 |
| 3UYR.PDB | O, L.PHE.213   | N, L.TYR.196   | H, L.TYR.196    | 2.86 | 2.00 | 4.60  |
| 3UYR.PDB | O, L.LYS.153   | N, L.THR.197   | H, L.THR.197    | 2.91 | 2.08 | 15.26 |
| 3UYR.PDB | O, L.LYS.211   | N, L.CYS.198   | H, L.CYS.198    | 2.83 | 2.02 | 16.54 |
| 3UYR.PDB | O, L.LYS.151   | N, L.GLU.199   | H, L.GLU.199    | 2.79 | 1.98 | 16.73 |
| 3UYR.PDB | O, L.ILE.209   | N, L.ALA.200   | H, L.ALA.200    | 2.74 | 1.92 | 13.71 |
| 3UYR.PDB | O, L.ASN.149   | N, L.THR.201   | H, L.THR.201    | 2.78 | 1.96 | 14.01 |
| 3UYR.PDB | OG1, L.THR.204 | ND1, L.HIS.202 | HD1, L.HIS.202  | 2.78 | 1.93 | 6.06  |
| 3UYR.PDB | O, L.ALA.200   | N, L.ILE.209   | H, L.ILE.209    | 2.92 | 2.18 | 25.89 |
| 3UYR.PDB | O, L.CYS.198   | N, L.LYS.211   | H, L.LYS.211    | 2.90 | 2.05 | 8.10  |
| 3UYR.PDB | O, L.TYR.196   | N, L.PHE.213   | H, L.PHE.213    | 2.87 | 2.05 | 16.74 |
| 3UYR.PDB | O, L.ASN.194   | N, L.ARG.215   | H, L.ARG.215    | 2.75 | 1.97 | 21.32 |
| 3UYR.PDB | O, L.HIS.193   | NE, L.ARG.215  | HE, L.ARG.215   | 2.87 | 2.04 | 12.99 |
| 3UYR.PDB | OD1, H.ASN.101 | NE2, P.GLN.48  | HE22, P.GLN.48  | 2.57 | 1.87 | 29.89 |
| 3X0E.PDB | O, A.PHE.198   | NZ, A.LYS.116  | HZ3, A.LYS.116  | 2.72 | 1.88 | 16.62 |
| 3X0E.PDB | OD1, A.ASP.122 | NE2, A.GLN.118 | HE21, A.GLN.118 | 2.93 | 2.22 | 29.07 |
| 3X0E.PDB | O, A.ASN.115   | N, A.ILE.119   | H, A.ILE.119    | 2.94 | 2.11 | 11.48 |
| 3X0E.PDB | O, A.GLN.118   | N, A.ASP.122   | H, A.ASP.122    | 2.95 | 2.12 | 13.26 |
| 3X0E.PDB | O, A.ILE.119   | N, A.VAL.123   | H, A.VAL.123    | 2.88 | 2.05 | 13.75 |
| 3X0E.PDB | OD2, A.ASP.195 | NZ, A.LYS.124  | HZ1, A.LYS.124  | 3.00 | 2.19 | 21.32 |
| 3X0E.PDB | O, A.ASP.122   | N, A.PHE.126   | H, A.PHE.126    | 2.90 | 2.08 | 15.30 |
| 3X0E.PDB | O, A.VAL.123   | N, A.TYR.127   | H, A.TYR.127    | 2.95 | 2.12 | 11.57 |
| 3X0E.PDB | O, A.LYS.124   | N, A.ASP.128   | H, A.ASP.128    | 2.92 | 2.07 | 7.55  |
| 3X0E.PDB | O, A.GLN.125   | N, A.GLN.129   | H, A.GLN.129    | 2.88 | 2.03 | 7.18  |
| 3X0E.PDB | O, A.TYR.127   | N, A.LEU.131   | H, A.LEU.131    | 2.82 | 2.00 | 14.74 |
| 3X0E.PDB | O, A.ASP.128   | N, A.GLN.132   | H, A.GLN.132    | 2.95 | 2.12 | 11.27 |
| 3X0E.PDB | O, A.ALA.130   | N, A.ALA.134   | H, A.ALA.134    | 2.77 | 1.95 | 14.29 |
| 3X0E.PDB | O, A.GLN.133   | N, A.ASP.137   | H, A.ASP.137    | 2.92 | 2.17 | 25.03 |
| 3X0E.PDB | O, A.ASN.141   | N, A.ALA.145   | H, A.ALA.145    | 2.97 | 2.17 | 18.25 |
| 3X0E.PDB | O, A.ASN.142   | N, A.VAL.146   | H, A.VAL.146    | 2.81 | 1.98 | 12.77 |
| 3X0E.PDB | O, A.LYS.144   | N, A.LYS.148   | H, A.LYS.148    | 2.95 | 2.10 | 7.95  |
| 3X0E.PDB | O, A.ALA.145   | N, A.THR.149   | H, A.THR.149    | 2.85 | 2.06 | 19.27 |
| 3X0E.PDB | O, A.VAL.146   | N, A.PHE.150   | H, A.PHE.150    | 2.92 | 2.09 | 13.09 |
| 3X0E.PDB | O, A.VAL.147   | N, A.HIS.151   | H, A.HIS.151    | 2.86 | 2.05 | 17.72 |
| 3X0E.PDB | O, A.LEU.174   | ND1, A.HIS.151 | HD1, A.HIS.151  | 2.63 | 1.79 | 9.32  |
| 3X0E.PDB | O, A.THR.149   | N, A.THR.153   | H, A.THR.153    | 2.90 | 2.06 | 11.00 |
| 3X0E.PDB | O, A.PHE.150   | N, A.LEU.154   | H, A.LEU.154    | 2.90 | 2.06 | 10.44 |

|          |                |                |                 |      |      |       |
|----------|----------------|----------------|-----------------|------|------|-------|
| 3X0E.PDB | OD2, A_ASP_189 | N, A_SER_160   | H, A_SER_160    | 2.87 | 2.16 | 28.56 |
| 3X0E.PDB | OD2, A_ASP_128 | OG1, A_THR_161 | HG1, A_THR_161  | 2.92 | 2.13 | 12.66 |
| 3X0E.PDB | O, A_LEU_162   | N, A_LEU_165   | H, A_LEU_165    | 2.87 | 2.07 | 18.34 |
| 3X0E.PDB | O, A_SER_168   | N, A_ASN_172   | H, A_ASN_172    | 2.80 | 2.05 | 24.69 |
| 3X0E.PDB | O, A_SER_168   | ND2, A_ASN_172 | HD22, A_ASN_172 | 2.72 | 1.93 | 18.83 |
| 3X0E.PDB | O, A_LEU_170   | N, A_ASN_173   | H, A_ASN_173    | 2.82 | 1.98 | 11.48 |
| 3X0E.PDB | O, A_PRO_176   | N, A_SER_179   | H, A_SER_179    | 2.96 | 2.12 | 10.85 |
| 3X0E.PDB | O, A_CYS_157   | ND2, A_ASN_184 | HD21, A_ASN_184 | 2.90 | 2.04 | 5.52  |
| 3X0E.PDB | OD1, A_ASP_155 | NZ, A_LYS_187  | HZ1, A_LYS_187  | 2.84 | 2.07 | 26.10 |
| 3X0E.PDB | OD2, A_ASP_189 | N, A_HIS_191   | H, A_HIS_191    | 2.94 | 2.18 | 22.64 |
| 3X0E.PDB | O, A_CYS_190   | N, A_ILE_194   | H, A_ILE_194    | 2.84 | 2.02 | 14.86 |
| 3X0E.PDB | O, A_HIS_191   | N, A_ASP_195   | H, A_ASP_195    | 2.95 | 2.12 | 12.91 |
| 3X0E.PDB | O, A_GLN_192   | N, A_ASP_196   | H, A_ASP_196    | 2.86 | 2.06 | 18.82 |
| 3X0E.PDB | O, A_ASP_196   | N, A_LYS_201   | H, A_LYS_201    | 2.89 | 2.07 | 14.52 |
| 3X0E.PDB | OD1, B_ASN_115 | N, B_GLN_118   | H, B_GLN_118    | 2.83 | 2.07 | 23.69 |
| 3X0E.PDB | O, B_LYS_116   | N, B_ALA_120   | H, B_ALA_120    | 2.96 | 2.13 | 11.70 |
| 3X0E.PDB | O, B_GLN_118   | N, B_ASP_122   | H, B_ASP_122    | 2.91 | 2.08 | 11.40 |
| 3X0E.PDB | O, B_ILE_119   | N, B_VAL_123   | H, B_VAL_123    | 2.88 | 2.07 | 15.19 |
| 3X0E.PDB | O, B_ALA_120   | N, B_LYS_124   | H, B_LYS_124    | 2.98 | 2.18 | 17.57 |
| 3X0E.PDB | OD1, B_ASP_195 | NZ, B_LYS_124  | HZ1, B_LYS_124  | 2.75 | 2.02 | 29.74 |
| 3X0E.PDB | O, B_VAL_123   | N, B_TYR_127   | H, B_TYR_127    | 2.87 | 2.05 | 14.21 |
| 3X0E.PDB | O, B_LYS_124   | N, B_ASP_128   | H, B_ASP_128    | 2.82 | 1.97 | 7.12  |
| 3X0E.PDB | O, B_GLN_125   | N, B_GLN_129   | H, B_GLN_129    | 2.95 | 2.09 | 4.29  |
| 3X0E.PDB | O, B_TYR_127   | N, B_LEU_131   | H, B_LEU_131    | 2.80 | 2.02 | 19.97 |
| 3X0E.PDB | O, B_GLN_129   | N, B_GLN_133   | H, B_GLN_133    | 2.90 | 2.04 | 5.41  |
| 3X0E.PDB | O, B_ALA_130   | N, B_ALA_134   | H, B_ALA_134    | 2.78 | 2.05 | 26.00 |
| 3X0E.PDB | O, B_GLN_132   | N, B_VAL_136   | H, B_VAL_136    | 2.97 | 2.12 | 6.76  |
| 3X0E.PDB | O, B_LYS_144   | N, B_LYS_148   | H, B_LYS_148    | 2.88 | 2.03 | 4.95  |
| 3X0E.PDB | O, B_ALA_145   | N, B_THR_149   | H, B_THR_149    | 2.96 | 2.14 | 15.45 |
| 3X0E.PDB | O, B_ALA_145   | OG1, B_THR_149 | HG1, B_THR_149  | 2.91 | 2.17 | 22.45 |
| 3X0E.PDB | O, B_VAL_146   | N, B_PHE_150   | H, B_PHE_150    | 2.95 | 2.10 | 9.14  |
| 3X0E.PDB | O, B_VAL_147   | N, B_HIS_151   | H, B_HIS_151    | 2.89 | 2.04 | 9.03  |
| 3X0E.PDB | O, B_LEU_174   | ND1, B_HIS_151 | HD1, B_HIS_151  | 2.75 | 1.90 | 7.86  |
| 3X0E.PDB | O, B_LYS_148   | N, B_GLU_152   | H, B_GLU_152    | 2.88 | 2.06 | 15.18 |
| 3X0E.PDB | O, B_THR_149   | N, B_THR_153   | H, B_THR_153    | 2.82 | 1.98 | 10.07 |
| 3X0E.PDB | O, B_PHE_150   | N, B_LEU_154   | H, B_LEU_154    | 2.87 | 2.04 | 11.99 |
| 3X0E.PDB | OG1, B_THR_166 | N, B_SER_159   | H, B_SER_159    | 2.96 | 2.14 | 15.38 |
| 3X0E.PDB | OD2, B_ASP_189 | N, B_SER_160   | H, B_SER_160    | 2.78 | 1.93 | 3.69  |
| 3X0E.PDB | OG, B_SER_159  | OG1, B_THR_161 | HG1, B_THR_161  | 2.79 | 1.98 | 7.89  |
| 3X0E.PDB | O, B_SER_159   | N, B_LEU_162   | H, B_LEU_162    | 2.92 | 2.08 | 12.42 |
| 3X0E.PDB | O, B_LEU_162   | N, B_THR_166   | H, B_THR_166    | 2.94 | 2.18 | 23.20 |
| 3X0E.PDB | O, B_LEU_162   | OG1, B_THR_166 | HG1, B_THR_166  | 2.88 | 2.11 | 16.63 |
| 3X0E.PDB | O, B_THR_163   | N, B_THR_167   | H, B_THR_167    | 2.85 | 2.03 | 14.83 |
| 3X0E.PDB | O, B_LEU_165   | N, B_VAL_169   | H, B_VAL_169    | 2.94 | 2.17 | 21.85 |
| 3X0E.PDB | O, B_THR_166   | N, B_LEU_170   | H, B_LEU_170    | 2.95 | 2.19 | 24.26 |
| 3X0E.PDB | O, B_THR_167   | N, B_LYS_171   | H, B_LYS_171    | 2.99 | 2.15 | 11.05 |
| 3X0E.PDB | O, B_ASN_184   | N, B_GLU_188   | H, B_GLU_188    | 2.89 | 2.05 | 8.79  |
| 3X0E.PDB | OD1, B_ASP_128 | NE2, B_HIS_191 | HE2, B_HIS_191  | 2.68 | 1.83 | 6.07  |
| 3X0E.PDB | OD1, B_ASP_189 | N, B_GLN_192   | H, B_GLN_192    | 2.88 | 2.05 | 11.35 |
| 3X0E.PDB | O, B_ASP_189   | N, B_LYS_193   | H, B_LYS_193    | 2.99 | 2.20 | 19.70 |
| 3X0E.PDB | O, B_CYS_190   | N, B_ILE_194   | H, B_ILE_194    | 2.95 | 2.13 | 14.03 |
| 3X0E.PDB | O, B_GLN_192   | N, B_ASP_196   | H, B_ASP_196    | 2.94 | 2.14 | 18.40 |
| 3X0E.PDB | O, B_LYS_193   | N, B_LEU_197   | H, B_LEU_197    | 2.89 | 2.17 | 28.98 |
| 3X0E.PDB | O, B_ASP_196   | N, B_LYS_201   | H, B_LYS_201    | 2.91 | 2.09 | 15.23 |
| 3X0F.PDB | OD1, A_ASN_115 | N, A_ASP_117   | H, A_ASP_117    | 2.76 | 2.05 | 29.22 |
| 3X0F.PDB | O, A_LYS_116   | N, A_ALA_120   | H, A_ALA_120    | 2.96 | 2.10 | 6.18  |
| 3X0F.PDB | O, A_GLN_118   | N, A_ASP_122   | H, A_ASP_122    | 2.90 | 2.09 | 15.79 |
| 3X0F.PDB | O, A_ILE_119   | N, A_VAL_123   | H, A_VAL_123    | 2.92 | 2.11 | 16.68 |

|          |                |                |                |      |      |       |
|----------|----------------|----------------|----------------|------|------|-------|
| 3X0F.PDB | O, A_ALA_120   | N, A_LYS_124   | H, A_LYS_124   | 2.96 | 2.13 | 12.80 |
| 3X0F.PDB | OD1, A_ASP_195 | NZ, A_LYS_124  | HZ3, A_LYS_124 | 2.91 | 2.03 | 6.30  |
| 3X0F.PDB | O, A_ASP_122   | N, A_PHE_126   | H, A_PHE_126   | 2.92 | 2.10 | 14.97 |
| 3X0F.PDB | O, A_VAL_123   | N, A_TYR_127   | H, A_TYR_127   | 2.88 | 2.05 | 12.59 |
| 3X0F.PDB | O, A_LYS_124   | N, A_ASP_128   | H, A_ASP_128   | 2.89 | 2.08 | 15.92 |
| 3X0F.PDB | O, A_TYR_127   | N, A_LEU_131   | H, A_LEU_131   | 2.80 | 1.98 | 14.29 |
| 3X0F.PDB | O, A_ALA_130   | N, A_ALA_134   | H, A_ALA_134   | 2.84 | 2.00 | 11.20 |
| 3X0F.PDB | O, A_GLN_133   | N, A_ASP_137   | H, A_ASP_137   | 2.91 | 2.07 | 8.58  |
| 3X0F.PDB | OD1, A_ASP_137 | N, A_ASP_139   | H, A_ASP_139   | 2.85 | 1.99 | 3.86  |
| 3X0F.PDB | O, A_ALA_140   | N, A_LYS_144   | H, A_LYS_144   | 2.97 | 2.14 | 11.74 |
| 3X0F.PDB | O, A_ALA_134   | NZ, A_LYS_144  | HZ3, A_LYS_144 | 2.61 | 1.87 | 27.66 |
| 3X0F.PDB | O, A_ASN_142   | N, A_VAL_146   | H, A_VAL_146   | 2.93 | 2.09 | 11.09 |
| 3X0F.PDB | O, A_ALA_143   | N, A_VAL_147   | H, A_VAL_147   | 2.89 | 2.04 | 7.77  |
| 3X0F.PDB | O, A_LYS_144   | N, A_LYS_148   | H, A_LYS_148   | 2.90 | 2.05 | 7.59  |
| 3X0F.PDB | O, A_SER_173   | NZ, A_LYS_148  | HZ3, A_LYS_148 | 2.88 | 2.00 | 7.58  |
| 3X0F.PDB | O, A_ALA_145   | OG1, A_THR_149 | HG1, A_THR_149 | 2.91 | 2.14 | 15.86 |
| 3X0F.PDB | O, A_VAL_147   | N, A_HIS_151   | H, A_HIS_151   | 2.90 | 2.06 | 9.89  |
| 3X0F.PDB | O, A_LEU_174   | ND1, A_HIS_151 | HD1, A_HIS_151 | 2.77 | 1.98 | 20.06 |
| 3X0F.PDB | O, A_LYS_148   | N, A_GLU_152   | H, A_GLU_152   | 2.93 | 2.09 | 11.11 |
| 3X0F.PDB | O, A_THR_149   | N, A_THR_153   | H, A_THR_153   | 2.90 | 2.09 | 16.44 |
| 3X0F.PDB | O, A_PHE_150   | N, A_LEU_154   | H, A_LEU_154   | 2.81 | 2.01 | 18.57 |
| 3X0F.PDB | OG1, A_THR_163 | N, A_ASN_160   | H, A_ASN_160   | 2.95 | 2.21 | 26.42 |
| 3X0F.PDB | OG, A_SER_159  | OG1, A_THR_163 | HG1, A_THR_163 | 2.77 | 1.96 | 7.35  |
| 3X0F.PDB | O, A_ASN_160   | N, A_THR_164   | H, A_THR_164   | 2.88 | 2.07 | 16.97 |
| 3X0F.PDB | O, A_ASN_160   | OG1, A_THR_164 | HG1, A_THR_164 | 2.73 | 2.01 | 24.68 |
| 3X0F.PDB | O, A_LEU_162   | N, A_THR_166   | H, A_THR_166   | 2.92 | 2.10 | 13.93 |
| 3X0F.PDB | O, A_THR_163   | OG1, A_THR_167 | HG1, A_THR_167 | 2.89 | 2.12 | 16.26 |
| 3X0F.PDB | O, A_THR_166   | N, A_LEU_170   | H, A_LEU_170   | 2.90 | 2.06 | 12.50 |
| 3X0F.PDB | O, A_THR_167   | N, A_ARG_171   | H, A_ARG_171   | 2.82 | 2.01 | 17.53 |
| 3X0F.PDB | O, A_ARG_171   | N, A_LEU_174   | H, A_LEU_174   | 2.93 | 2.08 | 5.89  |
| 3X0F.PDB | O, A_ASN_172   | N, A_CYS_175   | H, A_CYS_175   | 3.00 | 2.20 | 18.23 |
| 3X0F.PDB | OG1, A_THR_183 | N, A_ASN_180   | H, A_ASN_180   | 2.96 | 2.18 | 19.92 |
| 3X0F.PDB | OD1, A_ASN_180 | N, A_LEU_182   | H, A_LEU_182   | 2.45 | 1.71 | 25.25 |
| 3X0F.PDB | O, A_THR_183   | N, A_LEU_186   | H, A_LEU_186   | 2.99 | 2.15 | 11.85 |
| 3X0F.PDB | O, A_PRO_184   | N, A_GLN_187   | H, A_GLN_187   | 2.97 | 2.13 | 7.84  |
| 3X0F.PDB | OE1, A_GLN_192 | N, A_ASP_189   | H, A_ASP_189   | 2.95 | 2.17 | 21.65 |
| 3X0F.PDB | O, A_GLY_158   | N, A_CYS_190   | H, A_CYS_190   | 2.80 | 1.94 | 6.85  |
| 3X0F.PDB | OD1, A_ASP_128 | NE2, A_HIS_191 | HE2, A_HIS_191 | 2.65 | 1.83 | 14.50 |
| 3X0F.PDB | OD1, A_ASP_189 | N, A_GLN_192   | H, A_GLN_192   | 2.76 | 1.93 | 12.98 |
| 3X0F.PDB | O, A_CYS_190   | N, A_ILE_194   | H, A_ILE_194   | 2.92 | 2.08 | 11.33 |
| 3X0F.PDB | O, A_HIS_191   | N, A_ASP_195   | H, A_ASP_195   | 2.89 | 2.05 | 8.32  |
| 3X0F.PDB | OD1, B_ASN_115 | N, B_ASP_117   | H, B_ASP_117   | 2.83 | 2.09 | 25.59 |
| 3X0F.PDB | O, B_ILE_119   | N, B_VAL_123   | H, B_VAL_123   | 2.90 | 2.08 | 14.90 |
| 3X0F.PDB | O, B_ALA_120   | N, B_LYS_124   | H, B_LYS_124   | 2.96 | 2.13 | 14.11 |
| 3X0F.PDB | O, B_ASP_122   | N, B_PHE_126   | H, B_PHE_126   | 2.92 | 2.10 | 15.77 |
| 3X0F.PDB | O, B_VAL_123   | N, B_TYR_127   | H, B_TYR_127   | 2.83 | 1.99 | 10.66 |
| 3X0F.PDB | O, B_LYS_124   | N, B_ASP_128   | H, B_ASP_128   | 2.91 | 2.10 | 15.77 |
| 3X0F.PDB | O, B_TYR_127   | N, B_LEU_131   | H, B_LEU_131   | 2.83 | 2.00 | 14.03 |
| 3X0F.PDB | O, B_ASP_128   | N, B_GLN_132   | H, B_GLN_132   | 2.94 | 2.11 | 13.87 |
| 3X0F.PDB | O, B_ALA_130   | N, B_ALA_134   | H, B_ALA_134   | 2.84 | 1.99 | 5.94  |
| 3X0F.PDB | O, B_GLN_133   | N, B_ASP_137   | H, B_ASP_137   | 2.83 | 1.99 | 9.88  |
| 3X0F.PDB | OD1, B_ASP_137 | N, B_ASP_139   | H, B_ASP_139   | 2.78 | 1.95 | 12.28 |
| 3X0F.PDB | O, B_ASN_141   | N, B_ALA_145   | H, B_ALA_145   | 2.98 | 2.19 | 18.75 |
| 3X0F.PDB | O, B_ASN_142   | N, B_VAL_146   | H, B_VAL_146   | 2.93 | 2.10 | 14.03 |
| 3X0F.PDB | O, B_ALA_143   | N, B_VAL_147   | H, B_VAL_147   | 2.90 | 2.05 | 8.67  |
| 3X0F.PDB | O, B_LYS_144   | N, B_LYS_148   | H, B_LYS_148   | 2.93 | 2.08 | 6.49  |
| 3X0F.PDB | O, B_ALA_145   | OG1, B_THR_149 | HG1, B_THR_149 | 2.77 | 1.99 | 16.05 |
| 3X0F.PDB | O, B_VAL_147   | N, B_HIS_151   | H, B_HIS_151   | 2.84 | 2.00 | 10.99 |

|          |                |                |                |      |      |       |
|----------|----------------|----------------|----------------|------|------|-------|
| 3X0F.PDB | O, B_LEU.174   | ND1, B_HIS.151 | HD1, B_HIS.151 | 2.65 | 1.84 | 15.99 |
| 3X0F.PDB | OH, B_TYR.127  | NE2, B_HIS.151 | HE2, B_HIS.151 | 2.81 | 2.02 | 19.67 |
| 3X0F.PDB | O, B_LYS.148   | N, B_GLU.152   | H, B_GLU.152   | 2.77 | 1.92 | 6.84  |
| 3X0F.PDB | O, B_THR.149   | N, B_THR.153   | H, B_THR.153   | 2.95 | 2.13 | 14.83 |
| 3X0F.PDB | O, B_PHE.150   | N, B_LEU.154   | H, B_LEU.154   | 2.85 | 2.04 | 17.17 |
| 3X0F.PDB | OG1, B_THR.163 | OG, B_SER.159  | HG, B_SER.159  | 2.96 | 2.16 | 10.94 |
| 3X0F.PDB | O, B_ASN.160   | OG1, B_THR.164 | HG1, B_THR.164 | 2.57 | 1.80 | 16.52 |
| 3X0F.PDB | O, B_LEU.162   | N, B_THR.166   | H, B_THR.166   | 2.76 | 1.93 | 11.31 |
| 3X0F.PDB | O, B_THR.163   | N, B_THR.167   | H, B_THR.167   | 2.99 | 2.18 | 15.60 |
| 3X0F.PDB | O, B_THR.166   | N, B_LEU.170   | H, B_LEU.170   | 2.87 | 2.06 | 18.01 |
| 3X0F.PDB | O, B_GLY.158   | N, B_CYS.190   | H, B_CYS.190   | 2.83 | 2.05 | 20.10 |
| 3X0F.PDB | OD1, B_ASP.128 | NE2, B_HIS.191 | HE2, B_HIS.191 | 2.69 | 1.83 | 1.74  |
| 3X0F.PDB | O, B_CYS.190   | N, B_ILE.194   | H, B_ILE.194   | 2.81 | 1.97 | 10.56 |
| 3X0F.PDB | O, B_GLN.192   | N, B_GLU.196   | H, B_GLU.196   | 2.96 | 2.13 | 13.52 |
| 3X0F.PDB | O, B_LYS.193   | N, B_LEU.197   | H, B_LEU.197   | 2.98 | 2.18 | 18.16 |
| 3X0F.PDB | O, B_ILE.194   | N, B_PHE.198   | H, B_PHE.198   | 2.87 | 2.06 | 16.88 |
| 3X0F.PDB | O, B_ASP.195   | N, B_SER.199   | H, B_SER.199   | 2.79 | 2.06 | 26.20 |
| 4F33.PDB | OG, A_SER.27   | N, A_GLU.4     | H, A_GLU.4     | 2.93 | 2.12 | 15.90 |
| 4F33.PDB | O, A_SER.25    | N, A_THR.6     | H, A_THR.6     | 2.82 | 1.97 | 4.01  |
| 4F33.PDB | O, A_TYR.86    | NE2, A_GLN.7   | HE22, A_GLN.7  | 2.87 | 2.09 | 21.54 |
| 4F33.PDB | O, A_THR.23    | N, A_SER.8     | H, A_SER.8     | 2.88 | 2.08 | 17.40 |
| 4F33.PDB | O, A_LYS.103   | N, A_MET.12    | H, A_MET.12    | 2.89 | 2.08 | 17.33 |
| 4F33.PDB | OE2, A_GLU.18  | N, A_SER.15    | H, A_SER.15    | 2.97 | 2.12 | 6.98  |
| 4F33.PDB | O, A_VAL.78    | N, A_GLY.17    | H, A_GLY.17    | 2.85 | 2.06 | 20.41 |
| 4F33.PDB | O, A_ILE.75    | N, A_VAL.20    | H, A_VAL.20    | 2.97 | 2.17 | 19.12 |
| 4F33.PDB | O, A_LEU.73    | N, A_MET.22    | H, A_MET.22    | 2.86 | 2.02 | 10.29 |
| 4F33.PDB | O, A_SER.8     | N, A_THR.23    | H, A_THR.23    | 2.78 | 1.93 | 7.24  |
| 4F33.PDB | O, A_TYR.71    | N, A_CYS.24    | H, A_CYS.24    | 2.78 | 1.93 | 6.93  |
| 4F33.PDB | O, A_THR.6     | N, A_SER.25    | H, A_SER.25    | 2.80 | 1.94 | 5.80  |
| 4F33.PDB | O, A_ASN.69    | N, A_ALA.26    | H, A_ALA.26    | 2.83 | 1.99 | 8.87  |
| 4F33.PDB | O, A_ILE.48    | N, A_TRP.35    | H, A_TRP.35    | 2.69 | 1.86 | 13.25 |
| 4F33.PDB | O, A_TYR.87    | N, A_TYR.36    | H, A_TYR.36    | 2.79 | 1.98 | 16.56 |
| 4F33.PDB | O, A_LYS.45    | N, A_GLN.37    | H, A_GLN.37    | 2.93 | 2.17 | 24.56 |
| 4F33.PDB | O, A_THR.85    | N, A_GLN.38    | H, A_GLN.38    | 2.78 | 1.94 | 8.77  |
| 4F33.PDB | O, A_THR.42    | NE2, A_GLN.38  | HE21, A_GLN.38 | 2.85 | 2.01 | 10.50 |
| 4F33.PDB | OE1, B_GLN.39  | NE2, A_GLN.38  | HE22, A_GLN.38 | 2.96 | 2.13 | 12.75 |
| 4F33.PDB | O, A_GLU.81    | NZ, A_LYS.39   | HZ1, A_LYS.39  | 2.81 | 1.96 | 14.34 |
| 4F33.PDB | O, A_ASP.83    | NZ, A_LYS.39   | HZ3, A_LYS.39  | 2.88 | 2.10 | 24.06 |
| 4F33.PDB | O, A_LYS.39    | OG1, A_THR.42  | HG1, A_THR.42  | 2.81 | 1.99 | 3.65  |
| 4F33.PDB | O, B_GLY.110   | OG, A_SER.43   | HG, A_SER.43   | 2.65 | 1.95 | 25.99 |
| 4F33.PDB | O, A_GLN.37    | N, A_LYS.45    | H, A_LYS.45    | 2.79 | 1.96 | 13.89 |
| 4F33.PDB | O, B_ARG.104   | NH1, A_ARG.46  | HH11, A_ARG.46 | 2.62 | 1.83 | 18.99 |
| 4F33.PDB | O, A_TRP.35    | N, A_TRP.47    | H, A_TRP.47    | 2.84 | 2.05 | 19.82 |
| 4F33.PDB | O, A_LYS.53    | N, A_TYR.49    | H, A_TYR.49    | 2.79 | 1.99 | 16.95 |
| 4F33.PDB | O, A_MET.33    | N, A_THR.51    | H, A_THR.51    | 2.74 | 1.92 | 15.06 |
| 4F33.PDB | O, A_ASP.50    | N, A_SER.52    | H, A_SER.52    | 2.84 | 2.12 | 28.76 |
| 4F33.PDB | O, A_TYR.49    | N, A_LYS.53    | H, A_LYS.53    | 2.87 | 2.05 | 15.09 |
| 4F33.PDB | OD2, A_ASP.82  | NE, A_ARG.61   | HE, A_ARG.61   | 2.81 | 2.09 | 28.09 |
| 4F33.PDB | OD1, A_ASP.82  | NH2, A_ARG.61  | HH21, A_ARG.61 | 2.71 | 1.85 | 4.82  |
| 4F33.PDB | O, A_THR.74    | N, A_SER.63    | H, A_SER.63    | 2.91 | 2.14 | 22.09 |
| 4F33.PDB | O, A_ALA.26    | ND2, A_ASN.69  | HD21, A_ASN.69 | 2.95 | 2.09 | 2.58  |
| 4F33.PDB | O, A_SER.67    | N, A_SER.70    | H, A_SER.70    | 2.98 | 2.12 | 3.48  |
| 4F33.PDB | O, A_CYS.24    | N, A_TYR.71    | H, A_TYR.71    | 2.94 | 2.09 | 7.81  |
| 4F33.PDB | O, A_VAL.30    | OH, A_TYR.71   | HH, A_TYR.71   | 2.83 | 2.13 | 26.33 |
| 4F33.PDB | O, A_SER.65    | N, A_SER.72    | H, A_SER.72    | 2.82 | 1.99 | 12.37 |
| 4F33.PDB | O, A_MET.22    | N, A_LEU.73    | H, A_LEU.73    | 2.90 | 2.08 | 15.13 |
| 4F33.PDB | O, A_SER.63    | N, A_THR.74    | H, A_THR.74    | 2.86 | 2.01 | 8.97  |
| 4F33.PDB | OG1, A_THR.21  | OG1, A_THR.74  | HG1, A_THR.74  | 2.73 | 1.99 | 21.82 |

|          |                |                |                 |      |      |       |
|----------|----------------|----------------|-----------------|------|------|-------|
| 4F33.PDB | O, A_VAL_20    | N, A_ILE_75    | H, A_ILE_75     | 2.86 | 2.05 | 16.70 |
| 4F33.PDB | O, A_ARG_61    | N, A_SER_76    | H, A_SER_76     | 2.74 | 1.93 | 15.27 |
| 4F33.PDB | O, A_GLU_18    | N, A_VAL_78    | H, A_VAL_78     | 2.98 | 2.22 | 23.09 |
| 4F33.PDB | OD2, A_ASP_82  | N, A_GLU_79    | H, A_GLU_79     | 2.83 | 1.97 | 5.35  |
| 4F33.PDB | O, A_GLU_79    | N, A_ASP_82    | H, A_ASP_82     | 2.82 | 1.98 | 10.48 |
| 4F33.PDB | O, A_GLN_38    | N, A_THR_85    | H, A_THR_85     | 2.93 | 2.09 | 10.56 |
| 4F33.PDB | O, A_THR_102   | N, A_TYR_86    | H, A_TYR_86     | 2.88 | 2.05 | 12.33 |
| 4F33.PDB | O, A_TYR_36    | N, A_TYR_87    | H, A_TYR_87     | 2.86 | 2.04 | 15.05 |
| 4F33.PDB | OG1, A_THR_97  | NE2, A_GLN_90  | HE21, A_GLN_90  | 2.97 | 2.15 | 14.62 |
| 4F33.PDB | O, A_TYR_32    | NE1, A_TRP_91  | HE1, A_TRP_91   | 2.74 | 1.96 | 21.98 |
| 4F33.PDB | O, A_ILE_3     | OG1, A_THR_97  | HG1, A_THR_97   | 2.86 | 2.07 | 13.11 |
| 4F33.PDB | O, A_CYS_88    | N, A_GLY_99    | H, A_GLY_99     | 2.86 | 2.04 | 15.33 |
| 4F33.PDB | OE1, A_GLN_7   | N, A_GLY_101   | H, A_GLY_101    | 2.83 | 2.06 | 22.47 |
| 4F33.PDB | O, A_TYR_86    | N, A_THR_102   | H, A_THR_102    | 2.93 | 2.11 | 14.73 |
| 4F33.PDB | O, A_PRO_9     | OG1, A_THR_102 | HG1, A_THR_102  | 2.73 | 1.96 | 15.99 |
| 4F33.PDB | O, A_ALA_10    | N, A_LYS_103   | H, A_LYS_103    | 2.90 | 2.06 | 9.01  |
| 4F33.PDB | O, A_ALA_84    | N, A_VAL_104   | H, A_VAL_104    | 2.88 | 2.03 | 4.65  |
| 4F33.PDB | O, A_MET_12    | N, A_GLU_105   | H, A_GLU_105    | 2.79 | 1.94 | 7.59  |
| 4F33.PDB | OE1, A_GLN_166 | N, A_ILE_106   | H, A_ILE_106    | 2.90 | 2.05 | 6.64  |
| 4F33.PDB | O, A_ALA_14    | N, A_LYS_107   | H, A_LYS_107    | 2.83 | 2.00 | 10.77 |
| 4F33.PDB | OG, A_SER_13   | NZ, A_LYS_107  | HZ3, A_LYS_107  | 2.94 | 2.07 | 9.78  |
| 4F33.PDB | O, A_THR_109   | NE, A_ARG_108  | HE, A_ARG_108   | 2.77 | 1.91 | 3.92  |
| 4F33.PDB | O, A_ASP_170   | NH1, A_ARG_108 | HH11, A_ARG_108 | 2.95 | 2.12 | 11.15 |
| 4F33.PDB | O, A_TYR_140   | N, A_ALA_111   | H, A_ALA_111    | 2.85 | 2.01 | 10.73 |
| 4F33.PDB | O, A_LEU_135   | N, A_PHE_116   | H, A_PHE_116    | 2.94 | 2.15 | 19.06 |
| 4F33.PDB | O, A_VAL_133   | N, A_PHE_118   | H, A_PHE_118    | 2.80 | 2.01 | 19.24 |
| 4F33.PDB | OG, A_SER_131  | NE2, A_GLN_124 | HE22, A_GLN_124 | 2.81 | 1.96 | 5.54  |
| 4F33.PDB | O, A_LEU_125   | N, A_GLY_128   | H, A_GLY_128    | 2.79 | 1.95 | 9.52  |
| 4F33.PDB | O, A_LEU_181   | N, A_ALA_130   | H, A_ALA_130    | 2.76 | 1.92 | 9.83  |
| 4F33.PDB | OE1, A_GLN_124 | N, A_SER_131   | H, A_SER_131    | 2.96 | 2.15 | 16.54 |
| 4F33.PDB | O, A_LEU_179   | N, A_VAL_132   | H, A_VAL_132    | 2.82 | 1.98 | 11.91 |
| 4F33.PDB | O, A_SER_177   | N, A_CYS_134   | H, A_CYS_134    | 2.86 | 2.01 | 7.49  |
| 4F33.PDB | O, A_PHE_116   | N, A_LEU_135   | H, A_LEU_135    | 2.76 | 1.92 | 8.98  |
| 4F33.PDB | O, A_LEU_175   | N, A_LEU_136   | H, A_LEU_136    | 2.76 | 1.90 | 4.04  |
| 4F33.PDB | O, A_SER_114   | N, A_ASN_137   | H, A_ASN_137    | 2.84 | 2.02 | 13.99 |
| 4F33.PDB | O, A_TYR_173   | N, A_PHE_139   | H, A_PHE_139    | 2.85 | 2.04 | 16.43 |
| 4F33.PDB | O, A_ALA_111   | N, A_TYR_140   | H, A_TYR_140    | 2.90 | 2.09 | 16.65 |
| 4F33.PDB | O, A_THR_197   | N, A_LYS_145   | H, A_LYS_145    | 2.98 | 2.16 | 14.92 |
| 4F33.PDB | O, A_GLU_195   | N, A_GLN_147   | H, A_GLN_147    | 2.86 | 2.02 | 11.34 |
| 4F33.PDB | OG, A_SER_177  | NE1, A_TRP_148 | HE1, A_TRP_148  | 2.91 | 2.09 | 14.52 |
| 4F33.PDB | O, A_ALA_193   | N, A_LYS_149   | H, A_LYS_149    | 2.87 | 2.03 | 10.60 |
| 4F33.PDB | OE1, A_GLU_195 | NZ, A_LYS_149  | HZ2, A_LYS_149  | 2.59 | 1.85 | 28.21 |
| 4F33.PDB | O, A_VAL_191   | N, A_ASP_151   | H, A_ASP_151    | 2.75 | 1.92 | 13.23 |
| 4F33.PDB | O, A_VAL_150   | N, A_ALA_153   | H, A_ALA_153    | 2.85 | 2.00 | 6.45  |
| 4F33.PDB | O, A_TRP_148   | N, A_GLN_155   | H, A_GLN_155    | 2.92 | 2.11 | 17.54 |
| 4F33.PDB | OE1, A_GLN_155 | ND2, A_ASN_158 | HD22, A_ASN_158 | 2.89 | 2.06 | 12.00 |
| 4F33.PDB | O, A_THR_178   | N, A_GLN_160   | H, A_GLN_160    | 2.98 | 2.22 | 22.84 |
| 4F33.PDB | O, A_SER_176   | N, A_SER_162   | H, A_SER_162    | 2.94 | 2.15 | 19.03 |
| 4F33.PDB | O, B_PRO_173   | OG, A_SER_162  | HG, A_SER_162   | 2.76 | 2.03 | 23.18 |
| 4F33.PDB | O, A_SER_174   | N, A_THR_164   | H, A_THR_164    | 2.92 | 2.09 | 12.25 |
| 4F33.PDB | O, A_SER_171   | NE2, A_GLN_166 | HE21, A_GLN_166 | 2.92 | 2.09 | 13.24 |
| 4F33.PDB | O, A_ILE_106   | NE2, A_GLN_166 | HE22, A_GLN_166 | 2.72 | 1.92 | 18.36 |
| 4F33.PDB | OD1, A_ASP_167 | N, A_LYS_169   | H, A_LYS_169    | 2.65 | 1.81 | 10.48 |
| 4F33.PDB | O, A_ASP_167   | N, A_SER_171   | H, A_SER_171    | 2.90 | 2.19 | 29.27 |
| 4F33.PDB | OD1, A_ASP_170 | N, A_THR_172   | H, A_THR_172    | 2.86 | 2.04 | 14.41 |
| 4F33.PDB | OD1, A_ASP_170 | OG1, A_THR_172 | HG1, A_THR_172  | 2.68 | 1.86 | 4.02  |
| 4F33.PDB | O, A_PHE_139   | N, A_TYR_173   | H, A_TYR_173    | 2.78 | 1.94 | 7.95  |
| 4F33.PDB | OG1, A_THR_164 | N, A_SER_174   | H, A_SER_174    | 2.96 | 2.13 | 11.32 |

|          |                |               |                |      |      |       |
|----------|----------------|---------------|----------------|------|------|-------|
| 4F33.PDB | O, A_LEU_136   | N, A_LEU_175  | H, A_LEU_175   | 2.82 | 2.01 | 16.11 |
| 4F33.PDB | O, A_SER_162   | N, A_SER_176  | H, A_SER_176   | 2.89 | 2.07 | 14.35 |
| 4F33.PDB | O, A_CYS_134   | N, A_SER_177  | H, A_SER_177   | 2.92 | 2.09 | 13.76 |
| 4F33.PDB | O, A_GLN_160   | N, A_THR_178  | H, A_THR_178   | 2.88 | 2.04 | 10.18 |
| 4F33.PDB | O, A_VAL_132   | N, A_LEU_179  | H, A_LEU_179   | 2.84 | 2.02 | 14.45 |
| 4F33.PDB | O, A_ASN_158   | N, A_THR_180  | H, A_THR_180   | 2.95 | 2.12 | 11.92 |
| 4F33.PDB | O, A_ALA_130   | N, A_LEU_181  | H, A_LEU_181   | 2.88 | 2.05 | 13.17 |
| 4F33.PDB | O, A_GLY_128   | N, A_LYS_183  | H, A_LYS_183   | 2.98 | 2.19 | 19.73 |
| 4F33.PDB | OG, A_SER_182  | N, A_ASP_185  | H, A_ASP_185   | 2.87 | 2.04 | 12.72 |
| 4F33.PDB | O, A_SER_182   | N, A_TYR_186  | H, A_TYR_186   | 2.80 | 1.98 | 14.27 |
| 4F33.PDB | O, A_LYS_183   | N, A_GLU_187  | H, A_GLU_187   | 2.86 | 2.04 | 14.84 |
| 4F33.PDB | OD2, A_ASP_151 | N, A_LYS_190  | H, A_LYS_190   | 2.95 | 2.15 | 18.90 |
| 4F33.PDB | OD1, A_ASP_151 | N, A_VAL_191  | H, A_VAL_191   | 2.83 | 1.98 | 4.63  |
| 4F33.PDB | O, A_PHE_209   | N, A_TYR_192  | H, A_TYR_192   | 2.96 | 2.11 | 7.57  |
| 4F33.PDB | O, A_LYS_149   | N, A_ALA_193  | H, A_ALA_193   | 2.92 | 2.11 | 16.79 |
| 4F33.PDB | O, A_LYS_207   | N, A_CYS_194  | H, A_CYS_194   | 2.99 | 2.20 | 20.51 |
| 4F33.PDB | O, A_GLN_147   | N, A_GLU_195  | H, A_GLU_195   | 2.80 | 1.96 | 10.16 |
| 4F33.PDB | O, A_VAL_205   | N, A_VAL_196  | H, A_VAL_196   | 2.72 | 1.89 | 12.89 |
| 4F33.PDB | O, A_LYS_145   | N, A_THR_197  | H, A_THR_197   | 2.87 | 2.04 | 14.20 |
| 4F33.PDB | O, A_HIS_198   | N, A_LEU_201  | H, A_LEU_201   | 2.83 | 1.98 | 4.49  |
| 4F33.PDB | O, A_VAL_196   | N, A_VAL_205  | H, A_VAL_205   | 2.93 | 2.11 | 14.32 |
| 4F33.PDB | O, A_TYR_192   | N, A_PHE_209  | H, A_PHE_209   | 2.97 | 2.19 | 21.09 |
| 4F33.PDB | O, A_LYS_190   | N, A_ARG_211  | H, A_ARG_211   | 2.77 | 1.94 | 10.87 |
| 4F33.PDB | O, A_HIS_189   | NE, A_ARG_211 | HE, A_ARG_211  | 2.95 | 2.11 | 10.88 |
| 4F33.PDB | O, B_LYS_23    | N, B_GLN_5    | H, B_GLN_5     | 2.89 | 2.04 | 6.23  |
| 4F33.PDB | O, B_TYR_94    | NE2, B_GLN_6  | HE22, B_GLN_6  | 2.91 | 2.10 | 17.22 |
| 4F33.PDB | O, B_SER_21    | N, B_SER_7    | H, B_SER_7     | 2.99 | 2.26 | 27.49 |
| 4F33.PDB | O, B_PRO_114   | N, B_GLU_10   | H, B_GLU_10    | 2.94 | 2.16 | 20.47 |
| 4F33.PDB | O, B_LEU_86    | N, B_GLY_15   | H, B_GLY_15    | 2.71 | 1.91 | 16.40 |
| 4F33.PDB | O, B_LEU_83    | N, B_VAL_18   | H, B_VAL_18    | 2.93 | 2.17 | 23.19 |
| 4F33.PDB | O, B_MET_81    | N, B_ILE_20   | H, B_ILE_20    | 2.82 | 1.99 | 11.32 |
| 4F33.PDB | OG, B_SER_7    | N, B_SER_21   | H, B_SER_21    | 2.96 | 2.11 | 7.69  |
| 4F33.PDB | O, B_ALA_79    | N, B_CYS_22   | H, B_CYS_22    | 2.82 | 2.06 | 23.47 |
| 4F33.PDB | O, B_GLN_5     | N, B_LYS_23   | H, B_LYS_23    | 2.73 | 1.90 | 11.88 |
| 4F33.PDB | O, B_SER_77    | N, B_ALA_24   | H, B_ALA_24    | 2.97 | 2.12 | 8.25  |
| 4F33.PDB | O, B_GLN_3     | N, B_SER_25   | H, B_SER_25    | 2.93 | 2.12 | 17.16 |
| 4F33.PDB | O, B_SER_28    | N, B_GLY_31   | H, B_GLY_31    | 2.98 | 2.12 | 6.95  |
| 4F33.PDB | O, B_GLY_99    | N, B_THR_33   | H, B_THR_33    | 2.98 | 2.22 | 23.44 |
| 4F33.PDB | O, B_ALA_97    | N, B_ASN_35   | H, B_ASN_35    | 2.80 | 1.95 | 8.88  |
| 4F33.PDB | O, B_PHE_95    | N, B_VAL_37   | H, B_VAL_37    | 2.85 | 2.06 | 19.95 |
| 4F33.PDB | O, B_GLU_46    | N, B_LYS_38   | H, B_LYS_38    | 2.82 | 2.01 | 16.68 |
| 4F33.PDB | O, B_GLU_89    | NZ, B_LYS_38  | HZ1, B_LYS_38  | 2.86 | 1.98 | 5.39  |
| 4F33.PDB | O, B_VAL_93    | N, B_GLN_39   | H, B_GLN_39    | 2.87 | 2.01 | 5.84  |
| 4F33.PDB | OE1, A_GLN_38  | NE2, B_GLN_39 | HE22, B_GLN_39 | 2.82 | 1.97 | 5.31  |
| 4F33.PDB | O, B_SER_40    | N, B_LYS_43   | H, B_LYS_43    | 2.88 | 2.06 | 15.26 |
| 4F33.PDB | O, B_LYS_38    | N, B_GLU_46   | H, B_GLU_46    | 2.87 | 2.06 | 16.90 |
| 4F33.PDB | O, B_TRP_36    | N, B_ILE_48   | H, B_ILE_48    | 2.80 | 1.95 | 7.15  |
| 4F33.PDB | O, B_SER_59    | N, B_LEU_50   | H, B_LEU_50    | 2.87 | 2.08 | 19.32 |
| 4F33.PDB | O, B_MET_34    | N, B_ILE_51   | H, B_ILE_51    | 2.89 | 2.09 | 18.35 |
| 4F33.PDB | O, B_ALA_57    | N, B_THR_52   | H, B_THR_52    | 2.92 | 2.09 | 13.37 |
| 4F33.PDB | O, B_THR_52    | N, B_GLY_56   | H, B_GLY_56    | 2.89 | 2.15 | 26.20 |
| 4F33.PDB | OD1, B_ASN_55  | N, B_ALA_57   | H, B_ALA_57    | 2.85 | 2.00 | 7.05  |
| 4F33.PDB | O, B_LEU_50    | N, B_SER_59   | H, B_SER_59    | 2.88 | 2.09 | 19.09 |
| 4F33.PDB | O, B_ILE_48    | N, B_ASN_61   | H, B_ASN_61    | 2.90 | 2.09 | 17.36 |
| 4F33.PDB | O, B_TRP_47    | ND2, B_ASN_61 | HD21, B_ASN_61 | 2.94 | 2.11 | 14.44 |
| 4F33.PDB | OE2, B_GLU_46  | NZ, B_LYS_63  | HZ3, B_LYS_63  | 2.70 | 1.89 | 19.35 |
| 4F33.PDB | O, B_ASN_61    | N, B_PHE_64   | H, B_PHE_64    | 2.77 | 1.93 | 12.05 |
| 4F33.PDB | OD2, B_ASP_90  | NZ, B_LYS_67  | HZ2, B_LYS_67  | 2.73 | 1.86 | 7.48  |

|          |                |                |                 |      |      |       |
|----------|----------------|----------------|-----------------|------|------|-------|
| 4F33.PDB | O, B_LEU_84    | NZ, B_LYS_67   | HZ3, B_LYS_67   | 2.85 | 2.01 | 15.38 |
| 4F33.PDB | O, B_PHE_64    | N, B_ALA_68    | H, B_ALA_68     | 2.93 | 2.14 | 19.80 |
| 4F33.PDB | O, B_ASP_82    | N, B_THR_69    | H, B_THR_69     | 2.92 | 2.16 | 23.54 |
| 4F33.PDB | OH, B_TYR_60   | N, B_LEU_70    | H, B_LEU_70     | 2.92 | 2.07 | 9.07  |
| 4F33.PDB | O, B_THR_78    | N, B_ASP_73    | H, B_ASP_73     | 2.75 | 1.91 | 10.75 |
| 4F33.PDB | O, B_CYS_22    | N, B_ALA_79    | H, B_ALA_79     | 2.91 | 2.08 | 13.58 |
| 4F33.PDB | O, B_THR_71    | N, B_TYR_80    | H, B_TYR_80     | 2.83 | 1.97 | 4.70  |
| 4F33.PDB | O, B_ILE_20    | N, B_MET_81    | H, B_MET_81     | 2.96 | 2.15 | 15.91 |
| 4F33.PDB | O, B_THR_69    | N, B_ASP_82    | H, B_ASP_82     | 2.88 | 2.06 | 13.69 |
| 4F33.PDB | O, B_VAL_18    | N, B_LEU_83    | H, B_LEU_83     | 2.80 | 1.96 | 11.41 |
| 4F33.PDB | O, B_LYS_67    | N, B_LEU_84    | H, B_LEU_84     | 2.92 | 2.11 | 17.58 |
| 4F33.PDB | O, B_ALA_16    | N, B_LEU_86    | H, B_LEU_86     | 2.87 | 2.02 | 6.19  |
| 4F33.PDB | OD2, B_ASP_90  | N, B_THR_87    | H, B_THR_87     | 2.83 | 2.02 | 16.35 |
| 4F33.PDB | O, B_THR_87    | N, B_ASP_90    | H, B_ASP_90     | 2.88 | 2.04 | 10.12 |
| 4F33.PDB | O, B_SER_88    | N, B_SER_91    | H, B_SER_91     | 2.97 | 2.12 | 6.19  |
| 4F33.PDB | O, B_VAL_115   | N, B_ALA_92    | H, B_ALA_92     | 2.98 | 2.25 | 27.22 |
| 4F33.PDB | O, B_GLN_39    | N, B_VAL_93    | H, B_VAL_93     | 2.95 | 2.11 | 9.70  |
| 4F33.PDB | O, B_THR_113   | N, B_TYR_94    | H, B_TYR_94     | 2.86 | 2.02 | 9.76  |
| 4F33.PDB | O, B_VAL_37    | N, B_PHE_95    | H, B_PHE_95     | 2.79 | 1.94 | 9.71  |
| 4F33.PDB | O, B_ASN_35    | N, B_ALA_97    | H, B_ALA_97     | 2.79 | 2.04 | 25.47 |
| 4F33.PDB | O, B_TYR_108   | N, B_ARG_98    | H, B_ARG_98     | 2.80 | 2.01 | 18.50 |
| 4F33.PDB | OD2, B_ASP_107 | NH2, B_ARG_98  | HH21, B_ARG_98  | 2.74 | 1.88 | 6.50  |
| 4F33.PDB | O, B_THR_33    | N, B_GLY_99    | H, B_GLY_99     | 2.94 | 2.10 | 10.07 |
| 4F33.PDB | OD1, B_ASP_102 | NE, B_ARG_104  | HE, B_ARG_104   | 2.87 | 2.03 | 8.81  |
| 4F33.PDB | OD2, B_ASP_107 | NH1, B_ARG_104 | HH11, B_ARG_104 | 2.78 | 1.96 | 13.74 |
| 4F33.PDB | OD2, B_ASP_102 | NH2, B_ARG_104 | HH21, B_ARG_104 | 2.87 | 2.08 | 19.19 |
| 4F33.PDB | OH, A_TYR_36   | N, B_PHE_106   | H, B_PHE_106    | 2.97 | 2.12 | 7.79  |
| 4F33.PDB | O, B_CYS_96    | N, B_GLY_110   | H, B_GLY_110    | 2.83 | 1.98 | 5.16  |
| 4F33.PDB | OE1, B_GLN_6   | N, B_GLY_112   | H, B_GLY_112    | 2.90 | 2.10 | 18.34 |
| 4F33.PDB | O, B_TYR_94    | N, B_THR_113   | H, B_THR_113    | 2.81 | 1.99 | 14.66 |
| 4F33.PDB | O, B_SER_7     | OG1, B_THR_113 | HG1, B_THR_113  | 2.83 | 2.05 | 14.68 |
| 4F33.PDB | O, B_ALA_92    | N, B_VAL_115   | H, B_VAL_115    | 2.84 | 1.99 | 7.09  |
| 4F33.PDB | OG, B_SER_91   | N, B_VAL_117   | H, B_VAL_117    | 2.86 | 2.01 | 9.50  |
| 4F33.PDB | O, B_GLU_12    | N, B_SER_118   | H, B_SER_118    | 2.87 | 2.07 | 16.95 |
| 4F33.PDB | O, B_PHE_152   | N, B_LYS_123   | H, B_LYS_123    | 2.81 | 1.98 | 13.03 |
| 4F33.PDB | O, B_ASP_150   | NZ, B_LYS_123  | HZ2, B_LYS_123  | 2.83 | 2.00 | 16.92 |
| 4F33.PDB | O, B_GLY_124   | NZ, B_LYS_123  | HZ3, B_LYS_123  | 2.99 | 2.25 | 28.99 |
| 4F33.PDB | OE2, G_GLU_123 | N, B_GLY_124   | H, B_GLY_124    | 2.73 | 1.87 | 2.75  |
| 4F33.PDB | O, B_LYS_149   | N, B_SER_126   | H, B_SER_126    | 2.95 | 2.16 | 19.58 |
| 4F33.PDB | O, B_LEU_147   | N, B_PHE_128   | H, B_PHE_128    | 2.87 | 2.05 | 14.02 |
| 4F33.PDB | O, B_GLY_145   | N, B_LEU_130   | H, B_LEU_130    | 2.71 | 1.85 | 5.41  |
| 4F33.PDB | OG, B_SER_136  | N, B_SER_133   | H, B_SER_133    | 2.90 | 2.08 | 15.18 |
| 4F33.PDB | OG, B_SER_133  | N, B_LYS_135   | H, B_LYS_135    | 2.89 | 2.11 | 19.85 |
| 4F33.PDB | O, B_SER_133   | OG1, B_THR_137 | HG1, B_THR_137  | 2.92 | 2.21 | 25.24 |
| 4F33.PDB | O, B_SER_138   | N, B_THR_141   | H, B_THR_141    | 2.82 | 1.98 | 11.03 |
| 4F33.PDB | O, B_VAL_190   | N, B_ALA_142   | H, B_ALA_142    | 2.81 | 1.95 | 3.27  |
| 4F33.PDB | O, B_SER_136   | N, B_ALA_143   | H, B_ALA_143    | 2.75 | 1.93 | 14.52 |
| 4F33.PDB | O, B_LEU_130   | N, B_GLY_145   | H, B_GLY_145    | 2.97 | 2.22 | 25.31 |
| 4F33.PDB | O, B_PHE_128   | N, B_LEU_147   | H, B_LEU_147    | 2.81 | 1.97 | 10.25 |
| 4F33.PDB | O, B_LEU_184   | N, B_VAL_148   | H, B_VAL_148    | 2.76 | 1.91 | 7.90  |
| 4F33.PDB | O, B_SER_126   | N, B_LYS_149   | H, B_LYS_149    | 2.79 | 1.93 | 4.11  |
| 4F33.PDB | O, B_LYS_123   | N, B_PHE_152   | H, B_PHE_152    | 2.89 | 2.09 | 18.27 |
| 4F33.PDB | O, B_ASN_203   | N, B_SER_159   | H, B_SER_159    | 2.96 | 2.15 | 17.06 |
| 4F33.PDB | OG, B_SER_186  | NE1, B_TRP_160 | HE1, B_TRP_160  | 2.97 | 2.13 | 10.43 |
| 4F33.PDB | O, B_ILE_201   | N, B_ASN_161   | H, B_ASN_161    | 2.81 | 1.97 | 10.56 |
| 4F33.PDB | OD1, B_ASN_203 | N, B_SER_162   | H, B_SER_162    | 2.81 | 2.00 | 15.00 |
| 4F33.PDB | O, B_TRP_160   | N, B_GLY_163   | H, B_GLY_163    | 2.93 | 2.14 | 20.08 |
| 4F33.PDB | O, B_VAL_187   | N, B_HIS_170   | H, B_HIS_170    | 2.81 | 1.98 | 12.68 |



|          |                |                |                 |      |      |       |
|----------|----------------|----------------|-----------------|------|------|-------|
| 4F33.PDB | O, B_SER_185   | N, B_PHE_172   | H, B_PHE_172    | 3.00 | 2.14 | 5.14  |
| 4F33.PDB | O, B_SER_183   | N, B_VAL_175   | H, B_VAL_175    | 2.90 | 2.08 | 14.90 |
| 4F33.PDB | O, B_LEU_181   | N, B_GLN_177   | H, B_GLN_177    | 2.81 | 1.96 | 6.18  |
| 4F33.PDB | OD1, B_ASP_150 | NE2, B_GLN_177 | HE22, B_GLN_177 | 2.84 | 2.07 | 21.15 |
| 4F33.PDB | O, B_TYR_151   | N, B_TYR_182   | H, B_TYR_182    | 2.85 | 2.02 | 11.23 |
| 4F33.PDB | O, B_VAL_148   | N, B_LEU_184   | H, B_LEU_184    | 2.91 | 2.10 | 17.00 |
| 4F33.PDB | O, B_CYS_146   | N, B_SER_186   | H, B_SER_186    | 2.97 | 2.15 | 14.23 |
| 4F33.PDB | O, B_HIS_170   | N, B_VAL_187   | H, B_VAL_187    | 2.83 | 1.99 | 10.23 |
| 4F33.PDB | O, B_LEU_144   | N, B_VAL_188   | H, B_VAL_188    | 2.83 | 2.04 | 19.81 |
| 4F33.PDB | O, B_ALA_142   | N, B_VAL_190   | H, B_VAL_190    | 2.79 | 1.97 | 14.47 |
| 4F33.PDB | O, B_GLY_140   | N, B_SER_192   | H, B_SER_192    | 2.87 | 2.03 | 10.06 |
| 4F33.PDB | O, B_PRO_191   | N, B_SER_194   | H, B_SER_194    | 2.87 | 2.02 | 9.35  |
| 4F33.PDB | O, B_SER_194   | N, B_GLN_198   | H, B_GLN_198    | 2.75 | 1.90 | 4.61  |
| 4F33.PDB | O, B_THR_199   | NE2, B_GLN_198 | HE21, B_GLN_198 | 2.96 | 2.10 | 2.10  |
| 4F33.PDB | OD1, B_ASN_161 | N, B_ILE_201   | H, B_ILE_201    | 2.82 | 2.00 | 13.45 |
| 4F33.PDB | O, B_LYS_215   | N, B_CYS_202   | H, B_CYS_202    | 2.94 | 2.15 | 19.46 |
| 4F33.PDB | O, B_SER_159   | N, B_ASN_203   | H, B_ASN_203    | 2.77 | 1.92 | 6.83  |
| 4F33.PDB | OD1, B_ASP_214 | ND2, B_ASN_203 | HD21, B_ASN_203 | 2.97 | 2.12 | 8.15  |
| 4F33.PDB | O, B_VAL_213   | N, B_VAL_204   | H, B_VAL_204    | 2.74 | 1.90 | 9.17  |
| 4F33.PDB | O, B_THR_157   | N, B_ASN_205   | H, B_ASN_205    | 2.86 | 2.01 | 7.37  |
| 4F33.PDB | O, B_THR_211   | N, B_HIS_206   | H, B_HIS_206    | 2.85 | 2.00 | 6.46  |
| 4F33.PDB | OG, B_SER_209  | ND1, B_HIS_206 | HD1, B_HIS_206  | 2.61 | 1.78 | 12.57 |
| 4F33.PDB | O, B_PRO_153   | NE2, B_HIS_206 | HE2, B_HIS_206  | 2.85 | 2.02 | 12.89 |
| 4F33.PDB | O, B_LYS_207   | N, B_ASN_210   | H, B_ASN_210    | 2.94 | 2.11 | 13.00 |
| 4F33.PDB | O, H_ASP_214   | N, B_LYS_212   | H, B_LYS_212    | 2.81 | 2.00 | 15.02 |
| 4F33.PDB | O, B_VAL_204   | N, B_VAL_213   | H, B_VAL_213    | 2.80 | 1.98 | 15.11 |
| 4F33.PDB | O, H_LYS_212   | N, B_ASP_214   | H, B_ASP_214    | 2.84 | 2.02 | 15.98 |
| 4F33.PDB | O, B_CYS_202   | N, B_LYS_215   | H, B_LYS_215    | 2.91 | 2.09 | 16.20 |
| 4F33.PDB | OE1, A_GLU_123 | NZ, B_LYS_215  | HZ1, B_LYS_215  | 2.68 | 1.82 | 12.44 |
| 4F33.PDB | OG1, H_THR_211 | NZ, B_LYS_215  | HZ2, B_LYS_215  | 2.83 | 1.95 | 7.37  |
| 4F33.PDB | O, B_TYR_200   | N, B_VAL_217   | H, B_VAL_217    | 2.89 | 2.04 | 8.29  |
| 4F33.PDB | OG, C_SER_27   | N, C_GLU_4     | H, C_GLU_4      | 2.91 | 2.10 | 15.68 |
| 4F33.PDB | O, C_SER_25    | N, C_THR_6     | H, C_THR_6      | 2.79 | 1.94 | 4.69  |
| 4F33.PDB | O, C_TYR_86    | NE2, C_GLN_7   | HE22, C_GLN_7   | 2.91 | 2.14 | 22.16 |
| 4F33.PDB | O, C_THR_23    | N, C_SER_8     | H, C_SER_8      | 2.94 | 2.13 | 16.69 |
| 4F33.PDB | O, C_LYS_103   | N, C_MET_12    | H, C_MET_12     | 2.88 | 2.06 | 16.35 |
| 4F33.PDB | OE2, C_GLU_18  | N, C_SER_15    | H, C_SER_15     | 2.79 | 1.94 | 9.08  |
| 4F33.PDB | O, C_VAL_78    | N, C_GLY_17    | H, C_GLY_17     | 2.81 | 2.02 | 19.83 |
| 4F33.PDB | O, C_LEU_73    | N, C_MET_22    | H, C_MET_22     | 2.85 | 2.01 | 10.93 |
| 4F33.PDB | O, C_SER_8     | N, C_THR_23    | H, C_THR_23     | 2.77 | 1.93 | 10.15 |
| 4F33.PDB | O, C_TYR_71    | N, C_CYS_24    | H, C_CYS_24     | 2.75 | 1.90 | 8.61  |
| 4F33.PDB | O, C_THR_6     | N, C_SER_25    | H, C_SER_25     | 2.79 | 1.94 | 6.02  |
| 4F33.PDB | O, C_ASN_69    | N, C_ALA_26    | H, C_ALA_26     | 2.82 | 1.97 | 9.46  |
| 4F33.PDB | O, C_GLN_89    | N, C_HIS_34    | H, C_HIS_34     | 2.95 | 2.09 | 1.08  |
| 4F33.PDB | O, C_ILE_48    | N, C_TRP_35    | H, C_TRP_35     | 2.66 | 1.84 | 15.50 |
| 4F33.PDB | O, C_TYR_87    | N, C_TYR_36    | H, C_TYR_36     | 2.75 | 1.94 | 16.72 |
| 4F33.PDB | O, C_LYS_45    | N, C_GLN_37    | H, C_GLN_37     | 2.94 | 2.17 | 21.42 |
| 4F33.PDB | O, C_THR_85    | N, C_GLN_38    | H, C_GLN_38     | 2.81 | 1.97 | 10.54 |
| 4F33.PDB | O, C_THR_42    | NE2, C_GLN_38  | HE21, C_GLN_38  | 2.84 | 2.00 | 10.36 |
| 4F33.PDB | O, C_GLU_81    | NZ, C_LYS_39   | HZ1, C_LYS_39   | 2.82 | 1.94 | 9.21  |
| 4F33.PDB | O, C_ASP_83    | NZ, C_LYS_39   | HZ3, C_LYS_39   | 2.78 | 1.95 | 17.23 |
| 4F33.PDB | O, C_LYS_39    | OG1, C_THR_42  | HG1, C_THR_42   | 2.80 | 1.99 | 2.97  |
| 4F33.PDB | O, D_GLY_110   | OG, C_SER_43   | HG, C_SER_43    | 2.70 | 1.98 | 23.76 |
| 4F33.PDB | O, C_GLN_37    | N, C_LYS_45    | H, C_LYS_45     | 2.82 | 2.00 | 13.68 |
| 4F33.PDB | O, D_ARG_104   | NH1, C_ARG_46  | HH11, C_ARG_46  | 2.70 | 1.92 | 20.25 |
| 4F33.PDB | O, C_TRP_35    | N, C_TRP_47    | H, C_TRP_47     | 2.85 | 2.05 | 17.44 |
| 4F33.PDB | O, C_LYS_53    | N, C_TYR_49    | H, C_TYR_49     | 2.78 | 1.99 | 18.60 |
| 4F33.PDB | O, C_MET_33    | N, C_THR_51    | H, C_THR_51     | 2.75 | 1.94 | 16.16 |

|          |                |                |                 |      |      |       |
|----------|----------------|----------------|-----------------|------|------|-------|
| 4F33.PDB | O, C_ASP_50    | N, C_SER_52    | H, C_SER_52     | 2.86 | 2.16 | 29.76 |
| 4F33.PDB | O, C_TYR_49    | N, C_LYS_53    | H, C_LYS_53     | 2.90 | 2.09 | 16.92 |
| 4F33.PDB | OD2, C_ASP_82  | NE, C_ARG_61   | HE, C_ARG_61    | 2.88 | 2.06 | 14.32 |
| 4F33.PDB | OD1, C_ASP_82  | NH2, C_ARG_61  | HH21, C_ARG_61  | 2.91 | 2.08 | 14.25 |
| 4F33.PDB | O, C_THR_74    | N, C_SER_63    | H, C_SER_63     | 2.94 | 2.17 | 23.62 |
| 4F33.PDB | O, C_ALA_26    | ND2, C_ASN_69  | HD21, C_ASN_69  | 2.94 | 2.09 | 4.35  |
| 4F33.PDB | O, C_CYS_24    | N, C_TYR_71    | H, C_TYR_71     | 2.98 | 2.13 | 6.28  |
| 4F33.PDB | O, C_VAL_30    | OH, C_TYR_71   | HH, C_TYR_71    | 2.83 | 2.11 | 24.09 |
| 4F33.PDB | O, C_SER_65    | N, C_SER_72    | H, C_SER_72     | 2.76 | 1.92 | 10.63 |
| 4F33.PDB | O, C_MET_22    | N, C_LEU_73    | H, C_LEU_73     | 2.91 | 2.10 | 15.81 |
| 4F33.PDB | O, C_SER_63    | N, C_THR_74    | H, C_THR_74     | 2.85 | 2.00 | 8.73  |
| 4F33.PDB | OG1, C_THR_21  | OG1, C_THR_74  | HG1, C_THR_74   | 2.68 | 1.93 | 19.90 |
| 4F33.PDB | O, C_VAL_20    | N, C_ILE_75    | H, C_ILE_75     | 2.88 | 2.07 | 17.51 |
| 4F33.PDB | O, C_ARG_61    | N, C_SER_76    | H, C_SER_76     | 2.77 | 1.94 | 14.06 |
| 4F33.PDB | O, C_GLU_18    | N, C_VAL_78    | H, C_VAL_78     | 2.97 | 2.17 | 18.03 |
| 4F33.PDB | OD2, C_ASP_82  | N, C_GLU_79    | H, C_GLU_79     | 2.86 | 2.02 | 10.29 |
| 4F33.PDB | O, C_GLU_79    | N, C_ASP_82    | H, C_ASP_82     | 2.89 | 2.04 | 7.80  |
| 4F33.PDB | O, C_GLN_38    | N, C_THR_85    | H, C_THR_85     | 2.95 | 2.11 | 9.52  |
| 4F33.PDB | O, C_THR_102   | N, C_TYR_86    | H, C_TYR_86     | 2.85 | 2.02 | 13.04 |
| 4F33.PDB | O, C_TYR_36    | N, C_TYR_87    | H, C_TYR_87     | 2.85 | 2.03 | 14.78 |
| 4F33.PDB | O, C_TYR_32    | NE1, C_TRP_91  | HE1, C_TRP_91   | 2.75 | 1.98 | 22.25 |
| 4F33.PDB | O, D_TYR_60    | NE2, C_HIS_94  | HE2, C_HIS_94   | 2.75 | 2.00 | 24.62 |
| 4F33.PDB | O, C_ILE_3     | OG1, C_THR_97  | HG1, C_THR_97   | 2.89 | 2.10 | 13.01 |
| 4F33.PDB | O, C_CYS_88    | N, C_GLY_99    | H, C_GLY_99     | 2.82 | 2.00 | 15.41 |
| 4F33.PDB | OE1, C_GLN_7   | N, C_GLY_101   | H, C_GLY_101    | 2.82 | 2.04 | 21.32 |
| 4F33.PDB | O, C_TYR_86    | N, C_THR_102   | H, C_THR_102    | 2.90 | 2.08 | 14.65 |
| 4F33.PDB | O, C_PRO_9     | OG1, C_THR_102 | HG1, C_THR_102  | 2.73 | 1.96 | 16.75 |
| 4F33.PDB | O, C_ALA_10    | N, C_LYS_103   | H, C_LYS_103    | 2.87 | 2.02 | 9.78  |
| 4F33.PDB | O, C_ALA_84    | N, C_VAL_104   | H, C_VAL_104    | 2.85 | 1.99 | 3.00  |
| 4F33.PDB | O, C_MET_12    | N, C_GLU_105   | H, C_GLU_105    | 2.79 | 1.94 | 5.03  |
| 4F33.PDB | OE1, C_GLN_166 | N, C_ILE_106   | H, C_ILE_106    | 2.86 | 2.01 | 8.73  |
| 4F33.PDB | O, C_ALA_14    | N, C_LYS_107   | H, C_LYS_107    | 2.76 | 1.93 | 12.89 |
| 4F33.PDB | OG, C_SER_13   | NZ, C_LYS_107  | HZ3, C_LYS_107  | 2.78 | 1.89 | 2.73  |
| 4F33.PDB | O, C_THR_109   | NE, C_ARG_108  | HE, C_ARG_108   | 2.78 | 1.92 | 5.15  |
| 4F33.PDB | O, C_ASP_170   | NH1, C_ARG_108 | HH11, C_ARG_108 | 2.94 | 2.11 | 12.58 |
| 4F33.PDB | O, C_TYR_140   | N, C_ALA_111   | H, C_ALA_111    | 2.88 | 2.05 | 12.17 |
| 4F33.PDB | O, C_LEU_135   | N, C_PHE_116   | H, C_PHE_116    | 2.88 | 2.08 | 18.08 |
| 4F33.PDB | O, C_VAL_133   | N, C_PHE_118   | H, C_PHE_118    | 2.80 | 1.99 | 16.53 |
| 4F33.PDB | OG, C_SER_131  | NE2, C_GLN_124 | HE22, C_GLN_124 | 2.83 | 1.97 | 4.97  |
| 4F33.PDB | O, C_GLN_124   | N, C_SER_127   | H, C_SER_127    | 2.84 | 2.05 | 19.55 |
| 4F33.PDB | O, C_LEU_125   | N, C_GLY_128   | H, C_GLY_128    | 2.88 | 2.04 | 11.07 |
| 4F33.PDB | O, C_LEU_181   | N, C_ALA_130   | H, C_ALA_130    | 2.79 | 1.95 | 9.71  |
| 4F33.PDB | OE1, C_GLN_124 | N, C_SER_131   | H, C_SER_131    | 2.98 | 2.18 | 18.03 |
| 4F33.PDB | O, C_LEU_179   | N, C_VAL_132   | H, C_VAL_132    | 2.83 | 2.00 | 12.70 |
| 4F33.PDB | O, C_SER_177   | N, C_CYS_134   | H, C_CYS_134    | 2.82 | 1.97 | 5.76  |
| 4F33.PDB | O, C_PHE_116   | N, C_LEU_135   | H, C_LEU_135    | 2.74 | 1.89 | 9.47  |
| 4F33.PDB | O, C_LEU_175   | N, C_LEU_136   | H, C_LEU_136    | 2.76 | 1.91 | 7.00  |
| 4F33.PDB | O, C_SER_114   | N, C_ASN_137   | H, C_ASN_137    | 2.81 | 1.98 | 13.13 |
| 4F33.PDB | O, C_TYR_173   | N, C_PHE_139   | H, C_PHE_139    | 2.86 | 2.04 | 15.11 |
| 4F33.PDB | O, C_ALA_111   | N, C_TYR_140   | H, C_TYR_140    | 2.92 | 2.12 | 17.57 |
| 4F33.PDB | O, C_GLU_195   | N, C_GLN_147   | H, C_GLN_147    | 2.86 | 2.02 | 11.56 |
| 4F33.PDB | OG, C_SER_177  | NE1, C_TRP_148 | HE1, C_TRP_148  | 2.93 | 2.10 | 14.22 |
| 4F33.PDB | O, C_ALA_193   | N, C_LYS_149   | H, C_LYS_149    | 2.87 | 2.03 | 10.70 |
| 4F33.PDB | OE1, C_GLU_195 | NZ, C_LYS_149  | HZ2, C_LYS_149  | 2.67 | 1.88 | 22.11 |
| 4F33.PDB | O, C_VAL_191   | N, C_ASP_151   | H, C_ASP_151    | 2.76 | 1.93 | 12.00 |
| 4F33.PDB | O, C_VAL_150   | N, C_ALA_153   | H, C_ALA_153    | 2.82 | 1.97 | 7.87  |
| 4F33.PDB | O, C_TRP_148   | N, C_GLN_155   | H, C_GLN_155    | 2.94 | 2.10 | 11.34 |
| 4F33.PDB | OE1, C_GLN_155 | ND2, C_ASN_158 | HD22, C_ASN_158 | 2.91 | 2.09 | 15.33 |

|          |                |                |                 |      |      |       |
|----------|----------------|----------------|-----------------|------|------|-------|
| 4F33.PDB | O, C_SER.176   | N, C_SER.162   | H, C_SER.162    | 2.97 | 2.18 | 19.59 |
| 4F33.PDB | O, D_PRO.173   | OG, C_SER.162  | HG, C_SER.162   | 2.78 | 2.07 | 25.83 |
| 4F33.PDB | O, C_SER.174   | N, C_THR.164   | H, C_THR.164    | 2.96 | 2.13 | 12.36 |
| 4F33.PDB | O, C_SER.171   | NE2, C_GLN.166 | HE21, C_GLN.166 | 2.98 | 2.16 | 14.32 |
| 4F33.PDB | O, C_ILE.106   | NE2, C_GLN.166 | HE22, C_GLN.166 | 2.67 | 1.89 | 20.30 |
| 4F33.PDB | O, C_THR.172   | N, C_ASP.167   | H, C_ASP.167    | 2.93 | 2.09 | 7.56  |
| 4F33.PDB | OD1, C_ASP.167 | N, C_LYS.169   | H, C_LYS.169    | 2.61 | 1.77 | 10.10 |
| 4F33.PDB | OD1, C_ASP.170 | N, C_THR.172   | H, C_THR.172    | 2.87 | 2.04 | 12.16 |
| 4F33.PDB | OD1, C_ASP.170 | OG1, C_THR.172 | HG1, C_THR.172  | 2.72 | 1.91 | 5.07  |
| 4F33.PDB | O, C_PHE.139   | N, C_TYR.173   | H, C_TYR.173    | 2.83 | 2.00 | 13.92 |
| 4F33.PDB | OG1, C_THR.164 | N, C_SER.174   | H, C_SER.174    | 2.96 | 2.12 | 9.60  |
| 4F33.PDB | O, C_LEU.136   | N, C_LEU.175   | H, C_LEU.175    | 2.83 | 2.02 | 15.79 |
| 4F33.PDB | O, C_SER.162   | N, C_SER.176   | H, C_SER.176    | 2.89 | 2.07 | 14.79 |
| 4F33.PDB | O, C_CYS.134   | N, C_SER.177   | H, C_SER.177    | 2.90 | 2.08 | 14.93 |
| 4F33.PDB | O, C_GLN.160   | N, C_THR.178   | H, C_THR.178    | 2.90 | 2.07 | 13.20 |
| 4F33.PDB | O, C_VAL.132   | N, C_LEU.179   | H, C_LEU.179    | 2.84 | 2.04 | 17.52 |
| 4F33.PDB | O, C_ASN.158   | N, C_THR.180   | H, C_THR.180    | 2.93 | 2.09 | 10.99 |
| 4F33.PDB | O, C_ALA.130   | N, C_LEU.181   | H, C_LEU.181    | 2.89 | 2.06 | 12.78 |
| 4F33.PDB | O, C_GLY.128   | N, C_LYS.183   | H, C_LYS.183    | 2.87 | 2.02 | 7.20  |
| 4F33.PDB | OG, C_SER.182  | N, C_ASP.185   | H, C_ASP.185    | 2.76 | 1.98 | 21.47 |
| 4F33.PDB | O, C_SER.182   | N, C_TYR.186   | H, C_TYR.186    | 2.81 | 1.98 | 11.89 |
| 4F33.PDB | OD2, C_ASP.151 | N, C_LYS.190   | H, C_LYS.190    | 2.88 | 2.06 | 14.40 |
| 4F33.PDB | OD1, C_ASP.151 | N, C_VAL.191   | H, C_VAL.191    | 2.83 | 1.97 | 2.95  |
| 4F33.PDB | O, C_PHE.209   | N, C_TYR.192   | H, C_TYR.192    | 2.95 | 2.11 | 11.22 |
| 4F33.PDB | O, C_LYS.149   | N, C_ALA.193   | H, C_ALA.193    | 2.88 | 2.09 | 19.06 |
| 4F33.PDB | O, C_LYS.207   | N, C_CYS.194   | H, C_CYS.194    | 2.93 | 2.15 | 21.61 |
| 4F33.PDB | O, C_GLN.147   | N, C_GLU.195   | H, C_GLU.195    | 2.81 | 1.98 | 11.88 |
| 4F33.PDB | O, C_VAL.205   | N, C_VAL.196   | H, C_VAL.196    | 2.70 | 1.88 | 13.56 |
| 4F33.PDB | O, C_LYS.145   | N, C_THR.197   | H, C_THR.197    | 2.85 | 2.02 | 13.13 |
| 4F33.PDB | O, C_HIS.198   | N, C_LEU.201   | H, C_LEU.201    | 2.84 | 1.98 | 4.52  |
| 4F33.PDB | O, C_VAL.196   | N, C_VAL.205   | H, C_VAL.205    | 2.89 | 2.08 | 16.55 |
| 4F33.PDB | O, C_TYR.192   | N, C_PHE.209   | H, C_PHE.209    | 2.97 | 2.18 | 20.47 |
| 4F33.PDB | O, C_LYS.190   | N, C_ARG.211   | H, C_ARG.211    | 2.85 | 2.00 | 9.23  |
| 4F33.PDB | O, C_HIS.189   | NE, C_ARG.211  | HE, C_ARG.211   | 2.85 | 2.00 | 3.91  |
| 4F33.PDB | O, D_SER.25    | N, D_GLN.3     | H, D_GLN.3      | 2.93 | 2.12 | 15.40 |
| 4F33.PDB | O, D_LYS.23    | N, D_GLN.5     | H, D_GLN.5      | 2.87 | 2.02 | 5.59  |
| 4F33.PDB | O, D_TYR.94    | NE2, D_GLN.6   | HE22, D_GLN.6   | 2.88 | 2.07 | 16.36 |
| 4F33.PDB | O, D_PRO.114   | N, D_GLU.10    | H, D_GLU.10     | 2.90 | 2.11 | 19.09 |
| 4F33.PDB | O, D_THR.116   | N, D_GLU.12    | H, D_GLU.12     | 2.98 | 2.19 | 19.88 |
| 4F33.PDB | O, D_LEU.86    | N, D_GLY.15    | H, D_GLY.15     | 2.74 | 1.92 | 14.74 |
| 4F33.PDB | O, D_LEU.83    | N, D_VAL.18    | H, D_VAL.18     | 2.96 | 2.19 | 22.61 |
| 4F33.PDB | O, D_MET.81    | N, D_ILE.20    | H, D_ILE.20     | 2.89 | 2.06 | 12.32 |
| 4F33.PDB | OG, D_SER.7    | N, D_SER.21    | H, D_SER.21     | 2.90 | 2.06 | 8.88  |
| 4F33.PDB | O, D_ALA.79    | N, D_CYS.22    | H, D_CYS.22     | 2.83 | 2.09 | 25.29 |
| 4F33.PDB | O, D_GLN.5     | N, D_LYS.23    | H, D_LYS.23     | 2.75 | 1.91 | 10.41 |
| 4F33.PDB | O, D_SER.77    | N, D_ALA.24    | H, D_ALA.24     | 2.92 | 2.07 | 4.90  |
| 4F33.PDB | O, D_GLN.3     | N, D_SER.25    | H, D_SER.25     | 2.94 | 2.12 | 15.81 |
| 4F33.PDB | O, D_SER.28    | N, D_GLY.31    | H, D_GLY.31     | 2.96 | 2.11 | 6.44  |
| 4F33.PDB | O, D_GLY.99    | N, D_THR.33    | H, D_THR.33     | 2.96 | 2.15 | 17.63 |
| 4F33.PDB | O, D_ALA.97    | N, D_ASN.35    | H, D_ASN.35     | 2.79 | 1.98 | 15.45 |
| 4F33.PDB | O, D_PHE.95    | N, D_VAL.37    | H, D_VAL.37     | 2.84 | 2.04 | 17.56 |
| 4F33.PDB | O, D_GLU.46    | N, D_LYS.38    | H, D_LYS.38     | 2.82 | 2.00 | 14.83 |
| 4F33.PDB | O, D_GLU.89    | NZ, D_LYS.38   | HZ1, D_LYS.38   | 2.95 | 2.06 | 6.08  |
| 4F33.PDB | O, D_VAL.93    | N, D_GLN.39    | H, D_GLN.39     | 2.83 | 1.98 | 3.65  |
| 4F33.PDB | OE1, C_GLN.38  | NE2, D_GLN.39  | HE22, D_GLN.39  | 2.89 | 2.03 | 5.23  |
| 4F33.PDB | O, D_SER.40    | N, D_LYS.43    | H, D_LYS.43     | 2.91 | 2.09 | 14.92 |
| 4F33.PDB | O, D_LYS.38    | N, D_GLU.46    | H, D_GLU.46     | 2.91 | 2.09 | 16.01 |
| 4F33.PDB | O, D_TRP.36    | N, D_ILE.48    | H, D_ILE.48     | 2.86 | 2.02 | 11.41 |

|          |                |                |                 |      |      |       |
|----------|----------------|----------------|-----------------|------|------|-------|
| 4F33.PDB | O, D_SER_59    | N, D_LEU_50    | H, D_LEU_50     | 2.88 | 2.10 | 20.07 |
| 4F33.PDB | O, D_MET_34    | N, D_ILE_51    | H, D_ILE_51     | 2.90 | 2.09 | 16.54 |
| 4F33.PDB | O, D_ALA_57    | N, D_THR_52    | H, D_THR_52     | 2.93 | 2.11 | 14.70 |
| 4F33.PDB | O, D_THR_52    | N, D_GLY_56    | H, D_GLY_56     | 2.90 | 2.15 | 24.29 |
| 4F33.PDB | OD1, D_ASN_55  | N, D_ALA_57    | H, D_ALA_57     | 2.90 | 2.05 | 6.42  |
| 4F33.PDB | O, D_LEU_50    | N, D_SER_59    | H, D_SER_59     | 2.88 | 2.07 | 17.59 |
| 4F33.PDB | O, D_ILE_48    | N, D_ASN_61    | H, D_ASN_61     | 2.92 | 2.10 | 15.21 |
| 4F33.PDB | O, D_TRP_47    | ND2, D_ASN_61  | HD21, D_ASN_61  | 2.96 | 2.14 | 14.14 |
| 4F33.PDB | OE2, D_GLU_46  | NZ, D_LYS_63   | HZ3, D_LYS_63   | 2.60 | 1.76 | 15.82 |
| 4F33.PDB | O, D_ASN_61    | N, D_PHE_64    | H, D_PHE_64     | 2.75 | 1.91 | 9.55  |
| 4F33.PDB | OD2, D_ASP_90  | NZ, D_LYS_67   | HZ2, D_LYS_67   | 2.76 | 2.03 | 29.11 |
| 4F33.PDB | O, D_PHE_64    | N, D_ALA_68    | H, D_ALA_68     | 2.91 | 2.10 | 17.71 |
| 4F33.PDB | O, D_ASP_82    | N, D_THR_69    | H, D_THR_69     | 2.88 | 2.12 | 23.04 |
| 4F33.PDB | OH, D_TYR_60   | N, D_LEU_70    | H, D_LEU_70     | 2.83 | 1.99 | 10.08 |
| 4F33.PDB | O, D_THR_78    | N, D_ASP_73    | H, D_ASP_73     | 2.75 | 1.92 | 11.81 |
| 4F33.PDB | O, D_CYS_22    | N, D_ALA_79    | H, D_ALA_79     | 2.88 | 2.07 | 15.38 |
| 4F33.PDB | O, D_THR_71    | N, D_TYR_80    | H, D_TYR_80     | 2.77 | 1.92 | 5.85  |
| 4F33.PDB | O, D_ILE_20    | N, D_MET_81    | H, D_MET_81     | 2.97 | 2.15 | 15.01 |
| 4F33.PDB | O, D_THR_69    | N, D_ASP_82    | H, D_ASP_82     | 2.90 | 2.08 | 13.98 |
| 4F33.PDB | O, D_VAL_18    | N, D_LEU_83    | H, D_LEU_83     | 2.77 | 1.94 | 12.96 |
| 4F33.PDB | O, D_LYS_67    | N, D_LEU_84    | H, D_LEU_84     | 2.92 | 2.10 | 15.11 |
| 4F33.PDB | O, D_ALA_16    | N, D_LEU_86    | H, D_LEU_86     | 2.90 | 2.05 | 7.92  |
| 4F33.PDB | OD2, D_ASP_90  | N, D_THR_87    | H, D_THR_87     | 2.84 | 2.02 | 15.18 |
| 4F33.PDB | O, D_THR_87    | N, D_ASP_90    | H, D_ASP_90     | 2.90 | 2.06 | 10.57 |
| 4F33.PDB | O, D_SER_88    | N, D_SER_91    | H, D_SER_91     | 2.97 | 2.12 | 5.73  |
| 4F33.PDB | O, D_VAL_115   | N, D_ALA_92    | H, D_ALA_92     | 2.97 | 2.21 | 24.68 |
| 4F33.PDB | O, D_THR_113   | N, D_TYR_94    | H, D_TYR_94     | 2.85 | 2.00 | 9.44  |
| 4F33.PDB | O, D_VAL_37    | N, D_PHE_95    | H, D_PHE_95     | 2.78 | 1.94 | 9.26  |
| 4F33.PDB | O, D_ASN_35    | N, D_ALA_97    | H, D_ALA_97     | 2.87 | 2.11 | 23.35 |
| 4F33.PDB | O, D_TYR_108   | N, D_ARG_98    | H, D_ARG_98     | 2.83 | 2.05 | 21.19 |
| 4F33.PDB | OD2, D_ASP_107 | NH2, D_ARG_98  | HH21, D_ARG_98  | 2.74 | 1.89 | 7.29  |
| 4F33.PDB | O, D_THR_33    | N, D_GLY_99    | H, D_GLY_99     | 2.93 | 2.09 | 9.33  |
| 4F33.PDB | OD1, D_ASP_102 | NE, D_ARG_104  | HE, D_ARG_104   | 2.89 | 2.05 | 10.59 |
| 4F33.PDB | OD2, D_ASP_107 | NH1, D_ARG_104 | HH11, D_ARG_104 | 2.83 | 2.01 | 15.77 |
| 4F33.PDB | OD2, D_ASP_102 | NH2, D_ARG_104 | HH21, D_ARG_104 | 2.91 | 2.10 | 15.53 |
| 4F33.PDB | O, D_CYS_96    | N, D_GLY_110   | H, D_GLY_110    | 2.76 | 1.90 | 5.93  |
| 4F33.PDB | OE1, D_GLN_6   | N, D_GLY_112   | H, D_GLY_112    | 2.92 | 2.15 | 21.82 |
| 4F33.PDB | O, D_TYR_94    | N, D_THR_113   | H, D_THR_113    | 2.83 | 2.03 | 18.15 |
| 4F33.PDB | O, D_SER_7     | OG1, D_THR_113 | HG1, D_THR_113  | 2.79 | 2.01 | 15.83 |
| 4F33.PDB | O, D_ALA_92    | N, D_VAL_115   | H, D_VAL_115    | 2.80 | 1.95 | 9.13  |
| 4F33.PDB | O, D_GLU_10    | N, D_THR_116   | H, D_THR_116    | 2.95 | 2.12 | 11.31 |
| 4F33.PDB | OG, D_SER_91   | N, D_VAL_117   | H, D_VAL_117    | 2.81 | 1.98 | 11.24 |
| 4F33.PDB | O, D_GLU_12    | N, D_SER_118   | H, D_SER_118    | 2.89 | 2.09 | 17.84 |
| 4F33.PDB | O, D_PHE_152   | N, D_LYS_123   | H, D_LYS_123    | 2.79 | 1.97 | 13.96 |
| 4F33.PDB | O, D_ASP_150   | NZ, D_LYS_123  | HZ2, D_LYS_123  | 2.85 | 2.02 | 18.34 |
| 4F33.PDB | OE2, E_GLU_123 | N, D_GLY_124   | H, D_GLY_124    | 2.84 | 1.99 | 7.85  |
| 4F33.PDB | O, D_LYS_149   | N, D_SER_126   | H, D_SER_126    | 2.92 | 2.12 | 17.54 |
| 4F33.PDB | O, D_LEU_147   | N, D_PHE_128   | H, D_PHE_128    | 2.91 | 2.07 | 11.82 |
| 4F33.PDB | O, D_GLY_145   | N, D_LEU_130   | H, D_LEU_130    | 2.69 | 1.84 | 6.30  |
| 4F33.PDB | OG, D_SER_136  | N, D_SER_133   | H, D_SER_133    | 2.93 | 2.12 | 15.23 |
| 4F33.PDB | OG, D_SER_133  | N, D_LYS_135   | H, D_LYS_135    | 2.86 | 2.06 | 18.00 |
| 4F33.PDB | O, D_SER_133   | OG1, D_THR_137 | HG1, D_THR_137  | 2.93 | 2.22 | 24.93 |
| 4F33.PDB | O, D_SER_138   | N, D_THR_141   | H, D_THR_141    | 2.86 | 2.02 | 10.67 |
| 4F33.PDB | O, D_VAL_190   | N, D_ALA_142   | H, D_ALA_142    | 2.79 | 1.94 | 3.93  |
| 4F33.PDB | O, D_SER_136   | N, D_ALA_143   | H, D_ALA_143    | 2.80 | 1.98 | 13.96 |
| 4F33.PDB | O, D_VAL_188   | N, D_LEU_144   | H, D_LEU_144    | 2.99 | 2.17 | 15.33 |
| 4F33.PDB | O, D_LEU_130   | N, D_GLY_145   | H, D_GLY_145    | 2.95 | 2.17 | 22.25 |
| 4F33.PDB | O, D_PHE_128   | N, D_LEU_147   | H, D_LEU_147    | 2.85 | 2.01 | 10.25 |

|          |                |                |                 |      |      |       |
|----------|----------------|----------------|-----------------|------|------|-------|
| 4F33.PDB | O, D_LEU_184   | N, D_VAL_148   | H, D_VAL_148    | 2.76 | 1.91 | 9.22  |
| 4F33.PDB | O, D_SER_126   | N, D_LYS_149   | H, D_LYS_149    | 2.79 | 1.93 | 3.93  |
| 4F33.PDB | O, D_LYS_123   | N, D_PHE_152   | H, D_PHE_152    | 2.96 | 2.17 | 18.86 |
| 4F33.PDB | O, D_ASN_203   | N, D_SER_159   | H, D_SER_159    | 2.92 | 2.12 | 18.15 |
| 4F33.PDB | OG, D_SER_186  | NE1, D_TRP_160 | HE1, D_TRP_160  | 3.00 | 2.15 | 9.78  |
| 4F33.PDB | O, D_ILE_201   | N, D_ASN_161   | H, D_ASN_161    | 2.81 | 1.96 | 10.06 |
| 4F33.PDB | OD1, D_ASN_203 | N, D_SER_162   | H, D_SER_162    | 2.79 | 1.98 | 16.60 |
| 4F33.PDB | O, D_TRP_160   | N, D_GLY_163   | H, D_GLY_163    | 2.90 | 2.14 | 23.00 |
| 4F33.PDB | O, D_VAL_187   | N, D_HIS_170   | H, D_HIS_170    | 2.79 | 1.95 | 11.73 |
| 4F33.PDB | O, D_SER_185   | N, D_PHE_172   | H, D_PHE_172    | 2.98 | 2.14 | 9.15  |
| 4F33.PDB | O, D_SER_183   | N, D_VAL_175   | H, D_VAL_175    | 2.91 | 2.09 | 14.44 |
| 4F33.PDB | O, D_LEU_181   | N, D_GLN_177   | H, D_GLN_177    | 2.85 | 2.00 | 7.10  |
| 4F33.PDB | OD1, D_ASP_150 | NE2, D_GLN_177 | HE22, D_GLN_177 | 2.86 | 2.09 | 21.57 |
| 4F33.PDB | O, D_TYR_151   | N, D_TYR_182   | H, D_TYR_182    | 2.82 | 1.97 | 7.39  |
| 4F33.PDB | O, D_VAL_148   | N, D_LEU_184   | H, D_LEU_184    | 2.89 | 2.08 | 17.21 |
| 4F33.PDB | O, D_CYS_146   | N, D_SER_186   | H, D_SER_186    | 2.93 | 2.11 | 15.37 |
| 4F33.PDB | O, D_HIS_170   | N, D_VAL_187   | H, D_VAL_187    | 2.83 | 2.00 | 11.95 |
| 4F33.PDB | O, D_LEU_144   | N, D_VAL_188   | H, D_VAL_188    | 2.81 | 2.00 | 17.23 |
| 4F33.PDB | O, D_ALA_142   | N, D_VAL_190   | H, D_VAL_190    | 2.77 | 1.95 | 14.72 |
| 4F33.PDB | O, D_GLY_140   | N, D_SER_192   | H, D_SER_192    | 2.86 | 2.02 | 8.26  |
| 4F33.PDB | O, D_PRO_191   | N, D_SER_194   | H, D_SER_194    | 2.92 | 2.08 | 9.17  |
| 4F33.PDB | O, D_SER_194   | N, D_GLN_198   | H, D_GLN_198    | 2.75 | 1.89 | 2.92  |
| 4F33.PDB | OD1, D_ASN_161 | N, D_ILE_201   | H, D_ILE_201    | 2.80 | 1.96 | 10.93 |
| 4F33.PDB | O, D_LYS_215   | N, D_CYS_202   | H, D_CYS_202    | 2.93 | 2.15 | 21.05 |
| 4F33.PDB | O, D_SER_159   | N, D_ASN_203   | H, D_ASN_203    | 2.77 | 1.92 | 5.28  |
| 4F33.PDB | O, D_VAL_213   | N, D_VAL_204   | H, D_VAL_204    | 2.77 | 1.93 | 9.54  |
| 4F33.PDB | O, D_THR_157   | N, D_ASN_205   | H, D_ASN_205    | 2.87 | 2.02 | 7.57  |
| 4F33.PDB | O, D_THR_211   | N, D_HIS_206   | H, D_HIS_206    | 2.84 | 1.99 | 6.89  |
| 4F33.PDB | O, D_PRO_153   | NE2, D_HIS_206 | HE2, D_HIS_206  | 2.81 | 1.97 | 10.37 |
| 4F33.PDB | O, D_LYS_207   | N, D_ASN_210   | H, D_ASN_210    | 2.91 | 2.08 | 12.71 |
| 4F33.PDB | O, F_ASP_214   | N, D_LYS_212   | H, D_LYS_212    | 2.98 | 2.15 | 12.10 |
| 4F33.PDB | O, D_VAL_204   | N, D_VAL_213   | H, D_VAL_213    | 2.79 | 1.97 | 13.65 |
| 4F33.PDB | O, F_LYS_212   | N, D_ASP_214   | H, D_ASP_214    | 2.85 | 2.03 | 14.94 |
| 4F33.PDB | O, D_CYS_202   | N, D_LYS_215   | H, D_LYS_215    | 2.96 | 2.16 | 17.33 |
| 4F33.PDB | OE1, C_GLU_123 | NZ, D_LYS_215  | HZ1, D_LYS_215  | 2.79 | 1.99 | 22.47 |
| 4F33.PDB | OG1, F_THR_211 | NZ, D_LYS_215  | HZ2, D_LYS_215  | 2.86 | 1.99 | 10.67 |
| 4F33.PDB | O, F_ASN_210   | N, D_LYS_216   | H, D_LYS_216    | 2.98 | 2.16 | 15.42 |
| 4F33.PDB | O, D_TYR_200   | N, D_VAL_217   | H, D_VAL_217    | 2.85 | 2.00 | 8.55  |
| 4F33.PDB | OG, E_SER_27   | N, E_GLU_4     | H, E_GLU_4      | 2.92 | 2.11 | 16.14 |
| 4F33.PDB | O, E_SER_25    | N, E_THR_6     | H, E_THR_6      | 2.78 | 1.92 | 4.96  |
| 4F33.PDB | O, E_TYR_86    | NE2, E_GLN_7   | HE22, E_GLN_7   | 2.94 | 2.17 | 22.59 |
| 4F33.PDB | O, E_THR_23    | N, E_SER_8     | H, E_SER_8      | 2.92 | 2.12 | 16.81 |
| 4F33.PDB | O, E_LYS_103   | N, E_MET_12    | H, E_MET_12     | 2.82 | 1.98 | 10.01 |
| 4F33.PDB | O, E_GLU_105   | N, E_ALA_14    | H, E_ALA_14     | 2.97 | 2.16 | 16.60 |
| 4F33.PDB | OE2, E_GLU_18  | N, E_SER_15    | H, E_SER_15     | 2.79 | 1.94 | 7.58  |
| 4F33.PDB | O, E_VAL_78    | N, E_GLY_17    | H, E_GLY_17     | 2.81 | 2.00 | 17.52 |
| 4F33.PDB | OG1, E_THR_74  | OG1, E_THR_21  | HG1, E_THR_21   | 2.80 | 2.03 | 17.05 |
| 4F33.PDB | O, E_LEU_73    | N, E_MET_22    | H, E_MET_22     | 2.92 | 2.09 | 12.31 |
| 4F33.PDB | O, E_SER_8     | N, E_THR_23    | H, E_THR_23     | 2.82 | 1.97 | 8.66  |
| 4F33.PDB | O, E_TYR_71    | N, E_CYS_24    | H, E_CYS_24     | 2.67 | 1.82 | 5.57  |
| 4F33.PDB | O, E_THR_6     | N, E_SER_25    | H, E_SER_25     | 2.85 | 2.00 | 8.30  |
| 4F33.PDB | O, E_ASN_69    | N, E_ALA_26    | H, E_ALA_26     | 2.80 | 1.95 | 9.70  |
| 4F33.PDB | O, E_GLN_89    | N, E_HIS_34    | H, E_HIS_34     | 2.94 | 2.08 | 4.58  |
| 4F33.PDB | O, E_ILE_48    | N, E_TRP_35    | H, E_TRP_35     | 2.69 | 1.88 | 16.85 |
| 4F33.PDB | O, E_TYR_87    | N, E_TYR_36    | H, E_TYR_36     | 2.80 | 1.97 | 13.97 |
| 4F33.PDB | O, E_LYS_45    | N, E_GLN_37    | H, E_GLN_37     | 2.87 | 2.09 | 20.05 |
| 4F33.PDB | O, E_THR_85    | N, E_GLN_38    | H, E_GLN_38     | 2.87 | 2.05 | 13.42 |
| 4F33.PDB | O, E_THR_42    | NE2, E_GLN_38  | HE21, E_GLN_38  | 2.90 | 2.07 | 12.17 |

|          |                |                |                 |      |      |       |
|----------|----------------|----------------|-----------------|------|------|-------|
| 4F33.PDB | O, E_GLU_81    | NZ, E_LYS_39   | HZ1, E_LYS_39   | 2.82 | 1.96 | 12.79 |
| 4F33.PDB | O, E_ASP_83    | NZ, E_LYS_39   | HZ3, E_LYS_39   | 2.75 | 1.95 | 21.71 |
| 4F33.PDB | O, E_LYS_39    | OG1, E_THR_42  | HG1, E_THR_42   | 2.99 | 2.17 | 4.21  |
| 4F33.PDB | O, F_GLY_110   | OG, E_SER_43   | HG, E_SER_43    | 2.52 | 1.83 | 27.97 |
| 4F33.PDB | O, E_GLN_37    | N, E_LYS_45    | H, E_LYS_45     | 2.74 | 1.96 | 19.86 |
| 4F33.PDB | O, F_ARG_104   | NH1, E_ARG_46  | HH11, E_ARG_46  | 2.85 | 2.03 | 15.38 |
| 4F33.PDB | O, E_TRP_35    | N, E_TRP_47    | H, E_TRP_47     | 2.82 | 2.04 | 19.57 |
| 4F33.PDB | O, E_LYS_53    | N, E_TYR_49    | H, E_TYR_49     | 2.74 | 1.93 | 17.49 |
| 4F33.PDB | O, E_MET_33    | N, E_THR_51    | H, E_THR_51     | 2.76 | 1.93 | 12.30 |
| 4F33.PDB | O, E_ASP_50    | N, E_SER_52    | H, E_SER_52     | 2.85 | 2.14 | 29.22 |
| 4F33.PDB | O, E_TYR_49    | N, E_LYS_53    | H, E_LYS_53     | 2.87 | 2.09 | 20.53 |
| 4F33.PDB | O, E_TRP_47    | N, E_ALA_55    | H, E_ALA_55     | 2.97 | 2.11 | 5.56  |
| 4F33.PDB | OD2, E_ASP_82  | NE, E_ARG_61   | HE, E_ARG_61    | 2.93 | 2.08 | 6.42  |
| 4F33.PDB | OD1, E_ASP_82  | NH2, E_ARG_61  | HH21, E_ARG_61  | 2.82 | 1.98 | 9.42  |
| 4F33.PDB | O, E_THR_74    | N, E_SER_63    | H, E_SER_63     | 2.96 | 2.20 | 24.19 |
| 4F33.PDB | O, E_ALA_26    | ND2, E_ASN_69  | HD21, E_ASN_69  | 2.90 | 2.05 | 3.08  |
| 4F33.PDB | O, E_CYS_24    | N, E_TYR_71    | H, E_TYR_71     | 2.86 | 2.02 | 8.43  |
| 4F33.PDB | O, E_VAL_30    | OH, E_TYR_71   | HH, E_TYR_71    | 2.89 | 2.18 | 25.55 |
| 4F33.PDB | O, E_SER_65    | N, E_SER_72    | H, E_SER_72     | 2.76 | 1.93 | 12.78 |
| 4F33.PDB | O, E_SER_63    | N, E_THR_74    | H, E_THR_74     | 2.80 | 1.96 | 11.27 |
| 4F33.PDB | O, E_VAL_20    | N, E_ILE_75    | H, E_ILE_75     | 2.91 | 2.09 | 15.96 |
| 4F33.PDB | O, E_ARG_61    | N, E_SER_76    | H, E_SER_76     | 2.77 | 1.96 | 15.82 |
| 4F33.PDB | O, E_GLU_18    | N, E_VAL_78    | H, E_VAL_78     | 2.84 | 2.06 | 21.38 |
| 4F33.PDB | OD2, E_ASP_82  | N, E_GLU_79    | H, E_GLU_79     | 2.86 | 2.00 | 3.08  |
| 4F33.PDB | O, E_GLU_79    | N, E_ASP_82    | H, E_ASP_82     | 2.87 | 2.03 | 9.88  |
| 4F33.PDB | O, E_GLN_38    | N, E_THR_85    | H, E_THR_85     | 2.88 | 2.04 | 8.55  |
| 4F33.PDB | O, E_THR_102   | N, E_TYR_86    | H, E_TYR_86     | 2.86 | 2.02 | 10.02 |
| 4F33.PDB | O, E_TYR_36    | N, E_TYR_87    | H, E_TYR_87     | 2.88 | 2.07 | 16.48 |
| 4F33.PDB | OG1, E_THR_97  | NE2, E_GLN_90  | HE21, E_GLN_90  | 2.99 | 2.17 | 14.98 |
| 4F33.PDB | O, E_TYR_32    | NE1, E_TRP_91  | HE1, E_TRP_91   | 2.73 | 1.95 | 21.71 |
| 4F33.PDB | O, E_ILE_3     | OG1, E_THR_97  | HG1, E_THR_97   | 2.76 | 1.96 | 11.49 |
| 4F33.PDB | O, E_CYS_88    | N, E_GLY_99    | H, E_GLY_99     | 2.76 | 1.93 | 12.97 |
| 4F33.PDB | OE1, E_GLN_7   | N, E_GLY_101   | H, E_GLY_101    | 2.77 | 2.01 | 24.02 |
| 4F33.PDB | O, E_TYR_86    | N, E_THR_102   | H, E_THR_102    | 2.88 | 2.06 | 14.06 |
| 4F33.PDB | O, E_PRO_9     | OG1, E_THR_102 | HG1, E_THR_102  | 2.74 | 1.97 | 16.27 |
| 4F33.PDB | O, E_ALA_10    | N, E_LYS_103   | H, E_LYS_103    | 2.83 | 1.99 | 8.80  |
| 4F33.PDB | O, E_ALA_84    | N, E_VAL_104   | H, E_VAL_104    | 2.84 | 1.98 | 6.54  |
| 4F33.PDB | O, E_MET_12    | N, E_GLU_105   | H, E_GLU_105    | 2.75 | 1.90 | 5.61  |
| 4F33.PDB | OE1, E_GLN_166 | N, E_ILE_106   | H, E_ILE_106    | 2.88 | 2.05 | 11.13 |
| 4F33.PDB | O, E_ALA_14    | N, E_LYS_107   | H, E_LYS_107    | 2.77 | 1.92 | 7.71  |
| 4F33.PDB | O, E_THR_109   | NE, E_ARG_108  | HE, E_ARG_108   | 2.78 | 1.92 | 2.02  |
| 4F33.PDB | O, E_ASP_170   | NH1, E_ARG_108 | HH11, E_ARG_108 | 2.88 | 2.05 | 12.27 |
| 4F33.PDB | O, E_TYR_140   | N, E_ALA_111   | H, E_ALA_111    | 2.93 | 2.09 | 9.90  |
| 4F33.PDB | O, E_LEU_135   | N, E_PHE_116   | H, E_PHE_116    | 2.88 | 2.07 | 17.28 |
| 4F33.PDB | O, E_VAL_133   | N, E_PHE_118   | H, E_PHE_118    | 2.80 | 2.05 | 23.65 |
| 4F33.PDB | OG, E_SER_131  | NE2, E_GLN_124 | HE22, E_GLN_124 | 2.81 | 1.95 | 4.17  |
| 4F33.PDB | O, E_GLN_124   | N, E_SER_127   | H, E_SER_127    | 2.86 | 2.13 | 27.30 |
| 4F33.PDB | O, E_LEU_125   | N, E_GLY_128   | H, E_GLY_128    | 2.83 | 1.98 | 9.86  |
| 4F33.PDB | O, E_LEU_181   | N, E_ALA_130   | H, E_ALA_130    | 2.74 | 1.89 | 8.05  |
| 4F33.PDB | O, E_LEU_179   | N, E_VAL_132   | H, E_VAL_132    | 2.80 | 1.98 | 14.92 |
| 4F33.PDB | O, E_SER_177   | N, E_CYS_134   | H, E_CYS_134    | 2.85 | 2.00 | 9.73  |
| 4F33.PDB | O, E_PHE_116   | N, E_LEU_135   | H, E_LEU_135    | 2.83 | 1.99 | 7.95  |
| 4F33.PDB | O, E_LEU_175   | N, E_LEU_136   | H, E_LEU_136    | 2.79 | 1.94 | 6.94  |
| 4F33.PDB | O, E_SER_114   | N, E_ASN_137   | H, E_ASN_137    | 2.80 | 1.99 | 16.39 |
| 4F33.PDB | O, E_TYR_173   | N, E_PHE_139   | H, E_PHE_139    | 2.88 | 2.07 | 16.01 |
| 4F33.PDB | O, E_ALA_111   | N, E_TYR_140   | H, E_TYR_140    | 2.90 | 2.10 | 17.94 |
| 4F33.PDB | O, E_GLU_195   | N, E_GLN_147   | H, E_GLN_147    | 2.86 | 2.03 | 12.56 |
| 4F33.PDB | OG, E_SER_177  | NE1, E_TRP_148 | HE1, E_TRP_148  | 2.88 | 2.05 | 13.86 |

|          |                |                |                 |      |      |       |
|----------|----------------|----------------|-----------------|------|------|-------|
| 4F33.PDB | O, E_ALA_193   | N, E_LYS_149   | H, E_LYS_149    | 2.81 | 1.97 | 9.94  |
| 4F33.PDB | OE1, E_GLU_195 | NZ, E_LYS_149  | HZ2, E_LYS_149  | 2.77 | 1.97 | 22.37 |
| 4F33.PDB | O, E_VAL_191   | N, E_ASP_151   | H, E_ASP_151    | 2.76 | 1.93 | 11.74 |
| 4F33.PDB | O, E_VAL_150   | N, E_ALA_153   | H, E_ALA_153    | 2.93 | 2.08 | 7.11  |
| 4F33.PDB | O, E_TRP_148   | N, E_GLN_155   | H, E_GLN_155    | 2.90 | 2.06 | 11.04 |
| 4F33.PDB | OE1, E_GLN_155 | ND2, E_ASN_158 | HD22, E_ASN_158 | 2.91 | 2.08 | 12.67 |
| 4F33.PDB | O, F_LEU_176   | NE2, E_GLN_160 | HE22, E_GLN_160 | 2.93 | 2.08 | 4.21  |
| 4F33.PDB | O, E_SER_176   | N, E_SER_162   | H, E_SER_162    | 2.99 | 2.20 | 20.78 |
| 4F33.PDB | O, F_PRO_173   | OG, E_SER_162  | HG, E_SER_162   | 2.63 | 1.89 | 21.98 |
| 4F33.PDB | O, E_SER_174   | N, E_THR_164   | H, E_THR_164    | 2.96 | 2.13 | 13.63 |
| 4F33.PDB | O, E_SER_171   | NE2, E_GLN_166 | HE21, E_GLN_166 | 2.92 | 2.10 | 16.16 |
| 4F33.PDB | O, E_ILE_106   | NE2, E_GLN_166 | HE22, E_GLN_166 | 2.70 | 1.91 | 18.56 |
| 4F33.PDB | O, E_THR_172   | N, E_ASP_167   | H, E_ASP_167    | 2.96 | 2.11 | 9.67  |
| 4F33.PDB | OD1, E_ASP_170 | N, E_THR_172   | H, E_THR_172    | 2.87 | 2.07 | 17.42 |
| 4F33.PDB | OD1, E_ASP_170 | OG1, E_THR_172 | HG1, E_THR_172  | 2.66 | 1.85 | 7.41  |
| 4F33.PDB | O, E_PHE_139   | N, E_TYR_173   | H, E_TYR_173    | 2.81 | 1.97 | 10.48 |
| 4F33.PDB | OG1, E_THR_164 | N, E_SER_174   | H, E_SER_174    | 3.00 | 2.15 | 8.96  |
| 4F33.PDB | O, E_LEU_136   | N, E_LEU_175   | H, E_LEU_175    | 2.88 | 2.07 | 16.14 |
| 4F33.PDB | O, E_SER_162   | N, E_SER_176   | H, E_SER_176    | 2.95 | 2.12 | 13.93 |
| 4F33.PDB | O, E_CYS_134   | N, E_SER_177   | H, E_SER_177    | 2.89 | 2.07 | 14.26 |
| 4F33.PDB | O, E_GLN_160   | N, E_THR_178   | H, E_THR_178    | 2.90 | 2.07 | 12.50 |
| 4F33.PDB | O, E_VAL_132   | N, E_LEU_179   | H, E_LEU_179    | 2.83 | 2.00 | 13.32 |
| 4F33.PDB | O, E_ASN_158   | N, E_THR_180   | H, E_THR_180    | 2.97 | 2.13 | 9.98  |
| 4F33.PDB | O, E_ALA_130   | N, E_LEU_181   | H, E_LEU_181    | 2.88 | 2.04 | 11.81 |
| 4F33.PDB | O, E_GLY_128   | N, E_LYS_183   | H, E_LYS_183    | 2.91 | 2.08 | 11.41 |
| 4F33.PDB | OG, E_SER_182  | N, E_ASP_185   | H, E_ASP_185    | 2.89 | 2.05 | 12.49 |
| 4F33.PDB | O, E_SER_182   | N, E_TYR_186   | H, E_TYR_186    | 2.82 | 2.00 | 13.68 |
| 4F33.PDB | O, E_LYS_183   | N, E_GLU_187   | H, E_GLU_187    | 2.88 | 2.09 | 19.35 |
| 4F33.PDB | OD1, E_ASP_151 | N, E_VAL_191   | H, E_VAL_191    | 2.77 | 1.93 | 8.77  |
| 4F33.PDB | O, E_PHE_209   | N, E_TYR_192   | H, E_TYR_192    | 2.98 | 2.13 | 8.15  |
| 4F33.PDB | O, E_LYS_149   | N, E_ALA_193   | H, E_ALA_193    | 2.88 | 2.08 | 18.56 |
| 4F33.PDB | O, E_LYS_207   | N, E_CYS_194   | H, E_CYS_194    | 2.96 | 2.17 | 20.79 |
| 4F33.PDB | O, E_GLN_147   | N, E_GLU_195   | H, E_GLU_195    | 2.74 | 1.90 | 10.88 |
| 4F33.PDB | O, E_VAL_205   | N, E_VAL_196   | H, E_VAL_196    | 2.72 | 1.89 | 12.46 |
| 4F33.PDB | ND1, E_HIS_198 | N, E_GLY_200   | H, E_GLY_200    | 2.98 | 2.12 | 5.22  |
| 4F33.PDB | O, E_HIS_198   | N, E_LEU_201   | H, E_LEU_201    | 2.84 | 1.99 | 5.31  |
| 4F33.PDB | O, E_VAL_196   | N, E_VAL_205   | H, E_VAL_205    | 2.92 | 2.09 | 13.32 |
| 4F33.PDB | O, E_TYR_192   | N, E_PHE_209   | H, E_PHE_209    | 2.94 | 2.17 | 22.18 |
| 4F33.PDB | O, E_LYS_190   | N, E_ARG_211   | H, E_ARG_211    | 2.74 | 1.94 | 17.57 |
| 4F33.PDB | O, E_HIS_189   | NE, E_ARG_211  | HE, E_ARG_211   | 2.92 | 2.09 | 14.00 |
| 4F33.PDB | O, F_SER_25    | N, F_GLN_3     | H, F_GLN_3      | 2.92 | 2.09 | 11.79 |
| 4F33.PDB | O, F_LYS_23    | N, F_GLN_5     | H, F_GLN_5      | 2.85 | 2.00 | 7.55  |
| 4F33.PDB | O, F_TYR_94    | NE2, F_GLN_6   | HE22, F_GLN_6   | 2.86 | 2.05 | 16.42 |
| 4F33.PDB | O, F_PRO_114   | N, F_GLU_10    | H, F_GLU_10     | 2.96 | 2.18 | 21.47 |
| 4F33.PDB | O, F_THR_116   | N, F_GLU_12    | H, F_GLU_12     | 2.95 | 2.15 | 17.10 |
| 4F33.PDB | O, F_LEU_86    | N, F_GLY_15    | H, F_GLY_15     | 2.68 | 1.85 | 13.71 |
| 4F33.PDB | O, F_LEU_83    | N, F_VAL_18    | H, F_VAL_18     | 2.99 | 2.22 | 23.08 |
| 4F33.PDB | O, F_MET_81    | N, F_ILE_20    | H, F_ILE_20     | 2.85 | 2.01 | 12.08 |
| 4F33.PDB | OG, F_SER_7    | N, F_SER_21    | H, F_SER_21     | 2.96 | 2.12 | 10.03 |
| 4F33.PDB | O, F_GLN_5     | N, F_LYS_23    | H, F_LYS_23     | 2.77 | 1.93 | 10.80 |
| 4F33.PDB | O, F_SER_77    | N, F_ALA_24    | H, F_ALA_24     | 2.90 | 2.05 | 6.06  |
| 4F33.PDB | O, F_GLN_3     | N, F_SER_25    | H, F_SER_25     | 2.87 | 2.06 | 15.90 |
| 4F33.PDB | O, A_GLY_60    | N, F_PHE_29    | H, F_PHE_29     | 2.97 | 2.18 | 20.00 |
| 4F33.PDB | O, F_GLY_99    | N, F_THR_33    | H, F_THR_33     | 2.87 | 2.06 | 15.66 |
| 4F33.PDB | O, F_ALA_97    | N, F_ASN_35    | H, F_ASN_35     | 2.80 | 1.96 | 10.72 |
| 4F33.PDB | O, F_PHE_95    | N, F_VAL_37    | H, F_VAL_37     | 2.82 | 2.02 | 18.07 |
| 4F33.PDB | O, F_GLU_46    | N, F_LYS_38    | H, F_LYS_38     | 2.79 | 1.98 | 16.31 |
| 4F33.PDB | O, F_GLU_89    | NZ, F_LYS_38   | HZ1, F_LYS_38   | 2.88 | 2.00 | 2.60  |

|          |                |                |                 |      |      |       |
|----------|----------------|----------------|-----------------|------|------|-------|
| 4F33.PDB | O, F_VAL_93    | N, F_GLN_39    | H, F_GLN_39     | 2.84 | 1.98 | 5.27  |
| 4F33.PDB | OE1, E_GLN_38  | NE2, F_GLN_39  | HE22, F_GLN_39  | 2.92 | 2.06 | 5.53  |
| 4F33.PDB | O, F_SER_40    | N, F_LYS_43    | H, F_LYS_43     | 2.90 | 2.09 | 15.21 |
| 4F33.PDB | O, F_LYS_38    | N, F_GLU_46    | H, F_GLU_46     | 2.89 | 2.10 | 18.91 |
| 4F33.PDB | O, F_TRP_36    | N, F_ILE_48    | H, F_ILE_48     | 2.82 | 1.97 | 6.48  |
| 4F33.PDB | O, F_SER_59    | N, F_LEU_50    | H, F_LEU_50     | 2.90 | 2.11 | 20.04 |
| 4F33.PDB | O, F_MET_34    | N, F_ILE_51    | H, F_ILE_51     | 2.90 | 2.10 | 17.75 |
| 4F33.PDB | O, F_ALA_57    | N, F_THR_52    | H, F_THR_52     | 2.97 | 2.15 | 14.94 |
| 4F33.PDB | O, F_THR_52    | N, F_GLY_56    | H, F_GLY_56     | 2.93 | 2.22 | 29.15 |
| 4F33.PDB | OD1, F_ASN_55  | N, F_ALA_57    | H, F_ALA_57     | 2.86 | 2.00 | 3.80  |
| 4F33.PDB | O, F_LEU_50    | N, F_SER_59    | H, F_SER_59     | 2.89 | 2.09 | 17.90 |
| 4F33.PDB | O, F_ILE_48    | N, F_ASN_61    | H, F_ASN_61     | 2.97 | 2.17 | 18.69 |
| 4F33.PDB | O, F_TRP_47    | ND2, F_ASN_61  | HD21, F_ASN_61  | 2.90 | 2.07 | 11.50 |
| 4F33.PDB | OE2, F_GLU_46  | NZ, F_LYS_63   | HZ3, F_LYS_63   | 2.68 | 1.79 | 3.79  |
| 4F33.PDB | O, F_ASN_61    | N, F_PHE_64    | H, F_PHE_64     | 2.81 | 1.98 | 12.75 |
| 4F33.PDB | OD2, F_ASP_90  | NZ, F_LYS_67   | HZ2, F_LYS_67   | 2.98 | 2.09 | 4.59  |
| 4F33.PDB | O, F_LEU_84    | NZ, F_LYS_67   | HZ3, F_LYS_67   | 2.88 | 2.01 | 9.79  |
| 4F33.PDB | O, F_PHE_64    | N, F_ALA_68    | H, F_ALA_68     | 2.89 | 2.09 | 17.94 |
| 4F33.PDB | O, F_ASP_82    | N, F_THR_69    | H, F_THR_69     | 2.89 | 2.11 | 21.20 |
| 4F33.PDB | OH, F_TYR_60   | N, F_LEU_70    | H, F_LEU_70     | 2.85 | 2.00 | 7.63  |
| 4F33.PDB | O, F_THR_78    | N, F_ASP_73    | H, F_ASP_73     | 2.73 | 1.90 | 11.77 |
| 4F33.PDB | O, F_CYS_22    | N, F_ALA_79    | H, F_ALA_79     | 2.88 | 2.06 | 15.43 |
| 4F33.PDB | O, F_THR_71    | N, F_TYR_80    | H, F_TYR_80     | 2.81 | 1.96 | 9.04  |
| 4F33.PDB | O, F_ILE_20    | N, F_MET_81    | H, F_MET_81     | 2.93 | 2.11 | 15.35 |
| 4F33.PDB | O, F_THR_69    | N, F_ASP_82    | H, F_ASP_82     | 2.94 | 2.10 | 11.40 |
| 4F33.PDB | O, F_VAL_18    | N, F_LEU_83    | H, F_LEU_83     | 2.81 | 1.97 | 10.47 |
| 4F33.PDB | O, F_LYS_67    | N, F_LEU_84    | H, F_LEU_84     | 2.89 | 2.09 | 17.45 |
| 4F33.PDB | O, F_ALA_16    | N, F_LEU_86    | H, F_LEU_86     | 2.91 | 2.07 | 9.18  |
| 4F33.PDB | OD2, F_ASP_90  | N, F_THR_87    | H, F_THR_87     | 2.85 | 2.02 | 12.72 |
| 4F33.PDB | O, F_THR_87    | N, F_ASP_90    | H, F_ASP_90     | 2.83 | 1.99 | 10.62 |
| 4F33.PDB | O, F_VAL_115   | N, F_ALA_92    | H, F_ALA_92     | 2.97 | 2.26 | 28.93 |
| 4F33.PDB | O, F_THR_113   | N, F_TYR_94    | H, F_TYR_94     | 2.92 | 2.08 | 8.53  |
| 4F33.PDB | O, F_VAL_37    | N, F_PHE_95    | H, F_PHE_95     | 2.78 | 1.94 | 9.71  |
| 4F33.PDB | O, F_ASN_35    | N, F_ALA_97    | H, F_ALA_97     | 2.84 | 2.08 | 24.00 |
| 4F33.PDB | O, F_TYR_108   | N, F_ARG_98    | H, F_ARG_98     | 2.82 | 2.03 | 20.08 |
| 4F33.PDB | OD1, F_ASP_107 | NE, F_ARG_98   | HE, F_ARG_98    | 2.99 | 2.13 | 4.74  |
| 4F33.PDB | OD2, F_ASP_107 | NH2, F_ARG_98  | HH21, F_ARG_98  | 2.77 | 1.91 | 5.42  |
| 4F33.PDB | O, F_THR_33    | N, F_GLY_99    | H, F_GLY_99     | 2.97 | 2.13 | 11.08 |
| 4F33.PDB | OD1, F_ASP_102 | NE, F_ARG_104  | HE, F_ARG_104   | 2.84 | 1.99 | 7.33  |
| 4F33.PDB | OD2, F_ASP_107 | NH1, F_ARG_104 | HH11, F_ARG_104 | 2.84 | 2.02 | 14.35 |
| 4F33.PDB | OD2, F_ASP_102 | NH2, F_ARG_104 | HH21, F_ARG_104 | 2.90 | 2.10 | 17.22 |
| 4F33.PDB | OH, E_TYR_36   | N, F_PHE_106   | H, F_PHE_106    | 2.80 | 1.96 | 9.30  |
| 4F33.PDB | O, F_CYS_96    | N, F_GLY_110   | H, F_GLY_110    | 2.75 | 1.90 | 3.11  |
| 4F33.PDB | OE1, F_GLN_6   | N, F_GLY_112   | H, F_GLY_112    | 2.83 | 2.05 | 20.58 |
| 4F33.PDB | O, F_TYR_94    | N, F_THR_113   | H, F_THR_113    | 2.80 | 2.02 | 20.38 |
| 4F33.PDB | O, F_SER_7     | OG1, F_THR_113 | HG1, F_THR_113  | 2.84 | 2.08 | 18.41 |
| 4F33.PDB | O, F_ALA_92    | N, F_VAL_115   | H, F_VAL_115    | 2.82 | 1.98 | 10.24 |
| 4F33.PDB | OG, F_SER_91   | N, F_VAL_117   | H, F_VAL_117    | 2.84 | 2.00 | 11.18 |
| 4F33.PDB | O, F_GLU_12    | N, F_SER_118   | H, F_SER_118    | 2.89 | 2.09 | 17.44 |
| 4F33.PDB | O, F_PHE_152   | N, F_LYS_123   | H, F_LYS_123    | 2.81 | 1.98 | 13.07 |
| 4F33.PDB | O, F_ASP_150   | NZ, F_LYS_123  | HZ2, F_LYS_123  | 2.85 | 2.01 | 15.13 |
| 4F33.PDB | OE2, C_GLU_123 | N, F_GLY_124   | H, F_GLY_124    | 2.81 | 1.96 | 5.00  |
| 4F33.PDB | O, F_LYS_149   | N, F_SER_126   | H, F_SER_126    | 2.90 | 2.09 | 15.48 |
| 4F33.PDB | O, F_LEU_147   | N, F_PHE_128   | H, F_PHE_128    | 2.87 | 2.04 | 12.96 |
| 4F33.PDB | O, F_GLY_145   | N, F_LEU_130   | H, F_LEU_130    | 2.73 | 1.88 | 6.31  |
| 4F33.PDB | OG, F_SER_136  | N, F_SER_133   | H, F_SER_133    | 2.95 | 2.13 | 15.24 |
| 4F33.PDB | OG, F_SER_133  | N, F_LYS_135   | H, F_LYS_135    | 2.90 | 2.11 | 20.53 |
| 4F33.PDB | O, F_SER_133   | OG1, F_THR_137 | HG1, F_THR_137  | 2.95 | 2.23 | 24.52 |



|          |                |                |                 |      |      |       |
|----------|----------------|----------------|-----------------|------|------|-------|
| 4F33.PDB | O, F_SER_138   | N, F_THR_141   | H, F_THR_141    | 2.81 | 1.97 | 11.04 |
| 4F33.PDB | O, F_VAL_190   | N, F_ALA_142   | H, F_ALA_142    | 2.77 | 1.91 | 4.10  |
| 4F33.PDB | O, F_SER_136   | N, F_ALA_143   | H, F_ALA_143    | 2.80 | 1.97 | 12.99 |
| 4F33.PDB | O, F_LEU_130   | N, F_GLY_145   | H, F_GLY_145    | 2.92 | 2.16 | 24.09 |
| 4F33.PDB | O, F_PHE_128   | N, F_LEU_147   | H, F_LEU_147    | 2.82 | 1.98 | 9.09  |
| 4F33.PDB | O, F_LEU_184   | N, F_VAL_148   | H, F_VAL_148    | 2.76 | 1.91 | 9.03  |
| 4F33.PDB | O, F_SER_126   | N, F_LYS_149   | H, F_LYS_149    | 2.76 | 1.90 | 3.32  |
| 4F33.PDB | O, F_LYS_123   | N, F_PHE_152   | H, F_PHE_152    | 2.93 | 2.12 | 17.02 |
| 4F33.PDB | O, F_ASN_203   | N, F_SER_159   | H, F_SER_159    | 2.97 | 2.16 | 16.38 |
| 4F33.PDB | OG, F_SER_186  | NE1, F_TRP_160 | HE1, F_TRP_160  | 3.00 | 2.15 | 9.04  |
| 4F33.PDB | O, F_ILE_201   | N, F_ASN_161   | H, F_ASN_161    | 2.83 | 1.99 | 9.71  |
| 4F33.PDB | OD1, F_ASN_203 | N, F_SER_162   | H, F_SER_162    | 2.79 | 1.98 | 16.87 |
| 4F33.PDB | O, F_TRP_160   | N, F_GLY_163   | H, F_GLY_163    | 2.90 | 2.14 | 23.82 |
| 4F33.PDB | O, F_VAL_187   | N, F_HIS_170   | H, F_HIS_170    | 2.79 | 1.95 | 11.88 |
| 4F33.PDB | O, F_SER_185   | N, F_PHE_172   | H, F_PHE_172    | 2.94 | 2.09 | 4.01  |
| 4F33.PDB | O, F_SER_183   | N, F_VAL_175   | H, F_VAL_175    | 2.90 | 2.08 | 14.72 |
| 4F33.PDB | O, F_LEU_181   | N, F_GLN_177   | H, F_GLN_177    | 2.83 | 1.98 | 7.25  |
| 4F33.PDB | OD1, F_ASP_150 | NE2, F_GLN_177 | HE22, F_GLN_177 | 2.82 | 2.02 | 17.76 |
| 4F33.PDB | O, F_TYR_151   | N, F_TYR_182   | H, F_TYR_182    | 2.79 | 1.93 | 3.62  |
| 4F33.PDB | O, F_VAL_148   | N, F_LEU_184   | H, F_LEU_184    | 2.91 | 2.11 | 17.32 |
| 4F33.PDB | O, F_CYS_146   | N, F_SER_186   | H, F_SER_186    | 2.97 | 2.15 | 15.30 |
| 4F33.PDB | O, F_HIS_170   | N, F_VAL_187   | H, F_VAL_187    | 2.89 | 2.06 | 12.38 |
| 4F33.PDB | O, F_LEU_144   | N, F_VAL_188   | H, F_VAL_188    | 2.81 | 2.01 | 17.82 |
| 4F33.PDB | O, F_ALA_142   | N, F_VAL_190   | H, F_VAL_190    | 2.77 | 1.95 | 15.08 |
| 4F33.PDB | O, F_GLY_140   | N, F_SER_192   | H, F_SER_192    | 2.89 | 2.04 | 8.47  |
| 4F33.PDB | O, F_PRO_191   | N, F_SER_194   | H, F_SER_194    | 2.94 | 2.10 | 10.73 |
| 4F33.PDB | O, F_SER_194   | N, F_GLN_198   | H, F_GLN_198    | 2.74 | 1.88 | 2.67  |
| 4F33.PDB | O, F_THR_199   | NE2, F_GLN_198 | HE21, F_GLN_198 | 2.92 | 2.06 | 2.83  |
| 4F33.PDB | OD1, F_ASN_161 | N, F_ILE_201   | H, F_ILE_201    | 2.77 | 1.94 | 13.18 |
| 4F33.PDB | O, F_LYS_215   | N, F_CYS_202   | H, F_CYS_202    | 2.93 | 2.14 | 19.72 |
| 4F33.PDB | O, F_SER_159   | N, F_ASN_203   | H, F_ASN_203    | 2.82 | 1.96 | 5.68  |
| 4F33.PDB | OD1, F_ASP_214 | ND2, F_ASN_203 | HD21, F_ASN_203 | 2.95 | 2.10 | 8.40  |
| 4F33.PDB | O, F_VAL_213   | N, F_VAL_204   | H, F_VAL_204    | 2.74 | 1.89 | 7.26  |
| 4F33.PDB | O, F_THR_157   | N, F_ASN_205   | H, F_ASN_205    | 2.87 | 2.02 | 8.95  |
| 4F33.PDB | O, F_THR_211   | N, F_HIS_206   | H, F_HIS_206    | 2.87 | 2.02 | 7.60  |
| 4F33.PDB | OG, F_SER_209  | ND1, F_HIS_206 | HD1, F_HIS_206  | 2.64 | 1.82 | 13.68 |
| 4F33.PDB | O, F_PRO_153   | NE2, F_HIS_206 | HE2, F_HIS_206  | 2.81 | 1.97 | 9.86  |
| 4F33.PDB | O, F_LYS_207   | N, F_ASN_210   | H, F_ASN_210    | 2.97 | 2.15 | 14.98 |
| 4F33.PDB | O, D_ASP_214   | N, F_LYS_212   | H, F_LYS_212    | 2.94 | 2.11 | 12.64 |
| 4F33.PDB | O, F_VAL_204   | N, F_VAL_213   | H, F_VAL_213    | 2.85 | 2.02 | 13.27 |
| 4F33.PDB | O, D_LYS_212   | N, F_ASP_214   | H, F_ASP_214    | 2.84 | 2.02 | 14.84 |
| 4F33.PDB | O, F_CYS_202   | N, F_LYS_215   | H, F_LYS_215    | 2.92 | 2.10 | 15.07 |
| 4F33.PDB | OE1, E_GLU_123 | NZ, F_LYS_215  | HZ1, F_LYS_215  | 2.61 | 1.84 | 24.34 |
| 4F33.PDB | OG1, D_THR_211 | NZ, F_LYS_215  | HZ2, F_LYS_215  | 2.92 | 2.04 | 7.71  |
| 4F33.PDB | O, F_TYR_200   | N, F_VAL_217   | H, F_VAL_217    | 2.89 | 2.04 | 9.32  |
| 4F33.PDB | OG, G_SER_27   | N, G_GLU_4     | H, G_GLU_4      | 2.95 | 2.12 | 14.03 |
| 4F33.PDB | O, G_SER_25    | N, G_THR_6     | H, G_THR_6      | 2.78 | 1.93 | 4.59  |
| 4F33.PDB | O, G_TYR_86    | NE2, G_GLN_7   | HE22, G_GLN_7   | 2.90 | 2.13 | 22.62 |
| 4F33.PDB | O, G_THR_23    | N, G_SER_8     | H, G_SER_8      | 2.90 | 2.09 | 16.80 |
| 4F33.PDB | O, G_LYS_103   | N, G_MET_12    | H, G_MET_12     | 2.76 | 1.93 | 13.02 |
| 4F33.PDB | O, G_GLU_105   | N, G_ALA_14    | H, G_ALA_14     | 2.97 | 2.16 | 16.65 |
| 4F33.PDB | OE2, G_GLU_18  | N, G_SER_15    | H, G_SER_15     | 2.71 | 1.86 | 9.24  |
| 4F33.PDB | O, G_VAL_78    | N, G_GLY_17    | H, G_GLY_17     | 2.81 | 2.01 | 18.15 |
| 4F33.PDB | O, G_ILE_75    | N, G_VAL_20    | H, G_VAL_20     | 2.96 | 2.19 | 21.57 |
| 4F33.PDB | OG1, G_THR_74  | OG1, G_THR_21  | HG1, G_THR_21   | 2.73 | 1.97 | 18.47 |
| 4F33.PDB | O, G_SER_8     | N, G_THR_23    | H, G_THR_23     | 2.83 | 1.99 | 8.78  |
| 4F33.PDB | O, G_TYR_71    | N, G_CYS_24    | H, G_CYS_24     | 2.68 | 1.82 | 4.01  |
| 4F33.PDB | O, G_THR_6     | N, G_SER_25    | H, G_SER_25     | 2.81 | 1.96 | 7.25  |

|          |                |                |                 |      |      |       |
|----------|----------------|----------------|-----------------|------|------|-------|
| 4F33.PDB | O, G_ASN_69    | N, G_ALA_26    | H, G_ALA_26     | 2.79 | 1.95 | 9.77  |
| 4F33.PDB | O, G_GLN_89    | N, G_HIS_34    | H, G_HIS_34     | 2.98 | 2.11 | 0.46  |
| 4F33.PDB | O, G_ILE_48    | N, G_TRP_35    | H, G_TRP_35     | 2.66 | 1.84 | 13.67 |
| 4F33.PDB | O, G_TYR_87    | N, G_TYR_36    | H, G_TYR_36     | 2.77 | 1.96 | 14.84 |
| 4F33.PDB | O, G_LYS_45    | N, G_GLN_37    | H, G_GLN_37     | 2.88 | 2.13 | 24.53 |
| 4F33.PDB | O, G_THR_85    | N, G_GLN_38    | H, G_GLN_38     | 2.82 | 1.98 | 9.18  |
| 4F33.PDB | O, G_THR_42    | NE2, G_GLN_38  | HE21, G_GLN_38  | 2.88 | 2.05 | 12.56 |
| 4F33.PDB | O, G_GLU_81    | NZ, G_LYS_39   | HZ1, G_LYS_39   | 2.81 | 1.93 | 9.10  |
| 4F33.PDB | O, G_ASP_83    | NZ, G_LYS_39   | HZ3, G_LYS_39   | 2.78 | 1.91 | 11.96 |
| 4F33.PDB | O, G_GLN_37    | N, G_LYS_45    | H, G_LYS_45     | 2.77 | 1.97 | 18.28 |
| 4F33.PDB | O, G_TRP_35    | N, G_TRP_47    | H, G_TRP_47     | 2.83 | 2.03 | 17.67 |
| 4F33.PDB | O, G_LYS_53    | N, G_TYR_49    | H, G_TYR_49     | 2.75 | 1.94 | 15.45 |
| 4F33.PDB | O, G_MET_33    | N, G_THR_51    | H, G_THR_51     | 2.73 | 1.90 | 12.70 |
| 4F33.PDB | O, G_ASP_50    | N, G_SER_52    | H, G_SER_52     | 2.85 | 2.13 | 28.17 |
| 4F33.PDB | O, G_TYR_49    | N, G_LYS_53    | H, G_LYS_53     | 2.86 | 2.08 | 20.69 |
| 4F33.PDB | O, G_TRP_47    | N, G_ALA_55    | H, G_ALA_55     | 2.97 | 2.12 | 4.41  |
| 4F33.PDB | OD1, G_ASP_82  | NH2, G_ARG_61  | HH21, G_ARG_61  | 2.73 | 1.89 | 8.68  |
| 4F33.PDB | OE2, G_GLU_81  | NH2, G_ARG_61  | HH22, G_ARG_61  | 2.96 | 2.16 | 17.92 |
| 4F33.PDB | O, G_THR_74    | N, G_SER_63    | H, G_SER_63     | 2.95 | 2.19 | 22.57 |
| 4F33.PDB | O, G_ALA_26    | ND2, G_ASN_69  | HD21, G_ASN_69  | 2.91 | 2.05 | 4.65  |
| 4F33.PDB | O, G_SER_67    | N, G_SER_70    | H, G_SER_70     | 2.98 | 2.13 | 6.01  |
| 4F33.PDB | O, G_CYS_24    | N, G_TYR_71    | H, G_TYR_71     | 2.90 | 2.05 | 8.92  |
| 4F33.PDB | O, G_VAL_30    | OH, G_TYR_71   | HH, G_TYR_71    | 2.88 | 2.15 | 24.02 |
| 4F33.PDB | O, G_SER_65    | N, G_SER_72    | H, G_SER_72     | 2.77 | 1.93 | 11.28 |
| 4F33.PDB | O, G_SER_63    | N, G_THR_74    | H, G_THR_74     | 2.79 | 1.96 | 12.22 |
| 4F33.PDB | O, G_VAL_20    | N, G_ILE_75    | H, G_ILE_75     | 2.92 | 2.11 | 16.41 |
| 4F33.PDB | O, G_ARG_61    | N, G_SER_76    | H, G_SER_76     | 2.80 | 1.98 | 14.52 |
| 4F33.PDB | O, G_GLU_18    | N, G_VAL_78    | H, G_VAL_78     | 2.74 | 1.99 | 24.30 |
| 4F33.PDB | OD2, G_ASP_82  | N, G_GLU_79    | H, G_GLU_79     | 2.87 | 2.02 | 5.18  |
| 4F33.PDB | O, G_GLU_79    | N, G_ASP_82    | H, G_ASP_82     | 2.87 | 2.04 | 11.79 |
| 4F33.PDB | O, G_GLN_38    | N, G_THR_85    | H, G_THR_85     | 2.89 | 2.05 | 11.10 |
| 4F33.PDB | O, G_THR_102   | N, G_TYR_86    | H, G_TYR_86     | 2.86 | 2.02 | 10.07 |
| 4F33.PDB | O, G_TYR_36    | N, G_TYR_87    | H, G_TYR_87     | 2.88 | 2.07 | 16.64 |
| 4F33.PDB | O, G_TYR_32    | NE1, G_TRP_91  | HE1, G_TRP_91   | 2.74 | 1.97 | 22.30 |
| 4F33.PDB | OE1, G_GLN_90  | N, G_LYS_93    | H, G_LYS_93     | 2.98 | 2.15 | 12.47 |
| 4F33.PDB | O, H_TYR_60    | NE2, G_HIS_94  | HE2, G_HIS_94   | 2.97 | 2.17 | 17.68 |
| 4F33.PDB | O, G_ILE_3     | OG1, G_THR_97  | HG1, G_THR_97   | 2.79 | 1.99 | 11.42 |
| 4F33.PDB | O, G_CYS_88    | N, G_GLY_99    | H, G_GLY_99     | 2.79 | 1.97 | 13.30 |
| 4F33.PDB | OE1, G_GLN_7   | N, G_GLY_101   | H, G_GLY_101    | 2.78 | 2.01 | 21.97 |
| 4F33.PDB | O, G_TYR_86    | N, G_THR_102   | H, G_THR_102    | 2.90 | 2.07 | 12.97 |
| 4F33.PDB | O, G_PRO_9     | OG1, G_THR_102 | HG1, G_THR_102  | 2.80 | 2.04 | 18.20 |
| 4F33.PDB | O, G_ALA_10    | N, G_LYS_103   | H, G_LYS_103    | 2.82 | 1.98 | 10.32 |
| 4F33.PDB | O, G_ALA_84    | N, G_VAL_104   | H, G_VAL_104    | 2.84 | 1.98 | 2.92  |
| 4F33.PDB | O, G_MET_12    | N, G_GLU_105   | H, G_GLU_105    | 2.77 | 1.92 | 6.46  |
| 4F33.PDB | OE1, G_GLN_166 | N, G_ILE_106   | H, G_ILE_106    | 2.88 | 2.04 | 11.50 |
| 4F33.PDB | O, G_ALA_14    | N, G_LYS_107   | H, G_LYS_107    | 2.80 | 1.96 | 9.94  |
| 4F33.PDB | O, G_THR_109   | NE, G_ARG_108  | HE, G_ARG_108   | 2.74 | 1.88 | 3.40  |
| 4F33.PDB | O, G_ASP_170   | NH1, G_ARG_108 | HH11, G_ARG_108 | 2.91 | 2.09 | 13.89 |
| 4F33.PDB | O, G_TYR_140   | N, G_ALA_111   | H, G_ALA_111    | 2.91 | 2.07 | 11.81 |
| 4F33.PDB | O, G_LEU_135   | N, G_PHE_116   | H, G_PHE_116    | 2.84 | 2.01 | 14.03 |
| 4F33.PDB | O, G_VAL_133   | N, G_PHE_118   | H, G_PHE_118    | 2.82 | 2.01 | 17.24 |
| 4F33.PDB | OG, G_SER_131  | NE2, G_GLN_124 | HE22, G_GLN_124 | 2.79 | 1.93 | 5.18  |
| 4F33.PDB | O, G_GLN_124   | N, G_SER_127   | H, G_SER_127    | 2.82 | 2.03 | 19.57 |
| 4F33.PDB | O, G_LEU_125   | N, G_GLY_128   | H, G_GLY_128    | 2.86 | 2.03 | 13.69 |
| 4F33.PDB | O, G_LEU_181   | N, G_ALA_130   | H, G_ALA_130    | 2.79 | 1.94 | 9.03  |
| 4F33.PDB | O, G_LEU_179   | N, G_VAL_132   | H, G_VAL_132    | 2.82 | 1.99 | 12.45 |
| 4F33.PDB | O, G_SER_177   | N, G_CYS_134   | H, G_CYS_134    | 2.82 | 1.98 | 10.53 |
| 4F33.PDB | O, G_PHE_116   | N, G_LEU_135   | H, G_LEU_135    | 2.78 | 1.93 | 9.33  |

|          |                |                |                 |      |      |       |
|----------|----------------|----------------|-----------------|------|------|-------|
| 4F33.PDB | O, G_LEU_175   | N, G_LEU_136   | H, G_LEU_136    | 2.79 | 1.94 | 5.85  |
| 4F33.PDB | O, G_SER_114   | N, G_ASN_137   | H, G_ASN_137    | 2.85 | 2.02 | 14.57 |
| 4F33.PDB | O, G_TYR_173   | N, G_PHE_139   | H, G_PHE_139    | 2.87 | 2.06 | 16.25 |
| 4F33.PDB | O, G_ALA_111   | N, G_TYR_140   | H, G_TYR_140    | 2.87 | 2.06 | 17.58 |
| 4F33.PDB | O, G_GLU_195   | N, G_GLN_147   | H, G_GLN_147    | 2.86 | 2.03 | 12.62 |
| 4F33.PDB | OG, G_SER_177  | NE1, G_TRP_148 | HE1, G_TRP_148  | 2.87 | 2.04 | 13.06 |
| 4F33.PDB | O, G_ALA_193   | N, G_LYS_149   | H, G_LYS_149    | 2.82 | 1.98 | 9.73  |
| 4F33.PDB | O, G_VAL_191   | N, G_ASP_151   | H, G_ASP_151    | 2.80 | 1.96 | 11.61 |
| 4F33.PDB | O, G_VAL_150   | N, G_ALA_153   | H, G_ALA_153    | 2.97 | 2.12 | 7.09  |
| 4F33.PDB | O, G_TRP_148   | N, G_GLN_155   | H, G_GLN_155    | 2.87 | 2.02 | 6.80  |
| 4F33.PDB | OE1, G_GLN_155 | ND2, G_ASN_158 | HD22, G_ASN_158 | 2.92 | 2.10 | 14.66 |
| 4F33.PDB | O, H_LEU_176   | NE2, G_GLN_160 | HE22, G_GLN_160 | 2.89 | 2.04 | 8.42  |
| 4F33.PDB | O, G_SER_176   | N, G_SER_162   | H, G_SER_162    | 2.99 | 2.22 | 21.55 |
| 4F33.PDB | O, H_PRO_173   | OG, G_SER_162  | HG, G_SER_162   | 2.65 | 1.94 | 25.59 |
| 4F33.PDB | O, G_SER_174   | N, G_THR_164   | H, G_THR_164    | 3.00 | 2.17 | 13.79 |
| 4F33.PDB | O, G_SER_171   | NE2, G_GLN_166 | HE21, G_GLN_166 | 2.92 | 2.09 | 14.25 |
| 4F33.PDB | O, G_LE_106    | NE2, G_GLN_166 | HE22, G_GLN_166 | 2.78 | 2.00 | 21.03 |
| 4F33.PDB | O, G_THR_172   | N, G_ASP_167   | H, G_ASP_167    | 3.00 | 2.15 | 7.80  |
| 4F33.PDB | OD1, G_ASP_167 | N, G_LYS_169   | H, G_LYS_169    | 2.59 | 1.77 | 13.16 |
| 4F33.PDB | OD1, G_ASP_170 | N, G_THR_172   | H, G_THR_172    | 2.88 | 2.07 | 16.47 |
| 4F33.PDB | OD1, G_ASP_170 | OG1, G_THR_172 | HG1, G_THR_172  | 2.69 | 1.89 | 8.34  |
| 4F33.PDB | O, G_PHE_139   | N, G_TYR_173   | H, G_TYR_173    | 2.81 | 1.97 | 8.53  |
| 4F33.PDB | OG1, G_THR_164 | N, G_SER_174   | H, G_SER_174    | 2.96 | 2.14 | 13.32 |
| 4F33.PDB | O, G_LEU_136   | N, G_LEU_175   | H, G_LEU_175    | 2.80 | 1.99 | 16.36 |
| 4F33.PDB | O, G_SER_162   | N, G_SER_176   | H, G_SER_176    | 2.93 | 2.11 | 14.30 |
| 4F33.PDB | O, G_CYS_134   | N, G_SER_177   | H, G_SER_177    | 2.88 | 2.06 | 13.62 |
| 4F33.PDB | O, G_GLN_160   | N, G_THR_178   | H, G_THR_178    | 2.92 | 2.10 | 14.24 |
| 4F33.PDB | O, G_VAL_132   | N, G_LEU_179   | H, G_LEU_179    | 2.85 | 2.02 | 12.70 |
| 4F33.PDB | O, G_ASN_158   | N, G_THR_180   | H, G_THR_180    | 2.97 | 2.14 | 11.60 |
| 4F33.PDB | O, G_ALA_130   | N, G_LEU_181   | H, G_LEU_181    | 2.90 | 2.07 | 12.18 |
| 4F33.PDB | O, G_GLY_128   | N, G_LYS_183   | H, G_LYS_183    | 2.88 | 2.04 | 9.29  |
| 4F33.PDB | OG, G_SER_182  | N, G_ASP_185   | H, G_ASP_185    | 2.89 | 2.09 | 18.06 |
| 4F33.PDB | O, G_SER_182   | N, G_TYR_186   | H, G_TYR_186    | 2.85 | 2.00 | 5.00  |
| 4F33.PDB | O, G_LYS_183   | N, G_GLU_187   | H, G_GLU_187    | 2.98 | 2.20 | 20.06 |
| 4F33.PDB | O, G_ASP_185   | N, G_LYS_188   | H, G_LYS_188    | 2.67 | 1.90 | 21.28 |
| 4F33.PDB | OD2, G_ASP_151 | ND1, G_HIS_189 | HD1, G_HIS_189  | 2.86 | 2.09 | 22.44 |
| 4F33.PDB | OD1, G_ASP_151 | N, G_VAL_191   | H, G_VAL_191    | 2.83 | 1.98 | 7.69  |
| 4F33.PDB | O, G_PHE_209   | N, G_TYR_192   | H, G_TYR_192    | 2.93 | 2.08 | 7.39  |
| 4F33.PDB | O, G_LYS_149   | N, G_ALA_193   | H, G_ALA_193    | 2.92 | 2.11 | 16.65 |
| 4F33.PDB | O, G_LYS_207   | N, G_CYS_194   | H, G_CYS_194    | 2.88 | 2.10 | 20.64 |
| 4F33.PDB | O, G_GLN_147   | N, G_GLU_195   | H, G_GLU_195    | 2.75 | 1.91 | 11.05 |
| 4F33.PDB | O, G_VAL_205   | N, G_VAL_196   | H, G_VAL_196    | 2.75 | 1.92 | 11.23 |
| 4F33.PDB | ND1, G_HIS_198 | N, G_GLY_200   | H, G_GLY_200    | 2.95 | 2.10 | 7.40  |
| 4F33.PDB | O, G_HIS_198   | N, G_LEU_201   | H, G_LEU_201    | 2.95 | 2.09 | 6.07  |
| 4F33.PDB | O, G_VAL_196   | N, G_VAL_205   | H, G_VAL_205    | 2.94 | 2.12 | 15.56 |
| 4F33.PDB | O, G_TYR_192   | N, G_PHE_209   | H, G_PHE_209    | 2.97 | 2.19 | 21.65 |
| 4F33.PDB | O, G_LYS_190   | N, G_ARG_211   | H, G_ARG_211    | 2.69 | 1.87 | 14.60 |
| 4F33.PDB | O, G_HIS_189   | NE, G_ARG_211  | HE, G_ARG_211   | 2.61 | 1.80 | 15.33 |
| 4F33.PDB | O, H_SER_25    | N, H_GLN_3     | H, H_GLN_3      | 2.95 | 2.13 | 15.35 |
| 4F33.PDB | O, H_LYS_23    | N, H_GLN_5     | H, H_GLN_5      | 2.86 | 2.00 | 5.15  |
| 4F33.PDB | O, H_TYR_94    | NE2, H_GLN_6   | HE22, H_GLN_6   | 2.90 | 2.09 | 16.65 |
| 4F33.PDB | O, H_SER_21    | N, H_SER_7     | H, H_SER_7      | 2.94 | 2.20 | 26.21 |
| 4F33.PDB | O, H_PRO_114   | N, H_GLU_10    | H, H_GLU_10     | 2.90 | 2.11 | 19.39 |
| 4F33.PDB | O, H_LEU_86    | N, H_GLY_15    | H, H_GLY_15     | 2.71 | 1.88 | 13.48 |
| 4F33.PDB | O, H_LEU_83    | N, H_VAL_18    | H, H_VAL_18     | 2.99 | 2.23 | 23.20 |
| 4F33.PDB | O, H_MET_81    | N, H_ILE_20    | H, H_ILE_20     | 2.88 | 2.05 | 13.37 |
| 4F33.PDB | O, H_GLN_5     | N, H_LYS_23    | H, H_LYS_23     | 2.75 | 1.91 | 8.98  |
| 4F33.PDB | O, H_SER_77    | N, H_ALA_24    | H, H_ALA_24     | 2.91 | 2.05 | 3.04  |

|          |                |                |                 |      |      |       |
|----------|----------------|----------------|-----------------|------|------|-------|
| 4F33.PDB | O, H_GLN_3     | N, H_SER_25    | H, H_SER_25     | 2.89 | 2.07 | 15.25 |
| 4F33.PDB | O, C_GLY_60    | N, H_PHE_29    | H, H_PHE_29     | 2.96 | 2.15 | 17.00 |
| 4F33.PDB | O, H_SER_28    | N, H_GLY_31    | H, H_GLY_31     | 3.00 | 2.15 | 9.57  |
| 4F33.PDB | O, H_GLY_99    | N, H_THR_33    | H, H_THR_33     | 2.95 | 2.14 | 17.33 |
| 4F33.PDB | O, H_ALA_97    | N, H_ASN_35    | H, H_ASN_35     | 2.77 | 1.93 | 11.02 |
| 4F33.PDB | O, H_PHE_95    | N, H_VAL_37    | H, H_VAL_37     | 2.79 | 1.98 | 16.38 |
| 4F33.PDB | O, H_GLU_46    | N, H_LYS_38    | H, H_LYS_38     | 2.77 | 1.95 | 13.91 |
| 4F33.PDB | O, H_GLU_89    | NZ, H_LYS_38   | HZ1, H_LYS_38   | 2.83 | 1.95 | 4.26  |
| 4F33.PDB | O, H_VAL_93    | N, H_GLN_39    | H, H_GLN_39     | 2.79 | 1.93 | 3.64  |
| 4F33.PDB | O, H_SER_40    | N, H_LYS_43    | H, H_LYS_43     | 2.96 | 2.14 | 14.33 |
| 4F33.PDB | O, H_LYS_38    | N, H_GLU_46    | H, H_GLU_46     | 2.92 | 2.12 | 18.59 |
| 4F33.PDB | O, H_TRP_36    | N, H_ILE_48    | H, H_ILE_48     | 2.85 | 2.00 | 7.74  |
| 4F33.PDB | O, H_SER_59    | N, H_LEU_50    | H, H_LEU_50     | 2.90 | 2.12 | 20.46 |
| 4F33.PDB | O, H_MET_34    | N, H_ILE_51    | H, H_ILE_51     | 2.91 | 2.11 | 17.46 |
| 4F33.PDB | O, H_ALA_57    | N, H_THR_52    | H, H_THR_52     | 2.92 | 2.10 | 14.38 |
| 4F33.PDB | O, H_THR_52    | N, H_GLY_56    | H, H_GLY_56     | 2.89 | 2.18 | 28.64 |
| 4F33.PDB | OD1, H_ASN_55  | N, H_ALA_57    | H, H_ALA_57     | 2.90 | 2.05 | 3.80  |
| 4F33.PDB | O, H_LEU_50    | N, H_SER_59    | H, H_SER_59     | 2.92 | 2.11 | 17.14 |
| 4F33.PDB | O, H_ILE_48    | N, H_ASN_61    | H, H_ASN_61     | 2.88 | 2.05 | 13.78 |
| 4F33.PDB | O, H_TRP_47    | ND2, H_ASN_61  | HD21, H_ASN_61  | 2.94 | 2.11 | 13.13 |
| 4F33.PDB | OE2, H_GLU_46  | NZ, H_LYS_63   | HZ3, H_LYS_63   | 2.72 | 1.93 | 23.08 |
| 4F33.PDB | O, H_ASN_61    | N, H_PHE_64    | H, H_PHE_64     | 2.76 | 1.93 | 12.08 |
| 4F33.PDB | O, H_PHE_64    | N, H_LYS_67    | H, H_LYS_67     | 2.99 | 2.27 | 28.17 |
| 4F33.PDB | OD2, H_ASP_90  | NZ, H_LYS_67   | HZ2, H_LYS_67   | 2.82 | 1.98 | 16.29 |
| 4F33.PDB | O, H_LEU_84    | NZ, H_LYS_67   | HZ3, H_LYS_67   | 2.97 | 2.18 | 23.42 |
| 4F33.PDB | O, H_PHE_64    | N, H_ALA_68    | H, H_ALA_68     | 2.90 | 2.09 | 16.52 |
| 4F33.PDB | O, H_ASP_82    | N, H_THR_69    | H, H_THR_69     | 2.92 | 2.16 | 23.47 |
| 4F33.PDB | OH, H_TYR_60   | N, H_LEU_70    | H, H_LEU_70     | 2.87 | 2.03 | 9.16  |
| 4F33.PDB | O, H_THR_78    | N, H_ASP_73    | H, H_ASP_73     | 2.76 | 1.93 | 11.64 |
| 4F33.PDB | O, H_CYS_22    | N, H_ALA_79    | H, H_ALA_79     | 2.86 | 2.05 | 15.52 |
| 4F33.PDB | O, H_THR_71    | N, H_TYR_80    | H, H_TYR_80     | 2.82 | 1.96 | 4.65  |
| 4F33.PDB | O, H_ILE_20    | N, H_MET_81    | H, H_MET_81     | 2.94 | 2.11 | 14.01 |
| 4F33.PDB | O, H_THR_69    | N, H_ASP_82    | H, H_ASP_82     | 2.90 | 2.07 | 11.71 |
| 4F33.PDB | O, H_VAL_18    | N, H_LEU_83    | H, H_LEU_83     | 2.79 | 1.96 | 11.28 |
| 4F33.PDB | O, H_LYS_67    | N, H_LEU_84    | H, H_LEU_84     | 2.89 | 2.08 | 16.65 |
| 4F33.PDB | O, H_ALA_16    | N, H_LEU_86    | H, H_LEU_86     | 2.90 | 2.06 | 8.91  |
| 4F33.PDB | OD2, H_ASP_90  | N, H_THR_87    | H, H_THR_87     | 2.84 | 2.01 | 13.54 |
| 4F33.PDB | O, H_THR_87    | N, H_ASP_90    | H, H_ASP_90     | 2.82 | 1.98 | 9.38  |
| 4F33.PDB | O, H_SER_88    | N, H_SER_91    | H, H_SER_91     | 2.94 | 2.08 | 5.94  |
| 4F33.PDB | O, H_VAL_115   | N, H_ALA_92    | H, H_ALA_92     | 2.98 | 2.25 | 27.64 |
| 4F33.PDB | O, H_THR_113   | N, H_TYR_94    | H, H_TYR_94     | 2.93 | 2.08 | 7.56  |
| 4F33.PDB | O, H_VAL_37    | N, H_PHE_95    | H, H_PHE_95     | 2.76 | 1.92 | 9.09  |
| 4F33.PDB | O, H_ASN_35    | N, H_ALA_97    | H, H_ALA_97     | 2.85 | 2.09 | 23.41 |
| 4F33.PDB | O, H_TYR_108   | N, H_ARG_98    | H, H_ARG_98     | 2.84 | 2.07 | 21.36 |
| 4F33.PDB | OD1, H_ASP_107 | NE, H_ARG_98   | HE, H_ARG_98    | 2.95 | 2.15 | 18.92 |
| 4F33.PDB | OD2, H_ASP_107 | NH2, H_ARG_98  | HH21, H_ARG_98  | 2.79 | 1.95 | 8.93  |
| 4F33.PDB | O, H_THR_33    | N, H_GLY_99    | H, H_GLY_99     | 2.98 | 2.14 | 10.15 |
| 4F33.PDB | OD1, H_ASP_102 | NE, H_ARG_104  | HE, H_ARG_104   | 2.85 | 2.00 | 6.80  |
| 4F33.PDB | OD2, H_ASP_107 | NH1, H_ARG_104 | HH11, H_ARG_104 | 2.85 | 2.04 | 16.23 |
| 4F33.PDB | OD2, H_ASP_102 | NH2, H_ARG_104 | HH21, H_ARG_104 | 2.93 | 2.12 | 16.50 |
| 4F33.PDB | OH, G_TYR_36   | N, H_PHE_106   | H, H_PHE_106    | 2.74 | 1.89 | 7.07  |
| 4F33.PDB | O, H_CYS_96    | N, H_GLY_110   | H, H_GLY_110    | 2.73 | 1.87 | 4.66  |
| 4F33.PDB | OE1, H_GLN_6   | N, H_GLY_112   | H, H_GLY_112    | 2.84 | 2.08 | 23.08 |
| 4F33.PDB | O, H_TYR_94    | N, H_THR_113   | H, H_THR_113    | 2.79 | 2.00 | 19.33 |
| 4F33.PDB | O, H_SER_7     | OG1, H_THR_113 | HG1, H_THR_113  | 2.86 | 2.10 | 18.89 |
| 4F33.PDB | O, H_ALA_92    | N, H_VAL_115   | H, H_VAL_115    | 2.81 | 1.98 | 12.26 |
| 4F33.PDB | OG, H_SER_91   | N, H_VAL_117   | H, H_VAL_117    | 2.86 | 2.06 | 16.73 |
| 4F33.PDB | O, H_GLU_12    | N, H_SER_118   | H, H_SER_118    | 2.89 | 2.08 | 15.90 |

|          |                |                |                 |      |      |       |
|----------|----------------|----------------|-----------------|------|------|-------|
| 4F33.PDB | O, H_PHE.152   | N, H_LYS.123   | H, H_LYS.123    | 2.83 | 2.00 | 12.24 |
| 4F33.PDB | O, H_ASP.150   | NZ, H_LYS.123  | HZ2, H_LYS.123  | 2.81 | 1.95 | 12.86 |
| 4F33.PDB | OE2, A_GLU.123 | N, H_GLY.124   | H, H_GLY.124    | 2.97 | 2.12 | 7.35  |
| 4F33.PDB | O, H_LYS.149   | N, H_SER.126   | H, H_SER.126    | 2.87 | 2.05 | 14.54 |
| 4F33.PDB | O, H_LEU.147   | N, H_PHE.128   | H, H_PHE.128    | 2.88 | 2.06 | 14.55 |
| 4F33.PDB | O, H_GLY.145   | N, H_LEU.130   | H, H_LEU.130    | 2.75 | 1.90 | 6.63  |
| 4F33.PDB | OG, H_SER.136  | N, H_SER.133   | H, H_SER.133    | 2.96 | 2.15 | 16.37 |
| 4F33.PDB | OG, H_SER.133  | N, H_LYS.135   | H, H_LYS.135    | 2.86 | 2.08 | 20.02 |
| 4F33.PDB | O, G_SER.208   | NZ, H_LYS.135  | HZ3, H_LYS.135  | 2.85 | 1.99 | 13.05 |
| 4F33.PDB | O, H_SER.133   | OG1, H_THR.137 | HG1, H_THR.137  | 2.95 | 2.25 | 26.10 |
| 4F33.PDB | O, H_SER.138   | N, H_THR.141   | H, H_THR.141    | 2.82 | 1.99 | 10.59 |
| 4F33.PDB | O, H_VAL.190   | N, H_ALA.142   | H, H_ALA.142    | 2.80 | 1.95 | 4.86  |
| 4F33.PDB | O, H_SER.136   | N, H_ALA.143   | H, H_ALA.143    | 2.78 | 1.96 | 14.14 |
| 4F33.PDB | O, H_VAL.188   | N, H_LEU.144   | H, H_LEU.144    | 2.99 | 2.16 | 14.52 |
| 4F33.PDB | O, H_LEU.130   | N, H_GLY.145   | H, H_GLY.145    | 2.92 | 2.15 | 21.74 |
| 4F33.PDB | O, H_PHE.128   | N, H_LEU.147   | H, H_LEU.147    | 2.83 | 1.99 | 10.04 |
| 4F33.PDB | O, H_LEU.184   | N, H_VAL.148   | H, H_VAL.148    | 2.77 | 1.93 | 9.98  |
| 4F33.PDB | O, H_SER.126   | N, H_LYS.149   | H, H_LYS.149    | 2.81 | 1.96 | 4.12  |
| 4F33.PDB | O, H_LYS.123   | N, H_PHE.152   | H, H_PHE.152    | 2.92 | 2.12 | 18.54 |
| 4F33.PDB | OG, H_SER.186  | NE1, H_TRP.160 | HE1, H_TRP.160  | 2.99 | 2.15 | 10.12 |
| 4F33.PDB | O, H_ILE.201   | N, H_ASN.161   | H, H_ASN.161    | 2.75 | 1.91 | 10.53 |
| 4F33.PDB | OD1, H_ASN.203 | N, H_SER.162   | H, H_SER.162    | 2.80 | 1.99 | 16.84 |
| 4F33.PDB | O, H_TRP.160   | N, H_GLY.163   | H, H_GLY.163    | 2.91 | 2.16 | 25.30 |
| 4F33.PDB | O, H_ASN.161   | N, H_ALA.164   | H, H_ALA.164    | 2.99 | 2.13 | 5.75  |
| 4F33.PDB | O, H_VAL.187   | N, H_HIS.170   | H, H_HIS.170    | 2.76 | 1.93 | 12.16 |
| 4F33.PDB | O, H_SER.185   | N, H_PHE.172   | H, H_PHE.172    | 2.96 | 2.11 | 6.73  |
| 4F33.PDB | O, H_SER.183   | N, H_VAL.175   | H, H_VAL.175    | 2.88 | 2.06 | 12.99 |
| 4F33.PDB | O, H_LEU.181   | N, H_GLN.177   | H, H_GLN.177    | 2.85 | 2.00 | 6.78  |
| 4F33.PDB | OD1, H_ASP.150 | NE2, H_GLN.177 | HE22, H_GLN.177 | 2.83 | 2.04 | 19.22 |
| 4F33.PDB | O, H_GLN.177   | N, H_GLY.180   | H, H_GLY.180    | 2.96 | 2.10 | 4.33  |
| 4F33.PDB | O, H_TYR.151   | N, H_TYR.182   | H, H_TYR.182    | 2.83 | 1.98 | 4.16  |
| 4F33.PDB | O, H_VAL.148   | N, H_LEU.184   | H, H_LEU.184    | 2.93 | 2.14 | 19.17 |
| 4F33.PDB | O, H_CYS.146   | N, H_SER.186   | H, H_SER.186    | 2.99 | 2.19 | 16.98 |
| 4F33.PDB | O, H_HIS.170   | N, H_VAL.187   | H, H_VAL.187    | 2.86 | 2.03 | 12.28 |
| 4F33.PDB | O, H_LEU.144   | N, H_VAL.188   | H, H_VAL.188    | 2.79 | 1.98 | 17.58 |
| 4F33.PDB | O, H_ALA.142   | N, H_VAL.190   | H, H_VAL.190    | 2.80 | 1.99 | 14.89 |
| 4F33.PDB | O, H_GLY.140   | N, H_SER.192   | H, H_SER.192    | 2.85 | 2.00 | 7.56  |
| 4F33.PDB | O, H_SER.194   | N, H_GLN.198   | H, H_GLN.198    | 2.75 | 1.90 | 3.78  |
| 4F33.PDB | O, H_THR.199   | NE2, H_GLN.198 | HE21, H_GLN.198 | 2.90 | 2.04 | 2.16  |
| 4F33.PDB | OD1, H_ASN.161 | N, H_ILE.201   | H, H_ILE.201    | 2.74 | 1.91 | 10.89 |
| 4F33.PDB | O, H_LYS.215   | N, H_CYS.202   | H, H_CYS.202    | 2.98 | 2.20 | 21.56 |
| 4F33.PDB | O, H_SER.159   | N, H_ASN.203   | H, H_ASN.203    | 2.79 | 1.94 | 8.15  |
| 4F33.PDB | OD1, H_ASP.214 | ND2, H_ASN.203 | HD21, H_ASN.203 | 2.91 | 2.05 | 5.75  |
| 4F33.PDB | O, H_VAL.213   | N, H_VAL.204   | H, H_VAL.204    | 2.77 | 1.91 | 5.12  |
| 4F33.PDB | O, H_THR.157   | N, H_ASN.205   | H, H_ASN.205    | 2.86 | 2.02 | 8.69  |
| 4F33.PDB | O, H_THR.211   | N, H_HIS.206   | H, H_HIS.206    | 2.87 | 2.02 | 7.96  |
| 4F33.PDB | O, H_PRO.153   | NE2, H_HIS.206 | HE2, H_HIS.206  | 2.85 | 2.00 | 9.82  |
| 4F33.PDB | O, H_LYS.207   | N, H_ASN.210   | H, H_ASN.210    | 2.94 | 2.11 | 13.37 |
| 4F33.PDB | O, H_SER.209   | OG1, H_THR.211 | HG1, H_THR.211  | 2.98 | 2.28 | 27.00 |
| 4F33.PDB | O, H_VAL.204   | N, H_VAL.213   | H, H_VAL.213    | 2.84 | 2.02 | 14.41 |
| 4F33.PDB | O, B_LYS.212   | N, H_ASP.214   | H, H_ASP.214    | 2.71 | 1.89 | 15.00 |
| 4F33.PDB | O, H_CYS.202   | N, H_LYS.215   | H, H_LYS.215    | 2.98 | 2.18 | 17.82 |
| 4F33.PDB | OE1, G_GLU.123 | NZ, H_LYS.215  | HZ1, H_LYS.215  | 2.97 | 2.19 | 24.10 |
| 4F33.PDB | OG1, B_THR.211 | NZ, H_LYS.215  | HZ2, H_LYS.215  | 2.80 | 1.95 | 14.49 |
| 4F33.PDB | O, B_ASN.210   | N, H_LYS.216   | H, H_LYS.216    | 2.82 | 2.01 | 16.40 |
| 4F33.PDB | O, H_TYR.200   | N, H_VAL.217   | H, H_VAL.217    | 2.85 | 2.01 | 9.04  |
| 4F3F.PDB | O, A_SER.25    | N, A_THR.6     | H, A_THR.6      | 2.85 | 2.00 | 8.09  |
| 4F3F.PDB | O, A_THR.23    | N, A_SER.8     | H, A_SER.8      | 2.94 | 2.15 | 20.13 |

|          |                |                |                 |      |      |       |
|----------|----------------|----------------|-----------------|------|------|-------|
| 4F3F.PDB | O, A_LYS_103   | N, A_MET_12    | H, A_MET_12     | 2.79 | 1.97 | 13.63 |
| 4F3F.PDB | O, A_GLU_105   | N, A_ALA_14    | H, A_ALA_14     | 2.99 | 2.22 | 22.34 |
| 4F3F.PDB | O, A_VAL_78    | N, A_GLY_17    | H, A_GLY_17     | 2.86 | 2.04 | 14.29 |
| 4F3F.PDB | O, A_SER_15    | N, A_GLU_18    | H, A_GLU_18     | 3.00 | 2.16 | 11.55 |
| 4F3F.PDB | O, A_ILE_75    | N, A_VAL_20    | H, A_VAL_20     | 2.94 | 2.13 | 15.17 |
| 4F3F.PDB | O, A_LEU_73    | N, A_MET_22    | H, A_MET_22     | 2.83 | 2.00 | 12.74 |
| 4F3F.PDB | O, A_SER_8     | N, A_THR_23    | H, A_THR_23     | 2.79 | 1.94 | 4.31  |
| 4F3F.PDB | O, A_TYR_71    | N, A_CYS_24    | H, A_CYS_24     | 2.77 | 1.94 | 12.44 |
| 4F3F.PDB | O, A_THR_6     | N, A_SER_25    | H, A_SER_25     | 2.94 | 2.11 | 13.40 |
| 4F3F.PDB | O, A_ASN_69    | N, A_ALA_26    | H, A_ALA_26     | 2.80 | 1.96 | 8.83  |
| 4F3F.PDB | O, A_GLU_4     | N, A_SER_27    | H, A_SER_27     | 2.90 | 2.18 | 27.52 |
| 4F3F.PDB | O, A_GLN_89    | N, A_HIS_34    | H, A_HIS_34     | 2.93 | 2.11 | 13.52 |
| 4F3F.PDB | O, A_ILE_48    | N, A_TRP_35    | H, A_TRP_35     | 2.83 | 2.01 | 14.96 |
| 4F3F.PDB | O, A_TYR_87    | N, A_TYR_36    | H, A_TYR_36     | 2.88 | 2.12 | 23.08 |
| 4F3F.PDB | O, A_LYS_45    | N, A_GLN_37    | H, A_GLN_37     | 2.83 | 2.04 | 20.59 |
| 4F3F.PDB | O, A_THR_85    | N, A_GLN_38    | H, A_GLN_38     | 2.89 | 2.06 | 12.49 |
| 4F3F.PDB | O, A_THR_42    | NE2, A_GLN_38  | HE21, A_GLN_38  | 2.97 | 2.19 | 20.06 |
| 4F3F.PDB | OE1, B_GLN_39  | NE2, A_GLN_38  | HE22, A_GLN_38  | 2.88 | 2.04 | 8.75  |
| 4F3F.PDB | O, A_GLU_81    | NZ, A_LYS_39   | HZ1, A_LYS_39   | 2.81 | 1.98 | 18.05 |
| 4F3F.PDB | O, A_LYS_39    | OG1, A_THR_42  | HG1, A_THR_42   | 3.00 | 2.19 | 8.01  |
| 4F3F.PDB | O, A_GLN_37    | N, A_LYS_45    | H, A_LYS_45     | 2.76 | 2.04 | 27.53 |
| 4F3F.PDB | O, B_ARG_104   | NH1, A_ARG_46  | HH11, A_ARG_46  | 2.93 | 2.16 | 22.46 |
| 4F3F.PDB | O, A_TRP_35    | N, A_TRP_47    | H, A_TRP_47     | 2.80 | 1.94 | 4.03  |
| 4F3F.PDB | O, A_LYS_53    | N, A_TYR_49    | H, A_TYR_49     | 2.96 | 2.17 | 19.74 |
| 4F3F.PDB | ND1, A_HIS_34  | N, A_ASP_50    | H, A_ASP_50     | 2.97 | 2.24 | 27.25 |
| 4F3F.PDB | O, A_MET_33    | N, A_THR_51    | H, A_THR_51     | 2.64 | 1.85 | 18.18 |
| 4F3F.PDB | OD1, A_ASP_82  | NH2, A_ARG_61  | HH21, A_ARG_61  | 2.60 | 1.79 | 16.27 |
| 4F3F.PDB | OE2, A_GLU_81  | NH2, A_ARG_61  | HH22, A_ARG_61  | 2.95 | 2.12 | 13.66 |
| 4F3F.PDB | O, A_THR_74    | N, A_SER_63    | H, A_SER_63     | 2.85 | 2.05 | 18.09 |
| 4F3F.PDB | O, A_CYS_24    | N, A_TYR_71    | H, A_TYR_71     | 2.90 | 2.04 | 4.79  |
| 4F3F.PDB | O, A_SER_65    | N, A_SER_72    | H, A_SER_72     | 2.82 | 1.98 | 10.66 |
| 4F3F.PDB | O, A_MET_22    | N, A_LEU_73    | H, A_LEU_73     | 2.92 | 2.10 | 15.06 |
| 4F3F.PDB | O, A_SER_63    | N, A_THR_74    | H, A_THR_74     | 2.88 | 2.03 | 8.55  |
| 4F3F.PDB | OG1, A_THR_21  | OG1, A_THR_74  | HG1, A_THR_74   | 2.77 | 2.04 | 22.11 |
| 4F3F.PDB | O, A_VAL_20    | N, A_ILE_75    | H, A_ILE_75     | 2.85 | 2.01 | 11.39 |
| 4F3F.PDB | O, A_ARG_61    | N, A_SER_76    | H, A_SER_76     | 2.86 | 2.02 | 10.12 |
| 4F3F.PDB | O, A_GLU_18    | N, A_VAL_78    | H, A_VAL_78     | 2.86 | 2.14 | 28.13 |
| 4F3F.PDB | O, A_GLU_79    | N, A_ASP_82    | H, A_ASP_82     | 2.80 | 1.94 | 6.21  |
| 4F3F.PDB | O, A_GLN_38    | N, A_THR_85    | H, A_THR_85     | 2.92 | 2.06 | 3.36  |
| 4F3F.PDB | O, A_TYR_36    | N, A_TYR_87    | H, A_TYR_87     | 2.93 | 2.15 | 21.63 |
| 4F3F.PDB | O, A_LYS_93    | NE2, A_GLN_90  | HE22, A_GLN_90  | 2.99 | 2.13 | 6.87  |
| 4F3F.PDB | OE1, A_GLN_90  | N, A_LYS_93    | H, A_LYS_93     | 2.97 | 2.13 | 10.10 |
| 4F3F.PDB | OG, B_SER_59   | NE2, A_HIS_94  | HE2, A_HIS_94   | 2.82 | 2.03 | 19.68 |
| 4F3F.PDB | O, A_ILE_3     | OG1, A_THR_97  | HG1, A_THR_97   | 2.80 | 2.02 | 14.86 |
| 4F3F.PDB | O, A_CYS_88    | N, A_GLY_99    | H, A_GLY_99     | 2.99 | 2.20 | 20.16 |
| 4F3F.PDB | OE1, A_GLN_7   | N, A_GLY_101   | H, A_GLY_101    | 2.71 | 1.99 | 27.52 |
| 4F3F.PDB | O, A_TYR_86    | N, A_THR_102   | H, A_THR_102    | 2.92 | 2.11 | 15.50 |
| 4F3F.PDB | O, A_PRO_9     | OG1, A_THR_102 | HG1, A_THR_102  | 2.92 | 2.17 | 21.04 |
| 4F3F.PDB | O, A_ALA_10    | N, A_LYS_103   | H, A_LYS_103    | 2.75 | 1.91 | 11.21 |
| 4F3F.PDB | O, A_ALA_84    | N, A_VAL_104   | H, A_VAL_104    | 2.95 | 2.11 | 8.56  |
| 4F3F.PDB | O, A_MET_12    | N, A_GLU_105   | H, A_GLU_105    | 2.87 | 2.10 | 22.23 |
| 4F3F.PDB | OE1, A_GLN_166 | N, A_ILE_106   | H, A_ILE_106    | 2.99 | 2.18 | 16.49 |
| 4F3F.PDB | O, A_ALA_14    | N, A_LYS_107   | H, A_LYS_107    | 2.82 | 1.98 | 10.57 |
| 4F3F.PDB | O, A_THR_109   | NE, A_ARG_108  | HE, A_ARG_108   | 2.88 | 2.12 | 22.89 |
| 4F3F.PDB | O, A_ASP_170   | NH1, A_ARG_108 | HH11, A_ARG_108 | 2.89 | 2.10 | 20.47 |
| 4F3F.PDB | O, A_TYR_140   | N, A_ALA_111   | H, A_ALA_111    | 2.92 | 2.09 | 12.11 |
| 4F3F.PDB | O, A_LEU_135   | N, A_PHE_116   | H, A_PHE_116    | 2.90 | 2.08 | 13.90 |
| 4F3F.PDB | O, A_VAL_133   | N, A_PHE_118   | H, A_PHE_118    | 2.78 | 1.95 | 12.67 |

|          |                |                |                 |      |      |       |
|----------|----------------|----------------|-----------------|------|------|-------|
| 4F3F.PDB | OG, A_SER.131  | NE2, A_GLN.124 | HE22, A_GLN.124 | 2.84 | 2.05 | 19.05 |
| 4F3F.PDB | O, A_LEU.181   | N, A_ALA.130   | H, A_ALA.130    | 2.80 | 1.96 | 8.40  |
| 4F3F.PDB | O, A_LEU.179   | N, A_VAL.132   | H, A_VAL.132    | 2.96 | 2.17 | 19.13 |
| 4F3F.PDB | O, A_SER.177   | N, A_CYS.134   | H, A_CYS.134    | 2.84 | 2.04 | 17.70 |
| 4F3F.PDB | O, A_PHE.116   | N, A_LEU.135   | H, A_LEU.135    | 2.66 | 1.81 | 8.41  |
| 4F3F.PDB | O, A_LEU.175   | N, A_LEU.136   | H, A_LEU.136    | 2.88 | 2.03 | 5.32  |
| 4F3F.PDB | O, A_SER.114   | N, A_ASN.137   | H, A_ASN.137    | 2.75 | 1.89 | 4.10  |
| 4F3F.PDB | O, A_TYR.173   | N, A_PHE.139   | H, A_PHE.139    | 2.82 | 2.03 | 20.49 |
| 4F3F.PDB | O, A_ALA.111   | N, A_TYR.140   | H, A_TYR.140    | 2.95 | 2.18 | 22.48 |
| 4F3F.PDB | O, A_ALA.193   | N, A_LYS.149   | H, A_LYS.149    | 3.00 | 2.22 | 21.52 |
| 4F3F.PDB | O, A_VAL.191   | N, A_ASP.151   | H, A_ASP.151    | 2.71 | 1.88 | 11.67 |
| 4F3F.PDB | O, A_VAL.150   | N, A_ALA.153   | H, A_ALA.153    | 2.83 | 2.03 | 17.81 |
| 4F3F.PDB | O, A_TRP.148   | N, A_GLN.155   | H, A_GLN.155    | 2.92 | 2.17 | 25.11 |
| 4F3F.PDB | O, A_SER.176   | N, A_SER.162   | H, A_SER.162    | 2.98 | 2.24 | 25.07 |
| 4F3F.PDB | O, A_SER.174   | N, A_THR.164   | H, A_THR.164    | 2.92 | 2.10 | 15.13 |
| 4F3F.PDB | O, A_THR.172   | N, A_ASP.167   | H, A_ASP.167    | 2.94 | 2.11 | 11.83 |
| 4F3F.PDB | OD1, A_ASP.167 | N, A_LYS.169   | H, A_LYS.169    | 2.79 | 1.96 | 13.81 |
| 4F3F.PDB | OD1, A_ASP.170 | OG1, A_THR.172 | HG1, A_THR.172  | 2.85 | 2.05 | 10.97 |
| 4F3F.PDB | O, A_PHE.139   | N, A_TYR.173   | H, A_TYR.173    | 2.86 | 2.03 | 12.73 |
| 4F3F.PDB | O, A_SER.162   | N, A_SER.176   | H, A_SER.176    | 2.91 | 2.10 | 15.82 |
| 4F3F.PDB | O, A_CYS.134   | N, A_SER.177   | H, A_SER.177    | 2.93 | 2.13 | 19.09 |
| 4F3F.PDB | O, A_GLN.160   | N, A_THR.178   | H, A_THR.178    | 2.92 | 2.12 | 17.96 |
| 4F3F.PDB | O, A_VAL.132   | N, A_LEU.179   | H, A_LEU.179    | 2.93 | 2.14 | 19.16 |
| 4F3F.PDB | O, A_ALA.130   | N, A_LEU.181   | H, A_LEU.181    | 2.80 | 1.95 | 8.13  |
| 4F3F.PDB | O, A_SER.182   | N, A_TYR.186   | H, A_TYR.186    | 2.99 | 2.15 | 10.88 |
| 4F3F.PDB | OD1, A_ASP.151 | N, A_VAL.191   | H, A_VAL.191    | 2.94 | 2.11 | 13.49 |
| 4F3F.PDB | O, A_PHE.209   | N, A_TYR.192   | H, A_TYR.192    | 2.94 | 2.10 | 9.21  |
| 4F3F.PDB | O, A_GLN.147   | N, A_GLU.195   | H, A_GLU.195    | 2.80 | 1.99 | 16.60 |
| 4F3F.PDB | O, A_VAL.205   | N, A_VAL.196   | H, A_VAL.196    | 2.78 | 1.93 | 8.20  |
| 4F3F.PDB | ND1, A_HIS.198 | N, A_GLY.200   | H, A_GLY.200    | 2.95 | 2.12 | 12.01 |
| 4F3F.PDB | O, A_HIS.198   | N, A_LEU.201   | H, A_LEU.201    | 2.90 | 2.07 | 12.31 |
| 4F3F.PDB | O, B_TYR.94    | NE2, B_GLN.6   | HE22, B_GLN.6   | 2.92 | 2.11 | 17.10 |
| 4F3F.PDB | O, B_PRO.114   | N, B_GLU.10    | H, B_GLU.10     | 2.98 | 2.18 | 17.64 |
| 4F3F.PDB | O, B_LEU.86    | N, B_GLY.15    | H, B_GLY.15     | 2.56 | 1.75 | 16.93 |
| 4F3F.PDB | O, B_LYS.13    | N, B_ALA.16    | H, B_ALA.16     | 2.90 | 2.04 | 5.29  |
| 4F3F.PDB | O, B_LEU.83    | N, B_VAL.18    | H, B_VAL.18     | 2.95 | 2.18 | 22.39 |
| 4F3F.PDB | O, B_GLN.5     | N, B_LYS.23    | H, B_LYS.23     | 2.93 | 2.10 | 13.11 |
| 4F3F.PDB | O, B_SER.77    | N, B_ALA.24    | H, B_ALA.24     | 2.82 | 2.01 | 16.18 |
| 4F3F.PDB | O, B_GLN.3     | N, B_SER.25    | H, B_SER.25     | 3.00 | 2.19 | 16.92 |
| 4F3F.PDB | O, B_SER.28    | N, B_GLY.31    | H, B_GLY.31     | 2.71 | 1.95 | 22.79 |
| 4F3F.PDB | O, B_ALA.97    | N, B_ASN.35    | H, B_ASN.35     | 2.89 | 2.09 | 18.86 |
| 4F3F.PDB | O, B_GLY.49    | N, B_TRP.36    | H, B_TRP.36     | 3.00 | 2.19 | 17.54 |
| 4F3F.PDB | O, B_PHE.95    | N, B_VAL.37    | H, B_VAL.37     | 2.87 | 2.08 | 19.73 |
| 4F3F.PDB | O, B_GLU.46    | N, B_LYS.38    | H, B_LYS.38     | 2.87 | 2.05 | 15.48 |
| 4F3F.PDB | O, B_GLU.89    | NZ, B_LYS.38   | HZ1, B_LYS.38   | 2.93 | 2.08 | 14.15 |
| 4F3F.PDB | O, B_VAL.93    | N, B_GLN.39    | H, B_GLN.39     | 2.84 | 2.02 | 15.17 |
| 4F3F.PDB | OD1, B_ASN.35  | NE1, B_TRP.47  | HE1, B_TRP.47   | 2.99 | 2.19 | 19.59 |
| 4F3F.PDB | O, B_TRP.36    | N, B_ILE.48    | H, B_ILE.48     | 2.96 | 2.11 | 6.75  |
| 4F3F.PDB | O, B_SER.59    | N, B_LEU.50    | H, B_LEU.50     | 2.89 | 2.11 | 20.92 |
| 4F3F.PDB | O, B_MET.34    | N, B_ILE.51    | H, B_ILE.51     | 2.99 | 2.27 | 27.72 |
| 4F3F.PDB | O, B_THR.52    | N, B_GLY.56    | H, B_GLY.56     | 2.97 | 2.22 | 25.34 |
| 4F3F.PDB | OD1, B_ASN.55  | N, B_ALA.57    | H, B_ALA.57     | 2.90 | 2.06 | 10.30 |
| 4F3F.PDB | O, B_LEU.50    | N, B_SER.59    | H, B_SER.59     | 2.93 | 2.13 | 17.76 |
| 4F3F.PDB | O, B_ILE.48    | N, B_ASN.61    | H, B_ASN.61     | 2.87 | 2.04 | 12.30 |
| 4F3F.PDB | O, B_TRP.47    | ND2, B_ASN.61  | HD21, B_ASN.61  | 2.71 | 1.89 | 13.91 |
| 4F3F.PDB | O, B_ASN.61    | N, B_PHE.64    | H, B_PHE.64     | 2.78 | 1.97 | 15.06 |
| 4F3F.PDB | O, B_GLN.62    | N, B_ARG.65    | H, B_ARG.65     | 2.89 | 2.05 | 11.05 |
| 4F3F.PDB | OD2, B_ASP.90  | NZ, B_LYS.67   | HZ2, B_LYS.67   | 2.92 | 2.05 | 9.99  |

|          |                |                |                 |      |      |       |
|----------|----------------|----------------|-----------------|------|------|-------|
| 4F3F.PDB | O, B_PHE.64    | N, B_ALA.68    | H, B_ALA.68     | 2.96 | 2.20 | 23.34 |
| 4F3F.PDB | O, B_ASP.82    | N, B_THR.69    | H, B_THR.69     | 2.93 | 2.18 | 24.51 |
| 4F3F.PDB | O, B_THR.78    | N, B_ASP.73    | H, B_ASP.73     | 2.77 | 1.93 | 10.54 |
| 4F3F.PDB | O, B_TYR.54    | NZ, B_LYS.74   | HZ2, B_LYS.74   | 2.82 | 1.94 | 9.19  |
| 4F3F.PDB | O, B_LYS.74    | N, B_SER.77    | H, B_SER.77     | 2.92 | 2.08 | 10.24 |
| 4F3F.PDB | O, B_SER.76    | OG1, B_THR.78  | HG1, B_THR.78   | 2.88 | 2.12 | 18.89 |
| 4F3F.PDB | O, B_CYS.22    | N, B_ALA.79    | H, B_ALA.79     | 2.86 | 2.03 | 14.35 |
| 4F3F.PDB | O, B_THR.71    | N, B_TYR.80    | H, B_TYR.80     | 2.91 | 2.08 | 12.13 |
| 4F3F.PDB | O, B_ILE.20    | N, B_MET.81    | H, B_MET.81     | 2.89 | 2.08 | 15.65 |
| 4F3F.PDB | O, B_THR.69    | N, B_ASP.82    | H, B_ASP.82     | 2.91 | 2.07 | 10.66 |
| 4F3F.PDB | O, B_VAL.18    | N, B_LEU.83    | H, B_LEU.83     | 2.87 | 2.02 | 5.50  |
| 4F3F.PDB | O, B_LYS.67    | N, B_LEU.84    | H, B_LEU.84     | 2.90 | 2.07 | 12.20 |
| 4F3F.PDB | O, B_ALA.16    | N, B_LEU.86    | H, B_LEU.86     | 2.91 | 2.08 | 13.35 |
| 4F3F.PDB | OD2, B_ASP.90  | N, B_THR.87    | H, B_THR.87     | 2.74 | 1.92 | 13.61 |
| 4F3F.PDB | O, B_THR.87    | N, B_ASP.90    | H, B_ASP.90     | 2.93 | 2.08 | 9.70  |
| 4F3F.PDB | O, B_VAL.115   | N, B_ALA.92    | H, B_ALA.92     | 2.95 | 2.23 | 27.95 |
| 4F3F.PDB | O, B_THR.113   | N, B_TYR.94    | H, B_TYR.94     | 2.79 | 1.96 | 11.98 |
| 4F3F.PDB | O, B_VAL.37    | N, B_PHE.95    | H, B_PHE.95     | 2.81 | 2.00 | 16.62 |
| 4F3F.PDB | O, B_ASN.35    | N, B_ALA.97    | H, B_ALA.97     | 2.93 | 2.17 | 24.23 |
| 4F3F.PDB | O, B_TYR.108   | N, B_ARG.98    | H, B_ARG.98     | 2.77 | 2.02 | 24.77 |
| 4F3F.PDB | OD2, B_ASP.107 | NH2, B_ARG.98  | HH21, B_ARG.98  | 2.79 | 1.95 | 9.80  |
| 4F3F.PDB | O, B_GLY.105   | N, B_GLY.100   | H, B_GLY.100    | 2.89 | 2.13 | 23.94 |
| 4F3F.PDB | OE1, C_GLU.52  | N, B_ASP.102   | H, B_ASP.102    | 2.88 | 2.08 | 17.53 |
| 4F3F.PDB | O, B_GLY.103   | N, B_GLY.105   | H, B_GLY.105    | 2.80 | 2.09 | 28.59 |
| 4F3F.PDB | OH, A_TYR.36   | N, B_PHE.106   | H, B_PHE.106    | 2.71 | 1.88 | 12.56 |
| 4F3F.PDB | O, B_CYS.96    | N, B_GLY.110   | H, B_GLY.110    | 2.79 | 1.94 | 7.86  |
| 4F3F.PDB | OE1, B_GLN.6   | N, B_GLY.112   | H, B_GLY.112    | 2.83 | 2.12 | 28.70 |
| 4F3F.PDB | O, B_TYR.94    | N, B_THR.113   | H, B_THR.113    | 2.82 | 2.00 | 14.66 |
| 4F3F.PDB | O, B_SER.7     | OG1, B_THR.113 | HG1, B_THR.113  | 2.72 | 1.93 | 13.91 |
| 4F3F.PDB | O, B_ALA.92    | N, B_VAL.115   | H, B_VAL.115    | 2.81 | 1.96 | 5.43  |
| 4F3F.PDB | OG, B_SER.91   | N, B_VAL.117   | H, B_VAL.117    | 2.69 | 1.83 | 2.50  |
| 4F3F.PDB | OG, B_SER.118  | N, B_ALA.120   | H, B_ALA.120    | 2.75 | 2.02 | 26.82 |
| 4F3F.PDB | O, B_PHE.152   | N, B_LYS.123   | H, B_LYS.123    | 2.85 | 2.11 | 25.39 |
| 4F3F.PDB | O, B_LEU.147   | N, B_PHE.128   | H, B_PHE.128    | 2.79 | 2.01 | 20.40 |
| 4F3F.PDB | O, B_GLY.145   | N, B_LEU.130   | H, B_LEU.130    | 2.57 | 1.73 | 11.24 |
| 4F3F.PDB | O, B_LEU.130   | N, B_GLY.145   | H, B_GLY.145    | 2.80 | 2.01 | 19.86 |
| 4F3F.PDB | O, B_SER.186   | N, B_CYS.146   | H, B_CYS.146    | 2.73 | 1.98 | 24.62 |
| 4F3F.PDB | O, B_PHE.128   | N, B_LEU.147   | H, B_LEU.147    | 2.70 | 1.84 | 3.31  |
| 4F3F.PDB | O, B_LEU.184   | N, B_VAL.148   | H, B_VAL.148    | 2.84 | 2.01 | 12.24 |
| 4F3F.PDB | O, B_SER.126   | N, B_LYS.149   | H, B_LYS.149    | 2.81 | 2.00 | 15.44 |
| 4F3F.PDB | O, B_LYS.123   | N, B_PHE.152   | H, B_PHE.152    | 2.80 | 2.03 | 23.11 |
| 4F3F.PDB | O, B_ASN.205   | N, B_THR.157   | H, B_THR.157    | 2.70 | 1.85 | 8.13  |
| 4F3F.PDB | O, B_ILE.201   | N, B_ASN.161   | H, B_ASN.161    | 2.74 | 1.89 | 7.43  |
| 4F3F.PDB | O, B_ASN.161   | N, B_ALA.164   | H, B_ALA.164    | 2.98 | 2.15 | 14.27 |
| 4F3F.PDB | O, B_VAL.187   | N, B_HIS.170   | H, B_HIS.170    | 2.83 | 1.99 | 10.01 |
| 4F3F.PDB | OD1, A_ASN.138 | NE2, B_HIS.170 | HE2, B_HIS.170  | 2.82 | 2.05 | 21.56 |
| 4F3F.PDB | O, B_SER.185   | N, B_PHE.172   | H, B_PHE.172    | 2.99 | 2.14 | 4.25  |
| 4F3F.PDB | O, B_SER.183   | N, B_VAL.175   | H, B_VAL.175    | 2.79 | 1.99 | 18.03 |
| 4F3F.PDB | O, B_LEU.181   | N, B_GLN.177   | H, B_GLN.177    | 2.69 | 1.88 | 16.92 |
| 4F3F.PDB | OD1, B_ASP.150 | NE2, B_GLN.177 | HE22, B_GLN.177 | 2.87 | 2.13 | 25.54 |
| 4F3F.PDB | O, B_GLN.177   | N, B_GLY.180   | H, B_GLY.180    | 2.83 | 2.02 | 16.47 |
| 4F3F.PDB | O, B_TYR.151   | N, B_TYR.182   | H, B_TYR.182    | 2.87 | 2.02 | 3.69  |
| 4F3F.PDB | O, B_CYS.146   | N, B_SER.186   | H, B_SER.186    | 2.83 | 2.01 | 14.97 |
| 4F3F.PDB | O, B_HIS.170   | N, B_VAL.187   | H, B_VAL.187    | 2.77 | 1.93 | 9.44  |
| 4F3F.PDB | O, B_LEU.144   | N, B_VAL.188   | H, B_VAL.188    | 2.86 | 2.09 | 23.17 |
| 4F3F.PDB | O, B_ALA.142   | N, B_VAL.190   | H, B_VAL.190    | 2.86 | 2.06 | 18.75 |
| 4F3F.PDB | OD1, B_ASN.161 | N, B_ILE.201   | H, B_ILE.201    | 2.88 | 2.06 | 14.25 |
| 4F3F.PDB | O, B_SER.159   | N, B_ASN.203   | H, B_ASN.203    | 2.81 | 1.96 | 4.97  |



|          |                |                |                |      |      |       |
|----------|----------------|----------------|----------------|------|------|-------|
| 4F3F.PDB | O, B_VAL_213   | N, B_VAL_204   | H, B_VAL_204   | 2.70 | 1.90 | 17.22 |
| 4F3F.PDB | O, B_THR_211   | N, B_HIS_206   | H, B_HIS_206   | 2.82 | 2.01 | 16.21 |
| 4F3F.PDB | OG, B_SER_209  | ND1, B_HIS_206 | HD1, B_HIS_206 | 2.43 | 1.61 | 13.98 |
| 4F3F.PDB | O, B_PRO_153   | NE2, B_HIS_206 | HE2, B_HIS_206 | 2.65 | 1.82 | 11.74 |
| 4F3F.PDB | OE1, C_GLN_40  | N, C_ILE_16    | H, C_ILE_16    | 2.59 | 1.73 | 3.34  |
| 4F3F.PDB | OE1, C_GLU_27  | N, C_LYS_24    | H, C_LYS_24    | 2.86 | 2.05 | 15.66 |
| 4F3F.PDB | O, B_ASP_102   | NZ, C_LYS_24   | HZ2, C_LYS_24  | 2.85 | 2.03 | 18.08 |
| 4F3F.PDB | OD1, B_ASP_102 | N, C_LYS_25    | H, C_LYS_25    | 2.86 | 2.02 | 9.58  |
| 4F3F.PDB | OH, B_TYR_101  | NZ, C_LYS_25   | HZ3, C_LYS_25  | 2.87 | 2.11 | 26.18 |
| 4F3F.PDB | OH, A_TYR_32   | NE1, C_TRP_26  | HE1, C_TRP_26  | 2.97 | 2.17 | 18.16 |
| 4F3F.PDB | O, C_LYS_24    | N, C_LEU_28    | H, C_LEU_28    | 2.97 | 2.15 | 14.14 |
| 4F3F.PDB | O, C_LEU_28    | N, C_CYS_31    | H, C_CYS_31    | 2.99 | 2.25 | 25.66 |
| 4F3F.PDB | OD1, C_ASP_33  | N, C_LEU_36    | H, C_LEU_36    | 2.84 | 2.00 | 10.02 |
| 4F3F.PDB | O, C_ALA_34    | N, C_ALA_38    | H, C_ALA_38    | 2.78 | 1.99 | 18.86 |
| 4F3F.PDB | O, C_LEU_36    | OG1, C_THR_39  | HG1, C_THR_39  | 2.91 | 2.17 | 21.49 |
| 4F3F.PDB | OE2, C_GLU_15  | NH2, C_ARG_43  | HH21, C_ARG_43 | 2.88 | 2.04 | 9.30  |
| 4F3F.PDB | O, C_VAL_44    | N, C_ILE_47    | H, C_ILE_47    | 2.93 | 2.16 | 22.22 |
| 4F3F.PDB | O, C_ILE_47    | N, C_PHE_49    | H, C_PHE_49    | 2.71 | 1.99 | 27.94 |
| 4F3F.PDB | OE1, C_GLN_53  | N, C_THR_50    | H, C_THR_50    | 2.83 | 2.01 | 14.01 |
| 4F3F.PDB | O, C_TYR_23    | NE2, C_GLN_53  | HE21, C_GLN_53 | 2.91 | 2.11 | 17.04 |
| 4F3F.PDB | O, C_ILE_21    | NE2, C_GLN_53  | HE22, C_GLN_53 | 2.85 | 2.03 | 15.04 |
| 4F3F.PDB | O, C_THR_50    | N, C_LEU_54    | H, C_LEU_54    | 2.77 | 1.94 | 11.60 |
| 4F3F.PDB | O, C_TYR_51    | N, C_ASP_55    | H, C_ASP_55    | 2.90 | 2.12 | 22.28 |
| 4F3F.PDB | O, C_LEU_54    | N, C_LYS_58    | H, C_LYS_58    | 2.82 | 2.01 | 16.54 |
| 4F3F.PDB | O, C_ASP_55    | N, C_HIS_59    | H, C_HIS_59    | 2.98 | 2.22 | 24.03 |
| 4F3F.PDB | O, C_GLU_29    | NZ, C_LYS_60   | HZ1, C_LYS_60  | 2.68 | 1.83 | 14.40 |
| 4F3F.PDB | O, C_HIS_59    | N, C_ASP_62    | H, C_ASP_62    | 2.90 | 2.16 | 25.96 |
| 4F3F.PDB | O, C_HIS_59    | N, C_GLU_63    | H, C_GLU_63    | 2.98 | 2.18 | 17.58 |
| 4JAM.PDB | O, H_SER_25    | N, H_GLN_3     | H, H_GLN_3     | 2.94 | 2.14 | 17.76 |
| 4JAM.PDB | O, H_THR_23    | N, H_GLN_5     | H, H_GLN_5     | 3.00 | 2.20 | 17.90 |
| 4JAM.PDB | O, H_THR_21    | N, H_SER_7     | H, H_SER_7     | 2.81 | 2.01 | 18.59 |
| 4JAM.PDB | O, H_VAL_82C   | N, H_SER_15    | H, H_SER_15    | 2.81 | 1.98 | 12.83 |
| 4JAM.PDB | O, H_LYS_13    | N, H_GLU_16    | H, H_GLU_16    | 3.00 | 2.20 | 18.36 |
| 4JAM.PDB | O, H_LEU_82    | N, H_LEU_18    | H, H_LEU_18    | 2.84 | 2.06 | 21.67 |
| 4JAM.PDB | O, H_LEU_80    | N, H_LEU_20    | H, H_LEU_20    | 2.89 | 2.05 | 11.57 |
| 4JAM.PDB | O, H_PHE_78    | N, H_CYS_22    | H, H_CYS_22    | 2.73 | 1.91 | 13.99 |
| 4JAM.PDB | O, H_GLN_5     | N, H_THR_23    | H, H_THR_23    | 2.84 | 2.01 | 12.14 |
| 4JAM.PDB | O, H_ASP_76    | N, H_VAL_24    | H, H_VAL_24    | 2.88 | 2.03 | 6.27  |
| 4JAM.PDB | O, H_GLN_3     | N, H_SER_25    | H, H_SER_25    | 2.95 | 2.17 | 20.66 |
| 4JAM.PDB | O, H_GLY_30    | OG1, H_THR_32  | HG1, H_THR_32  | 2.84 | 2.06 | 16.49 |
| 4JAM.PDB | O, H_LEU_95    | N, H_TYR_33    | H, H_TYR_33    | 2.76 | 1.93 | 13.12 |
| 4JAM.PDB | O, H_ILE_51    | N, H_TRP_34    | H, H_TRP_34    | 2.84 | 2.05 | 18.90 |
| 4JAM.PDB | O, H_MET_29    | NE1, H_TRP_34  | HE1, H_TRP_34  | 2.94 | 2.08 | 6.03  |
| 4JAM.PDB | O, H_ALA_93    | N, H_SER_35    | H, H_SER_35    | 2.84 | 2.00 | 9.25  |
| 4JAM.PDB | O, H_GLY_49    | N, H_TRP_36    | H, H_TRP_36    | 2.94 | 2.10 | 11.93 |
| 4JAM.PDB | O, H_PHE_91    | N, H_LEU_37    | H, H_LEU_37    | 2.84 | 2.01 | 12.67 |
| 4JAM.PDB | O, H_GLU_46    | N, H_ARG_38    | H, H_ARG_38    | 2.86 | 2.06 | 18.02 |
| 4JAM.PDB | OE2, H_GLU_46  | NE, H_ARG_38   | HE, H_ARG_38   | 2.93 | 2.10 | 13.53 |
| 4JAM.PDB | OH, H_TYR_90   | NH1, H_ARG_38  | HH11, H_ARG_38 | 2.92 | 2.12 | 17.99 |
| 4JAM.PDB | OD1, H_ASP_86  | NH1, H_ARG_38  | HH12, H_ARG_38 | 2.91 | 2.07 | 10.41 |
| 4JAM.PDB | O, H_VAL_89    | N, H_LEU_39    | H, H_LEU_39    | 2.84 | 2.08 | 24.06 |
| 4JAM.PDB | O, H_ARG_38    | N, H_GLU_46    | H, H_GLU_46    | 2.84 | 2.01 | 13.22 |
| 4JAM.PDB | O, H_TRP_36    | N, H_ILE_48    | H, H_ILE_48    | 2.87 | 2.03 | 11.32 |
| 4JAM.PDB | O, H_ASN_58    | N, H_TYR_50    | H, H_TYR_50    | 2.84 | 2.06 | 20.47 |
| 4JAM.PDB | O, H_TRP_34    | N, H_ILE_51    | H, H_ILE_51    | 2.88 | 2.15 | 26.94 |
| 4JAM.PDB | O, H_GLU_56    | N, H_PHE_52    | H, H_PHE_52    | 2.96 | 2.12 | 11.30 |
| 4JAM.PDB | O, H_PHE_52    | N, H_GLY_55    | H, H_GLY_55    | 2.76 | 1.91 | 7.28  |
| 4JAM.PDB | O, H_TYR_50    | N, H_ASN_58    | H, H_ASN_58    | 2.98 | 2.17 | 16.49 |

|          |                |                |                |      |      |       |
|----------|----------------|----------------|----------------|------|------|-------|
| 4JAM.PDB | O, H_ILE_48    | N, H_SER_60    | H, H_SER_60    | 2.89 | 2.04 | 4.59  |
| 4JAM.PDB | O, H_LEU_63    | N, H_ARG_66    | H, H_ARG_66    | 2.96 | 2.10 | 3.45  |
| 4JAM.PDB | O, H_ARG_82A   | NH1, H_ARG_66  | HH11, H_ARG_66 | 2.94 | 2.15 | 19.87 |
| 4JAM.PDB | OD1, H_ASP_86  | NH2, H_ARG_66  | HH22, H_ARG_66 | 2.96 | 2.12 | 9.52  |
| 4JAM.PDB | O, H_ARG_81    | N, H_SER_68    | H, H_SER_68    | 2.89 | 2.11 | 20.79 |
| 4JAM.PDB | OH, H_TYR_59   | N, H_ILE_69    | H, H_ILE_69    | 2.96 | 2.15 | 16.37 |
| 4JAM.PDB | O, H_GLN_77    | N, H_ASP_72    | H, H_ASP_72    | 2.79 | 1.94 | 5.32  |
| 4JAM.PDB | OD1, H_ASP_72  | N, H_SER_74    | H, H_SER_74    | 2.98 | 2.20 | 21.77 |
| 4JAM.PDB | OD1, H_ASP_72  | N, H_GLU_75    | H, H_GLU_75    | 2.97 | 2.14 | 12.50 |
| 4JAM.PDB | O, H_CYS_22    | N, H_PHE_78    | H, H_PHE_78    | 2.92 | 2.11 | 17.57 |
| 4JAM.PDB | O, H_SER_70    | N, H_SER_79    | H, H_SER_79    | 2.91 | 2.12 | 20.02 |
| 4JAM.PDB | O, H_LEU_20    | N, H_LEU_80    | H, H_LEU_80    | 2.92 | 2.08 | 12.05 |
| 4JAM.PDB | O, H_SER_68    | N, H_ARG_81    | H, H_ARG_81    | 2.90 | 2.07 | 12.47 |
| 4JAM.PDB | O, H_LEU_18    | N, H_LEU_82    | H, H_LEU_82    | 2.90 | 2.10 | 17.80 |
| 4JAM.PDB | O, H_ARG_66    | N, H_ARG_82A   | H, H_ARG_82A   | 2.87 | 2.03 | 10.53 |
| 4JAM.PDB | OD2, H_ASP_86  | N, H_THR_83    | H, H_THR_83    | 2.93 | 2.14 | 18.89 |
| 4JAM.PDB | O, H_THR_83    | N, H_ASP_86    | H, H_ASP_86    | 2.85 | 2.00 | 7.55  |
| 4JAM.PDB | O, H_ALA_84    | N, H_THR_87    | H, H_THR_87    | 2.98 | 2.13 | 7.55  |
| 4JAM.PDB | O, H_LEU_39    | N, H_VAL_89    | H, H_VAL_89    | 2.92 | 2.09 | 11.66 |
| 4JAM.PDB | O, H_SER_107   | N, H_TYR_90    | H, H_TYR_90    | 2.92 | 2.07 | 8.56  |
| 4JAM.PDB | O, H_LEU_37    | N, H_PHE_91    | H, H_PHE_91    | 2.79 | 1.93 | 6.64  |
| 4JAM.PDB | O, H_SER_35    | N, H_ALA_93    | H, H_ALA_93    | 2.97 | 2.20 | 22.59 |
| 4JAM.PDB | O, H_ARG_101   | N, H_SER_94    | H, H_SER_94    | 2.87 | 2.08 | 19.41 |
| 4JAM.PDB | O, H_GLY_31    | N, H_ARG_97    | H, H_ARG_97    | 2.96 | 2.11 | 7.24  |
| 4JAM.PDB | O, H_LEU_100   | N, H_ALA_100C  | H, H_ALA_100C  | 3.00 | 2.15 | 9.56  |
| 4JAM.PDB | OH, L_TYR_36   | N, H_PHE_100E  | H, H_PHE_100E  | 2.85 | 2.03 | 15.20 |
| 4JAM.PDB | O, H_SER_94    | N, H_ARG_101   | H, H_ARG_101   | 2.76 | 1.92 | 10.57 |
| 4JAM.PDB | O, H_CYS_92    | N, H_GLY_104   | H, H_GLY_104   | 2.85 | 2.01 | 11.27 |
| 4JAM.PDB | O, H_TYR_90    | N, H_SER_107   | H, H_SER_107   | 2.95 | 2.16 | 20.47 |
| 4JAM.PDB | O, H_SER_7     | OG, H_SER_107  | HG, H_SER_107  | 2.70 | 1.93 | 17.20 |
| 4JAM.PDB | O, H_ALA_88    | N, H_VAL_109   | H, H_VAL_109   | 2.86 | 2.01 | 8.44  |
| 4JAM.PDB | OG1, H_THR_87  | N, H_VAL_111   | H, H_VAL_111   | 2.96 | 2.11 | 6.95  |
| 4JAM.PDB | O, H_PHE_146   | N, H_LYS_117   | H, H_LYS_117   | 2.84 | 2.00 | 10.63 |
| 4JAM.PDB | O, H_ASP_144   | NZ, H_LYS_117  | HZ2, H_LYS_117 | 2.90 | 2.10 | 21.43 |
| 4JAM.PDB | O, H_LYS_143   | N, H_SER_120   | H, H_SER_120   | 2.96 | 2.16 | 18.52 |
| 4JAM.PDB | O, H_LEU_141   | N, H_PHE_122   | H, H_PHE_122   | 2.88 | 2.04 | 12.44 |
| 4JAM.PDB | O, H_GLY_139   | N, H_LEU_124   | H, H_LEU_124   | 2.76 | 1.91 | 9.61  |
| 4JAM.PDB | OG, H_SER_127  | N, H_LYS_129   | H, H_LYS_129   | 2.99 | 2.25 | 26.12 |
| 4JAM.PDB | O, H_VAL_184   | N, H_ALA_136   | H, H_ALA_136   | 2.89 | 2.08 | 16.20 |
| 4JAM.PDB | O, H_LEU_124   | N, H_GLY_139   | H, H_GLY_139   | 2.92 | 2.13 | 20.18 |
| 4JAM.PDB | O, H_SER_180   | N, H_CYS_140   | H, H_CYS_140   | 2.84 | 2.07 | 21.53 |
| 4JAM.PDB | O, H_PHE_122   | N, H_LEU_141   | H, H_LEU_141   | 2.77 | 1.93 | 9.15  |
| 4JAM.PDB | O, H_LEU_178   | N, H_VAL_142   | H, H_VAL_142   | 2.76 | 1.91 | 9.10  |
| 4JAM.PDB | O, H_SER_120   | N, H_LYS_143   | H, H_LYS_143   | 2.77 | 1.92 | 7.28  |
| 4JAM.PDB | OD1, H_ASP_144 | NZ, H_LYS_143  | HZ2, H_LYS_143 | 3.00 | 2.12 | 8.81  |
| 4JAM.PDB | O, H_TYR_176   | N, H_TYR_145   | H, H_TYR_145   | 2.91 | 2.10 | 17.24 |
| 4JAM.PDB | O, H_LYS_117   | N, H_PHE_146   | H, H_PHE_146   | 2.94 | 2.14 | 18.10 |
| 4JAM.PDB | O, H_ASN_197   | N, H_SER_153   | H, H_SER_153   | 2.89 | 2.07 | 14.46 |
| 4JAM.PDB | OG, H_SER_180  | NE1, H_TRP_154 | HE1, H_TRP_154 | 2.95 | 2.10 | 8.20  |
| 4JAM.PDB | O, H_ILE_195   | N, H_ASN_155   | H, H_ASN_155   | 2.94 | 2.10 | 11.47 |
| 4JAM.PDB | OD1, H_ASN_197 | N, H_SER_156   | H, H_SER_156   | 2.74 | 1.93 | 17.72 |
| 4JAM.PDB | O, H_TRP_154   | N, H_GLY_157   | H, H_GLY_157   | 2.90 | 2.12 | 19.88 |
| 4JAM.PDB | O, H_VAL_181   | N, H_HIS_164   | H, H_HIS_164   | 2.85 | 2.02 | 12.88 |
| 4JAM.PDB | OG, H_SER_180  | OG1, H_THR_165 | HG1, H_THR_165 | 2.85 | 2.09 | 18.68 |
| 4JAM.PDB | O, H_SER_179   | N, H_PHE_166   | H, H_PHE_166   | 2.96 | 2.10 | 3.06  |
| 4JAM.PDB | O, H_SER_177   | N, H_VAL_169   | H, H_VAL_169   | 2.88 | 2.09 | 20.11 |
| 4JAM.PDB | O, H_LEU_175   | N, H_GLN_171   | H, H_GLN_171   | 2.88 | 2.02 | 6.22  |
| 4JAM.PDB | O, H_GLN_171   | N, H_GLY_174   | H, H_GLY_174   | 2.89 | 2.04 | 7.16  |

|          |                 |                |                |      |      |       |
|----------|-----------------|----------------|----------------|------|------|-------|
| 4JAM.PDB | O, H_TYR_145    | N, H_TYR_176   | H, H_TYR_176   | 2.77 | 1.92 | 3.97  |
| 4JAM.PDB | O, H_VAL_142    | N, H_LEU_178   | H, H_LEU_178   | 2.91 | 2.13 | 21.00 |
| 4JAM.PDB | O, H_CYS_140    | N, H_SER_180   | H, H_SER_180   | 3.00 | 2.18 | 15.61 |
| 4JAM.PDB | O, H_HIS_164    | N, H_VAL_181   | H, H_VAL_181   | 2.91 | 2.06 | 7.14  |
| 4JAM.PDB | O, H_LEU_138    | N, H_VAL_182   | H, H_VAL_182   | 2.78 | 1.95 | 12.87 |
| 4JAM.PDB | O, H_GLY_162    | N, H_THR_183   | H, H_THR_183   | 2.94 | 2.15 | 19.24 |
| 4JAM.PDB | O, H_GLY_134    | N, H_SER_186   | H, H_SER_186   | 2.99 | 2.13 | 1.16  |
| 4JAM.PDB | O, H_PRO_185    | N, H_SER_188   | H, H_SER_188   | 2.94 | 2.11 | 13.31 |
| 4JAM.PDB | O, H_SER_188    | N, H_GLN_192   | H, H_GLN_192   | 2.79 | 1.94 | 7.97  |
| 4JAM.PDB | OD1, H_ASN_155  | N, H_ILE_195   | H, H_ILE_195   | 2.97 | 2.17 | 18.26 |
| 4JAM.PDB | O, H_LYS_209    | N, H_CYS_196   | H, H_CYS_196   | 2.89 | 2.09 | 19.00 |
| 4JAM.PDB | O, H_SER_153    | N, H_ASN_197   | H, H_ASN_197   | 2.82 | 1.97 | 5.10  |
| 4JAM.PDB | O, H_VAL_207    | N, H_VAL_198   | H, H_VAL_198   | 2.79 | 1.94 | 6.21  |
| 4JAM.PDB | O, H_THR_151    | N, H_ASN_199   | H, H_ASN_199   | 2.92 | 2.08 | 11.31 |
| 4JAM.PDB | O, H_THR_205    | N, H_HIS_200   | H, H_HIS_200   | 2.85 | 1.99 | 2.37  |
| 4JAM.PDB | OG, H_SER_203   | ND1, H_HIS_200 | HD1, H_HIS_200 | 2.70 | 1.91 | 20.45 |
| 4JAM.PDB | O, H_PRO_147    | NE2, H_HIS_200 | HE2, H_HIS_200 | 2.80 | 1.96 | 10.13 |
| 4JAM.PDB | O, H_LYS_201    | N, H_ASN_204   | H, H_ASN_204   | 2.95 | 2.12 | 12.20 |
| 4JAM.PDB | O, H_VAL_198    | N, H_VAL_207   | H, H_VAL_207   | 2.89 | 2.08 | 17.27 |
| 4JAM.PDB | O, H_CYS_196    | N, H_LYS_209   | H, H_LYS_209   | 2.97 | 2.17 | 17.34 |
| 4JAM.PDB | O, H_TYR_194    | N, H_VAL_211   | H, H_VAL_211   | 2.86 | 2.01 | 8.16  |
| 4JAM.PDB | O, L_TYR_86     | NE2, L_GLN_6   | HE22, L_GLN_6  | 2.86 | 2.03 | 12.40 |
| 4JAM.PDB | O, L_GLN_103    | N, L_VAL_11    | H, L_VAL_11    | 2.91 | 2.06 | 8.42  |
| 4JAM.PDB | OE1, L_GLN_17   | N, L_SER_14    | H, L_SER_14    | 2.84 | 2.00 | 10.61 |
| 4JAM.PDB | O, L_ILE_75     | N, L_ALA_19    | H, L_ALA_19    | 2.99 | 2.17 | 15.72 |
| 4JAM.PDB | O, L_LEU_73     | N, L_ILE_21    | H, L_ILE_21    | 2.83 | 1.99 | 10.81 |
| 4JAM.PDB | O, L_ALA_71     | N, L_CYS_23    | H, L_CYS_23    | 2.74 | 2.01 | 26.68 |
| 4JAM.PDB | O, L_THR_5      | N, L_SER_24    | H, L_SER_24    | 2.92 | 2.08 | 11.35 |
| 4JAM.PDB | O, L_SER_69     | N, L_ALA_26    | H, L_ALA_26    | 2.89 | 2.06 | 12.83 |
| 4JAM.PDB | OD1, H_ASN_100B | ND2, L_ASN_32  | HD21, L_ASN_32 | 2.96 | 2.21 | 25.94 |
| 4JAM.PDB | OD1, L_ASN_51   | N, L_VAL_33    | H, L_VAL_33    | 2.88 | 2.05 | 13.33 |
| 4JAM.PDB | O, L_ILE_48     | N, L_TRP_35    | H, L_TRP_35    | 2.89 | 2.14 | 24.66 |
| 4JAM.PDB | O, L_TYR_87     | N, L_TYR_36    | H, L_TYR_36    | 2.84 | 2.01 | 12.44 |
| 4JAM.PDB | O, L_GLU_45     | N, L_GLN_37    | H, L_GLN_37    | 2.80 | 1.97 | 12.63 |
| 4JAM.PDB | OH, L_TYR_86    | NE2, L_GLN_37  | HE21, L_GLN_37 | 2.92 | 2.07 | 7.82  |
| 4JAM.PDB | O, L_ASP_85     | N, L_VAL_38    | H, L_VAL_38    | 2.71 | 1.87 | 12.07 |
| 4JAM.PDB | O, L_ILE_81     | NZ, L_LYS_39   | HZ3, L_LYS_39  | 2.71 | 1.89 | 18.99 |
| 4JAM.PDB | O, L_TRP_35     | N, L_VAL_47    | H, L_VAL_47    | 2.89 | 2.06 | 14.03 |
| 4JAM.PDB | O, L_LYS_53     | N, L_PHE_49    | H, L_PHE_49    | 2.86 | 2.03 | 12.66 |
| 4JAM.PDB | O, L_VAL_33     | N, L_ASN_51    | H, L_ASN_51    | 2.91 | 2.07 | 10.53 |
| 4JAM.PDB | O, L_GLU_50     | N, L_TYR_52    | H, L_TYR_52    | 2.89 | 2.17 | 28.38 |
| 4JAM.PDB | O, L_PHE_49     | N, L_LYS_53    | H, L_LYS_53    | 2.85 | 2.05 | 18.62 |
| 4JAM.PDB | OE1, L_GLU_50   | NZ, L_LYS_53   | HZ1, L_LYS_53  | 2.81 | 1.96 | 13.53 |
| 4JAM.PDB | OD2, L_ASP_82   | NE, L_ARG_61   | HE, L_ARG_61   | 2.81 | 2.02 | 19.36 |
| 4JAM.PDB | OD1, L_ASP_82   | NH2, L_ARG_61  | HH21, L_ARG_61 | 2.93 | 2.10 | 13.29 |
| 4JAM.PDB | O, L_THR_74     | N, L_SER_63    | H, L_SER_63    | 2.92 | 2.09 | 12.30 |
| 4JAM.PDB | O, L_ALA_26     | NZ, L_LYS_66   | HZ1, L_LYS_66  | 2.91 | 2.11 | 21.70 |
| 4JAM.PDB | O, L_GLY_68     | NZ, L_LYS_66   | HZ3, L_LYS_66  | 2.98 | 2.22 | 27.29 |
| 4JAM.PDB | O, L_CYS_23     | N, L_ALA_71    | H, L_ALA_71    | 2.82 | 2.01 | 15.87 |
| 4JAM.PDB | O, L_SER_65     | N, L_THR_72    | H, L_THR_72    | 2.77 | 1.93 | 11.94 |
| 4JAM.PDB | O, L_ILE_21     | N, L_LEU_73    | H, L_LEU_73    | 2.77 | 1.96 | 15.27 |
| 4JAM.PDB | O, L_SER_63     | N, L_THR_74    | H, L_THR_74    | 2.90 | 2.05 | 4.48  |
| 4JAM.PDB | O, L_ALA_19     | N, L_ILE_75    | H, L_ILE_75    | 2.91 | 2.09 | 14.28 |
| 4JAM.PDB | OD2, L_ASP_82   | N, L_GLN_79    | H, L_GLN_79    | 2.89 | 2.04 | 5.61  |
| 4JAM.PDB | O, L_GLN_79     | N, L_ASP_82    | H, L_ASP_82    | 2.89 | 2.09 | 18.18 |
| 4JAM.PDB | O, L_VAL_38     | N, L_ASP_85    | H, L_ASP_85    | 2.90 | 2.08 | 16.10 |
| 4JAM.PDB | O, L_THR_102    | N, L_TYR_86    | H, L_TYR_86    | 2.86 | 2.04 | 14.55 |
| 4JAM.PDB | O, L_TYR_36     | N, L_TYR_87    | H, L_TYR_87    | 2.99 | 2.18 | 17.93 |

|          |                |                |                 |      |      |       |
|----------|----------------|----------------|-----------------|------|------|-------|
| 4JAM.PDB | O, L_VAL_97    | N, L_VAL_90    | H, L_VAL_90     | 2.92 | 2.09 | 13.43 |
| 4JAM.PDB | O, L_THR_95A   | N, L_ASP_92    | H, L_ASP_92     | 2.92 | 2.16 | 23.57 |
| 4JAM.PDB | OD1, L_ASP_92  | N, L_PHE_94    | H, L_PHE_94     | 2.87 | 2.09 | 20.85 |
| 4JAM.PDB | OD1, L_ASP_92  | N, L_SER_95    | H, L_SER_95     | 2.87 | 2.05 | 13.98 |
| 4JAM.PDB | O, L_SER_95    | N, L_PHE_96    | H, L_PHE_96     | 2.80 | 2.09 | 28.58 |
| 4JAM.PDB | O, L_VAL_90    | N, L_VAL_97    | H, L_VAL_97     | 2.88 | 2.03 | 5.98  |
| 4JAM.PDB | O, L_CYS_88    | N, L_GLY_99    | H, L_GLY_99     | 2.82 | 1.99 | 13.21 |
| 4JAM.PDB | O, L_TYR_86    | N, L_THR_102   | H, L_THR_102    | 2.90 | 2.13 | 22.21 |
| 4JAM.PDB | O, L_PRO_7     | OG1, L_THR_102 | HG1, L_THR_102  | 2.58 | 1.77 | 7.88  |
| 4JAM.PDB | O, L_PRO_8     | N, L_GLN_103   | H, L_GLN_103    | 2.91 | 2.06 | 9.20  |
| 4JAM.PDB | O, L_ALA_84    | N, L_VAL_104   | H, L_VAL_104    | 2.83 | 1.97 | 5.25  |
| 4JAM.PDB | OE1, L_GLU_83  | N, L_VAL_106   | H, L_VAL_106    | 2.88 | 2.04 | 10.37 |
| 4JAM.PDB | O, L_VAL_113   | N, L_LEU_106A  | H, L_LEU_106A   | 2.89 | 2.06 | 12.78 |
| 4JAM.PDB | OH, L_TYR_172  | NH2, L_ARG_107 | HH22, L_ARG_107 | 2.87 | 2.14 | 27.08 |
| 4JAM.PDB | O, L_ASN_170   | NE2, L_GLN_108 | HE22, L_GLN_108 | 2.96 | 2.17 | 20.42 |
| 4JAM.PDB | OE1, L_GLU_198 | NZ, L_LYS_110  | HZ2, L_LYS_110  | 2.60 | 1.75 | 13.04 |
| 4JAM.PDB | O, L_TYR_140   | N, L_ALA_111   | H, L_ALA_111    | 2.92 | 2.08 | 10.21 |
| 4JAM.PDB | O, L_SER_137   | N, L_THR_114   | H, L_THR_114    | 2.88 | 2.05 | 12.38 |
| 4JAM.PDB | O, L_LEU_135   | N, L_THR_116   | H, L_THR_116    | 2.92 | 2.09 | 14.50 |
| 4JAM.PDB | O, L_VAL_133   | N, L_PHE_118   | H, L_PHE_118    | 2.86 | 2.02 | 11.47 |
| 4JAM.PDB | O, L_SER_122   | N, L_GLN_126   | H, L_GLN_126    | 2.95 | 2.16 | 20.22 |
| 4JAM.PDB | O, L_LEU_125   | N, L_ASN_128   | H, L_ASN_128    | 2.93 | 2.12 | 17.43 |
| 4JAM.PDB | OE2, L_GLU_124 | OG1, L_THR_131 | HG1, L_THR_131  | 2.56 | 1.86 | 25.46 |
| 4JAM.PDB | O, L_LEU_178   | N, L_LEU_132   | H, L_LEU_132    | 2.88 | 2.05 | 11.45 |
| 4JAM.PDB | O, L_SER_176   | N, L_CYS_134   | H, L_CYS_134    | 2.82 | 1.98 | 10.00 |
| 4JAM.PDB | O, L_THR_116   | N, L_LEU_135   | H, L_LEU_135    | 2.80 | 1.96 | 9.63  |
| 4JAM.PDB | O, L_ALA_174   | N, L_ILE_136   | H, L_ILE_136    | 2.86 | 2.07 | 20.07 |
| 4JAM.PDB | O, L_THR_114   | N, L_SER_137   | H, L_SER_137    | 2.99 | 2.19 | 17.72 |
| 4JAM.PDB | OE1, L_GLN_167 | N, L_ASP_138   | H, L_ASP_138    | 2.84 | 2.00 | 8.06  |
| 4JAM.PDB | O, L_ALA_111   | N, L_TYR_140   | H, L_TYR_140    | 2.99 | 2.16 | 14.54 |
| 4JAM.PDB | O, L_GLN_194   | N, L_ALA_147   | H, L_ALA_147    | 2.82 | 1.99 | 11.47 |
| 4JAM.PDB | OG, L_SER_176  | NE1, L_TRP_148 | HE1, L_TRP_148  | 2.87 | 2.03 | 8.58  |
| 4JAM.PDB | O, L_SER_192   | N, L_LYS_149   | H, L_LYS_149    | 2.97 | 2.15 | 15.62 |
| 4JAM.PDB | OE1, L_GLU_203 | NZ, L_LYS_149  | HZ2, L_LYS_149  | 2.76 | 1.94 | 19.38 |
| 4JAM.PDB | O, L_SER_153   | N, L_ALA_150   | H, L_ALA_150    | 2.77 | 1.99 | 21.36 |
| 4JAM.PDB | O, L_SER_190   | N, L_ASP_151   | H, L_ASP_151    | 2.76 | 1.91 | 6.56  |
| 4JAM.PDB | O, L_ALA_150   | N, L_SER_153   | H, L_SER_153    | 2.98 | 2.14 | 10.89 |
| 4JAM.PDB | O, L_TRP_148   | N, L_VAL_155   | H, L_VAL_155    | 2.93 | 2.10 | 14.25 |
| 4JAM.PDB | O, L_TYR_177   | N, L_GLU_160   | H, L_GLU_160    | 2.98 | 2.18 | 18.13 |
| 4JAM.PDB | O, L_SER_175   | N, L_THR_162   | H, L_THR_162    | 2.83 | 2.01 | 13.96 |
| 4JAM.PDB | O, L_ALA_173   | N, L_SER_165   | H, L_SER_165    | 2.87 | 2.08 | 18.46 |
| 4JAM.PDB | O, L_LYS_171   | N, L_GLN_167   | H, L_GLN_167    | 2.72 | 1.88 | 10.56 |
| 4JAM.PDB | OD1, L_ASN_169 | N, L_LYS_171   | H, L_LYS_171    | 2.95 | 2.10 | 8.57  |
| 4JAM.PDB | O, L_PHE_139   | N, L_TYR_172   | H, L_TYR_172    | 2.85 | 2.06 | 19.58 |
| 4JAM.PDB | O, L_SER_165   | N, L_ALA_173   | H, L_ALA_173    | 2.90 | 2.09 | 17.11 |
| 4JAM.PDB | O, L_ILE_136   | N, L_ALA_174   | H, L_ALA_174    | 2.73 | 1.92 | 17.17 |
| 4JAM.PDB | OG1, L_THR_162 | N, L_SER_175   | H, L_SER_175    | 2.85 | 2.04 | 16.03 |
| 4JAM.PDB | O, L_CYS_134   | N, L_SER_176   | H, L_SER_176    | 2.90 | 2.09 | 17.03 |
| 4JAM.PDB | O, L_GLU_160   | N, L_TYR_177   | H, L_TYR_177    | 2.83 | 2.06 | 21.58 |
| 4JAM.PDB | O, L_GLY_158   | N, L_SER_179   | H, L_SER_179    | 2.81 | 1.99 | 14.68 |
| 4JAM.PDB | OE1, L_GLN_184 | N, L_THR_181   | H, L_THR_181    | 2.99 | 2.16 | 13.42 |
| 4JAM.PDB | OG1, L_THR_181 | N, L_GLN_184   | H, L_GLN_184    | 2.98 | 2.15 | 12.48 |
| 4JAM.PDB | O, L_PRO_182   | N, L_LYS_186   | H, L_LYS_186    | 2.91 | 2.10 | 17.39 |
| 4JAM.PDB | O, L_GLN_184   | ND1, L_HIS_188 | HD1, L_HIS_188  | 2.79 | 1.96 | 11.98 |
| 4JAM.PDB | O, L_VAL_206   | N, L_TYR_191   | H, L_TYR_191    | 2.94 | 2.12 | 15.63 |
| 4JAM.PDB | O, L_LYS_149   | N, L_SER_192   | H, L_SER_192    | 2.93 | 2.14 | 19.54 |
| 4JAM.PDB | O, L_LYS_204   | N, L_CYS_193   | H, L_CYS_193    | 2.94 | 2.17 | 21.83 |
| 4JAM.PDB | O, L_ALA_147   | N, L_GLN_194   | H, L_GLN_194    | 2.78 | 1.94 | 10.07 |

|          |               |                |                |      |      |       |
|----------|---------------|----------------|----------------|------|------|-------|
| 4JAM.PDB | O, L_VAL_202  | N, L_VAL_195   | H, L_VAL_195   | 2.79 | 1.94 | 8.00  |
| 4JAM.PDB | O, L_THR_145  | N, L_THR_196   | H, L_THR_196   | 2.89 | 2.05 | 11.25 |
| 4JAM.PDB | O, L_SER_200  | N, L_HIS_197   | H, L_HIS_197   | 2.89 | 2.06 | 12.19 |
| 4JAM.PDB | O, L_PRO_141  | NE2, L_HIS_197 | HE2, L_HIS_197 | 2.88 | 2.09 | 19.08 |
| 4JAM.PDB | O, L_HIS_197  | N, L_SER_200   | H, L_SER_200   | 2.90 | 2.08 | 13.58 |
| 4JAM.PDB | O, B_THR_201  | N, L_THR_201   | H, L_THR_201   | 2.84 | 2.04 | 18.18 |
| 4JAM.PDB | O, L_VAL_195  | N, L_VAL_202   | H, L_VAL_202   | 2.85 | 2.05 | 16.95 |
| 4JAM.PDB | O, B_GLY_199  | N, L_GLU_203   | H, L_GLU_203   | 2.91 | 2.13 | 21.03 |
| 4JAM.PDB | O, L_CYS_193  | N, L_LYS_204   | H, L_LYS_204   | 2.98 | 2.16 | 14.76 |
| 4JAM.PDB | OG, L_SER_192 | OG1, L_THR_205 | HG1, L_THR_205 | 2.80 | 2.01 | 12.51 |
| 4JAM.PDB | O, L_TYR_191  | N, L_VAL_206   | H, L_VAL_206   | 2.94 | 2.11 | 11.22 |
| 4JAM.PDB | O, A_SER_25   | N, A_GLN_3     | H, A_GLN_3     | 2.94 | 2.10 | 9.95  |
| 4JAM.PDB | O, A_THR_23   | N, A_GLN_5     | H, A_GLN_5     | 2.89 | 2.07 | 13.60 |
| 4JAM.PDB | O, A_THR_21   | N, A_SER_7     | H, A_SER_7     | 2.82 | 2.01 | 14.85 |
| 4JAM.PDB | O, A_SER_110  | N, A_VAL_12    | H, A_VAL_12    | 2.99 | 2.19 | 18.50 |
| 4JAM.PDB | O, A_THR_112  | N, A_SER_14    | H, A_SER_14    | 2.90 | 2.06 | 9.18  |
| 4JAM.PDB | O, A_VAL_82C  | N, A_SER_15    | H, A_SER_15    | 2.89 | 2.08 | 16.29 |
| 4JAM.PDB | O, A_LEU_82   | N, A_LEU_18    | H, A_LEU_18    | 2.70 | 1.88 | 14.19 |
| 4JAM.PDB | O, A_LEU_80   | N, A_LEU_20    | H, A_LEU_20    | 2.81 | 1.98 | 11.56 |
| 4JAM.PDB | O, A_PHE_78   | N, A_CYS_22    | H, A_CYS_22    | 2.83 | 2.07 | 24.51 |
| 4JAM.PDB | O, A_GLN_5    | N, A_THR_23    | H, A_THR_23    | 2.83 | 1.99 | 10.35 |
| 4JAM.PDB | O, A_ASP_76   | N, A_VAL_24    | H, A_VAL_24    | 2.78 | 1.94 | 10.44 |
| 4JAM.PDB | O, A_GLN_3    | N, A_SER_25    | H, A_SER_25    | 2.88 | 2.06 | 13.90 |
| 4JAM.PDB | O, A_LEU_95   | N, A_TYR_33    | H, A_TYR_33    | 2.74 | 1.91 | 11.80 |
| 4JAM.PDB | O, A_ILE_51   | N, A_TRP_34    | H, A_TRP_34    | 2.90 | 2.16 | 25.25 |
| 4JAM.PDB | OE1, A_GLU_75 | NE1, A_TRP_34  | HE1, A_TRP_34  | 2.65 | 1.81 | 8.69  |
| 4JAM.PDB | O, A_ALA_93   | N, A_SER_35    | H, A_SER_35    | 2.81 | 1.97 | 10.90 |
| 4JAM.PDB | O, A_GLY_49   | N, A_TRP_36    | H, A_TRP_36    | 2.88 | 2.06 | 14.67 |
| 4JAM.PDB | O, A_PHE_91   | N, A_LEU_37    | H, A_LEU_37    | 2.78 | 1.96 | 15.17 |
| 4JAM.PDB | O, A_GLU_46   | N, A_ARG_38    | H, A_ARG_38    | 2.85 | 2.04 | 17.56 |
| 4JAM.PDB | OH, A_TYR_90  | NH1, A_ARG_38  | HH11, A_ARG_38 | 2.87 | 2.07 | 18.01 |
| 4JAM.PDB | OD1, A_ASP_86 | NH1, A_ARG_38  | HH12, A_ARG_38 | 2.79 | 1.96 | 13.17 |
| 4JAM.PDB | O, A_VAL_89   | N, A_LEU_39    | H, A_LEU_39    | 2.82 | 2.05 | 21.84 |
| 4JAM.PDB | OG, A_SER_40  | N, A_LYS_43    | H, A_LYS_43    | 2.68 | 1.90 | 20.68 |
| 4JAM.PDB | O, A_SER_40   | N, A_GLY_44    | H, A_GLY_44    | 2.72 | 2.01 | 28.80 |
| 4JAM.PDB | O, A_ARG_38   | N, A_GLU_46    | H, A_GLU_46    | 2.77 | 1.99 | 21.09 |
| 4JAM.PDB | O, A_TRP_36   | N, A_ILE_48    | H, A_ILE_48    | 2.90 | 2.07 | 12.30 |
| 4JAM.PDB | O, A_ASN_58   | N, A_TYR_50    | H, A_TYR_50    | 2.95 | 2.18 | 21.50 |
| 4JAM.PDB | O, A_TRP_34   | N, A_ILE_51    | H, A_ILE_51    | 2.90 | 2.16 | 25.67 |
| 4JAM.PDB | O, A_GLU_56   | N, A_PHE_52    | H, A_PHE_52    | 2.91 | 2.08 | 12.28 |
| 4JAM.PDB | O, A_PHE_52   | N, A_GLY_55    | H, A_GLY_55    | 2.79 | 1.95 | 9.90  |
| 4JAM.PDB | O, A_ILE_48   | N, A_SER_60    | H, A_SER_60    | 2.88 | 2.02 | 3.37  |
| 4JAM.PDB | O, A_SER_60   | N, A_LEU_63    | H, A_LEU_63    | 2.89 | 2.04 | 9.01  |
| 4JAM.PDB | O, A_ARG_82A  | NE, A_ARG_66   | HE, A_ARG_66   | 2.88 | 2.02 | 3.98  |
| 4JAM.PDB | OD2, A_ASP_86 | NH2, A_ARG_66  | HH22, A_ARG_66 | 2.34 | 1.63 | 27.75 |
| 4JAM.PDB | O, A_ARG_81   | N, A_SER_68    | H, A_SER_68    | 2.87 | 2.07 | 18.65 |
| 4JAM.PDB | OH, A_TYR_59  | N, A_ILE_69    | H, A_ILE_69    | 2.97 | 2.13 | 12.03 |
| 4JAM.PDB | O, A_ASP_72   | N, A_GLU_75    | H, A_GLU_75    | 2.93 | 2.09 | 9.42  |
| 4JAM.PDB | O, A_CYS_22   | N, A_PHE_78    | H, A_PHE_78    | 2.92 | 2.13 | 18.49 |
| 4JAM.PDB | O, A_SER_70   | N, A_SER_79    | H, A_SER_79    | 2.85 | 2.07 | 21.83 |
| 4JAM.PDB | O, A_LEU_20   | N, A_LEU_80    | H, A_LEU_80    | 2.84 | 2.00 | 11.63 |
| 4JAM.PDB | O, A_SER_68   | N, A_ARG_81    | H, A_ARG_81    | 2.88 | 2.05 | 14.04 |
| 4JAM.PDB | O, A_LEU_18   | N, A_LEU_82    | H, A_LEU_82    | 2.75 | 1.94 | 16.17 |
| 4JAM.PDB | O, A_ARG_66   | N, A_ARG_82A   | H, A_ARG_82A   | 2.95 | 2.11 | 11.99 |
| 4JAM.PDB | OD2, A_ASP_86 | N, A_THR_83    | H, A_THR_83    | 2.96 | 2.22 | 25.50 |
| 4JAM.PDB | O, A_THR_83   | N, A_ASP_86    | H, A_ASP_86    | 2.86 | 2.09 | 22.70 |
| 4JAM.PDB | O, A_SER_107  | N, A_TYR_90    | H, A_TYR_90    | 2.85 | 2.01 | 8.55  |
| 4JAM.PDB | O, A_LEU_37   | N, A_PHE_91    | H, A_PHE_91    | 2.75 | 1.90 | 5.20  |

|          |                |                |                 |      |      |       |
|----------|----------------|----------------|-----------------|------|------|-------|
| 4JAM.PDB | O, A_SER_35    | N, A_ALA_93    | H, A_ALA_93     | 2.93 | 2.20 | 27.04 |
| 4JAM.PDB | O, A_TYR_33    | N, A_LEU_95    | H, A_LEU_95     | 3.00 | 2.25 | 25.86 |
| 4JAM.PDB | O, A_GLY_31    | N, A_ARG_97    | H, A_ARG_97     | 2.91 | 2.06 | 7.51  |
| 4JAM.PDB | OH, B_TYR_36   | N, A_PHE_100E  | H, A_PHE_100E   | 2.90 | 2.09 | 16.41 |
| 4JAM.PDB | O, A_CYS_92    | N, A_GLY_104   | H, A_GLY_104    | 2.77 | 1.93 | 10.11 |
| 4JAM.PDB | O, A_TYR_90    | N, A_SER_107   | H, A_SER_107    | 2.89 | 2.11 | 20.38 |
| 4JAM.PDB | O, A_SER_7     | OG, A_SER_107  | HG, A_SER_107   | 2.54 | 1.76 | 15.69 |
| 4JAM.PDB | O, A_ALA_88    | N, A_VAL_109   | H, A_VAL_109    | 2.91 | 2.06 | 7.84  |
| 4JAM.PDB | O, A_GLY_10    | N, A_SER_110   | H, A_SER_110    | 2.93 | 2.15 | 20.41 |
| 4JAM.PDB | OG1, A_THR_87  | N, A_VAL_111   | H, A_VAL_111    | 2.97 | 2.12 | 7.94  |
| 4JAM.PDB | O, A_PHE_146   | N, A_LYS_117   | H, A_LYS_117    | 2.85 | 2.02 | 10.61 |
| 4JAM.PDB | O, A_ASP_144   | NZ, A_LYS_117  | HZ2, A_LYS_117  | 2.79 | 1.99 | 21.27 |
| 4JAM.PDB | O, A_LYS_143   | N, A_SER_120   | H, A_SER_120    | 2.98 | 2.15 | 12.51 |
| 4JAM.PDB | O, A_LEU_141   | N, A_PHE_122   | H, A_PHE_122    | 2.89 | 2.06 | 12.92 |
| 4JAM.PDB | O, A_GLY_139   | N, A_LEU_124   | H, A_LEU_124    | 2.77 | 1.92 | 5.35  |
| 4JAM.PDB | O, A_THR_131   | N, A_GLY_134   | H, A_GLY_134    | 2.80 | 2.06 | 25.22 |
| 4JAM.PDB | O, A_VAL_184   | N, A_ALA_136   | H, A_ALA_136    | 2.84 | 2.01 | 14.16 |
| 4JAM.PDB | O, A_LEU_124   | N, A_GLY_139   | H, A_GLY_139    | 2.85 | 2.09 | 22.70 |
| 4JAM.PDB | O, A_SER_180   | N, A_CYS_140   | H, A_CYS_140    | 2.87 | 2.09 | 20.45 |
| 4JAM.PDB | O, A_PHE_122   | N, A_LEU_141   | H, A_LEU_141    | 2.78 | 1.94 | 10.64 |
| 4JAM.PDB | O, A_LEU_178   | N, A_VAL_142   | H, A_VAL_142    | 2.76 | 1.91 | 7.10  |
| 4JAM.PDB | O, A_SER_120   | N, A_LYS_143   | H, A_LYS_143    | 2.81 | 1.96 | 7.64  |
| 4JAM.PDB | O, A_TYR_176   | N, A_TYR_145   | H, A_TYR_145    | 2.94 | 2.13 | 16.66 |
| 4JAM.PDB | O, A_LYS_117   | N, A_PHE_146   | H, A_PHE_146    | 2.87 | 2.06 | 16.70 |
| 4JAM.PDB | O, A_ASN_199   | N, A_THR_151   | H, A_THR_151    | 2.95 | 2.15 | 18.15 |
| 4JAM.PDB | O, A_ASN_197   | N, A_SER_153   | H, A_SER_153    | 2.87 | 2.06 | 16.36 |
| 4JAM.PDB | OG, A_SER_180  | NE1, A_TRP_154 | HE1, A_TRP_154  | 2.95 | 2.10 | 7.51  |
| 4JAM.PDB | O, A_ILE_195   | N, A_ASN_155   | H, A_ASN_155    | 2.80 | 1.97 | 12.29 |
| 4JAM.PDB | O, A_THR_193   | ND2, A_ASN_155 | HD22, A_ASN_155 | 2.86 | 2.05 | 16.16 |
| 4JAM.PDB | OD1, A_ASN_197 | N, A_SER_156   | H, A_SER_156    | 2.73 | 1.93 | 18.38 |
| 4JAM.PDB | O, A_TRP_154   | N, A_GLY_157   | H, A_GLY_157    | 2.96 | 2.18 | 20.46 |
| 4JAM.PDB | O, A_VAL_181   | N, A_HIS_164   | H, A_HIS_164    | 2.77 | 1.93 | 10.79 |
| 4JAM.PDB | O, A_SER_179   | N, A_PHE_166   | H, A_PHE_166    | 2.88 | 2.02 | 6.82  |
| 4JAM.PDB | O, A_SER_177   | N, A_VAL_169   | H, A_VAL_169    | 2.89 | 2.12 | 22.70 |
| 4JAM.PDB | O, A_LEU_175   | N, A_GLN_171   | H, A_GLN_171    | 2.93 | 2.09 | 10.51 |
| 4JAM.PDB | O, A_TYR_145   | N, A_TYR_176   | H, A_TYR_176    | 2.79 | 1.94 | 7.72  |
| 4JAM.PDB | O, A_VAL_142   | N, A_LEU_178   | H, A_LEU_178    | 2.85 | 2.07 | 20.92 |
| 4JAM.PDB | O, A_HIS_164   | N, A_VAL_181   | H, A_VAL_181    | 2.86 | 2.02 | 11.33 |
| 4JAM.PDB | O, A_LEU_138   | N, A_VAL_182   | H, A_VAL_182    | 2.71 | 1.88 | 13.50 |
| 4JAM.PDB | O, A_GLY_162   | N, A_THR_183   | H, A_THR_183    | 2.84 | 2.03 | 17.10 |
| 4JAM.PDB | O, A_ALA_136   | N, A_VAL_184   | H, A_VAL_184    | 2.93 | 2.09 | 11.23 |
| 4JAM.PDB | O, A_PRO_185   | N, A_SER_188   | H, A_SER_188    | 2.84 | 2.02 | 14.21 |
| 4JAM.PDB | O, A_SER_188   | N, A_GLN_192   | H, A_GLN_192    | 2.88 | 2.11 | 21.94 |
| 4JAM.PDB | OD1, A_ASN_155 | N, A_ILE_195   | H, A_ILE_195    | 2.80 | 2.00 | 18.20 |
| 4JAM.PDB | O, A_LYS_209   | N, A_CYS_196   | H, A_CYS_196    | 2.93 | 2.15 | 20.80 |
| 4JAM.PDB | O, A_SER_153   | N, A_ASN_197   | H, A_ASN_197    | 2.73 | 1.88 | 7.40  |
| 4JAM.PDB | OD1, A_ASP_208 | ND2, A_ASN_197 | HD21, A_ASN_197 | 2.90 | 2.10 | 17.20 |
| 4JAM.PDB | O, A_VAL_207   | N, A_VAL_198   | H, A_VAL_198    | 2.77 | 1.91 | 4.34  |
| 4JAM.PDB | O, A_THR_151   | N, A_ASN_199   | H, A_ASN_199    | 2.89 | 2.04 | 9.44  |
| 4JAM.PDB | O, A_THR_205   | N, A_HIS_200   | H, A_HIS_200    | 2.91 | 2.05 | 2.97  |
| 4JAM.PDB | OG, A_SER_203  | ND1, A_HIS_200 | HD1, A_HIS_200  | 2.74 | 1.92 | 14.00 |
| 4JAM.PDB | O, A_PRO_147   | NE2, A_HIS_200 | HE2, A_HIS_200  | 2.78 | 1.94 | 11.18 |
| 4JAM.PDB | O, A_LYS_201   | N, A_ASN_204   | H, A_ASN_204    | 2.92 | 2.09 | 11.42 |
| 4JAM.PDB | O, A_VAL_198   | N, A_VAL_207   | H, A_VAL_207    | 2.80 | 2.00 | 17.03 |
| 4JAM.PDB | O, A_TYR_194   | N, A_VAL_211   | H, A_VAL_211    | 2.81 | 1.96 | 8.45  |
| 4JAM.PDB | O, B_TYR_86    | NE2, B_GLN_6   | HE22, B_GLN_6   | 2.90 | 2.06 | 9.94  |
| 4JAM.PDB | O, B_GLN_103   | N, B_VAL_11    | H, B_VAL_11     | 2.89 | 2.06 | 12.76 |
| 4JAM.PDB | O, B_THR_105   | N, B_VAL_13    | H, B_VAL_13     | 2.98 | 2.16 | 14.79 |

|          |                |                |                |      |      |       |
|----------|----------------|----------------|----------------|------|------|-------|
| 4JAM.PDB | OE1, B_GLN_17  | N, B_SER_14    | H, B_SER_14    | 2.99 | 2.15 | 10.22 |
| 4JAM.PDB | O, B_THR_78    | N, B_GLY_16    | H, B_GLY_16    | 2.84 | 2.02 | 14.85 |
| 4JAM.PDB | O, B_ILE_75    | N, B_ALA_19    | H, B_ALA_19    | 2.87 | 2.07 | 18.88 |
| 4JAM.PDB | O, B_LEU_73    | N, B_ILE_21    | H, B_ILE_21    | 2.84 | 2.01 | 13.27 |
| 4JAM.PDB | O, B_ALA_71    | N, B_CYS_23    | H, B_CYS_23    | 2.84 | 2.13 | 29.21 |
| 4JAM.PDB | O, B_THR_5     | N, B_SER_24    | H, B_SER_24    | 2.89 | 2.07 | 16.00 |
| 4JAM.PDB | O, B_SER_69    | N, B_ALA_26    | H, B_ALA_26    | 2.97 | 2.15 | 14.49 |
| 4JAM.PDB | OD1, B_ASN_51  | N, B_VAL_33    | H, B_VAL_33    | 2.90 | 2.09 | 17.62 |
| 4JAM.PDB | O, B_ILE_48    | N, B_TRP_35    | H, B_TRP_35    | 2.87 | 2.06 | 17.28 |
| 4JAM.PDB | O, B_TYR_87    | N, B_TYR_36    | H, B_TYR_36    | 2.80 | 1.98 | 15.33 |
| 4JAM.PDB | O, B_GLU_45    | N, B_GLN_37    | H, B_GLN_37    | 2.84 | 2.00 | 10.11 |
| 4JAM.PDB | O, B_ASP_85    | N, B_VAL_38    | H, B_VAL_38    | 2.74 | 1.98 | 24.01 |
| 4JAM.PDB | O, B_TRP_35    | N, B_VAL_47    | H, B_VAL_47    | 2.91 | 2.08 | 11.41 |
| 4JAM.PDB | O, B_LYS_53    | N, B_PHE_49    | H, B_PHE_49    | 2.82 | 2.00 | 15.86 |
| 4JAM.PDB | O, B_VAL_33    | N, B_ASN_51    | H, B_ASN_51    | 2.89 | 2.05 | 8.66  |
| 4JAM.PDB | O, B_PHE_49    | N, B_LYS_53    | H, B_LYS_53    | 2.88 | 2.08 | 17.59 |
| 4JAM.PDB | OE1, B_GLU_50  | NZ, B_LYS_53   | HZ1, B_LYS_53  | 2.75 | 1.92 | 17.48 |
| 4JAM.PDB | OD2, B_ASP_82  | NE, B_ARG_61   | HE, B_ARG_61   | 2.84 | 2.00 | 9.73  |
| 4JAM.PDB | OD1, B_ASP_82  | NH2, B_ARG_61  | HH21, B_ARG_61 | 2.90 | 2.08 | 13.97 |
| 4JAM.PDB | O, B_THR_74    | N, B_SER_63    | H, B_SER_63    | 2.90 | 2.11 | 18.40 |
| 4JAM.PDB | O, B_THR_72    | N, B_SER_65    | H, B_SER_65    | 2.98 | 2.21 | 22.62 |
| 4JAM.PDB | O, B_GLY_68    | NZ, B_LYS_66   | HZ2, B_LYS_66  | 2.76 | 1.98 | 23.05 |
| 4JAM.PDB | O, B_ALA_26    | NZ, B_LYS_66   | HZ3, B_LYS_66  | 2.92 | 2.09 | 18.23 |
| 4JAM.PDB | O, B_THR_70    | N, B_SER_67    | H, B_SER_67    | 2.96 | 2.13 | 11.34 |
| 4JAM.PDB | O, B_CYS_23    | N, B_ALA_71    | H, B_ALA_71    | 2.82 | 1.99 | 11.72 |
| 4JAM.PDB | O, B_SER_65    | N, B_THR_72    | H, B_THR_72    | 2.73 | 1.91 | 13.48 |
| 4JAM.PDB | O, B_ILE_21    | N, B_LEU_73    | H, B_LEU_73    | 2.73 | 1.91 | 13.67 |
| 4JAM.PDB | O, B_SER_63    | N, B_THR_74    | H, B_THR_74    | 2.81 | 1.96 | 4.99  |
| 4JAM.PDB | O, B_ALA_19    | N, B_ILE_75    | H, B_ILE_75    | 2.81 | 1.98 | 12.21 |
| 4JAM.PDB | O, B_ARG_61    | N, B_ARG_76    | H, B_ARG_76    | 2.93 | 2.11 | 14.36 |
| 4JAM.PDB | O, B_GLN_17    | OG1, B_THR_78  | HG1, B_THR_78  | 2.80 | 2.08 | 24.26 |
| 4JAM.PDB | OD2, B_ASP_82  | N, B_GLN_79    | H, B_GLN_79    | 2.86 | 2.01 | 7.86  |
| 4JAM.PDB | O, B_GLN_79    | N, B_ASP_82    | H, B_ASP_82    | 2.76 | 1.93 | 12.45 |
| 4JAM.PDB | O, B_VAL_38    | N, B_ASP_85    | H, B_ASP_85    | 2.95 | 2.11 | 9.64  |
| 4JAM.PDB | O, B_THR_102   | N, B_TYR_86    | H, B_TYR_86    | 2.85 | 2.02 | 14.13 |
| 4JAM.PDB | O, B_TYR_36    | N, B_TYR_87    | H, B_TYR_87    | 2.90 | 2.10 | 18.08 |
| 4JAM.PDB | O, B_VAL_97    | N, B_VAL_90    | H, B_VAL_90    | 2.97 | 2.14 | 13.94 |
| 4JAM.PDB | O, B_THR_95A   | N, B_ASP_92    | H, B_ASP_92    | 2.89 | 2.11 | 20.40 |
| 4JAM.PDB | OD2, B_ASP_92  | N, B_PHE_94    | H, B_PHE_94    | 3.00 | 2.22 | 21.54 |
| 4JAM.PDB | OD2, B_ASP_92  | N, B_SER_95    | H, B_SER_95    | 2.88 | 2.04 | 10.50 |
| 4JAM.PDB | O, B_CYS_88    | N, B_GLY_99    | H, B_GLY_99    | 2.86 | 2.06 | 17.89 |
| 4JAM.PDB | O, B_TYR_86    | N, B_THR_102   | H, B_THR_102   | 2.89 | 2.09 | 19.07 |
| 4JAM.PDB | O, B_PRO_7     | OG1, B_THR_102 | HG1, B_THR_102 | 2.60 | 1.79 | 5.95  |
| 4JAM.PDB | O, B_PRO_8     | N, B_GLN_103   | H, B_GLN_103   | 2.92 | 2.06 | 5.49  |
| 4JAM.PDB | O, B_ALA_84    | N, B_VAL_104   | H, B_VAL_104   | 2.91 | 2.06 | 7.09  |
| 4JAM.PDB | O, B_VAL_11    | N, B_THR_105   | H, B_THR_105   | 2.91 | 2.10 | 16.07 |
| 4JAM.PDB | OE2, B_GLU_83  | N, B_VAL_106   | H, B_VAL_106   | 2.95 | 2.13 | 15.31 |
| 4JAM.PDB | O, B_VAL_13    | N, B_LEU_106A  | H, B_LEU_106A  | 2.82 | 1.99 | 13.48 |
| 4JAM.PDB | O, B_TYR_140   | N, B_ALA_111   | H, B_ALA_111   | 2.90 | 2.06 | 11.74 |
| 4JAM.PDB | O, B_SER_137   | N, B_THR_114   | H, B_THR_114   | 2.85 | 2.03 | 14.77 |
| 4JAM.PDB | O, B_LEU_135   | N, B_THR_116   | H, B_THR_116   | 2.92 | 2.10 | 15.29 |
| 4JAM.PDB | O, B_VAL_133   | N, B_PHE_118   | H, B_PHE_118   | 2.84 | 2.00 | 12.03 |
| 4JAM.PDB | O, B_SER_122   | N, B_GLN_126   | H, B_GLN_126   | 2.94 | 2.16 | 20.43 |
| 4JAM.PDB | O, B_LEU_125   | N, B_ASN_128   | H, B_ASN_128   | 2.88 | 2.08 | 18.55 |
| 4JAM.PDB | OE2, B_GLU_124 | OG1, B_THR_131 | HG1, B_THR_131 | 2.53 | 1.82 | 24.30 |
| 4JAM.PDB | O, B_LEU_178   | N, B_LEU_132   | H, B_LEU_132   | 2.89 | 2.06 | 12.17 |
| 4JAM.PDB | O, B_SER_176   | N, B_CYS_134   | H, B_CYS_134   | 2.78 | 1.93 | 7.29  |
| 4JAM.PDB | O, B_THR_116   | N, B_LEU_135   | H, B_LEU_135   | 2.79 | 1.95 | 9.74  |

|          |                |                |                 |      |      |       |
|----------|----------------|----------------|-----------------|------|------|-------|
| 4JAM.PDB | O, B_ALA_174   | N, B_ILE_136   | H, B_ILE_136    | 2.88 | 2.07 | 16.56 |
| 4JAM.PDB | O, B_THR_114   | N, B_SER_137   | H, B_SER_137    | 2.91 | 2.10 | 17.42 |
| 4JAM.PDB | OE1, B_GLN_167 | N, B_ASP_138   | H, B_ASP_138    | 2.91 | 2.10 | 16.41 |
| 4JAM.PDB | O, B_ALA_111   | N, B_TYR_140   | H, B_TYR_140    | 2.91 | 2.10 | 17.01 |
| 4JAM.PDB | O, B_PRO_141   | N, B_ALA_143   | H, B_ALA_143    | 2.99 | 2.27 | 28.43 |
| 4JAM.PDB | O, B_THR_196   | N, B_THR_145   | H, B_THR_145    | 2.96 | 2.12 | 11.72 |
| 4JAM.PDB | O, B_GLN_194   | N, B_ALA_147   | H, B_ALA_147    | 2.86 | 2.01 | 7.10  |
| 4JAM.PDB | OG, B_SER_176  | NE1, B_TRP_148 | HE1, B_TRP_148  | 2.84 | 1.99 | 9.50  |
| 4JAM.PDB | O, B_SER_192   | N, B_LYS_149   | H, B_LYS_149    | 2.91 | 2.11 | 17.98 |
| 4JAM.PDB | O, B_SER_153   | N, B_ALA_150   | H, B_ALA_150    | 2.77 | 1.99 | 21.31 |
| 4JAM.PDB | O, B_SER_190   | N, B_ASP_151   | H, B_ASP_151    | 2.80 | 1.95 | 5.68  |
| 4JAM.PDB | O, B_ALA_150   | N, B_SER_153   | H, B_SER_153    | 2.93 | 2.09 | 10.65 |
| 4JAM.PDB | O, B_TRP_148   | N, B_VAL_155   | H, B_VAL_155    | 2.88 | 2.08 | 19.02 |
| 4JAM.PDB | O, B_SER_175   | N, B_THR_162   | H, B_THR_162    | 2.91 | 2.09 | 13.86 |
| 4JAM.PDB | O, B_ALA_173   | N, B_SER_165   | H, B_SER_165    | 2.90 | 2.11 | 18.23 |
| 4JAM.PDB | O, B_LYS_171   | N, B_GLN_167   | H, B_GLN_167    | 2.72 | 1.89 | 12.32 |
| 4JAM.PDB | OD1, B_ASP_138 | ND2, B_ASN_169 | HD22, B_ASN_169 | 2.93 | 2.14 | 18.27 |
| 4JAM.PDB | O, B_GLN_167   | N, B_ASN_170   | H, B_ASN_170    | 2.86 | 2.04 | 15.66 |
| 4JAM.PDB | OD1, B_ASN_169 | N, B_LYS_171   | H, B_LYS_171    | 2.94 | 2.09 | 7.42  |
| 4JAM.PDB | O, B_PHE_139   | N, B_TYR_172   | H, B_TYR_172    | 2.86 | 2.05 | 16.14 |
| 4JAM.PDB | O, B_SER_165   | N, B_ALA_173   | H, B_ALA_173    | 2.83 | 2.03 | 18.01 |
| 4JAM.PDB | O, B_ILE_136   | N, B_ALA_174   | H, B_ALA_174    | 2.80 | 2.00 | 17.84 |
| 4JAM.PDB | OG1, B_THR_162 | N, B_SER_175   | H, B_SER_175    | 2.99 | 2.18 | 15.84 |
| 4JAM.PDB | O, B_CYS_134   | N, B_SER_176   | H, B_SER_176    | 2.83 | 2.04 | 19.01 |
| 4JAM.PDB | O, B_GLU_160   | N, B_TYR_177   | H, B_TYR_177    | 2.83 | 2.05 | 21.00 |
| 4JAM.PDB | O, B_GLY_158   | N, B_SER_179   | H, B_SER_179    | 2.85 | 2.02 | 11.54 |
| 4JAM.PDB | O, B_ALA_130   | N, B_LEU_180   | H, B_LEU_180    | 2.95 | 2.10 | 4.88  |
| 4JAM.PDB | OE1, B_GLN_184 | N, B_THR_181   | H, B_THR_181    | 2.84 | 2.01 | 11.32 |
| 4JAM.PDB | O, B_PRO_182   | N, B_LYS_186   | H, B_LYS_186    | 2.96 | 2.16 | 18.74 |
| 4JAM.PDB | O, B_GLN_184   | ND1, B_HIS_188 | HD1, B_HIS_188  | 2.78 | 1.95 | 11.73 |
| 4JAM.PDB | O, B_VAL_206   | N, B_TYR_191   | H, B_TYR_191    | 2.95 | 2.12 | 13.13 |
| 4JAM.PDB | O, B_LYS_149   | N, B_SER_192   | H, B_SER_192    | 2.94 | 2.14 | 18.61 |
| 4JAM.PDB | O, B_LYS_204   | N, B_CYS_193   | H, B_CYS_193    | 2.89 | 2.12 | 22.37 |
| 4JAM.PDB | O, B_ALA_147   | N, B_GLN_194   | H, B_GLN_194    | 2.78 | 1.93 | 7.25  |
| 4JAM.PDB | O, B_VAL_202   | N, B_VAL_195   | H, B_VAL_195    | 2.76 | 1.91 | 7.42  |
| 4JAM.PDB | O, B_THR_145   | N, B_THR_196   | H, B_THR_196    | 2.80 | 1.97 | 12.47 |
| 4JAM.PDB | O, B_SER_200   | N, B_HIS_197   | H, B_HIS_197    | 2.88 | 2.04 | 11.03 |
| 4JAM.PDB | O, B_ALA_143   | ND1, B_HIS_197 | HD1, B_HIS_197  | 2.86 | 2.07 | 19.34 |
| 4JAM.PDB | O, B_TYR_140   | NE2, B_HIS_197 | HE2, B_HIS_197  | 2.99 | 2.21 | 20.59 |
| 4JAM.PDB | O, L_THR_201   | N, B_THR_201   | H, B_THR_201    | 2.77 | 1.96 | 16.15 |
| 4JAM.PDB | O, B_VAL_195   | N, B_VAL_202   | H, B_VAL_202    | 2.88 | 2.09 | 18.94 |
| 4JAM.PDB | O, L_GLY_199   | N, B_GLU_203   | H, B_GLU_203    | 2.79 | 1.99 | 17.96 |
| 4JAM.PDB | O, B_CYS_193   | N, B_LYS_204   | H, B_LYS_204    | 2.99 | 2.16 | 13.66 |
| 4JAM.PDB | OG, B_SER_192  | OG1, B_THR_205 | HG1, B_THR_205  | 2.64 | 1.83 | 8.66  |
| 4JAM.PDB | O, B_TYR_191   | N, B_VAL_206   | H, B_VAL_206    | 2.87 | 2.04 | 12.78 |
| 4JAN.PDB | O, G_LEU_369   | OG1, G_THR_373 | HG1, G_THR_373  | 2.74 | 1.94 | 9.78  |
| 4JAN.PDB | OD2, G_ASP_457 | NE, G_ARG_469  | HE, G_ARG_469   | 2.84 | 2.10 | 25.29 |
| 4JAN.PDB | O, H_LEU_82    | N, H_LEU_18    | H, H_LEU_18     | 2.99 | 2.15 | 11.38 |
| 4JAN.PDB | O, H_LEU_80    | N, H_LEU_20    | H, H_LEU_20     | 2.91 | 2.08 | 12.99 |
| 4JAN.PDB | O, H_PHE_78    | N, H_CYS_22    | H, H_CYS_22     | 2.95 | 2.11 | 8.83  |
| 4JAN.PDB | O, H_LEU_95    | N, H_TYR_33    | H, H_TYR_33     | 2.93 | 2.08 | 3.54  |
| 4JAN.PDB | O, H_ALA_93    | N, H_SER_35    | H, H_SER_35     | 2.92 | 2.06 | 5.78  |
| 4JAN.PDB | O, H_GLY_49    | N, H_TRP_36    | H, H_TRP_36     | 2.83 | 2.01 | 15.38 |
| 4JAN.PDB | OE1, H_GLU_46  | NE, H_ARG_38   | HE, H_ARG_38    | 2.76 | 1.94 | 14.56 |
| 4JAN.PDB | O, H_GLU_56    | N, H_PHE_52    | H, H_PHE_52     | 2.90 | 2.07 | 12.88 |
| 4JAN.PDB | O, H_ILE_48    | N, H_SER_60    | H, H_SER_60     | 2.96 | 2.18 | 20.49 |
| 4JAN.PDB | O, H_ARG_81    | N, H_SER_68    | H, H_SER_68     | 2.97 | 2.23 | 25.47 |
| 4JAN.PDB | O, H_SER_70    | N, H_SER_79    | H, H_SER_79     | 2.76 | 2.01 | 24.12 |



|          |                 |                |                |      |      |       |
|----------|-----------------|----------------|----------------|------|------|-------|
| 4JAN.PDB | O, H_SER_68     | N, H_ARG_81    | H, H_ARG_81    | 2.78 | 1.96 | 15.76 |
| 4JAN.PDB | O, H_LEU_18     | N, H_LEU_82    | H, H_LEU_82    | 2.84 | 2.03 | 16.49 |
| 4JAN.PDB | O, H_ARG_66     | N, H_ARG_82A   | H, H_ARG_82A   | 2.86 | 2.03 | 11.31 |
| 4JAN.PDB | OD2, H_ASP_86   | N, H_THR_83    | H, H_THR_83    | 2.81 | 2.03 | 20.96 |
| 4JAN.PDB | O, H_LEU_39     | N, H_VAL_89    | H, H_VAL_89    | 2.99 | 2.16 | 12.27 |
| 4JAN.PDB | O, H_LEU_37     | N, H_PHE_91    | H, H_PHE_91    | 2.53 | 1.78 | 23.52 |
| 4JAN.PDB | O, H_SER_35     | N, H_ALA_93    | H, H_ALA_93    | 3.00 | 2.21 | 20.09 |
| 4JAN.PDB | O, H_ARG_101    | N, H_SER_94    | H, H_SER_94    | 2.78 | 1.97 | 15.85 |
| 4JAN.PDB | OH, L_TYR_36    | N, H_PHE_100E  | H, H_PHE_100E  | 2.91 | 2.16 | 24.28 |
| 4JAN.PDB | O, H_GLY_10     | N, H_SER_110   | H, H_SER_110   | 2.97 | 2.13 | 11.49 |
| 4JAN.PDB | OG1, H_THR_87   | N, H_VAL_111   | H, H_VAL_111   | 2.78 | 1.99 | 19.23 |
| 4JAN.PDB | O, H_LYS_143    | N, H_SER_120   | H, H_SER_120   | 3.00 | 2.19 | 17.41 |
| 4JAN.PDB | O, H_GLY_139    | N, H_LEU_124   | H, H_LEU_124   | 2.67 | 1.88 | 19.71 |
| 4JAN.PDB | O, H_SER_180    | N, H_CYS_140   | H, H_CYS_140   | 2.89 | 2.12 | 21.89 |
| 4JAN.PDB | O, H_PHE_122    | N, H_LEU_141   | H, H_LEU_141   | 2.69 | 1.97 | 27.64 |
| 4JAN.PDB | O, H_LEU_178    | N, H_VAL_142   | H, H_VAL_142   | 2.93 | 2.19 | 25.68 |
| 4JAN.PDB | O, H_SER_120    | N, H_LYS_143   | H, H_LYS_143   | 2.88 | 2.07 | 16.97 |
| 4JAN.PDB | OG, H_SER_177   | N, H_ASP_144   | H, H_ASP_144   | 2.98 | 2.22 | 23.77 |
| 4JAN.PDB | O, H_TYR_176    | N, H_TYR_145   | H, H_TYR_145   | 2.92 | 2.12 | 17.16 |
| 4JAN.PDB | O, H_ASN_197    | N, H_SER_153   | H, H_SER_153   | 2.94 | 2.18 | 23.25 |
| 4JAN.PDB | OG, H_SER_180   | NE1, H_TRP_154 | HE1, H_TRP_154 | 2.82 | 2.02 | 18.56 |
| 4JAN.PDB | O, H_ILE_195    | N, H_ASN_155   | H, H_ASN_155   | 2.83 | 2.00 | 12.78 |
| 4JAN.PDB | OD2, B_ASP_92   | OG, H_SER_156  | HG, H_SER_156  | 2.50 | 1.78 | 23.90 |
| 4JAN.PDB | O, H_ASN_155    | N, H_ALA_158   | H, H_ALA_158   | 2.83 | 2.01 | 13.54 |
| 4JAN.PDB | O, H_VAL_181    | N, H_HIS_164   | H, H_HIS_164   | 2.84 | 2.13 | 28.95 |
| 4JAN.PDB | O, H_SER_179    | N, H_PHE_166   | H, H_PHE_166   | 2.95 | 2.11 | 10.08 |
| 4JAN.PDB | O, H_SER_177    | N, H_VAL_169   | H, H_VAL_169   | 2.63 | 1.81 | 14.24 |
| 4JAN.PDB | O, H_LEU_175    | N, H_GLN_171   | H, H_GLN_171   | 2.71 | 1.98 | 26.37 |
| 4JAN.PDB | O, H_GLN_171    | N, H_GLY_174   | H, H_GLY_174   | 2.90 | 2.07 | 12.23 |
| 4JAN.PDB | O, H_TYR_145    | N, H_TYR_176   | H, H_TYR_176   | 2.70 | 1.90 | 16.76 |
| 4JAN.PDB | O, H_TYR_176    | OG, H_SER_177  | HG, H_SER_177  | 2.89 | 2.11 | 14.84 |
| 4JAN.PDB | O, H_VAL_142    | N, H_LEU_178   | H, H_LEU_178   | 3.00 | 2.25 | 25.78 |
| 4JAN.PDB | O, H_LEU_138    | N, H_VAL_182   | H, H_VAL_182   | 2.90 | 2.08 | 14.87 |
| 4JAN.PDB | O, H_ALA_136    | N, H_VAL_184   | H, H_VAL_184   | 2.78 | 2.07 | 28.36 |
| 4JAN.PDB | OD1, H_ASN_155  | N, H_ILE_195   | H, H_ILE_195   | 2.84 | 2.00 | 11.14 |
| 4JAN.PDB | O, H_SER_153    | N, H_ASN_197   | H, H_ASN_197   | 2.60 | 1.74 | 3.05  |
| 4JAN.PDB | O, H_VAL_207    | N, H_VAL_198   | H, H_VAL_198   | 2.76 | 1.92 | 8.31  |
| 4JAN.PDB | O, H_THR_205    | N, H_HIS_200   | H, H_HIS_200   | 2.76 | 1.93 | 11.54 |
| 4JAN.PDB | OG, H_SER_203   | ND1, H_HIS_200 | HD1, H_HIS_200 | 2.81 | 1.96 | 7.87  |
| 4JAN.PDB | O, H_PRO_147    | NE2, H_HIS_200 | HE2, H_HIS_200 | 2.77 | 1.95 | 14.57 |
| 4JAN.PDB | OD1, H_ASN_199  | NZ, H_LYS_201  | HZ2, H_LYS_201 | 2.90 | 2.05 | 14.58 |
| 4JAN.PDB | O, H_LYS_201    | N, H_ASN_204   | H, H_ASN_204   | 2.80 | 1.95 | 7.81  |
| 4JAN.PDB | OE1, L_GLU_123  | NZ, H_LYS_209  | HZ1, H_LYS_209 | 2.89 | 2.13 | 26.71 |
| 4JAN.PDB | O, L_SER_24     | N, L_THR_5     | H, L_THR_5     | 2.90 | 2.04 | 2.68  |
| 4JAN.PDB | OG1, L_THR_102  | NE2, L_GLN_6   | HE21, L_GLN_6  | 2.82 | 2.05 | 22.18 |
| 4JAN.PDB | O, L_THR_5      | N, L_SER_24    | H, L_SER_24    | 2.97 | 2.16 | 17.64 |
| 4JAN.PDB | OD1, H_ASN_100B | ND2, L_ASN_32  | HD21, L_ASN_32 | 2.76 | 1.91 | 6.44  |
| 4JAN.PDB | OD1, L_ASN_51   | N, L_VAL_33    | H, L_VAL_33    | 2.69 | 1.88 | 15.86 |
| 4JAN.PDB | O, L_ILE_48     | N, L_TRP_35    | H, L_TRP_35    | 2.76 | 1.98 | 21.52 |
| 4JAN.PDB | O, L_TYR_87     | N, L_TYR_36    | H, L_TYR_36    | 2.91 | 2.21 | 29.89 |
| 4JAN.PDB | O, L_GLU_45     | N, L_GLN_37    | H, L_GLN_37    | 2.95 | 2.11 | 10.30 |
| 4JAN.PDB | OH, L_TYR_86    | NE2, L_GLN_37  | HE21, L_GLN_37 | 2.95 | 2.09 | 6.42  |
| 4JAN.PDB | O, L_ASP_85     | N, L_VAL_38    | H, L_VAL_38    | 2.79 | 2.03 | 23.50 |
| 4JAN.PDB | O, L_LYS_53     | N, L_PHE_49    | H, L_PHE_49    | 2.88 | 2.09 | 19.26 |
| 4JAN.PDB | O, L_VAL_33     | N, L_ASN_51    | H, L_ASN_51    | 2.69 | 1.87 | 15.52 |
| 4JAN.PDB | O, L_GLU_50     | N, L_TYR_52    | H, L_TYR_52    | 2.84 | 2.11 | 27.26 |
| 4JAN.PDB | O, L_THR_70     | N, L_SER_67    | H, L_SER_67    | 3.00 | 2.15 | 8.93  |
| 4JAN.PDB | O, L_ILE_21     | N, L_LEU_73    | H, L_LEU_73    | 2.82 | 1.99 | 12.33 |

|          |                |                |                |      |      |       |
|----------|----------------|----------------|----------------|------|------|-------|
| 4JAN.PDB | O, L_THR_102   | N, L_TYR_86    | H, L_TYR_86    | 2.80 | 1.98 | 15.29 |
| 4JAN.PDB | O, L_TYR_36    | N, L_TYR_87    | H, L_TYR_87    | 2.98 | 2.17 | 16.36 |
| 4JAN.PDB | OE1, L_GLN_6   | N, L_CYS_88    | H, L_CYS_88    | 2.79 | 1.93 | 6.67  |
| 4JAN.PDB | O, L_CYS_34    | N, L_GLN_89    | H, L_GLN_89    | 2.97 | 2.18 | 19.32 |
| 4JAN.PDB | O, L_VAL_97    | N, L_VAL_90    | H, L_VAL_90    | 2.89 | 2.10 | 20.39 |
| 4JAN.PDB | OD2, L_ASP_92  | N, L_PHE_94    | H, L_PHE_94    | 2.63 | 1.85 | 20.98 |
| 4JAN.PDB | O, L_SER_95    | N, L_PHE_96    | H, L_PHE_96    | 2.69 | 1.97 | 28.39 |
| 4JAN.PDB | O, L_VAL_90    | N, L_VAL_97    | H, L_VAL_97    | 2.99 | 2.15 | 10.31 |
| 4JAN.PDB | O, L_CYS_88    | N, L_GLY_99    | H, L_GLY_99    | 2.82 | 2.06 | 23.88 |
| 4JAN.PDB | O, L_TYR_86    | N, L_THR_102   | H, L_THR_102   | 2.93 | 2.11 | 14.91 |
| 4JAN.PDB | O, L_PRO_7     | OG1, L_THR_102 | HG1, L_THR_102 | 2.82 | 2.04 | 15.16 |
| 4JAN.PDB | O, L_PRO_8     | N, L_GLN_103   | H, L_GLN_103   | 2.82 | 2.06 | 23.53 |
| 4JAN.PDB | O, L_TYR_140   | N, L_ALA_111   | H, L_ALA_111   | 2.97 | 2.14 | 13.46 |
| 4JAN.PDB | O, L_SER_137   | N, L_THR_114   | H, L_THR_114   | 2.99 | 2.13 | 3.09  |
| 4JAN.PDB | O, L_VAL_133   | N, L_PHE_118   | H, L_PHE_118   | 2.93 | 2.14 | 19.05 |
| 4JAN.PDB | O, L_LEU_125   | N, L_ASN_128   | H, L_ASN_128   | 2.78 | 1.96 | 14.81 |
| 4JAN.PDB | O, L_LEU_178   | N, L_LEU_132   | H, L_LEU_132   | 2.97 | 2.12 | 8.13  |
| 4JAN.PDB | O, L_SER_176   | N, L_CYS_134   | H, L_CYS_134   | 2.87 | 2.02 | 8.60  |
| 4JAN.PDB | O, L_THR_116   | N, L_LEU_135   | H, L_LEU_135   | 2.88 | 2.10 | 20.45 |
| 4JAN.PDB | O, L_ALA_174   | N, L_ILE_136   | H, L_ILE_136   | 2.97 | 2.14 | 12.22 |
| 4JAN.PDB | O, L_GLN_194   | N, L_ALA_147   | H, L_ALA_147   | 2.83 | 2.00 | 13.79 |
| 4JAN.PDB | OG, L_SER_176  | NE1, L_TRP_148 | HE1, L_TRP_148 | 2.88 | 2.04 | 9.05  |
| 4JAN.PDB | O, L_SER_192   | N, L_LYS_149   | H, L_LYS_149   | 2.99 | 2.18 | 15.44 |
| 4JAN.PDB | O, L_SER_153   | N, L_ALA_150   | H, L_ALA_150   | 2.78 | 2.08 | 29.85 |
| 4JAN.PDB | O, L_ALA_150   | N, L_SER_153   | H, L_SER_153   | 2.82 | 2.11 | 29.31 |
| 4JAN.PDB | O, L_TYR_177   | N, L_GLU_160   | H, L_GLU_160   | 2.87 | 2.05 | 14.31 |
| 4JAN.PDB | O, L_LYS_171   | N, L_GLN_167   | H, L_GLN_167   | 2.85 | 2.01 | 10.38 |
| 4JAN.PDB | O, L_ILE_136   | N, L_ALA_174   | H, L_ALA_174   | 2.73 | 1.95 | 20.72 |
| 4JAN.PDB | O, L_CYS_134   | N, L_SER_176   | H, L_SER_176   | 2.88 | 2.05 | 13.75 |
| 4JAN.PDB | O, L_GLU_160   | N, L_TYR_177   | H, L_TYR_177   | 2.73 | 1.90 | 14.38 |
| 4JAN.PDB | O, L_GLY_158   | N, L_SER_179   | H, L_SER_179   | 2.92 | 2.09 | 12.76 |
| 4JAN.PDB | O, L_ALA_130   | N, L_LEU_180   | H, L_LEU_180   | 2.75 | 1.90 | 5.66  |
| 4JAN.PDB | O, L_GLN_184   | ND1, L_HIS_188 | HD1, L_HIS_188 | 2.96 | 2.12 | 10.76 |
| 4JAN.PDB | OD1, L_ASP_151 | N, L_ARG_189   | H, L_ARG_189   | 3.00 | 2.16 | 11.57 |
| 4JAN.PDB | O, L_LYS_149   | N, L_SER_192   | H, L_SER_192   | 2.84 | 2.11 | 26.53 |
| 4JAN.PDB | O, L_LYS_204   | N, L_CYS_193   | H, L_CYS_193   | 2.87 | 2.03 | 10.09 |
| 4JAN.PDB | O, L_ALA_147   | N, L_GLN_194   | H, L_GLN_194   | 2.87 | 2.02 | 4.62  |
| 4JAN.PDB | O, L_VAL_202   | N, L_VAL_195   | H, L_VAL_195   | 2.90 | 2.06 | 10.52 |
| 4JAN.PDB | O, L_THR_145   | N, L_THR_196   | H, L_THR_196   | 2.87 | 2.04 | 12.50 |
| 4JAN.PDB | O, L_SER_200   | N, L_HIS_197   | H, L_HIS_197   | 2.86 | 2.00 | 3.42  |
| 4JAN.PDB | O, L_ASP_368   | OG1, L_THR_372 | HG1, L_THR_372 | 2.92 | 2.17 | 20.42 |
| 4JAN.PDB | O, A_THR_21    | N, A_SER_7     | H, A_SER_7     | 2.83 | 1.99 | 9.81  |
| 4JAN.PDB | O, A_THR_112   | N, A_SER_14    | H, A_SER_14    | 2.81 | 2.04 | 22.68 |
| 4JAN.PDB | O, A_LEU_80    | N, A_LEU_20    | H, A_LEU_20    | 2.96 | 2.16 | 17.44 |
| 4JAN.PDB | O, A_PHE_78    | N, A_CYS_22    | H, A_CYS_22    | 2.83 | 1.97 | 0.81  |
| 4JAN.PDB | O, A_GLN_5     | N, A_THR_23    | H, A_THR_23    | 2.99 | 2.16 | 14.12 |
| 4JAN.PDB | O, A_GLN_3     | N, A_SER_25    | H, A_SER_25    | 2.86 | 2.06 | 18.82 |
| 4JAN.PDB | O, A_LEU_95    | N, A_TYR_33    | H, A_TYR_33    | 2.88 | 2.02 | 1.62  |
| 4JAN.PDB | O, A_ILE_51    | N, A_TRP_34    | H, A_TRP_34    | 2.83 | 2.04 | 18.86 |
| 4JAN.PDB | O, A_MET_29    | NE1, A_TRP_34  | HE1, A_TRP_34  | 2.96 | 2.14 | 15.47 |
| 4JAN.PDB | O, A_ALA_93    | N, A_SER_35    | H, A_SER_35    | 2.87 | 2.01 | 0.65  |
| 4JAN.PDB | O, A_GLY_49    | N, A_TRP_36    | H, A_TRP_36    | 2.82 | 2.06 | 23.18 |
| 4JAN.PDB | O, A_GLY_44    | N, A_SER_40    | H, A_SER_40    | 2.94 | 2.14 | 17.50 |
| 4JAN.PDB | O, A_ARG_38    | N, A_GLU_46    | H, A_GLU_46    | 2.99 | 2.17 | 14.48 |
| 4JAN.PDB | O, A_TRP_36    | N, A_ILE_48    | H, A_ILE_48    | 2.86 | 2.04 | 16.32 |
| 4JAN.PDB | O, A_GLU_56    | N, A_PHE_52    | H, A_PHE_52    | 2.98 | 2.16 | 16.12 |
| 4JAN.PDB | O, A_ILE_48    | N, A_SER_60    | H, A_SER_60    | 2.99 | 2.18 | 16.95 |
| 4JAN.PDB | O, A_SER_60    | N, A_LEU_63    | H, A_LEU_63    | 2.80 | 1.99 | 16.81 |

|          |               |                |                |      |      |       |
|----------|---------------|----------------|----------------|------|------|-------|
| 4JAN.PDB | O, A_SER_68   | N, A_ARG_81    | H, A_ARG_81    | 2.93 | 2.10 | 13.34 |
| 4JAN.PDB | O, A_LEU_18   | N, A_LEU_82    | H, A_LEU_82    | 2.69 | 1.85 | 10.39 |
| 4JAN.PDB | O, A_GLU_16   | N, A_VAL_82C   | H, A_VAL_82C   | 3.00 | 2.21 | 20.36 |
| 4JAN.PDB | OD2, A_ASP_86 | N, A_THR_83    | H, A_THR_83    | 2.88 | 2.09 | 19.27 |
| 4JAN.PDB | O, A_THR_83   | N, A_ASP_86    | H, A_ASP_86    | 2.91 | 2.07 | 9.93  |
| 4JAN.PDB | O, A_SER_107  | N, A_TYR_90    | H, A_TYR_90    | 2.97 | 2.13 | 10.15 |
| 4JAN.PDB | O, A_LEU_37   | N, A_PHE_91    | H, A_PHE_91    | 2.69 | 1.88 | 17.21 |
| 4JAN.PDB | O, A_ARG_101  | N, A_SER_94    | H, A_SER_94    | 2.99 | 2.21 | 21.56 |
| 4JAN.PDB | OH, B_TYR_36  | N, A_PHE_100E  | H, A_PHE_100E  | 2.74 | 1.90 | 10.14 |
| 4JAN.PDB | OE1, A_GLU_6  | N, A_GLY_106   | H, A_GLY_106   | 2.61 | 1.75 | 6.59  |
| 4JAN.PDB | O, A_TYR_90   | N, A_SER_107   | H, A_SER_107   | 2.97 | 2.13 | 8.67  |
| 4JAN.PDB | O, A_ALA_88   | N, A_VAL_109   | H, A_VAL_109   | 2.99 | 2.18 | 17.96 |
| 4JAN.PDB | O, A_PHE_146  | N, A_LYS_117   | H, A_LYS_117   | 2.69 | 1.91 | 19.93 |
| 4JAN.PDB | O, A_LYS_143  | N, A_SER_120   | H, A_SER_120   | 2.98 | 2.15 | 12.62 |
| 4JAN.PDB | O, A_GLY_139  | N, A_LEU_124   | H, A_LEU_124   | 2.71 | 1.91 | 18.55 |
| 4JAN.PDB | O, A_SER_180  | N, A_CYS_140   | H, A_CYS_140   | 2.65 | 1.92 | 25.79 |
| 4JAN.PDB | O, A_PHE_122  | N, A_LEU_141   | H, A_LEU_141   | 2.77 | 1.98 | 18.97 |
| 4JAN.PDB | O, A_SER_120  | N, A_LYS_143   | H, A_LYS_143   | 2.80 | 1.94 | 2.87  |
| 4JAN.PDB | OG, A_SER_177 | N, A_ASP_144   | H, A_ASP_144   | 2.90 | 2.06 | 12.00 |
| 4JAN.PDB | O, A_LYS_117  | N, A_PHE_146   | H, A_PHE_146   | 2.99 | 2.19 | 18.95 |
| 4JAN.PDB | OG, A_SER_180 | NE1, A_TRP_154 | HE1, A_TRP_154 | 2.82 | 2.05 | 22.21 |
| 4JAN.PDB | O, A_ILE_195  | N, A_ASN_155   | H, A_ASN_155   | 2.74 | 1.91 | 12.38 |
| 4JAN.PDB | O, A_ASN_155  | N, A_ALA_158   | H, A_ALA_158   | 2.86 | 2.02 | 8.83  |
| 4JAN.PDB | O, A_THR_160  | N, A_VAL_163   | H, A_VAL_163   | 2.86 | 2.07 | 19.66 |
| 4JAN.PDB | O, A_VAL_181  | N, A_HIS_164   | H, A_HIS_164   | 2.90 | 2.04 | 3.65  |
| 4JAN.PDB | O, A_SER_177  | N, A_VAL_169   | H, A_VAL_169   | 2.73 | 1.92 | 17.07 |
| 4JAN.PDB | O, A_LEU_175  | N, A_GLN_171   | H, A_GLN_171   | 2.97 | 2.21 | 23.74 |
| 4JAN.PDB | O, A_TYR_145  | N, A_TYR_176   | H, A_TYR_176   | 2.83 | 2.03 | 16.73 |
| 4JAN.PDB | O, A_HIS_164  | N, A_VAL_181   | H, A_VAL_181   | 2.91 | 2.06 | 6.75  |
| 4JAN.PDB | O, A_LEU_138  | N, A_VAL_182   | H, A_VAL_182   | 2.71 | 1.89 | 15.22 |
| 4JAN.PDB | O, A_GLY_162  | N, A_THR_183   | H, A_THR_183   | 2.93 | 2.11 | 13.23 |
| 4JAN.PDB | O, A_SER_153  | N, A_ASN_197   | H, A_ASN_197   | 2.67 | 1.82 | 8.22  |
| 4JAN.PDB | O, A_VAL_207  | N, A_VAL_198   | H, A_VAL_198   | 2.88 | 2.07 | 16.65 |
| 4JAN.PDB | O, A_THR_205  | N, A_HIS_200   | H, A_HIS_200   | 2.71 | 1.87 | 10.96 |
| 4JAN.PDB | O, A_PRO_147  | NE2, A_HIS_200 | HE2, A_HIS_200 | 2.55 | 1.74 | 15.97 |
| 4JAN.PDB | O, A_LYS_201  | N, A_ASN_204   | H, A_ASN_204   | 2.88 | 2.07 | 15.76 |
| 4JAN.PDB | OG, B_SER_100 | N, B_GLN_6     | H, B_GLN_6     | 3.00 | 2.16 | 10.47 |
| 4JAN.PDB | O, B_TYR_86   | NE2, B_GLN_6   | HE22, B_GLN_6  | 2.99 | 2.19 | 18.54 |
| 4JAN.PDB | O, B_LEU_73   | N, B_ILE_21    | H, B_ILE_21    | 2.96 | 2.14 | 15.25 |
| 4JAN.PDB | O, B_SER_69   | N, B_GLY_25    | H, B_GLY_25    | 2.72 | 1.94 | 20.09 |
| 4JAN.PDB | O, I_GLY_458  | ND2, B_ASN_32  | HD22, B_ASN_32 | 2.86 | 2.11 | 24.85 |
| 4JAN.PDB | OD1, B_ASN_51 | N, B_VAL_33    | H, B_VAL_33    | 2.78 | 2.02 | 23.53 |
| 4JAN.PDB | O, B_ILE_48   | N, B_TRP_35    | H, B_TRP_35    | 2.62 | 1.79 | 12.25 |
| 4JAN.PDB | O, B_TYR_87   | N, B_TYR_36    | H, B_TYR_36    | 2.76 | 1.97 | 19.04 |
| 4JAN.PDB | O, B_GLU_45   | N, B_GLN_37    | H, B_GLN_37    | 2.98 | 2.12 | 6.36  |
| 4JAN.PDB | O, B_LYS_39   | N, B_GLN_42    | H, B_GLN_42    | 2.91 | 2.08 | 12.48 |
| 4JAN.PDB | O, B_GLN_37   | N, B_GLU_45    | H, B_GLU_45    | 2.95 | 2.21 | 25.79 |
| 4JAN.PDB | O, B_LYS_53   | N, B_PHE_49    | H, B_PHE_49    | 2.84 | 2.05 | 19.11 |
| 4JAN.PDB | O, B_VAL_33   | N, B_ASN_51    | H, B_ASN_51    | 2.74 | 1.89 | 7.92  |
| 4JAN.PDB | O, B_GLU_50   | N, B_TYR_52    | H, B_TYR_52    | 2.69 | 1.94 | 24.45 |
| 4JAN.PDB | O, B_ILE_58   | NH1, B_ARG_54  | HH11, B_ARG_54 | 2.92 | 2.17 | 24.41 |
| 4JAN.PDB | O, B_SER_65   | N, B_THR_72    | H, B_THR_72    | 2.86 | 2.07 | 20.13 |
| 4JAN.PDB | O, B_ILE_21   | N, B_LEU_73    | H, B_LEU_73    | 2.97 | 2.14 | 12.90 |
| 4JAN.PDB | O, B_SER_63   | N, B_THR_74    | H, B_THR_74    | 2.68 | 1.89 | 18.45 |
| 4JAN.PDB | O, B_ALA_19   | N, B_ILE_75    | H, B_ILE_75    | 2.83 | 1.99 | 8.89  |
| 4JAN.PDB | OD2, B_ASP_82 | N, B_GLN_79    | H, B_GLN_79    | 2.99 | 2.13 | 4.57  |
| 4JAN.PDB | O, B_GLY_77   | NE2, B_GLN_79  | HE21, B_GLN_79 | 2.96 | 2.14 | 15.90 |
| 4JAN.PDB | O, B_GLN_79   | N, B_ASP_82    | H, B_ASP_82    | 2.87 | 2.03 | 10.85 |

|          |                |                |                 |      |      |       |
|----------|----------------|----------------|-----------------|------|------|-------|
| 4JAN.PDB | O, B_THR_102   | N, B_TYR_86    | H, B_TYR_86     | 2.79 | 1.98 | 17.36 |
| 4JAN.PDB | O, B_TYR_36    | N, B_TYR_87    | H, B_TYR_87     | 2.95 | 2.16 | 19.18 |
| 4JAN.PDB | OE1, B_GLN_6   | N, B_CYS_88    | H, B_CYS_88     | 2.99 | 2.13 | 6.44  |
| 4JAN.PDB | O, B_VAL_97    | N, B_VAL_90    | H, B_VAL_90     | 2.92 | 2.10 | 15.26 |
| 4JAN.PDB | O, B_THR_95A   | N, B_ASP_92    | H, B_ASP_92     | 2.97 | 2.19 | 21.06 |
| 4JAN.PDB | OD1, B_ASP_92  | N, B_SER_95    | H, B_SER_95     | 2.95 | 2.11 | 10.76 |
| 4JAN.PDB | O, B_CYS_88    | N, B_GLY_99    | H, B_GLY_99     | 2.83 | 2.06 | 22.19 |
| 4JAN.PDB | O, B_PRO_7     | OG1, B_THR_102 | HG1, B_THR_102  | 2.80 | 2.02 | 16.54 |
| 4JAN.PDB | O, B_ALA_84    | N, B_VAL_104   | H, B_VAL_104    | 2.98 | 2.27 | 29.44 |
| 4JAN.PDB | O, B_SER_137   | N, B_THR_114   | H, B_THR_114    | 2.85 | 2.04 | 16.89 |
| 4JAN.PDB | O, B_LEU_135   | N, B_THR_116   | H, B_THR_116    | 2.95 | 2.14 | 16.39 |
| 4JAN.PDB | O, B_VAL_133   | N, B_PHE_118   | H, B_PHE_118    | 2.86 | 2.07 | 20.55 |
| 4JAN.PDB | O, B_LEU_125   | N, B_ASN_128   | H, B_ASN_128    | 2.72 | 1.91 | 16.63 |
| 4JAN.PDB | O, B_GLU_124   | N, B_LYS_129   | H, B_LYS_129    | 2.87 | 2.08 | 18.91 |
| 4JAN.PDB | OE2, B_GLU_124 | OG1, B_THR_131 | HG1, B_THR_131  | 2.64 | 1.97 | 29.01 |
| 4JAN.PDB | O, B_THR_116   | N, B_LEU_135   | H, B_LEU_135    | 2.75 | 1.97 | 21.41 |
| 4JAN.PDB | O, B_ALA_174   | N, B_ILE_136   | H, B_ILE_136    | 2.78 | 1.97 | 16.45 |
| 4JAN.PDB | OG, B_SER_176  | NE1, B_TRP_148 | HE1, B_TRP_148  | 2.83 | 1.98 | 7.29  |
| 4JAN.PDB | O, B_SER_192   | N, B_LYS_149   | H, B_LYS_149    | 2.90 | 2.11 | 19.36 |
| 4JAN.PDB | O, B_SER_190   | N, B_ASP_151   | H, B_ASP_151    | 2.88 | 2.10 | 21.97 |
| 4JAN.PDB | O, B_TRP_148   | N, B_VAL_155   | H, B_VAL_155    | 2.98 | 2.17 | 15.79 |
| 4JAN.PDB | O, B_SER_175   | N, B_THR_162   | H, B_THR_162    | 2.94 | 2.10 | 11.27 |
| 4JAN.PDB | O, B_ALA_173   | N, B_SER_165   | H, B_SER_165    | 2.74 | 1.89 | 5.66  |
| 4JAN.PDB | O, B_SER_165   | N, B_ALA_173   | H, B_ALA_173    | 2.84 | 2.14 | 29.64 |
| 4JAN.PDB | O, B_ILE_136   | N, B_ALA_174   | H, B_ALA_174    | 2.68 | 1.83 | 6.81  |
| 4JAN.PDB | OG1, B_THR_162 | N, B_SER_175   | H, B_SER_175    | 2.88 | 2.10 | 20.76 |
| 4JAN.PDB | O, B_CYS_134   | N, B_SER_176   | H, B_SER_176    | 2.98 | 2.17 | 16.97 |
| 4JAN.PDB | O, B_GLU_160   | N, B_TYR_177   | H, B_TYR_177    | 2.73 | 1.89 | 11.82 |
| 4JAN.PDB | O, B_GLY_158   | N, B_SER_179   | H, B_SER_179    | 2.67 | 1.83 | 10.89 |
| 4JAN.PDB | O, B_ALA_130   | N, B_LEU_180   | H, B_LEU_180    | 2.91 | 2.07 | 11.05 |
| 4JAN.PDB | O, B_GLN_184   | ND1, B_HIS_188 | HD1, B_HIS_188  | 2.88 | 2.12 | 24.08 |
| 4JAN.PDB | O, B_VAL_206   | N, B_TYR_191   | H, B_TYR_191    | 2.91 | 2.11 | 18.32 |
| 4JAN.PDB | O, B_LYS_149   | N, B_SER_192   | H, B_SER_192    | 2.92 | 2.08 | 10.84 |
| 4JAN.PDB | O, B_LYS_204   | N, B_CYS_193   | H, B_CYS_193    | 2.89 | 2.08 | 17.27 |
| 4JAN.PDB | O, B_THR_145   | N, B_THR_196   | H, B_THR_196    | 2.81 | 1.98 | 12.47 |
| 4JAN.PDB | O, B_TYR_191   | N, B_VAL_206   | H, B_VAL_206    | 2.97 | 2.16 | 15.65 |
| 4KRM.PDB | OG1, A_THR_339 | N, A_LYS_311   | H, A_LYS_311    | 2.92 | 2.20 | 28.58 |
| 4KRM.PDB | O, A_SER_340   | N, A_CYS_313   | H, A_CYS_313    | 2.94 | 2.14 | 18.43 |
| 4KRM.PDB | O, A_PHE_321   | N, A_GLY_317   | H, A_GLY_317    | 2.69 | 1.98 | 27.87 |
| 4KRM.PDB | O, A_ILE_318   | N, A_PHE_321   | H, A_PHE_321    | 2.88 | 2.03 | 7.40  |
| 4KRM.PDB | O, A_ILE_327   | OG, A_SER_326  | HG, A_SER_326   | 2.93 | 2.13 | 14.37 |
| 4KRM.PDB | O, A_HIS_346   | N, A_ILE_327   | H, A_ILE_327    | 2.90 | 2.07 | 14.21 |
| 4KRM.PDB | OD1, A_ASN_331 | N, A_ASN_328   | H, A_ASN_328    | 2.99 | 2.15 | 12.11 |
| 4KRM.PDB | OD1, A_ASN_328 | N, A_ASN_331   | H, A_ASN_331    | 2.99 | 2.22 | 23.18 |
| 4KRM.PDB | O, A_ASN_328   | N, A_ILE_332   | H, A_ILE_332    | 2.91 | 2.20 | 29.98 |
| 4KRM.PDB | O, A_LYS_311   | N, A_THR_339   | H, A_THR_339    | 2.88 | 2.02 | 6.29  |
| 4KRM.PDB | O, A_GLU_376   | N, A_ILE_341   | H, A_ILE_341    | 2.94 | 2.11 | 11.47 |
| 4KRM.PDB | O, A_CYS_313   | N, A_SER_342   | H, A_SER_342    | 2.76 | 1.95 | 16.34 |
| 4KRM.PDB | O, A_LEU_382   | N, A_ILE_347   | H, A_ILE_347    | 2.79 | 1.99 | 18.25 |
| 4KRM.PDB | OG, A_SER_326  | N, A_LEU_348   | H, A_LEU_348    | 2.83 | 2.02 | 16.65 |
| 4KRM.PDB | OE1, B_GLU_110 | NH1, A_ARG_353 | HH11, A_ARG_353 | 2.81 | 2.05 | 22.81 |
| 4KRM.PDB | O, B_GLU_110   | NH1, A_ARG_353 | HH12, A_ARG_353 | 2.55 | 1.85 | 29.89 |
| 4KRM.PDB | O, B_ALA_100   | NH2, A_ARG_353 | HH21, A_ARG_353 | 2.89 | 2.04 | 4.33  |
| 4KRM.PDB | O, A_THR_360   | N, A_ASP_355   | H, A_ASP_355    | 2.66 | 1.81 | 5.35  |
| 4KRM.PDB | OD2, A_ASP_355 | OG1, A_THR_358 | HG1, A_THR_358  | 2.65 | 1.94 | 26.40 |
| 4KRM.PDB | O, A_SER_356   | N, A_HIS_359   | H, A_HIS_359    | 2.84 | 2.01 | 13.45 |
| 4KRM.PDB | O, A_ASP_355   | N, A_THR_360   | H, A_THR_360    | 2.91 | 2.05 | 3.38  |
| 4KRM.PDB | O, A_ALA_351   | N, A_LEU_363   | H, A_LEU_363    | 2.79 | 2.01 | 20.09 |

|          |                |                |                 |      |      |       |
|----------|----------------|----------------|-----------------|------|------|-------|
| 4KRM.PDB | O, A_LEU_368   | N, A_LEU_371   | H, A_LEU_371    | 2.89 | 2.04 | 5.32  |
| 4KRM.PDB | O, A_CYS_338   | OG1, A_THR_373 | HG1, A_THR_373  | 2.68 | 1.93 | 22.17 |
| 4KRM.PDB | O, A_LEU_371   | N, A_VAL_374   | H, A_VAL_374    | 2.85 | 2.00 | 7.81  |
| 4KRM.PDB | O, A_THR_339   | N, A_LYS_375   | H, A_LYS_375    | 2.66 | 1.83 | 11.99 |
| 4KRM.PDB | O, A_ILE_401   | N, A_ILE_377   | H, A_ILE_377    | 2.94 | 2.18 | 24.17 |
| 4KRM.PDB | OD1, A_ASP_344 | N, A_PHE_380   | H, A_PHE_380    | 2.98 | 2.20 | 21.02 |
| 4KRM.PDB | O, A_SER_413   | N, A_LEU_381   | H, A_LEU_381    | 2.78 | 1.97 | 16.41 |
| 4KRM.PDB | O, A_LEU_345   | N, A_LEU_382   | H, A_LEU_382    | 2.88 | 2.02 | 4.02  |
| 4KRM.PDB | O, A_ALA_415   | N, A_ILE_383   | H, A_ILE_383    | 2.77 | 1.92 | 6.18  |
| 4KRM.PDB | O, A_ILE_347   | N, A_GLN_384   | H, A_GLN_384    | 2.86 | 2.00 | 5.29  |
| 4KRM.PDB | O, B_ASP_112   | NE2, A_GLN_384 | HE22, A_GLN_384 | 2.93 | 2.19 | 25.19 |
| 4KRM.PDB | O, A_ASP_392   | NE1, A_TRP_386 | HE1, A_TRP_386  | 2.99 | 2.28 | 29.76 |
| 4KRM.PDB | O, A_LEU_424   | N, A_LEU_393   | H, A_LEU_393    | 2.91 | 2.10 | 16.43 |
| 4KRM.PDB | O, A_LEU_393   | N, A_PHE_396   | H, A_PHE_396    | 2.71 | 1.87 | 10.13 |
| 4KRM.PDB | O, A_HIS_394   | N, A_GLU_397   | H, A_GLU_397    | 2.91 | 2.12 | 20.07 |
| 4KRM.PDB | O, A_LYS_372   | ND2, A_ASN_398 | HD22, A_ASN_398 | 2.93 | 2.13 | 18.65 |
| 4KRM.PDB | O, A_LYS_375   | N, A_GLU_400   | H, A_GLU_400    | 2.70 | 1.87 | 10.88 |
| 4KRM.PDB | O, A_ILE_377   | N, A_ARG_403   | H, A_ARG_403    | 2.78 | 1.94 | 11.49 |
| 4KRM.PDB | OE1, A_GLU_376 | NE, A_ARG_403  | HE, A_ARG_403   | 2.51 | 1.78 | 27.17 |
| 4KRM.PDB | O, A_THR_378   | N, A_ARG_405   | H, A_ARG_405    | 2.85 | 2.00 | 9.02  |
| 4KRM.PDB | OD1, A_ASP_434 | NZ, A_LYS_407  | HZ1, A_LYS_407  | 2.92 | 2.12 | 20.92 |
| 4KRM.PDB | O, A_PHE_412   | N, A_GLN_408   | H, A_GLN_408    | 2.63 | 1.80 | 13.69 |
| 4KRM.PDB | O, A_GLN_408   | N, A_GLN_411   | H, A_GLN_411    | 2.82 | 1.96 | 5.62  |
| 4KRM.PDB | O, A_GLN_408   | N, A_PHE_412   | H, A_PHE_412    | 2.94 | 2.09 | 8.70  |
| 4KRM.PDB | O, A_ASP_436   | N, A_SER_413   | H, A_SER_413    | 2.93 | 2.11 | 15.55 |
| 4KRM.PDB | O, A_LEU_381   | N, A_ALA_415   | H, A_ALA_415    | 2.80 | 1.97 | 12.88 |
| 4KRM.PDB | O, A_ILE_438   | N, A_VAL_416   | H, A_VAL_416    | 2.99 | 2.16 | 12.80 |
| 4KRM.PDB | O, A_ILE_383   | N, A_VAL_417   | H, A_VAL_417    | 2.95 | 2.13 | 13.97 |
| 4KRM.PDB | OD1, A_ASN_442 | N, A_LEU_419   | H, A_LEU_419    | 2.76 | 1.92 | 9.88  |
| 4KRM.PDB | O, A_THR_391   | N, A_THR_422   | H, A_THR_422    | 2.81 | 2.00 | 16.60 |
| 4KRM.PDB | O, A_GLU_400   | N, A_LYS_430   | H, A_LYS_430    | 2.90 | 2.04 | 3.76  |
| 4KRM.PDB | O, A_LEU_456   | N, A_ILE_432   | H, A_ILE_432    | 2.57 | 1.76 | 16.64 |
| 4KRM.PDB | O, A_ILE_402   | N, A_SER_433   | H, A_SER_433    | 2.90 | 2.16 | 25.97 |
| 4KRM.PDB | OE2, A_GLU_431 | OG, A_SER_433  | HG, A_SER_433   | 2.82 | 2.09 | 25.22 |
| 4KRM.PDB | O, A_GLN_411   | N, A_ASP_436   | H, A_ASP_436    | 2.93 | 2.08 | 7.26  |
| 4KRM.PDB | O, A_LYS_465   | N, A_ILE_439   | H, A_ILE_439    | 2.96 | 2.14 | 14.27 |
| 4KRM.PDB | O, A_ASN_442   | N, A_LEU_445   | H, A_LEU_445    | 2.98 | 2.12 | 2.89  |
| 4KRM.PDB | O, A_THR_422   | N, A_CYS_446   | H, A_CYS_446    | 2.97 | 2.11 | 5.38  |
| 4KRM.PDB | O, A_TYR_447   | OG1, A_THR_450 | HG1, A_THR_450  | 2.75 | 1.92 | 8.55  |
| 4KRM.PDB | O, A_TRP_453   | N, A_LEU_456   | H, A_LEU_456    | 2.93 | 2.12 | 17.80 |
| 4KRM.PDB | OE1, A_GLN_462 | N, A_GLY_458   | H, A_GLY_458    | 2.69 | 1.84 | 7.86  |
| 4KRM.PDB | OE1, A_GLN_462 | N, A_THR_459   | H, A_THR_459    | 2.99 | 2.16 | 12.73 |
| 4KRM.PDB | O, A_GLY_435   | NE2, A_GLN_462 | HE21, A_GLN_462 | 2.63 | 1.77 | 3.27  |
| 4KRM.PDB | OD1, A_ASP_436 | N, A_LYS_463   | H, A_LYS_463    | 2.91 | 2.06 | 8.47  |
| 4KRM.PDB | O, A_VAL_437   | N, A_LYS_465   | H, A_LYS_465    | 2.78 | 2.01 | 22.88 |
| 4KRM.PDB | O, A_ILE_439   | ND2, A_ASN_469 | HD21, A_ASN_469 | 2.85 | 2.08 | 21.76 |
| 4KRM.PDB | O, A_GLY_471   | N, A_CYS_475   | H, A_CYS_475    | 2.79 | 2.04 | 24.90 |
| 4KRM.PDB | O, A_GLU_472   | N, A_LYS_476   | H, A_LYS_476    | 2.77 | 1.94 | 13.13 |
| 4KRM.PDB | O, A_ASN_473   | N, A_ALA_477   | H, A_ALA_477    | 2.66 | 1.88 | 21.43 |
| 4KRM.PDB | O, A_HIS_483   | N, A_CYS_486   | H, A_CYS_486    | 2.87 | 2.03 | 10.18 |
| 4KRM.PDB | O, A_SER_501   | N, A_SER_487   | H, A_SER_487    | 2.90 | 2.07 | 12.52 |
| 4KRM.PDB | OG, A_SER_487  | N, A_GLU_489   | H, A_GLU_489    | 2.96 | 2.14 | 13.27 |
| 4KRM.PDB | OG1, A_THR_450 | N, A_CYS_491   | H, A_CYS_491    | 2.91 | 2.10 | 16.18 |
| 4KRM.PDB | O, A_ASP_498   | N, A_TRP_492   | H, A_TRP_492    | 2.86 | 2.05 | 15.11 |
| 4KRM.PDB | O, A_GLU_495   | N, A_ASP_498   | H, A_ASP_498    | 2.80 | 2.03 | 22.83 |
| 4KRM.PDB | O, A_LEU_485   | N, A_ARG_503   | H, A_ARG_503    | 2.76 | 1.90 | 4.21  |
| 4KRM.PDB | O, B_SER_25    | N, B_LYS_3     | H, B_LYS_3      | 2.91 | 2.07 | 11.33 |
| 4KRM.PDB | O, B_ALA_23    | N, B_GLU_5     | H, B_GLU_5      | 2.96 | 2.22 | 26.70 |

|          |                |               |                |      |      |       |
|----------|----------------|---------------|----------------|------|------|-------|
| 4KRM.PDB | O, B_THR_21    | N, B_SER_7    | H, B_SER_7     | 2.88 | 2.10 | 21.31 |
| 4KRM.PDB | O, B_THR_121   | N, B_VAL_12   | H, B_VAL_12    | 2.77 | 2.07 | 29.25 |
| 4KRM.PDB | O, B_SER_123   | N, B_THR_14   | H, B_THR_14    | 2.68 | 1.96 | 28.32 |
| 4KRM.PDB | O, B_SER_123   | OG1, B_THR_14 | HG1, B_THR_14  | 2.82 | 1.99 | 5.72  |
| 4KRM.PDB | O, B_LEU_86    | N, B_GLY_15   | H, B_GLY_15    | 2.91 | 2.05 | 5.95  |
| 4KRM.PDB | O, B_GLN_13    | N, B_GLY_16   | H, B_GLY_16    | 2.98 | 2.16 | 15.73 |
| 4KRM.PDB | O, B_MET_83    | N, B_LEU_18   | H, B_LEU_18    | 2.71 | 1.92 | 20.37 |
| 4KRM.PDB | OD1, B_ASP_80  | NE, B_ARG_19  | HE, B_ARG_19   | 2.67 | 1.85 | 15.03 |
| 4KRM.PDB | O, B_SER_7     | N, B_THR_21   | H, B_THR_21    | 2.89 | 2.05 | 10.43 |
| 4KRM.PDB | O, B_VAL_79    | N, B_CYS_22   | H, B_CYS_22    | 2.79 | 2.06 | 26.42 |
| 4KRM.PDB | O, B_GLU_5     | N, B_ALA_23   | H, B_ALA_23    | 2.89 | 2.05 | 11.71 |
| 4KRM.PDB | O, B_LYS_3     | N, B_SER_25   | H, B_SER_25    | 2.88 | 2.12 | 23.79 |
| 4KRM.PDB | O, B_SER_31    | NH2, B_ARG_30 | HH21, B_ARG_30 | 2.67 | 1.86 | 15.52 |
| 4KRM.PDB | O, B_ILE_51    | N, B_MET_34   | H, B_MET_34    | 2.89 | 2.11 | 20.74 |
| 4KRM.PDB | O, B_ALA_97    | N, B_GLY_35   | H, B_GLY_35    | 2.89 | 2.06 | 13.98 |
| 4KRM.PDB | O, B_SER_49    | N, B_TRP_36   | H, B_TRP_36    | 2.64 | 1.81 | 13.98 |
| 4KRM.PDB | O, B_TYR_95    | N, B_PHE_37   | H, B_PHE_37    | 2.76 | 1.91 | 6.76  |
| 4KRM.PDB | O, B_GLU_46    | N, B_ARG_38   | H, B_ARG_38    | 2.99 | 2.20 | 20.36 |
| 4KRM.PDB | OH, B_TYR_94   | NH1, B_ARG_38 | HH11, B_ARG_38 | 2.87 | 2.05 | 14.24 |
| 4KRM.PDB | OD2, B_ASP_90  | NH1, B_ARG_38 | HH12, B_ARG_38 | 2.85 | 2.02 | 12.95 |
| 4KRM.PDB | O, B_ILE_93    | N, B_GLN_39   | H, B_GLN_39    | 2.92 | 2.13 | 20.36 |
| 4KRM.PDB | O, B_ARG_38    | N, B_GLU_46   | H, B_GLU_46    | 2.95 | 2.11 | 11.02 |
| 4KRM.PDB | O, B_TRP_36    | N, B_VAL_48   | H, B_VAL_48    | 2.79 | 1.99 | 17.02 |
| 4KRM.PDB | O, B_GLY_59    | OG, B_SER_49  | HG, B_SER_49   | 3.00 | 2.27 | 25.42 |
| 4KRM.PDB | O, B_GLY_59    | N, B_GLY_50   | H, B_GLY_50    | 2.98 | 2.19 | 19.85 |
| 4KRM.PDB | O, B_MET_34    | N, B_ILE_51   | H, B_ILE_51    | 2.75 | 1.95 | 18.18 |
| 4KRM.PDB | O, B_SER_57    | N, B_SER_52   | H, B_SER_52    | 2.88 | 2.11 | 21.64 |
| 4KRM.PDB | O, B_SER_102   | N, B_TRP_53   | H, B_TRP_53    | 2.88 | 2.06 | 15.16 |
| 4KRM.PDB | O, C_LYS_310   | N, B_THR_58   | H, B_THR_58    | 2.99 | 2.17 | 13.91 |
| 4KRM.PDB | O, B_GLY_50    | N, B_GLY_59   | H, B_GLY_59    | 2.89 | 2.09 | 18.08 |
| 4KRM.PDB | O, C_GLU_308   | N, B_TYR_60   | H, B_TYR_60    | 2.75 | 1.96 | 19.67 |
| 4KRM.PDB | O, B_VAL_48    | N, B_ALA_61   | H, B_ALA_61    | 2.97 | 2.14 | 11.48 |
| 4KRM.PDB | O, B_GLN_82    | N, B_THR_69   | H, B_THR_69    | 2.86 | 2.07 | 20.15 |
| 4KRM.PDB | OH, B_TYR_60   | N, B_ILE_70   | H, B_ILE_70    | 2.77 | 1.93 | 11.16 |
| 4KRM.PDB | O, B_TYR_32    | NH1, B_ARG_72 | HH12, B_ARG_72 | 2.74 | 1.92 | 15.98 |
| 4KRM.PDB | O, B_THR_78    | N, B_ASP_73   | H, B_ASP_73    | 2.94 | 2.13 | 15.69 |
| 4KRM.PDB | O, B_TRP_53    | ND2, B_ASN_74 | HD21, B_ASN_74 | 2.77 | 1.97 | 18.80 |
| 4KRM.PDB | OD2, B_ASP_73  | N, B_LYS_76   | H, B_LYS_76    | 2.99 | 2.16 | 13.15 |
| 4KRM.PDB | O, B_CYS_22    | N, B_VAL_79   | H, B_VAL_79    | 2.99 | 2.26 | 27.32 |
| 4KRM.PDB | O, B_SER_71    | N, B_ASP_80   | H, B_ASP_80    | 2.86 | 2.11 | 25.20 |
| 4KRM.PDB | O, B_LEU_20    | N, B_LEU_81   | H, B_LEU_81    | 2.80 | 1.98 | 15.20 |
| 4KRM.PDB | O, B_THR_69    | N, B_GLN_82   | H, B_GLN_82    | 2.74 | 1.94 | 17.70 |
| 4KRM.PDB | O, B_LEU_18    | N, B_MET_83   | H, B_MET_83    | 2.77 | 1.93 | 11.70 |
| 4KRM.PDB | OD1, B_ASP_90  | N, B_LYS_87   | H, B_LYS_87    | 2.76 | 1.93 | 11.52 |
| 4KRM.PDB | O, B_LYS_87    | N, B_ASP_90   | H, B_ASP_90    | 2.96 | 2.12 | 11.27 |
| 4KRM.PDB | O, B_THR_118   | N, B_TYR_94   | H, B_TYR_94    | 2.77 | 1.94 | 12.66 |
| 4KRM.PDB | O, B_ASP_90    | OH, B_TYR_94  | HH, B_TYR_94   | 2.84 | 2.02 | 10.29 |
| 4KRM.PDB | O, B_PHE_37    | N, B_TYR_95   | H, B_TYR_95    | 2.82 | 2.03 | 20.26 |
| 4KRM.PDB | OE2, B_GLU_6   | N, B_CYS_96   | H, B_CYS_96    | 2.72 | 1.87 | 8.28  |
| 4KRM.PDB | O, B_GLY_35    | N, B_ALA_97   | H, B_ALA_97    | 2.96 | 2.23 | 26.81 |
| 4KRM.PDB | O, B_TYR_113   | N, B_ALA_98   | H, B_ALA_98    | 2.91 | 2.10 | 17.25 |
| 4KRM.PDB | O, B_GLY_33    | N, B_ALA_99   | H, B_ALA_99    | 2.85 | 2.03 | 15.87 |
| 4KRM.PDB | OD2, B_ASP_112 | N, B_ALA_100  | H, B_ALA_100   | 2.80 | 1.99 | 16.77 |
| 4KRM.PDB | OH, B_TYR_111  | N, B_TYR_105  | H, B_TYR_105   | 2.90 | 2.06 | 10.42 |
| 4KRM.PDB | O, B_TYR_105   | OH, B_TYR_111 | HH, B_TYR_111  | 2.48 | 1.64 | 3.96  |
| 4KRM.PDB | O, B_ALA_98    | N, B_ASP_112  | H, B_ASP_112   | 2.84 | 2.11 | 26.99 |
| 4KRM.PDB | O, B_CYS_96    | N, B_GLY_115  | H, B_GLY_115   | 2.90 | 2.14 | 23.95 |
| 4KRM.PDB | OE1, B_GLU_6   | N, B_GLY_117  | H, B_GLY_117   | 2.78 | 1.97 | 15.53 |

|          |                |                |                 |      |      |       |
|----------|----------------|----------------|-----------------|------|------|-------|
| 4KRM.PDB | O, B_ALA_92    | N, B_VAL_120   | H, B_VAL_120    | 2.95 | 2.13 | 14.97 |
| 4KRM.PDB | O, B_GLY_10    | N, B_THR_121   | H, B_THR_121    | 2.89 | 2.05 | 10.22 |
| 4KRM.PDB | O, B_VAL_12    | N, B_SER_123   | H, B_SER_123    | 2.95 | 2.12 | 14.13 |
| 4KRM.PDB | O, B_TYR_60    | N, C_GLU_308   | H, C_GLU_308    | 2.91 | 2.19 | 28.33 |
| 4KRM.PDB | O, B_THR_58    | N, C_LYS_310   | H, C_LYS_310    | 2.88 | 2.06 | 14.23 |
| 4KRM.PDB | OG1, C_THR_339 | N, C_LYS_311   | H, C_LYS_311    | 2.77 | 2.04 | 26.62 |
| 4KRM.PDB | O, B_ASP_56    | N, C_VAL_312   | H, C_VAL_312    | 2.73 | 1.89 | 9.64  |
| 4KRM.PDB | O, C_SER_340   | N, C_CYS_313   | H, C_CYS_313    | 2.90 | 2.07 | 13.28 |
| 4KRM.PDB | O, C_PHE_321   | N, C_GLY_317   | H, C_GLY_317    | 2.70 | 1.87 | 11.98 |
| 4KRM.PDB | OD1, C_ASN_331 | N, C_ASN_328   | H, C_ASN_328    | 2.83 | 1.99 | 10.78 |
| 4KRM.PDB | O, C_ASN_328   | N, C_ILE_332   | H, C_ILE_332    | 3.00 | 2.27 | 27.38 |
| 4KRM.PDB | O, C_ILE_332   | N, C_PHE_335   | H, C_PHE_335    | 2.93 | 2.08 | 7.41  |
| 4KRM.PDB | O, C_LYS_311   | N, C_THR_339   | H, C_THR_339    | 2.74 | 1.92 | 14.57 |
| 4KRM.PDB | O, C_GLU_376   | N, C_ILE_341   | H, C_ILE_341    | 2.82 | 2.00 | 14.90 |
| 4KRM.PDB | O, C_CYS_313   | N, C_SER_342   | H, C_SER_342    | 2.83 | 2.04 | 19.53 |
| 4KRM.PDB | OG1, C_THR_378 | N, C_GLY_343   | H, C_GLY_343    | 2.77 | 2.01 | 23.25 |
| 4KRM.PDB | O, C_LEU_382   | N, C_ILE_347   | H, C_ILE_347    | 2.86 | 2.08 | 21.12 |
| 4KRM.PDB | O, C_LEU_348   | N, C_ALA_351   | H, C_ALA_351    | 2.96 | 2.12 | 10.17 |
| 4KRM.PDB | OE1, D_GLU_110 | NH1, C_ARG_353 | HH11, C_ARG_353 | 2.87 | 2.05 | 16.15 |
| 4KRM.PDB | O, D_ALA_100   | NH2, C_ARG_353 | HH21, C_ARG_353 | 2.80 | 2.00 | 16.96 |
| 4KRM.PDB | O, C_VAL_350   | N, C_GLY_354   | H, C_GLY_354    | 2.77 | 2.02 | 24.08 |
| 4KRM.PDB | O, C_THR_360   | N, C_ASP_355   | H, C_ASP_355    | 2.65 | 1.83 | 13.88 |
| 4KRM.PDB | OD2, C_ASP_355 | OG1, C_THR_358 | HG1, C_THR_358  | 2.75 | 2.00 | 22.12 |
| 4KRM.PDB | O, C_SER_356   | N, C_HIS_359   | H, C_HIS_359    | 2.67 | 1.84 | 12.90 |
| 4KRM.PDB | O, C_ASP_355   | N, C_THR_360   | H, C_THR_360    | 2.84 | 1.99 | 7.14  |
| 4KRM.PDB | O, C_ALA_351   | N, C_LEU_363   | H, C_LEU_363    | 2.78 | 2.07 | 28.76 |
| 4KRM.PDB | O, C_ASP_364   | N, C_GLU_367   | H, C_GLU_367    | 2.87 | 2.07 | 17.30 |
| 4KRM.PDB | O, C_CYS_338   | OG1, C_THR_373 | HG1, C_THR_373  | 2.60 | 1.90 | 27.53 |
| 4KRM.PDB | O, C_LEU_371   | N, C_VAL_374   | H, C_VAL_374    | 3.00 | 2.15 | 9.63  |
| 4KRM.PDB | O, C_THR_339   | N, C_LYS_375   | H, C_LYS_375    | 2.73 | 1.87 | 2.04  |
| 4KRM.PDB | O, C_ILE_401   | N, C_ILE_377   | H, C_ILE_377    | 2.94 | 2.12 | 15.55 |
| 4KRM.PDB | O, C_ILE_341   | N, C_THR_378   | H, C_THR_378    | 2.99 | 2.14 | 8.37  |
| 4KRM.PDB | O, C_GLY_343   | N, C_GLY_379   | H, C_GLY_379    | 2.96 | 2.24 | 28.09 |
| 4KRM.PDB | OD1, C_ASP_344 | N, C_PHE_380   | H, C_PHE_380    | 2.87 | 2.06 | 16.59 |
| 4KRM.PDB | O, C_SER_413   | N, C_LEU_381   | H, C_LEU_381    | 2.85 | 2.05 | 18.05 |
| 4KRM.PDB | O, C_LEU_345   | N, C_LEU_382   | H, C_LEU_382    | 2.85 | 2.00 | 6.50  |
| 4KRM.PDB | O, C_ALA_415   | N, C_ILE_383   | H, C_ILE_383    | 2.86 | 2.06 | 18.11 |
| 4KRM.PDB | O, C_ILE_347   | N, C_GLN_384   | H, C_GLN_384    | 2.79 | 2.00 | 19.39 |
| 4KRM.PDB | O, C_ASP_392   | NE1, C_TRP_386 | HE1, C_TRP_386  | 2.82 | 2.06 | 23.80 |
| 4KRM.PDB | O, C_LEU_424   | N, C_LEU_393   | H, C_LEU_393    | 2.90 | 2.09 | 16.80 |
| 4KRM.PDB | O, C_LEU_393   | N, C_PHE_396   | H, C_PHE_396    | 2.95 | 2.11 | 10.22 |
| 4KRM.PDB | O, C_HIS_394   | N, C_GLU_397   | H, C_GLU_397    | 2.85 | 2.06 | 19.79 |
| 4KRM.PDB | O, C_LYS_372   | ND2, C_ASN_398 | HD22, C_ASN_398 | 2.65 | 1.81 | 9.39  |
| 4KRM.PDB | O, C_LYS_375   | N, C_GLU_400   | H, C_GLU_400    | 2.97 | 2.13 | 10.86 |
| 4KRM.PDB | O, C_GLU_431   | N, C_ILE_402   | H, C_ILE_402    | 2.98 | 2.16 | 15.59 |
| 4KRM.PDB | O, C_ILE_377   | N, C_ARG_403   | H, C_ARG_403    | 2.88 | 2.07 | 17.91 |
| 4KRM.PDB | OE1, C_GLU_376 | NH1, C_ARG_403 | HH11, C_ARG_403 | 3.00 | 2.18 | 16.51 |
| 4KRM.PDB | O, C_THR_378   | N, C_ARG_405   | H, C_ARG_405    | 2.81 | 1.97 | 9.73  |
| 4KRM.PDB | O, C_PHE_412   | N, C_GLN_408   | H, C_GLN_408    | 2.69 | 1.89 | 18.44 |
| 4KRM.PDB | O, C_GLN_408   | N, C_GLN_411   | H, C_GLN_411    | 2.85 | 2.01 | 8.79  |
| 4KRM.PDB | O, C_GLN_408   | N, C_PHE_412   | H, C_PHE_412    | 2.93 | 2.08 | 8.35  |
| 4KRM.PDB | O, C_ASP_436   | N, C_SER_413   | H, C_SER_413    | 2.81 | 1.98 | 12.74 |
| 4KRM.PDB | O, C_LEU_381   | N, C_ALA_415   | H, C_ALA_415    | 2.86 | 2.01 | 6.79  |
| 4KRM.PDB | O, C_ILE_438   | N, C_VAL_416   | H, C_VAL_416    | 2.91 | 2.08 | 11.96 |
| 4KRM.PDB | OD1, C_ASN_442 | N, C_LEU_419   | H, C_LEU_419    | 2.87 | 2.05 | 14.54 |
| 4KRM.PDB | O, C_THR_391   | N, C_THR_422   | H, C_THR_422    | 2.92 | 2.14 | 20.64 |
| 4KRM.PDB | OD1, C_ASP_498 | NH2, C_ARG_427 | HH21, C_ARG_427 | 2.43 | 1.69 | 25.29 |
| 4KRM.PDB | O, C_GLU_400   | N, C_LYS_430   | H, C_LYS_430    | 2.87 | 2.01 | 1.36  |

|          |                |                |                 |      |      |       |
|----------|----------------|----------------|-----------------|------|------|-------|
| 4KRM.PDB | O, C_LEU_456   | N, C_ILE_432   | H, C_ILE_432    | 2.84 | 1.99 | 8.13  |
| 4KRM.PDB | O, C_ILE_402   | N, C_SER_433   | H, C_SER_433    | 2.88 | 2.13 | 25.53 |
| 4KRM.PDB | OE2, C_GLU_431 | OG, C_SER_433  | HG, C_SER_433   | 2.86 | 2.06 | 14.79 |
| 4KRM.PDB | O, C_GLN_411   | N, C_ASP_436   | H, C_ASP_436    | 2.86 | 2.00 | 4.00  |
| 4KRM.PDB | O, C_LEU_414   | N, C_ILE_438   | H, C_ILE_438    | 2.90 | 2.08 | 13.19 |
| 4KRM.PDB | O, C_LYS_465   | N, C_ILE_439   | H, C_ILE_439    | 2.99 | 2.17 | 14.81 |
| 4KRM.PDB | OD1, C_ASN_469 | N, C_ASN_442   | H, C_ASN_442    | 2.74 | 1.97 | 21.04 |
| 4KRM.PDB | O, C_ASN_442   | N, C_LEU_445   | H, C_LEU_445    | 2.89 | 2.04 | 5.71  |
| 4KRM.PDB | O, C_TYR_447   | N, C_THR_450   | H, C_THR_450    | 2.94 | 2.09 | 7.41  |
| 4KRM.PDB | O, C_TYR_447   | OG1, C_THR_450 | HG1, C_THR_450  | 2.78 | 1.97 | 12.32 |
| 4KRM.PDB | OE1, C_GLU_489 | NZ, C_LYS_455  | HZ2, C_LYS_455  | 2.73 | 1.95 | 24.04 |
| 4KRM.PDB | O, C_TRP_453   | N, C_LEU_456   | H, C_LEU_456    | 2.87 | 2.15 | 27.86 |
| 4KRM.PDB | OE1, C_GLN_462 | N, C_THR_459   | H, C_THR_459    | 2.63 | 1.78 | 3.39  |
| 4KRM.PDB | O, C_SER_433   | OG1, C_THR_459 | HG1, C_THR_459  | 2.93 | 2.13 | 15.18 |
| 4KRM.PDB | O, C_GLY_435   | NE2, C_GLN_462 | HE21, C_GLN_462 | 2.88 | 2.03 | 7.30  |
| 4KRM.PDB | O, C_ILE_432   | NE2, C_GLN_462 | HE22, C_GLN_462 | 2.87 | 2.04 | 12.71 |
| 4KRM.PDB | OD1, C_ASP_436 | N, C_LYS_463   | H, C_LYS_463    | 2.83 | 1.97 | 7.15  |
| 4KRM.PDB | O, C_VAL_437   | N, C_LYS_465   | H, C_LYS_465    | 2.86 | 2.07 | 19.53 |
| 4KRM.PDB | O, C_ILE_439   | ND2, C_ASN_469 | HD21, C_ASN_469 | 2.82 | 2.06 | 23.01 |
| 4KRM.PDB | O, C_GLY_471   | N, C_CYS_475   | H, C_CYS_475    | 2.80 | 1.97 | 13.89 |
| 4KRM.PDB | O, C_GLU_472   | N, C_LYS_476   | H, C_LYS_476    | 2.76 | 1.96 | 18.66 |
| 4KRM.PDB | O, C_SER_501   | N, C_SER_487   | H, C_SER_487    | 2.90 | 2.08 | 13.40 |
| 4KRM.PDB | O, C_ASP_498   | N, C_TRP_492   | H, C_TRP_492    | 2.81 | 1.98 | 12.84 |
| 4KRM.PDB | O, C_PRO_496   | N, C_CYS_499   | H, C_CYS_499    | 2.91 | 2.08 | 13.02 |
| 4KRM.PDB | O, C_ALA_484   | NE, C_ARG_503  | HE, C_ARG_503   | 2.52 | 1.76 | 22.72 |
| 4KRM.PDB | O, D_SER_25    | N, D_LYS_3     | H, D_LYS_3      | 2.82 | 1.97 | 7.73  |
| 4KRM.PDB | O, D_ALA_23    | N, D_GLU_5     | H, D_GLU_5      | 2.92 | 2.10 | 13.79 |
| 4KRM.PDB | O, D_THR_121   | N, D_VAL_12    | H, D_VAL_12     | 2.95 | 2.18 | 23.16 |
| 4KRM.PDB | O, D_LEU_86    | N, D_GLY_15    | H, D_GLY_15     | 2.70 | 1.87 | 11.51 |
| 4KRM.PDB | O, D_GLN_13    | N, D_GLY_16    | H, D_GLY_16     | 2.72 | 1.98 | 26.19 |
| 4KRM.PDB | O, D_MET_83    | N, D_LEU_18    | H, D_LEU_18     | 3.00 | 2.20 | 18.58 |
| 4KRM.PDB | OE1, D_GLN_82  | NH1, D_ARG_19  | HH11, D_ARG_19  | 2.94 | 2.12 | 14.24 |
| 4KRM.PDB | O, D_LEU_81    | N, D_LEU_20    | H, D_LEU_20     | 2.98 | 2.19 | 20.30 |
| 4KRM.PDB | O, D_SER_7     | N, D_THR_21    | H, D_THR_21     | 2.83 | 1.99 | 11.71 |
| 4KRM.PDB | O, D_VAL_79    | N, D_CYS_22    | H, D_CYS_22     | 2.91 | 2.16 | 23.74 |
| 4KRM.PDB | O, D_GLU_5     | N, D_ALA_23    | H, D_ALA_23     | 2.86 | 2.02 | 10.32 |
| 4KRM.PDB | O, D_LYS_3     | N, D_SER_25    | H, D_SER_25     | 2.93 | 2.11 | 14.36 |
| 4KRM.PDB | OD2, C_ASP_355 | NH1, D_ARG_30  | HH12, D_ARG_30  | 2.45 | 1.63 | 13.53 |
| 4KRM.PDB | O, D_ALA_99    | N, D_GLY_33    | H, D_GLY_33     | 2.93 | 2.16 | 22.74 |
| 4KRM.PDB | O, D_ALA_97    | N, D_GLY_35    | H, D_GLY_35     | 2.86 | 2.06 | 17.94 |
| 4KRM.PDB | O, D_SER_49    | N, D_TRP_36    | H, D_TRP_36     | 2.77 | 1.94 | 12.95 |
| 4KRM.PDB | O, D_TYR_95    | N, D_PHE_37    | H, D_PHE_37     | 2.83 | 2.00 | 11.67 |
| 4KRM.PDB | O, D_GLU_46    | N, D_ARG_38    | H, D_ARG_38     | 2.89 | 2.09 | 17.91 |
| 4KRM.PDB | OE1, D_GLU_46  | NE, D_ARG_38   | HE, D_ARG_38    | 2.79 | 1.96 | 12.48 |
| 4KRM.PDB | O, D_ILE_93    | N, D_GLN_39    | H, D_GLN_39     | 2.91 | 2.12 | 19.63 |
| 4KRM.PDB | O, D_ARG_38    | N, D_GLU_46    | H, D_GLU_46     | 2.85 | 2.02 | 11.19 |
| 4KRM.PDB | O, D_TRP_36    | N, D_VAL_48    | H, D_VAL_48     | 2.93 | 2.16 | 21.89 |
| 4KRM.PDB | O, D_GLY_59    | OG, D_SER_49   | HG, D_SER_49    | 2.87 | 2.17 | 28.65 |
| 4KRM.PDB | O, D_GLY_59    | N, D_GLY_50    | H, D_GLY_50     | 2.97 | 2.17 | 17.64 |
| 4KRM.PDB | O, D_MET_34    | N, D_ILE_51    | H, D_ILE_51     | 2.91 | 2.12 | 20.05 |
| 4KRM.PDB | O, D_SER_102   | N, D_TRP_53    | H, D_TRP_53     | 2.83 | 2.01 | 14.56 |
| 4KRM.PDB | O, D_GLY_50    | N, D_GLY_59    | H, D_GLY_59     | 2.80 | 2.03 | 22.40 |
| 4KRM.PDB | O, E_GLU_308   | N, D_TYR_60    | H, D_TYR_60     | 2.82 | 2.08 | 26.84 |
| 4KRM.PDB | O, D_VAL_48    | N, D_ALA_61    | H, D_ALA_61     | 2.93 | 2.14 | 18.86 |
| 4KRM.PDB | O, D_GLN_82    | N, D_THR_69    | H, D_THR_69     | 2.93 | 2.16 | 22.84 |
| 4KRM.PDB | OH, D_TYR_60   | N, D_ILE_70    | H, D_ILE_70     | 2.85 | 2.02 | 13.28 |
| 4KRM.PDB | O, D_TYR_32    | NH2, D_ARG_72  | HH22, D_ARG_72  | 2.68 | 1.86 | 14.70 |
| 4KRM.PDB | O, D_TRP_53    | ND2, D_ASN_74  | HD21, D_ASN_74  | 2.93 | 2.13 | 17.25 |



|          |                |                |                 |      |      |       |
|----------|----------------|----------------|-----------------|------|------|-------|
| 4KRM.PDB | O, D_SER_71    | N, D_ASP_80    | H, D_ASP_80     | 2.68 | 1.90 | 20.52 |
| 4KRM.PDB | O, D_LEU_20    | N, D_LEU_81    | H, D_LEU_81     | 2.87 | 2.07 | 19.11 |
| 4KRM.PDB | O, D_THR_69    | N, D_GLN_82    | H, D_GLN_82     | 2.77 | 1.93 | 7.52  |
| 4KRM.PDB | O, D_LEU_18    | N, D_MET_83    | H, D_MET_83     | 2.74 | 1.89 | 9.04  |
| 4KRM.PDB | OD1, D_ASP_90  | N, D_LYS_87    | H, D_LYS_87     | 2.86 | 2.02 | 10.59 |
| 4KRM.PDB | O, D_THR_118   | N, D_TYR_94    | H, D_TYR_94     | 2.80 | 1.95 | 8.02  |
| 4KRM.PDB | O, D_ASP_90    | OH, D_TYR_94   | HH, D_TYR_94    | 2.74 | 1.90 | 2.03  |
| 4KRM.PDB | O, D_PHE_37    | N, D_TYR_95    | H, D_TYR_95     | 2.75 | 1.94 | 16.71 |
| 4KRM.PDB | OE2, D_GLU_6   | N, D_CYS_96    | H, D_CYS_96     | 2.74 | 1.90 | 11.31 |
| 4KRM.PDB | O, D_TYR_113   | N, D_ALA_98    | H, D_ALA_98     | 2.88 | 2.08 | 18.17 |
| 4KRM.PDB | O, D_GLY_33    | N, D_ALA_99    | H, D_ALA_99     | 2.73 | 1.90 | 13.15 |
| 4KRM.PDB | OD2, D_ASP_112 | N, D_ALA_100   | H, D_ALA_100    | 2.90 | 2.08 | 15.09 |
| 4KRM.PDB | O, D_SER_31    | N, D_GLY_101   | H, D_GLY_101    | 2.79 | 1.93 | 3.06  |
| 4KRM.PDB | O, D_TYR_105   | OH, D_TYR_111  | HH, D_TYR_111   | 2.68 | 1.86 | 10.32 |
| 4KRM.PDB | O, D_ALA_98    | N, D_ASP_112   | H, D_ASP_112    | 2.84 | 2.03 | 16.97 |
| 4KRM.PDB | O, D_ALA_92    | N, D_VAL_120   | H, D_VAL_120    | 2.94 | 2.12 | 14.83 |
| 4KRM.PDB | O, D_GLY_10    | N, D_THR_121   | H, D_THR_121    | 2.87 | 2.04 | 11.88 |
| 4KRM.PDB | OG1, D_THR_91  | N, D_VAL_122   | H, D_VAL_122    | 2.88 | 2.06 | 14.21 |
| 4KRM.PDB | O, D_THR_58    | N, E_LYS_310   | H, E_LYS_310    | 2.79 | 2.02 | 22.01 |
| 4KRM.PDB | O, E_SER_340   | N, E_CYS_313   | H, E_CYS_313    | 2.94 | 2.14 | 19.13 |
| 4KRM.PDB | O, E_PHE_321   | N, E_GLY_317   | H, E_GLY_317    | 2.77 | 1.95 | 14.36 |
| 4KRM.PDB | O, E_GLY_319   | N, E_LYS_322   | H, E_LYS_322    | 2.82 | 2.09 | 27.17 |
| 4KRM.PDB | O, E_ILE_327   | OG, E_SER_326  | HG, E_SER_326   | 2.91 | 2.09 | 10.66 |
| 4KRM.PDB | O, E_HIS_346   | N, E_ILE_327   | H, E_ILE_327    | 2.96 | 2.13 | 12.07 |
| 4KRM.PDB | OD1, E_ASN_331 | N, E_ASN_328   | H, E_ASN_328    | 2.92 | 2.08 | 11.06 |
| 4KRM.PDB | OD1, E_ASN_328 | N, E_ASN_331   | H, E_ASN_331    | 2.76 | 1.96 | 17.47 |
| 4KRM.PDB | O, E_LYS_311   | N, E_THR_339   | H, E_THR_339    | 2.88 | 2.04 | 8.53  |
| 4KRM.PDB | O, E_GLU_376   | N, E_ILE_341   | H, E_ILE_341    | 2.83 | 1.99 | 10.53 |
| 4KRM.PDB | O, E_CYS_313   | N, E_SER_342   | H, E_SER_342    | 2.81 | 2.01 | 18.67 |
| 4KRM.PDB | OG1, E_THR_378 | N, E_GLY_343   | H, E_GLY_343    | 2.67 | 1.96 | 28.18 |
| 4KRM.PDB | O, E_PHE_380   | N, E_LEU_345   | H, E_LEU_345    | 2.98 | 2.16 | 13.52 |
| 4KRM.PDB | O, E_LEU_382   | N, E_ILE_347   | H, E_ILE_347    | 2.93 | 2.15 | 21.34 |
| 4KRM.PDB | OG, E_SER_326  | N, E_LEU_348   | H, E_LEU_348    | 2.89 | 2.06 | 13.76 |
| 4KRM.PDB | O, E_LEU_348   | N, E_ALA_351   | H, E_ALA_351    | 2.93 | 2.15 | 20.83 |
| 4KRM.PDB | O, E_PRO_349   | N, E_ARG_353   | H, E_ARG_353    | 2.97 | 2.21 | 24.57 |
| 4KRM.PDB | OE1, F_GLU_110 | NH1, E_ARG_353 | HH11, E_ARG_353 | 2.85 | 2.03 | 14.34 |
| 4KRM.PDB | O, F_GLU_110   | NH1, E_ARG_353 | HH12, E_ARG_353 | 2.46 | 1.72 | 24.77 |
| 4KRM.PDB | O, F_ALA_100   | NH2, E_ARG_353 | HH21, E_ARG_353 | 2.81 | 1.99 | 15.85 |
| 4KRM.PDB | OD2, F_ASP_112 | NH2, E_ARG_353 | HH22, E_ARG_353 | 2.96 | 2.18 | 20.33 |
| 4KRM.PDB | O, E_VAL_350   | N, E_GLY_354   | H, E_GLY_354    | 2.78 | 1.95 | 14.18 |
| 4KRM.PDB | O, E_THR_360   | N, E_ASP_355   | H, E_ASP_355    | 2.77 | 1.92 | 5.02  |
| 4KRM.PDB | OD2, E_ASP_355 | OG1, E_THR_358 | HG1, E_THR_358  | 2.55 | 1.85 | 27.90 |
| 4KRM.PDB | O, E_SER_356   | N, E_HIS_359   | H, E_HIS_359    | 2.96 | 2.14 | 15.14 |
| 4KRM.PDB | O, E_ASP_355   | N, E_THR_360   | H, E_THR_360    | 2.89 | 2.04 | 8.71  |
| 4KRM.PDB | O, E_LEU_368   | N, E_LEU_371   | H, E_LEU_371    | 2.96 | 2.11 | 6.62  |
| 4KRM.PDB | O, E_CYS_338   | OG1, E_THR_373 | HG1, E_THR_373  | 2.65 | 1.89 | 21.62 |
| 4KRM.PDB | O, E_LEU_371   | N, E_VAL_374   | H, E_VAL_374    | 2.87 | 2.03 | 11.52 |
| 4KRM.PDB | O, E_THR_339   | N, E_LYS_375   | H, E_LYS_375    | 2.80 | 1.95 | 3.65  |
| 4KRM.PDB | O, E_ILE_341   | N, E_THR_378   | H, E_THR_378    | 2.99 | 2.16 | 11.77 |
| 4KRM.PDB | O, E_GLY_343   | N, E_GLY_379   | H, E_GLY_379    | 2.96 | 2.26 | 29.80 |
| 4KRM.PDB | O, E_SER_413   | N, E_LEU_381   | H, E_LEU_381    | 2.89 | 2.08 | 16.67 |
| 4KRM.PDB | O, E_LEU_345   | N, E_LEU_382   | H, E_LEU_382    | 2.95 | 2.10 | 8.54  |
| 4KRM.PDB | O, E_ALA_415   | N, E_ILE_383   | H, E_ILE_383    | 2.79 | 1.94 | 5.21  |
| 4KRM.PDB | O, F_ASP_112   | NE2, E_GLN_384 | HE22, E_GLN_384 | 2.82 | 2.10 | 28.13 |
| 4KRM.PDB | O, E_LEU_424   | N, E_LEU_393   | H, E_LEU_393    | 2.88 | 2.06 | 14.51 |
| 4KRM.PDB | O, E_LEU_393   | N, E_PHE_396   | H, E_PHE_396    | 2.99 | 2.16 | 13.86 |
| 4KRM.PDB | O, E_HIS_394   | N, E_GLU_397   | H, E_GLU_397    | 2.82 | 2.04 | 20.64 |
| 4KRM.PDB | O, E_LYS_372   | ND2, E_ASN_398 | HD22, E_ASN_398 | 2.92 | 2.11 | 15.20 |

|          |                |                |                 |      |      |       |
|----------|----------------|----------------|-----------------|------|------|-------|
| 4KRM.PDB | O, E.LYS.375   | N, E.GLU.400   | H, E.GLU.400    | 2.81 | 1.96 | 8.49  |
| 4KRM.PDB | O, E.ILE.377   | N, E.ARG.403   | H, E.ARG.403    | 2.94 | 2.11 | 13.50 |
| 4KRM.PDB | O, E.THR.378   | N, E.ARG.405   | H, E.ARG.405    | 2.98 | 2.15 | 12.71 |
| 4KRM.PDB | OD1, E.ASP.434 | NZ, E.LYS.407  | HZ1, E.LYS.407  | 2.65 | 1.88 | 23.95 |
| 4KRM.PDB | O, E.PHE.412   | N, E.GLN.408   | H, E.GLN.408    | 2.79 | 1.99 | 17.99 |
| 4KRM.PDB | O, E.LYS.407   | N, E.GLY.410   | H, E.GLY.410    | 2.97 | 2.18 | 18.85 |
| 4KRM.PDB | O, E.GLN.408   | N, E.GLN.411   | H, E.GLN.411    | 2.93 | 2.08 | 6.71  |
| 4KRM.PDB | O, E.ASP.436   | N, E.SER.413   | H, E.SER.413    | 2.91 | 2.10 | 16.30 |
| 4KRM.PDB | O, E.LEU.381   | N, E.ALA.415   | H, E.ALA.415    | 2.85 | 2.12 | 26.97 |
| 4KRM.PDB | O, E.ILE.383   | N, E.VAL.417   | H, E.VAL.417    | 2.90 | 2.05 | 7.33  |
| 4KRM.PDB | O, E.SER.440   | N, E.SER.418   | H, E.SER.418    | 2.92 | 2.12 | 18.48 |
| 4KRM.PDB | OD1, E.ASN.442 | N, E.LEU.419   | H, E.LEU.419    | 2.67 | 1.86 | 14.59 |
| 4KRM.PDB | O, E.THR.391   | N, E.THR.422   | H, E.THR.422    | 2.80 | 2.00 | 17.36 |
| 4KRM.PDB | O, E.LEU.456   | N, E.ILE.432   | H, E.ILE.432    | 2.68 | 1.84 | 9.53  |
| 4KRM.PDB | O, E.ILE.402   | N, E.SER.433   | H, E.SER.433    | 2.93 | 2.19 | 25.97 |
| 4KRM.PDB | OE2, E.GLU.431 | OG, E.SER.433  | HG, E.SER.433   | 2.91 | 2.17 | 23.57 |
| 4KRM.PDB | O, E.GLN.411   | N, E.ASP.436   | H, E.ASP.436    | 2.85 | 1.99 | 3.30  |
| 4KRM.PDB | O, E.LYS.465   | N, E.ILE.439   | H, E.ILE.439    | 2.87 | 2.04 | 13.60 |
| 4KRM.PDB | O, E.ASN.442   | N, E.LEU.445   | H, E.LEU.445    | 2.93 | 2.08 | 7.42  |
| 4KRM.PDB | O, E.THR.422   | N, E.CYS.446   | H, E.CYS.446    | 2.91 | 2.06 | 4.97  |
| 4KRM.PDB | O, E.TYR.447   | N, E.THR.450   | H, E.THR.450    | 2.98 | 2.15 | 11.59 |
| 4KRM.PDB | O, E.TYR.447   | OG1, E.THR.450 | HG1, E.THR.450  | 2.73 | 1.91 | 9.86  |
| 4KRM.PDB | O, E.GLU.489   | N, E.ASN.452   | H, E.ASN.452    | 2.85 | 2.08 | 22.47 |
| 4KRM.PDB | OE1, E.GLN.462 | N, E.GLY.458   | H, E.GLY.458    | 2.67 | 1.84 | 13.21 |
| 4KRM.PDB | OE1, E.GLN.462 | N, E.THR.459   | H, E.THR.459    | 2.93 | 2.08 | 6.67  |
| 4KRM.PDB | O, E.GLY.435   | NE2, E.GLN.462 | HE21, E.GLN.462 | 2.81 | 1.97 | 10.34 |
| 4KRM.PDB | OD1, E.ASP.436 | N, E.LYS.463   | H, E.LYS.463    | 2.74 | 1.90 | 10.82 |
| 4KRM.PDB | O, E.VAL.437   | N, E.LYS.465   | H, E.LYS.465    | 2.73 | 1.90 | 11.45 |
| 4KRM.PDB | O, E.ILE.439   | ND2, E.ASN.469 | HD21, E.ASN.469 | 2.99 | 2.18 | 18.20 |
| 4KRM.PDB | O, E.GLY.471   | N, E.CYS.475   | H, E.CYS.475    | 2.86 | 2.02 | 8.70  |
| 4KRM.PDB | O, E.GLU.472   | N, E.LYS.476   | H, E.LYS.476    | 2.70 | 1.86 | 10.04 |
| 4KRM.PDB | O, E.SER.501   | N, E.SER.487   | H, E.SER.487    | 2.92 | 2.08 | 12.18 |
| 4KRM.PDB | OG, E.SER.487  | N, E.GLU.489   | H, E.GLU.489    | 2.96 | 2.14 | 14.73 |
| 4KRM.PDB | OG1, E.THR.450 | N, E.CYS.491   | H, E.CYS.491    | 2.93 | 2.14 | 19.72 |
| 4KRM.PDB | O, E.ASP.498   | N, E.TRP.492   | H, E.TRP.492    | 2.80 | 1.98 | 14.94 |
| 4KRM.PDB | OD2, E.ASP.498 | N, E.GLU.495   | H, E.GLU.495    | 2.92 | 2.09 | 11.64 |
| 4KRM.PDB | O, E.GLU.495   | N, E.ASP.498   | H, E.ASP.498    | 2.98 | 2.18 | 17.73 |
| 4KRM.PDB | O, E.LEU.485   | N, E.ARG.503   | H, E.ARG.503    | 2.88 | 2.12 | 23.79 |
| 4KRM.PDB | O, F.SER.25    | N, F.LYS.3     | H, F.LYS.3      | 2.86 | 2.05 | 17.09 |
| 4KRM.PDB | O, F.THR.21    | N, F.SER.7     | H, F.SER.7      | 2.95 | 2.13 | 15.30 |
| 4KRM.PDB | O, F.SER.7     | N, F.THR.21    | H, F.THR.21     | 2.73 | 1.87 | 2.52  |
| 4KRM.PDB | O, F.LYS.3     | N, F.SER.25    | H, F.SER.25     | 2.98 | 2.15 | 11.96 |
| 4KRM.PDB | O, F.SER.31    | NH2, F.ARG.30  | HH21, F.ARG.30  | 2.61 | 1.79 | 15.83 |
| 4KRM.PDB | O, F.ALA.99    | N, F.GLY.33    | H, F.GLY.33     | 2.82 | 2.07 | 24.40 |
| 4KRM.PDB | O, F.ILE.51    | N, F.MET.34    | H, F.MET.34     | 2.93 | 2.11 | 15.70 |
| 4KRM.PDB | O, F.ALA.97    | N, F.GLY.35    | H, F.GLY.35     | 2.80 | 1.97 | 12.17 |
| 4KRM.PDB | O, F.SER.49    | N, F.TRP.36    | H, F.TRP.36     | 2.73 | 1.89 | 10.21 |
| 4KRM.PDB | O, F.TYR.95    | N, F.PHE.37    | H, F.PHE.37     | 2.81 | 1.97 | 10.88 |
| 4KRM.PDB | O, F.GLU.46    | N, F.ARG.38    | H, F.ARG.38     | 2.90 | 2.09 | 16.96 |
| 4KRM.PDB | OE1, F.GLU.46  | NE, F.ARG.38   | HE, F.ARG.38    | 2.74 | 1.95 | 18.99 |
| 4KRM.PDB | OD2, F.ASP.90  | NH1, F.ARG.38  | HH12, F.ARG.38  | 2.95 | 2.22 | 27.79 |
| 4KRM.PDB | OE1, F.GLU.46  | NH2, F.ARG.38  | HH21, F.ARG.38  | 2.97 | 2.26 | 28.90 |
| 4KRM.PDB | O, F.ILE.93    | N, F.GLN.39    | H, F.GLN.39     | 2.82 | 2.04 | 20.98 |
| 4KRM.PDB | O, F.ARG.38    | N, F.GLU.46    | H, F.GLU.46     | 2.90 | 2.06 | 10.12 |
| 4KRM.PDB | O, F.TRP.36    | N, F.VAL.48    | H, F.VAL.48     | 2.88 | 2.06 | 14.02 |
| 4KRM.PDB | O, F.GLY.59    | OG, F.SER.49   | HG, F.SER.49    | 2.88 | 2.11 | 18.96 |
| 4KRM.PDB | O, F.MET.34    | N, F.ILE.51    | H, F.ILE.51     | 2.74 | 1.95 | 19.38 |
| 4KRM.PDB | O, F.SER.57    | N, F.SER.52    | H, F.SER.52     | 2.97 | 2.18 | 19.50 |

|          |                |                |                 |      |      |       |
|----------|----------------|----------------|-----------------|------|------|-------|
| 4KRM.PDB | O, F_SER_102   | N, F_TRP_53    | H, F_TRP_53     | 2.81 | 2.02 | 19.56 |
| 4KRM.PDB | O, F_GLY_50    | N, F_GLY_59    | H, F_GLY_59     | 2.97 | 2.21 | 23.47 |
| 4KRM.PDB | O, F_VAL_48    | N, F_ALA_61    | H, F_ALA_61     | 2.76 | 1.97 | 19.40 |
| 4KRM.PDB | O, F_ALA_61    | N, F_VAL_64    | H, F_VAL_64     | 2.98 | 2.13 | 8.69  |
| 4KRM.PDB | O, F_GLN_82    | N, F_THR_69    | H, F_THR_69     | 2.91 | 2.11 | 18.52 |
| 4KRM.PDB | OH, F_TYR_60   | N, F_ILE_70    | H, F_ILE_70     | 2.89 | 2.06 | 11.48 |
| 4KRM.PDB | O, F_TYR_32    | NH2, F_ARG_72  | HH22, F_ARG_72  | 2.78 | 1.95 | 12.55 |
| 4KRM.PDB | O, F_THR_78    | N, F_ASP_73    | H, F_ASP_73     | 2.80 | 1.97 | 13.02 |
| 4KRM.PDB | O, F_TRP_53    | ND2, F_ASN_74  | HD21, F_ASN_74  | 2.93 | 2.12 | 16.19 |
| 4KRM.PDB | O, F_SER_71    | N, F_ASP_80    | H, F_ASP_80     | 2.70 | 1.92 | 21.61 |
| 4KRM.PDB | O, F_LEU_20    | N, F_LEU_81    | H, F_LEU_81     | 2.76 | 1.99 | 22.17 |
| 4KRM.PDB | O, F_THR_69    | N, F_GLN_82    | H, F_GLN_82     | 2.76 | 1.97 | 19.23 |
| 4KRM.PDB | O, F_LEU_18    | N, F_MET_83    | H, F_MET_83     | 2.64 | 1.79 | 6.89  |
| 4KRM.PDB | O, F_LYS_87    | N, F_ASP_90    | H, F_ASP_90     | 2.98 | 2.21 | 22.29 |
| 4KRM.PDB | O, F_VAL_120   | N, F_ALA_92    | H, F_ALA_92     | 2.97 | 2.23 | 25.76 |
| 4KRM.PDB | O, F_GLN_39    | N, F_ILE_93    | H, F_ILE_93     | 2.94 | 2.10 | 11.68 |
| 4KRM.PDB | O, F_THR_118   | N, F_TYR_94    | H, F_TYR_94     | 2.68 | 1.91 | 22.25 |
| 4KRM.PDB | O, F_PHE_37    | N, F_TYR_95    | H, F_TYR_95     | 2.61 | 1.83 | 20.76 |
| 4KRM.PDB | OE2, F_GLU_6   | N, F_CYS_96    | H, F_CYS_96     | 2.70 | 1.85 | 6.40  |
| 4KRM.PDB | O, F_TYR_113   | N, F_ALA_98    | H, F_ALA_98     | 2.93 | 2.11 | 13.82 |
| 4KRM.PDB | O, F_GLY_33    | N, F_ALA_99    | H, F_ALA_99     | 2.73 | 1.91 | 15.09 |
| 4KRM.PDB | OD2, F_ASP_112 | N, F_ALA_100   | H, F_ALA_100    | 2.76 | 1.94 | 15.63 |
| 4KRM.PDB | O, F_SER_31    | N, F_GLY_101   | H, F_GLY_101    | 2.75 | 1.91 | 9.93  |
| 4KRM.PDB | OG, F_SER_57   | NE1, F_TRP_104 | HE1, F_TRP_104  | 3.00 | 2.20 | 18.23 |
| 4KRM.PDB | OH, F_TYR_111  | N, F_TYR_105   | H, F_TYR_105    | 2.96 | 2.11 | 6.28  |
| 4KRM.PDB | O, F_TYR_105   | OH, F_TYR_111  | HH, F_TYR_111   | 2.59 | 1.76 | 7.82  |
| 4KRM.PDB | O, F_ALA_98    | N, F_ASP_112   | H, F_ASP_112    | 2.76 | 1.97 | 19.53 |
| 4KRM.PDB | O, F_ALA_92    | N, F_VAL_120   | H, F_VAL_120    | 2.87 | 2.04 | 13.51 |
| 4KRM.PDB | O, J_THR_58    | N, G_LYS_310   | H, G_LYS_310    | 2.73 | 1.87 | 4.39  |
| 4KRM.PDB | OG1, G_THR_339 | N, G_LYS_311   | H, G_LYS_311    | 2.65 | 1.81 | 9.30  |
| 4KRM.PDB | O, J_ASP_56    | N, G_VAL_312   | H, G_VAL_312    | 2.86 | 2.02 | 9.25  |
| 4KRM.PDB | O, G_SER_340   | N, G_CYS_313   | H, G_CYS_313    | 2.95 | 2.13 | 14.37 |
| 4KRM.PDB | OE2, G_GLU_320 | ND2, G_ASN_314 | HD22, G_ASN_314 | 2.93 | 2.08 | 7.68  |
| 4KRM.PDB | O, G_PHE_321   | N, G_GLY_317   | H, G_GLY_317    | 2.53 | 1.78 | 24.02 |
| 4KRM.PDB | O, G_ILE_318   | N, G_PHE_321   | H, G_PHE_321    | 2.93 | 2.11 | 15.10 |
| 4KRM.PDB | O, G_ILE_327   | OG, G_SER_326  | HG, G_SER_326   | 2.75 | 1.93 | 11.46 |
| 4KRM.PDB | OD1, G_ASN_331 | N, G_ASN_328   | H, G_ASN_328    | 2.74 | 1.90 | 10.28 |
| 4KRM.PDB | OD1, G_ASN_328 | N, G_THR_330   | H, G_THR_330    | 2.95 | 2.20 | 24.53 |
| 4KRM.PDB | O, G_LYS_311   | N, G_THR_339   | H, G_THR_339    | 2.89 | 2.05 | 9.34  |
| 4KRM.PDB | O, G_GLU_376   | N, G_ILE_341   | H, G_ILE_341    | 2.80 | 1.96 | 11.60 |
| 4KRM.PDB | O, G_CYS_313   | N, G_SER_342   | H, G_SER_342    | 2.82 | 1.98 | 11.49 |
| 4KRM.PDB | O, G_PHE_380   | N, G_LEU_345   | H, G_LEU_345    | 2.93 | 2.10 | 13.53 |
| 4KRM.PDB | O, G_LEU_382   | N, G_ILE_347   | H, G_ILE_347    | 2.70 | 1.92 | 20.05 |
| 4KRM.PDB | OD1, H_ASP_112 | N, G_VAL_350   | H, G_VAL_350    | 2.96 | 2.25 | 28.54 |
| 4KRM.PDB | O, H_GLU_110   | NH1, G_ARG_353 | HH12, G_ARG_353 | 2.56 | 1.83 | 26.87 |
| 4KRM.PDB | O, H_ALA_100   | NH2, G_ARG_353 | HH21, G_ARG_353 | 2.51 | 1.75 | 22.59 |
| 4KRM.PDB | O, G_THR_360   | N, G_ASP_355   | H, G_ASP_355    | 2.70 | 1.88 | 14.64 |
| 4KRM.PDB | OD2, G_ASP_355 | OG1, G_THR_358 | HG1, G_THR_358  | 2.44 | 1.73 | 26.83 |
| 4KRM.PDB | O, G_SER_356   | N, G_HIS_359   | H, G_HIS_359    | 2.93 | 2.09 | 11.16 |
| 4KRM.PDB | O, G_ASP_355   | N, G_THR_360   | H, G_THR_360    | 2.97 | 2.12 | 5.02  |
| 4KRM.PDB | O, G_ALA_351   | N, G_LEU_363   | H, G_LEU_363    | 2.76 | 1.95 | 17.12 |
| 4KRM.PDB | O, G_ASP_364   | N, G_GLU_367   | H, G_GLU_367    | 2.88 | 2.09 | 19.30 |
| 4KRM.PDB | O, G_CYS_338   | OG1, G_THR_373 | HG1, G_THR_373  | 2.73 | 2.02 | 27.50 |
| 4KRM.PDB | O, G_LEU_371   | N, G_VAL_374   | H, G_VAL_374    | 2.85 | 2.01 | 8.31  |
| 4KRM.PDB | O, G_THR_339   | N, G_LYS_375   | H, G_LYS_375    | 2.65 | 1.80 | 5.93  |
| 4KRM.PDB | O, G_ILE_401   | N, G_ILE_377   | H, G_ILE_377    | 2.87 | 2.09 | 20.96 |
| 4KRM.PDB | O, G_ILE_341   | N, G_THR_378   | H, G_THR_378    | 2.88 | 2.03 | 7.65  |
| 4KRM.PDB | O, G_GLY_343   | N, G_GLY_379   | H, G_GLY_379    | 2.80 | 2.07 | 27.17 |

|          |                |                |                 |      |      |       |
|----------|----------------|----------------|-----------------|------|------|-------|
| 4KRM.PDB | O, G_SER.413   | N, G_LEU.381   | H, G_LEU.381    | 2.90 | 2.12 | 21.15 |
| 4KRM.PDB | O, G_LEU.345   | N, G_LEU.382   | H, G_LEU.382    | 2.83 | 1.99 | 8.73  |
| 4KRM.PDB | O, G_ALA.415   | N, G_ILE.383   | H, G_ILE.383    | 2.86 | 2.01 | 8.40  |
| 4KRM.PDB | O, G_ILE.347   | N, G_GLN.384   | H, G_GLN.384    | 2.81 | 1.95 | 0.88  |
| 4KRM.PDB | O, G_LEU.424   | N, G_LEU.393   | H, G_LEU.393    | 2.77 | 1.94 | 12.00 |
| 4KRM.PDB | O, G_ASP.392   | N, G_HIS.394   | H, G_HIS.394    | 2.93 | 2.22 | 28.78 |
| 4KRM.PDB | O, G_LEU.393   | N, G_PHE.396   | H, G_PHE.396    | 2.92 | 2.10 | 14.77 |
| 4KRM.PDB | O, G_HIS.394   | N, G_GLU.397   | H, G_GLU.397    | 2.97 | 2.19 | 21.14 |
| 4KRM.PDB | O, G_LYS.372   | ND2, G_ASN.398 | HD22, G_ASN.398 | 2.84 | 2.00 | 11.57 |
| 4KRM.PDB | O, G_LYS.375   | N, G_GLU.400   | H, G_GLU.400    | 2.78 | 1.96 | 14.21 |
| 4KRM.PDB | O, G_LYS.375   | N, G_ILE.401   | H, G_ILE.401    | 2.99 | 2.20 | 20.10 |
| 4KRM.PDB | O, G_GLU.431   | N, G_ILE.402   | H, G_ILE.402    | 2.97 | 2.14 | 13.48 |
| 4KRM.PDB | O, G_ILE.377   | N, G_ARG.403   | H, G_ARG.403    | 2.93 | 2.11 | 14.81 |
| 4KRM.PDB | OE2, B_GLU.5   | NZ, G_LYS.407  | HZ1, G_LYS.407  | 2.98 | 2.17 | 20.60 |
| 4KRM.PDB | O, G_PHE.412   | N, G_GLN.408   | H, G_GLN.408    | 2.76 | 2.01 | 23.83 |
| 4KRM.PDB | O, G_LYS.407   | N, G_GLY.410   | H, G_GLY.410    | 2.94 | 2.22 | 27.68 |
| 4KRM.PDB | O, G_GLN.408   | N, G_GLN.411   | H, G_GLN.411    | 2.79 | 2.01 | 20.58 |
| 4KRM.PDB | O, G_ASP.436   | N, G_SER.413   | H, G_SER.413    | 2.85 | 2.07 | 21.98 |
| 4KRM.PDB | O, G_LEU.381   | N, G_ALA.415   | H, G_ALA.415    | 2.89 | 2.06 | 13.22 |
| 4KRM.PDB | O, G_ILE.438   | N, G_VAL.416   | H, G_VAL.416    | 2.96 | 2.13 | 13.42 |
| 4KRM.PDB | O, G_ILE.383   | N, G_VAL.417   | H, G_VAL.417    | 2.92 | 2.07 | 10.01 |
| 4KRM.PDB | O, G_SER.440   | N, G_SER.418   | H, G_SER.418    | 2.92 | 2.13 | 19.69 |
| 4KRM.PDB | OD1, G_ASN.442 | N, G_LEU.419   | H, G_LEU.419    | 2.75 | 1.90 | 7.74  |
| 4KRM.PDB | O, G_THR.391   | N, G_THR.422   | H, G_THR.422    | 2.76 | 1.99 | 22.35 |
| 4KRM.PDB | OD1, G_ASP.498 | NE, G_ARG.427  | HE, G_ARG.427   | 2.63 | 1.82 | 16.62 |
| 4KRM.PDB | O, G_GLU.400   | N, G_LYS.430   | H, G_LYS.430    | 2.83 | 2.00 | 11.28 |
| 4KRM.PDB | O, G_LEU.456   | N, G_ILE.432   | H, G_ILE.432    | 2.61 | 1.79 | 15.19 |
| 4KRM.PDB | O, G_ILE.402   | N, G_SER.433   | H, G_SER.433    | 2.83 | 2.10 | 26.95 |
| 4KRM.PDB | OE2, G_GLU.431 | OG, G_SER.433  | HG, G_SER.433   | 2.90 | 2.13 | 19.38 |
| 4KRM.PDB | O, G_GLN.411   | N, G_ASP.436   | H, G_ASP.436    | 2.84 | 1.99 | 7.12  |
| 4KRM.PDB | O, G_LEU.414   | N, G_ILE.438   | H, G_ILE.438    | 2.99 | 2.16 | 12.24 |
| 4KRM.PDB | O, G_LYS.465   | N, G_ILE.439   | H, G_ILE.439    | 2.85 | 2.05 | 16.86 |
| 4KRM.PDB | O, G_THR.422   | N, G_CYS.446   | H, G_CYS.446    | 2.95 | 2.09 | 5.98  |
| 4KRM.PDB | O, G_TYR.447   | OG1, G_THR.450 | HG1, G_THR.450  | 2.91 | 2.12 | 17.41 |
| 4KRM.PDB | O, G_TRP.453   | N, G_LEU.456   | H, G_LEU.456    | 2.82 | 2.02 | 18.78 |
| 4KRM.PDB | OE1, G_GLN.462 | N, G_GLY.458   | H, G_GLY.458    | 2.58 | 1.75 | 11.60 |
| 4KRM.PDB | OE1, G_GLN.462 | N, G_THR.459   | H, G_THR.459    | 2.66 | 1.85 | 16.39 |
| 4KRM.PDB | O, G_ILE.432   | NE2, G_GLN.462 | HE22, G_GLN.462 | 2.98 | 2.14 | 10.37 |
| 4KRM.PDB | OD2, G_ASP.436 | NZ, G_LYS.463  | HZ3, G_LYS.463  | 2.68 | 1.83 | 13.12 |
| 4KRM.PDB | O, G_VAL.437   | N, G_LYS.465   | H, G_LYS.465    | 2.68 | 1.91 | 21.58 |
| 4KRM.PDB | O, G_ILE.439   | ND2, G_ASN.469 | HD21, G_ASN.469 | 2.98 | 2.19 | 20.07 |
| 4KRM.PDB | O, G_GLY.479   | N, G_VAL.481   | H, G_VAL.481    | 2.78 | 2.05 | 26.86 |
| 4KRM.PDB | O, G_HIS.483   | N, G_CYS.486   | H, G_CYS.486    | 2.82 | 1.98 | 11.71 |
| 4KRM.PDB | O, G_SER.501   | N, G_SER.487   | H, G_SER.487    | 2.97 | 2.12 | 8.14  |
| 4KRM.PDB | OG1, G_THR.450 | N, G_CYS.491   | H, G_CYS.491    | 2.97 | 2.16 | 16.33 |
| 4KRM.PDB | O, G_ASP.498   | N, G_TRP.492   | H, G_TRP.492    | 2.74 | 1.91 | 11.68 |
| 4KRM.PDB | OD2, G_ASP.498 | N, G_GLU.495   | H, G_GLU.495    | 2.95 | 2.14 | 15.12 |
| 4KRM.PDB | O, G_GLU.495   | N, G_ASP.498   | H, G_ASP.498    | 2.86 | 2.09 | 21.75 |
| 4KRM.PDB | O, H_SER.25    | N, H_LYS.3     | H, H_LYS.3      | 2.79 | 1.95 | 8.78  |
| 4KRM.PDB | O, H_THR.121   | N, H_VAL.12    | H, H_VAL.12     | 2.78 | 2.06 | 27.37 |
| 4KRM.PDB | O, H_LEU.86    | N, H_GLY.15    | H, H_GLY.15     | 2.81 | 1.97 | 8.46  |
| 4KRM.PDB | O, H_GLN.13    | N, H_GLY.16    | H, H_GLY.16     | 2.88 | 2.10 | 20.19 |
| 4KRM.PDB | O, H_MET.83    | N, H_LEU.18    | H, H_LEU.18     | 2.86 | 2.12 | 25.13 |
| 4KRM.PDB | O, H_LEU.81    | N, H_LEU.20    | H, H_LEU.20     | 2.99 | 2.19 | 18.49 |
| 4KRM.PDB | O, H_SER.7     | N, H_THR.21    | H, H_THR.21     | 2.95 | 2.12 | 12.95 |
| 4KRM.PDB | OD1, H_ASP.80  | OG1, H_THR.21  | HG1, H_THR.21   | 2.86 | 2.06 | 13.63 |
| 4KRM.PDB | O, H_VAL.79    | N, H_CYS.22    | H, H_CYS.22     | 2.70 | 1.88 | 14.06 |
| 4KRM.PDB | O, H_GLU.5     | N, H_ALA.23    | H, H_ALA.23     | 2.89 | 2.06 | 12.94 |

|          |                |                |                 |      |      |       |
|----------|----------------|----------------|-----------------|------|------|-------|
| 4KRM.PDB | O, H_LYS_3     | N, H_SER_25    | H, H_SER_25     | 2.91 | 2.09 | 13.71 |
| 4KRM.PDB | O, H_GLN_1     | N, H_ARG_27    | H, H_ARG_27     | 2.48 | 1.77 | 28.35 |
| 4KRM.PDB | OD2, G_ASP_355 | NH1, H_ARG_30  | HH12, H_ARG_30  | 2.45 | 1.69 | 23.45 |
| 4KRM.PDB | O, H_SER_31    | NH2, H_ARG_30  | HH21, H_ARG_30  | 2.78 | 1.93 | 7.41  |
| 4KRM.PDB | O, H_ALA_99    | N, H_GLY_33    | H, H_GLY_33     | 2.86 | 2.05 | 16.44 |
| 4KRM.PDB | O, H_ALA_97    | N, H_GLY_35    | H, H_GLY_35     | 2.94 | 2.11 | 13.58 |
| 4KRM.PDB | O, H_SER_49    | N, H_TRP_36    | H, H_TRP_36     | 2.62 | 1.77 | 8.75  |
| 4KRM.PDB | O, H_TYR_95    | N, H_PHE_37    | H, H_PHE_37     | 2.89 | 2.05 | 9.66  |
| 4KRM.PDB | O, H_GLU_46    | N, H_ARG_38    | H, H_ARG_38     | 2.94 | 2.12 | 14.51 |
| 4KRM.PDB | OH, H_TYR_94   | NH1, H_ARG_38  | HH11, H_ARG_38  | 2.96 | 2.15 | 17.21 |
| 4KRM.PDB | OD2, H_ASP_90  | NH1, H_ARG_38  | HH12, H_ARG_38  | 2.78 | 1.94 | 11.87 |
| 4KRM.PDB | O, H_ILE_93    | N, H_GLN_39    | H, H_GLN_39     | 2.82 | 2.05 | 22.91 |
| 4KRM.PDB | O, H_ARG_38    | N, H_GLU_46    | H, H_GLU_46     | 2.85 | 2.00 | 7.03  |
| 4KRM.PDB | O, H_TRP_36    | N, H_VAL_48    | H, H_VAL_48     | 2.89 | 2.09 | 19.35 |
| 4KRM.PDB | O, H_GLY_59    | OG, H_SER_49   | HG, H_SER_49    | 2.79 | 2.01 | 17.53 |
| 4KRM.PDB | O, H_SER_57    | N, H_SER_52    | H, H_SER_52     | 2.91 | 2.10 | 15.97 |
| 4KRM.PDB | O, H_SER_102   | N, H_TRP_53    | H, H_TRP_53     | 2.86 | 2.06 | 18.40 |
| 4KRM.PDB | O, H_GLY_50    | N, H_GLY_59    | H, H_GLY_59     | 2.99 | 2.18 | 17.15 |
| 4KRM.PDB | O, H_VAL_48    | N, H_ALA_61    | H, H_ALA_61     | 2.83 | 2.04 | 18.74 |
| 4KRM.PDB | O, H_GLN_82    | N, H_THR_69    | H, H_THR_69     | 2.90 | 2.15 | 24.65 |
| 4KRM.PDB | OH, H_TYR_60   | N, H_ILE_70    | H, H_ILE_70     | 2.79 | 1.97 | 14.83 |
| 4KRM.PDB | O, H_ASP_80    | N, H_SER_71    | H, H_SER_71     | 3.00 | 2.23 | 22.57 |
| 4KRM.PDB | O, H_TRP_53    | ND2, H_ASN_74  | HD21, H_ASN_74  | 2.76 | 1.95 | 15.85 |
| 4KRM.PDB | OD2, H_ASP_73  | N, H_LYS_76    | H, H_LYS_76     | 2.90 | 2.09 | 16.51 |
| 4KRM.PDB | O, H_CYS_22    | N, H_VAL_79    | H, H_VAL_79     | 2.88 | 2.15 | 26.91 |
| 4KRM.PDB | O, H_SER_71    | N, H_ASP_80    | H, H_ASP_80     | 2.65 | 1.83 | 14.09 |
| 4KRM.PDB | O, H_LEU_20    | N, H_LEU_81    | H, H_LEU_81     | 2.81 | 2.00 | 15.97 |
| 4KRM.PDB | O, H_THR_69    | N, H_GLN_82    | H, H_GLN_82     | 2.88 | 2.06 | 13.12 |
| 4KRM.PDB | O, H_LEU_18    | N, H_MET_83    | H, H_MET_83     | 2.85 | 2.06 | 18.92 |
| 4KRM.PDB | OD1, H_ASP_90  | N, H_LYS_87    | H, H_LYS_87     | 2.94 | 2.18 | 22.86 |
| 4KRM.PDB | O, H_LYS_87    | N, H_ASP_90    | H, H_ASP_90     | 2.96 | 2.13 | 11.70 |
| 4KRM.PDB | O, H_VAL_120   | N, H_ALA_92    | H, H_ALA_92     | 2.96 | 2.18 | 20.64 |
| 4KRM.PDB | O, H_THR_118   | N, H_TYR_94    | H, H_TYR_94     | 2.81 | 1.97 | 10.96 |
| 4KRM.PDB | O, H_ASP_90    | OH, H_TYR_94   | HH, H_TYR_94    | 2.70 | 1.86 | 4.54  |
| 4KRM.PDB | O, H_PHE_37    | N, H_TYR_95    | H, H_TYR_95     | 2.58 | 1.73 | 7.75  |
| 4KRM.PDB | OE2, H_GLU_6   | N, H_CYS_96    | H, H_CYS_96     | 2.89 | 2.06 | 12.97 |
| 4KRM.PDB | O, H_TYR_113   | N, H_ALA_98    | H, H_ALA_98     | 2.83 | 2.01 | 14.92 |
| 4KRM.PDB | O, H_GLY_33    | N, H_ALA_99    | H, H_ALA_99     | 2.76 | 1.95 | 17.06 |
| 4KRM.PDB | OD2, H_ASP_112 | N, H_ALA_100   | H, H_ALA_100    | 2.90 | 2.11 | 20.56 |
| 4KRM.PDB | OH, H_TYR_111  | N, H_TYR_105   | H, H_TYR_105    | 3.00 | 2.17 | 13.07 |
| 4KRM.PDB | O, H_TYR_105   | OH, H_TYR_111  | HH, H_TYR_111   | 2.65 | 1.82 | 7.16  |
| 4KRM.PDB | O, H_ALA_98    | N, H_ASP_112   | H, H_ASP_112    | 2.68 | 1.89 | 19.59 |
| 4KRM.PDB | O, H_CYS_96    | N, H_GLY_115   | H, H_GLY_115    | 2.91 | 2.11 | 18.40 |
| 4KRM.PDB | O, H_ALA_92    | N, H_VAL_120   | H, H_VAL_120    | 2.84 | 1.98 | 5.98  |
| 4KRM.PDB | O, H_GLY_10    | N, H_THR_121   | H, H_THR_121    | 2.98 | 2.20 | 20.73 |
| 4KRM.PDB | O, H_VAL_12    | N, H_SER_123   | H, H_SER_123    | 2.98 | 2.16 | 13.88 |
| 4KRM.PDB | O, L_TYR_60    | N, L_GLU_308   | H, L_GLU_308    | 2.69 | 1.88 | 16.25 |
| 4KRM.PDB | O, L_THR_58    | N, L_LYS_310   | H, L_LYS_310    | 2.70 | 1.84 | 3.45  |
| 4KRM.PDB | OG1, L_THR_339 | N, L_LYS_311   | H, L_LYS_311    | 2.88 | 2.03 | 10.00 |
| 4KRM.PDB | O, L_ASP_56    | N, L_VAL_312   | H, L_VAL_312    | 2.83 | 1.98 | 8.53  |
| 4KRM.PDB | O, L_SER_340   | N, L_CYS_313   | H, L_CYS_313    | 2.89 | 2.06 | 11.76 |
| 4KRM.PDB | O, L_ASP_344   | N, L_ILE_316   | H, L_ILE_316    | 2.80 | 2.09 | 29.01 |
| 4KRM.PDB | O, L_PHE_321   | N, L_GLY_317   | H, L_GLY_317    | 2.73 | 1.96 | 22.99 |
| 4KRM.PDB | O, L_ILE_318   | N, L_PHE_321   | H, L_PHE_321    | 2.93 | 2.10 | 12.75 |
| 4KRM.PDB | O, L_ILE_327   | OG, L_SER_326  | HG, L_SER_326   | 2.89 | 2.08 | 11.44 |
| 4KRM.PDB | OD1, L_ASN_331 | N, L_ASN_328   | H, L_ASN_328    | 2.82 | 1.98 | 9.33  |
| 4KRM.PDB | OD1, L_ASN_328 | N, L_ASN_331   | H, L_ASN_331    | 2.99 | 2.20 | 19.62 |
| 4KRM.PDB | O, L_SER_326   | ND2, L_ASN_331 | HD21, L_ASN_331 | 2.92 | 2.07 | 8.49  |

|          |                |                |                 |      |      |       |
|----------|----------------|----------------|-----------------|------|------|-------|
| 4KRM.PDB | O, I.LE_332    | N, I.PHE_335   | H, I.PHE_335    | 2.95 | 2.11 | 11.07 |
| 4KRM.PDB | O, I.LYS_311   | N, I.THR_339   | H, I.THR_339    | 2.90 | 2.09 | 16.73 |
| 4KRM.PDB | O, I.GLU_376   | N, I.LE_341    | H, I.LE_341     | 2.71 | 1.87 | 11.39 |
| 4KRM.PDB | O, I.CYS_313   | N, I.SER_342   | H, I.SER_342    | 2.80 | 1.99 | 16.11 |
| 4KRM.PDB | OD1, J.ASP_112 | N, I.VAL_350   | H, I.VAL_350    | 2.88 | 2.05 | 13.27 |
| 4KRM.PDB | O, I.PRO_349   | N, I.PHE_352   | H, I.PHE_352    | 2.95 | 2.25 | 30.00 |
| 4KRM.PDB | OE1, J.GLU_110 | NH1, I.ARG_353 | HH11, I.ARG_353 | 2.86 | 2.07 | 18.90 |
| 4KRM.PDB | O, J.ALA_100   | NH2, I.ARG_353 | HH21, I.ARG_353 | 2.97 | 2.14 | 13.62 |
| 4KRM.PDB | OD2, J.ASP_112 | NH2, I.ARG_353 | HH22, I.ARG_353 | 3.00 | 2.19 | 17.61 |
| 4KRM.PDB | O, I.VAL_350   | N, I.GLY_354   | H, I.GLY_354    | 2.71 | 1.89 | 14.51 |
| 4KRM.PDB | O, I.THR_360   | N, I.ASP_355   | H, I.ASP_355    | 2.71 | 1.86 | 7.14  |
| 4KRM.PDB | O, I.SER_356   | N, I.HIS_359   | H, I.HIS_359    | 2.93 | 2.08 | 7.30  |
| 4KRM.PDB | O, I.ASP_355   | N, I.THR_360   | H, I.THR_360    | 2.86 | 2.01 | 5.45  |
| 4KRM.PDB | O, I.ALA_351   | N, I.LEU_363   | H, I.LEU_363    | 2.78 | 1.95 | 13.31 |
| 4KRM.PDB | O, I.ASP_364   | N, I.GLU_367   | H, I.GLU_367    | 2.93 | 2.21 | 27.86 |
| 4KRM.PDB | O, I.GLN_366   | N, I.ASP_369   | H, I.ASP_369    | 2.86 | 2.00 | 2.35  |
| 4KRM.PDB | O, I.CYS_338   | OG1, I.THR_373 | HG1, I.THR_373  | 2.82 | 2.09 | 25.50 |
| 4KRM.PDB | O, I.THR_339   | N, I.LYS_375   | H, I.LYS_375    | 2.71 | 1.85 | 3.93  |
| 4KRM.PDB | O, I.LE_401    | N, I.LE_377    | H, I.LE_377     | 2.89 | 2.07 | 14.58 |
| 4KRM.PDB | O, I.LE_341    | N, I.THR_378   | H, I.THR_378    | 2.93 | 2.08 | 9.23  |
| 4KRM.PDB | O, I.SER_413   | N, I.LEU_381   | H, I.LEU_381    | 2.75 | 1.94 | 16.75 |
| 4KRM.PDB | O, I.LEU_345   | N, I.LEU_382   | H, I.LEU_382    | 2.90 | 2.05 | 7.20  |
| 4KRM.PDB | O, I.ALA_415   | N, I.LE_383    | H, I.LE_383     | 2.86 | 2.06 | 17.70 |
| 4KRM.PDB | O, I.LE_347    | N, I.GLN_384   | H, I.GLN_384    | 2.86 | 2.01 | 5.31  |
| 4KRM.PDB | O, I.ASP_392   | NE1, I.TRP_386 | HE1, I.TRP_386  | 2.95 | 2.22 | 27.18 |
| 4KRM.PDB | O, I.LEU_424   | N, I.LEU_393   | H, I.LEU_393    | 2.95 | 2.14 | 17.35 |
| 4KRM.PDB | O, I.LEU_393   | N, I.PHE_396   | H, I.PHE_396    | 2.98 | 2.13 | 9.44  |
| 4KRM.PDB | O, I.HIS_394   | N, I.GLU_397   | H, I.GLU_397    | 2.79 | 2.02 | 21.70 |
| 4KRM.PDB | O, I.LYS_372   | ND2, I.ASN_398 | HD22, I.ASN_398 | 2.66 | 1.85 | 16.79 |
| 4KRM.PDB | O, I.GLU_431   | N, I.LE_402    | H, I.LE_402     | 2.98 | 2.16 | 14.32 |
| 4KRM.PDB | O, I.LE_377    | N, I.ARG_403   | H, I.ARG_403    | 2.74 | 1.92 | 14.23 |
| 4KRM.PDB | OE1, I.GLU_376 | NH1, I.ARG_403 | HH11, I.ARG_403 | 2.44 | 1.73 | 28.52 |
| 4KRM.PDB | O, I.THR_378   | N, I.ARG_405   | H, I.ARG_405    | 2.76 | 1.91 | 6.37  |
| 4KRM.PDB | O, I.PHE_412   | N, I.GLN_408   | H, I.GLN_408    | 2.70 | 1.95 | 24.36 |
| 4KRM.PDB | O, I.GLN_408   | N, I.GLN_411   | H, I.GLN_411    | 2.99 | 2.13 | 5.39  |
| 4KRM.PDB | O, I.GLN_408   | N, I.PHE_412   | H, I.PHE_412    | 2.93 | 2.08 | 4.67  |
| 4KRM.PDB | O, I.ASP_436   | N, I.SER_413   | H, I.SER_413    | 2.86 | 2.02 | 12.03 |
| 4KRM.PDB | O, I.LEU_381   | N, I.ALA_415   | H, I.ALA_415    | 2.85 | 2.03 | 14.56 |
| 4KRM.PDB | O, I.LE_438    | N, I.VAL_416   | H, I.VAL_416    | 2.89 | 2.05 | 11.42 |
| 4KRM.PDB | O, I.LE_383    | N, I.VAL_417   | H, I.VAL_417    | 2.89 | 2.03 | 5.24  |
| 4KRM.PDB | OD1, I.ASN_442 | N, I.LEU_419   | H, I.LEU_419    | 2.81 | 1.99 | 14.43 |
| 4KRM.PDB | O, I.THR_391   | N, I.THR_422   | H, I.THR_422    | 2.89 | 2.08 | 17.87 |
| 4KRM.PDB | O, I.GLU_400   | N, I.LYS_430   | H, I.LYS_430    | 2.98 | 2.13 | 8.06  |
| 4KRM.PDB | O, I.LEU_456   | N, I.LE_432    | H, I.LE_432     | 2.75 | 1.92 | 11.71 |
| 4KRM.PDB | O, I.LE_402    | N, I.SER_433   | H, I.SER_433    | 2.89 | 2.14 | 24.79 |
| 4KRM.PDB | OE2, I.GLU_431 | OG, I.SER_433  | HG, I.SER_433   | 2.91 | 2.09 | 9.73  |
| 4KRM.PDB | OD1, I.ASP_434 | N, I.GLY_435   | H, I.GLY_435    | 2.61 | 1.88 | 26.82 |
| 4KRM.PDB | O, I.GLN_411   | N, I.ASP_436   | H, I.ASP_436    | 2.81 | 1.95 | 4.03  |
| 4KRM.PDB | O, I.LEU_414   | N, I.LE_438    | H, I.LE_438     | 2.94 | 2.11 | 13.80 |
| 4KRM.PDB | OD1, I.ASN_469 | ND2, I.ASN_442 | HD22, I.ASN_442 | 2.76 | 1.93 | 12.03 |
| 4KRM.PDB | O, I.THR_422   | N, I.CYS_446   | H, I.CYS_446    | 2.73 | 1.88 | 7.27  |
| 4KRM.PDB | O, I.TYR_447   | OG1, I.THR_450 | HG1, I.THR_450  | 2.88 | 2.08 | 15.87 |
| 4KRM.PDB | OE1, I.GLN_462 | N, I.GLY_458   | H, I.GLY_458    | 2.63 | 1.77 | 6.16  |
| 4KRM.PDB | OE1, I.GLN_462 | N, I.THR_459   | H, I.THR_459    | 2.73 | 1.99 | 24.99 |
| 4KRM.PDB | O, I.LE_432    | NE2, I.GLN_462 | HE22, I.GLN_462 | 2.64 | 1.79 | 3.75  |
| 4KRM.PDB | O, I.VAL_437   | N, I.LYS_465   | H, I.LYS_465    | 2.80 | 2.00 | 17.16 |
| 4KRM.PDB | O, I.LE_439    | ND2, I.ASN_469 | HD21, I.ASN_469 | 2.82 | 2.04 | 21.05 |
| 4KRM.PDB | OD1, I.ASN_473 | OG, I.SER_474  | HG, I.SER_474   | 2.73 | 1.91 | 11.26 |

|          |                |                |                |      |      |       |
|----------|----------------|----------------|----------------|------|------|-------|
| 4KRM.PDB | O, I_GLY_479   | N, I_VAL_481   | H, I_VAL_481   | 2.96 | 2.25 | 29.56 |
| 4KRM.PDB | OG1, I_THR_450 | N, I_CYS_491   | H, I_CYS_491   | 2.81 | 1.99 | 15.75 |
| 4KRM.PDB | O, I_ASP_498   | N, I_TRP_492   | H, I_TRP_492   | 2.78 | 1.96 | 14.16 |
| 4KRM.PDB | O, I_PRO_496   | N, I_CYS_499   | H, I_CYS_499   | 2.92 | 2.09 | 12.35 |
| 4KRM.PDB | O, J_SER_25    | N, J_LYS_3     | H, J_LYS_3     | 2.85 | 2.01 | 8.57  |
| 4KRM.PDB | O, J_ALA_23    | N, J_GLU_5     | H, J_GLU_5     | 2.99 | 2.16 | 13.86 |
| 4KRM.PDB | O, J_THR_121   | N, J_VAL_12    | H, J_VAL_12    | 3.00 | 2.24 | 24.14 |
| 4KRM.PDB | O, J_LEU_86    | N, J_GLY_15    | H, J_GLY_15    | 2.66 | 1.81 | 6.69  |
| 4KRM.PDB | O, J_GLN_13    | N, J_GLY_16    | H, J_GLY_16    | 2.94 | 2.17 | 21.17 |
| 4KRM.PDB | OD1, J_ASP_80  | NE, J_ARG_19   | HE, J_ARG_19   | 2.78 | 1.97 | 16.74 |
| 4KRM.PDB | O, J_LEU_81    | N, J_LEU_20    | H, J_LEU_20    | 2.96 | 2.15 | 16.27 |
| 4KRM.PDB | O, J_SER_7     | N, J_THR_21    | H, J_THR_21    | 2.87 | 2.05 | 15.09 |
| 4KRM.PDB | O, J_VAL_79    | N, J_CYS_22    | H, J_CYS_22    | 2.95 | 2.23 | 28.38 |
| 4KRM.PDB | O, J_GLU_5     | N, J_ALA_23    | H, J_ALA_23    | 2.89 | 2.08 | 15.16 |
| 4KRM.PDB | O, J_GLN_1     | N, J_ARG_27    | H, J_ARG_27    | 2.63 | 1.91 | 27.25 |
| 4KRM.PDB | O, J_THR_28    | N, J_ARG_30    | H, J_ARG_30    | 2.80 | 2.09 | 29.22 |
| 4KRM.PDB | O, J_SER_31    | NH2, J_ARG_30  | HH21, J_ARG_30 | 2.53 | 1.73 | 17.55 |
| 4KRM.PDB | O, J_ALA_99    | N, J_GLY_33    | H, J_GLY_33    | 2.86 | 2.12 | 25.08 |
| 4KRM.PDB | O, J_ILE_51    | N, J_MET_34    | H, J_MET_34    | 2.99 | 2.28 | 29.29 |
| 4KRM.PDB | O, J_ALA_97    | N, J_GLY_35    | H, J_GLY_35    | 2.84 | 2.04 | 17.40 |
| 4KRM.PDB | O, J_SER_49    | N, J_TRP_36    | H, J_TRP_36    | 2.70 | 1.86 | 9.65  |
| 4KRM.PDB | O, J_TYR_95    | N, J_PHE_37    | H, J_PHE_37    | 2.82 | 1.99 | 12.49 |
| 4KRM.PDB | O, J_GLU_46    | N, J_ARG_38    | H, J_ARG_38    | 2.92 | 2.10 | 15.90 |
| 4KRM.PDB | OH, J_TYR_94   | NH1, J_ARG_38  | HH11, J_ARG_38 | 2.85 | 2.02 | 12.10 |
| 4KRM.PDB | OD2, J_ASP_90  | NH1, J_ARG_38  | HH12, J_ARG_38 | 2.97 | 2.15 | 14.05 |
| 4KRM.PDB | O, J_ILE_93    | N, J_GLN_39    | H, J_GLN_39    | 2.89 | 2.11 | 20.97 |
| 4KRM.PDB | O, J_ARG_38    | N, J_GLU_46    | H, J_GLU_46    | 2.86 | 2.02 | 11.35 |
| 4KRM.PDB | O, J_TRP_36    | N, J_VAL_48    | H, J_VAL_48    | 2.89 | 2.09 | 18.44 |
| 4KRM.PDB | O, J_MET_34    | N, J_ILE_51    | H, J_ILE_51    | 2.84 | 2.02 | 15.75 |
| 4KRM.PDB | O, J_SER_57    | N, J_SER_52    | H, J_SER_52    | 2.88 | 2.10 | 20.91 |
| 4KRM.PDB | O, J_SER_102   | N, J_TRP_53    | H, J_TRP_53    | 2.92 | 2.12 | 18.19 |
| 4KRM.PDB | O, J_GLY_50    | N, J_GLY_59    | H, J_GLY_59    | 2.99 | 2.18 | 16.04 |
| 4KRM.PDB | O, G_GLU_308   | N, J_TYR_60    | H, J_TYR_60    | 2.74 | 1.97 | 22.05 |
| 4KRM.PDB | O, J_VAL_48    | N, J_ALA_61    | H, J_ALA_61    | 2.78 | 1.94 | 11.47 |
| 4KRM.PDB | O, J_SER_63    | NH1, J_ARG_67  | HH11, J_ARG_67 | 2.71 | 1.87 | 10.55 |
| 4KRM.PDB | OD1, J_ASP_90  | NH2, J_ARG_67  | HH22, J_ARG_67 | 2.61 | 1.77 | 10.49 |
| 4KRM.PDB | O, J_GLN_82    | N, J_THR_69    | H, J_THR_69    | 2.92 | 2.13 | 20.56 |
| 4KRM.PDB | OH, J_TYR_60   | N, J_ILE_70    | H, J_ILE_70    | 2.83 | 2.01 | 15.28 |
| 4KRM.PDB | OD1, J_ASN_74  | NE, J_ARG_72   | HE, J_ARG_72   | 2.67 | 1.87 | 16.97 |
| 4KRM.PDB | O, J_TYR_32    | NH1, J_ARG_72  | HH12, J_ARG_72 | 2.75 | 1.96 | 19.64 |
| 4KRM.PDB | O, J_TYR_32    | NH2, J_ARG_72  | HH22, J_ARG_72 | 2.98 | 2.27 | 29.63 |
| 4KRM.PDB | O, J_TRP_53    | ND2, J_ASN_74  | HD21, J_ASN_74 | 2.64 | 1.92 | 27.41 |
| 4KRM.PDB | O, J_SER_71    | N, J_ASP_80    | H, J_ASP_80    | 2.70 | 1.90 | 17.63 |
| 4KRM.PDB | O, J_LEU_20    | N, J_LEU_81    | H, J_LEU_81    | 2.84 | 2.06 | 20.27 |
| 4KRM.PDB | O, J_THR_69    | N, J_GLN_82    | H, J_GLN_82    | 2.78 | 1.99 | 19.54 |
| 4KRM.PDB | O, J_LEU_18    | N, J_MET_83    | H, J_MET_83    | 2.71 | 1.90 | 15.45 |
| 4KRM.PDB | OD1, J_ASP_90  | N, J_LYS_87    | H, J_LYS_87    | 2.95 | 2.13 | 13.64 |
| 4KRM.PDB | O, J_LYS_87    | N, J_ASP_90    | H, J_ASP_90    | 2.61 | 1.76 | 7.15  |
| 4KRM.PDB | O, J_ASP_90    | OH, J_TYR_94   | HH, J_TYR_94   | 2.63 | 1.80 | 7.10  |
| 4KRM.PDB | O, J_PHE_37    | N, J_TYR_95    | H, J_TYR_95    | 2.62 | 1.79 | 12.04 |
| 4KRM.PDB | OE2, J_GLU_6   | N, J_CYS_96    | H, J_CYS_96    | 2.75 | 1.91 | 8.89  |
| 4KRM.PDB | O, J_TYR_113   | N, J_ALA_98    | H, J_ALA_98    | 3.00 | 2.20 | 18.29 |
| 4KRM.PDB | O, J_GLY_33    | N, J_ALA_99    | H, J_ALA_99    | 2.77 | 1.94 | 13.41 |
| 4KRM.PDB | OD2, J_ASP_112 | N, J_ALA_100   | H, J_ALA_100   | 2.99 | 2.17 | 16.23 |
| 4KRM.PDB | O, J_SER_31    | N, J_GLY_101   | H, J_GLY_101   | 2.93 | 2.08 | 6.19  |
| 4KRM.PDB | OG, J_SER_57   | NE1, J_TRP_104 | HE1, J_TRP_104 | 2.98 | 2.26 | 28.43 |
| 4KRM.PDB | OH, J_TYR_111  | N, J_TYR_105   | H, J_TYR_105   | 2.99 | 2.14 | 8.48  |
| 4KRM.PDB | O, J_TYR_105   | OH, J_TYR_111  | HH, J_TYR_111  | 2.76 | 1.92 | 3.09  |

|          |                |                |                 |      |      |       |
|----------|----------------|----------------|-----------------|------|------|-------|
| 4KRM.PDB | O, J_ALA_98    | N, J_ASP_112   | H, J_ASP_112    | 2.80 | 2.02 | 20.50 |
| 4KRM.PDB | OE1, J_GLU_6   | N, J_GLY_117   | H, J_GLY_117    | 2.88 | 2.04 | 11.43 |
| 4KRM.PDB | O, J_ALA_92    | N, J_VAL_120   | H, J_VAL_120    | 2.87 | 2.03 | 9.32  |
| 4KRM.PDB | O, J_GLY_10    | N, J_THR_121   | H, J_THR_121    | 2.81 | 1.98 | 11.54 |
| 4KRM.PDB | OG1, J_THR_91  | N, J_VAL_122   | H, J_VAL_122    | 2.77 | 1.92 | 7.72  |
| 4KRM.PDB | O, K_SER_340   | N, K_CYS_313   | H, K_CYS_313    | 2.84 | 2.01 | 12.83 |
| 4KRM.PDB | O, K_ASP_344   | N, K_ILE_316   | H, K_ILE_316    | 3.00 | 2.29 | 29.47 |
| 4KRM.PDB | O, K_PHE_321   | N, K_GLY_317   | H, K_GLY_317    | 2.69 | 1.90 | 19.46 |
| 4KRM.PDB | OD1, K_ASN_331 | N, K_ASN_328   | H, K_ASN_328    | 2.83 | 1.99 | 11.57 |
| 4KRM.PDB | OD1, K_ASN_328 | N, K_THR_330   | H, K_THR_330    | 2.89 | 2.17 | 28.13 |
| 4KRM.PDB | O, K_SER_326   | ND2, K_ASN_331 | HD21, K_ASN_331 | 2.93 | 2.14 | 20.17 |
| 4KRM.PDB | O, K_LYS_311   | N, K_THR_339   | H, K_THR_339    | 2.88 | 2.03 | 7.02  |
| 4KRM.PDB | O, K_GLU_376   | N, K_ILE_341   | H, K_ILE_341    | 2.75 | 1.92 | 10.64 |
| 4KRM.PDB | O, K_CYS_313   | N, K_SER_342   | H, K_SER_342    | 2.81 | 1.98 | 11.90 |
| 4KRM.PDB | O, K_PHE_380   | N, K_LEU_345   | H, K_LEU_345    | 2.95 | 2.14 | 16.87 |
| 4KRM.PDB | O, K_LEU_382   | N, K_ILE_347   | H, K_ILE_347    | 2.87 | 2.09 | 20.57 |
| 4KRM.PDB | OD1, L_ASP_112 | N, K_VAL_350   | H, K_VAL_350    | 2.89 | 2.07 | 15.44 |
| 4KRM.PDB | O, K_LEU_348   | N, K_ALA_351   | H, K_ALA_351    | 2.98 | 2.18 | 17.67 |
| 4KRM.PDB | O, K_PRO_349   | N, K_PHE_352   | H, K_PHE_352    | 2.94 | 2.16 | 21.68 |
| 4KRM.PDB | OE1, L_GLU_110 | NH1, K_ARG_353 | HH11, K_ARG_353 | 2.89 | 2.06 | 12.41 |
| 4KRM.PDB | O, L_GLU_110   | NH1, K_ARG_353 | HH12, K_ARG_353 | 2.54 | 1.80 | 24.42 |
| 4KRM.PDB | O, L_ALA_100   | NH2, K_ARG_353 | HH21, K_ARG_353 | 2.92 | 2.14 | 20.95 |
| 4KRM.PDB | OD2, L_ASP_112 | NH2, K_ARG_353 | HH22, K_ARG_353 | 2.89 | 2.07 | 13.96 |
| 4KRM.PDB | O, K_VAL_350   | N, K_GLY_354   | H, K_GLY_354    | 2.71 | 1.91 | 17.56 |
| 4KRM.PDB | O, K_THR_360   | N, K_ASP_355   | H, K_ASP_355    | 2.67 | 1.85 | 14.28 |
| 4KRM.PDB | O, K_ASP_355   | N, K_THR_358   | H, K_THR_358    | 2.95 | 2.19 | 22.97 |
| 4KRM.PDB | OD2, K_ASP_355 | OG1, K_THR_358 | HG1, K_THR_358  | 2.91 | 2.21 | 28.73 |
| 4KRM.PDB | O, K_ASP_355   | N, K_THR_360   | H, K_THR_360    | 2.96 | 2.12 | 9.53  |
| 4KRM.PDB | O, K_ALA_351   | N, K_LEU_363   | H, K_LEU_363    | 2.66 | 1.89 | 22.52 |
| 4KRM.PDB | O, K_ASP_364   | N, K_GLU_367   | H, K_GLU_367    | 2.81 | 1.97 | 10.44 |
| 4KRM.PDB | O, K_LEU_368   | N, K_LEU_371   | H, K_LEU_371    | 2.97 | 2.12 | 7.39  |
| 4KRM.PDB | O, K_THR_339   | N, K_LYS_375   | H, K_LYS_375    | 2.86 | 2.00 | 4.75  |
| 4KRM.PDB | O, K_ILE_401   | N, K_ILE_377   | H, K_ILE_377    | 2.86 | 2.06 | 18.35 |
| 4KRM.PDB | O, K_SER_413   | N, K_LEU_381   | H, K_LEU_381    | 2.86 | 2.05 | 17.20 |
| 4KRM.PDB | O, K_LEU_345   | N, K_LEU_382   | H, K_LEU_382    | 2.82 | 1.96 | 1.57  |
| 4KRM.PDB | O, K_ALA_415   | N, K_ILE_383   | H, K_ILE_383    | 2.80 | 1.95 | 7.54  |
| 4KRM.PDB | O, K_ILE_347   | N, K_GLN_384   | H, K_GLN_384    | 2.96 | 2.17 | 19.38 |
| 4KRM.PDB | O, K_LYS_375   | N, K_GLU_400   | H, K_GLU_400    | 2.90 | 2.08 | 14.24 |
| 4KRM.PDB | O, K_LYS_375   | N, K_ILE_401   | H, K_ILE_401    | 2.95 | 2.14 | 17.68 |
| 4KRM.PDB | O, K_ILE_377   | N, K_ARG_403   | H, K_ARG_403    | 2.74 | 1.95 | 18.26 |
| 4KRM.PDB | O, K_THR_378   | N, K_ARG_405   | H, K_ARG_405    | 2.74 | 1.91 | 12.90 |
| 4KRM.PDB | O, K_PHE_412   | N, K_GLN_408   | H, K_GLN_408    | 2.74 | 1.94 | 17.95 |
| 4KRM.PDB | O, K_ASP_436   | N, K_SER_413   | H, K_SER_413    | 2.84 | 2.02 | 13.83 |
| 4KRM.PDB | O, K_LEU_381   | N, K_ALA_415   | H, K_ALA_415    | 2.89 | 2.12 | 21.80 |
| 4KRM.PDB | O, K_SER_440   | N, K_SER_418   | H, K_SER_418    | 2.83 | 1.99 | 11.88 |
| 4KRM.PDB | O, K_THR_391   | N, K_THR_422   | H, K_THR_422    | 2.85 | 2.06 | 19.39 |
| 4KRM.PDB | O, K_GLU_400   | N, K_LYS_430   | H, K_LYS_430    | 2.91 | 2.08 | 12.04 |
| 4KRM.PDB | O, K_LEU_456   | N, K_ILE_432   | H, K_ILE_432    | 2.65 | 1.80 | 6.86  |
| 4KRM.PDB | OD2, K_ASP_434 | N, K_GLY_435   | H, K_GLY_435    | 2.55 | 1.82 | 26.56 |
| 4KRM.PDB | O, K_GLN_411   | N, K_ASP_436   | H, K_ASP_436    | 2.63 | 1.81 | 13.73 |
| 4KRM.PDB | O, K_LYS_465   | N, K_ILE_439   | H, K_ILE_439    | 2.92 | 2.09 | 12.95 |
| 4KRM.PDB | OD1, K_ASN_469 | N, K_ASN_442   | H, K_ASN_442    | 2.83 | 2.07 | 23.19 |
| 4KRM.PDB | O, K_THR_422   | N, K_CYS_446   | H, K_CYS_446    | 2.91 | 2.07 | 11.69 |
| 4KRM.PDB | O, K_TYR_447   | OG1, K_THR_450 | HG1, K_THR_450  | 2.66 | 1.87 | 18.01 |
| 4KRM.PDB | OE1, K_GLN_462 | N, K_GLY_458   | H, K_GLY_458    | 2.63 | 1.78 | 7.92  |
| 4KRM.PDB | OE1, K_GLN_462 | N, K_THR_459   | H, K_THR_459    | 2.89 | 2.13 | 24.15 |
| 4KRM.PDB | O, K_GLY_435   | NE2, K_GLN_462 | HE21, K_GLN_462 | 2.96 | 2.10 | 5.79  |
| 4KRM.PDB | O, K_ILE_432   | NE2, K_GLN_462 | HE22, K_GLN_462 | 2.88 | 2.05 | 10.71 |



|          |                |                |                 |      |      |       |
|----------|----------------|----------------|-----------------|------|------|-------|
| 4KRM.PDB | OD1, K_ASP_436 | N, K_LYS_463   | H, K_LYS_463    | 2.88 | 2.03 | 6.44  |
| 4KRM.PDB | O, K_VAL_437   | N, K_LYS_465   | H, K_LYS_465    | 2.84 | 2.14 | 29.81 |
| 4KRM.PDB | O, K_ILE_439   | ND2, K_ASN_469 | HD21, K_ASN_469 | 2.65 | 1.81 | 9.31  |
| 4KRM.PDB | O, K_HIS_483   | N, K_CYS_486   | H, K_CYS_486    | 2.95 | 2.11 | 10.23 |
| 4KRM.PDB | O, K_SER_501   | N, K_SER_487   | H, K_SER_487    | 2.75 | 1.90 | 8.02  |
| 4KRM.PDB | O, K_ASP_498   | N, K_TRP_492   | H, K_TRP_492    | 2.71 | 1.86 | 9.15  |
| 4KRM.PDB | OD2, K_ASP_498 | N, K_GLU_495   | H, K_GLU_495    | 2.88 | 2.09 | 20.84 |
| 4KRM.PDB | O, K_GLU_495   | N, K_ASP_498   | H, K_ASP_498    | 2.85 | 2.04 | 15.93 |
| 4KRM.PDB | O, L_SER_25    | N, L_LYS_3     | H, L_LYS_3      | 2.83 | 2.01 | 14.97 |
| 4KRM.PDB | O, L_THR_121   | N, L_VAL_12    | H, L_VAL_12     | 2.91 | 2.16 | 24.48 |
| 4KRM.PDB | O, L_SER_123   | OG1, L_THR_14  | HG1, L_THR_14   | 2.67 | 1.86 | 12.28 |
| 4KRM.PDB | O, L_LEU_86    | N, L_GLY_15    | H, L_GLY_15     | 2.91 | 2.05 | 2.74  |
| 4KRM.PDB | O, L_GLN_13    | N, L_GLY_16    | H, L_GLY_16     | 2.82 | 2.02 | 18.09 |
| 4KRM.PDB | O, L_MET_83    | N, L_LEU_18    | H, L_LEU_18     | 2.78 | 1.98 | 18.62 |
| 4KRM.PDB | OD1, L_ASP_80  | NE, L_ARG_19   | HE, L_ARG_19    | 2.96 | 2.10 | 5.59  |
| 4KRM.PDB | O, L_SER_7     | N, L_THR_21    | H, L_THR_21     | 2.74 | 1.90 | 9.36  |
| 4KRM.PDB | O, L_GLN_1     | N, L_ARG_27    | H, L_ARG_27     | 2.68 | 1.97 | 28.48 |
| 4KRM.PDB | OD2, K_ASP_355 | NH1, L_ARG_30  | HH12, L_ARG_30  | 2.44 | 1.65 | 18.93 |
| 4KRM.PDB | O, L_SER_31    | NH2, L_ARG_30  | HH21, L_ARG_30  | 2.82 | 1.99 | 12.91 |
| 4KRM.PDB | O, L_ALA_99    | N, L_GLY_33    | H, L_GLY_33     | 2.77 | 2.03 | 25.95 |
| 4KRM.PDB | O, L_ILE_51    | N, L_MET_34    | H, L_MET_34     | 2.99 | 2.20 | 19.18 |
| 4KRM.PDB | O, L_SER_49    | N, L_TRP_36    | H, L_TRP_36     | 2.68 | 1.84 | 10.36 |
| 4KRM.PDB | O, L_TYR_95    | N, L_PHE_37    | H, L_PHE_37     | 2.91 | 2.07 | 10.93 |
| 4KRM.PDB | O, L_GLU_46    | N, L_ARG_38    | H, L_ARG_38     | 2.90 | 2.07 | 13.98 |
| 4KRM.PDB | OE1, L_GLU_46  | NE, L_ARG_38   | HE, L_ARG_38    | 2.86 | 2.01 | 10.17 |
| 4KRM.PDB | O, L_ARG_38    | N, L_GLU_46    | H, L_GLU_46     | 2.74 | 1.90 | 10.16 |
| 4KRM.PDB | O, L_GLY_59    | OG, L_SER_49   | HG, L_SER_49    | 2.90 | 2.14 | 20.97 |
| 4KRM.PDB | O, L_MET_34    | N, L_ILE_51    | H, L_ILE_51     | 2.78 | 1.94 | 10.92 |
| 4KRM.PDB | O, L_SER_57    | N, L_SER_52    | H, L_SER_52     | 2.96 | 2.15 | 16.80 |
| 4KRM.PDB | O, L_SER_102   | N, L_TRP_53    | H, L_TRP_53     | 3.00 | 2.20 | 17.87 |
| 4KRM.PDB | O, L_LYS_310   | N, L_THR_58    | H, L_THR_58     | 2.98 | 2.15 | 12.69 |
| 4KRM.PDB | O, L_GLY_50    | N, L_GLY_59    | H, L_GLY_59     | 2.79 | 1.99 | 18.05 |
| 4KRM.PDB | O, L_GLU_308   | N, L_TYR_60    | H, L_TYR_60     | 2.75 | 2.02 | 27.31 |
| 4KRM.PDB | O, L_VAL_48    | N, L_ALA_61    | H, L_ALA_61     | 2.83 | 1.98 | 9.16  |
| 4KRM.PDB | O, L_VAL_64    | N, L_ARG_67    | H, L_ARG_67     | 3.00 | 2.22 | 21.09 |
| 4KRM.PDB | O, L_SER_63    | NH1, L_ARG_67  | HH11, L_ARG_67  | 2.44 | 1.68 | 23.68 |
| 4KRM.PDB | OD1, L_ASP_90  | NH2, L_ARG_67  | HH22, L_ARG_67  | 2.60 | 1.80 | 17.17 |
| 4KRM.PDB | O, L_GLN_82    | N, L_THR_69    | H, L_THR_69     | 2.84 | 2.07 | 22.44 |
| 4KRM.PDB | OH, L_TYR_60   | N, L_ILE_70    | H, L_ILE_70     | 2.86 | 2.03 | 11.87 |
| 4KRM.PDB | O, L_SER_71    | N, L_ASP_80    | H, L_ASP_80     | 2.67 | 1.93 | 24.67 |
| 4KRM.PDB | O, L_LEU_20    | N, L_LEU_81    | H, L_LEU_81     | 2.93 | 2.20 | 26.65 |
| 4KRM.PDB | O, L_THR_69    | N, L_GLN_82    | H, L_GLN_82     | 2.79 | 2.06 | 26.22 |
| 4KRM.PDB | O, L_LEU_18    | N, L_MET_83    | H, L_MET_83     | 2.64 | 1.78 | 5.27  |
| 4KRM.PDB | OD1, L_ASP_90  | N, L_LYS_87    | H, L_LYS_87     | 2.83 | 2.05 | 20.17 |
| 4KRM.PDB | O, L_LYS_87    | N, L_ASP_90    | H, L_ASP_90     | 2.74 | 1.91 | 10.51 |
| 4KRM.PDB | O, L_VAL_120   | N, L_ALA_92    | H, L_ALA_92     | 2.86 | 2.07 | 19.77 |
| 4KRM.PDB | O, L_THR_118   | N, L_TYR_94    | H, L_TYR_94     | 2.84 | 2.02 | 14.78 |
| 4KRM.PDB | O, L_ASP_90    | OH, L_TYR_94   | HH, L_TYR_94    | 2.64 | 1.81 | 6.78  |
| 4KRM.PDB | O, L_PHE_37    | N, L_TYR_95    | H, L_TYR_95     | 2.71 | 1.89 | 15.70 |
| 4KRM.PDB | OE2, L_GLU_6   | N, L_CYS_96    | H, L_CYS_96     | 2.72 | 1.88 | 9.52  |
| 4KRM.PDB | O, L_TYR_113   | N, L_ALA_98    | H, L_ALA_98     | 2.86 | 2.11 | 25.39 |
| 4KRM.PDB | O, L_GLY_33    | N, L_ALA_99    | H, L_ALA_99     | 2.67 | 1.81 | 5.83  |
| 4KRM.PDB | O, L_SER_31    | N, L_GLY_101   | H, L_GLY_101    | 2.99 | 2.14 | 7.82  |
| 4KRM.PDB | O, L_TYR_105   | OH, L_TYR_111  | HH, L_TYR_111   | 2.61 | 1.77 | 5.19  |
| 4KRM.PDB | O, L_ALA_98    | N, L_ASP_112   | H, L_ASP_112    | 2.77 | 2.00 | 22.02 |
| 4KRM.PDB | O, L_ALA_92    | N, L_VAL_120   | H, L_VAL_120    | 2.77 | 1.92 | 3.01  |
| 4KRM.PDB | O, L_GLY_10    | N, L_THR_121   | H, L_THR_121    | 2.92 | 2.12 | 18.79 |
| 4KRM.PDB | OG1, L_THR_91  | N, L_VAL_122   | H, L_VAL_122    | 2.76 | 1.92 | 9.29  |

|          |                |                |                 |      |      |       |
|----------|----------------|----------------|-----------------|------|------|-------|
| 4KRO.PDB | O, A_LYS_5     | N, A_GLU_35    | H, A_GLU_35     | 2.92 | 2.11 | 16.47 |
| 4KRO.PDB | O, A_VAL_268   | N, A_TYR_261   | H, A_TYR_261    | 2.78 | 2.04 | 26.05 |
| 4KRO.PDB | O, A_VAL_284   | N, A_VAL_276   | H, A_VAL_276    | 2.65 | 1.87 | 20.75 |
| 4KRO.PDB | O, A_SER_282   | N, A_THR_278   | H, A_THR_278    | 2.79 | 1.96 | 11.51 |
| 4KRO.PDB | OG1, A_THR_278 | OG, A_SER_282  | HG, A_SER_282   | 2.99 | 2.27 | 26.50 |
| 4KRO.PDB | O, A_SER_262   | N, A_CYS_283   | H, A_CYS_283    | 2.82 | 2.04 | 21.13 |
| 4KRO.PDB | O, A_VAL_276   | N, A_VAL_284   | H, A_VAL_284    | 2.74 | 2.03 | 29.17 |
| 4KRO.PDB | O, A_LYS_303   | N, A_TYR_292   | H, A_TYR_292    | 2.85 | 1.99 | 3.19  |
| 4KRO.PDB | O, A_LYS_301   | N, A_MET_294   | H, A_MET_294    | 2.78 | 1.96 | 14.61 |
| 4KRO.PDB | OE2, A_GLU_376 | NH2, A_ARG_310 | HH21, A_ARG_310 | 2.98 | 2.18 | 18.33 |
| 4KRO.PDB | OG1, A_THR_339 | N, A_LYS_311   | H, A_LYS_311    | 2.69 | 1.85 | 11.41 |
| 4KRO.PDB | O, A_LYS_336   | NZ, A_LYS_311  | HZ2, A_LYS_311  | 2.69 | 1.83 | 12.56 |
| 4KRO.PDB | O, A_ASP_344   | N, A_ILE_316   | H, A_ILE_316    | 2.97 | 2.17 | 18.52 |
| 4KRO.PDB | O, A_ILE_318   | N, A_PHE_321   | H, A_PHE_321    | 2.93 | 2.07 | 5.85  |
| 4KRO.PDB | OD1, A_ASN_331 | N, A_ASN_328   | H, A_ASN_328    | 2.73 | 1.96 | 22.23 |
| 4KRO.PDB | OD1, A_ASN_328 | N, A_ASN_331   | H, A_ASN_331    | 2.87 | 2.05 | 14.42 |
| 4KRO.PDB | O, A_ASN_331   | N, A_HIS_334   | H, A_HIS_334    | 2.89 | 2.11 | 21.52 |
| 4KRO.PDB | O, A_LYS_311   | N, A_THR_339   | H, A_THR_339    | 2.87 | 2.02 | 7.89  |
| 4KRO.PDB | O, A_CYS_313   | N, A_SER_342   | H, A_SER_342    | 2.88 | 2.10 | 20.40 |
| 4KRO.PDB | OG1, A_THR_378 | N, A_GLY_343   | H, A_GLY_343    | 2.79 | 1.97 | 15.18 |
| 4KRO.PDB | O, A_PHE_380   | N, A_LEU_345   | H, A_LEU_345    | 2.94 | 2.19 | 25.43 |
| 4KRO.PDB | O, A_LEU_382   | N, A_ILE_347   | H, A_ILE_347    | 2.91 | 2.17 | 26.62 |
| 4KRO.PDB | O, D_GLY_54    | NH1, A_ARG_353 | HH12, A_ARG_353 | 2.81 | 1.97 | 9.47  |
| 4KRO.PDB | O, A_VAL_350   | N, A_GLY_354   | H, A_GLY_354    | 2.70 | 1.97 | 26.74 |
| 4KRO.PDB | O, A_THR_360   | N, A_ASP_355   | H, A_ASP_355    | 2.94 | 2.16 | 20.76 |
| 4KRO.PDB | OD2, A_ASP_355 | OG1, A_THR_358 | HG1, A_THR_358  | 2.98 | 2.18 | 14.96 |
| 4KRO.PDB | O, A_SER_356   | N, A_HIS_359   | H, A_HIS_359    | 2.50 | 1.76 | 24.87 |
| 4KRO.PDB | O, A_ALA_351   | N, A_LEU_363   | H, A_LEU_363    | 2.64 | 1.78 | 3.26  |
| 4KRO.PDB | O, A_ASP_364   | N, A_GLU_367   | H, A_GLU_367    | 2.99 | 2.20 | 18.77 |
| 4KRO.PDB | O, A_LEU_368   | N, A_LEU_371   | H, A_LEU_371    | 2.92 | 2.07 | 9.49  |
| 4KRO.PDB | O, A_ASP_369   | N, A_LYS_372   | H, A_LYS_372    | 2.82 | 1.98 | 9.49  |
| 4KRO.PDB | O, A_CYS_338   | OG1, A_THR_373 | HG1, A_THR_373  | 2.91 | 2.20 | 27.34 |
| 4KRO.PDB | O, A_THR_339   | N, A_LYS_375   | H, A_LYS_375    | 2.64 | 1.78 | 1.90  |
| 4KRO.PDB | OG, B_SER_103  | NZ, A_LYS_375  | HZ2, A_LYS_375  | 2.61 | 1.76 | 15.34 |
| 4KRO.PDB | O, A_ILE_401   | N, A_ILE_377   | H, A_ILE_377    | 2.94 | 2.13 | 16.36 |
| 4KRO.PDB | OD1, A_ASP_344 | N, A_PHE_380   | H, A_PHE_380    | 2.92 | 2.14 | 21.56 |
| 4KRO.PDB | O, A_SER_413   | N, A_LEU_381   | H, A_LEU_381    | 2.80 | 2.00 | 16.89 |
| 4KRO.PDB | O, A_LEU_345   | N, A_LEU_382   | H, A_LEU_382    | 2.86 | 2.00 | 3.58  |
| 4KRO.PDB | O, A_ALA_415   | N, A_ILE_383   | H, A_ILE_383    | 2.88 | 2.04 | 11.10 |
| 4KRO.PDB | O, A_ILE_347   | N, A_GLN_384   | H, A_GLN_384    | 2.90 | 2.16 | 25.76 |
| 4KRO.PDB | OH, D_TYR_102  | NE2, A_GLN_384 | HE21, A_GLN_384 | 2.87 | 2.16 | 29.24 |
| 4KRO.PDB | O, A_LEU_424   | N, A_LEU_393   | H, A_LEU_393    | 2.79 | 1.95 | 10.09 |
| 4KRO.PDB | O, A_ASP_392   | N, A_HIS_394   | H, A_HIS_394    | 2.67 | 1.93 | 25.23 |
| 4KRO.PDB | O, A_LEU_393   | N, A_PHE_396   | H, A_PHE_396    | 2.83 | 1.98 | 8.97  |
| 4KRO.PDB | O, A_HIS_394   | N, A_GLU_397   | H, A_GLU_397    | 2.93 | 2.19 | 26.10 |
| 4KRO.PDB | O, A_LYS_375   | N, A_GLU_400   | H, A_GLU_400    | 2.79 | 1.95 | 10.25 |
| 4KRO.PDB | O, A_GLU_431   | N, A_ILE_402   | H, A_ILE_402    | 2.98 | 2.18 | 17.20 |
| 4KRO.PDB | O, A_ILE_377   | N, A_ARG_403   | H, A_ARG_403    | 2.73 | 1.91 | 14.33 |
| 4KRO.PDB | O, B_TYR_100   | NH2, A_ARG_403 | HH22, A_ARG_403 | 2.57 | 1.73 | 11.63 |
| 4KRO.PDB | O, A_GLY_379   | N, A_GLY_404   | H, A_GLY_404    | 2.93 | 2.20 | 27.61 |
| 4KRO.PDB | O, A_THR_378   | N, A_ARG_405   | H, A_ARG_405    | 2.90 | 2.05 | 8.12  |
| 4KRO.PDB | OD1, B_ASP_118 | NE, A_ARG_405  | HE, A_ARG_405   | 2.72 | 1.93 | 19.48 |
| 4KRO.PDB | O, A_PHE_412   | N, A_GLN_408   | H, A_GLN_408    | 2.80 | 2.00 | 17.98 |
| 4KRO.PDB | O, A_GLN_408   | N, A_GLN_411   | H, A_GLN_411    | 2.81 | 2.01 | 18.21 |
| 4KRO.PDB | O, A_GLN_408   | N, A_PHE_412   | H, A_PHE_412    | 2.97 | 2.14 | 13.47 |
| 4KRO.PDB | O, A_ASP_436   | N, A_SER_413   | H, A_SER_413    | 2.98 | 2.23 | 25.46 |
| 4KRO.PDB | O, A_ILE_438   | N, A_VAL_416   | H, A_VAL_416    | 2.84 | 2.03 | 15.03 |
| 4KRO.PDB | O, A_SER_440   | N, A_SER_418   | H, A_SER_418    | 2.77 | 2.00 | 21.19 |

|          |                |                |                 |      |      |       |
|----------|----------------|----------------|-----------------|------|------|-------|
| 4KRO.PDB | OD1, A_ASN_442 | N, A_LEU_419   | H, A_LEU_419    | 2.67 | 1.82 | 7.73  |
| 4KRO.PDB | O, A_THR_391   | N, A_THR_422   | H, A_THR_422    | 2.54 | 1.70 | 10.95 |
| 4KRO.PDB | OD1, A_ASP_498 | NH2, A_ARG_427 | HH21, A_ARG_427 | 2.62 | 1.82 | 18.67 |
| 4KRO.PDB | O, A_GLU_400   | N, A_LYS_430   | H, A_LYS_430    | 2.73 | 1.88 | 4.94  |
| 4KRO.PDB | O, A_GLN_411   | N, A_ASP_436   | H, A_ASP_436    | 2.89 | 2.06 | 12.84 |
| 4KRO.PDB | O, A_LEU_414   | N, A_ILE_438   | H, A_ILE_438    | 2.87 | 2.04 | 13.24 |
| 4KRO.PDB | O, A_LYS_465   | N, A_ILE_439   | H, A_ILE_439    | 2.84 | 1.99 | 6.10  |
| 4KRO.PDB | OD1, A_ASN_469 | ND2, A_ASN_442 | HD22, A_ASN_442 | 2.75 | 1.96 | 18.83 |
| 4KRO.PDB | O, A_THR_422   | N, A_CYS_446   | H, A_CYS_446    | 2.88 | 2.05 | 14.08 |
| 4KRO.PDB | O, A_TRP_453   | N, A_LEU_456   | H, A_LEU_456    | 2.81 | 2.03 | 20.74 |
| 4KRO.PDB | O, A_SER_433   | OG1, A_THR_459 | HG1, A_THR_459  | 2.64 | 1.93 | 27.14 |
| 4KRO.PDB | O, A_GLY_435   | NE2, A_GLN_462 | HE21, A_GLN_462 | 2.56 | 1.71 | 6.56  |
| 4KRO.PDB | OD1, A_ASP_436 | N, A_LYS_463   | H, A_LYS_463    | 2.76 | 1.91 | 6.26  |
| 4KRO.PDB | O, A_VAL_437   | N, A_LYS_465   | H, A_LYS_465    | 2.89 | 2.08 | 15.96 |
| 4KRO.PDB | O, A_ILE_439   | N, A_ILE_467   | H, A_ILE_467    | 2.90 | 2.11 | 19.76 |
| 4KRO.PDB | O, A_GLU_472   | N, A_LYS_476   | H, A_LYS_476    | 2.82 | 2.01 | 16.80 |
| 4KRO.PDB | O, A_HIS_483   | N, A_CYS_486   | H, A_CYS_486    | 3.00 | 2.18 | 14.93 |
| 4KRO.PDB | O, A_SER_501   | N, A_SER_487   | H, A_SER_487    | 2.94 | 2.09 | 7.57  |
| 4KRO.PDB | OG, A_SER_501  | OG, A_SER_487  | HG, A_SER_487   | 2.37 | 1.68 | 29.03 |
| 4KRO.PDB | OG, A_SER_487  | N, A_GLU_489   | H, A_GLU_489    | 2.96 | 2.12 | 10.12 |
| 4KRO.PDB | O, A_ASP_498   | N, A_TRP_492   | H, A_TRP_492    | 2.74 | 1.90 | 10.17 |
| 4KRO.PDB | O, A_GLY_490   | N, A_VAL_500   | H, A_VAL_500    | 2.91 | 2.13 | 19.89 |
| 4KRO.PDB | O, A_LEU_485   | N, A_ARG_503   | H, A_ARG_503    | 2.90 | 2.06 | 9.38  |
| 4KRO.PDB | OD1, A_ASN_504 | NH1, A_ARG_503 | HH11, A_ARG_503 | 2.52 | 1.76 | 23.61 |
| 4KRO.PDB | O, A_VAL_505   | N, A_VAL_512   | H, A_VAL_512    | 2.94 | 2.11 | 13.63 |
| 4KRO.PDB | OE1, A_GLU_524 | N, A_ASN_516   | H, A_ASN_516    | 2.81 | 1.95 | 3.86  |
| 4KRO.PDB | O, A_CYS_515   | N, A_LEU_517   | H, A_LEU_517    | 2.67 | 1.93 | 26.36 |
| 4KRO.PDB | O, A_LEU_517   | N, A_GLU_519   | H, A_GLU_519    | 2.78 | 2.04 | 26.41 |
| 4KRO.PDB | O, A_GLY_520   | NH1, A_ARG_523 | HH11, A_ARG_523 | 2.75 | 2.02 | 27.17 |
| 4KRO.PDB | O, A_ILE_532   | N, A_PHE_525   | H, A_PHE_525    | 2.85 | 2.07 | 20.01 |
| 4KRO.PDB | O, A_PHE_525   | N, A_ILE_532   | H, A_ILE_532    | 2.90 | 2.06 | 11.44 |
| 4KRO.PDB | O, A_ARG_523   | N, A_CYS_534   | H, A_CYS_534    | 2.64 | 1.78 | 1.35  |
| 4KRO.PDB | O, A_PRO_536   | N, A_CYS_538   | H, A_CYS_538    | 2.84 | 2.10 | 26.42 |
| 4KRO.PDB | O, A_GLN_557   | N, A_LEU_539   | H, A_LEU_539    | 2.89 | 2.11 | 20.92 |
| 4KRO.PDB | O, A_LEU_539   | NE2, A_GLN_541 | HE21, A_GLN_541 | 2.61 | 1.79 | 15.38 |
| 4KRO.PDB | O, A_ASN_554   | N, A_THR_548   | H, A_THR_548    | 2.75 | 1.93 | 14.66 |
| 4KRO.PDB | OG1, A_THR_548 | ND2, A_ASN_554 | HD22, A_ASN_554 | 2.92 | 2.13 | 19.09 |
| 4KRO.PDB | O, A_VAL_568   | N, A_TYR_561   | H, A_TYR_561    | 2.97 | 2.17 | 17.83 |
| 4KRO.PDB | O, A_GLY_458   | N, B_VAL_2     | H, B_VAL_2      | 2.76 | 1.93 | 12.61 |
| 4KRO.PDB | O, B_SER_25    | N, B_GLN_3     | H, B_GLN_3      | 2.75 | 1.92 | 13.69 |
| 4KRO.PDB | O, B_THR_77    | N, B_ALA_24    | H, B_ALA_24     | 2.76 | 1.99 | 21.77 |
| 4KRO.PDB | O, B_THR_99    | N, B_ALA_33    | H, B_ALA_33     | 2.78 | 2.00 | 21.37 |
| 4KRO.PDB | O, B_ILE_51    | N, B_MET_34    | H, B_MET_34     | 2.93 | 2.11 | 14.97 |
| 4KRO.PDB | O, B_GLY_55    | N, B_TYR_57    | H, B_TYR_57     | 2.52 | 1.78 | 25.18 |
| 4KRO.PDB | O, B_TYR_119   | N, B_ALA_98    | H, B_ALA_98     | 2.93 | 2.19 | 26.24 |
| 4KRO.PDB | O, B_SER_31    | N, B_LEU_101   | H, B_LEU_101    | 2.95 | 2.17 | 21.67 |
| 4KRO.PDB | O, B_SER_102   | N, B_TYR_105   | H, B_TYR_105    | 2.87 | 2.05 | 13.73 |
| 4KRO.PDB | O, B_PRO_114   | N, B_TYR_117   | H, B_TYR_117    | 2.95 | 2.10 | 5.45  |
| 4KRO.PDB | O, B_PRO_111   | OH, B_TYR_117  | HH, B_TYR_117   | 2.59 | 1.81 | 17.04 |
| 4KRO.PDB | O, C_ARG_24    | N, C_THR_5     | H, C_THR_5      | 2.91 | 2.15 | 23.49 |
| 4KRO.PDB | O, C_GLU_105   | N, C_VAL_13    | H, C_VAL_13     | 3.00 | 2.29 | 29.53 |
| 4KRO.PDB | O, C_LEU_73    | N, C_PHE_21    | H, C_PHE_21     | 2.68 | 1.86 | 14.19 |
| 4KRO.PDB | O, C_PHE_71    | N, C_CYS_23    | H, C_CYS_23     | 2.97 | 2.13 | 10.71 |
| 4KRO.PDB | O, C_THR_5     | N, C_ARG_24    | H, C_ARG_24     | 2.88 | 2.05 | 12.65 |
| 4KRO.PDB | O, C_THR_69    | N, C_ALA_25    | H, C_ALA_25     | 2.78 | 1.97 | 17.42 |
| 4KRO.PDB | O, C_GLY_68    | N, C_ILE_29    | H, C_ILE_29     | 2.76 | 1.93 | 13.88 |
| 4KRO.PDB | O, C_THR_31    | N, C_ILE_33    | H, C_ILE_33     | 2.83 | 2.11 | 27.53 |
| 4KRO.PDB | O, C_GLN_89    | N, C_HIS_34    | H, C_HIS_34     | 2.73 | 1.95 | 19.98 |

|          |                |                |                 |      |      |       |
|----------|----------------|----------------|-----------------|------|------|-------|
| 4KRO.PDB | O, C_ILE_48    | N, C_TRP_35    | H, C_TRP_35     | 2.83 | 2.00 | 11.93 |
| 4KRO.PDB | O, C_TYR_87    | N, C_TYR_36    | H, C_TYR_36     | 2.69 | 1.90 | 19.38 |
| 4KRO.PDB | OE1, C_GLN_89  | OH, C_TYR_36   | HH, C_TYR_36    | 2.63 | 1.80 | 6.46  |
| 4KRO.PDB | O, C_ARG_45    | N, C_GLN_37    | H, C_GLN_37     | 2.62 | 1.80 | 13.58 |
| 4KRO.PDB | OH, C_TYR_86   | NE2, C_GLN_37  | HE21, C_GLN_37  | 2.94 | 2.13 | 16.57 |
| 4KRO.PDB | O, C_ASP_85    | N, C_GLN_38    | H, C_GLN_38     | 2.68 | 1.83 | 9.02  |
| 4KRO.PDB | OE1, D_GLN_39  | NE2, C_GLN_38  | HE22, C_GLN_38  | 2.85 | 2.00 | 7.50  |
| 4KRO.PDB | O, C_GLN_37    | N, C_ARG_45    | H, C_ARG_45     | 2.41 | 1.69 | 27.50 |
| 4KRO.PDB | O, C_TRP_35    | N, C_LEU_47    | H, C_LEU_47     | 2.85 | 1.99 | 3.81  |
| 4KRO.PDB | O, C_GLU_53    | N, C_LYS_49    | H, C_LYS_49     | 2.98 | 2.17 | 16.10 |
| 4KRO.PDB | OD2, D_ASP_103 | OH, C_TYR_50   | HH, C_TYR_50    | 2.49 | 1.72 | 20.15 |
| 4KRO.PDB | O, C_ILE_33    | N, C_ALA_51    | H, C_ALA_51     | 2.88 | 2.14 | 26.02 |
| 4KRO.PDB | OD1, C_ASP_82  | NH2, C_ARG_61  | HH21, C_ARG_61  | 2.64 | 1.81 | 12.76 |
| 4KRO.PDB | O, C_GLY_30    | N, C_GLY_68    | H, C_GLY_68     | 2.70 | 1.96 | 25.34 |
| 4KRO.PDB | O, C_CYS_23    | N, C_PHE_71    | H, C_PHE_71     | 2.97 | 2.22 | 24.26 |
| 4KRO.PDB | O, C_SER_63    | N, C_SER_74    | H, C_SER_74     | 2.78 | 1.94 | 9.14  |
| 4KRO.PDB | O, C_VAL_19    | N, C_ILE_75    | H, C_ILE_75     | 2.80 | 2.05 | 24.74 |
| 4KRO.PDB | OD2, C_ASP_82  | N, C_GLU_79    | H, C_GLU_79     | 2.59 | 1.74 | 8.25  |
| 4KRO.PDB | O, C_GLU_79    | N, C_ASP_82    | H, C_ASP_82     | 2.82 | 1.98 | 10.41 |
| 4KRO.PDB | O, C_GLN_38    | N, C_ASP_85    | H, C_ASP_85     | 2.89 | 2.07 | 15.87 |
| 4KRO.PDB | O, C_THR_102   | N, C_TYR_86    | H, C_TYR_86     | 2.96 | 2.19 | 22.34 |
| 4KRO.PDB | O, C_ASP_82    | OH, C_TYR_86   | HH, C_TYR_86    | 2.61 | 1.78 | 7.16  |
| 4KRO.PDB | O, C_TYR_36    | N, C_TYR_87    | H, C_TYR_87     | 2.90 | 2.11 | 19.86 |
| 4KRO.PDB | O, D_TYR_104   | NE2, C_GLN_89  | HE22, C_GLN_89  | 3.00 | 2.19 | 16.80 |
| 4KRO.PDB | OD1, D_ASP_103 | ND2, C_ASN_91  | HD21, C_ASN_91  | 2.93 | 2.12 | 16.18 |
| 4KRO.PDB | OE1, C_GLN_90  | N, C_ASN_92    | H, C_ASN_92     | 2.89 | 2.15 | 26.36 |
| 4KRO.PDB | OD1, C_ASN_32  | ND2, C_ASN_92  | HD22, C_ASN_92  | 2.97 | 2.20 | 23.59 |
| 4KRO.PDB | O, A_ASN_469   | N, C_TRP_94    | H, C_TRP_94     | 2.75 | 1.95 | 19.24 |
| 4KRO.PDB | OD2, D_ASP_58  | NE1, C_TRP_94  | HE1, C_TRP_94   | 2.80 | 2.10 | 29.15 |
| 4KRO.PDB | O, C_CYS_88    | N, C_GLY_99    | H, C_GLY_99     | 2.89 | 2.12 | 21.60 |
| 4KRO.PDB | OE1, C_GLN_6   | N, C_GLY_101   | H, C_GLY_101    | 2.92 | 2.21 | 28.54 |
| 4KRO.PDB | O, C_TYR_86    | N, C_THR_102   | H, C_THR_102    | 2.97 | 2.19 | 21.52 |
| 4KRO.PDB | O, C_PRO_8     | OG1, C_THR_102 | HG1, C_THR_102  | 2.68 | 1.90 | 18.51 |
| 4KRO.PDB | O, C_VAL_9     | N, C_LYS_103   | H, C_LYS_103    | 2.98 | 2.14 | 9.34  |
| 4KRO.PDB | O, C_VAL_13    | N, C_LYS_107   | H, C_LYS_107    | 2.95 | 2.13 | 15.77 |
| 4KRO.PDB | O, C_TYR_140   | N, C_ALA_111   | H, C_ALA_111    | 2.89 | 2.03 | 3.33  |
| 4KRO.PDB | O, C_LEU_135   | N, C_PHE_116   | H, C_PHE_116    | 2.87 | 2.15 | 27.51 |
| 4KRO.PDB | O, C_VAL_133   | N, C_PHE_118   | H, C_PHE_118    | 2.79 | 2.04 | 24.19 |
| 4KRO.PDB | OG, C_SER_121  | N, C_GLN_124   | H, C_GLN_124    | 2.92 | 2.16 | 22.95 |
| 4KRO.PDB | OG, C_SER_131  | NE2, C_GLN_124 | HE22, C_GLN_124 | 2.85 | 2.00 | 6.78  |
| 4KRO.PDB | OE1, C_GLN_124 | N, C_SER_131   | H, C_SER_131    | 2.94 | 2.16 | 21.66 |
| 4KRO.PDB | O, C_LEU_179   | N, C_VAL_132   | H, C_VAL_132    | 2.76 | 1.90 | 3.17  |
| 4KRO.PDB | O, C_SER_177   | N, C_CYS_134   | H, C_CYS_134    | 2.88 | 2.05 | 12.39 |
| 4KRO.PDB | O, C_PHE_116   | N, C_LEU_135   | H, C_LEU_135    | 2.91 | 2.11 | 17.23 |
| 4KRO.PDB | O, C_LEU_175   | N, C_LEU_136   | H, C_LEU_136    | 2.87 | 2.05 | 14.62 |
| 4KRO.PDB | O, C_SER_114   | N, C_ASN_137   | H, C_ASN_137    | 2.91 | 2.13 | 21.13 |
| 4KRO.PDB | O, C_TYR_173   | N, C_PHE_139   | H, C_PHE_139    | 2.69 | 1.92 | 21.18 |
| 4KRO.PDB | O, C_ALA_111   | N, C_TYR_140   | H, C_TYR_140    | 2.84 | 1.99 | 7.77  |
| 4KRO.PDB | O, C_GLU_195   | N, C_GLN_147   | H, C_GLN_147    | 2.74 | 1.94 | 17.18 |
| 4KRO.PDB | OG, C_SER_177  | NE1, C_TRP_148 | HE1, C_TRP_148  | 2.83 | 2.01 | 15.90 |
| 4KRO.PDB | O, C_VAL_150   | N, C_ALA_153   | H, C_ALA_153    | 3.00 | 2.29 | 29.91 |
| 4KRO.PDB | O, C_TRP_148   | N, C_GLN_155   | H, C_GLN_155    | 2.90 | 2.07 | 11.42 |
| 4KRO.PDB | OE1, C_GLN_155 | ND2, C_ASN_158 | HD21, C_ASN_158 | 2.72 | 1.97 | 24.54 |
| 4KRO.PDB | O, D_LEU_176   | NE2, C_GLN_160 | HE22, C_GLN_160 | 2.74 | 1.92 | 15.89 |
| 4KRO.PDB | O, C_SER_174   | N, C_THR_164   | H, C_THR_164    | 2.94 | 2.12 | 15.62 |
| 4KRO.PDB | O, C_LEU_106   | NE2, C_GLN_166 | HE22, C_GLN_166 | 2.49 | 1.66 | 13.43 |
| 4KRO.PDB | OD1, C_ASP_167 | N, C_LYS_169   | H, C_LYS_169    | 2.54 | 1.73 | 16.83 |
| 4KRO.PDB | OD1, C_ASP_167 | N, C_ASP_170   | H, C_ASP_170    | 2.97 | 2.21 | 22.78 |

|          |                |                |                |      |      |       |
|----------|----------------|----------------|----------------|------|------|-------|
| 4KRO.PDB | OD1, C_ASP_170 | OG1, C_THR_172 | HG1, C_THR_172 | 2.68 | 1.86 | 11.97 |
| 4KRO.PDB | O, C_PHE_139   | N, C_TYR_173   | H, C_TYR_173   | 2.66 | 1.84 | 12.86 |
| 4KRO.PDB | O, C_LEU_136   | N, C_LEU_175   | H, C_LEU_175   | 2.88 | 2.06 | 14.51 |
| 4KRO.PDB | O, C_SER_162   | N, C_SER_176   | H, C_SER_176   | 2.82 | 2.00 | 14.99 |
| 4KRO.PDB | O, C_GLN_160   | N, C_THR_178   | H, C_THR_178   | 2.80 | 2.08 | 27.64 |
| 4KRO.PDB | O, C_VAL_132   | N, C_LEU_179   | H, C_LEU_179   | 2.78 | 2.01 | 22.37 |
| 4KRO.PDB | OG, C_SER_182  | N, C_ASP_185   | H, C_ASP_185   | 2.76 | 1.91 | 3.71  |
| 4KRO.PDB | O, C_SER_182   | N, C_TYR_186   | H, C_TYR_186   | 2.63 | 1.82 | 15.93 |
| 4KRO.PDB | O, C_LYS_183   | N, C_GLU_187   | H, C_GLU_187   | 2.89 | 2.10 | 19.45 |
| 4KRO.PDB | O, C_ASP_185   | ND1, C_HIS_189 | HD1, C_HIS_189 | 2.98 | 2.14 | 11.48 |
| 4KRO.PDB | O, C_TYR_186   | OH, C_TYR_192  | HH, C_TYR_192  | 2.55 | 1.84 | 27.09 |
| 4KRO.PDB | O, C_LYS_149   | N, C_ALA_193   | H, C_ALA_193   | 2.99 | 2.27 | 28.68 |
| 4KRO.PDB | O, C_GLN_147   | N, C_GLU_195   | H, C_GLU_195   | 2.80 | 2.05 | 25.03 |
| 4KRO.PDB | O, C_PRO_141   | NE2, C_HIS_198 | HE2, C_HIS_198 | 2.93 | 2.09 | 10.93 |
| 4KRO.PDB | O, D_SER_25    | N, D_GLN_3     | H, D_GLN_3     | 2.73 | 1.89 | 10.77 |
| 4KRO.PDB | O, D_THR_23    | N, D_LYS_5     | H, D_LYS_5     | 2.94 | 2.08 | 5.53  |
| 4KRO.PDB | OE1, D_GLN_111 | N, D_GLN_6     | H, D_GLN_6     | 2.70 | 1.86 | 8.92  |
| 4KRO.PDB | O, D_TYR_93    | NE2, D_GLN_6   | HE22, D_GLN_6  | 2.93 | 2.12 | 16.83 |
| 4KRO.PDB | O, D_THR_116   | N, D_VAL_12    | H, D_VAL_12    | 2.92 | 2.09 | 13.60 |
| 4KRO.PDB | O, D_LEU_85    | N, D_SER_15    | H, D_SER_15    | 2.92 | 2.10 | 15.76 |
| 4KRO.PDB | O, D_MET_82    | N, D_LEU_18    | H, D_LEU_18    | 2.86 | 2.03 | 12.27 |
| 4KRO.PDB | O, D_SER_7     | N, D_THR_21    | H, D_THR_21    | 2.91 | 2.14 | 22.32 |
| 4KRO.PDB | O, D_VAL_78    | N, D_CYS_22    | H, D_CYS_22    | 2.84 | 2.11 | 27.17 |
| 4KRO.PDB | O, D_LYS_5     | N, D_THR_23    | H, D_THR_23    | 2.75 | 1.97 | 20.91 |
| 4KRO.PDB | O, D_SER_76    | N, D_VAL_24    | H, D_VAL_24    | 2.87 | 2.01 | 5.71  |
| 4KRO.PDB | O, D_GLN_3     | N, D_SER_25    | H, D_SER_25    | 2.95 | 2.20 | 25.22 |
| 4KRO.PDB | OG, D_SER_28   | N, D_THR_30    | H, D_THR_30    | 2.84 | 2.00 | 11.38 |
| 4KRO.PDB | O, D_ALA_96    | N, D_HIS_35    | H, D_HIS_35    | 2.82 | 2.00 | 14.36 |
| 4KRO.PDB | O, D_GLY_49    | N, D_TRP_36    | H, D_TRP_36    | 2.85 | 2.06 | 19.08 |
| 4KRO.PDB | O, D_GLU_46    | N, D_ARG_38    | H, D_ARG_38    | 2.89 | 2.07 | 15.74 |
| 4KRO.PDB | OE1, D_GLU_46  | NE, D_ARG_38   | HE, D_ARG_38   | 3.00 | 2.22 | 20.92 |
| 4KRO.PDB | OH, D_TYR_93   | NH1, D_ARG_38  | HH11, D_ARG_38 | 2.92 | 2.15 | 22.16 |
| 4KRO.PDB | OE1, D_GLU_46  | NH2, D_ARG_38  | HH21, D_ARG_38 | 2.98 | 2.22 | 22.99 |
| 4KRO.PDB | O, D_ILE_92    | N, D_GLN_39    | H, D_GLN_39    | 2.94 | 2.21 | 27.13 |
| 4KRO.PDB | OE1, C_GLN_38  | NE2, D_GLN_39  | HE22, D_GLN_39 | 2.80 | 1.94 | 4.32  |
| 4KRO.PDB | OG, D_SER_40   | N, D_GLY_42    | H, D_GLY_42    | 2.92 | 2.07 | 6.19  |
| 4KRO.PDB | OG, D_SER_40   | N, D_LYS_43    | H, D_LYS_43    | 2.94 | 2.09 | 7.22  |
| 4KRO.PDB | O, D_ARG_38    | N, D_GLU_46    | H, D_GLU_46    | 2.75 | 1.90 | 6.17  |
| 4KRO.PDB | O, D_TRP_36    | N, D_LEU_48    | H, D_LEU_48    | 2.73 | 1.89 | 10.02 |
| 4KRO.PDB | O, D_ASP_58    | N, D_VAL_50    | H, D_VAL_50    | 2.87 | 2.09 | 21.92 |
| 4KRO.PDB | O, D_ASN_56    | N, D_TRP_52    | H, D_TRP_52    | 2.99 | 2.23 | 23.03 |
| 4KRO.PDB | O, D_TRP_52    | N, D_GLY_55    | H, D_GLY_55    | 2.93 | 2.09 | 9.77  |
| 4KRO.PDB | OH, D_TYR_59   | OG1, D_THR_57  | HG1, D_THR_57  | 2.96 | 2.15 | 12.78 |
| 4KRO.PDB | O, D_LEU_48    | N, D_ASN_60    | H, D_ASN_60    | 2.85 | 2.00 | 4.84  |
| 4KRO.PDB | O, D_TRP_47    | ND2, D_ASN_60  | HD22, D_ASN_60 | 2.96 | 2.11 | 6.97  |
| 4KRO.PDB | O, D_ASN_60    | N, D_PHE_63    | H, D_PHE_63    | 2.78 | 2.00 | 21.76 |
| 4KRO.PDB | O, D_ASN_83    | NH1, D_ARG_66  | HH11, D_ARG_66 | 2.85 | 2.14 | 29.21 |
| 4KRO.PDB | O, D_LYS_81    | N, D_SER_68    | H, D_SER_68    | 2.97 | 2.25 | 28.54 |
| 4KRO.PDB | OH, D_TYR_59   | N, D_ILE_69    | H, D_ILE_69    | 2.89 | 2.06 | 12.12 |
| 4KRO.PDB | O, D_SER_53    | NZ, D_LYS_71   | HZ1, D_LYS_71  | 2.91 | 2.02 | 5.81  |
| 4KRO.PDB | O, D_GLN_77    | N, D_ASP_72    | H, D_ASP_72    | 2.90 | 2.08 | 14.73 |
| 4KRO.PDB | OD1, D_ASP_72  | N, D_LYS_75    | H, D_LYS_75    | 2.48 | 1.64 | 10.83 |
| 4KRO.PDB | O, D_CYS_22    | N, D_VAL_78    | H, D_VAL_78    | 2.93 | 2.12 | 17.21 |
| 4KRO.PDB | O, D_ASN_70    | N, D_PHE_79    | H, D_PHE_79    | 2.77 | 1.91 | 3.73  |
| 4KRO.PDB | O, D_ILE_20    | N, D_PHE_80    | H, D_PHE_80    | 2.90 | 2.07 | 13.53 |
| 4KRO.PDB | O, D_ARG_66    | N, D_ASN_83    | H, D_ASN_83    | 2.97 | 2.16 | 16.89 |
| 4KRO.PDB | O, D_GLN_16    | N, D_LEU_85    | H, D_LEU_85    | 2.55 | 1.73 | 12.99 |
| 4KRO.PDB | OD2, D_ASP_89  | N, D_GLN_86    | H, D_GLN_86    | 2.43 | 1.70 | 25.84 |

|          |                |                |                 |      |      |       |
|----------|----------------|----------------|-----------------|------|------|-------|
| 4KRO.PDB | O, D_GLN_86    | N, D_ASP_89    | H, D_ASP_89     | 2.86 | 2.03 | 12.89 |
| 4KRO.PDB | O, D_SER_87    | N, D_THR_90    | H, D_THR_90     | 2.89 | 2.04 | 5.88  |
| 4KRO.PDB | O, D_SER_87    | OG1, D_THR_90  | HG1, D_THR_90   | 2.62 | 1.82 | 14.65 |
| 4KRO.PDB | O, D_THR_113   | N, D_TYR_93    | H, D_TYR_93     | 2.85 | 2.02 | 14.16 |
| 4KRO.PDB | O, D_ASP_89    | OH, D_TYR_93   | HH, D_TYR_93    | 2.82 | 1.98 | 1.28  |
| 4KRO.PDB | O, D_VAL_37    | N, D_TYR_94    | H, D_TYR_94     | 2.63 | 1.78 | 8.56  |
| 4KRO.PDB | OE1, D_GLN_6   | N, D_CYS_95    | H, D_CYS_95     | 2.92 | 2.20 | 28.43 |
| 4KRO.PDB | O, D_HIS_35    | N, D_ALA_96    | H, D_ALA_96     | 2.91 | 2.11 | 17.80 |
| 4KRO.PDB | O, D_TYR_108   | N, D_ARG_97    | H, D_ARG_97     | 2.79 | 1.98 | 15.74 |
| 4KRO.PDB | O, D_ALA_98    | NE, D_ARG_97   | HE, D_ARG_97    | 2.79 | 2.01 | 20.72 |
| 4KRO.PDB | O, D_ALA_98    | NH2, D_ARG_97  | HH21, D_ARG_97  | 2.94 | 2.23 | 29.79 |
| 4KRO.PDB | O, D_GLU_105   | N, D_LEU_99    | H, D_LEU_99     | 2.85 | 2.03 | 14.43 |
| 4KRO.PDB | OE1, A_GLN_408 | OH, D_TYR_102  | HH, D_TYR_102   | 2.75 | 1.97 | 18.39 |
| 4KRO.PDB | OD1, D_ASP_103 | N, D_TYR_104   | H, D_TYR_104    | 2.55 | 1.84 | 28.26 |
| 4KRO.PDB | OH, C_TYR_36   | N, D_PHE_106   | H, D_PHE_106    | 2.93 | 2.08 | 9.34  |
| 4KRO.PDB | O, D_CYS_95    | N, D_GLY_110   | H, D_GLY_110    | 2.62 | 1.82 | 17.46 |
| 4KRO.PDB | O, D_GLN_6     | NE2, D_GLN_111 | HE22, D_GLN_111 | 2.78 | 2.02 | 23.66 |
| 4KRO.PDB | O, D_TYR_93    | N, D_THR_113   | H, D_THR_113    | 2.89 | 2.15 | 25.46 |
| 4KRO.PDB | O, D_ALA_91    | N, D_VAL_115   | H, D_VAL_115    | 2.99 | 2.15 | 11.01 |
| 4KRO.PDB | OG, D_SER_118  | N, D_ALA_120   | H, D_ALA_120    | 2.76 | 1.99 | 21.72 |
| 4KRO.PDB | O, D_PHE_152   | N, D_LYS_123   | H, D_LYS_123    | 2.82 | 1.99 | 13.07 |
| 4KRO.PDB | O, D_LEU_147   | N, D_PHE_128   | H, D_PHE_128    | 2.92 | 2.17 | 24.83 |
| 4KRO.PDB | O, D_GLY_145   | N, D_LEU_130   | H, D_LEU_130    | 2.69 | 1.85 | 11.60 |
| 4KRO.PDB | O, D_VAL_190   | N, D_ALA_142   | H, D_ALA_142    | 2.67 | 1.84 | 12.02 |
| 4KRO.PDB | O, D_SER_186   | N, D_CYS_146   | H, D_CYS_146    | 2.74 | 1.92 | 15.98 |
| 4KRO.PDB | O, D_PHE_128   | N, D_LEU_147   | H, D_LEU_147    | 2.84 | 2.06 | 20.81 |
| 4KRO.PDB | O, D_LEU_184   | N, D_VAL_148   | H, D_VAL_148    | 2.86 | 2.09 | 22.97 |
| 4KRO.PDB | O, D_SER_126   | N, D_LYS_149   | H, D_LYS_149    | 2.93 | 2.10 | 12.69 |
| 4KRO.PDB | O, D_TYR_182   | N, D_TYR_151   | H, D_TYR_151    | 2.83 | 2.02 | 15.76 |
| 4KRO.PDB | O, D_LYS_123   | N, D_PHE_152   | H, D_PHE_152    | 2.93 | 2.11 | 15.98 |
| 4KRO.PDB | O, D_ASN_203   | N, D_SER_159   | H, D_SER_159    | 2.92 | 2.10 | 15.23 |
| 4KRO.PDB | O, D_ILE_201   | N, D_ASN_161   | H, D_ASN_161    | 2.76 | 1.94 | 14.37 |
| 4KRO.PDB | O, D_ASN_161   | N, D_ALA_164   | H, D_ALA_164    | 2.84 | 2.02 | 14.35 |
| 4KRO.PDB | O, D_VAL_187   | N, D_HIS_170   | H, D_HIS_170    | 2.69 | 1.86 | 10.95 |
| 4KRO.PDB | O, D_SER_185   | N, D_PHE_172   | H, D_PHE_172    | 2.85 | 2.00 | 6.56  |
| 4KRO.PDB | O, D_SER_183   | N, D_VAL_175   | H, D_VAL_175    | 2.75 | 1.89 | 4.87  |
| 4KRO.PDB | O, D_LEU_181   | N, D_GLN_177   | H, D_GLN_177    | 2.93 | 2.08 | 7.13  |
| 4KRO.PDB | O, D_TYR_151   | N, D_TYR_182   | H, D_TYR_182    | 2.50 | 1.65 | 4.99  |
| 4KRO.PDB | O, D_VAL_148   | N, D_LEU_184   | H, D_LEU_184    | 2.76 | 1.92 | 11.80 |
| 4KRO.PDB | O, D_HIS_170   | N, D_VAL_187   | H, D_VAL_187    | 2.73 | 1.92 | 16.55 |
| 4KRO.PDB | O, D_LEU_144   | N, D_VAL_188   | H, D_VAL_188    | 2.75 | 1.91 | 11.62 |
| 4KRO.PDB | O, D_ALA_142   | N, D_VAL_190   | H, D_VAL_190    | 2.86 | 2.04 | 15.25 |
| 4KRO.PDB | O, D_PRO_191   | N, D_SER_194   | H, D_SER_194    | 2.76 | 1.94 | 14.19 |
| 4KRO.PDB | O, D_PRO_191   | OG, D_SER_194  | HG, D_SER_194   | 2.46 | 1.63 | 8.00  |
| 4KRO.PDB | O, D_SER_194   | N, D_GLN_198   | H, D_GLN_198    | 2.58 | 1.74 | 10.02 |
| 4KRO.PDB | OD1, D_ASN_161 | N, D_ILE_201   | H, D_ILE_201    | 2.82 | 1.96 | 5.92  |
| 4KRO.PDB | O, D_SER_159   | N, D_ASN_203   | H, D_ASN_203    | 2.69 | 1.89 | 17.41 |
| 4KRO.PDB | O, D_VAL_213   | N, D_VAL_204   | H, D_VAL_204    | 2.66 | 1.81 | 8.41  |
| 4KRO.PDB | O, D_THR_211   | N, D_HIS_206   | H, D_HIS_206    | 2.94 | 2.10 | 11.11 |
| 4KRO.PDB | OG, D_SER_209  | ND1, D_HIS_206 | HD1, D_HIS_206  | 2.71 | 1.87 | 9.56  |
| 4KRO.PDB | O, D_PRO_153   | NE2, D_HIS_206 | HE2, D_HIS_206  | 2.79 | 1.99 | 18.14 |
| 4KRO.PDB | O, D_LYS_207   | N, D_ASN_210   | H, D_ASN_210    | 2.94 | 2.16 | 21.67 |
| 4KRO.PDB | O, D_VAL_204   | N, D_VAL_213   | H, D_VAL_213    | 2.73 | 1.93 | 18.78 |
| 4KRO.PDB | O, D_TYR_200   | N, D_VAL_217   | H, D_VAL_217    | 2.94 | 2.10 | 7.76  |
| 4KRP.PDB | OE2, A_GLU_376 | NH2, A_ARG_310 | HH21, A_ARG_310 | 2.93 | 2.09 | 9.81  |
| 4KRP.PDB | OG1, A_THR_339 | N, A_LYS_311   | H, A_LYS_311    | 2.83 | 2.07 | 23.53 |
| 4KRP.PDB | O, A_SER_340   | N, A_CYS_313   | H, A_CYS_313    | 2.79 | 2.04 | 24.55 |
| 4KRP.PDB | O, A_ILE_318   | N, A_PHE_321   | H, A_PHE_321    | 2.70 | 1.86 | 11.77 |

|          |                |                |                 |      |      |       |
|----------|----------------|----------------|-----------------|------|------|-------|
| 4KRP.PDB | OD1, A_ASN_331 | N, A_ASN_328   | H, A_ASN_328    | 2.72 | 1.98 | 25.49 |
| 4KRP.PDB | OD1, A_ASN_328 | N, A_ASN_331   | H, A_ASN_331    | 2.86 | 2.01 | 7.83  |
| 4KRP.PDB | O, A_SER_326   | ND2, A_ASN_331 | HD21, A_ASN_331 | 2.94 | 2.16 | 20.31 |
| 4KRP.PDB | O, A_LYS_311   | N, A_THR_339   | H, A_THR_339    | 2.82 | 1.97 | 9.55  |
| 4KRP.PDB | O, A_CYS_313   | N, A_SER_342   | H, A_SER_342    | 2.72 | 1.88 | 10.06 |
| 4KRP.PDB | O, A_PHE_380   | N, A_LEU_345   | H, A_LEU_345    | 3.00 | 2.26 | 26.76 |
| 4KRP.PDB | O, A_LEU_382   | N, A_ILE_347   | H, A_ILE_347    | 2.72 | 1.92 | 18.37 |
| 4KRP.PDB | O, A_PRO_349   | N, A_PHE_352   | H, A_PHE_352    | 2.78 | 2.03 | 24.55 |
| 4KRP.PDB | O, D_GLY_54    | NH2, A_ARG_353 | HH22, A_ARG_353 | 2.83 | 1.98 | 6.79  |
| 4KRP.PDB | O, A_VAL_350   | N, A_GLY_354   | H, A_GLY_354    | 2.64 | 1.84 | 18.31 |
| 4KRP.PDB | O, A_SER_356   | N, A_HIS_359   | H, A_HIS_359    | 2.65 | 1.82 | 11.74 |
| 4KRP.PDB | O, A_ASP_355   | N, A_THR_360   | H, A_THR_360    | 2.92 | 2.06 | 3.09  |
| 4KRP.PDB | O, A_ALA_351   | N, A_LEU_363   | H, A_LEU_363    | 2.92 | 2.16 | 23.72 |
| 4KRP.PDB | O, A_ASP_364   | N, A_GLU_367   | H, A_GLU_367    | 2.97 | 2.11 | 4.06  |
| 4KRP.PDB | O, A_LEU_368   | N, A_LEU_371   | H, A_LEU_371    | 2.87 | 2.01 | 5.39  |
| 4KRP.PDB | O, A_ASP_369   | N, A_LYS_372   | H, A_LYS_372    | 2.94 | 2.10 | 8.68  |
| 4KRP.PDB | O, A_LEU_371   | N, A_VAL_374   | H, A_VAL_374    | 2.92 | 2.07 | 7.73  |
| 4KRP.PDB | O, A_THR_339   | N, A_LYS_375   | H, A_LYS_375    | 2.78 | 1.92 | 1.18  |
| 4KRP.PDB | O, A_GLY_343   | N, A_GLY_379   | H, A_GLY_379    | 2.76 | 2.04 | 28.24 |
| 4KRP.PDB | O, A_SER_413   | N, A_LEU_381   | H, A_LEU_381    | 2.81 | 2.01 | 17.34 |
| 4KRP.PDB | O, A_LEU_345   | N, A_LEU_382   | H, A_LEU_382    | 2.80 | 1.94 | 4.00  |
| 4KRP.PDB | O, A_ILE_347   | N, A_GLN_384   | H, A_GLN_384    | 2.84 | 2.01 | 12.43 |
| 4KRP.PDB | O, A_LEU_424   | N, A_LEU_393   | H, A_LEU_393    | 2.97 | 2.16 | 16.10 |
| 4KRP.PDB | O, A_HIS_394   | N, A_GLU_397   | H, A_GLU_397    | 2.88 | 2.13 | 24.87 |
| 4KRP.PDB | O, A_LYS_375   | N, A_GLU_400   | H, A_GLU_400    | 2.71 | 1.87 | 9.05  |
| 4KRP.PDB | O, A_ILE_377   | N, A_ARG_403   | H, A_ARG_403    | 2.92 | 2.09 | 14.20 |
| 4KRP.PDB | O, A_THR_378   | N, A_ARG_405   | H, A_ARG_405    | 2.67 | 1.81 | 2.52  |
| 4KRP.PDB | OD1, B_ASP_115 | NH2, A_ARG_405 | HH21, A_ARG_405 | 2.63 | 1.81 | 15.48 |
| 4KRP.PDB | O, A_PHE_412   | N, A_GLN_408   | H, A_GLN_408    | 2.79 | 2.03 | 23.31 |
| 4KRP.PDB | O, A_LYS_407   | N, A_GLY_410   | H, A_GLY_410    | 2.86 | 2.05 | 17.53 |
| 4KRP.PDB | O, A_GLN_408   | N, A_GLN_411   | H, A_GLN_411    | 2.78 | 2.00 | 20.78 |
| 4KRP.PDB | O, A_ASP_436   | N, A_SER_413   | H, A_SER_413    | 2.87 | 2.07 | 17.71 |
| 4KRP.PDB | O, A_ILE_438   | N, A_VAL_416   | H, A_VAL_416    | 2.90 | 2.08 | 16.39 |
| 4KRP.PDB | O, A_SER_440   | N, A_SER_418   | H, A_SER_418    | 2.95 | 2.20 | 24.18 |
| 4KRP.PDB | OD1, A_ASN_442 | N, A_LEU_419   | H, A_LEU_419    | 2.73 | 1.91 | 15.19 |
| 4KRP.PDB | O, A_THR_391   | N, A_THR_422   | H, A_THR_422    | 2.73 | 1.88 | 8.32  |
| 4KRP.PDB | OD1, A_ASP_498 | NE, A_ARG_427  | HE, A_ARG_427   | 2.55 | 1.82 | 26.18 |
| 4KRP.PDB | OD1, A_ASP_498 | NH2, A_ARG_427 | HH21, A_ARG_427 | 2.59 | 1.89 | 29.61 |
| 4KRP.PDB | O, A_LEU_426   | N, A_LEU_429   | H, A_LEU_429    | 3.00 | 2.18 | 15.49 |
| 4KRP.PDB | O, A_GLU_400   | N, A_LYS_430   | H, A_LYS_430    | 2.88 | 2.03 | 9.97  |
| 4KRP.PDB | O, A_LEU_456   | N, A_ILE_432   | H, A_ILE_432    | 2.71 | 1.86 | 9.38  |
| 4KRP.PDB | OE2, A_GLU_431 | OG, A_SER_433  | HG, A_SER_433   | 2.69 | 1.90 | 15.48 |
| 4KRP.PDB | O, A_GLN_411   | N, A_ASP_436   | H, A_ASP_436    | 2.90 | 2.06 | 8.63  |
| 4KRP.PDB | O, A_LEU_414   | N, A_ILE_438   | H, A_ILE_438    | 2.88 | 2.06 | 16.00 |
| 4KRP.PDB | O, A_LYS_465   | N, A_ILE_439   | H, A_ILE_439    | 2.90 | 2.09 | 17.29 |
| 4KRP.PDB | O, A_VAL_416   | N, A_SER_440   | H, A_SER_440    | 2.97 | 2.14 | 13.77 |
| 4KRP.PDB | O, D_TYR_102   | OG, A_SER_440  | HG, A_SER_440   | 2.65 | 1.82 | 4.10  |
| 4KRP.PDB | OD1, A_ASN_469 | N, A_ASN_442   | H, A_ASN_442    | 2.97 | 2.19 | 20.16 |
| 4KRP.PDB | OD1, A_ASN_469 | ND2, A_ASN_442 | HD22, A_ASN_442 | 2.94 | 2.17 | 23.18 |
| 4KRP.PDB | OD1, D_ASP_58  | NZ, A_LYS_443  | HZ1, A_LYS_443  | 2.65 | 1.82 | 17.69 |
| 4KRP.PDB | O, A_ASN_442   | N, A_LEU_445   | H, A_LEU_445    | 2.90 | 2.04 | 7.12  |
| 4KRP.PDB | O, A_THR_422   | N, A_CYS_446   | H, A_CYS_446    | 2.71 | 1.90 | 15.25 |
| 4KRP.PDB | O, A_TYR_447   | N, A_ASN_449   | H, A_ASN_449    | 2.43 | 1.66 | 21.82 |
| 4KRP.PDB | OE1, A_GLU_489 | NZ, A_LYS_455  | HZ2, A_LYS_455  | 2.95 | 2.19 | 25.72 |
| 4KRP.PDB | O, A_TRP_453   | N, A_LEU_456   | H, A_LEU_456    | 2.87 | 2.09 | 20.64 |
| 4KRP.PDB | OE1, A_GLN_462 | N, A_THR_459   | H, A_THR_459    | 2.95 | 2.18 | 22.01 |
| 4KRP.PDB | O, A_SER_433   | OG1, A_THR_459 | HG1, A_THR_459  | 2.66 | 1.97 | 29.29 |
| 4KRP.PDB | O, A_GLY_435   | NE2, A_GLN_462 | HE21, A_GLN_462 | 2.76 | 1.90 | 2.70  |

|          |                |                |                 |      |      |       |
|----------|----------------|----------------|-----------------|------|------|-------|
| 4KRP.PDB | O, A_ILE.432   | NE2, A_GLN.462 | HE22, A_GLN.462 | 2.97 | 2.15 | 14.48 |
| 4KRP.PDB | O, A_VAL.437   | N, A_LYS.465   | H, A_LYS.465    | 2.75 | 1.95 | 18.20 |
| 4KRP.PDB | OD2, D_ASP.103 | NZ, A_LYS.465  | HZ2, A_LYS.465  | 2.93 | 2.05 | 5.06  |
| 4KRP.PDB | O, A_ILE.439   | N, A_ILE.467   | H, A_ILE.467    | 2.93 | 2.10 | 12.53 |
| 4KRP.PDB | OG, A_SER.474  | NE, A_ARG.470  | HE, A_ARG.470   | 2.76 | 1.96 | 18.13 |
| 4KRP.PDB | O, A_LYS.476   | N, A_GLY.479   | H, A_GLY.479    | 2.71 | 1.88 | 12.77 |
| 4KRP.PDB | O, A_CYS.475   | N, A_GLN.480   | H, A_GLN.480    | 2.77 | 1.95 | 13.73 |
| 4KRP.PDB | O, A_SER.501   | N, A_SER.487   | H, A_SER.487    | 2.89 | 2.04 | 7.18  |
| 4KRP.PDB | OG, A_SER.501  | OG, A_SER.487  | HG, A_SER.487   | 2.45 | 1.66 | 16.67 |
| 4KRP.PDB | O, A_ASP.498   | N, A_TRP.492   | H, A_TRP.492    | 2.79 | 1.96 | 13.24 |
| 4KRP.PDB | OE1, A_GLU.495 | NE, A_ARG.497  | HE, A_ARG.497   | 2.60 | 1.79 | 14.71 |
| 4KRP.PDB | O, A_GLU.495   | N, A_ASP.498   | H, A_ASP.498    | 2.96 | 2.15 | 17.44 |
| 4KRP.PDB | O, A_GLY.490   | N, A_VAL.500   | H, A_VAL.500    | 2.88 | 2.04 | 9.24  |
| 4KRP.PDB | O, A_LEU.485   | N, A_ARG.503   | H, A_ARG.503    | 2.76 | 1.97 | 19.17 |
| 4KRP.PDB | O, A_GLU.510   | N, A_ARG.507   | H, A_ARG.507    | 2.85 | 2.07 | 20.90 |
| 4KRP.PDB | OE1, A_GLU.524 | NE, A_ARG.507  | HE, A_ARG.507   | 2.83 | 2.04 | 19.78 |
| 4KRP.PDB | O, A_VAL.505   | N, A_VAL.512   | H, A_VAL.512    | 2.78 | 1.98 | 18.78 |
| 4KRP.PDB | O, A_GLY.520   | NH1, A_ARG.523 | HH11, A_ARG.523 | 2.96 | 2.22 | 25.33 |
| 4KRP.PDB | O, A_ASN.516   | N, A_GLU.524   | H, A_GLU.524    | 2.98 | 2.17 | 17.27 |
| 4KRP.PDB | O, A_ILE.532   | N, A_PHE.525   | H, A_PHE.525    | 2.83 | 2.06 | 21.15 |
| 4KRP.PDB | O, A_GLU.530   | N, A_GLU.527   | H, A_GLU.527    | 2.83 | 2.00 | 14.02 |
| 4KRP.PDB | O, A_SER.506   | N, A_CYS.531   | H, A_CYS.531    | 2.79 | 1.96 | 12.76 |
| 4KRP.PDB | O, A_PHE.525   | N, A_ILE.532   | H, A_ILE.532    | 2.70 | 1.90 | 17.86 |
| 4KRP.PDB | O, A_ARG.523   | N, A_CYS.534   | H, A_CYS.534    | 2.73 | 1.90 | 12.34 |
| 4KRP.PDB | O, A_HIS.535   | N, A_CYS.538   | H, A_CYS.538    | 2.99 | 2.17 | 14.86 |
| 4KRP.PDB | O, A_GLN.557   | N, A_LEU.539   | H, A_LEU.539    | 2.68 | 1.97 | 29.21 |
| 4KRP.PDB | O, A_LEU.539   | NE2, A_GLN.541 | HE21, A_GLN.541 | 2.85 | 2.01 | 8.93  |
| 4KRP.PDB | OD1, A_ASN.544 | N, A_ILE.545   | H, A_ILE.545    | 2.79 | 2.04 | 25.27 |
| 4KRP.PDB | OE2, A_GLU.527 | NH2, A_ARG.550 | HH22, A_ARG.550 | 2.54 | 1.76 | 21.10 |
| 4KRP.PDB | O, A_GLU.537   | N, A_ALA.559   | H, A_ALA.559    | 2.74 | 1.88 | 1.56  |
| 4KRP.PDB | O, A_ALA.559   | ND1, A_HIS.560 | HD1, A_HIS.560  | 2.61 | 1.91 | 29.44 |
| 4KRP.PDB | O, A_HIS.566   | N, A_ASP.563   | H, A_ASP.563    | 2.73 | 1.89 | 10.58 |
| 4KRP.PDB | O, A_TYR.561   | N, A_VAL.568   | H, A_VAL.568    | 2.97 | 2.14 | 13.62 |
| 4KRP.PDB | OG, C_SER.26   | N, C_LEU.3     | H, C_LEU.3      | 2.98 | 2.13 | 7.00  |
| 4KRP.PDB | O, C_ARG.24    | N, C_THR.5     | H, C_THR.5      | 2.78 | 1.93 | 4.32  |
| 4KRP.PDB | O, C_TYR.86    | NE2, C_GLN.6   | HE22, C_GLN.6   | 2.90 | 2.07 | 11.06 |
| 4KRP.PDB | O, C_SER.22    | N, C_SER.7     | H, C_SER.7      | 2.93 | 2.12 | 15.95 |
| 4KRP.PDB | O, C_LYS.103   | N, C_LEU.11    | H, C_LEU.11     | 2.74 | 2.00 | 25.88 |
| 4KRP.PDB | OE1, C_GLU.17  | N, C_SER.14    | H, C_SER.14     | 2.90 | 2.05 | 7.83  |
| 4KRP.PDB | O, C_VAL.78    | N, C_GLY.16    | H, C_GLY.16     | 2.86 | 2.04 | 14.86 |
| 4KRP.PDB | O, C_ILE.75    | N, C_VAL.19    | H, C_VAL.19     | 2.92 | 2.12 | 19.12 |
| 4KRP.PDB | O, C_LEU.73    | N, C_PHE.21    | H, C_PHE.21     | 2.85 | 2.02 | 11.22 |
| 4KRP.PDB | O, C_SER.7     | N, C_SER.22    | H, C_SER.22     | 2.96 | 2.13 | 12.93 |
| 4KRP.PDB | O, C_THR.5     | N, C_ARG.24    | H, C_ARG.24     | 2.76 | 1.98 | 20.70 |
| 4KRP.PDB | O, C_THR.69    | N, C_ALA.25    | H, C_ALA.25     | 2.58 | 1.76 | 13.74 |
| 4KRP.PDB | O, C_LEU.3     | N, C_SER.26    | H, C_SER.26     | 2.90 | 2.10 | 18.68 |
| 4KRP.PDB | O, C_GLY.68    | N, C_ILE.29    | H, C_ILE.29     | 2.84 | 2.01 | 12.74 |
| 4KRP.PDB | OD1, C_ASN.92  | ND2, C_ASN.32  | HD22, C_ASN.32  | 2.85 | 2.14 | 29.38 |
| 4KRP.PDB | O, C_THR.31    | N, C_ILE.33    | H, C_ILE.33     | 2.75 | 2.02 | 26.66 |
| 4KRP.PDB | O, C_GLN.89    | N, C_HIS.34    | H, C_HIS.34     | 2.86 | 2.05 | 15.92 |
| 4KRP.PDB | O, C_ILE.48    | N, C_TRP.35    | H, C_TRP.35     | 2.96 | 2.13 | 11.92 |
| 4KRP.PDB | O, C_TYR.87    | N, C_TYR.36    | H, C_TYR.36     | 2.77 | 1.96 | 16.47 |
| 4KRP.PDB | OE1, C_GLN.89  | OH, C_TYR.36   | HH, C_TYR.36    | 2.33 | 1.50 | 6.36  |
| 4KRP.PDB | O, C_ARG.45    | N, C_GLN.37    | H, C_GLN.37     | 2.82 | 2.00 | 14.50 |
| 4KRP.PDB | OH, C_TYR.86   | NE2, C_GLN.37  | HE21, C_GLN.37  | 2.85 | 2.02 | 13.51 |
| 4KRP.PDB | O, C_ASP.85    | N, C_GLN.38    | H, C_GLN.38     | 2.84 | 2.04 | 18.23 |
| 4KRP.PDB | OE1, D_GLN.39  | NE2, C_GLN.38  | HE22, C_GLN.38  | 2.70 | 1.84 | 6.09  |
| 4KRP.PDB | O, C_ARG.39    | N, C_GLY.42    | H, C_GLY.42     | 2.94 | 2.19 | 25.37 |



|          |                |                |                 |      |      |       |
|----------|----------------|----------------|-----------------|------|------|-------|
| 4KRP.PDB | O, C_GLN_37    | N, C_ARG_45    | H, C_ARG_45     | 2.51 | 1.81 | 29.63 |
| 4KRP.PDB | O, C_TRP_35    | N, C_LEU_47    | H, C_LEU_47     | 2.88 | 2.04 | 8.47  |
| 4KRP.PDB | O, C_GLU_53    | N, C_LYS_49    | H, C_LYS_49     | 2.92 | 2.08 | 11.40 |
| 4KRP.PDB | OE1, C_GLU_53  | NZ, C_LYS_49   | HZ3, C_LYS_49   | 2.81 | 1.93 | 8.64  |
| 4KRP.PDB | OD2, D_ASP_103 | OH, C_TYR_50   | HH, C_TYR_50    | 2.43 | 1.66 | 18.96 |
| 4KRP.PDB | O, C_ILE_33    | N, C_ALA_51    | H, C_ALA_51     | 2.69 | 1.90 | 19.00 |
| 4KRP.PDB | OD1, C_ASP_82  | NH2, C_ARG_61  | HH21, C_ARG_61  | 2.79 | 1.98 | 15.39 |
| 4KRP.PDB | O, C_SER_74    | N, C_SER_63    | H, C_SER_63     | 2.89 | 2.12 | 22.33 |
| 4KRP.PDB | O, C_THR_72    | N, C_SER_65    | H, C_SER_65     | 2.82 | 2.03 | 19.74 |
| 4KRP.PDB | O, C_GLY_30    | N, C_GLY_68    | H, C_GLY_68     | 2.65 | 1.84 | 16.72 |
| 4KRP.PDB | O, C_CYS_23    | N, C_PHE_71    | H, C_PHE_71     | 2.92 | 2.13 | 19.47 |
| 4KRP.PDB | O, C_SER_65    | N, C_THR_72    | H, C_THR_72     | 2.85 | 2.06 | 18.53 |
| 4KRP.PDB | O, C_SER_63    | N, C_SER_74    | H, C_SER_74     | 2.53 | 1.70 | 12.96 |
| 4KRP.PDB | O, C_VAL_19    | N, C_ILE_75    | H, C_ILE_75     | 2.98 | 2.18 | 17.84 |
| 4KRP.PDB | OD2, C_ASP_82  | N, C_GLU_79    | H, C_GLU_79     | 2.97 | 2.11 | 4.01  |
| 4KRP.PDB | O, C_GLN_38    | N, C_ASP_85    | H, C_ASP_85     | 2.96 | 2.14 | 13.68 |
| 4KRP.PDB | O, C_THR_102   | N, C_TYR_86    | H, C_TYR_86     | 2.85 | 2.05 | 17.70 |
| 4KRP.PDB | O, C_ASP_82    | OH, C_TYR_86   | HH, C_TYR_86    | 2.56 | 1.73 | 8.98  |
| 4KRP.PDB | O, C_HIS_34    | N, C_GLN_89    | H, C_GLN_89     | 2.79 | 2.03 | 23.96 |
| 4KRP.PDB | OG1, C_THR_96  | NE2, C_GLN_89  | HE21, C_GLN_89  | 2.69 | 1.93 | 23.74 |
| 4KRP.PDB | O, C_ASN_93    | NE2, C_GLN_90  | HE22, C_GLN_90  | 2.65 | 1.80 | 8.11  |
| 4KRP.PDB | O, C_ASN_32    | N, C_ASN_91    | H, C_ASN_91     | 2.95 | 2.16 | 18.97 |
| 4KRP.PDB | OD1, D_ASP_103 | ND2, C_ASN_91  | HD21, C_ASN_91  | 2.77 | 1.91 | 6.24  |
| 4KRP.PDB | OD1, C_ASN_93  | ND2, C_ASN_92  | HD22, C_ASN_92  | 2.69 | 1.97 | 27.74 |
| 4KRP.PDB | OE1, C_GLN_90  | N, C_ASN_93    | H, C_ASN_93     | 2.83 | 2.02 | 15.94 |
| 4KRP.PDB | O, A_ASN_469   | N, C_TRP_94    | H, C_TRP_94     | 2.68 | 1.89 | 19.97 |
| 4KRP.PDB | OD2, D_ASP_58  | NE1, C_TRP_94  | HE1, C_TRP_94   | 2.98 | 2.17 | 17.26 |
| 4KRP.PDB | O, C_GLN_90    | OG1, C_THR_96  | HG1, C_THR_96   | 2.81 | 1.98 | 6.89  |
| 4KRP.PDB | O, C_CYS_88    | N, C_GLY_99    | H, C_GLY_99     | 2.82 | 1.98 | 10.72 |
| 4KRP.PDB | OE1, C_GLN_6   | N, C_GLY_101   | H, C_GLY_101    | 2.99 | 2.26 | 27.03 |
| 4KRP.PDB | O, C_TYR_86    | N, C_THR_102   | H, C_THR_102    | 2.99 | 2.27 | 27.64 |
| 4KRP.PDB | O, C_PRO_8     | OG1, C_THR_102 | HG1, C_THR_102  | 2.64 | 1.87 | 19.11 |
| 4KRP.PDB | O, C_VAL_9     | N, C_LYS_103   | H, C_LYS_103    | 2.82 | 2.01 | 15.16 |
| 4KRP.PDB | OE2, C_GLU_105 | NZ, C_LYS_103  | HZ1, C_LYS_103  | 2.82 | 2.05 | 25.15 |
| 4KRP.PDB | O, C_ALA_84    | N, C_LEU_104   | H, C_LEU_104    | 2.94 | 2.09 | 2.60  |
| 4KRP.PDB | O, C_VAL_13    | N, C_LYS_107   | H, C_LYS_107    | 2.79 | 1.98 | 15.54 |
| 4KRP.PDB | O, C_TYR_140   | N, C_ALA_111   | H, C_ALA_111    | 2.77 | 1.92 | 7.65  |
| 4KRP.PDB | O, C_LEU_135   | N, C_PHE_116   | H, C_PHE_116    | 2.88 | 2.06 | 15.19 |
| 4KRP.PDB | O, C_VAL_133   | N, C_PHE_118   | H, C_PHE_118    | 2.72 | 1.89 | 12.07 |
| 4KRP.PDB | OG, C_SER_131  | NE2, C_GLN_124 | HE22, C_GLN_124 | 2.89 | 2.10 | 19.98 |
| 4KRP.PDB | O, C_GLN_124   | N, C_SER_127   | H, C_SER_127    | 2.75 | 2.03 | 27.79 |
| 4KRP.PDB | O, C_LEU_125   | N, C_GLY_128   | H, C_GLY_128    | 2.99 | 2.19 | 18.71 |
| 4KRP.PDB | O, C_LEU_179   | N, C_VAL_132   | H, C_VAL_132    | 2.64 | 1.85 | 19.72 |
| 4KRP.PDB | O, C_SER_177   | N, C_CYS_134   | H, C_CYS_134    | 2.73 | 1.88 | 7.44  |
| 4KRP.PDB | O, C_PHE_116   | N, C_LEU_135   | H, C_LEU_135    | 2.66 | 1.81 | 8.16  |
| 4KRP.PDB | O, C_LEU_175   | N, C_LEU_136   | H, C_LEU_136    | 2.74 | 1.88 | 6.29  |
| 4KRP.PDB | O, C_SER_114   | N, C_ASN_137   | H, C_ASN_137    | 2.81 | 1.97 | 10.83 |
| 4KRP.PDB | OG, C_SER_174  | N, C_ASN_138   | H, C_ASN_138    | 2.97 | 2.11 | 3.04  |
| 4KRP.PDB | O, C_TYR_173   | N, C_PHE_139   | H, C_PHE_139    | 2.73 | 1.95 | 19.51 |
| 4KRP.PDB | O, C_ALA_111   | N, C_TYR_140   | H, C_TYR_140    | 2.91 | 2.08 | 13.77 |
| 4KRP.PDB | O, C_THR_197   | N, C_LYS_145   | H, C_LYS_145    | 2.91 | 2.06 | 4.69  |
| 4KRP.PDB | O, C_GLU_195   | N, C_GLN_147   | H, C_GLN_147    | 2.81 | 1.96 | 9.38  |
| 4KRP.PDB | O, C_ALA_193   | N, C_LYS_149   | H, C_LYS_149    | 2.85 | 2.05 | 18.63 |
| 4KRP.PDB | O, C_ALA_153   | NE2, C_GLN_155 | HE21, C_GLN_155 | 2.95 | 2.09 | 2.78  |
| 4KRP.PDB | OE1, C_GLN_155 | ND2, C_ASN_158 | HD21, C_ASN_158 | 2.83 | 2.12 | 29.23 |
| 4KRP.PDB | O, D_LEU_176   | NE2, C_GLN_160 | HE22, C_GLN_160 | 2.56 | 1.80 | 22.58 |
| 4KRP.PDB | O, C_SER_176   | N, C_SER_162   | H, C_SER_162    | 2.90 | 2.19 | 29.40 |
| 4KRP.PDB | O, D_PRO_173   | OG, C_SER_162  | HG, C_SER_162   | 2.80 | 2.10 | 28.74 |

|          |                |                |                 |      |      |       |
|----------|----------------|----------------|-----------------|------|------|-------|
| 4KRP.PDB | O, C_SER.174   | N, C_THR.164   | H, C_THR.164    | 2.91 | 2.07 | 10.69 |
| 4KRP.PDB | O, C_LEU.106   | NE2, C_GLN.166 | HE22, C_GLN.166 | 2.63 | 1.89 | 25.54 |
| 4KRP.PDB | OD2, C_ASP.167 | N, C_LYS.169   | H, C_LYS.169    | 2.96 | 2.14 | 15.63 |
| 4KRP.PDB | OD1, C_ASP.170 | N, C_THR.172   | H, C_THR.172    | 2.88 | 2.10 | 20.13 |
| 4KRP.PDB | OD1, C_ASP.170 | OG1, C_THR.172 | HG1, C_THR.172  | 2.53 | 1.69 | 5.91  |
| 4KRP.PDB | O, C_PHE.139   | N, C_TYR.173   | H, C_TYR.173    | 2.71 | 1.87 | 11.75 |
| 4KRP.PDB | O, C_LEU.136   | N, C_LEU.175   | H, C_LEU.175    | 2.80 | 2.00 | 17.17 |
| 4KRP.PDB | O, C_SER.162   | N, C_SER.176   | H, C_SER.176    | 2.91 | 2.09 | 14.35 |
| 4KRP.PDB | O, C_CYS.134   | N, C_SER.177   | H, C_SER.177    | 2.80 | 1.97 | 12.12 |
| 4KRP.PDB | O, C_GLN.160   | N, C_THR.178   | H, C_THR.178    | 2.94 | 2.21 | 26.85 |
| 4KRP.PDB | O, C_VAL.132   | N, C_LEU.179   | H, C_LEU.179    | 2.74 | 1.93 | 15.89 |
| 4KRP.PDB | O, C_ALA.130   | N, C_LEU.181   | H, C_LEU.181    | 2.98 | 2.18 | 18.35 |
| 4KRP.PDB | O, C_SER.182   | N, C_TYR.186   | H, C_TYR.186    | 2.78 | 1.98 | 17.36 |
| 4KRP.PDB | O, C_LYS.183   | N, C_GLU.187   | H, C_GLU.187    | 2.89 | 2.07 | 14.82 |
| 4KRP.PDB | O, C_ASP.185   | ND1, C_HIS.189 | HD1, C_HIS.189  | 2.74 | 1.90 | 11.57 |
| 4KRP.PDB | OD1, C_ASP.151 | N, C_VAL.191   | H, C_VAL.191    | 2.89 | 2.04 | 6.74  |
| 4KRP.PDB | O, C_TYR.186   | OH, C_TYR.192  | HH, C_TYR.192   | 2.61 | 1.88 | 24.84 |
| 4KRP.PDB | O, C_LYS.149   | N, C_ALA.193   | H, C_ALA.193    | 2.84 | 2.08 | 22.88 |
| 4KRP.PDB | O, C_LYS.207   | N, C_CYS.194   | H, C_CYS.194    | 2.89 | 2.06 | 14.21 |
| 4KRP.PDB | O, C_GLN.147   | N, C_GLU.195   | H, C_GLU.195    | 2.73 | 1.87 | 5.27  |
| 4KRP.PDB | O, C_VAL.205   | N, C_VAL.196   | H, C_VAL.196    | 2.64 | 1.80 | 9.51  |
| 4KRP.PDB | O, C_LYS.145   | N, C_THR.197   | H, C_THR.197    | 2.81 | 1.98 | 11.85 |
| 4KRP.PDB | O, C_PRO.141   | NE2, C_HIS.198 | HE2, C_HIS.198  | 2.87 | 2.02 | 6.17  |
| 4KRP.PDB | O, C_LYS.190   | N, C_ARG.211   | H, C_ARG.211    | 2.85 | 2.03 | 15.20 |
| 4KRP.PDB | O, C_HIS.189   | NE, C_ARG.211  | HE, C_ARG.211   | 2.71 | 1.90 | 16.56 |
| 4KRP.PDB | O, D_SER.25    | N, D_GLN.3     | H, D_GLN.3      | 2.74 | 1.91 | 10.35 |
| 4KRP.PDB | O, D_THR.23    | N, D_LYS.5     | H, D_LYS.5      | 2.97 | 2.12 | 3.88  |
| 4KRP.PDB | OE1, D_GLN.111 | N, D_GLN.6     | H, D_GLN.6      | 2.91 | 2.08 | 12.88 |
| 4KRP.PDB | OG1, D_THR.113 | NE2, D_GLN.6   | HE21, D_GLN.6   | 2.88 | 2.03 | 4.76  |
| 4KRP.PDB | O, D_TYR.93    | NE2, D_GLN.6   | HE22, D_GLN.6   | 2.91 | 2.18 | 26.39 |
| 4KRP.PDB | O, D_THR.21    | N, D_SER.7     | H, D_SER.7      | 2.78 | 1.98 | 17.63 |
| 4KRP.PDB | O, D_LEU.85    | N, D_SER.15    | H, D_SER.15     | 2.66 | 1.85 | 14.89 |
| 4KRP.PDB | O, D_GLN.13    | N, D_GLN.16    | H, D_GLN.16     | 2.90 | 2.10 | 17.19 |
| 4KRP.PDB | O, D_MET.82    | N, D_LEU.18    | H, D_LEU.18     | 2.72 | 1.90 | 13.60 |
| 4KRP.PDB | O, D_SER.7     | N, D_THR.21    | H, D_THR.21     | 2.80 | 1.94 | 2.06  |
| 4KRP.PDB | O, D_VAL.78    | N, D_CYS.22    | H, D_CYS.22     | 2.79 | 1.97 | 15.13 |
| 4KRP.PDB | O, D_LYS.5     | N, D_THR.23    | H, D_THR.23     | 2.64 | 1.81 | 12.04 |
| 4KRP.PDB | O, D_SER.76    | N, D_VAL.24    | H, D_VAL.24     | 2.93 | 2.08 | 8.52  |
| 4KRP.PDB | OG, D_SER.28   | N, D_THR.30    | H, D_THR.30     | 2.95 | 2.11 | 10.64 |
| 4KRP.PDB | O, D_ALA.96    | N, D_HIS.35    | H, D_HIS.35     | 2.75 | 1.91 | 9.74  |
| 4KRP.PDB | O, D_GLY.49    | N, D_TRP.36    | H, D_TRP.36     | 2.84 | 2.06 | 19.69 |
| 4KRP.PDB | O, D_TYR.94    | N, D_VAL.37    | H, D_VAL.37     | 2.90 | 2.08 | 13.15 |
| 4KRP.PDB | O, D_GLU.46    | N, D_ARG.38    | H, D_ARG.38     | 2.87 | 2.05 | 14.44 |
| 4KRP.PDB | OH, D_TYR.93   | NH1, D_ARG.38  | HH11, D_ARG.38  | 2.96 | 2.18 | 20.80 |
| 4KRP.PDB | OD1, D_ASP.89  | NH1, D_ARG.38  | HH12, D_ARG.38  | 2.91 | 2.06 | 7.49  |
| 4KRP.PDB | OE1, C_GLN.38  | NE2, D_GLN.39  | HE22, D_GLN.39  | 2.72 | 1.87 | 5.47  |
| 4KRP.PDB | O, D_ARG.38    | N, D_GLU.46    | H, D_GLU.46     | 2.84 | 2.01 | 12.31 |
| 4KRP.PDB | O, D_TRP.36    | N, D_LEU.48    | H, D_LEU.48     | 2.81 | 1.97 | 10.41 |
| 4KRP.PDB | O, D_ASP.58    | N, D_VAL.50    | H, D_VAL.50     | 2.83 | 2.10 | 26.44 |
| 4KRP.PDB | O, D_ASN.56    | N, D_TRP.52    | H, D_TRP.52     | 2.85 | 2.04 | 16.32 |
| 4KRP.PDB | O, D_LEU.48    | N, D_ASN.60    | H, D_ASN.60     | 2.81 | 1.96 | 6.79  |
| 4KRP.PDB | O, D_TRP.47    | ND2, D_ASN.60  | HD22, D_ASN.60  | 2.84 | 2.05 | 19.17 |
| 4KRP.PDB | O, D_ASN.60    | N, D_PHE.63    | H, D_PHE.63     | 2.99 | 2.23 | 24.51 |
| 4KRP.PDB | OD1, D_ASP.89  | NH2, D_ARG.66  | HH22, D_ARG.66  | 2.59 | 1.74 | 9.60  |
| 4KRP.PDB | O, D_LYS.81    | N, D_SER.68    | H, D_SER.68     | 2.89 | 2.07 | 14.89 |
| 4KRP.PDB | OH, D_TYR.59   | N, D_ILE.69    | H, D_ILE.69     | 2.90 | 2.09 | 15.54 |
| 4KRP.PDB | O, D_CYS.22    | N, D_VAL.78    | H, D_VAL.78     | 2.72 | 1.92 | 18.23 |
| 4KRP.PDB | O, D_ASN.70    | N, D_PHE.79    | H, D_PHE.79     | 2.97 | 2.12 | 3.62  |

|          |                |                |                 |      |      |       |
|----------|----------------|----------------|-----------------|------|------|-------|
| 4KRP.PDB | O, D_ILE_20    | N, D_PHE_80    | H, D_PHE_80     | 2.75 | 1.92 | 12.16 |
| 4KRP.PDB | O, D_ARG_66    | N, D_ASN_83    | H, D_ASN_83     | 2.96 | 2.20 | 23.47 |
| 4KRP.PDB | O, D_GLN_16    | N, D_LEU_85    | H, D_LEU_85     | 2.88 | 2.04 | 9.71  |
| 4KRP.PDB | O, D_GLN_86    | N, D_ASP_89    | H, D_ASP_89     | 2.99 | 2.19 | 16.67 |
| 4KRP.PDB | O, D_SER_87    | N, D_THR_90    | H, D_THR_90     | 2.99 | 2.16 | 13.47 |
| 4KRP.PDB | O, D_SER_87    | OG1, D_THR_90  | HG1, D_THR_90   | 2.81 | 2.08 | 24.26 |
| 4KRP.PDB | O, D_ASP_89    | OH, D_TYR_93   | HH, D_TYR_93    | 2.65 | 1.83 | 9.74  |
| 4KRP.PDB | O, D_VAL_37    | N, D_TYR_94    | H, D_TYR_94     | 2.57 | 1.74 | 12.70 |
| 4KRP.PDB | O, D_HIS_35    | N, D_ALA_96    | H, D_ALA_96     | 2.75 | 1.98 | 21.78 |
| 4KRP.PDB | O, D_TYR_108   | N, D_ARG_97    | H, D_ARG_97     | 2.89 | 2.07 | 13.85 |
| 4KRP.PDB | O, D_ALA_98    | NE, D_ARG_97   | HE, D_ARG_97    | 2.79 | 1.94 | 9.03  |
| 4KRP.PDB | OE1, A_GLN_408 | OH, D_TYR_102  | HH, D_TYR_102   | 2.56 | 1.74 | 10.00 |
| 4KRP.PDB | OD1, D_ASP_103 | N, D_TYR_104   | H, D_TYR_104    | 2.53 | 1.80 | 26.58 |
| 4KRP.PDB | OG, A_SER_440  | OH, D_TYR_104  | HH, D_TYR_104   | 2.94 | 2.22 | 25.72 |
| 4KRP.PDB | OH, C_TYR_36   | N, D_PHE_106   | H, D_PHE_106    | 2.89 | 2.11 | 20.61 |
| 4KRP.PDB | O, D_PHE_106   | NE1, D_TRP_109 | HE1, D_TRP_109  | 2.74 | 2.02 | 27.52 |
| 4KRP.PDB | O, D_CYS_95    | N, D_GLY_110   | H, D_GLY_110    | 2.83 | 1.97 | 4.87  |
| 4KRP.PDB | O, D_TYR_93    | N, D_THR_113   | H, D_THR_113    | 2.79 | 2.00 | 19.35 |
| 4KRP.PDB | O, D_ALA_91    | N, D_VAL_115   | H, D_VAL_115    | 2.94 | 2.21 | 27.64 |
| 4KRP.PDB | O, D_GLY_10    | N, D_THR_116   | H, D_THR_116    | 2.48 | 1.64 | 10.06 |
| 4KRP.PDB | OG, D_SER_118  | N, D_ALA_120   | H, D_ALA_120    | 2.80 | 1.99 | 15.68 |
| 4KRP.PDB | O, D_PHE_152   | N, D_LYS_123   | H, D_LYS_123    | 2.61 | 1.84 | 21.89 |
| 4KRP.PDB | O, D_ASP_150   | NZ, D_LYS_123  | HZ2, D_LYS_123  | 2.97 | 2.10 | 10.97 |
| 4KRP.PDB | O, D_LYS_149   | N, D_SER_126   | H, D_SER_126    | 2.93 | 2.09 | 12.06 |
| 4KRP.PDB | O, D_LEU_147   | N, D_PHE_128   | H, D_PHE_128    | 2.93 | 2.14 | 18.89 |
| 4KRP.PDB | O, D_GLY_145   | N, D_LEU_130   | H, D_LEU_130    | 2.60 | 1.75 | 6.78  |
| 4KRP.PDB | O, D_VAL_190   | N, D_ALA_142   | H, D_ALA_142    | 2.58 | 1.73 | 8.25  |
| 4KRP.PDB | O, D_LEU_130   | N, D_GLY_145   | H, D_GLY_145    | 2.97 | 2.21 | 23.33 |
| 4KRP.PDB | O, D_SER_186   | N, D_CYS_146   | H, D_CYS_146    | 2.72 | 1.92 | 18.42 |
| 4KRP.PDB | O, D_PHE_128   | N, D_LEU_147   | H, D_LEU_147    | 2.61 | 1.77 | 10.44 |
| 4KRP.PDB | O, D_LEU_184   | N, D_VAL_148   | H, D_VAL_148    | 2.60 | 1.80 | 18.24 |
| 4KRP.PDB | O, D_TYR_182   | N, D_TYR_151   | H, D_TYR_151    | 2.99 | 2.17 | 14.93 |
| 4KRP.PDB | O, D_LYS_123   | N, D_PHE_152   | H, D_PHE_152    | 2.86 | 2.03 | 12.67 |
| 4KRP.PDB | O, D_ASN_205   | N, D_THR_157   | H, D_THR_157    | 2.80 | 1.97 | 11.71 |
| 4KRP.PDB | O, D_ILE_201   | N, D_ASN_161   | H, D_ASN_161    | 2.77 | 1.93 | 9.15  |
| 4KRP.PDB | OD1, D_ASN_203 | N, D_SER_162   | H, D_SER_162    | 2.69 | 1.90 | 19.84 |
| 4KRP.PDB | O, D_VAL_187   | N, D_HIS_170   | H, D_HIS_170    | 2.77 | 1.95 | 15.10 |
| 4KRP.PDB | O, D_SER_185   | N, D_PHE_172   | H, D_PHE_172    | 2.95 | 2.10 | 7.75  |
| 4KRP.PDB | O, D_LEU_181   | N, D_GLN_177   | H, D_GLN_177    | 2.91 | 2.07 | 9.36  |
| 4KRP.PDB | O, D_GLN_177   | N, D_GLY_180   | H, D_GLY_180    | 2.74 | 1.90 | 10.27 |
| 4KRP.PDB | OG, D_SER_179  | N, D_LEU_181   | H, D_LEU_181    | 2.98 | 2.17 | 16.32 |
| 4KRP.PDB | O, D_TYR_151   | N, D_TYR_182   | H, D_TYR_182    | 2.66 | 1.81 | 7.88  |
| 4KRP.PDB | O, D_VAL_148   | N, D_LEU_184   | H, D_LEU_184    | 2.65 | 1.91 | 24.40 |
| 4KRP.PDB | O, D_CYS_146   | N, D_SER_186   | H, D_SER_186    | 2.92 | 2.10 | 15.79 |
| 4KRP.PDB | O, D_HIS_170   | N, D_VAL_187   | H, D_VAL_187    | 2.99 | 2.16 | 13.15 |
| 4KRP.PDB | O, D_LEU_144   | N, D_VAL_188   | H, D_VAL_188    | 2.79 | 2.00 | 19.05 |
| 4KRP.PDB | O, D_ALA_142   | N, D_VAL_190   | H, D_VAL_190    | 2.74 | 1.92 | 13.51 |
| 4KRP.PDB | O, D_SER_192   | N, D_SER_194   | H, D_SER_194    | 2.72 | 1.97 | 24.52 |
| 4KRP.PDB | O, D_SER_194   | N, D_THR_197   | H, D_THR_197    | 2.83 | 2.02 | 16.59 |
| 4KRP.PDB | O, D_SER_194   | N, D_GLN_198   | H, D_GLN_198    | 2.63 | 1.78 | 8.20  |
| 4KRP.PDB | O, D_SER_159   | N, D_ASN_203   | H, D_ASN_203    | 2.84 | 2.01 | 11.39 |
| 4KRP.PDB | OD1, D_ASP_214 | ND2, D_ASN_203 | HD22, D_ASN_203 | 2.70 | 1.84 | 4.78  |
| 4KRP.PDB | O, D_VAL_213   | N, D_VAL_204   | H, D_VAL_204    | 2.74 | 1.92 | 15.13 |
| 4KRP.PDB | O, D_THR_157   | N, D_ASN_205   | H, D_ASN_205    | 2.79 | 1.96 | 11.86 |
| 4KRP.PDB | O, D_THR_211   | N, D_HIS_206   | H, D_HIS_206    | 2.93 | 2.14 | 19.62 |
| 4KRP.PDB | OG, D_SER_209  | ND1, D_HIS_206 | HD1, D_HIS_206  | 2.94 | 2.08 | 3.63  |
| 4KRP.PDB | O, D_PRO_153   | NE2, D_HIS_206 | HE2, D_HIS_206  | 2.75 | 1.91 | 8.08  |
| 4KRP.PDB | O, D_LYS_207   | N, D_ASN_210   | H, D_ASN_210    | 2.60 | 1.84 | 22.95 |

|          |                |                |                |      |      |       |
|----------|----------------|----------------|----------------|------|------|-------|
| 4KRP.PDB | OG, D_SER.209  | OG1, D_THR.211 | HG1, D_THR.211 | 2.56 | 1.87 | 28.78 |
| 4KRP.PDB | O, D_VAL.204   | N, D_VAL.213   | H, D_VAL.213   | 2.73 | 1.88 | 7.94  |
| 4KRP.PDB | O, D_TYR.200   | N, D_VAL.217   | H, D_VAL.217   | 2.90 | 2.06 | 11.80 |
| 4KRP.PDB | O, B_SER.25    | N, B_GLN.3     | H, B_GLN.3     | 2.91 | 2.07 | 9.08  |
| 4KRP.PDB | O, B_ALA.23    | N, B_VAL.5     | H, B_VAL.5     | 2.88 | 2.02 | 5.91  |
| 4KRP.PDB | OE1, A_GLU.431 | OH, B_TYR.32   | HH, B_TYR.32   | 2.59 | 1.78 | 7.49  |
| 4KRP.PDB | O, B_GLY.99    | N, B_ALA.33    | H, B_ALA.33    | 2.82 | 2.06 | 24.31 |
| 4KRP.PDB | O, B_MET.34    | N, B_ILE.51    | H, B_ILE.51    | 2.92 | 2.20 | 27.79 |
| 4KRP.PDB | O, B_SER.104   | ND2, B_ASN.52  | HD21, B_ASN.52 | 2.66 | 1.89 | 21.34 |
| 4KRP.PDB | O, B_ALA.50    | N, B_TYR.59    | H, B_TYR.59    | 2.95 | 2.11 | 9.44  |
| 4KRP.PDB | O, B_TYR.116   | N, B_ALA.98    | H, B_ALA.98    | 2.91 | 2.18 | 26.96 |
| 4KRP.PDB | OE1, A_GLU.400 | OH, B_TYR.100  | HH, B_TYR.100  | 2.94 | 2.13 | 13.29 |
| 4KRP.PDB | OE2, A_GLU.431 | OH, B_TYR.116  | HH, B_TYR.116  | 2.43 | 1.75 | 29.09 |
| 4NZR.PDB | O, H_SER.25    | N, H_GLN.3     | H, H_GLN.3     | 2.88 | 2.05 | 13.11 |
| 4NZR.PDB | O, H_THR.23    | N, H_GLN.5     | H, H_GLN.5     | 2.98 | 2.24 | 25.71 |
| 4NZR.PDB | O, H_SER.21    | N, H_SER.7     | H, H_SER.7     | 2.82 | 2.05 | 20.97 |
| 4NZR.PDB | O, H_THR.110   | N, H_VAL.12    | H, H_VAL.12    | 2.90 | 2.11 | 18.80 |
| 4NZR.PDB | OE1, H_GLU.16  | N, H_LYS.13    | H, H_LYS.13    | 2.94 | 2.09 | 8.37  |
| 4NZR.PDB | O, H_VAL.82C   | N, H_SER.15    | H, H_SER.15    | 2.76 | 1.92 | 10.81 |
| 4NZR.PDB | O, H_LEU.82    | N, H_LEU.18    | H, H_LEU.18    | 2.85 | 2.05 | 16.86 |
| 4NZR.PDB | O, H_LEU.80    | N, H_LEU.20    | H, H_LEU.20    | 2.86 | 2.03 | 13.74 |
| 4NZR.PDB | O, H_PHE.78    | N, H_CYS.22    | H, H_CYS.22    | 2.79 | 1.97 | 15.99 |
| 4NZR.PDB | O, H_GLN.5     | N, H_THR.23    | H, H_THR.23    | 2.93 | 2.12 | 16.85 |
| 4NZR.PDB | O, H_ASN.76    | N, H_VAL.24    | H, H_VAL.24    | 2.94 | 2.10 | 8.87  |
| 4NZR.PDB | O, H_GLN.3     | N, H_SER.25    | H, H_SER.25    | 2.82 | 1.99 | 12.13 |
| 4NZR.PDB | OD1, H_ASN.76  | N, H_ILE.29    | H, H_ILE.29    | 2.97 | 2.16 | 16.56 |
| 4NZR.PDB | O, H_ASP.31E   | N, H_GLY.31A   | H, H_GLY.31A   | 2.95 | 2.12 | 14.61 |
| 4NZR.PDB | O, H_GLU.31B   | N, H_ASP.31E   | H, H_ASP.31E   | 2.99 | 2.13 | 1.38  |
| 4NZR.PDB | O, H_ALA.93    | N, H_GLY.35    | H, H_GLY.35    | 2.82 | 1.96 | 6.32  |
| 4NZR.PDB | O, H_GLY.49    | N, H_TRP.36    | H, H_TRP.36    | 2.93 | 2.18 | 24.86 |
| 4NZR.PDB | O, H_PHE.91    | N, H_VAL.37    | H, H_VAL.37    | 2.89 | 2.07 | 13.63 |
| 4NZR.PDB | O, H_GLU.46    | N, H_ARG.38    | H, H_ARG.38    | 2.82 | 2.00 | 14.96 |
| 4NZR.PDB | OE1, H_GLU.46  | NE, H_ARG.38   | HE, H_ARG.38   | 2.83 | 2.07 | 23.07 |
| 4NZR.PDB | OH, H_TYR.90   | NH1, H_ARG.38  | HH11, H_ARG.38 | 2.96 | 2.16 | 17.91 |
| 4NZR.PDB | OD1, H_ASP.86  | NH1, H_ARG.38  | HH12, H_ARG.38 | 2.73 | 1.88 | 7.20  |
| 4NZR.PDB | OE1, H_GLU.46  | NH2, H_ARG.38  | HH21, H_ARG.38 | 2.78 | 2.02 | 22.98 |
| 4NZR.PDB | O, H_VAL.89    | N, H_HIS.39    | H, H_HIS.39    | 2.78 | 1.96 | 14.92 |
| 4NZR.PDB | O, H_SER.40    | N, H_LYS.43    | H, H_LYS.43    | 2.77 | 1.94 | 13.14 |
| 4NZR.PDB | O, H_ARG.38    | N, H_GLU.46    | H, H_GLU.46    | 2.92 | 2.12 | 17.91 |
| 4NZR.PDB | OG, H_SER.50   | NE1, H_TRP.47  | HE1, H_TRP.47  | 2.87 | 2.03 | 11.63 |
| 4NZR.PDB | O, H_TRP.36    | N, H_ILE.48    | H, H_ILE.48    | 2.93 | 2.07 | 4.55  |
| 4NZR.PDB | O, H_HIS.58    | N, H_SER.50    | H, H_SER.50    | 2.85 | 2.04 | 14.94 |
| 4NZR.PDB | O, H_TRP.34    | N, H_ILE.51    | H, H_ILE.51    | 2.79 | 1.98 | 16.48 |
| 4NZR.PDB | O, H_THR.56    | N, H_HIS.52    | H, H_HIS.52    | 2.85 | 2.01 | 9.46  |
| 4NZR.PDB | OD1, H_ASP.31G | NE2, H_HIS.52  | HE2, H_HIS.52  | 2.60 | 1.83 | 22.01 |
| 4NZR.PDB | OD1, H_ASP.31G | NE1, H_TRP.53  | HE1, H_TRP.53  | 2.92 | 2.20 | 28.43 |
| 4NZR.PDB | O, H_HIS.52    | N, H_GLY.55    | H, H_GLY.55    | 2.84 | 2.03 | 16.32 |
| 4NZR.PDB | O, H_SER.50    | N, H_HIS.58    | H, H_HIS.58    | 2.89 | 2.05 | 10.67 |
| 4NZR.PDB | O, H_ILE.48    | N, H_LYS.60    | H, H_LYS.60    | 2.87 | 2.02 | 5.64  |
| 4NZR.PDB | O, H_LYS.60    | N, H_LEU.63    | H, H_LEU.63    | 2.86 | 2.08 | 20.68 |
| 4NZR.PDB | O, H_LEU.63    | N, H_ARG.66    | H, H_ARG.66    | 2.78 | 1.94 | 10.08 |
| 4NZR.PDB | O, H_ALA.82A   | NH1, H_ARG.66  | HH11, H_ARG.66 | 2.95 | 2.12 | 13.91 |
| 4NZR.PDB | OD2, H_ASP.86  | NH1, H_ARG.66  | HH12, H_ARG.66 | 2.98 | 2.20 | 21.88 |
| 4NZR.PDB | O, H_ARG.81    | N, H_SER.68    | H, H_SER.68    | 2.95 | 2.16 | 19.71 |
| 4NZR.PDB | O, H_TRP.77    | N, H_ASP.72    | H, H_ASP.72    | 2.90 | 2.05 | 4.26  |
| 4NZR.PDB | O, H_ASP.27    | ND2, H_ASN.76  | HD21, H_ASN.76 | 2.81 | 2.01 | 17.45 |
| 4NZR.PDB | O, H_VAL.24    | ND2, H_ASN.76  | HD22, H_ASN.76 | 2.87 | 2.02 | 7.45  |
| 4NZR.PDB | O, H_SER.70    | N, H_SER.79    | H, H_SER.79    | 2.92 | 2.13 | 19.56 |

|          |                |                |                 |      |      |       |
|----------|----------------|----------------|-----------------|------|------|-------|
| 4NZR.PDB | O, H_LEU_20    | N, H_LEU_80    | H, H_LEU_80     | 2.88 | 2.05 | 13.30 |
| 4NZR.PDB | O, H_SER_68    | N, H_ARG_81    | H, H_ARG_81     | 2.79 | 1.94 | 8.27  |
| 4NZR.PDB | O, H_LEU_18    | N, H_LEU_82    | H, H_LEU_82     | 2.82 | 2.00 | 14.32 |
| 4NZR.PDB | O, H_ARG_66    | N, H_ALA_82A   | H, H_ALA_82A    | 2.75 | 1.90 | 8.50  |
| 4NZR.PDB | O, H_THR_83    | N, H_ASP_86    | H, H_ASP_86     | 2.82 | 1.97 | 8.78  |
| 4NZR.PDB | O, H_ALA_84    | N, H_THR_87    | H, H_THR_87     | 2.95 | 2.10 | 9.57  |
| 4NZR.PDB | O, H_HIS_39    | N, H_VAL_89    | H, H_VAL_89     | 2.90 | 2.08 | 15.32 |
| 4NZR.PDB | O, H_VAL_107   | N, H_TYR_90    | H, H_TYR_90     | 2.84 | 2.00 | 11.61 |
| 4NZR.PDB | O, H_VAL_37    | N, H_PHE_91    | H, H_PHE_91     | 2.75 | 1.91 | 10.12 |
| 4NZR.PDB | OE2, H_GLU_6   | N, H_CYS_92    | H, H_CYS_92     | 2.87 | 2.06 | 15.61 |
| 4NZR.PDB | O, H_GLY_35    | N, H_ALA_93    | H, H_ALA_93     | 2.84 | 2.09 | 24.53 |
| 4NZR.PDB | O, H_VAL_102   | N, H_ARG_94    | H, H_ARG_94     | 2.90 | 2.15 | 25.02 |
| 4NZR.PDB | OD1, H_ASP_101 | NE, H_ARG_94   | HE, H_ARG_94    | 2.90 | 2.05 | 5.79  |
| 4NZR.PDB | OD2, H_ASP_101 | NH2, H_ARG_94  | HH21, H_ARG_94  | 2.73 | 1.90 | 13.79 |
| 4NZR.PDB | O, H_HIS_33    | N, H_HIS_95    | H, H_HIS_95     | 2.85 | 2.00 | 2.84  |
| 4NZR.PDB | OG, H_SER_50   | ND1, H_HIS_95  | HD1, H_HIS_95   | 2.67 | 1.84 | 11.69 |
| 4NZR.PDB | O, H_GLY_100H  | NE2, H_HIS_95  | HE2, H_HIS_95   | 2.92 | 2.20 | 27.79 |
| 4NZR.PDB | O, H_TRP_100I  | N, H_ARG_96    | H, H_ARG_96     | 2.84 | 2.03 | 17.11 |
| 4NZR.PDB | O, H_ARG_96    | N, H_GLY_100H  | H, H_GLY_100H   | 2.83 | 2.09 | 26.32 |
| 4NZR.PDB | O, H_ARG_96    | N, H_TRP_100I  | H, H_TRP_100I   | 2.87 | 2.13 | 26.51 |
| 4NZR.PDB | OH, L_TYR_36   | N, H_PHE_100J  | H, H_PHE_100J   | 2.96 | 2.11 | 8.14  |
| 4NZR.PDB | O, H_PHE_100J  | NE1, H_TRP_103 | HE1, H_TRP_103  | 2.95 | 2.19 | 23.88 |
| 4NZR.PDB | O, H_CYS_92    | N, H_GLY_104   | H, H_GLY_104    | 2.86 | 2.04 | 15.44 |
| 4NZR.PDB | OE1, H_GLU_6   | N, H_GLY_106   | H, H_GLY_106    | 2.82 | 2.04 | 21.27 |
| 4NZR.PDB | O, H_TYR_90    | N, H_VAL_107   | H, H_VAL_107    | 2.93 | 2.12 | 16.92 |
| 4NZR.PDB | O, H_ALA_88    | N, H_VAL_109   | H, H_VAL_109    | 2.86 | 2.00 | 1.82  |
| 4NZR.PDB | O, H_GLY_10    | N, H_THR_110   | H, H_THR_110    | 2.80 | 1.95 | 8.91  |
| 4NZR.PDB | OG1, H_THR_87  | N, H_VAL_111   | H, H_VAL_111    | 2.87 | 2.02 | 10.02 |
| 4NZR.PDB | O, H_VAL_12    | N, H_SER_112   | H, H_SER_112    | 2.92 | 2.12 | 18.68 |
| 4NZR.PDB | O, H_PHE_148   | N, H_LYS_117   | H, H_LYS_117    | 2.83 | 1.99 | 10.22 |
| 4NZR.PDB | O, H_ASP_146   | NZ, H_LYS_117  | HZ2, H_LYS_117  | 2.85 | 2.05 | 22.38 |
| 4NZR.PDB | O, H_LYS_145   | N, H_SER_120   | H, H_SER_120    | 2.88 | 2.07 | 16.11 |
| 4NZR.PDB | O, H_LEU_143   | N, H_PHE_122   | H, H_PHE_122    | 2.83 | 2.00 | 12.46 |
| 4NZR.PDB | O, H_GLY_141   | N, H_LEU_124   | H, H_LEU_124    | 2.75 | 1.90 | 5.12  |
| 4NZR.PDB | O, H_VAL_193   | N, H_ALA_138   | H, H_ALA_138    | 2.76 | 1.91 | 7.40  |
| 4NZR.PDB | O, H_VAL_191   | N, H_LEU_140   | H, H_LEU_140    | 2.93 | 2.10 | 13.85 |
| 4NZR.PDB | O, H_LEU_124   | N, H_GLY_141   | H, H_GLY_141    | 2.91 | 2.17 | 26.54 |
| 4NZR.PDB | O, H_SER_189   | N, H_CYS_142   | H, H_CYS_142    | 2.86 | 2.07 | 19.75 |
| 4NZR.PDB | O, H_PHE_122   | N, H_LEU_143   | H, H_LEU_143    | 2.77 | 1.93 | 12.58 |
| 4NZR.PDB | O, H_LEU_187   | N, H_VAL_144   | H, H_VAL_144    | 2.76 | 1.91 | 5.81  |
| 4NZR.PDB | O, H_SER_120   | N, H_LYS_145   | H, H_LYS_145    | 2.83 | 1.98 | 8.06  |
| 4NZR.PDB | O, H_LYS_117   | N, H_PHE_148   | H, H_PHE_148    | 2.88 | 2.08 | 18.10 |
| 4NZR.PDB | O, H_ASN_211   | N, H_THR_153   | H, H_THR_153    | 2.86 | 2.04 | 14.37 |
| 4NZR.PDB | O, H_ASN_209   | N, H_SER_156   | H, H_SER_156    | 2.93 | 2.11 | 14.90 |
| 4NZR.PDB | O, H_ILE_207   | N, H_ASN_162   | H, H_ASN_162    | 2.83 | 1.99 | 8.33  |
| 4NZR.PDB | OD1, H_ASN_209 | N, H_SER_163   | H, H_SER_163    | 2.78 | 2.01 | 22.06 |
| 4NZR.PDB | O, H_VAL_190   | N, H_HIS_172   | H, H_HIS_172    | 2.89 | 2.06 | 13.96 |
| 4NZR.PDB | O, H_SER_188   | N, H_PHE_174   | H, H_PHE_174    | 2.98 | 2.13 | 5.13  |
| 4NZR.PDB | O, H_SER_186   | N, H_VAL_177   | H, H_VAL_177    | 2.84 | 2.01 | 12.47 |
| 4NZR.PDB | O, H_LEU_184   | N, H_GLN_179   | H, H_GLN_179    | 2.83 | 1.98 | 4.97  |
| 4NZR.PDB | OD1, H_ASP_146 | NE2, H_GLN_179 | HE22, H_GLN_179 | 2.89 | 2.12 | 22.14 |
| 4NZR.PDB | O, H_GLN_179   | N, H_GLY_183   | H, H_GLY_183    | 2.81 | 1.99 | 13.79 |
| 4NZR.PDB | O, H_TYR_147   | N, H_TYR_185   | H, H_TYR_185    | 2.76 | 1.91 | 6.87  |
| 4NZR.PDB | O, H_VAL_177   | N, H_SER_186   | H, H_SER_186    | 2.92 | 2.15 | 22.72 |
| 4NZR.PDB | O, H_VAL_144   | N, H_LEU_187   | H, H_LEU_187    | 2.86 | 2.05 | 15.45 |
| 4NZR.PDB | OG, L_SER_176  | OG, H_SER_188  | HG, H_SER_188   | 2.88 | 2.16 | 24.46 |
| 4NZR.PDB | O, H_CYS_142   | N, H_SER_189   | H, H_SER_189    | 2.99 | 2.16 | 13.39 |
| 4NZR.PDB | O, H_HIS_172   | N, H_VAL_190   | H, H_VAL_190    | 2.81 | 1.98 | 14.14 |

|          |                |                |                 |      |      |       |
|----------|----------------|----------------|-----------------|------|------|-------|
| 4NZR.PDB | O, H.LEU_140   | N, H.VAL_191   | H, H.VAL_191    | 2.76 | 1.94 | 15.00 |
| 4NZR.PDB | O, H.ALA_138   | N, H.VAL_193   | H, H.VAL_193    | 2.76 | 1.96 | 16.51 |
| 4NZR.PDB | O, H.GLY_136   | N, H.SER_195   | H, H.SER_195    | 2.71 | 1.87 | 10.73 |
| 4NZR.PDB | O, H.PRO_194   | N, H.SER_197   | H, H.SER_197    | 2.94 | 2.08 | 6.12  |
| 4NZR.PDB | O, H.SER_197   | N, H.GLN_203   | H, H.GLN_203    | 2.86 | 2.05 | 15.22 |
| 4NZR.PDB | OD1, H.ASN_162 | N, H.ILE_207   | H, H.ILE_207    | 2.78 | 1.97 | 16.55 |
| 4NZR.PDB | O, H.SER_156   | N, H.ASN_209   | H, H.ASN_209    | 2.81 | 1.96 | 7.21  |
| 4NZR.PDB | OD1, H.ASP_220 | ND2, H.ASN_209 | HD22, H.ASN_209 | 2.89 | 2.06 | 12.07 |
| 4NZR.PDB | O, H.VAL_219   | N, H.VAL_210   | H, H.VAL_210    | 2.75 | 1.90 | 7.71  |
| 4NZR.PDB | O, H.THR_153   | N, H.ASN_211   | H, H.ASN_211    | 2.89 | 2.07 | 14.75 |
| 4NZR.PDB | OG, H.SER_215  | ND1, H.HIS_212 | HD1, H.HIS_212  | 2.80 | 1.99 | 17.07 |
| 4NZR.PDB | O, H.PRO_149   | NE2, H.HIS_212 | HE2, H.HIS_212  | 2.62 | 1.78 | 7.68  |
| 4NZR.PDB | O, H.LYS_213   | N, H.ASN_216   | H, H.ASN_216    | 2.95 | 2.12 | 11.20 |
| 4NZR.PDB | O, H.VAL_210   | N, H.VAL_219   | H, H.VAL_219    | 2.94 | 2.10 | 10.72 |
| 4NZR.PDB | O, H.CYS_208   | N, H.LYS_221   | H, H.LYS_221    | 2.90 | 2.08 | 14.73 |
| 4NZR.PDB | OE2, L.GLU_123 | NZ, H.LYS_221  | HZ2, H.LYS_221  | 2.99 | 2.10 | 2.00  |
| 4NZR.PDB | OE2, H.GLU_226 | NE, H.ARG_222  | HE, H.ARG_222   | 2.65 | 1.93 | 27.41 |
| 4NZR.PDB | O, H.TYR_206   | N, H.VAL_225   | H, H.VAL_225    | 2.90 | 2.05 | 6.78  |
| 4NZR.PDB | OG, L.SER_26   | N, L.VAL_3     | H, L.VAL_3      | 2.89 | 2.07 | 14.71 |
| 4NZR.PDB | O, L.ARG_24    | N, L.THR_5     | H, L.THR_5      | 2.79 | 1.95 | 10.02 |
| 4NZR.PDB | OE1, L.GLN_100 | N, L.GLN_6     | H, L.GLN_6      | 2.88 | 2.02 | 5.19  |
| 4NZR.PDB | O, L.TYR_86    | NE2, L.GLN_6   | HE22, L.GLN_6   | 2.88 | 2.05 | 12.91 |
| 4NZR.PDB | O, L.LYS_103   | N, L.LEU_11    | H, L.LEU_11     | 2.85 | 2.09 | 23.33 |
| 4NZR.PDB | OE2, L.GLU_17  | N, L.SER_14    | H, L.SER_14     | 2.82 | 1.98 | 9.91  |
| 4NZR.PDB | O, M.PRO_119   | OG, L.SER_14   | HG, L.SER_14    | 2.76 | 2.00 | 18.37 |
| 4NZR.PDB | O, L.MET_78    | N, L.GLY_16    | H, L.GLY_16     | 2.77 | 1.93 | 12.23 |
| 4NZR.PDB | OG1, M.THR_110 | N, L.THR_18    | H, L.THR_18     | 2.82 | 2.00 | 15.23 |
| 4NZR.PDB | O, L.ILE_75    | N, L.VAL_19    | H, L.VAL_19     | 2.83 | 2.05 | 21.72 |
| 4NZR.PDB | O, L.LEU_73    | N, L.LEU_21    | H, L.LEU_21     | 2.87 | 2.02 | 8.50  |
| 4NZR.PDB | O, L.SER_7     | N, L.SER_22    | H, L.SER_22     | 2.89 | 2.05 | 9.28  |
| 4NZR.PDB | O, L.PHE_71    | N, L.CYS_23    | H, L.CYS_23     | 2.92 | 2.12 | 16.99 |
| 4NZR.PDB | O, L.THR_5     | N, L.ARG_24    | H, L.ARG_24     | 2.83 | 2.01 | 13.32 |
| 4NZR.PDB | O, L.THR_69    | N, L.ALA_25    | H, L.ALA_25     | 2.94 | 2.14 | 18.04 |
| 4NZR.PDB | O, L.GLY_68    | N, L.ILE_29    | H, L.ILE_29     | 2.91 | 2.06 | 8.12  |
| 4NZR.PDB | OD1, L.ASN_28  | N, L.ASN_30    | H, L.ASN_30     | 2.80 | 1.97 | 11.83 |
| 4NZR.PDB | OE1, L.GLU_92  | ND2, L.ASN_30  | HD22, L.ASN_30  | 2.94 | 2.10 | 10.05 |
| 4NZR.PDB | OH, L.TYR_52   | NZ, L.LYS_31   | HZ1, L.LYS_31   | 2.57 | 1.77 | 21.34 |
| 4NZR.PDB | O, L.ILE_29    | N, L.ASN_32    | H, L.ASN_32     | 2.86 | 2.02 | 10.39 |
| 4NZR.PDB | O, L.GLN_89    | N, L.ALA_34    | H, L.ALA_34     | 2.87 | 2.04 | 11.97 |
| 4NZR.PDB | O, L.ILE_48    | N, L.TRP_35    | H, L.TRP_35     | 2.93 | 2.13 | 19.22 |
| 4NZR.PDB | O, L.TYR_87    | N, L.TYR_36    | H, L.TYR_36     | 2.69 | 1.88 | 17.31 |
| 4NZR.PDB | O, L.ARG_45    | N, L.GLN_37    | H, L.GLN_37     | 2.90 | 2.09 | 17.34 |
| 4NZR.PDB | OH, L.TYR_86   | NE2, L.GLN_37  | HE21, L.GLN_37  | 2.96 | 2.11 | 9.58  |
| 4NZR.PDB | O, L.VAL_85    | N, L.TYR_38    | H, L.TYR_38     | 2.76 | 1.97 | 19.78 |
| 4NZR.PDB | O, L.GLN_37    | N, L.ARG_45    | H, L.ARG_45     | 2.86 | 2.09 | 21.39 |
| 4NZR.PDB | O, L.TRP_35    | N, L.VAL_47    | H, L.VAL_47     | 2.91 | 2.05 | 2.37  |
| 4NZR.PDB | O, L.SER_53    | N, L.PHE_49    | H, L.PHE_49     | 2.86 | 2.07 | 19.76 |
| 4NZR.PDB | OH, L.TYR_91   | N, L.GLU_50    | H, L.GLU_50     | 2.96 | 2.25 | 29.60 |
| 4NZR.PDB | O, L.LEU_33    | N, L.THR_51    | H, L.THR_51     | 2.80 | 1.96 | 10.12 |
| 4NZR.PDB | O, L.LYS_31    | OG1, L.THR_51  | HG1, L.THR_51   | 2.80 | 2.02 | 13.30 |
| 4NZR.PDB | O, L.GLU_50    | N, L.TYR_52    | H, L.TYR_52     | 2.75 | 2.01 | 25.67 |
| 4NZR.PDB | O, L.PHE_49    | N, L.SER_53    | H, L.SER_53     | 2.90 | 2.12 | 21.06 |
| 4NZR.PDB | OH, M.TYR_444  | N, L.LYS_54    | H, L.LYS_54     | 2.91 | 2.06 | 4.85  |
| 4NZR.PDB | OD2, L.ASP_82  | NH1, L.ARG_61  | HH12, L.ARG_61  | 2.70 | 1.89 | 15.31 |
| 4NZR.PDB | O, M.ALA_391   | NH2, L.ARG_61  | HH21, L.ARG_61  | 2.90 | 2.11 | 19.46 |
| 4NZR.PDB | OD1, L.ASP_82  | NH2, L.ARG_61  | HH22, L.ARG_61  | 2.85 | 2.01 | 9.02  |
| 4NZR.PDB | O, L.THR_74    | N, L.VAL_63    | H, L.VAL_63     | 2.91 | 2.08 | 12.21 |
| 4NZR.PDB | O, L.THR_72    | N, L.SER_65    | H, L.SER_65     | 2.90 | 2.08 | 15.21 |

|          |                |                |                 |      |      |       |
|----------|----------------|----------------|-----------------|------|------|-------|
| 4NZR.PDB | O, L_GLU_70    | N, L_SER_67    | H, L_SER_67     | 2.94 | 2.16 | 20.85 |
| 4NZR.PDB | O, L_CYS_23    | N, L_PHE_71    | H, L_PHE_71     | 2.88 | 2.14 | 25.90 |
| 4NZR.PDB | O, L_SER_65    | N, L_THR_72    | H, L_THR_72     | 2.94 | 2.11 | 12.62 |
| 4NZR.PDB | O, L_LEU_21    | N, L_LEU_73    | H, L_LEU_73     | 2.84 | 2.03 | 16.61 |
| 4NZR.PDB | O, L_VAL_63    | N, L_THR_74    | H, L_THR_74     | 2.76 | 1.90 | 4.94  |
| 4NZR.PDB | O, L_VAL_19    | N, L_ILE_75    | H, L_ILE_75     | 2.77 | 1.98 | 19.82 |
| 4NZR.PDB | O, L_ARG_61    | ND2, L_ASN_76  | HD22, L_ASN_76  | 2.96 | 2.12 | 12.10 |
| 4NZR.PDB | OG, M_SER_106  | N, L_ASN_77    | H, L_ASN_77     | 2.86 | 2.01 | 5.30  |
| 4NZR.PDB | O, L_GLU_17    | N, L_MET_78    | H, L_MET_78     | 2.92 | 2.06 | 6.39  |
| 4NZR.PDB | OD2, L_ASP_82  | N, L_GLN_79    | H, L_GLN_79     | 2.85 | 2.01 | 8.63  |
| 4NZR.PDB | O, L_ASN_77    | NE2, L_GLN_79  | HE21, L_GLN_79  | 2.79 | 1.94 | 9.45  |
| 4NZR.PDB | O, L_GLN_79    | N, L_ASP_82    | H, L_ASP_82     | 2.93 | 2.08 | 8.91  |
| 4NZR.PDB | O, L_TYR_38    | N, L_VAL_85    | H, L_VAL_85     | 2.95 | 2.10 | 5.38  |
| 4NZR.PDB | O, L_THR_102   | N, L_TYR_86    | H, L_TYR_86     | 2.91 | 2.07 | 11.72 |
| 4NZR.PDB | O, L_TYR_36    | N, L_TYR_87    | H, L_TYR_87     | 2.86 | 2.04 | 15.92 |
| 4NZR.PDB | O, L_THR_97    | N, L_GLN_90    | H, L_GLN_90     | 2.96 | 2.18 | 20.60 |
| 4NZR.PDB | O, H_ALA_100G  | NE, L_ARG_96   | HE, L_ARG_96    | 2.83 | 2.08 | 23.79 |
| 4NZR.PDB | O, L_GLU_93    | NH1, L_ARG_96  | HH11, L_ARG_96  | 2.92 | 2.18 | 26.23 |
| 4NZR.PDB | O, H_ALA_100G  | NH2, L_ARG_96  | HH21, L_ARG_96  | 2.80 | 2.05 | 24.03 |
| 4NZR.PDB | O, L_ILE_2     | OG1, L_THR_97  | HG1, L_THR_97   | 2.76 | 1.95 | 5.21  |
| 4NZR.PDB | O, L_CYS_88    | N, L_GLY_99    | H, L_GLY_99     | 2.96 | 2.18 | 21.78 |
| 4NZR.PDB | O, L_GLN_6     | NE2, L_GLN_100 | HE22, L_GLN_100 | 2.65 | 1.87 | 20.23 |
| 4NZR.PDB | OE1, L_GLN_6   | N, L_GLY_101   | H, L_GLY_101    | 2.96 | 2.20 | 24.19 |
| 4NZR.PDB | O, L_TYR_86    | N, L_THR_102   | H, L_THR_102    | 2.92 | 2.12 | 16.99 |
| 4NZR.PDB | O, L_PRO_8     | OG1, L_THR_102 | HG1, L_THR_102  | 2.71 | 2.03 | 28.62 |
| 4NZR.PDB | O, L_ASP_9     | N, L_LYS_103   | H, L_LYS_103    | 2.97 | 2.17 | 18.66 |
| 4NZR.PDB | O, L_ALA_84    | N, L_VAL_104   | H, L_VAL_104    | 2.92 | 2.09 | 11.20 |
| 4NZR.PDB | O, L_LEU_11    | N, L_ASP_105   | H, L_ASP_105    | 2.92 | 2.08 | 10.70 |
| 4NZR.PDB | O, L_VAL_13    | N, L_LYS_107   | H, L_LYS_107    | 2.87 | 2.06 | 16.88 |
| 4NZR.PDB | O, L_THR_109   | NE, L_ARG_108  | HE, L_ARG_108   | 2.88 | 2.03 | 6.39  |
| 4NZR.PDB | O, L_ASP_170   | NH1, L_ARG_108 | HH11, L_ARG_108 | 2.85 | 2.01 | 10.32 |
| 4NZR.PDB | O, M_ASN_177   | NH2, L_ARG_108 | HH22, L_ARG_108 | 2.82 | 2.05 | 22.21 |
| 4NZR.PDB | O, M_GLY_178   | N, L_THR_109   | H, L_THR_109    | 2.92 | 2.07 | 5.99  |
| 4NZR.PDB | O, M_GLY_178   | OG1, L_THR_109 | HG1, L_THR_109  | 2.88 | 2.17 | 26.23 |
| 4NZR.PDB | O, M_ASP_117   | N, L_VAL_110   | H, L_VAL_110    | 2.96 | 2.14 | 15.09 |
| 4NZR.PDB | O, L_TYR_140   | N, L_ALA_111   | H, L_ALA_111    | 2.82 | 1.99 | 12.32 |
| 4NZR.PDB | O, L_LEU_135   | N, L_PHE_116   | H, L_PHE_116    | 2.94 | 2.12 | 15.43 |
| 4NZR.PDB | O, L_VAL_133   | N, L_PHE_118   | H, L_PHE_118    | 2.81 | 1.99 | 14.02 |
| 4NZR.PDB | OG, L_SER_121  | N, L_GLN_124   | H, L_GLN_124    | 2.99 | 2.17 | 16.25 |
| 4NZR.PDB | OG, L_SER_131  | NE2, L_GLN_124 | HE22, L_GLN_124 | 2.90 | 2.04 | 4.21  |
| 4NZR.PDB | O, L_GLN_124   | N, L_SER_127   | H, L_SER_127    | 2.85 | 2.12 | 26.70 |
| 4NZR.PDB | O, L_LEU_125   | N, L_GLY_128   | H, L_GLY_128    | 2.99 | 2.18 | 17.68 |
| 4NZR.PDB | O, L_LEU_181   | N, L_ALA_130   | H, L_ALA_130    | 2.81 | 2.02 | 18.51 |
| 4NZR.PDB | OE1, L_GLN_124 | N, L_SER_131   | H, L_SER_131    | 2.91 | 2.10 | 17.17 |
| 4NZR.PDB | O, L_LEU_179   | N, L_VAL_132   | H, L_VAL_132    | 2.79 | 1.95 | 10.51 |
| 4NZR.PDB | O, L_SER_177   | N, L_CYS_134   | H, L_CYS_134    | 2.78 | 1.94 | 10.51 |
| 4NZR.PDB | O, L_PHE_116   | N, L_LEU_135   | H, L_LEU_135    | 2.78 | 1.93 | 7.68  |
| 4NZR.PDB | O, L_LEU_175   | N, L_LEU_136   | H, L_LEU_136    | 2.79 | 1.93 | 3.71  |
| 4NZR.PDB | O, L_SER_114   | N, L_ASN_137   | H, L_ASN_137    | 2.76 | 1.93 | 13.32 |
| 4NZR.PDB | OG, L_SER_174  | N, L_ASN_138   | H, L_ASN_138    | 2.97 | 2.12 | 9.18  |
| 4NZR.PDB | O, L_TYR_173   | N, L_PHE_139   | H, L_PHE_139    | 2.80 | 1.98 | 13.87 |
| 4NZR.PDB | O, L_ALA_111   | N, L_TYR_140   | H, L_TYR_140    | 2.94 | 2.14 | 17.85 |
| 4NZR.PDB | O, L_GLU_195   | N, L_GLN_147   | H, L_GLN_147    | 2.85 | 2.04 | 15.79 |
| 4NZR.PDB | OG, L_SER_177  | NE1, L_TRP_148 | HE1, L_TRP_148  | 2.91 | 2.07 | 10.59 |
| 4NZR.PDB | O, L_ALA_193   | N, L_LYS_149   | H, L_LYS_149    | 2.88 | 2.05 | 12.05 |
| 4NZR.PDB | O, L_VAL_191   | N, L_ASP_151   | H, L_ASP_151    | 2.81 | 1.98 | 13.22 |
| 4NZR.PDB | O, L_VAL_150   | N, L_ALA_153   | H, L_ALA_153    | 2.92 | 2.07 | 7.66  |
| 4NZR.PDB | O, L_TRP_148   | N, L_GLN_155   | H, L_GLN_155    | 2.84 | 2.00 | 9.48  |

|          |                |                |                 |      |      |       |
|----------|----------------|----------------|-----------------|------|------|-------|
| 4NZR.PDB | O, L_ALA_153   | NE2, L_GLN_155 | HE21, L_GLN_155 | 2.97 | 2.11 | 2.73  |
| 4NZR.PDB | OE1, L_GLN_155 | ND2, L_ASN_158 | HD21, L_ASN_158 | 2.96 | 2.11 | 9.14  |
| 4NZR.PDB | O, H_LEU_178   | NE2, L_GLN_160 | HE22, L_GLN_160 | 2.86 | 2.01 | 7.83  |
| 4NZR.PDB | O, L_SER_176   | N, L_SER_162   | H, L_SER_162    | 2.96 | 2.18 | 20.83 |
| 4NZR.PDB | O, H_PRO_175   | OG, L_SER_162  | HG, L_SER_162   | 2.79 | 1.98 | 7.14  |
| 4NZR.PDB | O, L_SER_174   | N, L_THR_164   | H, L_THR_164    | 2.96 | 2.15 | 15.87 |
| 4NZR.PDB | O, L_SER_171   | NE2, L_GLN_166 | HE21, L_GLN_166 | 2.93 | 2.09 | 7.84  |
| 4NZR.PDB | O, L_ILE_106   | NE2, L_GLN_166 | HE22, L_GLN_166 | 2.71 | 1.88 | 13.12 |
| 4NZR.PDB | O, L_THR_172   | N, L_ASP_167   | H, L_ASP_167    | 2.77 | 1.92 | 9.43  |
| 4NZR.PDB | OD1, L_ASP_167 | N, L_LYS_169   | H, L_LYS_169    | 2.86 | 2.01 | 8.70  |
| 4NZR.PDB | O, L_ASP_167   | N, L_SER_171   | H, L_SER_171    | 2.75 | 2.00 | 24.50 |
| 4NZR.PDB | OD1, L_ASP_170 | OG1, L_THR_172 | HG1, L_THR_172  | 2.70 | 1.89 | 6.41  |
| 4NZR.PDB | O, L_PHE_139   | N, L_TYR_173   | H, L_TYR_173    | 2.82 | 1.99 | 11.40 |
| 4NZR.PDB | OG1, L_THR_164 | N, L_SER_174   | H, L_SER_174    | 2.94 | 2.15 | 19.12 |
| 4NZR.PDB | O, L_LEU_136   | N, L_LEU_175   | H, L_LEU_175    | 2.89 | 2.12 | 21.67 |
| 4NZR.PDB | O, L_SER_162   | N, L_SER_176   | H, L_SER_176    | 2.97 | 2.14 | 13.36 |
| 4NZR.PDB | OG, H_SER_188  | OG, L_SER_176  | HG, L_SER_176   | 2.88 | 2.09 | 13.66 |
| 4NZR.PDB | O, L_CYS_134   | N, L_SER_177   | H, L_SER_177    | 2.86 | 2.02 | 10.25 |
| 4NZR.PDB | O, L_GLN_160   | N, L_THR_178   | H, L_THR_178    | 2.83 | 2.00 | 11.32 |
| 4NZR.PDB | O, L_VAL_132   | N, L_LEU_179   | H, L_LEU_179    | 2.78 | 1.96 | 14.30 |
| 4NZR.PDB | O, L_ASN_158   | N, L_THR_180   | H, L_THR_180    | 2.97 | 2.13 | 10.64 |
| 4NZR.PDB | O, L_ALA_130   | N, L_LEU_181   | H, L_LEU_181    | 2.88 | 2.04 | 10.13 |
| 4NZR.PDB | O, L_GLY_128   | N, L_LYS_183   | H, L_LYS_183    | 2.93 | 2.11 | 14.95 |
| 4NZR.PDB | O, L_SER_182   | N, L_TYR_186   | H, L_TYR_186    | 2.96 | 2.11 | 6.64  |
| 4NZR.PDB | O, L_LYS_183   | N, L_GLU_187   | H, L_GLU_187    | 3.00 | 2.19 | 17.62 |
| 4NZR.PDB | O, L_ASP_185   | N, L_LYS_188   | H, L_LYS_188    | 2.95 | 2.13 | 13.06 |
| 4NZR.PDB | OD2, L_ASP_151 | ND1, L_HIS_189 | HD1, L_HIS_189  | 2.85 | 2.11 | 26.53 |
| 4NZR.PDB | OD1, L_ASP_151 | N, L_VAL_191   | H, L_VAL_191    | 2.94 | 2.08 | 3.42  |
| 4NZR.PDB | O, L_PHE_209   | N, L_TYR_192   | H, L_TYR_192    | 2.93 | 2.08 | 7.61  |
| 4NZR.PDB | O, L_LYS_149   | N, L_ALA_193   | H, L_ALA_193    | 2.88 | 2.09 | 18.86 |
| 4NZR.PDB | O, L_LYS_207   | N, L_CYS_194   | H, L_CYS_194    | 2.85 | 2.01 | 12.39 |
| 4NZR.PDB | O, L_VAL_205   | N, L_VAL_196   | H, L_VAL_196    | 2.71 | 1.89 | 14.56 |
| 4NZR.PDB | O, L_LYS_145   | N, L_THR_197   | H, L_THR_197    | 2.92 | 2.09 | 11.99 |
| 4NZR.PDB | O, L_PRO_141   | NE2, L_HIS_198 | HE2, L_HIS_198  | 2.90 | 2.07 | 12.26 |
| 4NZR.PDB | ND1, L_HIS_198 | N, L_GLY_200   | H, L_GLY_200    | 2.94 | 2.09 | 6.73  |
| 4NZR.PDB | O, L_HIS_198   | N, L_LEU_201   | H, L_LEU_201    | 2.89 | 2.04 | 8.10  |
| 4NZR.PDB | O, L_VAL_196   | N, L_VAL_205   | H, L_VAL_205    | 2.92 | 2.14 | 20.36 |
| 4NZR.PDB | O, L_CYS_194   | N, L_LYS_207   | H, L_LYS_207    | 2.92 | 2.14 | 21.11 |
| 4NZR.PDB | O, L_TYR_192   | N, L_PHE_209   | H, L_PHE_209    | 2.96 | 2.19 | 21.79 |
| 4NZR.PDB | O, L_LYS_190   | N, L_ARG_211   | H, L_ARG_211    | 2.70 | 1.87 | 12.15 |
| 4NZR.PDB | O, L_HIS_189   | NE, L_ARG_211  | HE, L_ARG_211   | 2.80 | 2.03 | 21.60 |
| 4NZR.PDB | O, M_GLU_124   | N, M_TYR_82    | H, M_TYR_82     | 2.96 | 2.13 | 13.02 |
| 4NZR.PDB | O, M_SER_126   | N, M_SER_84    | H, M_SER_84     | 2.98 | 2.15 | 13.57 |
| 4NZR.PDB | O, M_LEU_128   | N, M_ILE_86    | H, M_ILE_86     | 2.86 | 2.05 | 17.30 |
| 4NZR.PDB | O, M_LYS_130   | N, M_LEU_88    | H, M_LEU_88     | 2.84 | 1.99 | 7.85  |
| 4NZR.PDB | OD1, M_ASP_87  | N, M_SER_89    | H, M_SER_89     | 2.86 | 2.02 | 8.48  |
| 4NZR.PDB | OD1, M_ASN_378 | NH1, M_ARG_95  | HH12, M_ARG_95  | 2.71 | 1.91 | 18.53 |
| 4NZR.PDB | O, M_PHE_94    | N, M_PHE_98    | H, M_PHE_98     | 2.87 | 2.04 | 11.19 |
| 4NZR.PDB | O, M_ARG_95    | N, M_ARG_99    | H, M_ARG_99     | 2.91 | 2.10 | 16.79 |
| 4NZR.PDB | O, M_PHE_98    | N, M_ALA_102   | H, M_ALA_102    | 2.82 | 1.99 | 13.59 |
| 4NZR.PDB | O, M_ARG_99    | N, M_ASN_103   | H, M_ASN_103    | 2.77 | 1.95 | 14.29 |
| 4NZR.PDB | O, M_ALA_102   | N, M_SER_106   | H, M_SER_106    | 2.84 | 2.02 | 14.09 |
| 4NZR.PDB | O, M_ASN_103   | N, M_GLU_107   | H, M_GLU_107    | 2.90 | 2.10 | 17.39 |
| 4NZR.PDB | O, M_GLU_104   | N, M_ALA_108   | H, M_ALA_108    | 2.97 | 2.17 | 17.15 |
| 4NZR.PDB | O, M_LEU_105   | N, M_ILE_109   | H, M_ILE_109    | 2.94 | 2.17 | 22.50 |
| 4NZR.PDB | O, M_SER_106   | N, M_THR_110   | H, M_THR_110    | 2.95 | 2.12 | 14.11 |
| 4NZR.PDB | O, M_SER_106   | OG1, M_THR_110 | HG1, M_THR_110  | 2.74 | 1.95 | 13.19 |
| 4NZR.PDB | O, M_GLU_107   | N, M_ASN_111   | H, M_ASN_111    | 2.94 | 2.16 | 21.46 |



|          |                |                |                 |      |      |       |
|----------|----------------|----------------|-----------------|------|------|-------|
| 4NZR.PDB | O, M_SER_112   | NZ, M_LYS_114  | HZ1, M_LYS_114  | 2.69 | 1.82 | 10.18 |
| 4NZR.PDB | O, M_VAL_120   | N, M_GLY_115   | H, M_GLY_115    | 2.93 | 2.17 | 24.30 |
| 4NZR.PDB | O, M_SER_156   | NE, M_ARG_118  | HE, M_ARG_118   | 3.00 | 2.25 | 25.81 |
| 4NZR.PDB | O, M_SER_156   | NH2, M_ARG_118 | HH21, M_ARG_118 | 2.85 | 2.07 | 20.58 |
| 4NZR.PDB | O, M_ARG_118   | N, M_VAL_120   | H, M_VAL_120    | 2.76 | 2.02 | 26.00 |
| 4NZR.PDB | O, M_TYR_144   | N, M_ILE_125   | H, M_ILE_125    | 2.88 | 2.09 | 19.38 |
| 4NZR.PDB | O, M_TYR_82    | N, M_SER_126   | H, M_SER_126    | 2.89 | 2.07 | 14.81 |
| 4NZR.PDB | OE2, M_GLU_124 | OG, M_SER_126  | HG, M_SER_126   | 2.49 | 1.81 | 27.79 |
| 4NZR.PDB | O, M_ALA_142   | N, M_GLY_127   | H, M_GLY_127    | 2.88 | 2.07 | 15.98 |
| 4NZR.PDB | O, M_SER_84    | N, M_LEU_128   | H, M_LEU_128    | 2.81 | 1.97 | 11.35 |
| 4NZR.PDB | O, M_PHE_140   | N, M_ILE_129   | H, M_ILE_129    | 2.77 | 1.91 | 2.60  |
| 4NZR.PDB | O, M_ILE_86    | N, M_LYS_130   | H, M_LYS_130    | 2.86 | 2.00 | 2.42  |
| 4NZR.PDB | O, M_THR_137   | OG1, M_THR_131 | HG1, M_THR_131  | 2.69 | 1.93 | 17.31 |
| 4NZR.PDB | O, M_TYR_379   | N, M_ILE_136   | H, M_ILE_136    | 2.91 | 2.08 | 13.78 |
| 4NZR.PDB | O, M_ILE_129   | N, M_PHE_140   | H, M_PHE_140    | 2.99 | 2.21 | 21.20 |
| 4NZR.PDB | OE2, M_GLU_124 | NZ, M_LYS_141  | HZ2, M_LYS_141  | 2.96 | 2.15 | 21.57 |
| 4NZR.PDB | O, M_GLY_127   | N, M_ALA_142   | H, M_ALA_142    | 2.80 | 1.95 | 6.73  |
| 4NZR.PDB | O, M_GLN_159   | N, M_GLY_143   | H, M_GLY_143    | 2.82 | 2.00 | 13.14 |
| 4NZR.PDB | O, M_ILE_125   | N, M_TYR_144   | H, M_TYR_144    | 2.80 | 2.04 | 23.22 |
| 4NZR.PDB | O, M_LEU_155   | N, M_HIS_147   | H, M_HIS_147    | 2.85 | 2.01 | 10.85 |
| 4NZR.PDB | O, M_SER_153   | N, M_ALA_149   | H, M_ALA_149    | 2.76 | 1.91 | 5.90  |
| 4NZR.PDB | O, M_ALA_149   | N, M_GLY_152   | H, M_GLY_152    | 2.79 | 1.94 | 8.29  |
| 4NZR.PDB | O, M_LEU_180   | N, M_TYR_158   | H, M_TYR_158    | 2.83 | 1.99 | 9.68  |
| 4NZR.PDB | O, M_GLY_143   | N, M_GLN_159   | H, M_GLN_159    | 2.87 | 2.04 | 13.27 |
| 4NZR.PDB | O, M_PHE_382   | N, M_PHE_164   | H, M_PHE_164    | 2.85 | 2.03 | 14.98 |
| 4NZR.PDB | O, M_TYR_338   | ND2, M_ASN_165 | HD21, M_ASN_165 | 2.81 | 2.03 | 20.49 |
| 4NZR.PDB | O, M_ASN_183   | ND2, M_ASN_165 | HD22, M_ASN_165 | 2.99 | 2.16 | 11.12 |
| 4NZR.PDB | OD1, M_ASN_335 | ND2, M_ASN_166 | HD22, M_ASN_166 | 2.95 | 2.13 | 14.03 |
| 4NZR.PDB | OD1, M_ASN_183 | NE, M_ARG_167  | HE, M_ARG_167   | 2.87 | 2.09 | 20.21 |
| 4NZR.PDB | OD1, M_ASP_339 | NH2, M_ARG_167 | HH22, M_ARG_167 | 2.84 | 2.05 | 19.40 |
| 4NZR.PDB | OE2, M_GLU_311 | N, M_LEU_169   | H, M_LEU_169    | 2.70 | 1.87 | 11.59 |
| 4NZR.PDB | OE2, M_GLU_311 | N, M_MET_170   | H, M_MET_170    | 2.91 | 2.07 | 11.26 |
| 4NZR.PDB | O, M_SER_198   | N, M_LEU_173   | H, M_LEU_173    | 2.95 | 2.10 | 5.86  |
| 4NZR.PDB | OD1, M_ASN_177 | N, M_THR_179   | H, M_THR_179    | 2.81 | 1.95 | 3.90  |
| 4NZR.PDB | OD1, M_ASN_177 | OG1, M_THR_179 | HG1, M_THR_179  | 2.75 | 1.94 | 6.81  |
| 4NZR.PDB | O, M_TYR_158   | N, M_ALA_182   | H, M_ALA_182    | 2.88 | 2.03 | 6.05  |
| 4NZR.PDB | OE1, M_GLN_174 | N, M_ASN_183   | H, M_ASN_183    | 2.83 | 2.00 | 12.26 |
| 4NZR.PDB | O, M_ASN_165   | ND2, M_ASN_183 | HD21, M_ASN_183 | 2.83 | 2.00 | 11.27 |
| 4NZR.PDB | O, M_TYR_187   | N, M_PHE_191   | H, M_PHE_191    | 2.90 | 2.07 | 12.39 |
| 4NZR.PDB | O, M_ASP_189   | N, M_SER_196   | H, M_SER_196    | 2.84 | 2.04 | 18.29 |
| 4NZR.PDB | O, M_PHE_197   | N, M_TRP_200   | H, M_TRP_200    | 2.82 | 1.97 | 10.31 |
| 4NZR.PDB | O, M_PRO_171   | NE1, M_TRP_200 | HE1, M_TRP_200  | 2.83 | 1.99 | 8.99  |
| 4NZR.PDB | O, M_PHE_222   | N, M_SER_201   | H, M_SER_201    | 2.78 | 1.94 | 12.33 |
| 4NZR.PDB | O, M_THR_203   | ND2, M_ASN_202 | HD22, M_ASN_202 | 2.86 | 2.06 | 17.05 |
| 4NZR.PDB | O, M_THR_220   | N, M_THR_203   | H, M_THR_203    | 2.86 | 2.05 | 16.26 |
| 4NZR.PDB | OD1, M_ASP_217 | OG1, M_THR_207 | HG1, M_THR_207  | 2.72 | 1.90 | 1.28  |
| 4NZR.PDB | O, M_TYR_216   | N, M_VAL_208   | H, M_VAL_208    | 2.71 | 1.87 | 8.33  |
| 4NZR.PDB | O, M_LEU_214   | N, M_THR_210   | H, M_THR_210    | 2.96 | 2.14 | 13.71 |
| 4NZR.PDB | O, M_ALA_245   | N, M_ASP_217   | H, M_ASP_217    | 2.93 | 2.09 | 9.77  |
| 4NZR.PDB | O, M_THR_206   | N, M_LYS_218   | H, M_LYS_218    | 2.92 | 2.13 | 20.21 |
| 4NZR.PDB | OG1, M_THR_203 | N, M_THR_220   | H, M_THR_220    | 2.85 | 2.05 | 18.11 |
| 4NZR.PDB | O, M_VAL_241   | N, M_TYR_221   | H, M_TYR_221    | 2.93 | 2.11 | 14.30 |
| 4NZR.PDB | O, M_SER_201   | N, M_PHE_222   | H, M_PHE_222    | 2.88 | 2.09 | 19.39 |
| 4NZR.PDB | O, M_ALA_224   | N, M_SER_227   | H, M_SER_227    | 2.86 | 2.03 | 13.10 |
| 4NZR.PDB | O, M_PRO_228   | N, M_SER_232   | H, M_SER_232    | 2.88 | 2.10 | 20.88 |
| 4NZR.PDB | O, M_LEU_229   | N, M_TYR_233   | H, M_TYR_233    | 2.92 | 2.16 | 23.55 |
| 4NZR.PDB | O, M_TYR_221   | N, M_VAL_241   | H, M_VAL_241    | 2.87 | 2.02 | 7.27  |
| 4NZR.PDB | OE1, M_GLU_261 | NZ, M_LYS_242  | HZ1, M_LYS_242  | 2.96 | 2.22 | 28.06 |

|          |                |                |                 |      |      |       |
|----------|----------------|----------------|-----------------|------|------|-------|
| 4NZR.PDB | O, M_GLU_261   | NZ, M_LYS_242  | HZ3, M_LYS_242  | 2.55 | 1.69 | 11.67 |
| 4NZR.PDB | O, M_TRP_219   | N, M_THR_243   | H, M_THR_243    | 2.79 | 1.95 | 10.59 |
| 4NZR.PDB | O, M_ASP_217   | N, M_ALA_245   | H, M_ALA_245    | 2.89 | 2.07 | 14.41 |
| 4NZR.PDB | O, M_ILE_267   | N, M_ILE_246   | H, M_ILE_246    | 2.96 | 2.14 | 14.76 |
| 4NZR.PDB | O, M_ARG_269   | N, M_ALA_248   | H, M_ALA_248    | 2.78 | 1.96 | 15.32 |
| 4NZR.PDB | OD1, M_ASP_247 | N, M_LYS_249   | H, M_LYS_249    | 2.95 | 2.10 | 5.78  |
| 4NZR.PDB | OD1, M_ASP_250 | NZ, M_LYS_249  | HZ2, M_LYS_249  | 2.93 | 2.05 | 7.77  |
| 4NZR.PDB | O, M_ASP_247   | N, M_ASP_250   | H, M_ASP_250    | 2.94 | 2.10 | 10.81 |
| 4NZR.PDB | O, M_ASP_250   | N, M_LEU_254   | H, M_LEU_254    | 2.89 | 2.16 | 27.92 |
| 4NZR.PDB | NE2, M_GLN_282 | NZ, M_LYS_255  | HZ2, M_LYS_255  | 2.97 | 2.08 | 5.26  |
| 4NZR.PDB | O, M_LEU_254   | N, M_ILE_258   | H, M_ILE_258    | 2.84 | 1.99 | 9.84  |
| 4NZR.PDB | O, M_THR_257   | N, M_GLU_261   | H, M_GLU_261    | 2.89 | 2.08 | 16.34 |
| 4NZR.PDB | O, M_ILE_258   | N, M_LYS_262   | H, M_LYS_262    | 2.89 | 2.11 | 21.82 |
| 4NZR.PDB | O, M_LYS_289   | N, M_LEU_266   | H, M_LEU_266    | 2.92 | 2.10 | 13.96 |
| 4NZR.PDB | O, M_LEU_244   | N, M_ILE_267   | H, M_ILE_267    | 2.88 | 2.03 | 7.52  |
| 4NZR.PDB | O, M_SER_291   | N, M_ILE_268   | H, M_ILE_268    | 2.95 | 2.09 | 5.10  |
| 4NZR.PDB | O, M_ILE_246   | N, M_ARG_269   | H, M_ARG_269    | 2.83 | 1.98 | 9.70  |
| 4NZR.PDB | OD2, M_ASP_217 | NH1, M_ARG_269 | HH12, M_ARG_269 | 2.82 | 1.99 | 14.04 |
| 4NZR.PDB | O, M_GLN_193   | NH2, M_ARG_269 | HH21, M_ARG_269 | 2.90 | 2.20 | 29.55 |
| 4NZR.PDB | O, M_TYR_293   | N, M_LEU_271   | H, M_LEU_271    | 2.91 | 2.07 | 10.40 |
| 4NZR.PDB | O, M_GLY_275   | N, M_LEU_278   | H, M_LEU_278    | 2.93 | 2.08 | 6.63  |
| 4NZR.PDB | O, M_SER_276   | N, M_ASN_279   | H, M_ASN_279    | 2.87 | 2.04 | 13.20 |
| 4NZR.PDB | O, M_LEU_278   | N, M_LEU_281   | H, M_LEU_281    | 3.00 | 2.14 | 5.40  |
| 4NZR.PDB | O, M_THR_264   | N, M_LYS_288   | H, M_LYS_288    | 2.79 | 2.01 | 19.89 |
| 4NZR.PDB | OE2, M_GLU_313 | NZ, M_LYS_289  | HZ1, M_LYS_289  | 2.70 | 1.96 | 27.41 |
| 4NZR.PDB | OE1, M_GLU_311 | NZ, M_LYS_289  | HZ3, M_LYS_289  | 2.89 | 2.00 | 2.29  |
| 4NZR.PDB | O, M_GLU_313   | N, M_LEU_292   | H, M_LEU_292    | 2.92 | 2.08 | 9.41  |
| 4NZR.PDB | O, M_ILE_268   | N, M_TYR_293   | H, M_TYR_293    | 2.81 | 1.96 | 5.69  |
| 4NZR.PDB | O, M_GLY_273   | N, M_THR_297   | H, M_THR_297    | 2.74 | 1.93 | 16.92 |
| 4NZR.PDB | O, M_ASN_274   | N, M_ASN_300   | H, M_ASN_300    | 2.77 | 1.96 | 17.19 |
| 4NZR.PDB | O, M_LEU_330   | NE2, M_GLN_304 | HE21, M_GLN_304 | 2.93 | 2.09 | 8.97  |
| 4NZR.PDB | O, M_VAL_329   | N, M_PHE_306   | H, M_PHE_306    | 2.92 | 2.13 | 19.27 |
| 4NZR.PDB | O, M_LYS_288   | N, M_VAL_310   | H, M_VAL_310    | 2.73 | 1.91 | 14.16 |
| 4NZR.PDB | O, M_ASN_335   | N, M_LEU_312   | H, M_LEU_312    | 2.83 | 2.09 | 26.31 |
| 4NZR.PDB | O, M_LEU_292   | N, M_TYR_315   | H, M_TYR_315    | 2.81 | 2.05 | 23.22 |
| 4NZR.PDB | O, M_GLY_294   | N, M_THR_317   | H, M_THR_317    | 2.77 | 1.95 | 15.24 |
| 4NZR.PDB | O, M_VAL_299   | N, M_ASN_326   | H, M_ASN_326    | 2.99 | 2.14 | 6.61  |
| 4NZR.PDB | O, M_VAL_309   | OG1, M_THR_334 | HG1, M_THR_334  | 2.89 | 2.12 | 15.85 |
| 4NZR.PDB | O, M_VAL_310   | N, M_ASN_335   | H, M_ASN_335    | 2.95 | 2.14 | 16.98 |
| 4NZR.PDB | O, M_VAL_310   | ND2, M_ASN_335 | HD22, M_ASN_335 | 2.97 | 2.16 | 17.87 |
| 4NZR.PDB | OE2, M_GLU_383 | N, M_VAL_336   | H, M_VAL_336    | 2.87 | 2.03 | 8.95  |
| 4NZR.PDB | O, M_LEU_312   | N, M_ILE_337   | H, M_ILE_337    | 2.90 | 2.08 | 14.00 |
| 4NZR.PDB | OD1, M_ASN_165 | N, M_TYR_338   | H, M_TYR_338    | 2.85 | 2.02 | 11.20 |
| 4NZR.PDB | OG, M_SER_343  | N, M_ASP_339   | H, M_ASP_339    | 2.88 | 2.05 | 13.57 |
| 4NZR.PDB | OD1, M_ASN_184 | N, M_LEU_340   | H, M_LEU_340    | 2.86 | 2.02 | 9.90  |
| 4NZR.PDB | O, M_ASP_339   | N, M_SER_343   | H, M_SER_343    | 2.85 | 2.02 | 12.90 |
| 4NZR.PDB | O, M_ALA_320   | NZ, M_LYS_344  | HZ1, M_LYS_344  | 2.76 | 1.89 | 11.48 |
| 4NZR.PDB | O, M_SER_318   | NZ, M_LYS_344  | HZ3, M_LYS_344  | 2.90 | 2.04 | 12.02 |
| 4NZR.PDB | O, M_PHE_323   | N, M_THR_347   | H, M_THR_347    | 2.86 | 2.04 | 13.38 |
| 4NZR.PDB | O, M_PHE_325   | N, M_ASP_350   | H, M_ASP_350    | 2.77 | 1.92 | 5.83  |
| 4NZR.PDB | O, M_LEU_399   | N, M_LEU_351   | H, M_LEU_351    | 2.77 | 1.98 | 19.72 |
| 4NZR.PDB | OD1, M_ASP_350 | N, M_THR_352   | H, M_THR_352    | 2.94 | 2.11 | 11.48 |
| 4NZR.PDB | OD1, M_ASP_350 | OG1, M_THR_352 | HG1, M_THR_352  | 2.69 | 1.93 | 19.00 |
| 4NZR.PDB | O, M_LEU_351   | N, M_VAL_354   | H, M_VAL_354    | 2.99 | 2.17 | 14.74 |
| 4NZR.PDB | O, M_ALA_363   | N, M_ASN_358   | H, M_ASN_358    | 2.83 | 2.00 | 12.67 |
| 4NZR.PDB | O, M_LEU_356   | N, M_ASP_365   | H, M_ASP_365    | 2.81 | 1.96 | 8.63  |
| 4NZR.PDB | O, M_GLN_357   | NZ, M_LYS_368  | HZ2, M_LYS_368  | 2.90 | 2.01 | 4.14  |
| 4NZR.PDB | O, M_ALA_366   | N, M_LYS_370   | H, M_LYS_370    | 2.94 | 2.09 | 7.76  |

|          |                |                |                 |      |      |       |
|----------|----------------|----------------|-----------------|------|------|-------|
| 4NZR.PDB | OE1, M_GLU_420 | NZ, M_LYS_370  | HZ2, M_LYS_370  | 2.61 | 1.80 | 20.02 |
| 4NZR.PDB | O, M_ASN_367   | N, M_GLN_371   | H, M_GLN_371    | 2.96 | 2.16 | 18.23 |
| 4NZR.PDB | OD1, M_ASP_375 | NE2, M_GLN_371 | HE21, M_GLN_371 | 2.92 | 2.12 | 18.76 |
| 4NZR.PDB | O, M_LEU_369   | N, M_VAL_373   | H, M_VAL_373    | 2.99 | 2.14 | 9.69  |
| 4NZR.PDB | O, M_LYS_370   | N, M_GLY_374   | H, M_GLY_374    | 2.80 | 1.98 | 14.26 |
| 4NZR.PDB | O, M_GLN_371   | N, M_ASP_375   | H, M_ASP_375    | 2.91 | 2.15 | 24.37 |
| 4NZR.PDB | O, M_VAL_373   | N, M_ILE_376   | H, M_ILE_376    | 2.99 | 2.25 | 26.03 |
| 4NZR.PDB | O, M_VAL_373   | N, M_TYR_377   | H, M_TYR_377    | 2.78 | 1.92 | 4.41  |
| 4NZR.PDB | O, M_GLY_374   | N, M_ASN_378   | H, M_ASN_378    | 2.88 | 2.07 | 16.83 |
| 4NZR.PDB | O, M_GLY_374   | N, M_TYR_379   | H, M_TYR_379    | 2.99 | 2.17 | 15.14 |
| 4NZR.PDB | OE1, M_GLU_383 | NH1, M_ARG_380 | HH11, M_ARG_380 | 2.65 | 1.84 | 14.74 |
| 4NZR.PDB | O, M_THR_334   | NH1, M_ARG_380 | HH12, M_ARG_380 | 2.93 | 2.14 | 19.06 |
| 4NZR.PDB | O, M_GLU_162   | NH1, M_ARG_381 | HH12, M_ARG_381 | 2.93 | 2.20 | 26.71 |
| 4NZR.PDB | OE1, M_GLU_162 | NH2, M_ARG_381 | HH22, M_ARG_381 | 3.00 | 2.22 | 21.24 |
| 4NZR.PDB | OE1, L_GLU_81  | NE, M_ARG_384  | HE, M_ARG_384   | 2.93 | 2.09 | 10.37 |
| 4NZR.PDB | O, M_GLY_388   | NH1, M_ARG_384 | HH12, M_ARG_384 | 2.81 | 2.01 | 18.07 |
| 4NZR.PDB | O, M_LYS_344   | NE2, M_GLN_385 | HE22, M_GLN_385 | 2.71 | 1.92 | 19.06 |
| 4NZR.PDB | O, M_GLU_383   | N, M_PHE_386   | H, M_PHE_386    | 2.99 | 2.17 | 16.23 |
| 4NZR.PDB | O, M_ARG_384   | N, M_GLN_387   | H, M_GLN_387    | 2.98 | 2.13 | 8.94  |
| 4NZR.PDB | O, M_ARG_381   | NE2, M_GLN_387 | HE21, M_GLN_387 | 2.77 | 1.96 | 17.54 |
| 4NZR.PDB | O, M_GLU_162   | NE2, M_GLN_387 | HE22, M_GLN_387 | 2.83 | 2.04 | 18.31 |
| 4NZR.PDB | OE1, M_GLN_387 | N, M_GLY_392   | H, M_GLY_392    | 2.78 | 1.95 | 10.56 |
| 4NZR.PDB | O, M_PHE_390   | N, M_GLY_393   | H, M_GLY_393    | 2.93 | 2.13 | 18.34 |
| 4NZR.PDB | OD1, M_ASP_396 | NZ, M_LYS_397  | HZ1, M_LYS_397  | 2.90 | 2.03 | 10.85 |
| 4NZR.PDB | O, M_TYR_437   | N, M_TYR_398   | H, M_TYR_398    | 2.93 | 2.11 | 14.24 |
| 4NZR.PDB | O, M_ILE_349   | N, M_LEU_399   | H, M_LEU_399    | 2.84 | 2.00 | 10.68 |
| 4NZR.PDB | O, M_THR_435   | N, M_VAL_400   | H, M_VAL_400    | 2.89 | 2.06 | 12.03 |
| 4NZR.PDB | OD2, M_ASP_410 | ND2, M_ASN_402 | HD22, M_ASN_402 | 2.93 | 2.14 | 18.97 |
| 4NZR.PDB | OD2, M_ASP_410 | N, M_VAL_403   | H, M_VAL_403    | 2.81 | 2.04 | 21.61 |
| 4NZR.PDB | OD1, M_ASN_404 | N, M_ASN_406   | H, M_ASN_406    | 2.87 | 2.04 | 12.77 |
| 4NZR.PDB | O, M_LYS_407   | N, M_ASP_411   | H, M_ASP_411    | 2.97 | 2.15 | 15.64 |
| 4NZR.PDB | O, M_ASP_408   | N, M_ASP_412   | H, M_ASP_412    | 2.92 | 2.12 | 19.03 |
| 4NZR.PDB | O, M_SER_409   | N, M_LEU_413   | H, M_LEU_413    | 2.93 | 2.10 | 12.24 |
| 4NZR.PDB | O, M_ASP_410   | N, M_VAL_414   | H, M_VAL_414    | 2.89 | 2.06 | 12.64 |
| 4NZR.PDB | O, M_ASP_411   | N, M_TYR_415   | H, M_TYR_415    | 2.83 | 1.98 | 9.53  |
| 4NZR.PDB | O, M_ASP_412   | N, M_ARG_416   | H, M_ARG_416    | 2.86 | 2.01 | 9.04  |
| 4NZR.PDB | OE2, M_GLU_464 | NH1, M_ARG_416 | HH12, M_ARG_416 | 2.68 | 1.83 | 5.86  |
| 4NZR.PDB | OE1, M_GLU_464 | NH2, M_ARG_416 | HH22, M_ARG_416 | 2.88 | 2.03 | 6.77  |
| 4NZR.PDB | O, M_LEU_413   | N, M_SER_417   | H, M_SER_417    | 2.88 | 2.05 | 11.51 |
| 4NZR.PDB | O, M_VAL_414   | N, M_LEU_418   | H, M_LEU_418    | 2.92 | 2.09 | 12.46 |
| 4NZR.PDB | O, M_LEU_418   | N, M_LEU_421   | H, M_LEU_421    | 2.84 | 2.06 | 20.21 |
| 4NZR.PDB | O, M_LYS_419   | N, M_ASN_422   | H, M_ASN_422    | 2.91 | 2.11 | 18.90 |
| 4NZR.PDB | O, M_LEU_418   | N, M_LEU_423   | H, M_LEU_423    | 2.97 | 2.13 | 11.14 |
| 4NZR.PDB | O, M_ASN_440   | N, M_HIS_424   | H, M_HIS_424    | 2.82 | 2.03 | 19.83 |
| 4NZR.PDB | O, M_ARG_438   | N, M_GLU_426   | H, M_GLU_426    | 2.73 | 1.89 | 8.53  |
| 4NZR.PDB | O, M_TYR_436   | N, M_TYR_429   | H, M_TYR_429    | 2.86 | 2.01 | 8.90  |
| 4NZR.PDB | OD1, M_ASP_411 | NH1, M_ARG_430 | HH12, M_ARG_430 | 2.84 | 2.06 | 21.86 |
| 4NZR.PDB | O, M_ASN_434   | N, M_GLU_431   | H, M_GLU_431    | 2.87 | 2.02 | 8.65  |
| 4NZR.PDB | O, M_VAL_400   | N, M_THR_435   | H, M_THR_435    | 2.80 | 1.99 | 16.75 |
| 4NZR.PDB | OD1, M_ASN_402 | OG1, M_THR_435 | HG1, M_THR_435  | 2.74 | 1.98 | 18.44 |
| 4NZR.PDB | O, M_TYR_429   | N, M_TYR_436   | H, M_TYR_436    | 2.75 | 1.91 | 12.60 |
| 4NZR.PDB | O, M_TYR_398   | N, M_TYR_437   | H, M_TYR_437    | 2.80 | 1.95 | 5.61  |
| 4NZR.PDB | O, M_GLU_427   | N, M_ARG_438   | H, M_ARG_438    | 2.92 | 2.08 | 10.71 |
| 4NZR.PDB | OD2, M_ASP_396 | NE, M_ARG_438  | HE, M_ARG_438   | 2.86 | 2.00 | 5.29  |
| 4NZR.PDB | O, M_ASP_396   | N, M_VAL_439   | H, M_VAL_439    | 2.78 | 2.00 | 20.99 |
| 4NZR.PDB | O, M_HIS_424   | N, M_ASN_440   | H, M_ASN_440    | 2.91 | 2.07 | 11.96 |
| 4NZR.PDB | OE2, M_GLU_426 | ND2, M_ASN_440 | HD22, M_ASN_440 | 2.87 | 2.05 | 14.71 |
| 4NZR.PDB | OH, M_TYR_394  | N, M_GLU_441   | H, M_GLU_441    | 2.91 | 2.08 | 11.38 |

|          |                |                |                 |      |      |       |
|----------|----------------|----------------|-----------------|------|------|-------|
| 4NZR.PDB | OD1, M_ASN_440 | N, M_ASN_442   | H, M_ASN_442    | 2.86 | 2.01 | 10.00 |
| 4NZR.PDB | O, M_GLU_426   | N, M_TYR_450   | H, M_TYR_450    | 2.94 | 2.10 | 8.91  |
| 4NZR.PDB | OG, M_SER_448  | N, M_GLU_451   | H, M_GLU_451    | 3.00 | 2.15 | 7.42  |
| 4NZR.PDB | O, M_SER_448   | N, M_ASN_452   | H, M_ASN_452    | 2.99 | 2.16 | 12.61 |
| 4NZR.PDB | O, M_GLY_446   | ND2, M_ASN_452 | HD22, M_ASN_452 | 2.95 | 2.14 | 17.61 |
| 4NZR.PDB | O, M_ILE_449   | N, M_GLU_453   | H, M_GLU_453    | 2.90 | 2.04 | 6.17  |
| 4NZR.PDB | OD1, M_ASP_412 | NH1, M_ARG_454 | HH12, M_ARG_454 | 2.79 | 1.98 | 15.66 |
| 4NZR.PDB | O, M_GLU_451   | N, M_ALA_455   | H, M_ALA_455    | 2.80 | 1.96 | 11.85 |
| 4NZR.PDB | O, M_GLU_453   | NH1, M_ARG_457 | HH11, M_ARG_457 | 2.87 | 2.09 | 20.01 |
| 4NZR.PDB | OD1, H_ASP_31E | NH1, M_ARG_457 | HH12, M_ARG_457 | 2.96 | 2.12 | 11.27 |
| 4NZR.PDB | OD2, H_ASP_31E | NH2, M_ARG_457 | HH22, M_ARG_457 | 2.55 | 1.75 | 17.03 |
| 4NZR.PDB | O, M_ARG_454   | N, M_ASP_458   | H, M_ASP_458    | 2.91 | 2.20 | 29.30 |
| 4NZR.PDB | O, M_ASP_458   | N, M_GLN_462   | H, M_GLN_462    | 2.90 | 2.06 | 11.58 |
| 4NZR.PDB | O, M_SER_459   | N, M_ASN_463   | H, M_ASN_463    | 2.97 | 2.15 | 14.56 |
| 4NZR.PDB | O, M_GLU_460   | N, M_GLU_464   | H, M_GLU_464    | 2.94 | 2.12 | 14.76 |
| 4NZR.PDB | O, M_PHE_461   | N, M_ILE_465   | H, M_ILE_465    | 2.92 | 2.11 | 16.00 |
| 4NZR.PDB | O, M_ASN_463   | N, M_LYS_467   | H, M_LYS_467    | 2.98 | 2.13 | 6.16  |
| 4NZR.PDB | O, M_GLU_464   | N, M_ARG_468   | H, M_ARG_468    | 2.90 | 2.06 | 11.94 |
| 4NZU.PDB | OG, L_SER_26   | N, L_GLU_3     | H, L_GLU_3      | 2.85 | 2.00 | 7.06  |
| 4NZU.PDB | O, L_GLN_24    | N, L_THR_5     | H, L_THR_5      | 2.89 | 2.06 | 12.85 |
| 4NZU.PDB | O, L_LYS_103   | N, L_LEU_11    | H, L_LEU_11     | 2.89 | 2.11 | 20.24 |
| 4NZU.PDB | O, L_GLU_105   | N, L_ALA_13    | H, L_ALA_13     | 2.97 | 2.15 | 15.91 |
| 4NZU.PDB | OD2, L_ASP_17  | N, L_SER_14    | H, L_SER_14     | 2.85 | 2.00 | 6.08  |
| 4NZU.PDB | O, L_LEU_78    | N, L_GLY_16    | H, L_GLY_16     | 2.75 | 1.92 | 11.17 |
| 4NZU.PDB | O, L_ILE_75    | N, L_VAL_19    | H, L_VAL_19     | 2.93 | 2.10 | 12.37 |
| 4NZU.PDB | O, L_PHE_73    | N, L_ILE_21    | H, L_ILE_21     | 2.89 | 2.06 | 11.61 |
| 4NZU.PDB | O, L_SER_7     | N, L_THR_22    | H, L_THR_22     | 2.86 | 2.01 | 5.56  |
| 4NZU.PDB | O, L_PHE_71    | N, L_CYS_23    | H, L_CYS_23     | 2.91 | 2.09 | 15.17 |
| 4NZU.PDB | O, L_THR_5     | N, L_GLN_24    | H, L_GLN_24     | 2.88 | 2.07 | 16.80 |
| 4NZU.PDB | O, L_THR_69    | N, L_ALA_25    | H, L_ALA_25     | 2.86 | 2.06 | 18.12 |
| 4NZU.PDB | O, L_GLY_68    | N, L_ILE_29    | H, L_ILE_29     | 2.87 | 2.02 | 6.63  |
| 4NZU.PDB | O, L_ILE_29    | N, L_PHE_32    | H, L_PHE_32     | 2.88 | 2.03 | 7.32  |
| 4NZU.PDB | O, L_GLN_89    | N, L_ASP_34    | H, L_ASP_34     | 2.88 | 2.05 | 12.07 |
| 4NZU.PDB | O, L_ILE_48    | N, L_TRP_35    | H, L_TRP_35     | 2.86 | 2.02 | 11.26 |
| 4NZU.PDB | O, L_TYR_87    | N, L_TYR_36    | H, L_TYR_36     | 2.84 | 2.02 | 14.90 |
| 4NZU.PDB | O, L_LYS_45    | N, L_GLN_37    | H, L_GLN_37     | 2.88 | 2.06 | 16.18 |
| 4NZU.PDB | O, L_VAL_85    | N, L_GLN_38    | H, L_GLN_38     | 2.81 | 2.00 | 16.84 |
| 4NZU.PDB | O, L_GLU_81    | NE, L_ARG_39   | HE, L_ARG_39    | 2.82 | 1.89 | 12.62 |
| 4NZU.PDB | O, L_ARG_39    | N, L_LYS_42    | H, L_LYS_42     | 2.98 | 2.17 | 16.62 |
| 4NZU.PDB | O, L_GLN_37    | N, L_LYS_45    | H, L_LYS_45     | 2.86 | 2.08 | 21.32 |
| 4NZU.PDB | O, L_TRP_35    | N, L_LEU_47    | H, L_LEU_47     | 2.90 | 2.05 | 4.96  |
| 4NZU.PDB | O, L_ASN_53    | N, L_TYR_49    | H, L_TYR_49     | 2.92 | 2.13 | 19.67 |
| 4NZU.PDB | O, L_LEU_33    | N, L_ALA_51    | H, L_ALA_51     | 2.73 | 1.91 | 14.91 |
| 4NZU.PDB | O, L_ASP_50    | N, L_SER_52    | H, L_SER_52     | 2.85 | 2.15 | 29.96 |
| 4NZU.PDB | O, L_TYR_49    | N, L_ASN_53    | H, L_ASN_53     | 2.95 | 2.12 | 14.12 |
| 4NZU.PDB | O, L_LEU_47    | N, L_ALA_55    | H, L_ALA_55     | 2.95 | 2.09 | 3.99  |
| 4NZU.PDB | OD2, L_ASP_82  | NE, L_ARG_61   | HE, L_ARG_61    | 2.83 | 2.03 | 27.68 |
| 4NZU.PDB | OD1, L_ASP_82  | NH2, L_ARG_61  | HH21, L_ARG_61  | 2.85 | 2.00 | 7.18  |
| 4NZU.PDB | O, L_THR_72    | N, L_SER_65    | H, L_SER_65     | 2.93 | 2.14 | 18.79 |
| 4NZU.PDB | O, L_ALA_30    | N, L_GLY_68    | H, L_GLY_68     | 2.88 | 2.07 | 17.47 |
| 4NZU.PDB | O, L_CYS_23    | N, L_PHE_71    | H, L_PHE_71     | 2.88 | 2.07 | 16.98 |
| 4NZU.PDB | O, L_SER_65    | N, L_THR_72    | H, L_THR_72     | 2.92 | 2.09 | 12.57 |
| 4NZU.PDB | O, L_ILE_21    | N, L_PHE_73    | H, L_PHE_73     | 2.91 | 2.08 | 12.35 |
| 4NZU.PDB | O, L_THR_63    | N, L_THR_74    | H, L_THR_74     | 2.88 | 2.05 | 11.92 |
| 4NZU.PDB | O, L_VAL_19    | N, L_ILE_75    | H, L_ILE_75     | 2.89 | 2.09 | 18.00 |
| 4NZU.PDB | O, L_ARG_61    | N, L_SER_76    | H, L_SER_76     | 2.83 | 2.03 | 17.44 |
| 4NZU.PDB | O, L_ASP_17    | N, L_LEU_78    | H, L_LEU_78     | 2.83 | 2.04 | 19.06 |
| 4NZU.PDB | OD2, L_ASP_82  | N, L_GLN_79    | H, L_GLN_79     | 2.91 | 2.07 | 9.01  |

|          |                |                |                 |      |      |       |
|----------|----------------|----------------|-----------------|------|------|-------|
| 4NZU.PDB | O, L_GLN_79    | N, L_ASP_82    | H, L_ASP_82     | 2.86 | 2.03 | 11.16 |
| 4NZU.PDB | O, L_THR_102   | N, L_TYR_86    | H, L_TYR_86     | 2.95 | 2.13 | 15.14 |
| 4NZU.PDB | O, L_TYR_36    | N, L_TYR_87    | H, L_TYR_87     | 2.92 | 2.11 | 16.96 |
| 4NZU.PDB | O, L_PHE_32    | N, L_TYR_91    | H, L_TYR_91     | 2.96 | 2.16 | 17.93 |
| 4NZU.PDB | O, L_CYS_88    | N, L_GLY_99    | H, L_GLY_99     | 2.83 | 2.03 | 18.33 |
| 4NZU.PDB | OE1, L_GLN_6   | N, L_GLY_101   | H, L_GLY_101    | 2.96 | 2.20 | 24.47 |
| 4NZU.PDB | O, L_TYR_86    | N, L_THR_102   | H, L_THR_102    | 2.91 | 2.10 | 16.25 |
| 4NZU.PDB | O, L_ALA_84    | N, L_LEU_104   | H, L_LEU_104    | 2.96 | 2.10 | 5.58  |
| 4NZU.PDB | O, L_LEU_11    | N, L_GLU_105   | H, L_GLU_105    | 2.96 | 2.15 | 17.50 |
| 4NZU.PDB | OE1, L_GLN_166 | N, L_THR_106   | H, L_THR_106    | 2.83 | 1.99 | 8.58  |
| 4NZU.PDB | O, L_ALA_13    | N, L_LYS_107   | H, L_LYS_107    | 2.88 | 2.05 | 13.69 |
| 4NZU.PDB | O, L_THR_109   | NE, L_ARG_108  | HE, L_ARG_108   | 2.81 | 1.86 | 9.52  |
| 4NZU.PDB | O, L_ASP_170   | NH1, L_ARG_108 | HH11, L_ARG_108 | 2.81 | 1.98 | 12.07 |
| 4NZU.PDB | O, L_TYR_140   | N, L_ALA_111   | H, L_ALA_111    | 2.88 | 2.04 | 11.37 |
| 4NZU.PDB | O, L_LEU_135   | N, L_PHE_116   | H, L_PHE_116    | 2.95 | 2.18 | 22.98 |
| 4NZU.PDB | O, L_VAL_133   | N, L_PHE_118   | H, L_PHE_118    | 2.80 | 2.00 | 18.01 |
| 4NZU.PDB | OG, L_SER_121  | N, L_GLN_124   | H, L_GLN_124    | 2.94 | 2.11 | 13.38 |
| 4NZU.PDB | O, L_LEU_181   | N, L_ALA_130   | H, L_ALA_130    | 2.90 | 2.05 | 9.45  |
| 4NZU.PDB | NE2, L_GLN_124 | N, L_SER_131   | H, L_SER_131    | 2.97 | 2.20 | 21.35 |
| 4NZU.PDB | O, L_LEU_179   | N, L_VAL_132   | H, L_VAL_132    | 2.90 | 2.07 | 11.76 |
| 4NZU.PDB | O, L_SER_177   | N, L_CYS_134   | H, L_CYS_134    | 2.87 | 2.04 | 13.69 |
| 4NZU.PDB | O, L_PHE_116   | N, L_LEU_135   | H, L_LEU_135    | 2.83 | 2.00 | 10.89 |
| 4NZU.PDB | O, L_LEU_175   | N, L_LEU_136   | H, L_LEU_136    | 2.84 | 1.99 | 6.57  |
| 4NZU.PDB | O, L_SER_114   | N, L_ASN_137   | H, L_ASN_137    | 2.79 | 1.96 | 12.42 |
| 4NZU.PDB | O, L_TYR_173   | N, L_PHE_139   | H, L_PHE_139    | 2.81 | 1.98 | 12.12 |
| 4NZU.PDB | O, L_ALA_111   | N, L_TYR_140   | H, L_TYR_140    | 2.98 | 2.17 | 16.59 |
| 4NZU.PDB | O, L_GLU_195   | N, L_GLN_147   | H, L_GLN_147    | 2.80 | 1.97 | 12.05 |
| 4NZU.PDB | OG, L_SER_177  | NE1, L_TRP_148 | HE1, L_TRP_148  | 2.90 | 1.89 | 11.12 |
| 4NZU.PDB | O, L_ALA_193   | N, L_LYS_149   | H, L_LYS_149    | 2.86 | 2.04 | 14.54 |
| 4NZU.PDB | O, L_VAL_191   | N, L_ASP_151   | H, L_ASP_151    | 2.81 | 1.98 | 13.30 |
| 4NZU.PDB | O, L_VAL_150   | N, L_ALA_153   | H, L_ALA_153    | 2.89 | 2.05 | 9.67  |
| 4NZU.PDB | O, L_TRP_148   | N, L_GLN_155   | H, L_GLN_155    | 2.91 | 2.07 | 10.18 |
| 4NZU.PDB | O, L_SER_176   | N, L_SER_162   | H, L_SER_162    | 2.96 | 2.18 | 20.50 |
| 4NZU.PDB | O, L_SER_174   | N, L_THR_164   | H, L_THR_164    | 2.99 | 2.18 | 16.93 |
| 4NZU.PDB | O, L_THR_172   | N, L_ASP_167   | H, L_ASP_167    | 2.80 | 1.96 | 8.83  |
| 4NZU.PDB | OD2, L_ASP_167 | N, L_LYS_169   | H, L_LYS_169    | 2.96 | 2.24 | 28.01 |
| 4NZU.PDB | OD2, L_ASP_167 | N, L_ASP_170   | H, L_ASP_170    | 2.95 | 2.13 | 14.40 |
| 4NZU.PDB | O, L_ASP_167   | N, L_SER_171   | H, L_SER_171    | 2.96 | 2.22 | 25.63 |
| 4NZU.PDB | OD1, L_ASP_170 | N, L_THR_172   | H, L_THR_172    | 2.94 | 2.13 | 16.20 |
| 4NZU.PDB | O, L_PHE_139   | N, L_TYR_173   | H, L_TYR_173    | 2.83 | 1.98 | 8.20  |
| 4NZU.PDB | O, L_LEU_136   | N, L_LEU_175   | H, L_LEU_175    | 2.85 | 2.05 | 17.53 |
| 4NZU.PDB | O, L_SER_162   | N, L_SER_176   | H, L_SER_176    | 2.96 | 2.14 | 14.63 |
| 4NZU.PDB | O, L_CYS_134   | N, L_SER_177   | H, L_SER_177    | 2.92 | 2.08 | 12.73 |
| 4NZU.PDB | O, L_GLN_160   | N, L_THR_178   | H, L_THR_178    | 2.85 | 2.02 | 12.21 |
| 4NZU.PDB | O, L_VAL_132   | N, L_LEU_179   | H, L_LEU_179    | 2.78 | 1.95 | 11.28 |
| 4NZU.PDB | O, L_ASN_158   | N, L_THR_180   | H, L_THR_180    | 2.89 | 2.04 | 7.97  |
| 4NZU.PDB | O, L_ALA_130   | N, L_LEU_181   | H, L_LEU_181    | 2.89 | 2.03 | 5.02  |
| 4NZU.PDB | O, L_GLY_128   | N, L_LYS_183   | H, L_LYS_183    | 2.93 | 2.08 | 7.57  |
| 4NZU.PDB | OG, L_SER_182  | N, L_ASP_185   | H, L_ASP_185    | 2.98 | 2.15 | 12.85 |
| 4NZU.PDB | O, L_SER_182   | N, L_TYR_186   | H, L_TYR_186    | 2.98 | 2.14 | 10.93 |
| 4NZU.PDB | O, L_LYS_183   | N, L_GLU_187   | H, L_GLU_187    | 2.86 | 2.03 | 12.51 |
| 4NZU.PDB | OD1, L_ASP_151 | N, L_LYS_190   | H, L_LYS_190    | 2.93 | 2.09 | 10.09 |
| 4NZU.PDB | OD1, L_ASP_151 | N, L_VAL_191   | H, L_VAL_191    | 2.97 | 2.13 | 9.29  |
| 4NZU.PDB | O, L_PHE_209   | N, L_TYR_192   | H, L_TYR_192    | 2.93 | 2.08 | 5.07  |
| 4NZU.PDB | O, L_LYS_149   | N, L_ALA_193   | H, L_ALA_193    | 2.96 | 2.16 | 18.28 |
| 4NZU.PDB | O, L_LYS_207   | N, L_CYS_194   | H, L_CYS_194    | 2.90 | 2.07 | 13.44 |
| 4NZU.PDB | O, L_GLN_147   | N, L_GLU_195   | H, L_GLU_195    | 2.85 | 2.00 | 7.85  |
| 4NZU.PDB | O, L_VAL_205   | N, L_VAL_196   | H, L_VAL_196    | 2.76 | 1.93 | 12.73 |

|          |                |               |                |      |      |       |
|----------|----------------|---------------|----------------|------|------|-------|
| 4NZU.PDB | O, L_LYS_145   | N, L_THR_197  | H, L_THR_197   | 2.96 | 2.14 | 13.76 |
| 4NZU.PDB | ND1, L_HIS_198 | N, L_GLY_200  | H, L_GLY_200   | 2.95 | 2.10 | 4.09  |
| 4NZU.PDB | O, L_HIS_198   | N, L_LEU_201  | H, L_LEU_201   | 2.91 | 2.06 | 7.34  |
| 4NZU.PDB | O, L_VAL_196   | N, L_VAL_205  | H, L_VAL_205   | 2.97 | 2.18 | 19.82 |
| 4NZU.PDB | O, L_TYR_192   | N, L_PHE_209  | H, L_PHE_209   | 2.95 | 2.17 | 20.95 |
| 4NZU.PDB | O, L_LYS_190   | N, L_ARG_211  | H, L_ARG_211   | 2.79 | 1.96 | 13.34 |
| 4NZU.PDB | O, L_HIS_189   | NE, L_ARG_211 | HE, L_ARG_211  | 2.83 | 1.95 | 20.09 |
| 4NZU.PDB | O, H_SER_25    | N, H_SER_3    | H, H_SER_3     | 2.94 | 2.15 | 18.68 |
| 4NZU.PDB | O, H_ALA_23    | N, H_VAL_5    | H, H_VAL_5     | 2.94 | 2.11 | 12.25 |
| 4NZU.PDB | OE1, H_GLN_105 | N, H_GLU_6    | H, H_GLU_6     | 2.88 | 2.02 | 2.55  |
| 4NZU.PDB | O, H_SER_21    | N, H_SER_7    | H, H_SER_7     | 2.91 | 2.11 | 18.23 |
| 4NZU.PDB | O, H_THR_110   | N, H_VAL_12   | H, H_VAL_12    | 2.93 | 2.20 | 26.91 |
| 4NZU.PDB | O, H_LEU_82C   | N, H_GLY_15   | H, H_GLY_15    | 2.72 | 1.86 | 1.10  |
| 4NZU.PDB | O, H_MET_82    | N, H_LEU_18   | H, H_LEU_18    | 2.87 | 2.07 | 18.95 |
| 4NZU.PDB | O, H_LEU_80    | N, H_LEU_20   | H, H_LEU_20    | 2.89 | 2.06 | 11.46 |
| 4NZU.PDB | O, H_SER_7     | N, H_SER_21   | H, H_SER_21    | 2.98 | 2.14 | 9.55  |
| 4NZU.PDB | O, H_LEU_78    | N, H_CYS_22   | H, H_CYS_22    | 2.82 | 2.04 | 21.59 |
| 4NZU.PDB | O, H_VAL_5     | N, H_ALA_23   | H, H_ALA_23    | 2.82 | 1.97 | 8.42  |
| 4NZU.PDB | O, H_ASN_76    | N, H_ALA_24   | H, H_ALA_24    | 2.93 | 2.07 | 4.56  |
| 4NZU.PDB | O, H_SER_3     | N, H_SER_25   | H, H_SER_25    | 2.99 | 2.20 | 20.90 |
| 4NZU.PDB | O, H_ALA_93    | N, H_HIS_35   | H, H_HIS_35    | 2.93 | 2.12 | 16.07 |
| 4NZU.PDB | O, H_ALA_49    | N, H_TRP_36   | H, H_TRP_36    | 2.92 | 2.14 | 21.04 |
| 4NZU.PDB | O, H_TYR_91    | N, H_VAL_37   | H, H_VAL_37    | 2.88 | 2.05 | 13.75 |
| 4NZU.PDB | O, H_GLU_46    | N, H_ARG_38   | H, H_ARG_38    | 2.81 | 1.97 | 10.17 |
| 4NZU.PDB | OE2, H_GLU_46  | NE, H_ARG_38  | HE, H_ARG_38   | 2.81 | 1.92 | 18.37 |
| 4NZU.PDB | OD1, H_ASP_86  | NH1, H_ARG_38 | HH12, H_ARG_38 | 2.87 | 2.03 | 8.91  |
| 4NZU.PDB | O, H_VAL_89    | N, H_GLN_39   | H, H_GLN_39    | 2.85 | 2.12 | 26.56 |
| 4NZU.PDB | O, H_ALA_40    | N, H_ASP_43   | H, H_ASP_43    | 2.95 | 2.13 | 14.09 |
| 4NZU.PDB | O, H_ARG_38    | N, H_GLU_46   | H, H_GLU_46    | 2.83 | 2.07 | 24.02 |
| 4NZU.PDB | O, H_TRP_36    | N, H_VAL_48   | H, H_VAL_48    | 2.86 | 2.04 | 15.06 |
| 4NZU.PDB | O, H_TYR_58    | N, H_PHE_50   | H, H_PHE_50    | 2.88 | 2.08 | 16.89 |
| 4NZU.PDB | O, H_PHE_34    | N, H_ILE_51   | H, H_ILE_51    | 2.88 | 2.05 | 13.34 |
| 4NZU.PDB | O, H_SER_56    | N, H_SER_52   | H, H_SER_52    | 2.92 | 2.10 | 13.95 |
| 4NZU.PDB | O, H_SER_52    | N, H_GLY_54   | H, H_GLY_54    | 2.94 | 2.14 | 17.16 |
| 4NZU.PDB | O, H_VAL_48    | N, H_ALA_60   | H, H_ALA_60    | 2.91 | 2.08 | 13.02 |
| 4NZU.PDB | O, H_SER_82B   | NH1, H_ARG_66 | HH11, H_ARG_66 | 2.99 | 2.16 | 13.59 |
| 4NZU.PDB | OD2, H_ASP_86  | NH1, H_ARG_66 | HH12, H_ARG_66 | 2.80 | 1.94 | 3.46  |
| 4NZU.PDB | O, H_GLN_81    | N, H_THR_68   | H, H_THR_68    | 2.85 | 2.05 | 17.96 |
| 4NZU.PDB | OH, H_TYR_59   | N, H_ILE_69   | H, H_ILE_69    | 2.96 | 2.13 | 12.69 |
| 4NZU.PDB | O, H_TYR_32    | NH1, H_ARG_71 | HH12, H_ARG_71 | 2.89 | 2.14 | 25.08 |
| 4NZU.PDB | O, H_TYR_32    | NH2, H_ARG_71 | HH22, H_ARG_71 | 2.94 | 2.22 | 27.85 |
| 4NZU.PDB | O, H_THR_77    | N, H_ASP_72   | H, H_ASP_72    | 2.87 | 2.04 | 12.43 |
| 4NZU.PDB | O, H_CYS_22    | N, H_LEU_78   | H, H_LEU_78    | 2.86 | 2.03 | 13.04 |
| 4NZU.PDB | O, H_SER_70    | N, H_SER_79   | H, H_SER_79    | 2.89 | 2.05 | 11.36 |
| 4NZU.PDB | O, H_LEU_20    | N, H_LEU_80   | H, H_LEU_80    | 2.94 | 2.13 | 15.87 |
| 4NZU.PDB | O, H_THR_68    | N, H_GLN_81   | H, H_GLN_81    | 2.89 | 2.05 | 10.75 |
| 4NZU.PDB | O, H_LEU_18    | N, H_MET_82   | H, H_MET_82    | 2.85 | 2.01 | 9.41  |
| 4NZU.PDB | O, H_ARG_66    | N, H_ASN_82A  | H, H_ASN_82A   | 2.85 | 2.04 | 16.30 |
| 4NZU.PDB | OD2, H_ASP_86  | N, H_LYS_83   | H, H_LYS_83    | 2.86 | 2.03 | 12.94 |
| 4NZU.PDB | O, H_LYS_83    | N, H_ASP_86   | H, H_ASP_86    | 2.84 | 2.02 | 13.61 |
| 4NZU.PDB | O, H_GLN_39    | N, H_VAL_89   | H, H_VAL_89    | 2.90 | 2.11 | 18.38 |
| 4NZU.PDB | O, H_THR_107   | N, H_TYR_90   | H, H_TYR_90    | 2.88 | 2.04 | 8.85  |
| 4NZU.PDB | O, H_VAL_37    | N, H_TYR_91   | H, H_TYR_91    | 2.73 | 1.88 | 6.70  |
| 4NZU.PDB | O, H_HIS_35    | N, H_ALA_93   | H, H_ALA_93    | 2.90 | 2.19 | 28.63 |
| 4NZU.PDB | O, H_TYR_102   | N, H_ARG_94   | H, H_ARG_94    | 2.97 | 2.19 | 21.23 |
| 4NZU.PDB | O, H_ALA_95    | NE, H_ARG_94  | HE, H_ARG_94   | 2.86 | 2.03 | 25.77 |
| 4NZU.PDB | O, H_ALA_95    | NH2, H_ARG_94 | HH21, H_ARG_94 | 2.85 | 2.09 | 22.83 |
| 4NZU.PDB | OD1, H_ASP_97  | NH2, H_ARG_94 | HH22, H_ARG_94 | 2.85 | 2.02 | 14.02 |

|          |                |                |                 |      |      |       |
|----------|----------------|----------------|-----------------|------|------|-------|
| 4NZU.PDB | O, H_SER_31    | N, H_CYS_100C  | H, H_CYS_100C   | 2.76 | 1.91 | 5.59  |
| 4NZU.PDB | O, H_LYS_100E  | N, H_ALA_100G  | H, H_ALA_100G   | 2.86 | 2.15 | 29.42 |
| 4NZU.PDB | OH, L_TYR_36   | N, H_PHE_100H  | H, H_PHE_100H   | 2.86 | 2.04 | 13.13 |
| 4NZU.PDB | O, H_PHE_100H  | NE1, H_TRP_103 | HE1, H_TRP_103  | 2.88 | 2.03 | 28.43 |
| 4NZU.PDB | O, H_CYS_92    | N, H_GLY_104   | H, H_GLY_104    | 2.88 | 2.05 | 13.50 |
| 4NZU.PDB | OE2, H_GLU_6   | N, H_GLY_106   | H, H_GLY_106    | 2.99 | 2.21 | 21.44 |
| 4NZU.PDB | O, H_ALA_88    | N, H_VAL_109   | H, H_VAL_109    | 2.91 | 2.05 | 3.91  |
| 4NZU.PDB | OG1, H_THR_87  | N, H_VAL_111   | H, H_VAL_111    | 2.93 | 2.07 | 3.36  |
| 4NZU.PDB | O, H_VAL_112   | N, H_SER_112   | H, H_SER_112    | 2.95 | 2.14 | 16.38 |
| 4NZU.PDB | OG, H_SER_112  | N, H_ALA_114   | H, H_ALA_114    | 2.91 | 2.06 | 8.79  |
| 4NZU.PDB | O, H_PHE_148   | N, H_LYS_117   | H, H_LYS_117    | 2.88 | 2.05 | 12.81 |
| 4NZU.PDB | O, H_LYS_145   | N, H_SER_120   | H, H_SER_120    | 2.90 | 2.12 | 21.09 |
| 4NZU.PDB | O, H_LEU_143   | N, H_PHE_122   | H, H_PHE_122    | 2.87 | 2.03 | 9.52  |
| 4NZU.PDB | O, H_GLY_141   | N, H_LEU_124   | H, H_LEU_124    | 2.81 | 1.96 | 5.22  |
| 4NZU.PDB | OG, H_SER_195  | N, H_GLY_135   | H, H_GLY_135    | 2.91 | 2.20 | 29.13 |
| 4NZU.PDB | O, H_VAL_193   | N, H_ALA_138   | H, H_ALA_138    | 2.83 | 2.01 | 14.25 |
| 4NZU.PDB | O, H_VAL_191   | N, H_LEU_140   | H, H_LEU_140    | 2.93 | 2.10 | 13.71 |
| 4NZU.PDB | O, H_LEU_124   | N, H_GLY_141   | H, H_GLY_141    | 2.82 | 2.09 | 26.80 |
| 4NZU.PDB | O, H_SER_189   | N, H_CYS_142   | H, H_CYS_142    | 2.85 | 2.07 | 19.90 |
| 4NZU.PDB | O, H_PHE_122   | N, H_LEU_143   | H, H_LEU_143    | 2.81 | 1.97 | 11.58 |
| 4NZU.PDB | O, H_LEU_187   | N, H_VAL_144   | H, H_VAL_144    | 2.71 | 1.85 | 5.98  |
| 4NZU.PDB | O, H_SER_120   | N, H_LYS_145   | H, H_LYS_145    | 2.81 | 1.96 | 5.69  |
| 4NZU.PDB | O, H_LYS_117   | N, H_PHE_148   | H, H_PHE_148    | 2.88 | 2.08 | 17.45 |
| 4NZU.PDB | O, H_ASN_209   | N, H_SER_156   | H, H_SER_156    | 2.95 | 2.15 | 17.06 |
| 4NZU.PDB | OG, H_SER_189  | NE1, H_TRP_157 | HE1, H_TRP_157  | 2.92 | 1.90 | 9.04  |
| 4NZU.PDB | O, H_ILE_207   | N, H_ASN_162   | H, H_ASN_162    | 2.83 | 1.99 | 9.99  |
| 4NZU.PDB | OD1, H_ASN_209 | N, H_SER_163   | H, H_SER_163    | 2.80 | 1.99 | 15.68 |
| 4NZU.PDB | O, H_TRP_157   | N, H_GLY_164   | H, H_GLY_164    | 2.93 | 2.20 | 26.82 |
| 4NZU.PDB | O, H_VAL_190   | N, H_HIS_172   | H, H_HIS_172    | 2.83 | 2.02 | 16.48 |
| 4NZU.PDB | O, H_SER_188   | N, H_PHE_174   | H, H_PHE_174    | 2.92 | 2.06 | 3.04  |
| 4NZU.PDB | O, H_SER_186   | N, H_VAL_177   | H, H_VAL_177    | 2.90 | 2.09 | 15.20 |
| 4NZU.PDB | O, H_LEU_184   | N, H_GLN_179   | H, H_GLN_179    | 2.86 | 2.01 | 8.15  |
| 4NZU.PDB | O, H_GLN_179   | N, H_GLY_183   | H, H_GLY_183    | 2.91 | 2.06 | 7.56  |
| 4NZU.PDB | O, H_TYR_147   | N, H_TYR_185   | H, H_TYR_185    | 2.80 | 1.95 | 8.98  |
| 4NZU.PDB | O, H_VAL_144   | N, H_LEU_187   | H, H_LEU_187    | 2.87 | 2.07 | 16.93 |
| 4NZU.PDB | O, H_CYS_142   | N, H_SER_189   | H, H_SER_189    | 2.99 | 2.16 | 14.04 |
| 4NZU.PDB | O, H_HIS_172   | N, H_VAL_190   | H, H_VAL_190    | 2.85 | 2.02 | 12.23 |
| 4NZU.PDB | O, H_LEU_140   | N, H_VAL_191   | H, H_VAL_191    | 2.86 | 2.05 | 16.60 |
| 4NZU.PDB | O, H_ALA_138   | N, H_VAL_193   | H, H_VAL_193    | 2.91 | 2.09 | 14.81 |
| 4NZU.PDB | O, H_GLY_136   | N, H_SER_195   | H, H_SER_195    | 2.96 | 2.15 | 15.58 |
| 4NZU.PDB | O, H_PRO_194   | N, H_SER_197   | H, H_SER_197    | 2.90 | 2.09 | 16.91 |
| 4NZU.PDB | OH, H_TYR_206  | OG, H_BSER_197 | HG, H_BSER_197  | 2.82 | 2.05 | 15.42 |
| 4NZU.PDB | O, H_SER_197   | N, H_GLN_203   | H, H_GLN_203    | 2.89 | 2.06 | 13.09 |
| 4NZU.PDB | OD1, H_ASN_162 | N, H_ILE_207   | H, H_ILE_207    | 2.90 | 2.10 | 18.98 |
| 4NZU.PDB | O, H_LYS_221   | N, H_CYS_208   | H, H_CYS_208    | 2.94 | 2.14 | 18.10 |
| 4NZU.PDB | O, H_SER_156   | N, H_ASN_209   | H, H_ASN_209    | 2.80 | 1.94 | 7.24  |
| 4NZU.PDB | O, H_VAL_219   | N, H_VAL_210   | H, H_VAL_210    | 2.79 | 1.93 | 4.11  |
| 4NZU.PDB | O, H_THR_153   | N, H_ASN_211   | H, H_ASN_211    | 2.98 | 2.16 | 14.35 |
| 4NZU.PDB | O, H_THR_217   | N, H_HIS_212   | H, H_HIS_212    | 2.78 | 1.93 | 6.91  |
| 4NZU.PDB | O, H_VAL_210   | N, H_VAL_219   | H, H_VAL_219    | 2.89 | 2.07 | 13.72 |
| 4NZU.PDB | O, H_CYS_208   | N, H_LYS_221   | H, H_LYS_221    | 2.90 | 2.08 | 13.19 |
| 4NZU.PDB | O, H_TYR_206   | N, H_VAL_223   | H, H_VAL_223    | 2.82 | 1.97 | 6.85  |
| 4QEX.PDB | OD2, A_ASP_414 | NH2, A_ARG_349 | HH21, A_ARG_349 | 3.00 | 2.26 | 27.00 |
| 4QEX.PDB | O, A_PHE_316   | N, A_ASN_356   | H, A_ASN_356    | 2.87 | 2.04 | 13.53 |
| 4QEX.PDB | O, H_ALA_78    | N, H_CYS_22    | H, H_CYS_22     | 2.89 | 2.13 | 23.77 |
| 4QEX.PDB | O, H_ILE_51    | N, H_MET_34    | H, H_MET_34     | 2.99 | 2.24 | 24.56 |
| 4QEX.PDB | O, H_MET_34    | N, H_ILE_51    | H, H_ILE_51     | 2.88 | 2.12 | 24.11 |
| 4QEX.PDB | O, H_VAL_37    | N, H_TYR_91    | H, H_TYR_91     | 2.94 | 2.16 | 21.47 |

|          |                |                |                 |      |      |       |
|----------|----------------|----------------|-----------------|------|------|-------|
| 4QEX.PDB | OD2, B.ASP_414 | NH2, B.ARG_349 | HH21, B.ARG_349 | 2.99 | 2.26 | 27.25 |
| 4QEX.PDB | O, B.PHE_316   | N, B.ASN_356   | H, B.ASN_356    | 2.87 | 2.04 | 13.77 |
| 4QEX.PDB | O, I.ALA_78    | N, I.CYS_22    | H, I.CYS_22     | 2.89 | 2.13 | 24.05 |
| 4QEX.PDB | O, I.ILE_51    | N, I.MET_34    | H, I.MET_34     | 2.98 | 2.23 | 24.63 |
| 4QEX.PDB | O, I.TYR_91    | N, I.VAL_37    | H, I.VAL_37     | 3.00 | 2.18 | 14.72 |
| 4QEX.PDB | O, I.MET_34    | N, I.ILE_51    | H, I.ILE_51     | 2.88 | 2.13 | 24.11 |
| 4QEX.PDB | O, I.VAL_37    | N, I.TYR_91    | H, I.TYR_91     | 2.96 | 2.15 | 17.39 |
| 4WUU.PDB | OD2, A.ASP_29  | ND1, A.HIS_3   | HD1, A.HIS_3    | 2.93 | 2.13 | 17.75 |
| 4WUU.PDB | O, A.TYR_99    | N, A.TYR_7     | H, A.TYR_7      | 2.76 | 1.92 | 10.35 |
| 4WUU.PDB | O, A.VAL_25    | N, A.PHE_8     | H, A.PHE_8      | 2.96 | 2.14 | 14.63 |
| 4WUU.PDB | O, A.ARG_97    | N, A.PHE_9     | H, A.PHE_9      | 2.76 | 2.00 | 23.12 |
| 4WUU.PDB | O, A.ILE_23    | N, A.THR_10    | H, A.THR_10     | 2.77 | 1.94 | 11.62 |
| 4WUU.PDB | O, A.HIS_93    | N, A.SER_13    | H, A.SER_13     | 2.94 | 2.18 | 22.69 |
| 4WUU.PDB | OG, A.SER_38   | N, A.PHE_22    | H, A.PHE_22     | 2.99 | 2.28 | 28.95 |
| 4WUU.PDB | O, A.THR_10    | N, A.ILE_23    | H, A.ILE_23     | 2.73 | 1.91 | 14.53 |
| 4WUU.PDB | O, A.PHE_36    | N, A.ALA_24    | H, A.ALA_24     | 2.98 | 2.17 | 16.88 |
| 4WUU.PDB | O, A.PHE_8     | N, A.VAL_25    | H, A.VAL_25     | 2.92 | 2.13 | 19.23 |
| 4WUU.PDB | O, A.ARG_6     | N, A.TYR_27    | H, A.TYR_27     | 2.91 | 2.07 | 7.74  |
| 4WUU.PDB | O, A.THR_31    | N, A.VAL_28    | H, A.VAL_28     | 2.84 | 2.03 | 16.38 |
| 4WUU.PDB | O, A.SER_4     | N, A.ASP_29    | H, A.ASP_29     | 2.78 | 1.95 | 12.60 |
| 4WUU.PDB | O, A.VAL_28    | N, A.THR_31    | H, A.THR_31     | 2.84 | 1.99 | 7.07  |
| 4WUU.PDB | OE1, A.GLU_46  | NE, A.ARG_35   | HE, A.ARG_35    | 2.77 | 1.96 | 15.11 |
| 4WUU.PDB | O, A.ALA_24    | N, A.PHE_36    | H, A.PHE_36     | 2.92 | 2.14 | 20.69 |
| 4WUU.PDB | O, A.PHE_22    | N, A.SER_38    | H, A.SER_38     | 2.95 | 2.16 | 19.48 |
| 4WUU.PDB | OD1, A.ASP_37  | N, A.ASP_39    | H, A.ASP_39     | 2.77 | 1.98 | 19.65 |
| 4WUU.PDB | OE2, A.GLU_46  | OG, A.SER_42   | HG, A.SER_42    | 2.85 | 2.07 | 18.95 |
| 4WUU.PDB | O, A.ARG_35    | N, A.GLU_46    | H, A.GLU_46     | 2.99 | 2.17 | 14.81 |
| 4WUU.PDB | O, A.PHE_33    | N, A.ARG_48    | H, A.ARG_48     | 2.89 | 2.07 | 14.83 |
| 4WUU.PDB | OD2, B.ASP_53  | NE, A.ARG_48   | HE, A.ARG_48    | 2.84 | 2.13 | 29.12 |
| 4WUU.PDB | OH, A.TYR_171  | OH, A.TYR_59   | HH, A.TYR_59    | 2.71 | 1.89 | 11.34 |
| 4WUU.PDB | O, A.PRO_57    | N, A.ASP_61    | H, A.ASP_61     | 2.71 | 1.85 | 6.09  |
| 4WUU.PDB | O, A.GLU_58    | N, A.GLY_62    | H, A.GLY_62     | 2.94 | 2.16 | 20.28 |
| 4WUU.PDB | O, A.TYR_59    | N, A.GLU_63    | H, A.GLU_63     | 2.86 | 2.00 | 6.81  |
| 4WUU.PDB | O, A.TRP_60    | N, A.THR_64    | H, A.THR_64     | 2.90 | 2.08 | 14.57 |
| 4WUU.PDB | OH, E.TYR_104  | NZ, A.LYS_66   | HZ3, A.LYS_66   | 2.89 | 2.02 | 10.84 |
| 4WUU.PDB | O, A.GLU_63    | N, A.VAL_67    | H, A.VAL_67     | 2.84 | 2.02 | 14.98 |
| 4WUU.PDB | O, A.ARG_65    | N, A.ALA_69    | H, A.ALA_69     | 3.00 | 2.14 | 3.72  |
| 4WUU.PDB | O, A.LYS_68    | OG, A.SER_71   | HG, A.SER_71    | 2.82 | 2.03 | 15.69 |
| 4WUU.PDB | O, A.ALA_69    | OG1, A.THR_73  | HG1, A.THR_73   | 3.00 | 2.20 | 14.54 |
| 4WUU.PDB | O, A.HIS_70    | N, A.HIS_74    | H, A.HIS_74     | 2.95 | 2.14 | 15.71 |
| 4WUU.PDB | O, A.SER_71    | N, A.ARG_75    | H, A.ARG_75     | 2.82 | 2.00 | 14.92 |
| 4WUU.PDB | O, A.THR_73    | N, A.ASP_77    | H, A.ASP_77     | 2.79 | 1.98 | 16.13 |
| 4WUU.PDB | O, A.VAL_76    | N, A.THR_80    | H, A.THR_80     | 2.88 | 2.08 | 19.21 |
| 4WUU.PDB | O, A.ASP_77    | N, A.LEU_81    | H, A.LEU_81     | 2.80 | 2.01 | 18.94 |
| 4WUU.PDB | OXT, C.LEU_9   | OH, A.TYR_84   | HH, A.TYR_84    | 2.64 | 1.82 | 12.17 |
| 4WUU.PDB | OD2, A.ASP_137 | OH, A.TYR_85   | HH, A.TYR_85    | 2.79 | 1.98 | 13.39 |
| 4WUU.PDB | O, A.SER_13    | OG, A.SER_92   | HG, A.SER_92    | 2.55 | 1.73 | 10.54 |
| 4WUU.PDB | OG, A.SER_13   | N, A.HIS_93    | H, A.HIS_93     | 2.78 | 1.95 | 13.85 |
| 4WUU.PDB | OD1, A.ASP_119 | N, A.THR_94    | H, A.THR_94     | 2.87 | 2.10 | 22.46 |
| 4WUU.PDB | O, A.SER_11    | N, A.VAL_95    | H, A.VAL_95     | 2.78 | 1.96 | 15.83 |
| 4WUU.PDB | O, A.ALA_117   | N, A.GLN_96    | H, A.GLN_96     | 2.85 | 2.05 | 18.30 |
| 4WUU.PDB | O, B.TRP_60    | NE2, A.GLN_96  | HE22, A.GLN_96  | 2.78 | 1.93 | 8.81  |
| 4WUU.PDB | O, A.PHE_9     | N, A.ARG_97    | H, A.ARG_97     | 2.92 | 2.14 | 20.57 |
| 4WUU.PDB | O, A.GLN_115   | N, A.MET_98    | H, A.MET_98     | 2.92 | 2.09 | 12.67 |
| 4WUU.PDB | O, A.MET_5     | N, A.CYS_101   | H, A.CYS_101    | 2.91 | 2.19 | 28.90 |
| 4WUU.PDB | O, A.ARG_111   | N, A.ASP_102   | H, A.ASP_102    | 2.81 | 1.99 | 13.14 |
| 4WUU.PDB | O, A.HIS_3     | N, A.VAL_103   | H, A.VAL_103    | 2.85 | 2.00 | 5.54  |
| 4WUU.PDB | O, A.ARG_108   | N, A.GLY_104   | H, A.GLY_104    | 2.96 | 2.19 | 22.29 |



|          |                |                |                 |      |      |       |
|----------|----------------|----------------|-----------------|------|------|-------|
| 4WUU.PDB | O, A_GLY_104   | N, A_TRP_107   | H, A_TRP_107    | 2.80 | 2.02 | 20.77 |
| 4WUU.PDB | O, A_ASP_102   | N, A_LEU_110   | H, A_LEU_110    | 2.72 | 1.90 | 14.82 |
| 4WUU.PDB | O, A_MET_98    | N, A_GLN_115   | H, A_GLN_115    | 2.70 | 1.87 | 13.07 |
| 4WUU.PDB | O, A_ILE_124   | N, A_TYR_116   | H, A_TYR_116    | 2.79 | 1.93 | 4.70  |
| 4WUU.PDB | OE1, A_GLN_87  | OH, A_TYR_118  | HH, A_TYR_118   | 2.94 | 2.13 | 11.47 |
| 4WUU.PDB | O, A_THR_94    | N, A_ASP_119   | H, A_ASP_119    | 2.71 | 1.87 | 9.67  |
| 4WUU.PDB | OG1, A_THR_143 | OH, A_TYR_123  | HH, A_TYR_123   | 2.74 | 1.95 | 17.32 |
| 4WUU.PDB | O, A_THR_134   | N, A_ALA_125   | H, A_ALA_125    | 2.79 | 2.07 | 26.99 |
| 4WUU.PDB | O, A_ALA_125   | N, A_THR_134   | H, A_THR_134    | 2.73 | 1.89 | 10.54 |
| 4WUU.PDB | O, A_ALA_140   | N, A_LYS_144   | H, A_LYS_144    | 2.66 | 1.82 | 11.78 |
| 4WUU.PDB | O, C_LEU_9     | NZ, A_LYS_146  | HZ3, A_LYS_146  | 2.76 | 1.90 | 13.68 |
| 4WUU.PDB | O, C_TYR_8     | NE1, A_TRP_147 | HE1, A_TRP_147  | 2.81 | 1.99 | 15.97 |
| 4WUU.PDB | O, A_LYS_146   | N, A_ALA_150   | H, A_ALA_150    | 2.92 | 2.13 | 20.13 |
| 4WUU.PDB | O, A_TRP_147   | N, A_VAL_152   | H, A_VAL_152    | 2.94 | 2.08 | 3.18  |
| 4WUU.PDB | O, A_VAL_152   | N, A_LEU_156   | H, A_LEU_156    | 2.97 | 2.15 | 15.29 |
| 4WUU.PDB | O, A_ALA_153   | N, A_ARG_157   | H, A_ARG_157    | 2.89 | 2.04 | 9.86  |
| 4WUU.PDB | O, C_ARG_1     | OH, A_TYR_159  | HH, A_TYR_159   | 2.86 | 2.02 | 6.39  |
| 4WUU.PDB | O, A_LEU_156   | N, A_LEU_160   | H, A_LEU_160    | 2.72 | 1.88 | 9.29  |
| 4WUU.PDB | O, A_TYR_159   | N, A_CYS_164   | H, A_CYS_164    | 2.62 | 1.77 | 6.61  |
| 4WUU.PDB | O, A_CYS_164   | N, A_LEU_168   | H, A_LEU_168    | 2.93 | 2.10 | 13.84 |
| 4WUU.PDB | O, A_VAL_165   | N, A_ARG_169   | H, A_ARG_169    | 2.89 | 2.05 | 8.58  |
| 4WUU.PDB | O, A_TRP_107   | NE, A_ARG_169  | HE, A_ARG_169   | 2.99 | 2.28 | 29.58 |
| 4WUU.PDB | O, A_TRP_107   | NH2, A_ARG_169 | HH21, A_ARG_169 | 2.90 | 2.19 | 28.46 |
| 4WUU.PDB | OE2, A_GLU_55  | NE, A_ARG_170  | HE, A_ARG_170   | 2.89 | 2.03 | 3.82  |
| 4WUU.PDB | O, A_TRP_167   | N, A_TYR_171   | H, A_TYR_171    | 2.90 | 2.05 | 5.21  |
| 4WUU.PDB | O, A_LEU_168   | N, A_LEU_172   | H, A_LEU_172    | 2.90 | 2.13 | 22.30 |
| 4WUU.PDB | O, A_ARG_170   | N, A_ASN_174   | H, A_ASN_174    | 2.98 | 2.15 | 11.94 |
| 4WUU.PDB | O, A_TYR_171   | N, A_GLY_175   | H, A_GLY_175    | 2.88 | 2.04 | 8.17  |
| 4WUU.PDB | O, A_GLY_175   | N, A_LEU_179   | H, A_LEU_179    | 2.67 | 1.82 | 8.19  |
| 4WUU.PDB | O, A_THR_178   | NH2, A_ARG_181 | HH21, A_ARG_181 | 2.71 | 1.91 | 17.26 |
| 4WUU.PDB | O, A_HIS_188   | N, A_TRP_204   | H, A_TRP_204    | 2.78 | 1.93 | 9.00  |
| 4WUU.PDB | O, A_LYS_186   | N, A_LEU_206   | H, A_LEU_206    | 2.86 | 2.04 | 15.38 |
| 4WUU.PDB | O, A_ASP_183   | N, A_TYR_209   | H, A_TYR_209    | 2.76 | 1.98 | 20.63 |
| 4WUU.PDB | O, A_ALA_245   | NE1, A_TRP_217 | HE1, A_TRP_217  | 2.84 | 2.09 | 23.84 |
| 4WUU.PDB | O, A_GLN_242   | N, A_ARG_234   | H, A_ARG_234    | 2.84 | 2.02 | 15.28 |
| 4WUU.PDB | OE1, B_GLN_8   | NH1, A_ARG_234 | HH11, A_ARG_234 | 2.79 | 2.07 | 27.49 |
| 4WUU.PDB | OE1, A_GLN_242 | NH2, A_ARG_234 | HH21, A_ARG_234 | 3.00 | 2.27 | 27.42 |
| 4WUU.PDB | O, A_THR_240   | N, A_ALA_236   | H, A_ALA_236    | 2.92 | 2.07 | 7.39  |
| 4WUU.PDB | OD1, A_ASP_238 | OG1, A_THR_240 | HG1, A_THR_240  | 2.61 | 1.79 | 8.96  |
| 4WUU.PDB | O, A_ARG_234   | N, A_GLN_242   | H, A_GLN_242    | 2.75 | 1.97 | 20.96 |
| 4WUU.PDB | O, B_HIS_31    | N, B_ARG_3     | H, B_ARG_3      | 2.86 | 2.03 | 11.56 |
| 4WUU.PDB | OG1, B_THR_86  | OG1, B_THR_4   | HG1, B_THR_4    | 2.90 | 2.14 | 21.40 |
| 4WUU.PDB | O, B_SER_28    | N, B_LYS_6     | H, B_LYS_6      | 2.87 | 2.05 | 15.60 |
| 4WUU.PDB | O, A_PRO_235   | OH, B_TYR_10   | HH, B_TYR_10    | 2.61 | 1.79 | 11.75 |
| 4WUU.PDB | O, B_PHE_22    | N, B_ARG_12    | H, B_ARG_12     | 2.79 | 2.03 | 23.74 |
| 4WUU.PDB | OD1, B_ASN_21  | N, B_HIS_13    | H, B_HIS_13     | 2.89 | 2.04 | 5.58  |
| 4WUU.PDB | O, B_PRO_72    | N, B_GLY_18    | H, B_GLY_18     | 2.92 | 2.11 | 17.66 |
| 4WUU.PDB | O, B_GLU_16    | N, B_LYS_19    | H, B_LYS_19     | 2.97 | 2.20 | 22.07 |
| 4WUU.PDB | O, B_PHE_70    | N, B_ASN_21    | H, B_ASN_21     | 2.81 | 2.00 | 16.15 |
| 4WUU.PDB | O, B_HIS_13    | ND2, B_ASN_21  | HD21, B_ASN_21  | 2.56 | 1.73 | 12.09 |
| 4WUU.PDB | OD1, B_ASN_21  | N, B_PHE_22    | H, B_PHE_22     | 2.97 | 2.25 | 28.82 |
| 4WUU.PDB | O, B_THR_68    | N, B_LEU_23    | H, B_LEU_23     | 2.82 | 1.98 | 11.92 |
| 4WUU.PDB | O, B_TYR_10    | N, B_ASN_24    | H, B_ASN_24     | 2.72 | 1.90 | 14.68 |
| 4WUU.PDB | O, A_ALA_236   | ND2, B_ASN_24  | HD21, B_ASN_24  | 2.81 | 2.05 | 22.96 |
| 4WUU.PDB | O, B_TYR_66    | N, B_CYS_25    | H, B_CYS_25     | 2.71 | 1.87 | 10.19 |
| 4WUU.PDB | O, B_GLN_8     | N, B_TYR_26    | H, B_TYR_26     | 2.86 | 2.05 | 15.75 |
| 4WUU.PDB | OE1, A_GLU_232 | OH, B_TYR_26   | HH, B_TYR_26    | 2.95 | 2.14 | 13.27 |
| 4WUU.PDB | O, B_LEU_64    | N, B_VAL_27    | H, B_VAL_27     | 2.92 | 2.11 | 17.06 |

|          |                |               |                |      |      |       |
|----------|----------------|---------------|----------------|------|------|-------|
| 4WUU.PDB | O, B_LYS_6     | N, B_SER_28   | H, B_SER_28    | 2.97 | 2.17 | 19.07 |
| 4WUU.PDB | O, B_ARG_3     | N, B_HIS_31   | H, B_HIS_31    | 2.97 | 2.16 | 15.90 |
| 4WUU.PDB | O, B_GLU_44    | N, B_LYS_41   | H, B_LYS_41    | 2.88 | 2.07 | 16.59 |
| 4WUU.PDB | O, B_GLU_77    | N, B_ASN_42   | H, B_ASN_42    | 2.51 | 1.66 | 6.56  |
| 4WUU.PDB | OD1, B_ASP_38  | NE, B_ARG_45  | HE, B_ARG_45   | 2.54 | 1.82 | 27.34 |
| 4WUU.PDB | O, B_LEU_65    | N, B_SER_52   | H, B_SER_52    | 2.79 | 2.01 | 20.88 |
| 4WUU.PDB | O, B_SER_61    | N, B_SER_57   | H, B_SER_57    | 2.89 | 2.12 | 21.85 |
| 4WUU.PDB | O, B_SER_57    | N, B_TRP_60   | H, B_TRP_60    | 2.99 | 2.16 | 14.14 |
| 4WUU.PDB | O, B_PHE_30    | N, B_PHE_62   | H, B_PHE_62    | 2.98 | 2.14 | 10.04 |
| 4WUU.PDB | OG, B_SER_52   | N, B_LEU_65   | H, B_LEU_65    | 2.96 | 2.16 | 18.95 |
| 4WUU.PDB | O, B_CYS_25    | N, B_TYR_66   | H, B_TYR_66    | 2.90 | 2.12 | 19.74 |
| 4WUU.PDB | OD1, B_ASN_42  | N, B_GLU_77   | H, B_GLU_77    | 2.71 | 1.88 | 11.42 |
| 4WUU.PDB | O, B_ASP_38    | N, B_ARG_81   | H, B_ARG_81    | 2.83 | 1.98 | 5.14  |
| 4WUU.PDB | O, B_LYS_91    | N, B_VAL_82   | H, B_VAL_82    | 2.78 | 1.94 | 11.03 |
| 4WUU.PDB | O, B_GLU_36    | N, B_ASN_83   | H, B_ASN_83    | 2.81 | 1.99 | 15.23 |
| 4WUU.PDB | O, B_PRO_32    | NE2, B_HIS_84 | HE2, B_HIS_84  | 2.79 | 1.94 | 7.34  |
| 4WUU.PDB | ND1, B_HIS_84  | OG1, B_THR_86 | HG1, B_THR_86  | 2.95 | 2.20 | 22.57 |
| 4WUU.PDB | O, B_CYS_80    | N, B_VAL_93   | H, B_VAL_93    | 2.90 | 2.07 | 14.26 |
| 4WUU.PDB | O, B_TYR_78    | N, B_TRP_95   | H, B_TRP_95    | 2.84 | 2.01 | 11.88 |
| 4WUU.PDB | OH, A_TYR_171  | N, C_ARG_1    | H1, C_ARG_1    | 2.79 | 2.03 | 25.96 |
| 4WUU.PDB | OE2, A_GLU_63  | N, C_MET_2    | H, C_MET_2     | 2.90 | 2.09 | 16.21 |
| 4WUU.PDB | O, D_TYR_87    | NE2, D_GLN_6  | HE22, D_GLN_6  | 2.71 | 1.90 | 15.76 |
| 4WUU.PDB | O, D_LYS_106   | N, D_ALA_10   | H, D_ALA_10    | 2.90 | 2.14 | 24.22 |
| 4WUU.PDB | OE1, D_GLN_16  | N, D_THR_13   | H, D_THR_13    | 2.67 | 1.88 | 19.99 |
| 4WUU.PDB | O, D_LEU_74    | N, D_ILE_20   | H, D_ILE_20    | 2.74 | 1.99 | 24.99 |
| 4WUU.PDB | O, D_THR_5     | N, D_SER_23   | H, D_SER_23    | 2.85 | 2.04 | 15.21 |
| 4WUU.PDB | O, D_THR_70    | N, D_GLY_24   | H, D_GLY_24    | 2.81 | 1.97 | 11.14 |
| 4WUU.PDB | OD1, D_ASN_28  | N, D_SER_25   | H, D_SER_25    | 2.82 | 2.03 | 19.32 |
| 4WUU.PDB | OD1, D_ASN_28  | N, D_ILE_29   | H, D_ILE_29    | 2.67 | 1.86 | 15.71 |
| 4WUU.PDB | O, D_SER_25    | N, D_GLY_30   | H, D_GLY_30    | 2.74 | 2.02 | 28.00 |
| 4WUU.PDB | OD1, D_ASN_52  | N, D_VAL_34   | H, D_VAL_34    | 2.65 | 1.82 | 10.44 |
| 4WUU.PDB | O, D_ILE_49    | N, D_TRP_36   | H, D_TRP_36    | 2.74 | 1.90 | 10.94 |
| 4WUU.PDB | O, D_TYR_88    | N, D_TYR_37   | H, D_TYR_37    | 2.74 | 1.93 | 16.60 |
| 4WUU.PDB | O, D_LYS_46    | N, D_GLN_38   | H, D_GLN_38    | 2.85 | 2.06 | 19.88 |
| 4WUU.PDB | O, D_ASP_86    | N, D_GLN_39   | H, D_GLN_39    | 2.86 | 2.07 | 20.09 |
| 4WUU.PDB | OE1, E_GLN_39  | NE2, D_GLN_39 | HE22, D_GLN_39 | 2.94 | 2.18 | 23.53 |
| 4WUU.PDB | O, D_GLN_38    | N, D_LYS_46   | H, D_LYS_46    | 2.66 | 1.91 | 24.48 |
| 4WUU.PDB | O, D_TRP_36    | N, D_LEU_48   | H, D_LEU_48    | 2.81 | 1.96 | 9.20  |
| 4WUU.PDB | O, D_VAL_34    | N, D_ASN_52   | H, D_ASN_52    | 2.71 | 1.91 | 17.51 |
| 4WUU.PDB | O, D_TYR_50    | N, D_GLN_54   | H, D_GLN_54    | 2.84 | 2.03 | 17.63 |
| 4WUU.PDB | OD2, D_ASP_83  | NE, D_ARG_62  | HE, D_ARG_62   | 2.79 | 2.08 | 28.83 |
| 4WUU.PDB | OD1, D_ASP_83  | NH2, D_ARG_62 | HH21, D_ARG_62 | 2.86 | 2.00 | 2.74  |
| 4WUU.PDB | O, D_SER_73    | N, D_SER_66   | H, D_SER_66    | 2.98 | 2.20 | 21.24 |
| 4WUU.PDB | O, D_SER_71    | N, D_SER_68   | H, D_SER_68    | 2.91 | 2.13 | 20.74 |
| 4WUU.PDB | O, D_CYS_22    | N, D_ALA_72   | H, D_ALA_72    | 2.80 | 1.97 | 12.36 |
| 4WUU.PDB | O, D_SER_64    | N, D_ALA_75   | H, D_ALA_75    | 2.67 | 1.84 | 13.24 |
| 4WUU.PDB | O, D_ARG_62    | N, D_SER_77   | H, D_SER_77    | 2.87 | 2.05 | 15.21 |
| 4WUU.PDB | O, D_GLN_16    | N, D_GLY_78   | H, D_GLY_78    | 2.83 | 2.06 | 22.13 |
| 4WUU.PDB | O, D_GLN_16    | N, D_LEU_79   | H, D_LEU_79    | 2.99 | 2.26 | 27.65 |
| 4WUU.PDB | O, D_GLY_78    | NE2, D_GLN_80 | HE21, D_GLN_80 | 2.75 | 1.96 | 20.10 |
| 4WUU.PDB | O, D_THR_105   | N, D_TYR_87   | H, D_TYR_87    | 2.90 | 2.13 | 23.52 |
| 4WUU.PDB | O, D_ASP_83    | OH, D_TYR_87  | HH, D_TYR_87   | 2.68 | 1.84 | 6.34  |
| 4WUU.PDB | O, D_TYR_37    | N, D_TYR_88   | H, D_TYR_88    | 2.89 | 2.07 | 13.58 |
| 4WUU.PDB | OE1, D_GLN_6   | N, D_CYS_89   | H, D_CYS_89    | 2.99 | 2.19 | 19.58 |
| 4WUU.PDB | O, D_GLY_98    | N, D_ASP_93   | H, D_ASP_93    | 2.75 | 1.89 | 0.36  |
| 4WUU.PDB | OD1, E_ASP_106 | NE1, D_TRP_99 | HE1, D_TRP_99  | 2.95 | 2.19 | 24.35 |
| 4WUU.PDB | O, D_ALA_91    | N, D_VAL_100  | H, D_VAL_100   | 2.97 | 2.13 | 10.77 |
| 4WUU.PDB | O, D_TYR_87    | N, D_THR_105  | H, D_THR_105   | 2.86 | 2.16 | 29.98 |

|          |                |                |                |      |      |       |
|----------|----------------|----------------|----------------|------|------|-------|
| 4WUU.PDB | O, D_PRO_7     | OG1, D_THR_105 | HG1, D_THR_105 | 2.43 | 1.60 | 5.47  |
| 4WUU.PDB | O, D_PRO_8     | N, D_LYS_106   | H, D_LYS_106   | 2.54 | 1.73 | 16.46 |
| 4WUU.PDB | O, D_ALA_10    | N, D_THR_108   | H, D_THR_108   | 2.87 | 2.05 | 14.29 |
| 4WUU.PDB | O, D_VAL_137   | N, D_PHE_122   | H, D_PHE_122   | 2.93 | 2.13 | 18.73 |
| 4WUU.PDB | O, D_ILE_140   | OG, D_SER_141  | HG, D_SER_141  | 2.39 | 1.64 | 20.74 |
| 4WUU.PDB | O, D_CYS_138   | N, D_SER_180   | H, D_SER_180   | 2.83 | 2.03 | 17.76 |
| 4WUU.PDB | OG1, D_THR_165 | OG, D_SER_180  | HG, D_SER_180  | 3.00 | 2.24 | 22.62 |
| 4WUU.PDB | O, D_GLU_164   | N, D_TYR_181   | H, D_TYR_181   | 2.94 | 2.09 | 6.97  |
| 4WUU.PDB | O, E_LYS_23    | N, E_VAL_5     | H, E_VAL_5     | 2.91 | 2.08 | 12.06 |
| 4WUU.PDB | O, E_TYR_94    | NE2, E_GLN_6   | HE22, E_GLN_6  | 2.66 | 1.82 | 10.49 |
| 4WUU.PDB | O, E_LEU_116   | N, E_GLU_10    | H, E_GLU_10    | 2.74 | 1.93 | 15.88 |
| 4WUU.PDB | O, E_THR_118   | N, E_LYS_12    | H, E_LYS_12    | 2.72 | 1.97 | 24.94 |
| 4WUU.PDB | O, E_LEU_81    | N, E_ILE_20    | H, E_ILE_20    | 2.99 | 2.27 | 27.77 |
| 4WUU.PDB | O, E_ALA_79    | N, E_CYS_22    | H, E_CYS_22    | 2.79 | 2.05 | 26.43 |
| 4WUU.PDB | O, E_VAL_5     | N, E_LYS_23    | H, E_LYS_23    | 2.85 | 2.00 | 7.51  |
| 4WUU.PDB | O, E_SER_77    | N, E_GLY_24    | H, E_GLY_24    | 2.96 | 2.13 | 14.07 |
| 4WUU.PDB | O, E_ALA_97    | N, E_SER_35    | H, E_SER_35    | 2.86 | 2.01 | 6.50  |
| 4WUU.PDB | O, E_TYR_95    | N, E_VAL_37    | H, E_VAL_37    | 2.60 | 1.79 | 15.34 |
| 4WUU.PDB | O, E_GLU_46    | N, E_ARG_38    | H, E_ARG_38    | 2.74 | 1.93 | 15.84 |
| 4WUU.PDB | O, E_MET_93    | N, E_GLN_39    | H, E_GLN_39    | 2.93 | 2.14 | 19.90 |
| 4WUU.PDB | OE1, D_GLN_39  | NE2, E_GLN_39  | HE22, E_GLN_39 | 2.55 | 1.73 | 14.29 |
| 4WUU.PDB | O, E_MET_40    | N, E_LYS_43    | H, E_LYS_43    | 2.92 | 2.08 | 8.65  |
| 4WUU.PDB | O, E_ARG_38    | N, E_GLU_46    | H, E_GLU_46    | 2.81 | 2.04 | 21.42 |
| 4WUU.PDB | O, E_TRP_36    | N, E_MET_48    | H, E_MET_48    | 2.85 | 2.01 | 9.52  |
| 4WUU.PDB | O, E_THR_59    | N, E_ARG_50    | H, E_ARG_50    | 2.92 | 2.11 | 16.22 |
| 4WUU.PDB | OE2, A_GLU_166 | NH2, E_ARG_50  | HH22, E_ARG_50 | 2.67 | 1.88 | 18.69 |
| 4WUU.PDB | O, E_ILE_34    | N, E_VAL_51    | H, E_VAL_51    | 2.91 | 2.10 | 17.37 |
| 4WUU.PDB | O, E_TYR_57    | N, E_ASP_52    | H, E_ASP_52    | 2.77 | 1.94 | 11.78 |
| 4WUU.PDB | OD1, E_ASP_52  | N, E_GLY_54    | H, E_GLY_54    | 2.93 | 2.22 | 29.55 |
| 4WUU.PDB | O, E_ILE_70    | OG, E_SER_58   | HG, E_SER_58   | 2.56 | 1.77 | 16.65 |
| 4WUU.PDB | O, E_MET_48    | N, E_SER_61    | H, E_SER_61    | 3.00 | 2.19 | 16.66 |
| 4WUU.PDB | O, E_SER_61    | N, E_PHE_64    | H, E_PHE_64    | 2.90 | 2.08 | 14.75 |
| 4WUU.PDB | O, E_GLN_82    | N, E_THR_69    | H, E_THR_69    | 2.86 | 2.06 | 17.27 |
| 4WUU.PDB | OH, E_TYR_60   | N, E_ILE_70    | H, E_ILE_70    | 2.95 | 2.13 | 13.50 |
| 4WUU.PDB | O, E_THR_78    | N, E_ASP_73    | H, E_ASP_73    | 2.72 | 1.95 | 22.66 |
| 4WUU.PDB | OD1, E_ASP_73  | OG, E_SER_75   | HG, E_SER_75   | 2.93 | 2.16 | 19.72 |
| 4WUU.PDB | O, E_CYS_22    | N, E_ALA_79    | H, E_ALA_79    | 2.74 | 1.89 | 8.78  |
| 4WUU.PDB | O, E_SER_71    | N, E_TYR_80    | H, E_TYR_80    | 2.97 | 2.17 | 17.59 |
| 4WUU.PDB | O, E_THR_69    | N, E_GLN_82    | H, E_GLN_82    | 2.93 | 2.22 | 28.66 |
| 4WUU.PDB | O, E_LEU_18    | N, E_TRP_83    | H, E_TRP_83    | 2.80 | 1.95 | 10.15 |
| 4WUU.PDB | OD2, E_ASP_90  | N, E_LYS_87    | H, E_LYS_87    | 2.81 | 1.97 | 9.45  |
| 4WUU.PDB | O, E_THR_115   | N, E_TYR_94    | H, E_TYR_94    | 2.93 | 2.16 | 22.48 |
| 4WUU.PDB | O, E_ASP_90    | OH, E_TYR_94   | HH, E_TYR_94   | 2.62 | 1.78 | 4.11  |
| 4WUU.PDB | O, E_VAL_37    | N, E_TYR_95    | H, E_TYR_95    | 2.78 | 2.01 | 21.75 |
| 4WUU.PDB | O, E_PRO_110   | N, E_ARG_98    | H, E_ARG_98    | 2.98 | 2.16 | 15.09 |
| 4WUU.PDB | OE1, A_GLU_63  | OH, E_TYR_104  | HH, E_TYR_104  | 2.59 | 1.76 | 7.82  |
| 4WUU.PDB | OE1, A_GLU_58  | N, E_TYR_105   | H, E_TYR_105   | 2.88 | 2.05 | 12.40 |
| 4WUU.PDB | OE1, A_GLU_55  | OH, E_TYR_105  | HH, E_TYR_105  | 2.47 | 1.79 | 29.86 |
| 4WUU.PDB | O, E_CYS_96    | N, E_GLY_112   | H, E_GLY_112   | 2.73 | 1.88 | 6.91  |
| 4WUU.PDB | O, E_SER_7     | OG1, E_THR_115 | HG1, E_THR_115 | 2.87 | 2.12 | 21.80 |
| 4WUU.PDB | O, E_ALA_92    | N, E_VAL_117   | H, E_VAL_117   | 2.94 | 2.09 | 9.12  |
| 4WUU.PDB | O, E_GLU_10    | N, E_THR_118   | H, E_THR_118   | 2.81 | 2.08 | 26.12 |
| 4WUU.PDB | OG1, E_THR_91  | N, E_VAL_119   | H, E_VAL_119   | 2.69 | 1.92 | 22.07 |
| 4WUU.PDB | O, E_SER_188   | N, E_CYS_148   | H, E_CYS_148   | 2.84 | 2.07 | 21.15 |
| 4WUU.PDB | O, E_PHE_130   | N, E_LEU_149   | H, E_LEU_149   | 2.81 | 2.09 | 28.03 |
| 4WUU.PDB | O, E_TYR_184   | N, E_TYR_153   | H, E_TYR_153   | 2.99 | 2.17 | 14.59 |
| 4WUU.PDB | OE1, E_GLU_156 | OH, E_TYR_153  | HH, E_TYR_153  | 2.97 | 2.18 | 16.08 |
| 4WUU.PDB | O, E_LYS_125   | N, E_PHE_154   | H, E_PHE_154   | 2.79 | 1.96 | 12.82 |

|          |                |                |                |      |      |       |
|----------|----------------|----------------|----------------|------|------|-------|
| 4WUU.PDB | O, E_TYR_153   | N, E_TYR_184   | H, E_TYR_184   | 2.70 | 1.85 | 7.96  |
| 4Z0X.PDB | O, A_ASP_25    | OH, A_TYR_2    | HH, A_TYR_2    | 2.80 | 1.97 | 6.75  |
| 4Z0X.PDB | O, A_SER_23    | N, A_THR_5     | H, A_THR_5     | 2.85 | 2.02 | 14.04 |
| 4Z0X.PDB | OG1, A_THR_101 | NE2, A_GLN_6   | HE21, A_GLN_6  | 2.98 | 2.23 | 24.64 |
| 4Z0X.PDB | O, A_TYR_85    | NE2, A_GLN_6   | HE22, A_GLN_6  | 2.80 | 1.95 | 8.09  |
| 4Z0X.PDB | O, A_THR_104   | N, A_VAL_12    | H, A_VAL_12    | 2.52 | 1.67 | 7.35  |
| 4Z0X.PDB | OG1, A_THR_77  | N, A_GLY_15    | H, A_GLY_15    | 2.67 | 1.88 | 19.17 |
| 4Z0X.PDB | OE1, A_GLN_16  | OG1, A_THR_17  | HG1, A_THR_17  | 2.97 | 2.23 | 24.46 |
| 4Z0X.PDB | O, A_LEU_72    | N, A_ILE_20    | H, A_ILE_20    | 2.77 | 1.96 | 17.57 |
| 4Z0X.PDB | O, A_ALA_70    | N, A_CYS_22    | H, A_CYS_22    | 2.77 | 1.99 | 21.67 |
| 4Z0X.PDB | O, A_THR_5     | N, A_SER_23    | H, A_SER_23    | 2.81 | 2.00 | 16.58 |
| 4Z0X.PDB | O, A_ASN_68    | N, A_GLY_24    | H, A_GLY_24    | 2.89 | 2.08 | 17.57 |
| 4Z0X.PDB | O, A_LEU_27    | N, A_LYS_30    | H, A_LYS_30    | 2.84 | 2.00 | 9.85  |
| 4Z0X.PDB | OD1, A_ASP_50  | N, A_VAL_32    | H, A_VAL_32    | 2.87 | 2.04 | 13.49 |
| 4Z0X.PDB | O, A_LEU_47    | N, A_TRP_34    | H, A_TRP_34    | 2.79 | 1.98 | 15.57 |
| 4Z0X.PDB | O, A_TYR_86    | N, A_TYR_35    | H, A_TYR_35    | 2.82 | 2.01 | 16.09 |
| 4Z0X.PDB | OE1, A_GLN_88  | OH, A_TYR_35   | HH, A_TYR_35   | 2.99 | 2.19 | 16.02 |
| 4Z0X.PDB | O, A_VAL_44    | N, A_GLN_36    | H, A_GLN_36    | 2.60 | 1.77 | 13.39 |
| 4Z0X.PDB | O, A_ASP_84    | N, A_GLN_37    | H, A_GLN_37    | 2.88 | 2.08 | 17.37 |
| 4Z0X.PDB | OE1, B_GLN_64  | NE2, A_GLN_37  | HE22, A_GLN_37 | 2.75 | 1.99 | 23.41 |
| 4Z0X.PDB | O, A_GLN_36    | N, A_VAL_44    | H, A_VAL_44    | 2.70 | 1.89 | 16.44 |
| 4Z0X.PDB | O, A_TRP_34    | N, A_VAL_46    | H, A_VAL_46    | 2.99 | 2.14 | 7.42  |
| 4Z0X.PDB | O, A_LYS_52    | N, A_TYR_48    | H, A_TYR_48    | 2.81 | 1.99 | 14.31 |
| 4Z0X.PDB | O, A_VAL_32    | N, A_ASP_50    | H, A_ASP_50    | 2.74 | 1.91 | 13.42 |
| 4Z0X.PDB | O, A_GLN_49    | N, A_SER_51    | H, A_SER_51    | 2.75 | 2.01 | 26.59 |
| 4Z0X.PDB | O, A_TYR_48    | N, A_LYS_52    | H, A_LYS_52    | 2.96 | 2.19 | 22.52 |
| 4Z0X.PDB | O, A_PHE_61    | NE, A_ARG_53   | HE, A_ARG_53   | 2.38 | 1.60 | 20.12 |
| 4Z0X.PDB | OD2, A_ASP_81  | NH1, A_ARG_60  | HH12, A_ARG_60 | 2.72 | 1.91 | 16.22 |
| 4Z0X.PDB | O, A_THR_73    | N, A_SER_62    | H, A_SER_62    | 2.83 | 2.01 | 14.05 |
| 4Z0X.PDB | O, A_THR_69    | N, A_SER_66    | H, A_SER_66    | 2.92 | 2.06 | 6.16  |
| 4Z0X.PDB | O, A_SER_66    | N, A_THR_69    | H, A_THR_69    | 2.80 | 1.94 | 3.16  |
| 4Z0X.PDB | OD1, A_ASN_68  | OG1, A_THR_69  | HG1, A_THR_69  | 2.91 | 2.09 | 9.92  |
| 4Z0X.PDB | O, A_CYS_22    | N, A_ALA_70    | H, A_ALA_70    | 2.78 | 1.96 | 14.70 |
| 4Z0X.PDB | O, A_SER_64    | N, A_THR_71    | H, A_THR_71    | 2.92 | 2.10 | 14.49 |
| 4Z0X.PDB | O, A_ILE_20    | N, A_LEU_72    | H, A_LEU_72    | 2.78 | 1.96 | 14.72 |
| 4Z0X.PDB | O, A_SER_62    | N, A_THR_73    | H, A_THR_73    | 2.73 | 1.87 | 2.53  |
| 4Z0X.PDB | O, A_ALA_18    | N, A_ILE_74    | H, A_ILE_74    | 2.71 | 1.87 | 12.36 |
| 4Z0X.PDB | O, A_ARG_60    | N, A_SER_75    | H, A_SER_75    | 2.66 | 1.92 | 25.71 |
| 4Z0X.PDB | O, A_GLN_78    | N, A_ASP_81    | H, A_ASP_81    | 2.82 | 2.02 | 19.19 |
| 4Z0X.PDB | O, A_GLN_37    | N, A_ASP_84    | H, A_ASP_84    | 2.80 | 1.95 | 9.61  |
| 4Z0X.PDB | O, A_THR_101   | N, A_TYR_85    | H, A_TYR_85    | 2.95 | 2.11 | 9.72  |
| 4Z0X.PDB | O, A_ASP_81    | OH, A_TYR_85   | HH, A_TYR_85   | 2.69 | 1.90 | 17.09 |
| 4Z0X.PDB | O, B_GLY_129   | NE2, A_GLN_88  | HE22, A_GLN_88 | 2.63 | 1.87 | 22.97 |
| 4Z0X.PDB | O, B_GLY_129   | NE1, A_TRP_90  | HE1, A_TRP_90  | 2.96 | 2.14 | 15.73 |
| 4Z0X.PDB | O, A_ALA_94    | N, A_ASP_91    | H, A_ASP_91    | 2.88 | 2.04 | 11.61 |
| 4Z0X.PDB | OH, C_TYR_443  | N, A_SER_93    | H, A_SER_93    | 2.99 | 2.17 | 13.42 |
| 4Z0X.PDB | O, A_ALA_89    | N, A_VAL_96    | H, A_VAL_96    | 2.88 | 2.05 | 11.58 |
| 4Z0X.PDB | O, A_CYS_87    | N, A_GLY_98    | H, A_GLY_98    | 2.99 | 2.16 | 12.80 |
| 4Z0X.PDB | O, A_TYR_85    | N, A_THR_101   | H, A_THR_101   | 2.96 | 2.16 | 18.49 |
| 4Z0X.PDB | O, A_PRO_7     | OG1, A_THR_101 | HG1, A_THR_101 | 2.61 | 1.78 | 9.78  |
| 4Z0X.PDB | O, A_PRO_8     | N, A_LYS_102   | H, A_LYS_102   | 2.94 | 2.08 | 5.27  |
| 4Z0X.PDB | O, A_ALA_83    | N, A_LEU_103   | H, A_LEU_103   | 2.90 | 2.08 | 13.84 |
| 4Z0X.PDB | O, A_VAL_10    | N, A_THR_104   | H, A_THR_104   | 2.88 | 2.05 | 13.22 |
| 4Z0X.PDB | O, A_VAL_12    | N, A_LEU_106   | H, A_LEU_106   | 2.44 | 1.64 | 16.67 |
| 4Z0X.PDB | O, B_LEU_139   | N, B_GLU_35    | H, B_GLU_35    | 2.78 | 1.95 | 12.53 |
| 4Z0X.PDB | O, B_LEU_111   | N, B_GLY_40    | H, B_GLY_40    | 2.87 | 2.06 | 15.69 |
| 4Z0X.PDB | O, B_LYS_38    | N, B_SER_41    | H, B_SER_41    | 2.91 | 2.07 | 11.45 |
| 4Z0X.PDB | O, B_LYS_38    | OG, B_SER_41   | HG, B_SER_41   | 2.46 | 1.70 | 19.33 |

|          |                |                |                |      |      |       |
|----------|----------------|----------------|----------------|------|------|-------|
| 4Z0X.PDB | OE2, B_GLU_107 | OG, B_SER_42   | HG, B_SER_42   | 2.96 | 2.17 | 17.40 |
| 4Z0X.PDB | O, B_MET_106   | N, B_VAL_45    | H, B_VAL_45    | 2.73 | 1.90 | 11.31 |
| 4Z0X.PDB | OE1, B_GLN_31  | N, B_SER_46    | H, B_SER_46    | 2.95 | 2.11 | 10.80 |
| 4Z0X.PDB | OE1, B_GLN_31  | OG, B_SER_46   | HG, B_SER_46   | 2.75 | 1.93 | 11.18 |
| 4Z0X.PDB | O, B_ALA_104   | N, B_CYS_47    | H, B_CYS_47    | 2.48 | 1.72 | 23.24 |
| 4Z0X.PDB | O, B_PHE_76    | N, B_ILE_59    | H, B_ILE_59    | 2.75 | 1.91 | 10.64 |
| 4Z0X.PDB | O, B_ALA_122   | N, B_THR_60    | H, B_THR_60    | 2.78 | 2.00 | 20.86 |
| 4Z0X.PDB | O, B_GLY_74    | N, B_TRP_61    | H, B_TRP_61    | 2.88 | 2.03 | 5.31  |
| 4Z0X.PDB | O, B_TYR_120   | N, B_VAL_62    | H, B_VAL_62    | 2.96 | 2.12 | 9.50  |
| 4Z0X.PDB | OE2, B_GLU_71  | NE, B_ARG_63   | HE, B_ARG_63   | 2.78 | 1.94 | 9.25  |
| 4Z0X.PDB | OD1, B_ASP_115 | NH1, B_ARG_63  | HH12, B_ARG_63 | 3.00 | 2.15 | 8.77  |
| 4Z0X.PDB | O, B_VAL_118   | N, B_GLN_64    | H, B_GLN_64    | 2.70 | 1.91 | 18.82 |
| 4Z0X.PDB | O, B_TRP_61    | N, B_MET_73    | H, B_MET_73    | 2.89 | 2.05 | 11.27 |
| 4Z0X.PDB | O, B_MET_84    | N, B_GLY_75    | H, B_GLY_75    | 2.80 | 2.00 | 19.09 |
| 4Z0X.PDB | O, B_ILE_59    | N, B_PHE_76    | H, B_PHE_76    | 2.84 | 2.02 | 13.51 |
| 4Z0X.PDB | O, B_GLY_75    | N, B_MET_84    | H, B_MET_84    | 2.91 | 2.08 | 13.54 |
| 4Z0X.PDB | OE1, B_GLN_90  | NE, B_ARG_92   | HE, B_ARG_92   | 2.75 | 1.97 | 21.20 |
| 4Z0X.PDB | OD2, B_ASP_115 | NH1, B_ARG_92  | HH12, B_ARG_92 | 2.90 | 2.09 | 15.11 |
| 4Z0X.PDB | OD1, B_ASP_115 | NH2, B_ARG_92  | HH22, B_ARG_92 | 2.68 | 1.87 | 17.08 |
| 4Z0X.PDB | O, B_GLU_107   | N, B_THR_94    | H, B_THR_94    | 2.93 | 2.14 | 19.73 |
| 4Z0X.PDB | O, B_TYR_105   | N, B_THR_96    | H, B_THR_96    | 2.98 | 2.17 | 16.27 |
| 4Z0X.PDB | O, B_SER_100   | OG, B_SER_102  | HG, B_SER_102  | 2.77 | 1.99 | 18.26 |
| 4Z0X.PDB | O, B_THR_96    | N, B_TYR_105   | H, B_TYR_105   | 2.64 | 1.82 | 13.50 |
| 4Z0X.PDB | O, B_VAL_45    | N, B_MET_106   | H, B_MET_106   | 2.83 | 1.98 | 6.79  |
| 4Z0X.PDB | O, B_THR_94    | N, B_GLU_107   | H, B_GLU_107   | 2.90 | 2.05 | 7.24  |
| 4Z0X.PDB | O, B_VAL_43    | N, B_LEU_108   | H, B_LEU_108   | 2.96 | 2.14 | 15.47 |
| 4Z0X.PDB | O, B_ARG_92    | N, B_THR_109   | H, B_THR_109   | 2.97 | 2.14 | 11.99 |
| 4Z0X.PDB | O, B_SER_41    | N, B_LEU_111   | H, B_LEU_111   | 2.94 | 2.09 | 6.29  |
| 4Z0X.PDB | OD2, B_ASP_115 | N, B_ARG_112   | H, B_ARG_112   | 2.72 | 1.96 | 22.70 |
| 4Z0X.PDB | O, B_ARG_112   | N, B_ASP_115   | H, B_ASP_115   | 2.66 | 1.82 | 10.17 |
| 4Z0X.PDB | O, B_THR_138   | N, B_TYR_119   | H, B_TYR_119   | 2.87 | 2.02 | 7.83  |
| 4Z0X.PDB | O, B_ASP_115   | OH, B_TYR_119  | HH, B_TYR_119  | 2.68 | 1.89 | 16.10 |
| 4Z0X.PDB | O, B_VAL_62    | N, B_TYR_120   | H, B_TYR_120   | 2.59 | 1.74 | 8.64  |
| 4Z0X.PDB | OE1, B_GLN_64  | OH, B_TYR_120  | HH, B_TYR_120  | 2.91 | 2.08 | 8.45  |
| 4Z0X.PDB | O, B_THR_60    | N, B_ALA_122   | H, B_ALA_122   | 2.71 | 1.91 | 17.66 |
| 4Z0X.PDB | O, B_TYR_133   | N, B_ARG_123   | H, B_ARG_123   | 2.79 | 1.95 | 10.77 |
| 4Z0X.PDB | O, B_VAL_27    | NE, B_ARG_123  | HE, B_ARG_123  | 2.62 | 1.82 | 18.21 |
| 4Z0X.PDB | O, C_LEU_441   | N, B_SER_127   | H, B_SER_127   | 2.61 | 1.82 | 19.78 |
| 4Z0X.PDB | OH, A_TYR_35   | N, B_TYR_131   | H, B_TYR_131   | 2.85 | 2.09 | 23.16 |
| 4Z0X.PDB | O, B_SER_32    | OG1, B_THR_138 | HG1, B_THR_138 | 2.51 | 1.69 | 7.93  |
| 4Z0X.PDB | O, B_ALA_117   | N, B_VAL_140   | H, B_VAL_140   | 2.85 | 1.99 | 6.27  |
| 4Z0X.PDB | O, B_GLU_35    | N, B_THR_141   | H, B_THR_141   | 2.88 | 2.05 | 13.44 |
| 4Z0X.PDB | O, C_ALA_439   | N, C_TYR_443   | H, C_TYR_443   | 2.86 | 2.01 | 7.86  |
| 5I76.PDB | OG, A_SER_26   | N, A_LEU_3     | H, A_LEU_3     | 2.93 | 2.11 | 13.63 |
| 5I76.PDB | O, A_ARG_24    | N, A_THR_5     | H, A_THR_5     | 2.85 | 2.02 | 11.85 |
| 5I76.PDB | O, A_TYR_86    | NE2, A_GLN_6   | HE22, A_GLN_6  | 2.97 | 2.18 | 18.78 |
| 5I76.PDB | O, A_LYS_103   | N, A_LEU_11    | H, A_LEU_11    | 2.81 | 1.99 | 15.02 |
| 5I76.PDB | O, A_VAL_78    | N, A_GLY_16    | H, A_GLY_16    | 2.83 | 1.97 | 5.42  |
| 5I76.PDB | OD1, A_ASN_76  | NH1, A_ARG_18  | HH11, A_ARG_18 | 2.77 | 1.94 | 12.53 |
| 5I76.PDB | O, A_ILE_75    | N, A_VAL_19    | H, A_VAL_19    | 2.92 | 2.11 | 15.94 |
| 5I76.PDB | O, A_LEU_73    | N, A_PHE_21    | H, A_PHE_21    | 2.75 | 1.92 | 12.31 |
| 5I76.PDB | O, A_PHE_71    | N, A_CYS_23    | H, A_CYS_23    | 2.97 | 2.12 | 7.46  |
| 5I76.PDB | O, A_THR_5     | N, A_ARG_24    | H, A_ARG_24    | 2.95 | 2.13 | 14.78 |
| 5I76.PDB | O, A_THR_69    | N, A_ALA_25    | H, A_ALA_25    | 2.95 | 2.17 | 21.21 |
| 5I76.PDB | O, A_GLY_68    | N, A_ILE_29    | H, A_ILE_29    | 2.89 | 2.05 | 11.68 |
| 5I76.PDB | O, A_ILE_29    | N, A_ASN_32    | H, A_ASN_32    | 2.93 | 2.08 | 6.67  |
| 5I76.PDB | O, A_THR_31    | N, A_ILE_33    | H, A_ILE_33    | 2.92 | 2.20 | 28.68 |
| 5I76.PDB | O, A_GLN_89    | N, A_HIS_34    | H, A_HIS_34    | 2.81 | 1.99 | 14.63 |

|          |                |                |                 |      |      |       |
|----------|----------------|----------------|-----------------|------|------|-------|
| 5I76.PDB | O, A_ILE_48    | N, A_TRP_35    | H, A_TRP_35     | 2.92 | 2.10 | 13.82 |
| 5I76.PDB | O, A_TYR_87    | N, A_TYR_36    | H, A_TYR_36     | 2.81 | 2.01 | 17.84 |
| 5I76.PDB | OE1, A_GLN_89  | OH, A_TYR_36   | HH, A_TYR_36    | 2.60 | 1.77 | 6.74  |
| 5I76.PDB | O, A_ARG_45    | N, A_GLN_37    | H, A_GLN_37     | 2.91 | 2.08 | 14.58 |
| 5I76.PDB | OH, A_TYR_86   | NE2, A_GLN_37  | HE21, A_GLN_37  | 2.93 | 2.09 | 10.63 |
| 5I76.PDB | O, A_ASP_85    | N, A_GLN_38    | H, A_GLN_38     | 2.79 | 1.98 | 15.97 |
| 5I76.PDB | OE1, B_GLN_39  | NE2, A_GLN_38  | HE22, A_GLN_38  | 2.94 | 2.10 | 10.68 |
| 5I76.PDB | O, A_ARG_39    | N, A_GLY_42    | H, A_GLY_42     | 2.91 | 2.09 | 15.47 |
| 5I76.PDB | O, B_GLY_110   | OG, A_SER_43   | HG, A_SER_43    | 2.73 | 2.02 | 27.09 |
| 5I76.PDB | O, A_TRP_35    | N, A_LEU_47    | H, A_LEU_47     | 2.79 | 1.93 | 2.43  |
| 5I76.PDB | OE1, A_GLU_53  | NZ, A_LYS_49   | HZ2, A_LYS_49   | 2.94 | 2.09 | 13.35 |
| 5I76.PDB | OD2, B_ASP_103 | OH, A_TYR_50   | HH, A_TYR_50    | 2.64 | 1.88 | 21.01 |
| 5I76.PDB | O, A_ILE_33    | N, A_ALA_51    | H, A_ALA_51     | 2.67 | 1.85 | 13.57 |
| 5I76.PDB | O, A_TYR_50    | N, A_SER_52    | H, A_SER_52     | 2.77 | 2.05 | 27.32 |
| 5I76.PDB | O, A_LYS_49    | N, A_GLU_53    | H, A_GLU_53     | 2.80 | 2.00 | 17.59 |
| 5I76.PDB | OD1, A_ASP_82  | NH2, A_ARG_61  | HH21, A_ARG_61  | 2.77 | 1.93 | 10.41 |
| 5I76.PDB | OE2, A_GLU_81  | NH2, A_ARG_61  | HH22, A_ARG_61  | 2.77 | 1.92 | 8.54  |
| 5I76.PDB | O, A_SER_74    | N, A_SER_63    | H, A_SER_63     | 2.94 | 2.14 | 18.34 |
| 5I76.PDB | O, A_THR_72    | N, A_SER_65    | H, A_SER_65     | 2.92 | 2.10 | 15.80 |
| 5I76.PDB | O, A_GLY_30    | N, A_GLY_68    | H, A_GLY_68     | 2.79 | 2.04 | 24.26 |
| 5I76.PDB | O, A_SER_65    | N, A_THR_72    | H, A_THR_72     | 2.94 | 2.12 | 13.74 |
| 5I76.PDB | O, A_PHE_21    | N, A_LEU_73    | H, A_LEU_73     | 3.00 | 2.22 | 21.96 |
| 5I76.PDB | O, A_SER_63    | N, A_SER_74    | H, A_SER_74     | 2.85 | 1.99 | 4.51  |
| 5I76.PDB | O, A_VAL_19    | N, A_ILE_75    | H, A_ILE_75     | 2.85 | 2.03 | 15.69 |
| 5I76.PDB | O, A_ARG_61    | N, A_ASN_76    | H, A_ASN_76     | 2.79 | 1.97 | 14.79 |
| 5I76.PDB | O, A_GLU_17    | N, A_VAL_78    | H, A_VAL_78     | 2.96 | 2.12 | 10.44 |
| 5I76.PDB | OD2, A_ASP_82  | N, A_GLU_79    | H, A_GLU_79     | 2.95 | 2.11 | 11.60 |
| 5I76.PDB | O, A_GLU_79    | N, A_ASP_82    | H, A_ASP_82     | 2.78 | 1.95 | 11.07 |
| 5I76.PDB | O, A_GLN_38    | N, A_ASP_85    | H, A_ASP_85     | 2.93 | 2.13 | 17.77 |
| 5I76.PDB | O, A_THR_102   | N, A_TYR_86    | H, A_TYR_86     | 2.91 | 2.14 | 23.37 |
| 5I76.PDB | O, A_ASP_82    | OH, A_TYR_86   | HH, A_TYR_86    | 2.55 | 1.72 | 9.51  |
| 5I76.PDB | O, A_TYR_36    | N, A_TYR_87    | H, A_TYR_87     | 2.89 | 2.08 | 16.03 |
| 5I76.PDB | OG1, A_THR_96  | NE2, A_GLN_89  | HE21, A_GLN_89  | 2.89 | 2.08 | 16.62 |
| 5I76.PDB | O, A_THR_97    | N, A_GLN_90    | H, A_GLN_90     | 2.93 | 2.15 | 21.05 |
| 5I76.PDB | OD1, A_ASN_93  | ND2, A_ASN_92  | HD22, A_ASN_92  | 2.89 | 2.06 | 14.53 |
| 5I76.PDB | O, A_GLN_90    | OG1, A_THR_96  | HG1, A_THR_96   | 2.66 | 1.94 | 25.05 |
| 5I76.PDB | O, A_ILE_2     | OG1, A_THR_97  | HG1, A_THR_97   | 2.88 | 2.08 | 14.12 |
| 5I76.PDB | O, A_CYS_88    | N, A_GLY_99    | H, A_GLY_99     | 2.80 | 1.99 | 16.49 |
| 5I76.PDB | OE1, A_GLN_6   | N, A_GLY_101   | H, A_GLY_101    | 2.95 | 2.25 | 29.58 |
| 5I76.PDB | O, A_TYR_86    | N, A_THR_102   | H, A_THR_102    | 2.91 | 2.11 | 17.28 |
| 5I76.PDB | O, A_PRO_8     | OG1, A_THR_102 | HG1, A_THR_102  | 2.77 | 2.04 | 24.64 |
| 5I76.PDB | O, A_VAL_9     | N, A_LYS_103   | H, A_LYS_103    | 2.97 | 2.12 | 8.09  |
| 5I76.PDB | O, A_ALA_84    | N, A_LEU_104   | H, A_LEU_104    | 2.94 | 2.08 | 1.76  |
| 5I76.PDB | O, A_LEU_11    | N, A_GLU_105   | H, A_GLU_105    | 2.78 | 1.93 | 6.87  |
| 5I76.PDB | O, A_VAL_13    | N, A_LYS_107   | H, A_LYS_107    | 2.80 | 1.97 | 11.70 |
| 5I76.PDB | OG, A_SER_12   | NZ, A_LYS_107  | HZ3, A_LYS_107  | 2.75 | 1.89 | 12.15 |
| 5I76.PDB | O, A_TYR_140   | N, A_ALA_111   | H, A_ALA_111    | 2.82 | 2.00 | 15.73 |
| 5I76.PDB | O, A_LEU_135   | N, A_PHE_116   | H, A_PHE_116    | 2.95 | 2.18 | 23.57 |
| 5I76.PDB | O, A_VAL_133   | N, A_PHE_118   | H, A_PHE_118    | 2.81 | 2.04 | 21.46 |
| 5I76.PDB | OG, A_SER_131  | NE2, A_GLN_124 | HE22, A_GLN_124 | 2.78 | 1.92 | 5.16  |
| 5I76.PDB | O, A_GLN_124   | N, A_SER_127   | H, A_SER_127    | 2.80 | 1.97 | 11.43 |
| 5I76.PDB | O, A_GLN_124   | OG, A_SER_127  | HG, A_SER_127   | 2.76 | 1.92 | 5.99  |
| 5I76.PDB | O, A_LEU_181   | N, A_ALA_130   | H, A_ALA_130    | 2.88 | 2.06 | 14.29 |
| 5I76.PDB | OE1, A_GLN_124 | N, A_SER_131   | H, A_SER_131    | 2.93 | 2.12 | 16.06 |
| 5I76.PDB | O, A_LEU_179   | N, A_VAL_132   | H, A_VAL_132    | 2.86 | 2.02 | 10.93 |
| 5I76.PDB | O, A_SER_177   | N, A_CYS_134   | H, A_CYS_134    | 2.84 | 1.99 | 8.38  |
| 5I76.PDB | O, A_PHE_116   | N, A_LEU_135   | H, A_LEU_135    | 2.80 | 1.96 | 8.13  |
| 5I76.PDB | O, A_LEU_175   | N, A_LEU_136   | H, A_LEU_136    | 2.86 | 2.01 | 4.38  |

|          |                |                |                 |      |      |       |
|----------|----------------|----------------|-----------------|------|------|-------|
| 5I76.PDB | O, A_SER_114   | N, A_ASN_137   | H, A_ASN_137    | 2.78 | 1.96 | 14.88 |
| 5I76.PDB | OG, A_SER_174  | N, A_ASN_138   | H, A_ASN_138    | 2.99 | 2.15 | 10.62 |
| 5I76.PDB | O, A_TYR_173   | N, A_PHE_139   | H, A_PHE_139    | 2.85 | 2.03 | 14.64 |
| 5I76.PDB | O, A_ALA_111   | N, A_TYR_140   | H, A_TYR_140    | 2.84 | 2.04 | 18.07 |
| 5I76.PDB | OE2, A_GLU_143 | NZ, A_LYS_145  | HZ3, A_LYS_145  | 2.87 | 2.06 | 20.39 |
| 5I76.PDB | O, A_GLU_195   | N, A_GLN_147   | H, A_GLN_147    | 2.83 | 2.01 | 15.29 |
| 5I76.PDB | OG, A_SER_177  | NE1, A_TRP_148 | HE1, A_TRP_148  | 2.97 | 2.15 | 13.90 |
| 5I76.PDB | O, A_ALA_193   | N, A_LYS_149   | H, A_LYS_149    | 2.89 | 2.04 | 9.43  |
| 5I76.PDB | O, A_VAL_191   | N, A_ASP_151   | H, A_ASP_151    | 2.77 | 1.94 | 12.86 |
| 5I76.PDB | O, A_TRP_148   | N, A_GLN_155   | H, A_GLN_155    | 2.81 | 1.97 | 9.99  |
| 5I76.PDB | O, A_ALA_153   | NE2, A_GLN_155 | HE21, A_GLN_155 | 2.93 | 2.08 | 7.12  |
| 5I76.PDB | O, A_THR_178   | N, A_GLN_160   | H, A_GLN_160    | 2.97 | 2.20 | 22.65 |
| 5I76.PDB | O, A_SER_176   | N, A_SER_162   | H, A_SER_162    | 2.82 | 2.02 | 18.15 |
| 5I76.PDB | O, B_PRO_173   | OG, A_SER_162  | HG, A_SER_162   | 2.48 | 1.79 | 28.75 |
| 5I76.PDB | O, A_SER_174   | N, A_THR_164   | H, A_THR_164    | 2.85 | 2.02 | 12.10 |
| 5I76.PDB | O, A_SER_171   | NE2, A_GLN_166 | HE21, A_GLN_166 | 2.90 | 2.05 | 6.30  |
| 5I76.PDB | O, A_LEU_106   | NE2, A_GLN_166 | HE22, A_GLN_166 | 2.72 | 1.91 | 17.00 |
| 5I76.PDB | O, A_THR_172   | N, A_ASP_167   | H, A_ASP_167    | 2.78 | 1.95 | 11.68 |
| 5I76.PDB | OD1, A_ASP_167 | N, A_LYS_169   | H, A_LYS_169    | 2.67 | 1.87 | 18.00 |
| 5I76.PDB | O, A_ASP_167   | N, A_SER_171   | H, A_SER_171    | 2.85 | 2.10 | 24.64 |
| 5I76.PDB | OD1, A_ASP_170 | OG1, A_THR_172 | HG1, A_THR_172  | 2.65 | 1.83 | 9.24  |
| 5I76.PDB | O, A_PHE_139   | N, A_TYR_173   | H, A_TYR_173    | 2.85 | 2.00 | 5.15  |
| 5I76.PDB | OE2, A_GLU_105 | OH, A_TYR_173  | HH, A_TYR_173   | 2.42 | 1.66 | 21.73 |
| 5I76.PDB | OG1, A_THR_164 | N, A_SER_174   | H, A_SER_174    | 2.83 | 2.01 | 15.67 |
| 5I76.PDB | O, A_LEU_136   | N, A_LEU_175   | H, A_LEU_175    | 2.85 | 2.05 | 17.34 |
| 5I76.PDB | O, A_SER_162   | N, A_SER_176   | H, A_SER_176    | 2.84 | 2.01 | 11.93 |
| 5I76.PDB | O, A_CYS_134   | N, A_SER_177   | H, A_SER_177    | 2.92 | 2.08 | 10.24 |
| 5I76.PDB | O, A_GLN_160   | N, A_THR_178   | H, A_THR_178    | 2.84 | 2.01 | 11.67 |
| 5I76.PDB | O, A_VAL_132   | N, A_LEU_179   | H, A_LEU_179    | 2.88 | 2.05 | 12.69 |
| 5I76.PDB | O, A_ALA_130   | N, A_LEU_181   | H, A_LEU_181    | 2.89 | 2.05 | 10.41 |
| 5I76.PDB | O, A_GLY_128   | N, A_LYS_183   | H, A_LYS_183    | 2.99 | 2.14 | 6.01  |
| 5I76.PDB | OG, A_SER_182  | N, A_ASP_185   | H, A_ASP_185    | 2.96 | 2.11 | 8.88  |
| 5I76.PDB | O, A_SER_182   | N, A_TYR_186   | H, A_TYR_186    | 2.77 | 1.92 | 7.00  |
| 5I76.PDB | O, A_LYS_183   | N, A_GLU_187   | H, A_GLU_187    | 2.88 | 2.08 | 18.36 |
| 5I76.PDB | O, A_ASP_185   | N, A_LYS_188   | H, A_LYS_188    | 2.97 | 2.19 | 21.73 |
| 5I76.PDB | OD1, A_ASP_151 | N, A_VAL_191   | H, A_VAL_191    | 2.98 | 2.13 | 9.38  |
| 5I76.PDB | O, A_PHE_209   | N, A_TYR_192   | H, A_TYR_192    | 2.92 | 2.08 | 9.60  |
| 5I76.PDB | O, A_LYS_149   | N, A_ALA_193   | H, A_ALA_193    | 2.91 | 2.19 | 28.01 |
| 5I76.PDB | O, A_LYS_207   | N, A_CYS_194   | H, A_CYS_194    | 2.85 | 2.00 | 8.12  |
| 5I76.PDB | O, A_GLN_147   | N, A_GLU_195   | H, A_GLU_195    | 2.84 | 1.99 | 7.10  |
| 5I76.PDB | O, A_VAL_205   | N, A_VAL_196   | H, A_VAL_196    | 2.79 | 2.00 | 20.45 |
| 5I76.PDB | O, A_LYS_145   | N, A_THR_197   | H, A_THR_197    | 2.98 | 2.16 | 15.25 |
| 5I76.PDB | O, A_PRO_141   | NE2, A_HIS_198 | HE2, A_HIS_198  | 2.94 | 2.11 | 12.28 |
| 5I76.PDB | ND1, A_HIS_198 | N, A_GLY_200   | H, A_GLY_200    | 2.85 | 1.99 | 1.58  |
| 5I76.PDB | O, A_HIS_198   | N, A_LEU_201   | H, A_LEU_201    | 2.86 | 2.01 | 7.02  |
| 5I76.PDB | O, A_CYS_194   | N, A_LYS_207   | H, A_LYS_207    | 2.92 | 2.10 | 16.09 |
| 5I76.PDB | O, A_TYR_192   | N, A_PHE_209   | H, A_PHE_209    | 2.90 | 2.13 | 22.49 |
| 5I76.PDB | O, A_LYS_190   | N, A_ARG_211   | H, A_ARG_211    | 2.76 | 1.93 | 12.12 |
| 5I76.PDB | O, A_HIS_189   | NE, A_ARG_211  | HE, A_ARG_211   | 2.68 | 1.86 | 13.91 |
| 5I76.PDB | O, B_SER_25    | N, B_GLN_3     | H, B_GLN_3      | 2.91 | 2.09 | 13.09 |
| 5I76.PDB | O, B_THR_23    | N, B_LYS_5     | H, B_LYS_5      | 2.90 | 2.14 | 23.54 |
| 5I76.PDB | OE1, B_GLN_111 | N, B_GLN_6     | H, B_GLN_6      | 2.83 | 2.01 | 14.84 |
| 5I76.PDB | O, B_TYR_93    | NE2, B_GLN_6   | HE22, B_GLN_6   | 2.84 | 1.99 | 7.48  |
| 5I76.PDB | O, B_THR_21    | N, B_SER_7     | H, B_SER_7      | 2.98 | 2.22 | 22.91 |
| 5I76.PDB | O, B_THR_116   | N, B_VAL_12    | H, B_VAL_12     | 2.86 | 2.03 | 11.02 |
| 5I76.PDB | O, B_LEU_85    | N, B_SER_15    | H, B_SER_15     | 2.72 | 1.87 | 6.27  |
| 5I76.PDB | O, B_PRO_14    | OG, B_SER_15   | HG, B_SER_15    | 2.58 | 1.82 | 21.55 |
| 5I76.PDB | O, B_GLN_13    | N, B_GLN_16    | H, B_GLN_16     | 2.98 | 2.13 | 9.97  |

|          |                |                |                 |      |      |       |
|----------|----------------|----------------|-----------------|------|------|-------|
| 5I76.PDB | O, B_MET_82    | N, B_LEU_18    | H, B_LEU_18     | 2.89 | 2.08 | 17.80 |
| 5I76.PDB | O, B_PHE_80    | N, B_ILE_20    | H, B_ILE_20     | 2.83 | 2.01 | 14.78 |
| 5I76.PDB | OG, B_SER_7    | N, B_THR_21    | H, B_THR_21     | 2.99 | 2.15 | 11.92 |
| 5I76.PDB | O, B_VAL_78    | N, B_CYS_22    | H, B_CYS_22     | 2.85 | 2.00 | 8.90  |
| 5I76.PDB | O, B_LYS_5     | N, B_THR_23    | H, B_THR_23     | 2.85 | 2.00 | 7.48  |
| 5I76.PDB | O, B_SER_76    | N, B_VAL_24    | H, B_VAL_24     | 2.97 | 2.13 | 10.77 |
| 5I76.PDB | O, B_GLN_3     | N, B_SER_25    | H, B_SER_25     | 2.89 | 2.10 | 18.84 |
| 5I76.PDB | O, B_SER_28    | N, B_ASN_31    | H, B_ASN_31     | 2.98 | 2.14 | 8.72  |
| 5I76.PDB | O, B_ILE_51    | N, B_VAL_34    | H, B_VAL_34     | 2.93 | 2.14 | 19.88 |
| 5I76.PDB | O, B_ALA_96    | N, B_HIS_35    | H, B_HIS_35     | 2.88 | 2.03 | 7.93  |
| 5I76.PDB | O, B_GLY_49    | N, B_TRP_36    | H, B_TRP_36     | 2.91 | 2.12 | 19.85 |
| 5I76.PDB | O, B_TYR_94    | N, B_VAL_37    | H, B_VAL_37     | 2.91 | 2.08 | 14.52 |
| 5I76.PDB | O, B_GLU_46    | N, B_ARG_38    | H, B_ARG_38     | 2.84 | 2.03 | 16.24 |
| 5I76.PDB | OD1, B_ASP_89  | NH1, B_ARG_38  | HH12, B_ARG_38  | 2.81 | 1.96 | 5.27  |
| 5I76.PDB | O, B_ILE_92    | N, B_GLN_39    | H, B_GLN_39     | 2.86 | 2.11 | 24.85 |
| 5I76.PDB | OE1, A_GLN_38  | NE2, B_GLN_39  | HE22, B_GLN_39  | 2.80 | 1.95 | 6.66  |
| 5I76.PDB | O, B_ARG_38    | N, B_GLU_46    | H, B_GLU_46     | 2.80 | 2.03 | 22.07 |
| 5I76.PDB | O, B_TRP_36    | N, B_LEU_48    | H, B_LEU_48     | 2.83 | 1.97 | 5.22  |
| 5I76.PDB | O, B_ASP_58    | N, B_VAL_50    | H, B_VAL_50     | 2.90 | 2.16 | 26.66 |
| 5I76.PDB | O, B_VAL_34    | N, B_ILE_51    | H, B_ILE_51     | 2.98 | 2.17 | 16.74 |
| 5I76.PDB | O, B_ASN_56    | N, B_TRP_52    | H, B_TRP_52     | 2.85 | 1.99 | 5.55  |
| 5I76.PDB | OD2, B_ASP_58  | NE1, B_TRP_52  | HE1, B_TRP_52   | 2.79 | 1.94 | 5.91  |
| 5I76.PDB | O, B_TRP_52    | N, B_GLY_55    | H, B_GLY_55     | 2.86 | 2.04 | 14.33 |
| 5I76.PDB | O, B_LEU_48    | N, B_ASN_60    | H, B_ASN_60     | 2.81 | 1.96 | 6.22  |
| 5I76.PDB | O, B_TRP_47    | ND2, B_ASN_60  | HD22, B_ASN_60  | 2.78 | 1.99 | 18.30 |
| 5I76.PDB | O, B_ASN_60    | N, B_PHE_63    | H, B_PHE_63     | 2.84 | 1.99 | 7.17  |
| 5I76.PDB | OD2, B_ASP_89  | NH1, B_ARG_66  | HH12, B_ARG_66  | 2.96 | 2.17 | 19.36 |
| 5I76.PDB | OD1, B_ASP_89  | NH2, B_ARG_66  | HH22, B_ARG_66  | 2.84 | 1.99 | 7.50  |
| 5I76.PDB | O, B_LYS_81    | N, B_SER_68    | H, B_SER_68     | 2.86 | 2.02 | 9.98  |
| 5I76.PDB | OH, B_TYR_59   | N, B_ILE_69    | H, B_ILE_69     | 3.00 | 2.17 | 14.31 |
| 5I76.PDB | O, B_SER_53    | NZ, B_LYS_71   | HZ1, B_LYS_71   | 2.77 | 1.91 | 12.10 |
| 5I76.PDB | O, B_GLN_77    | N, B_ASP_72    | H, B_ASP_72     | 2.80 | 1.95 | 9.05  |
| 5I76.PDB | OD1, B_ASP_72  | OG, B_SER_74   | HG, B_SER_74    | 2.49 | 1.80 | 29.35 |
| 5I76.PDB | O, B_CYS_22    | N, B_VAL_78    | H, B_VAL_78     | 2.83 | 1.99 | 12.58 |
| 5I76.PDB | O, B_ASN_70    | N, B_PHE_79    | H, B_PHE_79     | 2.80 | 1.94 | 1.15  |
| 5I76.PDB | O, B_ILE_20    | N, B_PHE_80    | H, B_PHE_80     | 2.88 | 2.02 | 3.13  |
| 5I76.PDB | O, B_SER_68    | N, B_LYS_81    | H, B_LYS_81     | 2.91 | 2.14 | 22.98 |
| 5I76.PDB | O, B_LEU_18    | N, B_MET_82    | H, B_MET_82     | 2.97 | 2.19 | 21.42 |
| 5I76.PDB | O, B_ARG_66    | N, B_ASN_83    | H, B_ASN_83     | 2.85 | 2.05 | 18.95 |
| 5I76.PDB | OD2, B_ASP_89  | N, B_GLN_86    | H, B_GLN_86     | 2.84 | 2.01 | 11.92 |
| 5I76.PDB | O, B_GLN_86    | N, B_ASP_89    | H, B_ASP_89     | 2.79 | 1.94 | 8.58  |
| 5I76.PDB | O, B_SER_87    | N, B_THR_90    | H, B_THR_90     | 2.93 | 2.07 | 2.10  |
| 5I76.PDB | O, B_GLN_39    | N, B_ILE_92    | H, B_ILE_92     | 2.94 | 2.12 | 13.61 |
| 5I76.PDB | O, B_THR_113   | N, B_TYR_93    | H, B_TYR_93     | 2.91 | 2.07 | 10.02 |
| 5I76.PDB | O, B_ASP_89    | OH, B_TYR_93   | HH, B_TYR_93    | 2.75 | 1.94 | 12.69 |
| 5I76.PDB | O, B_VAL_37    | N, B_TYR_94    | H, B_TYR_94     | 2.72 | 1.88 | 9.49  |
| 5I76.PDB | O, B_TYR_108   | N, B_ARG_97    | H, B_ARG_97     | 2.86 | 2.06 | 17.77 |
| 5I76.PDB | O, B_ALA_98    | NH1, B_ARG_97  | HH11, B_ARG_97  | 2.98 | 2.16 | 15.13 |
| 5I76.PDB | OD1, B_ASP_103 | N, B_TYR_104   | H, B_TYR_104    | 2.65 | 1.89 | 23.73 |
| 5I76.PDB | O, B_PHE_106   | NE1, B_TRP_109 | HE1, B_TRP_109  | 2.83 | 2.11 | 27.98 |
| 5I76.PDB | O, B_CYS_95    | N, B_GLY_110   | H, B_GLY_110    | 2.95 | 2.10 | 8.84  |
| 5I76.PDB | O, B_GLN_6     | NE2, B_GLN_111 | HE22, B_GLN_111 | 2.97 | 2.18 | 20.05 |
| 5I76.PDB | O, B_TYR_93    | N, B_THR_113   | H, B_THR_113    | 2.81 | 2.08 | 26.53 |
| 5I76.PDB | O, B_ALA_91    | N, B_VAL_115   | H, B_VAL_115    | 2.97 | 2.13 | 9.34  |
| 5I76.PDB | OG1, B_THR_90  | N, B_VAL_117   | H, B_VAL_117    | 2.78 | 1.93 | 4.58  |
| 5I76.PDB | O, B_PHE_152   | N, B_LYS_123   | H, B_LYS_123    | 2.83 | 1.99 | 11.39 |
| 5I76.PDB | O, B_ASP_150   | NZ, B_LYS_123  | HZ2, B_LYS_123  | 2.87 | 2.07 | 21.60 |
| 5I76.PDB | O, B_LYS_149   | N, B_SER_126   | H, B_SER_126    | 2.91 | 2.10 | 15.91 |



|          |                |                |                 |      |      |       |
|----------|----------------|----------------|-----------------|------|------|-------|
| 5I76.PDB | O, B_LEU_147   | N, B_PHE_128   | H, B_PHE_128    | 2.88 | 2.05 | 13.67 |
| 5I76.PDB | O, B_GLY_145   | N, B_LEU_130   | H, B_LEU_130    | 2.86 | 2.03 | 13.19 |
| 5I76.PDB | O, B_SER_134   | OG1, B_THR_137 | HG1, B_THR_137  | 2.81 | 2.01 | 14.63 |
| 5I76.PDB | O, B_VAL_190   | N, B_ALA_142   | H, B_ALA_142    | 2.82 | 1.97 | 8.01  |
| 5I76.PDB | O, B_LEU_130   | N, B_GLY_145   | H, B_GLY_145    | 2.93 | 2.14 | 20.40 |
| 5I76.PDB | O, B_SER_186   | N, B_CYS_146   | H, B_CYS_146    | 2.85 | 2.05 | 18.23 |
| 5I76.PDB | O, B_PHE_128   | N, B_LEU_147   | H, B_LEU_147    | 2.85 | 2.03 | 14.76 |
| 5I76.PDB | O, B_LEU_184   | N, B_VAL_148   | H, B_VAL_148    | 2.78 | 1.93 | 4.33  |
| 5I76.PDB | O, B_SER_126   | N, B_LYS_149   | H, B_LYS_149    | 2.80 | 1.95 | 7.51  |
| 5I76.PDB | O, B_LYS_123   | N, B_PHE_152   | H, B_PHE_152    | 2.84 | 2.02 | 15.64 |
| 5I76.PDB | O, B_ASN_205   | N, B_THR_157   | H, B_THR_157    | 2.93 | 2.11 | 15.41 |
| 5I76.PDB | O, B_ASN_203   | N, B_SER_159   | H, B_SER_159    | 2.90 | 2.10 | 17.76 |
| 5I76.PDB | OD1, B_ASN_203 | OG, B_SER_159  | HG, B_SER_159   | 2.82 | 2.04 | 17.93 |
| 5I76.PDB | OG, B_SER_186  | NE1, B_TRP_160 | HE1, B_TRP_160  | 2.99 | 2.15 | 11.06 |
| 5I76.PDB | O, B_ILE_201   | N, B_ASN_161   | H, B_ASN_161    | 2.78 | 1.93 | 9.08  |
| 5I76.PDB | OD1, B_ASN_203 | N, B_SER_162   | H, B_SER_162    | 2.79 | 2.01 | 21.54 |
| 5I76.PDB | O, B_TRP_160   | N, B_GLY_163   | H, B_GLY_163    | 2.88 | 2.13 | 24.26 |
| 5I76.PDB | O, B_ASN_161   | N, B_ALA_164   | H, B_ALA_164    | 2.99 | 2.14 | 8.06  |
| 5I76.PDB | O, B_VAL_187   | N, B_HIS_170   | H, B_HIS_170    | 2.79 | 1.96 | 12.00 |
| 5I76.PDB | O, B_SER_185   | N, B_PHE_172   | H, B_PHE_172    | 2.91 | 2.06 | 5.99  |
| 5I76.PDB | O, B_SER_183   | N, B_VAL_175   | H, B_VAL_175    | 2.87 | 2.03 | 11.83 |
| 5I76.PDB | O, B_LEU_181   | N, B_GLN_177   | H, B_GLN_177    | 2.84 | 2.00 | 8.84  |
| 5I76.PDB | OD1, B_ASP_150 | NE2, B_GLN_177 | HE22, B_GLN_177 | 2.79 | 2.00 | 19.18 |
| 5I76.PDB | O, B_GLN_177   | N, B_GLY_180   | H, B_GLY_180    | 2.82 | 1.98 | 9.91  |
| 5I76.PDB | O, B_TYR_151   | N, B_TYR_182   | H, B_TYR_182    | 2.72 | 1.88 | 9.69  |
| 5I76.PDB | O, B_VAL_148   | N, B_LEU_184   | H, B_LEU_184    | 2.84 | 2.03 | 15.91 |
| 5I76.PDB | OG, A_SER_176  | OG, B_SER_185  | HG, B_SER_185   | 2.89 | 2.15 | 23.05 |
| 5I76.PDB | O, B_CYS_146   | N, B_SER_186   | H, B_SER_186    | 2.93 | 2.10 | 13.63 |
| 5I76.PDB | O, B_HIS_170   | N, B_VAL_187   | H, B_VAL_187    | 2.94 | 2.11 | 13.31 |
| 5I76.PDB | O, B_LEU_144   | N, B_VAL_188   | H, B_VAL_188    | 2.83 | 2.02 | 16.59 |
| 5I76.PDB | O, B_ALA_142   | N, B_VAL_190   | H, B_VAL_190    | 2.85 | 2.05 | 17.07 |
| 5I76.PDB | O, B_GLY_140   | N, B_SER_192   | H, B_SER_192    | 2.92 | 2.09 | 13.75 |
| 5I76.PDB | O, B_PRO_191   | OG, B_SER_194  | HG, B_SER_194   | 2.91 | 2.11 | 15.99 |
| 5I76.PDB | O, B_SER_194   | N, B_GLN_198   | H, B_GLN_198    | 2.93 | 2.07 | 2.43  |
| 5I76.PDB | OG, B_SER_194  | OH, B_TYR_200  | HH, B_TYR_200   | 2.81 | 2.03 | 18.26 |
| 5I76.PDB | OD1, B_ASN_161 | N, B_ILE_201   | H, B_ILE_201    | 2.82 | 2.02 | 18.20 |
| 5I76.PDB | O, B_LYS_215   | N, B_CYS_202   | H, B_CYS_202    | 2.96 | 2.17 | 19.90 |
| 5I76.PDB | O, B_SER_159   | N, B_ASN_203   | H, B_ASN_203    | 2.80 | 1.94 | 5.79  |
| 5I76.PDB | OD1, B_ASP_214 | ND2, B_ASN_203 | HD22, B_ASN_203 | 2.90 | 2.11 | 19.71 |
| 5I76.PDB | O, B_VAL_213   | N, B_VAL_204   | H, B_VAL_204    | 2.78 | 1.92 | 4.35  |
| 5I76.PDB | O, B_THR_157   | N, B_ASN_205   | H, B_ASN_205    | 2.91 | 2.08 | 13.35 |
| 5I76.PDB | O, B_THR_211   | N, B_HIS_206   | H, B_HIS_206    | 2.85 | 2.00 | 6.66  |
| 5I76.PDB | O, B_LYS_207   | N, B_ASN_210   | H, B_ASN_210    | 2.96 | 2.11 | 7.92  |
| 5I76.PDB | O, B_VAL_204   | N, B_VAL_213   | H, B_VAL_213    | 2.87 | 2.05 | 15.17 |
| 5I76.PDB | O, B_CYS_202   | N, B_LYS_215   | H, B_LYS_215    | 2.91 | 2.13 | 20.69 |
| 5I76.PDB | OE1, A_GLU_123 | NZ, B_LYS_215  | HZ1, B_LYS_215  | 2.73 | 1.96 | 24.68 |
| 5I76.PDB | OE2, A_GLU_123 | NZ, B_LYS_215  | HZ1, B_LYS_215  | 2.89 | 2.11 | 24.69 |
| 5I76.PDB | OE1, B_GLU_218 | NE, B_ARG_216  | HE, B_ARG_216   | 2.64 | 1.90 | 25.25 |
| 5I76.PDB | OE1, B_GLU_218 | NH2, B_ARG_216 | HH21, B_ARG_216 | 2.69 | 1.98 | 29.12 |
| 5I76.PDB | O, B_TYR_200   | N, B_VAL_217   | H, B_VAL_217    | 2.83 | 1.99 | 10.82 |
| 5I76.PDB | O, C_ARG_24    | N, C_THR_5     | H, C_THR_5      | 2.87 | 2.03 | 8.25  |
| 5I76.PDB | O, C_TYR_86    | NE2, C_GLN_6   | HE22, C_GLN_6   | 2.86 | 2.05 | 16.89 |
| 5I76.PDB | O, C_LYS_103   | N, C_LEU_11    | H, C_LEU_11     | 2.75 | 1.91 | 12.00 |
| 5I76.PDB | O, C_GLU_105   | N, C_VAL_13    | H, C_VAL_13     | 2.98 | 2.20 | 22.09 |
| 5I76.PDB | OE1, C_GLU_17  | N, C_SER_14    | H, C_SER_14     | 3.00 | 2.15 | 7.87  |
| 5I76.PDB | O, C_VAL_78    | N, C_GLY_16    | H, C_GLY_16     | 2.98 | 2.12 | 1.61  |
| 5I76.PDB | O, C_ILE_75    | N, C_VAL_19    | H, C_VAL_19     | 2.86 | 2.02 | 11.04 |
| 5I76.PDB | O, C_LEU_73    | N, C_PHE_21    | H, C_PHE_21     | 2.77 | 1.93 | 10.26 |

|          |                |                |                |      |      |       |
|----------|----------------|----------------|----------------|------|------|-------|
| 5I76.PDB | O, C_PHE_71    | N, C_CYS_23    | H, C_CYS_23    | 2.95 | 2.11 | 10.08 |
| 5I76.PDB | O, C_THR_5     | N, C_ARG_24    | H, C_ARG_24    | 2.99 | 2.18 | 17.88 |
| 5I76.PDB | OD2, A_ASP_70  | NH1, C_ARG_24  | HH12, C_ARG_24 | 2.95 | 2.23 | 28.81 |
| 5I76.PDB | O, C_THR_69    | N, C_ALA_25    | H, C_ALA_25    | 2.74 | 1.96 | 20.09 |
| 5I76.PDB | O, C_GLY_68    | N, C_ILE_29    | H, C_ILE_29    | 2.91 | 2.08 | 12.56 |
| 5I76.PDB | O, C_ILE_29    | N, C_ASN_32    | H, C_ASN_32    | 2.96 | 2.11 | 6.37  |
| 5I76.PDB | O, C_THR_31    | N, C_ILE_33    | H, C_ILE_33    | 2.97 | 2.26 | 29.60 |
| 5I76.PDB | O, C_GLN_89    | N, C_HIS_34    | H, C_HIS_34    | 2.87 | 2.06 | 16.27 |
| 5I76.PDB | O, C_ILE_48    | N, C_TRP_35    | H, C_TRP_35    | 2.95 | 2.13 | 14.67 |
| 5I76.PDB | O, C_TYR_87    | N, C_TYR_36    | H, C_TYR_36    | 2.85 | 2.04 | 16.51 |
| 5I76.PDB | OE1, C_GLN_89  | OH, C_TYR_36   | HH, C_TYR_36   | 2.73 | 1.90 | 7.00  |
| 5I76.PDB | O, C_ARG_45    | N, C_GLN_37    | H, C_GLN_37    | 2.82 | 2.01 | 17.23 |
| 5I76.PDB | OH, C_TYR_86   | NE2, C_GLN_37  | HE21, C_GLN_37 | 2.93 | 2.09 | 9.49  |
| 5I76.PDB | O, C_ASP_85    | N, C_GLN_38    | H, C_GLN_38    | 2.82 | 1.99 | 13.89 |
| 5I76.PDB | O, C_GLY_42    | NE2, C_GLN_38  | HE21, C_GLN_38 | 3.00 | 2.24 | 24.26 |
| 5I76.PDB | O, C_ARG_39    | N, C_GLY_42    | H, C_GLY_42    | 2.88 | 2.09 | 19.43 |
| 5I76.PDB | O, D_GLY_110   | OG, C_SER_43   | HG, C_SER_43   | 2.84 | 2.15 | 29.22 |
| 5I76.PDB | O, C_GLN_37    | N, C_ARG_45    | H, C_ARG_45    | 2.65 | 1.95 | 29.24 |
| 5I76.PDB | OE1, C_GLN_37  | NH1, C_ARG_45  | HH11, C_ARG_45 | 2.96 | 2.15 | 17.42 |
| 5I76.PDB | O, C_TRP_35    | N, C_LEU_47    | H, C_LEU_47    | 2.79 | 1.93 | 2.36  |
| 5I76.PDB | O, C_GLU_53    | N, C_LYS_49    | H, C_LYS_49    | 2.99 | 2.18 | 15.56 |
| 5I76.PDB | OE1, C_GLU_53  | NZ, C_LYS_49   | HZ2, C_LYS_49  | 2.64 | 1.79 | 13.55 |
| 5I76.PDB | OD2, D_ASP_103 | OH, C_TYR_50   | HH, C_TYR_50   | 2.76 | 1.95 | 12.40 |
| 5I76.PDB | O, C_ILE_33    | N, C_ALA_51    | H, C_ALA_51    | 2.70 | 1.88 | 13.82 |
| 5I76.PDB | O, C_TYR_50    | N, C_SER_52    | H, C_SER_52    | 2.78 | 2.06 | 27.37 |
| 5I76.PDB | O, C_LYS_49    | N, C_GLU_53    | H, C_GLU_53    | 2.82 | 2.02 | 19.04 |
| 5I76.PDB | OD1, C_ASP_82  | NH2, C_ARG_61  | HH21, C_ARG_61 | 2.76 | 1.93 | 11.41 |
| 5I76.PDB | OE2, C_GLU_81  | NH2, C_ARG_61  | HH22, C_ARG_61 | 2.83 | 2.01 | 16.02 |
| 5I76.PDB | O, C_SER_74    | N, C_SER_63    | H, C_SER_63    | 2.93 | 2.13 | 17.96 |
| 5I76.PDB | O, C_THR_72    | N, C_SER_65    | H, C_SER_65    | 2.91 | 2.11 | 19.14 |
| 5I76.PDB | O, C_GLY_30    | N, C_GLY_68    | H, C_GLY_68    | 2.72 | 1.97 | 23.76 |
| 5I76.PDB | O, C_CYS_23    | N, C_PHE_71    | H, C_PHE_71    | 2.89 | 2.16 | 27.04 |
| 5I76.PDB | O, C_SER_65    | N, C_THR_72    | H, C_THR_72    | 2.94 | 2.10 | 11.42 |
| 5I76.PDB | O, C_PHE_21    | N, C_LEU_73    | H, C_LEU_73    | 2.99 | 2.22 | 23.12 |
| 5I76.PDB | O, C_SER_63    | N, C_SER_74    | H, C_SER_74    | 2.84 | 1.98 | 5.34  |
| 5I76.PDB | O, C_VAL_19    | N, C_ILE_75    | H, C_ILE_75    | 2.92 | 2.11 | 17.51 |
| 5I76.PDB | O, C_ARG_61    | N, C_ASN_76    | H, C_ASN_76    | 2.86 | 2.03 | 12.61 |
| 5I76.PDB | O, C_GLU_17    | N, C_VAL_78    | H, C_VAL_78    | 2.96 | 2.15 | 17.03 |
| 5I76.PDB | OD2, C_ASP_82  | N, C_GLU_79    | H, C_GLU_79    | 2.90 | 2.06 | 11.12 |
| 5I76.PDB | OG, C_SER_171  | OG, C_SER_80   | HG, C_SER_80   | 2.59 | 1.79 | 14.57 |
| 5I76.PDB | O, C_GLU_79    | N, C_ASP_82    | H, C_ASP_82    | 2.91 | 2.09 | 15.61 |
| 5I76.PDB | O, C_GLN_38    | N, C_ASP_85    | H, C_ASP_85    | 2.95 | 2.16 | 19.54 |
| 5I76.PDB | O, C_THR_102   | N, C_TYR_86    | H, C_TYR_86    | 2.85 | 2.08 | 22.66 |
| 5I76.PDB | O, C_ASP_82    | OH, C_TYR_86   | HH, C_TYR_86   | 2.60 | 1.79 | 11.86 |
| 5I76.PDB | O, C_TYR_36    | N, C_TYR_87    | H, C_TYR_87    | 2.91 | 2.10 | 16.52 |
| 5I76.PDB | OG1, C_THR_96  | NE2, C_GLN_89  | HE21, C_GLN_89 | 2.74 | 1.92 | 15.47 |
| 5I76.PDB | O, C_THR_97    | N, C_GLN_90    | H, C_GLN_90    | 2.85 | 2.07 | 20.66 |
| 5I76.PDB | O, C_ASN_93    | NE2, C_GLN_90  | HE22, C_GLN_90 | 2.93 | 2.08 | 7.37  |
| 5I76.PDB | OD1, C_ASN_93  | ND2, C_ASN_92  | HD22, C_ASN_92 | 2.84 | 2.03 | 16.29 |
| 5I76.PDB | O, C_GLN_90    | OG1, C_THR_96  | HG1, C_THR_96  | 2.71 | 1.98 | 25.42 |
| 5I76.PDB | O, C_ILE_2     | OG1, C_THR_97  | HG1, C_THR_97  | 2.79 | 1.98 | 12.72 |
| 5I76.PDB | O, C_CYS_88    | N, C_GLY_99    | H, C_GLY_99    | 2.86 | 2.07 | 19.65 |
| 5I76.PDB | O, C_TYR_86    | N, C_THR_102   | H, C_THR_102   | 2.98 | 2.17 | 16.60 |
| 5I76.PDB | O, C_PRO_8     | OG1, C_THR_102 | HG1, C_THR_102 | 2.70 | 1.91 | 16.81 |
| 5I76.PDB | O, C_VAL_9     | N, C_LYS_103   | H, C_LYS_103   | 2.92 | 2.08 | 9.07  |
| 5I76.PDB | O, C_ALA_84    | N, C_LEU_104   | H, C_LEU_104   | 3.00 | 2.14 | 2.26  |
| 5I76.PDB | O, C_LEU_11    | N, C_GLU_105   | H, C_GLU_105   | 2.83 | 1.99 | 8.86  |
| 5I76.PDB | O, C_VAL_13    | N, C_LYS_107   | H, C_LYS_107   | 2.70 | 1.85 | 8.61  |

|          |                |                |                 |      |      |       |
|----------|----------------|----------------|-----------------|------|------|-------|
| 5I76.PDB | O, C_THR_109   | NE, C_ARG_108  | HE, C_ARG_108   | 2.76 | 1.94 | 14.16 |
| 5I76.PDB | O, C_ASP_170   | NH1, C_ARG_108 | HH11, C_ARG_108 | 2.86 | 2.03 | 13.35 |
| 5I76.PDB | O, C_TYR_140   | N, C_ALA_111   | H, C_ALA_111    | 2.87 | 2.03 | 11.62 |
| 5I76.PDB | O, C_LEU_135   | N, C_PHE_116   | H, C_PHE_116    | 2.94 | 2.17 | 22.55 |
| 5I76.PDB | O, C_VAL_133   | N, C_PHE_118   | H, C_PHE_118    | 2.80 | 1.99 | 16.08 |
| 5I76.PDB | OG, C_SER_131  | NE2, C_GLN_124 | HE22, C_GLN_124 | 2.87 | 2.02 | 5.94  |
| 5I76.PDB | O, C_ASP_122   | N, C_LYS_126   | H, C_LYS_126    | 2.96 | 2.16 | 17.90 |
| 5I76.PDB | O, C_GLN_124   | N, C_SER_127   | H, C_SER_127    | 2.86 | 2.07 | 20.07 |
| 5I76.PDB | O, C_GLN_124   | OG, C_SER_127  | HG, C_SER_127   | 2.65 | 1.87 | 17.60 |
| 5I76.PDB | O, C_LEU_125   | N, C_GLY_128   | H, C_GLY_128    | 2.88 | 2.03 | 8.22  |
| 5I76.PDB | O, C_LEU_181   | N, C_ALA_130   | H, C_ALA_130    | 2.83 | 2.02 | 16.04 |
| 5I76.PDB | OE1, C_GLN_124 | N, C_SER_131   | H, C_SER_131    | 2.91 | 2.10 | 16.13 |
| 5I76.PDB | OG1, C_THR_180 | OG, C_SER_131  | HG, C_SER_131   | 2.93 | 2.13 | 14.64 |
| 5I76.PDB | O, C_LEU_179   | N, C_VAL_132   | H, C_VAL_132    | 2.79 | 1.93 | 4.92  |
| 5I76.PDB | O, C_SER_177   | N, C_CYS_134   | H, C_CYS_134    | 2.78 | 1.93 | 7.78  |
| 5I76.PDB | O, C_PHE_116   | N, C_LEU_135   | H, C_LEU_135    | 2.83 | 1.98 | 7.23  |
| 5I76.PDB | O, C_LEU_175   | N, C_LEU_136   | H, C_LEU_136    | 2.87 | 2.03 | 8.14  |
| 5I76.PDB | O, C_SER_114   | N, C_ASN_137   | H, C_ASN_137    | 2.83 | 1.99 | 9.65  |
| 5I76.PDB | O, C_TYR_173   | N, C_PHE_139   | H, C_PHE_139    | 2.81 | 1.98 | 14.22 |
| 5I76.PDB | O, C_ALA_111   | N, C_TYR_140   | H, C_TYR_140    | 2.97 | 2.16 | 16.55 |
| 5I76.PDB | OE1, C_GLU_105 | OH, C_TYR_140  | HH, C_TYR_140   | 2.89 | 2.14 | 22.51 |
| 5I76.PDB | O, C_THR_197   | N, C_LYS_145   | H, C_LYS_145    | 2.98 | 2.14 | 9.58  |
| 5I76.PDB | O, C_GLU_195   | N, C_GLN_147   | H, C_GLN_147    | 2.87 | 2.05 | 14.85 |
| 5I76.PDB | O, A_SER_202   | NE2, C_GLN_147 | HE22, C_GLN_147 | 2.78 | 1.96 | 13.33 |
| 5I76.PDB | OG, C_SER_177  | NE1, C_TRP_148 | HE1, C_TRP_148  | 2.90 | 2.11 | 19.54 |
| 5I76.PDB | O, C_ALA_193   | N, C_LYS_149   | H, C_LYS_149    | 2.90 | 2.07 | 12.57 |
| 5I76.PDB | O, C_ALA_153   | N, C_VAL_150   | H, C_VAL_150    | 2.94 | 2.13 | 15.93 |
| 5I76.PDB | O, C_VAL_191   | N, C_ASP_151   | H, C_ASP_151    | 2.91 | 2.07 | 12.19 |
| 5I76.PDB | O, C_VAL_150   | N, C_ALA_153   | H, C_ALA_153    | 2.82 | 1.97 | 8.28  |
| 5I76.PDB | O, C_TRP_148   | N, C_GLN_155   | H, C_GLN_155    | 2.85 | 2.01 | 11.31 |
| 5I76.PDB | O, C_ALA_153   | NE2, C_GLN_155 | HE21, C_GLN_155 | 2.94 | 2.09 | 9.82  |
| 5I76.PDB | OE1, C_GLN_155 | ND2, C_ASN_158 | HD22, C_ASN_158 | 2.96 | 2.21 | 25.95 |
| 5I76.PDB | O, C_THR_178   | N, C_GLN_160   | H, C_GLN_160    | 2.96 | 2.16 | 17.81 |
| 5I76.PDB | O, C_SER_176   | N, C_SER_162   | H, C_SER_162    | 2.87 | 2.08 | 18.90 |
| 5I76.PDB | O, C_SER_174   | N, C_THR_164   | H, C_THR_164    | 2.96 | 2.12 | 9.89  |
| 5I76.PDB | O, C_SER_171   | NE2, C_GLN_166 | HE21, C_GLN_166 | 2.93 | 2.09 | 11.05 |
| 5I76.PDB | O, C_LEU_106   | NE2, C_GLN_166 | HE22, C_GLN_166 | 2.76 | 1.97 | 19.15 |
| 5I76.PDB | O, C_THR_172   | N, C_ASP_167   | H, C_ASP_167    | 2.84 | 2.05 | 19.17 |
| 5I76.PDB | OD2, C_ASP_167 | N, C_LYS_169   | H, C_LYS_169    | 2.81 | 2.03 | 20.18 |
| 5I76.PDB | OD2, C_ASP_167 | N, C_ASP_170   | H, C_ASP_170    | 2.96 | 2.19 | 22.65 |
| 5I76.PDB | O, C_ASP_167   | N, C_SER_171   | H, C_SER_171    | 2.79 | 2.03 | 23.14 |
| 5I76.PDB | OD1, C_ASP_170 | N, C_THR_172   | H, C_THR_172    | 2.98 | 2.17 | 15.09 |
| 5I76.PDB | OD1, C_ASP_170 | OG1, C_THR_172 | HG1, C_THR_172  | 2.79 | 1.97 | 11.52 |
| 5I76.PDB | O, C_PHE_139   | N, C_TYR_173   | H, C_TYR_173    | 2.84 | 1.99 | 6.46  |
| 5I76.PDB | OE2, C_GLU_105 | OH, C_TYR_173  | HH, C_TYR_173   | 2.72 | 1.89 | 6.26  |
| 5I76.PDB | O, C_LEU_136   | N, C_LEU_175   | H, C_LEU_175    | 2.89 | 2.11 | 21.04 |
| 5I76.PDB | O, C_SER_162   | N, C_SER_176   | H, C_SER_176    | 2.87 | 2.04 | 12.82 |
| 5I76.PDB | O, C_CYS_134   | N, C_SER_177   | H, C_SER_177    | 2.86 | 2.04 | 15.37 |
| 5I76.PDB | O, C_GLN_160   | N, C_THR_178   | H, C_THR_178    | 2.89 | 2.09 | 17.26 |
| 5I76.PDB | O, C_VAL_132   | N, C_LEU_179   | H, C_LEU_179    | 2.86 | 2.02 | 11.05 |
| 5I76.PDB | O, C_ALA_130   | N, C_LEU_181   | H, C_LEU_181    | 2.86 | 2.03 | 12.11 |
| 5I76.PDB | O, C_SER_182   | N, C_TYR_186   | H, C_TYR_186    | 2.80 | 1.95 | 6.73  |
| 5I76.PDB | O, C_LYS_183   | N, C_GLU_187   | H, C_GLU_187    | 2.92 | 2.12 | 19.05 |
| 5I76.PDB | O, C_ASP_185   | N, C_LYS_188   | H, C_LYS_188    | 2.99 | 2.16 | 13.62 |
| 5I76.PDB | OD2, C_ASP_151 | ND1, C_HIS_189 | HD1, C_HIS_189  | 2.35 | 1.61 | 24.33 |
| 5I76.PDB | OD1, C_ASP_151 | N, C_VAL_191   | H, C_VAL_191    | 2.92 | 2.09 | 11.65 |
| 5I76.PDB | O, C_PHE_209   | N, C_TYR_192   | H, C_TYR_192    | 2.96 | 2.11 | 8.01  |
| 5I76.PDB | O, C_LYS_149   | N, C_ALA_193   | H, C_ALA_193    | 2.98 | 2.25 | 27.79 |

|          |                |               |                |      |      |       |
|----------|----------------|---------------|----------------|------|------|-------|
| 5I76.PDB | O, C_LYS_207   | N, C_CYS_194  | H, C_CYS_194   | 2.84 | 1.98 | 5.34  |
| 5I76.PDB | O, C_GLN_147   | N, C_GLU_195  | H, C_GLU_195   | 2.83 | 1.99 | 10.59 |
| 5I76.PDB | O, C_VAL_205   | N, C_VAL_196  | H, C_VAL_196   | 2.75 | 1.95 | 18.04 |
| 5I76.PDB | O, C_LYS_145   | N, C_THR_197  | H, C_THR_197   | 2.93 | 2.12 | 16.49 |
| 5I76.PDB | ND1, C_HIS_198 | N, C_GLY_200  | H, C_GLY_200   | 2.94 | 2.08 | 6.54  |
| 5I76.PDB | O, C_HIS_198   | N, C_LEU_201  | H, C_LEU_201   | 2.84 | 1.98 | 6.14  |
| 5I76.PDB | O, C_VAL_196   | N, C_VAL_205  | H, C_VAL_205   | 2.92 | 2.11 | 16.84 |
| 5I76.PDB | O, C_CYS_194   | N, C_LYS_207  | H, C_LYS_207   | 2.90 | 2.08 | 15.23 |
| 5I76.PDB | O, C_TYR_192   | N, C_PHE_209  | H, C_PHE_209   | 2.92 | 2.14 | 20.73 |
| 5I76.PDB | O, C_LYS_190   | N, C_ARG_211  | H, C_ARG_211   | 2.72 | 1.88 | 9.66  |
| 5I76.PDB | O, C_HIS_189   | NE, C_ARG_211 | HE, C_ARG_211  | 2.72 | 1.86 | 2.35  |
| 5I76.PDB | O, D_SER_25    | N, D_GLN_3    | H, D_GLN_3     | 2.94 | 2.11 | 12.93 |
| 5I76.PDB | O, D_THR_23    | N, D_LYS_5    | H, D_LYS_5     | 2.88 | 2.10 | 20.15 |
| 5I76.PDB | OE1, D_GLN_111 | N, D_GLN_6    | H, D_GLN_6     | 2.88 | 2.06 | 13.61 |
| 5I76.PDB | O, D_TYR_93    | NE2, D_GLN_6  | HE22, D_GLN_6  | 2.83 | 1.97 | 5.03  |
| 5I76.PDB | O, D_THR_21    | N, D_SER_7    | H, D_SER_7     | 2.93 | 2.18 | 24.73 |
| 5I76.PDB | O, D_THR_116   | N, D_VAL_12   | H, D_VAL_12    | 2.82 | 1.99 | 13.27 |
| 5I76.PDB | O, D_LEU_85    | N, D_SER_15   | H, D_SER_15    | 2.74 | 1.90 | 9.28  |
| 5I76.PDB | O, D_GLN_13    | N, D_GLN_16   | H, D_GLN_16    | 2.92 | 2.10 | 15.02 |
| 5I76.PDB | O, D_MET_82    | N, D_LEU_18   | H, D_LEU_18    | 2.87 | 2.04 | 11.26 |
| 5I76.PDB | O, D_PHE_80    | N, D_ILE_20   | H, D_ILE_20    | 2.93 | 2.12 | 15.50 |
| 5I76.PDB | O, D_VAL_78    | N, D_CYS_22   | H, D_CYS_22    | 2.82 | 1.97 | 8.74  |
| 5I76.PDB | O, D_LYS_5     | N, D_THR_23   | H, D_THR_23    | 2.84 | 2.00 | 7.60  |
| 5I76.PDB | O, D_SER_76    | N, D_VAL_24   | H, D_VAL_24    | 2.91 | 2.08 | 12.63 |
| 5I76.PDB | O, D_GLN_3     | N, D_SER_25   | H, D_SER_25    | 2.93 | 2.11 | 15.90 |
| 5I76.PDB | OG, D_SER_28   | OG1, D_THR_30 | HG1, D_THR_30  | 2.71 | 1.88 | 5.11  |
| 5I76.PDB | O, D_SER_28    | N, D_ASN_31   | H, D_ASN_31    | 2.99 | 2.14 | 9.76  |
| 5I76.PDB | O, D_ILE_51    | N, D_VAL_34   | H, D_VAL_34    | 2.92 | 2.14 | 20.26 |
| 5I76.PDB | O, D_ALA_96    | N, D_HIS_35   | H, D_HIS_35    | 2.85 | 2.01 | 8.24  |
| 5I76.PDB | O, D_GLY_49    | N, D_TRP_36   | H, D_TRP_36    | 2.85 | 2.04 | 16.83 |
| 5I76.PDB | O, D_TYR_94    | N, D_VAL_37   | H, D_VAL_37    | 2.97 | 2.15 | 14.15 |
| 5I76.PDB | O, D_GLU_46    | N, D_ARG_38   | H, D_ARG_38    | 2.89 | 2.08 | 16.88 |
| 5I76.PDB | OD1, D_ASP_89  | NH1, D_ARG_38 | HH12, D_ARG_38 | 2.88 | 2.03 | 7.89  |
| 5I76.PDB | O, D_ILE_92    | N, D_GLN_39   | H, D_GLN_39    | 2.87 | 2.14 | 26.90 |
| 5I76.PDB | OE1, C_GLN_38  | NE2, D_GLN_39 | HE22, D_GLN_39 | 2.85 | 2.01 | 10.98 |
| 5I76.PDB | O, D_ARG_38    | N, D_GLU_46   | H, D_GLU_46    | 2.89 | 2.10 | 19.77 |
| 5I76.PDB | O, D_TRP_36    | N, D_LEU_48   | H, D_LEU_48    | 2.71 | 1.86 | 7.08  |
| 5I76.PDB | O, D_ASP_58    | N, D_VAL_50   | H, D_VAL_50    | 2.87 | 2.11 | 23.52 |
| 5I76.PDB | O, D_VAL_34    | N, D_ILE_51   | H, D_ILE_51    | 3.00 | 2.19 | 16.46 |
| 5I76.PDB | O, D_ASN_56    | N, D_TRP_52   | H, D_TRP_52    | 2.87 | 2.02 | 5.92  |
| 5I76.PDB | OD2, D_ASP_58  | NE1, D_TRP_52 | HE1, D_TRP_52  | 2.82 | 1.96 | 3.64  |
| 5I76.PDB | O, D_TRP_52    | N, D_GLY_55   | H, D_GLY_55    | 2.86 | 2.03 | 12.93 |
| 5I76.PDB | O, D_VAL_50    | N, D_ASP_58   | H, D_ASP_58    | 2.98 | 2.17 | 16.49 |
| 5I76.PDB | O, D_LEU_48    | N, D_ASN_60   | H, D_ASN_60    | 2.77 | 1.91 | 2.03  |
| 5I76.PDB | O, D_TRP_47    | ND2, D_ASN_60 | HD22, D_ASN_60 | 2.84 | 2.02 | 13.85 |
| 5I76.PDB | O, D_ASN_60    | N, D_PHE_63   | H, D_PHE_63    | 2.84 | 1.99 | 9.46  |
| 5I76.PDB | OD2, D_ASP_89  | NH1, D_ARG_66 | HH12, D_ARG_66 | 2.85 | 2.02 | 11.59 |
| 5I76.PDB | OD1, D_ASP_89  | NH2, D_ARG_66 | HH22, D_ARG_66 | 2.74 | 1.89 | 8.51  |
| 5I76.PDB | O, D_LYS_81    | N, D_SER_68   | H, D_SER_68    | 2.88 | 2.06 | 12.89 |
| 5I76.PDB | OH, D_TYR_59   | N, D_ILE_69   | H, D_ILE_69    | 2.95 | 2.13 | 14.70 |
| 5I76.PDB | O, D_PHE_79    | N, D_ASN_70   | H, D_ASN_70    | 2.95 | 2.13 | 15.10 |
| 5I76.PDB | O, D_SER_53    | NZ, D_LYS_71  | HZ1, D_LYS_71  | 2.72 | 1.85 | 9.25  |
| 5I76.PDB | O, D_GLN_77    | N, D_ASP_72   | H, D_ASP_72    | 2.82 | 1.99 | 12.40 |
| 5I76.PDB | OD1, D_ASP_72  | OG, D_SER_74  | HG, D_SER_74   | 2.71 | 2.00 | 26.33 |
| 5I76.PDB | O, D_CYS_22    | N, D_VAL_78   | H, D_VAL_78    | 2.81 | 1.98 | 14.10 |
| 5I76.PDB | O, D_ASN_70    | N, D_PHE_79   | H, D_PHE_79    | 2.80 | 1.95 | 6.90  |
| 5I76.PDB | O, D_ILE_20    | N, D_PHE_80   | H, D_PHE_80    | 2.86 | 2.01 | 4.93  |
| 5I76.PDB | O, D_SER_68    | N, D_LYS_81   | H, D_LYS_81    | 2.90 | 2.09 | 17.14 |

|          |                |                |                 |      |      |       |
|----------|----------------|----------------|-----------------|------|------|-------|
| 5I76.PDB | O, D_LEU_18    | N, D_MET_82    | H, D_MET_82     | 2.95 | 2.17 | 20.62 |
| 5I76.PDB | O, D_ARG_66    | N, D_ASN_83    | H, D_ASN_83     | 2.77 | 1.99 | 20.75 |
| 5I76.PDB | OD2, D_ASP_89  | N, D_GLN_86    | H, D_GLN_86     | 2.92 | 2.09 | 12.09 |
| 5I76.PDB | O, D_GLN_86    | N, D_ASP_89    | H, D_ASP_89     | 2.77 | 1.93 | 7.75  |
| 5I76.PDB | O, D_SER_87    | N, D_THR_90    | H, D_THR_90     | 3.00 | 2.14 | 2.55  |
| 5I76.PDB | O, D_GLN_39    | N, D_ILE_92    | H, D_ILE_92     | 2.92 | 2.12 | 17.89 |
| 5I76.PDB | O, D_THR_113   | N, D_TYR_93    | H, D_TYR_93     | 2.90 | 2.07 | 10.93 |
| 5I76.PDB | O, D_ASP_89    | OH, D_TYR_93   | HH, D_TYR_93    | 2.67 | 1.84 | 7.84  |
| 5I76.PDB | O, D_VAL_37    | N, D_TYR_94    | H, D_TYR_94     | 2.74 | 1.91 | 13.14 |
| 5I76.PDB | O, D_TYR_108   | N, D_ARG_97    | H, D_ARG_97     | 2.84 | 2.04 | 16.66 |
| 5I76.PDB | O, D_GLU_105   | N, D_LEU_99    | H, D_LEU_99     | 2.74 | 1.99 | 24.80 |
| 5I76.PDB | OD1, D_ASP_103 | N, D_TYR_104   | H, D_TYR_104    | 2.78 | 2.02 | 23.34 |
| 5I76.PDB | OH, C_TYR_36   | N, D_PHE_106   | H, D_PHE_106    | 2.93 | 2.09 | 12.40 |
| 5I76.PDB | O, D_PHE_106   | NE1, D_TRP_109 | HE1, D_TRP_109  | 2.87 | 2.14 | 26.78 |
| 5I76.PDB | O, D_CYS_95    | N, D_GLY_110   | H, D_GLY_110    | 2.79 | 1.94 | 6.99  |
| 5I76.PDB | O, D_GLN_6     | NE2, D_GLN_111 | HE22, D_GLN_111 | 2.93 | 2.16 | 22.33 |
| 5I76.PDB | O, D_TYR_93    | N, D_THR_113   | H, D_THR_113    | 2.81 | 2.09 | 27.66 |
| 5I76.PDB | O, D_SER_7     | OG1, D_THR_113 | HG1, D_THR_113  | 2.96 | 2.26 | 28.05 |
| 5I76.PDB | O, D_ALA_91    | N, D_VAL_115   | H, D_VAL_115    | 2.92 | 2.06 | 1.61  |
| 5I76.PDB | OG1, D_THR_90  | N, D_VAL_117   | H, D_VAL_117    | 2.98 | 2.15 | 13.35 |
| 5I76.PDB | O, D_PHE_152   | N, D_LYS_123   | H, D_LYS_123    | 2.78 | 1.94 | 11.09 |
| 5I76.PDB | O, D_ASP_150   | NZ, D_LYS_123  | HZ2, D_LYS_123  | 2.95 | 2.13 | 19.50 |
| 5I76.PDB | O, D_LYS_149   | N, D_SER_126   | H, D_SER_126    | 2.93 | 2.12 | 16.07 |
| 5I76.PDB | O, D_LEU_147   | N, D_PHE_128   | H, D_PHE_128    | 2.86 | 2.04 | 14.01 |
| 5I76.PDB | O, D_GLY_145   | N, D_LEU_130   | H, D_LEU_130    | 2.76 | 1.93 | 12.37 |
| 5I76.PDB | O, D_VAL_190   | N, D_ALA_142   | H, D_ALA_142    | 2.84 | 1.99 | 7.81  |
| 5I76.PDB | O, D_VAL_188   | N, D_LEU_144   | H, D_LEU_144    | 2.94 | 2.11 | 12.57 |
| 5I76.PDB | O, D_LEU_130   | N, D_GLY_145   | H, D_GLY_145    | 2.87 | 2.09 | 20.87 |
| 5I76.PDB | O, D_SER_186   | N, D_CYS_146   | H, D_CYS_146    | 2.86 | 2.06 | 18.05 |
| 5I76.PDB | O, D_PHE_128   | N, D_LEU_147   | H, D_LEU_147    | 2.79 | 1.96 | 12.46 |
| 5I76.PDB | O, D_LEU_184   | N, D_VAL_148   | H, D_VAL_148    | 2.78 | 1.92 | 3.60  |
| 5I76.PDB | O, D_SER_126   | N, D_LYS_149   | H, D_LYS_149    | 2.86 | 2.01 | 8.73  |
| 5I76.PDB | OD1, D_ASP_150 | NZ, D_LYS_149  | HZ3, D_LYS_149  | 2.86 | 2.03 | 16.70 |
| 5I76.PDB | OE1, D_GLU_154 | OH, D_TYR_151  | HH, D_TYR_151   | 2.91 | 2.09 | 9.17  |
| 5I76.PDB | O, D_LYS_123   | N, D_PHE_152   | H, D_PHE_152    | 2.92 | 2.10 | 15.60 |
| 5I76.PDB | O, D_ASN_205   | N, D_THR_157   | H, D_THR_157    | 2.93 | 2.10 | 13.79 |
| 5I76.PDB | O, D_ASN_203   | N, D_SER_159   | H, D_SER_159    | 2.90 | 2.10 | 17.79 |
| 5I76.PDB | OD1, D_ASN_203 | OG, D_SER_159  | HG, D_SER_159   | 2.84 | 2.05 | 16.99 |
| 5I76.PDB | OG, D_SER_186  | NE1, D_TRP_160 | HE1, D_TRP_160  | 2.92 | 2.08 | 9.81  |
| 5I76.PDB | O, D_ILE_201   | N, D_ASN_161   | H, D_ASN_161    | 2.80 | 1.97 | 10.81 |
| 5I76.PDB | OD1, D_ASN_203 | N, D_SER_162   | H, D_SER_162    | 2.77 | 1.99 | 21.35 |
| 5I76.PDB | O, D_TRP_160   | N, D_GLY_163   | H, D_GLY_163    | 2.92 | 2.16 | 23.49 |
| 5I76.PDB | O, D_ASN_161   | N, D_ALA_164   | H, D_ALA_164    | 2.96 | 2.12 | 9.30  |
| 5I76.PDB | O, D_VAL_187   | N, D_HIS_170   | H, D_HIS_170    | 2.80 | 1.97 | 11.03 |
| 5I76.PDB | O, D_SER_185   | N, D_PHE_172   | H, D_PHE_172    | 2.92 | 2.07 | 3.58  |
| 5I76.PDB | O, D_LEU_181   | N, D_GLN_177   | H, D_GLN_177    | 2.88 | 2.03 | 5.94  |
| 5I76.PDB | OD1, D_ASP_150 | NE2, D_GLN_177 | HE22, D_GLN_177 | 2.71 | 1.92 | 19.90 |
| 5I76.PDB | O, D_GLN_177   | N, D_GLY_180   | H, D_GLY_180    | 2.92 | 2.07 | 7.88  |
| 5I76.PDB | O, D_TYR_151   | N, D_TYR_182   | H, D_TYR_182    | 2.70 | 1.85 | 9.44  |
| 5I76.PDB | O, D_VAL_148   | N, D_LEU_184   | H, D_LEU_184    | 2.93 | 2.12 | 16.08 |
| 5I76.PDB | O, D_CYS_146   | N, D_SER_186   | H, D_SER_186    | 2.93 | 2.10 | 13.35 |
| 5I76.PDB | O, D_HIS_170   | N, D_VAL_187   | H, D_VAL_187    | 2.85 | 2.02 | 13.58 |
| 5I76.PDB | O, D_LEU_144   | N, D_VAL_188   | H, D_VAL_188    | 2.84 | 2.04 | 18.13 |
| 5I76.PDB | O, D_ALA_142   | N, D_VAL_190   | H, D_VAL_190    | 2.88 | 2.06 | 15.90 |
| 5I76.PDB | O, D_GLY_140   | N, D_SER_192   | H, D_SER_192    | 2.66 | 1.82 | 10.87 |
| 5I76.PDB | O, D_PRO_191   | N, D_SER_194   | H, D_SER_194    | 2.93 | 2.12 | 17.62 |
| 5I76.PDB | O, D_PRO_191   | OG, D_SER_194  | HG, D_SER_194   | 2.78 | 2.01 | 19.83 |
| 5I76.PDB | O, D_SER_194   | N, D_GLN_198   | H, D_GLN_198    | 2.92 | 2.06 | 3.85  |

|          |                 |                |                 |      |      |       |
|----------|-----------------|----------------|-----------------|------|------|-------|
| 5I76.PDB | O, D_THR_199    | NE2, D_GLN_198 | HE21, D_GLN_198 | 2.86 | 2.01 | 0.69  |
| 5I76.PDB | OG, D_SER_194   | OH, D_TYR_200  | HH, D_TYR_200   | 2.69 | 1.90 | 16.49 |
| 5I76.PDB | OD1, D_ASN_161  | N, D_ILE_201   | H, D_ILE_201    | 2.91 | 2.08 | 13.96 |
| 5I76.PDB | O, D_LYS_215    | N, D_CYS_202   | H, D_CYS_202    | 2.93 | 2.15 | 21.14 |
| 5I76.PDB | O, D_SER_159    | N, D_ASN_203   | H, D_ASN_203    | 2.82 | 1.98 | 10.06 |
| 5I76.PDB | O, D_VAL_213    | N, D_VAL_204   | H, D_VAL_204    | 2.81 | 1.96 | 3.09  |
| 5I76.PDB | O, D_THR_157    | N, D_ASN_205   | H, D_ASN_205    | 2.91 | 2.08 | 12.09 |
| 5I76.PDB | O, D_THR_211    | N, D_HIS_206   | H, D_HIS_206    | 2.80 | 1.95 | 4.50  |
| 5I76.PDB | O, D_PRO_153    | NE2, D_HIS_206 | HE2, D_HIS_206  | 2.83 | 1.99 | 8.92  |
| 5I76.PDB | O, D_LYS_207    | N, D_ASN_210   | H, D_ASN_210    | 2.86 | 2.01 | 9.18  |
| 5I76.PDB | O, D_VAL_204    | N, D_VAL_213   | H, D_VAL_213    | 2.96 | 2.15 | 16.50 |
| 5I76.PDB | O, D_CYS_202    | N, D_LYS_215   | H, D_LYS_215    | 2.92 | 2.10 | 13.71 |
| 5I76.PDB | OE1, C_GLU_123  | NZ, D_LYS_215  | HZ1, D_LYS_215  | 2.60 | 1.73 | 11.40 |
| 5I76.PDB | O, D_TYR_200    | N, D_VAL_217   | H, D_VAL_217    | 2.83 | 1.98 | 9.45  |
| 5JO5.PDB | O, H_SER_25     | N, H_GLN_3     | H, H_GLN_3      | 2.86 | 2.02 | 10.87 |
| 5JO5.PDB | O, H_ALA_23     | N, H_VAL_5     | H, H_VAL_5      | 2.97 | 2.20 | 22.57 |
| 5JO5.PDB | O, H_SER_21     | N, H_SER_7     | H, H_SER_7      | 2.83 | 2.06 | 22.33 |
| 5JO5.PDB | OG1, H_THR_107  | N, H_GLY_9     | H, H_GLY_9      | 2.92 | 2.18 | 25.94 |
| 5JO5.PDB | O, H_THR_110    | N, H_VAL_12    | H, H_VAL_12     | 2.95 | 2.16 | 19.95 |
| 5JO5.PDB | O, H_LEU_82C    | N, H_GLY_15    | H, H_GLY_15     | 2.87 | 2.03 | 10.84 |
| 5JO5.PDB | O, H_LYS_13     | N, H_GLY_16    | H, H_GLY_16     | 2.89 | 2.08 | 16.43 |
| 5JO5.PDB | O, H_MET_82     | N, H_LEU_18    | H, H_LEU_18     | 2.85 | 2.08 | 21.54 |
| 5JO5.PDB | O, H_LEU_80     | N, H_LEU_20    | H, H_LEU_20     | 2.83 | 1.98 | 7.63  |
| 5JO5.PDB | O, H_SER_7      | N, H_SER_21    | H, H_SER_21     | 2.95 | 2.11 | 11.17 |
| 5JO5.PDB | O, H_LEU_78     | N, H_CYS_22    | H, H_CYS_22     | 2.71 | 1.93 | 21.85 |
| 5JO5.PDB | O, H_ASN_76     | N, H_ALA_24    | H, H_ALA_24     | 2.98 | 2.24 | 25.87 |
| 5JO5.PDB | O, H_GLN_3      | N, H_SER_25    | H, H_SER_25     | 2.97 | 2.18 | 20.13 |
| 5JO5.PDB | OD2, H_ASP_53   | NE1, H_TRP_33  | HE1, H_TRP_33   | 2.93 | 2.17 | 24.23 |
| 5JO5.PDB | O, H_ALA_93     | N, H_SER_35    | H, H_SER_35     | 2.89 | 2.05 | 12.04 |
| 5JO5.PDB | OG1, H_THR_95   | OG, H_SER_35   | HG, H_SER_35    | 2.68 | 1.99 | 28.91 |
| 5JO5.PDB | O, H_GLY_49     | N, H_TRP_36    | H, H_TRP_36     | 2.91 | 2.11 | 18.39 |
| 5JO5.PDB | O, H_TYR_91     | N, H_VAL_37    | H, H_VAL_37     | 2.87 | 2.05 | 15.23 |
| 5JO5.PDB | O, H_GLU_46     | N, H_ARG_38    | H, H_ARG_38     | 2.84 | 1.99 | 8.78  |
| 5JO5.PDB | OE1, H_GLU_46   | NE, H_ARG_38   | HE, H_ARG_38    | 2.82 | 2.00 | 14.74 |
| 5JO5.PDB | OH, H_TYR_90    | NH1, H_ARG_38  | HH11, H_ARG_38  | 2.91 | 2.09 | 14.97 |
| 5JO5.PDB | OD1, H_ASP_86   | NH1, H_ARG_38  | HH12, H_ARG_38  | 2.87 | 2.05 | 14.25 |
| 5JO5.PDB | O, H_VAL_89     | N, H_GLN_39    | H, H_GLN_39     | 2.85 | 2.14 | 29.27 |
| 5JO5.PDB | O, H_LYS_43     | NE2, H_GLN_39  | HE21, H_GLN_39  | 2.97 | 2.25 | 28.76 |
| 5JO5.PDB | OE1, L_GLN_38   | NE2, H_GLN_39  | HE22, H_GLN_39  | 2.84 | 2.00 | 9.38  |
| 5JO5.PDB | O, H_ALA_40     | N, H_LYS_43    | H, H_LYS_43     | 2.90 | 2.09 | 16.35 |
| 5JO5.PDB | O, H_ARG_38     | N, H_GLU_46    | H, H_GLU_46     | 2.79 | 2.02 | 21.68 |
| 5JO5.PDB | O, H_TRP_36     | N, H_VAL_48    | H, H_VAL_48     | 2.94 | 2.11 | 12.31 |
| 5JO5.PDB | OE1, H_GLU_100J | NE, H_ARG_50   | HE, H_ARG_50    | 2.77 | 2.00 | 22.35 |
| 5JO5.PDB | OD2, H_ASP_58   | NH2, H_ARG_50  | HH22, H_ARG_50  | 2.84 | 2.00 | 11.12 |
| 5JO5.PDB | O, H_MET_34     | N, H_ILE_51    | H, H_ILE_51     | 2.83 | 2.00 | 12.12 |
| 5JO5.PDB | O, H_THR_56     | N, H_LYS_52    | H, H_LYS_52     | 2.88 | 2.07 | 15.53 |
| 5JO5.PDB | O, H_LYS_52B    | N, H_GLY_54    | H, H_GLY_54     | 2.98 | 2.13 | 6.95  |
| 5JO5.PDB | O, H_SER_52A    | N, H_GLY_55    | H, H_GLY_55     | 2.78 | 2.06 | 28.32 |
| 5JO5.PDB | O, H_VAL_48     | N, H_ALA_60    | H, H_ALA_60     | 2.93 | 2.08 | 7.36  |
| 5JO5.PDB | O, H_VAL_63     | N, H_ARG_66    | H, H_ARG_66     | 2.94 | 2.10 | 10.09 |
| 5JO5.PDB | OD2, H_ASP_86   | NH1, H_ARG_66  | HH12, H_ARG_66  | 2.78 | 1.94 | 11.10 |
| 5JO5.PDB | O, H_PRO_62     | NH2, H_ARG_66  | HH21, H_ARG_66  | 2.88 | 2.03 | 7.86  |
| 5JO5.PDB | O, H_GLN_81     | N, H_THR_68    | H, H_THR_68     | 2.80 | 1.99 | 17.53 |
| 5JO5.PDB | OH, H_TYR_59    | N, H_ILE_69    | H, H_ILE_69     | 2.86 | 2.01 | 7.98  |
| 5JO5.PDB | OD1, H_ASP_73   | NE, H_ARG_71   | HE, H_ARG_71    | 2.85 | 2.05 | 17.58 |
| 5JO5.PDB | O, H_ALA_32     | NH1, H_ARG_71  | HH12, H_ARG_71  | 2.86 | 2.11 | 24.42 |
| 5JO5.PDB | O, H_ALA_32     | NH2, H_ARG_71  | HH22, H_ARG_71  | 2.83 | 2.07 | 23.03 |
| 5JO5.PDB | O, H_THR_77     | N, H_ASP_72    | H, H_ASP_72     | 2.89 | 2.04 | 7.72  |

|          |                |                |                 |      |      |       |
|----------|----------------|----------------|-----------------|------|------|-------|
| 5JO5.PDB | OD1, H_ASP_72  | OG, H_SER_74   | HG, H_SER_74    | 2.59 | 1.76 | 4.73  |
| 5JO5.PDB | O, H_LYS_75    | OG1, H_THR_77  | HG1, H_THR_77   | 2.84 | 2.04 | 15.24 |
| 5JO5.PDB | O, H_CYS_22    | N, H_LEU_78    | H, H_LEU_78     | 2.85 | 2.02 | 12.40 |
| 5JO5.PDB | O, H_SER_70    | N, H_TYR_79    | H, H_TYR_79     | 2.84 | 2.00 | 10.37 |
| 5JO5.PDB | O, H_LEU_20    | N, H_LEU_80    | H, H_LEU_80     | 2.99 | 2.17 | 15.30 |
| 5JO5.PDB | O, H_THR_68    | N, H_GLN_81    | H, H_GLN_81     | 2.80 | 1.97 | 11.82 |
| 5JO5.PDB | O, H_LEU_18    | N, H_MET_82    | H, H_MET_82     | 2.68 | 1.83 | 6.72  |
| 5JO5.PDB | O, H_ARG_66    | N, H_ASN_82A   | H, H_ASN_82A    | 2.89 | 2.08 | 16.66 |
| 5JO5.PDB | OD2, H_ASP_86  | N, H_LYS_83    | H, H_LYS_83     | 2.83 | 2.01 | 15.00 |
| 5JO5.PDB | O, H_LYS_83    | N, H_ASP_86    | H, H_ASP_86     | 2.89 | 2.04 | 9.43  |
| 5JO5.PDB | O, H_VAL_109   | N, H_ALA_88    | H, H_ALA_88     | 2.98 | 2.20 | 21.19 |
| 5JO5.PDB | O, H_GLN_39    | N, H_VAL_89    | H, H_VAL_89     | 2.91 | 2.12 | 19.27 |
| 5JO5.PDB | O, H_THR_107   | N, H_TYR_90    | H, H_TYR_90     | 2.80 | 1.96 | 8.92  |
| 5JO5.PDB | O, H_ASP_86    | OH, H_TYR_90   | HH, H_TYR_90    | 2.72 | 1.89 | 9.52  |
| 5JO5.PDB | O, H_VAL_37    | N, H_TYR_91    | H, H_TYR_91     | 2.60 | 1.74 | 3.84  |
| 5JO5.PDB | OE2, H_GLU_6   | N, H_CYS_92    | H, H_CYS_92     | 2.73 | 1.88 | 6.94  |
| 5JO5.PDB | O, H_SER_35    | N, H_ALA_93    | H, H_ALA_93     | 2.87 | 2.09 | 21.23 |
| 5JO5.PDB | OD2, H_ASP_102 | NE, H_ARG_94   | HE, H_ARG_94    | 2.81 | 2.07 | 25.27 |
| 5JO5.PDB | OD2, H_ASP_102 | NH1, H_ARG_94  | HH11, H_ARG_94  | 2.70 | 1.93 | 22.67 |
| 5JO5.PDB | O, H_TRP_33    | N, H_THR_95    | H, H_THR_95     | 2.84 | 2.02 | 13.21 |
| 5JO5.PDB | O, H_TYR_100K  | N, H_GLY_96    | H, H_GLY_96     | 2.75 | 2.04 | 28.69 |
| 5JO5.PDB | OH, L_TYR_36   | N, H_PHE_100L  | H, H_PHE_100L   | 2.79 | 1.96 | 12.88 |
| 5JO5.PDB | O, H_ARG_94    | N, H_GLN_101   | H, H_GLN_101    | 2.75 | 2.02 | 27.16 |
| 5JO5.PDB | O, H_CYS_92    | N, H_GLY_104   | H, H_GLY_104    | 2.98 | 2.18 | 17.80 |
| 5JO5.PDB | O, L_GLY_41    | NH2, H_ARG_105 | HH22, H_ARG_105 | 2.85 | 2.05 | 18.48 |
| 5JO5.PDB | OE1, H_GLU_6   | N, H_GLY_106   | H, H_GLY_106    | 2.83 | 1.97 | 2.31  |
| 5JO5.PDB | O, H_ALA_88    | N, H_VAL_109   | H, H_VAL_109    | 2.90 | 2.04 | 1.74  |
| 5JO5.PDB | OG1, H_THR_87  | N, H_VAL_111   | H, H_VAL_111    | 2.87 | 2.02 | 7.41  |
| 5JO5.PDB | O, H_PHE_146   | N, H_LYS_117   | H, H_LYS_117    | 2.78 | 1.95 | 14.10 |
| 5JO5.PDB | O, H_ASP_144   | NZ, H_LYS_117  | HZ2, H_LYS_117  | 2.88 | 2.15 | 29.08 |
| 5JO5.PDB | O, H_LEU_141   | N, H_PHE_122   | H, H_PHE_122    | 2.87 | 2.06 | 15.46 |
| 5JO5.PDB | O, H_GLY_139   | N, H_LEU_124   | H, H_LEU_124    | 2.83 | 1.98 | 8.83  |
| 5JO5.PDB | O, H_THR_135   | N, H_SER_132   | H, H_SER_132    | 2.79 | 2.00 | 20.13 |
| 5JO5.PDB | O, H_VAL_184   | N, H_ALA_136   | H, H_ALA_136    | 2.77 | 1.96 | 15.59 |
| 5JO5.PDB | O, H_LEU_124   | N, H_GLY_139   | H, H_GLY_139    | 2.94 | 2.17 | 22.16 |
| 5JO5.PDB | O, H_SER_180   | N, H_CYS_140   | H, H_CYS_140    | 2.79 | 2.01 | 20.41 |
| 5JO5.PDB | O, H_PHE_122   | N, H_LEU_141   | H, H_LEU_141    | 2.81 | 1.96 | 8.37  |
| 5JO5.PDB | O, H_LEU_178   | N, H_VAL_142   | H, H_VAL_142    | 2.78 | 1.93 | 4.91  |
| 5JO5.PDB | O, H_SER_120   | N, H_LYS_143   | H, H_LYS_143    | 2.78 | 1.93 | 7.38  |
| 5JO5.PDB | OE2, L_GLU_124 | NZ, H_LYS_143  | HZ2, H_LYS_143  | 2.46 | 1.63 | 17.05 |
| 5JO5.PDB | O, H_TYR_176   | N, H_TYR_145   | H, H_TYR_145    | 2.93 | 2.12 | 18.01 |
| 5JO5.PDB | O, H_LYS_117   | N, H_PHE_146   | H, H_PHE_146    | 2.91 | 2.11 | 18.36 |
| 5JO5.PDB | O, H_ASN_197   | N, H_SER_153   | H, H_SER_153    | 2.98 | 2.17 | 17.36 |
| 5JO5.PDB | OD1, H_ASN_197 | OG, H_SER_153  | HG, H_SER_153   | 2.83 | 2.04 | 17.75 |
| 5JO5.PDB | OG, H_SER_180  | NE1, H_TRP_154 | HE1, H_TRP_154  | 2.93 | 2.09 | 10.13 |
| 5JO5.PDB | O, H_ILE_195   | N, H_ASN_155   | H, H_ASN_155    | 2.79 | 1.95 | 11.56 |
| 5JO5.PDB | OD1, H_ASN_197 | N, H_SER_156   | H, H_SER_156    | 2.79 | 1.98 | 16.54 |
| 5JO5.PDB | O, H_VAL_181   | N, H_HIS_164   | H, H_HIS_164    | 2.87 | 2.04 | 11.88 |
| 5JO5.PDB | O, H_SER_179   | N, H_PHE_166   | H, H_PHE_166    | 2.94 | 2.09 | 7.03  |
| 5JO5.PDB | O, H_SER_177   | N, H_VAL_169   | H, H_VAL_169    | 2.82 | 1.99 | 13.61 |
| 5JO5.PDB | O, H_LEU_175   | N, H_GLN_171   | H, H_GLN_171    | 2.90 | 2.04 | 2.90  |
| 5JO5.PDB | OD1, H_ASP_144 | NE2, H_GLN_171 | HE22, H_GLN_171 | 2.85 | 2.05 | 18.06 |
| 5JO5.PDB | O, H_GLN_171   | N, H_GLY_174   | H, H_GLY_174    | 2.76 | 1.91 | 7.94  |
| 5JO5.PDB | O, H_TYR_145   | N, H_TYR_176   | H, H_TYR_176    | 2.87 | 2.01 | 3.19  |
| 5JO5.PDB | O, H_VAL_142   | N, H_LEU_178   | H, H_LEU_178    | 2.88 | 2.10 | 20.17 |
| 5JO5.PDB | OH, L_TYR_177  | OG, H_SER_179  | HG, H_SER_179   | 2.73 | 2.00 | 25.96 |
| 5JO5.PDB | O, H_CYS_140   | N, H_SER_180   | H, H_SER_180    | 2.97 | 2.15 | 16.14 |
| 5JO5.PDB | O, H_HIS_164   | N, H_VAL_181   | H, H_VAL_181    | 2.90 | 2.05 | 10.33 |

|          |                |                |                 |      |      |       |
|----------|----------------|----------------|-----------------|------|------|-------|
| 5JO5.PDB | O, H.LEU.138   | N, H.VAL.182   | H, H.VAL.182    | 2.81 | 1.98 | 13.21 |
| 5JO5.PDB | O, H.ALA.136   | N, H.VAL.184   | H, H.VAL.184    | 2.93 | 2.09 | 11.13 |
| 5JO5.PDB | O, H.GLY.134   | N, H.SER.186   | H, H.SER.186    | 2.74 | 1.90 | 11.33 |
| 5JO5.PDB | O, H.PRO.185   | N, H.SER.188   | H, H.SER.188    | 2.93 | 2.12 | 16.10 |
| 5JO5.PDB | O, H.PRO.185   | OG, H.SER.188  | HG, H.SER.188   | 2.69 | 1.85 | 3.24  |
| 5JO5.PDB | O, H.SER.188   | N, H.GLN.192   | H, H.GLN.192    | 2.64 | 1.80 | 8.80  |
| 5JO5.PDB | O, H.THR.193   | NE2, H.GLN.192 | HE21, H.GLN.192 | 2.95 | 2.13 | 13.81 |
| 5JO5.PDB | OG, H.SER.188  | OH, H.TYR.194  | HH, H.TYR.194   | 2.61 | 1.85 | 20.74 |
| 5JO5.PDB | OD1, H.ASN.155 | N, H.ILE.195   | H, H.ILE.195    | 2.90 | 2.09 | 16.29 |
| 5JO5.PDB | O, H.LYS.209   | N, H.CYS.196   | H, H.CYS.196    | 2.98 | 2.20 | 20.49 |
| 5JO5.PDB | O, H.SER.153   | N, H.ASN.197   | H, H.ASN.197    | 2.76 | 1.91 | 7.31  |
| 5JO5.PDB | OD1, H.ASP.208 | ND2, H.ASN.197 | HD22, H.ASN.197 | 2.91 | 2.06 | 7.04  |
| 5JO5.PDB | O, H.VAL.207   | N, H.VAL.198   | H, H.VAL.198    | 2.73 | 1.88 | 4.89  |
| 5JO5.PDB | O, H.THR.205   | N, H.HIS.200   | H, H.HIS.200    | 2.87 | 2.01 | 1.84  |
| 5JO5.PDB | O, H.PRO.147   | NE2, H.HIS.200 | HE2, H.HIS.200  | 2.76 | 1.91 | 9.60  |
| 5JO5.PDB | O, H.LYS.201   | N, H.ASN.204   | H, H.ASN.204    | 2.99 | 2.16 | 10.85 |
| 5JO5.PDB | O, H.VAL.198   | N, H.VAL.207   | H, H.VAL.207    | 2.80 | 1.98 | 14.15 |
| 5JO5.PDB | O, H.TYR.194   | N, H.VAL.211   | H, H.VAL.211    | 2.90 | 2.06 | 10.21 |
| 5JO5.PDB | O, L.GLN.24    | N, L.THR.5     | H, L.THR.5      | 2.86 | 2.04 | 14.84 |
| 5JO5.PDB | O, L.TYR.86    | NE2, L.GLN.6   | HE22, L.GLN.6   | 2.96 | 2.12 | 10.37 |
| 5JO5.PDB | O, L.LYS.103   | N, L.VAL.11    | H, L.VAL.11     | 2.96 | 2.14 | 15.21 |
| 5JO5.PDB | O, L.THR.105   | N, L.VAL.13    | H, L.VAL.13     | 2.96 | 2.22 | 26.22 |
| 5JO5.PDB | O, L.ALA.78    | N, L.GLY.16    | H, L.GLY.16     | 2.86 | 2.00 | 4.99  |
| 5JO5.PDB | O, L.ILE.75    | N, L.VAL.19    | H, L.VAL.19     | 2.97 | 2.17 | 18.95 |
| 5JO5.PDB | O, L.LEU.73    | N, L.ILE.21    | H, L.ILE.21     | 2.80 | 1.96 | 10.07 |
| 5JO5.PDB | O, L.ALA.71    | N, L.CYS.23    | H, L.CYS.23     | 2.65 | 1.81 | 9.51  |
| 5JO5.PDB | O, L.THR.5     | N, L.GLN.24    | H, L.GLN.24     | 2.94 | 2.18 | 24.54 |
| 5JO5.PDB | O, L.ASN.69    | N, L.GLY.25    | H, L.GLY.25     | 2.97 | 2.14 | 12.74 |
| 5JO5.PDB | O, L.ARG.91    | OG, L.SER.27   | HG, L.SER.27    | 2.58 | 1.79 | 15.77 |
| 5JO5.PDB | OE1, D.GLN.24  | OG, L.SER.30   | HG, L.SER.30    | 2.84 | 2.07 | 18.45 |
| 5JO5.PDB | O, L.SER.89    | N, L.SER.34    | H, L.SER.34     | 2.96 | 2.20 | 23.71 |
| 5JO5.PDB | O, L.ILE.48    | N, L.TRP.35    | H, L.TRP.35     | 2.92 | 2.12 | 18.40 |
| 5JO5.PDB | O, L.TYR.87    | N, L.TYR.36    | H, L.TYR.36     | 2.82 | 2.06 | 23.68 |
| 5JO5.PDB | O, L.VAL.45    | N, L.GLN.37    | H, L.GLN.37     | 2.90 | 2.07 | 14.26 |
| 5JO5.PDB | OH, L.TYR.86   | NE2, L.GLN.37  | HE21, L.GLN.37  | 2.94 | 2.08 | 4.10  |
| 5JO5.PDB | O, L.ASP.85    | N, L.GLN.38    | H, L.GLN.38     | 2.78 | 1.99 | 19.05 |
| 5JO5.PDB | OE1, H.GLN.39  | NE2, L.GLN.38  | HE22, L.GLN.38  | 2.83 | 2.00 | 13.03 |
| 5JO5.PDB | O, L.LYS.39    | N, L.GLN.42    | H, L.GLN.42     | 2.99 | 2.18 | 16.76 |
| 5JO5.PDB | O, L.GLN.37    | N, L.VAL.45    | H, L.VAL.45     | 2.86 | 2.09 | 22.29 |
| 5JO5.PDB | O, L.TRP.35    | N, L.VAL.47    | H, L.VAL.47     | 2.87 | 2.01 | 3.07  |
| 5JO5.PDB | OD1, L.ASN.52  | NE, L.ARG.54   | HE, L.ARG.54    | 2.95 | 2.15 | 18.15 |
| 5JO5.PDB | OD1, L.ASP.82  | NH2, L.ARG.61  | HH21, L.ARG.61  | 2.75 | 1.92 | 13.56 |
| 5JO5.PDB | OE2, L.GLU.81  | NH2, L.ARG.61  | HH22, L.ARG.61  | 2.98 | 2.17 | 16.30 |
| 5JO5.PDB | O, L.THR.74    | N, L.SER.63    | H, L.SER.63     | 2.91 | 2.14 | 22.21 |
| 5JO5.PDB | OD1, L.ASN.52  | N, L.GLY.64    | H, L.GLY.64     | 2.74 | 1.93 | 16.44 |
| 5JO5.PDB | O, L.SER.72    | N, L.SER.65    | H, L.SER.65     | 2.99 | 2.21 | 21.03 |
| 5JO5.PDB | O, L.THR.70    | N, L.SER.67    | H, L.SER.67     | 2.96 | 2.13 | 12.51 |
| 5JO5.PDB | O, L.SER.67    | N, L.THR.70    | H, L.THR.70     | 2.95 | 2.13 | 15.77 |
| 5JO5.PDB | O, L.SER.67    | OG1, L.THR.70  | HG1, L.THR.70   | 2.76 | 1.95 | 12.31 |
| 5JO5.PDB | O, L.CYS.23    | N, L.ALA.71    | H, L.ALA.71     | 2.78 | 1.96 | 15.50 |
| 5JO5.PDB | O, L.SER.65    | N, L.SER.72    | H, L.SER.72     | 2.85 | 2.01 | 11.19 |
| 5JO5.PDB | O, L.ILE.21    | N, L.LEU.73    | H, L.LEU.73     | 2.77 | 1.95 | 14.84 |
| 5JO5.PDB | O, L.SER.63    | N, L.THR.74    | H, L.THR.74     | 2.81 | 1.96 | 6.34  |
| 5JO5.PDB | O, L.VAL.19    | N, L.ILE.75    | H, L.ILE.75     | 2.92 | 2.10 | 14.23 |
| 5JO5.PDB | O, L.ARG.61    | N, L.THR.76    | H, L.THR.76     | 3.00 | 2.18 | 15.65 |
| 5JO5.PDB | O, L.GLN.17    | N, L.ALA.78    | H, L.ALA.78     | 2.90 | 2.06 | 10.41 |
| 5JO5.PDB | OD2, L.ASP.82  | N, L.GLN.79    | H, L.GLN.79     | 2.88 | 2.03 | 7.63  |
| 5JO5.PDB | O, L.GLN.79    | N, L.ASP.82    | H, L.ASP.82     | 2.84 | 1.99 | 8.17  |



|          |                 |                |                 |      |      |       |
|----------|-----------------|----------------|-----------------|------|------|-------|
| 5JO5.PDB | O, L_GLN_38     | N, L_ASP_85    | H, L_ASP_85     | 2.85 | 2.02 | 13.72 |
| 5JO5.PDB | O, L_THR_102    | N, L_TYR_86    | H, L_TYR_86     | 2.82 | 2.00 | 14.85 |
| 5JO5.PDB | O, L_ASP_82     | OH, L_TYR_86   | HH, L_TYR_86    | 2.63 | 1.81 | 7.96  |
| 5JO5.PDB | O, L_TYR_36     | N, L_TYR_87    | H, L_TYR_87     | 2.95 | 2.15 | 18.69 |
| 5JO5.PDB | O, L_SER_34     | N, L_SER_89    | H, L_SER_89     | 2.88 | 2.15 | 26.79 |
| 5JO5.PDB | O, L_VAL_97     | OG, L_SER_89   | HG, L_SER_89    | 2.82 | 2.06 | 20.46 |
| 5JO5.PDB | OE2, H_GLU_100J | NH2, L_ARG_91  | HH22, L_ARG_91  | 2.69 | 1.84 | 7.26  |
| 5JO5.PDB | OH, L_TYR_31    | N, L_GLY_95    | H, L_GLY_95     | 2.78 | 1.95 | 11.57 |
| 5JO5.PDB | OD1, L_ASP_92   | OG, L_SER_95A  | HG, L_SER_95A   | 2.53 | 1.76 | 19.87 |
| 5JO5.PDB | OD1, H_ASP_58   | NE, L_ARG_95B  | HE, L_ARG_95B   | 2.95 | 2.13 | 14.76 |
| 5JO5.PDB | OG, L_SER_95A   | N, L_LEU_95C   | H, L_LEU_95C    | 2.90 | 2.07 | 11.01 |
| 5JO5.PDB | O, L_SER_90     | N, L_VAL_97    | H, L_VAL_97     | 2.91 | 2.08 | 13.54 |
| 5JO5.PDB | O, L_CYS_88     | N, L_GLY_99    | H, L_GLY_99     | 2.86 | 2.04 | 15.85 |
| 5JO5.PDB | OE1, L_GLN_6    | N, L_GLY_101   | H, L_GLY_101    | 2.93 | 2.15 | 20.63 |
| 5JO5.PDB | O, L_TYR_86     | N, L_THR_102   | H, L_THR_102    | 2.83 | 2.05 | 21.30 |
| 5JO5.PDB | O, L_ASP_7      | OG1, L_THR_102 | HG1, L_THR_102  | 2.55 | 1.71 | 2.52  |
| 5JO5.PDB | O, L_PRO_8      | N, L_LYS_103   | H, L_LYS_103    | 2.89 | 2.05 | 8.92  |
| 5JO5.PDB | O, L_ALA_84     | N, L_LEU_104   | H, L_LEU_104    | 2.87 | 2.03 | 9.56  |
| 5JO5.PDB | OE2, L_GLU_83   | N, L_VAL_106   | H, L_VAL_106    | 2.95 | 2.18 | 22.86 |
| 5JO5.PDB | O, L_VAL_13     | N, L_LEU_106A  | H, L_LEU_106A   | 2.88 | 2.04 | 12.25 |
| 5JO5.PDB | OH, L_TYR_140   | N, L_SER_107   | H, L_SER_107    | 2.96 | 2.15 | 15.96 |
| 5JO5.PDB | OE1, L_GLU_198  | NZ, L_LYS_110  | HZ3, L_LYS_110  | 2.94 | 2.09 | 14.01 |
| 5JO5.PDB | O, L_TYR_140    | N, L_ALA_111   | H, L_ALA_111    | 2.75 | 1.91 | 11.65 |
| 5JO5.PDB | O, L_SER_137    | N, L_SER_114   | H, L_SER_114    | 2.88 | 2.08 | 18.09 |
| 5JO5.PDB | O, L_LEU_135    | N, L_THR_116   | H, L_THR_116    | 2.97 | 2.14 | 11.76 |
| 5JO5.PDB | O, L_VAL_133    | N, L_PHE_118   | H, L_PHE_118    | 2.81 | 1.95 | 5.47  |
| 5JO5.PDB | OE2, L_GLU_124  | OG1, L_THR_131 | HG1, L_THR_131  | 2.52 | 1.80 | 26.33 |
| 5JO5.PDB | O, L_LEU_178    | N, L_LEU_132   | H, L_LEU_132    | 2.86 | 2.05 | 15.80 |
| 5JO5.PDB | O, L_SER_176    | N, L_CYS_134   | H, L_CYS_134    | 2.82 | 1.97 | 8.12  |
| 5JO5.PDB | O, L_THR_116    | N, L_LEU_135   | H, L_LEU_135    | 2.90 | 2.05 | 8.63  |
| 5JO5.PDB | O, L_ALA_174    | N, L_ILE_136   | H, L_ILE_136    | 2.88 | 2.10 | 21.82 |
| 5JO5.PDB | O, L_SER_114    | N, L_SER_137   | H, L_SER_137    | 2.94 | 2.15 | 19.51 |
| 5JO5.PDB | OE1, L_GLN_167  | N, L_ASP_138   | H, L_ASP_138    | 2.79 | 2.02 | 21.93 |
| 5JO5.PDB | O, L_PRO_141    | N, L_ALA_143   | H, L_ALA_143    | 2.87 | 2.16 | 29.13 |
| 5JO5.PDB | O, L_GLN_194    | N, L_ALA_147   | H, L_ALA_147    | 2.86 | 2.03 | 12.40 |
| 5JO5.PDB | OG, L_SER_176   | NE1, L_TRP_148 | HE1, L_TRP_148  | 2.93 | 2.09 | 9.40  |
| 5JO5.PDB | O, L_SER_192    | N, L_LYS_149   | H, L_LYS_149    | 2.97 | 2.16 | 17.57 |
| 5JO5.PDB | O, L_SER_153    | N, L_ALA_150   | H, L_ALA_150    | 2.83 | 2.05 | 20.73 |
| 5JO5.PDB | O, L_TRP_148    | N, L_VAL_155   | H, L_VAL_155    | 2.95 | 2.13 | 15.00 |
| 5JO5.PDB | O, L_SER_175    | N, L_THR_162   | H, L_THR_162    | 2.86 | 2.04 | 15.42 |
| 5JO5.PDB | O, H_GLY_42     | OG1, L_THR_163 | HG1, L_THR_163  | 2.52 | 1.79 | 25.04 |
| 5JO5.PDB | O, L_LYS_171    | N, L_GLN_167   | H, L_GLN_167    | 2.64 | 1.79 | 5.56  |
| 5JO5.PDB | OD1, L_ASN_169  | NE2, L_GLN_167 | HE21, L_GLN_167 | 2.89 | 2.12 | 21.54 |
| 5JO5.PDB | O, L_PHE_139    | N, L_TYR_172   | H, L_TYR_172    | 2.91 | 2.12 | 19.98 |
| 5JO5.PDB | O, L_SER_165    | N, L_ALA_173   | H, L_ALA_173    | 2.99 | 2.18 | 16.79 |
| 5JO5.PDB | O, L_ILE_136    | N, L_ALA_174   | H, L_ALA_174    | 2.74 | 1.94 | 17.43 |
| 5JO5.PDB | OG1, L_THR_162  | OG, L_SER_175  | HG, L_SER_175   | 2.94 | 2.19 | 22.64 |
| 5JO5.PDB | O, L_CYS_134    | N, L_SER_176   | H, L_SER_176    | 2.92 | 2.13 | 20.19 |
| 5JO5.PDB | OG1, L_THR_161  | OG, L_SER_176  | HG, L_SER_176   | 2.79 | 2.07 | 26.34 |
| 5JO5.PDB | O, L_GLU_160    | N, L_TYR_177   | H, L_TYR_177    | 2.76 | 1.95 | 17.14 |
| 5JO5.PDB | O, L_LEU_132    | N, L_LEU_178   | H, L_LEU_178    | 2.97 | 2.16 | 15.14 |
| 5JO5.PDB | O, L_GLY_158    | N, L_SER_179   | H, L_SER_179    | 2.93 | 2.10 | 12.81 |
| 5JO5.PDB | O, L_ALA_130    | N, L_LEU_180   | H, L_LEU_180    | 2.74 | 1.88 | 1.66  |
| 5JO5.PDB | OE1, L_GLN_184  | N, L_THR_181   | H, L_THR_181    | 2.79 | 1.96 | 12.16 |
| 5JO5.PDB | O, L_LYS_149    | N, L_SER_192   | H, L_SER_192    | 2.91 | 2.12 | 19.77 |
| 5JO5.PDB | OG1, L_THR_205  | OG, L_SER_192  | HG, L_SER_192   | 2.82 | 2.12 | 28.14 |
| 5JO5.PDB | O, L_LYS_204    | N, L_CYS_193   | H, L_CYS_193    | 2.89 | 2.08 | 16.55 |
| 5JO5.PDB | O, L_ALA_147    | N, L_GLN_194   | H, L_GLN_194    | 2.74 | 1.89 | 6.08  |

|          |                 |                |                |      |      |       |
|----------|-----------------|----------------|----------------|------|------|-------|
| 5JO5.PDB | O, L_VAL_202    | N, L_VAL_195   | H, L_VAL_195   | 2.92 | 2.09 | 13.64 |
| 5JO5.PDB | O, L_THR_145    | N, L_THR_196   | H, L_THR_196   | 2.99 | 2.14 | 7.48  |
| 5JO5.PDB | O, L_SER_200    | N, L_HIS_197   | H, L_HIS_197   | 2.70 | 1.87 | 12.42 |
| 5JO5.PDB | O, L_PRO_141    | NE2, L_HIS_197 | HE2, L_HIS_197 | 2.84 | 2.04 | 18.51 |
| 5JO5.PDB | O, L_HIS_197    | N, L_SER_200   | H, L_SER_200   | 2.99 | 2.16 | 11.48 |
| 5JO5.PDB | OG1, L_THR_196  | OG1, L_THR_201 | HG1, L_THR_201 | 2.95 | 2.20 | 22.04 |
| 5JO5.PDB | O, L_VAL_195    | N, L_VAL_202   | H, L_VAL_202   | 2.93 | 2.11 | 14.66 |
| 5JO5.PDB | O, L_TYR_191    | N, L_VAL_206   | H, L_VAL_206   | 2.84 | 2.01 | 13.12 |
| 5JO5.PDB | O, A_SER_25     | N, A_GLN_3     | H, A_GLN_3     | 2.86 | 2.01 | 9.97  |
| 5JO5.PDB | O, A_ALA_23     | N, A_VAL_5     | H, A_VAL_5     | 3.00 | 2.23 | 23.15 |
| 5JO5.PDB | O, A_SER_21     | N, A_SER_7     | H, A_SER_7     | 2.80 | 2.01 | 19.59 |
| 5JO5.PDB | OG1, A_THR_107  | N, A_GLY_9     | H, A_GLY_9     | 2.93 | 2.20 | 27.02 |
| 5JO5.PDB | O, A_THR_110    | N, A_VAL_12    | H, A_VAL_12    | 2.89 | 2.09 | 18.23 |
| 5JO5.PDB | O, A_LEU_82C    | N, A_GLY_15    | H, A_GLY_15    | 2.79 | 1.96 | 12.62 |
| 5JO5.PDB | O, A_LYS_13     | N, A_GLY_16    | H, A_GLY_16    | 2.95 | 2.13 | 15.67 |
| 5JO5.PDB | O, A_MET_82     | N, A_LEU_18    | H, A_LEU_18    | 2.94 | 2.14 | 18.28 |
| 5JO5.PDB | O, A_LEU_80     | N, A_LEU_20    | H, A_LEU_20    | 2.82 | 2.00 | 14.35 |
| 5JO5.PDB | O, A_SER_7      | N, A_SER_21    | H, A_SER_21    | 2.92 | 2.08 | 11.20 |
| 5JO5.PDB | O, A_LEU_78     | N, A_CYS_22    | H, A_CYS_22    | 2.77 | 2.01 | 23.44 |
| 5JO5.PDB | O, A_VAL_5      | N, A_ALA_23    | H, A_ALA_23    | 2.96 | 2.14 | 16.35 |
| 5JO5.PDB | O, A_PHE_29     | N, A_ALA_32    | H, A_ALA_32    | 2.94 | 2.09 | 3.75  |
| 5JO5.PDB | OD2, A ASP_53   | NE1, A_TRP_33  | HE1, A_TRP_33  | 2.82 | 2.05 | 21.67 |
| 5JO5.PDB | O, A_ALA_93     | N, A_SER_35    | H, A_SER_35    | 2.92 | 2.09 | 13.78 |
| 5JO5.PDB | O, A_GLY_49     | N, A_TRP_36    | H, A_TRP_36    | 2.89 | 2.08 | 17.21 |
| 5JO5.PDB | O, A_TYR_91     | N, A_VAL_37    | H, A_VAL_37    | 2.83 | 2.00 | 13.43 |
| 5JO5.PDB | O, A_GLU_46     | N, A_ARG_38    | H, A_ARG_38    | 2.87 | 2.02 | 9.33  |
| 5JO5.PDB | OE1, A_GLU_46   | NE, A_ARG_38   | HE, A_ARG_38   | 2.78 | 1.97 | 16.63 |
| 5JO5.PDB | OD1, A ASP_86   | NH1, A_ARG_38  | HH12, A_ARG_38 | 2.83 | 2.01 | 14.60 |
| 5JO5.PDB | OE1, B_GLN_38   | NE2, A_GLN_39  | HE22, A_GLN_39 | 2.87 | 2.02 | 8.31  |
| 5JO5.PDB | O, A_ALA_40     | N, A_LYS_43    | H, A_LYS_43    | 2.86 | 2.03 | 13.20 |
| 5JO5.PDB | O, A_ARG_38     | N, A_GLU_46    | H, A_GLU_46    | 2.79 | 2.01 | 20.62 |
| 5JO5.PDB | O, A_TRP_36     | N, A_VAL_48    | H, A_VAL_48    | 2.91 | 2.08 | 13.09 |
| 5JO5.PDB | OE1, A_GLU_100J | NE, A_ARG_50   | HE, A_ARG_50   | 2.88 | 2.11 | 22.13 |
| 5JO5.PDB | OE2, A_GLU_100J | NH1, A_ARG_50  | HH11, A_ARG_50 | 2.91 | 2.07 | 11.34 |
| 5JO5.PDB | OD2, A ASP_58   | NH2, A_ARG_50  | HH22, A_ARG_50 | 2.88 | 2.05 | 13.39 |
| 5JO5.PDB | O, A_MET_34     | N, A_ILE_51    | H, A_ILE_51    | 2.86 | 2.02 | 11.89 |
| 5JO5.PDB | O, A_THR_56     | N, A_LYS_52    | H, A_LYS_52    | 2.85 | 2.02 | 13.45 |
| 5JO5.PDB | O, A_LYS_52B    | N, A_GLY_54    | H, A_GLY_54    | 2.90 | 2.06 | 8.56  |
| 5JO5.PDB | O, A_SER_52A    | N, A_GLY_55    | H, A_GLY_55    | 2.85 | 2.06 | 18.80 |
| 5JO5.PDB | O, A_VAL_48     | N, A_ALA_60    | H, A_ALA_60    | 2.97 | 2.12 | 7.83  |
| 5JO5.PDB | O, A_VAL_63     | N, A_ARG_66    | H, A_ARG_66    | 2.94 | 2.11 | 11.71 |
| 5JO5.PDB | O, A_SER_82B    | NH1, A_ARG_66  | HH11, A_ARG_66 | 2.94 | 2.23 | 29.90 |
| 5JO5.PDB | OD2, A ASP_86   | NH1, A_ARG_66  | HH12, A_ARG_66 | 2.80 | 1.98 | 14.11 |
| 5JO5.PDB | O, A_PRO_62     | NH2, A_ARG_66  | HH21, A_ARG_66 | 2.96 | 2.10 | 6.17  |
| 5JO5.PDB | O, A_GLN_81     | N, A_THR_68    | H, A_THR_68    | 2.83 | 2.01 | 13.97 |
| 5JO5.PDB | OH, A_TYR_59    | N, A_ILE_69    | H, A_ILE_69    | 2.85 | 2.01 | 8.90  |
| 5JO5.PDB | OD1, A ASP_73   | NE, A_ARG_71   | HE, A_ARG_71   | 2.86 | 2.09 | 22.09 |
| 5JO5.PDB | O, A_ALA_32     | NH1, A_ARG_71  | HH12, A_ARG_71 | 2.93 | 2.18 | 24.18 |
| 5JO5.PDB | O, A_ALA_32     | NH2, A_ARG_71  | HH22, A_ARG_71 | 2.90 | 2.14 | 22.88 |
| 5JO5.PDB | O, A_THR_77     | N, A ASP_72    | H, A ASP_72    | 2.96 | 2.10 | 6.62  |
| 5JO5.PDB | OD1, A ASP_72   | OG, A_SER_74   | HG, A_SER_74   | 2.54 | 1.80 | 22.83 |
| 5JO5.PDB | O, A_LYS_75     | OG1, A_THR_77  | HG1, A_THR_77  | 2.92 | 2.11 | 13.47 |
| 5JO5.PDB | O, A_CYS_22     | N, A_LEU_78    | H, A_LEU_78    | 2.92 | 2.08 | 10.42 |
| 5JO5.PDB | O, A_SER_70     | N, A_TYR_79    | H, A_TYR_79    | 2.88 | 2.05 | 13.41 |
| 5JO5.PDB | O, A_THR_68     | N, A_GLN_81    | H, A_GLN_81    | 2.75 | 1.92 | 12.07 |
| 5JO5.PDB | O, A_LEU_18     | N, A_MET_82    | H, A_MET_82    | 2.76 | 1.91 | 7.81  |
| 5JO5.PDB | OD2, A ASP_86   | N, A_LYS_83    | H, A_LYS_83    | 2.81 | 1.98 | 13.27 |
| 5JO5.PDB | O, A_LYS_83     | N, A ASP_86    | H, A ASP_86    | 2.81 | 1.98 | 12.37 |

|          |                |                |                 |      |      |       |
|----------|----------------|----------------|-----------------|------|------|-------|
| 5JO5.PDB | O, A_GLN_39    | N, A_VAL_89    | H, A_VAL_89     | 2.91 | 2.12 | 19.76 |
| 5JO5.PDB | O, A_THR_107   | N, A_TYR_90    | H, A_TYR_90     | 2.80 | 1.95 | 9.44  |
| 5JO5.PDB | O, A_ASP_86    | OH, A_TYR_90   | HH, A_TYR_90    | 2.68 | 1.87 | 12.71 |
| 5JO5.PDB | O, A_VAL_37    | N, A_TYR_91    | H, A_TYR_91     | 2.64 | 1.78 | 2.28  |
| 5JO5.PDB | OE2, A_GLU_6   | N, A_CYS_92    | H, A_CYS_92     | 2.84 | 2.03 | 15.70 |
| 5JO5.PDB | O, A_SER_35    | N, A_ALA_93    | H, A_ALA_93     | 2.90 | 2.14 | 23.25 |
| 5JO5.PDB | OD2, A_ASP_102 | NE, A_ARG_94   | HE, A_ARG_94    | 2.86 | 2.14 | 28.73 |
| 5JO5.PDB | OD2, A_ASP_102 | NH1, A_ARG_94  | HH11, A_ARG_94  | 2.58 | 1.79 | 19.06 |
| 5JO5.PDB | O, A_TRP_33    | N, A_THR_95    | H, A_THR_95     | 2.83 | 2.01 | 14.93 |
| 5JO5.PDB | O, A_TYR_100K  | N, A_GLY_96    | H, A_GLY_96     | 2.84 | 2.07 | 22.90 |
| 5JO5.PDB | O, A_GLU_100I  | N, A_TYR_98    | H, A_TYR_98     | 2.88 | 2.03 | 8.11  |
| 5JO5.PDB | O, A_GLY_96    | N, A_TYR_100K  | H, A_TYR_100K   | 2.90 | 2.10 | 17.32 |
| 5JO5.PDB | OH, B_TYR_36   | N, A_PHE_100L  | H, A_PHE_100L   | 2.86 | 2.06 | 18.12 |
| 5JO5.PDB | O, A_ARG_94    | N, A_GLN_101   | H, A_GLN_101    | 2.84 | 2.09 | 25.14 |
| 5JO5.PDB | O, B_GLY_41    | NH1, A_ARG_105 | HH12, A_ARG_105 | 2.66 | 1.82 | 9.49  |
| 5JO5.PDB | OE1, A_GLU_6   | N, A_GLY_106   | H, A_GLY_106    | 2.88 | 2.02 | 1.10  |
| 5JO5.PDB | O, A_ALA_88    | N, A_VAL_109   | H, A_VAL_109    | 2.93 | 2.07 | 3.98  |
| 5JO5.PDB | OG1, A_THR_87  | N, A_VAL_111   | H, A_VAL_111    | 2.98 | 2.14 | 10.40 |
| 5JO5.PDB | O, A_PHE_146   | N, A_LYS_117   | H, A_LYS_117    | 2.76 | 1.96 | 17.53 |
| 5JO5.PDB | O, A_ASP_144   | NZ, A_LYS_117  | HZ2, A_LYS_117  | 2.76 | 2.02 | 28.39 |
| 5JO5.PDB | O, A_LEU_141   | N, A_PHE_122   | H, A_PHE_122    | 2.89 | 2.09 | 16.71 |
| 5JO5.PDB | O, A_GLY_139   | N, A_LEU_124   | H, A_LEU_124    | 2.85 | 2.00 | 8.87  |
| 5JO5.PDB | O, A_SER_132   | N, A_THR_135   | H, A_THR_135    | 3.00 | 2.15 | 8.03  |
| 5JO5.PDB | O, A_VAL_184   | N, A_ALA_136   | H, A_ALA_136    | 2.76 | 1.95 | 16.74 |
| 5JO5.PDB | O, A_SER_180   | N, A_CYS_140   | H, A_CYS_140    | 2.83 | 2.05 | 19.65 |
| 5JO5.PDB | O, A_PHE_122   | N, A_LEU_141   | H, A_LEU_141    | 2.83 | 1.98 | 7.04  |
| 5JO5.PDB | O, A_LEU_178   | N, A_VAL_142   | H, A_VAL_142    | 2.79 | 1.93 | 5.86  |
| 5JO5.PDB | O, A_SER_120   | N, A_LYS_143   | H, A_LYS_143    | 2.78 | 1.93 | 6.54  |
| 5JO5.PDB | OE2, B_GLU_124 | NZ, A_LYS_143  | HZ2, A_LYS_143  | 2.62 | 1.83 | 23.29 |
| 5JO5.PDB | O, A_TYR_176   | N, A_TYR_145   | H, A_TYR_145    | 2.91 | 2.11 | 17.73 |
| 5JO5.PDB | O, A_LYS_117   | N, A_PHE_146   | H, A_PHE_146    | 2.93 | 2.13 | 18.00 |
| 5JO5.PDB | O, A_ASN_197   | N, A_SER_153   | H, A_SER_153    | 2.99 | 2.18 | 16.28 |
| 5JO5.PDB | OD1, A_ASN_197 | OG, A_SER_153  | HG, A_SER_153   | 2.78 | 2.00 | 18.34 |
| 5JO5.PDB | OG, A_SER_180  | NE1, A_TRP_154 | HE1, A_TRP_154  | 2.89 | 2.05 | 11.45 |
| 5JO5.PDB | O, A_ILE_195   | N, A_ASN_155   | H, A_ASN_155    | 2.78 | 1.95 | 12.63 |
| 5JO5.PDB | OD1, A_ASN_197 | N, A_SER_156   | H, A_SER_156    | 2.75 | 1.94 | 16.25 |
| 5JO5.PDB | O, A_TRP_154   | N, A_GLY_157   | H, A_GLY_157    | 2.98 | 2.18 | 18.25 |
| 5JO5.PDB | O, A_VAL_181   | N, A_HIS_164   | H, A_HIS_164    | 2.84 | 2.01 | 12.57 |
| 5JO5.PDB | O, A_SER_179   | N, A_PHE_166   | H, A_PHE_166    | 2.92 | 2.07 | 5.08  |
| 5JO5.PDB | O, A_SER_177   | N, A_VAL_169   | H, A_VAL_169    | 2.79 | 1.96 | 14.12 |
| 5JO5.PDB | O, A_LEU_175   | N, A_GLN_171   | H, A_GLN_171    | 2.92 | 2.06 | 3.13  |
| 5JO5.PDB | OD1, A_ASP_144 | NE2, A_GLN_171 | HE22, A_GLN_171 | 2.80 | 2.01 | 18.53 |
| 5JO5.PDB | O, A_GLN_171   | N, A_GLY_174   | H, A_GLY_174    | 2.84 | 1.99 | 4.07  |
| 5JO5.PDB | O, A_TYR_145   | N, A_TYR_176   | H, A_TYR_176    | 2.86 | 2.00 | 3.44  |
| 5JO5.PDB | O, A_VAL_142   | N, A_LEU_178   | H, A_LEU_178    | 2.89 | 2.11 | 20.35 |
| 5JO5.PDB | OH, B_TYR_177  | OG, A_SER_179  | HG, A_SER_179   | 2.83 | 2.10 | 25.21 |
| 5JO5.PDB | O, A_CYS_140   | N, A_SER_180   | H, A_SER_180    | 2.96 | 2.14 | 14.89 |
| 5JO5.PDB | O, A_HIS_164   | N, A_VAL_181   | H, A_VAL_181    | 2.88 | 2.06 | 14.86 |
| 5JO5.PDB | O, A_LEU_138   | N, A_VAL_182   | H, A_VAL_182    | 2.81 | 1.98 | 12.72 |
| 5JO5.PDB | O, A_ALA_136   | N, A_VAL_184   | H, A_VAL_184    | 2.85 | 2.03 | 14.13 |
| 5JO5.PDB | O, A_GLY_134   | N, A_SER_186   | H, A_SER_186    | 2.73 | 1.88 | 8.68  |
| 5JO5.PDB | O, A_PRO_185   | N, A_SER_188   | H, A_SER_188    | 2.87 | 2.11 | 23.16 |
| 5JO5.PDB | O, A_PRO_185   | OG, A_SER_188  | HG, A_SER_188   | 2.64 | 1.81 | 7.89  |
| 5JO5.PDB | O, A_SER_188   | N, A_THR_191   | H, A_THR_191    | 2.98 | 2.17 | 16.73 |
| 5JO5.PDB | O, A_SER_188   | N, A_GLN_192   | H, A_GLN_192    | 2.81 | 1.96 | 9.04  |
| 5JO5.PDB | OG, A_SER_188  | OH, A_TYR_194  | HH, A_TYR_194   | 2.69 | 1.94 | 22.27 |
| 5JO5.PDB | OD1, A_ASN_155 | N, A_ILE_195   | H, A_ILE_195    | 2.85 | 2.04 | 16.46 |
| 5JO5.PDB | O, A_LYS_209   | N, A_CYS_196   | H, A_CYS_196    | 2.97 | 2.19 | 19.93 |

|          |                |                |                |      |      |       |
|----------|----------------|----------------|----------------|------|------|-------|
| 5JO5.PDB | O, A_SER_153   | N, A_ASN_197   | H, A_ASN_197   | 2.77 | 1.92 | 7.59  |
| 5JO5.PDB | O, A_VAL_207   | N, A_VAL_198   | H, A_VAL_198   | 2.69 | 1.83 | 4.66  |
| 5JO5.PDB | OG, A_SER_203  | ND1, A_HIS_200 | HD1, A_HIS_200 | 2.79 | 2.03 | 23.43 |
| 5JO5.PDB | O, A_PRO_147   | NE2, A_HIS_200 | HE2, A_HIS_200 | 2.73 | 1.88 | 6.85  |
| 5JO5.PDB | O, A_SER_203   | OG1, A_THR_205 | HG1, A_THR_205 | 2.95 | 2.24 | 27.28 |
| 5JO5.PDB | O, A_VAL_198   | N, A_VAL_207   | H, A_VAL_207   | 2.77 | 1.95 | 15.31 |
| 5JO5.PDB | O, A_CYS_196   | N, A_LYS_209   | H, A_LYS_209   | 2.98 | 2.17 | 16.36 |
| 5JO5.PDB | OE2, B_GLU_123 | NZ, A_LYS_209  | HZ1, A_LYS_209 | 2.55 | 1.68 | 10.64 |
| 5JO5.PDB | O, A_TYR_194   | N, A_VAL_211   | H, A_VAL_211   | 2.93 | 2.09 | 10.38 |
| 5JO5.PDB | O, B_GLN_24    | N, B_THR_5     | H, B_THR_5     | 2.82 | 1.99 | 13.54 |
| 5JO5.PDB | O, B_TYR_86    | NE2, B_GLN_6   | HE22, B_GLN_6  | 2.95 | 2.13 | 14.24 |
| 5JO5.PDB | O, B_LYS_103   | N, B_VAL_11    | H, B_VAL_11    | 2.99 | 2.17 | 14.79 |
| 5JO5.PDB | O, B_THR_105   | N, B_VAL_13    | H, B_VAL_13    | 2.91 | 2.14 | 21.54 |
| 5JO5.PDB | O, B_ALA_78    | N, B_GLY_16    | H, B_GLY_16    | 2.80 | 1.95 | 6.96  |
| 5JO5.PDB | O, B_ALA_14    | N, B_GLN_17    | H, B_GLN_17    | 3.00 | 2.14 | 6.45  |
| 5JO5.PDB | O, B_ILE_75    | N, B_VAL_19    | H, B_VAL_19    | 2.94 | 2.13 | 16.92 |
| 5JO5.PDB | O, B_LEU_73    | N, B_ILE_21    | H, B_ILE_21    | 2.77 | 1.92 | 7.42  |
| 5JO5.PDB | O, B_ALA_71    | N, B_CYS_23    | H, B_CYS_23    | 2.73 | 1.95 | 21.25 |
| 5JO5.PDB | O, B_THR_5     | N, B_GLN_24    | H, B_GLN_24    | 2.88 | 2.15 | 26.17 |
| 5JO5.PDB | O, B_ASN_69    | N, B_GLY_25    | H, B_GLY_25    | 2.95 | 2.12 | 12.16 |
| 5JO5.PDB | O, B_ARG_91    | OG, B_SER_27   | HG, B_SER_27   | 2.69 | 1.95 | 23.94 |
| 5JO5.PDB | O, B_GLY_25    | N, B_LEU_28    | H, B_LEU_28    | 2.92 | 2.12 | 17.50 |
| 5JO5.PDB | O, B_SER_27    | N, B_SER_30    | H, B_SER_30    | 2.94 | 2.12 | 14.59 |
| 5JO5.PDB | O, B_SER_89    | N, B_SER_34    | H, B_SER_34    | 2.95 | 2.14 | 17.48 |
| 5JO5.PDB | O, B_ILE_48    | N, B_TRP_35    | H, B_TRP_35    | 2.82 | 2.01 | 17.71 |
| 5JO5.PDB | O, B_TYR_87    | N, B_TYR_36    | H, B_TYR_36    | 2.80 | 2.06 | 24.94 |
| 5JO5.PDB | O, B_VAL_45    | N, B_GLN_37    | H, B_GLN_37    | 2.88 | 2.07 | 16.60 |
| 5JO5.PDB | OH, B_TYR_86   | NE2, B_GLN_37  | HE21, B_GLN_37 | 2.95 | 2.09 | 5.48  |
| 5JO5.PDB | O, B_ASP_85    | N, B_GLN_38    | H, B_GLN_38    | 2.79 | 2.00 | 18.67 |
| 5JO5.PDB | OE1, A_GLN_39  | NE2, B_GLN_38  | HE22, B_GLN_38 | 2.90 | 2.07 | 12.43 |
| 5JO5.PDB | O, B_GLN_37    | N, B_VAL_45    | H, B_VAL_45    | 2.85 | 2.08 | 22.23 |
| 5JO5.PDB | O, B_TRP_35    | N, B_VAL_47    | H, B_VAL_47    | 2.80 | 1.94 | 1.50  |
| 5JO5.PDB | O, B_ASN_53    | N, B_TYR_49    | H, B_TYR_49    | 2.95 | 2.14 | 16.79 |
| 5JO5.PDB | O, B_ASP_60    | NH1, B_ARG_54  | HH12, B_ARG_54 | 2.83 | 2.07 | 22.75 |
| 5JO5.PDB | OD1, B_ASP_82  | NH2, B_ARG_61  | HH21, B_ARG_61 | 2.66 | 1.83 | 11.88 |
| 5JO5.PDB | O, B_THR_74    | N, B_SER_63    | H, B_SER_63    | 2.95 | 2.17 | 20.44 |
| 5JO5.PDB | OD1, B_ASN_52  | N, B_GLY_64    | H, B_GLY_64    | 2.76 | 1.93 | 12.24 |
| 5JO5.PDB | O, F_ARG_29    | ND2, B_ASN_69  | HD21, B_ASN_69 | 2.80 | 1.99 | 16.03 |
| 5JO5.PDB | O, B_SER_67    | N, B_THR_70    | H, B_THR_70    | 2.93 | 2.12 | 15.05 |
| 5JO5.PDB | O, B_SER_67    | OG1, B_THR_70  | HG1, B_THR_70  | 2.62 | 1.83 | 17.02 |
| 5JO5.PDB | O, B_CYS_23    | N, B_ALA_71    | H, B_ALA_71    | 2.77 | 1.96 | 16.51 |
| 5JO5.PDB | O, B_SER_65    | N, B_SER_72    | H, B_SER_72    | 2.94 | 2.10 | 12.05 |
| 5JO5.PDB | O, B_ILE_21    | N, B_LEU_73    | H, B_LEU_73    | 2.80 | 2.00 | 18.00 |
| 5JO5.PDB | O, B_SER_63    | N, B_THR_74    | H, B_THR_74    | 2.83 | 1.99 | 8.11  |
| 5JO5.PDB | O, B_VAL_19    | N, B_ILE_75    | H, B_ILE_75    | 2.88 | 2.05 | 12.36 |
| 5JO5.PDB | O, B_GLN_17    | N, B_ALA_78    | H, B_ALA_78    | 2.88 | 2.04 | 9.27  |
| 5JO5.PDB | OD2, B_ASP_82  | N, B_GLN_79    | H, B_GLN_79    | 2.90 | 2.05 | 7.32  |
| 5JO5.PDB | O, B_GLN_79    | N, B_ASP_82    | H, B_ASP_82    | 2.86 | 2.02 | 10.30 |
| 5JO5.PDB | O, B_GLN_38    | N, B_ASP_85    | H, B_ASP_85    | 2.90 | 2.08 | 13.72 |
| 5JO5.PDB | O, B_THR_102   | N, B_TYR_86    | H, B_TYR_86    | 2.83 | 2.01 | 15.48 |
| 5JO5.PDB | O, B_ASP_82    | OH, B_TYR_86   | HH, B_TYR_86   | 2.63 | 1.81 | 9.87  |
| 5JO5.PDB | O, B_TYR_36    | N, B_TYR_87    | H, B_TYR_87    | 2.92 | 2.12 | 17.35 |
| 5JO5.PDB | O, B_SER_34    | N, B_SER_89    | H, B_SER_89    | 2.90 | 2.16 | 26.65 |
| 5JO5.PDB | O, B_VAL_97    | OG, B_SER_89   | HG, B_SER_89   | 2.80 | 2.03 | 20.14 |
| 5JO5.PDB | O, A_GLY_100H  | NE, B_ARG_91   | HE, B_ARG_91   | 2.94 | 2.09 | 9.41  |
| 5JO5.PDB | OH, B_TYR_31   | N, B_GLY_95    | H, B_GLY_95    | 2.85 | 2.01 | 11.73 |
| 5JO5.PDB | OD1, B_ASP_92  | OG, B_SER_95A  | HG, B_SER_95A  | 2.47 | 1.67 | 15.14 |
| 5JO5.PDB | OG, B_SER_95A  | N, B_LEU_95C   | H, B_LEU_95C   | 2.98 | 2.13 | 6.04  |

|          |                |                |                 |      |      |       |
|----------|----------------|----------------|-----------------|------|------|-------|
| 5JO5.PDB | O, B_SER_90    | N, B_VAL_97    | H, B_VAL_97     | 2.93 | 2.11 | 13.52 |
| 5JO5.PDB | O, B_CYS_88    | N, B_GLY_99    | H, B_GLY_99     | 2.87 | 2.07 | 18.58 |
| 5JO5.PDB | O, B_TYR_86    | N, B_THR_102   | H, B_THR_102    | 2.85 | 2.06 | 19.16 |
| 5JO5.PDB | O, B_ASP_7     | OG1, B_THR_102 | HG1, B_THR_102  | 2.67 | 1.84 | 6.53  |
| 5JO5.PDB | O, B_PRO_8     | N, B_LYS_103   | H, B_LYS_103    | 2.86 | 2.01 | 7.04  |
| 5JO5.PDB | O, B_ALA_84    | N, B_LEU_104   | H, B_LEU_104    | 2.88 | 2.04 | 10.34 |
| 5JO5.PDB | O, B_VAL_11    | N, B_THR_105   | H, B_THR_105    | 2.98 | 2.17 | 16.12 |
| 5JO5.PDB | OE2, B_GLU_83  | N, B_VAL_106   | H, B_VAL_106    | 2.94 | 2.17 | 22.79 |
| 5JO5.PDB | O, B_VAL_13    | N, B_LEU_106A  | H, B_LEU_106A   | 2.84 | 2.01 | 13.15 |
| 5JO5.PDB | OH, B_TYR_140  | N, B_SER_107   | H, B_SER_107    | 2.96 | 2.17 | 18.24 |
| 5JO5.PDB | O, B_TYR_140   | N, B_ALA_111   | H, B_ALA_111    | 2.79 | 1.96 | 11.97 |
| 5JO5.PDB | O, B_SER_137   | N, B_SER_114   | H, B_SER_114    | 2.91 | 2.11 | 17.49 |
| 5JO5.PDB | O, B_LEU_135   | N, B_THR_116   | H, B_THR_116    | 2.96 | 2.13 | 12.67 |
| 5JO5.PDB | O, B_VAL_133   | N, B_PHE_118   | H, B_PHE_118    | 2.80 | 1.94 | 5.22  |
| 5JO5.PDB | O, B_LEU_125   | N, B_ASN_128   | H, B_ASN_128    | 2.88 | 2.06 | 15.38 |
| 5JO5.PDB | OE1, B_GLU_124 | N, B_THR_131   | H, B_THR_131    | 2.94 | 2.22 | 28.36 |
| 5JO5.PDB | OE2, B_GLU_124 | OG1, B_THR_131 | HG1, B_THR_131  | 2.59 | 1.86 | 24.88 |
| 5JO5.PDB | O, B_LEU_178   | N, B_LEU_132   | H, B_LEU_132    | 2.93 | 2.11 | 15.51 |
| 5JO5.PDB | O, B_SER_176   | N, B_CYS_134   | H, B_CYS_134    | 2.82 | 1.97 | 4.20  |
| 5JO5.PDB | O, B_THR_116   | N, B_LEU_135   | H, B_LEU_135    | 2.91 | 2.08 | 12.22 |
| 5JO5.PDB | O, B_ALA_174   | N, B_ILE_136   | H, B_ILE_136    | 2.90 | 2.13 | 23.29 |
| 5JO5.PDB | O, B_SER_114   | N, B_SER_137   | H, B_SER_137    | 2.93 | 2.15 | 21.86 |
| 5JO5.PDB | OE1, B_GLN_167 | N, B_ASP_138   | H, B_ASP_138    | 2.85 | 2.08 | 22.86 |
| 5JO5.PDB | O, B_ALA_111   | N, B_TYR_140   | H, B_TYR_140    | 2.99 | 2.17 | 16.28 |
| 5JO5.PDB | O, B_GLN_194   | N, B_ALA_147   | H, B_ALA_147    | 2.88 | 2.05 | 13.99 |
| 5JO5.PDB | OG, B_SER_176  | NE1, B_TRP_148 | HE1, B_TRP_148  | 2.89 | 2.05 | 10.46 |
| 5JO5.PDB | O, B_SER_192   | N, B_LYS_149   | H, B_LYS_149    | 2.94 | 2.16 | 21.00 |
| 5JO5.PDB | O, B_SER_153   | N, B_ALA_150   | H, B_ALA_150    | 2.80 | 1.98 | 15.92 |
| 5JO5.PDB | O, B_SER_190   | N, B_ASP_151   | H, B_ASP_151    | 2.96 | 2.12 | 10.60 |
| 5JO5.PDB | O, B_ALA_150   | N, B_SER_153   | H, B_SER_153    | 2.85 | 2.01 | 8.39  |
| 5JO5.PDB | O, B_TYR_177   | N, B_GLU_160   | H, B_GLU_160    | 2.99 | 2.19 | 18.42 |
| 5JO5.PDB | O, B_SER_175   | N, B_THR_162   | H, B_THR_162    | 2.83 | 2.00 | 12.84 |
| 5JO5.PDB | O, A_GLY_42    | OG1, B_THR_163 | HG1, B_THR_163  | 2.48 | 1.73 | 21.87 |
| 5JO5.PDB | O, B_LYS_171   | N, B_GLN_167   | H, B_GLN_167    | 2.72 | 1.87 | 6.72  |
| 5JO5.PDB | OD1, B_ASN_169 | NE2, B_GLN_167 | HE21, B_GLN_167 | 2.98 | 2.24 | 26.40 |
| 5JO5.PDB | OD1, B_ASP_138 | NE2, B_GLN_167 | HE22, B_GLN_167 | 2.99 | 2.14 | 6.65  |
| 5JO5.PDB | O, B_PHE_139   | N, B_TYR_172   | H, B_TYR_172    | 2.89 | 2.09 | 16.64 |
| 5JO5.PDB | O, B_ILE_136   | N, B_ALA_174   | H, B_ALA_174    | 2.78 | 1.99 | 18.28 |
| 5JO5.PDB | OG1, B_THR_162 | N, B_SER_175   | H, B_SER_175    | 2.97 | 2.18 | 20.62 |
| 5JO5.PDB | OG1, B_THR_162 | OG, B_SER_175  | HG, B_SER_175   | 2.87 | 2.11 | 21.53 |
| 5JO5.PDB | O, B_CYS_134   | N, B_SER_176   | H, B_SER_176    | 2.89 | 2.09 | 18.62 |
| 5JO5.PDB | OG1, B_THR_161 | OG, B_SER_176  | HG, B_SER_176   | 2.78 | 2.05 | 24.57 |
| 5JO5.PDB | O, B_GLU_160   | N, B_TYR_177   | H, B_TYR_177    | 2.74 | 1.95 | 18.78 |
| 5JO5.PDB | O, B_LEU_132   | N, B_LEU_178   | H, B_LEU_178    | 2.98 | 2.16 | 14.96 |
| 5JO5.PDB | O, B_GLY_158   | N, B_SER_179   | H, B_SER_179    | 2.79 | 1.95 | 12.09 |
| 5JO5.PDB | O, B_ALA_130   | N, B_LEU_180   | H, B_LEU_180    | 2.84 | 1.98 | 3.06  |
| 5JO5.PDB | OE1, B_GLN_184 | N, B_THR_181   | H, B_THR_181    | 2.98 | 2.15 | 11.97 |
| 5JO5.PDB | O, B_GLN_184   | OG, B_SER_187  | HG, B_SER_187   | 2.84 | 2.02 | 9.83  |
| 5JO5.PDB | OD1, B_ASP_151 | N, B_ARG_189   | H, B_ARG_189    | 2.77 | 1.99 | 21.06 |
| 5JO5.PDB | O, B_VAL_206   | N, B_TYR_191   | H, B_TYR_191    | 2.97 | 2.14 | 12.35 |
| 5JO5.PDB | O, B_LYS_149   | N, B_SER_192   | H, B_SER_192    | 2.94 | 2.15 | 19.79 |
| 5JO5.PDB | OG1, B_THR_205 | OG, B_SER_192  | HG, B_SER_192   | 2.59 | 1.90 | 29.12 |
| 5JO5.PDB | O, B_LYS_204   | N, B_CYS_193   | H, B_CYS_193    | 2.85 | 2.06 | 19.97 |
| 5JO5.PDB | O, B_ALA_147   | N, B_GLN_194   | H, B_GLN_194    | 2.76 | 1.91 | 8.07  |
| 5JO5.PDB | OE2, B_GLU_203 | NE2, B_GLN_194 | HE21, B_GLN_194 | 2.60 | 1.77 | 11.97 |
| 5JO5.PDB | O, B_VAL_202   | N, B_VAL_195   | H, B_VAL_195    | 2.87 | 2.03 | 10.67 |
| 5JO5.PDB | O, B_THR_145   | N, B_THR_196   | H, B_THR_196    | 2.94 | 2.09 | 7.84  |
| 5JO5.PDB | O, B_SER_200   | N, B_HIS_197   | H, B_HIS_197    | 2.84 | 2.00 | 11.99 |

|          |                 |                |                |      |      |       |
|----------|-----------------|----------------|----------------|------|------|-------|
| 5JO5.PDB | O, B.PRO_141    | NE2, B.HIS_197 | HE2, B.HIS_197 | 2.91 | 2.14 | 22.84 |
| 5JO5.PDB | OG1, B.THR_196  | OG1, B.THR_201 | HG1, B.THR_201 | 2.97 | 2.21 | 22.11 |
| 5JO5.PDB | O, B.VAL_195    | N, B.VAL_202   | H, B.VAL_202   | 2.91 | 2.09 | 14.85 |
| 5JO5.PDB | O, B.TYR_191    | N, B.VAL_206   | H, B.VAL_206   | 2.88 | 2.07 | 15.96 |
| 5JO5.PDB | O, C.SER_25     | N, C.GLN_3     | H, C.GLN_3     | 2.95 | 2.10 | 9.50  |
| 5JO5.PDB | O, C.SER_21     | N, C.SER_7     | H, C.SER_7     | 2.80 | 2.03 | 21.56 |
| 5JO5.PDB | OG1, C.THR_107  | N, C.GLY_9     | H, C.GLY_9     | 2.94 | 2.21 | 27.65 |
| 5JO5.PDB | O, C.THR_110    | N, C.VAL_12    | H, C.VAL_12    | 2.90 | 2.11 | 19.33 |
| 5JO5.PDB | O, C.LEU_82C    | N, C.GLY_15    | H, C.GLY_15    | 2.77 | 1.95 | 13.95 |
| 5JO5.PDB | O, C.LYS_13     | N, C.GLY_16    | H, C.GLY_16    | 2.93 | 2.13 | 17.72 |
| 5JO5.PDB | O, C.MET_82     | N, C.LEU_18    | H, C.LEU_18    | 2.90 | 2.11 | 18.94 |
| 5JO5.PDB | O, C.LEU_80     | N, C.LEU_20    | H, C.LEU_20    | 2.76 | 1.94 | 13.93 |
| 5JO5.PDB | O, C.SER_7      | N, C.SER_21    | H, C.SER_21    | 2.94 | 2.10 | 10.42 |
| 5JO5.PDB | O, C.LEU_78     | N, C.CYS_22    | H, C.CYS_22    | 2.73 | 1.95 | 21.22 |
| 5JO5.PDB | O, C.VAL_5      | N, C.ALA_23    | H, C.ALA_23    | 2.95 | 2.13 | 13.78 |
| 5JO5.PDB | O, C.PHE_29     | N, C.ALA_32    | H, C.ALA_32    | 2.90 | 2.05 | 5.82  |
| 5JO5.PDB | OD2, C.ASP_53   | NE1, C.TRP_33  | HE1, C.TRP_33  | 2.84 | 2.06 | 21.35 |
| 5JO5.PDB | O, C.ALA_93     | N, C.SER_35    | H, C.SER_35    | 2.93 | 2.11 | 13.64 |
| 5JO5.PDB | O, C.GLY_49     | N, C.TRP_36    | H, C.TRP_36    | 2.89 | 2.07 | 16.12 |
| 5JO5.PDB | O, C.TYR_91     | N, C.VAL_37    | H, C.VAL_37    | 2.87 | 2.05 | 13.46 |
| 5JO5.PDB | O, C.GLU_46     | N, C.ARG_38    | H, C.ARG_38    | 2.87 | 2.03 | 9.28  |
| 5JO5.PDB | OE1, C.GLU_46   | NE, C.ARG_38   | HE, C.ARG_38   | 2.77 | 1.97 | 17.97 |
| 5JO5.PDB | OH, C.TYR_90    | NH1, C.ARG_38  | HH11, C.ARG_38 | 3.00 | 2.18 | 14.70 |
| 5JO5.PDB | OD1, C.ASP_86   | NH1, C.ARG_38  | HH12, C.ARG_38 | 2.85 | 2.02 | 13.98 |
| 5JO5.PDB | OE1, D.GLN_38   | NE2, C.GLN_39  | HE22, C.GLN_39 | 2.86 | 2.02 | 9.45  |
| 5JO5.PDB | O, C.ALA_40     | N, C.LYS_43    | H, C.LYS_43    | 2.88 | 2.04 | 10.48 |
| 5JO5.PDB | O, C.ARG_38     | N, C.GLU_46    | H, C.GLU_46    | 2.77 | 1.99 | 20.78 |
| 5JO5.PDB | O, C.TRP_36     | N, C.VAL_48    | H, C.VAL_48    | 2.90 | 2.07 | 13.17 |
| 5JO5.PDB | OE1, C.GLU_100J | NE, C.ARG_50   | HE, C.ARG_50   | 2.87 | 2.09 | 20.20 |
| 5JO5.PDB | OD2, C.ASP_58   | NH1, C.ARG_50  | HH12, C.ARG_50 | 2.77 | 1.94 | 11.94 |
| 5JO5.PDB | OE2, C.GLU_100J | NH2, C.ARG_50  | HH21, C.ARG_50 | 2.86 | 2.02 | 10.69 |
| 5JO5.PDB | O, C.MET_34     | N, C.ILE_51    | H, C.ILE_51    | 2.83 | 1.99 | 11.56 |
| 5JO5.PDB | O, C.THR_56     | N, C.LYS_52    | H, C.LYS_52    | 2.95 | 2.12 | 13.78 |
| 5JO5.PDB | O, C.SER_52A    | N, C.ASP_53    | H, C.ASP_53    | 2.94 | 2.23 | 29.56 |
| 5JO5.PDB | O, C.LYS_52B    | N, C.GLY_54    | H, C.GLY_54    | 3.00 | 2.15 | 9.38  |
| 5JO5.PDB | O, C.SER_52A    | N, C.GLY_55    | H, C.GLY_55    | 2.78 | 2.00 | 20.47 |
| 5JO5.PDB | O, C.VAL_48     | N, C.ALA_60    | H, C.ALA_60    | 2.89 | 2.04 | 7.94  |
| 5JO5.PDB | O, C.VAL_63     | N, C.ARG_66    | H, C.ARG_66    | 2.93 | 2.09 | 10.54 |
| 5JO5.PDB | OD2, C.ASP_86   | NH1, C.ARG_66  | HH12, C.ARG_66 | 2.83 | 2.01 | 15.29 |
| 5JO5.PDB | O, C.PRO_62     | NH2, C.ARG_66  | HH21, C.ARG_66 | 2.87 | 2.02 | 7.14  |
| 5JO5.PDB | O, C.GLN_81     | N, C.THR_68    | H, C.THR_68    | 2.82 | 2.00 | 14.42 |
| 5JO5.PDB | OH, C.TYR_59    | N, C.ILE_69    | H, C.ILE_69    | 2.82 | 1.97 | 9.17  |
| 5JO5.PDB | OD1, C.ASP_73   | NE, C.ARG_71   | HE, C.ARG_71   | 2.90 | 2.12 | 21.25 |
| 5JO5.PDB | O, C.ALA_32     | NH1, C.ARG_71  | HH12, C.ARG_71 | 2.94 | 2.19 | 24.89 |
| 5JO5.PDB | O, C.ALA_32     | NH2, C.ARG_71  | HH22, C.ARG_71 | 2.89 | 2.13 | 22.77 |
| 5JO5.PDB | O, C.THR_77     | N, C.ASP_72    | H, C.ASP_72    | 2.91 | 2.06 | 7.23  |
| 5JO5.PDB | OD1, C.ASP_72   | OG, C.SER_74   | HG, C.SER_74   | 2.61 | 1.84 | 20.06 |
| 5JO5.PDB | O, C.CYS_22     | N, C.LEU_78    | H, C.LEU_78    | 2.88 | 2.05 | 11.40 |
| 5JO5.PDB | O, C.SER_70     | N, C.TYR_79    | H, C.TYR_79    | 2.85 | 2.00 | 9.09  |
| 5JO5.PDB | O, C.THR_68     | N, C.GLN_81    | H, C.GLN_81    | 2.76 | 1.93 | 12.88 |
| 5JO5.PDB | OD2, C.ASP_86   | N, C.LYS_83    | H, C.LYS_83    | 2.79 | 1.97 | 14.63 |
| 5JO5.PDB | O, C.LYS_83     | N, C.ASP_86    | H, C.ASP_86    | 2.83 | 2.00 | 13.05 |
| 5JO5.PDB | O, C.VAL_109    | N, C.ALA_88    | H, C.ALA_88    | 2.97 | 2.19 | 21.73 |
| 5JO5.PDB | O, C.GLN_39     | N, C.VAL_89    | H, C.VAL_89    | 2.92 | 2.12 | 17.72 |
| 5JO5.PDB | O, C.THR_107    | N, C.TYR_90    | H, C.TYR_90    | 2.82 | 1.97 | 9.30  |
| 5JO5.PDB | O, C.ASP_86     | OH, C.TYR_90   | HH, C.TYR_90   | 2.68 | 1.88 | 13.76 |
| 5JO5.PDB | O, C.VAL_37     | N, C.TYR_91    | H, C.TYR_91    | 2.60 | 1.74 | 2.45  |
| 5JO5.PDB | OE2, C.GLU_6    | N, C.CYS_92    | H, C.CYS_92    | 2.75 | 1.90 | 6.95  |

|          |                |                |                 |      |      |       |
|----------|----------------|----------------|-----------------|------|------|-------|
| 5JO5.PDB | O, C_SER_35    | N, C_ALA_93    | H, C_ALA_93     | 2.91 | 2.13 | 21.34 |
| 5JO5.PDB | OD2, C_ASP_102 | NE, C_ARG_94   | HE, C_ARG_94    | 2.79 | 2.08 | 28.98 |
| 5JO5.PDB | OD2, C_ASP_102 | NH1, C_ARG_94  | HH11, C_ARG_94  | 2.55 | 1.78 | 21.18 |
| 5JO5.PDB | O, C_TYR_100K  | N, C_GLY_96    | H, C_GLY_96     | 2.82 | 2.05 | 21.49 |
| 5JO5.PDB | O, C_GLU_100I  | N, C_TYR_98    | H, C_TYR_98     | 2.79 | 1.95 | 9.02  |
| 5JO5.PDB | O, C_GLY_96    | N, C_TYR_100K  | H, C_TYR_100K   | 2.91 | 2.11 | 17.91 |
| 5JO5.PDB | OH, D_TYR_36   | N, C_PHE_100L  | H, C_PHE_100L   | 2.87 | 2.08 | 19.05 |
| 5JO5.PDB | O, C_ARG_94    | N, C_GLN_101   | H, C_GLN_101    | 2.81 | 2.06 | 25.18 |
| 5JO5.PDB | O, C_CYS_92    | N, C_GLY_104   | H, C_GLY_104    | 2.86 | 2.05 | 16.43 |
| 5JO5.PDB | OE1, C_GLU_6   | N, C_ARG_105   | H, C_ARG_105    | 2.82 | 2.06 | 23.52 |
| 5JO5.PDB | OE1, C_GLU_6   | N, C_GLY_106   | H, C_GLY_106    | 2.82 | 1.96 | 3.31  |
| 5JO5.PDB | O, C_ALA_88    | N, C_VAL_109   | H, C_VAL_109    | 2.90 | 2.04 | 2.47  |
| 5JO5.PDB | OG1, C_THR_87  | N, C_VAL_111   | H, C_VAL_111    | 2.92 | 2.08 | 9.87  |
| 5JO5.PDB | O, C_PHE_146   | N, C_LYS_117   | H, C_LYS_117    | 2.76 | 1.94 | 13.75 |
| 5JO5.PDB | O, C_ASP_144   | NZ, C_LYS_117  | HZ2, C_LYS_117  | 2.78 | 2.05 | 29.84 |
| 5JO5.PDB | O, C_LEU_141   | N, C_PHE_122   | H, C_PHE_122    | 2.86 | 2.03 | 12.84 |
| 5JO5.PDB | O, C_GLY_139   | N, C_LEU_124   | H, C_LEU_124    | 2.85 | 2.00 | 9.59  |
| 5JO5.PDB | O, C_VAL_184   | N, C_ALA_136   | H, C_ALA_136    | 2.67 | 1.87 | 17.12 |
| 5JO5.PDB | O, C_VAL_182   | N, C_LEU_138   | H, C_LEU_138    | 2.99 | 2.15 | 10.96 |
| 5JO5.PDB | O, C_SER_180   | N, C_CYS_140   | H, C_CYS_140    | 2.84 | 2.06 | 20.26 |
| 5JO5.PDB | O, C_PHE_122   | N, C_LEU_141   | H, C_LEU_141    | 2.78 | 1.93 | 7.78  |
| 5JO5.PDB | O, C_LEU_178   | N, C_VAL_142   | H, C_VAL_142    | 2.81 | 1.96 | 6.47  |
| 5JO5.PDB | O, C_SER_120   | N, C_LYS_143   | H, C_LYS_143    | 2.82 | 1.98 | 11.11 |
| 5JO5.PDB | OE2, D_GLU_124 | NZ, C_LYS_143  | HZ2, C_LYS_143  | 2.79 | 1.92 | 10.71 |
| 5JO5.PDB | O, C_TYR_176   | N, C_TYR_145   | H, C_TYR_145    | 2.94 | 2.13 | 17.07 |
| 5JO5.PDB | O, C_LYS_117   | N, C_PHE_146   | H, C_PHE_146    | 2.94 | 2.13 | 16.66 |
| 5JO5.PDB | OD1, C_ASN_197 | OG, C_SER_153  | HG, C_SER_153   | 2.81 | 2.01 | 15.61 |
| 5JO5.PDB | OG, C_SER_180  | NE1, C_TRP_154 | HE1, C_TRP_154  | 2.96 | 2.13 | 11.76 |
| 5JO5.PDB | O, C_ILE_195   | N, C_ASN_155   | H, C_ASN_155    | 2.75 | 1.92 | 12.18 |
| 5JO5.PDB | OD1, C_ASN_197 | N, C_SER_156   | H, C_SER_156    | 2.79 | 1.97 | 14.38 |
| 5JO5.PDB | O, C_VAL_181   | N, C_HIS_164   | H, C_HIS_164    | 2.89 | 2.06 | 13.61 |
| 5JO5.PDB | O, C_SER_179   | N, C_PHE_166   | H, C_PHE_166    | 2.91 | 2.06 | 6.29  |
| 5JO5.PDB | OD1, C_ASP_144 | NE2, C_GLN_171 | HE22, C_GLN_171 | 2.92 | 2.12 | 18.22 |
| 5JO5.PDB | O, C_GLN_171   | N, C_GLY_174   | H, C_GLY_174    | 2.78 | 1.92 | 5.07  |
| 5JO5.PDB | O, C_TYR_145   | N, C_TYR_176   | H, C_TYR_176    | 2.90 | 2.05 | 5.55  |
| 5JO5.PDB | O, C_VAL_142   | N, C_LEU_178   | H, C_LEU_178    | 2.87 | 2.09 | 20.32 |
| 5JO5.PDB | OH, D_TYR_177  | OG, C_SER_179  | HG, C_SER_179   | 2.71 | 1.97 | 23.23 |
| 5JO5.PDB | O, C_HIS_164   | N, C_VAL_181   | H, C_VAL_181    | 2.89 | 2.06 | 14.17 |
| 5JO5.PDB | O, C_LEU_138   | N, C_VAL_182   | H, C_VAL_182    | 2.77 | 1.94 | 12.20 |
| 5JO5.PDB | O, C_ALA_136   | N, C_VAL_184   | H, C_VAL_184    | 2.81 | 1.98 | 13.68 |
| 5JO5.PDB | O, C_GLY_134   | N, C_SER_186   | H, C_SER_186    | 2.64 | 1.80 | 9.61  |
| 5JO5.PDB | O, C_PRO_185   | OG, C_SER_188  | HG, C_SER_188   | 2.73 | 1.93 | 15.82 |
| 5JO5.PDB | OG, C_SER_188  | OH, C_TYR_194  | HH, C_TYR_194   | 2.62 | 1.86 | 20.70 |
| 5JO5.PDB | OD1, C_ASN_155 | N, C_ILE_195   | H, C_ILE_195    | 2.85 | 2.02 | 13.84 |
| 5JO5.PDB | O, C_LYS_209   | N, C_CYS_196   | H, C_CYS_196    | 2.96 | 2.18 | 21.34 |
| 5JO5.PDB | O, C_SER_153   | N, C_ASN_197   | H, C_ASN_197    | 2.74 | 1.89 | 6.97  |
| 5JO5.PDB | OD1, C_ASP_208 | ND2, C_ASN_197 | HD22, C_ASN_197 | 2.98 | 2.12 | 6.27  |
| 5JO5.PDB | O, C_VAL_207   | N, C_VAL_198   | H, C_VAL_198    | 2.78 | 1.92 | 1.89  |
| 5JO5.PDB | OG, C_SER_203  | ND1, C_HIS_200 | HD1, C_HIS_200  | 2.85 | 2.10 | 24.59 |
| 5JO5.PDB | O, C_PRO_147   | NE2, C_HIS_200 | HE2, C_HIS_200  | 2.76 | 1.92 | 8.00  |
| 5JO5.PDB | O, C_LYS_201   | N, C_ASN_204   | H, C_ASN_204    | 2.96 | 2.12 | 10.38 |
| 5JO5.PDB | O, C_SER_203   | OG1, C_THR_205 | HG1, C_THR_205  | 2.94 | 2.25 | 29.40 |
| 5JO5.PDB | O, C_VAL_198   | N, C_VAL_207   | H, C_VAL_207    | 2.82 | 2.00 | 14.71 |
| 5JO5.PDB | O, C_CYS_196   | N, C_LYS_209   | H, C_LYS_209    | 3.00 | 2.20 | 18.19 |
| 5JO5.PDB | OE2, D_GLU_123 | NZ, C_LYS_209  | HZ1, C_LYS_209  | 2.58 | 1.72 | 11.28 |
| 5JO5.PDB | O, C_TYR_194   | N, C_VAL_211   | H, C_VAL_211    | 2.92 | 2.08 | 10.11 |
| 5JO5.PDB | O, D_LEU_4     | OG, D_SER_2    | HG, D_SER_2     | 2.63 | 1.95 | 29.82 |
| 5JO5.PDB | O, D_GLN_24    | N, D_THR_5     | H, D_THR_5      | 2.84 | 2.03 | 16.14 |

|          |               |                |                |      |      |       |
|----------|---------------|----------------|----------------|------|------|-------|
| 5JO5.PDB | O, D_TYR_86   | NE2, D_GLN_6   | HE22, D_GLN_6  | 3.00 | 2.19 | 16.22 |
| 5JO5.PDB | O, D_LYS_103  | N, D_VAL_11    | H, D_VAL_11    | 2.98 | 2.16 | 13.76 |
| 5JO5.PDB | O, D_THR_105  | N, D_VAL_13    | H, D_VAL_13    | 2.89 | 2.13 | 23.23 |
| 5JO5.PDB | O, D_ALA_78   | N, D_GLY_16    | H, D_GLY_16    | 2.84 | 1.98 | 3.58  |
| 5JO5.PDB | O, D_ILE_75   | N, D_VAL_19    | H, D_VAL_19    | 2.97 | 2.17 | 17.08 |
| 5JO5.PDB | O, D_LEU_73   | N, D_ILE_21    | H, D_ILE_21    | 2.92 | 2.07 | 8.03  |
| 5JO5.PDB | O, D_ALA_71   | N, D_CYS_23    | H, D_CYS_23    | 2.70 | 1.92 | 20.84 |
| 5JO5.PDB | O, D_THR_5    | N, D_GLN_24    | H, D_GLN_24    | 2.92 | 2.17 | 25.43 |
| 5JO5.PDB | O, D_ASN_69   | N, D_GLY_25    | H, D_GLY_25    | 2.96 | 2.12 | 12.19 |
| 5JO5.PDB | O, D_ARG_91   | OG, D_SER_27   | HG, D_SER_27   | 2.66 | 1.91 | 22.45 |
| 5JO5.PDB | O, D_GLY_25   | N, D_LEU_28    | H, D_LEU_28    | 2.92 | 2.11 | 17.85 |
| 5JO5.PDB | O, D_SER_27   | N, D_SER_30    | H, D_SER_30    | 2.96 | 2.14 | 14.55 |
| 5JO5.PDB | O, D_SER_89   | N, D_SER_34    | H, D_SER_34    | 2.92 | 2.12 | 18.05 |
| 5JO5.PDB | O, D_ILE_48   | N, D_TRP_35    | H, D_TRP_35    | 2.78 | 1.99 | 19.58 |
| 5JO5.PDB | O, D_TYR_87   | N, D_TYR_36    | H, D_TYR_36    | 2.78 | 2.03 | 24.47 |
| 5JO5.PDB | OG, D_SER_34  | OH, D_TYR_36   | HH, D_TYR_36   | 2.76 | 2.07 | 29.85 |
| 5JO5.PDB | O, D_VAL_45   | N, D_GLN_37    | H, D_GLN_37    | 2.86 | 2.04 | 14.87 |
| 5JO5.PDB | OH, D_TYR_86  | NE2, D_GLN_37  | HE21, D_GLN_37 | 2.93 | 2.09 | 8.87  |
| 5JO5.PDB | O, D_ASP_85   | N, D_GLN_38    | H, D_GLN_38    | 2.81 | 2.02 | 20.05 |
| 5JO5.PDB | OE1, C_GLN_39 | NE2, D_GLN_38  | HE22, D_GLN_38 | 2.92 | 2.09 | 12.72 |
| 5JO5.PDB | O, D_GLN_37   | N, D_VAL_45    | H, D_VAL_45    | 2.80 | 2.03 | 21.65 |
| 5JO5.PDB | O, D_TRP_35   | N, D_VAL_47    | H, D_VAL_47    | 2.89 | 2.03 | 2.23  |
| 5JO5.PDB | O, D_ASN_53   | N, D_TYR_49    | H, D_TYR_49    | 2.99 | 2.18 | 15.70 |
| 5JO5.PDB | OD1, D_ASP_82 | NH2, D_ARG_61  | HH21, D_ARG_61 | 2.88 | 2.03 | 6.97  |
| 5JO5.PDB | O, D_THR_74   | N, D_SER_63    | H, D_SER_63    | 2.94 | 2.16 | 21.20 |
| 5JO5.PDB | OD1, D_ASN_52 | N, D_GLY_64    | H, D_GLY_64    | 2.96 | 2.14 | 14.40 |
| 5JO5.PDB | O, D_SER_72   | N, D_SER_65    | H, D_SER_65    | 2.95 | 2.18 | 22.43 |
| 5JO5.PDB | O, L_ARG_29   | ND2, D_ASN_69  | HD21, D_ASN_69 | 2.86 | 2.03 | 13.06 |
| 5JO5.PDB | O, D_SER_67   | N, D_THR_70    | H, D_THR_70    | 2.94 | 2.12 | 15.68 |
| 5JO5.PDB | O, D_SER_67   | OG1, D_THR_70  | HG1, D_THR_70  | 2.67 | 1.87 | 14.98 |
| 5JO5.PDB | O, D_CYS_23   | N, D_ALA_71    | H, D_ALA_71    | 2.75 | 1.94 | 16.72 |
| 5JO5.PDB | O, D_SER_65   | N, D_SER_72    | H, D_SER_72    | 2.85 | 2.02 | 12.10 |
| 5JO5.PDB | O, D_ILE_21   | N, D_LEU_73    | H, D_LEU_73    | 2.82 | 2.05 | 22.07 |
| 5JO5.PDB | O, D_SER_63   | N, D_THR_74    | H, D_THR_74    | 2.79 | 1.94 | 10.27 |
| 5JO5.PDB | O, D_VAL_19   | N, D_ILE_75    | H, D_ILE_75    | 2.89 | 2.06 | 12.55 |
| 5JO5.PDB | O, D_GLN_17   | N, D_ALA_78    | H, D_ALA_78    | 2.90 | 2.06 | 11.54 |
| 5JO5.PDB | OD2, D_ASP_82 | N, D_GLN_79    | H, D_GLN_79    | 2.86 | 2.00 | 5.70  |
| 5JO5.PDB | O, D_GLN_79   | N, D_ASP_82    | H, D_ASP_82    | 2.84 | 2.00 | 10.08 |
| 5JO5.PDB | O, D_GLN_38   | N, D_ASP_85    | H, D_ASP_85    | 2.92 | 2.10 | 13.46 |
| 5JO5.PDB | O, D_THR_102  | N, D_TYR_86    | H, D_TYR_86    | 2.83 | 2.01 | 15.81 |
| 5JO5.PDB | O, D_ASP_82   | OH, D_TYR_86   | HH, D_TYR_86   | 2.68 | 1.86 | 10.68 |
| 5JO5.PDB | O, D_TYR_36   | N, D_TYR_87    | H, D_TYR_87    | 2.93 | 2.13 | 17.76 |
| 5JO5.PDB | O, D_SER_34   | N, D_SER_89    | H, D_SER_89    | 2.89 | 2.16 | 27.05 |
| 5JO5.PDB | O, D_VAL_97   | OG, D_SER_89   | HG, D_SER_89   | 2.81 | 2.05 | 20.40 |
| 5JO5.PDB | OH, D_TYR_31  | N, D_GLY_95    | H, D_GLY_95    | 2.87 | 2.05 | 14.54 |
| 5JO5.PDB | OD1, D_ASP_92 | OG, D_SER_95A  | HG, D_SER_95A  | 2.53 | 1.74 | 15.88 |
| 5JO5.PDB | OD1, C_ASP_58 | NE, D_ARG_95B  | HE, D_ARG_95B  | 2.94 | 2.10 | 11.64 |
| 5JO5.PDB | OG, D_SER_95A | N, D_LEU_95C   | H, D_LEU_95C   | 2.96 | 2.11 | 7.06  |
| 5JO5.PDB | O, D_SER_90   | N, D_VAL_97    | H, D_VAL_97    | 2.96 | 2.13 | 12.85 |
| 5JO5.PDB | O, D_CYS_88   | N, D_GLY_99    | H, D_GLY_99    | 2.87 | 2.08 | 18.28 |
| 5JO5.PDB | O, D_TYR_86   | N, D_THR_102   | H, D_THR_102   | 2.86 | 2.06 | 18.86 |
| 5JO5.PDB | O, D_ASP_7    | OG1, D_THR_102 | HG1, D_THR_102 | 2.66 | 1.83 | 6.75  |
| 5JO5.PDB | O, D_PRO_8    | N, D_LYS_103   | H, D_LYS_103   | 2.88 | 2.03 | 8.03  |
| 5JO5.PDB | O, D_ALA_84   | N, D_LEU_104   | H, D_LEU_104   | 2.86 | 2.02 | 9.74  |
| 5JO5.PDB | O, D_VAL_11   | N, D_THR_105   | H, D_THR_105   | 2.94 | 2.13 | 15.68 |
| 5JO5.PDB | OE2, D_GLU_83 | N, D_VAL_106   | H, D_VAL_106   | 2.99 | 2.26 | 27.16 |
| 5JO5.PDB | O, D_VAL_13   | N, D_LEU_106A  | H, D_LEU_106A  | 2.85 | 2.03 | 13.72 |
| 5JO5.PDB | OH, D_TYR_140 | N, D_SER_107   | H, D_SER_107   | 2.99 | 2.19 | 18.62 |



|          |                |                |                 |      |      |       |
|----------|----------------|----------------|-----------------|------|------|-------|
| 5JO5.PDB | O, D_TYR_140   | N, D_ALA_111   | H, D_ALA_111    | 2.83 | 2.00 | 12.24 |
| 5JO5.PDB | O, D_SER_137   | N, D_SER_114   | H, D_SER_114    | 2.93 | 2.12 | 17.17 |
| 5JO5.PDB | O, D_LEU_135   | N, D_THR_116   | H, D_THR_116    | 2.99 | 2.15 | 12.62 |
| 5JO5.PDB | O, D_VAL_133   | N, D_PHE_118   | H, D_PHE_118    | 2.76 | 1.91 | 6.01  |
| 5JO5.PDB | O, D_LEU_125   | N, D_ASN_128   | H, D_ASN_128    | 3.00 | 2.17 | 13.92 |
| 5JO5.PDB | OE1, D_GLU_124 | N, D_THR_131   | H, D_THR_131    | 2.94 | 2.20 | 26.30 |
| 5JO5.PDB | OE2, D_GLU_124 | OG1, D_THR_131 | HG1, D_THR_131  | 2.53 | 1.79 | 22.99 |
| 5JO5.PDB | O, D_LEU_178   | N, D_LEU_132   | H, D_LEU_132    | 2.92 | 2.11 | 16.22 |
| 5JO5.PDB | O, D_SER_176   | N, D_CYS_134   | H, D_CYS_134    | 2.87 | 2.02 | 3.73  |
| 5JO5.PDB | O, D_THR_116   | N, D_LEU_135   | H, D_LEU_135    | 2.89 | 2.05 | 10.60 |
| 5JO5.PDB | O, D_ALA_174   | N, D_ILE_136   | H, D_ILE_136    | 2.85 | 2.08 | 22.19 |
| 5JO5.PDB | O, D_SER_114   | N, D_SER_137   | H, D_SER_137    | 2.94 | 2.16 | 20.21 |
| 5JO5.PDB | OE1, D_GLN_167 | N, D_ASP_138   | H, D_ASP_138    | 2.90 | 2.13 | 21.66 |
| 5JO5.PDB | O, D_ALA_111   | N, D_TYR_140   | H, D_TYR_140    | 2.95 | 2.14 | 16.49 |
| 5JO5.PDB | O, D_PRO_141   | N, D_ALA_143   | H, D_ALA_143    | 2.91 | 2.20 | 29.22 |
| 5JO5.PDB | O, D_GLN_194   | N, D_ALA_147   | H, D_ALA_147    | 2.87 | 2.05 | 14.86 |
| 5JO5.PDB | OG, D_SER_176  | NE1, D_TRP_148 | HE1, D_TRP_148  | 2.85 | 2.01 | 9.98  |
| 5JO5.PDB | O, D_SER_153   | N, D_ALA_150   | H, D_ALA_150    | 2.82 | 2.02 | 17.16 |
| 5JO5.PDB | O, D_SER_190   | N, D_ASP_151   | H, D_ASP_151    | 2.91 | 2.08 | 10.80 |
| 5JO5.PDB | O, D_ALA_150   | N, D_SER_153   | H, D_SER_153    | 2.91 | 2.07 | 9.74  |
| 5JO5.PDB | O, D_TYR_177   | N, D_GLU_160   | H, D_GLU_160    | 2.99 | 2.19 | 18.70 |
| 5JO5.PDB | O, D_SER_175   | N, D_THR_162   | H, D_THR_162    | 2.86 | 2.03 | 12.76 |
| 5JO5.PDB | O, C_GLY_42    | OG1, D_THR_163 | HG1, D_THR_163  | 2.56 | 1.81 | 22.64 |
| 5JO5.PDB | O, D_LYS_171   | N, D_GLN_167   | H, D_GLN_167    | 2.61 | 1.77 | 8.91  |
| 5JO5.PDB | OD1, D_ASN_169 | NE2, D_GLN_167 | HE21, D_GLN_167 | 2.91 | 2.12 | 19.40 |
| 5JO5.PDB | OD1, D_ASP_138 | NE2, D_GLN_167 | HE22, D_GLN_167 | 2.88 | 2.03 | 6.31  |
| 5JO5.PDB | O, D_GLN_167   | N, D_ASN_170   | H, D_ASN_170    | 2.90 | 2.07 | 12.77 |
| 5JO5.PDB | O, D_PHE_139   | N, D_TYR_172   | H, D_TYR_172    | 2.94 | 2.13 | 17.51 |
| 5JO5.PDB | O, D_ILE_136   | N, D_ALA_174   | H, D_ALA_174    | 2.70 | 1.89 | 16.69 |
| 5JO5.PDB | OG1, D_THR_162 | N, D_SER_175   | H, D_SER_175    | 2.99 | 2.19 | 18.15 |
| 5JO5.PDB | O, D_CYS_134   | N, D_SER_176   | H, D_SER_176    | 2.88 | 2.10 | 20.17 |
| 5JO5.PDB | OG1, D_THR_161 | OG, D_SER_176  | HG, D_SER_176   | 2.78 | 2.01 | 20.04 |
| 5JO5.PDB | O, D_GLU_160   | N, D_TYR_177   | H, D_TYR_177    | 2.73 | 1.94 | 18.28 |
| 5JO5.PDB | O, D_LEU_132   | N, D_LEU_178   | H, D_LEU_178    | 3.00 | 2.17 | 13.80 |
| 5JO5.PDB | O, D_GLY_158   | N, D_SER_179   | H, D_SER_179    | 2.79 | 1.96 | 12.81 |
| 5JO5.PDB | O, D_ALA_130   | N, D_LEU_180   | H, D_LEU_180    | 2.83 | 1.97 | 3.34  |
| 5JO5.PDB | OD2, D_ASP_151 | ND1, D_HIS_188 | HD1, D_HIS_188  | 2.67 | 1.86 | 16.19 |
| 5JO5.PDB | O, D_VAL_206   | N, D_TYR_191   | H, D_TYR_191    | 2.99 | 2.16 | 11.55 |
| 5JO5.PDB | O, D_GLN_184   | OH, D_TYR_191  | HH, D_TYR_191   | 2.98 | 2.21 | 19.53 |
| 5JO5.PDB | O, D_LYS_149   | N, D_SER_192   | H, D_SER_192    | 2.91 | 2.12 | 19.04 |
| 5JO5.PDB | OG1, D_THR_205 | OG, D_SER_192  | HG, D_SER_192   | 2.76 | 2.06 | 27.74 |
| 5JO5.PDB | O, D_LYS_204   | N, D_CYS_193   | H, D_CYS_193    | 2.83 | 2.03 | 16.94 |
| 5JO5.PDB | O, D_ALA_147   | N, D_GLN_194   | H, D_GLN_194    | 2.79 | 1.95 | 9.12  |
| 5JO5.PDB | OE2, D_GLU_203 | NE2, D_GLN_194 | HE21, D_GLN_194 | 2.41 | 1.67 | 25.54 |
| 5JO5.PDB | O, D_VAL_202   | N, D_VAL_195   | H, D_VAL_195    | 2.84 | 2.00 | 11.51 |
| 5JO5.PDB | O, D_THR_145   | N, D_THR_196   | H, D_THR_196    | 2.90 | 2.05 | 9.26  |
| 5JO5.PDB | O, D_SER_200   | N, D_HIS_197   | H, D_HIS_197    | 2.74 | 1.91 | 13.29 |
| 5JO5.PDB | O, D_PRO_141   | NE2, D_HIS_197 | HE2, D_HIS_197  | 2.94 | 2.17 | 22.03 |
| 5JO5.PDB | O, D_HIS_197   | N, D_SER_200   | H, D_SER_200    | 2.99 | 2.14 | 6.86  |
| 5JO5.PDB | O, D_VAL_195   | N, D_VAL_202   | H, D_VAL_202    | 2.92 | 2.09 | 14.26 |
| 5JO5.PDB | O, D_TYR_191   | N, D_VAL_206   | H, D_VAL_206    | 2.89 | 2.07 | 14.82 |
| 5JO5.PDB | O, E_SER_25    | N, E_GLN_3     | H, E_GLN_3      | 2.86 | 2.02 | 10.81 |
| 5JO5.PDB | O, E_SER_21    | N, E_SER_7     | H, E_SER_7      | 2.79 | 2.01 | 21.43 |
| 5JO5.PDB | OG1, E_THR_107 | N, E_GLY_9     | H, E_GLY_9      | 2.94 | 2.20 | 26.14 |
| 5JO5.PDB | O, E_THR_110   | N, E_VAL_12    | H, E_VAL_12     | 2.91 | 2.13 | 20.76 |
| 5JO5.PDB | O, E_LEU_82C   | N, E_GLY_15    | H, E_GLY_15     | 2.84 | 2.01 | 12.49 |
| 5JO5.PDB | O, E_LYS_13    | N, E_GLY_16    | H, E_GLY_16     | 2.85 | 2.02 | 13.81 |
| 5JO5.PDB | O, E_MET_82    | N, E_LEU_18    | H, E_LEU_18     | 2.89 | 2.11 | 20.71 |

|          |                 |               |                |      |      |       |
|----------|-----------------|---------------|----------------|------|------|-------|
| 5JO5.PDB | O, E_LEU_80     | N, E_LEU_20   | H, E_LEU_20    | 2.82 | 1.97 | 8.28  |
| 5JO5.PDB | O, E_SER_7      | N, E_SER_21   | H, E_SER_21    | 2.95 | 2.12 | 12.48 |
| 5JO5.PDB | O, E_LEU_78     | N, E_CYS_22   | H, E_CYS_22    | 2.73 | 1.97 | 22.79 |
| 5JO5.PDB | O, E_ASN_76     | N, E_ALA_24   | H, E_ALA_24    | 2.94 | 2.16 | 21.70 |
| 5JO5.PDB | O, E_GLN_3      | N, E_SER_25   | H, E_SER_25    | 2.98 | 2.18 | 19.36 |
| 5JO5.PDB | OD2, E_ASP_53   | NE1, E_TRP_33 | HE1, E_TRP_33  | 2.89 | 2.14 | 24.08 |
| 5JO5.PDB | O, E_ALA_93     | N, E_SER_35   | H, E_SER_35    | 2.93 | 2.11 | 14.57 |
| 5JO5.PDB | OG1, E_THR_95   | OG, E_SER_35  | HG, E_SER_35   | 2.65 | 1.97 | 29.96 |
| 5JO5.PDB | O, E_GLY_49     | N, E_TRP_36   | H, E_TRP_36    | 2.88 | 2.07 | 17.60 |
| 5JO5.PDB | O, E_TYR_91     | N, E_VAL_37   | H, E_VAL_37    | 2.87 | 2.04 | 13.44 |
| 5JO5.PDB | O, E_GLU_46     | N, E_ARG_38   | H, E_ARG_38    | 2.86 | 2.02 | 8.76  |
| 5JO5.PDB | OE1, E_GLU_46   | NE, E_ARG_38  | HE, E_ARG_38   | 2.75 | 1.95 | 17.65 |
| 5JO5.PDB | OH, E_TYR_90    | NH1, E_ARG_38 | HH11, E_ARG_38 | 2.94 | 2.11 | 14.05 |
| 5JO5.PDB | OD1, E_ASP_86   | NH1, E_ARG_38 | HH12, E_ARG_38 | 2.82 | 2.00 | 15.16 |
| 5JO5.PDB | O, E_LYS_43     | NE2, E_GLN_39 | HE21, E_GLN_39 | 2.97 | 2.27 | 29.74 |
| 5JO5.PDB | OE1, F_GLN_38   | NE2, E_GLN_39 | HE22, E_GLN_39 | 2.90 | 2.06 | 10.70 |
| 5JO5.PDB | O, E_ALA_40     | N, E_LYS_43   | H, E_LYS_43    | 2.91 | 2.07 | 11.48 |
| 5JO5.PDB | O, E_ARG_38     | N, E_GLU_46   | H, E_GLU_46    | 2.82 | 2.03 | 20.58 |
| 5JO5.PDB | O, E_TRP_36     | N, E_VAL_48   | H, E_VAL_48    | 2.91 | 2.08 | 12.92 |
| 5JO5.PDB | OE1, E_GLU_100J | NE, E_ARG_50  | HE, E_ARG_50   | 2.82 | 2.06 | 22.79 |
| 5JO5.PDB | OD2, E_ASP_58   | NH1, E_ARG_50 | HH12, E_ARG_50 | 2.78 | 1.94 | 10.17 |
| 5JO5.PDB | OE2, E_GLU_100J | NH2, E_ARG_50 | HH21, E_ARG_50 | 2.98 | 2.13 | 7.82  |
| 5JO5.PDB | O, E_MET_34     | N, E_ILE_51   | H, E_ILE_51    | 2.82 | 1.99 | 12.16 |
| 5JO5.PDB | O, E_THR_56     | N, E_LYS_52   | H, E_LYS_52    | 2.88 | 2.06 | 15.44 |
| 5JO5.PDB | O, E_SER_52A    | N, E_GLY_55   | H, E_GLY_55    | 2.77 | 2.05 | 28.25 |
| 5JO5.PDB | O, E_VAL_48     | N, E_ALA_60   | H, E_ALA_60    | 2.92 | 2.07 | 6.71  |
| 5JO5.PDB | O, E_VAL_63     | N, E_ARG_66   | H, E_ARG_66    | 2.94 | 2.10 | 9.43  |
| 5JO5.PDB | OD2, E_ASP_86   | NH1, E_ARG_66 | HH12, E_ARG_66 | 2.75 | 1.91 | 9.04  |
| 5JO5.PDB | O, E_PRO_62     | NH2, E_ARG_66 | HH21, E_ARG_66 | 2.89 | 2.04 | 7.82  |
| 5JO5.PDB | O, E_GLN_81     | N, E_THR_68   | H, E_THR_68    | 2.78 | 1.96 | 15.96 |
| 5JO5.PDB | OH, E_TYR_59    | N, E_ILE_69   | H, E_ILE_69    | 2.86 | 2.02 | 8.94  |
| 5JO5.PDB | OD1, E_ASP_73   | NE, E_ARG_71  | HE, E_ARG_71   | 2.89 | 2.11 | 20.53 |
| 5JO5.PDB | O, E_ALA_32     | NH1, E_ARG_71 | HH12, E_ARG_71 | 2.87 | 2.12 | 24.62 |
| 5JO5.PDB | O, E_ALA_32     | NH2, E_ARG_71 | HH22, E_ARG_71 | 2.83 | 2.06 | 22.60 |
| 5JO5.PDB | O, E_THR_77     | N, E_ASP_72   | H, E_ASP_72    | 2.94 | 2.10 | 9.13  |
| 5JO5.PDB | OD1, E_ASP_72   | OG, E_SER_74  | HG, E_SER_74   | 2.60 | 1.77 | 6.90  |
| 5JO5.PDB | O, E_ASP_72     | N, E_LYS_75   | H, E_LYS_75    | 2.92 | 2.11 | 15.84 |
| 5JO5.PDB | O, E_LYS_75     | OG1, E_THR_77 | HG1, E_THR_77  | 2.87 | 2.06 | 11.81 |
| 5JO5.PDB | O, E_CYS_22     | N, E_LEU_78   | H, E_LEU_78    | 2.84 | 2.01 | 12.18 |
| 5JO5.PDB | O, E_SER_70     | N, E_TYR_79   | H, E_TYR_79    | 2.79 | 1.96 | 14.25 |
| 5JO5.PDB | O, E_LEU_20     | N, E_LEU_80   | H, E_LEU_80    | 2.96 | 2.14 | 14.05 |
| 5JO5.PDB | O, E_THR_68     | N, E_GLN_81   | H, E_GLN_81    | 2.80 | 1.97 | 12.32 |
| 5JO5.PDB | O, E_LEU_18     | N, E_MET_82   | H, E_MET_82    | 2.73 | 1.87 | 5.04  |
| 5JO5.PDB | O, E_ARG_66     | N, E_ASN_82A  | H, E_ASN_82A   | 2.93 | 2.10 | 12.92 |
| 5JO5.PDB | OD2, E_ASP_86   | N, E_LYS_83   | H, E_LYS_83    | 2.87 | 2.04 | 12.63 |
| 5JO5.PDB | O, E_LYS_83     | N, E_ASP_86   | H, E_ASP_86    | 2.88 | 2.03 | 9.99  |
| 5JO5.PDB | O, E_VAL_109    | N, E_ALA_88   | H, E_ALA_88    | 3.00 | 2.22 | 22.40 |
| 5JO5.PDB | O, E_GLN_39     | N, E_VAL_89   | H, E_VAL_89    | 2.94 | 2.14 | 17.80 |
| 5JO5.PDB | O, E_THR_107    | N, E_TYR_90   | H, E_TYR_90    | 2.81 | 1.97 | 10.34 |
| 5JO5.PDB | O, E_ASP_86     | OH, E_TYR_90  | HH, E_TYR_90   | 2.76 | 1.94 | 9.78  |
| 5JO5.PDB | O, E_VAL_37     | N, E_TYR_91   | H, E_TYR_91    | 2.62 | 1.76 | 3.70  |
| 5JO5.PDB | OE2, E_GLU_6    | N, E_CYS_92   | H, E_CYS_92    | 2.83 | 2.01 | 14.83 |
| 5JO5.PDB | O, E_SER_35     | N, E_ALA_93   | H, E_ALA_93    | 2.90 | 2.13 | 22.60 |
| 5JO5.PDB | OD2, E_ASP_102  | NE, E_ARG_94  | HE, E_ARG_94   | 2.83 | 2.08 | 25.07 |
| 5JO5.PDB | OD2, E_ASP_102  | NH2, E_ARG_94 | HH21, E_ARG_94 | 2.73 | 1.97 | 23.25 |
| 5JO5.PDB | O, E_TRP_33     | N, E_THR_95   | H, E_THR_95    | 2.81 | 1.99 | 14.28 |
| 5JO5.PDB | O, E_TYR_100K   | N, E_GLY_96   | H, E_GLY_96    | 2.75 | 2.03 | 27.94 |
| 5JO5.PDB | O, E_GLY_96     | N, E_TYR_100K | H, E_TYR_100K  | 2.92 | 2.10 | 14.59 |

|          |                |                |                 |      |      |       |
|----------|----------------|----------------|-----------------|------|------|-------|
| 5JO5.PDB | OH, F_TYR_36   | N, E_PHE_100L  | H, E_PHE_100L   | 2.79 | 1.96 | 13.04 |
| 5JO5.PDB | O, E_ARG_94    | N, E_GLN_101   | H, E_GLN_101    | 2.75 | 2.03 | 27.51 |
| 5JO5.PDB | O, F_GLY_41    | NH2, E_ARG_105 | HH22, E_ARG_105 | 2.92 | 2.13 | 19.96 |
| 5JO5.PDB | OE1, E_GLU_6   | N, E_GLY_106   | H, E_GLY_106    | 2.88 | 2.02 | 0.89  |
| 5JO5.PDB | O, E_ALA_88    | N, E_VAL_109   | H, E_VAL_109    | 2.88 | 2.03 | 1.87  |
| 5JO5.PDB | OG1, E_THR_87  | N, E_VAL_111   | H, E_VAL_111    | 2.92 | 2.06 | 5.86  |
| 5JO5.PDB | O, E_VAL_12    | N, E_SER_112   | H, E_SER_112    | 2.97 | 2.21 | 23.58 |
| 5JO5.PDB | O, E_PHE_146   | N, E_LYS_117   | H, E_LYS_117    | 2.75 | 1.93 | 13.93 |
| 5JO5.PDB | O, E_ASP_144   | NZ, E_LYS_117  | HZ2, E_LYS_117  | 2.91 | 2.14 | 25.25 |
| 5JO5.PDB | O, E_LEU_141   | N, E_PHE_122   | H, E_PHE_122    | 2.90 | 2.08 | 14.62 |
| 5JO5.PDB | O, E_GLY_139   | N, E_LEU_124   | H, E_LEU_124    | 2.87 | 2.02 | 7.60  |
| 5JO5.PDB | O, E_VAL_184   | N, E_ALA_136   | H, E_ALA_136    | 2.71 | 1.90 | 16.68 |
| 5JO5.PDB | O, E_LEU_124   | N, E_GLY_139   | H, E_GLY_139    | 2.98 | 2.20 | 21.04 |
| 5JO5.PDB | O, E_SER_180   | N, E_CYS_140   | H, E_CYS_140    | 2.80 | 2.01 | 20.63 |
| 5JO5.PDB | O, E_PHE_122   | N, E_LEU_141   | H, E_LEU_141    | 2.82 | 1.97 | 5.54  |
| 5JO5.PDB | O, E_LEU_178   | N, E_VAL_142   | H, E_VAL_142    | 2.80 | 1.95 | 6.99  |
| 5JO5.PDB | O, E_SER_120   | N, E_LYS_143   | H, E_LYS_143    | 2.77 | 1.93 | 10.34 |
| 5JO5.PDB | OE2, F_GLU_124 | NZ, E_LYS_143  | HZ2, E_LYS_143  | 2.55 | 1.75 | 21.57 |
| 5JO5.PDB | O, E_TYR_176   | N, E_TYR_145   | H, E_TYR_145    | 2.90 | 2.11 | 20.23 |
| 5JO5.PDB | O, E_LYS_117   | N, E_PHE_146   | H, E_PHE_146    | 2.89 | 2.08 | 16.85 |
| 5JO5.PDB | O, E_ASN_197   | N, E_SER_153   | H, E_SER_153    | 2.97 | 2.16 | 17.92 |
| 5JO5.PDB | OD1, E_ASN_197 | OG, E_SER_153  | HG, E_SER_153   | 2.80 | 2.02 | 18.49 |
| 5JO5.PDB | OG, E_SER_180  | NE1, E_TRP_154 | HE1, E_TRP_154  | 2.96 | 2.13 | 12.27 |
| 5JO5.PDB | O, E_ILE_195   | N, E_ASN_155   | H, E_ASN_155    | 2.72 | 1.89 | 11.94 |
| 5JO5.PDB | OD1, E_ASN_197 | N, E_SER_156   | H, E_SER_156    | 2.66 | 1.84 | 15.32 |
| 5JO5.PDB | O, E_VAL_181   | N, E_HIS_164   | H, E_HIS_164    | 2.85 | 2.02 | 11.29 |
| 5JO5.PDB | O, E_SER_179   | N, E_PHE_166   | H, E_PHE_166    | 2.89 | 2.04 | 5.07  |
| 5JO5.PDB | O, E_SER_177   | N, E_VAL_169   | H, E_VAL_169    | 2.81 | 2.02 | 19.59 |
| 5JO5.PDB | OD1, E_ASP_144 | NE2, E_GLN_171 | HE22, E_GLN_171 | 2.83 | 2.02 | 16.42 |
| 5JO5.PDB | O, E_GLN_171   | N, E_GLY_174   | H, E_GLY_174    | 2.76 | 1.91 | 5.26  |
| 5JO5.PDB | O, E_TYR_145   | N, E_TYR_176   | H, E_TYR_176    | 2.86 | 2.00 | 3.93  |
| 5JO5.PDB | O, E_VAL_142   | N, E_LEU_178   | H, E_LEU_178    | 2.85 | 2.07 | 21.31 |
| 5JO5.PDB | OH, F_TYR_177  | OG, E_SER_179  | HG, E_SER_179   | 2.58 | 1.87 | 27.02 |
| 5JO5.PDB | O, E_CYS_140   | N, E_SER_180   | H, E_SER_180    | 2.98 | 2.17 | 15.74 |
| 5JO5.PDB | O, E_HIS_164   | N, E_VAL_181   | H, E_VAL_181    | 2.86 | 2.02 | 9.16  |
| 5JO5.PDB | O, E_LEU_138   | N, E_VAL_182   | H, E_VAL_182    | 2.76 | 1.93 | 11.92 |
| 5JO5.PDB | O, E_ALA_136   | N, E_VAL_184   | H, E_VAL_184    | 2.83 | 2.00 | 12.03 |
| 5JO5.PDB | O, E_GLY_134   | N, E_SER_186   | H, E_SER_186    | 2.88 | 2.03 | 8.01  |
| 5JO5.PDB | O, E_GLY_133   | OG, E_SER_186  | HG, E_SER_186   | 2.97 | 2.22 | 21.72 |
| 5JO5.PDB | O, E_PRO_185   | N, E_SER_188   | H, E_SER_188    | 2.97 | 2.20 | 23.16 |
| 5JO5.PDB | O, E_PRO_185   | OG, E_SER_188  | HG, E_SER_188   | 2.59 | 1.76 | 5.13  |
| 5JO5.PDB | O, E_SER_188   | N, E_THR_191   | H, E_THR_191    | 2.90 | 2.15 | 24.49 |
| 5JO5.PDB | O, E_SER_188   | N, E_GLN_192   | H, E_GLN_192    | 2.68 | 1.83 | 7.38  |
| 5JO5.PDB | OG, E_SER_188  | OH, E_TYR_194  | HH, E_TYR_194   | 2.65 | 1.91 | 23.44 |
| 5JO5.PDB | OD1, E_ASN_155 | N, E_ILE_195   | H, E_ILE_195    | 2.79 | 1.96 | 12.66 |
| 5JO5.PDB | O, E_LYS_209   | N, E_CYS_196   | H, E_CYS_196    | 2.95 | 2.16 | 19.80 |
| 5JO5.PDB | O, E_SER_153   | N, E_ASN_197   | H, E_ASN_197    | 2.69 | 1.84 | 6.11  |
| 5JO5.PDB | OD1, E_ASP_208 | ND2, E_ASN_197 | HD22, E_ASN_197 | 2.93 | 2.08 | 6.74  |
| 5JO5.PDB | O, E_VAL_207   | N, E_VAL_198   | H, E_VAL_198    | 2.75 | 1.89 | 4.70  |
| 5JO5.PDB | O, E_THR_151   | N, E_ASN_199   | H, E_ASN_199    | 2.87 | 2.02 | 5.85  |
| 5JO5.PDB | O, E_THR_205   | N, E_HIS_200   | H, E_HIS_200    | 2.87 | 2.01 | 4.48  |
| 5JO5.PDB | O, E_PRO_147   | NE2, E_HIS_200 | HE2, E_HIS_200  | 2.80 | 1.96 | 10.29 |
| 5JO5.PDB | O, E_LYS_201   | N, E_ASN_204   | H, E_ASN_204    | 2.97 | 2.13 | 10.21 |
| 5JO5.PDB | O, E_SER_203   | OG1, E_THR_205 | HG1, E_THR_205  | 2.99 | 2.30 | 29.09 |
| 5JO5.PDB | O, E_VAL_198   | N, E_VAL_207   | H, E_VAL_207    | 2.77 | 1.95 | 14.33 |
| 5JO5.PDB | OE2, F_GLU_123 | NZ, E_LYS_209  | HZ1, E_LYS_209  | 2.57 | 1.74 | 17.62 |
| 5JO5.PDB | O, E_TYR_194   | N, E_VAL_211   | H, E_VAL_211    | 2.91 | 2.07 | 9.99  |
| 5JO5.PDB | O, F_GLN_24    | N, F_THR_5     | H, F_THR_5      | 2.85 | 2.04 | 16.07 |

|          |                 |                |                |      |      |       |
|----------|-----------------|----------------|----------------|------|------|-------|
| 5JO5.PDB | O, F_TYR_86     | NE2, F_GLN_6   | HE22, F_GLN_6  | 2.95 | 2.11 | 10.68 |
| 5JO5.PDB | O, F_LYS_103    | N, F_VAL_11    | H, F_VAL_11    | 2.95 | 2.12 | 12.95 |
| 5JO5.PDB | O, F_THR_105    | N, F_VAL_13    | H, F_VAL_13    | 2.93 | 2.19 | 26.75 |
| 5JO5.PDB | O, F_ALA_78     | N, F_GLY_16    | H, F_GLY_16    | 2.88 | 2.02 | 3.27  |
| 5JO5.PDB | O, F_ALA_14     | N, F_GLN_17    | H, F_GLN_17    | 2.98 | 2.13 | 8.18  |
| 5JO5.PDB | O, F_ILE_75     | N, F_VAL_19    | H, F_VAL_19    | 2.97 | 2.17 | 17.62 |
| 5JO5.PDB | O, F_LEU_73     | N, F_ILE_21    | H, F_ILE_21    | 2.79 | 1.95 | 9.82  |
| 5JO5.PDB | O, F_ALA_71     | N, F_CYS_23    | H, F_CYS_23    | 2.65 | 1.81 | 10.82 |
| 5JO5.PDB | O, F_THR_5      | N, F_GLN_24    | H, F_GLN_24    | 2.96 | 2.22 | 25.96 |
| 5JO5.PDB | O, F_ASN_69     | N, F_GLY_25    | H, F_GLY_25    | 2.99 | 2.16 | 12.96 |
| 5JO5.PDB | O, F_ARG_91     | OG, F_SER_27   | HG, F_SER_27   | 2.61 | 1.83 | 18.13 |
| 5JO5.PDB | O, F_SER_27     | N, F_SER_30    | H, F_SER_30    | 2.99 | 2.17 | 15.08 |
| 5JO5.PDB | OE1, B_GLN_24   | OG, F_SER_30   | HG, F_SER_30   | 2.88 | 2.11 | 20.15 |
| 5JO5.PDB | O, F_SER_89     | N, F_SER_34    | H, F_SER_34    | 2.96 | 2.19 | 21.82 |
| 5JO5.PDB | O, F_ILE_48     | N, F_TRP_35    | H, F_TRP_35    | 2.86 | 2.07 | 19.30 |
| 5JO5.PDB | O, F_TYR_87     | N, F_TYR_36    | H, F_TYR_36    | 2.85 | 2.11 | 26.39 |
| 5JO5.PDB | O, F_VAL_45     | N, F_GLN_37    | H, F_GLN_37    | 2.90 | 2.07 | 14.11 |
| 5JO5.PDB | OH, F_TYR_86    | NE2, F_GLN_37  | HE21, F_GLN_37 | 2.98 | 2.12 | 5.01  |
| 5JO5.PDB | O, F_ASP_85     | N, F_GLN_38    | H, F_GLN_38    | 2.82 | 2.06 | 22.85 |
| 5JO5.PDB | OE1, E_GLN_39   | NE2, F_GLN_38  | HE22, F_GLN_38 | 2.85 | 2.02 | 12.75 |
| 5JO5.PDB | O, F_GLN_37     | N, F_VAL_45    | H, F_VAL_45    | 2.82 | 2.05 | 21.93 |
| 5JO5.PDB | OD2, F_ASP_82   | NE, F_ARG_61   | HE, F_ARG_61   | 2.99 | 2.15 | 12.18 |
| 5JO5.PDB | OD1, F_ASP_82   | NH2, F_ARG_61  | HH21, F_ARG_61 | 2.81 | 1.97 | 11.97 |
| 5JO5.PDB | O, F_THR_74     | N, F_SER_63    | H, F_SER_63    | 2.98 | 2.21 | 22.42 |
| 5JO5.PDB | OD1, F_ASN_52   | N, F_GLY_64    | H, F_GLY_64    | 2.75 | 1.92 | 12.61 |
| 5JO5.PDB | O, F_SER_72     | N, F_SER_65    | H, F_SER_65    | 2.99 | 2.19 | 19.46 |
| 5JO5.PDB | O, F_THR_70     | N, F_SER_67    | H, F_SER_67    | 2.97 | 2.14 | 12.81 |
| 5JO5.PDB | O, F_SER_67     | N, F_THR_70    | H, F_THR_70    | 2.94 | 2.14 | 18.28 |
| 5JO5.PDB | O, F_SER_67     | OG1, F_THR_70  | HG1, F_THR_70  | 2.69 | 1.87 | 11.09 |
| 5JO5.PDB | O, F_CYS_23     | N, F_ALA_71    | H, F_ALA_71    | 2.78 | 1.96 | 15.69 |
| 5JO5.PDB | O, F_SER_65     | N, F_SER_72    | H, F_SER_72    | 2.89 | 2.05 | 10.31 |
| 5JO5.PDB | O, F_ILE_21     | N, F_LEU_73    | H, F_LEU_73    | 2.79 | 1.97 | 15.26 |
| 5JO5.PDB | O, F_SER_63     | N, F_THR_74    | H, F_THR_74    | 2.85 | 2.00 | 6.83  |
| 5JO5.PDB | O, F_VAL_19     | N, F_ILE_75    | H, F_ILE_75    | 2.91 | 2.08 | 12.77 |
| 5JO5.PDB | O, F_GLN_17     | N, F_ALA_78    | H, F_ALA_78    | 2.92 | 2.08 | 9.70  |
| 5JO5.PDB | OD2, F_ASP_82   | N, F_GLN_79    | H, F_GLN_79    | 2.94 | 2.10 | 8.41  |
| 5JO5.PDB | O, F_GLN_79     | N, F_ASP_82    | H, F_ASP_82    | 2.82 | 1.98 | 9.27  |
| 5JO5.PDB | O, F_GLN_38     | N, F_ASP_85    | H, F_ASP_85    | 2.86 | 2.02 | 11.88 |
| 5JO5.PDB | O, F_THR_102    | N, F_TYR_86    | H, F_TYR_86    | 2.82 | 2.01 | 15.14 |
| 5JO5.PDB | O, F_ASP_82     | OH, F_TYR_86   | HH, F_TYR_86   | 2.63 | 1.82 | 11.29 |
| 5JO5.PDB | O, F_TYR_36     | N, F_TYR_87    | H, F_TYR_87    | 2.95 | 2.15 | 18.80 |
| 5JO5.PDB | O, F_SER_34     | N, F_SER_89    | H, F_SER_89    | 2.90 | 2.17 | 27.32 |
| 5JO5.PDB | O, F_VAL_97     | OG, F_SER_89   | HG, F_SER_89   | 2.78 | 2.02 | 20.17 |
| 5JO5.PDB | OE2, E_GLU_100J | NH2, F_ARG_91  | HH22, F_ARG_91 | 2.72 | 1.87 | 5.99  |
| 5JO5.PDB | OH, F_TYR_31    | N, F_GLY_95    | H, F_GLY_95    | 2.74 | 1.89 | 6.32  |
| 5JO5.PDB | OD1, F_ASP_92   | OG, F_SER_95A  | HG, F_SER_95A  | 2.58 | 1.83 | 23.06 |
| 5JO5.PDB | OD1, E_ASP_58   | NE, F_ARG_95B  | HE, F_ARG_95B  | 2.92 | 2.09 | 12.47 |
| 5JO5.PDB | OG, F_SER_95A   | N, F_LEU_95C   | H, F_LEU_95C   | 2.90 | 2.05 | 9.93  |
| 5JO5.PDB | O, F_SER_90     | N, F_VAL_97    | H, F_VAL_97    | 2.91 | 2.09 | 15.13 |
| 5JO5.PDB | O, F_CYS_88     | N, F_GLY_99    | H, F_GLY_99    | 2.87 | 2.06 | 15.92 |
| 5JO5.PDB | OE1, F_GLN_6    | N, F_GLY_101   | H, F_GLY_101   | 2.94 | 2.16 | 20.91 |
| 5JO5.PDB | O, F_TYR_86     | N, F_THR_102   | H, F_THR_102   | 2.82 | 2.02 | 18.81 |
| 5JO5.PDB | O, F_ASP_7      | OG1, F_THR_102 | HG1, F_THR_102 | 2.62 | 1.78 | 2.80  |
| 5JO5.PDB | O, F_PRO_8      | N, F_LYS_103   | H, F_LYS_103   | 2.89 | 2.04 | 8.00  |
| 5JO5.PDB | O, F_ALA_84     | N, F_LEU_104   | H, F_LEU_104   | 2.87 | 2.02 | 9.37  |
| 5JO5.PDB | O, F_VAL_11     | N, F_THR_105   | H, F_THR_105   | 2.99 | 2.16 | 14.54 |
| 5JO5.PDB | OE2, F_GLU_83   | N, F_VAL_106   | H, F_VAL_106   | 3.00 | 2.24 | 24.21 |
| 5JO5.PDB | O, F_VAL_13     | N, F_LEU_106A  | H, F_LEU_106A  | 2.87 | 2.04 | 14.03 |

|          |                |                |                 |      |      |       |
|----------|----------------|----------------|-----------------|------|------|-------|
| 5JO5.PDB | OH, F_TYR_140  | N, F_SER_107   | H, F_SER_107    | 2.93 | 2.11 | 14.82 |
| 5JO5.PDB | OE1, F_GLU_198 | NZ, F_LYS_110  | HZ3, F_LYS_110  | 2.97 | 2.11 | 10.79 |
| 5JO5.PDB | O, F_TYR_140   | N, F_ALA_111   | H, F_ALA_111    | 2.81 | 1.99 | 13.38 |
| 5JO5.PDB | O, F_SER_137   | N, F_SER_114   | H, F_SER_114    | 2.87 | 2.06 | 17.12 |
| 5JO5.PDB | O, F_LEU_135   | N, F_THR_116   | H, F_THR_116    | 2.97 | 2.14 | 11.95 |
| 5JO5.PDB | O, F_VAL_133   | N, F_PHE_118   | H, F_PHE_118    | 2.79 | 1.95 | 9.20  |
| 5JO5.PDB | O, F_LEU_125   | N, F_ASN_128   | H, F_ASN_128    | 2.88 | 2.07 | 17.11 |
| 5JO5.PDB | OE1, F_GLU_124 | N, F_THR_131   | H, F_THR_131    | 2.94 | 2.22 | 28.54 |
| 5JO5.PDB | OE2, F_GLU_124 | OG1, F_THR_131 | HG1, F_THR_131  | 2.49 | 1.76 | 24.10 |
| 5JO5.PDB | O, F_LEU_178   | N, F_LEU_132   | H, F_LEU_132    | 2.91 | 2.08 | 13.23 |
| 5JO5.PDB | O, F_SER_176   | N, F_CYS_134   | H, F_CYS_134    | 2.83 | 1.97 | 3.69  |
| 5JO5.PDB | O, F_THR_116   | N, F_LEU_135   | H, F_LEU_135    | 2.88 | 2.04 | 11.11 |
| 5JO5.PDB | O, F_ALA_174   | N, F_ILE_136   | H, F_ILE_136    | 2.89 | 2.10 | 19.87 |
| 5JO5.PDB | O, F_SER_114   | N, F_SER_137   | H, F_SER_137    | 2.91 | 2.12 | 19.22 |
| 5JO5.PDB | OE1, F_GLN_167 | N, F_ASP_138   | H, F_ASP_138    | 2.81 | 2.05 | 22.81 |
| 5JO5.PDB | O, F_PRO_141   | N, F_ALA_143   | H, F_ALA_143    | 2.90 | 2.19 | 29.08 |
| 5JO5.PDB | O, F_GLN_194   | N, F_ALA_147   | H, F_ALA_147    | 2.81 | 1.99 | 13.22 |
| 5JO5.PDB | OG, F_SER_176  | NE1, F_TRP_148 | HE1, F_TRP_148  | 2.88 | 2.03 | 9.94  |
| 5JO5.PDB | O, F_SER_192   | N, F_LYS_149   | H, F_LYS_149    | 2.88 | 2.06 | 15.62 |
| 5JO5.PDB | O, F_SER_153   | N, F_ALA_150   | H, F_ALA_150    | 2.80 | 1.99 | 15.96 |
| 5JO5.PDB | O, F_SER_190   | N, F_ASP_151   | H, F_ASP_151    | 2.90 | 2.06 | 10.54 |
| 5JO5.PDB | O, F_TRP_148   | N, F_VAL_155   | H, F_VAL_155    | 2.94 | 2.14 | 18.31 |
| 5JO5.PDB | O, F_TYR_177   | N, F_GLU_160   | H, F_GLU_160    | 2.97 | 2.17 | 17.39 |
| 5JO5.PDB | O, F_SER_175   | N, F_THR_162   | H, F_THR_162    | 2.87 | 2.04 | 13.17 |
| 5JO5.PDB | O, E_GLY_42    | OG1, F_THR_163 | HG1, F_THR_163  | 2.55 | 1.80 | 22.10 |
| 5JO5.PDB | O, F_ALA_173   | N, F_SER_165   | H, F_SER_165    | 2.89 | 2.07 | 14.19 |
| 5JO5.PDB | O, F_LYS_171   | N, F_GLN_167   | H, F_GLN_167    | 2.66 | 1.81 | 8.80  |
| 5JO5.PDB | OD1, F_ASN_169 | NE2, F_GLN_167 | HE21, F_GLN_167 | 2.87 | 2.13 | 25.80 |
| 5JO5.PDB | OD1, F_ASP_138 | NE2, F_GLN_167 | HE22, F_GLN_167 | 2.86 | 2.01 | 8.07  |
| 5JO5.PDB | OD1, F_ASN_169 | N, F_LYS_171   | H, F_LYS_171    | 2.94 | 2.09 | 6.57  |
| 5JO5.PDB | O, F_PHE_139   | N, F_TYR_172   | H, F_TYR_172    | 2.89 | 2.07 | 14.51 |
| 5JO5.PDB | O, F_SER_165   | N, F_ALA_173   | H, F_ALA_173    | 2.87 | 2.08 | 18.80 |
| 5JO5.PDB | O, F_ILE_136   | N, F_ALA_174   | H, F_ALA_174    | 2.75 | 1.95 | 16.67 |
| 5JO5.PDB | O, F_CYS_134   | N, F_SER_176   | H, F_SER_176    | 2.88 | 2.10 | 19.67 |
| 5JO5.PDB | OG1, F_THR_161 | OG, F_SER_176  | HG, F_SER_176   | 2.84 | 2.06 | 17.97 |
| 5JO5.PDB | O, F_GLU_160   | N, F_TYR_177   | H, F_TYR_177    | 2.70 | 1.88 | 14.68 |
| 5JO5.PDB | O, F_LEU_132   | N, F_LEU_178   | H, F_LEU_178    | 2.95 | 2.12 | 12.77 |
| 5JO5.PDB | O, F_GLY_158   | N, F_SER_179   | H, F_SER_179    | 2.85 | 2.02 | 11.91 |
| 5JO5.PDB | O, F_ALA_130   | N, F_LEU_180   | H, F_LEU_180    | 2.77 | 1.91 | 5.50  |
| 5JO5.PDB | OE1, F_GLN_184 | N, F_THR_181   | H, F_THR_181    | 2.91 | 2.08 | 13.75 |
| 5JO5.PDB | OG1, F_THR_181 | N, F_GLN_184   | H, F_GLN_184    | 2.92 | 2.09 | 12.10 |
| 5JO5.PDB | O, F_THR_181   | N, F_TRP_185   | H, F_TRP_185    | 2.95 | 2.13 | 14.97 |
| 5JO5.PDB | O, F_GLN_184   | OG, F_SER_187  | HG, F_SER_187   | 2.92 | 2.14 | 19.66 |
| 5JO5.PDB | OD1, F_ASP_151 | N, F_ARG_189   | H, F_ARG_189    | 2.70 | 1.97 | 26.16 |
| 5JO5.PDB | O, F_VAL_206   | N, F_TYR_191   | H, F_TYR_191    | 2.98 | 2.14 | 9.84  |
| 5JO5.PDB | O, F_GLN_184   | OH, F_TYR_191  | HH, F_TYR_191   | 2.85 | 2.14 | 27.44 |
| 5JO5.PDB | O, F_LYS_149   | N, F_SER_192   | H, F_SER_192    | 2.93 | 2.14 | 18.88 |
| 5JO5.PDB | O, F_LYS_204   | N, F_CYS_193   | H, F_CYS_193    | 2.94 | 2.14 | 19.38 |
| 5JO5.PDB | O, F_ALA_147   | N, F_GLN_194   | H, F_GLN_194    | 2.69 | 1.84 | 5.08  |
| 5JO5.PDB | OE2, F_GLU_203 | NE2, F_GLN_194 | HE21, F_GLN_194 | 2.48 | 1.75 | 26.23 |
| 5JO5.PDB | O, F_VAL_202   | N, F_VAL_195   | H, F_VAL_195    | 2.88 | 2.05 | 13.06 |
| 5JO5.PDB | O, F_THR_145   | N, F_THR_196   | H, F_THR_196    | 2.95 | 2.10 | 7.48  |
| 5JO5.PDB | O, F_SER_200   | N, F_HIS_197   | H, F_HIS_197    | 2.74 | 1.91 | 11.69 |
| 5JO5.PDB | O, F_PRO_141   | NE2, F_HIS_197 | HE2, F_HIS_197  | 2.87 | 2.10 | 22.42 |
| 5JO5.PDB | O, F_HIS_197   | N, F_SER_200   | H, F_SER_200    | 2.97 | 2.13 | 8.27  |
| 5JO5.PDB | O, F_VAL_195   | N, F_VAL_202   | H, F_VAL_202    | 2.91 | 2.07 | 12.06 |
| 5JO5.PDB | O, F_TYR_191   | N, F_VAL_206   | H, F_VAL_206    | 2.91 | 2.09 | 15.37 |
| 5JR1.PDB | O, H_SER_21    | N, H_SER_7     | H, H_SER_7      | 2.87 | 2.09 | 21.13 |

|          |               |                |                 |      |      |       |
|----------|---------------|----------------|-----------------|------|------|-------|
| 5JR1.PDB | O, H_THR_110  | N, H_VAL_12    | H, H_VAL_12     | 2.96 | 2.15 | 17.17 |
| 5JR1.PDB | O, H_LEU_82C  | N, H_GLY_15    | H, H_GLY_15     | 2.79 | 1.94 | 9.64  |
| 5JR1.PDB | O, H_LYS_13   | N, H_GLY_16    | H, H_GLY_16     | 2.88 | 2.07 | 16.51 |
| 5JR1.PDB | O, H_MET_82   | N, H_LEU_18    | H, H_LEU_18     | 2.78 | 2.00 | 19.93 |
| 5JR1.PDB | O, H_LEU_80   | N, H_LEU_20    | H, H_LEU_20     | 2.79 | 1.95 | 10.03 |
| 5JR1.PDB | O, H_LEU_78   | N, H_CYS_22    | H, H_CYS_22     | 2.73 | 2.00 | 26.48 |
| 5JR1.PDB | O, H_ASN_76   | N, H_ALA_24    | H, H_ALA_24     | 2.94 | 2.10 | 11.00 |
| 5JR1.PDB | O, H_PHE_29   | N, H_ALA_32    | H, H_ALA_32     | 2.90 | 2.05 | 7.28  |
| 5JR1.PDB | O, H_ALA_93   | N, H_SER_35    | H, H_SER_35     | 2.81 | 1.99 | 14.30 |
| 5JR1.PDB | O, H_GLY_49   | N, H_TRP_36    | H, H_TRP_36     | 2.95 | 2.15 | 18.51 |
| 5JR1.PDB | O, H_TYR_91   | N, H_VAL_37    | H, H_VAL_37     | 2.90 | 2.08 | 14.88 |
| 5JR1.PDB | O, H_GLU_46   | N, H_ARG_38    | H, H_ARG_38     | 2.79 | 1.96 | 12.39 |
| 5JR1.PDB | OE2, H_GLU_46 | NE, H_ARG_38   | HE, H_ARG_38    | 2.66 | 1.91 | 24.18 |
| 5JR1.PDB | OH, H_TYR_90  | NH1, H_ARG_38  | HH11, H_ARG_38  | 2.93 | 2.12 | 16.05 |
| 5JR1.PDB | OD1, H_ASP_86 | NH1, H_ARG_38  | HH12, H_ARG_38  | 2.94 | 2.11 | 12.77 |
| 5JR1.PDB | OE2, H_GLU_46 | NH2, H_ARG_38  | HH21, H_ARG_38  | 2.68 | 1.95 | 27.48 |
| 5JR1.PDB | O, H_VAL_89   | N, H_GLN_39    | H, H_GLN_39     | 2.80 | 2.04 | 23.21 |
| 5JR1.PDB | O, H_ALA_40   | N, H_LYS_43    | H, H_LYS_43     | 2.97 | 2.14 | 12.77 |
| 5JR1.PDB | O, H_TRP_36   | N, H_VAL_48    | H, H_VAL_48     | 2.78 | 1.94 | 10.30 |
| 5JR1.PDB | O, H_ASP_58   | N, H_ARG_50    | H, H_ARG_50     | 2.97 | 2.19 | 21.36 |
| 5JR1.PDB | O, H_MET_34   | N, H_ILE_51    | H, H_ILE_51     | 2.89 | 2.08 | 16.37 |
| 5JR1.PDB | O, H_THR_56   | N, H_LYS_52    | H, H_LYS_52     | 2.98 | 2.15 | 12.98 |
| 5JR1.PDB | OD1, H_ASP_53 | N, H_GLY_54    | H, H_GLY_54     | 2.21 | 1.48 | 25.64 |
| 5JR1.PDB | O, H_VAL_48   | N, H_ALA_60    | H, H_ALA_60     | 2.91 | 2.06 | 6.87  |
| 5JR1.PDB | OD2, H_ASP_86 | NH1, H_ARG_66  | HH12, H_ARG_66  | 2.72 | 1.87 | 9.50  |
| 5JR1.PDB | O, H_PRO_62   | NH2, H_ARG_66  | HH21, H_ARG_66  | 2.78 | 1.93 | 7.41  |
| 5JR1.PDB | O, H_GLN_81   | N, H_THR_68    | H, H_THR_68     | 2.82 | 2.01 | 16.76 |
| 5JR1.PDB | OH, H_TYR_59  | N, H_ILE_69    | H, H_ILE_69     | 2.78 | 1.93 | 7.40  |
| 5JR1.PDB | OD1, H_ASP_73 | NE, H_ARG_71   | HE, H_ARG_71    | 2.99 | 2.20 | 19.01 |
| 5JR1.PDB | O, H_ALA_32   | NH1, H_ARG_71  | HH12, H_ARG_71  | 2.98 | 2.22 | 23.48 |
| 5JR1.PDB | O, H_ALA_32   | NH2, H_ARG_71  | HH22, H_ARG_71  | 2.99 | 2.24 | 24.05 |
| 5JR1.PDB | O, H_THR_77   | N, H_ASP_72    | H, H_ASP_72     | 2.92 | 2.10 | 14.47 |
| 5JR1.PDB | OD1, H_ASP_72 | OG, H_SER_74   | HG, H_SER_74    | 2.50 | 1.70 | 14.47 |
| 5JR1.PDB | O, H_LYS_75   | OG1, H_THR_77  | HG1, H_THR_77   | 2.91 | 2.09 | 10.97 |
| 5JR1.PDB | O, H_CYS_22   | N, H_LEU_78    | H, H_LEU_78     | 2.87 | 2.04 | 11.82 |
| 5JR1.PDB | O, H_SER_70   | N, H_TYR_79    | H, H_TYR_79     | 2.85 | 2.00 | 9.75  |
| 5JR1.PDB | O, H_LEU_20   | N, H_LEU_80    | H, H_LEU_80     | 2.93 | 2.12 | 16.09 |
| 5JR1.PDB | O, H_THR_68   | N, H_GLN_81    | H, H_GLN_81     | 2.82 | 1.98 | 10.53 |
| 5JR1.PDB | O, H_LEU_18   | N, H_MET_82    | H, H_MET_82     | 2.76 | 1.92 | 9.12  |
| 5JR1.PDB | OD2, H_ASP_86 | N, H_LYS_83    | H, H_LYS_83     | 2.82 | 1.96 | 6.84  |
| 5JR1.PDB | O, H_LYS_83   | N, H_ASP_86    | H, H_ASP_86     | 2.64 | 1.79 | 6.68  |
| 5JR1.PDB | O, H_VAL_109  | N, H_ALA_88    | H, H_ALA_88     | 2.98 | 2.19 | 19.05 |
| 5JR1.PDB | O, H_GLN_39   | N, H_VAL_89    | H, H_VAL_89     | 2.83 | 2.04 | 19.63 |
| 5JR1.PDB | O, H_THR_107  | N, H_TYR_90    | H, H_TYR_90     | 2.85 | 2.00 | 7.31  |
| 5JR1.PDB | O, H_ASP_86   | OH, H_TYR_90   | HH, H_TYR_90    | 2.69 | 1.86 | 8.47  |
| 5JR1.PDB | O, H_VAL_37   | N, H_TYR_91    | H, H_TYR_91     | 2.66 | 1.80 | 1.80  |
| 5JR1.PDB | OE2, H_GLU_6  | N, H_CYS_92    | H, H_CYS_92     | 2.70 | 1.87 | 12.64 |
| 5JR1.PDB | O, H_SER_35   | N, H_ALA_93    | H, H_ALA_93     | 2.93 | 2.15 | 21.88 |
| 5JR1.PDB | O, H_ASP_102  | N, H_ARG_94    | H, H_ARG_94     | 2.91 | 2.18 | 27.54 |
| 5JR1.PDB | O, H_TRP_33   | N, H_THR_95    | H, H_THR_95     | 2.98 | 2.15 | 11.92 |
| 5JR1.PDB | O, H_TYR_100K | N, H_GLY_96    | H, H_GLY_96     | 2.88 | 2.07 | 15.19 |
| 5JR1.PDB | O, H_GLU_100I | N, H_TYR_98    | H, H_TYR_98     | 2.97 | 2.17 | 18.39 |
| 5JR1.PDB | O, H_TYR_98   | N, H_GLU_100I  | H, H_GLU_100I   | 2.76 | 1.96 | 17.68 |
| 5JR1.PDB | O, H_GLY_96   | N, H_TYR_100K  | H, H_TYR_100K   | 2.85 | 2.09 | 23.20 |
| 5JR1.PDB | OH, L_TYR_36  | N, H_PHE_100L  | H, H_PHE_100L   | 2.93 | 2.14 | 18.24 |
| 5JR1.PDB | O, H_ARG_94   | N, H_GLN_101   | H, H_GLN_101    | 2.77 | 2.05 | 27.74 |
| 5JR1.PDB | O, L_GLY_41   | NH1, H_ARG_105 | HH11, H_ARG_105 | 2.58 | 1.82 | 23.25 |
| 5JR1.PDB | OE1, H_GLU_6  | N, H_GLY_106   | H, H_GLY_106    | 2.84 | 2.01 | 12.28 |

|          |                |                |                 |      |      |       |
|----------|----------------|----------------|-----------------|------|------|-------|
| 5JR1.PDB | O, H_TYR_90    | N, H_THR_107   | H, H_THR_107    | 2.99 | 2.28 | 29.77 |
| 5JR1.PDB | O, H_ALA_88    | N, H_VAL_109   | H, H_VAL_109    | 2.92 | 2.07 | 7.11  |
| 5JR1.PDB | OG1, H_THR_87  | N, H_BVAL_111  | H, H_BVAL_111   | 3.00 | 2.15 | 5.58  |
| 5JR1.PDB | O, H_PHE_146   | N, H_LYS_117   | H, H_LYS_117    | 2.82 | 1.99 | 13.52 |
| 5JR1.PDB | O, H_ASP_144   | NZ, H_LYS_117  | HZ2, H_LYS_117  | 2.92 | 2.10 | 18.09 |
| 5JR1.PDB | O, H_LYS_143   | N, H_SER_120   | H, H_SER_120    | 2.94 | 2.13 | 15.86 |
| 5JR1.PDB | O, H_LEU_141   | N, H_PHE_122   | H, H_PHE_122    | 2.88 | 2.05 | 12.08 |
| 5JR1.PDB | O, H_GLY_139   | N, H_LEU_124   | H, H_LEU_124    | 2.79 | 1.94 | 8.07  |
| 5JR1.PDB | O, H_VAL_184   | N, H_ALA_136   | H, H_ALA_136    | 2.78 | 1.96 | 15.67 |
| 5JR1.PDB | O, H_LEU_124   | N, H_GLY_139   | H, H_GLY_139    | 2.92 | 2.11 | 16.29 |
| 5JR1.PDB | O, H_SER_180   | N, H_CYS_140   | H, H_CYS_140    | 2.94 | 2.15 | 19.79 |
| 5JR1.PDB | O, H_PHE_122   | N, H_LEU_141   | H, H_LEU_141    | 2.84 | 1.99 | 9.59  |
| 5JR1.PDB | O, H_LEU_178   | N, H_VAL_142   | H, H_VAL_142    | 2.76 | 1.90 | 4.75  |
| 5JR1.PDB | O, H_SER_120   | N, H_LYS_143   | H, H_LYS_143    | 2.77 | 1.93 | 8.90  |
| 5JR1.PDB | O, H_TYR_176   | N, H_TYR_145   | H, H_TYR_145    | 2.95 | 2.14 | 16.52 |
| 5JR1.PDB | O, H_LYS_117   | N, H_PHE_146   | H, H_PHE_146    | 2.89 | 2.08 | 16.28 |
| 5JR1.PDB | O, H_ASN_199   | N, H_THR_151   | H, H_THR_151    | 2.93 | 2.09 | 11.48 |
| 5JR1.PDB | O, H_ASN_197   | N, H_SER_153   | H, H_SER_153    | 2.90 | 2.09 | 17.08 |
| 5JR1.PDB | OD1, H_ASN_197 | OG, H_SER_153  | HG, H_SER_153   | 2.85 | 2.04 | 12.85 |
| 5JR1.PDB | OG, H_SER_180  | NE1, H_TRP_154 | HE1, H_TRP_154  | 2.87 | 2.02 | 7.55  |
| 5JR1.PDB | O, H_ILE_195   | N, H_ASN_155   | H, H_ASN_155    | 2.82 | 1.98 | 10.05 |
| 5JR1.PDB | OD1, H_ASN_197 | N, H_SER_156   | H, H_SER_156    | 2.76 | 1.96 | 17.23 |
| 5JR1.PDB | O, H_VAL_181   | N, H_HIS_164   | H, H_HIS_164    | 2.82 | 1.99 | 11.94 |
| 5JR1.PDB | O, H_SER_179   | N, H_PHE_166   | H, H_PHE_166    | 2.91 | 2.06 | 3.95  |
| 5JR1.PDB | O, H_SER_177   | N, H_VAL_169   | H, H_VAL_169    | 2.84 | 2.03 | 16.11 |
| 5JR1.PDB | O, H_LEU_175   | N, H_GLN_171   | H, H_GLN_171    | 2.92 | 2.06 | 5.15  |
| 5JR1.PDB | OD1, H_ASP_144 | NE2, H_GLN_171 | HE22, H_GLN_171 | 2.73 | 1.95 | 20.99 |
| 5JR1.PDB | O, H_GLN_171   | N, H_GLY_174   | H, H_GLY_174    | 2.88 | 2.05 | 12.35 |
| 5JR1.PDB | O, H_TYR_145   | N, H_TYR_176   | H, H_TYR_176    | 2.81 | 1.96 | 8.57  |
| 5JR1.PDB | OE1, H_GLN_171 | OG, H_SER_177  | HG, H_SER_177   | 2.71 | 1.98 | 25.79 |
| 5JR1.PDB | O, H_VAL_142   | N, H_LEU_178   | H, H_LEU_178    | 2.91 | 2.11 | 17.70 |
| 5JR1.PDB | OH, L_TYR_178  | OG, H_SER_179  | HG, H_SER_179   | 2.83 | 2.03 | 15.88 |
| 5JR1.PDB | O, H_HIS_164   | N, H_VAL_181   | H, H_VAL_181    | 2.79 | 1.96 | 12.10 |
| 5JR1.PDB | O, H_LEU_138   | N, H_VAL_182   | H, H_VAL_182    | 2.82 | 2.00 | 14.39 |
| 5JR1.PDB | O, H_ALA_136   | N, H_VAL_184   | H, H_VAL_184    | 2.80 | 1.97 | 12.21 |
| 5JR1.PDB | O, H_GLY_134   | N, H_SER_186   | H, H_SER_186    | 2.82 | 1.97 | 7.53  |
| 5JR1.PDB | O, H_PRO_185   | OG, H_SER_188  | HG, H_SER_188   | 2.70 | 1.86 | 3.21  |
| 5JR1.PDB | O, H_SER_188   | N, H_GLN_192   | H, H_GLN_192    | 2.88 | 2.04 | 10.77 |
| 5JR1.PDB | OG, H_SER_188  | OH, H_TYR_194  | HH, H_TYR_194   | 2.70 | 1.94 | 20.59 |
| 5JR1.PDB | OD1, H_ASN_155 | N, H_ILE_195   | H, H_ILE_195    | 2.86 | 2.03 | 13.39 |
| 5JR1.PDB | O, H_LYS_209   | N, H_CYS_196   | H, H_CYS_196    | 2.96 | 2.17 | 19.83 |
| 5JR1.PDB | O, H_SER_153   | N, H_ASN_197   | H, H_ASN_197    | 2.79 | 1.95 | 7.76  |
| 5JR1.PDB | O, H_VAL_207   | N, H_VAL_198   | H, H_VAL_198    | 2.80 | 1.97 | 13.81 |
| 5JR1.PDB | O, H_THR_151   | N, H_ASN_199   | H, H_ASN_199    | 2.88 | 2.05 | 14.08 |
| 5JR1.PDB | O, H_THR_205   | N, H_HIS_200   | H, H_HIS_200    | 2.87 | 2.03 | 10.85 |
| 5JR1.PDB | O, H_PRO_147   | NE2, H_HIS_200 | HE2, H_HIS_200  | 2.86 | 2.02 | 11.05 |
| 5JR1.PDB | O, H_LYS_201   | N, H_ASN_204   | H, H_ASN_204    | 2.97 | 2.13 | 9.90  |
| 5JR1.PDB | O, H_VAL_198   | N, H_VAL_207   | H, H_VAL_207    | 2.90 | 2.09 | 16.74 |
| 5JR1.PDB | O, H_CYS_196   | N, H_LYS_209   | H, H_LYS_209    | 2.83 | 2.04 | 19.23 |
| 5JR1.PDB | OE2, H_GLU_212 | NE, H_BARG_210 | HE, H_BARG_210  | 2.40 | 1.64 | 22.83 |
| 5JR1.PDB | O, H_TYR_194   | N, H_VAL_211   | H, H_VAL_211    | 2.98 | 2.15 | 13.77 |
| 5JR1.PDB | O, L_ARG_24    | N, L_THR_5     | H, L_THR_5      | 2.88 | 2.05 | 12.05 |
| 5JR1.PDB | O, L_TYR_86    | NE2, L_GLN_6   | HE22, L_GLN_6   | 2.95 | 2.16 | 19.38 |
| 5JR1.PDB | O, L_LYS_103   | N, L_VAL_11    | H, L_VAL_11     | 2.92 | 2.11 | 16.33 |
| 5JR1.PDB | O, L_ALA_78    | N, L_GLY_16    | H, L_GLY_16     | 2.86 | 2.01 | 7.27  |
| 5JR1.PDB | O, L_LEU_73    | N, L_ILE_21    | H, L_ILE_21     | 2.79 | 1.95 | 10.20 |
| 5JR1.PDB | O, L_ALA_71    | N, L_CYS_23    | H, L_CYS_23     | 2.79 | 1.94 | 9.36  |
| 5JR1.PDB | O, L_THR_5     | N, L_ARG_24    | H, L_ARG_24     | 2.91 | 2.12 | 20.30 |

|          |                |                |                 |      |      |       |
|----------|----------------|----------------|-----------------|------|------|-------|
| 5JR1.PDB | O, L_GLY_25    | N, L_LEU_28    | H, L_LEU_28     | 2.91 | 2.14 | 22.06 |
| 5JR1.PDB | O, L_SER_89    | N, L_SER_34    | H, L_SER_34     | 2.85 | 2.04 | 16.48 |
| 5JR1.PDB | O, L_PHE_48    | N, L_TRP_35    | H, L_TRP_35     | 2.89 | 2.09 | 17.65 |
| 5JR1.PDB | O, L_TYR_87    | N, L_TYR_36    | H, L_TYR_36     | 2.89 | 2.07 | 15.48 |
| 5JR1.PDB | N, H_PHE_100L  | OH, L_TYR_36   | HH, L_TYR_36    | 2.93 | 2.21 | 26.41 |
| 5JR1.PDB | O, L_ILE_45    | N, L_GLN_37    | H, L_GLN_37     | 2.91 | 2.11 | 18.13 |
| 5JR1.PDB | OH, L_TYR_86   | NE2, L_GLN_37  | HE21, L_GLN_37  | 2.92 | 2.08 | 10.60 |
| 5JR1.PDB | O, L_GLU_85    | N, L_LYS_38    | H, L_LYS_38     | 2.75 | 1.91 | 11.42 |
| 5JR1.PDB | O, L_GLN_37    | N, L_ILE_45    | H, L_ILE_45     | 2.81 | 1.99 | 14.72 |
| 5JR1.PDB | O, L_TRP_35    | N, L_LEU_47    | H, L_LEU_47     | 2.80 | 1.95 | 7.57  |
| 5JR1.PDB | O, L_ASN_53    | N, L_TYR_49    | H, L_TYR_49     | 2.89 | 2.10 | 19.62 |
| 5JR1.PDB | O, L_PHE_62    | NE, L_ARG_54   | HE, L_ARG_54    | 2.79 | 2.02 | 21.45 |
| 5JR1.PDB | O, L_PHE_62    | NH2, L_ARG_54  | HH21, L_ARG_54  | 2.91 | 2.19 | 28.02 |
| 5JR1.PDB | OD2, L_ASP_82  | NE, L_ARG_61   | HE, L_ARG_61    | 2.81 | 2.00 | 15.72 |
| 5JR1.PDB | OD1, L_ASP_82  | NH2, L_ARG_61  | HH21, L_ARG_61  | 2.74 | 1.90 | 11.09 |
| 5JR1.PDB | O, L_THR_74    | N, L_SER_63    | H, L_SER_63     | 2.98 | 2.19 | 19.40 |
| 5JR1.PDB | O, L_SER_72    | N, L_SER_65    | H, L_SER_65     | 2.90 | 2.12 | 21.18 |
| 5JR1.PDB | O, L_SER_67    | N, L_ARG_70    | H, L_ARG_70     | 2.86 | 2.02 | 9.85  |
| 5JR1.PDB | O, L_CYS_23    | N, L_ALA_71    | H, L_ALA_71     | 2.91 | 2.10 | 16.23 |
| 5JR1.PDB | O, L_SER_65    | N, L_SER_72    | H, L_SER_72     | 2.84 | 2.01 | 12.34 |
| 5JR1.PDB | O, L_ILE_21    | N, L_LEU_73    | H, L_LEU_73     | 2.78 | 1.95 | 12.54 |
| 5JR1.PDB | O, L_SER_63    | N, L_THR_74    | H, L_THR_74     | 2.78 | 1.93 | 7.21  |
| 5JR1.PDB | OG1, L_THR_20  | OG1, L_THR_74  | HG1, L_THR_74   | 2.96 | 2.15 | 13.12 |
| 5JR1.PDB | O, L_VAL_19    | N, L_ILE_75    | H, L_ILE_75     | 2.80 | 1.99 | 13.64 |
| 5JR1.PDB | O, L_ARG_61    | N, L_SER_76    | H, L_SER_76     | 2.98 | 2.17 | 14.63 |
| 5JR1.PDB | O, L_ARG_17    | N, L_ALA_78    | H, L_ALA_78     | 2.83 | 2.04 | 17.38 |
| 5JR1.PDB | OD2, L_ASP_82  | N, L_GLN_79    | H, L_GLN_79     | 2.91 | 2.06 | 9.01  |
| 5JR1.PDB | O, L_GLN_79    | N, L_ASP_82    | H, L_ASP_82     | 2.90 | 2.05 | 8.33  |
| 5JR1.PDB | O, L_LYS_38    | N, L_GLU_85    | H, L_GLU_85     | 2.91 | 2.07 | 8.57  |
| 5JR1.PDB | O, L_THR_102   | N, L_TYR_86    | H, L_TYR_86     | 2.84 | 2.05 | 20.14 |
| 5JR1.PDB | O, L_ASP_82    | OH, L_TYR_86   | HH, L_TYR_86    | 2.65 | 1.82 | 8.64  |
| 5JR1.PDB | O, L_TYR_36    | N, L_TYR_87    | H, L_TYR_87     | 2.94 | 2.12 | 15.76 |
| 5JR1.PDB | O, L_VAL_97    | OG, L_SER_89   | HG, L_SER_89    | 2.81 | 2.07 | 23.50 |
| 5JR1.PDB | O, L_TYR_32    | OG, L_SER_90   | HG, L_SER_90    | 2.84 | 2.07 | 19.10 |
| 5JR1.PDB | O, L_SER_95A   | NE, L_ARG_91   | HE, L_ARG_91    | 2.92 | 2.13 | 19.73 |
| 5JR1.PDB | O, L_GLY_95    | NH1, L_ARG_91  | HH11, L_ARG_91  | 2.58 | 1.80 | 19.50 |
| 5JR1.PDB | O, H_PRO_100F  | NH1, L_ARG_91  | HH12, L_ARG_91  | 2.89 | 2.18 | 29.36 |
| 5JR1.PDB | O, H_PRO_100F  | NH2, L_ARG_91  | HH22, L_ARG_91  | 2.82 | 2.09 | 26.91 |
| 5JR1.PDB | O, L_LEU_95C   | N, L_ASP_92    | H, L_ASP_92     | 2.85 | 2.03 | 14.49 |
| 5JR1.PDB | OD2, L_ASP_92  | N, L_SER_94    | H, L_SER_94     | 2.66 | 1.84 | 13.82 |
| 5JR1.PDB | OD2, L_ASP_92  | OG, L_SER_94   | HG, L_SER_94    | 2.41 | 1.66 | 21.72 |
| 5JR1.PDB | O, L_ASP_92    | N, L_GLY_95    | H, L_GLY_95     | 2.95 | 2.09 | 5.43  |
| 5JR1.PDB | OD2, H_ASP_58  | NH2, L_ARG_95B | HH22, L_ARG_95B | 2.47 | 1.67 | 16.99 |
| 5JR1.PDB | O, L_SER_90    | N, L_VAL_97    | H, L_VAL_97     | 2.83 | 1.98 | 7.91  |
| 5JR1.PDB | O, L_CYS_88    | N, L_GLY_99    | H, L_GLY_99     | 2.88 | 2.08 | 16.95 |
| 5JR1.PDB | O, L_TYR_86    | N, L_THR_102   | H, L_THR_102    | 2.89 | 2.09 | 17.99 |
| 5JR1.PDB | O, L_GLU_7     | OG1, L_THR_102 | HG1, L_THR_102  | 2.75 | 1.92 | 9.86  |
| 5JR1.PDB | O, L_THR_8     | N, L_LYS_103   | H, L_LYS_103    | 2.87 | 2.02 | 7.49  |
| 5JR1.PDB | O, L_ALA_84    | N, L_LEU_104   | H, L_LEU_104    | 2.86 | 2.02 | 10.37 |
| 5JR1.PDB | O, L_VAL_11    | N, L_THR_105   | H, L_THR_105    | 2.95 | 2.12 | 13.22 |
| 5JR1.PDB | OD1, L_ASP_83  | N, L_VAL_106   | H, L_VAL_106    | 2.52 | 1.67 | 7.56  |
| 5JR1.PDB | O, L_VAL_13    | N, L_LEU_106A  | H, L_LEU_106A   | 2.86 | 2.04 | 13.99 |
| 5JR1.PDB | OH, L_TYR_141  | N, L_SER_107   | H, L_SER_107    | 2.98 | 2.19 | 19.63 |
| 5JR1.PDB | OE1, L_GLU_199 | NZ, L_LYS_110  | HZ3, L_LYS_110  | 2.77 | 1.91 | 11.53 |
| 5JR1.PDB | O, L_TYR_141   | N, L_ALA_111   | H, L_ALA_111    | 2.82 | 1.98 | 10.35 |
| 5JR1.PDB | O, L_SER_138   | N, L_SER_114   | H, L_SER_114    | 2.83 | 1.98 | 5.37  |
| 5JR1.PDB | O, L_LEU_136   | N, L_THR_116   | H, L_THR_116    | 2.93 | 2.12 | 15.66 |
| 5JR1.PDB | O, L_VAL_134   | N, L_PHE_118   | H, L_PHE_118    | 2.82 | 1.99 | 11.01 |



|          |                |                |                 |      |      |       |
|----------|----------------|----------------|-----------------|------|------|-------|
| 5JR1.PDB | O, L.SER.122   | N, L.LEU.126   | H, L.LEU.126    | 2.98 | 2.14 | 8.64  |
| 5JR1.PDB | O, L.LEU.126   | N, L.ASN.129   | H, L.ASN.129    | 2.85 | 2.04 | 16.99 |
| 5JR1.PDB | OE2, L.GLU.125 | OG1, L.THR.132 | HG1, L.THR.132  | 2.53 | 1.79 | 23.02 |
| 5JR1.PDB | O, L.LEU.179   | N, L.LEU.133   | H, L.LEU.133    | 2.87 | 2.06 | 17.19 |
| 5JR1.PDB | O, L.SER.177   | N, L.CYS.135   | H, L.CYS.135    | 2.87 | 2.01 | 4.08  |
| 5JR1.PDB | O, L.THR.116   | N, L.LEU.136   | H, L.LEU.136    | 2.82 | 1.96 | 6.02  |
| 5JR1.PDB | O, L.ALA.175   | N, L.ILE.137   | H, L.ILE.137    | 2.93 | 2.15 | 21.12 |
| 5JR1.PDB | O, L.SER.114   | N, L.SER.138   | H, L.SER.138    | 2.87 | 2.07 | 19.40 |
| 5JR1.PDB | OE1, L.GLN.168 | N, L.ASP.139   | H, L.ASP.139    | 2.93 | 2.12 | 16.63 |
| 5JR1.PDB | O, L.ALA.111   | N, L.TYR.141   | H, L.TYR.141    | 2.90 | 2.08 | 15.02 |
| 5JR1.PDB | O, L.GLN.195   | N, L.ALA.148   | H, L.ALA.148    | 2.93 | 2.11 | 16.11 |
| 5JR1.PDB | OG, L.SER.177  | NE1, L.TRP.149 | HE1, L.TRP.149  | 2.84 | 1.99 | 9.64  |
| 5JR1.PDB | O, L.SER.193   | N, L.LYS.150   | H, L.LYS.150    | 2.91 | 2.10 | 16.78 |
| 5JR1.PDB | OE1, L.GLN.195 | NZ, L.LYS.150  | HZ3, L.LYS.150  | 2.79 | 1.91 | 7.52  |
| 5JR1.PDB | O, L.SER.154   | N, L.ALA.151   | H, L.ALA.151    | 2.97 | 2.15 | 14.89 |
| 5JR1.PDB | O, L.ALA.151   | N, L.SER.154   | H, L.SER.154    | 2.85 | 2.01 | 8.48  |
| 5JR1.PDB | O, L.TRP.149   | N, L.VAL.156   | H, L.VAL.156    | 2.98 | 2.14 | 8.84  |
| 5JR1.PDB | O, L.TYR.178   | N, L.GLU.161   | H, L.GLU.161    | 2.96 | 2.15 | 17.71 |
| 5JR1.PDB | O, L.SER.176   | N, L.THR.163   | H, L.THR.163    | 2.91 | 2.08 | 11.01 |
| 5JR1.PDB | O, L.ALA.174   | N, L.SER.166   | H, L.SER.166    | 2.98 | 2.16 | 14.11 |
| 5JR1.PDB | O, L.LYS.172   | N, L.GLN.168   | H, L.GLN.168    | 2.54 | 1.68 | 1.19  |
| 5JR1.PDB | OD1, L.ASN.170 | NE2, L.GLN.168 | HE21, L.GLN.168 | 2.60 | 1.77 | 13.13 |
| 5JR1.PDB | OD1, L.ASP.139 | NE2, L.GLN.168 | HE22, L.GLN.168 | 2.73 | 1.87 | 5.77  |
| 5JR1.PDB | O, L.GLN.168   | N, L.ASN.171   | H, L.ASN.171    | 2.91 | 2.08 | 14.01 |
| 5JR1.PDB | O, L.PHE.140   | N, L.TYR.173   | H, L.TYR.173    | 2.88 | 2.05 | 13.43 |
| 5JR1.PDB | O, L.SER.166   | N, L.ALA.174   | H, L.ALA.174    | 2.94 | 2.15 | 19.09 |
| 5JR1.PDB | O, L.ILE.137   | N, L.ALA.175   | H, L.ALA.175    | 2.81 | 2.00 | 16.74 |
| 5JR1.PDB | O, L.CYS.135   | N, L.SER.177   | H, L.SER.177    | 2.92 | 2.12 | 17.27 |
| 5JR1.PDB | O, L.GLU.161   | N, L.TYR.178   | H, L.TYR.178    | 2.78 | 1.97 | 16.16 |
| 5JR1.PDB | O, L.LEU.133   | N, L.LEU.179   | H, L.LEU.179    | 2.98 | 2.17 | 15.29 |
| 5JR1.PDB | O, L.GLY.159   | N, L.SER.180   | H, L.SER.180    | 2.73 | 1.89 | 11.54 |
| 5JR1.PDB | O, L.ALA.131   | N, L.LEU.181   | H, L.LEU.181    | 2.95 | 2.10 | 6.67  |
| 5JR1.PDB | OE1, L.GLN.185 | N, L.THR.182   | H, L.THR.182    | 2.93 | 2.10 | 11.07 |
| 5JR1.PDB | OG1, L.THR.182 | N, L.GLN.185   | H, L.GLN.185    | 2.88 | 2.04 | 12.03 |
| 5JR1.PDB | O, L.THR.182   | N, L.TRP.186   | H, L.TRP.186    | 2.96 | 2.13 | 12.66 |
| 5JR1.PDB | O, L.VAL.207   | N, L.TYR.192   | H, L.TYR.192    | 2.92 | 2.08 | 9.44  |
| 5JR1.PDB | O, L.LYS.150   | N, L.SER.193   | H, L.SER.193    | 2.81 | 1.99 | 15.01 |
| 5JR1.PDB | O, L.LYS.205   | N, L.CYS.194   | H, L.CYS.194    | 2.96 | 2.17 | 19.17 |
| 5JR1.PDB | O, L.ALA.148   | N, L.GLN.195   | H, L.GLN.195    | 2.75 | 1.89 | 4.07  |
| 5JR1.PDB | OE2, L.GLU.204 | NE2, L.GLN.195 | HE21, L.GLN.195 | 2.95 | 2.12 | 11.81 |
| 5JR1.PDB | O, L.VAL.203   | N, L.VAL.196   | H, L.VAL.196    | 2.75 | 1.89 | 4.95  |
| 5JR1.PDB | O, L.THR.146   | N, L.THR.197   | H, L.THR.197    | 2.80 | 1.96 | 10.45 |
| 5JR1.PDB | O, L.SER.201   | N, L.HIS.198   | H, L.HIS.198    | 2.87 | 2.03 | 9.19  |
| 5JR1.PDB | O, L.PRO.142   | NE2, L.HIS.198 | HE2, L.HIS.198  | 2.88 | 2.11 | 21.70 |
| 5JR1.PDB | O, L.HIS.198   | N, L.SER.201   | H, L.SER.201    | 2.99 | 2.18 | 15.98 |
| 5JR1.PDB | OG1, L.THR.197 | OG1, L.THR.202 | HG1, L.THR.202  | 2.77 | 1.97 | 14.73 |
| 5JR1.PDB | O, L.VAL.196   | N, L.VAL.203   | H, L.VAL.203    | 2.77 | 1.92 | 8.70  |
| 5JR1.PDB | O, L.TYR.192   | N, L.VAL.207   | H, L.VAL.207    | 2.92 | 2.11 | 16.47 |
| 5JUE.PDB | OG, L.SER.26   | N, L.VAL.3     | H, L.VAL.3      | 2.98 | 2.17 | 16.79 |
| 5JUE.PDB | O, L.ARG.24    | N, L.THR.5     | H, L.THR.5      | 2.79 | 1.95 | 8.65  |
| 5JUE.PDB | O, L.TYR.86    | NE2, L.GLN.6   | HE22, L.GLN.6   | 2.67 | 1.82 | 7.14  |
| 5JUE.PDB | O, L.LYS.103   | N, L.LEU.11    | H, L.LEU.11     | 2.83 | 2.02 | 15.60 |
| 5JUE.PDB | O, L.ASP.105   | N, L.VAL.13    | H, L.VAL.13     | 2.59 | 1.84 | 24.65 |
| 5JUE.PDB | O, L.VAL.78    | N, L.GLY.16    | H, L.GLY.16     | 2.91 | 2.08 | 13.41 |
| 5JUE.PDB | O, L.ILE.75    | N, L.ALA.19    | H, L.ALA.19     | 2.83 | 2.04 | 19.69 |
| 5JUE.PDB | O, L.LEU.73    | N, L.ILE.21    | H, L.ILE.21     | 2.80 | 1.97 | 12.30 |
| 5JUE.PDB | O, L.PHE.71    | N, L.CYS.23    | H, L.CYS.23     | 2.87 | 2.07 | 17.94 |
| 5JUE.PDB | O, L.THR.5     | N, L.ARG.24    | H, L.ARG.24     | 2.84 | 2.02 | 16.32 |

|          |                |                |                 |      |      |       |
|----------|----------------|----------------|-----------------|------|------|-------|
| 5JUE.PDB | O, L_THR_69    | N, L_SER_25    | H, L_SER_25     | 2.87 | 2.09 | 20.67 |
| 5JUE.PDB | O, L_GLY_68    | N, L_LEU_27B   | H, L_LEU_27B    | 2.95 | 2.09 | 6.56  |
| 5JUE.PDB | O, L_ASN_30    | N, L_HIS_27D   | H, L_HIS_27D    | 2.78 | 1.95 | 11.98 |
| 5JUE.PDB | O, L_HIS_27D   | N, L_GLY_29    | H, L_GLY_29     | 2.92 | 2.07 | 9.18  |
| 5JUE.PDB | OD1, L_ASN_28  | N, L_ASN_30    | H, L_ASN_30     | 2.82 | 1.98 | 7.63  |
| 5JUE.PDB | O, L_SER_89    | N, L_HIS_34    | H, L_HIS_34     | 2.90 | 2.08 | 14.05 |
| 5JUE.PDB | O, L_ILE_48    | N, L_TRP_35    | H, L_TRP_35     | 2.88 | 2.05 | 13.75 |
| 5JUE.PDB | O, L_PHE_87    | N, L_TYR_36    | H, L_TYR_36     | 2.82 | 2.02 | 18.65 |
| 5JUE.PDB | O, H_MET_100E  | OH, L_TYR_36   | HH, L_TYR_36    | 2.57 | 1.73 | 1.94  |
| 5JUE.PDB | O, L_IYS_45    | N, L_LEU_37    | H, L_LEU_37     | 2.94 | 2.13 | 17.21 |
| 5JUE.PDB | O, L_VAL_85    | N, L_GLN_38    | H, L_GLN_38     | 2.76 | 1.91 | 8.75  |
| 5JUE.PDB | OH, H_TYR_91   | NE2, L_GLN_38  | HE22, L_GLN_38  | 2.57 | 1.77 | 17.09 |
| 5JUE.PDB | O, L_LEU_37    | N, L_IYS_45    | H, L_IYS_45     | 2.82 | 2.01 | 16.77 |
| 5JUE.PDB | O, L_TRP_35    | N, L_LEU_47    | H, L_LEU_47     | 2.92 | 2.07 | 6.45  |
| 5JUE.PDB | O, L_ASN_53    | N, L_TYR_49    | H, L_TYR_49     | 2.77 | 1.96 | 16.15 |
| 5JUE.PDB | O, L_LEU_33    | N, L_VAL_51    | H, L_VAL_51     | 2.73 | 1.88 | 3.35  |
| 5JUE.PDB | O, L_IYS_50    | N, L_SER_52    | H, L_SER_52     | 2.82 | 2.09 | 27.26 |
| 5JUE.PDB | O, L_TYR_49    | N, L_ASN_53    | H, L_ASN_53     | 2.91 | 2.09 | 15.10 |
| 5JUE.PDB | O, L_LEU_47    | N, L_PHE_55    | H, L_PHE_55     | 2.94 | 2.09 | 7.35  |
| 5JUE.PDB | OD1, L_ASP_82  | NH1, L_ARG_61  | HH12, L_ARG_61  | 2.84 | 1.98 | 1.66  |
| 5JUE.PDB | OD2, L_ASP_82  | NH2, L_ARG_61  | HH22, L_ARG_61  | 2.58 | 1.76 | 15.54 |
| 5JUE.PDB | O, L_IYS_74    | N, L_SER_63    | H, L_SER_63     | 2.99 | 2.17 | 15.39 |
| 5JUE.PDB | O, L_THR_72    | N, L_SER_65    | H, L_SER_65     | 2.99 | 2.19 | 17.98 |
| 5JUE.PDB | O, L_CYS_23    | N, L_PHE_71    | H, L_PHE_71     | 2.91 | 2.13 | 20.93 |
| 5JUE.PDB | O, L_SER_65    | N, L_THR_72    | H, L_THR_72     | 3.00 | 2.17 | 13.38 |
| 5JUE.PDB | O, L_ILE_21    | N, L_LEU_73    | H, L_LEU_73     | 2.72 | 1.90 | 13.66 |
| 5JUE.PDB | O, L_SER_63    | N, L_IYS_74    | H, L_IYS_74     | 2.85 | 1.99 | 5.09  |
| 5JUE.PDB | O, L_ALA_19    | N, L_ILE_75    | H, L_ILE_75     | 2.85 | 2.02 | 11.67 |
| 5JUE.PDB | O, L_ARG_61    | N, L_SER_76    | H, L_SER_76     | 2.90 | 2.06 | 8.87  |
| 5JUE.PDB | OD2, L_ASP_82  | N, L_GLU_79    | H, L_GLU_79     | 2.91 | 2.07 | 10.58 |
| 5JUE.PDB | O, L_GLN_38    | N, L_VAL_85    | H, L_VAL_85     | 2.89 | 2.03 | 2.65  |
| 5JUE.PDB | O, L_THR_102   | N, L_TYR_86    | H, L_TYR_86     | 2.84 | 1.99 | 9.23  |
| 5JUE.PDB | O, L_ASP_82    | OH, L_TYR_86   | HH, L_TYR_86    | 2.44 | 1.73 | 27.01 |
| 5JUE.PDB | O, L_HIS_34    | N, L_SER_89    | H, L_SER_89     | 2.89 | 2.13 | 24.06 |
| 5JUE.PDB | O, L_HIS_93    | NE2, L_GLN_90  | HE22, L_GLN_90  | 2.99 | 2.13 | 3.59  |
| 5JUE.PDB | O, L_LEU_27B   | OG1, L_THR_92  | HG1, L_THR_92   | 2.74 | 1.96 | 18.74 |
| 5JUE.PDB | OE1, L_GLN_90  | N, L_HIS_93    | H, L_HIS_93     | 2.98 | 2.13 | 5.06  |
| 5JUE.PDB | O, L_VAL_2     | OG1, L_THR_97  | HG1, L_THR_97   | 2.62 | 1.84 | 18.25 |
| 5JUE.PDB | O, L_CYS_88    | N, L_GLY_99    | H, L_GLY_99     | 2.87 | 2.05 | 14.91 |
| 5JUE.PDB | OE1, L_GLN_6   | N, L_GLY_101   | H, L_GLY_101    | 2.93 | 2.15 | 21.08 |
| 5JUE.PDB | O, L_TYR_86    | N, L_THR_102   | H, L_THR_102    | 2.79 | 2.00 | 18.87 |
| 5JUE.PDB | O, L_PRO_8     | OG1, L_THR_102 | HG1, L_THR_102  | 2.72 | 1.95 | 19.56 |
| 5JUE.PDB | O, L_LEU_9     | N, L_IYS_103   | H, L_IYS_103    | 2.97 | 2.12 | 8.91  |
| 5JUE.PDB | O, L_LEU_11    | N, L_ASP_105   | H, L_ASP_105    | 2.72 | 1.89 | 12.81 |
| 5JUE.PDB | OE1, L_GLN_166 | N, L_ILE_106   | H, L_ILE_106    | 2.97 | 2.13 | 9.61  |
| 5JUE.PDB | O, L_VAL_13    | N, L_IYS_107   | H, L_IYS_107    | 2.92 | 2.11 | 17.64 |
| 5JUE.PDB | O, L_ALA_109   | NE, L_ARG_108  | HE, L_ARG_108   | 2.71 | 1.88 | 11.79 |
| 5JUE.PDB | O, L_ASP_170   | NH1, L_ARG_108 | HH11, L_ARG_108 | 2.89 | 2.05 | 10.58 |
| 5JUE.PDB | O, L_TYR_140   | N, L_ALA_111   | H, L_ALA_111    | 2.90 | 2.07 | 11.29 |
| 5JUE.PDB | O, L_ASN_137   | N, L_THR_114   | H, L_THR_114    | 2.87 | 2.02 | 7.17  |
| 5JUE.PDB | O, L_VAL_133   | N, L_PHE_118   | H, L_PHE_118    | 2.73 | 1.99 | 26.03 |
| 5JUE.PDB | OG, L_SER_121  | N, L_GLN_124   | H, L_GLN_124    | 2.96 | 2.13 | 13.41 |
| 5JUE.PDB | OG, L_SER_131  | NE2, L_GLN_124 | HE22, L_GLN_124 | 2.87 | 2.01 | 1.74  |
| 5JUE.PDB | O, L_SER_122   | N, L_THR_126   | H, L_THR_126    | 2.98 | 2.17 | 17.04 |
| 5JUE.PDB | OE1, L_GLN_124 | N, L_SER_131   | H, L_SER_131    | 2.85 | 2.11 | 26.16 |
| 5JUE.PDB | O, L_LEU_179   | N, L_VAL_132   | H, L_VAL_132    | 2.77 | 1.93 | 11.31 |
| 5JUE.PDB | O, L_SER_177   | N, L_CYS_134   | H, L_CYS_134    | 2.80 | 1.98 | 14.40 |
| 5JUE.PDB | O, L_SER_116   | N, L_PHE_135   | H, L_PHE_135    | 2.88 | 2.09 | 19.24 |

|          |                |                |                 |      |      |       |
|----------|----------------|----------------|-----------------|------|------|-------|
| 5JUE.PDB | O, L_MET.175   | N, L_LEU.136   | H, L_LEU.136    | 2.81 | 1.96 | 4.25  |
| 5JUE.PDB | O, L_THR.114   | N, L_ASN.137   | H, L_ASN.137    | 2.86 | 2.04 | 14.67 |
| 5JUE.PDB | O, L_TYR.173   | N, L_PHE.139   | H, L_PHE.139    | 2.85 | 2.03 | 14.35 |
| 5JUE.PDB | OD2, L_ASP.105 | OH, L_TYR.140  | HH, L_TYR.140   | 2.73 | 1.90 | 9.39  |
| 5JUE.PDB | O, L_GLU.195   | N, L_LYS.147   | H, L_LYS.147    | 2.84 | 2.04 | 18.72 |
| 5JUE.PDB | OG, L_SER.177  | NE1, L_TRP.148 | HE1, L_TRP.148  | 2.84 | 1.99 | 8.07  |
| 5JUE.PDB | O, L_THR.193   | N, L_LYS.149   | H, L_LYS.149    | 2.96 | 2.16 | 18.02 |
| 5JUE.PDB | OE2, L_GLU.195 | NZ, L_LYS.149  | HZ1, L_LYS.149  | 2.94 | 2.11 | 18.07 |
| 5JUE.PDB | O, L_SER.153   | N, L_ILE.150   | H, L_ILE.150    | 2.87 | 2.09 | 21.73 |
| 5JUE.PDB | O, L_SER.191   | N, L_ASP.151   | H, L_ASP.151    | 2.80 | 1.96 | 9.61  |
| 5JUE.PDB | O, L_ILE.150   | N, L_SER.153   | H, L_SER.153    | 2.88 | 2.02 | 3.01  |
| 5JUE.PDB | O, L_TRP.148   | N, L_ARG.155   | H, L_ARG.155    | 2.83 | 2.02 | 17.08 |
| 5JUE.PDB | OE1, L_GLU.185 | NH1, L_ARG.155 | HH12, L_ARG.155 | 2.98 | 2.13 | 8.18  |
| 5JUE.PDB | O, L_THR.178   | N, L_LEU.160   | H, L_LEU.160    | 2.89 | 2.07 | 14.30 |
| 5JUE.PDB | O, L_SER.176   | N, L_SER.162   | H, L_SER.162    | 2.89 | 2.09 | 18.60 |
| 5JUE.PDB | O, H_PRO.167   | OG, L_SER.162  | HG, L_SER.162   | 2.70 | 1.95 | 22.84 |
| 5JUE.PDB | O, L_SER.174   | N, L_THR.164   | H, L_THR.164    | 2.96 | 2.13 | 11.82 |
| 5JUE.PDB | O, L_ILE.106   | NE2, L_GLN.166 | HE22, L_GLN.166 | 2.89 | 2.10 | 19.76 |
| 5JUE.PDB | O, L_THR.172   | N, L_ASP.167   | H, L_ASP.167    | 2.82 | 1.99 | 14.34 |
| 5JUE.PDB | OD2, L_ASP.167 | N, L_ASP.170   | H, L_ASP.170    | 2.89 | 2.09 | 18.48 |
| 5JUE.PDB | O, L_ASP.167   | N, L_SER.171   | H, L_SER.171    | 2.91 | 2.19 | 28.73 |
| 5JUE.PDB | OD1, L_ASP.170 | N, L_THR.172   | H, L_THR.172    | 2.88 | 2.05 | 13.18 |
| 5JUE.PDB | OD1, L_ASP.170 | OG1, L_THR.172 | HG1, L_THR.172  | 2.65 | 1.84 | 10.43 |
| 5JUE.PDB | O, L_PHE.139   | N, L_TYR.173   | H, L_TYR.173    | 2.81 | 1.98 | 12.09 |
| 5JUE.PDB | OD1, L_ASP.105 | OH, L_TYR.173  | HH, L_TYR.173   | 2.53 | 1.79 | 22.81 |
| 5JUE.PDB | O, L_LEU.136   | N, L_MET.175   | H, L_MET.175    | 2.80 | 2.04 | 23.93 |
| 5JUE.PDB | O, L_SER.162   | N, L_SER.176   | H, L_SER.176    | 2.85 | 2.01 | 10.71 |
| 5JUE.PDB | OG, H_SER.178  | OG, L_SER.176  | HG, L_SER.176   | 2.78 | 1.94 | 3.13  |
| 5JUE.PDB | O, L_CYS.134   | N, L_SER.177   | H, L_SER.177    | 2.87 | 2.03 | 11.31 |
| 5JUE.PDB | OD1, L_ASN.161 | OG, L_SER.177  | HG, L_SER.177   | 2.61 | 1.88 | 24.46 |
| 5JUE.PDB | O, L_LEU.160   | N, L_THR.178   | H, L_THR.178    | 2.82 | 1.98 | 12.12 |
| 5JUE.PDB | O, L_VAL.132   | N, L_LEU.179   | H, L_LEU.179    | 2.82 | 2.00 | 15.30 |
| 5JUE.PDB | O, L_GLY.158   | N, L_THR.180   | H, L_THR.180    | 2.90 | 2.06 | 10.37 |
| 5JUE.PDB | O, L_ALA.130   | N, L_LEU.181   | H, L_LEU.181    | 2.87 | 2.02 | 8.71  |
| 5JUE.PDB | OG1, L_THR.182 | N, L_GLU.185   | H, L_GLU.185    | 2.89 | 2.08 | 16.50 |
| 5JUE.PDB | O, L_THR.182   | N, L_TYR.186   | H, L_TYR.186    | 2.88 | 2.04 | 12.09 |
| 5JUE.PDB | O, L_LYS.183   | N, L_GLU.187   | H, L_GLU.187    | 2.97 | 2.16 | 17.18 |
| 5JUE.PDB | OD1, L_ASP.184 | NE, L_ARG.188  | HE, L_ARG.188   | 2.70 | 1.93 | 22.77 |
| 5JUE.PDB | OD1, L_ASP.151 | N, L_SER.191   | H, L_SER.191    | 2.84 | 1.99 | 8.55  |
| 5JUE.PDB | OG, L_SER.208  | OG1, L_THR.193 | HG1, L_THR.193  | 2.92 | 2.19 | 25.67 |
| 5JUE.PDB | O, L_LYS.207   | N, L_CYS.194   | H, L_CYS.194    | 2.90 | 2.07 | 13.15 |
| 5JUE.PDB | O, L_LYS.147   | N, L_GLU.195   | H, L_GLU.195    | 2.80 | 2.03 | 21.10 |
| 5JUE.PDB | O, L_ILE.205   | N, L_ALA.196   | H, L_ALA.196    | 2.77 | 1.93 | 11.01 |
| 5JUE.PDB | O, L_ASN.145   | N, L_THR.197   | H, L_THR.197    | 2.81 | 1.97 | 10.17 |
| 5JUE.PDB | ND1, L_HIS.198 | OG1, L_THR.200 | HG1, L_THR.200  | 2.88 | 2.17 | 27.29 |
| 5JUE.PDB | O, L_HIS.198   | N, L_SER.201   | H, L_SER.201    | 2.99 | 2.13 | 4.28  |
| 5JUE.PDB | O, L_ALA.196   | N, L_ILE.205   | H, L_ILE.205    | 2.89 | 2.16 | 26.61 |
| 5JUE.PDB | O, L_CYS.194   | N, L_LYS.207   | H, L_LYS.207    | 2.98 | 2.13 | 8.08  |
| 5JUE.PDB | O, L_TYR.192   | OG, L_SER.208  | HG, L_SER.208   | 2.94 | 2.25 | 29.37 |
| 5JUE.PDB | O, L_TYR.192   | N, L_PHE.209   | H, L_PHE.209    | 2.97 | 2.18 | 20.14 |
| 5JUE.PDB | O, L_ASN.190   | N, L_ARG.211   | H, L_ARG.211    | 2.82 | 2.02 | 17.54 |
| 5JUE.PDB | O, L_HIS.189   | NH1, L_ARG.211 | HH11, L_ARG.211 | 2.81 | 2.00 | 16.77 |
| 5JUE.PDB | O, H_LYS.23    | N, H_GLN.5     | H, H_GLN.5      | 2.85 | 2.00 | 7.87  |
| 5JUE.PDB | OE1, H_GLN.105 | N, H_GLU.6     | H, H_GLU.6      | 2.79 | 1.93 | 4.85  |
| 5JUE.PDB | O, H_THR.108   | N, H_GLU.10    | H, H_GLU.10     | 2.90 | 2.06 | 10.22 |
| 5JUE.PDB | O, H_THR.110   | N, H_VAL.12    | H, H_VAL.12     | 2.87 | 2.05 | 14.20 |
| 5JUE.PDB | O, H_LEU.82C   | N, H_GLY.15    | H, H_GLY.15     | 2.69 | 1.84 | 3.78  |
| 5JUE.PDB | O, H_PHE.82    | N, H_VAL.18    | H, H_VAL.18     | 2.89 | 2.15 | 25.49 |

|          |                |                |                 |      |      |       |
|----------|----------------|----------------|-----------------|------|------|-------|
| 5JUE.PDB | O, H_MET_80    | N, H_ILE_20    | H, H_ILE_20     | 2.88 | 2.05 | 14.33 |
| 5JUE.PDB | OG, H_SER_7    | N, H_SER_21    | H, H_SER_21     | 2.95 | 2.10 | 6.39  |
| 5JUE.PDB | O, H_GLN_5     | N, H_LYS_23    | H, H_LYS_23     | 2.86 | 2.01 | 5.12  |
| 5JUE.PDB | O, H_SER_76    | N, H_ALA_24    | H, H_ALA_24     | 2.79 | 1.93 | 3.59  |
| 5JUE.PDB | O, H_LEU_95    | N, H_TYR_33    | H, H_TYR_33     | 2.75 | 1.97 | 21.10 |
| 5JUE.PDB | O, H_ILE_51    | N, H_ILE_34    | H, H_ILE_34     | 2.95 | 2.13 | 14.74 |
| 5JUE.PDB | O, H_ALA_93    | N, H_HIS_35    | H, H_HIS_35     | 2.70 | 1.87 | 12.64 |
| 5JUE.PDB | O, H_GLY_49    | N, H_TRP_36    | H, H_TRP_36     | 2.96 | 2.14 | 14.80 |
| 5JUE.PDB | O, H_TYR_91    | N, H_VAL_37    | H, H_VAL_37     | 2.90 | 2.12 | 21.72 |
| 5JUE.PDB | O, H_GLU_46    | N, H_LYS_38    | H, H_LYS_38     | 2.77 | 1.91 | 6.07  |
| 5JUE.PDB | O, H_GLU_85    | NZ, H_LYS_38   | HZ3, H_LYS_38   | 2.96 | 2.18 | 24.16 |
| 5JUE.PDB | O, H_VAL_89    | N, H_GLN_39    | H, H_GLN_39     | 2.71 | 1.95 | 22.82 |
| 5JUE.PDB | O, H_LYS_38    | N, H_GLU_46    | H, H_GLU_46     | 2.82 | 2.03 | 19.41 |
| 5JUE.PDB | ND1, H_HIS_35  | NE1, H_TRP_47  | HE1, H_TRP_47   | 2.93 | 2.15 | 20.72 |
| 5JUE.PDB | O, H_TRP_36    | N, H_ILE_48    | H, H_ILE_48     | 2.82 | 1.97 | 8.50  |
| 5JUE.PDB | O, H_PHE_58    | N, H_PHE_50    | H, H_PHE_50     | 2.95 | 2.18 | 21.32 |
| 5JUE.PDB | O, H_ILE_34    | N, H_ILE_51    | H, H_ILE_51     | 2.91 | 2.08 | 13.15 |
| 5JUE.PDB | O, H_ALA_56    | N, H_SER_52    | H, H_SER_52     | 2.80 | 1.98 | 14.65 |
| 5JUE.PDB | O, H_TYR_32    | N, H_CYS_52A   | H, H_CYS_52A    | 2.96 | 2.15 | 16.57 |
| 5JUE.PDB | O, H_SER_52    | N, H_GLY_55    | H, H_GLY_55     | 2.82 | 2.07 | 24.44 |
| 5JUE.PDB | O, H_ILE_48    | N, H_ASN_60    | H, H_ASN_60     | 2.84 | 2.02 | 15.39 |
| 5JUE.PDB | O, H_TRP_47    | ND2, H_ASN_60  | HD22, H_ASN_60  | 2.96 | 2.15 | 16.53 |
| 5JUE.PDB | O, H_ASN_60    | N, H_PHE_63    | H, H_PHE_63     | 2.69 | 1.86 | 13.05 |
| 5JUE.PDB | O, H_PHE_63    | N, H_LYS_66    | H, H_LYS_66     | 2.88 | 2.11 | 21.18 |
| 5JUE.PDB | OD2, H_ASP_86  | NZ, H_LYS_66   | HZ1, H_LYS_66   | 2.76 | 1.87 | 4.19  |
| 5JUE.PDB | O, H_LYS_81    | N, H_THR_68    | H, H_THR_68     | 2.79 | 2.01 | 20.33 |
| 5JUE.PDB | OH, H_TYR_59   | N, H_PHE_69    | H, H_PHE_69     | 2.85 | 2.00 | 6.71  |
| 5JUE.PDB | O, H_THR_77    | N, H_ASP_72    | H, H_ASP_72     | 2.79 | 1.96 | 13.59 |
| 5JUE.PDB | O, H_SER_75    | OG1, H_THR_77  | HG1, H_THR_77   | 2.86 | 2.10 | 21.30 |
| 5JUE.PDB | O, H_CYS_22    | N, H_ALA_78    | H, H_ALA_78     | 2.84 | 2.01 | 12.71 |
| 5JUE.PDB | O, H_THR_70    | N, H_TYR_79    | H, H_TYR_79     | 2.81 | 1.97 | 11.04 |
| 5JUE.PDB | O, H_ILE_20    | N, H_MET_80    | H, H_MET_80     | 2.90 | 2.08 | 15.24 |
| 5JUE.PDB | O, H_THR_68    | N, H_LYS_81    | H, H_LYS_81     | 2.77 | 1.92 | 8.40  |
| 5JUE.PDB | O, H_VAL_18    | N, H_PHE_82    | H, H_PHE_82     | 2.76 | 1.93 | 11.48 |
| 5JUE.PDB | O, H_ALA_16    | N, H_LEU_82C   | H, H_LEU_82C    | 2.95 | 2.10 | 6.09  |
| 5JUE.PDB | OD2, H_ASP_86  | N, H_THR_83    | H, H_THR_83     | 2.87 | 2.09 | 20.55 |
| 5JUE.PDB | O, H_THR_83    | N, H_ASP_86    | H, H_ASP_86     | 2.75 | 1.95 | 17.05 |
| 5JUE.PDB | O, H_PHE_84    | N, H_SER_87    | H, H_SER_87     | 2.98 | 2.14 | 9.08  |
| 5JUE.PDB | O, H_GLN_39    | N, H_VAL_89    | H, H_VAL_89     | 2.93 | 2.09 | 11.76 |
| 5JUE.PDB | O, H_THR_107   | N, H_TYR_90    | H, H_TYR_90     | 2.88 | 2.04 | 10.67 |
| 5JUE.PDB | O, H_ASP_86    | OH, H_TYR_90   | HH, H_TYR_90    | 2.63 | 1.81 | 11.12 |
| 5JUE.PDB | O, H_VAL_37    | N, H_TYR_91    | H, H_TYR_91     | 2.79 | 1.95 | 9.11  |
| 5JUE.PDB | OE1, H_GLN_39  | OH, H_TYR_91   | HH, H_TYR_91    | 2.83 | 2.02 | 11.19 |
| 5JUE.PDB | O, H_HIS_35    | N, H_ALA_93    | H, H_ALA_93     | 2.84 | 2.10 | 26.47 |
| 5JUE.PDB | O, H_TYR_102   | N, H_ARG_94    | H, H_ARG_94     | 2.91 | 2.11 | 17.26 |
| 5JUE.PDB | OD1, H_ASP_101 | NE, H_ARG_94   | HE, H_ARG_94    | 2.72 | 1.88 | 8.15  |
| 5JUE.PDB | OD2, H_ASP_101 | NH2, H_ARG_94  | HH21, H_ARG_94  | 2.85 | 2.02 | 12.42 |
| 5JUE.PDB | O, H_TYR_33    | N, H_LEU_95    | H, H_LEU_95     | 2.78 | 2.01 | 21.79 |
| 5JUE.PDB | O, H_CYS_92    | N, H_GLY_104   | H, H_GLY_104    | 2.87 | 2.02 | 8.85  |
| 5JUE.PDB | O, H_GLU_6     | NE2, H_GLN_105 | HE22, H_GLN_105 | 2.95 | 2.22 | 27.22 |
| 5JUE.PDB | OE1, H_GLU_6   | N, H_GLY_106   | H, H_GLY_106    | 2.94 | 2.16 | 21.03 |
| 5JUE.PDB | O, H_TYR_90    | N, H_THR_107   | H, H_THR_107    | 2.85 | 2.05 | 17.16 |
| 5JUE.PDB | O, H_SER_7     | OG1, H_THR_107 | HG1, H_THR_107  | 2.75 | 1.97 | 19.56 |
| 5JUE.PDB | O, H_ALA_88    | N, H_VAL_109   | H, H_VAL_109    | 2.87 | 2.01 | 4.42  |
| 5JUE.PDB | O, H_GLU_10    | N, H_THR_110   | H, H_THR_110    | 2.93 | 2.09 | 10.96 |
| 5JUE.PDB | OG, H_SER_87   | N, H_VAL_111   | H, H_VAL_111    | 2.90 | 2.07 | 12.94 |
| 5JUE.PDB | OG, H_SER_112  | N, H_ALA_114   | H, H_ALA_114    | 2.93 | 2.07 | 5.78  |
| 5JUE.PDB | O, H_PHE_146   | N, H_THR_117   | H, H_THR_117    | 2.86 | 2.04 | 14.00 |

|          |                |                |                 |      |      |       |
|----------|----------------|----------------|-----------------|------|------|-------|
| 5JUE.PDB | O, H_LYS_115   | OG1, H_THR_117 | HG1, H_THR_117  | 2.86 | 2.06 | 13.74 |
| 5JUE.PDB | O, H_LYS_143   | N, H_SER_120   | H, H_SER_120    | 2.92 | 2.10 | 14.44 |
| 5JUE.PDB | O, H_LEU_141   | N, H_TYR_122   | H, H_TYR_122    | 2.78 | 1.95 | 12.46 |
| 5JUE.PDB | O, H_GLY_139   | N, H_LEU_124   | H, H_LEU_124    | 2.76 | 1.94 | 15.50 |
| 5JUE.PDB | O, H_VAL_183   | N, H_VAL_136   | H, H_VAL_136    | 2.78 | 1.97 | 15.84 |
| 5JUE.PDB | O, H_VAL_181   | N, H_LEU_138   | H, H_LEU_138    | 2.83 | 1.98 | 9.69  |
| 5JUE.PDB | O, H_LEU_124   | N, H_GLY_139   | H, H_GLY_139    | 2.92 | 2.12 | 17.53 |
| 5JUE.PDB | O, H_SER_179   | N, H_CYS_140   | H, H_CYS_140    | 2.90 | 2.16 | 25.88 |
| 5JUE.PDB | O, H_TYR_122   | N, H_LEU_141   | H, H_LEU_141    | 2.90 | 2.05 | 9.18  |
| 5JUE.PDB | O, H_LEU_177   | N, H_VAL_142   | H, H_VAL_142    | 2.80 | 1.96 | 9.80  |
| 5JUE.PDB | O, H_SER_120   | N, H_LYS_143   | H, H_LYS_143    | 2.83 | 1.99 | 8.41  |
| 5JUE.PDB | OE2, H_GLU_148 | OH, H_TYR_145  | HH, H_TYR_145   | 2.72 | 1.89 | 3.03  |
| 5JUE.PDB | O, H_THR_117   | N, H_PHE_146   | H, H_PHE_146    | 2.99 | 2.19 | 18.30 |
| 5JUE.PDB | O, H_ALA_198   | N, H_THR_151   | H, H_THR_151    | 2.83 | 2.01 | 15.90 |
| 5JUE.PDB | O, H_ASN_196   | N, H_THR_153   | H, H_THR_153    | 2.83 | 2.02 | 15.46 |
| 5JUE.PDB | OD1, H_ASN_196 | OG1, H_THR_153 | HG1, H_THR_153  | 2.74 | 1.98 | 20.12 |
| 5JUE.PDB | O, H_THR_194   | N, H_ASN_155   | H, H_ASN_155    | 2.82 | 1.98 | 9.66  |
| 5JUE.PDB | OD1, H_ASN_196 | N, H_SER_156   | H, H_SER_156    | 2.76 | 1.93 | 12.37 |
| 5JUE.PDB | O, H_ASN_155   | N, H_SER_158   | H, H_SER_158    | 2.96 | 2.12 | 11.60 |
| 5JUE.PDB | O, H_SER_180   | N, H_HIS_164   | H, H_HIS_164    | 2.88 | 2.06 | 15.45 |
| 5JUE.PDB | O, H_SER_178   | N, H_PHE_166   | H, H_PHE_166    | 2.91 | 2.05 | 0.92  |
| 5JUE.PDB | O, H_THR_176   | N, H_VAL_169   | H, H_VAL_169    | 2.91 | 2.09 | 14.10 |
| 5JUE.PDB | O, H_LEU_174   | N, H_GLN_171   | H, H_GLN_171    | 2.86 | 2.02 | 11.81 |
| 5JUE.PDB | O, H_TYR_145   | N, H_TYR_175   | H, H_TYR_175    | 2.78 | 1.92 | 3.54  |
| 5JUE.PDB | O, H_VAL_169   | N, H_THR_176   | H, H_THR_176    | 2.91 | 2.13 | 21.19 |
| 5JUE.PDB | O, H_VAL_142   | N, H_LEU_177   | H, H_LEU_177    | 2.89 | 2.07 | 15.29 |
| 5JUE.PDB | O, H_CYS_140   | N, H_SER_179   | H, H_SER_179    | 2.96 | 2.18 | 21.41 |
| 5JUE.PDB | O, H_HIS_164   | N, H_SER_180   | H, H_SER_180    | 2.77 | 1.97 | 17.64 |
| 5JUE.PDB | O, H_LEU_138   | N, H_VAL_181   | H, H_VAL_181    | 2.85 | 2.04 | 16.39 |
| 5JUE.PDB | O, H_GLY_162   | N, H_THR_182   | H, H_THR_182    | 2.95 | 2.18 | 23.27 |
| 5JUE.PDB | OG1, H_THR_137 | OG1, H_THR_182 | HG1, H_THR_182  | 2.77 | 2.00 | 20.14 |
| 5JUE.PDB | O, H_VAL_136   | N, H_VAL_183   | H, H_VAL_183    | 2.99 | 2.18 | 15.82 |
| 5JUE.PDB | O, H_SER_134   | N, H_SER_185   | H, H_SER_185    | 2.84 | 2.01 | 11.66 |
| 5JUE.PDB | O, H_THR_184   | N, H_THR_187   | H, H_THR_187    | 2.89 | 2.07 | 14.43 |
| 5JUE.PDB | OG1, H_THR_184 | OG1, H_THR_187 | HG1, H_THR_187  | 2.67 | 1.90 | 19.94 |
| 5JUE.PDB | O, H_THR_187   | N, H_GLN_191   | H, H_GLN_191    | 2.84 | 2.07 | 22.35 |
| 5JUE.PDB | OD1, H_ASN_155 | N, H_THR_194   | H, H_THR_194    | 2.84 | 2.06 | 20.75 |
| 5JUE.PDB | O, H_LYS_208   | N, H_CYS_195   | H, H_CYS_195    | 2.98 | 2.17 | 16.43 |
| 5JUE.PDB | O, H_THR_153   | N, H_ASN_196   | H, H_ASN_196    | 2.77 | 1.92 | 6.43  |
| 5JUE.PDB | O, H_VAL_206   | N, H_VAL_197   | H, H_VAL_197    | 2.87 | 2.03 | 11.32 |
| 5JUE.PDB | O, H_THR_151   | N, H_ALA_198   | H, H_ALA_198    | 2.82 | 2.00 | 15.03 |
| 5JUE.PDB | ND1, H_HIS_199 | OG, H_SER_202  | HG, H_SER_202   | 2.87 | 2.13 | 24.10 |
| 5JUE.PDB | O, H_PRO_200   | N, H_SER_203   | H, H_SER_203    | 2.74 | 1.98 | 23.65 |
| 5JUE.PDB | O, H_VAL_197   | N, H_VAL_206   | H, H_VAL_206    | 2.85 | 2.02 | 12.25 |
| 5JUE.PDB | O, H_CYS_195   | N, H_LYS_208   | H, H_LYS_208    | 2.96 | 2.13 | 13.25 |
| 5JUE.PDB | OE1, L_GLU_123 | NZ, H_LYS_208  | HZ1, H_LYS_208  | 2.81 | 1.98 | 17.66 |
| 5JUE.PDB | O, H_ILE_193   | N, H_ILE_210   | H, H_ILE_210    | 2.91 | 2.05 | 5.10  |
| 5JUE.PDB | O, H_ALA_125   | NE, H_ARG_213  | HE, H_ARG_213   | 2.97 | 2.21 | 22.96 |
| 5JUE.PDB | O, H_ALA_125   | NH1, H_ARG_213 | HH11, H_ARG_213 | 2.91 | 2.14 | 23.09 |
| 5JUE.PDB | O, L_PRO_119   | NH1, H_ARG_213 | HH12, H_ARG_213 | 2.84 | 2.13 | 29.21 |
| 5JUE.PDB | O, L_PRO_120   | NH2, H_ARG_213 | HH22, H_ARG_213 | 2.94 | 2.13 | 15.93 |
| 5JXA.PDB | OE1, H_GLN_105 | N, H_GLN_6     | H, H_GLN_6      | 2.84 | 1.98 | 2.17  |
| 5JXA.PDB | O, H_TYR_90    | NE2, H_GLN_6   | HE22, H_GLN_6   | 2.90 | 2.05 | 7.37  |
| 5JXA.PDB | O, H_VAL_110   | N, H_LYS_12    | H, H_LYS_12     | 2.83 | 2.00 | 13.73 |
| 5JXA.PDB | O, H_LEU_82C   | N, H_GLY_15    | H, H_GLY_15     | 2.72 | 1.89 | 11.76 |
| 5JXA.PDB | O, H_THR_13    | OG, H_SER_16   | HG, H_SER_16    | 2.64 | 1.85 | 16.20 |
| 5JXA.PDB | O, H_PHE_82    | N, H_VAL_18    | H, H_VAL_18     | 3.00 | 2.19 | 17.49 |
| 5JXA.PDB | O, H_MET_80    | N, H_ILE_20    | H, H_ILE_20     | 2.90 | 2.05 | 7.33  |

|          |                |                |                 |      |      |       |
|----------|----------------|----------------|-----------------|------|------|-------|
| 5JXA.PDB | O, H_ALA_78    | N, H_CYS_22    | H, H_CYS_22     | 2.76 | 2.06 | 29.69 |
| 5JXA.PDB | O, H_GLY_76G   | N, H_ALA_24    | H, H_ALA_24     | 2.81 | 1.96 | 7.69  |
| 5JXA.PDB | OD1, H_ASN_28  | N, H_ARG_30    | H, H_ARG_30     | 2.98 | 2.23 | 24.67 |
| 5JXA.PDB | O, H_SER_74    | NH2, H_ARG_30  | HH22, H_ARG_30  | 2.90 | 2.07 | 12.90 |
| 5JXA.PDB | O, H_ASN_28    | N, H_ASP_31    | H, H_ASP_31     | 2.98 | 2.13 | 8.21  |
| 5JXA.PDB | O, H_ILE_51    | N, H_ILE_34    | H, H_ILE_34     | 2.89 | 2.08 | 16.53 |
| 5JXA.PDB | O, H_GLY_49    | N, H_TRP_36    | H, H_TRP_36     | 2.93 | 2.16 | 21.63 |
| 5JXA.PDB | O, H_PHE_91    | N, H_VAL_37    | H, H_VAL_37     | 3.00 | 2.19 | 17.03 |
| 5JXA.PDB | O, H_GLU_46    | N, H_ARG_38    | H, H_ARG_38     | 2.95 | 2.12 | 11.49 |
| 5JXA.PDB | OE1, H_GLU_46  | NE, H_ARG_38   | HE, H_ARG_38    | 2.80 | 2.04 | 23.29 |
| 5JXA.PDB | OD1, H_ASP_86  | NH1, H_ARG_38  | HH12, H_ARG_38  | 2.74 | 1.88 | 4.26  |
| 5JXA.PDB | OE1, H_GLU_46  | NH2, H_ARG_38  | HH21, H_ARG_38  | 2.76 | 2.00 | 23.95 |
| 5JXA.PDB | O, H_GLU_89    | N, H_LEU_39    | H, H_LEU_39     | 2.77 | 1.93 | 11.85 |
| 5JXA.PDB | O, H_GLY_44    | N, H_ILE_40    | H, H_ILE_40     | 2.91 | 2.05 | 5.76  |
| 5JXA.PDB | O, H_ILE_40    | N, H_GLY_44    | H, H_GLY_44     | 2.97 | 2.17 | 18.25 |
| 5JXA.PDB | O, H_ARG_38    | N, H_GLU_46    | H, H_GLU_46     | 2.79 | 2.00 | 19.09 |
| 5JXA.PDB | O, H_TRP_36    | N, H_ILE_48    | H, H_ILE_48     | 2.83 | 1.98 | 7.19  |
| 5JXA.PDB | O, H_SER_58    | N, H_TRP_50    | H, H_TRP_50     | 2.83 | 2.05 | 20.31 |
| 5JXA.PDB | O, H_ILE_34    | N, H_ILE_51    | H, H_ILE_51     | 2.86 | 2.05 | 16.90 |
| 5JXA.PDB | O, H_ALA_56    | N, H_LYS_52    | H, H_LYS_52     | 2.85 | 2.02 | 13.26 |
| 5JXA.PDB | O, H_TRP_50    | N, H_SER_58    | H, H_SER_58     | 2.99 | 2.19 | 18.18 |
| 5JXA.PDB | O, H_ILE_48    | N, H_ALA_60    | H, H_ALA_60     | 2.91 | 2.07 | 7.65  |
| 5JXA.PDB | OE2, H_GLU_46  | NE2, H_GLN_62  | HE21, H_GLN_62  | 2.86 | 2.00 | 1.72  |
| 5JXA.PDB | O, H_ALA_60    | N, H_LEU_63    | H, H_LEU_63     | 2.91 | 2.10 | 16.09 |
| 5JXA.PDB | O, H_LEU_63    | N, H_ARG_66    | H, H_ARG_66     | 2.89 | 2.06 | 11.35 |
| 5JXA.PDB | OD1, H_ASP_86  | NH2, H_ARG_66  | HH22, H_ARG_66  | 2.96 | 2.11 | 6.31  |
| 5JXA.PDB | O, H_GLU_81    | N, H_SER_68    | H, H_SER_68     | 2.87 | 2.09 | 21.34 |
| 5JXA.PDB | OH, H_TYR_59   | N, H_MET_69    | H, H_MET_69     | 2.89 | 2.04 | 7.98  |
| 5JXA.PDB | O, H_PRO_52A   | NE, H_ARG_71   | HE, H_ARG_71    | 2.75 | 1.92 | 12.12 |
| 5JXA.PDB | O, H_ASP_76C   | OG, H_SER_74   | HG, H_SER_74    | 2.75 | 1.97 | 16.95 |
| 5JXA.PDB | OD1, H_ASP_76  | N, H_ASP_76B   | H, H_ASP_76B    | 2.44 | 1.62 | 14.02 |
| 5JXA.PDB | O, H_ASP_76    | N, H_ASP_76C   | H, H_ASP_76C    | 2.97 | 2.14 | 13.17 |
| 5JXA.PDB | OD2, H_ASP_76C | NE1, H_TRP_76F | HE1, H_TRP_76F  | 2.87 | 2.15 | 28.04 |
| 5JXA.PDB | O, H_CYS_22    | N, H_ALA_78    | H, H_ALA_78     | 2.89 | 2.05 | 10.11 |
| 5JXA.PDB | O, H_THR_70    | N, H_TYR_79    | H, H_TYR_79     | 2.80 | 1.95 | 8.03  |
| 5JXA.PDB | O, H_SER_68    | N, H_GLU_81    | H, H_GLU_81     | 2.76 | 1.90 | 6.10  |
| 5JXA.PDB | O, H_VAL_18    | N, H_PHE_82    | H, H_PHE_82     | 2.84 | 2.03 | 16.50 |
| 5JXA.PDB | O, H_ARG_66    | N, H_SER_82A   | H, H_SER_82A    | 2.80 | 1.99 | 17.15 |
| 5JXA.PDB | OD2, H_ASP_86  | N, H_THR_83    | H, H_THR_83     | 2.91 | 2.10 | 15.72 |
| 5JXA.PDB | O, H_THR_83    | N, H_ASP_86    | H, H_ASP_86     | 2.85 | 2.00 | 7.33  |
| 5JXA.PDB | O, H_THR_107   | N, H_TYR_90    | H, H_TYR_90     | 2.86 | 2.00 | 7.75  |
| 5JXA.PDB | O, H_VAL_37    | N, H_PHE_91    | H, H_PHE_91     | 2.82 | 1.95 | 8.59  |
| 5JXA.PDB | O, H_HIS_35    | N, H_VAL_93    | H, H_VAL_93     | 2.91 | 2.05 | 12.82 |
| 5JXA.PDB | O, H_TYR_102   | N, H_ARG_94    | H, H_ARG_94     | 2.93 | 2.09 | 18.47 |
| 5JXA.PDB | O, H_GLY_96    | NE, H_ARG_95   | HE, H_ARG_95    | 2.87 | 2.08 | 18.29 |
| 5JXA.PDB | O, H_GLY_96    | NH2, H_ARG_95  | HH21, H_ARG_95  | 2.95 | 2.20 | 24.49 |
| 5JXA.PDB | OD1, H_ASP_99  | NH2, H_ARG_95  | HH22, H_ARG_95  | 2.95 | 2.09 | 5.23  |
| 5JXA.PDB | OD2, L_ASP_50  | OH, H_TYR_100  | HH, H_TYR_100   | 2.57 | 1.75 | 11.76 |
| 5JXA.PDB | OH, L_TYR_36   | N, H_TRP_100F  | H, H_TRP_100F   | 2.85 | 2.00 | 7.52  |
| 5JXA.PDB | O, H_CYS_92    | N, H_GLY_104   | H, H_GLY_104    | 2.82 | 1.96 | 4.16  |
| 5JXA.PDB | O, H_GLN_6     | NE2, H_GLN_105 | HE22, H_GLN_105 | 2.97 | 2.19 | 21.71 |
| 5JXA.PDB | O, H_TYR_90    | N, H_THR_107   | H, H_THR_107    | 2.79 | 2.05 | 25.50 |
| 5JXA.PDB | O, H_SER_7     | OG1, H_THR_107 | HG1, H_THR_107  | 2.82 | 2.10 | 26.24 |
| 5JXA.PDB | O, H_ALA_88    | N, H_VAL_109   | H, H_VAL_109    | 2.99 | 2.13 | 5.29  |
| 5JXA.PDB | OG1, H_THR_87  | N, H_VAL_111   | H, H_VAL_111    | 2.97 | 2.11 | 2.98  |
| 5JXA.PDB | O, H_LYS_12    | N, H_SER_112   | H, H_SER_112    | 2.81 | 2.01 | 17.72 |
| 5JXA.PDB | OG, H_SER_112  | N, H_ALA_114   | H, H_ALA_114    | 2.92 | 2.06 | 5.24  |
| 5JXA.PDB | O, H_PHE_146   | N, H_LYS_117   | H, H_LYS_117    | 2.81 | 2.00 | 15.52 |

|          |                |                |                 |      |      |       |
|----------|----------------|----------------|-----------------|------|------|-------|
| 5JXA.PDB | O, H_ASP_144   | NZ, H_LYS_117  | HZ2, H_LYS_117  | 2.76 | 2.00 | 26.54 |
| 5JXA.PDB | O, H_LYS_143   | N, H_SER_120   | H, H_SER_120    | 2.88 | 2.02 | 13.76 |
| 5JXA.PDB | O, H_LEU_141   | N, H_PHE_122   | H, H_PHE_122    | 2.87 | 2.05 | 13.14 |
| 5JXA.PDB | O, H_GLY_139   | N, H_LEU_124   | H, H_LEU_124    | 2.78 | 1.93 | 6.72  |
| 5JXA.PDB | O, H_VAL_184   | N, H_ALA_136   | H, H_ALA_136    | 2.62 | 1.77 | 9.09  |
| 5JXA.PDB | O, H_LEU_124   | N, H_GLY_139   | H, H_GLY_139    | 2.90 | 2.16 | 25.91 |
| 5JXA.PDB | O, H_SER_180   | N, H_CYS_140   | H, H_CYS_140    | 2.84 | 2.03 | 17.78 |
| 5JXA.PDB | O, H_PHE_122   | N, H_LEU_141   | H, H_LEU_141    | 2.80 | 1.96 | 10.45 |
| 5JXA.PDB | O, H_LEU_178   | N, H_VAL_142   | H, H_VAL_142    | 2.71 | 1.86 | 8.75  |
| 5JXA.PDB | O, H_SER_120   | N, H_LYS_143   | H, H_LYS_143    | 2.86 | 2.01 | 6.05  |
| 5JXA.PDB | OD1, H_ASP_144 | NZ, H_LYS_143  | HZ3, H_LYS_143  | 2.92 | 2.12 | 22.30 |
| 5JXA.PDB | O, H_LYS_117   | N, H_PHE_146   | H, H_PHE_146    | 2.93 | 2.11 | 14.00 |
| 5JXA.PDB | O, H_ASN_199   | N, H_THR_151   | H, H_THR_151    | 2.95 | 2.12 | 13.67 |
| 5JXA.PDB | O, H_ASN_197   | N, H_SER_153   | H, H_SER_153    | 2.94 | 2.13 | 16.37 |
| 5JXA.PDB | OD1, H_ASN_197 | OG, H_SER_153  | HG, H_SER_153   | 2.75 | 1.96 | 17.62 |
| 5JXA.PDB | OG, H_SER_180  | NE1, H_TRP_154 | HE1, H_TRP_154  | 2.96 | 2.12 | 10.70 |
| 5JXA.PDB | O, H_ILE_195   | N, H_ASN_155   | H, H_ASN_155    | 2.75 | 1.91 | 9.52  |
| 5JXA.PDB | OD1, H_ASN_197 | N, H_SER_156   | H, H_SER_156    | 2.77 | 1.96 | 16.97 |
| 5JXA.PDB | O, H_VAL_181   | N, H_HIS_164   | H, H_HIS_164    | 2.83 | 2.00 | 13.86 |
| 5JXA.PDB | O, H_SER_179   | N, H_PHE_166   | H, H_PHE_166    | 3.00 | 2.16 | 10.32 |
| 5JXA.PDB | O, H_SER_177   | N, H_VAL_169   | H, H_VAL_169    | 2.97 | 2.15 | 15.76 |
| 5JXA.PDB | O, H_LEU_175   | N, H_GLN_171   | H, H_GLN_171    | 2.96 | 2.12 | 8.09  |
| 5JXA.PDB | O, H_LEU_175   | NE2, H_GLN_171 | HE21, H_GLN_171 | 2.90 | 2.06 | 9.29  |
| 5JXA.PDB | OD1, H_ASP_144 | NE2, H_GLN_171 | HE22, H_GLN_171 | 2.86 | 2.05 | 16.31 |
| 5JXA.PDB | O, H_GLN_171   | N, H_GLY_174   | H, H_GLY_174    | 2.95 | 2.10 | 7.88  |
| 5JXA.PDB | O, H_TYR_145   | N, H_TYR_176   | H, H_TYR_176    | 2.75 | 1.91 | 10.32 |
| 5JXA.PDB | O, H_VAL_142   | N, H_LEU_178   | H, H_LEU_178    | 2.89 | 2.08 | 16.18 |
| 5JXA.PDB | O, H_CYS_140   | N, H_SER_180   | H, H_SER_180    | 2.89 | 2.07 | 14.12 |
| 5JXA.PDB | O, H_HIS_164   | N, H_VAL_181   | H, H_VAL_181    | 2.89 | 2.06 | 12.60 |
| 5JXA.PDB | O, H_LEU_138   | N, H_VAL_182   | H, H_VAL_182    | 2.88 | 2.09 | 18.88 |
| 5JXA.PDB | O, H_ALA_136   | N, H_VAL_184   | H, H_VAL_184    | 2.85 | 2.04 | 16.24 |
| 5JXA.PDB | O, H_GLY_134   | N, H_SER_186   | H, H_SER_186    | 2.13 | 1.27 | 5.45  |
| 5JXA.PDB | O, H_PRO_185   | OG, H_SER_188  | HG, H_SER_188   | 2.58 | 1.75 | 4.20  |
| 5JXA.PDB | O, H_SER_188   | N, H_GLN_192   | H, H_GLN_192    | 2.82 | 1.97 | 8.59  |
| 5JXA.PDB | O, H_THR_193   | NE2, H_GLN_192 | HE21, H_GLN_192 | 2.91 | 2.09 | 13.40 |
| 5JXA.PDB | OG, H_SER_188  | OH, H_TYR_194  | HH, H_TYR_194   | 2.92 | 2.22 | 28.67 |
| 5JXA.PDB | OD1, H_ASN_155 | N, H_ILE_195   | H, H_ILE_195    | 2.81 | 2.00 | 16.75 |
| 5JXA.PDB | O, H_LYS_209   | N, H_CYS_196   | H, H_CYS_196    | 2.97 | 2.21 | 23.72 |
| 5JXA.PDB | O, H_SER_153   | N, H_ASN_197   | H, H_ASN_197    | 2.71 | 1.87 | 7.78  |
| 5JXA.PDB | O, H_VAL_207   | N, H_VAL_198   | H, H_VAL_198    | 2.72 | 1.86 | 4.76  |
| 5JXA.PDB | O, H_THR_151   | N, H_ASN_199   | H, H_ASN_199    | 2.95 | 2.11 | 11.96 |
| 5JXA.PDB | O, H_THR_205   | N, H_HIS_200   | H, H_HIS_200    | 2.85 | 2.00 | 9.64  |
| 5JXA.PDB | O, H_PRO_147   | NE2, H_HIS_200 | HE2, H_HIS_200  | 2.71 | 1.87 | 10.25 |
| 5JXA.PDB | ND1, H_HIS_200 | OG, H_SER_203  | HG, H_SER_203   | 2.82 | 2.10 | 26.44 |
| 5JXA.PDB | O, H_LYS_201   | N, H_ASN_204   | H, H_ASN_204    | 2.83 | 2.01 | 13.96 |
| 5JXA.PDB | O, H_VAL_198   | N, H_VAL_207   | H, H_VAL_207    | 2.84 | 2.02 | 14.35 |
| 5JXA.PDB | O, H_CYS_196   | N, H_LYS_209   | H, H_LYS_209    | 2.96 | 2.14 | 15.80 |
| 5JXA.PDB | O, H_TYR_194   | N, H_VAL_211   | H, H_VAL_211    | 2.90 | 2.05 | 6.52  |
| 5JXA.PDB | OG, L_SER_26   | N, L_VAL_3     | H, L_VAL_3      | 2.90 | 2.06 | 10.44 |
| 5JXA.PDB | O, L_LYS_24    | N, L_THR_5     | H, L_THR_5      | 2.81 | 1.98 | 12.20 |
| 5JXA.PDB | O, L_TYR_86    | NE2, L_GLN_6   | HE22, L_GLN_6   | 2.89 | 2.07 | 15.63 |
| 5JXA.PDB | O, L_GLU_103   | N, L_LEU_11    | H, L_LEU_11     | 2.77 | 1.93 | 11.05 |
| 5JXA.PDB | OE1, L_GLU_17  | N, L_SER_14    | H, L_SER_14     | 2.78 | 1.95 | 10.28 |
| 5JXA.PDB | O, L_LEU_78    | N, L_GLY_16    | H, L_GLY_16     | 2.83 | 2.05 | 20.59 |
| 5JXA.PDB | O, L_SER_14    | N, L_GLU_17    | H, L_GLU_17     | 2.99 | 2.14 | 6.52  |
| 5JXA.PDB | O, L_ILE_75    | N, L_ALA_19    | H, L_ALA_19     | 2.95 | 2.13 | 15.15 |
| 5JXA.PDB | O, L_LEU_73    | N, L_LEU_21    | H, L_LEU_21     | 2.85 | 2.01 | 11.82 |
| 5JXA.PDB | O, L_SER_7     | N, L_PHE_22    | H, L_PHE_22     | 2.93 | 2.08 | 9.65  |

|          |                |                |                 |      |      |       |
|----------|----------------|----------------|-----------------|------|------|-------|
| 5JXA.PDB | O, L_PHE.71    | N, L_CYS.23    | H, L_CYS.23     | 2.86 | 2.02 | 10.81 |
| 5JXA.PDB | O, L_THR.5     | N, L_LYS.24    | H, L_LYS.24     | 2.95 | 2.10 | 7.38  |
| 5JXA.PDB | O, L_THR.69    | N, L_ALA.25    | H, L_ALA.25     | 2.83 | 2.00 | 12.63 |
| 5JXA.PDB | O, L_ILE.48    | N, L_TRP.35    | H, L_TRP.35     | 2.93 | 2.10 | 13.22 |
| 5JXA.PDB | O, L_TYR.87    | N, L_TYR.36    | H, L_TYR.36     | 2.78 | 1.95 | 13.00 |
| 5JXA.PDB | OE1, L_GLN.89  | OH, L_TYR.36   | HH, L_TYR.36    | 2.71 | 1.91 | 14.07 |
| 5JXA.PDB | O, L_ARG.45    | N, L_GLN.37    | H, L_GLN.37     | 2.89 | 2.06 | 13.47 |
| 5JXA.PDB | OH, L_TYR.86   | NE2, L_GLN.37  | HE21, L_GLN.37  | 2.99 | 2.15 | 10.29 |
| 5JXA.PDB | O, L_VAL.85    | N, L_LYS.38    | H, L_LYS.38     | 2.75 | 1.89 | 4.40  |
| 5JXA.PDB | O, L_GLN.42    | NZ, L_LYS.38   | HZ3, L_LYS.38   | 2.71 | 1.90 | 27.32 |
| 5JXA.PDB | O, L_GLU.81    | NE, L_ARG.39   | HE, L_ARG.39    | 2.78 | 1.86 | 16.81 |
| 5JXA.PDB | O, L_ARG.39    | N, L_GLN.42    | H, L_GLN.42     | 2.96 | 2.14 | 14.42 |
| 5JXA.PDB | O, L_GLN.37    | N, L_ARG.45    | H, L_ARG.45     | 2.85 | 2.09 | 23.31 |
| 5JXA.PDB | O, L_TRP.35    | N, L_LEU.47    | H, L_LEU.47     | 2.90 | 2.06 | 9.03  |
| 5JXA.PDB | O, L_ARG.53    | N, L_TYR.49    | H, L_TYR.49     | 2.87 | 2.07 | 17.25 |
| 5JXA.PDB | O, L_MET.33    | N, L_THR.51    | H, L_THR.51     | 2.75 | 1.91 | 11.49 |
| 5JXA.PDB | O, L_TYR.49    | N, L_ARG.53    | H, L_ARG.53     | 2.88 | 2.10 | 22.06 |
| 5JXA.PDB | OH, H_TYR.100  | NH2, L_ARG.53  | HH21, L_ARG.53  | 2.89 | 2.07 | 18.12 |
| 5JXA.PDB | O, L_LEU.47    | N, L_ALA.55    | H, L_ALA.55     | 2.99 | 2.14 | 7.32  |
| 5JXA.PDB | OD2, L_ASP.82  | NE, L_ARG.61   | HE, L_ARG.61    | 2.88 | 2.15 | 27.19 |
| 5JXA.PDB | OD1, L_ASP.82  | NH2, L_ARG.61  | HH21, L_ARG.61  | 2.84 | 1.98 | 2.45  |
| 5JXA.PDB | O, L_THR.74    | N, L_VAL.63    | H, L_VAL.63     | 2.82 | 1.99 | 13.39 |
| 5JXA.PDB | O, L_PHE.72    | N, L_SER.65    | H, L_SER.65     | 2.91 | 2.10 | 15.27 |
| 5JXA.PDB | OD1, L_ASP.70  | OG1, L_THR.69  | HG1, L_THR.69   | 2.92 | 2.09 | 7.50  |
| 5JXA.PDB | O, L_CYS.23    | N, L_PHE.71    | H, L_PHE.71     | 2.96 | 2.17 | 20.10 |
| 5JXA.PDB | O, L_SER.65    | N, L_PHE.72    | H, L_PHE.72     | 2.92 | 2.09 | 12.41 |
| 5JXA.PDB | O, L_LEU.21    | N, L_LEU.73    | H, L_LEU.73     | 2.92 | 2.12 | 19.36 |
| 5JXA.PDB | O, L_VAL.63    | N, L_THR.74    | H, L_THR.74     | 2.86 | 2.00 | 5.29  |
| 5JXA.PDB | O, L_ALA.19    | N, L_ILE.75    | H, L_ILE.75     | 2.87 | 2.05 | 14.95 |
| 5JXA.PDB | O, L_ARG.61    | N, L_ASN.76    | H, L_ASN.76     | 2.88 | 2.03 | 8.54  |
| 5JXA.PDB | O, L_GLU.17    | N, L_LEU.78    | H, L_LEU.78     | 2.83 | 2.01 | 13.81 |
| 5JXA.PDB | OD2, L_ASP.82  | N, L_ASP.79    | H, L_ASP.79     | 2.65 | 1.79 | 5.80  |
| 5JXA.PDB | OD2, L_ASP.79  | N, L_GLU.81    | H, L_GLU.81     | 2.94 | 2.08 | 2.69  |
| 5JXA.PDB | O, L_ASP.79    | N, L_ASP.82    | H, L_ASP.82     | 2.79 | 1.95 | 7.93  |
| 5JXA.PDB | O, L_SER.102   | N, L_TYR.86    | H, L_TYR.86     | 2.86 | 2.03 | 12.51 |
| 5JXA.PDB | O, L_ASP.82    | OH, L_TYR.86   | HH, L_TYR.86    | 2.60 | 1.79 | 10.99 |
| 5JXA.PDB | O, L_TYR.36    | N, L_TYR.87    | H, L_TYR.87     | 2.95 | 2.13 | 15.47 |
| 5JXA.PDB | O, L_THR.34    | N, L_GLN.89    | H, L_GLN.89     | 2.89 | 2.18 | 29.17 |
| 5JXA.PDB | O, L_PHE.97    | N, L_GLN.90    | H, L_GLN.90     | 2.95 | 2.17 | 21.39 |
| 5JXA.PDB | O, L_GLN.90    | N, L_PHE.97    | H, L_PHE.97     | 2.85 | 2.03 | 15.63 |
| 5JXA.PDB | O, L_CYS.88    | N, L_GLY.99    | H, L_GLY.99     | 2.94 | 2.12 | 17.39 |
| 5JXA.PDB | OE1, L_GLN.6   | N, L_GLY.101   | H, L_GLY.101    | 2.89 | 2.15 | 26.61 |
| 5JXA.PDB | O, L_TYR.86    | N, L_SER.102   | H, L_SER.102    | 2.89 | 2.08 | 16.76 |
| 5JXA.PDB | O, L_PRO.8     | OG, L_SER.102  | HG, L_SER.102   | 2.69 | 2.00 | 29.55 |
| 5JXA.PDB | O, L_GLY.9     | N, L_GLU.103   | H, L_GLU.103    | 2.89 | 2.04 | 6.77  |
| 5JXA.PDB | O, L_ALA.84    | N, L_LEU.104   | H, L_LEU.104    | 2.88 | 2.04 | 11.59 |
| 5JXA.PDB | O, L_LEU.11    | N, L_GLU.105   | H, L_GLU.105    | 2.90 | 2.07 | 12.41 |
| 5JXA.PDB | OE1, L_GLN.166 | N, L_VAL.106   | H, L_VAL.106    | 2.98 | 2.12 | 4.21  |
| 5JXA.PDB | O, L_LEU.13    | N, L_HIS.107   | H, L_HIS.107    | 2.92 | 2.09 | 12.00 |
| 5JXA.PDB | O, L_THR.109   | NE, L_ARG.108  | HE, L_ARG.108   | 2.85 | 2.02 | 11.20 |
| 5JXA.PDB | O, L_ASP.170   | NH1, L_ARG.108 | HH11, L_ARG.108 | 2.90 | 2.05 | 7.50  |
| 5JXA.PDB | O, L_TYR.140   | N, L_ALA.111   | H, L_ALA.111    | 2.88 | 2.04 | 11.67 |
| 5JXA.PDB | O, L_LEU.135   | N, L_PHE.116   | H, L_PHE.116    | 2.95 | 2.16 | 18.98 |
| 5JXA.PDB | O, L_VAL.133   | N, L_PHE.118   | H, L_PHE.118    | 2.79 | 1.99 | 17.84 |
| 5JXA.PDB | OG, L_SER.131  | NE2, L_GLN.124 | HE22, L_GLN.124 | 2.80 | 1.95 | 4.80  |
| 5JXA.PDB | O, L_GLN.124   | N, L_SER.127   | H, L_SER.127    | 2.78 | 1.98 | 17.11 |
| 5JXA.PDB | O, L_LEU.125   | N, L_GLY.128   | H, L_GLY.128    | 2.90 | 2.04 | 5.48  |
| 5JXA.PDB | O, L_LEU.181   | N, L_ALA.130   | H, L_ALA.130    | 2.76 | 1.92 | 10.28 |



|          |                |                |                 |      |      |       |
|----------|----------------|----------------|-----------------|------|------|-------|
| 5JXA.PDB | OE1, L_GLN_124 | N, L_SER_131   | H, L_SER_131    | 3.00 | 2.18 | 14.97 |
| 5JXA.PDB | O, L_LEU_179   | N, L_VAL_132   | H, L_VAL_132    | 2.83 | 1.99 | 9.70  |
| 5JXA.PDB | O, L_SER_177   | N, L_CYS_134   | H, L_CYS_134    | 2.84 | 2.01 | 12.61 |
| 5JXA.PDB | O, L_PHE_116   | N, L_LEU_135   | H, L_LEU_135    | 2.76 | 1.91 | 8.80  |
| 5JXA.PDB | O, L_LEU_175   | N, L_LEU_136   | H, L_LEU_136    | 2.76 | 1.91 | 4.29  |
| 5JXA.PDB | O, L_SER_114   | N, L_ASN_137   | H, L_ASN_137    | 2.86 | 2.06 | 16.81 |
| 5JXA.PDB | O, L_TYR_173   | N, L_PHE_139   | H, L_PHE_139    | 2.83 | 2.00 | 12.08 |
| 5JXA.PDB | O, L_ALA_111   | N, L_TYR_140   | H, L_TYR_140    | 2.95 | 2.14 | 16.31 |
| 5JXA.PDB | OE1, L_GLU_105 | OH, L_TYR_140  | HH, L_TYR_140   | 2.43 | 1.65 | 17.73 |
| 5JXA.PDB | OE1, L_GLU_103 | NH1, L_ARG_142 | HH12, L_ARG_142 | 2.87 | 2.05 | 14.46 |
| 5JXA.PDB | OH, L_TYR_173  | NH2, L_ARG_142 | HH21, L_ARG_142 | 2.84 | 2.07 | 21.88 |
| 5JXA.PDB | OE2, L_GLU_103 | NH2, L_ARG_142 | HH22, L_ARG_142 | 2.79 | 1.94 | 8.50  |
| 5JXA.PDB | O, L_THR_197   | N, L_LYS_145   | H, L_LYS_145    | 2.95 | 2.11 | 9.81  |
| 5JXA.PDB | O, L_GLU_195   | N, L_GLN_147   | H, L_GLN_147    | 2.80 | 1.97 | 13.47 |
| 5JXA.PDB | O, L_TRP_148   | NE2, L_GLN_147 | HE21, L_GLN_147 | 2.90 | 2.05 | 7.67  |
| 5JXA.PDB | OG, L_SER_177  | NE1, L_TRP_148 | HE1, L_TRP_148  | 2.86 | 2.05 | 17.07 |
| 5JXA.PDB | O, L_ALA_193   | N, L_LYS_149   | H, L_LYS_149    | 2.88 | 2.05 | 13.32 |
| 5JXA.PDB | O, L_ALA_153   | N, L_VAL_150   | H, L_VAL_150    | 3.00 | 2.18 | 15.98 |
| 5JXA.PDB | O, L_VAL_191   | N, L_ASP_151   | H, L_ASP_151    | 2.79 | 1.95 | 10.19 |
| 5JXA.PDB | O, L_VAL_150   | N, L_ALA_153   | H, L_ALA_153    | 2.90 | 2.07 | 13.09 |
| 5JXA.PDB | O, L_TRP_148   | N, L_GLN_155   | H, L_GLN_155    | 2.93 | 2.09 | 9.40  |
| 5JXA.PDB | OE1, L_GLN_155 | ND2, L_ASN_158 | HD21, L_ASN_158 | 2.94 | 2.10 | 10.59 |
| 5JXA.PDB | O, H_LEU_170   | NE2, L_GLN_160 | HE22, L_GLN_160 | 2.84 | 1.99 | 4.55  |
| 5JXA.PDB | O, L_SER_176   | N, L_SER_162   | H, L_SER_162    | 2.98 | 2.19 | 20.08 |
| 5JXA.PDB | O, H_PRO_167   | OG, L_SER_162  | HG, L_SER_162   | 2.69 | 1.94 | 23.37 |
| 5JXA.PDB | O, L_SER_171   | NE2, L_GLN_166 | HE21, L_GLN_166 | 2.90 | 2.05 | 9.75  |
| 5JXA.PDB | O, L_VAL_106   | NE2, L_GLN_166 | HE22, L_GLN_166 | 2.89 | 2.10 | 19.46 |
| 5JXA.PDB | O, L_THR_172   | N, L_ASP_167   | H, L_ASP_167    | 2.83 | 2.01 | 13.03 |
| 5JXA.PDB | OD2, L_ASP_167 | N, L_LYS_169   | H, L_LYS_169    | 2.81 | 2.02 | 19.97 |
| 5JXA.PDB | OD2, L_ASP_167 | N, L_ASP_170   | H, L_ASP_170    | 2.85 | 2.02 | 14.37 |
| 5JXA.PDB | O, L_ASP_167   | N, L_SER_171   | H, L_SER_171    | 2.99 | 2.25 | 26.24 |
| 5JXA.PDB | OD1, L_ASP_170 | N, L_THR_172   | H, L_THR_172    | 2.91 | 2.07 | 10.06 |
| 5JXA.PDB | OD1, L_ASP_170 | OG1, L_THR_172 | HG1, L_THR_172  | 2.69 | 1.87 | 10.60 |
| 5JXA.PDB | O, L_PHE_139   | N, L_TYR_173   | H, L_TYR_173    | 2.81 | 1.97 | 11.11 |
| 5JXA.PDB | OE2, L_GLU_105 | OH, L_TYR_173  | HH, L_TYR_173   | 2.63 | 1.83 | 14.46 |
| 5JXA.PDB | OG1, L_THR_164 | N, L_SER_174   | H, L_SER_174    | 2.99 | 2.15 | 10.27 |
| 5JXA.PDB | O, L_LEU_136   | N, L_LEU_175   | H, L_LEU_175    | 2.81 | 2.01 | 18.94 |
| 5JXA.PDB | O, L_SER_162   | N, L_SER_176   | H, L_SER_176    | 2.93 | 2.11 | 14.73 |
| 5JXA.PDB | O, L_CYS_134   | N, L_SER_177   | H, L_SER_177    | 2.85 | 2.03 | 14.72 |
| 5JXA.PDB | O, L_GLN_160   | N, L_THR_178   | H, L_THR_178    | 2.87 | 2.05 | 14.07 |
| 5JXA.PDB | O, L_VAL_132   | N, L_LEU_179   | H, L_LEU_179    | 2.77 | 1.94 | 12.42 |
| 5JXA.PDB | O, L_ALA_130   | N, L_LEU_181   | H, L_LEU_181    | 2.90 | 2.06 | 10.98 |
| 5JXA.PDB | O, L_GLY_128   | N, L_LYS_183   | H, L_LYS_183    | 2.84 | 2.03 | 16.09 |
| 5JXA.PDB | O, L_SER_182   | N, L_TYR_186   | H, L_TYR_186    | 2.88 | 2.05 | 12.31 |
| 5JXA.PDB | O, L_LYS_183   | N, L_GLU_187   | H, L_GLU_187    | 2.94 | 2.15 | 20.11 |
| 5JXA.PDB | OD1, L_ASP_185 | NZ, L_LYS_188  | HZ2, L_LYS_188  | 2.85 | 2.03 | 19.98 |
| 5JXA.PDB | OD1, L_ASP_151 | N, L_VAL_191   | H, L_VAL_191    | 2.74 | 1.89 | 7.60  |
| 5JXA.PDB | O, L_PHE_209   | N, L_TYR_192   | H, L_TYR_192    | 2.93 | 2.07 | 4.78  |
| 5JXA.PDB | O, L_LYS_149   | N, L_ALA_193   | H, L_ALA_193    | 2.95 | 2.14 | 18.10 |
| 5JXA.PDB | O, L_LYS_207   | N, L_CYS_194   | H, L_CYS_194    | 2.83 | 1.98 | 9.36  |
| 5JXA.PDB | O, L_GLN_147   | N, L_GLU_195   | H, L_GLU_195    | 2.80 | 1.95 | 6.91  |
| 5JXA.PDB | O, L_VAL_205   | N, L_VAL_196   | H, L_VAL_196    | 2.78 | 1.95 | 10.55 |
| 5JXA.PDB | O, L_LYS_145   | N, L_THR_197   | H, L_THR_197    | 2.82 | 1.99 | 11.86 |
| 5JXA.PDB | O, L_PRO_141   | NE2, L_HIS_198 | HE2, L_HIS_198  | 2.88 | 2.05 | 12.53 |
| 5JXA.PDB | ND1, L_HIS_198 | N, L_GLY_200   | H, L_GLY_200    | 2.95 | 2.09 | 3.68  |
| 5JXA.PDB | O, L_HIS_198   | N, L_LEU_201   | H, L_LEU_201    | 2.92 | 2.08 | 9.11  |
| 5JXA.PDB | O, L_TYR_192   | N, L_PHE_209   | H, L_PHE_209    | 2.96 | 2.19 | 22.81 |
| 5JXA.PDB | OE2, L_GLU_213 | ND2, L_ASN_210 | HD22, L_ASN_210 | 2.76 | 1.93 | 12.84 |

|          |                |                |                 |      |      |       |
|----------|----------------|----------------|-----------------|------|------|-------|
| 5JXA.PDB | O, L_LYS_190   | N, L_ARG_211   | H, L_ARG_211    | 2.77 | 1.93 | 11.49 |
| 5JXA.PDB | O, L_HIS_189   | NE, L_ARG_211  | HE, L_ARG_211   | 2.81 | 1.95 | 5.90  |
| 5JXA.PDB | O, L_ASN_210   | N, L_GLU_213   | H, L_GLU_213    | 2.99 | 2.18 | 16.84 |
| 5M2C.PDB | OD1, A_ASN_115 | N, A_GLN_118   | H, A_GLN_118    | 2.65 | 1.88 | 23.04 |
| 5M2C.PDB | O, A_LYS_116   | N, A_ALA_120   | H, A_ALA_120    | 2.80 | 1.94 | 5.96  |
| 5M2C.PDB | O, A_ASP_117   | N, A_LYS_121   | H, A_LYS_121    | 2.93 | 2.08 | 6.70  |
| 5M2C.PDB | O, A_GLN_118   | N, A_ASP_122   | H, A_ASP_122    | 2.87 | 2.05 | 16.09 |
| 5M2C.PDB | O, A_ILE_119   | N, A_VAL_123   | H, A_VAL_123    | 2.90 | 2.07 | 12.20 |
| 5M2C.PDB | O, A_ALA_120   | N, A_LYS_124   | H, A_LYS_124    | 2.89 | 2.06 | 12.17 |
| 5M2C.PDB | OD1, A_ASP_195 | NZ, A_LYS_124  | HZ1, A_LYS_124  | 2.99 | 2.26 | 29.03 |
| 5M2C.PDB | O, A_LYS_121   | N, A_GLN_125   | H, A_GLN_125    | 2.83 | 2.00 | 12.74 |
| 5M2C.PDB | O, A_ASP_122   | N, A_PHE_126   | H, A_PHE_126    | 2.85 | 2.04 | 15.29 |
| 5M2C.PDB | O, A_VAL_123   | N, A_TYR_127   | H, A_TYR_127    | 2.79 | 1.94 | 7.39  |
| 5M2C.PDB | O, A_LYS_124   | N, A_ASP_128   | H, A_ASP_128    | 2.86 | 2.06 | 18.46 |
| 5M2C.PDB | O, A_TYR_127   | N, A_LEU_131   | H, A_LEU_131    | 2.86 | 2.03 | 12.22 |
| 5M2C.PDB | O, A_ALA_130   | N, A_ALA_134   | H, A_ALA_134    | 2.83 | 2.04 | 19.67 |
| 5M2C.PDB | O, A_ASN_142   | N, A_VAL_146   | H, A_VAL_146    | 2.94 | 2.13 | 15.93 |
| 5M2C.PDB | O, A_ALA_143   | N, A_VAL_147   | H, A_VAL_147    | 2.90 | 2.05 | 6.08  |
| 5M2C.PDB | O, A_LYS_144   | N, A_LYS_148   | H, A_LYS_148    | 2.93 | 2.10 | 12.46 |
| 5M2C.PDB | O, A_VAL_146   | N, A_PHE_150   | H, A_PHE_150    | 2.92 | 2.07 | 6.77  |
| 5M2C.PDB | O, A_VAL_147   | N, A_HIS_151   | H, A_HIS_151    | 2.88 | 2.04 | 10.85 |
| 5M2C.PDB | O, A_LEU_174   | ND1, A_HIS_151 | HD1, A_HIS_151  | 2.73 | 1.92 | 15.82 |
| 5M2C.PDB | OH, A_TYR_127  | NE2, A_HIS_151 | HE2, A_HIS_151  | 2.61 | 1.77 | 12.06 |
| 5M2C.PDB | O, A_LYS_148   | N, A_GLU_152   | H, A_GLU_152    | 2.86 | 2.05 | 15.70 |
| 5M2C.PDB | O, A_THR_149   | N, A_THR_153   | H, A_THR_153    | 2.91 | 2.10 | 16.77 |
| 5M2C.PDB | O, A_THR_149   | OG1, A_THR_153 | HG1, A_THR_153  | 2.64 | 1.94 | 28.18 |
| 5M2C.PDB | O, A_PHE_150   | N, A_LEU_154   | H, A_LEU_154    | 2.87 | 2.06 | 17.25 |
| 5M2C.PDB | OG1, A_THR_163 | N, A_SER_160   | H, A_SER_160    | 2.95 | 2.16 | 19.89 |
| 5M2C.PDB | OG, A_SER_159  | OG1, A_THR_163 | HG1, A_THR_163  | 2.88 | 2.07 | 13.51 |
| 5M2C.PDB | O, A_SER_160   | N, A_ALA_164   | H, A_ALA_164    | 2.88 | 2.08 | 17.84 |
| 5M2C.PDB | O, A_THR_163   | N, A_THR_167   | H, A_THR_167    | 3.00 | 2.16 | 10.84 |
| 5M2C.PDB | O, A_THR_163   | OG1, A_THR_167 | HG1, A_THR_167  | 2.60 | 1.83 | 18.83 |
| 5M2C.PDB | O, A_ALA_164   | N, A_SER_168   | H, A_SER_168    | 2.91 | 2.11 | 17.88 |
| 5M2C.PDB | O, A_LEU_165   | N, A_VAL_169   | H, A_VAL_169    | 2.99 | 2.26 | 28.05 |
| 5M2C.PDB | O, A_THR_166   | N, A_LEU_170   | H, A_LEU_170    | 2.75 | 1.89 | 5.46  |
| 5M2C.PDB | O, A_THR_167   | N, A_LYS_171   | H, A_LYS_171    | 2.68 | 1.86 | 14.38 |
| 5M2C.PDB | O, A_LYS_171   | N, A_LEU_174   | H, A_LEU_174    | 2.89 | 2.03 | 5.60  |
| 5M2C.PDB | O, A_ASN_172   | N, A_CYS_175   | H, A_CYS_175    | 2.92 | 2.11 | 15.91 |
| 5M2C.PDB | O, A_PRO_176   | N, A_SER_179   | H, A_SER_179    | 2.98 | 2.16 | 15.63 |
| 5M2C.PDB | O, A_PRO_176   | OG, A_SER_179  | HG, A_SER_179   | 2.63 | 1.93 | 27.89 |
| 5M2C.PDB | OG, A_SER_183  | N, A_ASN_180   | H, A_ASN_180    | 2.83 | 2.08 | 25.30 |
| 5M2C.PDB | O, A_ASN_180   | N, A_ASN_184   | H, A_ASN_184    | 2.95 | 2.10 | 7.28  |
| 5M2C.PDB | OG, A_SER_179  | ND2, A_ASN_184 | HD21, A_ASN_184 | 2.93 | 2.13 | 18.24 |
| 5M2C.PDB | O, A_SER_183   | N, A_PHE_186   | H, A_PHE_186    | 2.77 | 1.95 | 13.31 |
| 5M2C.PDB | O, A_GLY_158   | N, A_CYS_190   | H, A_CYS_190    | 2.73 | 1.87 | 5.91  |
| 5M2C.PDB | OD2, A_ASP_128 | NE2, A_HIS_191 | HE2, A_HIS_191  | 2.69 | 1.84 | 6.13  |
| 5M2C.PDB | OD2, A_ASP_189 | N, A_GLN_192   | H, A_GLN_192    | 2.84 | 2.00 | 11.08 |
| 5M2C.PDB | O, A_CYS_190   | N, A_ILE_194   | H, A_ILE_194    | 2.93 | 2.11 | 15.42 |
| 5M2C.PDB | O, A_HIS_191   | N, A_ASP_195   | H, A_ASP_195    | 2.87 | 2.03 | 10.69 |
| 5M2C.PDB | O, A_GLN_192   | N, A_ASP_196   | H, A_ASP_196    | 2.80 | 2.05 | 24.04 |
| 5M2C.PDB | O, A_LYS_193   | N, A_LEU_197   | H, A_LEU_197    | 2.95 | 2.18 | 21.85 |
| 5M2C.PDB | O, A_ASP_195   | OG, A_SER_199  | HG, A_SER_199   | 2.79 | 2.04 | 23.21 |
| 5M2C.PDB | O, A_ASP_196   | N, A_LYS_201   | H, A_LYS_201    | 2.85 | 2.04 | 17.50 |
| 5M2C.PDB | OD1, B_ASN_115 | N, B_GLN_118   | H, B_GLN_118    | 2.50 | 1.70 | 17.47 |
| 5M2C.PDB | O, B_LYS_116   | N, B_ALA_120   | H, B_ALA_120    | 2.85 | 2.00 | 7.33  |
| 5M2C.PDB | O, B_ASP_117   | N, B_LYS_121   | H, B_LYS_121    | 2.86 | 2.01 | 8.98  |
| 5M2C.PDB | O, B_GLN_118   | N, B_ASP_122   | H, B_ASP_122    | 2.84 | 2.03 | 16.46 |
| 5M2C.PDB | O, B_ILE_119   | N, B_VAL_123   | H, B_VAL_123    | 2.89 | 2.07 | 14.86 |

|          |                |                |                 |      |      |       |
|----------|----------------|----------------|-----------------|------|------|-------|
| 5M2C.PDB | O, B_ALA_120   | N, B_LYS_124   | H, B_LYS_124    | 2.93 | 2.08 | 10.04 |
| 5M2C.PDB | O, B_LYS_121   | N, B_GLN_125   | H, B_GLN_125    | 2.84 | 2.01 | 12.48 |
| 5M2C.PDB | O, B_ASP_122   | N, B_PHE_126   | H, B_PHE_126    | 2.86 | 2.06 | 18.89 |
| 5M2C.PDB | O, B_VAL_123   | N, B_TYR_127   | H, B_TYR_127    | 2.81 | 1.97 | 10.19 |
| 5M2C.PDB | O, B_LYS_124   | N, B_ASP_128   | H, B_ASP_128    | 2.88 | 2.10 | 21.63 |
| 5M2C.PDB | O, B_TYR_127   | N, B_LEU_131   | H, B_LEU_131    | 2.85 | 2.02 | 11.94 |
| 5M2C.PDB | O, B_ALA_130   | N, B_ALA_134   | H, B_ALA_134    | 2.90 | 2.12 | 20.23 |
| 5M2C.PDB | O, B_ASN_142   | N, B_VAL_146   | H, B_VAL_146    | 2.99 | 2.15 | 11.45 |
| 5M2C.PDB | O, B_ALA_143   | N, B_VAL_147   | H, B_VAL_147    | 2.91 | 2.05 | 3.26  |
| 5M2C.PDB | O, B_LYS_144   | N, B_LYS_148   | H, B_LYS_148    | 2.96 | 2.14 | 15.99 |
| 5M2C.PDB | O, B_ALA_145   | N, B_THR_149   | H, B_THR_149    | 2.98 | 2.21 | 21.80 |
| 5M2C.PDB | O, B_ALA_145   | OG1, B_THR_149 | HG1, B_THR_149  | 2.78 | 1.99 | 18.17 |
| 5M2C.PDB | O, B_VAL_146   | N, B_PHE_150   | H, B_PHE_150    | 2.91 | 2.07 | 8.81  |
| 5M2C.PDB | O, B_VAL_147   | N, B_HIS_151   | H, B_HIS_151    | 2.89 | 2.07 | 14.41 |
| 5M2C.PDB | O, B_LEU_174   | ND1, B_HIS_151 | HD1, B_HIS_151  | 2.73 | 1.93 | 16.98 |
| 5M2C.PDB | OH, B_TYR_127  | NE2, B_HIS_151 | HE2, B_HIS_151  | 2.61 | 1.78 | 13.01 |
| 5M2C.PDB | O, B_LYS_148   | N, B_GLU_152   | H, B_GLU_152    | 2.84 | 2.02 | 14.19 |
| 5M2C.PDB | O, B_THR_149   | N, B_THR_153   | H, B_THR_153    | 2.90 | 2.09 | 15.77 |
| 5M2C.PDB | O, B_PHE_150   | N, B_LEU_154   | H, B_LEU_154    | 2.88 | 2.08 | 18.38 |
| 5M2C.PDB | O, B_SER_160   | N, B_ALA_164   | H, B_ALA_164    | 2.89 | 2.09 | 18.03 |
| 5M2C.PDB | O, B_THR_163   | N, B_THR_167   | H, B_THR_167    | 2.99 | 2.16 | 11.49 |
| 5M2C.PDB | O, B_THR_163   | OG1, B_THR_167 | HG1, B_THR_167  | 2.57 | 1.79 | 17.65 |
| 5M2C.PDB | O, B_ALA_164   | N, B_SER_168   | H, B_SER_168    | 2.89 | 2.09 | 18.74 |
| 5M2C.PDB | O, B_LEU_165   | N, B_VAL_169   | H, B_VAL_169    | 2.94 | 2.15 | 19.39 |
| 5M2C.PDB | O, B_THR_166   | N, B_LEU_170   | H, B_LEU_170    | 2.77 | 1.92 | 7.49  |
| 5M2C.PDB | O, B_THR_167   | N, B_LYS_171   | H, B_LYS_171    | 2.70 | 1.89 | 16.35 |
| 5M2C.PDB | O, B_LYS_171   | N, B_LEU_174   | H, B_LEU_174    | 2.94 | 2.09 | 4.41  |
| 5M2C.PDB | O, B_ASN_172   | N, B_CYS_175   | H, B_CYS_175    | 2.97 | 2.15 | 14.80 |
| 5M2C.PDB | O, B_PRO_176   | OG, B_SER_179  | HG, B_SER_179   | 2.63 | 1.92 | 26.26 |
| 5M2C.PDB | OG, B_SER_183  | N, B_ASN_180   | H, B_ASN_180    | 2.76 | 1.98 | 21.29 |
| 5M2C.PDB | O, B_ASN_180   | N, B_ASN_184   | H, B_ASN_184    | 2.89 | 2.04 | 8.95  |
| 5M2C.PDB | OG, B_SER_179  | ND2, B_ASN_184 | HD21, B_ASN_184 | 2.89 | 2.10 | 19.97 |
| 5M2C.PDB | O, B_SER_183   | N, B_PHE_186   | H, B_PHE_186    | 2.92 | 2.09 | 13.99 |
| 5M2C.PDB | O, B_GLY_158   | N, B_CYS_190   | H, B_CYS_190    | 2.71 | 1.85 | 3.39  |
| 5M2C.PDB | OD2, B_ASP_128 | NE2, B_HIS_191 | HE2, B_HIS_191  | 2.71 | 1.86 | 7.63  |
| 5M2C.PDB | OD2, B_ASP_189 | N, B_GLN_192   | H, B_GLN_192    | 2.90 | 2.07 | 13.53 |
| 5M2C.PDB | O, B_CYS_190   | N, B_ILE_194   | H, B_ILE_194    | 2.91 | 2.10 | 17.50 |
| 5M2C.PDB | O, B_HIS_191   | N, B_ASP_195   | H, B_ASP_195    | 2.87 | 2.03 | 11.04 |
| 5M2C.PDB | O, B_GLN_192   | N, B_ASP_196   | H, B_ASP_196    | 2.81 | 2.05 | 23.43 |
| 5M2C.PDB | O, B_ASP_195   | N, B_SER_199   | H, B_SER_199    | 2.98 | 2.26 | 28.48 |
| 5M2C.PDB | O, B_ASP_195   | OG, B_SER_199  | HG, B_SER_199   | 2.85 | 2.13 | 27.00 |
| 5M2C.PDB | O, B_ASP_196   | N, B_LYS_201   | H, B_LYS_201    | 2.97 | 2.16 | 15.75 |
| 5M33.PDB | O, A_GLU_110   | N, A_PHE_113   | H, A_PHE_113    | 2.89 | 2.13 | 23.34 |
| 5M33.PDB | OD1, A_ASN_115 | N, A_GLN_118   | H, A_GLN_118    | 2.87 | 2.05 | 15.86 |
| 5M33.PDB | OD1, A_ASP_122 | NE2, A_GLN_118 | HE21, A_GLN_118 | 2.92 | 2.20 | 28.21 |
| 5M33.PDB | O, A_GLN_118   | N, A_ASP_122   | H, A_ASP_122    | 2.91 | 2.09 | 14.98 |
| 5M33.PDB | O, A_ILE_119   | N, A_VAL_123   | H, A_VAL_123    | 2.90 | 2.08 | 14.75 |
| 5M33.PDB | O, A_ALA_120   | N, A_LYS_124   | H, A_LYS_124    | 2.97 | 2.13 | 9.03  |
| 5M33.PDB | OD1, A_ASP_195 | NZ, A_LYS_124  | HZ3, A_LYS_124  | 2.81 | 2.00 | 20.18 |
| 5M33.PDB | O, A_LYS_121   | N, A_GLN_125   | H, A_GLN_125    | 2.95 | 2.14 | 15.95 |
| 5M33.PDB | O, A_ASP_122   | N, A_PHE_126   | H, A_PHE_126    | 2.85 | 2.02 | 12.96 |
| 5M33.PDB | O, A_VAL_123   | N, A_TYR_127   | H, A_TYR_127    | 2.90 | 2.06 | 8.97  |
| 5M33.PDB | NE2, A_HIS_151 | OH, A_TYR_127  | HH, A_TYR_127   | 2.74 | 1.90 | 5.54  |
| 5M33.PDB | O, A_LYS_124   | N, A_ASP_128   | H, A_ASP_128    | 2.96 | 2.14 | 15.35 |
| 5M33.PDB | O, A_GLN_125   | N, A_GLN_129   | H, A_GLN_129    | 2.89 | 2.05 | 10.97 |
| 5M33.PDB | O, A_TYR_127   | N, A_LEU_131   | H, A_LEU_131    | 2.85 | 2.03 | 13.94 |
| 5M33.PDB | O, A_ALA_130   | N, A_ALA_134   | H, A_ALA_134    | 2.84 | 2.03 | 15.90 |
| 5M33.PDB | O, A_GLN_133   | N, A_ASP_137   | H, A_ASP_137    | 2.89 | 2.12 | 21.46 |

|          |                |                |                 |      |      |       |
|----------|----------------|----------------|-----------------|------|------|-------|
| 5M33.PDB | O, A_ASP_139   | N, A_ASN_141   | H, A_ASN_141    | 2.85 | 2.12 | 27.58 |
| 5M33.PDB | O, A_ALA_140   | N, A_LYS_144   | H, A_LYS_144    | 2.99 | 2.14 | 7.21  |
| 5M33.PDB | O, A_ALA_134   | NZ, A_LYS_144  | HZ1, A_LYS_144  | 2.63 | 1.88 | 27.02 |
| 5M33.PDB | O, A_ASN_142   | N, A_VAL_146   | H, A_VAL_146    | 2.83 | 2.01 | 15.56 |
| 5M33.PDB | O, A_LYS_144   | N, A_LYS_148   | H, A_LYS_148    | 2.98 | 2.13 | 8.41  |
| 5M33.PDB | O, A_ALA_145   | N, A_THR_149   | H, A_THR_149    | 2.97 | 2.14 | 13.99 |
| 5M33.PDB | O, A_ALA_145   | OG1, A_THR_149 | HG1, A_THR_149  | 2.90 | 2.10 | 14.64 |
| 5M33.PDB | O, A_VAL_146   | N, A_PHE_150   | H, A_PHE_150    | 2.90 | 2.07 | 12.70 |
| 5M33.PDB | O, A_VAL_147   | N, A_HIS_151   | H, A_HIS_151    | 2.86 | 2.03 | 12.68 |
| 5M33.PDB | O, A_LEU_174   | ND1, A_HIS_151 | HD1, A_HIS_151  | 2.74 | 1.89 | 6.51  |
| 5M33.PDB | O, A_LYS_148   | N, A_GLU_152   | H, A_GLU_152    | 2.94 | 2.12 | 14.44 |
| 5M33.PDB | O, A_THR_149   | N, A_THR_153   | H, A_THR_153    | 2.89 | 2.04 | 7.79  |
| 5M33.PDB | O, A_PHE_150   | N, A_LEU_154   | H, A_LEU_154    | 2.88 | 2.05 | 10.83 |
| 5M33.PDB | OD2, A_ASP_189 | N, A_SER_160   | H, A_SER_160    | 2.83 | 2.06 | 21.68 |
| 5M33.PDB | O, A_LEU_162   | N, A_LEU_165   | H, A_LEU_165    | 2.91 | 2.09 | 16.07 |
| 5M33.PDB | O, A_LEU_165   | N, A_VAL_169   | H, A_VAL_169    | 2.92 | 2.13 | 19.68 |
| 5M33.PDB | O, A_THR_166   | N, A_LEU_170   | H, A_LEU_170    | 2.91 | 2.09 | 13.68 |
| 5M33.PDB | O, A_PRO_176   | N, A_SER_179   | H, A_SER_179    | 2.93 | 2.10 | 12.30 |
| 5M33.PDB | O, A_ASN_180   | N, A_ASN_184   | H, A_ASN_184    | 2.90 | 2.08 | 14.21 |
| 5M33.PDB | O, A_CYS_157   | ND2, A_ASN_184 | HD21, A_ASN_184 | 2.88 | 2.04 | 11.64 |
| 5M33.PDB | OD1, A_ASP_155 | NZ, A_LYS_187  | HZ1, A_LYS_187  | 2.82 | 1.95 | 10.61 |
| 5M33.PDB | O, A_GLY_158   | N, A_CYS_190   | H, A_CYS_190    | 2.93 | 2.07 | 4.56  |
| 5M33.PDB | OD2, A_ASP_189 | N, A_HIS_191   | H, A_HIS_191    | 2.98 | 2.19 | 19.93 |
| 5M33.PDB | OD2, A_ASP_128 | NE2, A_HIS_191 | HE2, A_HIS_191  | 2.76 | 2.00 | 23.16 |
| 5M33.PDB | OD1, A_ASP_196 | NE2, A_GLN_192 | HE21, A_GLN_192 | 2.98 | 2.18 | 18.41 |
| 5M33.PDB | OE1, A_GLU_188 | NZ, A_LYS_193  | HZ2, A_LYS_193  | 2.93 | 2.07 | 12.47 |
| 5M33.PDB | O, A_CYS_190   | N, A_ILE_194   | H, A_ILE_194    | 2.89 | 2.07 | 15.58 |
| 5M33.PDB | O, A_HIS_191   | N, A_ASP_195   | H, A_ASP_195    | 2.97 | 2.13 | 8.98  |
| 5M33.PDB | O, A_GLN_192   | N, A_ASP_196   | H, A_ASP_196    | 2.88 | 2.06 | 14.98 |
| 5M33.PDB | O, A_ASP_195   | N, A_SER_199   | H, A_SER_199    | 2.93 | 2.19 | 25.46 |
| 5M33.PDB | O, A_ASP_196   | N, A_LYS_201   | H, A_LYS_201    | 2.86 | 2.03 | 14.10 |
| 5M33.PDB | OE1, A_GLN_129 | N, B_VAL_114   | H, B_VAL_114    | 2.67 | 1.84 | 13.32 |
| 5M33.PDB | OD1, B_ASN_115 | N, B_GLN_118   | H, B_GLN_118    | 2.98 | 2.19 | 19.82 |
| 5M33.PDB | OD1, B_ASP_122 | NE2, B_GLN_118 | HE21, B_GLN_118 | 2.96 | 2.19 | 23.61 |
| 5M33.PDB | O, B_GLN_118   | N, B_ASP_122   | H, B_ASP_122    | 2.94 | 2.12 | 14.74 |
| 5M33.PDB | O, B_ILE_119   | N, B_VAL_123   | H, B_VAL_123    | 2.92 | 2.09 | 14.21 |
| 5M33.PDB | O, B_ALA_120   | N, B_LYS_124   | H, B_LYS_124    | 2.95 | 2.13 | 13.05 |
| 5M33.PDB | O, B_LYS_121   | N, B_GLN_125   | H, B_GLN_125    | 2.97 | 2.15 | 14.67 |
| 5M33.PDB | O, B_ASP_122   | N, B_PHE_126   | H, B_PHE_126    | 2.83 | 2.02 | 16.58 |
| 5M33.PDB | O, B_VAL_123   | N, B_TYR_127   | H, B_TYR_127    | 2.90 | 2.05 | 7.34  |
| 5M33.PDB | NE2, B_HIS_151 | OH, B_TYR_127  | HH, B_TYR_127   | 2.78 | 1.94 | 5.42  |
| 5M33.PDB | O, B_LYS_124   | N, B_ASP_128   | H, B_ASP_128    | 2.88 | 2.07 | 15.69 |
| 5M33.PDB | O, B_GLN_125   | N, B_GLN_129   | H, B_GLN_129    | 3.00 | 2.18 | 15.70 |
| 5M33.PDB | OE1, B_GLN_133 | NE2, B_GLN_129 | HE22, B_GLN_129 | 2.83 | 2.06 | 21.87 |
| 5M33.PDB | O, B_TYR_127   | N, B_LEU_131   | H, B_LEU_131    | 2.88 | 2.05 | 11.48 |
| 5M33.PDB | O, B_GLN_129   | N, B_GLN_133   | H, B_GLN_133    | 2.98 | 2.15 | 12.11 |
| 5M33.PDB | O, B_ALA_130   | N, B_ALA_134   | H, B_ALA_134    | 2.83 | 2.07 | 24.03 |
| 5M33.PDB | O, B_ALA_134   | NZ, B_LYS_144  | HZ2, B_LYS_144  | 2.73 | 1.99 | 28.33 |
| 5M33.PDB | O, B_ALA_143   | N, B_VAL_147   | H, B_VAL_147    | 2.84 | 1.99 | 5.95  |
| 5M33.PDB | O, B_LYS_144   | N, B_LYS_148   | H, B_LYS_148    | 2.93 | 2.08 | 9.25  |
| 5M33.PDB | O, B_ALA_145   | N, B_THR_149   | H, B_THR_149    | 2.93 | 2.11 | 14.19 |
| 5M33.PDB | O, B_ALA_145   | OG1, B_THR_149 | HG1, B_THR_149  | 2.85 | 2.11 | 23.29 |
| 5M33.PDB | O, B_VAL_146   | N, B_PHE_150   | H, B_PHE_150    | 2.93 | 2.09 | 9.45  |
| 5M33.PDB | O, B_VAL_147   | N, B_HIS_151   | H, B_HIS_151    | 2.93 | 2.09 | 11.38 |
| 5M33.PDB | O, B_LEU_174   | ND1, B_HIS_151 | HD1, B_HIS_151  | 2.74 | 1.90 | 9.06  |
| 5M33.PDB | O, B_LYS_148   | N, B_GLU_152   | H, B_GLU_152    | 2.91 | 2.08 | 12.10 |
| 5M33.PDB | O, B_THR_149   | N, B_THR_153   | H, B_THR_153    | 2.90 | 2.07 | 12.38 |
| 5M33.PDB | O, B_PHE_150   | N, B_LEU_154   | H, B_LEU_154    | 2.87 | 2.02 | 7.88  |

|          |                |                |                 |      |      |       |
|----------|----------------|----------------|-----------------|------|------|-------|
| 5M33.PDB | OD1, B_ASP_189 | N, B_SER_160   | H, B_SER_160    | 2.83 | 1.97 | 1.56  |
| 5M33.PDB | OD1, B_ASP_189 | OG, B_SER_160  | HG, B_SER_160   | 2.86 | 2.13 | 25.03 |
| 5M33.PDB | O, B_SER_159   | N, B_LEU_162   | H, B_LEU_162    | 2.96 | 2.12 | 9.23  |
| 5M33.PDB | O, B_LEU_162   | OG1, B_THR_166 | HG1, B_THR_166  | 2.89 | 2.08 | 13.11 |
| 5M33.PDB | O, B_THR_163   | N, B_THR_167   | H, B_THR_167    | 2.93 | 2.11 | 14.74 |
| 5M33.PDB | O, B_LEU_165   | N, B_VAL_169   | H, B_VAL_169    | 2.98 | 2.16 | 14.43 |
| 5M33.PDB | O, B_THR_167   | N, B_LYS_171   | H, B_LYS_171    | 2.99 | 2.26 | 27.58 |
| 5M33.PDB | O, B_SER_179   | N, B_SER_183   | H, B_SER_183    | 2.82 | 1.97 | 7.48  |
| 5M33.PDB | O, B_GLY_158   | N, B_CYS_190   | H, B_CYS_190    | 2.96 | 2.12 | 9.28  |
| 5M33.PDB | OD2, B_ASP_128 | NE2, B_HIS_191 | HE2, B_HIS_191  | 2.69 | 1.83 | 4.41  |
| 5M33.PDB | OD2, B_ASP_189 | N, B_GLN_192   | H, B_GLN_192    | 2.97 | 2.16 | 16.91 |
| 5M33.PDB | OD1, B_ASP_196 | NE2, B_GLN_192 | HE21, B_GLN_192 | 2.92 | 2.12 | 17.81 |
| 5M33.PDB | O, B_CYS_190   | N, B_ILE_194   | H, B_ILE_194    | 2.95 | 2.13 | 14.36 |
| 5M33.PDB | O, B_HIS_191   | N, B_ASP_195   | H, B_ASP_195    | 2.95 | 2.10 | 7.27  |
| 5M33.PDB | O, B_GLN_192   | N, B_ASP_196   | H, B_ASP_196    | 2.83 | 2.01 | 15.81 |
| 5M33.PDB | O, B_LYS_193   | N, B_LEU_197   | H, B_LEU_197    | 2.94 | 2.16 | 20.67 |
| 5M33.PDB | O, B_ASP_195   | N, B_SER_199   | H, B_SER_199    | 2.93 | 2.22 | 28.83 |
| 5M33.PDB | O, B_ASP_196   | N, B_LYS_201   | H, B_LYS_201    | 2.98 | 2.26 | 27.91 |
| 5M3D.PDB | O, A_ASP_117   | N, A_LYS_121   | H, A_LYS_121    | 2.91 | 2.07 | 9.22  |
| 5M3D.PDB | O, A_GLN_118   | N, A_ASP_122   | H, A_ASP_122    | 2.83 | 1.99 | 10.35 |
| 5M3D.PDB | O, A_ILE_119   | N, A_VAL_123   | H, A_VAL_123    | 2.80 | 2.00 | 16.75 |
| 5M3D.PDB | O, A_ALA_120   | N, A_LYS_124   | H, A_LYS_124    | 2.87 | 2.02 | 7.87  |
| 5M3D.PDB | OD2, A_ASP_195 | NZ, A_LYS_124  | HZ1, A_LYS_124  | 2.68 | 1.86 | 18.64 |
| 5M3D.PDB | O, A_LYS_121   | N, A_GLN_125   | H, A_GLN_125    | 2.82 | 1.99 | 11.95 |
| 5M3D.PDB | O, A_ASP_122   | N, A_PHE_126   | H, A_PHE_126    | 2.97 | 2.13 | 10.05 |
| 5M3D.PDB | O, A_VAL_123   | N, A_TYR_127   | H, A_TYR_127    | 2.86 | 2.04 | 15.68 |
| 5M3D.PDB | NE2, A_HIS_151 | OH, A_TYR_127  | HH, A_TYR_127   | 2.90 | 2.07 | 7.76  |
| 5M3D.PDB | O, A_LYS_124   | N, A_ASP_128   | H, A_ASP_128    | 2.81 | 1.97 | 10.20 |
| 5M3D.PDB | O, A_TYR_127   | N, A_LEU_131   | H, A_LEU_131    | 2.85 | 2.06 | 19.33 |
| 5M3D.PDB | O, A_ASP_128   | N, A_GLN_132   | H, A_GLN_132    | 2.90 | 2.05 | 6.60  |
| 5M3D.PDB | O, A_ALA_130   | N, A_ALA_134   | H, A_ALA_134    | 2.87 | 2.13 | 25.45 |
| 5M3D.PDB | O, A_LEU_131   | N, A_VAL_135   | H, A_VAL_135    | 2.91 | 2.18 | 26.93 |
| 5M3D.PDB | O, A_ALA_143   | N, A_VAL_147   | H, A_VAL_147    | 2.83 | 1.97 | 0.49  |
| 5M3D.PDB | O, A_LYS_144   | N, A_LYS_148   | H, A_LYS_148    | 2.78 | 1.93 | 2.97  |
| 5M3D.PDB | O, A_ALA_145   | N, A_THR_149   | H, A_THR_149    | 2.94 | 2.20 | 26.27 |
| 5M3D.PDB | O, A_VAL_146   | N, A_PHE_150   | H, A_PHE_150    | 2.81 | 1.96 | 8.90  |
| 5M3D.PDB | O, A_VAL_147   | N, A_HIS_151   | H, A_HIS_151    | 2.83 | 2.03 | 18.07 |
| 5M3D.PDB | O, A_LEU_174   | ND1, A_HIS_151 | HD1, A_HIS_151  | 2.54 | 1.70 | 10.32 |
| 5M3D.PDB | O, A_LYS_148   | N, A_GLU_152   | H, A_GLU_152    | 2.91 | 2.05 | 3.90  |
| 5M3D.PDB | O, A_THR_149   | N, A_THR_153   | H, A_THR_153    | 2.94 | 2.14 | 17.42 |
| 5M3D.PDB | O, A_THR_149   | OG1, A_THR_153 | HG1, A_THR_153  | 2.71 | 1.99 | 26.30 |
| 5M3D.PDB | O, A_PHE_150   | N, A_LEU_154   | H, A_LEU_154    | 2.82 | 2.01 | 16.30 |
| 5M3D.PDB | OG1, A_THR_163 | N, A_SER_160   | H, A_SER_160    | 2.68 | 1.93 | 24.41 |
| 5M3D.PDB | OG, A_SER_159  | OG1, A_THR_163 | HG1, A_THR_163  | 2.65 | 1.81 | 3.28  |
| 5M3D.PDB | O, A_SER_160   | N, A_ALA_164   | H, A_ALA_164    | 2.68 | 1.86 | 13.35 |
| 5M3D.PDB | O, A_LEU_162   | N, A_THR_166   | H, A_THR_166    | 2.92 | 2.11 | 17.03 |
| 5M3D.PDB | O, A_THR_163   | N, A_THR_167   | H, A_THR_167    | 2.80 | 1.97 | 12.32 |
| 5M3D.PDB | O, A_THR_163   | OG1, A_THR_167 | HG1, A_THR_167  | 2.52 | 1.70 | 11.15 |
| 5M3D.PDB | O, A_ALA_164   | N, A_SER_168   | H, A_SER_168    | 2.89 | 2.05 | 8.46  |
| 5M3D.PDB | O, A_LEU_165   | OG, A_SER_168  | HG, A_SER_168   | 2.61 | 1.86 | 22.97 |
| 5M3D.PDB | O, A_THR_166   | N, A_LEU_170   | H, A_LEU_170    | 2.78 | 1.95 | 12.52 |
| 5M3D.PDB | O, A_THR_167   | N, A_LYS_171   | H, A_LYS_171    | 2.87 | 2.05 | 15.75 |
| 5M3D.PDB | O, A_ASN_172   | N, A_CYS_175   | H, A_CYS_175    | 2.95 | 2.10 | 9.28  |
| 5M3D.PDB | OE2, A_GLU_152 | N, A_SER_177   | H, A_SER_177    | 2.77 | 2.02 | 24.92 |
| 5M3D.PDB | O, A_PRO_176   | N, A_SER_179   | H, A_SER_179    | 2.91 | 2.14 | 22.27 |
| 5M3D.PDB | O, A_GLY_158   | N, A_CYS_190   | H, A_CYS_190    | 2.75 | 1.91 | 12.01 |
| 5M3D.PDB | OD2, A_ASP_128 | NE2, A_HIS_191 | HE2, A_HIS_191  | 2.68 | 1.84 | 10.19 |
| 5M3D.PDB | OD2, A_ASP_189 | N, A_GLN_192   | H, A_GLN_192    | 2.94 | 2.11 | 13.24 |

|          |                |                |                |      |      |       |
|----------|----------------|----------------|----------------|------|------|-------|
| 5M3D.PDB | O, A_CYS_190   | N, A_ILE_194   | H, A_ILE_194   | 2.85 | 2.02 | 12.94 |
| 5M3D.PDB | O, A_GLN_192   | N, A_ASP_196   | H, A_ASP_196   | 2.98 | 2.19 | 20.53 |
| 5M3D.PDB | O, A_LYS_193   | N, A_LEU_197   | H, A_LEU_197   | 2.95 | 2.19 | 23.68 |
| 5M3D.PDB | O, A_ASP_196   | N, A_GLY_200   | H, A_GLY_200   | 2.84 | 2.13 | 29.15 |
| 5M3D.PDB | O, A_ASP_196   | N, A_LYS_201   | H, A_LYS_201   | 2.79 | 1.95 | 11.59 |
| 5M3D.PDB | O, B_ASP_117   | N, B_LYS_121   | H, B_LYS_121   | 2.91 | 2.06 | 7.49  |
| 5M3D.PDB | O, B_GLN_118   | N, B_ASP_122   | H, B_ASP_122   | 2.85 | 2.04 | 15.98 |
| 5M3D.PDB | O, B_ILE_119   | N, B_VAL_123   | H, B_VAL_123   | 2.79 | 2.02 | 22.71 |
| 5M3D.PDB | O, B_ALA_120   | N, B_LYS_124   | H, B_LYS_124   | 2.98 | 2.14 | 9.81  |
| 5M3D.PDB | O, B_LYS_121   | N, B_GLN_125   | H, B_GLN_125   | 2.85 | 2.02 | 12.96 |
| 5M3D.PDB | O, B_VAL_123   | N, B_TYR_127   | H, B_TYR_127   | 2.75 | 1.92 | 13.65 |
| 5M3D.PDB | O, B_LYS_124   | N, B_ASP_128   | H, B_ASP_128   | 2.78 | 1.96 | 14.20 |
| 5M3D.PDB | O, B_TYR_127   | N, B_LEU_131   | H, B_LEU_131   | 2.91 | 2.12 | 19.44 |
| 5M3D.PDB | O, B_ASP_128   | N, B_GLN_132   | H, B_GLN_132   | 2.94 | 2.09 | 6.13  |
| 5M3D.PDB | O, B_LEU_131   | N, B_VAL_135   | H, B_VAL_135   | 2.87 | 2.11 | 24.04 |
| 5M3D.PDB | O, B_GLN_133   | N, B_ASP_137   | H, B_ASP_137   | 2.97 | 2.23 | 25.98 |
| 5M3D.PDB | O, B_ALA_140   | N, B_LYS_144   | H, B_LYS_144   | 2.98 | 2.14 | 8.88  |
| 5M3D.PDB | O, B_ALA_143   | N, B_VAL_147   | H, B_VAL_147   | 2.86 | 2.01 | 7.67  |
| 5M3D.PDB | O, B_LYS_144   | N, B_LYS_148   | H, B_LYS_148   | 2.88 | 2.04 | 10.53 |
| 5M3D.PDB | O, B_ALA_145   | N, B_THR_149   | H, B_THR_149   | 2.92 | 2.16 | 24.76 |
| 5M3D.PDB | O, B_ALA_145   | OG1, B_THR_149 | HG1, B_THR_149 | 2.92 | 2.10 | 9.10  |
| 5M3D.PDB | O, B_VAL_146   | N, B_PHE_150   | H, B_PHE_150   | 2.87 | 2.03 | 11.14 |
| 5M3D.PDB | O, B_VAL_147   | N, B_HIS_151   | H, B_HIS_151   | 2.90 | 2.05 | 8.21  |
| 5M3D.PDB | O, B_LEU_174   | ND1, B_HIS_151 | HD1, B_HIS_151 | 2.69 | 1.87 | 15.29 |
| 5M3D.PDB | O, B_LYS_148   | N, B_GLU_152   | H, B_GLU_152   | 2.90 | 2.06 | 9.45  |
| 5M3D.PDB | O, B_THR_149   | N, B_THR_153   | H, B_THR_153   | 2.76 | 1.95 | 16.27 |
| 5M3D.PDB | O, B_THR_149   | OG1, B_THR_153 | HG1, B_THR_153 | 2.68 | 1.93 | 21.92 |
| 5M3D.PDB | O, B_PHE_150   | N, B_LEU_154   | H, B_LEU_154   | 2.72 | 1.93 | 19.17 |
| 5M3D.PDB | OG1, B_THR_163 | N, B_SER_160   | H, B_SER_160   | 2.60 | 1.81 | 18.90 |
| 5M3D.PDB | O, B_SER_160   | N, B_ALA_164   | H, B_ALA_164   | 2.64 | 1.86 | 20.55 |
| 5M3D.PDB | O, B_LEU_162   | N, B_THR_166   | H, B_THR_166   | 2.88 | 2.06 | 14.51 |
| 5M3D.PDB | O, B_THR_163   | N, B_THR_167   | H, B_THR_167   | 2.95 | 2.11 | 9.70  |
| 5M3D.PDB | O, B_THR_163   | OG1, B_THR_167 | HG1, B_THR_167 | 2.62 | 1.82 | 14.83 |
| 5M3D.PDB | O, B_ALA_164   | N, B_SER_168   | H, B_SER_168   | 2.95 | 2.12 | 11.19 |
| 5M3D.PDB | O, B_LEU_165   | N, B_VAL_169   | H, B_VAL_169   | 2.95 | 2.20 | 25.38 |
| 5M3D.PDB | O, B_THR_166   | N, B_LEU_170   | H, B_LEU_170   | 2.72 | 1.93 | 19.91 |
| 5M3D.PDB | O, B_THR_167   | N, B_LYS_171   | H, B_LYS_171   | 2.71 | 1.87 | 9.68  |
| 5M3D.PDB | O, B_LYS_171   | N, B_LEU_174   | H, B_LEU_174   | 2.95 | 2.14 | 16.60 |
| 5M3D.PDB | O, B_PRO_176   | OG, B_SER_179  | HG, B_SER_179  | 2.60 | 1.81 | 16.72 |
| 5M3D.PDB | O, B_ILE_181   | N, B_ASN_184   | H, B_ASN_184   | 2.99 | 2.21 | 20.02 |
| 5M3D.PDB | O, B_ILE_182   | N, B_LEU_185   | H, B_LEU_185   | 2.82 | 1.98 | 10.54 |
| 5M3D.PDB | O, B_GLY_158   | N, B_CYS_190   | H, B_CYS_190   | 2.80 | 1.94 | 4.10  |
| 5M3D.PDB | OD2, B_ASP_128 | NE2, B_HIS_191 | HE2, B_HIS_191 | 2.60 | 1.78 | 15.29 |
| 5M3D.PDB | OD2, B_ASP_189 | N, B_GLN_192   | H, B_GLN_192   | 2.93 | 2.11 | 13.82 |
| 5M3D.PDB | O, B_CYS_190   | N, B_ILE_194   | H, B_ILE_194   | 2.95 | 2.12 | 12.39 |
| 5M3D.PDB | O, B_GLN_192   | N, B_ASP_196   | H, B_ASP_196   | 2.84 | 2.02 | 14.80 |
| 5M3D.PDB | O, B_LYS_193   | N, B_LEU_197   | H, B_LEU_197   | 2.93 | 2.17 | 22.99 |
| 5M3D.PDB | O, B_ASP_195   | N, B_SER_199   | H, B_SER_199   | 2.86 | 2.15 | 29.72 |
| 5M3D.PDB | O, B_ASP_195   | OG, B_SER_199  | HG, B_SER_199  | 2.55 | 1.74 | 13.09 |
| 5M3D.PDB | O, B_ASP_196   | N, B_LYS_201   | H, B_LYS_201   | 2.86 | 2.06 | 19.17 |
| 5M3D.PDB | OD1, C_ASN_115 | N, C_ASP_117   | H, C_ASP_117   | 2.96 | 2.17 | 19.69 |
| 5M3D.PDB | O, C_ILE_119   | N, C_VAL_123   | H, C_VAL_123   | 2.94 | 2.22 | 28.48 |
| 5M3D.PDB | O, C_ALA_120   | N, C_LYS_124   | H, C_LYS_124   | 2.91 | 2.07 | 9.91  |
| 5M3D.PDB | O, C_LYS_121   | N, C_GLN_125   | H, C_GLN_125   | 2.85 | 2.05 | 17.95 |
| 5M3D.PDB | O, C_VAL_123   | N, C_TYR_127   | H, C_TYR_127   | 2.85 | 2.00 | 5.96  |
| 5M3D.PDB | O, C_LYS_124   | N, C_ASP_128   | H, C_ASP_128   | 2.86 | 2.05 | 16.00 |
| 5M3D.PDB | O, C_GLN_125   | N, C_GLN_129   | H, C_GLN_129   | 2.82 | 2.03 | 19.59 |
| 5M3D.PDB | O, C_TYR_127   | N, C_LEU_131   | H, C_LEU_131   | 2.81 | 1.98 | 13.11 |

|          |                |                |                |      |      |       |
|----------|----------------|----------------|----------------|------|------|-------|
| 5M3D.PDB | O, C_ASP_128   | N, C_GLN_132   | H, C_GLN_132   | 2.89 | 2.04 | 7.47  |
| 5M3D.PDB | O, C_ALA_130   | N, C_ALA_134   | H, C_ALA_134   | 2.74 | 1.97 | 21.94 |
| 5M3D.PDB | O, C_LEU_131   | N, C_VAL_135   | H, C_VAL_135   | 2.89 | 2.05 | 11.04 |
| 5M3D.PDB | O, C_ALA_134   | N, C_ASP_137   | H, C_ASP_137   | 2.88 | 2.05 | 12.98 |
| 5M3D.PDB | O, C_ASP_139   | N, C_ASN_142   | H, C_ASN_142   | 2.98 | 2.16 | 15.52 |
| 5M3D.PDB | O, C_ALA_143   | N, C_VAL_147   | H, C_VAL_147   | 2.88 | 2.05 | 12.04 |
| 5M3D.PDB | O, C_ALA_145   | N, C_THR_149   | H, C_THR_149   | 2.76 | 1.97 | 19.10 |
| 5M3D.PDB | O, C_ALA_145   | OG1, C_THR_149 | HG1, C_THR_149 | 2.85 | 2.04 | 10.77 |
| 5M3D.PDB | O, C_VAL_146   | N, C_PHE_150   | H, C_PHE_150   | 2.86 | 2.02 | 10.98 |
| 5M3D.PDB | O, C_VAL_147   | N, C_HIS_151   | H, C_HIS_151   | 2.93 | 2.10 | 13.09 |
| 5M3D.PDB | O, C_LEU_174   | ND1, C_HIS_151 | HD1, C_HIS_151 | 2.77 | 1.93 | 9.75  |
| 5M3D.PDB | OH, C_TYR_127  | NE2, C_HIS_151 | HE2, C_HIS_151 | 2.47 | 1.64 | 11.96 |
| 5M3D.PDB | O, C_LYS_148   | N, C_GLU_152   | H, C_GLU_152   | 2.93 | 2.07 | 6.86  |
| 5M3D.PDB | O, C_THR_149   | N, C_THR_153   | H, C_THR_153   | 2.90 | 2.09 | 16.64 |
| 5M3D.PDB | O, C_THR_149   | OG1, C_THR_153 | HG1, C_THR_153 | 2.82 | 2.11 | 26.57 |
| 5M3D.PDB | O, C_PHE_150   | N, C_LEU_154   | H, C_LEU_154   | 2.84 | 2.09 | 25.26 |
| 5M3D.PDB | O, C_SER_160   | N, C_ALA_164   | H, C_ALA_164   | 2.77 | 1.96 | 15.47 |
| 5M3D.PDB | O, C_THR_161   | N, C_LEU_165   | H, C_LEU_165   | 2.92 | 2.11 | 16.78 |
| 5M3D.PDB | O, C_LEU_162   | N, C_THR_166   | H, C_THR_166   | 2.96 | 2.13 | 14.34 |
| 5M3D.PDB | O, C_LEU_162   | OG1, C_THR_166 | HG1, C_THR_166 | 2.66 | 1.88 | 17.50 |
| 5M3D.PDB | O, C_THR_163   | N, C_THR_167   | H, C_THR_167   | 2.83 | 2.02 | 16.33 |
| 5M3D.PDB | O, C_ALA_164   | N, C_SER_168   | H, C_SER_168   | 2.89 | 2.05 | 9.74  |
| 5M3D.PDB | O, C_LEU_165   | N, C_VAL_169   | H, C_VAL_169   | 2.92 | 2.16 | 23.23 |
| 5M3D.PDB | O, C_THR_166   | N, C_LEU_170   | H, C_LEU_170   | 2.78 | 2.00 | 20.88 |
| 5M3D.PDB | O, C_THR_167   | N, C_LYS_171   | H, C_LYS_171   | 2.57 | 1.75 | 15.04 |
| 5M3D.PDB | O, C_LYS_171   | N, C_LEU_174   | H, C_LEU_174   | 2.84 | 1.99 | 6.87  |
| 5M3D.PDB | OE2, C_GLU_152 | N, C_SER_177   | H, C_SER_177   | 2.69 | 1.86 | 11.04 |
| 5M3D.PDB | O, C_PRO_176   | N, C_SER_179   | H, C_SER_179   | 2.93 | 2.13 | 18.85 |
| 5M3D.PDB | O, C_SER_183   | N, C_LYS_187   | H, C_LYS_187   | 2.80 | 1.94 | 3.39  |
| 5M3D.PDB | O, C_GLY_158   | N, C_CYS_190   | H, C_CYS_190   | 2.73 | 1.88 | 7.85  |
| 5M3D.PDB | OD2, C_ASP_128 | NE2, C_HIS_191 | HE2, C_HIS_191 | 2.54 | 1.74 | 17.73 |
| 5M3D.PDB | OD2, C_ASP_189 | N, C_GLN_192   | H, C_GLN_192   | 2.80 | 1.97 | 13.12 |
| 5M3D.PDB | O, C_CYS_190   | N, C_ILE_194   | H, C_ILE_194   | 2.91 | 2.07 | 10.39 |
| 5M3D.PDB | O, C_GLN_192   | N, C_ASP_196   | H, C_ASP_196   | 3.00 | 2.18 | 15.71 |
| 5M3D.PDB | O, C_LYS_193   | N, C_LEU_197   | H, C_LEU_197   | 2.84 | 2.09 | 24.23 |
| 5M3D.PDB | O, C_ILE_194   | N, C_PHE_198   | H, C_PHE_198   | 2.99 | 2.20 | 19.69 |
| 5M3D.PDB | O, C_ASP_195   | N, C_SER_199   | H, C_SER_199   | 2.70 | 2.00 | 29.60 |
| 5M3D.PDB | O, C_ASP_196   | N, C_GLY_200   | H, C_GLY_200   | 2.91 | 2.19 | 27.12 |
| 5M3D.PDB | O, C_ASP_196   | N, C_LYS_201   | H, C_LYS_201   | 2.94 | 2.12 | 15.69 |
| 5M3D.PDB | O, D_LYS_116   | N, D_ALA_120   | H, D_ALA_120   | 2.96 | 2.12 | 9.84  |
| 5M3D.PDB | O, D_ASP_117   | N, D_LYS_121   | H, D_LYS_121   | 2.91 | 2.07 | 10.71 |
| 5M3D.PDB | O, D_GLN_118   | N, D_ASP_122   | H, D_ASP_122   | 2.91 | 2.16 | 24.90 |
| 5M3D.PDB | O, D_ILE_119   | N, D_VAL_123   | H, D_VAL_123   | 2.93 | 2.21 | 28.37 |
| 5M3D.PDB | O, D_LYS_121   | N, D_GLN_125   | H, D_GLN_125   | 2.91 | 2.11 | 17.36 |
| 5M3D.PDB | O, D_ASP_122   | N, D_PHE_126   | H, D_PHE_126   | 2.97 | 2.18 | 20.39 |
| 5M3D.PDB | O, D_VAL_123   | N, D_TYR_127   | H, D_TYR_127   | 2.77 | 1.93 | 9.04  |
| 5M3D.PDB | O, D_LYS_124   | N, D_ASP_128   | H, D_ASP_128   | 2.88 | 2.02 | 2.98  |
| 5M3D.PDB | O, D_GLN_125   | N, D_GLN_129   | H, D_GLN_129   | 2.86 | 2.07 | 19.17 |
| 5M3D.PDB | O, D_TYR_127   | N, D_LEU_131   | H, D_LEU_131   | 2.78 | 1.93 | 8.17  |
| 5M3D.PDB | O, D_ASP_128   | N, D_GLN_132   | H, D_GLN_132   | 2.90 | 2.06 | 10.99 |
| 5M3D.PDB | O, D_ALA_130   | N, D_ALA_134   | H, D_ALA_134   | 2.62 | 1.92 | 29.22 |
| 5M3D.PDB | O, D_ALA_134   | N, D_ASP_137   | H, D_ASP_137   | 2.77 | 1.92 | 5.77  |
| 5M3D.PDB | OD1, D_ASP_139 | N, D_LYS_144   | H, D_LYS_144   | 2.75 | 1.89 | 6.98  |
| 5M3D.PDB | O, D_ALA_143   | N, D_VAL_147   | H, D_VAL_147   | 2.90 | 2.06 | 10.59 |
| 5M3D.PDB | O, D_ALA_145   | N, D_THR_149   | H, D_THR_149   | 2.80 | 2.05 | 24.05 |
| 5M3D.PDB | O, D_ALA_145   | OG1, D_THR_149 | HG1, D_THR_149 | 2.76 | 1.96 | 14.72 |
| 5M3D.PDB | O, D_VAL_146   | N, D_PHE_150   | H, D_PHE_150   | 2.91 | 2.07 | 9.79  |
| 5M3D.PDB | O, D_VAL_147   | N, D_HIS_151   | H, D_HIS_151   | 2.81 | 1.99 | 13.17 |

|          |                |                |                |      |      |       |
|----------|----------------|----------------|----------------|------|------|-------|
| 5M3D.PDB | O, D_LEU_174   | ND1, D_HIS_151 | HD1, D_HIS_151 | 2.86 | 2.05 | 15.14 |
| 5M3D.PDB | O, D_THR_149   | N, D_THR_153   | H, D_THR_153   | 2.95 | 2.11 | 9.66  |
| 5M3D.PDB | O, D_THR_149   | OG1, D_THR_153 | HG1, D_THR_153 | 2.80 | 2.08 | 26.61 |
| 5M3D.PDB | O, D_PHE_150   | N, D_LEU_154   | H, D_LEU_154   | 2.86 | 2.05 | 16.07 |
| 5M3D.PDB | O, D_SER_160   | N, D_ALA_164   | H, D_ALA_164   | 2.69 | 1.86 | 12.75 |
| 5M3D.PDB | O, D_THR_161   | N, D_LEU_165   | H, D_LEU_165   | 2.89 | 2.08 | 15.84 |
| 5M3D.PDB | O, D_LEU_162   | N, D_THR_166   | H, D_THR_166   | 2.90 | 2.06 | 10.23 |
| 5M3D.PDB | O, D_THR_163   | N, D_THR_167   | H, D_THR_167   | 2.74 | 1.91 | 11.96 |
| 5M3D.PDB | O, D_THR_163   | OG1, D_THR_167 | HG1, D_THR_167 | 2.95 | 2.24 | 27.05 |
| 5M3D.PDB | O, D_ALA_164   | N, D_SER_168   | H, D_SER_168   | 2.84 | 2.03 | 16.52 |
| 5M3D.PDB | O, D_LEU_165   | N, D_VAL_169   | H, D_VAL_169   | 2.95 | 2.18 | 22.42 |
| 5M3D.PDB | O, D_THR_166   | N, D_LEU_170   | H, D_LEU_170   | 2.84 | 2.04 | 17.12 |
| 5M3D.PDB | O, D_THR_167   | N, D_LYS_171   | H, D_LYS_171   | 2.56 | 1.77 | 19.83 |
| 5M3D.PDB | O, D_LYS_171   | N, D_LEU_174   | H, D_LEU_174   | 2.77 | 1.92 | 4.36  |
| 5M3D.PDB | O, D_PRO_176   | OG, D_SER_179  | HG, D_SER_179  | 2.66 | 1.84 | 11.66 |
| 5M3D.PDB | O, D_ASN_180   | OG, D_SER_183  | HG, D_SER_183  | 2.86 | 2.12 | 23.28 |
| 5M3D.PDB | O, D_ILE_182   | N, D_LEU_185   | H, D_LEU_185   | 2.97 | 2.13 | 11.47 |
| 5M3D.PDB | O, D_SER_183   | N, D_LYS_187   | H, D_LYS_187   | 2.96 | 2.10 | 3.55  |
| 5M3D.PDB | OE1, D_GLN_192 | N, D_ASP_189   | H, D_ASP_189   | 2.76 | 1.94 | 13.89 |
| 5M3D.PDB | O, D_GLY_158   | N, D_CYS_190   | H, D_CYS_190   | 2.79 | 1.94 | 7.19  |
| 5M3D.PDB | OD2, D_ASP_128 | NE2, D_HIS_191 | HE2, D_HIS_191 | 2.53 | 1.71 | 14.84 |
| 5M3D.PDB | OD2, D_ASP_189 | N, D_GLN_192   | H, D_GLN_192   | 2.82 | 1.99 | 12.15 |
| 5M3D.PDB | O, D_CYS_190   | N, D_ILE_194   | H, D_ILE_194   | 2.85 | 2.03 | 13.91 |
| 5M3D.PDB | O, D_GLN_192   | N, D_ASP_196   | H, D_ASP_196   | 2.90 | 2.15 | 24.84 |
| 5M3D.PDB | O, D_LYS_193   | N, D_LEU_197   | H, D_LEU_197   | 2.84 | 2.06 | 21.13 |
| 5M3D.PDB | O, D_ASP_196   | N, D_GLY_200   | H, D_GLY_200   | 2.79 | 2.05 | 26.33 |
| 5M3D.PDB | O, D_ASP_196   | N, D_LYS_201   | H, D_LYS_201   | 2.96 | 2.14 | 14.32 |
| 5M3T.PDB | O, A_ASN_115   | N, A_ILE_119   | H, A_ILE_119   | 2.94 | 2.13 | 16.30 |
| 5M3T.PDB | O, A_GLN_118   | N, A_ASP_122   | H, A_ASP_122   | 2.97 | 2.19 | 21.02 |
| 5M3T.PDB | O, A_ILE_119   | N, A_VAL_123   | H, A_VAL_123   | 2.95 | 2.14 | 16.63 |
| 5M3T.PDB | O, A_ASP_122   | N, A_PHE_126   | H, A_PHE_126   | 2.88 | 2.06 | 13.64 |
| 5M3T.PDB | O, A_VAL_123   | N, A_TYR_127   | H, A_TYR_127   | 2.88 | 2.09 | 19.10 |
| 5M3T.PDB | NE2, A_HIS_151 | OH, A_TYR_127  | HH, A_TYR_127  | 2.73 | 1.92 | 14.40 |
| 5M3T.PDB | O, A_LYS_124   | N, A_ASP_128   | H, A_ASP_128   | 2.86 | 2.07 | 18.62 |
| 5M3T.PDB | O, A_GLN_125   | N, A_GLN_129   | H, A_GLN_129   | 2.97 | 2.16 | 16.06 |
| 5M3T.PDB | O, A_TYR_127   | N, A_LEU_131   | H, A_LEU_131   | 2.89 | 2.07 | 15.58 |
| 5M3T.PDB | O, A_ALA_130   | N, A_ALA_134   | H, A_ALA_134   | 2.77 | 2.03 | 25.75 |
| 5M3T.PDB | O, A_ALA_140   | N, A_LYS_144   | H, A_LYS_144   | 2.98 | 2.17 | 17.68 |
| 5M3T.PDB | O, A_ASN_142   | N, A_VAL_146   | H, A_VAL_146   | 2.80 | 1.98 | 15.12 |
| 5M3T.PDB | O, A_ALA_143   | N, A_VAL_147   | H, A_VAL_147   | 2.84 | 1.99 | 7.75  |
| 5M3T.PDB | O, A_LYS_144   | N, A_LYS_148   | H, A_LYS_148   | 2.91 | 2.07 | 11.07 |
| 5M3T.PDB | O, A_ALA_145   | N, A_THR_149   | H, A_THR_149   | 2.85 | 2.06 | 19.94 |
| 5M3T.PDB | O, A_ALA_145   | OG1, A_THR_149 | HG1, A_THR_149 | 2.69 | 1.91 | 17.48 |
| 5M3T.PDB | O, A_VAL_146   | N, A_PHE_150   | H, A_PHE_150   | 2.91 | 2.08 | 11.96 |
| 5M3T.PDB | O, A_VAL_147   | N, A_HIS_151   | H, A_HIS_151   | 2.93 | 2.10 | 13.01 |
| 5M3T.PDB | O, A_LEU_174   | ND1, A_HIS_151 | HD1, A_HIS_151 | 2.75 | 1.93 | 15.38 |
| 5M3T.PDB | O, A_LYS_148   | N, A_GLU_152   | H, A_GLU_152   | 2.97 | 2.16 | 17.30 |
| 5M3T.PDB | O, A_THR_149   | N, A_THR_153   | H, A_THR_153   | 2.89 | 2.07 | 15.13 |
| 5M3T.PDB | O, A_THR_149   | OG1, A_THR_153 | HG1, A_THR_153 | 2.85 | 2.15 | 27.69 |
| 5M3T.PDB | O, A_GLU_188   | N, A_CYS_157   | H, A_CYS_157   | 2.99 | 2.17 | 14.35 |
| 5M3T.PDB | OD2, A_ASP_189 | N, A_SER_160   | H, A_SER_160   | 2.80 | 1.94 | 2.42  |
| 5M3T.PDB | OG, A_SER_159  | OG1, A_THR_161 | HG1, A_THR_161 | 2.93 | 2.10 | 8.83  |
| 5M3T.PDB | O, A_SER_159   | N, A_LEU_162   | H, A_LEU_162   | 3.00 | 2.15 | 8.92  |
| 5M3T.PDB | O, A_LEU_162   | N, A_THR_166   | H, A_THR_166   | 2.96 | 2.13 | 13.96 |
| 5M3T.PDB | O, A_LEU_162   | OG1, A_THR_166 | HG1, A_THR_166 | 2.89 | 2.11 | 19.45 |
| 5M3T.PDB | O, A_THR_163   | N, A_THR_167   | H, A_THR_167   | 2.97 | 2.15 | 13.47 |
| 5M3T.PDB | O, A_LEU_165   | N, A_VAL_169   | H, A_VAL_169   | 2.96 | 2.14 | 13.88 |
| 5M3T.PDB | O, A_THR_166   | N, A_LEU_170   | H, A_LEU_170   | 2.99 | 2.16 | 12.64 |



|          |                |                |                 |      |      |       |
|----------|----------------|----------------|-----------------|------|------|-------|
| 5M3T.PDB | O, A_VAL.169   | N, A_LEU.174   | H, A_LEU.174    | 2.96 | 2.11 | 5.74  |
| 5M3T.PDB | O, A_ILE.182   | N, A_PHE.186   | H, A_PHE.186    | 2.70 | 1.92 | 20.08 |
| 5M3T.PDB | O, A_GLY.158   | N, A_CYS.190   | H, A_CYS.190    | 2.89 | 2.03 | 5.47  |
| 5M3T.PDB | OD1, A_ASP.189 | N, A_HIS.191   | H, A_HIS.191    | 2.81 | 2.03 | 20.34 |
| 5M3T.PDB | OD1, A_ASP.128 | NE2, A_HIS.191 | HE2, A_HIS.191  | 2.70 | 1.84 | 4.47  |
| 5M3T.PDB | O, A_ASP.189   | N, A_LYS.193   | H, A_LYS.193    | 3.00 | 2.19 | 17.82 |
| 5M3T.PDB | O, A_ASP.155   | NZ, A_LYS.193  | HZ1, A_LYS.193  | 2.94 | 2.21 | 29.02 |
| 5M3T.PDB | O, A_CYS.190   | N, A_ILE.194   | H, A_ILE.194    | 2.88 | 2.04 | 11.45 |
| 5M3T.PDB | O, A_HIS.191   | N, A_ASP.195   | H, A_ASP.195    | 2.95 | 2.12 | 14.00 |
| 5M3T.PDB | O, A_GLN.192   | N, A_ASP.196   | H, A_ASP.196    | 2.79 | 2.00 | 19.02 |
| 5M3T.PDB | O, A_LYS.193   | N, A_LEU.197   | H, A_LEU.197    | 2.95 | 2.23 | 28.39 |
| 5M3T.PDB | O, B_ILE.119   | N, B_VAL.123   | H, B_VAL.123    | 2.98 | 2.18 | 17.74 |
| 5M3T.PDB | OD2, B_ASP.195 | NZ, B_LYS.124  | HZ1, B_LYS.124  | 2.94 | 2.15 | 23.24 |
| 5M3T.PDB | O, B_ASP.122   | N, B_PHE.126   | H, B_PHE.126    | 2.88 | 2.07 | 16.55 |
| 5M3T.PDB | O, B_VAL.123   | N, B_TYR.127   | H, B_TYR.127    | 2.81 | 1.99 | 15.05 |
| 5M3T.PDB | NE2, B_HIS.151 | OH, B_TYR.127  | HH, B_TYR.127   | 2.86 | 2.03 | 6.62  |
| 5M3T.PDB | O, B_LYS.124   | N, B_ASP.128   | H, B_ASP.128    | 2.79 | 1.96 | 14.44 |
| 5M3T.PDB | O, B_TYR.127   | N, B_LEU.131   | H, B_LEU.131    | 2.74 | 1.91 | 11.63 |
| 5M3T.PDB | O, B_ASP.128   | N, B_GLN.132   | H, B_GLN.132    | 2.93 | 2.08 | 4.43  |
| 5M3T.PDB | O, B_ALA.130   | N, B_ALA.134   | H, B_ALA.134    | 2.82 | 2.01 | 17.03 |
| 5M3T.PDB | O, B_LEU.131   | N, B_VAL.135   | H, B_VAL.135    | 2.93 | 2.13 | 18.76 |
| 5M3T.PDB | O, B_ALA.140   | N, B_LYS.144   | H, B_LYS.144    | 2.99 | 2.13 | 5.84  |
| 5M3T.PDB | O, B_ASN.142   | N, B_VAL.146   | H, B_VAL.146    | 2.82 | 1.98 | 10.01 |
| 5M3T.PDB | O, B_ALA.143   | N, B_VAL.147   | H, B_VAL.147    | 2.79 | 1.96 | 12.14 |
| 5M3T.PDB | O, B_LYS.144   | N, B_LYS.148   | H, B_LYS.148    | 2.86 | 2.03 | 12.94 |
| 5M3T.PDB | O, B_CYS.175   | NZ, B_LYS.148  | HZ1, B_LYS.148  | 2.54 | 1.78 | 25.33 |
| 5M3T.PDB | O, B_ASN.173   | NZ, B_LYS.148  | HZ2, B_LYS.148  | 2.88 | 2.03 | 13.59 |
| 5M3T.PDB | O, B_ALA.145   | N, B_THR.149   | H, B_THR.149    | 2.96 | 2.15 | 16.07 |
| 5M3T.PDB | O, B_ALA.145   | OG1, B_THR.149 | HG1, B_THR.149  | 2.88 | 2.12 | 22.32 |
| 5M3T.PDB | O, B_VAL.146   | N, B_PHE.150   | H, B_PHE.150    | 2.92 | 2.09 | 12.17 |
| 5M3T.PDB | O, B_VAL.147   | N, B_HIS.151   | H, B_HIS.151    | 2.86 | 2.03 | 12.60 |
| 5M3T.PDB | O, B_LEU.174   | ND1, B_HIS.151 | HD1, B_HIS.151  | 2.62 | 1.77 | 9.06  |
| 5M3T.PDB | O, B_LYS.148   | N, B_GLU.152   | H, B_GLU.152    | 2.91 | 2.09 | 13.59 |
| 5M3T.PDB | O, B_THR.149   | N, B_THR.153   | H, B_THR.153    | 2.94 | 2.11 | 13.14 |
| 5M3T.PDB | O, B_THR.149   | OG1, B_THR.153 | HG1, B_THR.153  | 2.80 | 2.10 | 28.85 |
| 5M3T.PDB | O, B_PHE.150   | N, B_LEU.154   | H, B_LEU.154    | 2.95 | 2.15 | 17.32 |
| 5M3T.PDB | OG1, B_THR.163 | N, B_SER.160   | H, B_SER.160    | 2.86 | 2.05 | 16.20 |
| 5M3T.PDB | O, B_SER.160   | N, B_ALA.164   | H, B_ALA.164    | 2.90 | 2.11 | 19.32 |
| 5M3T.PDB | O, B_THR.161   | N, B_LEU.165   | H, B_LEU.165    | 2.94 | 2.12 | 14.02 |
| 5M3T.PDB | O, B_LEU.162   | N, B_THR.166   | H, B_THR.166    | 2.99 | 2.17 | 13.93 |
| 5M3T.PDB | O, B_LEU.162   | OG1, B_THR.166 | HG1, B_THR.166  | 2.94 | 2.16 | 18.55 |
| 5M3T.PDB | O, B_THR.163   | N, B_THR.167   | H, B_THR.167    | 2.90 | 2.06 | 9.78  |
| 5M3T.PDB | O, B_THR.163   | OG1, B_THR.167 | HG1, B_THR.167  | 2.66 | 1.89 | 19.90 |
| 5M3T.PDB | O, B_ALA.164   | N, B_SER.168   | H, B_SER.168    | 2.96 | 2.19 | 22.50 |
| 5M3T.PDB | O, B_LEU.165   | OG, B_SER.168  | HG, B_SER.168   | 2.85 | 2.06 | 16.49 |
| 5M3T.PDB | O, B_THR.166   | N, B_LEU.170   | H, B_LEU.170    | 2.88 | 2.10 | 19.82 |
| 5M3T.PDB | O, B_THR.167   | N, B_LYS.171   | H, B_LYS.171    | 2.76 | 1.95 | 17.26 |
| 5M3T.PDB | O, B_SER.168   | ND2, B_ASN.172 | HD21, B_ASN.172 | 2.93 | 2.11 | 14.38 |
| 5M3T.PDB | O, B_ASN.172   | N, B_CYS.175   | H, B_CYS.175    | 2.85 | 2.01 | 8.34  |
| 5M3T.PDB | O, B_ILE.181   | N, B_ASN.184   | H, B_ASN.184    | 2.85 | 2.05 | 18.46 |
| 5M3T.PDB | O, B_SER.183   | N, B_LYS.187   | H, B_LYS.187    | 2.83 | 2.00 | 12.69 |
| 5M3T.PDB | OE1, B_GLN.192 | N, B_ASP.189   | H, B_ASP.189    | 2.94 | 2.14 | 17.48 |
| 5M3T.PDB | O, B_GLY.158   | N, B_CYS.190   | H, B_CYS.190    | 2.83 | 1.97 | 6.16  |
| 5M3T.PDB | OD1, B_ASP.128 | NE2, B_HIS.191 | HE2, B_HIS.191  | 2.76 | 1.92 | 11.16 |
| 5M3T.PDB | OD1, B_ASP.189 | N, B_GLN.192   | H, B_GLN.192    | 2.85 | 2.02 | 14.15 |
| 5M3T.PDB | O, B_LEU.154   | NZ, B_LYS.193  | HZ2, B_LYS.193  | 2.66 | 1.92 | 28.24 |
| 5M3T.PDB | O, B_CYS.190   | N, B_ILE.194   | H, B_ILE.194    | 2.86 | 2.09 | 22.77 |
| 5M3T.PDB | O, B_HIS.191   | N, B_ASP.195   | H, B_ASP.195    | 2.99 | 2.18 | 15.97 |

|          |                |                |                |      |      |       |
|----------|----------------|----------------|----------------|------|------|-------|
| 5M3T.PDB | O, B_GLN_192   | N, B_ASP_196   | H, B_ASP_196   | 2.98 | 2.18 | 17.63 |
| 5M3T.PDB | O, B_ASP_195   | OG, B_SER_199  | HG, B_SER_199  | 2.82 | 2.09 | 24.74 |
| 5M4R.PDB | OG1, A_THR_163 | N, A_SER_160   | H, A_SER_160   | 2.97 | 2.12 | 8.70  |
| 5M4R.PDB | OG, A_SER_159  | OG1, A_THR_163 | HG1, A_THR_163 | 2.93 | 2.14 | 15.31 |
| 5M4R.PDB | O, A_SER_160   | N, A_ALA_164   | H, A_ALA_164   | 2.56 | 1.75 | 15.32 |
| 5M4R.PDB | O, A_GLY_158   | N, A_CYS_190   | H, A_CYS_190   | 2.82 | 1.96 | 5.83  |
| 5M4R.PDB | OD2, A_ASP_128 | NE2, A_HIS_191 | HE2, A_HIS_191 | 2.54 | 1.73 | 17.27 |
| 5M4R.PDB | O, A_CYS_190   | N, A_ILE_194   | H, A_ILE_194   | 2.79 | 2.00 | 18.71 |
| 5M4R.PDB | O, A_HIS_191   | N, A_ASP_195   | H, A_ASP_195   | 2.85 | 2.00 | 5.80  |
| 5M4R.PDB | O, B_LYS_121   | N, B_GLN_125   | H, B_GLN_125   | 2.88 | 2.03 | 8.53  |
| 5M4R.PDB | O, B_LYS_124   | N, B_ASP_128   | H, B_ASP_128   | 2.83 | 1.99 | 10.44 |
| 5M4R.PDB | O, B_VAL_146   | N, B_PHE_150   | H, B_PHE_150   | 2.87 | 2.04 | 11.41 |
| 5M4R.PDB | O, B_VAL_147   | N, B_HIS_151   | H, B_HIS_151   | 2.85 | 2.02 | 12.74 |
| 5M4R.PDB | O, B_LYS_148   | N, B_GLU_152   | H, B_GLU_152   | 2.83 | 2.00 | 11.22 |
| 5M4R.PDB | O, B_THR_149   | N, B_THR_153   | H, B_THR_153   | 2.76 | 1.93 | 11.52 |
| 5M4R.PDB | O, B_THR_149   | OG1, B_THR_153 | HG1, B_THR_153 | 2.73 | 2.03 | 28.15 |
| 5M4R.PDB | OG1, B_THR_163 | N, B_SER_160   | H, B_SER_160   | 2.82 | 2.01 | 15.84 |
| 5M4R.PDB | OG, B_SER_159  | OG1, B_THR_163 | HG1, B_THR_163 | 2.85 | 2.02 | 5.63  |
| 5M4R.PDB | O, B_SER_160   | N, B_ALA_164   | H, B_ALA_164   | 2.76 | 2.02 | 25.53 |
| 5M4R.PDB | O, B_THR_161   | N, B_LEU_165   | H, B_LEU_165   | 2.85 | 2.00 | 9.07  |
| 5M4R.PDB | O, B_LEU_162   | N, B_THR_166   | H, B_THR_166   | 2.80 | 1.95 | 8.30  |
| 5M4R.PDB | O, B_LEU_162   | OG1, B_THR_166 | HG1, B_THR_166 | 2.92 | 2.11 | 12.23 |
| 5M4R.PDB | O, B_THR_163   | N, B_THR_167   | H, B_THR_167   | 2.81 | 1.99 | 13.82 |
| 5M4R.PDB | O, B_ALA_164   | N, B_SER_168   | H, B_SER_168   | 2.85 | 2.04 | 17.78 |
| 5M4R.PDB | O, B_LEU_165   | N, B_VAL_169   | H, B_VAL_169   | 2.67 | 1.97 | 29.59 |
| 5M4R.PDB | O, C_ASP_117   | N, C_LYS_121   | H, C_LYS_121   | 2.88 | 2.04 | 8.52  |
| 5M4R.PDB | O, C_ALA_120   | N, C_LYS_124   | H, C_LYS_124   | 2.90 | 2.05 | 8.18  |
| 5M4R.PDB | O, C_LYS_121   | N, C_GLN_125   | H, C_GLN_125   | 2.88 | 2.04 | 12.44 |
| 5M4R.PDB | O, C_ASP_122   | N, C_PHE_126   | H, C_PHE_126   | 2.84 | 1.99 | 7.74  |
| 5M4R.PDB | O, C_VAL_123   | N, C_TYR_127   | H, C_TYR_127   | 2.85 | 2.01 | 7.89  |
| 5M4R.PDB | O, C_LYS_124   | N, C_ASP_128   | H, C_ASP_128   | 2.85 | 2.01 | 11.99 |
| 5M4R.PDB | O, C_GLN_125   | N, C_GLN_129   | H, C_GLN_129   | 2.90 | 2.06 | 10.04 |
| 5M4R.PDB | O, C_PHE_126   | N, C_ALA_130   | H, C_ALA_130   | 2.92 | 2.07 | 6.44  |
| 5M4R.PDB | O, C_TYR_127   | N, C_LEU_131   | H, C_LEU_131   | 2.76 | 1.97 | 18.98 |
| 5M4R.PDB | O, C_ASP_128   | N, C_GLN_132   | H, C_GLN_132   | 2.86 | 2.01 | 6.65  |
| 5M4R.PDB | O, C_LEU_131   | N, C_VAL_135   | H, C_VAL_135   | 2.86 | 2.02 | 10.05 |
| 5M4R.PDB | O, C_ALA_143   | N, C_VAL_147   | H, C_VAL_147   | 2.83 | 1.98 | 7.24  |
| 5M4R.PDB | O, C_ALA_145   | N, C_THR_149   | H, C_THR_149   | 2.85 | 2.02 | 12.51 |
| 5M4R.PDB | O, C_VAL_146   | N, C_PHE_150   | H, C_PHE_150   | 2.86 | 2.02 | 10.77 |
| 5M4R.PDB | O, C_VAL_147   | N, C_HIS_151   | H, C_HIS_151   | 2.82 | 2.00 | 14.15 |
| 5M4R.PDB | O, C_THR_149   | OG1, C_THR_153 | HG1, C_THR_153 | 2.74 | 2.04 | 29.05 |
| 5M4R.PDB | O, C_PHE_150   | N, C_LEU_154   | H, C_LEU_154   | 2.89 | 2.07 | 13.98 |
| 5M4R.PDB | OG1, C_THR_163 | N, C_SER_160   | H, C_SER_160   | 2.80 | 1.95 | 7.20  |
| 5M4R.PDB | OG, C_SER_159  | OG1, C_THR_163 | HG1, C_THR_163 | 2.95 | 2.12 | 7.91  |
| 5M4R.PDB | O, C_SER_160   | N, C_ALA_164   | H, C_ALA_164   | 2.84 | 2.04 | 18.04 |
| 5M4R.PDB | O, C_THR_161   | N, C_LEU_165   | H, C_LEU_165   | 2.77 | 1.94 | 14.09 |
| 5M4R.PDB | O, C_LEU_162   | OG1, C_THR_166 | HG1, C_THR_166 | 2.73 | 1.97 | 21.05 |
| 5M4R.PDB | O, C_THR_163   | N, C_THR_167   | H, C_THR_167   | 2.86 | 2.02 | 10.18 |
| 5M4R.PDB | O, C_THR_163   | OG1, C_THR_167 | HG1, C_THR_167 | 2.56 | 1.86 | 28.52 |
| 5M4R.PDB | O, C_LEU_165   | N, C_VAL_169   | H, C_VAL_169   | 2.81 | 2.04 | 22.87 |
| 5M4R.PDB | OD2, C_ASP_189 | N, C_GLN_192   | H, C_GLN_192   | 2.75 | 1.90 | 7.52  |
| 5M4R.PDB | O, C_CYS_190   | N, C_ILE_194   | H, C_ILE_194   | 2.79 | 1.99 | 17.52 |
| 5M4R.PDB | O, C_HIS_191   | N, C_ASP_195   | H, C_ASP_195   | 2.83 | 1.98 | 6.12  |
| 5M4R.PDB | O, C_GLN_192   | N, C_ASP_196   | H, C_ASP_196   | 2.81 | 1.97 | 12.51 |
| 5M4R.PDB | O, C_LYS_193   | N, C_LEU_197   | H, C_LEU_197   | 2.74 | 1.99 | 24.89 |
| 5M4R.PDB | O, D_THR_149   | N, D_THR_153   | H, D_THR_153   | 2.76 | 1.94 | 13.90 |
| 5M4R.PDB | O, D_CYS_190   | N, D_ILE_194   | H, D_ILE_194   | 2.80 | 1.98 | 16.24 |
| 5M4R.PDB | O, D_ILE_194   | N, D_PHE_198   | H, D_PHE_198   | 2.90 | 2.07 | 14.01 |

|          |                |                |                |      |      |       |
|----------|----------------|----------------|----------------|------|------|-------|
| 5M4R.PDB | O, E_ALA.145   | N, E_THR.149   | H, E_THR.149   | 2.84 | 2.01 | 12.20 |
| 5M4R.PDB | O, E_VAL.147   | N, E_HIS.151   | H, E_HIS.151   | 2.82 | 1.99 | 11.67 |
| 5M4R.PDB | O, E_LYS.148   | N, E_GLU.152   | H, E_GLU.152   | 2.81 | 1.99 | 14.86 |
| 5M4R.PDB | O, E_THR.149   | N, E_THR.153   | H, E_THR.153   | 2.77 | 1.95 | 13.19 |
| 5M4R.PDB | O, E_THR.149   | OG1, E_THR.153 | HG1, E_THR.153 | 2.73 | 2.03 | 28.19 |
| 5M4R.PDB | O, E_PHE.150   | N, E_LEU.154   | H, E_LEU.154   | 2.88 | 2.06 | 14.16 |
| 5M4R.PDB | OG1, E_THR.163 | N, E_SER.160   | H, E_SER.160   | 2.70 | 1.88 | 13.56 |
| 5M4R.PDB | O, E_SER.160   | N, E_ALA.164   | H, E_ALA.164   | 2.73 | 1.96 | 22.03 |
| 5M4R.PDB | OD2, E_ASP.128 | NE2, E_HIS.191 | HE2, E_HIS.191 | 2.53 | 1.73 | 17.17 |
| 5M4R.PDB | O, E_CYS.190   | N, E_ILE.194   | H, E_ILE.194   | 2.78 | 1.97 | 15.37 |
| 5T6P.PDB | OG, A_SER.26   | N, A_LEU.3     | H, A_LEU.3     | 2.84 | 1.99 | 5.70  |
| 5T6P.PDB | O, A_ARG.24    | N, A_THR.5     | H, A_THR.5     | 2.80 | 1.96 | 9.75  |
| 5T6P.PDB | O, A_TYR.91    | NE2, A_GLN.6   | HE22, A_GLN.6  | 2.77 | 1.91 | 5.02  |
| 5T6P.PDB | O, A_SER.22    | N, A_THR.7     | H, A_THR.7     | 2.80 | 1.98 | 15.63 |
| 5T6P.PDB | O, A_LYS.108   | N, A_LEU.11    | H, A_LEU.11    | 2.86 | 2.14 | 28.05 |
| 5T6P.PDB | O, A_GLU.110   | N, A_VAL.13    | H, A_VAL.13    | 2.92 | 2.18 | 25.74 |
| 5T6P.PDB | O, A_ILE.80    | N, A_ALA.19    | H, A_ALA.19    | 2.98 | 2.15 | 13.33 |
| 5T6P.PDB | O, A_LEU.78    | N, A_ILE.21    | H, A_ILE.21    | 2.78 | 1.94 | 11.87 |
| 5T6P.PDB | O, A_THR.7     | N, A_SER.22    | H, A_SER.22    | 2.67 | 1.82 | 5.62  |
| 5T6P.PDB | O, A_PHE.76    | N, A_CYS.23    | H, A_CYS.23    | 2.67 | 1.84 | 13.46 |
| 5T6P.PDB | O, A_THR.5     | N, A_ARG.24    | H, A_ARG.24    | 2.81 | 2.01 | 17.15 |
| 5T6P.PDB | OD1, A_ASP.75  | NE, A_ARG.24   | HE, A_ARG.24   | 2.87 | 2.06 | 16.15 |
| 5T6P.PDB | O, A_THR.74    | N, A_SER.25    | H, A_SER.25    | 2.92 | 2.15 | 21.71 |
| 5T6P.PDB | O, A_LYS.35    | N, A_HIS.31    | H, A_HIS.31    | 2.71 | 1.85 | 5.88  |
| 5T6P.PDB | O, A_HIS.31    | N, A_GLY.34    | H, A_GLY.34    | 2.72 | 1.87 | 7.51  |
| 5T6P.PDB | OD1, A_ASN.33  | N, A_LYS.35    | H, A_LYS.35    | 2.79 | 1.96 | 11.94 |
| 5T6P.PDB | O, A_PHE.94    | N, A_GLU.39    | H, A_GLU.39    | 2.82 | 1.99 | 13.41 |
| 5T6P.PDB | O, A_ILE.53    | N, A_TRP.40    | H, A_TRP.40    | 2.93 | 2.13 | 18.35 |
| 5T6P.PDB | O, A_TYR.92    | N, A_TYR.41    | H, A_TYR.41    | 2.73 | 1.89 | 11.55 |
| 5T6P.PDB | O, A_LYS.50    | N, A_LEU.42    | H, A_LEU.42    | 2.88 | 2.08 | 18.93 |
| 5T6P.PDB | O, A_VAL.90    | N, A_GLN.43    | H, A_GLN.43    | 2.78 | 1.94 | 8.75  |
| 5T6P.PDB | O, A_GLN.47    | NE2, A_GLN.43  | HE21, A_GLN.43 | 2.91 | 2.07 | 10.44 |
| 5T6P.PDB | O, B_GLY.107   | OG, A_SER.48   | HG, A_SER.48   | 2.52 | 1.72 | 14.73 |
| 5T6P.PDB | O, A_LEU.42    | N, A_LYS.50    | H, A_LYS.50    | 2.76 | 2.01 | 25.02 |
| 5T6P.PDB | O, A_TRP.40    | N, A_LEU.52    | H, A_LEU.52    | 2.89 | 2.04 | 6.78  |
| 5T6P.PDB | O, A_LYS.58    | N, A_TYR.54    | H, A_TYR.54    | 2.88 | 2.08 | 17.82 |
| 5T6P.PDB | O, A_ILE.36    | NE, A_ARG.55   | HE, A_ARG.55   | 2.95 | 2.12 | 13.12 |
| 5T6P.PDB | O, A_LEU.38    | N, A_VAL.56    | H, A_VAL.56    | 2.81 | 1.97 | 8.99  |
| 5T6P.PDB | O, A_ARG.55    | N, A_SER.57    | H, A_SER.57    | 2.79 | 2.06 | 26.54 |
| 5T6P.PDB | O, A_TYR.54    | N, A_LYS.58    | H, A_LYS.58    | 2.92 | 2.13 | 19.37 |
| 5T6P.PDB | O, A_LEU.52    | N, A_PHE.60    | H, A_PHE.60    | 2.86 | 2.00 | 6.63  |
| 5T6P.PDB | OD1, A_ASP.87  | NH2, A_ARG.66  | HH22, A_ARG.66 | 2.87 | 2.03 | 10.92 |
| 5T6P.PDB | O, A_LYS.79    | N, A_SER.68    | H, A_SER.68    | 2.87 | 2.04 | 13.46 |
| 5T6P.PDB | O, A_CYS.23    | N, A_PHE.76    | H, A_PHE.76    | 2.81 | 1.99 | 14.73 |
| 5T6P.PDB | O, A_SER.70    | N, A_THR.77    | H, A_THR.77    | 2.96 | 2.14 | 16.18 |
| 5T6P.PDB | O, A_ILE.21    | N, A_LEU.78    | H, A_LEU.78    | 2.87 | 2.08 | 19.36 |
| 5T6P.PDB | O, A_SER.68    | N, A_LYS.79    | H, A_LYS.79    | 2.72 | 1.88 | 9.62  |
| 5T6P.PDB | O, A_ALA.19    | N, A_ILE.80    | H, A_ILE.80    | 2.82 | 1.98 | 10.03 |
| 5T6P.PDB | O, A_GLN.43    | N, A_VAL.90    | H, A_VAL.90    | 2.99 | 2.16 | 12.00 |
| 5T6P.PDB | O, A_THR.107   | N, A_TYR.91    | H, A_TYR.91    | 2.97 | 2.12 | 9.83  |
| 5T6P.PDB | O, A_ASP.87    | OH, A_TYR.91   | HH, A_TYR.91   | 2.67 | 1.98 | 29.62 |
| 5T6P.PDB | O, A_TYR.41    | N, A_TYR.92    | H, A_TYR.92    | 2.76 | 1.93 | 13.16 |
| 5T6P.PDB | OE1, A_GLN.6   | N, A_CYS.93    | H, A_CYS.93    | 2.94 | 2.12 | 14.92 |
| 5T6P.PDB | O, A_THR.102   | N, A_GLN.95    | H, A_GLN.95    | 2.94 | 2.13 | 17.40 |
| 5T6P.PDB | O, A_HIS.98    | NE2, A_GLN.95  | HE22, A_GLN.95 | 2.68 | 1.87 | 14.95 |
| 5T6P.PDB | O, A_TYR.37    | N, A_GLY.96    | H, A_GLY.96    | 2.73 | 1.90 | 11.23 |
| 5T6P.PDB | O, A_ILE.29    | OG, A_SER.97   | HG, A_SER.97   | 2.65 | 1.82 | 7.55  |
| 5T6P.PDB | OE1, A_GLN.95  | N, A_HIS.98    | H, A_HIS.98    | 2.88 | 2.02 | 3.19  |

|          |                |                |                 |      |      |       |
|----------|----------------|----------------|-----------------|------|------|-------|
| 5T6P.PDB | O, A_VAL_2     | OG1, A_THR_102 | HG1, A_THR_102  | 2.83 | 2.02 | 12.78 |
| 5T6P.PDB | O, A_CYS_93    | N, A_GLY_104   | H, A_GLY_104    | 2.64 | 1.79 | 9.16  |
| 5T6P.PDB | O, A_TYR_91    | N, A_THR_107   | H, A_THR_107    | 2.98 | 2.24 | 26.12 |
| 5T6P.PDB | O, A_PRO_8     | OG1, A_THR_107 | HG1, A_THR_107  | 2.63 | 1.91 | 24.93 |
| 5T6P.PDB | O, A_GLY_89    | N, A_LEU_109   | H, A_LEU_109    | 2.81 | 1.95 | 2.82  |
| 5T6P.PDB | O, A_VAL_13    | N, A_LYS_112   | H, A_LYS_112    | 2.81 | 1.97 | 10.01 |
| 5T6P.PDB | O, A_TYR_145   | N, A_ALA_116   | H, A_ALA_116    | 2.79 | 1.99 | 17.20 |
| 5T6P.PDB | O, A_ASN_142   | N, A_THR_119   | H, A_THR_119    | 2.97 | 2.14 | 12.03 |
| 5T6P.PDB | O, A_VAL_138   | N, A_PHE_123   | H, A_PHE_123    | 2.88 | 2.11 | 21.78 |
| 5T6P.PDB | OG, A_SER_136  | NE2, A_GLN_129 | HE22, A_GLN_129 | 2.81 | 1.96 | 6.44  |
| 5T6P.PDB | O, A_GLN_129   | OG, A_SER_132  | HG, A_SER_132   | 2.72 | 1.92 | 13.31 |
| 5T6P.PDB | O, A_LEU_130   | N, A_GLY_133   | H, A_GLY_133    | 2.98 | 2.20 | 21.49 |
| 5T6P.PDB | OE1, A_GLN_129 | N, A_SER_136   | H, A_SER_136    | 2.79 | 1.94 | 7.05  |
| 5T6P.PDB | O, A_LEU_184   | N, A_VAL_137   | H, A_VAL_137    | 2.71 | 1.87 | 10.57 |
| 5T6P.PDB | O, A_SER_182   | N, A_CYS_139   | H, A_CYS_139    | 2.76 | 2.04 | 28.21 |
| 5T6P.PDB | O, A_SER_121   | N, A_PHE_140   | H, A_PHE_140    | 2.76 | 1.97 | 19.62 |
| 5T6P.PDB | O, A_MET_180   | N, A_LEU_141   | H, A_LEU_141    | 2.79 | 1.94 | 5.89  |
| 5T6P.PDB | OG, A_SER_179  | N, A_ASN_143   | H, A_ASN_143    | 2.90 | 2.08 | 15.40 |
| 5T6P.PDB | O, A_TYR_178   | N, A_PHE_144   | H, A_PHE_144    | 2.81 | 1.97 | 9.66  |
| 5T6P.PDB | O, A_ALA_116   | N, A_TYR_145   | H, A_TYR_145    | 2.97 | 2.15 | 15.15 |
| 5T6P.PDB | O, A_GLU_200   | N, A_LYS_152   | H, A_LYS_152    | 2.97 | 2.17 | 16.98 |
| 5T6P.PDB | OG, A_SER_182  | NE1, A_TRP_153 | HE1, A_TRP_153  | 2.84 | 2.00 | 11.05 |
| 5T6P.PDB | O, A_THR_198   | N, A_LYS_154   | H, A_LYS_154    | 2.71 | 1.93 | 21.47 |
| 5T6P.PDB | O, A_SER_196   | N, A_ASP_156   | H, A_ASP_156    | 2.70 | 1.86 | 10.47 |
| 5T6P.PDB | O, A_TRP_153   | N, A_ARG_160   | H, A_ARG_160    | 2.85 | 2.08 | 22.60 |
| 5T6P.PDB | O, A_SER_181   | N, A_SER_167   | H, A_SER_167    | 2.92 | 2.15 | 23.07 |
| 5T6P.PDB | O, B_PRO_170   | OG, A_SER_167  | HG, A_SER_167   | 2.98 | 2.14 | 3.80  |
| 5T6P.PDB | O, A_LYS_147   | NE1, A_TRP_168 | HE1, A_TRP_168  | 2.99 | 2.28 | 29.51 |
| 5T6P.PDB | O, A_SER_179   | N, A_THR_169   | H, A_THR_169    | 2.77 | 1.93 | 8.31  |
| 5T6P.PDB | O, A_ASP_170   | OG1, A_THR_169 | HG1, A_THR_169  | 2.93 | 2.19 | 24.31 |
| 5T6P.PDB | O, A_THR_177   | N, A_ASP_172   | H, A_ASP_172    | 2.83 | 2.02 | 16.18 |
| 5T6P.PDB | OD1, A_ASP_172 | N, A_LYS_174   | H, A_LYS_174    | 2.80 | 1.97 | 12.91 |
| 5T6P.PDB | O, A_ASP_172   | N, A_SER_176   | H, A_SER_176    | 2.74 | 2.02 | 27.29 |
| 5T6P.PDB | OD1, A_ASP_175 | OG1, A_THR_177 | HG1, A_THR_177  | 2.59 | 1.78 | 13.64 |
| 5T6P.PDB | O, A_PHE_144   | N, A_TYR_178   | H, A_TYR_178    | 2.77 | 1.93 | 7.97  |
| 5T6P.PDB | O, A_LEU_141   | N, A_MET_180   | H, A_MET_180    | 2.77 | 1.96 | 16.22 |
| 5T6P.PDB | O, A_SER_167   | N, A_SER_181   | H, A_SER_181    | 2.83 | 2.04 | 19.51 |
| 5T6P.PDB | O, A_CYS_139   | N, A_SER_182   | H, A_SER_182    | 2.79 | 1.96 | 11.39 |
| 5T6P.PDB | OD1, A_ASN_166 | OG, A_SER_182  | HG, A_SER_182   | 2.54 | 1.72 | 9.61  |
| 5T6P.PDB | O, A_LEU_165   | N, A_THR_183   | H, A_THR_183    | 2.87 | 2.06 | 15.52 |
| 5T6P.PDB | O, A_VAL_137   | N, A_LEU_184   | H, A_LEU_184    | 2.77 | 1.97 | 18.32 |
| 5T6P.PDB | O, A_GLY_163   | N, A_THR_185   | H, A_THR_185    | 2.97 | 2.14 | 12.81 |
| 5T6P.PDB | O, A_ALA_135   | N, A_LEU_186   | H, A_LEU_186    | 2.78 | 1.96 | 13.71 |
| 5T6P.PDB | O, A_GLY_133   | N, A_LYS_188   | H, A_LYS_188    | 2.86 | 2.01 | 2.28  |
| 5T6P.PDB | OG1, A_THR_187 | N, A_GLU_190   | H, A_GLU_190    | 2.92 | 2.08 | 10.76 |
| 5T6P.PDB | O, A_THR_187   | N, A_TYR_191   | H, A_TYR_191    | 2.82 | 1.98 | 9.18  |
| 5T6P.PDB | OD1, A_ASP_156 | N, A_SER_196   | H, A_SER_196    | 2.91 | 2.06 | 3.81  |
| 5T6P.PDB | O, A_LYS_152   | N, A_GLU_200   | H, A_GLU_200    | 2.95 | 2.17 | 21.10 |
| 5T6P.PDB | O, A_ILE_210   | N, A_ALA_201   | H, A_ALA_201    | 2.76 | 1.98 | 21.19 |
| 5T6P.PDB | O, A_ASN_150   | N, A_THR_202   | H, A_THR_202    | 2.73 | 1.90 | 13.59 |
| 5T6P.PDB | OG, A_SER_206  | N, A_SER_208   | H, A_SER_208    | 2.93 | 2.13 | 18.20 |
| 5T6P.PDB | O, A_ALA_201   | N, A_ILE_210   | H, A_ILE_210    | 2.83 | 2.04 | 19.01 |
| 5T6P.PDB | O, B_SER_25    | N, B_LYS_3     | H, B_LYS_3      | 2.92 | 2.08 | 9.95  |
| 5T6P.PDB | O, B_ALA_23    | N, B_VAL_5     | H, B_VAL_5      | 2.98 | 2.21 | 22.28 |
| 5T6P.PDB | O, B_SER_21    | N, B_SER_7     | H, B_SER_7      | 2.97 | 2.22 | 25.31 |
| 5T6P.PDB | O, B_THR_113   | N, B_VAL_12    | H, B_VAL_12     | 2.78 | 2.02 | 23.72 |
| 5T6P.PDB | O, B_LEU_86    | N, B_GLY_15    | H, B_GLY_15     | 2.71 | 1.85 | 6.92  |
| 5T6P.PDB | O, B_ALA_13    | N, B_GLY_16    | H, B_GLY_16     | 2.97 | 2.19 | 21.44 |

|          |                |                |                |      |      |       |
|----------|----------------|----------------|----------------|------|------|-------|
| 5T6P.PDB | O, B_LEU_81    | N, B_LEU_20    | H, B_LEU_20    | 2.89 | 2.07 | 14.31 |
| 5T6P.PDB | O, B_VAL_5     | N, B_ALA_23    | H, B_ALA_23    | 2.70 | 1.89 | 15.98 |
| 5T6P.PDB | O, B_LYS_3     | N, B_SER_25    | H, B_SER_25    | 2.98 | 2.28 | 29.57 |
| 5T6P.PDB | O, B_ILE_51    | N, B_MET_34    | H, B_MET_34    | 2.95 | 2.13 | 15.81 |
| 5T6P.PDB | O, B_ALA_49    | N, B_TRP_36    | H, B_TRP_36    | 2.99 | 2.18 | 18.20 |
| 5T6P.PDB | O, B_GLU_46    | N, B_ARG_38    | H, B_ARG_38    | 2.93 | 2.09 | 10.53 |
| 5T6P.PDB | OE1, B_GLU_46  | NE, B_ARG_38   | HE, B_ARG_38   | 2.70 | 1.96 | 26.33 |
| 5T6P.PDB | O, B_ILE_93    | N, B_GLN_39    | H, B_GLN_39    | 2.73 | 1.94 | 18.82 |
| 5T6P.PDB | OE1, A_GLN_43  | NE2, B_GLN_39  | HE22, B_GLN_39 | 2.71 | 1.86 | 5.14  |
| 5T6P.PDB | O, B_ARG_44    | N, B_THR_40    | H, B_THR_40    | 2.94 | 2.13 | 17.68 |
| 5T6P.PDB | O, B_THR_40    | N, B_LYS_43    | H, B_LYS_43    | 2.81 | 1.99 | 15.16 |
| 5T6P.PDB | O, B_ARG_38    | N, B_GLU_46    | H, B_GLU_46    | 2.91 | 2.09 | 13.32 |
| 5T6P.PDB | O, B_TYR_59    | N, B_TYR_50    | H, B_TYR_50    | 2.85 | 2.14 | 28.28 |
| 5T6P.PDB | O, B_MET_34    | N, B_ILE_51    | H, B_ILE_51    | 3.00 | 2.23 | 23.58 |
| 5T6P.PDB | O, B_GLY_56    | N, B_ASN_52    | H, B_ASN_52    | 2.85 | 1.99 | 5.44  |
| 5T6P.PDB | O, B_ASN_52    | N, B_GLY_55    | H, B_GLY_55    | 2.99 | 2.14 | 4.85  |
| 5T6P.PDB | OD1, B_ASN_52  | N, B_GLY_56    | H, B_GLY_56    | 2.63 | 1.80 | 11.54 |
| 5T6P.PDB | O, F_PRO_8     | ND2, B_ASN_57  | HD21, B_ASN_57 | 2.91 | 2.07 | 9.74  |
| 5T6P.PDB | O, B_TYR_50    | N, B_TYR_59    | H, B_TYR_59    | 2.93 | 2.14 | 20.03 |
| 5T6P.PDB | O, B_GLN_82    | N, B_THR_69    | H, B_THR_69    | 2.67 | 1.94 | 26.83 |
| 5T6P.PDB | OD1, B_ASN_74  | NE, B_ARG_72   | HE, B_ARG_72   | 2.87 | 2.14 | 26.22 |
| 5T6P.PDB | O, B_THR_78    | N, B_ASP_73    | H, B_ASP_73    | 2.91 | 2.10 | 15.58 |
| 5T6P.PDB | O, B_LYS_76    | OG1, B_THR_78  | HG1, B_THR_78  | 2.86 | 2.09 | 20.72 |
| 5T6P.PDB | O, B_SER_71    | N, B_TYR_80    | H, B_TYR_80    | 2.84 | 1.99 | 6.51  |
| 5T6P.PDB | O, B_THR_69    | N, B_GLN_82    | H, B_GLN_82    | 2.81 | 1.97 | 9.07  |
| 5T6P.PDB | O, B_LEU_18    | N, B_MET_83    | H, B_MET_83    | 2.79 | 1.99 | 17.97 |
| 5T6P.PDB | O, B_ARG_67    | OG, B_SER_84   | HG, B_SER_84   | 2.97 | 2.16 | 13.27 |
| 5T6P.PDB | O, B_GLN_39    | N, B_ILE_93    | H, B_ILE_93    | 2.90 | 2.11 | 19.97 |
| 5T6P.PDB | O, B_THR_110   | N, B_TYR_94    | H, B_TYR_94    | 2.94 | 2.08 | 2.28  |
| 5T6P.PDB | O, B_ASP_90    | OH, B_TYR_94   | HH, B_TYR_94   | 2.68 | 1.86 | 11.38 |
| 5T6P.PDB | O, B_VAL_37    | N, B_TYR_95    | H, B_TYR_95    | 2.64 | 1.79 | 3.58  |
| 5T6P.PDB | O, B_PRO_33    | N, B_GLN_99    | H, B_GLN_99    | 2.96 | 2.14 | 14.24 |
| 5T6P.PDB | O, B_GLY_102   | N, B_TYR_100   | H, B_TYR_100   | 2.99 | 2.25 | 25.89 |
| 5T6P.PDB | OD1, B_ASP_104 | N, B_GLY_102   | H, B_GLY_102   | 2.80 | 1.95 | 8.41  |
| 5T6P.PDB | O, B_PHE_103   | NE1, B_TRP_106 | HE1, B_TRP_106 | 2.96 | 2.22 | 25.91 |
| 5T6P.PDB | O, B_CYS_96    | N, B_GLY_107   | H, B_GLY_107   | 2.84 | 2.03 | 15.83 |
| 5T6P.PDB | OE1, B_GLU_6   | N, B_GLY_109   | H, B_GLY_109   | 2.80 | 1.98 | 13.61 |
| 5T6P.PDB | O, B_ALA_92    | N, B_LEU_112   | H, B_LEU_112   | 2.89 | 2.04 | 9.43  |
| 5T6P.PDB | O, B_GLY_10    | N, B_THR_113   | H, B_THR_113   | 2.91 | 2.09 | 14.72 |
| 5T6P.PDB | O, B_VAL_12    | N, B_SER_115   | H, B_SER_115   | 2.80 | 2.05 | 24.92 |
| 5T6P.PDB | O, B_PHE_149   | N, B_THR_120   | H, B_THR_120   | 2.75 | 1.91 | 11.84 |
| 5T6P.PDB | O, B_LEU_144   | N, B_TYR_125   | H, B_TYR_125   | 2.91 | 2.10 | 16.22 |
| 5T6P.PDB | O, B_VAL_186   | N, B_VAL_139   | H, B_VAL_139   | 2.78 | 1.95 | 11.66 |
| 5T6P.PDB | O, B_VAL_184   | N, B_LEU_141   | H, B_LEU_141   | 2.63 | 1.79 | 9.20  |
| 5T6P.PDB | O, B_SER_182   | N, B_CYS_143   | H, B_CYS_143   | 2.65 | 1.86 | 19.42 |
| 5T6P.PDB | O, B_TYR_125   | N, B_LEU_144   | H, B_LEU_144   | 2.95 | 2.09 | 2.74  |
| 5T6P.PDB | O, B_LEU_180   | N, B_VAL_145   | H, B_VAL_145   | 2.75 | 1.91 | 7.82  |
| 5T6P.PDB | O, B_TYR_178   | N, B_TYR_148   | H, B_TYR_148   | 2.98 | 2.19 | 19.53 |
| 5T6P.PDB | O, B_THR_120   | N, B_PHE_149   | H, B_PHE_149   | 2.83 | 2.02 | 15.93 |
| 5T6P.PDB | O, B_ALA_201   | N, B_THR_154   | H, B_THR_154   | 2.97 | 2.17 | 18.38 |
| 5T6P.PDB | O, B_ASN_199   | N, B_THR_156   | H, B_THR_156   | 2.88 | 2.07 | 16.23 |
| 5T6P.PDB | O, B_THR_197   | N, B_ASN_158   | H, B_ASN_158   | 2.90 | 2.09 | 16.11 |
| 5T6P.PDB | O, B_SER_181   | N, B_PHE_169   | H, B_PHE_169   | 2.91 | 2.06 | 6.94  |
| 5T6P.PDB | O, B_LEU_177   | N, B_GLN_174   | H, B_GLN_174   | 2.84 | 1.98 | 4.57  |
| 5T6P.PDB | O, B_GLN_174   | N, B_LEU_177   | H, B_LEU_177   | 2.93 | 2.14 | 19.22 |
| 5T6P.PDB | O, B_TYR_148   | N, B_TYR_178   | H, B_TYR_178   | 2.71 | 1.85 | 6.27  |
| 5T6P.PDB | O, B_VAL_145   | N, B_LEU_180   | H, B_LEU_180   | 2.86 | 2.04 | 15.49 |
| 5T6P.PDB | O, B_CYS_143   | N, B_SER_182   | H, B_SER_182   | 2.70 | 1.91 | 18.91 |

|          |                |                |                |      |      |       |
|----------|----------------|----------------|----------------|------|------|-------|
| 5T6P.PDB | O, B_LEU_141   | N, B_VAL_184   | H, B_VAL_184   | 2.73 | 1.88 | 7.12  |
| 5T6P.PDB | O, B_VAL_139   | N, B_VAL_186   | H, B_VAL_186   | 2.85 | 2.02 | 12.50 |
| 5T6P.PDB | OD1, B_ASN_158 | N, B_THR_197   | H, B_THR_197   | 2.89 | 2.12 | 22.97 |
| 5T6P.PDB | O, B_LYS_211   | N, B_CYS_198   | H, B_CYS_198   | 2.83 | 2.00 | 11.79 |
| 5T6P.PDB | O, B_THR_156   | N, B_ASN_199   | H, B_ASN_199   | 2.83 | 1.97 | 3.18  |
| 5T6P.PDB | O, B_VAL_209   | N, B_VAL_200   | H, B_VAL_200   | 2.85 | 2.02 | 12.35 |
| 5T6P.PDB | O, B_THR_154   | N, B_ALA_201   | H, B_ALA_201   | 2.90 | 2.12 | 21.54 |
| 5T6P.PDB | O, B_PRO_150   | NE2, B_HIS_202 | HE2, B_HIS_202 | 2.71 | 1.86 | 4.81  |
| 5T6P.PDB | O, B_VAL_200   | N, B_VAL_209   | H, B_VAL_209   | 2.85 | 2.04 | 16.15 |
| 5T6P.PDB | O, B_CYS_198   | N, B_LYS_211   | H, B_LYS_211   | 2.86 | 2.05 | 16.75 |
| 5T6P.PDB | O, B_VAL_196   | N, B_ILE_213   | H, B_ILE_213   | 2.82 | 1.97 | 6.68  |
| 5T6P.PDB | OG, C_SER_26   | N, C_LEU_3     | H, C_LEU_3     | 2.79 | 1.93 | 4.03  |
| 5T6P.PDB | O, C_ARG_24    | N, C_THR_5     | H, C_THR_5     | 2.86 | 2.03 | 11.46 |
| 5T6P.PDB | O, C_TYR_91    | NE2, C_GLN_6   | HE22, C_GLN_6  | 2.75 | 1.89 | 3.04  |
| 5T6P.PDB | O, C_SER_22    | N, C_THR_7     | H, C_THR_7     | 2.88 | 2.06 | 14.16 |
| 5T6P.PDB | O, C_LYS_108   | N, C_LEU_11    | H, C_LEU_11    | 2.88 | 2.16 | 28.19 |
| 5T6P.PDB | O, C_GLU_110   | N, C_VAL_13    | H, C_VAL_13    | 2.97 | 2.24 | 26.82 |
| 5T6P.PDB | O, C_ILE_80    | N, C_ALA_19    | H, C_ALA_19    | 3.00 | 2.17 | 14.18 |
| 5T6P.PDB | O, C_LEU_78    | N, C_ILE_21    | H, C_ILE_21    | 2.76 | 1.92 | 12.06 |
| 5T6P.PDB | O, C_THR_7     | N, C_SER_22    | H, C_SER_22    | 2.70 | 1.85 | 6.95  |
| 5T6P.PDB | O, C_PHE_76    | N, C_CYS_23    | H, C_CYS_23    | 2.70 | 1.86 | 10.98 |
| 5T6P.PDB | O, C_THR_5     | N, C_ARG_24    | H, C_ARG_24    | 2.81 | 2.00 | 15.67 |
| 5T6P.PDB | OD1, C_ASP_75  | NE, C_ARG_24   | HE, C_ARG_24   | 2.92 | 2.14 | 20.59 |
| 5T6P.PDB | OD1, C_ASP_75  | NH2, C_ARG_24  | HH21, C_ARG_24 | 2.94 | 2.18 | 23.70 |
| 5T6P.PDB | O, C_HIS_31    | N, C_GLY_34    | H, C_GLY_34    | 2.90 | 2.04 | 3.71  |
| 5T6P.PDB | OD1, C_ASN_33  | N, C_LYS_35    | H, C_LYS_35    | 2.76 | 1.93 | 12.01 |
| 5T6P.PDB | O, C_PHE_94    | N, C_GLU_39    | H, C_GLU_39    | 2.84 | 2.01 | 13.22 |
| 5T6P.PDB | O, C_ILE_53    | N, C_TRP_40    | H, C_TRP_40    | 2.81 | 2.01 | 18.58 |
| 5T6P.PDB | O, C_TYR_92    | N, C_TYR_41    | H, C_TYR_41    | 2.76 | 1.92 | 9.44  |
| 5T6P.PDB | O, C_LYS_50    | N, C_LEU_42    | H, C_LEU_42    | 2.99 | 2.19 | 18.71 |
| 5T6P.PDB | O, C_VAL_90    | N, C_GLN_43    | H, C_GLN_43    | 2.75 | 1.90 | 8.01  |
| 5T6P.PDB | OE1, D_GLN_39  | NE2, C_GLN_43  | HE22, C_GLN_43 | 3.00 | 2.17 | 12.88 |
| 5T6P.PDB | O, D_GLY_107   | OG, C_SER_48   | HG, C_SER_48   | 2.66 | 1.94 | 25.38 |
| 5T6P.PDB | O, C_LEU_42    | N, C_LYS_50    | H, C_LYS_50    | 2.87 | 2.11 | 23.73 |
| 5T6P.PDB | O, C_TRP_40    | N, C_LEU_52    | H, C_LEU_52    | 2.81 | 1.96 | 6.06  |
| 5T6P.PDB | O, C_LYS_58    | N, C_TYR_54    | H, C_TYR_54    | 2.92 | 2.10 | 15.01 |
| 5T6P.PDB | O, C_LEU_38    | N, C_VAL_56    | H, C_VAL_56    | 2.88 | 2.04 | 8.48  |
| 5T6P.PDB | O, C_ARG_55    | N, C_SER_57    | H, C_SER_57    | 2.66 | 1.91 | 24.23 |
| 5T6P.PDB | O, C_TYR_54    | N, C_LYS_58    | H, C_LYS_58    | 2.91 | 2.14 | 22.42 |
| 5T6P.PDB | O, C_LEU_52    | N, C_PHE_60    | H, C_PHE_60    | 2.93 | 2.07 | 3.44  |
| 5T6P.PDB | O, C_LYS_79    | N, C_SER_68    | H, C_SER_68    | 2.83 | 1.99 | 10.51 |
| 5T6P.PDB | O, C_CYS_23    | N, C_PHE_76    | H, C_PHE_76    | 2.93 | 2.11 | 14.43 |
| 5T6P.PDB | O, C_ILE_21    | N, C_LEU_78    | H, C_LEU_78    | 2.76 | 1.99 | 21.57 |
| 5T6P.PDB | O, C_SER_68    | N, C_LYS_79    | H, C_LYS_79    | 2.78 | 1.92 | 4.56  |
| 5T6P.PDB | O, C_ALA_19    | N, C_ILE_80    | H, C_ILE_80    | 2.92 | 2.08 | 10.76 |
| 5T6P.PDB | O, C_GLN_43    | N, C_VAL_90    | H, C_VAL_90    | 2.95 | 2.12 | 13.12 |
| 5T6P.PDB | O, C_THR_107   | N, C_TYR_91    | H, C_TYR_91    | 2.80 | 1.96 | 9.61  |
| 5T6P.PDB | O, C_TYR_41    | N, C_TYR_92    | H, C_TYR_92    | 2.74 | 1.93 | 15.61 |
| 5T6P.PDB | O, C_HIS_98    | NE2, C_GLN_95  | HE22, C_GLN_95 | 2.72 | 1.90 | 15.32 |
| 5T6P.PDB | O, C_TYR_37    | N, C_GLY_96    | H, C_GLY_96    | 2.80 | 1.96 | 11.65 |
| 5T6P.PDB | O, C_ILE_29    | OG, C_SER_97   | HG, C_SER_97   | 2.80 | 1.98 | 12.04 |
| 5T6P.PDB | OE1, C_GLN_95  | N, C_HIS_98    | H, C_HIS_98    | 2.87 | 2.02 | 5.84  |
| 5T6P.PDB | O, C_VAL_2     | OG1, C_THR_102 | HG1, C_THR_102 | 2.71 | 1.89 | 10.27 |
| 5T6P.PDB | O, C_CYS_93    | N, C_GLY_104   | H, C_GLY_104   | 2.76 | 1.92 | 10.56 |
| 5T6P.PDB | OE1, C_GLN_6   | N, C_GLY_106   | H, C_GLY_106   | 2.99 | 2.28 | 28.82 |
| 5T6P.PDB | O, C_TYR_91    | N, C_THR_107   | H, C_THR_107   | 2.87 | 2.11 | 24.01 |
| 5T6P.PDB | O, C_PRO_8     | OG1, C_THR_107 | HG1, C_THR_107 | 2.74 | 2.02 | 25.98 |
| 5T6P.PDB | O, C_GLY_89    | N, C_LEU_109   | H, C_LEU_109   | 2.77 | 1.92 | 5.68  |

|          |                |                |                 |      |      |       |
|----------|----------------|----------------|-----------------|------|------|-------|
| 5T6P.PDB | OE1, C_GLN_171 | N, C_ILE_111   | H, C_ILE_111    | 2.98 | 2.15 | 12.64 |
| 5T6P.PDB | O, C_VAL_13    | N, C_LYS_112   | H, C_LYS_112    | 2.85 | 2.02 | 11.60 |
| 5T6P.PDB | O, C_ASP_175   | NE, C_ARG_113  | HE, C_ARG_113   | 2.48 | 1.76 | 27.03 |
| 5T6P.PDB | O, C_TYR_145   | N, C_ALA_116   | H, C_ALA_116    | 2.84 | 2.04 | 18.21 |
| 5T6P.PDB | O, C_ASN_142   | N, C_THR_119   | H, C_THR_119    | 2.93 | 2.10 | 12.42 |
| 5T6P.PDB | O, C_VAL_138   | N, C_PHE_123   | H, C_PHE_123    | 2.72 | 1.95 | 21.08 |
| 5T6P.PDB | OG, C_SER_136  | NE2, C_GLN_129 | HE22, C_GLN_129 | 2.79 | 1.95 | 11.34 |
| 5T6P.PDB | O, C_SER_127   | N, C_THR_131   | H, C_THR_131    | 2.98 | 2.17 | 16.75 |
| 5T6P.PDB | O, C_SER_127   | OG1, C_THR_131 | HG1, C_THR_131  | 2.92 | 2.09 | 7.67  |
| 5T6P.PDB | O, C_GLN_129   | OG, C_SER_132  | HG, C_SER_132   | 2.59 | 1.78 | 13.08 |
| 5T6P.PDB | O, C_LEU_130   | N, C_GLY_133   | H, C_GLY_133    | 2.95 | 2.18 | 22.40 |
| 5T6P.PDB | O, C_LEU_184   | N, C_VAL_137   | H, C_VAL_137    | 2.75 | 1.91 | 11.06 |
| 5T6P.PDB | O, C_SER_182   | N, C_CYS_139   | H, C_CYS_139    | 2.88 | 2.16 | 27.24 |
| 5T6P.PDB | O, C_SER_121   | N, C_PHE_140   | H, C_PHE_140    | 2.80 | 2.02 | 21.09 |
| 5T6P.PDB | O, C_MET_180   | N, C_LEU_141   | H, C_LEU_141    | 2.85 | 2.01 | 8.82  |
| 5T6P.PDB | OG, C_SER_179  | N, C_ASN_143   | H, C_ASN_143    | 2.94 | 2.10 | 9.85  |
| 5T6P.PDB | O, C_TYR_178   | N, C_PHE_144   | H, C_PHE_144    | 2.77 | 1.92 | 8.13  |
| 5T6P.PDB | OG, C_SER_182  | NE1, C_TRP_153 | HE1, C_TRP_153  | 2.89 | 2.07 | 15.50 |
| 5T6P.PDB | O, C_THR_198   | N, C_LYS_154   | H, C_LYS_154    | 2.75 | 1.96 | 18.48 |
| 5T6P.PDB | O, C_SER_196   | N, C_ASP_156   | H, C_ASP_156    | 2.70 | 1.86 | 10.78 |
| 5T6P.PDB | O, C_TRP_153   | N, C_ARG_160   | H, C_ARG_160    | 2.72 | 1.94 | 21.43 |
| 5T6P.PDB | O, C_SER_181   | N, C_SER_167   | H, C_SER_167    | 2.91 | 2.15 | 22.92 |
| 5T6P.PDB | O, C_LYS_147   | NE1, C_TRP_168 | HE1, C_TRP_168  | 3.00 | 2.28 | 28.07 |
| 5T6P.PDB | O, C_SER_179   | N, C_THR_169   | H, C_THR_169    | 2.70 | 1.86 | 8.97  |
| 5T6P.PDB | O, C_ASP_170   | OG1, C_THR_169 | HG1, C_THR_169  | 2.94 | 2.20 | 24.83 |
| 5T6P.PDB | O, C_SER_176   | NE2, C_GLN_171 | HE21, C_GLN_171 | 2.89 | 2.05 | 12.01 |
| 5T6P.PDB | O, C_ILE_111   | NE2, C_GLN_171 | HE22, C_GLN_171 | 2.85 | 2.04 | 15.54 |
| 5T6P.PDB | O, C_THR_177   | N, C_ASP_172   | H, C_ASP_172    | 2.94 | 2.12 | 14.22 |
| 5T6P.PDB | OD1, C_ASP_172 | N, C_LYS_174   | H, C_LYS_174    | 2.89 | 2.05 | 10.44 |
| 5T6P.PDB | O, C_ASP_172   | N, C_SER_176   | H, C_SER_176    | 2.80 | 2.08 | 27.25 |
| 5T6P.PDB | OD1, C_ASP_175 | N, C_THR_177   | H, C_THR_177    | 2.99 | 2.17 | 14.08 |
| 5T6P.PDB | OD1, C_ASP_175 | OG1, C_THR_177 | HG1, C_THR_177  | 2.69 | 1.86 | 7.21  |
| 5T6P.PDB | O, C_PHE_144   | N, C_TYR_178   | H, C_TYR_178    | 2.70 | 1.84 | 4.46  |
| 5T6P.PDB | O, C_LEU_141   | N, C_MET_180   | H, C_MET_180    | 2.84 | 2.02 | 15.41 |
| 5T6P.PDB | O, C_SER_167   | N, C_SER_181   | H, C_SER_181    | 2.79 | 2.00 | 19.18 |
| 5T6P.PDB | O, C_CYS_139   | N, C_SER_182   | H, C_SER_182    | 2.88 | 2.03 | 8.59  |
| 5T6P.PDB | OD1, C_ASN_166 | OG, C_SER_182  | HG, C_SER_182   | 2.45 | 1.64 | 11.11 |
| 5T6P.PDB | O, C_VAL_137   | N, C_LEU_184   | H, C_LEU_184    | 2.79 | 1.98 | 16.51 |
| 5T6P.PDB | O, C_ALA_135   | N, C_LEU_186   | H, C_LEU_186    | 2.93 | 2.10 | 13.93 |
| 5T6P.PDB | O, C_GLY_133   | N, C_LYS_188   | H, C_LYS_188    | 2.95 | 2.12 | 12.53 |
| 5T6P.PDB | O, C_THR_187   | N, C_TYR_191   | H, C_TYR_191    | 2.98 | 2.13 | 6.59  |
| 5T6P.PDB | OD1, C_ASP_156 | N, C_SER_196   | H, C_SER_196    | 2.87 | 2.02 | 6.00  |
| 5T6P.PDB | OG, C_SER_213  | OG1, C_THR_198 | HG1, C_THR_198  | 3.00 | 2.20 | 14.46 |
| 5T6P.PDB | O, C_ILE_210   | N, C_ALA_201   | H, C_ALA_201    | 2.94 | 2.14 | 17.24 |
| 5T6P.PDB | O, C_ASN_150   | N, C_THR_202   | H, C_THR_202    | 2.84 | 2.03 | 16.39 |
| 5T6P.PDB | O, C_ALA_201   | N, C_ILE_210   | H, C_ILE_210    | 2.99 | 2.24 | 25.62 |
| 5T6P.PDB | O, D_SER_25    | N, D_LYS_3     | H, D_LYS_3      | 2.88 | 2.06 | 14.17 |
| 5T6P.PDB | O, D_THR_113   | N, D_VAL_12    | H, D_VAL_12     | 2.73 | 1.95 | 21.29 |
| 5T6P.PDB | O, D_LEU_86    | N, D_GLY_15    | H, D_GLY_15     | 2.72 | 1.86 | 4.08  |
| 5T6P.PDB | O, D_ALA_13    | N, D_GLY_16    | H, D_GLY_16     | 2.92 | 2.16 | 22.99 |
| 5T6P.PDB | O, D_MET_83    | N, D_LEU_18    | H, D_LEU_18     | 2.98 | 2.18 | 18.81 |
| 5T6P.PDB | O, D_LEU_81    | N, D_LEU_20    | H, D_LEU_20     | 2.99 | 2.15 | 11.31 |
| 5T6P.PDB | O, D_VAL_5     | N, D_ALA_23    | H, D_ALA_23     | 2.75 | 1.94 | 16.20 |
| 5T6P.PDB | O, D_LYS_3     | N, D_SER_25    | H, D_SER_25     | 2.97 | 2.23 | 25.58 |
| 5T6P.PDB | O, D_ILE_51    | N, D_MET_34    | H, D_MET_34     | 2.96 | 2.14 | 15.76 |
| 5T6P.PDB | O, D_GLU_46    | N, D_ARG_38    | H, D_ARG_38     | 2.85 | 2.01 | 11.39 |
| 5T6P.PDB | O, D_ILE_93    | N, D_GLN_39    | H, D_GLN_39     | 2.72 | 1.93 | 19.22 |
| 5T6P.PDB | OE1, C_GLN_43  | NE2, D_GLN_39  | HE22, D_GLN_39  | 2.79 | 1.94 | 7.20  |

|          |                |                |                |      |      |       |
|----------|----------------|----------------|----------------|------|------|-------|
| 5T6P.PDB | O, D_THR_40    | N, D_LYS_43    | H, D_LYS_43    | 2.74 | 1.92 | 14.91 |
| 5T6P.PDB | O, D_ARG_38    | N, D_GLU_46    | H, D_GLU_46    | 2.87 | 2.03 | 9.75  |
| 5T6P.PDB | O, D_GLY_56    | N, D_ASN_52    | H, D_ASN_52    | 2.87 | 2.01 | 5.61  |
| 5T6P.PDB | OD1, D_ASN_52  | N, D_GLY_56    | H, D_GLY_56    | 2.70 | 1.88 | 14.82 |
| 5T6P.PDB | O, D_VAL_64    | N, D_ARG_67    | H, D_ARG_67    | 2.94 | 2.10 | 10.62 |
| 5T6P.PDB | O, D_GLN_82    | N, D_THR_69    | H, D_THR_69    | 2.84 | 2.13 | 29.43 |
| 5T6P.PDB | OD1, D_ASN_74  | NE, D_ARG_72   | HE, D_ARG_72   | 2.79 | 2.07 | 27.15 |
| 5T6P.PDB | O, D_TYR_32    | NH2, D_ARG_72  | HH22, D_ARG_72 | 3.00 | 2.24 | 24.48 |
| 5T6P.PDB | O, D_THR_78    | N, D_ASP_73    | H, D_ASP_73    | 2.80 | 1.97 | 14.04 |
| 5T6P.PDB | O, D_ASN_53    | ND2, D_ASN_74  | HD21, D_ASN_74 | 3.00 | 2.17 | 13.41 |
| 5T6P.PDB | O, D_LYS_76    | OG1, D_THR_78  | HG1, D_THR_78  | 2.82 | 2.06 | 20.07 |
| 5T6P.PDB | O, D_SER_71    | N, D_TYR_80    | H, D_TYR_80    | 2.80 | 1.95 | 7.50  |
| 5T6P.PDB | O, D_THR_69    | N, D_GLN_82    | H, D_GLN_82    | 2.94 | 2.10 | 10.42 |
| 5T6P.PDB | O, D_LEU_18    | N, D_MET_83    | H, D_MET_83    | 2.78 | 1.94 | 10.80 |
| 5T6P.PDB | O, D_ARG_67    | OG, D_SER_84   | HG, D_SER_84   | 2.89 | 2.11 | 18.15 |
| 5T6P.PDB | O, D_GLN_39    | N, D_ILE_93    | H, D_ILE_93    | 2.95 | 2.17 | 20.82 |
| 5T6P.PDB | O, D_ASP_90    | OH, D_TYR_94   | HH, D_TYR_94   | 2.82 | 2.01 | 12.26 |
| 5T6P.PDB | O, D_VAL_37    | N, D_TYR_95    | H, D_TYR_95    | 2.61 | 1.75 | 6.47  |
| 5T6P.PDB | O, D_TYR_105   | N, D_ARG_98    | H, D_ARG_98    | 2.94 | 2.21 | 27.44 |
| 5T6P.PDB | OD1, D_ASP_104 | N, D_GLY_102   | H, D_GLY_102   | 2.73 | 1.88 | 6.65  |
| 5T6P.PDB | OH, C_TYR_41   | N, D_PHE_103   | H, D_PHE_103   | 2.95 | 2.09 | 5.85  |
| 5T6P.PDB | O, D_PHE_103   | NE1, D_TRP_106 | HE1, D_TRP_106 | 2.89 | 2.15 | 26.36 |
| 5T6P.PDB | O, D_CYS_96    | N, D_GLY_107   | H, D_GLY_107   | 2.78 | 1.98 | 18.45 |
| 5T6P.PDB | OE1, D_GLU_6   | N, D_GLY_109   | H, D_GLY_109   | 2.82 | 1.98 | 11.29 |
| 5T6P.PDB | O, D_ALA_92    | N, D_LEU_112   | H, D_LEU_112   | 2.91 | 2.08 | 13.48 |
| 5T6P.PDB | O, D_GLY_10    | N, D_THR_113   | H, D_THR_113   | 2.98 | 2.16 | 15.81 |
| 5T6P.PDB | O, D_VAL_12    | N, D_SER_115   | H, D_SER_115   | 2.63 | 1.84 | 18.22 |
| 5T6P.PDB | OG, D_SER_115  | N, D_ALA_117   | H, D_ALA_117   | 2.99 | 2.16 | 13.20 |
| 5T6P.PDB | O, D_PHE_149   | N, D_THR_120   | H, D_THR_120   | 2.64 | 1.82 | 13.09 |
| 5T6P.PDB | O, D_LEU_144   | N, D_TYR_125   | H, D_TYR_125   | 2.84 | 2.03 | 17.31 |
| 5T6P.PDB | O, D_GLY_142   | N, D_LEU_127   | H, D_LEU_127   | 2.66 | 1.91 | 24.44 |
| 5T6P.PDB | O, D_VAL_184   | N, D_LEU_141   | H, D_LEU_141   | 2.71 | 1.86 | 8.53  |
| 5T6P.PDB | O, D_LEU_127   | N, D_GLY_142   | H, D_GLY_142   | 2.95 | 2.21 | 25.85 |
| 5T6P.PDB | O, D_SER_182   | N, D_CYS_143   | H, D_CYS_143   | 2.92 | 2.13 | 19.17 |
| 5T6P.PDB | O, D_TYR_125   | N, D_LEU_144   | H, D_LEU_144   | 2.68 | 1.83 | 6.73  |
| 5T6P.PDB | O, D_LEU_180   | N, D_VAL_145   | H, D_VAL_145   | 2.89 | 2.05 | 11.52 |
| 5T6P.PDB | O, D_TYR_178   | N, D_GLY_147   | H, D_GLY_147   | 2.78 | 2.07 | 29.34 |
| 5T6P.PDB | O, D_THR_120   | N, D_PHE_149   | H, D_PHE_149   | 2.69 | 1.86 | 13.14 |
| 5T6P.PDB | O, D_ASN_199   | N, D_THR_156   | H, D_THR_156   | 2.86 | 2.04 | 16.17 |
| 5T6P.PDB | OG, D_SER_182  | NE1, D_TRP_157 | HE1, D_TRP_157 | 2.97 | 2.13 | 11.56 |
| 5T6P.PDB | O, D_THR_197   | N, D_ASN_158   | H, D_ASN_158   | 2.80 | 1.97 | 13.62 |
| 5T6P.PDB | OD1, D_ASN_199 | N, D_SER_159   | H, D_SER_159   | 2.76 | 1.93 | 12.39 |
| 5T6P.PDB | O, D_SER_181   | N, D_PHE_169   | H, D_PHE_169   | 2.92 | 2.06 | 6.74  |
| 5T6P.PDB | O, D_LEU_177   | N, D_GLN_174   | H, D_GLN_174   | 2.90 | 2.05 | 9.77  |
| 5T6P.PDB | O, D_VAL_145   | N, D_LEU_180   | H, D_LEU_180   | 2.92 | 2.09 | 12.70 |
| 5T6P.PDB | O, D_CYS_143   | N, D_SER_182   | H, D_SER_182   | 2.99 | 2.18 | 17.49 |
| 5T6P.PDB | O, D_LEU_141   | N, D_VAL_184   | H, D_VAL_184   | 2.83 | 2.00 | 11.08 |
| 5T6P.PDB | O, D_VAL_139   | N, D_VAL_186   | H, D_VAL_186   | 2.98 | 2.17 | 17.79 |
| 5T6P.PDB | N, D_MET_138   | OG, D_SER_188  | HG, D_SER_188  | 2.81 | 2.08 | 24.12 |
| 5T6P.PDB | O, D_LYS_211   | N, D_CYS_198   | H, D_CYS_198   | 2.89 | 2.04 | 10.05 |
| 5T6P.PDB | O, D_THR_156   | N, D_ASN_199   | H, D_ASN_199   | 2.84 | 1.98 | 3.08  |
| 5T6P.PDB | O, D_THR_207   | N, D_HIS_202   | H, D_HIS_202   | 2.87 | 2.08 | 19.72 |
| 5T6P.PDB | O, D_PRO_150   | NE2, D_HIS_202 | HE2, D_HIS_202 | 2.50 | 1.66 | 9.39  |
| 5T6P.PDB | O, D_PRO_203   | N, D_SER_206   | H, D_SER_206   | 3.00 | 2.24 | 23.51 |
| 5T6P.PDB | O, D_HIS_202   | N, D_THR_207   | H, D_THR_207   | 2.78 | 1.92 | 6.54  |
| 5T6P.PDB | O, D_VAL_200   | N, D_VAL_209   | H, D_VAL_209   | 2.88 | 2.09 | 19.68 |
| 5T6P.PDB | O, D_CYS_198   | N, D_LYS_211   | H, D_LYS_211   | 2.87 | 2.05 | 13.61 |
| 5T6P.PDB | OE1, C_GLU_39  | NE, E_ARG_5    | HE, E_ARG_5    | 2.86 | 2.02 | 10.72 |



|          |                |                |                |      |      |       |
|----------|----------------|----------------|----------------|------|------|-------|
| 5T78.PDB | OD1, C_ASN_150 | N, A_ASP_1     | H1, A_ASP_1    | 2.85 | 2.07 | 23.76 |
| 5T78.PDB | OG, A_SER_26   | N, A_LEU_3     | H, A_LEU_3     | 2.77 | 1.92 | 5.16  |
| 5T78.PDB | O, A_ARG_24    | N, A_THR_5     | H, A_THR_5     | 2.76 | 1.94 | 14.03 |
| 5T78.PDB | O, A_SER_22    | N, A_THR_7     | H, A_THR_7     | 2.99 | 2.18 | 17.34 |
| 5T78.PDB | O, A_LYS_108   | N, A_LEU_11    | H, A_LEU_11    | 2.88 | 2.17 | 29.09 |
| 5T78.PDB | O, A_VAL_83    | N, A_GLY_16    | H, A_GLY_16    | 2.89 | 2.04 | 7.22  |
| 5T78.PDB | O, A_LEU_78    | N, A_ILE_21    | H, A_ILE_21    | 2.93 | 2.10 | 12.51 |
| 5T78.PDB | O, A_THR_7     | N, A_SER_22    | H, A_SER_22    | 2.70 | 1.84 | 3.93  |
| 5T78.PDB | O, A_PHE_76    | N, A_CYS_23    | H, A_CYS_23    | 2.77 | 1.99 | 20.04 |
| 5T78.PDB | O, A_THR_5     | N, A_ARG_24    | H, A_ARG_24    | 2.73 | 1.95 | 21.00 |
| 5T78.PDB | O, A_THR_74    | N, A_SER_25    | H, A_SER_25    | 2.93 | 2.13 | 18.34 |
| 5T78.PDB | O, A_LYS_35    | N, A_HIS_31    | H, A_HIS_31    | 2.86 | 2.05 | 16.92 |
| 5T78.PDB | O, A_HIS_31    | N, A_GLY_34    | H, A_GLY_34    | 2.98 | 2.13 | 5.88  |
| 5T78.PDB | OD1, A_ASN_33  | N, A_LYS_35    | H, A_LYS_35    | 2.95 | 2.11 | 11.40 |
| 5T78.PDB | O, A_PHE_94    | N, A_GLU_39    | H, A_GLU_39    | 2.67 | 1.85 | 14.17 |
| 5T78.PDB | O, A_ILE_53    | N, A_TRP_40    | H, A_TRP_40    | 2.80 | 1.98 | 14.47 |
| 5T78.PDB | O, A_TYR_92    | N, A_TYR_41    | H, A_TYR_41    | 2.83 | 2.00 | 12.62 |
| 5T78.PDB | O, A_LYS_50    | N, A_LEU_42    | H, A_LEU_42    | 2.94 | 2.12 | 15.79 |
| 5T78.PDB | O, A_VAL_90    | N, A_GLN_43    | H, A_GLN_43    | 2.75 | 1.91 | 9.96  |
| 5T78.PDB | O, A_GLN_47    | NE2, A_GLN_43  | HE21, A_GLN_43 | 2.87 | 2.05 | 14.69 |
| 5T78.PDB | OE1, B_GLN_39  | NE2, A_GLN_43  | HE22, A_GLN_43 | 2.92 | 2.08 | 9.79  |
| 5T78.PDB | O, A_LYS_44    | N, A_GLN_47    | H, A_GLN_47    | 2.88 | 2.11 | 22.48 |
| 5T78.PDB | O, B_GLY_107   | OG, A_SER_48   | HG, A_SER_48   | 2.44 | 1.64 | 14.53 |
| 5T78.PDB | O, A_LEU_42    | N, A_LYS_50    | H, A_LYS_50    | 2.92 | 2.18 | 25.97 |
| 5T78.PDB | O, A_TRP_40    | N, A_LEU_52    | H, A_LEU_52    | 2.90 | 2.04 | 3.31  |
| 5T78.PDB | O, A_LYS_58    | N, A_TYR_54    | H, A_TYR_54    | 2.94 | 2.12 | 16.14 |
| 5T78.PDB | O, A_LEU_38    | N, A_VAL_56    | H, A_VAL_56    | 2.99 | 2.14 | 9.64  |
| 5T78.PDB | O, A_ARG_55    | N, A_SER_57    | H, A_SER_57    | 2.65 | 1.91 | 25.85 |
| 5T78.PDB | O, A_TYR_54    | N, A_LYS_58    | H, A_LYS_58    | 2.90 | 2.09 | 16.26 |
| 5T78.PDB | O, A_LEU_52    | N, A_PHE_60    | H, A_PHE_60    | 2.85 | 2.03 | 15.54 |
| 5T78.PDB | OD2, A_ASP_87  | NH1, A_ARG_66  | HH12, A_ARG_66 | 2.55 | 1.80 | 24.29 |
| 5T78.PDB | OD1, A_ASP_87  | NH2, A_ARG_66  | HH22, A_ARG_66 | 2.87 | 2.03 | 11.23 |
| 5T78.PDB | O, A_LYS_79    | N, A_SER_68    | H, A_SER_68    | 2.94 | 2.13 | 16.71 |
| 5T78.PDB | O, A_THR_77    | N, A_SER_70    | H, A_SER_70    | 2.85 | 2.11 | 25.59 |
| 5T78.PDB | O, A_CYS_23    | N, A_PHE_76    | H, A_PHE_76    | 2.95 | 2.11 | 10.95 |
| 5T78.PDB | O, A_SER_70    | N, A_THR_77    | H, A_THR_77    | 2.83 | 2.03 | 18.36 |
| 5T78.PDB | O, A_ILE_21    | N, A_LEU_78    | H, A_LEU_78    | 2.90 | 2.07 | 13.51 |
| 5T78.PDB | O, A_SER_68    | N, A_LYS_79    | H, A_LYS_79    | 2.71 | 1.87 | 11.82 |
| 5T78.PDB | O, A_ALA_19    | N, A_ILE_80    | H, A_ILE_80    | 2.96 | 2.14 | 14.84 |
| 5T78.PDB | OD2, A_ASP_87  | N, A_GLU_84    | H, A_GLU_84    | 2.82 | 1.98 | 8.50  |
| 5T78.PDB | O, A_GLU_84    | N, A_ASP_87    | H, A_ASP_87    | 2.85 | 2.00 | 6.16  |
| 5T78.PDB | O, A_GLN_43    | N, A_VAL_90    | H, A_VAL_90    | 2.81 | 1.97 | 10.43 |
| 5T78.PDB | O, A_THR_107   | N, A_TYR_91    | H, A_TYR_91    | 2.77 | 1.92 | 8.36  |
| 5T78.PDB | O, A_ASP_87    | OH, A_TYR_91   | HH, A_TYR_91   | 2.69 | 1.98 | 27.33 |
| 5T78.PDB | O, A_TYR_41    | N, A_TYR_92    | H, A_TYR_92    | 2.75 | 1.92 | 13.82 |
| 5T78.PDB | O, B_LYS_43    | OH, A_TYR_92   | HH, A_TYR_92   | 2.74 | 2.03 | 27.20 |
| 5T78.PDB | O, A_HIS_98    | NE2, A_GLN_95  | HE22, A_GLN_95 | 2.92 | 2.12 | 18.53 |
| 5T78.PDB | O, A_TYR_37    | N, A_GLY_96    | H, A_GLY_96    | 2.69 | 1.89 | 17.50 |
| 5T78.PDB | O, A_ILE_29    | OG, A_SER_97   | HG, A_SER_97   | 2.60 | 1.77 | 8.73  |
| 5T78.PDB | OE1, A_GLN_95  | N, A_HIS_98    | H, A_HIS_98    | 2.98 | 2.13 | 5.45  |
| 5T78.PDB | O, A_VAL_2     | OG1, A_THR_102 | HG1, A_THR_102 | 2.90 | 2.09 | 13.47 |
| 5T78.PDB | O, A_CYS_93    | N, A_GLY_104   | H, A_GLY_104   | 2.80 | 1.97 | 11.96 |
| 5T78.PDB | O, A_TYR_91    | N, A_THR_107   | H, A_THR_107   | 2.90 | 2.14 | 23.68 |
| 5T78.PDB | O, A_PRO_8     | OG1, A_THR_107 | HG1, A_THR_107 | 2.83 | 2.13 | 28.32 |
| 5T78.PDB | O, A_GLY_89    | N, A_LEU_109   | H, A_LEU_109   | 2.84 | 2.00 | 8.45  |
| 5T78.PDB | O, A_LEU_11    | N, A_GLU_110   | H, A_GLU_110   | 2.89 | 2.03 | 4.85  |
| 5T78.PDB | OE1, A_GLN_171 | N, A_ILE_111   | H, A_ILE_111   | 2.97 | 2.14 | 12.35 |
| 5T78.PDB | O, A_VAL_13    | N, A_LYS_112   | H, A_LYS_112   | 2.85 | 2.01 | 10.13 |

|          |                |                |                 |      |      |       |
|----------|----------------|----------------|-----------------|------|------|-------|
| 5T78.PDB | O, A_ASP_175   | NE, A_ARG_113  | HE, A_ARG_113   | 2.74 | 2.03 | 29.28 |
| 5T78.PDB | O, A_TYR_145   | N, A_ALA_116   | H, A_ALA_116    | 2.81 | 1.98 | 12.42 |
| 5T78.PDB | O, A_ASN_142   | N, A_THR_119   | H, A_THR_119    | 2.97 | 2.16 | 15.94 |
| 5T78.PDB | O, A_VAL_138   | N, A_PHE_123   | H, A_PHE_123    | 2.72 | 1.95 | 21.36 |
| 5T78.PDB | OG, A_SER_136  | NE2, A_GLN_129 | HE22, A_GLN_129 | 2.86 | 2.01 | 3.70  |
| 5T78.PDB | OE1, A_GLN_129 | N, A_SER_136   | H, A_SER_136    | 2.91 | 2.06 | 8.11  |
| 5T78.PDB | O, A_LEU_184   | N, A_VAL_137   | H, A_VAL_137    | 2.77 | 1.93 | 11.05 |
| 5T78.PDB | O, A_SER_182   | N, A_CYS_139   | H, A_CYS_139    | 2.88 | 2.10 | 21.11 |
| 5T78.PDB | O, A_SER_121   | N, A_PHE_140   | H, A_PHE_140    | 2.83 | 2.07 | 23.10 |
| 5T78.PDB | O, A_MET_180   | N, A_LEU_141   | H, A_LEU_141    | 2.79 | 1.93 | 5.17  |
| 5T78.PDB | OG, A_SER_179  | N, A_ASN_143   | H, A_ASN_143    | 2.98 | 2.18 | 18.51 |
| 5T78.PDB | O, A_TYR_178   | N, A_PHE_144   | H, A_PHE_144    | 2.83 | 2.00 | 10.95 |
| 5T78.PDB | O, A_GLU_200   | N, A_LYS_152   | H, A_LYS_152    | 2.93 | 2.13 | 17.83 |
| 5T78.PDB | OG, A_SER_182  | NE1, A_TRP_153 | HE1, A_TRP_153  | 2.68 | 1.86 | 12.79 |
| 5T78.PDB | O, A_THR_198   | N, A_LYS_154   | H, A_LYS_154    | 2.86 | 2.06 | 17.77 |
| 5T78.PDB | O, A_SER_158   | N, A_ILE_155   | H, A_ILE_155    | 2.71 | 1.89 | 15.55 |
| 5T78.PDB | O, A_SER_196   | N, A_ASP_156   | H, A_ASP_156    | 2.87 | 2.03 | 11.28 |
| 5T78.PDB | O, A_THR_183   | N, A_LEU_165   | H, A_LEU_165    | 2.87 | 2.15 | 28.15 |
| 5T78.PDB | O, A_SER_181   | N, A_SER_167   | H, A_SER_167    | 2.88 | 2.13 | 24.95 |
| 5T78.PDB | O, B_PRO_170   | OG, A_SER_167  | HG, A_SER_167   | 2.91 | 2.11 | 14.54 |
| 5T78.PDB | O, A_SER_179   | N, A_THR_169   | H, A_THR_169    | 2.90 | 2.06 | 10.39 |
| 5T78.PDB | O, A_ASP_170   | OG1, A_THR_169 | HG1, A_THR_169  | 2.92 | 2.23 | 29.63 |
| 5T78.PDB | O, A_ILE_111   | NE2, A_GLN_171 | HE22, A_GLN_171 | 2.73 | 1.91 | 15.69 |
| 5T78.PDB | O, A_THR_177   | N, A_ASP_172   | H, A_ASP_172    | 2.80 | 1.95 | 9.74  |
| 5T78.PDB | OD1, A_ASP_172 | N, A_LYS_174   | H, A_LYS_174    | 2.78 | 1.98 | 17.25 |
| 5T78.PDB | OD1, A_ASP_175 | N, A_THR_177   | H, A_THR_177    | 2.96 | 2.13 | 13.21 |
| 5T78.PDB | OD1, A_ASP_175 | OG1, A_THR_177 | HG1, A_THR_177  | 2.57 | 1.74 | 7.68  |
| 5T78.PDB | O, A_PHE_144   | N, A_TYR_178   | H, A_TYR_178    | 2.78 | 1.93 | 4.54  |
| 5T78.PDB | O, A_LEU_141   | N, A_MET_180   | H, A_MET_180    | 2.83 | 2.03 | 17.69 |
| 5T78.PDB | O, A_SER_167   | N, A_SER_181   | H, A_SER_181    | 2.92 | 2.13 | 19.33 |
| 5T78.PDB | O, A_CYS_139   | N, A_SER_182   | H, A_SER_182    | 2.91 | 2.07 | 11.51 |
| 5T78.PDB | OD1, A_ASN_166 | OG, A_SER_182  | HG, A_SER_182   | 2.63 | 1.89 | 23.17 |
| 5T78.PDB | O, A_LEU_165   | N, A_THR_183   | H, A_THR_183    | 2.82 | 2.01 | 15.88 |
| 5T78.PDB | O, A_VAL_137   | N, A_LEU_184   | H, A_LEU_184    | 2.80 | 1.99 | 16.92 |
| 5T78.PDB | O, A_GLY_163   | N, A_THR_185   | H, A_THR_185    | 2.94 | 2.10 | 11.69 |
| 5T78.PDB | O, A_ALA_135   | N, A_LEU_186   | H, A_LEU_186    | 2.79 | 1.97 | 14.73 |
| 5T78.PDB | O, A_GLY_133   | N, A_LYS_188   | H, A_LYS_188    | 2.91 | 2.08 | 12.09 |
| 5T78.PDB | OD2, A_ASP_156 | ND1, A_HIS_194 | HD1, A_HIS_194  | 2.73 | 1.92 | 16.43 |
| 5T78.PDB | O, A_LYS_154   | N, A_THR_198   | H, A_THR_198    | 2.92 | 2.19 | 26.56 |
| 5T78.PDB | O, A_LYS_152   | N, A_GLU_200   | H, A_GLU_200    | 2.90 | 2.08 | 15.52 |
| 5T78.PDB | O, A_ILE_210   | N, A_ALA_201   | H, A_ALA_201    | 2.96 | 2.16 | 17.21 |
| 5T78.PDB | O, A_ASN_150   | N, A_THR_202   | H, A_THR_202    | 2.72 | 1.89 | 13.21 |
| 5T78.PDB | ND1, A_HIS_203 | OG1, A_THR_205 | HG1, A_THR_205  | 2.99 | 2.26 | 25.09 |
| 5T78.PDB | O, A_ALA_201   | N, A_ILE_210   | H, A_ILE_210    | 2.84 | 2.02 | 14.61 |
| 5T78.PDB | OG1, A_THR_198 | OG, A_SER_213  | HG, A_SER_213   | 2.76 | 1.99 | 20.46 |
| 5T78.PDB | O, B_SER_21    | N, B_SER_7     | H, B_SER_7      | 2.89 | 2.16 | 26.40 |
| 5T78.PDB | O, B_THR_113   | N, B_VAL_12    | H, B_VAL_12     | 2.88 | 2.08 | 18.22 |
| 5T78.PDB | O, B_LEU_86    | N, B_GLY_15    | H, B_GLY_15     | 2.82 | 1.98 | 8.23  |
| 5T78.PDB | O, B_LEU_81    | N, B_LEU_20    | H, B_LEU_20     | 2.77 | 1.95 | 14.38 |
| 5T78.PDB | O, B_VAL_5     | N, B_ALA_23    | H, B_ALA_23     | 2.79 | 1.96 | 12.99 |
| 5T78.PDB | O, B_ASN_77    | N, B_ALA_24    | H, B_ALA_24     | 2.95 | 2.10 | 5.61  |
| 5T78.PDB | O, B_ILE_97    | N, B_SER_35    | H, B_SER_35     | 3.00 | 2.17 | 14.65 |
| 5T78.PDB | O, B_ALA_49    | N, B_TRP_36    | H, B_TRP_36     | 2.97 | 2.18 | 20.26 |
| 5T78.PDB | O, B_GLU_46    | N, B_ARG_38    | H, B_ARG_38     | 2.72 | 1.88 | 9.22  |
| 5T78.PDB | OE1, B_GLU_46  | NE, B_ARG_38   | HE, B_ARG_38    | 2.94 | 2.16 | 20.63 |
| 5T78.PDB | OH, B_TYR_94   | NH1, B_ARG_38  | HH11, B_ARG_38  | 2.90 | 2.09 | 15.42 |
| 5T78.PDB | OD1, B_ASP_90  | NH1, B_ARG_38  | HH12, B_ARG_38  | 2.89 | 2.09 | 17.62 |
| 5T78.PDB | O, B_ILE_93    | N, B_GLN_39    | H, B_GLN_39     | 2.78 | 1.98 | 17.72 |

|          |                |                |                |      |      |       |
|----------|----------------|----------------|----------------|------|------|-------|
| 5T78.PDB | OE1, A_GLN_43  | NE2, B_GLN_39  | HE22, B_GLN_39 | 2.63 | 1.78 | 5.56  |
| 5T78.PDB | O, B_THR_40    | N, B_LYS_43    | H, B_LYS_43    | 2.64 | 1.83 | 15.69 |
| 5T78.PDB | O, B_ARG_38    | N, B_GLU_46    | H, B_GLU_46    | 2.78 | 1.95 | 11.59 |
| 5T78.PDB | O, B_TRP_36    | N, B_VAL_48    | H, B_VAL_48    | 2.96 | 2.11 | 4.39  |
| 5T78.PDB | O, B_GLN_82    | N, B_THR_69    | H, B_THR_69    | 2.84 | 2.05 | 19.71 |
| 5T78.PDB | OH, B_TYR_60   | N, B_ILE_70    | H, B_ILE_70    | 2.81 | 2.01 | 18.63 |
| 5T78.PDB | OD1, B_ASN_74  | NE, B_ARG_72   | HE, B_ARG_72   | 2.69 | 1.95 | 25.68 |
| 5T78.PDB | O, B_THR_78    | N, B_ASP_73    | H, B_ASP_73    | 3.00 | 2.15 | 8.98  |
| 5T78.PDB | O, B_CYS_22    | N, B_LEU_79    | H, B_LEU_79    | 2.95 | 2.15 | 18.76 |
| 5T78.PDB | O, B_SER_71    | N, B_TYR_80    | H, B_TYR_80    | 2.82 | 1.97 | 8.86  |
| 5T78.PDB | O, B_LEU_20    | N, B_LEU_81    | H, B_LEU_81    | 2.97 | 2.19 | 21.07 |
| 5T78.PDB | O, B_THR_69    | N, B_GLN_82    | H, B_GLN_82    | 2.85 | 2.05 | 17.58 |
| 5T78.PDB | O, B_LEU_18    | N, B_MET_83    | H, B_MET_83    | 2.74 | 1.98 | 23.26 |
| 5T78.PDB | OD2, B_ASP_90  | N, B_LYS_87    | H, B_LYS_87    | 2.78 | 1.92 | 2.04  |
| 5T78.PDB | O, B_GLN_39    | N, B_ILE_93    | H, B_ILE_93    | 2.84 | 2.04 | 18.32 |
| 5T78.PDB | O, B_THR_110   | N, B_TYR_94    | H, B_TYR_94    | 2.77 | 1.91 | 3.39  |
| 5T78.PDB | O, B_ASP_90    | OH, B_TYR_94   | HH, B_TYR_94   | 2.74 | 1.93 | 12.66 |
| 5T78.PDB | O, B_VAL_37    | N, B_TYR_95    | H, B_TYR_95    | 2.67 | 1.82 | 4.17  |
| 5T78.PDB | OE1, B_GLN_39  | OH, B_TYR_95   | HH, B_TYR_95   | 2.91 | 2.11 | 14.46 |
| 5T78.PDB | OE2, B_GLU_6   | N, B_CYS_96    | H, B_CYS_96    | 2.65 | 1.81 | 8.49  |
| 5T78.PDB | OD1, B_ASP_104 | N, B_GLY_102   | H, B_GLY_102   | 2.93 | 2.09 | 9.46  |
| 5T78.PDB | OH, A_TYR_41   | N, B_PHE_103   | H, B_PHE_103   | 2.85 | 2.00 | 5.24  |
| 5T78.PDB | O, B_PHE_103   | NE1, B_TRP_106 | HE1, B_TRP_106 | 2.89 | 2.16 | 27.37 |
| 5T78.PDB | O, B_CYS_96    | N, B_GLY_107   | H, B_GLY_107   | 2.88 | 2.05 | 11.81 |
| 5T78.PDB | O, B_ALA_92    | N, B_LEU_112   | H, B_LEU_112   | 2.91 | 2.10 | 16.63 |
| 5T78.PDB | OG1, B_THR_91  | N, B_VAL_114   | H, B_VAL_114   | 2.84 | 1.98 | 4.39  |
| 5T78.PDB | O, B_PHE_149   | N, B_THR_120   | H, B_THR_120   | 2.84 | 2.00 | 10.54 |
| 5T78.PDB | O, B_LYS_146   | N, B_SER_123   | H, B_SER_123   | 2.99 | 2.18 | 17.27 |
| 5T78.PDB | O, B_LEU_144   | N, B_TYR_125   | H, B_TYR_125   | 2.88 | 2.07 | 16.65 |
| 5T78.PDB | O, B_GLY_142   | N, B_LEU_127   | H, B_LEU_127   | 2.85 | 2.06 | 19.67 |
| 5T78.PDB | O, B_VAL_186   | N, B_VAL_139   | H, B_VAL_139   | 2.76 | 1.90 | 4.98  |
| 5T78.PDB | OG1, B_THR_185 | OG1, B_THR_140 | HG1, B_THR_140 | 2.97 | 2.14 | 5.19  |
| 5T78.PDB | O, B_VAL_184   | N, B_LEU_141   | H, B_LEU_141   | 2.73 | 1.89 | 10.61 |
| 5T78.PDB | O, B_SER_182   | N, B_CYS_143   | H, B_CYS_143   | 2.99 | 2.23 | 23.48 |
| 5T78.PDB | O, B_TYR_125   | N, B_LEU_144   | H, B_LEU_144   | 2.79 | 1.95 | 10.28 |
| 5T78.PDB | O, B_LEU_180   | N, B_VAL_145   | H, B_VAL_145   | 2.91 | 2.07 | 9.52  |
| 5T78.PDB | O, B_SER_123   | N, B_LYS_146   | H, B_LYS_146   | 2.85 | 2.01 | 7.84  |
| 5T78.PDB | O, B_THR_120   | N, B_PHE_149   | H, B_PHE_149   | 2.90 | 2.09 | 17.04 |
| 5T78.PDB | O, B_ALA_201   | N, B_THR_154   | H, B_THR_154   | 3.00 | 2.21 | 19.88 |
| 5T78.PDB | O, B_ASN_199   | N, B_THR_156   | H, B_THR_156   | 2.81 | 1.98 | 11.68 |
| 5T78.PDB | O, B_THR_197   | N, B_ASN_158   | H, B_ASN_158   | 2.82 | 1.98 | 10.92 |
| 5T78.PDB | OD1, B_ASN_199 | N, B_SER_159   | H, B_SER_159   | 2.70 | 1.89 | 14.93 |
| 5T78.PDB | O, B_TRP_157   | N, B_GLY_160   | H, B_GLY_160   | 2.98 | 2.17 | 16.73 |
| 5T78.PDB | O, B_SER_181   | N, B_PHE_169   | H, B_PHE_169   | 2.81 | 1.96 | 6.40  |
| 5T78.PDB | O, B_LEU_177   | N, B_GLN_174   | H, B_GLN_174   | 2.94 | 2.10 | 10.35 |
| 5T78.PDB | O, B_TYR_148   | N, B_TYR_178   | H, B_TYR_178   | 2.83 | 1.97 | 1.07  |
| 5T78.PDB | O, B_VAL_172   | N, B_THR_179   | H, B_THR_179   | 2.95 | 2.19 | 24.45 |
| 5T78.PDB | O, B_VAL_145   | N, B_LEU_180   | H, B_LEU_180   | 2.94 | 2.12 | 15.28 |
| 5T78.PDB | O, B_HIS_167   | N, B_SER_183   | H, B_SER_183   | 2.99 | 2.13 | 4.09  |
| 5T78.PDB | O, B_LEU_141   | N, B_VAL_184   | H, B_VAL_184   | 2.95 | 2.11 | 9.47  |
| 5T78.PDB | O, B_GLY_165   | N, B_THR_185   | H, B_THR_185   | 2.86 | 2.16 | 29.53 |
| 5T78.PDB | O, B_VAL_139   | N, B_VAL_186   | H, B_VAL_186   | 2.86 | 2.08 | 20.52 |
| 5T78.PDB | OD1, B_ASN_158 | N, B_THR_197   | H, B_THR_197   | 2.72 | 1.93 | 18.91 |
| 5T78.PDB | O, B_LYS_211   | N, B_CYS_198   | H, B_CYS_198   | 2.79 | 1.94 | 3.58  |
| 5T78.PDB | O, B_THR_156   | N, B_ASN_199   | H, B_ASN_199   | 2.75 | 1.89 | 4.63  |
| 5T78.PDB | O, B_VAL_209   | N, B_VAL_200   | H, B_VAL_200   | 2.85 | 2.01 | 8.95  |
| 5T78.PDB | O, B_THR_154   | N, B_ALA_201   | H, B_ALA_201   | 2.91 | 2.08 | 12.90 |
| 5T78.PDB | O, B_THR_207   | N, B_HIS_202   | H, B_HIS_202   | 2.79 | 1.94 | 7.70  |

|          |               |                |                |      |      |       |
|----------|---------------|----------------|----------------|------|------|-------|
| 5T78.PDB | O, B.PRO_150  | NE2, B.HIS_202 | HE2, B.HIS_202 | 2.74 | 1.92 | 14.58 |
| 5T78.PDB | O, B.PRO_203  | N, B.SER_206   | H, B.SER_206   | 2.79 | 2.01 | 21.34 |
| 5T78.PDB | O, B.VAL_200  | N, B.VAL_209   | H, B.VAL_209   | 2.83 | 2.00 | 12.26 |
| 5T78.PDB | O, B.CYS_198  | N, B.LYS_211   | H, B.LYS_211   | 2.91 | 2.09 | 14.58 |
| 5T78.PDB | O, B.VAL_196  | N, B.ILE_213   | H, B.ILE_213   | 2.98 | 2.13 | 8.16  |
| 5T78.PDB | OE1, A.GLU_39 | NH1, F.ARG_5   | HH11, F.ARG_5  | 2.68 | 1.83 | 9.33  |
| 5T78.PDB | OG, C.SER_26  | N, C.LEU_3     | H, C.LEU_3     | 2.73 | 1.88 | 4.61  |
| 5T78.PDB | O, C.ARG_24   | N, C.THR_5     | H, C.THR_5     | 2.78 | 1.95 | 10.72 |
| 5T78.PDB | O, C.TYR_91   | NE2, C.GLN_6   | HE22, C.GLN_6  | 2.96 | 2.13 | 12.54 |
| 5T78.PDB | O, C.SER_22   | N, C.THR_7     | H, C.THR_7     | 2.88 | 2.10 | 19.87 |
| 5T78.PDB | O, C.LYS_108  | N, C.LEU_11    | H, C.LEU_11    | 2.84 | 2.11 | 26.95 |
| 5T78.PDB | O, C.VAL_83   | N, C.GLY_16    | H, C.GLY_16    | 2.91 | 2.06 | 6.60  |
| 5T78.PDB | O, C.ILE_80   | N, C.ALA_19    | H, C.ALA_19    | 2.84 | 2.03 | 15.95 |
| 5T78.PDB | O, C.LEU_78   | N, C.ILE_21    | H, C.ILE_21    | 2.99 | 2.16 | 13.69 |
| 5T78.PDB | O, C.THR_7    | N, C.SER_22    | H, C.SER_22    | 2.73 | 1.88 | 3.18  |
| 5T78.PDB | O, C.PHE_76   | N, C.CYS_23    | H, C.CYS_23    | 2.75 | 1.96 | 19.40 |
| 5T78.PDB | O, C.THR_5    | N, C.ARG_24    | H, C.ARG_24    | 2.63 | 1.83 | 18.67 |
| 5T78.PDB | OD1, C.ASP_75 | NE, C.ARG_24   | HE, C.ARG_24   | 2.96 | 2.16 | 17.61 |
| 5T78.PDB | O, C.THR_74   | N, C.SER_25    | H, C.SER_25    | 2.94 | 2.15 | 19.26 |
| 5T78.PDB | O, C.LYS_35   | N, C.HIS_31    | H, C.HIS_31    | 2.92 | 2.13 | 19.70 |
| 5T78.PDB | OH, C.TYR_37  | ND2, C.ASN_33  | HD21, C.ASN_33 | 2.96 | 2.18 | 21.06 |
| 5T78.PDB | O, C.HIS_31   | N, C.GLY_34    | H, C.GLY_34    | 3.00 | 2.15 | 8.88  |
| 5T78.PDB | OD1, C.ASN_33 | N, C.LYS_35    | H, C.LYS_35    | 2.89 | 2.07 | 15.44 |
| 5T78.PDB | O, C.PHE_94   | N, C.GLU_39    | H, C.GLU_39    | 2.80 | 1.97 | 13.19 |
| 5T78.PDB | O, C.ILE_53   | N, C.TRP_40    | H, C.TRP_40    | 2.85 | 2.04 | 17.58 |
| 5T78.PDB | O, C.TYR_92   | N, C.TYR_41    | H, C.TYR_41    | 2.86 | 2.04 | 13.58 |
| 5T78.PDB | O, C.LYS_50   | N, C.LEU_42    | H, C.LEU_42    | 2.96 | 2.15 | 16.18 |
| 5T78.PDB | O, C.VAL_90   | N, C.GLN_43    | H, C.GLN_43    | 2.84 | 2.01 | 10.96 |
| 5T78.PDB | O, C.LYS_44   | N, C.GLN_47    | H, C.GLN_47    | 2.91 | 2.11 | 19.11 |
| 5T78.PDB | O, D.GLY_107  | OG, C.SER_48   | HG, C.SER_48   | 2.59 | 1.80 | 15.22 |
| 5T78.PDB | O, C.LEU_42   | N, C.LYS_50    | H, C.LYS_50    | 2.85 | 2.10 | 25.26 |
| 5T78.PDB | O, C.TRP_40   | N, C.LEU_52    | H, C.LEU_52    | 2.91 | 2.06 | 6.20  |
| 5T78.PDB | O, C.LYS_58   | N, C.TYR_54    | H, C.TYR_54    | 2.95 | 2.13 | 15.51 |
| 5T78.PDB | O, C.LEU_38   | N, C.VAL_56    | H, C.VAL_56    | 2.84 | 1.99 | 9.09  |
| 5T78.PDB | O, C.ARG_55   | N, C.SER_57    | H, C.SER_57    | 2.67 | 1.95 | 28.00 |
| 5T78.PDB | O, C.TYR_54   | N, C.LYS_58    | H, C.LYS_58    | 2.92 | 2.10 | 14.52 |
| 5T78.PDB | O, C.LEU_52   | N, C.PHE_60    | H, C.PHE_60    | 2.96 | 2.14 | 14.24 |
| 5T78.PDB | OD2, C.ASP_87 | NH1, C.ARG_66  | HH12, C.ARG_66 | 2.35 | 1.56 | 19.31 |
| 5T78.PDB | O, C.LYS_79   | N, C.SER_68    | H, C.SER_68    | 2.84 | 2.06 | 20.21 |
| 5T78.PDB | O, C.THR_77   | N, C.SER_70    | H, C.SER_70    | 2.99 | 2.25 | 25.43 |
| 5T78.PDB | O, C.CYS_23   | N, C.PHE_76    | H, C.PHE_76    | 2.98 | 2.15 | 10.91 |
| 5T78.PDB | O, C.SER_70   | N, C.THR_77    | H, C.THR_77    | 2.95 | 2.14 | 16.22 |
| 5T78.PDB | O, C.ILE_21   | N, C.LEU_78    | H, C.LEU_78    | 2.92 | 2.09 | 12.26 |
| 5T78.PDB | O, C.SER_68   | N, C.LYS_79    | H, C.LYS_79    | 2.69 | 1.86 | 12.12 |
| 5T78.PDB | O, C.ALA_19   | N, C.ILE_80    | H, C.ILE_80    | 2.92 | 2.10 | 14.89 |
| 5T78.PDB | O, C.ASP_17   | N, C.VAL_83    | H, C.VAL_83    | 2.96 | 2.10 | 6.35  |
| 5T78.PDB | O, C.GLU_84   | N, C.ASP_87    | H, C.ASP_87    | 2.96 | 2.11 | 8.35  |
| 5T78.PDB | O, C.GLN_43   | N, C.VAL_90    | H, C.VAL_90    | 2.89 | 2.05 | 10.76 |
| 5T78.PDB | O, C.THR_107  | N, C.TYR_91    | H, C.TYR_91    | 2.71 | 1.86 | 8.50  |
| 5T78.PDB | O, C.ASP_87   | OH, C.TYR_91   | HH, C.TYR_91   | 2.69 | 1.94 | 21.91 |
| 5T78.PDB | O, C.TYR_41   | N, C.TYR_92    | H, C.TYR_92    | 2.85 | 2.03 | 14.75 |
| 5T78.PDB | O, D.LYS_43   | OH, C.TYR_92   | HH, C.TYR_92   | 2.90 | 2.21 | 29.37 |
| 5T78.PDB | O, C.HIS_98   | NE2, C.GLN_95  | HE22, C.GLN_95 | 2.74 | 1.90 | 10.22 |
| 5T78.PDB | O, C.TYR_37   | N, C.GLY_96    | H, C.GLY_96    | 2.72 | 1.93 | 19.30 |
| 5T78.PDB | O, C.ILE_29   | OG, C.SER_97   | HG, C.SER_97   | 2.56 | 1.73 | 9.58  |
| 5T78.PDB | O, C.VAL_2    | OG1, C.THR_102 | HG1, C.THR_102 | 2.90 | 2.09 | 14.58 |
| 5T78.PDB | O, C.CYS_93   | N, C.GLY_104   | H, C.GLY_104   | 2.78 | 1.94 | 9.79  |
| 5T78.PDB | O, C.TYR_91   | N, C.THR_107   | H, C.THR_107   | 2.86 | 2.08 | 22.08 |

|          |                |                |                 |      |      |       |
|----------|----------------|----------------|-----------------|------|------|-------|
| 5T78.PDB | O, C_PRO_8     | OG1, C_THR_107 | HG1, C_THR_107  | 2.85 | 2.11 | 24.36 |
| 5T78.PDB | O, C_GLY_89    | N, C_LEU_109   | H, C_LEU_109    | 2.72 | 1.88 | 8.68  |
| 5T78.PDB | O, C_LEU_11    | N, C_GLU_110   | H, C_GLU_110    | 2.94 | 2.09 | 6.48  |
| 5T78.PDB | OE1, C_GLN_171 | N, C_ILE_111   | H, C_ILE_111    | 2.92 | 2.08 | 10.11 |
| 5T78.PDB | O, C_VAL_13    | N, C_LYS_112   | H, C_LYS_112    | 2.91 | 2.09 | 13.64 |
| 5T78.PDB | O, C_ASP_175   | NE, C_ARG_113  | HE, C_ARG_113   | 2.82 | 2.03 | 19.01 |
| 5T78.PDB | O, C_TYR_145   | N, C_ALA_116   | H, C_ALA_116    | 2.82 | 1.99 | 13.51 |
| 5T78.PDB | O, C_ASN_142   | N, C_THR_119   | H, C_THR_119    | 2.98 | 2.18 | 17.98 |
| 5T78.PDB | O, C_VAL_138   | N, C_PHE_123   | H, C_PHE_123    | 2.72 | 1.94 | 20.98 |
| 5T78.PDB | O, C_GLN_129   | OG, C_SER_132  | HG, C_SER_132   | 2.70 | 1.96 | 24.09 |
| 5T78.PDB | OE1, C_GLN_129 | N, C_SER_136   | H, C_SER_136    | 2.96 | 2.13 | 13.97 |
| 5T78.PDB | O, C_LEU_184   | N, C_VAL_137   | H, C_VAL_137    | 2.85 | 2.01 | 9.76  |
| 5T78.PDB | O, C_SER_182   | N, C_CYS_139   | H, C_CYS_139    | 2.88 | 2.10 | 20.35 |
| 5T78.PDB | O, C_SER_121   | N, C_PHE_140   | H, C_PHE_140    | 2.89 | 2.10 | 20.29 |
| 5T78.PDB | O, C_MET_180   | N, C_LEU_141   | H, C_LEU_141    | 2.83 | 1.97 | 5.00  |
| 5T78.PDB | OG, C_SER_179  | N, C_ASN_143   | H, C_ASN_143    | 2.76 | 1.98 | 21.20 |
| 5T78.PDB | O, C_TYR_178   | N, C_PHE_144   | H, C_PHE_144    | 2.82 | 2.00 | 13.31 |
| 5T78.PDB | OG, C_SER_182  | NE1, C_TRP_153 | HE1, C_TRP_153  | 2.84 | 2.01 | 13.01 |
| 5T78.PDB | O, C_THR_198   | N, C_LYS_154   | H, C_LYS_154    | 2.79 | 1.99 | 17.84 |
| 5T78.PDB | O, C_SER_158   | N, C_ILE_155   | H, C_ILE_155    | 2.77 | 1.97 | 16.65 |
| 5T78.PDB | O, C_SER_196   | N, C_ASP_156   | H, C_ASP_156    | 2.85 | 2.02 | 12.83 |
| 5T78.PDB | O, A_SER_26    | N, C_ASN_166   | H, C_ASN_166    | 2.63 | 1.86 | 20.95 |
| 5T78.PDB | O, D_PRO_170   | OG, C_SER_167  | HG, C_SER_167   | 2.87 | 2.05 | 10.83 |
| 5T78.PDB | O, C_LYS_147   | NE1, C_TRP_168 | HE1, C_TRP_168  | 2.87 | 2.16 | 29.23 |
| 5T78.PDB | O, C_SER_179   | N, C_THR_169   | H, C_THR_169    | 2.97 | 2.13 | 10.91 |
| 5T78.PDB | O, C_ILE_111   | NE2, C_GLN_171 | HE22, C_GLN_171 | 2.61 | 1.79 | 14.42 |
| 5T78.PDB | O, C_THR_177   | N, C_ASP_172   | H, C_ASP_172    | 2.84 | 2.00 | 11.78 |
| 5T78.PDB | OD1, C_ASP_175 | OG1, C_THR_177 | HG1, C_THR_177  | 2.53 | 1.70 | 9.09  |
| 5T78.PDB | O, C_PHE_144   | N, C_TYR_178   | H, C_TYR_178    | 2.83 | 1.97 | 6.87  |
| 5T78.PDB | O, C_LEU_141   | N, C_MET_180   | H, C_MET_180    | 2.81 | 2.01 | 18.22 |
| 5T78.PDB | O, C_SER_167   | N, C_SER_181   | H, C_SER_181    | 3.00 | 2.20 | 18.36 |
| 5T78.PDB | O, C_CYS_139   | N, C_SER_182   | H, C_SER_182    | 2.90 | 2.06 | 10.20 |
| 5T78.PDB | OD1, C_ASN_166 | OG, C_SER_182  | HG, C_SER_182   | 2.85 | 2.09 | 21.73 |
| 5T78.PDB | O, C_LEU_165   | N, C_THR_183   | H, C_THR_183    | 2.96 | 2.12 | 11.56 |
| 5T78.PDB | O, C_VAL_137   | N, C_LEU_184   | H, C_LEU_184    | 2.88 | 2.07 | 16.37 |
| 5T78.PDB | O, C_ALA_135   | N, C_LEU_186   | H, C_LEU_186    | 2.77 | 1.93 | 10.86 |
| 5T78.PDB | O, C_GLY_133   | N, C_LYS_188   | H, C_LYS_188    | 2.96 | 2.15 | 17.19 |
| 5T78.PDB | OG1, C_THR_187 | N, C_GLU_190   | H, C_GLU_190    | 2.96 | 2.14 | 14.63 |
| 5T78.PDB | OD2, C_ASP_156 | ND1, C_HIS_194 | HD1, C_HIS_194  | 2.58 | 1.78 | 18.23 |
| 5T78.PDB | O, C_LYS_152   | N, C_GLU_200   | H, C_GLU_200    | 2.99 | 2.19 | 18.60 |
| 5T78.PDB | O, C_ILE_210   | N, C_ALA_201   | H, C_ALA_201    | 2.91 | 2.11 | 18.88 |
| 5T78.PDB | O, C_ASN_150   | N, C_THR_202   | H, C_THR_202    | 2.79 | 1.96 | 11.41 |
| 5T78.PDB | O, C_PRO_146   | NE2, C_HIS_203 | HE2, C_HIS_203  | 2.99 | 2.15 | 9.93  |
| 5T78.PDB | ND1, C_HIS_203 | OG1, C_THR_205 | HG1, C_THR_205  | 3.00 | 2.26 | 23.83 |
| 5T78.PDB | O, C_ALA_201   | N, C_ILE_210   | H, C_ILE_210    | 2.84 | 2.01 | 13.72 |
| 5T78.PDB | O, C_ASN_195   | N, C_ARG_216   | H, C_ARG_216    | 2.82 | 2.00 | 14.32 |
| 5T78.PDB | O, D_SER_25    | N, D_LYS_3     | H, D_LYS_3      | 2.88 | 2.06 | 16.00 |
| 5T78.PDB | O, D_SER_21    | N, D_SER_7     | H, D_SER_7      | 2.77 | 2.07 | 29.94 |
| 5T78.PDB | O, D_THR_113   | N, D_VAL_12    | H, D_VAL_12     | 2.94 | 2.15 | 19.31 |
| 5T78.PDB | O, D_LEU_86    | N, D_GLY_15    | H, D_GLY_15     | 2.80 | 1.95 | 6.77  |
| 5T78.PDB | O, D_ALA_13    | N, D_GLY_16    | H, D_GLY_16     | 2.96 | 2.14 | 15.77 |
| 5T78.PDB | O, D_MET_83    | N, D_LEU_18    | H, D_LEU_18     | 2.98 | 2.18 | 18.13 |
| 5T78.PDB | O, D_LEU_81    | N, D_LEU_20    | H, D_LEU_20     | 2.82 | 2.00 | 15.18 |
| 5T78.PDB | O, D_VAL_5     | N, D_ALA_23    | H, D_ALA_23     | 2.89 | 2.09 | 16.85 |
| 5T78.PDB | O, D_ASN_77    | N, D_ALA_24    | H, D_ALA_24     | 2.81 | 1.96 | 7.81  |
| 5T78.PDB | O, D_ILE_97    | N, D_SER_35    | H, D_SER_35     | 2.90 | 2.09 | 16.41 |
| 5T78.PDB | O, D_ALA_49    | N, D_TRP_36    | H, D_TRP_36     | 2.96 | 2.19 | 21.68 |
| 5T78.PDB | O, D_GLU_46    | N, D_ARG_38    | H, D_ARG_38     | 2.84 | 1.99 | 7.93  |

|          |                |                |                |      |      |       |
|----------|----------------|----------------|----------------|------|------|-------|
| 5T78.PDB | OE1, D_GLU_46  | NE, D_ARG_38   | HE, D_ARG_38   | 2.65 | 1.91 | 25.36 |
| 5T78.PDB | OH, D_TYR_94   | NH1, D_ARG_38  | HH11, D_ARG_38 | 2.88 | 2.06 | 14.14 |
| 5T78.PDB | OD1, D_ASP_90  | NH1, D_ARG_38  | HH12, D_ARG_38 | 2.85 | 2.05 | 16.93 |
| 5T78.PDB | O, D_ILE_93    | N, D_GLN_39    | H, D_GLN_39    | 2.73 | 1.94 | 19.04 |
| 5T78.PDB | OE1, C_GLN_43  | NE2, D_GLN_39  | HE22, D_GLN_39 | 2.72 | 1.87 | 5.23  |
| 5T78.PDB | O, D_ARG_44    | N, D_THR_40    | H, D_THR_40    | 2.98 | 2.18 | 19.30 |
| 5T78.PDB | O, D_THR_40    | N, D_LYS_43    | H, D_LYS_43    | 2.67 | 1.84 | 13.85 |
| 5T78.PDB | O, D_ARG_38    | N, D_GLU_46    | H, D_GLU_46    | 2.84 | 2.01 | 12.67 |
| 5T78.PDB | O, D_TRP_36    | N, D_VAL_48    | H, D_VAL_48    | 2.98 | 2.12 | 3.28  |
| 5T78.PDB | O, D_MET_34    | N, D_ILE_51    | H, D_ILE_51    | 2.95 | 2.17 | 21.24 |
| 5T78.PDB | OD1, D_ASN_52  | N, D_GLY_56    | H, D_GLY_56    | 2.75 | 1.95 | 18.27 |
| 5T78.PDB | O, D_GLN_82    | N, D_THR_69    | H, D_THR_69    | 2.80 | 2.05 | 24.68 |
| 5T78.PDB | OH, D_TYR_60   | N, D_ILE_70    | H, D_ILE_70    | 2.81 | 2.01 | 18.25 |
| 5T78.PDB | OD1, D_ASN_74  | NE, D_ARG_72   | HE, D_ARG_72   | 2.71 | 2.01 | 29.42 |
| 5T78.PDB | O, D_TYR_32    | NH1, D_ARG_72  | HH12, D_ARG_72 | 2.98 | 2.17 | 17.20 |
| 5T78.PDB | O, D_CYS_22    | N, D_LEU_79    | H, D_LEU_79    | 2.88 | 2.07 | 17.29 |
| 5T78.PDB | O, D_SER_71    | N, D_TYR_80    | H, D_TYR_80    | 2.89 | 2.04 | 9.91  |
| 5T78.PDB | O, D_LEU_20    | N, D_LEU_81    | H, D_LEU_81    | 2.95 | 2.20 | 24.69 |
| 5T78.PDB | O, D_THR_69    | N, D_GLN_82    | H, D_GLN_82    | 2.94 | 2.12 | 15.46 |
| 5T78.PDB | O, D_LEU_18    | N, D_MET_83    | H, D_MET_83    | 2.79 | 2.00 | 20.15 |
| 5T78.PDB | OD2, D_ASP_90  | N, D_LYS_87    | H, D_LYS_87    | 2.89 | 2.04 | 6.02  |
| 5T78.PDB | O, D_LEU_112   | N, D_ALA_92    | H, D_ALA_92    | 2.85 | 2.07 | 20.10 |
| 5T78.PDB | O, D_GLN_39    | N, D_ILE_93    | H, D_ILE_93    | 2.93 | 2.16 | 22.14 |
| 5T78.PDB | O, D_THR_110   | N, D_TYR_94    | H, D_TYR_94    | 2.81 | 1.96 | 2.19  |
| 5T78.PDB | O, D_ASP_90    | OH, D_TYR_94   | HH, D_TYR_94   | 2.65 | 1.83 | 8.83  |
| 5T78.PDB | O, D_VAL_37    | N, D_TYR_95    | H, D_TYR_95    | 2.63 | 1.78 | 4.62  |
| 5T78.PDB | OE1, D_GLN_39  | OH, D_TYR_95   | HH, D_TYR_95   | 2.98 | 2.17 | 11.35 |
| 5T78.PDB | OE2, D_GLU_6   | N, D_CYS_96    | H, D_CYS_96    | 2.78 | 1.93 | 7.90  |
| 5T78.PDB | OD1, D_ASP_104 | N, D_GLY_102   | H, D_GLY_102   | 2.77 | 1.92 | 7.47  |
| 5T78.PDB | OH, C_TYR_41   | N, D_PHE_103   | H, D_PHE_103   | 2.85 | 2.00 | 7.54  |
| 5T78.PDB | O, D_CYS_96    | N, D_GLY_107   | H, D_GLY_107   | 2.94 | 2.10 | 10.44 |
| 5T78.PDB | OE1, D_GLU_6   | N, D_GLY_109   | H, D_GLY_109   | 2.82 | 1.99 | 12.53 |
| 5T78.PDB | O, D_ALA_92    | N, D_LEU_112   | H, D_LEU_112   | 2.76 | 1.94 | 15.02 |
| 5T78.PDB | OG1, D_THR_91  | N, D_VAL_114   | H, D_VAL_114   | 2.86 | 2.01 | 6.88  |
| 5T78.PDB | O, D_PHE_149   | N, D_THR_120   | H, D_THR_120   | 2.81 | 1.96 | 9.17  |
| 5T78.PDB | O, D_LYS_146   | N, D_SER_123   | H, D_SER_123   | 2.97 | 2.17 | 17.75 |
| 5T78.PDB | O, D_LEU_144   | N, D_TYR_125   | H, D_TYR_125   | 2.89 | 2.08 | 16.53 |
| 5T78.PDB | O, D_GLY_142   | N, D_LEU_127   | H, D_LEU_127   | 2.90 | 2.13 | 23.33 |
| 5T78.PDB | O, D_VAL_186   | N, D_VAL_139   | H, D_VAL_139   | 2.83 | 1.97 | 3.34  |
| 5T78.PDB | O, D_VAL_184   | N, D_LEU_141   | H, D_LEU_141   | 2.81 | 1.99 | 15.70 |
| 5T78.PDB | O, D_SER_182   | N, D_CYS_143   | H, D_CYS_143   | 2.95 | 2.18 | 22.37 |
| 5T78.PDB | O, D_TYR_125   | N, D_LEU_144   | H, D_LEU_144   | 2.93 | 2.09 | 9.92  |
| 5T78.PDB | O, D_LEU_180   | N, D_VAL_145   | H, D_VAL_145   | 2.81 | 1.97 | 7.59  |
| 5T78.PDB | O, D_SER_123   | N, D_LYS_146   | H, D_LYS_146   | 2.94 | 2.10 | 9.29  |
| 5T78.PDB | O, D_THR_120   | N, D_PHE_149   | H, D_PHE_149   | 2.90 | 2.10 | 18.43 |
| 5T78.PDB | O, D_ASN_199   | N, D_THR_156   | H, D_THR_156   | 2.94 | 2.10 | 10.47 |
| 5T78.PDB | OG, D_SER_182  | NE1, D_TRP_157 | HE1, D_TRP_157 | 2.99 | 2.19 | 18.03 |
| 5T78.PDB | O, D_THR_197   | N, D_ASN_158   | H, D_ASN_158   | 2.89 | 2.04 | 8.58  |
| 5T78.PDB | OD1, D_ASN_199 | N, D_SER_159   | H, D_SER_159   | 2.73 | 1.89 | 10.93 |
| 5T78.PDB | O, D_TRP_157   | N, D_GLY_160   | H, D_GLY_160   | 2.79 | 1.98 | 17.29 |
| 5T78.PDB | OD1, C_ASN_142 | NE2, D_HIS_167 | HE2, D_HIS_167 | 2.85 | 2.00 | 9.68  |
| 5T78.PDB | O, D_SER_181   | N, D_PHE_169   | H, D_PHE_169   | 2.91 | 2.06 | 5.50  |
| 5T78.PDB | O, D_THR_179   | N, D_VAL_172   | H, D_VAL_172   | 2.97 | 2.16 | 16.66 |
| 5T78.PDB | O, D_LEU_177   | N, D_GLN_174   | H, D_GLN_174   | 2.91 | 2.06 | 7.53  |
| 5T78.PDB | OD2, A_ASP_75  | N, D_SER_175   | H, D_SER_175   | 2.84 | 2.00 | 10.93 |
| 5T78.PDB | O, D_TYR_148   | N, D_TYR_178   | H, D_TYR_178   | 2.82 | 1.96 | 2.75  |
| 5T78.PDB | O, D_VAL_172   | N, D_THR_179   | H, D_THR_179   | 2.97 | 2.22 | 24.34 |
| 5T78.PDB | O, D_VAL_145   | N, D_LEU_180   | H, D_LEU_180   | 2.85 | 2.03 | 14.78 |

|          |                |                |                |      |      |       |
|----------|----------------|----------------|----------------|------|------|-------|
| 5T78.PDB | O, D_CYS.143   | N, D_SER.182   | H, D_SER.182   | 2.99 | 2.19 | 18.10 |
| 5T78.PDB | O, D_HIS.167   | N, D_SER.183   | H, D_SER.183   | 2.87 | 2.01 | 1.62  |
| 5T78.PDB | O, D_LEU.141   | N, D_VAL.184   | H, D_VAL.184   | 2.93 | 2.08 | 8.26  |
| 5T78.PDB | O, D_VAL.139   | N, D_VAL.186   | H, D_VAL.186   | 2.97 | 2.19 | 20.48 |
| 5T78.PDB | OD1, D_ASN.158 | N, D_THR.197   | H, D_THR.197   | 2.81 | 2.01 | 18.23 |
| 5T78.PDB | O, D_LYS.211   | N, D_CYS.198   | H, D_CYS.198   | 2.82 | 1.96 | 5.03  |
| 5T78.PDB | O, D_THR.156   | N, D_ASN.199   | H, D_ASN.199   | 2.88 | 2.02 | 1.38  |
| 5T78.PDB | O, D_VAL.209   | N, D_VAL.200   | H, D_VAL.200   | 2.81 | 1.96 | 8.46  |
| 5T78.PDB | O, D_THR.154   | N, D_ALA.201   | H, D_ALA.201   | 2.98 | 2.16 | 13.25 |
| 5T78.PDB | O, D_THR.207   | N, D_HIS.202   | H, D_HIS.202   | 2.80 | 1.95 | 7.22  |
| 5T78.PDB | O, D_PRO.150   | NE2, D_HIS.202 | HE2, D_HIS.202 | 2.66 | 1.84 | 14.06 |
| 5T78.PDB | O, D_PRO.203   | N, D_SER.206   | H, D_SER.206   | 2.91 | 2.12 | 19.46 |
| 5T78.PDB | O, D_VAL.200   | N, D_VAL.209   | H, D_VAL.209   | 2.85 | 2.03 | 14.24 |
| 5T78.PDB | O, D_CYS.198   | N, D_LYS.211   | H, D_LYS.211   | 2.85 | 2.05 | 18.38 |
| 5T78.PDB | OE1, C_GLU.39  | NH1, E_ARG.5   | HH11, E_ARG.5  | 2.69 | 1.87 | 13.16 |
| 5U3J.PDB | O, H_LEU.82C   | N, H_GLY.15    | H, H_GLY.15    | 2.68 | 1.83 | 3.74  |
| 5U3J.PDB | O, H_LYS.13    | N, H_GLY.16    | H, H_GLY.16    | 2.99 | 2.15 | 12.62 |
| 5U3J.PDB | O, H_MET.82    | N, H_LEU.18    | H, H_LEU.18    | 2.68 | 1.88 | 17.05 |
| 5U3J.PDB | OE1, H_GLN.81  | NE, H_ARG.19   | HE, H_ARG.19   | 2.98 | 2.21 | 22.79 |
| 5U3J.PDB | O, H_LEU.80    | N, H_LEU.20    | H, H_LEU.20    | 2.96 | 2.14 | 16.12 |
| 5U3J.PDB | O, H_LEU.78    | N, H_CYS.22    | H, H_CYS.22    | 2.77 | 1.97 | 17.66 |
| 5U3J.PDB | O, H_THR.28    | OG1, H_THR.32  | HG1, H_THR.32  | 2.71 | 2.00 | 27.44 |
| 5U3J.PDB | OD2, H_ASP.53  | NE1, H_TRP.33  | HE1, H_TRP.33  | 2.97 | 2.22 | 24.73 |
| 5U3J.PDB | O, H_THR.93    | N, H_SER.35    | H, H_SER.35    | 2.87 | 2.05 | 14.77 |
| 5U3J.PDB | O, H_GLY.49    | N, H_TRP.36    | H, H_TRP.36    | 2.81 | 1.99 | 15.09 |
| 5U3J.PDB | O, H_PHE.91    | N, H_VAL.37    | H, H_VAL.37    | 2.90 | 2.06 | 9.69  |
| 5U3J.PDB | OE1, H_GLU.46  | NE, H_ARG.38   | HE, H_ARG.38   | 2.88 | 2.05 | 13.82 |
| 5U3J.PDB | OD1, H_ASP.86  | NH1, H_ARG.38  | HH12, H_ARG.38 | 2.85 | 2.09 | 23.00 |
| 5U3J.PDB | OG, H_SER.35   | NE1, H_TRP.47  | HE1, H_TRP.47  | 2.44 | 1.73 | 27.73 |
| 5U3J.PDB | O, H_TRP.36    | N, H_VAL.48    | H, H_VAL.48    | 2.91 | 2.09 | 13.49 |
| 5U3J.PDB | O, H_GLU.58    | N, H_ARG.50    | H, H_ARG.50    | 2.88 | 2.07 | 16.55 |
| 5U3J.PDB | OE1, H_GLU.58  | NE, H_ARG.50   | HE, H_ARG.50   | 2.83 | 2.12 | 29.07 |
| 5U3J.PDB | OE1, H_GLU.58  | NH2, H_ARG.50  | HH21, H_ARG.50 | 2.79 | 2.08 | 29.38 |
| 5U3J.PDB | O, H_MET.34    | N, H_ILE.51    | H, H_ILE.51    | 2.70 | 1.90 | 17.80 |
| 5U3J.PDB | O, H_ASN.52B   | N, H_GLY.54    | H, H_GLY.54    | 2.97 | 2.17 | 18.44 |
| 5U3J.PDB | O, H_VAL.48    | N, H_ALA.60    | H, H_ALA.60    | 2.71 | 1.92 | 19.22 |
| 5U3J.PDB | O, H_VAL.63    | N, H_ARG.66    | H, H_ARG.66    | 2.99 | 2.15 | 10.50 |
| 5U3J.PDB | OD2, H_ASP.86  | NH1, H_ARG.66  | HH12, H_ARG.66 | 2.57 | 1.73 | 9.26  |
| 5U3J.PDB | OD1, H_ASP.86  | NH2, H_ARG.66  | HH22, H_ARG.66 | 2.89 | 2.04 | 5.32  |
| 5U3J.PDB | O, H_GLN.81    | N, H_THR.68    | H, H_THR.68    | 2.98 | 2.27 | 28.87 |
| 5U3J.PDB | OH, H_TYR.59   | N, H_ILE.69    | H, H_ILE.69    | 2.88 | 2.05 | 11.11 |
| 5U3J.PDB | O, H_THR.32    | NH1, H_ARG.71  | HH12, H_ARG.71 | 2.85 | 2.04 | 17.00 |
| 5U3J.PDB | O, H_THR.77    | N, H_ASP.72    | H, H_ASP.72    | 2.83 | 2.04 | 19.14 |
| 5U3J.PDB | O, H_ASP.72    | N, H_ARG.75    | H, H_ARG.75    | 2.96 | 2.12 | 10.52 |
| 5U3J.PDB | O, H_ARG.75    | OG1, H_THR.77  | HG1, H_THR.77  | 2.85 | 2.06 | 17.00 |
| 5U3J.PDB | O, H_CYS.22    | N, H_LEU.78    | H, H_LEU.78    | 2.84 | 2.02 | 14.17 |
| 5U3J.PDB | O, H_SER.70    | N, H_TYR.79    | H, H_TYR.79    | 2.89 | 2.05 | 10.03 |
| 5U3J.PDB | O, H_THR.68    | N, H_GLN.81    | H, H_GLN.81    | 2.76 | 1.91 | 9.85  |
| 5U3J.PDB | O, H_LEU.18    | N, H_MET.82    | H, H_MET.82    | 2.72 | 1.89 | 13.44 |
| 5U3J.PDB | O, H_ARG.66    | OG1, H_THR.82A | HG1, H_THR.82A | 2.74 | 1.94 | 14.02 |
| 5U3J.PDB | O, H_GLY.16    | N, H_LEU.82C   | H, H_LEU.82C   | 2.98 | 2.20 | 20.11 |
| 5U3J.PDB | OD2, H_ASP.86  | N, H_LYS.83    | H, H_LYS.83    | 2.93 | 2.08 | 5.84  |
| 5U3J.PDB | O, H_GLN.39    | N, H_ARG.89    | H, H_ARG.89    | 2.74 | 1.90 | 10.05 |
| 5U3J.PDB | O, H_THR.107   | N, H_TYR.90    | H, H_TYR.90    | 2.95 | 2.11 | 11.30 |
| 5U3J.PDB | O, H_ASP.86    | OH, H_TYR.90   | HH, H_TYR.90   | 2.53 | 1.71 | 8.74  |
| 5U3J.PDB | O, H_VAL.37    | N, H_PHE.91    | H, H_PHE.91    | 2.51 | 1.68 | 10.84 |
| 5U3J.PDB | OE2, H_GLU.6   | N, H_CYS.92    | H, H_CYS.92    | 2.75 | 1.89 | 6.53  |
| 5U3J.PDB | O, H_TRP.33    | N, H_ASP.95    | H, H_ASP.95    | 2.77 | 1.92 | 6.84  |

|          |                 |                |                 |      |      |       |
|----------|-----------------|----------------|-----------------|------|------|-------|
| 5U3J.PDB | O, H_TYR_100K   | N, H_GLU_98    | H, H_GLU_98     | 2.94 | 2.22 | 28.79 |
| 5U3J.PDB | O, H_PHE_100D   | N, H_TRP_100G  | H, H_TRP_100G   | 2.86 | 2.01 | 6.48  |
| 5U3J.PDB | O, H_GLU_100F   | OG, H_SER_100I | HG, H_SER_100I  | 2.76 | 1.95 | 12.70 |
| 5U3J.PDB | O, H_GLU_98     | N, H_TYR_100K  | H, H_TYR_100K   | 2.86 | 2.12 | 25.47 |
| 5U3J.PDB | OD1, L_ASP_31   | OH, H_TYR_100K | HH, H_TYR_100K  | 2.88 | 2.04 | 5.22  |
| 5U3J.PDB | OH, L_TYR_36    | N, H_MET_100N  | H, H_MET_100N   | 2.75 | 1.92 | 13.09 |
| 5U3J.PDB | OE1, H_GLU_6    | N, H_GLY_106   | H, H_GLY_106    | 2.94 | 2.10 | 10.69 |
| 5U3J.PDB | O, H_GLY_88     | N, H_VAL_109   | H, H_VAL_109    | 2.80 | 1.95 | 8.22  |
| 5U3J.PDB | O, H_GLY_10     | N, H_THR_110   | H, H_THR_110    | 2.98 | 2.17 | 17.31 |
| 5U3J.PDB | OG, H_SER_87    | N, H_VAL_111   | H, H_VAL_111    | 2.79 | 1.95 | 7.31  |
| 5U3J.PDB | O, H_PHE_146    | N, H_LYS_117   | H, H_LYS_117    | 2.94 | 2.12 | 14.80 |
| 5U3J.PDB | O, H_LYS_143    | N, H_SER_120   | H, H_SER_120    | 2.97 | 2.12 | 7.20  |
| 5U3J.PDB | O, H_LEU_141    | N, H_PHE_122   | H, H_PHE_122    | 2.79 | 2.02 | 22.59 |
| 5U3J.PDB | O, H_GLY_139    | N, H_LEU_124   | H, H_LEU_124    | 2.74 | 1.98 | 23.31 |
| 5U3J.PDB | O, H_SER_130    | N, H_ALA_137   | H, H_ALA_137    | 2.87 | 2.16 | 29.44 |
| 5U3J.PDB | O, H_SER_180    | N, H_CYS_140   | H, H_CYS_140    | 2.63 | 1.85 | 19.83 |
| 5U3J.PDB | O, H_PHE_122    | N, H_LEU_141   | H, H_LEU_141    | 2.71 | 1.86 | 7.01  |
| 5U3J.PDB | O, H_LEU_178    | N, H_VAL_142   | H, H_VAL_142    | 2.96 | 2.22 | 26.19 |
| 5U3J.PDB | O, H_LYS_117    | N, H_PHE_146   | H, H_PHE_146    | 2.97 | 2.25 | 28.41 |
| 5U3J.PDB | O, H_ASN_197    | N, H_SER_153   | H, H_SER_153    | 2.96 | 2.15 | 16.40 |
| 5U3J.PDB | OG, H_SER_180   | NE1, H_TRP_154 | HE1, H_TRP_154  | 2.98 | 2.15 | 12.85 |
| 5U3J.PDB | O, H_SER_177    | N, H_VAL_169   | H, H_VAL_169    | 2.87 | 2.08 | 18.96 |
| 5U3J.PDB | O, H_LEU_175    | N, H_GLN_171   | H, H_GLN_171    | 2.85 | 2.01 | 9.90  |
| 5U3J.PDB | O, H_GLN_171    | N, H_GLY_174   | H, H_GLY_174    | 2.81 | 1.98 | 10.98 |
| 5U3J.PDB | O, H_TYR_145    | N, H_TYR_176   | H, H_TYR_176    | 2.90 | 2.05 | 6.56  |
| 5U3J.PDB | O, H_VAL_142    | N, H_LEU_178   | H, H_LEU_178    | 2.95 | 2.16 | 18.81 |
| 5U3J.PDB | O, H_HIS_164    | N, H_VAL_181   | H, H_VAL_181    | 2.91 | 2.08 | 14.09 |
| 5U3J.PDB | O, H_LEU_138    | N, H_VAL_182   | H, H_VAL_182    | 2.66 | 1.85 | 17.24 |
| 5U3J.PDB | OD1, H_ASN_155  | N, H_ILE_195   | H, H_ILE_195    | 2.70 | 1.88 | 13.20 |
| 5U3J.PDB | O, H_SER_153    | N, H_ASN_197   | H, H_ASN_197    | 2.90 | 2.15 | 24.53 |
| 5U3J.PDB | O, H_VAL_207    | N, H_VAL_198   | H, H_VAL_198    | 2.82 | 1.98 | 9.42  |
| 5U3J.PDB | O, H_PRO_147    | NE2, H_HIS_200 | HE2, H_HIS_200  | 2.98 | 2.14 | 11.71 |
| 5U3J.PDB | O, H_VAL_198    | N, H_VAL_207   | H, H_VAL_207    | 2.90 | 2.10 | 17.28 |
| 5U3J.PDB | O, L_TYR_86     | NE2, L_GLN_6   | HE22, L_GLN_6   | 2.61 | 1.91 | 29.28 |
| 5U3J.PDB | O, L_ILE_29     | N, L_TYR_32    | H, L_TYR_32     | 2.94 | 2.08 | 3.56  |
| 5U3J.PDB | OE1, H_GLU_100F | OH, L_TYR_32   | HH, L_TYR_32    | 2.62 | 1.91 | 27.84 |
| 5U3J.PDB | O, L_ILE_48     | N, L_TRP_35    | H, L_TRP_35     | 2.59 | 1.80 | 18.85 |
| 5U3J.PDB | O, L_TYR_87     | N, L_TYR_36    | H, L_TYR_36     | 2.81 | 2.00 | 16.97 |
| 5U3J.PDB | OE1, L_GLN_89   | OH, L_TYR_36   | HH, L_TYR_36    | 2.74 | 1.93 | 13.79 |
| 5U3J.PDB | O, L_LYS_45     | N, L_GLN_37    | H, L_GLN_37     | 2.91 | 2.10 | 17.84 |
| 5U3J.PDB | OE1, H_GLN_39   | NE2, L_GLN_38  | HE22, L_GLN_38  | 2.66 | 1.83 | 12.57 |
| 5U3J.PDB | O, L_GLN_37     | N, L_LYS_45    | H, L_LYS_45     | 2.58 | 1.77 | 16.56 |
| 5U3J.PDB | O, L_LYS_53     | N, L_TYR_49    | H, L_TYR_49     | 2.83 | 2.07 | 23.24 |
| 5U3J.PDB | O, L_ASP_82     | OH, L_TYR_86   | HH, L_TYR_86    | 2.92 | 2.16 | 22.19 |
| 5U3J.PDB | O, L_ASN_34     | N, L_GLN_89    | H, L_GLN_89     | 2.94 | 2.19 | 25.35 |
| 5U3J.PDB | O, L_VAL_133    | N, L_PHE_118   | H, L_PHE_118    | 2.97 | 2.15 | 14.78 |
| 5U3J.PDB | OG, L_SER_131   | NE2, L_GLN_124 | HE22, L_GLN_124 | 2.67 | 1.82 | 7.69  |
| 5U3J.PDB | O, L_LEU_181    | N, L_ALA_130   | H, L_ALA_130    | 2.68 | 1.95 | 26.74 |
| 5U3J.PDB | O, L_LEU_179    | N, L_VAL_132   | H, L_VAL_132    | 2.84 | 2.01 | 12.36 |
| 5U3J.PDB | O, L_GLU_195    | N, L_GLN_147   | H, L_GLN_147    | 2.91 | 2.06 | 7.51  |
| 5U3J.PDB | OG, L_SER_177   | NE1, L_TRP_148 | HE1, L_TRP_148  | 2.81 | 2.02 | 19.92 |
| 5U3J.PDB | O, L_TRP_148    | N, L_GLN_155   | H, L_GLN_155    | 2.85 | 2.01 | 10.26 |
| 5U3J.PDB | O, H_PRO_167    | OG, L_SER_162  | HG, L_SER_162   | 2.90 | 2.16 | 24.21 |
| 5U3J.PDB | O, L_LEU_136    | N, L_LEU_175   | H, L_LEU_175    | 2.78 | 2.04 | 25.99 |
| 5U3J.PDB | O, L_SER_162    | N, L_SER_176   | H, L_SER_176    | 2.81 | 2.07 | 25.43 |
| 5U3J.PDB | O, L_GLN_160    | N, L_THR_178   | H, L_THR_178    | 2.90 | 2.05 | 9.65  |
| 5U3J.PDB | O, L_VAL_132    | N, L_LEU_179   | H, L_LEU_179    | 2.58 | 1.74 | 8.42  |
| 5U3J.PDB | O, L_ALA_130    | N, L_LEU_181   | H, L_LEU_181    | 2.90 | 2.18 | 27.62 |



|          |                 |                |                 |      |      |       |
|----------|-----------------|----------------|-----------------|------|------|-------|
| 5U3J.PDB | O, L.SER_182    | N, L.TYR_186   | H, L.TYR_186    | 2.73 | 1.97 | 23.20 |
| 5U3J.PDB | O, L.LYS_183    | N, L.GLU_187   | H, L.GLU_187    | 2.87 | 2.13 | 25.64 |
| 5U3J.PDB | O, L.VAL_205    | N, L.VAL_196   | H, L.VAL_196    | 2.92 | 2.06 | 3.44  |
| 5U3J.PDB | O, A.PHE_673    | OG1, A.THR_676 | HG1, A.THR_676  | 2.55 | 1.85 | 27.32 |
| 5U3J.PDB | O, A.ASP_674    | N, A.TRP_678   | H, A.TRP_678    | 2.96 | 2.23 | 26.81 |
| 5U3J.PDB | O, A.ILE_675    | N, A.LEU_679   | H, A.LEU_679    | 2.98 | 2.15 | 11.89 |
| 5U3J.PDB | O, A.THR_676    | N, A.TRP_680   | H, A.TRP_680    | 2.90 | 2.12 | 20.48 |
| 5U3J.PDB | O, A.ASN_677    | N, A.TYR_681   | H, A.TYR_681    | 2.74 | 1.96 | 21.09 |
| 5U3J.PDB | O, A.TRP_678    | N, A.ILE_682   | H, A.ILE_682    | 2.63 | 1.81 | 13.86 |
| 5U3N.PDB | O, H.VAL_23     | N, H.VAL_5     | H, H.VAL_5      | 2.91 | 2.06 | 7.34  |
| 5U3N.PDB | O, H.TYR_90     | NE2, H.GLN_6   | HE22, H.GLN_6   | 2.83 | 2.00 | 12.08 |
| 5U3N.PDB | O, H.LEU_82C    | N, H.GLY_15    | H, H.GLY_15     | 2.69 | 1.84 | 5.70  |
| 5U3N.PDB | O, H.LYS_13     | N, H.GLY_16    | H, H.GLY_16     | 2.84 | 2.03 | 16.66 |
| 5U3N.PDB | O, H.MET_82     | N, H.LEU_18    | H, H.LEU_18     | 2.86 | 2.07 | 19.50 |
| 5U3N.PDB | OG, H.SER_7     | N, H.SER_21    | H, H.SER_21     | 2.86 | 2.03 | 12.74 |
| 5U3N.PDB | O, H.VAL_5      | N, H.VAL_23    | H, H.VAL_23     | 2.81 | 1.99 | 14.35 |
| 5U3N.PDB | O, H.ASN_76     | N, H.THR_24    | H, H.THR_24     | 2.94 | 2.15 | 18.71 |
| 5U3N.PDB | O, H.GLN_3      | N, H.SER_25    | H, H.SER_25     | 2.99 | 2.20 | 19.07 |
| 5U3N.PDB | O, H.THR_28     | OG1, H.THR_32  | HG1, H.THR_32   | 2.86 | 2.15 | 27.61 |
| 5U3N.PDB | O, H.ILE_51     | N, H.MET_34    | H, H.MET_34     | 2.95 | 2.12 | 13.00 |
| 5U3N.PDB | O, H.ALA_49     | N, H.TRP_36    | H, H.TRP_36     | 2.81 | 2.02 | 19.03 |
| 5U3N.PDB | O, H.TYR_91     | N, H.VAL_37    | H, H.VAL_37     | 2.87 | 2.04 | 12.29 |
| 5U3N.PDB | O, H.GLU_46     | N, H.ARG_38    | H, H.ARG_38     | 2.84 | 1.99 | 7.64  |
| 5U3N.PDB | OE1, H.GLU_46   | NE, H.ARG_38   | HE, H.ARG_38    | 2.91 | 2.07 | 9.07  |
| 5U3N.PDB | OH, H.TYR_90    | NH1, H.ARG_38  | HH11, H.ARG_38  | 3.00 | 2.21 | 20.04 |
| 5U3N.PDB | O, H.VAL_89     | N, H.GLN_39    | H, H.GLN_39     | 2.83 | 2.04 | 20.47 |
| 5U3N.PDB | O, H.ARG_38     | N, H.GLU_46    | H, H.GLU_46     | 2.85 | 2.12 | 27.26 |
| 5U3N.PDB | O, H.TRP_36     | N, H.VAL_48    | H, H.VAL_48     | 2.79 | 1.97 | 13.99 |
| 5U3N.PDB | OD2, H.ASP_58   | NE, H.ARG_50   | HE, H.ARG_50    | 2.78 | 1.98 | 18.36 |
| 5U3N.PDB | O, H.MET_34     | N, H.ILE_51    | H, H.ILE_51     | 2.79 | 1.99 | 18.29 |
| 5U3N.PDB | O, H.ILE_56     | N, H.SER_52    | H, H.SER_52     | 2.99 | 2.26 | 27.62 |
| 5U3N.PDB | OD2, A.ASP_674  | NH1, H.ARG_52A | HH12, H.ARG_52A | 3.00 | 2.24 | 24.41 |
| 5U3N.PDB | OD1, H.ASP_53   | NH2, H.ARG_52A | HH21, H.ARG_52A | 2.93 | 2.18 | 25.35 |
| 5U3N.PDB | O, H.ARG_52A    | N, H.ASP_53    | H, H.ASP_53     | 2.99 | 2.21 | 21.52 |
| 5U3N.PDB | OG, H.SER_52    | N, H.ILE_56    | H, H.ILE_56     | 2.80 | 2.06 | 25.80 |
| 5U3N.PDB | O, H.VAL_48     | N, H.ALA_60    | H, H.ALA_60     | 2.80 | 1.95 | 7.61  |
| 5U3N.PDB | O, H.VAL_63     | N, H.ARG_66    | H, H.ARG_66     | 3.00 | 2.17 | 13.97 |
| 5U3N.PDB | OD2, H.ASP_86   | NH1, H.ARG_66  | HH12, H.ARG_66  | 2.73 | 1.91 | 14.46 |
| 5U3N.PDB | O, H.PRO_62     | NH2, H.ARG_66  | HH21, H.ARG_66  | 2.95 | 2.10 | 7.27  |
| 5U3N.PDB | O, H.HIS_81     | N, H.ILE_68    | H, H.ILE_68     | 2.90 | 2.10 | 18.72 |
| 5U3N.PDB | OH, H.TYR_59    | N, H.ILE_69    | H, H.ILE_69     | 2.92 | 2.12 | 19.11 |
| 5U3N.PDB | OD1, H.ASP_73   | NE, H.ARG_71   | HE, H.ARG_71    | 2.93 | 2.13 | 17.92 |
| 5U3N.PDB | O, H.THR_32     | NH1, H.ARG_71  | HH12, H.ARG_71  | 2.85 | 2.04 | 16.27 |
| 5U3N.PDB | O, H.THR_77     | N, H.ASP_72    | H, H.ASP_72     | 2.83 | 1.99 | 11.84 |
| 5U3N.PDB | O, H.CYS_22     | N, H.LEU_78    | H, H.LEU_78     | 2.84 | 2.00 | 10.39 |
| 5U3N.PDB | O, H.SER_70     | N, H.PHE_79    | H, H.PHE_79     | 2.80 | 1.94 | 3.12  |
| 5U3N.PDB | O, H.ILE_68     | N, H.HIS_81    | H, H.HIS_81     | 2.75 | 1.95 | 17.72 |
| 5U3N.PDB | O, H.LEU_18     | N, H.MET_82    | H, H.MET_82     | 2.59 | 1.75 | 10.08 |
| 5U3N.PDB | OD2, H.ASP_86   | N, H.LYS_83    | H, H.LYS_83     | 2.93 | 2.12 | 15.88 |
| 5U3N.PDB | O, H.LYS_83     | N, H.ASP_86    | H, H.ASP_86     | 2.78 | 1.94 | 11.41 |
| 5U3N.PDB | O, H.THR_107    | N, H.TYR_90    | H, H.TYR_90     | 2.72 | 1.88 | 9.30  |
| 5U3N.PDB | O, H.ASP_86     | OH, H.TYR_90   | HH, H.TYR_90    | 2.67 | 1.88 | 16.73 |
| 5U3N.PDB | O, H.VAL_37     | N, H.TYR_91    | H, H.TYR_91     | 2.62 | 1.77 | 5.09  |
| 5U3N.PDB | O, H.SER_35     | N, H.THR_93    | H, H.THR_93     | 2.88 | 2.10 | 21.23 |
| 5U3N.PDB | O, H.TRP_33     | N, H.ASP_95    | H, H.ASP_95     | 2.83 | 1.98 | 5.13  |
| 5U3N.PDB | O, H.TYR_100L   | N, H.GLU_96    | H, H.GLU_96     | 2.96 | 2.15 | 16.42 |
| 5U3N.PDB | O, H.ASN_100J   | N, H.ALA_98    | H, H.ALA_98     | 2.86 | 2.02 | 10.29 |
| 5U3N.PDB | OE1, H.GLU_100E | NE, H.ARG_100B | HE, H.ARG_100B  | 2.83 | 1.97 | 4.42  |

|          |                 |                 |                  |      |      |       |
|----------|-----------------|-----------------|------------------|------|------|-------|
| 5U3N.PDB | OE2, H_GLU_100E | NH2, H_ARG_100B | HH21, H_ARG_100B | 2.91 | 2.08 | 12.18 |
| 5U3N.PDB | OD1, L_ASP_31   | NH2, H_ARG_100B | HH22, H_ARG_100B | 2.97 | 2.15 | 14.50 |
| 5U3N.PDB | O, H_ARG_100B   | N, H_GLU_100E   | H, H_GLU_100E    | 2.83 | 2.05 | 20.60 |
| 5U3N.PDB | O, H_PHE_100C   | N, H_TRP_100F   | H, H_TRP_100F    | 2.93 | 2.08 | 6.81  |
| 5U3N.PDB | O, H_LEU_100A   | NE1, H_TRP_100F | HE1, H_TRP_100F  | 2.88 | 2.10 | 19.92 |
| 5U3N.PDB | O, H_GLU_100E   | N, H_TYR_100H   | H, H_TYR_100H    | 2.96 | 2.12 | 9.41  |
| 5U3N.PDB | O, H_ALA_98     | N, H_ASN_100J   | H, H_ASN_100J    | 2.93 | 2.10 | 13.13 |
| 5U3N.PDB | OD1, L_ASN_34   | ND2, H_ASN_100J | HD21, H_ASN_100J | 2.72 | 1.86 | 2.61  |
| 5U3N.PDB | O, H_GLU_96     | N, H_TYR_100L   | H, H_TYR_100L    | 2.88 | 2.05 | 12.56 |
| 5U3N.PDB | OH, L_TYR_36    | N, H_MET_100M   | H, H_MET_100M    | 2.99 | 2.13 | 5.54  |
| 5U3N.PDB | O, H_ALA_94     | N, H_ASP_101    | H, H_ASP_101     | 2.74 | 1.99 | 25.37 |
| 5U3N.PDB | O, H_CYS_92     | N, H_GLY_104    | H, H_GLY_104     | 2.82 | 1.98 | 9.77  |
| 5U3N.PDB | OE1, H_GLN_6    | N, H_GLY_106    | H, H_GLY_106     | 2.96 | 2.22 | 25.98 |
| 5U3N.PDB | O, H_TYR_90     | N, H_THR_107    | H, H_THR_107     | 2.85 | 2.08 | 22.78 |
| 5U3N.PDB | O, H_ALA_88     | N, H_VAL_109    | H, H_VAL_109     | 2.88 | 2.03 | 6.16  |
| 5U3N.PDB | O, H_GLY_10     | N, H_ILE_110    | H, H_ILE_110     | 2.94 | 2.09 | 6.89  |
| 5U3N.PDB | OG1, H_THR_87   | N, H_VAL_111    | H, H_VAL_111     | 2.89 | 2.03 | 4.98  |
| 5U3N.PDB | O, H_VAL_12     | N, H_SER_112    | H, H_SER_112     | 2.98 | 2.17 | 17.21 |
| 5U3N.PDB | O, H_PHE_146    | N, H_LYS_117    | H, H_LYS_117     | 2.78 | 1.97 | 16.03 |
| 5U3N.PDB | O, H_GLY_139    | N, H_LEU_124    | H, H_LEU_124     | 2.86 | 2.00 | 5.63  |
| 5U3N.PDB | O, H_VAL_184    | N, H_ALA_136    | H, H_ALA_136     | 2.84 | 1.99 | 5.94  |
| 5U3N.PDB | O, H_LEU_124    | N, H_GLY_139    | H, H_GLY_139     | 3.00 | 2.25 | 25.48 |
| 5U3N.PDB | O, H_SER_180    | N, H_CYS_140    | H, H_CYS_140     | 2.82 | 2.02 | 17.61 |
| 5U3N.PDB | O, H_PHE_122    | N, H_LEU_141    | H, H_LEU_141     | 2.79 | 1.95 | 10.76 |
| 5U3N.PDB | O, H_LEU_178    | N, H_VAL_142    | H, H_VAL_142     | 2.71 | 1.86 | 7.20  |
| 5U3N.PDB | O, H_SER_120    | N, H_LYS_143    | H, H_LYS_143     | 2.84 | 1.99 | 7.21  |
| 5U3N.PDB | O, H_LYS_117    | N, H_PHE_146    | H, H_PHE_146     | 2.94 | 2.13 | 16.41 |
| 5U3N.PDB | O, H_ASN_199    | N, H_THR_151    | H, H_THR_151     | 3.00 | 2.17 | 12.79 |
| 5U3N.PDB | OG, H_SER_180   | NE1, H_TRP_154  | HE1, H_TRP_154   | 2.95 | 2.11 | 9.10  |
| 5U3N.PDB | O, H_ILE_195    | N, H_ASN_155    | H, H_ASN_155     | 2.79 | 1.95 | 11.06 |
| 5U3N.PDB | OD1, H_ASN_197  | N, H_SER_156    | H, H_SER_156     | 2.62 | 1.82 | 17.28 |
| 5U3N.PDB | O, H_TRP_154    | N, H_GLY_157    | H, H_GLY_157     | 2.98 | 2.26 | 27.93 |
| 5U3N.PDB | OD1, L_ASN_138  | NE2, H_HIS_164  | HE2, H_HIS_164   | 2.92 | 2.21 | 29.54 |
| 5U3N.PDB | O, H_SER_179    | N, H_PHE_166    | H, H_PHE_166     | 2.96 | 2.11 | 6.98  |
| 5U3N.PDB | O, H_SER_177    | N, H_VAL_169    | H, H_VAL_169     | 2.89 | 2.05 | 12.11 |
| 5U3N.PDB | O, H_LEU_175    | N, H_GLN_171    | H, H_GLN_171     | 2.79 | 1.96 | 11.18 |
| 5U3N.PDB | O, H_LEU_175    | NE2, H_GLN_171  | HE21, H_GLN_171  | 2.95 | 2.10 | 7.82  |
| 5U3N.PDB | OD1, H_ASP_144  | NE2, H_GLN_171  | HE22, H_GLN_171  | 2.99 | 2.19 | 18.08 |
| 5U3N.PDB | O, H_GLN_171    | N, H_GLY_174    | H, H_GLY_174     | 2.89 | 2.04 | 7.78  |
| 5U3N.PDB | O, H_TYR_145    | N, H_TYR_176    | H, H_TYR_176     | 2.81 | 1.96 | 5.90  |
| 5U3N.PDB | O, H_VAL_169    | N, H_SER_177    | H, H_SER_177     | 2.98 | 2.23 | 24.19 |
| 5U3N.PDB | O, H_VAL_142    | N, H_LEU_178    | H, H_LEU_178     | 2.86 | 2.04 | 15.63 |
| 5U3N.PDB | O, H_HIS_164    | N, H_VAL_181    | H, H_VAL_181     | 2.83 | 1.99 | 10.90 |
| 5U3N.PDB | O, H_LEU_138    | N, H_VAL_182    | H, H_VAL_182     | 2.84 | 2.03 | 16.03 |
| 5U3N.PDB | O, H_ALA_136    | N, H_VAL_184    | H, H_VAL_184     | 2.89 | 2.08 | 16.51 |
| 5U3N.PDB | O, H_GLY_134    | N, H_SER_186    | H, H_SER_186     | 2.89 | 2.05 | 9.68  |
| 5U3N.PDB | O, H_PRO_185    | N, H_SER_188    | H, H_SER_188     | 2.86 | 2.07 | 20.15 |
| 5U3N.PDB | O, H_SER_188    | N, H_GLN_192    | H, H_GLN_192     | 2.98 | 2.15 | 13.47 |
| 5U3N.PDB | OD1, H_ASN_155  | N, H_ILE_195    | H, H_ILE_195     | 2.89 | 2.08 | 15.15 |
| 5U3N.PDB | O, H_LYS_209    | N, H_CYS_196    | H, H_CYS_196     | 2.96 | 2.17 | 20.77 |
| 5U3N.PDB | O, H_SER_153    | N, H_ASN_197    | H, H_ASN_197     | 2.66 | 1.82 | 9.65  |
| 5U3N.PDB | O, H_VAL_207    | N, H_VAL_198    | H, H_VAL_198     | 2.77 | 1.91 | 0.90  |
| 5U3N.PDB | O, H_THR_205    | N, H_HIS_200    | H, H_HIS_200     | 2.79 | 1.93 | 4.87  |
| 5U3N.PDB | O, H_PRO_147    | NE2, H_HIS_200  | HE2, H_HIS_200   | 2.62 | 1.78 | 9.36  |
| 5U3N.PDB | O, H_VAL_198    | N, H_VAL_207    | H, H_VAL_207     | 2.91 | 2.08 | 14.15 |
| 5U3N.PDB | O, H_TYR_194    | N, H_AVAL_211   | H, H_AVAL_211    | 2.89 | 2.05 | 9.34  |
| 5U3N.PDB | O, H_TYR_194    | N, H_BVAL_211   | H, H_BVAL_211    | 2.89 | 2.05 | 9.13  |
| 5U3N.PDB | O, H_PRO_126    | N, H_LYS_214    | H, H_LYS_214     | 2.98 | 2.16 | 14.79 |

|          |               |                |                 |      |      |       |
|----------|---------------|----------------|-----------------|------|------|-------|
| 5U3N.PDB | OG, L_SER_26  | N, L_ARG_3     | H, L_ARG_3      | 2.86 | 2.02 | 10.52 |
| 5U3N.PDB | O, L_ARG_24   | N, L_THR_5     | H, L_THR_5      | 2.80 | 1.98 | 16.09 |
| 5U3N.PDB | O, L_TYR_86   | NE2, L_GLN_6   | HE22, L_GLN_6   | 2.86 | 2.00 | 3.53  |
| 5U3N.PDB | O, L_LYS_103  | N, L_LEU_11    | H, L_LEU_11     | 2.90 | 2.11 | 18.99 |
| 5U3N.PDB | OH, L_TYR_140 | OG, L_SER_12   | HG, L_SER_12    | 2.60 | 1.87 | 23.71 |
| 5U3N.PDB | O, L_ASP_105  | N, L_ALA_13    | H, L_ALA_13     | 2.97 | 2.13 | 11.36 |
| 5U3N.PDB | OD2, L_ASP_17 | N, L_SER_14    | H, L_SER_14     | 2.75 | 1.96 | 18.71 |
| 5U3N.PDB | O, L_LEU_78   | N, L_GLY_16    | H, L_GLY_16     | 2.68 | 1.90 | 20.67 |
| 5U3N.PDB | O, L_ILE_75   | N, L_ILE_19    | H, L_ILE_19     | 2.79 | 1.95 | 9.47  |
| 5U3N.PDB | O, L_LEU_73   | N, L_ILE_21    | H, L_ILE_21     | 2.95 | 2.11 | 10.95 |
| 5U3N.PDB | O, L_PHE_71   | N, L_CYS_23    | H, L_CYS_23     | 2.87 | 2.04 | 13.33 |
| 5U3N.PDB | O, L_THR_5    | N, L_ARG_24    | H, L_ARG_24     | 2.75 | 1.90 | 7.83  |
| 5U3N.PDB | O, L_SER_69   | N, L_ALA_25    | H, L_ALA_25     | 2.85 | 2.03 | 14.92 |
| 5U3N.PDB | O, L_ARG_3    | N, L_SER_26    | H, L_SER_26     | 2.91 | 2.13 | 20.77 |
| 5U3N.PDB | O, L_GLY_68   | N, L_ILE_29    | H, L_ILE_29     | 2.69 | 1.85 | 10.61 |
| 5U3N.PDB | O, L_ILE_29   | N, L_TYR_32    | H, L_TYR_32     | 2.96 | 2.12 | 12.33 |
| 5U3N.PDB | O, L_ASP_31   | N, L_LEU_33    | H, L_LEU_33     | 2.77 | 2.05 | 28.04 |
| 5U3N.PDB | O, L_GLN_89   | N, L_ASN_34    | H, L_ASN_34     | 2.83 | 2.03 | 18.28 |
| 5U3N.PDB | OE1, L_GLN_89 | ND2, L_ASN_34  | HD22, L_ASN_34  | 2.99 | 2.18 | 18.14 |
| 5U3N.PDB | O, L_ILE_48   | N, L_TRP_35    | H, L_TRP_35     | 2.81 | 1.99 | 14.14 |
| 5U3N.PDB | O, L_TYR_87   | N, L_TYR_36    | H, L_TYR_36     | 2.79 | 1.96 | 13.76 |
| 5U3N.PDB | OE1, L_GLN_89 | OH, L_TYR_36   | HH, L_TYR_36    | 2.64 | 1.80 | 1.88  |
| 5U3N.PDB | O, L_LYS_45   | N, L_LYS_37    | H, L_LYS_37     | 2.84 | 2.01 | 13.10 |
| 5U3N.PDB | O, L_THR_85   | N, L_HIS_38    | H, L_HIS_38     | 2.80 | 2.03 | 21.49 |
| 5U3N.PDB | O, L_LYS_37   | N, L_LYS_45    | H, L_LYS_45     | 2.88 | 2.10 | 20.13 |
| 5U3N.PDB | O, L_TRP_35   | N, L_LEU_47    | H, L_LEU_47     | 2.79 | 1.93 | 3.84  |
| 5U3N.PDB | O, L_LYS_53   | N, L_TYR_49    | H, L_TYR_49     | 2.82 | 2.01 | 15.81 |
| 5U3N.PDB | OD1, L_ASN_34 | N, L_SER_50    | H, L_SER_50     | 2.96 | 2.18 | 21.09 |
| 5U3N.PDB | O, L_LEU_33   | N, L_ALA_51    | H, L_ALA_51     | 2.71 | 1.90 | 16.24 |
| 5U3N.PDB | O, L_TYR_49   | N, L_LYS_53    | H, L_LYS_53     | 2.83 | 2.03 | 18.60 |
| 5U3N.PDB | O, L_THR_72   | N, L_SER_65    | H, L_SER_65     | 2.95 | 2.15 | 18.23 |
| 5U3N.PDB | O, L_LYS_30   | N, L_GLY_68    | H, L_GLY_68     | 2.91 | 2.07 | 11.47 |
| 5U3N.PDB | O, L_CYS_23   | N, L_PHE_71    | H, L_PHE_71     | 2.92 | 2.08 | 10.20 |
| 5U3N.PDB | O, L_SER_65   | N, L_THR_72    | H, L_THR_72     | 2.89 | 2.07 | 15.08 |
| 5U3N.PDB | O, L_ILE_21   | N, L_LEU_73    | H, L_LEU_73     | 2.84 | 2.01 | 12.13 |
| 5U3N.PDB | O, L_SER_63   | N, L_THR_74    | H, L_THR_74     | 2.80 | 1.97 | 11.07 |
| 5U3N.PDB | O, L_ILE_19   | N, L_ILE_75    | H, L_ILE_75     | 2.86 | 2.08 | 19.78 |
| 5U3N.PDB | O, L_ARG_61   | N, L_SER_76    | H, L_SER_76     | 2.96 | 2.19 | 23.24 |
| 5U3N.PDB | O, L_ASP_17   | N, L_LEU_78    | H, L_LEU_78     | 2.72 | 1.92 | 19.04 |
| 5U3N.PDB | OD2, L_ASP_82 | N, L_GLN_79    | H, L_GLN_79     | 3.00 | 2.14 | 4.35  |
| 5U3N.PDB | O, L_GLN_79   | N, L_ASP_82    | H, L_ASP_82     | 2.83 | 1.99 | 10.16 |
| 5U3N.PDB | O, L_THR_102  | N, L_TYR_86    | H, L_TYR_86     | 2.90 | 2.10 | 17.67 |
| 5U3N.PDB | O, L_ASP_82   | OH, L_TYR_86   | HH, L_TYR_86    | 2.60 | 1.78 | 10.78 |
| 5U3N.PDB | O, L_TYR_36   | N, L_TYR_87    | H, L_TYR_87     | 2.92 | 2.10 | 15.56 |
| 5U3N.PDB | OE2, L_GLU_90 | N, L_TYR_92    | H, L_TYR_92     | 2.85 | 2.02 | 13.73 |
| 5U3N.PDB | O, L_CYS_88   | N, L_GLY_99    | H, L_GLY_99     | 2.82 | 2.02 | 16.99 |
| 5U3N.PDB | O, L_TYR_86   | N, L_THR_102   | H, L_THR_102    | 2.93 | 2.13 | 18.82 |
| 5U3N.PDB | O, L_PRO_8    | OG1, L_THR_102 | HG1, L_THR_102  | 2.67 | 1.96 | 27.26 |
| 5U3N.PDB | O, L_ALA_84   | N, L_VAL_104   | H, L_VAL_104    | 2.83 | 1.97 | 3.89  |
| 5U3N.PDB | O, L_LEU_11   | N, L_ASP_105   | H, L_ASP_105    | 2.98 | 2.15 | 13.92 |
| 5U3N.PDB | O, L_ALA_13   | N, L_LYS_107   | H, L_LYS_107    | 2.81 | 1.99 | 14.79 |
| 5U3N.PDB | O, L_THR_109  | NE, L_ARG_108  | HE, L_ARG_108   | 2.80 | 1.97 | 12.49 |
| 5U3N.PDB | O, L_ASP_170  | NH1, L_ARG_108 | HH11, L_ARG_108 | 2.97 | 2.15 | 15.13 |
| 5U3N.PDB | O, L_TYR_140  | N, L_ALA_111   | H, L_ALA_111    | 2.86 | 2.03 | 12.00 |
| 5U3N.PDB | O, L_LEU_135  | N, L_PHE_116   | H, L_PHE_116    | 2.88 | 2.09 | 19.79 |
| 5U3N.PDB | O, L_VAL_133  | N, L_PHE_118   | H, L_PHE_118    | 2.74 | 1.97 | 21.45 |
| 5U3N.PDB | OG, L_SER_131 | NE2, L_GLN_124 | HE22, L_GLN_124 | 2.80 | 1.94 | 3.81  |
| 5U3N.PDB | O, L_GLN_124  | N, L_SER_127   | H, L_SER_127    | 2.78 | 1.95 | 13.25 |

|          |                |                |                 |      |      |       |
|----------|----------------|----------------|-----------------|------|------|-------|
| 5U3N.PDB | O, L_GLN_124   | OG, L_SER_127  | HG, L_SER_127   | 2.63 | 1.79 | 4.63  |
| 5U3N.PDB | O, L_LEU_181   | N, L_ALA_130   | H, L_ALA_130    | 2.78 | 1.96 | 14.77 |
| 5U3N.PDB | OE1, L_GLN_124 | N, L_SER_131   | H, L_SER_131    | 2.94 | 2.15 | 18.69 |
| 5U3N.PDB | O, L_LEU_179   | N, L_VAL_132   | H, L_VAL_132    | 2.83 | 2.00 | 12.34 |
| 5U3N.PDB | O, L_SER_177   | N, L_CYS_134   | H, L_CYS_134    | 2.80 | 1.96 | 9.76  |
| 5U3N.PDB | O, L_PHE_116   | N, L_LEU_135   | H, L_LEU_135    | 2.72 | 1.88 | 11.53 |
| 5U3N.PDB | O, L_LEU_175   | N, L_LEU_136   | H, L_LEU_136    | 2.80 | 1.95 | 6.87  |
| 5U3N.PDB | O, L_SER_114   | N, L_ASN_137   | H, L_ASN_137    | 2.88 | 2.07 | 16.62 |
| 5U3N.PDB | OG, L_SER_174  | N, L_ASN_138   | H, L_ASN_138    | 2.99 | 2.16 | 12.45 |
| 5U3N.PDB | O, L_TYR_173   | N, L_PHE_139   | H, L_PHE_139    | 2.79 | 1.97 | 14.75 |
| 5U3N.PDB | O, L_ALA_111   | N, L_TYR_140   | H, L_TYR_140    | 2.87 | 2.08 | 18.95 |
| 5U3N.PDB | OD1, L_ASP_105 | OH, L_TYR_140  | HH, L_TYR_140   | 2.61 | 1.87 | 24.55 |
| 5U3N.PDB | O, L_GLU_195   | N, L_GLN_147   | H, L_GLN_147    | 2.84 | 2.01 | 12.00 |
| 5U3N.PDB | OG, L_SER_177  | NE1, L_TRP_148 | HE1, L_TRP_148  | 2.84 | 2.01 | 13.43 |
| 5U3N.PDB | O, L_ALA_193   | N, L_LYS_149   | H, L_LYS_149    | 2.84 | 2.00 | 9.94  |
| 5U3N.PDB | O, L_ALA_153   | N, L_VAL_150   | H, L_VAL_150    | 2.99 | 2.18 | 15.96 |
| 5U3N.PDB | O, L_AVAL_191  | N, L_ASP_151   | H, L_ASP_151    | 2.86 | 2.04 | 14.13 |
| 5U3N.PDB | O, L_BVAL_191  | N, L_ASP_151   | H, L_ASP_151    | 2.89 | 2.08 | 16.42 |
| 5U3N.PDB | O, L_VAL_150   | N, L_ALA_153   | H, L_ALA_153    | 2.90 | 2.05 | 8.35  |
| 5U3N.PDB | O, L_TRP_148   | N, L_GLN_155   | H, L_GLN_155    | 2.90 | 2.06 | 8.61  |
| 5U3N.PDB | O, L_ALA_153   | NE2, L_GLN_155 | HE21, L_GLN_155 | 2.97 | 2.12 | 8.23  |
| 5U3N.PDB | O, L_SER_176   | N, L_SER_162   | H, L_SER_162    | 2.95 | 2.15 | 17.97 |
| 5U3N.PDB | O, H_PRO_167   | OG, L_SER_162  | HG, L_SER_162   | 2.77 | 1.98 | 17.29 |
| 5U3N.PDB | O, L_SER_174   | N, L_THR_164   | H, L_THR_164    | 2.94 | 2.11 | 13.10 |
| 5U3N.PDB | O, L_SER_171   | NE2, L_GLN_166 | HE21, L_GLN_166 | 2.97 | 2.12 | 7.09  |
| 5U3N.PDB | O, L_LEU_106   | NE2, L_GLN_166 | HE22, L_GLN_166 | 2.79 | 2.02 | 22.69 |
| 5U3N.PDB | O, L_THR_172   | N, L_ASP_167   | H, L_ASP_167    | 2.90 | 2.10 | 16.69 |
| 5U3N.PDB | OD1, L_ASP_170 | N, L_THR_172   | H, L_THR_172    | 2.98 | 2.17 | 16.32 |
| 5U3N.PDB | OD1, L_ASP_170 | OG1, L_THR_172 | HG1, L_THR_172  | 2.63 | 1.80 | 7.71  |
| 5U3N.PDB | O, L_PHE_139   | N, L_TYR_173   | H, L_TYR_173    | 2.80 | 1.96 | 11.34 |
| 5U3N.PDB | OD2, L_ASP_105 | OH, L_TYR_173  | HH, L_TYR_173   | 2.66 | 1.88 | 16.93 |
| 5U3N.PDB | OG1, L_THR_164 | N, L_SER_174   | H, L_SER_174    | 2.99 | 2.17 | 14.48 |
| 5U3N.PDB | O, L_LEU_136   | N, L_LEU_175   | H, L_LEU_175    | 2.82 | 2.02 | 18.65 |
| 5U3N.PDB | O, L_SER_162   | N, L_SER_176   | H, L_SER_176    | 2.90 | 2.07 | 13.04 |
| 5U3N.PDB | O, L_CYS_134   | N, L_SER_177   | H, L_SER_177    | 2.88 | 2.05 | 10.58 |
| 5U3N.PDB | O, L_GLN_160   | N, L_THR_178   | H, L_THR_178    | 2.93 | 2.10 | 13.26 |
| 5U3N.PDB | O, L_VAL_132   | N, L_LEU_179   | H, L_LEU_179    | 2.72 | 1.91 | 15.62 |
| 5U3N.PDB | O, L_ASN_158   | N, L_ATHR_180  | H, L_ATHR_180   | 2.96 | 2.10 | 5.76  |
| 5U3N.PDB | O, L_ASN_158   | N, L_BTHR_180  | H, L_BTHR_180   | 2.98 | 2.13 | 8.23  |
| 5U3N.PDB | O, L_GLY_128   | N, L_LYS_183   | H, L_LYS_183    | 2.89 | 2.05 | 8.75  |
| 5U3N.PDB | O, L_SER_182   | N, L_TYR_186   | H, L_TYR_186    | 2.90 | 2.05 | 6.90  |
| 5U3N.PDB | O, L_LYS_183   | N, L_GLU_187   | H, L_GLU_187    | 2.91 | 2.12 | 19.43 |
| 5U3N.PDB | O, L_ASP_185   | ND1, L_HIS_189 | HD1, L_HIS_189  | 2.98 | 2.23 | 25.25 |
| 5U3N.PDB | OD1, L_ASP_151 | N, L_BVAL_191  | H, L_BVAL_191   | 3.00 | 2.14 | 6.33  |
| 5U3N.PDB | O, L_LYS_149   | N, L_ALA_193   | H, L_ALA_193    | 2.88 | 2.14 | 25.73 |
| 5U3N.PDB | O, L_LYS_207   | N, L_CYS_194   | H, L_CYS_194    | 2.96 | 2.16 | 18.86 |
| 5U3N.PDB | O, L_GLN_147   | N, L_GLU_195   | H, L_GLU_195    | 2.72 | 1.89 | 12.68 |
| 5U3N.PDB | O, L_VAL_205   | N, L_VAL_196   | H, L_VAL_196    | 2.76 | 1.95 | 15.71 |
| 5U3N.PDB | O, L_PRO_141   | NE2, L_HIS_198 | HE2, L_HIS_198  | 2.82 | 1.99 | 12.93 |
| 5U3N.PDB | O, L_HIS_198   | N, L_LEU_201   | H, L_LEU_201    | 2.79 | 1.94 | 8.84  |
| 5U3N.PDB | O, L_VAL_196   | N, L_VAL_205   | H, L_VAL_205    | 2.95 | 2.17 | 20.32 |
| 5U3N.PDB | O, L_TYR_192   | N, L_PHE_209   | H, L_PHE_209    | 2.95 | 2.17 | 22.09 |
| 5U3N.PDB | O, L_LYS_190   | N, L_ARG_211   | H, L_ARG_211    | 2.79 | 1.98 | 15.41 |
| 5U3N.PDB | O, L_HIS_189   | NE, L_ARG_211  | HE, L_ARG_211   | 2.72 | 1.88 | 11.65 |
| 5U3N.PDB | OD1, A_ASP_664 | N, A_TRP_666   | H, A_TRP_666    | 2.85 | 1.99 | 5.09  |
| 5U3N.PDB | OD2, A_ASP_674 | N, A_ASN_671   | H, A_ASN_671    | 2.89 | 2.10 | 19.70 |
| 5U3N.PDB | O, A_ASP_674   | N, A_TRP_678   | H, A_TRP_678    | 2.91 | 2.12 | 19.94 |
| 5U3N.PDB | O, A_ILE_675   | N, A_LEU_679   | H, A_LEU_679    | 2.85 | 2.02 | 12.95 |

|          |               |               |                |      |      |       |
|----------|---------------|---------------|----------------|------|------|-------|
| 5U3N.PDB | O, A_THR_676  | N, A_TRP_680  | H, A_TRP_680   | 2.88 | 2.03 | 5.54  |
| 5U3N.PDB | O, A_ASN_677  | N, A_TYR_681  | H, A_TYR_681   | 2.92 | 2.08 | 9.34  |
| 5U3N.PDB | O, A_TRP_678  | N, A_ILE_682  | H, A_ILE_682   | 2.84 | 2.11 | 26.86 |
| 5U3N.PDB | O, A_TRP_680  | N, A_LYS_684  | H, A_LYS_684   | 2.96 | 2.10 | 3.54  |
| 5UCB.PDB | O, H_SER_25   | N, H_GLN_3    | H, H_GLN_3     | 2.99 | 2.18 | 16.58 |
| 5UCB.PDB | O, H_SER_21   | N, H_SER_7    | H, H_SER_7     | 2.88 | 2.10 | 20.32 |
| 5UCB.PDB | O, H_THR_110  | N, H_VAL_12   | H, H_VAL_12    | 2.93 | 2.15 | 21.18 |
| 5UCB.PDB | O, H_LEU_82C  | N, H_GLY_15   | H, H_GLY_15    | 2.80 | 1.96 | 10.79 |
| 5UCB.PDB | O, H_GLN_13   | N, H_GLY_16   | H, H_GLY_16    | 2.96 | 2.13 | 13.46 |
| 5UCB.PDB | O, H_MET_82   | N, H_LEU_18   | H, H_LEU_18    | 2.96 | 2.17 | 20.10 |
| 5UCB.PDB | O, H_LEU_80   | N, H_LEU_20   | H, H_LEU_20    | 2.83 | 2.01 | 13.56 |
| 5UCB.PDB | O, H_SER_7    | N, H_SER_21   | H, H_SER_21    | 2.92 | 2.09 | 11.91 |
| 5UCB.PDB | O, H_ALA_78   | N, H_CYS_22   | H, H_CYS_22    | 2.76 | 2.02 | 25.89 |
| 5UCB.PDB | O, H_VAL_5    | N, H_ALA_23   | H, H_ALA_23    | 2.98 | 2.15 | 12.17 |
| 5UCB.PDB | O, H_GLN_3    | N, H_SER_25   | H, H_SER_25    | 2.87 | 2.02 | 8.54  |
| 5UCB.PDB | OD1, H_ASN_76 | N, H_VAL_29   | H, H_VAL_29    | 2.79 | 1.95 | 9.36  |
| 5UCB.PDB | OD1, H_ASN_28 | N, H_SER_30   | H, H_SER_30    | 2.95 | 2.10 | 6.39  |
| 5UCB.PDB | O, H_ALA_93   | N, H_HIS_35   | H, H_HIS_35    | 2.87 | 2.12 | 24.96 |
| 5UCB.PDB | OG, H_SER_33  | NE2, H_HIS_35 | HE2, H_HIS_35  | 2.88 | 2.09 | 19.50 |
| 5UCB.PDB | O, H_ALA_49   | N, H_TRP_36   | H, H_TRP_36    | 2.86 | 2.03 | 11.66 |
| 5UCB.PDB | O, H_TYR_91   | N, H_VAL_37   | H, H_VAL_37    | 2.92 | 2.10 | 13.93 |
| 5UCB.PDB | O, H_GLU_46   | N, H_ARG_38   | H, H_ARG_38    | 2.80 | 1.96 | 9.03  |
| 5UCB.PDB | OE1, H_GLU_46 | NE, H_ARG_38  | HE, H_ARG_38   | 2.85 | 2.03 | 15.54 |
| 5UCB.PDB | OH, H_TYR_90  | NH1, H_ARG_38 | HH11, H_ARG_38 | 2.94 | 2.12 | 15.88 |
| 5UCB.PDB | OD1, H_ASP_86 | NH1, H_ARG_38 | HH12, H_ARG_38 | 2.88 | 2.08 | 18.54 |
| 5UCB.PDB | O, H_VAL_89   | N, H_GLN_39   | H, H_GLN_39    | 2.83 | 2.10 | 26.74 |
| 5UCB.PDB | O, H_LYS_43   | NE2, H_GLN_39 | HE21, H_GLN_39 | 2.97 | 2.21 | 23.38 |
| 5UCB.PDB | OE1, L_GLN_38 | NE2, H_GLN_39 | HE22, H_GLN_39 | 2.96 | 2.12 | 9.92  |
| 5UCB.PDB | O, H_ALA_40   | N, H_LYS_43   | H, H_LYS_43    | 2.94 | 2.10 | 10.79 |
| 5UCB.PDB | O, H_ARG_38   | N, H_GLU_46   | H, H_GLU_46    | 2.82 | 2.01 | 15.90 |
| 5UCB.PDB | OG, H_SER_50  | NE1, H_TRP_47 | HE1, H_TRP_47  | 2.72 | 1.98 | 25.90 |
| 5UCB.PDB | O, H_TRP_36   | N, H_VAL_48   | H, H_VAL_48    | 2.90 | 2.07 | 12.31 |
| 5UCB.PDB | O, H_SER_58   | N, H_SER_50   | H, H_SER_50    | 2.91 | 2.11 | 18.26 |
| 5UCB.PDB | O, H_ILE_34   | N, H_ILE_51   | H, H_ILE_51    | 2.92 | 2.10 | 14.85 |
| 5UCB.PDB | O, H_SER_56   | N, H_TYR_52   | H, H_TYR_52    | 2.91 | 2.14 | 22.03 |
| 5UCB.PDB | O, B_LEU_5    | OH, H_TYR_53  | HH, H_TYR_53   | 2.73 | 1.99 | 23.03 |
| 5UCB.PDB | O, H_PRO_52A  | N, H_TYR_54   | H, H_TYR_54    | 2.76 | 2.01 | 24.37 |
| 5UCB.PDB | O, H_SER_50   | N, H_SER_58   | H, H_SER_58    | 2.97 | 2.16 | 17.28 |
| 5UCB.PDB | O, H_VAL_48   | N, H_ALA_60   | H, H_ALA_60    | 2.97 | 2.12 | 8.58  |
| 5UCB.PDB | O, H_VAL_63   | N, H_ARG_66   | H, H_ARG_66    | 2.93 | 2.10 | 10.67 |
| 5UCB.PDB | O, H_SER_82B  | NH1, H_ARG_66 | HH11, H_ARG_66 | 2.96 | 2.19 | 22.84 |
| 5UCB.PDB | OD2, H_ASP_86 | NH1, H_ARG_66 | HH12, H_ARG_66 | 2.75 | 1.90 | 5.99  |
| 5UCB.PDB | O, H_SER_62   | NH2, H_ARG_66 | HH21, H_ARG_66 | 2.91 | 2.06 | 4.12  |
| 5UCB.PDB | O, H_GLN_81   | N, H_THR_68   | H, H_THR_68    | 2.89 | 2.10 | 19.31 |
| 5UCB.PDB | OH, H_TYR_59  | N, H_ILE_69   | H, H_ILE_69    | 2.89 | 2.08 | 15.94 |
| 5UCB.PDB | O, H_THR_77   | N, H_ASP_72   | H, H_ASP_72    | 2.91 | 2.07 | 9.90  |
| 5UCB.PDB | OD1, H_ASP_72 | OG, H_SER_74  | HG, H_SER_74   | 2.60 | 1.83 | 20.07 |
| 5UCB.PDB | O, H_PHE_27   | ND2, H_ASN_76 | HD21, H_ASN_76 | 2.86 | 2.00 | 2.63  |
| 5UCB.PDB | O, H_LYS_75   | OG1, H_THR_77 | HG1, H_THR_77  | 2.96 | 2.13 | 8.72  |
| 5UCB.PDB | O, H_CYS_22   | N, H_ALA_78   | H, H_ALA_78    | 2.91 | 2.09 | 14.01 |
| 5UCB.PDB | O, H_SER_70   | N, H_TYR_79   | H, H_TYR_79    | 2.82 | 2.01 | 17.30 |
| 5UCB.PDB | O, H_LEU_20   | N, H_LEU_80   | H, H_LEU_80    | 2.93 | 2.12 | 15.92 |
| 5UCB.PDB | O, H_THR_68   | N, H_GLN_81   | H, H_GLN_81    | 2.85 | 2.03 | 14.25 |
| 5UCB.PDB | O, H_LEU_18   | N, H_MET_82   | H, H_MET_82    | 2.76 | 1.91 | 5.48  |
| 5UCB.PDB | OD2, H_ASP_86 | N, H_ARG_83   | H, H_ARG_83    | 2.84 | 2.02 | 15.13 |
| 5UCB.PDB | O, H_ARG_83   | N, H_ASP_86   | H, H_ASP_86    | 2.85 | 2.00 | 6.49  |
| 5UCB.PDB | O, H_GLN_39   | N, H_VAL_89   | H, H_VAL_89    | 2.94 | 2.15 | 19.65 |
| 5UCB.PDB | O, H_THR_107  | N, H_TYR_90   | H, H_TYR_90    | 2.82 | 1.97 | 6.43  |

|          |                |                |                 |      |      |       |
|----------|----------------|----------------|-----------------|------|------|-------|
| 5UCB.PDB | O, H_ASP_86    | OH, H_TYR_90   | HH, H_TYR_90    | 2.71 | 1.87 | 3.56  |
| 5UCB.PDB | O, H_VAL_37    | N, H_TYR_91    | H, H_TYR_91     | 2.75 | 1.90 | 8.79  |
| 5UCB.PDB | OE2, H_GLU_6   | N, H_CYS_92    | H, H_CYS_92     | 2.86 | 2.03 | 11.54 |
| 5UCB.PDB | O, H_HIS_35    | N, H_ALA_93    | H, H_ALA_93     | 2.82 | 2.03 | 19.85 |
| 5UCB.PDB | O, H_TYR_102   | N, H_ARG_94    | H, H_ARG_94     | 2.90 | 2.09 | 15.76 |
| 5UCB.PDB | O, H_SER_33    | N, H_GLY_95    | H, H_GLY_95     | 2.82 | 1.97 | 6.39  |
| 5UCB.PDB | O, H_ALA_99    | N, H_TYR_96    | H, H_TYR_96     | 2.79 | 1.94 | 8.94  |
| 5UCB.PDB | O, B_VAL_145   | N, H_GLY_97    | H, H_GLY_97     | 2.90 | 2.05 | 8.98  |
| 5UCB.PDB | O, H_TYR_96    | N, H_ALA_99    | H, H_ALA_99     | 2.86 | 2.03 | 11.06 |
| 5UCB.PDB | O, H_ARG_94    | N, H_ASP_101   | H, H_ASP_101    | 2.97 | 2.22 | 25.01 |
| 5UCB.PDB | O, H_CYS_92    | N, H_GLY_104   | H, H_GLY_104    | 2.92 | 2.08 | 11.62 |
| 5UCB.PDB | OE1, H_GLU_6   | N, H_GLY_106   | H, H_GLY_106    | 2.84 | 2.01 | 12.83 |
| 5UCB.PDB | O, H_TYR_90    | N, H_THR_107   | H, H_THR_107    | 2.95 | 2.15 | 17.03 |
| 5UCB.PDB | O, H_ALA_88    | N, H_VAL_109   | H, H_VAL_109    | 2.93 | 2.08 | 2.47  |
| 5UCB.PDB | OG1, H_THR_87  | N, H_VAL_111   | H, H_VAL_111    | 2.96 | 2.11 | 5.78  |
| 5UCB.PDB | O, H_VAL_12    | N, H_PHE_112   | H, H_PHE_112    | 2.91 | 2.15 | 23.15 |
| 5UCB.PDB | O, H_PHE_146   | N, H_LYS_116   | H, H_LYS_116    | 2.86 | 2.03 | 11.25 |
| 5UCB.PDB | O, H_LYS_143   | N, H_SER_120   | H, H_SER_120    | 2.97 | 2.14 | 12.13 |
| 5UCB.PDB | O, H_LEU_141   | N, H_PHE_122   | H, H_PHE_122    | 2.87 | 2.04 | 11.40 |
| 5UCB.PDB | O, H_GLY_139   | N, H_LEU_124   | H, H_LEU_124    | 2.78 | 1.92 | 6.23  |
| 5UCB.PDB | OG, H_SER_127  | N, H_LYS_129   | H, H_LYS_129    | 2.96 | 2.13 | 12.32 |
| 5UCB.PDB | O, L_SER_208   | NZ, H_LYS_129  | HZ2, H_LYS_129  | 2.83 | 2.06 | 25.53 |
| 5UCB.PDB | O, H_SER_127   | N, H_SER_130   | H, H_SER_130    | 2.91 | 2.06 | 7.11  |
| 5UCB.PDB | O, H_SER_132   | N, H_THR_135   | H, H_THR_135    | 2.95 | 2.10 | 8.67  |
| 5UCB.PDB | O, H_VAL_184   | N, H_ALA_136   | H, H_ALA_136    | 2.78 | 1.98 | 18.51 |
| 5UCB.PDB | O, H_SER_130   | N, H_ALA_137   | H, H_ALA_137    | 2.85 | 2.03 | 15.53 |
| 5UCB.PDB | O, H_VAL_182   | N, H_LEU_138   | H, H_LEU_138    | 2.99 | 2.18 | 16.62 |
| 5UCB.PDB | O, H_LEU_124   | N, H_GLY_139   | H, H_GLY_139    | 2.94 | 2.17 | 22.56 |
| 5UCB.PDB | O, H_SER_180   | N, H_CYS_140   | H, H_CYS_140    | 2.83 | 2.03 | 18.28 |
| 5UCB.PDB | O, H_PHE_122   | N, H_LEU_141   | H, H_LEU_141    | 2.79 | 1.94 | 8.33  |
| 5UCB.PDB | O, H_LEU_178   | N, H_VAL_142   | H, H_VAL_142    | 2.74 | 1.88 | 4.14  |
| 5UCB.PDB | O, H_SER_120   | N, H_LYS_143   | H, H_LYS_143    | 2.78 | 1.93 | 5.09  |
| 5UCB.PDB | O, H_LYS_116   | N, H_PHE_146   | H, H_PHE_146    | 2.95 | 2.14 | 16.58 |
| 5UCB.PDB | O, H_ASN_199   | N, H_THR_151   | H, H_THR_151    | 2.98 | 2.16 | 14.61 |
| 5UCB.PDB | O, H_ASN_197   | N, H_SER_153   | H, H_SER_153    | 2.95 | 2.14 | 16.54 |
| 5UCB.PDB | OD1, H_ASN_197 | OG, H_SER_153  | HG, H_SER_153   | 2.85 | 2.06 | 15.76 |
| 5UCB.PDB | OG, H_SER_180  | NE1, H_TRP_154 | HE1, H_TRP_154  | 2.92 | 2.07 | 7.16  |
| 5UCB.PDB | O, H_ILE_195   | N, H_ASN_155   | H, H_ASN_155    | 2.78 | 1.94 | 9.76  |
| 5UCB.PDB | OD1, H_ASN_197 | N, H_SER_156   | H, H_SER_156    | 2.74 | 1.94 | 17.37 |
| 5UCB.PDB | O, H_TRP_154   | N, H_GLY_157   | H, H_GLY_157    | 2.95 | 2.22 | 27.37 |
| 5UCB.PDB | O, H_VAL_181   | N, H_HIS_164   | H, H_HIS_164    | 2.82 | 1.99 | 13.79 |
| 5UCB.PDB | O, H_SER_179   | N, H_PHE_166   | H, H_PHE_166    | 2.94 | 2.09 | 6.35  |
| 5UCB.PDB | O, H_SER_177   | N, H_VAL_169   | H, H_VAL_169    | 2.90 | 2.07 | 11.28 |
| 5UCB.PDB | O, H_LEU_175   | N, H_GLN_171   | H, H_GLN_171    | 2.90 | 2.06 | 8.51  |
| 5UCB.PDB | OD1, H_ASP_144 | NE2, H_GLN_171 | HE22, H_GLN_171 | 2.78 | 1.99 | 18.86 |
| 5UCB.PDB | O, H_GLN_171   | N, H_GLY_174   | H, H_GLY_174    | 2.86 | 2.01 | 8.15  |
| 5UCB.PDB | O, H_TYR_145   | N, H_TYR_176   | H, H_TYR_176    | 2.86 | 2.01 | 5.39  |
| 5UCB.PDB | O, H_VAL_142   | N, H_LEU_178   | H, H_LEU_178    | 2.87 | 2.06 | 16.64 |
| 5UCB.PDB | O, H_HIS_164   | N, H_VAL_181   | H, H_VAL_181    | 2.87 | 2.03 | 11.87 |
| 5UCB.PDB | O, H_LEU_138   | N, H_VAL_182   | H, H_VAL_182    | 2.82 | 2.02 | 16.97 |
| 5UCB.PDB | O, H_ALA_136   | N, H_VAL_184   | H, H_VAL_184    | 2.90 | 2.07 | 12.53 |
| 5UCB.PDB | O, H_GLY_134   | N, H_SER_186   | H, H_SER_186    | 2.94 | 2.10 | 11.37 |
| 5UCB.PDB | O, H_PRO_185   | N, H_SER_188   | H, H_SER_188    | 2.97 | 2.14 | 13.02 |
| 5UCB.PDB | O, H_PRO_185   | OG, H_SER_188  | HG, H_SER_188   | 2.68 | 1.85 | 4.71  |
| 5UCB.PDB | O, H_THR_193   | NE2, H_GLN_192 | HE21, H_GLN_192 | 2.94 | 2.08 | 2.24  |
| 5UCB.PDB | OG, H_SER_188  | OH, H_TYR_194  | HH, H_TYR_194   | 2.72 | 1.90 | 9.93  |
| 5UCB.PDB | OD1, H_ASN_155 | N, H_ILE_195   | H, H_ILE_195    | 2.82 | 2.03 | 19.24 |
| 5UCB.PDB | O, H_LYS_209   | N, H_CYS_196   | H, H_CYS_196    | 2.98 | 2.19 | 20.71 |

|          |                |                |                 |      |      |       |
|----------|----------------|----------------|-----------------|------|------|-------|
| 5UCB.PDB | O, H_SER_153   | N, H_ASN_197   | H, H_ASN_197    | 2.75 | 1.90 | 8.02  |
| 5UCB.PDB | OD1, H_ASP_208 | ND2, H_ASN_197 | HD22, H_ASN_197 | 2.80 | 1.95 | 7.44  |
| 5UCB.PDB | O, H_VAL_207   | N, H_VAL_198   | H, H_VAL_198    | 2.80 | 1.95 | 7.37  |
| 5UCB.PDB | O, H_THR_151   | N, H_ASN_199   | H, H_ASN_199    | 2.96 | 2.13 | 12.40 |
| 5UCB.PDB | O, H_THR_205   | N, H_HIS_200   | H, H_HIS_200    | 2.86 | 2.02 | 9.86  |
| 5UCB.PDB | O, H_PRO_147   | NE2, H_HIS_200 | HE2, H_HIS_200  | 2.80 | 1.97 | 12.02 |
| 5UCB.PDB | O, H_VAL_198   | N, H_VAL_207   | H, H_VAL_207    | 2.86 | 2.03 | 11.55 |
| 5UCB.PDB | O, H_CYS_196   | N, H_LYS_209   | H, H_LYS_209    | 2.99 | 2.16 | 13.99 |
| 5UCB.PDB | O, H_TYR_194   | N, H_VAL_211   | H, H_VAL_211    | 2.90 | 2.04 | 4.78  |
| 5UCB.PDB | O, L_TYR_86    | NE2, L_GLN_6   | HE22, L_GLN_6   | 2.81 | 2.01 | 17.50 |
| 5UCB.PDB | O, L_LYS_103   | N, L_LEU_11    | H, L_LEU_11     | 2.85 | 2.05 | 18.74 |
| 5UCB.PDB | O, L_GLU_105   | N, L_ALA_13    | H, L_ALA_13     | 2.91 | 2.12 | 19.40 |
| 5UCB.PDB | OD2, L_ASP_17  | N, L_SER_14    | H, L_SER_14     | 2.85 | 2.00 | 7.52  |
| 5UCB.PDB | O, L_LEU_78    | N, L_GLY_16    | H, L_GLY_16     | 2.86 | 2.04 | 14.88 |
| 5UCB.PDB | O, L_SER_14    | N, L_ASP_17    | H, L_ASP_17     | 2.92 | 2.09 | 12.95 |
| 5UCB.PDB | O, L_LEU_73    | N, L_ILE_21    | H, L_ILE_21     | 2.89 | 2.08 | 16.55 |
| 5UCB.PDB | O, L_TYR_71    | N, L_CYS_23    | H, L_CYS_23     | 2.80 | 1.98 | 13.36 |
| 5UCB.PDB | O, L_THR_5     | N, L_ARG_24    | H, L_ARG_24     | 2.82 | 2.03 | 19.90 |
| 5UCB.PDB | O, L_THR_69    | N, L_ALA_25    | H, L_ALA_25     | 2.83 | 1.98 | 7.34  |
| 5UCB.PDB | OE1, L_GLN_3   | OG, L_SER_26   | HG, L_SER_26    | 2.61 | 1.78 | 7.17  |
| 5UCB.PDB | OD2, B_ASP_51  | OG, L_SER_30   | HG, L_SER_30    | 2.58 | 1.81 | 20.19 |
| 5UCB.PDB | O, L_ILE_48    | N, L_TRP_35    | H, L_TRP_35     | 2.89 | 2.09 | 17.06 |
| 5UCB.PDB | O, L_TYR_87    | N, L_TYR_36    | H, L_TYR_36     | 2.82 | 2.03 | 19.85 |
| 5UCB.PDB | OE1, L_GLN_89  | OH, L_TYR_36   | HH, L_TYR_36    | 2.64 | 1.84 | 15.57 |
| 5UCB.PDB | O, L_LYS_45    | N, L_GLN_37    | H, L_GLN_37     | 2.91 | 2.09 | 14.54 |
| 5UCB.PDB | OH, L_TYR_86   | NE2, L_GLN_37  | HE21, L_GLN_37  | 2.99 | 2.15 | 9.80  |
| 5UCB.PDB | O, L_THR_85    | N, L_GLN_38    | H, L_GLN_38     | 2.74 | 1.93 | 16.51 |
| 5UCB.PDB | O, L_LYS_42    | NE2, L_GLN_38  | HE21, L_GLN_38  | 2.88 | 2.08 | 17.97 |
| 5UCB.PDB | OE1, H_GLN_39  | NE2, L_GLN_38  | HE22, L_GLN_38  | 2.95 | 2.13 | 14.86 |
| 5UCB.PDB | O, L_GLU_81    | NZ, L_LYS_39   | HZ1, L_LYS_39   | 2.69 | 1.90 | 22.19 |
| 5UCB.PDB | O, L_GLN_37    | N, L_LYS_45    | H, L_LYS_45     | 2.84 | 2.05 | 19.57 |
| 5UCB.PDB | O, L_TRP_35    | N, L_LEU_47    | H, L_LEU_47     | 2.82 | 1.97 | 5.85  |
| 5UCB.PDB | O, L_SER_53    | N, L_TYR_49    | H, L_TYR_49     | 2.87 | 2.07 | 17.59 |
| 5UCB.PDB | O, L_VAL_33    | N, L_ALA_51    | H, L_ALA_51     | 2.85 | 2.02 | 11.41 |
| 5UCB.PDB | O, L_TYR_49    | N, L_SER_53    | H, L_SER_53     | 2.93 | 2.12 | 15.91 |
| 5UCB.PDB | O, L_LEU_47    | N, L_TYR_55    | H, L_TYR_55     | 2.94 | 2.08 | 2.44  |
| 5UCB.PDB | OD2, L_ASP_82  | NE, L_ARG_61   | HE, L_ARG_61    | 2.82 | 2.01 | 16.79 |
| 5UCB.PDB | OD1, L_ASP_82  | NH2, L_ARG_61  | HH21, L_ARG_61  | 2.85 | 1.99 | 4.65  |
| 5UCB.PDB | O, L_THR_74    | N, L_SER_63    | H, L_SER_63     | 2.97 | 2.19 | 19.92 |
| 5UCB.PDB | O, L_THR_72    | N, L_SER_65    | H, L_SER_65     | 2.97 | 2.20 | 22.80 |
| 5UCB.PDB | O, B_SER_47    | NH1, L_ARG_66  | HH12, L_ARG_66  | 2.77 | 1.99 | 21.64 |
| 5UCB.PDB | O, B_SER_47    | NH2, L_ARG_66  | HH22, L_ARG_66  | 2.89 | 2.16 | 27.12 |
| 5UCB.PDB | O, L_ASP_70    | N, L_SER_67    | H, L_SER_67     | 2.84 | 2.01 | 11.95 |
| 5UCB.PDB | O, B_ARG_48    | N, L_GLY_68    | H, L_GLY_68     | 2.79 | 1.95 | 9.02  |
| 5UCB.PDB | O, L_SER_67    | N, L_ASP_70    | H, L_ASP_70     | 2.95 | 2.11 | 10.96 |
| 5UCB.PDB | O, L_CYS_23    | N, L_TYR_71    | H, L_TYR_71     | 2.85 | 2.00 | 7.89  |
| 5UCB.PDB | O, L_SER_65    | N, L_THR_72    | H, L_THR_72     | 2.92 | 2.09 | 12.93 |
| 5UCB.PDB | OG1, L_THR_22  | OG1, L_THR_72  | HG1, L_THR_72   | 2.96 | 2.18 | 19.19 |
| 5UCB.PDB | O, L_ILE_21    | N, L_LEU_73    | H, L_LEU_73     | 2.82 | 2.02 | 18.31 |
| 5UCB.PDB | O, L_SER_63    | N, L_THR_74    | H, L_THR_74     | 2.88 | 2.03 | 7.94  |
| 5UCB.PDB | O, L_VAL_19    | N, L_ILE_75    | H, L_ILE_75     | 2.85 | 2.02 | 13.35 |
| 5UCB.PDB | O, L_ARG_61    | N, L_SER_76    | H, L_SER_76     | 2.93 | 2.12 | 17.13 |
| 5UCB.PDB | O, L_ASP_17    | N, L_LEU_78    | H, L_LEU_78     | 2.83 | 2.04 | 19.24 |
| 5UCB.PDB | OD2, L_ASP_82  | N, L_GLN_79    | H, L_GLN_79     | 2.81 | 1.95 | 4.90  |
| 5UCB.PDB | O, L_GLN_79    | N, L_ASP_82    | H, L_ASP_82     | 2.94 | 2.09 | 7.96  |
| 5UCB.PDB | O, L_GLN_38    | N, L_THR_85    | H, L_THR_85     | 2.95 | 2.11 | 8.28  |
| 5UCB.PDB | O, L_THR_102   | N, L_TYR_86    | H, L_TYR_86     | 2.88 | 2.06 | 15.79 |
| 5UCB.PDB | O, L_ASP_82    | OH, L_TYR_86   | HH, L_TYR_86    | 2.68 | 1.86 | 10.64 |

|          |                |                |                 |      |      |       |
|----------|----------------|----------------|-----------------|------|------|-------|
| 5UCB.PDB | O, L_TYR_36    | N, L_TYR_87    | H, L_TYR_87     | 2.88 | 2.06 | 15.19 |
| 5UCB.PDB | O, L_ALA_32    | N, L_ASP_91    | H, L_ASP_91     | 2.84 | 1.99 | 7.27  |
| 5UCB.PDB | O, L_LEU_95    | N, L_GLY_92    | H, L_GLY_92     | 2.81 | 2.01 | 17.89 |
| 5UCB.PDB | O, L_GLN_90    | N, L_THR_97    | H, L_THR_97     | 2.89 | 2.07 | 13.99 |
| 5UCB.PDB | O, L_CYS_88    | N, L_GLY_99    | H, L_GLY_99     | 2.87 | 2.06 | 16.05 |
| 5UCB.PDB | O, L_GLN_6     | NE2, L_GLN_100 | HE21, L_GLN_100 | 2.96 | 2.10 | 3.33  |
| 5UCB.PDB | O, L_TYR_86    | N, L_THR_102   | H, L_THR_102    | 2.91 | 2.11 | 19.06 |
| 5UCB.PDB | O, L_PRO_8     | OG1, L_THR_102 | HG1, L_THR_102  | 2.64 | 1.82 | 9.17  |
| 5UCB.PDB | O, L_SER_9     | N, L_LYS_103   | H, L_LYS_103    | 2.86 | 2.02 | 9.83  |
| 5UCB.PDB | OE1, L_GLU_165 | NZ, L_LYS_103  | HZ3, L_LYS_103  | 2.77 | 1.90 | 9.89  |
| 5UCB.PDB | O, L_ALA_84    | N, L_VAL_104   | H, L_VAL_104    | 2.92 | 2.06 | 4.48  |
| 5UCB.PDB | O, L_LEU_11    | N, L_GLU_105   | H, L_GLU_105    | 2.83 | 1.98 | 7.22  |
| 5UCB.PDB | OE1, L_GLN_166 | N, L_ILE_106   | H, L_ILE_106    | 2.97 | 2.14 | 12.29 |
| 5UCB.PDB | O, L_ALA_13    | N, L_LYS_107   | H, L_LYS_107    | 2.94 | 2.14 | 17.97 |
| 5UCB.PDB | O, L_THR_109   | NE, L_ARG_108  | HE, L_ARG_108   | 2.81 | 1.98 | 12.46 |
| 5UCB.PDB | O, L_ASP_170   | NH1, L_ARG_108 | HH11, L_ARG_108 | 2.96 | 2.13 | 10.72 |
| 5UCB.PDB | O, L_TYR_140   | N, L_ALA_111   | H, L_ALA_111    | 2.86 | 2.03 | 12.05 |
| 5UCB.PDB | O, L_LEU_135   | N, L_PHE_116   | H, L_PHE_116    | 2.91 | 2.10 | 16.52 |
| 5UCB.PDB | O, L_VAL_133   | N, L_PHE_118   | H, L_PHE_118    | 2.84 | 2.06 | 20.95 |
| 5UCB.PDB | OG, L_SER_131  | NE2, L_GLN_124 | HE22, L_GLN_124 | 2.73 | 1.87 | 2.66  |
| 5UCB.PDB | O, L_GLN_124   | N, L_SER_127   | H, L_SER_127    | 2.84 | 2.11 | 27.03 |
| 5UCB.PDB | O, L_GLN_124   | OG, L_SER_127  | HG, L_SER_127   | 2.54 | 1.72 | 9.22  |
| 5UCB.PDB | O, L_LEU_125   | N, L_GLY_128   | H, L_GLY_128    | 2.90 | 2.09 | 16.29 |
| 5UCB.PDB | O, L_LEU_181   | N, L_ALA_130   | H, L_ALA_130    | 2.86 | 2.04 | 14.78 |
| 5UCB.PDB | OE1, L_GLN_124 | N, L_SER_131   | H, L_SER_131    | 2.91 | 2.10 | 16.27 |
| 5UCB.PDB | O, L_LEU_179   | N, L_VAL_132   | H, L_VAL_132    | 2.80 | 1.95 | 9.72  |
| 5UCB.PDB | O, L_SER_177   | N, L_CYS_134   | H, L_CYS_134    | 2.81 | 1.97 | 8.89  |
| 5UCB.PDB | O, L_PHE_116   | N, L_LEU_135   | H, L_LEU_135    | 2.84 | 2.00 | 9.91  |
| 5UCB.PDB | O, L_LEU_175   | N, L_LEU_136   | H, L_LEU_136    | 2.82 | 1.97 | 6.91  |
| 5UCB.PDB | O, L_SER_114   | N, L_ASN_137   | H, L_ASN_137    | 2.82 | 2.00 | 13.64 |
| 5UCB.PDB | OG, L_SER_174  | N, L_ASN_138   | H, L_ASN_138    | 3.00 | 2.18 | 14.73 |
| 5UCB.PDB | O, L_TYR_173   | N, L_PHE_139   | H, L_PHE_139    | 2.80 | 1.98 | 15.50 |
| 5UCB.PDB | O, L_ALA_111   | N, L_TYR_140   | H, L_TYR_140    | 2.92 | 2.11 | 16.50 |
| 5UCB.PDB | O, L_GLU_195   | N, L_GLN_147   | H, L_GLN_147    | 2.87 | 2.02 | 9.88  |
| 5UCB.PDB | OG, L_SER_177  | NE1, L_TRP_148 | HE1, L_TRP_148  | 2.92 | 2.09 | 12.30 |
| 5UCB.PDB | O, L_ALA_193   | N, L_LYS_149   | H, L_LYS_149    | 2.92 | 2.09 | 12.63 |
| 5UCB.PDB | O, L_ALA_153   | N, L_VAL_150   | H, L_VAL_150    | 2.98 | 2.16 | 16.04 |
| 5UCB.PDB | O, L_VAL_191   | N, L_ASP_151   | H, L_ASP_151    | 2.74 | 1.90 | 10.65 |
| 5UCB.PDB | O, L_VAL_150   | N, L_ALA_153   | H, L_ALA_153    | 2.91 | 2.06 | 8.01  |
| 5UCB.PDB | O, L_TRP_148   | N, L_GLN_155   | H, L_GLN_155    | 2.94 | 2.12 | 14.17 |
| 5UCB.PDB | O, L_ALA_153   | NE2, L_GLN_155 | HE21, L_GLN_155 | 2.97 | 2.12 | 7.54  |
| 5UCB.PDB | OE1, L_GLN_155 | ND2, L_ASN_158 | HD21, L_ASN_158 | 2.98 | 2.15 | 12.35 |
| 5UCB.PDB | O, H_LEU_170   | NE2, L_GLN_160 | HE22, L_GLN_160 | 2.99 | 2.13 | 5.75  |
| 5UCB.PDB | O, L_SER_176   | N, L_SER_162   | H, L_SER_162    | 2.95 | 2.16 | 19.90 |
| 5UCB.PDB | O, H_PRO_167   | OG, L_SER_162  | HG, L_SER_162   | 2.68 | 1.94 | 24.13 |
| 5UCB.PDB | O, L_SER_174   | N, L_THR_164   | H, L_THR_164    | 2.94 | 2.12 | 14.57 |
| 5UCB.PDB | O, L_SER_171   | NE2, L_GLN_166 | HE21, L_GLN_166 | 2.94 | 2.17 | 23.45 |
| 5UCB.PDB | O, L_ILE_106   | NE2, L_GLN_166 | HE22, L_GLN_166 | 2.80 | 1.96 | 9.36  |
| 5UCB.PDB | O, L_THR_172   | N, L_ASP_167   | H, L_ASP_167    | 2.83 | 2.01 | 14.08 |
| 5UCB.PDB | OD2, L_ASP_167 | N, L_ASP_170   | H, L_ASP_170    | 2.95 | 2.15 | 18.34 |
| 5UCB.PDB | O, L_ASP_167   | N, L_SER_171   | H, L_SER_171    | 2.83 | 2.10 | 27.38 |
| 5UCB.PDB | OD1, L_ASP_170 | N, L_THR_172   | H, L_THR_172    | 2.93 | 2.09 | 9.94  |
| 5UCB.PDB | OD1, L_ASP_170 | OG1, L_THR_172 | HG1, L_THR_172  | 2.71 | 1.89 | 8.99  |
| 5UCB.PDB | O, L_PHE_139   | N, L_TYR_173   | H, L_TYR_173    | 2.82 | 1.97 | 6.86  |
| 5UCB.PDB | OE2, L_GLU_105 | OH, L_TYR_173  | HH, L_TYR_173   | 2.61 | 1.81 | 15.35 |
| 5UCB.PDB | O, L_LEU_136   | N, L_LEU_175   | H, L_LEU_175    | 2.88 | 2.08 | 17.16 |
| 5UCB.PDB | O, L_SER_162   | N, L_SER_176   | H, L_SER_176    | 2.94 | 2.12 | 15.24 |
| 5UCB.PDB | O, L_CYS_134   | N, L_SER_177   | H, L_SER_177    | 2.86 | 2.02 | 11.18 |



|          |                |                |                |      |      |       |
|----------|----------------|----------------|----------------|------|------|-------|
| 5UCB.PDB | O, L_GLN_160   | N, L_THR_178   | H, L_THR_178   | 2.87 | 2.04 | 12.63 |
| 5UCB.PDB | O, L_VAL_132   | N, L_LEU_179   | H, L_LEU_179   | 2.79 | 1.97 | 14.56 |
| 5UCB.PDB | O, L_ASN_158   | N, L_THR_180   | H, L_THR_180   | 2.97 | 2.12 | 9.36  |
| 5UCB.PDB | O, L_ALA_130   | N, L_LEU_181   | H, L_LEU_181   | 2.88 | 2.04 | 9.45  |
| 5UCB.PDB | OG, L_SER_182  | N, L_ASP_185   | H, L_ASP_185   | 3.00 | 2.15 | 7.40  |
| 5UCB.PDB | O, L_SER_182   | N, L_TYR_186   | H, L_TYR_186   | 2.90 | 2.06 | 11.13 |
| 5UCB.PDB | O, L_LYS_183   | N, L_GLU_187   | H, L_GLU_187   | 2.89 | 2.04 | 6.84  |
| 5UCB.PDB | OD1, L_ASP_151 | N, L_VAL_191   | H, L_VAL_191   | 2.90 | 2.05 | 6.39  |
| 5UCB.PDB | O, L_PHE_209   | N, L_TYR_192   | H, L_TYR_192   | 2.96 | 2.11 | 7.95  |
| 5UCB.PDB | O, L_LYS_149   | N, L_ALA_193   | H, L_ALA_193   | 2.91 | 2.10 | 16.38 |
| 5UCB.PDB | O, L_LYS_207   | N, L_CYS_194   | H, L_CYS_194   | 2.82 | 1.97 | 8.63  |
| 5UCB.PDB | O, L_GLN_147   | N, L_GLU_195   | H, L_GLU_195   | 2.82 | 1.97 | 7.58  |
| 5UCB.PDB | O, L_VAL_205   | N, L_VAL_196   | H, L_VAL_196   | 2.73 | 1.91 | 15.27 |
| 5UCB.PDB | O, L_LYS_145   | N, L_THR_197   | H, L_THR_197   | 2.87 | 2.03 | 10.61 |
| 5UCB.PDB | O, L_PRO_141   | NE2, L_HIS_198 | HE2, L_HIS_198 | 2.90 | 2.07 | 14.06 |
| 5UCB.PDB | ND1, L_HIS_198 | N, L_GLY_200   | H, L_GLY_200   | 2.97 | 2.11 | 4.92  |
| 5UCB.PDB | O, L_HIS_198   | N, L_LEU_201   | H, L_LEU_201   | 2.92 | 2.08 | 10.11 |
| 5UCB.PDB | O, L_VAL_196   | N, L_VAL_205   | H, L_VAL_205   | 2.94 | 2.22 | 28.63 |
| 5UCB.PDB | O, L_CYS_194   | N, L_LYS_207   | H, L_LYS_207   | 2.89 | 2.07 | 14.81 |
| 5UCB.PDB | O, L_TYR_192   | N, L_PHE_209   | H, L_PHE_209   | 2.96 | 2.17 | 21.00 |
| 5UCB.PDB | O, L_LYS_190   | N, L_ARG_211   | H, L_ARG_211   | 2.83 | 2.11 | 27.52 |
| 5UCB.PDB | O, B_GLU_28    | N, B_SER_4     | H, B_SER_4     | 2.92 | 2.10 | 13.37 |
| 5UCB.PDB | O, B_THR_26    | N, B_LEU_6     | H, B_LEU_6     | 2.81 | 1.99 | 15.67 |
| 5UCB.PDB | O, B_GLU_24    | N, B_LYS_9     | H, B_LYS_9     | 2.95 | 2.17 | 21.44 |
| 5UCB.PDB | O, B_GLU_22    | N, B_LEU_11    | H, B_LEU_11    | 2.84 | 1.99 | 8.95  |
| 5UCB.PDB | O, B_PRO_20    | ND2, B_ASN_12  | HD21, B_ASN_12 | 2.86 | 2.03 | 12.12 |
| 5UCB.PDB | O, B_ILE_138   | ND2, B_ASN_13  | HD21, B_ASN_13 | 2.86 | 2.13 | 26.24 |
| 5UCB.PDB | O, B_ARG_136   | N, B_ALA_15    | H, B_ALA_15    | 3.00 | 2.19 | 16.91 |
| 5UCB.PDB | OD1, B_ASP_132 | NZ, B_LYS_16   | HZ1, B_LYS_16  | 2.90 | 2.15 | 27.66 |
| 5UCB.PDB | O, B_ILE_134   | N, B_PHE_17    | H, B_PHE_17    | 2.94 | 2.10 | 10.85 |
| 5UCB.PDB | O, B_LYS_16    | N, B_ASP_19    | H, B_ASP_19    | 2.97 | 2.13 | 10.34 |
| 5UCB.PDB | O, B_ALA_75    | N, B_TYR_21    | H, B_TYR_21    | 2.82 | 2.02 | 17.42 |
| 5UCB.PDB | O, B_PHE_73    | N, B_PHE_23    | H, B_PHE_23    | 2.94 | 2.09 | 7.26  |
| 5UCB.PDB | O, B_LYS_9     | N, B_GLU_24    | H, B_GLU_24    | 2.80 | 1.98 | 14.46 |
| 5UCB.PDB | O, B_PHE_71    | N, B_ILE_25    | H, B_ILE_25    | 2.84 | 1.99 | 6.56  |
| 5UCB.PDB | O, B_GLY_7     | N, B_THR_26    | H, B_THR_26    | 2.95 | 2.10 | 4.53  |
| 5UCB.PDB | O, B_ASN_69    | N, B_PHE_27    | H, B_PHE_27    | 2.94 | 2.11 | 13.13 |
| 5UCB.PDB | O, B_SER_4     | N, B_GLU_28    | H, B_GLU_28    | 2.91 | 2.10 | 17.54 |
| 5UCB.PDB | O, B_GLY_67    | N, B_CYS_29    | H, B_CYS_29    | 2.96 | 2.14 | 15.57 |
| 5UCB.PDB | O, B_ILE_2     | N, B_LEU_30    | H, B_LEU_30    | 2.83 | 2.00 | 11.91 |
| 5UCB.PDB | OD2, B_ASP_153 | N, B_LYS_34    | H, B_LYS_34    | 2.94 | 2.14 | 18.44 |
| 5UCB.PDB | OH, B_TYR_100  | N, B_HIS_35    | H, B_HIS_35    | 2.93 | 2.15 | 21.81 |
| 5UCB.PDB | O, B_VAL_61    | N, B_LEU_37    | H, B_LEU_37    | 2.93 | 2.13 | 18.65 |
| 5UCB.PDB | O, B_ILE_59    | N, B_TRP_39    | H, B_TRP_39    | 2.91 | 2.12 | 19.76 |
| 5UCB.PDB | O, B_SER_97    | N, B_LYS_40    | H, B_LYS_40    | 2.88 | 2.06 | 15.75 |
| 5UCB.PDB | O, B_LEU_95    | N, B_THR_42    | H, B_THR_42    | 2.88 | 2.09 | 19.90 |
| 5UCB.PDB | O, B_GLN_54    | N, B_TYR_43    | H, B_TYR_43    | 2.83 | 2.01 | 14.02 |
| 5UCB.PDB | OE2, B_GLU_87  | OH, B_TYR_43   | HH, B_TYR_43   | 2.72 | 1.91 | 12.68 |
| 5UCB.PDB | O, B_VAL_93    | N, B_VAL_44    | H, B_VAL_44    | 2.93 | 2.08 | 6.15  |
| 5UCB.PDB | O, B_HIS_52    | N, B_GLY_45    | H, B_GLY_45    | 2.82 | 1.98 | 9.81  |
| 5UCB.PDB | OD1, B_ASP_51  | OG, B_SER_46   | HG, B_SER_46   | 2.83 | 2.02 | 12.78 |
| 5UCB.PDB | O, B_LEU_50    | N, B_SER_47    | H, B_SER_47    | 2.94 | 2.21 | 27.12 |
| 5UCB.PDB | OE1, B_GLU_87  | OG, B_SER_47   | HG, B_SER_47   | 2.62 | 1.82 | 14.05 |
| 5UCB.PDB | O, B_GLY_45    | N, B_HIS_52    | H, B_HIS_52    | 2.75 | 1.95 | 17.98 |
| 5UCB.PDB | O, B_TYR_43    | N, B_GLN_54    | H, B_GLN_54    | 2.99 | 2.21 | 20.44 |
| 5UCB.PDB | O, B_LEU_41    | N, B_LEU_56    | H, B_LEU_56    | 2.80 | 2.03 | 22.15 |
| 5UCB.PDB | O, B_TRP_39    | N, B_ILE_59    | H, B_ILE_59    | 2.85 | 2.07 | 20.70 |
| 5UCB.PDB | O, B_LEU_37    | N, B_VAL_61    | H, B_VAL_61    | 2.83 | 1.99 | 11.73 |

|          |                |                |                 |      |      |       |
|----------|----------------|----------------|-----------------|------|------|-------|
| 5UCB.PDB | O, B_CYS_29    | N, B_GLY_67    | H, B_GLY_67     | 2.83 | 1.97 | 6.62  |
| 5UCB.PDB | O, B_PHE_27    | N, B_ASN_69    | H, B_ASN_69     | 2.76 | 1.99 | 22.57 |
| 5UCB.PDB | O, B_PHE_23    | N, B_PHE_73    | H, B_PHE_73     | 2.79 | 1.98 | 16.10 |
| 5UCB.PDB | O, B_TYR_21    | N, B_ALA_75    | H, B_ALA_75     | 2.81 | 1.98 | 12.45 |
| 5UCB.PDB | OD2, B_ASP_57  | N, B_ASP_76    | H, B_ASP_76     | 2.88 | 2.07 | 15.78 |
| 5UCB.PDB | OE1, B_GLN_54  | N, B_SER_79    | H, B_SER_79     | 2.94 | 2.10 | 11.73 |
| 5UCB.PDB | O, B_ALA_80    | N, B_ILE_83    | H, B_ILE_83     | 3.00 | 2.16 | 12.13 |
| 5UCB.PDB | O, B_PRO_84    | N, B_GLU_87    | H, B_GLU_87     | 2.81 | 2.08 | 26.69 |
| 5UCB.PDB | O, B_GLU_87    | OG, B_SER_90   | HG, B_SER_90    | 2.87 | 2.04 | 8.25  |
| 5UCB.PDB | O, B_VAL_112   | N, B_THR_92    | H, B_THR_92     | 2.86 | 2.03 | 12.64 |
| 5UCB.PDB | O, B_THR_42    | N, B_LEU_95    | H, B_LEU_95     | 2.81 | 2.01 | 16.51 |
| 5UCB.PDB | O, B_VAL_108   | N, B_LEU_96    | H, B_LEU_96     | 2.80 | 1.97 | 10.47 |
| 5UCB.PDB | O, B_LYS_40    | N, B_SER_97    | H, B_SER_97     | 2.90 | 2.07 | 12.23 |
| 5UCB.PDB | O, B_GLU_38    | N, B_SER_99    | H, B_SER_99     | 2.90 | 2.12 | 21.40 |
| 5UCB.PDB | O, B_ARG_103   | N, B_TYR_100   | H, B_TYR_100    | 2.86 | 2.06 | 17.81 |
| 5UCB.PDB | OD1, B_ASP_153 | OH, B_TYR_100  | HH, B_TYR_100   | 2.55 | 1.73 | 8.75  |
| 5UCB.PDB | O, B_TYR_100   | N, B_ARG_103   | H, B_ARG_103    | 2.90 | 2.08 | 14.68 |
| 5UCB.PDB | O, B_VAL_151   | NE, B_ARG_103  | HE, B_ARG_103   | 2.81 | 2.01 | 18.23 |
| 5UCB.PDB | OD2, B_ASP_101 | NH1, B_ARG_103 | HH12, B_ARG_103 | 2.89 | 2.11 | 20.47 |
| 5UCB.PDB | O, B_THR_146   | N, B_ARG_107   | H, B_ARG_107    | 2.85 | 2.07 | 20.33 |
| 5UCB.PDB | OE2, B_GLU_104 | NE, B_ARG_107  | HE, B_ARG_107   | 2.91 | 2.05 | 4.26  |
| 5UCB.PDB | O, B_LEU_96    | N, B_VAL_108   | H, B_VAL_108    | 2.68 | 1.84 | 10.31 |
| 5UCB.PDB | O, B_ARG_144   | N, B_GLY_109   | H, B_GLY_109    | 2.80 | 1.96 | 9.36  |
| 5UCB.PDB | O, B_ILE_94    | N, B_TYR_110   | H, B_TYR_110    | 2.92 | 2.13 | 18.74 |
| 5UCB.PDB | O, L_ASP_91    | OH, B_TYR_111  | HH, B_TYR_111   | 2.57 | 1.75 | 11.11 |
| 5UCB.PDB | O, B_THR_92    | N, B_VAL_112   | H, B_VAL_112    | 2.87 | 2.09 | 21.11 |
| 5UCB.PDB | O, B_ASN_137   | N, B_ASN_113   | H, B_ASN_113    | 2.89 | 2.05 | 9.00  |
| 5UCB.PDB | O, B_SER_90    | ND2, B_ASN_114 | HD22, B_ASN_114 | 2.97 | 2.13 | 9.19  |
| 5UCB.PDB | O, B_GLU_118   | N, B_ARG_122   | H, B_ARG_122    | 2.99 | 2.17 | 14.84 |
| 5UCB.PDB | O, B_TYR_116   | NH1, B_ARG_122 | HH11, B_ARG_122 | 2.93 | 2.10 | 12.81 |
| 5UCB.PDB | O, B_GLU_120   | N, B_ASN_124   | H, B_ASN_124    | 2.98 | 2.27 | 29.44 |
| 5UCB.PDB | O, B_VAL_129   | NZ, B_LYS_128  | HZ2, B_LYS_128  | 2.82 | 1.95 | 9.37  |
| 5UCB.PDB | O, B_GLN_130   | N, B_HIS_133   | H, B_HIS_133    | 2.98 | 2.14 | 9.05  |
| 5UCB.PDB | OD1, B_ASP_117 | ND1, B_HIS_133 | HD1, B_HIS_133  | 2.95 | 2.15 | 18.23 |
| 5UCB.PDB | O, B_GLU_115   | N, B_VAL_135   | H, B_VAL_135    | 2.83 | 1.97 | 4.10  |
| 5UCB.PDB | O, B_ALA_15    | N, B_ARG_136   | H, B_ARG_136    | 2.79 | 1.98 | 17.55 |
| 5UCB.PDB | O, B_ASP_19    | NH1, B_ARG_136 | HH12, B_ARG_136 | 2.88 | 2.07 | 16.59 |
| 5UCB.PDB | O, B_ASN_113   | N, B_ASN_137   | H, B_ASN_137    | 2.81 | 2.02 | 19.05 |
| 5UCB.PDB | OD1, B_ASN_13  | N, B_ILE_138   | H, B_ILE_138    | 2.88 | 2.04 | 12.14 |
| 5UCB.PDB | O, B_TYR_111   | N, B_LEU_139   | H, B_LEU_139    | 2.86 | 2.01 | 7.51  |
| 5UCB.PDB | OG, H_SER_58   | NZ, B_LYS_142  | HZ3, B_LYS_142  | 2.83 | 1.96 | 8.82  |
| 5UCB.PDB | O, B_GLY_109   | N, B_ARG_144   | H, B_ARG_144    | 2.81 | 1.96 | 8.55  |
| 5UCB.PDB | O, B_LYS_142   | NH1, B_ARG_144 | HH11, B_ARG_144 | 2.91 | 2.12 | 19.24 |
| 5UCB.PDB | OD1, L_ASP_91  | NH2, B_ARG_144 | HH21, B_ARG_144 | 2.84 | 2.03 | 16.18 |
| 5UCB.PDB | O, B_ARG_107   | N, B_THR_146   | H, B_THR_146    | 2.81 | 1.98 | 11.97 |
| 5UCB.PDB | O, B_PHE_105   | N, B_PHE_148   | H, B_PHE_148    | 2.97 | 2.13 | 9.82  |
| 5UJZ.PDB | OD2, B_ASP_612 | N, B_PHE_503   | H, B_PHE_503    | 2.82 | 1.98 | 9.98  |
| 5UJZ.PDB | OE1, B_GLU_574 | N, B_ASN_571   | H, B_ASN_571    | 2.73 | 1.96 | 22.10 |
| 5UJZ.PDB | OD1, B_ASN_571 | N, B_LEU_573   | H, B_LEU_573    | 2.86 | 2.10 | 22.42 |
| 5UJZ.PDB | O, B_ARG_575   | N, B_ASN_579   | H, B_ASN_579    | 2.92 | 2.06 | 2.26  |
| 5UJZ.PDB | O, B_ARG_576   | N, B_LEU_580   | H, B_LEU_580    | 2.88 | 2.06 | 14.57 |
| 5UJZ.PDB | O, B_MET_577   | N, B_ASN_581   | H, B_ASN_581    | 2.87 | 2.02 | 8.14  |
| 5UJZ.PDB | O, B_GLU_578   | N, B_LYS_582   | H, B_LYS_582    | 2.88 | 2.03 | 6.05  |
| 5UJZ.PDB | O, B_ASN_579   | N, B_LYS_583   | H, B_LYS_583    | 2.96 | 2.20 | 23.30 |
| 5UJZ.PDB | O, B_LEU_580   | N, B_VAL_584   | H, B_VAL_584    | 2.77 | 1.95 | 12.45 |
| 5UJZ.PDB | O, B_LYS_583   | N, B_GLY_587   | H, B_GLY_587    | 2.90 | 2.12 | 21.34 |
| 5UJZ.PDB | O, B_VAL_584   | N, B_PHE_588   | H, B_PHE_588    | 2.97 | 2.16 | 15.91 |
| 5UJZ.PDB | O, B_PHE_588   | N, B_TRP_592   | H, B_TRP_592    | 2.95 | 2.10 | 7.22  |

|          |                |                |                |      |      |       |
|----------|----------------|----------------|----------------|------|------|-------|
| 5UJZ.PDB | O, B_ASP_590   | N, B_TYR_594   | H, B_TYR_594   | 2.86 | 2.06 | 18.30 |
| 5UJZ.PDB | O, B_ILE_591   | N, B_ASN_595   | H, B_ASN_595   | 2.96 | 2.11 | 4.50  |
| 5UJZ.PDB | O, B_TRP_592   | N, B_ALA_596   | H, B_ALA_596   | 2.92 | 2.09 | 14.14 |
| 5UJZ.PDB | O, B_THR_593   | N, B_GLU_597   | H, B_GLU_597   | 2.94 | 2.13 | 17.13 |
| 5UJZ.PDB | O, B_ASN_595   | N, B_LEU_599   | H, B_LEU_599   | 2.92 | 2.21 | 29.47 |
| 5UJZ.PDB | O, B_ALA_596   | N, B_VAL_600   | H, B_VAL_600   | 2.90 | 2.16 | 25.76 |
| 5UJZ.PDB | O, B_LEU_598   | N, B_LEU_602   | H, B_LEU_602   | 2.89 | 2.04 | 6.88  |
| 5UJZ.PDB | O, B_LEU_599   | N, B_GLU_603   | H, B_GLU_603   | 2.89 | 2.05 | 10.08 |
| 5UJZ.PDB | O, B_VAL_600   | N, B_ASN_604   | H, B_ASN_604   | 2.99 | 2.17 | 14.45 |
| 5UJZ.PDB | O, B_LEU_602   | N, B_ARG_606   | H, B_ARG_606   | 2.86 | 2.03 | 11.15 |
| 5UJZ.PDB | O, B_ASN_604   | N, B_LEU_608   | H, B_LEU_608   | 2.98 | 2.16 | 15.31 |
| 5UJZ.PDB | O, B_LEU_608   | N, B_ASP_612   | H, B_ASP_612   | 2.95 | 2.10 | 4.89  |
| 5UJZ.PDB | OE1, D_GLU_574 | N, D_ASN_571   | H, D_ASN_571   | 2.73 | 1.96 | 22.20 |
| 5UJZ.PDB | OD1, D_ASN_571 | N, D_LEU_573   | H, D_LEU_573   | 2.86 | 2.10 | 22.20 |
| 5UJZ.PDB | O, D_ARG_575   | N, D_ASN_579   | H, D_ASN_579   | 2.92 | 2.06 | 2.09  |
| 5UJZ.PDB | O, D_ARG_576   | N, D_LEU_580   | H, D_LEU_580   | 2.88 | 2.06 | 14.50 |
| 5UJZ.PDB | O, D_MET_577   | N, D_ASN_581   | H, D_ASN_581   | 2.87 | 2.02 | 7.86  |
| 5UJZ.PDB | O, D_GLU_578   | N, D_LYS_582   | H, D_LYS_582   | 2.88 | 2.03 | 5.99  |
| 5UJZ.PDB | O, D_ASN_579   | N, D_LYS_583   | H, D_LYS_583   | 2.96 | 2.20 | 23.42 |
| 5UJZ.PDB | O, D_LEU_580   | N, D_VAL_584   | H, D_VAL_584   | 2.77 | 1.95 | 12.36 |
| 5UJZ.PDB | O, D_ASN_581   | N, D_ASP_585   | H, D_ASP_585   | 2.93 | 2.09 | 8.97  |
| 5UJZ.PDB | O, D_LYS_583   | N, D_GLY_587   | H, D_GLY_587   | 2.90 | 2.12 | 21.44 |
| 5UJZ.PDB | O, D_VAL_584   | N, D_PHE_588   | H, D_PHE_588   | 2.97 | 2.16 | 15.92 |
| 5UJZ.PDB | O, D_ASP_585   | N, D_ILE_589   | H, D_ILE_589   | 2.87 | 2.03 | 9.83  |
| 5UJZ.PDB | O, D_PHE_588   | N, D_TRP_592   | H, D_TRP_592   | 2.95 | 2.10 | 7.33  |
| 5UJZ.PDB | O, D_TRP_592   | N, D_ALA_596   | H, D_ALA_596   | 2.92 | 2.09 | 14.04 |
| 5UJZ.PDB | O, D_ASN_595   | N, D_LEU_599   | H, D_LEU_599   | 2.91 | 2.21 | 29.48 |
| 5UJZ.PDB | OE1, F_GLU_574 | N, F_ASN_571   | H, F_ASN_571   | 2.73 | 1.96 | 22.15 |
| 5UJZ.PDB | OD1, F_ASN_571 | N, F_LEU_573   | H, F_LEU_573   | 2.86 | 2.10 | 22.13 |
| 5UJZ.PDB | O, F_ARG_575   | N, F_ASN_579   | H, F_ASN_579   | 2.92 | 2.05 | 1.88  |
| 5UJZ.PDB | O, F_ARG_576   | N, F_LEU_580   | H, F_LEU_580   | 2.88 | 2.06 | 14.64 |
| 5UJZ.PDB | O, F_MET_577   | N, F_ASN_581   | H, F_ASN_581   | 2.87 | 2.02 | 7.56  |
| 5UJZ.PDB | O, F_GLU_578   | N, F_LYS_582   | H, F_LYS_582   | 2.88 | 2.03 | 5.84  |
| 5UJZ.PDB | O, F_ASN_579   | N, F_LYS_583   | H, F_LYS_583   | 2.96 | 2.20 | 23.60 |
| 5UJZ.PDB | O, F_LEU_580   | N, F_VAL_584   | H, F_VAL_584   | 2.77 | 1.95 | 12.39 |
| 5UJZ.PDB | O, F_ASN_581   | N, F_ASP_585   | H, F_ASP_585   | 2.93 | 2.09 | 8.86  |
| 5UJZ.PDB | O, F_LYS_582   | N, F_ASP_586   | H, F_ASP_586   | 2.90 | 2.06 | 8.24  |
| 5UJZ.PDB | O, F_LYS_583   | N, F_GLY_587   | H, F_GLY_587   | 2.90 | 2.12 | 21.41 |
| 5UJZ.PDB | O, F_VAL_584   | N, F_PHE_588   | H, F_PHE_588   | 2.97 | 2.16 | 15.90 |
| 5UJZ.PDB | O, F_ASP_585   | N, F_ILE_589   | H, F_ILE_589   | 2.87 | 2.03 | 9.71  |
| 5UJZ.PDB | O, F_ASP_586   | N, F_ASP_590   | H, F_ASP_590   | 2.94 | 2.13 | 16.67 |
| 5UJZ.PDB | O, F_PHE_588   | N, F_TRP_592   | H, F_TRP_592   | 2.95 | 2.10 | 7.36  |
| 5UJZ.PDB | O, F_ILE_589   | N, F_THR_593   | H, F_THR_593   | 2.94 | 2.15 | 21.05 |
| 5UJZ.PDB | O, F_ASP_590   | N, F_TYR_594   | H, F_TYR_594   | 2.86 | 2.06 | 18.69 |
| 5UJZ.PDB | O, F_ILE_591   | N, F_ASN_595   | H, F_ASN_595   | 2.96 | 2.11 | 4.41  |
| 5UJZ.PDB | O, F_TRP_592   | N, F_ALA_596   | H, F_ALA_596   | 2.92 | 2.09 | 13.92 |
| 5UK0.PDB | O, A_THR_235   | N, A_VAL_178   | H, A_VAL_178   | 3.00 | 2.15 | 9.10  |
| 5UK0.PDB | O, A_TYR_233   | N, A_TRP_180   | H, A_TRP_180   | 2.83 | 2.06 | 22.85 |
| 5UK0.PDB | O, A_HIS_98    | N, A_TYR_232   | H, A_TYR_232   | 2.76 | 1.93 | 13.46 |
| 5UK0.PDB | O, A_TRP_180   | N, A_TYR_233   | H, A_TYR_233   | 2.86 | 2.01 | 7.16  |
| 5UK0.PDB | O, A_ALA_100   | NE1, A_TRP_234 | HE1, A_TRP_234 | 2.75 | 1.95 | 17.16 |
| 5UK0.PDB | O, A_VAL_178   | N, A_THR_235   | H, A_THR_235   | 2.96 | 2.15 | 14.92 |
| 5UK0.PDB | OD2, B_ASP_612 | N, B_PHE_503   | H, B_PHE_503   | 2.70 | 1.87 | 11.32 |
| 5UK0.PDB | O, B_ALA_505   | N, B_GLY_508   | H, B_GLY_508   | 2.62 | 1.89 | 25.83 |
| 5UK0.PDB | O, B_GLY_504   | N, B_PHE_509   | H, B_PHE_509   | 2.72 | 1.93 | 19.32 |
| 5UK0.PDB | O, B_ALA_535   | N, B_TYR_524   | H, B_TYR_524   | 2.87 | 2.06 | 16.06 |
| 5UK0.PDB | O, B_GLY_533   | N, B_HIS_526   | H, B_HIS_526   | 2.86 | 2.15 | 29.56 |
| 5UK0.PDB | O, B_TYR_524   | N, B_ALA_535   | H, B_ALA_535   | 2.96 | 2.18 | 21.03 |

|          |                |                |                 |      |      |       |
|----------|----------------|----------------|-----------------|------|------|-------|
| 5UK0.PDB | O, B_TYR_522   | N, B_ASP_537   | H, B_ASP_537    | 2.88 | 2.08 | 16.70 |
| 5UK0.PDB | O, B_GLN_538   | N, B_GLN_542   | H, B_GLN_542    | 2.87 | 2.06 | 16.85 |
| 5UK0.PDB | O, B_LYS_539   | N, B_ASN_543   | H, B_ASN_543    | 2.98 | 2.18 | 18.23 |
| 5UK0.PDB | O, B_SER_540   | N, B_ALA_544   | H, B_ALA_544    | 2.92 | 2.10 | 14.62 |
| 5UK0.PDB | O, B_THR_541   | N, B_ILE_545   | H, B_ILE_545    | 2.93 | 2.14 | 18.92 |
| 5UK0.PDB | O, B_GLN_542   | N, B_ASN_546   | H, B_ASN_546    | 2.90 | 2.07 | 13.85 |
| 5UK0.PDB | O, B_ILE_545   | N, B_THR_549   | H, B_THR_549    | 2.91 | 2.09 | 13.10 |
| 5UK0.PDB | O, B_ASN_546   | N, B_ASN_550   | H, B_ASN_550    | 2.97 | 2.16 | 16.74 |
| 5UK0.PDB | O, B_GLY_547   | N, B_LYS_551   | H, B_LYS_551    | 2.90 | 2.15 | 24.65 |
| 5UK0.PDB | O, B_ILE_548   | N, B_VAL_552   | H, B_VAL_552    | 2.98 | 2.14 | 11.61 |
| 5UK0.PDB | O, B_THR_549   | N, B_ASN_553   | H, B_ASN_553    | 2.96 | 2.10 | 2.11  |
| 5UK0.PDB | O, B_ASN_550   | N, B_SER_554   | H, B_SER_554    | 2.98 | 2.23 | 25.37 |
| 5UK0.PDB | O, B_VAL_552   | N, B_ILE_556   | H, B_ILE_556    | 2.99 | 2.17 | 15.52 |
| 5UK0.PDB | OD1, F_ASP_590 | ND2, B_ASN_560 | HD22, B_ASN_560 | 2.72 | 1.94 | 19.72 |
| 5UK0.PDB | O, B_GLU_574   | N, B_GLU_578   | H, B_GLU_578    | 2.95 | 2.23 | 28.27 |
| 5UK0.PDB | O, B_ARG_575   | N, B_ASN_579   | H, B_ASN_579    | 2.86 | 2.00 | 5.28  |
| 5UK0.PDB | O, B_ARG_576   | N, B_LEU_580   | H, B_LEU_580    | 2.90 | 2.08 | 14.14 |
| 5UK0.PDB | O, B_MET_577   | N, B_ASN_581   | H, B_ASN_581    | 2.90 | 2.05 | 9.42  |
| 5UK0.PDB | O, B_GLU_578   | N, B_LYS_582   | H, B_LYS_582    | 2.89 | 2.04 | 6.59  |
| 5UK0.PDB | O, B_ASN_579   | N, B_LYS_583   | H, B_LYS_583    | 2.99 | 2.19 | 17.96 |
| 5UK0.PDB | O, B_LEU_580   | N, B_VAL_584   | H, B_VAL_584    | 2.79 | 1.97 | 14.76 |
| 5UK0.PDB | O, B_ASN_581   | N, B_ASP_585   | H, B_ASP_585    | 2.96 | 2.12 | 8.51  |
| 5UK0.PDB | O, B_LYS_582   | N, B_ASP_586   | H, B_ASP_586    | 2.88 | 2.03 | 6.06  |
| 5UK0.PDB | O, B_LYS_583   | N, B_GLY_587   | H, B_GLY_587    | 2.88 | 2.11 | 21.69 |
| 5UK0.PDB | O, B_ASP_585   | N, B_ILE_589   | H, B_ILE_589    | 2.91 | 2.09 | 14.38 |
| 5UK0.PDB | O, B_ASP_586   | N, B_ASP_590   | H, B_ASP_590    | 2.91 | 2.09 | 14.55 |
| 5UK0.PDB | O, B_PHE_588   | N, B_TRP_592   | H, B_TRP_592    | 2.93 | 2.08 | 6.61  |
| 5UK0.PDB | O, B_ILE_589   | N, B_THR_593   | H, B_THR_593    | 2.96 | 2.20 | 24.14 |
| 5UK0.PDB | O, B_ASP_590   | N, B_TYR_594   | H, B_TYR_594    | 2.90 | 2.12 | 20.32 |
| 5UK0.PDB | O, B_ILE_591   | N, B_ASN_595   | H, B_ASN_595    | 2.98 | 2.13 | 3.96  |
| 5UK0.PDB | O, B_TRP_592   | N, B_ALA_596   | H, B_ALA_596    | 2.89 | 2.07 | 14.01 |
| 5UK0.PDB | O, B_THR_593   | N, B_GLU_597   | H, B_GLU_597    | 2.94 | 2.15 | 19.17 |
| 5UK0.PDB | O, B_ASN_595   | N, B_LEU_599   | H, B_LEU_599    | 2.94 | 2.22 | 27.64 |
| 5UK0.PDB | O, B_ALA_596   | N, B_VAL_600   | H, B_VAL_600    | 2.93 | 2.19 | 26.06 |
| 5UK0.PDB | O, B_LEU_598   | N, B_LEU_602   | H, B_LEU_602    | 2.93 | 2.09 | 10.30 |
| 5UK0.PDB | O, B_LEU_599   | N, B_GLU_603   | H, B_GLU_603    | 2.87 | 2.04 | 13.58 |
| 5UK0.PDB | O, B_VAL_600   | N, B_ASN_604   | H, B_ASN_604    | 2.99 | 2.17 | 14.76 |
| 5UK0.PDB | O, B_LEU_601   | N, B_GLU_605   | H, B_GLU_605    | 2.98 | 2.18 | 18.00 |
| 5UK0.PDB | O, B_LEU_602   | N, B_ARG_606   | H, B_ARG_606    | 2.85 | 2.01 | 10.65 |
| 5UK0.PDB | O, B_ASN_604   | N, B_LEU_608   | H, B_LEU_608    | 2.96 | 2.16 | 17.86 |
| 5UK0.PDB | O, B_GLU_605   | N, B_ASP_609   | H, B_ASP_609    | 2.94 | 2.14 | 18.33 |
| 5UK0.PDB | O, B_THR_607   | N, B_HIS_611   | H, B_HIS_611    | 2.95 | 2.15 | 17.84 |
| 5UK0.PDB | O, B_LEU_608   | N, B_ASP_612   | H, B_ASP_612    | 2.94 | 2.09 | 8.40  |
| 5UK0.PDB | O, B_ASP_609   | N, B_SER_613   | H, B_SER_613    | 2.89 | 2.09 | 18.36 |
| 5UK0.PDB | O, B_HIS_611   | N, B_VAL_615   | H, B_VAL_615    | 2.99 | 2.17 | 12.43 |
| 5UK0.PDB | O, B_SER_613   | N, B_ASN_617   | H, B_ASN_617    | 2.86 | 2.04 | 15.11 |
| 5UK0.PDB | O, F_LEU_502   | ND2, B_ASN_617 | HD22, B_ASN_617 | 2.60 | 1.80 | 16.74 |
| 5UK0.PDB | O, B_ASN_614   | N, B_LEU_618   | H, B_LEU_618    | 2.97 | 2.17 | 18.23 |
| 5UK0.PDB | O, B_VAL_615   | N, B_TYR_619   | H, B_TYR_619    | 2.89 | 2.08 | 17.73 |
| 5UK0.PDB | O, B_ASN_617   | N, B_LYS_621   | H, B_LYS_621    | 2.91 | 2.19 | 28.31 |
| 5UK0.PDB | O, B_LEU_618   | N, B_VAL_622   | H, B_VAL_622    | 2.91 | 2.12 | 20.36 |
| 5UK0.PDB | O, B_TYR_619   | N, B_LYS_623   | H, B_LYS_623    | 2.95 | 2.14 | 15.77 |
| 5UK0.PDB | O, B_GLU_639   | N, B_LYS_631   | H, B_LYS_631    | 2.93 | 2.13 | 17.90 |
| 5UK0.PDB | OD1, C_ASN_231 | N, C_HIS_98    | H, C_HIS_98     | 2.89 | 2.08 | 15.31 |
| 5UK0.PDB | O, C_ASP_101   | N, C_LEU_105   | H, C_LEU_105    | 2.95 | 2.14 | 16.91 |
| 5UK0.PDB | O, C_LEU_105   | N, C_LEU_109   | H, C_LEU_109    | 2.87 | 2.07 | 17.71 |
| 5UK0.PDB | O, C_THR_131   | N, C_THR_155   | H, C_THR_155    | 2.70 | 1.87 | 11.80 |
| 5UK0.PDB | O, C_THR_235   | N, C_VAL_178   | H, C_VAL_178    | 2.99 | 2.15 | 8.93  |

|          |                |                |                 |      |      |       |
|----------|----------------|----------------|-----------------|------|------|-------|
| 5UK0.PDB | O, C_TYR_233   | N, C_TRP_180   | H, C_TRP_180    | 2.83 | 2.06 | 22.92 |
| 5UK0.PDB | O, C_ILE_252   | N, C_GLY_181   | H, C_GLY_181    | 2.96 | 2.20 | 23.53 |
| 5UK0.PDB | O, C_ASN_231   | N, C_VAL_182   | H, C_VAL_182    | 2.94 | 2.21 | 26.92 |
| 5UK0.PDB | O, C_ASN_250   | N, C_HIS_183   | H, C_HIS_183    | 2.90 | 2.10 | 17.87 |
| 5UK0.PDB | O, C_HIS_98    | N, C_TYR_232   | H, C_TYR_232    | 2.75 | 1.93 | 13.38 |
| 5UK0.PDB | O, C_TRP_180   | N, C_TYR_233   | H, C_TYR_233    | 2.86 | 2.01 | 7.20  |
| 5UK0.PDB | O, C_ALA_100   | NE1, C_TRP_234 | HE1, C_TRP_234  | 2.75 | 1.95 | 17.15 |
| 5UK0.PDB | O, C_VAL_178   | N, C_THR_235   | H, C_THR_235    | 2.96 | 2.15 | 14.97 |
| 5UK0.PDB | O, C_VAL_176   | N, C_LEU_237   | H, C_LEU_237    | 2.90 | 2.14 | 23.70 |
| 5UK0.PDB | O, C_GLY_181   | N, C_ILE_252   | H, C_ILE_252    | 2.86 | 2.07 | 19.19 |
| 5UK0.PDB | OD1, D_ASP_586 | NH2, C_ARG_311 | HH22, C_ARG_311 | 2.98 | 2.20 | 18.56 |
| 5UK0.PDB | OD2, D_ASP_612 | N, D_PHE_503   | H, D_PHE_503    | 2.70 | 1.87 | 11.03 |
| 5UK0.PDB | O, D_ALA_505   | N, D_GLY_508   | H, D_GLY_508    | 2.63 | 1.89 | 25.56 |
| 5UK0.PDB | O, D_GLY_504   | N, D_PHE_509   | H, D_PHE_509    | 2.72 | 1.93 | 19.19 |
| 5UK0.PDB | O, D_ALA_535   | N, D_TYR_524   | H, D_TYR_524    | 2.87 | 2.06 | 15.73 |
| 5UK0.PDB | O, D_TYR_524   | N, D_ALA_535   | H, D_ALA_535    | 2.96 | 2.18 | 21.51 |
| 5UK0.PDB | O, D_TYR_522   | N, D_ASP_537   | H, D_ASP_537    | 2.88 | 2.07 | 16.56 |
| 5UK0.PDB | O, D_GLN_538   | N, D_GLN_542   | H, D_GLN_542    | 2.87 | 2.06 | 16.50 |
| 5UK0.PDB | O, D_LYS_539   | N, D_ASN_543   | H, D_ASN_543    | 2.98 | 2.18 | 18.20 |
| 5UK0.PDB | O, D_SER_540   | N, D_ALA_544   | H, D_ALA_544    | 2.93 | 2.11 | 14.85 |
| 5UK0.PDB | O, D_THR_541   | N, D_ILE_545   | H, D_ILE_545    | 2.93 | 2.14 | 18.87 |
| 5UK0.PDB | O, D_GLN_542   | N, D_ASN_546   | H, D_ASN_546    | 2.90 | 2.07 | 13.58 |
| 5UK0.PDB | O, D_ILE_545   | N, D_THR_549   | H, D_THR_549    | 2.91 | 2.09 | 12.94 |
| 5UK0.PDB | O, D_ASN_546   | N, D_ASN_550   | H, D_ASN_550    | 2.97 | 2.16 | 16.37 |
| 5UK0.PDB | O, D_GLY_547   | N, D_LYS_551   | H, D_LYS_551    | 2.90 | 2.15 | 24.73 |
| 5UK0.PDB | O, D_ILE_548   | N, D_VAL_552   | H, D_VAL_552    | 2.98 | 2.14 | 11.77 |
| 5UK0.PDB | O, D_THR_549   | N, D_ASN_553   | H, D_ASN_553    | 2.96 | 2.10 | 2.11  |
| 5UK0.PDB | O, D_ASN_550   | N, D_SER_554   | H, D_SER_554    | 2.98 | 2.23 | 25.34 |
| 5UK0.PDB | O, D_VAL_552   | N, D_ILE_556   | H, D_ILE_556    | 2.99 | 2.17 | 15.75 |
| 5UK0.PDB | OD1, B_ASP_590 | ND2, D_ASN_560 | HD22, D_ASN_560 | 2.73 | 1.95 | 20.06 |
| 5UK0.PDB | O, D_GLU_574   | N, D_GLU_578   | H, D_GLU_578    | 2.95 | 2.23 | 28.68 |
| 5UK0.PDB | O, D_ARG_575   | N, D_ASN_579   | H, D_ASN_579    | 2.86 | 2.00 | 3.72  |
| 5UK0.PDB | O, D_ARG_576   | N, D_LEU_580   | H, D_LEU_580    | 2.90 | 2.07 | 13.93 |
| 5UK0.PDB | O, D_MET_577   | N, D_ASN_581   | H, D_ASN_581    | 2.90 | 2.05 | 9.24  |
| 5UK0.PDB | O, D_GLU_578   | N, D_LYS_582   | H, D_LYS_582    | 2.89 | 2.04 | 7.42  |
| 5UK0.PDB | O, D_ASN_579   | N, D_LYS_583   | H, D_LYS_583    | 2.99 | 2.19 | 18.48 |
| 5UK0.PDB | O, D_LEU_580   | N, D_VAL_584   | H, D_VAL_584    | 2.79 | 1.97 | 14.60 |
| 5UK0.PDB | O, D_ASN_581   | N, D_ASP_585   | H, D_ASP_585    | 2.96 | 2.12 | 8.30  |
| 5UK0.PDB | O, D_LYS_582   | N, D_ASP_586   | H, D_ASP_586    | 2.88 | 2.03 | 7.07  |
| 5UK0.PDB | O, D_LYS_583   | N, D_GLY_587   | H, D_GLY_587    | 2.88 | 2.11 | 21.76 |
| 5UK0.PDB | O, D_ASP_585   | N, D_ILE_589   | H, D_ILE_589    | 2.91 | 2.09 | 14.41 |
| 5UK0.PDB | O, D_ASP_586   | N, D_ASP_590   | H, D_ASP_590    | 2.91 | 2.09 | 15.63 |
| 5UK0.PDB | O, D_PHE_588   | N, D_TRP_592   | H, D_TRP_592    | 2.93 | 2.08 | 6.27  |
| 5UK0.PDB | O, D_ILE_589   | N, D_THR_593   | H, D_THR_593    | 2.96 | 2.21 | 24.62 |
| 5UK0.PDB | O, D_ASP_590   | N, D_TYR_594   | H, D_TYR_594    | 2.90 | 2.12 | 21.14 |
| 5UK0.PDB | O, D_ILE_591   | N, D_ASN_595   | H, D_ASN_595    | 2.98 | 2.12 | 3.15  |
| 5UK0.PDB | O, D_TRP_592   | N, D_ALA_596   | H, D_ALA_596    | 2.89 | 2.07 | 14.15 |
| 5UK0.PDB | O, D_THR_593   | N, D_GLU_597   | H, D_GLU_597    | 2.94 | 2.15 | 19.89 |
| 5UK0.PDB | O, D_ASN_595   | N, D_LEU_599   | H, D_LEU_599    | 2.94 | 2.21 | 26.82 |
| 5UK0.PDB | O, D_ALA_596   | N, D_VAL_600   | H, D_VAL_600    | 2.93 | 2.19 | 25.78 |
| 5UK0.PDB | O, D_LEU_598   | N, D_LEU_602   | H, D_LEU_602    | 2.93 | 2.09 | 10.12 |
| 5UK0.PDB | O, D_LEU_599   | N, D_GLU_603   | H, D_GLU_603    | 2.86 | 2.04 | 13.30 |
| 5UK0.PDB | O, D_VAL_600   | N, D_ASN_604   | H, D_ASN_604    | 2.99 | 2.17 | 15.08 |
| 5UK0.PDB | O, D_LEU_601   | N, D_GLU_605   | H, D_GLU_605    | 2.98 | 2.18 | 18.56 |
| 5UK0.PDB | O, D_LEU_602   | N, D_ARG_606   | H, D_ARG_606    | 2.85 | 2.01 | 10.50 |
| 5UK0.PDB | O, D_ASN_604   | N, D_LEU_608   | H, D_LEU_608    | 2.96 | 2.16 | 18.11 |
| 5UK0.PDB | O, D_GLU_605   | N, D_ASP_609   | H, D_ASP_609    | 2.94 | 2.14 | 18.44 |
| 5UK0.PDB | O, D_THR_607   | N, D_HIS_611   | H, D_HIS_611    | 2.95 | 2.15 | 17.74 |

|          |                |                |                 |      |      |       |
|----------|----------------|----------------|-----------------|------|------|-------|
| 5UK0.PDB | O, D_LEU_608   | N, D_ASP_612   | H, D_ASP_612    | 2.94 | 2.09 | 8.59  |
| 5UK0.PDB | O, D_ASP_609   | N, D_SER_613   | H, D_SER_613    | 2.89 | 2.09 | 18.51 |
| 5UK0.PDB | O, D_HIS_611   | N, D_VAL_615   | H, D_VAL_615    | 2.99 | 2.17 | 12.24 |
| 5UK0.PDB | O, D_SER_613   | N, D_ASN_617   | H, D_ASN_617    | 2.86 | 2.05 | 15.31 |
| 5UK0.PDB | O, B_LEU_502   | ND2, D_ASN_617 | HD22, D_ASN_617 | 2.62 | 1.80 | 13.03 |
| 5UK0.PDB | O, D_ASN_614   | N, D_LEU_618   | H, D_LEU_618    | 2.97 | 2.17 | 17.99 |
| 5UK0.PDB | O, D_VAL_615   | N, D_TYR_619   | H, D_TYR_619    | 2.89 | 2.08 | 17.58 |
| 5UK0.PDB | O, D_ASN_617   | N, D_LYS_621   | H, D_LYS_621    | 2.91 | 2.19 | 28.69 |
| 5UK0.PDB | O, D_LEU_618   | N, D_VAL_622   | H, D_VAL_622    | 2.91 | 2.12 | 19.99 |
| 5UK0.PDB | O, D_TYR_619   | N, D_LYS_623   | H, D_LYS_623    | 2.95 | 2.14 | 15.66 |
| 5UK0.PDB | OH, D_TYR_659  | ND2, D_ASN_628 | HD22, D_ASN_628 | 2.78 | 1.98 | 17.11 |
| 5UK0.PDB | O, D_GLU_639   | N, D_LYS_631   | H, D_LYS_631    | 2.93 | 2.13 | 17.74 |
| 5UK0.PDB | OD1, E_ASN_231 | N, E_HIS_98    | H, E_HIS_98     | 2.89 | 2.08 | 15.58 |
| 5UK0.PDB | O, E_ASP_101   | N, E_LEU_105   | H, E_LEU_105    | 2.95 | 2.14 | 17.24 |
| 5UK0.PDB | O, E_ALA_253   | N, E_LEU_152   | H, E_LEU_152    | 2.92 | 2.19 | 27.06 |
| 5UK0.PDB | O, E_THR_235   | N, E_VAL_178   | H, E_VAL_178    | 2.99 | 2.15 | 9.16  |
| 5UK0.PDB | O, E_TYR_233   | N, E_TRP_180   | H, E_TRP_180    | 2.83 | 2.07 | 23.11 |
| 5UK0.PDB | O, E_ILE_252   | N, E_GLY_181   | H, E_GLY_181    | 2.96 | 2.20 | 23.58 |
| 5UK0.PDB | O, E_ASN_231   | N, E_VAL_182   | H, E_VAL_182    | 2.94 | 2.21 | 26.82 |
| 5UK0.PDB | O, E_ASN_250   | N, E_HIS_183   | H, E_HIS_183    | 2.90 | 2.10 | 17.70 |
| 5UK0.PDB | O, E_HIS_98    | N, E_TYR_232   | H, E_TYR_232    | 2.75 | 1.93 | 13.43 |
| 5UK0.PDB | O, E_TRP_180   | N, E_TYR_233   | H, E_TYR_233    | 2.86 | 2.01 | 7.32  |
| 5UK0.PDB | O, E_ALA_100   | NE1, E_TRP_234 | HE1, E_TRP_234  | 2.75 | 1.95 | 17.13 |
| 5UK0.PDB | O, E_VAL_178   | N, E_THR_235   | H, E_THR_235    | 2.96 | 2.15 | 14.95 |
| 5UK0.PDB | O, E_GLY_181   | N, E_ILE_252   | H, E_ILE_252    | 2.86 | 2.06 | 19.00 |
| 5UK0.PDB | O, E_LEU_152   | N, E_ALA_253   | H, E_ALA_253    | 2.98 | 2.15 | 13.22 |
| 5UK0.PDB | OD2, F_ASP_612 | N, F_PHE_503   | H, F_PHE_503    | 2.70 | 1.87 | 11.30 |
| 5UK0.PDB | O, F_ALA_505   | N, F_GLY_508   | H, F_GLY_508    | 2.62 | 1.89 | 25.82 |
| 5UK0.PDB | O, F_GLY_504   | N, F_PHE_509   | H, F_PHE_509    | 2.72 | 1.93 | 19.29 |
| 5UK0.PDB | O, F_TYR_522   | N, F_ASP_537   | H, F_ASP_537    | 2.88 | 2.08 | 16.77 |
| 5UK0.PDB | O, F_GLN_538   | N, F_GLN_542   | H, F_GLN_542    | 2.87 | 2.06 | 16.85 |
| 5UK0.PDB | O, F_LYS_539   | N, F_ASN_543   | H, F_ASN_543    | 2.98 | 2.18 | 18.15 |
| 5UK0.PDB | O, F_SER_540   | N, F_ALA_544   | H, F_ALA_544    | 2.92 | 2.10 | 14.52 |
| 5UK0.PDB | O, F_THR_541   | N, F_ILE_545   | H, F_ILE_545    | 2.93 | 2.14 | 19.01 |
| 5UK0.PDB | O, F_GLN_542   | N, F_ASN_546   | H, F_ASN_546    | 2.90 | 2.07 | 13.91 |
| 5UK0.PDB | O, F_ILE_545   | N, F_THR_549   | H, F_THR_549    | 2.91 | 2.09 | 13.20 |
| 5UK0.PDB | O, F_GLY_547   | N, F_LYS_551   | H, F_LYS_551    | 2.90 | 2.15 | 24.70 |
| 5UK0.PDB | O, F_ILE_548   | N, F_VAL_552   | H, F_VAL_552    | 2.98 | 2.14 | 11.60 |
| 5UK0.PDB | O, F_THR_549   | N, F_ASN_553   | H, F_ASN_553    | 2.96 | 2.10 | 2.17  |
| 5UK0.PDB | O, F_GLU_574   | N, F_GLU_578   | H, F_GLU_578    | 2.95 | 2.23 | 28.18 |
| 5UK0.PDB | O, F_ARG_575   | N, F_ASN_579   | H, F_ASN_579    | 2.86 | 2.00 | 5.11  |
| 5UK0.PDB | O, F_ARG_576   | N, F_LEU_580   | H, F_LEU_580    | 2.90 | 2.08 | 14.08 |
| 5UK0.PDB | O, F_MET_577   | N, F_ASN_581   | H, F_ASN_581    | 2.90 | 2.05 | 9.26  |
| 5UK0.PDB | O, F_GLU_578   | N, F_LYS_582   | H, F_LYS_582    | 2.89 | 2.04 | 6.55  |
| 5UK0.PDB | O, F_ASN_579   | N, F_LYS_583   | H, F_LYS_583    | 2.99 | 2.19 | 17.94 |
| 5UK0.PDB | O, F_LEU_580   | N, F_VAL_584   | H, F_VAL_584    | 2.79 | 1.97 | 14.87 |
| 5UK0.PDB | O, F_ASN_581   | N, F_ASP_585   | H, F_ASP_585    | 2.96 | 2.12 | 8.36  |
| 5UK0.PDB | O, F_LYS_582   | N, F_ASP_586   | H, F_ASP_586    | 2.88 | 2.03 | 6.16  |
| 5UK0.PDB | O, F_LYS_583   | N, F_GLY_587   | H, F_GLY_587    | 2.88 | 2.11 | 21.80 |
| 5UK0.PDB | O, F_ASP_585   | N, F_ILE_589   | H, F_ILE_589    | 2.91 | 2.09 | 14.50 |
| 5UK0.PDB | O, F_ASP_586   | N, F_ASP_590   | H, F_ASP_590    | 2.91 | 2.09 | 14.81 |
| 5UK0.PDB | O, F_PHE_588   | N, F_TRP_592   | H, F_TRP_592    | 2.93 | 2.08 | 6.51  |
| 5UK0.PDB | O, F_ILE_589   | N, F_THR_593   | H, F_THR_593    | 2.96 | 2.20 | 24.02 |
| 5UK0.PDB | O, F_ASP_590   | N, F_TYR_594   | H, F_TYR_594    | 2.90 | 2.12 | 20.53 |
| 5UK0.PDB | O, F_ILE_591   | N, F_ASN_595   | H, F_ASN_595    | 2.98 | 2.13 | 3.84  |
| 5UK0.PDB | O, F_TRP_592   | N, F_ALA_596   | H, F_ALA_596    | 2.89 | 2.07 | 13.98 |
| 5UK0.PDB | O, F_THR_593   | N, F_GLU_597   | H, F_GLU_597    | 2.94 | 2.15 | 19.04 |
| 5UK0.PDB | O, F_ASN_595   | N, F_LEU_599   | H, F_LEU_599    | 2.94 | 2.22 | 27.60 |

|          |                |                |                 |      |      |       |
|----------|----------------|----------------|-----------------|------|------|-------|
| 5UK0.PDB | O, F_ALA_596   | N, F_VAL_600   | H, F_VAL_600    | 2.93 | 2.19 | 26.00 |
| 5UK0.PDB | O, F_LEU_598   | N, F_LEU_602   | H, F_LEU_602    | 2.93 | 2.09 | 10.36 |
| 5UK0.PDB | O, F_LEU_599   | N, F_GLU_603   | H, F_GLU_603    | 2.87 | 2.04 | 13.60 |
| 5UK0.PDB | O, F_VAL_600   | N, F_ASN_604   | H, F_ASN_604    | 2.99 | 2.17 | 14.81 |
| 5UK0.PDB | O, F_LEU_601   | N, F_GLU_605   | H, F_GLU_605    | 2.98 | 2.18 | 18.18 |
| 5UK0.PDB | O, F_LEU_602   | N, F_ARG_606   | H, F_ARG_606    | 2.84 | 2.01 | 10.64 |
| 5UK0.PDB | O, F_ASN_604   | N, F_LEU_608   | H, F_LEU_608    | 2.96 | 2.16 | 17.90 |
| 5UK0.PDB | O, F_GLU_605   | N, F_ASP_609   | H, F_ASP_609    | 2.94 | 2.14 | 18.42 |
| 5UK0.PDB | O, F_THR_607   | N, F_HIS_611   | H, F_HIS_611    | 2.95 | 2.15 | 17.79 |
| 5UK0.PDB | O, F_LEU_608   | N, F_ASP_612   | H, F_ASP_612    | 2.94 | 2.09 | 8.54  |
| 5UK0.PDB | O, F_ASP_609   | N, F_SER_613   | H, F_SER_613    | 2.89 | 2.09 | 18.54 |
| 5UK0.PDB | O, F_HIS_611   | N, F_VAL_615   | H, F_VAL_615    | 2.99 | 2.17 | 12.51 |
| 5UK0.PDB | O, F_SER_613   | N, F_ASN_617   | H, F_ASN_617    | 2.86 | 2.04 | 15.17 |
| 5UK0.PDB | O, D_LEU_502   | ND2, F_ASN_617 | HD22, F_ASN_617 | 2.71 | 1.89 | 14.40 |
| 5UK0.PDB | O, F_ASN_614   | N, F_LEU_618   | H, F_LEU_618    | 2.97 | 2.17 | 18.13 |
| 5UK0.PDB | O, F_VAL_615   | N, F_TYR_619   | H, F_TYR_619    | 2.89 | 2.08 | 17.81 |
| 5UK0.PDB | O, F_ASN_617   | N, F_LYS_621   | H, F_LYS_621    | 2.91 | 2.19 | 28.37 |
| 5UK0.PDB | O, F_LEU_618   | N, F_VAL_622   | H, F_VAL_622    | 2.91 | 2.12 | 20.33 |
| 5UK0.PDB | O, F_TYR_619   | N, F_LYS_623   | H, F_LYS_623    | 2.95 | 2.14 | 15.82 |
| 5UK1.PDB | O, D_VAL_552   | N, D_ILE_556   | H, D_ILE_556    | 2.96 | 2.12 | 11.93 |
| 5UK1.PDB | OE1, F_GLU_574 | N, F_ASN_571   | H, F_ASN_571    | 2.86 | 2.03 | 13.31 |
| 5UK1.PDB | O, F_GLU_574   | N, F_GLU_578   | H, F_GLU_578    | 2.94 | 2.20 | 25.93 |
| 5UK1.PDB | O, F_ARG_575   | N, F_ASN_579   | H, F_ASN_579    | 2.86 | 2.00 | 2.72  |
| 5UK1.PDB | O, F_ARG_576   | N, F_LEU_580   | H, F_LEU_580    | 2.81 | 1.99 | 13.05 |
| 5UK1.PDB | O, F_MET_577   | N, F_ASN_581   | H, F_ASN_581    | 2.86 | 2.02 | 9.83  |
| 5UK1.PDB | O, F_GLU_578   | N, F_LYS_582   | H, F_LYS_582    | 2.87 | 2.01 | 5.13  |
| 5UK1.PDB | O, F_ASN_579   | N, F_LYS_583   | H, F_LYS_583    | 2.94 | 2.18 | 22.71 |
| 5UK1.PDB | O, F_LEU_580   | N, F_VAL_584   | H, F_VAL_584    | 2.76 | 1.97 | 18.59 |
| 5UK1.PDB | O, F_ASN_581   | N, F_ASP_585   | H, F_ASP_585    | 2.97 | 2.13 | 10.07 |
| 5UK1.PDB | O, F_VAL_584   | N, F_PHE_588   | H, F_PHE_588    | 2.96 | 2.20 | 23.32 |
| 5UK2.PDB | O, A_ALA_100   | NE1, A_TRP_234 | HE1, A_TRP_234  | 2.78 | 1.96 | 13.46 |
| 5UK2.PDB | OE1, B_GLU_574 | N, B_ASN_571   | H, B_ASN_571    | 2.96 | 2.16 | 19.53 |
| 5UK2.PDB | OD1, B_ASN_571 | N, B_LEU_573   | H, B_LEU_573    | 2.85 | 2.08 | 22.03 |
| 5UK2.PDB | O, B_ARG_575   | N, B_ASN_579   | H, B_ASN_579    | 2.99 | 2.13 | 2.73  |
| 5UK2.PDB | O, B_ARG_576   | N, B_LEU_580   | H, B_LEU_580    | 2.91 | 2.11 | 18.12 |
| 5UK2.PDB | O, B_MET_577   | N, B_ASN_581   | H, B_ASN_581    | 2.88 | 2.04 | 8.65  |
| 5UK2.PDB | O, B_GLU_578   | N, B_LYS_582   | H, B_LYS_582    | 2.97 | 2.11 | 2.97  |
| 5UK2.PDB | O, B_ASN_579   | N, B_LYS_583   | H, B_LYS_583    | 2.97 | 2.22 | 23.65 |
| 5UK2.PDB | O, B_LEU_580   | N, B_VAL_584   | H, B_VAL_584    | 2.78 | 1.98 | 15.70 |
| 5UK2.PDB | O, B_ASN_581   | N, B_ASP_585   | H, B_ASP_585    | 2.99 | 2.14 | 7.89  |
| 5UK2.PDB | O, B_LYS_583   | N, B_GLY_587   | H, B_GLY_587    | 2.91 | 2.15 | 22.85 |
| 5UK2.PDB | O, B_VAL_584   | N, B_PHE_588   | H, B_PHE_588    | 2.97 | 2.15 | 13.63 |
| 5UK2.PDB | O, B_ASP_585   | N, B_ILE_589   | H, B_ILE_589    | 2.86 | 2.03 | 12.99 |
| 5UK2.PDB | O, B_PHE_588   | N, B_TRP_592   | H, B_TRP_592    | 2.95 | 2.11 | 9.98  |
| 5UK2.PDB | O, B_ILE_589   | N, B_THR_593   | H, B_THR_593    | 2.97 | 2.20 | 23.17 |
| 5UK2.PDB | O, B_ASP_590   | N, B_TYR_594   | H, B_TYR_594    | 2.88 | 2.12 | 22.46 |
| 5UK2.PDB | O, B_ILE_591   | N, B_ASN_595   | H, B_ASN_595    | 2.96 | 2.11 | 4.99  |
| 5UK2.PDB | O, B_TRP_592   | N, B_ALA_596   | H, B_ALA_596    | 2.93 | 2.11 | 15.16 |
| 5UK2.PDB | OE1, F_GLU_574 | N, F_ASN_571   | H, F_ASN_571    | 2.96 | 2.16 | 19.49 |
| 5UK2.PDB | OD1, F_ASN_571 | N, F_LEU_573   | H, F_LEU_573    | 2.85 | 2.08 | 21.74 |
| 5UK2.PDB | O, F_ARG_575   | N, F_ASN_579   | H, F_ASN_579    | 2.99 | 2.13 | 2.69  |
| 5UK2.PDB | O, F_ARG_576   | N, F_LEU_580   | H, F_LEU_580    | 2.91 | 2.11 | 18.05 |
| 5UK2.PDB | O, F_MET_577   | N, F_ASN_581   | H, F_ASN_581    | 2.88 | 2.04 | 8.63  |
| 5UK2.PDB | O, F_ASN_579   | N, F_LYS_583   | H, F_LYS_583    | 2.97 | 2.22 | 23.60 |
| 5UK2.PDB | O, F_LEU_580   | N, F_VAL_584   | H, F_VAL_584    | 2.78 | 1.98 | 15.73 |
| 5UK2.PDB | O, F_VAL_584   | N, F_PHE_588   | H, F_PHE_588    | 2.97 | 2.15 | 13.56 |
| 5VXJ.PDB | O, A_VAL_41    | N, A_THR_45    | H, A_THR_45     | 2.85 | 2.03 | 14.33 |
| 5VXJ.PDB | O, A_SER_43    | N, A_LEU_47    | H, A_LEU_47     | 2.92 | 2.09 | 14.12 |

|          |                |                |                 |      |      |       |
|----------|----------------|----------------|-----------------|------|------|-------|
| 5VXJ.PDB | O, A_MET.46    | N, A_THR.50    | H, A_THR.50     | 2.71 | 1.87 | 10.48 |
| 5VXJ.PDB | O, A_MET.46    | OG1, A_THR.50  | HG1, A_THR.50   | 2.73 | 1.96 | 20.05 |
| 5VXJ.PDB | O, A_LEU.47    | N, A_LEU.51    | H, A_LEU.51     | 2.75 | 1.90 | 3.64  |
| 5VXJ.PDB | OD2, A_ASP.309 | NH2, A_ARG.55  | HH21, A_ARG.55  | 2.90 | 2.12 | 21.39 |
| 5VXJ.PDB | O, A_ASN.53    | N, A_THR.57    | H, A_THR.57     | 2.92 | 2.09 | 13.03 |
| 5VXJ.PDB | O, A_ILE.54    | N, A_ASN.58    | H, A_ASN.58     | 2.76 | 1.94 | 14.78 |
| 5VXJ.PDB | O, A_THR.57    | N, A_LEU.61    | H, A_LEU.61     | 2.95 | 2.16 | 20.24 |
| 5VXJ.PDB | O, A_ASN.58    | N, A_LYS.62    | H, A_LYS.62     | 2.92 | 2.08 | 10.15 |
| 5VXJ.PDB | OG, A_SER.302  | NZ, A_LYS.62   | HZ2, A_LYS.62   | 2.77 | 1.91 | 12.44 |
| 5VXJ.PDB | OG, A_SER.306  | NZ, A_LYS.62   | HZ3, A_LYS.62   | 2.75 | 1.92 | 16.95 |
| 5VXJ.PDB | O, A_LEU.61    | N, A_LEU.65    | H, A_LEU.65     | 2.88 | 2.04 | 11.05 |
| 5VXJ.PDB | O, A_THR.73    | N, A_GLU.77    | H, A_GLU.77     | 2.92 | 2.15 | 21.99 |
| 5VXJ.PDB | O, A_SER.74    | N, A_ILE.78    | H, A_ILE.78     | 2.84 | 1.99 | 6.65  |
| 5VXJ.PDB | O, A_GLU.77    | N, A_HIS.81    | H, A_HIS.81     | 2.96 | 2.12 | 10.84 |
| 5VXJ.PDB | O, A_ILE.78    | N, A_SER.82    | H, A_SER.82     | 2.74 | 1.89 | 4.58  |
| 5VXJ.PDB | O, A_ALA.79    | N, A_SER.83    | H, A_SER.83     | 2.95 | 2.13 | 16.02 |
| 5VXJ.PDB | O, A_LEU.80    | N, A_GLN.84    | H, A_GLN.84     | 2.97 | 2.17 | 18.25 |
| 5VXJ.PDB | O, A_HIS.81    | N, A_ILE.85    | H, A_ILE.85     | 2.84 | 2.00 | 10.73 |
| 5VXJ.PDB | O, A_SER.82    | N, A_SER.86    | H, A_SER.86     | 2.95 | 2.09 | 3.63  |
| 5VXJ.PDB | O, A_SER.83    | N, A_MET.87    | H, A_MET.87     | 2.90 | 2.08 | 16.45 |
| 5VXJ.PDB | O, A_ILE.85    | N, A_VAL.89    | H, A_VAL.89     | 2.68 | 1.83 | 6.60  |
| 5VXJ.PDB | O, A_SER.86    | N, A_ASN.90    | H, A_ASN.90     | 2.83 | 2.04 | 19.63 |
| 5VXJ.PDB | O, A_ASP.88    | N, A_SER.92    | H, A_SER.92     | 2.88 | 2.03 | 7.69  |
| 5VXJ.PDB | O, A_VAL.89    | N, A_ALA.93    | H, A_ALA.93     | 2.95 | 2.14 | 16.09 |
| 5VXJ.PDB | O, A_LYS.91    | N, A_LEU.95    | H, A_LEU.95     | 2.93 | 2.12 | 16.80 |
| 5VXJ.PDB | O, A_SER.92    | N, A_LEU.96    | H, A_LEU.96     | 2.83 | 1.97 | 3.74  |
| 5VXJ.PDB | O, A_ALA.93    | N, A_ASP.97    | H, A_ASP.97     | 2.81 | 2.03 | 20.86 |
| 5VXJ.PDB | O, A_LEU.96    | N, A_SER.100   | H, A_SER.100    | 2.98 | 2.27 | 29.77 |
| 5VXJ.PDB | O, A_ARG.132   | OG, A_SER.100  | HG, A_SER.100   | 2.62 | 1.84 | 18.43 |
| 5VXJ.PDB | OD2, A_ASP.97  | NE, A_ARG.101  | HE, A_ARG.101   | 2.80 | 1.97 | 13.39 |
| 5VXJ.PDB | O, A_ILE.98    | N, A_ASN.102   | H, A_ASN.102    | 2.95 | 2.11 | 10.28 |
| 5VXJ.PDB | O, A_SER.100   | N, A_GLU.103   | H, A_GLU.103    | 2.99 | 2.22 | 22.55 |
| 5VXJ.PDB | O, A_LEU.99    | N, A_TYR.104   | H, A_TYR.104    | 2.95 | 2.14 | 17.03 |
| 5VXJ.PDB | O, A_ILE.129   | NH1, A_ARG.111 | HH12, A_ARG.111 | 2.61 | 1.80 | 16.87 |
| 5VXJ.PDB | O, A_LEU.113   | N, A_SER.116   | H, A_SER.116    | 2.99 | 2.17 | 13.81 |
| 5VXJ.PDB | O, A_LEU.114   | N, A_ALA.117   | H, A_ALA.117    | 2.91 | 2.07 | 9.65  |
| 5VXJ.PDB | O, A_LYS.119   | N, A_GLU.122   | H, A_GLU.122    | 2.96 | 2.17 | 19.32 |
| 5VXJ.PDB | O, A_SER.130   | N, A_LEU.134   | H, A_LEU.134    | 2.99 | 2.20 | 18.86 |
| 5VXJ.PDB | O, A_TYR.104   | NE1, A_TRP.135 | HE1, A_TRP.135  | 2.84 | 2.08 | 23.47 |
| 5VXJ.PDB | O, A_GLU.133   | N, A_LYS.137   | H, A_LYS.137    | 2.97 | 2.16 | 17.73 |
| 5VXJ.PDB | O, A_LEU.134   | N, A_ILE.138   | H, A_ILE.138    | 2.93 | 2.16 | 21.74 |
| 5VXJ.PDB | O, A_TRP.135   | N, A_ALA.139   | H, A_ALA.139    | 2.99 | 2.16 | 12.41 |
| 5VXJ.PDB | O, A_ALA.136   | N, A_ASN.140   | H, A_ASN.140    | 2.89 | 2.04 | 5.99  |
| 5VXJ.PDB | O, A_LYS.137   | N, A_SER.141   | H, A_SER.141    | 2.86 | 2.11 | 24.60 |
| 5VXJ.PDB | O, A_ALA.121   | OG, A_SER.141  | HG, A_SER.141   | 2.90 | 2.17 | 24.63 |
| 5VXJ.PDB | O, A_ILE.138   | N, A_ILE.142   | H, A_ILE.142    | 2.98 | 2.14 | 10.65 |
| 5VXJ.PDB | O, A_ASN.140   | N, A_ASP.144   | H, A_ASP.144    | 2.74 | 1.94 | 18.04 |
| 5VXJ.PDB | O, A_SER.141   | N, A_ILE.145   | H, A_ILE.145    | 2.97 | 2.12 | 7.63  |
| 5VXJ.PDB | O, A_ASP.144   | N, A_GLN.148   | H, A_GLN.148    | 2.73 | 1.88 | 8.38  |
| 5VXJ.PDB | O, A_ILE.145   | N, A_LEU.150   | H, A_LEU.150    | 2.96 | 2.11 | 7.42  |
| 5VXJ.PDB | O, A_ASN.146   | N, A_LYS.151   | H, A_LYS.151    | 2.96 | 2.16 | 18.68 |
| 5VXJ.PDB | OE2, A_GLU.229 | OH, A_TYR.153  | HH, A_TYR.153   | 2.70 | 1.94 | 21.05 |
| 5VXJ.PDB | O, A_GLU.154   | N, A_SER.158   | H, A_SER.158    | 2.90 | 2.09 | 15.89 |
| 5VXJ.PDB | O, A_HIS.155   | N, A_SER.159   | H, A_SER.159    | 2.80 | 1.96 | 9.42  |
| 5VXJ.PDB | O, A_VAL.157   | N, A_THR.161   | H, A_THR.161    | 2.82 | 1.98 | 11.00 |
| 5VXJ.PDB | O, A_VAL.157   | OG1, A_THR.161 | HG1, A_THR.161  | 2.60 | 1.90 | 27.90 |
| 5VXJ.PDB | O, A_TYR.160   | N, A_TYR.164   | H, A_TYR.164    | 2.91 | 2.09 | 14.34 |
| 5VXJ.PDB | OD1, A_ASP.287 | OH, A_TYR.164  | HH, A_TYR.164   | 2.72 | 1.96 | 22.05 |



|          |                |                |                 |      |      |       |
|----------|----------------|----------------|-----------------|------|------|-------|
| 5VXJ.PDB | O, A_THR_161   | N, A_GLN_165   | H, A_GLN_165    | 2.84 | 2.05 | 19.22 |
| 5VXJ.PDB | O, A_GLN_162   | N, A_ASP_166   | H, A_ASP_166    | 2.94 | 2.09 | 8.93  |
| 5VXJ.PDB | O, A_MET_163   | N, A_PHE_167   | H, A_PHE_167    | 2.91 | 2.10 | 17.54 |
| 5VXJ.PDB | O, A_TYR_164   | N, A_SER_168   | H, A_SER_168    | 2.81 | 2.03 | 20.85 |
| 5VXJ.PDB | O, A_TYR_164   | OG, A_SER_168  | HG, A_SER_168   | 2.89 | 2.09 | 13.52 |
| 5VXJ.PDB | O, A_SER_168   | N, A_SER_172   | H, A_SER_172    | 2.98 | 2.21 | 21.86 |
| 5VXJ.PDB | O, A_LEU_174   | N, A_TRP_177   | H, A_TRP_177    | 2.99 | 2.26 | 27.17 |
| 5VXJ.PDB | OD1, A_ASP_184 | N, A_ASN_186   | H, A_ASN_186    | 2.76 | 1.91 | 7.29  |
| 5VXJ.PDB | O, A_LEU_271   | N, A_VAL_188   | H, A_VAL_188    | 2.87 | 2.09 | 19.88 |
| 5VXJ.PDB | O, A_SER_179   | N, A_LYS_189   | H, A_LYS_189    | 2.61 | 1.75 | 6.27  |
| 5VXJ.PDB | O, A_VAL_269   | N, A_LEU_190   | H, A_LEU_190    | 2.84 | 2.02 | 14.05 |
| 5VXJ.PDB | O, A_TRP_177   | N, A_GLN_191   | H, A_GLN_191    | 2.95 | 2.15 | 19.06 |
| 5VXJ.PDB | OE2, A_GLU_268 | NE2, A_GLN_191 | HE22, A_GLN_191 | 2.93 | 2.12 | 16.99 |
| 5VXJ.PDB | O, A_VAL_192   | N, A_LYS_196   | H, A_LYS_196    | 2.67 | 1.82 | 7.56  |
| 5VXJ.PDB | O, A_ASN_193   | N, A_LYS_197   | H, A_LYS_197    | 2.75 | 1.93 | 14.74 |
| 5VXJ.PDB | O, A_LYS_196   | N, A_GLU_200   | H, A_GLU_200    | 2.98 | 2.16 | 13.97 |
| 5VXJ.PDB | O, A_ALA_198   | N, A_LEU_202   | H, A_LEU_202    | 2.92 | 2.14 | 21.59 |
| 5VXJ.PDB | OD1, A_ASP_254 | NZ, A_LYS_203  | HZ2, A_LYS_203  | 2.48 | 1.62 | 10.37 |
| 5VXJ.PDB | O, A_GLU_201   | N, A_LYS_205   | H, A_LYS_205    | 2.84 | 2.05 | 19.85 |
| 5VXJ.PDB | OD2, A_ASP_166 | NZ, A_LYS_205  | HZ2, A_LYS_205  | 2.60 | 1.73 | 10.82 |
| 5VXJ.PDB | OD2, A_ASP_166 | OH, A_TYR_206  | HH, A_TYR_206   | 2.59 | 1.78 | 13.29 |
| 5VXJ.PDB | O, A_TYR_244   | N, A_VAL_218   | H, A_VAL_218    | 2.97 | 2.15 | 14.20 |
| 5VXJ.PDB | OG, A_SER_219  | N, A_GLN_222   | H, A_GLN_222    | 2.99 | 2.14 | 8.32  |
| 5VXJ.PDB | O, A_SER_219   | N, A_ALA_223   | H, A_ALA_223    | 2.98 | 2.15 | 10.83 |
| 5VXJ.PDB | O, A_GLN_220   | N, A_ASN_224   | H, A_ASN_224    | 2.96 | 2.18 | 20.88 |
| 5VXJ.PDB | O, A_ALA_223   | N, A_LEU_227   | H, A_LEU_227    | 2.92 | 2.16 | 24.23 |
| 5VXJ.PDB | O, A_TRP_226   | N, A_LEU_230   | H, A_LEU_230    | 2.82 | 1.96 | 5.43  |
| 5VXJ.PDB | O, A_LEU_227   | N, A_GLY_231   | H, A_GLY_231    | 2.79 | 1.94 | 7.11  |
| 5VXJ.PDB | O, A_VAL_245   | N, A_SER_238   | H, A_SER_238    | 2.93 | 2.14 | 18.31 |
| 5VXJ.PDB | O, A_SER_238   | N, A_VAL_245   | H, A_VAL_245    | 2.90 | 2.09 | 17.18 |
| 5VXJ.PDB | O, A_TYR_212   | N, A_VAL_246   | H, A_VAL_246    | 2.63 | 1.77 | 2.37  |
| 5VXJ.PDB | O, A_LYS_236   | N, A_SER_247   | H, A_SER_247    | 2.73 | 1.99 | 25.54 |
| 5VXJ.PDB | O, A_ILE_234   | N, A_ASN_249   | H, A_ASN_249    | 2.99 | 2.14 | 5.52  |
| 5VXJ.PDB | OD1, A_ASN_249 | N, A_THR_251   | H, A_THR_251    | 2.98 | 2.14 | 12.09 |
| 5VXJ.PDB | OD1, A_ASN_249 | OG1, A_THR_251 | HG1, A_THR_251  | 2.61 | 1.88 | 24.99 |
| 5VXJ.PDB | O, A_THR_251   | N, A_ASN_255   | H, A_ASN_255    | 2.72 | 1.90 | 15.38 |
| 5VXJ.PDB | O, A_PRO_252   | N, A_MET_256   | H, A_MET_256    | 2.93 | 2.09 | 10.06 |
| 5VXJ.PDB | O, A_ILE_253   | N, A_LEU_257   | H, A_LEU_257    | 2.89 | 2.11 | 21.11 |
| 5VXJ.PDB | O, A_ASP_254   | N, A_LYS_258   | H, A_LYS_258    | 2.89 | 2.05 | 10.53 |
| 5VXJ.PDB | O, A_ASN_255   | N, A_SER_259   | H, A_SER_259    | 2.85 | 2.05 | 18.21 |
| 5VXJ.PDB | O, A_MET_256   | N, A_LEU_260   | H, A_LEU_260    | 2.88 | 2.06 | 15.58 |
| 5VXJ.PDB | O, A_LEU_260   | N, A_LEU_263   | H, A_LEU_263    | 2.93 | 2.08 | 8.28  |
| 5VXJ.PDB | O, A_VAL_188   | N, A_LEU_271   | H, A_LEU_271    | 2.79 | 1.96 | 13.97 |
| 5VXJ.PDB | OD1, A_ASP_272 | N, A_LYS_275   | H, A_LYS_275    | 2.71 | 1.87 | 8.42  |
| 5VXJ.PDB | O, A_ASP_272   | N, A_TYR_276   | H, A_TYR_276    | 2.96 | 2.18 | 20.66 |
| 5VXJ.PDB | O, A_ASN_273   | N, A_GLN_277   | H, A_GLN_277    | 2.93 | 2.09 | 9.71  |
| 5VXJ.PDB | O, A_ALA_274   | N, A_ALA_278   | H, A_ALA_278    | 2.97 | 2.14 | 12.65 |
| 5VXJ.PDB | O, A_TYR_276   | N, A_ASN_280   | H, A_ASN_280    | 2.81 | 1.95 | 2.97  |
| 5VXJ.PDB | O, A_GLN_277   | N, A_ALA_281   | H, A_ALA_281    | 2.86 | 2.07 | 19.09 |
| 5VXJ.PDB | O, A_TRP_279   | N, A_PHE_283   | H, A_PHE_283    | 2.88 | 2.07 | 15.81 |
| 5VXJ.PDB | O, A_ASN_280   | N, A_SER_284   | H, A_SER_284    | 2.76 | 1.91 | 8.04  |
| 5VXJ.PDB | O, A_ASN_280   | OG, A_SER_284  | HG, A_SER_284   | 2.99 | 2.26 | 24.82 |
| 5VXJ.PDB | O, A_ALA_281   | N, A_ALA_285   | H, A_ALA_285    | 2.96 | 2.19 | 22.09 |
| 5VXJ.PDB | O, A_SER_284   | N, A_GLU_288   | H, A_GLU_288    | 2.97 | 2.15 | 15.81 |
| 5VXJ.PDB | O, A_ALA_285   | N, A_THR_289   | H, A_THR_289    | 2.87 | 2.12 | 24.45 |
| 5VXJ.PDB | O, A_ALA_285   | OG1, A_THR_289 | HG1, A_THR_289  | 2.86 | 2.03 | 7.57  |
| 5VXJ.PDB | O, A_ASP_287   | N, A_LYS_291   | H, A_LYS_291    | 2.93 | 2.09 | 9.56  |
| 5VXJ.PDB | O, A_GLU_288   | N, A_ASN_292   | H, A_ASN_292    | 2.87 | 2.05 | 14.52 |

|          |                |                |                 |      |      |       |
|----------|----------------|----------------|-----------------|------|------|-------|
| 5VXJ.PDB | O, A_THR_289   | N, A_ASN_293   | H, A_ASN_293    | 2.90 | 2.09 | 17.21 |
| 5VXJ.PDB | O, A_MET_290   | N, A_LEU_294   | H, A_LEU_294    | 2.92 | 2.07 | 7.82  |
| 5VXJ.PDB | O, A_LYS_291   | N, A_GLN_295   | H, A_GLN_295    | 2.99 | 2.14 | 9.97  |
| 5VXJ.PDB | O, A_ASN_292   | N, A_THR_296   | H, A_THR_296    | 2.84 | 2.08 | 24.09 |
| 5VXJ.PDB | O, A_LEU_294   | N, A_VAL_298   | H, A_VAL_298    | 2.91 | 2.08 | 13.79 |
| 5VXJ.PDB | O, A_LEU_297   | N, A_TYR_301   | H, A_TYR_301    | 2.90 | 2.05 | 7.11  |
| 5VXJ.PDB | O, A_VAL_298   | N, A_SER_302   | H, A_SER_302    | 2.79 | 1.95 | 9.28  |
| 5VXJ.PDB | O, A_GLN_299   | N, A_ASN_303   | H, A_ASN_303    | 2.74 | 1.90 | 10.18 |
| 5VXJ.PDB | O, A_LYS_300   | N, A_ALA_304   | H, A_ALA_304    | 2.86 | 2.05 | 16.63 |
| 5VXJ.PDB | O, A_TYR_301   | N, A_ASN_305   | H, A_ASN_305    | 2.97 | 2.18 | 19.72 |
| 5VXJ.PDB | OD1, A_ASN_58  | ND2, A_ASN_305 | HD21, A_ASN_305 | 2.96 | 2.14 | 16.38 |
| 5VXJ.PDB | O, A_ALA_304   | N, A_PHE_308   | H, A_PHE_308    | 2.88 | 2.04 | 10.22 |
| 5VXJ.PDB | O, A_ASN_305   | N, A_ASP_309   | H, A_ASP_309    | 2.74 | 1.94 | 18.74 |
| 5VXJ.PDB | O, A_SER_306   | N, A_ASN_310   | H, A_ASN_310    | 2.77 | 1.99 | 20.96 |
| 5VXJ.PDB | O, A_ASP_309   | N, A_LYS_313   | H, A_LYS_313    | 2.88 | 2.04 | 10.21 |
| 5VXJ.PDB | O, A_ASN_310   | N, A_VAL_314   | H, A_VAL_314    | 2.93 | 2.11 | 13.42 |
| 5VXJ.PDB | O, A_LEU_311   | N, A_LEU_315   | H, A_LEU_315    | 2.74 | 1.89 | 8.56  |
| 5VXJ.PDB | N, A_VAL_312   | N, A_SER_316   | H, A_SER_316    | 2.85 | 2.04 | 14.90 |
| 5VXJ.PDB | O, A_VAL_314   | OG1, A_THR_318 | HG1, A_THR_318  | 2.99 | 2.16 | 6.68  |
| 5VXJ.PDB | O, A_LEU_315   | N, A_ILE_319   | H, A_ILE_319    | 2.97 | 2.18 | 20.05 |
| 5VXJ.PDB | O, A_SER_316   | N, A_SER_320   | H, A_SER_320    | 3.00 | 2.17 | 14.20 |
| 5VXJ.PDB | O, A_THR_318   | OG, A_SER_322  | HG, A_SER_322   | 2.97 | 2.21 | 21.62 |
| 5VXJ.PDB | O, B_SER_25    | N, B_GLN_3     | H, B_GLN_3      | 2.86 | 2.03 | 13.37 |
| 5VXJ.PDB | O, B_ALA_23    | N, B_ALA_5     | H, B_ALA_5      | 2.95 | 2.16 | 20.65 |
| 5VXJ.PDB | O, B_GLN_114   | N, B_GLY_10    | H, B_GLY_10     | 2.78 | 1.93 | 4.26  |
| 5VXJ.PDB | O, B_THR_116   | N, B_ALA_12    | H, B_ALA_12     | 2.97 | 2.27 | 29.86 |
| 5VXJ.PDB | O, B_LEU_86    | N, B_GLY_15    | H, B_GLY_15     | 2.80 | 1.97 | 12.25 |
| 5VXJ.PDB | O, B_GLN_13    | N, B_GLY_16    | H, B_GLY_16     | 2.89 | 2.07 | 14.89 |
| 5VXJ.PDB | O, B_MET_83    | N, B_LEU_18    | H, B_LEU_18     | 2.81 | 2.01 | 18.59 |
| 5VXJ.PDB | OE1, B_GLN_82  | NE, B_ARG_19   | HE, B_ARG_19    | 2.47 | 1.66 | 15.76 |
| 5VXJ.PDB | O, B_THR_7     | N, B_SER_21    | H, B_SER_21     | 2.89 | 2.13 | 23.79 |
| 5VXJ.PDB | O, B_VAL_79    | N, B_CYS_22    | H, B_CYS_22     | 2.97 | 2.22 | 24.17 |
| 5VXJ.PDB | O, B_ALA_5     | N, B_ALA_23    | H, B_ALA_23     | 2.85 | 2.01 | 10.80 |
| 5VXJ.PDB | O, B_ASN_77    | N, B_ALA_24    | H, B_ALA_24     | 2.89 | 2.04 | 8.57  |
| 5VXJ.PDB | O, B_THR_28    | N, B_ARG_31    | H, B_ARG_31     | 2.95 | 2.13 | 14.81 |
| 5VXJ.PDB | O, B_GLY_99    | N, B_VAL_33    | H, B_VAL_33     | 2.85 | 2.06 | 20.75 |
| 5VXJ.PDB | O, B_ASN_97    | N, B_ASN_35    | H, B_ASN_35     | 2.73 | 1.92 | 16.35 |
| 5VXJ.PDB | O, B_VAL_95    | N, B_TYR_37    | H, B_TYR_37     | 2.74 | 1.89 | 6.02  |
| 5VXJ.PDB | OE2, B_GLU_46  | NE, B_ARG_38   | HE, B_ARG_38    | 2.93 | 2.12 | 17.64 |
| 5VXJ.PDB | OH, B_TYR_94   | NH1, B_ARG_38  | HH11, B_ARG_38  | 2.80 | 1.98 | 13.19 |
| 5VXJ.PDB | OD1, B_ASP_90  | NH1, B_ARG_38  | HH12, B_ARG_38  | 2.76 | 1.91 | 7.08  |
| 5VXJ.PDB | O, B_ARG_38    | N, B_GLU_46    | H, B_GLU_46     | 2.92 | 2.08 | 10.18 |
| 5VXJ.PDB | O, B_TRP_36    | N, B_VAL_48    | H, B_VAL_48     | 2.83 | 2.04 | 19.58 |
| 5VXJ.PDB | OD1, B_ASN_35  | NE, B_ARG_50   | HE, B_ARG_50    | 2.65 | 1.82 | 11.22 |
| 5VXJ.PDB | OE1, I_GLU_200 | NH1, B_ARG_50  | HH12, B_ARG_50  | 2.92 | 2.07 | 7.25  |
| 5VXJ.PDB | O, B_SER_30    | OH, B_TYR_52   | HH, B_TYR_52    | 2.72 | 1.93 | 15.55 |
| 5VXJ.PDB | OD1, B_ASP_53  | N, B_GLY_55    | H, B_GLY_55     | 2.72 | 1.91 | 16.35 |
| 5VXJ.PDB | O, B_ARG_50    | N, B_SER_59    | H, B_SER_59     | 2.55 | 1.72 | 12.05 |
| 5VXJ.PDB | O, B_VAL_48    | N, B_ALA_61    | H, B_ALA_61     | 2.78 | 1.92 | 5.65  |
| 5VXJ.PDB | OD2, B_ASP_90  | NH1, B_ARG_67  | HH12, B_ARG_67  | 2.82 | 2.01 | 16.67 |
| 5VXJ.PDB | OD1, B_ASP_90  | NH2, B_ARG_67  | HH22, B_ARG_67  | 2.96 | 2.12 | 11.06 |
| 5VXJ.PDB | O, B_VAL_64    | N, B_PHE_68    | H, B_PHE_68     | 2.90 | 2.06 | 11.49 |
| 5VXJ.PDB | O, B_GLN_82    | N, B_THR_69    | H, B_THR_69     | 2.99 | 2.19 | 17.88 |
| 5VXJ.PDB | O, B_HIS_80    | N, B_SER_71    | H, B_SER_71     | 2.98 | 2.19 | 19.14 |
| 5VXJ.PDB | O, B_ALA_32    | NH2, B_ARG_72  | HH22, B_ARG_72  | 2.73 | 1.87 | 6.16  |
| 5VXJ.PDB | O, B_THR_78    | N, B_ASP_73    | H, B_ASP_73     | 2.88 | 2.03 | 8.84  |
| 5VXJ.PDB | O, B_SER_71    | N, B_HIS_80    | H, B_HIS_80     | 2.94 | 2.16 | 21.65 |
| 5VXJ.PDB | O, B_LEU_20    | N, B_LEU_81    | H, B_LEU_81     | 2.93 | 2.12 | 17.56 |

|          |                |                |                 |      |      |       |
|----------|----------------|----------------|-----------------|------|------|-------|
| 5VXJ.PDB | O, B_THR_69    | N, B_GLN_82    | H, B_GLN_82     | 2.77 | 2.03 | 25.51 |
| 5VXJ.PDB | OD1, B_ASN_84  | NE2, B_GLN_82  | HE21, B_GLN_82  | 2.95 | 2.09 | 2.81  |
| 5VXJ.PDB | O, B_LEU_18    | N, B_MET_83    | H, B_MET_83     | 2.63 | 1.77 | 6.35  |
| 5VXJ.PDB | O, B_LYS_87    | N, B_ASP_90    | H, B_ASP_90     | 2.82 | 2.01 | 16.00 |
| 5VXJ.PDB | O, B_THR_113   | N, B_TYR_94    | H, B_TYR_94     | 2.87 | 2.08 | 19.12 |
| 5VXJ.PDB | O, B_ASP_90    | OH, B_TYR_94   | HH, B_TYR_94    | 2.68 | 1.86 | 10.06 |
| 5VXJ.PDB | O, B_TYR_37    | N, B_VAL_95    | H, B_VAL_95     | 3.00 | 2.17 | 13.97 |
| 5VXJ.PDB | O, B_ASN_35    | N, B_ASN_97    | H, B_ASN_97     | 2.80 | 2.07 | 26.52 |
| 5VXJ.PDB | OG1, B_THR_107 | ND2, B_ASN_97  | HD21, B_ASN_97  | 2.64 | 1.86 | 19.39 |
| 5VXJ.PDB | O, B_VAL_33    | N, B_GLY_99    | H, B_GLY_99     | 2.75 | 1.91 | 8.60  |
| 5VXJ.PDB | O, B_ARG_106   | N, B_ILE_100   | H, B_ILE_100    | 2.81 | 1.95 | 1.78  |
| 5VXJ.PDB | O, B_ASN_104   | N, B_ASP_102   | H, B_ASP_102    | 2.92 | 2.07 | 4.41  |
| 5VXJ.PDB | OE1, I_GLU_201 | OH, B_TYR_105  | HH, B_TYR_105   | 2.51 | 1.70 | 12.69 |
| 5VXJ.PDB | O, B_ALA_98    | OG1, B_THR_107 | HG1, B_THR_107  | 2.89 | 2.18 | 28.04 |
| 5VXJ.PDB | OE1, B_GLU_6   | N, B_GLY_112   | H, B_GLY_112    | 2.87 | 2.05 | 14.11 |
| 5VXJ.PDB | O, B_TYR_94    | N, B_THR_113   | H, B_THR_113    | 2.58 | 1.76 | 13.84 |
| 5VXJ.PDB | O, B_GLY_10    | N, B_THR_116   | H, B_THR_116    | 2.97 | 2.14 | 11.68 |
| 5VXJ.PDB | O, C_THR_45    | N, C_ASP_49    | H, C_ASP_49     | 3.00 | 2.16 | 11.23 |
| 5VXJ.PDB | O, C_MET_46    | N, C_THR_50    | H, C_THR_50     | 2.75 | 1.93 | 15.42 |
| 5VXJ.PDB | O, C_MET_46    | OG1, C_THR_50  | HG1, C_THR_50   | 2.84 | 2.05 | 16.87 |
| 5VXJ.PDB | O, C_LEU_47    | N, C_LEU_51    | H, C_LEU_51     | 2.66 | 1.82 | 9.17  |
| 5VXJ.PDB | OD2, C_ASP_309 | NH2, C_ARG_55  | HH21, C_ARG_55  | 2.97 | 2.17 | 18.00 |
| 5VXJ.PDB | O, C_HIS_52    | N, C_THR_56    | H, C_THR_56     | 2.83 | 2.00 | 14.10 |
| 5VXJ.PDB | O, C_ASN_53    | N, C_THR_57    | H, C_THR_57     | 2.88 | 2.05 | 12.91 |
| 5VXJ.PDB | O, C_ILE_54    | N, C_ASN_58    | H, C_ASN_58     | 2.78 | 2.03 | 23.87 |
| 5VXJ.PDB | O, C_THR_57    | N, C_LEU_61    | H, C_LEU_61     | 2.97 | 2.16 | 17.22 |
| 5VXJ.PDB | O, C_ASN_58    | N, C_LYS_62    | H, C_LYS_62     | 2.91 | 2.07 | 10.71 |
| 5VXJ.PDB | OG, C_SER_302  | NZ, C_LYS_62   | HZ2, C_LYS_62   | 2.61 | 1.73 | 6.54  |
| 5VXJ.PDB | O, C_THR_73    | N, C_GLU_77    | H, C_GLU_77     | 2.89 | 2.05 | 10.72 |
| 5VXJ.PDB | O, C_SER_74    | N, C_ILE_78    | H, C_ILE_78     | 2.75 | 1.91 | 9.49  |
| 5VXJ.PDB | O, C_LEU_75    | N, C_ALA_79    | H, C_ALA_79     | 2.88 | 2.03 | 7.76  |
| 5VXJ.PDB | O, C_GLU_76    | N, C_LEU_80    | H, C_LEU_80     | 2.83 | 1.99 | 11.70 |
| 5VXJ.PDB | O, C_GLU_77    | N, C_HIS_81    | H, C_HIS_81     | 2.88 | 2.03 | 8.46  |
| 5VXJ.PDB | O, C_ILE_78    | N, C_SER_82    | H, C_SER_82     | 2.83 | 2.00 | 12.85 |
| 5VXJ.PDB | OE2, C_GLU_154 | OG, C_SER_82   | HG, C_SER_82    | 2.58 | 1.81 | 19.25 |
| 5VXJ.PDB | O, C_ALA_79    | N, C_SER_83    | H, C_SER_83     | 2.82 | 1.99 | 12.64 |
| 5VXJ.PDB | O, C_HIS_81    | N, C_ILE_85    | H, C_ILE_85     | 2.92 | 2.10 | 14.49 |
| 5VXJ.PDB | O, C_SER_82    | N, C_SER_86    | H, C_SER_86     | 2.94 | 2.09 | 6.22  |
| 5VXJ.PDB | O, C_SER_83    | N, C_MET_87    | H, C_MET_87     | 2.90 | 2.13 | 22.48 |
| 5VXJ.PDB | O, C_ILE_85    | N, C_VAL_89    | H, C_VAL_89     | 2.71 | 1.95 | 23.99 |
| 5VXJ.PDB | O, C_SER_86    | N, C_ASN_90    | H, C_ASN_90     | 2.95 | 2.14 | 17.73 |
| 5VXJ.PDB | O, C_ASP_88    | OG, C_SER_92   | HG, C_SER_92    | 2.81 | 2.10 | 26.84 |
| 5VXJ.PDB | O, C_VAL_89    | N, C_ALA_93    | H, C_ALA_93     | 2.99 | 2.18 | 16.35 |
| 5VXJ.PDB | O, C_ASN_90    | N, C_GLN_94    | H, C_GLN_94     | 2.93 | 2.09 | 10.71 |
| 5VXJ.PDB | O, C_LYS_91    | N, C_LEU_95    | H, C_LEU_95     | 2.99 | 2.16 | 11.86 |
| 5VXJ.PDB | O, C_SER_92    | N, C_LEU_96    | H, C_LEU_96     | 2.76 | 1.91 | 4.52  |
| 5VXJ.PDB | O, C_ALA_93    | N, C_ASP_97    | H, C_ASP_97     | 2.67 | 1.87 | 17.34 |
| 5VXJ.PDB | O, C_GLN_94    | N, C_ILE_98    | H, C_ILE_98     | 2.93 | 2.20 | 27.48 |
| 5VXJ.PDB | O, C_LEU_95    | N, C_LEU_99    | H, C_LEU_99     | 2.86 | 2.06 | 16.81 |
| 5VXJ.PDB | O, C_LEU_96    | N, C_SER_100   | H, C_SER_100    | 2.97 | 2.19 | 20.79 |
| 5VXJ.PDB | O, C_ARG_132   | OG, C_SER_100  | HG, C_SER_100   | 2.62 | 1.83 | 15.07 |
| 5VXJ.PDB | OD2, C_ASP_97  | NE, C_ARG_101  | HE, C_ARG_101   | 2.84 | 2.03 | 16.71 |
| 5VXJ.PDB | O, C_ILE_98    | N, C_ASN_102   | H, C_ASN_102    | 2.93 | 2.10 | 11.46 |
| 5VXJ.PDB | OD1, C_ASN_107 | N, C_ALA_110   | H, C_ALA_110    | 2.74 | 1.90 | 11.07 |
| 5VXJ.PDB | O, C_ILE_106   | NE, C_ARG_111  | HE, C_ARG_111   | 2.84 | 2.08 | 23.05 |
| 5VXJ.PDB | O, C_ILE_129   | NH1, C_ARG_111 | HH12, C_ARG_111 | 2.70 | 1.99 | 28.89 |
| 5VXJ.PDB | O, C_ILE_129   | NH2, C_ARG_111 | HH22, C_ARG_111 | 2.67 | 1.95 | 27.54 |
| 5VXJ.PDB | O, C_LEU_113   | N, C_SER_116   | H, C_SER_116    | 2.74 | 1.92 | 13.94 |

|          |                |                |                 |      |      |       |
|----------|----------------|----------------|-----------------|------|------|-------|
| 5VXJ.PDB | O, C_PRO.118   | N, C_ALA.121   | H, C_ALA.121    | 2.93 | 2.09 | 9.05  |
| 5VXJ.PDB | O, C_LYS.119   | N, C_GLU.122   | H, C_GLU.122    | 2.93 | 2.12 | 17.73 |
| 5VXJ.PDB | O, D_GLY.56    | NH2, C_ARG.132 | HH22, C_ARG.132 | 2.97 | 2.20 | 22.55 |
| 5VXJ.PDB | O, C_SER.130   | N, C_LEU.134   | H, C_LEU.134    | 2.95 | 2.18 | 22.13 |
| 5VXJ.PDB | O, C_HIS.131   | N, C_TRP.135   | H, C_TRP.135    | 2.90 | 2.05 | 5.85  |
| 5VXJ.PDB | O, C_TYR.104   | NE1, C_TRP.135 | HE1, C_TRP.135  | 2.72 | 1.92 | 17.01 |
| 5VXJ.PDB | O, C_TRP.135   | N, C_ALA.139   | H, C_ALA.139    | 2.83 | 1.99 | 9.11  |
| 5VXJ.PDB | O, C_ALA.136   | N, C_ASN.140   | H, C_ASN.140    | 2.88 | 2.08 | 18.03 |
| 5VXJ.PDB | O, C_LYS.137   | N, C_SER.141   | H, C_SER.141    | 2.84 | 2.09 | 25.00 |
| 5VXJ.PDB | O, C_ALA.121   | OG, C_SER.141  | HG, C_SER.141   | 2.69 | 1.99 | 27.96 |
| 5VXJ.PDB | O, C_ASN.140   | N, C_ASP.144   | H, C_ASP.144    | 2.68 | 1.84 | 11.11 |
| 5VXJ.PDB | O, C_SER.141   | N, C_ILE.145   | H, C_ILE.145    | 2.98 | 2.16 | 13.90 |
| 5VXJ.PDB | O, C_ASP.144   | N, C_GLN.148   | H, C_GLN.148    | 2.81 | 1.97 | 10.25 |
| 5VXJ.PDB | O, C_ILE.145   | N, C_LEU.150   | H, C_LEU.150    | 2.99 | 2.16 | 11.96 |
| 5VXJ.PDB | O, C_ASN.146   | N, C_LYS.151   | H, C_LYS.151    | 2.89 | 2.07 | 15.50 |
| 5VXJ.PDB | O, C_TYR.153   | N, C_VAL.157   | H, C_VAL.157    | 2.98 | 2.14 | 11.48 |
| 5VXJ.PDB | O, C_GLU.154   | N, C_SER.158   | H, C_SER.158    | 2.91 | 2.10 | 16.58 |
| 5VXJ.PDB | O, C_HIS.155   | N, C_SER.159   | H, C_SER.159    | 2.84 | 2.04 | 18.93 |
| 5VXJ.PDB | O, C_VAL.157   | N, C_THR.161   | H, C_THR.161    | 2.84 | 2.01 | 12.19 |
| 5VXJ.PDB | O, C_TYR.160   | N, C_TYR.164   | H, C_TYR.164    | 2.88 | 2.06 | 13.58 |
| 5VXJ.PDB | OD1, C_ASP.287 | OH, C_TYR.164  | HH, C_TYR.164   | 2.77 | 1.96 | 12.03 |
| 5VXJ.PDB | O, C_THR.161   | N, C_GLN.165   | H, C_GLN.165    | 2.79 | 1.97 | 15.66 |
| 5VXJ.PDB | O, C_TYR.164   | N, C_SER.168   | H, C_SER.168    | 2.76 | 1.95 | 16.85 |
| 5VXJ.PDB | O, C_TYR.164   | OG, C_SER.168  | HG, C_SER.168   | 2.78 | 1.96 | 10.71 |
| 5VXJ.PDB | O, C_PHE.167   | N, C_LEU.171   | H, C_LEU.171    | 2.81 | 2.03 | 19.93 |
| 5VXJ.PDB | O, C_SER.168   | N, C_SER.172   | H, C_SER.172    | 2.88 | 2.13 | 25.56 |
| 5VXJ.PDB | O, C_LEU.271   | N, C_VAL.188   | H, C_VAL.188    | 2.99 | 2.14 | 7.19  |
| 5VXJ.PDB | O, C_SER.179   | N, C_LYS.189   | H, C_LYS.189    | 2.75 | 1.90 | 6.70  |
| 5VXJ.PDB | O, C_VAL.269   | N, C_LEU.190   | H, C_LEU.190    | 2.85 | 2.06 | 18.77 |
| 5VXJ.PDB | O, C_TRP.177   | N, C_GLN.191   | H, C_GLN.191    | 2.92 | 2.10 | 14.50 |
| 5VXJ.PDB | OE2, C_GLU.268 | NE2, C_GLN.191 | HE22, C_GLN.191 | 2.80 | 1.97 | 12.09 |
| 5VXJ.PDB | O, C_VAL.192   | N, C_LYS.196   | H, C_LYS.196    | 2.64 | 1.80 | 8.82  |
| 5VXJ.PDB | O, C_ASN.193   | N, C_LYS.197   | H, C_LYS.197    | 2.77 | 1.95 | 14.40 |
| 5VXJ.PDB | OE1, C_GLU.201 | NZ, C_LYS.197  | HZ3, C_LYS.197  | 2.59 | 1.85 | 27.46 |
| 5VXJ.PDB | O, C_LYS.196   | N, C_GLU.200   | H, C_GLU.200    | 2.98 | 2.14 | 10.98 |
| 5VXJ.PDB | O, C_ALA.198   | N, C_LEU.202   | H, C_LEU.202    | 2.84 | 2.10 | 25.29 |
| 5VXJ.PDB | OD1, C_ASP.254 | NZ, C_LYS.203  | HZ2, C_LYS.203  | 2.69 | 1.87 | 19.49 |
| 5VXJ.PDB | O, C_GLU.201   | N, C_LYS.205   | H, C_LYS.205    | 2.93 | 2.15 | 21.77 |
| 5VXJ.PDB | OD2, C_ASP.166 | NZ, C_LYS.205  | HZ2, C_LYS.205  | 2.85 | 1.99 | 12.15 |
| 5VXJ.PDB | OD2, C_ASP.166 | OH, C_TYR.206  | HH, C_TYR.206   | 2.58 | 1.76 | 10.37 |
| 5VXJ.PDB | O, C_TYR.244   | N, C_VAL.218   | H, C_VAL.218    | 2.89 | 2.05 | 9.55  |
| 5VXJ.PDB | O, C_SER.219   | N, C_ALA.223   | H, C_ALA.223    | 2.91 | 2.08 | 14.53 |
| 5VXJ.PDB | O, C_GLN.220   | N, C_ASN.224   | H, C_ASN.224    | 2.98 | 2.12 | 5.55  |
| 5VXJ.PDB | O, C_GLN.220   | ND2, C_ASN.224 | HD22, C_ASN.224 | 2.76 | 2.00 | 23.07 |
| 5VXJ.PDB | O, C_GLU.221   | N, C_LYS.225   | H, C_LYS.225    | 2.88 | 2.10 | 20.87 |
| 5VXJ.PDB | O, C_ALA.223   | N, C_LEU.227   | H, C_LEU.227    | 2.84 | 2.04 | 17.85 |
| 5VXJ.PDB | O, C_TRP.226   | N, C_LEU.230   | H, C_LEU.230    | 2.93 | 2.16 | 22.32 |
| 5VXJ.PDB | O, C_LEU.227   | N, C_GLY.231   | H, C_GLY.231    | 2.79 | 1.97 | 15.24 |
| 5VXJ.PDB | O, C_SER.247   | N, C_LYS.236   | H, C_LYS.236    | 2.90 | 2.15 | 23.83 |
| 5VXJ.PDB | O, C_VAL.245   | N, C_SER.238   | H, C_SER.238    | 2.96 | 2.16 | 18.06 |
| 5VXJ.PDB | O, C_SER.238   | N, C_VAL.245   | H, C_VAL.245    | 2.79 | 1.99 | 18.55 |
| 5VXJ.PDB | O, C_TYR.212   | N, C_VAL.246   | H, C_VAL.246    | 2.73 | 1.88 | 6.99  |
| 5VXJ.PDB | O, C_ILE.234   | N, C_ASN.249   | H, C_ASN.249    | 2.93 | 2.08 | 8.15  |
| 5VXJ.PDB | OD1, C_ASN.249 | N, C_THR.251   | H, C_THR.251    | 2.83 | 2.01 | 13.51 |
| 5VXJ.PDB | OD1, C_ASN.249 | OG1, C_THR.251 | HG1, C_THR.251  | 2.56 | 1.78 | 18.84 |
| 5VXJ.PDB | O, C_MET.250   | N, C_ASP.254   | H, C_ASP.254    | 2.97 | 2.14 | 14.27 |
| 5VXJ.PDB | O, C_THR.251   | N, C_ASN.255   | H, C_ASN.255    | 2.90 | 2.11 | 19.57 |
| 5VXJ.PDB | O, C_ASN.255   | N, C_SER.259   | H, C_SER.259    | 2.82 | 1.98 | 10.57 |

|          |                |                |                 |      |      |       |
|----------|----------------|----------------|-----------------|------|------|-------|
| 5VXJ.PDB | O, C_LEU_257   | N, C_ASP_261   | H, C_ASP_261    | 2.89 | 2.05 | 9.73  |
| 5VXJ.PDB | O, C_VAL_188   | N, C_LEU_271   | H, C_LEU_271    | 2.72 | 1.88 | 10.23 |
| 5VXJ.PDB | OD1, C_ASP_272 | N, C_LYS_275   | H, C_LYS_275    | 2.76 | 1.96 | 18.08 |
| 5VXJ.PDB | O, C_ASP_272   | N, C_TYR_276   | H, C_TYR_276    | 2.98 | 2.15 | 12.87 |
| 5VXJ.PDB | O, C_ASN_273   | N, C_GLN_277   | H, C_GLN_277    | 2.97 | 2.12 | 5.77  |
| 5VXJ.PDB | O, C_LYS_275   | N, C_TRP_279   | H, C_TRP_279    | 3.00 | 2.19 | 17.09 |
| 5VXJ.PDB | O, C_TYR_276   | N, C_ASN_280   | H, C_ASN_280    | 2.84 | 2.00 | 8.68  |
| 5VXJ.PDB | O, C_GLN_277   | N, C_ALA_281   | H, C_ALA_281    | 2.95 | 2.16 | 19.58 |
| 5VXJ.PDB | O, C_TRP_279   | N, C_PHE_283   | H, C_PHE_283    | 2.80 | 1.97 | 11.54 |
| 5VXJ.PDB | O, C_ASN_280   | N, C_SER_284   | H, C_SER_284    | 2.86 | 2.05 | 17.29 |
| 5VXJ.PDB | O, C_ALA_281   | N, C_ALA_285   | H, C_ALA_285    | 2.97 | 2.22 | 25.52 |
| 5VXJ.PDB | O, C_SER_284   | N, C_GLU_288   | H, C_GLU_288    | 2.90 | 2.09 | 16.06 |
| 5VXJ.PDB | O, C_ASP_287   | N, C_LYS_291   | H, C_LYS_291    | 2.96 | 2.16 | 17.42 |
| 5VXJ.PDB | O, C_GLU_288   | N, C_ASN_292   | H, C_ASN_292    | 2.78 | 1.93 | 7.30  |
| 5VXJ.PDB | O, C_MET_290   | N, C_LEU_294   | H, C_LEU_294    | 2.96 | 2.14 | 14.65 |
| 5VXJ.PDB | O, C_LYS_291   | N, C_GLN_295   | H, C_GLN_295    | 2.93 | 2.08 | 7.49  |
| 5VXJ.PDB | O, C_ASN_292   | N, C_THR_296   | H, C_THR_296    | 2.81 | 1.96 | 6.25  |
| 5VXJ.PDB | O, C_ASN_293   | N, C_LEU_297   | H, C_LEU_297    | 2.87 | 2.03 | 9.84  |
| 5VXJ.PDB | O, C_LEU_294   | N, C_VAL_298   | H, C_VAL_298    | 2.89 | 2.07 | 16.24 |
| 5VXJ.PDB | O, C_GLN_295   | N, C_GLN_299   | H, C_GLN_299    | 2.96 | 2.18 | 20.39 |
| 5VXJ.PDB | O, C_THR_296   | N, C_LYS_300   | H, C_LYS_300    | 2.95 | 2.12 | 12.60 |
| 5VXJ.PDB | O, C_VAL_298   | N, C_SER_302   | H, C_SER_302    | 2.91 | 2.17 | 26.05 |
| 5VXJ.PDB | O, C_GLN_299   | N, C_ASN_303   | H, C_ASN_303    | 2.83 | 2.01 | 12.96 |
| 5VXJ.PDB | O, C_LYS_300   | N, C_ALA_304   | H, C_ALA_304    | 2.95 | 2.16 | 19.44 |
| 5VXJ.PDB | OD1, C_ASN_58  | ND2, C_ASN_305 | HD21, C_ASN_305 | 2.84 | 2.04 | 17.79 |
| 5VXJ.PDB | O, C_ALA_304   | N, C_PHE_308   | H, C_PHE_308    | 2.91 | 2.07 | 9.64  |
| 5VXJ.PDB | O, C_ASN_305   | N, C_ASP_309   | H, C_ASP_309    | 2.81 | 2.07 | 26.01 |
| 5VXJ.PDB | O, C_SER_306   | N, C_ASN_310   | H, C_ASN_310    | 2.67 | 1.91 | 23.54 |
| 5VXJ.PDB | O, C_ASP_309   | N, C_LYS_313   | H, C_LYS_313    | 2.90 | 2.07 | 12.85 |
| 5VXJ.PDB | O, C_ASN_310   | N, C_VAL_314   | H, C_VAL_314    | 2.90 | 2.06 | 10.88 |
| 5VXJ.PDB | O, C_LEU_311   | N, C_LEU_315   | H, C_LEU_315    | 2.75 | 1.90 | 6.64  |
| 5VXJ.PDB | O, C_VAL_312   | N, C_SER_316   | H, C_SER_316    | 2.93 | 2.11 | 14.92 |
| 5VXJ.PDB | O, C_VAL_314   | OG, C_SER_317  | HG, C_SER_317   | 2.65 | 1.90 | 22.58 |
| 5VXJ.PDB | O, C_LEU_315   | OG1, C_THR_318 | HG1, C_THR_318  | 2.63 | 1.83 | 14.36 |
| 5VXJ.PDB | O, D_SER_25    | N, D_GLN_3     | H, D_GLN_3      | 2.83 | 2.04 | 19.53 |
| 5VXJ.PDB | O, D_ALA_23    | N, D_ALA_5     | H, D_ALA_5      | 2.92 | 2.12 | 17.92 |
| 5VXJ.PDB | O, D_SER_21    | N, D_THR_7     | H, D_THR_7      | 2.92 | 2.12 | 17.84 |
| 5VXJ.PDB | O, D_GLN_114   | N, D_GLY_10    | H, D_GLY_10     | 2.92 | 2.10 | 13.53 |
| 5VXJ.PDB | O, D_THR_116   | N, D_ALA_12    | H, D_ALA_12     | 2.90 | 2.14 | 23.36 |
| 5VXJ.PDB | O, D_LEU_86    | N, D_GLY_15    | H, D_GLY_15     | 2.64 | 1.81 | 11.28 |
| 5VXJ.PDB | O, D_GLN_13    | N, D_GLY_16    | H, D_GLY_16     | 2.82 | 2.06 | 23.83 |
| 5VXJ.PDB | O, D_MET_83    | N, D_LEU_18    | H, D_LEU_18     | 2.89 | 2.09 | 18.27 |
| 5VXJ.PDB | OD1, C_ASN_140 | NE, D_ARG_19   | HE, D_ARG_19    | 2.55 | 1.80 | 23.66 |
| 5VXJ.PDB | OE1, D_GLN_82  | NH1, D_ARG_19  | HH11, D_ARG_19  | 2.94 | 2.14 | 18.04 |
| 5VXJ.PDB | O, D_THR_7     | N, D_SER_21    | H, D_SER_21     | 2.99 | 2.14 | 7.08  |
| 5VXJ.PDB | O, D_ALA_5     | N, D_ALA_23    | H, D_ALA_23     | 2.87 | 2.03 | 10.49 |
| 5VXJ.PDB | O, D_ASN_77    | N, D_ALA_24    | H, D_ALA_24     | 2.92 | 2.08 | 9.76  |
| 5VXJ.PDB | O, D_THR_28    | N, D_ARG_31    | H, D_ARG_31     | 2.98 | 2.15 | 11.20 |
| 5VXJ.PDB | O, D_GLY_99    | N, D_VAL_33    | H, D_VAL_33     | 2.95 | 2.15 | 17.67 |
| 5VXJ.PDB | O, D_ASN_97    | N, D_ASN_35    | H, D_ASN_35     | 2.69 | 1.87 | 14.00 |
| 5VXJ.PDB | O, D_VAL_95    | N, D_TYR_37    | H, D_TYR_37     | 2.62 | 1.77 | 8.93  |
| 5VXJ.PDB | O, D_GLU_46    | N, D_ARG_38    | H, D_ARG_38     | 2.97 | 2.17 | 18.09 |
| 5VXJ.PDB | OE2, D_GLU_46  | NE, D_ARG_38   | HE, D_ARG_38    | 2.46 | 1.69 | 20.96 |
| 5VXJ.PDB | OD1, D_ASP_90  | NH1, D_ARG_38  | HH12, D_ARG_38  | 2.86 | 2.04 | 15.32 |
| 5VXJ.PDB | O, D_ARG_38    | N, D_GLU_46    | H, D_GLU_46     | 2.89 | 2.05 | 10.29 |
| 5VXJ.PDB | O, D_TRP_36    | N, D_VAL_48    | H, D_VAL_48     | 2.77 | 1.94 | 12.94 |
| 5VXJ.PDB | OD1, D_ASN_35  | NE, D_ARG_50   | HE, D_ARG_50    | 2.89 | 2.08 | 17.01 |
| 5VXJ.PDB | O, D_SER_30    | OH, D_TYR_52   | HH, D_TYR_52    | 2.65 | 1.82 | 6.70  |

|          |                |                |                |      |      |       |
|----------|----------------|----------------|----------------|------|------|-------|
| 5VXJ.PDB | OD1, D_ASP_53  | N, D_GLY_55    | H, D_GLY_55    | 2.89 | 2.10 | 19.66 |
| 5VXJ.PDB | O, D_ASP_53    | N, D_GLY_56    | H, D_GLY_56    | 2.97 | 2.13 | 9.23  |
| 5VXJ.PDB | O, D_ARG_50    | N, D_SER_59    | H, D_SER_59    | 2.64 | 1.81 | 11.93 |
| 5VXJ.PDB | O, D_VAL_48    | N, D_ALA_61    | H, D_ALA_61    | 2.74 | 1.98 | 23.42 |
| 5VXJ.PDB | OD2, D_ASP_90  | NH1, D_ARG_67  | HH12, D_ARG_67 | 2.76 | 1.94 | 14.49 |
| 5VXJ.PDB | OD1, D_ASP_90  | NH2, D_ARG_67  | HH22, D_ARG_67 | 2.92 | 2.07 | 6.62  |
| 5VXJ.PDB | O, D_VAL_64    | N, D_PHE_68    | H, D_PHE_68    | 2.99 | 2.19 | 16.85 |
| 5VXJ.PDB | O, D_GLN_82    | N, D_THR_69    | H, D_THR_69    | 2.99 | 2.18 | 16.88 |
| 5VXJ.PDB | O, D_HIS_80    | N, D_SER_71    | H, D_SER_71    | 2.95 | 2.13 | 13.86 |
| 5VXJ.PDB | OD1, D_ASN_74  | NE, D_ARG_72   | HE, D_ARG_72   | 2.76 | 1.91 | 6.10  |
| 5VXJ.PDB | O, D_THR_78    | N, D_ASP_73    | H, D_ASP_73    | 2.97 | 2.14 | 12.70 |
| 5VXJ.PDB | OD1, D_ASP_73  | N, D_LYS_76    | H, D_LYS_76    | 2.99 | 2.16 | 13.54 |
| 5VXJ.PDB | O, D_LEU_20    | N, D_LEU_81    | H, D_LEU_81    | 2.96 | 2.19 | 22.26 |
| 5VXJ.PDB | OD1, D_ASN_84  | NE2, D_GLN_82  | HE21, D_GLN_82 | 2.80 | 1.94 | 4.20  |
| 5VXJ.PDB | O, D_LEU_18    | N, D_MET_83    | H, D_MET_83    | 2.68 | 1.83 | 7.86  |
| 5VXJ.PDB | O, D_ARG_67    | N, D_ASN_84    | H, D_ASN_84    | 2.94 | 2.13 | 15.75 |
| 5VXJ.PDB | O, D_LYS_87    | N, D_ASP_90    | H, D_ASP_90    | 2.78 | 1.93 | 7.73  |
| 5VXJ.PDB | O, D_VAL_115   | N, D_ALA_92    | H, D_ALA_92    | 2.97 | 2.20 | 22.44 |
| 5VXJ.PDB | O, D_THR_113   | N, D_TYR_94    | H, D_TYR_94    | 2.96 | 2.15 | 16.57 |
| 5VXJ.PDB | O, D_ASP_90    | OH, D_TYR_94   | HH, D_TYR_94   | 2.94 | 2.12 | 10.43 |
| 5VXJ.PDB | O, D_TYR_37    | N, D_VAL_95    | H, D_VAL_95    | 2.83 | 2.02 | 15.84 |
| 5VXJ.PDB | O, D_ASN_35    | N, D_ASN_97    | H, D_ASN_97    | 2.86 | 2.07 | 19.41 |
| 5VXJ.PDB | OG1, D_THR_107 | ND2, D_ASN_97  | HD21, D_ASN_97 | 2.71 | 1.91 | 17.78 |
| 5VXJ.PDB | O, D_VAL_33    | N, D_GLY_99    | H, D_GLY_99    | 2.78 | 1.95 | 12.57 |
| 5VXJ.PDB | O, D_ARG_106   | N, D_ILE_100   | H, D_ILE_100   | 2.91 | 2.05 | 5.49  |
| 5VXJ.PDB | O, D_ARG_31    | N, D_PHE_101   | H, D_PHE_101   | 2.74 | 1.90 | 10.09 |
| 5VXJ.PDB | OE1, E_GLU_201 | OH, D_TYR_105  | HH, D_TYR_105  | 2.53 | 1.70 | 8.84  |
| 5VXJ.PDB | O, D_ALA_98    | OG1, D_THR_107 | HG1, D_THR_107 | 2.97 | 2.23 | 23.46 |
| 5VXJ.PDB | O, D_TYR_94    | N, D_THR_113   | H, D_THR_113   | 2.79 | 1.97 | 15.52 |
| 5VXJ.PDB | O, D_GLY_8     | OG1, D_THR_113 | HG1, D_THR_113 | 2.58 | 1.83 | 22.66 |
| 5VXJ.PDB | O, D_ALA_92    | N, D_VAL_115   | H, D_VAL_115   | 2.94 | 2.08 | 3.33  |
| 5VXJ.PDB | O, D_ALA_12    | N, D_SER_118   | H, D_SER_118   | 2.88 | 2.09 | 19.39 |
| 5VXJ.PDB | O, E_SER_42    | OG1, E_THR_45  | HG1, E_THR_45  | 2.81 | 2.08 | 25.17 |
| 5VXJ.PDB | O, E_SER_43    | N, E_LEU_47    | H, E_LEU_47    | 2.99 | 2.22 | 22.05 |
| 5VXJ.PDB | O, E_LEU_44    | N, E_ASN_48    | H, E_ASN_48    | 2.99 | 2.18 | 16.94 |
| 5VXJ.PDB | O, E_LEU_47    | N, E_LEU_51    | H, E_LEU_51    | 2.95 | 2.10 | 6.68  |
| 5VXJ.PDB | O, E_ASP_49    | N, E_ASN_53    | H, E_ASN_53    | 2.84 | 2.02 | 14.73 |
| 5VXJ.PDB | O, E_THR_50    | N, E_ILE_54    | H, E_ILE_54    | 2.90 | 2.13 | 22.19 |
| 5VXJ.PDB | OD2, E_ASP_309 | NH2, E_ARG_55  | HH21, E_ARG_55 | 2.82 | 2.06 | 24.28 |
| 5VXJ.PDB | O, E_HIS_52    | N, E_THR_56    | H, E_THR_56    | 2.95 | 2.14 | 17.58 |
| 5VXJ.PDB | O, E_ILE_54    | N, E_ASN_58    | H, E_ASN_58    | 2.86 | 2.04 | 14.78 |
| 5VXJ.PDB | O, E_THR_57    | N, E_LEU_61    | H, E_LEU_61    | 2.88 | 2.07 | 15.00 |
| 5VXJ.PDB | O, E_ASN_58    | N, E_LYS_62    | H, E_LYS_62    | 2.72 | 1.87 | 6.56  |
| 5VXJ.PDB | OG, E_SER_306  | NZ, E_LYS_62   | HZ1, E_LYS_62  | 2.46 | 1.61 | 13.80 |
| 5VXJ.PDB | O, E_GLN_59    | N, E_LYS_63    | H, E_LYS_63    | 2.92 | 2.13 | 20.33 |
| 5VXJ.PDB | OG, E_SER_74   | N, E_THR_71    | H, E_THR_71    | 2.92 | 2.17 | 24.42 |
| 5VXJ.PDB | O, E_THR_73    | N, E_GLU_77    | H, E_GLU_77    | 2.99 | 2.15 | 11.35 |
| 5VXJ.PDB | O, E_LEU_75    | N, E_ALA_79    | H, E_ALA_79    | 2.96 | 2.12 | 10.44 |
| 5VXJ.PDB | O, E_GLU_76    | N, E_LEU_80    | H, E_LEU_80    | 2.99 | 2.17 | 14.62 |
| 5VXJ.PDB | O, E_GLU_77    | N, E_HIS_81    | H, E_HIS_81    | 2.87 | 2.01 | 3.03  |
| 5VXJ.PDB | O, E_ILE_78    | N, E_SER_82    | H, E_SER_82    | 2.71 | 1.88 | 13.72 |
| 5VXJ.PDB | O, E_ALA_79    | N, E_SER_83    | H, E_SER_83    | 2.74 | 1.90 | 10.07 |
| 5VXJ.PDB | O, E_LEU_80    | N, E_GLN_84    | H, E_GLN_84    | 2.86 | 2.13 | 27.19 |
| 5VXJ.PDB | O, E_HIS_81    | N, E_ILE_85    | H, E_ILE_85    | 2.94 | 2.14 | 18.50 |
| 5VXJ.PDB | O, E_ILE_85    | N, E_VAL_89    | H, E_VAL_89    | 2.68 | 1.84 | 9.90  |
| 5VXJ.PDB | O, E_SER_86    | N, E_ASN_90    | H, E_ASN_90    | 2.92 | 2.12 | 17.55 |
| 5VXJ.PDB | O, E_ASP_88    | N, E_SER_92    | H, E_SER_92    | 2.75 | 1.92 | 13.99 |
| 5VXJ.PDB | O, E_VAL_89    | N, E_ALA_93    | H, E_ALA_93    | 2.83 | 2.00 | 12.43 |

|          |                |                |                 |      |      |       |
|----------|----------------|----------------|-----------------|------|------|-------|
| 5VXJ.PDB | O, E_ASN_90    | N, E_GLN_94    | H, E_GLN_94     | 2.83 | 2.00 | 12.46 |
| 5VXJ.PDB | O, E_LYS_91    | N, E_LEU_95    | H, E_LEU_95     | 2.99 | 2.16 | 12.05 |
| 5VXJ.PDB | O, E_SER_92    | N, E_LEU_96    | H, E_LEU_96     | 2.76 | 1.90 | 1.16  |
| 5VXJ.PDB | O, E_ALA_93    | N, E_ASP_97    | H, E_ASP_97     | 2.76 | 2.00 | 23.32 |
| 5VXJ.PDB | O, E_ARG_132   | OG, E_SER_100  | HG, E_SER_100   | 2.69 | 1.91 | 17.95 |
| 5VXJ.PDB | O, E_ILE_98    | N, E_ASN_102   | H, E_ASN_102    | 2.86 | 2.01 | 8.88  |
| 5VXJ.PDB | O, E_SER_100   | N, E_GLU_103   | H, E_GLU_103    | 2.97 | 2.19 | 21.11 |
| 5VXJ.PDB | O, E_LEU_99    | N, E_TYR_104   | H, E_TYR_104    | 2.98 | 2.17 | 15.50 |
| 5VXJ.PDB | OD1, E_ASN_107 | N, E_ALA_110   | H, E_ALA_110    | 2.69 | 1.84 | 7.11  |
| 5VXJ.PDB | O, E_ILE_106   | NE, E_ARG_111  | HE, E_ARG_111   | 2.78 | 2.02 | 23.50 |
| 5VXJ.PDB | O, E_LEU_113   | OG, E_SER_116  | HG, E_SER_116   | 2.58 | 1.78 | 13.78 |
| 5VXJ.PDB | O, E_LEU_114   | N, E_ALA_117   | H, E_ALA_117    | 2.86 | 2.02 | 11.54 |
| 5VXJ.PDB | O, E_PRO_118   | N, E_ALA_121   | H, E_ALA_121    | 2.98 | 2.15 | 11.22 |
| 5VXJ.PDB | O, E_LYS_119   | N, E_GLU_122   | H, E_GLU_122    | 2.92 | 2.14 | 21.73 |
| 5VXJ.PDB | O, E_TYR_104   | NE1, E_TRP_135 | HE1, E_TRP_135  | 2.71 | 1.94 | 22.95 |
| 5VXJ.PDB | O, E_GLU_133   | N, E_LYS_137   | H, E_LYS_137    | 2.86 | 2.07 | 19.63 |
| 5VXJ.PDB | OD2, F_ASP_73  | NZ, E_LYS_137  | HZ2, E_LYS_137  | 2.77 | 1.96 | 20.15 |
| 5VXJ.PDB | O, E_LEU_134   | N, E_ILE_138   | H, E_ILE_138    | 2.98 | 2.17 | 17.01 |
| 5VXJ.PDB | O, E_TRP_135   | N, E_ALA_139   | H, E_ALA_139    | 2.97 | 2.13 | 10.92 |
| 5VXJ.PDB | O, E_ALA_136   | N, E_ASN_140   | H, E_ASN_140    | 2.93 | 2.08 | 7.93  |
| 5VXJ.PDB | O, E_LYS_137   | N, E_SER_141   | H, E_SER_141    | 2.81 | 2.07 | 25.81 |
| 5VXJ.PDB | O, E_ALA_121   | OG, E_SER_141  | HG, E_SER_141   | 2.98 | 2.28 | 28.49 |
| 5VXJ.PDB | O, E_ASN_140   | N, E_ASP_144   | H, E_ASP_144    | 2.69 | 1.88 | 16.68 |
| 5VXJ.PDB | O, E_SER_141   | N, E_ILE_145   | H, E_ILE_145    | 2.84 | 2.00 | 9.07  |
| 5VXJ.PDB | O, E_ASP_144   | N, E_GLN_148   | H, E_GLN_148    | 2.78 | 1.95 | 12.00 |
| 5VXJ.PDB | O, E_ILE_145   | N, E_LEU_150   | H, E_LEU_150    | 2.93 | 2.08 | 9.20  |
| 5VXJ.PDB | O, E_ASN_146   | N, E_LYS_151   | H, E_LYS_151    | 2.91 | 2.08 | 12.08 |
| 5VXJ.PDB | O, E_TYR_153   | N, E_VAL_157   | H, E_VAL_157    | 2.91 | 2.06 | 8.11  |
| 5VXJ.PDB | O, E_GLU_154   | N, E_SER_158   | H, E_SER_158    | 2.80 | 1.95 | 8.74  |
| 5VXJ.PDB | O, E_HIS_155   | N, E_SER_159   | H, E_SER_159    | 2.71 | 1.87 | 11.62 |
| 5VXJ.PDB | O, E_ALA_156   | N, E_TYR_160   | H, E_TYR_160    | 2.93 | 2.08 | 7.60  |
| 5VXJ.PDB | O, E_VAL_157   | N, E_THR_161   | H, E_THR_161    | 2.81 | 1.98 | 13.79 |
| 5VXJ.PDB | O, E_VAL_157   | OG1, E_THR_161 | HG1, E_THR_161  | 2.55 | 1.80 | 22.47 |
| 5VXJ.PDB | O, E_TYR_160   | N, E_TYR_164   | H, E_TYR_164    | 3.00 | 2.18 | 15.88 |
| 5VXJ.PDB | OD1, E_ASP_287 | OH, E_TYR_164  | HH, E_TYR_164   | 2.85 | 2.09 | 21.13 |
| 5VXJ.PDB | O, E_THR_161   | N, E_GLN_165   | H, E_GLN_165    | 2.75 | 1.91 | 9.80  |
| 5VXJ.PDB | O, E_LEU_70    | NE2, E_GLN_165 | HE21, E_GLN_165 | 2.84 | 2.05 | 19.77 |
| 5VXJ.PDB | O, E_GLN_162   | N, E_ASP_166   | H, E_ASP_166    | 2.97 | 2.14 | 14.36 |
| 5VXJ.PDB | O, E_MET_163   | N, E_PHE_167   | H, E_PHE_167    | 2.92 | 2.13 | 18.67 |
| 5VXJ.PDB | O, E_TYR_164   | N, E_SER_168   | H, E_SER_168    | 2.77 | 1.96 | 15.85 |
| 5VXJ.PDB | O, E_TYR_164   | OG, E_SER_168  | HG, E_SER_168   | 2.89 | 2.07 | 10.15 |
| 5VXJ.PDB | O, E_PHE_167   | N, E_LEU_171   | H, E_LEU_171    | 2.80 | 2.00 | 18.45 |
| 5VXJ.PDB | O, E_SER_168   | N, E_SER_172   | H, E_SER_172    | 2.82 | 2.04 | 21.33 |
| 5VXJ.PDB | O, D_TYR_105   | OG, E_SER_173  | HG, E_SER_173   | 2.87 | 2.17 | 28.40 |
| 5VXJ.PDB | O, E_LEU_271   | N, E_VAL_188   | H, E_VAL_188    | 2.72 | 1.89 | 11.17 |
| 5VXJ.PDB | O, E_SER_179   | N, E_LYS_189   | H, E_LYS_189    | 2.74 | 1.89 | 6.16  |
| 5VXJ.PDB | O, E_VAL_269   | N, E_LEU_190   | H, E_LEU_190    | 2.84 | 2.05 | 20.49 |
| 5VXJ.PDB | O, E_TRP_177   | N, E_GLN_191   | H, E_GLN_191    | 2.94 | 2.12 | 14.86 |
| 5VXJ.PDB | O, E_VAL_192   | N, E_LYS_196   | H, E_LYS_196    | 2.75 | 1.91 | 8.80  |
| 5VXJ.PDB | O, E_ASN_193   | N, E_LYS_197   | H, E_LYS_197    | 2.71 | 1.85 | 6.12  |
| 5VXJ.PDB | OD1, D_ASN_97  | NZ, E_LYS_197  | HZ1, E_LYS_197  | 2.80 | 1.95 | 14.72 |
| 5VXJ.PDB | OE2, E_GLU_201 | NZ, E_LYS_197  | HZ3, E_LYS_197  | 2.47 | 1.71 | 25.42 |
| 5VXJ.PDB | O, E_LEU_195   | N, E_LEU_199   | H, E_LEU_199    | 3.00 | 2.17 | 13.11 |
| 5VXJ.PDB | O, E_LYS_196   | N, E_GLU_200   | H, E_GLU_200    | 2.76 | 1.92 | 10.71 |
| 5VXJ.PDB | O, E_ALA_198   | N, E_LEU_202   | H, E_LEU_202    | 2.95 | 2.17 | 21.29 |
| 5VXJ.PDB | OD1, E_ASP_254 | NZ, E_LYS_203  | HZ2, E_LYS_203  | 2.55 | 1.67 | 5.69  |
| 5VXJ.PDB | O, E_GLU_201   | N, E_LYS_205   | H, E_LYS_205    | 2.76 | 2.01 | 23.93 |
| 5VXJ.PDB | OD2, E_ASP_166 | NZ, E_LYS_205  | HZ2, E_LYS_205  | 2.79 | 1.95 | 15.80 |

|          |                |                |                 |      |      |       |
|----------|----------------|----------------|-----------------|------|------|-------|
| 5VXJ.PDB | OD2, E_ASP_166 | OH, E_TYR_206  | HH, E_TYR_206   | 2.80 | 1.99 | 13.17 |
| 5VXJ.PDB | O, F_GLY_112   | ND2, E_ASN_216 | HD21, E_ASN_216 | 2.68 | 1.91 | 21.74 |
| 5VXJ.PDB | O, E_TYR_244   | N, E_VAL_218   | H, E_VAL_218    | 2.90 | 2.07 | 12.38 |
| 5VXJ.PDB | O, E_SER_219   | N, E_ALA_223   | H, E_ALA_223    | 2.85 | 2.02 | 12.36 |
| 5VXJ.PDB | O, E_GLN_220   | N, E_ASN_224   | H, E_ASN_224    | 2.92 | 2.12 | 17.22 |
| 5VXJ.PDB | O, E_GLU_221   | N, E_LYS_225   | H, E_LYS_225    | 2.83 | 2.07 | 23.55 |
| 5VXJ.PDB | O, E_ALA_223   | N, E_LEU_227   | H, E_LEU_227    | 2.90 | 2.08 | 14.99 |
| 5VXJ.PDB | O, E_TRP_226   | N, E_LEU_230   | H, E_LEU_230    | 2.79 | 1.93 | 5.43  |
| 5VXJ.PDB | O, E_SER_247   | N, E_LYS_236   | H, E_LYS_236    | 2.89 | 2.18 | 29.32 |
| 5VXJ.PDB | O, E_GLY_243   | N, E_LYS_240   | H, E_LYS_240    | 2.92 | 2.06 | 6.86  |
| 5VXJ.PDB | O, E_VAL_218   | N, E_TYR_244   | H, E_TYR_244    | 2.83 | 2.10 | 27.72 |
| 5VXJ.PDB | O, E_SER_238   | N, E_VAL_245   | H, E_VAL_245    | 2.99 | 2.17 | 14.78 |
| 5VXJ.PDB | O, E_TYR_212   | N, E_VAL_246   | H, E_VAL_246    | 2.78 | 1.92 | 1.28  |
| 5VXJ.PDB | O, E_ILE_234   | N, E_ASN_249   | H, E_ASN_249    | 2.95 | 2.10 | 8.04  |
| 5VXJ.PDB | OD1, E_ASN_249 | N, E_THR_251   | H, E_THR_251    | 2.92 | 2.09 | 11.77 |
| 5VXJ.PDB | OD1, E_ASN_249 | OG1, E_THR_251 | HG1, E_THR_251  | 2.55 | 1.84 | 26.63 |
| 5VXJ.PDB | O, E_MET_250   | N, E_ASP_254   | H, E_ASP_254    | 2.99 | 2.17 | 15.41 |
| 5VXJ.PDB | O, E_THR_251   | N, E_ASN_255   | H, E_ASN_255    | 2.75 | 1.94 | 15.61 |
| 5VXJ.PDB | O, E_MET_256   | N, E_LEU_260   | H, E_LEU_260    | 2.96 | 2.20 | 24.13 |
| 5VXJ.PDB | O, E_LYS_258   | N, E_ASN_262   | H, E_ASN_262    | 2.93 | 2.19 | 25.85 |
| 5VXJ.PDB | O, E_VAL_188   | N, E_LEU_271   | H, E_LEU_271    | 2.71 | 1.86 | 9.01  |
| 5VXJ.PDB | O, E_ASN_273   | N, E_GLN_277   | H, E_GLN_277    | 2.93 | 2.08 | 8.17  |
| 5VXJ.PDB | O, E_LYS_275   | N, E_TRP_279   | H, E_TRP_279    | 2.94 | 2.10 | 8.60  |
| 5VXJ.PDB | O, E_TYR_276   | N, E_ASN_280   | H, E_ASN_280    | 2.69 | 1.83 | 1.86  |
| 5VXJ.PDB | O, E_TRP_279   | N, E_PHE_283   | H, E_PHE_283    | 2.90 | 2.06 | 8.44  |
| 5VXJ.PDB | O, E_GLU_288   | N, E_ASN_292   | H, E_ASN_292    | 2.93 | 2.09 | 10.24 |
| 5VXJ.PDB | O, E_THR_289   | N, E_ASN_293   | H, E_ASN_293    | 2.93 | 2.09 | 10.01 |
| 5VXJ.PDB | O, E_MET_290   | N, E_LEU_294   | H, E_LEU_294    | 2.94 | 2.11 | 13.11 |
| 5VXJ.PDB | O, E_LYS_291   | N, E_GLN_295   | H, E_GLN_295    | 2.83 | 1.98 | 7.53  |
| 5VXJ.PDB | O, E_ASN_292   | N, E_THR_296   | H, E_THR_296    | 2.78 | 2.01 | 22.46 |
| 5VXJ.PDB | O, E_LEU_294   | N, E_VAL_298   | H, E_VAL_298    | 2.95 | 2.10 | 6.64  |
| 5VXJ.PDB | O, E_THR_296   | N, E_LYS_300   | H, E_LYS_300    | 2.96 | 2.14 | 14.74 |
| 5VXJ.PDB | O, E_LEU_297   | N, E_TYR_301   | H, E_TYR_301    | 2.79 | 1.94 | 8.70  |
| 5VXJ.PDB | O, E_VAL_298   | N, E_SER_302   | H, E_SER_302    | 2.84 | 2.02 | 14.64 |
| 5VXJ.PDB | O, E_GLN_299   | N, E_ASN_303   | H, E_ASN_303    | 2.93 | 2.07 | 5.66  |
| 5VXJ.PDB | O, E_LYS_300   | N, E_ALA_304   | H, E_ALA_304    | 2.85 | 2.08 | 22.30 |
| 5VXJ.PDB | OD1, E_ASN_58  | ND2, E_ASN_305 | HD21, E_ASN_305 | 2.80 | 1.98 | 14.83 |
| 5VXJ.PDB | O, E_ALA_304   | N, E_PHE_308   | H, E_PHE_308    | 2.93 | 2.09 | 11.91 |
| 5VXJ.PDB | O, E_ASN_305   | N, E_ASP_309   | H, E_ASP_309    | 2.75 | 1.92 | 13.10 |
| 5VXJ.PDB | O, E_SER_306   | N, E_ASN_310   | H, E_ASN_310    | 2.83 | 2.05 | 20.17 |
| 5VXJ.PDB | O, E_LEU_311   | N, E_LEU_315   | H, E_LEU_315    | 2.80 | 1.98 | 13.54 |
| 5VXJ.PDB | O, E_VAL_312   | N, E_SER_316   | H, E_SER_316    | 2.92 | 2.08 | 10.70 |
| 5VXJ.PDB | O, E_LYS_313   | OG, E_SER_316  | HG, E_SER_316   | 2.95 | 2.17 | 17.14 |
| 5VXJ.PDB | O, E_VAL_314   | N, E_THR_318   | H, E_THR_318    | 2.84 | 2.03 | 16.20 |
| 5VXJ.PDB | O, E_LEU_315   | N, E_ILE_319   | H, E_ILE_319    | 2.87 | 2.09 | 21.51 |
| 5VXJ.PDB | O, E_SER_316   | OG, E_SER_320  | HG, E_SER_320   | 2.93 | 2.11 | 9.97  |
| 5VXJ.PDB | O, F_SER_25    | N, F_GLN_3     | H, F_GLN_3      | 2.86 | 2.05 | 17.85 |
| 5VXJ.PDB | O, F_ALA_23    | N, F_ALA_5     | H, F_ALA_5      | 2.98 | 2.24 | 26.74 |
| 5VXJ.PDB | O, F_SER_21    | N, F_THR_7     | H, F_THR_7      | 2.94 | 2.17 | 21.96 |
| 5VXJ.PDB | O, F_GLN_114   | N, F_GLY_10    | H, F_GLY_10     | 2.72 | 1.87 | 6.47  |
| 5VXJ.PDB | O, F_THR_116   | N, F_ALA_12    | H, F_ALA_12     | 2.88 | 2.15 | 27.23 |
| 5VXJ.PDB | O, F_LEU_86    | N, F_GLY_15    | H, F_GLY_15     | 2.89 | 2.06 | 12.09 |
| 5VXJ.PDB | O, F_GLN_13    | N, F_GLY_16    | H, F_GLY_16     | 2.90 | 2.06 | 10.07 |
| 5VXJ.PDB | O, F_MET_83    | N, F_LEU_18    | H, F_LEU_18     | 2.85 | 2.06 | 20.12 |
| 5VXJ.PDB | OE1, F_GLN_82  | NE, F_ARG_19   | HE, F_ARG_19    | 2.82 | 1.96 | 3.39  |
| 5VXJ.PDB | O, F_THR_7     | N, F_SER_21    | H, F_SER_21     | 2.85 | 2.05 | 18.37 |
| 5VXJ.PDB | O, F_VAL_79    | N, F_CYS_22    | H, F_CYS_22     | 2.95 | 2.15 | 19.55 |
| 5VXJ.PDB | O, F_ALA_5     | N, F_ALA_23    | H, F_ALA_23     | 2.80 | 1.96 | 10.17 |



|          |                |                |                 |      |      |       |
|----------|----------------|----------------|-----------------|------|------|-------|
| 5VXJ.PDB | O, F_ASN_77    | N, F_ALA_24    | H, F_ALA_24     | 2.80 | 1.95 | 4.41  |
| 5VXJ.PDB | O, F_GLY_99    | N, F_VAL_33    | H, F_VAL_33     | 2.72 | 1.90 | 15.23 |
| 5VXJ.PDB | O, F_ASN_97    | N, F_ASN_35    | H, F_ASN_35     | 2.71 | 1.87 | 10.04 |
| 5VXJ.PDB | OD1, F_ASN_97  | ND2, F_ASN_35  | HD22, F_ASN_35  | 2.86 | 2.08 | 21.21 |
| 5VXJ.PDB | O, F_ALA_49    | N, F_TRP_36    | H, F_TRP_36     | 2.90 | 2.07 | 13.72 |
| 5VXJ.PDB | O, F_VAL_95    | N, F_TYR_37    | H, F_TYR_37     | 2.88 | 2.02 | 2.78  |
| 5VXJ.PDB | OD1, F_ASP_90  | NH1, F_ARG_38  | HH12, F_ARG_38  | 2.92 | 2.20 | 28.14 |
| 5VXJ.PDB | OE2, F_GLU_46  | NH2, F_ARG_38  | HH21, F_ARG_38  | 2.73 | 1.93 | 18.99 |
| 5VXJ.PDB | OE1, F_GLU_44  | N, F_ARG_45    | H, F_ARG_45     | 2.62 | 1.85 | 20.92 |
| 5VXJ.PDB | O, F_ARG_38    | N, F_GLU_46    | H, F_GLU_46     | 2.92 | 2.09 | 11.31 |
| 5VXJ.PDB | O, F_TRP_36    | N, F_VAL_48    | H, F_VAL_48     | 2.74 | 1.91 | 14.11 |
| 5VXJ.PDB | O, F_SER_59    | N, F_ARG_50    | H, F_ARG_50     | 2.88 | 2.09 | 20.53 |
| 5VXJ.PDB | OE1, G_GLU_200 | NH2, F_ARG_50  | HH22, F_ARG_50  | 2.70 | 1.89 | 15.49 |
| 5VXJ.PDB | O, F_SER_30    | OH, F_TYR_52   | HH, F_TYR_52    | 2.69 | 1.86 | 8.38  |
| 5VXJ.PDB | OD1, F_ASP_53  | N, F_GLY_55    | H, F_GLY_55     | 2.61 | 1.87 | 25.39 |
| 5VXJ.PDB | O, F_ARG_50    | N, F_SER_59    | H, F_SER_59     | 2.82 | 2.00 | 14.71 |
| 5VXJ.PDB | O, F_SER_85    | NH1, F_ARG_67  | HH11, F_ARG_67  | 2.83 | 2.08 | 24.34 |
| 5VXJ.PDB | OD2, F_ASP_90  | NH1, F_ARG_67  | HH12, F_ARG_67  | 2.83 | 1.99 | 10.41 |
| 5VXJ.PDB | OD1, F_ASN_74  | NE, F_ARG_72   | HE, F_ARG_72    | 2.72 | 1.88 | 10.50 |
| 5VXJ.PDB | O, F_ALA_32    | NH1, F_ARG_72  | HH12, F_ARG_72  | 2.99 | 2.18 | 16.73 |
| 5VXJ.PDB | O, F_LEU_18    | N, F_MET_83    | H, F_MET_83     | 2.56 | 1.71 | 7.06  |
| 5VXJ.PDB | OD2, F_ASP_90  | N, F_LYS_87    | H, F_LYS_87     | 2.92 | 2.15 | 21.40 |
| 5VXJ.PDB | O, F_LYS_87    | N, F_ASP_90    | H, F_ASP_90     | 2.85 | 2.01 | 12.44 |
| 5VXJ.PDB | O, F_PRO_88    | N, F_THR_91    | H, F_THR_91     | 2.99 | 2.14 | 6.98  |
| 5VXJ.PDB | O, F_VAL_115   | N, F_ALA_92    | H, F_ALA_92     | 2.99 | 2.23 | 23.19 |
| 5VXJ.PDB | O, F_GLN_39    | N, F_MET_93    | H, F_MET_93     | 2.76 | 1.90 | 4.39  |
| 5VXJ.PDB | O, F_THR_113   | N, F_TYR_94    | H, F_TYR_94     | 2.89 | 2.09 | 17.19 |
| 5VXJ.PDB | O, F_ASP_90    | OH, F_TYR_94   | HH, F_TYR_94    | 2.65 | 1.83 | 9.35  |
| 5VXJ.PDB | OE2, F_GLU_6   | N, F_CYS_96    | H, F_CYS_96     | 2.48 | 1.64 | 10.12 |
| 5VXJ.PDB | O, F_ASN_35    | N, F_ASN_97    | H, F_ASN_97     | 2.96 | 2.17 | 18.94 |
| 5VXJ.PDB | OG1, F_THR_107 | ND2, F_ASN_97  | HD21, F_ASN_97  | 2.73 | 1.95 | 21.26 |
| 5VXJ.PDB | O, F_VAL_33    | N, F_GLY_99    | H, F_GLY_99     | 2.77 | 1.92 | 6.76  |
| 5VXJ.PDB | O, F_ARG_106   | N, F_ILE_100   | H, F_ILE_100    | 2.81 | 1.97 | 10.04 |
| 5VXJ.PDB | O, F_ARG_31    | N, F_PHE_101   | H, F_PHE_101    | 2.72 | 1.87 | 8.92  |
| 5VXJ.PDB | OE1, G_GLU_201 | OH, F_TYR_105  | HH, F_TYR_105   | 2.57 | 1.75 | 11.97 |
| 5VXJ.PDB | O, F_CYS_96    | N, F_GLY_110   | H, F_GLY_110    | 2.87 | 2.09 | 20.49 |
| 5VXJ.PDB | O, E_THR_217   | NE2, F_GLN_111 | HE22, F_GLN_111 | 2.98 | 2.12 | 6.26  |
| 5VXJ.PDB | OE1, F_GLU_6   | N, F_GLY_112   | H, F_GLY_112    | 2.49 | 1.66 | 12.35 |
| 5VXJ.PDB | O, F_TYR_94    | N, F_THR_113   | H, F_THR_113    | 2.80 | 1.99 | 17.44 |
| 5VXJ.PDB | O, F_ALA_92    | N, F_VAL_115   | H, F_VAL_115    | 2.94 | 2.08 | 6.59  |
| 5VXJ.PDB | OG1, F_THR_91  | N, F_VAL_117   | H, F_VAL_117    | 2.91 | 2.05 | 1.59  |
| 5VXJ.PDB | O, G_LEU_47    | N, G_LEU_51    | H, G_LEU_51     | 2.82 | 2.00 | 14.56 |
| 5VXJ.PDB | O, G_ASP_49    | N, G_ASN_53    | H, G_ASN_53     | 2.43 | 1.60 | 12.48 |
| 5VXJ.PDB | O, G_HIS_52    | N, G_THR_56    | H, G_THR_56     | 2.92 | 2.09 | 13.87 |
| 5VXJ.PDB | O, G_ARG_55    | N, G_THR_57    | H, G_THR_57     | 2.92 | 2.19 | 26.60 |
| 5VXJ.PDB | O, G_THR_57    | N, G_LEU_61    | H, G_LEU_61     | 2.82 | 1.99 | 11.74 |
| 5VXJ.PDB | O, G_ASN_58    | N, G_LYS_62    | H, G_LYS_62     | 2.82 | 1.97 | 8.16  |
| 5VXJ.PDB | O, G_LEU_61    | N, G_LEU_65    | H, G_LEU_65     | 2.93 | 2.16 | 22.32 |
| 5VXJ.PDB | O, G_LYS_62    | OG, G_SER_66   | HG, G_SER_66    | 2.76 | 1.97 | 15.54 |
| 5VXJ.PDB | O, G_ALA_79    | N, G_SER_83    | H, G_SER_83     | 2.87 | 2.11 | 23.33 |
| 5VXJ.PDB | O, G_LEU_80    | N, G_GLN_84    | H, G_GLN_84     | 2.88 | 2.12 | 24.02 |
| 5VXJ.PDB | O, G_HIS_81    | N, G_ILE_85    | H, G_ILE_85     | 2.98 | 2.19 | 19.61 |
| 5VXJ.PDB | O, G_ILE_85    | N, G_VAL_89    | H, G_VAL_89     | 2.81 | 2.00 | 16.83 |
| 5VXJ.PDB | O, G_ASP_88    | N, G_SER_92    | H, G_SER_92     | 2.63 | 1.80 | 11.22 |
| 5VXJ.PDB | O, G_ASP_88    | OG, G_SER_92   | HG, G_SER_92    | 2.83 | 2.07 | 20.88 |
| 5VXJ.PDB | O, G_VAL_89    | N, G_ALA_93    | H, G_ALA_93     | 2.81 | 1.99 | 14.69 |
| 5VXJ.PDB | O, G_SER_92    | N, G_LEU_96    | H, G_LEU_96     | 2.87 | 2.02 | 7.93  |
| 5VXJ.PDB | O, G_ALA_93    | N, G_ASP_97    | H, G_ASP_97     | 2.78 | 1.96 | 13.95 |

|          |                |                |                 |      |      |       |
|----------|----------------|----------------|-----------------|------|------|-------|
| 5VXJ.PDB | O, G_GLN_94    | N, G_ILE_98    | H, G_ILE_98     | 2.75 | 1.95 | 17.07 |
| 5VXJ.PDB | O, G_LEU_95    | N, G_LEU_99    | H, G_LEU_99     | 2.95 | 2.15 | 17.03 |
| 5VXJ.PDB | O, G_LEU_96    | N, G_SER_100   | H, G_SER_100    | 2.90 | 2.14 | 23.00 |
| 5VXJ.PDB | O, G_ARG_132   | OG, G_SER_100  | HG, G_SER_100   | 2.76 | 1.96 | 15.44 |
| 5VXJ.PDB | O, G_ASP_97    | N, G_ARG_101   | H, G_ARG_101    | 2.92 | 2.09 | 13.45 |
| 5VXJ.PDB | OD2, G_ASP_97  | NE, G_ARG_101  | HE, G_ARG_101   | 2.67 | 1.82 | 7.54  |
| 5VXJ.PDB | O, G_ILE_98    | N, G_ASN_102   | H, G_ASN_102    | 2.95 | 2.14 | 17.00 |
| 5VXJ.PDB | O, G_LEU_113   | OG, G_SER_116  | HG, G_SER_116   | 2.49 | 1.72 | 19.82 |
| 5VXJ.PDB | O, G_PRO_118   | N, G_ALA_121   | H, G_ALA_121    | 2.99 | 2.21 | 20.79 |
| 5VXJ.PDB | O, G_LYS_119   | N, G_GLU_122   | H, G_GLU_122    | 2.97 | 2.13 | 11.69 |
| 5VXJ.PDB | O, H_GLY_56    | NH2, G_ARG_132 | HH22, G_ARG_132 | 2.94 | 2.20 | 26.37 |
| 5VXJ.PDB | O, G_TYR_104   | NE1, G_TRP_135 | HE1, G_TRP_135  | 2.73 | 1.97 | 23.31 |
| 5VXJ.PDB | O, G_GLU_133   | N, G_LYS_137   | H, G_LYS_137    | 2.98 | 2.20 | 21.62 |
| 5VXJ.PDB | O, G_LEU_134   | N, G_ILE_138   | H, G_ILE_138    | 2.96 | 2.21 | 25.46 |
| 5VXJ.PDB | O, G_TRP_135   | N, G_ALA_139   | H, G_ALA_139    | 2.77 | 1.93 | 7.72  |
| 5VXJ.PDB | O, G_ALA_136   | N, G_ASN_140   | H, G_ASN_140    | 2.82 | 1.97 | 8.22  |
| 5VXJ.PDB | O, G_LYS_137   | N, G_SER_141   | H, G_SER_141    | 3.00 | 2.27 | 27.08 |
| 5VXJ.PDB | O, G_ALA_121   | OG, G_SER_141  | HG, G_SER_141   | 2.84 | 2.05 | 16.77 |
| 5VXJ.PDB | O, G_ASN_140   | N, G_ASP_144   | H, G_ASP_144    | 2.65 | 1.83 | 15.34 |
| 5VXJ.PDB | O, G_SER_141   | N, G_ILE_145   | H, G_ILE_145    | 2.98 | 2.15 | 13.01 |
| 5VXJ.PDB | O, G_ASP_144   | N, G_GLN_148   | H, G_GLN_148    | 2.87 | 2.03 | 9.64  |
| 5VXJ.PDB | O, G_ILE_145   | N, G_LEU_150   | H, G_LEU_150    | 2.93 | 2.09 | 11.15 |
| 5VXJ.PDB | O, G_ASN_146   | N, G_LYS_151   | H, G_LYS_151    | 2.69 | 1.86 | 11.46 |
| 5VXJ.PDB | O, G_LYS_151   | N, G_HIS_155   | H, G_HIS_155    | 2.94 | 2.14 | 18.38 |
| 5VXJ.PDB | O, G_VAL_152   | N, G_ALA_156   | H, G_ALA_156    | 2.99 | 2.15 | 9.93  |
| 5VXJ.PDB | O, G_TYR_153   | N, G_VAL_157   | H, G_VAL_157    | 2.97 | 2.12 | 8.52  |
| 5VXJ.PDB | O, G_GLU_154   | N, G_SER_158   | H, G_SER_158    | 2.89 | 2.07 | 14.41 |
| 5VXJ.PDB | O, G_HIS_155   | N, G_SER_159   | H, G_SER_159    | 2.67 | 1.82 | 8.29  |
| 5VXJ.PDB | O, G_ALA_156   | N, G_TYR_160   | H, G_TYR_160    | 2.95 | 2.09 | 4.91  |
| 5VXJ.PDB | O, G_VAL_157   | N, G_THR_161   | H, G_THR_161    | 2.89 | 2.06 | 12.73 |
| 5VXJ.PDB | O, G_VAL_157   | OG1, G_THR_161 | HG1, G_THR_161  | 2.73 | 2.03 | 28.26 |
| 5VXJ.PDB | O, G_TYR_160   | N, G_TYR_164   | H, G_TYR_164    | 2.94 | 2.13 | 15.80 |
| 5VXJ.PDB | OD1, G_ASP_287 | OH, G_TYR_164  | HH, G_TYR_164   | 2.79 | 1.99 | 15.03 |
| 5VXJ.PDB | O, G_THR_161   | N, G_GLN_165   | H, G_GLN_165    | 2.71 | 1.89 | 15.11 |
| 5VXJ.PDB | O, G_GLN_162   | N, G_ASP_166   | H, G_ASP_166    | 2.86 | 2.02 | 10.34 |
| 5VXJ.PDB | O, G_MET_163   | N, G_PHE_167   | H, G_PHE_167    | 2.94 | 2.13 | 15.85 |
| 5VXJ.PDB | O, G_TYR_164   | N, G_SER_168   | H, G_SER_168    | 2.76 | 1.96 | 17.74 |
| 5VXJ.PDB | O, G_PHE_167   | N, G_LEU_171   | H, G_LEU_171    | 2.92 | 2.14 | 21.89 |
| 5VXJ.PDB | O, F_TYR_105   | OG, G_SER_173  | HG, G_SER_173   | 2.88 | 2.16 | 26.33 |
| 5VXJ.PDB | OD1, I_ASN_292 | N, G_GLY_176   | H, G_GLY_176    | 2.76 | 2.01 | 25.37 |
| 5VXJ.PDB | O, G_LYS_189   | N, G_SER_179   | H, G_SER_179    | 2.93 | 2.15 | 21.27 |
| 5VXJ.PDB | O, G_SER_187   | N, G_GLY_181   | H, G_GLY_181    | 2.82 | 1.96 | 3.25  |
| 5VXJ.PDB | O, G_LEU_271   | N, G_VAL_188   | H, G_VAL_188    | 2.64 | 1.80 | 10.40 |
| 5VXJ.PDB | O, G_SER_179   | N, G_LYS_189   | H, G_LYS_189    | 2.74 | 1.88 | 0.48  |
| 5VXJ.PDB | O, G_VAL_269   | N, G_LEU_190   | H, G_LEU_190    | 2.94 | 2.10 | 11.59 |
| 5VXJ.PDB | O, G_TRP_177   | N, G_GLN_191   | H, G_GLN_191    | 2.89 | 2.06 | 12.28 |
| 5VXJ.PDB | O, G_VAL_192   | N, G_LYS_196   | H, G_LYS_196    | 2.73 | 1.88 | 6.19  |
| 5VXJ.PDB | O, G_ASN_193   | N, G_LYS_197   | H, G_LYS_197    | 2.77 | 1.93 | 12.03 |
| 5VXJ.PDB | OE2, G_GLU_201 | NZ, G_LYS_197  | HZ3, G_LYS_197  | 2.59 | 1.86 | 28.64 |
| 5VXJ.PDB | O, G_LYS_196   | N, G_GLU_200   | H, G_GLU_200    | 2.89 | 2.03 | 3.65  |
| 5VXJ.PDB | O, G_ALA_198   | N, G_LEU_202   | H, G_LEU_202    | 2.82 | 2.06 | 23.29 |
| 5VXJ.PDB | OD1, G_ASP_254 | NZ, G_LYS_203  | HZ2, G_LYS_203  | 2.49 | 1.62 | 9.92  |
| 5VXJ.PDB | O, G_GLU_201   | N, G_LYS_205   | H, G_LYS_205    | 2.90 | 2.17 | 27.16 |
| 5VXJ.PDB | OD2, G_ASP_166 | NZ, G_LYS_205  | HZ2, G_LYS_205  | 2.82 | 1.96 | 12.05 |
| 5VXJ.PDB | OD2, G_ASP_166 | OH, G_TYR_206  | HH, G_TYR_206   | 2.52 | 1.70 | 11.57 |
| 5VXJ.PDB | OE1, H_GLN_111 | OG1, G_THR_217 | HG1, G_THR_217  | 2.86 | 2.17 | 29.58 |
| 5VXJ.PDB | O, G_TYR_244   | N, G_VAL_218   | H, G_VAL_218    | 2.86 | 2.06 | 17.78 |
| 5VXJ.PDB | O, G_SER_219   | N, G_ALA_223   | H, G_ALA_223    | 2.97 | 2.15 | 15.26 |

|          |                |               |               |      |      |       |
|----------|----------------|---------------|---------------|------|------|-------|
| 5VXJ.PDB | O, G_ALA_223   | N, G_LEU_227  | H, G_LEU_227  | 2.91 | 2.13 | 21.40 |
| 5VXJ.PDB | O, G_ASN_224   | N, G_THR_228  | H, G_THR_228  | 2.94 | 2.09 | 5.59  |
| 5VXJ.PDB | O, G_TRP_226   | N, G_LEU_230  | H, G_LEU_230  | 2.80 | 1.99 | 15.37 |
| 5VXJ.PDB | O, G_SER_247   | N, G_LYS_236  | H, G_LYS_236  | 2.91 | 2.21 | 29.46 |
| 5VXJ.PDB | O, G_GLY_243   | N, G_LYS_240  | H, G_LYS_240  | 2.93 | 2.08 | 7.36  |
| 5VXJ.PDB | O, G_VAL_218   | N, G_TYR_244  | H, G_TYR_244  | 2.68 | 1.96 | 27.92 |
| 5VXJ.PDB | O, G_TYR_212   | N, G_VAL_246  | H, G_VAL_246  | 2.69 | 1.84 | 4.47  |
| 5VXJ.PDB | O, G_ILE_234   | N, G_ASN_249  | H, G_ASN_249  | 2.98 | 2.13 | 6.76  |
| 5VXJ.PDB | OD1, G_ASN_249 | N, G_THR_251  | H, G_THR_251  | 2.80 | 1.95 | 8.59  |
| 5VXJ.PDB | O, G_MET_250   | N, G_ASP_254  | H, G_ASP_254  | 2.98 | 2.15 | 13.88 |
| 5VXJ.PDB | O, G_THR_251   | N, G_ASN_255  | H, G_ASN_255  | 2.80 | 1.98 | 15.19 |
| 5VXJ.PDB | O, G_ILE_253   | N, G_LEU_257  | H, G_LEU_257  | 2.98 | 2.19 | 19.77 |
| 5VXJ.PDB | O, G_ASP_254   | N, G_LYS_258  | H, G_LYS_258  | 2.96 | 2.13 | 13.32 |
| 5VXJ.PDB | O, G_ASN_255   | N, G_SER_259  | H, G_SER_259  | 2.97 | 2.13 | 11.23 |
| 5VXJ.PDB | O, G_MET_256   | N, G_LEU_260  | H, G_LEU_260  | 2.98 | 2.17 | 16.38 |
| 5VXJ.PDB | O, G_LEU_257   | N, G_ASP_261  | H, G_ASP_261  | 2.95 | 2.11 | 10.36 |
| 5VXJ.PDB | O, G_VAL_188   | N, G_LEU_271  | H, G_LEU_271  | 2.72 | 1.88 | 11.49 |
| 5VXJ.PDB | OD1, G_ASP_272 | N, G_LYS_275  | H, G_LYS_275  | 2.67 | 1.82 | 9.36  |
| 5VXJ.PDB | O, G_ASN_273   | N, G_GLN_277  | H, G_GLN_277  | 2.90 | 2.04 | 4.56  |
| 5VXJ.PDB | O, G_TYR_276   | N, G_ASN_280  | H, G_ASN_280  | 2.80 | 1.95 | 8.62  |
| 5VXJ.PDB | O, G_TRP_279   | N, G_PHE_283  | H, G_PHE_283  | 2.87 | 2.07 | 17.67 |
| 5VXJ.PDB | O, G_ASN_280   | N, G_SER_284  | H, G_SER_284  | 2.95 | 2.13 | 14.24 |
| 5VXJ.PDB | O, G_ASN_280   | OG, G_SER_284 | HG, G_SER_284 | 2.97 | 2.24 | 25.76 |
| 5VXJ.PDB | O, G_SER_284   | N, G_GLU_288  | H, G_GLU_288  | 2.91 | 2.15 | 23.37 |
| 5VXJ.PDB | O, G_GLU_288   | N, G_ASN_292  | H, G_ASN_292  | 2.83 | 1.99 | 8.91  |
| 5VXJ.PDB | O, G_THR_289   | N, G_ASN_293  | H, G_ASN_293  | 2.94 | 2.09 | 6.63  |
| 5VXJ.PDB | O, G_LYS_291   | N, G_GLN_295  | H, G_GLN_295  | 2.97 | 2.14 | 12.50 |
| 5VXJ.PDB | O, G_ASN_292   | N, G_THR_296  | H, G_THR_296  | 2.78 | 1.97 | 17.22 |
| 5VXJ.PDB | O, G_ASN_293   | N, G_LEU_297  | H, G_LEU_297  | 2.97 | 2.15 | 14.27 |
| 5VXJ.PDB | O, G_LEU_294   | N, G_VAL_298  | H, G_VAL_298  | 2.94 | 2.10 | 8.59  |
| 5VXJ.PDB | O, G_THR_296   | N, G_LYS_300  | H, G_LYS_300  | 2.93 | 2.11 | 14.54 |
| 5VXJ.PDB | O, G_LEU_297   | N, G_TYR_301  | H, G_TYR_301  | 2.79 | 1.93 | 5.96  |
| 5VXJ.PDB | O, G_VAL_298   | N, G_SER_302  | H, G_SER_302  | 2.92 | 2.18 | 25.79 |
| 5VXJ.PDB | O, G_GLN_299   | N, G_ASN_303  | H, G_ASN_303  | 2.89 | 2.06 | 11.76 |
| 5VXJ.PDB | O, G_LYS_300   | N, G_ALA_304  | H, G_ALA_304  | 2.91 | 2.09 | 15.09 |
| 5VXJ.PDB | O, G_ASN_305   | N, G_ASP_309  | H, G_ASP_309  | 2.86 | 2.10 | 23.50 |
| 5VXJ.PDB | O, G_ASN_310   | N, G_VAL_314  | H, G_VAL_314  | 2.93 | 2.09 | 9.81  |
| 5VXJ.PDB | O, G_LEU_311   | N, G_LEU_315  | H, G_LEU_315  | 2.80 | 1.98 | 14.79 |
| 5VXJ.PDB | O, G_VAL_312   | N, G_SER_316  | H, G_SER_316  | 2.85 | 2.00 | 7.85  |
| 5VXJ.PDB | O, G_VAL_314   | OG, G_SER_317 | HG, G_SER_317 | 2.91 | 2.15 | 20.46 |
| 5VXJ.PDB | OE1, H_GLN_1   | N, H_VAL_2    | H, H_VAL_2    | 2.95 | 2.22 | 27.04 |
| 5VXJ.PDB | O, H_SER_25    | N, H_GLN_3    | H, H_GLN_3    | 2.91 | 2.09 | 16.25 |
| 5VXJ.PDB | O, H_ALA_23    | N, H_ALA_5    | H, H_ALA_5    | 2.99 | 2.18 | 17.17 |
| 5VXJ.PDB | O, H_SER_21    | N, H_THR_7    | H, H_THR_7    | 2.88 | 2.14 | 25.14 |
| 5VXJ.PDB | O, H_GLN_114   | N, H_GLY_10   | H, H_GLY_10   | 2.91 | 2.07 | 10.18 |
| 5VXJ.PDB | O, H_THR_116   | N, H_ALA_12   | H, H_ALA_12   | 2.81 | 2.11 | 29.16 |
| 5VXJ.PDB | O, H_LEU_86    | N, H_GLY_15   | H, H_GLY_15   | 2.89 | 2.09 | 19.18 |
| 5VXJ.PDB | O, H_GLN_13    | N, H_GLY_16   | H, H_GLY_16   | 2.90 | 2.08 | 13.33 |
| 5VXJ.PDB | O, H_MET_83    | N, H_LEU_18   | H, H_LEU_18   | 2.94 | 2.15 | 20.85 |
| 5VXJ.PDB | OE1, H_GLN_82  | NE, H_ARG_19  | HE, H_ARG_19  | 2.76 | 1.91 | 8.69  |
| 5VXJ.PDB | O, H_LEU_81    | N, H_LEU_20   | H, H_LEU_20   | 2.81 | 2.00 | 16.24 |
| 5VXJ.PDB | O, H_THR_7     | N, H_SER_21   | H, H_SER_21   | 2.81 | 2.01 | 17.25 |
| 5VXJ.PDB | O, H_VAL_79    | N, H_CYS_22   | H, H_CYS_22   | 2.93 | 2.10 | 13.46 |
| 5VXJ.PDB | O, H_ALA_5     | N, H_ALA_23   | H, H_ALA_23   | 2.89 | 2.09 | 18.03 |
| 5VXJ.PDB | O, H_ASN_77    | N, H_ALA_24   | H, H_ALA_24   | 2.87 | 2.01 | 2.06  |
| 5VXJ.PDB | O, H_THR_28    | N, H_ARG_31   | H, H_ARG_31   | 2.95 | 2.12 | 13.87 |
| 5VXJ.PDB | O, H_GLY_99    | N, H_VAL_33   | H, H_VAL_33   | 2.75 | 1.93 | 14.82 |
| 5VXJ.PDB | O, H_ASN_97    | N, H_ASN_35   | H, H_ASN_35   | 2.70 | 1.89 | 16.43 |

|          |                |                |                 |      |      |       |
|----------|----------------|----------------|-----------------|------|------|-------|
| 5VXJ.PDB | OD1, H_ASN_97  | ND2, H_ASN_35  | HD22, H_ASN_35  | 2.85 | 2.10 | 23.91 |
| 5VXJ.PDB | O, H_ALA_49    | N, H_TRP_36    | H, H_TRP_36     | 2.96 | 2.13 | 12.43 |
| 5VXJ.PDB | O, H_VAL_95    | N, H_TYR_37    | H, H_TYR_37     | 2.93 | 2.07 | 4.40  |
| 5VXJ.PDB | O, H_GLU_46    | N, H_ARG_38    | H, H_ARG_38     | 3.00 | 2.20 | 19.46 |
| 5VXJ.PDB | OD1, H_ASP_90  | NH1, H_ARG_38  | HH12, H_ARG_38  | 3.00 | 2.16 | 12.34 |
| 5VXJ.PDB | O, H_LYS_43    | NE2, H_GLN_39  | HE21, H_GLN_39  | 2.90 | 2.07 | 12.82 |
| 5VXJ.PDB | O, H_ALA_40    | N, H_LYS_43    | H, H_LYS_43     | 2.85 | 2.05 | 18.19 |
| 5VXJ.PDB | O, H_TRP_36    | N, H_VAL_48    | H, H_VAL_48     | 2.81 | 1.99 | 14.82 |
| 5VXJ.PDB | OD1, H_ASN_35  | NE, H_ARG_50   | HE, H_ARG_50    | 2.75 | 1.93 | 14.53 |
| 5VXJ.PDB | O, H_SER_30    | OH, H_TYR_52   | HH, H_TYR_52    | 2.54 | 1.73 | 12.01 |
| 5VXJ.PDB | O, H_ARG_50    | N, H_SER_59    | H, H_SER_59     | 2.65 | 1.83 | 14.48 |
| 5VXJ.PDB | O, H_VAL_48    | N, H_ALA_61    | H, H_ALA_61     | 2.92 | 2.06 | 6.45  |
| 5VXJ.PDB | OD2, H_ASP_90  | NH1, H_ARG_67  | HH12, H_ARG_67  | 2.89 | 2.05 | 9.62  |
| 5VXJ.PDB | O, H_VAL_64    | N, H_PHE_68    | H, H_PHE_68     | 2.94 | 2.11 | 12.01 |
| 5VXJ.PDB | O, H_GLN_82    | N, H_THR_69    | H, H_THR_69     | 2.98 | 2.17 | 16.65 |
| 5VXJ.PDB | O, H_HIS_80    | N, H_SER_71    | H, H_SER_71     | 2.96 | 2.17 | 19.86 |
| 5VXJ.PDB | OD1, H_ASN_74  | NE, H_ARG_72   | HE, H_ARG_72    | 2.76 | 1.95 | 17.61 |
| 5VXJ.PDB | O, H_THR_78    | N, H_ASP_73    | H, H_ASP_73     | 2.94 | 2.10 | 8.61  |
| 5VXJ.PDB | OD1, H_ASP_73  | N, H_ALA_75    | H, H_ALA_75     | 2.98 | 2.24 | 26.47 |
| 5VXJ.PDB | O, H_LEU_20    | N, H_LEU_81    | H, H_LEU_81     | 2.92 | 2.17 | 25.39 |
| 5VXJ.PDB | O, H_THR_69    | N, H_GLN_82    | H, H_GLN_82     | 2.80 | 2.01 | 19.49 |
| 5VXJ.PDB | OD1, H_ASN_84  | NE2, H_GLN_82  | HE21, H_GLN_82  | 2.86 | 2.05 | 16.57 |
| 5VXJ.PDB | O, H_LEU_18    | N, H_MET_83    | H, H_MET_83     | 2.73 | 1.88 | 6.75  |
| 5VXJ.PDB | OD2, H_ASP_90  | N, H_LYS_87    | H, H_LYS_87     | 2.78 | 1.93 | 8.81  |
| 5VXJ.PDB | O, H_LYS_87    | N, H_ASP_90    | H, H_ASP_90     | 2.91 | 2.12 | 18.68 |
| 5VXJ.PDB | O, H_PRO_88    | OG1, H_THR_91  | HG1, H_THR_91   | 2.87 | 2.17 | 28.10 |
| 5VXJ.PDB | O, H_GLN_39    | N, H_MET_93    | H, H_MET_93     | 2.94 | 2.08 | 2.62  |
| 5VXJ.PDB | O, H_THR_113   | N, H_TYR_94    | H, H_TYR_94     | 2.90 | 2.08 | 15.59 |
| 5VXJ.PDB | O, H_ASP_90    | OH, H_TYR_94   | HH, H_TYR_94    | 2.76 | 1.93 | 4.55  |
| 5VXJ.PDB | OE2, H_GLU_6   | N, H_CYS_96    | H, H_CYS_96     | 2.77 | 1.93 | 11.06 |
| 5VXJ.PDB | O, H_ASN_35    | N, H_ASN_97    | H, H_ASN_97     | 3.00 | 2.18 | 14.80 |
| 5VXJ.PDB | OG1, H_THR_107 | ND2, H_ASN_97  | HD21, H_ASN_97  | 2.53 | 1.81 | 26.67 |
| 5VXJ.PDB | O, H_VAL_33    | N, H_GLY_99    | H, H_GLY_99     | 2.83 | 1.97 | 3.41  |
| 5VXJ.PDB | O, H_ARG_31    | N, H_PHE_101   | H, H_PHE_101    | 2.92 | 2.07 | 4.69  |
| 5VXJ.PDB | O, H_ALA_98    | OG1, H_THR_107 | HG1, H_THR_107  | 2.78 | 2.00 | 18.25 |
| 5VXJ.PDB | O, H_TYR_94    | N, H_THR_113   | H, H_THR_113    | 2.71 | 1.88 | 13.43 |
| 5VXJ.PDB | O, H_ALA_92    | N, H_VAL_115   | H, H_VAL_115    | 2.99 | 2.14 | 8.76  |
| 5VXJ.PDB | O, I_HIS_52    | N, I_THR_56    | H, I_THR_56     | 3.00 | 2.25 | 25.56 |
| 5VXJ.PDB | O, I_ILE_54    | N, I_ASN_58    | H, I_ASN_58     | 2.85 | 2.04 | 16.92 |
| 5VXJ.PDB | OD1, I_ASP_309 | ND2, I_ASN_58  | HD22, I_ASN_58  | 2.73 | 1.88 | 5.94  |
| 5VXJ.PDB | O, I_THR_57    | N, I_LEU_61    | H, I_LEU_61     | 2.75 | 1.93 | 14.25 |
| 5VXJ.PDB | O, I_SER_74    | N, I_ILE_78    | H, I_ILE_78     | 2.96 | 2.17 | 19.05 |
| 5VXJ.PDB | O, I_ILE_78    | N, I_SER_82    | H, I_SER_82     | 2.89 | 2.03 | 4.23  |
| 5VXJ.PDB | OE1, I_GLU_154 | OG, I_SER_82   | HG, I_SER_82    | 2.52 | 1.79 | 24.33 |
| 5VXJ.PDB | O, I_ALA_79    | N, I_SER_83    | H, I_SER_83     | 2.97 | 2.17 | 18.99 |
| 5VXJ.PDB | O, I_LEU_80    | N, I_GLN_84    | H, I_GLN_84     | 2.85 | 2.09 | 23.46 |
| 5VXJ.PDB | O, I_HIS_81    | N, I_ILE_85    | H, I_ILE_85     | 2.91 | 2.07 | 9.50  |
| 5VXJ.PDB | O, I_SER_82    | N, I_SER_86    | H, I_SER_86     | 2.96 | 2.13 | 13.40 |
| 5VXJ.PDB | O, I_ILE_85    | N, I_VAL_89    | H, I_VAL_89     | 2.75 | 1.92 | 11.99 |
| 5VXJ.PDB | O, I_SER_86    | N, I_ASN_90    | H, I_ASN_90     | 2.87 | 2.05 | 14.01 |
| 5VXJ.PDB | O, I_ASP_88    | N, I_SER_92    | H, I_SER_92     | 2.88 | 2.08 | 18.99 |
| 5VXJ.PDB | O, I_VAL_89    | N, I_ALA_93    | H, I_ALA_93     | 2.77 | 1.96 | 17.15 |
| 5VXJ.PDB | O, I_SER_92    | N, I_LEU_96    | H, I_LEU_96     | 2.85 | 1.99 | 1.66  |
| 5VXJ.PDB | O, I_ALA_93    | N, I_ASP_97    | H, I_ASP_97     | 2.73 | 1.95 | 20.17 |
| 5VXJ.PDB | O, I_ARG_132   | OG, I_SER_100  | HG, I_SER_100   | 2.62 | 1.86 | 20.59 |
| 5VXJ.PDB | OD2, I_ASP_97  | NE, I_ARG_101  | HE, I_ARG_101   | 2.83 | 2.07 | 23.56 |
| 5VXJ.PDB | O, I_ILE_98    | N, I_ASN_102   | H, I_ASN_102    | 2.91 | 2.10 | 16.45 |
| 5VXJ.PDB | O, I_ILE_129   | NH2, I_ARG_111 | HH22, I_ARG_111 | 2.55 | 1.83 | 26.80 |

|          |                |                |                |      |      |       |
|----------|----------------|----------------|----------------|------|------|-------|
| 5VXJ.PDB | O, I.GLU.112   | N, I.HIS.115   | H, I.HIS.115   | 2.95 | 2.18 | 22.09 |
| 5VXJ.PDB | O, I.LEU.113   | N, I.SER.116   | H, I.SER.116   | 2.82 | 1.99 | 12.68 |
| 5VXJ.PDB | O, I.LEU.114   | N, I.ALA.117   | H, I.ALA.117   | 2.81 | 1.96 | 7.97  |
| 5VXJ.PDB | O, I.HIS.131   | N, I.TRP.135   | H, I.TRP.135   | 2.86 | 2.01 | 6.63  |
| 5VXJ.PDB | O, I.TYR.104   | NE1, I.TRP.135 | HE1, I.TRP.135 | 2.77 | 2.01 | 23.99 |
| 5VXJ.PDB | OD2, J.ASP.73  | NZ, I.LYS.137  | HZ3, I.LYS.137 | 2.90 | 2.17 | 29.52 |
| 5VXJ.PDB | O, I.TRP.135   | N, I.ALA.139   | H, I.ALA.139   | 2.88 | 2.02 | 5.33  |
| 5VXJ.PDB | O, I.ALA.136   | N, I.ASN.140   | H, I.ASN.140   | 2.79 | 1.94 | 7.31  |
| 5VXJ.PDB | O, I.ASN.140   | N, I.ASP.144   | H, I.ASP.144   | 2.67 | 1.82 | 9.22  |
| 5VXJ.PDB | O, I.SER.141   | N, I.ILE.145   | H, I.ILE.145   | 2.92 | 2.09 | 14.16 |
| 5VXJ.PDB | O, I.ASP.144   | N, I.GLN.148   | H, I.GLN.148   | 2.87 | 2.03 | 10.58 |
| 5VXJ.PDB | O, I.ASN.146   | N, I.LYS.151   | H, I.LYS.151   | 2.96 | 2.13 | 13.63 |
| 5VXJ.PDB | O, I.GLU.154   | N, I.SER.158   | H, I.SER.158   | 2.91 | 2.08 | 12.92 |
| 5VXJ.PDB | O, I.HIS.155   | N, I.SER.159   | H, I.SER.159   | 2.86 | 2.02 | 8.08  |
| 5VXJ.PDB | O, I.VAL.157   | N, I.THR.161   | H, I.THR.161   | 2.74 | 1.90 | 11.36 |
| 5VXJ.PDB | O, I.SER.158   | N, I.GLN.162   | H, I.GLN.162   | 2.99 | 2.14 | 8.77  |
| 5VXJ.PDB | O, I.TYR.160   | N, I.TYR.164   | H, I.TYR.164   | 2.94 | 2.12 | 14.36 |
| 5VXJ.PDB | OD1, I.ASP.287 | OH, I.TYR.164  | HH, I.TYR.164  | 2.95 | 2.16 | 17.45 |
| 5VXJ.PDB | O, I.THR.161   | N, I.GLN.165   | H, I.GLN.165   | 2.73 | 1.92 | 16.54 |
| 5VXJ.PDB | O, I.GLN.162   | N, I.ASP.166   | H, I.ASP.166   | 2.98 | 2.15 | 13.40 |
| 5VXJ.PDB | O, I.MET.163   | N, I.PHE.167   | H, I.PHE.167   | 2.92 | 2.10 | 14.46 |
| 5VXJ.PDB | O, I.TYR.164   | N, I.SER.168   | H, I.SER.168   | 2.79 | 1.99 | 18.69 |
| 5VXJ.PDB | O, I.TYR.164   | OG, I.SER.168  | HG, I.SER.168  | 2.84 | 2.02 | 10.56 |
| 5VXJ.PDB | O, I.PHE.167   | N, I.LEU.171   | H, I.LEU.171   | 2.88 | 2.09 | 18.97 |
| 5VXJ.PDB | O, I.SER.168   | N, I.SER.172   | H, I.SER.172   | 2.93 | 2.14 | 20.32 |
| 5VXJ.PDB | O, I.LEU.171   | N, I.LEU.174   | H, I.LEU.174   | 2.98 | 2.15 | 13.51 |
| 5VXJ.PDB | O, I.LYS.189   | N, I.SER.179   | H, I.SER.179   | 2.95 | 2.20 | 24.93 |
| 5VXJ.PDB | O, I.SER.187   | N, I.GLY.181   | H, I.GLY.181   | 2.71 | 1.95 | 23.30 |
| 5VXJ.PDB | O, I.LEU.271   | N, I.VAL.188   | H, I.VAL.188   | 2.51 | 1.65 | 3.63  |
| 5VXJ.PDB | O, I.SER.179   | N, I.LYS.189   | H, I.LYS.189   | 2.57 | 1.72 | 7.44  |
| 5VXJ.PDB | O, I.VAL.269   | N, I.LEU.190   | H, I.LEU.190   | 2.88 | 2.08 | 17.76 |
| 5VXJ.PDB | O, I.TRP.177   | N, I.GLN.191   | H, I.GLN.191   | 2.84 | 2.00 | 11.79 |
| 5VXJ.PDB | O, I.VAL.192   | N, I.LYS.196   | H, I.LYS.196   | 2.80 | 1.94 | 4.24  |
| 5VXJ.PDB | O, I.ASN.193   | N, I.LYS.197   | H, I.LYS.197   | 2.85 | 2.02 | 13.07 |
| 5VXJ.PDB | OD1, B.ASN.97  | NZ, I.LYS.197  | HZ1, I.LYS.197 | 2.68 | 1.88 | 21.92 |
| 5VXJ.PDB | O, I.LEU.195   | N, I.LEU.199   | H, I.LEU.199   | 3.00 | 2.18 | 15.17 |
| 5VXJ.PDB | O, I.LYS.196   | N, I.GLU.200   | H, I.GLU.200   | 2.81 | 1.96 | 9.14  |
| 5VXJ.PDB | O, I.LYS.197   | N, I.GLU.201   | H, I.GLU.201   | 2.97 | 2.16 | 16.25 |
| 5VXJ.PDB | O, I.ALA.198   | N, I.LEU.202   | H, I.LEU.202   | 3.00 | 2.21 | 19.76 |
| 5VXJ.PDB | OD1, I.ASP.254 | NZ, I.LYS.203  | HZ2, I.LYS.203 | 2.60 | 1.74 | 12.72 |
| 5VXJ.PDB | O, I.GLU.201   | N, I.LYS.205   | H, I.LYS.205   | 2.75 | 1.96 | 18.48 |
| 5VXJ.PDB | OD2, I.ASP.166 | NZ, I.LYS.205  | HZ2, I.LYS.205 | 2.77 | 1.91 | 10.79 |
| 5VXJ.PDB | OD2, I.ASP.166 | OH, I.TYR.206  | HH, I.TYR.206  | 2.50 | 1.67 | 8.28  |
| 5VXJ.PDB | O, I.VAL.246   | N, I.LEU.211   | H, I.LEU.211   | 2.81 | 2.10 | 28.98 |
| 5VXJ.PDB | O, I.SER.219   | N, I.ALA.223   | H, I.ALA.223   | 2.88 | 2.07 | 17.36 |
| 5VXJ.PDB | O, I.GLN.220   | N, I.ASN.224   | H, I.ASN.224   | 2.91 | 2.06 | 6.82  |
| 5VXJ.PDB | O, I.GLU.221   | N, I.LYS.225   | H, I.LYS.225   | 2.94 | 2.21 | 26.90 |
| 5VXJ.PDB | O, I.ALA.223   | N, I.LEU.227   | H, I.LEU.227   | 2.90 | 2.08 | 14.48 |
| 5VXJ.PDB | O, I.TRP.226   | N, I.LEU.230   | H, I.LEU.230   | 2.81 | 1.97 | 9.92  |
| 5VXJ.PDB | O, I.GLY.231   | N, I.ILE.234   | H, I.ILE.234   | 2.96 | 2.14 | 14.73 |
| 5VXJ.PDB | O, I.VAL.245   | N, I.SER.238   | H, I.SER.238   | 2.98 | 2.16 | 15.04 |
| 5VXJ.PDB | O, I.TYR.212   | N, I.VAL.246   | H, I.VAL.246   | 2.76 | 1.90 | 2.08  |
| 5VXJ.PDB | O, I.ILE.234   | N, I.ASN.249   | H, I.ASN.249   | 2.85 | 2.02 | 12.88 |
| 5VXJ.PDB | OD1, I.ASN.249 | N, I.THR.251   | H, I.THR.251   | 2.98 | 2.14 | 10.78 |
| 5VXJ.PDB | OD1, I.ASN.249 | OG1, I.THR.251 | HG1, I.THR.251 | 2.69 | 1.98 | 27.82 |
| 5VXJ.PDB | O, I.THR.251   | N, I.ASN.255   | H, I.ASN.255   | 2.72 | 1.91 | 16.03 |
| 5VXJ.PDB | O, I.PRO.252   | N, I.MET.256   | H, I.MET.256   | 2.98 | 2.15 | 12.95 |
| 5VXJ.PDB | O, I.ILE.253   | N, I.LEU.257   | H, I.LEU.257   | 2.86 | 2.03 | 13.56 |

|          |               |                |                |      |      |       |
|----------|---------------|----------------|----------------|------|------|-------|
| 5VXJ.PDB | O, I.ASP_254  | N, I.LYS_258   | H, I.LYS_258   | 2.91 | 2.07 | 10.53 |
| 5VXJ.PDB | O, I.ASN_255  | N, I.SER_259   | H, I.SER_259   | 2.91 | 2.10 | 16.35 |
| 5VXJ.PDB | O, I.MET_256  | N, I.LEU_260   | H, I.LEU_260   | 2.77 | 2.06 | 28.49 |
| 5VXJ.PDB | O, I.LEU_257  | N, I.ASP_261   | H, I.ASP_261   | 2.89 | 2.05 | 10.23 |
| 5VXJ.PDB | O, I.VAL_188  | N, I.LEU_271   | H, I.LEU_271   | 2.63 | 1.80 | 11.88 |
| 5VXJ.PDB | O, I.LYS_275  | N, I.TRP_279   | H, I.TRP_279   | 2.89 | 2.08 | 15.60 |
| 5VXJ.PDB | O, I.TYR_276  | N, I.ASN_280   | H, I.ASN_280   | 2.72 | 1.88 | 10.70 |
| 5VXJ.PDB | O, I.TRP_279  | N, I.PHE_283   | H, I.PHE_283   | 2.84 | 1.99 | 5.52  |
| 5VXJ.PDB | O, I.ASN_280  | N, I.SER_284   | H, I.SER_284   | 2.88 | 2.09 | 19.38 |
| 5VXJ.PDB | O, I.ASN_280  | OG, I.SER_284  | HG, I.SER_284  | 2.54 | 1.77 | 19.23 |
| 5VXJ.PDB | O, I.ALA_281  | N, I.ALA_285   | H, I.ALA_285   | 2.96 | 2.25 | 29.29 |
| 5VXJ.PDB | O, I.SER_284  | N, I.GLU_288   | H, I.GLU_288   | 2.89 | 2.11 | 20.80 |
| 5VXJ.PDB | O, I.THR_289  | N, I.ASN_293   | H, I.ASN_293   | 2.83 | 2.00 | 11.34 |
| 5VXJ.PDB | O, I.MET_290  | N, I.LEU_294   | H, I.LEU_294   | 2.91 | 2.07 | 11.98 |
| 5VXJ.PDB | O, I.ASN_292  | N, I.THR_296   | H, I.THR_296   | 2.91 | 2.10 | 15.19 |
| 5VXJ.PDB | O, I.LEU_294  | N, I.VAL_298   | H, I.VAL_298   | 2.97 | 2.13 | 11.40 |
| 5VXJ.PDB | O, I.GLN_295  | N, I.GLN_299   | H, I.GLN_299   | 2.67 | 1.83 | 9.61  |
| 5VXJ.PDB | O, I.THR_296  | N, I.LYS_300   | H, I.LYS_300   | 2.79 | 1.96 | 13.56 |
| 5VXJ.PDB | O, I.LEU_297  | N, I.TYR_301   | H, I.TYR_301   | 2.86 | 2.02 | 11.85 |
| 5VXJ.PDB | O, I.VAL_298  | N, I.SER_302   | H, I.SER_302   | 2.89 | 2.10 | 19.67 |
| 5VXJ.PDB | O, I.ASN_303  | N, I.ILE_307   | H, I.ILE_307   | 2.99 | 2.15 | 10.86 |
| 5VXJ.PDB | O, I.ALA_304  | N, I.PHE_308   | H, I.PHE_308   | 2.90 | 2.15 | 24.75 |
| 5VXJ.PDB | O, I.ASN_305  | N, I.ASP_309   | H, I.ASP_309   | 2.79 | 2.00 | 19.69 |
| 5VXJ.PDB | O, I.SER_306  | N, I.ASN_310   | H, I.ASN_310   | 2.75 | 1.93 | 13.59 |
| 5VXJ.PDB | O, I.ASP_309  | N, I.LYS_313   | H, I.LYS_313   | 2.84 | 2.05 | 19.66 |
| 5VXJ.PDB | O, I.LEU_311  | N, I.LEU_315   | H, I.LEU_315   | 2.80 | 1.96 | 10.49 |
| 5VXJ.PDB | O, I.VAL_312  | N, I.SER_316   | H, I.SER_316   | 3.00 | 2.19 | 16.29 |
| 5VXJ.PDB | O, I.LEU_315  | OG1, I.THR_318 | HG1, I.THR_318 | 2.75 | 2.04 | 26.52 |
| 5VXJ.PDB | O, I.LEU_315  | N, I.ILE_319   | H, I.ILE_319   | 2.98 | 2.22 | 23.66 |
| 5VXJ.PDB | O, J.SER_25   | N, J.GLN_3     | H, J.GLN_3     | 2.93 | 2.12 | 17.29 |
| 5VXJ.PDB | O, J.ALA_23   | N, J.ALA_5     | H, J.ALA_5     | 2.99 | 2.25 | 25.24 |
| 5VXJ.PDB | O, J.SER_21   | N, J.THR_7     | H, J.THR_7     | 2.92 | 2.17 | 25.75 |
| 5VXJ.PDB | O, J.GLN_114  | N, J.GLY_10    | H, J.GLY_10    | 2.89 | 2.04 | 6.92  |
| 5VXJ.PDB | O, J.THR_116  | N, J.ALA_12    | H, J.ALA_12    | 2.87 | 2.12 | 24.55 |
| 5VXJ.PDB | O, J.LEU_86   | N, J.GLY_15    | H, J.GLY_15    | 2.84 | 2.02 | 14.92 |
| 5VXJ.PDB | O, J.GLN_13   | N, J.GLY_16    | H, J.GLY_16    | 2.95 | 2.13 | 13.71 |
| 5VXJ.PDB | O, J.MET_83   | N, J.LEU_18    | H, J.LEU_18    | 2.83 | 2.07 | 23.77 |
| 5VXJ.PDB | OE1, J.GLN_82 | NE, J.ARG_19   | HE, J.ARG_19   | 2.52 | 1.72 | 17.43 |
| 5VXJ.PDB | O, J.THR_7    | N, J.SER_21    | H, J.SER_21    | 2.88 | 2.09 | 20.19 |
| 5VXJ.PDB | O, J.ASN_77   | N, J.ALA_24    | H, J.ALA_24    | 2.97 | 2.12 | 7.90  |
| 5VXJ.PDB | O, J.GLY_99   | N, J.VAL_33    | H, J.VAL_33    | 2.92 | 2.10 | 15.57 |
| 5VXJ.PDB | O, J.ASN_97   | N, J.ASN_35    | H, J.ASN_35    | 2.70 | 1.87 | 12.63 |
| 5VXJ.PDB | OD1, J.ASN_97 | ND2, J.ASN_35  | HD22, J.ASN_35 | 3.00 | 2.21 | 19.94 |
| 5VXJ.PDB | O, J.ALA_49   | N, J.TRP_36    | H, J.TRP_36    | 2.88 | 2.04 | 12.12 |
| 5VXJ.PDB | O, J.VAL_95   | N, J.TYR_37    | H, J.TYR_37    | 2.66 | 1.81 | 6.37  |
| 5VXJ.PDB | OD1, J.ASP_90 | NH1, J.ARG_38  | HH12, J.ARG_38 | 2.89 | 2.13 | 23.59 |
| 5VXJ.PDB | OE2, J.GLU_46 | NH2, J.ARG_38  | HH21, J.ARG_38 | 2.77 | 1.96 | 16.80 |
| 5VXJ.PDB | O, J.ARG_38   | N, J.GLU_46    | H, J.GLU_46    | 2.68 | 1.85 | 12.20 |
| 5VXJ.PDB | O, J.TRP_36   | N, J.VAL_48    | H, J.VAL_48    | 2.83 | 2.01 | 13.87 |
| 5VXJ.PDB | O, J.SER_59   | N, J.ARG_50    | H, J.ARG_50    | 2.92 | 2.18 | 25.84 |
| 5VXJ.PDB | OD1, J.ASN_35 | NE, J.ARG_50   | HE, J.ARG_50   | 2.74 | 1.91 | 11.68 |
| 5VXJ.PDB | O, J.SER_30   | OH, J.TYR_52   | HH, J.TYR_52   | 2.67 | 1.83 | 3.11  |
| 5VXJ.PDB | OD1, J.ASP_53 | N, J.GLY_55    | H, J.GLY_55    | 2.81 | 1.99 | 15.68 |
| 5VXJ.PDB | O, J.ARG_50   | N, J.SER_59    | H, J.SER_59    | 2.68 | 1.87 | 16.27 |
| 5VXJ.PDB | O, J.VAL_48   | N, J.ALA_61    | H, J.ALA_61    | 2.84 | 2.03 | 16.19 |
| 5VXJ.PDB | O, J.VAL_64   | N, J.ARG_67    | H, J.ARG_67    | 2.97 | 2.13 | 10.41 |
| 5VXJ.PDB | O, J.SER_85   | NH1, J.ARG_67  | HH11, J.ARG_67 | 2.90 | 2.16 | 26.24 |
| 5VXJ.PDB | OD2, J.ASP_90 | NH1, J.ARG_67  | HH12, J.ARG_67 | 2.55 | 1.74 | 16.72 |

|          |                |                |                 |      |      |       |
|----------|----------------|----------------|-----------------|------|------|-------|
| 5VXJ.PDB | OD1, J_ASP_90  | NH2, J_ARG_67  | HH22, J_ARG_67  | 2.84 | 1.98 | 5.11  |
| 5VXJ.PDB | O, J_VAL_64    | N, J_PHE_68    | H, J_PHE_68     | 2.99 | 2.15 | 10.61 |
| 5VXJ.PDB | O, J_HIS_80    | N, J_SER_71    | H, J_SER_71     | 2.98 | 2.20 | 21.12 |
| 5VXJ.PDB | O, J_ALA_32    | NH2, J_ARG_72  | HH22, J_ARG_72  | 2.52 | 1.69 | 13.12 |
| 5VXJ.PDB | O, J_THR_78    | N, J_ASP_73    | H, J_ASP_73     | 2.84 | 2.00 | 9.78  |
| 5VXJ.PDB | O, J_SER_71    | N, J_HIS_80    | H, J_HIS_80     | 2.97 | 2.18 | 20.55 |
| 5VXJ.PDB | O, J_THR_69    | N, J_GLN_82    | H, J_GLN_82     | 2.81 | 2.10 | 29.71 |
| 5VXJ.PDB | OD1, J_ASN_84  | NE2, J_GLN_82  | HE21, J_GLN_82  | 2.94 | 2.08 | 3.32  |
| 5VXJ.PDB | O, J_LEU_18    | N, J_MET_83    | H, J_MET_83     | 2.68 | 1.83 | 7.41  |
| 5VXJ.PDB | OD2, J_ASP_90  | N, J_LYS_87    | H, J_LYS_87     | 2.89 | 2.11 | 21.60 |
| 5VXJ.PDB | O, J_GLN_39    | N, J_MET_93    | H, J_MET_93     | 2.84 | 2.02 | 15.68 |
| 5VXJ.PDB | O, J_THR_113   | N, J_TYR_94    | H, J_TYR_94     | 2.95 | 2.11 | 9.77  |
| 5VXJ.PDB | O, J_ASP_90    | OH, J_TYR_94   | HH, J_TYR_94    | 2.90 | 2.08 | 7.74  |
| 5VXJ.PDB | O, J_ASN_35    | N, J_ASN_97    | H, J_ASN_97     | 2.69 | 1.93 | 22.73 |
| 5VXJ.PDB | OG1, J_THR_107 | ND2, J_ASN_97  | HD21, J_ASN_97  | 2.57 | 1.77 | 17.56 |
| 5VXJ.PDB | O, J_VAL_33    | N, J_GLY_99    | H, J_GLY_99     | 2.77 | 1.92 | 8.58  |
| 5VXJ.PDB | O, J_ARG_106   | N, J_ILE_100   | H, J_ILE_100    | 2.88 | 2.03 | 4.95  |
| 5VXJ.PDB | O, J_ARG_31    | N, J_PHE_101   | H, J_PHE_101    | 2.81 | 1.97 | 10.82 |
| 5VXJ.PDB | O, J_ALA_98    | OG1, J_THR_107 | HG1, J_THR_107  | 2.84 | 2.12 | 25.86 |
| 5VXJ.PDB | O, I_THR_217   | NE2, J_GLN_111 | HE22, J_GLN_111 | 2.92 | 2.11 | 16.33 |
| 5VXJ.PDB | OE1, J_GLU_6   | N, J_GLY_112   | H, J_GLY_112    | 2.94 | 2.09 | 6.96  |
| 5VXJ.PDB | O, J_TYR_94    | N, J_THR_113   | H, J_THR_113    | 2.80 | 1.97 | 13.72 |
| 5VXJ.PDB | OG1, J_THR_91  | N, J_VAL_117   | H, J_VAL_117    | 2.75 | 1.90 | 8.09  |
| 5VXK.PDB | O, B_SER_21    | N, B_SER_7     | H, B_SER_7      | 2.86 | 2.13 | 26.17 |
| 5VXK.PDB | O, B_GLN_13    | N, B_GLY_16    | H, B_GLY_16     | 2.95 | 2.16 | 18.88 |
| 5VXK.PDB | O, B_MET_83    | N, B_LEU_18    | H, B_LEU_18     | 2.96 | 2.15 | 15.77 |
| 5VXK.PDB | O, B_LEU_81    | N, B_LEU_20    | H, B_LEU_20     | 2.96 | 2.23 | 26.63 |
| 5VXK.PDB | O, B_VAL_79    | N, B_CYS_22    | H, B_CYS_22     | 2.62 | 1.80 | 13.05 |
| 5VXK.PDB | O, B_VAL_5     | N, B_ALA_23    | H, B_ALA_23     | 2.80 | 1.94 | 5.13  |
| 5VXK.PDB | OD1, B_ASN_77  | N, B_LEU_29    | H, B_LEU_29     | 2.87 | 2.10 | 22.34 |
| 5VXK.PDB | O, B_SER_49    | N, B_TRP_36    | H, B_TRP_36     | 2.81 | 1.99 | 12.98 |
| 5VXK.PDB | O, B_TYR_95    | N, B_PHE_37    | H, B_PHE_37     | 2.70 | 1.90 | 18.05 |
| 5VXK.PDB | O, B_GLU_46    | N, B_ARG_38    | H, B_ARG_38     | 2.93 | 2.12 | 16.27 |
| 5VXK.PDB | O, B_ARG_38    | N, B_GLU_46    | H, B_GLU_46     | 2.99 | 2.14 | 5.94  |
| 5VXK.PDB | O, B_TRP_36    | N, B_VAL_48    | H, B_VAL_48     | 2.67 | 1.86 | 15.37 |
| 5VXK.PDB | O, B_SER_59    | N, B_CYS_50    | H, B_CYS_50     | 2.88 | 2.12 | 22.90 |
| 5VXK.PDB | O, B_ILE_34    | N, B_ILE_51    | H, B_ILE_51     | 2.91 | 2.11 | 17.59 |
| 5VXK.PDB | O, B_THR_57    | N, B_SER_52    | H, B_SER_52     | 2.96 | 2.19 | 22.56 |
| 5VXK.PDB | O, B_GLN_106   | OG1, B_THR_57  | HG1, B_THR_57   | 2.72 | 2.03 | 28.93 |
| 5VXK.PDB | O, B_CYS_50    | N, B_SER_59    | H, B_SER_59     | 2.94 | 2.13 | 16.19 |
| 5VXK.PDB | O, B_VAL_48    | N, B_SER_61    | H, B_SER_61     | 2.73 | 1.90 | 12.27 |
| 5VXK.PDB | OD2, B_ASP_90  | NH2, B_ARG_67  | HH22, B_ARG_67  | 2.27 | 1.58 | 28.79 |
| 5VXK.PDB | OH, B_TYR_60   | N, B_ILE_70    | H, B_ILE_70     | 2.93 | 2.10 | 13.23 |
| 5VXK.PDB | O, B_SER_52    | NH1, B_ARG_72  | HH11, B_ARG_72  | 2.49 | 1.76 | 25.78 |
| 5VXK.PDB | O, B_ARG_78    | N, B_ASP_73    | H, B_ASP_73     | 2.58 | 1.73 | 6.46  |
| 5VXK.PDB | O, B_ASP_73    | N, B_ARG_78    | H, B_ARG_78     | 2.89 | 2.11 | 20.69 |
| 5VXK.PDB | O, B_CYS_22    | N, B_VAL_79    | H, B_VAL_79     | 2.94 | 2.14 | 17.09 |
| 5VXK.PDB | O, B_LEU_20    | N, B_LEU_81    | H, B_LEU_81     | 2.95 | 2.13 | 15.57 |
| 5VXK.PDB | O, B_THR_69    | N, B_GLN_82    | H, B_GLN_82     | 2.72 | 1.89 | 13.34 |
| 5VXK.PDB | O, B_LEU_18    | N, B_MET_83    | H, B_MET_83     | 2.84 | 2.03 | 16.84 |
| 5VXK.PDB | O, B_VAL_124   | N, B_ALA_92    | H, B_ALA_92     | 2.95 | 2.21 | 25.44 |
| 5VXK.PDB | O, B_PHE_37    | N, B_TYR_95    | H, B_TYR_95     | 2.71 | 1.89 | 14.49 |
| 5VXK.PDB | O, B_ALA_35    | N, B_ALA_97    | H, B_ALA_97     | 2.83 | 2.02 | 15.30 |
| 5VXK.PDB | O, B_VAL_117   | N, B_ALA_98    | H, B_ALA_98     | 2.99 | 2.21 | 21.08 |
| 5VXK.PDB | OD1, A_ASN_280 | N, B_SER_103   | H, B_SER_103    | 2.64 | 1.78 | 2.03  |
| 5VXK.PDB | OD1, A_ASN_280 | N, B_VAL_104   | H, B_VAL_104    | 2.84 | 2.01 | 12.48 |
| 5VXK.PDB | OG, A_SER_168  | NE2, B_GLN_106 | HE21, B_GLN_106 | 2.99 | 2.23 | 24.43 |
| 5VXK.PDB | OD2, A_ASP_287 | NE2, B_GLN_106 | HE22, B_GLN_106 | 2.77 | 1.94 | 12.81 |

|          |                |                |                 |      |      |       |
|----------|----------------|----------------|-----------------|------|------|-------|
| 5VXK.PDB | O, B_ILE_111   | ND1, B_HIS_115 | HD1, B_HIS_115  | 2.77 | 2.01 | 23.21 |
| 5VXK.PDB | O, B_GLY_113   | NE, B_ARG_116  | HE, B_ARG_116   | 2.86 | 2.06 | 17.67 |
| 5VXK.PDB | O, B_HIS_115   | NE1, B_TRP_118 | HE1, B_TRP_118  | 2.75 | 1.99 | 22.39 |
| 5VXK.PDB | OE1, B_GLU_6   | N, B_GLY_121   | H, B_GLY_121    | 2.76 | 1.92 | 11.78 |
| 5VXK.PDB | O, B_ALA_92    | N, B_VAL_124   | H, B_VAL_124    | 2.96 | 2.14 | 13.72 |
| 5VXK.PDB | OG1, B_THR_91  | N, B_VAL_126   | H, B_VAL_126    | 2.92 | 2.13 | 18.63 |
| 5VXK.PDB | O, A_LEU_44    | N, A_ASN_48    | H, A_ASN_48     | 2.73 | 1.91 | 14.91 |
| 5VXK.PDB | O, A_MET_46    | N, A_THR_50    | H, A_THR_50     | 2.82 | 1.97 | 7.12  |
| 5VXK.PDB | O, A_MET_46    | OG1, A_THR_50  | HG1, A_THR_50   | 2.68 | 1.85 | 7.57  |
| 5VXK.PDB | O, A_LEU_47    | N, A_LEU_51    | H, A_LEU_51     | 2.82 | 2.05 | 22.07 |
| 5VXK.PDB | O, A_ASP_49    | N, A_ASN_53    | H, A_ASN_53     | 2.90 | 2.05 | 9.25  |
| 5VXK.PDB | O, A_ASN_53    | OG1, A_THR_57  | HG1, A_THR_57   | 2.98 | 2.23 | 23.33 |
| 5VXK.PDB | O, A_ILE_54    | N, A_ASN_58    | H, A_ASN_58     | 2.93 | 2.11 | 14.43 |
| 5VXK.PDB | O, A_THR_56    | N, A_ALA_60    | H, A_ALA_60     | 2.98 | 2.15 | 13.11 |
| 5VXK.PDB | O, A_THR_57    | N, A_LEU_61    | H, A_LEU_61     | 2.94 | 2.13 | 16.68 |
| 5VXK.PDB | O, A_THR_71    | N, A_LEU_75    | H, A_LEU_75     | 2.95 | 2.14 | 16.00 |
| 5VXK.PDB | O, A_SER_74    | N, A_ILE_78    | H, A_ILE_78     | 2.92 | 2.06 | 5.83  |
| 5VXK.PDB | O, A_LEU_75    | N, A_ALA_79    | H, A_ALA_79     | 2.85 | 2.04 | 15.25 |
| 5VXK.PDB | O, A_GLU_77    | N, A_HIS_81    | H, A_HIS_81     | 2.98 | 2.14 | 8.61  |
| 5VXK.PDB | O, A_HIS_81    | N, A_ILE_85    | H, A_ILE_85     | 2.94 | 2.14 | 17.36 |
| 5VXK.PDB | O, A_SER_82    | N, A_SER_86    | H, A_SER_86     | 2.95 | 2.11 | 11.27 |
| 5VXK.PDB | O, A_SER_83    | N, A_MET_87    | H, A_MET_87     | 2.97 | 2.19 | 21.87 |
| 5VXK.PDB | O, A_ILE_85    | N, A_VAL_89    | H, A_VAL_89     | 2.79 | 2.01 | 20.21 |
| 5VXK.PDB | O, A_SER_86    | N, A_ASN_90    | H, A_ASN_90     | 2.99 | 2.14 | 5.84  |
| 5VXK.PDB | O, A_ASP_88    | N, A_SER_92    | H, A_SER_92     | 2.74 | 1.93 | 15.12 |
| 5VXK.PDB | O, A_ASP_88    | OG, A_SER_92   | HG, A_SER_92    | 3.00 | 2.29 | 28.37 |
| 5VXK.PDB | O, A_VAL_89    | N, A_ALA_93    | H, A_ALA_93     | 2.64 | 1.84 | 17.64 |
| 5VXK.PDB | O, A_SER_92    | N, A_LEU_96    | H, A_LEU_96     | 2.92 | 2.12 | 17.09 |
| 5VXK.PDB | O, A_LEU_96    | N, A_SER_100   | H, A_SER_100    | 2.70 | 1.93 | 21.92 |
| 5VXK.PDB | O, A_ARG_132   | OG, A_SER_100  | HG, A_SER_100   | 2.56 | 1.76 | 14.48 |
| 5VXK.PDB | O, A_ILE_98    | N, A_ASN_102   | H, A_ASN_102    | 2.91 | 2.05 | 5.88  |
| 5VXK.PDB | O, A_ILE_129   | NH1, A_ARG_111 | HH12, A_ARG_111 | 2.59 | 1.79 | 17.96 |
| 5VXK.PDB | O, A_ARG_111   | N, A_LEU_114   | H, A_LEU_114    | 2.85 | 2.05 | 18.01 |
| 5VXK.PDB | O, A_LEU_114   | N, A_ALA_117   | H, A_ALA_117    | 2.88 | 2.04 | 10.22 |
| 5VXK.PDB | O, A_TYR_104   | NE1, A_TRP_135 | HE1, A_TRP_135  | 2.54 | 1.70 | 9.79  |
| 5VXK.PDB | O, A_GLU_133   | N, A_LYS_137   | H, A_LYS_137    | 2.56 | 1.75 | 16.84 |
| 5VXK.PDB | O, A_LEU_134   | N, A_ILE_138   | H, A_ILE_138    | 2.73 | 1.96 | 22.76 |
| 5VXK.PDB | O, A_ALA_136   | N, A_ASN_140   | H, A_ASN_140    | 2.97 | 2.13 | 10.71 |
| 5VXK.PDB | O, A_ASN_140   | N, A_ASP_144   | H, A_ASP_144    | 2.65 | 1.81 | 8.85  |
| 5VXK.PDB | O, A_ASN_143   | N, A_GLU_147   | H, A_GLU_147    | 2.75 | 1.98 | 21.76 |
| 5VXK.PDB | O, A_ASP_144   | N, A_GLN_148   | H, A_GLN_148    | 2.72 | 1.87 | 4.64  |
| 5VXK.PDB | O, A_ASN_146   | N, A_LYS_151   | H, A_LYS_151    | 2.89 | 2.03 | 2.48  |
| 5VXK.PDB | O, A_LEU_150   | N, A_GLU_154   | H, A_GLU_154    | 2.80 | 1.99 | 16.19 |
| 5VXK.PDB | O, A_TYR_153   | N, A_VAL_157   | H, A_VAL_157    | 2.98 | 2.12 | 4.91  |
| 5VXK.PDB | O, A_HIS_155   | N, A_SER_159   | H, A_SER_159    | 2.74 | 1.89 | 9.23  |
| 5VXK.PDB | O, A_ALA_156   | N, A_TYR_160   | H, A_TYR_160    | 2.93 | 2.08 | 2.62  |
| 5VXK.PDB | O, A_VAL_157   | N, A_THR_161   | H, A_THR_161    | 2.80 | 1.98 | 15.42 |
| 5VXK.PDB | O, A_VAL_157   | OG1, A_THR_161 | HG1, A_THR_161  | 2.57 | 1.86 | 27.02 |
| 5VXK.PDB | O, A_SER_158   | N, A_GLN_162   | H, A_GLN_162    | 2.99 | 2.13 | 2.67  |
| 5VXK.PDB | O, A_TYR_160   | N, A_TYR_164   | H, A_TYR_164    | 2.84 | 2.00 | 11.73 |
| 5VXK.PDB | OD2, A_ASP_287 | OH, A_TYR_164  | HH, A_TYR_164   | 2.91 | 2.21 | 28.15 |
| 5VXK.PDB | O, A_THR_161   | N, A_GLN_165   | H, A_GLN_165    | 2.79 | 1.96 | 12.75 |
| 5VXK.PDB | O, A_MET_163   | N, A_PHE_167   | H, A_PHE_167    | 2.79 | 1.98 | 16.43 |
| 5VXK.PDB | O, A_TYR_164   | N, A_SER_168   | H, A_SER_168    | 2.63 | 1.79 | 8.68  |
| 5VXK.PDB | O, A_GLN_165   | N, A_ALA_169   | H, A_ALA_169    | 2.96 | 2.21 | 24.63 |
| 5VXK.PDB | O, A_SER_168   | N, A_SER_172   | H, A_SER_172    | 2.96 | 2.20 | 23.46 |
| 5VXK.PDB | O, A_LYS_189   | N, A_SER_179   | H, A_SER_179    | 2.81 | 2.06 | 25.54 |
| 5VXK.PDB | O, A_LEU_271   | N, A_VAL_188   | H, A_VAL_188    | 2.72 | 1.94 | 20.48 |



|          |                |                |                 |      |      |       |
|----------|----------------|----------------|-----------------|------|------|-------|
| 5VXK.PDB | O, A_SER_179   | N, A_LYS_189   | H, A_LYS_189    | 2.77 | 1.93 | 11.30 |
| 5VXK.PDB | O, A_VAL_269   | N, A_LEU_190   | H, A_LEU_190    | 2.98 | 2.14 | 11.69 |
| 5VXK.PDB | O, A_TRP_177   | N, A_GLN_191   | H, A_GLN_191    | 2.79 | 1.96 | 11.53 |
| 5VXK.PDB | O, A_GLN_191   | N, A_LEU_195   | H, A_LEU_195    | 2.98 | 2.12 | 0.40  |
| 5VXK.PDB | O, A_VAL_192   | N, A_LYS_196   | H, A_LYS_196    | 2.70 | 1.92 | 21.14 |
| 5VXK.PDB | OD2, A_ASP_261 | NZ, A_LYS_196  | HZ3, A_LYS_196  | 2.74 | 1.87 | 9.57  |
| 5VXK.PDB | O, A_ASN_193   | N, A_LYS_197   | H, A_LYS_197    | 2.84 | 1.99 | 8.82  |
| 5VXK.PDB | O, A_SER_194   | N, A_ALA_198   | H, A_ALA_198    | 2.95 | 2.12 | 13.78 |
| 5VXK.PDB | O, A_LYS_196   | N, A_GLU_200   | H, A_GLU_200    | 2.92 | 2.18 | 26.73 |
| 5VXK.PDB | O, A_LYS_197   | N, A_GLU_201   | H, A_GLU_201    | 2.99 | 2.17 | 14.72 |
| 5VXK.PDB | O, A_GLU_200   | N, A_GLU_204   | H, A_GLU_204    | 2.87 | 2.03 | 10.71 |
| 5VXK.PDB | O, A_VAL_246   | N, A_LEU_211   | H, A_LEU_211    | 2.69 | 1.92 | 21.70 |
| 5VXK.PDB | O, A_SER_219   | N, A_ALA_223   | H, A_ALA_223    | 2.87 | 2.01 | 6.41  |
| 5VXK.PDB | O, A_GLN_222   | N, A_TRP_226   | H, A_TRP_226    | 2.85 | 2.07 | 21.25 |
| 5VXK.PDB | O, A_ASN_224   | N, A_THR_228   | H, A_THR_228    | 2.67 | 1.85 | 13.34 |
| 5VXK.PDB | O, A_GLY_231   | N, A_THR_233   | H, A_THR_233    | 2.55 | 1.79 | 23.98 |
| 5VXK.PDB | O, A_SER_247   | N, A_LYS_236   | H, A_LYS_236    | 2.76 | 1.98 | 20.26 |
| 5VXK.PDB | O, A_VAL_245   | N, A_SER_238   | H, A_SER_238    | 2.92 | 2.13 | 19.88 |
| 5VXK.PDB | O, A_TYR_212   | N, A_VAL_246   | H, A_VAL_246    | 2.83 | 1.98 | 7.21  |
| 5VXK.PDB | O, A_LYS_236   | N, A_SER_247   | H, A_SER_247    | 2.77 | 1.95 | 15.51 |
| 5VXK.PDB | O, A_ILE_234   | N, A_ASN_249   | H, A_ASN_249    | 2.90 | 2.07 | 12.40 |
| 5VXK.PDB | OD1, A_ASN_249 | N, A_THR_251   | H, A_THR_251    | 2.95 | 2.10 | 9.19  |
| 5VXK.PDB | O, A_MET_250   | N, A_ASP_254   | H, A_ASP_254    | 2.78 | 1.96 | 13.63 |
| 5VXK.PDB | O, A_THR_251   | N, A_ASN_255   | H, A_ASN_255    | 2.70 | 1.89 | 17.04 |
| 5VXK.PDB | O, A_ASP_254   | N, A_LYS_258   | H, A_LYS_258    | 2.95 | 2.18 | 22.11 |
| 5VXK.PDB | O, A_ASN_255   | N, A_SER_259   | H, A_SER_259    | 2.99 | 2.21 | 21.36 |
| 5VXK.PDB | O, A_MET_256   | OG, A_SER_259  | HG, A_SER_259   | 2.72 | 1.88 | 2.53  |
| 5VXK.PDB | O, A_LEU_257   | N, A_ASP_261   | H, A_ASP_261    | 2.96 | 2.15 | 15.35 |
| 5VXK.PDB | O, A_LYS_258   | N, A_ASN_262   | H, A_ASN_262    | 3.00 | 2.20 | 18.58 |
| 5VXK.PDB | O, A_VAL_188   | N, A_LEU_271   | H, A_LEU_271    | 2.82 | 1.97 | 7.95  |
| 5VXK.PDB | O, A_ASN_186   | N, A_ASN_273   | H, A_ASN_273    | 2.88 | 2.14 | 26.01 |
| 5VXK.PDB | O, A_ASP_272   | N, A_TYR_276   | H, A_TYR_276    | 2.84 | 2.01 | 12.24 |
| 5VXK.PDB | OG1, B_THR_102 | OH, A_TYR_276  | HH, A_TYR_276   | 2.57 | 1.73 | 6.50  |
| 5VXK.PDB | O, A_ASN_273   | N, A_GLN_277   | H, A_GLN_277    | 2.84 | 2.02 | 14.45 |
| 5VXK.PDB | O, A_LYS_275   | N, A_TRP_279   | H, A_TRP_279    | 2.92 | 2.06 | 3.36  |
| 5VXK.PDB | O, A_TYR_276   | N, A_ASN_280   | H, A_ASN_280    | 2.71 | 1.86 | 7.15  |
| 5VXK.PDB | O, A_GLN_277   | N, A_ALA_281   | H, A_ALA_281    | 2.91 | 2.11 | 18.24 |
| 5VXK.PDB | O, A_ALA_281   | N, A_ALA_285   | H, A_ALA_285    | 2.89 | 2.13 | 23.89 |
| 5VXK.PDB | O, A_ASP_287   | N, A_LYS_291   | H, A_LYS_291    | 2.81 | 1.95 | 4.20  |
| 5VXK.PDB | O, A_GLU_288   | N, A_ASN_292   | H, A_ASN_292    | 2.77 | 1.96 | 17.31 |
| 5VXK.PDB | O, A_THR_289   | N, A_ASN_293   | H, A_ASN_293    | 2.79 | 1.96 | 12.40 |
| 5VXK.PDB | OH, A_TYR_160  | ND2, A_ASN_293 | HD22, A_ASN_293 | 2.77 | 1.97 | 18.05 |
| 5VXK.PDB | O, A_MET_290   | N, A_LEU_294   | H, A_LEU_294    | 2.88 | 2.05 | 13.48 |
| 5VXK.PDB | O, A_ASN_292   | N, A_THR_296   | H, A_THR_296    | 2.98 | 2.19 | 19.74 |
| 5VXK.PDB | O, A_LEU_294   | N, A_VAL_298   | H, A_VAL_298    | 2.93 | 2.09 | 11.47 |
| 5VXK.PDB | O, A_GLN_295   | N, A_GLN_299   | H, A_GLN_299    | 2.92 | 2.19 | 26.68 |
| 5VXK.PDB | O, A_THR_296   | N, A_LYS_300   | H, A_LYS_300    | 2.95 | 2.12 | 13.38 |
| 5VXK.PDB | O, A_LEU_297   | N, A_TYR_301   | H, A_TYR_301    | 2.89 | 2.06 | 12.10 |
| 5VXK.PDB | O, A_VAL_298   | N, A_SER_302   | H, A_SER_302    | 2.77 | 1.95 | 14.37 |
| 5VXK.PDB | O, A_GLN_299   | N, A_ASN_303   | H, A_ASN_303    | 2.69 | 1.84 | 7.73  |
| 5VXK.PDB | O, A_ALA_304   | N, A_PHE_308   | H, A_PHE_308    | 2.91 | 2.07 | 9.74  |
| 5VXK.PDB | O, A_ASN_305   | N, A_ASP_309   | H, A_ASP_309    | 2.69 | 1.83 | 5.55  |
| 5VXK.PDB | O, A_SER_306   | N, A_ASN_310   | H, A_ASN_310    | 2.96 | 2.11 | 5.89  |
| 5VXK.PDB | O, A_PHE_308   | N, A_VAL_312   | H, A_VAL_312    | 2.89 | 2.04 | 4.79  |
| 5VXK.PDB | O, A_ASP_309   | N, A_LYS_313   | H, A_LYS_313    | 2.99 | 2.14 | 4.76  |
| 5VXK.PDB | O, A_LEU_311   | N, A_LEU_315   | H, A_LEU_315    | 2.77 | 1.95 | 15.34 |
| 5VXK.PDB | O, A_VAL_312   | N, A_SER_316   | H, A_SER_316    | 2.86 | 2.04 | 13.60 |
| 5VXK.PDB | O, A_VAL_314   | N, A_THR_318   | H, A_THR_318    | 2.93 | 2.12 | 16.50 |

|          |                |                |                 |      |      |       |
|----------|----------------|----------------|-----------------|------|------|-------|
| 5VXK.PDB | O, A_LEU_315   | N, A_ILE_319   | H, A_ILE_319    | 2.77 | 1.92 | 6.38  |
| 5VXK.PDB | O, A_SER_316   | N, A_SER_320   | H, A_SER_320    | 2.83 | 1.98 | 7.77  |
| 5VXK.PDB | O, A_SER_316   | OG, A_SER_320  | HG, A_SER_320   | 2.92 | 2.19 | 24.37 |
| 5VXK.PDB | O, A_SER_317   | OG, A_SER_321  | HG, A_SER_321   | 2.91 | 2.13 | 18.92 |
| 5VXL.PDB | O, A_SER_42    | N, A_MET_46    | H, A_MET_46     | 2.87 | 2.01 | 3.50  |
| 5VXL.PDB | O, A_LEU_44    | N, A_ASN_48    | H, A_ASN_48     | 2.76 | 1.92 | 10.16 |
| 5VXL.PDB | O, A_THR_45    | N, A_ASP_49    | H, A_ASP_49     | 2.99 | 2.15 | 12.53 |
| 5VXL.PDB | O, A_MET_46    | OG1, A_THR_50  | HG1, A_THR_50   | 2.62 | 1.82 | 14.28 |
| 5VXL.PDB | O, A_LEU_47    | N, A_LEU_51    | H, A_LEU_51     | 2.90 | 2.10 | 17.57 |
| 5VXL.PDB | O, A_HIS_52    | N, A_THR_56    | H, A_THR_56     | 2.90 | 2.15 | 24.51 |
| 5VXL.PDB | O, A_ILE_54    | N, A_ASN_58    | H, A_ASN_58     | 2.71 | 1.88 | 13.56 |
| 5VXL.PDB | OD1, A_ASP_309 | ND2, A_ASN_58  | HD22, A_ASN_58  | 2.92 | 2.09 | 13.70 |
| 5VXL.PDB | O, A_THR_57    | N, A_LEU_61    | H, A_LEU_61     | 2.89 | 2.12 | 22.63 |
| 5VXL.PDB | O, A_THR_73    | N, A_GLU_77    | H, A_GLU_77     | 2.82 | 2.00 | 14.04 |
| 5VXL.PDB | O, A_SER_74    | N, A_ILE_78    | H, A_ILE_78     | 2.96 | 2.13 | 11.95 |
| 5VXL.PDB | OE1, A_GLU_154 | OG, A_SER_82   | HG, A_SER_82    | 2.52 | 1.77 | 21.68 |
| 5VXL.PDB | O, A_ALA_79    | N, A_SER_83    | H, A_SER_83     | 2.92 | 2.10 | 15.30 |
| 5VXL.PDB | O, A_LEU_80    | N, A_GLN_84    | H, A_GLN_84     | 2.91 | 2.12 | 19.31 |
| 5VXL.PDB | OD2, A_ASP_88  | NE2, A_GLN_84  | HE21, A_GLN_84  | 2.89 | 2.16 | 27.92 |
| 5VXL.PDB | O, A_HIS_81    | N, A_ILE_85    | H, A_ILE_85     | 2.85 | 2.01 | 10.10 |
| 5VXL.PDB | O, A_SER_82    | N, A_SER_86    | H, A_SER_86     | 2.94 | 2.14 | 18.49 |
| 5VXL.PDB | O, A_SER_82    | OG, A_SER_86   | HG, A_SER_86    | 2.79 | 1.98 | 12.76 |
| 5VXL.PDB | O, A_GLN_84    | N, A_ASP_88    | H, A_ASP_88     | 2.93 | 2.10 | 13.48 |
| 5VXL.PDB | O, A_ILE_85    | N, A_VAL_89    | H, A_VAL_89     | 2.78 | 1.95 | 11.84 |
| 5VXL.PDB | O, A_ASP_88    | N, A_SER_92    | H, A_SER_92     | 2.92 | 2.08 | 10.89 |
| 5VXL.PDB | O, A_ASP_88    | OG, A_SER_92   | HG, A_SER_92    | 2.87 | 2.05 | 11.00 |
| 5VXL.PDB | O, A_VAL_89    | N, A_ALA_93    | H, A_ALA_93     | 2.95 | 2.11 | 11.37 |
| 5VXL.PDB | O, A_LYS_91    | N, A_LEU_95    | H, A_LEU_95     | 2.97 | 2.17 | 17.92 |
| 5VXL.PDB | O, A_SER_92    | N, A_LEU_96    | H, A_LEU_96     | 2.63 | 1.78 | 7.72  |
| 5VXL.PDB | O, A_ALA_93    | N, A_ASP_97    | H, A_ASP_97     | 2.67 | 1.89 | 19.80 |
| 5VXL.PDB | O, A_SER_100   | N, A_GLU_103   | H, A_GLU_103    | 2.79 | 2.00 | 19.85 |
| 5VXL.PDB | O, A_PRO_118   | N, A_ALA_121   | H, A_ALA_121    | 2.84 | 2.03 | 15.32 |
| 5VXL.PDB | O, A_TYR_104   | NE1, A_TRP_135 | HE1, A_TRP_135  | 2.90 | 2.05 | 6.79  |
| 5VXL.PDB | O, A_GLU_133   | N, A_LYS_137   | H, A_LYS_137    | 2.91 | 2.15 | 23.30 |
| 5VXL.PDB | O, A_ALA_136   | ND2, A_ASN_140 | HD22, A_ASN_140 | 2.52 | 1.69 | 13.57 |
| 5VXL.PDB | O, A_ILE_138   | N, A_ILE_142   | H, A_ILE_142    | 2.68 | 1.84 | 10.96 |
| 5VXL.PDB | O, A_ASN_140   | N, A_ASP_144   | H, A_ASP_144    | 2.65 | 1.82 | 12.29 |
| 5VXL.PDB | O, A_SER_141   | N, A_ILE_145   | H, A_ILE_145    | 2.85 | 2.02 | 11.93 |
| 5VXL.PDB | O, A_ILE_145   | N, A_LEU_150   | H, A_LEU_150    | 2.86 | 2.08 | 21.09 |
| 5VXL.PDB | O, A_ASN_146   | N, A_LYS_151   | H, A_LYS_151    | 2.72 | 1.87 | 8.33  |
| 5VXL.PDB | O, A_TYR_153   | N, A_VAL_157   | H, A_VAL_157    | 2.99 | 2.14 | 9.15  |
| 5VXL.PDB | O, A_HIS_155   | OG, A_SER_158  | HG, A_SER_158   | 2.93 | 2.15 | 19.18 |
| 5VXL.PDB | O, A_HIS_155   | N, A_SER_159   | H, A_SER_159    | 2.66 | 1.80 | 3.85  |
| 5VXL.PDB | O, A_HIS_155   | OG, A_SER_159  | HG, A_SER_159   | 2.90 | 2.17 | 24.99 |
| 5VXL.PDB | O, A_ALA_156   | N, A_TYR_160   | H, A_TYR_160    | 2.93 | 2.09 | 8.00  |
| 5VXL.PDB | O, A_VAL_157   | N, A_THR_161   | H, A_THR_161    | 2.60 | 1.78 | 15.33 |
| 5VXL.PDB | O, A_VAL_157   | OG1, A_THR_161 | HG1, A_THR_161  | 2.46 | 1.70 | 20.64 |
| 5VXL.PDB | O, A_SER_158   | N, A_GLN_162   | H, A_GLN_162    | 2.84 | 1.98 | 1.63  |
| 5VXL.PDB | O, A_TYR_160   | N, A_TYR_164   | H, A_TYR_164    | 2.84 | 2.00 | 8.81  |
| 5VXL.PDB | O, A_THR_161   | N, A_GLN_165   | H, A_GLN_165    | 2.72 | 1.90 | 14.74 |
| 5VXL.PDB | O, A_TYR_164   | N, A_SER_168   | H, A_SER_168    | 2.87 | 2.04 | 11.91 |
| 5VXL.PDB | O, A_TYR_164   | OG, A_SER_168  | HG, A_SER_168   | 2.96 | 2.15 | 13.58 |
| 5VXL.PDB | O, A_PHE_167   | N, A_LEU_171   | H, A_LEU_171    | 2.92 | 2.16 | 23.19 |
| 5VXL.PDB | O, A_SER_168   | N, A_SER_172   | H, A_SER_172    | 2.92 | 2.12 | 18.79 |
| 5VXL.PDB | O, A_LYS_189   | N, A_SER_179   | H, A_SER_179    | 2.93 | 2.11 | 16.24 |
| 5VXL.PDB | O, A_SER_187   | N, A_GLY_181   | H, A_GLY_181    | 2.88 | 2.06 | 15.19 |
| 5VXL.PDB | O, A_SER_179   | N, A_LYS_189   | H, A_LYS_189    | 2.63 | 1.86 | 21.36 |
| 5VXL.PDB | O, A_VAL_269   | N, A_LEU_190   | H, A_LEU_190    | 2.66 | 1.92 | 26.28 |

|          |                |                |                 |      |      |       |
|----------|----------------|----------------|-----------------|------|------|-------|
| 5VXL.PDB | O, A_TRP_177   | N, A_GLN_191   | H, A_GLN_191    | 2.89 | 2.06 | 12.45 |
| 5VXL.PDB | O, A_VAL_192   | N, A_LYS_196   | H, A_LYS_196    | 2.82 | 1.98 | 9.06  |
| 5VXL.PDB | O, A_ASN_193   | N, A_LYS_197   | H, A_LYS_197    | 2.99 | 2.13 | 1.38  |
| 5VXL.PDB | O, A_LEU_195   | N, A_LEU_199   | H, A_LEU_199    | 2.96 | 2.13 | 13.84 |
| 5VXL.PDB | O, A_LYS_196   | N, A_GLU_200   | H, A_GLU_200    | 2.68 | 1.83 | 8.42  |
| 5VXL.PDB | O, A_LYS_197   | N, A_GLU_201   | H, A_GLU_201    | 2.99 | 2.18 | 15.98 |
| 5VXL.PDB | OD1, A_ASP_254 | NZ, A_LYS_203  | HZ3, A_LYS_203  | 2.55 | 1.71 | 15.49 |
| 5VXL.PDB | O, A_GLU_201   | N, A_LYS_205   | H, A_LYS_205    | 2.94 | 2.16 | 21.06 |
| 5VXL.PDB | OD2, B_ASP_52  | NZ, A_LYS_205  | HZ1, A_LYS_205  | 3.00 | 2.13 | 10.69 |
| 5VXL.PDB | OD2, A_ASP_166 | OH, A_TYR_206  | HH, A_TYR_206   | 2.43 | 1.61 | 11.33 |
| 5VXL.PDB | O, A_SER_219   | N, A_ALA_223   | H, A_ALA_223    | 2.65 | 1.81 | 10.36 |
| 5VXL.PDB | O, A_GLN_220   | N, A_ASN_224   | H, A_ASN_224    | 2.69 | 1.83 | 3.86  |
| 5VXL.PDB | OE1, A_GLN_148 | NE1, A_TRP_226 | HE1, A_TRP_226  | 2.87 | 2.02 | 9.28  |
| 5VXL.PDB | O, A_ALA_223   | N, A_LEU_227   | H, A_LEU_227    | 2.81 | 2.00 | 17.07 |
| 5VXL.PDB | O, A_TRP_226   | N, A_LEU_230   | H, A_LEU_230    | 2.94 | 2.11 | 10.97 |
| 5VXL.PDB | O, A_LEU_227   | N, A_GLY_231   | H, A_GLY_231    | 2.69 | 1.85 | 9.90  |
| 5VXL.PDB | O, A_GLY_243   | N, A_LYS_240   | H, A_LYS_240    | 2.98 | 2.14 | 10.92 |
| 5VXL.PDB | O, A_VAL_218   | N, A_TYR_244   | H, A_TYR_244    | 2.96 | 2.11 | 6.92  |
| 5VXL.PDB | O, A_SER_238   | N, A_VAL_245   | H, A_VAL_245    | 2.99 | 2.26 | 27.20 |
| 5VXL.PDB | O, A_TYR_212   | N, A_VAL_246   | H, A_VAL_246    | 2.52 | 1.74 | 20.61 |
| 5VXL.PDB | O, A_ILE_234   | N, A_ASN_249   | H, A_ASN_249    | 2.93 | 2.09 | 9.83  |
| 5VXL.PDB | OD1, A_ASN_249 | N, A_THR_251   | H, A_THR_251    | 2.75 | 1.91 | 9.14  |
| 5VXL.PDB | O, A_MET_250   | N, A_ASP_254   | H, A_ASP_254    | 2.85 | 2.02 | 11.68 |
| 5VXL.PDB | O, A_THR_251   | N, A_ASN_255   | H, A_ASN_255    | 2.77 | 1.94 | 13.53 |
| 5VXL.PDB | OE2, A_GLU_286 | ND2, A_ASN_255 | HD22, A_ASN_255 | 2.74 | 1.94 | 17.54 |
| 5VXL.PDB | O, A_ILE_253   | N, A_LEU_257   | H, A_LEU_257    | 2.98 | 2.15 | 14.50 |
| 5VXL.PDB | O, A_ASP_254   | N, A_LYS_258   | H, A_LYS_258    | 2.99 | 2.17 | 14.91 |
| 5VXL.PDB | O, A_ASN_255   | N, A_SER_259   | H, A_SER_259    | 2.97 | 2.14 | 13.88 |
| 5VXL.PDB | O, A_MET_256   | N, A_LEU_260   | H, A_LEU_260    | 2.88 | 2.07 | 16.61 |
| 5VXL.PDB | O, A_LEU_257   | N, A_ASP_261   | H, A_ASP_261    | 2.97 | 2.13 | 9.61  |
| 5VXL.PDB | O, A_LEU_260   | N, A_LEU_263   | H, A_LEU_263    | 2.99 | 2.27 | 28.32 |
| 5VXL.PDB | O, A_LEU_190   | N, A_VAL_269   | H, A_VAL_269    | 2.90 | 2.08 | 13.99 |
| 5VXL.PDB | O, A_VAL_188   | N, A_LEU_271   | H, A_LEU_271    | 2.85 | 2.02 | 11.38 |
| 5VXL.PDB | OD1, A_ASP_272 | N, A_ASN_273   | H, A_ASN_273    | 2.65 | 1.95 | 29.16 |
| 5VXL.PDB | O, A_TYR_276   | N, A_ASN_280   | H, A_ASN_280    | 2.86 | 2.01 | 4.96  |
| 5VXL.PDB | O, A_TRP_279   | N, A_PHE_283   | H, A_PHE_283    | 2.89 | 2.08 | 16.09 |
| 5VXL.PDB | O, A_ASN_280   | N, A_SER_284   | H, A_SER_284    | 2.73 | 1.94 | 20.02 |
| 5VXL.PDB | O, A_ASN_280   | OG, A_SER_284  | HG, A_SER_284   | 2.71 | 1.94 | 20.16 |
| 5VXL.PDB | O, A_ALA_281   | N, A_ALA_285   | H, A_ALA_285    | 2.78 | 2.01 | 22.25 |
| 5VXL.PDB | O, A_ALA_285   | N, A_THR_289   | H, A_THR_289    | 2.98 | 2.16 | 14.81 |
| 5VXL.PDB | O, A_ASP_287   | N, A_LYS_291   | H, A_LYS_291    | 2.89 | 2.06 | 14.03 |
| 5VXL.PDB | O, A_GLU_288   | N, A_ASN_292   | H, A_ASN_292    | 2.65 | 1.85 | 17.95 |
| 5VXL.PDB | O, A_THR_289   | N, A_ASN_293   | H, A_ASN_293    | 2.72 | 1.88 | 9.66  |
| 5VXL.PDB | O, A_MET_290   | N, A_LEU_294   | H, A_LEU_294    | 2.92 | 2.12 | 18.98 |
| 5VXL.PDB | O, A_ASN_292   | N, A_THR_296   | H, A_THR_296    | 2.80 | 2.02 | 20.58 |
| 5VXL.PDB | O, A_ASN_292   | OG1, A_THR_296 | HG1, A_THR_296  | 2.92 | 2.11 | 12.62 |
| 5VXL.PDB | O, A_LEU_294   | N, A_VAL_298   | H, A_VAL_298    | 2.97 | 2.14 | 12.75 |
| 5VXL.PDB | O, A_THR_296   | N, A_LYS_300   | H, A_LYS_300    | 2.96 | 2.11 | 7.04  |
| 5VXL.PDB | O, A_LEU_297   | N, A_TYR_301   | H, A_TYR_301    | 2.75 | 2.04 | 28.78 |
| 5VXL.PDB | O, A_VAL_298   | N, A_SER_302   | H, A_SER_302    | 2.75 | 1.91 | 8.45  |
| 5VXL.PDB | O, A_GLN_299   | N, A_ASN_303   | H, A_ASN_303    | 2.84 | 2.01 | 12.17 |
| 5VXL.PDB | O, A_TYR_301   | N, A_ASN_305   | H, A_ASN_305    | 2.82 | 2.10 | 28.03 |
| 5VXL.PDB | O, A_SER_302   | N, A_SER_306   | H, A_SER_306    | 2.92 | 2.14 | 21.23 |
| 5VXL.PDB | O, A_ASN_303   | N, A_ILE_307   | H, A_ILE_307    | 2.92 | 2.13 | 18.78 |
| 5VXL.PDB | O, A_ASN_305   | N, A_ASP_309   | H, A_ASP_309    | 2.71 | 1.93 | 21.31 |
| 5VXL.PDB | O, A_ILE_307   | N, A_LEU_311   | H, A_LEU_311    | 2.89 | 2.07 | 14.43 |
| 5VXL.PDB | O, A_ASP_309   | N, A_LYS_313   | H, A_LYS_313    | 2.80 | 1.99 | 16.36 |
| 5VXL.PDB | O, A_ASN_310   | N, A_VAL_314   | H, A_VAL_314    | 2.86 | 2.01 | 5.31  |

|          |                |                |                 |      |      |       |
|----------|----------------|----------------|-----------------|------|------|-------|
| 5VXL.PDB | O, A_VAL_312   | N, A_SER_316   | H, A_SER_316    | 2.63 | 1.77 | 5.33  |
| 5VXL.PDB | O, A_VAL_314   | OG1, A_THR_318 | HG1, A_THR_318  | 2.55 | 1.72 | 7.64  |
| 5VXL.PDB | O, B_SER_25    | N, B_GLN_3     | H, B_GLN_3      | 2.70 | 1.85 | 6.65  |
| 5VXL.PDB | O, B_SER_21    | N, B_SER_7     | H, B_SER_7      | 2.62 | 1.81 | 16.40 |
| 5VXL.PDB | O, B_THR_114   | N, B_VAL_12    | H, B_VAL_12     | 2.86 | 2.04 | 13.69 |
| 5VXL.PDB | O, B_LEU_87    | N, B_GLY_15    | H, B_GLY_15     | 2.66 | 1.82 | 8.14  |
| 5VXL.PDB | O, B_GLN_13    | N, B_GLY_16    | H, B_GLY_16     | 2.79 | 1.96 | 12.54 |
| 5VXL.PDB | O, B_MET_84    | N, B_LEU_18    | H, B_LEU_18     | 2.84 | 2.08 | 22.47 |
| 5VXL.PDB | O, B_LEU_18    | NH1, B_ARG_19  | HH11, B_ARG_19  | 2.76 | 1.99 | 23.14 |
| 5VXL.PDB | O, B_SER_7     | N, B_SER_21    | H, B_SER_21     | 2.79 | 1.97 | 15.64 |
| 5VXL.PDB | O, B_VAL_80    | N, B_CYS_22    | H, B_CYS_22     | 2.67 | 1.84 | 12.31 |
| 5VXL.PDB | O, B_GLN_3     | N, B_SER_25    | H, B_SER_25     | 2.94 | 2.16 | 21.35 |
| 5VXL.PDB | O, B_ILE_51    | N, B_MET_34    | H, B_MET_34     | 2.85 | 2.13 | 28.16 |
| 5VXL.PDB | O, B_ASN_98    | N, B_GLY_35    | H, B_GLY_35     | 2.93 | 2.19 | 27.03 |
| 5VXL.PDB | O, B_TYR_96    | N, B_TYR_37    | H, B_TYR_37     | 2.76 | 1.92 | 10.99 |
| 5VXL.PDB | O, B_GLU_46    | N, B_ARG_38    | H, B_ARG_38     | 2.91 | 2.11 | 17.69 |
| 5VXL.PDB | OD1, B_ASP_91  | NH1, B_ARG_38  | HH12, B_ARG_38  | 2.97 | 2.23 | 26.01 |
| 5VXL.PDB | O, B_MET_34    | N, B_ILE_51    | H, B_ILE_51     | 2.82 | 1.98 | 9.96  |
| 5VXL.PDB | O, B_ILE_30    | N, B_TYR_54    | H, B_TYR_54     | 2.87 | 2.10 | 22.14 |
| 5VXL.PDB | O, A_ALA_198   | OH, B_TYR_54   | HH, B_TYR_54    | 2.38 | 1.67 | 27.03 |
| 5VXL.PDB | OD1, A_ASP_166 | N, B_SER_55    | H, B_SER_55     | 2.91 | 2.18 | 28.04 |
| 5VXL.PDB | OD1, A_ASP_166 | OG, B_SER_55   | HG, B_SER_55    | 2.56 | 1.73 | 4.68  |
| 5VXL.PDB | O, B_ALA_62    | N, B_VAL_65    | H, B_VAL_65     | 2.93 | 2.21 | 29.05 |
| 5VXL.PDB | OD2, B_ASP_91  | NH1, B_ARG_68  | HH12, B_ARG_68  | 2.83 | 2.06 | 22.74 |
| 5VXL.PDB | O, B_SER_64    | NH2, B_ARG_68  | HH21, B_ARG_68  | 2.89 | 2.07 | 15.16 |
| 5VXL.PDB | OD1, B_ASN_75  | NE, B_ARG_73   | HE, B_ARG_73    | 2.98 | 2.26 | 28.00 |
| 5VXL.PDB | O, B_TYR_32    | NH1, B_ARG_73  | HH12, B_ARG_73  | 2.99 | 2.21 | 21.42 |
| 5VXL.PDB | O, B_ARG_79    | N, B_ASP_74    | H, B_ASP_74     | 2.83 | 1.98 | 9.00  |
| 5VXL.PDB | OH, B_TYR_81   | NE, B_ARG_79   | HE, B_ARG_79    | 2.96 | 2.14 | 13.15 |
| 5VXL.PDB | O, B_CYS_22    | N, B_VAL_80    | H, B_VAL_80     | 2.66 | 1.84 | 14.02 |
| 5VXL.PDB | O, B_SER_72    | N, B_TYR_81    | H, B_TYR_81     | 2.82 | 1.97 | 3.12  |
| 5VXL.PDB | O, B_LEU_20    | N, B_LEU_82    | H, B_LEU_82     | 2.80 | 2.00 | 19.11 |
| 5VXL.PDB | O, B_LEU_18    | N, B_MET_84    | H, B_MET_84     | 2.92 | 2.06 | 5.88  |
| 5VXL.PDB | O, B_ARG_68    | N, B_ASN_85    | H, B_ASN_85     | 2.99 | 2.16 | 13.78 |
| 5VXL.PDB | O, B_GLY_16    | N, B_LEU_87    | H, B_LEU_87     | 2.89 | 2.07 | 14.28 |
| 5VXL.PDB | OD2, B_ASP_91  | N, B_LYS_88    | H, B_LYS_88     | 2.92 | 2.07 | 3.13  |
| 5VXL.PDB | O, B_LYS_88    | N, B_ASP_91    | H, B_ASP_91     | 2.90 | 2.09 | 15.76 |
| 5VXL.PDB | O, B_PRO_89    | N, B_THR_92    | H, B_THR_92     | 2.97 | 2.23 | 25.58 |
| 5VXL.PDB | O, B_VAL_113   | N, B_ALA_93    | H, B_ALA_93     | 2.99 | 2.24 | 25.85 |
| 5VXL.PDB | O, B_THR_111   | N, B_TYR_95    | H, B_TYR_95     | 2.79 | 2.00 | 19.66 |
| 5VXL.PDB | O, B_ASP_91    | OH, B_TYR_95   | HH, B_TYR_95    | 2.70 | 1.86 | 0.59  |
| 5VXL.PDB | O, B_TYR_37    | N, B_TYR_96    | H, B_TYR_96     | 2.76 | 2.02 | 25.56 |
| 5VXL.PDB | OE2, B_GLU_6   | N, B_CYS_97    | H, B_CYS_97     | 2.88 | 2.07 | 15.37 |
| 5VXL.PDB | O, B_GLY_35    | N, B_ASN_98    | H, B_ASN_98     | 2.73 | 1.91 | 13.08 |
| 5VXL.PDB | O, B_TYR_106   | N, B_ALA_99    | H, B_ALA_99     | 2.92 | 2.09 | 12.87 |
| 5VXL.PDB | O, B_ASN_33    | N, B_ASN_100   | H, B_ASN_100    | 2.79 | 2.01 | 20.69 |
| 5VXL.PDB | O, B_ASN_104   | N, B_LEU_101   | H, B_LEU_101    | 2.93 | 2.12 | 16.88 |
| 5VXL.PDB | OE2, A_GLU_201 | NH2, B_ARG_102 | HH22, B_ARG_102 | 2.87 | 2.08 | 20.03 |
| 5VXL.PDB | O, B_LEU_101   | N, B_ASN_104   | H, B_ASN_104    | 2.99 | 2.18 | 16.70 |
| 5VXL.PDB | O, B_ALA_99    | N, B_TYR_106   | H, B_TYR_106    | 2.85 | 2.08 | 22.40 |
| 5VXL.PDB | OE1, B_GLU_6   | N, B_GLY_110   | H, B_GLY_110    | 2.56 | 1.79 | 21.05 |
| 5VXL.PDB | O, B_ALA_93    | N, B_VAL_113   | H, B_VAL_113    | 2.86 | 2.05 | 16.79 |
| 5VXM.PDB | O, A_SER_43    | N, A_LEU_47    | H, A_LEU_47     | 2.98 | 2.17 | 15.99 |
| 5VXM.PDB | O, A_THR_45    | N, A_ASP_49    | H, A_ASP_49     | 2.87 | 2.12 | 24.84 |
| 5VXM.PDB | O, A_LEU_47    | N, A_LEU_51    | H, A_LEU_51     | 2.78 | 1.93 | 8.20  |
| 5VXM.PDB | O, A_ASN_48    | N, A_HIS_52    | H, A_HIS_52     | 2.97 | 2.22 | 25.09 |
| 5VXM.PDB | O, A_HIS_52    | OG1, A_THR_56  | HG1, A_THR_56   | 2.93 | 2.14 | 17.08 |
| 5VXM.PDB | O, A_ILE_54    | N, A_ASN_58    | H, A_ASN_58     | 2.67 | 1.83 | 11.82 |

|          |                |                |                 |      |      |       |
|----------|----------------|----------------|-----------------|------|------|-------|
| 5VXM.PDB | OD1, A_ASP_309 | ND2, A_ASN_58  | HD22, A_ASN_58  | 2.74 | 1.89 | 5.63  |
| 5VXM.PDB | O, A_ARG_55    | N, A_GLN_59    | H, A_GLN_59     | 2.87 | 2.11 | 23.42 |
| 5VXM.PDB | O, A_THR_57    | N, A_LEU_61    | H, A_LEU_61     | 2.81 | 1.96 | 8.36  |
| 5VXM.PDB | O, A_ASN_58    | N, A_LYS_62    | H, A_LYS_62     | 2.92 | 2.12 | 18.24 |
| 5VXM.PDB | O, A_LYS_63    | OG, A_SER_66   | HG, A_SER_66    | 2.80 | 2.08 | 26.74 |
| 5VXM.PDB | O, A_THR_71    | N, A_LEU_75    | H, A_LEU_75     | 2.95 | 2.16 | 20.11 |
| 5VXM.PDB | O, A_SER_74    | N, A_ILE_78    | H, A_ILE_78     | 2.99 | 2.18 | 16.60 |
| 5VXM.PDB | O, A_LEU_75    | N, A_ALA_79    | H, A_ALA_79     | 2.89 | 2.06 | 11.29 |
| 5VXM.PDB | O, A_ILE_78    | N, A_SER_82    | H, A_SER_82     | 2.98 | 2.13 | 10.08 |
| 5VXM.PDB | O, A_ILE_78    | OG, A_SER_82   | HG, A_SER_82    | 2.83 | 2.02 | 14.46 |
| 5VXM.PDB | O, A_ALA_79    | N, A_SER_83    | H, A_SER_83     | 2.84 | 2.05 | 18.67 |
| 5VXM.PDB | O, A_LEU_80    | N, A_GLN_84    | H, A_GLN_84     | 2.64 | 1.80 | 8.82  |
| 5VXM.PDB | OD1, A_ASP_88  | NE2, A_GLN_84  | HE21, A_GLN_84  | 2.60 | 1.75 | 9.62  |
| 5VXM.PDB | O, A_HIS_81    | N, A_ILE_85    | H, A_ILE_85     | 2.65 | 1.82 | 12.85 |
| 5VXM.PDB | O, A_SER_82    | OG, A_SER_86   | HG, A_SER_86    | 2.97 | 2.14 | 6.66  |
| 5VXM.PDB | O, A_ILE_85    | N, A_VAL_89    | H, A_VAL_89     | 2.86 | 2.05 | 15.94 |
| 5VXM.PDB | O, A_MET_87    | N, A_LYS_91    | H, A_LYS_91     | 2.99 | 2.19 | 17.82 |
| 5VXM.PDB | O, A_ASP_88    | N, A_SER_92    | H, A_SER_92     | 2.77 | 1.94 | 12.57 |
| 5VXM.PDB | O, A_ILE_145   | N, A_LEU_150   | H, A_LEU_150    | 2.92 | 2.12 | 18.38 |
| 5VXM.PDB | O, A_ASN_146   | N, A_LYS_151   | H, A_LYS_151    | 2.86 | 2.02 | 9.54  |
| 5VXM.PDB | O, A_LEU_150   | N, A_GLU_154   | H, A_GLU_154    | 2.97 | 2.16 | 16.91 |
| 5VXM.PDB | O, A_VAL_152   | N, A_ALA_156   | H, A_ALA_156    | 2.98 | 2.13 | 8.33  |
| 5VXM.PDB | O, A_TYR_153   | N, A_VAL_157   | H, A_VAL_157    | 2.93 | 2.11 | 15.35 |
| 5VXM.PDB | O, A_GLU_154   | N, A_SER_158   | H, A_SER_158    | 2.98 | 2.18 | 17.97 |
| 5VXM.PDB | O, A_HIS_155   | N, A_SER_159   | H, A_SER_159    | 2.95 | 2.10 | 8.74  |
| 5VXM.PDB | O, A_VAL_157   | N, A_THR_161   | H, A_THR_161    | 2.89 | 2.06 | 13.47 |
| 5VXM.PDB | O, A_VAL_157   | OG1, A_THR_161 | HG1, A_THR_161  | 2.43 | 1.69 | 23.26 |
| 5VXM.PDB | O, A_SER_158   | N, A_GLN_162   | H, A_GLN_162    | 2.97 | 2.13 | 9.45  |
| 5VXM.PDB | O, A_SER_159   | N, A_MET_163   | H, A_MET_163    | 2.98 | 2.14 | 9.28  |
| 5VXM.PDB | O, A_TYR_160   | N, A_TYR_164   | H, A_TYR_164    | 2.84 | 2.00 | 11.12 |
| 5VXM.PDB | OD1, A_ASP_287 | OH, A_TYR_164  | HH, A_TYR_164   | 2.66 | 1.84 | 11.86 |
| 5VXM.PDB | O, A_THR_161   | N, A_GLN_165   | H, A_GLN_165    | 2.81 | 1.96 | 8.47  |
| 5VXM.PDB | O, A_LEU_70    | NE2, A_GLN_165 | HE21, A_GLN_165 | 2.72 | 1.96 | 23.75 |
| 5VXM.PDB | O, A_GLN_162   | N, A_ASP_166   | H, A_ASP_166    | 2.96 | 2.12 | 10.69 |
| 5VXM.PDB | O, A_MET_163   | N, A_PHE_167   | H, A_PHE_167    | 2.81 | 2.01 | 18.58 |
| 5VXM.PDB | O, A_TYR_164   | N, A_SER_168   | H, A_SER_168    | 2.79 | 2.00 | 19.99 |
| 5VXM.PDB | O, A_TYR_164   | OG, A_SER_168  | HG, A_SER_168   | 2.87 | 2.02 | 0.77  |
| 5VXM.PDB | O, A_SER_168   | N, A_SER_172   | H, A_SER_172    | 2.86 | 2.05 | 16.01 |
| 5VXM.PDB | O, A_LEU_171   | N, A_LEU_174   | H, A_LEU_174    | 2.94 | 2.11 | 13.11 |
| 5VXM.PDB | O, A_LEU_174   | N, A_TRP_177   | H, A_TRP_177    | 2.78 | 1.95 | 10.80 |
| 5VXM.PDB | OE2, B_GLU_111 | NE1, A_TRP_177 | HE1, A_TRP_177  | 2.76 | 1.97 | 19.61 |
| 5VXM.PDB | O, A_SER_187   | N, A_GLY_181   | H, A_GLY_181    | 2.97 | 2.17 | 18.19 |
| 5VXM.PDB | O, A_LEU_271   | N, A_VAL_188   | H, A_VAL_188    | 2.81 | 1.98 | 12.86 |
| 5VXM.PDB | O, A_SER_179   | N, A_LYS_189   | H, A_LYS_189    | 2.57 | 1.73 | 10.12 |
| 5VXM.PDB | O, A_VAL_269   | N, A_LEU_190   | H, A_LEU_190    | 2.87 | 2.05 | 15.09 |
| 5VXM.PDB | O, A_TRP_177   | N, A_GLN_191   | H, A_GLN_191    | 2.93 | 2.13 | 18.42 |
| 5VXM.PDB | O, A_VAL_192   | N, A_LYS_196   | H, A_LYS_196    | 2.81 | 1.97 | 10.63 |
| 5VXM.PDB | O, A_ASN_193   | N, A_LYS_197   | H, A_LYS_197    | 2.96 | 2.10 | 4.46  |
| 5VXM.PDB | O, A_LYS_196   | N, A_GLU_200   | H, A_GLU_200    | 2.84 | 2.04 | 17.32 |
| 5VXM.PDB | O, A_LEU_199   | N, A_LYS_203   | H, A_LYS_203    | 2.98 | 2.17 | 15.17 |
| 5VXM.PDB | O, A_GLU_200   | N, A_GLU_204   | H, A_GLU_204    | 2.89 | 2.04 | 8.12  |
| 5VXM.PDB | O, A_GLU_201   | N, A_LYS_205   | H, A_LYS_205    | 2.81 | 2.04 | 22.11 |
| 5VXM.PDB | OD2, A_ASP_166 | NZ, A_LYS_205  | HZ3, A_LYS_205  | 2.79 | 1.92 | 8.41  |
| 5VXM.PDB | OD2, A_ASP_166 | OH, A_TYR_206  | HH, A_TYR_206   | 2.53 | 1.73 | 14.26 |
| 5VXM.PDB | O, A_TYR_244   | N, A_VAL_218   | H, A_VAL_218    | 2.98 | 2.15 | 13.66 |
| 5VXM.PDB | O, A_SER_219   | N, A_ALA_223   | H, A_ALA_223    | 2.76 | 1.93 | 12.38 |
| 5VXM.PDB | O, A_GLN_220   | ND2, A_ASN_224 | HD22, A_ASN_224 | 2.78 | 1.96 | 13.87 |
| 5VXM.PDB | O, A_GLU_221   | N, A_LYS_225   | H, A_LYS_225    | 2.92 | 2.09 | 12.89 |

|          |                |                |                 |      |      |       |
|----------|----------------|----------------|-----------------|------|------|-------|
| 5VXM.PDB | O, A_ALA_223   | N, A_LEU_227   | H, A_LEU_227    | 2.97 | 2.23 | 26.22 |
| 5VXM.PDB | O, A_TRP_226   | N, A_LEU_230   | H, A_LEU_230    | 2.84 | 2.13 | 28.15 |
| 5VXM.PDB | O, A_LEU_227   | N, A_GLY_231   | H, A_GLY_231    | 2.67 | 1.83 | 9.65  |
| 5VXM.PDB | O, A_SER_247   | N, A_LYS_236   | H, A_LYS_236    | 2.94 | 2.17 | 23.09 |
| 5VXM.PDB | O, A_VAL_245   | N, A_SER_238   | H, A_SER_238    | 2.82 | 2.00 | 14.23 |
| 5VXM.PDB | O, A_GLY_243   | N, A_LYS_240   | H, A_LYS_240    | 2.90 | 2.05 | 7.30  |
| 5VXM.PDB | O, A_VAL_218   | N, A_TYR_244   | H, A_TYR_244    | 2.94 | 2.13 | 17.51 |
| 5VXM.PDB | O, A_TYR_212   | N, A_VAL_246   | H, A_VAL_246    | 2.67 | 1.83 | 9.46  |
| 5VXM.PDB | O, A_LYS_236   | N, A_SER_247   | H, A_SER_247    | 2.73 | 1.97 | 23.18 |
| 5VXM.PDB | O, A_ILE_234   | N, A_ASN_249   | H, A_ASN_249    | 2.66 | 1.81 | 8.12  |
| 5VXM.PDB | O, A_GLY_232   | ND2, A_ASN_249 | HD22, A_ASN_249 | 2.93 | 2.16 | 22.59 |
| 5VXM.PDB | OD1, A_ASN_249 | N, A_THR_251   | H, A_THR_251    | 2.92 | 2.07 | 8.88  |
| 5VXM.PDB | O, A_MET_250   | N, A_ASP_254   | H, A_ASP_254    | 2.82 | 1.99 | 10.70 |
| 5VXM.PDB | O, A_THR_251   | N, A_ASN_255   | H, A_ASN_255    | 2.65 | 1.83 | 15.00 |
| 5VXM.PDB | O, A_ILE_253   | N, A_LEU_257   | H, A_LEU_257    | 2.90 | 2.05 | 9.48  |
| 5VXM.PDB | O, A_ASP_254   | N, A_LYS_258   | H, A_LYS_258    | 2.93 | 2.08 | 4.06  |
| 5VXM.PDB | O, A_ASN_255   | OG, A_SER_259  | HG, A_SER_259   | 2.90 | 2.14 | 20.43 |
| 5VXM.PDB | O, A_MET_256   | N, A_LEU_260   | H, A_LEU_260    | 2.87 | 2.06 | 16.67 |
| 5VXM.PDB | O, A_LEU_257   | N, A_ASP_261   | H, A_ASP_261    | 2.90 | 2.07 | 12.51 |
| 5VXM.PDB | O, A_VAL_188   | N, A_LEU_271   | H, A_LEU_271    | 2.70 | 1.86 | 11.12 |
| 5VXM.PDB | O, A_TYR_276   | N, A_ASN_280   | H, A_ASN_280    | 2.79 | 1.94 | 7.45  |
| 5VXM.PDB | O, A_ALA_278   | N, A_GLY_282   | H, A_GLY_282    | 2.93 | 2.21 | 27.83 |
| 5VXM.PDB | O, A_TRP_279   | N, A_PHE_283   | H, A_PHE_283    | 2.71 | 1.90 | 16.14 |
| 5VXM.PDB | O, A_ALA_281   | N, A_ALA_285   | H, A_ALA_285    | 2.95 | 2.16 | 20.45 |
| 5VXM.PDB | O, A_GLY_282   | N, A_GLU_286   | H, A_GLU_286    | 2.89 | 2.04 | 9.37  |
| 5VXM.PDB | O, A_ALA_285   | N, A_THR_289   | H, A_THR_289    | 2.85 | 2.02 | 13.32 |
| 5VXM.PDB | O, A_GLU_286   | N, A_MET_290   | H, A_MET_290    | 2.99 | 2.16 | 12.67 |
| 5VXM.PDB | O, A_ASP_287   | N, A_LYS_291   | H, A_LYS_291    | 2.81 | 1.96 | 6.90  |
| 5VXM.PDB | OE2, A_GLU_288 | NZ, A_LYS_291  | HZ1, A_LYS_291  | 2.70 | 1.90 | 22.27 |
| 5VXM.PDB | O, A_GLU_288   | N, A_ASN_292   | H, A_ASN_292    | 2.85 | 2.03 | 14.40 |
| 5VXM.PDB | O, A_THR_289   | N, A_ASN_293   | H, A_ASN_293    | 2.86 | 2.04 | 14.91 |
| 5VXM.PDB | O, A_MET_290   | N, A_LEU_294   | H, A_LEU_294    | 2.98 | 2.18 | 17.50 |
| 5VXM.PDB | O, A_LYS_291   | N, A_GLN_295   | H, A_GLN_295    | 2.91 | 2.06 | 10.25 |
| 5VXM.PDB | O, A_ASN_292   | N, A_THR_296   | H, A_THR_296    | 2.99 | 2.15 | 11.78 |
| 5VXM.PDB | O, A_ASN_292   | OG1, A_THR_296 | HG1, A_THR_296  | 2.95 | 2.17 | 19.47 |
| 5VXM.PDB | O, A_LEU_294   | N, A_VAL_298   | H, A_VAL_298    | 2.79 | 1.95 | 9.51  |
| 5VXM.PDB | O, A_GLN_295   | N, A_GLN_299   | H, A_GLN_299    | 2.83 | 2.05 | 20.38 |
| 5VXM.PDB | O, A_VAL_298   | N, A_SER_302   | H, A_SER_302    | 2.97 | 2.12 | 8.83  |
| 5VXM.PDB | O, A_GLN_299   | N, A_ASN_303   | H, A_ASN_303    | 2.91 | 2.08 | 12.38 |
| 5VXM.PDB | O, A_LYS_300   | N, A_ALA_304   | H, A_ALA_304    | 2.94 | 2.10 | 8.88  |
| 5VXM.PDB | O, A_TYR_301   | N, A_ASN_305   | H, A_ASN_305    | 2.83 | 2.00 | 12.81 |
| 5VXM.PDB | O, A_SER_302   | N, A_SER_306   | H, A_SER_306    | 2.82 | 2.09 | 26.84 |
| 5VXM.PDB | O, A_ASN_303   | N, A_ILE_307   | H, A_ILE_307    | 2.93 | 2.12 | 16.79 |
| 5VXM.PDB | O, A_ALA_304   | N, A_PHE_308   | H, A_PHE_308    | 2.85 | 2.02 | 14.30 |
| 5VXM.PDB | O, A_ASN_305   | N, A_ASP_309   | H, A_ASP_309    | 2.84 | 2.05 | 19.19 |
| 5VXM.PDB | O, A_ASP_309   | N, A_LYS_313   | H, A_LYS_313    | 2.76 | 1.93 | 13.42 |
| 5VXM.PDB | O, B_SER_25    | N, B_GLN_3     | H, B_GLN_3      | 2.54 | 1.70 | 8.57  |
| 5VXM.PDB | O, B_SER_21    | N, B_SER_7     | H, B_SER_7      | 2.84 | 2.04 | 16.92 |
| 5VXM.PDB | O, B_LEU_86    | N, B_GLY_15    | H, B_GLY_15     | 2.69 | 1.85 | 9.47  |
| 5VXM.PDB | O, B_GLN_13    | N, B_GLY_16    | H, B_GLY_16     | 2.77 | 1.93 | 10.62 |
| 5VXM.PDB | O, B_MET_83    | N, B_LEU_18    | H, B_LEU_18     | 2.79 | 2.00 | 18.93 |
| 5VXM.PDB | O, B_LEU_81    | N, B_LEU_20    | H, B_LEU_20     | 2.91 | 2.09 | 14.06 |
| 5VXM.PDB | O, B_SER_7     | N, B_SER_21    | H, B_SER_21     | 2.77 | 1.94 | 13.53 |
| 5VXM.PDB | O, B_VAL_79    | N, B_CYS_22    | H, B_CYS_22     | 2.80 | 2.05 | 25.06 |
| 5VXM.PDB | O, B_VAL_5     | N, B_ALA_23    | H, B_ALA_23     | 2.85 | 2.03 | 14.23 |
| 5VXM.PDB | O, B_ASN_77    | N, B_VAL_24    | H, B_VAL_24     | 2.90 | 2.04 | 1.76  |
| 5VXM.PDB | O, B_GLN_3     | N, B_SER_25    | H, B_SER_25     | 2.84 | 2.00 | 10.15 |
| 5VXM.PDB | O, B_ALA_97    | N, B_GLY_35    | H, B_GLY_35     | 2.79 | 1.95 | 10.70 |

|          |                |                |                |      |      |       |
|----------|----------------|----------------|----------------|------|------|-------|
| 5VXM.PDB | O, B_SER_49    | N, B_TRP_36    | H, B_TRP_36    | 2.71 | 1.90 | 16.74 |
| 5VXM.PDB | O, B_PHE_95    | N, B_PHE_37    | H, B_PHE_37    | 2.88 | 2.07 | 17.02 |
| 5VXM.PDB | O, B_GLU_46    | N, B_ARG_38    | H, B_ARG_38    | 2.87 | 2.06 | 16.90 |
| 5VXM.PDB | OH, B_TYR_94   | NH1, B_ARG_38  | HH11, B_ARG_38 | 2.95 | 2.12 | 12.47 |
| 5VXM.PDB | OD1, B_ASP_90  | NH1, B_ARG_38  | HH12, B_ARG_38 | 2.77 | 1.97 | 17.13 |
| 5VXM.PDB | O, B_VAL_93    | N, B_GLN_39    | H, B_GLN_39    | 2.84 | 2.06 | 21.66 |
| 5VXM.PDB | O, B_ARG_38    | N, B_GLU_46    | H, B_GLU_46    | 2.82 | 2.11 | 29.28 |
| 5VXM.PDB | O, B_TRP_36    | N, B_VAL_48    | H, B_VAL_48    | 2.81 | 2.02 | 19.40 |
| 5VXM.PDB | O, B_ARG_59    | OG, B_SER_49   | HG, B_SER_49   | 2.90 | 2.19 | 27.71 |
| 5VXM.PDB | O, B_ARG_59    | N, B_CYS_50    | H, B_CYS_50    | 2.95 | 2.17 | 21.36 |
| 5VXM.PDB | O, B_ILE_34    | N, B_ILE_51    | H, B_ILE_51    | 2.96 | 2.19 | 22.03 |
| 5VXM.PDB | O, B_ASN_52    | N, B_GLY_55    | H, B_GLY_55    | 2.92 | 2.12 | 17.73 |
| 5VXM.PDB | OD1, B_ASP_54  | OG, B_SER_56   | HG, B_SER_56   | 2.63 | 1.84 | 17.09 |
| 5VXM.PDB | O, B_CYS_50    | N, B_ARG_59    | H, B_ARG_59    | 2.78 | 1.95 | 11.90 |
| 5VXM.PDB | O, B_VAL_48    | N, B_ALA_61    | H, B_ALA_61    | 2.94 | 2.11 | 11.33 |
| 5VXM.PDB | O, B_ALA_61    | N, B_VAL_64    | H, B_VAL_64    | 2.99 | 2.14 | 7.44  |
| 5VXM.PDB | OD2, B_ASP_90  | NH1, B_ARG_67  | HH12, B_ARG_67 | 2.75 | 1.92 | 11.95 |
| 5VXM.PDB | O, B_SER_63    | NH2, B_ARG_67  | HH21, B_ARG_67 | 2.79 | 1.93 | 1.60  |
| 5VXM.PDB | O, B_GLN_82    | N, B_THR_69    | H, B_THR_69    | 2.89 | 2.14 | 25.06 |
| 5VXM.PDB | OH, B_TYR_60   | N, B_ILE_70    | H, B_ILE_70    | 2.83 | 1.99 | 10.74 |
| 5VXM.PDB | O, B_THR_78    | N, B_ASP_73    | H, B_ASP_73    | 2.82 | 1.98 | 10.27 |
| 5VXM.PDB | O, B_LYS_76    | OG1, B_THR_78  | HG1, B_THR_78  | 2.89 | 2.13 | 21.00 |
| 5VXM.PDB | O, B_SER_71    | N, B_TYR_80    | H, B_TYR_80    | 2.70 | 1.86 | 9.68  |
| 5VXM.PDB | O, B_LEU_20    | N, B_LEU_81    | H, B_LEU_81    | 2.93 | 2.11 | 15.49 |
| 5VXM.PDB | O, B_THR_69    | N, B_GLN_82    | H, B_GLN_82    | 2.76 | 1.95 | 17.35 |
| 5VXM.PDB | OD1, B_ASN_84  | NE2, B_GLN_82  | HE21, B_GLN_82 | 2.81 | 1.97 | 10.38 |
| 5VXM.PDB | O, B_LEU_18    | N, B_MET_83    | H, B_MET_83    | 2.67 | 1.83 | 10.89 |
| 5VXM.PDB | OD2, B_ASP_90  | N, B_LYS_87    | H, B_LYS_87    | 2.82 | 1.98 | 12.23 |
| 5VXM.PDB | O, B_LYS_87    | N, B_ASP_90    | H, B_ASP_90    | 2.83 | 2.00 | 13.54 |
| 5VXM.PDB | O, B_VAL_121   | N, B_ALA_92    | H, B_ALA_92    | 2.97 | 2.16 | 16.91 |
| 5VXM.PDB | O, B_THR_119   | N, B_TYR_94    | H, B_TYR_94    | 2.86 | 2.01 | 6.10  |
| 5VXM.PDB | O, B_ASP_90    | OH, B_TYR_94   | HH, B_TYR_94   | 2.85 | 2.04 | 12.05 |
| 5VXM.PDB | O, B_PHE_37    | N, B_PHE_95    | H, B_PHE_95    | 2.68 | 1.84 | 10.79 |
| 5VXM.PDB | OE2, B_GLU_6   | N, B_CYS_96    | H, B_CYS_96    | 2.76 | 1.91 | 7.11  |
| 5VXM.PDB | O, B_GLY_35    | N, B_ALA_97    | H, B_ALA_97    | 2.99 | 2.18 | 17.54 |
| 5VXM.PDB | O, B_SER_114   | N, B_ALA_98    | H, B_ALA_98    | 2.98 | 2.19 | 20.00 |
| 5VXM.PDB | O, B_ALA_33    | N, B_LYS_99    | H, B_LYS_99    | 2.92 | 2.09 | 12.04 |
| 5VXM.PDB | O, B_CYS_104   | NZ, B_LYS_99   | HZ2, B_LYS_99  | 2.88 | 2.13 | 28.17 |
| 5VXM.PDB | O, B_PHE_103   | NZ, B_LYS_99   | HZ3, B_LYS_99  | 2.88 | 2.06 | 19.18 |
| 5VXM.PDB | O, A_ASP_166   | NE1, B_TRP_102 | HE1, B_TRP_102 | 2.92 | 2.09 | 13.88 |
| 5VXM.PDB | OE2, A_GLU_201 | N, B_CYS_104   | H, B_CYS_104   | 2.85 | 2.02 | 10.45 |
| 5VXM.PDB | OE1, A_GLU_201 | N, B_SER_105   | H, B_SER_105   | 2.58 | 1.74 | 9.22  |
| 5VXM.PDB | O, B_ALA_98    | N, B_ASN_113   | H, B_ASN_113   | 2.61 | 1.89 | 26.80 |
| 5VXM.PDB | O, B_CYS_96    | N, B_GLY_116   | H, B_GLY_116   | 2.83 | 2.02 | 17.26 |
| 5VXM.PDB | O, B_TYR_94    | N, B_THR_119   | H, B_THR_119   | 2.94 | 2.16 | 20.89 |
| 5VXM.PDB | O, B_ALA_92    | N, B_VAL_121   | H, B_VAL_121   | 2.99 | 2.14 | 5.92  |
| 5VXM.PDB | O, B_GLY_10    | N, B_THR_122   | H, B_THR_122   | 2.99 | 2.17 | 15.52 |
| 5VXM.PDB | OG1, B_THR_91  | N, B_VAL_123   | H, B_VAL_123   | 2.86 | 2.00 | 4.07  |
| 5VXR.PDB | O, H_THR_25    | N, H_GLN_3     | H, H_GLN_3     | 2.92 | 1.95 | 14.37 |
| 5VXR.PDB | O, H_THR_21    | N, H_SER_7     | H, H_SER_7     | 2.88 | 2.02 | 26.36 |
| 5VXR.PDB | O, H_THR_116   | N, H_VAL_12    | H, H_VAL_12    | 2.94 | 2.01 | 19.87 |
| 5VXR.PDB | O, H_VAL_85    | N, H_SER_15    | H, H_SER_15    | 2.75 | 1.75 | 7.98  |
| 5VXR.PDB | O, H_LEU_82    | N, H_LEU_18    | H, H_LEU_18    | 2.86 | 1.91 | 16.47 |
| 5VXR.PDB | O, H_LEU_80    | N, H_LEU_20    | H, H_LEU_20    | 2.86 | 1.87 | 11.91 |
| 5VXR.PDB | O, H_SER_7     | N, H_THR_21    | H, H_THR_21    | 2.94 | 1.94 | 9.22  |
| 5VXR.PDB | O, H_TYR_78    | N, H_CYS_22    | H, H_CYS_22    | 2.74 | 1.74 | 4.96  |
| 5VXR.PDB | O, H_GLN_5     | N, H_SER_23    | H, H_SER_23    | 2.92 | 1.94 | 11.80 |
| 5VXR.PDB | O, H_GLN_3     | N, H_THR_25    | H, H_THR_25    | 2.97 | 2.00 | 12.94 |

|          |                |               |                |      |      |       |
|----------|----------------|---------------|----------------|------|------|-------|
| 5VXR.PDB | OD1, H_ASN_76  | N, H_ILE_29   | H, H_ILE_29    | 2.90 | 1.95 | 16.89 |
| 5VXR.PDB | OH, H_TYR_100  | N, H_GLY_32   | H, H_GLY_32    | 2.89 | 1.92 | 12.65 |
| 5VXR.PDB | O, H_MET_98    | N, H_TYR_33   | H, H_TYR_33    | 2.88 | 1.88 | 9.69  |
| 5VXR.PDB | O, H_ILE_51    | N, H_TRP_34   | H, H_TRP_34    | 2.94 | 1.99 | 17.07 |
| 5VXR.PDB | O, H_SER_31    | NE1, H_TRP_34 | HE1, H_TRP_34  | 2.87 | 2.00 | 25.22 |
| 5VXR.PDB | O, H_ALA_96    | N, H_ASN_35   | H, H_ASN_35    | 2.84 | 1.89 | 16.00 |
| 5VXR.PDB | O, H_ALA_96    | ND2, H_ASN_35 | HD22, H_ASN_35 | 2.93 | 1.96 | 14.02 |
| 5VXR.PDB | O, H_GLY_49    | N, H_TRP_36   | H, H_TRP_36    | 2.83 | 1.89 | 18.36 |
| 5VXR.PDB | O, H_TYR_94    | N, H_ILE_37   | H, H_ILE_37    | 2.90 | 1.96 | 17.84 |
| 5VXR.PDB | O, H_GLU_46    | N, H_ARG_38   | H, H_ARG_38    | 2.92 | 1.95 | 13.24 |
| 5VXR.PDB | OE1, H_GLU_46  | NE, H_ARG_38  | HE, H_ARG_38   | 2.74 | 1.86 | 23.26 |
| 5VXR.PDB | OH, H_TYR_93   | NH1, H_ARG_38 | HH11, H_ARG_38 | 2.95 | 1.99 | 15.54 |
| 5VXR.PDB | OD1, H_ASP_89  | NH1, H_ARG_38 | HH12, H_ARG_38 | 2.81 | 1.80 | 4.81  |
| 5VXR.PDB | OE1, H_GLU_46  | NH2, H_ARG_38 | HH21, H_ARG_38 | 2.83 | 2.01 | 29.32 |
| 5VXR.PDB | O, H_THR_92    | N, H_LYS_39   | H, H_LYS_39    | 2.79 | 1.85 | 17.39 |
| 5VXR.PDB | OE1, L_GLN_38  | NZ, H_LYS_39  | HZ2, H_LYS_39  | 2.72 | 1.76 | 14.94 |
| 5VXR.PDB | O, H_LYS_44    | N, H_PHE_40   | H, H_PHE_40    | 2.95 | 2.01 | 17.78 |
| 5VXR.PDB | O, H_ARG_38    | N, H_GLU_46   | H, H_GLU_46    | 2.82 | 1.86 | 15.19 |
| 5VXR.PDB | OD1, H_ASN_35  | OH, H_TYR_47  | HH, H_TYR_47   | 2.72 | 1.74 | 8.88  |
| 5VXR.PDB | O, H_TRP_36    | N, H_VAL_48   | H, H_VAL_48    | 2.92 | 1.97 | 16.43 |
| 5VXR.PDB | O, H_TYR_58    | N, H_TYR_50   | H, H_TYR_50    | 2.82 | 1.91 | 21.30 |
| 5VXR.PDB | OD1, P_ASN_415 | OH, H_TYR_50  | HH, H_TYR_50   | 2.71 | 1.82 | 21.79 |
| 5VXR.PDB | O, H_TRP_34    | N, H_ILE_51   | H, H_ILE_51    | 2.89 | 1.95 | 17.36 |
| 5VXR.PDB | O, H_ASP_56    | N, H_SER_52   | H, H_SER_52    | 2.72 | 1.75 | 13.95 |
| 5VXR.PDB | O, H_SER_52    | N, H_GLY_55   | H, H_GLY_55    | 2.89 | 1.89 | 5.97  |
| 5VXR.PDB | O, H_VAL_48    | N, H_ASN_60   | H, H_ASN_60    | 2.87 | 1.86 | 4.40  |
| 5VXR.PDB | O, H_TYR_47    | ND2, H_ASN_60 | HD22, H_ASN_60 | 2.79 | 1.80 | 10.72 |
| 5VXR.PDB | OD1, H_ASN_60  | N, H_SER_62   | H, H_SER_62    | 2.94 | 2.03 | 22.09 |
| 5VXR.PDB | O, H_ASN_60    | N, H_LEU_63   | H, H_LEU_63    | 2.95 | 1.98 | 13.61 |
| 5VXR.PDB | O, H_LEU_63    | N, H_ARG_66   | H, H_ARG_66    | 2.91 | 1.93 | 12.44 |
| 5VXR.PDB | O, H_ASN_83    | NH1, H_ARG_66 | HH11, H_ARG_66 | 2.95 | 1.98 | 13.74 |
| 5VXR.PDB | OD1, H_ASP_89  | NH2, H_ARG_66 | HH22, H_ARG_66 | 2.99 | 1.98 | 4.54  |
| 5VXR.PDB | O, H_GLN_81    | N, H_SER_68   | H, H_SER_68    | 2.99 | 2.08 | 21.53 |
| 5VXR.PDB | O, H_TYR_53    | NH1, H_ARG_71 | HH12, H_ARG_71 | 2.89 | 2.01 | 24.28 |
| 5VXR.PDB | O, H_GLN_77    | N, H_ASP_72   | H, H_ASP_72    | 2.86 | 1.87 | 9.03  |
| 5VXR.PDB | O, H_ASP_27    | ND2, H_ASN_76 | HD21, H_ASN_76 | 2.65 | 1.73 | 19.67 |
| 5VXR.PDB | O, H_ASN_35    | OH, H_TYR_78  | HH, H_TYR_78   | 2.85 | 1.87 | 7.07  |
| 5VXR.PDB | O, H_THR_70    | N, H_TYR_79   | H, H_TYR_79    | 2.84 | 1.90 | 18.23 |
| 5VXR.PDB | OE1, H_GLN_77  | OH, H_TYR_79  | HH, H_TYR_79   | 2.72 | 1.76 | 12.10 |
| 5VXR.PDB | O, H_LEU_20    | N, H_LEU_80   | H, H_LEU_80    | 2.93 | 1.97 | 15.68 |
| 5VXR.PDB | O, H_SER_68    | N, H_GLN_81   | H, H_GLN_81    | 2.89 | 1.91 | 12.77 |
| 5VXR.PDB | O, H_LEU_18    | N, H_LEU_82   | H, H_LEU_82    | 2.90 | 1.93 | 13.50 |
| 5VXR.PDB | O, H_ARG_66    | N, H_ASN_83   | H, H_ASN_83    | 2.85 | 1.86 | 10.37 |
| 5VXR.PDB | O, H_THR_86    | N, H_ASP_89   | H, H_ASP_89    | 2.84 | 1.84 | 7.21  |
| 5VXR.PDB | O, H_LYS_39    | N, H_THR_92   | H, H_THR_92    | 2.80 | 1.83 | 13.98 |
| 5VXR.PDB | O, H_THR_113   | N, H_TYR_93   | H, H_TYR_93    | 2.85 | 1.85 | 8.50  |
| 5VXR.PDB | O, H_ASP_89    | OH, H_TYR_93  | HH, H_TYR_93   | 2.69 | 1.71 | 5.93  |
| 5VXR.PDB | O, H_ILE_37    | N, H_TYR_94   | H, H_TYR_94    | 2.75 | 1.75 | 6.84  |
| 5VXR.PDB | OE2, H_GLU_6   | N, H_CYS_95   | H, H_CYS_95    | 2.78 | 1.84 | 17.15 |
| 5VXR.PDB | O, H_SER_108   | N, H_ARG_97   | H, H_ARG_97    | 2.83 | 1.90 | 18.04 |
| 5VXR.PDB | O, H_TYR_33    | N, H_MET_98   | H, H_MET_98    | 2.92 | 1.95 | 14.04 |
| 5VXR.PDB | O, H_TYR_100   | N, H_GLN_103  | H, H_GLN_103   | 2.92 | 2.02 | 21.61 |
| 5VXR.PDB | OH, L_TYR_36   | N, H_PHE_106  | H, H_PHE_106   | 2.92 | 1.92 | 7.59  |
| 5VXR.PDB | O, H_CYS_95    | N, H_GLY_110  | H, H_GLY_110   | 2.91 | 1.93 | 12.29 |
| 5VXR.PDB | OE1, H_GLU_6   | N, H_GLY_112  | H, H_GLY_112   | 2.87 | 1.90 | 13.05 |
| 5VXR.PDB | O, H_TYR_93    | N, H_THR_113  | H, H_THR_113   | 2.95 | 2.02 | 20.05 |
| 5VXR.PDB | O, H_ALA_91    | N, H_VAL_115  | H, H_VAL_115   | 2.97 | 1.97 | 6.59  |
| 5VXR.PDB | O, H_SER_10    | N, H_THR_116  | H, H_THR_116   | 2.95 | 1.96 | 9.99  |



|          |                |                |                |      |      |       |
|----------|----------------|----------------|----------------|------|------|-------|
| 5VXR.PDB | OG1, H_THR_90  | N, H_VAL_117   | H, H_VAL_117   | 2.94 | 1.93 | 5.04  |
| 5VXR.PDB | O, H_VAL_12    | N, H_SER_118   | H, H_SER_118   | 2.98 | 2.10 | 24.14 |
| 5VXR.PDB | OG, H_SER_118  | N, H_ALA_120   | H, H_ALA_120   | 2.97 | 2.00 | 14.42 |
| 5VXR.PDB | O, H_PHE_152   | N, H_THR_123   | H, H_THR_123   | 2.88 | 1.92 | 15.25 |
| 5VXR.PDB | O, H_LYS_149   | N, H_SER_126   | H, H_SER_126   | 2.81 | 1.84 | 13.35 |
| 5VXR.PDB | O, H_LEU_147   | N, H_TYR_128   | H, H_TYR_128   | 2.83 | 1.83 | 9.66  |
| 5VXR.PDB | O, H_GLY_145   | N, H_LEU_130   | H, H_LEU_130   | 2.83 | 1.90 | 19.03 |
| 5VXR.PDB | O, H_VAL_189   | N, H_VAL_142   | H, H_VAL_142   | 2.94 | 1.98 | 15.04 |
| 5VXR.PDB | O, H_VAL_187   | N, H_LEU_144   | H, H_LEU_144   | 2.89 | 1.92 | 13.91 |
| 5VXR.PDB | O, H_LEU_130   | N, H_GLY_145   | H, H_GLY_145   | 2.93 | 2.02 | 21.14 |
| 5VXR.PDB | O, H_SER_185   | N, H_CYS_146   | H, H_CYS_146   | 2.89 | 1.97 | 20.23 |
| 5VXR.PDB | O, H_TYR_128   | N, H_LEU_147   | H, H_LEU_147   | 2.91 | 1.92 | 10.17 |
| 5VXR.PDB | O, H_MET_183   | N, H_VAL_148   | H, H_VAL_148   | 2.86 | 1.85 | 4.57  |
| 5VXR.PDB | O, H_SER_126   | N, H_LYS_149   | H, H_LYS_149   | 2.87 | 1.88 | 10.16 |
| 5VXR.PDB | OE2, H_GLU_154 | OH, H_TYR_151  | HH, H_TYR_151  | 2.81 | 1.83 | 6.84  |
| 5VXR.PDB | O, H_THR_123   | N, H_PHE_152   | H, H_PHE_152   | 2.98 | 2.05 | 18.35 |
| 5VXR.PDB | O, H_SER_202   | N, H_THR_159   | H, H_THR_159   | 2.91 | 1.94 | 14.94 |
| 5VXR.PDB | OG, H_SER_185  | NE1, H_TRP_160 | HE1, H_TRP_160 | 2.93 | 1.93 | 7.21  |
| 5VXR.PDB | O, H_THR_188   | OG, H_SER_168  | HG, H_SER_168  | 2.72 | 1.82 | 20.67 |
| 5VXR.PDB | O, H_SER_186   | N, H_HIS_170   | H, H_HIS_170   | 2.94 | 2.01 | 18.18 |
| 5VXR.PDB | OD1, L_ASN_138 | NE2, H_HIS_170 | HE2, H_HIS_170 | 2.89 | 1.98 | 20.57 |
| 5VXR.PDB | O, H_SER_184   | N, H_PHE_172   | H, H_PHE_172   | 2.89 | 1.89 | 7.85  |
| 5VXR.PDB | O, H_THR_182   | N, H_LEU_175   | H, H_LEU_175   | 2.96 | 2.01 | 16.29 |
| 5VXR.PDB | O, H_GLN_177   | OG, H_SER_178  | HG, H_SER_178  | 2.93 | 2.03 | 20.61 |
| 5VXR.PDB | O, H_TYR_151   | N, H_TYR_181   | H, H_TYR_181   | 2.81 | 1.80 | 4.32  |
| 5VXR.PDB | O, H_VAL_148   | N, H_MET_183   | H, H_MET_183   | 2.89 | 1.92 | 13.39 |
| 5VXR.PDB | O, H_LEU_144   | N, H_VAL_187   | H, H_VAL_187   | 2.82 | 1.86 | 14.30 |
| 5VXR.PDB | OG1, H_THR_143 | OG1, H_THR_188 | HG1, H_THR_188 | 2.81 | 1.84 | 10.15 |
| 5VXR.PDB | O, H_GLY_139   | OG, H_ASER_191 | HG, H_ASER_191 | 2.77 | 1.88 | 20.92 |
| 5VXR.PDB | O, H_GLY_139   | OG, H_BSER_191 | HG, H_BSER_191 | 2.77 | 1.86 | 19.71 |
| 5VXR.PDB | O, H_PRO_190   | N, H_THR_193   | H, H_THR_193   | 2.87 | 1.87 | 5.97  |
| 5VXR.PDB | O, H_THR_193   | N, H_GLN_197   | H, H_GLN_197   | 2.93 | 2.07 | 26.39 |
| 5VXR.PDB | OD1, H_ASN_161 | N, H_THR_200   | H, H_THR_200   | 2.97 | 2.02 | 17.18 |
| 5VXR.PDB | O, H_THR_159   | N, H_SER_202   | H, H_SER_202   | 2.75 | 1.75 | 5.74  |
| 5VXR.PDB | O, H_VAL_212   | N, H_VAL_203   | H, H_VAL_203   | 2.81 | 1.81 | 7.96  |
| 5VXR.PDB | O, H_THR_157   | N, H_ALA_204   | H, H_ALA_204   | 2.86 | 1.90 | 13.85 |
| 5VXR.PDB | O, H_THR_210   | N, H_HIS_205   | H, H_HIS_205   | 2.82 | 1.84 | 11.68 |
| 5VXR.PDB | O, H_PRO_153   | NE2, H_HIS_205 | HE2, H_HIS_205 | 2.81 | 1.82 | 9.76  |
| 5VXR.PDB | O, H_PRO_206   | N, H_SER_209   | H, H_SER_209   | 2.98 | 2.02 | 13.76 |
| 5VXR.PDB | O, H_SER_208   | OG1, H_THR_210 | HG1, H_THR_210 | 2.87 | 2.03 | 26.51 |
| 5VXR.PDB | O, H_VAL_203   | N, H_VAL_212   | H, H_VAL_212   | 2.95 | 2.00 | 16.98 |
| 5VXR.PDB | O, H_CYS_201   | N, H_LYS_214   | H, H_LYS_214   | 2.91 | 2.01 | 22.37 |
| 5VXR.PDB | OE2, L_GLU_123 | NZ, H_LYS_214  | HZ1, H_LYS_214 | 2.93 | 1.98 | 15.97 |
| 5VXR.PDB | O, H_VAL_199   | N, H_LEU_216   | H, H_LEU_216   | 2.90 | 1.89 | 4.43  |
| 5VXR.PDB | OG, L_SER_26   | N, L_VAL_3     | H, L_VAL_3     | 2.91 | 1.91 | 7.32  |
| 5VXR.PDB | O, L_ARG_24    | N, L_THR_5     | H, L_THR_5     | 2.78 | 1.77 | 4.90  |
| 5VXR.PDB | O, L_TYR_86    | NE2, L_GLN_6   | HE22, L_GLN_6  | 2.89 | 1.89 | 8.04  |
| 5VXR.PDB | O, L_SER_22    | N, L_SER_7     | H, L_SER_7     | 2.95 | 2.03 | 19.63 |
| 5VXR.PDB | O, L_LYS_103   | N, L_LEU_11    | H, L_LEU_11    | 2.93 | 2.01 | 19.94 |
| 5VXR.PDB | O, L_GLU_105   | N, L_VAL_13    | H, L_VAL_13    | 2.91 | 1.98 | 18.79 |
| 5VXR.PDB | O, L_VAL_78    | N, L_GLY_16    | H, L_GLY_16    | 2.93 | 1.93 | 8.01  |
| 5VXR.PDB | O, L_ILE_75    | N, L_ALA_19    | H, L_ALA_19    | 2.83 | 1.83 | 8.13  |
| 5VXR.PDB | O, L_SER_7     | N, L_SER_22    | H, L_SER_22    | 2.84 | 1.82 | 1.96  |
| 5VXR.PDB | O, L_PHE_71    | N, L_CYS_23    | H, L_CYS_23    | 2.89 | 1.92 | 13.55 |
| 5VXR.PDB | O, L_THR_5     | N, L_ARG_24    | H, L_ARG_24    | 2.90 | 1.89 | 4.93  |
| 5VXR.PDB | OD1, L_ASP_70  | NE, L_ARG_24   | HE, L_ARG_24   | 2.94 | 2.08 | 26.80 |
| 5VXR.PDB | O, L_THR_69    | N, L_ALA_25    | H, L_ALA_25    | 2.84 | 1.89 | 15.97 |
| 5VXR.PDB | O, L_LYS_30    | N, L_SER_27D   | H, L_SER_27D   | 2.97 | 2.06 | 21.07 |

|          |                |                |                 |      |      |       |
|----------|----------------|----------------|-----------------|------|------|-------|
| 5VXR.PDB | OD1, L_ASN_92  | OG, L_SER_27D  | HG, L_SER_27D   | 2.79 | 1.83 | 11.69 |
| 5VXR.PDB | O, L_SER_27D   | N, L_LYS_30    | H, L_LYS_30     | 3.00 | 2.02 | 13.12 |
| 5VXR.PDB | O, H_GLY_101   | NZ, L_LYS_30   | HZ1, L_LYS_30   | 2.83 | 1.85 | 13.06 |
| 5VXR.PDB | O, L_GLN_89    | N, L_HIS_34    | H, L_HIS_34     | 2.88 | 1.90 | 13.39 |
| 5VXR.PDB | OD1, L_ASN_91  | NE2, L_HIS_34  | HE2, L_HIS_34   | 2.77 | 1.79 | 12.93 |
| 5VXR.PDB | O, L_ILE_48    | N, L_TRP_35    | H, L_TRP_35     | 2.81 | 1.84 | 13.58 |
| 5VXR.PDB | O, L_TYR_87    | N, L_TYR_36    | H, L_TYR_36     | 2.86 | 1.93 | 18.12 |
| 5VXR.PDB | OE1, L_GLN_89  | OH, L_TYR_36   | HH, L_TYR_36    | 2.69 | 1.74 | 13.43 |
| 5VXR.PDB | O, L_LYS_45    | N, L_GLN_37    | H, L_GLN_37     | 2.88 | 1.93 | 17.34 |
| 5VXR.PDB | OH, L_TYR_86   | NE2, L_GLN_37  | HE21, L_GLN_37  | 2.98 | 1.98 | 9.70  |
| 5VXR.PDB | O, L_THR_85    | N, L_GLN_38    | H, L_GLN_38     | 2.78 | 1.82 | 15.10 |
| 5VXR.PDB | O, L_GLN_42    | NE2, L_GLN_38  | HE21, L_GLN_38  | 2.91 | 1.92 | 11.28 |
| 5VXR.PDB | O, L_ASP_81    | NZ, L_LYS_39   | HZ3, L_LYS_39   | 2.63 | 1.68 | 15.29 |
| 5VXR.PDB | O, L_GLN_37    | N, L_LYS_45    | H, L_LYS_45     | 2.79 | 1.86 | 19.53 |
| 5VXR.PDB | O, L_TRP_35    | N, L_LEU_47    | H, L_LEU_47     | 2.83 | 1.83 | 6.37  |
| 5VXR.PDB | O, L_ASN_53    | N, L_TYR_49    | H, L_TYR_49     | 2.88 | 1.93 | 17.74 |
| 5VXR.PDB | O, L_LEU_33    | N, L_ALA_51    | H, L_ALA_51     | 2.80 | 1.87 | 18.75 |
| 5VXR.PDB | O, L_TYR_49    | N, L_ASN_53    | H, L_ASN_53     | 2.90 | 1.93 | 14.40 |
| 5VXR.PDB | O, L_LEU_47    | N, L_GLU_55    | H, L_GLU_55     | 2.95 | 1.94 | 3.22  |
| 5VXR.PDB | O, L_PRO_59    | N, L_ARG_61    | H, L_ARG_61     | 2.78 | 1.96 | 29.25 |
| 5VXR.PDB | O, L_PRO_77    | NH1, L_ARG_61  | HH11, L_ARG_61  | 2.81 | 1.92 | 23.49 |
| 5VXR.PDB | OD2, L_ASP_82  | NH1, L_ARG_61  | HH12, L_ARG_61  | 2.75 | 1.79 | 15.16 |
| 5VXR.PDB | OD1, L_ASP_82  | NH2, L_ARG_61  | HH22, L_ARG_61  | 2.82 | 1.82 | 7.27  |
| 5VXR.PDB | O, L_THR_74    | N, L_SER_63    | H, L_SER_63     | 2.98 | 2.05 | 19.15 |
| 5VXR.PDB | O, L_THR_72    | N, L_SER_65    | H, L_SER_65     | 2.96 | 2.02 | 18.59 |
| 5VXR.PDB | OD1, L_ASP_27C | N, L_ARG_68    | H, L_ARG_68     | 2.98 | 2.08 | 21.58 |
| 5VXR.PDB | O, L_CYS_23    | N, L_PHE_71    | H, L_PHE_71     | 2.90 | 2.01 | 23.31 |
| 5VXR.PDB | O, L_SER_65    | N, L_THR_72    | H, L_THR_72     | 2.91 | 1.95 | 14.63 |
| 5VXR.PDB | O, L_ILE_21    | N, L_LEU_73    | H, L_LEU_73     | 2.86 | 1.89 | 14.64 |
| 5VXR.PDB | O, L_SER_63    | N, L_THR_74    | H, L_THR_74     | 2.84 | 1.84 | 5.95  |
| 5VXR.PDB | O, L_ALA_19    | N, L_ILE_75    | H, L_ILE_75     | 2.86 | 1.89 | 14.39 |
| 5VXR.PDB | O, L_ARG_61    | N, L_ASP_76    | H, L_ASP_76     | 2.76 | 1.80 | 14.69 |
| 5VXR.PDB | O, L_GLN_17    | N, L_VAL_78    | H, L_VAL_78     | 2.93 | 1.95 | 13.22 |
| 5VXR.PDB | OD2, L_ASP_82  | N, L_GLU_79    | H, L_GLU_79     | 2.85 | 1.85 | 8.34  |
| 5VXR.PDB | O, L_GLU_79    | N, L_ASP_82    | H, L_ASP_82     | 2.97 | 1.97 | 6.55  |
| 5VXR.PDB | O, L_THR_102   | N, L_TYR_86    | H, L_TYR_86     | 2.91 | 1.93 | 13.41 |
| 5VXR.PDB | O, L_ASP_82    | OH, L_TYR_86   | HH, L_TYR_86    | 2.70 | 1.78 | 16.73 |
| 5VXR.PDB | O, L_TYR_36    | N, L_TYR_87    | H, L_TYR_87     | 2.90 | 1.95 | 16.78 |
| 5VXR.PDB | O, L_THR_97    | N, L_HIS_90    | H, L_HIS_90     | 2.99 | 2.05 | 18.83 |
| 5VXR.PDB | O, P_GLY_418   | NE1, L_TRP_96  | HE1, L_TRP_96   | 2.88 | 1.87 | 5.74  |
| 5VXR.PDB | O, L_ILE_2     | OG1, L_THR_97  | HG1, L_THR_97   | 2.97 | 2.02 | 14.29 |
| 5VXR.PDB | O, L_CYS_88    | N, L_GLY_99    | H, L_GLY_99     | 2.83 | 1.83 | 7.30  |
| 5VXR.PDB | O, L_TYR_86    | N, L_THR_102   | H, L_THR_102    | 2.94 | 2.03 | 21.75 |
| 5VXR.PDB | O, L_PRO_8     | OG1, L_THR_102 | HG1, L_THR_102  | 2.75 | 1.79 | 11.72 |
| 5VXR.PDB | O, L_ALA_84    | N, L_LEU_104   | H, L_LEU_104    | 2.91 | 1.89 | 2.60  |
| 5VXR.PDB | OE1, L_GLN_166 | N, L_ILE_106   | H, L_ILE_106    | 2.84 | 1.85 | 9.18  |
| 5VXR.PDB | O, L_VAL_13    | N, L_LYS_107   | H, L_LYS_107    | 2.81 | 1.82 | 9.46  |
| 5VXR.PDB | O, L_ALA_109   | NE, L_ARG_108  | HE, L_ARG_108   | 2.87 | 1.86 | 6.94  |
| 5VXR.PDB | O, L_ASP_170   | NH1, L_ARG_108 | HH11, L_ARG_108 | 2.81 | 1.81 | 8.28  |
| 5VXR.PDB | O, L_TYR_140   | N, L_ALA_111   | H, L_ALA_111    | 2.89 | 1.90 | 8.41  |
| 5VXR.PDB | O, L_ASN_137   | N, L_THR_114   | H, L_THR_114    | 2.87 | 1.88 | 8.25  |
| 5VXR.PDB | O, L_PHE_135   | N, L_SER_116   | H, L_SER_116    | 2.96 | 2.02 | 17.37 |
| 5VXR.PDB | O, L_VAL_133   | N, L_PHE_118   | H, L_PHE_118    | 2.78 | 1.90 | 24.38 |
| 5VXR.PDB | OG, L_SER_131  | NE2, L_GLN_124 | HE22, L_GLN_124 | 2.92 | 1.91 | 5.03  |
| 5VXR.PDB | O, L_SER_122   | N, L_THR_126   | H, L_THR_126    | 2.91 | 1.96 | 16.41 |
| 5VXR.PDB | O, L_GLN_124   | OG, L_SER_127  | HG, L_SER_127   | 2.77 | 1.86 | 18.69 |
| 5VXR.PDB | O, L_LEU_181   | N, L_ALA_130   | H, L_ALA_130    | 2.92 | 2.02 | 22.78 |
| 5VXR.PDB | OE1, L_GLN_124 | N, L_SER_131   | H, L_SER_131    | 2.86 | 1.94 | 21.02 |

|          |                |                |                 |      |      |       |
|----------|----------------|----------------|-----------------|------|------|-------|
| 5VXR.PDB | O, L_LEU_179   | N, L_VAL_132   | H, L_VAL_132    | 2.84 | 1.88 | 14.58 |
| 5VXR.PDB | O, L_SER_116   | N, L_PHE_135   | H, L_PHE_135    | 2.89 | 1.98 | 20.99 |
| 5VXR.PDB | O, L_MET_175   | N, L_LEU_136   | H, L_LEU_136    | 2.88 | 1.87 | 5.63  |
| 5VXR.PDB | O, L_THR_114   | N, L_ASN_137   | H, L_ASN_137    | 2.89 | 1.90 | 10.32 |
| 5VXR.PDB | OG, L_SER_174  | N, L_ASN_138   | H, L_ASN_138    | 2.95 | 1.98 | 14.50 |
| 5VXR.PDB | O, L_TYR_173   | N, L_PHE_139   | H, L_PHE_139    | 2.83 | 1.84 | 11.10 |
| 5VXR.PDB | O, L_ALA_111   | N, L_TYR_140   | H, L_TYR_140    | 2.94 | 1.98 | 15.41 |
| 5VXR.PDB | O, L_GLU_195   | N, L_LYS_147   | H, L_LYS_147    | 2.93 | 1.98 | 16.97 |
| 5VXR.PDB | OG, L_SER_177  | NE1, L_TRP_148 | HE1, L_TRP_148  | 2.80 | 1.85 | 16.41 |
| 5VXR.PDB | O, L_THR_193   | N, L_LYS_149   | H, L_LYS_149    | 2.85 | 1.88 | 14.14 |
| 5VXR.PDB | O, L_SER_153   | N, L_ILE_150   | H, L_ILE_150    | 2.93 | 1.98 | 15.57 |
| 5VXR.PDB | O, L_SER_191   | N, L_ASP_151   | H, L_ASP_151    | 2.78 | 1.80 | 12.18 |
| 5VXR.PDB | O, L_ILE_150   | N, L_SER_153   | H, L_SER_153    | 2.99 | 1.99 | 4.98  |
| 5VXR.PDB | O, L_TRP_148   | N, L_ARG_155   | H, L_ARG_155    | 2.93 | 1.99 | 17.51 |
| 5VXR.PDB | O, L_THR_178   | N, L_LEU_160   | H, L_LEU_160    | 2.91 | 1.98 | 18.71 |
| 5VXR.PDB | O, L_SER_176   | N, L_SER_162   | H, L_SER_162    | 2.83 | 1.87 | 15.71 |
| 5VXR.PDB | O, L_SER_174   | N, L_THR_164   | H, L_THR_164    | 2.88 | 1.88 | 8.76  |
| 5VXR.PDB | O, L_SER_171   | NE2, L_GLN_166 | HE21, L_GLN_166 | 2.83 | 1.86 | 12.46 |
| 5VXR.PDB | O, L_ILE_106   | NE2, L_GLN_166 | HE22, L_GLN_166 | 2.77 | 1.85 | 20.51 |
| 5VXR.PDB | O, L_THR_172   | N, L_ASP_167   | H, L_ASP_167    | 2.85 | 1.85 | 9.35  |
| 5VXR.PDB | OD2, L_ASP_167 | N, L_LYS_169   | H, L_LYS_169    | 2.90 | 1.99 | 21.19 |
| 5VXR.PDB | OD2, L_ASP_167 | N, L_ASP_170   | H, L_ASP_170    | 2.84 | 1.89 | 16.19 |
| 5VXR.PDB | OD1, L_ASP_170 | N, L_THR_172   | H, L_THR_172    | 2.96 | 2.00 | 16.34 |
| 5VXR.PDB | OD1, L_ASP_170 | OG1, L_THR_172 | HG1, L_THR_172  | 2.70 | 1.76 | 15.44 |
| 5VXR.PDB | O, L_PHE_139   | N, L_TYR_173   | H, L_TYR_173    | 2.85 | 1.84 | 7.73  |
| 5VXR.PDB | O, L_LEU_136   | N, L_MET_175   | H, L_MET_175    | 2.84 | 1.91 | 18.20 |
| 5VXR.PDB | O, L_SER_162   | N, L_SER_176   | H, L_SER_176    | 2.88 | 1.94 | 17.54 |
| 5VXR.PDB | OG, H_SER_184  | OG, L_SER_176  | HG, L_SER_176   | 2.79 | 1.86 | 17.30 |
| 5VXR.PDB | O, L_CYS_134   | N, L_SER_177   | H, L_SER_177    | 2.91 | 1.91 | 10.22 |
| 5VXR.PDB | OD1, L_ASN_161 | OG, L_SER_177  | HG, L_SER_177   | 2.64 | 1.73 | 19.24 |
| 5VXR.PDB | O, L_LEU_160   | N, L_THR_178   | H, L_THR_178    | 2.85 | 1.91 | 18.48 |
| 5VXR.PDB | O, L_VAL_132   | N, L_LEU_179   | H, L_LEU_179    | 2.78 | 1.81 | 13.39 |
| 5VXR.PDB | O, L_GLY_158   | N, L_THR_180   | H, L_THR_180    | 2.83 | 1.86 | 14.32 |
| 5VXR.PDB | OG, L_SER_131  | OG1, L_THR_180 | HG1, L_THR_180  | 2.88 | 2.00 | 21.77 |
| 5VXR.PDB | O, L_ALA_130   | N, L_LEU_181   | H, L_LEU_181    | 2.83 | 1.84 | 9.97  |
| 5VXR.PDB | O, L_GLY_128   | N, L_LYS_183   | H, L_LYS_183    | 2.94 | 1.97 | 12.73 |
| 5VXR.PDB | O, L_THR_182   | N, L_TYR_186   | H, L_TYR_186    | 2.95 | 1.95 | 8.11  |
| 5VXR.PDB | O, L_LYS_183   | N, L_GLU_187   | H, L_GLU_187    | 3.00 | 2.08 | 21.03 |
| 5VXR.PDB | OD2, L_ASP_151 | ND1, L_HIS_189 | HD1, L_HIS_189  | 2.73 | 1.79 | 17.03 |
| 5VXR.PDB | OD1, L_ASP_151 | N, L_SER_191   | H, L_SER_191    | 2.90 | 1.90 | 6.70  |
| 5VXR.PDB | O, L_PHE_209   | N, L_TYR_192   | H, L_TYR_192    | 2.97 | 1.97 | 6.50  |
| 5VXR.PDB | O, L_LYS_149   | N, L_THR_193   | H, L_THR_193    | 2.96 | 2.06 | 22.36 |
| 5VXR.PDB | O, L_LYS_147   | N, L_GLU_195   | H, L_GLU_195    | 2.79 | 1.85 | 17.75 |
| 5VXR.PDB | O, L_ILE_205   | N, L_ALA_196   | H, L_ALA_196    | 2.78 | 1.81 | 13.90 |
| 5VXR.PDB | O, L_ASN_145   | N, L_THR_197   | H, L_THR_197    | 2.84 | 1.85 | 9.75  |
| 5VXR.PDB | O, L_PRO_141   | NE2, L_HIS_198 | HE2, L_HIS_198  | 2.90 | 1.90 | 7.27  |
| 5VXR.PDB | ND1, L_HIS_198 | OG1, L_THR_200 | HG1, L_THR_200  | 2.74 | 1.84 | 20.28 |
| 5VXR.PDB | O, L_SER_203   | OG, L_SER_201  | HG, L_SER_201   | 2.73 | 1.78 | 13.42 |
| 5VXR.PDB | O, L_ALA_196   | N, L_ILE_205   | H, L_ILE_205    | 2.98 | 2.07 | 22.00 |
| 5VXR.PDB | O, L_ASN_190   | N, L_ARG_211   | H, L_ARG_211    | 2.77 | 1.80 | 14.86 |
| 5VXR.PDB | O, L_HIS_189   | NE, L_ARG_211  | HE, L_ARG_211   | 2.85 | 1.85 | 8.53  |
| 5VXR.PDB | O, P_HIS_421   | N, P_ILE_414   | H, P_ILE_414    | 2.99 | 2.01 | 11.82 |
| 5VXR.PDB | OH, H_TYR_33   | N, P_ASN_415   | H, P_ASN_415    | 2.82 | 1.94 | 24.20 |
| 5VXR.PDB | O, P_SER_419   | N, P_THR_416   | H, P_THR_416    | 2.88 | 1.93 | 15.75 |
| 5VXR.PDB | NE2, P_HIS_421 | OG1, P_THR_416 | HG1, P_THR_416  | 2.72 | 1.87 | 24.94 |
| 5VXR.PDB | O, L_ASN_91    | NE1, P_TRP_420 | HE1, P_TRP_420  | 2.80 | 1.97 | 28.78 |
| 5VXR.PDB | O, P_ILE_414   | N, P_HIS_421   | H, P_HIS_421    | 2.91 | 2.04 | 25.40 |
| 5WKQ.PDB | O, A_ASN_74    | N, A_GLN_78    | H, A_GLN_78     | 2.98 | 2.14 | 9.16  |

|          |                |                |                 |      |      |       |
|----------|----------------|----------------|-----------------|------|------|-------|
| 5WKQ.PDB | O, A_ALA_75    | N, A_LEU_79    | H, A_LEU_79     | 2.93 | 2.08 | 8.87  |
| 5WKQ.PDB | O, A_SER_76    | OG1, A_THR_80  | HG1, A_THR_80   | 2.93 | 2.13 | 16.27 |
| 5WKQ.PDB | O, A_GLN_78    | N, A_LEU_82    | H, A_LEU_82     | 2.82 | 2.00 | 15.52 |
| 5WKQ.PDB | O, A_LEU_79    | N, A_ILE_83    | H, A_ILE_83     | 2.90 | 2.05 | 7.59  |
| 5WKQ.PDB | O, A_LEU_81    | N, A_ASN_85    | H, A_ASN_85     | 2.92 | 2.07 | 7.63  |
| 5WKQ.PDB | O, A_ILE_83    | N, A_ILE_87    | H, A_ILE_87     | 2.92 | 2.08 | 9.62  |
| 5WKQ.PDB | O, A_LEU_86    | N, A_LEU_90    | H, A_LEU_90     | 2.92 | 2.07 | 6.38  |
| 5WKQ.PDB | O, A_ILE_87    | N, A_GLY_91    | H, A_GLY_91     | 2.97 | 2.16 | 15.88 |
| 5WKQ.PDB | O, A_GLY_91    | OG, A_SER_94   | HG, A_SER_94    | 2.98 | 2.17 | 13.97 |
| 5WKQ.PDB | O, A_LEU_95    | N, A_THR_99    | H, A_THR_99     | 2.87 | 2.01 | 5.83  |
| 5WKQ.PDB | O, A_THR_96    | N, A_ASN_100   | H, A_ASN_100    | 2.93 | 2.14 | 18.75 |
| 5WKQ.PDB | O, A_LEU_98    | N, A_ILE_102   | H, A_ILE_102    | 2.87 | 2.09 | 20.92 |
| 5WKQ.PDB | O, A_THR_99    | N, A_THR_103   | H, A_THR_103    | 2.97 | 2.15 | 15.29 |
| 5WKQ.PDB | O, A_LYS_101   | N, A_TRP_105   | H, A_TRP_105    | 2.97 | 2.17 | 18.38 |
| 5WKQ.PDB | OG1, A_THR_80  | NZ, A_LYS_106  | HZ1, A_LYS_106  | 2.47 | 1.72 | 27.03 |
| 5WKQ.PDB | O, A_ALA_104   | N, A_GLN_108   | H, A_GLN_108    | 2.95 | 2.11 | 11.57 |
| 5WKQ.PDB | O, A_TRP_105   | N, A_GLN_109   | H, A_GLN_109    | 2.89 | 2.04 | 3.84  |
| 5WKQ.PDB | O, A_LYS_106   | N, A_GLN_110   | H, A_GLN_110    | 2.89 | 2.05 | 11.19 |
| 5WKQ.PDB | O, A_SER_107   | N, A_ALA_111   | H, A_ALA_111    | 3.00 | 2.17 | 13.35 |
| 5WKQ.PDB | O, A_GLN_108   | N, A_ARG_112   | H, A_ARG_112    | 2.98 | 2.16 | 14.92 |
| 5WKQ.PDB | O, A_GLN_109   | N, A_GLN_113   | H, A_GLN_113    | 2.94 | 2.10 | 9.80  |
| 5WKQ.PDB | O, A_ARG_112   | N, A_ASN_116   | H, A_ASN_116    | 2.83 | 1.99 | 11.00 |
| 5WKQ.PDB | O, A_GLN_113   | N, A_LEU_117   | H, A_LEU_117    | 2.99 | 2.18 | 16.36 |
| 5WKQ.PDB | O, A_LYS_115   | N, A_PHE_119   | H, A_PHE_119    | 2.80 | 1.98 | 13.76 |
| 5WKQ.PDB | O, A_ASN_116   | N, A_SER_120   | H, A_SER_120    | 2.81 | 1.97 | 9.85  |
| 5WKQ.PDB | O, A_PHE_119   | N, A_ILE_123   | H, A_ILE_123    | 2.99 | 2.14 | 9.43  |
| 5WKQ.PDB | O, A_SER_120   | N, A_ASN_124   | H, A_ASN_124    | 2.97 | 2.14 | 13.74 |
| 5WKQ.PDB | O, A_ILE_123   | N, A_LEU_127   | H, A_LEU_127    | 2.86 | 2.03 | 12.46 |
| 5WKQ.PDB | O, A_THR_125   | N, A_GLU_129   | H, A_GLU_129    | 2.89 | 2.06 | 14.27 |
| 5WKQ.PDB | O, A_LEU_126   | N, A_THR_130   | H, A_THR_130    | 2.85 | 2.02 | 13.06 |
| 5WKQ.PDB | O, A_LEU_127   | N, A_GLU_131   | H, A_GLU_131    | 2.91 | 2.07 | 8.81  |
| 5WKQ.PDB | O, A_SER_128   | N, A_GLY_132   | H, A_GLY_132    | 2.95 | 2.11 | 11.67 |
| 5WKQ.PDB | O, A_THR_130   | N, A_THR_134   | H, A_THR_134    | 2.86 | 2.03 | 13.70 |
| 5WKQ.PDB | O, A_THR_130   | OG1, A_THR_134 | HG1, A_THR_134  | 2.90 | 2.17 | 24.55 |
| 5WKQ.PDB | O, A_GLU_131   | N, A_ARG_135   | H, A_ARG_135    | 2.96 | 2.15 | 15.46 |
| 5WKQ.PDB | OG, B_SER_208  | NH2, A_ARG_135 | HH21, A_ARG_135 | 2.89 | 2.06 | 11.87 |
| 5WKQ.PDB | O, A_LEU_133   | N, A_TYR_137   | H, A_TYR_137    | 2.86 | 2.07 | 19.86 |
| 5WKQ.PDB | O, A_THR_134   | N, A_GLU_138   | H, A_GLU_138    | 2.82 | 1.98 | 11.30 |
| 5WKQ.PDB | O, A_TYR_137   | N, A_ILE_141   | H, A_ILE_141    | 2.92 | 2.07 | 6.24  |
| 5WKQ.PDB | O, A_GLN_140   | N, A_LEU_144   | H, A_LEU_144    | 2.76 | 1.98 | 19.80 |
| 5WKQ.PDB | O, A_ILE_141   | N, A_LYS_145   | H, A_LYS_145    | 2.95 | 2.17 | 21.49 |
| 5WKQ.PDB | O, A_LYS_143   | N, A_ALA_147   | H, A_ALA_147    | 2.98 | 2.17 | 16.58 |
| 5WKQ.PDB | O, A_LEU_144   | N, A_ASP_148   | H, A_ASP_148    | 2.92 | 2.09 | 13.80 |
| 5WKQ.PDB | O, A_ALA_147   | N, A_ILE_151   | H, A_ILE_151    | 3.00 | 2.18 | 14.31 |
| 5WKQ.PDB | O, A_SER_149   | N, A_ASP_153   | H, A_ASP_153    | 2.97 | 2.14 | 11.92 |
| 5WKQ.PDB | O, A_ILE_151   | N, A_GLU_155   | H, A_GLU_155    | 2.91 | 2.05 | 3.54  |
| 5WKQ.PDB | O, A_LYS_152   | N, A_ASN_156   | H, A_ASN_156    | 2.94 | 2.16 | 21.59 |
| 5WKQ.PDB | O, A_ASP_153   | N, A_LYS_157   | H, A_LYS_157    | 2.91 | 2.13 | 20.82 |
| 5WKQ.PDB | O, A_LEU_154   | N, A_ILE_158   | H, A_ILE_158    | 2.88 | 2.06 | 14.11 |
| 5WKQ.PDB | O, A_GLU_155   | N, A_ASN_159   | H, A_ASN_159    | 2.95 | 2.11 | 10.87 |
| 5WKQ.PDB | O, A_LYS_157   | N, A_ILE_161   | H, A_ILE_161    | 2.96 | 2.13 | 11.39 |
| 5WKQ.PDB | O, A_ILE_158   | N, A_GLN_162   | H, A_GLN_162    | 2.96 | 2.16 | 19.47 |
| 5WKQ.PDB | OE2, A_GLU_182 | NE2, A_GLN_162 | HE21, A_GLN_162 | 2.71 | 1.89 | 15.15 |
| 5WKQ.PDB | O, A_ILE_161   | N, A_LEU_165   | H, A_LEU_165    | 2.83 | 2.01 | 14.76 |
| 5WKQ.PDB | O, A_THR_163   | OG, A_SER_166  | HG, A_SER_166   | 2.82 | 1.99 | 6.15  |
| 5WKQ.PDB | O, A_ARG_164   | N, A_GLU_167   | H, A_GLU_167    | 2.98 | 2.16 | 15.01 |
| 5WKQ.PDB | O, A_LYS_175   | N, A_SER_179   | H, A_SER_179    | 2.81 | 1.95 | 0.77  |
| 5WKQ.PDB | O, A_LYS_177   | N, A_GLU_181   | H, A_GLU_181    | 2.97 | 2.17 | 18.02 |

|          |              |                |                 |      |      |       |
|----------|--------------|----------------|-----------------|------|------|-------|
| 5WKQ.PDB | O, A_LEU_178 | N, A_GLU_182   | H, A_GLU_182    | 2.79 | 1.97 | 15.96 |
| 5WKQ.PDB | O, A_SER_179 | N, A_ILE_183   | H, A_ILE_183    | 2.86 | 2.03 | 12.39 |
| 5WKQ.PDB | O, A_GLU_182 | N, A_THR_186   | H, A_THR_186    | 2.96 | 2.16 | 17.62 |
| 5WKQ.PDB | O, A_GLU_182 | OG1, A_THR_186 | HG1, A_THR_186  | 2.95 | 2.25 | 28.98 |
| 5WKQ.PDB | O, A_LEU_185 | N, A_LYS_189   | H, A_LYS_189    | 2.81 | 2.00 | 16.47 |
| 5WKQ.PDB | O, A_THR_186 | N, A_ASP_190   | H, A_ASP_190    | 2.80 | 1.95 | 5.67  |
| 5WKQ.PDB | O, A_LYS_188 | N, A_ALA_192   | H, A_ALA_192    | 2.92 | 2.13 | 19.91 |
| 5WKQ.PDB | O, A_LYS_189 | N, A_VAL_193   | H, A_VAL_193    | 2.85 | 2.05 | 18.34 |
| 5WKQ.PDB | O, A_ALA_192 | N, A_ARG_196   | H, A_ARG_196    | 2.85 | 2.00 | 8.33  |
| 5WKQ.PDB | O, A_ASP_195 | N, A_ILE_199   | H, A_ILE_199    | 2.97 | 2.14 | 13.27 |
| 5WKQ.PDB | O, A_ARG_196 | N, A_GLU_200   | H, A_GLU_200    | 2.87 | 2.01 | 4.50  |
| 5WKQ.PDB | O, A_LEU_198 | N, A_LYS_202   | H, A_LYS_202    | 2.90 | 2.10 | 18.39 |
| 5WKQ.PDB | O, A_ILE_199 | N, A_THR_203   | H, A_THR_203    | 2.80 | 1.96 | 10.08 |
| 5WKQ.PDB | O, A_ILE_199 | OG1, A_THR_203 | HG1, A_THR_203  | 2.97 | 2.24 | 25.20 |
| 5WKQ.PDB | O, A_LEU_204 | N, A_SER_208   | H, A_SER_208    | 2.96 | 2.20 | 23.33 |
| 5WKQ.PDB | O, A_ILE_206 | N, A_LEU_210   | H, A_LEU_210    | 2.92 | 2.12 | 17.69 |
| 5WKQ.PDB | O, A_HIS_207 | N, A_THR_211   | H, A_THR_211    | 3.00 | 2.23 | 23.43 |
| 5WKQ.PDB | O, A_SER_208 | N, A_ASP_212   | H, A_ASP_212    | 2.86 | 2.05 | 16.07 |
| 5WKQ.PDB | O, A_LYS_209 | N, A_LYS_213   | H, A_LYS_213    | 2.99 | 2.21 | 20.73 |
| 5WKQ.PDB | O, A_LEU_210 | N, A_SER_214   | H, A_SER_214    | 2.99 | 2.17 | 15.42 |
| 5WKQ.PDB | O, A_THR_211 | OG, A_SER_214  | HG, A_SER_214   | 2.74 | 1.93 | 13.01 |
| 5WKQ.PDB | O, A_ASP_212 | N, A_GLN_216   | H, A_GLN_216    | 2.85 | 2.04 | 17.18 |
| 5WKQ.PDB | O, A_LYS_213 | N, A_LEU_217   | H, A_LEU_217    | 2.82 | 1.99 | 14.07 |
| 5WKQ.PDB | O, A_MET_215 | N, A_LYS_219   | H, A_LYS_219    | 2.99 | 2.17 | 15.70 |
| 5WKQ.PDB | O, A_LEU_217 | N, A_ILE_221   | H, A_ILE_221    | 3.00 | 2.19 | 17.23 |
| 5WKQ.PDB | O, A_GLU_218 | N, A_ASP_222   | H, A_ASP_222    | 2.93 | 2.08 | 8.56  |
| 5WKQ.PDB | O, A_LYS_219 | N, A_SER_223   | H, A_SER_223    | 2.82 | 2.02 | 17.93 |
| 5WKQ.PDB | O, A_GLU_220 | N, A_PHE_224   | H, A_PHE_224    | 2.96 | 2.16 | 19.24 |
| 5WKQ.PDB | O, A_ILE_221 | N, A_SER_225   | H, A_SER_225    | 2.98 | 2.15 | 11.85 |
| 5WKQ.PDB | O, A_ASP_222 | N, A_ALA_226   | H, A_ALA_226    | 2.92 | 2.10 | 14.82 |
| 5WKQ.PDB | O, A_PHE_224 | N, A_SER_228   | H, A_SER_228    | 2.81 | 1.98 | 13.22 |
| 5WKQ.PDB | O, A_SER_225 | N, A_ASN_229   | H, A_ASN_229    | 2.97 | 2.17 | 18.32 |
| 5WKQ.PDB | O, A_ALA_226 | OG1, A_THR_230 | HG1, A_THR_230  | 3.00 | 2.17 | 9.26  |
| 5WKQ.PDB | O, A_SER_228 | NE2, A_GLN_235 | HE22, A_GLN_235 | 2.83 | 2.08 | 24.75 |
| 5WKQ.PDB | O, B_ALA_75  | N, B_LEU_79    | H, B_LEU_79     | 2.76 | 1.93 | 13.13 |
| 5WKQ.PDB | O, B_SER_76  | N, B_THR_80    | H, B_THR_80     | 3.00 | 2.21 | 19.48 |
| 5WKQ.PDB | O, B_GLN_78  | N, B_LEU_82    | H, B_LEU_82     | 2.90 | 2.10 | 19.38 |
| 5WKQ.PDB | O, B_LEU_79  | N, B_ILE_83    | H, B_ILE_83     | 2.90 | 2.06 | 11.95 |
| 5WKQ.PDB | O, B_LEU_81  | N, B_ASN_85    | H, B_ASN_85     | 2.99 | 2.16 | 14.14 |
| 5WKQ.PDB | O, B_LEU_82  | N, B_LEU_86    | H, B_LEU_86     | 2.93 | 2.11 | 15.27 |
| 5WKQ.PDB | O, B_ILE_83  | N, B_ILE_87    | H, B_ILE_87     | 2.80 | 1.97 | 13.54 |
| 5WKQ.PDB | O, B_GLY_84  | N, B_GLN_88    | H, B_GLN_88     | 2.92 | 2.15 | 21.64 |
| 5WKQ.PDB | O, B_LEU_86  | N, B_LEU_90    | H, B_LEU_90     | 2.83 | 1.98 | 8.98  |
| 5WKQ.PDB | O, B_ILE_87  | N, B_GLY_91    | H, B_GLY_91     | 2.92 | 2.09 | 13.90 |
| 5WKQ.PDB | O, B_LEU_95  | N, B_THR_99    | H, B_THR_99     | 2.78 | 1.92 | 3.48  |
| 5WKQ.PDB | O, B_THR_96  | N, B_ASN_100   | H, B_ASN_100    | 2.89 | 2.06 | 14.47 |
| 5WKQ.PDB | O, B_ALA_97  | N, B_LYS_101   | H, B_LYS_101    | 2.94 | 2.10 | 8.27  |
| 5WKQ.PDB | O, B_LEU_98  | N, B_ILE_102   | H, B_ILE_102    | 2.87 | 2.10 | 23.41 |
| 5WKQ.PDB | O, B_THR_99  | N, B_THR_103   | H, B_THR_103    | 2.98 | 2.14 | 12.40 |
| 5WKQ.PDB | O, B_LYS_101 | N, B_TRP_105   | H, B_TRP_105    | 2.85 | 2.02 | 12.87 |
| 5WKQ.PDB | O, B_ILE_102 | N, B_LYS_106   | H, B_LYS_106    | 2.89 | 2.08 | 17.14 |
| 5WKQ.PDB | O, B_TRP_105 | N, B_GLN_109   | H, B_GLN_109    | 2.93 | 2.12 | 16.73 |
| 5WKQ.PDB | O, B_LYS_106 | N, B_GLN_110   | H, B_GLN_110    | 2.89 | 2.09 | 18.27 |
| 5WKQ.PDB | O, B_SER_107 | N, B_ALA_111   | H, B_ALA_111    | 2.92 | 2.12 | 17.32 |
| 5WKQ.PDB | O, B_GLN_108 | N, B_ARG_112   | H, B_ARG_112    | 2.99 | 2.14 | 6.98  |
| 5WKQ.PDB | O, B_GLN_109 | N, B_GLN_113   | H, B_GLN_113    | 2.90 | 2.09 | 16.25 |
| 5WKQ.PDB | O, B_GLN_110 | N, B_GLN_114   | H, B_GLN_114    | 2.91 | 2.09 | 15.83 |
| 5WKQ.PDB | O, B_ALA_111 | N, B_LYS_115   | H, B_LYS_115    | 2.90 | 2.07 | 13.13 |

|          |                |                |                 |      |      |       |
|----------|----------------|----------------|-----------------|------|------|-------|
| 5WKQ.PDB | O, B_ARG_112   | N, B_ASN_116   | H, B_ASN_116    | 2.85 | 2.03 | 15.38 |
| 5WKQ.PDB | O, B_GLN_114   | N, B_GLU_118   | H, B_GLU_118    | 2.95 | 2.12 | 11.18 |
| 5WKQ.PDB | O, B_LYS_115   | N, B_PHE_119   | H, B_PHE_119    | 2.93 | 2.08 | 7.47  |
| 5WKQ.PDB | O, B_ASN_116   | N, B_SER_120   | H, B_SER_120    | 2.96 | 2.11 | 7.40  |
| 5WKQ.PDB | O, B_LEU_117   | N, B_ASP_121   | H, B_ASP_121    | 2.93 | 2.09 | 10.56 |
| 5WKQ.PDB | O, B_GLU_118   | N, B_LYS_122   | H, B_LYS_122    | 2.95 | 2.15 | 18.53 |
| 5WKQ.PDB | O, B_PHE_119   | N, B_ILE_123   | H, B_ILE_123    | 2.84 | 2.00 | 11.79 |
| 5WKQ.PDB | O, B_LYS_122   | N, B_LEU_126   | H, B_LEU_126    | 2.94 | 2.08 | 4.26  |
| 5WKQ.PDB | O, B_ILE_123   | N, B_LEU_127   | H, B_LEU_127    | 2.80 | 2.00 | 17.69 |
| 5WKQ.PDB | O, B_THR_125   | N, B_GLU_129   | H, B_GLU_129    | 2.91 | 2.08 | 11.09 |
| 5WKQ.PDB | O, B_LEU_126   | N, B_THR_130   | H, B_THR_130    | 2.83 | 2.00 | 12.55 |
| 5WKQ.PDB | O, B_LEU_127   | N, B_GLU_131   | H, B_GLU_131    | 2.89 | 2.05 | 10.95 |
| 5WKQ.PDB | O, B_THR_130   | N, B_THR_134   | H, B_THR_134    | 2.79 | 1.98 | 16.24 |
| 5WKQ.PDB | O, B_THR_130   | OG1, B_THR_134 | HG1, B_THR_134  | 2.99 | 2.22 | 19.25 |
| 5WKQ.PDB | O, B_GLY_132   | N, B_ASP_136   | H, B_ASP_136    | 2.99 | 2.18 | 16.20 |
| 5WKQ.PDB | O, B_LEU_133   | N, B_TYR_137   | H, B_TYR_137    | 2.84 | 2.01 | 13.19 |
| 5WKQ.PDB | O, B_THR_134   | N, B_GLU_138   | H, B_GLU_138    | 2.98 | 2.16 | 14.73 |
| 5WKQ.PDB | O, B_TYR_137   | N, B_ILE_141   | H, B_ILE_141    | 2.98 | 2.19 | 19.03 |
| 5WKQ.PDB | O, B_GLN_140   | N, B_LEU_144   | H, B_LEU_144    | 2.86 | 2.11 | 25.33 |
| 5WKQ.PDB | O, B_ILE_141   | N, B_LYS_145   | H, B_LYS_145    | 2.89 | 2.08 | 15.46 |
| 5WKQ.PDB | O, B_LYS_143   | N, B_ALA_147   | H, B_ALA_147    | 2.95 | 2.16 | 20.04 |
| 5WKQ.PDB | O, B_LEU_144   | N, B_ASP_148   | H, B_ASP_148    | 2.84 | 1.99 | 5.61  |
| 5WKQ.PDB | O, B_LYS_145   | N, B_SER_149   | H, B_SER_149    | 2.97 | 2.17 | 18.50 |
| 5WKQ.PDB | O, B_ASN_146   | N, B_LYS_150   | H, B_LYS_150    | 2.94 | 2.13 | 17.77 |
| 5WKQ.PDB | O, B_ALA_147   | N, B_ILE_151   | H, B_ILE_151    | 2.98 | 2.16 | 14.66 |
| 5WKQ.PDB | O, B_ASP_148   | N, B_LYS_152   | H, B_LYS_152    | 2.91 | 2.07 | 10.46 |
| 5WKQ.PDB | O, B_ILE_151   | N, B_GLU_155   | H, B_GLU_155    | 2.85 | 2.01 | 9.24  |
| 5WKQ.PDB | O, B_LYS_152   | N, B_ASN_156   | H, B_ASN_156    | 2.87 | 2.10 | 22.12 |
| 5WKQ.PDB | O, B_LEU_154   | N, B_ILE_158   | H, B_ILE_158    | 2.84 | 2.00 | 9.55  |
| 5WKQ.PDB | O, B_ASN_156   | N, B_GLN_160   | H, B_GLN_160    | 2.98 | 2.15 | 12.59 |
| 5WKQ.PDB | O, B_LYS_157   | N, B_ILE_161   | H, B_ILE_161    | 2.99 | 2.17 | 15.50 |
| 5WKQ.PDB | OE2, B_GLU_182 | NE2, B_GLN_162 | HE21, B_GLN_162 | 2.63 | 1.85 | 20.38 |
| 5WKQ.PDB | O, B_ASN_159   | N, B_THR_163   | H, B_THR_163    | 2.97 | 2.13 | 11.47 |
| 5WKQ.PDB | O, B_GLN_160   | N, B_ARG_164   | H, B_ARG_164    | 2.79 | 1.95 | 8.04  |
| 5WKQ.PDB | O, B_ILE_161   | N, B_LEU_165   | H, B_LEU_165    | 2.73 | 1.95 | 20.16 |
| 5WKQ.PDB | O, B_THR_163   | OG, B_SER_166  | HG, B_SER_166   | 2.84 | 2.00 | 2.60  |
| 5WKQ.PDB | O, B_GLU_182   | N, B_THR_186   | H, B_THR_186    | 2.91 | 2.09 | 14.89 |
| 5WKQ.PDB | O, B_LEU_185   | N, B_LYS_189   | H, B_LYS_189    | 2.88 | 2.10 | 21.13 |
| 5WKQ.PDB | O, B_THR_186   | N, B_ASP_190   | H, B_ASP_190    | 2.94 | 2.09 | 7.09  |
| 5WKQ.PDB | O, B_LYS_189   | N, B_VAL_193   | H, B_VAL_193    | 2.86 | 2.07 | 19.28 |
| 5WKQ.PDB | O, B_ALA_191   | N, B_ASP_195   | H, B_ASP_195    | 2.76 | 1.92 | 9.36  |
| 5WKQ.PDB | O, B_ALA_192   | N, B_ARG_196   | H, B_ARG_196    | 2.80 | 2.02 | 20.33 |
| 5WKQ.PDB | OD1, B_ASP_148 | NH1, B_ARG_196 | HH11, B_ARG_196 | 2.87 | 2.13 | 25.83 |
| 5WKQ.PDB | O, B_VAL_193   | N, B_THR_197   | H, B_THR_197    | 2.86 | 2.02 | 10.23 |
| 5WKQ.PDB | O, B_ARG_196   | N, B_GLU_200   | H, B_GLU_200    | 2.88 | 2.05 | 12.74 |
| 5WKQ.PDB | O, B_THR_197   | N, B_GLN_201   | H, B_GLN_201    | 2.89 | 2.05 | 8.57  |
| 5WKQ.PDB | O, B_ILE_199   | N, B_THR_203   | H, B_THR_203    | 2.92 | 2.14 | 20.25 |
| 5WKQ.PDB | O, B_ILE_199   | OG1, B_THR_203 | HG1, B_THR_203  | 2.75 | 2.02 | 24.53 |
| 5WKQ.PDB | O, B_GLU_200   | N, B_LEU_204   | H, B_LEU_204    | 2.93 | 2.09 | 11.16 |
| 5WKQ.PDB | O, B_THR_203   | N, B_HIS_207   | H, B_HIS_207    | 2.92 | 2.07 | 7.74  |
| 5WKQ.PDB | OE2, A_GLU_131 | ND1, B_HIS_207 | HD1, B_HIS_207  | 2.65 | 1.88 | 22.26 |
| 5WKQ.PDB | O, B_LEU_204   | N, B_SER_208   | H, B_SER_208    | 2.87 | 2.08 | 18.92 |
| 5WKQ.PDB | O, B_SER_205   | N, B_LYS_209   | H, B_LYS_209    | 2.90 | 2.09 | 16.81 |
| 5WKQ.PDB | O, B_ILE_206   | N, B_LEU_210   | H, B_LEU_210    | 2.88 | 2.10 | 21.93 |
| 5WKQ.PDB | O, B_HIS_207   | N, B_THR_211   | H, B_THR_211    | 2.88 | 2.05 | 12.96 |
| 5WKQ.PDB | OE1, A_GLU_131 | OG1, B_THR_211 | HG1, B_THR_211  | 2.63 | 1.86 | 19.68 |
| 5WKQ.PDB | O, B_SER_208   | N, B_ASP_212   | H, B_ASP_212    | 2.88 | 2.08 | 18.34 |
| 5WKQ.PDB | O, B_LYS_209   | N, B_LYS_213   | H, B_LYS_213    | 2.97 | 2.19 | 21.54 |

|          |                |               |                |      |      |       |
|----------|----------------|---------------|----------------|------|------|-------|
| 5WKQ.PDB | O, B_THR_211   | OG, B_SER_214 | HG, B_SER_214  | 2.63 | 1.88 | 22.05 |
| 5WKQ.PDB | O, B_ASP_212   | N, B_GLN_216  | H, B_GLN_216   | 2.92 | 2.09 | 13.17 |
| 5WKQ.PDB | O, B_LYS_213   | N, B_LEU_217  | H, B_LEU_217   | 2.89 | 2.06 | 14.20 |
| 5WKQ.PDB | O, B_MET_215   | N, B_LYS_219  | H, B_LYS_219   | 2.89 | 2.07 | 14.81 |
| 5WKQ.PDB | O, B_GLN_216   | N, B_GLU_220  | H, B_GLU_220   | 2.97 | 2.15 | 14.12 |
| 5WKQ.PDB | O, B_LEU_217   | N, B_ILE_221  | H, B_ILE_221   | 2.90 | 2.10 | 17.72 |
| 5WKQ.PDB | O, B_GLU_218   | N, B_ASP_222  | H, B_ASP_222   | 2.89 | 2.07 | 14.28 |
| 5WKQ.PDB | O, B_LYS_219   | N, B_SER_223  | H, B_SER_223   | 2.87 | 2.04 | 11.53 |
| 5WKQ.PDB | O, B_ASP_222   | N, B_ALA_226  | H, B_ALA_226   | 2.87 | 2.09 | 21.47 |
| 5WKQ.PDB | O, B_SER_223   | N, B_PHE_227  | H, B_PHE_227   | 2.88 | 2.09 | 20.68 |
| 5WN9.PDB | OE1, H_GLN_1   | NE2, H_GLN_3  | HE21, H_GLN_3  | 2.70 | 1.88 | 14.43 |
| 5WN9.PDB | O, H_LYS_23    | N, H_VAL_5    | H, H_VAL_5     | 2.93 | 2.10 | 13.33 |
| 5WN9.PDB | OE1, H_GLN_116 | N, H_GLN_6    | H, H_GLN_6     | 2.83 | 1.97 | 4.77  |
| 5WN9.PDB | O, H_TYR_94    | NE2, H_GLN_6  | HE22, H_GLN_6  | 2.87 | 2.09 | 20.35 |
| 5WN9.PDB | O, H_LEU_119   | N, H_GLU_10   | H, H_GLU_10    | 2.95 | 2.12 | 13.96 |
| 5WN9.PDB | O, H_THR_121   | N, H_LYS_12   | H, H_LYS_12    | 2.90 | 2.09 | 16.60 |
| 5WN9.PDB | O, H_LEU_86    | N, H_GLY_15   | H, H_GLY_15    | 2.76 | 1.92 | 11.25 |
| 5WN9.PDB | O, H_LEU_83    | N, H_VAL_18   | H, H_VAL_18    | 2.97 | 2.16 | 16.04 |
| 5WN9.PDB | O, H_MET_81    | N, H_LEU_20   | H, H_LEU_20    | 2.76 | 1.92 | 9.07  |
| 5WN9.PDB | O, H_VAL_5     | N, H_LYS_23   | H, H_LYS_23    | 2.84 | 1.99 | 8.74  |
| 5WN9.PDB | O, H_ASN_77    | N, H_ALA_24   | H, H_ALA_24    | 2.85 | 2.00 | 2.73  |
| 5WN9.PDB | O, H_GLN_3     | N, H_SER_25   | H, H_SER_25    | 2.91 | 2.11 | 19.22 |
| 5WN9.PDB | O, H_GLY_97    | N, H_SER_35   | H, H_SER_35    | 2.98 | 2.16 | 11.85 |
| 5WN9.PDB | O, H_TYR_95    | N, H_VAL_37   | H, H_VAL_37    | 2.89 | 2.08 | 15.19 |
| 5WN9.PDB | O, H_GLU_46    | N, H_ARG_38   | H, H_ARG_38    | 2.88 | 2.07 | 17.27 |
| 5WN9.PDB | OE1, H_GLU_46  | NE, H_ARG_38  | HE, H_ARG_38   | 2.78 | 2.00 | 20.76 |
| 5WN9.PDB | OH, H_TYR_94   | NH2, H_ARG_38 | HH21, H_ARG_38 | 2.96 | 2.17 | 18.48 |
| 5WN9.PDB | OD1, H_ASP_90  | NH2, H_ARG_38 | HH22, H_ARG_38 | 2.91 | 2.07 | 9.36  |
| 5WN9.PDB | O, H_VAL_93    | N, H_GLN_39   | H, H_GLN_39    | 2.85 | 2.11 | 25.52 |
| 5WN9.PDB | OE1, H_GLN_182 | NE2, H_GLN_39 | HE22, H_GLN_39 | 2.96 | 2.11 | 8.81  |
| 5WN9.PDB | O, H_ARG_38    | N, H_GLU_46   | H, H_GLU_46    | 2.90 | 2.11 | 19.48 |
| 5WN9.PDB | O, H_TRP_36    | N, H_MET_48   | H, H_MET_48    | 2.86 | 2.02 | 9.08  |
| 5WN9.PDB | O, H_TYR_59    | N, H_TRP_50   | H, H_TRP_50    | 2.87 | 2.08 | 18.82 |
| 5WN9.PDB | O, H_ALA_106   | NE1, H_TRP_50 | HE1, H_TRP_50  | 2.91 | 2.13 | 20.34 |
| 5WN9.PDB | O, H_VAL_34    | N, H_SER_51   | H, H_SER_51    | 2.88 | 2.09 | 18.45 |
| 5WN9.PDB | O, H_VAL_34    | OG, H_SER_51  | HG, H_SER_51   | 2.85 | 2.13 | 25.31 |
| 5WN9.PDB | O, H_ASN_57    | N, H_SER_52   | H, H_SER_52    | 2.90 | 2.09 | 17.84 |
| 5WN9.PDB | O, H_SER_52    | N, H_GLY_56   | H, H_GLY_56    | 2.91 | 2.13 | 21.69 |
| 5WN9.PDB | OD1, H_ASN_55  | N, H_ASN_57   | H, H_ASN_57    | 2.95 | 2.11 | 6.76  |
| 5WN9.PDB | O, H_TRP_50    | N, H_TYR_59   | H, H_TYR_59    | 2.96 | 2.17 | 19.00 |
| 5WN9.PDB | O, H_MET_48    | N, H_ALA_61   | H, H_ALA_61    | 2.91 | 2.07 | 8.09  |
| 5WN9.PDB | O, H_ALA_61    | N, H_LEU_64   | H, H_LEU_64    | 2.94 | 2.13 | 15.81 |
| 5WN9.PDB | O, H_LEU_64    | N, H_ARG_67   | H, H_ARG_67    | 2.91 | 2.19 | 28.27 |
| 5WN9.PDB | OD2, H_ASP_90  | NH1, H_ARG_67 | HH12, H_ARG_67 | 2.27 | 1.51 | 22.67 |
| 5WN9.PDB | O, H_GLU_82    | N, H_THR_69   | H, H_THR_69    | 2.97 | 2.19 | 21.04 |
| 5WN9.PDB | OH, H_TYR_60   | N, H_MET_70   | H, H_MET_70    | 2.89 | 2.04 | 9.93  |
| 5WN9.PDB | O, H_THR_78    | N, H_ASP_73   | H, H_ASP_73    | 2.77 | 1.94 | 12.50 |
| 5WN9.PDB | OD1, H_ASP_73  | N, H_SER_75   | H, H_SER_75    | 2.97 | 2.21 | 23.09 |
| 5WN9.PDB | OD1, H_ASP_73  | OG, H_SER_75  | HG, H_SER_75   | 2.58 | 1.79 | 16.04 |
| 5WN9.PDB | O, H_CYS_22    | N, H_ALA_79   | H, H_ALA_79    | 2.83 | 1.99 | 10.49 |
| 5WN9.PDB | O, H_THR_71    | N, H_TYR_80   | H, H_TYR_80    | 2.85 | 2.01 | 11.64 |
| 5WN9.PDB | O, H_LEU_20    | N, H_MET_81   | H, H_MET_81    | 2.95 | 2.14 | 16.70 |
| 5WN9.PDB | O, H_THR_69    | N, H_GLU_82   | H, H_GLU_82    | 2.85 | 2.02 | 12.09 |
| 5WN9.PDB | O, H_VAL_18    | N, H_LEU_83   | H, H_LEU_83    | 2.91 | 2.12 | 19.85 |
| 5WN9.PDB | O, H_ARG_67    | N, H_ARG_84   | H, H_ARG_84    | 2.80 | 1.98 | 15.10 |
| 5WN9.PDB | OG1, H_THR_69  | NH1, H_ARG_84 | HH12, H_ARG_84 | 2.83 | 2.06 | 21.62 |
| 5WN9.PDB | O, H_ALA_66    | NH2, H_ARG_84 | HH21, H_ARG_84 | 2.99 | 2.24 | 24.04 |
| 5WN9.PDB | O, H_ALA_16    | N, H_LEU_86   | H, H_LEU_86    | 2.99 | 2.14 | 2.07  |

|          |                |                |                 |      |      |       |
|----------|----------------|----------------|-----------------|------|------|-------|
| 5WN9.PDB | OD2, H_ASP_90  | N, H_ARG_87    | H, H_ARG_87     | 2.89 | 2.10 | 17.07 |
| 5WN9.PDB | O, H_SER_85    | NH1, H_ARG_87  | HH11, H_ARG_87  | 2.78 | 2.03 | 24.21 |
| 5WN9.PDB | O, H_ARG_87    | N, H_ASP_90    | H, H_ASP_90     | 2.92 | 2.07 | 9.16  |
| 5WN9.PDB | O, H_GLN_39    | N, H_VAL_93    | H, H_VAL_93     | 2.93 | 2.14 | 19.95 |
| 5WN9.PDB | O, H_THR_118   | N, H_TYR_94    | H, H_TYR_94     | 2.77 | 1.92 | 7.11  |
| 5WN9.PDB | O, H_ASP_90    | OH, H_TYR_94   | HH, H_TYR_94    | 2.64 | 1.81 | 7.80  |
| 5WN9.PDB | O, H_VAL_37    | N, H_TYR_95    | H, H_TYR_95     | 2.71 | 1.86 | 4.49  |
| 5WN9.PDB | O, H_SER_35    | N, H_GLY_97    | H, H_GLY_97     | 2.90 | 2.14 | 23.59 |
| 5WN9.PDB | O, H_SER_113   | N, H_ARG_98    | H, H_ARG_98     | 2.91 | 2.10 | 16.03 |
| 5WN9.PDB | OD1, H_ASP_112 | NE, H_ARG_98   | HE, H_ARG_98    | 2.94 | 2.13 | 15.87 |
| 5WN9.PDB | OD2, H_ASP_112 | NH1, H_ARG_98  | HH11, H_ARG_98  | 2.84 | 2.01 | 13.12 |
| 5WN9.PDB | O, H_PRO_110   | N, H_MET_100   | H, H_MET_100    | 2.87 | 2.05 | 15.00 |
| 5WN9.PDB | OD1, H_ASP_99  | N, H_GLY_109   | H, H_GLY_109    | 2.84 | 2.01 | 13.27 |
| 5WN9.PDB | OH, H_TYR_180  | N, H_PHE_111   | H, H_PHE_111    | 2.98 | 2.20 | 19.41 |
| 5WN9.PDB | O, H_CYS_96    | N, H_GLY_115   | H, H_GLY_115    | 2.86 | 2.02 | 9.77  |
| 5WN9.PDB | O, H_GLN_6     | NE2, H_GLN_116 | HE22, H_GLN_116 | 2.88 | 2.05 | 14.44 |
| 5WN9.PDB | OE1, H_GLN_6   | N, H_GLY_117   | H, H_GLY_117    | 2.99 | 2.25 | 25.16 |
| 5WN9.PDB | O, H_TYR_94    | N, H_THR_118   | H, H_THR_118    | 2.78 | 1.97 | 14.98 |
| 5WN9.PDB | O, H_SER_7     | OG1, H_THR_118 | HG1, H_THR_118  | 2.77 | 2.03 | 24.19 |
| 5WN9.PDB | O, H_ALA_92    | N, H_VAL_120   | H, H_VAL_120    | 2.95 | 2.10 | 8.42  |
| 5WN9.PDB | O, H_GLU_10    | N, H_THR_121   | H, H_THR_121    | 2.91 | 2.06 | 8.28  |
| 5WN9.PDB | OG1, H_THR_91  | N, H_VAL_122   | H, H_VAL_122    | 2.90 | 2.05 | 5.63  |
| 5WN9.PDB | O, H_LYS_12    | N, H_SER_123   | H, H_SER_123    | 2.75 | 1.94 | 16.31 |
| 5WN9.PDB | O, H_ARG_168   | N, H_THR_149   | H, H_THR_149    | 2.97 | 2.13 | 11.46 |
| 5WN9.PDB | O, H_TYR_230   | NE2, H_GLN_150 | HE22, H_GLN_150 | 2.99 | 2.13 | 4.72  |
| 5WN9.PDB | O, H_SER_166   | N, H_SER_151   | H, H_SER_151    | 2.95 | 2.15 | 17.82 |
| 5WN9.PDB | O, H_LYS_247   | N, H_VAL_155   | H, H_VAL_155    | 2.96 | 2.17 | 20.07 |
| 5WN9.PDB | O, H_GLU_249   | N, H_ALA_157   | H, H_ALA_157    | 2.97 | 2.20 | 22.22 |
| 5WN9.PDB | OD2, H_ASP_161 | N, H_SER_158   | H, H_SER_158    | 2.85 | 2.00 | 7.54  |
| 5WN9.PDB | O, H_LEU_222   | N, H_GLY_160   | H, H_GLY_160    | 2.71 | 1.90 | 15.63 |
| 5WN9.PDB | OG1, H_THR_218 | NH2, H_ARG_162 | HH21, H_ARG_162 | 2.83 | 2.04 | 19.79 |
| 5WN9.PDB | O, H_LEU_217   | N, H_ILE_165   | H, H_ILE_165    | 2.79 | 1.95 | 8.96  |
| 5WN9.PDB | O, H_SER_151   | N, H_SER_166   | H, H_SER_166    | 2.82 | 1.97 | 7.02  |
| 5WN9.PDB | O, H_PHE_215   | N, H_CYS_167   | H, H_CYS_167    | 2.89 | 2.04 | 8.23  |
| 5WN9.PDB | O, H_THR_149   | N, H_ARG_168   | H, H_ARG_168    | 2.89 | 2.06 | 13.39 |
| 5WN9.PDB | O, H_THR_213   | N, H_ALA_169   | H, H_ALA_169    | 2.83 | 2.01 | 14.31 |
| 5WN9.PDB | O, H_GLY_212   | N, H_ILE_173   | H, H_ILE_173    | 2.92 | 2.09 | 10.87 |
| 5WN9.PDB | O, H_ILE_173   | N, H_SER_176   | H, H_SER_176    | 2.94 | 2.08 | 5.22  |
| 5WN9.PDB | O, H_GLN_233   | N, H_ALA_178   | H, H_ALA_178    | 2.89 | 2.06 | 12.90 |
| 5WN9.PDB | O, H_ILE_192   | N, H_TRP_179   | H, H_TRP_179    | 2.88 | 2.07 | 16.13 |
| 5WN9.PDB | O, H_TYR_231   | N, H_TYR_180   | H, H_TYR_180    | 2.81 | 2.00 | 16.41 |
| 5WN9.PDB | OE1, H_GLN_233 | OH, H_TYR_180  | HH, H_TYR_180   | 2.70 | 1.87 | 8.37  |
| 5WN9.PDB | O, H_GLN_189   | N, H_GLN_181   | H, H_GLN_181    | 2.87 | 2.05 | 15.50 |
| 5WN9.PDB | O, H_THR_229   | N, H_GLN_182   | H, H_GLN_182    | 2.73 | 1.91 | 15.73 |
| 5WN9.PDB | O, H_LYS_186   | NE2, H_GLN_182 | HE21, H_GLN_182 | 2.95 | 2.15 | 17.69 |
| 5WN9.PDB | OE1, H_GLN_39  | NE2, H_GLN_182 | HE22, H_GLN_182 | 2.85 | 2.00 | 9.41  |
| 5WN9.PDB | O, H_GLN_181   | N, H_GLN_189   | H, H_GLN_189    | 2.76 | 1.98 | 20.74 |
| 5WN9.PDB | O, H_TRP_179   | N, H_LEU_191   | H, H_LEU_191    | 2.80 | 1.95 | 5.76  |
| 5WN9.PDB | O, H_SER_197   | N, H_TYR_193   | H, H_TYR_193    | 2.93 | 2.13 | 18.06 |
| 5WN9.PDB | O, H_LEU_177   | N, H_ALA_195   | H, H_ALA_195    | 2.82 | 2.00 | 13.79 |
| 5WN9.PDB | O, H_GLY_208   | OG, H_BSER_196 | HG, H_BSER_196  | 2.95 | 2.19 | 21.28 |
| 5WN9.PDB | O, H_TYR_193   | N, H_SER_197   | H, H_SER_197    | 2.88 | 2.08 | 19.19 |
| 5WN9.PDB | O, H_LEU_191   | N, H_GLN_199   | H, H_GLN_199    | 2.93 | 2.07 | 0.47  |
| 5WN9.PDB | OD2, H_ASP_226 | NE, H_ARG_205  | HE, H_ARG_205   | 2.80 | 1.99 | 17.36 |
| 5WN9.PDB | OD1, H_ASP_226 | NH1, H_ARG_205 | HH11, H_ARG_205 | 2.89 | 2.03 | 4.48  |
| 5WN9.PDB | O, H_THR_216   | N, H_SER_209   | H, H_SER_209    | 3.00 | 2.21 | 19.73 |
| 5WN9.PDB | O, H_SER_174   | N, H_GLY_212   | H, H_GLY_212    | 2.91 | 2.07 | 9.42  |
| 5WN9.PDB | O, H_CYS_167   | N, H_PHE_215   | H, H_PHE_215    | 2.93 | 2.12 | 15.69 |



|          |                |                |                |      |      |       |
|----------|----------------|----------------|----------------|------|------|-------|
| 5WN9.PDB | O, H_ILE_165   | N, H_LEU_217   | H, H_LEU_217   | 2.91 | 2.09 | 15.07 |
| 5WN9.PDB | O, H_SER_207   | N, H_THR_218   | H, H_THR_218   | 2.92 | 2.08 | 10.72 |
| 5WN9.PDB | OG1, H_THR_164 | OG1, H_THR_218 | HG1, H_THR_218 | 2.96 | 2.26 | 28.62 |
| 5WN9.PDB | O, H_VAL_163   | N, H_ILE_219   | H, H_ILE_219   | 2.79 | 1.97 | 14.91 |
| 5WN9.PDB | O, H_ARG_205   | N, H_SER_220   | H, H_SER_220   | 2.99 | 2.21 | 20.02 |
| 5WN9.PDB | O, H_ASP_161   | N, H_LEU_222   | H, H_LEU_222   | 2.76 | 1.97 | 18.80 |
| 5WN9.PDB | OD2, H_ASP_226 | N, H_GLN_223   | H, H_GLN_223   | 2.93 | 2.08 | 7.95  |
| 5WN9.PDB | O, H_GLN_223   | N, H_ASP_226   | H, H_ASP_226   | 2.82 | 1.98 | 8.91  |
| 5WN9.PDB | O, H_THR_246   | N, H_TYR_230   | H, H_TYR_230   | 2.87 | 2.06 | 16.33 |
| 5WN9.PDB | O, H_ASP_226   | OH, H_TYR_230  | HH, H_TYR_230  | 2.62 | 1.80 | 10.05 |
| 5WN9.PDB | O, H_TYR_180   | N, H_TYR_231   | H, H_TYR_231   | 2.93 | 2.12 | 16.57 |
| 5WN9.PDB | O, H_THR_241   | N, H_GLN_234   | H, H_GLN_234   | 2.95 | 2.18 | 23.47 |
| 5WN9.PDB | O, H_THR_146   | OG1, H_THR_241 | HG1, H_THR_241 | 2.72 | 1.91 | 13.19 |
| 5WN9.PDB | O, H_CYS_232   | N, H_GLY_243   | H, H_GLY_243   | 2.91 | 2.11 | 17.20 |
| 5WN9.PDB | O, H_TYR_230   | N, H_THR_246   | H, H_THR_246   | 2.86 | 2.08 | 20.56 |
| 5WN9.PDB | O, H_PRO_152   | OG1, H_THR_246 | HG1, H_THR_246 | 2.65 | 1.95 | 28.58 |
| 5WN9.PDB | O, H_SER_153   | N, H_LYS_247   | H, H_LYS_247   | 2.96 | 2.15 | 15.87 |
| 5WN9.PDB | O, H_ALA_228   | N, H_VAL_248   | H, H_VAL_248   | 2.90 | 2.04 | 3.82  |
| 5WN9.PDB | O, H_VAL_155   | N, H_GLU_249   | H, H_GLU_249   | 2.87 | 2.03 | 10.19 |
| 5WN9.PDB | O, A_LYS_187   | N, A_CYS_173   | H, A_CYS_173   | 2.97 | 2.18 | 19.66 |
| 5WN9.PDB | O, A_CYS_176   | N, A_ASN_179   | H, A_ASN_179   | 2.99 | 2.15 | 7.83  |
| 5WN9.PDB | O, A_SER_177   | NE1, A_TRP_183 | HE1, A_TRP_183 | 2.88 | 2.03 | 4.80  |
| 5WN9.PDB | O, A_VAL_171   | N, A_LYS_187   | H, A_LYS_187   | 2.85 | 2.04 | 15.74 |
| 5WN9.PDB | OD1, H_ASN_57  | NE, A_ARG_188  | HE, A_ARG_188  | 2.58 | 1.61 | 2.15  |

Table 5: The side chain and main chain hydrogen bonding networks of all experimentally determined antigen-antibody-related structures. In this table, a PDB file is specified with a four-letter PDB ID, except that the names of the PDB files corresponding to the single NMR structural model split from the NMR ensemble is specified with a four-letter PDB ID in addition to a hyphen followed by the single NMR structural model numeric ID, the residue naming scheme is **Chain ID\_residue name\_residue number**,  $\angle ADH$  represents the angle formed by acceptor (A), donor (D) and hydrogen (H) ( $\angle ADH$ ).

| PDB      | Acceptor (A)   | Donor (D)      | Hydrogen (H)    | D-A (Å) | H-A (Å) | $\angle ADH(^{\circ})$ |
|----------|----------------|----------------|-----------------|---------|---------|------------------------|
| 1A14.PDB | OG, H.SER.25   | NE2, H.GLN.5   | HE21, H.GLN.5   | 2.94    | 2.02    | 15.87                  |
| 1A14.PDB | OE1, L.GLN.38  | NE2, H.GLN.39  | HE21, H.GLN.39  | 2.62    | 1.69    | 9.24                   |
| 1A14.PDB | OG1, H.THR.77  | OG, H.SER.75   | HG, H.SER.75    | 2.86    | 2.04    | 27.11                  |
| 1A14.PDB | OE2, H.GLU.85  | OG, H.SER.84   | HG, H.SER.84    | 2.91    | 1.99    | 12.42                  |
| 1A14.PDB | OD2, H.ASP.101 | NH2, H.ARG.94  | HH21, H.ARG.94  | 2.75    | 1.83    | 16.91                  |
| 1E6J.PDB | OH, L.TYR.85   | NE2, L.GLN.36  | HE21, L.GLN.36  | 2.83    | 1.87    | 8.49                   |
| 1E6J.PDB | OE1, H.GLN.39  | NE2, L.GLN.37  | HE22, L.GLN.37  | 2.69    | 1.84    | 23.98                  |
| 1E6J.PDB | OG, L.SER.129  | NE2, L.GLN.122 | HE22, L.GLN.122 | 2.94    | 2.00    | 13.76                  |
| 1F3R.PDB | OD1, B.ASN.83  | OG1, B.THR.17  | HG1, B.THR.17   | 2.73    | 1.80    | 13.32                  |
| 1F3R.PDB | NE1, A.TRP.67  | OG, B.SER.61   | HG, B.SER.61    | 2.86    | 1.89    | 6.31                   |
| 1F3R.PDB | OG1, B.THR.212 | OG1, B.THR.158 | HG1, B.THR.158  | 2.80    | 1.87    | 11.10                  |
| 1F3R.PDB | OD1, B.ASP.220 | NH1, B.ARG.199 | HH12, B.ARG.199 | 2.89    | 1.98    | 22.15                  |
| 1F3R.PDB | OE1, B.GLN.217 | OG, B.SER.215  | HG, B.SER.215   | 2.66    | 1.72    | 13.57                  |
| 1F3R.PDB | NE1, B.TRP.47  | OH, B.TYR.227  | HH, B.TYR.227   | 2.99    | 2.20    | 29.73                  |
| 1F3R.PDB | OD1, B.ASN.188 | OH, B.TYR.229  | HH, B.TYR.229   | 2.66    | 1.70    | 7.44                   |
| 1HCV.PDB | OE2, A.GLU.46  | NE, A.ARG.38   | HE, A.ARG.38    | 2.98    | 2.01    | 4.47                   |
| 1HCV.PDB | OH, A.TYR.90   | NH1, A.ARG.38  | HH11, A.ARG.38  | 2.93    | 1.98    | 14.34                  |
| 1HCV.PDB | OD1, A.ASP.86  | NH1, A.ARG.38  | HH12, A.ARG.38  | 2.86    | 1.90    | 11.61                  |
| 1HGD.PDB | OE2, B.GLU.97  | NZ, A.LYS.27   | HZ1, A.LYS.27   | 2.80    | 1.78    | 9.95                   |
| 1HGD.PDB | OD2, A.ASP.275 | NZ, A.LYS.50   | HZ1, A.LYS.50   | 2.70    | 1.79    | 23.99                  |
| 1HGD.PDB | OD1, A.ASP.73  | ND1, A.HIS.75  | HD1, A.HIS.75   | 2.82    | 1.92    | 19.21                  |
| 1HGD.PDB | OD1, A.ASP.60  | NE, A.ARG.90   | HE, A.ARG.90    | 2.88    | 1.91    | 7.55                   |
| 1HGD.PDB | OD2, A.ASP.60  | NH2, A.ARG.90  | HH21, A.ARG.90  | 2.80    | 1.82    | 10.07                  |
| 1HGD.PDB | OD1, A.ASP.271 | OG, A.SER.91   | HG, A.SER.91    | 2.93    | 2.12    | 28.00                  |
| 1HGD.PDB | OD2, A.ASP.271 | OG, A.SER.91   | HG, A.SER.91    | 2.81    | 1.91    | 17.78                  |
| 1HGD.PDB | OD2, A.ASP.68  | OG, A.SER.95   | HG, A.SER.95    | 2.92    | 1.99    | 16.11                  |
| 1HGD.PDB | OD1, A.ASP.68  | OH, A.TYR.100  | HH, A.TYR.100   | 2.88    | 1.90    | 0.98                   |
| 1HGD.PDB | OD2, A.ASP.104 | OG, A.SER.107  | HG, A.SER.107   | 2.86    | 1.96    | 19.52                  |
| 1HGD.PDB | OE2, B.GLU.67  | NH2, A.ARG.109 | HH21, A.ARG.109 | 2.83    | 1.84    | 13.41                  |
| 1HGD.PDB | OD2, F.ASP.79  | OG, A.SER.110  | HG, A.SER.110   | 2.92    | 1.96    | 11.03                  |
| 1HGD.PDB | OE2, A.GLU.119 | OG1, A.THR.117 | HG1, A.THR.117  | 2.87    | 1.92    | 9.92                   |
| 1HGD.PDB | OD1, A.ASN.137 | NZ, A.LYS.140  | HZ2, A.LYS.140  | 2.76    | 1.82    | 19.96                  |
| 1HGD.PDB | OD2, A.ASP.77  | NE, A.ARG.141  | HE, A.ARG.141   | 2.80    | 1.97    | 26.87                  |
| 1HGD.PDB | OD1, A.ASP.77  | NH2, A.ARG.141 | HH21, A.ARG.141 | 2.86    | 1.95    | 21.98                  |
| 1HGD.PDB | OD2, A.ASP.77  | NH2, A.ARG.141 | HH21, A.ARG.141 | 2.74    | 1.86    | 23.87                  |
| 1HGD.PDB | OH, A.TYR.195  | NE1, A.TRP.153 | HE1, A.TRP.153  | 2.81    | 1.92    | 20.45                  |
| 1HGD.PDB | OE2, A.GLU.123 | NZ, A.LYS.176  | HZ2, A.LYS.176  | 2.69    | 1.80    | 25.20                  |
| 1HGD.PDB | OE1, A.GLU.123 | OH, A.TYR.178  | HH, A.TYR.178   | 2.75    | 1.82    | 12.48                  |
| 1HGD.PDB | OG1, A.THR.235 | NE1, A.TRP.180 | HE1, A.TRP.180  | 2.94    | 1.95    | 4.39                   |
| 1HGD.PDB | OG, A.SER.231  | NE2, A.HIS.184 | HE2, A.HIS.184  | 2.78    | 1.93    | 25.06                  |
| 1HGD.PDB | OD1, A.ASN.246 | NH2, A.ARG.201 | HH21, A.ARG.201 | 2.59    | 1.75    | 26.83                  |
| 1HGD.PDB | OG1, A.THR.206 | OG, A.SER.209  | HG, A.SER.209   | 2.90    | 1.96    | 11.12                  |
| 1HGD.PDB | OD1, E.ASP.101 | NE2, A.GLN.210 | HE22, A.GLN.210 | 3.00    | 2.15    | 26.33                  |
| 1HGD.PDB | OG1, A.THR.203 | OG1, A.THR.212 | HG1, A.THR.212  | 2.90    | 1.94    | 6.68                   |
| 1HGD.PDB | OE1, C.GLN.210 | NH2, A.ARG.220 | HH21, A.ARG.220 | 2.78    | 1.86    | 19.99                  |
| 1HGD.PDB | OE2, A.GLU.190 | OG, A.SER.228  | HG, A.SER.228   | 2.98    | 2.00    | 5.61                   |
| 1HGD.PDB | OD1, A.ASP.101 | OG, A.SER.231  | HG, A.SER.231   | 2.84    | 1.88    | 8.92                   |
| 1HGD.PDB | OE1, F.GLU.72  | NZ, A.LYS.238  | HZ3, A.LYS.238  | 2.93    | 1.92    | 13.44                  |
| 1HGD.PDB | OD1, A.ASN.165 | ND2, A.ASN.246 | HD22, A.ASN.246 | 2.92    | 1.97    | 12.69                  |
| 1HGD.PDB | OE1, A.GLN.191 | ND2, A.ASN.250 | HD21, A.ASN.250 | 2.94    | 1.98    | 9.96                   |
| 1HGD.PDB | OD1, A.ASN.133 | NH2, A.ARG.255 | HH22, A.ARG.255 | 2.53    | 1.69    | 26.82                  |
| 1HGD.PDB | OE2, A.GLU.119 | NH1, A.ARG.261 | HH12, A.ARG.261 | 2.65    | 1.81    | 27.93                  |
| 1HGD.PDB | OE1, A.GLU.119 | NH2, A.ARG.261 | HH22, A.ARG.261 | 2.88    | 1.97    | 22.77                  |
| 1HGD.PDB | OD2, A.ASP.85  | NZ, A.LYS.264  | HZ3, A.LYS.264  | 2.85    | 1.86    | 16.67                  |
| 1HGD.PDB | OE1, A.GLN.44  | NZ, A.LYS.292  | HZ1, A.LYS.292  | 2.71    | 1.70    | 11.58                  |
| 1HGD.PDB | OD2, A.ASP.291 | NZ, A.LYS.292  | HZ3, A.LYS.292  | 2.78    | 1.85    | 22.68                  |
| 1HGD.PDB | OD1, A.ASN.285 | ND2, A.ASN.298 | HD22, A.ASN.298 | 2.98    | 2.04    | 13.52                  |

|          |                |                |                 |      |      |       |
|----------|----------------|----------------|-----------------|------|------|-------|
| 1HGD.PDB | OE1, A_GLU_41  | NZ, A_LYS_315  | HZ3, A_LYS_315  | 2.76 | 1.81 | 20.40 |
| 1HGD.PDB | OE2, A_GLU_35  | ND2, A_ASN_322 | HD22, A_ASN_322 | 2.84 | 1.97 | 23.40 |
| 1HGD.PDB | OE1, B_GLN_34  | NE, B_ARG_25   | HE, B_ARG_25    | 2.65 | 1.77 | 20.51 |
| 1HGD.PDB | OD1, B ASP_46  | NE2, B_GLN_42  | HE22, B_GLN_42  | 2.84 | 1.95 | 20.63 |
| 1HGD.PDB | OG1, B_THR_107 | NZ, B_LYS_51   | HZ1, B_LYS_51   | 2.96 | 1.97 | 16.32 |
| 1HGD.PDB | OE1, B_GLU_103 | NZ, B_LYS_51   | HZ2, B_LYS_51   | 2.73 | 1.71 | 9.93  |
| 1HGD.PDB | ND1, B_HIS_106 | NZ, B_LYS_51   | HZ3, B_LYS_51   | 2.75 | 1.79 | 17.84 |
| 1HGD.PDB | OE1, B_GLU_57  | NH1, B_ARG_54  | HH11, B_ARG_54  | 2.86 | 1.87 | 11.55 |
| 1HGD.PDB | OE2, F_GLU_97  | NH2, B_ARG_54  | HH22, B_ARG_54  | 2.77 | 1.80 | 12.79 |
| 1HGD.PDB | OE2, B_GLU_61  | NZ, B_LYS_58   | HZ2, B_LYS_58   | 2.91 | 1.88 | 11.49 |
| 1HGD.PDB | OD2, F ASP_86  | NZ, B_LYS_62   | HZ1, B_LYS_62   | 2.61 | 1.78 | 29.53 |
| 1HGD.PDB | OD2, F ASP_90  | NZ, B_LYS_62   | HZ3, B_LYS_62   | 2.73 | 1.84 | 25.56 |
| 1HGD.PDB | OG, A_SER_110  | NE2, B_HIS_64  | HE2, B_HIS_64   | 2.96 | 2.01 | 12.34 |
| 1HGD.PDB | OE2, B_GLU_85  | NZ, B_LYS_68   | HZ2, B_LYS_68   | 2.76 | 1.74 | 9.73  |
| 1HGD.PDB | OE2, D_GLU_81  | NE, B_ARG_76   | HE, B_ARG_76    | 2.88 | 1.91 | 8.67  |
| 1HGD.PDB | OE2, D_GLU_74  | NH1, B_ARG_76  | HH12, B_ARG_76  | 2.84 | 1.82 | 2.51  |
| 1HGD.PDB | OE1, D_GLU_81  | NH2, B_ARG_76  | HH21, B_ARG_76  | 2.71 | 1.71 | 6.80  |
| 1HGD.PDB | OE1, D_GLU_74  | NH2, B_ARG_76  | HH22, B_ARG_76  | 2.75 | 1.75 | 3.21  |
| 1HGD.PDB | OE1, B_GLU_74  | NE2, B_GLN_78  | HE22, B_GLN_78  | 2.92 | 1.97 | 11.55 |
| 1HGD.PDB | OE1, D_GLU_85  | OH, B_TYR_83   | HH, B_TYR_83    | 2.65 | 1.81 | 23.27 |
| 1HGD.PDB | OH, F_TYR_83   | NZ, B_LYS_88   | HZ1, B_LYS_88   | 2.76 | 1.72 | 5.59  |
| 1HGD.PDB | OE2, B_GLU_120 | NH1, B_ARG_123 | HH11, B_ARG_123 | 2.79 | 1.91 | 24.17 |
| 1HGD.PDB | OE1, F_GLU_132 | NE, B_ARG_124  | HE, B_ARG_124   | 2.83 | 2.02 | 28.17 |
| 1HGD.PDB | OE2, F_GLU_132 | NE, B_ARG_124  | HE, B_ARG_124   | 2.88 | 2.01 | 22.00 |
| 1HGD.PDB | OH, B_TYR_157  | ND2, B_ASN_129 | HD22, B_ASN_129 | 2.78 | 1.83 | 11.22 |
| 1HGD.PDB | OE2, B_GLU_150 | ND2, B_ASN_154 | HD21, B_ASN_154 | 2.98 | 2.09 | 22.34 |
| 1HGD.PDB | OD1, B_ASN_154 | OG1, B_THR_156 | HG1, B_THR_156  | 2.75 | 1.84 | 16.14 |
| 1HGD.PDB | OE2, B_GLU_131 | NH1, B_ARG_170 | HH11, B_ARG_170 | 2.78 | 1.79 | 7.42  |
| 1HGD.PDB | OE2, D_GLU_97  | NZ, C_LYS_27   | HZ1, C_LYS_27   | 2.80 | 1.77 | 7.54  |
| 1HGD.PDB | OD2, C ASP_275 | NZ, C_LYS_50   | HZ1, C_LYS_50   | 2.66 | 1.78 | 25.77 |
| 1HGD.PDB | OD1, C ASP_73  | ND1, C_HIS_75  | HD1, C_HIS_75   | 2.77 | 1.87 | 19.67 |
| 1HGD.PDB | OD1, C ASP_60  | NE, C_ARG_90   | HE, C_ARG_90    | 2.86 | 1.89 | 9.66  |
| 1HGD.PDB | OD2, C ASP_60  | NH2, C_ARG_90  | HH21, C_ARG_90  | 2.78 | 1.79 | 10.49 |
| 1HGD.PDB | OD1, C ASP_271 | OG, C_SER_91   | HG, C_SER_91    | 2.93 | 2.11 | 26.93 |
| 1HGD.PDB | OD2, C ASP_271 | OG, C_SER_91   | HG, C_SER_91    | 2.86 | 1.96 | 18.80 |
| 1HGD.PDB | OD2, C ASP_68  | OG, C_SER_95   | HG, C_SER_95    | 2.88 | 1.96 | 15.18 |
| 1HGD.PDB | OD1, C ASP_68  | OH, C_TYR_100  | HH, C_TYR_100   | 2.89 | 1.96 | 14.39 |
| 1HGD.PDB | OD2, C ASP_104 | OG, C_SER_107  | HG, C_SER_107   | 2.91 | 2.00 | 17.92 |
| 1HGD.PDB | OE2, D_GLU_67  | NH2, C_ARG_109 | HH21, C_ARG_109 | 2.87 | 1.88 | 13.44 |
| 1HGD.PDB | OD2, B ASP_79  | OG, C_SER_110  | HG, C_SER_110   | 2.73 | 1.84 | 19.59 |
| 1HGD.PDB | OE2, C_GLU_119 | OG1, C_THR_117 | HG1, C_THR_117  | 2.86 | 1.93 | 10.42 |
| 1HGD.PDB | OD1, C_ASN_137 | NZ, C_LYS_140  | HZ2, C_LYS_140  | 2.78 | 1.84 | 20.52 |
| 1HGD.PDB | OD2, C ASP_77  | NE, C_ARG_141  | HE, C_ARG_141   | 2.80 | 1.97 | 27.06 |
| 1HGD.PDB | OD1, C ASP_77  | NH2, C_ARG_141 | HH21, C_ARG_141 | 2.87 | 1.96 | 21.76 |
| 1HGD.PDB | OD2, C ASP_77  | NH2, C_ARG_141 | HH21, C_ARG_141 | 2.75 | 1.86 | 23.93 |
| 1HGD.PDB | OD1, C_ASN_137 | OG, C_SER_145  | HG, C_SER_145   | 2.98 | 2.13 | 22.87 |
| 1HGD.PDB | OH, C_TYR_195  | NE1, C_TRP_153 | HE1, C_TRP_153  | 2.80 | 1.95 | 24.25 |
| 1HGD.PDB | OE2, C_GLU_123 | NZ, C_LYS_176  | HZ2, C_LYS_176  | 2.69 | 1.80 | 25.35 |
| 1HGD.PDB | OE1, C_GLU_123 | OH, C_TYR_178  | HH, C_TYR_178   | 2.73 | 1.80 | 13.21 |
| 1HGD.PDB | OG1, C_THR_235 | NE1, C_TRP_180 | HE1, C_TRP_180  | 2.91 | 1.93 | 2.97  |
| 1HGD.PDB | OG, C_SER_231  | NE2, C_HIS_184 | HE2, C_HIS_184  | 2.75 | 1.91 | 25.20 |
| 1HGD.PDB | OD1, C_ASN_250 | NE2, C_GLN_191 | HE21, C_GLN_191 | 2.98 | 2.02 | 9.43  |
| 1HGD.PDB | OD1, C_ASN_246 | NH2, C_ARG_201 | HH21, C_ARG_201 | 2.60 | 1.77 | 27.30 |
| 1HGD.PDB | OG1, C_THR_212 | OG1, C_THR_203 | HG1, C_THR_203  | 2.89 | 1.96 | 13.30 |
| 1HGD.PDB | OD2, C ASP_241 | NE, C_ARG_208  | HE, C_ARG_208   | 2.97 | 2.08 | 21.42 |
| 1HGD.PDB | OG1, C_THR_206 | OG, C_SER_209  | HG, C_SER_209   | 2.92 | 1.98 | 10.99 |
| 1HGD.PDB | OD1, A ASP_101 | NE2, C_GLN_210 | HE22, C_GLN_210 | 2.97 | 2.13 | 27.21 |
| 1HGD.PDB | OE1, E_GLN_210 | NH2, C_ARG_220 | HH21, C_ARG_220 | 2.69 | 1.80 | 23.00 |

|          |                |                |                 |      |      |       |
|----------|----------------|----------------|-----------------|------|------|-------|
| 1HGD.PDB | OE2, C_GLU_190 | OG, C_SER_228  | HG, C_SER_228   | 3.00 | 2.02 | 4.69  |
| 1HGD.PDB | OD1, C_ASP_101 | OG, C_SER_231  | HG, C_SER_231   | 2.87 | 1.90 | 8.39  |
| 1HGD.PDB | OE1, B_GLU_72  | NZ, C_LYS_238  | HZ1, C_LYS_238  | 2.80 | 1.83 | 17.68 |
| 1HGD.PDB | OD1, C_ASN_165 | ND2, C_ASN_246 | HD22, C_ASN_246 | 2.91 | 1.96 | 13.56 |
| 1HGD.PDB | OE1, C_GLN_191 | ND2, C_ASN_250 | HD21, C_ASN_250 | 2.90 | 1.95 | 10.99 |
| 1HGD.PDB | OD1, C_ASN_133 | NH2, C_ARG_255 | HH22, C_ARG_255 | 2.52 | 1.69 | 27.35 |
| 1HGD.PDB | OE2, C_GLU_119 | NH1, C_ARG_261 | HH12, C_ARG_261 | 2.66 | 1.83 | 27.96 |
| 1HGD.PDB | OE1, C_GLU_119 | NH2, C_ARG_261 | HH22, C_ARG_261 | 2.90 | 2.00 | 23.32 |
| 1HGD.PDB | OD2, C_ASP_85  | NZ, C_LYS_264  | HZ3, C_LYS_264  | 2.82 | 1.84 | 16.88 |
| 1HGD.PDB | OE1, C_GLN_44  | NZ, C_LYS_292  | HZ1, C_LYS_292  | 2.73 | 1.73 | 12.00 |
| 1HGD.PDB | OD2, C_ASP_291 | NZ, C_LYS_292  | HZ3, C_LYS_292  | 2.79 | 1.88 | 23.81 |
| 1HGD.PDB | OD1, C_ASN_285 | ND2, C_ASN_298 | HD22, C_ASN_298 | 2.96 | 2.02 | 13.09 |
| 1HGD.PDB | OE1, C_GLU_41  | NZ, C_LYS_315  | HZ3, C_LYS_315  | 2.78 | 1.84 | 20.99 |
| 1HGD.PDB | OE2, C_GLU_35  | ND2, C_ASN_322 | HD22, C_ASN_322 | 2.83 | 1.94 | 21.17 |
| 1HGD.PDB | OE1, D_GLU_15  | NZ, C_LYS_326  | HZ1, C_LYS_326  | 2.78 | 1.77 | 11.96 |
| 1HGD.PDB | OXT, C_THR_328 | NE2, C_GLN_327 | HE22, C_GLN_327 | 2.97 | 2.03 | 15.01 |
| 1HGD.PDB | OE1, D_GLN_34  | NE, D_ARG_25   | HE, D_ARG_25    | 2.61 | 1.77 | 24.43 |
| 1HGD.PDB | OD1, D_ASN_146 | ND2, D_ASN_28  | HD21, D_ASN_28  | 3.00 | 2.03 | 9.16  |
| 1HGD.PDB | OD2, D_ASP_37  | OG, D_SER_40   | HG, D_SER_40    | 2.86 | 1.96 | 18.80 |
| 1HGD.PDB | OD1, D_ASP_46  | NE2, D_GLN_42  | HE22, D_GLN_42  | 2.84 | 1.95 | 20.82 |
| 1HGD.PDB | OG1, D_THR_107 | NZ, D_LYS_51   | HZ1, D_LYS_51   | 2.96 | 1.98 | 16.97 |
| 1HGD.PDB | OE1, D_GLU_103 | NZ, D_LYS_51   | HZ2, D_LYS_51   | 2.74 | 1.72 | 8.47  |
| 1HGD.PDB | ND1, D_HIS_106 | NZ, D_LYS_51   | HZ3, D_LYS_51   | 2.74 | 1.78 | 16.91 |
| 1HGD.PDB | OE1, D_GLU_57  | NH1, D_ARG_54  | HH11, D_ARG_54  | 2.85 | 1.86 | 12.06 |
| 1HGD.PDB | OE2, B_GLU_97  | NH2, D_ARG_54  | HH22, D_ARG_54  | 2.79 | 1.82 | 13.03 |
| 1HGD.PDB | OE2, D_GLU_61  | NZ, D_LYS_58   | HZ2, D_LYS_58   | 2.90 | 1.87 | 10.86 |
| 1HGD.PDB | OD2, B_ASP_90  | NZ, D_LYS_62   | HZ3, D_LYS_62   | 2.62 | 1.79 | 29.99 |
| 1HGD.PDB | OG, C_SER_110  | NE2, D_HIS_64  | HE2, D_HIS_64   | 2.96 | 1.98 | 5.65  |
| 1HGD.PDB | OE2, D_GLU_85  | NZ, D_LYS_68   | HZ2, D_LYS_68   | 2.78 | 1.76 | 10.92 |
| 1HGD.PDB | OE2, F_GLU_81  | NE, D_ARG_76   | HE, D_ARG_76    | 2.83 | 1.87 | 10.56 |
| 1HGD.PDB | OE2, F_GLU_74  | NH1, D_ARG_76  | HH12, D_ARG_76  | 2.78 | 1.77 | 3.14  |
| 1HGD.PDB | OE1, F_GLU_81  | NH2, D_ARG_76  | HH21, D_ARG_76  | 2.65 | 1.67 | 9.42  |
| 1HGD.PDB | OE1, F_GLU_74  | NH2, D_ARG_76  | HH22, D_ARG_76  | 2.69 | 1.70 | 6.24  |
| 1HGD.PDB | OE1, D_GLU_74  | NE2, D_GLN_78  | HE22, D_GLN_78  | 2.94 | 1.97 | 10.43 |
| 1HGD.PDB | OE1, F_GLU_85  | OH, D_TYR_83   | HH, D_TYR_83    | 2.57 | 1.79 | 29.87 |
| 1HGD.PDB | OH, B_TYR_83   | NZ, D_LYS_88   | HZ1, D_LYS_88   | 2.76 | 1.72 | 5.75  |
| 1HGD.PDB | OE2, D_GLU_120 | NH1, D_ARG_123 | HH11, D_ARG_123 | 2.80 | 1.92 | 24.08 |
| 1HGD.PDB | OE1, B_GLU_132 | NE, D_ARG_124  | HE, D_ARG_124   | 2.80 | 2.01 | 29.31 |
| 1HGD.PDB | OE2, B_GLU_132 | NE, D_ARG_124  | HE, D_ARG_124   | 2.82 | 1.95 | 21.73 |
| 1HGD.PDB | OH, D_TYR_157  | ND2, D_ASN_129 | HD22, D_ASN_129 | 2.79 | 1.82 | 6.93  |
| 1HGD.PDB | OE2, D_GLU_150 | ND2, D_ASN_154 | HD21, D_ASN_154 | 2.88 | 2.05 | 27.54 |
| 1HGD.PDB | OD1, D_ASN_154 | OG1, D_THR_156 | HG1, D_THR_156  | 2.79 | 1.83 | 8.53  |
| 1HGD.PDB | NE2, D_HIS_142 | OH, D_TYR_157  | HH, D_TYR_157   | 2.78 | 1.89 | 18.65 |
| 1HGD.PDB | OE2, D_GLU_131 | NH1, D_ARG_170 | HH11, D_ARG_170 | 2.77 | 1.78 | 7.65  |
| 1HGD.PDB | OE2, F_GLU_97  | NZ, E_LYS_27   | HZ1, E_LYS_27   | 2.79 | 1.77 | 8.77  |
| 1HGD.PDB | OD2, E_ASP_275 | NZ, E_LYS_50   | HZ1, E_LYS_50   | 2.69 | 1.80 | 25.14 |
| 1HGD.PDB | OD1, E_ASP_73  | ND1, E_HIS_75  | HD1, E_HIS_75   | 2.79 | 1.88 | 18.25 |
| 1HGD.PDB | OD1, E_ASP_60  | NE, E_ARG_90   | HE, E_ARG_90    | 2.88 | 1.91 | 7.90  |
| 1HGD.PDB | OD2, E_ASP_60  | NH2, E_ARG_90  | HH21, E_ARG_90  | 2.82 | 1.83 | 10.15 |
| 1HGD.PDB | OD1, E_ASP_271 | OG, E_SER_91   | HG, E_SER_91    | 2.94 | 2.13 | 28.39 |
| 1HGD.PDB | OD2, E_ASP_271 | OG, E_SER_91   | HG, E_SER_91    | 2.84 | 1.93 | 17.47 |
| 1HGD.PDB | OD2, E_ASP_68  | OG, E_SER_95   | HG, E_SER_95    | 2.91 | 1.98 | 14.66 |
| 1HGD.PDB | OD1, E_ASP_68  | OH, E_TYR_100  | HH, E_TYR_100   | 2.86 | 1.93 | 14.06 |
| 1HGD.PDB | OD2, E_ASP_104 | OG, E_SER_107  | HG, E_SER_107   | 2.90 | 1.98 | 16.44 |
| 1HGD.PDB | OE2, F_GLU_67  | NH2, E_ARG_109 | HH21, E_ARG_109 | 2.82 | 1.85 | 14.73 |
| 1HGD.PDB | OD2, D_ASP_79  | OG, E_SER_110  | HG, E_SER_110   | 2.81 | 1.89 | 15.50 |
| 1HGD.PDB | OE2, E_GLU_119 | OG1, E_THR_117 | HG1, E_THR_117  | 2.90 | 1.95 | 9.79  |
| 1HGD.PDB | OD1, E_ASN_137 | NZ, E_LYS_140  | HZ2, E_LYS_140  | 2.79 | 1.84 | 19.51 |

|          |                |                |                 |      |      |       |
|----------|----------------|----------------|-----------------|------|------|-------|
| 1HGD.PDB | OD2, E_ASP_77  | NE, E_ARG_141  | HE, E_ARG_141   | 2.82 | 1.98 | 26.95 |
| 1HGD.PDB | OD1, E_ASP_77  | NH2, E_ARG_141 | HH21, E_ARG_141 | 2.88 | 1.95 | 21.13 |
| 1HGD.PDB | OD2, E_ASP_77  | NH2, E_ARG_141 | HH21, E_ARG_141 | 2.75 | 1.86 | 24.62 |
| 1HGD.PDB | OH, E_TYR_195  | NE1, E_TRP_153 | HE1, E_TRP_153  | 2.82 | 1.91 | 19.17 |
| 1HGD.PDB | OE2, E_GLU_123 | NZ, E_LYS_176  | HZ2, E_LYS_176  | 2.69 | 1.80 | 25.12 |
| 1HGD.PDB | OE1, E_GLU_123 | OH, E_TYR_178  | HH, E_TYR_178   | 2.75 | 1.83 | 13.46 |
| 1HGD.PDB | OG1, E_THR_235 | NE1, E_TRP_180 | HE1, E_TRP_180  | 2.93 | 1.94 | 3.75  |
| 1HGD.PDB | OG, E_SER_231  | NE2, E_HIS_184 | HE2, E_HIS_184  | 2.80 | 1.95 | 25.42 |
| 1HGD.PDB | OD1, E_ASN_246 | NH2, E_ARG_201 | HH21, E_ARG_201 | 2.60 | 1.77 | 27.54 |
| 1HGD.PDB | OG1, E_THR_212 | OG1, E_THR_203 | HG1, E_THR_203  | 2.93 | 1.99 | 12.22 |
| 1HGD.PDB | OG1, E_THR_206 | OG, E_SER_209  | HG, E_SER_209   | 2.91 | 1.97 | 11.26 |
| 1HGD.PDB | OD1, C_ASP_101 | NE2, E_GLN_210 | HE22, E_GLN_210 | 2.98 | 2.14 | 27.07 |
| 1HGD.PDB | OE1, A_GLN_210 | NH2, E_ARG_220 | HH21, E_ARG_220 | 2.77 | 1.90 | 25.11 |
| 1HGD.PDB | OE2, E_GLU_190 | OG, E_SER_228  | HG, E_SER_228   | 2.96 | 1.98 | 4.78  |
| 1HGD.PDB | OD1, E_ASP_101 | OG, E_SER_231  | HG, E_SER_231   | 2.85 | 1.91 | 13.25 |
| 1HGD.PDB | OE1, D_GLU_72  | NZ, E_LYS_238  | HZ3, E_LYS_238  | 2.87 | 1.86 | 13.40 |
| 1HGD.PDB | OD1, E_ASN_165 | ND2, E_ASN_246 | HD22, E_ASN_246 | 2.91 | 1.96 | 12.66 |
| 1HGD.PDB | OE1, E_GLN_191 | ND2, E_ASN_250 | HD21, E_ASN_250 | 2.95 | 1.99 | 9.92  |
| 1HGD.PDB | OD1, E_ASN_133 | NH2, E_ARG_255 | HH22, E_ARG_255 | 2.52 | 1.69 | 27.28 |
| 1HGD.PDB | OE2, E_GLU_119 | NH1, E_ARG_261 | HH12, E_ARG_261 | 2.64 | 1.81 | 27.92 |
| 1HGD.PDB | OE1, E_GLU_119 | NH2, E_ARG_261 | HH22, E_ARG_261 | 2.88 | 1.97 | 22.94 |
| 1HGD.PDB | OD2, E_ASP_85  | NZ, E_LYS_264  | HZ3, E_LYS_264  | 2.87 | 1.88 | 16.50 |
| 1HGD.PDB | OE1, E_GLN_44  | NZ, E_LYS_292  | HZ1, E_LYS_292  | 2.70 | 1.70 | 12.87 |
| 1HGD.PDB | OD2, E_ASP_291 | NZ, E_LYS_292  | HZ3, E_LYS_292  | 2.83 | 1.91 | 23.60 |
| 1HGD.PDB | OD1, E_ASN_285 | ND2, E_ASN_298 | HD22, E_ASN_298 | 2.95 | 2.01 | 14.15 |
| 1HGD.PDB | OE1, E_GLU_41  | NZ, E_LYS_315  | HZ3, E_LYS_315  | 2.76 | 1.83 | 22.10 |
| 1HGD.PDB | OE2, E_GLU_35  | ND2, E_ASN_322 | HD22, E_ASN_322 | 2.82 | 1.95 | 23.13 |
| 1HGD.PDB | OE1, F_GLU_15  | NZ, E_LYS_326  | HZ3, E_LYS_326  | 2.97 | 1.97 | 16.19 |
| 1HGD.PDB | OE1, F_GLN_34  | NE, F_ARG_25   | HE, F_ARG_25    | 2.93 | 2.07 | 24.69 |
| 1HGD.PDB | OE1, F_GLN_34  | NH2, F_ARG_25  | HH21, F_ARG_25  | 2.80 | 1.89 | 20.31 |
| 1HGD.PDB | OD1, F_ASN_146 | ND2, F_ASN_28  | HD21, F_ASN_28  | 2.81 | 1.89 | 15.27 |
| 1HGD.PDB | OD2, F_ASP_37  | OG, F_SER_40   | HG, F_SER_40    | 2.84 | 1.98 | 23.42 |
| 1HGD.PDB | OD1, F_ASP_46  | NE2, F_GLN_42  | HE22, F_GLN_42  | 2.83 | 1.94 | 21.51 |
| 1HGD.PDB | OE1, F_GLU_103 | NZ, F_LYS_51   | HZ2, F_LYS_51   | 2.72 | 1.70 | 8.28  |
| 1HGD.PDB | ND1, F_HIS_106 | NZ, F_LYS_51   | HZ3, F_LYS_51   | 2.73 | 1.76 | 16.89 |
| 1HGD.PDB | OE1, F_GLU_57  | NH1, F_ARG_54  | HH11, F_ARG_54  | 2.86 | 1.85 | 10.37 |
| 1HGD.PDB | OE2, D_GLU_97  | NH2, F_ARG_54  | HH22, F_ARG_54  | 2.72 | 1.75 | 12.85 |
| 1HGD.PDB | OE2, F_GLU_61  | NZ, F_LYS_58   | HZ2, F_LYS_58   | 2.92 | 1.89 | 10.22 |
| 1HGD.PDB | OD2, D_ASP_90  | NZ, F_LYS_62   | HZ3, F_LYS_62   | 2.71 | 1.86 | 28.09 |
| 1HGD.PDB | OG, E_SER_110  | NE2, F_HIS_64  | HE2, F_HIS_64   | 2.95 | 1.98 | 9.92  |
| 1HGD.PDB | OE2, F_GLU_85  | NZ, F_LYS_68   | HZ2, F_LYS_68   | 2.72 | 1.77 | 19.94 |
| 1HGD.PDB | OE2, B_GLU_81  | NE, F_ARG_76   | HE, F_ARG_76    | 2.86 | 1.90 | 10.66 |
| 1HGD.PDB | OE2, B_GLU_74  | NH1, F_ARG_76  | HH12, F_ARG_76  | 2.77 | 1.75 | 1.42  |
| 1HGD.PDB | OE1, B_GLU_81  | NH2, F_ARG_76  | HH21, F_ARG_76  | 2.64 | 1.65 | 5.37  |
| 1HGD.PDB | OE1, B_GLU_74  | NH2, F_ARG_76  | HH22, F_ARG_76  | 2.71 | 1.72 | 7.42  |
| 1HGD.PDB | OE1, F_GLU_74  | NE2, F_GLN_78  | HE22, F_GLN_78  | 2.96 | 1.99 | 9.91  |
| 1HGD.PDB | OE1, B_GLU_85  | OH, F_TYR_83   | HH, F_TYR_83    | 2.53 | 1.75 | 27.84 |
| 1HGD.PDB | OH, D_TYR_83   | NZ, F_LYS_88   | HZ1, F_LYS_88   | 2.67 | 1.66 | 8.83  |
| 1HGD.PDB | OE2, F_GLU_120 | NH1, F_ARG_123 | HH11, F_ARG_123 | 2.77 | 1.88 | 23.82 |
| 1HGD.PDB | OE1, D_GLU_132 | NE, F_ARG_124  | HE, F_ARG_124   | 2.96 | 2.14 | 28.71 |
| 1HGD.PDB | OE2, D_GLU_132 | NE, F_ARG_124  | HE, F_ARG_124   | 2.94 | 2.05 | 20.84 |
| 1HGD.PDB | OH, F_TYR_157  | ND2, F_ASN_129 | HD22, F_ASN_129 | 2.80 | 1.85 | 12.13 |
| 1HGD.PDB | OE2, F_GLU_131 | NH1, F_ARG_170 | HH11, F_ARG_170 | 2.76 | 1.77 | 6.97  |
| 1HGE.PDB | OE2, B_GLU_97  | NZ, A_LYS_27   | HZ1, A_LYS_27   | 2.80 | 1.78 | 10.14 |
| 1HGE.PDB | OD2, A_ASP_275 | NZ, A_LYS_50   | HZ1, A_LYS_50   | 2.75 | 1.80 | 21.09 |
| 1HGE.PDB | OD1, A_ASP_73  | ND1, A_HIS_75  | HD1, A_HIS_75   | 2.80 | 1.89 | 17.62 |
| 1HGE.PDB | OD1, A_ASP_60  | NE, A_ARG_90   | HE, A_ARG_90    | 2.85 | 1.89 | 7.94  |
| 1HGE.PDB | OD2, A_ASP_60  | NH2, A_ARG_90  | HH21, A_ARG_90  | 2.79 | 1.80 | 8.90  |

|          |                |                |                 |      |      |       |
|----------|----------------|----------------|-----------------|------|------|-------|
| 1HGE.PDB | OD2, A_ASP_271 | OG, A_SER_91   | HG, A_SER_91    | 2.81 | 1.90 | 18.10 |
| 1HGE.PDB | OD2, A_ASP_68  | OG, A_SER_95   | HG, A_SER_95    | 2.90 | 1.97 | 15.50 |
| 1HGE.PDB | OD1, A_ASP_68  | OH, A_TYR_100  | HH, A_TYR_100   | 2.91 | 1.93 | 2.88  |
| 1HGE.PDB | OD2, A_ASP_104 | OG, A_SER_107  | HG, A_SER_107   | 2.86 | 1.94 | 16.59 |
| 1HGE.PDB | OE2, B_GLU_67  | NH2, A_ARG_109 | HH21, A_ARG_109 | 2.74 | 1.75 | 12.19 |
| 1HGE.PDB | OD2, F_ASP_79  | OG, A_SER_110  | HG, A_SER_110   | 2.90 | 1.95 | 11.19 |
| 1HGE.PDB | OE2, A_GLU_119 | OG1, A_THR_117 | HG1, A_THR_117  | 2.90 | 1.95 | 8.88  |
| 1HGE.PDB | OD1, A_ASN_137 | NZ, A_LYS_140  | HZ2, A_LYS_140  | 2.81 | 1.83 | 16.67 |
| 1HGE.PDB | OD2, A_ASP_77  | NE, A_ARG_141  | HE, A_ARG_141   | 2.81 | 1.97 | 26.71 |
| 1HGE.PDB | OD1, A_ASP_77  | NH2, A_ARG_141 | HH21, A_ARG_141 | 2.89 | 1.98 | 21.76 |
| 1HGE.PDB | OD2, A_ASP_77  | NH2, A_ARG_141 | HH21, A_ARG_141 | 2.75 | 1.86 | 23.90 |
| 1HGE.PDB | OH, A_TYR_195  | NE1, A_TRP_153 | HE1, A_TRP_153  | 2.88 | 1.99 | 20.14 |
| 1HGE.PDB | OE2, A_GLU_123 | NZ, A_LYS_176  | HZ1, A_LYS_176  | 2.71 | 1.79 | 22.78 |
| 1HGE.PDB | OE1, A_GLU_123 | OH, A_TYR_178  | HH, A_TYR_178   | 2.75 | 1.82 | 10.80 |
| 1HGE.PDB | OG1, A_THR_235 | NE1, A_TRP_180 | HE1, A_TRP_180  | 2.92 | 1.93 | 3.33  |
| 1HGE.PDB | OG, A_SER_231  | NE2, A_HIS_184 | HE2, A_HIS_184  | 2.72 | 1.88 | 25.40 |
| 1HGE.PDB | OD1, A_ASN_246 | NH2, A_ARG_201 | HH21, A_ARG_201 | 2.60 | 1.73 | 24.24 |
| 1HGE.PDB | OG1, A_THR_206 | OG, A_SER_209  | HG, A_SER_209   | 2.97 | 2.03 | 10.25 |
| 1HGE.PDB | OD1, E_ASP_101 | NE2, A_GLN_210 | HE22, A_GLN_210 | 2.91 | 2.05 | 24.48 |
| 1HGE.PDB | OG1, A_THR_203 | OG1, A_THR_212 | HG1, A_THR_212  | 2.85 | 1.89 | 3.04  |
| 1HGE.PDB | OE1, C_GLN_210 | NH2, A_ARG_220 | HH21, A_ARG_220 | 2.71 | 1.78 | 19.14 |
| 1HGE.PDB | OD1, A_ASP_101 | OG, A_SER_231  | HG, A_SER_231   | 2.85 | 1.89 | 7.16  |
| 1HGE.PDB | OE1, F_GLU_72  | NZ, A_LYS_238  | HZ3, A_LYS_238  | 2.91 | 1.89 | 11.73 |
| 1HGE.PDB | OD1, A_ASN_165 | ND2, A_ASN_246 | HD22, A_ASN_246 | 2.88 | 1.94 | 13.15 |
| 1HGE.PDB | OE1, A_GLN_191 | ND2, A_ASN_250 | HD21, A_ASN_250 | 2.94 | 1.97 | 8.25  |
| 1HGE.PDB | OD1, A_ASN_133 | NH2, A_ARG_255 | HH22, A_ARG_255 | 2.48 | 1.67 | 28.93 |
| 1HGE.PDB | OE2, A_GLU_119 | NH1, A_ARG_261 | HH12, A_ARG_261 | 2.64 | 1.81 | 27.97 |
| 1HGE.PDB | OE1, A_GLU_119 | NH2, A_ARG_261 | HH22, A_ARG_261 | 2.84 | 1.95 | 24.23 |
| 1HGE.PDB | OD2, A_ASP_85  | NZ, A_LYS_264  | HZ3, A_LYS_264  | 2.77 | 1.79 | 16.96 |
| 1HGE.PDB | OE1, A_GLN_44  | NZ, A_LYS_292  | HZ1, A_LYS_292  | 2.69 | 1.69 | 12.67 |
| 1HGE.PDB | OD2, A_ASP_291 | NZ, A_LYS_292  | HZ3, A_LYS_292  | 2.82 | 1.86 | 19.03 |
| 1HGE.PDB | OE1, A_GLU_41  | NZ, A_LYS_315  | HZ3, A_LYS_315  | 2.82 | 1.87 | 21.00 |
| 1HGE.PDB | OE2, A_GLU_35  | ND2, A_ASN_322 | HD22, A_ASN_322 | 2.88 | 1.99 | 21.26 |
| 1HGE.PDB | OE1, A_GLU_325 | NZ, A_LYS_326  | HZ3, A_LYS_326  | 2.85 | 1.86 | 15.04 |
| 1HGE.PDB | OE1, B_GLN_34  | NE, B_ARG_25   | HE, B_ARG_25    | 2.59 | 1.77 | 25.60 |
| 1HGE.PDB | OG1, B_THR_32  | NE2, B_GLN_27  | HE22, B_GLN_27  | 2.99 | 2.08 | 18.28 |
| 1HGE.PDB | OD1, B_ASP_46  | NE2, B_GLN_42  | HE22, B_GLN_42  | 2.87 | 1.96 | 19.05 |
| 1HGE.PDB | OG1, B_THR_107 | NZ, B_LYS_51   | HZ1, B_LYS_51   | 2.97 | 1.99 | 17.16 |
| 1HGE.PDB | OE1, B_GLU_103 | NZ, B_LYS_51   | HZ2, B_LYS_51   | 2.76 | 1.73 | 6.92  |
| 1HGE.PDB | ND1, B_HIS_106 | NZ, B_LYS_51   | HZ3, B_LYS_51   | 2.73 | 1.78 | 18.14 |
| 1HGE.PDB | OE1, B_GLU_57  | NH1, B_ARG_54  | HH11, B_ARG_54  | 2.83 | 1.84 | 12.19 |
| 1HGE.PDB | OE2, F_GLU_97  | NH2, B_ARG_54  | HH22, B_ARG_54  | 2.84 | 1.86 | 12.76 |
| 1HGE.PDB | OD2, F_ASP_86  | NZ, B_LYS_62   | HZ1, B_LYS_62   | 2.60 | 1.76 | 28.82 |
| 1HGE.PDB | OD2, F_ASP_90  | NZ, B_LYS_62   | HZ3, B_LYS_62   | 2.69 | 1.82 | 26.81 |
| 1HGE.PDB | OG, A_SER_110  | NE2, B_HIS_64  | HE2, B_HIS_64   | 2.97 | 2.02 | 12.36 |
| 1HGE.PDB | OE2, B_GLU_85  | NZ, B_LYS_68   | HZ2, B_LYS_68   | 2.78 | 1.76 | 9.50  |
| 1HGE.PDB | OE2, D_GLU_81  | NE, B_ARG_76   | HE, B_ARG_76    | 2.87 | 1.91 | 11.56 |
| 1HGE.PDB | OE2, D_GLU_74  | NH1, B_ARG_76  | HH12, B_ARG_76  | 2.84 | 1.83 | 5.81  |
| 1HGE.PDB | OE1, D_GLU_81  | NH2, B_ARG_76  | HH21, B_ARG_76  | 2.70 | 1.70 | 6.45  |
| 1HGE.PDB | OE1, D_GLU_74  | NH2, B_ARG_76  | HH22, B_ARG_76  | 2.79 | 1.79 | 3.91  |
| 1HGE.PDB | OE1, B_GLU_74  | NE2, B_GLN_78  | HE22, B_GLN_78  | 2.97 | 2.00 | 7.88  |
| 1HGE.PDB | OE1, D_GLU_85  | OH, B_TYR_83   | HH, B_TYR_83    | 2.65 | 1.81 | 24.86 |
| 1HGE.PDB | OH, F_TYR_83   | NZ, B_LYS_88   | HZ1, B_LYS_88   | 2.75 | 1.71 | 5.62  |
| 1HGE.PDB | OE2, B_GLU_120 | NH1, B_ARG_123 | HH11, B_ARG_123 | 2.84 | 1.95 | 23.29 |
| 1HGE.PDB | OE1, F_GLU_132 | NE, B_ARG_124  | HE, B_ARG_124   | 2.80 | 1.98 | 27.36 |
| 1HGE.PDB | OE2, F_GLU_132 | NE, B_ARG_124  | HE, B_ARG_124   | 2.94 | 2.06 | 21.65 |
| 1HGE.PDB | OH, B_TYR_157  | ND2, B_ASN_129 | HD22, B_ASN_129 | 2.79 | 1.85 | 12.68 |
| 1HGE.PDB | OD2, B_ASP_145 | NZ, B_LYS_143  | HZ1, B_LYS_143  | 2.79 | 1.94 | 29.42 |

|          |                |                |                 |      |      |       |
|----------|----------------|----------------|-----------------|------|------|-------|
| 1HGE.PDB | OE2, B_GLU_150 | ND2, B_ASN_154 | HD21, B_ASN_154 | 2.93 | 2.05 | 22.48 |
| 1HGE.PDB | OD1, B_ASN_154 | OG1, B_THR_156 | HG1, B_THR_156  | 2.71 | 1.82 | 17.99 |
| 1HGE.PDB | OE2, B_GLU_131 | NH1, B_ARG_170 | HH11, B_ARG_170 | 2.80 | 1.80 | 6.47  |
| 1HGE.PDB | OE2, D_GLU_97  | NZ, C_LYS_27   | HZ1, C_LYS_27   | 2.79 | 1.77 | 8.74  |
| 1HGE.PDB | OD2, C_ASP_275 | NZ, C_LYS_50   | HZ1, C_LYS_50   | 2.70 | 1.77 | 22.15 |
| 1HGE.PDB | OD1, C_ASP_73  | ND1, C_HIS_75  | HD1, C_HIS_75   | 2.76 | 1.85 | 18.20 |
| 1HGE.PDB | OD1, C_ASP_60  | NE, C_ARG_90   | HE, C_ARG_90    | 2.84 | 1.88 | 10.34 |
| 1HGE.PDB | OD2, C_ASP_60  | NH2, C_ARG_90  | HH21, C_ARG_90  | 2.77 | 1.78 | 9.61  |
| 1HGE.PDB | OD2, C_ASP_271 | OG, C_SER_91   | HG, C_SER_91    | 2.80 | 1.91 | 19.19 |
| 1HGE.PDB | OD2, C_ASP_68  | OG, C_SER_95   | HG, C_SER_95    | 2.88 | 1.95 | 14.90 |
| 1HGE.PDB | OD1, C_ASP_68  | OH, C_TYR_100  | HH, C_TYR_100   | 2.89 | 1.97 | 15.01 |
| 1HGE.PDB | OD2, C_ASP_104 | OG, C_SER_107  | HG, C_SER_107   | 2.88 | 1.96 | 15.70 |
| 1HGE.PDB | OE2, D_GLU_67  | NH2, C_ARG_109 | HH21, C_ARG_109 | 2.78 | 1.79 | 11.19 |
| 1HGE.PDB | OD2, B_ASP_79  | OG, C_SER_110  | HG, C_SER_110   | 2.78 | 1.86 | 15.09 |
| 1HGE.PDB | OE2, C_GLU_119 | OG1, C_THR_117 | HG1, C_THR_117  | 2.89 | 1.94 | 9.29  |
| 1HGE.PDB | OD1, C_ASN_137 | NZ, C_LYS_140  | HZ2, C_LYS_140  | 2.83 | 1.86 | 16.66 |
| 1HGE.PDB | OD2, C_ASP_77  | NE, C_ARG_141  | HE, C_ARG_141   | 2.80 | 1.97 | 26.96 |
| 1HGE.PDB | OD1, C_ASP_77  | NH2, C_ARG_141 | HH21, C_ARG_141 | 2.88 | 1.96 | 21.42 |
| 1HGE.PDB | OD2, C_ASP_77  | NH2, C_ARG_141 | HH21, C_ARG_141 | 2.74 | 1.86 | 24.30 |
| 1HGE.PDB | OH, C_TYR_195  | NE1, C_TRP_153 | HE1, C_TRP_153  | 2.85 | 1.98 | 22.78 |
| 1HGE.PDB | OE2, C_GLU_123 | NZ, C_LYS_176  | HZ1, C_LYS_176  | 2.71 | 1.80 | 23.44 |
| 1HGE.PDB | OE1, C_GLU_123 | OH, C_TYR_178  | HH, C_TYR_178   | 2.73 | 1.80 | 12.29 |
| 1HGE.PDB | OG1, C_THR_235 | NE1, C_TRP_180 | HE1, C_TRP_180  | 2.92 | 1.93 | 1.68  |
| 1HGE.PDB | OG, C_SER_231  | NE2, C_HIS_184 | HE2, C_HIS_184  | 2.71 | 1.87 | 25.48 |
| 1HGE.PDB | OD1, C_ASN_250 | NE2, C_GLN_191 | HE21, C_GLN_191 | 3.00 | 2.03 | 7.73  |
| 1HGE.PDB | OD1, C_ASN_246 | NH2, C_ARG_201 | HH21, C_ARG_201 | 2.62 | 1.75 | 24.53 |
| 1HGE.PDB | OG1, C_THR_212 | OG1, C_THR_203 | HG1, C_THR_203  | 2.89 | 1.94 | 9.07  |
| 1HGE.PDB | OG1, C_THR_206 | OG, C_SER_209  | HG, C_SER_209   | 2.98 | 2.03 | 9.68  |
| 1HGE.PDB | OD1, A_ASP_101 | NE2, C_GLN_210 | HE22, C_GLN_210 | 2.93 | 2.07 | 24.92 |
| 1HGE.PDB | OE1, E_GLN_210 | NH2, C_ARG_220 | HH21, C_ARG_220 | 2.64 | 1.76 | 23.09 |
| 1HGE.PDB | OD1, C_ASP_101 | OG, C_SER_231  | HG, C_SER_231   | 2.89 | 1.93 | 7.03  |
| 1HGE.PDB | OE1, B_GLU_72  | NZ, C_LYS_238  | HZ1, C_LYS_238  | 2.78 | 1.80 | 16.75 |
| 1HGE.PDB | OD1, C_ASN_165 | ND2, C_ASN_246 | HD22, C_ASN_246 | 2.89 | 1.94 | 13.09 |
| 1HGE.PDB | OE1, C_GLN_191 | ND2, C_ASN_250 | HD21, C_ASN_250 | 2.89 | 1.93 | 9.19  |
| 1HGE.PDB | OD1, C_ASN_133 | NH2, C_ARG_255 | HH22, C_ARG_255 | 2.48 | 1.68 | 29.46 |
| 1HGE.PDB | OE2, C_GLU_119 | NH1, C_ARG_261 | HH12, C_ARG_261 | 2.65 | 1.82 | 27.69 |
| 1HGE.PDB | OE1, C_GLU_119 | NH2, C_ARG_261 | HH22, C_ARG_261 | 2.84 | 1.95 | 24.41 |
| 1HGE.PDB | OD2, C_ASP_85  | NZ, C_LYS_264  | HZ3, C_LYS_264  | 2.77 | 1.79 | 16.79 |
| 1HGE.PDB | OE1, C_GLN_44  | NZ, C_LYS_292  | HZ1, C_LYS_292  | 2.72 | 1.72 | 12.77 |
| 1HGE.PDB | OD2, C_ASP_291 | NZ, C_LYS_292  | HZ3, C_LYS_292  | 2.84 | 1.88 | 19.72 |
| 1HGE.PDB | OD1, C_ASN_285 | ND2, C_ASN_298 | HD22, C_ASN_298 | 2.99 | 2.05 | 12.60 |
| 1HGE.PDB | OE1, C_GLU_41  | NZ, C_LYS_315  | HZ3, C_LYS_315  | 2.82 | 1.88 | 21.70 |
| 1HGE.PDB | OE2, C_GLU_35  | ND2, C_ASN_322 | HD22, C_ASN_322 | 2.89 | 2.00 | 20.86 |
| 1HGE.PDB | OE1, D_GLU_15  | NZ, C_LYS_326  | HZ1, C_LYS_326  | 2.74 | 1.73 | 12.73 |
| 1HGE.PDB | OXT, C_THR_328 | NE2, C_GLN_327 | HE22, C_GLN_327 | 2.97 | 2.01 | 12.27 |
| 1HGE.PDB | OE1, D_GLN_34  | NE, D_ARG_25   | HE, D_ARG_25    | 2.56 | 1.76 | 28.50 |
| 1HGE.PDB | OD2, D_ASP_37  | OG, D_SER_40   | HG, D_SER_40    | 2.78 | 1.93 | 24.10 |
| 1HGE.PDB | OD1, D_ASP_46  | NE2, D_GLN_42  | HE22, D_GLN_42  | 2.87 | 1.96 | 19.33 |
| 1HGE.PDB | OE2, D_GLU_114 | NE2, D_GLN_47  | HE21, D_GLN_47  | 2.99 | 2.06 | 16.53 |
| 1HGE.PDB | OG1, D_THR_107 | NZ, D_LYS_51   | HZ1, D_LYS_51   | 2.96 | 1.98 | 16.83 |
| 1HGE.PDB | OE1, D_GLU_103 | NZ, D_LYS_51   | HZ2, D_LYS_51   | 2.76 | 1.73 | 6.47  |
| 1HGE.PDB | ND1, D_HIS_106 | NZ, D_LYS_51   | HZ3, D_LYS_51   | 2.77 | 1.82 | 18.39 |
| 1HGE.PDB | OE1, D_GLU_57  | NH1, D_ARG_54  | HH11, D_ARG_54  | 2.82 | 1.84 | 12.42 |
| 1HGE.PDB | OE2, B_GLU_97  | NH2, D_ARG_54  | HH22, D_ARG_54  | 2.87 | 1.89 | 12.82 |
| 1HGE.PDB | OG, C_SER_110  | NE2, D_HIS_64  | HE2, D_HIS_64   | 2.96 | 1.98 | 6.23  |
| 1HGE.PDB | OE2, D_GLU_85  | NZ, D_LYS_68   | HZ2, D_LYS_68   | 2.80 | 1.78 | 10.75 |
| 1HGE.PDB | OE2, F_GLU_81  | NE, D_ARG_76   | HE, D_ARG_76    | 2.79 | 1.85 | 14.06 |
| 1HGE.PDB | OE2, F_GLU_74  | NH1, D_ARG_76  | HH12, D_ARG_76  | 2.78 | 1.78 | 7.91  |

|          |                |                |                 |      |      |       |
|----------|----------------|----------------|-----------------|------|------|-------|
| 1HGE.PDB | OE1, F_GLU_81  | NH2, D_ARG_76  | HH21, D_ARG_76  | 2.63 | 1.67 | 11.36 |
| 1HGE.PDB | OE1, F_GLU_74  | NH2, D_ARG_76  | HH22, D_ARG_76  | 2.74 | 1.75 | 7.04  |
| 1HGE.PDB | OE1, D_GLU_74  | NE2, D_GLN_78  | HE22, D_GLN_78  | 2.96 | 1.99 | 8.03  |
| 1HGE.PDB | OE1, F_GLU_85  | OH, D_TYR_83   | HH, D_TYR_83    | 2.58 | 1.80 | 29.40 |
| 1HGE.PDB | OH, B_TYR_83   | NZ, D_LYS_88   | HZ1, D_LYS_88   | 2.71 | 1.68 | 6.52  |
| 1HGE.PDB | OE2, D_GLU_120 | NH1, D_ARG_123 | HH11, D_ARG_123 | 2.83 | 1.93 | 23.01 |
| 1HGE.PDB | OE1, B_GLU_132 | NE, D_ARG_124  | HE, D_ARG_124   | 2.78 | 1.98 | 28.90 |
| 1HGE.PDB | OE2, B_GLU_132 | NE, D_ARG_124  | HE, D_ARG_124   | 2.90 | 2.01 | 20.41 |
| 1HGE.PDB | OH, D_TYR_157  | ND2, D_ASN_129 | HD22, D_ASN_129 | 2.81 | 1.85 | 9.24  |
| 1HGE.PDB | OD1, D_ASN_154 | OG1, D_THR_156 | HG1, D_THR_156  | 2.74 | 1.81 | 12.51 |
| 1HGE.PDB | NE2, D_HIS_142 | OH, D_TYR_157  | HH, D_TYR_157   | 2.73 | 1.86 | 21.01 |
| 1HGE.PDB | OE2, D_GLU_131 | NH1, D_ARG_170 | HH11, D_ARG_170 | 2.79 | 1.79 | 6.83  |
| 1HGE.PDB | OE2, F_GLU_97  | NZ, E_LYS_27   | HZ1, E_LYS_27   | 2.79 | 1.77 | 9.75  |
| 1HGE.PDB | OD2, E_ASP_275 | NZ, E_LYS_50   | HZ1, E_LYS_50   | 2.73 | 1.80 | 21.86 |
| 1HGE.PDB | OD1, E_ASP_73  | ND1, E_HIS_75  | HD1, E_HIS_75   | 2.77 | 1.85 | 16.90 |
| 1HGE.PDB | OD1, E_ASP_60  | NE, E_ARG_90   | HE, E_ARG_90    | 2.88 | 1.91 | 8.59  |
| 1HGE.PDB | OD2, E_ASP_60  | NH2, E_ARG_90  | HH21, E_ARG_90  | 2.80 | 1.80 | 8.94  |
| 1HGE.PDB | OD2, E_ASP_271 | OG, E_SER_91   | HG, E_SER_91    | 2.83 | 1.92 | 17.26 |
| 1HGE.PDB | OD2, E_ASP_68  | OG, E_SER_95   | HG, E_SER_95    | 2.91 | 1.97 | 13.28 |
| 1HGE.PDB | OD1, E_ASP_68  | OH, E_TYR_100  | HH, E_TYR_100   | 2.88 | 1.95 | 14.25 |
| 1HGE.PDB | OD2, E_ASP_104 | OG, E_SER_107  | HG, E_SER_107   | 2.86 | 1.93 | 15.15 |
| 1HGE.PDB | OE2, F_GLU_67  | NH2, E_ARG_109 | HH21, E_ARG_109 | 2.78 | 1.79 | 11.63 |
| 1HGE.PDB | OD2, D_ASP_79  | OG, E_SER_110  | HG, E_SER_110   | 2.82 | 1.89 | 14.19 |
| 1HGE.PDB | OE2, E_GLU_119 | OG1, E_THR_117 | HG1, E_THR_117  | 2.93 | 1.97 | 8.29  |
| 1HGE.PDB | OD1, E_ASN_137 | NZ, E_LYS_140  | HZ2, E_LYS_140  | 2.84 | 1.86 | 16.83 |
| 1HGE.PDB | OD2, E_ASP_77  | NE, E_ARG_141  | HE, E_ARG_141   | 2.80 | 1.96 | 26.48 |
| 1HGE.PDB | OD1, E_ASP_77  | NH2, E_ARG_141 | HH21, E_ARG_141 | 2.91 | 2.00 | 21.55 |
| 1HGE.PDB | OD2, E_ASP_77  | NH2, E_ARG_141 | HH21, E_ARG_141 | 2.75 | 1.87 | 24.36 |
| 1HGE.PDB | OD1, E_ASP_77  | OG, E_SER_149  | HG, E_SER_149   | 2.99 | 2.14 | 24.93 |
| 1HGE.PDB | OH, E_TYR_195  | NE1, E_TRP_153 | HE1, E_TRP_153  | 2.90 | 1.99 | 18.82 |
| 1HGE.PDB | OE2, E_GLU_123 | NZ, E_LYS_176  | HZ1, E_LYS_176  | 2.73 | 1.81 | 23.24 |
| 1HGE.PDB | OE1, E_GLU_123 | OH, E_TYR_178  | HH, E_TYR_178   | 2.75 | 1.82 | 12.06 |
| 1HGE.PDB | OG1, E_THR_235 | NE1, E_TRP_180 | HE1, E_TRP_180  | 2.93 | 1.94 | 2.48  |
| 1HGE.PDB | OG, E_SER_231  | NE2, E_HIS_184 | HE2, E_HIS_184  | 2.75 | 1.91 | 25.72 |
| 1HGE.PDB | OD1, E_ASN_246 | NH2, E_ARG_201 | HH21, E_ARG_201 | 2.61 | 1.75 | 25.36 |
| 1HGE.PDB | OG1, E_THR_212 | OG1, E_THR_203 | HG1, E_THR_203  | 2.89 | 1.95 | 10.14 |
| 1HGE.PDB | OG1, E_THR_206 | OG, E_SER_209  | HG, E_SER_209   | 2.98 | 2.04 | 10.06 |
| 1HGE.PDB | OD1, C_ASP_101 | NE2, E_GLN_210 | HE22, E_GLN_210 | 2.89 | 2.04 | 25.02 |
| 1HGE.PDB | OE1, A_GLN_210 | NH2, E_ARG_220 | HH21, E_ARG_220 | 2.74 | 1.87 | 25.04 |
| 1HGE.PDB | OD1, E_ASP_101 | OG, E_SER_231  | HG, E_SER_231   | 2.87 | 1.92 | 12.10 |
| 1HGE.PDB | OE1, D_GLU_72  | NZ, E_LYS_238  | HZ3, E_LYS_238  | 2.85 | 1.84 | 12.25 |
| 1HGE.PDB | OD1, E_ASN_165 | ND2, E_ASN_246 | HD22, E_ASN_246 | 2.88 | 1.93 | 12.25 |
| 1HGE.PDB | OE1, E_GLN_191 | ND2, E_ASN_250 | HD21, E_ASN_250 | 2.94 | 1.97 | 8.28  |
| 1HGE.PDB | OD1, E_ASN_133 | NH2, E_ARG_255 | HH22, E_ARG_255 | 2.49 | 1.68 | 28.65 |
| 1HGE.PDB | OE2, E_GLU_119 | NH1, E_ARG_261 | HH12, E_ARG_261 | 2.65 | 1.81 | 27.82 |
| 1HGE.PDB | OE1, E_GLU_119 | NH2, E_ARG_261 | HH22, E_ARG_261 | 2.83 | 1.95 | 24.52 |
| 1HGE.PDB | OD2, E_ASP_85  | NZ, E_LYS_264  | HZ3, E_LYS_264  | 2.81 | 1.83 | 16.30 |
| 1HGE.PDB | OE1, E_GLN_44  | NZ, E_LYS_292  | HZ1, E_LYS_292  | 2.72 | 1.72 | 11.93 |
| 1HGE.PDB | OD2, E_ASP_291 | NZ, E_LYS_292  | HZ3, E_LYS_292  | 2.84 | 1.89 | 19.87 |
| 1HGE.PDB | OD1, E_ASN_285 | ND2, E_ASN_298 | HD22, E_ASN_298 | 2.98 | 2.04 | 13.10 |
| 1HGE.PDB | OD1, F_ASP_86  | NZ, E_LYS_310  | HZ3, E_LYS_310  | 2.86 | 2.02 | 29.64 |
| 1HGE.PDB | OE1, E_GLU_41  | NZ, E_LYS_315  | HZ3, E_LYS_315  | 2.80 | 1.87 | 22.54 |
| 1HGE.PDB | OE2, E_GLU_35  | ND2, E_ASN_322 | HD22, E_ASN_322 | 2.87 | 1.98 | 21.90 |
| 1HGE.PDB | OE1, F_GLU_15  | NZ, E_LYS_326  | HZ3, E_LYS_326  | 2.99 | 2.00 | 17.08 |
| 1HGE.PDB | OE1, F_GLN_34  | NE, F_ARG_25   | HE, F_ARG_25    | 2.92 | 2.07 | 24.83 |
| 1HGE.PDB | OE1, F_GLN_34  | NH2, F_ARG_25  | HH21, F_ARG_25  | 2.81 | 1.90 | 20.25 |
| 1HGE.PDB | OD1, F_ASN_146 | ND2, F_ASN_28  | HD21, F_ASN_28  | 2.81 | 1.89 | 15.75 |
| 1HGE.PDB | OD2, F_ASP_37  | OG, F_SER_40   | HG, F_SER_40    | 2.76 | 1.94 | 26.96 |



|          |                |                |                 |      |      |       |
|----------|----------------|----------------|-----------------|------|------|-------|
| 1HGE.PDB | OD1, F_ASP_46  | NE2, F_GLN_42  | HE22, F_GLN_42  | 2.86 | 1.96 | 19.38 |
| 1HGE.PDB | OE2, F_GLU_114 | NE2, F_GLN_47  | HE21, F_GLN_47  | 3.00 | 2.09 | 17.78 |
| 1HGE.PDB | OG1, F_THR_107 | NZ, F_LYS_51   | HZ1, F_LYS_51   | 2.97 | 2.00 | 18.12 |
| 1HGE.PDB | OE1, F_GLU_103 | NZ, F_LYS_51   | HZ2, F_LYS_51   | 2.77 | 1.74 | 6.40  |
| 1HGE.PDB | ND1, F_HIS_106 | NZ, F_LYS_51   | HZ3, F_LYS_51   | 2.74 | 1.79 | 17.89 |
| 1HGE.PDB | OE1, F_GLU_57  | NH1, F_ARG_54  | HH11, F_ARG_54  | 2.82 | 1.83 | 11.59 |
| 1HGE.PDB | OE2, D_GLU_97  | NH2, F_ARG_54  | HH22, F_ARG_54  | 2.80 | 1.82 | 12.52 |
| 1HGE.PDB | OD2, D_ASP_90  | NZ, F_LYS_62   | HZ2, F_LYS_62   | 2.67 | 1.83 | 29.15 |
| 1HGE.PDB | OG, E_SER_110  | NE2, F_HIS_64  | HE2, F_HIS_64   | 2.94 | 1.97 | 9.11  |
| 1HGE.PDB | OE2, F_GLU_85  | NZ, F_LYS_68   | HZ2, F_LYS_68   | 2.75 | 1.78 | 18.51 |
| 1HGE.PDB | OE2, B_GLU_81  | NE, F_ARG_76   | HE, F_ARG_76    | 2.85 | 1.89 | 11.64 |
| 1HGE.PDB | OE2, B_GLU_74  | NH1, F_ARG_76  | HH12, F_ARG_76  | 2.73 | 1.73 | 6.19  |
| 1HGE.PDB | OE1, B_GLU_81  | NH2, F_ARG_76  | HH21, F_ARG_76  | 2.65 | 1.66 | 5.51  |
| 1HGE.PDB | OE1, B_GLU_74  | NH2, F_ARG_76  | HH22, F_ARG_76  | 2.70 | 1.73 | 9.07  |
| 1HGE.PDB | OE1, F_GLU_74  | NE2, F_GLN_78  | HE22, F_GLN_78  | 2.96 | 1.99 | 8.87  |
| 1HGE.PDB | OE1, B_GLU_85  | OH, F_TYR_83   | HH, F_TYR_83    | 2.51 | 1.76 | 30.00 |
| 1HGE.PDB | OH, D_TYR_83   | NZ, F_LYS_88   | HZ1, F_LYS_88   | 2.67 | 1.65 | 8.34  |
| 1HGE.PDB | OE2, F_GLU_120 | NH1, F_ARG_123 | HH11, F_ARG_123 | 2.81 | 1.92 | 23.28 |
| 1HGE.PDB | OE1, D_GLU_132 | NE, F_ARG_124  | HE, F_ARG_124   | 2.92 | 2.09 | 27.36 |
| 1HGE.PDB | OH, F_TYR_157  | ND2, F_ASN_129 | HD22, F_ASN_129 | 2.80 | 1.87 | 15.30 |
| 1HGE.PDB | OE2, F_GLU_131 | NH1, F_ARG_170 | HH11, F_ARG_170 | 2.78 | 1.79 | 6.04  |
| 1HGF.PDB | OE2, B_GLU_97  | NZ, A_LYS_27   | HZ1, A_LYS_27   | 2.79 | 1.86 | 21.55 |
| 1HGF.PDB | OD2, A_ASP_275 | NZ, A_LYS_50   | HZ2, A_LYS_50   | 2.91 | 1.91 | 15.13 |
| 1HGF.PDB | OD1, A_ASP_73  | ND1, A_HIS_75  | HD1, A_HIS_75   | 2.84 | 1.91 | 15.59 |
| 1HGF.PDB | OD1, A_ASP_60  | NE, A_ARG_90   | HE, A_ARG_90    | 2.77 | 1.85 | 16.11 |
| 1HGF.PDB | OD2, A_ASP_60  | NH2, A_ARG_90  | HH21, A_ARG_90  | 2.84 | 1.84 | 8.73  |
| 1HGF.PDB | OD2, A_ASP_271 | OG, A_SER_91   | HG, A_SER_91    | 2.85 | 1.91 | 12.59 |
| 1HGF.PDB | OD2, A_ASP_104 | OG, A_SER_107  | HG, A_SER_107   | 2.89 | 1.97 | 16.55 |
| 1HGF.PDB | OE2, B_GLU_67  | NH2, A_ARG_109 | HH21, A_ARG_109 | 2.92 | 1.92 | 10.51 |
| 1HGF.PDB | OD2, F_ASP_79  | OG, A_SER_110  | HG, A_SER_110   | 2.82 | 1.90 | 15.87 |
| 1HGF.PDB | OE2, A_GLU_119 | OG1, A_THR_117 | HG1, A_THR_117  | 2.95 | 1.98 | 3.95  |
| 1HGF.PDB | ND2, A_ASN_152 | NE2, A_GLN_132 | HE21, A_GLN_132 | 2.94 | 2.00 | 10.26 |
| 1HGF.PDB | OD2, A_ASP_77  | NE, A_ARG_141  | HE, A_ARG_141   | 2.91 | 2.06 | 25.46 |
| 1HGF.PDB | OD1, A_ASP_77  | NH2, A_ARG_141 | HH21, A_ARG_141 | 2.84 | 1.97 | 26.05 |
| 1HGF.PDB | OD2, A_ASP_77  | NH2, A_ARG_141 | HH21, A_ARG_141 | 2.78 | 1.86 | 20.91 |
| 1HGF.PDB | OH, A_TYR_195  | NE1, A_TRP_153 | HE1, A_TRP_153  | 2.84 | 1.90 | 13.02 |
| 1HGF.PDB | OE2, A_GLU_123 | NZ, A_LYS_176  | HZ1, A_LYS_176  | 2.72 | 1.80 | 23.85 |
| 1HGF.PDB | OG1, A_THR_235 | NE1, A_TRP_180 | HE1, A_TRP_180  | 2.87 | 1.89 | 5.46  |
| 1HGF.PDB | OH, A_TYR_98   | NE2, A_HIS_183 | HE2, A_HIS_183  | 2.90 | 1.98 | 15.32 |
| 1HGF.PDB | OG, A_SER_231  | NE2, A_HIS_184 | HE2, A_HIS_184  | 2.68 | 1.88 | 29.05 |
| 1HGF.PDB | OD1, A_ASN_250 | NE2, A_GLN_191 | HE22, A_GLN_191 | 2.90 | 1.94 | 8.27  |
| 1HGF.PDB | OG1, A_THR_203 | OG1, A_THR_212 | HG1, A_THR_212  | 2.83 | 1.91 | 15.11 |
| 1HGF.PDB | OE1, C_GLN_210 | NH2, A_ARG_220 | HH21, A_ARG_220 | 2.64 | 1.76 | 23.62 |
| 1HGF.PDB | OD1, A_ASP_101 | OG, A_SER_231  | HG, A_SER_231   | 2.83 | 1.87 | 7.29  |
| 1HGF.PDB | OE1, F_GLU_72  | NZ, A_LYS_238  | HZ2, A_LYS_238  | 2.85 | 1.85 | 14.58 |
| 1HGF.PDB | OD1, A_ASN_165 | ND2, A_ASN_246 | HD21, A_ASN_246 | 2.93 | 2.03 | 19.92 |
| 1HGF.PDB | OE1, A_GLN_191 | ND2, A_ASN_250 | HD22, A_ASN_250 | 2.86 | 1.90 | 9.57  |
| 1HGF.PDB | OD1, A_ASN_133 | NH2, A_ARG_255 | HH22, A_ARG_255 | 2.49 | 1.67 | 28.52 |
| 1HGF.PDB | OE1, A_GLU_119 | NH2, A_ARG_261 | HH22, A_ARG_261 | 2.74 | 1.90 | 27.76 |
| 1HGF.PDB | OE1, A_GLN_44  | NZ, A_LYS_292  | HZ1, A_LYS_292  | 2.87 | 1.83 | 0.68  |
| 1HGF.PDB | OD1, A_ASP_291 | NZ, A_LYS_292  | HZ2, A_LYS_292  | 2.86 | 1.83 | 8.47  |
| 1HGF.PDB | OE1, A_GLU_41  | OG1, A_THR_313 | HG1, A_THR_313  | 2.68 | 1.87 | 27.57 |
| 1HGF.PDB | OG1, A_THR_313 | NZ, A_LYS_315  | HZ2, A_LYS_315  | 2.95 | 2.00 | 20.61 |
| 1HGF.PDB | OE2, A_GLU_35  | ND2, A_ASN_322 | HD21, A_ASN_322 | 2.76 | 1.93 | 26.44 |
| 1HGF.PDB | OE1, B_GLN_34  | NE, B_ARG_25   | HE, B_ARG_25    | 2.64 | 1.77 | 20.89 |
| 1HGF.PDB | OE1, B_GLN_34  | NH2, B_ARG_25  | HH21, B_ARG_25  | 2.81 | 1.99 | 28.67 |
| 1HGF.PDB | OE2, A_GLU_325 | NH2, B_ARG_25  | HH22, B_ARG_25  | 2.99 | 2.04 | 16.52 |
| 1HGF.PDB | OD1, B_ASP_46  | NE2, B_GLN_42  | HE21, B_GLN_42  | 2.87 | 1.99 | 22.40 |

|          |                |                |                 |      |      |       |
|----------|----------------|----------------|-----------------|------|------|-------|
| 1HGF.PDB | OE1, B_GLU_103 | NZ, B_LYS_51   | HZ1, B_LYS_51   | 2.74 | 1.70 | 5.26  |
| 1HGF.PDB | ND1, B_HIS_106 | NZ, B_LYS_51   | HZ3, B_LYS_51   | 2.67 | 1.72 | 18.38 |
| 1HGF.PDB | OE2, F_GLU_97  | NH2, B_ARG_54  | HH22, B_ARG_54  | 2.83 | 1.86 | 13.50 |
| 1HGF.PDB | OD2, F_ASP_86  | NZ, B_LYS_62   | HZ2, B_LYS_62   | 2.71 | 1.70 | 11.44 |
| 1HGF.PDB | OD2, F_ASP_90  | NZ, B_LYS_62   | HZ3, B_LYS_62   | 2.77 | 1.82 | 20.37 |
| 1HGF.PDB | OG, A_SER_266  | ND1, B_HIS_64  | HD1, B_HIS_64   | 2.66 | 1.79 | 20.68 |
| 1HGF.PDB | OG, A_SER_110  | NE2, B_HIS_64  | HE2, B_HIS_64   | 2.89 | 1.92 | 10.70 |
| 1HGF.PDB | OE2, B_GLU_85  | NZ, B_LYS_68   | HZ1, B_LYS_68   | 2.67 | 1.75 | 22.44 |
| 1HGF.PDB | OE2, D_GLU_81  | NE, B_ARG_76   | HE, B_ARG_76    | 2.92 | 1.92 | 2.47  |
| 1HGF.PDB | OE1, D_GLU_74  | NH1, B_ARG_76  | HH12, B_ARG_76  | 2.86 | 1.84 | 3.80  |
| 1HGF.PDB | OE1, D_GLU_81  | NH2, B_ARG_76  | HH21, B_ARG_76  | 2.73 | 1.74 | 10.29 |
| 1HGF.PDB | OE2, D_GLU_74  | NH2, B_ARG_76  | HH22, B_ARG_76  | 2.75 | 1.74 | 3.91  |
| 1HGF.PDB | OE1, D_GLU_85  | OH, B_TYR_83   | HH, B_TYR_83    | 2.57 | 1.80 | 29.66 |
| 1HGF.PDB | OH, F_TYR_83   | NZ, B_LYS_88   | HZ1, B_LYS_88   | 2.72 | 1.70 | 9.91  |
| 1HGF.PDB | OE2, B_GLU_120 | NH1, B_ARG_123 | HH11, B_ARG_123 | 2.78 | 1.93 | 26.74 |
| 1HGF.PDB | OE1, F_GLU_132 | NE, B_ARG_124  | HE, B_ARG_124   | 2.80 | 1.86 | 13.00 |
| 1HGF.PDB | OH, B_TYR_157  | ND2, B_ASN_129 | HD21, B_ASN_129 | 2.81 | 1.86 | 11.58 |
| 1HGF.PDB | OD1, B_ASN_154 | OG1, B_THR_156 | HG1, B_THR_156  | 2.68 | 1.80 | 19.09 |
| 1HGF.PDB | OE1, F_GLU_131 | NH2, B_ARG_163 | HH21, B_ARG_163 | 2.74 | 1.86 | 24.20 |
| 1HGF.PDB | OE2, B_GLU_131 | NH1, B_ARG_170 | HH11, B_ARG_170 | 2.84 | 1.84 | 5.96  |
| 1HGF.PDB | OE2, D_GLU_97  | NZ, C_LYS_27   | HZ1, C_LYS_27   | 2.81 | 1.85 | 19.93 |
| 1HGF.PDB | OD2, C_ASP_275 | NZ, C_LYS_50   | HZ2, C_LYS_50   | 2.88 | 1.87 | 13.71 |
| 1HGF.PDB | OD1, C_ASP_73  | ND1, C_HIS_75  | HD1, C_HIS_75   | 2.84 | 1.90 | 12.73 |
| 1HGF.PDB | OD1, C_ASP_60  | NE, C_ARG_90   | HE, C_ARG_90    | 2.76 | 1.85 | 16.46 |
| 1HGF.PDB | OD2, C_ASP_60  | NH2, C_ARG_90  | HH21, C_ARG_90  | 2.84 | 1.85 | 9.99  |
| 1HGF.PDB | OD1, C_ASP_271 | OG, C_SER_91   | HG, C_SER_91    | 2.91 | 2.11 | 29.01 |
| 1HGF.PDB | OD2, C_ASP_271 | OG, C_SER_91   | HG, C_SER_91    | 2.86 | 1.95 | 16.65 |
| 1HGF.PDB | OD1, C_ASP_68  | OH, C_TYR_100  | HH, C_TYR_100   | 2.97 | 2.03 | 12.15 |
| 1HGF.PDB | OD2, C_ASP_104 | OG, C_SER_107  | HG, C_SER_107   | 2.91 | 1.98 | 14.76 |
| 1HGF.PDB | OE2, D_GLU_67  | NH2, C_ARG_109 | HH21, C_ARG_109 | 2.91 | 1.92 | 11.49 |
| 1HGF.PDB | OD2, B_ASP_79  | OG, C_SER_110  | HG, C_SER_110   | 2.69 | 1.85 | 25.37 |
| 1HGF.PDB | OE2, C_GLU_119 | OG1, C_THR_117 | HG1, C_THR_117  | 2.97 | 2.00 | 2.16  |
| 1HGF.PDB | ND2, C_ASN_152 | NE2, C_GLN_132 | HE21, C_GLN_132 | 2.94 | 2.00 | 12.42 |
| 1HGF.PDB | OD2, C_ASP_77  | NE, C_ARG_141  | HE, C_ARG_141   | 2.91 | 2.05 | 25.56 |
| 1HGF.PDB | OD1, C_ASP_77  | NH2, C_ARG_141 | HH21, C_ARG_141 | 2.84 | 1.98 | 26.48 |
| 1HGF.PDB | OD2, C_ASP_77  | NH2, C_ARG_141 | HH21, C_ARG_141 | 2.79 | 1.86 | 20.63 |
| 1HGF.PDB | OH, C_TYR_195  | NE1, C_TRP_153 | HE1, C_TRP_153  | 2.82 | 1.92 | 18.47 |
| 1HGF.PDB | OE2, C_GLU_123 | NZ, C_LYS_176  | HZ1, C_LYS_176  | 2.72 | 1.80 | 22.47 |
| 1HGF.PDB | OG1, C_THR_235 | NE1, C_TRP_180 | HE1, C_TRP_180  | 2.86 | 1.88 | 3.91  |
| 1HGF.PDB | OH, C_TYR_98   | NE2, C_HIS_183 | HE2, C_HIS_183  | 2.89 | 1.99 | 18.89 |
| 1HGF.PDB | OG, C_SER_231  | NE2, C_HIS_184 | HE2, C_HIS_184  | 2.67 | 1.86 | 27.83 |
| 1HGF.PDB | OD1, C_ASN_250 | NE2, C_GLN_191 | HE22, C_GLN_191 | 2.91 | 1.94 | 7.66  |
| 1HGF.PDB | OG1, C_THR_212 | OG1, C_THR_203 | HG1, C_THR_203  | 2.82 | 1.90 | 14.76 |
| 1HGF.PDB | OE1, E_GLN_210 | NH2, C_ARG_220 | HH21, C_ARG_220 | 2.56 | 1.72 | 26.72 |
| 1HGF.PDB | OD1, C_ASP_101 | OG, C_SER_231  | HG, C_SER_231   | 2.86 | 1.89 | 4.34  |
| 1HGF.PDB | OE1, B_GLU_72  | NZ, C_LYS_238  | HZ2, C_LYS_238  | 2.75 | 1.78 | 18.48 |
| 1HGF.PDB | OD1, C_ASN_165 | ND2, C_ASN_246 | HD21, C_ASN_246 | 2.93 | 2.04 | 21.38 |
| 1HGF.PDB | OE1, C_GLN_191 | ND2, C_ASN_250 | HD22, C_ASN_250 | 2.84 | 1.89 | 10.62 |
| 1HGF.PDB | OD1, C_ASN_133 | NH2, C_ARG_255 | HH22, C_ARG_255 | 2.47 | 1.67 | 28.90 |
| 1HGF.PDB | OE1, C_GLU_119 | NH2, C_ARG_261 | HH22, C_ARG_261 | 2.72 | 1.88 | 28.14 |
| 1HGF.PDB | OE1, C_GLN_44  | NZ, C_LYS_292  | HZ1, C_LYS_292  | 2.89 | 1.84 | 2.00  |
| 1HGF.PDB | OD1, C_ASP_291 | NZ, C_LYS_292  | HZ2, C_LYS_292  | 2.88 | 1.85 | 8.89  |
| 1HGF.PDB | OE1, C_GLU_41  | OG1, C_THR_313 | HG1, C_THR_313  | 2.66 | 1.87 | 29.10 |
| 1HGF.PDB | OG1, C_THR_313 | NZ, C_LYS_315  | HZ2, C_LYS_315  | 2.92 | 1.98 | 21.54 |
| 1HGF.PDB | OE2, C_GLU_35  | ND2, C_ASN_322 | HD21, C_ASN_322 | 2.77 | 1.93 | 25.57 |
| 1HGF.PDB | OXT, C_THR_328 | NE2, C_GLN_327 | HE21, C_GLN_327 | 2.93 | 2.09 | 26.28 |
| 1HGF.PDB | OE1, D_GLN_34  | NE, D_ARG_25   | HE, D_ARG_25    | 2.69 | 1.78 | 17.17 |
| 1HGF.PDB | OD1, D_ASN_146 | ND2, D_ASN_28  | HD22, D_ASN_28  | 2.89 | 1.97 | 17.31 |

|          |                |                |                 |      |      |       |
|----------|----------------|----------------|-----------------|------|------|-------|
| 1HGF.PDB | OD2, D_ASP_37  | OG, D_SER_40   | HG, D_SER_40    | 2.85 | 1.95 | 18.29 |
| 1HGF.PDB | OD1, D_ASP_46  | NE2, D_GLN_42  | HE21, D_GLN_42  | 2.85 | 1.97 | 22.40 |
| 1HGF.PDB | OE1, D_GLU_103 | NZ, D_LYS_51   | HZ1, D_LYS_51   | 2.74 | 1.71 | 5.53  |
| 1HGF.PDB | ND1, D_HIS_106 | NZ, D_LYS_51   | HZ3, D_LYS_51   | 2.69 | 1.73 | 17.89 |
| 1HGF.PDB | OE2, B_GLU_97  | NH2, D_ARG_54  | HH22, D_ARG_54  | 2.84 | 1.86 | 12.74 |
| 1HGF.PDB | OD2, B_ASP_86  | NZ, D_LYS_62   | HZ2, D_LYS_62   | 2.69 | 1.69 | 13.49 |
| 1HGF.PDB | OD2, B_ASP_90  | NZ, D_LYS_62   | HZ3, D_LYS_62   | 2.68 | 1.77 | 22.81 |
| 1HGF.PDB | OG, C_SER_266  | ND1, D_HIS_64  | HD1, D_HIS_64   | 2.64 | 1.83 | 27.58 |
| 1HGF.PDB | OG, C_SER_110  | NE2, D_HIS_64  | HE2, D_HIS_64   | 2.90 | 1.92 | 7.33  |
| 1HGF.PDB | OE2, D_GLU_85  | NZ, D_LYS_68   | HZ1, D_LYS_68   | 2.73 | 1.78 | 19.48 |
| 1HGF.PDB | OE2, F_GLU_81  | NE, D_ARG_76   | HE, D_ARG_76    | 2.82 | 1.85 | 5.34  |
| 1HGF.PDB | OE1, F_GLU_74  | NH1, D_ARG_76  | HH12, D_ARG_76  | 2.79 | 1.78 | 3.81  |
| 1HGF.PDB | OE1, F_GLU_81  | NH2, D_ARG_76  | HH21, D_ARG_76  | 2.64 | 1.68 | 12.43 |
| 1HGF.PDB | OE2, F_GLU_74  | NH2, D_ARG_76  | HH22, D_ARG_76  | 2.70 | 1.71 | 7.38  |
| 1HGF.PDB | OE1, F_GLU_85  | OH, D_TYR_83   | HH, D_TYR_83    | 2.58 | 1.80 | 29.87 |
| 1HGF.PDB | OH, B_TYR_83   | NZ, D_LYS_88   | HZ1, D_LYS_88   | 2.68 | 1.69 | 13.85 |
| 1HGF.PDB | OE2, D_GLU_120 | NH1, D_ARG_123 | HH11, D_ARG_123 | 2.79 | 1.92 | 25.71 |
| 1HGF.PDB | OE1, B_GLU_132 | NE, D_ARG_124  | HE, D_ARG_124   | 2.79 | 1.88 | 16.40 |
| 1HGF.PDB | OH, D_TYR_157  | ND2, D_ASN_129 | HD21, D_ASN_129 | 2.81 | 1.84 | 5.39  |
| 1HGF.PDB | OG, D_SER_29   | NZ, D_LYS_143  | HZ1, D_LYS_143  | 2.83 | 1.89 | 20.16 |
| 1HGF.PDB | OD1, D_ASN_154 | OG1, D_THR_156 | HG1, D_THR_156  | 2.72 | 1.80 | 12.72 |
| 1HGF.PDB | NE2, D_HIS_142 | OH, D_TYR_157  | HH, D_TYR_157   | 2.72 | 1.85 | 19.75 |
| 1HGF.PDB | OE1, B_GLU_131 | NH2, D_ARG_163 | HH21, D_ARG_163 | 2.70 | 1.83 | 24.43 |
| 1HGF.PDB | OE2, D_GLU_131 | NH1, D_ARG_170 | HH11, D_ARG_170 | 2.84 | 1.84 | 5.29  |
| 1HGF.PDB | OE2, F_GLU_97  | NZ, E_LYS_27   | HZ1, E_LYS_27   | 2.75 | 1.83 | 22.30 |
| 1HGF.PDB | OD2, E_ASP_275 | NZ, E_LYS_50   | HZ2, E_LYS_50   | 2.90 | 1.90 | 14.56 |
| 1HGF.PDB | OD1, E_ASP_73  | ND1, E_HIS_75  | HD1, E_HIS_75   | 2.85 | 1.91 | 12.17 |
| 1HGF.PDB | OD1, E_ASP_60  | NE, E_ARG_90   | HE, E_ARG_90    | 2.80 | 1.85 | 10.51 |
| 1HGF.PDB | OD2, E_ASP_60  | NH2, E_ARG_90  | HH21, E_ARG_90  | 2.88 | 1.89 | 10.22 |
| 1HGF.PDB | OD2, E_ASP_104 | OG, E_SER_107  | HG, E_SER_107   | 2.88 | 1.94 | 12.45 |
| 1HGF.PDB | OE2, F_GLU_67  | NH2, E_ARG_109 | HH21, E_ARG_109 | 2.88 | 1.88 | 11.28 |
| 1HGF.PDB | OD2, D_ASP_79  | OG, E_SER_110  | HG, E_SER_110   | 2.78 | 1.90 | 21.69 |
| 1HGF.PDB | OE2, E_GLU_119 | OG1, E_THR_117 | HG1, E_THR_117  | 2.96 | 1.99 | 6.08  |
| 1HGF.PDB | ND2, E_ASN_152 | NE2, E_GLN_132 | HE21, E_GLN_132 | 2.95 | 2.01 | 11.55 |
| 1HGF.PDB | OD2, E_ASP_77  | NE, E_ARG_141  | HE, E_ARG_141   | 2.92 | 2.06 | 25.46 |
| 1HGF.PDB | OD1, E_ASP_77  | NH2, E_ARG_141 | HH21, E_ARG_141 | 2.83 | 1.96 | 25.41 |
| 1HGF.PDB | OD2, E_ASP_77  | NH2, E_ARG_141 | HH21, E_ARG_141 | 2.77 | 1.86 | 21.24 |
| 1HGF.PDB | OH, E_TYR_195  | NE1, E_TRP_153 | HE1, E_TRP_153  | 2.83 | 1.89 | 12.15 |
| 1HGF.PDB | OE2, E_GLU_123 | NZ, E_LYS_176  | HZ1, E_LYS_176  | 2.76 | 1.80 | 18.44 |
| 1HGF.PDB | OE1, E_GLU_123 | OH, E_TYR_178  | HH, E_TYR_178   | 2.88 | 1.93 | 11.71 |
| 1HGF.PDB | OG1, E_THR_235 | NE1, E_TRP_180 | HE1, E_TRP_180  | 2.85 | 1.87 | 2.94  |
| 1HGF.PDB | OH, E_TYR_98   | NE2, E_HIS_183 | HE2, E_HIS_183  | 2.91 | 1.99 | 15.99 |
| 1HGF.PDB | OG, E_SER_231  | NE2, E_HIS_184 | HE2, E_HIS_184  | 2.70 | 1.89 | 28.56 |
| 1HGF.PDB | OD1, E_ASN_250 | NE2, E_GLN_191 | HE22, E_GLN_191 | 2.96 | 1.99 | 7.90  |
| 1HGF.PDB | OG1, E_THR_212 | OG1, E_THR_203 | HG1, E_THR_203  | 2.89 | 1.95 | 9.70  |
| 1HGF.PDB | OE1, A_GLN_210 | NH2, E_ARG_220 | HH21, E_ARG_220 | 2.65 | 1.79 | 25.97 |
| 1HGF.PDB | OD1, E_ASP_101 | OG, E_SER_231  | HG, E_SER_231   | 2.82 | 1.90 | 15.36 |
| 1HGF.PDB | OE1, D_GLU_72  | NZ, E_LYS_238  | HZ2, E_LYS_238  | 2.83 | 1.84 | 16.42 |
| 1HGF.PDB | OD1, E_ASN_165 | ND2, E_ASN_246 | HD21, E_ASN_246 | 2.93 | 2.02 | 19.67 |
| 1HGF.PDB | OE1, E_GLN_191 | ND2, E_ASN_250 | HD22, E_ASN_250 | 2.87 | 1.91 | 8.14  |
| 1HGF.PDB | OD1, E_ASN_133 | NH2, E_ARG_255 | HH22, E_ARG_255 | 2.47 | 1.67 | 29.09 |
| 1HGF.PDB | OE1, E_GLU_119 | NH2, E_ARG_261 | HH22, E_ARG_261 | 2.73 | 1.89 | 28.16 |
| 1HGF.PDB | OE1, E_GLN_44  | NZ, E_LYS_292  | HZ1, E_LYS_292  | 2.90 | 1.86 | 1.40  |
| 1HGF.PDB | OD1, E_ASP_291 | NZ, E_LYS_292  | HZ2, E_LYS_292  | 2.87 | 1.84 | 9.03  |
| 1HGF.PDB | OE1, E_GLU_41  | OG1, E_THR_313 | HG1, E_THR_313  | 2.68 | 1.89 | 29.15 |
| 1HGF.PDB | OG1, E_THR_313 | NZ, E_LYS_315  | HZ2, E_LYS_315  | 2.94 | 2.00 | 21.30 |
| 1HGF.PDB | OE2, E_GLU_35  | ND2, E_ASN_322 | HD21, E_ASN_322 | 2.77 | 1.93 | 26.11 |
| 1HGF.PDB | OE1, F_GLN_34  | NE, F_ARG_25   | HE, F_ARG_25    | 2.89 | 2.02 | 23.18 |

|          |                |                |                 |      |      |       |
|----------|----------------|----------------|-----------------|------|------|-------|
| 1HGF.PDB | OE1, F_GLN_34  | NH2, F_ARG_25  | HH21, F_ARG_25  | 2.91 | 2.03 | 24.46 |
| 1HGF.PDB | OD1, F_ASN_146 | ND2, F_ASN_28  | HD22, F_ASN_28  | 2.88 | 2.02 | 23.75 |
| 1HGF.PDB | OD1, F_ASP_46  | NE2, F_GLN_42  | HE21, F_GLN_42  | 2.86 | 1.99 | 23.71 |
| 1HGF.PDB | OE1, F_GLU_103 | NZ, F_LYS_51   | HZ1, F_LYS_51   | 2.72 | 1.69 | 6.79  |
| 1HGF.PDB | ND1, F_HIS_106 | NZ, F_LYS_51   | HZ3, F_LYS_51   | 2.66 | 1.70 | 17.89 |
| 1HGF.PDB | OE2, D_GLU_97  | NH2, F_ARG_54  | HH22, F_ARG_54  | 2.79 | 1.81 | 11.74 |
| 1HGF.PDB | OD2, D_ASP_86  | NZ, F_LYS_62   | HZ2, F_LYS_62   | 2.67 | 1.68 | 13.64 |
| 1HGF.PDB | OD2, D_ASP_90  | NZ, F_LYS_62   | HZ3, F_LYS_62   | 2.75 | 1.81 | 20.23 |
| 1HGF.PDB | OG, E_SER_266  | ND1, F_HIS_64  | HD1, F_HIS_64   | 2.65 | 1.77 | 20.25 |
| 1HGF.PDB | OG, E_SER_110  | NE2, F_HIS_64  | HE2, F_HIS_64   | 2.89 | 1.92 | 9.46  |
| 1HGF.PDB | OE2, F_GLU_85  | NZ, F_LYS_68   | HZ1, F_LYS_68   | 2.64 | 1.77 | 26.62 |
| 1HGF.PDB | OE2, B_GLU_81  | NE, F_ARG_76   | HE, F_ARG_76    | 2.86 | 1.88 | 5.84  |
| 1HGF.PDB | OE1, B_GLU_74  | NH1, F_ARG_76  | HH12, F_ARG_76  | 2.78 | 1.77 | 1.59  |
| 1HGF.PDB | OE1, B_GLU_81  | NH2, F_ARG_76  | HH21, F_ARG_76  | 2.69 | 1.70 | 7.61  |
| 1HGF.PDB | OE2, B_GLU_74  | NH2, F_ARG_76  | HH22, F_ARG_76  | 2.71 | 1.73 | 8.88  |
| 1HGF.PDB | OH, D_TYR_83   | NZ, F_LYS_88   | HZ1, F_LYS_88   | 2.55 | 1.63 | 21.75 |
| 1HGF.PDB | OE2, F_GLU_120 | NH1, F_ARG_123 | HH11, F_ARG_123 | 2.79 | 1.92 | 25.30 |
| 1HGF.PDB | OE1, D_GLU_132 | NE, F_ARG_124  | HE, F_ARG_124   | 2.90 | 1.96 | 15.73 |
| 1HGF.PDB | OH, F_TYR_157  | ND2, F_ASN_129 | HD21, F_ASN_129 | 2.83 | 1.89 | 13.44 |
| 1HGF.PDB | OE1, D_GLU_131 | NH2, F_ARG_163 | HH21, F_ARG_163 | 2.69 | 1.84 | 27.00 |
| 1HGF.PDB | OE2, F_GLU_131 | NH1, F_ARG_170 | HH11, F_ARG_170 | 2.85 | 1.84 | 3.96  |
| 1HGG.PDB | OE2, B_GLU_97  | NZ, A_LYS_27   | HZ1, A_LYS_27   | 2.90 | 1.87 | 9.15  |
| 1HGG.PDB | OD2, A_ASP_275 | NZ, A_LYS_50   | HZ1, A_LYS_50   | 2.71 | 1.78 | 22.40 |
| 1HGG.PDB | OD1, A_ASP_73  | ND1, A_HIS_75  | HD1, A_HIS_75   | 2.77 | 1.87 | 17.99 |
| 1HGG.PDB | OD1, A_ASP_60  | NE, A_ARG_90   | HE, A_ARG_90    | 2.94 | 1.96 | 6.92  |
| 1HGG.PDB | OD2, A_ASP_60  | NH2, A_ARG_90  | HH21, A_ARG_90  | 2.79 | 1.81 | 10.63 |
| 1HGG.PDB | OD1, A_ASP_271 | OG, A_SER_91   | HG, A_SER_91    | 2.86 | 2.03 | 25.78 |
| 1HGG.PDB | OD2, A_ASP_271 | OG, A_SER_91   | HG, A_SER_91    | 2.85 | 1.97 | 21.46 |
| 1HGG.PDB | OD2, A_ASP_68  | OG, A_SER_95   | HG, A_SER_95    | 2.94 | 1.99 | 11.26 |
| 1HGG.PDB | OD1, A_ASP_68  | OH, A_TYR_100  | HH, A_TYR_100   | 2.94 | 1.99 | 11.28 |
| 1HGG.PDB | OD2, A_ASP_104 | OG, A_SER_107  | HG, A_SER_107   | 2.84 | 1.92 | 16.45 |
| 1HGG.PDB | OE2, B_GLU_67  | NH2, A_ARG_109 | HH21, A_ARG_109 | 2.84 | 1.86 | 14.43 |
| 1HGG.PDB | OD2, F_ASP_79  | OG, A_SER_110  | HG, A_SER_110   | 2.88 | 1.95 | 14.29 |
| 1HGG.PDB | OE2, A_GLU_119 | OG1, A_THR_117 | HG1, A_THR_117  | 2.88 | 1.93 | 9.58  |
| 1HGG.PDB | OD1, A_ASN_137 | NZ, A_LYS_140  | HZ2, A_LYS_140  | 2.76 | 1.76 | 13.87 |
| 1HGG.PDB | OD2, A_ASP_77  | NE, A_ARG_141  | HE, A_ARG_141   | 2.89 | 2.07 | 28.91 |
| 1HGG.PDB | OD1, A_ASP_77  | NH2, A_ARG_141 | HH21, A_ARG_141 | 2.76 | 1.85 | 22.03 |
| 1HGG.PDB | OD2, A_ASP_77  | NH2, A_ARG_141 | HH21, A_ARG_141 | 2.76 | 1.87 | 24.00 |
| 1HGG.PDB | OH, A_TYR_195  | NE1, A_TRP_153 | HE1, A_TRP_153  | 2.91 | 1.96 | 13.96 |
| 1HGG.PDB | OE2, A_GLU_123 | NZ, A_LYS_176  | HZ1, A_LYS_176  | 2.65 | 1.77 | 25.92 |
| 1HGG.PDB | OE1, A_GLU_123 | OH, A_TYR_178  | HH, A_TYR_178   | 2.78 | 1.83 | 8.16  |
| 1HGG.PDB | OG1, A_THR_235 | NE1, A_TRP_180 | HE1, A_TRP_180  | 2.92 | 1.93 | 2.35  |
| 1HGG.PDB | OG, A_SER_231  | NE2, A_HIS_184 | HE2, A_HIS_184  | 2.80 | 1.92 | 21.87 |
| 1HGG.PDB | OD1, A_ASN_246 | NH2, A_ARG_201 | HH21, A_ARG_201 | 2.65 | 1.72 | 18.81 |
| 1HGG.PDB | OD2, A_ASP_241 | NE, A_ARG_208  | HE, A_ARG_208   | 2.96 | 2.06 | 20.34 |
| 1HGG.PDB | OG1, A_THR_206 | OG, A_SER_209  | HG, A_SER_209   | 2.95 | 2.03 | 14.98 |
| 1HGG.PDB | OD1, E_ASP_101 | NE2, A_GLN_210 | HE22, A_GLN_210 | 2.99 | 2.07 | 17.95 |
| 1HGG.PDB | OG1, A_THR_203 | OG1, A_THR_212 | HG1, A_THR_212  | 2.88 | 1.92 | 6.20  |
| 1HGG.PDB | OE1, C_GLN_210 | NH2, A_ARG_220 | HH21, A_ARG_220 | 2.73 | 1.78 | 15.93 |
| 1HGG.PDB | OD1, A_ASP_101 | OG, A_SER_231  | HG, A_SER_231   | 2.88 | 1.92 | 8.82  |
| 1HGG.PDB | OE1, F_GLU_72  | NZ, A_LYS_238  | HZ3, A_LYS_238  | 2.93 | 1.93 | 14.31 |
| 1HGG.PDB | OE2, F_GLU_72  | NZ, A_LYS_238  | HZ3, A_LYS_238  | 2.74 | 1.91 | 29.92 |
| 1HGG.PDB | OD1, A_ASN_165 | ND2, A_ASN_246 | HD22, A_ASN_246 | 2.90 | 1.98 | 17.02 |
| 1HGG.PDB | OE1, A_GLN_191 | ND2, A_ASN_250 | HD21, A_ASN_250 | 2.92 | 1.96 | 11.11 |
| 1HGG.PDB | OD1, A_ASN_133 | NH2, A_ARG_255 | HH22, A_ARG_255 | 2.52 | 1.66 | 24.50 |
| 1HGG.PDB | OE2, A_GLU_119 | NH1, A_ARG_261 | HH12, A_ARG_261 | 2.68 | 1.87 | 29.79 |
| 1HGG.PDB | OE1, A_GLU_119 | NH2, A_ARG_261 | HH22, A_ARG_261 | 2.74 | 1.88 | 26.75 |
| 1HGG.PDB | OH, A_TYR_302  | NZ, A_LYS_264  | HZ1, A_LYS_264  | 2.93 | 1.98 | 19.58 |

|          |                |                |                 |      |      |       |
|----------|----------------|----------------|-----------------|------|------|-------|
| 1HGG.PDB | ND1, A_HIS_56  | NZ, A_LYS_264  | HZ2, A_LYS_264  | 2.66 | 1.73 | 19.87 |
| 1HGG.PDB | OD2, A_ASP_85  | NZ, A_LYS_264  | HZ3, A_LYS_264  | 2.83 | 1.83 | 12.74 |
| 1HGG.PDB | OE1, B_GLU_67  | NH1, A_ARG_269 | HH12, A_ARG_269 | 2.69 | 1.86 | 28.34 |
| 1HGG.PDB | OE1, A_GLN_44  | NZ, A_LYS_292  | HZ1, A_LYS_292  | 2.74 | 1.73 | 11.51 |
| 1HGG.PDB | OD2, A_ASP_291 | NZ, A_LYS_292  | HZ3, A_LYS_292  | 2.77 | 1.90 | 27.56 |
| 1HGG.PDB | OD1, A_ASN_285 | ND2, A_ASN_298 | HD22, A_ASN_298 | 2.97 | 2.01 | 11.28 |
| 1HGG.PDB | OD1, B_ASP_90  | NZ, A_LYS_310  | HZ2, A_LYS_310  | 2.70 | 1.74 | 18.08 |
| 1HGG.PDB | OE1, A_GLU_41  | NZ, A_LYS_315  | HZ3, A_LYS_315  | 2.73 | 1.81 | 23.14 |
| 1HGG.PDB | OE2, A_GLU_35  | ND2, A_ASN_322 | HD22, A_ASN_322 | 2.81 | 1.95 | 25.01 |
| 1HGG.PDB | OE2, B_GLU_15  | NZ, A_LYS_326  | HZ1, A_LYS_326  | 2.83 | 1.89 | 21.04 |
| 1HGG.PDB | OE1, A_GLU_325 | NZ, A_LYS_326  | HZ3, A_LYS_326  | 2.82 | 1.86 | 18.51 |
| 1HGG.PDB | OE1, B_GLN_34  | NE, B_ARG_25   | HE, B_ARG_25    | 2.80 | 1.89 | 18.36 |
| 1HGG.PDB | OE1, B_GLN_34  | NH2, B_ARG_25  | HH21, B_ARG_25  | 2.91 | 2.04 | 24.97 |
| 1HGG.PDB | OE2, A_GLU_325 | NH2, B_ARG_25  | HH22, B_ARG_25  | 2.94 | 1.96 | 12.23 |
| 1HGG.PDB | OD2, B_ASP_37  | OG, B_SER_40   | HG, B_SER_40    | 2.80 | 1.93 | 21.69 |
| 1HGG.PDB | OD1, B_ASP_46  | NE2, B_GLN_42  | HE22, B_GLN_42  | 2.83 | 1.95 | 21.37 |
| 1HGG.PDB | OE2, B_GLU_114 | NE2, B_GLN_47  | HE21, B_GLN_47  | 2.96 | 2.05 | 17.92 |
| 1HGG.PDB | OG1, B_THR_107 | NZ, B_LYS_51   | HZ1, B_LYS_51   | 2.97 | 2.00 | 18.19 |
| 1HGG.PDB | OE1, B_GLU_103 | NZ, B_LYS_51   | HZ2, B_LYS_51   | 2.76 | 1.73 | 5.86  |
| 1HGG.PDB | ND1, B_HIS_106 | NZ, B_LYS_51   | HZ3, B_LYS_51   | 2.77 | 1.79 | 14.96 |
| 1HGG.PDB | OE1, B_GLU_57  | NH1, B_ARG_54  | HH11, B_ARG_54  | 2.86 | 1.86 | 11.23 |
| 1HGG.PDB | OE2, F_GLU_97  | NH2, B_ARG_54  | HH22, B_ARG_54  | 2.75 | 1.76 | 9.96  |
| 1HGG.PDB | OE2, B_GLU_61  | NZ, B_LYS_58   | HZ3, B_LYS_58   | 2.94 | 1.92 | 12.53 |
| 1HGG.PDB | OD2, F_ASP_90  | NZ, B_LYS_62   | HZ2, B_LYS_62   | 2.65 | 1.82 | 29.87 |
| 1HGG.PDB | OD2, F_ASP_86  | NZ, B_LYS_62   | HZ3, B_LYS_62   | 2.64 | 1.73 | 23.35 |
| 1HGG.PDB | OG, A_SER_110  | NE2, B_HIS_64  | HE2, B_HIS_64   | 2.90 | 1.96 | 14.63 |
| 1HGG.PDB | OE2, B_GLU_85  | NZ, B_LYS_68   | HZ2, B_LYS_68   | 2.75 | 1.72 | 7.06  |
| 1HGG.PDB | OE2, B_GLU_72  | OG, B_SER_71   | HG, B_SER_71    | 2.84 | 2.03 | 27.31 |
| 1HGG.PDB | OE2, D_GLU_81  | NE, B_ARG_76   | HE, B_ARG_76    | 2.94 | 1.96 | 10.47 |
| 1HGG.PDB | OE1, D_GLU_74  | NH1, B_ARG_76  | HH12, B_ARG_76  | 2.88 | 1.89 | 10.69 |
| 1HGG.PDB | OE1, D_GLU_81  | NH2, B_ARG_76  | HH21, B_ARG_76  | 2.73 | 1.73 | 5.91  |
| 1HGG.PDB | OE2, D_GLU_74  | NH2, B_ARG_76  | HH22, B_ARG_76  | 2.82 | 1.82 | 7.26  |
| 1HGG.PDB | OE1, D_GLU_85  | OH, B_TYR_83   | HH, B_TYR_83    | 2.68 | 1.80 | 19.99 |
| 1HGG.PDB | OH, F_TYR_83   | NZ, B_LYS_88   | HZ1, B_LYS_88   | 2.77 | 1.73 | 5.14  |
| 1HGG.PDB | OE2, B_GLU_120 | NH1, B_ARG_123 | HH11, B_ARG_123 | 2.73 | 1.87 | 25.50 |
| 1HGG.PDB | OE1, F_GLU_132 | NE, B_ARG_124  | HE, B_ARG_124   | 2.84 | 1.98 | 22.96 |
| 1HGG.PDB | OE2, F_GLU_132 | NE, B_ARG_124  | HE, B_ARG_124   | 2.81 | 1.98 | 25.54 |
| 1HGG.PDB | OH, B_TYR_157  | ND2, B_ASN_129 | HD22, B_ASN_129 | 2.80 | 1.86 | 13.18 |
| 1HGG.PDB | OD1, B_ASN_154 | OG1, B_THR_156 | HG1, B_THR_156  | 2.71 | 1.81 | 17.64 |
| 1HGG.PDB | OE2, B_GLU_131 | NH1, B_ARG_170 | HH11, B_ARG_170 | 2.85 | 1.85 | 6.28  |
| 1HGG.PDB | OE2, D_GLU_97  | NZ, C_LYS_27   | HZ1, C_LYS_27   | 2.94 | 1.91 | 8.28  |
| 1HGG.PDB | OD2, C_ASP_275 | NZ, C_LYS_50   | HZ1, C_LYS_50   | 2.68 | 1.77 | 23.74 |
| 1HGG.PDB | OE1, C_GLU_82  | NH2, C_ARG_57  | HH21, C_ARG_57  | 2.59 | 1.77 | 28.22 |
| 1HGG.PDB | OD1, C_ASP_73  | ND1, C_HIS_75  | HD1, C_HIS_75   | 2.72 | 1.84 | 20.87 |
| 1HGG.PDB | OD1, C_ASP_60  | NE, C_ARG_90   | HE, C_ARG_90    | 2.93 | 1.95 | 8.71  |
| 1HGG.PDB | OD2, C_ASP_60  | NH2, C_ARG_90  | HH21, C_ARG_90  | 2.79 | 1.80 | 9.72  |
| 1HGG.PDB | OD1, C_ASP_271 | OG, C_SER_91   | HG, C_SER_91    | 2.89 | 2.06 | 25.85 |
| 1HGG.PDB | OD2, C_ASP_271 | OG, C_SER_91   | HG, C_SER_91    | 2.90 | 2.02 | 21.44 |
| 1HGG.PDB | OD2, C_ASP_68  | OG, C_SER_95   | HG, C_SER_95    | 2.90 | 1.95 | 11.80 |
| 1HGG.PDB | OD1, C_ASP_68  | OH, C_TYR_100  | HH, C_TYR_100   | 2.93 | 1.98 | 11.50 |
| 1HGG.PDB | OD2, C_ASP_104 | OG, C_SER_107  | HG, C_SER_107   | 2.88 | 1.95 | 15.82 |
| 1HGG.PDB | OE2, D_GLU_67  | NH2, C_ARG_109 | HH21, C_ARG_109 | 2.85 | 1.88 | 14.56 |
| 1HGG.PDB | OD2, B_ASP_79  | OG, C_SER_110  | HG, C_SER_110   | 2.76 | 1.86 | 17.83 |
| 1HGG.PDB | OE2, C_GLU_119 | OG1, C_THR_117 | HG1, C_THR_117  | 2.92 | 1.97 | 8.69  |
| 1HGG.PDB | OD1, C_ASN_137 | NZ, C_LYS_140  | HZ2, C_LYS_140  | 2.78 | 1.78 | 13.21 |
| 1HGG.PDB | OD2, C_ASP_77  | NE, C_ARG_141  | HE, C_ARG_141   | 2.87 | 2.06 | 29.23 |
| 1HGG.PDB | OD1, C_ASP_77  | NH2, C_ARG_141 | HH21, C_ARG_141 | 2.76 | 1.85 | 22.10 |
| 1HGG.PDB | OD2, C_ASP_77  | NH2, C_ARG_141 | HH21, C_ARG_141 | 2.74 | 1.86 | 24.28 |

|          |                |                |                 |      |      |       |
|----------|----------------|----------------|-----------------|------|------|-------|
| 1HGG.PDB | OD1, C_ASN_137 | OG, C_SER_145  | HG, C_SER_145   | 2.90 | 2.03 | 20.82 |
| 1HGG.PDB | OH, C_TYR_195  | NE1, C_TRP_153 | HE1, C_TRP_153  | 2.90 | 1.98 | 17.08 |
| 1HGG.PDB | OE2, C_GLU_123 | NZ, C_LYS_176  | HZ1, C_LYS_176  | 2.63 | 1.76 | 26.89 |
| 1HGG.PDB | OE1, C_GLU_123 | OH, C_TYR_178  | HH, C_TYR_178   | 2.78 | 1.82 | 5.18  |
| 1HGG.PDB | OG1, C_THR_235 | NE1, C_TRP_180 | HE1, C_TRP_180  | 2.92 | 1.93 | 1.99  |
| 1HGG.PDB | OG, C_SER_231  | NE2, C_HIS_184 | HE2, C_HIS_184  | 2.79 | 1.91 | 21.48 |
| 1HGG.PDB | OD1, C_ASN_250 | NE2, C_GLN_191 | HE21, C_GLN_191 | 2.95 | 1.99 | 11.16 |
| 1HGG.PDB | OD1, C_ASN_246 | NH2, C_ARG_201 | HH21, C_ARG_201 | 2.66 | 1.74 | 19.39 |
| 1HGG.PDB | OG1, C_THR_212 | OG1, C_THR_203 | HG1, C_THR_203  | 2.83 | 1.91 | 13.70 |
| 1HGG.PDB | OD2, C_ASP_241 | NE, C_ARG_208  | HE, C_ARG_208   | 2.93 | 2.03 | 20.59 |
| 1HGG.PDB | OG1, C_THR_206 | OG, C_SER_209  | HG, C_SER_209   | 2.99 | 2.06 | 14.06 |
| 1HGG.PDB | OE1, E_GLN_210 | NH2, C_ARG_220 | HH21, C_ARG_220 | 2.61 | 1.71 | 21.26 |
| 1HGG.PDB | OD1, C_ASP_101 | OG, C_SER_231  | HG, C_SER_231   | 2.91 | 1.95 | 9.20  |
| 1HGG.PDB | OE1, B_GLU_72  | NZ, C_LYS_238  | HZ1, C_LYS_238  | 2.83 | 1.86 | 17.18 |
| 1HGG.PDB | OE2, B_GLU_72  | NZ, C_LYS_238  | HZ1, C_LYS_238  | 2.70 | 1.87 | 29.85 |
| 1HGG.PDB | OD1, C_ASN_165 | ND2, C_ASN_246 | HD22, C_ASN_246 | 2.88 | 1.97 | 17.94 |
| 1HGG.PDB | OE1, C_GLN_191 | ND2, C_ASN_250 | HD21, C_ASN_250 | 2.88 | 1.93 | 11.32 |
| 1HGG.PDB | OD1, C_ASN_133 | NH2, C_ARG_255 | HH22, C_ARG_255 | 2.54 | 1.68 | 24.43 |
| 1HGG.PDB | OE2, C_GLU_119 | NH1, C_ARG_261 | HH12, C_ARG_261 | 2.67 | 1.86 | 29.79 |
| 1HGG.PDB | OE1, C_GLU_119 | NH2, C_ARG_261 | HH22, C_ARG_261 | 2.73 | 1.87 | 26.76 |
| 1HGG.PDB | OH, C_TYR_302  | NZ, C_LYS_264  | HZ1, C_LYS_264  | 2.88 | 1.92 | 18.77 |
| 1HGG.PDB | ND1, C_HIS_56  | NZ, C_LYS_264  | HZ2, C_LYS_264  | 2.66 | 1.73 | 19.57 |
| 1HGG.PDB | OD2, C_ASP_85  | NZ, C_LYS_264  | HZ3, C_LYS_264  | 2.85 | 1.83 | 11.83 |
| 1HGG.PDB | OE1, D_GLU_67  | NH1, C_ARG_269 | HH12, C_ARG_269 | 2.69 | 1.85 | 27.75 |
| 1HGG.PDB | OE1, C_GLN_44  | NZ, C_LYS_292  | HZ1, C_LYS_292  | 2.77 | 1.76 | 11.69 |
| 1HGG.PDB | OD2, C_ASP_291 | NZ, C_LYS_292  | HZ3, C_LYS_292  | 2.78 | 1.91 | 27.51 |
| 1HGG.PDB | OD1, C_ASN_285 | ND2, C_ASN_298 | HD22, C_ASN_298 | 2.95 | 2.00 | 10.88 |
| 1HGG.PDB | OD1, D_ASP_90  | NZ, C_LYS_310  | HZ2, C_LYS_310  | 2.65 | 1.73 | 21.74 |
| 1HGG.PDB | OE1, C_GLU_41  | NZ, C_LYS_315  | HZ3, C_LYS_315  | 2.73 | 1.82 | 23.48 |
| 1HGG.PDB | OE2, C_GLU_35  | ND2, C_ASN_322 | HD22, C_ASN_322 | 2.82 | 1.96 | 24.18 |
| 1HGG.PDB | OXT, C_THR_328 | NE2, C_GLN_327 | HE22, C_GLN_327 | 2.99 | 2.05 | 16.22 |
| 1HGG.PDB | OE1, D_GLN_34  | NE, D_ARG_25   | HE, D_ARG_25    | 2.69 | 1.81 | 20.51 |
| 1HGG.PDB | OE1, D_GLN_34  | NH2, D_ARG_25  | HH21, D_ARG_25  | 2.92 | 2.08 | 27.66 |
| 1HGG.PDB | OD1, D_ASN_146 | ND2, D_ASN_28  | HD21, D_ASN_28  | 2.95 | 1.98 | 8.75  |
| 1HGG.PDB | OD2, D_ASP_37  | OG, D_SER_40   | HG, D_SER_40    | 2.77 | 1.93 | 24.58 |
| 1HGG.PDB | OD1, D_ASP_46  | NE2, D_GLN_42  | HE22, D_GLN_42  | 2.85 | 1.96 | 21.08 |
| 1HGG.PDB | OE2, D_GLU_114 | NE2, D_GLN_47  | HE21, D_GLN_47  | 2.97 | 2.05 | 17.17 |
| 1HGG.PDB | OG1, D_THR_107 | NZ, D_LYS_51   | HZ1, D_LYS_51   | 2.98 | 2.00 | 17.66 |
| 1HGG.PDB | OE1, D_GLU_103 | NZ, D_LYS_51   | HZ2, D_LYS_51   | 2.77 | 1.73 | 6.39  |
| 1HGG.PDB | ND1, D_HIS_106 | NZ, D_LYS_51   | HZ3, D_LYS_51   | 2.76 | 1.78 | 15.09 |
| 1HGG.PDB | OE1, D_GLU_57  | NH1, D_ARG_54  | HH11, D_ARG_54  | 2.86 | 1.86 | 11.12 |
| 1HGG.PDB | OE2, B_GLU_97  | NH2, D_ARG_54  | HH22, D_ARG_54  | 2.76 | 1.78 | 10.56 |
| 1HGG.PDB | OE2, D_GLU_61  | NZ, D_LYS_58   | HZ3, D_LYS_58   | 2.91 | 1.89 | 12.30 |
| 1HGG.PDB | OG, C_SER_110  | NE2, D_HIS_64  | HE2, D_HIS_64   | 2.86 | 1.90 | 9.42  |
| 1HGG.PDB | OE2, D_GLU_85  | NZ, D_LYS_68   | HZ2, D_LYS_68   | 2.77 | 1.74 | 6.59  |
| 1HGG.PDB | OE2, D_GLU_72  | OG, D_SER_71   | HG, D_SER_71    | 2.82 | 2.00 | 26.77 |
| 1HGG.PDB | OE2, F_GLU_81  | NE, D_ARG_76   | HE, D_ARG_76    | 2.86 | 1.89 | 9.57  |
| 1HGG.PDB | OE1, F_GLU_74  | NH1, D_ARG_76  | HH12, D_ARG_76  | 2.78 | 1.80 | 12.10 |
| 1HGG.PDB | OE1, F_GLU_81  | NH2, D_ARG_76  | HH21, D_ARG_76  | 2.67 | 1.68 | 6.66  |
| 1HGG.PDB | OE2, F_GLU_74  | NH2, D_ARG_76  | HH22, D_ARG_76  | 2.74 | 1.75 | 9.29  |
| 1HGG.PDB | OE1, F_GLU_85  | OH, D_TYR_83   | HH, D_TYR_83    | 2.59 | 1.78 | 26.83 |
| 1HGG.PDB | OH, B_TYR_83   | NZ, D_LYS_88   | HZ1, D_LYS_88   | 2.73 | 1.70 | 8.35  |
| 1HGG.PDB | OE2, D_GLU_120 | NH1, D_ARG_123 | HH11, D_ARG_123 | 2.73 | 1.87 | 25.59 |
| 1HGG.PDB | OE1, B_GLU_132 | NE, D_ARG_124  | HE, D_ARG_124   | 2.86 | 2.00 | 22.57 |
| 1HGG.PDB | OE2, B_GLU_132 | NE, D_ARG_124  | HE, D_ARG_124   | 2.78 | 1.96 | 26.12 |
| 1HGG.PDB | OH, D_TYR_157  | ND2, D_ASN_129 | HD22, D_ASN_129 | 2.80 | 1.84 | 10.50 |
| 1HGG.PDB | OD1, D_ASN_154 | OG1, D_THR_156 | HG1, D_THR_156  | 2.73 | 1.82 | 15.46 |
| 1HGG.PDB | NE2, D_HIS_142 | OH, D_TYR_157  | HH, D_TYR_157   | 2.72 | 1.85 | 20.87 |

|          |                |                |                 |      |      |       |
|----------|----------------|----------------|-----------------|------|------|-------|
| 1HGG.PDB | OE2, D_GLU_131 | NH1, D_ARG_170 | HH11, D_ARG_170 | 2.85 | 1.86 | 6.70  |
| 1HGG.PDB | OE2, F_GLU_97  | NZ, E_LYS_27   | HZ1, E_LYS_27   | 2.91 | 1.88 | 8.89  |
| 1HGG.PDB | OD2, E_ASP_275 | NZ, E_LYS_50   | HZ1, E_LYS_50   | 2.68 | 1.77 | 24.10 |
| 1HGG.PDB | OD1, E_ASP_73  | ND1, E_HIS_75  | HD1, E_HIS_75   | 2.75 | 1.85 | 17.34 |
| 1HGG.PDB | OD1, E_ASP_60  | NE, E_ARG_90   | HE, E_ARG_90    | 2.91 | 1.94 | 9.27  |
| 1HGG.PDB | OD2, E_ASP_60  | NH2, E_ARG_90  | HH21, E_ARG_90  | 2.83 | 1.84 | 9.64  |
| 1HGG.PDB | OD1, E_ASP_271 | OG, E_SER_91   | HG, E_SER_91    | 2.92 | 2.07 | 24.79 |
| 1HGG.PDB | OD2, E_ASP_271 | OG, E_SER_91   | HG, E_SER_91    | 2.93 | 2.06 | 22.08 |
| 1HGG.PDB | OD2, E_ASP_68  | OG, E_SER_95   | HG, E_SER_95    | 2.93 | 1.98 | 13.19 |
| 1HGG.PDB | OD1, E_ASP_68  | OH, E_TYR_100  | HH, E_TYR_100   | 2.92 | 1.96 | 10.90 |
| 1HGG.PDB | OD2, E_ASP_104 | OG, E_SER_107  | HG, E_SER_107   | 2.85 | 1.93 | 15.56 |
| 1HGG.PDB | OE2, F_GLU_67  | NH2, E_ARG_109 | HH21, E_ARG_109 | 2.88 | 1.90 | 14.20 |
| 1HGG.PDB | OD2, D_ASP_79  | OG, E_SER_110  | HG, E_SER_110   | 2.79 | 1.88 | 16.48 |
| 1HGG.PDB | OE2, E_GLU_119 | OG1, E_THR_117 | HG1, E_THR_117  | 2.95 | 1.99 | 7.33  |
| 1HGG.PDB | OD1, E_ASN_137 | NZ, E_LYS_140  | HZ2, E_LYS_140  | 2.76 | 1.76 | 13.40 |
| 1HGG.PDB | OD2, E_ASP_77  | NE, E_ARG_141  | HE, E_ARG_141   | 2.90 | 2.09 | 29.10 |
| 1HGG.PDB | OD1, E_ASP_77  | NH2, E_ARG_141 | HH21, E_ARG_141 | 2.80 | 1.90 | 22.17 |
| 1HGG.PDB | OD2, E_ASP_77  | NH2, E_ARG_141 | HH21, E_ARG_141 | 2.74 | 1.86 | 23.74 |
| 1HGG.PDB | OD1, E_ASN_137 | OG, E_SER_145  | HG, E_SER_145   | 2.95 | 2.08 | 20.42 |
| 1HGG.PDB | OH, E_TYR_195  | NE1, E_TRP_153 | HE1, E_TRP_153  | 2.91 | 1.97 | 14.69 |
| 1HGG.PDB | OE2, E_GLU_123 | NZ, E_LYS_176  | HZ1, E_LYS_176  | 2.65 | 1.78 | 26.50 |
| 1HGG.PDB | OE1, E_GLU_123 | OH, E_TYR_178  | HH, E_TYR_178   | 2.80 | 1.84 | 8.47  |
| 1HGG.PDB | OG1, E_THR_235 | NE1, E_TRP_180 | HE1, E_TRP_180  | 2.93 | 1.94 | 2.01  |
| 1HGG.PDB | OG, E_SER_231  | NE2, E_HIS_184 | HE2, E_HIS_184  | 2.81 | 1.94 | 22.49 |
| 1HGG.PDB | OD1, E_ASN_246 | NH2, E_ARG_201 | HH21, E_ARG_201 | 2.66 | 1.74 | 20.08 |
| 1HGG.PDB | OG1, E_THR_212 | OG1, E_THR_203 | HG1, E_THR_203  | 2.88 | 1.95 | 13.34 |
| 1HGG.PDB | OD2, E_ASP_241 | NE, E_ARG_208  | HE, E_ARG_208   | 2.96 | 2.05 | 19.90 |
| 1HGG.PDB | OG1, E_THR_206 | OG, E_SER_209  | HG, E_SER_209   | 2.99 | 2.07 | 14.54 |
| 1HGG.PDB | OD1, C_ASP_101 | NE2, E_GLN_210 | HE22, E_GLN_210 | 2.96 | 2.04 | 17.70 |
| 1HGG.PDB | OE1, A_GLN_210 | NH2, E_ARG_220 | HH21, E_ARG_220 | 2.72 | 1.80 | 20.26 |
| 1HGG.PDB | OD1, E_ASP_101 | OG, E_SER_231  | HG, E_SER_231   | 2.91 | 1.96 | 10.31 |
| 1HGG.PDB | OE1, D_GLU_72  | NZ, E_LYS_238  | HZ1, E_LYS_238  | 2.89 | 1.89 | 13.93 |
| 1HGG.PDB | OD1, E_ASN_165 | ND2, E_ASN_246 | HD22, E_ASN_246 | 2.88 | 1.96 | 17.66 |
| 1HGG.PDB | OE1, E_GLN_191 | ND2, E_ASN_250 | HD21, E_ASN_250 | 2.89 | 1.94 | 10.20 |
| 1HGG.PDB | OD1, E_ASN_133 | NH2, E_ARG_255 | HH22, E_ARG_255 | 2.55 | 1.68 | 24.24 |
| 1HGG.PDB | OE2, E_GLU_119 | NH1, E_ARG_261 | HH12, E_ARG_261 | 2.69 | 1.87 | 29.29 |
| 1HGG.PDB | OE1, E_GLU_119 | NH2, E_ARG_261 | HH22, E_ARG_261 | 2.74 | 1.88 | 26.67 |
| 1HGG.PDB | OH, E_TYR_302  | NZ, E_LYS_264  | HZ1, E_LYS_264  | 2.90 | 1.93 | 18.14 |
| 1HGG.PDB | ND1, E_HIS_56  | NZ, E_LYS_264  | HZ2, E_LYS_264  | 2.66 | 1.73 | 20.09 |
| 1HGG.PDB | OD2, E_ASP_85  | NZ, E_LYS_264  | HZ3, E_LYS_264  | 2.85 | 1.83 | 11.84 |
| 1HGG.PDB | OE1, F_GLU_67  | NH1, E_ARG_269 | HH12, E_ARG_269 | 2.69 | 1.85 | 27.32 |
| 1HGG.PDB | OE1, E_GLN_44  | NZ, E_LYS_292  | HZ1, E_LYS_292  | 2.77 | 1.75 | 10.61 |
| 1HGG.PDB | OD2, E_ASP_291 | NZ, E_LYS_292  | HZ3, E_LYS_292  | 2.76 | 1.90 | 27.94 |
| 1HGG.PDB | OD1, E_ASN_285 | ND2, E_ASN_298 | HD22, E_ASN_298 | 2.95 | 2.00 | 11.31 |
| 1HGG.PDB | OD1, F_ASP_90  | NZ, E_LYS_310  | HZ2, E_LYS_310  | 2.64 | 1.72 | 22.12 |
| 1HGG.PDB | OE1, E_GLU_41  | NZ, E_LYS_315  | HZ3, E_LYS_315  | 2.68 | 1.80 | 26.22 |
| 1HGG.PDB | OE2, E_GLU_35  | ND2, E_ASN_322 | HD22, E_ASN_322 | 2.79 | 1.94 | 25.02 |
| 1HGG.PDB | OE1, F_GLU_15  | NZ, E_LYS_326  | HZ3, E_LYS_326  | 2.98 | 1.97 | 15.13 |
| 1HGG.PDB | OD2, F_ASP_37  | OG, F_SER_40   | HG, F_SER_40    | 2.74 | 1.92 | 26.19 |
| 1HGG.PDB | OD1, F_ASP_46  | NE2, F_GLN_42  | HE22, F_GLN_42  | 2.82 | 1.94 | 21.99 |
| 1HGG.PDB | OE2, F_GLU_114 | NE2, F_GLN_47  | HE21, F_GLN_47  | 2.97 | 2.06 | 18.05 |
| 1HGG.PDB | OG1, F_THR_107 | NZ, F_LYS_51   | HZ1, F_LYS_51   | 2.98 | 2.02 | 18.55 |
| 1HGG.PDB | OE1, F_GLU_103 | NZ, F_LYS_51   | HZ2, F_LYS_51   | 2.79 | 1.76 | 6.25  |
| 1HGG.PDB | ND1, F_HIS_106 | NZ, F_LYS_51   | HZ3, F_LYS_51   | 2.72 | 1.74 | 15.22 |
| 1HGG.PDB | OE1, F_GLU_57  | NH1, F_ARG_54  | HH11, F_ARG_54  | 2.85 | 1.85 | 10.83 |
| 1HGG.PDB | OE2, D_GLU_97  | NH2, F_ARG_54  | HH22, F_ARG_54  | 2.73 | 1.74 | 10.16 |
| 1HGG.PDB | OE2, F_GLU_61  | NZ, F_LYS_58   | HZ3, F_LYS_58   | 2.94 | 1.92 | 12.48 |
| 1HGG.PDB | OD2, D_ASP_86  | NZ, F_LYS_62   | HZ3, F_LYS_62   | 2.58 | 1.75 | 29.01 |

|          |                |                |                 |      |      |       |
|----------|----------------|----------------|-----------------|------|------|-------|
| 1HGG.PDB | OG, E_SER.110  | NE2, F_HIS.64  | HE2, F_HIS.64   | 2.87 | 1.91 | 10.03 |
| 1HGG.PDB | OE2, F_GLU.85  | NZ, F_LYS.68   | HZ2, F_LYS.68   | 2.75 | 1.74 | 10.05 |
| 1HGG.PDB | OE2, F_GLU.72  | OG, F_SER.71   | HG, F_SER.71    | 2.86 | 2.03 | 26.49 |
| 1HGG.PDB | OE2, B_GLU.81  | NE, F_ARG.76   | HE, F_ARG.76    | 2.88 | 1.92 | 11.44 |
| 1HGG.PDB | OE1, B_GLU.74  | NH1, F_ARG.76  | HH12, F_ARG.76  | 2.75 | 1.76 | 9.13  |
| 1HGG.PDB | OE1, B_GLU.81  | NH2, F_ARG.76  | HH21, F_ARG.76  | 2.67 | 1.68 | 1.99  |
| 1HGG.PDB | OE2, B_GLU.74  | NH2, F_ARG.76  | HH22, F_ARG.76  | 2.79 | 1.81 | 10.64 |
| 1HGG.PDB | OH, D_TYR.83   | NZ, F_LYS.88   | HZ1, F_LYS.88   | 2.68 | 1.67 | 10.46 |
| 1HGG.PDB | OE2, F_GLU.120 | NH1, F_ARG.123 | HH11, F_ARG.123 | 2.72 | 1.86 | 25.68 |
| 1HGG.PDB | OE1, D_GLU.132 | NE, F_ARG.124  | HE, F_ARG.124   | 2.96 | 2.09 | 22.59 |
| 1HGG.PDB | OE2, D_GLU.132 | NE, F_ARG.124  | HE, F_ARG.124   | 2.87 | 2.01 | 24.00 |
| 1HGG.PDB | OH, F_TYR.157  | ND2, F_ASN.129 | HD22, F_ASN.129 | 2.79 | 1.86 | 14.20 |
| 1HGG.PDB | OE2, F_GLU.131 | NH1, F_ARG.170 | HH11, F_ARG.170 | 2.84 | 1.84 | 6.38  |
| 1HGH.PDB | OE2, B_GLU.97  | NZ, A_LYS.27   | HZ1, A_LYS.27   | 2.78 | 1.76 | 9.03  |
| 1HGH.PDB | OD2, A_ASP.275 | NZ, A_LYS.50   | HZ1, A_LYS.50   | 2.79 | 1.83 | 19.36 |
| 1HGH.PDB | OD1, A_ASP.73  | ND1, A_HIS.75  | HD1, A_HIS.75   | 2.74 | 1.85 | 19.20 |
| 1HGH.PDB | OD1, A_ASP.60  | NE, A_ARG.90   | HE, A_ARG.90    | 2.85 | 1.88 | 8.50  |
| 1HGH.PDB | OD2, A_ASP.60  | NH2, A_ARG.90  | HH21, A_ARG.90  | 2.79 | 1.80 | 9.33  |
| 1HGH.PDB | OD2, A_ASP.271 | OG, A_SER.91   | HG, A_SER.91    | 2.76 | 1.89 | 21.30 |
| 1HGH.PDB | OD2, A_ASP.68  | OG, A_SER.95   | HG, A_SER.95    | 2.83 | 1.95 | 21.96 |
| 1HGH.PDB | OD1, A_ASP.68  | OH, A_TYR.100  | HH, A_TYR.100   | 2.95 | 2.07 | 21.37 |
| 1HGH.PDB | OD2, A_ASP.104 | OG, A_SER.107  | HG, A_SER.107   | 2.88 | 1.94 | 14.34 |
| 1HGH.PDB | OE2, B_GLU.67  | NH2, A_ARG.109 | HH21, A_ARG.109 | 2.86 | 1.88 | 13.48 |
| 1HGH.PDB | OD2, F_ASP.79  | OG, A_SER.110  | HG, A_SER.110   | 2.97 | 2.01 | 11.65 |
| 1HGH.PDB | OE2, A_GLU.119 | OG1, A_THR.117 | HG1, A_THR.117  | 2.86 | 1.91 | 8.00  |
| 1HGH.PDB | OD1, A_ASN.137 | NZ, A_LYS.140  | HZ2, A_LYS.140  | 2.74 | 1.73 | 12.09 |
| 1HGH.PDB | OD2, A_ASP.77  | NE, A_ARG.141  | HE, A_ARG.141   | 2.85 | 2.03 | 27.72 |
| 1HGH.PDB | OD1, A_ASP.77  | NH2, A_ARG.141 | HH21, A_ARG.141 | 2.86 | 1.95 | 21.78 |
| 1HGH.PDB | OD2, A_ASP.77  | NH2, A_ARG.141 | HH21, A_ARG.141 | 2.74 | 1.85 | 23.60 |
| 1HGH.PDB | OH, A_TYR.195  | NE1, A_TRP.153 | HE1, A_TRP.153  | 2.96 | 2.05 | 18.96 |
| 1HGH.PDB | OE2, A_GLU.123 | NZ, A_LYS.176  | HZ1, A_LYS.176  | 2.68 | 1.79 | 24.70 |
| 1HGH.PDB | OE1, A_GLU.123 | OH, A_TYR.178  | HH, A_TYR.178   | 2.75 | 1.81 | 10.37 |
| 1HGH.PDB | OG1, A_THR.235 | NE1, A_TRP.180 | HE1, A_TRP.180  | 2.89 | 1.90 | 1.65  |
| 1HGH.PDB | OG, A_SER.231  | NE2, A_HIS.184 | HE2, A_HIS.184  | 2.74 | 1.90 | 25.48 |
| 1HGH.PDB | OD1, A_ASN.250 | NE2, A_GLN.191 | HE21, A_GLN.191 | 2.96 | 2.00 | 8.72  |
| 1HGH.PDB | OD1, A_ASN.246 | NH2, A_ARG.201 | HH21, A_ARG.201 | 2.63 | 1.71 | 19.32 |
| 1HGH.PDB | OG1, A_THR.206 | OG, A_SER.209  | HG, A_SER.209   | 2.93 | 1.98 | 8.14  |
| 1HGH.PDB | OD1, E_ASP.101 | NE2, A_GLN.210 | HE22, A_GLN.210 | 2.97 | 2.14 | 27.61 |
| 1HGH.PDB | OG1, A_THR.203 | OG1, A_THR.212 | HG1, A_THR.212  | 2.93 | 1.98 | 7.92  |
| 1HGH.PDB | OE1, C_GLN.210 | NH2, A_ARG.220 | HH21, A_ARG.220 | 2.66 | 1.73 | 18.15 |
| 1HGH.PDB | OD1, A_ASP.101 | OG, A_SER.231  | HG, A_SER.231   | 2.86 | 1.91 | 11.01 |
| 1HGH.PDB | OE1, F_GLU.72  | NZ, A_LYS.238  | HZ3, A_LYS.238  | 2.92 | 1.93 | 15.64 |
| 1HGH.PDB | OD1, A_ASN.165 | ND2, A_ASN.246 | HD22, A_ASN.246 | 2.95 | 1.98 | 10.57 |
| 1HGH.PDB | OE1, A_GLN.191 | ND2, A_ASN.250 | HD21, A_ASN.250 | 2.87 | 1.90 | 5.96  |
| 1HGH.PDB | OE2, A_GLU.119 | NH1, A_ARG.261 | HH12, A_ARG.261 | 2.62 | 1.81 | 29.53 |
| 1HGH.PDB | OE1, A_GLU.119 | NH2, A_ARG.261 | HH22, A_ARG.261 | 2.87 | 1.97 | 23.64 |
| 1HGH.PDB | OD2, A_ASP.85  | NZ, A_LYS.264  | HZ3, A_LYS.264  | 2.81 | 1.82 | 15.33 |
| 1HGH.PDB | OE1, A_GLN.44  | NZ, A_LYS.292  | HZ1, A_LYS.292  | 2.68 | 1.67 | 11.56 |
| 1HGH.PDB | OD2, A_ASP.291 | NZ, A_LYS.292  | HZ3, A_LYS.292  | 2.82 | 1.85 | 18.01 |
| 1HGH.PDB | OD1, B_ASP.86  | NZ, A_LYS.310  | HZ2, A_LYS.310  | 2.71 | 1.84 | 27.09 |
| 1HGH.PDB | OE1, A_GLU.41  | NZ, A_LYS.315  | HZ3, A_LYS.315  | 2.87 | 1.90 | 18.83 |
| 1HGH.PDB | OE2, A_GLU.35  | ND2, A_ASN.322 | HD22, A_ASN.322 | 2.83 | 1.93 | 20.02 |
| 1HGH.PDB | OE1, A_GLU.325 | NZ, A_LYS.326  | HZ3, A_LYS.326  | 2.84 | 1.87 | 17.61 |
| 1HGH.PDB | OE1, B_GLN.34  | NE, B_ARG.25   | HE, B_ARG.25    | 2.67 | 1.79 | 21.37 |
| 1HGH.PDB | OE1, B_GLN.34  | NH2, B_ARG.25  | HH21, B_ARG.25  | 2.91 | 2.10 | 29.24 |
| 1HGH.PDB | OD1, B_ASP.46  | NE2, B_GLN.42  | HE22, B_GLN.42  | 2.86 | 1.97 | 20.47 |
| 1HGH.PDB | OE1, B_GLU.103 | NZ, B_LYS.51   | HZ1, B_LYS.51   | 2.79 | 1.76 | 7.63  |
| 1HGH.PDB | ND1, B_HIS.106 | NZ, B_LYS.51   | HZ2, B_LYS.51   | 2.80 | 1.85 | 18.51 |



|          |                |                |                 |      |      |       |
|----------|----------------|----------------|-----------------|------|------|-------|
| 1HGH.PDB | OG1, B.THR.107 | NZ, B.LYS.51   | HZ3, B.LYS.51   | 2.89 | 1.91 | 15.99 |
| 1HGH.PDB | OE1, B.GLU.57  | NH1, B.ARG.54  | HH11, B.ARG.54  | 2.86 | 1.87 | 11.36 |
| 1HGH.PDB | OE2, F.GLU.97  | NH2, B.ARG.54  | HH22, B.ARG.54  | 2.82 | 1.86 | 15.60 |
| 1HGH.PDB | OD2, F.ASP.86  | NZ, B.LYS.62   | HZ1, B.LYS.62   | 2.66 | 1.80 | 27.71 |
| 1HGH.PDB | OD2, F.ASP.90  | NZ, B.LYS.62   | HZ3, B.LYS.62   | 2.68 | 1.82 | 27.13 |
| 1HGH.PDB | OG, A.SER.110  | NE2, B.HIS.64  | HE2, B.HIS.64   | 2.87 | 1.91 | 11.96 |
| 1HGH.PDB | OE2, B.GLU.85  | NZ, B.LYS.68   | HZ2, B.LYS.68   | 2.73 | 1.71 | 6.94  |
| 1HGH.PDB | OE2, D.GLU.81  | NE, B.ARG.76   | HE, B.ARG.76    | 2.87 | 1.90 | 9.70  |
| 1HGH.PDB | OE2, D.GLU.74  | NH1, B.ARG.76  | HH12, B.ARG.76  | 2.91 | 1.90 | 8.45  |
| 1HGH.PDB | OE1, D.GLU.81  | NH2, B.ARG.76  | HH21, B.ARG.76  | 2.77 | 1.76 | 5.47  |
| 1HGH.PDB | OE1, D.GLU.74  | NH2, B.ARG.76  | HH22, B.ARG.76  | 2.89 | 1.87 | 2.83  |
| 1HGH.PDB | OE1, B.GLU.74  | NE2, B.GLN.78  | HE22, B.GLN.78  | 2.91 | 1.95 | 10.12 |
| 1HGH.PDB | OE1, D.GLU.85  | OH, B.TYR.83   | HH, B.TYR.83    | 2.69 | 1.84 | 23.96 |
| 1HGH.PDB | OH, F.TYR.83   | NZ, B.LYS.88   | HZ1, B.LYS.88   | 2.74 | 1.71 | 7.44  |
| 1HGH.PDB | OE2, B.GLU.120 | NH1, B.ARG.123 | HH11, B.ARG.123 | 2.74 | 1.85 | 22.74 |
| 1HGH.PDB | OE1, F.GLU.132 | NE, B.ARG.124  | HE, B.ARG.124   | 2.76 | 1.94 | 26.47 |
| 1HGH.PDB | OE2, F.GLU.132 | NE, B.ARG.124  | HE, B.ARG.124   | 2.83 | 1.98 | 23.62 |
| 1HGH.PDB | OH, B.TYR.157  | ND2, B.ASN.129 | HD22, B.ASN.129 | 2.83 | 1.87 | 11.09 |
| 1HGH.PDB | OE2, B.GLU.150 | ND2, B.ASN.154 | HD21, B.ASN.154 | 2.97 | 2.10 | 23.74 |
| 1HGH.PDB | OD1, B.ASN.154 | OG1, B.THR.156 | HG1, B.THR.156  | 2.66 | 1.78 | 19.28 |
| 1HGH.PDB | OE2, B.GLU.131 | NH1, B.ARG.170 | HH11, B.ARG.170 | 2.83 | 1.83 | 5.81  |
| 1HGH.PDB | OE2, D.GLU.97  | NZ, C.LYS.27   | HZ1, C.LYS.27   | 2.82 | 1.78 | 7.61  |
| 1HGH.PDB | OD2, C.ASP.275 | NZ, C.LYS.50   | HZ1, C.LYS.50   | 2.77 | 1.81 | 19.74 |
| 1HGH.PDB | OD1, C.ASP.73  | ND1, C.HIS.75  | HD1, C.HIS.75   | 2.71 | 1.84 | 22.23 |
| 1HGH.PDB | OD1, C.ASP.60  | NE, C.ARG.90   | HE, C.ARG.90    | 2.80 | 1.87 | 15.44 |
| 1HGH.PDB | OD2, C.ASP.60  | NH2, C.ARG.90  | HH21, C.ARG.90  | 2.76 | 1.77 | 8.79  |
| 1HGH.PDB | OD2, C.ASP.271 | OG, C.SER.91   | HG, C.SER.91    | 2.80 | 1.87 | 12.62 |
| 1HGH.PDB | OD2, C.ASP.68  | OG, C.SER.95   | HG, C.SER.95    | 2.83 | 1.92 | 18.04 |
| 1HGH.PDB | OD1, C.ASP.68  | OH, C.TYR.100  | HH, C.TYR.100   | 2.94 | 2.01 | 15.20 |
| 1HGH.PDB | OD2, C.ASP.104 | OG, C.SER.107  | HG, C.SER.107   | 2.88 | 1.96 | 17.02 |
| 1HGH.PDB | OE2, D.GLU.67  | NH2, C.ARG.109 | HH21, C.ARG.109 | 2.86 | 1.88 | 13.66 |
| 1HGH.PDB | OD2, B.ASP.79  | OG, C.SER.110  | HG, C.SER.110   | 2.78 | 1.85 | 13.87 |
| 1HGH.PDB | OE2, C.GLU.119 | OG1, C.THR.117 | HG1, C.THR.117  | 2.87 | 1.92 | 8.14  |
| 1HGH.PDB | OD1, C.ASN.137 | NZ, C.LYS.140  | HZ2, C.LYS.140  | 2.76 | 1.74 | 10.11 |
| 1HGH.PDB | OD2, C.ASP.77  | NE, C.ARG.141  | HE, C.ARG.141   | 2.85 | 2.02 | 26.86 |
| 1HGH.PDB | OD1, C.ASP.77  | NH2, C.ARG.141 | HH21, C.ARG.141 | 2.88 | 1.98 | 22.59 |
| 1HGH.PDB | OD2, C.ASP.77  | NH2, C.ARG.141 | HH21, C.ARG.141 | 2.75 | 1.86 | 23.43 |
| 1HGH.PDB | OD1, C.ASN.137 | OG, C.SER.145  | HG, C.SER.145   | 2.89 | 2.04 | 23.42 |
| 1HGH.PDB | OH, C.TYR.195  | NE1, C.TRP.153 | HE1, C.TRP.153  | 2.92 | 2.00 | 17.94 |
| 1HGH.PDB | OE2, C.GLU.123 | NZ, C.LYS.176  | HZ1, C.LYS.176  | 2.65 | 1.80 | 28.51 |
| 1HGH.PDB | OE1, C.GLU.123 | OH, C.TYR.178  | HH, C.TYR.178   | 2.74 | 1.81 | 11.36 |
| 1HGH.PDB | OG1, C.THR.235 | NE1, C.TRP.180 | HE1, C.TRP.180  | 2.88 | 1.89 | 0.71  |
| 1HGH.PDB | OG, C.SER.231  | NE2, C.HIS.184 | HE2, C.HIS.184  | 2.77 | 1.92 | 24.69 |
| 1HGH.PDB | OD1, C.ASN.250 | NE2, C.GLN.191 | HE21, C.GLN.191 | 2.95 | 1.99 | 9.46  |
| 1HGH.PDB | OD1, C.ASN.246 | NH2, C.ARG.201 | HH21, C.ARG.201 | 2.65 | 1.73 | 20.02 |
| 1HGH.PDB | OG1, C.THR.212 | OG1, C.THR.203 | HG1, C.THR.203  | 2.92 | 1.98 | 11.43 |
| 1HGH.PDB | OD2, C.ASP.241 | NE, C.ARG.208  | HE, C.ARG.208   | 2.97 | 2.08 | 22.63 |
| 1HGH.PDB | OG1, C.THR.206 | OG, C.SER.209  | HG, C.SER.209   | 2.95 | 2.00 | 8.11  |
| 1HGH.PDB | OD1, A.ASP.101 | NE2, C.GLN.210 | HE22, C.GLN.210 | 2.93 | 2.07 | 24.87 |
| 1HGH.PDB | OE1, E.GLN.210 | NH2, C.ARG.220 | HH21, C.ARG.220 | 2.57 | 1.72 | 26.03 |
| 1HGH.PDB | OD1, C.ASP.101 | OG, C.SER.231  | HG, C.SER.231   | 2.86 | 1.92 | 12.68 |
| 1HGH.PDB | OE1, B.GLU.72  | NZ, C.LYS.238  | HZ1, C.LYS.238  | 2.71 | 1.80 | 22.72 |
| 1HGH.PDB | OD1, C.ASN.165 | ND2, C.ASN.246 | HD22, C.ASN.246 | 2.97 | 2.00 | 10.03 |
| 1HGH.PDB | OE1, C.GLN.191 | ND2, C.ASN.250 | HD21, C.ASN.250 | 2.86 | 1.89 | 6.98  |
| 1HGH.PDB | OE2, C.GLU.119 | NH1, C.ARG.261 | HH12, C.ARG.261 | 2.64 | 1.82 | 29.37 |
| 1HGH.PDB | OE1, C.GLU.119 | NH2, C.ARG.261 | HH22, C.ARG.261 | 2.85 | 1.97 | 24.44 |
| 1HGH.PDB | OD2, C.ASP.85  | NZ, C.LYS.264  | HZ3, C.LYS.264  | 2.79 | 1.81 | 15.90 |
| 1HGH.PDB | OE1, C.GLN.44  | NZ, C.LYS.292  | HZ1, C.LYS.292  | 2.68 | 1.68 | 11.00 |

|          |                |                |                 |      |      |       |
|----------|----------------|----------------|-----------------|------|------|-------|
| 1HGH.PDB | OD2, C_ASP_291 | NZ, C_LYS_292  | HZ3, C_LYS_292  | 2.82 | 1.84 | 17.38 |
| 1HGH.PDB | OD1, C_ASN_285 | ND2, C_ASN_298 | HD22, C_ASN_298 | 2.99 | 2.06 | 14.92 |
| 1HGH.PDB | OD1, D_ASP_86  | NZ, C_LYS_310  | HZ2, C_LYS_310  | 2.73 | 1.85 | 26.20 |
| 1HGH.PDB | OE1, C_GLU_41  | NZ, C_LYS_315  | HZ3, C_LYS_315  | 2.87 | 1.91 | 19.47 |
| 1HGH.PDB | OE2, C_GLU_35  | ND2, C_ASN_322 | HD22, C_ASN_322 | 2.82 | 1.91 | 18.57 |
| 1HGH.PDB | OE1, D_GLU_15  | NZ, C_LYS_326  | HZ1, C_LYS_326  | 2.77 | 1.75 | 11.00 |
| 1HGH.PDB | OXT, C_THR_328 | NE2, C_GLN_327 | HE22, C_GLN_327 | 2.93 | 1.99 | 14.57 |
| 1HGH.PDB | OE1, D_GLN_34  | NE, D_ARG_25   | HE, D_ARG_25    | 2.91 | 1.96 | 12.36 |
| 1HGH.PDB | OD2, D_ASP_37  | OG, D_SER_40   | HG, D_SER_40    | 2.74 | 1.93 | 27.28 |
| 1HGH.PDB | OD1, D_ASP_46  | NE2, D_GLN_42  | HE22, D_GLN_42  | 2.87 | 1.96 | 19.71 |
| 1HGH.PDB | OE1, D_GLU_103 | NZ, D_LYS_51   | HZ1, D_LYS_51   | 2.74 | 1.72 | 7.43  |
| 1HGH.PDB | ND1, D_HIS_106 | NZ, D_LYS_51   | HZ2, D_LYS_51   | 2.80 | 1.84 | 18.41 |
| 1HGH.PDB | OG1, D_THR_107 | NZ, D_LYS_51   | HZ3, D_LYS_51   | 2.90 | 1.93 | 16.98 |
| 1HGH.PDB | OE1, D_GLU_57  | NH1, D_ARG_54  | HH11, D_ARG_54  | 2.86 | 1.86 | 11.45 |
| 1HGH.PDB | OE2, B_GLU_97  | NH2, D_ARG_54  | HH22, D_ARG_54  | 2.80 | 1.85 | 16.64 |
| 1HGH.PDB | OG, C_SER_110  | NE2, D_HIS_64  | HE2, D_HIS_64   | 2.84 | 1.88 | 10.18 |
| 1HGH.PDB | OE2, D_GLU_85  | NZ, D_LYS_68   | HZ2, D_LYS_68   | 2.75 | 1.73 | 9.37  |
| 1HGH.PDB | OE2, F_GLU_81  | NE, D_ARG_76   | HE, D_ARG_76    | 2.79 | 1.84 | 10.45 |
| 1HGH.PDB | OE2, F_GLU_74  | NH1, D_ARG_76  | HH12, D_ARG_76  | 2.77 | 1.77 | 10.38 |
| 1HGH.PDB | OE1, F_GLU_81  | NH2, D_ARG_76  | HH21, D_ARG_76  | 2.70 | 1.70 | 6.41  |
| 1HGH.PDB | OE1, F_GLU_74  | NH2, D_ARG_76  | HH22, D_ARG_76  | 2.75 | 1.75 | 5.88  |
| 1HGH.PDB | OE1, D_GLU_74  | NE2, D_GLN_78  | HE22, D_GLN_78  | 2.92 | 1.96 | 9.79  |
| 1HGH.PDB | OE1, F_GLU_85  | OH, D_TYR_83   | HH, D_TYR_83    | 2.59 | 1.81 | 29.86 |
| 1HGH.PDB | OH, B_TYR_83   | NZ, D_LYS_88   | HZ1, D_LYS_88   | 2.66 | 1.64 | 7.83  |
| 1HGH.PDB | OE2, D_GLU_120 | NH1, D_ARG_123 | HH11, D_ARG_123 | 2.77 | 1.87 | 22.36 |
| 1HGH.PDB | OE1, B_GLU_132 | NE, D_ARG_124  | HE, D_ARG_124   | 2.80 | 1.98 | 26.35 |
| 1HGH.PDB | OE2, B_GLU_132 | NE, D_ARG_124  | HE, D_ARG_124   | 2.84 | 1.99 | 23.38 |
| 1HGH.PDB | OH, D_TYR_157  | ND2, D_ASN_129 | HD22, D_ASN_129 | 2.83 | 1.87 | 7.67  |
| 1HGH.PDB | OD1, D_ASN_154 | OG1, D_THR_156 | HG1, D_THR_156  | 2.69 | 1.80 | 16.96 |
| 1HGH.PDB | NE2, D_HIS_142 | OH, D_TYR_157  | HH, D_TYR_157   | 2.68 | 1.87 | 26.02 |
| 1HGH.PDB | OE2, D_GLU_131 | NH1, D_ARG_170 | HH11, D_ARG_170 | 2.83 | 1.83 | 5.85  |
| 1HGH.PDB | OE2, F_GLU_97  | NZ, E_LYS_27   | HZ1, E_LYS_27   | 2.77 | 1.74 | 8.08  |
| 1HGH.PDB | OD2, E_ASP_275 | NZ, E_LYS_50   | HZ1, E_LYS_50   | 2.78 | 1.83 | 20.38 |
| 1HGH.PDB | OD1, E_ASP_73  | ND1, E_HIS_75  | HD1, E_HIS_75   | 2.70 | 1.83 | 21.52 |
| 1HGH.PDB | OD1, E_ASP_60  | NE, E_ARG_90   | HE, E_ARG_90    | 2.82 | 1.87 | 13.57 |
| 1HGH.PDB | OD2, E_ASP_60  | NH2, E_ARG_90  | HH21, E_ARG_90  | 2.82 | 1.82 | 8.69  |
| 1HGH.PDB | OD2, E_ASP_271 | OG, E_SER_91   | HG, E_SER_91    | 2.81 | 1.88 | 14.87 |
| 1HGH.PDB | OD2, E_ASP_68  | OG, E_SER_95   | HG, E_SER_95    | 2.88 | 1.94 | 13.28 |
| 1HGH.PDB | OD1, E_ASP_68  | OH, E_TYR_100  | HH, E_TYR_100   | 2.91 | 1.97 | 12.96 |
| 1HGH.PDB | OD2, E_ASP_104 | OG, E_SER_107  | HG, E_SER_107   | 2.88 | 1.97 | 18.12 |
| 1HGH.PDB | OE2, F_GLU_67  | NH2, E_ARG_109 | HH21, E_ARG_109 | 2.88 | 1.90 | 13.56 |
| 1HGH.PDB | OD2, D_ASP_79  | OG, E_SER_110  | HG, E_SER_110   | 2.90 | 1.94 | 9.49  |
| 1HGH.PDB | OE2, E_GLU_119 | OG1, E_THR_117 | HG1, E_THR_117  | 2.88 | 1.94 | 11.16 |
| 1HGH.PDB | OD1, E_ASN_137 | NZ, E_LYS_140  | HZ2, E_LYS_140  | 2.75 | 1.75 | 11.91 |
| 1HGH.PDB | OD2, E_ASP_77  | NE, E_ARG_141  | HE, E_ARG_141   | 2.85 | 2.01 | 27.16 |
| 1HGH.PDB | OD1, E_ASP_77  | NH2, E_ARG_141 | HH21, E_ARG_141 | 2.89 | 1.99 | 22.46 |
| 1HGH.PDB | OD2, E_ASP_77  | NH2, E_ARG_141 | HH21, E_ARG_141 | 2.74 | 1.84 | 23.25 |
| 1HGH.PDB | OD1, E_ASN_137 | OG, E_SER_145  | HG, E_SER_145   | 2.98 | 2.07 | 15.03 |
| 1HGH.PDB | OH, E_TYR_195  | NE1, E_TRP_153 | HE1, E_TRP_153  | 2.94 | 2.03 | 18.49 |
| 1HGH.PDB | OE2, E_GLU_123 | NZ, E_LYS_176  | HZ1, E_LYS_176  | 2.69 | 1.82 | 26.87 |
| 1HGH.PDB | OE1, E_GLU_123 | OH, E_TYR_178  | HH, E_TYR_178   | 2.77 | 1.82 | 8.79  |
| 1HGH.PDB | OG1, E_THR_235 | NE1, E_TRP_180 | HE1, E_TRP_180  | 2.88 | 1.89 | 0.99  |
| 1HGH.PDB | OG, E_SER_231  | NE2, E_HIS_184 | HE2, E_HIS_184  | 2.78 | 1.93 | 25.10 |
| 1HGH.PDB | OD1, E_ASN_250 | NE2, E_GLN_191 | HE21, E_GLN_191 | 2.99 | 2.02 | 8.22  |
| 1HGH.PDB | OD1, E_ASN_246 | NH2, E_ARG_201 | HH21, E_ARG_201 | 2.64 | 1.73 | 21.41 |
| 1HGH.PDB | OG1, E_THR_212 | OG1, E_THR_203 | HG1, E_THR_203  | 2.98 | 2.08 | 17.30 |
| 1HGH.PDB | OG1, E_THR_206 | OG, E_SER_209  | HG, E_SER_209   | 2.95 | 2.00 | 8.64  |
| 1HGH.PDB | OD1, C_ASP_101 | NE2, E_GLN_210 | HE22, E_GLN_210 | 2.95 | 2.09 | 25.33 |

|          |                |                |                 |      |      |       |
|----------|----------------|----------------|-----------------|------|------|-------|
| 1HGH.PDB | OE1, A_GLN_210 | NH2, E_ARG_220 | HH21, E_ARG_220 | 2.68 | 1.79 | 22.30 |
| 1HGH.PDB | OD1, E_ASP_101 | OG, E_SER_231  | HG, E_SER_231   | 2.86 | 1.91 | 11.78 |
| 1HGH.PDB | OE1, D_GLU_72  | NZ, E_LYS_238  | HZ3, E_LYS_238  | 2.87 | 1.88 | 15.42 |
| 1HGH.PDB | OD1, E_ASN_165 | ND2, E_ASN_246 | HD22, E_ASN_246 | 2.98 | 2.01 | 10.13 |
| 1HGH.PDB | OE1, E_GLN_191 | ND2, E_ASN_250 | HD21, E_ASN_250 | 2.89 | 1.92 | 6.88  |
| 1HGH.PDB | OE2, E_GLU_119 | NH1, E_ARG_261 | HH12, E_ARG_261 | 2.63 | 1.81 | 29.30 |
| 1HGH.PDB | OE1, E_GLU_119 | NH2, E_ARG_261 | HH22, E_ARG_261 | 2.85 | 1.96 | 24.42 |
| 1HGH.PDB | OD2, E_ASP_85  | NZ, E_LYS_264  | HZ3, E_LYS_264  | 2.81 | 1.82 | 14.94 |
| 1HGH.PDB | OE1, F_GLU_67  | NH1, E_ARG_269 | HH12, E_ARG_269 | 2.71 | 1.88 | 29.19 |
| 1HGH.PDB | OE1, E_GLN_44  | NZ, E_LYS_292  | HZ1, E_LYS_292  | 2.67 | 1.66 | 10.24 |
| 1HGH.PDB | OD2, E_ASP_291 | NZ, E_LYS_292  | HZ3, E_LYS_292  | 2.84 | 1.86 | 17.36 |
| 1HGH.PDB | OD1, F_ASP_86  | NZ, E_LYS_310  | HZ2, E_LYS_310  | 2.74 | 1.87 | 26.77 |
| 1HGH.PDB | OE1, E_GLU_41  | NZ, E_LYS_315  | HZ3, E_LYS_315  | 2.85 | 1.89 | 19.70 |
| 1HGH.PDB | OE2, E_GLU_35  | ND2, E_ASN_322 | HD22, E_ASN_322 | 2.80 | 1.90 | 19.14 |
| 1HGH.PDB | OE1, F_GLU_15  | NZ, E_LYS_326  | HZ3, E_LYS_326  | 2.90 | 1.89 | 12.96 |
| 1HGH.PDB | OE1, F_GLN_34  | NH2, F_ARG_25  | HH21, F_ARG_25  | 2.92 | 2.03 | 23.48 |
| 1HGH.PDB | OD1, F_ASN_146 | ND2, F_ASN_28  | HD21, F_ASN_28  | 2.91 | 1.96 | 12.69 |
| 1HGH.PDB | OD2, F_ASP_37  | OG, F_SER_40   | HG, F_SER_40    | 2.73 | 1.92 | 26.94 |
| 1HGH.PDB | OD1, F_ASP_46  | NE2, F_GLN_42  | HE22, F_GLN_42  | 2.85 | 1.95 | 20.25 |
| 1HGH.PDB | OE2, F_GLU_114 | NE2, F_GLN_47  | HE21, F_GLN_47  | 2.99 | 2.08 | 19.28 |
| 1HGH.PDB | OE1, F_GLU_103 | NZ, F_LYS_51   | HZ1, F_LYS_51   | 2.75 | 1.72 | 7.02  |
| 1HGH.PDB | ND1, F_HIS_106 | NZ, F_LYS_51   | HZ2, F_LYS_51   | 2.77 | 1.82 | 19.11 |
| 1HGH.PDB | OG1, F_THR_107 | NZ, F_LYS_51   | HZ3, F_LYS_51   | 2.93 | 1.96 | 17.40 |
| 1HGH.PDB | OE1, F_GLU_57  | NH1, F_ARG_54  | HH11, F_ARG_54  | 2.88 | 1.88 | 10.86 |
| 1HGH.PDB | OE2, D_GLU_97  | NH2, F_ARG_54  | HH22, F_ARG_54  | 2.72 | 1.77 | 15.67 |
| 1HGH.PDB | OD2, D_ASP_90  | NZ, F_LYS_62   | HZ2, F_LYS_62   | 2.68 | 1.83 | 28.02 |
| 1HGH.PDB | OG, E_SER_110  | NE2, F_HIS_64  | HE2, F_HIS_64   | 2.87 | 1.91 | 9.23  |
| 1HGH.PDB | OE2, F_GLU_85  | NZ, F_LYS_68   | HZ2, F_LYS_68   | 2.73 | 1.74 | 15.07 |
| 1HGH.PDB | OE2, B_GLU_81  | NE, F_ARG_76   | HE, F_ARG_76    | 2.84 | 1.87 | 10.72 |
| 1HGH.PDB | OE2, B_GLU_74  | NH1, F_ARG_76  | HH12, F_ARG_76  | 2.73 | 1.73 | 5.34  |
| 1HGH.PDB | OE1, B_GLU_81  | NH2, F_ARG_76  | HH21, F_ARG_76  | 2.71 | 1.70 | 1.21  |
| 1HGH.PDB | OE1, B_GLU_74  | NH2, F_ARG_76  | HH22, F_ARG_76  | 2.78 | 1.78 | 7.19  |
| 1HGH.PDB | OE1, F_GLU_74  | NE2, F_GLN_78  | HE22, F_GLN_78  | 2.92 | 1.95 | 8.97  |
| 1HGH.PDB | OE1, B_GLU_85  | OH, F_TYR_83   | HH, F_TYR_83    | 2.53 | 1.74 | 27.23 |
| 1HGH.PDB | OH, D_TYR_83   | NZ, F_LYS_88   | HZ1, F_LYS_88   | 2.65 | 1.63 | 9.88  |
| 1HGH.PDB | OE2, F_GLU_120 | NH1, F_ARG_123 | HH11, F_ARG_123 | 2.74 | 1.84 | 22.63 |
| 1HGH.PDB | OE1, D_GLU_132 | NE, F_ARG_124  | HE, F_ARG_124   | 2.89 | 2.06 | 26.55 |
| 1HGH.PDB | OE2, D_GLU_132 | NE, F_ARG_124  | HE, F_ARG_124   | 2.92 | 2.03 | 21.52 |
| 1HGH.PDB | OH, F_TYR_157  | ND2, F_ASN_129 | HD22, F_ASN_129 | 2.82 | 1.88 | 14.11 |
| 1HGH.PDB | OE2, F_GLU_131 | NH1, F_ARG_170 | HH11, F_ARG_170 | 2.84 | 1.84 | 5.40  |
| 1HGI.PDB | OE2, B_GLU_97  | NZ, A_LYS_27   | HZ1, A_LYS_27   | 2.90 | 1.86 | 7.66  |
| 1HGI.PDB | OD2, A_ASP_275 | NZ, A_LYS_50   | HZ1, A_LYS_50   | 2.71 | 1.78 | 22.79 |
| 1HGI.PDB | OD1, A_ASP_73  | ND1, A_HIS_75  | HD1, A_HIS_75   | 2.90 | 1.96 | 15.34 |
| 1HGI.PDB | OD1, A_ASP_60  | NE, A_ARG_90   | HE, A_ARG_90    | 2.89 | 1.91 | 4.93  |
| 1HGI.PDB | OD2, A_ASP_60  | NH2, A_ARG_90  | HH21, A_ARG_90  | 2.83 | 1.85 | 11.60 |
| 1HGI.PDB | OD1, A_ASP_271 | OG, A_SER_91   | HG, A_SER_91    | 2.93 | 2.10 | 25.86 |
| 1HGI.PDB | OD2, A_ASP_271 | OG, A_SER_91   | HG, A_SER_91    | 2.80 | 1.92 | 20.51 |
| 1HGI.PDB | OD2, A_ASP_68  | OG, A_SER_95   | HG, A_SER_95    | 2.89 | 1.96 | 14.00 |
| 1HGI.PDB | OD1, A_ASP_68  | OH, A_TYR_100  | HH, A_TYR_100   | 2.99 | 2.05 | 13.08 |
| 1HGI.PDB | OD2, A_ASP_104 | OG, A_SER_107  | HG, A_SER_107   | 2.89 | 1.96 | 15.23 |
| 1HGI.PDB | OE2, B_GLU_67  | NH2, A_ARG_109 | HH21, A_ARG_109 | 2.80 | 1.81 | 13.24 |
| 1HGI.PDB | OE2, A_GLU_119 | OG1, A_THR_117 | HG1, A_THR_117  | 2.93 | 2.01 | 15.43 |
| 1HGI.PDB | OD1, A_ASN_137 | NZ, A_LYS_140  | HZ2, A_LYS_140  | 2.79 | 1.79 | 13.01 |
| 1HGI.PDB | OD2, A_ASP_77  | NE, A_ARG_141  | HE, A_ARG_141   | 2.82 | 2.01 | 29.43 |
| 1HGI.PDB | OD1, A_ASP_77  | NH2, A_ARG_141 | HH21, A_ARG_141 | 2.93 | 2.01 | 20.43 |
| 1HGI.PDB | OD2, A_ASP_77  | NH2, A_ARG_141 | HH21, A_ARG_141 | 2.69 | 1.82 | 24.99 |
| 1HGI.PDB | OH, A_TYR_195  | NE1, A_TRP_153 | HE1, A_TRP_153  | 2.87 | 1.98 | 21.02 |
| 1HGI.PDB | OG1, A_THR_131 | OG, A_SER_157  | HG, A_SER_157   | 2.97 | 2.02 | 9.12  |

|          |                |                |                 |      |      |       |
|----------|----------------|----------------|-----------------|------|------|-------|
| 1HGI.PDB | OE2, A_GLU_123 | NZ, A_LYS_176  | HZ1, A_LYS_176  | 2.68 | 1.79 | 25.50 |
| 1HGI.PDB | OE1, A_GLU_123 | OH, A_TYR_178  | HH, A_TYR_178   | 2.78 | 1.82 | 7.33  |
| 1HGI.PDB | OG1, A_THR_235 | NE1, A_TRP_180 | HE1, A_TRP_180  | 2.85 | 1.87 | 3.02  |
| 1HGI.PDB | OG, A_SER_231  | NE2, A_HIS_184 | HE2, A_HIS_184  | 2.81 | 1.93 | 22.19 |
| 1HGI.PDB | OD1, A_ASN_250 | NE2, A_GLN_191 | HE21, A_GLN_191 | 2.93 | 1.97 | 11.19 |
| 1HGI.PDB | OD1, A_ASN_246 | NH2, A_ARG_201 | HH21, A_ARG_201 | 2.54 | 1.71 | 26.99 |
| 1HGI.PDB | OD2, A_ASP_241 | NE, A_ARG_208  | HE, A_ARG_208   | 2.96 | 2.05 | 19.55 |
| 1HGI.PDB | OG1, A_THR_203 | OG1, A_THR_212 | HG1, A_THR_212  | 2.96 | 2.00 | 2.15  |
| 1HGI.PDB | OE1, C_GLN_210 | NH2, A_ARG_220 | HH21, A_ARG_220 | 2.65 | 1.73 | 18.55 |
| 1HGI.PDB | OD1, A_ASP_101 | OG, A_SER_231  | HG, A_SER_231   | 2.96 | 2.01 | 11.74 |
| 1HGI.PDB | OE1, F_GLU_72  | NZ, A_LYS_238  | HZ3, A_LYS_238  | 2.85 | 1.85 | 15.00 |
| 1HGI.PDB | OE1, A_GLN_191 | ND2, A_ASN_250 | HD21, A_ASN_250 | 2.89 | 1.93 | 10.00 |
| 1HGI.PDB | OE2, A_GLU_119 | NH1, A_ARG_261 | HH12, A_ARG_261 | 2.66 | 1.83 | 28.46 |
| 1HGI.PDB | OE1, A_GLU_119 | NH2, A_ARG_261 | HH22, A_ARG_261 | 2.85 | 1.99 | 27.12 |
| 1HGI.PDB | OD2, A_ASP_85  | NZ, A_LYS_264  | HZ3, A_LYS_264  | 2.82 | 1.85 | 17.23 |
| 1HGI.PDB | OE1, A_GLN_44  | NZ, A_LYS_292  | HZ1, A_LYS_292  | 2.74 | 1.74 | 11.73 |
| 1HGI.PDB | OD2, A_ASP_291 | NZ, A_LYS_292  | HZ3, A_LYS_292  | 2.81 | 1.89 | 23.33 |
| 1HGI.PDB | OD1, B_ASP_86  | NZ, A_LYS_310  | HZ3, A_LYS_310  | 2.76 | 1.92 | 29.34 |
| 1HGI.PDB | OE1, A_GLU_41  | NZ, A_LYS_315  | HZ3, A_LYS_315  | 2.77 | 1.82 | 19.86 |
| 1HGI.PDB | OE2, A_GLU_35  | ND2, A_ASN_322 | HD22, A_ASN_322 | 2.93 | 1.97 | 12.34 |
| 1HGI.PDB | OE2, B_GLU_15  | NZ, A_LYS_326  | HZ1, A_LYS_326  | 2.79 | 1.93 | 27.33 |
| 1HGI.PDB | OE1, A_GLU_325 | NZ, A_LYS_326  | HZ3, A_LYS_326  | 2.91 | 1.94 | 17.77 |
| 1HGI.PDB | OE1, B_GLN_34  | NE, B_ARG_25   | HE, B_ARG_25    | 2.60 | 1.78 | 26.17 |
| 1HGI.PDB | OE1, B_GLN_34  | NH2, B_ARG_25  | HH21, B_ARG_25  | 2.75 | 1.92 | 27.98 |
| 1HGI.PDB | OE2, A_GLU_325 | NH2, B_ARG_25  | HH22, B_ARG_25  | 2.93 | 1.95 | 13.46 |
| 1HGI.PDB | OD1, B_ASP_46  | NE2, B_GLN_42  | HE22, B_GLN_42  | 2.89 | 2.02 | 23.36 |
| 1HGI.PDB | OG1, B_THR_107 | NZ, B_LYS_51   | HZ1, B_LYS_51   | 2.96 | 1.97 | 15.88 |
| 1HGI.PDB | OE1, B_GLU_103 | NZ, B_LYS_51   | HZ2, B_LYS_51   | 2.82 | 1.78 | 6.88  |
| 1HGI.PDB | ND1, B_HIS_106 | NZ, B_LYS_51   | HZ3, B_LYS_51   | 2.81 | 1.87 | 19.52 |
| 1HGI.PDB | OE1, B_GLU_57  | NH1, B_ARG_54  | HH11, B_ARG_54  | 2.86 | 1.87 | 11.02 |
| 1HGI.PDB | OE2, F_GLU_97  | NH2, B_ARG_54  | HH22, B_ARG_54  | 2.81 | 1.84 | 14.63 |
| 1HGI.PDB | OD2, F_ASP_86  | NZ, B_LYS_62   | HZ1, B_LYS_62   | 2.67 | 1.78 | 25.75 |
| 1HGI.PDB | OG, A_SER_110  | NE2, B_HIS_64  | HE2, B_HIS_64   | 2.87 | 1.89 | 8.13  |
| 1HGI.PDB | OE2, B_GLU_85  | NZ, B_LYS_68   | HZ2, B_LYS_68   | 2.79 | 1.75 | 2.13  |
| 1HGI.PDB | OE2, D_GLU_81  | NE, B_ARG_76   | HE, B_ARG_76    | 2.86 | 1.89 | 7.04  |
| 1HGI.PDB | OE2, D_GLU_74  | NH1, B_ARG_76  | HH12, B_ARG_76  | 2.92 | 1.89 | 1.72  |
| 1HGI.PDB | OE1, D_GLU_81  | NH2, B_ARG_76  | HH21, B_ARG_76  | 2.71 | 1.72 | 8.42  |
| 1HGI.PDB | OE1, D_GLU_74  | NH2, B_ARG_76  | HH22, B_ARG_76  | 2.86 | 1.86 | 6.93  |
| 1HGI.PDB | OE1, B_GLU_74  | NE2, B_GLN_78  | HE22, B_GLN_78  | 2.94 | 1.97 | 8.23  |
| 1HGI.PDB | OE1, D_GLU_85  | OH, B_TYR_83   | HH, B_TYR_83    | 2.78 | 1.84 | 13.46 |
| 1HGI.PDB | OH, F_TYR_83   | NZ, B_LYS_88   | HZ1, B_LYS_88   | 2.65 | 1.64 | 9.94  |
| 1HGI.PDB | OE2, B_GLU_120 | NH1, B_ARG_123 | HH11, B_ARG_123 | 2.84 | 1.97 | 25.22 |
| 1HGI.PDB | OE1, F_GLU_132 | NE, B_ARG_124  | HE, B_ARG_124   | 2.81 | 1.96 | 23.50 |
| 1HGI.PDB | OE2, F_GLU_132 | NE, B_ARG_124  | HE, B_ARG_124   | 2.86 | 2.02 | 24.92 |
| 1HGI.PDB | OH, B_TYR_157  | ND2, B_ASN_129 | HD22, B_ASN_129 | 2.81 | 1.86 | 9.72  |
| 1HGI.PDB | OE2, B_GLU_150 | ND2, B_ASN_154 | HD21, B_ASN_154 | 2.84 | 2.01 | 27.47 |
| 1HGI.PDB | OD1, B_ASN_154 | OG1, B_THR_156 | HG1, B_THR_156  | 2.64 | 1.78 | 21.15 |
| 1HGI.PDB | OE2, B_GLU_131 | NH1, B_ARG_170 | HH11, B_ARG_170 | 2.77 | 1.77 | 6.54  |
| 1HGI.PDB | OE2, D_GLU_97  | NZ, C_LYS_27   | HZ1, C_LYS_27   | 2.88 | 1.83 | 6.58  |
| 1HGI.PDB | OD2, C_ASP_275 | NZ, C_LYS_50   | HZ1, C_LYS_50   | 2.68 | 1.77 | 23.91 |
| 1HGI.PDB | OD1, C_ASP_73  | ND1, C_HIS_75  | HD1, C_HIS_75   | 2.88 | 1.94 | 15.46 |
| 1HGI.PDB | OD1, C_ASP_60  | NE, C_ARG_90   | HE, C_ARG_90    | 2.83 | 1.88 | 11.13 |
| 1HGI.PDB | OD2, C_ASP_60  | NH2, C_ARG_90  | HH21, C_ARG_90  | 2.77 | 1.79 | 11.02 |
| 1HGI.PDB | OD1, C_ASP_271 | OG, C_SER_91   | HG, C_SER_91    | 2.95 | 2.13 | 27.22 |
| 1HGI.PDB | OD2, C_ASP_271 | OG, C_SER_91   | HG, C_SER_91    | 2.83 | 1.94 | 19.64 |
| 1HGI.PDB | OD2, C_ASP_68  | OG, C_SER_95   | HG, C_SER_95    | 2.89 | 1.96 | 14.85 |
| 1HGI.PDB | OD1, C_ASP_68  | OH, C_TYR_100  | HH, C_TYR_100   | 2.94 | 1.99 | 10.92 |
| 1HGI.PDB | OD2, C_ASP_104 | OG, C_SER_107  | HG, C_SER_107   | 2.90 | 1.96 | 13.90 |

|          |                |                |                 |      |      |       |
|----------|----------------|----------------|-----------------|------|------|-------|
| 1HGI.PDB | OE2, D_GLU_67  | NH2, C_ARG_109 | HH21, C_ARG_109 | 2.82 | 1.84 | 15.02 |
| 1HGI.PDB | OD2, B_ASP_79  | OG, C_SER_110  | HG, C_SER_110   | 2.85 | 1.90 | 11.29 |
| 1HGI.PDB | OE2, C_GLU_119 | OG1, C_THR_117 | HG1, C_THR_117  | 2.95 | 2.03 | 14.67 |
| 1HGI.PDB | OD1, C_ASN_137 | NZ, C_LYS_140  | HZ2, C_LYS_140  | 2.83 | 1.83 | 12.62 |
| 1HGI.PDB | OD2, C_ASP_77  | NE, C_ARG_141  | HE, C_ARG_141   | 2.83 | 2.02 | 29.40 |
| 1HGI.PDB | OD1, C_ASP_77  | NH2, C_ARG_141 | HH21, C_ARG_141 | 2.93 | 2.01 | 20.50 |
| 1HGI.PDB | OD2, C_ASP_77  | NH2, C_ARG_141 | HH21, C_ARG_141 | 2.70 | 1.83 | 25.10 |
| 1HGI.PDB | OH, C_TYR_195  | NE1, C_TRP_153 | HE1, C_TRP_153  | 2.82 | 1.96 | 22.98 |
| 1HGI.PDB | OE2, C_GLU_123 | NZ, C_LYS_176  | HZ1, C_LYS_176  | 2.68 | 1.80 | 26.11 |
| 1HGI.PDB | OE1, C_GLU_123 | OH, C_TYR_178  | HH, C_TYR_178   | 2.75 | 1.80 | 7.25  |
| 1HGI.PDB | OG1, C_THR_235 | NE1, C_TRP_180 | HE1, C_TRP_180  | 2.84 | 1.86 | 3.22  |
| 1HGI.PDB | OG, C_SER_231  | NE2, C_HIS_184 | HE2, C_HIS_184  | 2.81 | 1.93 | 22.34 |
| 1HGI.PDB | OD1, C_ASN_250 | NE2, C_GLN_191 | HE21, C_GLN_191 | 2.86 | 1.91 | 10.94 |
| 1HGI.PDB | OD1, C_ASN_246 | NH2, C_ARG_201 | HH21, C_ARG_201 | 2.55 | 1.72 | 27.61 |
| 1HGI.PDB | OG1, C_THR_212 | OG1, C_THR_203 | HG1, C_THR_203  | 2.94 | 2.00 | 11.06 |
| 1HGI.PDB | OD2, C_ASP_241 | NE, C_ARG_208  | HE, C_ARG_208   | 2.92 | 2.01 | 19.66 |
| 1HGI.PDB | OE1, E_GLN_210 | NH2, C_ARG_220 | HH21, C_ARG_220 | 2.62 | 1.75 | 23.70 |
| 1HGI.PDB | OD1, C_ASP_101 | OG, C_SER_231  | HG, C_SER_231   | 2.97 | 2.02 | 12.14 |
| 1HGI.PDB | OE1, B_GLU_72  | NZ, C_LYS_238  | HZ1, C_LYS_238  | 2.67 | 1.77 | 23.68 |
| 1HGI.PDB | OE1, C_GLN_191 | ND2, C_ASN_250 | HD21, C_ASN_250 | 2.87 | 1.92 | 11.00 |
| 1HGI.PDB | OE2, C_GLU_119 | NH1, C_ARG_261 | HH12, C_ARG_261 | 2.66 | 1.84 | 29.01 |
| 1HGI.PDB | OE1, C_GLU_119 | NH2, C_ARG_261 | HH22, C_ARG_261 | 2.84 | 1.99 | 27.78 |
| 1HGI.PDB | OD2, C_ASP_85  | NZ, C_LYS_264  | HZ3, C_LYS_264  | 2.83 | 1.86 | 17.28 |
| 1HGI.PDB | OE1, C_GLN_44  | NZ, C_LYS_292  | HZ1, C_LYS_292  | 2.75 | 1.75 | 12.02 |
| 1HGI.PDB | OD2, C_ASP_291 | NZ, C_LYS_292  | HZ3, C_LYS_292  | 2.82 | 1.90 | 23.36 |
| 1HGI.PDB | OD1, C_ASN_285 | ND2, C_ASN_298 | HD22, C_ASN_298 | 3.00 | 2.03 | 7.73  |
| 1HGI.PDB | OD1, D_ASP_86  | NZ, C_LYS_310  | HZ3, C_LYS_310  | 2.77 | 1.93 | 29.51 |
| 1HGI.PDB | OE1, C_GLU_41  | NZ, C_LYS_315  | HZ3, C_LYS_315  | 2.75 | 1.80 | 20.43 |
| 1HGI.PDB | OE2, C_GLU_35  | ND2, C_ASN_322 | HD22, C_ASN_322 | 2.90 | 1.95 | 11.70 |
| 1HGI.PDB | OE1, D_GLU_15  | NZ, C_LYS_326  | HZ1, C_LYS_326  | 2.83 | 1.84 | 16.25 |
| 1HGI.PDB | OE1, D_GLN_34  | NE, D_ARG_25   | HE, D_ARG_25    | 2.62 | 1.78 | 23.70 |
| 1HGI.PDB | OD1, D_ASN_146 | ND2, D_ASN_28  | HD21, D_ASN_28  | 2.93 | 1.98 | 12.39 |
| 1HGI.PDB | OD2, D_ASP_37  | OG, D_SER_40   | HG, D_SER_40    | 2.78 | 1.93 | 23.19 |
| 1HGI.PDB | OD1, D_ASP_46  | NE2, D_GLN_42  | HE22, D_GLN_42  | 2.88 | 2.01 | 23.38 |
| 1HGI.PDB | OE1, D_GLU_103 | NZ, D_LYS_51   | HZ2, D_LYS_51   | 2.81 | 1.77 | 5.89  |
| 1HGI.PDB | ND1, D_HIS_106 | NZ, D_LYS_51   | HZ3, D_LYS_51   | 2.78 | 1.83 | 18.78 |
| 1HGI.PDB | OE1, D_GLU_57  | NH1, D_ARG_54  | HH11, D_ARG_54  | 2.85 | 1.86 | 11.80 |
| 1HGI.PDB | OE2, B_GLU_97  | NH2, D_ARG_54  | HH22, D_ARG_54  | 2.81 | 1.85 | 15.40 |
| 1HGI.PDB | OE2, D_GLU_61  | NZ, D_LYS_58   | HZ2, D_LYS_58   | 3.00 | 2.01 | 17.14 |
| 1HGI.PDB | OG, C_SER_110  | NE2, D_HIS_64  | HE2, D_HIS_64   | 2.83 | 1.85 | 2.78  |
| 1HGI.PDB | OE2, D_GLU_85  | NZ, D_LYS_68   | HZ2, D_LYS_68   | 2.81 | 1.76 | 2.16  |
| 1HGI.PDB | OE2, F_GLU_81  | NE, D_ARG_76   | HE, D_ARG_76    | 2.80 | 1.82 | 5.40  |
| 1HGI.PDB | OE2, F_GLU_74  | NH1, D_ARG_76  | HH12, D_ARG_76  | 2.78 | 1.76 | 4.18  |
| 1HGI.PDB | OE1, F_GLU_81  | NH2, D_ARG_76  | HH21, D_ARG_76  | 2.61 | 1.67 | 15.38 |
| 1HGI.PDB | OE1, F_GLU_74  | NH2, D_ARG_76  | HH22, D_ARG_76  | 2.76 | 1.77 | 8.75  |
| 1HGI.PDB | OE1, D_GLU_74  | NE2, D_GLN_78  | HE22, D_GLN_78  | 2.92 | 1.95 | 8.47  |
| 1HGI.PDB | OE1, F_GLU_85  | OH, D_TYR_83   | HH, D_TYR_83    | 2.69 | 1.81 | 20.41 |
| 1HGI.PDB | OH, B_TYR_83   | NZ, D_LYS_88   | HZ1, D_LYS_88   | 2.66 | 1.64 | 7.30  |
| 1HGI.PDB | OE2, D_GLU_120 | NH1, D_ARG_123 | HH11, D_ARG_123 | 2.83 | 1.97 | 25.69 |
| 1HGI.PDB | OE1, B_GLU_132 | NE, D_ARG_124  | HE, D_ARG_124   | 2.84 | 1.98 | 23.95 |
| 1HGI.PDB | OE2, B_GLU_132 | NE, D_ARG_124  | HE, D_ARG_124   | 2.88 | 2.03 | 24.96 |
| 1HGI.PDB | OH, D_TYR_157  | ND2, D_ASN_129 | HD22, D_ASN_129 | 2.81 | 1.84 | 5.40  |
| 1HGI.PDB | OD1, D_ASN_154 | OG1, D_THR_156 | HG1, D_THR_156  | 2.68 | 1.79 | 17.62 |
| 1HGI.PDB | NE2, D_HIS_142 | OH, D_TYR_157  | HH, D_TYR_157   | 2.72 | 1.85 | 20.80 |
| 1HGI.PDB | OE2, D_GLU_131 | NH1, D_ARG_170 | HH11, D_ARG_170 | 2.77 | 1.78 | 6.80  |
| 1HGI.PDB | OE2, F_GLU_97  | NZ, E_LYS_27   | HZ1, E_LYS_27   | 2.86 | 1.82 | 7.44  |
| 1HGI.PDB | OD2, E_ASP_275 | NZ, E_LYS_50   | HZ1, E_LYS_50   | 2.70 | 1.78 | 22.89 |
| 1HGI.PDB | OD1, E_ASP_73  | ND1, E_HIS_75  | HD1, E_HIS_75   | 2.87 | 1.94 | 15.26 |

|          |                |                |                 |      |      |       |
|----------|----------------|----------------|-----------------|------|------|-------|
| 1HGI.PDB | OD1, E_ASP_60  | NE, E_ARG_90   | HE, E_ARG_90    | 2.89 | 1.92 | 8.33  |
| 1HGI.PDB | OD2, E_ASP_60  | NH2, E_ARG_90  | HH21, E_ARG_90  | 2.84 | 1.85 | 10.04 |
| 1HGI.PDB | OD1, E_ASP_271 | OG, E_SER_91   | HG, E_SER_91    | 2.94 | 2.11 | 26.21 |
| 1HGI.PDB | OD2, E_ASP_271 | OG, E_SER_91   | HG, E_SER_91    | 2.82 | 1.93 | 20.43 |
| 1HGI.PDB | OD2, E_ASP_68  | OG, E_SER_95   | HG, E_SER_95    | 2.90 | 1.96 | 13.54 |
| 1HGI.PDB | OD1, E_ASP_68  | OH, E_TYR_100  | HH, E_TYR_100   | 2.94 | 1.98 | 8.32  |
| 1HGI.PDB | OD2, E_ASP_104 | OG, E_SER_107  | HG, E_SER_107   | 2.91 | 1.98 | 14.52 |
| 1HGI.PDB | OE2, F_GLU_67  | NH2, E_ARG_109 | HH21, E_ARG_109 | 2.78 | 1.80 | 14.37 |
| 1HGI.PDB | OD2, D_ASP_79  | OG, E_SER_110  | HG, E_SER_110   | 2.90 | 1.94 | 10.08 |
| 1HGI.PDB | OE2, E_GLU_119 | OG1, E_THR_117 | HG1, E_THR_117  | 2.98 | 2.05 | 12.54 |
| 1HGI.PDB | OD1, E_ASN_137 | NZ, E_LYS_140  | HZ2, E_LYS_140  | 2.83 | 1.82 | 12.93 |
| 1HGI.PDB | OD2, E_ASP_77  | NE, E_ARG_141  | HE, E_ARG_141   | 2.83 | 2.01 | 29.05 |
| 1HGI.PDB | OD1, E_ASP_77  | NH2, E_ARG_141 | HH21, E_ARG_141 | 2.94 | 2.01 | 20.45 |
| 1HGI.PDB | OD2, E_ASP_77  | NH2, E_ARG_141 | HH21, E_ARG_141 | 2.70 | 1.83 | 24.80 |
| 1HGI.PDB | OD1, E_ASN_137 | OG, E_SER_145  | HG, E_SER_145   | 2.92 | 2.15 | 29.94 |
| 1HGI.PDB | OH, E_TYR_195  | NE1, E_TRP_153 | HE1, E_TRP_153  | 2.87 | 1.98 | 20.67 |
| 1HGI.PDB | OE2, E_GLU_123 | NZ, E_LYS_176  | HZ1, E_LYS_176  | 2.69 | 1.80 | 25.89 |
| 1HGI.PDB | OE1, E_GLU_123 | OH, E_TYR_178  | HH, E_TYR_178   | 2.77 | 1.82 | 8.27  |
| 1HGI.PDB | OG1, E_THR_235 | NE1, E_TRP_180 | HE1, E_TRP_180  | 2.85 | 1.87 | 2.03  |
| 1HGI.PDB | OG, E_SER_231  | NE2, E_HIS_184 | HE2, E_HIS_184  | 2.81 | 1.95 | 23.57 |
| 1HGI.PDB | OD1, E_ASN_250 | NE2, E_GLN_191 | HE21, E_GLN_191 | 2.93 | 1.97 | 10.64 |
| 1HGI.PDB | OD1, E_ASN_246 | NH2, E_ARG_201 | HH21, E_ARG_201 | 2.57 | 1.74 | 27.51 |
| 1HGI.PDB | OD2, E_ASP_241 | NE, E_ARG_208  | HE, E_ARG_208   | 2.98 | 2.07 | 19.52 |
| 1HGI.PDB | OE1, A_GLN_210 | NH2, E_ARG_220 | HH21, E_ARG_220 | 2.69 | 1.80 | 23.03 |
| 1HGI.PDB | OD1, E_ASP_101 | OG, E_SER_231  | HG, E_SER_231   | 2.99 | 2.05 | 12.53 |
| 1HGI.PDB | OE1, D_GLU_72  | NZ, E_LYS_238  | HZ3, E_LYS_238  | 2.80 | 1.81 | 15.90 |
| 1HGI.PDB | OE1, E_GLN_191 | ND2, E_ASN_250 | HD21, E_ASN_250 | 2.90 | 1.94 | 10.02 |
| 1HGI.PDB | OE2, E_GLU_119 | NH1, E_ARG_261 | HH12, E_ARG_261 | 2.65 | 1.83 | 28.50 |
| 1HGI.PDB | OE1, E_GLU_119 | NH2, E_ARG_261 | HH22, E_ARG_261 | 2.84 | 1.99 | 27.52 |
| 1HGI.PDB | OD2, E_ASP_85  | NZ, E_LYS_264  | HZ3, E_LYS_264  | 2.86 | 1.87 | 16.39 |
| 1HGI.PDB | OE1, E_GLN_44  | NZ, E_LYS_292  | HZ1, E_LYS_292  | 2.73 | 1.72 | 12.13 |
| 1HGI.PDB | OD2, E_ASP_291 | NZ, E_LYS_292  | HZ3, E_LYS_292  | 2.87 | 1.94 | 23.09 |
| 1HGI.PDB | OD1, E_ASN_285 | ND2, E_ASN_298 | HD22, E_ASN_298 | 2.97 | 2.00 | 7.97  |
| 1HGI.PDB | OD1, F_ASP_86  | NZ, E_LYS_310  | HZ3, E_LYS_310  | 2.76 | 1.91 | 29.16 |
| 1HGI.PDB | OE1, E_GLU_41  | NZ, E_LYS_315  | HZ3, E_LYS_315  | 2.74 | 1.81 | 21.50 |
| 1HGI.PDB | OE2, E_GLU_35  | ND2, E_ASN_322 | HD22, E_ASN_322 | 2.92 | 1.96 | 12.59 |
| 1HGI.PDB | OE1, F_GLU_15  | NZ, E_LYS_326  | HZ3, E_LYS_326  | 2.88 | 1.86 | 11.05 |
| 1HGI.PDB | OE1, F_GLN_34  | NH2, F_ARG_25  | HH21, F_ARG_25  | 2.91 | 1.98 | 18.85 |
| 1HGI.PDB | OD1, F_ASN_146 | ND2, F_ASN_28  | HD21, F_ASN_28  | 2.93 | 2.01 | 16.48 |
| 1HGI.PDB | OD2, F_ASP_37  | OG, F_SER_40   | HG, F_SER_40    | 2.76 | 1.92 | 24.70 |
| 1HGI.PDB | OD1, F_ASP_46  | NE2, F_GLN_42  | HE22, F_GLN_42  | 2.86 | 1.99 | 23.93 |
| 1HGI.PDB | OE1, F_GLU_103 | NZ, F_LYS_51   | HZ2, F_LYS_51   | 2.80 | 1.76 | 5.82  |
| 1HGI.PDB | ND1, F_HIS_106 | NZ, F_LYS_51   | HZ3, F_LYS_51   | 2.75 | 1.80 | 19.60 |
| 1HGI.PDB | OE1, F_GLU_57  | NH1, F_ARG_54  | HH11, F_ARG_54  | 2.83 | 1.84 | 11.68 |
| 1HGI.PDB | OE2, D_GLU_97  | NH2, F_ARG_54  | HH22, F_ARG_54  | 2.75 | 1.79 | 14.82 |
| 1HGI.PDB | OG, E_SER_110  | NE2, F_HIS_64  | HE2, F_HIS_64   | 2.84 | 1.87 | 3.62  |
| 1HGI.PDB | OE2, F_GLU_85  | NZ, F_LYS_68   | HZ2, F_LYS_68   | 2.74 | 1.72 | 8.70  |
| 1HGI.PDB | OE2, B_GLU_81  | NE, F_ARG_76   | HE, F_ARG_76    | 2.85 | 1.88 | 7.37  |
| 1HGI.PDB | OE2, B_GLU_74  | NH1, F_ARG_76  | HH12, F_ARG_76  | 2.77 | 1.76 | 3.93  |
| 1HGI.PDB | OE1, B_GLU_81  | NH2, F_ARG_76  | HH21, F_ARG_76  | 2.64 | 1.66 | 4.79  |
| 1HGI.PDB | OE1, B_GLU_74  | NH2, F_ARG_76  | HH22, F_ARG_76  | 2.76 | 1.78 | 10.40 |
| 1HGI.PDB | OE1, F_GLU_74  | NE2, F_GLN_78  | HE22, F_GLN_78  | 2.95 | 1.98 | 8.40  |
| 1HGI.PDB | OE1, B_GLU_85  | OH, F_TYR_83   | HH, F_TYR_83    | 2.58 | 1.75 | 24.06 |
| 1HGI.PDB | OH, D_TYR_83   | NZ, F_LYS_88   | HZ1, F_LYS_88   | 2.61 | 1.62 | 12.49 |
| 1HGI.PDB | OE2, F_GLU_120 | NH1, F_ARG_123 | HH11, F_ARG_123 | 2.81 | 1.95 | 25.91 |
| 1HGI.PDB | OE1, D_GLU_132 | NE, F_ARG_124  | HE, F_ARG_124   | 2.96 | 2.09 | 23.50 |
| 1HGI.PDB | OE2, D_GLU_132 | NE, F_ARG_124  | HE, F_ARG_124   | 2.96 | 2.09 | 23.34 |
| 1HGI.PDB | OH, F_TYR_157  | ND2, F_ASN_129 | HD22, F_ASN_129 | 2.81 | 1.86 | 11.53 |

|          |                |                |                 |      |      |       |
|----------|----------------|----------------|-----------------|------|------|-------|
| 1HGI.PDB | OE2, D_GLU_131 | NH2, F_ARG_163 | HH22, F_ARG_163 | 2.69 | 1.85 | 26.81 |
| 1HGI.PDB | OE2, F_GLU_131 | NH1, F_ARG_170 | HH11, F_ARG_170 | 2.75 | 1.76 | 6.67  |
| 1HGJ.PDB | OE2, B_GLU_97  | NZ, A_LYS_27   | HZ1, A_LYS_27   | 2.81 | 1.78 | 9.30  |
| 1HGJ.PDB | OD2, A_ASP_275 | NZ, A_LYS_50   | HZ1, A_LYS_50   | 2.74 | 1.82 | 22.91 |
| 1HGJ.PDB | OD1, A_ASP_73  | ND1, A_HIS_75  | HD1, A_HIS_75   | 2.83 | 1.91 | 17.40 |
| 1HGJ.PDB | OD1, A_ASP_60  | NE, A_ARG_90   | HE, A_ARG_90    | 2.88 | 1.91 | 7.56  |
| 1HGJ.PDB | OD2, A_ASP_60  | NH2, A_ARG_90  | HH21, A_ARG_90  | 2.81 | 1.82 | 10.05 |
| 1HGJ.PDB | OD1, A_ASP_271 | OG, A_SER_91   | HG, A_SER_91    | 2.98 | 2.13 | 24.27 |
| 1HGJ.PDB | OD2, A_ASP_271 | OG, A_SER_91   | HG, A_SER_91    | 2.78 | 1.90 | 20.01 |
| 1HGJ.PDB | OD2, A_ASP_68  | OG, A_SER_95   | HG, A_SER_95    | 2.95 | 2.05 | 19.19 |
| 1HGJ.PDB | OD2, A_ASP_104 | OG, A_SER_107  | HG, A_SER_107   | 2.84 | 1.95 | 18.85 |
| 1HGJ.PDB | OE2, B_GLU_67  | NH2, A_ARG_109 | HH21, A_ARG_109 | 2.75 | 1.77 | 12.07 |
| 1HGJ.PDB | OD2, F_ASP_79  | OG, A_SER_110  | HG, A_SER_110   | 2.94 | 1.98 | 10.39 |
| 1HGJ.PDB | OE2, A_GLU_119 | OG1, A_THR_117 | HG1, A_THR_117  | 2.87 | 1.94 | 12.44 |
| 1HGJ.PDB | OD1, A_ASN_137 | NZ, A_LYS_140  | HZ2, A_LYS_140  | 2.70 | 1.70 | 13.62 |
| 1HGJ.PDB | OD2, A_ASP_77  | NE, A_ARG_141  | HE, A_ARG_141   | 2.82 | 1.99 | 27.09 |
| 1HGJ.PDB | OD1, A_ASP_77  | NH2, A_ARG_141 | HH21, A_ARG_141 | 2.82 | 1.90 | 21.48 |
| 1HGJ.PDB | OD2, A_ASP_77  | NH2, A_ARG_141 | HH21, A_ARG_141 | 2.75 | 1.86 | 24.28 |
| 1HGJ.PDB | OH, A_TYR_195  | NE1, A_TRP_153 | HE1, A_TRP_153  | 2.85 | 1.94 | 18.91 |
| 1HGJ.PDB | OE2, A_GLU_123 | NZ, A_LYS_176  | HZ1, A_LYS_176  | 2.68 | 1.78 | 24.65 |
| 1HGJ.PDB | OE1, A_GLU_123 | OH, A_TYR_178  | HH, A_TYR_178   | 2.79 | 1.84 | 8.91  |
| 1HGJ.PDB | OG1, A_THR_235 | NE1, A_TRP_180 | HE1, A_TRP_180  | 2.92 | 1.93 | 4.44  |
| 1HGJ.PDB | OG, A_SER_231  | NE2, A_HIS_184 | HE2, A_HIS_184  | 2.75 | 1.92 | 26.36 |
| 1HGJ.PDB | OD1, A_ASN_246 | NH2, A_ARG_201 | HH21, A_ARG_201 | 2.58 | 1.73 | 25.49 |
| 1HGJ.PDB | OG1, A_THR_206 | OG, A_SER_209  | HG, A_SER_209   | 3.00 | 2.04 | 8.15  |
| 1HGJ.PDB | OG1, A_THR_203 | OG1, A_THR_212 | HG1, A_THR_212  | 2.89 | 1.93 | 3.12  |
| 1HGJ.PDB | OE1, C_GLN_210 | NH2, A_ARG_220 | HH21, A_ARG_220 | 2.67 | 1.78 | 22.50 |
| 1HGJ.PDB | OD1, A_ASP_101 | OG, A_SER_231  | HG, A_SER_231   | 2.87 | 1.91 | 9.73  |
| 1HGJ.PDB | OE1, F_GLU_72  | NZ, A_LYS_238  | HZ3, A_LYS_238  | 2.90 | 1.90 | 13.91 |
| 1HGJ.PDB | OD1, A_ASN_165 | ND2, A_ASN_246 | HD22, A_ASN_246 | 2.91 | 1.95 | 11.26 |
| 1HGJ.PDB | OD1, A_ASN_133 | NH2, A_ARG_255 | HH22, A_ARG_255 | 2.53 | 1.70 | 27.52 |
| 1HGJ.PDB | OE2, A_GLU_119 | NH1, A_ARG_261 | HH12, A_ARG_261 | 2.65 | 1.82 | 28.35 |
| 1HGJ.PDB | OE1, A_GLU_119 | NH2, A_ARG_261 | HH22, A_ARG_261 | 2.90 | 1.99 | 23.18 |
| 1HGJ.PDB | OD2, A_ASP_85  | NZ, A_LYS_264  | HZ3, A_LYS_264  | 2.84 | 1.85 | 15.53 |
| 1HGJ.PDB | OE1, A_GLN_44  | NZ, A_LYS_292  | HZ1, A_LYS_292  | 2.71 | 1.70 | 11.30 |
| 1HGJ.PDB | OD2, A_ASP_291 | NZ, A_LYS_292  | HZ3, A_LYS_292  | 2.80 | 1.82 | 17.27 |
| 1HGJ.PDB | OE1, A_GLU_41  | NZ, A_LYS_315  | HZ3, A_LYS_315  | 2.85 | 1.90 | 20.12 |
| 1HGJ.PDB | OE2, A_GLU_35  | ND2, A_ASN_322 | HD22, A_ASN_322 | 2.88 | 1.99 | 20.96 |
| 1HGJ.PDB | OE1, A_GLU_325 | NZ, A_LYS_326  | HZ3, A_LYS_326  | 2.92 | 1.93 | 15.95 |
| 1HGJ.PDB | OE1, B_GLN_34  | NE, B_ARG_25   | HE, B_ARG_25    | 2.57 | 1.79 | 29.34 |
| 1HGJ.PDB | OE2, A_GLU_325 | NH2, B_ARG_25  | HH22, B_ARG_25  | 2.97 | 2.01 | 15.94 |
| 1HGJ.PDB | OD1, B_ASP_46  | NE2, B_GLN_42  | HE22, B_GLN_42  | 2.81 | 1.92 | 21.14 |
| 1HGJ.PDB | OE2, B_GLU_114 | NE2, B_GLN_47  | HE21, B_GLN_47  | 2.96 | 2.05 | 17.93 |
| 1HGJ.PDB | OG1, B_THR_107 | NZ, B_LYS_51   | HZ1, B_LYS_51   | 2.96 | 1.99 | 17.76 |
| 1HGJ.PDB | OE1, B_GLU_103 | NZ, B_LYS_51   | HZ2, B_LYS_51   | 2.78 | 1.74 | 6.16  |
| 1HGJ.PDB | ND1, B_HIS_106 | NZ, B_LYS_51   | HZ3, B_LYS_51   | 2.79 | 1.82 | 16.46 |
| 1HGJ.PDB | OE1, B_GLU_57  | NH1, B_ARG_54  | HH11, B_ARG_54  | 2.87 | 1.87 | 9.43  |
| 1HGJ.PDB | OE2, F_GLU_97  | NH2, B_ARG_54  | HH22, B_ARG_54  | 2.77 | 1.81 | 15.09 |
| 1HGJ.PDB | OD2, F_ASP_86  | NZ, B_LYS_62   | HZ1, B_LYS_62   | 2.65 | 1.75 | 23.55 |
| 1HGJ.PDB | OD2, F_ASP_90  | NZ, B_LYS_62   | HZ3, B_LYS_62   | 2.74 | 1.89 | 28.52 |
| 1HGJ.PDB | OG, A_SER_110  | NE2, B_HIS_64  | HE2, B_HIS_64   | 2.89 | 1.93 | 11.21 |
| 1HGJ.PDB | OE2, B_GLU_85  | NZ, B_LYS_68   | HZ2, B_LYS_68   | 2.78 | 1.76 | 8.72  |
| 1HGJ.PDB | OE2, D_GLU_81  | NE, B_ARG_76   | HE, B_ARG_76    | 2.90 | 1.93 | 10.80 |
| 1HGJ.PDB | OE2, D_GLU_74  | NH1, B_ARG_76  | HH12, B_ARG_76  | 2.88 | 1.87 | 5.28  |
| 1HGJ.PDB | OE1, D_GLU_81  | NH2, B_ARG_76  | HH21, B_ARG_76  | 2.72 | 1.72 | 3.64  |
| 1HGJ.PDB | OE1, D_GLU_74  | NH2, B_ARG_76  | HH22, B_ARG_76  | 2.85 | 1.84 | 3.19  |
| 1HGJ.PDB | OE1, B_GLU_74  | NE2, B_GLN_78  | HE22, B_GLN_78  | 2.90 | 1.95 | 12.93 |
| 1HGJ.PDB | OE1, D_GLU_85  | OH, B_TYR_83   | HH, B_TYR_83    | 2.67 | 1.83 | 24.12 |

|          |                |                |                 |      |      |       |
|----------|----------------|----------------|-----------------|------|------|-------|
| 1HGJ.PDB | OH, F.TYR.83   | NZ, B.LYS.88   | HZ1, B.LYS.88   | 2.78 | 1.75 | 7.42  |
| 1HGJ.PDB | OE2, B.GLU.120 | NH1, B.ARG.123 | HH11, B.ARG.123 | 2.74 | 1.86 | 23.95 |
| 1HGJ.PDB | OE1, F.GLU.132 | NE, B.ARG.124  | HE, B.ARG.124   | 2.82 | 2.00 | 27.29 |
| 1HGJ.PDB | OE2, F.GLU.132 | NE, B.ARG.124  | HE, B.ARG.124   | 2.91 | 2.02 | 20.91 |
| 1HGJ.PDB | OH, B.TYR.157  | ND2, B.ASN.129 | HD22, B.ASN.129 | 2.77 | 1.84 | 15.18 |
| 1HGJ.PDB | OE2, B.GLU.150 | ND2, B.ASN.154 | HD21, B.ASN.154 | 2.81 | 2.00 | 28.55 |
| 1HGJ.PDB | OD1, B.ASN.154 | OG1, B.THR.156 | HG1, B.THR.156  | 2.67 | 1.80 | 19.98 |
| 1HGJ.PDB | OE2, B.GLU.131 | NH1, B.ARG.170 | HH11, B.ARG.170 | 2.80 | 1.80 | 6.39  |
| 1HGJ.PDB | OE2, D.GLU.97  | NZ, C.LYS.27   | HZ1, C.LYS.27   | 2.82 | 1.80 | 8.63  |
| 1HGJ.PDB | OD2, C.ASP.275 | NZ, C.LYS.50   | HZ1, C.LYS.50   | 2.74 | 1.82 | 22.76 |
| 1HGJ.PDB | OD1, C.ASP.73  | ND1, C.HIS.75  | HD1, C.HIS.75   | 2.80 | 1.89 | 17.49 |
| 1HGJ.PDB | OD1, C.ASP.60  | NE, C.ARG.90   | HE, C.ARG.90    | 2.88 | 1.91 | 9.03  |
| 1HGJ.PDB | OD2, C.ASP.60  | NH2, C.ARG.90  | HH21, C.ARG.90  | 2.78 | 1.79 | 9.66  |
| 1HGJ.PDB | OD1, C.ASP.271 | OG, C.SER.91   | HG, C.SER.91    | 2.99 | 2.16 | 26.38 |
| 1HGJ.PDB | OD2, C.ASP.271 | OG, C.SER.91   | HG, C.SER.91    | 2.81 | 1.92 | 18.67 |
| 1HGJ.PDB | OD2, C.ASP.68  | OG, C.SER.95   | HG, C.SER.95    | 2.93 | 1.99 | 14.68 |
| 1HGJ.PDB | OD1, C.ASP.68  | OH, C.TYR.100  | HH, C.TYR.100   | 2.88 | 1.95 | 14.58 |
| 1HGJ.PDB | OD2, C.ASP.104 | OG, C.SER.107  | HG, C.SER.107   | 2.90 | 1.99 | 17.96 |
| 1HGJ.PDB | OE2, D.GLU.67  | NH2, C.ARG.109 | HH21, C.ARG.109 | 2.76 | 1.78 | 13.33 |
| 1HGJ.PDB | OD2, B.ASP.79  | OG, C.SER.110  | HG, C.SER.110   | 2.79 | 1.87 | 14.95 |
| 1HGJ.PDB | OE2, C.GLU.119 | OG1, C.THR.117 | HG1, C.THR.117  | 2.88 | 1.94 | 11.85 |
| 1HGJ.PDB | OD1, C.ASN.137 | NZ, C.LYS.140  | HZ2, C.LYS.140  | 2.71 | 1.72 | 13.24 |
| 1HGJ.PDB | OD2, C.ASP.77  | NE, C.ARG.141  | HE, C.ARG.141   | 2.82 | 1.99 | 27.42 |
| 1HGJ.PDB | OD1, C.ASP.77  | NH2, C.ARG.141 | HH21, C.ARG.141 | 2.81 | 1.89 | 21.37 |
| 1HGJ.PDB | OD2, C.ASP.77  | NH2, C.ARG.141 | HH21, C.ARG.141 | 2.74 | 1.86 | 24.47 |
| 1HGJ.PDB | OD1, C.ASN.137 | OG, C.SER.145  | HG, C.SER.145   | 2.92 | 2.08 | 24.33 |
| 1HGJ.PDB | OH, C.TYR.195  | NE1, C.TRP.153 | HE1, C.TRP.153  | 2.84 | 1.96 | 21.72 |
| 1HGJ.PDB | OE2, C.GLU.123 | NZ, C.LYS.176  | HZ1, C.LYS.176  | 2.69 | 1.80 | 24.96 |
| 1HGJ.PDB | OE1, C.GLU.123 | OH, C.TYR.178  | HH, C.TYR.178   | 2.77 | 1.82 | 8.51  |
| 1HGJ.PDB | OG1, C.THR.235 | NE1, C.TRP.180 | HE1, C.TRP.180  | 2.91 | 1.92 | 4.72  |
| 1HGJ.PDB | OG, C.SER.231  | NE2, C.HIS.184 | HE2, C.HIS.184  | 2.74 | 1.91 | 26.34 |
| 1HGJ.PDB | OD1, C.ASN.250 | NE2, C.GLN.191 | HE21, C.GLN.191 | 2.99 | 2.02 | 8.22  |
| 1HGJ.PDB | OD1, C.ASN.246 | NH2, C.ARG.201 | HH21, C.ARG.201 | 2.59 | 1.74 | 25.86 |
| 1HGJ.PDB | OG1, C.THR.212 | OG1, C.THR.203 | HG1, C.THR.203  | 2.89 | 1.94 | 9.95  |
| 1HGJ.PDB | OE1, E.GLN.210 | NH2, C.ARG.220 | HH21, C.ARG.220 | 2.66 | 1.82 | 26.85 |
| 1HGJ.PDB | OD1, C.ASP.101 | OG, C.SER.231  | HG, C.SER.231   | 2.91 | 1.95 | 9.37  |
| 1HGJ.PDB | OE1, B.GLU.72  | NZ, C.LYS.238  | HZ1, C.LYS.238  | 2.75 | 1.79 | 18.67 |
| 1HGJ.PDB | OD1, C.ASN.165 | ND2, C.ASN.246 | HD22, C.ASN.246 | 2.89 | 1.93 | 12.15 |
| 1HGJ.PDB | OD1, C.ASN.133 | NH2, C.ARG.255 | HH22, C.ARG.255 | 2.54 | 1.71 | 27.08 |
| 1HGJ.PDB | OE2, C.GLU.119 | NH1, C.ARG.261 | HH12, C.ARG.261 | 2.65 | 1.83 | 28.56 |
| 1HGJ.PDB | OE1, C.GLU.119 | NH2, C.ARG.261 | HH22, C.ARG.261 | 2.92 | 2.03 | 23.97 |
| 1HGJ.PDB | OD2, C.ASP.85  | NZ, C.LYS.264  | HZ3, C.LYS.264  | 2.82 | 1.83 | 14.94 |
| 1HGJ.PDB | OE1, C.GLN.44  | NZ, C.LYS.292  | HZ1, C.LYS.292  | 2.73 | 1.72 | 10.59 |
| 1HGJ.PDB | OD2, C.ASP.291 | NZ, C.LYS.292  | HZ3, C.LYS.292  | 2.82 | 1.84 | 16.66 |
| 1HGJ.PDB | OD1, D.ASP.86  | NZ, C.LYS.310  | HZ3, C.LYS.310  | 2.94 | 2.10 | 29.37 |
| 1HGJ.PDB | OE1, C.GLU.41  | NZ, C.LYS.315  | HZ3, C.LYS.315  | 2.86 | 1.91 | 20.22 |
| 1HGJ.PDB | OE2, C.GLU.35  | ND2, C.ASN.322 | HD22, C.ASN.322 | 2.88 | 1.97 | 19.99 |
| 1HGJ.PDB | OE1, D.GLU.15  | NZ, C.LYS.326  | HZ1, C.LYS.326  | 2.91 | 1.86 | 5.48  |
| 1HGJ.PDB | OE1, D.GLN.34  | NE, D.ARG.25   | HE, D.ARG.25    | 2.65 | 1.80 | 23.08 |
| 1HGJ.PDB | OD1, D.ASN.146 | ND2, D.ASN.28  | HD21, D.ASN.28  | 2.98 | 2.03 | 11.81 |
| 1HGJ.PDB | OD2, D.ASP.37  | OG, D.SER.40   | HG, D.SER.40    | 2.82 | 1.96 | 22.49 |
| 1HGJ.PDB | OD1, D.ASP.46  | NE2, D.GLN.42  | HE22, D.GLN.42  | 2.81 | 1.92 | 21.12 |
| 1HGJ.PDB | OE2, D.GLU.114 | NE2, D.GLN.47  | HE21, D.GLN.47  | 2.94 | 2.03 | 18.44 |
| 1HGJ.PDB | OG1, D.THR.107 | NZ, D.LYS.51   | HZ1, D.LYS.51   | 2.97 | 1.99 | 16.18 |
| 1HGJ.PDB | OE1, D.GLU.103 | NZ, D.LYS.51   | HZ2, D.LYS.51   | 2.80 | 1.76 | 6.89  |
| 1HGJ.PDB | ND1, D.HIS.106 | NZ, D.LYS.51   | HZ3, D.LYS.51   | 2.79 | 1.82 | 16.80 |
| 1HGJ.PDB | OE1, D.GLU.57  | NH1, D.ARG.54  | HH11, D.ARG.54  | 2.87 | 1.86 | 9.17  |
| 1HGJ.PDB | OE2, B.GLU.97  | NH2, D.ARG.54  | HH22, D.ARG.54  | 2.84 | 1.88 | 15.58 |



|          |                |                |                 |      |      |       |
|----------|----------------|----------------|-----------------|------|------|-------|
| 1HGJ.PDB | OG, C_SER_110  | NE2, D_HIS_64  | HE2, D_HIS_64   | 2.89 | 1.91 | 5.59  |
| 1HGJ.PDB | OE2, D_GLU_85  | NZ, D_LYS_68   | HZ2, D_LYS_68   | 2.82 | 1.80 | 11.23 |
| 1HGJ.PDB | OE2, F_GLU_81  | NE, D_ARG_76   | HE, D_ARG_76    | 2.85 | 1.89 | 10.87 |
| 1HGJ.PDB | OE2, F_GLU_74  | NH1, D_ARG_76  | HH12, D_ARG_76  | 2.76 | 1.76 | 7.89  |
| 1HGJ.PDB | OE1, F_GLU_81  | NH2, D_ARG_76  | HH21, D_ARG_76  | 2.68 | 1.69 | 5.65  |
| 1HGJ.PDB | OE1, F_GLU_74  | NH2, D_ARG_76  | HH22, D_ARG_76  | 2.71 | 1.72 | 5.59  |
| 1HGJ.PDB | OE1, D_GLU_74  | NE2, D_GLN_78  | HE22, D_GLN_78  | 2.88 | 1.94 | 14.79 |
| 1HGJ.PDB | OE1, F_GLU_85  | OH, D_TYR_83   | HH, D_TYR_83    | 2.63 | 1.81 | 25.72 |
| 1HGJ.PDB | OH, B_TYR_83   | NZ, D_LYS_88   | HZ1, D_LYS_88   | 2.75 | 1.72 | 7.31  |
| 1HGJ.PDB | OE2, D_GLU_120 | NH1, D_ARG_123 | HH11, D_ARG_123 | 2.74 | 1.85 | 23.39 |
| 1HGJ.PDB | OE1, B_GLU_132 | NE, D_ARG_124  | HE, D_ARG_124   | 2.80 | 1.98 | 27.33 |
| 1HGJ.PDB | OE2, B_GLU_132 | NE, D_ARG_124  | HE, D_ARG_124   | 2.87 | 2.00 | 21.99 |
| 1HGJ.PDB | OH, B_TYR_141  | NH1, D_ARG_127 | HH12, D_ARG_127 | 2.99 | 2.02 | 12.89 |
| 1HGJ.PDB | OH, D_TYR_157  | ND2, D_ASN_129 | HD22, D_ASN_129 | 2.79 | 1.84 | 10.20 |
| 1HGJ.PDB | OD1, D_ASN_154 | OG1, D_THR_156 | HG1, D_THR_156  | 2.71 | 1.81 | 16.75 |
| 1HGJ.PDB | NE2, D_HIS_142 | OH, D_TYR_157  | HH, D_TYR_157   | 2.78 | 1.88 | 18.06 |
| 1HGJ.PDB | OE2, D_GLU_131 | NH1, D_ARG_170 | HH11, D_ARG_170 | 2.79 | 1.80 | 6.55  |
| 1HGJ.PDB | OE2, F_GLU_97  | NZ, E_LYS_27   | HZ1, E_LYS_27   | 2.81 | 1.79 | 8.50  |
| 1HGJ.PDB | OD2, E_ASP_275 | NZ, E_LYS_50   | HZ1, E_LYS_50   | 2.74 | 1.82 | 22.90 |
| 1HGJ.PDB | OD1, E_ASP_73  | ND1, E_HIS_75  | HD1, E_HIS_75   | 2.80 | 1.88 | 17.19 |
| 1HGJ.PDB | OD1, E_ASP_60  | NE, E_ARG_90   | HE, E_ARG_90    | 2.91 | 1.94 | 8.87  |
| 1HGJ.PDB | OD2, E_ASP_60  | NH2, E_ARG_90  | HH21, E_ARG_90  | 2.83 | 1.83 | 8.62  |
| 1HGJ.PDB | OD1, E_ASP_271 | OG, E_SER_91   | HG, E_SER_91    | 2.99 | 2.15 | 25.95 |
| 1HGJ.PDB | OD2, E_ASP_271 | OG, E_SER_91   | HG, E_SER_91    | 2.82 | 1.92 | 18.47 |
| 1HGJ.PDB | OD2, E_ASP_68  | OG, E_SER_95   | HG, E_SER_95    | 2.94 | 2.00 | 13.81 |
| 1HGJ.PDB | OD1, E_ASP_68  | OH, E_TYR_100  | HH, E_TYR_100   | 2.88 | 1.94 | 12.28 |
| 1HGJ.PDB | OD2, E_ASP_104 | OG, E_SER_107  | HG, E_SER_107   | 2.85 | 1.94 | 18.67 |
| 1HGJ.PDB | OE2, F_GLU_67  | NH2, E_ARG_109 | HH21, E_ARG_109 | 2.76 | 1.77 | 12.82 |
| 1HGJ.PDB | OD2, D_ASP_79  | OG, E_SER_110  | HG, E_SER_110   | 2.79 | 1.87 | 15.96 |
| 1HGJ.PDB | OE2, E_GLU_119 | OG1, E_THR_117 | HG1, E_THR_117  | 2.91 | 1.96 | 10.96 |
| 1HGJ.PDB | OD1, E_ASN_137 | NZ, E_LYS_140  | HZ2, E_LYS_140  | 2.71 | 1.72 | 13.56 |
| 1HGJ.PDB | OD2, E_ASP_77  | NE, E_ARG_141  | HE, E_ARG_141   | 2.84 | 2.00 | 27.31 |
| 1HGJ.PDB | OD1, E_ASP_77  | NH2, E_ARG_141 | HH21, E_ARG_141 | 2.84 | 1.92 | 21.35 |
| 1HGJ.PDB | OD2, E_ASP_77  | NH2, E_ARG_141 | HH21, E_ARG_141 | 2.75 | 1.86 | 24.32 |
| 1HGJ.PDB | OD1, E_ASN_137 | OG, E_SER_145  | HG, E_SER_145   | 2.96 | 2.12 | 24.46 |
| 1HGJ.PDB | OH, E_TYR_195  | NE1, E_TRP_153 | HE1, E_TRP_153  | 2.83 | 1.93 | 19.26 |
| 1HGJ.PDB | OE2, E_GLU_123 | NZ, E_LYS_176  | HZ1, E_LYS_176  | 2.69 | 1.80 | 25.95 |
| 1HGJ.PDB | OE1, E_GLU_123 | OH, E_TYR_178  | HH, E_TYR_178   | 2.77 | 1.83 | 11.08 |
| 1HGJ.PDB | OG1, E_THR_235 | NE1, E_TRP_180 | HE1, E_TRP_180  | 2.94 | 1.96 | 4.45  |
| 1HGJ.PDB | OG, E_SER_231  | NE2, E_HIS_184 | HE2, E_HIS_184  | 2.75 | 1.92 | 26.56 |
| 1HGJ.PDB | OD1, E_ASN_246 | NH2, E_ARG_201 | HH21, E_ARG_201 | 2.59 | 1.74 | 26.30 |
| 1HGJ.PDB | OG1, E_THR_212 | OG1, E_THR_203 | HG1, E_THR_203  | 2.93 | 1.99 | 12.00 |
| 1HGJ.PDB | OD1, C_ASP_101 | NE2, E_GLN_210 | HE22, E_GLN_210 | 2.94 | 2.10 | 26.45 |
| 1HGJ.PDB | OE1, A_GLN_210 | NH2, E_ARG_220 | HH21, E_ARG_220 | 2.69 | 1.86 | 28.41 |
| 1HGJ.PDB | OD1, E_ASP_101 | OG, E_SER_231  | HG, E_SER_231   | 2.90 | 1.95 | 11.36 |
| 1HGJ.PDB | OE1, D_GLU_72  | NZ, E_LYS_238  | HZ3, E_LYS_238  | 2.87 | 1.86 | 13.82 |
| 1HGJ.PDB | OD1, E_ASN_165 | ND2, E_ASN_246 | HD22, E_ASN_246 | 2.89 | 1.94 | 11.88 |
| 1HGJ.PDB | OD1, E_ASN_133 | NH2, E_ARG_255 | HH22, E_ARG_255 | 2.55 | 1.71 | 26.62 |
| 1HGJ.PDB | OE2, E_GLU_119 | NH1, E_ARG_261 | HH12, E_ARG_261 | 2.65 | 1.82 | 28.15 |
| 1HGJ.PDB | OE1, E_GLU_119 | NH2, E_ARG_261 | HH22, E_ARG_261 | 2.91 | 2.01 | 23.66 |
| 1HGJ.PDB | OD2, E_ASP_85  | NZ, E_LYS_264  | HZ3, E_LYS_264  | 2.86 | 1.86 | 15.01 |
| 1HGJ.PDB | OE1, E_GLN_44  | NZ, E_LYS_292  | HZ1, E_LYS_292  | 2.72 | 1.70 | 10.33 |
| 1HGJ.PDB | OD2, E_ASP_291 | NZ, E_LYS_292  | HZ3, E_LYS_292  | 2.83 | 1.86 | 17.49 |
| 1HGJ.PDB | OD1, F_ASP_86  | NZ, E_LYS_310  | HZ3, E_LYS_310  | 2.93 | 2.08 | 29.22 |
| 1HGJ.PDB | OE1, E_GLU_41  | NZ, E_LYS_315  | HZ3, E_LYS_315  | 2.86 | 1.91 | 20.65 |
| 1HGJ.PDB | OE2, E_GLU_35  | ND2, E_ASN_322 | HD22, E_ASN_322 | 2.86 | 1.96 | 20.74 |
| 1HGJ.PDB | OE1, F_GLU_15  | NZ, E_LYS_326  | HZ3, E_LYS_326  | 2.87 | 1.86 | 12.83 |
| 1HGJ.PDB | OE1, F_GLN_34  | NE, F_ARG_25   | HE, F_ARG_25    | 2.86 | 2.05 | 28.42 |

|             |                |                |                 |      |      |       |
|-------------|----------------|----------------|-----------------|------|------|-------|
| 1HGJ.PDB    | OE1, F_GLN_34  | NH2, F_ARG_25  | HH21, F_ARG_25  | 2.64 | 1.73 | 20.69 |
| 1HGJ.PDB    | OD1, F_ASN_146 | ND2, F_ASN_28  | HD21, F_ASN_28  | 2.81 | 1.89 | 16.64 |
| 1HGJ.PDB    | OD2, F_ASP_37  | OG, F_SER_40   | HG, F_SER_40    | 2.80 | 1.95 | 24.06 |
| 1HGJ.PDB    | OD1, F_ASP_46  | NE2, F_GLN_42  | HE22, F_GLN_42  | 2.80 | 1.92 | 21.18 |
| 1HGJ.PDB    | OE2, F_GLU_114 | NE2, F_GLN_47  | HE21, F_GLN_47  | 2.95 | 2.04 | 18.06 |
| 1HGJ.PDB    | OE1, F_GLU_103 | NZ, F_LYS_51   | HZ2, F_LYS_51   | 2.79 | 1.75 | 5.77  |
| 1HGJ.PDB    | ND1, F_HIS_106 | NZ, F_LYS_51   | HZ3, F_LYS_51   | 2.75 | 1.79 | 17.21 |
| 1HGJ.PDB    | OE1, F_GLU_57  | NH1, F_ARG_54  | HH11, F_ARG_54  | 2.86 | 1.86 | 9.70  |
| 1HGJ.PDB    | OE2, D_GLU_97  | NH2, F_ARG_54  | HH22, F_ARG_54  | 2.77 | 1.81 | 14.54 |
| 1HGJ.PDB    | OG, E_SER_110  | NE2, F_HIS_64  | HE2, F_HIS_64   | 2.90 | 1.93 | 7.02  |
| 1HGJ.PDB    | OE2, F_GLU_85  | NZ, F_LYS_68   | HZ2, F_LYS_68   | 2.74 | 1.77 | 18.09 |
| 1HGJ.PDB    | OE2, B_GLU_81  | NE, F_ARG_76   | HE, F_ARG_76    | 2.85 | 1.89 | 12.57 |
| 1HGJ.PDB    | OE2, B_GLU_74  | NH1, F_ARG_76  | HH12, F_ARG_76  | 2.70 | 1.70 | 4.55  |
| 1HGJ.PDB    | OE1, B_GLU_81  | NH2, F_ARG_76  | HH21, F_ARG_76  | 2.65 | 1.66 | 2.84  |
| 1HGJ.PDB    | OE1, B_GLU_74  | NH2, F_ARG_76  | HH22, F_ARG_76  | 2.72 | 1.73 | 7.95  |
| 1HGJ.PDB    | OE1, F_GLU_74  | NE2, F_GLN_78  | HE22, F_GLN_78  | 2.92 | 1.97 | 13.10 |
| 1HGJ.PDB    | OE1, B_GLU_85  | OH, F_TYR_83   | HH, F_TYR_83    | 2.53 | 1.75 | 28.54 |
| 1HGJ.PDB    | OH, D_TYR_83   | NZ, F_LYS_88   | HZ1, F_LYS_88   | 2.70 | 1.68 | 8.19  |
| 1HGJ.PDB    | OE2, F_GLU_120 | NH1, F_ARG_123 | HH11, F_ARG_123 | 2.73 | 1.86 | 24.44 |
| 1HGJ.PDB    | OE1, D_GLU_132 | NE, F_ARG_124  | HE, F_ARG_124   | 2.92 | 2.09 | 27.65 |
| 1HGJ.PDB    | OE2, D_GLU_132 | NE, F_ARG_124  | HE, F_ARG_124   | 2.96 | 2.06 | 20.98 |
| 1HGJ.PDB    | OH, F_TYR_157  | ND2, F_ASN_129 | HD22, F_ASN_129 | 2.75 | 1.85 | 17.65 |
| 1HGJ.PDB    | OE2, F_GLU_131 | NH1, F_ARG_170 | HH11, F_ARG_170 | 2.79 | 1.80 | 6.77  |
| 1OSP.PDB    | OE1, L_GLN_89  | OH, L_TYR_36   | HH, L_TYR_36    | 2.81 | 1.86 | 10.05 |
| 1OSP.PDB    | OG1, L_THR_97  | NE2, L_GLN_90  | HE22, L_GLN_90  | 3.00 | 2.06 | 15.72 |
| 1OSP.PDB    | OE1, L_GLU_105 | OH, L_TYR_140  | HH, L_TYR_140   | 2.90 | 2.03 | 21.23 |
| 1OSP.PDB    | OG, L_SER_177  | NE1, L_TRP_148 | HE1, L_TRP_148  | 2.94 | 1.97 | 6.03  |
| 1OSP.PDB    | OG, L_SER_131  | OG1, L_THR_180 | HG1, L_THR_180  | 2.85 | 1.92 | 11.66 |
| 1OSP.PDB    | OD2, L_ASP_110 | NZ, L_LYS_199  | HZ3, L_LYS_199  | 2.64 | 1.82 | 29.88 |
| 1OSP.PDB    | OD1, H_ASN_83  | OG1, H_THR_17  | HG1, H_THR_17   | 2.79 | 1.95 | 24.49 |
| 1OSP.PDB    | OE1, H_GLU_46  | NH1, H_ARG_38  | HH11, H_ARG_38  | 2.77 | 1.80 | 9.20  |
| 1OSP.PDB    | OH, H_TYR_93   | NH2, H_ARG_38  | HH21, H_ARG_38  | 2.83 | 1.87 | 12.82 |
| 1OSP.PDB    | OD1, H_ASP_89  | NH2, H_ARG_38  | HH22, H_ARG_38  | 2.83 | 1.91 | 19.07 |
| 1OSP.PDB    | OD2, L_ASP_1   | OG, H_SER_62   | HG, H_SER_62    | 2.98 | 2.17 | 26.53 |
| 1OSP.PDB    | OG, H_SER_186  | NE1, H_TRP_161 | HE1, H_TRP_161  | 2.94 | 1.96 | 6.92  |
| 1OSP.PDB    | OG, L_SER_176  | OG, H_SER_185  | HG, H_SER_185   | 2.74 | 1.91 | 24.72 |
| 1OSP.PDB    | OG, H_SER_209  | ND1, H_HIS_206 | HD1, H_HIS_206  | 2.73 | 1.88 | 25.05 |
| 1OSP.PDB    | OE1, L_GLU_123 | NZ, H_LYS_215  | HZ2, H_LYS_215  | 2.78 | 1.85 | 20.53 |
| 1OSP.PDB    | OD1, O_ASP_33  | NZ, O_LYS_39   | HZ2, O_LYS_39   | 2.81 | 1.85 | 17.76 |
| 1OSP.PDB    | OG1, O_THR_143 | NH1, O_ARG_139 | HH11, O_ARG_139 | 2.73 | 1.78 | 14.74 |
| 1OSP.PDB    | OE2, O_GLU_160 | NH2, O_ARG_139 | HH22, O_ARG_139 | 2.96 | 2.05 | 19.95 |
| 1OSP.PDB    | OE1, O_GLU_160 | NZ, O_LYS_189  | HZ1, O_LYS_189  | 2.95 | 1.93 | 9.44  |
| 1OSP.PDB    | OG, O_SER_198  | ND2, O_ASN_190 | HD22, O_ASN_190 | 2.97 | 2.02 | 11.75 |
| 1OSP.PDB    | OD1, O_ASP_234 | OG1, O_THR_224 | HG1, O_THR_224  | 2.71 | 1.92 | 27.50 |
| 1OSP.PDB    | OD1, O_ASP_234 | OH, O_TYR_248  | HH, O_TYR_248   | 2.73 | 1.90 | 24.06 |
| 1PSK.PDB    | OG, L_SER_176  | NE1, L_TRP_147 | HE1, L_TRP_147  | 2.73 | 1.78 | 10.14 |
| 1PSK.PDB    | OD1, L_ASN_160 | OG, L_SER_176  | HG, L_SER_176   | 2.79 | 1.87 | 14.99 |
| 1PSK.PDB    | NE1, H_TRP_47  | ND1, H_HIS_35  | HD1, H_HIS_35   | 2.92 | 2.03 | 20.19 |
| 1PSK.PDB    | OG1, H_THR_78  | OG, H_SER_76   | HG, H_SER_76    | 2.94 | 2.03 | 16.27 |
| 1PSK.PDB    | OH, H_TYR_27   | OG, H_SER_98   | HG, H_SER_98    | 2.95 | 2.06 | 19.06 |
| 1R21-1.PDB  | OG1, A_THR_69  | ND2, A_ASN_62  | HD21, A_ASN_62  | 2.86 | 1.99 | 21.79 |
| 1R21-10.PDB | OG1, A_THR_69  | ND2, A_ASN_62  | HD21, A_ASN_62  | 2.90 | 2.06 | 25.22 |
| 1R21-11.PDB | OG, A_SER_64   | ND2, A_ASN_62  | HD22, A_ASN_62  | 2.35 | 1.48 | 21.77 |
| 1R21-12.PDB | OD1, A_ASN_67  | OG1, A_THR_66  | HG1, A_THR_66   | 2.34 | 1.38 | 3.67  |
| 1R21-13.PDB | OG1, A_THR_69  | ND2, A_ASN_62  | HD22, A_ASN_62  | 2.50 | 1.62 | 19.65 |
| 1R21-13.PDB | OH, A_TYR_97   | ND2, A_ASN_99  | HD21, A_ASN_99  | 2.51 | 1.54 | 7.69  |
| 1R21-14.PDB | OG1, A_THR_69  | ND2, A_ASN_62  | HD21, A_ASN_62  | 2.52 | 1.57 | 12.09 |
| 1R21-14.PDB | OE1, A_GLU_57  | NE, A_ARG_81   | HE, A_ARG_81    | 2.82 | 2.02 | 29.06 |

|             |                |                |                 |      |      |       |
|-------------|----------------|----------------|-----------------|------|------|-------|
| 1R21-14.PDB | OE2, A_GLU_57  | NH2, A_ARG_81  | HH21, A_ARG_81  | 2.46 | 1.50 | 12.90 |
| 1R21-14.PDB | OH, A_TYR_97   | ND2, A_ASN_99  | HD22, A_ASN_99  | 2.66 | 1.70 | 8.32  |
| 1R21-16.PDB | OE1, A_GLU_57  | NE, A_ARG_81   | HE, A_ARG_81    | 2.43 | 1.60 | 25.79 |
| 1R21-17.PDB | ND2, A_ASN_99  | NE, A_ARG_5    | HE, A_ARG_5     | 2.79 | 1.84 | 10.87 |
| 1R21-17.PDB | OG, A_SER_94   | OG1, A_THR_89  | HG1, A_THR_89   | 2.85 | 1.94 | 16.35 |
| 1R21-18.PDB | OD1, A_ASN_67  | OG1, A_THR_66  | HG1, A_THR_66   | 2.60 | 1.66 | 10.07 |
| 1R21-18.PDB | OE2, A_GLU_100 | NE2, A_HIS_84  | HE2, A_HIS_84   | 2.44 | 1.60 | 25.14 |
| 1R21-19.PDB | OE2, A_GLU_34  | NE2, A_GLN_47  | HE21, A_GLN_47  | 2.80 | 1.93 | 22.82 |
| 1R21-19.PDB | OG1, A_THR_69  | ND2, A_ASN_62  | HD21, A_ASN_62  | 2.83 | 2.03 | 29.57 |
| 1R21-2.PDB  | OE2, A_GLU_34  | NE2, A_GLN_47  | HE21, A_GLN_47  | 2.62 | 1.65 | 7.42  |
| 1R21-2.PDB  | OG1, A_THR_69  | ND2, A_ASN_62  | HD21, A_ASN_62  | 2.81 | 1.92 | 20.56 |
| 1R21-2.PDB  | OG, A_SER_64   | ND2, A_ASN_62  | HD22, A_ASN_62  | 2.42 | 1.53 | 18.22 |
| 1R21-2.PDB  | OG, A_SER_94   | OG1, A_THR_89  | HG1, A_THR_89   | 2.98 | 2.02 | 6.58  |
| 1R21-2.PDB  | OD2, A_ASP_16  | NH1, A_ARG_96  | HH12, A_ARG_96  | 2.71 | 1.87 | 26.03 |
| 1R21-22.PDB | OG, A_SER_64   | ND2, A_ASN_62  | HD22, A_ASN_62  | 2.37 | 1.45 | 16.21 |
| 1R21-23.PDB | OE1, A_GLU_57  | NE, A_ARG_81   | HE, A_ARG_81    | 2.65 | 1.70 | 11.54 |
| 1R21-3.PDB  | OD1, A_ASP_16  | NE2, A_HIS_19  | HE2, A_HIS_19   | 2.71 | 1.85 | 23.51 |
| 1R21-3.PDB  | OE2, A_GLU_34  | NE2, A_GLN_47  | HE22, A_GLN_47  | 2.72 | 1.92 | 29.24 |
| 1R21-3.PDB  | OG1, A_THR_69  | ND2, A_ASN_62  | HD21, A_ASN_62  | 2.87 | 2.01 | 23.40 |
| 1R21-4.PDB  | OD1, A_ASN_67  | OG1, A_THR_66  | HG1, A_THR_66   | 2.40 | 1.45 | 5.76  |
| 1R21-4.PDB  | OE1, A_GLU_57  | NE, A_ARG_81   | HE, A_ARG_81    | 2.76 | 1.87 | 19.46 |
| 1R21-4.PDB  | OE1, A_GLU_57  | NH2, A_ARG_81  | HH21, A_ARG_81  | 2.93 | 2.10 | 27.48 |
| 1R21-5.PDB  | OG1, A_THR_69  | ND2, A_ASN_62  | HD22, A_ASN_62  | 2.62 | 1.75 | 21.48 |
| 1R21-6.PDB  | OG1, A_THR_69  | ND2, A_ASN_62  | HD21, A_ASN_62  | 2.81 | 1.95 | 22.23 |
| 1R21-6.PDB  | OD1, A_ASN_67  | OG1, A_THR_66  | HG1, A_THR_66   | 2.30 | 1.42 | 18.29 |
| 1R21-7.PDB  | OD1, A_ASN_67  | OG1, A_THR_66  | HG1, A_THR_66   | 2.91 | 2.05 | 21.54 |
| 1R21-9.PDB  | OG1, A_THR_69  | ND2, A_ASN_62  | HD21, A_ASN_62  | 2.59 | 1.65 | 13.02 |
| 1VFB.PDB    | OE1, A_GLN_89  | OH, A_TYR_36   | HH, A_TYR_36    | 2.84 | 2.00 | 25.31 |
| 1VFB.PDB    | OD2, A_ASP_82  | NE, A_ARG_61   | HE, A_ARG_61    | 2.88 | 1.96 | 15.15 |
| 1VFB.PDB    | OD1, A_ASP_82  | NH2, A_ARG_61  | HH21, A_ARG_61  | 2.85 | 1.87 | 9.42  |
| 1VFB.PDB    | OE1, B_GLU_98  | NH1, A_ARG_96  | HH12, A_ARG_96  | 2.82 | 1.84 | 8.38  |
| 1VFB.PDB    | OE2, B_GLU_98  | NH2, A_ARG_96  | HH22, A_ARG_96  | 2.81 | 1.85 | 10.74 |
| 1VFB.PDB    | OG, B_SER_28   | OG1, B_THR_30  | HG1, B_THR_30   | 2.97 | 2.08 | 19.82 |
| 1VFB.PDB    | OE1, B_GLU_98  | ND2, B_ASN_35  | HD21, B_ASN_35  | 2.85 | 2.00 | 23.37 |
| 1VFB.PDB    | OD1, B_ASP_89  | NH1, B_ARG_38  | HH12, B_ARG_38  | 3.00 | 2.07 | 17.31 |
| 1VFB.PDB    | OE1, A_GLN_38  | NE2, B_GLN_39  | HE21, B_GLN_39  | 2.95 | 1.98 | 8.04  |
| 1VFB.PDB    | OD1, B_ASN_35  | NE1, B_TRP_47  | HE1, B_TRP_47   | 2.80 | 1.83 | 5.78  |
| 1VFB.PDB    | OD2, B_ASP_89  | NH1, B_ARG_66  | HH12, B_ARG_66  | 2.89 | 1.97 | 19.13 |
| 1VFB.PDB    | OD1, B_ASP_89  | NH2, B_ARG_66  | HH22, B_ARG_66  | 2.93 | 1.93 | 3.85  |
| 1VFB.PDB    | OD1, B_ASN_73  | NZ, B_LYS_71   | HZ1, B_LYS_71   | 2.93 | 2.08 | 28.65 |
| 1VFB.PDB    | OG, B_SER_70   | NZ, B_LYS_81   | HZ2, B_LYS_81   | 2.92 | 2.05 | 26.58 |
| 1VFB.PDB    | OD1, B_ASN_83  | OG, B_SER_84   | HG, B_SER_84    | 2.99 | 2.04 | 8.51  |
| 1VFB.PDB    | OD1, B_ASP_104 | NE, B_ARG_97   | HE, B_ARG_97    | 2.99 | 2.02 | 4.50  |
| 1VFB.PDB    | OD2, B_ASP_104 | NH2, B_ARG_97  | HH21, B_ARG_97  | 2.86 | 1.87 | 3.52  |
| 1VFB.PDB    | OG1, C_THR_89  | NE2, C_HIS_15  | HE2, C_HIS_15   | 2.84 | 1.94 | 19.37 |
| 1VFB.PDB    | OE1, C_GLN_41  | OG1, C_THR_40  | HG1, C_THR_40   | 2.88 | 1.98 | 18.75 |
| 1VFB.PDB    | OG1, C_THR_69  | OG, C_SER_60   | HG, C_SER_60    | 2.78 | 1.84 | 10.98 |
| 1VFB.PDB    | OD1, C_ASN_27  | NE1, C_TRP_111 | HE1, C_TRP_111  | 2.95 | 2.01 | 14.04 |
| 1VFB.PDB    | OE1, C_GLN_121 | NH1, C_ARG_125 | HH11, C_ARG_125 | 2.96 | 2.02 | 16.36 |
| 2MKL-1.PDB  | OXT, C_ALA_105 | NZ, C_LYS_13   | HZ3, C_LYS_13   | 2.65 | 1.63 | 10.83 |
| 2MKL-1.PDB  | OG1, C_ASP_80  | OG1, C_THR_21  | HG1, C_THR_21   | 2.65 | 1.79 | 22.35 |
| 2MKL-1.PDB  | OD2, C_ASP_80  | NE2, C_GLN_22  | HE21, C_GLN_22  | 2.86 | 1.96 | 18.61 |
| 2MKL-1.PDB  | OG, C_SER_34   | NZ, C_LYS_65   | HZ2, C_LYS_65   | 2.81 | 1.84 | 16.47 |
| 2MKL-1.PDB  | OE1, C_GLU_78  | OG1, C_THR_83  | HG1, C_THR_83   | 2.66 | 1.70 | 8.48  |
| 2MKL-1.PDB  | OD1, C_ASP_80  | NZ, C_LYS_104  | HZ1, C_LYS_104  | 2.72 | 1.78 | 20.43 |
| 2MKL-10.PDB | OE2, C_GLU_90  | NZ, C_LYS_40   | HZ2, C_LYS_40   | 2.58 | 1.67 | 23.06 |
| 2MKL-10.PDB | OG, C_SER_62   | OG1, C_THR_67  | HG1, C_THR_67   | 2.83 | 1.88 | 6.13  |
| 2MKL-10.PDB | OXT, C_ALA_105 | NZ, C_LYS_104  | HZ3, C_LYS_104  | 2.68 | 1.72 | 17.77 |

|            |                |                |                 |      |      |       |
|------------|----------------|----------------|-----------------|------|------|-------|
| 2MKL-2.PDB | OXT, C_ALA_105 | NZ, C_LYS_13   | HZ3, C_LYS_13   | 2.61 | 1.67 | 20.57 |
| 2MKL-2.PDB | OD1, C_ASP_35  | OG, C_SER_34   | HG, C_SER_34    | 2.77 | 1.81 | 5.76  |
| 2MKL-2.PDB | OH, C_TYR_85   | NH1, C_ARG_50  | HH11, C_ARG_50  | 2.66 | 1.70 | 14.67 |
| 2MKL-2.PDB | OE2, C_GLU_78  | NH1, C_ARG_50  | HH12, C_ARG_50  | 2.73 | 1.79 | 17.34 |
| 2MKL-2.PDB | OE1, C_GLU_55  | NZ, C_LYS_71   | HZ1, C_LYS_71   | 2.72 | 1.71 | 11.97 |
| 2MKL-2.PDB | OD1, C_ASN_46  | OG1, C_THR_83  | HG1, C_THR_83   | 2.72 | 1.91 | 26.52 |
| 2MKL-3.PDB | OE1, C_GLU_93  | NH1, C_ARG_3   | HH12, C_ARG_3   | 2.68 | 1.70 | 11.24 |
| 2MKL-3.PDB | OXT, C_ALA_105 | NZ, C_LYS_13   | HZ1, C_LYS_13   | 2.67 | 1.72 | 19.52 |
| 2MKL-3.PDB | OG, C_SER_34   | NZ, C_LYS_65   | HZ3, C_LYS_65   | 2.80 | 1.76 | 6.92  |
| 2MKL-3.PDB | OE2, C_GLU_55  | NZ, C_LYS_71   | HZ1, C_LYS_71   | 2.64 | 1.59 | 1.73  |
| 2MKL-3.PDB | OG1, C_THR_26  | NZ, C_LYS_71   | HZ3, C_LYS_71   | 2.86 | 1.95 | 23.23 |
| 2MKL-3.PDB | OD1, C_ASN_46  | OG1, C_THR_83  | HG1, C_THR_83   | 2.91 | 1.97 | 11.57 |
| 2MKL-3.PDB | OD1, C_ASP_80  | NZ, C_LYS_104  | HZ2, C_LYS_104  | 2.61 | 1.56 | 1.39  |
| 2MKL-4.PDB | OE1, C_GLU_17  | NE1, C_TRP_20  | HE1, C_TRP_20   | 2.69 | 1.70 | 6.61  |
| 2MKL-4.PDB | OE1, C_GLU_37  | ND2, C_ASN_38  | HD21, C_ASN_38  | 2.75 | 1.84 | 18.89 |
| 2MKL-4.PDB | OE1, C_GLU_84  | ND2, C_ASN_46  | HD21, C_ASN_46  | 2.79 | 1.87 | 17.49 |
| 2MKL-4.PDB | OH, C_TYR_85   | NE, C_ARG_50   | HE, C_ARG_50    | 2.95 | 2.07 | 22.98 |
| 2MKL-4.PDB | OE1, C_GLU_78  | NH2, C_ARG_50  | HH21, C_ARG_50  | 2.70 | 1.74 | 15.78 |
| 2MKL-4.PDB | OE2, C_GLU_55  | NZ, C_LYS_71   | HZ1, C_LYS_71   | 2.65 | 1.66 | 15.29 |
| 2MKL-5.PDB | OG1, C_THR_5   | NE2, C_GLN_4   | HE21, C_GLN_4   | 2.80 | 1.92 | 21.71 |
| 2MKL-5.PDB | OD1, C_ASP_35  | OG, C_SER_34   | HG, C_SER_34    | 2.85 | 1.91 | 12.30 |
| 2MKL-5.PDB | OE1, C_GLU_78  | NH2, C_ARG_50  | HH22, C_ARG_50  | 2.76 | 1.81 | 16.18 |
| 2MKL-5.PDB | OD2, C_ASP_6   | NZ, C_LYS_65   | HZ2, C_LYS_65   | 2.68 | 1.69 | 14.66 |
| 2MKL-5.PDB | OE2, C_GLU_78  | OG1, C_THR_83  | HG1, C_THR_83   | 2.81 | 1.87 | 12.01 |
| 2MKL-5.PDB | OXT, C_ALA_105 | NZ, C_LYS_104  | HZ2, C_LYS_104  | 2.74 | 1.74 | 13.81 |
| 2MKL-6.PDB | OXT, C_ALA_105 | NZ, C_LYS_13   | HZ2, C_LYS_13   | 2.64 | 1.69 | 18.78 |
| 2MKL-6.PDB | OE2, C_GLU_17  | NZ, C_LYS_13   | HZ3, C_LYS_13   | 2.63 | 1.59 | 5.83  |
| 2MKL-6.PDB | OE1, C_GLU_84  | ND2, C_ASN_46  | HD21, C_ASN_46  | 2.90 | 1.97 | 15.36 |
| 2MKL-6.PDB | OE2, C_GLU_78  | NH2, C_ARG_50  | HH22, C_ARG_50  | 2.72 | 1.70 | 3.73  |
| 2MKL-6.PDB | OD2, C_ASP_6   | NZ, C_LYS_65   | HZ3, C_LYS_65   | 2.59 | 1.63 | 17.95 |
| 2MKL-6.PDB | OE2, C_GLU_55  | NZ, C_LYS_71   | HZ1, C_LYS_71   | 2.70 | 1.72 | 16.34 |
| 2MKL-6.PDB | OD1, C_ASN_46  | OG1, C_THR_83  | HG1, C_THR_83   | 2.65 | 1.71 | 11.83 |
| 2MKL-6.PDB | OD1, C_ASP_80  | NZ, C_LYS_104  | HZ1, C_LYS_104  | 2.64 | 1.71 | 20.84 |
| 2MKL-7.PDB | OD1, C_ASP_6   | NE, C_ARG_3    | HE, C_ARG_3     | 2.80 | 1.90 | 20.83 |
| 2MKL-7.PDB | OD2, C_ASP_6   | NE, C_ARG_3    | HE, C_ARG_3     | 2.95 | 2.13 | 27.86 |
| 2MKL-7.PDB | OD2, C_ASP_6   | NH2, C_ARG_3   | HH21, C_ARG_3   | 2.72 | 1.79 | 18.49 |
| 2MKL-7.PDB | OD1, C_ASP_6   | NZ, C_LYS_65   | HZ2, C_LYS_65   | 2.61 | 1.57 | 4.07  |
| 2MKL-7.PDB | OG1, C_THR_24  | NZ, C_LYS_73   | HZ1, C_LYS_73   | 2.79 | 1.84 | 19.74 |
| 2MKL-7.PDB | OE2, C_GLU_78  | OG1, C_THR_83  | HG1, C_THR_83   | 2.59 | 1.64 | 9.74  |
| 2MKL-8.PDB | OG, C_SER_70   | NE1, C_TRP_43  | HE1, C_TRP_43   | 2.82 | 1.83 | 2.10  |
| 2MKL-8.PDB | OE2, C_GLU_78  | NH1, C_ARG_50  | HH12, C_ARG_50  | 2.63 | 1.62 | 3.58  |
| 2MKL-8.PDB | OD2, C_ASP_6   | NZ, C_LYS_65   | HZ3, C_LYS_65   | 2.64 | 1.68 | 18.41 |
| 2MKL-8.PDB | OD1, C_ASP_80  | NZ, C_LYS_104  | HZ1, C_LYS_104  | 2.61 | 1.59 | 9.01  |
| 2MKL-9.PDB | OE2, C_GLU_78  | NH2, C_ARG_50  | HH22, C_ARG_50  | 2.68 | 1.69 | 8.63  |
| 2MKL-9.PDB | OD2, C_ASP_6   | NZ, C_LYS_65   | HZ2, C_LYS_65   | 2.75 | 1.71 | 7.05  |
| 2MKL-9.PDB | OE2, C_GLU_37  | OG, C_SER_92   | HG, C_SER_92    | 3.00 | 2.20 | 28.49 |
| 3SE8.PDB   | OE2, G_GLU_91  | NE1, G_TRP_45  | HE1, G_TRP_45   | 2.78 | 2.03 | 24.08 |
| 3SE8.PDB   | OE2, G_GLU_64  | ND1, G_HIS_66  | HD1, G_HIS_66   | 2.82 | 1.98 | 11.41 |
| 3SE8.PDB   | OE1, G_GLU_64  | ND2, G_ASN_67  | HD22, G_ASN_67  | 2.82 | 2.00 | 14.84 |
| 3SE8.PDB   | OD1, G_ASN_99  | NE2, G_GLN_103 | HE22, G_GLN_103 | 2.99 | 2.17 | 14.68 |
| 3SE8.PDB   | OE2, G_GLU_381 | NZ, G_LYS_207  | HZ2, G_LYS_207  | 2.74 | 1.86 | 4.82  |
| 3SE8.PDB   | OE2, G_GLU_83  | OG, G_SER_243  | HG, G_SER_243   | 2.64 | 1.83 | 7.57  |
| 3SE8.PDB   | OH, G_TYR_486  | ND1, G_HIS_249 | HD1, G_HIS_249  | 2.64 | 1.81 | 12.83 |
| 3SE8.PDB   | OE1, G_GLU_482 | NE2, G_HIS_249 | HE2, G_HIS_249  | 3.00 | 2.16 | 9.93  |
| 3SE8.PDB   | OE2, G_GLU_269 | NZ, G_LYS_348  | HZ1, G_LYS_348  | 2.90 | 2.14 | 25.94 |
| 3SE8.PDB   | OE1, G_GLU_351 | NZ, G_LYS_348  | HZ3, G_LYS_348  | 2.96 | 2.10 | 14.00 |
| 3SE8.PDB   | OD1, G_ASN_295 | ND2, G_ASN_444 | HD21, G_ASN_444 | 2.87 | 2.12 | 25.11 |
| 3SE8.PDB   | OG1, G_THR_297 | ND2, G_ASN_444 | HD22, G_ASN_444 | 2.77 | 1.99 | 20.73 |

|          |                |                 |                  |      |      |       |
|----------|----------------|-----------------|------------------|------|------|-------|
| 3SE8.PDB | OD2, G.ASP.457 | NE, G.ARG.469   | HE, G.ARG.469    | 2.90 | 2.06 | 8.93  |
| 3SE8.PDB | OD1, G.ASP.457 | NH2, G.ARG.469  | HH21, G.ARG.469  | 2.93 | 2.11 | 16.29 |
| 3SE8.PDB | OE1, G.GLN.105 | NE1, G.TRP.479  | HE1, G.TRP.479   | 2.68 | 1.92 | 22.70 |
| 3SE8.PDB | OE1, G.GLU.91  | NZ, G.LYS.487   | HZ1, G.LYS.487   | 2.58 | 1.77 | 20.55 |
| 3SE8.PDB | OD1, G.ASP.47  | NZ, G.LYS.487   | HZ2, G.LYS.487   | 2.90 | 2.08 | 19.02 |
| 3SE8.PDB | OE1, H.GLU.46  | NH1, H.ARG.38   | HH11, H.ARG.38   | 2.64 | 1.78 | 1.94  |
| 3SE8.PDB | OH, H.TYR.90   | NH2, H.ARG.38   | HH21, H.ARG.38   | 2.79 | 1.95 | 9.66  |
| 3SE8.PDB | OD1, H.ASP.86  | NH2, H.ARG.38   | HH22, H.ARG.38   | 2.67 | 1.83 | 8.41  |
| 3SE8.PDB | OD1, G.ASN.280 | NE1, H.TRP.50   | HE1, H.TRP.50    | 3.00 | 2.21 | 20.49 |
| 3SE8.PDB | OE2, H.GLU.46  | NE2, H.GLN.62   | HE21, H.GLN.62   | 2.91 | 2.06 | 7.60  |
| 3SE8.PDB | OD1, G.ASP.457 | NE2, H.GLN.64   | HE22, H.GLN.64   | 2.94 | 2.12 | 14.23 |
| 3SE8.PDB | OD2, H.ASP.86  | NH2, H.ARG.66   | HH22, H.ARG.66   | 2.60 | 1.84 | 23.72 |
| 3SE8.PDB | OD2, G.ASP.368 | NH2, H.ARG.71   | HH22, H.ARG.71   | 2.91 | 2.05 | 6.24  |
| 3SE8.PDB | OG, H.SER.180  | NE1, H.TRP.154  | HE1, H.TRP.154   | 2.94 | 2.09 | 7.62  |
| 3SE8.PDB | OD1, H.ASP.144 | NE2, H.GLN.171  | HE22, H.GLN.171  | 2.79 | 1.98 | 16.20 |
| 3SE8.PDB | OG, H.SER.203  | ND1, H.HIS.200  | HD1, H.HIS.200   | 2.45 | 1.61 | 10.75 |
| 3SE8.PDB | OD1, L.ASP.70  | NZ, L.LYS.24    | HZ3, L.LYS.24    | 2.62 | 1.80 | 18.41 |
| 3SE8.PDB | OH, L.TYR.86   | NE2, L.GLN.37   | HE21, L.GLN.37   | 2.98 | 2.15 | 12.85 |
| 3SE8.PDB | OD2, L.ASP.50  | NE, L.ARG.53    | HE, L.ARG.53     | 2.87 | 2.02 | 8.47  |
| 3SE8.PDB | OD2, L.ASP.82  | NE, L.ARG.61    | HE, L.ARG.61     | 2.91 | 2.18 | 26.35 |
| 3SE8.PDB | OD1, L.ASP.82  | NH2, L.ARG.61   | HH21, L.ARG.61   | 2.77 | 1.91 | 2.48  |
| 3SE8.PDB | OG, L.SER.131  | NE2, L.GLN.124  | HE22, L.GLN.124  | 2.53 | 1.70 | 11.07 |
| 3SE8.PDB | OE2, L.GLU.103 | NH2, L.ARG.142  | HH22, L.ARG.142  | 2.84 | 2.00 | 11.39 |
| 3SE8.PDB | OE1, L.GLU.195 | NE2, L.GLN.147  | HE21, L.GLN.147  | 2.66 | 1.93 | 26.32 |
| 3SE8.PDB | OG, L.SER.177  | NE1, L.TRP.148  | HE1, L.TRP.148   | 2.88 | 2.08 | 18.18 |
| 3SE8.PDB | OD1, L.ASP.170 | OG1, L.THR.172  | HG1, L.THR.172   | 2.49 | 1.68 | 7.38  |
| 3SE9.PDB | OE2, G.GLU.64  | ND1, G.HIS.66   | HD1, G.HIS.66    | 2.73 | 1.88 | 8.47  |
| 3SE9.PDB | OE1, G.GLU.64  | ND2, G.ASN.67   | HD21, G.ASN.67   | 2.83 | 2.01 | 14.03 |
| 3SE9.PDB | OD1, G.ASN.99  | NE2, G.GLN.103  | HE21, G.GLN.103  | 2.75 | 1.96 | 19.57 |
| 3SE9.PDB | OE1, G.GLN.117 | NZ, G.LYS.121   | HZ3, G.LYS.121   | 2.58 | 1.83 | 27.32 |
| 3SE9.PDB | OE2, G.GLU.83  | OG, G.SER.243   | HG, G.SER.243    | 2.65 | 1.89 | 17.63 |
| 3SE9.PDB | OH, G.TYR.486  | ND1, G.HIS.249  | HD1, G.HIS.249   | 2.73 | 1.91 | 13.84 |
| 3SE9.PDB | OE1, G.GLN.422 | NH1, G.ARG.327  | HH11, G.ARG.327  | 2.62 | 1.84 | 19.91 |
| 3SE9.PDB | OE1, G.GLU.370 | ND2, G.ASN.425  | HD21, G.ASN.425  | 2.86 | 2.02 | 9.78  |
| 3SE9.PDB | OD1, G.ASN.295 | ND2, G.ASN.444  | HD21, G.ASN.444  | 2.93 | 2.17 | 24.18 |
| 3SE9.PDB | OG1, G.THR.297 | ND2, G.ASN.444  | HD22, G.ASN.444  | 2.97 | 2.23 | 26.41 |
| 3SE9.PDB | OE2, G.GLU.466 | NH1, G.ARG.456  | HH11, G.ARG.456  | 2.71 | 1.88 | 12.87 |
| 3SE9.PDB | OE1, G.GLN.105 | NE1, G.TRP.479  | HE1, G.TRP.479   | 2.69 | 1.89 | 17.56 |
| 3SE9.PDB | OE1, G.GLU.91  | NZ, G.LYS.487   | HZ3, G.LYS.487   | 2.63 | 1.86 | 24.78 |
| 3SE9.PDB | OD1, H.ASP.81  | NE, H.ARG.19    | HE, H.ARG.19     | 2.75 | 1.91 | 10.76 |
| 3SE9.PDB | OH, H.TYR.90   | NH1, H.ARG.38   | HH11, H.ARG.38   | 2.99 | 2.21 | 21.73 |
| 3SE9.PDB | OD1, H.ASP.86  | NH1, H.ARG.38   | HH12, H.ARG.38   | 2.86 | 2.03 | 12.66 |
| 3SE9.PDB | OD1, G.ASN.280 | NE1, H.TRP.50   | HE1, H.TRP.50    | 2.86 | 2.03 | 11.46 |
| 3SE9.PDB | OG, G.SER.365  | NH1, H.ARG.64   | HH11, H.ARG.64   | 2.81 | 2.04 | 21.79 |
| 3SE9.PDB | OD2, H.ASP.86  | NH2, H.ARG.66   | HH22, H.ARG.66   | 2.37 | 1.62 | 23.34 |
| 3SE9.PDB | OD2, G.ASP.368 | NH1, H.ARG.71   | HH12, H.ARG.71   | 2.77 | 1.92 | 7.25  |
| 3SE9.PDB | OG, H.SER.21   | ND1, H.HIS.79   | HD1, H.HIS.79    | 2.69 | 1.93 | 23.16 |
| 3SE9.PDB | OG, H.SER.68   | NH1, H.ARG.82A  | HH12, H.ARG.82A  | 2.84 | 2.02 | 15.25 |
| 3SE9.PDB | OD1, H.ASP.101 | NH2, H.ARG.94   | HH21, H.ARG.94   | 2.74 | 1.90 | 10.49 |
| 3SE9.PDB | OH, H.TYR.100E | NE2, H.GLN.100B | HE22, H.GLN.100B | 2.88 | 2.05 | 12.80 |
| 3SE9.PDB | OD1, G.ASN.279 | NE1, H.TRP.100D | HE1, H.TRP.100D  | 2.86 | 2.13 | 26.83 |
| 3SE9.PDB | OG, H.SER.180  | NE1, H.TRP.154  | HE1, H.TRP.154   | 2.83 | 2.00 | 12.34 |
| 3SE9.PDB | OD1, L.ASN.138 | NE2, H.HIS.164  | HE2, H.HIS.164   | 2.87 | 2.10 | 22.18 |
| 3SE9.PDB | OD1, H.ASP.144 | NE2, H.GLN.171  | HE22, H.GLN.171  | 2.70 | 1.89 | 15.22 |
| 3SE9.PDB | OD1, H.ASP.208 | ND2, H.ASN.197  | HD21, H.ASN.197  | 2.90 | 2.07 | 13.74 |
| 3SE9.PDB | OG, H.SER.203  | ND1, H.HIS.200  | HD1, H.HIS.200   | 2.68 | 1.84 | 9.59  |
| 3SE9.PDB | OG, L.SER.131  | NE2, L.GLN.124  | HE21, L.GLN.124  | 2.87 | 2.02 | 8.09  |
| 3SE9.PDB | OG, L.SER.177  | NE1, L.TRP.148  | HE1, L.TRP.148   | 2.88 | 2.05 | 13.01 |

|          |                |                |                 |      |      |       |
|----------|----------------|----------------|-----------------|------|------|-------|
| 3SE9.PDB | OD1, L_ASP_170 | OG1, L_THR_172 | HG1, L_THR_172  | 2.48 | 1.71 | 16.29 |
| 3SE9.PDB | OE1, L_GLU_187 | NZ, L_LYS_183  | HZ3, L_LYS_183  | 2.82 | 2.09 | 29.82 |
| 3SE9.PDB | OD2, L_ASP_151 | ND1, L_HIS_189 | HD1, L_HIS_189  | 2.89 | 2.18 | 29.99 |
| 3THM.PDB | OD1, L_ASP_93  | ND2, L_ASN_28  | HD21, L_ASN_28  | 2.85 | 2.01 | 9.28  |
| 3THM.PDB | OH, L_TYR_87   | NE2, L_GLN_38  | HE21, L_GLN_38  | 2.86 | 2.05 | 16.36 |
| 3THM.PDB | OD1, L_ASP_83  | NE, L_ARG_62   | HE, L_ARG_62    | 2.86 | 2.03 | 12.52 |
| 3THM.PDB | OD2, L_ASP_83  | NH2, L_ARG_62  | HH21, L_ARG_62  | 2.63 | 1.79 | 10.74 |
| 3THM.PDB | OD2, L_ASP_78  | NH1, L_ARG_77  | HH11, L_ARG_77  | 2.79 | 2.00 | 19.01 |
| 3THM.PDB | OG, L_SER_180  | NE1, L_TRP_152 | HE1, L_TRP_152  | 2.84 | 1.99 | 7.64  |
| 3THM.PDB | OD1, L_ASP_142 | NE2, L_GLN_171 | HE22, L_GLN_171 | 2.87 | 2.03 | 8.80  |
| 3THM.PDB | OD1, L_ASP_155 | ND1, L_HIS_192 | HD1, L_HIS_192  | 2.84 | 1.98 | 0.83  |
| 3THM.PDB | OG1, L_THR_205 | OG1, L_THR_200 | HG1, L_THR_200  | 2.83 | 2.04 | 14.40 |
| 3THM.PDB | OE1, H_GLU_48  | NE, H_ARG_40   | HE, H_ARG_40    | 2.92 | 2.11 | 16.36 |
| 3THM.PDB | OD1, H_ASP_96  | NH1, H_ARG_40  | HH12, H_ARG_40  | 2.76 | 1.92 | 9.45  |
| 3THM.PDB | OE1, L_GLN_39  | NE2, H_GLN_41  | HE22, H_GLN_41  | 2.98 | 2.14 | 9.35  |
| 3THM.PDB | OG, H_SER_52   | NE1, H_TRP_49  | HE1, H_TRP_49   | 2.98 | 2.27 | 29.23 |
| 3THM.PDB | OD1, H_ASP_96  | NH2, H_ARG_73  | HH22, H_ARG_73  | 2.91 | 2.05 | 3.20  |
| 3THM.PDB | OD1, H_ASP_120 | NE, H_ARG_104  | HE, H_ARG_104   | 2.94 | 2.10 | 9.96  |
| 3THM.PDB | OD2, H_ASP_120 | NH2, H_ARG_104 | HH21, H_ARG_104 | 2.75 | 2.00 | 25.31 |
| 3THM.PDB | OD2, H_ASP_110 | OG1, H_THR_112 | HG1, H_THR_112  | 2.76 | 1.95 | 7.38  |
| 3THM.PDB | OD1, H_ASP_109 | NE2, H_GLN_115 | HE21, H_GLN_115 | 2.80 | 1.96 | 11.40 |
| 3THM.PDB | OG, L_SER_183  | NZ, H_LYS_162  | HZ1, H_LYS_162  | 2.77 | 1.97 | 21.34 |
| 3THM.PDB | OG1, L_THR_135 | NZ, H_LYS_162  | HZ2, H_LYS_162  | 2.85 | 2.02 | 17.75 |
| 3THM.PDB | OG, H_SER_199  | NE1, H_TRP_173 | HE1, H_TRP_173  | 3.00 | 2.15 | 7.78  |
| 3THM.PDB | OD1, H_ASP_227 | ND2, H_ASN_216 | HD22, H_ASN_216 | 2.86 | 2.03 | 14.19 |
| 3THM.PDB | OG, H_SER_222  | ND1, H_HIS_219 | HD1, H_HIS_219  | 2.82 | 2.08 | 24.90 |
| 3THM.PDB | OD2, F_ASP_56  | ND1, F_HIS_38  | HD1, F_HIS_38   | 2.77 | 1.98 | 19.59 |
| 3THM.PDB | OH, H_TYR_35   | ND1, F_HIS_44  | HD1, F_HIS_44   | 2.69 | 1.83 | 5.98  |
| 3THM.PDB | OG, H_SER_63   | NE2, F_HIS_44  | HE2, F_HIS_44   | 2.83 | 2.07 | 23.36 |
| 3TJE.PDB | OD1, L_ASP_93  | ND2, L_ASN_28  | HD21, L_ASN_28  | 2.73 | 1.89 | 10.95 |
| 3TJE.PDB | OD1, L_ASP_94  | NH1, L_ARG_31  | HH11, L_ARG_31  | 2.81 | 2.04 | 22.49 |
| 3TJE.PDB | OH, L_TYR_87   | NE2, L_GLN_38  | HE21, L_GLN_38  | 2.91 | 2.10 | 17.00 |
| 3TJE.PDB | OD2, L_ASP_83  | NH1, L_ARG_62  | HH12, L_ARG_62  | 2.77 | 1.98 | 19.25 |
| 3TJE.PDB | OD1, L_ASP_83  | NH2, L_ARG_62  | HH22, L_ARG_62  | 2.87 | 2.01 | 3.19  |
| 3TJE.PDB | OD2, L_ASP_78  | NH1, L_ARG_77  | HH11, L_ARG_77  | 2.74 | 1.93 | 16.91 |
| 3TJE.PDB | OE2, L_GLU_128 | OG1, L_THR_135 | HG1, L_THR_135  | 2.52 | 1.76 | 18.95 |
| 3TJE.PDB | OG, L_SER_180  | NE1, L_TRP_152 | HE1, L_TRP_152  | 2.95 | 2.10 | 8.91  |
| 3TJE.PDB | OD1, L_ASP_142 | NE2, L_GLN_171 | HE21, L_GLN_171 | 2.80 | 1.98 | 15.09 |
| 3TJE.PDB | OG1, L_THR_205 | OG1, L_THR_200 | HG1, L_THR_200  | 2.75 | 1.97 | 15.90 |
| 3TJE.PDB | OE1, H_GLU_48  | NE, H_ARG_40   | HE, H_ARG_40    | 2.72 | 1.90 | 14.58 |
| 3TJE.PDB | OD1, H_ASP_96  | NH1, H_ARG_40  | HH12, H_ARG_40  | 2.84 | 2.01 | 12.94 |
| 3TJE.PDB | OE1, L_GLN_39  | NE2, H_GLN_41  | HE21, H_GLN_41  | 2.98 | 2.15 | 10.85 |
| 3TJE.PDB | OD2, H_ASP_96  | NH1, H_ARG_73  | HH12, H_ARG_73  | 2.84 | 2.09 | 24.31 |
| 3TJE.PDB | OD1, H_ASP_96  | NH2, H_ARG_73  | HH22, H_ARG_73  | 2.94 | 2.09 | 3.77  |
| 3TJE.PDB | OD2, H_ASP_79  | OG, H_SER_81   | HG, H_SER_81    | 2.85 | 2.15 | 27.35 |
| 3TJE.PDB | OD1, H_ASP_120 | NE, H_ARG_104  | HE, H_ARG_104   | 2.87 | 2.06 | 15.55 |
| 3TJE.PDB | OD2, H_ASP_120 | NH2, H_ARG_104 | HH21, H_ARG_104 | 2.68 | 1.96 | 27.63 |
| 3TJE.PDB | OG, H_SER_199  | NE1, H_TRP_173 | HE1, H_TRP_173  | 2.95 | 2.10 | 8.21  |
| 3TJE.PDB | OD1, H_ASP_163 | NE2, H_GLN_190 | HE21, H_GLN_190 | 2.74 | 1.93 | 16.43 |
| 3TJE.PDB | OD1, H_ASP_227 | ND2, H_ASN_216 | HD22, H_ASN_216 | 2.79 | 1.98 | 17.28 |
| 3TJE.PDB | OG, H_SER_222  | OG1, H_THR_224 | HG1, H_THR_224  | 2.65 | 1.92 | 22.20 |
| 3TJE.PDB | OH, H_TYR_35   | ND1, F_HIS_44  | HD1, F_HIS_44   | 2.56 | 1.70 | 3.69  |
| 3TJE.PDB | OE2, F_GLU_98  | NE, F_ARG_112  | HE, F_ARG_112   | 2.97 | 2.20 | 22.98 |
| 3U2S.PDB | OE1, H_GLU_95  | NE2, H_HIS_35  | HE2, H_HIS_35   | 2.64 | 1.80 | 11.05 |
| 3U2S.PDB | OE2, H_GLU_46  | NE, H_ARG_38   | HE, H_ARG_38    | 2.80 | 2.01 | 18.34 |
| 3U2S.PDB | OD1, H_ASP_86  | NH1, H_ARG_38  | HH12, H_ARG_38  | 2.84 | 2.00 | 11.28 |
| 3U2S.PDB | OE2, H_GLU_46  | NH2, H_ARG_38  | HH21, H_ARG_38  | 2.92 | 2.18 | 25.81 |
| 3U2S.PDB | OE1, L_GLN_38  | NE2, H_GLN_39  | HE22, H_GLN_39  | 2.89 | 2.04 | 8.55  |

|          |                |                |                 |      |      |       |
|----------|----------------|----------------|-----------------|------|------|-------|
| 3U2S.PDB | OE1, H_GLU_46  | OG, H_SER_62   | HG, H_SER_62    | 2.75 | 1.94 | 7.42  |
| 3U2S.PDB | OD2, H_ASP_86  | NH1, H_ARG_66  | HH12, H_ARG_66  | 2.53 | 1.74 | 19.65 |
| 3U2S.PDB | OD1, H_ASP_86  | NH2, H_ARG_66  | HH22, H_ARG_66  | 2.93 | 2.08 | 7.53  |
| 3U2S.PDB | OD1, H_ASN_73  | NE, H_ARG_71   | HE, H_ARG_71    | 2.77 | 1.98 | 19.66 |
| 3U2S.PDB | OD1, H_ASP_101 | NE, H_ARG_94   | HE, H_ARG_94    | 2.95 | 2.09 | 2.87  |
| 3U2S.PDB | OD2, H_ASP_101 | NH2, H_ARG_94  | HH21, H_ARG_94  | 2.85 | 2.03 | 14.60 |
| 3U2S.PDB | OG, H_SER_180  | NE1, H_TRP_154 | HE1, H_TRP_154  | 2.93 | 2.08 | 7.46  |
| 3U2S.PDB | OG, L_SER_165  | NE2, H_HIS_164 | HE2, H_HIS_164  | 2.93 | 2.12 | 16.97 |
| 3U2S.PDB | OD2, H_ASP_144 | NE2, H_GLN_171 | HE22, H_GLN_171 | 2.87 | 2.09 | 20.57 |
| 3U2S.PDB | OD2, H_ASP_208 | ND2, H_ASN_197 | HD21, H_ASN_197 | 2.76 | 1.92 | 10.02 |
| 3U2S.PDB | OG, H_SER_203  | ND1, H_HIS_200 | HD1, H_HIS_200  | 2.77 | 1.92 | 6.39  |
| 3U2S.PDB | OG1, L_THR_74  | OG1, L_THR_20  | HG1, L_THR_20   | 2.83 | 2.11 | 23.78 |
| 3U2S.PDB | OD2, L_ASP_27B | OG1, L_THR_26  | HG1, L_THR_26   | 2.86 | 2.11 | 19.40 |
| 3U2S.PDB | OH, L_TYR_86   | NE2, L_GLN_37  | HE21, L_GLN_37  | 2.82 | 1.97 | 2.95  |
| 3U2S.PDB | OE1, H_GLN_39  | NE2, L_GLN_38  | HE22, L_GLN_38  | 2.91 | 2.09 | 13.75 |
| 3U2S.PDB | OD2, L_ASP_50  | NZ, L_LYS_53   | HZ2, L_LYS_53   | 2.84 | 1.96 | 4.63  |
| 3U2S.PDB | OD2, C_ASP_167 | ND2, L_ASN_60  | HD22, L_ASN_60  | 2.90 | 2.14 | 22.76 |
| 3U2S.PDB | OD2, L_ASP_82  | NH1, L_ARG_61  | HH12, L_ARG_61  | 2.86 | 2.09 | 21.77 |
| 3U2S.PDB | OD1, L_ASP_82  | NH2, L_ARG_61  | HH22, L_ARG_61  | 2.97 | 2.11 | 4.14  |
| 3U2S.PDB | OE2, L_GLU_31  | NZ, L_LYS_66   | HZ1, L_LYS_66   | 2.99 | 2.15 | 15.69 |
| 3U2S.PDB | OD1, H_ASP_61  | NH2, L_ARG_95A | HH22, L_ARG_95A | 2.34 | 1.58 | 22.53 |
| 3U2S.PDB | OE2, H_GLU_95  | NH2, L_ARG_96  | HH21, L_ARG_96  | 2.87 | 2.05 | 15.72 |
| 3U2S.PDB | OE2, L_GLU_124 | OG1, L_THR_131 | HG1, L_THR_131  | 2.54 | 1.83 | 25.31 |
| 3U2S.PDB | OG, L_SER_176  | NE1, L_TRP_148 | HE1, L_TRP_148  | 2.93 | 2.09 | 11.15 |
| 3U2S.PDB | OD1, L_ASP_138 | NE2, L_GLN_167 | HE22, L_GLN_167 | 2.82 | 2.00 | 15.99 |
| 3U2S.PDB | OD1, L_ASP_138 | ND2, L_ASN_169 | HD22, L_ASN_169 | 2.92 | 2.10 | 15.30 |
| 3U2S.PDB | OG1, L_THR_201 | OG1, L_THR_196 | HG1, L_THR_196  | 2.99 | 2.20 | 12.41 |
| 3U2S.PDB | OH, H_TYR_100K | ND2, G_ASN_173 | HD21, G_ASN_173 | 2.97 | 2.13 | 8.87  |
| 3U2S.PDB | OE1, A_GLN_81  | NH1, A_ARG_19  | HH11, A_ARG_19  | 2.87 | 2.10 | 22.03 |
| 3U2S.PDB | OE1, A_GLU_95  | NE2, A_HIS_35  | HE2, A_HIS_35   | 2.70 | 1.86 | 8.94  |
| 3U2S.PDB | OE2, A_GLU_46  | NE, A_ARG_38   | HE, A_ARG_38    | 2.74 | 1.98 | 23.65 |
| 3U2S.PDB | OH, A_TYR_90   | NH1, A_ARG_38  | HH11, A_ARG_38  | 2.88 | 2.07 | 17.44 |
| 3U2S.PDB | OD1, A_ASP_86  | NH1, A_ARG_38  | HH12, A_ARG_38  | 2.89 | 2.04 | 8.28  |
| 3U2S.PDB | OE2, A_GLU_46  | NH2, A_ARG_38  | HH21, A_ARG_38  | 2.90 | 2.18 | 27.83 |
| 3U2S.PDB | OE1, B_GLN_38  | NE2, A_GLN_39  | HE22, A_GLN_39  | 2.92 | 2.07 | 7.34  |
| 3U2S.PDB | OD2, A_ASP_86  | NH1, A_ARG_66  | HH12, A_ARG_66  | 2.48 | 1.66 | 13.42 |
| 3U2S.PDB | OD1, A_ASN_73  | NE, A_ARG_71   | HE, A_ARG_71    | 2.81 | 2.03 | 20.92 |
| 3U2S.PDB | OE1, A_GLU_85  | NH1, A_ARG_83  | HH11, A_ARG_83  | 2.91 | 2.14 | 21.39 |
| 3U2S.PDB | OD1, A_ASP_101 | NE, A_ARG_94   | HE, A_ARG_94    | 2.84 | 1.98 | 4.74  |
| 3U2S.PDB | OD2, A_ASP_101 | NH2, A_ARG_94  | HH21, A_ARG_94  | 2.90 | 2.12 | 20.79 |
| 3U2S.PDB | OG1, B_THR_131 | NZ, A_LYS_143  | HZ2, A_LYS_143  | 2.41 | 1.67 | 27.35 |
| 3U2S.PDB | OD2, A_ASP_144 | NE2, A_GLN_171 | HE22, A_GLN_171 | 2.82 | 1.98 | 10.06 |
| 3U2S.PDB | OG, A_SER_203  | ND1, A_HIS_200 | HD1, A_HIS_200  | 2.63 | 1.78 | 5.16  |
| 3U2S.PDB | OG1, B_THR_74  | OG1, B_THR_20  | HG1, B_THR_20   | 2.88 | 2.16 | 24.36 |
| 3U2S.PDB | OD2, B_ASP_27B | OG1, B_THR_26  | HG1, B_THR_26   | 2.89 | 2.14 | 20.81 |
| 3U2S.PDB | OH, B_TYR_86   | NE2, B_GLN_37  | HE21, B_GLN_37  | 2.88 | 2.02 | 1.18  |
| 3U2S.PDB | OE1, A_GLN_39  | NE2, B_GLN_38  | HE22, B_GLN_38  | 2.92 | 2.08 | 10.61 |
| 3U2S.PDB | OD2, B_ASP_50  | NZ, B_LYS_53   | HZ2, B_LYS_53   | 2.75 | 1.88 | 8.80  |
| 3U2S.PDB | OD2, B_ASP_82  | NH1, B_ARG_61  | HH12, B_ARG_61  | 2.78 | 1.98 | 19.10 |
| 3U2S.PDB | OD1, B_ASP_82  | NH2, B_ARG_61  | HH22, B_ARG_61  | 2.93 | 2.07 | 0.82  |
| 3U2S.PDB | OD1, A_ASP_61  | NH1, B_ARG_95A | HH12, B_ARG_95A | 2.63 | 1.91 | 26.97 |
| 3U2S.PDB | OE2, A_GLU_95  | NH2, B_ARG_96  | HH21, B_ARG_96  | 2.98 | 2.16 | 13.77 |
| 3U2S.PDB | OG, B_SER_176  | NE1, B_TRP_148 | HE1, B_TRP_148  | 2.87 | 2.03 | 9.65  |
| 3U2S.PDB | OD1, B_ASN_169 | NE2, B_GLN_167 | HE21, B_GLN_167 | 2.93 | 2.16 | 22.14 |
| 3U2S.PDB | OD1, B_ASP_138 | NE2, B_GLN_167 | HE22, B_GLN_167 | 2.75 | 1.90 | 7.18  |
| 3U2S.PDB | OG1, B_THR_201 | OG1, B_THR_196 | HG1, B_THR_196  | 2.79 | 1.99 | 11.66 |
| 3UYR.PDB | OE1, H_GLU_46  | NE, H_ARG_38   | HE, H_ARG_38    | 2.84 | 2.03 | 16.92 |
| 3UYR.PDB | OD1, H_ASN_50  | NE1, H_TRP_47  | HE1, H_TRP_47   | 2.95 | 2.18 | 22.72 |

|          |                |                |                 |      |      |       |
|----------|----------------|----------------|-----------------|------|------|-------|
| 3UYR.PDB | OD1, H_ASP_105 | NE, H_ARG_98   | HE, H_ARG_98    | 2.98 | 2.16 | 14.38 |
| 3UYR.PDB | OD2, H_ASP_105 | NH2, H_ARG_98  | HH21, H_ARG_98  | 2.92 | 2.07 | 8.84  |
| 3UYR.PDB | OG, H_SER_183  | NE1, H_TRP_158 | HE1, H_TRP_158  | 2.93 | 2.08 | 7.42  |
| 3UYR.PDB | OG, H_SER_206  | ND1, H_HIS_203 | HD1, H_HIS_203  | 2.81 | 2.06 | 24.47 |
| 3UYR.PDB | OE2, L_GLU_127 | NZ, H_LYS_212  | HZ3, H_LYS_212  | 2.87 | 2.08 | 23.12 |
| 3UYR.PDB | OD2, L_ASP_87  | NH1, L_ARG_66  | HH12, L_ARG_66  | 2.92 | 2.12 | 17.99 |
| 3UYR.PDB | OG, L_SER_135  | NE2, L_GLN_128 | HE22, L_GLN_128 | 2.97 | 2.12 | 5.23  |
| 3UYR.PDB | OD1, L_ASP_174 | OG1, L_THR_176 | HG1, L_THR_176  | 2.78 | 1.97 | 7.90  |
| 3UYR.PDB | OD2, L_ASP_155 | ND1, L_HIS_193 | HD1, L_HIS_193  | 2.93 | 2.16 | 21.52 |
| 3UYR.PDB | ND2, L_ASN_216 | ND2, L_ASN_194 | HD22, L_ASN_194 | 2.90 | 2.18 | 28.48 |
| 3UYR.PDB | OG1, L_THR_204 | ND1, L_HIS_202 | HD1, L_HIS_202  | 2.78 | 1.93 | 6.06  |
| 3UYR.PDB | OD1, H_ASN_101 | NE2, P_GLN_48  | HE22, P_GLN_48  | 2.57 | 1.87 | 29.89 |
| 3X0E.PDB | OD1, A_ASP_122 | NE2, A_GLN_118 | HE21, A_GLN_118 | 2.93 | 2.22 | 29.07 |
| 3X0E.PDB | OD2, A_ASP_195 | NZ, A_LYS_124  | HZ1, A_LYS_124  | 3.00 | 2.19 | 21.32 |
| 3X0E.PDB | OD2, A_ASP_128 | OG1, A_THR_161 | HG1, A_THR_161  | 2.92 | 2.13 | 12.66 |
| 3X0E.PDB | OD1, A_ASP_155 | NZ, A_LYS_187  | HZ1, A_LYS_187  | 2.84 | 2.07 | 26.10 |
| 3X0E.PDB | OD1, B_ASP_195 | NZ, B_LYS_124  | HZ1, B_LYS_124  | 2.75 | 2.02 | 29.74 |
| 3X0E.PDB | OG, B_SER_159  | OG1, B_THR_161 | HG1, B_THR_161  | 2.79 | 1.98 | 7.89  |
| 3X0E.PDB | OD1, B_ASP_128 | NE2, B_HIS_191 | HE2, B_HIS_191  | 2.68 | 1.83 | 6.07  |
| 3X0F.PDB | OD1, A_ASP_195 | NZ, A_LYS_124  | HZ3, A_LYS_124  | 2.91 | 2.03 | 6.30  |
| 3X0F.PDB | OG, A_SER_159  | OG1, A_THR_163 | HG1, A_THR_163  | 2.77 | 1.96 | 7.35  |
| 3X0F.PDB | OD1, A_ASP_128 | NE2, A_HIS_191 | HE2, A_HIS_191  | 2.65 | 1.83 | 14.50 |
| 3X0F.PDB | OH, B_TYR_127  | NE2, B_HIS_151 | HE2, B_HIS_151  | 2.81 | 2.02 | 19.67 |
| 3X0F.PDB | OG1, B_THR_163 | OG, B_SER_159  | HG, B_SER_159   | 2.96 | 2.16 | 10.94 |
| 3X0F.PDB | OD1, B_ASP_128 | NE2, B_HIS_191 | HE2, B_HIS_191  | 2.69 | 1.83 | 1.74  |
| 4F33.PDB | OE1, B_GLN_39  | NE2, A_GLN_38  | HE22, A_GLN_38  | 2.96 | 2.13 | 12.75 |
| 4F33.PDB | OD2, A_ASP_82  | NE, A_ARG_61   | HE, A_ARG_61    | 2.81 | 2.09 | 28.09 |
| 4F33.PDB | OD1, A_ASP_82  | NH2, A_ARG_61  | HH21, A_ARG_61  | 2.71 | 1.85 | 4.82  |
| 4F33.PDB | OG1, A_THR_21  | OG1, A_THR_74  | HG1, A_THR_74   | 2.73 | 1.99 | 21.82 |
| 4F33.PDB | OG1, A_THR_97  | NE2, A_GLN_90  | HE21, A_GLN_90  | 2.97 | 2.15 | 14.62 |
| 4F33.PDB | OG, A_SER_13   | NZ, A_LYS_107  | HZ3, A_LYS_107  | 2.94 | 2.07 | 9.78  |
| 4F33.PDB | OG, A_SER_131  | NE2, A_GLN_124 | HE22, A_GLN_124 | 2.81 | 1.96 | 5.54  |
| 4F33.PDB | OG, A_SER_177  | NE1, A_TRP_148 | HE1, A_TRP_148  | 2.91 | 2.09 | 14.52 |
| 4F33.PDB | OE1, A_GLU_195 | NZ, A_LYS_149  | HZ2, A_LYS_149  | 2.59 | 1.85 | 28.21 |
| 4F33.PDB | OE1, A_GLN_155 | ND2, A_ASN_158 | HD22, A_ASN_158 | 2.89 | 2.06 | 12.00 |
| 4F33.PDB | OD1, A_ASP_170 | OG1, A_THR_172 | HG1, A_THR_172  | 2.68 | 1.86 | 4.02  |
| 4F33.PDB | OE1, A_GLN_38  | NE2, B_GLN_39  | HE22, B_GLN_39  | 2.82 | 1.97 | 5.31  |
| 4F33.PDB | OE2, B_GLU_46  | NZ, B_LYS_63   | HZ3, B_LYS_63   | 2.70 | 1.89 | 19.35 |
| 4F33.PDB | OD2, B_ASP_90  | NZ, B_LYS_67   | HZ2, B_LYS_67   | 2.73 | 1.86 | 7.48  |
| 4F33.PDB | OD2, B_ASP_107 | NH2, B_ARG_98  | HH21, B_ARG_98  | 2.74 | 1.88 | 6.50  |
| 4F33.PDB | OD1, B_ASP_102 | NE, B_ARG_104  | HE, B_ARG_104   | 2.87 | 2.03 | 8.81  |
| 4F33.PDB | OD2, B_ASP_107 | NH1, B_ARG_104 | HH11, B_ARG_104 | 2.78 | 1.96 | 13.74 |
| 4F33.PDB | OD2, B_ASP_102 | NH2, B_ARG_104 | HH21, B_ARG_104 | 2.87 | 2.08 | 19.19 |
| 4F33.PDB | OG, B_SER_186  | NE1, B_TRP_160 | HE1, B_TRP_160  | 2.97 | 2.13 | 10.43 |
| 4F33.PDB | OD1, B_ASP_150 | NE2, B_GLN_177 | HE22, B_GLN_177 | 2.84 | 2.07 | 21.15 |
| 4F33.PDB | OD1, B_ASP_214 | ND2, B_ASN_203 | HD21, B_ASN_203 | 2.97 | 2.12 | 8.15  |
| 4F33.PDB | OG, B_SER_209  | ND1, B_HIS_206 | HD1, B_HIS_206  | 2.61 | 1.78 | 12.57 |
| 4F33.PDB | OE1, A_GLU_123 | NZ, B_LYS_215  | HZ1, B_LYS_215  | 2.68 | 1.82 | 12.44 |
| 4F33.PDB | OG1, H_THR_211 | NZ, B_LYS_215  | HZ2, B_LYS_215  | 2.83 | 1.95 | 7.37  |
| 4F33.PDB | OD2, C_ASP_82  | NE, C_ARG_61   | HE, C_ARG_61    | 2.88 | 2.06 | 14.32 |
| 4F33.PDB | OD1, C_ASP_82  | NH2, C_ARG_61  | HH21, C_ARG_61  | 2.91 | 2.08 | 14.25 |
| 4F33.PDB | OG1, C_THR_21  | OG1, C_THR_74  | HG1, C_THR_74   | 2.68 | 1.93 | 19.90 |
| 4F33.PDB | OG, C_SER_13   | NZ, C_LYS_107  | HZ3, C_LYS_107  | 2.78 | 1.89 | 2.73  |
| 4F33.PDB | OG, C_SER_131  | NE2, C_GLN_124 | HE22, C_GLN_124 | 2.83 | 1.97 | 4.97  |
| 4F33.PDB | OG, C_SER_177  | NE1, C_TRP_148 | HE1, C_TRP_148  | 2.93 | 2.10 | 14.22 |
| 4F33.PDB | OE1, C_GLU_195 | NZ, C_LYS_149  | HZ2, C_LYS_149  | 2.67 | 1.88 | 22.11 |
| 4F33.PDB | OE1, C_GLN_155 | ND2, C_ASN_158 | HD22, C_ASN_158 | 2.91 | 2.09 | 15.33 |
| 4F33.PDB | OD1, C_ASP_170 | OG1, C_THR_172 | HG1, C_THR_172  | 2.72 | 1.91 | 5.07  |



|          |                |                |                 |      |      |       |
|----------|----------------|----------------|-----------------|------|------|-------|
| 4F33.PDB | OE1, C_GLN_38  | NE2, D_GLN_39  | HE22, D_GLN_39  | 2.89 | 2.03 | 5.23  |
| 4F33.PDB | OE2, D_GLU_46  | NZ, D_LYS_63   | HZ3, D_LYS_63   | 2.60 | 1.76 | 15.82 |
| 4F33.PDB | OD2, D_ASP_90  | NZ, D_LYS_67   | HZ2, D_LYS_67   | 2.76 | 2.03 | 29.11 |
| 4F33.PDB | OD2, D_ASP_107 | NH2, D_ARG_98  | HH21, D_ARG_98  | 2.74 | 1.89 | 7.29  |
| 4F33.PDB | OD1, D_ASP_102 | NE, D_ARG_104  | HE, D_ARG_104   | 2.89 | 2.05 | 10.59 |
| 4F33.PDB | OD2, D_ASP_107 | NH1, D_ARG_104 | HH11, D_ARG_104 | 2.83 | 2.01 | 15.77 |
| 4F33.PDB | OD2, D_ASP_102 | NH2, D_ARG_104 | HH21, D_ARG_104 | 2.91 | 2.10 | 15.53 |
| 4F33.PDB | OG, D_SER_186  | NE1, D_TRP_160 | HE1, D_TRP_160  | 3.00 | 2.15 | 9.78  |
| 4F33.PDB | OD1, D_ASP_150 | NE2, D_GLN_177 | HE22, D_GLN_177 | 2.86 | 2.09 | 21.57 |
| 4F33.PDB | OE1, C_GLU_123 | NZ, D_LYS_215  | HZ1, D_LYS_215  | 2.79 | 1.99 | 22.47 |
| 4F33.PDB | OG1, F_THR_211 | NZ, D_LYS_215  | HZ2, D_LYS_215  | 2.86 | 1.99 | 10.67 |
| 4F33.PDB | OG1, E_THR_74  | OG1, E_THR_21  | HG1, E_THR_21   | 2.80 | 2.03 | 17.05 |
| 4F33.PDB | OD2, E_ASP_82  | NE, E_ARG_61   | HE, E_ARG_61    | 2.93 | 2.08 | 6.42  |
| 4F33.PDB | OD1, E_ASP_82  | NH2, E_ARG_61  | HH21, E_ARG_61  | 2.82 | 1.98 | 9.42  |
| 4F33.PDB | OG1, E_THR_97  | NE2, E_GLN_90  | HE21, E_GLN_90  | 2.99 | 2.17 | 14.98 |
| 4F33.PDB | OG, E_SER_131  | NE2, E_GLN_124 | HE22, E_GLN_124 | 2.81 | 1.95 | 4.17  |
| 4F33.PDB | OG, E_SER_177  | NE1, E_TRP_148 | HE1, E_TRP_148  | 2.88 | 2.05 | 13.86 |
| 4F33.PDB | OE1, E_GLU_195 | NZ, E_LYS_149  | HZ2, E_LYS_149  | 2.77 | 1.97 | 22.37 |
| 4F33.PDB | OE1, E_GLN_155 | ND2, E_ASN_158 | HD22, E_ASN_158 | 2.91 | 2.08 | 12.67 |
| 4F33.PDB | OD1, E_ASP_170 | OG1, E_THR_172 | HG1, E_THR_172  | 2.66 | 1.85 | 7.41  |
| 4F33.PDB | OE1, E_GLN_38  | NE2, F_GLN_39  | HE22, F_GLN_39  | 2.92 | 2.06 | 5.53  |
| 4F33.PDB | OE2, F_GLU_46  | NZ, F_LYS_63   | HZ3, F_LYS_63   | 2.68 | 1.79 | 3.79  |
| 4F33.PDB | OD2, F_ASP_90  | NZ, F_LYS_67   | HZ2, F_LYS_67   | 2.98 | 2.09 | 4.59  |
| 4F33.PDB | OD1, F_ASP_107 | NE, F_ARG_98   | HE, F_ARG_98    | 2.99 | 2.13 | 4.74  |
| 4F33.PDB | OD2, F_ASP_107 | NH2, F_ARG_98  | HH21, F_ARG_98  | 2.77 | 1.91 | 5.42  |
| 4F33.PDB | OD1, F_ASP_102 | NE, F_ARG_104  | HE, F_ARG_104   | 2.84 | 1.99 | 7.33  |
| 4F33.PDB | OD2, F_ASP_107 | NH1, F_ARG_104 | HH11, F_ARG_104 | 2.84 | 2.02 | 14.35 |
| 4F33.PDB | OD2, F_ASP_102 | NH2, F_ARG_104 | HH21, F_ARG_104 | 2.90 | 2.10 | 17.22 |
| 4F33.PDB | OG, F_SER_186  | NE1, F_TRP_160 | HE1, F_TRP_160  | 3.00 | 2.15 | 9.04  |
| 4F33.PDB | OD1, F_ASP_150 | NE2, F_GLN_177 | HE22, F_GLN_177 | 2.82 | 2.02 | 17.76 |
| 4F33.PDB | OD1, F_ASP_214 | ND2, F_ASN_203 | HD21, F_ASN_203 | 2.95 | 2.10 | 8.40  |
| 4F33.PDB | OG, F_SER_209  | ND1, F_HIS_206 | HD1, F_HIS_206  | 2.64 | 1.82 | 13.68 |
| 4F33.PDB | OE1, E_GLU_123 | NZ, F_LYS_215  | HZ1, F_LYS_215  | 2.61 | 1.84 | 24.34 |
| 4F33.PDB | OG1, D_THR_211 | NZ, F_LYS_215  | HZ2, F_LYS_215  | 2.92 | 2.04 | 7.71  |
| 4F33.PDB | OG1, G_THR_74  | OG1, G_THR_21  | HG1, G_THR_21   | 2.73 | 1.97 | 18.47 |
| 4F33.PDB | OD1, G_ASP_82  | NH2, G_ARG_61  | HH21, G_ARG_61  | 2.73 | 1.89 | 8.68  |
| 4F33.PDB | OE2, G_GLU_81  | NH2, G_ARG_61  | HH22, G_ARG_61  | 2.96 | 2.16 | 17.92 |
| 4F33.PDB | OG, G_SER_131  | NE2, G_GLN_124 | HE22, G_GLN_124 | 2.79 | 1.93 | 5.18  |
| 4F33.PDB | OG, G_SER_177  | NE1, G_TRP_148 | HE1, G_TRP_148  | 2.87 | 2.04 | 13.06 |
| 4F33.PDB | OE1, G_GLN_155 | ND2, G_ASN_158 | HD22, G_ASN_158 | 2.92 | 2.10 | 14.66 |
| 4F33.PDB | OD1, G_ASP_170 | OG1, G_THR_172 | HG1, G_THR_172  | 2.69 | 1.89 | 8.34  |
| 4F33.PDB | OD2, G_ASP_151 | ND1, G_HIS_189 | HD1, G_HIS_189  | 2.86 | 2.09 | 22.44 |
| 4F33.PDB | OE2, H_GLU_46  | NZ, H_LYS_63   | HZ3, H_LYS_63   | 2.72 | 1.93 | 23.08 |
| 4F33.PDB | OD2, H_ASP_90  | NZ, H_LYS_67   | HZ2, H_LYS_67   | 2.82 | 1.98 | 16.29 |
| 4F33.PDB | OD1, H_ASP_107 | NE, H_ARG_98   | HE, H_ARG_98    | 2.95 | 2.15 | 18.92 |
| 4F33.PDB | OD2, H_ASP_107 | NH2, H_ARG_98  | HH21, H_ARG_98  | 2.79 | 1.95 | 8.93  |
| 4F33.PDB | OD1, H_ASP_102 | NE, H_ARG_104  | HE, H_ARG_104   | 2.85 | 2.00 | 6.80  |
| 4F33.PDB | OD2, H_ASP_107 | NH1, H_ARG_104 | HH11, H_ARG_104 | 2.85 | 2.04 | 16.23 |
| 4F33.PDB | OD2, H_ASP_102 | NH2, H_ARG_104 | HH21, H_ARG_104 | 2.93 | 2.12 | 16.50 |
| 4F33.PDB | OG, H_SER_186  | NE1, H_TRP_160 | HE1, H_TRP_160  | 2.99 | 2.15 | 10.12 |
| 4F33.PDB | OD1, H_ASP_150 | NE2, H_GLN_177 | HE22, H_GLN_177 | 2.83 | 2.04 | 19.22 |
| 4F33.PDB | OD1, H_ASP_214 | ND2, H_ASN_203 | HD21, H_ASN_203 | 2.91 | 2.05 | 5.75  |
| 4F33.PDB | OE1, G_GLU_123 | NZ, H_LYS_215  | HZ1, H_LYS_215  | 2.97 | 2.19 | 24.10 |
| 4F33.PDB | OG1, B_THR_211 | NZ, H_LYS_215  | HZ2, H_LYS_215  | 2.80 | 1.95 | 14.49 |
| 4F3F.PDB | OE1, B_GLN_39  | NE2, A_GLN_38  | HE22, A_GLN_38  | 2.88 | 2.04 | 8.75  |
| 4F3F.PDB | OD1, A_ASP_82  | NH2, A_ARG_61  | HH21, A_ARG_61  | 2.60 | 1.79 | 16.27 |
| 4F3F.PDB | OE2, A_GLU_81  | NH2, A_ARG_61  | HH22, A_ARG_61  | 2.95 | 2.12 | 13.66 |
| 4F3F.PDB | OG1, A_THR_21  | OG1, A_THR_74  | HG1, A_THR_74   | 2.77 | 2.04 | 22.11 |

|          |                 |                |                 |      |      |       |
|----------|-----------------|----------------|-----------------|------|------|-------|
| 4F3F.PDB | OG, B.SER.59    | NE2, A.HIS.94  | HE2, A.HIS.94   | 2.82 | 2.03 | 19.68 |
| 4F3F.PDB | OG, A.SER.131   | NE2, A.GLN.124 | HE22, A.GLN.124 | 2.84 | 2.05 | 19.05 |
| 4F3F.PDB | OD1, A.ASP.170  | OG1, A.THR.172 | HG1, A.THR.172  | 2.85 | 2.05 | 10.97 |
| 4F3F.PDB | OD1, B.ASN.35   | NE1, B.TRP.47  | HE1, B.TRP.47   | 2.99 | 2.19 | 19.59 |
| 4F3F.PDB | OD2, B.ASP.90   | NZ, B.LYS.67   | HZ2, B.LYS.67   | 2.92 | 2.05 | 9.99  |
| 4F3F.PDB | OD2, B.ASP.107  | NH2, B.ARG.98  | HH21, B.ARG.98  | 2.79 | 1.95 | 9.80  |
| 4F3F.PDB | OD1, A.ASN.138  | NE2, B.HIS.170 | HE2, B.HIS.170  | 2.82 | 2.05 | 21.56 |
| 4F3F.PDB | OD1, B.ASP.150  | NE2, B.GLN.177 | HE22, B.GLN.177 | 2.87 | 2.13 | 25.54 |
| 4F3F.PDB | OG, B.SER.209   | ND1, B.HIS.206 | HD1, B.HIS.206  | 2.43 | 1.61 | 13.98 |
| 4F3F.PDB | OH, B.TYR.101   | NZ, C.LYS.25   | HZ3, C.LYS.25   | 2.87 | 2.11 | 26.18 |
| 4F3F.PDB | OH, A.TYR.32    | NE1, C.TRP.26  | HE1, C.TRP.26   | 2.97 | 2.17 | 18.16 |
| 4F3F.PDB | OE2, C.GLU.15   | NH2, C.ARG.43  | HH21, C.ARG.43  | 2.88 | 2.04 | 9.30  |
| 4JAM.PDB | OE2, H.GLU.46   | NE, H.ARG.38   | HE, H.ARG.38    | 2.93 | 2.10 | 13.53 |
| 4JAM.PDB | OH, H.TYR.90    | NH1, H.ARG.38  | HH11, H.ARG.38  | 2.92 | 2.12 | 17.99 |
| 4JAM.PDB | OD1, H.ASP.86   | NH1, H.ARG.38  | HH12, H.ARG.38  | 2.91 | 2.07 | 10.41 |
| 4JAM.PDB | OD1, H.ASP.86   | NH2, H.ARG.66  | HH22, H.ARG.66  | 2.96 | 2.12 | 9.52  |
| 4JAM.PDB | OD1, H.ASP.144  | NZ, H.LYS.143  | HZ2, H.LYS.143  | 3.00 | 2.12 | 8.81  |
| 4JAM.PDB | OG, H.SER.180   | NE1, H.TRP.154 | HE1, H.TRP.154  | 2.95 | 2.10 | 8.20  |
| 4JAM.PDB | OG, H.SER.180   | OG1, H.THR.165 | HG1, H.THR.165  | 2.85 | 2.09 | 18.68 |
| 4JAM.PDB | OG, H.SER.203   | ND1, H.HIS.200 | HD1, H.HIS.200  | 2.70 | 1.91 | 20.45 |
| 4JAM.PDB | OD1, H.ASN.100B | ND2, L.ASN.32  | HD21, L.ASN.32  | 2.96 | 2.21 | 25.94 |
| 4JAM.PDB | OH, L.TYR.86    | NE2, L.GLN.37  | HE21, L.GLN.37  | 2.92 | 2.07 | 7.82  |
| 4JAM.PDB | OE1, L.GLU.50   | NZ, L.LYS.53   | HZ1, L.LYS.53   | 2.81 | 1.96 | 13.53 |
| 4JAM.PDB | OD2, L.ASP.82   | NE, L.ARG.61   | HE, L.ARG.61    | 2.81 | 2.02 | 19.36 |
| 4JAM.PDB | OD1, L.ASP.82   | NH2, L.ARG.61  | HH21, L.ARG.61  | 2.93 | 2.10 | 13.29 |
| 4JAM.PDB | OH, L.TYR.172   | NH2, L.ARG.107 | HH22, L.ARG.107 | 2.87 | 2.14 | 27.08 |
| 4JAM.PDB | OE1, L.GLU.198  | NZ, L.LYS.110  | HZ2, L.LYS.110  | 2.60 | 1.75 | 13.04 |
| 4JAM.PDB | OE2, L.GLU.124  | OG1, L.THR.131 | HG1, L.THR.131  | 2.56 | 1.86 | 25.46 |
| 4JAM.PDB | OG, L.SER.176   | NE1, L.TRP.148 | HE1, L.TRP.148  | 2.87 | 2.03 | 8.58  |
| 4JAM.PDB | OE1, L.GLU.203  | NZ, L.LYS.149  | HZ2, L.LYS.149  | 2.76 | 1.94 | 19.38 |
| 4JAM.PDB | OG, L.SER.192   | OG1, L.THR.205 | HG1, L.THR.205  | 2.80 | 2.01 | 12.51 |
| 4JAM.PDB | OE1, A.GLU.75   | NE1, A.TRP.34  | HE1, A.TRP.34   | 2.65 | 1.81 | 8.69  |
| 4JAM.PDB | OH, A.TYR.90    | NH1, A.ARG.38  | HH11, A.ARG.38  | 2.87 | 2.07 | 18.01 |
| 4JAM.PDB | OD1, A.ASP.86   | NH1, A.ARG.38  | HH12, A.ARG.38  | 2.79 | 1.96 | 13.17 |
| 4JAM.PDB | OD2, A.ASP.86   | NH2, A.ARG.66  | HH22, A.ARG.66  | 2.34 | 1.63 | 27.75 |
| 4JAM.PDB | OG, A.SER.180   | NE1, A.TRP.154 | HE1, A.TRP.154  | 2.95 | 2.10 | 7.51  |
| 4JAM.PDB | OD1, A.ASP.208  | ND2, A.ASN.197 | HD21, A.ASN.197 | 2.90 | 2.10 | 17.20 |
| 4JAM.PDB | OG, A.SER.203   | ND1, A.HIS.200 | HD1, A.HIS.200  | 2.74 | 1.92 | 14.00 |
| 4JAM.PDB | OE1, B.GLU.50   | NZ, B.LYS.53   | HZ1, B.LYS.53   | 2.75 | 1.92 | 17.48 |
| 4JAM.PDB | OD2, B.ASP.82   | NE, B.ARG.61   | HE, B.ARG.61    | 2.84 | 2.00 | 9.73  |
| 4JAM.PDB | OD1, B.ASP.82   | NH2, B.ARG.61  | HH21, B.ARG.61  | 2.90 | 2.08 | 13.97 |
| 4JAM.PDB | OE2, B.GLU.124  | OG1, B.THR.131 | HG1, B.THR.131  | 2.53 | 1.82 | 24.30 |
| 4JAM.PDB | OG, B.SER.176   | NE1, B.TRP.148 | HE1, B.TRP.148  | 2.84 | 1.99 | 9.50  |
| 4JAM.PDB | OD1, B.ASP.138  | ND2, B.ASN.169 | HD22, B.ASN.169 | 2.93 | 2.14 | 18.27 |
| 4JAM.PDB | OG, B.SER.192   | OG1, B.THR.205 | HG1, B.THR.205  | 2.64 | 1.83 | 8.66  |
| 4JAN.PDB | OD2, G.ASP.457  | NE, G.ARG.469  | HE, G.ARG.469   | 2.84 | 2.10 | 25.29 |
| 4JAN.PDB | OE1, H.GLU.46   | NE, H.ARG.38   | HE, H.ARG.38    | 2.76 | 1.94 | 14.56 |
| 4JAN.PDB | OG, H.SER.180   | NE1, H.TRP.154 | HE1, H.TRP.154  | 2.82 | 2.02 | 18.56 |
| 4JAN.PDB | OD2, B.ASP.92   | OG, H.SER.156  | HG, H.SER.156   | 2.50 | 1.78 | 23.90 |
| 4JAN.PDB | OG, H.SER.203   | ND1, H.HIS.200 | HD1, H.HIS.200  | 2.81 | 1.96 | 7.87  |
| 4JAN.PDB | OD1, H.ASN.199  | NZ, H.LYS.201  | HZ2, H.LYS.201  | 2.90 | 2.05 | 14.58 |
| 4JAN.PDB | OE1, L.GLU.123  | NZ, H.LYS.209  | HZ1, H.LYS.209  | 2.89 | 2.13 | 26.71 |
| 4JAN.PDB | OG1, L.THR.102  | NE2, L.GLN.6   | HE21, L.GLN.6   | 2.82 | 2.05 | 22.18 |
| 4JAN.PDB | OD1, H.ASN.100B | ND2, L.ASN.32  | HD21, L.ASN.32  | 2.76 | 1.91 | 6.44  |
| 4JAN.PDB | OH, L.TYR.86    | NE2, L.GLN.37  | HE21, L.GLN.37  | 2.95 | 2.09 | 6.42  |
| 4JAN.PDB | OG, L.SER.176   | NE1, L.TRP.148 | HE1, L.TRP.148  | 2.88 | 2.04 | 9.05  |
| 4JAN.PDB | OG, A.SER.180   | NE1, A.TRP.154 | HE1, A.TRP.154  | 2.82 | 2.05 | 22.21 |
| 4JAN.PDB | OE2, B.GLU.124  | OG1, B.THR.131 | HG1, B.THR.131  | 2.64 | 1.97 | 29.01 |

|          |                |                |                 |      |      |       |
|----------|----------------|----------------|-----------------|------|------|-------|
| 4JAN.PDB | OG, B_SER_176  | NE1, B_TRP_148 | HE1, B_TRP_148  | 2.83 | 1.98 | 7.29  |
| 4KRM.PDB | OE1, B_GLU_110 | NH1, A_ARG_353 | HH11, A_ARG_353 | 2.81 | 2.05 | 22.81 |
| 4KRM.PDB | OD2, A_ASP_355 | OG1, A_THR_358 | HG1, A_THR_358  | 2.65 | 1.94 | 26.40 |
| 4KRM.PDB | OE1, A_GLU_376 | NE, A_ARG_403  | HE, A_ARG_403   | 2.51 | 1.78 | 27.17 |
| 4KRM.PDB | OD1, A_ASP_434 | NZ, A_LYS_407  | HZ1, A_LYS_407  | 2.92 | 2.12 | 20.92 |
| 4KRM.PDB | OE2, A_GLU_431 | OG, A_SER_433  | HG, A_SER_433   | 2.82 | 2.09 | 25.22 |
| 4KRM.PDB | OD1, B_ASP_80  | NE, B_ARG_19   | HE, B_ARG_19    | 2.67 | 1.85 | 15.03 |
| 4KRM.PDB | OH, B_TYR_94   | NH1, B_ARG_38  | HH11, B_ARG_38  | 2.87 | 2.05 | 14.24 |
| 4KRM.PDB | OD2, B_ASP_90  | NH1, B_ARG_38  | HH12, B_ARG_38  | 2.85 | 2.02 | 12.95 |
| 4KRM.PDB | OE1, D_GLU_110 | NH1, C_ARG_353 | HH11, C_ARG_353 | 2.87 | 2.05 | 16.15 |
| 4KRM.PDB | OD2, C_ASP_355 | OG1, C_THR_358 | HG1, C_THR_358  | 2.75 | 2.00 | 22.12 |
| 4KRM.PDB | OE1, C_GLU_376 | NH1, C_ARG_403 | HH11, C_ARG_403 | 3.00 | 2.18 | 16.51 |
| 4KRM.PDB | OD1, C_ASP_498 | NH2, C_ARG_427 | HH21, C_ARG_427 | 2.43 | 1.69 | 25.29 |
| 4KRM.PDB | OE2, C_GLU_431 | OG, C_SER_433  | HG, C_SER_433   | 2.86 | 2.06 | 14.79 |
| 4KRM.PDB | OE1, C_GLU_489 | NZ, C_LYS_455  | HZ2, C_LYS_455  | 2.73 | 1.95 | 24.04 |
| 4KRM.PDB | OE1, D_GLN_82  | NH1, D_ARG_19  | HH11, D_ARG_19  | 2.94 | 2.12 | 14.24 |
| 4KRM.PDB | OD2, C_ASP_355 | NH1, D_ARG_30  | HH12, D_ARG_30  | 2.45 | 1.63 | 13.53 |
| 4KRM.PDB | OE1, D_GLU_46  | NE, D_ARG_38   | HE, D_ARG_38    | 2.79 | 1.96 | 12.48 |
| 4KRM.PDB | OE1, F_GLU_110 | NH1, E_ARG_353 | HH11, E_ARG_353 | 2.85 | 2.03 | 14.34 |
| 4KRM.PDB | OD2, F_ASP_112 | NH2, E_ARG_353 | HH22, E_ARG_353 | 2.96 | 2.18 | 20.33 |
| 4KRM.PDB | OD2, E_ASP_355 | OG1, E_THR_358 | HG1, E_THR_358  | 2.55 | 1.85 | 27.90 |
| 4KRM.PDB | OD1, E_ASP_434 | NZ, E_LYS_407  | HZ1, E_LYS_407  | 2.65 | 1.88 | 23.95 |
| 4KRM.PDB | OE2, E_GLU_431 | OG, E_SER_433  | HG, E_SER_433   | 2.91 | 2.17 | 23.57 |
| 4KRM.PDB | OE1, F_GLU_46  | NE, F_ARG_38   | HE, F_ARG_38    | 2.74 | 1.95 | 18.99 |
| 4KRM.PDB | OD2, F_ASP_90  | NH1, F_ARG_38  | HH12, F_ARG_38  | 2.95 | 2.22 | 27.79 |
| 4KRM.PDB | OE1, F_GLU_46  | NH2, F_ARG_38  | HH21, F_ARG_38  | 2.97 | 2.26 | 28.90 |
| 4KRM.PDB | OG, F_SER_57   | NE1, F_TRP_104 | HE1, F_TRP_104  | 3.00 | 2.20 | 18.23 |
| 4KRM.PDB | OE2, G_GLU_320 | ND2, G_ASN_314 | HD22, G_ASN_314 | 2.93 | 2.08 | 7.68  |
| 4KRM.PDB | OD2, G_ASP_355 | OG1, G_THR_358 | HG1, G_THR_358  | 2.44 | 1.73 | 26.83 |
| 4KRM.PDB | OE2, B_GLU_5   | NZ, G_LYS_407  | HZ1, G_LYS_407  | 2.98 | 2.17 | 20.60 |
| 4KRM.PDB | OD1, G_ASP_498 | NE, G_ARG_427  | HE, G_ARG_427   | 2.63 | 1.82 | 16.62 |
| 4KRM.PDB | OE2, G_GLU_431 | OG, G_SER_433  | HG, G_SER_433   | 2.90 | 2.13 | 19.38 |
| 4KRM.PDB | OD2, G_ASP_436 | NZ, G_LYS_463  | HZ3, G_LYS_463  | 2.68 | 1.83 | 13.12 |
| 4KRM.PDB | OD1, H_ASP_80  | OG1, H_THR_21  | HG1, H_THR_21   | 2.86 | 2.06 | 13.63 |
| 4KRM.PDB | OD2, G_ASP_355 | NH1, H_ARG_30  | HH12, H_ARG_30  | 2.45 | 1.69 | 23.45 |
| 4KRM.PDB | OH, H_TYR_94   | NH1, H_ARG_38  | HH11, H_ARG_38  | 2.96 | 2.15 | 17.21 |
| 4KRM.PDB | OD2, H_ASP_90  | NH1, H_ARG_38  | HH12, H_ARG_38  | 2.78 | 1.94 | 11.87 |
| 4KRM.PDB | OE1, J_GLU_110 | NH1, I_ARG_353 | HH11, I_ARG_353 | 2.86 | 2.07 | 18.90 |
| 4KRM.PDB | OD2, J_ASP_112 | NH2, I_ARG_353 | HH22, I_ARG_353 | 3.00 | 2.19 | 17.61 |
| 4KRM.PDB | OE1, I_GLU_376 | NH1, I_ARG_403 | HH11, I_ARG_403 | 2.44 | 1.73 | 28.52 |
| 4KRM.PDB | OE2, I_GLU_431 | OG, I_SER_433  | HG, I_SER_433   | 2.91 | 2.09 | 9.73  |
| 4KRM.PDB | OD1, I_ASN_469 | ND2, I_ASN_442 | HD22, I_ASN_442 | 2.76 | 1.93 | 12.03 |
| 4KRM.PDB | OD1, I_ASN_473 | OG, I_SER_474  | HG, I_SER_474   | 2.73 | 1.91 | 11.26 |
| 4KRM.PDB | OD1, J_ASP_80  | NE, J_ARG_19   | HE, J_ARG_19    | 2.78 | 1.97 | 16.74 |
| 4KRM.PDB | OH, J_TYR_94   | NH1, J_ARG_38  | HH11, J_ARG_38  | 2.85 | 2.02 | 12.10 |
| 4KRM.PDB | OD2, J_ASP_90  | NH1, J_ARG_38  | HH12, J_ARG_38  | 2.97 | 2.15 | 14.05 |
| 4KRM.PDB | OD1, J_ASP_90  | NH2, J_ARG_67  | HH22, J_ARG_67  | 2.61 | 1.77 | 10.49 |
| 4KRM.PDB | OD1, J_ASN_74  | NE, J_ARG_72   | HE, J_ARG_72    | 2.67 | 1.87 | 16.97 |
| 4KRM.PDB | OG, J_SER_57   | NE1, J_TRP_104 | HE1, J_TRP_104  | 2.98 | 2.26 | 28.43 |
| 4KRM.PDB | OE1, L_GLU_110 | NH1, K_ARG_353 | HH11, K_ARG_353 | 2.89 | 2.06 | 12.41 |
| 4KRM.PDB | OD2, L_ASP_112 | NH2, K_ARG_353 | HH22, K_ARG_353 | 2.89 | 2.07 | 13.96 |
| 4KRM.PDB | OD2, K_ASP_355 | OG1, K_THR_358 | HG1, K_THR_358  | 2.91 | 2.21 | 28.73 |
| 4KRM.PDB | OD1, L_ASP_80  | NE, L_ARG_19   | HE, L_ARG_19    | 2.96 | 2.10 | 5.59  |
| 4KRM.PDB | OD2, K_ASP_355 | NH1, L_ARG_30  | HH12, L_ARG_30  | 2.44 | 1.65 | 18.93 |
| 4KRM.PDB | OE1, L_GLU_46  | NE, L_ARG_38   | HE, L_ARG_38    | 2.86 | 2.01 | 10.17 |
| 4KRM.PDB | OD1, L_ASP_90  | NH2, L_ARG_67  | HH22, L_ARG_67  | 2.60 | 1.80 | 17.17 |
| 4KRO.PDB | OG1, A_THR_278 | OG, A_SER_282  | HG, A_SER_282   | 2.99 | 2.27 | 26.50 |
| 4KRO.PDB | OE2, A_GLU_376 | NH2, A_ARG_310 | HH21, A_ARG_310 | 2.98 | 2.18 | 18.33 |

|          |                |                |                 |      |      |       |
|----------|----------------|----------------|-----------------|------|------|-------|
| 4KRO.PDB | OD2, A_ASP_355 | OG1, A_THR_358 | HG1, A_THR_358  | 2.98 | 2.18 | 14.96 |
| 4KRO.PDB | OG, B_SER_103  | NZ, A_LYS_375  | HZ2, A_LYS_375  | 2.61 | 1.76 | 15.34 |
| 4KRO.PDB | OH, D_TYR_102  | NE2, A_GLN_384 | HE21, A_GLN_384 | 2.87 | 2.16 | 29.24 |
| 4KRO.PDB | OD1, B_ASP_118 | NE, A_ARG_405  | HE, A_ARG_405   | 2.72 | 1.93 | 19.48 |
| 4KRO.PDB | OD1, A_ASP_498 | NH2, A_ARG_427 | HH21, A_ARG_427 | 2.62 | 1.82 | 18.67 |
| 4KRO.PDB | OD1, A_ASN_469 | ND2, A_ASN_442 | HD22, A_ASN_442 | 2.75 | 1.96 | 18.83 |
| 4KRO.PDB | OG, A_SER_501  | OG, A_SER_487  | HG, A_SER_487   | 2.37 | 1.68 | 29.03 |
| 4KRO.PDB | OD1, A_ASN_504 | NH1, A_ARG_503 | HH11, A_ARG_503 | 2.52 | 1.76 | 23.61 |
| 4KRO.PDB | OG1, A_THR_548 | ND2, A_ASN_554 | HD22, A_ASN_554 | 2.92 | 2.13 | 19.09 |
| 4KRO.PDB | OE1, C_GLN_89  | OH, C_TYR_36   | HH, C_TYR_36    | 2.63 | 1.80 | 6.46  |
| 4KRO.PDB | OH, C_TYR_86   | NE2, C_GLN_37  | HE21, C_GLN_37  | 2.94 | 2.13 | 16.57 |
| 4KRO.PDB | OE1, D_GLN_39  | NE2, C_GLN_38  | HE22, C_GLN_38  | 2.85 | 2.00 | 7.50  |
| 4KRO.PDB | OD2, D_ASP_103 | OH, C_TYR_50   | HH, C_TYR_50    | 2.49 | 1.72 | 20.15 |
| 4KRO.PDB | OD1, C_ASP_82  | NH2, C_ARG_61  | HH21, C_ARG_61  | 2.64 | 1.81 | 12.76 |
| 4KRO.PDB | OD1, D_ASP_103 | ND2, C_ASN_91  | HD21, C_ASN_91  | 2.93 | 2.12 | 16.18 |
| 4KRO.PDB | OD1, C_ASN_32  | ND2, C_ASN_92  | HD22, C_ASN_92  | 2.97 | 2.20 | 23.59 |
| 4KRO.PDB | OD2, D_ASP_58  | NE1, C_TRP_94  | HE1, C_TRP_94   | 2.80 | 2.10 | 29.15 |
| 4KRO.PDB | OG, C_SER_131  | NE2, C_GLN_124 | HE22, C_GLN_124 | 2.85 | 2.00 | 6.78  |
| 4KRO.PDB | OG, C_SER_177  | NE1, C_TRP_148 | HE1, C_TRP_148  | 2.83 | 2.01 | 15.90 |
| 4KRO.PDB | OE1, C_GLN_155 | ND2, C_ASN_158 | HD21, C_ASN_158 | 2.72 | 1.97 | 24.54 |
| 4KRO.PDB | OD1, C_ASP_170 | OG1, C_THR_172 | HG1, C_THR_172  | 2.68 | 1.86 | 11.97 |
| 4KRO.PDB | OE1, D_GLU_46  | NE, D_ARG_38   | HE, D_ARG_38    | 3.00 | 2.22 | 20.92 |
| 4KRO.PDB | OH, D_TYR_93   | NH1, D_ARG_38  | HH11, D_ARG_38  | 2.92 | 2.15 | 22.16 |
| 4KRO.PDB | OE1, D_GLU_46  | NH2, D_ARG_38  | HH21, D_ARG_38  | 2.98 | 2.22 | 22.99 |
| 4KRO.PDB | OE1, C_GLN_38  | NE2, D_GLN_39  | HE22, D_GLN_39  | 2.80 | 1.94 | 4.32  |
| 4KRO.PDB | OH, D_TYR_59   | OG1, D_THR_57  | HG1, D_THR_57   | 2.96 | 2.15 | 12.78 |
| 4KRO.PDB | OE1, A_GLN_408 | OH, D_TYR_102  | HH, D_TYR_102   | 2.75 | 1.97 | 18.39 |
| 4KRO.PDB | OG, D_SER_209  | ND1, D_HIS_206 | HD1, D_HIS_206  | 2.71 | 1.87 | 9.56  |
| 4KRP.PDB | OE2, A_GLU_376 | NH2, A_ARG_310 | HH21, A_ARG_310 | 2.93 | 2.09 | 9.81  |
| 4KRP.PDB | OD1, B_ASP_115 | NH2, A_ARG_405 | HH21, A_ARG_405 | 2.63 | 1.81 | 15.48 |
| 4KRP.PDB | OD1, A_ASP_498 | NE, A_ARG_427  | HE, A_ARG_427   | 2.55 | 1.82 | 26.18 |
| 4KRP.PDB | OD1, A_ASP_498 | NH2, A_ARG_427 | HH21, A_ARG_427 | 2.59 | 1.89 | 29.61 |
| 4KRP.PDB | OE2, A_GLU_431 | OG, A_SER_433  | HG, A_SER_433   | 2.69 | 1.90 | 15.48 |
| 4KRP.PDB | OD1, A_ASN_469 | ND2, A_ASN_442 | HD22, A_ASN_442 | 2.94 | 2.17 | 23.18 |
| 4KRP.PDB | OD1, D_ASP_58  | NZ, A_LYS_443  | HZ1, A_LYS_443  | 2.65 | 1.82 | 17.69 |
| 4KRP.PDB | OE1, A_GLU_489 | NZ, A_LYS_455  | HZ2, A_LYS_455  | 2.95 | 2.19 | 25.72 |
| 4KRP.PDB | OD2, D_ASP_103 | NZ, A_LYS_465  | HZ2, A_LYS_465  | 2.93 | 2.05 | 5.06  |
| 4KRP.PDB | OG, A_SER_474  | NE, A_ARG_470  | HE, A_ARG_470   | 2.76 | 1.96 | 18.13 |
| 4KRP.PDB | OG, A_SER_501  | OG, A_SER_487  | HG, A_SER_487   | 2.45 | 1.66 | 16.67 |
| 4KRP.PDB | OE1, A_GLU_495 | NE, A_ARG_497  | HE, A_ARG_497   | 2.60 | 1.79 | 14.71 |
| 4KRP.PDB | OE1, A_GLU_524 | NE, A_ARG_507  | HE, A_ARG_507   | 2.83 | 2.04 | 19.78 |
| 4KRP.PDB | OE2, A_GLU_527 | NH2, A_ARG_550 | HH22, A_ARG_550 | 2.54 | 1.76 | 21.10 |
| 4KRP.PDB | OD1, C_ASN_92  | ND2, C_ASN_32  | HD22, C_ASN_32  | 2.85 | 2.14 | 29.38 |
| 4KRP.PDB | OE1, C_GLN_89  | OH, C_TYR_36   | HH, C_TYR_36    | 2.33 | 1.50 | 6.36  |
| 4KRP.PDB | OH, C_TYR_86   | NE2, C_GLN_37  | HE21, C_GLN_37  | 2.85 | 2.02 | 13.51 |
| 4KRP.PDB | OE1, D_GLN_39  | NE2, C_GLN_38  | HE22, C_GLN_38  | 2.70 | 1.84 | 6.09  |
| 4KRP.PDB | OE1, C_GLU_53  | NZ, C_LYS_49   | HZ3, C_LYS_49   | 2.81 | 1.93 | 8.64  |
| 4KRP.PDB | OD2, D_ASP_103 | OH, C_TYR_50   | HH, C_TYR_50    | 2.43 | 1.66 | 18.96 |
| 4KRP.PDB | OD1, C_ASP_82  | NH2, C_ARG_61  | HH21, C_ARG_61  | 2.79 | 1.98 | 15.39 |
| 4KRP.PDB | OG1, C_THR_96  | NE2, C_GLN_89  | HE21, C_GLN_89  | 2.69 | 1.93 | 23.74 |
| 4KRP.PDB | OD1, D_ASP_103 | ND2, C_ASN_91  | HD21, C_ASN_91  | 2.77 | 1.91 | 6.24  |
| 4KRP.PDB | OD1, C_ASN_93  | ND2, C_ASN_92  | HD22, C_ASN_92  | 2.69 | 1.97 | 27.74 |
| 4KRP.PDB | OD2, D_ASP_58  | NE1, C_TRP_94  | HE1, C_TRP_94   | 2.98 | 2.17 | 17.26 |
| 4KRP.PDB | OE2, C_GLU_105 | NZ, C_LYS_103  | HZ1, C_LYS_103  | 2.82 | 2.05 | 25.15 |
| 4KRP.PDB | OG, C_SER_131  | NE2, C_GLN_124 | HE22, C_GLN_124 | 2.89 | 2.10 | 19.98 |
| 4KRP.PDB | OE1, C_GLN_155 | ND2, C_ASN_158 | HD21, C_ASN_158 | 2.83 | 2.12 | 29.23 |
| 4KRP.PDB | OD1, C_ASP_170 | OG1, C_THR_172 | HG1, C_THR_172  | 2.53 | 1.69 | 5.91  |
| 4KRP.PDB | OG1, D_THR_113 | NE2, D_GLN_6   | HE21, D_GLN_6   | 2.88 | 2.03 | 4.76  |

|          |                |                |                 |      |      |       |
|----------|----------------|----------------|-----------------|------|------|-------|
| 4KRP.PDB | OH, D_TYR_93   | NH1, D_ARG_38  | HH11, D_ARG_38  | 2.96 | 2.18 | 20.80 |
| 4KRP.PDB | OD1, D_ASP_89  | NH1, D_ARG_38  | HH12, D_ARG_38  | 2.91 | 2.06 | 7.49  |
| 4KRP.PDB | OE1, C_GLN_38  | NE2, D_GLN_39  | HE22, D_GLN_39  | 2.72 | 1.87 | 5.47  |
| 4KRP.PDB | OD1, D_ASP_89  | NH2, D_ARG_66  | HH22, D_ARG_66  | 2.59 | 1.74 | 9.60  |
| 4KRP.PDB | OE1, A_GLN_408 | OH, D_TYR_102  | HH, D_TYR_102   | 2.56 | 1.74 | 10.00 |
| 4KRP.PDB | OG, A_SER_440  | OH, D_TYR_104  | HH, D_TYR_104   | 2.94 | 2.22 | 25.72 |
| 4KRP.PDB | OD1, D_ASP_214 | ND2, D_ASN_203 | HD22, D_ASN_203 | 2.70 | 1.84 | 4.78  |
| 4KRP.PDB | OG, D_SER_209  | ND1, D_HIS_206 | HD1, D_HIS_206  | 2.94 | 2.08 | 3.63  |
| 4KRP.PDB | OG, D_SER_209  | OG1, D_THR_211 | HG1, D_THR_211  | 2.56 | 1.87 | 28.78 |
| 4KRP.PDB | OE1, A_GLU_431 | OH, B_TYR_32   | HH, B_TYR_32    | 2.59 | 1.78 | 7.49  |
| 4KRP.PDB | OE1, A_GLU_400 | OH, B_TYR_100  | HH, B_TYR_100   | 2.94 | 2.13 | 13.29 |
| 4KRP.PDB | OE2, A_GLU_431 | OH, B_TYR_116  | HH, B_TYR_116   | 2.43 | 1.75 | 29.09 |
| 4NZR.PDB | OE1, H_GLU_46  | NE, H_ARG_38   | HE, H_ARG_38    | 2.83 | 2.07 | 23.07 |
| 4NZR.PDB | OH, H_TYR_90   | NH1, H_ARG_38  | HH11, H_ARG_38  | 2.96 | 2.16 | 17.91 |
| 4NZR.PDB | OD1, H_ASP_86  | NH1, H_ARG_38  | HH12, H_ARG_38  | 2.73 | 1.88 | 7.20  |
| 4NZR.PDB | OE1, H_GLU_46  | NH2, H_ARG_38  | HH21, H_ARG_38  | 2.78 | 2.02 | 22.98 |
| 4NZR.PDB | OG, H_SER_50   | NE1, H_TRP_47  | HE1, H_TRP_47   | 2.87 | 2.03 | 11.63 |
| 4NZR.PDB | OD1, H_ASP_31G | NE2, H_HIS_52  | HE2, H_HIS_52   | 2.60 | 1.83 | 22.01 |
| 4NZR.PDB | OD1, H_ASP_31G | NE1, H_TRP_53  | HE1, H_TRP_53   | 2.92 | 2.20 | 28.43 |
| 4NZR.PDB | OD2, H_ASP_86  | NH1, H_ARG_66  | HH12, H_ARG_66  | 2.98 | 2.20 | 21.88 |
| 4NZR.PDB | OD1, H_ASP_101 | NE, H_ARG_94   | HE, H_ARG_94    | 2.90 | 2.05 | 5.79  |
| 4NZR.PDB | OD2, H_ASP_101 | NH2, H_ARG_94  | HH21, H_ARG_94  | 2.73 | 1.90 | 13.79 |
| 4NZR.PDB | OG, H_SER_50   | ND1, H_HIS_95  | HD1, H_HIS_95   | 2.67 | 1.84 | 11.69 |
| 4NZR.PDB | OD1, H_ASP_146 | NE2, H_GLN_179 | HE22, H_GLN_179 | 2.89 | 2.12 | 22.14 |
| 4NZR.PDB | OG, L_SER_176  | OG, H_SER_188  | HG, H_SER_188   | 2.88 | 2.16 | 24.46 |
| 4NZR.PDB | OD1, H_ASP_220 | ND2, H_ASN_209 | HD22, H_ASN_209 | 2.89 | 2.06 | 12.07 |
| 4NZR.PDB | OG, H_SER_215  | ND1, H_HIS_212 | HD1, H_HIS_212  | 2.80 | 1.99 | 17.07 |
| 4NZR.PDB | OE2, L_GLU_123 | NZ, H_LYS_221  | HZ2, H_LYS_221  | 2.99 | 2.10 | 2.00  |
| 4NZR.PDB | OE2, H_GLU_226 | NE, H_ARG_222  | HE, H_ARG_222   | 2.65 | 1.93 | 27.41 |
| 4NZR.PDB | OE1, L_GLU_92  | ND2, L_ASN_30  | HD22, L_ASN_30  | 2.94 | 2.10 | 10.05 |
| 4NZR.PDB | OH, L_TYR_52   | NZ, L_LYS_31   | HZ1, L_LYS_31   | 2.57 | 1.77 | 21.34 |
| 4NZR.PDB | OH, L_TYR_86   | NE2, L_GLN_37  | HE21, L_GLN_37  | 2.96 | 2.11 | 9.58  |
| 4NZR.PDB | OD2, L_ASP_82  | NH1, L_ARG_61  | HH12, L_ARG_61  | 2.70 | 1.89 | 15.31 |
| 4NZR.PDB | OD1, L_ASP_82  | NH2, L_ARG_61  | HH22, L_ARG_61  | 2.85 | 2.01 | 9.02  |
| 4NZR.PDB | OG, L_SER_131  | NE2, L_GLN_124 | HE22, L_GLN_124 | 2.90 | 2.04 | 4.21  |
| 4NZR.PDB | OG, L_SER_177  | NE1, L_TRP_148 | HE1, L_TRP_148  | 2.91 | 2.07 | 10.59 |
| 4NZR.PDB | OE1, L_GLN_155 | ND2, L_ASN_158 | HD21, L_ASN_158 | 2.96 | 2.11 | 9.14  |
| 4NZR.PDB | OD1, L_ASP_170 | OG1, L_THR_172 | HG1, L_THR_172  | 2.70 | 1.89 | 6.41  |
| 4NZR.PDB | OG, H_SER_188  | OG, L_SER_176  | HG, L_SER_176   | 2.88 | 2.09 | 13.66 |
| 4NZR.PDB | OD2, L_ASP_151 | ND1, L_HIS_189 | HD1, L_HIS_189  | 2.85 | 2.11 | 26.53 |
| 4NZR.PDB | OD1, M_ASN_378 | NH1, M_ARG_95  | HH12, M_ARG_95  | 2.71 | 1.91 | 18.53 |
| 4NZR.PDB | OE2, M_GLU_124 | OG, M_SER_126  | HG, M_SER_126   | 2.49 | 1.81 | 27.79 |
| 4NZR.PDB | OE2, M_GLU_124 | NZ, M_LYS_141  | HZ2, M_LYS_141  | 2.96 | 2.15 | 21.57 |
| 4NZR.PDB | OD1, M_ASN_335 | ND2, M_ASN_166 | HD22, M_ASN_166 | 2.95 | 2.13 | 14.03 |
| 4NZR.PDB | OD1, M_ASN_183 | NE, M_ARG_167  | HE, M_ARG_167   | 2.87 | 2.09 | 20.21 |
| 4NZR.PDB | OD1, M_ASP_339 | NH2, M_ARG_167 | HH22, M_ARG_167 | 2.84 | 2.05 | 19.40 |
| 4NZR.PDB | OD1, M_ASN_177 | OG1, M_THR_179 | HG1, M_THR_179  | 2.75 | 1.94 | 6.81  |
| 4NZR.PDB | OD1, M_ASP_217 | OG1, M_THR_207 | HG1, M_THR_207  | 2.72 | 1.90 | 1.28  |
| 4NZR.PDB | OE1, M_GLU_261 | NZ, M_LYS_242  | HZ1, M_LYS_242  | 2.96 | 2.22 | 28.06 |
| 4NZR.PDB | OD1, M_ASP_250 | NZ, M_LYS_249  | HZ2, M_LYS_249  | 2.93 | 2.05 | 7.77  |
| 4NZR.PDB | NE2, M_GLN_282 | NZ, M_LYS_255  | HZ2, M_LYS_255  | 2.97 | 2.08 | 5.26  |
| 4NZR.PDB | OD2, M_ASP_217 | NH1, M_ARG_269 | HH12, M_ARG_269 | 2.82 | 1.99 | 14.04 |
| 4NZR.PDB | OE2, M_GLU_313 | NZ, M_LYS_289  | HZ1, M_LYS_289  | 2.70 | 1.96 | 27.41 |
| 4NZR.PDB | OE1, M_GLU_311 | NZ, M_LYS_289  | HZ3, M_LYS_289  | 2.89 | 2.00 | 2.29  |
| 4NZR.PDB | OD1, M_ASP_350 | OG1, M_THR_352 | HG1, M_THR_352  | 2.69 | 1.93 | 19.00 |
| 4NZR.PDB | OE1, M_GLU_420 | NZ, M_LYS_370  | HZ2, M_LYS_370  | 2.61 | 1.80 | 20.02 |
| 4NZR.PDB | OD1, M_ASP_375 | NE2, M_GLN_371 | HE21, M_GLN_371 | 2.92 | 2.12 | 18.76 |
| 4NZR.PDB | OE1, M_GLU_383 | NH1, M_ARG_380 | HH11, M_ARG_380 | 2.65 | 1.84 | 14.74 |

|          |                |                |                 |      |      |       |
|----------|----------------|----------------|-----------------|------|------|-------|
| 4NZR.PDB | OE1, M_GLU_162 | NH2, M_ARG_381 | HH22, M_ARG_381 | 3.00 | 2.22 | 21.24 |
| 4NZR.PDB | OE1, L_GLU_81  | NE, M_ARG_384  | HE, M_ARG_384   | 2.93 | 2.09 | 10.37 |
| 4NZR.PDB | OD1, M_ASP_396 | NZ, M_LYS_397  | HZ1, M_LYS_397  | 2.90 | 2.03 | 10.85 |
| 4NZR.PDB | OD2, M_ASP_410 | ND2, M_ASN_402 | HD22, M_ASN_402 | 2.93 | 2.14 | 18.97 |
| 4NZR.PDB | OE2, M_GLU_464 | NH1, M_ARG_416 | HH12, M_ARG_416 | 2.68 | 1.83 | 5.86  |
| 4NZR.PDB | OE1, M_GLU_464 | NH2, M_ARG_416 | HH22, M_ARG_416 | 2.88 | 2.03 | 6.77  |
| 4NZR.PDB | OD1, M_ASP_411 | NH1, M_ARG_430 | HH12, M_ARG_430 | 2.84 | 2.06 | 21.86 |
| 4NZR.PDB | OD1, M_ASN_402 | OG1, M_THR_435 | HG1, M_THR_435  | 2.74 | 1.98 | 18.44 |
| 4NZR.PDB | OD2, M_ASP_396 | NE, M_ARG_438  | HE, M_ARG_438   | 2.86 | 2.00 | 5.29  |
| 4NZR.PDB | OE2, M_GLU_426 | ND2, M_ASN_440 | HD22, M_ASN_440 | 2.87 | 2.05 | 14.71 |
| 4NZR.PDB | OD1, M_ASP_412 | NH1, M_ARG_454 | HH12, M_ARG_454 | 2.79 | 1.98 | 15.66 |
| 4NZR.PDB | OD1, H_ASP_31E | NH1, M_ARG_457 | HH12, M_ARG_457 | 2.96 | 2.12 | 11.27 |
| 4NZR.PDB | OD2, H_ASP_31E | NH2, M_ARG_457 | HH22, M_ARG_457 | 2.55 | 1.75 | 17.03 |
| 4NZU.PDB | OD2, L_ASP_82  | NE, L_ARG_61   | HE, L_ARG_61    | 2.83 | 2.03 | 27.68 |
| 4NZU.PDB | OD1, L_ASP_82  | NH2, L_ARG_61  | HH21, L_ARG_61  | 2.85 | 2.00 | 7.18  |
| 4NZU.PDB | OG, L_SER_177  | NE1, L_TRP_148 | HE1, L_TRP_148  | 2.90 | 1.89 | 11.12 |
| 4NZU.PDB | OE2, H_GLU_46  | NE, H_ARG_38   | HE, H_ARG_38    | 2.81 | 1.92 | 18.37 |
| 4NZU.PDB | OD1, H_ASP_86  | NH1, H_ARG_38  | HH12, H_ARG_38  | 2.87 | 2.03 | 8.91  |
| 4NZU.PDB | OD2, H_ASP_86  | NH1, H_ARG_66  | HH12, H_ARG_66  | 2.80 | 1.94 | 3.46  |
| 4NZU.PDB | OD1, H_ASP_97  | NH2, H_ARG_94  | HH22, H_ARG_94  | 2.85 | 2.02 | 14.02 |
| 4NZU.PDB | OG, H_SER_189  | NE1, H_TRP_157 | HE1, H_TRP_157  | 2.92 | 1.90 | 9.04  |
| 4NZU.PDB | OH, H_TYR_206  | OG, H_BSER_197 | HG, H_BSER_197  | 2.82 | 2.05 | 15.42 |
| 4QEX.PDB | OD2, A_ASP_414 | NH2, A_ARG_349 | HH21, A_ARG_349 | 3.00 | 2.26 | 27.00 |
| 4QEX.PDB | OD2, B_ASP_414 | NH2, B_ARG_349 | HH21, B_ARG_349 | 2.99 | 2.26 | 27.25 |
| 4WUU.PDB | OD2, A_ASP_29  | ND1, A_HIS_3   | HD1, A_HIS_3    | 2.93 | 2.13 | 17.75 |
| 4WUU.PDB | OE1, A_GLU_46  | NE, A_ARG_35   | HE, A_ARG_35    | 2.77 | 1.96 | 15.11 |
| 4WUU.PDB | OE2, A_GLU_46  | OG, A_SER_42   | HG, A_SER_42    | 2.85 | 2.07 | 18.95 |
| 4WUU.PDB | OD2, B_ASP_53  | NE, A_ARG_48   | HE, A_ARG_48    | 2.84 | 2.13 | 29.12 |
| 4WUU.PDB | OH, A_TYR_171  | OH, A_TYR_59   | HH, A_TYR_59    | 2.71 | 1.89 | 11.34 |
| 4WUU.PDB | OH, E_TYR_104  | NZ, A_LYS_66   | HZ3, A_LYS_66   | 2.89 | 2.02 | 10.84 |
| 4WUU.PDB | OXT, C_LEU_9   | OH, A_TYR_84   | HH, A_TYR_84    | 2.64 | 1.82 | 12.17 |
| 4WUU.PDB | OD2, A_ASP_137 | OH, A_TYR_85   | HH, A_TYR_85    | 2.79 | 1.98 | 13.39 |
| 4WUU.PDB | OE1, A_GLN_87  | OH, A_TYR_118  | HH, A_TYR_118   | 2.94 | 2.13 | 11.47 |
| 4WUU.PDB | OG1, A_THR_143 | OH, A_TYR_123  | HH, A_TYR_123   | 2.74 | 1.95 | 17.32 |
| 4WUU.PDB | OE2, A_GLU_55  | NE, A_ARG_170  | HE, A_ARG_170   | 2.89 | 2.03 | 3.82  |
| 4WUU.PDB | OE1, B_GLN_8   | NH1, A_ARG_234 | HH11, A_ARG_234 | 2.79 | 2.07 | 27.49 |
| 4WUU.PDB | OE1, A_GLN_242 | NH2, A_ARG_234 | HH21, A_ARG_234 | 3.00 | 2.27 | 27.42 |
| 4WUU.PDB | OD1, A_ASP_238 | OG1, A_THR_240 | HG1, A_THR_240  | 2.61 | 1.79 | 8.96  |
| 4WUU.PDB | OG1, B_THR_86  | OG1, B_THR_4   | HG1, B_THR_4    | 2.90 | 2.14 | 21.40 |
| 4WUU.PDB | OE1, A_GLU_232 | OH, B_TYR_26   | HH, B_TYR_26    | 2.95 | 2.14 | 13.27 |
| 4WUU.PDB | OD1, B_ASP_38  | NE, B_ARG_45   | HE, B_ARG_45    | 2.54 | 1.82 | 27.34 |
| 4WUU.PDB | ND1, B_HIS_84  | OG1, B_THR_86  | HG1, B_THR_86   | 2.95 | 2.20 | 22.57 |
| 4WUU.PDB | OE1, E_GLN_39  | NE2, D_GLN_39  | HE22, D_GLN_39  | 2.94 | 2.18 | 23.53 |
| 4WUU.PDB | OD2, D_ASP_83  | NE, D_ARG_62   | HE, D_ARG_62    | 2.79 | 2.08 | 28.83 |
| 4WUU.PDB | OD1, D_ASP_83  | NH2, D_ARG_62  | HH21, D_ARG_62  | 2.86 | 2.00 | 2.74  |
| 4WUU.PDB | OD1, E_ASP_106 | NE1, D_TRP_99  | HE1, D_TRP_99   | 2.95 | 2.19 | 24.35 |
| 4WUU.PDB | OG1, D_THR_165 | OG, D_SER_180  | HG, D_SER_180   | 3.00 | 2.24 | 22.62 |
| 4WUU.PDB | OE1, D_GLN_39  | NE2, E_GLN_39  | HE22, E_GLN_39  | 2.55 | 1.73 | 14.29 |
| 4WUU.PDB | OE2, A_GLU_166 | NH2, E_ARG_50  | HH22, E_ARG_50  | 2.67 | 1.88 | 18.69 |
| 4WUU.PDB | OD1, E_ASP_73  | OG, E_SER_75   | HG, E_SER_75    | 2.93 | 2.16 | 19.72 |
| 4WUU.PDB | OE1, A_GLU_63  | OH, E_TYR_104  | HH, E_TYR_104   | 2.59 | 1.76 | 7.82  |
| 4WUU.PDB | OE1, A_GLU_55  | OH, E_TYR_105  | HH, E_TYR_105   | 2.47 | 1.79 | 29.86 |
| 4WUU.PDB | OE1, E_GLU_156 | OH, E_TYR_153  | HH, E_TYR_153   | 2.97 | 2.18 | 16.08 |
| 4Z0X.PDB | OG1, A_THR_101 | NE2, A_GLN_6   | HE21, A_GLN_6   | 2.98 | 2.23 | 24.64 |
| 4Z0X.PDB | OE1, A_GLN_16  | OG1, A_THR_17  | HG1, A_THR_17   | 2.97 | 2.23 | 24.46 |
| 4Z0X.PDB | OE1, A_GLN_88  | OH, A_TYR_35   | HH, A_TYR_35    | 2.99 | 2.19 | 16.02 |
| 4Z0X.PDB | OE1, B_GLN_64  | NE2, A_GLN_37  | HE22, A_GLN_37  | 2.75 | 1.99 | 23.41 |
| 4Z0X.PDB | OD2, A_ASP_81  | NH1, A_ARG_60  | HH12, A_ARG_60  | 2.72 | 1.91 | 16.22 |

|          |                |                |                 |      |      |       |
|----------|----------------|----------------|-----------------|------|------|-------|
| 4Z0X.PDB | OD1, A.ASN.68  | OG1, A.THR.69  | HG1, A.THR.69   | 2.91 | 2.09 | 9.92  |
| 4Z0X.PDB | OE2, B.GLU.107 | OG, B.SER.42   | HG, B.SER.42    | 2.96 | 2.17 | 17.40 |
| 4Z0X.PDB | OE1, B.GLN.31  | OG, B.SER.46   | HG, B.SER.46    | 2.75 | 1.93 | 11.18 |
| 4Z0X.PDB | OE2, B.GLU.71  | NE, B.ARG.63   | HE, B.ARG.63    | 2.78 | 1.94 | 9.25  |
| 4Z0X.PDB | OD1, B.ASP.115 | NH1, B.ARG.63  | HH12, B.ARG.63  | 3.00 | 2.15 | 8.77  |
| 4Z0X.PDB | OE1, B.GLN.90  | NE, B.ARG.92   | HE, B.ARG.92    | 2.75 | 1.97 | 21.20 |
| 4Z0X.PDB | OD2, B.ASP.115 | NH1, B.ARG.92  | HH12, B.ARG.92  | 2.90 | 2.09 | 15.11 |
| 4Z0X.PDB | OD1, B.ASP.115 | NH2, B.ARG.92  | HH22, B.ARG.92  | 2.68 | 1.87 | 17.08 |
| 4Z0X.PDB | OE1, B.GLN.64  | OH, B.TYR.120  | HH, B.TYR.120   | 2.91 | 2.08 | 8.45  |
| 5I76.PDB | OD1, A.ASN.76  | NH1, A.ARG.18  | HH11, A.ARG.18  | 2.77 | 1.94 | 12.53 |
| 5I76.PDB | OE1, A.GLN.89  | OH, A.TYR.36   | HH, A.TYR.36    | 2.60 | 1.77 | 6.74  |
| 5I76.PDB | OH, A.TYR.86   | NE2, A.GLN.37  | HE21, A.GLN.37  | 2.93 | 2.09 | 10.63 |
| 5I76.PDB | OE1, B.GLN.39  | NE2, A.GLN.38  | HE22, A.GLN.38  | 2.94 | 2.10 | 10.68 |
| 5I76.PDB | OE1, A.GLU.53  | NZ, A.LYS.49   | HZ2, A.LYS.49   | 2.94 | 2.09 | 13.35 |
| 5I76.PDB | OD2, B.ASP.103 | OH, A.TYR.50   | HH, A.TYR.50    | 2.64 | 1.88 | 21.01 |
| 5I76.PDB | OD1, A.ASP.82  | NH2, A.ARG.61  | HH21, A.ARG.61  | 2.77 | 1.93 | 10.41 |
| 5I76.PDB | OE2, A.GLU.81  | NH2, A.ARG.61  | HH22, A.ARG.61  | 2.77 | 1.92 | 8.54  |
| 5I76.PDB | OG1, A.THR.96  | NE2, A.GLN.89  | HE21, A.GLN.89  | 2.89 | 2.08 | 16.62 |
| 5I76.PDB | OD1, A.ASN.93  | ND2, A.ASN.92  | HD22, A.ASN.92  | 2.89 | 2.06 | 14.53 |
| 5I76.PDB | OG, A.SER.12   | NZ, A.LYS.107  | HZ3, A.LYS.107  | 2.75 | 1.89 | 12.15 |
| 5I76.PDB | OG, A.SER.131  | NE2, A.GLN.124 | HE22, A.GLN.124 | 2.78 | 1.92 | 5.16  |
| 5I76.PDB | OE2, A.GLU.143 | NZ, A.LYS.145  | HZ3, A.LYS.145  | 2.87 | 2.06 | 20.39 |
| 5I76.PDB | OG, A.SER.177  | NE1, A.TRP.148 | HE1, A.TRP.148  | 2.97 | 2.15 | 13.90 |
| 5I76.PDB | OD1, A.ASP.170 | OG1, A.THR.172 | HG1, A.THR.172  | 2.65 | 1.83 | 9.24  |
| 5I76.PDB | OE2, A.GLU.105 | OH, A.TYR.173  | HH, A.TYR.173   | 2.42 | 1.66 | 21.73 |
| 5I76.PDB | OD1, B.ASP.89  | NH1, B.ARG.38  | HH12, B.ARG.38  | 2.81 | 1.96 | 5.27  |
| 5I76.PDB | OE1, A.GLN.38  | NE2, B.GLN.39  | HE22, B.GLN.39  | 2.80 | 1.95 | 6.66  |
| 5I76.PDB | OD2, B.ASP.58  | NE1, B.TRP.52  | HE1, B.TRP.52   | 2.79 | 1.94 | 5.91  |
| 5I76.PDB | OD2, B.ASP.89  | NH1, B.ARG.66  | HH12, B.ARG.66  | 2.96 | 2.17 | 19.36 |
| 5I76.PDB | OD1, B.ASP.89  | NH2, B.ARG.66  | HH22, B.ARG.66  | 2.84 | 1.99 | 7.50  |
| 5I76.PDB | OD1, B.ASP.72  | OG, B.SER.74   | HG, B.SER.74    | 2.49 | 1.80 | 29.35 |
| 5I76.PDB | OD1, B.ASN.203 | OG, B.SER.159  | HG, B.SER.159   | 2.82 | 2.04 | 17.93 |
| 5I76.PDB | OG, B.SER.186  | NE1, B.TRP.160 | HE1, B.TRP.160  | 2.99 | 2.15 | 11.06 |
| 5I76.PDB | OD1, B.ASP.150 | NE2, B.GLN.177 | HE22, B.GLN.177 | 2.79 | 2.00 | 19.18 |
| 5I76.PDB | OG, A.SER.176  | OG, B.SER.185  | HG, B.SER.185   | 2.89 | 2.15 | 23.05 |
| 5I76.PDB | OG, B.SER.194  | OH, B.TYR.200  | HH, B.TYR.200   | 2.81 | 2.03 | 18.26 |
| 5I76.PDB | OD1, B.ASP.214 | ND2, B.ASN.203 | HD22, B.ASN.203 | 2.90 | 2.11 | 19.71 |
| 5I76.PDB | OE1, A.GLU.123 | NZ, B.LYS.215  | HZ1, B.LYS.215  | 2.73 | 1.96 | 24.68 |
| 5I76.PDB | OE2, A.GLU.123 | NZ, B.LYS.215  | HZ1, B.LYS.215  | 2.89 | 2.11 | 24.69 |
| 5I76.PDB | OE1, B.GLU.218 | NE, B.ARG.216  | HE, B.ARG.216   | 2.64 | 1.90 | 25.25 |
| 5I76.PDB | OE1, B.GLU.218 | NH2, B.ARG.216 | HH21, B.ARG.216 | 2.69 | 1.98 | 29.12 |
| 5I76.PDB | OD2, A.ASP.70  | NH1, C.ARG.24  | HH12, C.ARG.24  | 2.95 | 2.23 | 28.81 |
| 5I76.PDB | OE1, C.GLN.89  | OH, C.TYR.36   | HH, C.TYR.36    | 2.73 | 1.90 | 7.00  |
| 5I76.PDB | OH, C.TYR.86   | NE2, C.GLN.37  | HE21, C.GLN.37  | 2.93 | 2.09 | 9.49  |
| 5I76.PDB | OE1, C.GLN.37  | NH1, C.ARG.45  | HH11, C.ARG.45  | 2.96 | 2.15 | 17.42 |
| 5I76.PDB | OE1, C.GLU.53  | NZ, C.LYS.49   | HZ2, C.LYS.49   | 2.64 | 1.79 | 13.55 |
| 5I76.PDB | OD2, D.ASP.103 | OH, C.TYR.50   | HH, C.TYR.50    | 2.76 | 1.95 | 12.40 |
| 5I76.PDB | OD1, C.ASP.82  | NH2, C.ARG.61  | HH21, C.ARG.61  | 2.76 | 1.93 | 11.41 |
| 5I76.PDB | OE2, C.GLU.81  | NH2, C.ARG.61  | HH22, C.ARG.61  | 2.83 | 2.01 | 16.02 |
| 5I76.PDB | OG, C.SER.171  | OG, C.SER.80   | HG, C.SER.80    | 2.59 | 1.79 | 14.57 |
| 5I76.PDB | OG1, C.THR.96  | NE2, C.GLN.89  | HE21, C.GLN.89  | 2.74 | 1.92 | 15.47 |
| 5I76.PDB | OD1, C.ASN.93  | ND2, C.ASN.92  | HD22, C.ASN.92  | 2.84 | 2.03 | 16.29 |
| 5I76.PDB | OG, C.SER.131  | NE2, C.GLN.124 | HE22, C.GLN.124 | 2.87 | 2.02 | 5.94  |
| 5I76.PDB | OG1, C.THR.180 | OG, C.SER.131  | HG, C.SER.131   | 2.93 | 2.13 | 14.64 |
| 5I76.PDB | OE1, C.GLU.105 | OH, C.TYR.140  | HH, C.TYR.140   | 2.89 | 2.14 | 22.51 |
| 5I76.PDB | OG, C.SER.177  | NE1, C.TRP.148 | HE1, C.TRP.148  | 2.90 | 2.11 | 19.54 |
| 5I76.PDB | OE1, C.GLN.155 | ND2, C.ASN.158 | HD22, C.ASN.158 | 2.96 | 2.21 | 25.95 |
| 5I76.PDB | OD1, C.ASP.170 | OG1, C.THR.172 | HG1, C.THR.172  | 2.79 | 1.97 | 11.52 |

|          |                 |                |                 |      |      |       |
|----------|-----------------|----------------|-----------------|------|------|-------|
| 5I76.PDB | OE2, C_GLU_105  | OH, C_TYR_173  | HH, C_TYR_173   | 2.72 | 1.89 | 6.26  |
| 5I76.PDB | OD2, C_ASP_151  | ND1, C_HIS_189 | HD1, C_HIS_189  | 2.35 | 1.61 | 24.33 |
| 5I76.PDB | OG, D_SER_28    | OG1, D_THR_30  | HG1, D_THR_30   | 2.71 | 1.88 | 5.11  |
| 5I76.PDB | OD1, D_ASP_89   | NH1, D_ARG_38  | HH12, D_ARG_38  | 2.88 | 2.03 | 7.89  |
| 5I76.PDB | OE1, C_GLN_38   | NE2, D_GLN_39  | HE22, D_GLN_39  | 2.85 | 2.01 | 10.98 |
| 5I76.PDB | OD2, D_ASP_58   | NE1, D_TRP_52  | HE1, D_TRP_52   | 2.82 | 1.96 | 3.64  |
| 5I76.PDB | OD2, D_ASP_89   | NH1, D_ARG_66  | HH12, D_ARG_66  | 2.85 | 2.02 | 11.59 |
| 5I76.PDB | OD1, D_ASP_89   | NH2, D_ARG_66  | HH22, D_ARG_66  | 2.74 | 1.89 | 8.51  |
| 5I76.PDB | OD1, D_ASP_72   | OG, D_SER_74   | HG, D_SER_74    | 2.71 | 2.00 | 26.33 |
| 5I76.PDB | OD1, D_ASP_150  | NZ, D_LYS_149  | HZ3, D_LYS_149  | 2.86 | 2.03 | 16.70 |
| 5I76.PDB | OE1, D_GLU_154  | OH, D_TYR_151  | HH, D_TYR_151   | 2.91 | 2.09 | 9.17  |
| 5I76.PDB | OD1, D_ASN_203  | OG, D_SER_159  | HG, D_SER_159   | 2.84 | 2.05 | 16.99 |
| 5I76.PDB | OG, D_SER_186   | NE1, D_TRP_160 | HE1, D_TRP_160  | 2.92 | 2.08 | 9.81  |
| 5I76.PDB | OD1, D_ASP_150  | NE2, D_GLN_177 | HE22, D_GLN_177 | 2.71 | 1.92 | 19.90 |
| 5I76.PDB | OG, D_SER_194   | OH, D_TYR_200  | HH, D_TYR_200   | 2.69 | 1.90 | 16.49 |
| 5I76.PDB | OE1, C_GLU_123  | NZ, D_LYS_215  | HZ1, D_LYS_215  | 2.60 | 1.73 | 11.40 |
| 5JO5.PDB | OD2, H_ASP_53   | NE1, H_TRP_33  | HE1, H_TRP_33   | 2.93 | 2.17 | 24.23 |
| 5JO5.PDB | OG1, H_THR_95   | OG, H_SER_35   | HG, H_SER_35    | 2.68 | 1.99 | 28.91 |
| 5JO5.PDB | OE1, H_GLU_46   | NE, H_ARG_38   | HE, H_ARG_38    | 2.82 | 2.00 | 14.74 |
| 5JO5.PDB | OH, H_TYR_90    | NH1, H_ARG_38  | HH11, H_ARG_38  | 2.91 | 2.09 | 14.97 |
| 5JO5.PDB | OD1, H_ASP_86   | NH1, H_ARG_38  | HH12, H_ARG_38  | 2.87 | 2.05 | 14.25 |
| 5JO5.PDB | OE1, L_GLN_38   | NE2, H_GLN_39  | HE22, H_GLN_39  | 2.84 | 2.00 | 9.38  |
| 5JO5.PDB | OE1, H_GLU_100J | NE, H_ARG_50   | HE, H_ARG_50    | 2.77 | 2.00 | 22.35 |
| 5JO5.PDB | OD2, H_ASP_58   | NH2, H_ARG_50  | HH22, H_ARG_50  | 2.84 | 2.00 | 11.12 |
| 5JO5.PDB | OD2, H_ASP_86   | NH1, H_ARG_66  | HH12, H_ARG_66  | 2.78 | 1.94 | 11.10 |
| 5JO5.PDB | OD1, H_ASP_73   | NE, H_ARG_71   | HE, H_ARG_71    | 2.85 | 2.05 | 17.58 |
| 5JO5.PDB | OD1, H_ASP_72   | OG, H_SER_74   | HG, H_SER_74    | 2.59 | 1.76 | 4.73  |
| 5JO5.PDB | OD2, H_ASP_102  | NE, H_ARG_94   | HE, H_ARG_94    | 2.81 | 2.07 | 25.27 |
| 5JO5.PDB | OD2, H_ASP_102  | NH1, H_ARG_94  | HH11, H_ARG_94  | 2.70 | 1.93 | 22.67 |
| 5JO5.PDB | OE2, L_GLU_124  | NZ, H_LYS_143  | HZ2, H_LYS_143  | 2.46 | 1.63 | 17.05 |
| 5JO5.PDB | OD1, H_ASN_197  | OG, H_SER_153  | HG, H_SER_153   | 2.83 | 2.04 | 17.75 |
| 5JO5.PDB | OG, H_SER_180   | NE1, H_TRP_154 | HE1, H_TRP_154  | 2.93 | 2.09 | 10.13 |
| 5JO5.PDB | OD1, H_ASP_144  | NE2, H_GLN_171 | HE22, H_GLN_171 | 2.85 | 2.05 | 18.06 |
| 5JO5.PDB | OH, L_TYR_177   | OG, H_SER_179  | HG, H_SER_179   | 2.73 | 2.00 | 25.96 |
| 5JO5.PDB | OG, H_SER_188   | OH, H_TYR_194  | HH, H_TYR_194   | 2.61 | 1.85 | 20.74 |
| 5JO5.PDB | OD1, H_ASP_208  | ND2, H_ASN_197 | HD22, H_ASN_197 | 2.91 | 2.06 | 7.04  |
| 5JO5.PDB | OE1, D_GLN_24   | OG, L_SER_30   | HG, L_SER_30    | 2.84 | 2.07 | 18.45 |
| 5JO5.PDB | OH, L_TYR_86    | NE2, L_GLN_37  | HE21, L_GLN_37  | 2.94 | 2.08 | 4.10  |
| 5JO5.PDB | OE1, H_GLN_39   | NE2, L_GLN_38  | HE22, L_GLN_38  | 2.83 | 2.00 | 13.03 |
| 5JO5.PDB | OD1, L_ASN_52   | NE, L_ARG_54   | HE, L_ARG_54    | 2.95 | 2.15 | 18.15 |
| 5JO5.PDB | OD1, L_ASP_82   | NH2, L_ARG_61  | HH21, L_ARG_61  | 2.75 | 1.92 | 13.56 |
| 5JO5.PDB | OE2, L_GLU_81   | NH2, L_ARG_61  | HH22, L_ARG_61  | 2.98 | 2.17 | 16.30 |
| 5JO5.PDB | OE2, H_GLU_100J | NH2, L_ARG_91  | HH22, L_ARG_91  | 2.69 | 1.84 | 7.26  |
| 5JO5.PDB | OD1, L_ASP_92   | OG, L_SER_95A  | HG, L_SER_95A   | 2.53 | 1.76 | 19.87 |
| 5JO5.PDB | OD1, H_ASP_58   | NE, L_ARG_95B  | HE, L_ARG_95B   | 2.95 | 2.13 | 14.76 |
| 5JO5.PDB | OE1, L_GLU_198  | NZ, L_LYS_110  | HZ3, L_LYS_110  | 2.94 | 2.09 | 14.01 |
| 5JO5.PDB | OE2, L_GLU_124  | OG1, L_THR_131 | HG1, L_THR_131  | 2.52 | 1.80 | 26.33 |
| 5JO5.PDB | OG, L_SER_176   | NE1, L_TRP_148 | HE1, L_TRP_148  | 2.93 | 2.09 | 9.40  |
| 5JO5.PDB | OD1, L_ASN_169  | NE2, L_GLN_167 | HE21, L_GLN_167 | 2.89 | 2.12 | 21.54 |
| 5JO5.PDB | OG1, L_THR_162  | OG, L_SER_175  | HG, L_SER_175   | 2.94 | 2.19 | 22.64 |
| 5JO5.PDB | OG1, L_THR_161  | OG, L_SER_176  | HG, L_SER_176   | 2.79 | 2.07 | 26.34 |
| 5JO5.PDB | OG1, L_THR_205  | OG, L_SER_192  | HG, L_SER_192   | 2.82 | 2.12 | 28.14 |
| 5JO5.PDB | OG1, L_THR_196  | OG1, L_THR_201 | HG1, L_THR_201  | 2.95 | 2.20 | 22.04 |
| 5JO5.PDB | OD2, A_ASP_53   | NE1, A_TRP_33  | HE1, A_TRP_33   | 2.82 | 2.05 | 21.67 |
| 5JO5.PDB | OE1, A_GLU_46   | NE, A_ARG_38   | HE, A_ARG_38    | 2.78 | 1.97 | 16.63 |
| 5JO5.PDB | OD1, A_ASP_86   | NH1, A_ARG_38  | HH12, A_ARG_38  | 2.83 | 2.01 | 14.60 |
| 5JO5.PDB | OE1, B_GLN_38   | NE2, A_GLN_39  | HE22, A_GLN_39  | 2.87 | 2.02 | 8.31  |
| 5JO5.PDB | OE1, A_GLU_100J | NE, A_ARG_50   | HE, A_ARG_50    | 2.88 | 2.11 | 22.13 |



|          |                 |                |                 |      |      |       |
|----------|-----------------|----------------|-----------------|------|------|-------|
| 5JO5.PDB | OE2, A_GLU_100J | NH1, A_ARG_50  | HH11, A_ARG_50  | 2.91 | 2.07 | 11.34 |
| 5JO5.PDB | OD2, A_ASP_58   | NH2, A_ARG_50  | HH22, A_ARG_50  | 2.88 | 2.05 | 13.39 |
| 5JO5.PDB | OD2, A_ASP_86   | NH1, A_ARG_66  | HH12, A_ARG_66  | 2.80 | 1.98 | 14.11 |
| 5JO5.PDB | OD1, A_ASP_73   | NE, A_ARG_71   | HE, A_ARG_71    | 2.86 | 2.09 | 22.09 |
| 5JO5.PDB | OD1, A_ASP_72   | OG, A_SER_74   | HG, A_SER_74    | 2.54 | 1.80 | 22.83 |
| 5JO5.PDB | OD2, A_ASP_102  | NE, A_ARG_94   | HE, A_ARG_94    | 2.86 | 2.14 | 28.73 |
| 5JO5.PDB | OD2, A_ASP_102  | NH1, A_ARG_94  | HH11, A_ARG_94  | 2.58 | 1.79 | 19.06 |
| 5JO5.PDB | OE2, B_GLU_124  | NZ, A_LYS_143  | HZ2, A_LYS_143  | 2.62 | 1.83 | 23.29 |
| 5JO5.PDB | OD1, A_ASN_197  | OG, A_SER_153  | HG, A_SER_153   | 2.78 | 2.00 | 18.34 |
| 5JO5.PDB | OG, A_SER_180   | NE1, A_TRP_154 | HE1, A_TRP_154  | 2.89 | 2.05 | 11.45 |
| 5JO5.PDB | OD1, A_ASP_144  | NE2, A_GLN_171 | HE22, A_GLN_171 | 2.80 | 2.01 | 18.53 |
| 5JO5.PDB | OH, B_TYR_177   | OG, A_SER_179  | HG, A_SER_179   | 2.83 | 2.10 | 25.21 |
| 5JO5.PDB | OG, A_SER_188   | OH, A_TYR_194  | HH, A_TYR_194   | 2.69 | 1.94 | 22.27 |
| 5JO5.PDB | OG, A_SER_203   | ND1, A_HIS_200 | HD1, A_HIS_200  | 2.79 | 2.03 | 23.43 |
| 5JO5.PDB | OE2, B_GLU_123  | NZ, A_LYS_209  | HZ1, A_LYS_209  | 2.55 | 1.68 | 10.64 |
| 5JO5.PDB | OH, B_TYR_86    | NE2, B_GLN_37  | HE21, B_GLN_37  | 2.95 | 2.09 | 5.48  |
| 5JO5.PDB | OE1, A_GLN_39   | NE2, B_GLN_38  | HE22, B_GLN_38  | 2.90 | 2.07 | 12.43 |
| 5JO5.PDB | OD1, B_ASP_82   | NH2, B_ARG_61  | HH21, B_ARG_61  | 2.66 | 1.83 | 11.88 |
| 5JO5.PDB | OD1, B_ASP_92   | OG, B_SER_95A  | HG, B_SER_95A   | 2.47 | 1.67 | 15.14 |
| 5JO5.PDB | OE2, B_GLU_124  | OG1, B_THR_131 | HG1, B_THR_131  | 2.59 | 1.86 | 24.88 |
| 5JO5.PDB | OG, B_SER_176   | NE1, B_TRP_148 | HE1, B_TRP_148  | 2.89 | 2.05 | 10.46 |
| 5JO5.PDB | OD1, B_ASN_169  | NE2, B_GLN_167 | HE21, B_GLN_167 | 2.98 | 2.24 | 26.40 |
| 5JO5.PDB | OD1, B_ASP_138  | NE2, B_GLN_167 | HE22, B_GLN_167 | 2.99 | 2.14 | 6.65  |
| 5JO5.PDB | OG1, B_THR_162  | OG, B_SER_175  | HG, B_SER_175   | 2.87 | 2.11 | 21.53 |
| 5JO5.PDB | OG1, B_THR_161  | OG, B_SER_176  | HG, B_SER_176   | 2.78 | 2.05 | 24.57 |
| 5JO5.PDB | OG1, B_THR_205  | OG, B_SER_192  | HG, B_SER_192   | 2.59 | 1.90 | 29.12 |
| 5JO5.PDB | OE2, B_GLU_203  | NE2, B_GLN_194 | HE21, B_GLN_194 | 2.60 | 1.77 | 11.97 |
| 5JO5.PDB | OG1, B_THR_196  | OG1, B_THR_201 | HG1, B_THR_201  | 2.97 | 2.21 | 22.11 |
| 5JO5.PDB | OD2, C_ASP_53   | NE1, C_TRP_33  | HE1, C_TRP_33   | 2.84 | 2.06 | 21.35 |
| 5JO5.PDB | OE1, C_GLU_46   | NE, C_ARG_38   | HE, C_ARG_38    | 2.77 | 1.97 | 17.97 |
| 5JO5.PDB | OH, C_TYR_90    | NH1, C_ARG_38  | HH11, C_ARG_38  | 3.00 | 2.18 | 14.70 |
| 5JO5.PDB | OD1, C_ASP_86   | NH1, C_ARG_38  | HH12, C_ARG_38  | 2.85 | 2.02 | 13.98 |
| 5JO5.PDB | OE1, D_GLN_38   | NE2, C_GLN_39  | HE22, C_GLN_39  | 2.86 | 2.02 | 9.45  |
| 5JO5.PDB | OE1, C_GLU_100J | NE, C_ARG_50   | HE, C_ARG_50    | 2.87 | 2.09 | 20.20 |
| 5JO5.PDB | OD2, C_ASP_58   | NH1, C_ARG_50  | HH12, C_ARG_50  | 2.77 | 1.94 | 11.94 |
| 5JO5.PDB | OE2, C_GLU_100J | NH2, C_ARG_50  | HH21, C_ARG_50  | 2.86 | 2.02 | 10.69 |
| 5JO5.PDB | OD2, C_ASP_86   | NH1, C_ARG_66  | HH12, C_ARG_66  | 2.83 | 2.01 | 15.29 |
| 5JO5.PDB | OD1, C_ASP_73   | NE, C_ARG_71   | HE, C_ARG_71    | 2.90 | 2.12 | 21.25 |
| 5JO5.PDB | OD1, C_ASP_72   | OG, C_SER_74   | HG, C_SER_74    | 2.61 | 1.84 | 20.06 |
| 5JO5.PDB | OD2, C_ASP_102  | NE, C_ARG_94   | HE, C_ARG_94    | 2.79 | 2.08 | 28.98 |
| 5JO5.PDB | OD2, C_ASP_102  | NH1, C_ARG_94  | HH11, C_ARG_94  | 2.55 | 1.78 | 21.18 |
| 5JO5.PDB | OE2, D_GLU_124  | NZ, C_LYS_143  | HZ2, C_LYS_143  | 2.79 | 1.92 | 10.71 |
| 5JO5.PDB | OD1, C_ASN_197  | OG, C_SER_153  | HG, C_SER_153   | 2.81 | 2.01 | 15.61 |
| 5JO5.PDB | OG, C_SER_180   | NE1, C_TRP_154 | HE1, C_TRP_154  | 2.96 | 2.13 | 11.76 |
| 5JO5.PDB | OD1, C_ASP_144  | NE2, C_GLN_171 | HE22, C_GLN_171 | 2.92 | 2.12 | 18.22 |
| 5JO5.PDB | OH, D_TYR_177   | OG, C_SER_179  | HG, C_SER_179   | 2.71 | 1.97 | 23.23 |
| 5JO5.PDB | OG, C_SER_188   | OH, C_TYR_194  | HH, C_TYR_194   | 2.62 | 1.86 | 20.70 |
| 5JO5.PDB | OD1, C_ASP_208  | ND2, C_ASN_197 | HD22, C_ASN_197 | 2.98 | 2.12 | 6.27  |
| 5JO5.PDB | OG, C_SER_203   | ND1, C_HIS_200 | HD1, C_HIS_200  | 2.85 | 2.10 | 24.59 |
| 5JO5.PDB | OE2, D_GLU_123  | NZ, C_LYS_209  | HZ1, C_LYS_209  | 2.58 | 1.72 | 11.28 |
| 5JO5.PDB | OG, D_SER_34    | OH, D_TYR_36   | HH, D_TYR_36    | 2.76 | 2.07 | 29.85 |
| 5JO5.PDB | OH, D_TYR_86    | NE2, D_GLN_37  | HE21, D_GLN_37  | 2.93 | 2.09 | 8.87  |
| 5JO5.PDB | OE1, C_GLN_39   | NE2, D_GLN_38  | HE22, D_GLN_38  | 2.92 | 2.09 | 12.72 |
| 5JO5.PDB | OD1, D_ASP_82   | NH2, D_ARG_61  | HH21, D_ARG_61  | 2.88 | 2.03 | 6.97  |
| 5JO5.PDB | OD1, D_ASP_92   | OG, D_SER_95A  | HG, D_SER_95A   | 2.53 | 1.74 | 15.88 |
| 5JO5.PDB | OD1, C_ASP_58   | NE, D_ARG_95B  | HE, D_ARG_95B   | 2.94 | 2.10 | 11.64 |
| 5JO5.PDB | OE2, D_GLU_124  | OG1, D_THR_131 | HG1, D_THR_131  | 2.53 | 1.79 | 22.99 |
| 5JO5.PDB | OG, D_SER_176   | NE1, D_TRP_148 | HE1, D_TRP_148  | 2.85 | 2.01 | 9.98  |

|          |                 |                |                 |      |      |       |
|----------|-----------------|----------------|-----------------|------|------|-------|
| 5JO5.PDB | OD1, D_ASN_169  | NE2, D_GLN_167 | HE21, D_GLN_167 | 2.91 | 2.12 | 19.40 |
| 5JO5.PDB | OD1, D_ASP_138  | NE2, D_GLN_167 | HE22, D_GLN_167 | 2.88 | 2.03 | 6.31  |
| 5JO5.PDB | OG1, D_THR_161  | OG, D_SER_176  | HG, D_SER_176   | 2.78 | 2.01 | 20.04 |
| 5JO5.PDB | OD2, D_ASP_151  | ND1, D_HIS_188 | HD1, D_HIS_188  | 2.67 | 1.86 | 16.19 |
| 5JO5.PDB | OG1, D_THR_205  | OG, D_SER_192  | HG, D_SER_192   | 2.76 | 2.06 | 27.74 |
| 5JO5.PDB | OE2, D_GLU_203  | NE2, D_GLN_194 | HE21, D_GLN_194 | 2.41 | 1.67 | 25.54 |
| 5JO5.PDB | OD2, E_ASP_53   | NE1, E_TRP_33  | HE1, E_TRP_33   | 2.89 | 2.14 | 24.08 |
| 5JO5.PDB | OG1, E_THR_95   | OG, E_SER_35   | HG, E_SER_35    | 2.65 | 1.97 | 29.96 |
| 5JO5.PDB | OE1, E_GLU_46   | NE, E_ARG_38   | HE, E_ARG_38    | 2.75 | 1.95 | 17.65 |
| 5JO5.PDB | OH, E_TYR_90    | NH1, E_ARG_38  | HH11, E_ARG_38  | 2.94 | 2.11 | 14.05 |
| 5JO5.PDB | OD1, E_ASP_86   | NH1, E_ARG_38  | HH12, E_ARG_38  | 2.82 | 2.00 | 15.16 |
| 5JO5.PDB | OE1, F_GLN_38   | NE2, E_GLN_39  | HE22, E_GLN_39  | 2.90 | 2.06 | 10.70 |
| 5JO5.PDB | OE1, E_GLU_100J | NE, E_ARG_50   | HE, E_ARG_50    | 2.82 | 2.06 | 22.79 |
| 5JO5.PDB | OD2, E_ASP_58   | NH1, E_ARG_50  | HH12, E_ARG_50  | 2.78 | 1.94 | 10.17 |
| 5JO5.PDB | OE2, E_GLU_100J | NH2, E_ARG_50  | HH21, E_ARG_50  | 2.98 | 2.13 | 7.82  |
| 5JO5.PDB | OD2, E_ASP_86   | NH1, E_ARG_66  | HH12, E_ARG_66  | 2.75 | 1.91 | 9.04  |
| 5JO5.PDB | OD1, E_ASP_73   | NE, E_ARG_71   | HE, E_ARG_71    | 2.89 | 2.11 | 20.53 |
| 5JO5.PDB | OD1, E_ASP_72   | OG, E_SER_74   | HG, E_SER_74    | 2.60 | 1.77 | 6.90  |
| 5JO5.PDB | OD2, E_ASP_102  | NE, E_ARG_94   | HE, E_ARG_94    | 2.83 | 2.08 | 25.07 |
| 5JO5.PDB | OD2, E_ASP_102  | NH2, E_ARG_94  | HH21, E_ARG_94  | 2.73 | 1.97 | 23.25 |
| 5JO5.PDB | OE2, F_GLU_124  | NZ, E_LYS_143  | HZ2, E_LYS_143  | 2.55 | 1.75 | 21.57 |
| 5JO5.PDB | OD1, E_ASN_197  | OG, E_SER_153  | HG, E_SER_153   | 2.80 | 2.02 | 18.49 |
| 5JO5.PDB | OG, E_SER_180   | NE1, E_TRP_154 | HE1, E_TRP_154  | 2.96 | 2.13 | 12.27 |
| 5JO5.PDB | OD1, E_ASP_144  | NE2, E_GLN_171 | HE22, E_GLN_171 | 2.83 | 2.02 | 16.42 |
| 5JO5.PDB | OH, F_TYR_177   | OG, E_SER_179  | HG, E_SER_179   | 2.58 | 1.87 | 27.02 |
| 5JO5.PDB | OG, E_SER_188   | OH, E_TYR_194  | HH, E_TYR_194   | 2.65 | 1.91 | 23.44 |
| 5JO5.PDB | OD1, E_ASP_208  | ND2, E_ASN_197 | HD22, E_ASN_197 | 2.93 | 2.08 | 6.74  |
| 5JO5.PDB | OE2, F_GLU_123  | NZ, E_LYS_209  | HZ1, E_LYS_209  | 2.57 | 1.74 | 17.62 |
| 5JO5.PDB | OE1, B_GLN_24   | OG, F_SER_30   | HG, F_SER_30    | 2.88 | 2.11 | 20.15 |
| 5JO5.PDB | OH, F_TYR_86    | NE2, F_GLN_37  | HE21, F_GLN_37  | 2.98 | 2.12 | 5.01  |
| 5JO5.PDB | OE1, E_GLN_39   | NE2, F_GLN_38  | HE22, F_GLN_38  | 2.85 | 2.02 | 12.75 |
| 5JO5.PDB | OD2, F_ASP_82   | NE, F_ARG_61   | HE, F_ARG_61    | 2.99 | 2.15 | 12.18 |
| 5JO5.PDB | OD1, F_ASP_82   | NH2, F_ARG_61  | HH21, F_ARG_61  | 2.81 | 1.97 | 11.97 |
| 5JO5.PDB | OE2, E_GLU_100J | NH2, F_ARG_91  | HH22, F_ARG_91  | 2.72 | 1.87 | 5.99  |
| 5JO5.PDB | OD1, F_ASP_92   | OG, F_SER_95A  | HG, F_SER_95A   | 2.58 | 1.83 | 23.06 |
| 5JO5.PDB | OD1, E_ASP_58   | NE, F_ARG_95B  | HE, F_ARG_95B   | 2.92 | 2.09 | 12.47 |
| 5JO5.PDB | OE1, F_GLU_198  | NZ, F_LYS_110  | HZ3, F_LYS_110  | 2.97 | 2.11 | 10.79 |
| 5JO5.PDB | OE2, F_GLU_124  | OG1, F_THR_131 | HG1, F_THR_131  | 2.49 | 1.76 | 24.10 |
| 5JO5.PDB | OG, F_SER_176   | NE1, F_TRP_148 | HE1, F_TRP_148  | 2.88 | 2.03 | 9.94  |
| 5JO5.PDB | OD1, F_ASN_169  | NE2, F_GLN_167 | HE21, F_GLN_167 | 2.87 | 2.13 | 25.80 |
| 5JO5.PDB | OD1, F_ASP_138  | NE2, F_GLN_167 | HE22, F_GLN_167 | 2.86 | 2.01 | 8.07  |
| 5JO5.PDB | OG1, F_THR_161  | OG, F_SER_176  | HG, F_SER_176   | 2.84 | 2.06 | 17.97 |
| 5JO5.PDB | OE2, F_GLU_203  | NE2, F_GLN_194 | HE21, F_GLN_194 | 2.48 | 1.75 | 26.23 |
| 5JR1.PDB | OE2, H_GLU_46   | NE, H_ARG_38   | HE, H_ARG_38    | 2.66 | 1.91 | 24.18 |
| 5JR1.PDB | OH, H_TYR_90    | NH1, H_ARG_38  | HH11, H_ARG_38  | 2.93 | 2.12 | 16.05 |
| 5JR1.PDB | OD1, H_ASP_86   | NH1, H_ARG_38  | HH12, H_ARG_38  | 2.94 | 2.11 | 12.77 |
| 5JR1.PDB | OE2, H_GLU_46   | NH2, H_ARG_38  | HH21, H_ARG_38  | 2.68 | 1.95 | 27.48 |
| 5JR1.PDB | OD2, H_ASP_86   | NH1, H_ARG_66  | HH12, H_ARG_66  | 2.72 | 1.87 | 9.50  |
| 5JR1.PDB | OD1, H_ASP_73   | NE, H_ARG_71   | HE, H_ARG_71    | 2.99 | 2.20 | 19.01 |
| 5JR1.PDB | OD1, H_ASP_72   | OG, H_SER_74   | HG, H_SER_74    | 2.50 | 1.70 | 14.47 |
| 5JR1.PDB | OD1, H_ASN_197  | OG, H_SER_153  | HG, H_SER_153   | 2.85 | 2.04 | 12.85 |
| 5JR1.PDB | OG, H_SER_180   | NE1, H_TRP_154 | HE1, H_TRP_154  | 2.87 | 2.02 | 7.55  |
| 5JR1.PDB | OD1, H_ASP_144  | NE2, H_GLN_171 | HE22, H_GLN_171 | 2.73 | 1.95 | 20.99 |
| 5JR1.PDB | OE1, H_GLN_171  | OG, H_SER_177  | HG, H_SER_177   | 2.71 | 1.98 | 25.79 |
| 5JR1.PDB | OH, L_TYR_178   | OG, H_SER_179  | HG, H_SER_179   | 2.83 | 2.03 | 15.88 |
| 5JR1.PDB | OG, H_SER_188   | OH, H_TYR_194  | HH, H_TYR_194   | 2.70 | 1.94 | 20.59 |
| 5JR1.PDB | OE2, H_GLU_212  | NE, H_BARG_210 | HE, H_BARG_210  | 2.40 | 1.64 | 22.83 |
| 5JR1.PDB | OH, L_TYR_86    | NE2, L_GLN_37  | HE21, L_GLN_37  | 2.92 | 2.08 | 10.60 |

|          |                |                |                 |      |      |       |
|----------|----------------|----------------|-----------------|------|------|-------|
| 5JR1.PDB | OD2, L_ASP_82  | NE, L_ARG_61   | HE, L_ARG_61    | 2.81 | 2.00 | 15.72 |
| 5JR1.PDB | OD1, L_ASP_82  | NH2, L_ARG_61  | HH21, L_ARG_61  | 2.74 | 1.90 | 11.09 |
| 5JR1.PDB | OG1, L_THR_20  | OG1, L_THR_74  | HG1, L_THR_74   | 2.96 | 2.15 | 13.12 |
| 5JR1.PDB | OD2, L_ASP_92  | OG, L_SER_94   | HG, L_SER_94    | 2.41 | 1.66 | 21.72 |
| 5JR1.PDB | OD2, H_ASP_58  | NH2, L_ARG_95B | HH22, L_ARG_95B | 2.47 | 1.67 | 16.99 |
| 5JR1.PDB | OE1, L_GLU_199 | NZ, L_LYS_110  | HZ3, L_LYS_110  | 2.77 | 1.91 | 11.53 |
| 5JR1.PDB | OE2, L_GLU_125 | OG1, L_THR_132 | HG1, L_THR_132  | 2.53 | 1.79 | 23.02 |
| 5JR1.PDB | OG, L_SER_177  | NE1, L_TRP_149 | HE1, L_TRP_149  | 2.84 | 1.99 | 9.64  |
| 5JR1.PDB | OE1, L_GLN_195 | NZ, L_LYS_150  | HZ3, L_LYS_150  | 2.79 | 1.91 | 7.52  |
| 5JR1.PDB | OD1, L_ASN_170 | NE2, L_GLN_168 | HE21, L_GLN_168 | 2.60 | 1.77 | 13.13 |
| 5JR1.PDB | OD1, L_ASP_139 | NE2, L_GLN_168 | HE22, L_GLN_168 | 2.73 | 1.87 | 5.77  |
| 5JR1.PDB | OE2, L_GLU_204 | NE2, L_GLN_195 | HE21, L_GLN_195 | 2.95 | 2.12 | 11.81 |
| 5JR1.PDB | OG1, L_THR_197 | OG1, L_THR_202 | HG1, L_THR_202  | 2.77 | 1.97 | 14.73 |
| 5JUE.PDB | OH, H_TYR_91   | NE2, L_GLN_38  | HE22, L_GLN_38  | 2.57 | 1.77 | 17.09 |
| 5JUE.PDB | OD1, L_ASP_82  | NH1, L_ARG_61  | HH12, L_ARG_61  | 2.84 | 1.98 | 1.66  |
| 5JUE.PDB | OD2, L_ASP_82  | NH2, L_ARG_61  | HH22, L_ARG_61  | 2.58 | 1.76 | 15.54 |
| 5JUE.PDB | OG, L_SER_131  | NE2, L_GLN_124 | HE22, L_GLN_124 | 2.87 | 2.01 | 1.74  |
| 5JUE.PDB | OD2, L_ASP_105 | OH, L_TYR_140  | HH, L_TYR_140   | 2.73 | 1.90 | 9.39  |
| 5JUE.PDB | OG, L_SER_177  | NE1, L_TRP_148 | HE1, L_TRP_148  | 2.84 | 1.99 | 8.07  |
| 5JUE.PDB | OE2, L_GLU_195 | NZ, L_LYS_149  | HZ1, L_LYS_149  | 2.94 | 2.11 | 18.07 |
| 5JUE.PDB | OE1, L_GLU_185 | NH1, L_ARG_155 | HH12, L_ARG_155 | 2.98 | 2.13 | 8.18  |
| 5JUE.PDB | OD1, L_ASP_170 | OG1, L_THR_172 | HG1, L_THR_172  | 2.65 | 1.84 | 10.43 |
| 5JUE.PDB | OD1, L_ASP_105 | OH, L_TYR_173  | HH, L_TYR_173   | 2.53 | 1.79 | 22.81 |
| 5JUE.PDB | OG, H_SER_178  | OG, L_SER_176  | HG, L_SER_176   | 2.78 | 1.94 | 3.13  |
| 5JUE.PDB | OD1, L_ASN_161 | OG, L_SER_177  | HG, L_SER_177   | 2.61 | 1.88 | 24.46 |
| 5JUE.PDB | OD1, L_ASP_184 | NE, L_ARG_188  | HE, L_ARG_188   | 2.70 | 1.93 | 22.77 |
| 5JUE.PDB | OG, L_SER_208  | OG1, L_THR_193 | HG1, L_THR_193  | 2.92 | 2.19 | 25.67 |
| 5JUE.PDB | ND1, L_HIS_198 | OG1, L_THR_200 | HG1, L_THR_200  | 2.88 | 2.17 | 27.29 |
| 5JUE.PDB | ND1, H_HIS_35  | NE1, H_TRP_47  | HE1, H_TRP_47   | 2.93 | 2.15 | 20.72 |
| 5JUE.PDB | OD2, H_ASP_86  | NZ, H_LYS_66   | HZ1, H_LYS_66   | 2.76 | 1.87 | 4.19  |
| 5JUE.PDB | OE1, H_GLN_39  | OH, H_TYR_91   | HH, H_TYR_91    | 2.83 | 2.02 | 11.19 |
| 5JUE.PDB | OD1, H_ASP_101 | NE, H_ARG_94   | HE, H_ARG_94    | 2.72 | 1.88 | 8.15  |
| 5JUE.PDB | OD2, H_ASP_101 | NH2, H_ARG_94  | HH21, H_ARG_94  | 2.85 | 2.02 | 12.42 |
| 5JUE.PDB | OE2, H_GLU_148 | OH, H_TYR_145  | HH, H_TYR_145   | 2.72 | 1.89 | 3.03  |
| 5JUE.PDB | OD1, H_ASN_196 | OG1, H_THR_153 | HG1, H_THR_153  | 2.74 | 1.98 | 20.12 |
| 5JUE.PDB | OG1, H_THR_137 | OG1, H_THR_182 | HG1, H_THR_182  | 2.77 | 2.00 | 20.14 |
| 5JUE.PDB | OG1, H_THR_184 | OG1, H_THR_187 | HG1, H_THR_187  | 2.67 | 1.90 | 19.94 |
| 5JUE.PDB | ND1, H_HIS_199 | OG, H_SER_202  | HG, H_SER_202   | 2.87 | 2.13 | 24.10 |
| 5JUE.PDB | OE1, L_GLU_123 | NZ, H_LYS_208  | HZ1, H_LYS_208  | 2.81 | 1.98 | 17.66 |
| 5JXA.PDB | OE1, H_GLU_46  | NE, H_ARG_38   | HE, H_ARG_38    | 2.80 | 2.04 | 23.29 |
| 5JXA.PDB | OD1, H_ASP_86  | NH1, H_ARG_38  | HH12, H_ARG_38  | 2.74 | 1.88 | 4.26  |
| 5JXA.PDB | OE1, H_GLU_46  | NH2, H_ARG_38  | HH21, H_ARG_38  | 2.76 | 2.00 | 23.95 |
| 5JXA.PDB | OE2, H_GLU_46  | NE2, H_GLN_62  | HE21, H_GLN_62  | 2.86 | 2.00 | 1.72  |
| 5JXA.PDB | OD1, H_ASP_86  | NH2, H_ARG_66  | HH22, H_ARG_66  | 2.96 | 2.11 | 6.31  |
| 5JXA.PDB | OD2, H_ASP_76C | NE1, H_TRP_76F | HE1, H_TRP_76F  | 2.87 | 2.15 | 28.04 |
| 5JXA.PDB | OD1, H_ASP_99  | NH2, H_ARG_95  | HH22, H_ARG_95  | 2.95 | 2.09 | 5.23  |
| 5JXA.PDB | OD2, L_ASP_50  | OH, H_TYR_100  | HH, H_TYR_100   | 2.57 | 1.75 | 11.76 |
| 5JXA.PDB | OD1, H_ASP_144 | NZ, H_LYS_143  | HZ3, H_LYS_143  | 2.92 | 2.12 | 22.30 |
| 5JXA.PDB | OD1, H_ASN_197 | OG, H_SER_153  | HG, H_SER_153   | 2.75 | 1.96 | 17.62 |
| 5JXA.PDB | OG, H_SER_180  | NE1, H_TRP_154 | HE1, H_TRP_154  | 2.96 | 2.12 | 10.70 |
| 5JXA.PDB | OD1, H_ASP_144 | NE2, H_GLN_171 | HE22, H_GLN_171 | 2.86 | 2.05 | 16.31 |
| 5JXA.PDB | OG, H_SER_188  | OH, H_TYR_194  | HH, H_TYR_194   | 2.92 | 2.22 | 28.67 |
| 5JXA.PDB | ND1, H_HIS_200 | OG, H_SER_203  | HG, H_SER_203   | 2.82 | 2.10 | 26.44 |
| 5JXA.PDB | OE1, L_GLN_89  | OH, L_TYR_36   | HH, L_TYR_36    | 2.71 | 1.91 | 14.07 |
| 5JXA.PDB | OH, L_TYR_86   | NE2, L_GLN_37  | HE21, L_GLN_37  | 2.99 | 2.15 | 10.29 |
| 5JXA.PDB | OH, H_TYR_100  | NH2, L_ARG_53  | HH21, L_ARG_53  | 2.89 | 2.07 | 18.12 |
| 5JXA.PDB | OD2, L_ASP_82  | NE, L_ARG_61   | HE, L_ARG_61    | 2.88 | 2.15 | 27.19 |
| 5JXA.PDB | OD1, L_ASP_82  | NH2, L_ARG_61  | HH21, L_ARG_61  | 2.84 | 1.98 | 2.45  |

|          |                |                |                 |      |      |       |
|----------|----------------|----------------|-----------------|------|------|-------|
| 5JXA.PDB | OD1, L_ASP_70  | OG1, L_THR_69  | HG1, L_THR_69   | 2.92 | 2.09 | 7.50  |
| 5JXA.PDB | OG, L_SER_131  | NE2, L_GLN_124 | HE22, L_GLN_124 | 2.80 | 1.95 | 4.80  |
| 5JXA.PDB | OE1, L_GLU_105 | OH, L_TYR_140  | HH, L_TYR_140   | 2.43 | 1.65 | 17.73 |
| 5JXA.PDB | OE1, L_GLU_103 | NH1, L_ARG_142 | HH12, L_ARG_142 | 2.87 | 2.05 | 14.46 |
| 5JXA.PDB | OH, L_TYR_173  | NH2, L_ARG_142 | HH21, L_ARG_142 | 2.84 | 2.07 | 21.88 |
| 5JXA.PDB | OE2, L_GLU_103 | NH2, L_ARG_142 | HH22, L_ARG_142 | 2.79 | 1.94 | 8.50  |
| 5JXA.PDB | OG, L_SER_177  | NE1, L_TRP_148 | HE1, L_TRP_148  | 2.86 | 2.05 | 17.07 |
| 5JXA.PDB | OE1, L_GLN_155 | ND2, L_ASN_158 | HD21, L_ASN_158 | 2.94 | 2.10 | 10.59 |
| 5JXA.PDB | OD1, L_ASP_170 | OG1, L_THR_172 | HG1, L_THR_172  | 2.69 | 1.87 | 10.60 |
| 5JXA.PDB | OE2, L_GLU_105 | OH, L_TYR_173  | HH, L_TYR_173   | 2.63 | 1.83 | 14.46 |
| 5JXA.PDB | OD1, L_ASP_185 | NZ, L_LYS_188  | HZ2, L_LYS_188  | 2.85 | 2.03 | 19.98 |
| 5JXA.PDB | OE2, L_GLU_213 | ND2, L_ASN_210 | HD22, L_ASN_210 | 2.76 | 1.93 | 12.84 |
| 5M2C.PDB | OD1, A_ASP_195 | NZ, A_LYS_124  | HZ1, A_LYS_124  | 2.99 | 2.26 | 29.03 |
| 5M2C.PDB | OH, A_TYR_127  | NE2, A_HIS_151 | HE2, A_HIS_151  | 2.61 | 1.77 | 12.06 |
| 5M2C.PDB | OG, A_SER_159  | OG1, A_THR_163 | HG1, A_THR_163  | 2.88 | 2.07 | 13.51 |
| 5M2C.PDB | OG, A_SER_179  | ND2, A_ASN_184 | HD21, A_ASN_184 | 2.93 | 2.13 | 18.24 |
| 5M2C.PDB | OD2, A_ASP_128 | NE2, A_HIS_191 | HE2, A_HIS_191  | 2.69 | 1.84 | 6.13  |
| 5M2C.PDB | OH, B_TYR_127  | NE2, B_HIS_151 | HE2, B_HIS_151  | 2.61 | 1.78 | 13.01 |
| 5M2C.PDB | OG, B_SER_179  | ND2, B_ASN_184 | HD21, B_ASN_184 | 2.89 | 2.10 | 19.97 |
| 5M2C.PDB | OD2, B_ASP_128 | NE2, B_HIS_191 | HE2, B_HIS_191  | 2.71 | 1.86 | 7.63  |
| 5M33.PDB | OD1, A_ASP_122 | NE2, A_GLN_118 | HE21, A_GLN_118 | 2.92 | 2.20 | 28.21 |
| 5M33.PDB | OD1, A_ASP_195 | NZ, A_LYS_124  | HZ3, A_LYS_124  | 2.81 | 2.00 | 20.18 |
| 5M33.PDB | NE2, A_HIS_151 | OH, A_TYR_127  | HH, A_TYR_127   | 2.74 | 1.90 | 5.54  |
| 5M33.PDB | OD1, A_ASP_155 | NZ, A_LYS_187  | HZ1, A_LYS_187  | 2.82 | 1.95 | 10.61 |
| 5M33.PDB | OD2, A_ASP_128 | NE2, A_HIS_191 | HE2, A_HIS_191  | 2.76 | 2.00 | 23.16 |
| 5M33.PDB | OD1, A_ASP_196 | NE2, A_GLN_192 | HE21, A_GLN_192 | 2.98 | 2.18 | 18.41 |
| 5M33.PDB | OE1, A_GLU_188 | NZ, A_LYS_193  | HZ2, A_LYS_193  | 2.93 | 2.07 | 12.47 |
| 5M33.PDB | OD1, B_ASP_122 | NE2, B_GLN_118 | HE21, B_GLN_118 | 2.96 | 2.19 | 23.61 |
| 5M33.PDB | NE2, B_HIS_151 | OH, B_TYR_127  | HH, B_TYR_127   | 2.78 | 1.94 | 5.42  |
| 5M33.PDB | OE1, B_GLN_133 | NE2, B_GLN_129 | HE22, B_GLN_129 | 2.83 | 2.06 | 21.87 |
| 5M33.PDB | OD1, B_ASP_189 | OG, B_SER_160  | HG, B_SER_160   | 2.86 | 2.13 | 25.03 |
| 5M33.PDB | OD2, B_ASP_128 | NE2, B_HIS_191 | HE2, B_HIS_191  | 2.69 | 1.83 | 4.41  |
| 5M33.PDB | OD1, B_ASP_196 | NE2, B_GLN_192 | HE21, B_GLN_192 | 2.92 | 2.12 | 17.81 |
| 5M3D.PDB | OD2, A_ASP_195 | NZ, A_LYS_124  | HZ1, A_LYS_124  | 2.68 | 1.86 | 18.64 |
| 5M3D.PDB | NE2, A_HIS_151 | OH, A_TYR_127  | HH, A_TYR_127   | 2.90 | 2.07 | 7.76  |
| 5M3D.PDB | OG, A_SER_159  | OG1, A_THR_163 | HG1, A_THR_163  | 2.65 | 1.81 | 3.28  |
| 5M3D.PDB | OD2, A_ASP_128 | NE2, A_HIS_191 | HE2, A_HIS_191  | 2.68 | 1.84 | 10.19 |
| 5M3D.PDB | OD2, B_ASP_128 | NE2, B_HIS_191 | HE2, B_HIS_191  | 2.60 | 1.78 | 15.29 |
| 5M3D.PDB | OH, C_TYR_127  | NE2, C_HIS_151 | HE2, C_HIS_151  | 2.47 | 1.64 | 11.96 |
| 5M3D.PDB | OD2, C_ASP_128 | NE2, C_HIS_191 | HE2, C_HIS_191  | 2.54 | 1.74 | 17.73 |
| 5M3D.PDB | OD2, D_ASP_128 | NE2, D_HIS_191 | HE2, D_HIS_191  | 2.53 | 1.71 | 14.84 |
| 5M3T.PDB | NE2, A_HIS_151 | OH, A_TYR_127  | HH, A_TYR_127   | 2.73 | 1.92 | 14.40 |
| 5M3T.PDB | OG, A_SER_159  | OG1, A_THR_161 | HG1, A_THR_161  | 2.93 | 2.10 | 8.83  |
| 5M3T.PDB | OD1, A_ASP_128 | NE2, A_HIS_191 | HE2, A_HIS_191  | 2.70 | 1.84 | 4.47  |
| 5M3T.PDB | OD2, B_ASP_195 | NZ, B_LYS_124  | HZ1, B_LYS_124  | 2.94 | 2.15 | 23.24 |
| 5M3T.PDB | NE2, B_HIS_151 | OH, B_TYR_127  | HH, B_TYR_127   | 2.86 | 2.03 | 6.62  |
| 5M3T.PDB | OD1, B_ASP_128 | NE2, B_HIS_191 | HE2, B_HIS_191  | 2.76 | 1.92 | 11.16 |
| 5M4R.PDB | OG, A_SER_159  | OG1, A_THR_163 | HG1, A_THR_163  | 2.93 | 2.14 | 15.31 |
| 5M4R.PDB | OD2, A_ASP_128 | NE2, A_HIS_191 | HE2, A_HIS_191  | 2.54 | 1.73 | 17.27 |
| 5M4R.PDB | OG, B_SER_159  | OG1, B_THR_163 | HG1, B_THR_163  | 2.85 | 2.02 | 5.63  |
| 5M4R.PDB | OG, C_SER_159  | OG1, C_THR_163 | HG1, C_THR_163  | 2.95 | 2.12 | 7.91  |
| 5M4R.PDB | OD2, E_ASP_128 | NE2, E_HIS_191 | HE2, E_HIS_191  | 2.53 | 1.73 | 17.17 |
| 5T6P.PDB | OD1, A_ASP_75  | NE, A_ARG_24   | HE, A_ARG_24    | 2.87 | 2.06 | 16.15 |
| 5T6P.PDB | OD1, A_ASP_87  | NH2, A_ARG_66  | HH22, A_ARG_66  | 2.87 | 2.03 | 10.92 |
| 5T6P.PDB | OG, A_SER_136  | NE2, A_GLN_129 | HE22, A_GLN_129 | 2.81 | 1.96 | 6.44  |
| 5T6P.PDB | OG, A_SER_182  | NE1, A_TRP_153 | HE1, A_TRP_153  | 2.84 | 2.00 | 11.05 |
| 5T6P.PDB | OD1, A_ASP_175 | OG1, A_THR_177 | HG1, A_THR_177  | 2.59 | 1.78 | 13.64 |
| 5T6P.PDB | OD1, A_ASN_166 | OG, A_SER_182  | HG, A_SER_182   | 2.54 | 1.72 | 9.61  |

|          |                |                |                 |      |      |       |
|----------|----------------|----------------|-----------------|------|------|-------|
| 5T6P.PDB | OE1, B_GLU_46  | NE, B_ARG_38   | HE, B_ARG_38    | 2.70 | 1.96 | 26.33 |
| 5T6P.PDB | OE1, A_GLN_43  | NE2, B_GLN_39  | HE22, B_GLN_39  | 2.71 | 1.86 | 5.14  |
| 5T6P.PDB | OD1, B_ASN_74  | NE, B_ARG_72   | HE, B_ARG_72    | 2.87 | 2.14 | 26.22 |
| 5T6P.PDB | OD1, C_ASP_75  | NE, C_ARG_24   | HE, C_ARG_24    | 2.92 | 2.14 | 20.59 |
| 5T6P.PDB | OD1, C_ASP_75  | NH2, C_ARG_24  | HH21, C_ARG_24  | 2.94 | 2.18 | 23.70 |
| 5T6P.PDB | OE1, D_GLN_39  | NE2, C_GLN_43  | HE22, C_GLN_43  | 3.00 | 2.17 | 12.88 |
| 5T6P.PDB | OG, C_SER_136  | NE2, C_GLN_129 | HE22, C_GLN_129 | 2.79 | 1.95 | 11.34 |
| 5T6P.PDB | OG, C_SER_182  | NE1, C_TRP_153 | HE1, C_TRP_153  | 2.89 | 2.07 | 15.50 |
| 5T6P.PDB | OD1, C_ASP_175 | OG1, C_THR_177 | HG1, C_THR_177  | 2.69 | 1.86 | 7.21  |
| 5T6P.PDB | OD1, C_ASN_166 | OG, C_SER_182  | HG, C_SER_182   | 2.45 | 1.64 | 11.11 |
| 5T6P.PDB | OG, C_SER_213  | OG1, C_THR_198 | HG1, C_THR_198  | 3.00 | 2.20 | 14.46 |
| 5T6P.PDB | OE1, C_GLN_43  | NE2, D_GLN_39  | HE22, D_GLN_39  | 2.79 | 1.94 | 7.20  |
| 5T6P.PDB | OD1, D_ASN_74  | NE, D_ARG_72   | HE, D_ARG_72    | 2.79 | 2.07 | 27.15 |
| 5T6P.PDB | OG, D_SER_182  | NE1, D_TRP_157 | HE1, D_TRP_157  | 2.97 | 2.13 | 11.56 |
| 5T6P.PDB | OE1, C_GLU_39  | NE, E_ARG_5    | HE, E_ARG_5     | 2.86 | 2.02 | 10.72 |
| 5T78.PDB | OE1, B_GLN_39  | NE2, A_GLN_43  | HE22, A_GLN_43  | 2.92 | 2.08 | 9.79  |
| 5T78.PDB | OD2, A_ASP_87  | NH1, A_ARG_66  | HH12, A_ARG_66  | 2.55 | 1.80 | 24.29 |
| 5T78.PDB | OD1, A_ASP_87  | NH2, A_ARG_66  | HH22, A_ARG_66  | 2.87 | 2.03 | 11.23 |
| 5T78.PDB | OG, A_SER_136  | NE2, A_GLN_129 | HE22, A_GLN_129 | 2.86 | 2.01 | 3.70  |
| 5T78.PDB | OG, A_SER_182  | NE1, A_TRP_153 | HE1, A_TRP_153  | 2.68 | 1.86 | 12.79 |
| 5T78.PDB | OD1, A_ASP_175 | OG1, A_THR_177 | HG1, A_THR_177  | 2.57 | 1.74 | 7.68  |
| 5T78.PDB | OD1, A_ASN_166 | OG, A_SER_182  | HG, A_SER_182   | 2.63 | 1.89 | 23.17 |
| 5T78.PDB | OD2, A_ASP_156 | ND1, A_HIS_194 | HD1, A_HIS_194  | 2.73 | 1.92 | 16.43 |
| 5T78.PDB | ND1, A_HIS_203 | OG1, A_THR_205 | HG1, A_THR_205  | 2.99 | 2.26 | 25.09 |
| 5T78.PDB | OG1, A_THR_198 | OG, A_SER_213  | HG, A_SER_213   | 2.76 | 1.99 | 20.46 |
| 5T78.PDB | OE1, B_GLU_46  | NE, B_ARG_38   | HE, B_ARG_38    | 2.94 | 2.16 | 20.63 |
| 5T78.PDB | OH, B_TYR_94   | NH1, B_ARG_38  | HH11, B_ARG_38  | 2.90 | 2.09 | 15.42 |
| 5T78.PDB | OD1, B_ASP_90  | NH1, B_ARG_38  | HH12, B_ARG_38  | 2.89 | 2.09 | 17.62 |
| 5T78.PDB | OE1, A_GLN_43  | NE2, B_GLN_39  | HE22, B_GLN_39  | 2.63 | 1.78 | 5.56  |
| 5T78.PDB | OD1, B_ASN_74  | NE, B_ARG_72   | HE, B_ARG_72    | 2.69 | 1.95 | 25.68 |
| 5T78.PDB | OE1, B_GLN_39  | OH, B_TYR_95   | HH, B_TYR_95    | 2.91 | 2.11 | 14.46 |
| 5T78.PDB | OG1, B_THR_185 | OG1, B_THR_140 | HG1, B_THR_140  | 2.97 | 2.14 | 5.19  |
| 5T78.PDB | OE1, A_GLU_39  | NH1, F_ARG_5   | HH11, F_ARG_5   | 2.68 | 1.83 | 9.33  |
| 5T78.PDB | OD1, C_ASP_75  | NE, C_ARG_24   | HE, C_ARG_24    | 2.96 | 2.16 | 17.61 |
| 5T78.PDB | OH, C_TYR_37   | ND2, C_ASN_33  | HD21, C_ASN_33  | 2.96 | 2.18 | 21.06 |
| 5T78.PDB | OD2, C_ASP_87  | NH1, C_ARG_66  | HH12, C_ARG_66  | 2.35 | 1.56 | 19.31 |
| 5T78.PDB | OG, C_SER_182  | NE1, C_TRP_153 | HE1, C_TRP_153  | 2.84 | 2.01 | 13.01 |
| 5T78.PDB | OD1, C_ASP_175 | OG1, C_THR_177 | HG1, C_THR_177  | 2.53 | 1.70 | 9.09  |
| 5T78.PDB | OD1, C_ASN_166 | OG, C_SER_182  | HG, C_SER_182   | 2.85 | 2.09 | 21.73 |
| 5T78.PDB | OD2, C_ASP_156 | ND1, C_HIS_194 | HD1, C_HIS_194  | 2.58 | 1.78 | 18.23 |
| 5T78.PDB | ND1, C_HIS_203 | OG1, C_THR_205 | HG1, C_THR_205  | 3.00 | 2.26 | 23.83 |
| 5T78.PDB | OE1, D_GLU_46  | NE, D_ARG_38   | HE, D_ARG_38    | 2.65 | 1.91 | 25.36 |
| 5T78.PDB | OH, D_TYR_94   | NH1, D_ARG_38  | HH11, D_ARG_38  | 2.88 | 2.06 | 14.14 |
| 5T78.PDB | OD1, D_ASP_90  | NH1, D_ARG_38  | HH12, D_ARG_38  | 2.85 | 2.05 | 16.93 |
| 5T78.PDB | OE1, C_GLN_43  | NE2, D_GLN_39  | HE22, D_GLN_39  | 2.72 | 1.87 | 5.23  |
| 5T78.PDB | OD1, D_ASN_74  | NE, D_ARG_72   | HE, D_ARG_72    | 2.71 | 2.01 | 29.42 |
| 5T78.PDB | OE1, D_GLN_39  | OH, D_TYR_95   | HH, D_TYR_95    | 2.98 | 2.17 | 11.35 |
| 5T78.PDB | OG, D_SER_182  | NE1, D_TRP_157 | HE1, D_TRP_157  | 2.99 | 2.19 | 18.03 |
| 5T78.PDB | OD1, C_ASN_142 | NE2, D_HIS_167 | HE2, D_HIS_167  | 2.85 | 2.00 | 9.68  |
| 5T78.PDB | OE1, C_GLU_39  | NH1, E_ARG_5   | HH11, E_ARG_5   | 2.69 | 1.87 | 13.16 |
| 5U3J.PDB | OE1, H_GLN_81  | NE, H_ARG_19   | HE, H_ARG_19    | 2.98 | 2.21 | 22.79 |
| 5U3J.PDB | OD2, H_ASP_53  | NE1, H_TRP_33  | HE1, H_TRP_33   | 2.97 | 2.22 | 24.73 |
| 5U3J.PDB | OE1, H_GLU_46  | NE, H_ARG_38   | HE, H_ARG_38    | 2.88 | 2.05 | 13.82 |
| 5U3J.PDB | OD1, H_ASP_86  | NH1, H_ARG_38  | HH12, H_ARG_38  | 2.85 | 2.09 | 23.00 |
| 5U3J.PDB | OG, H_SER_35   | NE1, H_TRP_47  | HE1, H_TRP_47   | 2.44 | 1.73 | 27.73 |
| 5U3J.PDB | OE1, H_GLU_58  | NE, H_ARG_50   | HE, H_ARG_50    | 2.83 | 2.12 | 29.07 |
| 5U3J.PDB | OE1, H_GLU_58  | NH2, H_ARG_50  | HH21, H_ARG_50  | 2.79 | 2.08 | 29.38 |
| 5U3J.PDB | OD2, H_ASP_86  | NH1, H_ARG_66  | HH12, H_ARG_66  | 2.57 | 1.73 | 9.26  |

|          |                 |                 |                  |      |      |       |
|----------|-----------------|-----------------|------------------|------|------|-------|
| 5U3J.PDB | OD1, H_ASP_86   | NH2, H_ARG_66   | HH22, H_ARG_66   | 2.89 | 2.04 | 5.32  |
| 5U3J.PDB | OD1, L_ASP_31   | OH, H_TYR_100K  | HH, H_TYR_100K   | 2.88 | 2.04 | 5.22  |
| 5U3J.PDB | OG, H_SER_180   | NE1, H_TRP_154  | HE1, H_TRP_154   | 2.98 | 2.15 | 12.85 |
| 5U3J.PDB | OE1, H_GLU_100F | OH, L_TYR_32    | HH, L_TYR_32     | 2.62 | 1.91 | 27.84 |
| 5U3J.PDB | OE1, L_GLN_89   | OH, L_TYR_36    | HH, L_TYR_36     | 2.74 | 1.93 | 13.79 |
| 5U3J.PDB | OE1, H_GLN_39   | NE2, L_GLN_38   | HE22, L_GLN_38   | 2.66 | 1.83 | 12.57 |
| 5U3J.PDB | OG, L_SER_131   | NE2, L_GLN_124  | HE22, L_GLN_124  | 2.67 | 1.82 | 7.69  |
| 5U3J.PDB | OG, L_SER_177   | NE1, L_TRP_148  | HE1, L_TRP_148   | 2.81 | 2.02 | 19.92 |
| 5U3N.PDB | OE1, H_GLU_46   | NE, H_ARG_38    | HE, H_ARG_38     | 2.91 | 2.07 | 9.07  |
| 5U3N.PDB | OH, H_TYR_90    | NH1, H_ARG_38   | HH11, H_ARG_38   | 3.00 | 2.21 | 20.04 |
| 5U3N.PDB | OD2, H_ASP_58   | NE, H_ARG_50    | HE, H_ARG_50     | 2.78 | 1.98 | 18.36 |
| 5U3N.PDB | OD2, A_ASP_674  | NH1, H_ARG_52A  | HH12, H_ARG_52A  | 3.00 | 2.24 | 24.41 |
| 5U3N.PDB | OD1, H_ASP_53   | NH2, H_ARG_52A  | HH21, H_ARG_52A  | 2.93 | 2.18 | 25.35 |
| 5U3N.PDB | OD2, H_ASP_86   | NH1, H_ARG_66   | HH12, H_ARG_66   | 2.73 | 1.91 | 14.46 |
| 5U3N.PDB | OD1, H_ASP_73   | NE, H_ARG_71    | HE, H_ARG_71     | 2.93 | 2.13 | 17.92 |
| 5U3N.PDB | OE1, H_GLU_100E | NE, H_ARG_100B  | HE, H_ARG_100B   | 2.83 | 1.97 | 4.42  |
| 5U3N.PDB | OE2, H_GLU_100E | NH2, H_ARG_100B | HH21, H_ARG_100B | 2.91 | 2.08 | 12.18 |
| 5U3N.PDB | OD1, L_ASP_31   | NH2, H_ARG_100B | HH22, H_ARG_100B | 2.97 | 2.15 | 14.50 |
| 5U3N.PDB | OD1, L_ASN_34   | ND2, H_ASN_100J | HD21, H_ASN_100J | 2.72 | 1.86 | 2.61  |
| 5U3N.PDB | OG, H_SER_180   | NE1, H_TRP_154  | HE1, H_TRP_154   | 2.95 | 2.11 | 9.10  |
| 5U3N.PDB | OD1, L_ASN_138  | NE2, H_HIS_164  | HE2, H_HIS_164   | 2.92 | 2.21 | 29.54 |
| 5U3N.PDB | OD1, H_ASP_144  | NE2, H_GLN_171  | HE22, H_GLN_171  | 2.99 | 2.19 | 18.08 |
| 5U3N.PDB | OH, L_TYR_140   | OG, L_SER_12    | HG, L_SER_12     | 2.60 | 1.87 | 23.71 |
| 5U3N.PDB | OE1, L_GLN_89   | ND2, L_ASN_34   | HD22, L_ASN_34   | 2.99 | 2.18 | 18.14 |
| 5U3N.PDB | OE1, L_GLN_89   | OH, L_TYR_36    | HH, L_TYR_36     | 2.64 | 1.80 | 1.88  |
| 5U3N.PDB | OG, L_SER_131   | NE2, L_GLN_124  | HE22, L_GLN_124  | 2.80 | 1.94 | 3.81  |
| 5U3N.PDB | OD1, L_ASP_105  | OH, L_TYR_140   | HH, L_TYR_140    | 2.61 | 1.87 | 24.55 |
| 5U3N.PDB | OG, L_SER_177   | NE1, L_TRP_148  | HE1, L_TRP_148   | 2.84 | 2.01 | 13.43 |
| 5U3N.PDB | OD1, L_ASP_170  | OG1, L_THR_172  | HG1, L_THR_172   | 2.63 | 1.80 | 7.71  |
| 5U3N.PDB | OD2, L_ASP_105  | OH, L_TYR_173   | HH, L_TYR_173    | 2.66 | 1.88 | 16.93 |
| 5UCB.PDB | OG, H_SER_33    | NE2, H_HIS_35   | HE2, H_HIS_35    | 2.88 | 2.09 | 19.50 |
| 5UCB.PDB | OE1, H_GLU_46   | NE, H_ARG_38    | HE, H_ARG_38     | 2.85 | 2.03 | 15.54 |
| 5UCB.PDB | OH, H_TYR_90    | NH1, H_ARG_38   | HH11, H_ARG_38   | 2.94 | 2.12 | 15.88 |
| 5UCB.PDB | OD1, H_ASP_86   | NH1, H_ARG_38   | HH12, H_ARG_38   | 2.88 | 2.08 | 18.54 |
| 5UCB.PDB | OE1, L_GLN_38   | NE2, H_GLN_39   | HE22, H_GLN_39   | 2.96 | 2.12 | 9.92  |
| 5UCB.PDB | OG, H_SER_50    | NE1, H_TRP_47   | HE1, H_TRP_47    | 2.72 | 1.98 | 25.90 |
| 5UCB.PDB | OD2, H_ASP_86   | NH1, H_ARG_66   | HH12, H_ARG_66   | 2.75 | 1.90 | 5.99  |
| 5UCB.PDB | OD1, H_ASP_72   | OG, H_SER_74    | HG, H_SER_74     | 2.60 | 1.83 | 20.07 |
| 5UCB.PDB | OD1, H_ASN_197  | OG1, H_SER_153  | HG, H_SER_153    | 2.85 | 2.06 | 15.76 |
| 5UCB.PDB | OG, H_SER_180   | NE1, H_TRP_154  | HE1, H_TRP_154   | 2.92 | 2.07 | 7.16  |
| 5UCB.PDB | OD1, H_ASP_144  | NE2, H_GLN_171  | HE22, H_GLN_171  | 2.78 | 1.99 | 18.86 |
| 5UCB.PDB | OG, H_SER_188   | OH, H_TYR_194   | HH, H_TYR_194    | 2.72 | 1.90 | 9.93  |
| 5UCB.PDB | OD1, H_ASP_208  | ND2, H_ASN_197  | HD22, H_ASN_197  | 2.80 | 1.95 | 7.44  |
| 5UCB.PDB | OE1, L_GLN_3    | OG, L_SER_26    | HG, L_SER_26     | 2.61 | 1.78 | 7.17  |
| 5UCB.PDB | OD2, B_ASP_51   | OG, L_SER_30    | HG, L_SER_30     | 2.58 | 1.81 | 20.19 |
| 5UCB.PDB | OE1, L_GLN_89   | OH, L_TYR_36    | HH, L_TYR_36     | 2.64 | 1.84 | 15.57 |
| 5UCB.PDB | OH, L_TYR_86    | NE2, L_GLN_37   | HE21, L_GLN_37   | 2.99 | 2.15 | 9.80  |
| 5UCB.PDB | OE1, H_GLN_39   | NE2, L_GLN_38   | HE22, L_GLN_38   | 2.95 | 2.13 | 14.86 |
| 5UCB.PDB | OD2, L_ASP_82   | NE, L_ARG_61    | HE, L_ARG_61     | 2.82 | 2.01 | 16.79 |
| 5UCB.PDB | OD1, L_ASP_82   | NH2, L_ARG_61   | HH21, L_ARG_61   | 2.85 | 1.99 | 4.65  |
| 5UCB.PDB | OG1, L_THR_22   | OG1, L_THR_72   | HG1, L_THR_72    | 2.96 | 2.18 | 19.19 |
| 5UCB.PDB | OE1, L_GLU_165  | NZ, L_LYS_103   | HZ3, L_LYS_103   | 2.77 | 1.90 | 9.89  |
| 5UCB.PDB | OG, L_SER_131   | NE2, L_GLN_124  | HE22, L_GLN_124  | 2.73 | 1.87 | 2.66  |
| 5UCB.PDB | OG, L_SER_177   | NE1, L_TRP_148  | HE1, L_TRP_148   | 2.92 | 2.09 | 12.30 |
| 5UCB.PDB | OE1, L_GLN_155  | ND2, L_ASN_158  | HD21, L_ASN_158  | 2.98 | 2.15 | 12.35 |
| 5UCB.PDB | OD1, L_ASP_170  | OG1, L_THR_172  | HG1, L_THR_172   | 2.71 | 1.89 | 8.99  |
| 5UCB.PDB | OE2, L_GLU_105  | OH, L_TYR_173   | HH, L_TYR_173    | 2.61 | 1.81 | 15.35 |
| 5UCB.PDB | OD1, B_ASP_132  | NZ, B_LYS_16    | HZ1, B_LYS_16    | 2.90 | 2.15 | 27.66 |

|          |                |                |                 |      |      |       |
|----------|----------------|----------------|-----------------|------|------|-------|
| 5UCB.PDB | OE2, B_GLU_87  | OH, B_TYR_43   | HH, B_TYR_43    | 2.72 | 1.91 | 12.68 |
| 5UCB.PDB | OD1, B_ASP_51  | OG, B_SER_46   | HG, B_SER_46    | 2.83 | 2.02 | 12.78 |
| 5UCB.PDB | OE1, B_GLU_87  | OG, B_SER_47   | HG, B_SER_47    | 2.62 | 1.82 | 14.05 |
| 5UCB.PDB | OD1, B_ASP_153 | OH, B_TYR_100  | HH, B_TYR_100   | 2.55 | 1.73 | 8.75  |
| 5UCB.PDB | OD2, B_ASP_101 | NH1, B_ARG_103 | HH12, B_ARG_103 | 2.89 | 2.11 | 20.47 |
| 5UCB.PDB | OE2, B_GLU_104 | NE, B_ARG_107  | HE, B_ARG_107   | 2.91 | 2.05 | 4.26  |
| 5UCB.PDB | OD1, B_ASP_117 | ND1, B_HIS_133 | HD1, B_HIS_133  | 2.95 | 2.15 | 18.23 |
| 5UCB.PDB | OG, H_SER_58   | NZ, B_LYS_142  | HZ3, B_LYS_142  | 2.83 | 1.96 | 8.82  |
| 5UCB.PDB | OD1, L_ASP_91  | NH2, B_ARG_144 | HH21, B_ARG_144 | 2.84 | 2.03 | 16.18 |
| 5UK0.PDB | OD1, F_ASP_590 | ND2, B_ASN_560 | HD22, B_ASN_560 | 2.72 | 1.94 | 19.72 |
| 5UK0.PDB | OD1, D_ASP_586 | NH2, C_ARG_311 | HH22, C_ARG_311 | 2.98 | 2.20 | 18.56 |
| 5UK0.PDB | OD1, B_ASP_590 | ND2, D_ASN_560 | HD22, D_ASN_560 | 2.73 | 1.95 | 20.06 |
| 5UK0.PDB | OH, D_TYR_659  | ND2, D_ASN_628 | HD22, D_ASN_628 | 2.78 | 1.98 | 17.11 |
| 5VXJ.PDB | OD2, A_ASP_309 | NH2, A_ARG_55  | HH21, A_ARG_55  | 2.90 | 2.12 | 21.39 |
| 5VXJ.PDB | OG, A_SER_302  | NZ, A_LYS_62   | HZ2, A_LYS_62   | 2.77 | 1.91 | 12.44 |
| 5VXJ.PDB | OG, A_SER_306  | NZ, A_LYS_62   | HZ3, A_LYS_62   | 2.75 | 1.92 | 16.95 |
| 5VXJ.PDB | OD2, A_ASP_97  | NE, A_ARG_101  | HE, A_ARG_101   | 2.80 | 1.97 | 13.39 |
| 5VXJ.PDB | OE2, A_GLU_229 | OH, A_TYR_153  | HH, A_TYR_153   | 2.70 | 1.94 | 21.05 |
| 5VXJ.PDB | OD1, A_ASP_287 | OH, A_TYR_164  | HH, A_TYR_164   | 2.72 | 1.96 | 22.05 |
| 5VXJ.PDB | OE2, A_GLU_268 | NE2, A_GLN_191 | HE22, A_GLN_191 | 2.93 | 2.12 | 16.99 |
| 5VXJ.PDB | OD1, A_ASP_254 | NZ, A_LYS_203  | HZ2, A_LYS_203  | 2.48 | 1.62 | 10.37 |
| 5VXJ.PDB | OD2, A_ASP_166 | NZ, A_LYS_205  | HZ2, A_LYS_205  | 2.60 | 1.73 | 10.82 |
| 5VXJ.PDB | OD2, A_ASP_166 | OH, A_TYR_206  | HH, A_TYR_206   | 2.59 | 1.78 | 13.29 |
| 5VXJ.PDB | OD1, A_ASN_249 | OG1, A_THR_251 | HG1, A_THR_251  | 2.61 | 1.88 | 24.99 |
| 5VXJ.PDB | OD1, A_ASN_58  | ND2, A_ASN_305 | HD21, A_ASN_305 | 2.96 | 2.14 | 16.38 |
| 5VXJ.PDB | OE1, B_GLN_82  | NE, B_ARG_19   | HE, B_ARG_19    | 2.47 | 1.66 | 15.76 |
| 5VXJ.PDB | OE2, B_GLU_46  | NE, B_ARG_38   | HE, B_ARG_38    | 2.93 | 2.12 | 17.64 |
| 5VXJ.PDB | OH, B_TYR_94   | NH1, B_ARG_38  | HH11, B_ARG_38  | 2.80 | 1.98 | 13.19 |
| 5VXJ.PDB | OD1, B_ASP_90  | NH1, B_ARG_38  | HH12, B_ARG_38  | 2.76 | 1.91 | 7.08  |
| 5VXJ.PDB | OD1, B_ASN_35  | NE, B_ARG_50   | HE, B_ARG_50    | 2.65 | 1.82 | 11.22 |
| 5VXJ.PDB | OE1, I_GLU_200 | NH1, B_ARG_50  | HH12, B_ARG_50  | 2.92 | 2.07 | 7.25  |
| 5VXJ.PDB | OD2, B_ASP_90  | NH1, B_ARG_67  | HH12, B_ARG_67  | 2.82 | 2.01 | 16.67 |
| 5VXJ.PDB | OD1, B_ASP_90  | NH2, B_ARG_67  | HH22, B_ARG_67  | 2.96 | 2.12 | 11.06 |
| 5VXJ.PDB | OD1, B_ASN_84  | NE2, B_GLN_82  | HE21, B_GLN_82  | 2.95 | 2.09 | 2.81  |
| 5VXJ.PDB | OG1, B_THR_107 | ND2, B_ASN_97  | HD21, B_ASN_97  | 2.64 | 1.86 | 19.39 |
| 5VXJ.PDB | OE1, I_GLU_201 | OH, B_TYR_105  | HH, B_TYR_105   | 2.51 | 1.70 | 12.69 |
| 5VXJ.PDB | OD2, C_ASP_309 | NH2, C_ARG_55  | HH21, C_ARG_55  | 2.97 | 2.17 | 18.00 |
| 5VXJ.PDB | OG, C_SER_302  | NZ, C_LYS_62   | HZ2, C_LYS_62   | 2.61 | 1.73 | 6.54  |
| 5VXJ.PDB | OE2, C_GLU_154 | OG, C_SER_82   | HG, C_SER_82    | 2.58 | 1.81 | 19.25 |
| 5VXJ.PDB | OD2, C_ASP_97  | NE, C_ARG_101  | HE, C_ARG_101   | 2.84 | 2.03 | 16.71 |
| 5VXJ.PDB | OD1, C_ASP_287 | OH, C_TYR_164  | HH, C_TYR_164   | 2.77 | 1.96 | 12.03 |
| 5VXJ.PDB | OE2, C_GLU_268 | NE2, C_GLN_191 | HE22, C_GLN_191 | 2.80 | 1.97 | 12.09 |
| 5VXJ.PDB | OE1, C_GLU_201 | NZ, C_LYS_197  | HZ3, C_LYS_197  | 2.59 | 1.85 | 27.46 |
| 5VXJ.PDB | OD1, C_ASP_254 | NZ, C_LYS_203  | HZ2, C_LYS_203  | 2.69 | 1.87 | 19.49 |
| 5VXJ.PDB | OD2, C_ASP_166 | NZ, C_LYS_205  | HZ2, C_LYS_205  | 2.85 | 1.99 | 12.15 |
| 5VXJ.PDB | OD2, C_ASP_166 | OH, C_TYR_206  | HH, C_TYR_206   | 2.58 | 1.76 | 10.37 |
| 5VXJ.PDB | OD1, C_ASN_249 | OG1, C_THR_251 | HG1, C_THR_251  | 2.56 | 1.78 | 18.84 |
| 5VXJ.PDB | OD1, C_ASN_58  | ND2, C_ASN_305 | HD21, C_ASN_305 | 2.84 | 2.04 | 17.79 |
| 5VXJ.PDB | OD1, C_ASN_140 | NE, D_ARG_19   | HE, D_ARG_19    | 2.55 | 1.80 | 23.66 |
| 5VXJ.PDB | OE1, D_GLN_82  | NH1, D_ARG_19  | HH11, D_ARG_19  | 2.94 | 2.14 | 18.04 |
| 5VXJ.PDB | OE2, D_GLU_46  | NE, D_ARG_38   | HE, D_ARG_38    | 2.46 | 1.69 | 20.96 |
| 5VXJ.PDB | OD1, D_ASP_90  | NH1, D_ARG_38  | HH12, D_ARG_38  | 2.86 | 2.04 | 15.32 |
| 5VXJ.PDB | OD1, D_ASN_35  | NE, D_ARG_50   | HE, D_ARG_50    | 2.89 | 2.08 | 17.01 |
| 5VXJ.PDB | OD2, D_ASP_90  | NH1, D_ARG_67  | HH12, D_ARG_67  | 2.76 | 1.94 | 14.49 |
| 5VXJ.PDB | OD1, D_ASP_90  | NH2, D_ARG_67  | HH22, D_ARG_67  | 2.92 | 2.07 | 6.62  |
| 5VXJ.PDB | OD1, D_ASN_74  | NE, D_ARG_72   | HE, D_ARG_72    | 2.76 | 1.91 | 6.10  |
| 5VXJ.PDB | OD1, D_ASN_84  | NE2, D_GLN_82  | HE21, D_GLN_82  | 2.80 | 1.94 | 4.20  |
| 5VXJ.PDB | OG1, D_THR_107 | ND2, D_ASN_97  | HD21, D_ASN_97  | 2.71 | 1.91 | 17.78 |

|          |                |                |                 |      |      |       |
|----------|----------------|----------------|-----------------|------|------|-------|
| 5VXJ.PDB | OE1, E_GLU_201 | OH, D_TYR_105  | HH, D_TYR_105   | 2.53 | 1.70 | 8.84  |
| 5VXJ.PDB | OD2, E_ASP_309 | NH2, E_ARG_55  | HH21, E_ARG_55  | 2.82 | 2.06 | 24.28 |
| 5VXJ.PDB | OG, E_SER_306  | NZ, E_LYS_62   | HZ1, E_LYS_62   | 2.46 | 1.61 | 13.80 |
| 5VXJ.PDB | OD2, F_ASP_73  | NZ, E_LYS_137  | HZ2, E_LYS_137  | 2.77 | 1.96 | 20.15 |
| 5VXJ.PDB | OD1, E_ASP_287 | OH, E_TYR_164  | HH, E_TYR_164   | 2.85 | 2.09 | 21.13 |
| 5VXJ.PDB | OD1, D_ASN_97  | NZ, E_LYS_197  | HZ1, E_LYS_197  | 2.80 | 1.95 | 14.72 |
| 5VXJ.PDB | OE2, E_GLU_201 | NZ, E_LYS_197  | HZ3, E_LYS_197  | 2.47 | 1.71 | 25.42 |
| 5VXJ.PDB | OD1, E_ASP_254 | NZ, E_LYS_203  | HZ2, E_LYS_203  | 2.55 | 1.67 | 5.69  |
| 5VXJ.PDB | OD2, E_ASP_166 | NZ, E_LYS_205  | HZ2, E_LYS_205  | 2.79 | 1.95 | 15.80 |
| 5VXJ.PDB | OD2, E_ASP_166 | OH, E_TYR_206  | HH, E_TYR_206   | 2.80 | 1.99 | 13.17 |
| 5VXJ.PDB | OD1, E_ASN_249 | OG1, E_THR_251 | HG1, E_THR_251  | 2.55 | 1.84 | 26.63 |
| 5VXJ.PDB | OD1, E_ASN_58  | ND2, E_ASN_305 | HD21, E_ASN_305 | 2.80 | 1.98 | 14.83 |
| 5VXJ.PDB | OE1, F_GLN_82  | NE, F_ARG_19   | HE, F_ARG_19    | 2.82 | 1.96 | 3.39  |
| 5VXJ.PDB | OD1, F_ASN_97  | ND2, F_ASN_35  | HD22, F_ASN_35  | 2.86 | 2.08 | 21.21 |
| 5VXJ.PDB | OD1, F_ASP_90  | NH1, F_ARG_38  | HH12, F_ARG_38  | 2.92 | 2.20 | 28.14 |
| 5VXJ.PDB | OE2, F_GLU_46  | NH2, F_ARG_38  | HH21, F_ARG_38  | 2.73 | 1.93 | 18.99 |
| 5VXJ.PDB | OE1, G_GLU_200 | NH2, F_ARG_50  | HH22, F_ARG_50  | 2.70 | 1.89 | 15.49 |
| 5VXJ.PDB | OD2, F_ASP_90  | NH1, F_ARG_67  | HH12, F_ARG_67  | 2.83 | 1.99 | 10.41 |
| 5VXJ.PDB | OD1, F_ASN_74  | NE, F_ARG_72   | HE, F_ARG_72    | 2.72 | 1.88 | 10.50 |
| 5VXJ.PDB | OG1, F_THR_107 | ND2, F_ASN_97  | HD21, F_ASN_97  | 2.73 | 1.95 | 21.26 |
| 5VXJ.PDB | OE1, G_GLU_201 | OH, F_TYR_105  | HH, F_TYR_105   | 2.57 | 1.75 | 11.97 |
| 5VXJ.PDB | OD2, G_ASP_97  | NE, G_ARG_101  | HE, G_ARG_101   | 2.67 | 1.82 | 7.54  |
| 5VXJ.PDB | OD1, G_ASP_287 | OH, G_TYR_164  | HH, G_TYR_164   | 2.79 | 1.99 | 15.03 |
| 5VXJ.PDB | OE2, G_GLU_201 | NZ, G_LYS_197  | HZ3, G_LYS_197  | 2.59 | 1.86 | 28.64 |
| 5VXJ.PDB | OD1, G_ASP_254 | NZ, G_LYS_203  | HZ2, G_LYS_203  | 2.49 | 1.62 | 9.92  |
| 5VXJ.PDB | OD2, G_ASP_166 | NZ, G_LYS_205  | HZ2, G_LYS_205  | 2.82 | 1.96 | 12.05 |
| 5VXJ.PDB | OD2, G_ASP_166 | OH, G_TYR_206  | HH, G_TYR_206   | 2.52 | 1.70 | 11.57 |
| 5VXJ.PDB | OE1, H_GLN_111 | OG1, G_THR_217 | HG1, G_THR_217  | 2.86 | 2.17 | 29.58 |
| 5VXJ.PDB | OE1, H_GLN_82  | NE, H_ARG_19   | HE, H_ARG_19    | 2.76 | 1.91 | 8.69  |
| 5VXJ.PDB | OD1, H_ASN_97  | ND2, H_ASN_35  | HD22, H_ASN_35  | 2.85 | 2.10 | 23.91 |
| 5VXJ.PDB | OD1, H_ASP_90  | NH1, H_ARG_38  | HH12, H_ARG_38  | 3.00 | 2.16 | 12.34 |
| 5VXJ.PDB | OD1, H_ASN_35  | NE, H_ARG_50   | HE, H_ARG_50    | 2.75 | 1.93 | 14.53 |
| 5VXJ.PDB | OD2, H_ASP_90  | NH1, H_ARG_67  | HH12, H_ARG_67  | 2.89 | 2.05 | 9.62  |
| 5VXJ.PDB | OD1, H_ASN_74  | NE, H_ARG_72   | HE, H_ARG_72    | 2.76 | 1.95 | 17.61 |
| 5VXJ.PDB | OD1, H_ASN_84  | NE2, H_GLN_82  | HE21, H_GLN_82  | 2.86 | 2.05 | 16.57 |
| 5VXJ.PDB | OG1, H_THR_107 | ND2, H_ASN_97  | HD21, H_ASN_97  | 2.53 | 1.81 | 26.67 |
| 5VXJ.PDB | OD1, I_ASP_309 | ND2, I_ASN_58  | HD22, I_ASN_58  | 2.73 | 1.88 | 5.94  |
| 5VXJ.PDB | OE1, I_GLU_154 | OG, I_SER_82   | HG, I_SER_82    | 2.52 | 1.79 | 24.33 |
| 5VXJ.PDB | OD2, I_ASP_97  | NE, I_ARG_101  | HE, I_ARG_101   | 2.83 | 2.07 | 23.56 |
| 5VXJ.PDB | OD2, J_ASP_73  | NZ, I_LYS_137  | HZ3, I_LYS_137  | 2.90 | 2.17 | 29.52 |
| 5VXJ.PDB | OD1, I_ASP_287 | OH, I_TYR_164  | HH, I_TYR_164   | 2.95 | 2.16 | 17.45 |
| 5VXJ.PDB | OD1, B_ASN_97  | NZ, I_LYS_197  | HZ1, I_LYS_197  | 2.68 | 1.88 | 21.92 |
| 5VXJ.PDB | OD1, I_ASP_254 | NZ, I_LYS_203  | HZ2, I_LYS_203  | 2.60 | 1.74 | 12.72 |
| 5VXJ.PDB | OD2, I_ASP_166 | NZ, I_LYS_205  | HZ2, I_LYS_205  | 2.77 | 1.91 | 10.79 |
| 5VXJ.PDB | OD2, I_ASP_166 | OH, I_TYR_206  | HH, I_TYR_206   | 2.50 | 1.67 | 8.28  |
| 5VXJ.PDB | OD1, I_ASN_249 | OG1, I_THR_251 | HG1, I_THR_251  | 2.69 | 1.98 | 27.82 |
| 5VXJ.PDB | OE1, J_GLN_82  | NE, J_ARG_19   | HE, J_ARG_19    | 2.52 | 1.72 | 17.43 |
| 5VXJ.PDB | OD1, J_ASN_97  | ND2, J_ASN_35  | HD22, J_ASN_35  | 3.00 | 2.21 | 19.94 |
| 5VXJ.PDB | OD1, J_ASP_90  | NH1, J_ARG_38  | HH12, J_ARG_38  | 2.89 | 2.13 | 23.59 |
| 5VXJ.PDB | OE2, J_GLU_46  | NH2, J_ARG_38  | HH21, J_ARG_38  | 2.77 | 1.96 | 16.80 |
| 5VXJ.PDB | OD1, J_ASN_35  | NE, J_ARG_50   | HE, J_ARG_50    | 2.74 | 1.91 | 11.68 |
| 5VXJ.PDB | OD2, J_ASP_90  | NH1, J_ARG_67  | HH12, J_ARG_67  | 2.55 | 1.74 | 16.72 |
| 5VXJ.PDB | OD1, J_ASP_90  | NH2, J_ARG_67  | HH22, J_ARG_67  | 2.84 | 1.98 | 5.11  |
| 5VXJ.PDB | OD1, J_ASN_84  | NE2, J_GLN_82  | HE21, J_GLN_82  | 2.94 | 2.08 | 3.32  |
| 5VXJ.PDB | OG1, J_THR_107 | ND2, J_ASN_97  | HD21, J_ASN_97  | 2.57 | 1.77 | 17.56 |
| 5VXK.PDB | OD2, B_ASP_90  | NH2, B_ARG_67  | HH22, B_ARG_67  | 2.27 | 1.58 | 28.79 |
| 5VXK.PDB | OG, A_SER_168  | NE2, B_GLN_106 | HE21, B_GLN_106 | 2.99 | 2.23 | 24.43 |
| 5VXK.PDB | OD2, A_ASP_287 | NE2, B_GLN_106 | HE22, B_GLN_106 | 2.77 | 1.94 | 12.81 |



|          |                |                |                 |      |      |       |
|----------|----------------|----------------|-----------------|------|------|-------|
| 5VXK.PDB | OD2, A_ASP_287 | OH, A_TYR_164  | HH, A_TYR_164   | 2.91 | 2.21 | 28.15 |
| 5VXK.PDB | OD2, A_ASP_261 | NZ, A_LYS_196  | HZ3, A_LYS_196  | 2.74 | 1.87 | 9.57  |
| 5VXK.PDB | OG1, B_THR_102 | OH, A_TYR_276  | HH, A_TYR_276   | 2.57 | 1.73 | 6.50  |
| 5VXK.PDB | OH, A_TYR_160  | ND2, A_ASN_293 | HD22, A_ASN_293 | 2.77 | 1.97 | 18.05 |
| 5VXL.PDB | OD1, A_ASP_309 | ND2, A_ASN_58  | HD22, A_ASN_58  | 2.92 | 2.09 | 13.70 |
| 5VXL.PDB | OE1, A_GLU_154 | OG, A_SER_82   | HG, A_SER_82    | 2.52 | 1.77 | 21.68 |
| 5VXL.PDB | OD2, A_ASP_88  | NE2, A_GLN_84  | HE21, A_GLN_84  | 2.89 | 2.16 | 27.92 |
| 5VXL.PDB | OD1, A_ASP_254 | NZ, A_LYS_203  | HZ3, A_LYS_203  | 2.55 | 1.71 | 15.49 |
| 5VXL.PDB | OD2, B_ASP_52  | NZ, A_LYS_205  | HZ1, A_LYS_205  | 3.00 | 2.13 | 10.69 |
| 5VXL.PDB | OD2, A_ASP_166 | OH, A_TYR_206  | HH, A_TYR_206   | 2.43 | 1.61 | 11.33 |
| 5VXL.PDB | OE1, A_GLN_148 | NE1, A_TRP_226 | HE1, A_TRP_226  | 2.87 | 2.02 | 9.28  |
| 5VXL.PDB | OE2, A_GLU_286 | ND2, A_ASN_255 | HD22, A_ASN_255 | 2.74 | 1.94 | 17.54 |
| 5VXL.PDB | OD1, B_ASP_91  | NH1, B_ARG_38  | HH12, B_ARG_38  | 2.97 | 2.23 | 26.01 |
| 5VXL.PDB | OD1, A_ASP_166 | OG, B_SER_55   | HG, B_SER_55    | 2.56 | 1.73 | 4.68  |
| 5VXL.PDB | OD2, B_ASP_91  | NH1, B_ARG_68  | HH12, B_ARG_68  | 2.83 | 2.06 | 22.74 |
| 5VXL.PDB | OD1, B_ASN_75  | NE, B_ARG_73   | HE, B_ARG_73    | 2.98 | 2.26 | 28.00 |
| 5VXL.PDB | OH, B_TYR_81   | NE, B_ARG_79   | HE, B_ARG_79    | 2.96 | 2.14 | 13.15 |
| 5VXL.PDB | OE2, A_GLU_201 | NH2, B_ARG_102 | HH22, B_ARG_102 | 2.87 | 2.08 | 20.03 |
| 5VXM.PDB | OD1, A_ASP_309 | ND2, A_ASN_58  | HD22, A_ASN_58  | 2.74 | 1.89 | 5.63  |
| 5VXM.PDB | OD1, A_ASP_88  | NE2, A_GLN_84  | HE21, A_GLN_84  | 2.60 | 1.75 | 9.62  |
| 5VXM.PDB | OD1, A_ASP_287 | OH, A_TYR_164  | HH, A_TYR_164   | 2.66 | 1.84 | 11.86 |
| 5VXM.PDB | OE2, B_GLU_111 | NE1, A_TRP_177 | HE1, A_TRP_177  | 2.76 | 1.97 | 19.61 |
| 5VXM.PDB | OD2, A_ASP_166 | NZ, A_LYS_205  | HZ3, A_LYS_205  | 2.79 | 1.92 | 8.41  |
| 5VXM.PDB | OD2, A_ASP_166 | OH, A_TYR_206  | HH, A_TYR_206   | 2.53 | 1.73 | 14.26 |
| 5VXM.PDB | OE2, A_GLU_288 | NZ, A_LYS_291  | HZ1, A_LYS_291  | 2.70 | 1.90 | 22.27 |
| 5VXM.PDB | OH, B_TYR_94   | NH1, B_ARG_38  | HH11, B_ARG_38  | 2.95 | 2.12 | 12.47 |
| 5VXM.PDB | OD1, B_ASP_90  | NH1, B_ARG_38  | HH12, B_ARG_38  | 2.77 | 1.97 | 17.13 |
| 5VXM.PDB | OD1, B_ASP_54  | OG, B_SER_56   | HG, B_SER_56    | 2.63 | 1.84 | 17.09 |
| 5VXM.PDB | OD2, B_ASP_90  | NH1, B_ARG_67  | HH12, B_ARG_67  | 2.75 | 1.92 | 11.95 |
| 5VXM.PDB | OD1, B_ASN_84  | NE2, B_GLN_82  | HE21, B_GLN_82  | 2.81 | 1.97 | 10.38 |
| 5VXR.PDB | OE1, H_GLU_46  | NE, H_ARG_38   | HE, H_ARG_38    | 2.74 | 1.86 | 23.26 |
| 5VXR.PDB | OH, H_TYR_93   | NH1, H_ARG_38  | HH11, H_ARG_38  | 2.95 | 1.99 | 15.54 |
| 5VXR.PDB | OD1, H_ASP_89  | NH1, H_ARG_38  | HH12, H_ARG_38  | 2.81 | 1.80 | 4.81  |
| 5VXR.PDB | OE1, H_GLU_46  | NH2, H_ARG_38  | HH21, H_ARG_38  | 2.83 | 2.01 | 29.32 |
| 5VXR.PDB | OE1, L_GLN_38  | NZ, H_LYS_39   | HZ2, H_LYS_39   | 2.72 | 1.76 | 14.94 |
| 5VXR.PDB | OD1, H_ASN_35  | OH, H_TYR_47   | HH, H_TYR_47    | 2.72 | 1.74 | 8.88  |
| 5VXR.PDB | OD1, P_ASN_415 | OH, H_TYR_50   | HH, H_TYR_50    | 2.71 | 1.82 | 21.79 |
| 5VXR.PDB | OD1, H_ASP_89  | NH2, H_ARG_66  | HH22, H_ARG_66  | 2.99 | 1.98 | 4.54  |
| 5VXR.PDB | OE1, H_GLN_77  | OH, H_TYR_79   | HH, H_TYR_79    | 2.72 | 1.76 | 12.10 |
| 5VXR.PDB | OE2, H_GLU_154 | OH, H_TYR_151  | HH, H_TYR_151   | 2.81 | 1.83 | 6.84  |
| 5VXR.PDB | OG, H_SER_185  | NE1, H_TRP_160 | HE1, H_TRP_160  | 2.93 | 1.93 | 7.21  |
| 5VXR.PDB | OD1, L_ASN_138 | NE2, H_HIS_170 | HE2, H_HIS_170  | 2.89 | 1.98 | 20.57 |
| 5VXR.PDB | OG1, H_THR_143 | OG1, H_THR_188 | HG1, H_THR_188  | 2.81 | 1.84 | 10.15 |
| 5VXR.PDB | OE2, L_GLU_123 | NZ, H_LYS_214  | HZ1, H_LYS_214  | 2.93 | 1.98 | 15.97 |
| 5VXR.PDB | OD1, L_ASP_70  | NE, L_ARG_24   | HE, L_ARG_24    | 2.94 | 2.08 | 26.80 |
| 5VXR.PDB | OD1, L_ASN_92  | OG, L_SER_27D  | HG, L_SER_27D   | 2.79 | 1.83 | 11.69 |
| 5VXR.PDB | OD1, L_ASN_91  | NE2, L_HIS_34  | HE2, L_HIS_34   | 2.77 | 1.79 | 12.93 |
| 5VXR.PDB | OE1, L_GLN_89  | OH, L_TYR_36   | HH, L_TYR_36    | 2.69 | 1.74 | 13.43 |
| 5VXR.PDB | OH, L_TYR_86   | NE2, L_GLN_37  | HE21, L_GLN_37  | 2.98 | 1.98 | 9.70  |
| 5VXR.PDB | OD2, L_ASP_82  | NH1, L_ARG_61  | HH12, L_ARG_61  | 2.75 | 1.79 | 15.16 |
| 5VXR.PDB | OD1, L_ASP_82  | NH2, L_ARG_61  | HH22, L_ARG_61  | 2.82 | 1.82 | 7.27  |
| 5VXR.PDB | OG, L_SER_131  | NE2, L_GLN_124 | HE22, L_GLN_124 | 2.92 | 1.91 | 5.03  |
| 5VXR.PDB | OG, L_SER_177  | NE1, L_TRP_148 | HE1, L_TRP_148  | 2.80 | 1.85 | 16.41 |
| 5VXR.PDB | OD1, L_ASP_170 | OG1, L_THR_172 | HG1, L_THR_172  | 2.70 | 1.76 | 15.44 |
| 5VXR.PDB | OG, H_SER_184  | OG, L_SER_176  | HG, L_SER_176   | 2.79 | 1.86 | 17.30 |
| 5VXR.PDB | OD1, L_ASN_161 | OG, L_SER_177  | HG, L_SER_177   | 2.64 | 1.73 | 19.24 |
| 5VXR.PDB | OG, L_SER_131  | OG1, L_THR_180 | HG1, L_THR_180  | 2.88 | 2.00 | 21.77 |
| 5VXR.PDB | OD2, L_ASP_151 | ND1, L_HIS_189 | HD1, L_HIS_189  | 2.73 | 1.79 | 17.03 |

|          |                |                |                 |      |      |       |
|----------|----------------|----------------|-----------------|------|------|-------|
| 5VXR.PDB | ND1, L_HIS_198 | OG1, L_THR_200 | HG1, L_THR_200  | 2.74 | 1.84 | 20.28 |
| 5VXR.PDB | NE2, P_HIS_421 | OG1, P_THR_416 | HG1, P_THR_416  | 2.72 | 1.87 | 24.94 |
| 5WKQ.PDB | OG1, A_THR_80  | NZ, A_LYS_106  | HZ1, A_LYS_106  | 2.47 | 1.72 | 27.03 |
| 5WKQ.PDB | OG, B_SER_208  | NH2, A_ARG_135 | HH21, A_ARG_135 | 2.89 | 2.06 | 11.87 |
| 5WKQ.PDB | OE2, A_GLU_182 | NE2, A_GLN_162 | HE21, A_GLN_162 | 2.71 | 1.89 | 15.15 |
| 5WKQ.PDB | OE2, B_GLU_182 | NE2, B_GLN_162 | HE21, B_GLN_162 | 2.63 | 1.85 | 20.38 |
| 5WKQ.PDB | OD1, B_ASP_148 | NH1, B_ARG_196 | HH11, B_ARG_196 | 2.87 | 2.13 | 25.83 |
| 5WKQ.PDB | OE2, A_GLU_131 | ND1, B_HIS_207 | HD1, B_HIS_207  | 2.65 | 1.88 | 22.26 |
| 5WKQ.PDB | OE1, A_GLU_131 | OG1, B_THR_211 | HG1, B_THR_211  | 2.63 | 1.86 | 19.68 |
| 5WN9.PDB | OE1, H_GLN_1   | NE2, H_GLN_3   | HE21, H_GLN_3   | 2.70 | 1.88 | 14.43 |
| 5WN9.PDB | OE1, H_GLU_46  | NE, H_ARG_38   | HE, H_ARG_38    | 2.78 | 2.00 | 20.76 |
| 5WN9.PDB | OH, H_TYR_94   | NH2, H_ARG_38  | HH21, H_ARG_38  | 2.96 | 2.17 | 18.48 |
| 5WN9.PDB | OD1, H_ASP_90  | NH2, H_ARG_38  | HH22, H_ARG_38  | 2.91 | 2.07 | 9.36  |
| 5WN9.PDB | OE1, H_GLN_182 | NE2, H_GLN_39  | HE22, H_GLN_39  | 2.96 | 2.11 | 8.81  |
| 5WN9.PDB | OD2, H_ASP_90  | NH1, H_ARG_67  | HH12, H_ARG_67  | 2.27 | 1.51 | 22.67 |
| 5WN9.PDB | OD1, H_ASP_73  | OG, H_SER_75   | HG, H_SER_75    | 2.58 | 1.79 | 16.04 |
| 5WN9.PDB | OG1, H_THR_69  | NH1, H_ARG_84  | HH12, H_ARG_84  | 2.83 | 2.06 | 21.62 |
| 5WN9.PDB | OD1, H_ASP_112 | NE, H_ARG_98   | HE, H_ARG_98    | 2.94 | 2.13 | 15.87 |
| 5WN9.PDB | OD2, H_ASP_112 | NH1, H_ARG_98  | HH11, H_ARG_98  | 2.84 | 2.01 | 13.12 |
| 5WN9.PDB | OG1, H_THR_218 | NH2, H_ARG_162 | HH21, H_ARG_162 | 2.83 | 2.04 | 19.79 |
| 5WN9.PDB | OE1, H_GLN_233 | OH, H_TYR_180  | HH, H_TYR_180   | 2.70 | 1.87 | 8.37  |
| 5WN9.PDB | OE1, H_GLN_39  | NE2, H_GLN_182 | HE22, H_GLN_182 | 2.85 | 2.00 | 9.41  |
| 5WN9.PDB | OD2, H_ASP_226 | NE, H_ARG_205  | HE, H_ARG_205   | 2.80 | 1.99 | 17.36 |
| 5WN9.PDB | OD1, H_ASP_226 | NH1, H_ARG_205 | HH11, H_ARG_205 | 2.89 | 2.03 | 4.48  |
| 5WN9.PDB | OG1, H_THR_164 | OG1, H_THR_218 | HG1, H_THR_218  | 2.96 | 2.26 | 28.62 |
| 5WN9.PDB | OD1, H_ASN_57  | NE, A_ARG_188  | HE, A_ARG_188   | 2.58 | 1.61 | 2.15  |

Table 6: The side chain hydrogen bonding networks of all experimentally determined antigen-antibody-related structures. In this table, a PDB file is specified with a four-letter PDB ID, except that the names of the PDB files corresponding to the single NMR structural model split from the NMR ensemble is specified with a four-letter PDB ID in addition to a hyphen followed by the single NMR structural model numeric ID, the residue naming scheme is **Chain ID\_residue name\_residue number**,  $\angle ADH$  represents the angle formed by acceptor (A), donor (D) and hydrogen (H) ( $\angle ADH$ ).

| PDB      | Acceptor (A)   | Donor (D)      | Hydrogen (H)    | D-A (Å) | H-A (Å) | $\angle ADH(^{\circ})$ |
|----------|----------------|----------------|-----------------|---------|---------|------------------------|
| 1A14.PDB | OE1, L_GLN_38  | NE2, H_GLN_39  | HE21, H_GLN_39  | 2.62    | 1.69    | 9.24                   |
| 1A14.PDB | OH, L_TYR_36   | N, H_PHE_100E  | H, H_PHE_100E   | 2.73    | 1.81    | 13.85                  |
| 1E6J.PDB | OE1, H_GLN_39  | NE2, L_GLN_37  | HE22, L_GLN_37  | 2.69    | 1.84    | 23.98                  |
| 1F3R.PDB | O, B_ASN_230   | OH, A_TYR_72   | HH, A_TYR_72    | 2.67    | 1.70    | 2.56                   |
| 1F3R.PDB | O, A_GLY_70    | NH2, B_ARG_50  | HH21, B_ARG_50  | 2.81    | 1.79    | 6.29                   |
| 1F3R.PDB | NE1, A_TRP_67  | OG, B_SER_61   | HG, B_SER_61    | 2.86    | 1.89    | 6.31                   |
| 1F3R.PDB | O, A_ILE_75    | OH, B_TYR_170  | HH, B_TYR_170   | 2.72    | 1.77    | 10.88                  |
| 1F3R.PDB | O, A_ASP_71    | OH, B_TYR_233  | HH, B_TYR_233   | 2.71    | 1.89    | 25.38                  |
| 1HGD.PDB | O, B_ILE_140   | N, A_ALA_11    | H, A_ALA_11     | 2.90    | 2.03    | 23.17                  |
| 1HGD.PDB | O, B_PHE_138   | N, A_LEU_13    | H, A_LEU_13     | 2.95    | 2.00    | 13.08                  |
| 1HGD.PDB | O, B_ARG_25    | N, A_CYS_14    | H, A_CYS_14     | 2.89    | 1.92    | 6.63                   |
| 1HGD.PDB | O, B_GLY_136   | N, A_LEU_15    | H, A_LEU_15     | 2.87    | 1.90    | 8.68                   |
| 1HGD.PDB | O, B_GLY_23    | N, A_GLY_16    | H, A_GLY_16     | 2.93    | 2.02    | 18.64                  |
| 1HGD.PDB | O, B_TRP_21    | N, A_HIS_18    | H, A_HIS_18     | 2.86    | 2.01    | 24.44                  |
| 1HGD.PDB | OE2, B_GLU_97  | NZ, A_LYS_27   | HZ1, A_LYS_27   | 2.80    | 1.78    | 9.95                   |
| 1HGD.PDB | OE2, B_GLU_67  | NH2, A_ARG_109 | HH21, A_ARG_109 | 2.83    | 1.84    | 13.41                  |
| 1HGD.PDB | OD2, F_ASP_79  | OG, A_SER_110  | HG, A_SER_110   | 2.92    | 1.96    | 11.03                  |
| 1HGD.PDB | OD1, E_ASP_101 | NE2, A_GLN_210 | HE22, A_GLN_210 | 3.00    | 2.15    | 26.33                  |
| 1HGD.PDB | OE1, C_GLN_210 | NH2, A_ARG_220 | HH21, A_ARG_220 | 2.78    | 1.86    | 19.99                  |
| 1HGD.PDB | O, F_SER_71    | NZ, A_LYS_238  | HZ2, A_LYS_238  | 2.63    | 1.73    | 23.20                  |
| 1HGD.PDB | OE1, F_GLU_72  | NZ, A_LYS_238  | HZ3, A_LYS_238  | 2.93    | 1.92    | 13.44                  |
| 1HGD.PDB | O, B_LYS_68    | NZ, A_LYS_299  | HZ2, A_LYS_299  | 2.96    | 1.95    | 12.60                  |
| 1HGD.PDB | O, B_LYS_62    | N, A_GLY_303   | H, A_GLY_303    | 2.91    | 1.96    | 9.72                   |
| 1HGD.PDB | OG, B_SER_93   | N, A_LYS_310   | H, A_LYS_310    | 2.92    | 1.97    | 11.29                  |
| 1HGD.PDB | OD1, B_ASN_104 | N, A_ALA_317   | H, A_ALA_317    | 2.78    | 1.85    | 14.55                  |
| 1HGD.PDB | O, A_VAL_323   | N, B_GLY_13    | H, B_GLY_13     | 2.71    | 1.77    | 11.58                  |
| 1HGD.PDB | O, A_HIS_17    | N, B_TRP_14    | H, B_TRP_14     | 2.85    | 1.93    | 15.85                  |
| 1HGD.PDB | O, A_GLY_16    | N, B_GLY_23    | H, B_GLY_23     | 2.92    | 1.99    | 15.76                  |
| 1HGD.PDB | O, A_CYS_14    | N, B_ARG_25    | H, B_ARG_25     | 2.96    | 2.02    | 13.01                  |
| 1HGD.PDB | OE2, F_GLU_97  | NH2, B_ARG_54  | HH22, B_ARG_54  | 2.77    | 1.80    | 12.79                  |
| 1HGD.PDB | OD2, F_ASP_86  | NZ, B_LYS_62   | HZ1, B_LYS_62   | 2.61    | 1.78    | 29.53                  |
| 1HGD.PDB | OD2, F_ASP_90  | NZ, B_LYS_62   | HZ3, B_LYS_62   | 2.73    | 1.84    | 25.56                  |
| 1HGD.PDB | OG, A_SER_110  | NE2, B_HIS_64  | HE2, B_HIS_64   | 2.96    | 2.01    | 12.34                  |
| 1HGD.PDB | O, A_LYS_299   | NZ, B_LYS_68   | HZ1, B_LYS_68   | 2.92    | 1.90    | 10.17                  |
| 1HGD.PDB | OG, C_SER_107  | N, B_ARG_76    | H, B_ARG_76     | 2.80    | 1.86    | 12.47                  |
| 1HGD.PDB | OE2, D_GLU_81  | NE, B_ARG_76   | HE, B_ARG_76    | 2.88    | 1.91    | 8.67                   |
| 1HGD.PDB | OE2, D_GLU_74  | NH1, B_ARG_76  | HH12, B_ARG_76  | 2.84    | 1.82    | 2.51                   |
| 1HGD.PDB | OE1, D_GLU_81  | NH2, B_ARG_76  | HH21, B_ARG_76  | 2.71    | 1.71    | 6.80                   |
| 1HGD.PDB | OE1, D_GLU_74  | NH2, B_ARG_76  | HH22, B_ARG_76  | 2.75    | 1.75    | 3.21                   |
| 1HGD.PDB | OE1, D_GLU_85  | OH, B_TYR_83   | HH, B_TYR_83    | 2.65    | 1.81    | 23.27                  |
| 1HGD.PDB | OH, F_TYR_83   | NZ, B_LYS_88   | HZ1, B_LYS_88   | 2.76    | 1.72    | 5.59                   |
| 1HGD.PDB | O, A_LYS_27    | ND2, B_ASN_104 | HD22, B_ASN_104 | 2.94    | 1.98    | 9.01                   |
| 1HGD.PDB | O, F_LEU_2     | OG, B_SER_113  | HG, B_SER_113   | 2.69    | 1.91    | 29.59                  |
| 1HGD.PDB | OE1, F_GLU_132 | NE, B_ARG_124  | HE, B_ARG_124   | 2.83    | 2.02    | 28.17                  |
| 1HGD.PDB | OE2, F_GLU_132 | NE, B_ARG_124  | HE, B_ARG_124   | 2.88    | 2.01    | 22.00                  |
| 1HGD.PDB | O, A_LEU_13    | N, B_PHE_138   | H, B_PHE_138    | 2.71    | 1.82    | 20.20                  |
| 1HGD.PDB | O, A_ALA_11    | N, B_ILE_140   | H, B_ILE_140    | 2.81    | 1.89    | 16.38                  |
| 1HGD.PDB | O, F_ARG_170   | NH1, B_ARG_163 | HH12, B_ARG_163 | 2.75    | 1.79    | 14.15                  |
| 1HGD.PDB | O, D_ILE_140   | N, C_ALA_11    | H, C_ALA_11     | 2.91    | 2.01    | 19.96                  |
| 1HGD.PDB | O, D_GLN_27    | N, C_THR_12    | H, C_THR_12     | 2.92    | 1.96    | 10.52                  |
| 1HGD.PDB | O, D_PHE_138   | N, C_LEU_13    | H, C_LEU_13     | 2.98    | 2.02    | 9.60                   |
| 1HGD.PDB | O, D_ARG_25    | N, C_CYS_14    | H, C_CYS_14     | 2.74    | 1.84    | 19.68                  |
| 1HGD.PDB | O, D_GLY_136   | N, C_LEU_15    | H, C_LEU_15     | 2.88    | 1.91    | 5.44                   |
| 1HGD.PDB | O, D_GLY_23    | N, C_GLY_16    | H, C_GLY_16     | 2.97    | 2.07    | 19.04                  |
| 1HGD.PDB | O, D_TRP_21    | N, C_HIS_18    | H, C_HIS_18     | 2.85    | 1.99    | 23.00                  |
| 1HGD.PDB | OE2, D_GLU_97  | NZ, C_LYS_27   | HZ1, C_LYS_27   | 2.80    | 1.77    | 7.54                   |
| 1HGD.PDB | OE2, D_GLU_67  | NH2, C_ARG_109 | HH21, C_ARG_109 | 2.87    | 1.88    | 13.44                  |

|          |                |                |                 |      |      |       |
|----------|----------------|----------------|-----------------|------|------|-------|
| 1HGD.PDB | OD2, B.ASP.79  | OG, C.SER.110  | HG, C.SER.110   | 2.73 | 1.84 | 19.59 |
| 1HGD.PDB | OD1, A.ASP.101 | NE2, C.GLN.210 | HE22, C.GLN.210 | 2.97 | 2.13 | 27.21 |
| 1HGD.PDB | OE1, E.GLN.210 | NH2, C.ARG.220 | HH21, C.ARG.220 | 2.69 | 1.80 | 23.00 |
| 1HGD.PDB | OE1, B.GLU.72  | NZ, C.LYS.238  | HZ1, C.LYS.238  | 2.80 | 1.83 | 17.68 |
| 1HGD.PDB | O, B.SER.71    | NZ, C.LYS.238  | HZ3, C.LYS.238  | 2.57 | 1.67 | 23.33 |
| 1HGD.PDB | O, D.LYS.68    | NZ, C.LYS.299  | HZ2, C.LYS.299  | 2.97 | 1.97 | 13.11 |
| 1HGD.PDB | O, D.LYS.62    | N, C.GLY.303   | H, C.GLY.303    | 2.92 | 1.97 | 11.11 |
| 1HGD.PDB | OG, D.SER.93   | N, C.LYS.310   | H, C.LYS.310    | 2.96 | 2.01 | 12.70 |
| 1HGD.PDB | OD1, D.ASN.104 | N, C.ALA.317   | H, C.ALA.317    | 2.76 | 1.81 | 11.23 |
| 1HGD.PDB | OE1, D.GLU.15  | NZ, C.LYS.326  | HZ1, C.LYS.326  | 2.78 | 1.77 | 11.96 |
| 1HGD.PDB | O, C.VAL.323   | N, D.GLY.13    | H, D.GLY.13     | 2.70 | 1.78 | 14.49 |
| 1HGD.PDB | O, C.HIS.17    | N, D.TRP.14    | H, D.TRP.14     | 2.85 | 1.91 | 13.36 |
| 1HGD.PDB | O, C.GLY.16    | N, D.GLY.23    | H, D.GLY.23     | 2.93 | 2.01 | 16.45 |
| 1HGD.PDB | O, C.CYS.14    | N, D.ARG.25    | H, D.ARG.25     | 2.91 | 1.95 | 9.92  |
| 1HGD.PDB | O, C.THR.12    | N, D.GLN.27    | H, D.GLN.27     | 2.91 | 1.98 | 16.00 |
| 1HGD.PDB | O, A.THR.28    | NE, D.ARG.54   | HE, D.ARG.54    | 3.00 | 2.06 | 13.94 |
| 1HGD.PDB | OE2, B.GLU.97  | NH2, D.ARG.54  | HH22, D.ARG.54  | 2.79 | 1.82 | 13.03 |
| 1HGD.PDB | OD2, B.ASP.90  | NZ, D.LYS.62   | HZ3, D.LYS.62   | 2.62 | 1.79 | 29.99 |
| 1HGD.PDB | OG, C.SER.110  | NE2, D.HIS.64  | HE2, D.HIS.64   | 2.96 | 1.98 | 5.65  |
| 1HGD.PDB | O, C.LYS.299   | NZ, D.LYS.68   | HZ1, D.LYS.68   | 2.93 | 1.92 | 12.36 |
| 1HGD.PDB | OG, E.SER.107  | N, D.ARG.76    | H, D.ARG.76     | 2.86 | 1.90 | 9.40  |
| 1HGD.PDB | OE2, F.GLU.81  | NE, D.ARG.76   | HE, D.ARG.76    | 2.83 | 1.87 | 10.56 |
| 1HGD.PDB | OE2, F.GLU.74  | NH1, D.ARG.76  | HH12, D.ARG.76  | 2.78 | 1.77 | 3.14  |
| 1HGD.PDB | OE1, F.GLU.81  | NH2, D.ARG.76  | HH21, D.ARG.76  | 2.65 | 1.67 | 9.42  |
| 1HGD.PDB | OE1, F.GLU.74  | NH2, D.ARG.76  | HH22, D.ARG.76  | 2.69 | 1.70 | 6.24  |
| 1HGD.PDB | OE1, F.GLU.85  | OH, D.TYR.83   | HH, D.TYR.83    | 2.57 | 1.79 | 29.87 |
| 1HGD.PDB | OH, B.TYR.83   | NZ, D.LYS.88   | HZ1, D.LYS.88   | 2.76 | 1.72 | 5.75  |
| 1HGD.PDB | O, C.LYS.27    | ND2, D.ASN.104 | HD22, D.ASN.104 | 2.96 | 2.00 | 10.74 |
| 1HGD.PDB | OE1, B.GLU.132 | NE, D.ARG.124  | HE, D.ARG.124   | 2.80 | 2.01 | 29.31 |
| 1HGD.PDB | OE2, B.GLU.132 | NE, D.ARG.124  | HE, D.ARG.124   | 2.82 | 1.95 | 21.73 |
| 1HGD.PDB | O, C.LEU.13    | N, D.PHE.138   | H, D.PHE.138    | 2.74 | 1.85 | 19.25 |
| 1HGD.PDB | O, C.ALA.11    | N, D.ILE.140   | H, D.ILE.140    | 2.85 | 1.94 | 17.95 |
| 1HGD.PDB | O, B.ARG.170   | NH1, D.ARG.163 | HH12, D.ARG.163 | 2.77 | 1.79 | 12.64 |
| 1HGD.PDB | O, F.ILE.140   | N, E.ALA.11    | H, E.ALA.11     | 2.92 | 2.03 | 20.36 |
| 1HGD.PDB | O, F.GLN.27    | N, E.THR.12    | H, E.THR.12     | 2.97 | 2.03 | 14.03 |
| 1HGD.PDB | O, F.PHE.138   | N, E.LEU.13    | H, E.LEU.13     | 2.98 | 2.02 | 11.10 |
| 1HGD.PDB | O, F.ARG.25    | N, E.CYS.14    | H, E.CYS.14     | 2.65 | 1.79 | 21.42 |
| 1HGD.PDB | O, F.GLY.136   | N, E.LEU.15    | H, E.LEU.15     | 2.85 | 1.88 | 5.88  |
| 1HGD.PDB | O, F.GLY.23    | N, E.GLY.16    | H, E.GLY.16     | 2.93 | 2.04 | 20.98 |
| 1HGD.PDB | O, F.TRP.21    | N, E.HIS.18    | H, E.HIS.18     | 2.83 | 1.98 | 25.03 |
| 1HGD.PDB | OE2, F.GLU.97  | NZ, E.LYS.27   | HZ1, E.LYS.27   | 2.79 | 1.77 | 8.77  |
| 1HGD.PDB | OE2, F.GLU.67  | NH2, E.ARG.109 | HH21, E.ARG.109 | 2.82 | 1.85 | 14.73 |
| 1HGD.PDB | OD2, D.ASP.79  | OG, E.SER.110  | HG, E.SER.110   | 2.81 | 1.89 | 15.50 |
| 1HGD.PDB | OD1, C.ASP.101 | NE2, E.GLN.210 | HE22, E.GLN.210 | 2.98 | 2.14 | 27.07 |
| 1HGD.PDB | OE1, A.GLN.210 | NH2, E.ARG.220 | HH21, E.ARG.220 | 2.77 | 1.90 | 25.11 |
| 1HGD.PDB | O, D.SER.71    | NZ, E.LYS.238  | HZ2, E.LYS.238  | 2.73 | 1.80 | 21.39 |
| 1HGD.PDB | OE1, D.GLU.72  | NZ, E.LYS.238  | HZ3, E.LYS.238  | 2.87 | 1.86 | 13.40 |
| 1HGD.PDB | O, F.LYS.68    | NZ, E.LYS.299  | HZ1, E.LYS.299  | 2.98 | 1.98 | 14.54 |
| 1HGD.PDB | O, F.LYS.62    | N, E.GLY.303   | H, E.GLY.303    | 2.94 | 1.98 | 8.87  |
| 1HGD.PDB | OG, F.SER.93   | N, E.LYS.310   | H, E.LYS.310    | 2.95 | 2.00 | 12.05 |
| 1HGD.PDB | OD1, F.ASN.104 | N, E.ALA.317   | H, E.ALA.317    | 2.79 | 1.84 | 10.01 |
| 1HGD.PDB | OE2, F.GLU.15  | N, E.GLU.325   | H, E.GLU.325    | 2.91 | 2.10 | 28.29 |
| 1HGD.PDB | OE1, F.GLU.15  | NZ, E.LYS.326  | HZ3, E.LYS.326  | 2.97 | 1.97 | 16.19 |
| 1HGD.PDB | O, E.VAL.323   | N, F.GLY.13    | H, F.GLY.13     | 2.71 | 1.79 | 15.38 |
| 1HGD.PDB | O, E.HIS.17    | N, F.TRP.14    | H, F.TRP.14     | 2.87 | 1.92 | 12.04 |
| 1HGD.PDB | O, E.GLY.16    | N, F.GLY.23    | H, F.GLY.23     | 2.91 | 2.00 | 17.89 |
| 1HGD.PDB | O, E.CYS.14    | N, F.ARG.25    | H, F.ARG.25     | 2.88 | 1.94 | 13.26 |
| 1HGD.PDB | O, E.THR.12    | N, F.GLN.27    | H, F.GLN.27     | 2.97 | 2.04 | 16.25 |

|          |                |                |                 |      |      |       |
|----------|----------------|----------------|-----------------|------|------|-------|
| 1HGD.PDB | OE2, D_GLU_97  | NH2, F_ARG_54  | HH22, F_ARG_54  | 2.72 | 1.75 | 12.85 |
| 1HGD.PDB | OD2, D_ASP_90  | NZ, F_LYS_62   | HZ3, F_LYS_62   | 2.71 | 1.86 | 28.09 |
| 1HGD.PDB | OG, E_SER_110  | NE2, F_HIS_64  | HE2, F_HIS_64   | 2.95 | 1.98 | 9.92  |
| 1HGD.PDB | O, E_LYS_299   | NZ, F_LYS_68   | HZ1, F_LYS_68   | 2.97 | 1.94 | 5.85  |
| 1HGD.PDB | OG, A_SER_107  | N, F_ARG_76    | H, F_ARG_76     | 2.82 | 1.86 | 9.34  |
| 1HGD.PDB | OE2, B_GLU_81  | NE, F_ARG_76   | HE, F_ARG_76    | 2.86 | 1.90 | 10.66 |
| 1HGD.PDB | OE2, B_GLU_74  | NH1, F_ARG_76  | HH12, F_ARG_76  | 2.77 | 1.75 | 1.42  |
| 1HGD.PDB | OE1, B_GLU_81  | NH2, F_ARG_76  | HH21, F_ARG_76  | 2.64 | 1.65 | 5.37  |
| 1HGD.PDB | OE1, B_GLU_74  | NH2, F_ARG_76  | HH22, F_ARG_76  | 2.71 | 1.72 | 7.42  |
| 1HGD.PDB | OE1, B_GLU_85  | OH, F_TYR_83   | HH, F_TYR_83    | 2.53 | 1.75 | 27.84 |
| 1HGD.PDB | OH, D_TYR_83   | NZ, F_LYS_88   | HZ1, F_LYS_88   | 2.67 | 1.66 | 8.83  |
| 1HGD.PDB | O, E_LYS_27    | ND2, F_ASN_104 | HD22, F_ASN_104 | 2.95 | 1.99 | 8.95  |
| 1HGD.PDB | O, D_LEU_2     | OG, F_SER_113  | HG, F_SER_113   | 2.74 | 1.91 | 25.98 |
| 1HGD.PDB | OE1, D_GLU_132 | NE, F_ARG_124  | HE, F_ARG_124   | 2.96 | 2.14 | 28.71 |
| 1HGD.PDB | OE2, D_GLU_132 | NE, F_ARG_124  | HE, F_ARG_124   | 2.94 | 2.05 | 20.84 |
| 1HGD.PDB | O, E_LEU_13    | N, F_PHE_138   | H, F_PHE_138    | 2.72 | 1.85 | 21.62 |
| 1HGD.PDB | O, E_ALA_11    | N, F_ILE_140   | H, F_ILE_140    | 2.82 | 1.92 | 18.45 |
| 1HGD.PDB | O, D_ARG_170   | NH1, F_ARG_163 | HH12, F_ARG_163 | 2.94 | 1.98 | 14.11 |
| 1HGE.PDB | O, B_ILE_140   | N, A_ALA_11    | H, A_ALA_11     | 2.81 | 1.93 | 21.75 |
| 1HGE.PDB | O, B_PHE_138   | N, A_LEU_13    | H, A_LEU_13     | 2.99 | 2.04 | 13.41 |
| 1HGE.PDB | O, B_ARG_25    | N, A_CYS_14    | H, A_CYS_14     | 2.88 | 1.92 | 6.83  |
| 1HGE.PDB | O, B_GLY_136   | N, A_LEU_15    | H, A_LEU_15     | 2.86 | 1.90 | 7.71  |
| 1HGE.PDB | O, B_GLY_23    | N, A_GLY_16    | H, A_GLY_16     | 2.95 | 2.03 | 17.76 |
| 1HGE.PDB | O, B_TRP_21    | N, A_HIS_18    | H, A_HIS_18     | 2.85 | 1.97 | 21.20 |
| 1HGE.PDB | OE2, B_GLU_97  | NZ, A_LYS_27   | HZ1, A_LYS_27   | 2.80 | 1.78 | 10.14 |
| 1HGE.PDB | OE2, B_GLU_67  | NH2, A_ARG_109 | HH21, A_ARG_109 | 2.74 | 1.75 | 12.19 |
| 1HGE.PDB | OD2, F_ASP_79  | OG, A_SER_110  | HG, A_SER_110   | 2.90 | 1.95 | 11.19 |
| 1HGE.PDB | OD1, E_ASP_101 | NE2, A_GLN_210 | HE22, A_GLN_210 | 2.91 | 2.05 | 24.48 |
| 1HGE.PDB | OE1, C_GLN_210 | NH2, A_ARG_220 | HH21, A_ARG_220 | 2.71 | 1.78 | 19.14 |
| 1HGE.PDB | O, F_SER_71    | NZ, A_LYS_238  | HZ2, A_LYS_238  | 2.67 | 1.73 | 19.84 |
| 1HGE.PDB | OE1, F_GLU_72  | NZ, A_LYS_238  | HZ3, A_LYS_238  | 2.91 | 1.89 | 11.73 |
| 1HGE.PDB | O, B_LYS_68    | NZ, A_LYS_299  | HZ2, A_LYS_299  | 2.95 | 1.93 | 10.27 |
| 1HGE.PDB | O, B_LYS_62    | N, A_GLY_303   | H, A_GLY_303    | 2.95 | 1.98 | 8.88  |
| 1HGE.PDB | OG, B_SER_93   | N, A_LYS_310   | H, A_LYS_310    | 2.91 | 1.95 | 10.06 |
| 1HGE.PDB | OD1, B_ASN_104 | N, A_ALA_317   | H, A_ALA_317    | 2.72 | 1.81 | 16.15 |
| 1HGE.PDB | O, A_VAL_323   | N, B_GLY_13    | H, B_GLY_13     | 2.72 | 1.79 | 12.30 |
| 1HGE.PDB | O, A_HIS_17    | N, B_TRP_14    | H, B_TRP_14     | 2.85 | 1.92 | 15.18 |
| 1HGE.PDB | O, A_GLY_16    | N, B_GLY_23    | H, B_GLY_23     | 2.92 | 2.01 | 18.67 |
| 1HGE.PDB | O, A_CYS_14    | N, B_ARG_25    | H, B_ARG_25     | 3.00 | 2.06 | 13.87 |
| 1HGE.PDB | OE2, F_GLU_97  | NH2, B_ARG_54  | HH22, B_ARG_54  | 2.84 | 1.86 | 12.76 |
| 1HGE.PDB | OD2, F_ASP_86  | NZ, B_LYS_62   | HZ1, B_LYS_62   | 2.60 | 1.76 | 28.82 |
| 1HGE.PDB | OD2, F_ASP_90  | NZ, B_LYS_62   | HZ3, B_LYS_62   | 2.69 | 1.82 | 26.81 |
| 1HGE.PDB | OG, A_SER_110  | NE2, B_HIS_64  | HE2, B_HIS_64   | 2.97 | 2.02 | 12.36 |
| 1HGE.PDB | O, A_LYS_299   | NZ, B_LYS_68   | HZ1, B_LYS_68   | 2.93 | 1.92 | 11.15 |
| 1HGE.PDB | OG, C_SER_107  | N, B_ARG_76    | H, B_ARG_76     | 2.82 | 1.86 | 9.28  |
| 1HGE.PDB | OE2, D_GLU_81  | NE, B_ARG_76   | HE, B_ARG_76    | 2.87 | 1.91 | 11.56 |
| 1HGE.PDB | OE2, D_GLU_74  | NH1, B_ARG_76  | HH12, B_ARG_76  | 2.84 | 1.83 | 5.81  |
| 1HGE.PDB | OE1, D_GLU_81  | NH2, B_ARG_76  | HH21, B_ARG_76  | 2.70 | 1.70 | 6.45  |
| 1HGE.PDB | OE1, D_GLU_74  | NH2, B_ARG_76  | HH22, B_ARG_76  | 2.79 | 1.79 | 3.91  |
| 1HGE.PDB | OE1, D_GLU_85  | OH, B_TYR_83   | HH, B_TYR_83    | 2.65 | 1.81 | 24.86 |
| 1HGE.PDB | OH, F_TYR_83   | NZ, B_LYS_88   | HZ1, B_LYS_88   | 2.75 | 1.71 | 5.62  |
| 1HGE.PDB | O, A_LYS_27    | ND2, B_ASN_104 | HD22, B_ASN_104 | 2.93 | 1.97 | 10.25 |
| 1HGE.PDB | OE1, F_GLU_132 | NE, B_ARG_124  | HE, B_ARG_124   | 2.80 | 1.98 | 27.36 |
| 1HGE.PDB | OE2, F_GLU_132 | NE, B_ARG_124  | HE, B_ARG_124   | 2.94 | 2.06 | 21.65 |
| 1HGE.PDB | O, A_LEU_13    | N, B_PHE_138   | H, B_PHE_138    | 2.71 | 1.84 | 21.33 |
| 1HGE.PDB | O, A_ALA_11    | N, B_ILE_140   | H, B_ILE_140    | 2.75 | 1.86 | 18.72 |
| 1HGE.PDB | O, F_ARG_170   | NH1, B_ARG_163 | HH12, B_ARG_163 | 2.78 | 1.81 | 13.88 |
| 1HGE.PDB | O, D_ILE_140   | N, C_ALA_11    | H, C_ALA_11     | 2.80 | 1.91 | 19.98 |

|          |                |                |                 |      |      |       |
|----------|----------------|----------------|-----------------|------|------|-------|
| 1HGE.PDB | O, D_PHE_138   | N, C_LEU_13    | H, C_LEU_13     | 2.99 | 2.04 | 12.20 |
| 1HGE.PDB | O, D_ARG_25    | N, C_CYS_14    | H, C_CYS_14     | 2.73 | 1.82 | 16.85 |
| 1HGE.PDB | O, D_GLY_136   | N, C_LEU_15    | H, C_LEU_15     | 2.89 | 1.92 | 5.03  |
| 1HGE.PDB | O, D_GLY_23    | N, C_GLY_16    | H, C_GLY_16     | 2.98 | 2.07 | 18.60 |
| 1HGE.PDB | O, D_TRP_21    | N, C_HIS_18    | H, C_HIS_18     | 2.85 | 1.96 | 19.89 |
| 1HGE.PDB | OE2, D_GLU_97  | NZ, C_LYS_27   | HZ1, C_LYS_27   | 2.79 | 1.77 | 8.74  |
| 1HGE.PDB | OE2, D_GLU_67  | NH2, C_ARG_109 | HH21, C_ARG_109 | 2.78 | 1.79 | 11.19 |
| 1HGE.PDB | OD2, B_ASP_79  | OG, C_SER_110  | HG, C_SER_110   | 2.78 | 1.86 | 15.09 |
| 1HGE.PDB | OD1, A_ASP_101 | NE2, C_GLN_210 | HE22, C_GLN_210 | 2.93 | 2.07 | 24.92 |
| 1HGE.PDB | OE1, E_GLN_210 | NH2, C_ARG_220 | HH21, C_ARG_220 | 2.64 | 1.76 | 23.09 |
| 1HGE.PDB | OE1, B_GLU_72  | NZ, C_LYS_238  | HZ1, C_LYS_238  | 2.78 | 1.80 | 16.75 |
| 1HGE.PDB | O, B_SER_71    | NZ, C_LYS_238  | HZ3, C_LYS_238  | 2.65 | 1.71 | 19.56 |
| 1HGE.PDB | O, D_LYS_68    | NZ, C_LYS_299  | HZ2, C_LYS_299  | 2.96 | 1.94 | 10.83 |
| 1HGE.PDB | O, D_LYS_62    | N, C_GLY_303   | H, C_GLY_303    | 2.94 | 1.98 | 10.89 |
| 1HGE.PDB | OG, D_SER_93   | N, C_LYS_310   | H, C_LYS_310    | 2.92 | 1.96 | 11.23 |
| 1HGE.PDB | OD1, D_ASN_104 | N, C_ALA_317   | H, C_ALA_317    | 2.73 | 1.80 | 14.37 |
| 1HGE.PDB | OE1, D_GLU_15  | NZ, C_LYS_326  | HZ1, C_LYS_326  | 2.74 | 1.73 | 12.73 |
| 1HGE.PDB | O, C_VAL_323   | N, D_GLY_13    | H, D_GLY_13     | 2.71 | 1.79 | 14.79 |
| 1HGE.PDB | O, C_HIS_17    | N, D_TRP_14    | H, D_TRP_14     | 2.88 | 1.94 | 13.07 |
| 1HGE.PDB | O, C_GLY_16    | N, D_GLY_23    | H, D_GLY_23     | 2.94 | 2.04 | 19.95 |
| 1HGE.PDB | O, C_CYS_14    | N, D_ARG_25    | H, D_ARG_25     | 2.94 | 1.98 | 9.40  |
| 1HGE.PDB | O, C_THR_12    | N, D_GLN_27    | H, D_GLN_27     | 2.86 | 1.95 | 18.04 |
| 1HGE.PDB | OE2, B_GLU_97  | NH2, D_ARG_54  | HH22, D_ARG_54  | 2.87 | 1.89 | 12.82 |
| 1HGE.PDB | OG, C_SER_110  | NE2, D_HIS_64  | HE2, D_HIS_64   | 2.96 | 1.98 | 6.23  |
| 1HGE.PDB | O, C_LYS_299   | NZ, D_LYS_68   | HZ1, D_LYS_68   | 2.92 | 1.91 | 12.00 |
| 1HGE.PDB | OG, E_SER_107  | N, D_ARG_76    | H, D_ARG_76     | 2.87 | 1.90 | 6.58  |
| 1HGE.PDB | OE2, F_GLU_81  | NE, D_ARG_76   | HE, D_ARG_76    | 2.79 | 1.85 | 14.06 |
| 1HGE.PDB | OE2, F_GLU_74  | NH1, D_ARG_76  | HH12, D_ARG_76  | 2.78 | 1.78 | 7.91  |
| 1HGE.PDB | OE1, F_GLU_81  | NH2, D_ARG_76  | HH21, D_ARG_76  | 2.63 | 1.67 | 11.36 |
| 1HGE.PDB | OE1, F_GLU_74  | NH2, D_ARG_76  | HH22, D_ARG_76  | 2.74 | 1.75 | 7.04  |
| 1HGE.PDB | OE1, F_GLU_85  | OH, D_TYR_83   | HH, D_TYR_83    | 2.58 | 1.80 | 29.40 |
| 1HGE.PDB | OH, B_TYR_83   | NZ, D_LYS_88   | HZ1, D_LYS_88   | 2.71 | 1.68 | 6.52  |
| 1HGE.PDB | O, C_LYS_27    | ND2, D_ASN_104 | HD22, D_ASN_104 | 2.96 | 2.00 | 10.88 |
| 1HGE.PDB | OE1, B_GLU_132 | NE, D_ARG_124  | HE, D_ARG_124   | 2.78 | 1.98 | 28.90 |
| 1HGE.PDB | OE2, B_GLU_132 | NE, D_ARG_124  | HE, D_ARG_124   | 2.90 | 2.01 | 20.41 |
| 1HGE.PDB | O, C_LEU_13    | N, D_PHE_138   | H, D_PHE_138    | 2.74 | 1.87 | 21.30 |
| 1HGE.PDB | O, C_ALA_11    | N, D_ILE_140   | H, D_ILE_140    | 2.78 | 1.88 | 18.97 |
| 1HGE.PDB | O, B_ARG_170   | NH1, D_ARG_163 | HH12, D_ARG_163 | 2.79 | 1.82 | 14.16 |
| 1HGE.PDB | O, F_ILE_140   | N, E_ALA_11    | H, E_ALA_11     | 2.82 | 1.93 | 19.79 |
| 1HGE.PDB | O, F_GLN_27    | N, E_THR_12    | H, E_THR_12     | 2.91 | 1.97 | 12.43 |
| 1HGE.PDB | O, F_PHE_138   | N, E_LEU_13    | H, E_LEU_13     | 2.98 | 2.03 | 12.93 |
| 1HGE.PDB | O, F_ARG_25    | N, E_CYS_14    | H, E_CYS_14     | 2.61 | 1.80 | 26.88 |
| 1HGE.PDB | O, F_GLY_136   | N, E_LEU_15    | H, E_LEU_15     | 2.88 | 1.90 | 5.56  |
| 1HGE.PDB | O, F_GLY_23    | N, E_GLY_16    | H, E_GLY_16     | 2.95 | 2.06 | 19.95 |
| 1HGE.PDB | O, F_TRP_21    | N, E_HIS_18    | H, E_HIS_18     | 2.85 | 1.97 | 21.43 |
| 1HGE.PDB | OE2, F_GLU_97  | NZ, E_LYS_27   | HZ1, E_LYS_27   | 2.79 | 1.77 | 9.75  |
| 1HGE.PDB | OE2, F_GLU_67  | NH2, E_ARG_109 | HH21, E_ARG_109 | 2.78 | 1.79 | 11.63 |
| 1HGE.PDB | OD2, D_ASP_79  | OG, E_SER_110  | HG, E_SER_110   | 2.82 | 1.89 | 14.19 |
| 1HGE.PDB | OD1, C_ASP_101 | NE2, E_GLN_210 | HE22, E_GLN_210 | 2.89 | 2.04 | 25.02 |
| 1HGE.PDB | OE1, A_GLN_210 | NH2, E_ARG_220 | HH21, E_ARG_220 | 2.74 | 1.87 | 25.04 |
| 1HGE.PDB | O, D_SER_71    | NZ, E_LYS_238  | HZ2, E_LYS_238  | 2.75 | 1.79 | 18.19 |
| 1HGE.PDB | OE1, D_GLU_72  | NZ, E_LYS_238  | HZ3, E_LYS_238  | 2.85 | 1.84 | 12.25 |
| 1HGE.PDB | O, F_LYS_68    | NZ, E_LYS_299  | HZ2, E_LYS_299  | 2.95 | 1.93 | 11.73 |
| 1HGE.PDB | O, F_LYS_62    | N, E_GLY_303   | H, E_GLY_303    | 2.95 | 1.98 | 8.29  |
| 1HGE.PDB | OG, F_SER_93   | N, E_LYS_310   | H, E_LYS_310    | 2.93 | 1.97 | 10.15 |
| 1HGE.PDB | OD1, F_ASP_86  | NZ, E_LYS_310  | HZ3, E_LYS_310  | 2.86 | 2.02 | 29.64 |
| 1HGE.PDB | OD1, F_ASN_104 | N, E_ALA_317   | H, E_ALA_317    | 2.73 | 1.80 | 13.22 |
| 1HGE.PDB | OE1, F_GLU_15  | NZ, E_LYS_326  | HZ3, E_LYS_326  | 2.99 | 2.00 | 17.08 |

|          |                |                |                 |      |      |       |
|----------|----------------|----------------|-----------------|------|------|-------|
| 1HGE.PDB | O, E_VAL_323   | N, F_GLY_13    | H, F_GLY_13     | 2.72 | 1.79 | 12.93 |
| 1HGE.PDB | O, E_HIS_17    | N, F_TRP_14    | H, F_TRP_14     | 2.85 | 1.91 | 12.63 |
| 1HGE.PDB | O, E_GLY_16    | N, F_GLY_23    | H, F_GLY_23     | 2.91 | 2.01 | 19.90 |
| 1HGE.PDB | O, E_CYS_14    | N, F_ARG_25    | H, F_ARG_25     | 2.88 | 1.93 | 12.79 |
| 1HGE.PDB | O, E_THR_12    | N, F_GLN_27    | H, F_GLN_27     | 2.82 | 1.90 | 16.16 |
| 1HGE.PDB | OE2, D_GLU_97  | NH2, F_ARG_54  | HH22, F_ARG_54  | 2.80 | 1.82 | 12.52 |
| 1HGE.PDB | OD2, D_ASP_90  | NZ, F_LYS_62   | HZ2, F_LYS_62   | 2.67 | 1.83 | 29.15 |
| 1HGE.PDB | OG, E_SER_110  | NE2, F_HIS_64  | HE2, F_HIS_64   | 2.94 | 1.97 | 9.11  |
| 1HGE.PDB | O, E_LYS_299   | NZ, F_LYS_68   | HZ1, F_LYS_68   | 2.97 | 1.93 | 4.62  |
| 1HGE.PDB | OG, A_SER_107  | N, F_ARG_76    | H, F_ARG_76     | 2.81 | 1.83 | 4.38  |
| 1HGE.PDB | OE2, B_GLU_81  | NE, F_ARG_76   | HE, F_ARG_76    | 2.85 | 1.89 | 11.64 |
| 1HGE.PDB | OE2, B_GLU_74  | NH1, F_ARG_76  | HH12, F_ARG_76  | 2.73 | 1.73 | 6.19  |
| 1HGE.PDB | OE1, B_GLU_81  | NH2, F_ARG_76  | HH21, F_ARG_76  | 2.65 | 1.66 | 5.51  |
| 1HGE.PDB | OE1, B_GLU_74  | NH2, F_ARG_76  | HH22, F_ARG_76  | 2.70 | 1.73 | 9.07  |
| 1HGE.PDB | OE1, B_GLU_85  | OH, F_TYR_83   | HH, F_TYR_83    | 2.51 | 1.76 | 30.00 |
| 1HGE.PDB | OH, D_TYR_83   | NZ, F_LYS_88   | HZ1, F_LYS_88   | 2.67 | 1.65 | 8.34  |
| 1HGE.PDB | O, E_LYS_27    | ND2, F_ASN_104 | HD22, F_ASN_104 | 2.94 | 1.99 | 10.01 |
| 1HGE.PDB | OE1, D_GLU_132 | NE, F_ARG_124  | HE, F_ARG_124   | 2.92 | 2.09 | 27.36 |
| 1HGE.PDB | O, E_LEU_13    | N, F_PHE_138   | H, F_PHE_138    | 2.73 | 1.86 | 22.03 |
| 1HGE.PDB | O, E_ALA_11    | N, F_ILE_140   | H, F_ILE_140    | 2.75 | 1.87 | 19.65 |
| 1HGE.PDB | O, D_ARG_170   | NH1, F_ARG_163 | HH12, F_ARG_163 | 2.95 | 1.99 | 14.32 |
| 1HGF.PDB | O, B_ILE_140   | N, A_ALA_11    | H, A_ALA_11     | 2.90 | 2.03 | 22.48 |
| 1HGF.PDB | O, B_PHE_138   | N, A_LEU_13    | H, A_LEU_13     | 2.96 | 1.99 | 8.07  |
| 1HGF.PDB | O, B_ARG_25    | N, A_CYS_14    | H, A_CYS_14     | 2.98 | 2.02 | 8.89  |
| 1HGF.PDB | O, B_GLY_136   | N, A_LEU_15    | H, A_LEU_15     | 2.92 | 1.95 | 7.83  |
| 1HGF.PDB | O, B_GLY_23    | N, A_GLY_16    | H, A_GLY_16     | 2.92 | 2.03 | 19.80 |
| 1HGF.PDB | O, B_TRP_21    | N, A_HIS_18    | H, A_HIS_18     | 2.92 | 2.01 | 18.08 |
| 1HGF.PDB | OE2, B_GLU_97  | NZ, A_LYS_27   | HZ1, A_LYS_27   | 2.79 | 1.86 | 21.55 |
| 1HGF.PDB | OE2, B_GLU_67  | NH2, A_ARG_109 | HH21, A_ARG_109 | 2.92 | 1.92 | 10.51 |
| 1HGF.PDB | OD2, F_ASP_79  | OG, A_SER_110  | HG, A_SER_110   | 2.82 | 1.90 | 15.87 |
| 1HGF.PDB | OE1, C_GLN_210 | NH2, A_ARG_220 | HH21, A_ARG_220 | 2.64 | 1.76 | 23.62 |
| 1HGF.PDB | OE1, F_GLU_72  | NZ, A_LYS_238  | HZ2, A_LYS_238  | 2.85 | 1.85 | 14.58 |
| 1HGF.PDB | O, F_SER_71    | NZ, A_LYS_238  | HZ3, A_LYS_238  | 2.63 | 1.67 | 16.71 |
| 1HGF.PDB | O, B_LYS_62    | N, A_GLY_303   | H, A_GLY_303    | 2.90 | 1.93 | 4.88  |
| 1HGF.PDB | OG, B_SER_93   | N, A_LYS_310   | H, A_LYS_310    | 2.89 | 1.97 | 16.03 |
| 1HGF.PDB | OD1, B_ASN_104 | N, A_ALA_317   | H, A_ALA_317    | 2.74 | 1.82 | 15.07 |
| 1HGF.PDB | O, A_VAL_323   | N, B_GLY_13    | H, B_GLY_13     | 2.74 | 1.86 | 21.47 |
| 1HGF.PDB | O, A_HIS_17    | N, B_TRP_14    | H, B_TRP_14     | 2.87 | 1.97 | 19.18 |
| 1HGF.PDB | O, A_CYS_14    | N, B_ARG_25    | H, B_ARG_25     | 2.97 | 2.03 | 13.73 |
| 1HGF.PDB | OE2, A_GLU_325 | NH2, B_ARG_25  | HH22, B_ARG_25  | 2.99 | 2.04 | 16.52 |
| 1HGF.PDB | O, E_THR_28    | NE, B_ARG_54   | HE, B_ARG_54    | 2.92 | 1.94 | 6.13  |
| 1HGF.PDB | OE2, F_GLU_97  | NH2, B_ARG_54  | HH22, B_ARG_54  | 2.83 | 1.86 | 13.50 |
| 1HGF.PDB | OD2, F_ASP_86  | NZ, B_LYS_62   | HZ2, B_LYS_62   | 2.71 | 1.70 | 11.44 |
| 1HGF.PDB | OD2, F_ASP_90  | NZ, B_LYS_62   | HZ3, B_LYS_62   | 2.77 | 1.82 | 20.37 |
| 1HGF.PDB | OG, A_SER_266  | ND1, B_HIS_64  | HD1, B_HIS_64   | 2.66 | 1.79 | 20.68 |
| 1HGF.PDB | OG, A_SER_110  | NE2, B_HIS_64  | HE2, B_HIS_64   | 2.89 | 1.92 | 10.70 |
| 1HGF.PDB | O, A_LYS_299   | NZ, B_LYS_68   | HZ2, B_LYS_68   | 2.93 | 1.89 | 4.53  |
| 1HGF.PDB | OG, C_SER_107  | N, B_ARG_76    | H, B_ARG_76     | 2.84 | 1.90 | 13.38 |
| 1HGF.PDB | OE2, D_GLU_81  | NE, B_ARG_76   | HE, B_ARG_76    | 2.92 | 1.92 | 2.47  |
| 1HGF.PDB | OE1, D_GLU_74  | NH1, B_ARG_76  | HH12, B_ARG_76  | 2.86 | 1.84 | 3.80  |
| 1HGF.PDB | OE1, D_GLU_81  | NH2, B_ARG_76  | HH21, B_ARG_76  | 2.73 | 1.74 | 10.29 |
| 1HGF.PDB | OE2, D_GLU_74  | NH2, B_ARG_76  | HH22, B_ARG_76  | 2.75 | 1.74 | 3.91  |
| 1HGF.PDB | OE1, D_GLU_85  | OH, B_TYR_83   | HH, B_TYR_83    | 2.57 | 1.80 | 29.66 |
| 1HGF.PDB | OH, F_TYR_83   | NZ, B_LYS_88   | HZ1, B_LYS_88   | 2.72 | 1.70 | 9.91  |
| 1HGF.PDB | O, A_LYS_27    | ND2, B_ASN_104 | HD21, B_ASN_104 | 2.88 | 1.94 | 13.97 |
| 1HGF.PDB | O, F_LEU_2     | OG, B_SER_113  | HG, B_SER_113   | 2.68 | 1.90 | 29.80 |
| 1HGF.PDB | OE1, F_GLU_132 | NE, B_ARG_124  | HE, B_ARG_124   | 2.80 | 1.86 | 13.00 |
| 1HGF.PDB | O, A_LEU_13    | N, B_PHE_138   | H, B_PHE_138    | 2.73 | 1.88 | 23.58 |

|          |                |                |                 |      |      |       |
|----------|----------------|----------------|-----------------|------|------|-------|
| 1HGF.PDB | O, A_ALA_11    | N, B_ILE_140   | H, B_ILE_140    | 2.80 | 1.87 | 14.66 |
| 1HGF.PDB | O, F_ARG_170   | NH1, B_ARG_163 | HH12, B_ARG_163 | 2.79 | 1.78 | 1.27  |
| 1HGF.PDB | OE1, F_GLU_131 | NH2, B_ARG_163 | HH21, B_ARG_163 | 2.74 | 1.86 | 24.20 |
| 1HGF.PDB | O, D_ILE_140   | N, C_ALA_11    | H, C_ALA_11     | 2.89 | 2.00 | 20.42 |
| 1HGF.PDB | O, D_GLN_27    | N, C_THR_12    | H, C_THR_12     | 2.90 | 1.96 | 12.68 |
| 1HGF.PDB | O, D_PHE_138   | N, C_LEU_13    | H, C_LEU_13     | 2.97 | 1.99 | 7.01  |
| 1HGF.PDB | O, D_ARG_25    | N, C_CYS_14    | H, C_CYS_14     | 2.79 | 1.86 | 15.57 |
| 1HGF.PDB | O, D_GLY_136   | N, C_LEU_15    | H, C_LEU_15     | 2.95 | 1.97 | 3.72  |
| 1HGF.PDB | O, D_GLY_23    | N, C_GLY_16    | H, C_GLY_16     | 2.95 | 2.05 | 18.06 |
| 1HGF.PDB | O, D_TRP_21    | N, C_HIS_18    | H, C_HIS_18     | 2.91 | 2.01 | 18.40 |
| 1HGF.PDB | OE2, D_GLU_97  | NZ, C_LYS_27   | HZ1, C_LYS_27   | 2.81 | 1.85 | 19.93 |
| 1HGF.PDB | OE2, D_GLU_67  | NH2, C_ARG_109 | HH21, C_ARG_109 | 2.91 | 1.92 | 11.49 |
| 1HGF.PDB | OD2, B_ASP_79  | OG, C_SER_110  | HG, C_SER_110   | 2.69 | 1.85 | 25.37 |
| 1HGF.PDB | OE1, E_GLN_210 | NH2, C_ARG_220 | HH21, C_ARG_220 | 2.56 | 1.72 | 26.72 |
| 1HGF.PDB | OE1, B_GLU_72  | NZ, C_LYS_238  | HZ2, C_LYS_238  | 2.75 | 1.78 | 18.48 |
| 1HGF.PDB | O, B_SER_71    | NZ, C_LYS_238  | HZ3, C_LYS_238  | 2.61 | 1.62 | 12.67 |
| 1HGF.PDB | O, D_LYS_62    | N, C_GLY_303   | H, C_GLY_303    | 2.91 | 1.95 | 8.09  |
| 1HGF.PDB | OG, D_SER_93   | N, C_LYS_310   | H, C_LYS_310    | 2.89 | 1.98 | 17.69 |
| 1HGF.PDB | OD1, D_ASN_104 | N, C_ALA_317   | H, C_ALA_317    | 2.78 | 1.83 | 11.25 |
| 1HGF.PDB | O, C_VAL_323   | N, D_GLY_13    | H, D_GLY_13     | 2.72 | 1.85 | 21.39 |
| 1HGF.PDB | O, C_HIS_17    | N, D_TRP_14    | H, D_TRP_14     | 2.87 | 1.96 | 16.75 |
| 1HGF.PDB | O, C_CYS_14    | N, D_ARG_25    | H, D_ARG_25     | 2.90 | 1.93 | 7.59  |
| 1HGF.PDB | O, C_THR_12    | N, D_GLN_27    | H, D_GLN_27     | 2.86 | 1.94 | 17.23 |
| 1HGF.PDB | O, A_THR_28    | NE, D_ARG_54   | HE, D_ARG_54    | 2.88 | 1.90 | 8.46  |
| 1HGF.PDB | OE2, B_GLU_97  | NH2, D_ARG_54  | HH22, D_ARG_54  | 2.84 | 1.86 | 12.74 |
| 1HGF.PDB | OD2, B_ASP_86  | NZ, D_LYS_62   | HZ2, D_LYS_62   | 2.69 | 1.69 | 13.49 |
| 1HGF.PDB | OD2, B_ASP_90  | NZ, D_LYS_62   | HZ3, D_LYS_62   | 2.68 | 1.77 | 22.81 |
| 1HGF.PDB | OG, C_SER_266  | ND1, D_HIS_64  | HD1, D_HIS_64   | 2.64 | 1.83 | 27.58 |
| 1HGF.PDB | OG, C_SER_110  | NE2, D_HIS_64  | HE2, D_HIS_64   | 2.90 | 1.92 | 7.33  |
| 1HGF.PDB | O, C_LYS_299   | NZ, D_LYS_68   | HZ2, D_LYS_68   | 2.93 | 1.89 | 4.98  |
| 1HGF.PDB | OG, E_SER_107  | N, D_ARG_76    | H, D_ARG_76     | 2.91 | 1.94 | 7.76  |
| 1HGF.PDB | OE2, F_GLU_81  | NE, D_ARG_76   | HE, D_ARG_76    | 2.82 | 1.85 | 5.34  |
| 1HGF.PDB | OE1, F_GLU_74  | NH1, D_ARG_76  | HH12, D_ARG_76  | 2.79 | 1.78 | 3.81  |
| 1HGF.PDB | OE1, F_GLU_81  | NH2, D_ARG_76  | HH21, D_ARG_76  | 2.64 | 1.68 | 12.43 |
| 1HGF.PDB | OE2, F_GLU_74  | NH2, D_ARG_76  | HH22, D_ARG_76  | 2.70 | 1.71 | 7.38  |
| 1HGF.PDB | OE1, F_GLU_85  | OH, D_TYR_83   | HH, D_TYR_83    | 2.58 | 1.80 | 29.87 |
| 1HGF.PDB | OH, B_TYR_83   | NZ, D_LYS_88   | HZ1, D_LYS_88   | 2.68 | 1.69 | 13.85 |
| 1HGF.PDB | O, C_LYS_27    | ND2, D_ASN_104 | HD21, D_ASN_104 | 2.89 | 1.96 | 15.72 |
| 1HGF.PDB | OE1, B_GLU_132 | NE, D_ARG_124  | HE, D_ARG_124   | 2.79 | 1.88 | 16.40 |
| 1HGF.PDB | O, C_LEU_13    | N, D_PHE_138   | H, D_PHE_138    | 2.75 | 1.91 | 24.76 |
| 1HGF.PDB | O, C_ALA_11    | N, D_ILE_140   | H, D_ILE_140    | 2.82 | 1.90 | 15.68 |
| 1HGF.PDB | O, B_ARG_170   | NH1, D_ARG_163 | HH12, D_ARG_163 | 2.84 | 1.83 | 3.71  |
| 1HGF.PDB | OE1, B_GLU_131 | NH2, D_ARG_163 | HH21, D_ARG_163 | 2.70 | 1.83 | 24.43 |
| 1HGF.PDB | O, F_ILE_140   | N, E_ALA_11    | H, E_ALA_11     | 2.95 | 2.06 | 20.63 |
| 1HGF.PDB | O, F_GLN_27    | N, E_THR_12    | H, E_THR_12     | 2.87 | 1.93 | 12.24 |
| 1HGF.PDB | O, F_PHE_138   | N, E_LEU_13    | H, E_LEU_13     | 2.96 | 1.99 | 8.43  |
| 1HGF.PDB | O, F_ARG_25    | N, E_CYS_14    | H, E_CYS_14     | 2.65 | 1.83 | 26.13 |
| 1HGF.PDB | O, F_GLY_136   | N, E_LEU_15    | H, E_LEU_15     | 2.91 | 1.93 | 3.45  |
| 1HGF.PDB | O, F_GLY_23    | N, E_GLY_16    | H, E_GLY_16     | 2.94 | 2.06 | 22.45 |
| 1HGF.PDB | O, F_TRP_21    | N, E_HIS_18    | H, E_HIS_18     | 2.91 | 2.00 | 17.81 |
| 1HGF.PDB | OE2, F_GLU_97  | NZ, E_LYS_27   | HZ1, E_LYS_27   | 2.75 | 1.83 | 22.30 |
| 1HGF.PDB | OE2, F_GLU_67  | NH2, E_ARG_109 | HH21, E_ARG_109 | 2.88 | 1.88 | 11.28 |
| 1HGF.PDB | OD2, D_ASP_79  | OG, E_SER_110  | HG, E_SER_110   | 2.78 | 1.90 | 21.69 |
| 1HGF.PDB | OE1, A_GLN_210 | NH2, E_ARG_220 | HH21, E_ARG_220 | 2.65 | 1.79 | 25.97 |
| 1HGF.PDB | OE1, D_GLU_72  | NZ, E_LYS_238  | HZ2, E_LYS_238  | 2.83 | 1.84 | 16.42 |
| 1HGF.PDB | O, D_SER_71    | NZ, E_LYS_238  | HZ3, E_LYS_238  | 2.74 | 1.75 | 13.85 |
| 1HGF.PDB | O, F_LYS_62    | N, E_GLY_303   | H, E_GLY_303    | 2.90 | 1.93 | 6.18  |
| 1HGF.PDB | OG, F_SER_93   | N, E_LYS_310   | H, E_LYS_310    | 2.86 | 1.93 | 14.59 |



|          |                |                |                 |      |      |       |
|----------|----------------|----------------|-----------------|------|------|-------|
| 1HGF.PDB | OD1, F_ASN_104 | N, E_ALA_317   | H, E_ALA_317    | 2.72 | 1.78 | 10.77 |
| 1HGF.PDB | O, E_VAL_323   | N, F_GLY_13    | H, F_GLY_13     | 2.75 | 1.85 | 19.07 |
| 1HGF.PDB | O, E_HIS_17    | N, F_TRP_14    | H, F_TRP_14     | 2.87 | 1.96 | 16.52 |
| 1HGF.PDB | O, E_CYS_14    | N, F_ARG_25    | H, F_ARG_25     | 2.91 | 1.94 | 8.25  |
| 1HGF.PDB | O, E_THR_12    | N, F_GLN_27    | H, F_GLN_27     | 3.00 | 2.08 | 17.91 |
| 1HGF.PDB | OE2, D_GLU_97  | NH2, F_ARG_54  | HH22, F_ARG_54  | 2.79 | 1.81 | 11.74 |
| 1HGF.PDB | OD2, D_ASP_86  | NZ, F_LYS_62   | HZ2, F_LYS_62   | 2.67 | 1.68 | 13.64 |
| 1HGF.PDB | OD2, D_ASP_90  | NZ, F_LYS_62   | HZ3, F_LYS_62   | 2.75 | 1.81 | 20.23 |
| 1HGF.PDB | OG, E_SER_266  | ND1, F_HIS_64  | HD1, F_HIS_64   | 2.65 | 1.77 | 20.25 |
| 1HGF.PDB | OG, E_SER_110  | NE2, F_HIS_64  | HE2, F_HIS_64   | 2.89 | 1.92 | 9.46  |
| 1HGF.PDB | O, E_LYS_299   | NZ, F_LYS_68   | HZ2, F_LYS_68   | 2.97 | 1.95 | 8.70  |
| 1HGF.PDB | OG, A_SER_107  | N, F_ARG_76    | H, F_ARG_76     | 2.83 | 1.87 | 9.12  |
| 1HGF.PDB | OE2, B_GLU_81  | NE, F_ARG_76   | HE, F_ARG_76    | 2.86 | 1.88 | 5.84  |
| 1HGF.PDB | OE1, B_GLU_74  | NH1, F_ARG_76  | HH12, F_ARG_76  | 2.78 | 1.77 | 1.59  |
| 1HGF.PDB | OE1, B_GLU_81  | NH2, F_ARG_76  | HH21, F_ARG_76  | 2.69 | 1.70 | 7.61  |
| 1HGF.PDB | OE2, B_GLU_74  | NH2, F_ARG_76  | HH22, F_ARG_76  | 2.71 | 1.73 | 8.88  |
| 1HGF.PDB | OH, D_TYR_83   | NZ, F_LYS_88   | HZ1, F_LYS_88   | 2.55 | 1.63 | 21.75 |
| 1HGF.PDB | O, E_LYS_27    | ND2, F_ASN_104 | HD21, F_ASN_104 | 2.91 | 1.99 | 15.12 |
| 1HGF.PDB | O, D_LEU_2     | OG, F_SER_113  | HG, F_SER_113   | 2.73 | 1.92 | 27.40 |
| 1HGF.PDB | OE1, D_GLU_132 | NE, F_ARG_124  | HE, F_ARG_124   | 2.90 | 1.96 | 15.73 |
| 1HGF.PDB | O, E_LEU_13    | N, F_PHE_138   | H, F_PHE_138    | 2.75 | 1.92 | 26.04 |
| 1HGF.PDB | O, E_ALA_11    | N, F_ILE_140   | H, F_ILE_140    | 2.82 | 1.90 | 16.36 |
| 1HGF.PDB | OE1, D_GLU_131 | NH2, F_ARG_163 | HH21, F_ARG_163 | 2.69 | 1.84 | 27.00 |
| 1HGG.PDB | O, B_ILE_140   | N, A_ALA_11    | H, A_ALA_11     | 2.90 | 1.98 | 16.87 |
| 1HGG.PDB | O, B_PHE_138   | N, A_LEU_13    | H, A_LEU_13     | 2.97 | 2.01 | 10.10 |
| 1HGG.PDB | O, B_ARG_25    | N, A_CYS_14    | H, A_CYS_14     | 2.92 | 1.97 | 11.02 |
| 1HGG.PDB | O, B_GLY_136   | N, A_LEU_15    | H, A_LEU_15     | 2.86 | 1.89 | 7.78  |
| 1HGG.PDB | O, B_GLY_23    | N, A_GLY_16    | H, A_GLY_16     | 2.90 | 2.00 | 20.11 |
| 1HGG.PDB | O, B_TRP_21    | N, A_HIS_18    | H, A_HIS_18     | 2.90 | 1.99 | 17.50 |
| 1HGG.PDB | OE2, B_GLU_97  | NZ, A_LYS_27   | HZ1, A_LYS_27   | 2.90 | 1.87 | 9.15  |
| 1HGG.PDB | OE2, B_GLU_67  | NH2, A_ARG_109 | HH21, A_ARG_109 | 2.84 | 1.86 | 14.43 |
| 1HGG.PDB | OD2, F_ASP_79  | OG, A_SER_110  | HG, A_SER_110   | 2.88 | 1.95 | 14.29 |
| 1HGG.PDB | OD1, E_ASP_101 | NE2, A_GLN_210 | HE22, A_GLN_210 | 2.99 | 2.07 | 17.95 |
| 1HGG.PDB | OE1, C_GLN_210 | NH2, A_ARG_220 | HH21, A_ARG_220 | 2.73 | 1.78 | 15.93 |
| 1HGG.PDB | O, F_SER_71    | NZ, A_LYS_238  | HZ2, A_LYS_238  | 2.70 | 1.77 | 20.55 |
| 1HGG.PDB | OE1, F_GLU_72  | NZ, A_LYS_238  | HZ3, A_LYS_238  | 2.93 | 1.93 | 14.31 |
| 1HGG.PDB | OE2, F_GLU_72  | NZ, A_LYS_238  | HZ3, A_LYS_238  | 2.74 | 1.91 | 29.92 |
| 1HGG.PDB | OE1, B_GLU_67  | NH1, A_ARG_269 | HH12, A_ARG_269 | 2.69 | 1.86 | 28.34 |
| 1HGG.PDB | O, B_LYS_68    | NZ, A_LYS_299  | HZ1, A_LYS_299  | 2.91 | 1.88 | 9.16  |
| 1HGG.PDB | O, B_LYS_62    | N, A_GLY_303   | H, A_GLY_303    | 2.91 | 1.94 | 6.06  |
| 1HGG.PDB | OG, B_SER_93   | N, A_LYS_310   | H, A_LYS_310    | 2.89 | 1.96 | 14.59 |
| 1HGG.PDB | OD1, B_ASP_90  | NZ, A_LYS_310  | HZ2, A_LYS_310  | 2.70 | 1.74 | 18.08 |
| 1HGG.PDB | OD1, B_ASN_104 | N, A_ALA_317   | H, A_ALA_317    | 2.79 | 1.88 | 16.20 |
| 1HGG.PDB | OE2, B_GLU_15  | NZ, A_LYS_326  | HZ1, A_LYS_326  | 2.83 | 1.89 | 21.04 |
| 1HGG.PDB | O, A_VAL_323   | N, B_GLY_13    | H, B_GLY_13     | 2.71 | 1.78 | 13.00 |
| 1HGG.PDB | O, A_HIS_17    | N, B_TRP_14    | H, B_TRP_14     | 2.79 | 1.88 | 17.76 |
| 1HGG.PDB | O, A_GLY_16    | N, B_GLY_23    | H, B_GLY_23     | 2.99 | 2.09 | 20.32 |
| 1HGG.PDB | OE2, A_GLU_325 | NH2, B_ARG_25  | HH22, B_ARG_25  | 2.94 | 1.96 | 12.23 |
| 1HGG.PDB | O, E_THR_28    | NE, B_ARG_54   | HE, B_ARG_54    | 2.94 | 1.97 | 7.82  |
| 1HGG.PDB | OE2, F_GLU_97  | NH2, B_ARG_54  | HH22, B_ARG_54  | 2.75 | 1.76 | 9.96  |
| 1HGG.PDB | OD2, F_ASP_90  | NZ, B_LYS_62   | HZ2, B_LYS_62   | 2.65 | 1.82 | 29.87 |
| 1HGG.PDB | OD2, F_ASP_86  | NZ, B_LYS_62   | HZ3, B_LYS_62   | 2.64 | 1.73 | 23.35 |
| 1HGG.PDB | OG, A_SER_110  | NE2, B_HIS_64  | HE2, B_HIS_64   | 2.90 | 1.96 | 14.63 |
| 1HGG.PDB | O, A_LYS_299   | NZ, B_LYS_68   | HZ1, B_LYS_68   | 2.86 | 1.83 | 9.73  |
| 1HGG.PDB | OG, C_SER_107  | N, B_ARG_76    | H, B_ARG_76     | 2.77 | 1.82 | 10.45 |
| 1HGG.PDB | OE2, D_GLU_81  | NE, B_ARG_76   | HE, B_ARG_76    | 2.94 | 1.96 | 10.47 |
| 1HGG.PDB | OE1, D_GLU_74  | NH1, B_ARG_76  | HH12, B_ARG_76  | 2.88 | 1.89 | 10.69 |
| 1HGG.PDB | OE1, D_GLU_81  | NH2, B_ARG_76  | HH21, B_ARG_76  | 2.73 | 1.73 | 5.91  |

|          |                |                |                 |      |      |       |
|----------|----------------|----------------|-----------------|------|------|-------|
| 1HGG.PDB | OE2, D_GLU_74  | NH2, B_ARG_76  | HH22, B_ARG_76  | 2.82 | 1.82 | 7.26  |
| 1HGG.PDB | OE1, D_GLU_85  | OH, B_TYR_83   | HH, B_TYR_83    | 2.68 | 1.80 | 19.99 |
| 1HGG.PDB | OH, F_TYR_83   | NZ, B_LYS_88   | HZ1, B_LYS_88   | 2.77 | 1.73 | 5.14  |
| 1HGG.PDB | O, A_LYS_27    | ND2, B_ASN_104 | HD22, B_ASN_104 | 2.88 | 1.95 | 14.60 |
| 1HGG.PDB | OE1, F_GLU_132 | NE, B_ARG_124  | HE, B_ARG_124   | 2.84 | 1.98 | 22.96 |
| 1HGG.PDB | OE2, F_GLU_132 | NE, B_ARG_124  | HE, B_ARG_124   | 2.81 | 1.98 | 25.54 |
| 1HGG.PDB | O, A_LEU_13    | N, B_PHE_138   | H, B_PHE_138    | 2.70 | 1.86 | 24.49 |
| 1HGG.PDB | O, A_ALA_11    | N, B_ILE_140   | H, B_ILE_140    | 2.77 | 1.86 | 18.05 |
| 1HGG.PDB | O, F_ARG_170   | NH1, B_ARG_163 | HH12, B_ARG_163 | 2.76 | 1.82 | 18.13 |
| 1HGG.PDB | O, D_ILE_140   | N, C_ALA_11    | H, C_ALA_11     | 2.88 | 1.96 | 16.67 |
| 1HGG.PDB | O, D_PHE_138   | N, C_LEU_13    | H, C_LEU_13     | 3.00 | 2.04 | 10.72 |
| 1HGG.PDB | O, D_ARG_25    | N, C_CYS_14    | H, C_CYS_14     | 2.73 | 1.80 | 13.70 |
| 1HGG.PDB | O, D_GLY_136   | N, C_LEU_15    | H, C_LEU_15     | 2.90 | 1.94 | 8.49  |
| 1HGG.PDB | O, D_GLY_23    | N, C_GLY_16    | H, C_GLY_16     | 2.91 | 2.01 | 20.14 |
| 1HGG.PDB | O, D_TRP_21    | N, C_HIS_18    | H, C_HIS_18     | 2.90 | 2.00 | 17.75 |
| 1HGG.PDB | OE2, D_GLU_97  | NZ, C_LYS_27   | HZ1, C_LYS_27   | 2.94 | 1.91 | 8.28  |
| 1HGG.PDB | OE2, D_GLU_67  | NH2, C_ARG_109 | HH21, C_ARG_109 | 2.85 | 1.88 | 14.56 |
| 1HGG.PDB | OD2, B_ASP_79  | OG, C_SER_110  | HG, C_SER_110   | 2.76 | 1.86 | 17.83 |
| 1HGG.PDB | OE1, E_GLN_210 | NH2, C_ARG_220 | HH21, C_ARG_220 | 2.61 | 1.71 | 21.26 |
| 1HGG.PDB | OE1, B_GLU_72  | NZ, C_LYS_238  | HZ1, C_LYS_238  | 2.83 | 1.86 | 17.18 |
| 1HGG.PDB | OE2, B_GLU_72  | NZ, C_LYS_238  | HZ1, C_LYS_238  | 2.70 | 1.87 | 29.85 |
| 1HGG.PDB | O, B_SER_71    | NZ, C_LYS_238  | HZ3, C_LYS_238  | 2.64 | 1.71 | 20.39 |
| 1HGG.PDB | OE1, D_GLU_67  | NH1, C_ARG_269 | HH12, C_ARG_269 | 2.69 | 1.85 | 27.75 |
| 1HGG.PDB | O, D_LYS_68    | NZ, C_LYS_299  | HZ1, C_LYS_299  | 2.94 | 1.91 | 9.55  |
| 1HGG.PDB | O, D_LYS_62    | N, C_GLY_303   | H, C_GLY_303    | 2.91 | 1.94 | 5.10  |
| 1HGG.PDB | OG, D_SER_93   | N, C_LYS_310   | H, C_LYS_310    | 2.89 | 1.96 | 14.95 |
| 1HGG.PDB | OD1, D_ASP_90  | NZ, C_LYS_310  | HZ2, C_LYS_310  | 2.65 | 1.73 | 21.74 |
| 1HGG.PDB | OD1, D_ASN_104 | N, C_ALA_317   | H, C_ALA_317    | 2.78 | 1.87 | 17.02 |
| 1HGG.PDB | O, C_VAL_323   | N, D_GLY_13    | H, D_GLY_13     | 2.71 | 1.79 | 13.39 |
| 1HGG.PDB | O, C_HIS_17    | N, D_TRP_14    | H, D_TRP_14     | 2.80 | 1.89 | 17.21 |
| 1HGG.PDB | O, C_GLY_16    | N, D_GLY_23    | H, D_GLY_23     | 2.99 | 2.09 | 20.18 |
| 1HGG.PDB | O, C_CYS_14    | N, D_ARG_25    | H, D_ARG_25     | 2.94 | 1.98 | 8.24  |
| 1HGG.PDB | O, A_THR_28    | NE, D_ARG_54   | HE, D_ARG_54    | 2.88 | 1.91 | 8.15  |
| 1HGG.PDB | OE2, B_GLU_97  | NH2, D_ARG_54  | HH22, D_ARG_54  | 2.76 | 1.78 | 10.56 |
| 1HGG.PDB | OG, C_SER_110  | NE2, D_HIS_64  | HE2, D_HIS_64   | 2.86 | 1.90 | 9.42  |
| 1HGG.PDB | O, C_LYS_299   | NZ, D_LYS_68   | HZ1, D_LYS_68   | 2.84 | 1.83 | 12.46 |
| 1HGG.PDB | OG, E_SER_107  | N, D_ARG_76    | H, D_ARG_76     | 2.84 | 1.88 | 7.98  |
| 1HGG.PDB | OE2, F_GLU_81  | NE, D_ARG_76   | HE, D_ARG_76    | 2.86 | 1.89 | 9.57  |
| 1HGG.PDB | OE1, F_GLU_74  | NH1, D_ARG_76  | HH12, D_ARG_76  | 2.78 | 1.80 | 12.10 |
| 1HGG.PDB | OE1, F_GLU_81  | NH2, D_ARG_76  | HH21, D_ARG_76  | 2.67 | 1.68 | 6.66  |
| 1HGG.PDB | OE2, F_GLU_74  | NH2, D_ARG_76  | HH22, D_ARG_76  | 2.74 | 1.75 | 9.29  |
| 1HGG.PDB | OE1, F_GLU_85  | OH, D_TYR_83   | HH, D_TYR_83    | 2.59 | 1.78 | 26.83 |
| 1HGG.PDB | OH, B_TYR_83   | NZ, D_LYS_88   | HZ1, D_LYS_88   | 2.73 | 1.70 | 8.35  |
| 1HGG.PDB | O, C_LYS_27    | ND2, D_ASN_104 | HD22, D_ASN_104 | 2.86 | 1.93 | 13.53 |
| 1HGG.PDB | OE1, B_GLU_132 | NE, D_ARG_124  | HE, D_ARG_124   | 2.86 | 2.00 | 22.57 |
| 1HGG.PDB | OE2, B_GLU_132 | NE, D_ARG_124  | HE, D_ARG_124   | 2.78 | 1.96 | 26.12 |
| 1HGG.PDB | O, C_LEU_13    | N, D_PHE_138   | H, D_PHE_138    | 2.73 | 1.88 | 23.87 |
| 1HGG.PDB | O, C_ALA_11    | N, D_ILE_140   | H, D_ILE_140    | 2.80 | 1.89 | 17.21 |
| 1HGG.PDB | O, B_ARG_170   | NH1, D_ARG_163 | HH12, D_ARG_163 | 2.79 | 1.85 | 17.60 |
| 1HGG.PDB | O, F_ILE_140   | N, E_ALA_11    | H, E_ALA_11     | 2.91 | 1.98 | 15.76 |
| 1HGG.PDB | O, F_GLN_27    | N, E_THR_12    | H, E_THR_12     | 2.92 | 1.99 | 15.18 |
| 1HGG.PDB | O, F_PHE_138   | N, E_LEU_13    | H, E_LEU_13     | 2.97 | 2.01 | 11.10 |
| 1HGG.PDB | O, F_ARG_25    | N, E_CYS_14    | H, E_CYS_14     | 2.71 | 1.83 | 19.57 |
| 1HGG.PDB | O, F_GLY_136   | N, E_LEU_15    | H, E_LEU_15     | 2.87 | 1.90 | 6.84  |
| 1HGG.PDB | O, F_GLY_23    | N, E_GLY_16    | H, E_GLY_16     | 2.91 | 2.01 | 19.19 |
| 1HGG.PDB | O, F_TRP_21    | N, E_HIS_18    | H, E_HIS_18     | 2.89 | 1.99 | 18.05 |
| 1HGG.PDB | OE2, F_GLU_97  | NZ, E_LYS_27   | HZ1, E_LYS_27   | 2.91 | 1.88 | 8.89  |
| 1HGG.PDB | OE2, F_GLU_67  | NH2, E_ARG_109 | HH21, E_ARG_109 | 2.88 | 1.90 | 14.20 |

|          |                |                |                 |      |      |       |
|----------|----------------|----------------|-----------------|------|------|-------|
| 1HGG.PDB | OD2, D-ASP.79  | OG, E-SER.110  | HG, E-SER.110   | 2.79 | 1.88 | 16.48 |
| 1HGG.PDB | OD1, C-ASP.101 | NE2, E-GLN.210 | HE22, E-GLN.210 | 2.96 | 2.04 | 17.70 |
| 1HGG.PDB | OE1, A-GLN.210 | NH2, E-ARG.220 | HH21, E-ARG.220 | 2.72 | 1.80 | 20.26 |
| 1HGG.PDB | OE1, D-GLU.72  | NZ, E-LYS.238  | HZ1, E-LYS.238  | 2.89 | 1.89 | 13.93 |
| 1HGG.PDB | O, D-SER.71    | NZ, E-LYS.238  | HZ3, E-LYS.238  | 2.80 | 1.86 | 20.00 |
| 1HGG.PDB | OE1, F-GLU.67  | NH1, E-ARG.269 | HH12, E-ARG.269 | 2.69 | 1.85 | 27.32 |
| 1HGG.PDB | O, F-LYS.68    | NZ, E-LYS.299  | HZ1, E-LYS.299  | 2.93 | 1.91 | 9.86  |
| 1HGG.PDB | O, F-LYS.62    | N, E-GLY.303   | H, E-GLY.303    | 2.92 | 1.95 | 6.71  |
| 1HGG.PDB | OG, F-SER.93   | N, E-LYS.310   | H, E-LYS.310    | 2.89 | 1.95 | 15.34 |
| 1HGG.PDB | OD1, F-ASP.90  | NZ, E-LYS.310  | HZ2, E-LYS.310  | 2.64 | 1.72 | 22.12 |
| 1HGG.PDB | OD1, F-ASN.104 | N, E-ALA.317   | H, E-ALA.317    | 2.80 | 1.89 | 16.99 |
| 1HGG.PDB | OE2, F-GLU.15  | N, E-GLU.325   | H, E-GLU.325    | 2.88 | 2.08 | 28.79 |
| 1HGG.PDB | OE1, F-GLU.15  | NZ, E-LYS.326  | HZ3, E-LYS.326  | 2.98 | 1.97 | 15.13 |
| 1HGG.PDB | O, E-VAL.323   | N, F-GLY.13    | H, F-GLY.13     | 2.73 | 1.78 | 9.21  |
| 1HGG.PDB | O, E-HIS.17    | N, F-TRP.14    | H, F-TRP.14     | 2.81 | 1.90 | 18.17 |
| 1HGG.PDB | O, E-GLY.16    | N, F-GLY.23    | H, F-GLY.23     | 2.97 | 2.08 | 20.37 |
| 1HGG.PDB | O, E-CYS.14    | N, F-ARG.25    | H, F-ARG.25     | 2.99 | 2.04 | 12.72 |
| 1HGG.PDB | O, E-THR.12    | N, F-GLN.27    | H, F-GLN.27     | 2.98 | 2.05 | 15.41 |
| 1HGG.PDB | OE2, D-GLU.97  | NH2, F-ARG.54  | HH22, F-ARG.54  | 2.73 | 1.74 | 10.16 |
| 1HGG.PDB | OD2, D-ASP.86  | NZ, F-LYS.62   | HZ3, F-LYS.62   | 2.58 | 1.75 | 29.01 |
| 1HGG.PDB | OG, E-SER.110  | NE2, F-HIS.64  | HE2, F-HIS.64   | 2.87 | 1.91 | 10.03 |
| 1HGG.PDB | O, E-LYS.299   | NZ, F-LYS.68   | HZ1, F-LYS.68   | 2.85 | 1.83 | 8.63  |
| 1HGG.PDB | OG, A-SER.107  | N, F-ARG.76    | H, F-ARG.76     | 2.79 | 1.82 | 4.90  |
| 1HGG.PDB | OE2, B-GLU.81  | NE, F-ARG.76   | HE, F-ARG.76    | 2.88 | 1.92 | 11.44 |
| 1HGG.PDB | OE1, B-GLU.74  | NH1, F-ARG.76  | HH12, F-ARG.76  | 2.75 | 1.76 | 9.13  |
| 1HGG.PDB | OE1, B-GLU.81  | NH2, F-ARG.76  | HH21, F-ARG.76  | 2.67 | 1.68 | 1.99  |
| 1HGG.PDB | OE2, B-GLU.74  | NH2, F-ARG.76  | HH22, F-ARG.76  | 2.79 | 1.81 | 10.64 |
| 1HGG.PDB | OH, D-TYR.83   | NZ, F-LYS.88   | HZ1, F-LYS.88   | 2.68 | 1.67 | 10.46 |
| 1HGG.PDB | O, E-LYS.27    | ND2, F-ASN.104 | HD22, F-ASN.104 | 2.91 | 1.98 | 14.98 |
| 1HGG.PDB | OE1, D-GLU.132 | NE, F-ARG.124  | HE, F-ARG.124   | 2.96 | 2.09 | 22.59 |
| 1HGG.PDB | OE2, D-GLU.132 | NE, F-ARG.124  | HE, F-ARG.124   | 2.87 | 2.01 | 24.00 |
| 1HGG.PDB | O, E-LEU.13    | N, F-PHE.138   | H, F-PHE.138    | 2.72 | 1.87 | 23.38 |
| 1HGG.PDB | O, E-ALA.11    | N, F-ILE.140   | H, F-ILE.140    | 2.79 | 1.89 | 17.86 |
| 1HGG.PDB | O, D-ARG.170   | NH1, F-ARG.163 | HH12, F-ARG.163 | 2.94 | 2.00 | 17.69 |
| 1HGH.PDB | O, B-ILE.140   | N, A-ALA.11    | H, A-ALA.11     | 2.91 | 2.03 | 21.75 |
| 1HGH.PDB | O, B-PHE.138   | N, A-LEU.13    | H, A-LEU.13     | 2.96 | 1.99 | 9.24  |
| 1HGH.PDB | O, B-ARG.25    | N, A-CYS.14    | H, A-CYS.14     | 2.90 | 1.93 | 6.13  |
| 1HGH.PDB | O, B-GLY.136   | N, A-LEU.15    | H, A-LEU.15     | 2.89 | 1.92 | 5.59  |
| 1HGH.PDB | O, B-GLY.23    | N, A-GLY.16    | H, A-GLY.16     | 2.92 | 2.07 | 24.71 |
| 1HGH.PDB | O, B-TRP.21    | N, A-HIS.18    | H, A-HIS.18     | 2.92 | 2.03 | 20.10 |
| 1HGH.PDB | OE2, B-GLU.97  | NZ, A-LYS.27   | HZ1, A-LYS.27   | 2.78 | 1.76 | 9.03  |
| 1HGH.PDB | OE2, B-GLU.67  | NH2, A-ARG.109 | HH21, A-ARG.109 | 2.86 | 1.88 | 13.48 |
| 1HGH.PDB | OD2, F-ASP.79  | OG, A-SER.110  | HG, A-SER.110   | 2.97 | 2.01 | 11.65 |
| 1HGH.PDB | OD1, E-ASP.101 | NE2, A-GLN.210 | HE22, A-GLN.210 | 2.97 | 2.14 | 27.61 |
| 1HGH.PDB | OE1, C-GLN.210 | NH2, A-ARG.220 | HH21, A-ARG.220 | 2.66 | 1.73 | 18.15 |
| 1HGH.PDB | O, F-SER.71    | NZ, A-LYS.238  | HZ2, A-LYS.238  | 2.69 | 1.74 | 19.56 |
| 1HGH.PDB | OE1, F-GLU.72  | NZ, A-LYS.238  | HZ3, A-LYS.238  | 2.92 | 1.93 | 15.64 |
| 1HGH.PDB | O, B-LYS.68    | NZ, A-LYS.299  | HZ1, A-LYS.299  | 2.98 | 1.97 | 13.59 |
| 1HGH.PDB | O, B-LYS.62    | N, A-GLY.303   | H, A-GLY.303    | 3.00 | 2.03 | 6.35  |
| 1HGH.PDB | OG, B-SER.93   | N, A-LYS.310   | H, A-LYS.310    | 2.90 | 1.94 | 8.41  |
| 1HGH.PDB | OD1, B-ASP.86  | NZ, A-LYS.310  | HZ2, A-LYS.310  | 2.71 | 1.84 | 27.09 |
| 1HGH.PDB | OD1, B-ASN.104 | N, A-ALA.317   | H, A-ALA.317    | 2.74 | 1.80 | 10.38 |
| 1HGH.PDB | O, A-VAL.323   | N, B-GLY.13    | H, B-GLY.13     | 2.69 | 1.78 | 16.40 |
| 1HGH.PDB | O, A-HIS.17    | N, B-TRP.14    | H, B-TRP.14     | 2.80 | 1.87 | 14.18 |
| 1HGH.PDB | O, A-GLY.16    | N, B-GLY.23    | H, B-GLY.23     | 2.92 | 2.01 | 18.42 |
| 1HGH.PDB | O, A-CYS.14    | N, B-ARG.25    | H, B-ARG.25     | 2.97 | 2.02 | 12.29 |
| 1HGH.PDB | OE2, F-GLU.97  | NH2, B-ARG.54  | HH22, B-ARG.54  | 2.82 | 1.86 | 15.60 |
| 1HGH.PDB | OD2, F-ASP.86  | NZ, B-LYS.62   | HZ1, B-LYS.62   | 2.66 | 1.80 | 27.71 |

|          |                |                |                 |      |      |       |
|----------|----------------|----------------|-----------------|------|------|-------|
| 1HGH.PDB | OD2, F_ASP_90  | NZ, B_LYS_62   | HZ3, B_LYS_62   | 2.68 | 1.82 | 27.13 |
| 1HGH.PDB | OG, A_SER_110  | NE2, B_HIS_64  | HE2, B_HIS_64   | 2.87 | 1.91 | 11.96 |
| 1HGH.PDB | O, A_LYS_299   | NZ, B_LYS_68   | HZ1, B_LYS_68   | 2.89 | 1.86 | 6.42  |
| 1HGH.PDB | OG, C_SER_107  | N, B_ARG_76    | H, B_ARG_76     | 2.88 | 1.92 | 9.13  |
| 1HGH.PDB | OE2, D_GLU_81  | NE, B_ARG_76   | HE, B_ARG_76    | 2.87 | 1.90 | 9.70  |
| 1HGH.PDB | OE2, D_GLU_74  | NH1, B_ARG_76  | HH12, B_ARG_76  | 2.91 | 1.90 | 8.45  |
| 1HGH.PDB | OE1, D_GLU_81  | NH2, B_ARG_76  | HH21, B_ARG_76  | 2.77 | 1.76 | 5.47  |
| 1HGH.PDB | OE1, D_GLU_74  | NH2, B_ARG_76  | HH22, B_ARG_76  | 2.89 | 1.87 | 2.83  |
| 1HGH.PDB | OE1, D_GLU_85  | OH, B_TYR_83   | HH, B_TYR_83    | 2.69 | 1.84 | 23.96 |
| 1HGH.PDB | OH, F_TYR_83   | NZ, B_LYS_88   | HZ1, B_LYS_88   | 2.74 | 1.71 | 7.44  |
| 1HGH.PDB | O, A_LYS_27    | ND2, B_ASN_104 | HD22, B_ASN_104 | 2.88 | 1.93 | 11.07 |
| 1HGH.PDB | OE1, F_GLU_132 | NE, B_ARG_124  | HE, B_ARG_124   | 2.76 | 1.94 | 26.47 |
| 1HGH.PDB | OE2, F_GLU_132 | NE, B_ARG_124  | HE, B_ARG_124   | 2.83 | 1.98 | 23.62 |
| 1HGH.PDB | O, A_LEU_13    | N, B_PHE_138   | H, B_PHE_138    | 2.71 | 1.82 | 19.17 |
| 1HGH.PDB | O, A_ALA_11    | N, B_ILE_140   | H, B_ILE_140    | 2.77 | 1.85 | 16.34 |
| 1HGH.PDB | O, F_ARG_170   | NH1, B_ARG_163 | HH12, B_ARG_163 | 2.69 | 1.71 | 10.72 |
| 1HGH.PDB | O, D_ILE_140   | N, C_ALA_11    | H, C_ALA_11     | 2.90 | 2.02 | 21.17 |
| 1HGH.PDB | O, D_GLN_27    | N, C_THR_12    | H, C_THR_12     | 2.94 | 1.99 | 10.37 |
| 1HGH.PDB | O, D_PHE_138   | N, C_LEU_13    | H, C_LEU_13     | 2.98 | 2.01 | 8.63  |
| 1HGH.PDB | O, D_ARG_25    | N, C_CYS_14    | H, C_CYS_14     | 2.74 | 1.80 | 11.01 |
| 1HGH.PDB | O, D_GLY_136   | N, C_LEU_15    | H, C_LEU_15     | 2.92 | 1.95 | 6.34  |
| 1HGH.PDB | O, D_GLY_23    | N, C_GLY_16    | H, C_GLY_16     | 2.95 | 2.08 | 23.40 |
| 1HGH.PDB | O, D_TRP_21    | N, C_HIS_18    | H, C_HIS_18     | 2.93 | 2.04 | 20.66 |
| 1HGH.PDB | OE2, D_GLU_97  | NZ, C_LYS_27   | HZ1, C_LYS_27   | 2.82 | 1.78 | 7.61  |
| 1HGH.PDB | OE2, D_GLU_67  | NH2, C_ARG_109 | HH21, C_ARG_109 | 2.86 | 1.88 | 13.66 |
| 1HGH.PDB | OD2, B_ASP_79  | OG, C_SER_110  | HG, C_SER_110   | 2.78 | 1.85 | 13.87 |
| 1HGH.PDB | OD1, A_ASP_101 | NE2, C_GLN_210 | HE22, C_GLN_210 | 2.93 | 2.07 | 24.87 |
| 1HGH.PDB | OE1, E_GLN_210 | NH2, C_ARG_220 | HH21, C_ARG_220 | 2.57 | 1.72 | 26.03 |
| 1HGH.PDB | OE1, B_GLU_72  | NZ, C_LYS_238  | HZ1, C_LYS_238  | 2.71 | 1.80 | 22.72 |
| 1HGH.PDB | O, B_SER_71    | NZ, C_LYS_238  | HZ3, C_LYS_238  | 2.68 | 1.75 | 20.57 |
| 1HGH.PDB | OG, D_SER_93   | N, C_LYS_310   | H, C_LYS_310    | 2.93 | 1.96 | 8.29  |
| 1HGH.PDB | OD1, D_ASP_86  | NZ, C_LYS_310  | HZ2, C_LYS_310  | 2.73 | 1.85 | 26.20 |
| 1HGH.PDB | OD1, D_ASN_104 | N, C_ALA_317   | H, C_ALA_317    | 2.74 | 1.81 | 14.42 |
| 1HGH.PDB | OE1, D_GLU_15  | NZ, C_LYS_326  | HZ1, C_LYS_326  | 2.77 | 1.75 | 11.00 |
| 1HGH.PDB | O, C_VAL_323   | N, D_GLY_13    | H, D_GLY_13     | 2.68 | 1.77 | 15.36 |
| 1HGH.PDB | O, C_HIS_17    | N, D_TRP_14    | H, D_TRP_14     | 2.80 | 1.87 | 13.64 |
| 1HGH.PDB | O, C_GLY_16    | N, D_GLY_23    | H, D_GLY_23     | 2.92 | 2.01 | 18.18 |
| 1HGH.PDB | O, C_CYS_14    | N, D_ARG_25    | H, D_ARG_25     | 2.90 | 1.94 | 10.42 |
| 1HGH.PDB | O, C_THR_12    | N, D_GLN_27    | H, D_GLN_27     | 2.91 | 1.98 | 14.85 |
| 1HGH.PDB | O, A_THR_28    | NE, D_ARG_54   | HE, D_ARG_54    | 2.96 | 1.98 | 3.97  |
| 1HGH.PDB | OE2, B_GLU_97  | NH2, D_ARG_54  | HH22, D_ARG_54  | 2.80 | 1.85 | 16.64 |
| 1HGH.PDB | OG, C_SER_110  | NE2, D_HIS_64  | HE2, D_HIS_64   | 2.84 | 1.88 | 10.18 |
| 1HGH.PDB | O, C_LYS_299   | NZ, D_LYS_68   | HZ1, D_LYS_68   | 2.88 | 1.85 | 6.67  |
| 1HGH.PDB | OG, E_SER_107  | N, D_ARG_76    | H, D_ARG_76     | 2.91 | 1.94 | 8.23  |
| 1HGH.PDB | OE2, F_GLU_81  | NE, D_ARG_76   | HE, D_ARG_76    | 2.79 | 1.84 | 10.45 |
| 1HGH.PDB | OE2, F_GLU_74  | NH1, D_ARG_76  | HH12, D_ARG_76  | 2.77 | 1.77 | 10.38 |
| 1HGH.PDB | OE1, F_GLU_81  | NH2, D_ARG_76  | HH21, D_ARG_76  | 2.70 | 1.70 | 6.41  |
| 1HGH.PDB | OE1, F_GLU_74  | NH2, D_ARG_76  | HH22, D_ARG_76  | 2.75 | 1.75 | 5.88  |
| 1HGH.PDB | OE1, F_GLU_85  | OH, D_TYR_83   | HH, D_TYR_83    | 2.59 | 1.81 | 29.86 |
| 1HGH.PDB | OH, B_TYR_83   | NZ, D_LYS_88   | HZ1, D_LYS_88   | 2.66 | 1.64 | 7.83  |
| 1HGH.PDB | O, C_LYS_27    | ND2, D_ASN_104 | HD22, D_ASN_104 | 2.89 | 1.94 | 11.70 |
| 1HGH.PDB | OE1, B_GLU_132 | NE, D_ARG_124  | HE, D_ARG_124   | 2.80 | 1.98 | 26.35 |
| 1HGH.PDB | OE2, B_GLU_132 | NE, D_ARG_124  | HE, D_ARG_124   | 2.84 | 1.99 | 23.38 |
| 1HGH.PDB | O, C_LEU_13    | N, D_PHE_138   | H, D_PHE_138    | 2.75 | 1.85 | 18.05 |
| 1HGH.PDB | O, C_ALA_11    | N, D_ILE_140   | H, D_ILE_140    | 2.83 | 1.90 | 15.57 |
| 1HGH.PDB | O, B_ARG_170   | NH1, D_ARG_163 | HH12, D_ARG_163 | 2.75 | 1.77 | 10.76 |
| 1HGH.PDB | O, F_ILE_140   | N, E_ALA_11    | H, E_ALA_11     | 2.92 | 2.02 | 19.53 |
| 1HGH.PDB | O, F_PHE_138   | N, E_LEU_13    | H, E_LEU_13     | 2.96 | 1.99 | 9.34  |

|          |                |                |                 |      |      |       |
|----------|----------------|----------------|-----------------|------|------|-------|
| 1HGH.PDB | O, F_ARG_25    | N, E_CYS_14    | H, E_CYS_14     | 2.64 | 1.78 | 21.59 |
| 1HGH.PDB | O, F_GLY_136   | N, E_LEU_15    | H, E_LEU_15     | 2.90 | 1.93 | 5.74  |
| 1HGH.PDB | O, F_GLY_23    | N, E_GLY_16    | H, E_GLY_16     | 2.92 | 2.05 | 22.72 |
| 1HGH.PDB | O, F_TRP_21    | N, E_HIS_18    | H, E_HIS_18     | 2.92 | 2.03 | 19.54 |
| 1HGH.PDB | OE2, F_GLU_97  | NZ, E_LYS_27   | HZ1, E_LYS_27   | 2.77 | 1.74 | 8.08  |
| 1HGH.PDB | OE2, F_GLU_67  | NH2, E_ARG_109 | HH21, E_ARG_109 | 2.88 | 1.90 | 13.56 |
| 1HGH.PDB | OD2, D_ASP_79  | OG, E_SER_110  | HG, E_SER_110   | 2.90 | 1.94 | 9.49  |
| 1HGH.PDB | OD1, C_ASP_101 | NE2, E_GLN_210 | HE22, E_GLN_210 | 2.95 | 2.09 | 25.33 |
| 1HGH.PDB | OE1, A_GLN_210 | NH2, E_ARG_220 | HH21, E_ARG_220 | 2.68 | 1.79 | 22.30 |
| 1HGH.PDB | O, D_SER_71    | NZ, E_LYS_238  | HZ2, E_LYS_238  | 2.84 | 1.88 | 19.22 |
| 1HGH.PDB | OE1, D_GLU_72  | NZ, E_LYS_238  | HZ3, E_LYS_238  | 2.87 | 1.88 | 15.42 |
| 1HGH.PDB | OE1, F_GLU_67  | NH1, E_ARG_269 | HH12, E_ARG_269 | 2.71 | 1.88 | 29.19 |
| 1HGH.PDB | O, F_LYS_62    | N, E_GLY_303   | H, E_GLY_303    | 2.98 | 2.01 | 7.92  |
| 1HGH.PDB | OG, F_SER_93   | N, E_LYS_310   | H, E_LYS_310    | 2.93 | 1.97 | 10.42 |
| 1HGH.PDB | OD1, F_ASP_86  | NZ, E_LYS_310  | HZ2, E_LYS_310  | 2.74 | 1.87 | 26.77 |
| 1HGH.PDB | O, F_SER_93    | NE2, E_GLN_311 | HE21, E_GLN_311 | 2.99 | 2.02 | 4.65  |
| 1HGH.PDB | OD1, F_ASN_104 | N, E_ALA_317   | H, E_ALA_317    | 2.75 | 1.81 | 11.69 |
| 1HGH.PDB | OE2, F_GLU_15  | N, E_GLU_325   | H, E_GLU_325    | 2.97 | 2.16 | 28.37 |
| 1HGH.PDB | OE1, F_GLU_15  | NZ, E_LYS_326  | HZ3, E_LYS_326  | 2.90 | 1.89 | 12.96 |
| 1HGH.PDB | O, E_VAL_323   | N, F_GLY_13    | H, F_GLY_13     | 2.70 | 1.77 | 11.97 |
| 1HGH.PDB | O, E_HIS_17    | N, F_TRP_14    | H, F_TRP_14     | 2.81 | 1.87 | 12.50 |
| 1HGH.PDB | O, E_GLY_16    | N, F_GLY_23    | H, F_GLY_23     | 2.91 | 2.00 | 17.53 |
| 1HGH.PDB | O, E_CYS_14    | N, F_ARG_25    | H, F_ARG_25     | 2.90 | 1.98 | 16.77 |
| 1HGH.PDB | O, E_THR_12    | N, F_GLN_27    | H, F_GLN_27     | 2.91 | 2.03 | 20.46 |
| 1HGH.PDB | OE2, D_GLU_97  | NH2, F_ARG_54  | HH22, F_ARG_54  | 2.72 | 1.77 | 15.67 |
| 1HGH.PDB | OD2, D_ASP_90  | NZ, F_LYS_62   | HZ2, F_LYS_62   | 2.68 | 1.83 | 28.02 |
| 1HGH.PDB | OG, E_SER_110  | NE2, F_HIS_64  | HE2, F_HIS_64   | 2.87 | 1.91 | 9.23  |
| 1HGH.PDB | O, E_LYS_299   | NZ, F_LYS_68   | HZ1, F_LYS_68   | 2.91 | 1.87 | 1.37  |
| 1HGH.PDB | OG, A_SER_107  | N, F_ARG_76    | H, F_ARG_76     | 2.80 | 1.83 | 4.45  |
| 1HGH.PDB | OE2, B_GLU_81  | NE, F_ARG_76   | HE, F_ARG_76    | 2.84 | 1.87 | 10.72 |
| 1HGH.PDB | OE2, B_GLU_74  | NH1, F_ARG_76  | HH12, F_ARG_76  | 2.73 | 1.73 | 5.34  |
| 1HGH.PDB | OE1, B_GLU_81  | NH2, F_ARG_76  | HH21, F_ARG_76  | 2.71 | 1.70 | 1.21  |
| 1HGH.PDB | OE1, B_GLU_74  | NH2, F_ARG_76  | HH22, F_ARG_76  | 2.78 | 1.78 | 7.19  |
| 1HGH.PDB | OE1, B_GLU_85  | OH, F_TYR_83   | HH, F_TYR_83    | 2.53 | 1.74 | 27.23 |
| 1HGH.PDB | OH, D_TYR_83   | NZ, F_LYS_88   | HZ1, F_LYS_88   | 2.65 | 1.63 | 9.88  |
| 1HGH.PDB | O, E_LYS_27    | ND2, F_ASN_104 | HD22, F_ASN_104 | 2.90 | 1.95 | 12.28 |
| 1HGH.PDB | OE1, D_GLU_132 | NE, F_ARG_124  | HE, F_ARG_124   | 2.89 | 2.06 | 26.55 |
| 1HGH.PDB | OE2, D_GLU_132 | NE, F_ARG_124  | HE, F_ARG_124   | 2.92 | 2.03 | 21.52 |
| 1HGH.PDB | O, E_LEU_13    | N, F_PHE_138   | H, F_PHE_138    | 2.71 | 1.82 | 18.02 |
| 1HGH.PDB | O, E_ALA_11    | N, F_ILE_140   | H, F_ILE_140    | 2.79 | 1.87 | 15.45 |
| 1HGH.PDB | O, D_ARG_170   | NH1, F_ARG_163 | HH12, F_ARG_163 | 2.89 | 1.90 | 10.67 |
| 1HGI.PDB | O, B_ILE_140   | N, A_ALA_11    | H, A_ALA_11     | 2.84 | 1.92 | 15.59 |
| 1HGI.PDB | O, B_PHE_138   | N, A_LEU_13    | H, A_LEU_13     | 3.00 | 2.03 | 9.98  |
| 1HGI.PDB | O, B_ARG_25    | N, A_CYS_14    | H, A_CYS_14     | 2.96 | 2.03 | 15.50 |
| 1HGI.PDB | O, B_GLY_136   | N, A_LEU_15    | H, A_LEU_15     | 2.93 | 1.96 | 7.25  |
| 1HGI.PDB | O, B_GLY_23    | N, A_GLY_16    | H, A_GLY_16     | 2.98 | 2.12 | 23.40 |
| 1HGI.PDB | O, B_TRP_21    | N, A_HIS_18    | H, A_HIS_18     | 2.89 | 1.98 | 18.40 |
| 1HGI.PDB | OE2, B_GLU_97  | NZ, A_LYS_27   | HZ1, A_LYS_27   | 2.90 | 1.86 | 7.66  |
| 1HGI.PDB | OE2, B_GLU_67  | NH2, A_ARG_109 | HH21, A_ARG_109 | 2.80 | 1.81 | 13.24 |
| 1HGI.PDB | OE1, C_GLN_210 | NH2, A_ARG_220 | HH21, A_ARG_220 | 2.65 | 1.73 | 18.55 |
| 1HGI.PDB | OE1, F_SER_71  | NZ, A_LYS_238  | HZ2, A_LYS_238  | 2.65 | 1.80 | 28.67 |
| 1HGI.PDB | OE1, F_GLU_72  | NZ, A_LYS_238  | HZ3, A_LYS_238  | 2.85 | 1.85 | 15.00 |
| 1HGI.PDB | O, B_LYS_62    | N, A_GLY_303   | H, A_GLY_303    | 2.96 | 1.99 | 7.07  |
| 1HGI.PDB | OG, B_SER_93   | N, A_LYS_310   | H, A_LYS_310    | 2.98 | 2.05 | 15.58 |
| 1HGI.PDB | OD1, B_ASP_86  | NZ, A_LYS_310  | HZ3, A_LYS_310  | 2.76 | 1.92 | 29.34 |
| 1HGI.PDB | OD1, B_ASN_104 | N, A_ALA_317   | H, A_ALA_317    | 2.74 | 1.83 | 15.76 |
| 1HGI.PDB | OE2, B_GLU_15  | NZ, A_LYS_326  | HZ1, A_LYS_326  | 2.79 | 1.93 | 27.33 |
| 1HGI.PDB | OE1, B_GLU_15  | N, A_THR_328   | H, A_THR_328    | 2.87 | 1.93 | 12.65 |

|          |                |                |                 |      |      |       |
|----------|----------------|----------------|-----------------|------|------|-------|
| 1HGI.PDB | O, A_VAL_323   | N, B_GLY_13    | H, B_GLY_13     | 2.68 | 1.79 | 18.45 |
| 1HGI.PDB | O, A_HIS_17    | N, B_TRP_14    | H, B_TRP_14     | 2.78 | 1.88 | 17.65 |
| 1HGI.PDB | O, A_GLY_16    | N, B_GLY_23    | H, B_GLY_23     | 2.97 | 2.06 | 17.58 |
| 1HGI.PDB | OE2, A_GLU_325 | NH2, B_ARG_25  | HH22, B_ARG_25  | 2.93 | 1.95 | 13.46 |
| 1HGI.PDB | O, E_THR_28    | NE, B_ARG_54   | HE, B_ARG_54    | 2.88 | 1.92 | 10.21 |
| 1HGI.PDB | OE2, F_GLU_97  | NH2, B_ARG_54  | HH22, B_ARG_54  | 2.81 | 1.84 | 14.63 |
| 1HGI.PDB | OD2, F_ASP_86  | NZ, B_LYS_62   | HZ1, B_LYS_62   | 2.67 | 1.78 | 25.75 |
| 1HGI.PDB | OG, A_SER_110  | NE2, B_HIS_64  | HE2, B_HIS_64   | 2.87 | 1.89 | 8.13  |
| 1HGI.PDB | O, A_LYS_299   | NZ, B_LYS_68   | HZ1, B_LYS_68   | 2.81 | 1.78 | 9.15  |
| 1HGI.PDB | OG, C_SER_107  | N, B_ARG_76    | H, B_ARG_76     | 2.85 | 1.90 | 10.66 |
| 1HGI.PDB | OE2, D_GLU_81  | NE, B_ARG_76   | HE, B_ARG_76    | 2.86 | 1.89 | 7.04  |
| 1HGI.PDB | OE2, D_GLU_74  | NH1, B_ARG_76  | HH12, B_ARG_76  | 2.92 | 1.89 | 1.72  |
| 1HGI.PDB | OE1, D_GLU_81  | NH2, B_ARG_76  | HH21, B_ARG_76  | 2.71 | 1.72 | 8.42  |
| 1HGI.PDB | OE1, D_GLU_74  | NH2, B_ARG_76  | HH22, B_ARG_76  | 2.86 | 1.86 | 6.93  |
| 1HGI.PDB | OE1, D_GLU_85  | OH, B_TYR_83   | HH, B_TYR_83    | 2.78 | 1.84 | 13.46 |
| 1HGI.PDB | OH, F_TYR_83   | NZ, B_LYS_88   | HZ1, B_LYS_88   | 2.65 | 1.64 | 9.94  |
| 1HGI.PDB | O, A_LYS_27    | ND2, B_ASN_104 | HD22, B_ASN_104 | 2.86 | 1.90 | 10.00 |
| 1HGI.PDB | O, F_LEU_2     | OG, B_SER_113  | HG, B_SER_113   | 2.77 | 1.90 | 22.05 |
| 1HGI.PDB | OE1, F_GLU_132 | NE, B_ARG_124  | HE, B_ARG_124   | 2.81 | 1.96 | 23.50 |
| 1HGI.PDB | OE2, F_GLU_132 | NE, B_ARG_124  | HE, B_ARG_124   | 2.86 | 2.02 | 24.92 |
| 1HGI.PDB | O, A_LEU_13    | N, B_PHE_138   | H, B_PHE_138    | 2.74 | 1.89 | 23.78 |
| 1HGI.PDB | O, A_ALA_11    | N, B_ILE_140   | H, B_ILE_140    | 2.77 | 1.87 | 18.46 |
| 1HGI.PDB | O, F_ARG_170   | NH1, B_ARG_163 | HH12, B_ARG_163 | 2.73 | 1.76 | 13.86 |
| 1HGI.PDB | O, D_ILE_140   | N, C_ALA_11    | H, C_ALA_11     | 2.86 | 1.93 | 15.33 |
| 1HGI.PDB | O, D_GLN_27    | N, C_THR_12    | H, C_THR_12     | 2.98 | 2.01 | 4.69  |
| 1HGI.PDB | O, D_PHE_138   | N, C_LEU_13    | H, C_LEU_13     | 2.99 | 2.03 | 9.93  |
| 1HGI.PDB | O, D_ARG_25    | N, C_CYS_14    | H, C_CYS_14     | 2.67 | 1.83 | 24.75 |
| 1HGI.PDB | O, D_GLY_136   | N, C_LEU_15    | H, C_LEU_15     | 2.95 | 1.98 | 7.51  |
| 1HGI.PDB | O, D_GLY_23    | N, C_GLY_16    | H, C_GLY_16     | 2.99 | 2.12 | 22.96 |
| 1HGI.PDB | O, D_TRP_21    | N, C_HIS_18    | H, C_HIS_18     | 2.88 | 1.97 | 18.12 |
| 1HGI.PDB | OE2, D_GLU_97  | NZ, C_LYS_27   | HZ1, C_LYS_27   | 2.88 | 1.83 | 6.58  |
| 1HGI.PDB | OE2, D_GLU_67  | NH2, C_ARG_109 | HH21, C_ARG_109 | 2.82 | 1.84 | 15.02 |
| 1HGI.PDB | OD2, B_ASP_79  | OG, C_SER_110  | HG, C_SER_110   | 2.85 | 1.90 | 11.29 |
| 1HGI.PDB | OE1, E_GLN_210 | NH2, C_ARG_220 | HH21, C_ARG_220 | 2.62 | 1.75 | 23.70 |
| 1HGI.PDB | OE1, B_GLU_72  | NZ, C_LYS_238  | HZ1, C_LYS_238  | 2.67 | 1.77 | 23.68 |
| 1HGI.PDB | O, B_SER_71    | NZ, C_LYS_238  | HZ3, C_LYS_238  | 2.57 | 1.73 | 28.43 |
| 1HGI.PDB | O, D_LYS_62    | N, C_GLY_303   | H, C_GLY_303    | 2.97 | 2.00 | 7.92  |
| 1HGI.PDB | OD1, D_ASP_86  | NZ, C_LYS_310  | HZ3, C_LYS_310  | 2.77 | 1.93 | 29.51 |
| 1HGI.PDB | OD1, D_ASN_104 | N, C_ALA_317   | H, C_ALA_317    | 2.74 | 1.83 | 16.29 |
| 1HGI.PDB | OE1, D_GLU_15  | NZ, C_LYS_326  | HZ1, C_LYS_326  | 2.83 | 1.84 | 16.25 |
| 1HGI.PDB | O, C_VAL_323   | N, D_GLY_13    | H, D_GLY_13     | 2.65 | 1.77 | 19.23 |
| 1HGI.PDB | O, C_HIS_17    | N, D_TRP_14    | H, D_TRP_14     | 2.83 | 1.92 | 16.86 |
| 1HGI.PDB | O, C_GLY_16    | N, D_GLY_23    | H, D_GLY_23     | 2.94 | 2.02 | 16.89 |
| 1HGI.PDB | O, C_CYS_14    | N, D_ARG_25    | H, D_ARG_25     | 2.88 | 1.94 | 13.44 |
| 1HGI.PDB | O, C_THR_12    | N, D_GLN_27    | H, D_GLN_27     | 2.95 | 2.00 | 13.47 |
| 1HGI.PDB | O, A_THR_28    | NE, D_ARG_54   | HE, D_ARG_54    | 2.83 | 1.87 | 10.21 |
| 1HGI.PDB | OE2, B_GLU_97  | NH2, D_ARG_54  | HH22, D_ARG_54  | 2.81 | 1.85 | 15.40 |
| 1HGI.PDB | OG, C_SER_110  | NE2, D_HIS_64  | HE2, D_HIS_64   | 2.83 | 1.85 | 2.78  |
| 1HGI.PDB | O, C_LYS_299   | NZ, D_LYS_68   | HZ1, D_LYS_68   | 2.79 | 1.78 | 10.55 |
| 1HGI.PDB | OG, E_SER_107  | N, D_ARG_76    | H, D_ARG_76     | 2.89 | 1.92 | 9.17  |
| 1HGI.PDB | OE2, F_GLU_81  | NE, D_ARG_76   | HE, D_ARG_76    | 2.80 | 1.82 | 5.40  |
| 1HGI.PDB | OE2, F_GLU_74  | NH1, D_ARG_76  | HH12, D_ARG_76  | 2.78 | 1.76 | 4.18  |
| 1HGI.PDB | OE1, F_GLU_81  | NH2, D_ARG_76  | HH21, D_ARG_76  | 2.61 | 1.67 | 15.38 |
| 1HGI.PDB | OE1, F_GLU_74  | NH2, D_ARG_76  | HH22, D_ARG_76  | 2.76 | 1.77 | 8.75  |
| 1HGI.PDB | OE1, F_GLU_85  | OH, D_TYR_83   | HH, D_TYR_83    | 2.69 | 1.81 | 20.41 |
| 1HGI.PDB | OH, B_TYR_83   | NZ, D_LYS_88   | HZ1, D_LYS_88   | 2.66 | 1.64 | 7.30  |
| 1HGI.PDB | O, C_LYS_27    | ND2, D_ASN_104 | HD22, D_ASN_104 | 2.83 | 1.88 | 11.60 |
| 1HGI.PDB | O, B_LEU_2     | OG, D_SER_113  | HG, D_SER_113   | 2.77 | 1.91 | 22.96 |

|          |                |                |                 |      |      |       |
|----------|----------------|----------------|-----------------|------|------|-------|
| 1HGI.PDB | OE1, B_GLU_132 | NE, D_ARG_124  | HE, D_ARG_124   | 2.84 | 1.98 | 23.95 |
| 1HGI.PDB | OE2, B_GLU_132 | NE, D_ARG_124  | HE, D_ARG_124   | 2.88 | 2.03 | 24.96 |
| 1HGI.PDB | O, C_LEU_13    | N, D_PHE_138   | H, D_PHE_138    | 2.79 | 1.92 | 22.46 |
| 1HGI.PDB | O, C_ALA_11    | N, D_ILE_140   | H, D_ILE_140    | 2.81 | 1.91 | 18.30 |
| 1HGI.PDB | O, B_ARG_170   | NH1, D_ARG_163 | HH12, D_ARG_163 | 2.80 | 1.83 | 13.94 |
| 1HGI.PDB | O, F_ILE_140   | N, E_ALA_11    | H, E_ALA_11     | 2.89 | 1.95 | 14.83 |
| 1HGI.PDB | O, F_GLN_27    | N, E_THR_12    | H, E_THR_12     | 2.94 | 2.00 | 13.31 |
| 1HGI.PDB | O, F_PHE_138   | N, E_LEU_13    | H, E_LEU_13     | 2.97 | 2.02 | 11.46 |
| 1HGI.PDB | O, F_ARG_25    | N, E_CYS_14    | H, E_CYS_14     | 2.66 | 1.84 | 26.53 |
| 1HGI.PDB | O, F_GLY_136   | N, E_LEU_15    | H, E_LEU_15     | 2.92 | 1.95 | 6.28  |
| 1HGI.PDB | O, F_GLY_23    | N, E_GLY_16    | H, E_GLY_16     | 2.99 | 2.12 | 22.78 |
| 1HGI.PDB | O, F_TRP_21    | N, E_HIS_18    | H, E_HIS_18     | 2.89 | 1.99 | 19.14 |
| 1HGI.PDB | OE2, F_GLU_97  | NZ, E_LYS_27   | HZ1, E_LYS_27   | 2.86 | 1.82 | 7.44  |
| 1HGI.PDB | OE2, F_GLU_67  | NH2, E_ARG_109 | HH21, E_ARG_109 | 2.78 | 1.80 | 14.37 |
| 1HGI.PDB | OD2, D_ASP_79  | OG, E_SER_110  | HG, E_SER_110   | 2.90 | 1.94 | 10.08 |
| 1HGI.PDB | OE1, A_GLN_210 | NH2, E_ARG_220 | HH21, E_ARG_220 | 2.69 | 1.80 | 23.03 |
| 1HGI.PDB | O, D_SER_71    | NZ, E_LYS_238  | HZ2, E_LYS_238  | 2.75 | 1.87 | 26.62 |
| 1HGI.PDB | OE1, D_GLU_72  | NZ, E_LYS_238  | HZ3, E_LYS_238  | 2.80 | 1.81 | 15.90 |
| 1HGI.PDB | O, F_LYS_62    | N, E_GLY_303   | H, E_GLY_303    | 2.93 | 1.96 | 6.65  |
| 1HGI.PDB | OG, F_SER_93   | N, E_LYS_310   | H, E_LYS_310    | 2.99 | 2.05 | 13.79 |
| 1HGI.PDB | OD1, F_ASP_86  | NZ, E_LYS_310  | HZ3, E_LYS_310  | 2.76 | 1.91 | 29.16 |
| 1HGI.PDB | OD1, F_ASN_104 | N, E_ALA_317   | H, E_ALA_317    | 2.72 | 1.81 | 15.78 |
| 1HGI.PDB | OE1, F_GLU_15  | NZ, E_LYS_326  | HZ3, E_LYS_326  | 2.88 | 1.86 | 11.05 |
| 1HGI.PDB | O, E_VAL_323   | N, F_GLY_13    | H, F_GLY_13     | 2.66 | 1.77 | 18.62 |
| 1HGI.PDB | O, E_HIS_17    | N, F_TRP_14    | H, F_TRP_14     | 2.84 | 1.93 | 16.42 |
| 1HGI.PDB | O, E_GLY_16    | N, F_GLY_23    | H, F_GLY_23     | 2.97 | 2.05 | 16.89 |
| 1HGI.PDB | O, E_CYS_14    | N, F_ARG_25    | H, F_ARG_25     | 2.91 | 2.04 | 22.96 |
| 1HGI.PDB | O, E_THR_12    | N, F_GLN_27    | H, F_GLN_27     | 2.93 | 1.99 | 14.92 |
| 1HGI.PDB | O, C_THR_28    | NE, F_ARG_54   | HE, F_ARG_54    | 2.95 | 1.99 | 9.70  |
| 1HGI.PDB | OE2, D_GLU_97  | NH2, F_ARG_54  | HH22, F_ARG_54  | 2.75 | 1.79 | 14.82 |
| 1HGI.PDB | OG, E_SER_110  | NE2, F_HIS_64  | HE2, F_HIS_64   | 2.84 | 1.87 | 3.62  |
| 1HGI.PDB | O, E_LYS_299   | NZ, F_LYS_68   | HZ1, F_LYS_68   | 2.80 | 1.76 | 2.37  |
| 1HGI.PDB | OG, A_SER_107  | N, F_ARG_76    | H, F_ARG_76     | 2.79 | 1.83 | 7.22  |
| 1HGI.PDB | OE2, B_GLU_81  | NE, F_ARG_76   | HE, F_ARG_76    | 2.85 | 1.88 | 7.37  |
| 1HGI.PDB | OE2, B_GLU_74  | NH1, F_ARG_76  | HH12, F_ARG_76  | 2.77 | 1.76 | 3.93  |
| 1HGI.PDB | OE1, B_GLU_81  | NH2, F_ARG_76  | HH21, F_ARG_76  | 2.64 | 1.66 | 4.79  |
| 1HGI.PDB | OE1, B_GLU_74  | NH2, F_ARG_76  | HH22, F_ARG_76  | 2.76 | 1.78 | 10.40 |
| 1HGI.PDB | OE1, B_GLU_85  | OH, F_TYR_83   | HH, F_TYR_83    | 2.58 | 1.75 | 24.06 |
| 1HGI.PDB | OH, D_TYR_83   | NZ, F_LYS_88   | HZ1, F_LYS_88   | 2.61 | 1.62 | 12.49 |
| 1HGI.PDB | O, E_LYS_27    | ND2, F_ASN_104 | HD22, F_ASN_104 | 2.88 | 1.93 | 10.77 |
| 1HGI.PDB | O, D_LEU_2     | OG, F_SER_113  | HG, F_SER_113   | 2.78 | 1.94 | 24.17 |
| 1HGI.PDB | OE1, D_GLU_132 | NE, F_ARG_124  | HE, F_ARG_124   | 2.96 | 2.09 | 23.50 |
| 1HGI.PDB | OE2, D_GLU_132 | NE, F_ARG_124  | HE, F_ARG_124   | 2.96 | 2.09 | 23.34 |
| 1HGI.PDB | O, E_LEU_13    | N, F_PHE_138   | H, F_PHE_138    | 2.75 | 1.89 | 22.82 |
| 1HGI.PDB | O, E_ALA_11    | N, F_ILE_140   | H, F_ILE_140    | 2.78 | 1.89 | 18.92 |
| 1HGI.PDB | O, D_ARG_170   | NH1, F_ARG_163 | HH12, F_ARG_163 | 2.92 | 1.95 | 13.55 |
| 1HGI.PDB | OE2, D_GLU_131 | NH2, F_ARG_163 | HH22, F_ARG_163 | 2.69 | 1.85 | 26.81 |
| 1HGJ.PDB | O, B_ILE_140   | N, A_ALA_11    | H, A_ALA_11     | 2.85 | 1.95 | 18.97 |
| 1HGJ.PDB | O, B_PHE_138   | N, A_LEU_13    | H, A_LEU_13     | 2.97 | 2.00 | 8.62  |
| 1HGJ.PDB | O, B_ARG_25    | N, A_CYS_14    | H, A_CYS_14     | 2.88 | 1.94 | 12.89 |
| 1HGJ.PDB | O, B_GLY_136   | N, A_LEU_15    | H, A_LEU_15     | 2.93 | 1.95 | 2.37  |
| 1HGJ.PDB | O, B_GLY_23    | N, A_GLY_16    | H, A_GLY_16     | 2.86 | 1.96 | 18.97 |
| 1HGJ.PDB | O, B_TRP_21    | N, A_HIS_18    | H, A_HIS_18     | 2.85 | 1.98 | 21.54 |
| 1HGJ.PDB | OE2, B_GLU_97  | NZ, A_LYS_27   | HZ1, A_LYS_27   | 2.81 | 1.78 | 9.30  |
| 1HGJ.PDB | OE2, B_GLU_67  | NH2, A_ARG_109 | HH21, A_ARG_109 | 2.75 | 1.77 | 12.07 |
| 1HGJ.PDB | OD2, F_ASP_79  | OG, A_SER_110  | HG, A_SER_110   | 2.94 | 1.98 | 10.39 |
| 1HGJ.PDB | OE1, C_GLN_210 | NH2, A_ARG_220 | HH21, A_ARG_220 | 2.67 | 1.78 | 22.50 |
| 1HGJ.PDB | O, F_SER_71    | NZ, A_LYS_238  | HZ2, A_LYS_238  | 2.62 | 1.72 | 23.44 |

|          |                |                |                 |      |      |       |
|----------|----------------|----------------|-----------------|------|------|-------|
| 1HGJ.PDB | OE1, F_GLU_72  | NZ, A_LYS_238  | HZ3, A_LYS_238  | 2.90 | 1.90 | 13.91 |
| 1HGJ.PDB | O, B_LYS_68    | NZ, A_LYS_299  | HZ2, A_LYS_299  | 2.95 | 1.96 | 14.91 |
| 1HGJ.PDB | O, B_LYS_62    | N, A_GLY_303   | H, A_GLY_303    | 2.93 | 1.97 | 8.41  |
| 1HGJ.PDB | OD1, B_ASN_104 | N, A_ALA_317   | H, A_ALA_317    | 2.74 | 1.81 | 13.01 |
| 1HGJ.PDB | OE1, B_GLU_15  | N, A_THR_328   | H, A_THR_328    | 2.99 | 2.03 | 9.44  |
| 1HGJ.PDB | O, A_VAL_323   | N, B_GLY_13    | H, B_GLY_13     | 2.69 | 1.76 | 11.68 |
| 1HGJ.PDB | O, A_HIS_17    | N, B_TRP_14    | H, B_TRP_14     | 2.84 | 1.89 | 12.22 |
| 1HGJ.PDB | O, A_GLY_16    | N, B_GLY_23    | H, B_GLY_23     | 2.94 | 2.02 | 17.07 |
| 1HGJ.PDB | O, A_CYS_14    | N, B_ARG_25    | H, B_ARG_25     | 2.98 | 2.05 | 15.51 |
| 1HGJ.PDB | OE2, A_GLU_325 | NH2, B_ARG_25  | HH22, B_ARG_25  | 2.97 | 2.01 | 15.94 |
| 1HGJ.PDB | O, E_THR_28    | NE, B_ARG_54   | HE, B_ARG_54    | 3.00 | 2.04 | 10.82 |
| 1HGJ.PDB | OE2, F_GLU_97  | NH2, B_ARG_54  | HH22, B_ARG_54  | 2.77 | 1.81 | 15.09 |
| 1HGJ.PDB | OD2, F_ASP_86  | NZ, B_LYS_62   | HZ1, B_LYS_62   | 2.65 | 1.75 | 23.55 |
| 1HGJ.PDB | OD2, F_ASP_90  | NZ, B_LYS_62   | HZ3, B_LYS_62   | 2.74 | 1.89 | 28.52 |
| 1HGJ.PDB | OG, A_SER_110  | NE2, B_HIS_64  | HE2, B_HIS_64   | 2.89 | 1.93 | 11.21 |
| 1HGJ.PDB | O, A_LYS_299   | NZ, B_LYS_68   | HZ1, B_LYS_68   | 2.90 | 1.89 | 11.39 |
| 1HGJ.PDB | OG, C_SER_107  | N, B_ARG_76    | H, B_ARG_76     | 2.84 | 1.89 | 10.24 |
| 1HGJ.PDB | OE2, D_GLU_81  | NE, B_ARG_76   | HE, B_ARG_76    | 2.90 | 1.93 | 10.80 |
| 1HGJ.PDB | OE2, D_GLU_74  | NH1, B_ARG_76  | HH12, B_ARG_76  | 2.88 | 1.87 | 5.28  |
| 1HGJ.PDB | OE1, D_GLU_81  | NH2, B_ARG_76  | HH21, B_ARG_76  | 2.72 | 1.72 | 3.64  |
| 1HGJ.PDB | OE1, D_GLU_74  | NH2, B_ARG_76  | HH22, B_ARG_76  | 2.85 | 1.84 | 3.19  |
| 1HGJ.PDB | OE1, D_GLU_85  | OH, B_TYR_83   | HH, B_TYR_83    | 2.67 | 1.83 | 24.12 |
| 1HGJ.PDB | OH, F_TYR_83   | NZ, B_LYS_88   | HZ1, B_LYS_88   | 2.78 | 1.75 | 7.42  |
| 1HGJ.PDB | O, A_LYS_27    | ND2, B_ASN_104 | HD22, B_ASN_104 | 2.89 | 1.94 | 10.52 |
| 1HGJ.PDB | O, F_LEU_2     | OG, B_SER_113  | HG, B_SER_113   | 2.74 | 1.91 | 25.16 |
| 1HGJ.PDB | OE1, F_GLU_132 | NE, B_ARG_124  | HE, B_ARG_124   | 2.82 | 2.00 | 27.29 |
| 1HGJ.PDB | OE2, F_GLU_132 | NE, B_ARG_124  | HE, B_ARG_124   | 2.91 | 2.02 | 20.91 |
| 1HGJ.PDB | O, A_LEU_13    | N, B_PHE_138   | H, B_PHE_138    | 2.71 | 1.86 | 23.78 |
| 1HGJ.PDB | O, A_ALA_11    | N, B_ILE_140   | H, B_ILE_140    | 2.77 | 1.86 | 16.77 |
| 1HGJ.PDB | O, F_ARG_170   | NH1, B_ARG_163 | HH12, B_ARG_163 | 2.72 | 1.75 | 12.61 |
| 1HGJ.PDB | O, D_ILE_140   | N, C_ALA_11    | H, C_ALA_11     | 2.85 | 1.95 | 19.06 |
| 1HGJ.PDB | O, D_GLN_27    | N, C_THR_12    | H, C_THR_12     | 2.99 | 2.03 | 8.05  |
| 1HGJ.PDB | O, D_PHE_138   | N, C_LEU_13    | H, C_LEU_13     | 2.99 | 2.02 | 7.89  |
| 1HGJ.PDB | O, D_ARG_25    | N, C_CYS_14    | H, C_CYS_14     | 2.76 | 1.85 | 16.80 |
| 1HGJ.PDB | O, D_GLY_136   | N, C_LEU_15    | H, C_LEU_15     | 2.95 | 1.97 | 3.95  |
| 1HGJ.PDB | O, D_GLY_23    | N, C_GLY_16    | H, C_GLY_16     | 2.89 | 1.98 | 18.54 |
| 1HGJ.PDB | O, D_TRP_21    | N, C_HIS_18    | H, C_HIS_18     | 2.86 | 1.97 | 20.63 |
| 1HGJ.PDB | OE2, D_GLU_97  | NZ, C_LYS_27   | HZ1, C_LYS_27   | 2.82 | 1.80 | 8.63  |
| 1HGJ.PDB | OE2, D_GLU_67  | NH2, C_ARG_109 | HH21, C_ARG_109 | 2.76 | 1.78 | 13.33 |
| 1HGJ.PDB | OD2, B_ASP_79  | OG, C_SER_110  | HG, C_SER_110   | 2.79 | 1.87 | 14.95 |
| 1HGJ.PDB | OE1, E_GLN_210 | NH2, C_ARG_220 | HH21, C_ARG_220 | 2.66 | 1.82 | 26.85 |
| 1HGJ.PDB | OE1, B_GLU_72  | NZ, C_LYS_238  | HZ1, C_LYS_238  | 2.75 | 1.79 | 18.67 |
| 1HGJ.PDB | O, B_SER_71    | NZ, C_LYS_238  | HZ3, C_LYS_238  | 2.55 | 1.67 | 24.42 |
| 1HGJ.PDB | O, D_LYS_68    | NZ, C_LYS_299  | HZ2, C_LYS_299  | 2.96 | 1.96 | 14.80 |
| 1HGJ.PDB | O, D_LYS_62    | N, C_GLY_303   | H, C_GLY_303    | 2.93 | 1.98 | 10.54 |
| 1HGJ.PDB | OG, D_SER_93   | N, C_LYS_310   | H, C_LYS_310    | 3.00 | 2.04 | 11.61 |
| 1HGJ.PDB | OD1, D_ASP_86  | NZ, C_LYS_310  | HZ3, C_LYS_310  | 2.94 | 2.10 | 29.37 |
| 1HGJ.PDB | OD1, D_ASN_104 | N, C_ALA_317   | H, C_ALA_317    | 2.74 | 1.82 | 13.77 |
| 1HGJ.PDB | OE1, D_GLU_15  | NZ, C_LYS_326  | HZ1, C_LYS_326  | 2.91 | 1.86 | 5.48  |
| 1HGJ.PDB | O, C_VAL_323   | N, D_GLY_13    | H, D_GLY_13     | 2.70 | 1.77 | 13.01 |
| 1HGJ.PDB | O, C_HIS_17    | N, D_TRP_14    | H, D_TRP_14     | 2.84 | 1.88 | 10.47 |
| 1HGJ.PDB | O, C_GLY_16    | N, D_GLY_23    | H, D_GLY_23     | 2.95 | 2.03 | 16.60 |
| 1HGJ.PDB | O, C_CYS_14    | N, D_ARG_25    | H, D_ARG_25     | 2.96 | 2.03 | 15.69 |
| 1HGJ.PDB | O, C_THR_12    | N, D_GLN_27    | H, D_GLN_27     | 2.96 | 2.04 | 16.68 |
| 1HGJ.PDB | O, A_THR_28    | NE, D_ARG_54   | HE, D_ARG_54    | 2.94 | 1.98 | 10.71 |
| 1HGJ.PDB | OE2, B_GLU_97  | NH2, D_ARG_54  | HH22, D_ARG_54  | 2.84 | 1.88 | 15.58 |
| 1HGJ.PDB | OG, C_SER_110  | NE2, D_HIS_64  | HE2, D_HIS_64   | 2.89 | 1.91 | 5.59  |
| 1HGJ.PDB | O, C_LYS_299   | NZ, D_LYS_68   | HZ1, D_LYS_68   | 2.93 | 1.91 | 11.63 |



|          |                |                |                 |      |      |       |
|----------|----------------|----------------|-----------------|------|------|-------|
| 1HGJ.PDB | OG, E_SER_107  | N, D_ARG_76    | H, D_ARG_76     | 2.86 | 1.90 | 9.67  |
| 1HGJ.PDB | OE2, F_GLU_81  | NE, D_ARG_76   | HE, D_ARG_76    | 2.85 | 1.89 | 10.87 |
| 1HGJ.PDB | OE2, F_GLU_74  | NH1, D_ARG_76  | HH12, D_ARG_76  | 2.76 | 1.76 | 7.89  |
| 1HGJ.PDB | OE1, F_GLU_81  | NH2, D_ARG_76  | HH21, D_ARG_76  | 2.68 | 1.69 | 5.65  |
| 1HGJ.PDB | OE1, F_GLU_74  | NH2, D_ARG_76  | HH22, D_ARG_76  | 2.71 | 1.72 | 5.59  |
| 1HGJ.PDB | OE1, F_GLU_85  | OH, D_TYR_83   | HH, D_TYR_83    | 2.63 | 1.81 | 25.72 |
| 1HGJ.PDB | OH, B_TYR_83   | NZ, D_LYS_88   | HZ1, D_LYS_88   | 2.75 | 1.72 | 7.31  |
| 1HGJ.PDB | O, C_LYS_27    | ND2, D_ASN_104 | HD22, D_ASN_104 | 2.90 | 1.94 | 10.67 |
| 1HGJ.PDB | O, B_LEU_2     | OG, D_SER_113  | HG, D_SER_113   | 2.68 | 1.87 | 27.58 |
| 1HGJ.PDB | OE1, B_GLU_132 | NE, D_ARG_124  | HE, D_ARG_124   | 2.80 | 1.98 | 27.33 |
| 1HGJ.PDB | OE2, B_GLU_132 | NE, D_ARG_124  | HE, D_ARG_124   | 2.87 | 2.00 | 21.99 |
| 1HGJ.PDB | OH, B_TYR_141  | NH1, D_ARG_127 | HH12, D_ARG_127 | 2.99 | 2.02 | 12.89 |
| 1HGJ.PDB | O, C_LEU_13    | N, D_PHE_138   | H, D_PHE_138    | 2.74 | 1.87 | 22.25 |
| 1HGJ.PDB | O, C_ALA_11    | N, D_ILE_140   | H, D_ILE_140    | 2.80 | 1.87 | 15.19 |
| 1HGJ.PDB | O, B_ARG_170   | NH1, D_ARG_163 | HH12, D_ARG_163 | 2.74 | 1.76 | 11.80 |
| 1HGJ.PDB | O, F_ILE_140   | N, E_ALA_11    | H, E_ALA_11     | 2.86 | 1.96 | 18.18 |
| 1HGJ.PDB | O, F_GLN_27    | N, E_THR_12    | H, E_THR_12     | 2.93 | 2.00 | 15.55 |
| 1HGJ.PDB | O, F_PHE_138   | N, E_LEU_13    | H, E_LEU_13     | 2.96 | 1.99 | 8.56  |
| 1HGJ.PDB | O, F_ARG_25    | N, E_CYS_14    | H, E_CYS_14     | 2.66 | 1.82 | 24.90 |
| 1HGJ.PDB | O, F_GLY_136   | N, E_LEU_15    | H, E_LEU_15     | 2.91 | 1.94 | 3.68  |
| 1HGJ.PDB | O, F_GLY_23    | N, E_GLY_16    | H, E_GLY_16     | 2.87 | 1.96 | 18.32 |
| 1HGJ.PDB | O, F_TRP_21    | N, E_HIS_18    | H, E_HIS_18     | 2.83 | 1.96 | 22.19 |
| 1HGJ.PDB | OE2, F_GLU_97  | NZ, E_LYS_27   | HZ1, E_LYS_27   | 2.81 | 1.79 | 8.50  |
| 1HGJ.PDB | OE2, F_GLU_67  | NH2, E_ARG_109 | HH21, E_ARG_109 | 2.76 | 1.77 | 12.82 |
| 1HGJ.PDB | OD2, D_ASP_79  | OG, E_SER_110  | HG, E_SER_110   | 2.79 | 1.87 | 15.96 |
| 1HGJ.PDB | OD1, C_ASP_101 | NE2, E_GLN_210 | HE22, E_GLN_210 | 2.94 | 2.10 | 26.45 |
| 1HGJ.PDB | OE1, A_GLN_210 | NH2, E_ARG_220 | HH21, E_ARG_220 | 2.69 | 1.86 | 28.41 |
| 1HGJ.PDB | O, D_SER_71    | NZ, E_LYS_238  | HZ2, E_LYS_238  | 2.65 | 1.73 | 22.71 |
| 1HGJ.PDB | OE1, D_GLU_72  | NZ, E_LYS_238  | HZ3, E_LYS_238  | 2.87 | 1.86 | 13.82 |
| 1HGJ.PDB | O, F_LYS_68    | NZ, E_LYS_299  | HZ1, E_LYS_299  | 2.94 | 1.95 | 15.31 |
| 1HGJ.PDB | O, F_LYS_62    | N, E_GLY_303   | H, E_GLY_303    | 2.92 | 1.96 | 9.12  |
| 1HGJ.PDB | OG, F_SER_93   | N, E_LYS_310   | H, E_LYS_310    | 2.99 | 2.03 | 10.38 |
| 1HGJ.PDB | OD1, F_ASP_86  | NZ, E_LYS_310  | HZ3, E_LYS_310  | 2.93 | 2.08 | 29.22 |
| 1HGJ.PDB | OD1, F_ASN_104 | N, E_ALA_317   | H, E_ALA_317    | 2.73 | 1.80 | 11.35 |
| 1HGJ.PDB | OE2, F_GLU_15  | N, E_GLU_325   | H, E_GLU_325    | 2.88 | 2.08 | 29.65 |
| 1HGJ.PDB | OE1, F_GLU_15  | NZ, E_LYS_326  | HZ3, E_LYS_326  | 2.87 | 1.86 | 12.83 |
| 1HGJ.PDB | O, E_VAL_323   | N, F_GLY_13    | H, F_GLY_13     | 2.69 | 1.76 | 10.96 |
| 1HGJ.PDB | O, E_HIS_17    | N, F_TRP_14    | H, F_TRP_14     | 2.84 | 1.89 | 11.67 |
| 1HGJ.PDB | O, E_GLY_16    | N, F_GLY_23    | H, F_GLY_23     | 2.93 | 2.01 | 16.90 |
| 1HGJ.PDB | O, E_CYS_14    | N, F_ARG_25    | H, F_ARG_25     | 2.87 | 1.99 | 20.85 |
| 1HGJ.PDB | O, E_THR_12    | N, F_GLN_27    | H, F_GLN_27     | 2.89 | 1.97 | 15.73 |
| 1HGJ.PDB | OE2, D_GLU_97  | NH2, F_ARG_54  | HH22, F_ARG_54  | 2.77 | 1.81 | 14.54 |
| 1HGJ.PDB | OG, E_SER_110  | NE2, F_HIS_64  | HE2, F_HIS_64   | 2.90 | 1.93 | 7.02  |
| 1HGJ.PDB | O, E_LYS_299   | NZ, F_LYS_68   | HZ1, F_LYS_68   | 2.93 | 1.90 | 4.77  |
| 1HGJ.PDB | OG, A_SER_107  | N, F_ARG_76    | H, F_ARG_76     | 2.85 | 1.88 | 6.29  |
| 1HGJ.PDB | OE2, B_GLU_81  | NE, F_ARG_76   | HE, F_ARG_76    | 2.85 | 1.89 | 12.57 |
| 1HGJ.PDB | OE2, B_GLU_74  | NH1, F_ARG_76  | HH12, F_ARG_76  | 2.70 | 1.70 | 4.55  |
| 1HGJ.PDB | OE1, B_GLU_81  | NH2, F_ARG_76  | HH21, F_ARG_76  | 2.65 | 1.66 | 2.84  |
| 1HGJ.PDB | OE1, B_GLU_74  | NH2, F_ARG_76  | HH22, F_ARG_76  | 2.72 | 1.73 | 7.95  |
| 1HGJ.PDB | OE1, B_GLU_85  | OH, F_TYR_83   | HH, F_TYR_83    | 2.53 | 1.75 | 28.54 |
| 1HGJ.PDB | OH, D_TYR_83   | NZ, F_LYS_88   | HZ1, F_LYS_88   | 2.70 | 1.68 | 8.19  |
| 1HGJ.PDB | O, E_LYS_27    | ND2, F_ASN_104 | HD22, F_ASN_104 | 2.91 | 1.96 | 11.78 |
| 1HGJ.PDB | O, D_LEU_2     | OG, F_SER_113  | HG, F_SER_113   | 2.74 | 1.92 | 26.51 |
| 1HGJ.PDB | OE1, D_GLU_132 | NE, F_ARG_124  | HE, F_ARG_124   | 2.92 | 2.09 | 27.65 |
| 1HGJ.PDB | OE2, D_GLU_132 | NE, F_ARG_124  | HE, F_ARG_124   | 2.96 | 2.06 | 20.98 |
| 1HGJ.PDB | O, E_LEU_13    | N, F_PHE_138   | H, F_PHE_138    | 2.73 | 1.87 | 22.18 |
| 1HGJ.PDB | O, E_ALA_11    | N, F_ILE_140   | H, F_ILE_140    | 2.78 | 1.87 | 17.89 |
| 1HGJ.PDB | O, D_ARG_170   | NH1, F_ARG_163 | HH12, F_ARG_163 | 2.89 | 1.91 | 11.37 |

|          |                |                 |                 |      |      |       |
|----------|----------------|-----------------|-----------------|------|------|-------|
| 1OSP.PDB | O, O_LYS_44    | NH1, L_ARG_32   | HH12, L_ARG_32  | 2.98 | 2.09 | 22.73 |
| 1OSP.PDB | O, O_SER_43    | NH2, L_ARG_32   | HH22, L_ARG_32  | 2.91 | 1.93 | 9.19  |
| 1OSP.PDB | OD2, L_ASP_1   | OG, H_SER_62    | HG, H_SER_62    | 2.98 | 2.17 | 26.53 |
| 1OSP.PDB | O, O_ASP_93    | N, H_TYR_101    | H, H_TYR_101    | 2.96 | 2.00 | 9.88  |
| 1OSP.PDB | OH, L_TYR_36   | N, H_PHE_107    | H, H_PHE_107    | 2.90 | 1.92 | 4.68  |
| 1OSP.PDB | OG, L_SER_176  | OG, H_SER_185   | HG, H_SER_185   | 2.74 | 1.91 | 24.72 |
| 1OSP.PDB | OE1, L_GLU_123 | NZ, H_LYS_215   | HZ2, H_LYS_215  | 2.78 | 1.85 | 20.53 |
| 1PSK.PDB | O, H_PRO_168   | OG, L_SER_161   | HG, L_SER_161   | 2.76 | 1.90 | 22.64 |
| 1VFB.PDB | OE1, C_GLN_121 | N, A_SER_93     | H, A_SER_93     | 2.89 | 1.92 | 8.17  |
| 1VFB.PDB | OE1, B_GLU_98  | NH1, A_ARG_96   | HH12, A_ARG_96  | 2.82 | 1.84 | 8.38  |
| 1VFB.PDB | OE2, B_GLU_98  | NH2, A_ARG_96   | HH22, A_ARG_96  | 2.81 | 1.85 | 10.74 |
| 1VFB.PDB | OE1, A_GLN_38  | NE2, B_GLN_39   | HE21, B_GLN_39  | 2.95 | 1.98 | 8.04  |
| 1VFB.PDB | O, C_GLY_22    | NH1, B_ARG_102  | HH12, B_ARG_102 | 2.82 | 1.90 | 18.81 |
| 1VFB.PDB | OD2, B_ASP_100 | N, C_SER_24     | H, C_SER_24     | 2.91 | 2.09 | 27.47 |
| 1VFB.PDB | O, A_PHE_91    | NE2, C_GLN_121  | HE21, C_GLN_121 | 2.82 | 1.88 | 14.37 |
| 3SE8.PDB | O, H_TRP_54    | N, G_ASP_368    | H, G_ASP_368    | 2.75 | 1.91 | 10.72 |
| 3SE8.PDB | OE2, L_GLU_96  | N, G_GLY_459    | H, G_GLY_459    | 2.81 | 1.99 | 15.35 |
| 3SE8.PDB | OD1, G_ASN_280 | NE1, H_TRP_50   | HE1, H_TRP_50   | 3.00 | 2.21 | 20.49 |
| 3SE8.PDB | O, G_GLY_473   | NE1, H_TRP_54   | HE1, H_TRP_54   | 2.82 | 1.98 | 10.03 |
| 3SE8.PDB | O, G_GLY_458   | N, H_ARG_61     | H, H_ARG_61     | 2.91 | 2.08 | 12.24 |
| 3SE8.PDB | OD1, G_ASP_457 | NE2, H_GLN_64   | HE22, H_GLN_64  | 2.94 | 2.12 | 14.23 |
| 3SE8.PDB | OD2, G_ASP_368 | NH2, H_ARG_71   | HH22, H_ARG_71  | 2.91 | 2.05 | 6.24  |
| 3SE8.PDB | OH, L_TYR_36   | N, H_TRP_100F   | H, H_TRP_100F   | 2.89 | 2.04 | 6.32  |
| 3SE8.PDB | OE1, H_GLN_101 | N, L_SER_56     | H, L_SER_56     | 2.97 | 2.12 | 7.63  |
| 3SE8.PDB | O, H_PRO_167   | OG, L_SER_162   | HG, L_SER_162   | 2.71 | 1.98 | 23.05 |
| 3SE9.PDB | O, H_THR_53    | N, G_ASP_368    | H, G_ASP_368    | 2.97 | 2.15 | 15.24 |
| 3SE9.PDB | OD1, G_ASN_280 | NE1, H_TRP_50   | HE1, H_TRP_50   | 2.86 | 2.03 | 11.46 |
| 3SE9.PDB | O, G_ARG_456   | ND2, H_ASN_57   | HD22, H_ASN_57  | 2.82 | 1.98 | 10.42 |
| 3SE9.PDB | OG, G_SER_365  | NH1, H_ARG_64   | HH11, H_ARG_64  | 2.81 | 2.04 | 21.79 |
| 3SE9.PDB | OD2, G_ASP_368 | NH1, H_ARG_71   | HH12, H_ARG_71  | 2.77 | 1.92 | 7.25  |
| 3SE9.PDB | O, G_GLY_429   | NH1, H_ARG_73   | HH12, H_ARG_73  | 2.99 | 2.23 | 23.32 |
| 3SE9.PDB | OD1, G_ASN_279 | NE1, H_TRP_100D | HE1, H_TRP_100D | 2.86 | 2.13 | 26.83 |
| 3SE9.PDB | OH, L_TYR_36   | N, H_PHE_100F   | H, H_PHE_100F   | 2.88 | 2.05 | 11.59 |
| 3SE9.PDB | OD1, L_ASN_138 | NE2, H_HIS_164  | HE2, H_HIS_164  | 2.87 | 2.10 | 22.18 |
| 3SE9.PDB | O, H_PRO_167   | OG, L_SER_162   | HG, L_SER_162   | 2.60 | 1.89 | 25.20 |
| 3THM.PDB | O, H_ALA_117   | ND2, L_ASN_35   | HD21, L_ASN_35  | 2.77 | 1.97 | 17.79 |
| 3THM.PDB | OE1, L_GLN_39  | NE2, H_GLN_41   | HE22, H_GLN_41  | 2.98 | 2.14 | 9.35  |
| 3THM.PDB | O, F_CYS_43    | NH1, H_ARG_105  | HH12, H_ARG_105 | 2.85 | 2.05 | 18.46 |
| 3THM.PDB | OG, L_SER_183  | NZ, H_LYS_162   | HZ1, H_LYS_162  | 2.77 | 1.97 | 21.34 |
| 3THM.PDB | OG1, L_THR_135 | NZ, H_LYS_162   | HZ2, H_LYS_162  | 2.85 | 2.02 | 17.75 |
| 3THM.PDB | OH, H_TYR_35   | ND1, F_HIS_44   | HD1, F_HIS_44   | 2.69 | 1.83 | 5.98  |
| 3THM.PDB | OG, H_SER_63   | NE2, F_HIS_44   | HE2, F_HIS_44   | 2.83 | 2.07 | 23.36 |
| 3THM.PDB | O, L_SER_51    | NZ, F_LYS_78    | HZ2, F_LYS_78   | 3.00 | 2.15 | 15.09 |
| 3TJE.PDB | O, H_ALA_117   | ND2, L_ASN_35   | HD21, L_ASN_35  | 2.81 | 2.01 | 17.88 |
| 3TJE.PDB | OE1, L_GLN_39  | NE2, H_GLN_41   | HE21, H_GLN_41  | 2.98 | 2.15 | 10.85 |
| 3TJE.PDB | O, F_CYS_43    | NH1, H_ARG_105  | HH12, H_ARG_105 | 2.85 | 2.08 | 23.11 |
| 3TJE.PDB | OH, L_TYR_37   | N, H_PHE_119    | H, H_PHE_119    | 2.96 | 2.10 | 4.74  |
| 3TJE.PDB | OH, H_TYR_35   | ND1, F_HIS_44   | HD1, F_HIS_44   | 2.56 | 1.70 | 3.69  |
| 3U2S.PDB | OE1, L_GLN_38  | NE2, H_GLN_39   | HE22, H_GLN_39  | 2.89 | 2.04 | 8.55  |
| 3U2S.PDB | OH, L_TYR_36   | N, H_MET_100T   | H, H_MET_100T   | 2.95 | 2.15 | 18.41 |
| 3U2S.PDB | OG, L_SER_165  | NE2, H_HIS_164  | HE2, H_HIS_164  | 2.93 | 2.12 | 16.97 |
| 3U2S.PDB | OE1, H_GLN_39  | NE2, L_GLN_38   | HE22, L_GLN_38  | 2.91 | 2.09 | 13.75 |
| 3U2S.PDB | OD2, C_ASP_167 | ND2, L_ASN_60   | HD22, L_ASN_60  | 2.90 | 2.14 | 22.76 |
| 3U2S.PDB | OD1, H_ASP_61  | NH2, L_ARG_95A  | HH22, L_ARG_95A | 2.34 | 1.58 | 22.53 |
| 3U2S.PDB | OE2, H_GLU_95  | NH2, L_ARG_96   | HH21, L_ARG_96  | 2.87 | 2.05 | 15.72 |
| 3U2S.PDB | O, H_ASN_100F  | N, G_LYS_169    | H, G_LYS_169    | 2.84 | 1.99 | 7.68  |
| 3U2S.PDB | OH, H_TYR_100K | ND2, G_ASN_173  | HD21, G_ASN_173 | 2.97 | 2.13 | 8.87  |
| 3U2S.PDB | OE1, B_GLN_38  | NE2, A_GLN_39   | HE22, A_GLN_39  | 2.92 | 2.07 | 7.34  |

|          |                |                |                 |      |      |       |
|----------|----------------|----------------|-----------------|------|------|-------|
| 3U2S.PDB | O, C_ASP_167   | N, A_ASN_100F  | H, A_ASN_100F   | 2.97 | 2.14 | 14.21 |
| 3U2S.PDB | OG1, B_THR_131 | NZ, A_LYS_143  | HZ2, A_LYS_143  | 2.41 | 1.67 | 27.35 |
| 3U2S.PDB | OE1, A_GLN_39  | NE2, B_GLN_38  | HE22, B_GLN_38  | 2.92 | 2.08 | 10.61 |
| 3U2S.PDB | OG1, H_THR_160 | N, B_ALA_80    | H, B_ALA_80     | 2.90 | 2.08 | 14.44 |
| 3U2S.PDB | OD1, A_ASP_61  | NH1, B_ARG_95A | HH12, B_ARG_95A | 2.63 | 1.91 | 26.97 |
| 3U2S.PDB | OE2, A_GLU_95  | NH2, B_ARG_96  | HH21, B_ARG_96  | 2.98 | 2.16 | 13.77 |
| 3U2S.PDB | O, A_ASN_100F  | N, C_LYS_169   | H, C_LYS_169    | 2.91 | 2.08 | 13.24 |
| 3UYR.PDB | OE1, P_GLN_48  | N, H_ASN_101   | H, H_ASN_101    | 2.90 | 2.08 | 14.57 |
| 3UYR.PDB | OH, L_TYR_41   | N, H_LEU_104   | H, H_LEU_104    | 2.91 | 2.05 | 4.02  |
| 3UYR.PDB | OE2, L_GLU_127 | NZ, H_LYS_212  | HZ3, H_LYS_212  | 2.87 | 2.08 | 23.12 |
| 3UYR.PDB | O, P_PRO_50    | NE2, L_HIS_31  | HE2, L_HIS_31   | 2.91 | 2.13 | 21.00 |
| 3UYR.PDB | O, H_PRO_171   | OG, L_SER_166  | HG, L_SER_166   | 2.72 | 1.97 | 20.46 |
| 3UYR.PDB | OD1, H_ASN_101 | NE2, P_GLN_48  | HE22, P_GLN_48  | 2.57 | 1.87 | 29.89 |
| 4F33.PDB | OE1, B_GLN_39  | NE2, A_GLN_38  | HE22, A_GLN_38  | 2.96 | 2.13 | 12.75 |
| 4F33.PDB | O, B_GLY_110   | OG, A_SER_43   | HG, A_SER_43    | 2.65 | 1.95 | 25.99 |
| 4F33.PDB | O, B_ARG_104   | NH1, A_ARG_46  | HH11, A_ARG_46  | 2.62 | 1.83 | 18.99 |
| 4F33.PDB | O, B_PRO_173   | OG, A_SER_162  | HG, A_SER_162   | 2.76 | 2.03 | 23.18 |
| 4F33.PDB | OE1, A_GLN_38  | NE2, B_GLN_39  | HE22, B_GLN_39  | 2.82 | 1.97 | 5.31  |
| 4F33.PDB | OH, A_TYR_36   | N, B_PHE_106   | H, B_PHE_106    | 2.97 | 2.12 | 7.79  |
| 4F33.PDB | OE2, G_GLU_123 | N, B_GLY_124   | H, B_GLY_124    | 2.73 | 1.87 | 2.75  |
| 4F33.PDB | O, H_ASP_214   | N, B_LYS_212   | H, B_LYS_212    | 2.81 | 2.00 | 15.02 |
| 4F33.PDB | O, H_LYS_212   | N, B_ASP_214   | H, B_ASP_214    | 2.84 | 2.02 | 15.98 |
| 4F33.PDB | OE1, A_GLU_123 | NZ, B_LYS_215  | HZ1, B_LYS_215  | 2.68 | 1.82 | 12.44 |
| 4F33.PDB | OG1, H_THR_211 | NZ, B_LYS_215  | HZ2, B_LYS_215  | 2.83 | 1.95 | 7.37  |
| 4F33.PDB | O, D_GLY_110   | OG, C_SER_43   | HG, C_SER_43    | 2.70 | 1.98 | 23.76 |
| 4F33.PDB | O, D_ARG_104   | NH1, C_ARG_46  | HH11, C_ARG_46  | 2.70 | 1.92 | 20.25 |
| 4F33.PDB | O, D_TYR_60    | NE2, C_HIS_94  | HE2, C_HIS_94   | 2.75 | 2.00 | 24.62 |
| 4F33.PDB | O, D_PRO_173   | OG, C_SER_162  | HG, C_SER_162   | 2.78 | 2.07 | 25.83 |
| 4F33.PDB | OE1, C_GLN_38  | NE2, D_GLN_39  | HE22, D_GLN_39  | 2.89 | 2.03 | 5.23  |
| 4F33.PDB | OE2, E_GLU_123 | N, D_GLY_124   | H, D_GLY_124    | 2.84 | 1.99 | 7.85  |
| 4F33.PDB | O, F_ASP_214   | N, D_LYS_212   | H, D_LYS_212    | 2.98 | 2.15 | 12.10 |
| 4F33.PDB | O, F_LYS_212   | N, D_ASP_214   | H, D_ASP_214    | 2.85 | 2.03 | 14.94 |
| 4F33.PDB | OE1, C_GLU_123 | NZ, D_LYS_215  | HZ1, D_LYS_215  | 2.79 | 1.99 | 22.47 |
| 4F33.PDB | OG1, F_THR_211 | NZ, D_LYS_215  | HZ2, D_LYS_215  | 2.86 | 1.99 | 10.67 |
| 4F33.PDB | O, F_ASN_210   | N, D_LYS_216   | H, D_LYS_216    | 2.98 | 2.16 | 15.42 |
| 4F33.PDB | O, F_GLY_110   | OG, E_SER_43   | HG, E_SER_43    | 2.52 | 1.83 | 27.97 |
| 4F33.PDB | O, F_ARG_104   | NH1, E_ARG_46  | HH11, E_ARG_46  | 2.85 | 2.03 | 15.38 |
| 4F33.PDB | O, F_LEU_176   | NE2, E_GLN_160 | HE22, E_GLN_160 | 2.93 | 2.08 | 4.21  |
| 4F33.PDB | O, F_PRO_173   | OG, E_SER_162  | HG, E_SER_162   | 2.63 | 1.89 | 21.98 |
| 4F33.PDB | O, A_GLY_60    | N, F_PHE_29    | H, F_PHE_29     | 2.97 | 2.18 | 20.00 |
| 4F33.PDB | OE1, E_GLN_38  | NE2, F_GLN_39  | HE22, F_GLN_39  | 2.92 | 2.06 | 5.53  |
| 4F33.PDB | OH, E_TYR_36   | N, F_PHE_106   | H, F_PHE_106    | 2.80 | 1.96 | 9.30  |
| 4F33.PDB | OE2, C_GLU_123 | N, F_GLY_124   | H, F_GLY_124    | 2.81 | 1.96 | 5.00  |
| 4F33.PDB | O, D_ASP_214   | N, F_LYS_212   | H, F_LYS_212    | 2.94 | 2.11 | 12.64 |
| 4F33.PDB | O, D_LYS_212   | N, F_ASP_214   | H, F_ASP_214    | 2.84 | 2.02 | 14.84 |
| 4F33.PDB | OE1, E_GLU_123 | NZ, F_LYS_215  | HZ1, F_LYS_215  | 2.61 | 1.84 | 24.34 |
| 4F33.PDB | OG1, D_THR_211 | NZ, F_LYS_215  | HZ2, F_LYS_215  | 2.92 | 2.04 | 7.71  |
| 4F33.PDB | O, H_TYR_60    | NE2, G_HIS_94  | HE2, G_HIS_94   | 2.97 | 2.17 | 17.68 |
| 4F33.PDB | O, H_LEU_176   | NE2, G_GLN_160 | HE22, G_GLN_160 | 2.89 | 2.04 | 8.42  |
| 4F33.PDB | O, H_PRO_173   | OG, G_SER_162  | HG, G_SER_162   | 2.65 | 1.94 | 25.59 |
| 4F33.PDB | O, C_GLY_60    | N, H_PHE_29    | H, H_PHE_29     | 2.96 | 2.15 | 17.00 |
| 4F33.PDB | OH, G_TYR_36   | N, H_PHE_106   | H, H_PHE_106    | 2.74 | 1.89 | 7.07  |
| 4F33.PDB | OE2, A_GLU_123 | N, H_GLY_124   | H, H_GLY_124    | 2.97 | 2.12 | 7.35  |
| 4F33.PDB | O, G_SER_208   | NZ, H_LYS_135  | HZ3, H_LYS_135  | 2.85 | 1.99 | 13.05 |
| 4F33.PDB | O, B_LYS_212   | N, H_ASP_214   | H, H_ASP_214    | 2.71 | 1.89 | 15.00 |
| 4F33.PDB | OE1, G_GLU_123 | NZ, H_LYS_215  | HZ1, H_LYS_215  | 2.97 | 2.19 | 24.10 |
| 4F33.PDB | OG1, B_THR_211 | NZ, H_LYS_215  | HZ2, H_LYS_215  | 2.80 | 1.95 | 14.49 |
| 4F33.PDB | O, B_ASN_210   | N, H_LYS_216   | H, H_LYS_216    | 2.82 | 2.01 | 16.40 |

|          |                 |                |                 |      |      |       |
|----------|-----------------|----------------|-----------------|------|------|-------|
| 4F3F.PDB | OE1, B_GLN_39   | NE2, A_GLN_38  | HE22, A_GLN_38  | 2.88 | 2.04 | 8.75  |
| 4F3F.PDB | O, B_ARG_104    | NH1, A_ARG_46  | HH11, A_ARG_46  | 2.93 | 2.16 | 22.46 |
| 4F3F.PDB | OG, B_SER_59    | NE2, A_HIS_94  | HE2, A_HIS_94   | 2.82 | 2.03 | 19.68 |
| 4F3F.PDB | OE1, C_GLU_52   | N, B_ASP_102   | H, B_ASP_102    | 2.88 | 2.08 | 17.53 |
| 4F3F.PDB | OH, A_TYR_36    | N, B_PHE_106   | H, B_PHE_106    | 2.71 | 1.88 | 12.56 |
| 4F3F.PDB | OD1, A_ASN_138  | NE2, B_HIS_170 | HE2, B_HIS_170  | 2.82 | 2.05 | 21.56 |
| 4F3F.PDB | O, B_ASP_102    | NZ, C_LYS_24   | HZ2, C_LYS_24   | 2.85 | 2.03 | 18.08 |
| 4F3F.PDB | OD1, B_ASP_102  | N, C_LYS_25    | H, C_LYS_25     | 2.86 | 2.02 | 9.58  |
| 4F3F.PDB | OH, B_TYR_101   | NZ, C_LYS_25   | HZ3, C_LYS_25   | 2.87 | 2.11 | 26.18 |
| 4F3F.PDB | OH, A_TYR_32    | NE1, C_TRP_26  | HE1, C_TRP_26   | 2.97 | 2.17 | 18.16 |
| 4JAM.PDB | OH, L_TYR_36    | N, H_PHE_100E  | H, H_PHE_100E   | 2.85 | 2.03 | 15.20 |
| 4JAM.PDB | OD1, H_ASN_100B | ND2, L_ASN_32  | HD21, L_ASN_32  | 2.96 | 2.21 | 25.94 |
| 4JAM.PDB | O, B_THR_201    | N, L_THR_201   | H, L_THR_201    | 2.84 | 2.04 | 18.18 |
| 4JAM.PDB | O, B_GLY_199    | N, L_GLU_203   | H, L_GLU_203    | 2.91 | 2.13 | 21.03 |
| 4JAM.PDB | OH, B_TYR_36    | N, A_PHE_100E  | H, A_PHE_100E   | 2.90 | 2.09 | 16.41 |
| 4JAM.PDB | O, L_THR_201    | N, B_THR_201   | H, B_THR_201    | 2.77 | 1.96 | 16.15 |
| 4JAM.PDB | O, L_GLY_199    | N, B_GLU_203   | H, B_GLU_203    | 2.79 | 1.99 | 17.96 |
| 4JAN.PDB | OH, L_TYR_36    | N, H_PHE_100E  | H, H_PHE_100E   | 2.91 | 2.16 | 24.28 |
| 4JAN.PDB | OD2, B_ASP_92   | OG, H_SER_156  | HG, H_SER_156   | 2.50 | 1.78 | 23.90 |
| 4JAN.PDB | OE1, L_GLU_123  | NZ, H_LYS_209  | HZ1, H_LYS_209  | 2.89 | 2.13 | 26.71 |
| 4JAN.PDB | OD1, H_ASN_100B | ND2, L_ASN_32  | HD21, L_ASN_32  | 2.76 | 1.91 | 6.44  |
| 4JAN.PDB | OH, B_TYR_36    | N, A_PHE_100E  | H, A_PHE_100E   | 2.74 | 1.90 | 10.14 |
| 4JAN.PDB | O, I_GLY_458    | ND2, B_ASN_32  | HD22, B_ASN_32  | 2.86 | 2.11 | 24.85 |
| 4KRM.PDB | OE1, B_GLU_110  | NH1, A_ARG_353 | HH11, A_ARG_353 | 2.81 | 2.05 | 22.81 |
| 4KRM.PDB | O, B_GLU_110    | NH1, A_ARG_353 | HH12, A_ARG_353 | 2.55 | 1.85 | 29.89 |
| 4KRM.PDB | O, B_ALA_100    | NH2, A_ARG_353 | HH21, A_ARG_353 | 2.89 | 2.04 | 4.33  |
| 4KRM.PDB | O, B_ASP_112    | NE2, A_GLN_384 | HE22, A_GLN_384 | 2.93 | 2.19 | 25.19 |
| 4KRM.PDB | O, C_LYS_310    | N, B_THR_58    | H, B_THR_58     | 2.99 | 2.17 | 13.91 |
| 4KRM.PDB | O, C_GLU_308    | N, B_TYR_60    | H, B_TYR_60     | 2.75 | 1.96 | 19.67 |
| 4KRM.PDB | O, B_TYR_60     | N, C_GLU_308   | H, C_GLU_308    | 2.91 | 2.19 | 28.33 |
| 4KRM.PDB | O, B_THR_58     | N, C_LYS_310   | H, C_LYS_310    | 2.88 | 2.06 | 14.23 |
| 4KRM.PDB | O, B_ASP_56     | N, C_VAL_312   | H, C_VAL_312    | 2.73 | 1.89 | 9.64  |
| 4KRM.PDB | OE1, D_GLU_110  | NH1, C_ARG_353 | HH11, C_ARG_353 | 2.87 | 2.05 | 16.15 |
| 4KRM.PDB | O, D_ALA_100    | NH2, C_ARG_353 | HH21, C_ARG_353 | 2.80 | 2.00 | 16.96 |
| 4KRM.PDB | OD2, C_ASP_355  | NH1, D_ARG_30  | HH12, D_ARG_30  | 2.45 | 1.63 | 13.53 |
| 4KRM.PDB | O, E_GLU_308    | N, D_TYR_60    | H, D_TYR_60     | 2.82 | 2.08 | 26.84 |
| 4KRM.PDB | O, D_THR_58     | N, E_LYS_310   | H, E_LYS_310    | 2.79 | 2.02 | 22.01 |
| 4KRM.PDB | OE1, F_GLU_110  | NH1, E_ARG_353 | HH11, E_ARG_353 | 2.85 | 2.03 | 14.34 |
| 4KRM.PDB | O, F_GLU_110    | NH1, E_ARG_353 | HH12, E_ARG_353 | 2.46 | 1.72 | 24.77 |
| 4KRM.PDB | O, F_ALA_100    | NH2, E_ARG_353 | HH21, E_ARG_353 | 2.81 | 1.99 | 15.85 |
| 4KRM.PDB | OD2, F_ASP_112  | NH2, E_ARG_353 | HH22, E_ARG_353 | 2.96 | 2.18 | 20.33 |
| 4KRM.PDB | O, F_ASP_112    | NE2, E_GLN_384 | HE22, E_GLN_384 | 2.82 | 2.10 | 28.13 |
| 4KRM.PDB | O, J_THR_58     | N, G_LYS_310   | H, G_LYS_310    | 2.73 | 1.87 | 4.39  |
| 4KRM.PDB | O, J_ASP_56     | N, G_VAL_312   | H, G_VAL_312    | 2.86 | 2.02 | 9.25  |
| 4KRM.PDB | OD1, H_ASP_112  | N, G_VAL_350   | H, G_VAL_350    | 2.96 | 2.25 | 28.54 |
| 4KRM.PDB | O, H_GLU_110    | NH1, G_ARG_353 | HH12, G_ARG_353 | 2.56 | 1.83 | 26.87 |
| 4KRM.PDB | O, H_ALA_100    | NH2, G_ARG_353 | HH21, G_ARG_353 | 2.51 | 1.75 | 22.59 |
| 4KRM.PDB | OE2, B_GLU_5    | NZ, G_LYS_407  | HZ1, G_LYS_407  | 2.98 | 2.17 | 20.60 |
| 4KRM.PDB | OD2, G_ASP_355  | NH1, H_ARG_30  | HH12, H_ARG_30  | 2.45 | 1.69 | 23.45 |
| 4KRM.PDB | O, L_TYR_60     | N, I_GLU_308   | H, I_GLU_308    | 2.69 | 1.88 | 16.25 |
| 4KRM.PDB | O, L_THR_58     | N, I_LYS_310   | H, I_LYS_310    | 2.70 | 1.84 | 3.45  |
| 4KRM.PDB | O, L_ASP_56     | N, I_VAL_312   | H, I_VAL_312    | 2.83 | 1.98 | 8.53  |
| 4KRM.PDB | OD1, J_ASP_112  | N, I_VAL_350   | H, I_VAL_350    | 2.88 | 2.05 | 13.27 |
| 4KRM.PDB | OE1, J_GLU_110  | NH1, I_ARG_353 | HH11, I_ARG_353 | 2.86 | 2.07 | 18.90 |
| 4KRM.PDB | O, J_ALA_100    | NH2, I_ARG_353 | HH21, I_ARG_353 | 2.97 | 2.14 | 13.62 |
| 4KRM.PDB | OD2, J_ASP_112  | NH2, I_ARG_353 | HH22, I_ARG_353 | 3.00 | 2.19 | 17.61 |
| 4KRM.PDB | O, G_GLU_308    | N, J_TYR_60    | H, J_TYR_60     | 2.74 | 1.97 | 22.05 |
| 4KRM.PDB | OD1, L_ASP_112  | N, K_VAL_350   | H, K_VAL_350    | 2.89 | 2.07 | 15.44 |

|          |                |                |                 |      |      |       |
|----------|----------------|----------------|-----------------|------|------|-------|
| 4KRM.PDB | OE1, L_GLU_110 | NH1, K_ARG_353 | HH11, K_ARG_353 | 2.89 | 2.06 | 12.41 |
| 4KRM.PDB | O, L_GLU_110   | NH1, K_ARG_353 | HH12, K_ARG_353 | 2.54 | 1.80 | 24.42 |
| 4KRM.PDB | O, L_ALA_100   | NH2, K_ARG_353 | HH21, K_ARG_353 | 2.92 | 2.14 | 20.95 |
| 4KRM.PDB | OD2, L_ASP_112 | NH2, K_ARG_353 | HH22, K_ARG_353 | 2.89 | 2.07 | 13.96 |
| 4KRM.PDB | OD2, K_ASP_355 | NH1, L_ARG_30  | HH12, L_ARG_30  | 2.44 | 1.65 | 18.93 |
| 4KRM.PDB | O, L_LYS_310   | N, L_THR_58    | H, L_THR_58     | 2.98 | 2.15 | 12.69 |
| 4KRM.PDB | O, L_GLU_308   | N, L_TYR_60    | H, L_TYR_60     | 2.75 | 2.02 | 27.31 |
| 4KRO.PDB | O, D_GLY_54    | NH1, A_ARG_353 | HH12, A_ARG_353 | 2.81 | 1.97 | 9.47  |
| 4KRO.PDB | OG, B_SER_103  | NZ, A_LYS_375  | HZ2, A_LYS_375  | 2.61 | 1.76 | 15.34 |
| 4KRO.PDB | OH, D_TYR_102  | NE2, A_GLN_384 | HE21, A_GLN_384 | 2.87 | 2.16 | 29.24 |
| 4KRO.PDB | O, B_TYR_100   | NH2, A_ARG_403 | HH22, A_ARG_403 | 2.57 | 1.73 | 11.63 |
| 4KRO.PDB | OD1, B_ASP_118 | NE, A_ARG_405  | HE, A_ARG_405   | 2.72 | 1.93 | 19.48 |
| 4KRO.PDB | O, A_GLY_458   | N, B_VAL_2     | H, B_VAL_2      | 2.76 | 1.93 | 12.61 |
| 4KRO.PDB | OE1, D_GLN_39  | NE2, C_GLN_38  | HE22, C_GLN_38  | 2.85 | 2.00 | 7.50  |
| 4KRO.PDB | OD2, D_ASP_103 | OH, C_TYR_50   | HH, C_TYR_50    | 2.49 | 1.72 | 20.15 |
| 4KRO.PDB | O, D_TYR_104   | NE2, C_GLN_89  | HE22, C_GLN_89  | 3.00 | 2.19 | 16.80 |
| 4KRO.PDB | OD1, D_ASP_103 | ND2, C_ASN_91  | HD21, C_ASN_91  | 2.93 | 2.12 | 16.18 |
| 4KRO.PDB | O, A_ASN_469   | N, C_TRP_94    | H, C_TRP_94     | 2.75 | 1.95 | 19.24 |
| 4KRO.PDB | OD2, D_ASP_58  | NE1, C_TRP_94  | HE1, C_TRP_94   | 2.80 | 2.10 | 29.15 |
| 4KRO.PDB | O, D_LEU_176   | NE2, C_GLN_160 | HE22, C_GLN_160 | 2.74 | 1.92 | 15.89 |
| 4KRO.PDB | OE1, C_GLN_38  | NE2, D_GLN_39  | HE22, D_GLN_39  | 2.80 | 1.94 | 4.32  |
| 4KRO.PDB | OE1, A_GLN_408 | OH, D_TYR_102  | HH, D_TYR_102   | 2.75 | 1.97 | 18.39 |
| 4KRO.PDB | OH, C_TYR_36   | N, D_PHE_106   | H, D_PHE_106    | 2.93 | 2.08 | 9.34  |
| 4KRP.PDB | O, D_GLY_54    | NH2, A_ARG_353 | HH22, A_ARG_353 | 2.83 | 1.98 | 6.79  |
| 4KRP.PDB | OD1, B_ASP_115 | NH2, A_ARG_405 | HH21, A_ARG_405 | 2.63 | 1.81 | 15.48 |
| 4KRP.PDB | O, D_TYR_102   | OG, A_SER_440  | HG, A_SER_440   | 2.65 | 1.82 | 4.10  |
| 4KRP.PDB | OD1, D_ASP_58  | NZ, A_LYS_443  | HZ1, A_LYS_443  | 2.65 | 1.82 | 17.69 |
| 4KRP.PDB | OD2, D_ASP_103 | NZ, A_LYS_465  | HZ2, A_LYS_465  | 2.93 | 2.05 | 5.06  |
| 4KRP.PDB | OE1, D_GLN_39  | NE2, C_GLN_38  | HE22, C_GLN_38  | 2.70 | 1.84 | 6.09  |
| 4KRP.PDB | OD2, D_ASP_103 | OH, C_TYR_50   | HH, C_TYR_50    | 2.43 | 1.66 | 18.96 |
| 4KRP.PDB | OD1, D_ASP_103 | ND2, C_ASN_91  | HD21, C_ASN_91  | 2.77 | 1.91 | 6.24  |
| 4KRP.PDB | O, A_ASN_469   | N, C_TRP_94    | H, C_TRP_94     | 2.68 | 1.89 | 19.97 |
| 4KRP.PDB | OD2, D_ASP_58  | NE1, C_TRP_94  | HE1, C_TRP_94   | 2.98 | 2.17 | 17.26 |
| 4KRP.PDB | O, D_LEU_176   | NE2, C_GLN_160 | HE22, C_GLN_160 | 2.56 | 1.80 | 22.58 |
| 4KRP.PDB | O, D_PRO_173   | OG, C_SER_162  | HG, C_SER_162   | 2.80 | 2.10 | 28.74 |
| 4KRP.PDB | OE1, C_GLN_38  | NE2, D_GLN_39  | HE22, D_GLN_39  | 2.72 | 1.87 | 5.47  |
| 4KRP.PDB | OE1, A_GLN_408 | OH, D_TYR_102  | HH, D_TYR_102   | 2.56 | 1.74 | 10.00 |
| 4KRP.PDB | OG, A_SER_440  | OH, D_TYR_104  | HH, D_TYR_104   | 2.94 | 2.22 | 25.72 |
| 4KRP.PDB | OH, C_TYR_36   | N, D_PHE_106   | H, D_PHE_106    | 2.89 | 2.11 | 20.61 |
| 4KRP.PDB | OE1, A_GLU_431 | OH, B_TYR_32   | HH, B_TYR_32    | 2.59 | 1.78 | 7.49  |
| 4KRP.PDB | OE1, A_GLU_400 | OH, B_TYR_100  | HH, B_TYR_100   | 2.94 | 2.13 | 13.29 |
| 4KRP.PDB | OE2, A_GLU_431 | OH, B_TYR_116  | HH, B_TYR_116   | 2.43 | 1.75 | 29.09 |
| 4NZR.PDB | OH, L_TYR_36   | N, H_PHE_100J  | H, H_PHE_100J   | 2.96 | 2.11 | 8.14  |
| 4NZR.PDB | OG, L_SER_176  | OG, H_SER_188  | HG, H_SER_188   | 2.88 | 2.16 | 24.46 |
| 4NZR.PDB | OE2, L_GLU_123 | NZ, H_LYS_221  | HZ2, H_LYS_221  | 2.99 | 2.10 | 2.00  |
| 4NZR.PDB | O, M_PRO_119   | OG, L_SER_14   | HG, L_SER_14    | 2.76 | 2.00 | 18.37 |
| 4NZR.PDB | OG1, M_THR_110 | N, L_THR_18    | H, L_THR_18     | 2.82 | 2.00 | 15.23 |
| 4NZR.PDB | OH, M_TYR_444  | N, L_LYS_54    | H, L_LYS_54     | 2.91 | 2.06 | 4.85  |
| 4NZR.PDB | O, M_ALA_391   | NH2, L_ARG_61  | HH21, L_ARG_61  | 2.90 | 2.11 | 19.46 |
| 4NZR.PDB | OG, M_SER_106  | N, L_ASN_77    | H, L_ASN_77     | 2.86 | 2.01 | 5.30  |
| 4NZR.PDB | O, H_ALA_100G  | NE, L_ARG_96   | HE, L_ARG_96    | 2.83 | 2.08 | 23.79 |
| 4NZR.PDB | O, H_ALA_100G  | NH2, L_ARG_96  | HH21, L_ARG_96  | 2.80 | 2.05 | 24.03 |
| 4NZR.PDB | O, M_ASN_177   | NH2, L_ARG_108 | HH22, L_ARG_108 | 2.82 | 2.05 | 22.21 |
| 4NZR.PDB | O, M_GLY_178   | N, L_THR_109   | H, L_THR_109    | 2.92 | 2.07 | 5.99  |
| 4NZR.PDB | O, M_GLY_178   | OG1, L_THR_109 | HG1, L_THR_109  | 2.88 | 2.17 | 26.23 |
| 4NZR.PDB | O, M_ASP_117   | N, L_VAL_110   | H, L_VAL_110    | 2.96 | 2.14 | 15.09 |
| 4NZR.PDB | O, H_LEU_178   | NE2, L_GLN_160 | HE22, L_GLN_160 | 2.86 | 2.01 | 7.83  |
| 4NZR.PDB | O, H_PRO_175   | OG, L_SER_162  | HG, L_SER_162   | 2.79 | 1.98 | 7.14  |

|          |                 |                |                 |      |      |       |
|----------|-----------------|----------------|-----------------|------|------|-------|
| 4NZR.PDB | OG, H_SER_188   | OG, L_SER_176  | HG, L_SER_176   | 2.88 | 2.09 | 13.66 |
| 4NZR.PDB | OE1, L_GLU_81   | NE, M_ARG_384  | HE, M_ARG_384   | 2.93 | 2.09 | 10.37 |
| 4NZR.PDB | OD1, H_ASP_31E  | NH1, M_ARG_457 | HH12, M_ARG_457 | 2.96 | 2.12 | 11.27 |
| 4NZR.PDB | OD2, H_ASP_31E  | NH2, M_ARG_457 | HH22, M_ARG_457 | 2.55 | 1.75 | 17.03 |
| 4NZU.PDB | OH, L_TYR_36    | N, H_PHE_100H  | H, H_PHE_100H   | 2.86 | 2.04 | 13.13 |
| 4WUU.PDB | OD2, B_ASP_53   | NE, A_ARG_48   | HE, A_ARG_48    | 2.84 | 2.13 | 29.12 |
| 4WUU.PDB | OH, E_TYR_104   | NZ, A_LYS_66   | HZ3, A_LYS_66   | 2.89 | 2.02 | 10.84 |
| 4WUU.PDB | OXT, C_LEU_9    | OH, A_TYR_84   | HH, A_TYR_84    | 2.64 | 1.82 | 12.17 |
| 4WUU.PDB | O, B_TRP_60     | NE2, A_GLN_96  | HE22, A_GLN_96  | 2.78 | 1.93 | 8.81  |
| 4WUU.PDB | O, C_LEU_9      | NZ, A_LYS_146  | HZ3, A_LYS_146  | 2.76 | 1.90 | 13.68 |
| 4WUU.PDB | O, C_TYR_8      | NE1, A_TRP_147 | HE1, A_TRP_147  | 2.81 | 1.99 | 15.97 |
| 4WUU.PDB | O, C_ARG_1      | OH, A_TYR_159  | HH, A_TYR_159   | 2.86 | 2.02 | 6.39  |
| 4WUU.PDB | OE1, B_GLN_8    | NH1, A_ARG_234 | HH11, A_ARG_234 | 2.79 | 2.07 | 27.49 |
| 4WUU.PDB | O, A_PRO_235    | OH, B_TYR_10   | HH, B_TYR_10    | 2.61 | 1.79 | 11.75 |
| 4WUU.PDB | O, A_ALA_236    | ND2, B_ASN_24  | HD21, B_ASN_24  | 2.81 | 2.05 | 22.96 |
| 4WUU.PDB | OE1, A_GLU_232  | OH, B_TYR_26   | HH, B_TYR_26    | 2.95 | 2.14 | 13.27 |
| 4WUU.PDB | OH, A_TYR_171   | N, C_ARG_1     | H1, C_ARG_1     | 2.79 | 2.03 | 25.96 |
| 4WUU.PDB | OE2, A_GLU_63   | N, C_MET_2     | H, C_MET_2      | 2.90 | 2.09 | 16.21 |
| 4WUU.PDB | OE1, E_GLN_39   | NE2, D_GLN_39  | HE22, D_GLN_39  | 2.94 | 2.18 | 23.53 |
| 4WUU.PDB | OD1, E_ASP_106  | NE1, D_TRP_99  | HE1, D_TRP_99   | 2.95 | 2.19 | 24.35 |
| 4WUU.PDB | OE1, D_GLN_39   | NE2, E_GLN_39  | HE22, E_GLN_39  | 2.55 | 1.73 | 14.29 |
| 4WUU.PDB | OE2, A_GLU_166  | NH2, E_ARG_50  | HH22, E_ARG_50  | 2.67 | 1.88 | 18.69 |
| 4WUU.PDB | OE1, A_GLU_63   | OH, E_TYR_104  | HH, E_TYR_104   | 2.59 | 1.76 | 7.82  |
| 4WUU.PDB | OE1, A_GLU_58   | N, E_TYR_105   | H, E_TYR_105    | 2.88 | 2.05 | 12.40 |
| 4WUU.PDB | OE1, A_GLU_55   | OH, E_TYR_105  | HH, E_TYR_105   | 2.47 | 1.79 | 29.86 |
| 4Z0X.PDB | OE1, B_GLN_64   | NE2, A_GLN_37  | HE22, A_GLN_37  | 2.75 | 1.99 | 23.41 |
| 4Z0X.PDB | O, B_GLY_129    | NE2, A_GLN_88  | HE22, A_GLN_88  | 2.63 | 1.87 | 22.97 |
| 4Z0X.PDB | O, B_GLY_129    | NE1, A_TRP_90  | HE1, A_TRP_90   | 2.96 | 2.14 | 15.73 |
| 4Z0X.PDB | OH, C_TYR_443   | N, A_SER_93    | H, A_SER_93     | 2.99 | 2.17 | 13.42 |
| 4Z0X.PDB | O, C_LEU_441    | N, B_SER_127   | H, B_SER_127    | 2.61 | 1.82 | 19.78 |
| 4Z0X.PDB | OH, A_TYR_35    | N, B_TYR_131   | H, B_TYR_131    | 2.85 | 2.09 | 23.16 |
| 5I76.PDB | OE1, B_GLN_39   | NE2, A_GLN_38  | HE22, A_GLN_38  | 2.94 | 2.10 | 10.68 |
| 5I76.PDB | O, B_GLY_110    | OG, A_SER_43   | HG, A_SER_43    | 2.73 | 2.02 | 27.09 |
| 5I76.PDB | OD2, B_ASP_103  | OH, A_TYR_50   | HH, A_TYR_50    | 2.64 | 1.88 | 21.01 |
| 5I76.PDB | O, B_PRO_173    | OG, A_SER_162  | HG, A_SER_162   | 2.48 | 1.79 | 28.75 |
| 5I76.PDB | OE1, A_GLN_38   | NE2, B_GLN_39  | HE22, B_GLN_39  | 2.80 | 1.95 | 6.66  |
| 5I76.PDB | OG, A_SER_176   | OG, B_SER_185  | HG, B_SER_185   | 2.89 | 2.15 | 23.05 |
| 5I76.PDB | OE1, A_GLU_123  | NZ, B_LYS_215  | HZ1, B_LYS_215  | 2.73 | 1.96 | 24.68 |
| 5I76.PDB | OE2, A_GLU_123  | NZ, B_LYS_215  | HZ1, B_LYS_215  | 2.89 | 2.11 | 24.69 |
| 5I76.PDB | OD2, A_ASP_70   | NH1, C_ARG_24  | HH12, C_ARG_24  | 2.95 | 2.23 | 28.81 |
| 5I76.PDB | O, D_GLY_110    | OG, C_SER_43   | HG, C_SER_43    | 2.84 | 2.15 | 29.22 |
| 5I76.PDB | OD2, D_ASP_103  | OH, C_TYR_50   | HH, C_TYR_50    | 2.76 | 1.95 | 12.40 |
| 5I76.PDB | O, A_SER_202    | NE2, C_GLN_147 | HE22, C_GLN_147 | 2.78 | 1.96 | 13.33 |
| 5I76.PDB | OE1, C_GLN_38   | NE2, D_GLN_39  | HE22, D_GLN_39  | 2.85 | 2.01 | 10.98 |
| 5I76.PDB | OH, C_TYR_36    | N, D_PHE_106   | H, D_PHE_106    | 2.93 | 2.09 | 12.40 |
| 5I76.PDB | OE1, C_GLU_123  | NZ, D_LYS_215  | HZ1, D_LYS_215  | 2.60 | 1.73 | 11.40 |
| 5JO5.PDB | OE1, L_GLN_38   | NE2, H_GLN_39  | HE22, H_GLN_39  | 2.84 | 2.00 | 9.38  |
| 5JO5.PDB | OH, L_TYR_36    | N, H_PHE_100L  | H, H_PHE_100L   | 2.79 | 1.96 | 12.88 |
| 5JO5.PDB | O, L_GLY_41     | NH2, H_ARG_105 | HH22, H_ARG_105 | 2.85 | 2.05 | 18.48 |
| 5JO5.PDB | OE2, L_GLU_124  | NZ, H_LYS_143  | HZ2, H_LYS_143  | 2.46 | 1.63 | 17.05 |
| 5JO5.PDB | OH, L_TYR_177   | OG, H_SER_179  | HG, H_SER_179   | 2.73 | 2.00 | 25.96 |
| 5JO5.PDB | OE1, D_GLN_24   | OG, L_SER_30   | HG, L_SER_30    | 2.84 | 2.07 | 18.45 |
| 5JO5.PDB | OE1, H_GLN_39   | NE2, L_GLN_38  | HE22, L_GLN_38  | 2.83 | 2.00 | 13.03 |
| 5JO5.PDB | OE2, H_GLU_100J | NH2, L_ARG_91  | HH22, L_ARG_91  | 2.69 | 1.84 | 7.26  |
| 5JO5.PDB | OD1, H_ASP_58   | NE, L_ARG_95B  | HE, L_ARG_95B   | 2.95 | 2.13 | 14.76 |
| 5JO5.PDB | O, H_GLY_42     | OG1, L_THR_163 | HG1, L_THR_163  | 2.52 | 1.79 | 25.04 |
| 5JO5.PDB | OE1, B_GLN_38   | NE2, A_GLN_39  | HE22, A_GLN_39  | 2.87 | 2.02 | 8.31  |
| 5JO5.PDB | OH, B_TYR_36    | N, A_PHE_100L  | H, A_PHE_100L   | 2.86 | 2.06 | 18.12 |

|          |                 |                |                 |      |      |       |
|----------|-----------------|----------------|-----------------|------|------|-------|
| 5JO5.PDB | O, B_GLY_41     | NH1, A_ARG_105 | HH12, A_ARG_105 | 2.66 | 1.82 | 9.49  |
| 5JO5.PDB | OE2, B_GLU_124  | NZ, A_LYS_143  | HZ2, A_LYS_143  | 2.62 | 1.83 | 23.29 |
| 5JO5.PDB | OH, B_TYR_177   | OG, A_SER_179  | HG, A_SER_179   | 2.83 | 2.10 | 25.21 |
| 5JO5.PDB | OE2, B_GLU_123  | NZ, A_LYS_209  | HZ1, A_LYS_209  | 2.55 | 1.68 | 10.64 |
| 5JO5.PDB | OE1, A_GLN_39   | NE2, B_GLN_38  | HE22, B_GLN_38  | 2.90 | 2.07 | 12.43 |
| 5JO5.PDB | O, F_ARG_29     | ND2, B_ASN_69  | HD21, B_ASN_69  | 2.80 | 1.99 | 16.03 |
| 5JO5.PDB | O, A_GLY_100H   | NE, B_ARG_91   | HE, B_ARG_91    | 2.94 | 2.09 | 9.41  |
| 5JO5.PDB | O, A_GLY_42     | OG1, B_THR_163 | HG1, B_THR_163  | 2.48 | 1.73 | 21.87 |
| 5JO5.PDB | OE1, D_GLN_38   | NE2, C_GLN_39  | HE22, C_GLN_39  | 2.86 | 2.02 | 9.45  |
| 5JO5.PDB | OH, D_TYR_36    | N, C_PHE_100L  | H, C_PHE_100L   | 2.87 | 2.08 | 19.05 |
| 5JO5.PDB | OE2, D_GLU_124  | NZ, C_LYS_143  | HZ2, C_LYS_143  | 2.79 | 1.92 | 10.71 |
| 5JO5.PDB | OH, D_TYR_177   | OG, C_SER_179  | HG, C_SER_179   | 2.71 | 1.97 | 23.23 |
| 5JO5.PDB | OE2, D_GLU_123  | NZ, C_LYS_209  | HZ1, C_LYS_209  | 2.58 | 1.72 | 11.28 |
| 5JO5.PDB | OE1, C_GLN_39   | NE2, D_GLN_38  | HE22, D_GLN_38  | 2.92 | 2.09 | 12.72 |
| 5JO5.PDB | O, L_ARG_29     | ND2, D_ASN_69  | HD21, D_ASN_69  | 2.86 | 2.03 | 13.06 |
| 5JO5.PDB | OD1, C_ASP_58   | NE, D_ARG_95B  | HE, D_ARG_95B   | 2.94 | 2.10 | 11.64 |
| 5JO5.PDB | O, C_GLY_42     | OG1, D_THR_163 | HG1, D_THR_163  | 2.56 | 1.81 | 22.64 |
| 5JO5.PDB | OE1, F_GLN_38   | NE2, E_GLN_39  | HE22, E_GLN_39  | 2.90 | 2.06 | 10.70 |
| 5JO5.PDB | OH, F_TYR_36    | N, E_PHE_100L  | H, E_PHE_100L   | 2.79 | 1.96 | 13.04 |
| 5JO5.PDB | O, F_GLY_41     | NH2, E_ARG_105 | HH22, E_ARG_105 | 2.92 | 2.13 | 19.96 |
| 5JO5.PDB | OE2, F_GLU_124  | NZ, E_LYS_143  | HZ2, E_LYS_143  | 2.55 | 1.75 | 21.57 |
| 5JO5.PDB | OH, F_TYR_177   | OG, E_SER_179  | HG, E_SER_179   | 2.58 | 1.87 | 27.02 |
| 5JO5.PDB | OE2, F_GLU_123  | NZ, E_LYS_209  | HZ1, E_LYS_209  | 2.57 | 1.74 | 17.62 |
| 5JO5.PDB | OE1, B_GLN_24   | OG, F_SER_30   | HG, F_SER_30    | 2.88 | 2.11 | 20.15 |
| 5JO5.PDB | OE1, E_GLN_39   | NE2, F_GLN_38  | HE22, F_GLN_38  | 2.85 | 2.02 | 12.75 |
| 5JO5.PDB | OE2, E_GLU_100J | NH2, F_ARG_91  | HH22, F_ARG_91  | 2.72 | 1.87 | 5.99  |
| 5JO5.PDB | OD1, E_ASP_58   | NE, F_ARG_95B  | HE, F_ARG_95B   | 2.92 | 2.09 | 12.47 |
| 5JO5.PDB | O, E_GLY_42     | OG1, F_THR_163 | HG1, F_THR_163  | 2.55 | 1.80 | 22.10 |
| 5JR1.PDB | OH, L_TYR_36    | N, H_PHE_100L  | H, H_PHE_100L   | 2.93 | 2.14 | 18.24 |
| 5JR1.PDB | O, L_GLY_41     | NH1, H_ARG_105 | HH11, H_ARG_105 | 2.58 | 1.82 | 23.25 |
| 5JR1.PDB | OH, L_TYR_178   | OG, H_SER_179  | HG, H_SER_179   | 2.83 | 2.03 | 15.88 |
| 5JR1.PDB | N, H_PHE_100L   | OH, L_TYR_36   | HH, L_TYR_36    | 2.93 | 2.21 | 26.41 |
| 5JR1.PDB | O, H_PRO_100F   | NH1, L_ARG_91  | HH12, L_ARG_91  | 2.89 | 2.18 | 29.36 |
| 5JR1.PDB | O, H_PRO_100F   | NH2, L_ARG_91  | HH22, L_ARG_91  | 2.82 | 2.09 | 26.91 |
| 5JR1.PDB | OD2, H_ASP_58   | NH2, L_ARG_95B | HH22, L_ARG_95B | 2.47 | 1.67 | 16.99 |
| 5JUE.PDB | O, H_MET_100E   | OH, L_TYR_36   | HH, L_TYR_36    | 2.57 | 1.73 | 1.94  |
| 5JUE.PDB | OH, H_TYR_91    | NE2, L_GLN_38  | HE22, L_GLN_38  | 2.57 | 1.77 | 17.09 |
| 5JUE.PDB | O, H_PRO_167    | OG, L_SER_162  | HG, L_SER_162   | 2.70 | 1.95 | 22.84 |
| 5JUE.PDB | OG, H_SER_178   | OG, L_SER_176  | HG, L_SER_176   | 2.78 | 1.94 | 3.13  |
| 5JUE.PDB | OE1, L_GLU_123  | NZ, H_LYS_208  | HZ1, H_LYS_208  | 2.81 | 1.98 | 17.66 |
| 5JUE.PDB | O, L_PRO_119    | NH1, H_ARG_213 | HH12, H_ARG_213 | 2.84 | 2.13 | 29.21 |
| 5JUE.PDB | O, L_PRO_120    | NH2, H_ARG_213 | HH22, H_ARG_213 | 2.94 | 2.13 | 15.93 |
| 5JXA.PDB | OD2, L_ASP_50   | OH, H_TYR_100  | HH, H_TYR_100   | 2.57 | 1.75 | 11.76 |
| 5JXA.PDB | OH, L_TYR_36    | N, H_TRP_100F  | H, H_TRP_100F   | 2.85 | 2.00 | 7.52  |
| 5JXA.PDB | OH, H_TYR_100   | NH2, L_ARG_53  | HH21, L_ARG_53  | 2.89 | 2.07 | 18.12 |
| 5JXA.PDB | O, H_LEU_170    | NE2, L_GLN_160 | HE22, L_GLN_160 | 2.84 | 1.99 | 4.55  |
| 5JXA.PDB | O, H_PRO_167    | OG, L_SER_162  | HG, L_SER_162   | 2.69 | 1.94 | 23.37 |
| 5M33.PDB | OE1, A_GLN_129  | N, B_VAL_114   | H, B_VAL_114    | 2.67 | 1.84 | 13.32 |
| 5T6P.PDB | O, B_GLY_107    | OG, A_SER_48   | HG, A_SER_48    | 2.52 | 1.72 | 14.73 |
| 5T6P.PDB | O, B_PRO_170    | OG, A_SER_167  | HG, A_SER_167   | 2.98 | 2.14 | 3.80  |
| 5T6P.PDB | OE1, A_GLN_43   | NE2, B_GLN_39  | HE22, B_GLN_39  | 2.71 | 1.86 | 5.14  |
| 5T6P.PDB | O, F_PRO_8      | ND2, B_ASN_57  | HD21, B_ASN_57  | 2.91 | 2.07 | 9.74  |
| 5T6P.PDB | OE1, D_GLN_39   | NE2, C_GLN_43  | HE22, C_GLN_43  | 3.00 | 2.17 | 12.88 |
| 5T6P.PDB | O, D_GLY_107    | OG, C_SER_48   | HG, C_SER_48    | 2.66 | 1.94 | 25.38 |
| 5T6P.PDB | OE1, C_GLN_43   | NE2, D_GLN_39  | HE22, D_GLN_39  | 2.79 | 1.94 | 7.20  |
| 5T6P.PDB | OH, C_TYR_41    | N, D_PHE_103   | H, D_PHE_103    | 2.95 | 2.09 | 5.85  |
| 5T6P.PDB | OE1, C_GLU_39   | NE, E_ARG_5    | HE, E_ARG_5     | 2.86 | 2.02 | 10.72 |
| 5T78.PDB | OD1, C_ASN_150  | N, A_ASP_1     | H1, A_ASP_1     | 2.85 | 2.07 | 23.76 |

|          |                 |                 |                  |      |      |       |
|----------|-----------------|-----------------|------------------|------|------|-------|
| 5T78.PDB | OE1, B_GLN_39   | NE2, A_GLN_43   | HE22, A_GLN_43   | 2.92 | 2.08 | 9.79  |
| 5T78.PDB | O, B_GLY_107    | OG, A_SER_48    | HG, A_SER_48     | 2.44 | 1.64 | 14.53 |
| 5T78.PDB | O, B_LYS_43     | OH, A_TYR_92    | HH, A_TYR_92     | 2.74 | 2.03 | 27.20 |
| 5T78.PDB | O, B_PRO_170    | OG, A_SER_167   | HG, A_SER_167    | 2.91 | 2.11 | 14.54 |
| 5T78.PDB | OE1, A_GLN_43   | NE2, B_GLN_39   | HE22, B_GLN_39   | 2.63 | 1.78 | 5.56  |
| 5T78.PDB | OH, A_TYR_41    | N, B_PHE_103    | H, B_PHE_103     | 2.85 | 2.00 | 5.24  |
| 5T78.PDB | OE1, A_GLU_39   | NH1, F_ARG_5    | HH11, F_ARG_5    | 2.68 | 1.83 | 9.33  |
| 5T78.PDB | O, D_GLY_107    | OG, C_SER_48    | HG, C_SER_48     | 2.59 | 1.80 | 15.22 |
| 5T78.PDB | O, D_LYS_43     | OH, C_TYR_92    | HH, C_TYR_92     | 2.90 | 2.21 | 29.37 |
| 5T78.PDB | O, A_SER_26     | N, C_ASN_166    | H, C_ASN_166     | 2.63 | 1.86 | 20.95 |
| 5T78.PDB | O, D_PRO_170    | OG, C_SER_167   | HG, C_SER_167    | 2.87 | 2.05 | 10.83 |
| 5T78.PDB | OE1, C_GLN_43   | NE2, D_GLN_39   | HE22, D_GLN_39   | 2.72 | 1.87 | 5.23  |
| 5T78.PDB | OH, C_TYR_41    | N, D_PHE_103    | H, D_PHE_103     | 2.85 | 2.00 | 7.54  |
| 5T78.PDB | OD1, C_ASN_142  | NE2, D_HIS_167  | HE2, D_HIS_167   | 2.85 | 2.00 | 9.68  |
| 5T78.PDB | OD2, A_ASP_75   | N, D_SER_175    | H, D_SER_175     | 2.84 | 2.00 | 10.93 |
| 5T78.PDB | OE1, C_GLU_39   | NH1, E_ARG_5    | HH11, E_ARG_5    | 2.69 | 1.87 | 13.16 |
| 5U3J.PDB | OD1, L_ASP_31   | OH, H_TYR_100K  | HH, H_TYR_100K   | 2.88 | 2.04 | 5.22  |
| 5U3J.PDB | OH, L_TYR_36    | N, H_MET_100N   | H, H_MET_100N    | 2.75 | 1.92 | 13.09 |
| 5U3J.PDB | OE1, H_GLU_100F | OH, L_TYR_32    | HH, L_TYR_32     | 2.62 | 1.91 | 27.84 |
| 5U3J.PDB | OE1, H_GLN_39   | NE2, L_GLN_38   | HE22, L_GLN_38   | 2.66 | 1.83 | 12.57 |
| 5U3J.PDB | O, H_PRO_167    | OG, L_SER_162   | HG, L_SER_162    | 2.90 | 2.16 | 24.21 |
| 5U3N.PDB | OD2, A_ASP_674  | NH1, H_ARG_52A  | HH12, H_ARG_52A  | 3.00 | 2.24 | 24.41 |
| 5U3N.PDB | OD1, L_ASP_31   | NH2, H_ARG_100B | HH22, H_ARG_100B | 2.97 | 2.15 | 14.50 |
| 5U3N.PDB | OD1, L_ASN_34   | ND2, H_ASN_100J | HD21, H_ASN_100J | 2.72 | 1.86 | 2.61  |
| 5U3N.PDB | OH, L_TYR_36    | N, H_MET_100M   | H, H_MET_100M    | 2.99 | 2.13 | 5.54  |
| 5U3N.PDB | OD1, L_ASN_138  | NE2, H_HIS_164  | HE2, H_HIS_164   | 2.92 | 2.21 | 29.54 |
| 5U3N.PDB | O, H_PRO_167    | OG, L_SER_162   | HG, L_SER_162    | 2.77 | 1.98 | 17.29 |
| 5UCB.PDB | OE1, L_GLN_38   | NE2, H_GLN_39   | HE22, H_GLN_39   | 2.96 | 2.12 | 9.92  |
| 5UCB.PDB | O, B_LEU_5      | OH, H_TYR_53    | HH, H_TYR_53     | 2.73 | 1.99 | 23.03 |
| 5UCB.PDB | O, B_VAL_145    | N, H_GLY_97     | H, H_GLY_97      | 2.90 | 2.05 | 8.98  |
| 5UCB.PDB | O, L_SER_208    | NZ, H_LYS_129   | HZ2, H_LYS_129   | 2.83 | 2.06 | 25.53 |
| 5UCB.PDB | OD2, B_ASP_51   | OG, L_SER_30    | HG, L_SER_30     | 2.58 | 1.81 | 20.19 |
| 5UCB.PDB | OE1, H_GLN_39   | NE2, L_GLN_38   | HE22, L_GLN_38   | 2.95 | 2.13 | 14.86 |
| 5UCB.PDB | O, B_SER_47     | NH1, L_ARG_66   | HH12, L_ARG_66   | 2.77 | 1.99 | 21.64 |
| 5UCB.PDB | O, B_SER_47     | NH2, L_ARG_66   | HH22, L_ARG_66   | 2.89 | 2.16 | 27.12 |
| 5UCB.PDB | O, B_ARG_48     | N, L_GLY_68     | H, L_GLY_68      | 2.79 | 1.95 | 9.02  |
| 5UCB.PDB | O, H_LEU_170    | NE2, L_GLN_160  | HE22, L_GLN_160  | 2.99 | 2.13 | 5.75  |
| 5UCB.PDB | O, H_PRO_167    | OG, L_SER_162   | HG, L_SER_162    | 2.68 | 1.94 | 24.13 |
| 5UCB.PDB | O, L_ASP_91     | OH, B_TYR_111   | HH, B_TYR_111    | 2.57 | 1.75 | 11.11 |
| 5UCB.PDB | OG, H_SER_58    | NZ, B_LYS_142   | HZ3, B_LYS_142   | 2.83 | 1.96 | 8.82  |
| 5UCB.PDB | OD1, L_ASP_91   | NH2, B_ARG_144  | HH21, B_ARG_144  | 2.84 | 2.03 | 16.18 |
| 5UK0.PDB | OD1, F_ASP_590  | ND2, B_ASN_560  | HD22, B_ASN_560  | 2.72 | 1.94 | 19.72 |
| 5UK0.PDB | O, F_LEU_502    | ND2, B_ASN_617  | HD22, B_ASN_617  | 2.60 | 1.80 | 16.74 |
| 5UK0.PDB | OD1, D_ASP_586  | NH2, C_ARG_311  | HH22, C_ARG_311  | 2.98 | 2.20 | 18.56 |
| 5UK0.PDB | OD1, B_ASP_590  | ND2, D_ASN_560  | HD22, D_ASN_560  | 2.73 | 1.95 | 20.06 |
| 5UK0.PDB | O, B_LEU_502    | ND2, D_ASN_617  | HD22, D_ASN_617  | 2.62 | 1.80 | 13.03 |
| 5UK0.PDB | O, D_LEU_502    | ND2, F_ASN_617  | HD22, F_ASN_617  | 2.71 | 1.89 | 14.40 |
| 5VXJ.PDB | OE1, I_GLU_200  | NH1, B_ARG_50   | HH12, B_ARG_50   | 2.92 | 2.07 | 7.25  |
| 5VXJ.PDB | OE1, I_GLU_201  | OH, B_TYR_105   | HH, B_TYR_105    | 2.51 | 1.70 | 12.69 |
| 5VXJ.PDB | O, D_GLY_56     | NH2, C_ARG_132  | HH22, C_ARG_132  | 2.97 | 2.20 | 22.55 |
| 5VXJ.PDB | OD1, C_ASN_140  | NE, D_ARG_19    | HE, D_ARG_19     | 2.55 | 1.80 | 23.66 |
| 5VXJ.PDB | OE1, E_GLU_201  | OH, D_TYR_105   | HH, D_TYR_105    | 2.53 | 1.70 | 8.84  |
| 5VXJ.PDB | OD2, F_ASP_73   | NZ, E_LYS_137   | HZ2, E_LYS_137   | 2.77 | 1.96 | 20.15 |
| 5VXJ.PDB | O, D_TYR_105    | OG, E_SER_173   | HG, E_SER_173    | 2.87 | 2.17 | 28.40 |
| 5VXJ.PDB | OD1, D_ASN_97   | NZ, E_LYS_197   | HZ1, E_LYS_197   | 2.80 | 1.95 | 14.72 |
| 5VXJ.PDB | O, F_GLY_112    | ND2, E_ASN_216  | HD21, E_ASN_216  | 2.68 | 1.91 | 21.74 |
| 5VXJ.PDB | OE1, G_GLU_200  | NH2, F_ARG_50   | HH22, F_ARG_50   | 2.70 | 1.89 | 15.49 |
| 5VXJ.PDB | OE1, G_GLU_201  | OH, F_TYR_105   | HH, F_TYR_105    | 2.57 | 1.75 | 11.97 |



|          |                |                |                 |      |      |       |
|----------|----------------|----------------|-----------------|------|------|-------|
| 5VXJ.PDB | O, E_THR_217   | NE2, F_GLN_111 | HE22, F_GLN_111 | 2.98 | 2.12 | 6.26  |
| 5VXJ.PDB | O, H_GLY_56    | NH2, G_ARG_132 | HH22, G_ARG_132 | 2.94 | 2.20 | 26.37 |
| 5VXJ.PDB | O, F_TYR_105   | OG, G_SER_173  | HG, G_SER_173   | 2.88 | 2.16 | 26.33 |
| 5VXJ.PDB | OD1, L_ASN_292 | N, G_GLY_176   | H, G_GLY_176    | 2.76 | 2.01 | 25.37 |
| 5VXJ.PDB | OE1, H_GLN_111 | OG1, G_THR_217 | HG1, G_THR_217  | 2.86 | 2.17 | 29.58 |
| 5VXJ.PDB | OD2, J_ASP_73  | NZ, L_LYS_137  | HZ3, L_LYS_137  | 2.90 | 2.17 | 29.52 |
| 5VXJ.PDB | OD1, B_ASN_97  | NZ, L_LYS_197  | HZ1, L_LYS_197  | 2.68 | 1.88 | 21.92 |
| 5VXJ.PDB | O, L_THR_217   | NE2, J_GLN_111 | HE22, J_GLN_111 | 2.92 | 2.11 | 16.33 |
| 5VXK.PDB | OD1, A_ASN_280 | N, B_SER_103   | H, B_SER_103    | 2.64 | 1.78 | 2.03  |
| 5VXK.PDB | OD1, A_ASN_280 | N, B_VAL_104   | H, B_VAL_104    | 2.84 | 2.01 | 12.48 |
| 5VXK.PDB | OG, A_SER_168  | NE2, B_GLN_106 | HE21, B_GLN_106 | 2.99 | 2.23 | 24.43 |
| 5VXK.PDB | OD2, A_ASP_287 | NE2, B_GLN_106 | HE22, B_GLN_106 | 2.77 | 1.94 | 12.81 |
| 5VXK.PDB | OG1, B_THR_102 | OH, A_TYR_276  | HH, A_TYR_276   | 2.57 | 1.73 | 6.50  |
| 5VXL.PDB | OD2, B_ASP_52  | NZ, A_LYS_205  | HZ1, A_LYS_205  | 3.00 | 2.13 | 10.69 |
| 5VXL.PDB | O, A_ALA_198   | OH, B_TYR_54   | HH, B_TYR_54    | 2.38 | 1.67 | 27.03 |
| 5VXL.PDB | OD1, A_ASP_166 | N, B_SER_55    | H, B_SER_55     | 2.91 | 2.18 | 28.04 |
| 5VXL.PDB | OD1, A_ASP_166 | OG, B_SER_55   | HG, B_SER_55    | 2.56 | 1.73 | 4.68  |
| 5VXL.PDB | OE2, A_GLU_201 | NH2, B_ARG_102 | HH22, B_ARG_102 | 2.87 | 2.08 | 20.03 |
| 5VXM.PDB | OE2, B_GLU_111 | NE1, A_TRP_177 | HE1, A_TRP_177  | 2.76 | 1.97 | 19.61 |
| 5VXM.PDB | O, A_ASP_166   | NE1, B_TRP_102 | HE1, B_TRP_102  | 2.92 | 2.09 | 13.88 |
| 5VXM.PDB | OE2, A_GLU_201 | N, B_CYS_104   | H, B_CYS_104    | 2.85 | 2.02 | 10.45 |
| 5VXM.PDB | OE1, A_GLU_201 | N, B_SER_105   | H, B_SER_105    | 2.58 | 1.74 | 9.22  |
| 5VXR.PDB | OE1, L_GLN_38  | NZ, H_LYS_39   | HZ2, H_LYS_39   | 2.72 | 1.76 | 14.94 |
| 5VXR.PDB | OD1, P_ASN_415 | OH, H_TYR_50   | HH, H_TYR_50    | 2.71 | 1.82 | 21.79 |
| 5VXR.PDB | OH, L_TYR_36   | N, H_PHE_106   | H, H_PHE_106    | 2.92 | 1.92 | 7.59  |
| 5VXR.PDB | OD1, L_ASN_138 | NE2, H_HIS_170 | HE2, H_HIS_170  | 2.89 | 1.98 | 20.57 |
| 5VXR.PDB | OE2, L_GLU_123 | NZ, H_LYS_214  | HZ1, H_LYS_214  | 2.93 | 1.98 | 15.97 |
| 5VXR.PDB | O, H_GLY_101   | NZ, L_LYS_30   | HZ1, L_LYS_30   | 2.83 | 1.85 | 13.06 |
| 5VXR.PDB | O, P_GLY_418   | NE1, L_TRP_96  | HE1, L_TRP_96   | 2.88 | 1.87 | 5.74  |
| 5VXR.PDB | OG, H_SER_184  | OG, L_SER_176  | HG, L_SER_176   | 2.79 | 1.86 | 17.30 |
| 5VXR.PDB | OH, H_TYR_33   | N, P_ASN_415   | H, P_ASN_415    | 2.82 | 1.94 | 24.20 |
| 5VXR.PDB | O, L_ASN_91    | NE1, P_TRP_420 | HE1, P_TRP_420  | 2.80 | 1.97 | 28.78 |
| 5WKQ.PDB | OG, B_SER_208  | NH2, A_ARG_135 | HH21, A_ARG_135 | 2.89 | 2.06 | 11.87 |
| 5WKQ.PDB | OE2, A_GLU_131 | ND1, B_HIS_207 | HD1, B_HIS_207  | 2.65 | 1.88 | 22.26 |
| 5WKQ.PDB | OE1, A_GLU_131 | OG1, B_THR_211 | HG1, B_THR_211  | 2.63 | 1.86 | 19.68 |
| 5WN9.PDB | OD1, H_ASN_57  | NE, A_ARG_188  | HE, A_ARG_188   | 2.58 | 1.61 | 2.15  |

Table 7: Interfacial side chain and main chain hydrogen bonding networks of all experimentally determined antigen-antibody-related structures. In this table, a PDB file is specified with a four-letter PDB ID, except that the names of the PDB files corresponding to the single NMR structural model split from the NMR ensemble is specified with a four-letter PDB ID in addition to a hyphen followed by the single NMR structural model numeric ID, the residue naming scheme is **Chain ID\_residue name\_residue number**,  $\angle ADH$  represents the angle formed by acceptor (A), donor (D) and hydrogen (H) ( $\angle ADH$ ).

| PDB      | Acceptor (A)   | Donor (D)      | Hydrogen (H)    | D-A (Å) | H-A (Å) | $\angle ADH(^{\circ})$ |
|----------|----------------|----------------|-----------------|---------|---------|------------------------|
| 1A14.PDB | OE1, L_GLN_38  | NE2, H_GLN_39  | HE21, H_GLN_39  | 2.62    | 1.69    | 9.24                   |
| 1E6J.PDB | OE1, H_GLN_39  | NE2, L_GLN_37  | HE22, L_GLN_37  | 2.69    | 1.84    | 23.98                  |
| 1F3R.PDB | NE1, A_TRP_67  | OG, B_SER_61   | HG, B_SER_61    | 2.86    | 1.89    | 6.31                   |
| 1HGD.PDB | OE2, B_GLU_97  | NZ, A_LYS_27   | HZ1, A_LYS_27   | 2.80    | 1.78    | 9.95                   |
| 1HGD.PDB | OE2, B_GLU_67  | NH2, A_ARG_109 | HH21, A_ARG_109 | 2.83    | 1.84    | 13.41                  |
| 1HGD.PDB | OD2, F_ASP_79  | OG, A_SER_110  | HG, A_SER_110   | 2.92    | 1.96    | 11.03                  |
| 1HGD.PDB | OD1, E_ASP_101 | NE2, A_GLN_210 | HE22, A_GLN_210 | 3.00    | 2.15    | 26.33                  |
| 1HGD.PDB | OE1, C_GLN_210 | NH2, A_ARG_220 | HH21, A_ARG_220 | 2.78    | 1.86    | 19.99                  |
| 1HGD.PDB | OE1, F_GLU_72  | NZ, A_LYS_238  | HZ3, A_LYS_238  | 2.93    | 1.92    | 13.44                  |
| 1HGD.PDB | OE2, F_GLU_97  | NH2, B_ARG_54  | HH22, B_ARG_54  | 2.77    | 1.80    | 12.79                  |
| 1HGD.PDB | OD2, F_ASP_86  | NZ, B_LYS_62   | HZ1, B_LYS_62   | 2.61    | 1.78    | 29.53                  |
| 1HGD.PDB | OD2, F_ASP_90  | NZ, B_LYS_62   | HZ3, B_LYS_62   | 2.73    | 1.84    | 25.56                  |
| 1HGD.PDB | OG, A_SER_110  | NE2, B_HIS_64  | HE2, B_HIS_64   | 2.96    | 2.01    | 12.34                  |
| 1HGD.PDB | OE2, D_GLU_81  | NE, B_ARG_76   | HE, B_ARG_76    | 2.88    | 1.91    | 8.67                   |
| 1HGD.PDB | OE2, D_GLU_74  | NH1, B_ARG_76  | HH12, B_ARG_76  | 2.84    | 1.82    | 2.51                   |
| 1HGD.PDB | OE1, D_GLU_81  | NH2, B_ARG_76  | HH21, B_ARG_76  | 2.71    | 1.71    | 6.80                   |
| 1HGD.PDB | OE1, D_GLU_74  | NH2, B_ARG_76  | HH22, B_ARG_76  | 2.75    | 1.75    | 3.21                   |
| 1HGD.PDB | OE1, D_GLU_85  | OH, B_TYR_83   | HH, B_TYR_83    | 2.65    | 1.81    | 23.27                  |
| 1HGD.PDB | OH, F_TYR_83   | NZ, B_LYS_88   | HZ1, B_LYS_88   | 2.76    | 1.72    | 5.59                   |
| 1HGD.PDB | OE1, F_GLU_132 | NE, B_ARG_124  | HE, B_ARG_124   | 2.83    | 2.02    | 28.17                  |
| 1HGD.PDB | OE2, F_GLU_132 | NE, B_ARG_124  | HE, B_ARG_124   | 2.88    | 2.01    | 22.00                  |
| 1HGD.PDB | OE2, D_GLU_97  | NZ, C_LYS_27   | HZ1, C_LYS_27   | 2.80    | 1.77    | 7.54                   |
| 1HGD.PDB | OE2, D_GLU_67  | NH2, C_ARG_109 | HH21, C_ARG_109 | 2.87    | 1.88    | 13.44                  |
| 1HGD.PDB | OD2, B_ASP_79  | OG, C_SER_110  | HG, C_SER_110   | 2.73    | 1.84    | 19.59                  |
| 1HGD.PDB | OD1, A_ASP_101 | NE2, C_GLN_210 | HE22, C_GLN_210 | 2.97    | 2.13    | 27.21                  |
| 1HGD.PDB | OE1, E_GLN_210 | NH2, C_ARG_220 | HH21, C_ARG_220 | 2.69    | 1.80    | 23.00                  |
| 1HGD.PDB | OE1, B_GLU_72  | NZ, C_LYS_238  | HZ1, C_LYS_238  | 2.80    | 1.83    | 17.68                  |
| 1HGD.PDB | OE1, D_GLU_15  | NZ, C_LYS_326  | HZ1, C_LYS_326  | 2.78    | 1.77    | 11.96                  |
| 1HGD.PDB | OE2, B_GLU_97  | NH2, D_ARG_54  | HH22, D_ARG_54  | 2.79    | 1.82    | 13.03                  |
| 1HGD.PDB | OD2, B_ASP_90  | NZ, D_LYS_62   | HZ3, D_LYS_62   | 2.62    | 1.79    | 29.99                  |
| 1HGD.PDB | OG, C_SER_110  | NE2, D_HIS_64  | HE2, D_HIS_64   | 2.96    | 1.98    | 5.65                   |
| 1HGD.PDB | OE2, F_GLU_81  | NE, D_ARG_76   | HE, D_ARG_76    | 2.83    | 1.87    | 10.56                  |
| 1HGD.PDB | OE2, F_GLU_74  | NH1, D_ARG_76  | HH12, D_ARG_76  | 2.78    | 1.77    | 3.14                   |
| 1HGD.PDB | OE1, F_GLU_81  | NH2, D_ARG_76  | HH21, D_ARG_76  | 2.65    | 1.67    | 9.42                   |
| 1HGD.PDB | OE1, F_GLU_74  | NH2, D_ARG_76  | HH22, D_ARG_76  | 2.69    | 1.70    | 6.24                   |
| 1HGD.PDB | OE1, F_GLU_85  | OH, D_TYR_83   | HH, D_TYR_83    | 2.57    | 1.79    | 29.87                  |
| 1HGD.PDB | OH, B_TYR_83   | NZ, D_LYS_88   | HZ1, D_LYS_88   | 2.76    | 1.72    | 5.75                   |
| 1HGD.PDB | OE1, B_GLU_132 | NE, D_ARG_124  | HE, D_ARG_124   | 2.80    | 2.01    | 29.31                  |
| 1HGD.PDB | OE2, B_GLU_132 | NE, D_ARG_124  | HE, D_ARG_124   | 2.82    | 1.95    | 21.73                  |
| 1HGD.PDB | OE2, F_GLU_97  | NZ, E_LYS_27   | HZ1, E_LYS_27   | 2.79    | 1.77    | 8.77                   |
| 1HGD.PDB | OE2, F_GLU_67  | NH2, E_ARG_109 | HH21, E_ARG_109 | 2.82    | 1.85    | 14.73                  |
| 1HGD.PDB | OD2, D_ASP_79  | OG, E_SER_110  | HG, E_SER_110   | 2.81    | 1.89    | 15.50                  |
| 1HGD.PDB | OD1, C_ASP_101 | NE2, E_GLN_210 | HE22, E_GLN_210 | 2.98    | 2.14    | 27.07                  |
| 1HGD.PDB | OE1, A_GLN_210 | NH2, E_ARG_220 | HH21, E_ARG_220 | 2.77    | 1.90    | 25.11                  |
| 1HGD.PDB | OE1, D_GLU_72  | NZ, E_LYS_238  | HZ3, E_LYS_238  | 2.87    | 1.86    | 13.40                  |
| 1HGD.PDB | OE1, F_GLU_15  | NZ, E_LYS_326  | HZ3, E_LYS_326  | 2.97    | 1.97    | 16.19                  |
| 1HGD.PDB | OE2, D_GLU_97  | NH2, F_ARG_54  | HH22, F_ARG_54  | 2.72    | 1.75    | 12.85                  |
| 1HGD.PDB | OD2, D_ASP_90  | NZ, F_LYS_62   | HZ3, F_LYS_62   | 2.71    | 1.86    | 28.09                  |
| 1HGD.PDB | OG, E_SER_110  | NE2, F_HIS_64  | HE2, F_HIS_64   | 2.95    | 1.98    | 9.92                   |
| 1HGD.PDB | OE2, B_GLU_81  | NE, F_ARG_76   | HE, F_ARG_76    | 2.86    | 1.90    | 10.66                  |
| 1HGD.PDB | OE2, B_GLU_74  | NH1, F_ARG_76  | HH12, F_ARG_76  | 2.77    | 1.75    | 1.42                   |
| 1HGD.PDB | OE1, B_GLU_81  | NH2, F_ARG_76  | HH21, F_ARG_76  | 2.64    | 1.65    | 5.37                   |
| 1HGD.PDB | OE1, B_GLU_74  | NH2, F_ARG_76  | HH22, F_ARG_76  | 2.71    | 1.72    | 7.42                   |
| 1HGD.PDB | OE1, B_GLU_85  | OH, F_TYR_83   | HH, F_TYR_83    | 2.53    | 1.75    | 27.84                  |
| 1HGD.PDB | OH, D_TYR_83   | NZ, F_LYS_88   | HZ1, F_LYS_88   | 2.67    | 1.66    | 8.83                   |
| 1HGD.PDB | OE1, D_GLU_132 | NE, F_ARG_124  | HE, F_ARG_124   | 2.96    | 2.14    | 28.71                  |
| 1HGD.PDB | OE2, D_GLU_132 | NE, F_ARG_124  | HE, F_ARG_124   | 2.94    | 2.05    | 20.84                  |

|          |                |                |                 |      |      |       |
|----------|----------------|----------------|-----------------|------|------|-------|
| 1HGE.PDB | OE2, B_GLU_97  | NZ, A_LYS_27   | HZ1, A_LYS_27   | 2.80 | 1.78 | 10.14 |
| 1HGE.PDB | OE2, B_GLU_67  | NH2, A_ARG_109 | HH21, A_ARG_109 | 2.74 | 1.75 | 12.19 |
| 1HGE.PDB | OD2, F_ASP_79  | OG, A_SER_110  | HG, A_SER_110   | 2.90 | 1.95 | 11.19 |
| 1HGE.PDB | OD1, E_ASP_101 | NE2, A_GLN_210 | HE22, A_GLN_210 | 2.91 | 2.05 | 24.48 |
| 1HGE.PDB | OE1, C_GLN_210 | NH2, A_ARG_220 | HH21, A_ARG_220 | 2.71 | 1.78 | 19.14 |
| 1HGE.PDB | OE1, F_GLU_72  | NZ, A_LYS_238  | HZ3, A_LYS_238  | 2.91 | 1.89 | 11.73 |
| 1HGE.PDB | OE2, F_GLU_97  | NH2, B_ARG_54  | HH22, B_ARG_54  | 2.84 | 1.86 | 12.76 |
| 1HGE.PDB | OD2, F_ASP_86  | NZ, B_LYS_62   | HZ1, B_LYS_62   | 2.60 | 1.76 | 28.82 |
| 1HGE.PDB | OD2, F_ASP_90  | NZ, B_LYS_62   | HZ3, B_LYS_62   | 2.69 | 1.82 | 26.81 |
| 1HGE.PDB | OG, A_SER_110  | NE2, B_HIS_64  | HE2, B_HIS_64   | 2.97 | 2.02 | 12.36 |
| 1HGE.PDB | OE2, D_GLU_81  | NE, B_ARG_76   | HE, B_ARG_76    | 2.87 | 1.91 | 11.56 |
| 1HGE.PDB | OE2, D_GLU_74  | NH1, B_ARG_76  | HH12, B_ARG_76  | 2.84 | 1.83 | 5.81  |
| 1HGE.PDB | OE1, D_GLU_81  | NH2, B_ARG_76  | HH21, B_ARG_76  | 2.70 | 1.70 | 6.45  |
| 1HGE.PDB | OE1, D_GLU_74  | NH2, B_ARG_76  | HH22, B_ARG_76  | 2.79 | 1.79 | 3.91  |
| 1HGE.PDB | OE1, D_GLU_85  | OH, B_TYR_83   | HH, B_TYR_83    | 2.65 | 1.81 | 24.86 |
| 1HGE.PDB | OH, F_TYR_83   | NZ, B_LYS_88   | HZ1, B_LYS_88   | 2.75 | 1.71 | 5.62  |
| 1HGE.PDB | OE1, F_GLU_132 | NE, B_ARG_124  | HE, B_ARG_124   | 2.80 | 1.98 | 27.36 |
| 1HGE.PDB | OE2, F_GLU_132 | NE, B_ARG_124  | HE, B_ARG_124   | 2.94 | 2.06 | 21.65 |
| 1HGE.PDB | OE2, D_GLU_97  | NZ, C_LYS_27   | HZ1, C_LYS_27   | 2.79 | 1.77 | 8.74  |
| 1HGE.PDB | OE2, D_GLU_67  | NH2, C_ARG_109 | HH21, C_ARG_109 | 2.78 | 1.79 | 11.19 |
| 1HGE.PDB | OD2, B_ASP_79  | OG, C_SER_110  | HG, C_SER_110   | 2.78 | 1.86 | 15.09 |
| 1HGE.PDB | OD1, A_ASP_101 | NE2, C_GLN_210 | HE22, C_GLN_210 | 2.93 | 2.07 | 24.92 |
| 1HGE.PDB | OE1, E_GLN_210 | NH2, C_ARG_220 | HH21, C_ARG_220 | 2.64 | 1.76 | 23.09 |
| 1HGE.PDB | OE1, B_GLU_72  | NZ, C_LYS_238  | HZ1, C_LYS_238  | 2.78 | 1.80 | 16.75 |
| 1HGE.PDB | OE1, D_GLU_15  | NZ, C_LYS_326  | HZ1, C_LYS_326  | 2.74 | 1.73 | 12.73 |
| 1HGE.PDB | OE2, B_GLU_97  | NH2, D_ARG_54  | HH22, D_ARG_54  | 2.87 | 1.89 | 12.82 |
| 1HGE.PDB | OG, C_SER_110  | NE2, D_HIS_64  | HE2, D_HIS_64   | 2.96 | 1.98 | 6.23  |
| 1HGE.PDB | OE2, F_GLU_81  | NE, D_ARG_76   | HE, D_ARG_76    | 2.79 | 1.85 | 14.06 |
| 1HGE.PDB | OE2, F_GLU_74  | NH1, D_ARG_76  | HH12, D_ARG_76  | 2.78 | 1.78 | 7.91  |
| 1HGE.PDB | OE1, F_GLU_81  | NH2, D_ARG_76  | HH21, D_ARG_76  | 2.63 | 1.67 | 11.36 |
| 1HGE.PDB | OE1, F_GLU_74  | NH2, D_ARG_76  | HH22, D_ARG_76  | 2.74 | 1.75 | 7.04  |
| 1HGE.PDB | OE1, F_GLU_85  | OH, D_TYR_83   | HH, D_TYR_83    | 2.58 | 1.80 | 29.40 |
| 1HGE.PDB | OH, B_TYR_83   | NZ, D_LYS_88   | HZ1, D_LYS_88   | 2.71 | 1.68 | 6.52  |
| 1HGE.PDB | OE1, B_GLU_132 | NE, D_ARG_124  | HE, D_ARG_124   | 2.78 | 1.98 | 28.90 |
| 1HGE.PDB | OE2, B_GLU_132 | NE, D_ARG_124  | HE, D_ARG_124   | 2.90 | 2.01 | 20.41 |
| 1HGE.PDB | OE2, F_GLU_97  | NZ, E_LYS_27   | HZ1, E_LYS_27   | 2.79 | 1.77 | 9.75  |
| 1HGE.PDB | OE2, F_GLU_67  | NH2, E_ARG_109 | HH21, E_ARG_109 | 2.78 | 1.79 | 11.63 |
| 1HGE.PDB | OD2, D_ASP_79  | OG, E_SER_110  | HG, E_SER_110   | 2.82 | 1.89 | 14.19 |
| 1HGE.PDB | OD1, C_ASP_101 | NE2, E_GLN_210 | HE22, E_GLN_210 | 2.89 | 2.04 | 25.02 |
| 1HGE.PDB | OE1, A_GLN_210 | NH2, E_ARG_220 | HH21, E_ARG_220 | 2.74 | 1.87 | 25.04 |
| 1HGE.PDB | OE1, D_GLU_72  | NZ, E_LYS_238  | HZ3, E_LYS_238  | 2.85 | 1.84 | 12.25 |
| 1HGE.PDB | OD1, F_ASP_86  | NZ, E_LYS_310  | HZ3, E_LYS_310  | 2.86 | 2.02 | 29.64 |
| 1HGE.PDB | OE1, F_GLU_15  | NZ, E_LYS_326  | HZ3, E_LYS_326  | 2.99 | 2.00 | 17.08 |
| 1HGE.PDB | OE2, D_GLU_97  | NH2, F_ARG_54  | HH22, F_ARG_54  | 2.80 | 1.82 | 12.52 |
| 1HGE.PDB | OD2, D_ASP_90  | NZ, F_LYS_62   | HZ2, F_LYS_62   | 2.67 | 1.83 | 29.15 |
| 1HGE.PDB | OG, E_SER_110  | NE2, F_HIS_64  | HE2, F_HIS_64   | 2.94 | 1.97 | 9.11  |
| 1HGE.PDB | OE2, B_GLU_81  | NE, F_ARG_76   | HE, F_ARG_76    | 2.85 | 1.89 | 11.64 |
| 1HGE.PDB | OE2, B_GLU_74  | NH1, F_ARG_76  | HH12, F_ARG_76  | 2.73 | 1.73 | 6.19  |
| 1HGE.PDB | OE1, B_GLU_81  | NH2, F_ARG_76  | HH21, F_ARG_76  | 2.65 | 1.66 | 5.51  |
| 1HGE.PDB | OE1, B_GLU_74  | NH2, F_ARG_76  | HH22, F_ARG_76  | 2.70 | 1.73 | 9.07  |
| 1HGE.PDB | OE1, B_GLU_85  | OH, F_TYR_83   | HH, F_TYR_83    | 2.51 | 1.76 | 30.00 |
| 1HGE.PDB | OH, D_TYR_83   | NZ, F_LYS_88   | HZ1, F_LYS_88   | 2.67 | 1.65 | 8.34  |
| 1HGE.PDB | OE1, D_GLU_132 | NE, F_ARG_124  | HE, F_ARG_124   | 2.92 | 2.09 | 27.36 |
| 1HGF.PDB | OE2, B_GLU_97  | NZ, A_LYS_27   | HZ1, A_LYS_27   | 2.79 | 1.86 | 21.55 |
| 1HGF.PDB | OE2, B_GLU_67  | NH2, A_ARG_109 | HH21, A_ARG_109 | 2.92 | 1.92 | 10.51 |
| 1HGF.PDB | OD2, F_ASP_79  | OG, A_SER_110  | HG, A_SER_110   | 2.82 | 1.90 | 15.87 |
| 1HGF.PDB | OE1, C_GLN_210 | NH2, A_ARG_220 | HH21, A_ARG_220 | 2.64 | 1.76 | 23.62 |
| 1HGF.PDB | OE1, F_GLU_72  | NZ, A_LYS_238  | HZ2, A_LYS_238  | 2.85 | 1.85 | 14.58 |

|          |                |                |                 |      |      |       |
|----------|----------------|----------------|-----------------|------|------|-------|
| 1HGF.PDB | OE2, A_GLU_325 | NH2, B_ARG_25  | HH22, B_ARG_25  | 2.99 | 2.04 | 16.52 |
| 1HGF.PDB | OE2, F_GLU_97  | NH2, B_ARG_54  | HH22, B_ARG_54  | 2.83 | 1.86 | 13.50 |
| 1HGF.PDB | OD2, F ASP_86  | NZ, B_LYS_62   | HZ2, B_LYS_62   | 2.71 | 1.70 | 11.44 |
| 1HGF.PDB | OD2, F ASP_90  | NZ, B_LYS_62   | HZ3, B_LYS_62   | 2.77 | 1.82 | 20.37 |
| 1HGF.PDB | OG, A_SER_266  | ND1, B_HIS_64  | HD1, B_HIS_64   | 2.66 | 1.79 | 20.68 |
| 1HGF.PDB | OG, A_SER_110  | NE2, B_HIS_64  | HE2, B_HIS_64   | 2.89 | 1.92 | 10.70 |
| 1HGF.PDB | OE2, D_GLU_81  | NE, B_ARG_76   | HE, B_ARG_76    | 2.92 | 1.92 | 2.47  |
| 1HGF.PDB | OE1, D_GLU_74  | NH1, B_ARG_76  | HH12, B_ARG_76  | 2.86 | 1.84 | 3.80  |
| 1HGF.PDB | OE1, D_GLU_81  | NH2, B_ARG_76  | HH21, B_ARG_76  | 2.73 | 1.74 | 10.29 |
| 1HGF.PDB | OE2, D_GLU_74  | NH2, B_ARG_76  | HH22, B_ARG_76  | 2.75 | 1.74 | 3.91  |
| 1HGF.PDB | OE1, D_GLU_85  | OH, B_TYR_83   | HH, B_TYR_83    | 2.57 | 1.80 | 29.66 |
| 1HGF.PDB | OH, F_TYR_83   | NZ, B_LYS_88   | HZ1, B_LYS_88   | 2.72 | 1.70 | 9.91  |
| 1HGF.PDB | OE1, F_GLU_132 | NE, B_ARG_124  | HE, B_ARG_124   | 2.80 | 1.86 | 13.00 |
| 1HGF.PDB | OE1, F_GLU_131 | NH2, B_ARG_163 | HH21, B_ARG_163 | 2.74 | 1.86 | 24.20 |
| 1HGF.PDB | OE2, D_GLU_97  | NZ, C_LYS_27   | HZ1, C_LYS_27   | 2.81 | 1.85 | 19.93 |
| 1HGF.PDB | OE2, D_GLU_67  | NH2, C_ARG_109 | HH21, C_ARG_109 | 2.91 | 1.92 | 11.49 |
| 1HGF.PDB | OD2, B ASP_79  | OG, C_SER_110  | HG, C_SER_110   | 2.69 | 1.85 | 25.37 |
| 1HGF.PDB | OE1, E_GLN_210 | NH2, C_ARG_220 | HH21, C_ARG_220 | 2.56 | 1.72 | 26.72 |
| 1HGF.PDB | OE1, B_GLU_72  | NZ, C_LYS_238  | HZ2, C_LYS_238  | 2.75 | 1.78 | 18.48 |
| 1HGF.PDB | OE2, B_GLU_97  | NH2, D_ARG_54  | HH22, D_ARG_54  | 2.84 | 1.86 | 12.74 |
| 1HGF.PDB | OD2, B ASP_86  | NZ, D_LYS_62   | HZ2, D_LYS_62   | 2.69 | 1.69 | 13.49 |
| 1HGF.PDB | OD2, B ASP_90  | NZ, D_LYS_62   | HZ3, D_LYS_62   | 2.68 | 1.77 | 22.81 |
| 1HGF.PDB | OG, C_SER_266  | ND1, D_HIS_64  | HD1, D_HIS_64   | 2.64 | 1.83 | 27.58 |
| 1HGF.PDB | OG, C_SER_110  | NE2, D_HIS_64  | HE2, D_HIS_64   | 2.90 | 1.92 | 7.33  |
| 1HGF.PDB | OE2, F_GLU_81  | NE, D_ARG_76   | HE, D_ARG_76    | 2.82 | 1.85 | 5.34  |
| 1HGF.PDB | OE1, F_GLU_74  | NH1, D_ARG_76  | HH12, D_ARG_76  | 2.79 | 1.78 | 3.81  |
| 1HGF.PDB | OE1, F_GLU_81  | NH2, D_ARG_76  | HH21, D_ARG_76  | 2.64 | 1.68 | 12.43 |
| 1HGF.PDB | OE2, F_GLU_74  | NH2, D_ARG_76  | HH22, D_ARG_76  | 2.70 | 1.71 | 7.38  |
| 1HGF.PDB | OE1, F_GLU_85  | OH, D_TYR_83   | HH, D_TYR_83    | 2.58 | 1.80 | 29.87 |
| 1HGF.PDB | OH, B_TYR_83   | NZ, D_LYS_88   | HZ1, D_LYS_88   | 2.68 | 1.69 | 13.85 |
| 1HGF.PDB | OE1, B_GLU_132 | NE, D_ARG_124  | HE, D_ARG_124   | 2.79 | 1.88 | 16.40 |
| 1HGF.PDB | OE1, B_GLU_131 | NH2, D_ARG_163 | HH21, D_ARG_163 | 2.70 | 1.83 | 24.43 |
| 1HGF.PDB | OE2, F_GLU_97  | NZ, E_LYS_27   | HZ1, E_LYS_27   | 2.75 | 1.83 | 22.30 |
| 1HGF.PDB | OE2, F_GLU_67  | NH2, E_ARG_109 | HH21, E_ARG_109 | 2.88 | 1.88 | 11.28 |
| 1HGF.PDB | OD2, D ASP_79  | OG, E_SER_110  | HG, E_SER_110   | 2.78 | 1.90 | 21.69 |
| 1HGF.PDB | OE1, A_GLN_210 | NH2, E_ARG_220 | HH21, E_ARG_220 | 2.65 | 1.79 | 25.97 |
| 1HGF.PDB | OE1, D_GLU_72  | NZ, E_LYS_238  | HZ2, E_LYS_238  | 2.83 | 1.84 | 16.42 |
| 1HGF.PDB | OE2, D_GLU_97  | NH2, F_ARG_54  | HH22, F_ARG_54  | 2.79 | 1.81 | 11.74 |
| 1HGF.PDB | OD2, D ASP_86  | NZ, F_LYS_62   | HZ2, F_LYS_62   | 2.67 | 1.68 | 13.64 |
| 1HGF.PDB | OD2, D ASP_90  | NZ, F_LYS_62   | HZ3, F_LYS_62   | 2.75 | 1.81 | 20.23 |
| 1HGF.PDB | OG, E_SER_266  | ND1, F_HIS_64  | HD1, F_HIS_64   | 2.65 | 1.77 | 20.25 |
| 1HGF.PDB | OG, E_SER_110  | NE2, F_HIS_64  | HE2, F_HIS_64   | 2.89 | 1.92 | 9.46  |
| 1HGF.PDB | OE2, B_GLU_81  | NE, F_ARG_76   | HE, F_ARG_76    | 2.86 | 1.88 | 5.84  |
| 1HGF.PDB | OE1, B_GLU_74  | NH1, F_ARG_76  | HH12, F_ARG_76  | 2.78 | 1.77 | 1.59  |
| 1HGF.PDB | OE1, B_GLU_81  | NH2, F_ARG_76  | HH21, F_ARG_76  | 2.69 | 1.70 | 7.61  |
| 1HGF.PDB | OE2, B_GLU_74  | NH2, F_ARG_76  | HH22, F_ARG_76  | 2.71 | 1.73 | 8.88  |
| 1HGF.PDB | OH, D_TYR_83   | NZ, F_LYS_88   | HZ1, F_LYS_88   | 2.55 | 1.63 | 21.75 |
| 1HGF.PDB | OE1, D_GLU_132 | NE, F_ARG_124  | HE, F_ARG_124   | 2.90 | 1.96 | 15.73 |
| 1HGF.PDB | OE1, D_GLU_131 | NH2, F_ARG_163 | HH21, F_ARG_163 | 2.69 | 1.84 | 27.00 |
| 1HGG.PDB | OE2, B_GLU_97  | NZ, A_LYS_27   | HZ1, A_LYS_27   | 2.90 | 1.87 | 9.15  |
| 1HGG.PDB | OE2, B_GLU_67  | NH2, A_ARG_109 | HH21, A_ARG_109 | 2.84 | 1.86 | 14.43 |
| 1HGG.PDB | OD2, F ASP_79  | OG, A_SER_110  | HG, A_SER_110   | 2.88 | 1.95 | 14.29 |
| 1HGG.PDB | OD1, E ASP_101 | NE2, A_GLN_210 | HE22, A_GLN_210 | 2.99 | 2.07 | 17.95 |
| 1HGG.PDB | OE1, C_GLN_210 | NH2, A_ARG_220 | HH21, A_ARG_220 | 2.73 | 1.78 | 15.93 |
| 1HGG.PDB | OE1, F_GLU_72  | NZ, A_LYS_238  | HZ3, A_LYS_238  | 2.93 | 1.93 | 14.31 |
| 1HGG.PDB | OE2, F_GLU_72  | NZ, A_LYS_238  | HZ3, A_LYS_238  | 2.74 | 1.91 | 29.92 |
| 1HGG.PDB | OE1, B_GLU_67  | NH1, A_ARG_269 | HH12, A_ARG_269 | 2.69 | 1.86 | 28.34 |
| 1HGG.PDB | OD1, B ASP_90  | NZ, A_LYS_310  | HZ2, A_LYS_310  | 2.70 | 1.74 | 18.08 |

|          |                |                |                 |      |      |       |
|----------|----------------|----------------|-----------------|------|------|-------|
| 1HGG.PDB | OE2, B_GLU_15  | NZ, A_LYS_326  | HZ1, A_LYS_326  | 2.83 | 1.89 | 21.04 |
| 1HGG.PDB | OE2, A_GLU_325 | NH2, B_ARG_25  | HH22, B_ARG_25  | 2.94 | 1.96 | 12.23 |
| 1HGG.PDB | OE2, F_GLU_97  | NH2, B_ARG_54  | HH22, B_ARG_54  | 2.75 | 1.76 | 9.96  |
| 1HGG.PDB | OD2, F_ASP_90  | NZ, B_LYS_62   | HZ2, B_LYS_62   | 2.65 | 1.82 | 29.87 |
| 1HGG.PDB | OD2, F_ASP_86  | NZ, B_LYS_62   | HZ3, B_LYS_62   | 2.64 | 1.73 | 23.35 |
| 1HGG.PDB | OG, A_SER_110  | NE2, B_HIS_64  | HE2, B_HIS_64   | 2.90 | 1.96 | 14.63 |
| 1HGG.PDB | OE2, D_GLU_81  | NE, B_ARG_76   | HE, B_ARG_76    | 2.94 | 1.96 | 10.47 |
| 1HGG.PDB | OE1, D_GLU_74  | NH1, B_ARG_76  | HH12, B_ARG_76  | 2.88 | 1.89 | 10.69 |
| 1HGG.PDB | OE1, D_GLU_81  | NH2, B_ARG_76  | HH21, B_ARG_76  | 2.73 | 1.73 | 5.91  |
| 1HGG.PDB | OE2, D_GLU_74  | NH2, B_ARG_76  | HH22, B_ARG_76  | 2.82 | 1.82 | 7.26  |
| 1HGG.PDB | OE1, D_GLU_85  | OH, B_TYR_83   | HH, B_TYR_83    | 2.68 | 1.80 | 19.99 |
| 1HGG.PDB | OH, F_TYR_83   | NZ, B_LYS_88   | HZ1, B_LYS_88   | 2.77 | 1.73 | 5.14  |
| 1HGG.PDB | OE1, F_GLU_132 | NE, B_ARG_124  | HE, B_ARG_124   | 2.84 | 1.98 | 22.96 |
| 1HGG.PDB | OE2, F_GLU_132 | NE, B_ARG_124  | HE, B_ARG_124   | 2.81 | 1.98 | 25.54 |
| 1HGG.PDB | OE2, D_GLU_97  | NZ, C_LYS_27   | HZ1, C_LYS_27   | 2.94 | 1.91 | 8.28  |
| 1HGG.PDB | OE2, D_GLU_67  | NH2, C_ARG_109 | HH21, C_ARG_109 | 2.85 | 1.88 | 14.56 |
| 1HGG.PDB | OD2, B_ASP_79  | OG, C_SER_110  | HG, C_SER_110   | 2.76 | 1.86 | 17.83 |
| 1HGG.PDB | OE1, E_GLN_210 | NH2, C_ARG_220 | HH21, C_ARG_220 | 2.61 | 1.71 | 21.26 |
| 1HGG.PDB | OE1, B_GLU_72  | NZ, C_LYS_238  | HZ1, C_LYS_238  | 2.83 | 1.86 | 17.18 |
| 1HGG.PDB | OE2, B_GLU_72  | NZ, C_LYS_238  | HZ1, C_LYS_238  | 2.70 | 1.87 | 29.85 |
| 1HGG.PDB | OE1, D_GLU_67  | NH1, C_ARG_269 | HH12, C_ARG_269 | 2.69 | 1.85 | 27.75 |
| 1HGG.PDB | OD1, D_ASP_90  | NZ, C_LYS_310  | HZ2, C_LYS_310  | 2.65 | 1.73 | 21.74 |
| 1HGG.PDB | OE2, B_GLU_97  | NH2, D_ARG_54  | HH22, D_ARG_54  | 2.76 | 1.78 | 10.56 |
| 1HGG.PDB | OG, C_SER_110  | NE2, D_HIS_64  | HE2, D_HIS_64   | 2.86 | 1.90 | 9.42  |
| 1HGG.PDB | OE2, F_GLU_81  | NE, D_ARG_76   | HE, D_ARG_76    | 2.86 | 1.89 | 9.57  |
| 1HGG.PDB | OE1, F_GLU_74  | NH1, D_ARG_76  | HH12, D_ARG_76  | 2.78 | 1.80 | 12.10 |
| 1HGG.PDB | OE1, F_GLU_81  | NH2, D_ARG_76  | HH21, D_ARG_76  | 2.67 | 1.68 | 6.66  |
| 1HGG.PDB | OE2, F_GLU_74  | NH2, D_ARG_76  | HH22, D_ARG_76  | 2.74 | 1.75 | 9.29  |
| 1HGG.PDB | OE1, F_GLU_85  | OH, D_TYR_83   | HH, D_TYR_83    | 2.59 | 1.78 | 26.83 |
| 1HGG.PDB | OH, B_TYR_83   | NZ, D_LYS_88   | HZ1, D_LYS_88   | 2.73 | 1.70 | 8.35  |
| 1HGG.PDB | OE1, B_GLU_132 | NE, D_ARG_124  | HE, D_ARG_124   | 2.86 | 2.00 | 22.57 |
| 1HGG.PDB | OE2, B_GLU_132 | NE, D_ARG_124  | HE, D_ARG_124   | 2.78 | 1.96 | 26.12 |
| 1HGG.PDB | OE2, F_GLU_97  | NZ, E_LYS_27   | HZ1, E_LYS_27   | 2.91 | 1.88 | 8.89  |
| 1HGG.PDB | OE2, F_GLU_67  | NH2, E_ARG_109 | HH21, E_ARG_109 | 2.88 | 1.90 | 14.20 |
| 1HGG.PDB | OD2, D_ASP_79  | OG, E_SER_110  | HG, E_SER_110   | 2.79 | 1.88 | 16.48 |
| 1HGG.PDB | OD1, C_ASP_101 | NE2, E_GLN_210 | HE22, E_GLN_210 | 2.96 | 2.04 | 17.70 |
| 1HGG.PDB | OE1, A_GLN_210 | NH2, E_ARG_220 | HH21, E_ARG_220 | 2.72 | 1.80 | 20.26 |
| 1HGG.PDB | OE1, D_GLU_72  | NZ, E_LYS_238  | HZ1, E_LYS_238  | 2.89 | 1.89 | 13.93 |
| 1HGG.PDB | OE1, F_GLU_67  | NH1, E_ARG_269 | HH12, E_ARG_269 | 2.69 | 1.85 | 27.32 |
| 1HGG.PDB | OD1, F_ASP_90  | NZ, E_LYS_310  | HZ2, E_LYS_310  | 2.64 | 1.72 | 22.12 |
| 1HGG.PDB | OE1, F_GLU_15  | NZ, E_LYS_326  | HZ3, E_LYS_326  | 2.98 | 1.97 | 15.13 |
| 1HGG.PDB | OE2, D_GLU_97  | NH2, F_ARG_54  | HH22, F_ARG_54  | 2.73 | 1.74 | 10.16 |
| 1HGG.PDB | OD2, D_ASP_86  | NZ, F_LYS_62   | HZ3, F_LYS_62   | 2.58 | 1.75 | 29.01 |
| 1HGG.PDB | OG, E_SER_110  | NE2, F_HIS_64  | HE2, F_HIS_64   | 2.87 | 1.91 | 10.03 |
| 1HGG.PDB | OE2, B_GLU_81  | NE, F_ARG_76   | HE, F_ARG_76    | 2.88 | 1.92 | 11.44 |
| 1HGG.PDB | OE1, B_GLU_74  | NH1, F_ARG_76  | HH12, F_ARG_76  | 2.75 | 1.76 | 9.13  |
| 1HGG.PDB | OE1, B_GLU_81  | NH2, F_ARG_76  | HH21, F_ARG_76  | 2.67 | 1.68 | 1.99  |
| 1HGG.PDB | OE2, B_GLU_74  | NH2, F_ARG_76  | HH22, F_ARG_76  | 2.79 | 1.81 | 10.64 |
| 1HGG.PDB | OH, D_TYR_83   | NZ, F_LYS_88   | HZ1, F_LYS_88   | 2.68 | 1.67 | 10.46 |
| 1HGG.PDB | OE1, D_GLU_132 | NE, F_ARG_124  | HE, F_ARG_124   | 2.96 | 2.09 | 22.59 |
| 1HGG.PDB | OE2, D_GLU_132 | NE, F_ARG_124  | HE, F_ARG_124   | 2.87 | 2.01 | 24.00 |
| 1HGH.PDB | OE2, B_GLU_97  | NZ, A_LYS_27   | HZ1, A_LYS_27   | 2.78 | 1.76 | 9.03  |
| 1HGH.PDB | OE2, B_GLU_67  | NH2, A_ARG_109 | HH21, A_ARG_109 | 2.86 | 1.88 | 13.48 |
| 1HGH.PDB | OD2, F_ASP_79  | OG, A_SER_110  | HG, A_SER_110   | 2.97 | 2.01 | 11.65 |
| 1HGH.PDB | OD1, E_ASP_101 | NE2, A_GLN_210 | HE22, A_GLN_210 | 2.97 | 2.14 | 27.61 |
| 1HGH.PDB | OE1, C_GLN_210 | NH2, A_ARG_220 | HH21, A_ARG_220 | 2.66 | 1.73 | 18.15 |
| 1HGH.PDB | OE1, F_GLU_72  | NZ, A_LYS_238  | HZ3, A_LYS_238  | 2.92 | 1.93 | 15.64 |
| 1HGH.PDB | OD1, B_ASP_86  | NZ, A_LYS_310  | HZ2, A_LYS_310  | 2.71 | 1.84 | 27.09 |

|          |                |                |                 |      |      |       |
|----------|----------------|----------------|-----------------|------|------|-------|
| 1HGH.PDB | OE2, F_GLU_97  | NH2, B_ARG_54  | HH22, B_ARG_54  | 2.82 | 1.86 | 15.60 |
| 1HGH.PDB | OD2, F_ASP_86  | NZ, B_LYS_62   | HZ1, B_LYS_62   | 2.66 | 1.80 | 27.71 |
| 1HGH.PDB | OD2, F_ASP_90  | NZ, B_LYS_62   | HZ3, B_LYS_62   | 2.68 | 1.82 | 27.13 |
| 1HGH.PDB | OG, A_SER_110  | NE2, B_HIS_64  | HE2, B_HIS_64   | 2.87 | 1.91 | 11.96 |
| 1HGH.PDB | OE2, D_GLU_81  | NE, B_ARG_76   | HE, B_ARG_76    | 2.87 | 1.90 | 9.70  |
| 1HGH.PDB | OE2, D_GLU_74  | NH1, B_ARG_76  | HH12, B_ARG_76  | 2.91 | 1.90 | 8.45  |
| 1HGH.PDB | OE1, D_GLU_81  | NH2, B_ARG_76  | HH21, B_ARG_76  | 2.77 | 1.76 | 5.47  |
| 1HGH.PDB | OE1, D_GLU_74  | NH2, B_ARG_76  | HH22, B_ARG_76  | 2.89 | 1.87 | 2.83  |
| 1HGH.PDB | OE1, D_GLU_85  | OH, B_TYR_83   | HH, B_TYR_83    | 2.69 | 1.84 | 23.96 |
| 1HGH.PDB | OH, F_TYR_83   | NZ, B_LYS_88   | HZ1, B_LYS_88   | 2.74 | 1.71 | 7.44  |
| 1HGH.PDB | OE1, F_GLU_132 | NE, B_ARG_124  | HE, B_ARG_124   | 2.76 | 1.94 | 26.47 |
| 1HGH.PDB | OE2, F_GLU_132 | NE, B_ARG_124  | HE, B_ARG_124   | 2.83 | 1.98 | 23.62 |
| 1HGH.PDB | OE2, D_GLU_97  | NZ, C_LYS_27   | HZ1, C_LYS_27   | 2.82 | 1.78 | 7.61  |
| 1HGH.PDB | OE2, D_GLU_67  | NH2, C_ARG_109 | HH21, C_ARG_109 | 2.86 | 1.88 | 13.66 |
| 1HGH.PDB | OD2, B_ASP_79  | OG, C_SER_110  | HG, C_SER_110   | 2.78 | 1.85 | 13.87 |
| 1HGH.PDB | OD1, A_ASP_101 | NE2, C_GLN_210 | HE22, C_GLN_210 | 2.93 | 2.07 | 24.87 |
| 1HGH.PDB | OE1, E_GLN_210 | NH2, C_ARG_220 | HH21, C_ARG_220 | 2.57 | 1.72 | 26.03 |
| 1HGH.PDB | OE1, B_GLU_72  | NZ, C_LYS_238  | HZ1, C_LYS_238  | 2.71 | 1.80 | 22.72 |
| 1HGH.PDB | OD1, D_ASP_86  | NZ, C_LYS_310  | HZ2, C_LYS_310  | 2.73 | 1.85 | 26.20 |
| 1HGH.PDB | OE1, D_GLU_15  | NZ, C_LYS_326  | HZ1, C_LYS_326  | 2.77 | 1.75 | 11.00 |
| 1HGH.PDB | OE2, B_GLU_97  | NH2, D_ARG_54  | HH22, D_ARG_54  | 2.80 | 1.85 | 16.64 |
| 1HGH.PDB | OG, C_SER_110  | NE2, D_HIS_64  | HE2, D_HIS_64   | 2.84 | 1.88 | 10.18 |
| 1HGH.PDB | OE2, F_GLU_81  | NE, D_ARG_76   | HE, D_ARG_76    | 2.79 | 1.84 | 10.45 |
| 1HGH.PDB | OE2, F_GLU_74  | NH1, D_ARG_76  | HH12, D_ARG_76  | 2.77 | 1.77 | 10.38 |
| 1HGH.PDB | OE1, F_GLU_81  | NH2, D_ARG_76  | HH21, D_ARG_76  | 2.70 | 1.70 | 6.41  |
| 1HGH.PDB | OE1, F_GLU_74  | NH2, D_ARG_76  | HH22, D_ARG_76  | 2.75 | 1.75 | 5.88  |
| 1HGH.PDB | OE1, F_GLU_85  | OH, D_TYR_83   | HH, D_TYR_83    | 2.59 | 1.81 | 29.86 |
| 1HGH.PDB | OH, B_TYR_83   | NZ, D_LYS_88   | HZ1, D_LYS_88   | 2.66 | 1.64 | 7.83  |
| 1HGH.PDB | OE1, B_GLU_132 | NE, D_ARG_124  | HE, D_ARG_124   | 2.80 | 1.98 | 26.35 |
| 1HGH.PDB | OE2, B_GLU_132 | NE, D_ARG_124  | HE, D_ARG_124   | 2.84 | 1.99 | 23.38 |
| 1HGH.PDB | OE2, F_GLU_97  | NZ, E_LYS_27   | HZ1, E_LYS_27   | 2.77 | 1.74 | 8.08  |
| 1HGH.PDB | OE2, F_GLU_67  | NH2, E_ARG_109 | HH21, E_ARG_109 | 2.88 | 1.90 | 13.56 |
| 1HGH.PDB | OD2, D_ASP_79  | OG, E_SER_110  | HG, E_SER_110   | 2.90 | 1.94 | 9.49  |
| 1HGH.PDB | OD1, C_ASP_101 | NE2, E_GLN_210 | HE22, E_GLN_210 | 2.95 | 2.09 | 25.33 |
| 1HGH.PDB | OE1, A_GLN_210 | NH2, E_ARG_220 | HH21, E_ARG_220 | 2.68 | 1.79 | 22.30 |
| 1HGH.PDB | OE1, D_GLU_72  | NZ, E_LYS_238  | HZ3, E_LYS_238  | 2.87 | 1.88 | 15.42 |
| 1HGH.PDB | OE1, F_GLU_67  | NH1, E_ARG_269 | HH12, E_ARG_269 | 2.71 | 1.88 | 29.19 |
| 1HGH.PDB | OD1, F_ASP_86  | NZ, E_LYS_310  | HZ2, E_LYS_310  | 2.74 | 1.87 | 26.77 |
| 1HGH.PDB | OE1, F_GLU_15  | NZ, E_LYS_326  | HZ3, E_LYS_326  | 2.90 | 1.89 | 12.96 |
| 1HGH.PDB | OE2, D_GLU_97  | NH2, F_ARG_54  | HH22, F_ARG_54  | 2.72 | 1.77 | 15.67 |
| 1HGH.PDB | OD2, D_ASP_90  | NZ, F_LYS_62   | HZ2, F_LYS_62   | 2.68 | 1.83 | 28.02 |
| 1HGH.PDB | OG, E_SER_110  | NE2, F_HIS_64  | HE2, F_HIS_64   | 2.87 | 1.91 | 9.23  |
| 1HGH.PDB | OE2, B_GLU_81  | NE, F_ARG_76   | HE, F_ARG_76    | 2.84 | 1.87 | 10.72 |
| 1HGH.PDB | OE2, B_GLU_74  | NH1, F_ARG_76  | HH12, F_ARG_76  | 2.73 | 1.73 | 5.34  |
| 1HGH.PDB | OE1, B_GLU_81  | NH2, F_ARG_76  | HH21, F_ARG_76  | 2.71 | 1.70 | 1.21  |
| 1HGH.PDB | OE1, B_GLU_74  | NH2, F_ARG_76  | HH22, F_ARG_76  | 2.78 | 1.78 | 7.19  |
| 1HGH.PDB | OE1, B_GLU_85  | OH, F_TYR_83   | HH, F_TYR_83    | 2.53 | 1.74 | 27.23 |
| 1HGH.PDB | OH, D_TYR_83   | NZ, F_LYS_88   | HZ1, F_LYS_88   | 2.65 | 1.63 | 9.88  |
| 1HGH.PDB | OE1, D_GLU_132 | NE, F_ARG_124  | HE, F_ARG_124   | 2.89 | 2.06 | 26.55 |
| 1HGH.PDB | OE2, D_GLU_132 | NE, F_ARG_124  | HE, F_ARG_124   | 2.92 | 2.03 | 21.52 |
| 1HGI.PDB | OE2, B_GLU_97  | NZ, A_LYS_27   | HZ1, A_LYS_27   | 2.90 | 1.86 | 7.66  |
| 1HGI.PDB | OE2, B_GLU_67  | NH2, A_ARG_109 | HH21, A_ARG_109 | 2.80 | 1.81 | 13.24 |
| 1HGI.PDB | OE1, C_GLN_210 | NH2, A_ARG_220 | HH21, A_ARG_220 | 2.65 | 1.73 | 18.55 |
| 1HGI.PDB | OE1, F_GLU_72  | NZ, A_LYS_238  | HZ3, A_LYS_238  | 2.85 | 1.85 | 15.00 |
| 1HGI.PDB | OD1, B_ASP_86  | NZ, A_LYS_310  | HZ3, A_LYS_310  | 2.76 | 1.92 | 29.34 |
| 1HGI.PDB | OE2, B_GLU_15  | NZ, A_LYS_326  | HZ1, A_LYS_326  | 2.79 | 1.93 | 27.33 |
| 1HGI.PDB | OE2, A_GLU_325 | NH2, B_ARG_25  | HH22, B_ARG_25  | 2.93 | 1.95 | 13.46 |
| 1HGI.PDB | OE2, F_GLU_97  | NH2, B_ARG_54  | HH22, B_ARG_54  | 2.81 | 1.84 | 14.63 |

|          |                |                |                 |      |      |       |
|----------|----------------|----------------|-----------------|------|------|-------|
| 1HGI.PDB | OD2, F_ASP_86  | NZ, B_LYS_62   | HZ1, B_LYS_62   | 2.67 | 1.78 | 25.75 |
| 1HGI.PDB | OG, A_SER_110  | NE2, B_HIS_64  | HE2, B_HIS_64   | 2.87 | 1.89 | 8.13  |
| 1HGI.PDB | OE2, D_GLU_81  | NE, B_ARG_76   | HE, B_ARG_76    | 2.86 | 1.89 | 7.04  |
| 1HGI.PDB | OE2, D_GLU_74  | NH1, B_ARG_76  | HH12, B_ARG_76  | 2.92 | 1.89 | 1.72  |
| 1HGI.PDB | OE1, D_GLU_81  | NH2, B_ARG_76  | HH21, B_ARG_76  | 2.71 | 1.72 | 8.42  |
| 1HGI.PDB | OE1, D_GLU_74  | NH2, B_ARG_76  | HH22, B_ARG_76  | 2.86 | 1.86 | 6.93  |
| 1HGI.PDB | OE1, D_GLU_85  | OH, B_TYR_83   | HH, B_TYR_83    | 2.78 | 1.84 | 13.46 |
| 1HGI.PDB | OH, F_TYR_83   | NZ, B_LYS_88   | HZ1, B_LYS_88   | 2.65 | 1.64 | 9.94  |
| 1HGI.PDB | OE1, F_GLU_132 | NE, B_ARG_124  | HE, B_ARG_124   | 2.81 | 1.96 | 23.50 |
| 1HGI.PDB | OE2, F_GLU_132 | NE, B_ARG_124  | HE, B_ARG_124   | 2.86 | 2.02 | 24.92 |
| 1HGI.PDB | OE2, D_GLU_97  | NZ, C_LYS_27   | HZ1, C_LYS_27   | 2.88 | 1.83 | 6.58  |
| 1HGI.PDB | OE2, D_GLU_67  | NH2, C_ARG_109 | HH21, C_ARG_109 | 2.82 | 1.84 | 15.02 |
| 1HGI.PDB | OD2, B_ASP_79  | OG, C_SER_110  | HG, C_SER_110   | 2.85 | 1.90 | 11.29 |
| 1HGI.PDB | OE1, E_GLN_210 | NH2, C_ARG_220 | HH21, C_ARG_220 | 2.62 | 1.75 | 23.70 |
| 1HGI.PDB | OE1, B_GLU_72  | NZ, C_LYS_238  | HZ1, C_LYS_238  | 2.67 | 1.77 | 23.68 |
| 1HGI.PDB | OD1, D_ASP_86  | NZ, C_LYS_310  | HZ3, C_LYS_310  | 2.77 | 1.93 | 29.51 |
| 1HGI.PDB | OE1, D_GLU_15  | NZ, C_LYS_326  | HZ1, C_LYS_326  | 2.83 | 1.84 | 16.25 |
| 1HGI.PDB | OE2, B_GLU_97  | NH2, D_ARG_54  | HH22, D_ARG_54  | 2.81 | 1.85 | 15.40 |
| 1HGI.PDB | OG, C_SER_110  | NE2, D_HIS_64  | HE2, D_HIS_64   | 2.83 | 1.85 | 2.78  |
| 1HGI.PDB | OE2, F_GLU_81  | NE, D_ARG_76   | HE, D_ARG_76    | 2.80 | 1.82 | 5.40  |
| 1HGI.PDB | OE2, F_GLU_74  | NH1, D_ARG_76  | HH12, D_ARG_76  | 2.78 | 1.76 | 4.18  |
| 1HGI.PDB | OE1, F_GLU_81  | NH2, D_ARG_76  | HH21, D_ARG_76  | 2.61 | 1.67 | 15.38 |
| 1HGI.PDB | OE1, F_GLU_74  | NH2, D_ARG_76  | HH22, D_ARG_76  | 2.76 | 1.77 | 8.75  |
| 1HGI.PDB | OE1, F_GLU_85  | OH, D_TYR_83   | HH, D_TYR_83    | 2.69 | 1.81 | 20.41 |
| 1HGI.PDB | OH, B_TYR_83   | NZ, D_LYS_88   | HZ1, D_LYS_88   | 2.66 | 1.64 | 7.30  |
| 1HGI.PDB | OE1, B_GLU_132 | NE, D_ARG_124  | HE, D_ARG_124   | 2.84 | 1.98 | 23.95 |
| 1HGI.PDB | OE2, B_GLU_132 | NE, D_ARG_124  | HE, D_ARG_124   | 2.88 | 2.03 | 24.96 |
| 1HGI.PDB | OE2, F_GLU_97  | NZ, E_LYS_27   | HZ1, E_LYS_27   | 2.86 | 1.82 | 7.44  |
| 1HGI.PDB | OE2, F_GLU_67  | NH2, E_ARG_109 | HH21, E_ARG_109 | 2.78 | 1.80 | 14.37 |
| 1HGI.PDB | OD2, D_ASP_79  | OG, E_SER_110  | HG, E_SER_110   | 2.90 | 1.94 | 10.08 |
| 1HGI.PDB | OE1, A_GLN_210 | NH2, E_ARG_220 | HH21, E_ARG_220 | 2.69 | 1.80 | 23.03 |
| 1HGI.PDB | OE1, D_GLU_72  | NZ, E_LYS_238  | HZ3, E_LYS_238  | 2.80 | 1.81 | 15.90 |
| 1HGI.PDB | OD1, F_ASP_86  | NZ, E_LYS_310  | HZ3, E_LYS_310  | 2.76 | 1.91 | 29.16 |
| 1HGI.PDB | OE1, F_GLU_15  | NZ, E_LYS_326  | HZ3, E_LYS_326  | 2.88 | 1.86 | 11.05 |
| 1HGI.PDB | OE2, D_GLU_97  | NH2, F_ARG_54  | HH22, F_ARG_54  | 2.75 | 1.79 | 14.82 |
| 1HGI.PDB | OG, E_SER_110  | NE2, F_HIS_64  | HE2, F_HIS_64   | 2.84 | 1.87 | 3.62  |
| 1HGI.PDB | OE2, B_GLU_81  | NE, F_ARG_76   | HE, F_ARG_76    | 2.85 | 1.88 | 7.37  |
| 1HGI.PDB | OE2, B_GLU_74  | NH1, F_ARG_76  | HH12, F_ARG_76  | 2.77 | 1.76 | 3.93  |
| 1HGI.PDB | OE1, B_GLU_81  | NH2, F_ARG_76  | HH21, F_ARG_76  | 2.64 | 1.66 | 4.79  |
| 1HGI.PDB | OE1, B_GLU_74  | NH2, F_ARG_76  | HH22, F_ARG_76  | 2.76 | 1.78 | 10.40 |
| 1HGI.PDB | OE1, B_GLU_85  | OH, F_TYR_83   | HH, F_TYR_83    | 2.58 | 1.75 | 24.06 |
| 1HGI.PDB | OH, D_TYR_83   | NZ, F_LYS_88   | HZ1, F_LYS_88   | 2.61 | 1.62 | 12.49 |
| 1HGI.PDB | OE1, D_GLU_132 | NE, F_ARG_124  | HE, F_ARG_124   | 2.96 | 2.09 | 23.50 |
| 1HGI.PDB | OE2, D_GLU_132 | NE, F_ARG_124  | HE, F_ARG_124   | 2.96 | 2.09 | 23.34 |
| 1HGI.PDB | OE2, D_GLU_131 | NH2, F_ARG_163 | HH22, F_ARG_163 | 2.69 | 1.85 | 26.81 |
| 1HGJ.PDB | OE2, B_GLU_97  | NZ, A_LYS_27   | HZ1, A_LYS_27   | 2.81 | 1.78 | 9.30  |
| 1HGJ.PDB | OE2, B_GLU_67  | NH2, A_ARG_109 | HH21, A_ARG_109 | 2.75 | 1.77 | 12.07 |
| 1HGJ.PDB | OD2, F_ASP_79  | OG, A_SER_110  | HG, A_SER_110   | 2.94 | 1.98 | 10.39 |
| 1HGJ.PDB | OE1, C_GLN_210 | NH2, A_ARG_220 | HH21, A_ARG_220 | 2.67 | 1.78 | 22.50 |
| 1HGJ.PDB | OE1, F_GLU_72  | NZ, A_LYS_238  | HZ3, A_LYS_238  | 2.90 | 1.90 | 13.91 |
| 1HGJ.PDB | OE2, A_GLU_325 | NH2, B_ARG_25  | HH22, B_ARG_25  | 2.97 | 2.01 | 15.94 |
| 1HGJ.PDB | OE2, F_GLU_97  | NH2, B_ARG_54  | HH22, B_ARG_54  | 2.77 | 1.81 | 15.09 |
| 1HGJ.PDB | OD2, F_ASP_86  | NZ, B_LYS_62   | HZ1, B_LYS_62   | 2.65 | 1.75 | 23.55 |
| 1HGJ.PDB | OD2, F_ASP_90  | NZ, B_LYS_62   | HZ3, B_LYS_62   | 2.74 | 1.89 | 28.52 |
| 1HGJ.PDB | OG, A_SER_110  | NE2, B_HIS_64  | HE2, B_HIS_64   | 2.89 | 1.93 | 11.21 |
| 1HGJ.PDB | OE2, D_GLU_81  | NE, B_ARG_76   | HE, B_ARG_76    | 2.90 | 1.93 | 10.80 |
| 1HGJ.PDB | OE2, D_GLU_74  | NH1, B_ARG_76  | HH12, B_ARG_76  | 2.88 | 1.87 | 5.28  |
| 1HGJ.PDB | OE1, D_GLU_81  | NH2, B_ARG_76  | HH21, B_ARG_76  | 2.72 | 1.72 | 3.64  |

|          |                |                 |                 |      |      |       |
|----------|----------------|-----------------|-----------------|------|------|-------|
| 1HGJ.PDB | OE1, D_GLU_74  | NH2, B_ARG_76   | HH22, B_ARG_76  | 2.85 | 1.84 | 3.19  |
| 1HGJ.PDB | OE1, D_GLU_85  | OH, B_TYR_83    | HH, B_TYR_83    | 2.67 | 1.83 | 24.12 |
| 1HGJ.PDB | OH, F_TYR_83   | NZ, B_LYS_88    | HZ1, B_LYS_88   | 2.78 | 1.75 | 7.42  |
| 1HGJ.PDB | OE1, F_GLU_132 | NE, B_ARG_124   | HE, B_ARG_124   | 2.82 | 2.00 | 27.29 |
| 1HGJ.PDB | OE2, F_GLU_132 | NE, B_ARG_124   | HE, B_ARG_124   | 2.91 | 2.02 | 20.91 |
| 1HGJ.PDB | OE2, D_GLU_97  | NZ, C_LYS_27    | HZ1, C_LYS_27   | 2.82 | 1.80 | 8.63  |
| 1HGJ.PDB | OE2, D_GLU_67  | NH2, C_ARG_109  | HH21, C_ARG_109 | 2.76 | 1.78 | 13.33 |
| 1HGJ.PDB | OD2, B_ASP_79  | OG, C_SER_110   | HG, C_SER_110   | 2.79 | 1.87 | 14.95 |
| 1HGJ.PDB | OE1, E_GLN_210 | NH2, C_ARG_220  | HH21, C_ARG_220 | 2.66 | 1.82 | 26.85 |
| 1HGJ.PDB | OE1, B_GLU_72  | NZ, C_LYS_238   | HZ1, C_LYS_238  | 2.75 | 1.79 | 18.67 |
| 1HGJ.PDB | OD1, D_ASP_86  | NZ, C_LYS_310   | HZ3, C_LYS_310  | 2.94 | 2.10 | 29.37 |
| 1HGJ.PDB | OE1, D_GLU_15  | NZ, C_LYS_326   | HZ1, C_LYS_326  | 2.91 | 1.86 | 5.48  |
| 1HGJ.PDB | OE2, B_GLU_97  | NH2, D_ARG_54   | HH22, D_ARG_54  | 2.84 | 1.88 | 15.58 |
| 1HGJ.PDB | OG, C_SER_110  | NE2, D_HIS_64   | HE2, D_HIS_64   | 2.89 | 1.91 | 5.59  |
| 1HGJ.PDB | OE2, F_GLU_81  | NE, D_ARG_76    | HE, D_ARG_76    | 2.85 | 1.89 | 10.87 |
| 1HGJ.PDB | OE2, F_GLU_74  | NH1, D_ARG_76   | HH12, D_ARG_76  | 2.76 | 1.76 | 7.89  |
| 1HGJ.PDB | OE1, F_GLU_81  | NH2, D_ARG_76   | HH21, D_ARG_76  | 2.68 | 1.69 | 5.65  |
| 1HGJ.PDB | OE1, F_GLU_74  | NH2, D_ARG_76   | HH22, D_ARG_76  | 2.71 | 1.72 | 5.59  |
| 1HGJ.PDB | OE1, F_GLU_85  | OH, D_TYR_83    | HH, D_TYR_83    | 2.63 | 1.81 | 25.72 |
| 1HGJ.PDB | OH, B_TYR_83   | NZ, D_LYS_88    | HZ1, D_LYS_88   | 2.75 | 1.72 | 7.31  |
| 1HGJ.PDB | OE1, B_GLU_132 | NE, D_ARG_124   | HE, D_ARG_124   | 2.80 | 1.98 | 27.33 |
| 1HGJ.PDB | OE2, B_GLU_132 | NE, D_ARG_124   | HE, D_ARG_124   | 2.87 | 2.00 | 21.99 |
| 1HGJ.PDB | OH, B_TYR_141  | NH1, D_ARG_127  | HH12, D_ARG_127 | 2.99 | 2.02 | 12.89 |
| 1HGJ.PDB | OE2, F_GLU_97  | NZ, E_LYS_27    | HZ1, E_LYS_27   | 2.81 | 1.79 | 8.50  |
| 1HGJ.PDB | OE2, F_GLU_67  | NH2, E_ARG_109  | HH21, E_ARG_109 | 2.76 | 1.77 | 12.82 |
| 1HGJ.PDB | OD2, D_ASP_79  | OG, E_SER_110   | HG, E_SER_110   | 2.79 | 1.87 | 15.96 |
| 1HGJ.PDB | OD1, C_ASP_101 | NE2, E_GLN_210  | HE22, E_GLN_210 | 2.94 | 2.10 | 26.45 |
| 1HGJ.PDB | OE1, A_GLN_210 | NH2, E_ARG_220  | HH21, E_ARG_220 | 2.69 | 1.86 | 28.41 |
| 1HGJ.PDB | OE1, D_GLU_72  | NZ, E_LYS_238   | HZ3, E_LYS_238  | 2.87 | 1.86 | 13.82 |
| 1HGJ.PDB | OD1, F_ASP_86  | NZ, E_LYS_310   | HZ3, E_LYS_310  | 2.93 | 2.08 | 29.22 |
| 1HGJ.PDB | OE1, F_GLU_15  | NZ, E_LYS_326   | HZ3, E_LYS_326  | 2.87 | 1.86 | 12.83 |
| 1HGJ.PDB | OE2, D_GLU_97  | NH2, F_ARG_54   | HH22, F_ARG_54  | 2.77 | 1.81 | 14.54 |
| 1HGJ.PDB | OG, E_SER_110  | NE2, F_HIS_64   | HE2, F_HIS_64   | 2.90 | 1.93 | 7.02  |
| 1HGJ.PDB | OE2, B_GLU_81  | NE, F_ARG_76    | HE, F_ARG_76    | 2.85 | 1.89 | 12.57 |
| 1HGJ.PDB | OE2, B_GLU_74  | NH1, F_ARG_76   | HH12, F_ARG_76  | 2.70 | 1.70 | 4.55  |
| 1HGJ.PDB | OE1, B_GLU_81  | NH2, F_ARG_76   | HH21, F_ARG_76  | 2.65 | 1.66 | 2.84  |
| 1HGJ.PDB | OE1, B_GLU_74  | NH2, F_ARG_76   | HH22, F_ARG_76  | 2.72 | 1.73 | 7.95  |
| 1HGJ.PDB | OE1, B_GLU_85  | OH, F_TYR_83    | HH, F_TYR_83    | 2.53 | 1.75 | 28.54 |
| 1HGJ.PDB | OH, D_TYR_83   | NZ, F_LYS_88    | HZ1, F_LYS_88   | 2.70 | 1.68 | 8.19  |
| 1HGJ.PDB | OE1, D_GLU_132 | NE, F_ARG_124   | HE, F_ARG_124   | 2.92 | 2.09 | 27.65 |
| 1HGJ.PDB | OE2, D_GLU_132 | NE, F_ARG_124   | HE, F_ARG_124   | 2.96 | 2.06 | 20.98 |
| 1OSP.PDB | OD2, L_ASP_1   | OG, H_SER_62    | HG, H_SER_62    | 2.98 | 2.17 | 26.53 |
| 1OSP.PDB | OG, L_SER_176  | OG, H_SER_185   | HG, H_SER_185   | 2.74 | 1.91 | 24.72 |
| 1OSP.PDB | OE1, L_GLU_123 | NZ, H_LYS_215   | HZ2, H_LYS_215  | 2.78 | 1.85 | 20.53 |
| 1VFB.PDB | OE1, B_GLU_98  | NH1, A_ARG_96   | HH12, A_ARG_96  | 2.82 | 1.84 | 8.38  |
| 1VFB.PDB | OE2, B_GLU_98  | NH2, A_ARG_96   | HH22, A_ARG_96  | 2.81 | 1.85 | 10.74 |
| 1VFB.PDB | OE1, A_GLN_38  | NE2, B_GLN_39   | HE21, B_GLN_39  | 2.95 | 1.98 | 8.04  |
| 3SE8.PDB | OD1, G_ASN_280 | NE1, H_TRP_50   | HE1, H_TRP_50   | 3.00 | 2.21 | 20.49 |
| 3SE8.PDB | OD1, G_ASP_457 | NE2, H_GLN_64   | HE22, H_GLN_64  | 2.94 | 2.12 | 14.23 |
| 3SE8.PDB | OD2, G_ASP_368 | NH2, H_ARG_71   | HH22, H_ARG_71  | 2.91 | 2.05 | 6.24  |
| 3SE9.PDB | OD1, G_ASN_280 | NE1, H_TRP_50   | HE1, H_TRP_50   | 2.86 | 2.03 | 11.46 |
| 3SE9.PDB | OG, G_SER_365  | NH1, H_ARG_64   | HH11, H_ARG_64  | 2.81 | 2.04 | 21.79 |
| 3SE9.PDB | OD2, G_ASP_368 | NH1, H_ARG_71   | HH12, H_ARG_71  | 2.77 | 1.92 | 7.25  |
| 3SE9.PDB | OD1, G_ASN_279 | NE1, H_TRP_100D | HE1, H_TRP_100D | 2.86 | 2.13 | 26.83 |
| 3SE9.PDB | OD1, L_ASN_138 | NE2, H_HIS_164  | HE2, H_HIS_164  | 2.87 | 2.10 | 22.18 |
| 3THM.PDB | OE1, L_GLN_39  | NE2, H_GLN_41   | HE22, H_GLN_41  | 2.98 | 2.14 | 9.35  |
| 3THM.PDB | OG, L_SER_183  | NZ, H_LYS_162   | HZ1, H_LYS_162  | 2.77 | 1.97 | 21.34 |
| 3THM.PDB | OG1, L_THR_135 | NZ, H_LYS_162   | HZ2, H_LYS_162  | 2.85 | 2.02 | 17.75 |



|          |                 |                |                 |      |      |       |
|----------|-----------------|----------------|-----------------|------|------|-------|
| 3THM.PDB | OH, H_TYR_35    | ND1, F_HIS_44  | HD1, F_HIS_44   | 2.69 | 1.83 | 5.98  |
| 3THM.PDB | OG, H_SER_63    | NE2, F_HIS_44  | HE2, F_HIS_44   | 2.83 | 2.07 | 23.36 |
| 3TJE.PDB | OE1, L_GLN_39   | NE2, H_GLN_41  | HE21, H_GLN_41  | 2.98 | 2.15 | 10.85 |
| 3TJE.PDB | OH, H_TYR_35    | ND1, F_HIS_44  | HD1, F_HIS_44   | 2.56 | 1.70 | 3.69  |
| 3U2S.PDB | OE1, L_GLN_38   | NE2, H_GLN_39  | HE22, H_GLN_39  | 2.89 | 2.04 | 8.55  |
| 3U2S.PDB | OG, L_SER_165   | NE2, H_HIS_164 | HE2, H_HIS_164  | 2.93 | 2.12 | 16.97 |
| 3U2S.PDB | OE1, H_GLN_39   | NE2, L_GLN_38  | HE22, L_GLN_38  | 2.91 | 2.09 | 13.75 |
| 3U2S.PDB | OD2, C_ASP_167  | ND2, L_ASN_60  | HD22, L_ASN_60  | 2.90 | 2.14 | 22.76 |
| 3U2S.PDB | OD1, H_ASP_61   | NH2, L_ARG_95A | HH22, L_ARG_95A | 2.34 | 1.58 | 22.53 |
| 3U2S.PDB | OE2, H_GLU_95   | NH2, L_ARG_96  | HH21, L_ARG_96  | 2.87 | 2.05 | 15.72 |
| 3U2S.PDB | OH, H_TYR_100K  | ND2, G_ASN_173 | HD21, G_ASN_173 | 2.97 | 2.13 | 8.87  |
| 3U2S.PDB | OE1, B_GLN_38   | NE2, A_GLN_39  | HE22, A_GLN_39  | 2.92 | 2.07 | 7.34  |
| 3U2S.PDB | OG1, B_THR_131  | NZ, A_LYS_143  | HZ2, A_LYS_143  | 2.41 | 1.67 | 27.35 |
| 3U2S.PDB | OE1, A_GLN_39   | NE2, B_GLN_38  | HE22, B_GLN_38  | 2.92 | 2.08 | 10.61 |
| 3U2S.PDB | OD1, A_ASP_61   | NH1, B_ARG_95A | HH12, B_ARG_95A | 2.63 | 1.91 | 26.97 |
| 3U2S.PDB | OE2, A_GLU_95   | NH2, B_ARG_96  | HH21, B_ARG_96  | 2.98 | 2.16 | 13.77 |
| 3UYR.PDB | OE2, L_GLU_127  | NZ, H_LYS_212  | HZ3, H_LYS_212  | 2.87 | 2.08 | 23.12 |
| 3UYR.PDB | OD1, H_ASN_101  | NE2, P_GLN_48  | HE22, P_GLN_48  | 2.57 | 1.87 | 29.89 |
| 4F33.PDB | OE1, B_GLN_39   | NE2, A_GLN_38  | HE22, A_GLN_38  | 2.96 | 2.13 | 12.75 |
| 4F33.PDB | OE1, A_GLN_38   | NE2, B_GLN_39  | HE22, B_GLN_39  | 2.82 | 1.97 | 5.31  |
| 4F33.PDB | OE1, A_GLU_123  | NZ, B_LYS_215  | HZ1, B_LYS_215  | 2.68 | 1.82 | 12.44 |
| 4F33.PDB | OG1, H_THR_211  | NZ, B_LYS_215  | HZ2, B_LYS_215  | 2.83 | 1.95 | 7.37  |
| 4F33.PDB | OE1, C_GLN_38   | NE2, D_GLN_39  | HE22, D_GLN_39  | 2.89 | 2.03 | 5.23  |
| 4F33.PDB | OE1, C_GLU_123  | NZ, D_LYS_215  | HZ1, D_LYS_215  | 2.79 | 1.99 | 22.47 |
| 4F33.PDB | OG1, F_THR_211  | NZ, D_LYS_215  | HZ2, D_LYS_215  | 2.86 | 1.99 | 10.67 |
| 4F33.PDB | OE1, E_GLN_38   | NE2, F_GLN_39  | HE22, F_GLN_39  | 2.92 | 2.06 | 5.53  |
| 4F33.PDB | OE1, E_GLU_123  | NZ, F_LYS_215  | HZ1, F_LYS_215  | 2.61 | 1.84 | 24.34 |
| 4F33.PDB | OG1, D_THR_211  | NZ, F_LYS_215  | HZ2, F_LYS_215  | 2.92 | 2.04 | 7.71  |
| 4F33.PDB | OE1, G_GLU_123  | NZ, H_LYS_215  | HZ1, H_LYS_215  | 2.97 | 2.19 | 24.10 |
| 4F33.PDB | OG1, B_THR_211  | NZ, H_LYS_215  | HZ2, H_LYS_215  | 2.80 | 1.95 | 14.49 |
| 4F3F.PDB | OE1, B_GLN_39   | NE2, A_GLN_38  | HE22, A_GLN_38  | 2.88 | 2.04 | 8.75  |
| 4F3F.PDB | OG, B_SER_59    | NE2, A_HIS_94  | HE2, A_HIS_94   | 2.82 | 2.03 | 19.68 |
| 4F3F.PDB | OD1, A_ASN_138  | NE2, B_HIS_170 | HE2, B_HIS_170  | 2.82 | 2.05 | 21.56 |
| 4F3F.PDB | OH, B_TYR_101   | NZ, C_LYS_25   | HZ3, C_LYS_25   | 2.87 | 2.11 | 26.18 |
| 4F3F.PDB | OH, A_TYR_32    | NE1, C_TRP_26  | HE1, C_TRP_26   | 2.97 | 2.17 | 18.16 |
| 4JAM.PDB | OD1, H_ASN_100B | ND2, L_ASN_32  | HD21, L_ASN_32  | 2.96 | 2.21 | 25.94 |
| 4JAN.PDB | OD2, B_ASP_92   | OG, H_SER_156  | HG, H_SER_156   | 2.50 | 1.78 | 23.90 |
| 4JAN.PDB | OE1, L_GLU_123  | NZ, H_LYS_209  | HZ1, H_LYS_209  | 2.89 | 2.13 | 26.71 |
| 4JAN.PDB | OD1, H_ASN_100B | ND2, L_ASN_32  | HD21, L_ASN_32  | 2.76 | 1.91 | 6.44  |
| 4KRM.PDB | OE1, B_GLU_110  | NH1, A_ARG_353 | HH11, A_ARG_353 | 2.81 | 2.05 | 22.81 |
| 4KRM.PDB | OE1, D_GLU_110  | NH1, C_ARG_353 | HH11, C_ARG_353 | 2.87 | 2.05 | 16.15 |
| 4KRM.PDB | OD2, C_ASP_355  | NH1, D_ARG_30  | HH12, D_ARG_30  | 2.45 | 1.63 | 13.53 |
| 4KRM.PDB | OE1, F_GLU_110  | NH1, E_ARG_353 | HH11, E_ARG_353 | 2.85 | 2.03 | 14.34 |
| 4KRM.PDB | OD2, F_ASP_112  | NH2, E_ARG_353 | HH22, E_ARG_353 | 2.96 | 2.18 | 20.33 |
| 4KRM.PDB | OE2, B_GLU_5    | NZ, G_LYS_407  | HZ1, G_LYS_407  | 2.98 | 2.17 | 20.60 |
| 4KRM.PDB | OD2, G_ASP_355  | NH1, H_ARG_30  | HH12, H_ARG_30  | 2.45 | 1.69 | 23.45 |
| 4KRM.PDB | OE1, J_GLU_110  | NH1, I_ARG_353 | HH11, I_ARG_353 | 2.86 | 2.07 | 18.90 |
| 4KRM.PDB | OD2, J_ASP_112  | NH2, I_ARG_353 | HH22, I_ARG_353 | 3.00 | 2.19 | 17.61 |
| 4KRM.PDB | OE1, L_GLU_110  | NH1, K_ARG_353 | HH11, K_ARG_353 | 2.89 | 2.06 | 12.41 |
| 4KRM.PDB | OD2, L_ASP_112  | NH2, K_ARG_353 | HH22, K_ARG_353 | 2.89 | 2.07 | 13.96 |
| 4KRM.PDB | OD2, K_ASP_355  | NH1, L_ARG_30  | HH12, L_ARG_30  | 2.44 | 1.65 | 18.93 |
| 4KRO.PDB | OG, B_SER_103   | NZ, A_LYS_375  | HZ2, A_LYS_375  | 2.61 | 1.76 | 15.34 |
| 4KRO.PDB | OH, D_TYR_102   | NE2, A_GLN_384 | HE21, A_GLN_384 | 2.87 | 2.16 | 29.24 |
| 4KRO.PDB | OD1, B_ASP_118  | NE, A_ARG_405  | HE, A_ARG_405   | 2.72 | 1.93 | 19.48 |
| 4KRO.PDB | OE1, D_GLN_39   | NE2, C_GLN_38  | HE22, C_GLN_38  | 2.85 | 2.00 | 7.50  |
| 4KRO.PDB | OD2, D_ASP_103  | OH, C_TYR_50   | HH, C_TYR_50    | 2.49 | 1.72 | 20.15 |
| 4KRO.PDB | OD1, D_ASP_103  | ND2, C_ASN_91  | HD21, C_ASN_91  | 2.93 | 2.12 | 16.18 |
| 4KRO.PDB | OD2, D_ASP_58   | NE1, C_TRP_94  | HE1, C_TRP_94   | 2.80 | 2.10 | 29.15 |

|          |                 |                |                 |      |      |       |
|----------|-----------------|----------------|-----------------|------|------|-------|
| 4KRO.PDB | OE1, C_GLN_38   | NE2, D_GLN_39  | HE22, D_GLN_39  | 2.80 | 1.94 | 4.32  |
| 4KRO.PDB | OE1, A_GLN_408  | OH, D_TYR_102  | HH, D_TYR_102   | 2.75 | 1.97 | 18.39 |
| 4KRP.PDB | OD1, B_ASP_115  | NH2, A_ARG_405 | HH21, A_ARG_405 | 2.63 | 1.81 | 15.48 |
| 4KRP.PDB | OD1, D_ASP_58   | NZ, A_LYS_443  | HZ1, A_LYS_443  | 2.65 | 1.82 | 17.69 |
| 4KRP.PDB | OD2, D_ASP_103  | NZ, A_LYS_465  | HZ2, A_LYS_465  | 2.93 | 2.05 | 5.06  |
| 4KRP.PDB | OE1, D_GLN_39   | NE2, C_GLN_38  | HE22, C_GLN_38  | 2.70 | 1.84 | 6.09  |
| 4KRP.PDB | OD2, D_ASP_103  | OH, C_TYR_50   | HH, C_TYR_50    | 2.43 | 1.66 | 18.96 |
| 4KRP.PDB | OD1, D_ASP_103  | ND2, C_ASN_91  | HD21, C_ASN_91  | 2.77 | 1.91 | 6.24  |
| 4KRP.PDB | OD2, D_ASP_58   | NE1, C_TRP_94  | HE1, C_TRP_94   | 2.98 | 2.17 | 17.26 |
| 4KRP.PDB | OE1, C_GLN_38   | NE2, D_GLN_39  | HE22, D_GLN_39  | 2.72 | 1.87 | 5.47  |
| 4KRP.PDB | OE1, A_GLN_408  | OH, D_TYR_102  | HH, D_TYR_102   | 2.56 | 1.74 | 10.00 |
| 4KRP.PDB | OG, A_SER_440   | OH, D_TYR_104  | HH, D_TYR_104   | 2.94 | 2.22 | 25.72 |
| 4KRP.PDB | OE1, A_GLU_431  | OH, B_TYR_32   | HH, B_TYR_32    | 2.59 | 1.78 | 7.49  |
| 4KRP.PDB | OE1, A_GLU_400  | OH, B_TYR_100  | HH, B_TYR_100   | 2.94 | 2.13 | 13.29 |
| 4KRP.PDB | OE2, A_GLU_431  | OH, B_TYR_116  | HH, B_TYR_116   | 2.43 | 1.75 | 29.09 |
| 4NZR.PDB | OG, L_SER_176   | OG, H_SER_188  | HG, H_SER_188   | 2.88 | 2.16 | 24.46 |
| 4NZR.PDB | OE2, L_GLU_123  | NZ, H_LYS_221  | HZ2, H_LYS_221  | 2.99 | 2.10 | 2.00  |
| 4NZR.PDB | OG, H_SER_188   | OG, L_SER_176  | HG, L_SER_176   | 2.88 | 2.09 | 13.66 |
| 4NZR.PDB | OE1, L_GLU_81   | NE, M_ARG_384  | HE, M_ARG_384   | 2.93 | 2.09 | 10.37 |
| 4NZR.PDB | OD1, H_ASP_31E  | NH1, M_ARG_457 | HH12, M_ARG_457 | 2.96 | 2.12 | 11.27 |
| 4NZR.PDB | OD2, H_ASP_31E  | NH2, M_ARG_457 | HH22, M_ARG_457 | 2.55 | 1.75 | 17.03 |
| 4WUU.PDB | OD2, B_ASP_53   | NE, A_ARG_48   | HE, A_ARG_48    | 2.84 | 2.13 | 29.12 |
| 4WUU.PDB | OH, E_TYR_104   | NZ, A_LYS_66   | HZ3, A_LYS_66   | 2.89 | 2.02 | 10.84 |
| 4WUU.PDB | OXT, C_LEU_9    | OH, A_TYR_84   | HH, A_TYR_84    | 2.64 | 1.82 | 12.17 |
| 4WUU.PDB | OE1, B_GLN_8    | NH1, A_ARG_234 | HH11, A_ARG_234 | 2.79 | 2.07 | 27.49 |
| 4WUU.PDB | OE1, A_GLU_232  | OH, B_TYR_26   | HH, B_TYR_26    | 2.95 | 2.14 | 13.27 |
| 4WUU.PDB | OE1, E_GLN_39   | NE2, D_GLN_39  | HE22, D_GLN_39  | 2.94 | 2.18 | 23.53 |
| 4WUU.PDB | OD1, E_ASP_106  | NE1, D_TRP_99  | HE1, D_TRP_99   | 2.95 | 2.19 | 24.35 |
| 4WUU.PDB | OE1, D_GLN_39   | NE2, E_GLN_39  | HE22, E_GLN_39  | 2.55 | 1.73 | 14.29 |
| 4WUU.PDB | OE2, A_GLU_166  | NH2, E_ARG_50  | HH22, E_ARG_50  | 2.67 | 1.88 | 18.69 |
| 4WUU.PDB | OE1, A_GLU_63   | OH, E_TYR_104  | HH, E_TYR_104   | 2.59 | 1.76 | 7.82  |
| 4WUU.PDB | OE1, A_GLU_55   | OH, E_TYR_105  | HH, E_TYR_105   | 2.47 | 1.79 | 29.86 |
| 4Z0X.PDB | OE1, B_GLN_64   | NE2, A_GLN_37  | HE22, A_GLN_37  | 2.75 | 1.99 | 23.41 |
| 5I76.PDB | OE1, B_GLN_39   | NE2, A_GLN_38  | HE22, A_GLN_38  | 2.94 | 2.10 | 10.68 |
| 5I76.PDB | OD2, B_ASP_103  | OH, A_TYR_50   | HH, A_TYR_50    | 2.64 | 1.88 | 21.01 |
| 5I76.PDB | OE1, A_GLN_38   | NE2, B_GLN_39  | HE22, B_GLN_39  | 2.80 | 1.95 | 6.66  |
| 5I76.PDB | OG, A_SER_176   | OG, B_SER_185  | HG, B_SER_185   | 2.89 | 2.15 | 23.05 |
| 5I76.PDB | OE1, A_GLU_123  | NZ, B_LYS_215  | HZ1, B_LYS_215  | 2.73 | 1.96 | 24.68 |
| 5I76.PDB | OE2, A_GLU_123  | NZ, B_LYS_215  | HZ1, B_LYS_215  | 2.89 | 2.11 | 24.69 |
| 5I76.PDB | OD2, A_ASP_70   | NH1, C_ARG_24  | HH12, C_ARG_24  | 2.95 | 2.23 | 28.81 |
| 5I76.PDB | OD2, D_ASP_103  | OH, C_TYR_50   | HH, C_TYR_50    | 2.76 | 1.95 | 12.40 |
| 5I76.PDB | OE1, C_GLN_38   | NE2, D_GLN_39  | HE22, D_GLN_39  | 2.85 | 2.01 | 10.98 |
| 5I76.PDB | OE1, C_GLU_123  | NZ, D_LYS_215  | HZ1, D_LYS_215  | 2.60 | 1.73 | 11.40 |
| 5JO5.PDB | OE1, L_GLN_38   | NE2, H_GLN_39  | HE22, H_GLN_39  | 2.84 | 2.00 | 9.38  |
| 5JO5.PDB | OE2, L_GLU_124  | NZ, H_LYS_143  | HZ2, H_LYS_143  | 2.46 | 1.63 | 17.05 |
| 5JO5.PDB | OH, L_TYR_177   | OG, H_SER_179  | HG, H_SER_179   | 2.73 | 2.00 | 25.96 |
| 5JO5.PDB | OE1, D_GLN_24   | OG, L_SER_30   | HG, L_SER_30    | 2.84 | 2.07 | 18.45 |
| 5JO5.PDB | OE1, H_GLN_39   | NE2, L_GLN_38  | HE22, L_GLN_38  | 2.83 | 2.00 | 13.03 |
| 5JO5.PDB | OE2, H_GLU_100J | NH2, L_ARG_91  | HH22, L_ARG_91  | 2.69 | 1.84 | 7.26  |
| 5JO5.PDB | OD1, H_ASP_58   | NE, L_ARG_95B  | HE, L_ARG_95B   | 2.95 | 2.13 | 14.76 |
| 5JO5.PDB | OE1, B_GLN_38   | NE2, A_GLN_39  | HE22, A_GLN_39  | 2.87 | 2.02 | 8.31  |
| 5JO5.PDB | OE2, B_GLU_124  | NZ, A_LYS_143  | HZ2, A_LYS_143  | 2.62 | 1.83 | 23.29 |
| 5JO5.PDB | OH, B_TYR_177   | OG, A_SER_179  | HG, A_SER_179   | 2.83 | 2.10 | 25.21 |
| 5JO5.PDB | OE2, B_GLU_123  | NZ, A_LYS_209  | HZ1, A_LYS_209  | 2.55 | 1.68 | 10.64 |
| 5JO5.PDB | OE1, A_GLN_39   | NE2, B_GLN_38  | HE22, B_GLN_38  | 2.90 | 2.07 | 12.43 |
| 5JO5.PDB | OE1, D_GLN_38   | NE2, C_GLN_39  | HE22, C_GLN_39  | 2.86 | 2.02 | 9.45  |
| 5JO5.PDB | OE2, D_GLU_124  | NZ, C_LYS_143  | HZ2, C_LYS_143  | 2.79 | 1.92 | 10.71 |
| 5JO5.PDB | OH, D_TYR_177   | OG, C_SER_179  | HG, C_SER_179   | 2.71 | 1.97 | 23.23 |

|          |                 |                 |                  |      |      |       |
|----------|-----------------|-----------------|------------------|------|------|-------|
| 5JO5.PDB | OE2, D_GLU_123  | NZ, C_LYS_209   | HZ1, C_LYS_209   | 2.58 | 1.72 | 11.28 |
| 5JO5.PDB | OE1, C_GLN_39   | NE2, D_GLN_38   | HE22, D_GLN_38   | 2.92 | 2.09 | 12.72 |
| 5JO5.PDB | OD1, C_ASP_58   | NE, D_ARG_95B   | HE, D_ARG_95B    | 2.94 | 2.10 | 11.64 |
| 5JO5.PDB | OE1, F_GLN_38   | NE2, E_GLN_39   | HE22, E_GLN_39   | 2.90 | 2.06 | 10.70 |
| 5JO5.PDB | OE2, F_GLU_124  | NZ, E_LYS_143   | HZ2, E_LYS_143   | 2.55 | 1.75 | 21.57 |
| 5JO5.PDB | OH, F_TYR_177   | OG, E_SER_179   | HG, E_SER_179    | 2.58 | 1.87 | 27.02 |
| 5JO5.PDB | OE2, F_GLU_123  | NZ, E_LYS_209   | HZ1, E_LYS_209   | 2.57 | 1.74 | 17.62 |
| 5JO5.PDB | OE1, B_GLN_24   | OG, F_SER_30    | HG, F_SER_30     | 2.88 | 2.11 | 20.15 |
| 5JO5.PDB | OE1, E_GLN_39   | NE2, F_GLN_38   | HE22, F_GLN_38   | 2.85 | 2.02 | 12.75 |
| 5JO5.PDB | OE2, E_GLU_100J | NH2, F_ARG_91   | HH22, F_ARG_91   | 2.72 | 1.87 | 5.99  |
| 5JO5.PDB | OD1, E_ASP_58   | NE, F_ARG_95B   | HE, F_ARG_95B    | 2.92 | 2.09 | 12.47 |
| 5JR1.PDB | OH, L_TYR_178   | OG, H_SER_179   | HG, H_SER_179    | 2.83 | 2.03 | 15.88 |
| 5JR1.PDB | OD2, H_ASP_58   | NH2, L_ARG_95B  | HH22, L_ARG_95B  | 2.47 | 1.67 | 16.99 |
| 5JUE.PDB | OH, H_TYR_91    | NE2, L_GLN_38   | HE22, L_GLN_38   | 2.57 | 1.77 | 17.09 |
| 5JUE.PDB | OG, H_SER_178   | OG, L_SER_176   | HG, L_SER_176    | 2.78 | 1.94 | 3.13  |
| 5JUE.PDB | OE1, L_GLU_123  | NZ, H_LYS_208   | HZ1, H_LYS_208   | 2.81 | 1.98 | 17.66 |
| 5JXA.PDB | OD2, L_ASP_50   | OH, H_TYR_100   | HH, H_TYR_100    | 2.57 | 1.75 | 11.76 |
| 5JXA.PDB | OH, H_TYR_100   | NH2, L_ARG_53   | HH21, L_ARG_53   | 2.89 | 2.07 | 18.12 |
| 5T6P.PDB | OE1, A_GLN_43   | NE2, B_GLN_39   | HE22, B_GLN_39   | 2.71 | 1.86 | 5.14  |
| 5T6P.PDB | OE1, D_GLN_39   | NE2, C_GLN_43   | HE22, C_GLN_43   | 3.00 | 2.17 | 12.88 |
| 5T6P.PDB | OE1, C_GLN_43   | NE2, D_GLN_39   | HE22, D_GLN_39   | 2.79 | 1.94 | 7.20  |
| 5T6P.PDB | OE1, C_GLU_39   | NE, E_ARG_5     | HE, E_ARG_5      | 2.86 | 2.02 | 10.72 |
| 5T78.PDB | OE1, B_GLN_39   | NE2, A_GLN_43   | HE22, A_GLN_43   | 2.92 | 2.08 | 9.79  |
| 5T78.PDB | OE1, A_GLN_43   | NE2, B_GLN_39   | HE22, B_GLN_39   | 2.63 | 1.78 | 5.56  |
| 5T78.PDB | OE1, A_GLU_39   | NH1, F_ARG_5    | HH11, F_ARG_5    | 2.68 | 1.83 | 9.33  |
| 5T78.PDB | OE1, C_GLN_43   | NE2, D_GLN_39   | HE22, D_GLN_39   | 2.72 | 1.87 | 5.23  |
| 5T78.PDB | OD1, C_ASN_142  | NE2, D_HIS_167  | HE2, D_HIS_167   | 2.85 | 2.00 | 9.68  |
| 5T78.PDB | OE1, C_GLU_39   | NH1, E_ARG_5    | HH11, E_ARG_5    | 2.69 | 1.87 | 13.16 |
| 5U3J.PDB | OD1, L_ASP_31   | OH, H_TYR_100K  | HH, H_TYR_100K   | 2.88 | 2.04 | 5.22  |
| 5U3J.PDB | OE1, H_GLU_100F | OH, L_TYR_32    | HH, L_TYR_32     | 2.62 | 1.91 | 27.84 |
| 5U3J.PDB | OE1, H_GLN_39   | NE2, L_GLN_38   | HE22, L_GLN_38   | 2.66 | 1.83 | 12.57 |
| 5U3N.PDB | OD2, A_ASP_674  | NH1, H_ARG_52A  | HH12, H_ARG_52A  | 3.00 | 2.24 | 24.41 |
| 5U3N.PDB | OD1, L_ASP_31   | NH2, H_ARG_100B | HH22, H_ARG_100B | 2.97 | 2.15 | 14.50 |
| 5U3N.PDB | OD1, L_ASN_34   | ND2, H_ASN_100J | HD21, H_ASN_100J | 2.72 | 1.86 | 2.61  |
| 5U3N.PDB | OD1, L_ASN_138  | NE2, H_HIS_164  | HE2, H_HIS_164   | 2.92 | 2.21 | 29.54 |
| 5UCB.PDB | OE1, L_GLN_38   | NE2, H_GLN_39   | HE22, H_GLN_39   | 2.96 | 2.12 | 9.92  |
| 5UCB.PDB | OD2, B_ASP_51   | OG, L_SER_30    | HG, L_SER_30     | 2.58 | 1.81 | 20.19 |
| 5UCB.PDB | OE1, H_GLN_39   | NE2, L_GLN_38   | HE22, L_GLN_38   | 2.95 | 2.13 | 14.86 |
| 5UCB.PDB | OG, H_SER_58    | NZ, B_LYS_142   | HZ3, B_LYS_142   | 2.83 | 1.96 | 8.82  |
| 5UCB.PDB | OD1, L_ASP_91   | NH2, B_ARG_144  | HH21, B_ARG_144  | 2.84 | 2.03 | 16.18 |
| 5UK0.PDB | OD1, F_ASP_590  | ND2, B_ASN_560  | HD22, B_ASN_560  | 2.72 | 1.94 | 19.72 |
| 5UK0.PDB | OD1, D_ASP_586  | NH2, C_ARG_311  | HH22, C_ARG_311  | 2.98 | 2.20 | 18.56 |
| 5UK0.PDB | OD1, B_ASP_590  | ND2, D_ASN_560  | HD22, D_ASN_560  | 2.73 | 1.95 | 20.06 |
| 5VXJ.PDB | OE1, I_GLU_200  | NH1, B_ARG_50   | HH12, B_ARG_50   | 2.92 | 2.07 | 7.25  |
| 5VXJ.PDB | OE1, I_GLU_201  | OH, B_TYR_105   | HH, B_TYR_105    | 2.51 | 1.70 | 12.69 |
| 5VXJ.PDB | OD1, C_ASN_140  | NE, D_ARG_19    | HE, D_ARG_19     | 2.55 | 1.80 | 23.66 |
| 5VXJ.PDB | OE1, E_GLU_201  | OH, D_TYR_105   | HH, D_TYR_105    | 2.53 | 1.70 | 8.84  |
| 5VXJ.PDB | OD2, F_ASP_73   | NZ, E_LYS_137   | HZ2, E_LYS_137   | 2.77 | 1.96 | 20.15 |
| 5VXJ.PDB | OD1, D_ASN_97   | NZ, E_LYS_197   | HZ1, E_LYS_197   | 2.80 | 1.95 | 14.72 |
| 5VXJ.PDB | OE1, G_GLU_200  | NH2, F_ARG_50   | HH22, F_ARG_50   | 2.70 | 1.89 | 15.49 |
| 5VXJ.PDB | OE1, G_GLU_201  | OH, F_TYR_105   | HH, F_TYR_105    | 2.57 | 1.75 | 11.97 |
| 5VXJ.PDB | OE1, H_GLN_111  | OG1, G_THR_217  | HG1, G_THR_217   | 2.86 | 2.17 | 29.58 |
| 5VXJ.PDB | OD2, J_ASP_73   | NZ, I_LYS_137   | HZ3, I_LYS_137   | 2.90 | 2.17 | 29.52 |
| 5VXJ.PDB | OD1, B_ASN_97   | NZ, I_LYS_197   | HZ1, I_LYS_197   | 2.68 | 1.88 | 21.92 |
| 5VXK.PDB | OG, A_SER_168   | NE2, B_GLN_106  | HE21, B_GLN_106  | 2.99 | 2.23 | 24.43 |
| 5VXK.PDB | OD2, A_ASP_287  | NE2, B_GLN_106  | HE22, B_GLN_106  | 2.77 | 1.94 | 12.81 |
| 5VXK.PDB | OG1, B_THR_102  | OH, A_TYR_276   | HH, A_TYR_276    | 2.57 | 1.73 | 6.50  |
| 5VXL.PDB | OD2, B_ASP_52   | NZ, A_LYS_205   | HZ1, A_LYS_205   | 3.00 | 2.13 | 10.69 |

|          |                |                |                 |      |      |       |
|----------|----------------|----------------|-----------------|------|------|-------|
| 5VXL.PDB | OD1, A_ASP_166 | OG, B_SER_55   | HG, B_SER_55    | 2.56 | 1.73 | 4.68  |
| 5VXL.PDB | OE2, A_GLU_201 | NH2, B_ARG_102 | HH22, B_ARG_102 | 2.87 | 2.08 | 20.03 |
| 5VXM.PDB | OE2, B_GLU_111 | NE1, A_TRP_177 | HE1, A_TRP_177  | 2.76 | 1.97 | 19.61 |
| 5VXR.PDB | OE1, L_GLN_38  | NZ, H_LYS_39   | HZ2, H_LYS_39   | 2.72 | 1.76 | 14.94 |
| 5VXR.PDB | OD1, P_ASN_415 | OH, H_TYR_50   | HH, H_TYR_50    | 2.71 | 1.82 | 21.79 |
| 5VXR.PDB | OD1, L_ASN_138 | NE2, H_HIS_170 | HE2, H_HIS_170  | 2.89 | 1.98 | 20.57 |
| 5VXR.PDB | OE2, L_GLU_123 | NZ, H_LYS_214  | HZ1, H_LYS_214  | 2.93 | 1.98 | 15.97 |
| 5VXR.PDB | OG, H_SER_184  | OG, L_SER_176  | HG, L_SER_176   | 2.79 | 1.86 | 17.30 |
| 5WKQ.PDB | OG, B_SER_208  | NH2, A_ARG_135 | HH21, A_ARG_135 | 2.89 | 2.06 | 11.87 |
| 5WKQ.PDB | OE2, A_GLU_131 | ND1, B_HIS_207 | HD1, B_HIS_207  | 2.65 | 1.88 | 22.26 |
| 5WKQ.PDB | OE1, A_GLU_131 | OG1, B_THR_211 | HG1, B_THR_211  | 2.63 | 1.86 | 19.68 |
| 5WN9.PDB | OD1, H_ASN_57  | NE, A_ARG_188  | HE, A_ARG_188   | 2.58 | 1.61 | 2.15  |

Table 8: Interfacial side chain hydrogen bonding networks of all experimentally determined antigen-antibody-related structures. In this table, a PDB file is specified with a four-letter PDB ID, except that the names of the PDB files corresponding to the single NMR structural model split from the NMR ensemble is specified with a four-letter PDB ID in addition to a hyphen followed by the single NMR structural model numeric ID, the residue naming scheme is **Chain ID\_residue name\_residue number**,  $\angle ADH$  represents the angle formed by acceptor (A), donor (D) and hydrogen (H) ( $\angle ADH$ ).

## Residue-specific analysis of the interfacial electrostatic features of all experimentally determined antigen-antibody-related structures

[1A14', 1A2Y', 1A7L', 1A7N', 1A7O', 1A7P', 1A7Q', 1A7R', 1ADQ', 1BJ1', 1BLN', 1BQL', 1BVK', 1C08', 1C12', 1CE1', 1CFS', 1CFT', 1CG9', 1CLO', 1CLY', 1CLZ', 1CS9-1', 1CS9-3', 1CS9-6', 1CT6-1', 1CT6-7', 1CZ8', 1DBJ', 1DBK', 1DBM', 1DEE', 1DLF', 1DQD', 1DQJ', 1DQM', 1DQQ', 1DVF', 1DZB', 1E4W', 1E4X', 1E6J', 1E6O', 1EJO', 1EMT', 1ETZ', 1F11', 1F2X', 1F3R', 1F4W', 1F4X', 1F4Y', 1F8T', 1F90', 1FBI', 1FCC', 1FDL', 1FJ1', 1FRG', 1FUJ', 1FVC', 1FVD', 1FVE', 1G6V', 1G7H', 1G7I', 1G7J', 1G7L', 1G7M', 1G8Q', 1G9M', 1G9N', 1GC1', 1GGB', 1GGC', 1GGI', 1GPO', 1HCV', 1HEZ', 1HGD', 1HGE', 1HGF', 1HGG', 1HGH', 1HGI', 1HGI', 1HGI', 1HGI', 1HIL', 1HIM', 1HIN', 1I8I', 1I8K', 1I8M', 1IC4', 1IC5', 1IC7', 1IFH', 1IGF', 1IND', 1INE', 1IQW', 1IT9', 1J05', 1J1O', 1J1P', 1J1X', 1JFQ', 1JHL', 1JP5', 1JPS', 1JPT', 1JRH', 1JTO', 1JTP', 1JTT', 1JV5', 1K6Q', 1KB5', 1KC5', 1KCR', 1KCS', 1KIP', 1KIQ', 1KIR', 1KTR', 1L7I', 1LK3', 1M71', 1M7D', 1M7I', 1MCO', 1MEL', 1MFA', 1MFB', 1MFC', 1MHH', 1MLB', 1MLC', 1N64', 1NBY', 1NBZ', 1NDG', 1NDM', 1NGW', 1NGX', 1NGY', 1NGZ', 1NLB', 1NMC', 1OB1', 1OP9', 1OSP', 1OW0', 1P2C', 1P4B', 1P7K', 1PG7', 1PSK', 1PZ5', 1Q9K', 1Q9L', 1Q9O', 1Q9W', 1QBL', 1QBM', 1QGC', 1QKZ', 1QOK', 1R21-1', 1R21-10', 1R21-11', 1R21-12', 1R21-13', 1R21-14', 1R21-15', 1R21-16', 1R21-17', 1R21-18', 1R21-19', 1R21-2', 1R21-20', 1R21-21', 1R21-22', 1R21-23', 1R21-3', 1R21-4', 1R21-5', 1R21-6', 1R21-7', 1R21-8', 1R21-9', 1RZJ', 1RZK', 1S3K', 1S5I', 1S78', 1SM3', 1SQ2', 1SVZ', 1T2Q', 1T6V', 1TYE', 1TZH', 1TZI', 1U6A', 1UA6', 1UAC', 1UCB', 1UJ3', 1UWX', 1UZ6', 1UZ8', 1V7M', 1V7N', 1VER', 1VES', 1VFA', 1VFB', 1W72', 1WEJ', 1WZ1', 1XF2', 1XGY', 1XIW', 1YC7', 1YC8', 1YEI', 1YEJ', 1YEK', 1YNT', 1YQV', 1YYL', 1YYM', 1YZZ', 1ZEA', 1ZMY', 2AAB', 2ARJ', 2B2X', 2B4C', 2BDN', 2BJM', 2BRR', 2COQ', 2D03', 2DBL', 2DLF', 2DQC', 2DQD', 2DQE', 2DQF', 2DQG', 2DQH', 2DQI', 2DQJ', 2DQT', 2DQU', 2FB4', 2FD6', 2FR4', 2H32', 2H9G', 2HFG', 2HKF', 2HMG', 2HQ6', 2HRP', 2I24', 2I25', 2I26', 2I27', 2I5Y', 2I60', 2IFF', 2IG2', 2IGF', 2IHL', 2J4W', 2J5L', 2JB6', 2JEL', 2MCP', 2MKL-1', 2MKL-10', 2MKL-2', 2MKL-3', 2MKL-4', 2MKL-5', 2MKL-6', 2MKL-7', 2MKL-8',

'2MKL-9', '2MTW', '2NXY', '2NXZ', '2NY0', '2NY1', '2NY2', '2NY3', '2NY4', '2NY5',  
 '2NY6', '2NY7', '2OR9', '2ORB', '2OSL', '2OTU', '2OTW', '2P8L', '2P8M', '2P8P', '2PR4',  
 '2Q8A', '2Q8B', '2QAD', '2QQI', '2QQM', '2QQN', '2R29', '2R69', '2UYL', '2VC2', '2VDK',  
 '2VDL', '2VDM', '2VDN', '2VDO', '2VDP', '2VDQ', '2VDR', '2VIR', '2VIS', '2VIT', '2VIU',  
 '2VXS', '2VXT', '2VXU', '2VXV', '2XEF', '2XEG', '2XEI', '2XEJ', '2XZQ', '2Y06', '2Y07',  
 '2Y36', '2Y7S', '2YPV', '2YWY', '2YWZ', '2ZCH', '2ZCK', '2ZCL', '2ZNW', '2ZNX', '2ZPK',  
 '32C2', '3A67', '3A6B', '3A6C', '3AUV', '3B9K', '3BDY', '3BE1', '3BGF', '3BIK', '3BIS',  
 '3BKY', '3BO8', '3BT2', '3BZ4', '3C09', '3C5S', '3C6S', '3CVH', '3CXD', '3D0L', '3D0V',  
 '3D9A', '3DRO', '3DRQ', '3DSF', '3EBA', '3EOA', '3EOB', '3ESU', '3ESV', '3ET9', '3ETB',  
 '3EYV', '3FMG', '3G39', '3G3A', '3G3B', '3GGW', '3GHB', '3GHE', '3GJF', '3GNM', '3GO1',  
 '3HAE', '3HFM', '3HI6', '3HMG', '3HZK', '3HZM', '3HZV', '3HZY', '3I02', '3I9G', '3IET',  
 '3IF1', '3IJH', '3IJS', '3IJY', '3IKC', '3IU3', '3IU4', '3IVK', '3J5M', '3J70', '3JCC', '3KS0',  
 '3L7E', '3LZF', '3M18', '3M19', '3MLR', '3MLS', '3MLT', '3MLU', '3MLV', '3MLW', '3MLX',  
 '3MLY', '3MLZ', '3NFP', '3NGB', '3NH7', '3NZ8', '3O2D', '3O41', '3O45', '3OJD', '3P0V',  
 '3P0Y', '3P11', '3PGF', '3PNW', '3PP4', '3Q3G', '3QA3', '3QG6', '3QG7', '3QO1', '3QUM',  
 '3R08', '3SE8', '3SE9', '3SGD', '3SKJ', '3SY0', '3T4Y', '3T65', '3T77', '3THM', '3TJE',  
 '3U1S', '3U2S', '3U36', '3UBX', '3UJI', '3UJJ', '3UJT', '3UO1', '3UYR', '3V4P', '3V4U',  
 '3V4V', '3V52', '3V6F', '3WIH', '3WN5', '3X0E', '3X0F', '4A6Y', '4AG4', '4B50', '4BH7',  
 '4BH8', '4C83', '4CJD', '4DAG', '4DGV', '4DGY', '4E9O', '4EBQ', '4EDW', '4EDX', '4ETQ',  
 '4F33', '4F3F', '4FFV', '4FFW', '4FQH', '4FQI', '4G6A', '4G6F', '4GMT', '4GXU', '4GXV',  
 '4GXX', '4H0G', '4H0H', '4H0I', '4H8W', '4HF5', '4HGK', '4HH9', '4HHA', '4HIE', '4HIH',  
 '4HII', '4HIJ', '4HK0', '4HK3', '4HKB', '4HKX', '4HLZ', '4HMG', '4HWB', '4HXA', '4HXB',  
 '4I2X', '4I3R', '4I3S', '4JAM', '4JAN', '4JHA', '4JHW', '4JO1', '4JO2', '4JO3', '4JO4', '4K24',  
 '4K2U', '4KI5', '4KJY', '4KPH', '4KRL', '4KRM', '4KRO', '4KRP', '4KV5', '4KXZ', '4LQF',  
 '4LSS', '4LST', '4LU5', '4M1D', '4M1G', '4M3J', '4M3K', '4M5Y', '4M7J', '4M7Z', '4M93',  
 '4MA1', '4N0Y', '4N1H', '4NBX', '4NBY', '4NBZ', '4NC0', '4NC1', '4NC2', '4NGH', '4NHC',  
 '4NIK', '4NZR', '4NZT', '4NZU', '4O5L', '4OLU', '4OLV', '4OLW', '4OLX', '4OLY', '4OLZ',  
 '4OM0', '4OM1', '4OT1', '4OTX', '4P49', '4P9H', '4PTT', '4PTU', '4Q6I', '4Q97', '4Q9B',  
 '4Q9C', '4QEX', '4QHU', '4QTI', '4QXG', '4R2G', '4R4H', '4R7D', '4R7N', '4R9Y', '4RAU',  
 '4RRP', '4TRP', '4TUJ', '4TUK', '4TUL', '4TUO', '4U0Q', '4U3X', '4U6G', '4U6V', '4UAO',

'4UV6', '4WEU', '4WHT', '4WHY', '4WUU', '4XVJ', '4YHP', '4YHY', '4YHZ', '4YNY',  
 '4YO0', '4Z0X', '4ZD3', '4ZFF', '4ZFG', '4ZFO', '4ZH7', '5A2I', '5A2J', '5A2K', '5A2L',  
 '5A7X', '5A8H', '5AZE', '5BW7', '5CMA', '5CP3', '5CP7', '5DFV', '5DFW', '5DMI', '5DMJ',  
 '5DWU', '5ERW', '5EZI', '5EZJ', '5EZL', '5EZN', '5EZO', '5GGV', '5GKR', '5GKS', '5HDQ',  
 '5HMG', '5I4F', '5I76', '5IHL', '5ITB', '5J3D', '5JO5', '5JOF', '5JR1', '5JUE', '5JXA', '5KZP',  
 '5LDN', '5M2C', '5M33', '5M3D', '5M3T', '5M4R', '5MO9', '5N2B', '5N4J', '5N7B', '5N7W',  
 '5N88', '5NPH', '5NPI', '5NPJ', '5NST', '5NUZ', '5O14', '5O1R', '5OLM', '5OPY', '5OWP',  
 '5SV3', '5SV4', '5T6P', '5T78', '5TCX', '5TIH', '5TIK', '5TL5', '5TLJ', '5TLK', '5TRU',  
 '5TZ2', '5TZT', '5TZU', '5U3J', '5U3N', '5UCB', '5UEA', '5UEK', '5UG0', '5UJZ', '5UK0',  
 '5UK1', '5UK2', '5UR8', '5VF2', '5VL3', '5VN8', '5VXJ', '5VXK', '5VXL', '5VXM', '5VXR',  
 '5VZR', '5W2B', '5W9H', '5W9I', '5W9J', '5W9K', '5W9L', '5W9M', '5W9N', '5W9O',  
 '5W9P', '5WK4', '5WKQ', '5WN9', '5WNA', '5WNB', '5XBM', '5XCQ', '5XCR', '5XCS',  
 '5XCT', '5XCU', '5XCV', '5XJ3', '5XRT', '5XWD', '5YC5', '5ZV3', '6A3V', '6A3W', '6A76',  
 '6A77', '6A78', '6A79', '6AL5', '6ANA', '6AND', '6ANI', '6AQ7', '6ATT', '6AZZ', '6B08',  
 '6B0A', '6B0E', '6B0G', '6B0H', '6BE2', '6BE3', '6BE4', '6BIT', '6BRB', '6BXA', '6BXC',  
 '6BXD', '6BXE', '6BZU', '6BZV', '6BZW', '6BZY', '6C5H', '6C5I', '6C5J', '6C5K', '6C6X',  
 '6C6Y', '6C6Z', '6CUJ', '6DC3', '6DC4', '6DC5', '6DCV', '6DCW', '6DDM', '6DDR', '6DDV',  
 '6DFG', '6DFH', '6DG2', '6E62', '6E63', '6E64', '6E65', '6E8V', '6E9G', '6E9H', '6E9I',  
 '6E9K', '6E9Q', '6E9U', '6EDU', '6EJG', '6EJM', '6EK2', '6EUN', '6EUP', '6EV1', '6EV2',  
 '6EWB', '6FAB', '6FAX', '6FN1', '6FN4', '6FRJ', '6GK7', '6GK8', '6H2Y', '6I3Z', '6I9J',  
 '6IAP', '6JMQ', '6JMR', '6K4Z', '6K7O', '6KN9', '6MH2', '6MHR', '6MI2', '6MN7', '6MPG',  
 '6MPH', '6MQC', '6MQE', '6MQM', '6MQR', '6MQS', '6N16', '6N1V', '6N1W', '6N5B',  
 '6N5D', '6N5E', '6N6B', '6NB5', '6NB8', '6NC2', '6NC3', '6NEX', '6NF2', '6NF5', '6NFC',  
 '6NMR', '6NMS', '6NMT', '6NMU', '6NMV', '6O9B', '6O9C', '6OGX', '6OKM', '6OKN',  
 '6OOR', '6OSY', '6OT1', '6P62', '6P65', '6PE8', '6PE9', '6PHB', '6PHC', '6PHD', '6PHF',  
 '6PHG', '6PHH', '6PI7', '6PYC', '6PYD', '6PZW', '6RPS', '6S3T', '6U02', '6U1T', '6U59',  
 '6UG7', '6UG8', '6UG9', '6UGA']

| PDB ID | Residue A | Atom A | Residue B  | Atom B | Distance (Å) |
|--------|-----------|--------|------------|--------|--------------|
| 1A14   | N_ARG_82  | NH1    | N_ASP_127  | OD2    | 3.377        |
| 1A14   | N_ARG_82  | NH2    | N_ASP_127  | OD2    | 3.103        |
| 1A14   | N_ARG_118 | NH1    | N_GLU_119  | OE2    | 3.614        |
| 1A14   | N_ARG_118 | NH2    | N_GLU_425  | OE1    | 2.718        |
| 1A14   | N_ARG_118 | NH2    | N_GLU_425  | OE2    | 3.457        |
| 1A14   | N_ARG_130 | NH1    | N_GLU_128  | OE2    | 3.346        |
| 1A14   | N_ARG_141 | NH1    | N_GLU_110  | OE2    | 2.663        |
| 1A14   | N_ARG_156 | NH1    | N_GLU_119  | OE1    | 3.576        |
| 1A14   | N_ARG_156 | NH2    | N_GLU_119  | OE1    | 3.307        |
| 1A14   | N_ARG_172 | NH1    | N_GLU_174  | OE1    | 3.579        |
| 1A14   | N_ARG_172 | NH1    | N_GLU_174  | OE2    | 2.688        |
| 1A14   | N_ARG_189 | NH1    | N_ASP_125  | OD1    | 2.993        |
| 1A14   | N_ARG_209 | NH2    | N_GLU_174  | OE1    | 2.647        |
| 1A14   | N_ARG_224 | NH1    | N_GLU_276  | OE1    | 3.468        |
| 1A14   | N_ARG_224 | NH1    | N_GLU_276  | OE2    | 2.449        |
| 1A14   | N_ARG_224 | NH2    | N_GLU_276  | OE2    | 3.362        |
| 1A14   | N_HIS_274 | ND1    | N_GLU_276  | OE2    | 3.981        |
| 1A14   | N_HIS_274 | NE2    | N_GLU_276  | OE2    | 3.658        |
| 1A14   | N_ARG_292 | NH2    | N_GLU_277  | OE1    | 3.076        |
| 1A14   | N_ARG_292 | NH2    | N_GLU_277  | OE2    | 3.834        |
| 1A14   | N_ARG_300 | NH1    | N_ASP_324  | OD1    | 3.224        |
| 1A14   | N_ARG_300 | NH2    | N_ASP_324  | OD1    | 3.465        |
| 1A14   | N_ARG_304 | NH1    | N_GLU_286  | OE2    | 3.487        |
| 1A14   | N_HIS_312 | ND1    | N_GLU_266  | OE1    | 3.839        |
| 1A14   | N_HIS_312 | ND1    | N_GLU_266  | OE2    | 2.824        |
| 1A14   | N_ARG_364 | NH1    | N_ASP_330  | OD2    | 3.955        |
| 1A14   | N_ARG_364 | NH1    | N_GLU_375  | OE2    | 2.918        |
| 1A14   | N_ARG_364 | NH2    | N_ASP_330  | OD1    | 2.939        |
| 1A14   | N_ARG_364 | NH2    | N_ASP_330  | OD2    | 2.852        |
| 1A14   | N_LYS_387 | NZ     | N_ASP_386  | OD1    | 2.949        |
| 1A14   | N_LYS_387 | NZ     | N_ASP_386  | OD2    | 3.684        |
| 1A14   | N_ARG_428 | NH1    | N_ASP_460  | OD2    | 2.670        |
| 1A14   | N_ARG_428 | NH2    | N_GLU_433  | OE1    | 3.485        |
| 1A14   | N_ARG_428 | NH2    | N_GLU_433  | OE2    | 2.572        |
| 1A14   | N_LYS_432 | NZ     | H_ASP_56   | OD1    | 3.071        |
| 1A14   | H_LYS_38  | NZ     | H_ASP_86   | OD1    | 3.927        |
| 1A14   | H_LYS_66  | NZ     | H_ASP_86   | OD1    | 3.084        |
| 1A14   | H_LYS_66  | NZ     | H_ASP_86   | OD2    | 3.096        |
| 1A14   | H_ARG_94  | NH2    | H_ASP_101  | OD2    | 2.754        |
| 1A14   | H_ARG_100 | NH1    | H_ASP_100B | OD1    | 2.852        |
| 1A14   | H_ARG_100 | NH1    | H_ASP_100B | OD2    | 3.179        |
| 1A14   | L_ARG_61  | NH1    | L_GLU_79   | OE1    | 3.189        |
| 1A14   | L_ARG_61  | NH1    | L_GLU_79   | OE2    | 3.942        |
| 1A14   | L_ARG_61  | NH2    | L_GLU_79   | OE1    | 3.107        |
| 1A14   | L_ARG_61  | NH2    | L_ASP_82   | OD1    | 2.650        |
| 1A14   | L_ARG_61  | NH2    | L_ASP_82   | OD2    | 3.122        |



---

Table 9: 1A14-specific salt bridging networks analysis. In this table, a PDB file is specified with a four-letter PDB ID, except that the names of the PDB files corresponding to the single NMR structural model split from the NMR ensemble is specified with a four-letter PDB ID in addition to a hyphen followed by the single NMR structural model numeric ID, the residue naming scheme is **Chain ID\_residue name\_residue number**,  $\angle ADH$  represents the angle formed by acceptor (A), donor (D) and hydrogen (H) ( $\angle ADH$ ).

| PDB ID | Residue A | Atom A | Residue B | Atom B | Distance (Å) |
|--------|-----------|--------|-----------|--------|--------------|
| 1A2Y   | A_ARG_61  | NH2    | A_GLU_81  | OE2    | 3.299        |
| 1A2Y   | A_ARG_61  | NH2    | A_ASP_82  | OD1    | 2.783        |
| 1A2Y   | A_ARG_61  | NH2    | A_ASP_82  | OD2    | 3.405        |
| 1A2Y   | A_ARG_96  | NH1    | B_GLU_98  | OE1    | 2.846        |
| 1A2Y   | A_ARG_96  | NH1    | B_GLU_98  | OE2    | 3.664        |
| 1A2Y   | A_ARG_96  | NH2    | B_GLU_98  | OE1    | 3.545        |
| 1A2Y   | A_ARG_96  | NH2    | B_GLU_98  | OE2    | 2.882        |
| 1A2Y   | B_ARG_38  | NH1    | B_ASP_89  | OD1    | 3.030        |
| 1A2Y   | B_ARG_38  | NH2    | B_GLU_46  | OE1    | 3.122        |
| 1A2Y   | B_ARG_38  | NH2    | B_ASP_89  | OD1    | 3.828        |
| 1A2Y   | B_ARG_66  | NH1    | B_ASP_89  | OD1    | 3.898        |
| 1A2Y   | B_ARG_66  | NH1    | B_ASP_89  | OD2    | 3.063        |
| 1A2Y   | B_ARG_66  | NH2    | B_ASP_89  | OD1    | 3.023        |
| 1A2Y   | B_ARG_66  | NH2    | B_ASP_89  | OD2    | 3.441        |
| 1A2Y   | B_ARG_97  | NH2    | B_ASP_104 | OD1    | 3.891        |
| 1A2Y   | B_ARG_97  | NH2    | B_ASP_104 | OD2    | 2.921        |
| 1A2Y   | B_ARG_102 | NH1    | B_ASP_100 | OD2    | 3.378        |
| 1A2Y   | C_ARG_61  | NH1    | C_ASP_48  | OD1    | 2.641        |
| 1A2Y   | C_ARG_68  | NH1    | C_ASP_66  | OD2    | 3.417        |
| 1A2Y   | C_ARG_125 | NH1    | C_ASP_119 | OD1    | 3.449        |
| 1A2Y   | C_ARG_125 | NH1    | C_ASP_119 | OD2    | 3.142        |
| 1A2Y   | C_ARG_125 | NH2    | C_ASP_119 | OD2    | 3.057        |

Table 10: 1A2Y-specific salt bridging networks analysis. In this table, a PDB file is specified with a four-letter PDB ID, except that the names of the PDB files corresponding to the single NMR structural model split from the NMR ensemble is specified with a four-letter PDB ID in addition to a hyphen followed by the single NMR structural model numeric ID, the residue naming scheme is **Chain ID\_residue name\_residue number**,  $\angle ADH$  represents the angle formed by acceptor (A), donor (D) and hydrogen (H) ( $\angle ADH$ ).

| PDB ID | Residue A  | Atom A | Residue B  | Atom B | Distance (Å) |
|--------|------------|--------|------------|--------|--------------|
| 1A7L   | A_LYS_15   | NZ     | A_GLU_111  | OE1    | 3.415        |
| 1A7L   | A_LYS_15   | NZ     | A_GLU_111  | OE2    | 2.711        |
| 1A7L   | A_LYS_83   | NZ     | A_ASP_87   | OD1    | 3.030        |
| 1A7L   | A_LYS_83   | NZ     | A_ASP_87   | OD2    | 3.304        |
| 1A7L   | A_LYS_140  | NZ     | A_ASP_136  | OD1    | 3.902        |
| 1A7L   | A_LYS_140  | NZ     | A_ASP_136  | OD2    | 2.755        |
| 1A7L   | A_LYS_170  | NZ     | A_ASP_180  | OD2    | 2.887        |
| 1A7L   | A_LYS_189  | NZ     | A_ASP_358  | OD2    | 2.997        |
| 1A7L   | A_HIS_203  | ND1    | A_ASP_136  | OD2    | 2.891        |
| 1A7L   | A_LYS_219  | NZ     | B_GLU_131  | OE1    | 3.835        |
| 1A7L   | A_LYS_251  | NZ     | A_ASP_164  | OD2    | 3.413        |
| 1A7L   | A_ARG_316  | NH1    | A_ASP_236  | OD2    | 3.471        |
| 1A7L   | A_ARG_316  | NH2    | A_ASP_314  | OD2    | 2.893        |
| 1A7L   | A_ARG_344  | NH2    | A_GLU_153  | OE1    | 2.800        |
| 1A7L   | A_ARG_344  | NH2    | A_GLU_153  | OE2    | 3.001        |
| 1A7L   | A_ARG_135E | NH2    | A_ASP_133E | OD1    | 3.683        |
| 1A7L   | A_ARG_135E | NH2    | A_ASP_133E | OD2    | 3.429        |
| 1A7L   | B_LYS_15   | NZ     | B_GLU_111  | OE1    | 3.377        |
| 1A7L   | B_LYS_15   | NZ     | B_GLU_111  | OE2    | 3.759        |
| 1A7L   | B_LYS_42   | NZ     | B_GLU_44   | OE2    | 3.460        |
| 1A7L   | B_LYS_42   | NZ     | B_GLU_45   | OE2    | 3.115        |
| 1A7L   | B_LYS_140  | NZ     | B_ASP_136  | OD2    | 3.464        |
| 1A7L   | B_LYS_170  | NZ     | B_ASP_180  | OD2    | 3.114        |
| 1A7L   | B_LYS_189  | NZ     | B_ASP_358  | OD2    | 3.685        |
| 1A7L   | B_HIS_203  | ND1    | B_ASP_136  | OD2    | 2.601        |
| 1A7L   | B_LYS_251  | NZ     | B_ASP_164  | OD2    | 3.639        |
| 1A7L   | B_LYS_277  | NZ     | B_GLU_281  | OE1    | 3.203        |
| 1A7L   | B_LYS_277  | NZ     | B_GLU_281  | OE2    | 2.832        |
| 1A7L   | B_ARG_316  | NH1    | B_ASP_236  | OD1    | 3.944        |
| 1A7L   | B_ARG_316  | NH1    | B_ASP_236  | OD2    | 3.485        |
| 1A7L   | B_ARG_316  | NH2    | B_ASP_314  | OD2    | 3.346        |
| 1A7L   | B_LYS_326  | NZ     | B_GLU_322  | OE2    | 3.744        |
| 1A7L   | B_ARG_344  | NH2    | B_GLU_153  | OE1    | 2.942        |
| 1A7L   | B_ARG_344  | NH2    | B_GLU_153  | OE2    | 3.765        |
| 1A7L   | C_LYS_29   | NZ     | C_GLU_28   | OE2    | 3.650        |
| 1A7L   | C_LYS_83   | NZ     | C_ASP_87   | OD1    | 3.169        |
| 1A7L   | C_LYS_83   | NZ     | C_ASP_87   | OD2    | 3.327        |
| 1A7L   | C_LYS_102  | NZ     | C_GLU_78   | OE1    | 3.945        |
| 1A7L   | C_LYS_140  | NZ     | C_ASP_136  | OD1    | 2.897        |
| 1A7L   | C_LYS_140  | NZ     | C_ASP_136  | OD2    | 3.618        |
| 1A7L   | C_LYS_170  | NZ     | C_GLU_172  | OE2    | 3.002        |
| 1A7L   | C_LYS_189  | NZ     | C_ASP_184  | OD1    | 3.860        |
| 1A7L   | C_LYS_189  | NZ     | C_ASP_358  | OD2    | 3.399        |
| 1A7L   | C_HIS_203  | ND1    | C_ASP_136  | OD1    | 2.895        |
| 1A7L   | C_LYS_219  | NZ     | C_GLU_221  | OE2    | 3.817        |
| 1A7L   | C_LYS_277  | NZ     | C_GLU_281  | OE1    | 3.148        |
| 1A7L   | C_LYS_277  | NZ     | C_GLU_281  | OE2    | 3.283        |
| 1A7L   | C_LYS_295  | NZ     | C_GLU_291  | OE2    | 3.540        |
| 1A7L   | C_ARG_316  | NH1    | C_ASP_236  | OD2    | 3.877        |
| 1A7L   | C_ARG_316  | NH2    | C_ASP_314  | OD2    | 3.048        |
| 1A7L   | C_LYS_326  | NZ     | C_GLU_322  | OE2    | 3.201        |
| 1A7L   | C_ARG_344  | NH1    | C_GLU_153  | OE1    | 3.865        |
| 1A7L   | C_ARG_344  | NH1    | C_GLU_153  | OE2    | 2.640        |
| 1A7L   | C_ARG_344  | NH2    | C_GLU_153  | OE1    | 2.933        |
| 1A7L   | C_ARG_344  | NH2    | C_GLU_153  | OE2    | 3.058        |
| 1A7L   | C_LYS_362  | NZ     | C_ASP_363  | OD1    | 3.768        |

---

Table 11: 1A7L-specific salt bridging networks analysis. In this table, a PDB file is specified with a four-letter PDB ID, except that the names of the PDB files corresponding to the single NMR structural model split from the NMR ensemble is specified with a four-letter PDB ID in addition to a hyphen followed by the single NMR structural model numeric ID, the residue naming scheme is **Chain ID\_residue name\_residue number**,  $\angle ADH$  represents the angle formed by acceptor (A), donor (D) and hydrogen (H) ( $\angle ADH$ ).

| PDB ID | Residue A | Atom A | Residue B | Atom B | Distance (Å) |
|--------|-----------|--------|-----------|--------|--------------|
| 1A7N   | L_ARG_61  | NH2    | L_ASP_81  | OD2    | 3.125        |
| 1A7N   | L_ARG_61  | NH2    | L_ASP_82  | OD1    | 2.727        |
| 1A7N   | L_ARG_61  | NH2    | L_ASP_82  | OD2    | 3.246        |
| 1A7N   | L_ARG_96  | NH1    | H_GLU_298 | OE1    | 2.957        |
| 1A7N   | L_ARG_96  | NH1    | H_GLU_298 | OE2    | 3.249        |
| 1A7N   | L_ARG_96  | NH2    | H_GLU_298 | OE2    | 3.297        |
| 1A7N   | L_LYS_107 | NZ     | L_GLU_17  | OE2    | 2.821        |
| 1A7N   | H_ARG_238 | NH1    | H_ASP_289 | OD1    | 2.802        |
| 1A7N   | H_ARG_238 | NH2    | H_GLU_246 | OE1    | 3.463        |
| 1A7N   | H_ARG_238 | NH2    | H_GLU_246 | OE2    | 3.781        |
| 1A7N   | H_ARG_238 | NH2    | H_ASP_289 | OD1    | 3.741        |
| 1A7N   | H_ARG_266 | NH1    | H_ASP_289 | OD1    | 3.782        |
| 1A7N   | H_ARG_266 | NH1    | H_ASP_289 | OD2    | 2.637        |
| 1A7N   | H_ARG_266 | NH2    | H_ASP_289 | OD1    | 3.006        |
| 1A7N   | H_ARG_266 | NH2    | H_ASP_289 | OD2    | 3.237        |
| 1A7N   | H_LYS_275 | NZ     | H_ASP_272 | OD2    | 3.739        |
| 1A7N   | H_ARG_297 | NH2    | H_ASP_304 | OD1    | 3.472        |
| 1A7N   | H_ARG_297 | NH2    | H_ASP_304 | OD2    | 2.559        |
| 1A7N   | H_ARG_302 | NH1    | H_ASP_300 | OD1    | 2.938        |

Table 12: 1A7N-specific salt bridging networks analysis. In this table, a PDB file is specified with a four-letter PDB ID, except that the names of the PDB files corresponding to the single NMR structural model split from the NMR ensemble is specified with a four-letter PDB ID in addition to a hyphen followed by the single NMR structural model numeric ID, the residue naming scheme is **Chain ID residue name residue number**,  $\angle ADH$  represents the angle formed by acceptor (A), donor (D) and hydrogen (H) ( $\angle ADH$ ).

| PDB ID | Residue A | Atom A | Residue B | Atom B | Distance (Å) |
|--------|-----------|--------|-----------|--------|--------------|
| 1A7O   | L_ARG_61  | NH2    | L_ASP_81  | OD2    | 3.044        |
| 1A7O   | L_ARG_61  | NH2    | L_ASP_82  | OD1    | 2.765        |
| 1A7O   | L_ARG_61  | NH2    | L_ASP_82  | OD2    | 3.549        |
| 1A7O   | L_LYS_107 | NZ     | L_GLU_17  | OE2    | 3.441        |
| 1A7O   | H_ARG_238 | NH1    | H_ASP_289 | OD1    | 2.721        |
| 1A7O   | H_ARG_238 | NH2    | H_GLU_246 | OE1    | 3.298        |
| 1A7O   | H_ARG_238 | NH2    | H_GLU_246 | OE2    | 3.986        |
| 1A7O   | H_ARG_238 | NH2    | H_ASP_289 | OD1    | 3.845        |
| 1A7O   | H_ARG_266 | NH1    | H_ASP_289 | OD1    | 3.739        |
| 1A7O   | H_ARG_266 | NH1    | H_ASP_289 | OD2    | 2.614        |
| 1A7O   | H_ARG_266 | NH2    | H_ASP_289 | OD1    | 2.654        |
| 1A7O   | H_ARG_266 | NH2    | H_ASP_289 | OD2    | 2.979        |
| 1A7O   | H_ARG_297 | NH2    | H_ASP_304 | OD1    | 3.602        |
| 1A7O   | H_ARG_297 | NH2    | H_ASP_304 | OD2    | 2.696        |

Table 13: 1A7O-specific salt bridging networks analysis. In this table, a PDB file is specified with a four-letter PDB ID, except that the names of the PDB files corresponding to the single NMR structural model split from the NMR ensemble is specified with a four-letter PDB ID in addition to a hyphen followed by the single NMR structural model numeric ID, the residue naming scheme is **Chain ID\_residue name\_residue number**,  $\angle ADH$  represents the angle formed by acceptor (A), donor (D) and hydrogen (H) ( $\angle ADH$ ).

| PDB ID | Residue A | Atom A | Residue B | Atom B | Distance (Å) |
|--------|-----------|--------|-----------|--------|--------------|
| 1A7P   | L_ARG_61  | NH2    | L_ASP_81  | OD2    | 3.219        |
| 1A7P   | L_ARG_61  | NH2    | L_ASP_82  | OD1    | 2.851        |
| 1A7P   | L_ARG_61  | NH2    | L_ASP_82  | OD2    | 3.384        |
| 1A7P   | L_ARG_96  | NH2    | H_GLU_298 | OE1    | 3.845        |
| 1A7P   | L_ARG_96  | NH2    | H_GLU_298 | OE2    | 2.867        |
| 1A7P   | L_LYS_107 | NZ     | L_GLU_17  | OE2    | 2.919        |
| 1A7P   | H_ARG_238 | NH1    | H_ASP_289 | OD1    | 2.885        |
| 1A7P   | H_ARG_238 | NH2    | H_GLU_246 | OE1    | 3.234        |
| 1A7P   | H_ARG_238 | NH2    | H_GLU_246 | OE2    | 3.868        |
| 1A7P   | H_ARG_238 | NH2    | H_ASP_289 | OD1    | 3.785        |
| 1A7P   | H_ARG_266 | NH1    | H_ASP_289 | OD1    | 3.679        |
| 1A7P   | H_ARG_266 | NH1    | H_ASP_289 | OD2    | 2.508        |
| 1A7P   | H_ARG_266 | NH2    | H_ASP_289 | OD1    | 2.957        |
| 1A7P   | H_ARG_266 | NH2    | H_ASP_289 | OD2    | 3.253        |
| 1A7P   | H_ARG_297 | NH2    | H_ASP_304 | OD1    | 3.629        |
| 1A7P   | H_ARG_297 | NH2    | H_ASP_304 | OD2    | 2.709        |

Table 14: 1A7P-specific salt bridging networks analysis. In this table, a PDB file is specified with a four-letter PDB ID, except that the names of the PDB files corresponding to the single NMR structural model split from the NMR ensemble is specified with a four-letter PDB ID in addition to a hyphen followed by the single NMR structural model numeric ID, the residue naming scheme is **Chain ID\_residue name\_residue number**,  $\angle ADH$  represents the angle formed by acceptor (A), donor (D) and hydrogen (H) ( $\angle ADH$ ).

| PDB ID | Residue A | Atom A | Residue B | Atom B | Distance (Å) |
|--------|-----------|--------|-----------|--------|--------------|
| 1A7Q   | L_ARG_96  | NH1    | H_GLU_298 | OE1    | 2.615        |
| 1A7Q   | L_ARG_96  | NH1    | H_GLU_298 | OE2    | 3.239        |
| 1A7Q   | L_ARG_96  | NH2    | H_GLU_298 | OE1    | 3.431        |
| 1A7Q   | L_ARG_96  | NH2    | H_GLU_298 | OE2    | 2.621        |
| 1A7Q   | H_ARG_238 | NH1    | H_ASP_289 | OD1    | 2.800        |
| 1A7Q   | H_ARG_238 | NH2    | H_GLU_246 | OE1    | 3.193        |
| 1A7Q   | H_ARG_238 | NH2    | H_GLU_246 | OE2    | 3.915        |
| 1A7Q   | H_ARG_238 | NH2    | H_ASP_289 | OD1    | 3.788        |
| 1A7Q   | H_ARG_266 | NH1    | H_ASP_289 | OD1    | 3.820        |
| 1A7Q   | H_ARG_266 | NH1    | H_ASP_289 | OD2    | 2.595        |
| 1A7Q   | H_ARG_266 | NH2    | H_ASP_289 | OD1    | 2.974        |
| 1A7Q   | H_ARG_266 | NH2    | H_ASP_289 | OD2    | 3.211        |
| 1A7Q   | H_ARG_297 | NH2    | H_ASP_304 | OD1    | 3.728        |
| 1A7Q   | H_ARG_297 | NH2    | H_ASP_304 | OD2    | 2.870        |
| 1A7Q   | H_ARG_299 | NH1    | H_ASP_304 | OD2    | 3.412        |
| 1A7Q   | H_ARG_302 | NH1    | H_ASP_300 | OD2    | 3.990        |

Table 15: 1A7Q-specific salt bridging networks analysis. In this table, a PDB file is specified with a four-letter PDB ID, except that the names of the PDB files corresponding to the single NMR structural model split from the NMR ensemble is specified with a four-letter PDB ID in addition to a hyphen followed by the single NMR structural model numeric ID, the residue naming scheme is **Chain ID\_residue name\_residue number**,  $\angle ADH$  represents the angle formed by acceptor (A), donor (D) and hydrogen (H) ( $\angle ADH$ ).



| PDB ID | Residue A | Atom A | Residue B | Atom B | Distance (Å) |
|--------|-----------|--------|-----------|--------|--------------|
| 1A7R   | L_ARG_61  | NH2    | L_ASP_81  | OD2    | 3.198        |
| 1A7R   | L_ARG_61  | NH2    | L_ASP_82  | OD1    | 2.615        |
| 1A7R   | L_ARG_61  | NH2    | L_ASP_82  | OD2    | 3.098        |
| 1A7R   | L_ARG_96  | NH1    | H_GLU_298 | OE1    | 2.658        |
| 1A7R   | L_ARG_96  | NH1    | H_GLU_298 | OE2    | 3.535        |
| 1A7R   | L_ARG_96  | NH2    | H_GLU_298 | OE1    | 3.614        |
| 1A7R   | L_ARG_96  | NH2    | H_GLU_298 | OE2    | 2.905        |
| 1A7R   | L_LYS_107 | NZ     | L_GLU_17  | OE2    | 3.377        |
| 1A7R   | H_ARG_238 | NH1    | H_ASP_289 | OD1    | 2.846        |
| 1A7R   | H_ARG_238 | NH2    | H_GLU_246 | OE1    | 3.349        |
| 1A7R   | H_ARG_238 | NH2    | H_GLU_246 | OE2    | 3.834        |
| 1A7R   | H_ARG_238 | NH2    | H_ASP_289 | OD1    | 3.880        |
| 1A7R   | H_ARG_266 | NH1    | H_ASP_289 | OD1    | 3.623        |
| 1A7R   | H_ARG_266 | NH1    | H_ASP_289 | OD2    | 2.578        |
| 1A7R   | H_ARG_266 | NH2    | H_ASP_289 | OD1    | 2.893        |
| 1A7R   | H_ARG_266 | NH2    | H_ASP_289 | OD2    | 3.226        |
| 1A7R   | H_LYS_275 | NZ     | H_ASP_272 | OD2    | 3.976        |
| 1A7R   | H_ARG_297 | NH2    | H_ASP_304 | OD1    | 3.559        |
| 1A7R   | H_ARG_297 | NH2    | H_ASP_304 | OD2    | 2.633        |

Table 16: 1A7R-specific salt bridging networks analysis. In this table, a PDB file is specified with a four-letter PDB ID, except that the names of the PDB files corresponding to the single NMR structural model split from the NMR ensemble is specified with a four-letter PDB ID in addition to a hyphen followed by the single NMR structural model numeric ID, the residue naming scheme is **Chain ID residue name residue number**,  $\angle ADH$  represents the angle formed by acceptor (A), donor (D) and hydrogen (H) ( $\angle ADH$ ).

| PDB ID | Residue A | Atom A | Residue B | Atom B | Distance (Å) |
|--------|-----------|--------|-----------|--------|--------------|
| 1ADQ   | A_LYS_248 | NZ     | A_GLU_380 | OE2    | 3.226        |
| 1ADQ   | A_ARG_255 | NH1    | A_ASP_249 | OD1    | 3.987        |
| 1ADQ   | A_ARG_255 | NH2    | H_ASP_31  | OD2    | 2.929        |
| 1ADQ   | A_LYS_320 | NZ     | A_GLU_333 | OE1    | 3.855        |
| 1ADQ   | A_LYS_320 | NZ     | A_GLU_333 | OE2    | 3.755        |
| 1ADQ   | A_LYS_326 | NZ     | A_ASP_270 | OD1    | 3.273        |
| 1ADQ   | A_LYS_326 | NZ     | A_ASP_270 | OD2    | 3.723        |
| 1ADQ   | A_LYS_338 | NZ     | A_GLU_430 | OE1    | 3.031        |
| 1ADQ   | A_LYS_338 | NZ     | A_GLU_430 | OE2    | 2.803        |
| 1ADQ   | A_ARG_344 | NH1    | A_ASP_401 | OD2    | 3.235        |
| 1ADQ   | A_ARG_416 | NH1    | A_GLU_388 | OE1    | 3.926        |
| 1ADQ   | A_ARG_416 | NH1    | A_GLU_388 | OE2    | 3.113        |
| 1ADQ   | A_ARG_416 | NH2    | A_GLU_388 | OE1    | 3.507        |
| 1ADQ   | A_ARG_416 | NH2    | A_GLU_388 | OE2    | 2.923        |
| 1ADQ   | A_HIS_433 | NE2    | L_ASP_50  | OD1    | 3.394        |
| 1ADQ   | A_HIS_433 | NE2    | L_ASP_50  | OD2    | 3.883        |
| 1ADQ   | L_LYS_31  | NZ     | L_ASP_92  | OD1    | 3.026        |
| 1ADQ   | L_ARG_61  | NH2    | L_GLU_79  | OE1    | 3.104        |
| 1ADQ   | L_ARG_61  | NH2    | L_ASP_82  | OD1    | 3.715        |
| 1ADQ   | L_ARG_61  | NH2    | L_ASP_82  | OD2    | 3.959        |
| 1ADQ   | L_HIS_95B | NE2    | H_ASP_61  | OD2    | 3.425        |
| 1ADQ   | L_LYS_149 | NZ     | L_GLU_206 | OE1    | 3.712        |
| 1ADQ   | H_ARG_38  | NH1    | H_ASP_86  | OD1    | 3.336        |
| 1ADQ   | H_ARG_66  | NH1    | H_ASP_86  | OD1    | 3.600        |
| 1ADQ   | H_ARG_66  | NH1    | H_ASP_86  | OD2    | 2.617        |
| 1ADQ   | H_ARG_66  | NH2    | H_ASP_86  | OD1    | 2.939        |
| 1ADQ   | H_ARG_66  | NH2    | H_ASP_86  | OD2    | 3.254        |
| 1ADQ   | H_LYS_158 | NZ     | H_GLU_220 | OE1    | 3.150        |
| 1ADQ   | H_LYS_184 | NZ     | H_ASP_146 | OD2    | 3.128        |
| 1ADQ   | H_LYS_221 | NZ     | H_ASP_222 | OD2    | 3.919        |

Table 17: 1ADQ-specific salt bridging networks analysis. In this table, a PDB file is specified with a four-letter PDB ID, except that the names of the PDB files corresponding to the single NMR structural model split from the NMR ensemble is specified with a four-letter PDB ID in addition to a hyphen followed by the single NMR structural model numeric ID, the residue naming scheme is **Chain ID\_residue name\_residue number**,  $\angle ADH$  represents the angle formed by acceptor (A), donor (D) and hydrogen (H) ( $\angle ADH$ ).

| PDB ID | Residue A | Atom A | Residue B | Atom B | Distance (Å) |
|--------|-----------|--------|-----------|--------|--------------|
| 1BJ1   | L_ARG_61  | NH2    | L_GLU_81  | OE2    | 3.689        |
| 1BJ1   | L_ARG_61  | NH2    | L_ASP_82  | OD1    | 2.770        |
| 1BJ1   | L_ARG_61  | NH2    | L_ASP_82  | OD2    | 3.181        |
| 1BJ1   | L_LYS_103 | NZ     | L_GLU_165 | OE2    | 3.052        |
| 1BJ1   | L_ARG_142 | NH2    | L_GLU_105 | OE2    | 3.352        |
| 1BJ1   | L_LYS_188 | NZ     | L_ASP_185 | OD1    | 3.571        |
| 1BJ1   | H_ARG_38  | NH1    | H_ASP_90  | OD1    | 3.092        |
| 1BJ1   | H_ARG_38  | NH2    | H_GLU_46  | OE1    | 3.575        |
| 1BJ1   | H_ARG_38  | NH2    | H_ASP_90  | OD1    | 3.916        |
| 1BJ1   | H_ARG_67  | NH1    | H_ASP_90  | OD2    | 2.757        |
| 1BJ1   | H_ARG_67  | NH2    | H_ASP_90  | OD1    | 3.333        |
| 1BJ1   | H_ARG_67  | NH2    | H_ASP_90  | OD2    | 3.289        |
| 1BJ1   | H_ARG_87  | NH1    | H_GLU_89  | OE2    | 3.150        |
| 1BJ1   | H_LYS_153 | NZ     | H_ASP_154 | OD1    | 3.946        |
| 1BJ1   | H_LYS_219 | NZ     | L_GLU_123 | OE1    | 2.948        |
| 1BJ1   | H_LYS_220 | NZ     | H_GLU_222 | OE1    | 3.519        |
| 1BJ1   | H_LYS_224 | NZ     | L_ASP_122 | OD2    | 2.691        |
| 1BJ1   | V_ARG_23  | NH1    | W_GLU_30  | OE1    | 3.305        |
| 1BJ1   | V_ARG_56  | NH2    | V_GLU_38  | OE1    | 3.031        |
| 1BJ1   | V_ARG_82  | NH1    | V_GLU_42  | OE1    | 3.483        |
| 1BJ1   | V_ARG_82  | NH2    | V_GLU_42  | OE1    | 2.954        |
| 1BJ1   | V_HIS_99  | NE2    | V_GLU_73  | OE2    | 3.634        |
| 1BJ1   | V_LYS_107 | NZ     | V_GLU_64  | OE1    | 3.520        |
| 1BJ1   | W_ARG_23  | NH1    | V_GLU_30  | OE1    | 3.351        |
| 1BJ1   | W_ARG_56  | NH2    | W_GLU_38  | OE1    | 3.008        |
| 1BJ1   | W_ARG_82  | NH1    | W_GLU_42  | OE2    | 3.753        |
| 1BJ1   | W_ARG_82  | NH2    | W_GLU_42  | OE2    | 2.675        |
| 1BJ1   | W_HIS_99  | NE2    | W_GLU_73  | OE2    | 3.679        |
| 1BJ1   | W_ARG_105 | NH1    | W_GLU_103 | OE1    | 3.917        |
| 1BJ1   | W_ARG_105 | NH2    | W_GLU_103 | OE1    | 2.651        |
| 1BJ1   | W_LYS_107 | NZ     | W_GLU_64  | OE1    | 3.656        |
| 1BJ1   | J_ARG_61  | NH2    | J_GLU_81  | OE2    | 3.502        |
| 1BJ1   | J_ARG_61  | NH2    | J_ASP_82  | OD1    | 2.721        |
| 1BJ1   | J_ARG_61  | NH2    | J_ASP_82  | OD2    | 3.272        |
| 1BJ1   | J_LYS_103 | NZ     | J_GLU_165 | OE2    | 3.042        |
| 1BJ1   | J_LYS_126 | NZ     | J_GLU_123 | OE2    | 3.084        |
| 1BJ1   | J_LYS_145 | NZ     | J_GLU_195 | OE2    | 3.741        |
| 1BJ1   | J_LYS_188 | NZ     | J_ASP_185 | OD1    | 3.653        |
| 1BJ1   | K_ARG_38  | NH1    | K_ASP_90  | OD1    | 3.157        |
| 1BJ1   | K_ARG_38  | NH2    | K_GLU_46  | OE1    | 3.735        |
| 1BJ1   | K_ARG_38  | NH2    | K_ASP_90  | OD1    | 3.789        |
| 1BJ1   | K_ARG_67  | NH1    | K_ASP_90  | OD2    | 2.824        |
| 1BJ1   | K_ARG_67  | NH2    | K_ASP_90  | OD1    | 3.565        |
| 1BJ1   | K_ARG_67  | NH2    | K_ASP_90  | OD2    | 3.500        |
| 1BJ1   | K_ARG_87  | NH1    | K_GLU_89  | OE2    | 3.633        |
| 1BJ1   | K_LYS_127 | NZ     | K_ASP_154 | OD2    | 3.373        |
| 1BJ1   | K_LYS_220 | NZ     | K_GLU_222 | OE1    | 3.843        |

---

Table 18: 1BJ1-specific salt bridging networks analysis. In this table, a PDB file is specified with a four-letter PDB ID, except that the names of the PDB files corresponding to the single NMR structural model split from the NMR ensemble is specified with a four-letter PDB ID in addition to a hyphen followed by the single NMR structural model numeric ID, the residue naming scheme is **Chain ID\_residue name\_residue number**,  $\angle ADH$  represents the angle formed by acceptor (A), donor (D) and hydrogen (H) ( $\angle ADH$ ).

| PDB ID | Residue A | Atom A | Residue B | Atom B | Distance (Å) |
|--------|-----------|--------|-----------|--------|--------------|
| 1BLN   | A_ARG_24  | NH1    | A_ASP_70  | OD1    | 2.713        |
| 1BLN   | A_LYS_39  | NZ     | A_GLU_81  | OE1    | 3.030        |
| 1BLN   | A_LYS_39  | NZ     | A_GLU_81  | OE2    | 2.665        |
| 1BLN   | A_ARG_54  | NH1    | A_ASP_60  | OD1    | 3.451        |
| 1BLN   | A_ARG_54  | NH1    | A_ASP_60  | OD2    | 2.737        |
| 1BLN   | A_ARG_54  | NH2    | A_ASP_60  | OD1    | 3.686        |
| 1BLN   | A_ARG_61  | NH1    | A_GLU_79  | OE1    | 3.238        |
| 1BLN   | A_ARG_61  | NH1    | A_GLU_79  | OE2    | 2.929        |
| 1BLN   | A_ARG_61  | NH2    | A_GLU_79  | OE1    | 2.868        |
| 1BLN   | A_ARG_61  | NH2    | A_ASP_82  | OD1    | 2.719        |
| 1BLN   | A_ARG_61  | NH2    | A_ASP_82  | OD2    | 2.933        |
| 1BLN   | A_LYS_103 | NZ     | A_ASP_165 | OD1    | 2.680        |
| 1BLN   | A_LYS_103 | NZ     | A_ASP_165 | OD2    | 2.779        |
| 1BLN   | A_LYS_149 | NZ     | A_GLU_195 | OE1    | 2.904        |
| 1BLN   | A_LYS_149 | NZ     | A_GLU_195 | OE2    | 2.718        |
| 1BLN   | A_LYS_169 | NZ     | A_ASP_167 | OD1    | 3.151        |
| 1BLN   | A_LYS_169 | NZ     | A_ASP_167 | OD2    | 2.577        |
| 1BLN   | A_LYS_169 | NZ     | A_ASP_170 | OD2    | 3.534        |
| 1BLN   | A_LYS_183 | NZ     | A_ASP_184 | OD1    | 3.490        |
| 1BLN   | A_LYS_183 | NZ     | A_ASP_184 | OD2    | 2.917        |
| 1BLN   | A_ARG_188 | NH1    | A_GLU_185 | OE2    | 2.624        |
| 1BLN   | A_ARG_188 | NH2    | A_GLU_185 | OE1    | 3.741        |
| 1BLN   | A_ARG_188 | NH2    | A_GLU_185 | OE2    | 2.727        |
| 1BLN   | A_HIS_189 | ND1    | A_ASP_151 | OD2    | 2.822        |
| 1BLN   | A_HIS_189 | NE2    | A_GLU_154 | OE1    | 3.457        |
| 1BLN   | A_HIS_189 | NE2    | A_GLU_154 | OE2    | 3.510        |
| 1BLN   | A_ARG_211 | NH1    | A_GLU_213 | OE2    | 3.546        |
| 1BLN   | B_ARG_38  | NH1    | B_GLU_46  | OE1    | 2.899        |
| 1BLN   | B_ARG_38  | NH2    | B_ASP_86  | OD1    | 2.861        |
| 1BLN   | B_LYS_64  | NZ     | B_ASP_61  | OD1    | 2.441        |
| 1BLN   | B_ARG_66  | NH1    | B_ASP_86  | OD1    | 3.791        |
| 1BLN   | B_ARG_66  | NH1    | B_ASP_86  | OD2    | 2.687        |
| 1BLN   | B_ARG_66  | NH2    | B_GLU_85  | OE2    | 2.818        |
| 1BLN   | B_ARG_66  | NH2    | B_ASP_86  | OD1    | 2.906        |
| 1BLN   | B_ARG_66  | NH2    | B_ASP_86  | OD2    | 3.348        |
| 1BLN   | B_LYS_75  | NZ     | B_ASP_72  | OD1    | 2.753        |
| 1BLN   | B_LYS_75  | NZ     | B_ASP_72  | OD2    | 2.989        |
| 1BLN   | B_ARG_83  | NH2    | B_GLU_85  | OE1    | 2.930        |
| 1BLN   | B_ARG_83  | NH2    | B_GLU_85  | OE2    | 2.872        |
| 1BLN   | B_LYS_218 | NZ     | B_ASP_220 | OD1    | 2.783        |
| 1BLN   | B_LYS_218 | NZ     | B_ASP_220 | OD2    | 2.601        |
| 1BLN   | B_LYS_221 | NZ     | A_GLU_123 | OE2    | 2.688        |
| 1BLN   | B_LYS_222 | NZ     | B_GLU_226 | OE1    | 2.622        |
| 1BLN   | B_LYS_222 | NZ     | B_GLU_226 | OE2    | 2.602        |
| 1BLN   | C_ARG_24  | NH1    | C_ASP_70  | OD1    | 3.436        |
| 1BLN   | C_ARG_24  | NH1    | C_ASP_70  | OD2    | 2.560        |
| 1BLN   | C_LYS_39  | NZ     | C_GLU_81  | OE1    | 2.548        |
| 1BLN   | C_LYS_39  | NZ     | C_GLU_81  | OE2    | 2.754        |
| 1BLN   | C_ARG_54  | NH1    | C_ASP_60  | OD2    | 3.393        |
| 1BLN   | C_ARG_61  | NH1    | C_GLU_79  | OE1    | 3.333        |
| 1BLN   | C_ARG_61  | NH1    | C_GLU_79  | OE2    | 2.726        |
| 1BLN   | C_ARG_61  | NH2    | C_GLU_79  | OE1    | 3.200        |
| 1BLN   | C_ARG_61  | NH2    | C_ASP_82  | OD1    | 2.668        |
| 1BLN   | C_ARG_61  | NH2    | C_ASP_82  | OD2    | 3.423        |
| 1BLN   | C_LYS_103 | NZ     | C_GLU_105 | OE2    | 2.790        |
| 1BLN   | C_LYS_103 | NZ     | C_ASP_165 | OD1    | 3.363        |
| 1BLN   | C_LYS_103 | NZ     | C_ASP_165 | OD2    | 3.568        |

|      |           |     |           |     |       |
|------|-----------|-----|-----------|-----|-------|
| 1BLN | C_LYS_149 | NZ  | C_GLU_195 | OE1 | 2.899 |
| 1BLN | C_LYS_149 | NZ  | C_GLU_195 | OE2 | 2.725 |
| 1BLN | C_LYS_169 | NZ  | C_ASP_167 | OD1 | 3.137 |
| 1BLN | C_LYS_169 | NZ  | C_ASP_167 | OD2 | 2.563 |
| 1BLN | C_LYS_169 | NZ  | C_ASP_170 | OD2 | 3.533 |
| 1BLN | C_LYS_183 | NZ  | C_ASP_184 | OD1 | 3.499 |
| 1BLN | C_LYS_183 | NZ  | C_ASP_184 | OD2 | 2.904 |
| 1BLN | C_ARG_188 | NH1 | C_GLU_185 | OE2 | 2.652 |
| 1BLN | C_ARG_188 | NH2 | C_GLU_185 | OE1 | 3.758 |
| 1BLN | C_ARG_188 | NH2 | C_GLU_185 | OE2 | 2.730 |
| 1BLN | C_HIS_189 | ND1 | C_ASP_151 | OD2 | 2.783 |
| 1BLN | C_HIS_189 | NE2 | C_GLU_154 | OE1 | 3.449 |
| 1BLN | C_HIS_189 | NE2 | C_GLU_154 | OE2 | 3.510 |
| 1BLN | C_ARG_211 | NH1 | C_GLU_213 | OE2 | 3.540 |
| 1BLN | D_ARG_38  | NH1 | D_ASP_86  | OD1 | 2.873 |
| 1BLN | D_ARG_38  | NH2 | D_GLU_46  | OE1 | 2.870 |
| 1BLN | D_ARG_38  | NH2 | D_ASP_86  | OD1 | 3.962 |
| 1BLN | D_LYS_64  | NZ  | D_ASP_61  | OD1 | 2.496 |
| 1BLN | D_ARG_66  | NH1 | D_ASP_86  | OD1 | 3.322 |
| 1BLN | D_ARG_66  | NH1 | D_ASP_86  | OD2 | 3.365 |
| 1BLN | D_ARG_66  | NH2 | D_ASP_86  | OD1 | 3.949 |
| 1BLN | D_ARG_66  | NH2 | D_ASP_86  | OD2 | 2.588 |
| 1BLN | D_LYS_75  | NZ  | D_ASP_72  | OD1 | 2.846 |
| 1BLN | D_LYS_75  | NZ  | D_ASP_72  | OD2 | 2.946 |
| 1BLN | D_ARG_83  | NH2 | D_GLU_85  | OE2 | 2.754 |
| 1BLN | D_LYS_218 | NZ  | D_ASP_220 | OD1 | 2.806 |
| 1BLN | D_LYS_218 | NZ  | D_ASP_220 | OD2 | 2.614 |
| 1BLN | D_LYS_221 | NZ  | C_GLU_123 | OE2 | 2.694 |
| 1BLN | D_LYS_222 | NZ  | D_GLU_226 | OE1 | 2.616 |
| 1BLN | D_LYS_222 | NZ  | D_GLU_226 | OE2 | 2.583 |

Table 19: 1BLN-specific salt bridging networks analysis. In this table, a PDB file is specified with a four-letter PDB ID, except that the names of the PDB files corresponding to the single NMR structural model split from the NMR ensemble is specified with a four-letter PDB ID in addition to a hyphen followed by the single NMR structural model numeric ID, the residue naming scheme is **Chain ID\_residue name\_residue number**,  $\angle ADH$  represents the angle formed by acceptor (A), donor (D) and hydrogen (H) ( $\angle ADH$ ).

| PDB ID | Residue A | Atom A | Residue B | Atom B | Distance (Å) |
|--------|-----------|--------|-----------|--------|--------------|
| 1BQL   | L_LYS_44  | NZ     | H_ASP_104 | OD1    | 3.995        |
| 1BQL   | L_ARG_45  | NH2    | H_ASP_104 | OD2    | 3.212        |
| 1BQL   | L_ARG_60  | NH2    | L_ASP_81  | OD1    | 2.877        |
| 1BQL   | L_ARG_106 | NH2    | L_ASP_168 | OD1    | 2.775        |
| 1BQL   | L_ARG_106 | NH2    | L_ASP_168 | OD2    | 3.565        |
| 1BQL   | L_LYS_147 | NZ     | L_GLU_193 | OE1    | 3.381        |
| 1BQL   | L_LYS_147 | NZ     | L_GLU_193 | OE2    | 3.056        |
| 1BQL   | L_LYS_167 | NZ     | L_ASP_165 | OD1    | 3.577        |
| 1BQL   | L_ARG_186 | NH2    | L_ASP_182 | OD2    | 3.759        |
| 1BQL   | L_HIS_187 | ND1    | L_ASP_149 | OD2    | 3.204        |
| 1BQL   | H_LYS_38  | NZ     | H_GLU_46  | OE2    | 3.708        |
| 1BQL   | H_LYS_67  | NZ     | H_ASP_90  | OD1    | 3.576        |
| 1BQL   | H_LYS_67  | NZ     | H_ASP_90  | OD2    | 2.891        |
| 1BQL   | H_LYS_208 | NZ     | H_ASP_210 | OD1    | 3.394        |
| 1BQL   | H_LYS_211 | NZ     | L_GLU_121 | OE1    | 2.714        |
| 1BQL   | H_LYS_211 | NZ     | L_GLU_121 | OE2    | 2.963        |
| 1BQL   | Y_LYS_1   | NZ     | Y_GLU_7   | OE1    | 2.931        |
| 1BQL   | Y_LYS_1   | NZ     | Y_GLU_7   | OE2    | 3.316        |
| 1BQL   | Y_LYS_13  | NZ     | Y_ASP_18  | OD2    | 3.337        |
| 1BQL   | Y_ARG_45  | NH1    | H_GLU_50  | OE1    | 3.800        |
| 1BQL   | Y_ARG_45  | NH1    | H_GLU_50  | OE2    | 2.920        |
| 1BQL   | Y_LYS_68  | NZ     | H_GLU_50  | OE1    | 3.561        |
| 1BQL   | Y_LYS_97  | NZ     | Y_ASP_101 | OD1    | 2.891        |
| 1BQL   | Y_ARG_125 | NH2    | Y_ASP_119 | OD2    | 2.588        |

Table 20: 1BQL-specific salt bridging networks analysis. In this table, a PDB file is specified with a four-letter PDB ID, except that the names of the PDB files corresponding to the single NMR structural model split from the NMR ensemble is specified with a four-letter PDB ID in addition to a hyphen followed by the single NMR structural model numeric ID, the residue naming scheme is **Chain ID\_residue name\_residue number**,  $\angle ADH$  represents the angle formed by acceptor (A), donor (D) and hydrogen (H) ( $\angle ADH$ ).

| PDB ID | Residue A | Atom A | Residue B | Atom B | Distance (Å) |
|--------|-----------|--------|-----------|--------|--------------|
| 1BVK   | A_ARG_24  | NH1    | A_ASP_70  | OD1    | 2.987        |
| 1BVK   | A_ARG_61  | NH2    | A_GLU_81  | OE1    | 3.459        |
| 1BVK   | A_ARG_61  | NH2    | A_ASP_82  | OD1    | 2.453        |
| 1BVK   | A_ARG_61  | NH2    | A_ASP_82  | OD2    | 3.255        |
| 1BVK   | A_ARG_96  | NH2    | B_GLU_98  | OE1    | 2.978        |
| 1BVK   | A_ARG_96  | NH2    | B_GLU_98  | OE2    | 2.932        |
| 1BVK   | B_ARG_38  | NH1    | B_ASP_89  | OD1    | 2.858        |
| 1BVK   | B_ARG_38  | NH2    | B_GLU_46  | OE1    | 3.400        |
| 1BVK   | B_ARG_38  | NH2    | B_GLU_46  | OE2    | 3.917        |
| 1BVK   | B_ARG_38  | NH2    | B_ASP_89  | OD1    | 3.415        |
| 1BVK   | B_ARG_66  | NH1    | B_ASP_89  | OD1    | 3.789        |
| 1BVK   | B_ARG_66  | NH1    | B_ASP_89  | OD2    | 2.919        |
| 1BVK   | B_ARG_66  | NH2    | B_ASP_89  | OD1    | 2.669        |
| 1BVK   | B_ARG_66  | NH2    | B_ASP_89  | OD2    | 3.080        |
| 1BVK   | B_ARG_97  | NH2    | B_ASP_104 | OD1    | 3.302        |
| 1BVK   | B_ARG_97  | NH2    | B_ASP_104 | OD2    | 3.220        |
| 1BVK   | B_ARG_102 | NH1    | B_ASP_100 | OD2    | 3.508        |
| 1BVK   | B_ARG_102 | NH2    | B_ASP_100 | OD2    | 3.959        |
| 1BVK   | C_ARG_61  | NH1    | C_ASP_48  | OD2    | 2.726        |
| 1BVK   | C_ARG_68  | NH1    | C_ASP_66  | OD2    | 3.814        |
| 1BVK   | C_ARG_125 | NH1    | C_ASP_119 | OD2    | 3.413        |
| 1BVK   | C_ARG_125 | NH2    | C_ASP_119 | OD2    | 2.659        |
| 1BVK   | D_ARG_24  | NH1    | D_ASP_70  | OD1    | 3.898        |
| 1BVK   | D_ARG_24  | NH1    | D_ASP_70  | OD2    | 3.517        |
| 1BVK   | D_ARG_61  | NH1    | D_GLU_81  | OE1    | 3.485        |
| 1BVK   | D_ARG_61  | NH1    | D_GLU_81  | OE2    | 3.564        |
| 1BVK   | D_ARG_61  | NH2    | D_GLU_81  | OE1    | 2.809        |
| 1BVK   | D_ARG_61  | NH2    | D_GLU_81  | OE2    | 3.799        |
| 1BVK   | D_ARG_61  | NH2    | D_ASP_82  | OD1    | 2.873        |
| 1BVK   | D_ARG_61  | NH2    | D_ASP_82  | OD2    | 3.655        |
| 1BVK   | D_ARG_96  | NH2    | E_GLU_98  | OE1    | 2.525        |
| 1BVK   | D_ARG_96  | NH2    | E_GLU_98  | OE2    | 2.753        |
| 1BVK   | E_ARG_38  | NH1    | E_ASP_89  | OD1    | 3.089        |
| 1BVK   | E_ARG_38  | NH2    | E_GLU_46  | OE1    | 3.613        |
| 1BVK   | E_ARG_38  | NH2    | E_GLU_46  | OE2    | 3.594        |
| 1BVK   | E_ARG_38  | NH2    | E_ASP_89  | OD1    | 3.476        |
| 1BVK   | E_ARG_66  | NH1    | E_ASP_89  | OD1    | 3.924        |
| 1BVK   | E_ARG_66  | NH1    | E_ASP_89  | OD2    | 2.743        |
| 1BVK   | E_ARG_66  | NH2    | E_ASP_89  | OD1    | 3.027        |
| 1BVK   | E_ARG_66  | NH2    | E_ASP_89  | OD2    | 3.167        |
| 1BVK   | E_ARG_97  | NH2    | E_ASP_104 | OD1    | 3.359        |
| 1BVK   | E_ARG_97  | NH2    | E_ASP_104 | OD2    | 2.447        |
| 1BVK   | E_ARG_102 | NH1    | E_ASP_100 | OD2    | 3.374        |
| 1BVK   | E_ARG_102 | NH2    | E_ASP_100 | OD2    | 3.788        |
| 1BVK   | F_LYS_1   | NZ     | F_GLU_7   | OE2    | 2.724        |
| 1BVK   | F_LYS_13  | NZ     | F_ASP_18  | OD2    | 3.816        |
| 1BVK   | F_ARG_61  | NH1    | F_ASP_48  | OD2    | 3.232        |
| 1BVK   | F_ARG_125 | NH1    | F_ASP_119 | OD1    | 3.126        |
| 1BVK   | F_ARG_125 | NH1    | F_ASP_119 | OD2    | 2.577        |
| 1BVK   | F_ARG_125 | NH2    | F_ASP_119 | OD2    | 2.733        |



---

Table 21: 1BVK-specific salt bridging networks analysis. In this table, a PDB file is specified with a four-letter PDB ID, except that the names of the PDB files corresponding to the single NMR structural model split from the NMR ensemble is specified with a four-letter PDB ID in addition to a hyphen followed by the single NMR structural model numeric ID, the residue naming scheme is **Chain ID\_residue name\_residue number**,  $\angle ADH$  represents the angle formed by acceptor (A), donor (D) and hydrogen (H) ( $\angle ADH$ ).

| PDB ID | Residue A | Atom A | Residue B | Atom B | Distance (Å) |
|--------|-----------|--------|-----------|--------|--------------|
| 1C08   | A_ARG_61  | NH1    | A_GLU_79  | OE1    | 3.359        |
| 1C08   | A_ARG_61  | NH1    | A_GLU_79  | OE2    | 3.299        |
| 1C08   | A_ARG_61  | NH2    | A_GLU_79  | OE1    | 3.600        |
| 1C08   | A_ARG_61  | NH2    | A_GLU_81  | OE2    | 3.058        |
| 1C08   | A_ARG_61  | NH2    | A_ASP_82  | OD1    | 2.615        |
| 1C08   | A_ARG_61  | NH2    | A_ASP_82  | OD2    | 3.483        |
| 1C08   | A_LYS_103 | NZ     | A_GLU_105 | OE2    | 3.843        |
| 1C08   | B_ARG_38  | NH1    | B_ASP_89  | OD1    | 2.821        |
| 1C08   | B_ARG_38  | NH2    | B_GLU_46  | OE1    | 2.693        |
| 1C08   | B_ARG_38  | NH2    | B_ASP_89  | OD1    | 3.615        |
| 1C08   | B_ARG_66  | NH1    | B_ASP_89  | OD1    | 3.916        |
| 1C08   | B_ARG_66  | NH1    | B_ASP_89  | OD2    | 3.160        |
| 1C08   | B_ARG_66  | NH2    | B_ASP_89  | OD1    | 3.080        |
| 1C08   | B_ARG_66  | NH2    | B_ASP_89  | OD2    | 3.629        |
| 1C08   | B_LYS_75  | NZ     | B_ASP_72  | OD2    | 2.822        |
| 1C08   | C_LYS_1   | NZ     | C_GLU_7   | OE1    | 3.861        |
| 1C08   | C_LYS_1   | NZ     | C_GLU_7   | OE2    | 2.619        |
| 1C08   | C_ARG_61  | NH1    | C_ASP_48  | OD2    | 2.684        |
| 1C08   | C_ARG_61  | NH2    | C_ASP_48  | OD2    | 3.901        |
| 1C08   | C_LYS_97  | NZ     | B_ASP_32  | OD1    | 2.620        |
| 1C08   | C_LYS_97  | NZ     | B_ASP_32  | OD2    | 3.999        |
| 1C08   | C_LYS_97  | NZ     | B_ASP_99  | OD2    | 2.365        |
| 1C08   | C_ARG_125 | NH1    | C_ASP_119 | OD2    | 3.458        |
| 1C08   | C_ARG_125 | NH2    | C_ASP_119 | OD1    | 3.749        |
| 1C08   | C_ARG_125 | NH2    | C_ASP_119 | OD2    | 3.808        |

Table 22: 1C08-specific salt bridging networks analysis. In this table, a PDB file is specified with a four-letter PDB ID, except that the names of the PDB files corresponding to the single NMR structural model split from the NMR ensemble is specified with a four-letter PDB ID in addition to a hyphen followed by the single NMR structural model numeric ID, the residue naming scheme is **Chain ID\_residue name\_residue number**,  $\angle ADH$  represents the angle formed by acceptor (A), donor (D) and hydrogen (H) ( $\angle ADH$ ).

| PDB ID | Residue A | Atom A | Residue B | Atom B | Distance (Å) |
|--------|-----------|--------|-----------|--------|--------------|
| 1C12   | A_ARG_61  | NH1    | A_GLU_79  | OE1    | 3.872        |
| 1C12   | A_ARG_61  | NH1    | A_GLU_79  | OE2    | 3.629        |
| 1C12   | A_ARG_61  | NH1    | A_GLU_81  | OE2    | 3.588        |
| 1C12   | A_ARG_61  | NH1    | A_ASP_82  | OD1    | 3.976        |
| 1C12   | A_ARG_61  | NH2    | A_ASP_82  | OD1    | 2.627        |
| 1C12   | A_ARG_61  | NH2    | A_ASP_82  | OD2    | 3.162        |
| 1C12   | A_LYS_103 | NZ     | A_ASP_85  | OD1    | 2.711        |
| 1C12   | A_LYS_103 | NZ     | A_ASP_85  | OD2    | 3.993        |
| 1C12   | A_LYS_147 | NZ     | A_GLU_154 | OE2    | 3.218        |
| 1C12   | A_LYS_149 | NZ     | A_GLU_154 | OE1    | 3.689        |
| 1C12   | A_ARG_155 | NH1    | A_GLU_185 | OE1    | 3.418        |
| 1C12   | A_ARG_155 | NH2    | A_GLU_185 | OE1    | 3.302        |
| 1C12   | A_LYS_169 | NZ     | A_ASP_167 | OD1    | 3.892        |
| 1C12   | A_ARG_188 | NH1    | A_ASP_184 | OD1    | 3.647        |
| 1C12   | A_ARG_188 | NH1    | A_ASP_184 | OD2    | 3.352        |
| 1C12   | A_HIS_189 | ND1    | A_ASP_151 | OD2    | 3.592        |
| 1C12   | A_LYS_199 | NZ     | A_ASP_143 | OD2    | 3.366        |
| 1C12   | A_ARG_211 | NH2    | A_GLU_187 | OE2    | 3.347        |
| 1C12   | B_ARG_338 | NH1    | B_GLU_346 | OE2    | 2.575        |
| 1C12   | B_ARG_338 | NH2    | B_ASP_386 | OD1    | 2.668        |
| 1C12   | B_ARG_366 | NH1    | B_ASP_386 | OD1    | 2.858        |
| 1C12   | B_ARG_366 | NH1    | B_ASP_386 | OD2    | 3.220        |
| 1C12   | B_ARG_366 | NH2    | B_ASP_386 | OD1    | 3.966        |
| 1C12   | B_ARG_366 | NH2    | B_ASP_386 | OD2    | 2.872        |
| 1C12   | B_LYS_508 | NZ     | A_GLU_123 | OE2    | 3.314        |

Table 23: 1C12-specific salt bridging networks analysis. In this table, a PDB file is specified with a four-letter PDB ID, except that the names of the PDB files corresponding to the single NMR structural model split from the NMR ensemble is specified with a four-letter PDB ID in addition to a hyphen followed by the single NMR structural model numeric ID, the residue naming scheme is **Chain ID\_residue name\_residue number**,  $\angle ADH$  represents the angle formed by acceptor (A), donor (D) and hydrogen (H) ( $\angle ADH$ ).

| PDB ID | Residue A | Atom A | Residue B | Atom B | Distance (Å) |
|--------|-----------|--------|-----------|--------|--------------|
| 1CE1   | L_ARG_61  | NH2    | L_GLU_81  | OE1    | 3.727        |
| 1CE1   | L_ARG_61  | NH2    | L_ASP_82  | OD1    | 2.705        |
| 1CE1   | L_ARG_61  | NH2    | L_ASP_82  | OD2    | 3.700        |
| 1CE1   | L_ARG_94  | NH2    | H_GLU_61  | OE2    | 3.979        |
| 1CE1   | L_ARG_96  | NH1    | H_GLU_101 | OE1    | 2.707        |
| 1CE1   | L_ARG_96  | NH1    | H_GLU_101 | OE2    | 3.562        |
| 1CE1   | L_ARG_96  | NH2    | H_GLU_101 | OE1    | 3.509        |
| 1CE1   | L_ARG_96  | NH2    | H_GLU_101 | OE2    | 2.787        |
| 1CE1   | L_LYS_103 | NZ     | L_GLU_105 | OE1    | 3.913        |
| 1CE1   | L_LYS_149 | NZ     | L_GLU_195 | OE2    | 3.867        |
| 1CE1   | L_LYS_188 | NZ     | L_ASP_185 | OD1    | 3.892        |
| 1CE1   | H_ARG_38  | NH1    | H_ASP_92  | OD1    | 2.855        |
| 1CE1   | H_ARG_38  | NH2    | H_GLU_46  | OE1    | 2.954        |
| 1CE1   | H_ARG_38  | NH2    | H_ASP_92  | OD1    | 3.724        |
| 1CE1   | H_ARG_52  | NH1    | H_GLU_61  | OE2    | 3.297        |
| 1CE1   | H_ARG_52  | NH2    | H_GLU_61  | OE2    | 2.740        |
| 1CE1   | H_ARG_52  | NH2    | P_ASP_7   | OD1    | 3.481        |
| 1CE1   | H_LYS_56  | NZ     | P_ASP_7   | OD2    | 2.951        |
| 1CE1   | H_ARG_69  | NH1    | H_ASP_92  | OD1    | 3.674        |
| 1CE1   | H_ARG_69  | NH1    | H_ASP_92  | OD2    | 2.964        |
| 1CE1   | H_ARG_69  | NH2    | H_ASP_92  | OD1    | 2.906        |
| 1CE1   | H_ARG_69  | NH2    | H_ASP_92  | OD2    | 3.491        |
| 1CE1   | H_ARG_100 | NH2    | H_ASP_109 | OD1    | 3.721        |
| 1CE1   | H_ARG_100 | NH2    | H_ASP_109 | OD2    | 2.688        |
| 1CE1   | H_LYS_218 | NZ     | H_GLU_220 | OE2    | 3.210        |

Table 24: 1CE1-specific salt bridging networks analysis. In this table, a PDB file is specified with a four-letter PDB ID, except that the names of the PDB files corresponding to the single NMR structural model split from the NMR ensemble is specified with a four-letter PDB ID in addition to a hyphen followed by the single NMR structural model numeric ID, the residue naming scheme is **Chain ID\_residue name\_residue number**,  $\angle ADH$  represents the angle formed by acceptor (A), donor (D) and hydrogen (H) ( $\angle ADH$ ).

| PDB ID | Residue A | Atom A | Residue B | Atom B | Distance (Å) |
|--------|-----------|--------|-----------|--------|--------------|
| 1CFS   | A_ARG_61  | NH1    | A_GLU_79  | OE1    | 3.782        |
| 1CFS   | A_ARG_61  | NH1    | A_ASP_82  | OD1    | 2.689        |
| 1CFS   | A_ARG_61  | NH1    | A_ASP_82  | OD2    | 2.385        |
| 1CFS   | A_ARG_61  | NH2    | A_GLU_79  | OE1    | 3.368        |
| 1CFS   | A_LYS_147 | NZ     | A_GLU_154 | OE2    | 3.751        |
| 1CFS   | A_LYS_149 | NZ     | A_GLU_195 | OE1    | 3.919        |
| 1CFS   | A_LYS_149 | NZ     | A_GLU_195 | OE2    | 2.427        |
| 1CFS   | A_HIS_189 | ND1    | A_ASP_151 | OD2    | 3.201        |
| 1CFS   | A_LYS_199 | NZ     | A_ASP_110 | OD2    | 2.468        |
| 1CFS   | A_ARG_211 | NH2    | A_GLU_187 | OE2    | 3.817        |
| 1CFS   | B_LYS_19  | NZ     | B_GLU_82  | OE1    | 2.420        |
| 1CFS   | B_LYS_19  | NZ     | B_GLU_82  | OE2    | 3.235        |
| 1CFS   | B_HIS_35  | NE2    | B_GLU_33  | OE1    | 3.092        |
| 1CFS   | B_LYS_38  | NZ     | B_ASP_90  | OD1    | 3.977        |
| 1CFS   | B_LYS_63  | NZ     | B_GLU_46  | OE2    | 2.435        |
| 1CFS   | B_LYS_67  | NZ     | B_ASP_90  | OD2    | 3.258        |
| 1CFS   | B_ARG_98  | NH1    | B_ASP_100 | OD1    | 3.172        |
| 1CFS   | B_ARG_98  | NH1    | B_ASP_100 | OD2    | 2.621        |
| 1CFS   | B_LYS_99  | NZ     | B_GLU_33  | OE1    | 3.391        |
| 1CFS   | B_LYS_207 | NZ     | A_GLU_123 | OE1    | 3.526        |
| 1CFS   | B_ARG_212 | NH2    | B_GLU_210 | OE1    | 3.742        |

Table 25: 1CFS-specific salt bridging networks analysis. In this table, a PDB file is specified with a four-letter PDB ID, except that the names of the PDB files corresponding to the single NMR structural model split from the NMR ensemble is specified with a four-letter PDB ID in addition to a hyphen followed by the single NMR structural model numeric ID, the residue naming scheme is **Chain ID\_residue name\_residue number**,  $\angle ADH$  represents the angle formed by acceptor (A), donor (D) and hydrogen (H) ( $\angle ADH$ ).

| PDB ID | Residue A | Atom A | Residue B | Atom B | Distance (Å) |
|--------|-----------|--------|-----------|--------|--------------|
| 1CFT   | A_ARG.61  | NH1    | A_GLU.79  | OE1    | 3.018        |
| 1CFT   | A_ARG.61  | NH1    | A_GLU.79  | OE2    | 2.933        |
| 1CFT   | A_ARG.61  | NH1    | A_ASP.82  | OD1    | 3.900        |
| 1CFT   | A_ARG.61  | NH1    | A_ASP.82  | OD2    | 3.509        |
| 1CFT   | A_ARG.61  | NH2    | A_ASP.82  | OD1    | 3.453        |
| 1CFT   | A_LYS.103 | NZ     | A_ASP.105 | OD1    | 3.879        |
| 1CFT   | A_LYS.103 | NZ     | A_ASP.105 | OD2    | 3.379        |
| 1CFT   | A_LYS.149 | NZ     | A_GLU.195 | OE1    | 3.740        |
| 1CFT   | A_LYS.149 | NZ     | A_GLU.195 | OE2    | 2.938        |
| 1CFT   | A_ARG.155 | NH1    | A_GLU.185 | OE2    | 3.873        |
| 1CFT   | A_ARG.155 | NH2    | A_GLU.185 | OE1    | 3.494        |
| 1CFT   | A_ARG.155 | NH2    | A_GLU.185 | OE2    | 2.450        |
| 1CFT   | A_LYS.183 | NZ     | A_GLU.187 | OE1    | 3.152        |
| 1CFT   | A_LYS.183 | NZ     | A_GLU.187 | OE2    | 3.103        |
| 1CFT   | A_HIS.189 | ND1    | A_ASP.151 | OD2    | 2.935        |
| 1CFT   | B_HIS.35  | NE2    | B_GLU.33  | OE1    | 2.890        |
| 1CFT   | B_LYS.38  | NZ     | B_ASP.90  | OD1    | 3.646        |
| 1CFT   | B_LYS.63  | NZ     | B_GLU.46  | OE1    | 3.173        |
| 1CFT   | B_LYS.63  | NZ     | B_GLU.46  | OE2    | 3.453        |
| 1CFT   | B_LYS.67  | NZ     | B_ASP.90  | OD1    | 3.866        |
| 1CFT   | B_LYS.67  | NZ     | B_ASP.90  | OD2    | 2.897        |
| 1CFT   | B_ARG.98  | NH2    | B_ASP.100 | OD1    | 3.436        |
| 1CFT   | B_ARG.98  | NH2    | B_ASP.100 | OD2    | 2.735        |
| 1CFT   | B_LYS.99  | NZ     | B_GLU.33  | OE1    | 2.555        |
| 1CFT   | B_LYS.204 | NZ     | B_ASP.206 | OD2    | 3.553        |
| 1CFT   | B_LYS.207 | NZ     | A_GLU.123 | OE1    | 2.550        |
| 1CFT   | B_LYS.208 | NZ     | B_GLU.210 | OE2    | 2.675        |
| 1CFT   | C_LYS.2   | NZ     | A_ASP.92  | OD1    | 2.682        |

Table 26: 1CFT-specific salt bridging networks analysis. In this table, a PDB file is specified with a four-letter PDB ID, except that the names of the PDB files corresponding to the single NMR structural model split from the NMR ensemble is specified with a four-letter PDB ID in addition to a hyphen followed by the single NMR structural model numeric ID, the residue naming scheme is **Chain ID\_residue name\_residue number**,  $\angle ADH$  represents the angle formed by acceptor (A), donor (D) and hydrogen (H) ( $\angle ADH$ ).

| PDB ID | Residue A | Atom A | Residue B | Atom B | Distance (Å) |
|--------|-----------|--------|-----------|--------|--------------|
| 1CG9   | A_HIS_3   | ND1    | A_ASP_29  | OD2    | 2.918        |
| 1CG9   | A_ARG_6   | NH1    | A_ASP_102 | OD1    | 3.165        |
| 1CG9   | A_ARG_6   | NH2    | A_ASP_102 | OD1    | 2.958        |
| 1CG9   | A_ARG_6   | NH2    | A_ASP_102 | OD2    | 3.809        |
| 1CG9   | A_ARG_14  | NH1    | A_ASP_39  | OD1    | 3.895        |
| 1CG9   | A_ARG_14  | NH1    | A_ASP_39  | OD2    | 3.383        |
| 1CG9   | A_ARG_14  | NH2    | A_ASP_39  | OD1    | 2.876        |
| 1CG9   | A_ARG_14  | NH2    | A_ASP_39  | OD2    | 3.696        |
| 1CG9   | A_ARG_17  | NH1    | B_ASP_35  | OD2    | 3.201        |
| 1CG9   | A_ARG_17  | NH2    | B_ASP_35  | OD1    | 3.038        |
| 1CG9   | A_ARG_17  | NH2    | B_ASP_35  | OD2    | 3.401        |
| 1CG9   | A_ARG_21  | NH2    | A_ASP_37  | OD1    | 3.415        |
| 1CG9   | A_ARG_21  | NH2    | A_ASP_37  | OD2    | 2.852        |
| 1CG9   | A_ARG_35  | NH1    | A_GLU_46  | OE1    | 3.005        |
| 1CG9   | A_ARG_35  | NH1    | A_GLU_46  | OE2    | 3.637        |
| 1CG9   | A_ARG_35  | NH2    | A_ASP_37  | OD2    | 3.660        |
| 1CG9   | A_ARG_44  | NH2    | A_GLU_46  | OE2    | 3.936        |
| 1CG9   | A_ARG_48  | NH1    | A_GLU_46  | OE1    | 3.350        |
| 1CG9   | A_ARG_48  | NH2    | A_GLU_46  | OE1    | 3.509        |
| 1CG9   | A_ARG_48  | NH2    | B_ASP_54  | OD1    | 3.456        |
| 1CG9   | A_ARG_48  | NH2    | B_ASP_54  | OD2    | 3.762        |
| 1CG9   | A_ARG_82  | NH1    | A_GLU_89  | OE1    | 2.878        |
| 1CG9   | A_ARG_82  | NH1    | A_GLU_89  | OE2    | 2.767        |
| 1CG9   | A_HIS_93  | ND1    | A_ASP_119 | OD1    | 3.615        |
| 1CG9   | A_HIS_93  | ND1    | A_ASP_119 | OD2    | 2.882        |
| 1CG9   | A_ARG_111 | NH2    | A_ASP_102 | OD2    | 3.428        |
| 1CG9   | A_HIS_113 | NE2    | A_ASP_102 | OD2    | 2.935        |
| 1CG9   | A_ARG_151 | NH2    | A_GLU_154 | OE1    | 3.687        |
| 1CG9   | A_ARG_151 | NH2    | A_GLU_154 | OE2    | 3.160        |
| 1CG9   | A_ARG_169 | NH2    | A_GLU_166 | OE1    | 3.233        |
| 1CG9   | A_ARG_170 | NH2    | A_GLU_166 | OE2    | 3.714        |
| 1CG9   | A_HIS_191 | NE2    | A_GLU_254 | OE1    | 3.499        |
| 1CG9   | A_HIS_191 | NE2    | A_GLU_254 | OE2    | 3.158        |
| 1CG9   | A_HIS_192 | ND1    | B_ASP_99  | OD2    | 3.812        |
| 1CG9   | A_ARG_256 | NH1    | A_ASP_220 | OD2    | 2.755        |
| 1CG9   | A_ARG_256 | NH2    | A_GLU_253 | OE1    | 2.835        |
| 1CG9   | B_LYS_7   | NZ     | A_GLU_232 | OE1    | 3.887        |
| 1CG9   | B_ARG_46  | NH1    | B_GLU_48  | OE2    | 3.451        |
| 1CG9   | B_ARG_82  | NH2    | B_ASP_39  | OD2    | 3.296        |

Table 27: 1CG9-specific salt bridging networks analysis. In this table, a PDB file is specified with a four-letter PDB ID, except that the names of the PDB files corresponding to the single NMR structural model split from the NMR ensemble is specified with a four-letter PDB ID in addition to a hyphen followed by the single NMR structural model numeric ID, the residue naming scheme is **Chain ID\_residue name\_residue number**,  $\angle ADH$  represents the angle formed by acceptor (A), donor (D) and hydrogen (H) ( $\angle ADH$ ).

| PDB ID | Residue A | Atom A | Residue B | Atom B | Distance (Å) |
|--------|-----------|--------|-----------|--------|--------------|
| 1CLO   | L_ARG_61  | NH2    | L_GLU_81  | OE2    | 3.507        |
| 1CLO   | L_ARG_61  | NH2    | L_ASP_82  | OD1    | 2.686        |
| 1CLO   | L_ARG_61  | NH2    | L_ASP_82  | OD2    | 3.628        |
| 1CLO   | L_LYS_107 | NZ     | L_GLU_17  | OE2    | 3.193        |
| 1CLO   | L_LYS_147 | NZ     | L_GLU_154 | OE1    | 2.893        |
| 1CLO   | L_LYS_149 | NZ     | L_GLU_195 | OE1    | 2.730        |
| 1CLO   | L_LYS_183 | NZ     | L_GLU_187 | OE1    | 3.637        |
| 1CLO   | L_ARG_188 | NH2    | L_ASP_184 | OD2    | 3.790        |
| 1CLO   | L_HIS_189 | ND1    | L_ASP_151 | OD2    | 3.698        |
| 1CLO   | L_HIS_189 | NE2    | L_GLU_185 | OE1    | 3.878        |
| 1CLO   | L_HIS_189 | NE2    | L_GLU_185 | OE2    | 3.586        |
| 1CLO   | L_LYS_199 | NZ     | L_ASP_110 | OD1    | 3.988        |
| 1CLO   | H_ARG_38  | NH1    | H_ASP_86  | OD1    | 2.756        |
| 1CLO   | H_ARG_38  | NH2    | H_GLU_46  | OE1    | 3.383        |
| 1CLO   | H_ARG_38  | NH2    | H_GLU_46  | OE2    | 3.812        |
| 1CLO   | H_ARG_38  | NH2    | H_ASP_86  | OD1    | 3.644        |
| 1CLO   | H_ARG_66  | NH1    | H_ASP_86  | OD1    | 3.875        |
| 1CLO   | H_ARG_66  | NH1    | H_ASP_86  | OD2    | 3.046        |
| 1CLO   | H_ARG_66  | NH2    | H_ASP_86  | OD1    | 2.884        |
| 1CLO   | H_ARG_66  | NH2    | H_ASP_86  | OD2    | 3.391        |
| 1CLO   | H_ARG_94  | NH2    | H_ASP_101 | OD1    | 3.855        |
| 1CLO   | H_ARG_94  | NH2    | H_ASP_101 | OD2    | 2.771        |
| 1CLO   | H_ARG_99  | NH2    | H_GLU_58  | OE1    | 2.867        |
| 1CLO   | H_ARG_99  | NH2    | H_GLU_58  | OE2    | 3.927        |

Table 28: 1CLO-specific salt bridging networks analysis. In this table, a PDB file is specified with a four-letter PDB ID, except that the names of the PDB files corresponding to the single NMR structural model split from the NMR ensemble is specified with a four-letter PDB ID in addition to a hyphen followed by the single NMR structural model numeric ID, the residue naming scheme is **Chain ID\_residue name\_residue number**,  $\angle ADH$  represents the angle formed by acceptor (A), donor (D) and hydrogen (H) ( $\angle ADH$ ).



| PDB ID | Residue A | Atom A | Residue B | Atom B | Distance (Å) |
|--------|-----------|--------|-----------|--------|--------------|
| 1CLY   | L_ARG_24  | NH2    | L_ASP_70  | OD1    | 3.806        |
| 1CLY   | L_ARG_24  | NH2    | L_ASP_70  | OD2    | 2.805        |
| 1CLY   | L_ARG_54  | NH2    | L_ASP_60  | OD1    | 3.787        |
| 1CLY   | L_ARG_61  | NH1    | L_ASP_82  | OD1    | 2.802        |
| 1CLY   | L_ARG_61  | NH1    | L_ASP_82  | OD2    | 3.085        |
| 1CLY   | L_LYS_188 | NZ     | L_ASP_185 | OD1    | 3.969        |
| 1CLY   | L_HIS_189 | ND1    | L_ASP_151 | OD2    | 3.439        |
| 1CLY   | H_ARG_38  | NH1    | H_ASP_86  | OD1    | 2.869        |
| 1CLY   | H_ARG_38  | NH2    | H_GLU_46  | OE1    | 3.344        |
| 1CLY   | H_ARG_38  | NH2    | H_ASP_86  | OD1    | 3.797        |
| 1CLY   | H_LYS_64  | NZ     | H_ASP_58  | OD1    | 2.930        |
| 1CLY   | H_ARG_66  | NH1    | H_ASP_86  | OD1    | 3.905        |
| 1CLY   | H_ARG_66  | NH1    | H_ASP_86  | OD2    | 2.752        |
| 1CLY   | H_ARG_66  | NH2    | H_ASP_86  | OD1    | 2.793        |
| 1CLY   | H_ARG_66  | NH2    | H_ASP_86  | OD2    | 3.024        |
| 1CLY   | H_LYS_83  | NZ     | H_GLU_85  | OE2    | 3.267        |

Table 29: 1CLY-specific salt bridging networks analysis. In this table, a PDB file is specified with a four-letter PDB ID, except that the names of the PDB files corresponding to the single NMR structural model split from the NMR ensemble is specified with a four-letter PDB ID in addition to a hyphen followed by the single NMR structural model numeric ID, the residue naming scheme is **Chain ID\_residue name\_residue number**,  $\angle ADH$  represents the angle formed by acceptor (A), donor (D) and hydrogen (H) ( $\angle ADH$ ).

| PDB ID | Residue A | Atom A | Residue B | Atom B | Distance (Å) |
|--------|-----------|--------|-----------|--------|--------------|
| 1CLZ   | L_ARG_24  | NH1    | L_ASP_70  | OD1    | 3.101        |
| 1CLZ   | L_ARG_24  | NH1    | L_ASP_70  | OD2    | 3.153        |
| 1CLZ   | L_ARG_54  | NH2    | L_ASP_60  | OD2    | 3.723        |
| 1CLZ   | L_ARG_61  | NH1    | L_GLU_81  | OE2    | 2.935        |
| 1CLZ   | L_ARG_61  | NH1    | L_ASP_82  | OD1    | 2.614        |
| 1CLZ   | L_ARG_61  | NH1    | L_ASP_82  | OD2    | 2.847        |
| 1CLZ   | L_ARG_61  | NH2    | L_GLU_81  | OE2    | 2.838        |
| 1CLZ   | L_ARG_155 | NH1    | L_GLU_195 | OE1    | 3.513        |
| 1CLZ   | L_ARG_155 | NH1    | L_GLU_195 | OE2    | 2.873        |
| 1CLZ   | L_ARG_155 | NH2    | L_GLU_195 | OE2    | 3.852        |
| 1CLZ   | L_LYS_183 | NZ     | L_ASP_184 | OD1    | 3.131        |
| 1CLZ   | L_LYS_183 | NZ     | L_ASP_184 | OD2    | 3.972        |
| 1CLZ   | L_LYS_199 | NZ     | L_ASP_110 | OD1    | 3.811        |
| 1CLZ   | L_LYS_207 | NZ     | H_ASP_130 | OD1    | 3.119        |
| 1CLZ   | L_LYS_207 | NZ     | H_ASP_130 | OD2    | 3.445        |
| 1CLZ   | H_ARG_38  | NH1    | H_GLU_85  | OE2    | 3.982        |
| 1CLZ   | H_ARG_38  | NH1    | H_ASP_86  | OD1    | 2.887        |
| 1CLZ   | H_ARG_38  | NH2    | H_GLU_46  | OE1    | 2.799        |
| 1CLZ   | H_ARG_38  | NH2    | H_GLU_46  | OE2    | 3.386        |
| 1CLZ   | H_ARG_38  | NH2    | H_GLU_85  | OE2    | 3.329        |
| 1CLZ   | H_LYS_64  | NZ     | H_ASP_61  | OD1    | 3.149        |
| 1CLZ   | H_ARG_66  | NH1    | H_ASP_86  | OD2    | 2.828        |
| 1CLZ   | H_ARG_66  | NH2    | H_ASP_86  | OD1    | 3.003        |
| 1CLZ   | H_ARG_66  | NH2    | H_ASP_86  | OD2    | 2.860        |
| 1CLZ   | H_LYS_75  | NZ     | H_ASP_72  | OD1    | 3.567        |
| 1CLZ   | H_LYS_75  | NZ     | H_ASP_72  | OD2    | 3.842        |
| 1CLZ   | H_ARG_172 | NH1    | L_ASP_170 | OD2    | 3.885        |
| 1CLZ   | H_ARG_172 | NH2    | L_ASP_170 | OD2    | 3.384        |
| 1CLZ   | H_LYS_221 | NZ     | L_GLU_123 | OE1    | 3.750        |
| 1CLZ   | H_LYS_221 | NZ     | L_GLU_123 | OE2    | 2.509        |

Table 30: 1CLZ-specific salt bridging networks analysis. In this table, a PDB file is specified with a four-letter PDB ID, except that the names of the PDB files corresponding to the single NMR structural model split from the NMR ensemble is specified with a four-letter PDB ID in addition to a hyphen followed by the single NMR structural model numeric ID, the residue naming scheme is **Chain ID\_residue name\_residue number**,  $\angle ADH$  represents the angle formed by acceptor (A), donor (D) and hydrogen (H) ( $\angle ADH$ ).

| PDB ID | Residue A | Atom A | Residue B | Atom B | Distance (Å) |
|--------|-----------|--------|-----------|--------|--------------|
| 1CS9-1 | A_ARG_5   | NH1    | A_GLU_7   | OE1    | 3.450        |
| 1CS9-1 | A_ARG_5   | NH2    | A_GLU_7   | OE1    | 3.678        |

Table 31: 1CS9-1-specific salt bridging networks analysis. In this table, a PDB file is specified with a four-letter PDB ID, except that the names of the PDB files corresponding to the single NMR structural model split from the NMR ensemble is specified with a four-letter PDB ID in addition to a hyphen followed by the single NMR structural model numeric ID, the residue naming scheme is **Chain ID\_residue name\_residue number**,  $\angle ADH$  represents the angle formed by acceptor (A), donor (D) and hydrogen (H) ( $\angle ADH$ ).

| PDB ID | Residue A | Atom A | Residue B | Atom B | Distance (Å) |
|--------|-----------|--------|-----------|--------|--------------|
| 1CS9-3 | A_ARG_5   | NH1    | A_GLU_7   | OE2    | 3.468        |
| 1CS9-3 | A_ARG_5   | NH2    | A_GLU_7   | OE1    | 3.563        |
| 1CS9-3 | A_ARG_5   | NH2    | A_GLU_7   | OE2    | 3.412        |

Table 32: 1CS9-3-specific salt bridging networks analysis. In this table, a PDB file is specified with a four-letter PDB ID, except that the names of the PDB files corresponding to the single NMR structural model split from the NMR ensemble is specified with a four-letter PDB ID in addition to a hyphen followed by the single NMR structural model numeric ID, the residue naming scheme is **Chain ID\_residue name\_residue number**,  $\angle ADH$  represents the angle formed by acceptor (A), donor (D) and hydrogen (H) ( $\angle ADH$ ).

| PDB ID | Residue A | Atom A | Residue B | Atom B | Distance (Å) |
|--------|-----------|--------|-----------|--------|--------------|
| 1CS9-6 | A_ARG_5   | NH2    | A_GLU_7   | OE1    | 3.965        |
| 1CS9-6 | A_ARG_5   | NH2    | A_GLU_7   | OE2    | 3.461        |

Table 33: 1CS9-6-specific salt bridging networks analysis. In this table, a PDB file is specified with a four-letter PDB ID, except that the names of the PDB files corresponding to the single NMR structural model split from the NMR ensemble is specified with a four-letter PDB ID in addition to a hyphen followed by the single NMR structural model numeric ID, the residue naming scheme is **Chain ID\_residue name\_residue number**,  $\angle ADH$  represents the angle formed by acceptor (A), donor (D) and hydrogen (H) ( $\angle ADH$ ).

| PDB ID | Residue A | Atom A | Residue B | Atom B | Distance (Å) |
|--------|-----------|--------|-----------|--------|--------------|
| 1CT6-1 | A_ARG_5   | NH2    | A_GLU_7   | OE2    | 3.406        |

Table 34: 1CT6-1-specific salt bridging networks analysis. In this table, a PDB file is specified with a four-letter PDB ID, except that the names of the PDB files corresponding to the single NMR structural model split from the NMR ensemble is specified with a four-letter PDB ID in addition to a hyphen followed by the single NMR structural model numeric ID, the residue naming scheme is **Chain ID\_residue name\_residue number**,  $\angle ADH$  represents the angle formed by acceptor (A), donor (D) and hydrogen (H) ( $\angle ADH$ ).

| PDB ID | Residue A | Atom A | Residue B | Atom B | Distance (Å) |
|--------|-----------|--------|-----------|--------|--------------|
| 1CT6-7 | A_ARG_5   | NH1    | A_GLU_7   | OE1    | 3.406        |
| 1CT6-7 | A_ARG_5   | NH2    | A_GLU_7   | OE1    | 3.280        |

Table 35: 1CT6-7-specific salt bridging networks analysis. In this table, a PDB file is specified with a four-letter PDB ID, except that the names of the PDB files corresponding to the single NMR structural model split from the NMR ensemble is specified with a four-letter PDB ID in addition to a hyphen followed by the single NMR structural model numeric ID, the residue naming scheme is **Chain ID\_residue name\_residue number**,  $\angle ADH$  represents the angle formed by acceptor (A), donor (D) and hydrogen (H) ( $\angle ADH$ ).

| PDB ID | Residue A | Atom A | Residue B | Atom B | Distance (Å) |
|--------|-----------|--------|-----------|--------|--------------|
| 1CZ8   | V_ARG_23  | NH1    | W_GLU_30  | OE1    | 3.162        |
| 1CZ8   | V_ARG_23  | NH1    | W_GLU_30  | OE2    | 3.558        |
| 1CZ8   | V_ARG_56  | NH1    | V_GLU_38  | OE1    | 2.977        |
| 1CZ8   | V_ARG_56  | NH1    | V_GLU_38  | OE2    | 3.581        |
| 1CZ8   | V_ARG_56  | NH2    | V_GLU_38  | OE1    | 3.435        |
| 1CZ8   | V_ARG_82  | NH1    | V_GLU_42  | OE1    | 3.541        |
| 1CZ8   | V_ARG_82  | NH1    | V_GLU_42  | OE2    | 3.530        |
| 1CZ8   | V_ARG_82  | NH2    | V_GLU_42  | OE1    | 2.378        |
| 1CZ8   | V_ARG_82  | NH2    | V_GLU_42  | OE2    | 3.778        |
| 1CZ8   | V_LYS_84  | NZ     | V_GLU_44  | OE1    | 3.578        |
| 1CZ8   | V_HIS_99  | NE2    | V_GLU_73  | OE2    | 3.799        |
| 1CZ8   | W_ARG_23  | NH1    | V_GLU_30  | OE1    | 3.011        |
| 1CZ8   | W_ARG_23  | NH1    | V_GLU_30  | OE2    | 3.663        |
| 1CZ8   | W_ARG_56  | NH1    | W_GLU_38  | OE1    | 3.539        |
| 1CZ8   | W_ARG_56  | NH2    | W_GLU_38  | OE1    | 2.665        |
| 1CZ8   | W_ARG_82  | NH1    | W_GLU_42  | OE1    | 3.515        |
| 1CZ8   | W_ARG_82  | NH1    | W_GLU_42  | OE2    | 3.352        |
| 1CZ8   | W_ARG_82  | NH2    | W_GLU_42  | OE1    | 2.236        |
| 1CZ8   | W_ARG_82  | NH2    | W_GLU_42  | OE2    | 3.471        |
| 1CZ8   | W_LYS_84  | NZ     | W_GLU_44  | OE1    | 3.728        |
| 1CZ8   | W_HIS_99  | NE2    | W_GLU_73  | OE2    | 3.726        |
| 1CZ8   | W_ARG_105 | NH1    | W_GLU_103 | OE1    | 3.814        |
| 1CZ8   | W_ARG_105 | NH2    | W_GLU_103 | OE1    | 3.500        |
| 1CZ8   | L_ARG_61  | NH2    | L_GLU_81  | OE1    | 3.328        |
| 1CZ8   | L_ARG_61  | NH2    | L_ASP_82  | OD1    | 3.668        |
| 1CZ8   | L_ARG_61  | NH2    | L_ASP_82  | OD2    | 2.923        |
| 1CZ8   | L_LYS_103 | NZ     | L_GLU_165 | OE1    | 3.942        |
| 1CZ8   | L_LYS_103 | NZ     | L_GLU_165 | OE2    | 3.656        |
| 1CZ8   | L_ARG_142 | NH1    | L_GLU_105 | OE1    | 3.981        |
| 1CZ8   | L_ARG_142 | NH2    | L_GLU_105 | OE1    | 2.514        |
| 1CZ8   | L_LYS_188 | NZ     | L_ASP_185 | OD1    | 3.914        |
| 1CZ8   | H_HIS_31  | NE2    | H_ASP_28  | OD1    | 3.613        |
| 1CZ8   | H_HIS_31  | NE2    | H_ASP_28  | OD2    | 3.218        |
| 1CZ8   | H_ARG_38  | NH1    | H_ASP_90  | OD1    | 2.960        |
| 1CZ8   | H_ARG_38  | NH2    | H_GLU_46  | OE2    | 3.234        |
| 1CZ8   | H_ARG_67  | NH1    | H_ASP_90  | OD1    | 3.710        |
| 1CZ8   | H_ARG_67  | NH1    | H_ASP_90  | OD2    | 2.499        |
| 1CZ8   | H_ARG_67  | NH2    | H_ASP_90  | OD1    | 2.930        |
| 1CZ8   | H_ARG_67  | NH2    | H_ASP_90  | OD2    | 3.145        |
| 1CZ8   | H_ARG_87  | NH1    | H_GLU_89  | OE2    | 3.671        |
| 1CZ8   | H_LYS_98  | NZ     | H_ASP_111 | OD1    | 3.604        |
| 1CZ8   | H_LYS_153 | NZ     | H_ASP_154 | OD1    | 3.169        |
| 1CZ8   | H_LYS_153 | NZ     | H_ASP_154 | OD2    | 3.317        |
| 1CZ8   | H_LYS_219 | NZ     | L_GLU_123 | OE1    | 3.027        |
| 1CZ8   | H_LYS_224 | NZ     | L_ASP_122 | OD1    | 2.846        |
| 1CZ8   | H_LYS_224 | NZ     | L_ASP_122 | OD2    | 3.185        |
| 1CZ8   | X_ARG_61  | NH2    | X_GLU_81  | OE1    | 2.956        |
| 1CZ8   | X_ARG_61  | NH2    | X_ASP_82  | OD1    | 3.979        |
| 1CZ8   | X_ARG_61  | NH2    | X_ASP_82  | OD2    | 3.064        |
| 1CZ8   | X_LYS_103 | NZ     | X_GLU_165 | OE1    | 3.796        |
| 1CZ8   | X_LYS_103 | NZ     | X_GLU_165 | OE2    | 3.476        |
| 1CZ8   | X_LYS_183 | NZ     | X_GLU_187 | OE1    | 3.233        |
| 1CZ8   | X_HIS_189 | ND1    | X_ASP_151 | OD2    | 2.531        |
| 1CZ8   | X_ARG_211 | NH1    | X_GLU_187 | OE2    | 3.961        |
| 1CZ8   | X_ARG_211 | NH2    | X_GLU_187 | OE2    | 3.336        |
| 1CZ8   | Y_HIS_31  | NE2    | Y_ASP_28  | OD2    | 2.704        |
| 1CZ8   | Y_ARG_38  | NH1    | Y_ASP_90  | OD1    | 2.984        |



|      |           |     |           |     |       |
|------|-----------|-----|-----------|-----|-------|
| 1CZ8 | Y_ARG_38  | NH2 | Y_GLU_46  | OE2 | 3.050 |
| 1CZ8 | Y_ARG_67  | NH1 | Y_ASP_90  | OD1 | 3.758 |
| 1CZ8 | Y_ARG_67  | NH1 | Y_ASP_90  | OD2 | 2.753 |
| 1CZ8 | Y_ARG_67  | NH2 | Y_ASP_90  | OD1 | 3.089 |
| 1CZ8 | Y_ARG_67  | NH2 | Y_ASP_90  | OD2 | 3.481 |
| 1CZ8 | Y_ARG_87  | NH1 | Y_GLU_89  | OE2 | 3.919 |
| 1CZ8 | Y_LYS_98  | NZ  | Y_ASP_111 | OD1 | 3.728 |
| 1CZ8 | Y_LYS_153 | NZ  | Y_ASP_154 | OD1 | 3.924 |
| 1CZ8 | Y_LYS_219 | NZ  | X_GLU_123 | OE2 | 3.832 |

Table 36: 1CZ8-specific salt bridging networks analysis. In this table, a PDB file is specified with a four-letter PDB ID, except that the names of the PDB files corresponding to the single NMR structural model split from the NMR ensemble is specified with a four-letter PDB ID in addition to a hyphen followed by the single NMR structural model numeric ID, the residue naming scheme is **Chain ID\_residue name\_residue number**,  $\angle ADH$  represents the angle formed by acceptor (A), donor (D) and hydrogen (H) ( $\angle ADH$ ).

| PDB ID | Residue A | Atom A | Residue B | Atom B | Distance (Å) |
|--------|-----------|--------|-----------|--------|--------------|
| 1DBJ   | L_ARG_61  | NH1    | L_ASP_82  | OD1    | 2.891        |
| 1DBJ   | L_ARG_61  | NH1    | L_ASP_82  | OD2    | 2.924        |
| 1DBJ   | L_LYS_149 | NZ     | L_GLU_195 | OE2    | 2.903        |
| 1DBJ   | L_ARG_155 | NH2    | L_GLU_185 | OE1    | 3.640        |
| 1DBJ   | L_LYS_183 | NZ     | L_GLU_187 | OE1    | 3.039        |
| 1DBJ   | L_LYS_183 | NZ     | L_GLU_187 | OE2    | 3.038        |
| 1DBJ   | L_ARG_188 | NH1    | L_GLU_185 | OE1    | 2.980        |
| 1DBJ   | L_ARG_188 | NH1    | L_GLU_185 | OE2    | 3.840        |
| 1DBJ   | L_HIS_189 | ND1    | L_ASP_151 | OD1    | 3.098        |
| 1DBJ   | L_HIS_189 | ND1    | L_ASP_151 | OD2    | 3.952        |
| 1DBJ   | L_HIS_189 | NE2    | L_GLU_185 | OE2    | 3.171        |
| 1DBJ   | H_LYS_13  | NZ     | H_GLU_16  | OE1    | 3.105        |
| 1DBJ   | H_LYS_46  | NZ     | H_ASP_62  | OD2    | 3.771        |
| 1DBJ   | H_ARG_66  | NH1    | H_ASP_86  | OD2    | 2.961        |
| 1DBJ   | H_ARG_66  | NH2    | H_ASP_86  | OD1    | 3.477        |
| 1DBJ   | H_ARG_66  | NH2    | H_ASP_86  | OD2    | 3.338        |
| 1DBJ   | H_LYS_83  | NZ     | H_GLU_85  | OE1    | 3.571        |
| 1DBJ   | H_LYS_83  | NZ     | H_GLU_85  | OE2    | 3.324        |
| 1DBJ   | H_ARG_94  | NH2    | H_ASP_101 | OD1    | 3.264        |
| 1DBJ   | H_ARG_94  | NH2    | H_ASP_101 | OD2    | 2.951        |
| 1DBJ   | H_LYS_221 | NZ     | L_GLU_123 | OE1    | 3.386        |
| 1DBJ   | H_LYS_221 | NZ     | L_GLU_123 | OE2    | 2.770        |

Table 37: 1DBJ-specific salt bridging networks analysis. In this table, a PDB file is specified with a four-letter PDB ID, except that the names of the PDB files corresponding to the single NMR structural model split from the NMR ensemble is specified with a four-letter PDB ID in addition to a hyphen followed by the single NMR structural model numeric ID, the residue naming scheme is **Chain ID\_residue name\_residue number**,  $\angle ADH$  represents the angle formed by acceptor (A), donor (D) and hydrogen (H) ( $\angle ADH$ ).

| PDB ID | Residue A | Atom A | Residue B | Atom B | Distance (Å) |
|--------|-----------|--------|-----------|--------|--------------|
| 1DBK   | L_LYS_39  | NZ     | L_GLU_81  | OE2    | 2.712        |
| 1DBK   | L_ARG_61  | NH1    | L_ASP_82  | OD1    | 2.915        |
| 1DBK   | L_ARG_61  | NH1    | L_ASP_82  | OD2    | 2.731        |
| 1DBK   | L_ARG_61  | NH2    | L_GLU_79  | OE1    | 3.019        |
| 1DBK   | L_ARG_61  | NH2    | L_ASP_82  | OD1    | 2.792        |
| 1DBK   | L_ARG_61  | NH2    | L_ASP_82  | OD2    | 3.954        |
| 1DBK   | L_LYS_149 | NZ     | L_GLU_195 | OE1    | 3.811        |
| 1DBK   | L_LYS_149 | NZ     | L_GLU_195 | OE2    | 3.034        |
| 1DBK   | L_ARG_155 | NH2    | L_GLU_185 | OE2    | 2.794        |
| 1DBK   | L_LYS_169 | NZ     | L_ASP_167 | OD1    | 2.955        |
| 1DBK   | L_LYS_169 | NZ     | L_ASP_167 | OD2    | 3.539        |
| 1DBK   | L_HIS_189 | ND1    | L_ASP_151 | OD1    | 3.187        |
| 1DBK   | L_HIS_189 | NE2    | L_GLU_185 | OE1    | 3.126        |
| 1DBK   | L_HIS_189 | NE2    | L_GLU_185 | OE2    | 3.082        |
| 1DBK   | H_LYS_12  | NZ     | H_GLU_16  | OE2    | 3.384        |
| 1DBK   | H_LYS_46  | NZ     | H_ASP_62  | OD2    | 3.857        |
| 1DBK   | H_ARG_66  | NH1    | H_ASP_86  | OD1    | 3.550        |
| 1DBK   | H_ARG_66  | NH2    | H_ASP_86  | OD1    | 3.122        |
| 1DBK   | H_ARG_66  | NH2    | H_ASP_86  | OD2    | 2.683        |
| 1DBK   | H_ARG_94  | NH2    | H_ASP_101 | OD2    | 3.605        |
| 1DBK   | H_HIS_172 | ND1    | L_ASP_167 | OD2    | 3.619        |
| 1DBK   | H_LYS_221 | NZ     | L_GLU_123 | OE2    | 3.030        |

Table 38: 1DBK-specific salt bridging networks analysis. In this table, a PDB file is specified with a four-letter PDB ID, except that the names of the PDB files corresponding to the single NMR structural model split from the NMR ensemble is specified with a four-letter PDB ID in addition to a hyphen followed by the single NMR structural model numeric ID, the residue naming scheme is **Chain ID\_residue name\_residue number**,  $\angle ADH$  represents the angle formed by acceptor (A), donor (D) and hydrogen (H) ( $\angle ADH$ ).

| PDB ID | Residue A | Atom A | Residue B | Atom B | Distance (Å) |
|--------|-----------|--------|-----------|--------|--------------|
| 1DBM   | L_ARG_61  | NH1    | L_ASP_82  | OD1    | 2.913        |
| 1DBM   | L_ARG_61  | NH1    | L_ASP_82  | OD2    | 3.927        |
| 1DBM   | L_LYS_103 | NZ     | L_GLU_105 | OE1    | 2.993        |
| 1DBM   | L_LYS_142 | NZ     | L_GLU_105 | OE1    | 2.864        |
| 1DBM   | L_LYS_147 | NZ     | L_GLU_154 | OE2    | 3.864        |
| 1DBM   | L_LYS_149 | NZ     | L_GLU_195 | OE1    | 3.140        |
| 1DBM   | L_LYS_149 | NZ     | L_GLU_195 | OE2    | 3.919        |
| 1DBM   | L_ARG_155 | NH2    | L_GLU_185 | OE2    | 2.959        |
| 1DBM   | L_LYS_183 | NZ     | L_GLU_187 | OE1    | 3.017        |
| 1DBM   | L_LYS_183 | NZ     | L_GLU_187 | OE2    | 2.825        |
| 1DBM   | L_HIS_189 | ND1    | L_ASP_151 | OD1    | 3.307        |
| 1DBM   | L_HIS_189 | ND1    | L_ASP_151 | OD2    | 3.881        |
| 1DBM   | L_HIS_189 | NE2    | L_ASP_151 | OD1    | 3.334        |
| 1DBM   | L_HIS_189 | NE2    | L_ASP_151 | OD2    | 2.747        |
| 1DBM   | L_LYS_199 | NZ     | L_ASP_110 | OD1    | 3.963        |
| 1DBM   | L_LYS_199 | NZ     | L_ASP_110 | OD2    | 3.388        |
| 1DBM   | H_LYS_12  | NZ     | H_GLU_16  | OE1    | 3.842        |
| 1DBM   | H_LYS_46  | NZ     | H_ASP_62  | OD1    | 3.760        |
| 1DBM   | H_LYS_46  | NZ     | H_ASP_62  | OD2    | 2.943        |
| 1DBM   | H_ARG_66  | NH2    | H_ASP_86  | OD1    | 2.873        |
| 1DBM   | H_ARG_66  | NH2    | H_ASP_86  | OD2    | 2.647        |
| 1DBM   | H_ARG_94  | NH1    | H_ASP_101 | OD1    | 3.264        |
| 1DBM   | H_ARG_94  | NH1    | H_ASP_101 | OD2    | 2.957        |
| 1DBM   | H_LYS_218 | NZ     | H_ASP_220 | OD1    | 2.773        |
| 1DBM   | H_LYS_218 | NZ     | H_ASP_220 | OD2    | 3.444        |
| 1DBM   | H_LYS_221 | NZ     | L_GLU_123 | OE2    | 3.277        |

Table 39: 1DBM-specific salt bridging networks analysis. In this table, a PDB file is specified with a four-letter PDB ID, except that the names of the PDB files corresponding to the single NMR structural model split from the NMR ensemble is specified with a four-letter PDB ID in addition to a hyphen followed by the single NMR structural model numeric ID, the residue naming scheme is **Chain ID\_residue name\_residue number**,  $\angle ADH$  represents the angle formed by acceptor (A), donor (D) and hydrogen (H) ( $\angle ADH$ ).

| PDB ID | Residue A  | Atom A | Residue B  | Atom B | Distance (Å) |
|--------|------------|--------|------------|--------|--------------|
| 1DEE   | A_ARG_24   | NH1    | D_GLU_1555 | OE1    | 3.510        |
| 1DEE   | A_ARG_24   | NH2    | A_ASP_70   | OD2    | 3.825        |
| 1DEE   | A_ARG_61   | NH1    | A_GLU_81   | OE2    | 3.998        |
| 1DEE   | A_ARG_61   | NH2    | A_GLU_81   | OE2    | 3.015        |
| 1DEE   | A_ARG_61   | NH2    | A_ASP_82   | OD1    | 2.929        |
| 1DEE   | A_ARG_61   | NH2    | A_ASP_82   | OD2    | 3.738        |
| 1DEE   | A_ARG_142  | NH1    | A_GLU_105  | OE2    | 3.645        |
| 1DEE   | A_ARG_142  | NH2    | A_GLU_105  | OE2    | 3.806        |
| 1DEE   | A_LYS_149  | NZ     | A_GLU_195  | OE1    | 3.119        |
| 1DEE   | A_LYS_183  | NZ     | A_GLU_187  | OE1    | 3.333        |
| 1DEE   | A_LYS_183  | NZ     | A_GLU_187  | OE2    | 3.384        |
| 1DEE   | A_HIS_189  | ND1    | A_ASP_151  | OD2    | 3.212        |
| 1DEE   | B_ARG_538  | NH1    | B_ASP_590  | OD1    | 2.876        |
| 1DEE   | B_ARG_538  | NH2    | B_GLU_546  | OE1    | 3.449        |
| 1DEE   | B_ARG_538  | NH2    | B_ASP_590  | OD1    | 3.533        |
| 1DEE   | B_ARG_567  | NH1    | B_ASP_590  | OD1    | 3.757        |
| 1DEE   | B_ARG_567  | NH1    | B_ASP_590  | OD2    | 2.653        |
| 1DEE   | B_ARG_567  | NH2    | B_ASP_590  | OD1    | 2.770        |
| 1DEE   | B_ARG_567  | NH2    | B_ASP_590  | OD2    | 3.245        |
| 1DEE   | B_ARG_587  | NH2    | B_GLU_589  | OE2    | 3.287        |
| 1DEE   | B_ARG_587  | NH2    | B_ASP_590  | OD1    | 3.980        |
| 1DEE   | B_LYS_598  | NZ     | B_ASP_609  | OD1    | 3.328        |
| 1DEE   | B_LYS_598  | NZ     | B_ASP_609  | OD2    | 2.849        |
| 1DEE   | B_LYS_663  | NZ     | B_ASP_669  | OD1    | 2.882        |
| 1DEE   | B_LYS_663  | NZ     | B_ASP_669  | OD2    | 3.035        |
| 1DEE   | B_LYS_665  | NZ     | B_GLU_704  | OE1    | 2.806        |
| 1DEE   | B_LYS_665  | NZ     | B_GLU_704  | OE2    | 3.764        |
| 1DEE   | B_ARG_674  | NH1    | A_ASP_167  | OD2    | 3.579        |
| 1DEE   | B_LYS_684  | NZ     | B_ASP_652  | OD2    | 3.529        |
| 1DEE   | B_HIS_705  | NE2    | B_ASP_720  | OD2    | 3.635        |
| 1DEE   | B_LYS_719  | NZ     | A_GLU_123  | OE1    | 2.730        |
| 1DEE   | B_LYS_719  | NZ     | A_GLU_123  | OE2    | 3.113        |
| 1DEE   | C_ARG_1024 | NH1    | C_ASP_1070 | OD1    | 3.035        |
| 1DEE   | C_ARG_1024 | NH1    | C_ASP_1070 | OD2    | 3.310        |
| 1DEE   | C_ARG_1061 | NH2    | C_GLU_1081 | OE2    | 3.124        |
| 1DEE   | C_ARG_1061 | NH2    | C_ASP_1082 | OD1    | 2.857        |
| 1DEE   | C_ARG_1061 | NH2    | C_ASP_1082 | OD2    | 3.774        |
| 1DEE   | C_LYS_1103 | NZ     | C_GLU_1165 | OE1    | 3.566        |
| 1DEE   | C_LYS_1103 | NZ     | C_GLU_1165 | OE2    | 2.924        |
| 1DEE   | C_LYS_1107 | NZ     | C_ASP_1017 | OD2    | 3.997        |
| 1DEE   | C_LYS_1149 | NZ     | C_GLU_1195 | OE1    | 3.072        |
| 1DEE   | C_LYS_1183 | NZ     | C_GLU_1187 | OE2    | 3.540        |
| 1DEE   | C_LYS_1188 | NZ     | C_ASP_1185 | OD2    | 3.897        |
| 1DEE   | C_HIS_1189 | ND1    | C_ASP_1151 | OD2    | 2.785        |
| 1DEE   | D_ARG_1519 | NH1    | G_ASP_1834 | OD1    | 3.122        |
| 1DEE   | D_ARG_1519 | NH1    | G_ASP_1834 | OD2    | 3.064        |
| 1DEE   | D_ARG_1519 | NH2    | G_ASP_1834 | OD1    | 3.684        |
| 1DEE   | D_ARG_1519 | NH2    | G_ASP_1834 | OD2    | 2.875        |
| 1DEE   | D_ARG_1538 | NH1    | D_ASP_1590 | OD1    | 2.724        |
| 1DEE   | D_ARG_1538 | NH2    | D_GLU_1546 | OE1    | 3.584        |
| 1DEE   | D_ARG_1538 | NH2    | D_GLU_1546 | OE2    | 3.849        |
| 1DEE   | D_ARG_1538 | NH2    | D_ASP_1590 | OD1    | 3.421        |
| 1DEE   | D_LYS_1565 | NZ     | D_ASP_1562 | OD1    | 2.918        |
| 1DEE   | D_ARG_1567 | NH1    | D_ASP_1590 | OD1    | 3.432        |
| 1DEE   | D_ARG_1567 | NH2    | D_ASP_1590 | OD1    | 2.922        |
| 1DEE   | D_ARG_1567 | NH2    | D_ASP_1590 | OD2    | 2.448        |
| 1DEE   | D_LYS_1576 | NZ     | D_ASP_1573 | OD2    | 3.953        |

|      |            |     |            |     |       |
|------|------------|-----|------------|-----|-------|
| 1DEE | D_ARG.1587 | NH1 | D_GLU.1589 | OE2 | 3.755 |
| 1DEE | D_ARG.1587 | NH2 | D_GLU.1589 | OE2 | 2.965 |
| 1DEE | D_LYS.1598 | NZ  | D_ASP.1609 | OD1 | 3.236 |
| 1DEE | D_LYS.1598 | NZ  | D_ASP.1609 | OD2 | 3.057 |
| 1DEE | D_LYS.1663 | NZ  | D_ASP.1669 | OD1 | 3.393 |
| 1DEE | D_LYS.1663 | NZ  | D_ASP.1669 | OD2 | 3.077 |
| 1DEE | D_LYS.1665 | NZ  | D_GLU.1704 | OE1 | 2.915 |
| 1DEE | D_ARG.1674 | NH1 | C_ASP.1167 | OD2 | 3.619 |
| 1DEE | D_HIS.1705 | NE2 | D_ASP.1720 | OD2 | 3.228 |
| 1DEE | D_LYS.1719 | NZ  | C_GLU.1123 | OE1 | 3.687 |
| 1DEE | D_LYS.1719 | NZ  | C_GLU.1123 | OE2 | 2.890 |
| 1DEE | E_ARG.2024 | NH1 | E_ASP.2070 | OD1 | 3.455 |
| 1DEE | E_ARG.2024 | NH1 | E_ASP.2070 | OD2 | 3.446 |
| 1DEE | E_ARG.2024 | NH2 | E_ASP.2070 | OD2 | 3.331 |
| 1DEE | E_ARG.2061 | NH2 | E_GLU.2081 | OE2 | 3.103 |
| 1DEE | E_ARG.2061 | NH2 | E_ASP.2082 | OD1 | 3.070 |
| 1DEE | E_ARG.2061 | NH2 | E_ASP.2082 | OD2 | 3.805 |
| 1DEE | E_ARG.2142 | NH1 | E_GLU.2165 | OE2 | 3.927 |
| 1DEE | E_LYS.2149 | NZ  | E_GLU.2195 | OE1 | 2.878 |
| 1DEE | E_LYS.2149 | NZ  | E_GLU.2195 | OE2 | 3.165 |
| 1DEE | E_LYS.2183 | NZ  | E_GLU.2187 | OE1 | 2.894 |
| 1DEE | E_LYS.2183 | NZ  | E_GLU.2187 | OE2 | 3.210 |
| 1DEE | E_HIS.2189 | ND1 | E_ASP.2151 | OD2 | 3.099 |
| 1DEE | F_ARG.2519 | NH1 | H_ASP.2834 | OD1 | 3.463 |
| 1DEE | F_ARG.2519 | NH1 | H_ASP.2834 | OD2 | 2.731 |
| 1DEE | F_ARG.2519 | NH2 | H_ASP.2834 | OD1 | 3.523 |
| 1DEE | F_ARG.2519 | NH2 | H_ASP.2834 | OD2 | 3.444 |
| 1DEE | F_ARG.2538 | NH1 | F_ASP.2590 | OD1 | 2.942 |
| 1DEE | F_ARG.2538 | NH2 | F_GLU.2546 | OE1 | 3.386 |
| 1DEE | F_ARG.2538 | NH2 | F_GLU.2546 | OE2 | 3.004 |
| 1DEE | F_LYS.2565 | NZ  | F_ASP.2562 | OD1 | 3.402 |
| 1DEE | F_ARG.2567 | NH1 | F_ASP.2590 | OD1 | 3.677 |
| 1DEE | F_ARG.2567 | NH2 | F_ASP.2590 | OD1 | 2.797 |
| 1DEE | F_ARG.2567 | NH2 | F_ASP.2590 | OD2 | 2.401 |
| 1DEE | F_ARG.2587 | NH2 | F_GLU.2589 | OE2 | 3.479 |
| 1DEE | F_LYS.2598 | NZ  | F_ASP.2609 | OD1 | 3.297 |
| 1DEE | F_LYS.2598 | NZ  | F_ASP.2609 | OD2 | 2.926 |
| 1DEE | F_LYS.2663 | NZ  | F_ASP.2669 | OD1 | 3.683 |
| 1DEE | F_LYS.2663 | NZ  | F_ASP.2669 | OD2 | 2.643 |
| 1DEE | F_LYS.2665 | NZ  | F_GLU.2704 | OE1 | 3.853 |
| 1DEE | F_LYS.2665 | NZ  | F_GLU.2704 | OE2 | 3.766 |
| 1DEE | F_ARG.2674 | NH1 | E_ASP.2167 | OD2 | 3.989 |
| 1DEE | F_HIS.2705 | ND1 | F_ASP.2720 | OD2 | 3.943 |
| 1DEE | F_HIS.2705 | NE2 | F_ASP.2720 | OD2 | 2.896 |
| 1DEE | F_LYS.2719 | NZ  | E_GLU.2123 | OE1 | 2.882 |
| 1DEE | F_LYS.2719 | NZ  | E_GLU.2123 | OE2 | 3.779 |
| 1DEE | G_LYS.1848 | NZ  | G_GLU.1845 | OE1 | 3.421 |
| 1DEE | G_LYS.1848 | NZ  | G_GLU.1845 | OE2 | 3.954 |
| 1DEE | H_ARG.2825 | NH1 | H_GLU.2822 | OE2 | 2.870 |

---

Table 40: 1DEE-specific salt bridging networks analysis. In this table, a PDB file is specified with a four-letter PDB ID, except that the names of the PDB files corresponding to the single NMR structural model split from the NMR ensemble is specified with a four-letter PDB ID in addition to a hyphen followed by the single NMR structural model numeric ID, the residue naming scheme is **Chain ID\_residue name\_residue number**,  $\angle ADH$  represents the angle formed by acceptor (A), donor (D) and hydrogen (H) ( $\angle ADH$ ).

| PDB ID | Residue A | Atom A | Residue B | Atom B | Distance (Å) |
|--------|-----------|--------|-----------|--------|--------------|
| 1DLF   | L_ARG_61  | NH1    | L_GLU_79  | OE2    | 3.180        |
| 1DLF   | L_ARG_61  | NH1    | L_GLU_81  | OE2    | 3.784        |
| 1DLF   | L_ARG_61  | NH2    | L_GLU_79  | OE1    | 3.855        |
| 1DLF   | L_ARG_61  | NH2    | L_GLU_79  | OE2    | 3.835        |
| 1DLF   | L_ARG_61  | NH2    | L_GLU_81  | OE2    | 2.913        |
| 1DLF   | L_ARG_61  | NH2    | L_ASP_82  | OD1    | 2.721        |
| 1DLF   | L_ARG_61  | NH2    | L_ASP_82  | OD2    | 3.431        |
| 1DLF   | L_LYS_103 | NZ     | L_GLU_105 | OE1    | 3.806        |
| 1DLF   | H_ARG_38  | NH1    | H_GLU_85  | OE2    | 3.709        |
| 1DLF   | H_ARG_38  | NH1    | H_ASP_86  | OD1    | 2.859        |
| 1DLF   | H_ARG_38  | NH2    | H_GLU_46  | OE2    | 3.187        |
| 1DLF   | H_ARG_38  | NH2    | H_GLU_85  | OE2    | 2.874        |
| 1DLF   | H_ARG_38  | NH2    | H_ASP_86  | OD1    | 3.920        |
| 1DLF   | H_HIS_55  | NE2    | H_ASP_73  | OD2    | 3.282        |
| 1DLF   | H_ARG_66  | NH1    | H_ASP_86  | OD1    | 3.873        |
| 1DLF   | H_ARG_66  | NH1    | H_ASP_86  | OD2    | 2.756        |
| 1DLF   | H_ARG_66  | NH2    | H_GLU_85  | OE2    | 3.284        |
| 1DLF   | H_ARG_66  | NH2    | H_ASP_86  | OD1    | 3.045        |
| 1DLF   | H_ARG_66  | NH2    | H_ASP_86  | OD2    | 3.370        |
| 1DLF   | H_ARG_71  | NH2    | H_ASP_73  | OD1    | 3.603        |

Table 41: 1DLF-specific salt bridging networks analysis. In this table, a PDB file is specified with a four-letter PDB ID, except that the names of the PDB files corresponding to the single NMR structural model split from the NMR ensemble is specified with a four-letter PDB ID in addition to a hyphen followed by the single NMR structural model numeric ID, the residue naming scheme is **Chain ID\_residue name\_residue number**,  $\angle ADH$  represents the angle formed by acceptor (A), donor (D) and hydrogen (H) ( $\angle ADH$ ).



| PDB ID | Residue A | Atom A | Residue B | Atom B | Distance (Å) |
|--------|-----------|--------|-----------|--------|--------------|
| 1DQD   | L_ARG_60  | NH2    | L_GLU_80  | OE1    | 2.987        |
| 1DQD   | L_ARG_60  | NH2    | L_ASP_81  | OD1    | 3.630        |
| 1DQD   | L_ARG_60  | NH2    | L_ASP_81  | OD2    | 2.547        |
| 1DQD   | L_LYS_146 | NZ     | L_GLU_153 | OE2    | 3.290        |
| 1DQD   | L_LYS_148 | NZ     | L_GLU_194 | OE1    | 2.964        |
| 1DQD   | L_LYS_148 | NZ     | L_GLU_194 | OE2    | 3.564        |
| 1DQD   | L_ARG_154 | NH2    | L_GLU_184 | OE1    | 2.744        |
| 1DQD   | L_ARG_154 | NH2    | L_GLU_184 | OE2    | 3.605        |
| 1DQD   | L_ARG_187 | NH1    | L_ASP_183 | OD1    | 2.725        |
| 1DQD   | L_ARG_187 | NH2    | L_ASP_183 | OD1    | 3.759        |
| 1DQD   | L_HIS_188 | ND1    | L_ASP_150 | OD2    | 2.488        |
| 1DQD   | L_ARG_210 | NH2    | L_GLU_186 | OE1    | 3.748        |
| 1DQD   | H_ARG_38  | NH1    | H_GLU_46  | OE2    | 2.968        |
| 1DQD   | H_ARG_38  | NH1    | H_ASP_89  | OD2    | 3.490        |
| 1DQD   | H_ARG_38  | NH2    | H_ASP_89  | OD2    | 2.519        |
| 1DQD   | H_ARG_66  | NH1    | H_ASP_89  | OD1    | 3.667        |
| 1DQD   | H_ARG_66  | NH1    | H_ASP_89  | OD2    | 3.034        |
| 1DQD   | H_ARG_66  | NH2    | H_ASP_89  | OD1    | 3.179        |
| 1DQD   | H_ARG_66  | NH2    | H_ASP_89  | OD2    | 3.557        |
| 1DQD   | H_ARG_75  | NH1    | H_ASP_72  | OD2    | 3.952        |
| 1DQD   | H_LYS_217 | NZ     | L_GLU_122 | OE2    | 3.953        |

Table 42: 1DQD-specific salt bridging networks analysis. In this table, a PDB file is specified with a four-letter PDB ID, except that the names of the PDB files corresponding to the single NMR structural model split from the NMR ensemble is specified with a four-letter PDB ID in addition to a hyphen followed by the single NMR structural model numeric ID, the residue naming scheme is **Chain ID\_residue name\_residue number**,  $\angle ADH$  represents the angle formed by acceptor (A), donor (D) and hydrogen (H) ( $\angle ADH$ ).

| PDB ID | Residue A | Atom A | Residue B | Atom B | Distance (Å) |
|--------|-----------|--------|-----------|--------|--------------|
| 1DQJ   | A_ARG_24  | NH2    | A_ASP_70  | OD1    | 3.733        |
| 1DQJ   | A_ARG_61  | NH2    | A_GLU_81  | OE1    | 3.324        |
| 1DQJ   | A_ARG_61  | NH2    | A_ASP_82  | OD1    | 2.881        |
| 1DQJ   | A_ARG_61  | NH2    | A_ASP_82  | OD2    | 3.607        |
| 1DQJ   | A_ARG_155 | NH1    | A_GLU_185 | OE2    | 3.740        |
| 1DQJ   | A_ARG_155 | NH2    | A_GLU_185 | OE2    | 3.256        |
| 1DQJ   | A_LYS_199 | NZ     | A_ASP_110 | OD2    | 3.573        |
| 1DQJ   | B_ARG_38  | NH1    | B_GLU_46  | OE1    | 2.669        |
| 1DQJ   | B_ARG_38  | NH1    | B_ASP_89  | OD1    | 3.653        |
| 1DQJ   | B_ARG_38  | NH2    | B_ASP_89  | OD1    | 2.527        |
| 1DQJ   | B_ARG_66  | NH1    | B_ASP_89  | OD1    | 3.044        |
| 1DQJ   | B_ARG_66  | NH1    | B_ASP_89  | OD2    | 3.584        |
| 1DQJ   | B_ARG_66  | NH2    | B_ASP_89  | OD1    | 3.713        |
| 1DQJ   | B_ARG_66  | NH2    | B_ASP_89  | OD2    | 2.977        |
| 1DQJ   | B_LYS_216 | NZ     | B_ASP_218 | OD2    | 3.941        |
| 1DQJ   | B_LYS_219 | NZ     | A_GLU_123 | OE2    | 2.598        |
| 1DQJ   | C_LYS_1   | NZ     | C_GLU_7   | OE1    | 3.940        |
| 1DQJ   | C_LYS_1   | NZ     | C_GLU_7   | OE2    | 2.753        |
| 1DQJ   | C_LYS_97  | NZ     | B_ASP_32  | OD2    | 2.665        |
| 1DQJ   | C_ARG_125 | NH2    | C_ASP_119 | OD1    | 3.333        |
| 1DQJ   | C_ARG_125 | NH2    | C_ASP_119 | OD2    | 2.489        |

Table 43: 1DQJ-specific salt bridging networks analysis. In this table, a PDB file is specified with a four-letter PDB ID, except that the names of the PDB files corresponding to the single NMR structural model split from the NMR ensemble is specified with a four-letter PDB ID in addition to a hyphen followed by the single NMR structural model numeric ID, the residue naming scheme is **Chain ID\_residue name\_residue number**,  $\angle ADH$  represents the angle formed by acceptor (A), donor (D) and hydrogen (H) ( $\angle ADH$ ).

| PDB ID | Residue A | Atom A | Residue B | Atom B | Distance (Å) |
|--------|-----------|--------|-----------|--------|--------------|
| 1DQM   | L_ARG_61  | NH1    | L_GLU_81  | OE2    | 3.595        |
| 1DQM   | L_ARG_61  | NH1    | L_ASP_82  | OD1    | 2.747        |
| 1DQM   | L_ARG_61  | NH1    | L_ASP_82  | OD2    | 3.200        |
| 1DQM   | L_ARG_61  | NH2    | L_GLU_81  | OE2    | 3.902        |
| 1DQM   | L_LYS_147 | NZ     | L_GLU_154 | OE1    | 3.964        |
| 1DQM   | L_LYS_147 | NZ     | L_GLU_195 | OE2    | 3.903        |
| 1DQM   | L_LYS_149 | NZ     | L_GLU_195 | OE1    | 3.696        |
| 1DQM   | L_ARG_155 | NH1    | L_GLU_185 | OE2    | 3.981        |
| 1DQM   | L_ARG_188 | NH2    | L_ASP_184 | OD1    | 3.190        |
| 1DQM   | L_HIS_189 | ND1    | L_ASP_151 | OD2    | 3.171        |
| 1DQM   | L_LYS_199 | NZ     | L_ASP_110 | OD2    | 3.862        |
| 1DQM   | L_LYS_207 | NZ     | H_ASP_130 | OD1    | 3.491        |
| 1DQM   | L_LYS_207 | NZ     | H_ASP_130 | OD2    | 3.782        |
| 1DQM   | H_ARG_38  | NH1    | H_GLU_46  | OE1    | 2.699        |
| 1DQM   | H_ARG_38  | NH1    | H_ASP_89  | OD1    | 3.926        |
| 1DQM   | H_ARG_38  | NH2    | H_ASP_89  | OD1    | 2.730        |
| 1DQM   | H_ARG_66  | NH1    | H_ASP_89  | OD1    | 3.559        |
| 1DQM   | H_ARG_66  | NH1    | H_ASP_89  | OD2    | 2.987        |
| 1DQM   | H_ARG_66  | NH2    | H_ASP_89  | OD1    | 3.082        |
| 1DQM   | H_ARG_66  | NH2    | H_ASP_89  | OD2    | 3.726        |

Table 44: 1DQM-specific salt bridging networks analysis. In this table, a PDB file is specified with a four-letter PDB ID, except that the names of the PDB files corresponding to the single NMR structural model split from the NMR ensemble is specified with a four-letter PDB ID in addition to a hyphen followed by the single NMR structural model numeric ID, the residue naming scheme is **Chain ID\_residue name\_residue number**,  $\angle ADH$  represents the angle formed by acceptor (A), donor (D) and hydrogen (H) ( $\angle ADH$ ).

| PDB ID | Residue A | Atom A | Residue B | Atom B | Distance (Å) |
|--------|-----------|--------|-----------|--------|--------------|
| 1DQQ   | A_ARG.24  | NH1    | A_ASP.70  | OD2    | 3.225        |
| 1DQQ   | A_LYS.49  | NZ     | B_ASP.101 | OD1    | 2.957        |
| 1DQQ   | A_ARG.61  | NH1    | A_ASP.82  | OD1    | 2.631        |
| 1DQQ   | A_ARG.61  | NH1    | A_ASP.82  | OD2    | 2.802        |
| 1DQQ   | A_ARG.61  | NH2    | A_GLU.79  | OE1    | 3.923        |
| 1DQQ   | A_ARG.61  | NH2    | A_GLU.79  | OE2    | 3.136        |
| 1DQQ   | A_ARG.61  | NH2    | A_GLU.81  | OE2    | 3.324        |
| 1DQQ   | A_ARG.61  | NH2    | A_ASP.82  | OD1    | 3.627        |
| 1DQQ   | A_LYS.147 | NZ     | A_GLU.154 | OE1    | 3.318        |
| 1DQQ   | A_LYS.147 | NZ     | A_GLU.154 | OE2    | 3.055        |
| 1DQQ   | A_LYS.149 | NZ     | A_GLU.195 | OE1    | 3.522        |
| 1DQQ   | A_LYS.149 | NZ     | A_GLU.195 | OE2    | 3.885        |
| 1DQQ   | A_ARG.155 | NH1    | A_GLU.185 | OE2    | 3.911        |
| 1DQQ   | A_ARG.155 | NH2    | A_GLU.185 | OE2    | 3.794        |
| 1DQQ   | A_ARG.188 | NH2    | A_ASP.184 | OD1    | 2.977        |
| 1DQQ   | A_LYS.199 | NZ     | A_ASP.110 | OD1    | 3.108        |
| 1DQQ   | A_LYS.199 | NZ     | A_ASP.110 | OD2    | 3.095        |
| 1DQQ   | B_ARG.38  | NH1    | B_GLU.46  | OE1    | 2.694        |
| 1DQQ   | B_ARG.38  | NH1    | B_ASP.89  | OD1    | 3.867        |
| 1DQQ   | B_ARG.38  | NH2    | B_ASP.89  | OD1    | 2.625        |
| 1DQQ   | B_ARG.66  | NH1    | B_ASP.89  | OD1    | 3.469        |
| 1DQQ   | B_ARG.66  | NH1    | B_ASP.89  | OD2    | 2.954        |
| 1DQQ   | B_ARG.66  | NH2    | B_ASP.89  | OD1    | 2.959        |
| 1DQQ   | B_ARG.66  | NH2    | B_ASP.89  | OD2    | 3.690        |
| 1DQQ   | B_LYS.216 | NZ     | D_ASP.218 | OD1    | 2.965        |
| 1DQQ   | B_LYS.219 | NZ     | A_GLU.123 | OE2    | 2.763        |
| 1DQQ   | C_LYS.49  | NZ     | D_ASP.101 | OD1    | 3.456        |
| 1DQQ   | C_LYS.49  | NZ     | D_ASP.101 | OD2    | 3.943        |
| 1DQQ   | C_LYS.147 | NZ     | C_GLU.154 | OE2    | 3.726        |
| 1DQQ   | C_LYS.149 | NZ     | C_GLU.195 | OE1    | 3.353        |
| 1DQQ   | C_ARG.155 | NH2    | C_GLU.185 | OE2    | 3.704        |
| 1DQQ   | C_ARG.188 | NH2    | C_ASP.184 | OD1    | 2.882        |
| 1DQQ   | C_ARG.188 | NH2    | C_ASP.184 | OD2    | 3.940        |
| 1DQQ   | C_HIS.189 | ND1    | C_ASP.151 | OD2    | 2.642        |
| 1DQQ   | C_LYS.199 | NZ     | C_ASP.110 | OD2    | 3.094        |
| 1DQQ   | C_ARG.211 | NH2    | C_GLU.187 | OE2    | 2.769        |
| 1DQQ   | D_ARG.38  | NH1    | D_GLU.46  | OE1    | 2.831        |
| 1DQQ   | D_ARG.38  | NH1    | D_ASP.89  | OD1    | 3.780        |
| 1DQQ   | D_ARG.38  | NH2    | D_ASP.89  | OD1    | 2.692        |
| 1DQQ   | D_ARG.66  | NH1    | D_ASP.89  | OD1    | 3.708        |
| 1DQQ   | D_ARG.66  | NH2    | D_ASP.89  | OD1    | 3.416        |
| 1DQQ   | D_ARG.66  | NH2    | D_ASP.89  | OD2    | 2.649        |
| 1DQQ   | D_LYS.216 | NZ     | D_ASP.218 | OD1    | 2.953        |
| 1DQQ   | D_LYS.216 | NZ     | D_ASP.218 | OD2    | 2.618        |
| 1DQQ   | D_LYS.219 | NZ     | C_GLU.123 | OE1    | 3.088        |

Table 45: 1DQQ-specific salt bridging networks analysis. In this table, a PDB file is specified with a four-letter PDB ID, except that the names of the PDB files corresponding to the single NMR structural model split from the NMR ensemble is specified with a four-letter PDB ID in addition to a hyphen followed by the single NMR structural model numeric ID, the residue naming scheme is **Chain ID\_residue name\_residue number**,  $\angle ADH$  represents the angle formed by acceptor (A), donor (D) and hydrogen (H) ( $\angle ADH$ ).

| PDB ID | Residue A | Atom A | Residue B | Atom B | Distance (Å) |
|--------|-----------|--------|-----------|--------|--------------|
| 1DVF   | A_ARG_61  | NH2    | A_GLU_81  | OE2    | 3.091        |
| 1DVF   | A_ARG_61  | NH2    | A_ASP_82  | OD1    | 2.772        |
| 1DVF   | A_ARG_61  | NH2    | A_ASP_82  | OD2    | 3.277        |
| 1DVF   | A_ARG_96  | NH1    | B_GLU_98  | OE1    | 2.616        |
| 1DVF   | A_ARG_96  | NH1    | B_GLU_98  | OE2    | 3.746        |
| 1DVF   | A_ARG_96  | NH2    | B_GLU_98  | OE1    | 3.400        |
| 1DVF   | A_ARG_96  | NH2    | B_GLU_98  | OE2    | 2.958        |
| 1DVF   | A_LYS_103 | NZ     | A_GLU_105 | OE2    | 3.937        |
| 1DVF   | B_ARG_38  | NH1    | B_ASP_89  | OD1    | 2.871        |
| 1DVF   | B_ARG_38  | NH2    | B_GLU_46  | OE1    | 3.990        |
| 1DVF   | B_ARG_38  | NH2    | B_GLU_46  | OE2    | 3.805        |
| 1DVF   | B_ARG_38  | NH2    | B_ASP_89  | OD1    | 3.345        |
| 1DVF   | B_ARG_66  | NH1    | B_ASP_89  | OD1    | 3.908        |
| 1DVF   | B_ARG_66  | NH1    | B_ASP_89  | OD2    | 3.826        |
| 1DVF   | B_ARG_66  | NH2    | B_ASP_89  | OD1    | 3.644        |
| 1DVF   | B_ARG_66  | NH2    | B_ASP_89  | OD2    | 2.583        |
| 1DVF   | B_LYS_75  | NZ     | B_ASP_72  | OD2    | 2.871        |
| 1DVF   | B_HIS_86  | ND1    | B_ASP_88  | OD2    | 3.353        |
| 1DVF   | B_ARG_97  | NH2    | B_ASP_104 | OD1    | 3.629        |
| 1DVF   | B_ARG_97  | NH2    | B_ASP_104 | OD2    | 2.634        |
| 1DVF   | B_ARG_102 | NH1    | B_ASP_100 | OD2    | 2.926        |
| 1DVF   | C_ARG_61  | NH1    | C_ASP_82  | OD1    | 3.565        |
| 1DVF   | C_ARG_61  | NH1    | C_ASP_82  | OD2    | 2.521        |
| 1DVF   | C_ARG_61  | NH2    | C_GLU_79  | OE2    | 3.798        |
| 1DVF   | C_ARG_61  | NH2    | C_GLU_81  | OE2    | 3.578        |
| 1DVF   | C_ARG_61  | NH2    | C_ASP_82  | OD1    | 2.671        |
| 1DVF   | C_ARG_61  | NH2    | C_ASP_82  | OD2    | 3.084        |
| 1DVF   | C_LYS_103 | NZ     | C_GLU_105 | OE2    | 3.563        |
| 1DVF   | D_HIS_33  | NE2    | B_ASP_100 | OD1    | 3.569        |
| 1DVF   | D_HIS_33  | NE2    | B_ASP_100 | OD2    | 3.052        |
| 1DVF   | D_HIS_33  | NE2    | D_ASP_52  | OD2    | 3.296        |
| 1DVF   | D_LYS_62  | NZ     | D_GLU_46  | OE1    | 3.985        |
| 1DVF   | D_LYS_66  | NZ     | D_ASP_86  | OD1    | 3.906        |
| 1DVF   | D_LYS_66  | NZ     | D_ASP_86  | OD2    | 2.839        |

Table 46: 1DVF-specific salt bridging networks analysis. In this table, a PDB file is specified with a four-letter PDB ID, except that the names of the PDB files corresponding to the single NMR structural model split from the NMR ensemble is specified with a four-letter PDB ID in addition to a hyphen followed by the single NMR structural model numeric ID, the residue naming scheme is **Chain ID\_residue name\_residue number**,  $\angle ADH$  represents the angle formed by acceptor (A), donor (D) and hydrogen (H) ( $\angle ADH$ ).

| PDB ID | Residue A | Atom A | Residue B | Atom B | Distance (Å) |
|--------|-----------|--------|-----------|--------|--------------|
| 1DZB   | A_LYS_38  | NZ     | A_ASP_90  | OD1    | 3.686        |
| 1DZB   | A_ARG_40  | NH2    | A_GLU_46  | OE1    | 3.204        |
| 1DZB   | A_ARG_40  | NH2    | A_GLU_46  | OE2    | 2.668        |
| 1DZB   | A_LYS_63  | NZ     | B_GLU_89  | OE1    | 3.983        |
| 1DZB   | A_LYS_67  | NZ     | B_ASP_90  | OD2    | 3.792        |
| 1DZB   | A_ARG_234 | NH2    | A_ASP_104 | OD1    | 2.721        |
| 1DZB   | A_ARG_234 | NH2    | A_ASP_104 | OD2    | 3.895        |
| 1DZB   | A_ARG_261 | NH1    | A_GLU_279 | OE1    | 3.537        |
| 1DZB   | B_LYS_38  | NZ     | B_ASP_90  | OD1    | 3.512        |
| 1DZB   | B_ARG_40  | NH2    | B_GLU_46  | OE1    | 3.754        |
| 1DZB   | B_ARG_40  | NH2    | B_GLU_46  | OE2    | 3.419        |
| 1DZB   | B_LYS_63  | NZ     | B_GLU_46  | OE1    | 3.854        |
| 1DZB   | B_LYS_67  | NZ     | B_ASP_90  | OD1    | 3.833        |
| 1DZB   | B_ARG_234 | NH2    | B_ASP_104 | OD1    | 2.732        |
| 1DZB   | B_ARG_234 | NH2    | B_ASP_104 | OD2    | 3.591        |
| 1DZB   | B_ARG_261 | NH1    | B_GLU_279 | OE2    | 3.580        |
| 1DZB   | X_LYS_1   | NZ     | X_GLU_7   | OE1    | 3.363        |
| 1DZB   | X_LYS_1   | NZ     | X_GLU_7   | OE2    | 3.292        |
| 1DZB   | X_ARG_61  | NH2    | A_ASP_256 | OD2    | 3.887        |
| 1DZB   | X_LYS_73  | NZ     | A_ASP_256 | OD1    | 3.412        |
| 1DZB   | X_LYS_73  | NZ     | A_ASP_256 | OD2    | 3.290        |
| 1DZB   | X_ARG_112 | NH2    | A_ASP_31  | OD2    | 3.878        |
| 1DZB   | X_ARG_125 | NH2    | X_ASP_119 | OD2    | 3.529        |
| 1DZB   | Y_LYS_73  | NZ     | B_ASP_256 | OD1    | 3.559        |

Table 47: 1DZB-specific salt bridging networks analysis. In this table, a PDB file is specified with a four-letter PDB ID, except that the names of the PDB files corresponding to the single NMR structural model split from the NMR ensemble is specified with a four-letter PDB ID in addition to a hyphen followed by the single NMR structural model numeric ID, the residue naming scheme is **Chain ID\_residue name\_residue number**,  $\angle ADH$  represents the angle formed by acceptor (A), donor (D) and hydrogen (H) ( $\angle ADH$ ).

| PDB ID | Residue A | Atom A | Residue B | Atom B | Distance (Å) |
|--------|-----------|--------|-----------|--------|--------------|
| 1E4W   | H_HIS_35  | ND1    | H_GLU_50  | OE1    | 3.798        |
| 1E4W   | H_HIS_35  | NE2    | H_GLU_50  | OE1    | 3.250        |
| 1E4W   | H_ARG_40  | NH1    | H_GLU_85  | OE1    | 2.990        |
| 1E4W   | H_ARG_40  | NH1    | H_GLU_85  | OE2    | 3.128        |
| 1E4W   | H_ARG_40  | NH2    | H_GLU_85  | OE1    | 3.469        |
| 1E4W   | H_LYS_62  | NZ     | H_GLU_46  | OE1    | 2.859        |
| 1E4W   | H_LYS_62  | NZ     | H_GLU_46  | OE2    | 3.777        |
| 1E4W   | H_LYS_64  | NZ     | H_GLU_61  | OE2    | 3.986        |
| 1E4W   | H_LYS_66  | NZ     | H_ASP_86  | OD1    | 3.553        |
| 1E4W   | H_LYS_66  | NZ     | H_ASP_86  | OD2    | 2.752        |
| 1E4W   | H_LYS_205 | NZ     | L_GLU_123 | OE1    | 3.384        |
| 1E4W   | H_LYS_205 | NZ     | L_GLU_123 | OE2    | 3.066        |
| 1E4W   | L_ARG_24  | NH2    | L_ASP_70  | OD1    | 2.921        |
| 1E4W   | L_ARG_24  | NH2    | L_ASP_70  | OD2    | 2.509        |
| 1E4W   | L_ARG_61  | NH1    | L_GLU_79  | OE2    | 3.003        |
| 1E4W   | L_ARG_61  | NH2    | L_GLU_79  | OE2    | 3.488        |
| 1E4W   | L_ARG_61  | NH2    | L_GLU_81  | OE2    | 2.874        |
| 1E4W   | L_ARG_61  | NH2    | L_ASP_82  | OD1    | 2.888        |
| 1E4W   | L_ARG_61  | NH2    | L_ASP_82  | OD2    | 3.583        |
| 1E4W   | L_LYS_103 | NZ     | L_ASP_165 | OD1    | 3.413        |
| 1E4W   | L_LYS_147 | NZ     | L_GLU_154 | OE1    | 3.975        |
| 1E4W   | L_LYS_149 | NZ     | L_GLU_195 | OE1    | 3.539        |
| 1E4W   | L_LYS_149 | NZ     | L_GLU_195 | OE2    | 2.744        |
| 1E4W   | L_ARG_155 | NH1    | L_GLU_185 | OE1    | 3.875        |
| 1E4W   | L_ARG_155 | NH1    | L_GLU_185 | OE2    | 2.836        |
| 1E4W   | L_ARG_155 | NH2    | L_GLU_185 | OE1    | 3.575        |
| 1E4W   | L_ARG_155 | NH2    | L_GLU_185 | OE2    | 3.879        |
| 1E4W   | L_LYS_183 | NZ     | L_GLU_187 | OE2    | 2.427        |
| 1E4W   | P_HIS_2   | ND1    | P_GLU_5   | OE1    | 3.603        |
| 1E4W   | P_HIS_2   | ND1    | P_GLU_5   | OE2    | 2.765        |

Table 48: 1E4W-specific salt bridging networks analysis. In this table, a PDB file is specified with a four-letter PDB ID, except that the names of the PDB files corresponding to the single NMR structural model split from the NMR ensemble is specified with a four-letter PDB ID in addition to a hyphen followed by the single NMR structural model numeric ID, the residue naming scheme is **Chain ID\_residue name\_residue number**,  $\angle ADH$  represents the angle formed by acceptor (A), donor (D) and hydrogen (H) ( $\angle ADH$ ).

| PDB ID | Residue A | Atom A | Residue B | Atom B | Distance (Å) |
|--------|-----------|--------|-----------|--------|--------------|
| 1E4X   | H_HIS_35  | ND1    | H_GLU_50  | OE1    | 3.676        |
| 1E4X   | H_HIS_35  | NE2    | H_GLU_50  | OE1    | 3.169        |
| 1E4X   | H_ARG_40  | NH1    | H_GLU_85  | OE1    | 3.357        |
| 1E4X   | H_LYS_62  | NZ     | H_GLU_46  | OE1    | 2.577        |
| 1E4X   | H_LYS_62  | NZ     | H_GLU_46  | OE2    | 3.834        |
| 1E4X   | H_LYS_64  | NZ     | H_GLU_61  | OE1    | 2.708        |
| 1E4X   | H_LYS_64  | NZ     | H_GLU_61  | OE2    | 3.973        |
| 1E4X   | H_LYS_66  | NZ     | H_ASP_86  | OD1    | 3.625        |
| 1E4X   | H_LYS_66  | NZ     | H_ASP_86  | OD2    | 3.022        |
| 1E4X   | I_HIS_35  | ND1    | I_GLU_50  | OE1    | 3.895        |
| 1E4X   | I_HIS_35  | NE2    | I_GLU_50  | OE1    | 3.180        |
| 1E4X   | I_ARG_40  | NH1    | I_GLU_85  | OE1    | 2.650        |
| 1E4X   | I_ARG_40  | NH2    | I_GLU_46  | OE1    | 3.611        |
| 1E4X   | I_LYS_62  | NZ     | I_GLU_46  | OE2    | 2.935        |
| 1E4X   | I_LYS_64  | NZ     | I_GLU_61  | OE1    | 2.622        |
| 1E4X   | I_LYS_66  | NZ     | I_ASP_86  | OD1    | 3.395        |
| 1E4X   | I_LYS_66  | NZ     | I_ASP_86  | OD2    | 2.825        |
| 1E4X   | I_LYS_205 | NZ     | M_GLU_123 | OE1    | 2.874        |
| 1E4X   | I_LYS_205 | NZ     | M_GLU_123 | OE2    | 3.751        |
| 1E4X   | L_ARG_24  | NH1    | L_ASP_70  | OD1    | 2.619        |
| 1E4X   | L_ARG_24  | NH1    | L_ASP_70  | OD2    | 3.556        |
| 1E4X   | L_ARG_24  | NH2    | L_ASP_70  | OD1    | 3.060        |
| 1E4X   | L_ARG_24  | NH2    | L_ASP_70  | OD2    | 2.776        |
| 1E4X   | L_ARG_61  | NH2    | L_GLU_81  | OE2    | 3.067        |
| 1E4X   | L_ARG_61  | NH2    | L_ASP_82  | OD1    | 2.814        |
| 1E4X   | L_ARG_61  | NH2    | L_ASP_82  | OD2    | 3.641        |
| 1E4X   | L_LYS_147 | NZ     | L_GLU_154 | OE1    | 3.971        |
| 1E4X   | L_LYS_149 | NZ     | L_GLU_195 | OE1    | 3.274        |
| 1E4X   | L_LYS_149 | NZ     | L_GLU_195 | OE2    | 2.560        |
| 1E4X   | L_ARG_155 | NH1    | L_GLU_185 | OE1    | 3.930        |
| 1E4X   | L_ARG_155 | NH1    | L_GLU_185 | OE2    | 2.776        |
| 1E4X   | L_ARG_155 | NH2    | L_GLU_185 | OE1    | 3.867        |
| 1E4X   | L_ARG_155 | NH2    | L_GLU_185 | OE2    | 3.813        |
| 1E4X   | L_LYS_183 | NZ     | L_GLU_187 | OE1    | 2.722        |
| 1E4X   | L_LYS_183 | NZ     | L_GLU_187 | OE2    | 2.806        |
| 1E4X   | L_HIS_189 | ND1    | L_ASP_151 | OD2    | 2.526        |
| 1E4X   | L_LYS_199 | NZ     | L_ASP_110 | OD1    | 3.989        |
| 1E4X   | L_LYS_199 | NZ     | L_ASP_110 | OD2    | 2.510        |
| 1E4X   | M_ARG_24  | NH1    | M_ASP_70  | OD1    | 2.588        |
| 1E4X   | M_ARG_24  | NH1    | M_ASP_70  | OD2    | 3.544        |
| 1E4X   | M_ARG_61  | NH2    | M_GLU_81  | OE2    | 2.997        |
| 1E4X   | M_ARG_61  | NH2    | M_ASP_82  | OD1    | 2.719        |
| 1E4X   | M_ARG_61  | NH2    | M_ASP_82  | OD2    | 3.382        |
| 1E4X   | M_LYS_147 | NZ     | M_GLU_195 | OE1    | 3.439        |
| 1E4X   | M_LYS_149 | NZ     | M_GLU_195 | OE1    | 3.962        |
| 1E4X   | M_LYS_149 | NZ     | M_GLU_195 | OE2    | 3.421        |
| 1E4X   | M_ARG_155 | NH1    | M_GLU_185 | OE1    | 3.714        |
| 1E4X   | M_ARG_155 | NH1    | M_GLU_185 | OE2    | 2.851        |
| 1E4X   | M_ARG_155 | NH2    | M_GLU_185 | OE1    | 3.119        |
| 1E4X   | M_ARG_155 | NH2    | M_GLU_185 | OE2    | 3.643        |
| 1E4X   | M_LYS_183 | NZ     | M_GLU_187 | OE1    | 3.326        |
| 1E4X   | M_LYS_183 | NZ     | M_GLU_187 | OE2    | 2.734        |
| 1E4X   | M_HIS_189 | ND1    | M_ASP_151 | OD2    | 2.418        |
| 1E4X   | M_LYS_199 | NZ     | M_ASP_110 | OD2    | 3.890        |
| 1E4X   | P_HIS_4   | ND1    | P_ASP_7   | OD1    | 3.911        |
| 1E4X   | P_HIS_4   | ND1    | P_ASP_7   | OD2    | 2.895        |
| 1E4X   | Q_HIS_4   | ND1    | Q_ASP_7   | OD1    | 3.489        |



| 1E4X | Q_HIS_4 | ND1 | Q_ASP_7  | OD2 | 2.725 |
|------|---------|-----|----------|-----|-------|
| 1E4X | Q_HIS_4 | NE2 | I_ASP_98 | OD2 | 3.960 |

Table 49: 1E4X-specific salt bridging networks analysis. In this table, a PDB file is specified with a four-letter PDB ID, except that the names of the PDB files corresponding to the single NMR structural model split from the NMR ensemble is specified with a four-letter PDB ID in addition to a hyphen followed by the single NMR structural model numeric ID, the residue naming scheme is **Chain ID\_residue name\_residue number**,  $\angle ADH$  represents the angle formed by acceptor (A), donor (D) and hydrogen (H) ( $\angle ADH$ ).

| PDB ID | Residue A | Atom A | Residue B | Atom B | Distance (Å) |
|--------|-----------|--------|-----------|--------|--------------|
| 1E6J   | H_LYS_38  | NZ     | H_ASP_90  | OD1    | 3.507        |
| 1E6J   | H_ARG_40  | NH2    | H_GLU_89  | OE1    | 3.271        |
| 1E6J   | H_LYS_63  | NZ     | H_GLU_46  | OE1    | 2.880        |
| 1E6J   | H_LYS_63  | NZ     | H_GLU_46  | OE2    | 3.429        |
| 1E6J   | H_LYS_67  | NZ     | H_ASP_90  | OD1    | 3.890        |
| 1E6J   | H_LYS_67  | NZ     | H_ASP_90  | OD2    | 2.857        |
| 1E6J   | H_ARG_102 | NH1    | H_ASP_108 | OD1    | 3.654        |
| 1E6J   | H_ARG_102 | NH1    | H_ASP_108 | OD2    | 3.188        |
| 1E6J   | H_ARG_102 | NH2    | H_ASP_108 | OD2    | 3.453        |
| 1E6J   | H_LYS_215 | NZ     | L_GLU_121 | OE1    | 3.273        |
| 1E6J   | H_LYS_215 | NZ     | L_GLU_121 | OE2    | 3.199        |
| 1E6J   | L_LYS_52  | NZ     | L_GLU_49  | OE1    | 2.788        |
| 1E6J   | L_ARG_60  | NH1    | L_GLU_78  | OE1    | 3.448        |
| 1E6J   | L_ARG_60  | NH1    | L_GLU_78  | OE2    | 3.377        |
| 1E6J   | L_ARG_60  | NH2    | L_GLU_80  | OE1    | 3.435        |
| 1E6J   | L_ARG_60  | NH2    | L_GLU_80  | OE2    | 3.837        |
| 1E6J   | L_ARG_60  | NH2    | L_ASP_81  | OD1    | 3.036        |
| 1E6J   | L_ARG_60  | NH2    | L_ASP_81  | OD2    | 3.778        |
| 1E6J   | L_LYS_101 | NZ     | L_GLU_103 | OE2    | 3.191        |
| 1E6J   | L_LYS_101 | NZ     | L_ASP_163 | OD1    | 3.381        |
| 1E6J   | L_LYS_101 | NZ     | L_ASP_163 | OD2    | 3.618        |
| 1E6J   | L_LYS_140 | NZ     | L_GLU_103 | OE1    | 3.034        |
| 1E6J   | L_LYS_140 | NZ     | L_GLU_103 | OE2    | 3.715        |
| 1E6J   | L_LYS_147 | NZ     | L_GLU_193 | OE1    | 3.705        |
| 1E6J   | L_LYS_147 | NZ     | L_GLU_193 | OE2    | 3.642        |
| 1E6J   | L_ARG_153 | NH2    | L_GLU_183 | OE2    | 3.850        |
| 1E6J   | L_LYS_181 | NZ     | L_GLU_185 | OE1    | 2.925        |
| 1E6J   | L_LYS_181 | NZ     | L_GLU_185 | OE2    | 3.102        |
| 1E6J   | L_HIS_187 | ND1    | L_ASP_149 | OD2    | 3.110        |
| 1E6J   | L_LYS_197 | NZ     | L_ASP_108 | OD1    | 3.404        |
| 1E6J   | L_LYS_197 | NZ     | L_ASP_108 | OD2    | 3.535        |
| 1E6J   | P_LYS_25  | NZ     | P_GLU_28  | OE1    | 3.310        |
| 1E6J   | P_LYS_30  | NZ     | P_GLU_35  | OE1    | 3.279        |
| 1E6J   | P_LYS_30  | NZ     | P_GLU_35  | OE2    | 3.714        |
| 1E6J   | P_ARG_82  | NH2    | P_GLU_79  | OE1    | 3.880        |
| 1E6J   | P_ARG_82  | NH2    | P_GLU_79  | OE2    | 2.977        |
| 1E6J   | P_ARG_97  | NH1    | P_ASP_103 | OD1    | 3.867        |
| 1E6J   | P_ARG_97  | NH1    | P_ASP_103 | OD2    | 2.872        |
| 1E6J   | P_ARG_97  | NH2    | P_ASP_103 | OD2    | 2.992        |
| 1E6J   | P_ARG_97  | NH2    | P_GLU_113 | OE1    | 3.011        |
| 1E6J   | P_ARG_97  | NH2    | P_GLU_113 | OE2    | 2.907        |
| 1E6J   | P_LYS_131 | NZ     | P_GLU_128 | OE2    | 3.566        |
| 1E6J   | P_LYS_140 | NZ     | P_GLU_75  | OE1    | 3.007        |
| 1E6J   | P_ARG_162 | NH2    | P_ASP_166 | OD1    | 2.737        |
| 1E6J   | P_ARG_162 | NH2    | P_ASP_166 | OD2    | 3.737        |
| 1E6J   | P_ARG_167 | NH2    | P_GLU_159 | OE1    | 3.117        |
| 1E6J   | P_ARG_167 | NH2    | P_GLU_159 | OE2    | 3.307        |

---

Table 50: 1E6J-specific salt bridging networks analysis. In this table, a PDB file is specified with a four-letter PDB ID, except that the names of the PDB files corresponding to the single NMR structural model split from the NMR ensemble is specified with a four-letter PDB ID in addition to a hyphen followed by the single NMR structural model numeric ID, the residue naming scheme is **Chain ID\_residue name\_residue number**,  $\angle ADH$  represents the angle formed by acceptor (A), donor (D) and hydrogen (H) ( $\angle ADH$ ).

| PDB ID | Residue A | Atom A | Residue B | Atom B | Distance (Å) |
|--------|-----------|--------|-----------|--------|--------------|
| 1E6O   | H_ARG_40  | NH1    | H_GLU_89  | OE1    | 3.448        |
| 1E6O   | H_ARG_40  | NH2    | H_GLU_89  | OE1    | 2.779        |
| 1E6O   | H_LYS_63  | NZ     | H_GLU_46  | OE1    | 3.050        |
| 1E6O   | H_LYS_67  | NZ     | H_ASP_90  | OD1    | 3.728        |
| 1E6O   | H_LYS_67  | NZ     | H_ASP_90  | OD2    | 2.754        |
| 1E6O   | H_ARG_98  | NH2    | H_ASP_108 | OD1    | 3.003        |
| 1E6O   | H_ARG_98  | NH2    | H_ASP_108 | OD2    | 3.258        |
| 1E6O   | H_LYS_215 | NZ     | L_GLU_121 | OE1    | 2.731        |
| 1E6O   | H_LYS_215 | NZ     | L_GLU_121 | OE2    | 3.094        |
| 1E6O   | L_LYS_52  | NZ     | L_GLU_49  | OE1    | 2.480        |
| 1E6O   | L_ARG_60  | NH1    | L_GLU_78  | OE1    | 3.734        |
| 1E6O   | L_ARG_60  | NH1    | L_GLU_78  | OE2    | 3.517        |
| 1E6O   | L_ARG_60  | NH2    | L_GLU_78  | OE1    | 3.763        |
| 1E6O   | L_ARG_60  | NH2    | L_GLU_80  | OE1    | 3.787        |
| 1E6O   | L_ARG_60  | NH2    | L_GLU_80  | OE2    | 3.444        |
| 1E6O   | L_ARG_60  | NH2    | L_ASP_81  | OD1    | 2.714        |
| 1E6O   | L_ARG_60  | NH2    | L_ASP_81  | OD2    | 3.690        |
| 1E6O   | L_LYS_101 | NZ     | L_GLU_103 | OE2    | 2.711        |
| 1E6O   | L_LYS_101 | NZ     | L_ASP_163 | OD1    | 2.813        |
| 1E6O   | L_LYS_101 | NZ     | L_ASP_163 | OD2    | 3.565        |
| 1E6O   | L_LYS_140 | NZ     | L_GLU_103 | OE1    | 2.639        |
| 1E6O   | L_LYS_140 | NZ     | L_GLU_103 | OE2    | 3.651        |
| 1E6O   | L_LYS_147 | NZ     | L_GLU_193 | OE1    | 3.537        |
| 1E6O   | L_LYS_147 | NZ     | L_GLU_193 | OE2    | 3.485        |
| 1E6O   | L_LYS_181 | NZ     | L_GLU_185 | OE1    | 3.457        |
| 1E6O   | L_LYS_181 | NZ     | L_GLU_185 | OE2    | 2.602        |
| 1E6O   | L_HIS_187 | ND1    | L_ASP_149 | OD2    | 2.973        |
| 1E6O   | L_LYS_197 | NZ     | L_ASP_108 | OD1    | 3.626        |
| 1E6O   | L_LYS_197 | NZ     | L_ASP_108 | OD2    | 2.685        |

Table 51: 1E6O-specific salt bridging networks analysis. In this table, a PDB file is specified with a four-letter PDB ID, except that the names of the PDB files corresponding to the single NMR structural model split from the NMR ensemble is specified with a four-letter PDB ID in addition to a hyphen followed by the single NMR structural model numeric ID, the residue naming scheme is **Chain ID\_residue name\_residue number**,  $\angle ADH$  represents the angle formed by acceptor (A), donor (D) and hydrogen (H) ( $\angle ADH$ ).

| PDB ID | Residue A  | Atom A | Residue B  | Atom B | Distance (Å) |
|--------|------------|--------|------------|--------|--------------|
| 1EJO   | L.HIS_2038 | NE2    | H.ASP_2603 | OD1    | 3.217        |
| 1EJO   | L.ARG_2065 | NH1    | L.ASP_2085 | OD1    | 3.884        |
| 1EJO   | L.ARG_2065 | NH1    | L.ASP_2085 | OD2    | 3.751        |
| 1EJO   | L.ARG_2065 | NH1    | L.ASP_2086 | OD1    | 3.789        |
| 1EJO   | L.ARG_2065 | NH1    | L.ASP_2086 | OD2    | 2.949        |
| 1EJO   | L.ARG_2065 | NH2    | L.GLU_2083 | OE2    | 3.437        |
| 1EJO   | L.LYS_2107 | NZ     | L.ASP_2169 | OD1    | 3.608        |
| 1EJO   | L.LYS_2153 | NZ     | L.GLU_2199 | OE2    | 3.964        |
| 1EJO   | L.ARG_2159 | NH2    | L.GLU_2189 | OE1    | 2.792        |
| 1EJO   | L.ARG_2159 | NH2    | L.GLU_2189 | OE2    | 2.939        |
| 1EJO   | L.LYS_2187 | NZ     | L.ASP_2188 | OD1    | 3.810        |
| 1EJO   | H.ARG_2537 | NH1    | H.ASP_2589 | OD1    | 2.793        |
| 1EJO   | H.ARG_2537 | NH2    | H.GLU_2545 | OE1    | 3.422        |
| 1EJO   | H.ARG_2537 | NH2    | H.ASP_2589 | OD1    | 3.718        |
| 1EJO   | H.ARG_2543 | NH1    | H.GLU_2545 | OE1    | 3.893        |
| 1EJO   | H.ARG_2543 | NH1    | H.GLU_2545 | OE2    | 2.876        |
| 1EJO   | H.ARG_2543 | NH2    | H.GLU_2541 | OE1    | 3.189        |
| 1EJO   | H.ARG_2566 | NH1    | H.ASP_2589 | OD2    | 2.850        |
| 1EJO   | H.ARG_2566 | NH2    | H.ASP_2589 | OD1    | 3.228        |
| 1EJO   | H.ARG_2566 | NH2    | H.ASP_2589 | OD2    | 3.243        |
| 1EJO   | H.ARG_2598 | NH1    | H.ASP_2603 | OD1    | 3.142        |
| 1EJO   | H.ARG_2598 | NH1    | H.ASP_2603 | OD2    | 3.978        |
| 1EJO   | H.ARG_2598 | NH2    | H.ASP_2603 | OD1    | 3.242        |
| 1EJO   | H.ARG_2598 | NH2    | H.ASP_2603 | OD2    | 2.790        |
| 1EJO   | H.ARG_2598 | NH2    | P.ASP_3143 | OD1    | 3.795        |
| 1EJO   | H.ARG_2598 | NH2    | P.ASP_3143 | OD2    | 2.982        |
| 1EJO   | H.LYS_2714 | NZ     | L.GLU_2127 | OE1    | 2.933        |
| 1EJO   | H.LYS_2714 | NZ     | L.GLU_2127 | OE2    | 3.046        |
| 1EJO   | P.ARG_3141 | NH1    | L.GLU_2027 | OE2    | 3.696        |
| 1EJO   | P.ARG_3141 | NH1    | L.GLU_2097 | OE1    | 2.675        |
| 1EJO   | P.ARG_3141 | NH2    | L.GLU_2027 | OE2    | 3.441        |

Table 52: 1EJO-specific salt bridging networks analysis. In this table, a PDB file is specified with a four-letter PDB ID, except that the names of the PDB files corresponding to the single NMR structural model split from the NMR ensemble is specified with a four-letter PDB ID in addition to a hyphen followed by the single NMR structural model numeric ID, the residue naming scheme is **Chain ID\_residue name\_residue number**,  $\angle ADH$  represents the angle formed by acceptor (A), donor (D) and hydrogen (H) ( $\angle ADH$ ).

| PDB ID | Residue A | Atom A | Residue B | Atom B | Distance (Å) |
|--------|-----------|--------|-----------|--------|--------------|
| 1EMT   | L_LYS_39  | NZ     | L_GLU_81  | OE1    | 2.666        |
| 1EMT   | L_LYS_39  | NZ     | L_GLU_81  | OE2    | 3.409        |
| 1EMT   | L_ARG_61  | NH1    | L_ASP_82  | OD1    | 2.890        |
| 1EMT   | L_ARG_61  | NH2    | L_ASP_82  | OD1    | 2.955        |
| 1EMT   | L_ARG_61  | NH2    | L_ASP_82  | OD2    | 2.766        |
| 1EMT   | L_LYS_147 | NZ     | L_GLU_154 | OE2    | 3.689        |
| 1EMT   | L_LYS_149 | NZ     | L_GLU_195 | OE2    | 3.241        |
| 1EMT   | L_LYS_183 | NZ     | L_GLU_187 | OE1    | 2.782        |
| 1EMT   | L_LYS_183 | NZ     | L_GLU_187 | OE2    | 3.826        |
| 1EMT   | L_ARG_188 | NH2    | L_GLU_185 | OE1    | 3.057        |
| 1EMT   | L_ARG_188 | NH2    | L_GLU_185 | OE2    | 3.248        |
| 1EMT   | L_HIS_189 | ND1    | L_GLU_185 | OE2    | 3.669        |
| 1EMT   | L_HIS_189 | NE2    | L_GLU_185 | OE2    | 3.443        |
| 1EMT   | H_LYS_63  | NZ     | L_ASP_1   | OD1    | 3.310        |
| 1EMT   | H_LYS_67  | NZ     | H_ASP_90  | OD1    | 2.648        |
| 1EMT   | H_LYS_67  | NZ     | H_ASP_90  | OD2    | 3.672        |
| 1EMT   | H_LYS_211 | NZ     | L_GLU_123 | OE1    | 2.945        |
| 1EMT   | H_LYS_211 | NZ     | L_GLU_123 | OE2    | 2.554        |

Table 53: 1EMT-specific salt bridging networks analysis. In this table, a PDB file is specified with a four-letter PDB ID, except that the names of the PDB files corresponding to the single NMR structural model split from the NMR ensemble is specified with a four-letter PDB ID in addition to a hyphen followed by the single NMR structural model numeric ID, the residue naming scheme is **Chain ID\_residue name\_residue number**,  $\angle ADH$  represents the angle formed by acceptor (A), donor (D) and hydrogen (H) ( $\angle ADH$ ).

| PDB ID | Residue A | Atom A | Residue B | Atom B | Distance (Å) |
|--------|-----------|--------|-----------|--------|--------------|
| 1ETZ   | L_ARG_23  | NH2    | L_ASP_71  | OD2    | 3.806        |
| 1ETZ   | L_ARG_63  | NH2    | L_GLU_83  | OE2    | 3.283        |
| 1ETZ   | L_ARG_63  | NH2    | L_ASP_84  | OD1    | 2.986        |
| 1ETZ   | L_ARG_63  | NH2    | L_ASP_84  | OD2    | 3.556        |
| 1ETZ   | L_LYS_113 | NZ     | L_GLU_201 | OE1    | 3.231        |
| 1ETZ   | L_ARG_186 | NH1    | B_GLU_48  | OE1    | 2.771        |
| 1ETZ   | L_ARG_186 | NH1    | B_GLU_48  | OE2    | 3.248        |
| 1ETZ   | L_ARG_190 | NH1    | L_GLU_189 | OE2    | 3.584        |
| 1ETZ   | L_ARG_190 | NH2    | L_GLU_189 | OE2    | 3.089        |
| 1ETZ   | L_ARG_190 | NH2    | B_GLU_48  | OE2    | 3.331        |
| 1ETZ   | H_ARG_40  | NH1    | H_ASP_91  | OD1    | 2.907        |
| 1ETZ   | H_ARG_40  | NH2    | H_GLU_48  | OE1    | 3.221        |
| 1ETZ   | H_ARG_40  | NH2    | H_ASP_91  | OD1    | 3.222        |
| 1ETZ   | H_ARG_68  | NH2    | H_ASP_91  | OD1    | 3.774        |
| 1ETZ   | H_ARG_68  | NH2    | H_ASP_91  | OD2    | 2.733        |
| 1ETZ   | H_LYS_73  | NZ     | H_ASP_57  | OD1    | 3.834        |
| 1ETZ   | H_ARG_99  | NH1    | H_ASP_114 | OD1    | 2.968        |
| 1ETZ   | H_ARG_99  | NH1    | H_ASP_114 | OD2    | 3.185        |
| 1ETZ   | H_ARG_100 | NH1    | H_ASP_52  | OD1    | 3.260        |
| 1ETZ   | H_ARG_100 | NH1    | H_ASP_52  | OD2    | 2.758        |
| 1ETZ   | H_LYS_156 | NZ     | L_GLU_127 | OE2    | 3.377        |
| 1ETZ   | H_LYS_221 | NZ     | L_GLU_126 | OE1    | 3.184        |
| 1ETZ   | A_ARG_23  | NH1    | A_ASP_71  | OD2    | 2.921        |
| 1ETZ   | A_ARG_23  | NH2    | A_ASP_71  | OD2    | 2.821        |
| 1ETZ   | A_ARG_63  | NH2    | A_GLU_83  | OE2    | 3.430        |
| 1ETZ   | A_ARG_63  | NH2    | A_ASP_84  | OD1    | 2.842        |
| 1ETZ   | A_ARG_63  | NH2    | A_ASP_84  | OD2    | 3.406        |
| 1ETZ   | A_LYS_113 | NZ     | A_GLU_201 | OE1    | 2.940        |
| 1ETZ   | A_ARG_186 | NH1    | H_GLU_45  | OE2    | 3.236        |
| 1ETZ   | A_ARG_186 | NH2    | H_GLU_48  | OE1    | 3.518        |
| 1ETZ   | B_ARG_40  | NH1    | B_ASP_91  | OD1    | 3.069        |
| 1ETZ   | B_ARG_40  | NH2    | B_GLU_48  | OE1    | 3.077        |
| 1ETZ   | B_ARG_40  | NH2    | B_ASP_91  | OD1    | 3.733        |
| 1ETZ   | B_LYS_59  | NZ     | B_ASP_57  | OD1    | 3.243        |
| 1ETZ   | B_LYS_59  | NZ     | B_ASP_57  | OD2    | 3.017        |
| 1ETZ   | B_ARG_68  | NH1    | B_ASP_91  | OD1    | 3.924        |
| 1ETZ   | B_ARG_68  | NH2    | B_ASP_91  | OD1    | 3.185        |
| 1ETZ   | B_ARG_68  | NH2    | B_ASP_91  | OD2    | 2.598        |
| 1ETZ   | B_LYS_73  | NZ     | B_ASP_57  | OD1    | 2.975        |
| 1ETZ   | B_ARG_99  | NH1    | B_ASP_114 | OD1    | 2.870        |
| 1ETZ   | B_ARG_99  | NH1    | B_ASP_114 | OD2    | 3.787        |
| 1ETZ   | B_ARG_100 | NH1    | B_ASP_52  | OD1    | 2.947        |
| 1ETZ   | B_ARG_100 | NH1    | B_ASP_52  | OD2    | 2.788        |
| 1ETZ   | B_LYS_156 | NZ     | A_GLU_127 | OE2    | 2.979        |
| 1ETZ   | B_LYS_221 | NZ     | A_GLU_126 | OE1    | 3.572        |
| 1ETZ   | B_LYS_222 | NZ     | B_GLU_224 | OE1    | 3.556        |

---

Table 54: 1ETZ-specific salt bridging networks analysis. In this table, a PDB file is specified with a four-letter PDB ID, except that the names of the PDB files corresponding to the single NMR structural model split from the NMR ensemble is specified with a four-letter PDB ID in addition to a hyphen followed by the single NMR structural model numeric ID, the residue naming scheme is **Chain ID\_residue name\_residue number**,  $\angle ADH$  represents the angle formed by acceptor (A), donor (D) and hydrogen (H) ( $\angle ADH$ ).



| PDB ID | Residue A | Atom A | Residue B | Atom B | Distance (Å) |
|--------|-----------|--------|-----------|--------|--------------|
| 1F11   | A_ARG_61  | NH1    | A_GLU_79  | OE2    | 3.870        |
| 1F11   | A_ARG_61  | NH1    | A_GLU_81  | OE1    | 3.780        |
| 1F11   | A_ARG_61  | NH2    | A_GLU_81  | OE1    | 3.819        |
| 1F11   | A_ARG_61  | NH2    | A_ASP_82  | OD1    | 2.589        |
| 1F11   | A_ARG_61  | NH2    | A_ASP_82  | OD2    | 2.998        |
| 1F11   | A_LYS_147 | NZ     | A_GLU_154 | OE1    | 3.554        |
| 1F11   | A_LYS_149 | NZ     | A_GLU_195 | OE1    | 2.800        |
| 1F11   | A_LYS_149 | NZ     | A_GLU_195 | OE2    | 3.495        |
| 1F11   | A_ARG_155 | NH2    | A_GLU_185 | OE2    | 3.833        |
| 1F11   | A_LYS_183 | NZ     | A_ASP_184 | OD1    | 3.227        |
| 1F11   | A_LYS_183 | NZ     | A_ASP_184 | OD2    | 3.413        |
| 1F11   | A_HIS_189 | NE2    | A_ASP_151 | OD2    | 3.960        |
| 1F11   | A_ARG_211 | NH1    | A_GLU_187 | OE1    | 3.379        |
| 1F11   | B_LYS_35  | NZ     | B_ASP_50  | OD2    | 2.899        |
| 1F11   | B_LYS_62  | NZ     | B_GLU_46  | OE1    | 3.878        |
| 1F11   | B_LYS_62  | NZ     | B_GLU_46  | OE2    | 3.017        |
| 1F11   | B_LYS_66  | NZ     | B_ASP_86  | OD1    | 3.898        |
| 1F11   | B_LYS_66  | NZ     | B_ASP_86  | OD2    | 2.909        |
| 1F11   | B_LYS_218 | NZ     | B_ASP_220 | OD1    | 3.293        |
| 1F11   | B_LYS_221 | NZ     | A_GLU_123 | OE2    | 3.880        |
| 1F11   | C_ARG_61  | NH1    | C_GLU_79  | OE2    | 3.820        |
| 1F11   | C_ARG_61  | NH1    | C_GLU_81  | OE1    | 3.765        |
| 1F11   | C_ARG_61  | NH2    | C_GLU_81  | OE1    | 3.827        |
| 1F11   | C_ARG_61  | NH2    | C_ASP_82  | OD1    | 2.588        |
| 1F11   | C_ARG_61  | NH2    | C_ASP_82  | OD2    | 2.920        |
| 1F11   | C_LYS_147 | NZ     | C_GLU_154 | OE1    | 3.496        |
| 1F11   | C_LYS_149 | NZ     | C_GLU_195 | OE1    | 2.803        |
| 1F11   | C_LYS_149 | NZ     | C_GLU_195 | OE2    | 3.539        |
| 1F11   | C_ARG_155 | NH2    | C_GLU_185 | OE2    | 3.909        |
| 1F11   | C_LYS_183 | NZ     | C_ASP_184 | OD1    | 3.200        |
| 1F11   | C_LYS_183 | NZ     | C_ASP_184 | OD2    | 3.469        |
| 1F11   | C_ARG_211 | NH1    | C_GLU_187 | OE1    | 3.266        |
| 1F11   | D_LYS_35  | NZ     | D_ASP_50  | OD2    | 2.846        |
| 1F11   | D_LYS_62  | NZ     | D_GLU_46  | OE1    | 3.912        |
| 1F11   | D_LYS_62  | NZ     | D_GLU_46  | OE2    | 3.130        |
| 1F11   | D_LYS_66  | NZ     | D_ASP_86  | OD1    | 3.943        |
| 1F11   | D_LYS_66  | NZ     | D_ASP_86  | OD2    | 2.885        |
| 1F11   | D_LYS_218 | NZ     | D_ASP_220 | OD1    | 3.381        |
| 1F11   | D_LYS_221 | NZ     | C_GLU_123 | OE2    | 3.786        |

Table 55: 1F11-specific salt bridging networks analysis. In this table, a PDB file is specified with a four-letter PDB ID, except that the names of the PDB files corresponding to the single NMR structural model split from the NMR ensemble is specified with a four-letter PDB ID in addition to a hyphen followed by the single NMR structural model numeric ID, the residue naming scheme is **Chain ID\_residue name\_residue number**,  $\angle ADH$  represents the angle formed by acceptor (A), donor (D) and hydrogen (H) ( $\angle ADH$ ).

| PDB ID | Residue A  | Atom A | Residue B  | Atom B | Distance (Å) |
|--------|------------|--------|------------|--------|--------------|
| 1F2X   | K_ARG_838  | NH1    | K_ASP_888  | OD1    | 2.859        |
| 1F2X   | K_ARG_838  | NH2    | K_GLU_846  | OE2    | 2.923        |
| 1F2X   | K_ARG_865  | NH1    | K_ASP_888  | OD1    | 3.794        |
| 1F2X   | K_ARG_865  | NH1    | K_ASP_888  | OD2    | 2.763        |
| 1F2X   | K_ARG_865  | NH2    | K_ASP_888  | OD1    | 3.027        |
| 1F2X   | K_ARG_865  | NH2    | K_ASP_888  | OD2    | 3.447        |
| 1F2X   | K_LYS_874  | NZ     | K_ASP_871  | OD1    | 3.294        |
| 1F2X   | K_ARG_909  | NH2    | K_ASP_912  | OD1    | 2.589        |
| 1F2X   | K_ARG_909  | NH2    | K_ASP_912  | OD2    | 3.255        |
| 1F2X   | L_ARG_1038 | NH1    | L_ASP_1088 | OD1    | 2.834        |
| 1F2X   | L_ARG_1038 | NH2    | L_GLU_1046 | OE2    | 3.098        |
| 1F2X   | L_ARG_1038 | NH2    | L_ASP_1088 | OD1    | 3.939        |
| 1F2X   | L_ARG_1065 | NH1    | L_ASP_1088 | OD1    | 3.834        |
| 1F2X   | L_ARG_1065 | NH1    | L_ASP_1088 | OD2    | 2.618        |
| 1F2X   | L_ARG_1065 | NH2    | L_ASP_1088 | OD1    | 3.165        |
| 1F2X   | L_ARG_1065 | NH2    | L_ASP_1088 | OD2    | 3.405        |
| 1F2X   | L_ARG_1109 | NH2    | L_ASP_1112 | OD1    | 3.166        |
| 1F2X   | L_ARG_1109 | NH2    | L_ASP_1112 | OD2    | 2.892        |

Table 56: 1F2X-specific salt bridging networks analysis. In this table, a PDB file is specified with a four-letter PDB ID, except that the names of the PDB files corresponding to the single NMR structural model split from the NMR ensemble is specified with a four-letter PDB ID in addition to a hyphen followed by the single NMR structural model numeric ID, the residue naming scheme is **Chain ID\_residue name\_residue number**,  $\angle ADH$  represents the angle formed by acceptor (A), donor (D) and hydrogen (H) ( $\angle ADH$ ).

| PDB ID | Residue A | Atom A | Residue B | Atom B | Distance (Å) |
|--------|-----------|--------|-----------|--------|--------------|
| 1F3R   | B_ARG_38  | NH1    | B_ASP_89  | OD2    | 2.997        |
| 1F3R   | B_ARG_38  | NH2    | B_GLU_46  | OE1    | 3.068        |
| 1F3R   | B_ARG_50  | NH1    | B_ASP_98  | OD1    | 3.532        |
| 1F3R   | B_ARG_66  | NH1    | B_ASP_89  | OD1    | 3.017        |
| 1F3R   | B_ARG_66  | NH2    | B_ASP_89  | OD1    | 3.057        |
| 1F3R   | B_ARG_97  | NH1    | B_ASP_111 | OD1    | 3.327        |
| 1F3R   | B_ARG_97  | NH1    | B_ASP_111 | OD2    | 3.427        |
| 1F3R   | B_ARG_97  | NH2    | B_ASP_111 | OD1    | 3.187        |
| 1F3R   | B_ARG_97  | NH2    | B_ASP_111 | OD2    | 3.419        |
| 1F3R   | B_LYS_177 | NZ     | B_GLU_180 | OE1    | 3.798        |
| 1F3R   | B_LYS_177 | NZ     | B_GLU_180 | OE2    | 3.027        |
| 1F3R   | B_ARG_199 | NH1    | B_ASP_220 | OD1    | 2.891        |
| 1F3R   | B_ARG_199 | NH1    | B_ASP_220 | OD2    | 3.346        |
| 1F3R   | B_ARG_199 | NH2    | B_GLU_219 | OE1    | 3.171        |
| 1F3R   | B_LYS_244 | NZ     | B_GLU_242 | OE2    | 3.193        |
| 1F3R   | B_LYS_249 | NZ     | B_GLU_247 | OE1    | 3.078        |

Table 57: 1F3R-specific salt bridging networks analysis. In this table, a PDB file is specified with a four-letter PDB ID, except that the names of the PDB files corresponding to the single NMR structural model split from the NMR ensemble is specified with a four-letter PDB ID in addition to a hyphen followed by the single NMR structural model numeric ID, the residue naming scheme is **Chain ID\_residue name\_residue number**,  $\angle ADH$  represents the angle formed by acceptor (A), donor (D) and hydrogen (H) ( $\angle ADH$ ).

| PDB ID | Residue A | Atom A | Residue B | Atom B | Distance (Å) |
|--------|-----------|--------|-----------|--------|--------------|
| 1F4W   | L_ARG_63  | NH2    | L_GLU_83  | OE2    | 3.740        |
| 1F4W   | L_ARG_63  | NH2    | L_ASP_84  | OD1    | 3.103        |
| 1F4W   | L_ARG_63  | NH2    | L_ASP_84  | OD2    | 3.558        |
| 1F4W   | L_LYS_113 | NZ     | L_GLU_201 | OE1    | 2.889        |
| 1F4W   | L_LYS_169 | NZ     | L_GLU_85  | OE2    | 3.500        |
| 1F4W   | H_ARG_38  | NH1    | H_ASP_90  | OD1    | 2.942        |
| 1F4W   | H_ARG_38  | NH2    | H_GLU_46  | OE1    | 2.644        |
| 1F4W   | H_ARG_67  | NH1    | H_ASP_90  | OD1    | 3.871        |
| 1F4W   | H_ARG_67  | NH1    | H_ASP_90  | OD2    | 2.697        |
| 1F4W   | H_ARG_67  | NH2    | H_ASP_90  | OD1    | 3.052        |
| 1F4W   | H_ARG_67  | NH2    | H_ASP_90  | OD2    | 3.253        |
| 1F4W   | H_ARG_72  | NH2    | H_ASP_74  | OD1    | 3.561        |
| 1F4W   | H_LYS_76  | NZ     | H_ASP_73  | OD2    | 3.208        |
| 1F4W   | H_ARG_98  | NH1    | H_ASP_105 | OD1    | 3.445        |
| 1F4W   | H_ARG_98  | NH1    | H_ASP_105 | OD2    | 2.877        |
| 1F4W   | H_LYS_147 | NZ     | L_GLU_127 | OE2    | 2.611        |
| 1F4W   | H_LYS_212 | NZ     | L_GLU_126 | OE1    | 2.614        |
| 1F4W   | H_LYS_212 | NZ     | L_GLU_126 | OE2    | 2.379        |

Table 58: 1F4W-specific salt bridging networks analysis. In this table, a PDB file is specified with a four-letter PDB ID, except that the names of the PDB files corresponding to the single NMR structural model split from the NMR ensemble is specified with a four-letter PDB ID in addition to a hyphen followed by the single NMR structural model numeric ID, the residue naming scheme is **Chain ID\_residue name\_residue number**,  $\angle ADH$  represents the angle formed by acceptor (A), donor (D) and hydrogen (H) ( $\angle ADH$ ).

| PDB ID | Residue A | Atom A | Residue B | Atom B | Distance (Å) |
|--------|-----------|--------|-----------|--------|--------------|
| 1F4X   | L_HIS_44  | ND1    | L_GLU_40  | OE2    | 3.729        |
| 1F4X   | L_ARG_63  | NH2    | L_ASP_84  | OD1    | 3.061        |
| 1F4X   | L_ARG_63  | NH2    | L_ASP_84  | OD2    | 3.605        |
| 1F4X   | L_LYS_113 | NZ     | L_GLU_201 | OE1    | 3.012        |
| 1F4X   | L_LYS_169 | NZ     | L_GLU_85  | OE2    | 3.678        |
| 1F4X   | H_ARG_38  | NH1    | H_ASP_90  | OD1    | 2.949        |
| 1F4X   | H_ARG_38  | NH2    | H_GLU_46  | OE1    | 2.849        |
| 1F4X   | H_ARG_38  | NH2    | H_ASP_90  | OD1    | 3.913        |
| 1F4X   | H_ARG_67  | NH1    | H_ASP_90  | OD1    | 3.808        |
| 1F4X   | H_ARG_67  | NH1    | H_ASP_90  | OD2    | 2.538        |
| 1F4X   | H_ARG_67  | NH2    | H_ASP_90  | OD1    | 3.205        |
| 1F4X   | H_ARG_67  | NH2    | H_ASP_90  | OD2    | 3.358        |
| 1F4X   | H_ARG_72  | NH2    | H_ASP_74  | OD1    | 3.580        |
| 1F4X   | H_LYS_76  | NZ     | H_ASP_73  | OD2    | 2.862        |
| 1F4X   | H_ARG_98  | NH1    | H_ASP_105 | OD1    | 3.356        |
| 1F4X   | H_ARG_98  | NH1    | H_ASP_105 | OD2    | 2.740        |
| 1F4X   | H_LYS_147 | NZ     | L_GLU_127 | OE2    | 2.699        |
| 1F4X   | H_LYS_212 | NZ     | L_GLU_126 | OE1    | 2.421        |
| 1F4X   | H_LYS_212 | NZ     | L_GLU_126 | OE2    | 2.990        |

Table 59: 1F4X-specific salt bridging networks analysis. In this table, a PDB file is specified with a four-letter PDB ID, except that the names of the PDB files corresponding to the single NMR structural model split from the NMR ensemble is specified with a four-letter PDB ID in addition to a hyphen followed by the single NMR structural model numeric ID, the residue naming scheme is **Chain ID** **residue name** **residue number**,  $\angle ADH$  represents the angle formed by acceptor (A), donor (D) and hydrogen (H) ( $\angle ADH$ ).

| PDB ID | Residue A | Atom A | Residue B | Atom B | Distance (Å) |
|--------|-----------|--------|-----------|--------|--------------|
| 1F4Y   | L_ARG_63  | NH2    | L_ASP_84  | OD1    | 3.366        |
| 1F4Y   | L_LYS_105 | NZ     | L_GLU_85  | OE1    | 3.158        |
| 1F4Y   | H_ARG_38  | NH1    | H_ASP_90  | OD1    | 3.048        |
| 1F4Y   | H_ARG_38  | NH2    | H_GLU_46  | OE1    | 2.579        |
| 1F4Y   | H_LYS_65  | NZ     | H_ASP_62  | OD1    | 3.084        |
| 1F4Y   | H_LYS_65  | NZ     | H_ASP_62  | OD2    | 3.693        |
| 1F4Y   | H_ARG_67  | NH1    | H_ASP_90  | OD1    | 3.760        |
| 1F4Y   | H_ARG_67  | NH1    | H_ASP_90  | OD2    | 2.465        |
| 1F4Y   | H_ARG_67  | NH2    | H_ASP_90  | OD1    | 2.587        |
| 1F4Y   | H_ARG_67  | NH2    | H_ASP_90  | OD2    | 2.864        |
| 1F4Y   | H_ARG_98  | NH1    | H_ASP_105 | OD1    | 3.675        |
| 1F4Y   | H_ARG_98  | NH1    | H_ASP_105 | OD2    | 3.275        |
| 1F4Y   | H_LYS_212 | NZ     | L_GLU_126 | OE2    | 3.609        |

Table 60: 1F4Y-specific salt bridging networks analysis. In this table, a PDB file is specified with a four-letter PDB ID, except that the names of the PDB files corresponding to the single NMR structural model split from the NMR ensemble is specified with a four-letter PDB ID in addition to a hyphen followed by the single NMR structural model numeric ID, the residue naming scheme is **Chain ID\_residue name\_residue number**,  $\angle ADH$  represents the angle formed by acceptor (A), donor (D) and hydrogen (H) ( $\angle ADH$ ).

| PDB ID | Residue A | Atom A | Residue B | Atom B | Distance (Å) |
|--------|-----------|--------|-----------|--------|--------------|
| 1F8T   | L_ARG_46  | NH2    | L_ASP_55  | OD1    | 2.680        |
| 1F8T   | L_ARG_46  | NH2    | L_ASP_55  | OD2    | 3.749        |
| 1F8T   | L_ARG_61  | NH1    | L_GLU_79  | OE1    | 3.213        |
| 1F8T   | L_ARG_61  | NH2    | L_GLU_79  | OE1    | 3.750        |
| 1F8T   | L_ARG_61  | NH2    | L_ASP_82  | OD1    | 2.713        |
| 1F8T   | L_ARG_61  | NH2    | L_ASP_82  | OD2    | 3.022        |
| 1F8T   | L_ARG_77  | NH1    | L_GLU_79  | OE2    | 2.715        |
| 1F8T   | L_ARG_77  | NH2    | L_GLU_79  | OE2    | 3.752        |
| 1F8T   | L_ARG_96  | NH1    | H_ASP_97  | OD1    | 3.105        |
| 1F8T   | L_ARG_96  | NH1    | H_ASP_97  | OD2    | 3.586        |
| 1F8T   | L_ARG_96  | NH2    | H_ASP_97  | OD1    | 3.395        |
| 1F8T   | L_ARG_96  | NH2    | H_ASP_97  | OD2    | 2.424        |
| 1F8T   | L_LYS_    | NZ     | L_GLU_    | OE1    | 3.476        |
| 1F8T   | L_LYS_    | NZ     | L_GLU_    | OE1    | 3.068        |
| 1F8T   | L_LYS_    | NZ     | L_GLU_    | OE2    | 3.947        |
| 1F8T   | L_ARG_    | NH2    | L_GLU_    | OE1    | 3.027        |
| 1F8T   | L_ARG_    | NH2    | L_GLU_    | OE2    | 2.531        |
| 1F8T   | L_LYS_    | NZ     | L_GLU_    | OE2    | 3.307        |
| 1F8T   | L_HIS_    | ND1    | L_ASP_    | OD2    | 2.855        |
| 1F8T   | L_LYS_199 | NZ     | L_ASP_110 | OD2    | 3.253        |
| 1F8T   | H_ARG_38  | NH1    | H_ASP_86  | OD1    | 2.940        |
| 1F8T   | H_ARG_38  | NH2    | H_GLU_46  | OE1    | 2.881        |
| 1F8T   | H_ARG_38  | NH2    | H_ASP_86  | OD1    | 3.828        |
| 1F8T   | H_ARG_66  | NH1    | H_ASP_86  | OD1    | 3.709        |
| 1F8T   | H_ARG_66  | NH1    | H_ASP_86  | OD2    | 3.187        |
| 1F8T   | H_ARG_66  | NH2    | H_ASP_86  | OD1    | 2.923        |
| 1F8T   | H_ARG_66  | NH2    | H_ASP_86  | OD2    | 3.622        |
| 1F8T   | H_LYS_221 | NZ     | L_GLU_123 | OE1    | 3.087        |

Table 61: 1F8T-specific salt bridging networks analysis. In this table, a PDB file is specified with a four-letter PDB ID, except that the names of the PDB files corresponding to the single NMR structural model split from the NMR ensemble is specified with a four-letter PDB ID in addition to a hyphen followed by the single NMR structural model numeric ID, the residue naming scheme is **Chain ID\_residue name\_residue number**,  $\angle ADH$  represents the angle formed by acceptor (A), donor (D) and hydrogen (H) ( $\angle ADH$ ).

| PDB ID | Residue A | Atom A | Residue B | Atom B | Distance (Å) |
|--------|-----------|--------|-----------|--------|--------------|
| 1F90   | L_LYS_30  | NZ     | E_GLU_4   | OE1    | 2.620        |
| 1F90   | L_LYS_30  | NZ     | E_GLU_4   | OE2    | 2.679        |
| 1F90   | L_ARG_46  | NH2    | L_ASP_55  | OD1    | 2.495        |
| 1F90   | L_ARG_46  | NH2    | L_ASP_55  | OD2    | 3.861        |
| 1F90   | L_ARG_61  | NH1    | L_GLU_79  | OE2    | 3.045        |
| 1F90   | L_ARG_61  | NH2    | L_GLU_79  | OE2    | 3.948        |
| 1F90   | L_ARG_61  | NH2    | L_GLU_81  | OE1    | 3.955        |
| 1F90   | L_ARG_61  | NH2    | L_ASP_82  | OD1    | 2.600        |
| 1F90   | L_ARG_61  | NH2    | L_ASP_82  | OD2    | 2.843        |
| 1F90   | L_ARG_77  | NH1    | L_GLU_79  | OE1    | 2.895        |
| 1F90   | L_ARG_77  | NH1    | L_GLU_79  | OE2    | 3.695        |
| 1F90   | L_ARG_96  | NH2    | H_ASP_97  | OD1    | 2.720        |
| 1F90   | L_ARG_96  | NH2    | H_ASP_97  | OD2    | 2.722        |
| 1F90   | L_LYS_103 | NZ     | L_GLU_105 | OE1    | 3.749        |
| 1F90   | L_LYS_103 | NZ     | L_ASP_165 | OD1    | 3.843        |
| 1F90   | L_LYS_149 | NZ     | L_GLU_195 | OE1    | 3.370        |
| 1F90   | L_LYS_149 | NZ     | L_GLU_195 | OE2    | 3.504        |
| 1F90   | L_ARG_188 | NH1    | L_GLU_185 | OE2    | 2.963        |
| 1F90   | L_ARG_188 | NH2    | L_GLU_185 | OE2    | 3.164        |
| 1F90   | L_HIS_189 | ND1    | L_ASP_151 | OD2    | 3.004        |
| 1F90   | L_HIS_189 | NE2    | L_GLU_185 | OE2    | 2.903        |
| 1F90   | H_ARG_38  | NH1    | H_ASP_86  | OD1    | 3.080        |
| 1F90   | H_ARG_38  | NH2    | H_GLU_46  | OE1    | 3.030        |
| 1F90   | H_ARG_38  | NH2    | H_ASP_86  | OD1    | 3.543        |
| 1F90   | H_ARG_66  | NH1    | H_ASP_86  | OD1    | 3.378        |
| 1F90   | H_ARG_66  | NH1    | H_ASP_86  | OD2    | 3.136        |
| 1F90   | H_ARG_66  | NH2    | H_ASP_86  | OD1    | 2.890        |
| 1F90   | H_ARG_66  | NH2    | H_ASP_86  | OD2    | 3.648        |
| 1F90   | H_LYS_221 | NZ     | L_GLU_123 | OE2    | 3.675        |
| 1F90   | E_LYS_1   | NZ     | E_GLU_5   | OE1    | 3.986        |
| 1F90   | E_LYS_1   | NZ     | E_GLU_5   | OE2    | 3.901        |

Table 62: 1F90-specific salt bridging networks analysis. In this table, a PDB file is specified with a four-letter PDB ID, except that the names of the PDB files corresponding to the single NMR structural model split from the NMR ensemble is specified with a four-letter PDB ID in addition to a hyphen followed by the single NMR structural model numeric ID, the residue naming scheme is **Chain ID\_residue name\_residue number**,  $\angle ADH$  represents the angle formed by acceptor (A), donor (D) and hydrogen (H) ( $\angle ADH$ ).



| PDB ID | Residue A | Atom A | Residue B | Atom B | Distance (Å) |
|--------|-----------|--------|-----------|--------|--------------|
| 1FBI   | L_ARG_61  | NH1    | L_ASP_82  | OD1    | 3.634        |
| 1FBI   | L_ARG_61  | NH1    | L_ASP_82  | OD2    | 2.723        |
| 1FBI   | L_ARG_61  | NH2    | L_ASP_82  | OD1    | 3.289        |
| 1FBI   | L_ARG_61  | NH2    | L_ASP_82  | OD2    | 3.818        |
| 1FBI   | L_LYS_147 | NZ     | L_GLU_195 | OE2    | 3.806        |
| 1FBI   | L_LYS_149 | NZ     | L_GLU_195 | OE1    | 2.895        |
| 1FBI   | L_LYS_149 | NZ     | L_GLU_195 | OE2    | 3.340        |
| 1FBI   | L_ARG_155 | NH1    | L_GLU_185 | OE2    | 3.988        |
| 1FBI   | L_ARG_155 | NH2    | L_GLU_185 | OE1    | 3.443        |
| 1FBI   | L_ARG_155 | NH2    | L_GLU_185 | OE2    | 3.420        |
| 1FBI   | L_LYS_183 | NZ     | L_GLU_187 | OE1    | 3.147        |
| 1FBI   | L_LYS_183 | NZ     | L_GLU_187 | OE2    | 3.215        |
| 1FBI   | L_HIS_189 | ND1    | L_ASP_151 | OD2    | 3.770        |
| 1FBI   | L_LYS_199 | NZ     | L_ASP_110 | OD1    | 2.851        |
| 1FBI   | L_LYS_199 | NZ     | L_ASP_110 | OD2    | 3.860        |
| 1FBI   | H_HIS_35  | ND1    | H_GLU_50  | OE2    | 3.933        |
| 1FBI   | H_HIS_35  | NE2    | H_GLU_50  | OE2    | 3.486        |
| 1FBI   | H_LYS_38  | NZ     | H_ASP_90  | OD1    | 3.514        |
| 1FBI   | H_LYS_38  | NZ     | H_ASP_90  | OD2    | 3.031        |
| 1FBI   | H_LYS_63  | NZ     | L_ASP_1   | OD1    | 2.933        |
| 1FBI   | H_LYS_63  | NZ     | L_ASP_1   | OD2    | 2.804        |
| 1FBI   | H_LYS_65  | NZ     | H_GLU_62  | OE1    | 2.904        |
| 1FBI   | H_LYS_67  | NZ     | H_ASP_90  | OD1    | 3.905        |
| 1FBI   | H_LYS_217 | NZ     | L_GLU_123 | OE1    | 3.667        |
| 1FBI   | X_LYS_1   | NZ     | X_GLU_7   | OE2    | 3.145        |
| 1FBI   | X_HIS_15  | ND1    | H_ASP_55  | OD1    | 3.190        |
| 1FBI   | X_HIS_15  | ND1    | H_ASP_55  | OD2    | 3.649        |
| 1FBI   | X_ARG_61  | NH1    | X_ASP_48  | OD1    | 3.808        |
| 1FBI   | X_ARG_61  | NH1    | X_ASP_48  | OD2    | 3.628        |
| 1FBI   | X_ARG_61  | NH2    | X_ASP_48  | OD1    | 3.862        |
| 1FBI   | X_LYS_96  | NZ     | H_ASP_52  | OD2    | 2.922        |
| 1FBI   | X_LYS_97  | NZ     | H_GLU_50  | OE1    | 3.586        |
| 1FBI   | X_LYS_97  | NZ     | H_GLU_50  | OE2    | 2.898        |
| 1FBI   | X_ARG_121 | NH1    | X_ASP_119 | OD1    | 3.058        |
| 1FBI   | P_ARG_24  | NH2    | P_ASP_70  | OD1    | 3.358        |
| 1FBI   | P_ARG_61  | NH1    | P_GLU_79  | OE2    | 3.500        |
| 1FBI   | P_ARG_61  | NH2    | P_ASP_82  | OD2    | 2.619        |
| 1FBI   | P_LYS_149 | NZ     | P_GLU_195 | OE1    | 3.522        |
| 1FBI   | P_LYS_149 | NZ     | P_GLU_195 | OE2    | 3.273        |
| 1FBI   | P_LYS_183 | NZ     | P_GLU_187 | OE1    | 3.943        |
| 1FBI   | P_HIS_189 | ND1    | P_ASP_151 | OD2    | 3.620        |
| 1FBI   | P_HIS_189 | NE2    | P_GLU_185 | OE1    | 3.397        |
| 1FBI   | P_HIS_189 | NE2    | P_GLU_185 | OE2    | 3.570        |
| 1FBI   | P_LYS_199 | NZ     | P_ASP_110 | OD2    | 3.380        |
| 1FBI   | P_ARG_211 | NH2    | P_GLU_187 | OE1    | 3.763        |
| 1FBI   | Q_HIS_35  | NE2    | Q_GLU_50  | OE2    | 3.940        |
| 1FBI   | Q_LYS_63  | NZ     | P_ASP_1   | OD1    | 3.020        |
| 1FBI   | Q_LYS_63  | NZ     | P_ASP_1   | OD2    | 3.850        |
| 1FBI   | Q_LYS_65  | NZ     | Q_GLU_62  | OE1    | 2.725        |
| 1FBI   | Q_LYS_65  | NZ     | Q_GLU_62  | OE2    | 3.529        |
| 1FBI   | Y_HIS_15  | ND1    | Q_ASP_55  | OD1    | 3.335        |
| 1FBI   | Y_HIS_15  | ND1    | Q_ASP_55  | OD2    | 3.838        |
| 1FBI   | Y_LYS_96  | NZ     | Q_ASP_52  | OD2    | 2.727        |
| 1FBI   | Y_LYS_97  | NZ     | Q_GLU_50  | OE1    | 2.828        |
| 1FBI   | Y_LYS_97  | NZ     | Q_GLU_50  | OE2    | 3.159        |

---

Table 63: 1FBI-specific salt bridging networks analysis. In this table, a PDB file is specified with a four-letter PDB ID, except that the names of the PDB files corresponding to the single NMR structural model split from the NMR ensemble is specified with a four-letter PDB ID in addition to a hyphen followed by the single NMR structural model numeric ID, the residue naming scheme is **Chain ID\_residue name\_residue number**,  $\angle ADH$  represents the angle formed by acceptor (A), donor (D) and hydrogen (H) ( $\angle ADH$ ).

| PDB ID | Residue A | Atom A | Residue B | Atom B | Distance (Å) |
|--------|-----------|--------|-----------|--------|--------------|
| 1FCC   | A_LYS_248 | NZ     | A_GLU_380 | OE2    | 2.872        |
| 1FCC   | A_ARG_255 | NH1    | A_ASP_249 | OD1    | 3.810        |
| 1FCC   | A_LYS_317 | NZ     | A_ASP_280 | OD2    | 3.593        |
| 1FCC   | A_LYS_320 | NZ     | A_GLU_333 | OE2    | 2.861        |
| 1FCC   | A_LYS_322 | NZ     | A_GLU_333 | OE2    | 3.431        |
| 1FCC   | A_LYS_338 | NZ     | A_GLU_430 | OE1    | 3.073        |
| 1FCC   | A_LYS_338 | NZ     | A_GLU_430 | OE2    | 2.873        |
| 1FCC   | A_LYS_370 | NZ     | B_GLU_357 | OE2    | 2.948        |
| 1FCC   | A_LYS_409 | NZ     | B_ASP_399 | OD2    | 2.859        |
| 1FCC   | A_ARG_416 | NH1    | A_GLU_388 | OE1    | 2.663        |
| 1FCC   | A_ARG_416 | NH1    | A_GLU_388 | OE2    | 2.822        |
| 1FCC   | A_ARG_416 | NH2    | A_GLU_388 | OE1    | 3.781        |
| 1FCC   | A_ARG_416 | NH2    | A_GLU_388 | OE2    | 2.901        |
| 1FCC   | A_LYS_439 | NZ     | B_GLU_356 | OE1    | 3.550        |
| 1FCC   | A_LYS_439 | NZ     | B_GLU_356 | OE2    | 3.522        |
| 1FCC   | C_LYS_4   | NZ     | C_GLU_15  | OE1    | 3.955        |
| 1FCC   | C_LYS_4   | NZ     | C_GLU_15  | OE2    | 3.020        |
| 1FCC   | C_LYS_28  | NZ     | A_GLU_380 | OE1    | 2.730        |
| 1FCC   | C_LYS_28  | NZ     | A_GLU_380 | OE2    | 3.982        |
| 1FCC   | C_LYS_28  | NZ     | A_GLU_382 | OE1    | 3.879        |
| 1FCC   | C_LYS_28  | NZ     | A_GLU_382 | OE2    | 2.866        |
| 1FCC   | C_LYS_31  | NZ     | C_GLU_27  | OE2    | 2.693        |
| 1FCC   | B_LYS_248 | NZ     | B_GLU_380 | OE2    | 2.873        |
| 1FCC   | B_ARG_255 | NH1    | B_ASP_249 | OD1    | 3.810        |
| 1FCC   | B_LYS_317 | NZ     | B_ASP_280 | OD2    | 3.592        |
| 1FCC   | B_LYS_320 | NZ     | B_GLU_333 | OE2    | 2.862        |
| 1FCC   | B_LYS_322 | NZ     | B_GLU_333 | OE2    | 3.430        |
| 1FCC   | B_LYS_338 | NZ     | B_GLU_430 | OE1    | 3.074        |
| 1FCC   | B_LYS_338 | NZ     | B_GLU_430 | OE2    | 2.873        |
| 1FCC   | B_LYS_370 | NZ     | A_GLU_357 | OE2    | 2.633        |
| 1FCC   | B_LYS_409 | NZ     | A_ASP_399 | OD2    | 3.360        |
| 1FCC   | B_ARG_416 | NH1    | B_GLU_388 | OE1    | 2.663        |
| 1FCC   | B_ARG_416 | NH1    | B_GLU_388 | OE2    | 2.823        |
| 1FCC   | B_ARG_416 | NH2    | B_GLU_388 | OE1    | 3.781        |
| 1FCC   | B_ARG_416 | NH2    | B_GLU_388 | OE2    | 2.902        |
| 1FCC   | B_LYS_439 | NZ     | A_GLU_356 | OE1    | 3.166        |
| 1FCC   | B_LYS_439 | NZ     | A_GLU_356 | OE2    | 3.295        |
| 1FCC   | D_LYS_4   | NZ     | D_GLU_15  | OE1    | 3.955        |
| 1FCC   | D_LYS_4   | NZ     | D_GLU_15  | OE2    | 3.020        |
| 1FCC   | D_LYS_28  | NZ     | B_GLU_380 | OE1    | 2.730        |
| 1FCC   | D_LYS_28  | NZ     | B_GLU_380 | OE2    | 3.982        |
| 1FCC   | D_LYS_28  | NZ     | B_GLU_382 | OE1    | 3.879        |
| 1FCC   | D_LYS_28  | NZ     | B_GLU_382 | OE2    | 2.865        |
| 1FCC   | D_LYS_31  | NZ     | D_GLU_27  | OE2    | 2.693        |

Table 64: 1FCC-specific salt bridging networks analysis. In this table, a PDB file is specified with a four-letter PDB ID, except that the names of the PDB files corresponding to the single NMR structural model split from the NMR ensemble is specified with a four-letter PDB ID in addition to a hyphen followed by the single NMR structural model numeric ID, the residue naming scheme is **Chain ID\_residue name\_residue number**,  $\angle ADH$  represents the angle formed by acceptor (A), donor (D) and hydrogen (H) ( $\angle ADH$ ).

| PDB ID | Residue A | Atom A | Residue B | Atom B | Distance (Å) |
|--------|-----------|--------|-----------|--------|--------------|
| 1FDL   | L_ARG_61  | NH1    | L_GLU_81  | OE2    | 3.900        |
| 1FDL   | L_ARG_61  | NH1    | L_ASP_82  | OD1    | 2.792        |
| 1FDL   | L_ARG_61  | NH1    | L_ASP_82  | OD2    | 2.681        |
| 1FDL   | L_ARG_61  | NH2    | L_GLU_81  | OE2    | 3.608        |
| 1FDL   | L_ARG_96  | NH1    | H_GLU_98  | OE1    | 3.307        |
| 1FDL   | L_ARG_96  | NH1    | H_GLU_98  | OE2    | 2.802        |
| 1FDL   | L_ARG_96  | NH2    | H_GLU_98  | OE1    | 2.754        |
| 1FDL   | L_ARG_96  | NH2    | H_GLU_98  | OE2    | 3.656        |
| 1FDL   | L_LYS_107 | NZ     | L_GLU_17  | OE1    | 3.380        |
| 1FDL   | L_LYS_149 | NZ     | L_GLU_195 | OE1    | 3.099        |
| 1FDL   | L_LYS_149 | NZ     | L_GLU_195 | OE2    | 3.490        |
| 1FDL   | L_ARG_155 | NH2    | L_GLU_185 | OE1    | 3.454        |
| 1FDL   | L_ARG_155 | NH2    | L_GLU_185 | OE2    | 3.567        |
| 1FDL   | L_LYS_183 | NZ     | L_GLU_187 | OE1    | 2.772        |
| 1FDL   | L_LYS_183 | NZ     | L_GLU_187 | OE2    | 2.921        |
| 1FDL   | L_HIS_189 | ND1    | L_ASP_151 | OD2    | 3.048        |
| 1FDL   | L_LYS_199 | NZ     | L_ASP_110 | OD1    | 2.959        |
| 1FDL   | L_LYS_199 | NZ     | L_ASP_110 | OD2    | 3.198        |
| 1FDL   | H_ARG_38  | NH1    | H_ASP_89  | OD2    | 3.284        |
| 1FDL   | H_ARG_38  | NH2    | H_GLU_46  | OE1    | 3.064        |
| 1FDL   | H_ARG_38  | NH2    | H_ASP_89  | OD2    | 3.961        |
| 1FDL   | H_ARG_66  | NH1    | H_ASP_89  | OD2    | 3.688        |
| 1FDL   | H_ARG_66  | NH2    | H_ASP_89  | OD1    | 2.978        |
| 1FDL   | H_ARG_66  | NH2    | H_ASP_89  | OD2    | 3.755        |
| 1FDL   | H_ARG_97  | NH2    | H_ASP_104 | OD1    | 2.804        |
| 1FDL   | H_ARG_97  | NH2    | H_ASP_104 | OD2    | 2.688        |
| 1FDL   | H_ARG_102 | NH1    | H_ASP_100 | OD1    | 3.620        |
| 1FDL   | H_LYS_211 | NZ     | L_GLU_123 | OE1    | 2.896        |
| 1FDL   | H_LYS_211 | NZ     | L_GLU_123 | OE2    | 3.291        |
| 1FDL   | Y_LYS_1   | NZ     | Y_GLU_7   | OE2    | 3.281        |
| 1FDL   | Y_ARG_61  | NH1    | Y_ASP_48  | OD2    | 3.796        |
| 1FDL   | Y_ARG_61  | NH2    | Y_ASP_48  | OD2    | 3.093        |
| 1FDL   | Y_ARG_125 | NH1    | Y_ASP_119 | OD1    | 3.041        |
| 1FDL   | Y_ARG_125 | NH1    | Y_ASP_119 | OD2    | 3.285        |
| 1FDL   | Y_ARG_125 | NH2    | Y_ASP_119 | OD1    | 3.894        |
| 1FDL   | Y_ARG_125 | NH2    | Y_ASP_119 | OD2    | 2.759        |

Table 65: 1FDL-specific salt bridging networks analysis. In this table, a PDB file is specified with a four-letter PDB ID, except that the names of the PDB files corresponding to the single NMR structural model split from the NMR ensemble is specified with a four-letter PDB ID in addition to a hyphen followed by the single NMR structural model numeric ID, the residue naming scheme is **Chain ID\_residue name\_residue number**,  $\angle ADH$  represents the angle formed by acceptor (A), donor (D) and hydrogen (H) ( $\angle ADH$ ).

| PDB ID | Residue A | Atom A | Residue B | Atom B | Distance (Å) |
|--------|-----------|--------|-----------|--------|--------------|
| 1FJ1   | A_LYS_24  | NZ     | A_ASP_70  | OD1    | 3.672        |
| 1FJ1   | A_LYS_24  | NZ     | A_ASP_70  | OD2    | 2.846        |
| 1FJ1   | A_ARG_61  | NH2    | A_ASP_82  | OD1    | 2.576        |
| 1FJ1   | A_ARG_61  | NH2    | A_ASP_82  | OD2    | 2.776        |
| 1FJ1   | A_LYS_103 | NZ     | A_GLU_105 | OE2    | 3.775        |
| 1FJ1   | A_LYS_147 | NZ     | A_GLU_154 | OE2    | 3.963        |
| 1FJ1   | A_LYS_149 | NZ     | A_GLU_195 | OE2    | 2.928        |
| 1FJ1   | A_ARG_155 | NH1    | A_GLU_185 | OE2    | 3.662        |
| 1FJ1   | A_ARG_155 | NH2    | A_GLU_185 | OE1    | 2.919        |
| 1FJ1   | A_ARG_155 | NH2    | A_GLU_185 | OE2    | 3.026        |
| 1FJ1   | A_ARG_188 | NH2    | E_GLU_196 | OE2    | 3.475        |
| 1FJ1   | A_HIS_189 | ND1    | E_GLU_196 | OE1    | 3.723        |
| 1FJ1   | A_HIS_189 | NE2    | E_GLU_196 | OE1    | 3.502        |
| 1FJ1   | A_LYS_199 | NZ     | A_ASP_110 | OD1    | 3.803        |
| 1FJ1   | A_LYS_199 | NZ     | A_ASP_110 | OD2    | 3.857        |
| 1FJ1   | B_ARG_47  | NH1    | A_ASP_1   | OD1    | 3.251        |
| 1FJ1   | B_ARG_47  | NH2    | A_ASP_1   | OD1    | 2.492        |
| 1FJ1   | B_LYS_65  | NZ     | B_ASP_62  | OD1    | 3.433        |
| 1FJ1   | B_ARG_67  | NH1    | B_ASP_90  | OD1    | 2.927        |
| 1FJ1   | B_ARG_67  | NH1    | B_ASP_90  | OD2    | 3.891        |
| 1FJ1   | B_ARG_67  | NH2    | B_ASP_90  | OD1    | 3.450        |
| 1FJ1   | B_ARG_67  | NH2    | B_ASP_90  | OD2    | 3.269        |
| 1FJ1   | B_ARG_98  | NH2    | B_ASP_101 | OD1    | 3.026        |
| 1FJ1   | B_ARG_98  | NH2    | B_ASP_101 | OD2    | 3.672        |
| 1FJ1   | B_LYS_209 | NZ     | B_GLU_211 | OE1    | 3.349        |
| 1FJ1   | B_LYS_209 | NZ     | B_GLU_211 | OE2    | 3.845        |
| 1FJ1   | C_LYS_24  | NZ     | C_ASP_70  | OD1    | 3.574        |
| 1FJ1   | C_LYS_24  | NZ     | C_ASP_70  | OD2    | 2.777        |
| 1FJ1   | C_ARG_61  | NH2    | C_ASP_82  | OD1    | 2.572        |
| 1FJ1   | C_ARG_61  | NH2    | C_ASP_82  | OD2    | 2.742        |
| 1FJ1   | C_LYS_103 | NZ     | C_GLU_105 | OE2    | 3.738        |
| 1FJ1   | C_LYS_147 | NZ     | C_GLU_154 | OE2    | 3.995        |
| 1FJ1   | C_LYS_149 | NZ     | C_GLU_195 | OE2    | 2.876        |
| 1FJ1   | C_ARG_155 | NH1    | C_GLU_185 | OE2    | 3.699        |
| 1FJ1   | C_ARG_155 | NH2    | C_GLU_185 | OE1    | 2.898        |
| 1FJ1   | C_ARG_155 | NH2    | C_GLU_185 | OE2    | 3.006        |
| 1FJ1   | C_HIS_189 | NE2    | F_GLU_196 | OE1    | 3.808        |
| 1FJ1   | C_LYS_199 | NZ     | C_ASP_110 | OD1    | 3.817        |
| 1FJ1   | C_LYS_199 | NZ     | C_ASP_110 | OD2    | 3.838        |
| 1FJ1   | D_ARG_47  | NH1    | C_ASP_1   | OD1    | 3.296        |
| 1FJ1   | D_ARG_47  | NH2    | C_ASP_1   | OD1    | 2.800        |
| 1FJ1   | D_LYS_65  | NZ     | D_ASP_62  | OD1    | 3.432        |
| 1FJ1   | D_ARG_67  | NH1    | D_ASP_90  | OD1    | 2.939        |
| 1FJ1   | D_ARG_67  | NH1    | D_ASP_90  | OD2    | 3.923        |
| 1FJ1   | D_ARG_67  | NH2    | D_ASP_90  | OD1    | 3.458        |
| 1FJ1   | D_ARG_67  | NH2    | D_ASP_90  | OD2    | 3.292        |
| 1FJ1   | D_ARG_98  | NH2    | D_ASP_101 | OD1    | 3.012        |
| 1FJ1   | D_ARG_98  | NH2    | D_ASP_101 | OD2    | 3.702        |
| 1FJ1   | D_LYS_209 | NZ     | D_GLU_211 | OE1    | 3.891        |
| 1FJ1   | E_LYS_117 | NZ     | E_ASP_118 | OD1    | 3.779        |
| 1FJ1   | E_ARG_139 | NH1    | E_GLU_160 | OE2    | 3.349        |
| 1FJ1   | E_ARG_139 | NH2    | E_GLU_160 | OE2    | 3.249        |
| 1FJ1   | E_ARG_144 | NH1    | E_GLU_146 | OE2    | 2.339        |
| 1FJ1   | E_ARG_144 | NH2    | E_GLU_146 | OE2    | 3.724        |
| 1FJ1   | E_LYS_157 | NZ     | E_GLU_168 | OE2    | 3.224        |
| 1FJ1   | E_LYS_159 | NZ     | E_GLU_168 | OE2    | 3.688        |
| 1FJ1   | E_LYS_175 | NZ     | E_GLU_174 | OE1    | 3.503        |

|      |           |     |           |     |       |
|------|-----------|-----|-----------|-----|-------|
| 1FJ1 | E_LYS_189 | NZ  | E_GLU_160 | OE1 | 2.964 |
| 1FJ1 | E_LYS_189 | NZ  | E_GLU_160 | OE2 | 3.493 |
| 1FJ1 | E_LYS_212 | NZ  | E_ASP_203 | OD2 | 3.853 |
| 1FJ1 | F_LYS_117 | NZ  | F_ASP_118 | OD1 | 3.790 |
| 1FJ1 | F_ARG_139 | NH1 | F_GLU_160 | OE2 | 3.340 |
| 1FJ1 | F_ARG_139 | NH2 | F_GLU_160 | OE2 | 3.235 |
| 1FJ1 | F_ARG_144 | NH1 | F_GLU_146 | OE2 | 2.359 |
| 1FJ1 | F_ARG_144 | NH2 | F_GLU_146 | OE2 | 3.733 |
| 1FJ1 | F_LYS_157 | NZ  | F_GLU_168 | OE2 | 3.244 |
| 1FJ1 | F_LYS_159 | NZ  | F_GLU_168 | OE2 | 3.700 |
| 1FJ1 | F_LYS_175 | NZ  | F_GLU_174 | OE1 | 3.506 |
| 1FJ1 | F_LYS_189 | NZ  | F_GLU_160 | OE1 | 2.954 |
| 1FJ1 | F_LYS_189 | NZ  | F_GLU_160 | OE2 | 3.524 |
| 1FJ1 | F_LYS_212 | NZ  | F_ASP_203 | OD2 | 3.830 |

Table 66: 1FJ1-specific salt bridging networks analysis. In this table, a PDB file is specified with a four-letter PDB ID, except that the names of the PDB files corresponding to the single NMR structural model split from the NMR ensemble is specified with a four-letter PDB ID in addition to a hyphen followed by the single NMR structural model numeric ID, the residue naming scheme is **Chain ID\_residue name\_residue number**,  $\angle ADH$  represents the angle formed by acceptor (A), donor (D) and hydrogen (H) ( $\angle ADH$ ).

| PDB ID | Residue A | Atom A | Residue B | Atom B | Distance (Å) |
|--------|-----------|--------|-----------|--------|--------------|
| 1FRG   | L_LYS_24  | NZ     | L_ASP_76  | OD2    | 3.234        |
| 1FRG   | L_ARG_67  | NH2    | L_GLU_87  | OE2    | 3.036        |
| 1FRG   | L_ARG_67  | NH2    | L_ASP_88  | OD1    | 2.765        |
| 1FRG   | L_ARG_67  | NH2    | L_ASP_88  | OD2    | 3.277        |
| 1FRG   | L_LYS_109 | NZ     | L_ASP_171 | OD1    | 2.782        |
| 1FRG   | L_LYS_109 | NZ     | L_ASP_171 | OD2    | 3.487        |
| 1FRG   | L_LYS_113 | NZ     | L_GLU_17  | OE2    | 3.158        |
| 1FRG   | L_LYS_148 | NZ     | L_GLU_111 | OE2    | 3.465        |
| 1FRG   | L_LYS_155 | NZ     | L_GLU_201 | OE1    | 3.359        |
| 1FRG   | L_LYS_155 | NZ     | L_GLU_201 | OE2    | 3.552        |
| 1FRG   | L_ARG_161 | NH2    | L_GLU_191 | OE1    | 3.188        |
| 1FRG   | L_ARG_161 | NH2    | L_GLU_191 | OE2    | 2.743        |
| 1FRG   | L_LYS_175 | NZ     | L_ASP_176 | OD2    | 3.335        |
| 1FRG   | L_ARG_194 | NH2    | L_ASP_190 | OD2    | 3.738        |
| 1FRG   | L_LYS_205 | NZ     | L_ASP_116 | OD1    | 2.961        |
| 1FRG   | L_LYS_205 | NZ     | L_ASP_116 | OD2    | 3.132        |
| 1FRG   | L_LYS_213 | NZ     | H_ASP_354 | OD1    | 3.324        |
| 1FRG   | L_ARG_217 | NH2    | L_GLU_193 | OE1    | 3.045        |
| 1FRG   | H_ARG_255 | NH1    | H_GLU_263 | OE1    | 2.874        |
| 1FRG   | H_ARG_255 | NH2    | H_ASP_307 | OD1    | 2.867        |
| 1FRG   | H_LYS_282 | NZ     | H_ASP_279 | OD1    | 3.750        |
| 1FRG   | H_LYS_282 | NZ     | H_ASP_279 | OD2    | 3.157        |
| 1FRG   | H_ARG_284 | NH1    | H_ASP_307 | OD1    | 3.863        |
| 1FRG   | H_ARG_284 | NH1    | H_ASP_307 | OD2    | 2.813        |
| 1FRG   | H_ARG_284 | NH2    | H_ASP_307 | OD1    | 2.826        |
| 1FRG   | H_ARG_284 | NH2    | H_ASP_307 | OD2    | 3.114        |
| 1FRG   | H_LYS_304 | NZ     | H_GLU_306 | OE2    | 3.614        |
| 1FRG   | H_ARG_315 | NH1    | H_GLU_317 | OE1    | 2.677        |
| 1FRG   | H_ARG_315 | NH1    | H_GLU_317 | OE2    | 3.312        |
| 1FRG   | H_ARG_316 | NH1    | L_ASP_97  | OD1    | 2.879        |
| 1FRG   | H_ARG_316 | NH2    | L_ASP_97  | OD1    | 3.078        |
| 1FRG   | H_ARG_316 | NH2    | P_ASP_5   | OD2    | 2.959        |
| 1FRG   | H_LYS_322 | NZ     | L_GLU_61  | OE1    | 2.861        |
| 1FRG   | H_LYS_322 | NZ     | L_GLU_61  | OE2    | 3.997        |
| 1FRG   | H_LYS_432 | NZ     | L_GLU_129 | OE1    | 3.086        |
| 1FRG   | H_LYS_432 | NZ     | L_GLU_129 | OE2    | 3.769        |

Table 67: 1FRG-specific salt bridging networks analysis. In this table, a PDB file is specified with a four-letter PDB ID, except that the names of the PDB files corresponding to the single NMR structural model split from the NMR ensemble is specified with a four-letter PDB ID in addition to a hyphen followed by the single NMR structural model numeric ID, the residue naming scheme is **Chain ID\_residue name\_residue number**,  $\angle ADH$  represents the angle formed by acceptor (A), donor (D) and hydrogen (H) ( $\angle ADH$ ).

| PDB ID | Residue A | Atom A | Residue B | Atom B | Distance (Å) |
|--------|-----------|--------|-----------|--------|--------------|
| 1FUJ   | A_HIS_20  | NE2    | A_GLU_157 | OE2    | 3.467        |
| 1FUJ   | A_ARG_27  | NH2    | A_GLU_157 | OE1    | 3.676        |
| 1FUJ   | A_ARG_27  | NH2    | A_GLU_157 | OE2    | 3.673        |
| 1FUJ   | A_HIS_57  | ND1    | A_ASP_102 | OD1    | 3.496        |
| 1FUJ   | A_HIS_57  | ND1    | A_ASP_102 | OD2    | 2.542        |
| 1FUJ   | A_HIS_71  | NE2    | A_GLU_21  | OE2    | 2.398        |
| 1FUJ   | A_LYS_187 | NZ     | B_GLU_97  | OE1    | 3.506        |
| 1FUJ   | B_ARG_27  | NH1    | B_GLU_157 | OE1    | 2.690        |
| 1FUJ   | B_ARG_27  | NH1    | B_GLU_157 | OE2    | 2.783        |
| 1FUJ   | B_HIS_57  | ND1    | B_ASP_102 | OD1    | 3.393        |
| 1FUJ   | B_HIS_57  | ND1    | B_ASP_102 | OD2    | 2.604        |
| 1FUJ   | B_HIS_71  | NE2    | B_GLU_21  | OE2    | 2.397        |
| 1FUJ   | B_ARG_143 | NH1    | A_ASP_61  | OD2    | 3.455        |
| 1FUJ   | B_LYS_187 | NZ     | A_GLU_97  | OE1    | 3.870        |
| 1FUJ   | C_HIS_20  | ND1    | C_GLU_157 | OE2    | 3.974        |
| 1FUJ   | C_HIS_20  | NE2    | C_GLU_157 | OE2    | 3.570        |
| 1FUJ   | C_ARG_27  | NH2    | C_GLU_157 | OE1    | 2.756        |
| 1FUJ   | C_ARG_27  | NH2    | C_GLU_157 | OE2    | 3.280        |
| 1FUJ   | C_HIS_57  | ND1    | C_ASP_102 | OD1    | 3.598        |
| 1FUJ   | C_HIS_57  | ND1    | C_ASP_102 | OD2    | 2.742        |
| 1FUJ   | C_ARG_60  | NH2    | C_ASP_61  | OD1    | 3.164        |
| 1FUJ   | C_HIS_71  | NE2    | C_GLU_21  | OE2    | 2.759        |
| 1FUJ   | C_ARG_143 | NH2    | D_ASP_61  | OD1    | 3.394        |
| 1FUJ   | C_ARG_143 | NH2    | D_ASP_61  | OD2    | 3.428        |
| 1FUJ   | C_LYS_187 | NZ     | D_GLU_97  | OE2    | 2.917        |
| 1FUJ   | D_HIS_20  | NE2    | D_GLU_157 | OE2    | 3.668        |
| 1FUJ   | D_ARG_27  | NH1    | D_GLU_157 | OE1    | 2.572        |
| 1FUJ   | D_ARG_27  | NH1    | D_GLU_157 | OE2    | 3.950        |
| 1FUJ   | D_HIS_57  | ND1    | D_ASP_102 | OD1    | 3.325        |
| 1FUJ   | D_HIS_57  | ND1    | D_ASP_102 | OD2    | 2.459        |
| 1FUJ   | D_HIS_71  | NE2    | D_GLU_21  | OE2    | 2.398        |
| 1FUJ   | D_HIS_147 | ND1    | C_GLU_97  | OE1    | 3.734        |
| 1FUJ   | D_LYS_187 | NZ     | C_GLU_97  | OE1    | 3.930        |

Table 68: 1FUJ-specific salt bridging networks analysis. In this table, a PDB file is specified with a four-letter PDB ID, except that the names of the PDB files corresponding to the single NMR structural model split from the NMR ensemble is specified with a four-letter PDB ID in addition to a hyphen followed by the single NMR structural model numeric ID, the residue naming scheme is **Chain ID\_residue name\_residue number**,  $\angle ADH$  represents the angle formed by acceptor (A), donor (D) and hydrogen (H) ( $\angle ADH$ ).



| PDB ID | Residue A | Atom A | Residue B | Atom B | Distance (Å) |
|--------|-----------|--------|-----------|--------|--------------|
| 1FVC   | A_ARG_24  | NH1    | A_ASP_70  | OD1    | 3.629        |
| 1FVC   | A_ARG_24  | NH1    | A_ASP_70  | OD2    | 3.125        |
| 1FVC   | A_ARG_24  | NH2    | A_ASP_70  | OD2    | 3.258        |
| 1FVC   | A_ARG_61  | NH2    | A_GLU_81  | OE2    | 3.238        |
| 1FVC   | A_ARG_61  | NH2    | A_ASP_82  | OD1    | 2.827        |
| 1FVC   | A_ARG_61  | NH2    | A_ASP_82  | OD2    | 3.397        |
| 1FVC   | A_LYS_107 | NZ     | A_ASP_17  | OD2    | 3.723        |
| 1FVC   | B_LYS_30  | NZ     | B_ASP_31  | OD1    | 2.864        |
| 1FVC   | B_ARG_38  | NH1    | B_ASP_90  | OD1    | 3.106        |
| 1FVC   | B_ARG_38  | NH2    | B_GLU_46  | OE1    | 3.355        |
| 1FVC   | B_ARG_38  | NH2    | B_ASP_90  | OD1    | 3.972        |
| 1FVC   | B_ARG_67  | NH1    | B_ASP_90  | OD1    | 3.826        |
| 1FVC   | B_ARG_67  | NH1    | B_ASP_90  | OD2    | 2.865        |
| 1FVC   | B_ARG_67  | NH2    | B_ASP_90  | OD1    | 2.815        |
| 1FVC   | B_ARG_67  | NH2    | B_ASP_90  | OD2    | 3.370        |
| 1FVC   | B_LYS_76  | NZ     | B_ASP_73  | OD2    | 3.296        |
| 1FVC   | B_ARG_98  | NH1    | B_ASP_108 | OD1    | 3.172        |
| 1FVC   | B_ARG_98  | NH1    | B_ASP_108 | OD2    | 2.880        |
| 1FVC   | C_ARG_61  | NH1    | C_GLU_81  | OE2    | 3.955        |
| 1FVC   | C_ARG_61  | NH2    | C_GLU_81  | OE2    | 3.336        |
| 1FVC   | C_ARG_61  | NH2    | C_ASP_82  | OD1    | 2.944        |
| 1FVC   | C_ARG_61  | NH2    | C_ASP_82  | OD2    | 3.489        |
| 1FVC   | C_ARG_66  | NH2    | C_ASP_28  | OD1    | 3.198        |
| 1FVC   | D_ARG_38  | NH1    | D_ASP_90  | OD1    | 3.684        |
| 1FVC   | D_ARG_38  | NH2    | D_GLU_46  | OE1    | 3.562        |
| 1FVC   | D_ARG_67  | NH1    | D_ASP_90  | OD1    | 3.498        |
| 1FVC   | D_ARG_67  | NH1    | D_ASP_90  | OD2    | 2.863        |
| 1FVC   | D_ARG_67  | NH2    | D_ASP_90  | OD1    | 3.039        |
| 1FVC   | D_ARG_67  | NH2    | D_ASP_90  | OD2    | 3.182        |
| 1FVC   | D_ARG_98  | NH1    | D_ASP_108 | OD1    | 3.384        |
| 1FVC   | D_ARG_98  | NH1    | D_ASP_108 | OD2    | 2.939        |

Table 69: 1FVC-specific salt bridging networks analysis. In this table, a PDB file is specified with a four-letter PDB ID, except that the names of the PDB files corresponding to the single NMR structural model split from the NMR ensemble is specified with a four-letter PDB ID in addition to a hyphen followed by the single NMR structural model numeric ID, the residue naming scheme is **Chain ID\_residue name\_residue number**,  $\angle ADH$  represents the angle formed by acceptor (A), donor (D) and hydrogen (H) ( $\angle ADH$ ).

| PDB ID | Residue A | Atom A | Residue B | Atom B | Distance (Å) |
|--------|-----------|--------|-----------|--------|--------------|
| 1FVD   | A_ARG_18  | NH1    | C_ASP_70  | OD2    | 3.361        |
| 1FVD   | A_ARG_24  | NH2    | A_ASP_70  | OD1    | 3.049        |
| 1FVD   | A_ARG_24  | NH2    | A_ASP_70  | OD2    | 3.841        |
| 1FVD   | A_ARG_61  | NH2    | A_GLU_81  | OE2    | 3.219        |
| 1FVD   | A_ARG_61  | NH2    | A_ASP_82  | OD1    | 3.298        |
| 1FVD   | A_ARG_61  | NH2    | A_ASP_82  | OD2    | 3.528        |
| 1FVD   | A_ARG_66  | NH2    | A_ASP_28  | OD1    | 3.272        |
| 1FVD   | A_LYS_103 | NZ     | A_GLU_165 | OE2    | 2.750        |
| 1FVD   | A_ARG_142 | NH1    | A_GLU_105 | OE1    | 3.252        |
| 1FVD   | A_ARG_142 | NH1    | A_GLU_105 | OE2    | 3.136        |
| 1FVD   | A_ARG_142 | NH2    | A_GLU_105 | OE1    | 2.987        |
| 1FVD   | A_ARG_142 | NH2    | A_GLU_105 | OE2    | 3.986        |
| 1FVD   | A_LYS_183 | NZ     | A_GLU_187 | OE2    | 3.983        |
| 1FVD   | A_LYS_188 | NZ     | A_ASP_185 | OD1    | 3.689        |
| 1FVD   | B_ARG_38  | NH1    | B_ASP_90  | OD1    | 2.959        |
| 1FVD   | B_ARG_38  | NH2    | B_GLU_46  | OE1    | 3.651        |
| 1FVD   | B_ARG_38  | NH2    | B_ASP_90  | OD1    | 3.403        |
| 1FVD   | B_LYS_65  | NZ     | B_ASP_62  | OD1    | 3.297        |
| 1FVD   | B_ARG_67  | NH1    | B_ASP_90  | OD2    | 3.358        |
| 1FVD   | B_ARG_67  | NH2    | B_ASP_90  | OD1    | 3.444        |
| 1FVD   | B_ARG_67  | NH2    | B_ASP_90  | OD2    | 3.537        |
| 1FVD   | B_LYS_76  | NZ     | B_ASP_73  | OD2    | 3.292        |
| 1FVD   | B_ARG_98  | NH2    | B_ASP_108 | OD1    | 3.885        |
| 1FVD   | B_ARG_98  | NH2    | B_ASP_108 | OD2    | 2.828        |
| 1FVD   | B_LYS_150 | NZ     | B_ASP_151 | OD1    | 3.971        |
| 1FVD   | B_LYS_150 | NZ     | B_ASP_151 | OD2    | 3.685        |
| 1FVD   | B_LYS_216 | NZ     | A_GLU_123 | OE2    | 3.426        |
| 1FVD   | C_ARG_18  | NH1    | A_ASP_70  | OD2    | 3.065        |
| 1FVD   | C_ARG_24  | NH1    | C_ASP_70  | OD1    | 3.877        |
| 1FVD   | C_ARG_24  | NH2    | C_ASP_70  | OD1    | 3.499        |
| 1FVD   | C_ARG_24  | NH2    | C_ASP_70  | OD2    | 3.062        |
| 1FVD   | C_ARG_61  | NH2    | C_GLU_81  | OE2    | 3.791        |
| 1FVD   | C_ARG_61  | NH2    | C_ASP_82  | OD1    | 2.871        |
| 1FVD   | C_ARG_61  | NH2    | C_ASP_82  | OD2    | 3.205        |
| 1FVD   | C_ARG_66  | NH2    | C_ASP_28  | OD1    | 3.599        |
| 1FVD   | C_LYS_103 | NZ     | C_GLU_165 | OE1    | 3.456        |
| 1FVD   | C_ARG_142 | NH1    | C_GLU_105 | OE1    | 3.866        |
| 1FVD   | D_ARG_38  | NH1    | D_ASP_90  | OD1    | 2.804        |
| 1FVD   | D_ARG_38  | NH2    | D_GLU_46  | OE1    | 3.405        |
| 1FVD   | D_ARG_38  | NH2    | D_ASP_90  | OD1    | 3.854        |
| 1FVD   | D_ARG_67  | NH1    | D_ASP_90  | OD1    | 3.794        |
| 1FVD   | D_ARG_67  | NH1    | D_ASP_90  | OD2    | 2.754        |
| 1FVD   | D_ARG_67  | NH2    | D_ASP_90  | OD1    | 2.991        |
| 1FVD   | D_ARG_67  | NH2    | D_ASP_90  | OD2    | 3.196        |
| 1FVD   | D_LYS_76  | NZ     | D_ASP_73  | OD2    | 3.310        |
| 1FVD   | D_ARG_87  | NH1    | D_GLU_89  | OE1    | 3.906        |
| 1FVD   | D_ARG_87  | NH2    | D_GLU_89  | OE1    | 3.896        |
| 1FVD   | D_ARG_87  | NH2    | D_ASP_90  | OD1    | 3.754        |
| 1FVD   | D_ARG_98  | NH1    | D_ASP_108 | OD1    | 3.545        |
| 1FVD   | D_ARG_98  | NH1    | D_ASP_108 | OD2    | 3.091        |
| 1FVD   | D_LYS_150 | NZ     | D_ASP_151 | OD1    | 3.457        |
| 1FVD   | D_LYS_150 | NZ     | D_ASP_151 | OD2    | 3.794        |
| 1FVD   | D_LYS_213 | NZ     | D_ASP_215 | OD1    | 2.673        |
| 1FVD   | D_LYS_216 | NZ     | C_GLU_123 | OE1    | 2.737        |

---

Table 70: 1FVD-specific salt bridging networks analysis. In this table, a PDB file is specified with a four-letter PDB ID, except that the names of the PDB files corresponding to the single NMR structural model split from the NMR ensemble is specified with a four-letter PDB ID in addition to a hyphen followed by the single NMR structural model numeric ID, the residue naming scheme is **Chain ID\_residue name\_residue number**,  $\angle ADH$  represents the angle formed by acceptor (A), donor (D) and hydrogen (H) ( $\angle ADH$ ).

| PDB ID | Residue A | Atom A | Residue B | Atom B | Distance (Å) |
|--------|-----------|--------|-----------|--------|--------------|
| 1FVE   | A_ARG_18  | NH1    | C_ASP_70  | OD1    | 3.613        |
| 1FVE   | A_ARG_18  | NH1    | C_ASP_70  | OD2    | 3.316        |
| 1FVE   | A_ARG_24  | NH2    | A_ASP_70  | OD1    | 3.581        |
| 1FVE   | A_ARG_24  | NH2    | A_ASP_70  | OD2    | 3.679        |
| 1FVE   | A_ARG_61  | NH2    | A_GLU_81  | OE2    | 3.047        |
| 1FVE   | A_ARG_61  | NH2    | A_ASP_82  | OD1    | 3.215        |
| 1FVE   | A_ARG_61  | NH2    | A_ASP_82  | OD2    | 3.538        |
| 1FVE   | A_ARG_66  | NH2    | A_ASP_28  | OD1    | 3.900        |
| 1FVE   | A_LYS_103 | NZ     | A_GLU_105 | OE1    | 3.573        |
| 1FVE   | A_LYS_103 | NZ     | A_GLU_105 | OE2    | 3.185        |
| 1FVE   | A_LYS_103 | NZ     | A_GLU_165 | OE1    | 2.869        |
| 1FVE   | A_LYS_103 | NZ     | A_GLU_165 | OE2    | 3.988        |
| 1FVE   | A_ARG_142 | NH2    | A_GLU_105 | OE1    | 3.848        |
| 1FVE   | A_ARG_142 | NH2    | A_GLU_105 | OE2    | 3.667        |
| 1FVE   | A_ARG_142 | NH2    | A_GLU_165 | OE2    | 3.452        |
| 1FVE   | A_LYS_149 | NZ     | A_GLU_195 | OE1    | 2.902        |
| 1FVE   | A_LYS_169 | NZ     | A_ASP_167 | OD2    | 3.928        |
| 1FVE   | A_LYS_169 | NZ     | A_ASP_170 | OD2    | 3.977        |
| 1FVE   | B_ARG_38  | NH1    | B_ASP_90  | OD1    | 3.055        |
| 1FVE   | B_ARG_38  | NH2    | B_GLU_46  | OE2    | 3.767        |
| 1FVE   | B_ARG_38  | NH2    | B_ASP_90  | OD1    | 3.522        |
| 1FVE   | B_ARG_67  | NH1    | B_ASP_90  | OD2    | 3.077        |
| 1FVE   | B_ARG_67  | NH2    | B_ASP_90  | OD1    | 3.046        |
| 1FVE   | B_ARG_67  | NH2    | B_ASP_90  | OD2    | 3.273        |
| 1FVE   | B_LYS_76  | NZ     | B_ASP_73  | OD2    | 3.045        |
| 1FVE   | B_ARG_87  | NH1    | B_GLU_89  | OE2    | 3.292        |
| 1FVE   | B_ARG_98  | NH2    | B_ASP_108 | OD2    | 3.050        |
| 1FVE   | B_LYS_150 | NZ     | B_ASP_151 | OD1    | 3.911        |
| 1FVE   | B_LYS_150 | NZ     | B_ASP_151 | OD2    | 3.600        |
| 1FVE   | B_LYS_216 | NZ     | A_GLU_123 | OE2    | 3.328        |
| 1FVE   | B_LYS_217 | NZ     | B_GLU_219 | OE1    | 3.280        |
| 1FVE   | C_ARG_61  | NH2    | C_GLU_81  | OE2    | 3.092        |
| 1FVE   | C_ARG_61  | NH2    | C_ASP_82  | OD1    | 2.991        |
| 1FVE   | C_ARG_61  | NH2    | C_ASP_82  | OD2    | 3.500        |
| 1FVE   | C_LYS_103 | NZ     | C_GLU_165 | OE1    | 3.377        |
| 1FVE   | C_LYS_103 | NZ     | C_GLU_165 | OE2    | 3.755        |
| 1FVE   | C_ARG_142 | NH2    | C_GLU_105 | OE1    | 3.256        |
| 1FVE   | C_HIS_189 | ND1    | C_ASP_151 | OD2    | 3.275        |
| 1FVE   | C_LYS_190 | NZ     | C_ASP_151 | OD1    | 3.284        |
| 1FVE   | C_LYS_190 | NZ     | C_ASP_151 | OD2    | 3.663        |
| 1FVE   | D_ARG_38  | NH1    | D_GLU_46  | OE1    | 3.179        |
| 1FVE   | D_ARG_38  | NH1    | D_GLU_46  | OE2    | 3.488        |
| 1FVE   | D_ARG_38  | NH2    | D_ASP_90  | OD1    | 2.634        |
| 1FVE   | D_ARG_67  | NH1    | D_ASP_90  | OD1    | 3.960        |
| 1FVE   | D_ARG_67  | NH1    | D_ASP_90  | OD2    | 2.712        |
| 1FVE   | D_ARG_67  | NH2    | D_ASP_90  | OD1    | 2.924        |
| 1FVE   | D_ARG_67  | NH2    | D_ASP_90  | OD2    | 3.109        |
| 1FVE   | D_LYS_76  | NZ     | D_ASP_73  | OD2    | 3.266        |
| 1FVE   | D_ARG_87  | NH1    | D_GLU_89  | OE2    | 3.190        |
| 1FVE   | D_ARG_87  | NH2    | D_ASP_90  | OD1    | 3.371        |
| 1FVE   | D_ARG_98  | NH1    | D_ASP_108 | OD1    | 3.433        |
| 1FVE   | D_ARG_98  | NH1    | D_ASP_108 | OD2    | 2.999        |
| 1FVE   | D_LYS_150 | NZ     | D_ASP_151 | OD1    | 3.818        |
| 1FVE   | D_LYS_150 | NZ     | D_ASP_151 | OD2    | 3.688        |

---

Table 71: 1FVE-specific salt bridging networks analysis. In this table, a PDB file is specified with a four-letter PDB ID, except that the names of the PDB files corresponding to the single NMR structural model split from the NMR ensemble is specified with a four-letter PDB ID in addition to a hyphen followed by the single NMR structural model numeric ID, the residue naming scheme is **Chain ID\_residue name\_residue number**,  $\angle ADH$  represents the angle formed by acceptor (A), donor (D) and hydrogen (H) ( $\angle ADH$ ).

| PDB ID | Residue A | Atom A | Residue B | Atom B | Distance (Å) |
|--------|-----------|--------|-----------|--------|--------------|
| 1G6V   | A_HIS_4   | NE2    | A_ASP_19  | OD2    | 3.118        |
| 1G6V   | A_HIS_15  | NE2    | A_GLU_14  | OE1    | 3.258        |
| 1G6V   | A_ARG_58  | NH1    | A_GLU_69  | OE1    | 3.110        |
| 1G6V   | A_ARG_58  | NH1    | A_GLU_69  | OE2    | 2.848        |
| 1G6V   | A_LYS_76  | NZ     | A_ASP_71  | OD2    | 3.042        |
| 1G6V   | A_ARG_89  | NH2    | A_ASP_75  | OD1    | 3.650        |
| 1G6V   | A_ARG_89  | NH2    | A_ASP_75  | OD2    | 3.835        |
| 1G6V   | A_HIS_96  | ND1    | A_GLU_106 | OE2    | 3.452        |
| 1G6V   | A_HIS_96  | NE2    | A_GLU_106 | OE1    | 3.503        |
| 1G6V   | A_HIS_96  | NE2    | A_GLU_106 | OE2    | 3.870        |
| 1G6V   | A_HIS_107 | ND1    | A_GLU_117 | OE1    | 3.817        |
| 1G6V   | A_HIS_107 | ND1    | A_GLU_117 | OE2    | 3.100        |
| 1G6V   | A_HIS_119 | NE2    | A_GLU_117 | OE2    | 2.477        |
| 1G6V   | A_LYS_127 | NZ     | A_ASP_139 | OD1    | 3.129        |
| 1G6V   | A_LYS_168 | NZ     | A_GLU_238 | OE1    | 3.560        |
| 1G6V   | A_ARG_182 | NH1    | A_ASP_180 | OD1    | 3.589        |
| 1G6V   | A_ARG_182 | NH1    | A_ASP_180 | OD2    | 3.216        |
| 1G6V   | A_ARG_182 | NH2    | A_ASP_180 | OD2    | 2.890        |
| 1G6V   | A_LYS_225 | NZ     | A_ASP_165 | OD1    | 3.680        |
| 1G6V   | A_LYS_225 | NZ     | A_ASP_165 | OD2    | 3.357        |
| 1G6V   | A_ARG_227 | NH1    | A_ASP_101 | OD2    | 3.543        |
| 1G6V   | A_ARG_227 | NH2    | A_ASP_101 | OD2    | 3.620        |
| 1G6V   | A_LYS_228 | NZ     | A_GLU_238 | OE1    | 3.937        |
| 1G6V   | A_LYS_257 | NZ     | A_ASP_41  | OD1    | 3.993        |
| 1G6V   | K_ARG_838 | NH1    | K_GLU_887 | OE1    | 3.646        |
| 1G6V   | K_ARG_838 | NH1    | K_ASP_888 | OD1    | 3.042        |
| 1G6V   | K_ARG_838 | NH2    | K_GLU_846 | OE1    | 3.505        |
| 1G6V   | K_ARG_838 | NH2    | K_GLU_846 | OE2    | 3.350        |
| 1G6V   | K_ARG_838 | NH2    | K_GLU_887 | OE1    | 3.576        |
| 1G6V   | K_ARG_838 | NH2    | K_GLU_887 | OE2    | 3.967        |
| 1G6V   | K_ARG_865 | NH1    | K_ASP_888 | OD2    | 3.258        |
| 1G6V   | K_ARG_865 | NH2    | K_ASP_888 | OD1    | 2.941        |
| 1G6V   | K_ARG_865 | NH2    | K_ASP_888 | OD2    | 3.106        |
| 1G6V   | K_LYS_885 | NZ     | K_GLU_887 | OE2    | 3.937        |
| 1G6V   | K_ARG_907 | NH1    | A_GLU_187 | OE2    | 2.962        |
| 1G6V   | K_ARG_909 | NH1    | A_GLU_187 | OE1    | 3.909        |
| 1G6V   | K_ARG_909 | NH2    | A_GLU_187 | OE1    | 3.477        |
| 1G6V   | K_ARG_909 | NH2    | K_ASP_912 | OD1    | 3.915        |

Table 72: 1G6V-specific salt bridging networks analysis. In this table, a PDB file is specified with a four-letter PDB ID, except that the names of the PDB files corresponding to the single NMR structural model split from the NMR ensemble is specified with a four-letter PDB ID in addition to a hyphen followed by the single NMR structural model numeric ID, the residue naming scheme is **Chain ID\_residue name\_residue number**,  $\angle ADH$  represents the angle formed by acceptor (A), donor (D) and hydrogen (H) ( $\angle ADH$ ).

| PDB ID | Residue A | Atom A | Residue B | Atom B | Distance (Å) |
|--------|-----------|--------|-----------|--------|--------------|
| 1G7H   | A_ARG_61  | NH1    | A_GLU_81  | OE2    | 3.037        |
| 1G7H   | A_ARG_61  | NH1    | A_ASP_82  | OD1    | 3.527        |
| 1G7H   | A_ARG_61  | NH1    | A_ASP_82  | OD2    | 2.782        |
| 1G7H   | A_ARG_96  | NH1    | B_GLU_98  | OE1    | 2.788        |
| 1G7H   | A_ARG_96  | NH1    | B_GLU_98  | OE2    | 3.317        |
| 1G7H   | A_ARG_96  | NH2    | B_GLU_98  | OE1    | 3.736        |
| 1G7H   | A_ARG_96  | NH2    | B_GLU_98  | OE2    | 2.819        |
| 1G7H   | A_LYS_107 | NZ     | A_GLU_17  | OE1    | 3.055        |
| 1G7H   | A_LYS_107 | NZ     | A_GLU_17  | OE2    | 3.162        |
| 1G7H   | B_ARG_38  | NH1    | B_GLU_46  | OE1    | 3.731        |
| 1G7H   | B_ARG_38  | NH1    | B_GLU_46  | OE2    | 3.064        |
| 1G7H   | B_ARG_38  | NH1    | B_ASP_89  | OD1    | 3.653        |
| 1G7H   | B_ARG_38  | NH2    | B_ASP_89  | OD1    | 3.025        |
| 1G7H   | B_ARG_66  | NH1    | B_ASP_89  | OD1    | 2.763        |
| 1G7H   | B_ARG_66  | NH1    | B_ASP_89  | OD2    | 2.968        |
| 1G7H   | B_ARG_66  | NH2    | B_ASP_89  | OD1    | 3.934        |
| 1G7H   | B_ARG_66  | NH2    | B_ASP_89  | OD2    | 2.612        |
| 1G7H   | B_LYS_75  | NZ     | B_ASP_72  | OD1    | 2.977        |
| 1G7H   | B_ARG_97  | NH1    | B_ASP_104 | OD1    | 3.709        |
| 1G7H   | B_ARG_97  | NH1    | B_ASP_104 | OD2    | 2.680        |
| 1G7H   | B_ARG_102 | NH2    | B_ASP_100 | OD1    | 3.012        |
| 1G7H   | C_LYS_1   | NZ     | C_GLU_7   | OE1    | 3.565        |
| 1G7H   | C_ARG_61  | NH2    | C_ASP_48  | OD2    | 3.173        |
| 1G7H   | C_ARG_125 | NH1    | C_ASP_119 | OD2    | 2.772        |
| 1G7H   | C_ARG_125 | NH2    | C_ASP_119 | OD1    | 3.386        |
| 1G7H   | C_ARG_125 | NH2    | C_ASP_119 | OD2    | 3.194        |

Table 73: 1G7H-specific salt bridging networks analysis. In this table, a PDB file is specified with a four-letter PDB ID, except that the names of the PDB files corresponding to the single NMR structural model split from the NMR ensemble is specified with a four-letter PDB ID in addition to a hyphen followed by the single NMR structural model numeric ID, the residue naming scheme is **Chain ID\_residue name\_residue number**,  $\angle ADH$  represents the angle formed by acceptor (A), donor (D) and hydrogen (H) ( $\angle ADH$ ).

| PDB ID | Residue A | Atom A | Residue B | Atom B | Distance (Å) |
|--------|-----------|--------|-----------|--------|--------------|
| 1G7I   | A_ARG_61  | NH1    | A_GLU_81  | OE2    | 2.718        |
| 1G7I   | A_ARG_61  | NH1    | A_ASP_82  | OD1    | 3.562        |
| 1G7I   | A_ARG_61  | NH1    | A_ASP_82  | OD2    | 2.822        |
| 1G7I   | A_ARG_96  | NH1    | B_GLU_98  | OE1    | 2.881        |
| 1G7I   | A_ARG_96  | NH1    | B_GLU_98  | OE2    | 3.589        |
| 1G7I   | A_ARG_96  | NH2    | B_GLU_98  | OE1    | 3.599        |
| 1G7I   | A_ARG_96  | NH2    | B_GLU_98  | OE2    | 2.841        |
| 1G7I   | A_LYS_107 | NZ     | A_GLU_17  | OE1    | 2.870        |
| 1G7I   | A_LYS_107 | NZ     | A_GLU_17  | OE2    | 3.799        |
| 1G7I   | B_ARG_38  | NH1    | B_GLU_46  | OE2    | 3.033        |
| 1G7I   | B_ARG_38  | NH1    | B_ASP_89  | OD1    | 3.781        |
| 1G7I   | B_ARG_38  | NH2    | B_ASP_89  | OD1    | 3.005        |
| 1G7I   | B_ARG_66  | NH1    | B_ASP_89  | OD1    | 2.745        |
| 1G7I   | B_ARG_66  | NH1    | B_ASP_89  | OD2    | 3.417        |
| 1G7I   | B_ARG_66  | NH2    | B_ASP_89  | OD1    | 3.758        |
| 1G7I   | B_ARG_66  | NH2    | B_ASP_89  | OD2    | 2.954        |
| 1G7I   | B_ARG_97  | NH1    | B_ASP_104 | OD1    | 3.710        |
| 1G7I   | B_ARG_97  | NH1    | B_ASP_104 | OD2    | 2.883        |
| 1G7I   | B_ARG_102 | NH2    | B_ASP_100 | OD1    | 3.310        |
| 1G7I   | C_LYS_1   | NZ     | C_GLU_7   | OE1    | 3.016        |
| 1G7I   | C_LYS_1   | NZ     | C_GLU_7   | OE2    | 3.596        |
| 1G7I   | C_ARG_61  | NH2    | C_ASP_48  | OD1    | 3.373        |
| 1G7I   | C_ARG_68  | NH2    | C_ASP_66  | OD2    | 3.145        |
| 1G7I   | C_ARG_125 | NH1    | C_ASP_119 | OD2    | 2.952        |
| 1G7I   | C_ARG_125 | NH2    | C_ASP_119 | OD1    | 3.392        |
| 1G7I   | C_ARG_125 | NH2    | C_ASP_119 | OD2    | 2.970        |

Table 74: 1G7I-specific salt bridging networks analysis. In this table, a PDB file is specified with a four-letter PDB ID, except that the names of the PDB files corresponding to the single NMR structural model split from the NMR ensemble is specified with a four-letter PDB ID in addition to a hyphen followed by the single NMR structural model numeric ID, the residue naming scheme is **Chain ID\_residue name\_residue number**,  $\angle ADH$  represents the angle formed by acceptor (A), donor (D) and hydrogen (H) ( $\angle ADH$ ).



| PDB ID | Residue A | Atom A | Residue B | Atom B | Distance (Å) |
|--------|-----------|--------|-----------|--------|--------------|
| 1G7J   | A_ARG_61  | NH1    | A_GLU_81  | OE2    | 3.122        |
| 1G7J   | A_ARG_61  | NH1    | A_ASP_82  | OD1    | 3.459        |
| 1G7J   | A_ARG_61  | NH1    | A_ASP_82  | OD2    | 2.826        |
| 1G7J   | A_ARG_96  | NH1    | B_GLU_98  | OE1    | 2.834        |
| 1G7J   | A_ARG_96  | NH1    | B_GLU_98  | OE2    | 3.535        |
| 1G7J   | A_ARG_96  | NH2    | B_GLU_98  | OE1    | 3.524        |
| 1G7J   | A_ARG_96  | NH2    | B_GLU_98  | OE2    | 2.694        |
| 1G7J   | A_LYS_107 | NZ     | A_GLU_17  | OE1    | 3.323        |
| 1G7J   | A_LYS_107 | NZ     | A_GLU_17  | OE2    | 2.601        |
| 1G7J   | B_ARG_38  | NH1    | B_GLU_46  | OE1    | 3.932        |
| 1G7J   | B_ARG_38  | NH1    | B_GLU_46  | OE2    | 2.970        |
| 1G7J   | B_ARG_38  | NH1    | B_ASP_89  | OD1    | 3.769        |
| 1G7J   | B_ARG_38  | NH2    | B_ASP_89  | OD1    | 2.824        |
| 1G7J   | B_ARG_66  | NH1    | B_ASP_89  | OD1    | 2.871        |
| 1G7J   | B_ARG_66  | NH1    | B_ASP_89  | OD2    | 3.276        |
| 1G7J   | B_ARG_66  | NH2    | B_ASP_89  | OD1    | 3.824        |
| 1G7J   | B_ARG_66  | NH2    | B_ASP_89  | OD2    | 2.793        |
| 1G7J   | B_HIS_86  | NE2    | B_ASP_88  | OD1    | 3.358        |
| 1G7J   | B_HIS_86  | NE2    | B_ASP_88  | OD2    | 3.564        |
| 1G7J   | B_ARG_97  | NH1    | B_ASP_104 | OD1    | 3.791        |
| 1G7J   | B_ARG_97  | NH1    | B_ASP_104 | OD2    | 2.737        |
| 1G7J   | B_ARG_102 | NH2    | B_ASP_100 | OD1    | 3.301        |
| 1G7J   | C_LYS_1   | NZ     | C_GLU_7   | OE1    | 2.740        |
| 1G7J   | C_ARG_61  | NH1    | C_ASP_48  | OD2    | 3.771        |
| 1G7J   | C_ARG_125 | NH1    | C_ASP_119 | OD2    | 3.004        |
| 1G7J   | C_ARG_125 | NH2    | C_ASP_119 | OD1    | 3.354        |
| 1G7J   | C_ARG_125 | NH2    | C_ASP_119 | OD2    | 3.147        |

Table 75: 1G7J-specific salt bridging networks analysis. In this table, a PDB file is specified with a four-letter PDB ID, except that the names of the PDB files corresponding to the single NMR structural model split from the NMR ensemble is specified with a four-letter PDB ID in addition to a hyphen followed by the single NMR structural model numeric ID, the residue naming scheme is **Chain ID\_residue name\_residue number**,  $\angle ADH$  represents the angle formed by acceptor (A), donor (D) and hydrogen (H) ( $\angle ADH$ ).

| PDB ID | Residue A | Atom A | Residue B | Atom B | Distance (Å) |
|--------|-----------|--------|-----------|--------|--------------|
| 1G7L   | A_ARG_61  | NH1    | A_GLU_81  | OE2    | 3.595        |
| 1G7L   | A_ARG_61  | NH1    | A_ASP_82  | OD1    | 3.389        |
| 1G7L   | A_ARG_61  | NH1    | A_ASP_82  | OD2    | 2.780        |
| 1G7L   | A_ARG_96  | NH1    | B_GLU_98  | OE1    | 2.744        |
| 1G7L   | A_ARG_96  | NH1    | B_GLU_98  | OE2    | 3.483        |
| 1G7L   | A_ARG_96  | NH2    | B_GLU_98  | OE1    | 3.535        |
| 1G7L   | A_ARG_96  | NH2    | B_GLU_98  | OE2    | 2.761        |
| 1G7L   | A_LYS_107 | NZ     | A_GLU_17  | OE1    | 3.286        |
| 1G7L   | A_LYS_107 | NZ     | A_GLU_17  | OE2    | 2.822        |
| 1G7L   | B_ARG_38  | NH1    | B_GLU_46  | OE2    | 3.105        |
| 1G7L   | B_ARG_38  | NH1    | B_ASP_89  | OD1    | 3.832        |
| 1G7L   | B_ARG_38  | NH2    | B_ASP_89  | OD1    | 2.874        |
| 1G7L   | B_ARG_66  | NH1    | B_ASP_89  | OD1    | 3.004        |
| 1G7L   | B_ARG_66  | NH1    | B_ASP_89  | OD2    | 3.786        |
| 1G7L   | B_ARG_66  | NH2    | B_ASP_89  | OD1    | 3.392        |
| 1G7L   | B_ARG_66  | NH2    | B_ASP_89  | OD2    | 2.877        |
| 1G7L   | B_ARG_97  | NH1    | B_ASP_104 | OD1    | 3.584        |
| 1G7L   | B_ARG_97  | NH1    | B_ASP_104 | OD2    | 2.551        |
| 1G7L   | B_ARG_102 | NH2    | B_ASP_100 | OD1    | 3.204        |
| 1G7L   | C_LYS_1   | NZ     | C_GLU_7   | OE1    | 2.763        |
| 1G7L   | C_HIS_15  | NE2    | C_ASP_87  | OD2    | 3.997        |
| 1G7L   | C_ARG_61  | NH2    | C_ASP_48  | OD2    | 2.882        |
| 1G7L   | C_ARG_125 | NH1    | C_ASP_119 | OD2    | 2.762        |
| 1G7L   | C_ARG_125 | NH2    | C_ASP_119 | OD1    | 3.327        |
| 1G7L   | C_ARG_125 | NH2    | C_ASP_119 | OD2    | 2.838        |

Table 76: 1G7L-specific salt bridging networks analysis. In this table, a PDB file is specified with a four-letter PDB ID, except that the names of the PDB files corresponding to the single NMR structural model split from the NMR ensemble is specified with a four-letter PDB ID in addition to a hyphen followed by the single NMR structural model numeric ID, the residue naming scheme is **Chain ID\_residue name\_residue number**,  $\angle ADH$  represents the angle formed by acceptor (A), donor (D) and hydrogen (H) ( $\angle ADH$ ).

| PDB ID | Residue A | Atom A | Residue B | Atom B | Distance (Å) |
|--------|-----------|--------|-----------|--------|--------------|
| 1G7M   | A_ARG_61  | NH1    | A_GLU_81  | OE2    | 3.936        |
| 1G7M   | A_ARG_61  | NH1    | A_ASP_82  | OD1    | 3.601        |
| 1G7M   | A_ARG_61  | NH1    | A_ASP_82  | OD2    | 2.851        |
| 1G7M   | A_ARG_96  | NH1    | B_GLU_98  | OE1    | 2.792        |
| 1G7M   | A_ARG_96  | NH1    | B_GLU_98  | OE2    | 3.493        |
| 1G7M   | A_ARG_96  | NH2    | B_GLU_98  | OE1    | 3.544        |
| 1G7M   | A_ARG_96  | NH2    | B_GLU_98  | OE2    | 2.732        |
| 1G7M   | B_ARG_38  | NH1    | B_GLU_46  | OE1    | 3.743        |
| 1G7M   | B_ARG_38  | NH1    | B_GLU_46  | OE2    | 3.134        |
| 1G7M   | B_ARG_38  | NH1    | B_ASP_89  | OD1    | 3.885        |
| 1G7M   | B_ARG_38  | NH2    | B_ASP_89  | OD1    | 2.901        |
| 1G7M   | B_ARG_66  | NH1    | B_ASP_89  | OD1    | 3.117        |
| 1G7M   | B_ARG_66  | NH1    | B_ASP_89  | OD2    | 3.721        |
| 1G7M   | B_ARG_66  | NH2    | B_ASP_89  | OD1    | 3.761        |
| 1G7M   | B_ARG_66  | NH2    | B_ASP_89  | OD2    | 2.897        |
| 1G7M   | B_LYS_75  | NZ     | B_ASP_72  | OD1    | 3.993        |
| 1G7M   | B_ARG_97  | NH1    | B_ASP_104 | OD1    | 3.720        |
| 1G7M   | B_ARG_97  | NH1    | B_ASP_104 | OD2    | 2.732        |
| 1G7M   | B_ARG_102 | NH2    | B_ASP_100 | OD1    | 3.308        |
| 1G7M   | C_LYS_1   | NZ     | C_GLU_7   | OE1    | 2.835        |
| 1G7M   | C_ARG_61  | NH2    | C_ASP_48  | OD2    | 3.861        |
| 1G7M   | C_ARG_125 | NH1    | C_ASP_119 | OD2    | 2.991        |
| 1G7M   | C_ARG_125 | NH2    | C_ASP_119 | OD1    | 3.407        |
| 1G7M   | C_ARG_125 | NH2    | C_ASP_119 | OD2    | 3.048        |

Table 77: 1G7M-specific salt bridging networks analysis. In this table, a PDB file is specified with a four-letter PDB ID, except that the names of the PDB files corresponding to the single NMR structural model split from the NMR ensemble is specified with a four-letter PDB ID in addition to a hyphen followed by the single NMR structural model numeric ID, the residue naming scheme is **Chain ID\_residue name\_residue number**,  $\angle ADH$  represents the angle formed by acceptor (A), donor (D) and hydrogen (H) ( $\angle ADH$ ).

| PDB ID | Residue A | Atom A | Residue B | Atom B | Distance (Å) |
|--------|-----------|--------|-----------|--------|--------------|
| 1G8Q   | A_LYS_121 | NZ     | A_ASP_122 | OD1    | 2.599        |
| 1G8Q   | A_LYS_121 | NZ     | A_ASP_122 | OD2    | 3.460        |
| 1G8Q   | A_LYS_124 | NZ     | A_ASP_195 | OD1    | 3.016        |
| 1G8Q   | A_LYS_124 | NZ     | A_ASP_195 | OD2    | 3.072        |
| 1G8Q   | A_LYS_187 | NZ     | A_ASP_155 | OD2    | 2.795        |
| 1G8Q   | A_HIS_191 | NE2    | A_ASP_128 | OD1    | 3.354        |
| 1G8Q   | A_HIS_191 | NE2    | A_ASP_128 | OD2    | 2.859        |
| 1G8Q   | A_LYS_193 | NZ     | A_ASP_155 | OD1    | 3.991        |
| 1G8Q   | B_LYS_224 | NZ     | B_ASP_295 | OD1    | 2.542        |
| 1G8Q   | B_LYS_224 | NZ     | B_ASP_295 | OD2    | 3.203        |
| 1G8Q   | B_HIS_291 | NE2    | B_ASP_228 | OD1    | 2.670        |
| 1G8Q   | B_HIS_291 | NE2    | B_ASP_228 | OD2    | 3.342        |
| 1G8Q   | B_LYS_293 | NZ     | B_GLU_288 | OE2    | 2.739        |

Table 78: 1G8Q-specific salt bridging networks analysis. In this table, a PDB file is specified with a four-letter PDB ID, except that the names of the PDB files corresponding to the single NMR structural model split from the NMR ensemble is specified with a four-letter PDB ID in addition to a hyphen followed by the single NMR structural model numeric ID, the residue naming scheme is **Chain ID\_residue name\_residue number**,  $\angle ADH$  represents the angle formed by acceptor (A), donor (D) and hydrogen (H) ( $\angle ADH$ ).

| PDB ID | Residue A | Atom A | Residue B | Atom B | Distance (Å) |
|--------|-----------|--------|-----------|--------|--------------|
| 1G9M   | G_LYS_207 | NZ     | G_GLU_381 | OE1    | 3.792        |
| 1G9M   | G_LYS_207 | NZ     | G_GLU_381 | OE2    | 2.500        |
| 1G9M   | G_LYS_231 | NZ     | G_GLU_268 | OE2    | 3.144        |
| 1G9M   | G_HIS_249 | NE2    | G_GLU_482 | OE1    | 3.558        |
| 1G9M   | G_HIS_249 | NE2    | G_GLU_482 | OE2    | 3.514        |
| 1G9M   | G_LYS_337 | NZ     | G_GLU_293 | OE2    | 3.954        |
| 1G9M   | G_LYS_348 | NZ     | G_GLU_269 | OE2    | 2.920        |
| 1G9M   | G_LYS_348 | NZ     | G_GLU_351 | OE2    | 3.765        |
| 1G9M   | G_LYS_357 | NZ     | G_GLU_466 | OE1    | 3.174        |
| 1G9M   | G_ARG_419 | NH1    | H_GLU_103 | OE2    | 3.773        |
| 1G9M   | G_ARG_419 | NH2    | H_GLU_103 | OE2    | 2.762        |
| 1G9M   | G_ARG_419 | NH2    | H_GLU_108 | OE2    | 3.794        |
| 1G9M   | G_ARG_456 | NH2    | G_GLU_466 | OE1    | 3.727        |
| 1G9M   | G_ARG_456 | NH2    | G_GLU_466 | OE2    | 3.003        |
| 1G9M   | G_ARG_469 | NH2    | G_ASP_457 | OD1    | 3.290        |
| 1G9M   | G_ARG_476 | NH1    | G_ASP_474 | OD1    | 2.906        |
| 1G9M   | G_ARG_480 | NH1    | G_ASP_477 | OD1    | 2.553        |
| 1G9M   | G_LYS_487 | NZ     | G_GLU_91  | OE1    | 3.951        |
| 1G9M   | G_LYS_487 | NZ     | G_GLU_91  | OE2    | 2.923        |
| 1G9M   | C_LYS_8   | NZ     | C_GLU_119 | OE1    | 2.848        |
| 1G9M   | C_HIS_27  | NE2    | C_GLU_85  | OE1    | 2.711        |
| 1G9M   | C_LYS_29  | NZ     | G_ASP_279 | OD2    | 3.077        |
| 1G9M   | C_LYS_29  | NZ     | C_GLU_85  | OE1    | 2.735        |
| 1G9M   | C_LYS_29  | NZ     | C_GLU_85  | OE2    | 3.809        |
| 1G9M   | C_LYS_46  | NZ     | C_ASP_56  | OD1    | 3.759        |
| 1G9M   | C_ARG_54  | NH1    | C_ASP_78  | OD1    | 3.768        |
| 1G9M   | C_ARG_54  | NH1    | C_ASP_78  | OD2    | 2.778        |
| 1G9M   | C_ARG_54  | NH2    | C_ASP_78  | OD1    | 2.931        |
| 1G9M   | C_ARG_54  | NH2    | C_ASP_78  | OD2    | 3.434        |
| 1G9M   | C_ARG_59  | NH1    | G_ASP_368 | OD1    | 3.576        |
| 1G9M   | C_ARG_59  | NH1    | G_ASP_368 | OD2    | 3.197        |
| 1G9M   | C_ARG_59  | NH2    | G_ASP_368 | OD1    | 2.550        |
| 1G9M   | C_ARG_59  | NH2    | G_ASP_368 | OD2    | 3.360        |
| 1G9M   | C_ARG_134 | NH2    | C_ASP_153 | OD1    | 3.987        |
| 1G9M   | L_ARG_24  | NH2    | L_GLU_3   | OE2    | 3.072        |
| 1G9M   | L_ARG_61  | NH2    | L_GLU_81  | OE2    | 3.403        |
| 1G9M   | L_ARG_61  | NH2    | L_ASP_82  | OD1    | 2.707        |
| 1G9M   | L_ARG_61  | NH2    | L_ASP_82  | OD2    | 3.381        |
| 1G9M   | L_LYS_151 | NZ     | L_GLU_197 | OE1    | 3.157        |
| 1G9M   | L_LYS_151 | NZ     | L_GLU_197 | OE2    | 3.538        |
| 1G9M   | L_HIS_191 | ND1    | L_ASP_153 | OD2    | 3.573        |
| 1G9M   | H_LYS_12  | NZ     | H_GLU_10  | OE1    | 3.811        |
| 1G9M   | H_LYS_19  | NZ     | H_GLU_82  | OE2    | 2.937        |
| 1G9M   | H_ARG_31  | NH2    | H_GLU_103 | OE1    | 3.557        |
| 1G9M   | H_ARG_31  | NH2    | H_ASP_105 | OD1    | 3.841        |
| 1G9M   | H_ARG_31  | NH2    | H_ASP_105 | OD2    | 3.073        |
| 1G9M   | H_ARG_38  | NH1    | H_GLU_46  | OE1    | 3.715        |
| 1G9M   | H_ARG_38  | NH1    | H_GLU_46  | OE2    | 2.917        |
| 1G9M   | H_ARG_38  | NH2    | H_ASP_90  | OD2    | 2.688        |
| 1G9M   | H_ARG_50  | NH2    | H_GLU_101 | OE2    | 2.484        |
| 1G9M   | H_HIS_63  | NE2    | H_GLU_46  | OE1    | 3.776        |
| 1G9M   | H_HIS_63  | NE2    | H_GLU_46  | OE2    | 2.782        |
| 1G9M   | H_ARG_67  | NH1    | H_ASP_90  | OD1    | 2.916        |
| 1G9M   | H_ARG_67  | NH1    | H_ASP_90  | OD2    | 3.928        |
| 1G9M   | H_ARG_67  | NH2    | H_ASP_90  | OD1    | 3.114        |
| 1G9M   | H_ARG_67  | NH2    | H_ASP_90  | OD2    | 2.646        |
| 1G9M   | H_LYS_74  | NZ     | H_ASP_56  | OD1    | 3.247        |

|      |           |     |           |     |       |
|------|-----------|-----|-----------|-----|-------|
| 1G9M | H_LYS_74  | NZ  | H_ASP_56  | OD2 | 3.751 |
| 1G9M | H_ARG_84  | NH2 | H_GLU_82  | OE1 | 2.803 |
| 1G9M | H_ARG_110 | NH2 | H_GLU_108 | OE1 | 3.721 |
| 1G9M | H_LYS_158 | NZ  | H_ASP_159 | OD1 | 2.791 |
| 1G9M | H_LYS_158 | NZ  | H_ASP_159 | OD2 | 2.929 |

Table 79: 1G9M-specific salt bridging networks analysis. In this table, a PDB file is specified with a four-letter PDB ID, except that the names of the PDB files corresponding to the single NMR structural model split from the NMR ensemble is specified with a four-letter PDB ID in addition to a hyphen followed by the single NMR structural model numeric ID, the residue naming scheme is **Chain ID\_residue name\_residue number**,  $\angle ADH$  represents the angle formed by acceptor (A), donor (D) and hydrogen (H) ( $\angle ADH$ ).

| PDB ID | Residue A | Atom A | Residue B | Atom B | Distance (Å) |
|--------|-----------|--------|-----------|--------|--------------|
| 1G9N   | G_LYS_121 | NZ     | G_GLU_429 | OE1    | 2.598        |
| 1G9N   | G_LYS_121 | NZ     | G_GLU_429 | OE2    | 3.835        |
| 1G9N   | G_LYS_207 | NZ     | G_GLU_381 | OE1    | 3.761        |
| 1G9N   | G_LYS_207 | NZ     | G_GLU_381 | OE2    | 3.069        |
| 1G9N   | G_HIS_249 | NE2    | G_GLU_482 | OE1    | 3.588        |
| 1G9N   | G_LYS_282 | NZ     | G_GLU_275 | OE1    | 3.728        |
| 1G9N   | G_LYS_282 | NZ     | G_GLU_275 | OE2    | 2.699        |
| 1G9N   | G_LYS_348 | NZ     | G_GLU_269 | OE2    | 3.322        |
| 1G9N   | G_LYS_348 | NZ     | G_GLU_351 | OE1    | 3.879        |
| 1G9N   | G_LYS_348 | NZ     | G_GLU_351 | OE2    | 3.198        |
| 1G9N   | G_LYS_350 | NZ     | G_ASP_395 | OD1    | 3.491        |
| 1G9N   | G_LYS_357 | NZ     | G_GLU_466 | OE1    | 3.697        |
| 1G9N   | G_ARG_419 | NH1    | H_GLU_106 | OE1    | 2.930        |
| 1G9N   | G_ARG_419 | NH1    | H_GLU_106 | OE2    | 3.665        |
| 1G9N   | G_ARG_419 | NH2    | H_GLU_103 | OE1    | 2.300        |
| 1G9N   | G_ARG_419 | NH2    | H_GLU_106 | OE2    | 3.990        |
| 1G9N   | G_ARG_456 | NH2    | G_GLU_466 | OE1    | 3.622        |
| 1G9N   | G_ARG_456 | NH2    | G_GLU_466 | OE2    | 3.509        |
| 1G9N   | G_ARG_469 | NH2    | G_ASP_457 | OD1    | 3.668        |
| 1G9N   | G_ARG_476 | NH1    | G_ASP_474 | OD1    | 3.685        |
| 1G9N   | G_ARG_476 | NH2    | G_GLU_102 | OE1    | 3.192        |
| 1G9N   | G_ARG_476 | NH2    | G_GLU_102 | OE2    | 2.740        |
| 1G9N   | G_ARG_480 | NH1    | G_ASP_477 | OD1    | 3.994        |
| 1G9N   | G_LYS_487 | NZ     | G_GLU_91  | OE2    | 3.841        |
| 1G9N   | G_LYS_490 | NZ     | G_GLU_492 | OE1    | 3.571        |
| 1G9N   | C_LYS_29  | NZ     | C_GLU_85  | OE1    | 3.106        |
| 1G9N   | C_LYS_29  | NZ     | C_GLU_85  | OE2    | 3.864        |
| 1G9N   | C_LYS_35  | NZ     | G_ASP_457 | OD2    | 3.608        |
| 1G9N   | C_ARG_54  | NH1    | C_ASP_78  | OD1    | 3.979        |
| 1G9N   | C_ARG_54  | NH1    | C_ASP_78  | OD2    | 2.754        |
| 1G9N   | C_ARG_54  | NH2    | C_ASP_78  | OD1    | 2.744        |
| 1G9N   | C_ARG_54  | NH2    | C_ASP_78  | OD2    | 3.015        |
| 1G9N   | C_ARG_59  | NH1    | G_ASP_368 | OD1    | 3.032        |
| 1G9N   | C_ARG_59  | NH1    | G_ASP_368 | OD2    | 3.045        |
| 1G9N   | C_ARG_59  | NH2    | G_ASP_368 | OD1    | 2.609        |
| 1G9N   | C_ARG_59  | NH2    | G_ASP_368 | OD2    | 3.355        |
| 1G9N   | C_HIS_107 | ND1    | C_ASP_105 | OD1    | 2.754        |
| 1G9N   | C_HIS_107 | ND1    | C_ASP_105 | OD2    | 3.107        |
| 1G9N   | C_ARG_134 | NH2    | C_ASP_153 | OD1    | 3.650        |
| 1G9N   | C_LYS_136 | NZ     | C_GLU_150 | OE2    | 3.852        |
| 1G9N   | C_LYS_136 | NZ     | C_ASP_153 | OD1    | 3.794        |
| 1G9N   | C_LYS_136 | NZ     | C_ASP_153 | OD2    | 2.773        |
| 1G9N   | C_LYS_171 | NZ     | C_GLU_169 | OE1    | 3.972        |
| 1G9N   | C_LYS_171 | NZ     | C_GLU_169 | OE2    | 2.770        |
| 1G9N   | L_ARG_61  | NH2    | L_GLU_81  | OE1    | 3.113        |
| 1G9N   | L_ARG_61  | NH2    | L_ASP_82  | OD1    | 3.659        |
| 1G9N   | L_ARG_97  | NH2    | L_GLU_1   | OE1    | 3.685        |
| 1G9N   | L_ARG_97  | NH2    | L_GLU_1   | OE2    | 2.961        |
| 1G9N   | L_HIS_191 | ND1    | L_ASP_153 | OD2    | 2.588        |
| 1G9N   | L_HIS_191 | NE2    | L_ASP_187 | OD2    | 2.897        |
| 1G9N   | L_ARG_213 | NH1    | L_GLU_189 | OE1    | 3.830        |
| 1G9N   | H_ARG_31  | NH2    | H_ASP_105 | OD1    | 3.178        |
| 1G9N   | H_ARG_31  | NH2    | H_ASP_105 | OD2    | 3.436        |
| 1G9N   | H_ARG_38  | NH1    | H_GLU_46  | OE1    | 2.711        |
| 1G9N   | H_ARG_38  | NH1    | H_GLU_46  | OE2    | 3.252        |
| 1G9N   | H_ARG_38  | NH2    | H_ASP_90  | OD2    | 2.680        |
| 1G9N   | H_ARG_50  | NH2    | H_GLU_101 | OE2    | 2.305        |

|      |           |     |           |     |       |
|------|-----------|-----|-----------|-----|-------|
| 1G9N | H_ARG_67  | NH1 | H_ASP_90  | OD1 | 3.457 |
| 1G9N | H_ARG_67  | NH2 | H_ASP_90  | OD1 | 2.540 |
| 1G9N | H_ARG_67  | NH2 | H_ASP_90  | OD2 | 2.635 |
| 1G9N | H_LYS_74  | NZ  | H_ASP_56  | OD2 | 2.889 |
| 1G9N | H_ARG_84  | NH2 | H_GLU_82  | OE1 | 3.161 |
| 1G9N | H_ARG_110 | NH1 | H_GLU_108 | OE1 | 3.833 |
| 1G9N | H_ARG_110 | NH2 | H_GLU_108 | OE1 | 3.692 |
| 1G9N | H_LYS_158 | NZ  | H_ASP_159 | OD1 | 2.649 |
| 1G9N | H_LYS_158 | NZ  | H_ASP_159 | OD2 | 3.459 |
| 1G9N | H_LYS_224 | NZ  | L_GLU_125 | OE1 | 3.507 |
| 1G9N | H_LYS_224 | NZ  | L_GLU_125 | OE2 | 3.538 |
| 1G9N | H_LYS_229 | NZ  | L_ASP_124 | OD2 | 3.557 |

Table 80: 1G9N-specific salt bridging networks analysis. In this table, a PDB file is specified with a four-letter PDB ID, except that the names of the PDB files corresponding to the single NMR structural model split from the NMR ensemble is specified with a four-letter PDB ID in addition to a hyphen followed by the single NMR structural model numeric ID, the residue naming scheme is **Chain ID\_residue name\_residue number**,  $\angle ADH$  represents the angle formed by acceptor (A), donor (D) and hydrogen (H) ( $\angle ADH$ ).



| PDB ID | Residue A | Atom A | Residue B | Atom B | Distance (Å) |
|--------|-----------|--------|-----------|--------|--------------|
| 1GC1   | G_LYS_207 | NZ     | G_GLU_381 | OE1    | 3.546        |
| 1GC1   | G_LYS_207 | NZ     | G_GLU_381 | OE2    | 2.763        |
| 1GC1   | G_LYS_231 | NZ     | G_GLU_268 | OE1    | 2.870        |
| 1GC1   | G_HIS_249 | NE2    | G_GLU_482 | OE1    | 2.874        |
| 1GC1   | G_LYS_282 | NZ     | G_ASP_279 | OD2    | 2.766        |
| 1GC1   | G_ARG_335 | NH1    | G_ASP_412 | OD1    | 2.680        |
| 1GC1   | G_ARG_335 | NH1    | G_ASP_412 | OD2    | 3.973        |
| 1GC1   | G_ARG_335 | NH2    | G_ASP_412 | OD1    | 3.328        |
| 1GC1   | G_LYS_337 | NZ     | G_GLU_293 | OE1    | 2.668        |
| 1GC1   | G_LYS_357 | NZ     | G_GLU_466 | OE2    | 3.400        |
| 1GC1   | G_ARG_419 | NH1    | H_GLU_106 | OE1    | 2.761        |
| 1GC1   | G_ARG_419 | NH2    | H_GLU_106 | OE1    | 2.942        |
| 1GC1   | G_ARG_419 | NH2    | H_GLU_108 | OE1    | 3.887        |
| 1GC1   | G_ARG_419 | NH2    | H_GLU_108 | OE2    | 3.401        |
| 1GC1   | G_ARG_456 | NH2    | G_GLU_466 | OE1    | 2.736        |
| 1GC1   | G_ARG_456 | NH2    | G_GLU_466 | OE2    | 3.604        |
| 1GC1   | G_ARG_469 | NH2    | G_ASP_457 | OD1    | 3.571        |
| 1GC1   | G_ARG_469 | NH2    | G_ASP_457 | OD2    | 2.956        |
| 1GC1   | G_ARG_476 | NH1    | G_ASP_474 | OD1    | 3.210        |
| 1GC1   | G_ARG_480 | NH1    | G_ASP_477 | OD1    | 3.075        |
| 1GC1   | C_LYS_1   | NZ     | C_GLU_92  | OE1    | 2.611        |
| 1GC1   | C_LYS_7   | NZ     | C_ASP_10  | OD1    | 3.825        |
| 1GC1   | C_LYS_7   | NZ     | C_ASP_10  | OD2    | 2.811        |
| 1GC1   | C_LYS_8   | NZ     | C_GLU_119 | OE1    | 2.599        |
| 1GC1   | C_HIS_27  | ND1    | C_GLU_85  | OE1    | 2.734        |
| 1GC1   | C_LYS_29  | NZ     | G_ASP_279 | OD1    | 2.748        |
| 1GC1   | C_LYS_29  | NZ     | C_GLU_85  | OE1    | 2.817        |
| 1GC1   | C_LYS_29  | NZ     | C_GLU_85  | OE2    | 3.379        |
| 1GC1   | C_LYS_46  | NZ     | C_ASP_56  | OD2    | 2.852        |
| 1GC1   | C_LYS_50  | NZ     | C_GLU_77  | OE1    | 2.464        |
| 1GC1   | C_LYS_50  | NZ     | C_GLU_77  | OE2    | 3.327        |
| 1GC1   | C_ARG_54  | NH1    | C_ASP_78  | OD1    | 3.681        |
| 1GC1   | C_ARG_54  | NH1    | C_ASP_78  | OD2    | 2.523        |
| 1GC1   | C_ARG_54  | NH2    | C_ASP_78  | OD1    | 2.648        |
| 1GC1   | C_ARG_54  | NH2    | C_ASP_78  | OD2    | 3.132        |
| 1GC1   | C_ARG_59  | NH1    | G_ASP_368 | OD1    | 2.780        |
| 1GC1   | C_ARG_59  | NH1    | G_ASP_368 | OD2    | 3.645        |
| 1GC1   | C_ARG_59  | NH2    | G_ASP_368 | OD1    | 3.062        |
| 1GC1   | C_ARG_59  | NH2    | G_ASP_368 | OD2    | 2.481        |
| 1GC1   | C_LYS_90  | NZ     | C_GLU_85  | OE2    | 3.366        |
| 1GC1   | C_ARG_134 | NH2    | C_ASP_153 | OD1    | 3.312        |
| 1GC1   | C_ARG_134 | NH2    | C_ASP_153 | OD2    | 3.071        |
| 1GC1   | C_LYS_167 | NZ     | C_GLU_169 | OE1    | 3.179        |
| 1GC1   | L_ARG_24  | NH1    | L_GLU_3   | OE1    | 2.728        |
| 1GC1   | L_ARG_24  | NH2    | L_GLU_3   | OE1    | 3.024        |
| 1GC1   | L_ARG_24  | NH2    | L_GLU_3   | OE2    | 3.874        |
| 1GC1   | L_ARG_61  | NH1    | L_GLU_81  | OE2    | 3.374        |
| 1GC1   | L_ARG_61  | NH1    | L_ASP_82  | OD1    | 2.506        |
| 1GC1   | L_ARG_61  | NH1    | L_ASP_82  | OD2    | 2.919        |
| 1GC1   | L_ARG_61  | NH2    | L_GLU_81  | OE2    | 3.159        |
| 1GC1   | L_LYS_128 | NZ     | L_ASP_124 | OD1    | 2.735        |
| 1GC1   | L_LYS_185 | NZ     | L_GLU_189 | OE1    | 3.492        |
| 1GC1   | L_LYS_185 | NZ     | L_GLU_189 | OE2    | 3.997        |
| 1GC1   | L_HIS_191 | ND1    | L_ASP_153 | OD2    | 3.341        |
| 1GC1   | L_HIS_191 | NE2    | L_ASP_187 | OD1    | 2.956        |
| 1GC1   | L_HIS_191 | NE2    | L_ASP_187 | OD2    | 3.839        |
| 1GC1   | H_LYS_12  | NZ     | H_GLU_10  | OE1    | 2.918        |

|      |           |     |           |     |       |
|------|-----------|-----|-----------|-----|-------|
| 1GC1 | H_LYS_19  | NZ  | H_GLU_82  | OE1 | 2.992 |
| 1GC1 | H_ARG_31  | NH1 | H_GLU_106 | OE2 | 2.532 |
| 1GC1 | H_ARG_38  | NH1 | H_GLU_46  | OE2 | 2.989 |
| 1GC1 | H_ARG_38  | NH1 | H_ASP_90  | OD1 | 3.814 |
| 1GC1 | H_ARG_38  | NH2 | H_ASP_90  | OD1 | 2.619 |
| 1GC1 | H_ARG_50  | NH2 | H_GLU_101 | OE2 | 2.957 |
| 1GC1 | H_HIS_63  | NE2 | H_GLU_46  | OE1 | 3.828 |
| 1GC1 | H_HIS_63  | NE2 | H_GLU_46  | OE2 | 2.878 |
| 1GC1 | H_ARG_67  | NH1 | H_ASP_90  | OD1 | 3.587 |
| 1GC1 | H_ARG_67  | NH1 | H_ASP_90  | OD2 | 2.706 |
| 1GC1 | H_ARG_67  | NH2 | H_ASP_90  | OD1 | 2.708 |
| 1GC1 | H_ARG_67  | NH2 | H_ASP_90  | OD2 | 3.261 |
| 1GC1 | H_ARG_84  | NH2 | H_GLU_82  | OE2 | 2.925 |
| 1GC1 | H_LYS_158 | NZ  | H_ASP_159 | OD1 | 2.936 |
| 1GC1 | H_LYS_158 | NZ  | H_ASP_159 | OD2 | 3.481 |
| 1GC1 | H_LYS_224 | NZ  | L_GLU_125 | OE1 | 2.581 |
| 1GC1 | H_LYS_224 | NZ  | L_GLU_125 | OE2 | 3.963 |

Table 81: 1GC1-specific salt bridging networks analysis. In this table, a PDB file is specified with a four-letter PDB ID, except that the names of the PDB files corresponding to the single NMR structural model split from the NMR ensemble is specified with a four-letter PDB ID in addition to a hyphen followed by the single NMR structural model numeric ID, the residue naming scheme is **Chain ID\_residue name\_residue number**,  $\angle ADH$  represents the angle formed by acceptor (A), donor (D) and hydrogen (H) ( $\angle ADH$ ).

| PDB ID | Residue A | Atom A | Residue B | Atom B | Distance (Å) |
|--------|-----------|--------|-----------|--------|--------------|
| 1GGB   | L_LYS_39  | NZ     | L_ASP_81  | OD1    | 3.691        |
| 1GGB   | L_ARG_61  | NH2    | L_ASP_82  | OD1    | 3.069        |
| 1GGB   | L_ARG_61  | NH2    | L_ASP_82  | OD2    | 3.921        |
| 1GGB   | L_LYS_149 | NZ     | L_GLU_195 | OE1    | 3.055        |
| 1GGB   | L_LYS_149 | NZ     | L_GLU_195 | OE2    | 3.602        |
| 1GGB   | L_ARG_155 | NH1    | L_GLU_185 | OE1    | 3.649        |
| 1GGB   | L_ARG_155 | NH2    | L_GLU_185 | OE1    | 2.814        |
| 1GGB   | L_HIS_189 | ND1    | L_ASP_151 | OD2    | 3.149        |
| 1GGB   | L_ARG_211 | NH2    | L_GLU_187 | OE2    | 3.888        |
| 1GGB   | H_ARG_38  | NH1    | H_ASP_86  | OD1    | 3.008        |
| 1GGB   | H_ARG_38  | NH2    | H_GLU_46  | OE1    | 3.247        |
| 1GGB   | H_ARG_38  | NH2    | H_ASP_86  | OD1    | 3.365        |
| 1GGB   | H_ARG_58  | NH1    | L_ASP_94  | OD1    | 3.623        |
| 1GGB   | H_ARG_58  | NH2    | L_ASP_94  | OD1    | 2.873        |
| 1GGB   | H_ARG_66  | NH1    | H_ASP_83  | OD1    | 3.682        |
| 1GGB   | H_ARG_66  | NH1    | H_ASP_86  | OD1    | 3.167        |
| 1GGB   | H_ARG_66  | NH1    | H_ASP_86  | OD2    | 3.895        |
| 1GGB   | H_ARG_66  | NH2    | H_ASP_83  | OD1    | 3.328        |
| 1GGB   | H_ARG_66  | NH2    | H_ASP_86  | OD1    | 3.262        |
| 1GGB   | H_ARG_66  | NH2    | H_ASP_86  | OD2    | 2.539        |
| 1GGB   | H_LYS_221 | NZ     | L_GLU_123 | OE1    | 2.690        |
| 1GGB   | H_LYS_221 | NZ     | L_GLU_123 | OE2    | 3.205        |
| 1GGB   | H_LYS_222 | NZ     | H_GLU_226 | OE2    | 3.191        |

Table 82: 1GGB-specific salt bridging networks analysis. In this table, a PDB file is specified with a four-letter PDB ID, except that the names of the PDB files corresponding to the single NMR structural model split from the NMR ensemble is specified with a four-letter PDB ID in addition to a hyphen followed by the single NMR structural model numeric ID, the residue naming scheme is **Chain ID\_residue name\_residue number**,  $\angle ADH$  represents the angle formed by acceptor (A), donor (D) and hydrogen (H) ( $\angle ADH$ ).

| PDB ID | Residue A | Atom A | Residue B | Atom B | Distance (Å) |
|--------|-----------|--------|-----------|--------|--------------|
| 1GGC   | L_ARG_61  | NH1    | L_GLU_79  | OE2    | 3.692        |
| 1GGC   | L_ARG_61  | NH1    | L_ASP_82  | OD1    | 3.115        |
| 1GGC   | L_ARG_61  | NH1    | L_ASP_82  | OD2    | 2.752        |
| 1GGC   | L_ARG_61  | NH2    | L_GLU_79  | OE1    | 3.661        |
| 1GGC   | L_ARG_61  | NH2    | L_GLU_79  | OE2    | 3.675        |
| 1GGC   | L_ARG_61  | NH2    | L_ASP_82  | OD1    | 3.438        |
| 1GGC   | L_LYS_149 | NZ     | L_GLU_195 | OE2    | 3.691        |
| 1GGC   | L_ARG_155 | NH2    | L_GLU_185 | OE2    | 2.870        |
| 1GGC   | L_LYS_183 | NZ     | L_GLU_187 | OE1    | 3.373        |
| 1GGC   | L_LYS_183 | NZ     | L_GLU_187 | OE2    | 3.046        |
| 1GGC   | L_LYS_199 | NZ     | L_ASP_110 | OD1    | 3.437        |
| 1GGC   | L_LYS_199 | NZ     | L_ASP_110 | OD2    | 2.666        |
| 1GGC   | H_ARG_38  | NH1    | H_ASP_86  | OD1    | 3.206        |
| 1GGC   | H_ARG_38  | NH2    | H_GLU_46  | OE1    | 3.183        |
| 1GGC   | H_ARG_38  | NH2    | H_ASP_86  | OD1    | 3.921        |
| 1GGC   | H_ARG_58  | NH2    | L_ASP_94  | OD1    | 3.221        |
| 1GGC   | H_ARG_66  | NH1    | H_ASP_86  | OD1    | 3.876        |
| 1GGC   | H_ARG_66  | NH2    | H_ASP_86  | OD1    | 2.865        |
| 1GGC   | H_ARG_66  | NH2    | H_ASP_86  | OD2    | 2.907        |
| 1GGC   | H_LYS_218 | NZ     | H_ASP_220 | OD1    | 3.849        |
| 1GGC   | H_LYS_221 | NZ     | L_GLU_123 | OE1    | 2.942        |

Table 83: 1GGC-specific salt bridging networks analysis. In this table, a PDB file is specified with a four-letter PDB ID, except that the names of the PDB files corresponding to the single NMR structural model split from the NMR ensemble is specified with a four-letter PDB ID in addition to a hyphen followed by the single NMR structural model numeric ID, the residue naming scheme is **Chain ID\_residue name\_residue number**,  $\angle ADH$  represents the angle formed by acceptor (A), donor (D) and hydrogen (H) ( $\angle ADH$ ).

| PDB ID | Residue A | Atom A | Residue B | Atom B | Distance (Å) |
|--------|-----------|--------|-----------|--------|--------------|
| 1GGI   | L_LYS_39  | NZ     | L_ASP_81  | OD2    | 3.200        |
| 1GGI   | L_ARG_61  | NH2    | L_ASP_82  | OD1    | 3.494        |
| 1GGI   | L_ARG_61  | NH2    | L_ASP_82  | OD2    | 3.194        |
| 1GGI   | L_LYS_142 | NZ     | L_GLU_105 | OE1    | 3.057        |
| 1GGI   | L_LYS_149 | NZ     | L_GLU_195 | OE1    | 3.085        |
| 1GGI   | L_LYS_149 | NZ     | L_GLU_195 | OE2    | 2.765        |
| 1GGI   | L_ARG_155 | NH2    | L_GLU_185 | OE1    | 2.906        |
| 1GGI   | L_ARG_155 | NH2    | L_GLU_185 | OE2    | 3.331        |
| 1GGI   | L_LYS_183 | NZ     | L_GLU_187 | OE1    | 2.955        |
| 1GGI   | L_LYS_183 | NZ     | L_GLU_187 | OE2    | 3.308        |
| 1GGI   | H_ARG_38  | NH1    | H_GLU_46  | OE1    | 2.813        |
| 1GGI   | H_ARG_38  | NH2    | H_ASP_86  | OD1    | 2.641        |
| 1GGI   | H_HIS_50  | NE2    | H_GLU_95  | OE1    | 3.102        |
| 1GGI   | H_ARG_58  | NH1    | H_ASP_56  | OD1    | 3.338        |
| 1GGI   | H_ARG_58  | NH1    | H_ASP_56  | OD2    | 3.571        |
| 1GGI   | H_ARG_58  | NH2    | L_ASP_94  | OD2    | 3.749        |
| 1GGI   | H_ARG_66  | NH1    | H_ASP_86  | OD1    | 3.518        |
| 1GGI   | H_ARG_66  | NH1    | H_ASP_86  | OD2    | 3.473        |
| 1GGI   | H_ARG_66  | NH2    | H_ASP_86  | OD1    | 3.109        |
| 1GGI   | H_ARG_66  | NH2    | H_ASP_86  | OD2    | 2.810        |
| 1GGI   | H_LYS_221 | NZ     | L_GLU_123 | OE2    | 3.900        |
| 1GGI   | P_LYS_312 | NZ     | H_ASP_54  | OD1    | 2.914        |
| 1GGI   | P_LYS_312 | NZ     | H_ASP_54  | OD2    | 3.188        |
| 1GGI   | P_LYS_312 | NZ     | H_ASP_56  | OD1    | 2.830        |
| 1GGI   | P_LYS_312 | NZ     | H_ASP_56  | OD2    | 3.728        |
| 1GGI   | M_ARG_24  | NH1    | M_ASP_70  | OD1    | 2.935        |
| 1GGI   | M_ARG_24  | NH1    | M_ASP_70  | OD2    | 3.520        |
| 1GGI   | M_ARG_61  | NH1    | M_ASP_82  | OD1    | 2.935        |
| 1GGI   | M_ARG_61  | NH1    | M_ASP_82  | OD2    | 2.776        |
| 1GGI   | M_ARG_61  | NH2    | M_ASP_82  | OD1    | 3.065        |
| 1GGI   | M_LYS_142 | NZ     | M_GLU_105 | OE1    | 3.711        |
| 1GGI   | M_LYS_142 | NZ     | M_GLU_105 | OE2    | 2.989        |
| 1GGI   | M_ARG_155 | NH1    | M_GLU_185 | OE2    | 3.862        |
| 1GGI   | M_ARG_155 | NH2    | M_GLU_185 | OE1    | 2.644        |
| 1GGI   | M_ARG_155 | NH2    | M_GLU_185 | OE2    | 3.063        |
| 1GGI   | M_LYS_183 | NZ     | M_GLU_187 | OE1    | 3.427        |
| 1GGI   | M_LYS_183 | NZ     | M_GLU_187 | OE2    | 3.848        |
| 1GGI   | M_HIS_189 | ND1    | M_ASP_151 | OD2    | 3.374        |
| 1GGI   | M_LYS_199 | NZ     | M_ASP_110 | OD1    | 3.172        |
| 1GGI   | M_LYS_199 | NZ     | M_ASP_110 | OD2    | 3.326        |
| 1GGI   | J_ARG_38  | NH1    | J_ASP_86  | OD1    | 2.716        |
| 1GGI   | J_ARG_38  | NH2    | J_ASP_86  | OD1    | 3.121        |
| 1GGI   | J_HIS_50  | NE2    | J_GLU_95  | OE1    | 2.732        |
| 1GGI   | J_ARG_58  | NH1    | J_ASP_56  | OD2    | 2.535        |
| 1GGI   | J_ARG_58  | NH2    | M_ASP_94  | OD2    | 3.966        |
| 1GGI   | J_ARG_66  | NH1    | J_ASP_86  | OD1    | 3.627        |
| 1GGI   | J_ARG_66  | NH2    | J_ASP_86  | OD1    | 3.502        |
| 1GGI   | J_ARG_66  | NH2    | J_ASP_86  | OD2    | 2.746        |
| 1GGI   | J_HIS_172 | NE2    | M_ASP_167 | OD2    | 3.287        |
| 1GGI   | J_LYS_221 | NZ     | M_GLU_123 | OE1    | 3.528        |
| 1GGI   | J_LYS_221 | NZ     | M_GLU_123 | OE2    | 3.781        |
| 1GGI   | Q_LYS_312 | NZ     | J_ASP_54  | OD1    | 3.299        |
| 1GGI   | Q_LYS_312 | NZ     | J_ASP_54  | OD2    | 2.967        |
| 1GGI   | Q_LYS_312 | NZ     | J_ASP_56  | OD1    | 3.964        |
| 1GGI   | Q_LYS_312 | NZ     | J_ASP_56  | OD2    | 3.120        |

---

Table 84: 1GGI-specific salt bridging networks analysis. In this table, a PDB file is specified with a four-letter PDB ID, except that the names of the PDB files corresponding to the single NMR structural model split from the NMR ensemble is specified with a four-letter PDB ID in addition to a hyphen followed by the single NMR structural model numeric ID, the residue naming scheme is **Chain ID\_residue name\_residue number**,  $\angle ADH$  represents the angle formed by acceptor (A), donor (D) and hydrogen (H) ( $\angle ADH$ ).

| PDB ID | Residue A | Atom A | Residue B | Atom B | Distance (Å) |
|--------|-----------|--------|-----------|--------|--------------|
| 1GPO   | L_LYS_54  | NZ     | H_ASP_101 | OD1    | 2.768        |
| 1GPO   | L_LYS_54  | NZ     | H_ASP_101 | OD2    | 3.525        |
| 1GPO   | L_ARG_66  | NH2    | L_GLU_86  | OE2    | 3.655        |
| 1GPO   | L_ARG_66  | NH2    | L_ASP_87  | OD1    | 2.651        |
| 1GPO   | L_ARG_66  | NH2    | L_ASP_87  | OD2    | 3.453        |
| 1GPO   | L_LYS_147 | NZ     | L_ASP_148 | OD1    | 3.371        |
| 1GPO   | L_LYS_152 | NZ     | L_GLU_159 | OE2    | 2.707        |
| 1GPO   | L_LYS_154 | NZ     | L_GLU_200 | OE2    | 3.219        |
| 1GPO   | L_ARG_160 | NH1    | L_GLU_190 | OE2    | 3.906        |
| 1GPO   | L_ARG_193 | NH2    | L_ASP_189 | OD1    | 3.683        |
| 1GPO   | L_ARG_193 | NH2    | L_ASP_189 | OD2    | 2.940        |
| 1GPO   | L_HIS_194 | NE2    | L_GLU_190 | OE2    | 3.215        |
| 1GPO   | L_LYS_204 | NZ     | L_ASP_115 | OD1    | 3.884        |
| 1GPO   | L_LYS_204 | NZ     | L_ASP_115 | OD2    | 2.884        |
| 1GPO   | H_ARG_38  | NH1    | H_ASP_89  | OD1    | 3.025        |
| 1GPO   | H_ARG_38  | NH2    | H_GLU_46  | OE1    | 2.836        |
| 1GPO   | H_ARG_38  | NH2    | H_ASP_89  | OD1    | 3.663        |
| 1GPO   | H_ARG_66  | NH1    | H_ASP_89  | OD1    | 3.859        |
| 1GPO   | H_ARG_66  | NH1    | H_ASP_89  | OD2    | 3.366        |
| 1GPO   | H_ARG_66  | NH2    | H_ASP_89  | OD1    | 3.032        |
| 1GPO   | H_ARG_66  | NH2    | H_ASP_89  | OD2    | 3.658        |
| 1GPO   | H_LYS_208 | NZ     | L_GLU_128 | OE2    | 3.848        |
| 1GPO   | M_ARG_24  | NH1    | M_ASP_75  | OD1    | 3.059        |
| 1GPO   | M_LYS_44  | NZ     | M_GLU_86  | OE1    | 3.993        |
| 1GPO   | M_LYS_54  | NZ     | L_ASP_101 | OD1    | 3.704        |
| 1GPO   | M_ARG_66  | NH2    | M_GLU_86  | OE2    | 3.739        |
| 1GPO   | M_ARG_66  | NH2    | M_ASP_87  | OD1    | 2.836        |
| 1GPO   | M_ARG_66  | NH2    | M_ASP_87  | OD2    | 3.679        |
| 1GPO   | M_LYS_108 | NZ     | M_GLU_110 | OE1    | 2.976        |
| 1GPO   | M_LYS_108 | NZ     | M_GLU_110 | OE2    | 3.953        |
| 1GPO   | M_LYS_154 | NZ     | M_GLU_200 | OE1    | 3.791        |
| 1GPO   | M_LYS_154 | NZ     | M_GLU_200 | OE2    | 3.297        |
| 1GPO   | M_HIS_194 | ND1    | M_ASP_156 | OD2    | 3.167        |
| 1GPO   | M_HIS_194 | NE2    | M_GLU_190 | OE2    | 3.816        |
| 1GPO   | I_ARG_38  | NH1    | I_ASP_89  | OD1    | 2.915        |
| 1GPO   | I_ARG_38  | NH2    | I_GLU_46  | OE1    | 3.130        |
| 1GPO   | I_ARG_38  | NH2    | I_GLU_46  | OE2    | 3.937        |
| 1GPO   | I_ARG_38  | NH2    | I_ASP_89  | OD1    | 3.560        |
| 1GPO   | I_ARG_66  | NH1    | I_ASP_89  | OD1    | 3.810        |
| 1GPO   | I_ARG_66  | NH1    | I_ASP_89  | OD2    | 3.000        |
| 1GPO   | I_ARG_66  | NH2    | I_ASP_89  | OD1    | 3.073        |
| 1GPO   | I_ARG_66  | NH2    | I_ASP_89  | OD2    | 3.643        |
| 1GPO   | I_LYS_208 | NZ     | M_GLU_128 | OE2    | 3.367        |

Table 85: 1GPO-specific salt bridging networks analysis. In this table, a PDB file is specified with a four-letter PDB ID, except that the names of the PDB files corresponding to the single NMR structural model split from the NMR ensemble is specified with a four-letter PDB ID in addition to a hyphen followed by the single NMR structural model numeric ID, the residue naming scheme is **Chain ID\_residue name\_residue number**,  $\angle ADH$  represents the angle formed by acceptor (A), donor (D) and hydrogen (H) ( $\angle ADH$ ).

| PDB ID | Residue A | Atom A | Residue B | Atom B | Distance (Å) |
|--------|-----------|--------|-----------|--------|--------------|
| 1HCV   | A_ARG_38  | NH1    | A_ASP_86  | OD1    | 2.863        |
| 1HCV   | A_ARG_38  | NH2    | A_GLU_46  | OE2    | 3.573        |
| 1HCV   | A_ARG_38  | NH2    | A_ASP_86  | OD1    | 3.820        |
| 1HCV   | A_ARG_66  | NH2    | A_ASP_86  | OD1    | 3.579        |
| 1HCV   | A_ARG_66  | NH2    | A_ASP_86  | OD2    | 2.581        |

Table 86: 1HCV-specific salt bridging networks analysis. In this table, a PDB file is specified with a four-letter PDB ID, except that the names of the PDB files corresponding to the single NMR structural model split from the NMR ensemble is specified with a four-letter PDB ID in addition to a hyphen followed by the single NMR structural model numeric ID, the residue naming scheme is **Chain ID\_residue name\_residue number**,  $\angle ADH$  represents the angle formed by acceptor (A), donor (D) and hydrogen (H) ( $\angle ADH$ ).



| PDB ID | Residue A | Atom A | Residue B | Atom B | Distance (Å) |
|--------|-----------|--------|-----------|--------|--------------|
| 1HEZ   | A_ARG_24  | NH1    | C_ASP_70  | OD1    | 3.567        |
| 1HEZ   | A_ARG_24  | NH1    | C_ASP_70  | OD2    | 3.209        |
| 1HEZ   | A_ARG_24  | NH2    | A_ASP_70  | OD1    | 3.267        |
| 1HEZ   | A_ARG_24  | NH2    | A_ASP_70  | OD2    | 3.046        |
| 1HEZ   | A_ARG_61  | NH2    | A_GLU_81  | OE1    | 2.928        |
| 1HEZ   | A_ARG_61  | NH2    | A_ASP_82  | OD1    | 2.762        |
| 1HEZ   | A_ARG_61  | NH2    | A_ASP_82  | OD2    | 3.538        |
| 1HEZ   | A_LYS_103 | NZ     | A_GLU_165 | OE2    | 3.539        |
| 1HEZ   | A_LYS_145 | NZ     | A_GLU_143 | OE1    | 3.528        |
| 1HEZ   | A_LYS_145 | NZ     | A_GLU_143 | OE2    | 2.903        |
| 1HEZ   | A_LYS_149 | NZ     | A_GLU_195 | OE1    | 2.775        |
| 1HEZ   | B_ARG_38  | NH1    | B_ASP_90  | OD1    | 3.118        |
| 1HEZ   | B_ARG_38  | NH2    | B_GLU_46  | OE1    | 2.692        |
| 1HEZ   | B_ARG_38  | NH2    | B_GLU_46  | OE2    | 3.888        |
| 1HEZ   | B_ARG_67  | NH1    | B_ASP_90  | OD1    | 3.575        |
| 1HEZ   | B_ARG_67  | NH1    | B_ASP_90  | OD2    | 3.985        |
| 1HEZ   | B_ARG_67  | NH2    | B_ASP_90  | OD1    | 3.231        |
| 1HEZ   | B_ARG_67  | NH2    | B_ASP_90  | OD2    | 2.419        |
| 1HEZ   | B_LYS_98  | NZ     | B_ASP_109 | OD1    | 3.274        |
| 1HEZ   | B_LYS_98  | NZ     | B_ASP_109 | OD2    | 3.047        |
| 1HEZ   | B_HIS_205 | NE2    | B_ASP_220 | OD2    | 3.169        |
| 1HEZ   | B_LYS_219 | NZ     | A_GLU_123 | OE1    | 2.923        |
| 1HEZ   | B_LYS_219 | NZ     | A_GLU_123 | OE2    | 2.722        |
| 1HEZ   | C_ARG_24  | NH1    | E_ASP_855 | OD1    | 2.717        |
| 1HEZ   | C_ARG_61  | NH2    | C_GLU_81  | OE1    | 3.663        |
| 1HEZ   | C_ARG_61  | NH2    | C_GLU_81  | OE2    | 3.949        |
| 1HEZ   | C_ARG_61  | NH2    | C_ASP_82  | OD1    | 2.937        |
| 1HEZ   | C_ARG_61  | NH2    | C_ASP_82  | OD2    | 3.542        |
| 1HEZ   | C_LYS_103 | NZ     | C_GLU_165 | OE1    | 2.714        |
| 1HEZ   | C_LYS_107 | NZ     | E_ASP_867 | OD1    | 2.620        |
| 1HEZ   | C_LYS_149 | NZ     | C_GLU_195 | OE2    | 3.147        |
| 1HEZ   | C_LYS_169 | NZ     | C_ASP_167 | OD1    | 3.018        |
| 1HEZ   | C_LYS_169 | NZ     | C_ASP_167 | OD2    | 3.798        |
| 1HEZ   | C_LYS_183 | NZ     | C_GLU_187 | OE1    | 3.073        |
| 1HEZ   | C_LYS_183 | NZ     | C_GLU_187 | OE2    | 3.001        |
| 1HEZ   | C_LYS_190 | NZ     | C_GLU_213 | OE1    | 3.539        |
| 1HEZ   | D_ARG_38  | NH1    | D_ASP_90  | OD1    | 2.991        |
| 1HEZ   | D_ARG_38  | NH2    | D_GLU_46  | OE1    | 3.960        |
| 1HEZ   | D_ARG_38  | NH2    | D_GLU_46  | OE2    | 3.492        |
| 1HEZ   | D_ARG_38  | NH2    | D_ASP_90  | OD1    | 3.798        |
| 1HEZ   | D_ARG_67  | NH1    | D_ASP_90  | OD1    | 3.763        |
| 1HEZ   | D_ARG_67  | NH1    | D_ASP_90  | OD2    | 2.714        |
| 1HEZ   | D_ARG_67  | NH2    | D_ASP_90  | OD1    | 2.942        |
| 1HEZ   | D_ARG_67  | NH2    | D_ASP_90  | OD2    | 3.444        |
| 1HEZ   | D_LYS_76  | NZ     | D_ASP_73  | OD1    | 3.956        |
| 1HEZ   | D_LYS_76  | NZ     | D_ASP_73  | OD2    | 3.200        |
| 1HEZ   | D_LYS_98  | NZ     | D_ASP_109 | OD1    | 2.982        |
| 1HEZ   | D_LYS_98  | NZ     | D_ASP_109 | OD2    | 3.292        |
| 1HEZ   | D_LYS_163 | NZ     | D_ASP_169 | OD1    | 2.707        |
| 1HEZ   | D_LYS_163 | NZ     | D_ASP_169 | OD2    | 2.741        |
| 1HEZ   | D_HIS_205 | NE2    | D_ASP_220 | OD1    | 3.150        |
| 1HEZ   | D_HIS_205 | NE2    | D_ASP_220 | OD2    | 3.664        |
| 1HEZ   | E_ARG_852 | NH1    | E_GLU_849 | OE1    | 2.953        |
| 1HEZ   | E_ARG_852 | NH1    | E_GLU_849 | OE2    | 2.803        |
| 1HEZ   | E_ARG_852 | NH2    | E_GLU_849 | OE2    | 3.099        |
| 1HEZ   | E_HIS_874 | NE2    | E_GLU_869 | OE2    | 3.386        |

---

Table 87: 1HEZ-specific salt bridging networks analysis. In this table, a PDB file is specified with a four-letter PDB ID, except that the names of the PDB files corresponding to the single NMR structural model split from the NMR ensemble is specified with a four-letter PDB ID in addition to a hyphen followed by the single NMR structural model numeric ID, the residue naming scheme is **Chain ID\_residue name\_residue number**,  $\angle ADH$  represents the angle formed by acceptor (A), donor (D) and hydrogen (H) ( $\angle ADH$ ).

| PDB ID | Residue A | Atom A | Residue B | Atom B | Distance (Å) |
|--------|-----------|--------|-----------|--------|--------------|
| 1HGD   | A_LYS_27  | NZ     | B_GLU_97  | OE1    | 2.787        |
| 1HGD   | A_LYS_27  | NZ     | B_GLU_97  | OE2    | 2.801        |
| 1HGD   | A_LYS_50  | NZ     | A_ASP_275 | OD1    | 3.503        |
| 1HGD   | A_LYS_50  | NZ     | A_ASP_275 | OD2    | 2.699        |
| 1HGD   | A_ARG_57  | NH2    | A_GLU_82  | OE1    | 2.541        |
| 1HGD   | A_ARG_57  | NH2    | A_GLU_82  | OE2    | 3.602        |
| 1HGD   | A_HIS_75  | ND1    | A_ASP_73  | OD1    | 2.825        |
| 1HGD   | A_HIS_75  | ND1    | A_ASP_73  | OD2    | 3.404        |
| 1HGD   | A_HIS_75  | NE2    | A_ASP_63  | OD1    | 3.503        |
| 1HGD   | A_ARG_90  | NH2    | A_ASP_60  | OD1    | 3.606        |
| 1HGD   | A_ARG_90  | NH2    | A_ASP_60  | OD2    | 2.804        |
| 1HGD   | A_ARG_109 | NH1    | A_GLU_89  | OE1    | 2.520        |
| 1HGD   | A_ARG_109 | NH1    | A_GLU_89  | OE2    | 3.261        |
| 1HGD   | A_ARG_109 | NH2    | B_GLU_67  | OE1    | 3.474        |
| 1HGD   | A_ARG_109 | NH2    | B_GLU_67  | OE2    | 2.826        |
| 1HGD   | A_ARG_141 | NH2    | A_ASP_77  | OD1    | 2.863        |
| 1HGD   | A_ARG_141 | NH2    | A_ASP_77  | OD2    | 2.743        |
| 1HGD   | A_LYS_176 | NZ     | A_GLU_123 | OE2    | 2.689        |
| 1HGD   | A_HIS_183 | NE2    | A_GLU_190 | OE2    | 3.734        |
| 1HGD   | A_LYS_238 | NZ     | F_GLU_72  | OE1    | 2.925        |
| 1HGD   | A_LYS_238 | NZ     | F_GLU_72  | OE2    | 2.815        |
| 1HGD   | A_ARG_261 | NH1    | A_GLU_119 | OE2    | 2.647        |
| 1HGD   | A_ARG_261 | NH2    | A_GLU_119 | OE1    | 2.879        |
| 1HGD   | A_ARG_261 | NH2    | A_GLU_119 | OE2    | 2.926        |
| 1HGD   | A_LYS_264 | NZ     | A_ASP_85  | OD1    | 3.573        |
| 1HGD   | A_LYS_264 | NZ     | A_ASP_85  | OD2    | 2.845        |
| 1HGD   | A_ARG_269 | NH1    | B_GLU_67  | OE1    | 2.758        |
| 1HGD   | A_ARG_269 | NH2    | B_GLU_67  | OE1    | 3.754        |
| 1HGD   | A_LYS_292 | NZ     | A_ASP_291 | OD1    | 2.852        |
| 1HGD   | A_LYS_292 | NZ     | A_ASP_291 | OD2    | 2.779        |
| 1HGD   | A_LYS_299 | NZ     | B_GLU_69  | OE2    | 2.769        |
| 1HGD   | A_LYS_310 | NZ     | B_ASP_86  | OD1    | 2.861        |
| 1HGD   | A_LYS_310 | NZ     | B_ASP_90  | OD1    | 2.569        |
| 1HGD   | A_LYS_315 | NZ     | A_GLU_41  | OE1    | 2.760        |
| 1HGD   | A_LYS_326 | NZ     | A_GLU_325 | OE1    | 3.012        |
| 1HGD   | A_LYS_326 | NZ     | B_GLU_15  | OE1    | 3.037        |
| 1HGD   | A_LYS_326 | NZ     | B_GLU_15  | OE2    | 2.743        |
| 1HGD   | B_ARG_25  | NH1    | A_GLU_325 | OE2    | 3.743        |
| 1HGD   | B_ARG_25  | NH2    | A_GLU_325 | OE2    | 3.016        |
| 1HGD   | B_LYS_51  | NZ     | B_GLU_103 | OE1    | 2.725        |
| 1HGD   | B_ARG_54  | NH1    | B_GLU_57  | OE1    | 2.860        |
| 1HGD   | B_ARG_54  | NH1    | B_GLU_57  | OE2    | 2.845        |
| 1HGD   | B_ARG_54  | NH1    | F_GLU_97  | OE2    | 3.275        |
| 1HGD   | B_ARG_54  | NH2    | F_GLU_97  | OE2    | 2.774        |
| 1HGD   | B_LYS_58  | NZ     | B_GLU_61  | OE2    | 2.905        |
| 1HGD   | B_LYS_62  | NZ     | F_ASP_86  | OD1    | 2.852        |
| 1HGD   | B_LYS_62  | NZ     | F_ASP_86  | OD2    | 2.612        |
| 1HGD   | B_LYS_62  | NZ     | F_ASP_90  | OD1    | 3.620        |
| 1HGD   | B_LYS_62  | NZ     | F_ASP_90  | OD2    | 2.727        |
| 1HGD   | B_LYS_68  | NZ     | B_GLU_85  | OE1    | 3.140        |
| 1HGD   | B_LYS_68  | NZ     | B_GLU_85  | OE2    | 2.759        |
| 1HGD   | B_ARG_76  | NH1    | D_GLU_74  | OE1    | 3.558        |
| 1HGD   | B_ARG_76  | NH1    | D_GLU_74  | OE2    | 2.838        |
| 1HGD   | B_ARG_76  | NH2    | D_GLU_74  | OE1    | 2.751        |
| 1HGD   | B_ARG_76  | NH2    | D_GLU_74  | OE2    | 3.529        |
| 1HGD   | B_ARG_76  | NH2    | D_GLU_81  | OE1    | 2.707        |
| 1HGD   | B_ARG_76  | NH2    | D_GLU_81  | OE2    | 3.498        |

|      |           |     |           |     |       |
|------|-----------|-----|-----------|-----|-------|
| 1HGD | B_LYS_117 | NZ  | B_GLU_114 | OE1 | 2.958 |
| 1HGD | B_LYS_117 | NZ  | B_GLU_114 | OE2 | 2.520 |
| 1HGD | B_ARG_123 | NH1 | B_GLU_120 | OE1 | 2.589 |
| 1HGD | B_ARG_123 | NH1 | B_GLU_120 | OE2 | 2.787 |
| 1HGD | B_ARG_123 | NH2 | F_GLU_132 | OE1 | 3.169 |
| 1HGD | B_ARG_124 | NH1 | B_GLU_120 | OE1 | 3.722 |
| 1HGD | B_ARG_124 | NH2 | F_GLU_132 | OE1 | 3.011 |
| 1HGD | B_ARG_124 | NH2 | F_GLU_132 | OE2 | 3.294 |
| 1HGD | B_ARG_127 | NH1 | F_GLU_131 | OE1 | 2.471 |
| 1HGD | B_LYS_143 | NZ  | B_ASP_145 | OD2 | 2.849 |
| 1HGD | B_ARG_153 | NH1 | B_GLU_150 | OE1 | 2.627 |
| 1HGD | B_HIS_159 | NE2 | B_ASP_160 | OD2 | 3.135 |
| 1HGD | B_ARG_163 | NH2 | F_GLU_131 | OE1 | 2.583 |
| 1HGD | B_ARG_163 | NH2 | F_GLU_131 | OE2 | 2.596 |
| 1HGD | B_ARG_170 | NH1 | B_GLU_131 | OE2 | 2.779 |
| 1HGD | B_ARG_170 | NH1 | D_GLU_128 | OE1 | 3.354 |
| 1HGD | B_ARG_170 | NH1 | D_GLU_128 | OE2 | 3.628 |
| 1HGD | B_ARG_170 | NH2 | B_GLU_128 | OE2 | 2.668 |
| 1HGD | B_LYS_174 | NZ  | D_ASP_164 | OD1 | 2.787 |
| 1HGD | B_LYS_174 | NZ  | D_ASP_164 | OD2 | 2.517 |
| 1HGD | C_LYS_27  | NZ  | D_GLU_97  | OE1 | 2.760 |
| 1HGD | C_LYS_27  | NZ  | D_GLU_97  | OE2 | 2.799 |
| 1HGD | C_LYS_50  | NZ  | C_ASP_275 | OD1 | 3.482 |
| 1HGD | C_LYS_50  | NZ  | C_ASP_275 | OD2 | 2.664 |
| 1HGD | C_ARG_57  | NH2 | C_GLU_82  | OE1 | 2.562 |
| 1HGD | C_ARG_57  | NH2 | C_GLU_82  | OE2 | 3.993 |
| 1HGD | C_HIS_75  | ND1 | C_ASP_73  | OD1 | 2.767 |
| 1HGD | C_HIS_75  | ND1 | C_ASP_73  | OD2 | 3.384 |
| 1HGD | C_HIS_75  | NE2 | C_ASP_63  | OD1 | 3.497 |
| 1HGD | C_ARG_90  | NH2 | C_ASP_60  | OD1 | 3.613 |
| 1HGD | C_ARG_90  | NH2 | C_ASP_60  | OD2 | 2.775 |
| 1HGD | C_ARG_109 | NH1 | C_GLU_89  | OE1 | 2.543 |
| 1HGD | C_ARG_109 | NH1 | C_GLU_89  | OE2 | 3.286 |
| 1HGD | C_ARG_109 | NH2 | D_GLU_67  | OE1 | 3.480 |
| 1HGD | C_ARG_109 | NH2 | D_GLU_67  | OE2 | 2.867 |
| 1HGD | C_ARG_141 | NH2 | C_ASP_77  | OD1 | 2.873 |
| 1HGD | C_ARG_141 | NH2 | C_ASP_77  | OD2 | 2.747 |
| 1HGD | C_LYS_176 | NZ  | C_GLU_123 | OE2 | 2.693 |
| 1HGD | C_HIS_183 | NE2 | C_GLU_190 | OE2 | 3.721 |
| 1HGD | C_LYS_238 | NZ  | B_GLU_72  | OE1 | 2.801 |
| 1HGD | C_LYS_238 | NZ  | B_GLU_72  | OE2 | 2.746 |
| 1HGD | C_ARG_261 | NH1 | C_GLU_119 | OE2 | 2.657 |
| 1HGD | C_ARG_261 | NH2 | C_GLU_119 | OE1 | 2.896 |
| 1HGD | C_ARG_261 | NH2 | C_GLU_119 | OE2 | 2.924 |
| 1HGD | C_LYS_264 | NZ  | C_ASP_85  | OD1 | 3.582 |
| 1HGD | C_LYS_264 | NZ  | C_ASP_85  | OD2 | 2.818 |
| 1HGD | C_ARG_269 | NH1 | D_GLU_67  | OE1 | 2.720 |
| 1HGD | C_ARG_269 | NH2 | D_GLU_67  | OE1 | 3.733 |
| 1HGD | C_LYS_292 | NZ  | C_ASP_291 | OD1 | 2.883 |
| 1HGD | C_LYS_292 | NZ  | C_ASP_291 | OD2 | 2.789 |
| 1HGD | C_LYS_299 | NZ  | D_GLU_69  | OE2 | 2.796 |
| 1HGD | C_LYS_310 | NZ  | D_ASP_86  | OD1 | 2.878 |
| 1HGD | C_LYS_310 | NZ  | D_ASP_90  | OD1 | 2.526 |
| 1HGD | C_LYS_315 | NZ  | C_GLU_41  | OE1 | 2.785 |
| 1HGD | C_LYS_326 | NZ  | D_GLU_15  | OE1 | 2.784 |
| 1HGD | C_LYS_326 | NZ  | D_GLU_15  | OE2 | 3.881 |
| 1HGD | D_LYS_51  | NZ  | D_GLU_103 | OE1 | 2.736 |
| 1HGD | D_ARG_54  | NH1 | B_GLU_97  | OE2 | 3.293 |

|      |           |     |           |     |       |
|------|-----------|-----|-----------|-----|-------|
| 1HGD | D_ARG_54  | NH1 | D_GLU_57  | OE1 | 2.846 |
| 1HGD | D_ARG_54  | NH1 | D_GLU_57  | OE2 | 2.834 |
| 1HGD | D_ARG_54  | NH2 | B_GLU_97  | OE2 | 2.793 |
| 1HGD | D_LYS_58  | NZ  | D_GLU_61  | OE2 | 2.900 |
| 1HGD | D_LYS_62  | NZ  | B_ASP_86  | OD1 | 2.884 |
| 1HGD | D_LYS_62  | NZ  | B_ASP_86  | OD2 | 2.567 |
| 1HGD | D_LYS_62  | NZ  | B_ASP_90  | OD1 | 3.576 |
| 1HGD | D_LYS_62  | NZ  | B_ASP_90  | OD2 | 2.617 |
| 1HGD | D_LYS_68  | NZ  | D_GLU_85  | OE1 | 3.140 |
| 1HGD | D_LYS_68  | NZ  | D_GLU_85  | OE2 | 2.777 |
| 1HGD | D_ARG_76  | NH1 | F_GLU_74  | OE1 | 3.379 |
| 1HGD | D_ARG_76  | NH1 | F_GLU_74  | OE2 | 2.785 |
| 1HGD | D_ARG_76  | NH2 | F_GLU_74  | OE1 | 2.687 |
| 1HGD | D_ARG_76  | NH2 | F_GLU_74  | OE2 | 3.593 |
| 1HGD | D_ARG_76  | NH2 | F_GLU_81  | OE1 | 2.649 |
| 1HGD | D_ARG_76  | NH2 | F_GLU_81  | OE2 | 3.537 |
| 1HGD | D_LYS_117 | NZ  | D_GLU_114 | OE1 | 3.015 |
| 1HGD | D_LYS_117 | NZ  | D_GLU_114 | OE2 | 2.569 |
| 1HGD | D_ARG_123 | NH1 | D_GLU_120 | OE1 | 2.582 |
| 1HGD | D_ARG_123 | NH1 | D_GLU_120 | OE2 | 2.804 |
| 1HGD | D_ARG_123 | NH2 | B_GLU_132 | OE1 | 3.120 |
| 1HGD | D_ARG_124 | NH1 | D_GLU_120 | OE1 | 3.720 |
| 1HGD | D_ARG_124 | NH2 | B_GLU_132 | OE1 | 2.998 |
| 1HGD | D_ARG_124 | NH2 | B_GLU_132 | OE2 | 3.261 |
| 1HGD | D_ARG_127 | NH1 | B_GLU_131 | OE1 | 2.513 |
| 1HGD | D_LYS_143 | NZ  | D_ASP_145 | OD2 | 2.863 |
| 1HGD | D_ARG_153 | NH1 | D_GLU_150 | OE1 | 2.616 |
| 1HGD | D_HIS_159 | NE2 | D_ASP_160 | OD2 | 3.164 |
| 1HGD | D_ARG_163 | NH2 | B_GLU_131 | OE1 | 2.583 |
| 1HGD | D_ARG_163 | NH2 | B_GLU_131 | OE2 | 2.616 |
| 1HGD | D_ARG_170 | NH1 | D_GLU_131 | OE2 | 2.771 |
| 1HGD | D_ARG_170 | NH1 | F_GLU_128 | OE1 | 3.487 |
| 1HGD | D_ARG_170 | NH1 | F_GLU_128 | OE2 | 3.741 |
| 1HGD | D_ARG_170 | NH2 | D_GLU_128 | OE2 | 2.697 |
| 1HGD | D_LYS_174 | NZ  | F_ASP_164 | OD1 | 2.806 |
| 1HGD | D_LYS_174 | NZ  | F_ASP_164 | OD2 | 2.686 |
| 1HGD | E_LYS_27  | NZ  | F_GLU_97  | OE1 | 2.794 |
| 1HGD | E_LYS_27  | NZ  | F_GLU_97  | OE2 | 2.792 |
| 1HGD | E_LYS_50  | NZ  | E_ASP_275 | OD1 | 3.496 |
| 1HGD | E_LYS_50  | NZ  | E_ASP_275 | OD2 | 2.695 |
| 1HGD | E_ARG_57  | NH2 | E_GLU_82  | OE1 | 2.588 |
| 1HGD | E_HIS_75  | ND1 | E_ASP_73  | OD1 | 2.791 |
| 1HGD | E_HIS_75  | ND1 | E_ASP_73  | OD2 | 3.377 |
| 1HGD | E_HIS_75  | NE2 | E_ASP_63  | OD1 | 3.540 |
| 1HGD | E_ARG_90  | NH2 | E_ASP_60  | OD1 | 3.606 |
| 1HGD | E_ARG_90  | NH2 | E_ASP_60  | OD2 | 2.820 |
| 1HGD | E_ARG_109 | NH1 | E_GLU_89  | OE1 | 2.520 |
| 1HGD | E_ARG_109 | NH1 | E_GLU_89  | OE2 | 3.279 |
| 1HGD | E_ARG_109 | NH2 | F_GLU_67  | OE1 | 3.474 |
| 1HGD | E_ARG_109 | NH2 | F_GLU_67  | OE2 | 2.818 |
| 1HGD | E_ARG_141 | NH2 | E_ASP_77  | OD1 | 2.875 |
| 1HGD | E_ARG_141 | NH2 | E_ASP_77  | OD2 | 2.746 |
| 1HGD | E_LYS_176 | NZ  | E_GLU_123 | OE2 | 2.694 |
| 1HGD | E_HIS_183 | NE2 | E_GLU_190 | OE2 | 3.738 |
| 1HGD | E_LYS_238 | NZ  | D_GLU_72  | OE1 | 2.872 |
| 1HGD | E_LYS_238 | NZ  | D_GLU_72  | OE2 | 2.843 |
| 1HGD | E_ARG_261 | NH1 | E_GLU_119 | OE2 | 2.644 |
| 1HGD | E_ARG_261 | NH2 | E_GLU_119 | OE1 | 2.878 |

|      |           |     |           |     |       |
|------|-----------|-----|-----------|-----|-------|
| 1HGD | E_ARG_261 | NH2 | E_GLU_119 | OE2 | 2.908 |
| 1HGD | E_LYS_264 | NZ  | E_ASP_85  | OD1 | 3.622 |
| 1HGD | E_LYS_264 | NZ  | E_ASP_85  | OD2 | 2.868 |
| 1HGD | E_ARG_269 | NH1 | F_GLU_67  | OE1 | 2.732 |
| 1HGD | E_ARG_269 | NH2 | F_GLU_67  | OE1 | 3.760 |
| 1HGD | E_LYS_292 | NZ  | E_ASP_291 | OD1 | 2.887 |
| 1HGD | E_LYS_292 | NZ  | E_ASP_291 | OD2 | 2.826 |
| 1HGD | E_LYS_299 | NZ  | F_GLU_69  | OE2 | 2.767 |
| 1HGD | E_LYS_310 | NZ  | F_ASP_86  | OD1 | 2.884 |
| 1HGD | E_LYS_310 | NZ  | F_ASP_90  | OD1 | 2.533 |
| 1HGD | E_LYS_315 | NZ  | E_GLU_41  | OE1 | 2.761 |
| 1HGD | E_LYS_326 | NZ  | F_GLU_15  | OE1 | 2.967 |
| 1HGD | E_LYS_326 | NZ  | F_GLU_15  | OE2 | 3.203 |
| 1HGD | F_LYS_51  | NZ  | F_GLU_103 | OE1 | 2.718 |
| 1HGD | F_ARG_54  | NH1 | D_GLU_97  | OE2 | 3.306 |
| 1HGD | F_ARG_54  | NH1 | F_GLU_57  | OE1 | 2.855 |
| 1HGD | F_ARG_54  | NH1 | F_GLU_57  | OE2 | 2.837 |
| 1HGD | F_ARG_54  | NH2 | D_GLU_97  | OE2 | 2.719 |
| 1HGD | F_LYS_58  | NZ  | F_GLU_61  | OE2 | 2.922 |
| 1HGD | F_LYS_62  | NZ  | D_ASP_86  | OD1 | 2.854 |
| 1HGD | F_LYS_62  | NZ  | D_ASP_86  | OD2 | 2.590 |
| 1HGD | F_LYS_62  | NZ  | D_ASP_90  | OD1 | 3.656 |
| 1HGD | F_LYS_62  | NZ  | D_ASP_90  | OD2 | 2.713 |
| 1HGD | F_HIS_64  | NE2 | D_ASP_79  | OD2 | 3.996 |
| 1HGD | F_LYS_68  | NZ  | F_GLU_85  | OE1 | 3.116 |
| 1HGD | F_LYS_68  | NZ  | F_GLU_85  | OE2 | 2.719 |
| 1HGD | F_ARG_76  | NH1 | B_GLU_74  | OE1 | 3.419 |
| 1HGD | F_ARG_76  | NH1 | B_GLU_74  | OE2 | 2.766 |
| 1HGD | F_ARG_76  | NH2 | B_GLU_74  | OE1 | 2.711 |
| 1HGD | F_ARG_76  | NH2 | B_GLU_74  | OE2 | 3.568 |
| 1HGD | F_ARG_76  | NH2 | B_GLU_81  | OE1 | 2.637 |
| 1HGD | F_ARG_76  | NH2 | B_GLU_81  | OE2 | 3.557 |
| 1HGD | F_LYS_117 | NZ  | F_GLU_114 | OE1 | 3.015 |
| 1HGD | F_LYS_117 | NZ  | F_GLU_114 | OE2 | 2.552 |
| 1HGD | F_ARG_123 | NH1 | F_GLU_120 | OE1 | 2.598 |
| 1HGD | F_ARG_123 | NH1 | F_GLU_120 | OE2 | 2.770 |
| 1HGD | F_ARG_123 | NH2 | D_GLU_132 | OE1 | 3.156 |
| 1HGD | F_ARG_124 | NH1 | F_GLU_120 | OE1 | 3.728 |
| 1HGD | F_ARG_124 | NH2 | D_GLU_132 | OE1 | 3.098 |
| 1HGD | F_ARG_124 | NH2 | D_GLU_132 | OE2 | 3.292 |
| 1HGD | F_ARG_127 | NH1 | D_GLU_131 | OE1 | 2.558 |
| 1HGD | F_LYS_143 | NZ  | F_ASP_145 | OD2 | 2.843 |
| 1HGD | F_ARG_153 | NH1 | F_GLU_150 | OE2 | 2.541 |
| 1HGD | F_HIS_159 | NE2 | F_ASP_160 | OD2 | 3.168 |
| 1HGD | F_ARG_163 | NH2 | D_GLU_131 | OE1 | 2.583 |
| 1HGD | F_ARG_163 | NH2 | D_GLU_131 | OE2 | 2.699 |
| 1HGD | F_ARG_170 | NH1 | B_GLU_128 | OE1 | 3.398 |
| 1HGD | F_ARG_170 | NH1 | B_GLU_128 | OE2 | 3.736 |
| 1HGD | F_ARG_170 | NH1 | F_GLU_131 | OE2 | 2.763 |
| 1HGD | F_ARG_170 | NH2 | F_GLU_128 | OE2 | 2.704 |
| 1HGD | F_LYS_174 | NZ  | B_ASP_164 | OD1 | 2.545 |
| 1HGD | F_LYS_174 | NZ  | B_ASP_164 | OD2 | 2.838 |

---

Table 88: 1HGD-specific salt bridging networks analysis. In this table, a PDB file is specified with a four-letter PDB ID, except that the names of the PDB files corresponding to the single NMR structural model split from the NMR ensemble is specified with a four-letter PDB ID in addition to a hyphen followed by the single NMR structural model numeric ID, the residue naming scheme is **Chain ID\_residue name\_residue number**,  $\angle ADH$  represents the angle formed by acceptor (A), donor (D) and hydrogen (H) ( $\angle ADH$ ).

| PDB ID | Residue A | Atom A | Residue B | Atom B | Distance (Å) |
|--------|-----------|--------|-----------|--------|--------------|
| 1HGE   | A_LYS_27  | NZ     | B_GLU_97  | OE1    | 2.881        |
| 1HGE   | A_LYS_27  | NZ     | B_GLU_97  | OE2    | 2.803        |
| 1HGE   | A_LYS_50  | NZ     | A_ASP_275 | OD1    | 3.562        |
| 1HGE   | A_LYS_50  | NZ     | A_ASP_275 | OD2    | 2.748        |
| 1HGE   | A_ARG_57  | NH2    | A_GLU_82  | OE1    | 2.500        |
| 1HGE   | A_ARG_57  | NH2    | A_GLU_82  | OE2    | 3.546        |
| 1HGE   | A_HIS_75  | ND1    | A_ASP_73  | OD1    | 2.802        |
| 1HGE   | A_HIS_75  | ND1    | A_ASP_73  | OD2    | 3.532        |
| 1HGE   | A_HIS_75  | NE2    | A_ASP_63  | OD1    | 3.437        |
| 1HGE   | A_ARG_90  | NH2    | A_ASP_60  | OD1    | 3.553        |
| 1HGE   | A_ARG_90  | NH2    | A_ASP_60  | OD2    | 2.793        |
| 1HGE   | A_ARG_109 | NH1    | A_GLU_89  | OE1    | 2.487        |
| 1HGE   | A_ARG_109 | NH1    | A_GLU_89  | OE2    | 3.213        |
| 1HGE   | A_ARG_109 | NH2    | B_GLU_67  | OE1    | 3.666        |
| 1HGE   | A_ARG_109 | NH2    | B_GLU_67  | OE2    | 2.737        |
| 1HGE   | A_ARG_141 | NH2    | A_ASP_77  | OD1    | 2.893        |
| 1HGE   | A_ARG_141 | NH2    | A_ASP_77  | OD2    | 2.750        |
| 1HGE   | A_LYS_176 | NZ     | A_GLU_123 | OE2    | 2.715        |
| 1HGE   | A_HIS_183 | NE2    | A_GLU_190 | OE2    | 3.843        |
| 1HGE   | A_LYS_238 | NZ     | F_GLU_72  | OE1    | 2.915        |
| 1HGE   | A_LYS_238 | NZ     | F_GLU_72  | OE2    | 2.732        |
| 1HGE   | A_ARG_261 | NH1    | A_GLU_119 | OE2    | 2.640        |
| 1HGE   | A_ARG_261 | NH2    | A_GLU_119 | OE1    | 2.839        |
| 1HGE   | A_ARG_261 | NH2    | A_GLU_119 | OE2    | 2.928        |
| 1HGE   | A_LYS_264 | NZ     | A_ASP_85  | OD1    | 3.662        |
| 1HGE   | A_LYS_264 | NZ     | A_ASP_85  | OD2    | 2.767        |
| 1HGE   | A_ARG_269 | NH1    | B_GLU_67  | OE1    | 2.727        |
| 1HGE   | A_ARG_269 | NH2    | B_GLU_67  | OE1    | 3.813        |
| 1HGE   | A_LYS_292 | NZ     | A_ASP_291 | OD1    | 2.918        |
| 1HGE   | A_LYS_292 | NZ     | A_ASP_291 | OD2    | 2.823        |
| 1HGE   | A_LYS_299 | NZ     | B_GLU_69  | OE2    | 2.765        |
| 1HGE   | A_LYS_310 | NZ     | B_ASP_86  | OD1    | 2.860        |
| 1HGE   | A_LYS_310 | NZ     | B_ASP_90  | OD1    | 2.586        |
| 1HGE   | A_LYS_310 | NZ     | B_ASP_90  | OD2    | 3.982        |
| 1HGE   | A_LYS_315 | NZ     | A_GLU_41  | OE1    | 2.816        |
| 1HGE   | A_LYS_326 | NZ     | A_GLU_325 | OE1    | 2.847        |
| 1HGE   | A_LYS_326 | NZ     | B_GLU_15  | OE1    | 3.112        |
| 1HGE   | A_LYS_326 | NZ     | B_GLU_15  | OE2    | 2.788        |
| 1HGE   | B_ARG_25  | NH1    | A_GLU_325 | OE2    | 3.901        |
| 1HGE   | B_ARG_25  | NH2    | A_GLU_325 | OE2    | 3.058        |
| 1HGE   | B_LYS_51  | NZ     | B_GLU_103 | OE1    | 2.764        |
| 1HGE   | B_ARG_54  | NH1    | B_GLU_57  | OE1    | 2.831        |
| 1HGE   | B_ARG_54  | NH1    | B_GLU_57  | OE2    | 2.867        |
| 1HGE   | B_ARG_54  | NH1    | F_GLU_97  | OE2    | 3.352        |
| 1HGE   | B_ARG_54  | NH2    | F_GLU_97  | OE2    | 2.840        |
| 1HGE   | B_LYS_58  | NZ     | B_GLU_61  | OE2    | 3.128        |
| 1HGE   | B_LYS_62  | NZ     | F_ASP_86  | OD1    | 2.965        |
| 1HGE   | B_LYS_62  | NZ     | F_ASP_86  | OD2    | 2.602        |
| 1HGE   | B_LYS_62  | NZ     | F_ASP_90  | OD1    | 3.562        |
| 1HGE   | B_LYS_62  | NZ     | F_ASP_90  | OD2    | 2.691        |
| 1HGE   | B_LYS_68  | NZ     | B_GLU_85  | OE1    | 3.200        |
| 1HGE   | B_LYS_68  | NZ     | B_GLU_85  | OE2    | 2.780        |
| 1HGE   | B_ARG_76  | NH1    | D_GLU_74  | OE1    | 3.487        |
| 1HGE   | B_ARG_76  | NH1    | D_GLU_74  | OE2    | 2.838        |
| 1HGE   | B_ARG_76  | NH2    | D_GLU_74  | OE1    | 2.788        |
| 1HGE   | B_ARG_76  | NH2    | D_GLU_74  | OE2    | 3.585        |
| 1HGE   | B_ARG_76  | NH2    | D_GLU_81  | OE1    | 2.698        |



|      |           |     |           |     |       |
|------|-----------|-----|-----------|-----|-------|
| 1HGE | B_ARG_76  | NH2 | D_GLU_81  | OE2 | 3.486 |
| 1HGE | B_LYS_117 | NZ  | B_GLU_114 | OE1 | 3.021 |
| 1HGE | B_LYS_117 | NZ  | B_GLU_114 | OE2 | 2.593 |
| 1HGE | B_ARG_123 | NH1 | B_GLU_120 | OE1 | 2.560 |
| 1HGE | B_ARG_123 | NH1 | B_GLU_120 | OE2 | 2.842 |
| 1HGE | B_ARG_123 | NH2 | F_GLU_132 | OE1 | 3.159 |
| 1HGE | B_ARG_124 | NH1 | B_GLU_120 | OE1 | 3.659 |
| 1HGE | B_ARG_124 | NH2 | F_GLU_132 | OE1 | 3.028 |
| 1HGE | B_ARG_124 | NH2 | F_GLU_132 | OE2 | 3.444 |
| 1HGE | B_ARG_127 | NH1 | F_GLU_131 | OE1 | 2.492 |
| 1HGE | B_LYS_143 | NZ  | B_ASP_145 | OD2 | 2.791 |
| 1HGE | B_ARG_153 | NH1 | B_GLU_150 | OE1 | 2.552 |
| 1HGE | B_HIS_159 | NE2 | B_ASP_160 | OD2 | 2.984 |
| 1HGE | B_ARG_163 | NH2 | F_GLU_131 | OE1 | 2.609 |
| 1HGE | B_ARG_163 | NH2 | F_GLU_131 | OE2 | 2.622 |
| 1HGE | B_ARG_170 | NH1 | B_GLU_131 | OE2 | 2.795 |
| 1HGE | B_ARG_170 | NH1 | D_GLU_128 | OE1 | 3.351 |
| 1HGE | B_ARG_170 | NH1 | D_GLU_128 | OE2 | 3.595 |
| 1HGE | B_ARG_170 | NH2 | B_GLU_128 | OE2 | 2.691 |
| 1HGE | B_LYS_174 | NZ  | D_ASP_164 | OD1 | 2.542 |
| 1HGE | B_LYS_174 | NZ  | D_ASP_164 | OD2 | 2.784 |
| 1HGE | C_LYS_27  | NZ  | D_GLU_97  | OE1 | 2.850 |
| 1HGE | C_LYS_27  | NZ  | D_GLU_97  | OE2 | 2.792 |
| 1HGE | C_LYS_50  | NZ  | C_ASP_275 | OD1 | 3.553 |
| 1HGE | C_LYS_50  | NZ  | C_ASP_275 | OD2 | 2.700 |
| 1HGE | C_ARG_57  | NH2 | C_GLU_82  | OE1 | 2.538 |
| 1HGE | C_ARG_57  | NH2 | C_GLU_82  | OE2 | 3.923 |
| 1HGE | C_HIS_75  | ND1 | C_ASP_73  | OD1 | 2.756 |
| 1HGE | C_HIS_75  | ND1 | C_ASP_73  | OD2 | 3.513 |
| 1HGE | C_HIS_75  | NE2 | C_ASP_63  | OD1 | 3.447 |
| 1HGE | C_ARG_90  | NH2 | C_ASP_60  | OD1 | 3.557 |
| 1HGE | C_ARG_90  | NH2 | C_ASP_60  | OD2 | 2.770 |
| 1HGE | C_ARG_109 | NH1 | C_GLU_89  | OE1 | 2.521 |
| 1HGE | C_ARG_109 | NH1 | C_GLU_89  | OE2 | 3.282 |
| 1HGE | C_ARG_109 | NH2 | D_GLU_67  | OE1 | 3.673 |
| 1HGE | C_ARG_109 | NH2 | D_GLU_67  | OE2 | 2.784 |
| 1HGE | C_ARG_141 | NH2 | C_ASP_77  | OD1 | 2.880 |
| 1HGE | C_ARG_141 | NH2 | C_ASP_77  | OD2 | 2.743 |
| 1HGE | C_LYS_176 | NZ  | C_GLU_123 | OE2 | 2.713 |
| 1HGE | C_HIS_183 | NE2 | C_GLU_190 | OE2 | 3.847 |
| 1HGE | C_LYS_238 | NZ  | B_GLU_72  | OE1 | 2.779 |
| 1HGE | C_LYS_238 | NZ  | B_GLU_72  | OE2 | 2.668 |
| 1HGE | C_ARG_261 | NH1 | C_GLU_119 | OE2 | 2.652 |
| 1HGE | C_ARG_261 | NH2 | C_GLU_119 | OE1 | 2.839 |
| 1HGE | C_ARG_261 | NH2 | C_GLU_119 | OE2 | 2.930 |
| 1HGE | C_LYS_264 | NZ  | C_ASP_85  | OD1 | 3.674 |
| 1HGE | C_LYS_264 | NZ  | C_ASP_85  | OD2 | 2.771 |
| 1HGE | C_ARG_269 | NH1 | D_GLU_67  | OE1 | 2.720 |
| 1HGE | C_ARG_269 | NH2 | D_GLU_67  | OE1 | 3.811 |
| 1HGE | C_LYS_292 | NZ  | C_ASP_291 | OD1 | 2.950 |
| 1HGE | C_LYS_292 | NZ  | C_ASP_291 | OD2 | 2.836 |
| 1HGE | C_LYS_299 | NZ  | D_GLU_69  | OE2 | 2.808 |
| 1HGE | C_LYS_310 | NZ  | D_ASP_86  | OD1 | 2.890 |
| 1HGE | C_LYS_310 | NZ  | D_ASP_90  | OD1 | 2.566 |
| 1HGE | C_LYS_310 | NZ  | D_ASP_90  | OD2 | 3.955 |
| 1HGE | C_LYS_315 | NZ  | C_GLU_41  | OE1 | 2.819 |
| 1HGE | C_LYS_326 | NZ  | D_GLU_15  | OE1 | 2.739 |
| 1HGE | C_LYS_326 | NZ  | D_GLU_15  | OE2 | 3.731 |

|      |           |     |           |     |       |
|------|-----------|-----|-----------|-----|-------|
| 1HGE | D_LYS_51  | NZ  | D_GLU_103 | OE1 | 2.765 |
| 1HGE | D_ARG_54  | NH1 | B_GLU_97  | OE2 | 3.383 |
| 1HGE | D_ARG_54  | NH1 | D_GLU_57  | OE1 | 2.823 |
| 1HGE | D_ARG_54  | NH1 | D_GLU_57  | OE2 | 2.877 |
| 1HGE | D_ARG_54  | NH2 | B_GLU_97  | OE2 | 2.866 |
| 1HGE | D_LYS_58  | NZ  | D_GLU_61  | OE2 | 3.115 |
| 1HGE | D_LYS_62  | NZ  | B_ASP_86  | OD1 | 3.023 |
| 1HGE | D_LYS_62  | NZ  | B_ASP_86  | OD2 | 2.550 |
| 1HGE | D_LYS_62  | NZ  | B_ASP_90  | OD1 | 3.565 |
| 1HGE | D_LYS_62  | NZ  | B_ASP_90  | OD2 | 2.627 |
| 1HGE | D_LYS_68  | NZ  | D_GLU_85  | OE1 | 3.196 |
| 1HGE | D_LYS_68  | NZ  | D_GLU_85  | OE2 | 2.796 |
| 1HGE | D_ARG_76  | NH1 | F_GLU_74  | OE1 | 3.355 |
| 1HGE | D_ARG_76  | NH1 | F_GLU_74  | OE2 | 2.783 |
| 1HGE | D_ARG_76  | NH2 | F_GLU_74  | OE1 | 2.745 |
| 1HGE | D_ARG_76  | NH2 | F_GLU_74  | OE2 | 3.636 |
| 1HGE | D_ARG_76  | NH2 | F_GLU_81  | OE1 | 2.634 |
| 1HGE | D_ARG_76  | NH2 | F_GLU_81  | OE2 | 3.497 |
| 1HGE | D_LYS_117 | NZ  | D_GLU_114 | OE1 | 3.039 |
| 1HGE | D_LYS_117 | NZ  | D_GLU_114 | OE2 | 2.617 |
| 1HGE | D_ARG_123 | NH1 | D_GLU_120 | OE1 | 2.560 |
| 1HGE | D_ARG_123 | NH1 | D_GLU_120 | OE2 | 2.826 |
| 1HGE | D_ARG_123 | NH2 | B_GLU_132 | OE1 | 3.118 |
| 1HGE | D_ARG_124 | NH1 | D_GLU_120 | OE1 | 3.700 |
| 1HGE | D_ARG_124 | NH2 | B_GLU_132 | OE1 | 3.002 |
| 1HGE | D_ARG_124 | NH2 | B_GLU_132 | OE2 | 3.417 |
| 1HGE | D_ARG_127 | NH1 | B_GLU_131 | OE1 | 2.524 |
| 1HGE | D_LYS_143 | NZ  | D_ASP_145 | OD2 | 2.817 |
| 1HGE | D_ARG_153 | NH1 | D_GLU_150 | OE2 | 2.568 |
| 1HGE | D_HIS_159 | NE2 | D_ASP_160 | OD2 | 3.004 |
| 1HGE | D_ARG_163 | NH2 | B_GLU_131 | OE1 | 2.587 |
| 1HGE | D_ARG_163 | NH2 | B_GLU_131 | OE2 | 2.600 |
| 1HGE | D_ARG_170 | NH1 | D_GLU_131 | OE2 | 2.790 |
| 1HGE | D_ARG_170 | NH1 | F_GLU_128 | OE1 | 3.477 |
| 1HGE | D_ARG_170 | NH1 | F_GLU_128 | OE2 | 3.701 |
| 1HGE | D_ARG_170 | NH2 | D_GLU_128 | OE2 | 2.719 |
| 1HGE | D_LYS_174 | NZ  | F_ASP_164 | OD1 | 2.678 |
| 1HGE | D_LYS_174 | NZ  | F_ASP_164 | OD2 | 2.785 |
| 1HGE | E_LYS_27  | NZ  | F_GLU_97  | OE1 | 2.844 |
| 1HGE | E_LYS_27  | NZ  | F_GLU_97  | OE2 | 2.791 |
| 1HGE | E_LYS_50  | NZ  | E_ASP_275 | OD1 | 3.556 |
| 1HGE | E_LYS_50  | NZ  | E_ASP_275 | OD2 | 2.730 |
| 1HGE | E_ARG_57  | NH2 | E_GLU_82  | OE1 | 2.607 |
| 1HGE | E_ARG_57  | NH2 | E_GLU_82  | OE2 | 3.970 |
| 1HGE | E_HIS_75  | ND1 | E_ASP_73  | OD1 | 2.770 |
| 1HGE | E_HIS_75  | ND1 | E_ASP_73  | OD2 | 3.474 |
| 1HGE | E_HIS_75  | NE2 | E_ASP_63  | OD1 | 3.473 |
| 1HGE | E_ARG_90  | NH2 | E_ASP_60  | OD1 | 3.571 |
| 1HGE | E_ARG_90  | NH2 | E_ASP_60  | OD2 | 2.802 |
| 1HGE | E_ARG_109 | NH1 | E_GLU_89  | OE1 | 2.498 |
| 1HGE | E_ARG_109 | NH1 | E_GLU_89  | OE2 | 3.250 |
| 1HGE | E_ARG_109 | NH2 | F_GLU_67  | OE1 | 3.658 |
| 1HGE | E_ARG_109 | NH2 | F_GLU_67  | OE2 | 2.776 |
| 1HGE | E_ARG_141 | NH2 | E_ASP_77  | OD1 | 2.913 |
| 1HGE | E_ARG_141 | NH2 | E_ASP_77  | OD2 | 2.749 |
| 1HGE | E_LYS_176 | NZ  | E_GLU_123 | OE2 | 2.730 |
| 1HGE | E_HIS_183 | NE2 | E_GLU_190 | OE2 | 3.836 |
| 1HGE | E_LYS_238 | NZ  | D_GLU_72  | OE1 | 2.851 |

|      |           |     |           |     |       |
|------|-----------|-----|-----------|-----|-------|
| 1HGE | E_LYS_238 | NZ  | D_GLU_72  | OE2 | 2.740 |
| 1HGE | E_ARG_261 | NH1 | E_GLU_119 | OE2 | 2.647 |
| 1HGE | E_ARG_261 | NH2 | E_GLU_119 | OE1 | 2.833 |
| 1HGE | E_ARG_261 | NH2 | E_GLU_119 | OE2 | 2.933 |
| 1HGE | E_LYS_264 | NZ  | E_ASP_85  | OD1 | 3.706 |
| 1HGE | E_LYS_264 | NZ  | E_ASP_85  | OD2 | 2.812 |
| 1HGE | E_ARG_269 | NH1 | F_GLU_67  | OE1 | 2.696 |
| 1HGE | E_ARG_269 | NH2 | F_GLU_67  | OE1 | 3.784 |
| 1HGE | E_LYS_292 | NZ  | E_ASP_291 | OD1 | 2.975 |
| 1HGE | E_LYS_292 | NZ  | E_ASP_291 | OD2 | 2.845 |
| 1HGE | E_LYS_299 | NZ  | F_GLU_69  | OE2 | 2.768 |
| 1HGE | E_LYS_310 | NZ  | F_ASP_86  | OD1 | 2.863 |
| 1HGE | E_LYS_310 | NZ  | F_ASP_90  | OD1 | 2.577 |
| 1HGE | E_LYS_310 | NZ  | F_ASP_90  | OD2 | 3.952 |
| 1HGE | E_LYS_315 | NZ  | E_GLU_41  | OE1 | 2.801 |
| 1HGE | E_LYS_326 | NZ  | F_GLU_15  | OE1 | 2.987 |
| 1HGE | E_LYS_326 | NZ  | F_GLU_15  | OE2 | 3.095 |
| 1HGE | F_LYS_51  | NZ  | F_GLU_103 | OE1 | 2.773 |
| 1HGE | F_ARG_54  | NH1 | D_GLU_97  | OE2 | 3.384 |
| 1HGE | F_ARG_54  | NH1 | F_GLU_57  | OE1 | 2.822 |
| 1HGE | F_ARG_54  | NH1 | F_GLU_57  | OE2 | 2.866 |
| 1HGE | F_ARG_54  | NH2 | D_GLU_97  | OE2 | 2.800 |
| 1HGE | F_LYS_58  | NZ  | F_GLU_61  | OE2 | 3.128 |
| 1HGE | F_LYS_62  | NZ  | D_ASP_86  | OD1 | 2.945 |
| 1HGE | F_LYS_62  | NZ  | D_ASP_86  | OD2 | 2.535 |
| 1HGE | F_LYS_62  | NZ  | D_ASP_90  | OD1 | 3.592 |
| 1HGE | F_LYS_62  | NZ  | D_ASP_90  | OD2 | 2.671 |
| 1HGE | F_LYS_68  | NZ  | F_GLU_85  | OE1 | 3.151 |
| 1HGE | F_LYS_68  | NZ  | F_GLU_85  | OE2 | 2.745 |
| 1HGE | F_ARG_76  | NH1 | B_GLU_74  | OE1 | 3.326 |
| 1HGE | F_ARG_76  | NH1 | B_GLU_74  | OE2 | 2.732 |
| 1HGE | F_ARG_76  | NH2 | B_GLU_74  | OE1 | 2.705 |
| 1HGE | F_ARG_76  | NH2 | B_GLU_74  | OE2 | 3.590 |
| 1HGE | F_ARG_76  | NH2 | B_GLU_81  | OE1 | 2.650 |
| 1HGE | F_ARG_76  | NH2 | B_GLU_81  | OE2 | 3.592 |
| 1HGE | F_LYS_117 | NZ  | F_GLU_114 | OE1 | 3.064 |
| 1HGE | F_LYS_117 | NZ  | F_GLU_114 | OE2 | 2.613 |
| 1HGE | F_ARG_123 | NH1 | F_GLU_120 | OE1 | 2.576 |
| 1HGE | F_ARG_123 | NH1 | F_GLU_120 | OE2 | 2.810 |
| 1HGE | F_ARG_123 | NH2 | D_GLU_132 | OE1 | 3.161 |
| 1HGE | F_ARG_124 | NH1 | F_GLU_120 | OE1 | 3.667 |
| 1HGE | F_ARG_124 | NH2 | D_GLU_132 | OE1 | 3.085 |
| 1HGE | F_ARG_124 | NH2 | D_GLU_132 | OE2 | 3.468 |
| 1HGE | F_ARG_127 | NH1 | D_GLU_131 | OE1 | 2.578 |
| 1HGE | F_LYS_143 | NZ  | F_ASP_145 | OD2 | 2.798 |
| 1HGE | F_ARG_153 | NH1 | F_GLU_150 | OE2 | 2.492 |
| 1HGE | F_HIS_159 | NE2 | F_ASP_160 | OD2 | 3.030 |
| 1HGE | F_ARG_163 | NH2 | D_GLU_131 | OE1 | 2.628 |
| 1HGE | F_ARG_163 | NH2 | D_GLU_131 | OE2 | 2.698 |
| 1HGE | F_ARG_170 | NH1 | B_GLU_128 | OE1 | 3.389 |
| 1HGE | F_ARG_170 | NH1 | B_GLU_128 | OE2 | 3.679 |
| 1HGE | F_ARG_170 | NH1 | F_GLU_131 | OE2 | 2.783 |
| 1HGE | F_ARG_170 | NH2 | F_GLU_128 | OE2 | 2.721 |
| 1HGE | F_LYS_174 | NZ  | B_ASP_164 | OD1 | 2.537 |
| 1HGE | F_LYS_174 | NZ  | B_ASP_164 | OD2 | 2.796 |

---

Table 89: 1HGE-specific salt bridging networks analysis. In this table, a PDB file is specified with a four-letter PDB ID, except that the names of the PDB files corresponding to the single NMR structural model split from the NMR ensemble is specified with a four-letter PDB ID in addition to a hyphen followed by the single NMR structural model numeric ID, the residue naming scheme is **Chain ID\_residue name\_residue number**,  $\angle ADH$  represents the angle formed by acceptor (A), donor (D) and hydrogen (H) ( $\angle ADH$ ).

| PDB ID | Residue A | Atom A | Residue B | Atom B | Distance (Å) |
|--------|-----------|--------|-----------|--------|--------------|
| 1HGF   | A_LYS_27  | NZ     | B_GLU_97  | OE1    | 2.809        |
| 1HGF   | A_LYS_27  | NZ     | B_GLU_97  | OE2    | 2.791        |
| 1HGF   | A_LYS_50  | NZ     | A_ASP_275 | OD2    | 2.912        |
| 1HGF   | A_ARG_57  | NH2    | A_GLU_82  | OE1    | 2.650        |
| 1HGF   | A_ARG_57  | NH2    | A_GLU_82  | OE2    | 3.590        |
| 1HGF   | A_HIS_75  | ND1    | A_ASP_73  | OD1    | 2.838        |
| 1HGF   | A_HIS_75  | ND1    | A_ASP_73  | OD2    | 3.347        |
| 1HGF   | A_HIS_75  | NE2    | A_ASP_63  | OD1    | 3.455        |
| 1HGF   | A_ARG_90  | NH2    | A_ASP_60  | OD1    | 3.473        |
| 1HGF   | A_ARG_90  | NH2    | A_ASP_60  | OD2    | 2.841        |
| 1HGF   | A_ARG_109 | NH1    | A_GLU_89  | OE1    | 2.536        |
| 1HGF   | A_ARG_109 | NH1    | A_GLU_89  | OE2    | 2.889        |
| 1HGF   | A_ARG_109 | NH2    | B_GLU_67  | OE1    | 3.699        |
| 1HGF   | A_ARG_109 | NH2    | B_GLU_67  | OE2    | 2.917        |
| 1HGF   | A_ARG_141 | NH2    | A_ASP_77  | OD1    | 2.837        |
| 1HGF   | A_ARG_141 | NH2    | A_ASP_77  | OD2    | 2.783        |
| 1HGF   | A_LYS_176 | NZ     | A_GLU_123 | OE2    | 2.716        |
| 1HGF   | A_LYS_176 | NZ     | A_ASP_172 | OD1    | 3.709        |
| 1HGF   | A_HIS_183 | NE2    | A_GLU_190 | OE2    | 3.660        |
| 1HGF   | A_LYS_238 | NZ     | F_GLU_72  | OE1    | 2.852        |
| 1HGF   | A_LYS_238 | NZ     | F_GLU_72  | OE2    | 2.778        |
| 1HGF   | A_ARG_261 | NH1    | A_GLU_119 | OE1    | 3.779        |
| 1HGF   | A_ARG_261 | NH1    | A_GLU_119 | OE2    | 2.603        |
| 1HGF   | A_ARG_261 | NH2    | A_GLU_119 | OE1    | 2.742        |
| 1HGF   | A_ARG_261 | NH2    | A_GLU_119 | OE2    | 3.168        |
| 1HGF   | A_LYS_264 | NZ     | A_ASP_85  | OD2    | 3.310        |
| 1HGF   | A_ARG_269 | NH1    | B_GLU_67  | OE1    | 2.939        |
| 1HGF   | A_LYS_292 | NZ     | A_ASP_291 | OD1    | 2.863        |
| 1HGF   | A_LYS_292 | NZ     | A_ASP_291 | OD2    | 3.511        |
| 1HGF   | A_LYS_299 | NZ     | B_GLU_69  | OE2    | 3.681        |
| 1HGF   | A_LYS_310 | NZ     | B_ASP_86  | OD1    | 2.820        |
| 1HGF   | A_LYS_310 | NZ     | B_ASP_90  | OD1    | 2.555        |
| 1HGF   | A_LYS_310 | NZ     | B_ASP_90  | OD2    | 3.978        |
| 1HGF   | A_LYS_315 | NZ     | A_GLU_41  | OE1    | 3.740        |
| 1HGF   | A_LYS_326 | NZ     | A_GLU_325 | OE1    | 2.712        |
| 1HGF   | A_LYS_326 | NZ     | B_GLU_15  | OE1    | 3.851        |
| 1HGF   | A_LYS_326 | NZ     | B_GLU_15  | OE2    | 3.863        |
| 1HGF   | B_ARG_25  | NH1    | A_GLU_325 | OE2    | 3.563        |
| 1HGF   | B_ARG_25  | NH2    | A_GLU_325 | OE2    | 2.989        |
| 1HGF   | B_LYS_51  | NZ     | B_GLU_103 | OE1    | 2.735        |
| 1HGF   | B_ARG_54  | NH1    | B_GLU_57  | OE1    | 3.296        |
| 1HGF   | B_ARG_54  | NH1    | F_GLU_97  | OE2    | 3.282        |
| 1HGF   | B_ARG_54  | NH2    | F_GLU_97  | OE2    | 2.831        |
| 1HGF   | B_LYS_62  | NZ     | F_ASP_86  | OD1    | 3.116        |
| 1HGF   | B_LYS_62  | NZ     | F_ASP_86  | OD2    | 2.708        |
| 1HGF   | B_LYS_62  | NZ     | F_ASP_90  | OD1    | 3.733        |
| 1HGF   | B_LYS_62  | NZ     | F_ASP_90  | OD2    | 2.767        |
| 1HGF   | B_LYS_68  | NZ     | B_GLU_85  | OE1    | 3.045        |
| 1HGF   | B_LYS_68  | NZ     | B_GLU_85  | OE2    | 2.673        |
| 1HGF   | B_ARG_76  | NH1    | D_GLU_74  | OE1    | 2.859        |
| 1HGF   | B_ARG_76  | NH1    | D_GLU_74  | OE2    | 3.561        |
| 1HGF   | B_ARG_76  | NH2    | D_GLU_74  | OE1    | 3.524        |
| 1HGF   | B_ARG_76  | NH2    | D_GLU_74  | OE2    | 2.746        |
| 1HGF   | B_ARG_76  | NH2    | D_GLU_81  | OE1    | 2.726        |
| 1HGF   | B_ARG_76  | NH2    | D_GLU_81  | OE2    | 3.662        |
| 1HGF   | B_LYS_117 | NZ     | B_GLU_114 | OE1    | 3.311        |
| 1HGF   | B_LYS_117 | NZ     | B_GLU_114 | OE2    | 2.558        |

|      |           |     |           |     |       |
|------|-----------|-----|-----------|-----|-------|
| 1HGF | B_ARG_123 | NH1 | B_GLU_120 | OE1 | 2.618 |
| 1HGF | B_ARG_123 | NH1 | B_GLU_120 | OE2 | 2.780 |
| 1HGF | B_ARG_123 | NH2 | F_GLU_132 | OE1 | 3.495 |
| 1HGF | B_ARG_124 | NH2 | F_GLU_132 | OE1 | 3.111 |
| 1HGF | B_ARG_124 | NH2 | F_GLU_132 | OE2 | 3.495 |
| 1HGF | B_ARG_127 | NH1 | F_GLU_131 | OE1 | 2.468 |
| 1HGF | B_ARG_153 | NH1 | B_GLU_150 | OE1 | 2.531 |
| 1HGF | B_HIS_159 | NE2 | B_ASP_160 | OD2 | 3.002 |
| 1HGF | B_ARG_163 | NH2 | F_GLU_131 | OE1 | 2.740 |
| 1HGF | B_ARG_163 | NH2 | F_GLU_131 | OE2 | 2.533 |
| 1HGF | B_ARG_170 | NH1 | B_GLU_131 | OE2 | 2.840 |
| 1HGF | B_ARG_170 | NH1 | D_GLU_128 | OE1 | 3.455 |
| 1HGF | B_ARG_170 | NH1 | D_GLU_128 | OE2 | 3.294 |
| 1HGF | B_ARG_170 | NH2 | B_GLU_128 | OE2 | 2.821 |
| 1HGF | B_LYS_174 | NZ  | D_ASP_164 | OD2 | 3.813 |
| 1HGF | C_LYS_27  | NZ  | D_GLU_97  | OE1 | 2.824 |
| 1HGF | C_LYS_27  | NZ  | D_GLU_97  | OE2 | 2.808 |
| 1HGF | C_LYS_50  | NZ  | C_ASP_275 | OD2 | 2.881 |
| 1HGF | C_ARG_57  | NH2 | C_GLU_82  | OE1 | 2.589 |
| 1HGF | C_ARG_57  | NH2 | C_GLU_82  | OE2 | 3.890 |
| 1HGF | C_HIS_75  | ND1 | C_ASP_73  | OD1 | 2.839 |
| 1HGF | C_HIS_75  | ND1 | C_ASP_73  | OD2 | 3.334 |
| 1HGF | C_HIS_75  | NE2 | C_ASP_63  | OD1 | 3.432 |
| 1HGF | C_ARG_90  | NH2 | C_ASP_60  | OD1 | 3.494 |
| 1HGF | C_ARG_90  | NH2 | C_ASP_60  | OD2 | 2.843 |
| 1HGF | C_ARG_109 | NH1 | C_GLU_89  | OE1 | 2.579 |
| 1HGF | C_ARG_109 | NH1 | C_GLU_89  | OE2 | 2.919 |
| 1HGF | C_ARG_109 | NH2 | D_GLU_67  | OE1 | 3.698 |
| 1HGF | C_ARG_109 | NH2 | D_GLU_67  | OE2 | 2.914 |
| 1HGF | C_ARG_141 | NH2 | C_ASP_77  | OD1 | 2.838 |
| 1HGF | C_ARG_141 | NH2 | C_ASP_77  | OD2 | 2.786 |
| 1HGF | C_LYS_176 | NZ  | C_GLU_123 | OE2 | 2.724 |
| 1HGF | C_LYS_176 | NZ  | C_ASP_172 | OD1 | 3.678 |
| 1HGF | C_HIS_183 | NE2 | C_GLU_190 | OE2 | 3.665 |
| 1HGF | C_LYS_238 | NZ  | B_GLU_72  | OE1 | 2.746 |
| 1HGF | C_LYS_238 | NZ  | B_GLU_72  | OE2 | 2.727 |
| 1HGF | C_ARG_261 | NH1 | C_GLU_119 | OE1 | 3.774 |
| 1HGF | C_ARG_261 | NH1 | C_GLU_119 | OE2 | 2.592 |
| 1HGF | C_ARG_261 | NH2 | C_GLU_119 | OE1 | 2.721 |
| 1HGF | C_ARG_261 | NH2 | C_GLU_119 | OE2 | 3.119 |
| 1HGF | C_LYS_264 | NZ  | C_ASP_85  | OD2 | 3.303 |
| 1HGF | C_ARG_269 | NH1 | D_GLU_67  | OE1 | 2.900 |
| 1HGF | C_LYS_292 | NZ  | C_ASP_291 | OD1 | 2.883 |
| 1HGF | C_LYS_292 | NZ  | C_ASP_291 | OD2 | 3.545 |
| 1HGF | C_LYS_299 | NZ  | D_GLU_69  | OE2 | 3.732 |
| 1HGF | C_LYS_310 | NZ  | D_ASP_86  | OD1 | 2.839 |
| 1HGF | C_LYS_310 | NZ  | D_ASP_90  | OD1 | 2.507 |
| 1HGF | C_LYS_310 | NZ  | D_ASP_90  | OD2 | 3.941 |
| 1HGF | C_LYS_315 | NZ  | C_GLU_41  | OE1 | 3.725 |
| 1HGF | C_LYS_326 | NZ  | D_GLU_15  | OE1 | 3.713 |
| 1HGF | D_LYS_51  | NZ  | D_GLU_103 | OE1 | 2.742 |
| 1HGF | D_ARG_54  | NH1 | B_GLU_97  | OE2 | 3.314 |
| 1HGF | D_ARG_54  | NH1 | D_GLU_57  | OE1 | 3.296 |
| 1HGF | D_ARG_54  | NH2 | B_GLU_97  | OE2 | 2.840 |
| 1HGF | D_LYS_62  | NZ  | B_ASP_86  | OD1 | 3.122 |
| 1HGF | D_LYS_62  | NZ  | B_ASP_86  | OD2 | 2.686 |
| 1HGF | D_LYS_62  | NZ  | B_ASP_90  | OD1 | 3.703 |
| 1HGF | D_LYS_62  | NZ  | B_ASP_90  | OD2 | 2.682 |

|      |           |     |           |     |       |
|------|-----------|-----|-----------|-----|-------|
| 1HGF | D_LYS_68  | NZ  | D_GLU_85  | OE1 | 3.023 |
| 1HGF | D_LYS_68  | NZ  | D_GLU_85  | OE2 | 2.732 |
| 1HGF | D_ARG_76  | NH1 | F_GLU_74  | OE1 | 2.790 |
| 1HGF | D_ARG_76  | NH1 | F_GLU_74  | OE2 | 3.379 |
| 1HGF | D_ARG_76  | NH2 | F_GLU_74  | OE1 | 3.594 |
| 1HGF | D_ARG_76  | NH2 | F_GLU_74  | OE2 | 2.697 |
| 1HGF | D_ARG_76  | NH2 | F_GLU_81  | OE1 | 2.644 |
| 1HGF | D_ARG_76  | NH2 | F_GLU_81  | OE2 | 3.691 |
| 1HGF | D_LYS_117 | NZ  | D_GLU_114 | OE1 | 3.303 |
| 1HGF | D_LYS_117 | NZ  | D_GLU_114 | OE2 | 2.574 |
| 1HGF | D_ARG_123 | NH1 | D_GLU_120 | OE1 | 2.580 |
| 1HGF | D_ARG_123 | NH1 | D_GLU_120 | OE2 | 2.788 |
| 1HGF | D_ARG_123 | NH2 | B_GLU_132 | OE1 | 3.407 |
| 1HGF | D_ARG_124 | NH2 | B_GLU_132 | OE1 | 3.100 |
| 1HGF | D_ARG_124 | NH2 | B_GLU_132 | OE2 | 3.442 |
| 1HGF | D_ARG_127 | NH1 | B_GLU_131 | OE1 | 2.516 |
| 1HGF | D_ARG_153 | NH1 | D_GLU_150 | OE1 | 2.657 |
| 1HGF | D_HIS_159 | NE2 | D_ASP_160 | OD2 | 3.002 |
| 1HGF | D_ARG_163 | NH2 | B_GLU_131 | OE1 | 2.704 |
| 1HGF | D_ARG_163 | NH2 | B_GLU_131 | OE2 | 2.556 |
| 1HGF | D_ARG_170 | NH1 | D_GLU_131 | OE2 | 2.839 |
| 1HGF | D_ARG_170 | NH1 | F_GLU_128 | OE1 | 3.604 |
| 1HGF | D_ARG_170 | NH1 | F_GLU_128 | OE2 | 3.428 |
| 1HGF | D_ARG_170 | NH2 | D_GLU_128 | OE2 | 2.843 |
| 1HGF | E_LYS_27  | NZ  | F_GLU_97  | OE1 | 2.793 |
| 1HGF | E_LYS_27  | NZ  | F_GLU_97  | OE2 | 2.754 |
| 1HGF | E_LYS_50  | NZ  | E_ASP_275 | OD2 | 2.903 |
| 1HGF | E_ARG_57  | NH2 | E_GLU_82  | OE1 | 2.780 |
| 1HGF | E_HIS_75  | ND1 | E_ASP_73  | OD1 | 2.855 |
| 1HGF | E_HIS_75  | ND1 | E_ASP_73  | OD2 | 3.339 |
| 1HGF | E_HIS_75  | NE2 | E_ASP_63  | OD1 | 3.444 |
| 1HGF | E_ARG_90  | NH2 | E_ASP_60  | OD1 | 3.506 |
| 1HGF | E_ARG_90  | NH2 | E_ASP_60  | OD2 | 2.882 |
| 1HGF | E_ARG_109 | NH1 | E_GLU_89  | OE1 | 2.522 |
| 1HGF | E_ARG_109 | NH1 | E_GLU_89  | OE2 | 2.887 |
| 1HGF | E_ARG_109 | NH2 | F_GLU_67  | OE1 | 3.694 |
| 1HGF | E_ARG_109 | NH2 | F_GLU_67  | OE2 | 2.878 |
| 1HGF | E_ARG_141 | NH2 | E_ASP_77  | OD1 | 2.834 |
| 1HGF | E_ARG_141 | NH2 | E_ASP_77  | OD2 | 2.773 |
| 1HGF | E_LYS_176 | NZ  | E_GLU_123 | OE2 | 2.761 |
| 1HGF | E_LYS_176 | NZ  | E_ASP_172 | OD1 | 3.700 |
| 1HGF | E_HIS_183 | NE2 | E_GLU_190 | OE2 | 3.673 |
| 1HGF | E_LYS_238 | NZ  | D_GLU_72  | OE1 | 2.831 |
| 1HGF | E_LYS_238 | NZ  | D_GLU_72  | OE2 | 2.834 |
| 1HGF | E_ARG_261 | NH1 | E_GLU_119 | OE1 | 3.764 |
| 1HGF | E_ARG_261 | NH1 | E_GLU_119 | OE2 | 2.590 |
| 1HGF | E_ARG_261 | NH2 | E_GLU_119 | OE1 | 2.729 |
| 1HGF | E_ARG_261 | NH2 | E_GLU_119 | OE2 | 3.139 |
| 1HGF | E_LYS_264 | NZ  | E_ASP_85  | OD2 | 3.295 |
| 1HGF | E_ARG_269 | NH1 | F_GLU_67  | OE1 | 2.906 |
| 1HGF | E_LYS_292 | NZ  | E_ASP_291 | OD1 | 2.871 |
| 1HGF | E_LYS_292 | NZ  | E_ASP_291 | OD2 | 3.523 |
| 1HGF | E_LYS_299 | NZ  | F_GLU_69  | OE2 | 3.655 |
| 1HGF | E_LYS_310 | NZ  | F_ASP_86  | OD1 | 2.832 |
| 1HGF | E_LYS_310 | NZ  | F_ASP_90  | OD1 | 2.514 |
| 1HGF | E_LYS_310 | NZ  | F_ASP_90  | OD2 | 3.973 |
| 1HGF | E_LYS_315 | NZ  | E_GLU_41  | OE1 | 3.726 |
| 1HGF | E_LYS_326 | NZ  | F_GLU_15  | OE1 | 3.652 |

|      |           |     |           |     |       |
|------|-----------|-----|-----------|-----|-------|
| 1HGF | E_LYS_326 | NZ  | F_GLU_15  | OE2 | 3.771 |
| 1HGF | F_LYS_51  | NZ  | F_GLU_103 | OE1 | 2.723 |
| 1HGF | F_ARG_54  | NH1 | D_GLU_97  | OE2 | 3.368 |
| 1HGF | F_ARG_54  | NH1 | F_GLU_57  | OE1 | 3.280 |
| 1HGF | F_ARG_54  | NH2 | D_GLU_97  | OE2 | 2.791 |
| 1HGF | F_LYS_62  | NZ  | D_ASP_86  | OD1 | 3.076 |
| 1HGF | F_LYS_62  | NZ  | D_ASP_86  | OD2 | 2.672 |
| 1HGF | F_LYS_62  | NZ  | D_ASP_90  | OD1 | 3.773 |
| 1HGF | F_LYS_62  | NZ  | D_ASP_90  | OD2 | 2.752 |
| 1HGF | F_LYS_68  | NZ  | F_GLU_85  | OE1 | 3.011 |
| 1HGF | F_LYS_68  | NZ  | F_GLU_85  | OE2 | 2.638 |
| 1HGF | F_ARG_76  | NH1 | B_GLU_74  | OE1 | 2.779 |
| 1HGF | F_ARG_76  | NH1 | B_GLU_74  | OE2 | 3.420 |
| 1HGF | F_ARG_76  | NH2 | B_GLU_74  | OE1 | 3.542 |
| 1HGF | F_ARG_76  | NH2 | B_GLU_74  | OE2 | 2.707 |
| 1HGF | F_ARG_76  | NH2 | B_GLU_81  | OE1 | 2.689 |
| 1HGF | F_ARG_76  | NH2 | B_GLU_81  | OE2 | 3.716 |
| 1HGF | F_LYS_117 | NZ  | F_GLU_114 | OE1 | 3.348 |
| 1HGF | F_LYS_117 | NZ  | F_GLU_114 | OE2 | 2.589 |
| 1HGF | F_ARG_123 | NH1 | F_GLU_120 | OE1 | 2.596 |
| 1HGF | F_ARG_123 | NH1 | F_GLU_120 | OE2 | 2.789 |
| 1HGF | F_ARG_123 | NH2 | D_GLU_132 | OE1 | 3.469 |
| 1HGF | F_ARG_124 | NH2 | D_GLU_132 | OE1 | 3.198 |
| 1HGF | F_ARG_124 | NH2 | D_GLU_132 | OE2 | 3.522 |
| 1HGF | F_ARG_127 | NH1 | D_GLU_131 | OE1 | 2.568 |
| 1HGF | F_HIS_159 | NE2 | F_ASP_160 | OD2 | 3.032 |
| 1HGF | F_ARG_163 | NH2 | D_GLU_131 | OE1 | 2.689 |
| 1HGF | F_ARG_163 | NH2 | D_GLU_131 | OE2 | 2.644 |
| 1HGF | F_ARG_170 | NH1 | B_GLU_128 | OE1 | 3.432 |
| 1HGF | F_ARG_170 | NH1 | B_GLU_128 | OE2 | 3.366 |
| 1HGF | F_ARG_170 | NH1 | F_GLU_131 | OE2 | 2.852 |
| 1HGF | F_ARG_170 | NH2 | F_GLU_128 | OE2 | 2.847 |
| 1HGF | F_LYS_174 | NZ  | B_ASP_164 | OD2 | 3.837 |

Table 90: 1HGF-specific salt bridging networks analysis. In this table, a PDB file is specified with a four-letter PDB ID, except that the names of the PDB files corresponding to the single NMR structural model split from the NMR ensemble is specified with a four-letter PDB ID in addition to a hyphen followed by the single NMR structural model numeric ID, the residue naming scheme is **Chain ID\_residue name\_residue number**,  $\angle ADH$  represents the angle formed by acceptor (A), donor (D) and hydrogen (H) ( $\angle ADH$ ).



| PDB ID | Residue A | Atom A | Residue B | Atom B | Distance (Å) |
|--------|-----------|--------|-----------|--------|--------------|
| 1HGG   | A_LYS_27  | NZ     | B_GLU_97  | OE1    | 2.679        |
| 1HGG   | A_LYS_27  | NZ     | B_GLU_97  | OE2    | 2.904        |
| 1HGG   | A_LYS_50  | NZ     | A_ASP_275 | OD1    | 3.658        |
| 1HGG   | A_LYS_50  | NZ     | A_ASP_275 | OD2    | 2.711        |
| 1HGG   | A_ARG_57  | NH2    | A_GLU_82  | OE1    | 2.519        |
| 1HGG   | A_ARG_57  | NH2    | A_GLU_82  | OE2    | 3.336        |
| 1HGG   | A_HIS_75  | ND1    | A_ASP_73  | OD1    | 2.772        |
| 1HGG   | A_HIS_75  | ND1    | A_ASP_73  | OD2    | 3.336        |
| 1HGG   | A_HIS_75  | NE2    | A_ASP_63  | OD1    | 3.694        |
| 1HGG   | A_ARG_90  | NH2    | A_ASP_60  | OD1    | 3.622        |
| 1HGG   | A_ARG_90  | NH2    | A_ASP_60  | OD2    | 2.794        |
| 1HGG   | A_ARG_109 | NH1    | A_GLU_89  | OE1    | 2.517        |
| 1HGG   | A_ARG_109 | NH1    | A_GLU_89  | OE2    | 3.003        |
| 1HGG   | A_ARG_109 | NH2    | B_GLU_67  | OE1    | 3.854        |
| 1HGG   | A_ARG_109 | NH2    | B_GLU_67  | OE2    | 2.838        |
| 1HGG   | A_ARG_141 | NH2    | A_ASP_77  | OD1    | 2.758        |
| 1HGG   | A_ARG_141 | NH2    | A_ASP_77  | OD2    | 2.757        |
| 1HGG   | A_LYS_176 | NZ     | A_GLU_123 | OE2    | 2.648        |
| 1HGG   | A_HIS_183 | NE2    | A_GLU_190 | OE2    | 3.990        |
| 1HGG   | A_LYS_238 | NZ     | F_GLU_72  | OE1    | 2.931        |
| 1HGG   | A_LYS_238 | NZ     | F_GLU_72  | OE2    | 2.744        |
| 1HGG   | A_ARG_261 | NH1    | A_GLU_119 | OE1    | 3.988        |
| 1HGG   | A_ARG_261 | NH1    | A_GLU_119 | OE2    | 2.685        |
| 1HGG   | A_ARG_261 | NH2    | A_GLU_119 | OE1    | 2.738        |
| 1HGG   | A_ARG_261 | NH2    | A_GLU_119 | OE2    | 2.969        |
| 1HGG   | A_LYS_264 | NZ     | A_ASP_85  | OD1    | 3.326        |
| 1HGG   | A_LYS_264 | NZ     | A_ASP_85  | OD2    | 2.834        |
| 1HGG   | A_ARG_269 | NH1    | B_GLU_67  | OE1    | 2.694        |
| 1HGG   | A_ARG_269 | NH2    | B_GLU_67  | OE1    | 3.814        |
| 1HGG   | A_LYS_292 | NZ     | A_ASP_291 | OD1    | 2.980        |
| 1HGG   | A_LYS_292 | NZ     | A_ASP_291 | OD2    | 2.773        |
| 1HGG   | A_LYS_299 | NZ     | B_GLU_69  | OE2    | 2.915        |
| 1HGG   | A_LYS_310 | NZ     | B_ASP_86  | OD1    | 2.852        |
| 1HGG   | A_LYS_310 | NZ     | B_ASP_90  | OD1    | 2.700        |
| 1HGG   | A_LYS_310 | NZ     | B_ASP_90  | OD2    | 3.923        |
| 1HGG   | A_LYS_315 | NZ     | A_GLU_41  | OE1    | 2.731        |
| 1HGG   | A_LYS_326 | NZ     | A_GLU_325 | OE1    | 2.817        |
| 1HGG   | A_LYS_326 | NZ     | B_GLU_15  | OE1    | 3.039        |
| 1HGG   | A_LYS_326 | NZ     | B_GLU_15  | OE2    | 2.830        |
| 1HGG   | B_ARG_25  | NH1    | A_GLU_325 | OE2    | 3.770        |
| 1HGG   | B_ARG_25  | NH2    | A_GLU_325 | OE2    | 2.944        |
| 1HGG   | B_LYS_51  | NZ     | B_GLU_103 | OE1    | 2.759        |
| 1HGG   | B_ARG_54  | NH1    | B_GLU_57  | OE1    | 2.857        |
| 1HGG   | B_ARG_54  | NH1    | B_GLU_57  | OE2    | 2.882        |
| 1HGG   | B_ARG_54  | NH1    | F_GLU_97  | OE2    | 3.410        |
| 1HGG   | B_ARG_54  | NH2    | F_GLU_97  | OE2    | 2.750        |
| 1HGG   | B_LYS_58  | NZ     | B_GLU_61  | OE2    | 2.938        |
| 1HGG   | B_LYS_62  | NZ     | F_ASP_86  | OD1    | 2.889        |
| 1HGG   | B_LYS_62  | NZ     | F_ASP_86  | OD2    | 2.639        |
| 1HGG   | B_LYS_62  | NZ     | F_ASP_90  | OD1    | 3.716        |
| 1HGG   | B_LYS_62  | NZ     | F_ASP_90  | OD2    | 2.650        |
| 1HGG   | B_LYS_68  | NZ     | B_GLU_85  | OE1    | 3.149        |
| 1HGG   | B_LYS_68  | NZ     | B_GLU_85  | OE2    | 2.746        |
| 1HGG   | B_ARG_76  | NH1    | D_GLU_74  | OE1    | 2.882        |
| 1HGG   | B_ARG_76  | NH1    | D_GLU_74  | OE2    | 3.580        |
| 1HGG   | B_ARG_76  | NH2    | D_GLU_74  | OE1    | 3.459        |
| 1HGG   | B_ARG_76  | NH2    | D_GLU_74  | OE2    | 2.820        |

|      |           |     |           |     |       |
|------|-----------|-----|-----------|-----|-------|
| 1HGG | B_ARG_76  | NH2 | D_GLU_81  | OE1 | 2.731 |
| 1HGG | B_ARG_76  | NH2 | D_GLU_81  | OE2 | 3.473 |
| 1HGG | B_LYS_117 | NZ  | B_GLU_114 | OE1 | 3.037 |
| 1HGG | B_LYS_117 | NZ  | B_GLU_114 | OE2 | 2.573 |
| 1HGG | B_ARG_123 | NH1 | B_GLU_120 | OE1 | 2.615 |
| 1HGG | B_ARG_123 | NH1 | B_GLU_120 | OE2 | 2.734 |
| 1HGG | B_ARG_123 | NH2 | F_GLU_132 | OE1 | 2.827 |
| 1HGG | B_ARG_124 | NH1 | B_GLU_120 | OE1 | 3.704 |
| 1HGG | B_ARG_124 | NH2 | F_GLU_132 | OE1 | 3.221 |
| 1HGG | B_ARG_124 | NH2 | F_GLU_132 | OE2 | 3.297 |
| 1HGG | B_ARG_127 | NH1 | F_GLU_131 | OE1 | 2.465 |
| 1HGG | B_LYS_143 | NZ  | B_ASP_145 | OD2 | 2.940 |
| 1HGG | B_ARG_153 | NH1 | B_GLU_150 | OE1 | 2.632 |
| 1HGG | B_HIS_159 | NE2 | B_ASP_160 | OD2 | 3.121 |
| 1HGG | B_ARG_163 | NH2 | B_GLU_128 | OE1 | 3.737 |
| 1HGG | B_ARG_163 | NH2 | F_GLU_131 | OE1 | 2.594 |
| 1HGG | B_ARG_163 | NH2 | F_GLU_131 | OE2 | 2.562 |
| 1HGG | B_ARG_170 | NH1 | B_GLU_131 | OE2 | 2.846 |
| 1HGG | B_ARG_170 | NH1 | D_GLU_128 | OE1 | 3.236 |
| 1HGG | B_ARG_170 | NH1 | D_GLU_128 | OE2 | 3.289 |
| 1HGG | B_ARG_170 | NH2 | B_GLU_128 | OE2 | 2.890 |
| 1HGG | B_LYS_174 | NZ  | D_ASP_164 | OD1 | 2.736 |
| 1HGG | B_LYS_174 | NZ  | D_ASP_164 | OD2 | 2.575 |
| 1HGG | C_LYS_27  | NZ  | D_GLU_97  | OE1 | 2.683 |
| 1HGG | C_LYS_27  | NZ  | D_GLU_97  | OE2 | 2.941 |
| 1HGG | C_LYS_50  | NZ  | C_ASP_275 | OD1 | 3.663 |
| 1HGG | C_LYS_50  | NZ  | C_ASP_275 | OD2 | 2.681 |
| 1HGG | C_ARG_57  | NH2 | C_GLU_82  | OE1 | 2.593 |
| 1HGG | C_ARG_57  | NH2 | C_GLU_82  | OE2 | 3.431 |
| 1HGG | C_HIS_75  | ND1 | C_ASP_73  | OD1 | 2.715 |
| 1HGG | C_HIS_75  | ND1 | C_ASP_73  | OD2 | 3.305 |
| 1HGG | C_HIS_75  | NE2 | C_ASP_63  | OD1 | 3.698 |
| 1HGG | C_ARG_90  | NH2 | C_ASP_60  | OD1 | 3.640 |
| 1HGG | C_ARG_90  | NH2 | C_ASP_60  | OD2 | 2.792 |
| 1HGG | C_ARG_109 | NH1 | C_GLU_89  | OE1 | 2.511 |
| 1HGG | C_ARG_109 | NH1 | C_GLU_89  | OE2 | 3.012 |
| 1HGG | C_ARG_109 | NH2 | D_GLU_67  | OE1 | 3.869 |
| 1HGG | C_ARG_109 | NH2 | D_GLU_67  | OE2 | 2.853 |
| 1HGG | C_ARG_141 | NH2 | C_ASP_77  | OD1 | 2.758 |
| 1HGG | C_ARG_141 | NH2 | C_ASP_77  | OD2 | 2.737 |
| 1HGG | C_LYS_176 | NZ  | C_GLU_123 | OE2 | 2.629 |
| 1HGG | C_HIS_183 | NE2 | C_GLU_190 | OE2 | 3.969 |
| 1HGG | C_LYS_238 | NZ  | B_GLU_72  | OE1 | 2.830 |
| 1HGG | C_LYS_238 | NZ  | B_GLU_72  | OE2 | 2.699 |
| 1HGG | C_ARG_261 | NH1 | C_GLU_119 | OE1 | 3.989 |
| 1HGG | C_ARG_261 | NH1 | C_GLU_119 | OE2 | 2.670 |
| 1HGG | C_ARG_261 | NH2 | C_GLU_119 | OE1 | 2.730 |
| 1HGG | C_ARG_261 | NH2 | C_GLU_119 | OE2 | 2.933 |
| 1HGG | C_LYS_264 | NZ  | C_ASP_85  | OD1 | 3.356 |
| 1HGG | C_LYS_264 | NZ  | C_ASP_85  | OD2 | 2.849 |
| 1HGG | C_ARG_269 | NH1 | D_GLU_67  | OE1 | 2.688 |
| 1HGG | C_ARG_269 | NH2 | D_GLU_67  | OE1 | 3.820 |
| 1HGG | C_LYS_292 | NZ  | C_ASP_291 | OD1 | 3.021 |
| 1HGG | C_LYS_292 | NZ  | C_ASP_291 | OD2 | 2.777 |
| 1HGG | C_LYS_299 | NZ  | D_GLU_69  | OE2 | 2.932 |
| 1HGG | C_LYS_310 | NZ  | D_ASP_86  | OD1 | 2.859 |
| 1HGG | C_LYS_310 | NZ  | D_ASP_90  | OD1 | 2.651 |
| 1HGG | C_LYS_310 | NZ  | D_ASP_90  | OD2 | 3.858 |

|      |           |     |           |     |       |
|------|-----------|-----|-----------|-----|-------|
| 1HGG | C_LYS_315 | NZ  | C_GLU_41  | OE1 | 2.732 |
| 1HGG | C_LYS_326 | NZ  | D_GLU_15  | OE1 | 2.591 |
| 1HGG | C_LYS_326 | NZ  | D_GLU_15  | OE2 | 3.450 |
| 1HGG | D_LYS_51  | NZ  | D_GLU_103 | OE1 | 2.765 |
| 1HGG | D_ARG_54  | NH1 | B_GLU_97  | OE2 | 3.442 |
| 1HGG | D_ARG_54  | NH1 | D_GLU_57  | OE1 | 2.855 |
| 1HGG | D_ARG_54  | NH1 | D_GLU_57  | OE2 | 2.880 |
| 1HGG | D_ARG_54  | NH2 | B_GLU_97  | OE2 | 2.764 |
| 1HGG | D_LYS_58  | NZ  | D_GLU_61  | OE2 | 2.913 |
| 1HGG | D_LYS_62  | NZ  | B_ASP_86  | OD1 | 2.924 |
| 1HGG | D_LYS_62  | NZ  | B_ASP_86  | OD2 | 2.567 |
| 1HGG | D_LYS_62  | NZ  | B_ASP_90  | OD1 | 3.695 |
| 1HGG | D_LYS_62  | NZ  | B_ASP_90  | OD2 | 2.575 |
| 1HGG | D_LYS_68  | NZ  | D_GLU_85  | OE1 | 3.169 |
| 1HGG | D_LYS_68  | NZ  | D_GLU_85  | OE2 | 2.772 |
| 1HGG | D_ARG_76  | NH1 | F_GLU_74  | OE1 | 2.783 |
| 1HGG | D_ARG_76  | NH1 | F_GLU_74  | OE2 | 3.379 |
| 1HGG | D_ARG_76  | NH2 | F_GLU_74  | OE1 | 3.480 |
| 1HGG | D_ARG_76  | NH2 | F_GLU_74  | OE2 | 2.737 |
| 1HGG | D_ARG_76  | NH2 | F_GLU_81  | OE1 | 2.674 |
| 1HGG | D_ARG_76  | NH2 | F_GLU_81  | OE2 | 3.521 |
| 1HGG | D_LYS_117 | NZ  | D_GLU_114 | OE1 | 3.041 |
| 1HGG | D_LYS_117 | NZ  | D_GLU_114 | OE2 | 2.574 |
| 1HGG | D_ARG_123 | NH1 | D_GLU_120 | OE1 | 2.613 |
| 1HGG | D_ARG_123 | NH1 | D_GLU_120 | OE2 | 2.730 |
| 1HGG | D_ARG_123 | NH2 | B_GLU_132 | OE1 | 2.793 |
| 1HGG | D_ARG_124 | NH1 | D_GLU_120 | OE1 | 3.717 |
| 1HGG | D_ARG_124 | NH2 | B_GLU_132 | OE1 | 3.241 |
| 1HGG | D_ARG_124 | NH2 | B_GLU_132 | OE2 | 3.297 |
| 1HGG | D_ARG_127 | NH1 | B_GLU_131 | OE1 | 2.475 |
| 1HGG | D_LYS_143 | NZ  | D_ASP_145 | OD2 | 2.930 |
| 1HGG | D_ARG_153 | NH1 | D_GLU_150 | OE1 | 2.636 |
| 1HGG | D_HIS_159 | NE2 | D_ASP_160 | OD2 | 3.127 |
| 1HGG | D_ARG_163 | NH2 | B_GLU_131 | OE1 | 2.580 |
| 1HGG | D_ARG_163 | NH2 | B_GLU_131 | OE2 | 2.598 |
| 1HGG | D_ARG_163 | NH2 | D_GLU_128 | OE1 | 3.766 |
| 1HGG | D_ARG_170 | NH1 | D_GLU_131 | OE2 | 2.855 |
| 1HGG | D_ARG_170 | NH1 | F_GLU_128 | OE1 | 3.365 |
| 1HGG | D_ARG_170 | NH1 | F_GLU_128 | OE2 | 3.390 |
| 1HGG | D_ARG_170 | NH2 | D_GLU_128 | OE2 | 2.921 |
| 1HGG | D_LYS_174 | NZ  | F_ASP_164 | OD1 | 2.763 |
| 1HGG | D_LYS_174 | NZ  | F_ASP_164 | OD2 | 2.711 |
| 1HGG | E_LYS_27  | NZ  | F_GLU_97  | OE1 | 2.689 |
| 1HGG | E_LYS_27  | NZ  | F_GLU_97  | OE2 | 2.909 |
| 1HGG | E_LYS_50  | NZ  | E_ASP_275 | OD1 | 3.653 |
| 1HGG | E_LYS_50  | NZ  | E_ASP_275 | OD2 | 2.678 |
| 1HGG | E_ARG_57  | NH2 | E_GLU_82  | OE1 | 2.569 |
| 1HGG | E_ARG_57  | NH2 | E_GLU_82  | OE2 | 3.845 |
| 1HGG | E_HIS_75  | ND1 | E_ASP_73  | OD1 | 2.755 |
| 1HGG | E_HIS_75  | ND1 | E_ASP_73  | OD2 | 3.285 |
| 1HGG | E_HIS_75  | NE2 | E_ASP_63  | OD1 | 3.700 |
| 1HGG | E_ARG_90  | NH2 | E_ASP_60  | OD1 | 3.616 |
| 1HGG | E_ARG_90  | NH2 | E_ASP_60  | OD2 | 2.834 |
| 1HGG | E_ARG_109 | NH1 | E_GLU_89  | OE1 | 2.488 |
| 1HGG | E_ARG_109 | NH1 | E_GLU_89  | OE2 | 2.947 |
| 1HGG | E_ARG_109 | NH2 | F_GLU_67  | OE1 | 3.891 |
| 1HGG | E_ARG_109 | NH2 | F_GLU_67  | OE2 | 2.876 |
| 1HGG | E_ARG_141 | NH2 | E_ASP_77  | OD1 | 2.801 |

|      |           |     |           |     |       |
|------|-----------|-----|-----------|-----|-------|
| 1HGG | E_ARG_141 | NH2 | E_ASP_77  | OD2 | 2.744 |
| 1HGG | E_LYS_176 | NZ  | E_GLU_123 | OE2 | 2.653 |
| 1HGG | E_HIS_183 | NE2 | E_GLU_190 | OE2 | 3.980 |
| 1HGG | E_LYS_238 | NZ  | D_GLU_72  | OE1 | 2.893 |
| 1HGG | E_LYS_238 | NZ  | D_GLU_72  | OE2 | 2.782 |
| 1HGG | E_ARG_261 | NH1 | E_GLU_119 | OE1 | 3.984 |
| 1HGG | E_ARG_261 | NH1 | E_GLU_119 | OE2 | 2.694 |
| 1HGG | E_ARG_261 | NH2 | E_GLU_119 | OE1 | 2.738 |
| 1HGG | E_ARG_261 | NH2 | E_GLU_119 | OE2 | 2.981 |
| 1HGG | E_LYS_264 | NZ  | E_ASP_85  | OD1 | 3.369 |
| 1HGG | E_LYS_264 | NZ  | E_ASP_85  | OD2 | 2.847 |
| 1HGG | E_ARG_269 | NH1 | F_GLU_67  | OE1 | 2.691 |
| 1HGG | E_ARG_269 | NH2 | F_GLU_67  | OE1 | 3.830 |
| 1HGG | E_LYS_292 | NZ  | E_ASP_291 | OD1 | 2.996 |
| 1HGG | E_LYS_292 | NZ  | E_ASP_291 | OD2 | 2.759 |
| 1HGG | E_LYS_299 | NZ  | F_GLU_69  | OE2 | 2.920 |
| 1HGG | E_LYS_310 | NZ  | F_ASP_86  | OD1 | 2.871 |
| 1HGG | E_LYS_310 | NZ  | F_ASP_90  | OD1 | 2.639 |
| 1HGG | E_LYS_310 | NZ  | F_ASP_90  | OD2 | 3.900 |
| 1HGG | E_LYS_315 | NZ  | E_GLU_41  | OE1 | 2.684 |
| 1HGG | E_LYS_326 | NZ  | F_GLU_15  | OE1 | 2.975 |
| 1HGG | E_LYS_326 | NZ  | F_GLU_15  | OE2 | 3.000 |
| 1HGG | F_LYS_51  | NZ  | F_GLU_103 | OE1 | 2.794 |
| 1HGG | F_ARG_54  | NH1 | D_GLU_97  | OE2 | 3.483 |
| 1HGG | F_ARG_54  | NH1 | F_GLU_57  | OE1 | 2.848 |
| 1HGG | F_ARG_54  | NH1 | F_GLU_57  | OE2 | 2.863 |
| 1HGG | F_ARG_54  | NH2 | D_GLU_97  | OE2 | 2.727 |
| 1HGG | F_LYS_58  | NZ  | F_GLU_61  | OE2 | 2.938 |
| 1HGG | F_LYS_62  | NZ  | D_ASP_86  | OD1 | 2.904 |
| 1HGG | F_LYS_62  | NZ  | D_ASP_86  | OD2 | 2.582 |
| 1HGG | F_LYS_62  | NZ  | D_ASP_90  | OD1 | 3.752 |
| 1HGG | F_LYS_62  | NZ  | D_ASP_90  | OD2 | 2.595 |
| 1HGG | F_LYS_68  | NZ  | F_GLU_85  | OE1 | 3.147 |
| 1HGG | F_LYS_68  | NZ  | F_GLU_85  | OE2 | 2.755 |
| 1HGG | F_ARG_76  | NH1 | B_GLU_74  | OE1 | 2.750 |
| 1HGG | F_ARG_76  | NH1 | B_GLU_74  | OE2 | 3.432 |
| 1HGG | F_ARG_76  | NH2 | B_GLU_74  | OE1 | 3.456 |
| 1HGG | F_ARG_76  | NH2 | B_GLU_74  | OE2 | 2.786 |
| 1HGG | F_ARG_76  | NH2 | B_GLU_81  | OE1 | 2.674 |
| 1HGG | F_ARG_76  | NH2 | B_GLU_81  | OE2 | 3.545 |
| 1HGG | F_LYS_117 | NZ  | F_GLU_114 | OE1 | 3.063 |
| 1HGG | F_LYS_117 | NZ  | F_GLU_114 | OE2 | 2.581 |
| 1HGG | F_ARG_123 | NH1 | F_GLU_120 | OE1 | 2.640 |
| 1HGG | F_ARG_123 | NH1 | F_GLU_120 | OE2 | 2.718 |
| 1HGG | F_ARG_123 | NH2 | D_GLU_132 | OE1 | 2.843 |
| 1HGG | F_ARG_124 | NH1 | F_GLU_120 | OE1 | 3.721 |
| 1HGG | F_ARG_124 | NH2 | D_GLU_132 | OE1 | 3.317 |
| 1HGG | F_ARG_124 | NH2 | D_GLU_132 | OE2 | 3.342 |
| 1HGG | F_ARG_127 | NH1 | D_GLU_131 | OE1 | 2.523 |
| 1HGG | F_LYS_143 | NZ  | F_ASP_145 | OD2 | 2.914 |
| 1HGG | F_ARG_153 | NH1 | F_GLU_150 | OE2 | 2.532 |
| 1HGG | F_HIS_159 | NE2 | F_ASP_160 | OD2 | 3.162 |
| 1HGG | F_ARG_163 | NH2 | D_GLU_131 | OE1 | 2.589 |
| 1HGG | F_ARG_163 | NH2 | D_GLU_131 | OE2 | 2.640 |
| 1HGG | F_ARG_163 | NH2 | F_GLU_128 | OE1 | 3.754 |
| 1HGG | F_ARG_170 | NH1 | B_GLU_128 | OE1 | 3.237 |
| 1HGG | F_ARG_170 | NH1 | B_GLU_128 | OE2 | 3.354 |
| 1HGG | F_ARG_170 | NH1 | F_GLU_131 | OE2 | 2.835 |

|      |           |     |           |     |       |
|------|-----------|-----|-----------|-----|-------|
| 1HGG | F_ARG_170 | NH2 | F_GLU_128 | OE2 | 2.924 |
| 1HGG | F_LYS_174 | NZ  | B_ASP_164 | OD1 | 2.757 |
| 1HGG | F_LYS_174 | NZ  | B_ASP_164 | OD2 | 2.547 |

Table 91: 1HGG-specific salt bridging networks analysis. In this table, a PDB file is specified with a four-letter PDB ID, except that the names of the PDB files corresponding to the single NMR structural model split from the NMR ensemble is specified with a four-letter PDB ID in addition to a hyphen followed by the single NMR structural model numeric ID, the residue naming scheme is **Chain ID\_residue name\_residue number**,  $\angle ADH$  represents the angle formed by acceptor (A), donor (D) and hydrogen (H) ( $\angle ADH$ ).

| PDB ID | Residue A | Atom A | Residue B | Atom B | Distance (Å) |
|--------|-----------|--------|-----------|--------|--------------|
| 1HGH   | A_LYS_27  | NZ     | B_GLU_97  | OE1    | 2.856        |
| 1HGH   | A_LYS_27  | NZ     | B_GLU_97  | OE2    | 2.781        |
| 1HGH   | A_LYS_50  | NZ     | A_ASP_275 | OD1    | 3.680        |
| 1HGH   | A_LYS_50  | NZ     | A_ASP_275 | OD2    | 2.788        |
| 1HGH   | A_ARG_57  | NH2    | A_GLU_82  | OE1    | 2.548        |
| 1HGH   | A_ARG_57  | NH2    | A_GLU_82  | OE2    | 3.398        |
| 1HGH   | A_HIS_75  | ND1    | A_ASP_73  | OD1    | 2.741        |
| 1HGH   | A_HIS_75  | ND1    | A_ASP_73  | OD2    | 3.401        |
| 1HGH   | A_HIS_75  | NE2    | A_ASP_63  | OD1    | 3.595        |
| 1HGH   | A_ARG_90  | NH2    | A_ASP_60  | OD1    | 3.580        |
| 1HGH   | A_ARG_90  | NH2    | A_ASP_60  | OD2    | 2.788        |
| 1HGH   | A_ARG_109 | NH1    | A_GLU_89  | OE1    | 2.475        |
| 1HGH   | A_ARG_109 | NH1    | A_GLU_89  | OE2    | 3.343        |
| 1HGH   | A_ARG_109 | NH2    | B_GLU_67  | OE1    | 3.697        |
| 1HGH   | A_ARG_109 | NH2    | B_GLU_67  | OE2    | 2.864        |
| 1HGH   | A_ARG_141 | NH2    | A_ASP_77  | OD1    | 2.863        |
| 1HGH   | A_ARG_141 | NH2    | A_ASP_77  | OD2    | 2.744        |
| 1HGH   | A_LYS_176 | NZ     | A_GLU_123 | OE2    | 2.684        |
| 1HGH   | A_HIS_183 | NE2    | A_GLU_190 | OE2    | 3.803        |
| 1HGH   | A_LYS_238 | NZ     | F_GLU_72  | OE1    | 2.921        |
| 1HGH   | A_LYS_238 | NZ     | F_GLU_72  | OE2    | 2.736        |
| 1HGH   | A_ARG_261 | NH1    | A_GLU_119 | OE2    | 2.623        |
| 1HGH   | A_ARG_261 | NH2    | A_GLU_119 | OE1    | 2.866        |
| 1HGH   | A_ARG_261 | NH2    | A_GLU_119 | OE2    | 2.801        |
| 1HGH   | A_LYS_264 | NZ     | A_ASP_85  | OD1    | 3.600        |
| 1HGH   | A_LYS_264 | NZ     | A_ASP_85  | OD2    | 2.814        |
| 1HGH   | A_ARG_269 | NH1    | B_GLU_67  | OE1    | 2.720        |
| 1HGH   | A_ARG_269 | NH2    | B_GLU_67  | OE1    | 3.718        |
| 1HGH   | A_LYS_292 | NZ     | A_ASP_291 | OD1    | 3.015        |
| 1HGH   | A_LYS_292 | NZ     | A_ASP_291 | OD2    | 2.819        |
| 1HGH   | A_LYS_299 | NZ     | B_GLU_69  | OE2    | 2.918        |
| 1HGH   | A_LYS_310 | NZ     | B_ASP_86  | OD1    | 2.712        |
| 1HGH   | A_LYS_310 | NZ     | B_ASP_90  | OD1    | 2.578        |
| 1HGH   | A_LYS_310 | NZ     | B_ASP_90  | OD2    | 3.975        |
| 1HGH   | A_LYS_315 | NZ     | A_GLU_41  | OE1    | 2.869        |
| 1HGH   | A_LYS_326 | NZ     | A_GLU_325 | OE1    | 2.838        |
| 1HGH   | A_LYS_326 | NZ     | B_GLU_15  | OE1    | 3.092        |
| 1HGH   | A_LYS_326 | NZ     | B_GLU_15  | OE2    | 2.707        |
| 1HGH   | B_ARG_25  | NH1    | A_GLU_325 | OE2    | 3.971        |
| 1HGH   | B_ARG_25  | NH2    | A_GLU_325 | OE2    | 3.017        |
| 1HGH   | B_LYS_51  | NZ     | B_GLU_103 | OE1    | 2.789        |
| 1HGH   | B_ARG_54  | NH1    | B_GLU_57  | OE1    | 2.865        |
| 1HGH   | B_ARG_54  | NH1    | B_GLU_57  | OE2    | 2.969        |
| 1HGH   | B_ARG_54  | NH1    | F_GLU_97  | OE2    | 3.285        |
| 1HGH   | B_ARG_54  | NH2    | F_GLU_97  | OE2    | 2.823        |
| 1HGH   | B_LYS_58  | NZ     | B_GLU_61  | OE2    | 3.237        |
| 1HGH   | B_LYS_62  | NZ     | F_ASP_86  | OD1    | 3.064        |
| 1HGH   | B_LYS_62  | NZ     | F_ASP_86  | OD2    | 2.661        |
| 1HGH   | B_LYS_62  | NZ     | F_ASP_90  | OD1    | 3.547        |
| 1HGH   | B_LYS_62  | NZ     | F_ASP_90  | OD2    | 2.683        |
| 1HGH   | B_LYS_68  | NZ     | B_GLU_85  | OE1    | 3.132        |
| 1HGH   | B_LYS_68  | NZ     | B_GLU_85  | OE2    | 2.734        |
| 1HGH   | B_ARG_76  | NH1    | D_GLU_74  | OE1    | 3.707        |
| 1HGH   | B_ARG_76  | NH1    | D_GLU_74  | OE2    | 2.912        |
| 1HGH   | B_ARG_76  | NH2    | D_GLU_74  | OE1    | 2.889        |
| 1HGH   | B_ARG_76  | NH2    | D_GLU_74  | OE2    | 3.526        |
| 1HGH   | B_ARG_76  | NH2    | D_GLU_81  | OE1    | 2.765        |

|      |           |     |           |     |       |
|------|-----------|-----|-----------|-----|-------|
| 1HGH | B_ARG_76  | NH2 | D_GLU_81  | OE2 | 3.411 |
| 1HGH | B_LYS_117 | NZ  | B_GLU_114 | OE1 | 3.139 |
| 1HGH | B_LYS_117 | NZ  | B_GLU_114 | OE2 | 2.561 |
| 1HGH | B_ARG_123 | NH1 | B_GLU_120 | OE1 | 2.569 |
| 1HGH | B_ARG_123 | NH1 | B_GLU_120 | OE2 | 2.742 |
| 1HGH | B_ARG_123 | NH2 | F_GLU_132 | OE1 | 3.134 |
| 1HGH | B_ARG_124 | NH1 | B_GLU_120 | OE1 | 3.740 |
| 1HGH | B_ARG_124 | NH2 | F_GLU_132 | OE1 | 3.005 |
| 1HGH | B_ARG_124 | NH2 | F_GLU_132 | OE2 | 3.302 |
| 1HGH | B_ARG_127 | NH1 | F_GLU_131 | OE1 | 2.524 |
| 1HGH | B_LYS_143 | NZ  | B_ASP_145 | OD2 | 2.787 |
| 1HGH | B_ARG_153 | NH1 | B_GLU_150 | OE1 | 2.556 |
| 1HGH | B_HIS_159 | NE2 | B_ASP_160 | OD2 | 3.003 |
| 1HGH | B_ARG_163 | NH2 | F_GLU_131 | OE1 | 2.607 |
| 1HGH | B_ARG_163 | NH2 | F_GLU_131 | OE2 | 2.538 |
| 1HGH | B_ARG_170 | NH1 | B_GLU_131 | OE2 | 2.832 |
| 1HGH | B_ARG_170 | NH1 | D_GLU_128 | OE1 | 3.253 |
| 1HGH | B_ARG_170 | NH1 | D_GLU_128 | OE2 | 3.577 |
| 1HGH | B_ARG_170 | NH2 | B_GLU_128 | OE2 | 2.706 |
| 1HGH | B_LYS_174 | NZ  | D_ASP_164 | OD1 | 2.767 |
| 1HGH | B_LYS_174 | NZ  | D_ASP_164 | OD2 | 2.573 |
| 1HGH | C_LYS_27  | NZ  | D_GLU_97  | OE1 | 2.897 |
| 1HGH | C_LYS_27  | NZ  | D_GLU_97  | OE2 | 2.815 |
| 1HGH | C_LYS_50  | NZ  | C_ASP_275 | OD1 | 3.681 |
| 1HGH | C_LYS_50  | NZ  | C_ASP_275 | OD2 | 2.765 |
| 1HGH | C_ARG_57  | NH2 | C_GLU_82  | OE1 | 2.537 |
| 1HGH | C_ARG_57  | NH2 | C_GLU_82  | OE2 | 3.720 |
| 1HGH | C_HIS_75  | ND1 | C_ASP_73  | OD1 | 2.705 |
| 1HGH | C_HIS_75  | ND1 | C_ASP_73  | OD2 | 3.403 |
| 1HGH | C_HIS_75  | NE2 | C_ASP_63  | OD1 | 3.580 |
| 1HGH | C_ARG_90  | NH2 | C_ASP_60  | OD1 | 3.561 |
| 1HGH | C_ARG_90  | NH2 | C_ASP_60  | OD2 | 2.760 |
| 1HGH | C_ARG_109 | NH1 | C_GLU_89  | OE1 | 2.510 |
| 1HGH | C_ARG_109 | NH1 | C_GLU_89  | OE2 | 3.378 |
| 1HGH | C_ARG_109 | NH2 | D_GLU_67  | OE1 | 3.686 |
| 1HGH | C_ARG_109 | NH2 | D_GLU_67  | OE2 | 2.856 |
| 1HGH | C_ARG_141 | NH2 | C_ASP_77  | OD1 | 2.881 |
| 1HGH | C_ARG_141 | NH2 | C_ASP_77  | OD2 | 2.750 |
| 1HGH | C_LYS_176 | NZ  | C_GLU_123 | OE2 | 2.654 |
| 1HGH | C_HIS_183 | NE2 | C_GLU_190 | OE2 | 3.784 |
| 1HGH | C_LYS_238 | NZ  | B_GLU_72  | OE1 | 2.713 |
| 1HGH | C_LYS_238 | NZ  | B_GLU_72  | OE2 | 2.597 |
| 1HGH | C_ARG_261 | NH1 | C_GLU_119 | OE2 | 2.638 |
| 1HGH | C_ARG_261 | NH2 | C_GLU_119 | OE1 | 2.853 |
| 1HGH | C_ARG_261 | NH2 | C_GLU_119 | OE2 | 2.786 |
| 1HGH | C_LYS_264 | NZ  | C_ASP_85  | OD1 | 3.599 |
| 1HGH | C_LYS_264 | NZ  | C_ASP_85  | OD2 | 2.793 |
| 1HGH | C_ARG_269 | NH1 | D_GLU_67  | OE1 | 2.732 |
| 1HGH | C_ARG_269 | NH2 | D_GLU_67  | OE1 | 3.725 |
| 1HGH | C_LYS_292 | NZ  | C_ASP_291 | OD1 | 3.012 |
| 1HGH | C_LYS_292 | NZ  | C_ASP_291 | OD2 | 2.815 |
| 1HGH | C_LYS_299 | NZ  | D_GLU_69  | OE2 | 2.939 |
| 1HGH | C_LYS_310 | NZ  | D_ASP_86  | OD1 | 2.734 |
| 1HGH | C_LYS_310 | NZ  | D_ASP_90  | OD1 | 2.551 |
| 1HGH | C_LYS_310 | NZ  | D_ASP_90  | OD2 | 3.913 |
| 1HGH | C_LYS_315 | NZ  | C_GLU_41  | OE1 | 2.867 |
| 1HGH | C_LYS_326 | NZ  | D_GLU_15  | OE1 | 2.774 |
| 1HGH | C_LYS_326 | NZ  | D_GLU_15  | OE2 | 3.676 |

|      |           |     |           |     |       |
|------|-----------|-----|-----------|-----|-------|
| 1HGH | D_LYS_51  | NZ  | D_GLU_103 | OE1 | 2.742 |
| 1HGH | D_ARG_54  | NH1 | B_GLU_97  | OE2 | 3.277 |
| 1HGH | D_ARG_54  | NH1 | D_GLU_57  | OE1 | 2.856 |
| 1HGH | D_ARG_54  | NH1 | D_GLU_57  | OE2 | 2.958 |
| 1HGH | D_ARG_54  | NH2 | B_GLU_97  | OE2 | 2.797 |
| 1HGH | D_LYS_58  | NZ  | D_GLU_61  | OE2 | 3.225 |
| 1HGH | D_LYS_62  | NZ  | B_ASP_86  | OD1 | 3.011 |
| 1HGH | D_LYS_62  | NZ  | B_ASP_86  | OD2 | 2.510 |
| 1HGH | D_LYS_62  | NZ  | B_ASP_90  | OD1 | 3.543 |
| 1HGH | D_LYS_62  | NZ  | B_ASP_90  | OD2 | 2.589 |
| 1HGH | D_LYS_68  | NZ  | D_GLU_85  | OE1 | 3.123 |
| 1HGH | D_LYS_68  | NZ  | D_GLU_85  | OE2 | 2.750 |
| 1HGH | D_ARG_76  | NH1 | F_GLU_74  | OE1 | 3.430 |
| 1HGH | D_ARG_76  | NH1 | F_GLU_74  | OE2 | 2.765 |
| 1HGH | D_ARG_76  | NH2 | F_GLU_74  | OE1 | 2.747 |
| 1HGH | D_ARG_76  | NH2 | F_GLU_74  | OE2 | 3.553 |
| 1HGH | D_ARG_76  | NH2 | F_GLU_81  | OE1 | 2.698 |
| 1HGH | D_ARG_76  | NH2 | F_GLU_81  | OE2 | 3.487 |
| 1HGH | D_LYS_117 | NZ  | D_GLU_114 | OE1 | 3.179 |
| 1HGH | D_LYS_117 | NZ  | D_GLU_114 | OE2 | 2.579 |
| 1HGH | D_ARG_123 | NH1 | D_GLU_120 | OE1 | 2.573 |
| 1HGH | D_ARG_123 | NH1 | D_GLU_120 | OE2 | 2.771 |
| 1HGH | D_ARG_123 | NH2 | B_GLU_132 | OE1 | 3.141 |
| 1HGH | D_ARG_124 | NH1 | D_GLU_120 | OE1 | 3.722 |
| 1HGH | D_ARG_124 | NH2 | B_GLU_132 | OE1 | 3.050 |
| 1HGH | D_ARG_124 | NH2 | B_GLU_132 | OE2 | 3.354 |
| 1HGH | D_ARG_127 | NH1 | B_GLU_131 | OE1 | 2.536 |
| 1HGH | D_LYS_143 | NZ  | D_ASP_145 | OD2 | 2.793 |
| 1HGH | D_ARG_153 | NH1 | D_GLU_150 | OE2 | 2.554 |
| 1HGH | D_HIS_159 | NE2 | D_ASP_160 | OD2 | 3.042 |
| 1HGH | D_ARG_163 | NH2 | B_GLU_131 | OE1 | 2.609 |
| 1HGH | D_ARG_163 | NH2 | B_GLU_131 | OE2 | 2.570 |
| 1HGH | D_ARG_170 | NH1 | D_GLU_131 | OE2 | 2.834 |
| 1HGH | D_ARG_170 | NH1 | F_GLU_128 | OE1 | 3.352 |
| 1HGH | D_ARG_170 | NH1 | F_GLU_128 | OE2 | 3.641 |
| 1HGH | D_ARG_170 | NH2 | D_GLU_128 | OE2 | 2.742 |
| 1HGH | D_LYS_174 | NZ  | F_ASP_164 | OD1 | 2.863 |
| 1HGH | D_LYS_174 | NZ  | F_ASP_164 | OD2 | 2.724 |
| 1HGH | E_LYS_27  | NZ  | F_GLU_97  | OE1 | 2.917 |
| 1HGH | E_LYS_27  | NZ  | F_GLU_97  | OE2 | 2.767 |
| 1HGH | E_LYS_50  | NZ  | E_ASP_275 | OD1 | 3.706 |
| 1HGH | E_LYS_50  | NZ  | E_ASP_275 | OD2 | 2.783 |
| 1HGH | E_ARG_57  | NH2 | E_GLU_82  | OE1 | 2.543 |
| 1HGH | E_ARG_57  | NH2 | E_GLU_82  | OE2 | 3.770 |
| 1HGH | E_HIS_75  | ND1 | E_ASP_73  | OD1 | 2.703 |
| 1HGH | E_HIS_75  | ND1 | E_ASP_73  | OD2 | 3.377 |
| 1HGH | E_HIS_75  | NE2 | E_ASP_63  | OD1 | 3.572 |
| 1HGH | E_ARG_90  | NH2 | E_ASP_60  | OD1 | 3.573 |
| 1HGH | E_ARG_90  | NH2 | E_ASP_60  | OD2 | 2.816 |
| 1HGH | E_ARG_109 | NH1 | E_GLU_89  | OE1 | 2.463 |
| 1HGH | E_ARG_109 | NH1 | E_GLU_89  | OE2 | 3.357 |
| 1HGH | E_ARG_109 | NH2 | F_GLU_67  | OE1 | 3.698 |
| 1HGH | E_ARG_109 | NH2 | F_GLU_67  | OE2 | 2.878 |
| 1HGH | E_ARG_141 | NH2 | E_ASP_77  | OD1 | 2.892 |
| 1HGH | E_ARG_141 | NH2 | E_ASP_77  | OD2 | 2.736 |
| 1HGH | E_LYS_176 | NZ  | E_GLU_123 | OE2 | 2.692 |
| 1HGH | E_HIS_183 | NE2 | E_GLU_190 | OE2 | 3.780 |
| 1HGH | E_LYS_238 | NZ  | D_GLU_72  | OE1 | 2.870 |



|      |           |     |           |     |       |
|------|-----------|-----|-----------|-----|-------|
| 1HGH | E_LYS_238 | NZ  | D_GLU_72  | OE2 | 2.766 |
| 1HGH | E_ARG_261 | NH1 | E_GLU_119 | OE2 | 2.629 |
| 1HGH | E_ARG_261 | NH2 | E_GLU_119 | OE1 | 2.852 |
| 1HGH | E_ARG_261 | NH2 | E_GLU_119 | OE2 | 2.789 |
| 1HGH | E_LYS_264 | NZ  | E_ASP_85  | OD1 | 3.620 |
| 1HGH | E_LYS_264 | NZ  | E_ASP_85  | OD2 | 2.815 |
| 1HGH | E_ARG_269 | NH1 | F_GLU_67  | OE1 | 2.705 |
| 1HGH | E_ARG_269 | NH2 | F_GLU_67  | OE1 | 3.715 |
| 1HGH | E_LYS_292 | NZ  | E_ASP_291 | OD1 | 3.036 |
| 1HGH | E_LYS_292 | NZ  | E_ASP_291 | OD2 | 2.839 |
| 1HGH | E_LYS_299 | NZ  | F_GLU_69  | OE2 | 2.896 |
| 1HGH | E_LYS_310 | NZ  | F_ASP_86  | OD1 | 2.740 |
| 1HGH | E_LYS_310 | NZ  | F_ASP_90  | OD1 | 2.571 |
| 1HGH | E_LYS_310 | NZ  | F_ASP_90  | OD2 | 3.948 |
| 1HGH | E_LYS_315 | NZ  | E_GLU_41  | OE1 | 2.853 |
| 1HGH | E_LYS_326 | NZ  | F_GLU_15  | OE1 | 2.900 |
| 1HGH | E_LYS_326 | NZ  | F_GLU_15  | OE2 | 3.072 |
| 1HGH | F_LYS_51  | NZ  | F_GLU_103 | OE1 | 2.753 |
| 1HGH | F_ARG_54  | NH1 | D_GLU_97  | OE2 | 3.293 |
| 1HGH | F_ARG_54  | NH1 | F_GLU_57  | OE1 | 2.877 |
| 1HGH | F_ARG_54  | NH1 | F_GLU_57  | OE2 | 2.968 |
| 1HGH | F_ARG_54  | NH2 | D_GLU_97  | OE2 | 2.723 |
| 1HGH | F_LYS_58  | NZ  | F_GLU_61  | OE2 | 3.244 |
| 1HGH | F_LYS_62  | NZ  | D_ASP_86  | OD1 | 3.012 |
| 1HGH | F_LYS_62  | NZ  | D_ASP_86  | OD2 | 2.546 |
| 1HGH | F_LYS_62  | NZ  | D_ASP_90  | OD1 | 3.612 |
| 1HGH | F_LYS_62  | NZ  | D_ASP_90  | OD2 | 2.682 |
| 1HGH | F_LYS_68  | NZ  | F_GLU_85  | OE1 | 3.145 |
| 1HGH | F_LYS_68  | NZ  | F_GLU_85  | OE2 | 2.728 |
| 1HGH | F_ARG_76  | NH1 | B_GLU_74  | OE1 | 3.509 |
| 1HGH | F_ARG_76  | NH1 | B_GLU_74  | OE2 | 2.732 |
| 1HGH | F_ARG_76  | NH2 | B_GLU_74  | OE1 | 2.780 |
| 1HGH | F_ARG_76  | NH2 | B_GLU_74  | OE2 | 3.488 |
| 1HGH | F_ARG_76  | NH2 | B_GLU_81  | OE1 | 2.709 |
| 1HGH | F_ARG_76  | NH2 | B_GLU_81  | OE2 | 3.513 |
| 1HGH | F_LYS_117 | NZ  | F_GLU_114 | OE1 | 3.171 |
| 1HGH | F_LYS_117 | NZ  | F_GLU_114 | OE2 | 2.578 |
| 1HGH | F_ARG_123 | NH1 | F_GLU_120 | OE1 | 2.557 |
| 1HGH | F_ARG_123 | NH1 | F_GLU_120 | OE2 | 2.739 |
| 1HGH | F_ARG_123 | NH2 | D_GLU_132 | OE1 | 3.148 |
| 1HGH | F_ARG_124 | NH1 | F_GLU_120 | OE1 | 3.713 |
| 1HGH | F_ARG_124 | NH2 | D_GLU_132 | OE1 | 3.099 |
| 1HGH | F_ARG_124 | NH2 | D_GLU_132 | OE2 | 3.356 |
| 1HGH | F_ARG_127 | NH1 | D_GLU_131 | OE1 | 2.577 |
| 1HGH | F_LYS_143 | NZ  | F_ASP_145 | OD2 | 2.769 |
| 1HGH | F_ARG_153 | NH1 | F_GLU_150 | OE2 | 2.536 |
| 1HGH | F_HIS_159 | NE2 | F_ASP_160 | OD2 | 3.043 |
| 1HGH | F_ARG_163 | NH2 | D_GLU_131 | OE1 | 2.600 |
| 1HGH | F_ARG_163 | NH2 | D_GLU_131 | OE2 | 2.611 |
| 1HGH | F_ARG_170 | NH1 | B_GLU_128 | OE1 | 3.225 |
| 1HGH | F_ARG_170 | NH1 | B_GLU_128 | OE2 | 3.576 |
| 1HGH | F_ARG_170 | NH1 | F_GLU_131 | OE2 | 2.843 |
| 1HGH | F_ARG_170 | NH2 | F_GLU_128 | OE2 | 2.737 |
| 1HGH | F_LYS_174 | NZ  | B_ASP_164 | OD1 | 2.776 |
| 1HGH | F_LYS_174 | NZ  | B_ASP_164 | OD2 | 2.495 |

---

Table 92: 1HGH-specific salt bridging networks analysis. In this table, a PDB file is specified with a four-letter PDB ID, except that the names of the PDB files corresponding to the single NMR structural model split from the NMR ensemble is specified with a four-letter PDB ID in addition to a hyphen followed by the single NMR structural model numeric ID, the residue naming scheme is **Chain ID\_residue name\_residue number**,  $\angle ADH$  represents the angle formed by acceptor (A), donor (D) and hydrogen (H) ( $\angle ADH$ ).

| PDB ID | Residue A | Atom A | Residue B | Atom B | Distance (Å) |
|--------|-----------|--------|-----------|--------|--------------|
| 1HGI   | A.LYS_27  | NZ     | B.GLU_97  | OE1    | 2.940        |
| 1HGI   | A.LYS_27  | NZ     | B.GLU_97  | OE2    | 2.900        |
| 1HGI   | A.LYS_50  | NZ     | A.ASP_275 | OD1    | 3.608        |
| 1HGI   | A.LYS_50  | NZ     | A.ASP_275 | OD2    | 2.707        |
| 1HGI   | A.ARG_57  | NH2    | A.GLU_82  | OE1    | 2.526        |
| 1HGI   | A.ARG_57  | NH2    | A.GLU_82  | OE2    | 3.433        |
| 1HGI   | A.HIS_75  | ND1    | A.ASP_73  | OD1    | 2.896        |
| 1HGI   | A.HIS_75  | ND1    | A.ASP_73  | OD2    | 3.177        |
| 1HGI   | A.HIS_75  | NE2    | A.ASP_63  | OD1    | 3.557        |
| 1HGI   | A.ARG_90  | NH2    | A.ASP_60  | OD1    | 3.597        |
| 1HGI   | A.ARG_90  | NH2    | A.ASP_60  | OD2    | 2.834        |
| 1HGI   | A.ARG_109 | NH1    | A.GLU_89  | OE1    | 2.511        |
| 1HGI   | A.ARG_109 | NH1    | A.GLU_89  | OE2    | 3.252        |
| 1HGI   | A.ARG_109 | NH2    | B.GLU_67  | OE1    | 3.638        |
| 1HGI   | A.ARG_109 | NH2    | B.GLU_67  | OE2    | 2.797        |
| 1HGI   | A.ARG_141 | NH2    | A.ASP_77  | OD1    | 2.933        |
| 1HGI   | A.ARG_141 | NH2    | A.ASP_77  | OD2    | 2.691        |
| 1HGI   | A.LYS_176 | NZ     | A.GLU_123 | OE2    | 2.677        |
| 1HGI   | A.LYS_238 | NZ     | F.GLU_72  | OE1    | 2.849        |
| 1HGI   | A.LYS_238 | NZ     | F.GLU_72  | OE2    | 2.839        |
| 1HGI   | A.ARG_261 | NH1    | A.GLU_119 | OE2    | 2.655        |
| 1HGI   | A.ARG_261 | NH2    | A.GLU_119 | OE1    | 2.852        |
| 1HGI   | A.ARG_261 | NH2    | A.GLU_119 | OE2    | 2.888        |
| 1HGI   | A.LYS_264 | NZ     | A.ASP_85  | OD1    | 3.460        |
| 1HGI   | A.LYS_264 | NZ     | A.ASP_85  | OD2    | 2.825        |
| 1HGI   | A.ARG_269 | NH1    | B.GLU_67  | OE1    | 2.748        |
| 1HGI   | A.ARG_269 | NH2    | B.GLU_67  | OE1    | 3.823        |
| 1HGI   | A.LYS_292 | NZ     | A.ASP_291 | OD1    | 2.954        |
| 1HGI   | A.LYS_292 | NZ     | A.ASP_291 | OD2    | 2.810        |
| 1HGI   | A.LYS_299 | NZ     | B.GLU_69  | OE2    | 2.728        |
| 1HGI   | A.LYS_310 | NZ     | B.ASP_86  | OD1    | 2.759        |
| 1HGI   | A.LYS_310 | NZ     | B.ASP_90  | OD1    | 2.527        |
| 1HGI   | A.LYS_315 | NZ     | A.GLU_41  | OE1    | 2.774        |
| 1HGI   | A.LYS_326 | NZ     | A.GLU_325 | OE1    | 2.913        |
| 1HGI   | A.LYS_326 | NZ     | B.GLU_15  | OE1    | 3.374        |
| 1HGI   | A.LYS_326 | NZ     | B.GLU_15  | OE2    | 2.794        |
| 1HGI   | B.ARG_25  | NH1    | A.GLU_325 | OE2    | 3.734        |
| 1HGI   | B.ARG_25  | NH2    | A.GLU_325 | OE2    | 2.929        |
| 1HGI   | B.LYS_51  | NZ     | B.GLU_103 | OE1    | 2.815        |
| 1HGI   | B.ARG_54  | NH1    | B.GLU_57  | OE1    | 2.860        |
| 1HGI   | B.ARG_54  | NH1    | B.GLU_57  | OE2    | 2.893        |
| 1HGI   | B.ARG_54  | NH1    | F.GLU_97  | OE2    | 3.222        |
| 1HGI   | B.ARG_54  | NH2    | F.GLU_97  | OE2    | 2.806        |
| 1HGI   | B.LYS_58  | NZ     | B.GLU_61  | OE2    | 3.021        |
| 1HGI   | B.LYS_62  | NZ     | F.ASP_86  | OD1    | 2.942        |
| 1HGI   | B.LYS_62  | NZ     | F.ASP_86  | OD2    | 2.668        |
| 1HGI   | B.LYS_62  | NZ     | F.ASP_90  | OD1    | 3.332        |
| 1HGI   | B.LYS_62  | NZ     | F.ASP_90  | OD2    | 2.667        |
| 1HGI   | B.LYS_68  | NZ     | B.GLU_85  | OE1    | 3.269        |
| 1HGI   | B.LYS_68  | NZ     | B.GLU_85  | OE2    | 2.791        |
| 1HGI   | B.ARG_76  | NH1    | D.GLU_74  | OE1    | 3.625        |
| 1HGI   | B.ARG_76  | NH1    | D.GLU_74  | OE2    | 2.918        |
| 1HGI   | B.ARG_76  | NH2    | D.GLU_74  | OE1    | 2.861        |
| 1HGI   | B.ARG_76  | NH2    | D.GLU_74  | OE2    | 3.621        |
| 1HGI   | B.ARG_76  | NH2    | D.GLU_81  | OE1    | 2.708        |
| 1HGI   | B.ARG_76  | NH2    | D.GLU_81  | OE2    | 3.474        |
| 1HGI   | B.LYS_117 | NZ     | B.GLU_114 | OE1    | 3.138        |

|      |           |     |           |     |       |
|------|-----------|-----|-----------|-----|-------|
| 1HGI | B_LYS_117 | NZ  | B_GLU_114 | OE2 | 2.563 |
| 1HGI | B_ARG_123 | NH1 | B_GLU_120 | OE1 | 2.571 |
| 1HGI | B_ARG_123 | NH1 | B_GLU_120 | OE2 | 2.840 |
| 1HGI | B_ARG_123 | NH2 | F_GLU_132 | OE1 | 3.105 |
| 1HGI | B_ARG_124 | NH1 | B_GLU_120 | OE1 | 3.733 |
| 1HGI | B_ARG_124 | NH2 | F_GLU_132 | OE1 | 3.081 |
| 1HGI | B_ARG_124 | NH2 | F_GLU_132 | OE2 | 3.356 |
| 1HGI | B_ARG_127 | NH1 | F_GLU_131 | OE1 | 2.493 |
| 1HGI | B_LYS_143 | NZ  | B_ASP_145 | OD2 | 2.749 |
| 1HGI | B_ARG_153 | NH1 | B_GLU_150 | OE1 | 2.584 |
| 1HGI | B_HIS_159 | NE2 | B_ASP_160 | OD2 | 3.012 |
| 1HGI | B_ARG_163 | NH2 | B_GLU_128 | OE1 | 3.957 |
| 1HGI | B_ARG_163 | NH2 | F_GLU_131 | OE1 | 2.586 |
| 1HGI | B_ARG_163 | NH2 | F_GLU_131 | OE2 | 2.598 |
| 1HGI | B_ARG_170 | NH1 | B_GLU_131 | OE2 | 2.767 |
| 1HGI | B_ARG_170 | NH1 | D_GLU_128 | OE1 | 3.640 |
| 1HGI | B_ARG_170 | NH1 | D_GLU_128 | OE2 | 3.301 |
| 1HGI | B_ARG_170 | NH2 | B_GLU_128 | OE2 | 2.947 |
| 1HGI | B_LYS_174 | NZ  | D_ASP_164 | OD1 | 2.745 |
| 1HGI | B_LYS_174 | NZ  | D_ASP_164 | OD2 | 2.560 |
| 1HGI | C_LYS_27  | NZ  | D_GLU_97  | OE1 | 2.951 |
| 1HGI | C_LYS_27  | NZ  | D_GLU_97  | OE2 | 2.876 |
| 1HGI | C_LYS_50  | NZ  | C_ASP_275 | OD1 | 3.635 |
| 1HGI | C_LYS_50  | NZ  | C_ASP_275 | OD2 | 2.676 |
| 1HGI | C_ARG_57  | NH2 | C_GLU_82  | OE1 | 2.525 |
| 1HGI | C_ARG_57  | NH2 | C_GLU_82  | OE2 | 3.836 |
| 1HGI | C_HIS_75  | ND1 | C_ASP_73  | OD1 | 2.875 |
| 1HGI | C_HIS_75  | ND1 | C_ASP_73  | OD2 | 3.155 |
| 1HGI | C_HIS_75  | NE2 | C_ASP_63  | OD1 | 3.544 |
| 1HGI | C_ARG_90  | NH2 | C_ASP_60  | OD1 | 3.575 |
| 1HGI | C_ARG_90  | NH2 | C_ASP_60  | OD2 | 2.774 |
| 1HGI | C_ARG_109 | NH1 | C_GLU_89  | OE1 | 2.522 |
| 1HGI | C_ARG_109 | NH1 | C_GLU_89  | OE2 | 3.270 |
| 1HGI | C_ARG_109 | NH2 | D_GLU_67  | OE1 | 3.637 |
| 1HGI | C_ARG_109 | NH2 | D_GLU_67  | OE2 | 2.819 |
| 1HGI | C_ARG_141 | NH2 | C_ASP_77  | OD1 | 2.934 |
| 1HGI | C_ARG_141 | NH2 | C_ASP_77  | OD2 | 2.703 |
| 1HGI | C_LYS_176 | NZ  | C_GLU_123 | OE2 | 2.678 |
| 1HGI | C_LYS_238 | NZ  | B_GLU_72  | OE1 | 2.671 |
| 1HGI | C_LYS_238 | NZ  | B_GLU_72  | OE2 | 2.721 |
| 1HGI | C_ARG_261 | NH1 | C_GLU_119 | OE2 | 2.664 |
| 1HGI | C_ARG_261 | NH2 | C_GLU_119 | OE1 | 2.844 |
| 1HGI | C_ARG_261 | NH2 | C_GLU_119 | OE2 | 2.850 |
| 1HGI | C_LYS_264 | NZ  | C_ASP_85  | OD1 | 3.489 |
| 1HGI | C_LYS_264 | NZ  | C_ASP_85  | OD2 | 2.832 |
| 1HGI | C_ARG_269 | NH1 | D_GLU_67  | OE1 | 2.753 |
| 1HGI | C_ARG_269 | NH2 | D_GLU_67  | OE1 | 3.850 |
| 1HGI | C_LYS_292 | NZ  | C_ASP_291 | OD1 | 2.977 |
| 1HGI | C_LYS_292 | NZ  | C_ASP_291 | OD2 | 2.816 |
| 1HGI | C_LYS_299 | NZ  | D_GLU_69  | OE2 | 2.739 |
| 1HGI | C_LYS_310 | NZ  | D_ASP_86  | OD1 | 2.772 |
| 1HGI | C_LYS_310 | NZ  | D_ASP_90  | OD1 | 2.525 |
| 1HGI | C_LYS_315 | NZ  | C_GLU_41  | OE1 | 2.748 |
| 1HGI | C_LYS_326 | NZ  | D_GLU_15  | OE1 | 2.825 |
| 1HGI | C_LYS_326 | NZ  | D_GLU_15  | OE2 | 3.570 |
| 1HGI | D_LYS_51  | NZ  | D_GLU_103 | OE1 | 2.810 |
| 1HGI | D_ARG_54  | NH1 | B_GLU_97  | OE2 | 3.254 |
| 1HGI | D_ARG_54  | NH1 | D_GLU_57  | OE1 | 2.846 |

|      |           |     |           |     |       |
|------|-----------|-----|-----------|-----|-------|
| 1HGI | D_ARG_54  | NH1 | D_GLU_57  | OE2 | 2.899 |
| 1HGI | D_ARG_54  | NH2 | B_GLU_97  | OE2 | 2.808 |
| 1HGI | D_LYS_58  | NZ  | D_GLU_61  | OE2 | 2.998 |
| 1HGI | D_LYS_62  | NZ  | B_ASP_86  | OD1 | 2.962 |
| 1HGI | D_LYS_62  | NZ  | B_ASP_86  | OD2 | 2.570 |
| 1HGI | D_LYS_62  | NZ  | B_ASP_90  | OD1 | 3.335 |
| 1HGI | D_LYS_62  | NZ  | B_ASP_90  | OD2 | 2.541 |
| 1HGI | D_LYS_68  | NZ  | D_GLU_85  | OE1 | 3.268 |
| 1HGI | D_LYS_68  | NZ  | D_GLU_85  | OE2 | 2.807 |
| 1HGI | D_ARG_76  | NH1 | F_GLU_74  | OE1 | 3.375 |
| 1HGI | D_ARG_76  | NH1 | F_GLU_74  | OE2 | 2.776 |
| 1HGI | D_ARG_76  | NH2 | F_GLU_74  | OE1 | 2.760 |
| 1HGI | D_ARG_76  | NH2 | F_GLU_74  | OE2 | 3.657 |
| 1HGI | D_ARG_76  | NH2 | F_GLU_81  | OE1 | 2.608 |
| 1HGI | D_ARG_76  | NH2 | F_GLU_81  | OE2 | 3.506 |
| 1HGI | D_LYS_117 | NZ  | D_GLU_114 | OE1 | 3.195 |
| 1HGI | D_LYS_117 | NZ  | D_GLU_114 | OE2 | 2.582 |
| 1HGI | D_ARG_123 | NH1 | D_GLU_120 | OE1 | 2.549 |
| 1HGI | D_ARG_123 | NH1 | D_GLU_120 | OE2 | 2.835 |
| 1HGI | D_ARG_123 | NH2 | B_GLU_132 | OE1 | 3.093 |
| 1HGI | D_ARG_124 | NH1 | D_GLU_120 | OE1 | 3.750 |
| 1HGI | D_ARG_124 | NH2 | B_GLU_132 | OE1 | 3.096 |
| 1HGI | D_ARG_124 | NH2 | B_GLU_132 | OE2 | 3.377 |
| 1HGI | D_ARG_127 | NH1 | B_GLU_131 | OE1 | 2.513 |
| 1HGI | D_LYS_143 | NZ  | D_ASP_145 | OD2 | 2.778 |
| 1HGI | D_ARG_153 | NH1 | D_GLU_150 | OE2 | 2.550 |
| 1HGI | D_HIS_159 | NE2 | D_ASP_160 | OD2 | 3.012 |
| 1HGI | D_ARG_163 | NH2 | B_GLU_131 | OE1 | 2.590 |
| 1HGI | D_ARG_163 | NH2 | B_GLU_131 | OE2 | 2.616 |
| 1HGI | D_ARG_163 | NH2 | D_GLU_128 | OE1 | 3.999 |
| 1HGI | D_ARG_170 | NH1 | D_GLU_131 | OE2 | 2.771 |
| 1HGI | D_ARG_170 | NH1 | F_GLU_128 | OE1 | 3.797 |
| 1HGI | D_ARG_170 | NH1 | F_GLU_128 | OE2 | 3.417 |
| 1HGI | D_ARG_170 | NH2 | D_GLU_128 | OE2 | 2.974 |
| 1HGI | D_LYS_174 | NZ  | F_ASP_164 | OD1 | 2.814 |
| 1HGI | D_LYS_174 | NZ  | F_ASP_164 | OD2 | 2.727 |
| 1HGI | E_LYS_27  | NZ  | F_GLU_97  | OE1 | 2.961 |
| 1HGI | E_LYS_27  | NZ  | F_GLU_97  | OE2 | 2.862 |
| 1HGI | E_LYS_50  | NZ  | E_ASP_275 | OD1 | 3.624 |
| 1HGI | E_LYS_50  | NZ  | E_ASP_275 | OD2 | 2.698 |
| 1HGI | E_ARG_57  | NH2 | E_GLU_82  | OE1 | 2.652 |
| 1HGI | E_ARG_57  | NH2 | E_GLU_82  | OE2 | 3.886 |
| 1HGI | E_HIS_75  | ND1 | E_ASP_73  | OD1 | 2.868 |
| 1HGI | E_HIS_75  | ND1 | E_ASP_73  | OD2 | 3.142 |
| 1HGI | E_HIS_75  | NE2 | E_ASP_63  | OD1 | 3.556 |
| 1HGI | E_ARG_90  | NH2 | E_ASP_60  | OD1 | 3.607 |
| 1HGI | E_ARG_90  | NH2 | E_ASP_60  | OD2 | 2.841 |
| 1HGI | E_ARG_109 | NH1 | E_GLU_89  | OE1 | 2.478 |
| 1HGI | E_ARG_109 | NH1 | E_GLU_89  | OE2 | 3.260 |
| 1HGI | E_ARG_109 | NH2 | F_GLU_67  | OE1 | 3.649 |
| 1HGI | E_ARG_109 | NH2 | F_GLU_67  | OE2 | 2.781 |
| 1HGI | E_ARG_141 | NH2 | E_ASP_77  | OD1 | 2.937 |
| 1HGI | E_ARG_141 | NH2 | E_ASP_77  | OD2 | 2.703 |
| 1HGI | E_LYS_176 | NZ  | E_GLU_123 | OE2 | 2.685 |
| 1HGI | E_LYS_238 | NZ  | D_GLU_72  | OE1 | 2.803 |
| 1HGI | E_LYS_238 | NZ  | D_GLU_72  | OE2 | 2.859 |
| 1HGI | E_ARG_261 | NH1 | E_GLU_119 | OE2 | 2.651 |
| 1HGI | E_ARG_261 | NH2 | E_GLU_119 | OE1 | 2.844 |

|      |           |     |           |     |       |
|------|-----------|-----|-----------|-----|-------|
| 1HGI | E_ARG_261 | NH2 | E_GLU_119 | OE2 | 2.870 |
| 1HGI | E_LYS_264 | NZ  | E_ASP_85  | OD1 | 3.485 |
| 1HGI | E_LYS_264 | NZ  | E_ASP_85  | OD2 | 2.858 |
| 1HGI | E_ARG_269 | NH1 | F_GLU_67  | OE1 | 2.720 |
| 1HGI | E_ARG_269 | NH2 | F_GLU_67  | OE1 | 3.815 |
| 1HGI | E_LYS_292 | NZ  | E_ASP_291 | OD1 | 2.984 |
| 1HGI | E_LYS_292 | NZ  | E_ASP_291 | OD2 | 2.865 |
| 1HGI | E_LYS_299 | NZ  | F_GLU_69  | OE2 | 2.715 |
| 1HGI | E_LYS_310 | NZ  | F_ASP_86  | OD1 | 2.757 |
| 1HGI | E_LYS_310 | NZ  | F_ASP_90  | OD1 | 2.523 |
| 1HGI | E_LYS_315 | NZ  | E_GLU_41  | OE1 | 2.741 |
| 1HGI | E_LYS_326 | NZ  | F_GLU_15  | OE1 | 2.882 |
| 1HGI | E_LYS_326 | NZ  | F_GLU_15  | OE2 | 3.090 |
| 1HGI | F_LYS_51  | NZ  | F_GLU_103 | OE1 | 2.800 |
| 1HGI | F_ARG_54  | NH1 | D_GLU_97  | OE2 | 3.254 |
| 1HGI | F_ARG_54  | NH1 | F_GLU_57  | OE1 | 2.835 |
| 1HGI | F_ARG_54  | NH1 | F_GLU_57  | OE2 | 2.892 |
| 1HGI | F_ARG_54  | NH2 | D_GLU_97  | OE2 | 2.750 |
| 1HGI | F_LYS_58  | NZ  | F_GLU_61  | OE2 | 3.021 |
| 1HGI | F_LYS_62  | NZ  | D_ASP_86  | OD1 | 2.884 |
| 1HGI | F_LYS_62  | NZ  | D_ASP_86  | OD2 | 2.563 |
| 1HGI | F_LYS_62  | NZ  | D_ASP_90  | OD1 | 3.358 |
| 1HGI | F_LYS_62  | NZ  | D_ASP_90  | OD2 | 2.609 |
| 1HGI | F_LYS_68  | NZ  | F_GLU_85  | OE1 | 3.264 |
| 1HGI | F_LYS_68  | NZ  | F_GLU_85  | OE2 | 2.739 |
| 1HGI | F_ARG_76  | NH1 | B_GLU_74  | OE1 | 3.420 |
| 1HGI | F_ARG_76  | NH1 | B_GLU_74  | OE2 | 2.771 |
| 1HGI | F_ARG_76  | NH2 | B_GLU_74  | OE1 | 2.763 |
| 1HGI | F_ARG_76  | NH2 | B_GLU_74  | OE2 | 3.604 |
| 1HGI | F_ARG_76  | NH2 | B_GLU_81  | OE1 | 2.645 |
| 1HGI | F_ARG_76  | NH2 | B_GLU_81  | OE2 | 3.592 |
| 1HGI | F_LYS_117 | NZ  | F_GLU_114 | OE1 | 3.182 |
| 1HGI | F_LYS_117 | NZ  | F_GLU_114 | OE2 | 2.543 |
| 1HGI | F_ARG_123 | NH1 | F_GLU_120 | OE1 | 2.586 |
| 1HGI | F_ARG_123 | NH1 | F_GLU_120 | OE2 | 2.812 |
| 1HGI | F_ARG_123 | NH2 | D_GLU_132 | OE1 | 3.144 |
| 1HGI | F_ARG_124 | NH1 | F_GLU_120 | OE1 | 3.763 |
| 1HGI | F_ARG_124 | NH2 | D_GLU_132 | OE1 | 3.185 |
| 1HGI | F_ARG_124 | NH2 | D_GLU_132 | OE2 | 3.386 |
| 1HGI | F_ARG_127 | NH1 | D_GLU_131 | OE1 | 2.561 |
| 1HGI | F_LYS_143 | NZ  | F_ASP_145 | OD2 | 2.731 |
| 1HGI | F_ARG_153 | NH1 | F_GLU_150 | OE2 | 2.577 |
| 1HGI | F_HIS_159 | NE2 | F_ASP_160 | OD2 | 3.055 |
| 1HGI | F_ARG_163 | NH2 | D_GLU_131 | OE1 | 2.567 |
| 1HGI | F_ARG_163 | NH2 | D_GLU_131 | OE2 | 2.692 |
| 1HGI | F_ARG_163 | NH2 | F_GLU_128 | OE1 | 3.975 |
| 1HGI | F_ARG_170 | NH1 | B_GLU_128 | OE1 | 3.621 |
| 1HGI | F_ARG_170 | NH1 | B_GLU_128 | OE2 | 3.345 |
| 1HGI | F_ARG_170 | NH1 | F_GLU_131 | OE2 | 2.754 |
| 1HGI | F_ARG_170 | NH2 | F_GLU_128 | OE2 | 2.972 |
| 1HGI | F_LYS_174 | NZ  | B_ASP_164 | OD1 | 2.789 |
| 1HGI | F_LYS_174 | NZ  | B_ASP_164 | OD2 | 2.521 |

---

Table 93: 1HGI-specific salt bridging networks analysis. In this table, a PDB file is specified with a four-letter PDB ID, except that the names of the PDB files corresponding to the single NMR structural model split from the NMR ensemble is specified with a four-letter PDB ID in addition to a hyphen followed by the single NMR structural model numeric ID, the residue naming scheme is **Chain ID\_residue name\_residue number**,  $\angle ADH$  represents the angle formed by acceptor (A), donor (D) and hydrogen (H) ( $\angle ADH$ ).

| PDB ID | Residue A | Atom A | Residue B | Atom B | Distance (Å) |
|--------|-----------|--------|-----------|--------|--------------|
| 1HGJ   | A_LYS_27  | NZ     | B_GLU_97  | OE1    | 2.775        |
| 1HGJ   | A_LYS_27  | NZ     | B_GLU_97  | OE2    | 2.807        |
| 1HGJ   | A_LYS_50  | NZ     | A_ASP_275 | OD1    | 3.487        |
| 1HGJ   | A_LYS_50  | NZ     | A_ASP_275 | OD2    | 2.742        |
| 1HGJ   | A_ARG_57  | NH2    | A_GLU_82  | OE1    | 2.521        |
| 1HGJ   | A_ARG_57  | NH2    | A_GLU_82  | OE2    | 3.796        |
| 1HGJ   | A_HIS_75  | ND1    | A_ASP_73  | OD1    | 2.831        |
| 1HGJ   | A_HIS_75  | ND1    | A_ASP_73  | OD2    | 3.407        |
| 1HGJ   | A_HIS_75  | NE2    | A_ASP_63  | OD1    | 3.353        |
| 1HGJ   | A_ARG_90  | NH2    | A_ASP_60  | OD1    | 3.662        |
| 1HGJ   | A_ARG_90  | NH2    | A_ASP_60  | OD2    | 2.811        |
| 1HGJ   | A_ARG_109 | NH1    | A_GLU_89  | OE1    | 2.528        |
| 1HGJ   | A_ARG_109 | NH1    | A_GLU_89  | OE2    | 3.223        |
| 1HGJ   | A_ARG_109 | NH2    | B_GLU_67  | OE1    | 3.648        |
| 1HGJ   | A_ARG_109 | NH2    | B_GLU_67  | OE2    | 2.748        |
| 1HGJ   | A_ARG_141 | NH2    | A_ASP_77  | OD1    | 2.818        |
| 1HGJ   | A_ARG_141 | NH2    | A_ASP_77  | OD2    | 2.748        |
| 1HGJ   | A_LYS_176 | NZ     | A_GLU_123 | OE2    | 2.680        |
| 1HGJ   | A_HIS_183 | NE2    | A_GLU_190 | OE2    | 3.316        |
| 1HGJ   | A_LYS_238 | NZ     | F_GLU_72  | OE1    | 2.903        |
| 1HGJ   | A_LYS_238 | NZ     | F_GLU_72  | OE2    | 2.788        |
| 1HGJ   | A_ARG_261 | NH1    | A_GLU_119 | OE2    | 2.647        |
| 1HGJ   | A_ARG_261 | NH2    | A_GLU_119 | OE1    | 2.898        |
| 1HGJ   | A_ARG_261 | NH2    | A_GLU_119 | OE2    | 2.927        |
| 1HGJ   | A_LYS_264 | NZ     | A_ASP_85  | OD1    | 3.715        |
| 1HGJ   | A_LYS_264 | NZ     | A_ASP_85  | OD2    | 2.840        |
| 1HGJ   | A_ARG_269 | NH1    | B_GLU_67  | OE1    | 2.736        |
| 1HGJ   | A_ARG_269 | NH2    | B_GLU_67  | OE1    | 3.791        |
| 1HGJ   | A_LYS_292 | NZ     | A_ASP_291 | OD1    | 2.856        |
| 1HGJ   | A_LYS_292 | NZ     | A_ASP_291 | OD2    | 2.799        |
| 1HGJ   | A_LYS_299 | NZ     | B_GLU_69  | OE2    | 2.821        |
| 1HGJ   | A_LYS_310 | NZ     | B_ASP_86  | OD1    | 2.922        |
| 1HGJ   | A_LYS_310 | NZ     | B_ASP_90  | OD1    | 2.569        |
| 1HGJ   | A_LYS_315 | NZ     | A_GLU_41  | OE1    | 2.855        |
| 1HGJ   | A_LYS_326 | NZ     | A_GLU_325 | OE1    | 2.919        |
| 1HGJ   | A_LYS_326 | NZ     | B_GLU_15  | OE1    | 3.187        |
| 1HGJ   | A_LYS_326 | NZ     | B_GLU_15  | OE2    | 2.826        |
| 1HGJ   | B_ARG_25  | NH1    | A_GLU_325 | OE2    | 3.775        |
| 1HGJ   | B_ARG_25  | NH2    | A_GLU_325 | OE2    | 2.974        |
| 1HGJ   | B_LYS_51  | NZ     | B_GLU_103 | OE1    | 2.778        |
| 1HGJ   | B_ARG_54  | NH1    | B_GLU_57  | OE1    | 2.874        |
| 1HGJ   | B_ARG_54  | NH1    | B_GLU_57  | OE2    | 2.925        |
| 1HGJ   | B_ARG_54  | NH1    | F_GLU_97  | OE2    | 3.272        |
| 1HGJ   | B_ARG_54  | NH2    | F_GLU_97  | OE2    | 2.774        |
| 1HGJ   | B_LYS_58  | NZ     | B_GLU_61  | OE2    | 3.374        |
| 1HGJ   | B_LYS_62  | NZ     | F_ASP_86  | OD1    | 2.863        |
| 1HGJ   | B_LYS_62  | NZ     | F_ASP_86  | OD2    | 2.651        |
| 1HGJ   | B_LYS_62  | NZ     | F_ASP_90  | OD1    | 3.453        |
| 1HGJ   | B_LYS_62  | NZ     | F_ASP_90  | OD2    | 2.738        |
| 1HGJ   | B_LYS_68  | NZ     | B_GLU_85  | OE1    | 3.167        |
| 1HGJ   | B_LYS_68  | NZ     | B_GLU_85  | OE2    | 2.782        |
| 1HGJ   | B_ARG_76  | NH1    | D_GLU_74  | OE1    | 3.648        |
| 1HGJ   | B_ARG_76  | NH1    | D_GLU_74  | OE2    | 2.885        |
| 1HGJ   | B_ARG_76  | NH2    | D_GLU_74  | OE1    | 2.846        |
| 1HGJ   | B_ARG_76  | NH2    | D_GLU_74  | OE2    | 3.547        |
| 1HGJ   | B_ARG_76  | NH2    | D_GLU_81  | OE1    | 2.721        |
| 1HGJ   | B_ARG_76  | NH2    | D_GLU_81  | OE2    | 3.500        |



|      |           |     |           |     |       |
|------|-----------|-----|-----------|-----|-------|
| 1HGJ | B_LYS_117 | NZ  | B_GLU_114 | OE1 | 3.054 |
| 1HGJ | B_LYS_117 | NZ  | B_GLU_114 | OE2 | 2.578 |
| 1HGJ | B_ARG_123 | NH1 | B_GLU_120 | OE1 | 2.614 |
| 1HGJ | B_ARG_123 | NH1 | B_GLU_120 | OE2 | 2.737 |
| 1HGJ | B_ARG_123 | NH2 | F_GLU_132 | OE1 | 3.120 |
| 1HGJ | B_ARG_124 | NH1 | B_GLU_120 | OE1 | 3.704 |
| 1HGJ | B_ARG_124 | NH2 | F_GLU_132 | OE1 | 3.095 |
| 1HGJ | B_ARG_124 | NH2 | F_GLU_132 | OE2 | 3.375 |
| 1HGJ | B_ARG_127 | NH1 | F_GLU_131 | OE1 | 2.484 |
| 1HGJ | B_LYS_143 | NZ  | B_ASP_145 | OD2 | 2.863 |
| 1HGJ | B_ARG_153 | NH1 | B_GLU_150 | OE1 | 2.677 |
| 1HGJ | B_HIS_159 | NE2 | B_ASP_160 | OD2 | 3.106 |
| 1HGJ | B_ARG_163 | NH2 | F_GLU_131 | OE1 | 2.591 |
| 1HGJ | B_ARG_163 | NH2 | F_GLU_131 | OE2 | 2.571 |
| 1HGJ | B_ARG_170 | NH1 | B_GLU_131 | OE2 | 2.795 |
| 1HGJ | B_ARG_170 | NH1 | D_GLU_128 | OE1 | 3.291 |
| 1HGJ | B_ARG_170 | NH1 | D_GLU_128 | OE2 | 3.706 |
| 1HGJ | B_ARG_170 | NH2 | B_GLU_128 | OE2 | 2.712 |
| 1HGJ | B_LYS_174 | NZ  | D_ASP_164 | OD1 | 2.810 |
| 1HGJ | B_LYS_174 | NZ  | D_ASP_164 | OD2 | 2.550 |
| 1HGJ | C_LYS_27  | NZ  | D_GLU_97  | OE1 | 2.755 |
| 1HGJ | C_LYS_27  | NZ  | D_GLU_97  | OE2 | 2.824 |
| 1HGJ | C_LYS_50  | NZ  | C_ASP_275 | OD1 | 3.494 |
| 1HGJ | C_LYS_50  | NZ  | C_ASP_275 | OD2 | 2.741 |
| 1HGJ | C_ARG_57  | NH2 | C_GLU_82  | OE1 | 2.545 |
| 1HGJ | C_ARG_57  | NH2 | C_GLU_82  | OE2 | 3.939 |
| 1HGJ | C_HIS_75  | ND1 | C_ASP_73  | OD1 | 2.800 |
| 1HGJ | C_HIS_75  | ND1 | C_ASP_73  | OD2 | 3.368 |
| 1HGJ | C_HIS_75  | NE2 | C_ASP_63  | OD1 | 3.332 |
| 1HGJ | C_ARG_90  | NH2 | C_ASP_60  | OD1 | 3.676 |
| 1HGJ | C_ARG_90  | NH2 | C_ASP_60  | OD2 | 2.784 |
| 1HGJ | C_ARG_109 | NH1 | C_GLU_89  | OE1 | 2.558 |
| 1HGJ | C_ARG_109 | NH1 | C_GLU_89  | OE2 | 3.226 |
| 1HGJ | C_ARG_109 | NH2 | D_GLU_67  | OE1 | 3.638 |
| 1HGJ | C_ARG_109 | NH2 | D_GLU_67  | OE2 | 2.758 |
| 1HGJ | C_ARG_141 | NH2 | C_ASP_77  | OD1 | 2.808 |
| 1HGJ | C_ARG_141 | NH2 | C_ASP_77  | OD2 | 2.737 |
| 1HGJ | C_LYS_176 | NZ  | C_GLU_123 | OE2 | 2.691 |
| 1HGJ | C_HIS_183 | NE2 | C_GLU_190 | OE2 | 3.331 |
| 1HGJ | C_LYS_238 | NZ  | B_GLU_72  | OE1 | 2.749 |
| 1HGJ | C_LYS_238 | NZ  | B_GLU_72  | OE2 | 2.713 |
| 1HGJ | C_ARG_261 | NH1 | C_GLU_119 | OE2 | 2.654 |
| 1HGJ | C_ARG_261 | NH2 | C_GLU_119 | OE1 | 2.921 |
| 1HGJ | C_ARG_261 | NH2 | C_GLU_119 | OE2 | 2.914 |
| 1HGJ | C_LYS_264 | NZ  | C_ASP_85  | OD1 | 3.727 |
| 1HGJ | C_LYS_264 | NZ  | C_ASP_85  | OD2 | 2.825 |
| 1HGJ | C_ARG_269 | NH1 | D_GLU_67  | OE1 | 2.708 |
| 1HGJ | C_ARG_269 | NH2 | D_GLU_67  | OE1 | 3.781 |
| 1HGJ | C_LYS_292 | NZ  | C_ASP_291 | OD1 | 2.908 |
| 1HGJ | C_LYS_292 | NZ  | C_ASP_291 | OD2 | 2.818 |
| 1HGJ | C_LYS_299 | NZ  | D_GLU_69  | OE2 | 2.827 |
| 1HGJ | C_LYS_310 | NZ  | D_ASP_86  | OD1 | 2.943 |
| 1HGJ | C_LYS_310 | NZ  | D_ASP_90  | OD1 | 2.532 |
| 1HGJ | C_LYS_315 | NZ  | C_GLU_41  | OE1 | 2.864 |
| 1HGJ | C_LYS_326 | NZ  | D_GLU_15  | OE1 | 2.911 |
| 1HGJ | C_LYS_326 | NZ  | D_GLU_15  | OE2 | 3.904 |
| 1HGJ | D_LYS_51  | NZ  | D_GLU_103 | OE1 | 2.796 |
| 1HGJ | D_ARG_54  | NH1 | B_GLU_97  | OE2 | 3.338 |

|      |           |     |           |     |       |
|------|-----------|-----|-----------|-----|-------|
| 1HGJ | D_ARG_54  | NH1 | D_GLU_57  | OE1 | 2.865 |
| 1HGJ | D_ARG_54  | NH1 | D_GLU_57  | OE2 | 2.909 |
| 1HGJ | D_ARG_54  | NH2 | B_GLU_97  | OE2 | 2.835 |
| 1HGJ | D_LYS_58  | NZ  | D_GLU_61  | OE2 | 3.356 |
| 1HGJ | D_LYS_62  | NZ  | B_ASP_86  | OD1 | 2.910 |
| 1HGJ | D_LYS_62  | NZ  | B_ASP_86  | OD2 | 2.574 |
| 1HGJ | D_LYS_62  | NZ  | B_ASP_90  | OD1 | 3.419 |
| 1HGJ | D_LYS_62  | NZ  | B_ASP_90  | OD2 | 2.622 |
| 1HGJ | D_LYS_68  | NZ  | D_GLU_85  | OE1 | 3.144 |
| 1HGJ | D_LYS_68  | NZ  | D_GLU_85  | OE2 | 2.820 |
| 1HGJ | D_ARG_76  | NH1 | F_GLU_74  | OE1 | 3.424 |
| 1HGJ | D_ARG_76  | NH1 | F_GLU_74  | OE2 | 2.763 |
| 1HGJ | D_ARG_76  | NH2 | F_GLU_74  | OE1 | 2.714 |
| 1HGJ | D_ARG_76  | NH2 | F_GLU_74  | OE2 | 3.550 |
| 1HGJ | D_ARG_76  | NH2 | F_GLU_81  | OE1 | 2.684 |
| 1HGJ | D_ARG_76  | NH2 | F_GLU_81  | OE2 | 3.574 |
| 1HGJ | D_LYS_117 | NZ  | D_GLU_114 | OE1 | 3.086 |
| 1HGJ | D_LYS_117 | NZ  | D_GLU_114 | OE2 | 2.611 |
| 1HGJ | D_ARG_123 | NH1 | D_GLU_120 | OE1 | 2.598 |
| 1HGJ | D_ARG_123 | NH1 | D_GLU_120 | OE2 | 2.741 |
| 1HGJ | D_ARG_123 | NH2 | B_GLU_132 | OE1 | 3.075 |
| 1HGJ | D_ARG_124 | NH1 | D_GLU_120 | OE1 | 3.708 |
| 1HGJ | D_ARG_124 | NH2 | B_GLU_132 | OE1 | 3.055 |
| 1HGJ | D_ARG_124 | NH2 | B_GLU_132 | OE2 | 3.342 |
| 1HGJ | D_ARG_127 | NH1 | B_GLU_131 | OE1 | 2.514 |
| 1HGJ | D_LYS_143 | NZ  | D_ASP_145 | OD2 | 2.897 |
| 1HGJ | D_ARG_153 | NH1 | D_GLU_150 | OE1 | 2.604 |
| 1HGJ | D_HIS_159 | NE2 | D_ASP_160 | OD2 | 3.102 |
| 1HGJ | D_ARG_163 | NH2 | B_GLU_131 | OE1 | 2.599 |
| 1HGJ | D_ARG_163 | NH2 | B_GLU_131 | OE2 | 2.594 |
| 1HGJ | D_ARG_170 | NH1 | D_GLU_131 | OE2 | 2.793 |
| 1HGJ | D_ARG_170 | NH1 | F_GLU_128 | OE1 | 3.405 |
| 1HGJ | D_ARG_170 | NH1 | F_GLU_128 | OE2 | 3.769 |
| 1HGJ | D_ARG_170 | NH2 | D_GLU_128 | OE2 | 2.726 |
| 1HGJ | D_LYS_174 | NZ  | F_ASP_164 | OD1 | 2.824 |
| 1HGJ | D_LYS_174 | NZ  | F_ASP_164 | OD2 | 2.673 |
| 1HGJ | E_LYS_27  | NZ  | F_GLU_97  | OE1 | 2.779 |
| 1HGJ | E_LYS_27  | NZ  | F_GLU_97  | OE2 | 2.813 |
| 1HGJ | E_LYS_50  | NZ  | E_ASP_275 | OD1 | 3.506 |
| 1HGJ | E_LYS_50  | NZ  | E_ASP_275 | OD2 | 2.739 |
| 1HGJ | E_ARG_57  | NH2 | E_GLU_82  | OE1 | 2.663 |
| 1HGJ | E_HIS_75  | ND1 | E_ASP_73  | OD1 | 2.798 |
| 1HGJ | E_HIS_75  | ND1 | E_ASP_73  | OD2 | 3.347 |
| 1HGJ | E_HIS_75  | NE2 | E_ASP_63  | OD1 | 3.371 |
| 1HGJ | E_ARG_90  | NH2 | E_ASP_60  | OD1 | 3.683 |
| 1HGJ | E_ARG_90  | NH2 | E_ASP_60  | OD2 | 2.826 |
| 1HGJ | E_ARG_109 | NH1 | E_GLU_89  | OE1 | 2.541 |
| 1HGJ | E_ARG_109 | NH1 | E_GLU_89  | OE2 | 3.205 |
| 1HGJ | E_ARG_109 | NH2 | F_GLU_67  | OE1 | 3.635 |
| 1HGJ | E_ARG_109 | NH2 | F_GLU_67  | OE2 | 2.759 |
| 1HGJ | E_ARG_141 | NH2 | E_ASP_77  | OD1 | 2.840 |
| 1HGJ | E_ARG_141 | NH2 | E_ASP_77  | OD2 | 2.747 |
| 1HGJ | E_LYS_176 | NZ  | E_GLU_123 | OE2 | 2.685 |
| 1HGJ | E_HIS_183 | NE2 | E_GLU_190 | OE2 | 3.333 |
| 1HGJ | E_LYS_238 | NZ  | D_GLU_72  | OE1 | 2.865 |
| 1HGJ | E_LYS_238 | NZ  | D_GLU_72  | OE2 | 2.804 |
| 1HGJ | E_ARG_261 | NH1 | E_GLU_119 | OE2 | 2.651 |
| 1HGJ | E_ARG_261 | NH2 | E_GLU_119 | OE1 | 2.905 |

|      |           |     |           |     |       |
|------|-----------|-----|-----------|-----|-------|
| 1HGJ | E_ARG_261 | NH2 | E_GLU_119 | OE2 | 2.913 |
| 1HGJ | E_LYS_264 | NZ  | E_ASP_85  | OD1 | 3.746 |
| 1HGJ | E_LYS_264 | NZ  | E_ASP_85  | OD2 | 2.856 |
| 1HGJ | E_ARG_269 | NH1 | F_GLU_67  | OE1 | 2.691 |
| 1HGJ | E_ARG_269 | NH2 | F_GLU_67  | OE1 | 3.759 |
| 1HGJ | E_LYS_292 | NZ  | E_ASP_291 | OD1 | 2.893 |
| 1HGJ | E_LYS_292 | NZ  | E_ASP_291 | OD2 | 2.833 |
| 1HGJ | E_LYS_299 | NZ  | F_GLU_69  | OE2 | 2.806 |
| 1HGJ | E_LYS_310 | NZ  | F_ASP_86  | OD1 | 2.930 |
| 1HGJ | E_LYS_310 | NZ  | F_ASP_90  | OD1 | 2.553 |
| 1HGJ | E_LYS_315 | NZ  | E_GLU_41  | OE1 | 2.860 |
| 1HGJ | E_LYS_326 | NZ  | F_GLU_15  | OE1 | 2.874 |
| 1HGJ | E_LYS_326 | NZ  | F_GLU_15  | OE2 | 3.254 |
| 1HGJ | F_LYS_51  | NZ  | F_GLU_103 | OE1 | 2.791 |
| 1HGJ | F_ARG_54  | NH1 | D_GLU_97  | OE2 | 3.349 |
| 1HGJ | F_ARG_54  | NH1 | F_GLU_57  | OE1 | 2.862 |
| 1HGJ | F_ARG_54  | NH1 | F_GLU_57  | OE2 | 2.926 |
| 1HGJ | F_ARG_54  | NH2 | D_GLU_97  | OE2 | 2.771 |
| 1HGJ | F_LYS_58  | NZ  | F_GLU_61  | OE2 | 3.370 |
| 1HGJ | F_LYS_62  | NZ  | D_ASP_86  | OD1 | 2.846 |
| 1HGJ | F_LYS_62  | NZ  | D_ASP_86  | OD2 | 2.568 |
| 1HGJ | F_LYS_62  | NZ  | D_ASP_90  | OD1 | 3.467 |
| 1HGJ | F_LYS_62  | NZ  | D_ASP_90  | OD2 | 2.658 |
| 1HGJ | F_LYS_68  | NZ  | F_GLU_85  | OE1 | 3.136 |
| 1HGJ | F_LYS_68  | NZ  | F_GLU_85  | OE2 | 2.737 |
| 1HGJ | F_ARG_76  | NH1 | B_GLU_74  | OE1 | 3.383 |
| 1HGJ | F_ARG_76  | NH1 | B_GLU_74  | OE2 | 2.704 |
| 1HGJ | F_ARG_76  | NH2 | B_GLU_74  | OE1 | 2.715 |
| 1HGJ | F_ARG_76  | NH2 | B_GLU_74  | OE2 | 3.551 |
| 1HGJ | F_ARG_76  | NH2 | B_GLU_81  | OE1 | 2.654 |
| 1HGJ | F_ARG_76  | NH2 | B_GLU_81  | OE2 | 3.611 |
| 1HGJ | F_LYS_117 | NZ  | F_GLU_114 | OE1 | 3.106 |
| 1HGJ | F_LYS_117 | NZ  | F_GLU_114 | OE2 | 2.590 |
| 1HGJ | F_ARG_123 | NH1 | F_GLU_120 | OE1 | 2.625 |
| 1HGJ | F_ARG_123 | NH1 | F_GLU_120 | OE2 | 2.732 |
| 1HGJ | F_ARG_123 | NH2 | D_GLU_132 | OE1 | 3.110 |
| 1HGJ | F_ARG_124 | NH1 | F_GLU_120 | OE1 | 3.711 |
| 1HGJ | F_ARG_124 | NH2 | D_GLU_132 | OE1 | 3.125 |
| 1HGJ | F_ARG_124 | NH2 | D_GLU_132 | OE2 | 3.360 |
| 1HGJ | F_ARG_127 | NH1 | D_GLU_131 | OE1 | 2.554 |
| 1HGJ | F_LYS_143 | NZ  | F_ASP_145 | OD2 | 2.873 |
| 1HGJ | F_ARG_153 | NH1 | F_GLU_150 | OE2 | 2.597 |
| 1HGJ | F_HIS_159 | NE2 | F_ASP_160 | OD2 | 3.139 |
| 1HGJ | F_ARG_163 | NH2 | D_GLU_131 | OE1 | 2.636 |
| 1HGJ | F_ARG_163 | NH2 | D_GLU_131 | OE2 | 2.696 |
| 1HGJ | F_ARG_170 | NH1 | B_GLU_128 | OE1 | 3.311 |
| 1HGJ | F_ARG_170 | NH1 | B_GLU_128 | OE2 | 3.766 |
| 1HGJ | F_ARG_170 | NH1 | F_GLU_131 | OE2 | 2.790 |
| 1HGJ | F_ARG_170 | NH2 | F_GLU_128 | OE2 | 2.737 |
| 1HGJ | F_LYS_174 | NZ  | B_ASP_164 | OD1 | 2.859 |
| 1HGJ | F_LYS_174 | NZ  | B_ASP_164 | OD2 | 2.554 |

---

Table 94: 1HGJ-specific salt bridging networks analysis. In this table, a PDB file is specified with a four-letter PDB ID, except that the names of the PDB files corresponding to the single NMR structural model split from the NMR ensemble is specified with a four-letter PDB ID in addition to a hyphen followed by the single NMR structural model numeric ID, the residue naming scheme is **Chain ID\_residue name\_residue number**,  $\angle ADH$  represents the angle formed by acceptor (A), donor (D) and hydrogen (H) ( $\angle ADH$ ).

| PDB ID | Residue A | Atom A | Residue B | Atom B | Distance (Å) |
|--------|-----------|--------|-----------|--------|--------------|
| 1HIL   | A_LYS_28  | NZ     | B_ASP_99  | OD1    | 3.388        |
| 1HIL   | A_LYS_28  | NZ     | B_ASP_99  | OD2    | 3.371        |
| 1HIL   | A_LYS_30  | NZ     | B_ASP_99  | OD2    | 3.991        |
| 1HIL   | A_ARG_61  | NH2    | A_GLU_81  | OE2    | 3.453        |
| 1HIL   | A_ARG_61  | NH2    | A_ASP_82  | OD1    | 2.803        |
| 1HIL   | A_ARG_61  | NH2    | A_ASP_82  | OD2    | 3.572        |
| 1HIL   | A_LYS_142 | NZ     | A_GLU_105 | OE1    | 3.449        |
| 1HIL   | A_LYS_147 | NZ     | A_GLU_154 | OE1    | 3.856        |
| 1HIL   | A_LYS_147 | NZ     | A_GLU_154 | OE2    | 3.602        |
| 1HIL   | A_LYS_149 | NZ     | A_GLU_195 | OE2    | 3.175        |
| 1HIL   | A_ARG_155 | NH2    | A_GLU_185 | OE1    | 3.376        |
| 1HIL   | A_ARG_155 | NH2    | A_GLU_185 | OE2    | 2.897        |
| 1HIL   | A_LYS_169 | NZ     | A_ASP_170 | OD2    | 2.962        |
| 1HIL   | A_LYS_183 | NZ     | A_GLU_187 | OE1    | 2.919        |
| 1HIL   | A_LYS_183 | NZ     | A_GLU_187 | OE2    | 3.001        |
| 1HIL   | A_ARG_188 | NH1    | A_ASP_184 | OD1    | 2.997        |
| 1HIL   | A_ARG_188 | NH2    | A_ASP_184 | OD1    | 2.719        |
| 1HIL   | A_HIS_189 | ND1    | A_ASP_151 | OD2    | 2.887        |
| 1HIL   | A_HIS_189 | NE2    | A_GLU_185 | OE2    | 3.281        |
| 1HIL   | A_LYS_199 | NZ     | A_ASP_110 | OD1    | 3.849        |
| 1HIL   | A_LYS_199 | NZ     | A_ASP_110 | OD2    | 2.611        |
| 1HIL   | B_ARG_38  | NH1    | B_ASP_86  | OD1    | 2.872        |
| 1HIL   | B_ARG_38  | NH2    | B_GLU_46  | OE1    | 2.814        |
| 1HIL   | B_ARG_38  | NH2    | B_ASP_86  | OD1    | 3.831        |
| 1HIL   | B_ARG_44  | NH1    | B_ASP_42  | OD2    | 3.962        |
| 1HIL   | B_ARG_44  | NH2    | B_ASP_42  | OD2    | 2.795        |
| 1HIL   | B_ARG_66  | NH1    | B_ASP_86  | OD1    | 3.878        |
| 1HIL   | B_ARG_66  | NH1    | B_ASP_86  | OD2    | 2.766        |
| 1HIL   | B_ARG_66  | NH2    | B_ASP_86  | OD1    | 2.971        |
| 1HIL   | B_ARG_66  | NH2    | B_ASP_86  | OD2    | 3.323        |
| 1HIL   | B_ARG_94  | NH2    | B_GLU_96  | OE1    | 2.937        |
| 1HIL   | B_ARG_94  | NH2    | B_GLU_96  | OE2    | 3.442        |
| 1HIL   | B_ARG_95  | NH1    | A_ASP_91  | OD1    | 2.828        |
| 1HIL   | B_ARG_95  | NH1    | A_ASP_91  | OD2    | 3.804        |
| 1HIL   | B_ARG_95  | NH2    | A_ASP_91  | OD1    | 3.160        |
| 1HIL   | B_ARG_95  | NH2    | A_ASP_91  | OD2    | 3.904        |
| 1HIL   | B_HIS_172 | NE2    | A_ASP_167 | OD2    | 3.701        |
| 1HIL   | B_LYS_221 | NZ     | A_GLU_123 | OE1    | 2.980        |
| 1HIL   | B_LYS_222 | NZ     | B_GLU_226 | OE2    | 3.471        |
| 1HIL   | C_LYS_28  | NZ     | D_ASP_99  | OD1    | 3.565        |
| 1HIL   | C_LYS_28  | NZ     | D_ASP_99  | OD2    | 3.509        |
| 1HIL   | C_ARG_61  | NH2    | C_GLU_81  | OE1    | 3.959        |
| 1HIL   | C_ARG_61  | NH2    | C_GLU_81  | OE2    | 3.333        |
| 1HIL   | C_ARG_61  | NH2    | C_ASP_82  | OD1    | 2.824        |
| 1HIL   | C_ARG_61  | NH2    | C_ASP_82  | OD2    | 3.820        |
| 1HIL   | C_LYS_149 | NZ     | C_GLU_195 | OE1    | 2.867        |
| 1HIL   | C_LYS_149 | NZ     | C_GLU_195 | OE2    | 3.545        |
| 1HIL   | C_ARG_155 | NH1    | C_GLU_185 | OE2    | 3.376        |
| 1HIL   | C_LYS_183 | NZ     | C_GLU_187 | OE1    | 2.913        |
| 1HIL   | C_LYS_183 | NZ     | C_GLU_187 | OE2    | 2.922        |
| 1HIL   | C_ARG_188 | NH2    | C_ASP_184 | OD2    | 3.681        |
| 1HIL   | C_HIS_189 | ND1    | C_ASP_151 | OD2    | 2.657        |
| 1HIL   | C_LYS_199 | NZ     | C_ASP_110 | OD1    | 3.869        |
| 1HIL   | C_LYS_199 | NZ     | C_ASP_110 | OD2    | 3.718        |
| 1HIL   | D_ARG_38  | NH1    | D_GLU_85  | OE2    | 3.765        |
| 1HIL   | D_ARG_38  | NH1    | D_ASP_86  | OD1    | 2.811        |
| 1HIL   | D_ARG_38  | NH2    | D_GLU_46  | OE1    | 2.914        |

|      |           |     |           |     |       |
|------|-----------|-----|-----------|-----|-------|
| 1HIL | D_ARG_38  | NH2 | D_GLU_85  | OE1 | 3.376 |
| 1HIL | D_ARG_38  | NH2 | D_GLU_85  | OE2 | 2.939 |
| 1HIL | D_ARG_38  | NH2 | D_ASP_86  | OD1 | 3.843 |
| 1HIL | D_LYS_64  | NZ  | D_ASP_61  | OD1 | 3.347 |
| 1HIL | D_ARG_66  | NH1 | D_ASP_86  | OD2 | 2.825 |
| 1HIL | D_ARG_66  | NH2 | D_GLU_85  | OE2 | 3.393 |
| 1HIL | D_ARG_66  | NH2 | D_ASP_86  | OD1 | 3.008 |
| 1HIL | D_ARG_66  | NH2 | D_ASP_86  | OD2 | 3.234 |
| 1HIL | D_ARG_94  | NH2 | D_GLU_96  | OE1 | 3.117 |
| 1HIL | D_ARG_94  | NH2 | D_GLU_96  | OE2 | 3.597 |
| 1HIL | D_ARG_95  | NH1 | C_ASP_91  | OD1 | 2.906 |
| 1HIL | D_ARG_95  | NH1 | C_ASP_91  | OD2 | 3.993 |
| 1HIL | D_ARG_95  | NH2 | C_ASP_91  | OD1 | 3.045 |
| 1HIL | D_ARG_95  | NH2 | C_ASP_91  | OD2 | 3.822 |
| 1HIL | D_LYS_221 | NZ  | C_GLU_123 | OE1 | 2.896 |
| 1HIL | D_LYS_221 | NZ  | C_GLU_123 | OE2 | 3.091 |

Table 95: 1HIL-specific salt bridging networks analysis. In this table, a PDB file is specified with a four-letter PDB ID, except that the names of the PDB files corresponding to the single NMR structural model split from the NMR ensemble is specified with a four-letter PDB ID in addition to a hyphen followed by the single NMR structural model numeric ID, the residue naming scheme is **Chain ID\_residue name\_residue number**,  $\angle ADH$  represents the angle formed by acceptor (A), donor (D) and hydrogen (H) ( $\angle ADH$ ).

| PDB ID | Residue A | Atom A | Residue B | Atom B | Distance (Å) |
|--------|-----------|--------|-----------|--------|--------------|
| 1HIM   | H_ARG_54  | NH1    | H_ASP_60  | OD1    | 3.270        |
| 1HIM   | H_ARG_61  | NH1    | H_ASP_82  | OD1    | 2.766        |
| 1HIM   | H_ARG_61  | NH1    | H_ASP_82  | OD2    | 2.580        |
| 1HIM   | H_ARG_61  | NH2    | H_GLU_81  | OE1    | 3.629        |
| 1HIM   | H_ARG_61  | NH2    | H_GLU_81  | OE2    | 3.486        |
| 1HIM   | H_LYS_103 | NZ     | H_GLU_105 | OE1    | 2.947        |
| 1HIM   | H_LYS_103 | NZ     | H_GLU_105 | OE2    | 3.074        |
| 1HIM   | H_LYS_103 | NZ     | H_ASP_165 | OD1    | 2.840        |
| 1HIM   | H_LYS_103 | NZ     | H_ASP_165 | OD2    | 2.960        |
| 1HIM   | H_ARG_108 | NH2    | H_ASP_170 | OD1    | 3.527        |
| 1HIM   | H_LYS_142 | NZ     | H_GLU_105 | OE2    | 3.186        |
| 1HIM   | H_LYS_149 | NZ     | H_GLU_195 | OE1    | 3.565        |
| 1HIM   | H_ARG_155 | NH1    | H_GLU_185 | OE1    | 3.606        |
| 1HIM   | H_ARG_155 | NH2    | H_GLU_185 | OE1    | 3.185        |
| 1HIM   | H_LYS_183 | NZ     | H_GLU_187 | OE1    | 3.388        |
| 1HIM   | H_ARG_188 | NH1    | H_ASP_184 | OD2    | 3.229        |
| 1HIM   | H_ARG_188 | NH2    | H_ASP_184 | OD2    | 3.788        |
| 1HIM   | H_ARG_188 | NH2    | H_GLU_185 | OE2    | 3.216        |
| 1HIM   | H_HIS_189 | ND1    | H_ASP_151 | OD2    | 3.238        |
| 1HIM   | H_HIS_189 | NE2    | H_GLU_185 | OE1    | 3.139        |
| 1HIM   | H_HIS_189 | NE2    | H_GLU_185 | OE2    | 2.919        |
| 1HIM   | H_LYS_199 | NZ     | H_ASP_110 | OD1    | 3.999        |
| 1HIM   | H_LYS_199 | NZ     | H_ASP_110 | OD2    | 3.600        |
| 1HIM   | H_ARG_211 | NH2    | H_GLU_187 | OE2    | 3.728        |
| 1HIM   | L_ARG_38  | NH1    | L_GLU_46  | OE1    | 2.537        |
| 1HIM   | L_ARG_38  | NH2    | L_ASP_86  | OD1    | 2.913        |
| 1HIM   | L_ARG_44  | NH1    | L_ASP_42  | OD2    | 3.518        |
| 1HIM   | L_ARG_44  | NH2    | L_ASP_42  | OD2    | 2.772        |
| 1HIM   | L_LYS_64  | NZ     | L_ASP_61  | OD1    | 3.754        |
| 1HIM   | L_ARG_66  | NH2    | L_ASP_86  | OD1    | 3.439        |
| 1HIM   | L_ARG_66  | NH2    | L_ASP_86  | OD2    | 2.636        |
| 1HIM   | L_ARG_94  | NH2    | L_GLU_96  | OE1    | 2.855        |
| 1HIM   | L_ARG_94  | NH2    | L_GLU_96  | OE2    | 2.784        |
| 1HIM   | L_ARG_95  | NH1    | H_ASP_91  | OD1    | 3.100        |
| 1HIM   | L_ARG_95  | NH2    | H_ASP_91  | OD1    | 3.427        |
| 1HIM   | L_ARG_95  | NH2    | P_ASP_104 | OD1    | 3.909        |
| 1HIM   | L_ARG_95  | NH2    | P_ASP_104 | OD2    | 3.079        |
| 1HIM   | L_LYS_218 | NZ     | L_ASP_220 | OD1    | 2.947        |
| 1HIM   | L_LYS_218 | NZ     | L_ASP_220 | OD2    | 3.790        |
| 1HIM   | L_LYS_221 | NZ     | H_GLU_123 | OE1    | 3.486        |
| 1HIM   | L_LYS_221 | NZ     | H_GLU_123 | OE2    | 2.924        |
| 1HIM   | L_LYS_222 | NZ     | L_GLU_226 | OE1    | 3.594        |
| 1HIM   | L_LYS_222 | NZ     | L_GLU_226 | OE2    | 3.507        |
| 1HIM   | J_LYS_28  | NZ     | M_GLU_100 | OE1    | 3.991        |
| 1HIM   | J_LYS_28  | NZ     | M_GLU_100 | OE2    | 3.433        |
| 1HIM   | J_ARG_54  | NH1    | J_ASP_60  | OD1    | 3.053        |
| 1HIM   | J_ARG_61  | NH1    | J_GLU_81  | OE1    | 2.794        |
| 1HIM   | J_ARG_61  | NH1    | J_ASP_82  | OD1    | 2.566        |
| 1HIM   | J_ARG_61  | NH1    | J_ASP_82  | OD2    | 2.940        |
| 1HIM   | J_ARG_61  | NH2    | J_GLU_81  | OE1    | 2.977        |
| 1HIM   | J_ARG_61  | NH2    | J_GLU_81  | OE2    | 3.767        |
| 1HIM   | J_LYS_103 | NZ     | J_GLU_105 | OE1    | 3.363        |
| 1HIM   | J_LYS_103 | NZ     | J_GLU_105 | OE2    | 3.574        |
| 1HIM   | J_LYS_103 | NZ     | J_ASP_165 | OD1    | 2.834        |
| 1HIM   | J_LYS_103 | NZ     | J_ASP_165 | OD2    | 3.265        |
| 1HIM   | J_ARG_108 | NH1    | J_ASP_170 | OD2    | 3.737        |
| 1HIM   | J_LYS_142 | NZ     | J_GLU_105 | OE2    | 3.350        |

|      |           |     |           |     |       |
|------|-----------|-----|-----------|-----|-------|
| 1HIM | J_LYS_147 | NZ  | J_GLU_154 | OE1 | 3.824 |
| 1HIM | J_LYS_149 | NZ  | J_GLU_195 | OE1 | 2.922 |
| 1HIM | J_ARG_155 | NH1 | J_GLU_185 | OE2 | 2.780 |
| 1HIM | J_ARG_155 | NH2 | J_GLU_185 | OE2 | 2.860 |
| 1HIM | J_LYS_183 | NZ  | J_GLU_187 | OE1 | 3.132 |
| 1HIM | J_LYS_183 | NZ  | J_GLU_187 | OE2 | 3.144 |
| 1HIM | J_ARG_188 | NH1 | J_GLU_185 | OE1 | 3.001 |
| 1HIM | J_ARG_188 | NH2 | J_GLU_185 | OE1 | 3.202 |
| 1HIM | J_HIS_189 | ND1 | J_ASP_151 | OD2 | 3.228 |
| 1HIM | J_HIS_189 | NE2 | J_GLU_185 | OE1 | 3.040 |
| 1HIM | J_HIS_189 | NE2 | J_GLU_185 | OE2 | 3.204 |
| 1HIM | J_LYS_199 | NZ  | J_ASP_110 | OD1 | 2.949 |
| 1HIM | J_LYS_199 | NZ  | J_ASP_110 | OD2 | 3.017 |
| 1HIM | M_ARG_38  | NH1 | M_ASP_86  | OD1 | 2.851 |
| 1HIM | M_ARG_38  | NH2 | M_GLU_46  | OE1 | 3.834 |
| 1HIM | M_ARG_38  | NH2 | M_ASP_86  | OD1 | 3.546 |
| 1HIM | M_LYS_64  | NZ  | M_ASP_61  | OD1 | 3.375 |
| 1HIM | M_LYS_64  | NZ  | M_ASP_61  | OD2 | 3.721 |
| 1HIM | M_ARG_66  | NH1 | M_ASP_86  | OD2 | 2.851 |
| 1HIM | M_ARG_66  | NH2 | M_ASP_86  | OD1 | 3.649 |
| 1HIM | M_ARG_66  | NH2 | M_ASP_86  | OD2 | 3.020 |
| 1HIM | M_LYS_75  | NZ  | M_ASP_72  | OD2 | 3.415 |
| 1HIM | M_LYS_83  | NZ  | M_GLU_85  | OE2 | 3.803 |
| 1HIM | M_LYS_83  | NZ  | M_ASP_86  | OD1 | 2.818 |
| 1HIM | M_LYS_83  | NZ  | M_ASP_86  | OD2 | 3.385 |
| 1HIM | M_ARG_94  | NH2 | M_GLU_96  | OE1 | 2.883 |
| 1HIM | M_ARG_94  | NH2 | M_GLU_96  | OE2 | 2.984 |
| 1HIM | M_ARG_95  | NH1 | J_ASP_91  | OD1 | 2.854 |
| 1HIM | M_ARG_95  | NH2 | J_ASP_91  | OD1 | 3.712 |
| 1HIM | M_ARG_95  | NH2 | R_ASP_104 | OD1 | 2.834 |
| 1HIM | M_ARG_95  | NH2 | R_ASP_104 | OD2 | 3.540 |
| 1HIM | M_LYS_222 | NZ  | M_GLU_226 | OE2 | 2.900 |

Table 96: 1HIM-specific salt bridging networks analysis. In this table, a PDB file is specified with a four-letter PDB ID, except that the names of the PDB files corresponding to the single NMR structural model split from the NMR ensemble is specified with a four-letter PDB ID in addition to a hyphen followed by the single NMR structural model numeric ID, the residue naming scheme is **Chain ID\_residue name\_residue number**,  $\angle ADH$  represents the angle formed by acceptor (A), donor (D) and hydrogen (H) ( $\angle ADH$ ).



| PDB ID | Residue A | Atom A | Residue B | Atom B | Distance (Å) |
|--------|-----------|--------|-----------|--------|--------------|
| 1HIN   | L_LYS_28  | NZ     | H_GLU_100 | OE2    | 2.975        |
| 1HIN   | L_ARG_54  | NH1    | L_ASP_60  | OD1    | 2.976        |
| 1HIN   | L_ARG_54  | NH2    | L_ASP_60  | OD1    | 3.006        |
| 1HIN   | L_ARG_61  | NH2    | L_ASP_82  | OD1    | 3.350        |
| 1HIN   | L_LYS_103 | NZ     | L_GLU_105 | OE1    | 3.163        |
| 1HIN   | L_LYS_103 | NZ     | L_GLU_105 | OE2    | 2.963        |
| 1HIN   | L_LYS_103 | NZ     | L_ASP_165 | OD1    | 3.325        |
| 1HIN   | L_LYS_107 | NZ     | L_GLU_17  | OE1    | 3.860        |
| 1HIN   | L_LYS_147 | NZ     | L_GLU_195 | OE2    | 3.604        |
| 1HIN   | L_LYS_183 | NZ     | L_GLU_187 | OE1    | 3.063        |
| 1HIN   | L_LYS_183 | NZ     | L_GLU_187 | OE2    | 2.809        |
| 1HIN   | L_ARG_188 | NH1    | L_GLU_185 | OE1    | 3.655        |
| 1HIN   | L_HIS_189 | ND1    | L_ASP_151 | OD2    | 2.920        |
| 1HIN   | L_HIS_189 | NE2    | L_GLU_185 | OE2    | 2.966        |
| 1HIN   | H_ARG_38  | NH1    | H_ASP_86  | OD1    | 2.756        |
| 1HIN   | H_ARG_38  | NH2    | H_GLU_46  | OE2    | 3.346        |
| 1HIN   | H_ARG_38  | NH2    | H_ASP_86  | OD1    | 3.928        |
| 1HIN   | H_ARG_44  | NH1    | H_ASP_42  | OD1    | 3.927        |
| 1HIN   | H_ARG_44  | NH1    | H_ASP_42  | OD2    | 3.226        |
| 1HIN   | H_ARG_44  | NH2    | H_ASP_42  | OD1    | 3.335        |
| 1HIN   | H_ARG_66  | NH1    | H_ASP_86  | OD1    | 3.830        |
| 1HIN   | H_ARG_66  | NH1    | H_ASP_86  | OD2    | 3.068        |
| 1HIN   | H_ARG_66  | NH2    | H_ASP_86  | OD1    | 3.938        |
| 1HIN   | H_LYS_83  | NZ     | H_ASP_86  | OD1    | 3.978        |
| 1HIN   | H_ARG_94  | NH2    | H_GLU_96  | OE1    | 2.995        |
| 1HIN   | H_ARG_94  | NH2    | H_GLU_96  | OE2    | 3.965        |
| 1HIN   | H_ARG_95  | NH1    | L_ASP_91  | OD1    | 3.169        |
| 1HIN   | H_ARG_95  | NH1    | P_ASP_104 | OD1    | 3.889        |
| 1HIN   | H_ARG_95  | NH2    | L_ASP_91  | OD1    | 2.746        |

Table 97: 1HIN-specific salt bridging networks analysis. In this table, a PDB file is specified with a four-letter PDB ID, except that the names of the PDB files corresponding to the single NMR structural model split from the NMR ensemble is specified with a four-letter PDB ID in addition to a hyphen followed by the single NMR structural model numeric ID, the residue naming scheme is **Chain ID\_residue name\_residue number**,  $\angle ADH$  represents the angle formed by acceptor (A), donor (D) and hydrogen (H) ( $\angle ADH$ ).

| PDB ID | Residue A | Atom A | Residue B | Atom B | Distance (Å) |
|--------|-----------|--------|-----------|--------|--------------|
| 1I8I   | A_ARG_22  | NH2    | A_ASP_70  | OD2    | 3.152        |
| 1I8I   | A_ARG_61  | NH1    | A_GLU_81  | OE1    | 3.598        |
| 1I8I   | A_ARG_61  | NH2    | A_GLU_81  | OE1    | 2.756        |
| 1I8I   | A_ARG_61  | NH2    | A_ASP_82  | OD1    | 2.774        |
| 1I8I   | B_ARG_338 | NH1    | B_ASP_390 | OD1    | 3.395        |
| 1I8I   | B_ARG_338 | NH2    | B_GLU_346 | OE1    | 3.519        |
| 1I8I   | B_ARG_338 | NH2    | B_GLU_346 | OE2    | 3.077        |
| 1I8I   | B_LYS_343 | NZ     | A_ASP_85  | OD1    | 3.777        |
| 1I8I   | B_ARG_367 | NH1    | B_ASP_390 | OD1    | 3.777        |
| 1I8I   | B_ARG_367 | NH1    | B_ASP_390 | OD2    | 2.803        |
| 1I8I   | B_ARG_367 | NH2    | B_ASP_390 | OD1    | 2.832        |
| 1I8I   | B_ARG_367 | NH2    | B_ASP_390 | OD2    | 3.335        |
| 1I8I   | B_ARG_398 | NH1    | B_ASP_408 | OD1    | 2.704        |
| 1I8I   | B_ARG_398 | NH1    | B_ASP_408 | OD2    | 3.295        |
| 1I8I   | C_LYS_502 | NZ     | A_GLU_50  | OE1    | 3.673        |
| 1I8I   | C_LYS_502 | NZ     | A_GLU_50  | OE2    | 3.232        |

Table 98: 1I8I-specific salt bridging networks analysis. In this table, a PDB file is specified with a four-letter PDB ID, except that the names of the PDB files corresponding to the single NMR structural model split from the NMR ensemble is specified with a four-letter PDB ID in addition to a hyphen followed by the single NMR structural model numeric ID, the residue naming scheme is **Chain ID\_residue name\_residue number**,  $\angle ADH$  represents the angle formed by acceptor (A), donor (D) and hydrogen (H) ( $\angle ADH$ ).

| PDB ID | Residue A | Atom A | Residue B | Atom B | Distance (Å) |
|--------|-----------|--------|-----------|--------|--------------|
| 1I8K   | A_ARG_61  | NH1    | A_GLU_81  | OE1    | 3.901        |
| 1I8K   | A_ARG_61  | NH2    | A_GLU_81  | OE1    | 2.704        |
| 1I8K   | A_ARG_61  | NH2    | A_ASP_82  | OD1    | 2.775        |
| 1I8K   | A_ARG_61  | NH2    | A_ASP_82  | OD2    | 3.582        |
| 1I8K   | A_LYS_103 | NZ     | A_GLU_105 | OE1    | 3.849        |
| 1I8K   | A_LYS_103 | NZ     | A_GLU_105 | OE2    | 3.265        |
| 1I8K   | B_ARG_338 | NH1    | B_ASP_390 | OD1    | 2.955        |
| 1I8K   | B_ARG_338 | NH2    | B_GLU_346 | OE2    | 2.897        |
| 1I8K   | B_LYS_343 | NZ     | A_ASP_85  | OD1    | 3.688        |
| 1I8K   | B_LYS_343 | NZ     | A_ASP_85  | OD2    | 2.833        |
| 1I8K   | B_LYS_365 | NZ     | B_ASP_362 | OD1    | 3.025        |
| 1I8K   | B_ARG_367 | NH1    | B_ASP_390 | OD1    | 3.793        |
| 1I8K   | B_ARG_367 | NH1    | B_ASP_390 | OD2    | 2.806        |
| 1I8K   | B_ARG_367 | NH2    | B_ASP_390 | OD1    | 2.921        |
| 1I8K   | B_ARG_367 | NH2    | B_ASP_390 | OD2    | 3.420        |
| 1I8K   | B_ARG_398 | NH1    | B_ASP_408 | OD1    | 3.548        |
| 1I8K   | B_ARG_398 | NH1    | B_ASP_408 | OD2    | 2.958        |
| 1I8K   | C_LYS_502 | NZ     | A_GLU_50  | OE1    | 3.381        |
| 1I8K   | C_LYS_502 | NZ     | A_GLU_50  | OE2    | 3.653        |

Table 99: 1I8K-specific salt bridging networks analysis. In this table, a PDB file is specified with a four-letter PDB ID, except that the names of the PDB files corresponding to the single NMR structural model split from the NMR ensemble is specified with a four-letter PDB ID in addition to a hyphen followed by the single NMR structural model numeric ID, the residue naming scheme is **Chain ID residue name residue number**,  $\angle ADH$  represents the angle formed by acceptor (A), donor (D) and hydrogen (H) ( $\angle ADH$ ).

| PDB ID | Residue A | Atom A | Residue B | Atom B | Distance (Å) |
|--------|-----------|--------|-----------|--------|--------------|
| 1I8M   | L_ARG_61  | NH2    | L_GLU_81  | OE2    | 3.348        |
| 1I8M   | L_ARG_61  | NH2    | L_ASP_82  | OD1    | 2.791        |
| 1I8M   | L_ARG_61  | NH2    | L_ASP_82  | OD2    | 3.473        |
| 1I8M   | L_LYS_149 | NZ     | L_GLU_195 | OE1    | 2.669        |
| 1I8M   | L_ARG_155 | NH1    | L_GLU_185 | OE1    | 3.608        |
| 1I8M   | L_ARG_155 | NH1    | L_GLU_185 | OE2    | 3.044        |
| 1I8M   | L_ARG_155 | NH2    | L_GLU_185 | OE1    | 2.570        |
| 1I8M   | L_ARG_155 | NH2    | L_GLU_185 | OE2    | 3.578        |
| 1I8M   | L_ARG_188 | NH1    | L_GLU_185 | OE1    | 3.999        |
| 1I8M   | L_HIS_189 | ND1    | L_ASP_151 | OD2    | 2.965        |
| 1I8M   | L_HIS_189 | NE2    | L_GLU_185 | OE1    | 3.384        |
| 1I8M   | L_ARG_211 | NH1    | L_GLU_187 | OE1    | 3.084        |
| 1I8M   | H_LYS_62  | NZ     | H_GLU_46  | OE2    | 2.992        |
| 1I8M   | H_LYS_66  | NZ     | H_ASP_86  | OD1    | 2.668        |
| 1I8M   | H_LYS_66  | NZ     | H_ASP_86  | OD2    | 3.680        |
| 1I8M   | H_ARG_94  | NH2    | H_ASP_101 | OD1    | 3.336        |
| 1I8M   | H_ARG_94  | NH2    | H_ASP_101 | OD2    | 3.003        |
| 1I8M   | H_LYS_208 | NZ     | L_GLU_123 | OE1    | 2.918        |
| 1I8M   | A_ARG_61  | NH1    | A_GLU_81  | OE2    | 3.331        |
| 1I8M   | A_ARG_61  | NH1    | A_ASP_82  | OD1    | 2.710        |
| 1I8M   | A_ARG_61  | NH1    | A_ASP_82  | OD2    | 3.466        |
| 1I8M   | A_LYS_147 | NZ     | A_GLU_195 | OE1    | 3.288        |
| 1I8M   | A_LYS_149 | NZ     | A_GLU_195 | OE1    | 3.797        |
| 1I8M   | A_LYS_149 | NZ     | A_GLU_195 | OE2    | 2.770        |
| 1I8M   | A_ARG_155 | NH1    | A_GLU_185 | OE1    | 2.722        |
| 1I8M   | A_ARG_155 | NH2    | A_GLU_185 | OE1    | 3.688        |
| 1I8M   | A_LYS_183 | NZ     | A_GLU_187 | OE1    | 3.381        |
| 1I8M   | A_HIS_189 | ND1    | A_ASP_151 | OD2    | 2.740        |
| 1I8M   | A_LYS_199 | NZ     | A_ASP_110 | OD2    | 3.951        |
| 1I8M   | A_ARG_211 | NH1    | A_GLU_187 | OE2    | 3.834        |
| 1I8M   | B_LYS_66  | NZ     | B_ASP_86  | OD1    | 2.796        |
| 1I8M   | B_LYS_66  | NZ     | B_ASP_86  | OD2    | 3.783        |
| 1I8M   | B_ARG_94  | NH2    | B_ASP_101 | OD1    | 3.715        |
| 1I8M   | B_ARG_94  | NH2    | B_ASP_101 | OD2    | 2.888        |
| 1I8M   | B_LYS_208 | NZ     | A_GLU_123 | OE2    | 2.887        |

Table 100: 1I8M-specific salt bridging networks analysis. In this table, a PDB file is specified with a four-letter PDB ID, except that the names of the PDB files corresponding to the single NMR structural model split from the NMR ensemble is specified with a four-letter PDB ID in addition to a hyphen followed by the single NMR structural model numeric ID, the residue naming scheme is **Chain ID\_residue name\_residue number**,  $\angle ADH$  represents the angle formed by acceptor (A), donor (D) and hydrogen (H) ( $\angle ADH$ ).

| PDB ID | Residue A | Atom A | Residue B | Atom B | Distance (Å) |
|--------|-----------|--------|-----------|--------|--------------|
| 1IC4   | L_ARG_61  | NH1    | L_GLU_81  | OE1    | 2.751        |
| 1IC4   | L_ARG_61  | NH1    | L_ASP_82  | OD1    | 2.563        |
| 1IC4   | L_ARG_61  | NH1    | L_ASP_82  | OD2    | 3.173        |
| 1IC4   | L_ARG_61  | NH2    | L_GLU_79  | OE1    | 3.626        |
| 1IC4   | L_ARG_61  | NH2    | L_GLU_81  | OE1    | 3.608        |
| 1IC4   | H_ARG_38  | NH1    | H_ASP_89  | OD1    | 2.935        |
| 1IC4   | H_ARG_38  | NH2    | H_GLU_46  | OE1    | 2.745        |
| 1IC4   | H_ARG_38  | NH2    | H_ASP_89  | OD1    | 3.350        |
| 1IC4   | H_ARG_66  | NH1    | H_ASP_89  | OD2    | 3.087        |
| 1IC4   | H_ARG_66  | NH2    | H_ASP_89  | OD1    | 3.196        |
| 1IC4   | H_ARG_66  | NH2    | H_ASP_89  | OD2    | 3.495        |
| 1IC4   | H_LYS_75  | NZ     | H_ASP_72  | OD2    | 2.682        |
| 1IC4   | Y_LYS_1   | NZ     | Y_GLU_7   | OE1    | 3.619        |
| 1IC4   | Y_LYS_1   | NZ     | Y_GLU_7   | OE2    | 2.535        |
| 1IC4   | Y_LYS_13  | NZ     | Y_ASP_18  | OD2    | 3.711        |
| 1IC4   | Y_ARG_61  | NH2    | Y_ASP_48  | OD1    | 3.871        |
| 1IC4   | Y_ARG_68  | NH2    | Y_ASP_66  | OD2    | 2.848        |
| 1IC4   | Y_LYS_97  | NZ     | H_ASP_99  | OD1    | 2.657        |
| 1IC4   | Y_LYS_97  | NZ     | H_ASP_99  | OD2    | 3.938        |
| 1IC4   | Y_ARG_125 | NH1    | Y_ASP_119 | OD1    | 3.300        |
| 1IC4   | Y_ARG_125 | NH1    | Y_ASP_119 | OD2    | 3.023        |
| 1IC4   | Y_ARG_125 | NH2    | Y_ASP_119 | OD2    | 3.490        |

Table 101: 1IC4-specific salt bridging networks analysis. In this table, a PDB file is specified with a four-letter PDB ID, except that the names of the PDB files corresponding to the single NMR structural model split from the NMR ensemble is specified with a four-letter PDB ID in addition to a hyphen followed by the single NMR structural model numeric ID, the residue naming scheme is **Chain ID\_residue name\_residue number**,  $\angle ADH$  represents the angle formed by acceptor (A), donor (D) and hydrogen (H) ( $\angle ADH$ ).

| PDB ID | Residue A | Atom A | Residue B | Atom B | Distance (Å) |
|--------|-----------|--------|-----------|--------|--------------|
| 1IC5   | L_LYS_39  | NZ     | L_GLU_42  | OE1    | 3.119        |
| 1IC5   | L_ARG_61  | NH1    | L_GLU_79  | OE1    | 3.450        |
| 1IC5   | L_ARG_61  | NH1    | L_GLU_81  | OE1    | 2.953        |
| 1IC5   | L_ARG_61  | NH1    | L_ASP_82  | OD1    | 2.717        |
| 1IC5   | L_ARG_61  | NH1    | L_ASP_82  | OD2    | 3.546        |
| 1IC5   | L_ARG_61  | NH2    | L_GLU_79  | OE1    | 3.079        |
| 1IC5   | L_ARG_61  | NH2    | L_GLU_79  | OE2    | 3.755        |
| 1IC5   | L_LYS_103 | NZ     | L_GLU_105 | OE2    | 3.954        |
| 1IC5   | H_ARG_38  | NH1    | H_ASP_89  | OD1    | 2.839        |
| 1IC5   | H_ARG_38  | NH2    | H_GLU_46  | OE1    | 2.758        |
| 1IC5   | H_ARG_38  | NH2    | H_ASP_89  | OD1    | 3.693        |
| 1IC5   | H_ARG_66  | NH1    | H_ASP_89  | OD1    | 3.998        |
| 1IC5   | H_ARG_66  | NH1    | H_ASP_89  | OD2    | 3.250        |
| 1IC5   | H_ARG_66  | NH2    | H_ASP_89  | OD1    | 3.110        |
| 1IC5   | H_ARG_66  | NH2    | H_ASP_89  | OD2    | 3.644        |
| 1IC5   | H_LYS_75  | NZ     | H_ASP_72  | OD2    | 3.897        |
| 1IC5   | Y_LYS_1   | NZ     | Y_GLU_7   | OE1    | 3.768        |
| 1IC5   | Y_LYS_1   | NZ     | Y_GLU_7   | OE2    | 2.582        |
| 1IC5   | Y_ARG_61  | NH2    | Y_ASP_48  | OD1    | 3.930        |
| 1IC5   | Y_LYS_97  | NZ     | H_ASP_32  | OD1    | 2.694        |
| 1IC5   | Y_ARG_125 | NH1    | Y_ASP_119 | OD1    | 3.569        |
| 1IC5   | Y_ARG_125 | NH1    | Y_ASP_119 | OD2    | 3.500        |
| 1IC5   | Y_ARG_125 | NH2    | Y_ASP_119 | OD1    | 3.857        |
| 1IC5   | Y_ARG_125 | NH2    | Y_ASP_119 | OD2    | 2.635        |

Table 102: 1IC5-specific salt bridging networks analysis. In this table, a PDB file is specified with a four-letter PDB ID, except that the names of the PDB files corresponding to the single NMR structural model split from the NMR ensemble is specified with a four-letter PDB ID in addition to a hyphen followed by the single NMR structural model numeric ID, the residue naming scheme is **Chain ID\_residue name\_residue number**,  $\angle ADH$  represents the angle formed by acceptor (A), donor (D) and hydrogen (H) ( $\angle ADH$ ).

| PDB ID | Residue A | Atom A | Residue B | Atom B | Distance (Å) |
|--------|-----------|--------|-----------|--------|--------------|
| 1IC7   | L_ARG_45  | NH2    | L_GLU_42  | OE1    | 3.451        |
| 1IC7   | L_ARG_61  | NH1    | L_GLU_79  | OE1    | 3.604        |
| 1IC7   | L_ARG_61  | NH1    | L_GLU_81  | OE2    | 3.867        |
| 1IC7   | L_ARG_61  | NH2    | L_GLU_81  | OE2    | 2.625        |
| 1IC7   | L_ARG_61  | NH2    | L_ASP_82  | OD1    | 2.810        |
| 1IC7   | L_ARG_61  | NH2    | L_ASP_82  | OD2    | 3.484        |
| 1IC7   | L_LYS_103 | NZ     | L_GLU_105 | OE2    | 2.664        |
| 1IC7   | H_ARG_38  | NH1    | H_ASP_89  | OD1    | 2.659        |
| 1IC7   | H_ARG_38  | NH2    | H_GLU_46  | OE1    | 2.814        |
| 1IC7   | H_ARG_38  | NH2    | H_ASP_89  | OD1    | 3.507        |
| 1IC7   | H_ARG_66  | NH1    | H_ASP_89  | OD1    | 3.777        |
| 1IC7   | H_ARG_66  | NH1    | H_ASP_89  | OD2    | 2.821        |
| 1IC7   | H_ARG_66  | NH2    | H_ASP_89  | OD1    | 3.054        |
| 1IC7   | H_ARG_66  | NH2    | H_ASP_89  | OD2    | 3.478        |
| 1IC7   | Y_LYS_1   | NZ     | Y_GLU_7   | OE1    | 3.641        |
| 1IC7   | Y_LYS_1   | NZ     | Y_GLU_7   | OE2    | 2.660        |
| 1IC7   | Y_ARG_125 | NH2    | Y_ASP_119 | OD1    | 3.644        |
| 1IC7   | Y_ARG_125 | NH2    | Y_ASP_119 | OD2    | 2.585        |

Table 103: 1IC7-specific salt bridging networks analysis. In this table, a PDB file is specified with a four-letter PDB ID, except that the names of the PDB files corresponding to the single NMR structural model split from the NMR ensemble is specified with a four-letter PDB ID in addition to a hyphen followed by the single NMR structural model numeric ID, the residue naming scheme is **Chain ID\_residue name\_residue number**,  $\angle ADH$  represents the angle formed by acceptor (A), donor (D) and hydrogen (H) ( $\angle ADH$ ).

| PDB ID | Residue A | Atom A | Residue B | Atom B | Distance (Å) |
|--------|-----------|--------|-----------|--------|--------------|
| 1IFH   | L_ARG_54  | NH1    | L_ASP_60  | OD1    | 3.414        |
| 1IFH   | L_ARG_54  | NH1    | L_ASP_60  | OD2    | 3.205        |
| 1IFH   | L_ARG_61  | NH1    | L_ASP_82  | OD1    | 2.658        |
| 1IFH   | L_ARG_61  | NH1    | L_ASP_82  | OD2    | 3.079        |
| 1IFH   | L_ARG_61  | NH2    | L_GLU_81  | OE2    | 3.987        |
| 1IFH   | L_LYS_149 | NZ     | L_GLU_195 | OE1    | 3.474        |
| 1IFH   | L_LYS_149 | NZ     | L_GLU_195 | OE2    | 3.400        |
| 1IFH   | L_ARG_155 | NH1    | L_GLU_185 | OE1    | 3.273        |
| 1IFH   | L_ARG_155 | NH2    | L_GLU_185 | OE2    | 3.721        |
| 1IFH   | L_ARG_188 | NH1    | L_ASP_184 | OD1    | 3.900        |
| 1IFH   | L_ARG_188 | NH2    | L_ASP_184 | OD1    | 3.145        |
| 1IFH   | L_HIS_189 | ND1    | L_ASP_151 | OD2    | 3.236        |
| 1IFH   | L_LYS_199 | NZ     | L_ASP_110 | OD1    | 3.492        |
| 1IFH   | L_LYS_199 | NZ     | L_ASP_110 | OD2    | 3.178        |
| 1IFH   | H_ARG_38  | NH1    | H_ASP_86  | OD1    | 3.355        |
| 1IFH   | H_ARG_38  | NH2    | H_GLU_46  | OE1    | 3.340        |
| 1IFH   | H_ARG_38  | NH2    | H_ASP_86  | OD1    | 3.860        |
| 1IFH   | H_ARG_66  | NH1    | H_ASP_86  | OD1    | 3.538        |
| 1IFH   | H_ARG_66  | NH2    | H_ASP_86  | OD1    | 3.023        |
| 1IFH   | H_ARG_66  | NH2    | H_ASP_86  | OD2    | 2.605        |
| 1IFH   | H_ARG_94  | NH2    | H_GLU_96  | OE1    | 2.733        |
| 1IFH   | H_ARG_95  | NH1    | L_ASP_91  | OD1    | 2.782        |
| 1IFH   | H_ARG_95  | NH2    | P_ASP_104 | OD1    | 2.974        |
| 1IFH   | H_ARG_95  | NH2    | P_ASP_104 | OD2    | 2.813        |
| 1IFH   | H_LYS_221 | NZ     | L_GLU_123 | OE1    | 3.267        |
| 1IFH   | H_LYS_221 | NZ     | L_GLU_123 | OE2    | 2.926        |
| 1IFH   | H_LYS_222 | NZ     | H_GLU_226 | OE2    | 3.617        |

Table 104: 1IFH-specific salt bridging networks analysis. In this table, a PDB file is specified with a four-letter PDB ID, except that the names of the PDB files corresponding to the single NMR structural model split from the NMR ensemble is specified with a four-letter PDB ID in addition to a hyphen followed by the single NMR structural model numeric ID, the residue naming scheme is **Chain ID\_residue name\_residue number**,  $\angle ADH$  represents the angle formed by acceptor (A), donor (D) and hydrogen (H) ( $\angle ADH$ ).



| PDB ID | Residue A | Atom A | Residue B | Atom B | Distance (Å) |
|--------|-----------|--------|-----------|--------|--------------|
| 1IGF   | L_LYS_50  | NZ     | H_ASP_98  | OD2    | 3.036        |
| 1IGF   | L_ARG_61  | NH1    | L_GLU_79  | OE1    | 3.608        |
| 1IGF   | L_ARG_61  | NH1    | L_GLU_79  | OE2    | 3.209        |
| 1IGF   | L_ARG_61  | NH2    | L_ASP_82  | OD1    | 2.804        |
| 1IGF   | L_ARG_61  | NH2    | L_ASP_82  | OD2    | 2.709        |
| 1IGF   | L_LYS_142 | NZ     | L_ASP_143 | OD1    | 3.847        |
| 1IGF   | L_LYS_142 | NZ     | L_ASP_143 | OD2    | 3.953        |
| 1IGF   | L_LYS_149 | NZ     | L_GLU_195 | OE1    | 3.005        |
| 1IGF   | L_HIS_189 | ND1    | L_GLU_185 | OE1    | 3.423        |
| 1IGF   | L_HIS_189 | ND1    | L_GLU_185 | OE2    | 3.814        |
| 1IGF   | L_HIS_189 | NE2    | L_GLU_154 | OE1    | 3.930        |
| 1IGF   | L_HIS_189 | NE2    | L_GLU_154 | OE2    | 2.963        |
| 1IGF   | L_HIS_189 | NE2    | L_GLU_185 | OE1    | 3.959        |
| 1IGF   | L_LYS_199 | NZ     | L_ASP_110 | OD1    | 2.851        |
| 1IGF   | L_LYS_199 | NZ     | L_ASP_110 | OD2    | 3.161        |
| 1IGF   | H_ARG_38  | NH1    | H_GLU_46  | OE1    | 2.875        |
| 1IGF   | H_ARG_38  | NH1    | H_GLU_46  | OE2    | 3.277        |
| 1IGF   | H_ARG_38  | NH2    | H_ASP_86  | OD1    | 2.708        |
| 1IGF   | H_LYS_64  | NZ     | H_ASP_61  | OD1    | 3.360        |
| 1IGF   | H_ARG_66  | NH1    | H_ASP_86  | OD1    | 3.532        |
| 1IGF   | H_ARG_66  | NH1    | H_ASP_86  | OD2    | 2.901        |
| 1IGF   | H_ARG_66  | NH2    | H_ASP_86  | OD1    | 3.011        |
| 1IGF   | H_ARG_66  | NH2    | H_ASP_86  | OD2    | 3.582        |
| 1IGF   | H_ARG_83  | NH2    | H_GLU_85  | OE2    | 3.398        |
| 1IGF   | H_ARG_94  | NH1    | H_ASP_101 | OD1    | 2.803        |
| 1IGF   | H_ARG_94  | NH1    | H_ASP_101 | OD2    | 2.950        |
| 1IGF   | H_LYS_221 | NZ     | L_GLU_123 | OE1    | 3.549        |
| 1IGF   | M_ARG_61  | NH1    | M_ASP_82  | OD1    | 3.656        |
| 1IGF   | M_ARG_61  | NH2    | M_GLU_79  | OE1    | 3.684        |
| 1IGF   | M_ARG_61  | NH2    | M_GLU_79  | OE2    | 3.861        |
| 1IGF   | M_ARG_61  | NH2    | M_ASP_82  | OD1    | 3.256        |
| 1IGF   | M_ARG_61  | NH2    | M_ASP_82  | OD2    | 2.603        |
| 1IGF   | M_LYS_149 | NZ     | M_GLU_195 | OE1    | 3.495        |
| 1IGF   | M_LYS_183 | NZ     | M_GLU_187 | OE2    | 2.898        |
| 1IGF   | M_LYS_199 | NZ     | M_ASP_110 | OD2    | 3.163        |
| 1IGF   | J_ARG_38  | NH1    | J_ASP_86  | OD1    | 3.058        |
| 1IGF   | J_ARG_38  | NH2    | J_GLU_46  | OE1    | 2.898        |
| 1IGF   | J_ARG_38  | NH2    | J_GLU_85  | OE2    | 3.952        |
| 1IGF   | J_LYS_64  | NZ     | J_ASP_61  | OD1    | 3.146        |
| 1IGF   | J_LYS_64  | NZ     | J_ASP_61  | OD2    | 3.948        |
| 1IGF   | J_ARG_66  | NH1    | J_GLU_85  | OE2    | 3.586        |
| 1IGF   | J_ARG_66  | NH1    | J_ASP_86  | OD1    | 3.108        |
| 1IGF   | J_ARG_66  | NH1    | J_ASP_86  | OD2    | 3.486        |
| 1IGF   | J_ARG_66  | NH2    | J_ASP_86  | OD1    | 3.509        |
| 1IGF   | J_ARG_66  | NH2    | J_ASP_86  | OD2    | 2.722        |
| 1IGF   | J_ARG_83  | NH1    | J_GLU_85  | OE1    | 3.819        |
| 1IGF   | J_ARG_83  | NH2    | J_GLU_85  | OE1    | 3.702        |
| 1IGF   | J_ARG_83  | NH2    | J_GLU_85  | OE2    | 3.508        |
| 1IGF   | J_ARG_94  | NH2    | J_ASP_101 | OD1    | 2.994        |
| 1IGF   | J_ARG_94  | NH2    | J_ASP_101 | OD2    | 2.766        |
| 1IGF   | J_LYS_218 | NZ     | J_ASP_220 | OD1    | 3.151        |
| 1IGF   | J_LYS_221 | NZ     | M_GLU_123 | OE1    | 3.800        |
| 1IGF   | J_LYS_221 | NZ     | M_GLU_123 | OE2    | 3.750        |

---

Table 105: 1IGF-specific salt bridging networks analysis. In this table, a PDB file is specified with a four-letter PDB ID, except that the names of the PDB files corresponding to the single NMR structural model split from the NMR ensemble is specified with a four-letter PDB ID in addition to a hyphen followed by the single NMR structural model numeric ID, the residue naming scheme is **Chain ID\_residue name\_residue number**,  $\angle ADH$  represents the angle formed by acceptor (A), donor (D) and hydrogen (H) ( $\angle ADH$ ).

| PDB ID | Residue A | Atom A | Residue B | Atom B | Distance (Å) |
|--------|-----------|--------|-----------|--------|--------------|
| 1IND   | L_LYS_41  | NZ     | L_GLU_83  | OE1    | 3.721        |
| 1IND   | L_ARG_63  | NH2    | L_GLU_83  | OE2    | 3.365        |
| 1IND   | L_ARG_63  | NH2    | L_ASP_84  | OD1    | 2.728        |
| 1IND   | L_ARG_63  | NH2    | L_ASP_84  | OD2    | 3.765        |
| 1IND   | L_LYS_72  | NZ     | L_ASP_71  | OD1    | 3.764        |
| 1IND   | L_LYS_113 | NZ     | L_GLU_201 | OE1    | 3.425        |
| 1IND   | L_ARG_186 | NH2    | L_GLU_189 | OE1    | 2.887        |
| 1IND   | L_ARG_186 | NH2    | L_GLU_189 | OE2    | 2.679        |
| 1IND   | L_HIS_191 | ND1    | L_ASP_154 | OD2    | 3.038        |
| 1IND   | H_ARG_38  | NH1    | H_GLU_46  | OE1    | 3.013        |
| 1IND   | H_ARG_38  | NH2    | H_ASP_90  | OD1    | 2.950        |
| 1IND   | H_ARG_67  | NH1    | H_ASP_90  | OD1    | 3.223        |
| 1IND   | H_ARG_67  | NH2    | H_ASP_90  | OD1    | 3.035        |
| 1IND   | H_ARG_67  | NH2    | H_ASP_90  | OD2    | 2.402        |
| 1IND   | H_ARG_87  | NH2    | H_GLU_89  | OE1    | 2.860        |
| 1IND   | H_HIS_106 | ND1    | H_GLU_6   | OE1    | 3.067        |
| 1IND   | H_LYS_143 | NZ     | L_GLU_127 | OE2    | 2.765        |
| 1IND   | H_HIS_164 | NE2    | L_ASP_141 | OD1    | 3.891        |

Table 106: 1IND-specific salt bridging networks analysis. In this table, a PDB file is specified with a four-letter PDB ID, except that the names of the PDB files corresponding to the single NMR structural model split from the NMR ensemble is specified with a four-letter PDB ID in addition to a hyphen followed by the single NMR structural model numeric ID, the residue naming scheme is **Chain ID\_residue name\_residue number**,  $\angle ADH$  represents the angle formed by acceptor (A), donor (D) and hydrogen (H) ( $\angle ADH$ ).

| PDB ID | Residue A | Atom A | Residue B | Atom B | Distance (Å) |
|--------|-----------|--------|-----------|--------|--------------|
| 1INE   | L_ARG_63  | NH1    | L_ASP_84  | OD1    | 3.522        |
| 1INE   | L_ARG_63  | NH1    | L_ASP_84  | OD2    | 3.841        |
| 1INE   | L_LYS_113 | NZ     | L_GLU_201 | OE1    | 3.453        |
| 1INE   | L_LYS_152 | NZ     | L_GLU_206 | OE1    | 3.945        |
| 1INE   | L_ARG_186 | NH2    | L_GLU_189 | OE1    | 3.738        |
| 1INE   | L_ARG_186 | NH2    | L_GLU_189 | OE2    | 2.847        |
| 1INE   | L_HIS_191 | ND1    | L_ASP_154 | OD2    | 2.790        |
| 1INE   | H_ARG_38  | NH1    | H_GLU_46  | OE1    | 3.495        |
| 1INE   | H_ARG_38  | NH1    | H_GLU_46  | OE2    | 3.232        |
| 1INE   | H_ARG_38  | NH2    | H_ASP_90  | OD1    | 2.602        |
| 1INE   | H_ARG_67  | NH2    | H_ASP_90  | OD1    | 3.249        |
| 1INE   | H_ARG_67  | NH2    | H_ASP_90  | OD2    | 2.823        |
| 1INE   | H_ARG_87  | NH2    | H_GLU_89  | OE1    | 2.822        |
| 1INE   | H_LYS_143 | NZ     | L_GLU_127 | OE2    | 2.920        |
| 1INE   | H_HIS_164 | NE2    | L_ASP_141 | OD2    | 3.817        |

Table 107: 1INE-specific salt bridging networks analysis. In this table, a PDB file is specified with a four-letter PDB ID, except that the names of the PDB files corresponding to the single NMR structural model split from the NMR ensemble is specified with a four-letter PDB ID in addition to a hyphen followed by the single NMR structural model numeric ID, the residue naming scheme is **Chain ID\_residue name\_residue number**,  $\angle ADH$  represents the angle formed by acceptor (A), donor (D) and hydrogen (H) ( $\angle ADH$ ).

| PDB ID | Residue A | Atom A | Residue B | Atom B | Distance (Å) |
|--------|-----------|--------|-----------|--------|--------------|
| 1IQW   | L_LYS_24  | NZ     | L_ASP_74  | OD1    | 3.077        |
| 1IQW   | L_LYS_24  | NZ     | L_ASP_74  | OD2    | 3.598        |
| 1IQW   | L_ARG_65  | NH1    | L_GLU_83  | OE2    | 3.811        |
| 1IQW   | L_ARG_65  | NH1    | L_GLU_85  | OE2    | 3.948        |
| 1IQW   | L_ARG_65  | NH2    | L_GLU_85  | OE2    | 2.881        |
| 1IQW   | L_ARG_65  | NH2    | L_ASP_86  | OD1    | 2.853        |
| 1IQW   | L_ARG_65  | NH2    | L_ASP_86  | OD2    | 3.630        |
| 1IQW   | L_ARG_100 | NH1    | L_ASP_98  | OD2    | 3.926        |
| 1IQW   | L_ARG_100 | NH2    | L_ASP_98  | OD2    | 3.900        |
| 1IQW   | L_ARG_100 | NH2    | H_GLU_50  | OE1    | 2.572        |
| 1IQW   | L_ARG_100 | NH2    | H_GLU_50  | OE2    | 2.799        |
| 1IQW   | L_ARG_112 | NH1    | L_ASP_174 | OD1    | 3.939        |
| 1IQW   | L_LYS_146 | NZ     | L_GLU_109 | OE1    | 3.307        |
| 1IQW   | L_LYS_151 | NZ     | L_GLU_158 | OE1    | 3.903        |
| 1IQW   | L_LYS_151 | NZ     | L_GLU_158 | OE2    | 3.426        |
| 1IQW   | L_LYS_153 | NZ     | L_GLU_199 | OE1    | 2.679        |
| 1IQW   | L_LYS_153 | NZ     | L_GLU_199 | OE2    | 3.687        |
| 1IQW   | L_ARG_159 | NH1    | L_GLU_189 | OE1    | 2.786        |
| 1IQW   | L_ARG_159 | NH2    | L_GLU_189 | OE1    | 3.653        |
| 1IQW   | L_LYS_187 | NZ     | L_GLU_191 | OE1    | 3.905        |
| 1IQW   | L_HIS_193 | ND1    | L_ASP_155 | OD2    | 3.111        |
| 1IQW   | L_LYS_203 | NZ     | L_ASP_114 | OD1    | 2.895        |
| 1IQW   | L_LYS_203 | NZ     | L_ASP_114 | OD2    | 3.727        |
| 1IQW   | H_LYS_67  | NZ     | H_ASP_90  | OD1    | 3.551        |
| 1IQW   | H_ARG_98  | NH2    | H_ASP_109 | OD1    | 2.686        |
| 1IQW   | H_ARG_98  | NH2    | H_ASP_109 | OD2    | 3.835        |
| 1IQW   | H_ARG_100 | NH1    | H_ASP_109 | OD1    | 3.614        |
| 1IQW   | H_HIS_172 | NE2    | L_ASP_171 | OD1    | 3.594        |

Table 108: 1IQW-specific salt bridging networks analysis. In this table, a PDB file is specified with a four-letter PDB ID, except that the names of the PDB files corresponding to the single NMR structural model split from the NMR ensemble is specified with a four-letter PDB ID in addition to a hyphen followed by the single NMR structural model numeric ID, the residue naming scheme is **Chain ID\_residue name\_residue number**,  $\angle ADH$  represents the angle formed by acceptor (A), donor (D) and hydrogen (H) ( $\angle ADH$ ).

| PDB ID | Residue A | Atom A | Residue B | Atom B | Distance (Å) |
|--------|-----------|--------|-----------|--------|--------------|
| 1IT9   | L_ARG_65  | NH1    | L_GLU_85  | OE1    | 3.637        |
| 1IT9   | L_ARG_65  | NH2    | L_GLU_85  | OE1    | 2.628        |
| 1IT9   | L_ARG_65  | NH2    | L_ASP_86  | OD1    | 2.793        |
| 1IT9   | L_ARG_65  | NH2    | L_ASP_86  | OD2    | 3.255        |
| 1IT9   | L_ARG_100 | NH1    | L_ASP_98  | OD2    | 3.522        |
| 1IT9   | L_ARG_100 | NH2    | L_ASP_98  | OD2    | 3.953        |
| 1IT9   | L_ARG_100 | NH2    | H_GLU_50  | OE2    | 3.105        |
| 1IT9   | L_LYS_153 | NZ     | L_GLU_199 | OE1    | 3.686        |
| 1IT9   | L_LYS_187 | NZ     | L_GLU_191 | OE2    | 3.697        |
| 1IT9   | L_LYS_192 | NZ     | L_ASP_189 | OD1    | 3.604        |
| 1IT9   | H_LYS_63  | NZ     | H_GLU_46  | OE1    | 3.197        |
| 1IT9   | H_LYS_67  | NZ     | H_ASP_90  | OD1    | 3.421        |
| 1IT9   | H_LYS_67  | NZ     | H_ASP_90  | OD2    | 2.822        |
| 1IT9   | H_ARG_98  | NH1    | H_ASP_109 | OD1    | 3.442        |
| 1IT9   | H_ARG_98  | NH1    | H_ASP_109 | OD2    | 2.634        |
| 1IT9   | H_LYS_217 | NZ     | L_GLU_127 | OE1    | 3.545        |
| 1IT9   | H_LYS_217 | NZ     | L_GLU_127 | OE2    | 3.302        |

Table 109: 1IT9-specific salt bridging networks analysis. In this table, a PDB file is specified with a four-letter PDB ID, except that the names of the PDB files corresponding to the single NMR structural model split from the NMR ensemble is specified with a four-letter PDB ID in addition to a hyphen followed by the single NMR structural model numeric ID, the residue naming scheme is **Chain ID\_residue name\_residue number**,  $\angle ADH$  represents the angle formed by acceptor (A), donor (D) and hydrogen (H) ( $\angle ADH$ ).

| PDB ID | Residue A | Atom A | Residue B | Atom B | Distance (Å) |
|--------|-----------|--------|-----------|--------|--------------|
| 1J05   | L_ARG_18  | NH1    | L_ASP_76  | OD2    | 2.833        |
| 1J05   | L_LYS_103 | NZ     | L_GLU_105 | OE2    | 3.967        |
| 1J05   | H_ARG_40  | NH1    | H_GLU_85  | OE1    | 3.148        |
| 1J05   | H_ARG_40  | NH2    | H_GLU_85  | OE1    | 2.682        |
| 1J05   | H_LYS_58  | NZ     | L_ASP_94  | OD2    | 2.663        |
| 1J05   | H_LYS_62  | NZ     | H_GLU_46  | OE2    | 2.498        |
| 1J05   | H_LYS_66  | NZ     | H_ASP_86  | OD1    | 3.951        |
| 1J05   | H_LYS_66  | NZ     | H_ASP_86  | OD2    | 2.776        |
| 1J05   | A_ARG_18  | NH2    | A_ASP_76  | OD2    | 3.093        |
| 1J05   | A_ARG_61  | NH2    | A_ASP_81  | OD1    | 3.469        |
| 1J05   | A_ARG_61  | NH2    | A_ASP_82  | OD1    | 2.736        |
| 1J05   | A_ARG_61  | NH2    | A_ASP_82  | OD2    | 3.685        |
| 1J05   | B_LYS_58  | NZ     | A_ASP_94  | OD2    | 2.870        |
| 1J05   | B_LYS_62  | NZ     | B_GLU_46  | OE1    | 3.609        |
| 1J05   | B_LYS_66  | NZ     | B_ASP_86  | OD1    | 3.619        |
| 1J05   | B_LYS_66  | NZ     | B_ASP_86  | OD2    | 2.721        |

Table 110: 1J05-specific salt bridging networks analysis. In this table, a PDB file is specified with a four-letter PDB ID, except that the names of the PDB files corresponding to the single NMR structural model split from the NMR ensemble is specified with a four-letter PDB ID in addition to a hyphen followed by the single NMR structural model numeric ID, the residue naming scheme is **Chain ID\_residue name\_residue number**,  $\angle ADH$  represents the angle formed by acceptor (A), donor (D) and hydrogen (H) ( $\angle ADH$ ).

| PDB ID | Residue A | Atom A | Residue B | Atom B | Distance (Å) |
|--------|-----------|--------|-----------|--------|--------------|
| 1J1O   | L_ARG_61  | NH2    | L_ASP_82  | OD1    | 2.910        |
| 1J1O   | L_ARG_61  | NH2    | L_ASP_82  | OD2    | 3.568        |
| 1J1O   | L_LYS_103 | NZ     | L_GLU_105 | OE2    | 3.101        |
| 1J1O   | H_ARG_38  | NH1    | H_ASP_89  | OD1    | 2.830        |
| 1J1O   | H_ARG_38  | NH2    | H_GLU_46  | OE1    | 2.878        |
| 1J1O   | H_ARG_38  | NH2    | H_ASP_89  | OD1    | 3.468        |
| 1J1O   | H_ARG_66  | NH1    | H_ASP_89  | OD1    | 3.734        |
| 1J1O   | H_ARG_66  | NH1    | H_ASP_89  | OD2    | 3.001        |
| 1J1O   | H_ARG_66  | NH2    | H_ASP_89  | OD1    | 3.010        |
| 1J1O   | H_ARG_66  | NH2    | H_ASP_89  | OD2    | 3.624        |
| 1J1O   | H_LYS_75  | NZ     | H_ASP_72  | OD1    | 3.670        |
| 1J1O   | H_LYS_75  | NZ     | H_ASP_72  | OD2    | 2.565        |
| 1J1O   | Y_LYS_1   | NZ     | Y_GLU_7   | OE2    | 2.858        |
| 1J1O   | Y_LYS_13  | NZ     | Y_ASP_18  | OD1    | 3.427        |
| 1J1O   | Y_LYS_13  | NZ     | Y_ASP_18  | OD2    | 3.311        |
| 1J1O   | Y_ARG_61  | NH1    | Y_ASP_48  | OD2    | 2.936        |
| 1J1O   | Y_ARG_61  | NH2    | Y_ASP_48  | OD2    | 3.586        |
| 1J1O   | Y_ARG_68  | NH2    | Y_ASP_66  | OD2    | 3.730        |
| 1J1O   | Y_LYS_97  | NZ     | H_ASP_32  | OD1    | 2.636        |
| 1J1O   | Y_LYS_97  | NZ     | H_ASP_32  | OD2    | 3.985        |
| 1J1O   | Y_LYS_97  | NZ     | H_ASP_99  | OD1    | 3.590        |
| 1J1O   | Y_LYS_97  | NZ     | H_ASP_99  | OD2    | 2.896        |
| 1J1O   | Y_ARG_125 | NH1    | Y_ASP_119 | OD2    | 3.446        |
| 1J1O   | Y_ARG_125 | NH2    | Y_ASP_119 | OD1    | 3.689        |
| 1J1O   | Y_ARG_125 | NH2    | Y_ASP_119 | OD2    | 3.547        |

Table 111: 1J1O-specific salt bridging networks analysis. In this table, a PDB file is specified with a four-letter PDB ID, except that the names of the PDB files corresponding to the single NMR structural model split from the NMR ensemble is specified with a four-letter PDB ID in addition to a hyphen followed by the single NMR structural model numeric ID, the residue naming scheme is **Chain ID\_residue name\_residue number**,  $\angle ADH$  represents the angle formed by acceptor (A), donor (D) and hydrogen (H) ( $\angle ADH$ ).



| PDB ID | Residue A | Atom A | Residue B | Atom B | Distance (Å) |
|--------|-----------|--------|-----------|--------|--------------|
| 1J1P   | L_ARG_61  | NH2    | L_ASP_82  | OD1    | 2.811        |
| 1J1P   | L_ARG_61  | NH2    | L_ASP_82  | OD2    | 3.464        |
| 1J1P   | L_LYS_103 | NZ     | L_GLU_105 | OE2    | 2.960        |
| 1J1P   | H_ARG_38  | NH1    | H_ASP_89  | OD1    | 2.854        |
| 1J1P   | H_ARG_38  | NH2    | H_GLU_46  | OE1    | 2.924        |
| 1J1P   | H_ARG_38  | NH2    | H_ASP_89  | OD1    | 3.457        |
| 1J1P   | H_ARG_66  | NH1    | H_ASP_89  | OD1    | 3.754        |
| 1J1P   | H_ARG_66  | NH1    | H_ASP_89  | OD2    | 3.009        |
| 1J1P   | H_ARG_66  | NH2    | H_ASP_89  | OD1    | 2.987        |
| 1J1P   | H_ARG_66  | NH2    | H_ASP_89  | OD2    | 3.600        |
| 1J1P   | H_LYS_75  | NZ     | H_ASP_72  | OD1    | 3.943        |
| 1J1P   | H_LYS_75  | NZ     | H_ASP_72  | OD2    | 2.743        |
| 1J1P   | Y_LYS_1   | NZ     | Y_GLU_7   | OE2    | 2.945        |
| 1J1P   | Y_ARG_61  | NH1    | Y_ASP_48  | OD1    | 3.659        |
| 1J1P   | Y_ARG_61  | NH1    | Y_ASP_48  | OD2    | 2.763        |
| 1J1P   | Y_ARG_61  | NH2    | Y_ASP_48  | OD2    | 3.923        |
| 1J1P   | Y_ARG_68  | NH2    | Y_ASP_66  | OD2    | 3.805        |
| 1J1P   | Y_LYS_97  | NZ     | H_ASP_32  | OD1    | 2.700        |
| 1J1P   | Y_LYS_97  | NZ     | H_ASP_99  | OD1    | 3.721        |
| 1J1P   | Y_LYS_97  | NZ     | H_ASP_99  | OD2    | 2.595        |
| 1J1P   | Y_ARG_125 | NH1    | Y_ASP_119 | OD1    | 3.879        |
| 1J1P   | Y_ARG_125 | NH1    | Y_ASP_119 | OD2    | 2.802        |
| 1J1P   | Y_ARG_125 | NH2    | Y_ASP_119 | OD1    | 3.068        |
| 1J1P   | Y_ARG_125 | NH2    | Y_ASP_119 | OD2    | 3.059        |

Table 112: 1J1P-specific salt bridging networks analysis. In this table, a PDB file is specified with a four-letter PDB ID, except that the names of the PDB files corresponding to the single NMR structural model split from the NMR ensemble is specified with a four-letter PDB ID in addition to a hyphen followed by the single NMR structural model numeric ID, the residue naming scheme is **Chain ID\_residue name\_residue number**,  $\angle ADH$  represents the angle formed by acceptor (A), donor (D) and hydrogen (H) ( $\angle ADH$ ).

| PDB ID | Residue A | Atom A | Residue B | Atom B | Distance (Å) |
|--------|-----------|--------|-----------|--------|--------------|
| 1J1X   | L_ARG_61  | NH1    | L_GLU_81  | OE2    | 3.955        |
| 1J1X   | L_ARG_61  | NH2    | L_GLU_81  | OE2    | 2.869        |
| 1J1X   | L_ARG_61  | NH2    | L_ASP_82  | OD1    | 2.807        |
| 1J1X   | L_ARG_61  | NH2    | L_ASP_82  | OD2    | 3.443        |
| 1J1X   | L_LYS_103 | NZ     | L_GLU_105 | OE2    | 3.635        |
| 1J1X   | H_ARG_38  | NH1    | H_ASP_89  | OD1    | 2.839        |
| 1J1X   | H_ARG_38  | NH2    | H_GLU_46  | OE1    | 2.984        |
| 1J1X   | H_ARG_38  | NH2    | H_ASP_89  | OD1    | 3.410        |
| 1J1X   | H_ARG_66  | NH1    | H_ASP_89  | OD1    | 3.723        |
| 1J1X   | H_ARG_66  | NH1    | H_ASP_89  | OD2    | 3.043        |
| 1J1X   | H_ARG_66  | NH2    | H_ASP_89  | OD1    | 3.064        |
| 1J1X   | H_ARG_66  | NH2    | H_ASP_89  | OD2    | 3.686        |
| 1J1X   | Y_LYS_1   | NZ     | Y_GLU_7   | OE2    | 2.973        |
| 1J1X   | Y_ARG_61  | NH1    | Y_ASP_48  | OD2    | 2.934        |
| 1J1X   | Y_ARG_68  | NH2    | Y_ASP_66  | OD2    | 3.707        |
| 1J1X   | Y_LYS_97  | NZ     | H_ASP_32  | OD1    | 2.655        |
| 1J1X   | Y_LYS_97  | NZ     | H_ASP_32  | OD2    | 3.935        |
| 1J1X   | Y_LYS_97  | NZ     | H_ASP_99  | OD1    | 3.479        |
| 1J1X   | Y_LYS_97  | NZ     | H_ASP_99  | OD2    | 2.956        |
| 1J1X   | Y_ARG_125 | NH1    | Y_ASP_119 | OD1    | 3.927        |
| 1J1X   | Y_ARG_125 | NH1    | Y_ASP_119 | OD2    | 3.825        |
| 1J1X   | Y_ARG_125 | NH2    | Y_ASP_119 | OD2    | 2.717        |

Table 113: 1J1X-specific salt bridging networks analysis. In this table, a PDB file is specified with a four-letter PDB ID, except that the names of the PDB files corresponding to the single NMR structural model split from the NMR ensemble is specified with a four-letter PDB ID in addition to a hyphen followed by the single NMR structural model numeric ID, the residue naming scheme is **Chain ID\_residue name\_residue number**,  $\angle ADH$  represents the angle formed by acceptor (A), donor (D) and hydrogen (H) ( $\angle ADH$ ).

| PDB ID | Residue A | Atom A | Residue B | Atom B | Distance (Å) |
|--------|-----------|--------|-----------|--------|--------------|
| 1JFQ   | L_ARG_61  | NH2    | L_GLU_81  | OE2    | 3.034        |
| 1JFQ   | L_ARG_61  | NH2    | L_ASP_82  | OD1    | 2.626        |
| 1JFQ   | L_ARG_61  | NH2    | L_ASP_82  | OD2    | 3.469        |
| 1JFQ   | L_LYS_147 | NZ     | L_GLU_154 | OE2    | 3.134        |
| 1JFQ   | L_LYS_149 | NZ     | L_GLU_195 | OE1    | 3.635        |
| 1JFQ   | L_LYS_149 | NZ     | L_GLU_195 | OE2    | 2.808        |
| 1JFQ   | L_LYS_169 | NZ     | L_ASP_167 | OD1    | 3.763        |
| 1JFQ   | L_LYS_169 | NZ     | L_ASP_167 | OD2    | 3.427        |
| 1JFQ   | L_LYS_183 | NZ     | L_GLU_187 | OE2    | 3.965        |
| 1JFQ   | L_ARG_188 | NH1    | L_ASP_184 | OD1    | 2.482        |
| 1JFQ   | L_ARG_188 | NH1    | L_ASP_184 | OD2    | 3.747        |
| 1JFQ   | L_ARG_188 | NH2    | L_GLU_185 | OE2    | 3.747        |
| 1JFQ   | L_HIS_189 | NE2    | L_GLU_185 | OE2    | 3.915        |
| 1JFQ   | L_LYS_199 | NZ     | L_ASP_110 | OD1    | 3.726        |
| 1JFQ   | L_LYS_199 | NZ     | L_ASP_110 | OD2    | 2.782        |
| 1JFQ   | H_LYS_363 | NZ     | H_GLU_346 | OE1    | 2.893        |
| 1JFQ   | H_LYS_367 | NZ     | H_ASP_390 | OD2    | 3.164        |
| 1JFQ   | H_ARG_398 | NH2    | H_ASP_409 | OD1    | 3.741        |
| 1JFQ   | H_ARG_398 | NH2    | H_ASP_409 | OD2    | 2.842        |
| 1JFQ   | H_LYS_516 | NZ     | L_GLU_123 | OE1    | 3.003        |
| 1JFQ   | H_LYS_516 | NZ     | L_GLU_123 | OE2    | 3.095        |

Table 114: 1JFQ-specific salt bridging networks analysis. In this table, a PDB file is specified with a four-letter PDB ID, except that the names of the PDB files corresponding to the single NMR structural model split from the NMR ensemble is specified with a four-letter PDB ID in addition to a hyphen followed by the single NMR structural model numeric ID, the residue naming scheme is **Chain ID\_residue name\_residue number**,  $\angle ADH$  represents the angle formed by acceptor (A), donor (D) and hydrogen (H) ( $\angle ADH$ ).

| PDB ID | Residue A | Atom A | Residue B | Atom B | Distance (Å) |
|--------|-----------|--------|-----------|--------|--------------|
| 1JHL   | L_ARG_61  | NH2    | L_ASP_82  | OD2    | 2.857        |
| 1JHL   | L_LYS_107 | NZ     | L_GLU_17  | OE1    | 3.758        |
| 1JHL   | H_LYS_63  | NZ     | H_GLU_46  | OE1    | 2.911        |
| 1JHL   | H_LYS_63  | NZ     | H_GLU_46  | OE2    | 3.457        |
| 1JHL   | H_ARG_98  | NH1    | H_ASP_106 | OD1    | 3.193        |
| 1JHL   | H_ARG_98  | NH1    | H_ASP_106 | OD2    | 2.879        |
| 1JHL   | A_LYS_1   | NZ     | A_GLU_7   | OE2    | 2.890        |
| 1JHL   | A_ARG_112 | NH1    | H_ASP_55  | OD1    | 3.828        |
| 1JHL   | A_ARG_112 | NH1    | H_ASP_55  | OD2    | 3.112        |
| 1JHL   | A_LYS_116 | NZ     | H_ASP_99  | OD1    | 3.763        |
| 1JHL   | A_LYS_116 | NZ     | H_ASP_99  | OD2    | 3.232        |
| 1JHL   | A_ARG_125 | NH2    | A_ASP_119 | OD2    | 3.005        |

Table 115: 1JHL-specific salt bridging networks analysis. In this table, a PDB file is specified with a four-letter PDB ID, except that the names of the PDB files corresponding to the single NMR structural model split from the NMR ensemble is specified with a four-letter PDB ID in addition to a hyphen followed by the single NMR structural model numeric ID, the residue naming scheme is **Chain ID** **residue name** **residue number**,  $\angle ADH$  represents the angle formed by acceptor (A), donor (D) and hydrogen (H) ( $\angle ADH$ ).

| PDB ID | Residue A | Atom A | Residue B | Atom B | Distance (Å) |
|--------|-----------|--------|-----------|--------|--------------|
| 1JP5   | A_ARG_24  | NH1    | A_ASP_75  | OD1    | 3.622        |
| 1JP5   | A_ARG_24  | NH1    | A_ASP_75  | OD2    | 2.930        |
| 1JP5   | A_ARG_24  | NH2    | A_ASP_75  | OD1    | 2.789        |
| 1JP5   | A_ARG_24  | NH2    | A_ASP_75  | OD2    | 3.224        |
| 1JP5   | A_ARG_66  | NH1    | A_GLU_84  | OE2    | 3.961        |
| 1JP5   | A_ARG_66  | NH2    | A_GLU_86  | OE1    | 3.649        |
| 1JP5   | A_ARG_66  | NH2    | A_ASP_87  | OD1    | 2.642        |
| 1JP5   | A_ARG_66  | NH2    | A_ASP_87  | OD2    | 2.495        |
| 1JP5   | A_ARG_82  | NH1    | A_GLU_84  | OE2    | 3.359        |
| 1JP5   | A_HIS_162 | NE2    | A_ASP_226 | OD1    | 3.329        |
| 1JP5   | A_HIS_162 | NE2    | A_ASP_226 | OD2    | 3.666        |
| 1JP5   | A_LYS_173 | NZ     | A_ASP_190 | OD2    | 2.916        |
| 1JP5   | A_LYS_192 | NZ     | A_ASP_189 | OD1    | 2.549        |
| 1JP5   | A_ARG_194 | NH1    | A_GLU_216 | OE2    | 3.691        |
| 1JP5   | A_ARG_194 | NH1    | A_ASP_217 | OD1    | 3.483        |
| 1JP5   | A_ARG_194 | NH1    | A_ASP_217 | OD2    | 3.993        |
| 1JP5   | A_ARG_194 | NH2    | A_ASP_217 | OD1    | 3.125        |
| 1JP5   | A_ARG_194 | NH2    | A_ASP_217 | OD2    | 2.288        |
| 1JP5   | A_ARG_227 | NH1    | A_GLU_232 | OE1    | 3.878        |
| 1JP5   | A_ARG_227 | NH1    | A_GLU_232 | OE2    | 3.876        |
| 1JP5   | A_HIS_228 | ND1    | A_ASP_226 | OD1    | 3.183        |
| 1JP5   | A_HIS_228 | ND1    | A_ASP_226 | OD2    | 3.924        |
| 1JP5   | B_ARG_24  | NH1    | B_ASP_75  | OD1    | 3.589        |
| 1JP5   | B_ARG_24  | NH1    | B_ASP_75  | OD2    | 2.884        |
| 1JP5   | B_ARG_24  | NH2    | B_ASP_75  | OD1    | 2.786        |
| 1JP5   | B_ARG_24  | NH2    | B_ASP_75  | OD2    | 3.283        |
| 1JP5   | B_ARG_66  | NH2    | B_GLU_86  | OE1    | 3.667        |
| 1JP5   | B_ARG_66  | NH2    | B_ASP_87  | OD1    | 2.594        |
| 1JP5   | B_ARG_66  | NH2    | B_ASP_87  | OD2    | 2.543        |
| 1JP5   | B_ARG_82  | NH1    | B_GLU_84  | OE2    | 3.388        |
| 1JP5   | B_LYS_139 | NZ     | B_GLU_137 | OE1    | 3.932        |
| 1JP5   | B_HIS_162 | NE2    | B_ASP_226 | OD1    | 3.248        |
| 1JP5   | B_HIS_162 | NE2    | B_ASP_226 | OD2    | 3.774        |
| 1JP5   | B_LYS_173 | NZ     | B_ASP_190 | OD2    | 3.014        |
| 1JP5   | B_LYS_192 | NZ     | B_ASP_189 | OD1    | 2.617        |
| 1JP5   | B_ARG_194 | NH1    | B_GLU_216 | OE2    | 3.383        |
| 1JP5   | B_ARG_194 | NH1    | B_ASP_217 | OD1    | 2.811        |
| 1JP5   | B_ARG_194 | NH1    | B_ASP_217 | OD2    | 3.494        |
| 1JP5   | B_ARG_194 | NH2    | B_ASP_217 | OD1    | 3.744        |
| 1JP5   | B_ARG_194 | NH2    | B_ASP_217 | OD2    | 2.928        |
| 1JP5   | B_ARG_227 | NH1    | B_GLU_232 | OE1    | 3.968        |
| 1JP5   | B_ARG_227 | NH1    | B_GLU_232 | OE2    | 3.830        |
| 1JP5   | B_HIS_228 | ND1    | B_ASP_226 | OD1    | 3.260        |
| 1JP5   | B_HIS_228 | ND1    | B_ASP_226 | OD2    | 3.862        |

Table 116: 1JP5-specific salt bridging networks analysis. In this table, a PDB file is specified with a four-letter PDB ID, except that the names of the PDB files corresponding to the single NMR structural model split from the NMR ensemble is specified with a four-letter PDB ID in addition to a hyphen followed by the single NMR structural model numeric ID, the residue naming scheme is **Chain ID\_residue name\_residue number**,  $\angle ADH$  represents the angle formed by acceptor (A), donor (D) and hydrogen (H) ( $\angle ADH$ ).

| PDB ID | Residue A | Atom A | Residue B | Atom B | Distance (Å) |
|--------|-----------|--------|-----------|--------|--------------|
| 1JPS   | L_ARG_24  | NH1    | L_ASP_70  | OD2    | 3.616        |
| 1JPS   | L_ARG_27  | NH2    | L_GLU_93  | OE1    | 3.147        |
| 1JPS   | L_ARG_61  | NH2    | L_GLU_81  | OE2    | 3.693        |
| 1JPS   | L_ARG_61  | NH2    | L_ASP_82  | OD1    | 2.870        |
| 1JPS   | L_ARG_61  | NH2    | L_ASP_82  | OD2    | 3.637        |
| 1JPS   | L_LYS_103 | NZ     | L_GLU_165 | OE1    | 2.915        |
| 1JPS   | L_LYS_126 | NZ     | L_GLU_123 | OE1    | 3.492        |
| 1JPS   | L_ARG_142 | NH2    | L_GLU_105 | OE2    | 3.364        |
| 1JPS   | L_LYS_149 | NZ     | L_GLU_195 | OE2    | 3.272        |
| 1JPS   | L_LYS_188 | NZ     | L_ASP_185 | OD1    | 3.281        |
| 1JPS   | H_LYS_30  | NZ     | H_GLU_54  | OE1    | 3.726        |
| 1JPS   | H_HIS_35  | NE2    | H_ASP_99  | OD2    | 2.904        |
| 1JPS   | H_ARG_38  | NH1    | H_ASP_90  | OD1    | 2.795        |
| 1JPS   | H_ARG_38  | NH2    | H_GLU_46  | OE2    | 3.099        |
| 1JPS   | H_ARG_38  | NH2    | H_ASP_90  | OD1    | 3.661        |
| 1JPS   | H_LYS_63  | NZ     | H_ASP_61  | OD1    | 2.512        |
| 1JPS   | H_LYS_63  | NZ     | H_ASP_61  | OD2    | 3.231        |
| 1JPS   | H_ARG_67  | NH1    | H_ASP_90  | OD1    | 3.087        |
| 1JPS   | H_ARG_67  | NH1    | H_ASP_90  | OD2    | 3.639        |
| 1JPS   | H_ARG_67  | NH2    | H_ASP_90  | OD1    | 3.450        |
| 1JPS   | H_ARG_67  | NH2    | H_ASP_90  | OD2    | 2.676        |
| 1JPS   | H_ARG_98  | NH2    | H_ASP_105 | OD1    | 3.651        |
| 1JPS   | H_ARG_98  | NH2    | H_ASP_105 | OD2    | 2.801        |
| 1JPS   | H_LYS_147 | NZ     | H_ASP_148 | OD1    | 3.289        |
| 1JPS   | H_LYS_214 | NZ     | H_GLU_216 | OE2    | 3.681        |
| 1JPS   | T_LYS_15  | NZ     | T_GLU_24  | OE2    | 3.265        |
| 1JPS   | T_LYS_20  | NZ     | T_ASP_58  | OD2    | 3.975        |
| 1JPS   | T_LYS_46  | NZ     | T_GLU_62  | OE2    | 3.654        |
| 1JPS   | T_LYS_48  | NZ     | T_GLU_62  | OE2    | 2.510        |
| 1JPS   | T_LYS_65  | NZ     | T_GLU_62  | OE1    | 3.161        |
| 1JPS   | T_LYS_65  | NZ     | T_GLU_62  | OE2    | 3.595        |
| 1JPS   | T_LYS_122 | NZ     | T_ASP_178 | OD1    | 2.673        |
| 1JPS   | T_LYS_122 | NZ     | T_ASP_178 | OD2    | 3.856        |
| 1JPS   | T_LYS_159 | NZ     | T_ASP_180 | OD2    | 2.746        |
| 1JPS   | T_LYS_201 | NZ     | H_ASP_52  | OD1    | 2.781        |

Table 117: 1JPS-specific salt bridging networks analysis. In this table, a PDB file is specified with a four-letter PDB ID, except that the names of the PDB files corresponding to the single NMR structural model split from the NMR ensemble is specified with a four-letter PDB ID in addition to a hyphen followed by the single NMR structural model numeric ID, the residue naming scheme is **Chain ID\_residue name\_residue number**,  $\angle ADH$  represents the angle formed by acceptor (A), donor (D) and hydrogen (H) ( $\angle ADH$ ).

| PDB ID | Residue A | Atom A | Residue B | Atom B | Distance (Å) |
|--------|-----------|--------|-----------|--------|--------------|
| 1JPT   | L_ARG_24  | NH2    | L_ASP_70  | OD1    | 3.381        |
| 1JPT   | L_ARG_24  | NH2    | L_ASP_70  | OD2    | 2.823        |
| 1JPT   | L_ARG_27  | NH2    | L_GLU_93  | OE1    | 2.552        |
| 1JPT   | L_ARG_61  | NH2    | L_GLU_81  | OE2    | 3.592        |
| 1JPT   | L_ARG_61  | NH2    | L_ASP_82  | OD1    | 2.733        |
| 1JPT   | L_ARG_61  | NH2    | L_ASP_82  | OD2    | 3.583        |
| 1JPT   | L_LYS_149 | NZ     | L_GLU_195 | OE1    | 3.445        |
| 1JPT   | L_HIS_189 | ND1    | L_ASP_151 | OD2    | 2.609        |
| 1JPT   | L_ARG_211 | NH1    | L_GLU_187 | OE1    | 3.952        |
| 1JPT   | H_LYS_30  | NZ     | H_GLU_54  | OE1    | 3.750        |
| 1JPT   | H_HIS_35  | NE2    | H_ASP_99  | OD2    | 2.901        |
| 1JPT   | H_ARG_38  | NH1    | H_ASP_90  | OD1    | 2.806        |
| 1JPT   | H_ARG_38  | NH2    | H_GLU_46  | OE2    | 3.279        |
| 1JPT   | H_ARG_38  | NH2    | H_ASP_90  | OD1    | 3.559        |
| 1JPT   | H_LYS_63  | NZ     | H_GLU_46  | OE1    | 2.705        |
| 1JPT   | H_LYS_63  | NZ     | H_ASP_61  | OD1    | 3.701        |
| 1JPT   | H_ARG_67  | NH1    | H_ASP_90  | OD1    | 3.340        |
| 1JPT   | H_ARG_67  | NH1    | H_ASP_90  | OD2    | 3.607        |
| 1JPT   | H_ARG_67  | NH2    | H_ASP_90  | OD1    | 3.600        |
| 1JPT   | H_ARG_67  | NH2    | H_ASP_90  | OD2    | 2.497        |
| 1JPT   | H_ARG_87  | NH2    | H_GLU_89  | OE1    | 3.851        |
| 1JPT   | H_ARG_98  | NH2    | H_ASP_105 | OD1    | 3.572        |
| 1JPT   | H_ARG_98  | NH2    | H_ASP_105 | OD2    | 2.539        |
| 1JPT   | H_LYS_147 | NZ     | H_ASP_148 | OD1    | 3.107        |
| 1JPT   | H_LYS_147 | NZ     | H_ASP_148 | OD2    | 3.168        |
| 1JPT   | H_LYS_213 | NZ     | L_GLU_123 | OE1    | 3.226        |
| 1JPT   | H_LYS_213 | NZ     | L_GLU_123 | OE2    | 3.740        |

Table 118: 1JPT-specific salt bridging networks analysis. In this table, a PDB file is specified with a four-letter PDB ID, except that the names of the PDB files corresponding to the single NMR structural model split from the NMR ensemble is specified with a four-letter PDB ID in addition to a hyphen followed by the single NMR structural model numeric ID, the residue naming scheme is **Chain ID\_residue name\_residue number**,  $\angle ADH$  represents the angle formed by acceptor (A), donor (D) and hydrogen (H) ( $\angle ADH$ ).

| PDB ID | Residue A | Atom A | Residue B | Atom B | Distance (Å) |
|--------|-----------|--------|-----------|--------|--------------|
| 1JRH   | L_ARG_61  | NH2    | L_ASP_82  | OD1    | 3.229        |
| 1JRH   | L_ARG_61  | NH2    | L_ASP_82  | OD2    | 3.948        |
| 1JRH   | L_LYS_103 | NZ     | L_ASP_165 | OD2    | 3.995        |
| 1JRH   | H_ARG_38  | NH1    | H_GLU_46  | OE1    | 2.881        |
| 1JRH   | H_ARG_38  | NH1    | H_GLU_46  | OE2    | 3.879        |
| 1JRH   | H_ARG_38  | NH2    | H_ASP_86  | OD2    | 3.530        |
| 1JRH   | H_LYS_57  | NZ     | H_ASP_55  | OD2    | 3.070        |
| 1JRH   | H_ARG_66  | NH1    | H_ASP_86  | OD1    | 3.819        |
| 1JRH   | H_ARG_66  | NH1    | H_ASP_86  | OD2    | 3.178        |
| 1JRH   | H_ARG_66  | NH2    | H_ASP_86  | OD1    | 3.486        |
| 1JRH   | H_ARG_66  | NH2    | H_ASP_86  | OD2    | 2.963        |
| 1JRH   | H_LYS_71  | NZ     | H_ASP_55  | OD1    | 3.729        |
| 1JRH   | H_ARG_75  | NH2    | H_ASP_72  | OD2    | 2.739        |
| 1JRH   | H_ARG_94  | NH2    | H_ASP_101 | OD2    | 2.863        |
| 1JRH   | I_LYS_52  | NZ     | H_ASP_54  | OD1    | 3.471        |
| 1JRH   | I_LYS_52  | NZ     | H_ASP_54  | OD2    | 2.819        |
| 1JRH   | I_LYS_52  | NZ     | H_ASP_56  | OD2    | 2.824        |
| 1JRH   | I_HIS_73  | NE2    | I_ASP_72  | OD1    | 3.994        |
| 1JRH   | I_HIS_73  | NE2    | I_ASP_72  | OD2    | 3.992        |
| 1JRH   | I_ARG_84  | NH1    | I_GLU_45  | OE1    | 2.869        |
| 1JRH   | I_ARG_84  | NH1    | I_GLU_45  | OE2    | 3.093        |
| 1JRH   | I_ARG_84  | NH2    | L_GLU_27  | OE1    | 3.652        |
| 1JRH   | I_ARG_84  | NH2    | L_GLU_27  | OE2    | 3.984        |
| 1JRH   | I_LYS_86  | NZ     | I_GLU_93  | OE1    | 3.237        |
| 1JRH   | I_LYS_86  | NZ     | I_GLU_93  | OE2    | 3.629        |

Table 119: 1JRH-specific salt bridging networks analysis. In this table, a PDB file is specified with a four-letter PDB ID, except that the names of the PDB files corresponding to the single NMR structural model split from the NMR ensemble is specified with a four-letter PDB ID in addition to a hyphen followed by the single NMR structural model numeric ID, the residue naming scheme is **Chain ID\_residue name\_residue number**,  $\angle ADH$  represents the angle formed by acceptor (A), donor (D) and hydrogen (H) ( $\angle ADH$ ).



| PDB ID | Residue A | Atom A | Residue B | Atom B | Distance (Å) |
|--------|-----------|--------|-----------|--------|--------------|
| 1JTO   | A_ARG_38  | NH1    | A_ASP_90  | OD2    | 2.989        |
| 1JTO   | A_ARG_38  | NH2    | A_GLU_46  | OE1    | 3.765        |
| 1JTO   | A_ARG_38  | NH2    | A_GLU_46  | OE2    | 3.163        |
| 1JTO   | A_ARG_38  | NH2    | A_ASP_90  | OD2    | 3.961        |
| 1JTO   | A_ARG_67  | NH1    | A_ASP_90  | OD1    | 2.656        |
| 1JTO   | A_ARG_67  | NH1    | A_ASP_90  | OD2    | 3.690        |
| 1JTO   | A_ARG_67  | NH2    | A_ASP_90  | OD1    | 3.432        |
| 1JTO   | A_ARG_67  | NH2    | A_ASP_90  | OD2    | 2.929        |
| 1JTO   | B_ARG_38  | NH1    | B_ASP_90  | OD2    | 2.804        |
| 1JTO   | B_ARG_38  | NH2    | B_GLU_46  | OE1    | 3.744        |
| 1JTO   | B_ARG_38  | NH2    | B_ASP_90  | OD2    | 3.904        |
| 1JTO   | B_LYS_65  | NZ     | B_ASP_62  | OD1    | 3.988        |
| 1JTO   | B_ARG_67  | NH1    | B_ASP_90  | OD1    | 2.582        |
| 1JTO   | B_ARG_67  | NH1    | B_ASP_90  | OD2    | 4.000        |
| 1JTO   | B_ARG_67  | NH2    | B_ASP_90  | OD1    | 3.081        |
| 1JTO   | B_ARG_67  | NH2    | B_ASP_90  | OD2    | 2.986        |
| 1JTO   | L_LYS_1   | NZ     | L_GLU_7   | OE2    | 3.834        |
| 1JTO   | L_LYS_13  | NZ     | L_ASP_18  | OD2    | 2.997        |
| 1JTO   | L_ARG_61  | NH2    | L_ASP_48  | OD1    | 3.510        |
| 1JTO   | L_LYS_97  | NZ     | L_ASP_101 | OD1    | 2.937        |
| 1JTO   | L_ARG_125 | NH1    | L_ASP_119 | OD2    | 3.230        |
| 1JTO   | L_ARG_125 | NH2    | L_ASP_119 | OD1    | 3.769        |
| 1JTO   | L_ARG_125 | NH2    | L_ASP_119 | OD2    | 3.012        |
| 1JTO   | M_LYS_1   | NZ     | M_GLU_7   | OE1    | 3.717        |
| 1JTO   | M_LYS_1   | NZ     | M_GLU_7   | OE2    | 2.519        |
| 1JTO   | M_ARG_61  | NH2    | M_ASP_48  | OD1    | 3.874        |
| 1JTO   | M_ARG_125 | NH1    | M_ASP_119 | OD2    | 2.938        |
| 1JTO   | M_ARG_125 | NH2    | M_ASP_119 | OD1    | 3.078        |
| 1JTO   | M_ARG_125 | NH2    | M_ASP_119 | OD2    | 3.152        |

Table 120: 1JTO-specific salt bridging networks analysis. In this table, a PDB file is specified with a four-letter PDB ID, except that the names of the PDB files corresponding to the single NMR structural model split from the NMR ensemble is specified with a four-letter PDB ID in addition to a hyphen followed by the single NMR structural model numeric ID, the residue naming scheme is **Chain ID\_residue name\_residue number**,  $\angle ADH$  represents the angle formed by acceptor (A), donor (D) and hydrogen (H) ( $\angle ADH$ ).

| PDB ID | Residue A | Atom A | Residue B | Atom B | Distance (Å) |
|--------|-----------|--------|-----------|--------|--------------|
| 1JTP   | A_ARG_38  | NH1    | A_ASP_90  | OD1    | 2.844        |
| 1JTP   | A_ARG_38  | NH2    | A_GLU_46  | OE1    | 2.990        |
| 1JTP   | A_ARG_38  | NH2    | A_ASP_90  | OD1    | 3.872        |
| 1JTP   | A_LYS_65  | NZ     | A_ASP_62  | OD1    | 3.073        |
| 1JTP   | A_ARG_67  | NH1    | A_GLU_87  | OE1    | 3.833        |
| 1JTP   | A_ARG_67  | NH1    | A_ASP_90  | OD1    | 3.796        |
| 1JTP   | A_ARG_67  | NH1    | A_ASP_90  | OD2    | 2.836        |
| 1JTP   | A_ARG_67  | NH2    | A_GLU_87  | OE2    | 3.971        |
| 1JTP   | A_ARG_67  | NH2    | A_ASP_90  | OD1    | 3.167        |
| 1JTP   | A_ARG_67  | NH2    | A_ASP_90  | OD2    | 3.669        |
| 1JTP   | B_ARG_38  | NH1    | B_ASP_90  | OD1    | 3.088        |
| 1JTP   | B_ARG_38  | NH2    | B_GLU_46  | OE1    | 3.231        |
| 1JTP   | B_ARG_38  | NH2    | B_GLU_46  | OE2    | 3.901        |
| 1JTP   | B_LYS_65  | NZ     | B_ASP_62  | OD1    | 2.767        |
| 1JTP   | B_ARG_67  | NH1    | B_ASP_90  | OD1    | 3.639        |
| 1JTP   | B_ARG_67  | NH1    | B_ASP_90  | OD2    | 2.730        |
| 1JTP   | B_ARG_67  | NH2    | B_ASP_90  | OD1    | 2.941        |
| 1JTP   | B_ARG_67  | NH2    | B_ASP_90  | OD2    | 3.599        |
| 1JTP   | L_LYS_1   | NZ     | L_GLU_7   | OE1    | 3.651        |
| 1JTP   | L_LYS_1   | NZ     | L_GLU_7   | OE2    | 2.871        |
| 1JTP   | L_LYS_13  | NZ     | L_ASP_18  | OD2    | 2.822        |
| 1JTP   | L_ARG_61  | NH2    | L_ASP_48  | OD2    | 3.676        |
| 1JTP   | L_ARG_125 | NH2    | L_ASP_119 | OD2    | 3.456        |
| 1JTP   | M_LYS_1   | NZ     | M_GLU_7   | OE1    | 3.807        |
| 1JTP   | M_LYS_1   | NZ     | M_GLU_7   | OE2    | 2.795        |
| 1JTP   | M_LYS_13  | NZ     | M_ASP_18  | OD2    | 3.184        |
| 1JTP   | M_ARG_61  | NH2    | M_ASP_48  | OD2    | 3.928        |
| 1JTP   | M_ARG_125 | NH1    | M_ASP_119 | OD1    | 3.405        |
| 1JTP   | M_ARG_125 | NH1    | M_ASP_119 | OD2    | 2.529        |
| 1JTP   | M_ARG_125 | NH2    | M_ASP_119 | OD1    | 2.657        |
| 1JTP   | M_ARG_125 | NH2    | M_ASP_119 | OD2    | 3.292        |

Table 121: 1JTP-specific salt bridging networks analysis. In this table, a PDB file is specified with a four-letter PDB ID, except that the names of the PDB files corresponding to the single NMR structural model split from the NMR ensemble is specified with a four-letter PDB ID in addition to a hyphen followed by the single NMR structural model numeric ID, the residue naming scheme is **Chain ID\_residue name\_residue number**,  $\angle ADH$  represents the angle formed by acceptor (A), donor (D) and hydrogen (H) ( $\angle ADH$ ).

| PDB ID | Residue A | Atom A | Residue B | Atom B | Distance (Å) |
|--------|-----------|--------|-----------|--------|--------------|
| 1JTT   | A_ARG_38  | NH1    | A_ASP_90  | OD1    | 2.882        |
| 1JTT   | A_ARG_38  | NH2    | A_GLU_46  | OE2    | 2.917        |
| 1JTT   | A_LYS_65  | NZ     | A_ASP_62  | OD2    | 2.806        |
| 1JTT   | A_ARG_67  | NH1    | A_ASP_90  | OD1    | 3.707        |
| 1JTT   | A_ARG_67  | NH1    | A_ASP_90  | OD2    | 2.718        |
| 1JTT   | A_ARG_67  | NH2    | A_ASP_90  | OD1    | 3.006        |
| 1JTT   | A_ARG_67  | NH2    | A_ASP_90  | OD2    | 3.559        |
| 1JTT   | L_LYS_1   | NZ     | L_GLU_7   | OE2    | 2.871        |
| 1JTT   | L_ARG_61  | NH2    | L_ASP_48  | OD2    | 3.382        |
| 1JTT   | L_ARG_125 | NH1    | L_ASP_119 | OD1    | 3.528        |
| 1JTT   | L_ARG_125 | NH1    | L_ASP_119 | OD2    | 3.412        |
| 1JTT   | L_ARG_125 | NH2    | L_ASP_119 | OD1    | 3.866        |
| 1JTT   | L_ARG_125 | NH2    | L_ASP_119 | OD2    | 2.346        |

Table 122: 1JTT-specific salt bridging networks analysis. In this table, a PDB file is specified with a four-letter PDB ID, except that the names of the PDB files corresponding to the single NMR structural model split from the NMR ensemble is specified with a four-letter PDB ID in addition to a hyphen followed by the single NMR structural model numeric ID, the residue naming scheme is **Chain ID\_residue name\_residue number**,  $\angle ADH$  represents the angle formed by acceptor (A), donor (D) and hydrogen (H) ( $\angle ADH$ ).

| PDB ID | Residue A | Atom A | Residue B | Atom B | Distance (Å) |
|--------|-----------|--------|-----------|--------|--------------|
| 1JV5   | A_ARG_61  | NH1    | A_GLU_81  | OE1    | 3.715        |
| 1JV5   | A_ARG_61  | NH1    | A_ASP_82  | OD1    | 3.734        |
| 1JV5   | A_ARG_61  | NH2    | A_ASP_82  | OD1    | 2.672        |
| 1JV5   | A_ARG_61  | NH2    | A_ASP_82  | OD2    | 3.335        |
| 1JV5   | B_LYS_363 | NZ     | B_GLU_346 | OE1    | 3.710        |
| 1JV5   | B_LYS_367 | NZ     | B_ASP_390 | OD1    | 2.564        |
| 1JV5   | B_LYS_367 | NZ     | B_ASP_390 | OD2    | 3.314        |

Table 123: 1JV5-specific salt bridging networks analysis. In this table, a PDB file is specified with a four-letter PDB ID, except that the names of the PDB files corresponding to the single NMR structural model split from the NMR ensemble is specified with a four-letter PDB ID in addition to a hyphen followed by the single NMR structural model numeric ID, the residue naming scheme is **Chain ID\_residue name\_residue number**,  $\angle ADH$  represents the angle formed by acceptor (A), donor (D) and hydrogen (H) ( $\angle ADH$ ).

| PDB ID | Residue A | Atom A | Residue B | Atom B | Distance (Å) |
|--------|-----------|--------|-----------|--------|--------------|
| 1K6Q   | L_LYS_3   | NZ     | L_ASP_1   | OD1    | 3.247        |
| 1K6Q   | L_LYS_3   | NZ     | L_ASP_1   | OD2    | 3.989        |
| 1K6Q   | L_ARG_27  | NH1    | L_GLU_93  | OE1    | 3.087        |
| 1K6Q   | L_ARG_27  | NH2    | L_GLU_93  | OE1    | 3.061        |
| 1K6Q   | L_ARG_27  | NH2    | L_GLU_93  | OE2    | 3.535        |
| 1K6Q   | L_ARG_61  | NH1    | L_GLU_79  | OE2    | 3.467        |
| 1K6Q   | L_ARG_61  | NH2    | L_GLU_79  | OE1    | 3.569        |
| 1K6Q   | L_ARG_61  | NH2    | L_GLU_79  | OE2    | 3.481        |
| 1K6Q   | L_ARG_61  | NH2    | L_ASP_81  | OD1    | 3.557        |
| 1K6Q   | L_ARG_61  | NH2    | L_ASP_82  | OD1    | 2.902        |
| 1K6Q   | L_ARG_61  | NH2    | L_ASP_82  | OD2    | 3.306        |
| 1K6Q   | L_LYS_149 | NZ     | L_GLU_195 | OE1    | 3.892        |
| 1K6Q   | L_LYS_149 | NZ     | L_GLU_195 | OE2    | 2.797        |
| 1K6Q   | L_ARG_188 | NH1    | L_GLU_185 | OE1    | 3.503        |
| 1K6Q   | L_ARG_188 | NH2    | L_GLU_185 | OE1    | 2.593        |
| 1K6Q   | L_ARG_188 | NH2    | L_GLU_185 | OE2    | 3.878        |
| 1K6Q   | L_HIS_189 | ND1    | L_ASP_151 | OD2    | 2.798        |
| 1K6Q   | H_LYS_30  | NZ     | H_GLU_54  | OE1    | 3.652        |
| 1K6Q   | H_HIS_35  | NE2    | H_ASP_99  | OD2    | 3.337        |
| 1K6Q   | H_ARG_40  | NH1    | H_GLU_89  | OE2    | 2.763        |
| 1K6Q   | H_ARG_40  | NH2    | H_GLU_89  | OE2    | 2.831        |
| 1K6Q   | H_LYS_63  | NZ     | H_GLU_46  | OE1    | 3.998        |
| 1K6Q   | H_LYS_67  | NZ     | H_ASP_90  | OD1    | 3.649        |
| 1K6Q   | H_LYS_67  | NZ     | H_ASP_90  | OD2    | 3.070        |
| 1K6Q   | H_ARG_98  | NH2    | H_ASP_105 | OD1    | 3.693        |
| 1K6Q   | H_ARG_98  | NH2    | H_ASP_105 | OD2    | 2.580        |
| 1K6Q   | H_HIS_168 | NE2    | L_ASP_167 | OD1    | 3.896        |

Table 124: 1K6Q-specific salt bridging networks analysis. In this table, a PDB file is specified with a four-letter PDB ID, except that the names of the PDB files corresponding to the single NMR structural model split from the NMR ensemble is specified with a four-letter PDB ID in addition to a hyphen followed by the single NMR structural model numeric ID, the residue naming scheme is **Chain ID\_residue name\_residue number**,  $\angle ADH$  represents the angle formed by acceptor (A), donor (D) and hydrogen (H) ( $\angle ADH$ ).

| PDB ID | Residue A | Atom A | Residue B | Atom B | Distance (Å) |
|--------|-----------|--------|-----------|--------|--------------|
| 1KB5   | A_ARG_4   | NH1    | A_GLU_25  | OE1    | 3.756        |
| 1KB5   | A_ARG_4   | NH1    | A_GLU_25  | OE2    | 3.640        |
| 1KB5   | A_ARG_4   | NH2    | A_GLU_25  | OE1    | 2.650        |
| 1KB5   | A_ARG_4   | NH2    | A_GLU_25  | OE2    | 3.717        |
| 1KB5   | A_ARG_61  | NH1    | A_ASP_84  | OD1    | 3.434        |
| 1KB5   | A_ARG_61  | NH1    | A_ASP_84  | OD2    | 2.899        |
| 1KB5   | A_ARG_61  | NH2    | A_ASP_84  | OD1    | 2.515        |
| 1KB5   | A_ARG_61  | NH2    | A_ASP_84  | OD2    | 3.185        |
| 1KB5   | A_LYS_72  | NZ     | A_GLU_70  | OE1    | 3.823        |
| 1KB5   | A_ARG_93  | NH1    | B_GLU_105 | OE1    | 2.975        |
| 1KB5   | A_ARG_93  | NH1    | B_GLU_105 | OE2    | 3.412        |
| 1KB5   | A_ARG_101 | NH2    | H_ASP_98  | OD1    | 2.690        |
| 1KB5   | B_ARG_22  | NH2    | B_GLU_74  | OE2    | 3.622        |
| 1KB5   | B_LYS_26  | NZ     | B_GLU_5   | OE1    | 2.619        |
| 1KB5   | B_ARG_50  | NH2    | B_ASP_72  | OD1    | 3.832        |
| 1KB5   | L_LYS_27  | NZ     | B_ASP_54  | OD1    | 3.460        |
| 1KB5   | L_ARG_61  | NH1    | L_ASP_82  | OD1    | 3.130        |
| 1KB5   | L_ARG_61  | NH1    | L_ASP_82  | OD2    | 2.318        |
| 1KB5   | L_ARG_61  | NH2    | L_GLU_81  | OE2    | 3.530        |
| 1KB5   | L_ARG_61  | NH2    | L_ASP_82  | OD1    | 2.659        |
| 1KB5   | L_ARG_61  | NH2    | L_ASP_82  | OD2    | 3.409        |
| 1KB5   | L_LYS_149 | NZ     | L_GLU_195 | OE1    | 3.078        |
| 1KB5   | L_ARG_155 | NH2    | L_GLU_185 | OE1    | 2.951        |
| 1KB5   | L_ARG_155 | NH2    | L_GLU_185 | OE2    | 3.151        |
| 1KB5   | L_ARG_188 | NH1    | L_GLU_185 | OE2    | 3.844        |
| 1KB5   | L_ARG_188 | NH2    | L_ASP_184 | OD1    | 3.621        |
| 1KB5   | L_HIS_189 | NE2    | L_ASP_151 | OD2    | 3.476        |
| 1KB5   | H_LYS_62  | NZ     | H_GLU_46  | OE2    | 3.773        |
| 1KB5   | H_ARG_66  | NH1    | H_ASP_86  | OD2    | 3.354        |
| 1KB5   | H_ARG_94  | NH1    | H_ASP_101 | OD1    | 3.952        |
| 1KB5   | H_ARG_94  | NH1    | H_ASP_101 | OD2    | 2.472        |
| 1KB5   | H_ARG_94  | NH2    | H_ASP_101 | OD2    | 2.694        |
| 1KB5   | H_ARG_96  | NH1    | A_ASP_26  | OD1    | 2.599        |
| 1KB5   | H_ARG_96  | NH1    | A_ASP_26  | OD2    | 2.834        |
| 1KB5   | H_ARG_96  | NH2    | L_GLU_56  | OE2    | 2.981        |
| 1KB5   | H_ARG_96  | NH2    | H_ASP_101 | OD1    | 3.517        |
| 1KB5   | H_ARG_96  | NH2    | H_ASP_101 | OD2    | 3.239        |
| 1KB5   | H_LYS_209 | NZ     | H_GLU_211 | OE1    | 3.539        |
| 1KB5   | H_LYS_209 | NZ     | H_GLU_211 | OE2    | 3.472        |

Table 125: 1KB5-specific salt bridging networks analysis. In this table, a PDB file is specified with a four-letter PDB ID, except that the names of the PDB files corresponding to the single NMR structural model split from the NMR ensemble is specified with a four-letter PDB ID in addition to a hyphen followed by the single NMR structural model numeric ID, the residue naming scheme is **Chain ID\_residue name\_residue number**,  $\angle ADH$  represents the angle formed by acceptor (A), donor (D) and hydrogen (H) ( $\angle ADH$ ).

| PDB ID | Residue A | Atom A | Residue B | Atom B | Distance (Å) |
|--------|-----------|--------|-----------|--------|--------------|
| 1KC5   | L_ARG_54  | NH1    | L_ASP_60  | OD1    | 2.682        |
| 1KC5   | L_ARG_61  | NH1    | L_ASP_82  | OD1    | 2.395        |
| 1KC5   | L_ARG_61  | NH1    | L_ASP_82  | OD2    | 2.703        |
| 1KC5   | L_ARG_61  | NH2    | L_ASP_82  | OD1    | 3.920        |
| 1KC5   | L_LYS_107 | NZ     | L_GLU_17  | OE2    | 3.192        |
| 1KC5   | L_LYS_142 | NZ     | L_GLU_105 | OE2    | 3.861        |
| 1KC5   | L_LYS_147 | NZ     | L_GLU_154 | OE1    | 3.049        |
| 1KC5   | L_LYS_147 | NZ     | L_GLU_154 | OE2    | 3.591        |
| 1KC5   | L_LYS_149 | NZ     | L_GLU_195 | OE1    | 2.716        |
| 1KC5   | L_LYS_149 | NZ     | L_GLU_195 | OE2    | 3.100        |
| 1KC5   | L_ARG_155 | NH1    | L_GLU_185 | OE1    | 3.442        |
| 1KC5   | L_LYS_169 | NZ     | L_ASP_167 | OD1    | 3.457        |
| 1KC5   | L_LYS_169 | NZ     | L_ASP_167 | OD2    | 3.411        |
| 1KC5   | L_ARG_188 | NH1    | L_GLU_185 | OE2    | 3.469        |
| 1KC5   | L_HIS_189 | ND1    | L_ASP_151 | OD2    | 3.918        |
| 1KC5   | L_HIS_189 | NE2    | L_GLU_185 | OE1    | 3.880        |
| 1KC5   | L_LYS_199 | NZ     | L_ASP_110 | OD2    | 2.858        |
| 1KC5   | H_ARG_39  | NH1    | H_ASP_90  | OD1    | 3.033        |
| 1KC5   | H_ARG_39  | NH2    | H_GLU_47  | OE1    | 2.994        |
| 1KC5   | H_ARG_67  | NH2    | H_ASP_90  | OD1    | 3.361        |
| 1KC5   | H_ARG_67  | NH2    | H_ASP_90  | OD2    | 2.772        |
| 1KC5   | H_ARG_98  | NH1    | H_ASP_104 | OD2    | 2.421        |
| 1KC5   | H_LYS_211 | NZ     | L_GLU_123 | OE2    | 2.759        |

Table 126: 1KC5-specific salt bridging networks analysis. In this table, a PDB file is specified with a four-letter PDB ID, except that the names of the PDB files corresponding to the single NMR structural model split from the NMR ensemble is specified with a four-letter PDB ID in addition to a hyphen followed by the single NMR structural model numeric ID, the residue naming scheme is **Chain ID\_residue name\_residue number**,  $\angle ADH$  represents the angle formed by acceptor (A), donor (D) and hydrogen (H) ( $\angle ADH$ ).

| PDB ID | Residue A | Atom A | Residue B | Atom B | Distance (Å) |
|--------|-----------|--------|-----------|--------|--------------|
| 1KCR   | L_ARG_61  | NH1    | L_ASP_82  | OD1    | 3.167        |
| 1KCR   | L_ARG_61  | NH1    | L_ASP_82  | OD2    | 3.442        |
| 1KCR   | L_LYS_146 | NZ     | L_GLU_153 | OE1    | 3.602        |
| 1KCR   | L_LYS_146 | NZ     | L_GLU_153 | OE2    | 3.503        |
| 1KCR   | L_LYS_148 | NZ     | L_GLU_194 | OE1    | 3.325        |
| 1KCR   | L_ARG_154 | NH2    | L_GLU_184 | OE1    | 3.047        |
| 1KCR   | L_ARG_154 | NH2    | L_GLU_184 | OE2    | 3.767        |
| 1KCR   | L_HIS_188 | ND1    | L_ASP_150 | OD2    | 3.289        |
| 1KCR   | H_ARG_39  | NH1    | H_ASP_90  | OD1    | 2.787        |
| 1KCR   | H_ARG_39  | NH2    | H_GLU_47  | OE1    | 3.186        |
| 1KCR   | H_ARG_39  | NH2    | H_ASP_90  | OD1    | 2.864        |
| 1KCR   | H_ARG_67  | NH1    | H_ASP_90  | OD1    | 3.439        |
| 1KCR   | H_ARG_67  | NH1    | H_ASP_90  | OD2    | 3.339        |
| 1KCR   | H_ARG_67  | NH2    | H_ASP_90  | OD1    | 3.781        |
| 1KCR   | H_ARG_67  | NH2    | H_ASP_90  | OD2    | 2.578        |
| 1KCR   | H_LYS_76  | NZ     | H_ASP_73  | OD2    | 3.906        |

Table 127: 1KCR-specific salt bridging networks analysis. In this table, a PDB file is specified with a four-letter PDB ID, except that the names of the PDB files corresponding to the single NMR structural model split from the NMR ensemble is specified with a four-letter PDB ID in addition to a hyphen followed by the single NMR structural model numeric ID, the residue naming scheme is **Chain ID\_residue name\_residue number**,  $\angle ADH$  represents the angle formed by acceptor (A), donor (D) and hydrogen (H) ( $\angle ADH$ ).



| PDB ID | Residue A | Atom A | Residue B | Atom B | Distance (Å) |
|--------|-----------|--------|-----------|--------|--------------|
| 1KCS   | L_LYS_24  | NZ     | L_ASP_70  | OD1    | 3.278        |
| 1KCS   | L_ARG_54  | NH1    | L_ASP_60  | OD1    | 3.351        |
| 1KCS   | L_ARG_61  | NH1    | L_ASP_82  | OD1    | 3.132        |
| 1KCS   | L_ARG_61  | NH1    | L_ASP_82  | OD2    | 3.710        |
| 1KCS   | L_LYS_103 | NZ     | L_ASP_85  | OD2    | 3.830        |
| 1KCS   | L_LYS_149 | NZ     | L_GLU_195 | OE1    | 3.249        |
| 1KCS   | L_LYS_149 | NZ     | L_GLU_195 | OE2    | 3.257        |
| 1KCS   | L_HIS_189 | ND1    | L_ASP_151 | OD2    | 2.813        |
| 1KCS   | L_LYS_199 | NZ     | L_ASP_110 | OD1    | 3.476        |
| 1KCS   | L_LYS_199 | NZ     | L_ASP_110 | OD2    | 3.643        |
| 1KCS   | H_ARG_39  | NH1    | H_ASP_90  | OD1    | 2.811        |
| 1KCS   | H_ARG_39  | NH2    | H_GLU_47  | OE1    | 2.833        |
| 1KCS   | H_ARG_39  | NH2    | H_ASP_90  | OD1    | 3.463        |
| 1KCS   | H_ARG_67  | NH1    | H_ASP_90  | OD1    | 3.415        |
| 1KCS   | H_ARG_67  | NH1    | H_ASP_90  | OD2    | 3.871        |
| 1KCS   | H_ARG_67  | NH2    | H_ASP_90  | OD1    | 2.423        |
| 1KCS   | H_ARG_67  | NH2    | H_ASP_90  | OD2    | 2.528        |
| 1KCS   | H_LYS_211 | NZ     | L_GLU_123 | OE1    | 3.340        |
| 1KCS   | H_LYS_211 | NZ     | L_GLU_123 | OE2    | 2.904        |
| 1KCS   | H_LYS_212 | NZ     | H_GLU_214 | OE2    | 2.957        |

Table 128: 1KCS-specific salt bridging networks analysis. In this table, a PDB file is specified with a four-letter PDB ID, except that the names of the PDB files corresponding to the single NMR structural model split from the NMR ensemble is specified with a four-letter PDB ID in addition to a hyphen followed by the single NMR structural model numeric ID, the residue naming scheme is **Chain ID\_residue name\_residue number**,  $\angle ADH$  represents the angle formed by acceptor (A), donor (D) and hydrogen (H) ( $\angle ADH$ ).

| PDB ID | Residue A | Atom A | Residue B | Atom B | Distance (Å) |
|--------|-----------|--------|-----------|--------|--------------|
| 1KIP   | A_ARG_61  | NH2    | A_GLU_81  | OE2    | 3.479        |
| 1KIP   | A_ARG_61  | NH2    | A_ASP_82  | OD1    | 2.597        |
| 1KIP   | A_ARG_61  | NH2    | A_ASP_82  | OD2    | 3.338        |
| 1KIP   | A_ARG_96  | NH1    | B_GLU_98  | OE1    | 2.773        |
| 1KIP   | A_ARG_96  | NH1    | B_GLU_98  | OE2    | 3.817        |
| 1KIP   | A_ARG_96  | NH2    | B_GLU_98  | OE1    | 3.280        |
| 1KIP   | A_ARG_96  | NH2    | B_GLU_98  | OE2    | 2.802        |
| 1KIP   | A_LYS_107 | NZ     | A_GLU_17  | OE1    | 3.197        |
| 1KIP   | A_LYS_107 | NZ     | A_GLU_17  | OE2    | 2.849        |
| 1KIP   | B_ARG_38  | NH1    | B_ASP_89  | OD1    | 3.191        |
| 1KIP   | B_ARG_38  | NH2    | B_GLU_46  | OE1    | 3.093        |
| 1KIP   | B_ARG_38  | NH2    | B_GLU_46  | OE2    | 3.933        |
| 1KIP   | B_ARG_38  | NH2    | B_ASP_89  | OD1    | 3.743        |
| 1KIP   | B_ARG_66  | NH1    | B_ASP_89  | OD1    | 3.854        |
| 1KIP   | B_ARG_66  | NH1    | B_ASP_89  | OD2    | 2.776        |
| 1KIP   | B_ARG_66  | NH2    | B_ASP_89  | OD1    | 2.725        |
| 1KIP   | B_ARG_66  | NH2    | B_ASP_89  | OD2    | 3.126        |
| 1KIP   | B_ARG_97  | NH2    | B_ASP_104 | OD1    | 3.837        |
| 1KIP   | B_ARG_97  | NH2    | B_ASP_104 | OD2    | 2.804        |
| 1KIP   | B_ARG_102 | NH1    | B_ASP_100 | OD2    | 3.276        |
| 1KIP   | C_LYS_1   | NZ     | C_GLU_7   | OE2    | 3.468        |
| 1KIP   | C_ARG_61  | NH1    | C_ASP_48  | OD1    | 3.721        |
| 1KIP   | C_ARG_125 | NH1    | C_ASP_119 | OD1    | 3.514        |
| 1KIP   | C_ARG_125 | NH1    | C_ASP_119 | OD2    | 3.062        |
| 1KIP   | C_ARG_125 | NH2    | C_ASP_119 | OD2    | 3.245        |

Table 129: 1KIP-specific salt bridging networks analysis. In this table, a PDB file is specified with a four-letter PDB ID, except that the names of the PDB files corresponding to the single NMR structural model split from the NMR ensemble is specified with a four-letter PDB ID in addition to a hyphen followed by the single NMR structural model numeric ID, the residue naming scheme is **Chain ID\_residue name\_residue number**,  $\angle ADH$  represents the angle formed by acceptor (A), donor (D) and hydrogen (H) ( $\angle ADH$ ).

| PDB ID | Residue A | Atom A | Residue B | Atom B | Distance (Å) |
|--------|-----------|--------|-----------|--------|--------------|
| 1KIQ   | A_ARG.61  | NH2    | A_GLU.81  | OE2    | 3.197        |
| 1KIQ   | A_ARG.61  | NH2    | A_ASP.82  | OD1    | 2.691        |
| 1KIQ   | A_ARG.61  | NH2    | A_ASP.82  | OD2    | 3.415        |
| 1KIQ   | A_ARG.96  | NH1    | B_GLU.98  | OE1    | 2.812        |
| 1KIQ   | A_ARG.96  | NH1    | B_GLU.98  | OE2    | 3.589        |
| 1KIQ   | A_ARG.96  | NH2    | B_GLU.98  | OE1    | 3.677        |
| 1KIQ   | A_ARG.96  | NH2    | B_GLU.98  | OE2    | 2.919        |
| 1KIQ   | A_LYS.103 | NZ     | A_GLU.105 | OE1    | 2.805        |
| 1KIQ   | A_LYS.103 | NZ     | A_GLU.105 | OE2    | 3.912        |
| 1KIQ   | A_LYS.107 | NZ     | A_GLU.17  | OE1    | 3.881        |
| 1KIQ   | A_LYS.107 | NZ     | A_GLU.17  | OE2    | 2.784        |
| 1KIQ   | B_ARG.38  | NH1    | B_ASP.89  | OD1    | 2.893        |
| 1KIQ   | B_ARG.38  | NH2    | B_GLU.46  | OE1    | 3.199        |
| 1KIQ   | B_ARG.38  | NH2    | B_GLU.46  | OE2    | 3.778        |
| 1KIQ   | B_ARG.38  | NH2    | B_ASP.89  | OD1    | 3.733        |
| 1KIQ   | B_ARG.66  | NH1    | B_ASP.89  | OD1    | 3.789        |
| 1KIQ   | B_ARG.66  | NH1    | B_ASP.89  | OD2    | 2.815        |
| 1KIQ   | B_ARG.66  | NH2    | B_ASP.89  | OD1    | 2.856        |
| 1KIQ   | B_ARG.66  | NH2    | B_ASP.89  | OD2    | 3.346        |
| 1KIQ   | B_LYS.75  | NZ     | B_ASP.72  | OD2    | 3.652        |
| 1KIQ   | B_ARG.97  | NH2    | B_ASP.104 | OD1    | 3.671        |
| 1KIQ   | B_ARG.97  | NH2    | B_ASP.104 | OD2    | 2.756        |
| 1KIQ   | B_ARG.102 | NH1    | B_ASP.100 | OD2    | 3.299        |
| 1KIQ   | C_LYS.1   | NZ     | C_GLU.7   | OE1    | 3.271        |
| 1KIQ   | C_LYS.1   | NZ     | C_GLU.7   | OE2    | 3.227        |
| 1KIQ   | C_LYS.13  | NZ     | C_ASP.18  | OD2    | 3.514        |
| 1KIQ   | C_ARG.68  | NH1    | C_ASP.66  | OD2    | 2.812        |
| 1KIQ   | C_ARG.125 | NH1    | C_ASP.119 | OD1    | 3.267        |
| 1KIQ   | C_ARG.125 | NH1    | C_ASP.119 | OD2    | 3.095        |
| 1KIQ   | C_ARG.125 | NH2    | C_ASP.119 | OD2    | 3.062        |

Table 130: 1KIQ-specific salt bridging networks analysis. In this table, a PDB file is specified with a four-letter PDB ID, except that the names of the PDB files corresponding to the single NMR structural model split from the NMR ensemble is specified with a four-letter PDB ID in addition to a hyphen followed by the single NMR structural model numeric ID, the residue naming scheme is **Chain ID\_residue name\_residue number**,  $\angle ADH$  represents the angle formed by acceptor (A), donor (D) and hydrogen (H) ( $\angle ADH$ ).

| PDB ID | Residue A | Atom A | Residue B | Atom B | Distance (Å) |
|--------|-----------|--------|-----------|--------|--------------|
| 1KIR   | A_ARG_61  | NH2    | A_GLU_81  | OE2    | 3.612        |
| 1KIR   | A_ARG_61  | NH2    | A_ASP_82  | OD1    | 2.646        |
| 1KIR   | A_ARG_61  | NH2    | A_ASP_82  | OD2    | 3.502        |
| 1KIR   | A_ARG_96  | NH1    | B_GLU_98  | OE1    | 2.757        |
| 1KIR   | A_ARG_96  | NH1    | B_GLU_98  | OE2    | 3.582        |
| 1KIR   | A_ARG_96  | NH2    | B_GLU_98  | OE1    | 3.625        |
| 1KIR   | A_ARG_96  | NH2    | B_GLU_98  | OE2    | 2.980        |
| 1KIR   | A_LYS_107 | NZ     | A_GLU_17  | OE2    | 2.685        |
| 1KIR   | B_ARG_38  | NH1    | B_ASP_89  | OD1    | 3.082        |
| 1KIR   | B_ARG_38  | NH2    | B_GLU_46  | OE1    | 3.138        |
| 1KIR   | B_ARG_38  | NH2    | B_GLU_46  | OE2    | 3.860        |
| 1KIR   | B_ARG_38  | NH2    | B_ASP_89  | OD1    | 3.771        |
| 1KIR   | B_ARG_66  | NH1    | B_ASP_89  | OD2    | 2.949        |
| 1KIR   | B_ARG_66  | NH2    | B_ASP_89  | OD1    | 2.669        |
| 1KIR   | B_ARG_66  | NH2    | B_ASP_89  | OD2    | 2.955        |
| 1KIR   | B_LYS_75  | NZ     | B_ASP_72  | OD2    | 3.972        |
| 1KIR   | B_ARG_97  | NH2    | B_ASP_104 | OD1    | 3.914        |
| 1KIR   | B_ARG_97  | NH2    | B_ASP_104 | OD2    | 2.816        |
| 1KIR   | B_ARG_102 | NH1    | B_ASP_100 | OD2    | 3.339        |
| 1KIR   | C_LYS_1   | NZ     | C_GLU_7   | OE1    | 3.936        |
| 1KIR   | C_LYS_1   | NZ     | C_GLU_7   | OE2    | 3.274        |
| 1KIR   | C_ARG_68  | NH1    | C_ASP_66  | OD2    | 3.347        |
| 1KIR   | C_ARG_125 | NH1    | C_ASP_119 | OD1    | 3.220        |
| 1KIR   | C_ARG_125 | NH1    | C_ASP_119 | OD2    | 2.967        |
| 1KIR   | C_ARG_125 | NH2    | C_ASP_119 | OD2    | 3.129        |

Table 131: 1KIR-specific salt bridging networks analysis. In this table, a PDB file is specified with a four-letter PDB ID, except that the names of the PDB files corresponding to the single NMR structural model split from the NMR ensemble is specified with a four-letter PDB ID in addition to a hyphen followed by the single NMR structural model numeric ID, the residue naming scheme is **Chain ID\_residue name\_residue number**,  $\angle ADH$  represents the angle formed by acceptor (A), donor (D) and hydrogen (H) ( $\angle ADH$ ).

| PDB ID | Residue A | Atom A | Residue B | Atom B | Distance (Å) |
|--------|-----------|--------|-----------|--------|--------------|
| 1KTR   | L_ARG_24  | NH2    | L_ASP_75  | OD1    | 3.305        |
| 1KTR   | L_ARG_24  | NH2    | L_ASP_75  | OD2    | 3.234        |
| 1KTR   | L_ARG_66  | NH1    | L_ASP_87  | OD1    | 3.908        |
| 1KTR   | L_ARG_66  | NH1    | L_ASP_87  | OD2    | 2.898        |
| 1KTR   | L_ARG_66  | NH2    | L_GLU_84  | OE1    | 3.858        |
| 1KTR   | L_ARG_66  | NH2    | L_GLU_84  | OE2    | 3.876        |
| 1KTR   | L_ARG_66  | NH2    | L_ASP_87  | OD1    | 2.818        |
| 1KTR   | L_ARG_66  | NH2    | L_ASP_87  | OD2    | 3.123        |
| 1KTR   | L_LYS_108 | NZ     | L_GLU_110 | OE2    | 3.290        |
| 1KTR   | L_ARG_200 | NH1    | L_ASP_223 | OD1    | 3.461        |
| 1KTR   | L_ARG_200 | NH1    | L_ASP_223 | OD2    | 3.017        |
| 1KTR   | L_ARG_200 | NH2    | L_ASP_223 | OD1    | 2.813        |
| 1KTR   | L_ARG_200 | NH2    | L_ASP_223 | OD2    | 3.629        |
| 1KTR   | P_HIS_4   | NE2    | L_ASP_183 | OD1    | 3.445        |
| 1KTR   | P_HIS_4   | NE2    | L_ASP_183 | OD2    | 2.673        |
| 1KTR   | P_HIS_6   | ND1    | L_GLU_39  | OE1    | 3.223        |
| 1KTR   | P_HIS_6   | ND1    | L_GLU_39  | OE2    | 2.811        |
| 1KTR   | P_HIS_6   | NE2    | L_GLU_230 | OE1    | 3.040        |
| 1KTR   | P_HIS_6   | NE2    | L_GLU_230 | OE2    | 3.199        |

Table 132: 1KTR-specific salt bridging networks analysis. In this table, a PDB file is specified with a four-letter PDB ID, except that the names of the PDB files corresponding to the single NMR structural model split from the NMR ensemble is specified with a four-letter PDB ID in addition to a hyphen followed by the single NMR structural model numeric ID, the residue naming scheme is **Chain ID** **residue name** **residue number**,  $\angle ADH$  represents the angle formed by acceptor (A), donor (D) and hydrogen (H) ( $\angle ADH$ ).

| PDB ID | Residue A | Atom A | Residue B | Atom B | Distance (Å) |
|--------|-----------|--------|-----------|--------|--------------|
| 1L7I   | L_LYS_24  | NZ     | L_ASP_70  | OD1    | 3.450        |
| 1L7I   | L_LYS_24  | NZ     | L_ASP_70  | OD2    | 2.756        |
| 1L7I   | L_ARG_61  | NH2    | L_GLU_81  | OE1    | 3.159        |
| 1L7I   | L_ARG_61  | NH2    | L_ASP_82  | OD1    | 2.832        |
| 1L7I   | L_ARG_61  | NH2    | L_ASP_82  | OD2    | 3.810        |
| 1L7I   | L_LYS_149 | NZ     | L_GLU_195 | OE1    | 3.108        |
| 1L7I   | L_LYS_149 | NZ     | L_GLU_195 | OE2    | 3.606        |
| 1L7I   | L_HIS_189 | ND1    | L_ASP_151 | OD2    | 3.427        |
| 1L7I   | H_ARG_38  | NH1    | H_ASP_86  | OD1    | 2.914        |
| 1L7I   | H_ARG_38  | NH2    | H_GLU_46  | OE1    | 3.005        |
| 1L7I   | H_ARG_62  | NH2    | H_GLU_46  | OE1    | 3.101        |
| 1L7I   | H_ARG_62  | NH2    | H_GLU_46  | OE2    | 2.791        |
| 1L7I   | H_ARG_66  | NH1    | H_ASP_86  | OD1    | 2.927        |
| 1L7I   | H_ARG_66  | NH1    | H_ASP_86  | OD2    | 3.600        |
| 1L7I   | H_ARG_94  | NH2    | H_ASP_101 | OD1    | 3.112        |
| 1L7I   | H_LYS_143 | NZ     | H_ASP_144 | OD1    | 3.173        |
| 1L7I   | H_LYS_143 | NZ     | H_ASP_144 | OD2    | 3.234        |
| 1L7I   | H_LYS_209 | NZ     | L_GLU_123 | OE1    | 2.718        |
| 1L7I   | H_LYS_210 | NZ     | H_GLU_212 | OE2    | 3.013        |

Table 133: 1L7I-specific salt bridging networks analysis. In this table, a PDB file is specified with a four-letter PDB ID, except that the names of the PDB files corresponding to the single NMR structural model split from the NMR ensemble is specified with a four-letter PDB ID in addition to a hyphen followed by the single NMR structural model numeric ID, the residue naming scheme is **Chain ID residue name residue number**,  $\angle ADH$  represents the angle formed by acceptor (A), donor (D) and hydrogen (H) ( $\angle ADH$ ).

| PDB ID | Residue A | Atom A | Residue B | Atom B | Distance (Å) |
|--------|-----------|--------|-----------|--------|--------------|
| 1LK3   | A_ARG_27  | NH1    | A_GLU_151 | OE1    | 3.162        |
| 1LK3   | A_ARG_27  | NH1    | A_GLU_151 | OE2    | 3.248        |
| 1LK3   | A_ARG_27  | NH2    | A_GLU_151 | OE2    | 2.810        |
| 1LK3   | A_LYS_99  | NZ     | A_GLU_96  | OE2    | 3.379        |
| 1LK3   | A_LYS_125 | NZ     | A_GLU_122 | OE2    | 3.974        |
| 1LK3   | A_LYS_130 | NZ     | L_ASP_1   | OD1    | 2.906        |
| 1LK3   | L_ARG_31  | NH1    | A_GLU_133 | OE1    | 2.703        |
| 1LK3   | L_ARG_60  | NH1    | L_GLU_78  | OE1    | 3.757        |
| 1LK3   | L_ARG_60  | NH1    | L_ASP_81  | OD1    | 3.577        |
| 1LK3   | L_ARG_60  | NH1    | L_ASP_81  | OD2    | 2.703        |
| 1LK3   | L_ARG_60  | NH2    | L_GLU_78  | OE1    | 3.450        |
| 1LK3   | L_ARG_60  | NH2    | L_GLU_78  | OE2    | 3.792        |
| 1LK3   | L_ARG_60  | NH2    | L_ASP_81  | OD1    | 2.902        |
| 1LK3   | L_ARG_60  | NH2    | L_ASP_81  | OD2    | 3.590        |
| 1LK3   | L_LYS_146 | NZ     | L_GLU_153 | OE2    | 2.870        |
| 1LK3   | L_LYS_148 | NZ     | L_GLU_194 | OE1    | 2.968        |
| 1LK3   | L_LYS_148 | NZ     | L_GLU_194 | OE2    | 3.177        |
| 1LK3   | L_ARG_154 | NH1    | L_ASP_184 | OD1    | 3.134        |
| 1LK3   | L_ARG_154 | NH1    | L_ASP_184 | OD2    | 3.607        |
| 1LK3   | L_ARG_154 | NH2    | L_ASP_184 | OD1    | 3.715        |
| 1LK3   | L_ARG_154 | NH2    | L_ASP_184 | OD2    | 2.806        |
| 1LK3   | L_ARG_155 | NH1    | L_GLU_153 | OE2    | 2.979        |
| 1LK3   | L_LYS_182 | NZ     | L_GLU_186 | OE2    | 3.604        |
| 1LK3   | L_HIS_188 | ND1    | L_ASP_150 | OD2    | 3.740        |
| 1LK3   | L_HIS_188 | NE2    | L_ASP_184 | OD1    | 3.222        |
| 1LK3   | H_LYS_13  | NZ     | H_GLU_121 | OE2    | 2.581        |
| 1LK3   | H_LYS_23  | NZ     | I_GLU_121 | OE2    | 2.800        |
| 1LK3   | H_LYS_65  | NZ     | H_GLU_62  | OE1    | 3.360        |
| 1LK3   | H_LYS_67  | NZ     | H_ASP_90  | OD1    | 3.589        |
| 1LK3   | H_LYS_67  | NZ     | H_ASP_90  | OD2    | 2.874        |
| 1LK3   | H_LYS_214 | NZ     | L_GLU_122 | OE1    | 2.517        |
| 1LK3   | B_ARG_27  | NH1    | B_GLU_151 | OE1    | 2.917        |
| 1LK3   | B_ARG_27  | NH2    | B_GLU_151 | OE1    | 3.090        |
| 1LK3   | B_ARG_27  | NH2    | B_GLU_151 | OE2    | 3.902        |
| 1LK3   | B_LYS_88  | NZ     | B_GLU_81  | OE2    | 3.290        |
| 1LK3   | B_LYS_99  | NZ     | B_GLU_96  | OE1    | 3.193        |
| 1LK3   | B_LYS_99  | NZ     | B_GLU_96  | OE2    | 3.913        |
| 1LK3   | B_LYS_125 | NZ     | B_GLU_122 | OE2    | 3.816        |
| 1LK3   | B_LYS_130 | NZ     | M_ASP_1   | OD1    | 2.851        |
| 1LK3   | M_LYS_23  | NZ     | M_ASP_69  | OD1    | 2.916        |
| 1LK3   | M_LYS_23  | NZ     | M_ASP_69  | OD2    | 3.739        |
| 1LK3   | M_ARG_31  | NH1    | B_GLU_133 | OE1    | 2.693        |
| 1LK3   | M_LYS_38  | NZ     | M_ASP_80  | OD1    | 3.251        |
| 1LK3   | M_LYS_38  | NZ     | M_ASP_80  | OD2    | 3.163        |
| 1LK3   | M_ARG_60  | NH1    | M_ASP_81  | OD1    | 3.524        |
| 1LK3   | M_ARG_60  | NH1    | M_ASP_81  | OD2    | 2.748        |
| 1LK3   | M_ARG_60  | NH2    | M_GLU_78  | OE1    | 3.446        |
| 1LK3   | M_ARG_60  | NH2    | M_GLU_78  | OE2    | 3.705        |
| 1LK3   | M_ARG_60  | NH2    | M_ASP_81  | OD1    | 2.992        |
| 1LK3   | M_ARG_60  | NH2    | M_ASP_81  | OD2    | 3.699        |
| 1LK3   | M_LYS_148 | NZ     | M_GLU_194 | OE1    | 3.154        |
| 1LK3   | M_LYS_148 | NZ     | M_GLU_194 | OE2    | 2.891        |
| 1LK3   | M_ARG_154 | NH1    | M_ASP_184 | OD1    | 3.102        |
| 1LK3   | M_ARG_154 | NH1    | M_ASP_184 | OD2    | 3.559        |
| 1LK3   | M_ARG_154 | NH2    | M_ASP_184 | OD1    | 3.772        |
| 1LK3   | M_ARG_154 | NH2    | M_ASP_184 | OD2    | 2.866        |
| 1LK3   | M_ARG_155 | NH1    | M_GLU_153 | OE2    | 2.799        |

|      |           |     |           |     |       |
|------|-----------|-----|-----------|-----|-------|
| 1LK3 | M_LYS_182 | NZ  | M_GLU_186 | OE1 | 2.894 |
| 1LK3 | M_LYS_182 | NZ  | M_GLU_186 | OE2 | 3.921 |
| 1LK3 | M_HIS_188 | ND1 | M_ASP_150 | OD2 | 3.800 |
| 1LK3 | M_HIS_188 | NE2 | M_ASP_184 | OD1 | 3.004 |
| 1LK3 | M_LYS_198 | NZ  | M_ASP_109 | OD1 | 3.702 |
| 1LK3 | M_LYS_198 | NZ  | M_ASP_109 | OD2 | 3.602 |
| 1LK3 | I_LYS_13  | NZ  | I_GLU_121 | OE1 | 2.774 |
| 1LK3 | I_LYS_63  | NZ  | M_ASP_1   | OD2 | 3.881 |
| 1LK3 | I_LYS_67  | NZ  | I_ASP_90  | OD1 | 3.913 |
| 1LK3 | I_LYS_67  | NZ  | I_ASP_90  | OD2 | 2.939 |
| 1LK3 | I_LYS_214 | NZ  | M_GLU_122 | OE2 | 2.753 |

Table 134: 1LK3-specific salt bridging networks analysis. In this table, a PDB file is specified with a four-letter PDB ID, except that the names of the PDB files corresponding to the single NMR structural model split from the NMR ensemble is specified with a four-letter PDB ID in addition to a hyphen followed by the single NMR structural model numeric ID, the residue naming scheme is **Chain ID\_residue name\_residue number**,  $\angle ADH$  represents the angle formed by acceptor (A), donor (D) and hydrogen (H) ( $\angle ADH$ ).



| PDB ID | Residue A | Atom A | Residue B | Atom B | Distance (Å) |
|--------|-----------|--------|-----------|--------|--------------|
| 1M71   | A_ARG_14  | NH1    | A_ASP_17  | OD1    | 3.710        |
| 1M71   | A_HIS_27D | ND1    | A_ASP_28  | OD1    | 3.392        |
| 1M71   | A_HIS_27D | ND1    | A_ASP_28  | OD2    | 2.865        |
| 1M71   | A_LYS_39  | NZ     | A_GLU_81  | OE1    | 2.866        |
| 1M71   | A_ARG_61  | NH1    | A_GLU_79  | OE1    | 3.543        |
| 1M71   | A_ARG_61  | NH2    | A_ASP_82  | OD1    | 2.481        |
| 1M71   | A_ARG_61  | NH2    | A_ASP_82  | OD2    | 2.894        |
| 1M71   | A_LYS_149 | NZ     | A_GLU_195 | OE2    | 3.376        |
| 1M71   | A_LYS_183 | NZ     | A_GLU_187 | OE1    | 2.685        |
| 1M71   | A_ARG_188 | NH1    | A_GLU_185 | OE1    | 3.609        |
| 1M71   | A_ARG_188 | NH2    | A_ASP_184 | OD1    | 3.517        |
| 1M71   | A_HIS_189 | ND1    | A_ASP_151 | OD1    | 3.287        |
| 1M71   | A_LYS_199 | NZ     | A_ASP_110 | OD1    | 2.781        |
| 1M71   | A_LYS_199 | NZ     | A_ASP_110 | OD2    | 3.508        |
| 1M71   | B_ARG_38  | NH1    | B_GLU_46  | OE1    | 2.911        |
| 1M71   | B_ARG_38  | NH1    | B_GLU_46  | OE2    | 3.780        |
| 1M71   | B_ARG_38  | NH2    | B_ASP_86  | OD1    | 3.068        |
| 1M71   | B_ARG_52  | NH1    | B_GLU_50  | OE2    | 2.697        |
| 1M71   | B_HIS_58  | ND1    | B_GLU_50  | OE2    | 3.091        |
| 1M71   | B_ARG_66  | NH1    | B_ASP_86  | OD1    | 3.230        |
| 1M71   | B_ARG_66  | NH1    | B_ASP_86  | OD2    | 3.124        |
| 1M71   | B_ARG_66  | NH2    | B_ASP_86  | OD1    | 3.143        |
| 1M71   | B_ARG_66  | NH2    | B_ASP_86  | OD2    | 3.298        |
| 1M71   | B_ARG_71  | NH1    | B_ASP_73  | OD2    | 3.433        |
| 1M71   | B_LYS_75  | NZ     | B_ASP_72  | OD2    | 3.881        |
| 1M71   | B_ARG_83  | NH1    | B_GLU_85  | OE2    | 3.022        |
| 1M71   | B_ARG_83  | NH2    | B_GLU_85  | OE2    | 2.413        |
| 1M71   | B_ARG_94  | NH1    | B_ASP_101 | OD1    | 3.346        |
| 1M71   | B_ARG_94  | NH1    | B_ASP_101 | OD2    | 3.346        |
| 1M71   | B_ARG_164 | NH1    | A_ASP_167 | OD2    | 3.246        |
| 1M71   | B_ARG_164 | NH1    | A_ASP_170 | OD1    | 3.912        |
| 1M71   | B_ARG_164 | NH2    | A_ASP_167 | OD2    | 2.886        |
| 1M71   | B_LYS_208 | NZ     | A_GLU_123 | OE1    | 2.546        |
| 1M71   | B_LYS_208 | NZ     | A_GLU_123 | OE2    | 3.594        |

Table 135: 1M71-specific salt bridging networks analysis. In this table, a PDB file is specified with a four-letter PDB ID, except that the names of the PDB files corresponding to the single NMR structural model split from the NMR ensemble is specified with a four-letter PDB ID in addition to a hyphen followed by the single NMR structural model numeric ID, the residue naming scheme is **Chain ID\_residue name\_residue number**,  $\angle ADH$  represents the angle formed by acceptor (A), donor (D) and hydrogen (H) ( $\angle ADH$ ).

| PDB ID | Residue A | Atom A | Residue B | Atom B | Distance (Å) |
|--------|-----------|--------|-----------|--------|--------------|
| 1M7D   | A_ARG_24  | NH1    | A_ASP_70  | OD1    | 3.427        |
| 1M7D   | A_HIS_27D | ND1    | A_ASP_28  | OD1    | 3.488        |
| 1M7D   | A_HIS_27D | ND1    | A_ASP_28  | OD2    | 3.058        |
| 1M7D   | A_LYS_39  | NZ     | A_GLU_81  | OE1    | 2.802        |
| 1M7D   | A_ARG_61  | NH1    | A_ASP_82  | OD1    | 2.789        |
| 1M7D   | A_ARG_61  | NH1    | A_ASP_82  | OD2    | 3.838        |
| 1M7D   | A_ARG_61  | NH2    | A_ASP_82  | OD1    | 3.397        |
| 1M7D   | A_ARG_61  | NH2    | A_ASP_82  | OD2    | 2.952        |
| 1M7D   | A_LYS_103 | NZ     | A_ASP_165 | OD1    | 3.651        |
| 1M7D   | A_LYS_149 | NZ     | A_GLU_195 | OE1    | 2.888        |
| 1M7D   | A_LYS_149 | NZ     | A_GLU_195 | OE2    | 3.877        |
| 1M7D   | A_ARG_188 | NH1    | A_GLU_185 | OE1    | 2.963        |
| 1M7D   | A_ARG_188 | NH2    | A_ASP_184 | OD1    | 3.464        |
| 1M7D   | A_HIS_189 | ND1    | A_ASP_151 | OD1    | 2.856        |
| 1M7D   | A_HIS_189 | NE2    | A_GLU_185 | OE2    | 2.728        |
| 1M7D   | A_LYS_199 | NZ     | A_ASP_110 | OD1    | 3.424        |
| 1M7D   | B_ARG_38  | NH1    | B_GLU_46  | OE1    | 3.681        |
| 1M7D   | B_ARG_38  | NH1    | B_GLU_46  | OE2    | 3.270        |
| 1M7D   | B_ARG_38  | NH2    | B_ASP_86  | OD1    | 3.018        |
| 1M7D   | B_ARG_52  | NH1    | B_GLU_50  | OE2    | 3.410        |
| 1M7D   | B_HIS_58  | ND1    | B_GLU_50  | OE2    | 3.864        |
| 1M7D   | B_ARG_66  | NH1    | B_ASP_86  | OD1    | 3.193        |
| 1M7D   | B_ARG_66  | NH1    | B_ASP_86  | OD2    | 3.613        |
| 1M7D   | B_ARG_66  | NH2    | B_ASP_86  | OD1    | 3.775        |
| 1M7D   | B_ARG_66  | NH2    | B_ASP_86  | OD2    | 2.708        |
| 1M7D   | B_ARG_71  | NH1    | B_ASP_73  | OD2    | 2.991        |
| 1M7D   | B_LYS_75  | NZ     | B_ASP_72  | OD1    | 3.686        |
| 1M7D   | B_ARG_94  | NH1    | B_ASP_101 | OD1    | 3.533        |
| 1M7D   | B_ARG_94  | NH1    | B_ASP_101 | OD2    | 2.689        |
| 1M7D   | B_ARG_164 | NH1    | A_ASP_167 | OD2    | 3.313        |
| 1M7D   | B_ARG_164 | NH1    | A_ASP_170 | OD1    | 3.795        |
| 1M7D   | B_ARG_164 | NH2    | A_ASP_167 | OD2    | 3.482        |
| 1M7D   | B_LYS_208 | NZ     | A_GLU_123 | OE1    | 2.586        |
| 1M7D   | B_LYS_208 | NZ     | A_GLU_123 | OE2    | 3.420        |

Table 136: 1M7D-specific salt bridging networks analysis. In this table, a PDB file is specified with a four-letter PDB ID, except that the names of the PDB files corresponding to the single NMR structural model split from the NMR ensemble is specified with a four-letter PDB ID in addition to a hyphen followed by the single NMR structural model numeric ID, the residue naming scheme is **Chain ID\_residue name\_residue number**,  $\angle ADH$  represents the angle formed by acceptor (A), donor (D) and hydrogen (H) ( $\angle ADH$ ).

| PDB ID | Residue A | Atom A | Residue B | Atom B | Distance (Å) |
|--------|-----------|--------|-----------|--------|--------------|
| 1M7I   | A_ARG_14  | NH1    | A_ASP_17  | OD1    | 3.105        |
| 1M7I   | A_ARG_14  | NH1    | A_ASP_17  | OD2    | 3.058        |
| 1M7I   | A_ARG_24  | NH1    | A_ASP_70  | OD1    | 3.369        |
| 1M7I   | A_ARG_24  | NH1    | A_ASP_70  | OD2    | 3.708        |
| 1M7I   | A_HIS_27D | ND1    | A_ASP_28  | OD1    | 3.271        |
| 1M7I   | A_HIS_27D | ND1    | A_ASP_28  | OD2    | 2.955        |
| 1M7I   | A_LYS_39  | NZ     | A_GLU_81  | OE1    | 3.102        |
| 1M7I   | A_ARG_61  | NH1    | A_ASP_82  | OD1    | 2.522        |
| 1M7I   | A_ARG_61  | NH1    | A_ASP_82  | OD2    | 3.863        |
| 1M7I   | A_ARG_61  | NH2    | A_GLU_79  | OE2    | 3.752        |
| 1M7I   | A_ARG_61  | NH2    | A_ASP_82  | OD1    | 2.961        |
| 1M7I   | A_ARG_61  | NH2    | A_ASP_82  | OD2    | 2.695        |
| 1M7I   | A_LYS_103 | NZ     | A_ASP_165 | OD1    | 3.427        |
| 1M7I   | A_LYS_147 | NZ     | A_GLU_154 | OE1    | 3.983        |
| 1M7I   | A_LYS_149 | NZ     | A_GLU_195 | OE1    | 2.955        |
| 1M7I   | A_LYS_183 | NZ     | A_GLU_187 | OE1    | 3.069        |
| 1M7I   | A_LYS_183 | NZ     | A_GLU_187 | OE2    | 2.718        |
| 1M7I   | A_ARG_188 | NH1    | A_GLU_185 | OE1    | 2.765        |
| 1M7I   | A_ARG_188 | NH1    | A_GLU_185 | OE2    | 3.812        |
| 1M7I   | A_ARG_188 | NH2    | A_ASP_184 | OD1    | 3.546        |
| 1M7I   | A_HIS_189 | ND1    | A_ASP_151 | OD1    | 2.633        |
| 1M7I   | A_HIS_189 | NE2    | A_GLU_185 | OE2    | 3.470        |
| 1M7I   | A_LYS_199 | NZ     | A_ASP_110 | OD1    | 3.401        |
| 1M7I   | A_LYS_199 | NZ     | A_ASP_110 | OD2    | 3.942        |
| 1M7I   | B_LYS_3   | NZ     | B_GLU_5   | OE1    | 3.875        |
| 1M7I   | B_ARG_38  | NH1    | B_GLU_46  | OE1    | 3.661        |
| 1M7I   | B_ARG_38  | NH1    | B_GLU_46  | OE2    | 3.487        |
| 1M7I   | B_ARG_38  | NH2    | B_ASP_86  | OD1    | 2.988        |
| 1M7I   | B_ARG_52  | NH1    | B_GLU_50  | OE2    | 3.454        |
| 1M7I   | B_LYS_64  | NZ     | B_GLU_61  | OE1    | 3.621        |
| 1M7I   | B_ARG_66  | NH1    | B_ASP_86  | OD1    | 3.442        |
| 1M7I   | B_ARG_66  | NH2    | B_ASP_86  | OD1    | 3.524        |
| 1M7I   | B_ARG_66  | NH2    | B_ASP_86  | OD2    | 3.046        |
| 1M7I   | B_ARG_71  | NH1    | B_ASP_73  | OD2    | 3.013        |
| 1M7I   | B_ARG_83  | NH2    | B_GLU_85  | OE2    | 3.534        |
| 1M7I   | B_ARG_94  | NH1    | B_ASP_101 | OD1    | 3.458        |
| 1M7I   | B_ARG_94  | NH1    | B_ASP_101 | OD2    | 2.750        |
| 1M7I   | B_ARG_164 | NH1    | A_ASP_167 | OD2    | 3.340        |
| 1M7I   | B_ARG_164 | NH1    | A_ASP_170 | OD1    | 3.884        |
| 1M7I   | B_ARG_164 | NH2    | A_ASP_167 | OD2    | 3.473        |
| 1M7I   | B_LYS_208 | NZ     | A_GLU_123 | OE1    | 3.031        |
| 1M7I   | B_LYS_208 | NZ     | A_GLU_123 | OE2    | 3.016        |

Table 137: 1M7I-specific salt bridging networks analysis. In this table, a PDB file is specified with a four-letter PDB ID, except that the names of the PDB files corresponding to the single NMR structural model split from the NMR ensemble is specified with a four-letter PDB ID in addition to a hyphen followed by the single NMR structural model numeric ID, the residue naming scheme is **Chain ID\_residue name\_residue number**,  $\angle ADH$  represents the angle formed by acceptor (A), donor (D) and hydrogen (H) ( $\angle ADH$ ).

| PDB ID | Residue A | Atom A | Residue B | Atom B | Distance (Å) |
|--------|-----------|--------|-----------|--------|--------------|
| 1MCO   | L_LYS_55  | NZ     | L_GLU_52  | OE1    | 3.257        |
| 1MCO   | L_LYS_55  | NZ     | L_GLU_52  | OE2    | 2.994        |
| 1MCO   | L_ARG_63  | NH1    | L_GLU_83  | OE1    | 3.878        |
| 1MCO   | L_ARG_63  | NH1    | L_ASP_84  | OD1    | 3.777        |
| 1MCO   | L_ARG_63  | NH1    | L_ASP_84  | OD2    | 3.204        |
| 1MCO   | L_ARG_63  | NH2    | L_GLU_83  | OE1    | 2.986        |
| 1MCO   | L_LYS_153 | NZ     | L_GLU_207 | OE1    | 3.930        |
| 1MCO   | L_HIS_192 | ND1    | L_ASP_155 | OD1    | 3.857        |
| 1MCO   | L_HIS_192 | ND1    | L_ASP_155 | OD2    | 3.328        |
| 1MCO   | H_ARG_40  | NH1    | H_ASP_91  | OD2    | 3.601        |
| 1MCO   | H_ARG_40  | NH2    | H_GLU_48  | OE1    | 3.700        |
| 1MCO   | H_ARG_68  | NH1    | H_ASP_91  | OD2    | 3.621        |
| 1MCO   | H_ARG_68  | NH2    | H_ASP_91  | OD2    | 3.951        |
| 1MCO   | H_ARG_99  | NH1    | H_ASP_27  | OD1    | 3.647        |
| 1MCO   | H_ARG_99  | NH1    | H_ASP_27  | OD2    | 2.797        |
| 1MCO   | H_LYS_302 | NZ     | H_ASP_265 | OD1    | 3.759        |
| 1MCO   | H_LYS_302 | NZ     | H_ASP_265 | OD2    | 3.098        |
| 1MCO   | H_LYS_305 | NZ     | H_GLU_318 | OE1    | 3.587        |
| 1MCO   | H_LYS_305 | NZ     | H_GLU_318 | OE2    | 3.377        |
| 1MCO   | H_ARG_329 | NH1    | H_ASP_386 | OD1    | 3.691        |
| 1MCO   | H_ARG_401 | NH1    | H_GLU_373 | OE1    | 3.230        |
| 1MCO   | H_ARG_401 | NH1    | H_GLU_373 | OE2    | 3.498        |
| 1MCO   | H_ARG_401 | NH2    | H_GLU_373 | OE1    | 3.949        |
| 1MCO   | H_ARG_401 | NH2    | H_GLU_373 | OE2    | 3.117        |

Table 138: 1MCO-specific salt bridging networks analysis. In this table, a PDB file is specified with a four-letter PDB ID, except that the names of the PDB files corresponding to the single NMR structural model split from the NMR ensemble is specified with a four-letter PDB ID in addition to a hyphen followed by the single NMR structural model numeric ID, the residue naming scheme is **Chain ID\_residue name\_residue number**,  $\angle ADH$  represents the angle formed by acceptor (A), donor (D) and hydrogen (H) ( $\angle ADH$ ).

| PDB ID | Residue A | Atom A | Residue B | Atom B | Distance (Å) |
|--------|-----------|--------|-----------|--------|--------------|
| 1MEL   | A_ARG_38  | NH1    | A_ASP_90  | OD1    | 3.059        |
| 1MEL   | A_ARG_38  | NH2    | A_GLU_46  | OE1    | 3.526        |
| 1MEL   | A_ARG_38  | NH2    | A_GLU_46  | OE2    | 3.673        |
| 1MEL   | A_ARG_38  | NH2    | A_ASP_90  | OD1    | 3.839        |
| 1MEL   | A_ARG_67  | NH1    | A_ASP_90  | OD1    | 3.797        |
| 1MEL   | A_ARG_67  | NH1    | A_ASP_90  | OD2    | 2.991        |
| 1MEL   | A_ARG_67  | NH2    | A_ASP_90  | OD1    | 2.893        |
| 1MEL   | A_ARG_67  | NH2    | A_ASP_90  | OD2    | 3.367        |
| 1MEL   | B_ARG_38  | NH1    | B_ASP_90  | OD1    | 3.033        |
| 1MEL   | B_ARG_38  | NH2    | B_GLU_46  | OE2    | 2.855        |
| 1MEL   | B_ARG_38  | NH2    | B_ASP_90  | OD1    | 3.939        |
| 1MEL   | B_LYS_65  | NZ     | B_ASP_62  | OD1    | 3.615        |
| 1MEL   | B_ARG_67  | NH1    | B_ASP_90  | OD2    | 2.997        |
| 1MEL   | B_ARG_67  | NH2    | B_ASP_90  | OD1    | 2.985        |
| 1MEL   | B_ARG_67  | NH2    | B_ASP_90  | OD2    | 2.943        |
| 1MEL   | B_HIS_111 | NE2    | B_GLU_108 | OE1    | 3.372        |
| 1MEL   | L_LYS_1   | NZ     | L_GLU_7   | OE1    | 3.475        |
| 1MEL   | L_LYS_1   | NZ     | L_GLU_7   | OE2    | 3.097        |
| 1MEL   | L_HIS_15  | NE2    | L_ASP_87  | OD1    | 3.885        |
| 1MEL   | L_ARG_61  | NH2    | L_ASP_48  | OD2    | 3.045        |
| 1MEL   | L_LYS_97  | NZ     | L_ASP_101 | OD2    | 2.722        |
| 1MEL   | L_ARG_125 | NH2    | L_ASP_119 | OD1    | 3.620        |
| 1MEL   | L_ARG_125 | NH2    | L_ASP_119 | OD2    | 2.816        |
| 1MEL   | M_LYS_1   | NZ     | M_GLU_7   | OE1    | 3.630        |
| 1MEL   | M_LYS_1   | NZ     | M_GLU_7   | OE2    | 2.907        |
| 1MEL   | M_ARG_61  | NH2    | M_ASP_48  | OD2    | 3.828        |
| 1MEL   | M_ARG_125 | NH1    | M_ASP_119 | OD2    | 3.053        |
| 1MEL   | M_ARG_125 | NH2    | M_ASP_119 | OD1    | 3.215        |
| 1MEL   | M_ARG_125 | NH2    | M_ASP_119 | OD2    | 3.106        |

Table 139: 1MEL-specific salt bridging networks analysis. In this table, a PDB file is specified with a four-letter PDB ID, except that the names of the PDB files corresponding to the single NMR structural model split from the NMR ensemble is specified with a four-letter PDB ID in addition to a hyphen followed by the single NMR structural model numeric ID, the residue naming scheme is **Chain ID\_residue name\_residue number**,  $\angle ADH$  represents the angle formed by acceptor (A), donor (D) and hydrogen (H) ( $\angle ADH$ ).

| PDB ID | Residue A | Atom A | Residue B | Atom B | Distance (Å) |
|--------|-----------|--------|-----------|--------|--------------|
| 1MFA   | L_HIS_34  | ND1    | L_ASP_52  | OD1    | 2.763        |
| 1MFA   | L_ARG_63  | NH2    | L_ASP_84  | OD1    | 2.796        |
| 1MFA   | L_ARG_63  | NH2    | L_ASP_84  | OD2    | 3.671        |
| 1MFA   | H_LYS_313 | NZ     | H_GLU_296 | OE1    | 3.001        |
| 1MFA   | H_LYS_313 | NZ     | H_GLU_296 | OE2    | 3.675        |
| 1MFA   | H_LYS_317 | NZ     | H_ASP_340 | OD1    | 3.252        |
| 1MFA   | H_LYS_317 | NZ     | H_ASP_340 | OD2    | 2.782        |
| 1MFA   | H_ARG_348 | NH2    | H_ASP_356 | OD1    | 3.621        |
| 1MFA   | H_ARG_348 | NH2    | H_ASP_356 | OD2    | 2.864        |

Table 140: 1MFA-specific salt bridging networks analysis. In this table, a PDB file is specified with a four-letter PDB ID, except that the names of the PDB files corresponding to the single NMR structural model split from the NMR ensemble is specified with a four-letter PDB ID in addition to a hyphen followed by the single NMR structural model numeric ID, the residue naming scheme is **Chain ID\_residue name\_residue number**,  $\angle ADH$  represents the angle formed by acceptor (A), donor (D) and hydrogen (H) ( $\angle ADH$ ).

| PDB ID | Residue A | Atom A | Residue B | Atom B | Distance (Å) |
|--------|-----------|--------|-----------|--------|--------------|
| 1MFB   | L_HIS_34  | ND1    | L_ASP_52  | OD1    | 2.852        |
| 1MFB   | L_HIS_44  | ND1    | L_GLU_40  | OE2    | 3.943        |
| 1MFB   | L_ARG_63  | NH2    | L_GLU_83  | OE2    | 3.681        |
| 1MFB   | L_ARG_63  | NH2    | L_ASP_84  | OD1    | 2.962        |
| 1MFB   | L_ARG_63  | NH2    | L_ASP_84  | OD2    | 3.489        |
| 1MFB   | L_LYS_113 | NZ     | L_GLU_201 | OE1    | 3.004        |
| 1MFB   | L_LYS_169 | NZ     | L_GLU_85  | OE2    | 3.323        |
| 1MFB   | L_HIS_191 | ND1    | L_ASP_154 | OD2    | 3.623        |
| 1MFB   | H_LYS_313 | NZ     | H_GLU_296 | OE1    | 3.225        |
| 1MFB   | H_LYS_313 | NZ     | H_GLU_296 | OE2    | 3.887        |
| 1MFB   | H_LYS_317 | NZ     | H_ASP_340 | OD1    | 3.570        |
| 1MFB   | H_LYS_317 | NZ     | H_ASP_340 | OD2    | 2.807        |
| 1MFB   | H_ARG_348 | NH1    | H_ASP_356 | OD1    | 3.475        |
| 1MFB   | H_ARG_348 | NH1    | H_ASP_356 | OD2    | 3.034        |
| 1MFB   | H_LYS_398 | NZ     | L_GLU_127 | OE2    | 2.924        |
| 1MFB   | H_LYS_463 | NZ     | L_GLU_126 | OE1    | 3.780        |

Table 141: 1MFB-specific salt bridging networks analysis. In this table, a PDB file is specified with a four-letter PDB ID, except that the names of the PDB files corresponding to the single NMR structural model split from the NMR ensemble is specified with a four-letter PDB ID in addition to a hyphen followed by the single NMR structural model numeric ID, the residue naming scheme is **Chain ID\_residue name\_residue number**,  $\angle ADH$  represents the angle formed by acceptor (A), donor (D) and hydrogen (H) ( $\angle ADH$ ).

| PDB ID | Residue A | Atom A | Residue B | Atom B | Distance (Å) |
|--------|-----------|--------|-----------|--------|--------------|
| 1MFC   | L_HIS_34  | ND1    | L_ASP_52  | OD1    | 2.788        |
| 1MFC   | L_ARG_63  | NH2    | L_GLU_83  | OE2    | 3.733        |
| 1MFC   | L_ARG_63  | NH2    | L_ASP_84  | OD1    | 2.943        |
| 1MFC   | L_ARG_63  | NH2    | L_ASP_84  | OD2    | 3.639        |
| 1MFC   | L_LYS_72  | NZ     | L_ASP_71  | OD1    | 3.757        |
| 1MFC   | L_LYS_113 | NZ     | L_GLU_201 | OE1    | 2.885        |
| 1MFC   | L_LYS_169 | NZ     | L_GLU_85  | OE2    | 2.931        |
| 1MFC   | L_HIS_191 | ND1    | L_ASP_154 | OD2    | 3.170        |
| 1MFC   | H_LYS_313 | NZ     | H_GLU_296 | OE1    | 3.268        |
| 1MFC   | H_LYS_313 | NZ     | H_GLU_296 | OE2    | 3.847        |
| 1MFC   | H_LYS_317 | NZ     | H_ASP_340 | OD1    | 3.122        |
| 1MFC   | H_LYS_317 | NZ     | H_ASP_340 | OD2    | 2.805        |
| 1MFC   | H_ARG_348 | NH1    | H_ASP_356 | OD1    | 3.435        |
| 1MFC   | H_ARG_348 | NH1    | H_ASP_356 | OD2    | 2.938        |
| 1MFC   | H_LYS_398 | NZ     | L_GLU_127 | OE2    | 2.815        |
| 1MFC   | H_LYS_463 | NZ     | L_GLU_126 | OE1    | 3.807        |

Table 142: 1MFC-specific salt bridging networks analysis. In this table, a PDB file is specified with a four-letter PDB ID, except that the names of the PDB files corresponding to the single NMR structural model split from the NMR ensemble is specified with a four-letter PDB ID in addition to a hyphen followed by the single NMR structural model numeric ID, the residue naming scheme is **Chain ID\_residue name\_residue number**,  $\angle ADH$  represents the angle formed by acceptor (A), donor (D) and hydrogen (H) ( $\angle ADH$ ).



| PDB ID | Residue A  | Atom A | Residue B | Atom B | Distance (Å) |
|--------|------------|--------|-----------|--------|--------------|
| 1MHH   | A_ARG_61   | NH1    | A_GLU_81  | OE1    | 3.842        |
| 1MHH   | A_ARG_61   | NH2    | A_GLU_81  | OE1    | 2.895        |
| 1MHH   | A_ARG_61   | NH2    | A_ASP_82  | OD1    | 2.685        |
| 1MHH   | A_ARG_61   | NH2    | A_ASP_82  | OD2    | 3.421        |
| 1MHH   | A_LYS_103  | NZ     | A_GLU_105 | OE1    | 3.375        |
| 1MHH   | A_LYS_103  | NZ     | A_GLU_105 | OE2    | 3.766        |
| 1MHH   | A_LYS_142  | NZ     | A_GLU_105 | OE1    | 3.319        |
| 1MHH   | A_LYS_142  | NZ     | A_GLU_105 | OE2    | 2.969        |
| 1MHH   | A_LYS_147  | NZ     | A_GLU_195 | OE2    | 3.944        |
| 1MHH   | A_LYS_149  | NZ     | A_GLU_195 | OE1    | 2.919        |
| 1MHH   | A_LYS_149  | NZ     | A_GLU_195 | OE2    | 3.626        |
| 1MHH   | A_ARG_155  | NH2    | A_GLU_185 | OE2    | 3.327        |
| 1MHH   | A_LYS_183  | NZ     | A_GLU_187 | OE1    | 2.817        |
| 1MHH   | A_LYS_183  | NZ     | A_GLU_187 | OE2    | 3.387        |
| 1MHH   | A_HIS_189  | ND1    | A_ASP_151 | OD2    | 2.738        |
| 1MHH   | A_LYS_199  | NZ     | A_ASP_110 | OD2    | 3.962        |
| 1MHH   | B_LYS_64   | NZ     | B_ASP_61  | OD1    | 3.336        |
| 1MHH   | B_ARG_66   | NH1    | B_ASP_86  | OD1    | 3.761        |
| 1MHH   | B_ARG_66   | NH1    | B_ASP_86  | OD2    | 2.813        |
| 1MHH   | B_ARG_66   | NH2    | B_ASP_86  | OD1    | 3.094        |
| 1MHH   | B_ARG_66   | NH2    | B_ASP_86  | OD2    | 3.485        |
| 1MHH   | B_ARG_94   | NH2    | B_ASP_101 | OD1    | 2.684        |
| 1MHH   | B_ARG_94   | NH2    | B_ASP_101 | OD2    | 3.615        |
| 1MHH   | B_LYS_208  | NZ     | A_GLU_123 | OE2    | 3.019        |
| 1MHH   | C_LYS_24   | NZ     | C_ASP_70  | OD1    | 3.911        |
| 1MHH   | C_ARG_61   | NH1    | C_GLU_81  | OE2    | 3.375        |
| 1MHH   | C_ARG_61   | NH1    | C_ASP_82  | OD1    | 2.924        |
| 1MHH   | C_ARG_61   | NH1    | C_ASP_82  | OD2    | 3.294        |
| 1MHH   | C_ARG_61   | NH2    | C_ASP_82  | OD1    | 3.459        |
| 1MHH   | C_ARG_61   | NH2    | C_ASP_82  | OD2    | 2.571        |
| 1MHH   | C_LYS_147  | NZ     | C_GLU_195 | OE1    | 3.060        |
| 1MHH   | C_LYS_149  | NZ     | C_GLU_195 | OE2    | 3.143        |
| 1MHH   | C_ARG_155  | NH1    | C_GLU_185 | OE1    | 3.912        |
| 1MHH   | C_ARG_155  | NH1    | C_GLU_185 | OE2    | 3.653        |
| 1MHH   | C_ARG_155  | NH2    | C_GLU_185 | OE1    | 2.731        |
| 1MHH   | C_ARG_155  | NH2    | C_GLU_185 | OE2    | 3.507        |
| 1MHH   | C_LYS_183  | NZ     | C_GLU_187 | OE1    | 2.713        |
| 1MHH   | C_ARG_188  | NH1    | E_ASP_831 | OD2    | 3.196        |
| 1MHH   | C_ARG_188  | NH2    | E_ASP_831 | OD2    | 3.360        |
| 1MHH   | C_HIS_189  | ND1    | C_ASP_151 | OD1    | 2.633        |
| 1MHH   | C_LYS_199  | NZ     | C_ASP_110 | OD2    | 2.558        |
| 1MHH   | D_ARG_66   | NH1    | D_ASP_86  | OD1    | 3.829        |
| 1MHH   | D_ARG_66   | NH1    | D_ASP_86  | OD2    | 2.884        |
| 1MHH   | D_ARG_66   | NH2    | D_ASP_86  | OD1    | 2.828        |
| 1MHH   | D_ARG_66   | NH2    | D_ASP_86  | OD2    | 3.264        |
| 1MHH   | D_ARG_94   | NH2    | D_ASP_101 | OD1    | 3.655        |
| 1MHH   | D_ARG_94   | NH2    | D_ASP_101 | OD2    | 2.611        |
| 1MHH   | E_LYS_833  | NZ     | C_GLU_185 | OE2    | 2.489        |
| 1MHH   | E_LYS_840  | NZ     | E_GLU_838 | OE1    | 3.866        |
| 1MHH   | E_HIS_874  | NE2    | E_GLU_869 | OE2    | 3.707        |
| 1MHH   | E_LYS_878  | NZ     | E_ASP_867 | OD2    | 2.644        |
| 1MHH   | F_LYS_1833 | NZ     | C_GLU_17  | OE1    | 3.798        |

---

Table 143: 1MHH-specific salt bridging networks analysis. In this table, a PDB file is specified with a four-letter PDB ID, except that the names of the PDB files corresponding to the single NMR structural model split from the NMR ensemble is specified with a four-letter PDB ID in addition to a hyphen followed by the single NMR structural model numeric ID, the residue naming scheme is **Chain ID\_residue name\_residue number**,  $\angle ADH$  represents the angle formed by acceptor (A), donor (D) and hydrogen (H) ( $\angle ADH$ ).

| PDB ID | Residue A | Atom A | Residue B | Atom B | Distance (Å) |
|--------|-----------|--------|-----------|--------|--------------|
| 1MLB   | A_ARG_61  | NH1    | A_ASP_82  | OD1    | 2.159        |
| 1MLB   | A_ARG_61  | NH1    | A_ASP_82  | OD2    | 2.329        |
| 1MLB   | A_ARG_61  | NH2    | A_GLU_79  | OE1    | 3.872        |
| 1MLB   | A_ARG_61  | NH2    | A_GLU_81  | OE2    | 3.099        |
| 1MLB   | A_LYS_147 | NZ     | A_GLU_154 | OE1    | 3.634        |
| 1MLB   | A_LYS_147 | NZ     | A_GLU_154 | OE2    | 2.438        |
| 1MLB   | A_LYS_149 | NZ     | A_GLU_195 | OE1    | 3.556        |
| 1MLB   | A_LYS_149 | NZ     | A_GLU_195 | OE2    | 3.786        |
| 1MLB   | A_ARG_155 | NH1    | A_GLU_185 | OE2    | 2.511        |
| 1MLB   | A_ARG_155 | NH2    | A_GLU_185 | OE1    | 3.793        |
| 1MLB   | A_ARG_155 | NH2    | A_GLU_185 | OE2    | 2.918        |
| 1MLB   | A_HIS_189 | ND1    | A_ASP_151 | OD2    | 2.937        |
| 1MLB   | A_LYS_199 | NZ     | A_ASP_110 | OD2    | 2.869        |
| 1MLB   | B_ARG_40  | NH1    | B_GLU_89  | OE2    | 3.375        |
| 1MLB   | B_ARG_40  | NH2    | B_GLU_89  | OE2    | 3.648        |
| 1MLB   | B_LYS_63  | NZ     | B_GLU_46  | OE1    | 3.279        |
| 1MLB   | B_LYS_67  | NZ     | B_ASP_90  | OD1    | 2.983        |
| 1MLB   | B_LYS_67  | NZ     | B_ASP_90  | OD2    | 2.383        |
| 1MLB   | B_ARG_98  | NH2    | B_ASP_100 | OD1    | 3.092        |
| 1MLB   | B_ARG_98  | NH2    | B_ASP_100 | OD2    | 2.647        |
| 1MLB   | B_LYS_211 | NZ     | A_GLU_123 | OE1    | 3.556        |

Table 144: 1MLB-specific salt bridging networks analysis. In this table, a PDB file is specified with a four-letter PDB ID, except that the names of the PDB files corresponding to the single NMR structural model split from the NMR ensemble is specified with a four-letter PDB ID in addition to a hyphen followed by the single NMR structural model numeric ID, the residue naming scheme is **Chain ID\_residue name\_residue number**,  $\angle ADH$  represents the angle formed by acceptor (A), donor (D) and hydrogen (H) ( $\angle ADH$ ).

| PDB ID | Residue A | Atom A | Residue B | Atom B | Distance (Å) |
|--------|-----------|--------|-----------|--------|--------------|
| 1MLC   | A_ARG.61  | NH1    | A_ASP.82  | OD1    | 2.951        |
| 1MLC   | A_ARG.61  | NH1    | A_ASP.82  | OD2    | 2.608        |
| 1MLC   | A_LYS.149 | NZ     | A_GLU.195 | OE1    | 3.271        |
| 1MLC   | A_LYS.149 | NZ     | A_GLU.195 | OE2    | 2.595        |
| 1MLC   | A_ARG.155 | NH2    | A_GLU.185 | OE1    | 2.706        |
| 1MLC   | A_ARG.155 | NH2    | A_GLU.185 | OE2    | 3.006        |
| 1MLC   | A_LYS.183 | NZ     | A_GLU.187 | OE1    | 2.465        |
| 1MLC   | A_LYS.183 | NZ     | A_GLU.187 | OE2    | 2.957        |
| 1MLC   | A_HIS.189 | ND1    | A_ASP.151 | OD2    | 3.264        |
| 1MLC   | A_HIS.189 | NE2    | A_GLU.185 | OE2    | 3.846        |
| 1MLC   | A_LYS.199 | NZ     | A_ASP.110 | OD1    | 3.804        |
| 1MLC   | A_LYS.199 | NZ     | A_ASP.110 | OD2    | 2.246        |
| 1MLC   | B_LYS.38  | NZ     | B_ASP.90  | OD1    | 3.791        |
| 1MLC   | B_ARG.40  | NH2    | B_GLU.89  | OE1    | 3.285        |
| 1MLC   | B_LYS.63  | NZ     | B_GLU.46  | OE2    | 3.505        |
| 1MLC   | B_LYS.67  | NZ     | B_ASP.90  | OD1    | 3.662        |
| 1MLC   | B_LYS.67  | NZ     | B_ASP.90  | OD2    | 2.412        |
| 1MLC   | B_ARG.98  | NH2    | B_ASP.100 | OD1    | 2.914        |
| 1MLC   | B_ARG.98  | NH2    | B_ASP.100 | OD2    | 3.525        |
| 1MLC   | C_ARG.61  | NH1    | C_ASP.82  | OD1    | 3.434        |
| 1MLC   | C_ARG.61  | NH1    | C_ASP.82  | OD2    | 2.291        |
| 1MLC   | C_ARG.61  | NH2    | C_ASP.82  | OD1    | 2.696        |
| 1MLC   | C_ARG.61  | NH2    | C_ASP.82  | OD2    | 3.196        |
| 1MLC   | C_ARG.155 | NH2    | C_GLU.185 | OE2    | 3.214        |
| 1MLC   | C_LYS.183 | NZ     | C_GLU.187 | OE1    | 2.976        |
| 1MLC   | C_LYS.183 | NZ     | C_GLU.187 | OE2    | 3.623        |
| 1MLC   | C_ARG.188 | NH1    | C_GLU.185 | OE1    | 3.888        |
| 1MLC   | C_HIS.189 | ND1    | C_ASP.151 | OD2    | 3.300        |
| 1MLC   | C_HIS.189 | NE2    | C_GLU.185 | OE1    | 2.956        |
| 1MLC   | C_LYS.199 | NZ     | C_ASP.110 | OD2    | 3.357        |
| 1MLC   | D_LYS.63  | NZ     | D_GLU.46  | OE2    | 2.938        |
| 1MLC   | D_LYS.67  | NZ     | D_ASP.90  | OD1    | 3.041        |
| 1MLC   | D_LYS.67  | NZ     | D_ASP.90  | OD2    | 2.752        |
| 1MLC   | D_ARG.98  | NH2    | D_ASP.100 | OD1    | 3.684        |
| 1MLC   | D_ARG.98  | NH2    | D_ASP.100 | OD2    | 2.571        |
| 1MLC   | E_LYS.1   | NZ     | E_GLU.7   | OE2    | 3.616        |
| 1MLC   | E_ARG.45  | NH2    | B_GLU.50  | OE2    | 3.032        |
| 1MLC   | E_ARG.68  | NH1    | B_GLU.50  | OE2    | 3.781        |
| 1MLC   | E_ARG.68  | NH2    | B_GLU.35  | OE2    | 2.927        |
| 1MLC   | E_ARG.68  | NH2    | B_GLU.50  | OE1    | 2.510        |
| 1MLC   | E_ARG.68  | NH2    | B_GLU.50  | OE2    | 3.189        |
| 1MLC   | F_LYS.1   | NZ     | F_GLU.7   | OE2    | 3.323        |
| 1MLC   | F_ARG.45  | NH2    | D_GLU.50  | OE2    | 2.431        |
| 1MLC   | F_ARG.68  | NH2    | D_GLU.35  | OE2    | 3.266        |
| 1MLC   | F_ARG.68  | NH2    | D_GLU.50  | OE1    | 2.710        |
| 1MLC   | F_ARG.68  | NH2    | D_GLU.50  | OE2    | 3.606        |
| 1MLC   | F_ARG.125 | NH1    | F_ASP.119 | OD2    | 3.464        |
| 1MLC   | F_ARG.125 | NH2    | F_ASP.119 | OD2    | 2.213        |

---

Table 145: 1MLC-specific salt bridging networks analysis. In this table, a PDB file is specified with a four-letter PDB ID, except that the names of the PDB files corresponding to the single NMR structural model split from the NMR ensemble is specified with a four-letter PDB ID in addition to a hyphen followed by the single NMR structural model numeric ID, the residue naming scheme is **Chain ID\_residue name\_residue number**,  $\angle ADH$  represents the angle formed by acceptor (A), donor (D) and hydrogen (H) ( $\angle ADH$ ).

| PDB ID | Residue A | Atom A | Residue B | Atom B | Distance (Å) |
|--------|-----------|--------|-----------|--------|--------------|
| 1N64   | L_LYS_24  | NZ     | L_ASP_70  | OD2    | 3.651        |
| 1N64   | L_ARG_54  | NH2    | L_ASP_60  | OD2    | 3.449        |
| 1N64   | L_ARG_61  | NH1    | L_GLU_81  | OE1    | 3.429        |
| 1N64   | L_ARG_61  | NH1    | L_ASP_82  | OD1    | 2.971        |
| 1N64   | L_ARG_61  | NH1    | L_ASP_82  | OD2    | 2.992        |
| 1N64   | L_LYS_142 | NZ     | L_GLU_105 | OE2    | 3.590        |
| 1N64   | L_LYS_149 | NZ     | L_GLU_195 | OE1    | 3.534        |
| 1N64   | L_ARG_155 | NH2    | L_GLU_185 | OE2    | 3.243        |
| 1N64   | L_LYS_183 | NZ     | L_GLU_187 | OE2    | 2.697        |
| 1N64   | L_HIS_189 | ND1    | L_ASP_151 | OD2    | 3.116        |
| 1N64   | L_ARG_211 | NH2    | L_GLU_187 | OE1    | 3.018        |
| 1N64   | H_LYS_12  | NZ     | H_GLU_16  | OE1    | 3.976        |
| 1N64   | H_LYS_64  | NZ     | H_ASP_61  | OD1    | 2.775        |
| 1N64   | H_ARG_66  | NH1    | H_ASP_86  | OD1    | 3.467        |
| 1N64   | H_ARG_66  | NH1    | H_ASP_86  | OD2    | 3.004        |
| 1N64   | H_ARG_66  | NH2    | H_ASP_86  | OD1    | 2.824        |
| 1N64   | H_ARG_66  | NH2    | H_ASP_86  | OD2    | 3.196        |
| 1N64   | H_ARG_94  | NH1    | H_ASP_101 | OD1    | 2.581        |
| 1N64   | H_ARG_94  | NH1    | H_ASP_101 | OD2    | 3.313        |
| 1N64   | H_LYS_208 | NZ     | L_GLU_123 | OE1    | 3.752        |

Table 146: 1N64-specific salt bridging networks analysis. In this table, a PDB file is specified with a four-letter PDB ID, except that the names of the PDB files corresponding to the single NMR structural model split from the NMR ensemble is specified with a four-letter PDB ID in addition to a hyphen followed by the single NMR structural model numeric ID, the residue naming scheme is **Chain ID\_residue name\_residue number**,  $\angle ADH$  represents the angle formed by acceptor (A), donor (D) and hydrogen (H) ( $\angle ADH$ ).

| PDB ID | Residue A | Atom A | Residue B | Atom B | Distance (Å) |
|--------|-----------|--------|-----------|--------|--------------|
| 1NBY   | A_ARG.61  | NH2    | A_GLU.81  | OE1    | 3.423        |
| 1NBY   | A_ARG.61  | NH2    | A_ASP.82  | OD1    | 2.821        |
| 1NBY   | A_ARG.61  | NH2    | A_ASP.82  | OD2    | 3.549        |
| 1NBY   | A_LYS.103 | NZ     | A_GLU.105 | OE2    | 3.768        |
| 1NBY   | A_LYS.147 | NZ     | A_GLU.154 | OE2    | 3.844        |
| 1NBY   | A_LYS.149 | NZ     | A_GLU.195 | OE1    | 3.898        |
| 1NBY   | A_LYS.149 | NZ     | A_GLU.195 | OE2    | 3.414        |
| 1NBY   | A_ARG.155 | NH2    | A_GLU.185 | OE2    | 3.438        |
| 1NBY   | A_LYS.169 | NZ     | A_ASP.167 | OD1    | 3.633        |
| 1NBY   | A_LYS.169 | NZ     | A_ASP.167 | OD2    | 2.995        |
| 1NBY   | B_ARG.338 | NH1    | B_ASP.389 | OD1    | 2.811        |
| 1NBY   | B_ARG.338 | NH2    | B_GLU.346 | OE1    | 2.861        |
| 1NBY   | B_ARG.338 | NH2    | B_ASP.389 | OD1    | 3.519        |
| 1NBY   | B_ARG.366 | NH1    | B_ASP.389 | OD1    | 3.031        |
| 1NBY   | B_ARG.366 | NH1    | B_ASP.389 | OD2    | 3.595        |
| 1NBY   | B_ARG.366 | NH2    | B_ASP.389 | OD1    | 3.673        |
| 1NBY   | B_ARG.366 | NH2    | B_ASP.389 | OD2    | 2.895        |
| 1NBY   | B_LYS.508 | NZ     | A_GLU.123 | OE1    | 2.458        |
| 1NBY   | B_LYS.508 | NZ     | A_GLU.123 | OE2    | 3.274        |
| 1NBY   | C_LYS.601 | NZ     | C_GLU.607 | OE2    | 2.838        |
| 1NBY   | C_LYS.613 | NZ     | C_ASP.618 | OD1    | 3.678        |
| 1NBY   | C_LYS.697 | NZ     | B_ASP.332 | OD1    | 3.949        |
| 1NBY   | C_LYS.697 | NZ     | B_ASP.332 | OD2    | 2.515        |
| 1NBY   | C_ARG.725 | NH1    | C_ASP.719 | OD1    | 3.590        |
| 1NBY   | C_ARG.725 | NH1    | C_ASP.719 | OD2    | 3.913        |
| 1NBY   | C_ARG.725 | NH2    | C_ASP.719 | OD1    | 3.444        |
| 1NBY   | C_ARG.725 | NH2    | C_ASP.719 | OD2    | 3.368        |

Table 147: 1NBY-specific salt bridging networks analysis. In this table, a PDB file is specified with a four-letter PDB ID, except that the names of the PDB files corresponding to the single NMR structural model split from the NMR ensemble is specified with a four-letter PDB ID in addition to a hyphen followed by the single NMR structural model numeric ID, the residue naming scheme is **Chain ID\_residue name\_residue number**,  $\angle ADH$  represents the angle formed by acceptor (A), donor (D) and hydrogen (H) ( $\angle ADH$ ).

| PDB ID | Residue A | Atom A | Residue B  | Atom B | Distance (Å) |
|--------|-----------|--------|------------|--------|--------------|
| 1NBZ   | A_ARG_24  | NH2    | A_ASP_70   | OD1    | 2.834        |
| 1NBZ   | A_ARG_61  | NH1    | A_GLU_79   | OE2    | 3.336        |
| 1NBZ   | A_ARG_61  | NH2    | A_GLU_79   | OE2    | 3.126        |
| 1NBZ   | A_ARG_61  | NH2    | A_GLU_81   | OE1    | 3.673        |
| 1NBZ   | A_ARG_61  | NH2    | A_ASP_82   | OD1    | 2.933        |
| 1NBZ   | A_ARG_61  | NH2    | A_ASP_82   | OD2    | 3.530        |
| 1NBZ   | A_LYS_147 | NZ     | A_GLU_154  | OE1    | 3.461        |
| 1NBZ   | A_LYS_149 | NZ     | A_GLU_195B | OE1    | 3.640        |
| 1NBZ   | A_ARG_155 | NH1    | A_GLU_185  | OE2    | 3.835        |
| 1NBZ   | A_ARG_155 | NH2    | A_GLU_185  | OE2    | 3.081        |
| 1NBZ   | B_ARG_338 | NH1    | B_GLU_346  | OE1    | 2.666        |
| 1NBZ   | B_ARG_338 | NH1    | B_ASP_389  | OD1    | 3.713        |
| 1NBZ   | B_ARG_338 | NH2    | B_ASP_389  | OD1    | 2.601        |
| 1NBZ   | B_ARG_366 | NH1    | B_ASP_389  | OD1    | 3.099        |
| 1NBZ   | B_ARG_366 | NH1    | B_ASP_389  | OD2    | 3.734        |
| 1NBZ   | B_ARG_366 | NH2    | B_ASP_389  | OD1    | 3.577        |
| 1NBZ   | B_ARG_366 | NH2    | B_ASP_389  | OD2    | 2.894        |
| 1NBZ   | C_LYS_601 | NZ     | C_GLU_607  | OE2    | 3.226        |
| 1NBZ   | C_ARG_661 | NH1    | C_ASP_648  | OD1    | 3.578        |
| 1NBZ   | C_ARG_661 | NH1    | C_ASP_648  | OD2    | 3.756        |

Table 148: 1NBZ-specific salt bridging networks analysis. In this table, a PDB file is specified with a four-letter PDB ID, except that the names of the PDB files corresponding to the single NMR structural model split from the NMR ensemble is specified with a four-letter PDB ID in addition to a hyphen followed by the single NMR structural model numeric ID, the residue naming scheme is **Chain ID\_residue name\_residue number**,  $\angle ADH$  represents the angle formed by acceptor (A), donor (D) and hydrogen (H) ( $\angle ADH$ ).



| PDB ID | Residue A | Atom A | Residue B | Atom B | Distance (Å) |
|--------|-----------|--------|-----------|--------|--------------|
| 1NDG   | A_ARG_61  | NH2    | A_GLU_81  | OE1    | 3.007        |
| 1NDG   | A_ARG_61  | NH2    | A_ASP_82  | OD1    | 2.723        |
| 1NDG   | A_ARG_61  | NH2    | A_ASP_82  | OD2    | 3.409        |
| 1NDG   | A_LYS_147 | NZ     | A_GLU_154 | OE1    | 3.627        |
| 1NDG   | A_LYS_149 | NZ     | A_GLU_195 | OE1    | 3.917        |
| 1NDG   | A_LYS_149 | NZ     | A_GLU_195 | OE2    | 3.737        |
| 1NDG   | A_ARG_155 | NH2    | A_GLU_185 | OE2    | 3.269        |
| 1NDG   | A_LYS_199 | NZ     | A_ASP_110 | OD2    | 3.863        |
| 1NDG   | B_ARG_338 | NH1    | B_GLU_346 | OE1    | 2.782        |
| 1NDG   | B_ARG_338 | NH1    | B_ASP_389 | OD1    | 3.738        |
| 1NDG   | B_ARG_338 | NH2    | B_ASP_389 | OD1    | 2.639        |
| 1NDG   | B_HIS_360 | NE2    | A_ASP_1   | OD2    | 3.716        |
| 1NDG   | B_ARG_366 | NH1    | B_ASP_389 | OD1    | 3.027        |
| 1NDG   | B_ARG_366 | NH1    | B_ASP_389 | OD2    | 3.618        |
| 1NDG   | B_ARG_366 | NH2    | B_ASP_389 | OD1    | 3.672        |
| 1NDG   | B_ARG_366 | NH2    | B_ASP_389 | OD2    | 2.903        |
| 1NDG   | B_LYS_519 | NZ     | A_GLU_123 | OE2    | 2.645        |
| 1NDG   | C_LYS_601 | NZ     | C_GLU_607 | OE1    | 3.948        |
| 1NDG   | C_LYS_601 | NZ     | C_GLU_607 | OE2    | 3.018        |
| 1NDG   | C_LYS_613 | NZ     | C_ASP_618 | OD2    | 3.695        |
| 1NDG   | C_ARG_668 | NH1    | C_ASP_666 | OD2    | 3.998        |
| 1NDG   | C_LYS_697 | NZ     | B_ASP_332 | OD1    | 3.996        |
| 1NDG   | C_LYS_697 | NZ     | B_ASP_332 | OD2    | 2.706        |
| 1NDG   | C_LYS_697 | NZ     | B_ASP_399 | OD1    | 2.922        |
| 1NDG   | C_LYS_697 | NZ     | B_ASP_399 | OD2    | 3.579        |
| 1NDG   | C_ARG_725 | NH2    | C_ASP_719 | OD1    | 3.484        |
| 1NDG   | C_ARG_725 | NH2    | C_ASP_719 | OD2    | 2.665        |

Table 149: 1NDG-specific salt bridging networks analysis. In this table, a PDB file is specified with a four-letter PDB ID, except that the names of the PDB files corresponding to the single NMR structural model split from the NMR ensemble is specified with a four-letter PDB ID in addition to a hyphen followed by the single NMR structural model numeric ID, the residue naming scheme is **Chain ID\_residue name\_residue number**,  $\angle ADH$  represents the angle formed by acceptor (A), donor (D) and hydrogen (H) ( $\angle ADH$ ).

| PDB ID | Residue A | Atom A | Residue B | Atom B | Distance (Å) |
|--------|-----------|--------|-----------|--------|--------------|
| 1NDM   | A_ARG_24  | NH2    | A_ASP_70  | OD1    | 3.107        |
| 1NDM   | A_ARG_61  | NH1    | A_GLU_79  | OE1    | 3.684        |
| 1NDM   | A_ARG_61  | NH1    | A_GLU_79  | OE2    | 2.866        |
| 1NDM   | A_ARG_61  | NH2    | A_GLU_79  | OE1    | 3.477        |
| 1NDM   | A_ARG_61  | NH2    | A_GLU_79  | OE2    | 3.744        |
| 1NDM   | A_ARG_61  | NH2    | A_GLU_81  | OE1    | 3.172        |
| 1NDM   | A_ARG_61  | NH2    | A_ASP_82  | OD1    | 2.876        |
| 1NDM   | A_ARG_61  | NH2    | A_ASP_82  | OD2    | 3.578        |
| 1NDM   | A_LYS_149 | NZ     | A_GLU_195 | OE1    | 3.953        |
| 1NDM   | A_LYS_149 | NZ     | A_GLU_195 | OE2    | 3.016        |
| 1NDM   | A_ARG_155 | NH1    | A_GLU_185 | OE1    | 3.939        |
| 1NDM   | A_ARG_155 | NH2    | A_GLU_185 | OE1    | 3.970        |
| 1NDM   | A_ARG_188 | NH2    | A_ASP_184 | OD1    | 3.023        |
| 1NDM   | A_LYS_199 | NZ     | A_ASP_110 | OD2    | 3.562        |
| 1NDM   | B_ARG_338 | NH1    | B_GLU_346 | OE1    | 2.753        |
| 1NDM   | B_ARG_338 | NH1    | B_ASP_389 | OD1    | 3.746        |
| 1NDM   | B_ARG_338 | NH2    | B_ASP_389 | OD1    | 2.687        |
| 1NDM   | B_ARG_366 | NH1    | B_ASP_389 | OD1    | 3.863        |
| 1NDM   | B_ARG_366 | NH2    | B_ASP_389 | OD1    | 3.499        |
| 1NDM   | B_ARG_366 | NH2    | B_ASP_389 | OD2    | 2.806        |
| 1NDM   | B_ARG_397 | NH1    | B_ASP_332 | OD1    | 3.700        |
| 1NDM   | B_ARG_397 | NH2    | B_ASP_401 | OD1    | 2.798        |
| 1NDM   | B_ARG_397 | NH2    | B_ASP_401 | OD2    | 3.696        |
| 1NDM   | B_LYS_519 | NZ     | A_GLU_123 | OE1    | 3.184        |
| 1NDM   | C_LYS_601 | NZ     | C_GLU_607 | OE1    | 3.751        |
| 1NDM   | C_LYS_601 | NZ     | C_GLU_607 | OE2    | 2.713        |
| 1NDM   | C_ARG_668 | NH1    | C_ASP_666 | OD2    | 3.599        |
| 1NDM   | C_LYS_697 | NZ     | B_ASP_332 | OD1    | 3.954        |
| 1NDM   | C_LYS_697 | NZ     | B_ASP_332 | OD2    | 2.468        |
| 1NDM   | C_LYS_697 | NZ     | B_GLU_399 | OE1    | 2.743        |

Table 150: 1NDM-specific salt bridging networks analysis. In this table, a PDB file is specified with a four-letter PDB ID, except that the names of the PDB files corresponding to the single NMR structural model split from the NMR ensemble is specified with a four-letter PDB ID in addition to a hyphen followed by the single NMR structural model numeric ID, the residue naming scheme is **Chain ID\_residue name\_residue number**,  $\angle ADH$  represents the angle formed by acceptor (A), donor (D) and hydrogen (H) ( $\angle ADH$ ).

| PDB ID | Residue A | Atom A | Residue B | Atom B | Distance (Å) |
|--------|-----------|--------|-----------|--------|--------------|
| 1NGW   | L_LYS_24  | NZ     | L_ASP_70  | OD1    | 3.381        |
| 1NGW   | L_ARG_61  | NH1    | L_ASP_82  | OD1    | 2.889        |
| 1NGW   | L_ARG_61  | NH1    | L_ASP_82  | OD2    | 3.061        |
| 1NGW   | L_LYS_103 | NZ     | L_GLU_165 | OE1    | 3.834        |
| 1NGW   | L_LYS_103 | NZ     | L_GLU_165 | OE2    | 3.110        |
| 1NGW   | L_LYS_149 | NZ     | L_GLU_195 | OE1    | 2.871        |
| 1NGW   | L_LYS_183 | NZ     | L_GLU_187 | OE1    | 3.850        |
| 1NGW   | L_LYS_183 | NZ     | L_GLU_187 | OE2    | 2.603        |
| 1NGW   | L_LYS_188 | NZ     | L_ASP_185 | OD1    | 3.745        |
| 1NGW   | H_LYS_38  | NZ     | H_GLU_89  | OE1    | 3.916        |
| 1NGW   | H_LYS_38  | NZ     | H_GLU_89  | OE2    | 3.046        |
| 1NGW   | H_ARG_40  | NH1    | H_GLU_89  | OE2    | 3.692        |
| 1NGW   | H_LYS_63  | NZ     | H_GLU_46  | OE1    | 3.487        |
| 1NGW   | H_LYS_67  | NZ     | H_GLU_89  | OE1    | 3.643        |
| 1NGW   | H_LYS_67  | NZ     | H_ASP_90  | OD1    | 2.985        |
| 1NGW   | H_LYS_67  | NZ     | H_ASP_90  | OD2    | 3.338        |
| 1NGW   | H_ARG_98  | NH1    | H_ASP_102 | OD1    | 3.333        |
| 1NGW   | H_ARG_99  | NH2    | H_ASP_100 | OD1    | 3.884        |
| 1NGW   | H_ARG_99  | NH2    | H_ASP_100 | OD2    | 3.152        |
| 1NGW   | H_LYS_144 | NZ     | H_ASP_145 | OD1    | 3.933        |
| 1NGW   | H_LYS_144 | NZ     | H_ASP_145 | OD2    | 3.556        |
| 1NGW   | H_HIS_165 | NE2    | L_ASP_167 | OD1    | 3.771        |
| 1NGW   | H_LYS_210 | NZ     | L_GLU_123 | OE1    | 3.544        |
| 1NGW   | H_LYS_210 | NZ     | L_GLU_123 | OE2    | 3.092        |
| 1NGW   | A_LYS_24  | NZ     | A_ASP_70  | OD1    | 3.412        |
| 1NGW   | A_ARG_61  | NH1    | A_ASP_82  | OD1    | 2.833        |
| 1NGW   | A_ARG_61  | NH1    | A_ASP_82  | OD2    | 3.020        |
| 1NGW   | A_LYS_103 | NZ     | A_GLU_165 | OE2    | 3.226        |
| 1NGW   | A_LYS_149 | NZ     | A_GLU_195 | OE1    | 2.874        |
| 1NGW   | A_LYS_183 | NZ     | A_GLU_187 | OE1    | 3.842        |
| 1NGW   | A_LYS_183 | NZ     | A_GLU_187 | OE2    | 2.592        |
| 1NGW   | A_LYS_188 | NZ     | A_ASP_185 | OD1    | 3.777        |
| 1NGW   | B_LYS_38  | NZ     | B_GLU_89  | OE1    | 3.908        |
| 1NGW   | B_LYS_38  | NZ     | B_GLU_89  | OE2    | 3.066        |
| 1NGW   | B_ARG_40  | NH1    | B_GLU_89  | OE2    | 3.715        |
| 1NGW   | B_LYS_63  | NZ     | B_GLU_46  | OE1    | 3.549        |
| 1NGW   | B_LYS_67  | NZ     | B_GLU_89  | OE1    | 3.643        |
| 1NGW   | B_LYS_67  | NZ     | B_ASP_90  | OD1    | 2.988        |
| 1NGW   | B_LYS_67  | NZ     | B_ASP_90  | OD2    | 3.345        |
| 1NGW   | B_ARG_98  | NH1    | B_ASP_102 | OD1    | 3.321        |
| 1NGW   | B_ARG_99  | NH2    | B_ASP_100 | OD1    | 3.865        |
| 1NGW   | B_ARG_99  | NH2    | B_ASP_100 | OD2    | 3.174        |
| 1NGW   | B_LYS_144 | NZ     | B_ASP_145 | OD1    | 3.893        |
| 1NGW   | B_LYS_144 | NZ     | B_ASP_145 | OD2    | 3.494        |
| 1NGW   | B_HIS_165 | NE2    | A_ASP_167 | OD1    | 3.804        |
| 1NGW   | B_LYS_210 | NZ     | A_GLU_123 | OE1    | 3.662        |
| 1NGW   | B_LYS_210 | NZ     | A_GLU_123 | OE2    | 3.240        |

---

Table 151: 1NGW-specific salt bridging networks analysis. In this table, a PDB file is specified with a four-letter PDB ID, except that the names of the PDB files corresponding to the single NMR structural model split from the NMR ensemble is specified with a four-letter PDB ID in addition to a hyphen followed by the single NMR structural model numeric ID, the residue naming scheme is **Chain ID\_residue name\_residue number**,  $\angle ADH$  represents the angle formed by acceptor (A), donor (D) and hydrogen (H) ( $\angle ADH$ ).

| PDB ID | Residue A | Atom A | Residue B | Atom B | Distance (Å) |
|--------|-----------|--------|-----------|--------|--------------|
| 1NGX   | A_LYS_24  | NZ     | A_ASP_70  | OD1    | 3.081        |
| 1NGX   | A_LYS_24  | NZ     | A_ASP_70  | OD2    | 3.994        |
| 1NGX   | A_ARG_61  | NH2    | A_ASP_82  | OD1    | 2.985        |
| 1NGX   | A_ARG_61  | NH2    | A_ASP_82  | OD2    | 2.969        |
| 1NGX   | A_LYS_149 | NZ     | A_GLU_195 | OE1    | 3.396        |
| 1NGX   | A_LYS_149 | NZ     | A_GLU_195 | OE2    | 3.345        |
| 1NGX   | A_LYS_188 | NZ     | A_ASP_185 | OD2    | 3.626        |
| 1NGX   | B_ARG_40  | NH1    | B_GLU_46  | OE2    | 3.949        |
| 1NGX   | B_ARG_40  | NH2    | B_GLU_89  | OE1    | 3.668        |
| 1NGX   | B_ARG_40  | NH2    | B_GLU_89  | OE2    | 3.900        |
| 1NGX   | B_LYS_65  | NZ     | B_GLU_62  | OE1    | 3.589        |
| 1NGX   | B_LYS_65  | NZ     | B_GLU_62  | OE2    | 2.814        |
| 1NGX   | B_ARG_98  | NH1    | B_GLU_6   | OE1    | 3.105        |
| 1NGX   | B_ARG_98  | NH1    | B_GLU_6   | OE2    | 3.939        |
| 1NGX   | B_ARG_98  | NH2    | B_GLU_6   | OE1    | 3.343        |
| 1NGX   | B_ARG_98  | NH2    | B_GLU_6   | OE2    | 2.833        |
| 1NGX   | B_LYS_210 | NZ     | A_GLU_123 | OE1    | 3.994        |
| 1NGX   | L_LYS_24  | NZ     | L_ASP_70  | OD1    | 3.096        |
| 1NGX   | L_LYS_24  | NZ     | L_ASP_70  | OD2    | 3.994        |
| 1NGX   | L_LYS_45  | NZ     | H_ASP_102 | OD2    | 3.800        |
| 1NGX   | L_ARG_61  | NH2    | L_ASP_82  | OD1    | 2.986        |
| 1NGX   | L_ARG_61  | NH2    | L_ASP_82  | OD2    | 2.973        |
| 1NGX   | L_LYS_149 | NZ     | L_GLU_195 | OE1    | 3.398        |
| 1NGX   | L_LYS_149 | NZ     | L_GLU_195 | OE2    | 3.336        |
| 1NGX   | L_LYS_188 | NZ     | L_ASP_185 | OD2    | 3.617        |
| 1NGX   | H_ARG_40  | NH1    | H_GLU_46  | OE2    | 3.939        |
| 1NGX   | H_ARG_40  | NH2    | H_GLU_89  | OE1    | 3.665        |
| 1NGX   | H_ARG_40  | NH2    | H_GLU_89  | OE2    | 3.888        |
| 1NGX   | H_LYS_65  | NZ     | H_GLU_62  | OE1    | 3.585        |
| 1NGX   | H_LYS_65  | NZ     | H_GLU_62  | OE2    | 2.810        |
| 1NGX   | H_ARG_98  | NH1    | H_GLU_6   | OE1    | 3.117        |
| 1NGX   | H_ARG_98  | NH1    | H_GLU_6   | OE2    | 3.962        |
| 1NGX   | H_ARG_98  | NH2    | H_GLU_6   | OE1    | 3.326        |
| 1NGX   | H_ARG_98  | NH2    | H_GLU_6   | OE2    | 2.854        |
| 1NGX   | H_LYS_210 | NZ     | L_GLU_123 | OE1    | 3.804        |

Table 152: 1NGX-specific salt bridging networks analysis. In this table, a PDB file is specified with a four-letter PDB ID, except that the names of the PDB files corresponding to the single NMR structural model split from the NMR ensemble is specified with a four-letter PDB ID in addition to a hyphen followed by the single NMR structural model numeric ID, the residue naming scheme is **Chain ID\_residue name\_residue number**,  $\angle ADH$  represents the angle formed by acceptor (A), donor (D) and hydrogen (H) ( $\angle ADH$ ).

| PDB ID | Residue A | Atom A | Residue B | Atom B | Distance (Å) |
|--------|-----------|--------|-----------|--------|--------------|
| 1NGY   | A_ARG_18  | NH1    | A_ASP_17  | OD2    | 3.594        |
| 1NGY   | A_LYS_24  | NZ     | A_ASP_70  | OD2    | 3.919        |
| 1NGY   | A_ARG_61  | NH2    | A_ASP_82  | OD1    | 2.968        |
| 1NGY   | A_ARG_61  | NH2    | A_ASP_82  | OD2    | 3.529        |
| 1NGY   | A_LYS_103 | NZ     | A_ASP_85  | OD1    | 3.853        |
| 1NGY   | A_LYS_103 | NZ     | A_ASP_85  | OD2    | 3.272        |
| 1NGY   | A_LYS_188 | NZ     | A_ASP_185 | OD2    | 2.771        |
| 1NGY   | A_HIS_189 | ND1    | A_ASP_151 | OD1    | 3.054        |
| 1NGY   | B_LYS_67  | NZ     | B_ASP_90  | OD1    | 3.731        |
| 1NGY   | B_LYS_67  | NZ     | B_ASP_90  | OD2    | 2.958        |
| 1NGY   | B_ARG_98  | NH1    | B_ASP_102 | OD1    | 3.607        |
| 1NGY   | B_ARG_98  | NH1    | B_ASP_102 | OD2    | 3.510        |
| 1NGY   | B_ARG_99  | NH2    | B_ASP_100 | OD2    | 3.858        |
| 1NGY   | B_LYS_144 | NZ     | B_ASP_145 | OD1    | 3.371        |
| 1NGY   | B_LYS_144 | NZ     | B_ASP_145 | OD2    | 3.636        |
| 1NGY   | B_LYS_211 | NZ     | B_GLU_213 | OE2    | 3.805        |
| 1NGY   | B_LYS_215 | NZ     | A_ASP_122 | OD1    | 3.713        |
| 1NGY   | B_LYS_215 | NZ     | A_ASP_122 | OD2    | 3.325        |

Table 153: 1NGY-specific salt bridging networks analysis. In this table, a PDB file is specified with a four-letter PDB ID, except that the names of the PDB files corresponding to the single NMR structural model split from the NMR ensemble is specified with a four-letter PDB ID in addition to a hyphen followed by the single NMR structural model numeric ID, the residue naming scheme is **Chain ID\_residue name\_residue number**,  $\angle ADH$  represents the angle formed by acceptor (A), donor (D) and hydrogen (H) ( $\angle ADH$ ).

| PDB ID | Residue A | Atom A | Residue B | Atom B | Distance (Å) |
|--------|-----------|--------|-----------|--------|--------------|
| 1NGZ   | A_ARG_    | NH1    | A_ASP_    | OD1    | 3.637        |
| 1NGZ   | A_ARG_    | NH1    | A_ASP_    | OD2    | 2.596        |
| 1NGZ   | A_ARG_    | NH2    | A_GLU_    | OE1    | 3.959        |
| 1NGZ   | A_ARG_    | NH2    | A_ASP_    | OD1    | 3.037        |
| 1NGZ   | A_ARG_    | NH2    | A_ASP_    | OD2    | 3.356        |
| 1NGZ   | A_LYS_    | NZ     | A_GLU_    | OE1    | 2.828        |
| 1NGZ   | A_LYS_    | NZ     | A_GLU_    | OE2    | 3.489        |
| 1NGZ   | A_LYS_    | NZ     | A_GLU_    | OE1    | 3.044        |
| 1NGZ   | A_LYS_    | NZ     | A_GLU_    | OE1    | 3.604        |
| 1NGZ   | A_HIS_    | ND1    | A_ASP_    | OD1    | 3.223        |
| 1NGZ   | B_LYS_    | NZ     | B_GLU_    | OE1    | 2.735        |
| 1NGZ   | B_ARG_    | NH2    | B_ASP_    | OD2    | 3.084        |
| 1NGZ   | B_LYS_    | NZ     | B_ASP_    | OD1    | 3.293        |
| 1NGZ   | B_LYS_    | NZ     | A_GLU_    | OE2    | 3.517        |
| 1NGZ   | B_LYS_    | NZ     | B_GLU_    | OE2    | 3.319        |

Table 154: 1NGZ-specific salt bridging networks analysis. In this table, a PDB file is specified with a four-letter PDB ID, except that the names of the PDB files corresponding to the single NMR structural model split from the NMR ensemble is specified with a four-letter PDB ID in addition to a hyphen followed by the single NMR structural model numeric ID, the residue naming scheme is **Chain ID\_residue name\_residue number**,  $\angle ADH$  represents the angle formed by acceptor (A), donor (D) and hydrogen (H) ( $\angle ADH$ ).

| PDB ID | Residue A | Atom A | Residue B | Atom B | Distance (Å) |
|--------|-----------|--------|-----------|--------|--------------|
| 1NLB   | L_ARG_61  | NH1    | L_GLU_81  | OE1    | 3.945        |
| 1NLB   | L_ARG_61  | NH1    | L_ASP_82  | OD1    | 3.512        |
| 1NLB   | L_ARG_61  | NH1    | L_ASP_82  | OD2    | 2.842        |
| 1NLB   | L_ARG_61  | NH2    | L_ASP_82  | OD1    | 2.825        |
| 1NLB   | L_ARG_61  | NH2    | L_ASP_82  | OD2    | 3.519        |
| 1NLB   | L_LYS_103 | NZ     | L_GLU_105 | OE1    | 2.975        |
| 1NLB   | L_LYS_149 | NZ     | L_GLU_195 | OE1    | 2.997        |
| 1NLB   | L_LYS_149 | NZ     | L_GLU_195 | OE2    | 3.428        |
| 1NLB   | L_ARG_155 | NH1    | L_GLU_185 | OE1    | 3.426        |
| 1NLB   | L_ARG_155 | NH1    | L_GLU_185 | OE2    | 3.047        |
| 1NLB   | L_HIS_189 | ND1    | L_ASP_151 | OD2    | 2.936        |
| 1NLB   | L_LYS_199 | NZ     | L_ASP_110 | OD1    | 3.501        |
| 1NLB   | H_LYS_64  | NZ     | H_ASP_61  | OD2    | 2.732        |
| 1NLB   | H_ARG_66  | NH1    | H_ASP_86  | OD1    | 3.711        |
| 1NLB   | H_ARG_66  | NH1    | H_ASP_86  | OD2    | 2.788        |
| 1NLB   | H_ARG_66  | NH2    | H_ASP_86  | OD1    | 2.985        |
| 1NLB   | H_ARG_66  | NH2    | H_ASP_86  | OD2    | 3.410        |
| 1NLB   | H_ARG_94  | NH1    | H_ASP_101 | OD1    | 2.645        |
| 1NLB   | H_ARG_94  | NH1    | H_ASP_101 | OD2    | 3.679        |
| 1NLB   | H_LYS_115 | NZ     | H_ASP_173 | OD2    | 3.346        |
| 1NLB   | H_LYS_205 | NZ     | H_ASP_207 | OD1    | 3.946        |
| 1NLB   | H_LYS_205 | NZ     | H_ASP_207 | OD2    | 2.901        |
| 1NLB   | H_LYS_208 | NZ     | L_GLU_123 | OE1    | 3.572        |

Table 155: 1NLB-specific salt bridging networks analysis. In this table, a PDB file is specified with a four-letter PDB ID, except that the names of the PDB files corresponding to the single NMR structural model split from the NMR ensemble is specified with a four-letter PDB ID in addition to a hyphen followed by the single NMR structural model numeric ID, the residue naming scheme is **Chain ID\_residue name\_residue number**,  $\angle ADH$  represents the angle formed by acceptor (A), donor (D) and hydrogen (H) ( $\angle ADH$ ).



| PDB ID | Residue A | Atom A | Residue B  | Atom B | Distance (Å) |
|--------|-----------|--------|------------|--------|--------------|
| 1NMC   | N_ARG_118 | NH1    | N_GLU_119  | OE2    | 3.499        |
| 1NMC   | N_ARG_118 | NH2    | N_GLU_119  | OE2    | 3.987        |
| 1NMC   | N_ARG_118 | NH2    | N_GLU_425  | OE1    | 2.873        |
| 1NMC   | N_ARG_118 | NH2    | N_GLU_425  | OE2    | 3.183        |
| 1NMC   | N_ARG_130 | NH1    | N_GLU_128  | OE1    | 3.693        |
| 1NMC   | N_ARG_130 | NH1    | N_GLU_128  | OE2    | 3.810        |
| 1NMC   | N_ARG_141 | NH1    | N_GLU_110  | OE2    | 2.793        |
| 1NMC   | N_ARG_152 | NH2    | N_ASP_151  | OD1    | 3.884        |
| 1NMC   | N_ARG_156 | NH1    | N_GLU_119  | OE1    | 3.978        |
| 1NMC   | N_ARG_156 | NH2    | N_GLU_119  | OE1    | 3.322        |
| 1NMC   | N_ARG_172 | NH1    | N_GLU_174  | OE2    | 2.630        |
| 1NMC   | N_ARG_189 | NH2    | N_ASP_125  | OD1    | 2.838        |
| 1NMC   | N_ARG_209 | NH1    | N_GLU_174  | OE1    | 3.221        |
| 1NMC   | N_ARG_209 | NH1    | N_GLU_174  | OE2    | 3.350        |
| 1NMC   | N_ARG_209 | NH2    | N_GLU_174  | OE1    | 3.641        |
| 1NMC   | N_ARG_209 | NH2    | N_GLU_174  | OE2    | 3.567        |
| 1NMC   | N_ARG_224 | NH2    | N_GLU_276  | OE1    | 3.973        |
| 1NMC   | N_ARG_224 | NH2    | N_GLU_276  | OE2    | 2.790        |
| 1NMC   | N_LYS_264 | NZ     | N_GLU_266  | OE1    | 3.220        |
| 1NMC   | N_LYS_273 | NZ     | N_ASP_339  | OD1    | 3.418        |
| 1NMC   | N_HIS_274 | NE2    | N_GLU_276  | OE2    | 3.907        |
| 1NMC   | N_ARG_292 | NH1    | N_GLU_277  | OE1    | 2.656        |
| 1NMC   | N_ARG_292 | NH1    | N_GLU_277  | OE2    | 3.466        |
| 1NMC   | N_ARG_300 | NH1    | N_ASP_324  | OD2    | 3.693        |
| 1NMC   | N_ARG_300 | NH2    | N_ASP_324  | OD1    | 3.980        |
| 1NMC   | N_ARG_304 | NH1    | N_GLU_286  | OE2    | 2.662        |
| 1NMC   | N_HIS_312 | ND1    | N_GLU_266  | OE2    | 2.860        |
| 1NMC   | N_ARG_364 | NH1    | N_GLU_375  | OE2    | 2.972        |
| 1NMC   | N_ARG_364 | NH2    | N_ASP_330  | OD1    | 3.061        |
| 1NMC   | N_ARG_364 | NH2    | N_ASP_330  | OD2    | 2.772        |
| 1NMC   | N_ARG_428 | NH1    | N_ASP_460  | OD2    | 2.607        |
| 1NMC   | N_ARG_428 | NH2    | N_GLU_433  | OE1    | 3.420        |
| 1NMC   | N_ARG_428 | NH2    | N_GLU_433  | OE2    | 2.884        |
| 1NMC   | N_LYS_432 | NZ     | H_ASP_56   | OD1    | 2.750        |
| 1NMC   | H_LYS_62  | NZ     | H_GLU_46   | OE1    | 2.874        |
| 1NMC   | H_LYS_62  | NZ     | H_GLU_46   | OE2    | 3.520        |
| 1NMC   | H_LYS_66  | NZ     | H_ASP_86   | OD2    | 3.403        |
| 1NMC   | H_ARG_94  | NH2    | H_ASP_101  | OD1    | 3.582        |
| 1NMC   | H_ARG_94  | NH2    | H_ASP_101  | OD2    | 2.789        |
| 1NMC   | H_ARG_100 | NH1    | H_ASP_100B | OD1    | 2.808        |
| 1NMC   | H_ARG_100 | NH1    | H_ASP_100B | OD2    | 2.674        |
| 1NMC   | H_ARG_100 | NH2    | H_ASP_100B | OD1    | 3.142        |
| 1NMC   | L_ARG_61  | NH1    | L_GLU_79   | OE1    | 3.308        |
| 1NMC   | L_ARG_61  | NH2    | L_GLU_79   | OE1    | 3.314        |
| 1NMC   | L_ARG_61  | NH2    | L_ASP_82   | OD1    | 2.650        |
| 1NMC   | L_ARG_61  | NH2    | L_ASP_82   | OD2    | 3.093        |
| 1NMC   | L_ARG_107 | NH2    | L_ASP_108  | OD2    | 3.871        |
| 1NMC   | A_ARG_118 | NH1    | A_GLU_119  | OE2    | 3.500        |
| 1NMC   | A_ARG_118 | NH2    | A_GLU_119  | OE2    | 3.987        |
| 1NMC   | A_ARG_118 | NH2    | A_GLU_425  | OE1    | 2.872        |
| 1NMC   | A_ARG_118 | NH2    | A_GLU_425  | OE2    | 3.182        |
| 1NMC   | A_ARG_130 | NH1    | A_GLU_128  | OE1    | 3.693        |
| 1NMC   | A_ARG_130 | NH1    | A_GLU_128  | OE2    | 3.809        |
| 1NMC   | A_ARG_141 | NH1    | A_GLU_110  | OE2    | 2.794        |
| 1NMC   | A_ARG_152 | NH2    | A_ASP_151  | OD1    | 3.884        |
| 1NMC   | A_ARG_156 | NH1    | A_GLU_119  | OE1    | 3.979        |
| 1NMC   | A_ARG_156 | NH2    | A_GLU_119  | OE1    | 3.323        |

|      |           |     |            |     |       |
|------|-----------|-----|------------|-----|-------|
| 1NMC | A_ARG_172 | NH1 | A_GLU_174  | OE2 | 2.630 |
| 1NMC | A_ARG_189 | NH2 | A_ASP_125  | OD1 | 2.839 |
| 1NMC | A_ARG_209 | NH1 | A_GLU_174  | OE1 | 3.221 |
| 1NMC | A_ARG_209 | NH1 | A_GLU_174  | OE2 | 3.350 |
| 1NMC | A_ARG_209 | NH2 | A_GLU_174  | OE1 | 3.641 |
| 1NMC | A_ARG_209 | NH2 | A_GLU_174  | OE2 | 3.567 |
| 1NMC | A_ARG_224 | NH2 | A_GLU_276  | OE1 | 3.973 |
| 1NMC | A_ARG_224 | NH2 | A_GLU_276  | OE2 | 2.791 |
| 1NMC | A_LYS_264 | NZ  | A_GLU_266  | OE1 | 3.220 |
| 1NMC | A_LYS_273 | NZ  | A_ASP_339  | OD1 | 3.419 |
| 1NMC | A_HIS_274 | NE2 | A_GLU_276  | OE2 | 3.907 |
| 1NMC | A_ARG_292 | NH1 | A_GLU_277  | OE1 | 2.655 |
| 1NMC | A_ARG_292 | NH1 | A_GLU_277  | OE2 | 3.465 |
| 1NMC | A_ARG_300 | NH1 | A_ASP_324  | OD2 | 3.694 |
| 1NMC | A_ARG_300 | NH2 | A_ASP_324  | OD1 | 3.980 |
| 1NMC | A_ARG_304 | NH1 | A_GLU_286  | OE2 | 2.663 |
| 1NMC | A_HIS_312 | ND1 | A_GLU_266  | OE2 | 2.860 |
| 1NMC | A_ARG_364 | NH1 | A_GLU_375  | OE2 | 2.972 |
| 1NMC | A_ARG_364 | NH2 | A_ASP_330  | OD1 | 3.062 |
| 1NMC | A_ARG_364 | NH2 | A_ASP_330  | OD2 | 2.772 |
| 1NMC | A_ARG_428 | NH1 | A_ASP_460  | OD2 | 2.606 |
| 1NMC | A_ARG_428 | NH2 | A_GLU_433  | OE1 | 3.421 |
| 1NMC | A_ARG_428 | NH2 | A_GLU_433  | OE2 | 2.883 |
| 1NMC | A_LYS_432 | NZ  | B_ASP_56   | OD1 | 2.750 |
| 1NMC | B_LYS_62  | NZ  | B_GLU_46   | OE1 | 2.874 |
| 1NMC | B_LYS_62  | NZ  | B_GLU_46   | OE2 | 3.520 |
| 1NMC | B_LYS_66  | NZ  | B_ASP_86   | OD2 | 3.404 |
| 1NMC | B_ARG_94  | NH2 | B_ASP_101  | OD1 | 3.582 |
| 1NMC | B_ARG_94  | NH2 | B_ASP_101  | OD2 | 2.789 |
| 1NMC | B_ARG_100 | NH1 | B_ASP_100B | OD1 | 2.808 |
| 1NMC | B_ARG_100 | NH1 | B_ASP_100B | OD2 | 2.675 |
| 1NMC | B_ARG_100 | NH2 | B_ASP_100B | OD1 | 3.142 |
| 1NMC | C_ARG_61  | NH1 | C_GLU_79   | OE1 | 3.308 |
| 1NMC | C_ARG_61  | NH2 | C_GLU_79   | OE1 | 3.313 |
| 1NMC | C_ARG_61  | NH2 | C_ASP_82   | OD1 | 2.649 |
| 1NMC | C_ARG_61  | NH2 | C_ASP_82   | OD2 | 3.094 |
| 1NMC | C_ARG_107 | NH2 | C_ASP_108  | OD2 | 3.871 |

Table 156: 1NMC-specific salt bridging networks analysis. In this table, a PDB file is specified with a four-letter PDB ID, except that the names of the PDB files corresponding to the single NMR structural model split from the NMR ensemble is specified with a four-letter PDB ID in addition to a hyphen followed by the single NMR structural model numeric ID, the residue naming scheme is **Chain ID\_residue name\_residue number**,  $\angle ADH$  represents the angle formed by acceptor (A), donor (D) and hydrogen (H) ( $\angle ADH$ ).

| PDB ID | Residue A | Atom A | Residue B | Atom B | Distance (Å) |
|--------|-----------|--------|-----------|--------|--------------|
| 1OB1   | A_ARG_61  | NH1    | A_GLU_81  | OE2    | 3.808        |
| 1OB1   | A_ARG_61  | NH1    | A_ASP_82  | OD1    | 2.619        |
| 1OB1   | A_ARG_61  | NH1    | A_ASP_82  | OD2    | 2.877        |
| 1OB1   | A_ARG_61  | NH2    | A_GLU_81  | OE2    | 3.763        |
| 1OB1   | A_ARG_61  | NH2    | F_ASP_59  | OD1    | 3.421        |
| 1OB1   | A_ARG_61  | NH2    | F_ASP_59  | OD2    | 2.223        |
| 1OB1   | A_LYS_103 | NZ     | A_GLU_105 | OE1    | 3.763        |
| 1OB1   | A_ARG_154 | NH2    | A_GLU_184 | OE2    | 2.981        |
| 1OB1   | A_LYS_182 | NZ     | A_ASP_183 | OD1    | 3.727        |
| 1OB1   | A_LYS_182 | NZ     | A_GLU_186 | OE1    | 3.077        |
| 1OB1   | A_HIS_188 | NE2    | A_GLU_184 | OE2    | 3.652        |
| 1OB1   | A_ARG_210 | NH2    | A_GLU_186 | OE2    | 3.268        |
| 1OB1   | B_LYS_13  | NZ     | B_GLU_16  | OE2    | 3.100        |
| 1OB1   | B_ARG_66  | NH1    | B_ASP_86  | OD1    | 3.867        |
| 1OB1   | B_ARG_66  | NH2    | B_ASP_86  | OD1    | 2.818        |
| 1OB1   | B_ARG_66  | NH2    | B_ASP_86  | OD2    | 3.197        |
| 1OB1   | B_ARG_94  | NH1    | B_ASP_101 | OD1    | 3.340        |
| 1OB1   | B_ARG_94  | NH1    | B_ASP_101 | OD2    | 2.759        |
| 1OB1   | B_HIS_164 | NE2    | A_ASP_166 | OD2    | 3.671        |
| 1OB1   | B_LYS_205 | NZ     | B_ASP_207 | OD1    | 3.102        |
| 1OB1   | B_LYS_205 | NZ     | B_ASP_207 | OD2    | 2.900        |
| 1OB1   | B_LYS_209 | NZ     | B_GLU_211 | OE1    | 3.918        |
| 1OB1   | B_LYS_209 | NZ     | B_GLU_211 | OE2    | 3.120        |
| 1OB1   | C_LYS_9   | NZ     | C_GLU_24  | OE2    | 3.557        |
| 1OB1   | C_LYS_9   | NZ     | C_GLU_26  | OE2    | 3.148        |
| 1OB1   | C_LYS_10  | NZ     | B_ASP_100 | OD1    | 2.437        |
| 1OB1   | C_ARG_20  | NH1    | C_GLU_24  | OE1    | 3.737        |
| 1OB1   | C_ARG_20  | NH2    | C_GLU_24  | OE1    | 2.454        |
| 1OB1   | C_ARG_20  | NH2    | C_GLU_24  | OE2    | 3.232        |
| 1OB1   | C_HIS_21  | NE2    | C_GLU_27  | OE2    | 2.879        |
| 1OB1   | C_LYS_80  | NZ     | D_GLU_79  | OE1    | 3.373        |
| 1OB1   | C_LYS_80  | NZ     | D_GLU_81  | OE1    | 3.553        |
| 1OB1   | C_LYS_80  | NZ     | D_GLU_81  | OE2    | 2.714        |
| 1OB1   | D_ARG_61  | NH1    | D_GLU_81  | OE2    | 3.991        |
| 1OB1   | D_ARG_61  | NH1    | D_ASP_82  | OD1    | 2.474        |
| 1OB1   | D_ARG_61  | NH1    | D_ASP_82  | OD2    | 2.804        |
| 1OB1   | D_ARG_61  | NH2    | C_ASP_59  | OD1    | 3.599        |
| 1OB1   | D_ARG_61  | NH2    | C_ASP_59  | OD2    | 2.460        |
| 1OB1   | D_ARG_61  | NH2    | D_GLU_81  | OE2    | 3.779        |
| 1OB1   | D_LYS_103 | NZ     | D_GLU_105 | OE1    | 3.861        |
| 1OB1   | D_ARG_154 | NH2    | D_GLU_184 | OE2    | 2.971        |
| 1OB1   | D_LYS_182 | NZ     | D_ASP_183 | OD1    | 3.753        |
| 1OB1   | D_LYS_182 | NZ     | D_GLU_186 | OE1    | 3.086        |
| 1OB1   | D_HIS_188 | NE2    | D_GLU_184 | OE2    | 3.651        |
| 1OB1   | D_ARG_210 | NH2    | D_GLU_186 | OE2    | 3.229        |
| 1OB1   | E_LYS_13  | NZ     | E_GLU_16  | OE2    | 3.102        |
| 1OB1   | E_LYS_46  | NZ     | E_ASP_44  | OD2    | 3.971        |
| 1OB1   | E_ARG_66  | NH1    | E_ASP_86  | OD1    | 3.843        |
| 1OB1   | E_ARG_66  | NH2    | E_ASP_86  | OD1    | 2.795        |
| 1OB1   | E_ARG_66  | NH2    | E_ASP_86  | OD2    | 3.186        |
| 1OB1   | E_ARG_94  | NH1    | E_ASP_101 | OD1    | 3.270        |
| 1OB1   | E_ARG_94  | NH1    | E_ASP_101 | OD2    | 2.697        |
| 1OB1   | E_ARG_98  | NH1    | F_ASP_39  | OD1    | 2.706        |
| 1OB1   | E_HIS_164 | NE2    | D_ASP_166 | OD2    | 3.790        |
| 1OB1   | E_LYS_205 | NZ     | E_ASP_207 | OD1    | 3.032        |
| 1OB1   | E_LYS_205 | NZ     | E_ASP_207 | OD2    | 2.849        |
| 1OB1   | E_LYS_209 | NZ     | E_GLU_211 | OE1    | 3.962        |

|      |           |     |           |     |       |
|------|-----------|-----|-----------|-----|-------|
| 1OB1 | E_LYS_209 | NZ  | E_GLU_211 | OE2 | 3.194 |
| 1OB1 | F_LYS_9   | NZ  | F_GLU_24  | OE2 | 3.571 |
| 1OB1 | F_LYS_9   | NZ  | F_GLU_26  | OE2 | 3.085 |
| 1OB1 | F_LYS_10  | NZ  | E_ASP_100 | OD1 | 2.524 |
| 1OB1 | F_ARG_20  | NH1 | F_GLU_24  | OE1 | 3.734 |
| 1OB1 | F_ARG_20  | NH2 | F_GLU_24  | OE1 | 2.432 |
| 1OB1 | F_ARG_20  | NH2 | F_GLU_24  | OE2 | 3.245 |
| 1OB1 | F_HIS_21  | NE2 | F_GLU_27  | OE2 | 2.859 |
| 1OB1 | F_LYS_80  | NZ  | A_GLU_79  | OE1 | 3.743 |
| 1OB1 | F_LYS_80  | NZ  | A_GLU_81  | OE1 | 3.454 |
| 1OB1 | F_LYS_80  | NZ  | A_GLU_81  | OE2 | 2.796 |
| 1OB1 | F_HIS_96  | NE2 | A_GLU_79  | OE1 | 3.773 |

Table 157: 1OB1-specific salt bridging networks analysis. In this table, a PDB file is specified with a four-letter PDB ID, except that the names of the PDB files corresponding to the single NMR structural model split from the NMR ensemble is specified with a four-letter PDB ID in addition to a hyphen followed by the single NMR structural model numeric ID, the residue naming scheme is **Chain ID\_residue name\_residue number**,  $\angle ADH$  represents the angle formed by acceptor (A), donor (D) and hydrogen (H) ( $\angle ADH$ ).

| PDB ID | Residue A | Atom A | Residue B | Atom B | Distance (Å) |
|--------|-----------|--------|-----------|--------|--------------|
| 1OP9   | A_ARG_35  | NH1    | A_ASP_87  | OD1    | 2.983        |
| 1OP9   | A_ARG_35  | NH2    | A_GLU_43  | OE2    | 2.955        |
| 1OP9   | A_ARG_49  | NH1    | A_ASP_52  | OD1    | 2.941        |
| 1OP9   | A_ARG_49  | NH1    | A_ASP_52  | OD2    | 3.907        |
| 1OP9   | A_ARG_64  | NH1    | A_ASP_87  | OD1    | 3.965        |
| 1OP9   | A_ARG_64  | NH1    | A_ASP_87  | OD2    | 2.867        |
| 1OP9   | A_ARG_64  | NH2    | A_ASP_87  | OD1    | 3.040        |
| 1OP9   | A_ARG_64  | NH2    | A_ASP_87  | OD2    | 3.424        |
| 1OP9   | B_LYS_1   | NZ     | B_GLU_7   | OE2    | 2.875        |
| 1OP9   | B_LYS_97  | NZ     | A_GLU_97  | OE1    | 2.570        |
| 1OP9   | B_ARG_98  | NH1    | B_ASP_102 | OD1    | 2.828        |
| 1OP9   | B_ARG_98  | NH1    | B_ASP_102 | OD2    | 3.807        |
| 1OP9   | B_ARG_101 | NH1    | A_ASP_109 | OD1    | 3.213        |
| 1OP9   | B_ARG_101 | NH1    | A_ASP_109 | OD2    | 2.829        |
| 1OP9   | B_ARG_101 | NH2    | A_ASP_109 | OD1    | 2.793        |
| 1OP9   | B_ARG_101 | NH2    | A_ASP_109 | OD2    | 3.765        |
| 1OP9   | B_ARG_122 | NH1    | B_ASP_120 | OD1    | 3.408        |

Table 158: 1OP9-specific salt bridging networks analysis. In this table, a PDB file is specified with a four-letter PDB ID, except that the names of the PDB files corresponding to the single NMR structural model split from the NMR ensemble is specified with a four-letter PDB ID in addition to a hyphen followed by the single NMR structural model numeric ID, the residue naming scheme is **Chain ID\_residue name\_residue number**,  $\angle ADH$  represents the angle formed by acceptor (A), donor (D) and hydrogen (H) ( $\angle ADH$ ).

| PDB ID | Residue A | Atom A | Residue B | Atom B | Distance (Å) |
|--------|-----------|--------|-----------|--------|--------------|
| 1OSP   | L_ARG_61  | NH1    | L_GLU_81  | OE2    | 3.794        |
| 1OSP   | L_ARG_61  | NH1    | L_ASP_82  | OD1    | 2.742        |
| 1OSP   | L_ARG_61  | NH1    | L_ASP_82  | OD2    | 3.281        |
| 1OSP   | L_LYS_69  | NZ     | L_ASP_70  | OD2    | 3.957        |
| 1OSP   | L_LYS_147 | NZ     | L_GLU_154 | OE1    | 3.795        |
| 1OSP   | L_LYS_149 | NZ     | L_GLU_195 | OE1    | 3.168        |
| 1OSP   | L_LYS_149 | NZ     | L_GLU_195 | OE2    | 3.070        |
| 1OSP   | L_ARG_155 | NH2    | L_GLU_185 | OE1    | 3.054        |
| 1OSP   | L_ARG_155 | NH2    | L_GLU_185 | OE2    | 3.470        |
| 1OSP   | L_ARG_188 | NH2    | L_GLU_185 | OE2    | 3.854        |
| 1OSP   | L_LYS_199 | NZ     | L_ASP_110 | OD1    | 3.945        |
| 1OSP   | L_LYS_199 | NZ     | L_ASP_110 | OD2    | 2.639        |
| 1OSP   | L_ARG_211 | NH1    | L_GLU_187 | OE2    | 3.387        |
| 1OSP   | L_ARG_211 | NH2    | L_GLU_187 | OE2    | 3.391        |
| 1OSP   | H_ARG_38  | NH1    | H_GLU_46  | OE1    | 2.774        |
| 1OSP   | H_ARG_38  | NH2    | H_ASP_89  | OD1    | 2.825        |
| 1OSP   | H_ARG_97  | NH2    | H_GLU_27  | OE1    | 3.273        |
| 1OSP   | H_ARG_99  | NH1    | L_GLU_55  | OE1    | 3.970        |
| 1OSP   | H_ARG_99  | NH1    | L_GLU_55  | OE2    | 2.686        |
| 1OSP   | H_ARG_99  | NH2    | O_ASP_92  | OD1    | 3.355        |
| 1OSP   | H_ARG_99  | NH2    | O_ASP_92  | OD2    | 2.514        |
| 1OSP   | H_LYS_215 | NZ     | L_GLU_123 | OE1    | 2.783        |
| 1OSP   | H_LYS_215 | NZ     | L_GLU_123 | OE2    | 3.079        |
| 1OSP   | O_LYS_39  | NZ     | O_ASP_33  | OD1    | 2.809        |
| 1OSP   | O_LYS_46  | NZ     | L_ASP_66  | OD2    | 3.087        |
| 1OSP   | O_LYS_69  | NZ     | O_ASP_92  | OD1    | 3.769        |
| 1OSP   | O_LYS_103 | NZ     | O_GLU_128 | OE2    | 3.115        |
| 1OSP   | O_LYS_113 | NZ     | O_GLU_123 | OE1    | 3.755        |
| 1OSP   | O_LYS_129 | NZ     | O_GLU_131 | OE1    | 3.327        |
| 1OSP   | O_ARG_139 | NH1    | O_GLU_160 | OE2    | 3.268        |
| 1OSP   | O_ARG_139 | NH2    | O_GLU_160 | OE2    | 2.962        |
| 1OSP   | O_ARG_144 | NH1    | O_GLU_146 | OE1    | 3.930        |
| 1OSP   | O_ARG_144 | NH1    | O_GLU_146 | OE2    | 2.637        |
| 1OSP   | O_LYS_159 | NZ     | O_GLU_168 | OE2    | 3.915        |
| 1OSP   | O_LYS_175 | NZ     | O_GLU_174 | OE2    | 3.895        |
| 1OSP   | O_LYS_189 | NZ     | O_GLU_160 | OE1    | 2.949        |
| 1OSP   | O_LYS_189 | NZ     | O_GLU_160 | OE2    | 3.302        |

Table 159: 1OSP-specific salt bridging networks analysis. In this table, a PDB file is specified with a four-letter PDB ID, except that the names of the PDB files corresponding to the single NMR structural model split from the NMR ensemble is specified with a four-letter PDB ID in addition to a hyphen followed by the single NMR structural model numeric ID, the residue naming scheme is **Chain ID\_residue name\_residue number**,  $\angle ADH$  represents the angle formed by acceptor (A), donor (D) and hydrogen (H) ( $\angle ADH$ ).

| PDB ID | Residue A | Atom A | Residue B | Atom B | Distance (Å) |
|--------|-----------|--------|-----------|--------|--------------|
| 1OW0   | A_ARG_250 | NH1    | A_ASP_378 | OD1    | 2.566        |
| 1OW0   | A_ARG_250 | NH1    | A_ASP_378 | OD2    | 3.422        |
| 1OW0   | A_ARG_250 | NH1    | A_GLU_437 | OE1    | 2.982        |
| 1OW0   | A_ARG_250 | NH2    | A_ASP_378 | OD1    | 3.947        |
| 1OW0   | A_ARG_250 | NH2    | A_GLU_437 | OE1    | 2.644        |
| 1OW0   | A_ARG_372 | NH1    | A_GLU_403 | OE1    | 2.406        |
| 1OW0   | A_ARG_372 | NH1    | A_GLU_403 | OE2    | 2.605        |
| 1OW0   | A_ARG_372 | NH2    | A_GLU_403 | OE1    | 3.805        |
| 1OW0   | B_ARG_250 | NH1    | B_ASP_378 | OD1    | 2.587        |
| 1OW0   | B_ARG_250 | NH1    | B_ASP_378 | OD2    | 3.428        |
| 1OW0   | B_ARG_250 | NH1    | B_GLU_437 | OE1    | 2.993        |
| 1OW0   | B_ARG_250 | NH2    | B_ASP_378 | OD1    | 3.931        |
| 1OW0   | B_ARG_250 | NH2    | B_GLU_437 | OE1    | 2.615        |
| 1OW0   | B_ARG_372 | NH1    | B_GLU_403 | OE1    | 2.384        |
| 1OW0   | B_ARG_372 | NH1    | B_GLU_403 | OE2    | 2.617        |
| 1OW0   | B_ARG_372 | NH2    | B_GLU_403 | OE1    | 3.789        |
| 1OW0   | C_LYS_13  | NZ     | C_GLU_63  | OE2    | 3.686        |
| 1OW0   | C_ARG_52  | NH2    | C_GLU_49  | OE1    | 2.995        |
| 1OW0   | C_ARG_52  | NH2    | C_GLU_49  | OE2    | 3.667        |
| 1OW0   | C_LYS_55  | NZ     | C_GLU_59  | OE1    | 3.649        |
| 1OW0   | C_LYS_55  | NZ     | C_GLU_59  | OE2    | 3.759        |
| 1OW0   | C_HIS_68  | ND1    | C_ASP_21  | OD2    | 3.825        |
| 1OW0   | C_HIS_68  | NE2    | C_ASP_21  | OD2    | 3.915        |
| 1OW0   | C_LYS_139 | NZ     | C_GLU_142 | OE2    | 3.692        |
| 1OW0   | C_ARG_171 | NH1    | C_GLU_140 | OE2    | 3.418        |
| 1OW0   | C_ARG_171 | NH2    | C_GLU_140 | OE2    | 3.168        |
| 1OW0   | D_LYS_13  | NZ     | D_GLU_63  | OE2    | 3.662        |
| 1OW0   | D_ARG_52  | NH2    | D_GLU_49  | OE1    | 3.006        |
| 1OW0   | D_ARG_52  | NH2    | D_GLU_49  | OE2    | 3.670        |
| 1OW0   | D_LYS_55  | NZ     | D_GLU_59  | OE1    | 3.602        |
| 1OW0   | D_LYS_55  | NZ     | D_GLU_59  | OE2    | 3.741        |
| 1OW0   | D_HIS_68  | ND1    | D_ASP_21  | OD2    | 3.833        |
| 1OW0   | D_HIS_68  | NE2    | D_ASP_21  | OD2    | 3.920        |
| 1OW0   | D_LYS_139 | NZ     | D_GLU_142 | OE2    | 3.692        |
| 1OW0   | D_ARG_171 | NH1    | D_GLU_140 | OE2    | 3.423        |
| 1OW0   | D_ARG_171 | NH2    | D_GLU_140 | OE2    | 3.181        |

Table 160: 1OW0-specific salt bridging networks analysis. In this table, a PDB file is specified with a four-letter PDB ID, except that the names of the PDB files corresponding to the single NMR structural model split from the NMR ensemble is specified with a four-letter PDB ID in addition to a hyphen followed by the single NMR structural model numeric ID, the residue naming scheme is **Chain ID\_residue name\_residue number**,  $\angle ADH$  represents the angle formed by acceptor (A), donor (D) and hydrogen (H) ( $\angle ADH$ ).

| PDB ID | Residue A  | Atom A | Residue B  | Atom B | Distance (Å) |
|--------|------------|--------|------------|--------|--------------|
| 1P2C   | A_ARG_24   | NH2    | A_ASP_70   | OD1    | 3.561        |
| 1P2C   | A_ARG_24   | NH2    | A_ASP_70   | OD2    | 3.968        |
| 1P2C   | A_ARG_61   | NH1    | A_GLU_79   | OE1    | 3.212        |
| 1P2C   | A_ARG_61   | NH1    | A_ASP_82   | OD1    | 3.355        |
| 1P2C   | A_ARG_61   | NH1    | A_ASP_82   | OD2    | 2.848        |
| 1P2C   | A_ARG_61   | NH2    | A_GLU_79   | OE1    | 2.589        |
| 1P2C   | A_ARG_61   | NH2    | A_GLU_79   | OE2    | 3.654        |
| 1P2C   | A_LYS_149  | NZ     | A_GLU_195  | OE1    | 3.222        |
| 1P2C   | A_LYS_149  | NZ     | A_GLU_195  | OE2    | 3.909        |
| 1P2C   | A_ARG_155  | NH1    | A_GLU_185  | OE1    | 3.712        |
| 1P2C   | A_ARG_155  | NH1    | A_GLU_185  | OE2    | 3.813        |
| 1P2C   | A_ARG_155  | NH2    | A_GLU_185  | OE1    | 3.966        |
| 1P2C   | A_ARG_155  | NH2    | A_GLU_185  | OE2    | 2.811        |
| 1P2C   | A_LYS_183  | NZ     | A_GLU_187  | OE2    | 2.959        |
| 1P2C   | A_ARG_188  | NH2    | F_ASP_1518 | OD1    | 2.778        |
| 1P2C   | A_HIS_189  | ND1    | A_ASP_151  | OD2    | 2.583        |
| 1P2C   | A_LYS_199  | NZ     | A_ASP_110  | OD1    | 2.789        |
| 1P2C   | B_ARG_340  | NH1    | B_GLU_389  | OE1    | 3.429        |
| 1P2C   | B_LYS_363  | NZ     | B_GLU_346  | OE1    | 3.861        |
| 1P2C   | B_LYS_367  | NZ     | B_ASP_390  | OD1    | 2.706        |
| 1P2C   | B_LYS_367  | NZ     | B_ASP_390  | OD2    | 3.064        |
| 1P2C   | B_ARG_398  | NH2    | B_ASP_400  | OD1    | 2.942        |
| 1P2C   | B_ARG_398  | NH2    | B_ASP_400  | OD2    | 3.446        |
| 1P2C   | B_LYS_511  | NZ     | A_GLU_123  | OE1    | 3.498        |
| 1P2C   | C_LYS_601  | NZ     | C_GLU_607  | OE1    | 2.618        |
| 1P2C   | C_ARG_645  | NH2    | B_GLU_350  | OE1    | 2.980        |
| 1P2C   | C_ARG_668  | NH1    | B_GLU_350  | OE1    | 3.355        |
| 1P2C   | C_ARG_668  | NH1    | B_GLU_350  | OE2    | 3.681        |
| 1P2C   | C_ARG_668  | NH2    | B_GLU_335  | OE2    | 3.090        |
| 1P2C   | C_ARG_668  | NH2    | B_GLU_350  | OE1    | 3.316        |
| 1P2C   | C_ARG_668  | NH2    | B_GLU_350  | OE2    | 2.404        |
| 1P2C   | C_ARG_725  | NH2    | C_ASP_719  | OD1    | 2.463        |
| 1P2C   | C_ARG_725  | NH2    | C_ASP_719  | OD2    | 3.674        |
| 1P2C   | D_ARG_924  | NH2    | D_ASP_970  | OD2    | 3.311        |
| 1P2C   | D_ARG_961  | NH1    | D_GLU_981  | OE2    | 3.455        |
| 1P2C   | D_ARG_961  | NH1    | D_ASP_982  | OD1    | 3.476        |
| 1P2C   | D_ARG_961  | NH1    | D_ASP_982  | OD2    | 3.040        |
| 1P2C   | D_LYS_1049 | NZ     | D_GLU_1095 | OE1    | 3.108        |
| 1P2C   | D_ARG_1055 | NH1    | D_GLU_1085 | OE1    | 3.789        |
| 1P2C   | D_ARG_1055 | NH1    | D_GLU_1085 | OE2    | 2.663        |
| 1P2C   | D_ARG_1055 | NH2    | D_GLU_1085 | OE2    | 2.728        |
| 1P2C   | D_HIS_1089 | ND1    | D_ASP_1051 | OD1    | 2.579        |
| 1P2C   | D_LYS_1099 | NZ     | D_ASP_1010 | OD2    | 2.865        |
| 1P2C   | D_ARG_1111 | NH1    | D_GLU_1087 | OE2    | 3.738        |
| 1P2C   | E_LYS_1263 | NZ     | E_GLU_1246 | OE2    | 3.563        |
| 1P2C   | E_LYS_1267 | NZ     | E_ASP_1290 | OD2    | 2.785        |
| 1P2C   | E_ARG_1298 | NH2    | E_ASP_1300 | OD1    | 2.640        |
| 1P2C   | E_ARG_1298 | NH2    | E_ASP_1300 | OD2    | 3.489        |
| 1P2C   | E_LYS_1411 | NZ     | D_GLU_1023 | OE1    | 3.897        |
| 1P2C   | F_LYS_1501 | NZ     | F_GLU_1507 | OE1    | 2.851        |
| 1P2C   | F_ARG_1545 | NH2    | E_GLU_1250 | OE1    | 2.861        |
| 1P2C   | F_ARG_1561 | NH1    | F_ASP_1548 | OD2    | 3.292        |
| 1P2C   | F_ARG_1568 | NH1    | E_GLU_1250 | OE1    | 3.580        |
| 1P2C   | F_ARG_1568 | NH1    | E_GLU_1250 | OE2    | 3.708        |
| 1P2C   | F_ARG_1568 | NH2    | E_GLU_1235 | OE2    | 2.833        |
| 1P2C   | F_ARG_1568 | NH2    | E_GLU_1250 | OE1    | 3.551        |
| 1P2C   | F_ARG_1568 | NH2    | E_GLU_1250 | OE2    | 2.418        |



| 1P2C | F_ARG_1625 | NH2 | F_ASP_1619 | OD1 | 3.266 |
|------|------------|-----|------------|-----|-------|
| 1P2C | F_ARG_1625 | NH2 | F_ASP_1619 | OD2 | 3.611 |

Table 161: 1P2C-specific salt bridging networks analysis. In this table, a PDB file is specified with a four-letter PDB ID, except that the names of the PDB files corresponding to the single NMR structural model split from the NMR ensemble is specified with a four-letter PDB ID in addition to a hyphen followed by the single NMR structural model numeric ID, the residue naming scheme is **Chain ID\_residue name\_residue number**,  $\angle ADH$  represents the angle formed by acceptor (A), donor (D) and hydrogen (H) ( $\angle ADH$ ).

| PDB ID | Residue A | Atom A | Residue B | Atom B | Distance (Å) |
|--------|-----------|--------|-----------|--------|--------------|
| 1P4B   | L_ARG_77  | NH2    | L_GLU_99  | OE2    | 3.709        |
| 1P4B   | L_ARG_77  | NH2    | L_ASP_100 | OD1    | 2.914        |
| 1P4B   | L_ARG_77  | NH2    | L_ASP_100 | OD2    | 3.654        |
| 1P4B   | H_ARG_45  | NH1    | H_ASP_100 | OD1    | 2.724        |
| 1P4B   | H_ARG_45  | NH2    | H_GLU_53  | OE1    | 3.936        |
| 1P4B   | H_ARG_45  | NH2    | H_GLU_53  | OE2    | 3.140        |
| 1P4B   | H_ARG_45  | NH2    | H_ASP_100 | OD1    | 3.840        |
| 1P4B   | H_ARG_77  | NH1    | H_ASP_100 | OD1    | 3.338        |
| 1P4B   | H_ARG_77  | NH1    | H_ASP_100 | OD2    | 2.557        |
| 1P4B   | H_ARG_77  | NH2    | H_ASP_100 | OD1    | 3.920        |
| 1P4B   | H_LYS_86  | NZ     | H_ASP_83  | OD1    | 3.623        |
| 1P4B   | P_HIS_2   | NE2    | H_ASP_65  | OD1    | 3.248        |
| 1P4B   | P_HIS_2   | NE2    | H_ASP_65  | OD2    | 3.747        |
| 1P4B   | P_ARG_9   | NH1    | H_ASP_137 | OD1    | 2.804        |
| 1P4B   | P_ARG_9   | NH1    | H_ASP_137 | OD2    | 3.838        |
| 1P4B   | P_ARG_9   | NH2    | H_ASP_137 | OD1    | 3.399        |
| 1P4B   | P_ARG_9   | NH2    | H_ASP_137 | OD2    | 3.080        |
| 1P4B   | P_ARG_9   | NH2    | P_GLU_6   | OE1    | 3.138        |

Table 162: 1P4B-specific salt bridging networks analysis. In this table, a PDB file is specified with a four-letter PDB ID, except that the names of the PDB files corresponding to the single NMR structural model split from the NMR ensemble is specified with a four-letter PDB ID in addition to a hyphen followed by the single NMR structural model numeric ID, the residue naming scheme is **Chain ID\_residue name\_residue number**,  $\angle ADH$  represents the angle formed by acceptor (A), donor (D) and hydrogen (H) ( $\angle ADH$ ).

| PDB ID | Residue A | Atom A | Residue B | Atom B | Distance (Å) |
|--------|-----------|--------|-----------|--------|--------------|
| 1P7K   | L_ARG_61  | NH2    | L_GLU_81  | OE2    | 2.946        |
| 1P7K   | L_ARG_61  | NH2    | L_ASP_82  | OD1    | 2.757        |
| 1P7K   | L_ARG_61  | NH2    | L_ASP_82  | OD2    | 3.505        |
| 1P7K   | L_LYS_149 | NZ     | L_GLU_195 | OE1    | 3.555        |
| 1P7K   | L_LYS_149 | NZ     | L_GLU_195 | OE2    | 3.346        |
| 1P7K   | L_ARG_155 | NH1    | L_GLU_185 | OE2    | 3.215        |
| 1P7K   | L_ARG_155 | NH2    | L_GLU_185 | OE2    | 2.646        |
| 1P7K   | H_LYS_40  | NZ     | H_GLU_85  | OE1    | 3.931        |
| 1P7K   | H_LYS_62  | NZ     | L_GLU_1   | OE2    | 3.723        |
| 1P7K   | H_LYS_66  | NZ     | H_ASP_86  | OD1    | 2.877        |
| 1P7K   | H_LYS_66  | NZ     | H_ASP_86  | OD2    | 3.789        |
| 1P7K   | H_ARG_94  | NH2    | H_ASP_101 | OD1    | 3.280        |
| 1P7K   | H_ARG_94  | NH2    | H_ASP_101 | OD2    | 3.021        |
| 1P7K   | H_LYS_208 | NZ     | L_GLU_123 | OE1    | 3.517        |
| 1P7K   | H_LYS_208 | NZ     | L_GLU_123 | OE2    | 2.802        |
| 1P7K   | A_ARG_61  | NH2    | A_ASP_82  | OD1    | 2.829        |
| 1P7K   | A_ARG_61  | NH2    | A_ASP_82  | OD2    | 3.548        |
| 1P7K   | A_LYS_103 | NZ     | A_ASP_165 | OD1    | 3.013        |
| 1P7K   | A_LYS_103 | NZ     | A_ASP_165 | OD2    | 3.850        |
| 1P7K   | A_LYS_149 | NZ     | A_GLU_195 | OE2    | 3.766        |
| 1P7K   | A_ARG_155 | NH1    | A_GLU_185 | OE2    | 3.343        |
| 1P7K   | A_ARG_155 | NH2    | A_GLU_185 | OE2    | 3.044        |
| 1P7K   | A_HIS_189 | ND1    | A_ASP_151 | OD2    | 3.542        |
| 1P7K   | A_LYS_199 | NZ     | A_ASP_110 | OD1    | 3.716        |
| 1P7K   | A_LYS_199 | NZ     | A_ASP_110 | OD2    | 2.490        |
| 1P7K   | B_LYS_62  | NZ     | A_GLU_1   | OE2    | 2.848        |
| 1P7K   | B_LYS_66  | NZ     | B_ASP_86  | OD1    | 2.903        |
| 1P7K   | B_LYS_66  | NZ     | B_ASP_86  | OD2    | 3.739        |
| 1P7K   | B_ARG_94  | NH2    | B_ASP_101 | OD1    | 3.555        |
| 1P7K   | B_ARG_94  | NH2    | B_ASP_101 | OD2    | 2.792        |

Table 163: 1P7K-specific salt bridging networks analysis. In this table, a PDB file is specified with a four-letter PDB ID, except that the names of the PDB files corresponding to the single NMR structural model split from the NMR ensemble is specified with a four-letter PDB ID in addition to a hyphen followed by the single NMR structural model numeric ID, the residue naming scheme is **Chain ID\_residue name\_residue number**,  $\angle ADH$  represents the angle formed by acceptor (A), donor (D) and hydrogen (H) ( $\angle ADH$ ).

| PDB ID | Residue A | Atom A | Residue B | Atom B | Distance (Å) |
|--------|-----------|--------|-----------|--------|--------------|
| 1PG7   | H_HIS_35  | NE2    | H_ASP_95  | OD2    | 2.988        |
| 1PG7   | H_ARG_38  | NH1    | H_ASP_86  | OD1    | 2.891        |
| 1PG7   | H_ARG_38  | NH2    | H_GLU_46  | OE1    | 2.886        |
| 1PG7   | H_ARG_38  | NH2    | H_GLU_46  | OE2    | 3.488        |
| 1PG7   | H_ARG_38  | NH2    | H_ASP_86  | OD1    | 3.755        |
| 1PG7   | H_LYS_62  | NZ     | H_GLU_46  | OE1    | 3.013        |
| 1PG7   | H_LYS_62  | NZ     | H_ASP_60  | OD2    | 3.697        |
| 1PG7   | H_ARG_66  | NH2    | H_ASP_86  | OD1    | 3.366        |
| 1PG7   | H_ARG_66  | NH2    | H_ASP_86  | OD2    | 2.811        |
| 1PG7   | H_ARG_83  | NH1    | H_GLU_85  | OE2    | 3.159        |
| 1PG7   | H_ARG_94  | NH2    | H_ASP_101 | OD1    | 3.671        |
| 1PG7   | H_ARG_94  | NH2    | H_ASP_101 | OD2    | 2.700        |
| 1PG7   | H_LYS_143 | NZ     | H_ASP_144 | OD1    | 3.667        |
| 1PG7   | H_LYS_209 | NZ     | L_GLU_123 | OE1    | 2.828        |
| 1PG7   | H_LYS_209 | NZ     | L_GLU_123 | OE2    | 3.697        |
| 1PG7   | L_HIS_35  | NE2    | L_ASP_95  | OD2    | 2.860        |
| 1PG7   | L_ARG_38  | NH1    | L_ASP_86  | OD1    | 3.016        |
| 1PG7   | L_ARG_38  | NH2    | L_GLU_46  | OE1    | 3.146        |
| 1PG7   | L_ARG_38  | NH2    | L_GLU_46  | OE2    | 3.649        |
| 1PG7   | L_ARG_38  | NH2    | L_GLU_85  | OE2    | 3.601        |
| 1PG7   | L_ARG_38  | NH2    | L_ASP_86  | OD1    | 3.900        |
| 1PG7   | L_ARG_66  | NH2    | L_ASP_86  | OD1    | 3.391        |
| 1PG7   | L_ARG_66  | NH2    | L_ASP_86  | OD2    | 2.626        |
| 1PG7   | L_ARG_83  | NH2    | L_GLU_85  | OE1    | 3.938        |
| 1PG7   | L_ARG_94  | NH2    | L_ASP_101 | OD1    | 3.654        |
| 1PG7   | L_ARG_94  | NH2    | L_ASP_101 | OD2    | 2.818        |
| 1PG7   | L_LYS_143 | NZ     | L_ASP_144 | OD1    | 3.370        |
| 1PG7   | L_LYS_209 | NZ     | M_GLU_123 | OE1    | 2.829        |
| 1PG7   | L_LYS_209 | NZ     | M_GLU_123 | OE2    | 3.963        |
| 1PG7   | L_LYS_210 | NZ     | L_GLU_212 | OE1    | 3.335        |
| 1PG7   | L_LYS_210 | NZ     | L_GLU_212 | OE2    | 3.997        |
| 1PG7   | L_LYS_30  | NZ     | X_GLU_95  | OE1    | 3.476        |
| 1PG7   | L_LYS_30  | NZ     | X_GLU_95  | OE2    | 2.795        |
| 1PG7   | L_ARG_61  | NH2    | L_ASP_82  | OD1    | 3.019        |
| 1PG7   | L_ARG_61  | NH2    | L_ASP_82  | OD2    | 3.567        |
| 1PG7   | L_LYS_149 | NZ     | L_GLU_195 | OE1    | 3.477        |
| 1PG7   | L_LYS_149 | NZ     | L_GLU_195 | OE2    | 3.023        |
| 1PG7   | L_LYS_183 | NZ     | L_GLU_187 | OE2    | 2.996        |
| 1PG7   | L_HIS_189 | ND1    | L_ASP_151 | OD2    | 3.757        |
| 1PG7   | M_ARG_24  | NH2    | M_ASP_70  | OD1    | 3.617        |
| 1PG7   | M_ARG_24  | NH2    | M_ASP_70  | OD2    | 2.951        |
| 1PG7   | M_ARG_27  | NH1    | M_GLU_93  | OE2    | 3.544        |
| 1PG7   | M_LYS_30  | NZ     | Z_GLU_95  | OE2    | 3.166        |
| 1PG7   | M_ARG_61  | NH2    | M_GLU_81  | OE2    | 3.691        |
| 1PG7   | M_ARG_61  | NH2    | M_ASP_82  | OD1    | 3.010        |
| 1PG7   | M_ARG_61  | NH2    | M_ASP_82  | OD2    | 3.569        |
| 1PG7   | M_LYS_149 | NZ     | M_GLU_195 | OE1    | 2.679        |
| 1PG7   | M_LYS_183 | NZ     | M_GLU_187 | OE1    | 3.114        |
| 1PG7   | M_LYS_183 | NZ     | M_GLU_187 | OE2    | 2.640        |
| 1PG7   | M_LYS_188 | NZ     | M_ASP_185 | OD1    | 3.378        |
| 1PG7   | M_HIS_189 | ND1    | M_ASP_151 | OD2    | 3.163        |
| 1PG7   | W_ARG_24  | NH2    | W_ASP_69  | OD1    | 2.965        |
| 1PG7   | W_HIS_42  | ND1    | W_GLU_38  | OE2    | 3.572        |
| 1PG7   | W_ARG_61  | NH2    | W_ASP_82  | OD1    | 2.800        |
| 1PG7   | W_ARG_61  | NH2    | W_ASP_82  | OD2    | 3.379        |
| 1PG7   | W_LYS_111 | NZ     | W_GLU_197 | OE1    | 3.487        |
| 1PG7   | W_LYS_111 | NZ     | W_GLU_197 | OE2    | 3.605        |

|      |           |     |           |     |       |
|------|-----------|-----|-----------|-----|-------|
| 1PG7 | W_LYS_150 | NZ  | W_GLU_202 | OE1 | 3.697 |
| 1PG7 | W_LYS_150 | NZ  | W_GLU_202 | OE2 | 2.961 |
| 1PG7 | W_HIS_193 | NE2 | W_GLU_202 | OE1 | 2.915 |
| 1PG7 | W_HIS_193 | NE2 | W_GLU_202 | OE2 | 3.635 |
| 1PG7 | X_HIS_32  | NE2 | X_ASP_96  | OD1 | 3.692 |
| 1PG7 | X_LYS_62  | NZ  | X_GLU_46  | OE2 | 3.660 |
| 1PG7 | X_LYS_64  | NZ  | X_ASP_65  | OD2 | 3.444 |
| 1PG7 | X_LYS_66  | NZ  | X_ASP_86  | OD1 | 2.694 |
| 1PG7 | X_LYS_66  | NZ  | X_ASP_86  | OD2 | 3.927 |
| 1PG7 | X_ARG_94  | NH1 | H_GLU_53  | OE1 | 3.386 |
| 1PG7 | X_ARG_94  | NH1 | H_GLU_53  | OE2 | 3.321 |
| 1PG7 | X_ARG_94  | NH2 | H_GLU_53  | OE1 | 3.937 |
| 1PG7 | X_ARG_94  | NH2 | H_GLU_53  | OE2 | 2.866 |
| 1PG7 | X_ARG_94  | NH2 | X_ASP_101 | OD1 | 3.743 |
| 1PG7 | X_ARG_94  | NH2 | X_ASP_101 | OD2 | 2.609 |
| 1PG7 | X_ARG_98  | NH2 | H_ASP_95  | OD1 | 2.990 |
| 1PG7 | X_ARG_98  | NH2 | H_ASP_95  | OD2 | 3.561 |
| 1PG7 | X_HIS_100 | NE2 | X_ASP_96  | OD1 | 3.548 |
| 1PG7 | X_HIS_100 | NE2 | X_ASP_96  | OD2 | 3.817 |
| 1PG7 | X_LYS_143 | NZ  | W_GLU_125 | OE2 | 2.675 |
| 1PG7 | X_HIS_164 | NE2 | W_GLU_139 | OE2 | 3.801 |
| 1PG7 | X_LYS_208 | NZ  | W_GLU_124 | OE2 | 2.927 |
| 1PG7 | Y_ARG_24  | NH1 | Y_ASP_69  | OD2 | 3.633 |
| 1PG7 | Y_HIS_42  | ND1 | Y_GLU_38  | OE2 | 2.936 |
| 1PG7 | Y_ARG_61  | NH2 | Y_GLU_81  | OE1 | 3.193 |
| 1PG7 | Y_ARG_61  | NH2 | Y_ASP_82  | OD1 | 2.746 |
| 1PG7 | Y_ARG_61  | NH2 | Y_ASP_82  | OD2 | 3.675 |
| 1PG7 | Y_LYS_111 | NZ  | Y_GLU_197 | OE1 | 3.272 |
| 1PG7 | Y_LYS_111 | NZ  | Y_GLU_197 | OE2 | 2.744 |
| 1PG7 | Y_LYS_150 | NZ  | Y_GLU_202 | OE2 | 3.486 |
| 1PG7 | Y_LYS_170 | NZ  | Y_GLU_139 | OE1 | 3.781 |
| 1PG7 | Y_HIS_193 | NE2 | Y_GLU_202 | OE1 | 3.285 |
| 1PG7 | Y_HIS_193 | NE2 | Y_GLU_202 | OE2 | 3.532 |
| 1PG7 | Z_LYS_66  | NZ  | Z_ASP_86  | OD2 | 2.953 |
| 1PG7 | Z_ARG_94  | NH1 | I_GLU_53  | OE1 | 3.259 |
| 1PG7 | Z_ARG_94  | NH1 | I_GLU_53  | OE2 | 3.931 |
| 1PG7 | Z_ARG_94  | NH1 | Z_ASP_101 | OD1 | 3.771 |
| 1PG7 | Z_ARG_94  | NH1 | Z_ASP_101 | OD2 | 2.810 |
| 1PG7 | Z_ARG_94  | NH2 | I_GLU_53  | OE1 | 2.918 |
| 1PG7 | Z_ARG_94  | NH2 | I_GLU_53  | OE2 | 2.525 |
| 1PG7 | Z_ARG_98  | NH2 | I_ASP_95  | OD1 | 3.168 |
| 1PG7 | Z_ARG_98  | NH2 | I_ASP_95  | OD2 | 3.781 |
| 1PG7 | Z_HIS_100 | NE2 | Z_ASP_96  | OD1 | 3.911 |
| 1PG7 | Z_HIS_100 | NE2 | Z_ASP_96  | OD2 | 3.774 |
| 1PG7 | Z_LYS_143 | NZ  | Y_GLU_125 | OE2 | 2.901 |
| 1PG7 | Z_LYS_208 | NZ  | Y_GLU_124 | OE2 | 3.302 |

Table 164: 1PG7-specific salt bridging networks analysis. In this table, a PDB file is specified with a four-letter PDB ID, except that the names of the PDB files corresponding to the single NMR structural model split from the NMR ensemble is specified with a four-letter PDB ID in addition to a hyphen followed by the single NMR structural model numeric ID, the residue naming scheme is **Chain ID\_residue name\_residue number**,  $\angle ADH$  represents the angle formed by acceptor (A), donor (D) and hydrogen (H) ( $\angle ADH$ ).

| PDB ID | Residue A | Atom A | Residue B | Atom B | Distance (Å) |
|--------|-----------|--------|-----------|--------|--------------|
| 1PSK   | L_ARG_60  | NH1    | L_GLU_80  | OE1    | 3.760        |
| 1PSK   | L_ARG_60  | NH1    | L_GLU_80  | OE2    | 3.891        |
| 1PSK   | L_ARG_60  | NH1    | L_ASP_81  | OD2    | 3.537        |
| 1PSK   | L_ARG_60  | NH2    | L_GLU_80  | OE1    | 3.568        |
| 1PSK   | L_ARG_60  | NH2    | L_GLU_80  | OE2    | 3.225        |
| 1PSK   | L_ARG_60  | NH2    | L_ASP_81  | OD1    | 3.069        |
| 1PSK   | L_ARG_60  | NH2    | L_ASP_81  | OD2    | 3.788        |
| 1PSK   | L_LYS_141 | NZ     | L_ASP_142 | OD2    | 3.990        |
| 1PSK   | L_LYS_148 | NZ     | L_GLU_194 | OE2    | 2.802        |
| 1PSK   | L_ARG_154 | NH2    | L_GLU_184 | OE1    | 3.691        |
| 1PSK   | L_HIS_188 | ND1    | L_ASP_150 | OD2    | 2.717        |
| 1PSK   | L_LYS_198 | NZ     | L_ASP_142 | OD2    | 3.973        |
| 1PSK   | H_LYS_38  | NZ     | H_ASP_90  | OD1    | 3.879        |
| 1PSK   | H_ARG_84  | NH1    | H_GLU_82  | OE1    | 3.149        |
| 1PSK   | H_ARG_84  | NH2    | H_GLU_82  | OE1    | 3.059        |
| 1PSK   | H_ARG_84  | NH2    | H_GLU_82  | OE2    | 3.244        |
| 1PSK   | H_LYS_99  | NZ     | H_ASP_102 | OD2    | 3.135        |

Table 165: 1PSK-specific salt bridging networks analysis. In this table, a PDB file is specified with a four-letter PDB ID, except that the names of the PDB files corresponding to the single NMR structural model split from the NMR ensemble is specified with a four-letter PDB ID in addition to a hyphen followed by the single NMR structural model numeric ID, the residue naming scheme is **Chain ID\_residue name\_residue number**,  $\angle ADH$  represents the angle formed by acceptor (A), donor (D) and hydrogen (H) ( $\angle ADH$ ).

| PDB ID | Residue A | Atom A | Residue B | Atom B | Distance (Å) |
|--------|-----------|--------|-----------|--------|--------------|
| 1PZ5   | A_ARG_24  | NH1    | A_ASP_70  | OD1    | 3.050        |
| 1PZ5   | A_ARG_24  | NH1    | A_ASP_70  | OD2    | 3.589        |
| 1PZ5   | A_HIS_27D | ND1    | A_ASP_28  | OD1    | 3.297        |
| 1PZ5   | A_HIS_27D | ND1    | A_ASP_28  | OD2    | 3.192        |
| 1PZ5   | A_HIS_27D | NE2    | C_ASP_2   | OD1    | 2.720        |
| 1PZ5   | A_LYS_39  | NZ     | A_GLU_81  | OE1    | 3.469        |
| 1PZ5   | A_ARG_61  | NH1    | A_ASP_82  | OD1    | 2.720        |
| 1PZ5   | A_ARG_61  | NH1    | A_ASP_82  | OD2    | 3.796        |
| 1PZ5   | A_ARG_61  | NH2    | A_GLU_79  | OE1    | 3.814        |
| 1PZ5   | A_ARG_61  | NH2    | A_GLU_79  | OE2    | 3.855        |
| 1PZ5   | A_ARG_61  | NH2    | A_ASP_82  | OD1    | 3.374        |
| 1PZ5   | A_ARG_61  | NH2    | A_ASP_82  | OD2    | 2.955        |
| 1PZ5   | A_ARG_77  | NH1    | A_ASP_60  | OD2    | 3.886        |
| 1PZ5   | A_LYS_147 | NZ     | A_GLU_154 | OE1    | 3.998        |
| 1PZ5   | A_LYS_149 | NZ     | A_GLU_195 | OE1    | 2.953        |
| 1PZ5   | A_LYS_149 | NZ     | A_GLU_195 | OE2    | 3.630        |
| 1PZ5   | A_LYS_183 | NZ     | A_GLU_187 | OE1    | 2.839        |
| 1PZ5   | A_LYS_183 | NZ     | A_GLU_187 | OE2    | 2.663        |
| 1PZ5   | A_ARG_188 | NH1    | A_ASP_184 | OD1    | 3.586        |
| 1PZ5   | A_ARG_188 | NH1    | A_GLU_185 | OE1    | 3.143        |
| 1PZ5   | A_ARG_188 | NH2    | A_ASP_184 | OD1    | 2.987        |
| 1PZ5   | A_HIS_189 | ND1    | A_ASP_151 | OD1    | 3.048        |
| 1PZ5   | A_HIS_189 | NE2    | A_GLU_185 | OE2    | 2.825        |
| 1PZ5   | A_LYS_199 | NZ     | A_ASP_110 | OD1    | 3.069        |
| 1PZ5   | A_LYS_199 | NZ     | A_ASP_110 | OD2    | 3.840        |
| 1PZ5   | B_ARG_38  | NH1    | B_GLU_46  | OE2    | 2.914        |
| 1PZ5   | B_ARG_38  | NH1    | B_ASP_86  | OD1    | 3.910        |
| 1PZ5   | B_ARG_38  | NH2    | B_ASP_86  | OD1    | 2.823        |
| 1PZ5   | B_ARG_52  | NH1    | B_GLU_50  | OE2    | 2.848        |
| 1PZ5   | B_HIS_58  | ND1    | B_GLU_50  | OE2    | 3.633        |
| 1PZ5   | B_ARG_66  | NH1    | B_ASP_86  | OD1    | 3.057        |
| 1PZ5   | B_ARG_66  | NH1    | B_ASP_86  | OD2    | 3.525        |
| 1PZ5   | B_ARG_66  | NH2    | B_ASP_86  | OD1    | 3.778        |
| 1PZ5   | B_ARG_66  | NH2    | B_ASP_86  | OD2    | 2.847        |
| 1PZ5   | B_ARG_71  | NH1    | B_ASP_73  | OD2    | 3.288        |
| 1PZ5   | B_ARG_94  | NH1    | B_ASP_101 | OD1    | 3.495        |
| 1PZ5   | B_ARG_94  | NH1    | B_ASP_101 | OD2    | 2.627        |
| 1PZ5   | B_ARG_164 | NH1    | A_ASP_167 | OD2    | 3.218        |
| 1PZ5   | B_ARG_164 | NH2    | A_ASP_167 | OD2    | 3.712        |
| 1PZ5   | B_LYS_208 | NZ     | A_GLU_123 | OE1    | 2.648        |
| 1PZ5   | B_LYS_208 | NZ     | A_GLU_123 | OE2    | 3.713        |

Table 166: 1PZ5-specific salt bridging networks analysis. In this table, a PDB file is specified with a four-letter PDB ID, except that the names of the PDB files corresponding to the single NMR structural model split from the NMR ensemble is specified with a four-letter PDB ID in addition to a hyphen followed by the single NMR structural model numeric ID, the residue naming scheme is **Chain ID\_residue name\_residue number**,  $\angle ADH$  represents the angle formed by acceptor (A), donor (D) and hydrogen (H) ( $\angle ADH$ ).

| PDB ID | Residue A | Atom A | Residue B | Atom B | Distance (Å) |
|--------|-----------|--------|-----------|--------|--------------|
| 1Q9K   | A_ARG_54  | NH2    | A_ASP_60  | OD2    | 3.319        |
| 1Q9K   | A_ARG_61  | NH1    | A_ASP_82  | OD1    | 2.801        |
| 1Q9K   | A_ARG_61  | NH1    | A_ASP_82  | OD2    | 3.363        |
| 1Q9K   | A_ARG_61  | NH2    | A_GLU_81  | OE1    | 3.964        |
| 1Q9K   | A_ARG_95  | NH2    | B_ASP_95  | OD1    | 3.932        |
| 1Q9K   | A_ARG_95  | NH2    | B_ASP_95  | OD2    | 3.226        |
| 1Q9K   | A_LYS_146 | NZ     | A_GLU_153 | OE1    | 3.709        |
| 1Q9K   | A_LYS_148 | NZ     | A_GLU_194 | OE1    | 3.150        |
| 1Q9K   | A_LYS_148 | NZ     | A_GLU_194 | OE2    | 3.820        |
| 1Q9K   | A_LYS_168 | NZ     | A_ASP_166 | OD1    | 2.237        |
| 1Q9K   | A_LYS_168 | NZ     | A_ASP_166 | OD2    | 3.163        |
| 1Q9K   | A_HIS_188 | ND1    | A_ASP_150 | OD2    | 2.831        |
| 1Q9K   | A_LYS_198 | NZ     | A_ASP_109 | OD1    | 3.804        |
| 1Q9K   | A_LYS_198 | NZ     | A_ASP_109 | OD2    | 3.067        |
| 1Q9K   | B_ARG_38  | NH1    | B_ASP_86  | OD2    | 2.774        |
| 1Q9K   | B_ARG_38  | NH2    | B_GLU_46  | OE1    | 3.263        |
| 1Q9K   | B_ARG_38  | NH2    | B_ASP_86  | OD2    | 3.827        |
| 1Q9K   | B_ARG_52  | NH1    | B_GLU_56  | OE2    | 3.179        |
| 1Q9K   | B_ARG_52  | NH2    | B_GLU_56  | OE2    | 2.529        |
| 1Q9K   | B_ARG_64  | NH1    | B_ASP_86  | OD1    | 2.817        |
| 1Q9K   | B_ARG_64  | NH1    | B_ASP_86  | OD2    | 3.706        |
| 1Q9K   | B_ARG_64  | NH2    | B_ASP_86  | OD1    | 3.623        |
| 1Q9K   | B_ARG_64  | NH2    | B_ASP_86  | OD2    | 3.040        |
| 1Q9K   | B_HIS_162 | NE2    | A_ASP_166 | OD1    | 3.847        |

Table 167: 1Q9K-specific salt bridging networks analysis. In this table, a PDB file is specified with a four-letter PDB ID, except that the names of the PDB files corresponding to the single NMR structural model split from the NMR ensemble is specified with a four-letter PDB ID in addition to a hyphen followed by the single NMR structural model numeric ID, the residue naming scheme is **Chain ID\_residue name\_residue number**,  $\angle ADH$  represents the angle formed by acceptor (A), donor (D) and hydrogen (H) ( $\angle ADH$ ).



| PDB ID | Residue A  | Atom A | Residue B | Atom B | Distance (Å) |
|--------|------------|--------|-----------|--------|--------------|
| 1Q9L   | B_ARG_38   | NH1    | B_ASP_86  | OD2    | 2.938        |
| 1Q9L   | B_ARG_38   | NH2    | B_GLU_46  | OE1    | 3.214        |
| 1Q9L   | B_ARG_38   | NH2    | B_GLU_46  | OE2    | 3.981        |
| 1Q9L   | B_ARG_38   | NH2    | B_ASP_86  | OD2    | 3.814        |
| 1Q9L   | B_ARG_52   | NH1    | B_GLU_56  | OE2    | 3.639        |
| 1Q9L   | B_ARG_52   | NH2    | B_GLU_56  | OE2    | 2.657        |
| 1Q9L   | B_ARG_64   | NH1    | B_ASP_86  | OD1    | 2.799        |
| 1Q9L   | B_ARG_64   | NH2    | B_ASP_86  | OD1    | 3.122        |
| 1Q9L   | B_ARG_64   | NH2    | B_ASP_86  | OD2    | 2.942        |
| 1Q9L   | B_HIS_96   | ND1    | B_ASP_97  | OD2    | 2.998        |
| 1Q9L   | B_LYS_113  | NZ     | B_ASP_171 | OD2    | 3.940        |
| 1Q9L   | B_LYS_206  | NZ     | A_GLU_122 | OE2    | 3.242        |
| 1Q9L   | D_ARG_38   | NH1    | D_ASP_86  | OD2    | 3.041        |
| 1Q9L   | D_ARG_38   | NH2    | D_GLU_46  | OE1    | 2.944        |
| 1Q9L   | D_ARG_38   | NH2    | D_GLU_46  | OE2    | 3.965        |
| 1Q9L   | D_ARG_52   | NH1    | D_GLU_56  | OE2    | 3.147        |
| 1Q9L   | D_ARG_52   | NH2    | D_GLU_56  | OE2    | 2.760        |
| 1Q9L   | D_ARG_64   | NH1    | D_ASP_86  | OD1    | 2.602        |
| 1Q9L   | D_ARG_64   | NH1    | D_ASP_86  | OD2    | 3.534        |
| 1Q9L   | D_ARG_64   | NH2    | D_ASP_86  | OD1    | 3.533        |
| 1Q9L   | D_ARG_64   | NH2    | D_ASP_86  | OD2    | 2.877        |
| 1Q9L   | D_HIS_96   | ND1    | D_ASP_97  | OD2    | 3.015        |
| 1Q9L   | D_HIS_96   | NE2    | D_ASP_97  | OD2    | 3.962        |
| 1Q9L   | D_ARG_100B | NH1    | B_GLU_85  | OE1    | 3.618        |
| 1Q9L   | D_ARG_100B | NH1    | B_GLU_85  | OE2    | 3.115        |
| 1Q9L   | D_HIS_162  | NE2    | C_ASP_166 | OD1    | 3.172        |
| 1Q9L   | A_LYS_24   | NZ     | A_ASP_70  | OD2    | 3.888        |
| 1Q9L   | A_LYS_39   | NZ     | A_GLU_81  | OE2    | 3.778        |
| 1Q9L   | A_ARG_54   | NH2    | A_ASP_60  | OD2    | 3.464        |
| 1Q9L   | A_ARG_61   | NH1    | A_ASP_82  | OD1    | 3.170        |
| 1Q9L   | A_ARG_61   | NH1    | A_ASP_82  | OD2    | 2.681        |
| 1Q9L   | A_ARG_61   | NH2    | A_GLU_81  | OE1    | 3.824        |
| 1Q9L   | A_ARG_95   | NH2    | B_ASP_95  | OD2    | 3.284        |
| 1Q9L   | A_LYS_102  | NZ     | A_GLU_104 | OE2    | 2.656        |
| 1Q9L   | A_LYS_146  | NZ     | A_GLU_194 | OE2    | 3.634        |
| 1Q9L   | A_LYS_148  | NZ     | A_GLU_194 | OE1    | 3.229        |
| 1Q9L   | A_LYS_148  | NZ     | A_GLU_194 | OE2    | 3.316        |
| 1Q9L   | A_ARG_154  | NH2    | A_GLU_184 | OE1    | 2.873        |
| 1Q9L   | A_LYS_168  | NZ     | A_ASP_166 | OD1    | 3.711        |
| 1Q9L   | A_LYS_168  | NZ     | A_ASP_166 | OD2    | 3.118        |
| 1Q9L   | A_ARG_187  | NH1    | A_GLU_184 | OE2    | 2.612        |
| 1Q9L   | A_HIS_188  | ND1    | A_ASP_150 | OD2    | 2.879        |
| 1Q9L   | A_HIS_188  | NE2    | A_GLU_184 | OE1    | 3.087        |
| 1Q9L   | A_HIS_188  | NE2    | A_GLU_184 | OE2    | 3.294        |
| 1Q9L   | A_LYS_198  | NZ     | A_ASP_109 | OD2    | 3.680        |
| 1Q9L   | C_LYS_39   | NZ     | C_GLU_81  | OE1    | 3.843        |
| 1Q9L   | C_ARG_54   | NH2    | C_ASP_60  | OD2    | 2.952        |
| 1Q9L   | C_ARG_61   | NH1    | C_ASP_82  | OD1    | 2.562        |
| 1Q9L   | C_ARG_61   | NH1    | C_ASP_82  | OD2    | 2.760        |
| 1Q9L   | C_ARG_95   | NH2    | D_ASP_95  | OD2    | 3.309        |
| 1Q9L   | C_LYS_102  | NZ     | C_GLU_104 | OE2    | 3.348        |
| 1Q9L   | C_LYS_148  | NZ     | C_GLU_194 | OE1    | 2.541        |
| 1Q9L   | C_LYS_148  | NZ     | C_GLU_194 | OE2    | 3.918        |
| 1Q9L   | C_ARG_154  | NH1    | C_GLU_184 | OE1    | 3.911        |
| 1Q9L   | C_LYS_168  | NZ     | C_ASP_166 | OD1    | 2.581        |
| 1Q9L   | C_LYS_168  | NZ     | C_ASP_166 | OD2    | 2.492        |
| 1Q9L   | C_ARG_187  | NH1    | C_GLU_184 | OE2    | 2.720        |

|      |           |     |           |     |       |
|------|-----------|-----|-----------|-----|-------|
| 1Q9L | C_HIS_188 | ND1 | C_ASP_150 | OD2 | 2.739 |
| 1Q9L | C_HIS_188 | NE2 | C_GLU_184 | OE1 | 3.004 |
| 1Q9L | C_HIS_188 | NE2 | C_GLU_184 | OE2 | 3.759 |

Table 168: 1Q9L-specific salt bridging networks analysis. In this table, a PDB file is specified with a four-letter PDB ID, except that the names of the PDB files corresponding to the single NMR structural model split from the NMR ensemble is specified with a four-letter PDB ID in addition to a hyphen followed by the single NMR structural model numeric ID, the residue naming scheme is **Chain ID\_residue name\_residue number**,  $\angle ADH$  represents the angle formed by acceptor (A), donor (D) and hydrogen (H) ( $\angle ADH$ ).

| PDB ID | Residue A | Atom A | Residue B  | Atom B | Distance (Å) |
|--------|-----------|--------|------------|--------|--------------|
| 1Q9O   | B_ARG_38  | NH1    | B_GLU_46   | OE1    | 3.016        |
| 1Q9O   | B_ARG_38  | NH1    | B_GLU_46   | OE2    | 3.916        |
| 1Q9O   | B_ARG_38  | NH1    | B_ASP_86   | OD2    | 3.956        |
| 1Q9O   | B_ARG_38  | NH2    | B_ASP_86   | OD2    | 2.860        |
| 1Q9O   | B_ARG_52  | NH1    | B_GLU_56   | OE2    | 2.831        |
| 1Q9O   | B_ARG_52  | NH2    | B_GLU_56   | OE2    | 3.407        |
| 1Q9O   | B_ARG_64  | NH1    | B_ASP_86   | OD1    | 3.248        |
| 1Q9O   | B_ARG_64  | NH1    | B_ASP_86   | OD2    | 2.899        |
| 1Q9O   | B_ARG_64  | NH2    | B_ASP_86   | OD1    | 2.692        |
| 1Q9O   | B_ARG_64  | NH2    | B_ASP_86   | OD2    | 3.771        |
| 1Q9O   | B_ARG_83  | NH2    | B_GLU_85   | OE1    | 2.612        |
| 1Q9O   | B_ARG_94  | NH1    | B_ASP_100D | OD1    | 3.613        |
| 1Q9O   | B_ARG_94  | NH1    | B_ASP_100D | OD2    | 2.755        |
| 1Q9O   | B_ARG_100 | NH1    | A_GLU_55   | OE1    | 3.447        |
| 1Q9O   | B_ARG_100 | NH1    | A_GLU_55   | OE2    | 3.466        |
| 1Q9O   | B_ARG_100 | NH2    | A_GLU_55   | OE1    | 3.378        |
| 1Q9O   | B_ARG_100 | NH2    | A_GLU_55   | OE2    | 2.999        |
| 1Q9O   | B_LYS_206 | NZ     | A_GLU_122  | OE2    | 3.964        |
| 1Q9O   | D_ARG_38  | NH1    | D_ASP_86   | OD2    | 2.888        |
| 1Q9O   | D_ARG_38  | NH2    | D_GLU_46   | OE1    | 3.098        |
| 1Q9O   | D_ARG_38  | NH2    | D_ASP_86   | OD2    | 3.945        |
| 1Q9O   | D_ARG_52  | NH1    | D_GLU_56   | OE2    | 3.504        |
| 1Q9O   | D_ARG_52  | NH2    | D_GLU_56   | OE2    | 3.047        |
| 1Q9O   | D_ARG_64  | NH1    | D_ASP_86   | OD1    | 2.898        |
| 1Q9O   | D_ARG_64  | NH1    | D_ASP_86   | OD2    | 3.621        |
| 1Q9O   | D_ARG_64  | NH2    | D_ASP_86   | OD1    | 3.767        |
| 1Q9O   | D_ARG_64  | NH2    | D_ASP_86   | OD2    | 3.117        |
| 1Q9O   | D_ARG_83  | NH2    | D_GLU_85   | OE1    | 3.293        |
| 1Q9O   | D_ARG_83  | NH2    | D_GLU_85   | OE2    | 3.082        |
| 1Q9O   | D_ARG_94  | NH2    | D_ASP_100D | OD1    | 2.763        |
| 1Q9O   | D_ARG_94  | NH2    | D_ASP_100D | OD2    | 3.701        |
| 1Q9O   | D_ARG_100 | NH1    | C_GLU_55   | OE1    | 3.493        |
| 1Q9O   | D_ARG_100 | NH1    | C_GLU_55   | OE2    | 3.040        |
| 1Q9O   | D_ARG_100 | NH2    | C_GLU_55   | OE1    | 3.391        |
| 1Q9O   | D_ARG_100 | NH2    | C_GLU_55   | OE2    | 3.047        |
| 1Q9O   | A_ARG_54  | NH1    | A_ASP_60   | OD2    | 3.439        |
| 1Q9O   | A_ARG_61  | NH1    | A_ASP_82   | OD1    | 3.512        |
| 1Q9O   | A_ARG_61  | NH1    | A_ASP_82   | OD2    | 2.892        |
| 1Q9O   | A_ARG_61  | NH2    | A_GLU_81   | OE1    | 3.882        |
| 1Q9O   | A_ARG_61  | NH2    | A_ASP_82   | OD1    | 2.949        |
| 1Q9O   | A_ARG_61  | NH2    | A_ASP_82   | OD2    | 3.770        |
| 1Q9O   | A_ARG_95  | NH2    | B_ASP_95   | OD1    | 2.958        |
| 1Q9O   | A_ARG_95  | NH2    | B_ASP_95   | OD2    | 3.717        |
| 1Q9O   | A_LYS_102 | NZ     | A_GLU_104  | OE1    | 2.779        |
| 1Q9O   | A_LYS_146 | NZ     | A_GLU_194  | OE2    | 2.676        |
| 1Q9O   | A_LYS_148 | NZ     | A_GLU_194  | OE1    | 3.510        |
| 1Q9O   | A_LYS_182 | NZ     | A_GLU_186  | OE1    | 2.761        |
| 1Q9O   | A_LYS_182 | NZ     | A_GLU_186  | OE2    | 3.253        |
| 1Q9O   | A_HIS_188 | ND1    | A_ASP_150  | OD2    | 2.674        |
| 1Q9O   | A_LYS_198 | NZ     | A_ASP_109  | OD1    | 3.691        |
| 1Q9O   | A_LYS_198 | NZ     | A_ASP_109  | OD2    | 3.683        |
| 1Q9O   | C_ARG_61  | NH1    | C_ASP_82   | OD1    | 2.516        |
| 1Q9O   | C_ARG_61  | NH1    | C_ASP_82   | OD2    | 3.228        |
| 1Q9O   | C_ARG_61  | NH2    | C_GLU_81   | OE2    | 3.883        |
| 1Q9O   | C_ARG_95  | NH2    | D_ASP_95   | OD1    | 3.672        |
| 1Q9O   | C_ARG_95  | NH2    | D_ASP_95   | OD2    | 2.974        |
| 1Q9O   | C_LYS_102 | NZ     | C_GLU_104  | OE1    | 3.839        |

|      |           |    |           |     |       |
|------|-----------|----|-----------|-----|-------|
| 1Q9O | C_LYS_148 | NZ | C_GLU_194 | OE1 | 2.914 |
| 1Q9O | C_LYS_148 | NZ | C_GLU_194 | OE2 | 3.816 |

Table 169: 1Q9O-specific salt bridging networks analysis. In this table, a PDB file is specified with a four-letter PDB ID, except that the names of the PDB files corresponding to the single NMR structural model split from the NMR ensemble is specified with a four-letter PDB ID in addition to a hyphen followed by the single NMR structural model numeric ID, the residue naming scheme is **Chain ID\_residue name\_residue number**,  $\angle ADH$  represents the angle formed by acceptor (A), donor (D) and hydrogen (H) ( $\angle ADH$ ).

| PDB ID | Residue A | Atom A | Residue B  | Atom B | Distance (Å) |
|--------|-----------|--------|------------|--------|--------------|
| 1Q9W   | A_ARG_61  | NH2    | A_ASP_82   | OD1    | 2.327        |
| 1Q9W   | A_ARG_61  | NH2    | A_ASP_82   | OD2    | 2.627        |
| 1Q9W   | A_ARG_95  | NH2    | B_ASP_95   | OD1    | 2.949        |
| 1Q9W   | A_ARG_95  | NH2    | B_ASP_95   | OD2    | 3.845        |
| 1Q9W   | A_LYS_102 | NZ     | A_GLU_104  | OE1    | 3.845        |
| 1Q9W   | A_LYS_146 | NZ     | A_GLU_153  | OE2    | 3.713        |
| 1Q9W   | A_LYS_148 | NZ     | A_GLU_194  | OE1    | 2.859        |
| 1Q9W   | A_ARG_154 | NH1    | A_GLU_184  | OE1    | 3.813        |
| 1Q9W   | A_ARG_154 | NH2    | A_GLU_184  | OE1    | 3.493        |
| 1Q9W   | A_ARG_154 | NH2    | A_GLU_184  | OE2    | 2.753        |
| 1Q9W   | A_ARG_187 | NH1    | A_GLU_184  | OE2    | 3.961        |
| 1Q9W   | A_ARG_187 | NH2    | A_GLU_184  | OE2    | 2.743        |
| 1Q9W   | A_HIS_188 | ND1    | A_ASP_150  | OD2    | 2.924        |
| 1Q9W   | B_ARG_38  | NH1    | B_ASP_86   | OD2    | 2.826        |
| 1Q9W   | B_ARG_38  | NH2    | B_GLU_46   | OE1    | 3.067        |
| 1Q9W   | B_ARG_38  | NH2    | B_ASP_86   | OD2    | 3.866        |
| 1Q9W   | B_ARG_52  | NH1    | B_GLU_56   | OE2    | 3.024        |
| 1Q9W   | B_ARG_52  | NH2    | B_GLU_56   | OE2    | 3.531        |
| 1Q9W   | B_ARG_64  | NH1    | B_ASP_86   | OD1    | 2.680        |
| 1Q9W   | B_ARG_64  | NH1    | B_ASP_86   | OD2    | 3.618        |
| 1Q9W   | B_ARG_64  | NH2    | B_ASP_86   | OD1    | 3.562        |
| 1Q9W   | B_ARG_64  | NH2    | B_ASP_86   | OD2    | 3.048        |
| 1Q9W   | B_ARG_83  | NH2    | B_GLU_85   | OE1    | 3.148        |
| 1Q9W   | B_ARG_83  | NH2    | B_GLU_85   | OE2    | 3.088        |
| 1Q9W   | B_ARG_94  | NH2    | B_ASP_100D | OD1    | 2.686        |
| 1Q9W   | B_ARG_94  | NH2    | B_ASP_100D | OD2    | 3.453        |
| 1Q9W   | B_ARG_100 | NH1    | A_GLU_55   | OE1    | 2.615        |
| 1Q9W   | B_ARG_100 | NH1    | A_GLU_55   | OE2    | 3.657        |
| 1Q9W   | B_ARG_100 | NH2    | A_GLU_55   | OE1    | 2.891        |
| 1Q9W   | B_ARG_100 | NH2    | A_GLU_55   | OE2    | 3.820        |
| 1Q9W   | C_LYS_24  | NZ     | C_ASP_70   | OD1    | 3.583        |
| 1Q9W   | C_ARG_61  | NH2    | C_ASP_82   | OD1    | 2.769        |
| 1Q9W   | C_ARG_61  | NH2    | C_ASP_82   | OD2    | 3.531        |
| 1Q9W   | C_ARG_95  | NH2    | D_ASP_95   | OD1    | 2.929        |
| 1Q9W   | C_ARG_95  | NH2    | D_ASP_95   | OD2    | 3.831        |
| 1Q9W   | C_LYS_106 | NZ     | C_GLU_17   | OE1    | 2.879        |
| 1Q9W   | C_LYS_148 | NZ     | C_GLU_194  | OE1    | 2.881        |
| 1Q9W   | C_LYS_148 | NZ     | C_GLU_194  | OE2    | 3.569        |
| 1Q9W   | C_ARG_154 | NH2    | C_GLU_184  | OE1    | 2.757        |
| 1Q9W   | C_LYS_168 | NZ     | C_ASP_166  | OD1    | 3.032        |
| 1Q9W   | C_LYS_168 | NZ     | C_ASP_166  | OD2    | 2.758        |
| 1Q9W   | C_ARG_187 | NH1    | C_GLU_184  | OE2    | 2.691        |
| 1Q9W   | C_ARG_187 | NH2    | C_GLU_184  | OE2    | 2.833        |
| 1Q9W   | D_ARG_38  | NH1    | D_ASP_86   | OD2    | 2.855        |
| 1Q9W   | D_ARG_38  | NH2    | D_GLU_46   | OE1    | 3.105        |
| 1Q9W   | D_ARG_38  | NH2    | D_ASP_86   | OD2    | 3.747        |
| 1Q9W   | D_ARG_52  | NH1    | D_GLU_56   | OE2    | 3.012        |
| 1Q9W   | D_ARG_52  | NH2    | D_GLU_56   | OE2    | 3.725        |
| 1Q9W   | D_ARG_64  | NH1    | D_ASP_86   | OD1    | 3.569        |
| 1Q9W   | D_ARG_64  | NH1    | D_ASP_86   | OD2    | 3.180        |
| 1Q9W   | D_ARG_94  | NH2    | D_ASP_100D | OD1    | 2.639        |
| 1Q9W   | D_ARG_94  | NH2    | D_ASP_100D | OD2    | 3.620        |
| 1Q9W   | D_ARG_100 | NH1    | C_GLU_55   | OE1    | 3.356        |
| 1Q9W   | D_ARG_100 | NH1    | C_GLU_55   | OE2    | 3.002        |
| 1Q9W   | D_ARG_100 | NH2    | C_GLU_55   | OE1    | 3.373        |
| 1Q9W   | D_ARG_100 | NH2    | C_GLU_55   | OE2    | 3.045        |

---

Table 170: 1Q9W-specific salt bridging networks analysis. In this table, a PDB file is specified with a four-letter PDB ID, except that the names of the PDB files corresponding to the single NMR structural model split from the NMR ensemble is specified with a four-letter PDB ID in addition to a hyphen followed by the single NMR structural model numeric ID, the residue naming scheme is **Chain ID\_residue name\_residue number**,  $\angle ADH$  represents the angle formed by acceptor (A), donor (D) and hydrogen (H) ( $\angle ADH$ ).

| PDB ID | Residue A | Atom A | Residue B | Atom B | Distance (Å) |
|--------|-----------|--------|-----------|--------|--------------|
| 1QBL   | L_ARG_61  | NH2    | L_ASP_82  | OD1    | 2.786        |
| 1QBL   | L_ARG_61  | NH2    | L_ASP_82  | OD2    | 3.721        |
| 1QBL   | L_LYS_147 | NZ     | L_GLU_154 | OE1    | 3.338        |
| 1QBL   | L_LYS_149 | NZ     | L_GLU_195 | OE1    | 3.827        |
| 1QBL   | L_LYS_149 | NZ     | L_GLU_195 | OE2    | 2.952        |
| 1QBL   | L_ARG_155 | NH1    | L_GLU_185 | OE1    | 3.191        |
| 1QBL   | L_ARG_155 | NH1    | L_GLU_185 | OE2    | 3.323        |
| 1QBL   | L_ARG_155 | NH2    | L_GLU_185 | OE1    | 3.979        |
| 1QBL   | L_ARG_155 | NH2    | L_GLU_185 | OE2    | 2.777        |
| 1QBL   | L_HIS_189 | ND1    | L_ASP_151 | OD2    | 2.720        |
| 1QBL   | L_HIS_189 | NE2    | L_GLU_185 | OE2    | 3.448        |
| 1QBL   | L_LYS_199 | NZ     | L_ASP_110 | OD2    | 3.257        |
| 1QBL   | H_LYS_63  | NZ     | H_GLU_46  | OE1    | 3.796        |
| 1QBL   | H_LYS_67  | NZ     | H_ASP_90  | OD2    | 3.852        |
| 1QBL   | H_LYS_212 | NZ     | L_GLU_123 | OE1    | 3.581        |

Table 171: 1QBL-specific salt bridging networks analysis. In this table, a PDB file is specified with a four-letter PDB ID, except that the names of the PDB files corresponding to the single NMR structural model split from the NMR ensemble is specified with a four-letter PDB ID in addition to a hyphen followed by the single NMR structural model numeric ID, the residue naming scheme is **Chain ID\_residue name\_residue number**,  $\angle ADH$  represents the angle formed by acceptor (A), donor (D) and hydrogen (H) ( $\angle ADH$ ).

| PDB ID | Residue A | Atom A | Residue B | Atom B | Distance (Å) |
|--------|-----------|--------|-----------|--------|--------------|
| 1QBM   | L_ARG_61  | NH2    | L_GLU_81  | OE2    | 2.739        |
| 1QBM   | L_ARG_61  | NH2    | L_ASP_82  | OD1    | 2.797        |
| 1QBM   | L_ARG_61  | NH2    | L_ASP_82  | OD2    | 3.689        |
| 1QBM   | L_LYS_107 | NZ     | L_GLU_17  | OE1    | 3.352        |
| 1QBM   | L_LYS_107 | NZ     | L_GLU_17  | OE2    | 3.277        |
| 1QBM   | L_LYS_142 | NZ     | L_ASP_143 | OD1    | 3.711        |
| 1QBM   | L_LYS_147 | NZ     | L_GLU_154 | OE2    | 2.702        |
| 1QBM   | L_LYS_149 | NZ     | L_GLU_195 | OE1    | 3.463        |
| 1QBM   | L_LYS_149 | NZ     | L_GLU_195 | OE2    | 3.031        |
| 1QBM   | L_ARG_155 | NH1    | L_GLU_185 | OE1    | 3.258        |
| 1QBM   | L_ARG_155 | NH1    | L_GLU_185 | OE2    | 2.899        |
| 1QBM   | L_ARG_155 | NH2    | L_GLU_185 | OE2    | 2.603        |
| 1QBM   | L_HIS_189 | ND1    | L_ASP_151 | OD2    | 2.710        |
| 1QBM   | H_LYS_63  | NZ     | H_GLU_46  | OE1    | 3.520        |
| 1QBM   | H_LYS_67  | NZ     | H_ASP_90  | OD1    | 3.236        |
| 1QBM   | H_LYS_67  | NZ     | H_ASP_90  | OD2    | 3.485        |
| 1QBM   | H_LYS_212 | NZ     | L_GLU_123 | OE1    | 2.762        |
| 1QBM   | H_LYS_212 | NZ     | L_GLU_123 | OE2    | 3.773        |

Table 172: 1QBM-specific salt bridging networks analysis. In this table, a PDB file is specified with a four-letter PDB ID, except that the names of the PDB files corresponding to the single NMR structural model split from the NMR ensemble is specified with a four-letter PDB ID in addition to a hyphen followed by the single NMR structural model numeric ID, the residue naming scheme is **Chain ID\_residue name\_residue number**,  $\angle ADH$  represents the angle formed by acceptor (A), donor (D) and hydrogen (H) ( $\angle ADH$ ).



| PDB ID | Residue A | Atom A | Residue B | Atom B | Distance (Å) |
|--------|-----------|--------|-----------|--------|--------------|
| 1QGC   | 1_LYS_41  | NZ     | 1_GLU_175 | OE2    | 3.394        |
| 1QGC   | 1_HIS_57  | NE2    | 1_ASP_59  | OD2    | 3.737        |
| 1QGC   | 1_ARG_114 | NH2    | 1_GLU_77  | OE2    | 2.895        |
| 1QGC   | 1_ARG_124 | NH1    | 2_ASP_41  | OD1    | 3.642        |
| 1QGC   | 1_ARG_124 | NH1    | 2_ASP_41  | OD2    | 2.877        |
| 1QGC   | 1_ARG_124 | NH2    | 2_ASP_41  | OD1    | 3.740        |
| 1QGC   | 1_ARG_179 | NH1    | 1_ASP_37  | OD1    | 3.088        |
| 1QGC   | 1_ARG_179 | NH2    | 1_ASP_37  | OD1    | 3.997        |
| 1QGC   | 1_ARG_179 | NH2    | 1_GLU_77  | OE2    | 3.665        |
| 1QGC   | 1_LYS_181 | NZ     | 1_ASP_37  | OD1    | 3.047        |
| 1QGC   | 1_LYS_181 | NZ     | 1_ASP_37  | OD2    | 3.465        |
| 1QGC   | 1_LYS_181 | NZ     | 1_GLU_77  | OE2    | 3.717        |
| 1QGC   | 2_ARG_54  | NH1    | 2_GLU_59  | OE1    | 3.984        |
| 1QGC   | 2_ARG_54  | NH1    | 2_GLU_59  | OE2    | 3.432        |
| 1QGC   | 2_ARG_54  | NH2    | 2_GLU_59  | OE1    | 3.031        |
| 1QGC   | 2_ARG_54  | NH2    | 2_GLU_59  | OE2    | 3.842        |
| 1QGC   | 2_LYS_88  | NZ     | 2_GLU_86  | OE1    | 3.903        |
| 1QGC   | 2_ARG_102 | NH1    | 2_GLU_40  | OE1    | 2.629        |
| 1QGC   | 2_ARG_102 | NH2    | 2_ASP_41  | OD1    | 2.799        |
| 1QGC   | 2_ARG_102 | NH2    | 2_ASP_41  | OD2    | 3.402        |
| 1QGC   | 2_HIS_157 | NE2    | 2_ASP_106 | OD1    | 2.653        |
| 1QGC   | 2_HIS_157 | NE2    | 2_ASP_106 | OD2    | 3.740        |
| 1QGC   | 2_ARG_167 | NH2    | 3_ASP_166 | OD1    | 2.757        |
| 1QGC   | 2_ARG_167 | NH2    | 3_ASP_166 | OD2    | 2.777        |
| 1QGC   | 2_HIS_174 | ND1    | 2_ASP_169 | OD1    | 3.562        |
| 1QGC   | 2_HIS_174 | ND1    | 2_ASP_169 | OD2    | 2.877        |
| 1QGC   | 2_HIS_174 | NE2    | 2_GLU_128 | OE1    | 2.739        |
| 1QGC   | 2_HIS_174 | NE2    | 2_GLU_128 | OE2    | 3.273        |
| 1QGC   | 2_LYS_198 | NZ     | 2_ASP_68  | OD1    | 3.053        |
| 1QGC   | 2_LYS_198 | NZ     | 2_ASP_68  | OD2    | 3.315        |
| 1QGC   | 3_LYS_20  | NZ     | 3_ASP_18  | OD2    | 2.699        |
| 1QGC   | 3_ARG_120 | NH1    | 3_GLU_146 | OE2    | 2.906        |
| 1QGC   | 3_ARG_120 | NH2    | 3_ASP_148 | OD2    | 2.596        |
| 1QGC   | 3_LYS_193 | NZ     | 3_ASP_116 | OD2    | 3.610        |
| 1QGC   | 3_LYS_207 | NZ     | 3_GLU_49  | OE1    | 3.193        |
| 1QGC   | 4_ARG_18  | NH1    | 4_ASP_80  | OD2    | 2.980        |
| 1QGC   | 4_ARG_18  | NH2    | 4_ASP_80  | OD2    | 3.279        |
| 1QGC   | 4_ARG_24  | NH1    | 4_ASP_74  | OD2    | 3.755        |
| 1QGC   | 4_ARG_24  | NH2    | 4_ASP_74  | OD1    | 3.361        |
| 1QGC   | 4_ARG_24  | NH2    | 4_ASP_74  | OD2    | 2.753        |
| 1QGC   | 4_ARG_65  | NH1    | 4_ASP_86  | OD1    | 3.995        |
| 1QGC   | 4_ARG_65  | NH1    | 4_ASP_86  | OD2    | 2.787        |
| 1QGC   | 4_ARG_65  | NH2    | 4_ASP_85  | OD2    | 3.117        |
| 1QGC   | 4_ARG_65  | NH2    | 4_ASP_86  | OD1    | 3.250        |
| 1QGC   | 4_ARG_65  | NH2    | 4_ASP_86  | OD2    | 3.419        |
| 1QGC   | 4_LYS_107 | NZ     | 4_ASP_109 | OD1    | 3.987        |
| 1QGC   | 4_LYS_107 | NZ     | 4_ASP_169 | OD1    | 3.205        |
| 1QGC   | 4_LYS_153 | NZ     | 4_GLU_199 | OE1    | 3.327        |
| 1QGC   | 4_ARG_159 | NH1    | 4_GLU_189 | OE1    | 3.473        |
| 1QGC   | 4_LYS_173 | NZ     | 4_ASP_171 | OD1    | 3.263        |
| 1QGC   | 4_LYS_173 | NZ     | 4_ASP_171 | OD2    | 3.461        |
| 1QGC   | 4_LYS_187 | NZ     | 4_GLU_191 | OE1    | 2.654        |
| 1QGC   | 4_LYS_203 | NZ     | 4_ASP_114 | OD1    | 3.911        |
| 1QGC   | 4_LYS_203 | NZ     | 4_ASP_114 | OD2    | 3.518        |
| 1QGC   | A_ARG_38  | NH1    | A_ASP_90  | OD1    | 3.118        |
| 1QGC   | A_ARG_38  | NH2    | A_GLU_46  | OE1    | 3.211        |
| 1QGC   | A_ARG_38  | NH2    | A_ASP_90  | OD1    | 3.660        |

|      |           |     |           |     |       |
|------|-----------|-----|-----------|-----|-------|
| 1QGC | A_ARG_67  | NH1 | A_ASP_90  | OD1 | 3.761 |
| 1QGC | A_ARG_67  | NH1 | A_ASP_90  | OD2 | 2.866 |
| 1QGC | A_ARG_67  | NH2 | A_ASP_90  | OD1 | 3.418 |
| 1QGC | A_ARG_67  | NH2 | A_ASP_90  | OD2 | 3.559 |
| 1QGC | A_ARG_98  | NH1 | A_ASP_101 | OD1 | 3.353 |
| 1QGC | A_ARG_98  | NH1 | A_ASP_101 | OD2 | 3.278 |
| 1QGC | A_ARG_98  | NH2 | A_ASP_101 | OD1 | 3.317 |
| 1QGC | A_ARG_98  | NH2 | A_ASP_101 | OD2 | 3.911 |
| 1QGC | A_ARG_99  | NH1 | A_ASP_104 | OD1 | 2.799 |
| 1QGC | A_ARG_99  | NH2 | A_ASP_104 | OD1 | 2.841 |
| 1QGC | A_ARG_99  | NH2 | A_ASP_104 | OD2 | 3.281 |
| 1QGC | A_ARG_99  | NH2 | 5_ASP_143 | OD1 | 3.483 |
| 1QGC | A_LYS_215 | NZ  | 4_GLU_127 | OE2 | 3.716 |

Table 173: 1QGC-specific salt bridging networks analysis. In this table, a PDB file is specified with a four-letter PDB ID, except that the names of the PDB files corresponding to the single NMR structural model split from the NMR ensemble is specified with a four-letter PDB ID in addition to a hyphen followed by the single NMR structural model numeric ID, the residue naming scheme is **Chain ID\_residue name\_residue number**,  $\angle ADH$  represents the angle formed by acceptor (A), donor (D) and hydrogen (H) ( $\angle ADH$ ).

| PDB ID | Residue A | Atom A | Residue B | Atom B | Distance (Å) |
|--------|-----------|--------|-----------|--------|--------------|
| 1QKZ   | A.LYS_15  | NZ     | A.GLU_61  | OE1    | 3.616        |
| 1QKZ   | A.LYS_36  | NZ     | A.GLU_32  | OE2    | 3.573        |
| 1QKZ   | H.ARG_38  | NH1    | H.ASP_86  | OD1    | 2.872        |
| 1QKZ   | H.ARG_38  | NH2    | H.GLU_46  | OE1    | 2.843        |
| 1QKZ   | H.ARG_38  | NH2    | H.GLU_46  | OE2    | 3.701        |
| 1QKZ   | H.ARG_38  | NH2    | H.ASP_86  | OD1    | 3.867        |
| 1QKZ   | H.LYS_64  | NZ     | H.ASP_61  | OD1    | 2.866        |
| 1QKZ   | H.ARG_66  | NH2    | H.ASP_86  | OD1    | 3.410        |
| 1QKZ   | H.ARG_66  | NH2    | H.ASP_86  | OD2    | 2.614        |
| 1QKZ   | H.LYS_83  | NZ     | H.GLU_85  | OE1    | 3.867        |
| 1QKZ   | H.ARG_94  | NH2    | H.ASP_101 | OD1    | 3.649        |
| 1QKZ   | H.ARG_94  | NH2    | H.ASP_101 | OD2    | 2.613        |
| 1QKZ   | H.LYS_208 | NZ     | L.GLU_123 | OE2    | 2.582        |
| 1QKZ   | L.ARG_61  | NH1    | L.ASP_82  | OD1    | 3.436        |
| 1QKZ   | L.ARG_61  | NH1    | L.ASP_82  | OD2    | 2.498        |
| 1QKZ   | L.ARG_61  | NH2    | L.GLU_79  | OE1    | 3.597        |
| 1QKZ   | L.ARG_61  | NH2    | L.ASP_82  | OD1    | 2.782        |
| 1QKZ   | L.ARG_61  | NH2    | L.ASP_82  | OD2    | 3.478        |
| 1QKZ   | L.ARG_77  | NH2    | L.GLU_79  | OE2    | 3.903        |
| 1QKZ   | L.LYS_103 | NZ     | L.GLU_105 | OE1    | 3.233        |
| 1QKZ   | L.LYS_147 | NZ     | L.GLU_154 | OE1    | 3.920        |
| 1QKZ   | L.LYS_147 | NZ     | L.GLU_154 | OE2    | 2.870        |
| 1QKZ   | L.LYS_149 | NZ     | L.GLU_195 | OE1    | 2.933        |
| 1QKZ   | L.LYS_149 | NZ     | L.GLU_195 | OE2    | 3.912        |
| 1QKZ   | L.ARG_155 | NH1    | L.GLU_185 | OE1    | 3.847        |
| 1QKZ   | L.ARG_155 | NH1    | L.GLU_185 | OE2    | 2.779        |
| 1QKZ   | L.ARG_155 | NH2    | L.GLU_185 | OE2    | 3.332        |
| 1QKZ   | L.LYS_183 | NZ     | L.GLU_187 | OE1    | 3.886        |
| 1QKZ   | L.LYS_183 | NZ     | L.GLU_187 | OE2    | 2.674        |
| 1QKZ   | L.HIS_189 | ND1    | L.ASP_151 | OD2    | 2.784        |
| 1QKZ   | L.LYS_199 | NZ     | L.ASP_110 | OD2    | 2.613        |

Table 174: 1QKZ-specific salt bridging networks analysis. In this table, a PDB file is specified with a four-letter PDB ID, except that the names of the PDB files corresponding to the single NMR structural model split from the NMR ensemble is specified with a four-letter PDB ID in addition to a hyphen followed by the single NMR structural model numeric ID, the residue naming scheme is **Chain ID\_residue name\_residue number**,  $\angle ADH$  represents the angle formed by acceptor (A), donor (D) and hydrogen (H) ( $\angle ADH$ ).

| PDB ID | Residue A | Atom A | Residue B | Atom B | Distance (Å) |
|--------|-----------|--------|-----------|--------|--------------|
| 1QOK   | A_ARG_64  | NH1    | A_GLU_72  | OE2    | 2.857        |
| 1QOK   | A_ARG_64  | NH2    | A_ASP_116 | OD1    | 2.731        |
| 1QOK   | A_LYS_89  | NZ     | A_GLU_72  | OE1    | 3.015        |
| 1QOK   | A_LYS_89  | NZ     | A_GLU_72  | OE2    | 3.466        |
| 1QOK   | A_LYS_93  | NZ     | A_ASP_116 | OD1    | 3.171        |
| 1QOK   | A_LYS_93  | NZ     | A_ASP_116 | OD2    | 2.764        |
| 1QOK   | A_ARG_221 | NH2    | A_GLU_241 | OE1    | 3.500        |
| 1QOK   | A_ARG_221 | NH2    | A_GLU_241 | OE2    | 3.768        |
| 1QOK   | A_ARG_221 | NH2    | A_ASP_242 | OD1    | 2.782        |
| 1QOK   | A_ARG_221 | NH2    | A_ASP_242 | OD2    | 3.516        |
| 1QOK   | A_LYS_263 | NZ     | A_GLU_265 | OE2    | 3.711        |
| 1QOK   | A_LYS_267 | NZ     | A_GLU_178 | OE1    | 3.144        |
| 1QOK   | A_LYS_267 | NZ     | A_GLU_178 | OE2    | 3.767        |

Table 175: 1QOK-specific salt bridging networks analysis. In this table, a PDB file is specified with a four-letter PDB ID, except that the names of the PDB files corresponding to the single NMR structural model split from the NMR ensemble is specified with a four-letter PDB ID in addition to a hyphen followed by the single NMR structural model numeric ID, the residue naming scheme is **Chain ID\_residue name\_residue number**,  $\angle ADH$  represents the angle formed by acceptor (A), donor (D) and hydrogen (H) ( $\angle ADH$ ).

| PDB ID  | Residue A | Atom A | Residue B | Atom B | Distance (Å) |
|---------|-----------|--------|-----------|--------|--------------|
| 1R21-1  | A_HIS_54  | NE2    | A_GLU_52  | OE2    | 3.592        |
| 1R21-1  | A_HIS_61  | NE2    | A_GLU_52  | OE1    | 3.344        |
| 1R21-1  | A_ARG_96  | NH1    | A_ASP_16  | OD1    | 3.366        |
| 1R21-1  | A_ARG_96  | NH2    | A_GLU_98  | OE2    | 3.736        |
| 1R21-10 | A_HIS_54  | NE2    | A_GLU_52  | OE1    | 3.820        |
| 1R21-10 | A_HIS_54  | NE2    | A_GLU_52  | OE2    | 3.819        |
| 1R21-10 | A_HIS_61  | NE2    | A_GLU_52  | OE1    | 3.243        |
| 1R21-11 | A_LYS_50  | NZ     | A_GLU_52  | OE1    | 3.980        |
| 1R21-11 | A_HIS_54  | NE2    | A_GLU_52  | OE1    | 3.682        |
| 1R21-11 | A_HIS_54  | NE2    | A_GLU_52  | OE2    | 3.726        |
| 1R21-11 | A_HIS_61  | NE2    | A_GLU_52  | OE1    | 3.099        |
| 1R21-11 | A_ARG_81  | NH2    | A_GLU_57  | OE1    | 3.622        |
| 1R21-11 | A_ARG_81  | NH2    | A_GLU_57  | OE2    | 3.877        |
| 1R21-12 | A_ARG_6   | NH2    | A_GLU_98  | OE2    | 3.220        |
| 1R21-12 | A_LYS_50  | NZ     | A_GLU_52  | OE2    | 3.513        |
| 1R21-12 | A_HIS_54  | ND1    | A_GLU_55  | OE1    | 3.706        |
| 1R21-12 | A_HIS_61  | NE2    | A_GLU_52  | OE1    | 3.484        |
| 1R21-12 | A_HIS_61  | NE2    | A_GLU_52  | OE2    | 3.957        |
| 1R21-12 | A_LYS_83  | NZ     | A_ASP_86  | OD1    | 3.921        |
| 1R21-12 | A_ARG_96  | NH1    | A_ASP_16  | OD1    | 2.338        |
| 1R21-12 | A_ARG_96  | NH2    | A_ASP_16  | OD1    | 3.435        |
| 1R21-13 | A_LYS_50  | NZ     | A_GLU_52  | OE2    | 3.811        |
| 1R21-13 | A_HIS_61  | NE2    | A_GLU_52  | OE1    | 3.018        |
| 1R21-13 | A_HIS_61  | NE2    | A_GLU_52  | OE2    | 3.663        |
| 1R21-13 | A_ARG_96  | NH1    | A_ASP_16  | OD1    | 2.697        |
| 1R21-13 | A_ARG_96  | NH2    | A_GLU_98  | OE2    | 3.649        |
| 1R21-14 | A_HIS_61  | ND1    | A_GLU_52  | OE2    | 3.472        |
| 1R21-14 | A_HIS_61  | NE2    | A_GLU_52  | OE1    | 2.859        |
| 1R21-14 | A_HIS_61  | NE2    | A_GLU_52  | OE2    | 3.106        |
| 1R21-14 | A_ARG_81  | NH2    | A_GLU_57  | OE1    | 3.503        |
| 1R21-14 | A_ARG_81  | NH2    | A_GLU_57  | OE2    | 2.460        |
| 1R21-14 | A_ARG_96  | NH2    | A_GLU_98  | OE2    | 2.878        |
| 1R21-15 | A_ARG_6   | NH2    | A_GLU_100 | OE1    | 2.871        |
| 1R21-15 | A_ARG_6   | NH2    | A_GLU_100 | OE2    | 3.726        |
| 1R21-15 | A_HIS_54  | NE2    | A_GLU_52  | OE1    | 3.410        |
| 1R21-15 | A_HIS_54  | NE2    | A_GLU_52  | OE2    | 3.502        |
| 1R21-15 | A_HIS_61  | NE2    | A_GLU_52  | OE1    | 3.119        |
| 1R21-15 | A_ARG_81  | NH2    | A_GLU_57  | OE1    | 3.147        |
| 1R21-16 | A_HIS_54  | NE2    | A_GLU_52  | OE1    | 3.412        |
| 1R21-16 | A_HIS_54  | NE2    | A_GLU_52  | OE2    | 3.663        |
| 1R21-16 | A_HIS_61  | NE2    | A_GLU_52  | OE1    | 2.774        |
| 1R21-16 | A_ARG_81  | NH2    | A_GLU_57  | OE1    | 2.662        |
| 1R21-16 | A_ARG_81  | NH2    | A_GLU_57  | OE2    | 3.500        |
| 1R21-16 | A_ARG_96  | NH2    | A_GLU_98  | OE2    | 3.655        |
| 1R21-17 | A_HIS_19  | NE2    | A_ASP_16  | OD1    | 2.979        |
| 1R21-17 | A_LYS_50  | NZ     | A_GLU_52  | OE1    | 3.597        |
| 1R21-17 | A_HIS_54  | NE2    | A_GLU_52  | OE1    | 3.729        |
| 1R21-17 | A_HIS_54  | NE2    | A_GLU_52  | OE2    | 3.299        |
| 1R21-17 | A_HIS_61  | NE2    | A_GLU_52  | OE1    | 3.150        |
| 1R21-17 | A_ARG_96  | NH1    | A_ASP_16  | OD1    | 3.990        |
| 1R21-17 | A_ARG_96  | NH1    | A_ASP_16  | OD2    | 3.847        |
| 1R21-18 | A_HIS_54  | NE2    | A_GLU_52  | OE2    | 3.726        |
| 1R21-18 | A_HIS_61  | NE2    | A_GLU_52  | OE1    | 3.370        |
| 1R21-18 | A_HIS_84  | NE2    | A_GLU_100 | OE2    | 2.435        |
| 1R21-18 | A_ARG_96  | NH2    | A_GLU_98  | OE2    | 3.170        |
| 1R21-19 | A_HIS_54  | NE2    | A_GLU_52  | OE2    | 3.585        |
| 1R21-19 | A_HIS_61  | NE2    | A_GLU_52  | OE1    | 3.355        |

|         |          |     |          |     |       |
|---------|----------|-----|----------|-----|-------|
| 1R21-19 | A_ARG_96 | NH2 | A_GLU_98 | OE2 | 2.978 |
|---------|----------|-----|----------|-----|-------|

Table 176: 1R21-1-specific salt bridging networks analysis. In this table, a PDB file is specified with a four-letter PDB ID, except that the names of the PDB files corresponding to the single NMR structural model split from the NMR ensemble is specified with a four-letter PDB ID in addition to a hyphen followed by the single NMR structural model numeric ID, the residue naming scheme is **Chain ID\_residue name\_residue number**,  $\angle ADH$  represents the angle formed by acceptor (A), donor (D) and hydrogen (H) ( $\angle ADH$ ).

| PDB ID  | Residue A | Atom A | Residue B | Atom B | Distance (Å) |
|---------|-----------|--------|-----------|--------|--------------|
| 1R21-10 | A_HIS_54  | NE2    | A_GLU_52  | OE1    | 3.820        |
| 1R21-10 | A_HIS_54  | NE2    | A_GLU_52  | OE2    | 3.819        |
| 1R21-10 | A_HIS_61  | NE2    | A_GLU_52  | OE1    | 3.243        |

Table 177: 1R21-10-specific salt bridging networks analysis. In this table, a PDB file is specified with a four-letter PDB ID, except that the names of the PDB files corresponding to the single NMR structural model split from the NMR ensemble is specified with a four-letter PDB ID in addition to a hyphen followed by the single NMR structural model numeric ID, the residue naming scheme is **Chain ID\_residue name\_residue number**,  $\angle ADH$  represents the angle formed by acceptor (A), donor (D) and hydrogen (H) ( $\angle ADH$ ).

| PDB ID  | Residue A | Atom A | Residue B | Atom B | Distance (Å) |
|---------|-----------|--------|-----------|--------|--------------|
| 1R21-11 | A_LYS_50  | NZ     | A_GLU_52  | OE1    | 3.980        |
| 1R21-11 | A_HIS_54  | NE2    | A_GLU_52  | OE1    | 3.682        |
| 1R21-11 | A_HIS_54  | NE2    | A_GLU_52  | OE2    | 3.726        |
| 1R21-11 | A_HIS_61  | NE2    | A_GLU_52  | OE1    | 3.099        |
| 1R21-11 | A_ARG_81  | NH2    | A_GLU_57  | OE1    | 3.622        |
| 1R21-11 | A_ARG_81  | NH2    | A_GLU_57  | OE2    | 3.877        |

Table 178: 1R21-11-specific salt bridging networks analysis. In this table, a PDB file is specified with a four-letter PDB ID, except that the names of the PDB files corresponding to the single NMR structural model split from the NMR ensemble is specified with a four-letter PDB ID in addition to a hyphen followed by the single NMR structural model numeric ID, the residue naming scheme is **Chain ID\_residue name\_residue number**,  $\angle ADH$  represents the angle formed by acceptor (A), donor (D) and hydrogen (H) ( $\angle ADH$ ).



| PDB ID  | Residue A | Atom A | Residue B | Atom B | Distance (Å) |
|---------|-----------|--------|-----------|--------|--------------|
| 1R21-12 | A_ARG_6   | NH2    | A_GLU_98  | OE2    | 3.220        |
| 1R21-12 | A_LYS_50  | NZ     | A_GLU_52  | OE2    | 3.513        |
| 1R21-12 | A_HIS_54  | ND1    | A_GLU_55  | OE1    | 3.706        |
| 1R21-12 | A_HIS_61  | NE2    | A_GLU_52  | OE1    | 3.484        |
| 1R21-12 | A_HIS_61  | NE2    | A_GLU_52  | OE2    | 3.957        |
| 1R21-12 | A_LYS_83  | NZ     | A_ASP_86  | OD1    | 3.921        |
| 1R21-12 | A_ARG_96  | NH1    | A_ASP_16  | OD1    | 2.338        |
| 1R21-12 | A_ARG_96  | NH2    | A_ASP_16  | OD1    | 3.435        |

Table 179: 1R21-12-specific salt bridging networks analysis. In this table, a PDB file is specified with a four-letter PDB ID, except that the names of the PDB files corresponding to the single NMR structural model split from the NMR ensemble is specified with a four-letter PDB ID in addition to a hyphen followed by the single NMR structural model numeric ID, the residue naming scheme is **Chain ID\_residue name\_residue number**,  $\angle ADH$  represents the angle formed by acceptor (A), donor (D) and hydrogen (H) ( $\angle ADH$ ).

| PDB ID  | Residue A | Atom A | Residue B | Atom B | Distance (Å) |
|---------|-----------|--------|-----------|--------|--------------|
| 1R21-13 | A_LYS_50  | NZ     | A_GLU_52  | OE2    | 3.811        |
| 1R21-13 | A_HIS_61  | NE2    | A_GLU_52  | OE1    | 3.018        |
| 1R21-13 | A_HIS_61  | NE2    | A_GLU_52  | OE2    | 3.663        |
| 1R21-13 | A_ARG_96  | NH1    | A_ASP_16  | OD1    | 2.697        |
| 1R21-13 | A_ARG_96  | NH2    | A_GLU_98  | OE2    | 3.649        |

Table 180: 1R21-13-specific salt bridging networks analysis. In this table, a PDB file is specified with a four-letter PDB ID, except that the names of the PDB files corresponding to the single NMR structural model split from the NMR ensemble is specified with a four-letter PDB ID in addition to a hyphen followed by the single NMR structural model numeric ID, the residue naming scheme is **Chain ID\_residue name\_residue number**,  $\angle ADH$  represents the angle formed by acceptor (A), donor (D) and hydrogen (H) ( $\angle ADH$ ).

| PDB ID  | Residue A | Atom A | Residue B | Atom B | Distance (Å) |
|---------|-----------|--------|-----------|--------|--------------|
| 1R21-14 | A_HIS_61  | ND1    | A_GLU_52  | OE2    | 3.472        |
| 1R21-14 | A_HIS_61  | NE2    | A_GLU_52  | OE1    | 2.859        |
| 1R21-14 | A_HIS_61  | NE2    | A_GLU_52  | OE2    | 3.106        |
| 1R21-14 | A_ARG_81  | NH2    | A_GLU_57  | OE1    | 3.503        |
| 1R21-14 | A_ARG_81  | NH2    | A_GLU_57  | OE2    | 2.460        |
| 1R21-14 | A_ARG_96  | NH2    | A_GLU_98  | OE2    | 2.878        |

Table 181: 1R21-14-specific salt bridging networks analysis. In this table, a PDB file is specified with a four-letter PDB ID, except that the names of the PDB files corresponding to the single NMR structural model split from the NMR ensemble is specified with a four-letter PDB ID in addition to a hyphen followed by the single NMR structural model numeric ID, the residue naming scheme is **Chain ID\_residue name\_residue number**,  $\angle ADH$  represents the angle formed by acceptor (A), donor (D) and hydrogen (H) ( $\angle ADH$ ).

| PDB ID  | Residue A | Atom A | Residue B | Atom B | Distance (Å) |
|---------|-----------|--------|-----------|--------|--------------|
| 1R21-15 | A_ARG_6   | NH2    | A_GLU_100 | OE1    | 2.871        |
| 1R21-15 | A_ARG_6   | NH2    | A_GLU_100 | OE2    | 3.726        |
| 1R21-15 | A_HIS_54  | NE2    | A_GLU_52  | OE1    | 3.410        |
| 1R21-15 | A_HIS_54  | NE2    | A_GLU_52  | OE2    | 3.502        |
| 1R21-15 | A_HIS_61  | NE2    | A_GLU_52  | OE1    | 3.119        |
| 1R21-15 | A_ARG_81  | NH2    | A_GLU_57  | OE1    | 3.147        |

Table 182: 1R21-15-specific salt bridging networks analysis. In this table, a PDB file is specified with a four-letter PDB ID, except that the names of the PDB files corresponding to the single NMR structural model split from the NMR ensemble is specified with a four-letter PDB ID in addition to a hyphen followed by the single NMR structural model numeric ID, the residue naming scheme is **Chain ID\_residue name\_residue number**,  $\angle ADH$  represents the angle formed by acceptor (A), donor (D) and hydrogen (H) ( $\angle ADH$ ).

| PDB ID  | Residue A | Atom A | Residue B | Atom B | Distance (Å) |
|---------|-----------|--------|-----------|--------|--------------|
| 1R21-16 | A_HIS_54  | NE2    | A_GLU_52  | OE1    | 3.412        |
| 1R21-16 | A_HIS_54  | NE2    | A_GLU_52  | OE2    | 3.663        |
| 1R21-16 | A_HIS_61  | NE2    | A_GLU_52  | OE1    | 2.774        |
| 1R21-16 | A_ARG_81  | NH2    | A_GLU_57  | OE1    | 2.662        |
| 1R21-16 | A_ARG_81  | NH2    | A_GLU_57  | OE2    | 3.500        |
| 1R21-16 | A_ARG_96  | NH2    | A_GLU_98  | OE2    | 3.655        |

Table 183: 1R21-16-specific salt bridging networks analysis. In this table, a PDB file is specified with a four-letter PDB ID, except that the names of the PDB files corresponding to the single NMR structural model split from the NMR ensemble is specified with a four-letter PDB ID in addition to a hyphen followed by the single NMR structural model numeric ID, the residue naming scheme is **Chain ID\_residue name\_residue number**,  $\angle ADH$  represents the angle formed by acceptor (A), donor (D) and hydrogen (H) ( $\angle ADH$ ).

| PDB ID  | Residue A | Atom A | Residue B | Atom B | Distance (Å) |
|---------|-----------|--------|-----------|--------|--------------|
| 1R21-17 | A_HIS_19  | NE2    | A_ASP_16  | OD1    | 2.979        |
| 1R21-17 | A_LYS_50  | NZ     | A_GLU_52  | OE1    | 3.597        |
| 1R21-17 | A_HIS_54  | NE2    | A_GLU_52  | OE1    | 3.729        |
| 1R21-17 | A_HIS_54  | NE2    | A_GLU_52  | OE2    | 3.299        |
| 1R21-17 | A_HIS_61  | NE2    | A_GLU_52  | OE1    | 3.150        |
| 1R21-17 | A_ARG_96  | NH1    | A_ASP_16  | OD1    | 3.990        |
| 1R21-17 | A_ARG_96  | NH1    | A_ASP_16  | OD2    | 3.847        |

Table 184: 1R21-17-specific salt bridging networks analysis. In this table, a PDB file is specified with a four-letter PDB ID, except that the names of the PDB files corresponding to the single NMR structural model split from the NMR ensemble is specified with a four-letter PDB ID in addition to a hyphen followed by the single NMR structural model numeric ID, the residue naming scheme is **Chain ID\_residue name\_residue number**,  $\angle ADH$  represents the angle formed by acceptor (A), donor (D) and hydrogen (H) ( $\angle ADH$ ).

| PDB ID  | Residue A | Atom A | Residue B | Atom B | Distance (Å) |
|---------|-----------|--------|-----------|--------|--------------|
| 1R21-18 | A_HIS_54  | NE2    | A_GLU_52  | OE2    | 3.726        |
| 1R21-18 | A_HIS_61  | NE2    | A_GLU_52  | OE1    | 3.370        |
| 1R21-18 | A_HIS_84  | NE2    | A_GLU_100 | OE2    | 2.435        |
| 1R21-18 | A_ARG_96  | NH2    | A_GLU_98  | OE2    | 3.170        |

Table 185: 1R21-18-specific salt bridging networks analysis. In this table, a PDB file is specified with a four-letter PDB ID, except that the names of the PDB files corresponding to the single NMR structural model split from the NMR ensemble is specified with a four-letter PDB ID in addition to a hyphen followed by the single NMR structural model numeric ID, the residue naming scheme is **Chain ID\_residue name\_residue number**,  $\angle ADH$  represents the angle formed by acceptor (A), donor (D) and hydrogen (H) ( $\angle ADH$ ).

| PDB ID  | Residue A | Atom A | Residue B | Atom B | Distance (Å) |
|---------|-----------|--------|-----------|--------|--------------|
| 1R21-19 | A_HIS_54  | NE2    | A_GLU_52  | OE2    | 3.585        |
| 1R21-19 | A_HIS_61  | NE2    | A_GLU_52  | OE1    | 3.355        |
| 1R21-19 | A_ARG_96  | NH2    | A_GLU_98  | OE2    | 2.978        |

Table 186: 1R21-19-specific salt bridging networks analysis. In this table, a PDB file is specified with a four-letter PDB ID, except that the names of the PDB files corresponding to the single NMR structural model split from the NMR ensemble is specified with a four-letter PDB ID in addition to a hyphen followed by the single NMR structural model numeric ID, the residue naming scheme is **Chain ID\_residue name\_residue number**,  $\angle ADH$  represents the angle formed by acceptor (A), donor (D) and hydrogen (H) ( $\angle ADH$ ).



| PDB ID  | Residue A | Atom A | Residue B | Atom B | Distance (Å) |
|---------|-----------|--------|-----------|--------|--------------|
| 1R21-2  | A_HIS_54  | NE2    | A_GLU_52  | OE1    | 3.826        |
| 1R21-2  | A_HIS_54  | NE2    | A_GLU_52  | OE2    | 2.948        |
| 1R21-2  | A_HIS_61  | NE2    | A_GLU_52  | OE1    | 3.312        |
| 1R21-2  | A_ARG_96  | NH1    | A_ASP_16  | OD1    | 2.740        |
| 1R21-2  | A_ARG_96  | NH1    | A_ASP_16  | OD2    | 2.714        |
| 1R21-2  | A_ARG_96  | NH2    | A_ASP_16  | OD1    | 3.323        |
| 1R21-20 | A_HIS_54  | NE2    | A_GLU_52  | OE2    | 3.415        |
| 1R21-20 | A_HIS_61  | NE2    | A_GLU_52  | OE1    | 3.170        |
| 1R21-20 | A_HIS_84  | NE2    | A_GLU_100 | OE2    | 3.227        |
| 1R21-20 | A_ARG_96  | NH1    | A_ASP_16  | OD1    | 3.434        |
| 1R21-20 | A_ARG_96  | NH1    | A_ASP_16  | OD2    | 3.592        |
| 1R21-21 | A_ARG_6   | NH2    | A_GLU_98  | OE1    | 3.967        |
| 1R21-21 | A_HIS_19  | NE2    | A_ASP_16  | OD2    | 3.709        |
| 1R21-21 | A_HIS_61  | NE2    | A_GLU_52  | OE1    | 3.030        |
| 1R21-22 | A_HIS_54  | NE2    | A_GLU_52  | OE1    | 3.543        |
| 1R21-22 | A_HIS_54  | NE2    | A_GLU_52  | OE2    | 3.368        |
| 1R21-22 | A_HIS_61  | NE2    | A_GLU_52  | OE1    | 3.436        |
| 1R21-22 | A_ARG_96  | NH1    | A_ASP_16  | OD1    | 3.702        |
| 1R21-22 | A_ARG_96  | NH1    | A_ASP_16  | OD2    | 3.090        |
| 1R21-23 | A_ARG_6   | NH1    | A_GLU_98  | OE1    | 2.790        |
| 1R21-23 | A_HIS_61  | NE2    | A_GLU_52  | OE1    | 3.027        |
| 1R21-23 | A_ARG_81  | NH2    | A_GLU_57  | OE1    | 3.135        |
| 1R21-23 | A_ARG_96  | NH1    | A_ASP_16  | OD1    | 2.357        |
| 1R21-23 | A_ARG_96  | NH1    | A_ASP_16  | OD2    | 3.412        |
| 1R21-23 | A_ARG_96  | NH2    | A_GLU_98  | OE2    | 3.160        |

Table 187: 1R21-2-specific salt bridging networks analysis. In this table, a PDB file is specified with a four-letter PDB ID, except that the names of the PDB files corresponding to the single NMR structural model split from the NMR ensemble is specified with a four-letter PDB ID in addition to a hyphen followed by the single NMR structural model numeric ID, the residue naming scheme is **Chain ID\_residue name\_residue number**,  $\angle ADH$  represents the angle formed by acceptor (A), donor (D) and hydrogen (H) ( $\angle ADH$ ).

| PDB ID  | Residue A | Atom A | Residue B | Atom B | Distance (Å) |
|---------|-----------|--------|-----------|--------|--------------|
| 1R21-20 | A_HIS_54  | NE2    | A_GLU_52  | OE2    | 3.415        |
| 1R21-20 | A_HIS_61  | NE2    | A_GLU_52  | OE1    | 3.170        |
| 1R21-20 | A_HIS_84  | NE2    | A_GLU_100 | OE2    | 3.227        |
| 1R21-20 | A_ARG_96  | NH1    | A_ASP_16  | OD1    | 3.434        |
| 1R21-20 | A_ARG_96  | NH1    | A_ASP_16  | OD2    | 3.592        |

Table 188: 1R21-20-specific salt bridging networks analysis. In this table, a PDB file is specified with a four-letter PDB ID, except that the names of the PDB files corresponding to the single NMR structural model split from the NMR ensemble is specified with a four-letter PDB ID in addition to a hyphen followed by the single NMR structural model numeric ID, the residue naming scheme is **Chain ID\_residue name\_residue number**,  $\angle ADH$  represents the angle formed by acceptor (A), donor (D) and hydrogen (H) ( $\angle ADH$ ).

| PDB ID  | Residue A | Atom A | Residue B | Atom B | Distance (Å) |
|---------|-----------|--------|-----------|--------|--------------|
| 1R21-21 | A_ARG_6   | NH2    | A_GLU_98  | OE1    | 3.967        |
| 1R21-21 | A_HIS_19  | NE2    | A_ASP_16  | OD2    | 3.709        |
| 1R21-21 | A_HIS_61  | NE2    | A_GLU_52  | OE1    | 3.030        |

Table 189: 1R21-21-specific salt bridging networks analysis. In this table, a PDB file is specified with a four-letter PDB ID, except that the names of the PDB files corresponding to the single NMR structural model split from the NMR ensemble is specified with a four-letter PDB ID in addition to a hyphen followed by the single NMR structural model numeric ID, the residue naming scheme is **Chain ID\_residue name\_residue number**,  $\angle ADH$  represents the angle formed by acceptor (A), donor (D) and hydrogen (H) ( $\angle ADH$ ).

| PDB ID  | Residue A | Atom A | Residue B | Atom B | Distance (Å) |
|---------|-----------|--------|-----------|--------|--------------|
| 1R21-22 | A_HIS_54  | NE2    | A_GLU_52  | OE1    | 3.543        |
| 1R21-22 | A_HIS_54  | NE2    | A_GLU_52  | OE2    | 3.368        |
| 1R21-22 | A_HIS_61  | NE2    | A_GLU_52  | OE1    | 3.436        |
| 1R21-22 | A_ARG_96  | NH1    | A_ASP_16  | OD1    | 3.702        |
| 1R21-22 | A_ARG_96  | NH1    | A_ASP_16  | OD2    | 3.090        |

Table 190: 1R21-22-specific salt bridging networks analysis. In this table, a PDB file is specified with a four-letter PDB ID, except that the names of the PDB files corresponding to the single NMR structural model split from the NMR ensemble is specified with a four-letter PDB ID in addition to a hyphen followed by the single NMR structural model numeric ID, the residue naming scheme is **Chain ID\_residue name\_residue number**,  $\angle ADH$  represents the angle formed by acceptor (A), donor (D) and hydrogen (H) ( $\angle ADH$ ).

| PDB ID  | Residue A | Atom A | Residue B | Atom B | Distance (Å) |
|---------|-----------|--------|-----------|--------|--------------|
| 1R21-23 | A_ARG_6   | NH1    | A_GLU_98  | OE1    | 2.790        |
| 1R21-23 | A_HIS_61  | NE2    | A_GLU_52  | OE1    | 3.027        |
| 1R21-23 | A_ARG_81  | NH2    | A_GLU_57  | OE1    | 3.135        |
| 1R21-23 | A_ARG_96  | NH1    | A_ASP_16  | OD1    | 2.357        |
| 1R21-23 | A_ARG_96  | NH1    | A_ASP_16  | OD2    | 3.412        |
| 1R21-23 | A_ARG_96  | NH2    | A_GLU_98  | OE2    | 3.160        |

Table 191: 1R21-23-specific salt bridging networks analysis. In this table, a PDB file is specified with a four-letter PDB ID, except that the names of the PDB files corresponding to the single NMR structural model split from the NMR ensemble is specified with a four-letter PDB ID in addition to a hyphen followed by the single NMR structural model numeric ID, the residue naming scheme is **Chain ID\_residue name\_residue number**,  $\angle ADH$  represents the angle formed by acceptor (A), donor (D) and hydrogen (H) ( $\angle ADH$ ).

| PDB ID | Residue A | Atom A | Residue B | Atom B | Distance (Å) |
|--------|-----------|--------|-----------|--------|--------------|
| 1R21-3 | A_HIS_19  | NE2    | A_ASP_16  | OD1    | 2.708        |
| 1R21-3 | A_HIS_19  | NE2    | A_ASP_16  | OD2    | 3.092        |
| 1R21-3 | A_LYS_50  | NZ     | A_GLU_52  | OE2    | 3.328        |
| 1R21-3 | A_HIS_61  | NE2    | A_GLU_52  | OE1    | 3.178        |
| 1R21-3 | A_HIS_61  | NE2    | A_GLU_52  | OE2    | 3.637        |
| 1R21-3 | A_ARG_81  | NH2    | A_GLU_57  | OE1    | 3.507        |
| 1R21-3 | A_ARG_81  | NH2    | A_GLU_57  | OE2    | 2.346        |
| 1R21-3 | A_ARG_96  | NH1    | A_GLU_98  | OE1    | 3.034        |
| 1R21-3 | A_ARG_96  | NH2    | A_GLU_98  | OE1    | 3.009        |

Table 192: 1R21-3-specific salt bridging networks analysis. In this table, a PDB file is specified with a four-letter PDB ID, except that the names of the PDB files corresponding to the single NMR structural model split from the NMR ensemble is specified with a four-letter PDB ID in addition to a hyphen followed by the single NMR structural model numeric ID, the residue naming scheme is **Chain ID\_residue name\_residue number**,  $\angle ADH$  represents the angle formed by acceptor (A), donor (D) and hydrogen (H) ( $\angle ADH$ ).

| PDB ID | Residue A | Atom A | Residue B | Atom B | Distance (Å) |
|--------|-----------|--------|-----------|--------|--------------|
| 1R21-4 | A_HIS_61  | ND1    | A_GLU_52  | OE2    | 3.789        |
| 1R21-4 | A_HIS_61  | NE2    | A_GLU_52  | OE1    | 2.749        |
| 1R21-4 | A_HIS_61  | NE2    | A_GLU_52  | OE2    | 3.111        |
| 1R21-4 | A_ARG_81  | NH2    | A_GLU_57  | OE1    | 2.933        |
| 1R21-4 | A_ARG_96  | NH1    | A_GLU_98  | OE1    | 3.705        |
| 1R21-4 | A_ARG_96  | NH1    | A_GLU_98  | OE2    | 3.277        |
| 1R21-4 | A_ARG_96  | NH2    | A_GLU_98  | OE2    | 2.612        |

Table 193: 1R21-4-specific salt bridging networks analysis. In this table, a PDB file is specified with a four-letter PDB ID, except that the names of the PDB files corresponding to the single NMR structural model split from the NMR ensemble is specified with a four-letter PDB ID in addition to a hyphen followed by the single NMR structural model numeric ID, the residue naming scheme is **Chain ID\_residue name\_residue number**,  $\angle ADH$  represents the angle formed by acceptor (A), donor (D) and hydrogen (H) ( $\angle ADH$ ).

| PDB ID | Residue A | Atom A | Residue B | Atom B | Distance (Å) |
|--------|-----------|--------|-----------|--------|--------------|
| 1R21-5 | A_ARG_6   | NH1    | A_GLU_100 | OE2    | 3.869        |
| 1R21-5 | A_ARG_6   | NH2    | A_GLU_100 | OE2    | 2.476        |
| 1R21-5 | A_HIS_54  | NE2    | A_GLU_52  | OE1    | 3.312        |
| 1R21-5 | A_HIS_54  | NE2    | A_GLU_52  | OE2    | 3.040        |
| 1R21-5 | A_HIS_61  | NE2    | A_GLU_52  | OE1    | 2.875        |
| 1R21-5 | A_ARG_96  | NH2    | A_GLU_98  | OE2    | 3.021        |

Table 194: 1R21-5-specific salt bridging networks analysis. In this table, a PDB file is specified with a four-letter PDB ID, except that the names of the PDB files corresponding to the single NMR structural model split from the NMR ensemble is specified with a four-letter PDB ID in addition to a hyphen followed by the single NMR structural model numeric ID, the residue naming scheme is **Chain ID\_residue name\_residue number**,  $\angle ADH$  represents the angle formed by acceptor (A), donor (D) and hydrogen (H) ( $\angle ADH$ ).



| PDB ID | Residue A | Atom A | Residue B | Atom B | Distance (Å) |
|--------|-----------|--------|-----------|--------|--------------|
| 1R21-6 | A_HIS_19  | NE2    | A_ASP_16  | OD2    | 3.980        |
| 1R21-6 | A_HIS_54  | NE2    | A_GLU_52  | OE1    | 3.369        |
| 1R21-6 | A_HIS_54  | NE2    | A_GLU_52  | OE2    | 3.405        |
| 1R21-6 | A_HIS_61  | NE2    | A_GLU_52  | OE1    | 3.317        |

Table 195: 1R21-6-specific salt bridging networks analysis. In this table, a PDB file is specified with a four-letter PDB ID, except that the names of the PDB files corresponding to the single NMR structural model split from the NMR ensemble is specified with a four-letter PDB ID in addition to a hyphen followed by the single NMR structural model numeric ID, the residue naming scheme is **Chain ID\_residue name\_residue number**,  $\angle ADH$  represents the angle formed by acceptor (A), donor (D) and hydrogen (H) ( $\angle ADH$ ).

| PDB ID | Residue A | Atom A | Residue B | Atom B | Distance (Å) |
|--------|-----------|--------|-----------|--------|--------------|
| 1R21-7 | A_HIS_19  | NE2    | A_ASP_16  | OD1    | 3.586        |
| 1R21-7 | A_HIS_19  | NE2    | A_ASP_16  | OD2    | 3.080        |
| 1R21-7 | A_HIS_61  | NE2    | A_GLU_52  | OE1    | 3.436        |
| 1R21-7 | A_ARG_81  | NH2    | A_GLU_57  | OE2    | 3.637        |

Table 196: 1R21-7-specific salt bridging networks analysis. In this table, a PDB file is specified with a four-letter PDB ID, except that the names of the PDB files corresponding to the single NMR structural model split from the NMR ensemble is specified with a four-letter PDB ID in addition to a hyphen followed by the single NMR structural model numeric ID, the residue naming scheme is **Chain ID\_residue name\_residue number**,  $\angle ADH$  represents the angle formed by acceptor (A), donor (D) and hydrogen (H) ( $\angle ADH$ ).

| PDB ID | Residue A | Atom A | Residue B | Atom B | Distance (Å) |
|--------|-----------|--------|-----------|--------|--------------|
| 1R21-8 | A_ARG_6   | NH2    | A_GLU_98  | OE1    | 3.720        |
| 1R21-8 | A_HIS_54  | NE2    | A_GLU_52  | OE1    | 3.655        |
| 1R21-8 | A_HIS_54  | NE2    | A_GLU_52  | OE2    | 3.218        |
| 1R21-8 | A_HIS_61  | NE2    | A_GLU_52  | OE1    | 3.063        |
| 1R21-8 | A_ARG_96  | NH2    | A_GLU_98  | OE2    | 3.712        |

Table 197: 1R21-8-specific salt bridging networks analysis. In this table, a PDB file is specified with a four-letter PDB ID, except that the names of the PDB files corresponding to the single NMR structural model split from the NMR ensemble is specified with a four-letter PDB ID in addition to a hyphen followed by the single NMR structural model numeric ID, the residue naming scheme is **Chain ID\_residue name\_residue number**,  $\angle ADH$  represents the angle formed by acceptor (A), donor (D) and hydrogen (H) ( $\angle ADH$ ).

| PDB ID | Residue A | Atom A | Residue B | Atom B | Distance (Å) |
|--------|-----------|--------|-----------|--------|--------------|
| 1R21-9 | A_HIS_54  | ND1    | A_GLU_55  | OE1    | 2.611        |
| 1R21-9 | A_HIS_61  | NE2    | A_GLU_52  | OE1    | 3.068        |
| 1R21-9 | A_ARG_96  | NH2    | A_GLU_98  | OE2    | 3.654        |

Table 198: 1R21-9-specific salt bridging networks analysis. In this table, a PDB file is specified with a four-letter PDB ID, except that the names of the PDB files corresponding to the single NMR structural model split from the NMR ensemble is specified with a four-letter PDB ID in addition to a hyphen followed by the single NMR structural model numeric ID, the residue naming scheme is **Chain ID\_residue name\_residue number**,  $\angle ADH$  represents the angle formed by acceptor (A), donor (D) and hydrogen (H) ( $\angle ADH$ ).

| PDB ID | Residue A | Atom A | Residue B  | Atom B | Distance (Å) |
|--------|-----------|--------|------------|--------|--------------|
| 1RZJ   | G.LYS.207 | NZ     | G.GLU.381  | OE1    | 3.995        |
| 1RZJ   | G.LYS.207 | NZ     | G.GLU.381  | OE2    | 2.764        |
| 1RZJ   | G.LYS.231 | NZ     | G.GLU.268  | OE2    | 3.358        |
| 1RZJ   | G.HIS.249 | NE2    | G.GLU.482  | OE1    | 3.036        |
| 1RZJ   | G.LYS.348 | NZ     | G.GLU.269  | OE2    | 2.716        |
| 1RZJ   | G.LYS.357 | NZ     | G.GLU.466  | OE1    | 3.793        |
| 1RZJ   | G.ARG.419 | NH2    | H.GLU.99   | OE2    | 2.591        |
| 1RZJ   | G.ARG.456 | NH2    | G.GLU.466  | OE1    | 3.427        |
| 1RZJ   | G.ARG.456 | NH2    | G.GLU.466  | OE2    | 2.814        |
| 1RZJ   | G.ARG.469 | NH2    | G.ASP.457  | OD1    | 2.972        |
| 1RZJ   | G.ARG.476 | NH1    | G.ASP.474  | OD1    | 2.853        |
| 1RZJ   | G.ARG.480 | NH1    | G.ASP.477  | OD1    | 2.656        |
| 1RZJ   | G.LYS.487 | NZ     | G.GLU.91   | OE1    | 3.654        |
| 1RZJ   | G.LYS.487 | NZ     | G.GLU.91   | OE2    | 2.711        |
| 1RZJ   | C.LYS.8   | NZ     | C.GLU.119  | OE1    | 2.627        |
| 1RZJ   | C.LYS.8   | NZ     | C.GLU.119  | OE2    | 3.972        |
| 1RZJ   | C.HIS.27  | NE2    | C.GLU.85   | OE1    | 2.626        |
| 1RZJ   | C.LYS.29  | NZ     | G.ASP.279  | OD2    | 3.209        |
| 1RZJ   | C.LYS.29  | NZ     | C.GLU.85   | OE1    | 3.520        |
| 1RZJ   | C.LYS.35  | NZ     | G.ASP.457  | OD2    | 3.838        |
| 1RZJ   | C.LYS.46  | NZ     | C.ASP.56   | OD1    | 3.928        |
| 1RZJ   | C.ARG.54  | NH1    | C.ASP.78   | OD2    | 3.656        |
| 1RZJ   | C.ARG.54  | NH2    | C.ASP.78   | OD1    | 2.906        |
| 1RZJ   | C.ARG.54  | NH2    | C.ASP.78   | OD2    | 3.632        |
| 1RZJ   | C.ARG.58  | NH1    | C.GLU.13   | OE1    | 2.664        |
| 1RZJ   | C.ARG.59  | NH1    | G.ASP.368  | OD1    | 3.788        |
| 1RZJ   | C.ARG.59  | NH1    | G.ASP.368  | OD2    | 3.342        |
| 1RZJ   | C.ARG.59  | NH2    | G.ASP.368  | OD1    | 2.531        |
| 1RZJ   | C.ARG.59  | NH2    | G.ASP.368  | OD2    | 3.174        |
| 1RZJ   | C.LYS.90  | NZ     | C.GLU.85   | OE2    | 3.877        |
| 1RZJ   | C.LYS.171 | NZ     | C.GLU.169  | OE1    | 3.508        |
| 1RZJ   | L.ARG.61  | NH2    | L.GLU.81   | OE2    | 3.350        |
| 1RZJ   | L.ARG.61  | NH2    | L.ASP.82   | OD1    | 2.670        |
| 1RZJ   | L.ARG.61  | NH2    | L.ASP.82   | OD2    | 3.090        |
| 1RZJ   | L.LYS.149 | NZ     | L.GLU.195  | OE1    | 2.951        |
| 1RZJ   | L.LYS.149 | NZ     | L.GLU.195  | OE2    | 3.523        |
| 1RZJ   | L.HIS.189 | ND1    | L.ASP.151  | OD2    | 3.250        |
| 1RZJ   | H.LYS.12  | NZ     | H.GLU.10   | OE1    | 3.962        |
| 1RZJ   | H.LYS.19  | NZ     | H.GLU.81   | OE2    | 3.444        |
| 1RZJ   | H.ARG.31  | NH2    | H.ASP.100A | OD1    | 3.714        |
| 1RZJ   | H.ARG.31  | NH2    | H.ASP.100A | OD2    | 2.889        |
| 1RZJ   | H.ARG.38  | NH1    | H.GLU.46   | OE1    | 3.693        |
| 1RZJ   | H.ARG.38  | NH1    | H.GLU.46   | OE2    | 2.534        |
| 1RZJ   | H.ARG.38  | NH2    | H.ASP.86   | OD2    | 2.669        |
| 1RZJ   | H.ARG.50  | NH2    | H.GLU.97   | OE2    | 2.721        |
| 1RZJ   | H.HIS.62  | NE2    | H.GLU.46   | OE1    | 3.941        |
| 1RZJ   | H.HIS.62  | NE2    | H.GLU.46   | OE2    | 3.006        |
| 1RZJ   | H.ARG.66  | NH1    | H.ASP.86   | OD1    | 2.823        |
| 1RZJ   | H.ARG.66  | NH1    | H.ASP.86   | OD2    | 3.878        |
| 1RZJ   | H.ARG.66  | NH2    | H.ASP.86   | OD1    | 3.045        |
| 1RZJ   | H.ARG.66  | NH2    | H.ASP.86   | OD2    | 2.664        |
| 1RZJ   | H.ARG.82A | NH1    | H.GLU.81   | OE1    | 2.688        |
| 1RZJ   | H.LYS.101 | NZ     | H.GLU.1    | OE1    | 3.982        |
| 1RZJ   | H.HIS.102 | NE2    | H.GLU.1    | OE1    | 3.443        |
| 1RZJ   | H.LYS.143 | NZ     | H.ASP.144  | OD1    | 3.134        |
| 1RZJ   | H.LYS.143 | NZ     | H.ASP.144  | OD2    | 3.259        |
| 1RZJ   | H.LYS.209 | NZ     | L.GLU.123  | OE1    | 3.812        |

---

Table 199: 1RZJ-specific salt bridging networks analysis. In this table, a PDB file is specified with a four-letter PDB ID, except that the names of the PDB files corresponding to the single NMR structural model split from the NMR ensemble is specified with a four-letter PDB ID in addition to a hyphen followed by the single NMR structural model numeric ID, the residue naming scheme is **Chain ID\_residue name\_residue number**,  $\angle ADH$  represents the angle formed by acceptor (A), donor (D) and hydrogen (H) ( $\angle ADH$ ).

| PDB ID | Residue A | Atom A | Residue B  | Atom B | Distance (Å) |
|--------|-----------|--------|------------|--------|--------------|
| 1RZK   | G.LYS.121 | NZ     | G.GLU.429  | OE1    | 2.734        |
| 1RZK   | G.LYS.121 | NZ     | G.GLU.429  | OE2    | 3.567        |
| 1RZK   | G.LYS.207 | NZ     | G.GLU.381  | OE1    | 3.945        |
| 1RZK   | G.LYS.207 | NZ     | G.GLU.381  | OE2    | 3.126        |
| 1RZK   | G.LYS.232 | NZ     | G.GLU.351  | OE1    | 3.994        |
| 1RZK   | G.HIS.249 | NE2    | G.GLU.482  | OE1    | 3.525        |
| 1RZK   | G.LYS.282 | NZ     | G.GLU.275  | OE1    | 3.953        |
| 1RZK   | G.LYS.282 | NZ     | G.GLU.275  | OE2    | 2.642        |
| 1RZK   | G.LYS.348 | NZ     | G.GLU.269  | OE2    | 3.206        |
| 1RZK   | G.LYS.348 | NZ     | G.GLU.351  | OE1    | 3.941        |
| 1RZK   | G.LYS.348 | NZ     | G.GLU.351  | OE2    | 3.259        |
| 1RZK   | G.LYS.350 | NZ     | G.ASP.395  | OD1    | 3.580        |
| 1RZK   | G.LYS.357 | NZ     | G.GLU.466  | OE1    | 3.719        |
| 1RZK   | G.ARG.419 | NH1    | H.GLU.100B | OE1    | 2.999        |
| 1RZK   | G.ARG.419 | NH1    | H.GLU.100B | OE2    | 3.674        |
| 1RZK   | G.ARG.419 | NH2    | H.GLU.99   | OE1    | 2.292        |
| 1RZK   | G.ARG.419 | NH2    | H.GLU.100B | OE2    | 3.969        |
| 1RZK   | G.ARG.456 | NH2    | G.GLU.466  | OE1    | 3.468        |
| 1RZK   | G.ARG.456 | NH2    | G.GLU.466  | OE2    | 3.536        |
| 1RZK   | G.ARG.469 | NH2    | G.ASP.457  | OD1    | 3.234        |
| 1RZK   | G.ARG.476 | NH1    | G.ASP.474  | OD1    | 3.441        |
| 1RZK   | G.ARG.476 | NH2    | G.GLU.102  | OE1    | 3.296        |
| 1RZK   | G.ARG.476 | NH2    | G.GLU.102  | OE2    | 3.010        |
| 1RZK   | G.LYS.487 | NZ     | G.GLU.91   | OE2    | 3.524        |
| 1RZK   | G.LYS.490 | NZ     | G.GLU.492  | OE1    | 3.300        |
| 1RZK   | C.LYS.29  | NZ     | C.GLU.85   | OE1    | 2.833        |
| 1RZK   | C.LYS.29  | NZ     | C.GLU.85   | OE2    | 3.848        |
| 1RZK   | C.LYS.35  | NZ     | G.ASP.457  | OD2    | 3.741        |
| 1RZK   | C.ARG.54  | NH1    | C.ASP.78   | OD1    | 3.987        |
| 1RZK   | C.ARG.54  | NH1    | C.ASP.78   | OD2    | 2.755        |
| 1RZK   | C.ARG.54  | NH2    | C.ASP.78   | OD1    | 2.666        |
| 1RZK   | C.ARG.54  | NH2    | C.ASP.78   | OD2    | 2.988        |
| 1RZK   | C.ARG.59  | NH1    | G.ASP.368  | OD1    | 3.343        |
| 1RZK   | C.ARG.59  | NH1    | G.ASP.368  | OD2    | 3.154        |
| 1RZK   | C.ARG.59  | NH2    | G.ASP.368  | OD1    | 2.433        |
| 1RZK   | C.ARG.59  | NH2    | G.ASP.368  | OD2    | 2.977        |
| 1RZK   | C.HIS.107 | ND1    | C.ASP.105  | OD1    | 2.891        |
| 1RZK   | C.HIS.107 | ND1    | C.ASP.105  | OD2    | 3.166        |
| 1RZK   | C.ARG.134 | NH2    | C.ASP.153  | OD1    | 3.766        |
| 1RZK   | C.LYS.136 | NZ     | C.GLU.150  | OE2    | 3.884        |
| 1RZK   | C.LYS.136 | NZ     | C.ASP.153  | OD1    | 3.936        |
| 1RZK   | C.LYS.136 | NZ     | C.ASP.153  | OD2    | 2.987        |
| 1RZK   | C.LYS.171 | NZ     | C.GLU.169  | OE2    | 2.874        |
| 1RZK   | L.ARG.61  | NH2    | L.GLU.81   | OE1    | 3.127        |
| 1RZK   | L.ARG.61  | NH2    | L.ASP.82   | OD1    | 3.576        |
| 1RZK   | L.ARG.95B | NH2    | L.ASP.1    | OD2    | 2.985        |
| 1RZK   | L.HIS.189 | ND1    | L.ASP.151  | OD2    | 2.585        |
| 1RZK   | L.HIS.189 | NE2    | L.ASP.185  | OD1    | 3.599        |
| 1RZK   | L.HIS.189 | NE2    | L.ASP.185  | OD2    | 2.802        |
| 1RZK   | L.ARG.211 | NH1    | L.GLU.187  | OE1    | 3.851        |
| 1RZK   | H.ARG.31  | NH2    | H.ASP.100A | OD1    | 3.070        |
| 1RZK   | H.ARG.31  | NH2    | H.ASP.100A | OD2    | 3.614        |
| 1RZK   | H.ARG.38  | NH1    | H.GLU.46   | OE1    | 2.779        |
| 1RZK   | H.ARG.38  | NH1    | H.GLU.46   | OE2    | 3.342        |
| 1RZK   | H.ARG.38  | NH2    | H.ASP.86   | OD2    | 2.684        |
| 1RZK   | H.ARG.50  | NH2    | H.GLU.97   | OE2    | 2.332        |
| 1RZK   | H.ARG.66  | NH1    | H.ASP.86   | OD1    | 3.598        |

|      |           |     |           |     |       |
|------|-----------|-----|-----------|-----|-------|
| 1RZK | H_ARG_66  | NH2 | H_ASP_86  | OD1 | 2.415 |
| 1RZK | H_ARG_66  | NH2 | H_ASP_86  | OD2 | 2.739 |
| 1RZK | H_LYS_73  | NZ  | H_ASP_55  | OD2 | 2.968 |
| 1RZK | H_ARG_82A | NH2 | H_GLU_81  | OE1 | 3.271 |
| 1RZK | H_LYS_143 | NZ  | H_ASP_144 | OD1 | 2.615 |
| 1RZK | H_LYS_143 | NZ  | H_ASP_144 | OD2 | 3.235 |
| 1RZK | H_HIS_164 | NE2 | L_ASP_167 | OD1 | 3.880 |
| 1RZK | H_HIS_164 | NE2 | L_ASP_167 | OD2 | 2.505 |
| 1RZK | H_LYS_206 | NZ  | H_ASP_208 | OD2 | 3.965 |
| 1RZK | H_LYS_209 | NZ  | L_GLU_123 | OE1 | 3.513 |
| 1RZK | H_LYS_209 | NZ  | L_GLU_123 | OE2 | 3.584 |

Table 200: 1RZK-specific salt bridging networks analysis. In this table, a PDB file is specified with a four-letter PDB ID, except that the names of the PDB files corresponding to the single NMR structural model split from the NMR ensemble is specified with a four-letter PDB ID in addition to a hyphen followed by the single NMR structural model numeric ID, the residue naming scheme is **Chain ID\_residue name\_residue number**,  $\angle ADH$  represents the angle formed by acceptor (A), donor (D) and hydrogen (H) ( $\angle ADH$ ).



| PDB ID | Residue A | Atom A | Residue B | Atom B | Distance (Å) |
|--------|-----------|--------|-----------|--------|--------------|
| 1S3K   | L_ARG_66  | NH2    | L_GLU_86  | OE2    | 3.884        |
| 1S3K   | L_ARG_66  | NH2    | L_ASP_87  | OD1    | 2.838        |
| 1S3K   | L_ARG_66  | NH2    | L_ASP_87  | OD2    | 3.885        |
| 1S3K   | L_LYS_108 | NZ     | L_GLU_170 | OE2    | 3.919        |
| 1S3K   | L_HIS_194 | ND1    | L_ASP_156 | OD2    | 2.733        |
| 1S3K   | H_ARG_38  | NH1    | H_ASP_90  | OD1    | 2.899        |
| 1S3K   | H_ARG_38  | NH2    | H_GLU_46  | OE2    | 3.185        |
| 1S3K   | H_ARG_38  | NH2    | H_ASP_90  | OD1    | 3.935        |
| 1S3K   | H_LYS_65  | NZ     | H_ASP_59  | OD1    | 3.006        |
| 1S3K   | H_ARG_67  | NH1    | H_ASP_90  | OD1    | 3.672        |
| 1S3K   | H_ARG_67  | NH1    | H_ASP_90  | OD2    | 2.699        |
| 1S3K   | H_ARG_67  | NH2    | H_ASP_90  | OD1    | 2.977        |
| 1S3K   | H_ARG_67  | NH2    | H_ASP_90  | OD2    | 3.482        |
| 1S3K   | H_ARG_101 | NH1    | H_ASP_31  | OD2    | 3.352        |
| 1S3K   | H_LYS_149 | NZ     | H_ASP_150 | OD1    | 3.589        |

Table 201: 1S3K-specific salt bridging networks analysis. In this table, a PDB file is specified with a four-letter PDB ID, except that the names of the PDB files corresponding to the single NMR structural model split from the NMR ensemble is specified with a four-letter PDB ID in addition to a hyphen followed by the single NMR structural model numeric ID, the residue naming scheme is **Chain ID\_residue name\_residue number**,  $\angle ADH$  represents the angle formed by acceptor (A), donor (D) and hydrogen (H) ( $\angle ADH$ ).

| PDB ID | Residue A | Atom A | Residue B | Atom B | Distance (Å) |
|--------|-----------|--------|-----------|--------|--------------|
| 1S5I   | L_ARG_46  | NH2    | L_ASP_55  | OD1    | 2.460        |
| 1S5I   | L_ARG_46  | NH2    | L_ASP_55  | OD2    | 3.856        |
| 1S5I   | L_ARG_61  | NH1    | L_GLU_79  | OE1    | 3.126        |
| 1S5I   | L_ARG_61  | NH1    | L_GLU_81  | OE2    | 3.788        |
| 1S5I   | L_ARG_61  | NH2    | L_GLU_79  | OE1    | 3.704        |
| 1S5I   | L_ARG_61  | NH2    | L_ASP_82  | OD1    | 2.499        |
| 1S5I   | L_ARG_61  | NH2    | L_ASP_82  | OD2    | 2.521        |
| 1S5I   | L_ARG_77  | NH1    | L_GLU_79  | OE2    | 3.348        |
| 1S5I   | L_ARG_96  | NH1    | H_ASP_97  | OD1    | 3.601        |
| 1S5I   | L_ARG_96  | NH2    | H_ASP_97  | OD1    | 2.496        |
| 1S5I   | L_ARG_96  | NH2    | H_ASP_97  | OD2    | 2.511        |
| 1S5I   | L_LYS_147 | NZ     | L_GLU_154 | OE1    | 3.415        |
| 1S5I   | L_LYS_149 | NZ     | L_GLU_195 | OE1    | 2.811        |
| 1S5I   | L_LYS_149 | NZ     | L_GLU_195 | OE2    | 3.034        |
| 1S5I   | L_ARG_155 | NH1    | L_GLU_185 | OE1    | 2.637        |
| 1S5I   | L_ARG_155 | NH2    | L_GLU_185 | OE1    | 3.738        |
| 1S5I   | L_ARG_188 | NH2    | L_GLU_185 | OE2    | 2.926        |
| 1S5I   | L_HIS_189 | ND1    | L_ASP_151 | OD2    | 2.858        |
| 1S5I   | L_HIS_189 | NE2    | L_GLU_185 | OE1    | 2.459        |
| 1S5I   | L_HIS_189 | NE2    | L_GLU_185 | OE2    | 3.318        |
| 1S5I   | H_ARG_38  | NH1    | H_ASP_86  | OD1    | 2.668        |
| 1S5I   | H_ARG_38  | NH2    | H_GLU_46  | OE1    | 2.890        |
| 1S5I   | H_ARG_38  | NH2    | H_ASP_86  | OD1    | 3.667        |
| 1S5I   | H_ARG_66  | NH1    | H_ASP_86  | OD1    | 3.962        |
| 1S5I   | H_ARG_66  | NH1    | H_ASP_86  | OD2    | 3.293        |
| 1S5I   | H_ARG_66  | NH2    | H_ASP_86  | OD1    | 3.251        |
| 1S5I   | H_ARG_66  | NH2    | H_ASP_86  | OD2    | 3.537        |
| 1S5I   | H_LYS_75  | NZ     | H_ASP_72  | OD1    | 3.618        |
| 1S5I   | H_LYS_75  | NZ     | H_ASP_72  | OD2    | 2.868        |
| 1S5I   | H_HIS_172 | NE2    | L_ASP_167 | OD2    | 3.741        |
| 1S5I   | H_LYS_218 | NZ     | H_ASP_220 | OD1    | 3.717        |
| 1S5I   | H_LYS_221 | NZ     | L_GLU_123 | OE2    | 3.213        |

Table 202: 1S5I-specific salt bridging networks analysis. In this table, a PDB file is specified with a four-letter PDB ID, except that the names of the PDB files corresponding to the single NMR structural model split from the NMR ensemble is specified with a four-letter PDB ID in addition to a hyphen followed by the single NMR structural model numeric ID, the residue naming scheme is **Chain ID\_residue name\_residue number**,  $\angle ADH$  represents the angle formed by acceptor (A), donor (D) and hydrogen (H) ( $\angle ADH$ ).

| PDB ID | Residue A | Atom A | Residue B | Atom B | Distance (Å) |
|--------|-----------|--------|-----------|--------|--------------|
| 1S78   | A_ARG_25  | NH2    | A_ASP_22  | OD2    | 3.377        |
| 1S78   | A_HIS_26  | NE2    | A_ASP_22  | OD1    | 3.860        |
| 1S78   | A_HIS_26  | NE2    | A_ASP_22  | OD2    | 3.677        |
| 1S78   | A_ARG_76  | NH1    | A_ASP_54  | OD1    | 3.940        |
| 1S78   | A_ARG_81  | NH2    | A_GLU_57  | OE1    | 3.403        |
| 1S78   | A_ARG_81  | NH2    | A_GLU_57  | OE2    | 3.079        |
| 1S78   | A_ARG_121 | NH1    | A_GLU_188 | OE1    | 2.989        |
| 1S78   | A_ARG_121 | NH2    | A_GLU_188 | OE1    | 3.618        |
| 1S78   | A_ARG_121 | NH2    | A_ASP_189 | OD1    | 3.441        |
| 1S78   | A_ARG_121 | NH2    | A_ASP_189 | OD2    | 3.303        |
| 1S78   | A_ARG_135 | NH2    | A_ASP_96  | OD1    | 3.677        |
| 1S78   | A_ARG_135 | NH2    | A_ASP_96  | OD2    | 3.036        |
| 1S78   | A_HIS_152 | NE2    | A_GLU_125 | OE1    | 3.976        |
| 1S78   | A_ARG_166 | NH2    | A_ASP_143 | OD1    | 3.122        |
| 1S78   | A_ARG_204 | NH1    | A_ASP_149 | OD1    | 3.810        |
| 1S78   | A_ARG_204 | NH2    | A_GLU_125 | OE2    | 2.685        |
| 1S78   | A_LYS_206 | NZ     | A_ASP_212 | OD2    | 3.591        |
| 1S78   | A_HIS_238 | ND1    | A_GLU_243 | OE1    | 3.574        |
| 1S78   | A_HIS_238 | ND1    | A_GLU_243 | OE2    | 2.921        |
| 1S78   | A_ARG_308 | NH2    | A_GLU_310 | OE2    | 3.285        |
| 1S78   | A_LYS_311 | NZ     | A_ASP_285 | OD2    | 3.743        |
| 1S78   | A_HIS_327 | NE2    | A_GLU_341 | OE1    | 2.783        |
| 1S78   | A_HIS_327 | NE2    | A_GLU_341 | OE2    | 2.983        |
| 1S78   | A_ARG_332 | NH1    | A_GLU_357 | OE2    | 3.575        |
| 1S78   | A_ARG_332 | NH2    | A_GLU_357 | OE1    | 3.867        |
| 1S78   | A_ARG_332 | NH2    | A_GLU_357 | OE2    | 2.955        |
| 1S78   | A_LYS_347 | NZ     | A_GLU_299 | OE2    | 2.643        |
| 1S78   | A_LYS_347 | NZ     | A_GLU_383 | OE1    | 3.238        |
| 1S78   | A_ARG_410 | NH2    | A_GLU_383 | OE1    | 3.550        |
| 1S78   | A_ARG_410 | NH2    | A_GLU_383 | OE2    | 3.659        |
| 1S78   | A_ARG_412 | NH1    | A_GLU_299 | OE1    | 3.168        |
| 1S78   | A_ARG_412 | NH1    | A_GLU_299 | OE2    | 3.462        |
| 1S78   | A_ARG_412 | NH2    | A_GLU_299 | OE2    | 3.187        |
| 1S78   | A_ARG_437 | NH1    | A_GLU_438 | OE1    | 3.837        |
| 1S78   | A_ARG_465 | NH1    | A_GLU_438 | OE1    | 2.796        |
| 1S78   | A_ARG_465 | NH1    | A_GLU_438 | OE2    | 3.955        |
| 1S78   | A_ARG_477 | NH1    | A_GLU_485 | OE1    | 2.683        |
| 1S78   | A_ARG_477 | NH2    | A_GLU_481 | OE2    | 3.214        |
| 1S78   | A_ARG_477 | NH2    | A_GLU_485 | OE1    | 3.223        |
| 1S78   | A_ARG_514 | NH1    | A_GLU_531 | OE2    | 2.772        |
| 1S78   | A_ARG_523 | NH1    | A_GLU_531 | OE1    | 3.483        |
| 1S78   | A_ARG_523 | NH1    | A_GLU_531 | OE2    | 3.476        |
| 1S78   | B_ARG_25  | NH2    | B_ASP_22  | OD2    | 3.334        |
| 1S78   | B_HIS_26  | NE2    | B_ASP_22  | OD1    | 3.990        |
| 1S78   | B_HIS_26  | NE2    | B_ASP_22  | OD2    | 3.840        |
| 1S78   | B_ARG_76  | NH1    | B_ASP_54  | OD1    | 3.948        |
| 1S78   | B_ARG_81  | NH2    | B_GLU_57  | OE1    | 3.380        |
| 1S78   | B_ARG_81  | NH2    | B_GLU_57  | OE2    | 3.017        |
| 1S78   | B_ARG_121 | NH1    | B_GLU_188 | OE1    | 2.787        |
| 1S78   | B_ARG_121 | NH2    | B_GLU_188 | OE1    | 3.424        |
| 1S78   | B_ARG_121 | NH2    | B_ASP_189 | OD1    | 3.468        |
| 1S78   | B_ARG_121 | NH2    | B_ASP_189 | OD2    | 3.329        |
| 1S78   | B_ARG_135 | NH2    | B_ASP_96  | OD1    | 3.610        |
| 1S78   | B_ARG_135 | NH2    | B_ASP_96  | OD2    | 2.916        |
| 1S78   | B_HIS_152 | NE2    | B_GLU_125 | OE1    | 3.902        |
| 1S78   | B_ARG_166 | NH2    | B_ASP_143 | OD1    | 3.128        |
| 1S78   | B_ARG_204 | NH1    | B_ASP_149 | OD1    | 3.952        |

|      |           |     |           |     |       |
|------|-----------|-----|-----------|-----|-------|
| 1S78 | B_ARG_204 | NH2 | B_GLU_125 | OE2 | 2.608 |
| 1S78 | B_LYS_206 | NZ  | B_ASP_212 | OD2 | 3.574 |
| 1S78 | B_HIS_238 | ND1 | B_GLU_243 | OE1 | 3.602 |
| 1S78 | B_HIS_238 | ND1 | B_GLU_243 | OE2 | 2.978 |
| 1S78 | B_ARG_308 | NH2 | B_GLU_310 | OE2 | 3.284 |
| 1S78 | B_LYS_311 | NZ  | B_ASP_285 | OD2 | 3.757 |
| 1S78 | B_HIS_327 | NE2 | B_GLU_341 | OE1 | 2.772 |
| 1S78 | B_HIS_327 | NE2 | B_GLU_341 | OE2 | 2.972 |
| 1S78 | B_ARG_332 | NH1 | B_GLU_357 | OE2 | 3.726 |
| 1S78 | B_ARG_332 | NH2 | B_GLU_357 | OE1 | 3.938 |
| 1S78 | B_ARG_332 | NH2 | B_GLU_357 | OE2 | 2.990 |
| 1S78 | B_LYS_347 | NZ  | B_GLU_299 | OE2 | 2.672 |
| 1S78 | B_LYS_347 | NZ  | B_GLU_383 | OE1 | 3.084 |
| 1S78 | B_LYS_347 | NZ  | B_GLU_383 | OE2 | 3.934 |
| 1S78 | B_ARG_410 | NH2 | B_GLU_383 | OE1 | 3.602 |
| 1S78 | B_ARG_410 | NH2 | B_GLU_383 | OE2 | 3.759 |
| 1S78 | B_ARG_412 | NH1 | B_GLU_299 | OE1 | 3.217 |
| 1S78 | B_ARG_412 | NH1 | B_GLU_299 | OE2 | 3.556 |
| 1S78 | B_ARG_412 | NH2 | B_GLU_299 | OE2 | 3.170 |
| 1S78 | B_ARG_465 | NH1 | B_GLU_438 | OE1 | 2.881 |
| 1S78 | B_ARG_477 | NH1 | B_GLU_485 | OE1 | 2.617 |
| 1S78 | B_ARG_477 | NH1 | B_GLU_485 | OE2 | 3.941 |
| 1S78 | B_ARG_477 | NH2 | B_GLU_481 | OE2 | 3.169 |
| 1S78 | B_ARG_477 | NH2 | B_GLU_485 | OE1 | 3.166 |
| 1S78 | B_ARG_514 | NH1 | B_GLU_531 | OE1 | 3.612 |
| 1S78 | B_ARG_514 | NH1 | B_GLU_531 | OE2 | 2.336 |
| 1S78 | B_ARG_523 | NH1 | B_GLU_531 | OE1 | 3.374 |
| 1S78 | B_ARG_523 | NH1 | B_GLU_531 | OE2 | 3.242 |
| 1S78 | B_HIS_567 | ND1 | B_GLU_544 | OE1 | 3.248 |
| 1S78 | B_HIS_567 | ND1 | B_GLU_544 | OE2 | 3.019 |
| 1S78 | C_LYS_24  | NZ  | C_ASP_70  | OD1 | 3.323 |
| 1S78 | C_ARG_61  | NH2 | C_ASP_82  | OD1 | 2.646 |
| 1S78 | C_ARG_61  | NH2 | C_ASP_82  | OD2 | 3.273 |
| 1S78 | C_LYS_103 | NZ  | C_GLU_165 | OE1 | 3.918 |
| 1S78 | C_LYS_103 | NZ  | C_GLU_165 | OE2 | 2.759 |
| 1S78 | C_LYS_149 | NZ  | C_GLU_195 | OE2 | 3.249 |
| 1S78 | C_HIS_189 | ND1 | C_ASP_151 | OD2 | 3.312 |
| 1S78 | C_ARG_211 | NH1 | C_GLU_187 | OE2 | 3.367 |
| 1S78 | D_ARG_38  | NH1 | D_ASP_86  | OD1 | 3.229 |
| 1S78 | D_ARG_38  | NH2 | D_GLU_46  | OE1 | 2.855 |
| 1S78 | D_ARG_62  | NH1 | D_GLU_85  | OE1 | 3.019 |
| 1S78 | D_ARG_62  | NH2 | D_GLU_46  | OE1 | 3.024 |
| 1S78 | D_ARG_62  | NH2 | D_GLU_46  | OE2 | 3.448 |
| 1S78 | D_ARG_66  | NH1 | D_ASP_86  | OD1 | 3.283 |
| 1S78 | D_ARG_66  | NH1 | D_ASP_86  | OD2 | 2.439 |
| 1S78 | D_ARG_66  | NH2 | D_ASP_86  | OD1 | 3.573 |
| 1S78 | D_ARG_94  | NH2 | D_ASP_101 | OD1 | 3.501 |
| 1S78 | D_ARG_94  | NH2 | D_ASP_101 | OD2 | 2.662 |
| 1S78 | D_LYS_143 | NZ  | D_ASP_144 | OD2 | 3.814 |
| 1S78 | D_HIS_164 | NE2 | C_ASP_167 | OD1 | 3.839 |
| 1S78 | D_LYS_209 | NZ  | C_GLU_123 | OE1 | 3.290 |
| 1S78 | D_LYS_214 | NZ  | C_ASP_122 | OD1 | 3.484 |
| 1S78 | E_LYS_24  | NZ  | E_ASP_70  | OD1 | 3.695 |
| 1S78 | E_LYS_24  | NZ  | E_ASP_70  | OD2 | 3.318 |
| 1S78 | E_ARG_61  | NH2 | E_GLU_81  | OE1 | 3.985 |
| 1S78 | E_ARG_61  | NH2 | E_GLU_81  | OE2 | 3.655 |
| 1S78 | E_ARG_61  | NH2 | E_ASP_82  | OD1 | 2.822 |
| 1S78 | E_ARG_61  | NH2 | E_ASP_82  | OD2 | 3.506 |

|      |           |     |           |     |       |
|------|-----------|-----|-----------|-----|-------|
| 1S78 | E_LYS_103 | NZ  | E_GLU_165 | OE1 | 2.948 |
| 1S78 | E_LYS_103 | NZ  | E_GLU_165 | OE2 | 3.258 |
| 1S78 | E_HIS_189 | ND1 | E_ASP_151 | OD2 | 2.704 |
| 1S78 | F_ARG_38  | NH1 | F_ASP_86  | OD1 | 3.191 |
| 1S78 | F_ARG_38  | NH2 | F_GLU_46  | OE1 | 2.976 |
| 1S78 | F_ARG_38  | NH2 | F_ASP_86  | OD1 | 3.546 |
| 1S78 | F_ARG_66  | NH1 | F_ASP_86  | OD1 | 2.849 |
| 1S78 | F_ARG_66  | NH1 | F_ASP_86  | OD2 | 2.628 |
| 1S78 | F_ARG_83  | NH1 | F_GLU_85  | OE1 | 3.280 |
| 1S78 | F_ARG_83  | NH1 | F_GLU_85  | OE2 | 3.676 |
| 1S78 | F_ARG_94  | NH2 | F_ASP_101 | OD1 | 3.456 |
| 1S78 | F_ARG_94  | NH2 | F_ASP_101 | OD2 | 2.584 |

Table 203: 1S78-specific salt bridging networks analysis. In this table, a PDB file is specified with a four-letter PDB ID, except that the names of the PDB files corresponding to the single NMR structural model split from the NMR ensemble is specified with a four-letter PDB ID in addition to a hyphen followed by the single NMR structural model numeric ID, the residue naming scheme is **Chain ID\_residue name\_residue number**,  $\angle ADH$  represents the angle formed by acceptor (A), donor (D) and hydrogen (H) ( $\angle ADH$ ).

| PDB ID | Residue A | Atom A | Residue B | Atom B | Distance (Å) |
|--------|-----------|--------|-----------|--------|--------------|
| 1SM3   | L_HIS_42  | ND1    | L_GLU_38  | OE2    | 3.552        |
| 1SM3   | L_ARG_61  | NH2    | L_GLU_81  | OE2    | 2.761        |
| 1SM3   | L_ARG_61  | NH2    | L_ASP_82  | OD1    | 2.739        |
| 1SM3   | L_ARG_61  | NH2    | L_ASP_82  | OD2    | 3.626        |
| 1SM3   | L_LYS_110 | NZ     | L_GLU_198 | OE2    | 2.701        |
| 1SM3   | L_HIS_188 | ND1    | L_ASP_151 | OD2    | 2.837        |
| 1SM3   | H_ARG_38  | NH1    | H_ASP_86  | OD1    | 2.991        |
| 1SM3   | H_ARG_38  | NH2    | H_GLU_46  | OE1    | 3.308        |
| 1SM3   | H_ARG_38  | NH2    | H_GLU_46  | OE2    | 3.468        |
| 1SM3   | H_ARG_38  | NH2    | H_ASP_86  | OD1    | 3.893        |
| 1SM3   | H_LYS_43  | NZ     | H_GLU_46  | OE1    | 3.090        |
| 1SM3   | H_ARG_52  | NH1    | H_GLU_50  | OE2    | 2.647        |
| 1SM3   | H_HIS_58  | ND1    | H_GLU_50  | OE2    | 2.597        |
| 1SM3   | H_ARG_66  | NH1    | H_ASP_86  | OD1    | 3.622        |
| 1SM3   | H_ARG_66  | NH2    | H_ASP_86  | OD1    | 3.305        |
| 1SM3   | H_ARG_66  | NH2    | H_ASP_86  | OD2    | 2.417        |
| 1SM3   | H_ARG_71  | NH2    | H_ASP_73  | OD1    | 3.453        |
| 1SM3   | H_LYS_143 | NZ     | L_GLU_124 | OE2    | 2.757        |

Table 204: 1SM3-specific salt bridging networks analysis. In this table, a PDB file is specified with a four-letter PDB ID, except that the names of the PDB files corresponding to the single NMR structural model split from the NMR ensemble is specified with a four-letter PDB ID in addition to a hyphen followed by the single NMR structural model numeric ID, the residue naming scheme is **Chain ID\_residue name\_residue number**,  $\angle ADH$  represents the angle formed by acceptor (A), donor (D) and hydrogen (H) ( $\angle ADH$ ).

| PDB ID | Residue A | Atom A | Residue B | Atom B | Distance (Å) |
|--------|-----------|--------|-----------|--------|--------------|
| 1SQ2   | L_LYS_1   | NZ     | L_GLU_7   | OE1    | 3.597        |
| 1SQ2   | L_LYS_1   | NZ     | L_GLU_7   | OE2    | 2.720        |
| 1SQ2   | L_ARG_61  | NH1    | L_ASP_48  | OD2    | 3.006        |
| 1SQ2   | L_ARG_73  | NH2    | N_ASP_93  | OD1    | 3.549        |
| 1SQ2   | L_ARG_73  | NH2    | N_ASP_93  | OD2    | 3.002        |
| 1SQ2   | L_ARG_125 | NH1    | L_ASP_119 | OD2    | 3.203        |
| 1SQ2   | L_ARG_125 | NH2    | L_ASP_119 | OD1    | 3.605        |
| 1SQ2   | L_ARG_125 | NH2    | L_ASP_119 | OD2    | 2.909        |
| 1SQ2   | N_ARG_2   | NH1    | N_ASP_26  | OD2    | 3.782        |
| 1SQ2   | N_ARG_2   | NH2    | N_ASP_4   | OD1    | 3.667        |
| 1SQ2   | N_ARG_2   | NH2    | N_ASP_4   | OD2    | 3.350        |
| 1SQ2   | N_ARG_8   | NH1    | N_ASP_106 | OD1    | 3.394        |
| 1SQ2   | N_ARG_38  | NH1    | N_ASP_77  | OD1    | 3.866        |
| 1SQ2   | N_LYS_39  | NZ     | N_GLU_46  | OE1    | 3.723        |
| 1SQ2   | N_LYS_51  | NZ     | N_GLU_57  | OE1    | 2.817        |
| 1SQ2   | N_LYS_51  | NZ     | N_GLU_57  | OE2    | 3.620        |
| 1SQ2   | N_ARG_54  | NH1    | N_ASP_77  | OD1    | 3.089        |
| 1SQ2   | N_ARG_54  | NH1    | N_ASP_77  | OD2    | 3.597        |
| 1SQ2   | N_ARG_54  | NH2    | N_ASP_77  | OD1    | 3.562        |
| 1SQ2   | N_ARG_54  | NH2    | N_ASP_77  | OD2    | 2.591        |
| 1SQ2   | N_ARG_82  | NH1    | N_GLU_46  | OE2    | 3.823        |
| 1SQ2   | N_ARG_100 | NH1    | L_ASP_52  | OD1    | 3.032        |
| 1SQ2   | N_ARG_100 | NH1    | L_ASP_52  | OD2    | 3.454        |
| 1SQ2   | N_ARG_100 | NH2    | L_ASP_52  | OD1    | 3.561        |
| 1SQ2   | N_ARG_100 | NH2    | L_ASP_52  | OD2    | 3.218        |

Table 205: 1SQ2-specific salt bridging networks analysis. In this table, a PDB file is specified with a four-letter PDB ID, except that the names of the PDB files corresponding to the single NMR structural model split from the NMR ensemble is specified with a four-letter PDB ID in addition to a hyphen followed by the single NMR structural model numeric ID, the residue naming scheme is **Chain ID\_residue name\_residue number**,  $\angle ADH$  represents the angle formed by acceptor (A), donor (D) and hydrogen (H) ( $\angle ADH$ ).

| PDB ID | Residue A | Atom A | Residue B | Atom B | Distance (Å) |
|--------|-----------|--------|-----------|--------|--------------|
| 1SVZ   | A_ARG_24  | NH2    | A_ASP_75  | OD1    | 2.929        |
| 1SVZ   | A_ARG_66  | NH1    | A_ASP_87  | OD1    | 3.870        |
| 1SVZ   | A_ARG_66  | NH1    | A_ASP_87  | OD2    | 2.678        |
| 1SVZ   | A_ARG_66  | NH2    | A_GLU_84  | OE1    | 3.931        |
| 1SVZ   | A_ARG_66  | NH2    | A_GLU_86  | OE2    | 3.128        |
| 1SVZ   | A_ARG_66  | NH2    | A_ASP_87  | OD1    | 3.084        |
| 1SVZ   | A_ARG_66  | NH2    | A_ASP_87  | OD2    | 3.325        |
| 1SVZ   | A_LYS_139 | NZ     | A_GLU_137 | OE1    | 3.533        |
| 1SVZ   | A_HIS_162 | NE2    | A_ASP_226 | OD2    | 2.871        |
| 1SVZ   | A_LYS_173 | NZ     | A_ASP_190 | OD2    | 3.311        |
| 1SVZ   | A_LYS_192 | NZ     | A_ASP_189 | OD1    | 2.477        |
| 1SVZ   | A_ARG_194 | NH1    | A_ASP_217 | OD1    | 3.731        |
| 1SVZ   | A_ARG_194 | NH1    | A_ASP_217 | OD2    | 2.724        |
| 1SVZ   | A_ARG_194 | NH2    | A_ASP_217 | OD1    | 2.551        |
| 1SVZ   | A_ARG_194 | NH2    | A_ASP_217 | OD2    | 2.852        |
| 1SVZ   | A_ARG_227 | NH2    | A_GLU_232 | OE1    | 3.187        |
| 1SVZ   | A_ARG_227 | NH2    | A_GLU_232 | OE2    | 2.728        |
| 1SVZ   | A_HIS_228 | ND1    | A_ASP_226 | OD1    | 2.644        |
| 1SVZ   | B_ARG_24  | NH2    | B_ASP_75  | OD1    | 3.400        |
| 1SVZ   | B_ARG_24  | NH2    | B_ASP_75  | OD2    | 3.186        |
| 1SVZ   | B_ARG_66  | NH1    | B_GLU_84  | OE2    | 3.553        |
| 1SVZ   | B_ARG_66  | NH2    | B_GLU_86  | OE2    | 2.747        |
| 1SVZ   | B_ARG_66  | NH2    | B_ASP_87  | OD1    | 3.046        |
| 1SVZ   | B_ARG_66  | NH2    | B_ASP_87  | OD2    | 3.702        |
| 1SVZ   | B_LYS_139 | NZ     | B_GLU_143 | OE1    | 3.577        |
| 1SVZ   | B_HIS_162 | NE2    | B_ASP_226 | OD2    | 2.989        |
| 1SVZ   | B_LYS_165 | NZ     | B_GLU_216 | OE2    | 2.834        |
| 1SVZ   | B_LYS_173 | NZ     | B_ASP_190 | OD1    | 3.857        |
| 1SVZ   | B_LYS_173 | NZ     | B_ASP_190 | OD2    | 3.237        |
| 1SVZ   | B_LYS_192 | NZ     | B_ASP_189 | OD1    | 3.974        |
| 1SVZ   | B_ARG_194 | NH2    | B_ASP_217 | OD1    | 3.693        |
| 1SVZ   | B_ARG_194 | NH2    | B_ASP_217 | OD2    | 2.595        |
| 1SVZ   | B_ARG_227 | NH1    | B_GLU_232 | OE1    | 3.056        |
| 1SVZ   | B_ARG_227 | NH1    | B_GLU_232 | OE2    | 3.538        |
| 1SVZ   | B_HIS_228 | ND1    | B_ASP_226 | OD1    | 2.570        |
| 1SVZ   | B_HIS_228 | ND1    | B_ASP_226 | OD2    | 3.901        |

Table 206: 1SVZ-specific salt bridging networks analysis. In this table, a PDB file is specified with a four-letter PDB ID, except that the names of the PDB files corresponding to the single NMR structural model split from the NMR ensemble is specified with a four-letter PDB ID in addition to a hyphen followed by the single NMR structural model numeric ID, the residue naming scheme is **Chain ID\_residue name\_residue number**,  $\angle ADH$  represents the angle formed by acceptor (A), donor (D) and hydrogen (H) ( $\angle ADH$ ).



| PDB ID | Residue A | Atom A | Residue B | Atom B | Distance (Å) |
|--------|-----------|--------|-----------|--------|--------------|
| 1T2Q   | L_ARG_25  | NH2    | L_ASP_76  | OD1    | 3.792        |
| 1T2Q   | L_ARG_60  | NH2    | L_ASP_66  | OD1    | 3.739        |
| 1T2Q   | L_ARG_67  | NH1    | L_GLU_85  | OE1    | 3.406        |
| 1T2Q   | L_ARG_67  | NH2    | L_GLU_85  | OE1    | 3.629        |
| 1T2Q   | L_ARG_67  | NH2    | L_GLU_87  | OE2    | 3.632        |
| 1T2Q   | L_ARG_67  | NH2    | L_ASP_88  | OD1    | 2.658        |
| 1T2Q   | L_ARG_67  | NH2    | L_ASP_88  | OD2    | 3.450        |
| 1T2Q   | L_LYS_109 | NZ     | L_ASP_171 | OD1    | 3.845        |
| 1T2Q   | L_LYS_148 | NZ     | L_GLU_111 | OE2    | 3.401        |
| 1T2Q   | L_LYS_155 | NZ     | L_GLU_201 | OE1    | 3.097        |
| 1T2Q   | L_LYS_155 | NZ     | L_GLU_201 | OE2    | 2.790        |
| 1T2Q   | L_ARG_194 | NH2    | L_ASP_190 | OD2    | 2.982        |
| 1T2Q   | L_HIS_195 | ND1    | L_ASP_157 | OD2    | 2.589        |
| 1T2Q   | H_ARG_39  | NH1    | H_ASP_90  | OD1    | 2.798        |
| 1T2Q   | H_ARG_39  | NH2    | H_GLU_47  | OE1    | 2.910        |
| 1T2Q   | H_ARG_39  | NH2    | H_GLU_47  | OE2    | 3.823        |
| 1T2Q   | H_ARG_39  | NH2    | H_ASP_90  | OD1    | 3.822        |
| 1T2Q   | H_LYS_44  | NZ     | H_ASP_89  | OD2    | 3.291        |
| 1T2Q   | H_ARG_67  | NH1    | H_ASP_90  | OD1    | 3.874        |
| 1T2Q   | H_ARG_67  | NH1    | H_ASP_90  | OD2    | 2.949        |
| 1T2Q   | H_ARG_67  | NH2    | H_ASP_90  | OD1    | 2.874        |
| 1T2Q   | H_ARG_67  | NH2    | H_ASP_90  | OD2    | 3.246        |
| 1T2Q   | H_LYS_76  | NZ     | H_ASP_73  | OD2    | 3.621        |
| 1T2Q   | H_ARG_98  | NH2    | H_ASP_107 | OD1    | 3.528        |
| 1T2Q   | H_ARG_98  | NH2    | H_ASP_107 | OD2    | 2.637        |

Table 207: 1T2Q-specific salt bridging networks analysis. In this table, a PDB file is specified with a four-letter PDB ID, except that the names of the PDB files corresponding to the single NMR structural model split from the NMR ensemble is specified with a four-letter PDB ID in addition to a hyphen followed by the single NMR structural model numeric ID, the residue naming scheme is **Chain ID\_residue name\_residue number**,  $\angle ADH$  represents the angle formed by acceptor (A), donor (D) and hydrogen (H) ( $\angle ADH$ ).

| PDB ID | Residue A | Atom A | Residue B | Atom B | Distance (Å) |
|--------|-----------|--------|-----------|--------|--------------|
| 1T6V   | L_LYS.1   | NZ     | L_GLU.7   | OE1    | 3.814        |
| 1T6V   | L_LYS.1   | NZ     | L_GLU.7   | OE2    | 2.661        |
| 1T6V   | L_ARG.61  | NH1    | L_ASP.48  | OD2    | 3.269        |
| 1T6V   | L_ARG.73  | NH1    | N_ASP.93  | OD2    | 3.564        |
| 1T6V   | L_ARG.73  | NH2    | N_ASP.93  | OD1    | 3.874        |
| 1T6V   | L_ARG.73  | NH2    | N_ASP.93  | OD2    | 2.603        |
| 1T6V   | L_ARG.125 | NH1    | L_ASP.119 | OD2    | 3.001        |
| 1T6V   | L_ARG.125 | NH2    | L_ASP.119 | OD1    | 3.584        |
| 1T6V   | L_ARG.125 | NH2    | L_ASP.119 | OD2    | 2.767        |
| 1T6V   | N_ARG.2   | NH2    | N_ASP.4   | OD1    | 3.696        |
| 1T6V   | N_ARG.2   | NH2    | N_ASP.4   | OD2    | 3.005        |
| 1T6V   | N_ARG.25  | NH1    | N_ASP.4   | OD2    | 2.946        |
| 1T6V   | N_ARG.38  | NH2    | N_GLU.47  | OE1    | 3.551        |
| 1T6V   | N_LYS.40  | NZ     | N_GLU.76  | OE1    | 3.049        |
| 1T6V   | N_LYS.51  | NZ     | N_GLU.57  | OE1    | 2.788        |
| 1T6V   | N_LYS.51  | NZ     | N_GLU.57  | OE2    | 3.528        |
| 1T6V   | N_ARG.54  | NH1    | N_ASP.77  | OD1    | 2.809        |
| 1T6V   | N_ARG.54  | NH1    | N_ASP.77  | OD2    | 3.785        |
| 1T6V   | N_ARG.54  | NH2    | N_ASP.77  | OD1    | 3.326        |
| 1T6V   | N_ARG.54  | NH2    | N_ASP.77  | OD2    | 2.873        |
| 1T6V   | N_ARG.100 | NH1    | L_ASP.52  | OD1    | 2.973        |
| 1T6V   | N_ARG.100 | NH1    | L_ASP.52  | OD2    | 3.510        |
| 1T6V   | N_ARG.100 | NH2    | L_ASP.52  | OD1    | 3.501        |
| 1T6V   | N_ARG.100 | NH2    | L_ASP.52  | OD2    | 3.094        |
| 1T6V   | M_LYS.1   | NZ     | M_GLU.7   | OE1    | 3.728        |
| 1T6V   | M_LYS.1   | NZ     | M_GLU.7   | OE2    | 2.757        |
| 1T6V   | M_ARG.61  | NH1    | M_ASP.48  | OD1    | 3.656        |
| 1T6V   | M_ARG.61  | NH1    | M_ASP.48  | OD2    | 3.383        |
| 1T6V   | M_ARG.73  | NH2    | O_ASP.93  | OD1    | 3.734        |
| 1T6V   | M_ARG.73  | NH2    | O_ASP.93  | OD2    | 2.904        |
| 1T6V   | M_LYS.97  | NZ     | N_ASP.106 | OD1    | 3.749        |
| 1T6V   | M_LYS.97  | NZ     | N_ASP.106 | OD2    | 2.853        |
| 1T6V   | M_ARG.125 | NH1    | M_ASP.119 | OD2    | 2.764        |
| 1T6V   | M_ARG.125 | NH2    | M_ASP.119 | OD1    | 3.456        |
| 1T6V   | M_ARG.125 | NH2    | M_ASP.119 | OD2    | 3.061        |
| 1T6V   | O_ARG.2   | NH1    | O_ASP.26  | OD2    | 3.626        |
| 1T6V   | O_ARG.2   | NH2    | O_ASP.4   | OD1    | 3.686        |
| 1T6V   | O_ARG.2   | NH2    | O_ASP.4   | OD2    | 2.970        |
| 1T6V   | O_ARG.8   | NH1    | O_ASP.106 | OD1    | 3.002        |
| 1T6V   | O_ARG.8   | NH2    | O_ASP.106 | OD1    | 3.850        |
| 1T6V   | O_LYS.51  | NZ     | O_GLU.57  | OE1    | 2.819        |
| 1T6V   | O_LYS.51  | NZ     | O_GLU.57  | OE2    | 3.551        |
| 1T6V   | O_ARG.54  | NH1    | O_ASP.77  | OD1    | 3.107        |
| 1T6V   | O_ARG.54  | NH1    | O_ASP.77  | OD2    | 3.912        |
| 1T6V   | O_ARG.54  | NH2    | O_ASP.77  | OD1    | 3.448        |
| 1T6V   | O_ARG.54  | NH2    | O_ASP.77  | OD2    | 2.988        |
| 1T6V   | O_ARG.82  | NH1    | O_GLU.46  | OE1    | 3.614        |
| 1T6V   | O_ARG.82  | NH1    | O_GLU.46  | OE2    | 3.761        |
| 1T6V   | O_ARG.100 | NH1    | M_ASP.52  | OD1    | 3.232        |
| 1T6V   | O_ARG.100 | NH1    | M_ASP.52  | OD2    | 2.872        |
| 1T6V   | O_ARG.100 | NH2    | M_ASP.52  | OD1    | 3.920        |
| 1T6V   | O_ARG.100 | NH2    | M_ASP.52  | OD2    | 2.990        |

---

Table 208: 1T6V-specific salt bridging networks analysis. In this table, a PDB file is specified with a four-letter PDB ID, except that the names of the PDB files corresponding to the single NMR structural model split from the NMR ensemble is specified with a four-letter PDB ID in addition to a hyphen followed by the single NMR structural model numeric ID, the residue naming scheme is **Chain ID\_residue name\_residue number**,  $\angle ADH$  represents the angle formed by acceptor (A), donor (D) and hydrogen (H) ( $\angle ADH$ ).

| PDB ID | Residue A | Atom A | Residue B | Atom B | Distance (Å) |
|--------|-----------|--------|-----------|--------|--------------|
| 1TYE   | A_HIS_30  | ND1    | A_GLU_136 | OE2    | 3.797        |
| 1TYE   | A_HIS_30  | ND1    | E_ASP_429 | OD2    | 3.896        |
| 1TYE   | A_HIS_30  | NE2    | A_GLU_136 | OE2    | 3.547        |
| 1TYE   | A_ARG_32  | NH1    | E_ASP_429 | OD1    | 3.657        |
| 1TYE   | A_ARG_32  | NH1    | E_ASP_429 | OD2    | 2.825        |
| 1TYE   | A_ARG_73  | NH1    | C_ASP_71  | OD1    | 3.528        |
| 1TYE   | A_ARG_73  | NH1    | C_ASP_71  | OD2    | 3.396        |
| 1TYE   | A_ARG_73  | NH2    | A_ASP_71  | OD1    | 3.946        |
| 1TYE   | A_ARG_73  | NH2    | A_ASP_71  | OD2    | 3.781        |
| 1TYE   | A_ARG_73  | NH2    | C_ASP_71  | OD2    | 2.714        |
| 1TYE   | A_ARG_73  | NH2    | C_GLU_75  | OE1    | 3.907        |
| 1TYE   | A_LYS_88  | NZ     | A_ASP_71  | OD1    | 3.924        |
| 1TYE   | A_LYS_88  | NZ     | A_GLU_75  | OE1    | 3.696        |
| 1TYE   | A_ARG_90  | NH2    | A_GLU_49  | OE1    | 3.556        |
| 1TYE   | A_ARG_147 | NH1    | A_GLU_142 | OE2    | 3.894        |
| 1TYE   | A_ARG_147 | NH2    | A_GLU_142 | OE2    | 3.182        |
| 1TYE   | A_ARG_153 | NH1    | A_GLU_157 | OE2    | 3.772        |
| 1TYE   | A_ARG_153 | NH2    | A_GLU_120 | OE1    | 3.065        |
| 1TYE   | A_ARG_153 | NH2    | A_GLU_120 | OE2    | 3.052        |
| 1TYE   | A_ARG_165 | NH1    | A_ASP_163 | OD1    | 2.964        |
| 1TYE   | A_ARG_165 | NH1    | A_ASP_163 | OD2    | 2.782        |
| 1TYE   | A_ARG_165 | NH2    | A_GLU_123 | OE1    | 2.740        |
| 1TYE   | A_ARG_165 | NH2    | A_GLU_123 | OE2    | 3.080        |
| 1TYE   | A_ARG_279 | NH2    | A_GLU_268 | OE2    | 3.715        |
| 1TYE   | A_ARG_327 | NH1    | A_GLU_283 | OE1    | 2.906        |
| 1TYE   | A_ARG_335 | NH1    | A_ASP_301 | OD1    | 3.950        |
| 1TYE   | A_ARG_335 | NH1    | A_ASP_301 | OD2    | 2.979        |
| 1TYE   | A_ARG_335 | NH2    | A_ASP_301 | OD1    | 3.045        |
| 1TYE   | A_ARG_335 | NH2    | A_ASP_301 | OD2    | 3.119        |
| 1TYE   | A_ARG_422 | NH1    | A_ASP_24  | OD1    | 3.230        |
| 1TYE   | B_ARG_91  | NH1    | B_GLU_60  | OE1    | 3.253        |
| 1TYE   | B_ARG_91  | NH2    | B_ASP_432 | OD2    | 3.964        |
| 1TYE   | B_ARG_105 | NH1    | B_ASP_71  | OD1    | 3.549        |
| 1TYE   | B_LYS_159 | NZ     | B_ASP_224 | OD1    | 3.816        |
| 1TYE   | B_LYS_159 | NZ     | B_ASP_224 | OD2    | 2.677        |
| 1TYE   | B_LYS_209 | NZ     | B_GLU_206 | OE1    | 3.537        |
| 1TYE   | B_LYS_209 | NZ     | B_GLU_206 | OE2    | 3.891        |
| 1TYE   | B_ARG_216 | NH1    | A_GLU_123 | OE1    | 2.702        |
| 1TYE   | B_ARG_239 | NH1    | B_ASP_113 | OD1    | 2.627        |
| 1TYE   | B_LYS_253 | NZ     | A_ASP_232 | OD2    | 3.290        |
| 1TYE   | B_HIS_255 | ND1    | B_ASP_259 | OD2    | 3.030        |
| 1TYE   | B_HIS_255 | NE2    | B_ASP_158 | OD2    | 3.791        |
| 1TYE   | B_HIS_255 | NE2    | B_ASP_217 | OD1    | 3.796        |
| 1TYE   | B_HIS_255 | NE2    | B_ASP_217 | OD2    | 2.660        |
| 1TYE   | B_HIS_274 | NE2    | B_ASP_270 | OD1    | 3.163        |
| 1TYE   | B_HIS_274 | NE2    | B_ASP_270 | OD2    | 2.921        |
| 1TYE   | B_HIS_280 | ND1    | B_ASP_278 | OD2    | 3.747        |
| 1TYE   | B_LYS_298 | NZ     | B_GLU_297 | OE2    | 3.673        |
| 1TYE   | B_LYS_302 | NZ     | B_ASP_233 | OD1    | 3.013        |
| 1TYE   | B_LYS_302 | NZ     | B_ASP_233 | OD2    | 3.373        |
| 1TYE   | B_LYS_354 | NZ     | B_GLU_356 | OE1    | 3.389        |
| 1TYE   | B_LYS_390 | NZ     | B_ASP_393 | OD2    | 3.994        |
| 1TYE   | B_ARG_404 | NH2    | B_GLU_364 | OE2    | 2.885        |
| 1TYE   | B_LYS_410 | NZ     | B_ASP_434 | OD1    | 3.437        |
| 1TYE   | C_ARG_73  | NH1    | A_ASP_71  | OD1    | 3.491        |
| 1TYE   | C_ARG_73  | NH2    | A_ASP_71  | OD1    | 3.688        |
| 1TYE   | C_ARG_73  | NH2    | A_ASP_71  | OD2    | 3.197        |

|      |           |     |           |     |       |
|------|-----------|-----|-----------|-----|-------|
| 1TYE | C_ARG_73  | NH2 | C_ASP_71  | OD1 | 3.681 |
| 1TYE | C_ARG_73  | NH2 | C_ASP_71  | OD2 | 3.705 |
| 1TYE | C_LYS_88  | NZ  | C_ASP_71  | OD1 | 3.778 |
| 1TYE | C_LYS_88  | NZ  | C_GLU_75  | OE2 | 3.812 |
| 1TYE | C_ARG_90  | NH1 | C_GLU_49  | OE1 | 2.673 |
| 1TYE | C_ARG_90  | NH1 | C_GLU_49  | OE2 | 3.918 |
| 1TYE | C_LYS_118 | NZ  | C_GLU_117 | OE2 | 3.898 |
| 1TYE | C_ARG_147 | NH1 | C_GLU_142 | OE2 | 3.614 |
| 1TYE | C_ARG_147 | NH2 | C_GLU_142 | OE2 | 3.566 |
| 1TYE | C_ARG_153 | NH2 | C_GLU_120 | OE1 | 3.220 |
| 1TYE | C_ARG_153 | NH2 | C_GLU_120 | OE2 | 3.597 |
| 1TYE | C_ARG_165 | NH1 | C_ASP_163 | OD1 | 3.313 |
| 1TYE | C_ARG_165 | NH1 | C_ASP_163 | OD2 | 2.716 |
| 1TYE | C_ARG_165 | NH2 | C_GLU_123 | OE1 | 3.193 |
| 1TYE | C_ARG_165 | NH2 | C_GLU_123 | OE2 | 3.129 |
| 1TYE | C_ARG_279 | NH2 | C_GLU_268 | OE2 | 3.615 |
| 1TYE | C_ARG_281 | NH2 | C_GLU_229 | OE2 | 3.746 |
| 1TYE | C_ARG_327 | NH1 | C_GLU_283 | OE2 | 2.647 |
| 1TYE | C_ARG_422 | NH1 | C_ASP_24  | OD1 | 2.911 |
| 1TYE | C_ARG_422 | NH1 | C_ASP_24  | OD2 | 3.921 |
| 1TYE | D_LYS_46  | NZ  | D_ASP_47  | OD2 | 3.909 |
| 1TYE | D_ARG_62  | NH2 | D_GLU_60  | OE1 | 3.320 |
| 1TYE | D_ARG_91  | NH1 | D_ASP_432 | OD2 | 3.976 |
| 1TYE | D_ARG_91  | NH2 | D_ASP_432 | OD1 | 3.669 |
| 1TYE | D_ARG_91  | NH2 | D_ASP_432 | OD2 | 3.225 |
| 1TYE | D_ARG_105 | NH1 | D_ASP_71  | OD1 | 3.673 |
| 1TYE | D_LYS_159 | NZ  | D_ASP_224 | OD1 | 3.999 |
| 1TYE | D_LYS_159 | NZ  | D_ASP_224 | OD2 | 2.881 |
| 1TYE | D_LYS_209 | NZ  | D_GLU_206 | OE2 | 3.266 |
| 1TYE | D_ARG_216 | NH1 | C_GLU_123 | OE1 | 2.914 |
| 1TYE | D_ARG_216 | NH1 | C_GLU_123 | OE2 | 3.969 |
| 1TYE | D_ARG_239 | NH1 | D_ASP_113 | OD1 | 2.677 |
| 1TYE | D_HIS_244 | NE2 | D_ASP_113 | OD2 | 3.772 |
| 1TYE | D_LYS_253 | NZ  | C_ASP_232 | OD2 | 3.400 |
| 1TYE | D_HIS_255 | ND1 | D_ASP_259 | OD2 | 2.788 |
| 1TYE | D_HIS_255 | NE2 | D_ASP_158 | OD2 | 3.582 |
| 1TYE | D_HIS_255 | NE2 | D_ASP_217 | OD1 | 3.881 |
| 1TYE | D_HIS_255 | NE2 | D_ASP_217 | OD2 | 2.918 |
| 1TYE | D_HIS_274 | NE2 | D_ASP_270 | OD1 | 3.141 |
| 1TYE | D_HIS_274 | NE2 | D_ASP_270 | OD2 | 2.980 |
| 1TYE | D_HIS_280 | ND1 | D_ASP_278 | OD2 | 3.600 |
| 1TYE | D_LYS_298 | NZ  | D_GLU_297 | OE2 | 3.766 |
| 1TYE | D_LYS_302 | NZ  | D_ASP_233 | OD1 | 3.683 |
| 1TYE | D_LYS_302 | NZ  | D_ASP_233 | OD2 | 3.005 |
| 1TYE | D_LYS_354 | NZ  | D_GLU_356 | OE1 | 3.054 |
| 1TYE | D_LYS_354 | NZ  | D_GLU_356 | OE2 | 3.182 |
| 1TYE | D_ARG_360 | NH1 | D_GLU_358 | OE2 | 2.869 |
| 1TYE | E_HIS_30  | NE2 | E_GLU_136 | OE2 | 3.296 |
| 1TYE | E_ARG_32  | NH2 | E_ASP_28  | OD2 | 3.193 |
| 1TYE | E_ARG_73  | NH2 | E_ASP_71  | OD2 | 3.212 |
| 1TYE | E_LYS_88  | NZ  | E_GLU_75  | OE1 | 3.717 |
| 1TYE | E_ARG_90  | NH1 | E_GLU_49  | OE1 | 3.580 |
| 1TYE | E_ARG_153 | NH1 | E_GLU_157 | OE2 | 3.995 |
| 1TYE | E_ARG_153 | NH2 | E_GLU_120 | OE1 | 3.767 |
| 1TYE | E_ARG_165 | NH1 | E_ASP_163 | OD1 | 3.534 |
| 1TYE | E_ARG_165 | NH1 | E_ASP_163 | OD2 | 2.834 |
| 1TYE | E_ARG_165 | NH2 | E_GLU_123 | OE1 | 2.970 |
| 1TYE | E_ARG_165 | NH2 | E_GLU_123 | OE2 | 3.167 |

|      |           |     |           |     |       |
|------|-----------|-----|-----------|-----|-------|
| 1TYE | E_ARG_279 | NH2 | E_GLU_268 | OE2 | 3.525 |
| 1TYE | E_ARG_281 | NH2 | E_GLU_229 | OE2 | 3.697 |
| 1TYE | E_ARG_327 | NH1 | E_GLU_283 | OE2 | 2.691 |
| 1TYE | E_ARG_355 | NH1 | E_GLU_324 | OE2 | 3.503 |
| 1TYE | E_ARG_368 | NH2 | A_ASP_429 | OD2 | 3.921 |
| 1TYE | E_ARG_422 | NH1 | E_ASP_24  | OD1 | 3.604 |
| 1TYE | E_ARG_422 | NH1 | E_ASP_24  | OD2 | 3.672 |
| 1TYE | F_ARG_67  | NH2 | F_GLU_65  | OE1 | 3.259 |
| 1TYE | F_ARG_91  | NH1 | F_GLU_60  | OE2 | 2.911 |
| 1TYE | F_ARG_91  | NH2 | F_ASP_432 | OD2 | 2.722 |
| 1TYE | F_LYS_159 | NZ  | F_ASP_224 | OD2 | 2.976 |
| 1TYE | F_LYS_209 | NZ  | F_GLU_206 | OE1 | 3.424 |
| 1TYE | F_ARG_214 | NH2 | F_ASP_179 | OD2 | 2.925 |
| 1TYE | F_ARG_216 | NH1 | E_GLU_123 | OE1 | 2.938 |
| 1TYE | F_ARG_216 | NH1 | E_GLU_123 | OE2 | 3.244 |
| 1TYE | F_ARG_239 | NH1 | F_ASP_113 | OD1 | 2.831 |
| 1TYE | F_ARG_239 | NH1 | F_ASP_113 | OD2 | 3.398 |
| 1TYE | F_HIS_244 | NE2 | F_ASP_113 | OD2 | 3.408 |
| 1TYE | F_LYS_253 | NZ  | E_ASP_232 | OD2 | 3.394 |
| 1TYE | F_HIS_255 | ND1 | F_ASP_259 | OD2 | 2.813 |
| 1TYE | F_HIS_255 | NE2 | F_ASP_158 | OD2 | 3.756 |
| 1TYE | F_HIS_255 | NE2 | F_ASP_217 | OD1 | 3.834 |
| 1TYE | F_HIS_255 | NE2 | F_ASP_217 | OD2 | 2.822 |
| 1TYE | F_HIS_274 | NE2 | F_ASP_270 | OD1 | 3.189 |
| 1TYE | F_HIS_274 | NE2 | F_ASP_270 | OD2 | 2.810 |
| 1TYE | F_HIS_280 | ND1 | F_ASP_278 | OD2 | 3.328 |
| 1TYE | F_LYS_298 | NZ  | F_GLU_297 | OE2 | 3.779 |
| 1TYE | F_LYS_302 | NZ  | F_ASP_233 | OD2 | 2.915 |
| 1TYE | F_LYS_354 | NZ  | F_GLU_356 | OE2 | 3.665 |
| 1TYE | F_ARG_360 | NH1 | F_GLU_358 | OE2 | 2.965 |

Table 209: 1TYE-specific salt bridging networks analysis. In this table, a PDB file is specified with a four-letter PDB ID, except that the names of the PDB files corresponding to the single NMR structural model split from the NMR ensemble is specified with a four-letter PDB ID in addition to a hyphen followed by the single NMR structural model numeric ID, the residue naming scheme is **Chain ID\_residue name\_residue number**,  $\angle ADH$  represents the angle formed by acceptor (A), donor (D) and hydrogen (H) ( $\angle ADH$ ).

| PDB ID | Residue A | Atom A | Residue B | Atom B | Distance (Å) |
|--------|-----------|--------|-----------|--------|--------------|
| 1TZH   | V_ARG_23  | NH1    | W_GLU_30  | OE2    | 3.100        |
| 1TZH   | V_ARG_56  | NH1    | V_GLU_38  | OE2    | 3.313        |
| 1TZH   | V_ARG_56  | NH2    | V_GLU_38  | OE1    | 3.086        |
| 1TZH   | V_ARG_56  | NH2    | V_GLU_38  | OE2    | 3.428        |
| 1TZH   | V_ARG_82  | NH2    | V_GLU_42  | OE1    | 2.933        |
| 1TZH   | V_LYS_84  | NZ     | V_GLU_44  | OE2    | 3.642        |
| 1TZH   | V_HIS_90  | NE2    | H_ASP_33  | OD1    | 2.826        |
| 1TZH   | V_HIS_90  | NE2    | H_ASP_33  | OD2    | 2.524        |
| 1TZH   | V_ARG_105 | NH2    | V_GLU_103 | OE1    | 3.855        |
| 1TZH   | W_ARG_23  | NH1    | V_GLU_30  | OE1    | 3.346        |
| 1TZH   | W_ARG_56  | NH1    | W_GLU_38  | OE2    | 3.335        |
| 1TZH   | W_ARG_56  | NH2    | W_GLU_38  | OE1    | 3.077        |
| 1TZH   | W_ARG_56  | NH2    | W_GLU_38  | OE2    | 3.382        |
| 1TZH   | W_ARG_82  | NH2    | W_GLU_42  | OE2    | 2.977        |
| 1TZH   | W_HIS_90  | NE2    | B_ASP_33  | OD1    | 3.121        |
| 1TZH   | W_HIS_90  | NE2    | B_ASP_33  | OD2    | 2.585        |
| 1TZH   | W_HIS_99  | NE2    | W_GLU_73  | OE2    | 3.842        |
| 1TZH   | W_ARG_105 | NH2    | W_GLU_103 | OE1    | 3.129        |
| 1TZH   | W_LYS_107 | NZ     | W_GLU_67  | OE1    | 3.188        |
| 1TZH   | W_LYS_107 | NZ     | W_GLU_67  | OE2    | 3.161        |
| 1TZH   | A_ARG_24  | NH1    | A_ASP_70  | OD2    | 3.886        |
| 1TZH   | A_ARG_61  | NH2    | A_GLU_81  | OE1    | 3.363        |
| 1TZH   | A_ARG_61  | NH2    | A_ASP_82  | OD1    | 3.162        |
| 1TZH   | A_ARG_61  | NH2    | A_ASP_82  | OD2    | 3.912        |
| 1TZH   | A_LYS_103 | NZ     | A_GLU_165 | OE1    | 2.800        |
| 1TZH   | A_LYS_103 | NZ     | A_GLU_165 | OE2    | 3.540        |
| 1TZH   | A_LYS_149 | NZ     | A_GLU_195 | OE1    | 3.634        |
| 1TZH   | A_LYS_149 | NZ     | A_GLU_195 | OE2    | 2.910        |
| 1TZH   | A_LYS_183 | NZ     | A_GLU_187 | OE1    | 3.287        |
| 1TZH   | A_LYS_183 | NZ     | A_GLU_187 | OE2    | 2.651        |
| 1TZH   | A_LYS_188 | NZ     | A_ASP_185 | OD1    | 3.831        |
| 1TZH   | A_HIS_189 | ND1    | A_ASP_151 | OD2    | 2.992        |
| 1TZH   | B_ARG_38  | NH1    | B_ASP_86  | OD1    | 3.008        |
| 1TZH   | B_ARG_38  | NH2    | B_GLU_46  | OE1    | 3.146        |
| 1TZH   | B_ARG_38  | NH2    | B_GLU_46  | OE2    | 3.677        |
| 1TZH   | B_ARG_38  | NH2    | B_ASP_86  | OD1    | 3.681        |
| 1TZH   | B_ARG_66  | NH1    | B_ASP_86  | OD1    | 3.515        |
| 1TZH   | B_ARG_66  | NH1    | B_ASP_86  | OD2    | 2.745        |
| 1TZH   | B_ARG_66  | NH2    | B_ASP_86  | OD1    | 3.270        |
| 1TZH   | B_ARG_66  | NH2    | B_ASP_86  | OD2    | 3.900        |
| 1TZH   | B_ARG_94  | NH2    | B_ASP_32  | OD1    | 3.304        |
| 1TZH   | B_ARG_94  | NH2    | B_ASP_32  | OD2    | 3.875        |
| 1TZH   | B_LYS_143 | NZ     | B_ASP_144 | OD1    | 2.731        |
| 1TZH   | B_LYS_143 | NZ     | B_ASP_144 | OD2    | 3.209        |
| 1TZH   | B_LYS_209 | NZ     | A_GLU_123 | OE2    | 3.903        |
| 1TZH   | L_ARG_24  | NH2    | L_ASP_70  | OD2    | 3.428        |
| 1TZH   | L_ARG_61  | NH2    | L_GLU_81  | OE1    | 3.330        |
| 1TZH   | L_ARG_61  | NH2    | L_ASP_82  | OD1    | 3.040        |
| 1TZH   | L_ARG_61  | NH2    | L_ASP_82  | OD2    | 3.443        |
| 1TZH   | L_LYS_103 | NZ     | L_GLU_105 | OE2    | 3.246        |
| 1TZH   | L_LYS_103 | NZ     | L_GLU_165 | OE1    | 3.341        |
| 1TZH   | L_LYS_103 | NZ     | L_GLU_165 | OE2    | 3.547        |
| 1TZH   | L_ARG_142 | NH2    | L_GLU_165 | OE1    | 3.821        |
| 1TZH   | L_LYS_183 | NZ     | L_GLU_187 | OE2    | 3.055        |
| 1TZH   | L_ARG_211 | NH2    | L_GLU_187 | OE1    | 3.313        |
| 1TZH   | H_ARG_38  | NH1    | H_ASP_86  | OD1    | 3.223        |
| 1TZH   | H_ARG_38  | NH2    | H_GLU_46  | OE1    | 3.456        |

|      |           |     |           |     |       |
|------|-----------|-----|-----------|-----|-------|
| 1TZH | H_ARG_38  | NH2 | H_ASP_86  | OD1 | 3.593 |
| 1TZH | H_ARG_66  | NH1 | H_ASP_86  | OD2 | 3.197 |
| 1TZH | H_ARG_66  | NH2 | H_ASP_86  | OD1 | 2.884 |
| 1TZH | H_ARG_66  | NH2 | H_ASP_86  | OD2 | 3.307 |
| 1TZH | H_ARG_94  | NH2 | H_ASP_32  | OD1 | 3.594 |
| 1TZH | H_ARG_94  | NH2 | H_ASP_32  | OD2 | 2.870 |
| 1TZH | H_LYS_143 | NZ  | H_ASP_144 | OD1 | 3.985 |
| 1TZH | H_LYS_143 | NZ  | H_ASP_144 | OD2 | 3.661 |
| 1TZH | H_HIS_164 | NE2 | L_ASP_167 | OD1 | 3.495 |
| 1TZH | H_LYS_209 | NZ  | L_GLU_123 | OE1 | 2.754 |
| 1TZH | H_LYS_209 | NZ  | L_GLU_123 | OE2 | 3.404 |

Table 210: 1TZH-specific salt bridging networks analysis. In this table, a PDB file is specified with a four-letter PDB ID, except that the names of the PDB files corresponding to the single NMR structural model split from the NMR ensemble is specified with a four-letter PDB ID in addition to a hyphen followed by the single NMR structural model numeric ID, the residue naming scheme is **Chain ID\_residue name\_residue number**,  $\angle ADH$  represents the angle formed by acceptor (A), donor (D) and hydrogen (H) ( $\angle ADH$ ).



| PDB ID | Residue A | Atom A | Residue B | Atom B | Distance (Å) |
|--------|-----------|--------|-----------|--------|--------------|
| 1TZI   | A_ARG_24  | NH1    | A_ASP_70  | OD1    | 3.345        |
| 1TZI   | A_ARG_61  | NH2    | A_GLU_81  | OE2    | 3.484        |
| 1TZI   | A_ARG_61  | NH2    | A_ASP_82  | OD1    | 3.184        |
| 1TZI   | A_LYS_103 | NZ     | A_GLU_165 | OE2    | 3.341        |
| 1TZI   | A_LYS_149 | NZ     | A_GLU_195 | OE2    | 3.678        |
| 1TZI   | B_HIS_35  | NE2    | B_ASP_33  | OD1    | 3.655        |
| 1TZI   | B_HIS_35  | NE2    | B_ASP_33  | OD2    | 3.046        |
| 1TZI   | B_HIS_35  | NE2    | B_ASP_50  | OD2    | 3.907        |
| 1TZI   | B_ARG_38  | NH1    | B_ASP_86  | OD1    | 3.155        |
| 1TZI   | B_ARG_38  | NH2    | B_GLU_46  | OE1    | 3.042        |
| 1TZI   | B_ARG_38  | NH2    | B_GLU_46  | OE2    | 3.847        |
| 1TZI   | B_ARG_38  | NH2    | B_ASP_86  | OD1    | 3.843        |
| 1TZI   | B_LYS_64  | NZ     | B_ASP_61  | OD1    | 3.600        |
| 1TZI   | B_LYS_64  | NZ     | B_ASP_61  | OD2    | 3.744        |
| 1TZI   | B_ARG_66  | NH1    | B_ASP_86  | OD2    | 3.093        |
| 1TZI   | B_ARG_66  | NH2    | B_ASP_86  | OD1    | 3.082        |
| 1TZI   | B_ARG_66  | NH2    | B_ASP_86  | OD2    | 3.244        |
| 1TZI   | B_ARG_94  | NH2    | B_ASP_101 | OD1    | 3.674        |
| 1TZI   | B_ARG_94  | NH2    | B_ASP_101 | OD2    | 2.631        |
| 1TZI   | B_LYS_143 | NZ     | B_ASP_144 | OD1    | 3.643        |
| 1TZI   | B_LYS_143 | NZ     | B_ASP_144 | OD2    | 3.293        |
| 1TZI   | B_LYS_209 | NZ     | A_GLU_123 | OE2    | 3.786        |
| 1TZI   | V_ARG_56  | NH1    | V_GLU_38  | OE1    | 3.287        |
| 1TZI   | V_ARG_56  | NH1    | V_GLU_38  | OE2    | 3.396        |
| 1TZI   | V_ARG_56  | NH2    | V_GLU_38  | OE2    | 3.863        |
| 1TZI   | V_HIS_99  | NE2    | V_GLU_73  | OE2    | 3.539        |

Table 211: 1TZI-specific salt bridging networks analysis. In this table, a PDB file is specified with a four-letter PDB ID, except that the names of the PDB files corresponding to the single NMR structural model split from the NMR ensemble is specified with a four-letter PDB ID in addition to a hyphen followed by the single NMR structural model numeric ID, the residue naming scheme is **Chain ID\_residue name\_residue number**,  $\angle ADH$  represents the angle formed by acceptor (A), donor (D) and hydrogen (H) ( $\angle ADH$ ).

| PDB ID | Residue A | Atom A | Residue B | Atom B | Distance (Å) |
|--------|-----------|--------|-----------|--------|--------------|
| 1U6A   | L_ARG_24  | NH2    | L_ASP_70  | OD2    | 3.902        |
| 1U6A   | L_ARG_61  | NH1    | L_GLU_79  | OE2    | 3.901        |
| 1U6A   | L_ARG_61  | NH2    | L_GLU_81  | OE2    | 3.590        |
| 1U6A   | L_ARG_61  | NH2    | L_ASP_82  | OD1    | 2.937        |
| 1U6A   | L_ARG_61  | NH2    | L_ASP_82  | OD2    | 3.603        |
| 1U6A   | L_LYS_149 | NZ     | L_GLU_195 | OE1    | 2.946        |
| 1U6A   | L_LYS_149 | NZ     | L_GLU_195 | OE2    | 3.367        |
| 1U6A   | L_LYS_188 | NZ     | L_ASP_185 | OD1    | 3.941        |
| 1U6A   | L_HIS_189 | ND1    | L_ASP_151 | OD2    | 2.371        |
| 1U6A   | L_ARG_211 | NH1    | L_GLU_187 | OE1    | 2.862        |
| 1U6A   | H_ARG_38  | NH1    | H_ASP_86  | OD1    | 2.883        |
| 1U6A   | H_ARG_38  | NH2    | H_ASP_86  | OD1    | 3.710        |
| 1U6A   | H_ARG_66  | NH1    | H_ASP_86  | OD1    | 3.475        |
| 1U6A   | H_ARG_66  | NH1    | H_ASP_86  | OD2    | 2.761        |
| 1U6A   | H_ARG_66  | NH2    | H_ASP_86  | OD1    | 2.683        |
| 1U6A   | H_ARG_66  | NH2    | H_ASP_86  | OD2    | 3.375        |
| 1U6A   | H_LYS_143 | NZ     | H_ASP_144 | OD1    | 3.705        |
| 1U6A   | H_LYS_143 | NZ     | H_ASP_144 | OD2    | 3.600        |
| 1U6A   | H_HIS_164 | NE2    | L_ASP_167 | OD1    | 3.994        |
| 1U6A   | H_LYS_210 | NZ     | H_GLU_212 | OE2    | 3.157        |

Table 212: 1U6A-specific salt bridging networks analysis. In this table, a PDB file is specified with a four-letter PDB ID, except that the names of the PDB files corresponding to the single NMR structural model split from the NMR ensemble is specified with a four-letter PDB ID in addition to a hyphen followed by the single NMR structural model numeric ID, the residue naming scheme is **Chain ID\_residue name\_residue number**,  $\angle ADH$  represents the angle formed by acceptor (A), donor (D) and hydrogen (H) ( $\angle ADH$ ).

| PDB ID | Residue A | Atom A | Residue B | Atom B | Distance (Å) |
|--------|-----------|--------|-----------|--------|--------------|
| 1UA6   | L_ARG_61  | NH1    | L_GLU_81  | OE2    | 3.789        |
| 1UA6   | L_ARG_61  | NH2    | L_GLU_81  | OE2    | 2.779        |
| 1UA6   | L_ARG_61  | NH2    | L_ASP_82  | OD1    | 2.629        |
| 1UA6   | L_ARG_61  | NH2    | L_ASP_82  | OD2    | 3.362        |
| 1UA6   | L_LYS_103 | NZ     | L_GLU_105 | OE2    | 3.651        |
| 1UA6   | H_ARG_38  | NH1    | H_ASP_89  | OD2    | 2.881        |
| 1UA6   | H_ARG_38  | NH2    | H_GLU_46  | OE1    | 2.829        |
| 1UA6   | H_ARG_38  | NH2    | H_ASP_89  | OD2    | 3.526        |
| 1UA6   | H_ARG_66  | NH1    | H_ASP_89  | OD1    | 3.005        |
| 1UA6   | H_ARG_66  | NH1    | H_ASP_89  | OD2    | 3.836        |
| 1UA6   | H_ARG_66  | NH2    | H_ASP_89  | OD1    | 3.531        |
| 1UA6   | H_ARG_66  | NH2    | H_ASP_89  | OD2    | 2.947        |
| 1UA6   | Y_LYS_1   | NZ     | Y_GLU_7   | OE2    | 3.070        |
| 1UA6   | Y_LYS_13  | NZ     | Y_ASP_18  | OD2    | 2.985        |
| 1UA6   | Y_LYS_97  | NZ     | H_ASP_32  | OD1    | 2.722        |
| 1UA6   | Y_LYS_97  | NZ     | H_ASP_99  | OD2    | 2.674        |
| 1UA6   | Y_ARG_125 | NH1    | Y_ASP_119 | OD1    | 3.848        |
| 1UA6   | Y_ARG_125 | NH1    | Y_ASP_119 | OD2    | 3.662        |
| 1UA6   | Y_ARG_125 | NH2    | Y_ASP_119 | OD2    | 2.731        |

Table 213: 1UA6-specific salt bridging networks analysis. In this table, a PDB file is specified with a four-letter PDB ID, except that the names of the PDB files corresponding to the single NMR structural model split from the NMR ensemble is specified with a four-letter PDB ID in addition to a hyphen followed by the single NMR structural model numeric ID, the residue naming scheme is **Chain ID residue name residue number**,  $\angle ADH$  represents the angle formed by acceptor (A), donor (D) and hydrogen (H) ( $\angle ADH$ ).

| PDB ID | Residue A | Atom A | Residue B | Atom B | Distance (Å) |
|--------|-----------|--------|-----------|--------|--------------|
| 1UAC   | L_ARG_45  | NH2    | L_GLU_42  | OE1    | 3.506        |
| 1UAC   | L_ARG_61  | NH1    | L_GLU_79  | OE1    | 3.446        |
| 1UAC   | L_ARG_61  | NH1    | L_GLU_79  | OE2    | 3.988        |
| 1UAC   | L_ARG_61  | NH2    | L_GLU_79  | OE1    | 3.597        |
| 1UAC   | L_ARG_61  | NH2    | L_GLU_81  | OE2    | 2.939        |
| 1UAC   | L_ARG_61  | NH2    | L_ASP_82  | OD1    | 3.382        |
| 1UAC   | L_ARG_61  | NH2    | L_ASP_82  | OD2    | 3.786        |
| 1UAC   | H_ARG_38  | NH1    | H_ASP_89  | OD1    | 2.495        |
| 1UAC   | H_ARG_38  | NH2    | H_GLU_46  | OE1    | 2.848        |
| 1UAC   | H_ARG_38  | NH2    | H_ASP_89  | OD1    | 3.590        |
| 1UAC   | H_ARG_66  | NH1    | H_ASP_89  | OD1    | 3.633        |
| 1UAC   | H_ARG_66  | NH1    | H_ASP_89  | OD2    | 2.604        |
| 1UAC   | H_ARG_66  | NH2    | H_ASP_89  | OD1    | 3.226        |
| 1UAC   | H_ARG_66  | NH2    | H_ASP_89  | OD2    | 3.547        |
| 1UAC   | Y_LYS_1   | NZ     | Y_GLU_7   | OE2    | 3.056        |
| 1UAC   | Y_LYS_13  | NZ     | Y_ASP_18  | OD2    | 3.156        |
| 1UAC   | Y_LYS_97  | NZ     | H_ASP_32  | OD1    | 2.750        |
| 1UAC   | Y_LYS_97  | NZ     | H_ASP_32  | OD2    | 3.845        |
| 1UAC   | Y_LYS_97  | NZ     | H_ASP_99  | OD2    | 2.749        |
| 1UAC   | Y_HIS_121 | ND1    | Y_ASP_119 | OD1    | 3.781        |
| 1UAC   | Y_HIS_121 | NE2    | Y_ASP_119 | OD1    | 3.474        |
| 1UAC   | Y_ARG_125 | NH1    | Y_ASP_119 | OD1    | 3.237        |
| 1UAC   | Y_ARG_125 | NH1    | Y_ASP_119 | OD2    | 3.553        |
| 1UAC   | Y_ARG_125 | NH2    | Y_ASP_119 | OD1    | 3.403        |
| 1UAC   | Y_ARG_125 | NH2    | Y_ASP_119 | OD2    | 2.499        |

Table 214: 1UAC-specific salt bridging networks analysis. In this table, a PDB file is specified with a four-letter PDB ID, except that the names of the PDB files corresponding to the single NMR structural model split from the NMR ensemble is specified with a four-letter PDB ID in addition to a hyphen followed by the single NMR structural model numeric ID, the residue naming scheme is **Chain ID\_residue name\_residue number**,  $\angle ADH$  represents the angle formed by acceptor (A), donor (D) and hydrogen (H) ( $\angle ADH$ ).

| PDB ID | Residue A | Atom A | Residue B | Atom B | Distance (Å) |
|--------|-----------|--------|-----------|--------|--------------|
| 1UCB   | L_ARG_24  | NH1    | L_ASP_70  | OD1    | 3.292        |
| 1UCB   | L_ARG_24  | NH1    | L_ASP_70  | OD2    | 3.887        |
| 1UCB   | L_ARG_24  | NH2    | L_ASP_70  | OD1    | 3.839        |
| 1UCB   | L_ARG_24  | NH2    | L_ASP_70  | OD2    | 3.203        |
| 1UCB   | L_LYS_50  | NZ     | H_ASP_98  | OD1    | 3.160        |
| 1UCB   | L_ARG_61  | NH1    | L_ASP_82  | OD2    | 2.752        |
| 1UCB   | L_ARG_61  | NH2    | L_GLU_81  | OE2    | 3.557        |
| 1UCB   | L_ARG_61  | NH2    | L_ASP_82  | OD1    | 2.863        |
| 1UCB   | L_ARG_61  | NH2    | L_ASP_82  | OD2    | 2.961        |
| 1UCB   | L_ARG_77  | NH2    | L_GLU_79  | OE1    | 3.741        |
| 1UCB   | L_ARG_77  | NH2    | L_GLU_79  | OE2    | 2.900        |
| 1UCB   | L_LYS_103 | NZ     | L_GLU_165 | OE1    | 3.505        |
| 1UCB   | L_LYS_103 | NZ     | L_GLU_165 | OE2    | 3.935        |
| 1UCB   | L_ARG_142 | NH2    | L_GLU_165 | OE1    | 3.407        |
| 1UCB   | L_LYS_188 | NZ     | L_ASP_185 | OD2    | 3.372        |
| 1UCB   | L_HIS_189 | ND1    | L_ASP_151 | OD2    | 3.021        |
| 1UCB   | L_ARG_211 | NH2    | L_GLU_187 | OE1    | 3.809        |
| 1UCB   | H_ARG_38  | NH1    | H_ASP_86  | OD1    | 2.991        |
| 1UCB   | H_ARG_38  | NH2    | H_GLU_46  | OE1    | 3.160        |
| 1UCB   | H_LYS_64  | NZ     | H_ASP_61  | OD1    | 2.788        |
| 1UCB   | H_LYS_64  | NZ     | H_ASP_61  | OD2    | 3.139        |
| 1UCB   | H_ARG_66  | NH1    | H_ASP_86  | OD1    | 3.656        |
| 1UCB   | H_ARG_66  | NH1    | H_ASP_86  | OD2    | 2.889        |
| 1UCB   | H_ARG_66  | NH2    | H_ASP_86  | OD1    | 3.058        |
| 1UCB   | H_ARG_66  | NH2    | H_ASP_86  | OD2    | 3.202        |
| 1UCB   | H_LYS_75  | NZ     | H_ASP_72  | OD2    | 3.809        |
| 1UCB   | H_LYS_221 | NZ     | L_GLU_123 | OE1    | 3.128        |
| 1UCB   | H_ARG_222 | NH1    | H_GLU_226 | OE1    | 3.921        |
| 1UCB   | H_ARG_222 | NH1    | H_GLU_226 | OE2    | 3.794        |
| 1UCB   | H_ARG_222 | NH2    | H_GLU_226 | OE2    | 3.739        |

Table 215: 1UCB-specific salt bridging networks analysis. In this table, a PDB file is specified with a four-letter PDB ID, except that the names of the PDB files corresponding to the single NMR structural model split from the NMR ensemble is specified with a four-letter PDB ID in addition to a hyphen followed by the single NMR structural model numeric ID, the residue naming scheme is **Chain ID\_residue name\_residue number**,  $\angle ADH$  represents the angle formed by acceptor (A), donor (D) and hydrogen (H) ( $\angle ADH$ ).

| PDB ID | Residue A | Atom A | Residue B | Atom B | Distance (Å) |
|--------|-----------|--------|-----------|--------|--------------|
| 1UJ3   | A_ARG.61  | NH2    | A_GLU.81  | OE2    | 3.553        |
| 1UJ3   | A_ARG.61  | NH2    | A_ASP.82  | OD1    | 2.902        |
| 1UJ3   | A_ARG.61  | NH2    | A_ASP.82  | OD2    | 3.527        |
| 1UJ3   | A_HIS.91  | NE2    | B_ASP.399 | OD1    | 3.708        |
| 1UJ3   | A_HIS.91  | NE2    | B_ASP.399 | OD2    | 2.884        |
| 1UJ3   | A_LYS.103 | NZ     | A_GLU.165 | OE1    | 3.612        |
| 1UJ3   | A_LYS.103 | NZ     | A_GLU.165 | OE2    | 3.641        |
| 1UJ3   | A_LYS.107 | NZ     | A_ASP.17  | OD2    | 3.650        |
| 1UJ3   | A_LYS.149 | NZ     | A_GLU.195 | OE1    | 2.640        |
| 1UJ3   | A_LYS.149 | NZ     | A_GLU.195 | OE2    | 3.439        |
| 1UJ3   | A_LYS.183 | NZ     | A_GLU.187 | OE1    | 3.625        |
| 1UJ3   | A_LYS.183 | NZ     | A_GLU.187 | OE2    | 3.082        |
| 1UJ3   | A_LYS.188 | NZ     | A_ASP.185 | OD1    | 3.389        |
| 1UJ3   | B_HIS.335 | NE2    | B_ASP.399 | OD1    | 3.715        |
| 1UJ3   | B_LYS.363 | NZ     | B_ASP.361 | OD1    | 2.797        |
| 1UJ3   | B_LYS.363 | NZ     | B_ASP.361 | OD2    | 3.526        |
| 1UJ3   | B_ARG.367 | NH1    | B_ASP.390 | OD1    | 3.568        |
| 1UJ3   | B_ARG.367 | NH1    | B_ASP.390 | OD2    | 2.817        |
| 1UJ3   | B_ARG.367 | NH2    | B_ASP.390 | OD1    | 2.726        |
| 1UJ3   | B_ARG.367 | NH2    | B_ASP.390 | OD2    | 3.364        |
| 1UJ3   | B_ARG.398 | NH2    | B_ASP.405 | OD1    | 3.535        |
| 1UJ3   | B_ARG.398 | NH2    | B_ASP.405 | OD2    | 2.642        |
| 1UJ3   | B_ARG.433 | NH2    | B_GLU.516 | OE2    | 3.825        |
| 1UJ3   | B_LYS.447 | NZ     | B_ASP.448 | OD1    | 3.091        |
| 1UJ3   | B_LYS.447 | NZ     | B_ASP.448 | OD2    | 2.878        |
| 1UJ3   | B_LYS.513 | NZ     | A_GLU.123 | OE1    | 3.554        |
| 1UJ3   | B_LYS.513 | NZ     | A_GLU.123 | OE2    | 3.075        |
| 1UJ3   | B_ARG.514 | NH2    | B_GLU.516 | OE1    | 3.640        |
| 1UJ3   | C_LYS.615 | NZ     | C_GLU.624 | OE1    | 2.927        |
| 1UJ3   | C_LYS.646 | NZ     | C_GLU.662 | OE2    | 3.280        |
| 1UJ3   | C_LYS.648 | NZ     | C_GLU.662 | OE2    | 3.204        |
| 1UJ3   | C_LYS.665 | NZ     | C_GLU.662 | OE1    | 3.069        |
| 1UJ3   | C_LYS.665 | NZ     | C_GLU.662 | OE2    | 3.168        |
| 1UJ3   | C_LYS.722 | NZ     | C_ASP.778 | OD1    | 2.825        |
| 1UJ3   | C_LYS.722 | NZ     | C_ASP.778 | OD2    | 3.467        |
| 1UJ3   | C_LYS.759 | NZ     | C_ASP.780 | OD2    | 2.414        |
| 1UJ3   | C_LYS.766 | NZ     | A_ASP.1   | OD1    | 3.997        |
| 1UJ3   | C_LYS.769 | NZ     | B_ASP.399 | OD1    | 2.791        |
| 1UJ3   | C_LYS.769 | NZ     | B_ASP.399 | OD2    | 3.372        |
| 1UJ3   | C_LYS.801 | NZ     | B_ASP.352 | OD1    | 2.774        |
| 1UJ3   | C_LYS.801 | NZ     | B_ASP.352 | OD2    | 3.632        |

Table 216: 1UJ3-specific salt bridging networks analysis. In this table, a PDB file is specified with a four-letter PDB ID, except that the names of the PDB files corresponding to the single NMR structural model split from the NMR ensemble is specified with a four-letter PDB ID in addition to a hyphen followed by the single NMR structural model numeric ID, the residue naming scheme is **Chain ID\_residue name\_residue number**,  $\angle ADH$  represents the angle formed by acceptor (A), donor (D) and hydrogen (H) ( $\angle ADH$ ).

| PDB ID | Residue A | Atom A | Residue B | Atom B | Distance (Å) |
|--------|-----------|--------|-----------|--------|--------------|
| 1UWX   | A.LYS_36  | NZ     | A.GLU_32  | OE1    | 2.824        |
| 1UWX   | B.LYS_36  | NZ     | B.GLU_32  | OE2    | 2.807        |
| 1UWX   | H.LYS_12  | NZ     | H.GLU_10  | OE1    | 3.100        |
| 1UWX   | H.LYS_64  | NZ     | H.ASP_61  | OD1    | 3.798        |
| 1UWX   | H.ARG_66  | NH1    | H.ASP_86  | OD1    | 2.454        |
| 1UWX   | H.ARG_66  | NH1    | H.ASP_86  | OD2    | 2.896        |
| 1UWX   | H.ARG_94  | NH2    | H.ASP_101 | OD1    | 2.904        |
| 1UWX   | H.ARG_94  | NH2    | H.ASP_101 | OD2    | 3.891        |
| 1UWX   | H.HIS_164 | NE2    | L.ASP_168 | OD2    | 3.899        |
| 1UWX   | H.LYS_208 | NZ     | L.GLU_124 | OE2    | 2.744        |
| 1UWX   | H.LYS_209 | NZ     | H.GLU_211 | OE2    | 3.816        |
| 1UWX   | K.ARG_63  | NH1    | K.ASP_84  | OD1    | 3.154        |
| 1UWX   | K.ARG_63  | NH1    | K.ASP_84  | OD2    | 2.158        |
| 1UWX   | K.ARG_63  | NH2    | K.ASP_84  | OD1    | 3.226        |
| 1UWX   | K.ARG_63  | NH2    | K.ASP_84  | OD2    | 3.623        |
| 1UWX   | K.LYS_150 | NZ     | K.GLU_196 | OE1    | 3.737        |
| 1UWX   | K.LYS_150 | NZ     | K.GLU_196 | OE2    | 3.159        |
| 1UWX   | K.ARG_156 | NH1    | K.GLU_186 | OE1    | 2.610        |
| 1UWX   | K.ARG_156 | NH1    | K.GLU_186 | OE2    | 3.937        |
| 1UWX   | K.ARG_156 | NH2    | K.GLU_186 | OE1    | 3.178        |
| 1UWX   | K.ARG_156 | NH2    | K.GLU_186 | OE2    | 2.975        |
| 1UWX   | K.LYS_184 | NZ     | K.GLU_188 | OE1    | 3.993        |
| 1UWX   | K.HIS_190 | ND1    | K.ASP_152 | OD2    | 2.933        |
| 1UWX   | K.LYS_200 | NZ     | K.ASP_111 | OD2    | 3.114        |
| 1UWX   | K.ARG_212 | NH1    | K.GLU_188 | OE2    | 3.245        |
| 1UWX   | L.ARG_63  | NH1    | L.ASP_84  | OD1    | 3.321        |
| 1UWX   | L.ARG_63  | NH1    | L.ASP_84  | OD2    | 2.266        |
| 1UWX   | L.ARG_63  | NH2    | L.ASP_84  | OD1    | 3.278        |
| 1UWX   | L.ARG_63  | NH2    | L.ASP_84  | OD2    | 3.625        |
| 1UWX   | L.LYS_150 | NZ     | L.GLU_196 | OE1    | 3.639        |
| 1UWX   | L.LYS_150 | NZ     | L.GLU_196 | OE2    | 3.224        |
| 1UWX   | L.ARG_156 | NH1    | L.GLU_186 | OE1    | 2.635        |
| 1UWX   | L.ARG_156 | NH1    | L.GLU_186 | OE2    | 3.963        |
| 1UWX   | L.ARG_156 | NH2    | L.GLU_186 | OE1    | 3.120        |
| 1UWX   | L.ARG_156 | NH2    | L.GLU_186 | OE2    | 2.947        |
| 1UWX   | L.LYS_184 | NZ     | L.GLU_188 | OE1    | 3.917        |
| 1UWX   | L.HIS_190 | ND1    | L.ASP_152 | OD2    | 2.931        |
| 1UWX   | L.LYS_200 | NZ     | L.ASP_111 | OD2    | 3.029        |
| 1UWX   | L.ARG_212 | NH1    | L.GLU_188 | OE2    | 3.191        |
| 1UWX   | M.LYS_12  | NZ     | M.GLU_10  | OE1    | 3.235        |
| 1UWX   | M.LYS_64  | NZ     | M.ASP_61  | OD1    | 3.798        |
| 1UWX   | M.ARG_66  | NH1    | M.ASP_86  | OD1    | 2.526        |
| 1UWX   | M.ARG_66  | NH1    | M.ASP_86  | OD2    | 2.861        |
| 1UWX   | M.ARG_94  | NH2    | M.ASP_101 | OD1    | 2.895        |
| 1UWX   | M.ARG_94  | NH2    | M.ASP_101 | OD2    | 3.832        |
| 1UWX   | M.LYS_208 | NZ     | K.GLU_124 | OE2    | 2.705        |
| 1UWX   | M.LYS_209 | NZ     | M.GLU_211 | OE1    | 3.750        |

---

Table 217: 1UWX-specific salt bridging networks analysis. In this table, a PDB file is specified with a four-letter PDB ID, except that the names of the PDB files corresponding to the single NMR structural model split from the NMR ensemble is specified with a four-letter PDB ID in addition to a hyphen followed by the single NMR structural model numeric ID, the residue naming scheme is **Chain ID\_residue name\_residue number**,  $\angle ADH$  represents the angle formed by acceptor (A), donor (D) and hydrogen (H) ( $\angle ADH$ ).



| PDB ID | Residue A | Atom A | Residue B | Atom B | Distance (Å) |
|--------|-----------|--------|-----------|--------|--------------|
| 1UZ6   | E_ARG_24  | NH1    | E_ASP_70  | OD2    | 3.187        |
| 1UZ6   | E_LYS_39  | NZ     | E_GLU_81  | OE1    | 3.464        |
| 1UZ6   | E_ARG_61  | NH1    | E_ASP_82  | OD1    | 3.736        |
| 1UZ6   | E_ARG_61  | NH1    | E_ASP_82  | OD2    | 2.887        |
| 1UZ6   | E_ARG_61  | NH2    | E_GLU_79  | OE1    | 3.920        |
| 1UZ6   | E_ARG_61  | NH2    | E_GLU_79  | OE2    | 3.989        |
| 1UZ6   | E_ARG_61  | NH2    | E_ASP_82  | OD1    | 3.165        |
| 1UZ6   | E_ARG_61  | NH2    | E_ASP_82  | OD2    | 3.643        |
| 1UZ6   | E_LYS_103 | NZ     | E_ASP_164 | OD1    | 3.599        |
| 1UZ6   | E_ARG_154 | NH2    | E_GLU_184 | OE1    | 3.820        |
| 1UZ6   | E_ARG_154 | NH2    | E_GLU_184 | OE2    | 3.327        |
| 1UZ6   | E_LYS_182 | NZ     | E_ASP_183 | OD1    | 3.722        |
| 1UZ6   | E_ARG_210 | NH1    | E_GLU_186 | OE1    | 3.231        |
| 1UZ6   | F_ARG_38  | NH1    | F_ASP_86  | OD1    | 2.903        |
| 1UZ6   | F_ARG_38  | NH2    | F_GLU_46  | OE1    | 2.942        |
| 1UZ6   | F_ARG_38  | NH2    | F_ASP_86  | OD1    | 3.966        |
| 1UZ6   | F_LYS_66  | NZ     | F_ASP_86  | OD1    | 3.610        |
| 1UZ6   | F_LYS_66  | NZ     | F_ASP_86  | OD2    | 2.606        |
| 1UZ6   | F_ARG_164 | NH1    | E_ASP_166 | OD1    | 3.662        |
| 1UZ6   | F_ARG_164 | NH2    | E_ASP_166 | OD1    | 3.708        |
| 1UZ6   | F_ARG_164 | NH2    | E_ASP_169 | OD2    | 3.554        |
| 1UZ6   | F_LYS_208 | NZ     | E_GLU_122 | OE1    | 3.883        |
| 1UZ6   | F_ARG_209 | NH1    | E_GLU_122 | OE2    | 3.531        |
| 1UZ6   | H_ARG_38  | NH1    | H_ASP_86  | OD1    | 2.872        |
| 1UZ6   | H_ARG_38  | NH2    | H_GLU_46  | OE1    | 3.043        |
| 1UZ6   | H_ARG_38  | NH2    | H_ASP_86  | OD1    | 3.674        |
| 1UZ6   | H_LYS_66  | NZ     | H_GLU_85  | OE2    | 3.660        |
| 1UZ6   | H_LYS_66  | NZ     | H_ASP_86  | OD1    | 3.366        |
| 1UZ6   | H_LYS_66  | NZ     | H_ASP_86  | OD2    | 2.666        |
| 1UZ6   | H_ARG_164 | NH1    | L_ASP_166 | OD1    | 3.603        |
| 1UZ6   | H_ARG_164 | NH2    | L_ASP_166 | OD1    | 3.557        |
| 1UZ6   | H_ARG_164 | NH2    | L_ASP_169 | OD2    | 3.746        |
| 1UZ6   | H_LYS_208 | NZ     | L_GLU_122 | OE1    | 3.795        |
| 1UZ6   | H_ARG_209 | NH1    | L_GLU_122 | OE2    | 3.180        |
| 1UZ6   | L_ARG_24  | NH1    | L_ASP_70  | OD2    | 3.991        |
| 1UZ6   | L_LYS_27  | NZ     | L_GLU_93  | OE1    | 3.534        |
| 1UZ6   | L_LYS_27  | NZ     | L_GLU_93  | OE2    | 2.676        |
| 1UZ6   | L_ARG_61  | NH1    | L_ASP_82  | OD1    | 3.953        |
| 1UZ6   | L_ARG_61  | NH1    | L_ASP_82  | OD2    | 2.962        |
| 1UZ6   | L_ARG_61  | NH2    | L_GLU_79  | OE1    | 3.473        |
| 1UZ6   | L_ARG_61  | NH2    | L_GLU_79  | OE2    | 3.740        |
| 1UZ6   | L_ARG_61  | NH2    | L_ASP_82  | OD1    | 3.090        |
| 1UZ6   | L_ARG_61  | NH2    | L_ASP_82  | OD2    | 3.270        |
| 1UZ6   | L_LYS_103 | NZ     | L_ASP_164 | OD1    | 3.480        |
| 1UZ6   | L_LYS_146 | NZ     | L_GLU_194 | OE1    | 3.535        |
| 1UZ6   | L_LYS_148 | NZ     | L_GLU_194 | OE1    | 3.899        |
| 1UZ6   | L_ARG_154 | NH2    | L_GLU_184 | OE2    | 3.580        |
| 1UZ6   | L_LYS_182 | NZ     | L_ASP_183 | OD1    | 3.739        |
| 1UZ6   | L_HIS_188 | ND1    | L_ASP_150 | OD2    | 3.153        |
| 1UZ6   | L_ARG_210 | NH1    | L_GLU_186 | OE1    | 3.084        |
| 1UZ6   | M_ARG_61  | NH1    | M_ASP_82  | OD1    | 3.933        |
| 1UZ6   | M_ARG_61  | NH1    | M_ASP_82  | OD2    | 3.129        |
| 1UZ6   | M_ARG_61  | NH2    | M_GLU_79  | OE1    | 3.335        |
| 1UZ6   | M_ARG_61  | NH2    | M_GLU_79  | OE2    | 3.866        |
| 1UZ6   | M_ARG_61  | NH2    | M_ASP_82  | OD1    | 3.049        |
| 1UZ6   | M_ARG_61  | NH2    | M_ASP_82  | OD2    | 3.623        |
| 1UZ6   | M_LYS_148 | NZ     | M_GLU_194 | OE2    | 3.095        |

|      |           |     |           |     |       |
|------|-----------|-----|-----------|-----|-------|
| 1UZ6 | M_ARG_187 | NH2 | M_ASP_183 | OD2 | 3.819 |
| 1UZ6 | M_ARG_210 | NH1 | M_GLU_186 | OE1 | 3.314 |
| 1UZ6 | P_ARG_38  | NH1 | P_ASP_86  | OD1 | 3.091 |
| 1UZ6 | P_ARG_38  | NH2 | P_GLU_46  | OE1 | 3.209 |
| 1UZ6 | P_LYS_66  | NZ  | P_GLU_85  | OE2 | 3.456 |
| 1UZ6 | P_LYS_66  | NZ  | P_ASP_86  | OD1 | 3.180 |
| 1UZ6 | P_LYS_66  | NZ  | P_ASP_86  | OD2 | 2.816 |
| 1UZ6 | P_ARG_164 | NH1 | M_ASP_166 | OD1 | 3.636 |
| 1UZ6 | P_ARG_164 | NH2 | M_ASP_166 | OD1 | 3.666 |
| 1UZ6 | P_ARG_164 | NH2 | M_ASP_166 | OD2 | 3.901 |
| 1UZ6 | P_ARG_164 | NH2 | M_ASP_169 | OD2 | 3.942 |
| 1UZ6 | P_LYS_208 | NZ  | M_GLU_122 | OE1 | 3.361 |
| 1UZ6 | V_ARG_24  | NH1 | V_ASP_70  | OD1 | 3.878 |
| 1UZ6 | V_ARG_61  | NH1 | V_GLU_79  | OE2 | 3.911 |
| 1UZ6 | V_ARG_61  | NH1 | V_ASP_82  | OD1 | 3.899 |
| 1UZ6 | V_ARG_61  | NH1 | V_ASP_82  | OD2 | 2.935 |
| 1UZ6 | V_ARG_61  | NH2 | V_GLU_79  | OE1 | 3.307 |
| 1UZ6 | V_ARG_61  | NH2 | V_GLU_79  | OE2 | 3.400 |
| 1UZ6 | V_ARG_61  | NH2 | V_ASP_82  | OD1 | 3.022 |
| 1UZ6 | V_ARG_61  | NH2 | V_ASP_82  | OD2 | 3.415 |
| 1UZ6 | V_ARG_210 | NH1 | V_GLU_186 | OE1 | 3.469 |
| 1UZ6 | W_ARG_38  | NH1 | W_ASP_86  | OD1 | 2.995 |
| 1UZ6 | W_ARG_38  | NH2 | W_GLU_46  | OE1 | 3.152 |
| 1UZ6 | W_ARG_38  | NH2 | W_ASP_86  | OD1 | 3.942 |
| 1UZ6 | W_LYS_66  | NZ  | W_ASP_86  | OD1 | 3.438 |
| 1UZ6 | W_LYS_66  | NZ  | W_ASP_86  | OD2 | 2.729 |
| 1UZ6 | W_ARG_164 | NH2 | V_ASP_166 | OD1 | 3.892 |
| 1UZ6 | W_LYS_208 | NZ  | V_GLU_122 | OE1 | 3.069 |

Table 218: 1UZ6-specific salt bridging networks analysis. In this table, a PDB file is specified with a four-letter PDB ID, except that the names of the PDB files corresponding to the single NMR structural model split from the NMR ensemble is specified with a four-letter PDB ID in addition to a hyphen followed by the single NMR structural model numeric ID, the residue naming scheme is **Chain ID\_residue name\_residue number**,  $\angle ADH$  represents the angle formed by acceptor (A), donor (D) and hydrogen (H) ( $\angle ADH$ ).

| PDB ID | Residue A | Atom A | Residue B | Atom B | Distance (Å) |
|--------|-----------|--------|-----------|--------|--------------|
| 1UZ8   | A_LYS_27  | NZ     | A_GLU_93  | OE1    | 3.391        |
| 1UZ8   | A_LYS_27  | NZ     | A_GLU_93  | OE2    | 2.682        |
| 1UZ8   | A_ARG_61  | NH1    | A_ASP_82  | OD1    | 3.976        |
| 1UZ8   | A_ARG_61  | NH1    | A_ASP_82  | OD2    | 2.909        |
| 1UZ8   | A_ARG_61  | NH2    | A_GLU_79  | OE1    | 3.289        |
| 1UZ8   | A_ARG_61  | NH2    | A_GLU_79  | OE2    | 3.601        |
| 1UZ8   | A_ARG_61  | NH2    | A_ASP_82  | OD1    | 3.343        |
| 1UZ8   | A_ARG_61  | NH2    | A_ASP_82  | OD2    | 3.539        |
| 1UZ8   | A_LYS_146 | NZ     | A_GLU_153 | OE1    | 3.641        |
| 1UZ8   | A_LYS_148 | NZ     | A_GLU_194 | OE1    | 3.715        |
| 1UZ8   | A_LYS_148 | NZ     | A_GLU_194 | OE2    | 3.109        |
| 1UZ8   | A_ARG_154 | NH2    | A_GLU_184 | OE2    | 3.405        |
| 1UZ8   | A_LYS_198 | NZ     | A_ASP_109 | OD2    | 3.179        |
| 1UZ8   | B_ARG_38  | NH1    | B_ASP_86  | OD1    | 2.828        |
| 1UZ8   | B_ARG_38  | NH2    | B_GLU_46  | OE1    | 2.788        |
| 1UZ8   | B_ARG_38  | NH2    | B_ASP_86  | OD1    | 3.820        |
| 1UZ8   | B_ARG_164 | NH1    | A_ASP_166 | OD1    | 3.299        |
| 1UZ8   | B_ARG_164 | NH2    | A_ASP_166 | OD1    | 3.745        |
| 1UZ8   | B_ARG_164 | NH2    | A_ASP_169 | OD2    | 3.660        |
| 1UZ8   | H_ARG_38  | NH1    | H_ASP_86  | OD1    | 2.763        |
| 1UZ8   | H_ARG_38  | NH2    | H_GLU_46  | OE1    | 2.922        |
| 1UZ8   | H_ARG_38  | NH2    | H_GLU_46  | OE2    | 3.999        |
| 1UZ8   | H_ARG_38  | NH2    | H_ASP_86  | OD1    | 3.765        |
| 1UZ8   | H_LYS_66  | NZ     | H_ASP_86  | OD1    | 3.706        |
| 1UZ8   | H_LYS_66  | NZ     | H_ASP_86  | OD2    | 2.911        |
| 1UZ8   | H_ARG_83  | NH1    | H_GLU_85  | OE1    | 3.092        |
| 1UZ8   | H_ARG_164 | NH1    | L_ASP_166 | OD1    | 3.385        |
| 1UZ8   | H_ARG_164 | NH2    | L_ASP_166 | OD1    | 3.573        |
| 1UZ8   | H_ARG_164 | NH2    | L_ASP_169 | OD2    | 3.234        |
| 1UZ8   | H_ARG_209 | NH1    | H_GLU_211 | OE2    | 3.154        |
| 1UZ8   | L_ARG_24  | NH1    | L_ASP_70  | OD1    | 2.826        |
| 1UZ8   | L_ARG_24  | NH1    | L_ASP_70  | OD2    | 3.113        |
| 1UZ8   | L_ARG_24  | NH2    | L_ASP_70  | OD1    | 3.329        |
| 1UZ8   | L_LYS_27  | NZ     | L_GLU_93  | OE2    | 2.774        |
| 1UZ8   | L_ARG_61  | NH1    | L_ASP_82  | OD1    | 3.829        |
| 1UZ8   | L_ARG_61  | NH1    | L_ASP_82  | OD2    | 2.912        |
| 1UZ8   | L_ARG_61  | NH2    | L_GLU_79  | OE1    | 3.480        |
| 1UZ8   | L_ARG_61  | NH2    | L_GLU_79  | OE2    | 3.414        |
| 1UZ8   | L_ARG_61  | NH2    | L_ASP_82  | OD1    | 3.012        |
| 1UZ8   | L_ARG_61  | NH2    | L_ASP_82  | OD2    | 3.357        |
| 1UZ8   | L_LYS_148 | NZ     | L_GLU_194 | OE1    | 3.195        |
| 1UZ8   | L_LYS_148 | NZ     | L_GLU_194 | OE2    | 2.816        |
| 1UZ8   | L_LYS_168 | NZ     | L_ASP_169 | OD2    | 3.822        |
| 1UZ8   | L_ARG_187 | NH1    | L_ASP_183 | OD1    | 2.762        |
| 1UZ8   | L_ARG_187 | NH1    | L_ASP_183 | OD2    | 3.197        |
| 1UZ8   | L_ARG_187 | NH2    | L_ASP_183 | OD2    | 3.876        |
| 1UZ8   | L_HIS_188 | ND1    | L_ASP_150 | OD2    | 3.610        |
| 1UZ8   | L_LYS_198 | NZ     | L_ASP_109 | OD2    | 3.897        |

---

Table 219: 1UZ8-specific salt bridging networks analysis. In this table, a PDB file is specified with a four-letter PDB ID, except that the names of the PDB files corresponding to the single NMR structural model split from the NMR ensemble is specified with a four-letter PDB ID in addition to a hyphen followed by the single NMR structural model numeric ID, the residue naming scheme is **Chain ID\_residue name\_residue number**,  $\angle ADH$  represents the angle formed by acceptor (A), donor (D) and hydrogen (H) ( $\angle ADH$ ).

| PDB ID | Residue A | Atom A | Residue B | Atom B | Distance (Å) |
|--------|-----------|--------|-----------|--------|--------------|
| 1V7M   | L_ARG_60  | NH1    | L_GLU_80  | OE2    | 3.088        |
| 1V7M   | L_ARG_60  | NH1    | L_ASP_81  | OD1    | 3.052        |
| 1V7M   | L_ARG_60  | NH1    | L_ASP_81  | OD2    | 3.141        |
| 1V7M   | L_ARG_60  | NH2    | L_GLU_80  | OE2    | 3.221        |
| 1V7M   | L_ARG_95  | NH1    | H_GLU_50  | OE1    | 3.532        |
| 1V7M   | L_LYS_106 | NZ     | L_GLU_17  | OE1    | 3.130        |
| 1V7M   | L_LYS_106 | NZ     | L_GLU_17  | OE2    | 3.699        |
| 1V7M   | L_LYS_148 | NZ     | L_GLU_194 | OE2    | 3.477        |
| 1V7M   | L_ARG_154 | NH1    | L_GLU_184 | OE1    | 3.773        |
| 1V7M   | L_HIS_188 | ND1    | L_ASP_150 | OD2    | 2.800        |
| 1V7M   | H_ARG_38  | NH1    | H_GLU_46  | OE1    | 2.783        |
| 1V7M   | H_ARG_38  | NH1    | H_GLU_46  | OE2    | 2.898        |
| 1V7M   | H_ARG_38  | NH2    | H_ASP_92  | OD1    | 2.675        |
| 1V7M   | H_ARG_52  | NH1    | H_GLU_50  | OE2    | 3.445        |
| 1V7M   | H_LYS_54  | NZ     | H_ASP_76  | OD2    | 3.910        |
| 1V7M   | H_HIS_58  | NE2    | H_ASP_76  | OD2    | 3.340        |
| 1V7M   | H_LYS_67  | NZ     | H_GLU_64  | OE2    | 3.635        |
| 1V7M   | H_ARG_69  | NH1    | H_ASP_92  | OD1    | 3.860        |
| 1V7M   | H_ARG_69  | NH2    | H_ASP_92  | OD1    | 3.348        |
| 1V7M   | H_ARG_69  | NH2    | H_ASP_92  | OD2    | 2.369        |
| 1V7M   | H_ARG_74  | NH2    | H_ASP_76  | OD1    | 3.636        |
| 1V7M   | V_LYS_14  | NZ     | V_ASP_18  | OD1    | 3.648        |
| 1V7M   | V_ARG_98  | NH2    | H_ASP_31  | OD1    | 3.697        |
| 1V7M   | M_ARG_60  | NH1    | M_GLU_80  | OE2    | 3.752        |
| 1V7M   | M_ARG_60  | NH1    | M_ASP_81  | OD1    | 2.835        |
| 1V7M   | M_ARG_60  | NH1    | M_ASP_81  | OD2    | 3.333        |
| 1V7M   | M_ARG_60  | NH2    | M_GLU_80  | OE2    | 3.575        |
| 1V7M   | M_ARG_95  | NH1    | L_GLU_50  | OE1    | 3.801        |
| 1V7M   | M_LYS_102 | NZ     | M_GLU_104 | OE1    | 2.649        |
| 1V7M   | M_LYS_106 | NZ     | M_GLU_17  | OE1    | 2.876        |
| 1V7M   | M_LYS_148 | NZ     | M_GLU_194 | OE2    | 3.647        |
| 1V7M   | M_ARG_154 | NH1    | M_GLU_184 | OE1    | 3.586        |
| 1V7M   | M_ARG_154 | NH1    | M_GLU_184 | OE2    | 3.164        |
| 1V7M   | M_LYS_182 | NZ     | M_GLU_186 | OE1    | 2.598        |
| 1V7M   | M_LYS_182 | NZ     | M_GLU_186 | OE2    | 3.298        |
| 1V7M   | M_ARG_187 | NH2    | M_ASP_183 | OD1    | 3.583        |
| 1V7M   | M_HIS_188 | ND1    | M_ASP_150 | OD2    | 3.144        |
| 1V7M   | M_HIS_188 | NE2    | M_GLU_184 | OE1    | 3.787        |
| 1V7M   | L_LYS_3   | NZ     | L_GLU_1   | OE1    | 3.725        |
| 1V7M   | L_LYS_3   | NZ     | L_GLU_1   | OE2    | 3.237        |
| 1V7M   | L_ARG_38  | NH1    | L_GLU_46  | OE1    | 2.802        |
| 1V7M   | L_ARG_38  | NH1    | L_GLU_46  | OE2    | 3.233        |
| 1V7M   | L_ARG_38  | NH2    | L_ASP_92  | OD1    | 2.882        |
| 1V7M   | L_ARG_52  | NH1    | L_GLU_50  | OE2    | 3.907        |
| 1V7M   | L_HIS_58  | NE2    | L_ASP_76  | OD2    | 3.052        |
| 1V7M   | L_LYS_67  | NZ     | L_GLU_64  | OE2    | 3.990        |
| 1V7M   | L_ARG_69  | NH1    | L_ASP_92  | OD1    | 3.419        |
| 1V7M   | L_ARG_69  | NH2    | L_ASP_92  | OD1    | 2.654        |
| 1V7M   | L_ARG_69  | NH2    | L_ASP_92  | OD2    | 2.603        |
| 1V7M   | L_ARG_74  | NH2    | L_ASP_76  | OD1    | 3.380        |
| 1V7M   | X_LYS_14  | NZ     | X_ASP_18  | OD1    | 3.674        |
| 1V7M   | X_HIS_33  | ND1    | X_GLU_31  | OE2    | 3.284        |
| 1V7M   | X_LYS_59  | NZ     | X_GLU_56  | OE2    | 3.569        |
| 1V7M   | X_ARG_98  | NH2    | L_ASP_31  | OD1    | 3.214        |
| 1V7M   | X_ARG_117 | NH1    | X_ASP_45  | OD1    | 3.802        |
| 1V7M   | X_ARG_117 | NH1    | X_ASP_45  | OD2    | 3.906        |

---

Table 220: 1V7M-specific salt bridging networks analysis. In this table, a PDB file is specified with a four-letter PDB ID, except that the names of the PDB files corresponding to the single NMR structural model split from the NMR ensemble is specified with a four-letter PDB ID in addition to a hyphen followed by the single NMR structural model numeric ID, the residue naming scheme is **Chain ID\_residue name\_residue number**,  $\angle ADH$  represents the angle formed by acceptor (A), donor (D) and hydrogen (H) ( $\angle ADH$ ).

| PDB ID | Residue A | Atom A | Residue B | Atom B | Distance (Å) |
|--------|-----------|--------|-----------|--------|--------------|
| 1V7N   | L_ARG_60  | NH1    | L_ASP_81  | OD1    | 2.332        |
| 1V7N   | L_ARG_60  | NH1    | L_ASP_81  | OD2    | 3.010        |
| 1V7N   | L_ARG_60  | NH2    | L_GLU_80  | OE2    | 2.836        |
| 1V7N   | L_ARG_95  | NH1    | H_GLU_50  | OE1    | 3.194        |
| 1V7N   | L_LYS_102 | NZ     | L_ASP_164 | OD1    | 2.653        |
| 1V7N   | L_ARG_107 | NH1    | L_ASP_169 | OD2    | 2.613        |
| 1V7N   | L_ARG_107 | NH1    | O_GLU_78  | OE2    | 3.587        |
| 1V7N   | L_ARG_107 | NH2    | O_GLU_78  | OE1    | 3.844        |
| 1V7N   | L_ARG_107 | NH2    | O_GLU_78  | OE2    | 2.214        |
| 1V7N   | L_LYS_148 | NZ     | L_GLU_194 | OE2    | 3.869        |
| 1V7N   | L_ARG_154 | NH2    | L_GLU_184 | OE1    | 2.591        |
| 1V7N   | L_ARG_154 | NH2    | L_GLU_184 | OE2    | 3.206        |
| 1V7N   | L_LYS_182 | NZ     | L_GLU_186 | OE2    | 3.250        |
| 1V7N   | L_HIS_188 | ND1    | L_ASP_150 | OD2    | 2.542        |
| 1V7N   | L_LYS_198 | NZ     | L_ASP_109 | OD2    | 2.675        |
| 1V7N   | H_LYS_3   | NZ     | H_GLU_5   | OE1    | 3.106        |
| 1V7N   | H_ARG_38  | NH1    | H_GLU_46  | OE1    | 2.776        |
| 1V7N   | H_ARG_38  | NH1    | H_GLU_46  | OE2    | 3.676        |
| 1V7N   | H_ARG_38  | NH1    | H_ASP_92  | OD1    | 3.973        |
| 1V7N   | H_ARG_38  | NH2    | H_ASP_92  | OD1    | 3.183        |
| 1V7N   | H_LYS_43  | NZ     | H_GLU_46  | OE2    | 3.925        |
| 1V7N   | H_LYS_54  | NZ     | H_ASP_76  | OD2    | 3.243        |
| 1V7N   | H_HIS_58  | NE2    | H_ASP_76  | OD1    | 3.889        |
| 1V7N   | H_HIS_58  | NE2    | H_ASP_76  | OD2    | 2.715        |
| 1V7N   | H_LYS_67  | NZ     | H_GLU_64  | OE2    | 2.803        |
| 1V7N   | H_ARG_69  | NH1    | H_ASP_92  | OD1    | 3.102        |
| 1V7N   | H_ARG_69  | NH1    | H_ASP_92  | OD2    | 3.339        |
| 1V7N   | H_ARG_69  | NH2    | H_ASP_92  | OD1    | 3.121        |
| 1V7N   | H_ARG_69  | NH2    | H_ASP_92  | OD2    | 2.212        |
| 1V7N   | H_ARG_74  | NH2    | H_ASP_76  | OD1    | 3.408        |
| 1V7N   | H_LYS_78  | NZ     | H_ASP_75  | OD2    | 3.016        |
| 1V7N   | H_ARG_216 | NH1    | H_ASP_217 | OD2    | 3.146        |
| 1V7N   | H_ARG_216 | NH2    | Z_ASP_123 | OD2    | 3.997        |
| 1V7N   | M_ARG_60  | NH1    | M_ASP_81  | OD1    | 2.547        |
| 1V7N   | M_ARG_60  | NH1    | M_ASP_81  | OD2    | 2.256        |
| 1V7N   | M_ARG_60  | NH2    | M_GLU_80  | OE2    | 3.293        |
| 1V7N   | M_ARG_60  | NH2    | M_ASP_81  | OD1    | 3.559        |
| 1V7N   | M_ARG_95  | NH1    | L_GLU_50  | OE1    | 2.984        |
| 1V7N   | M_LYS_102 | NZ     | M_ASP_164 | OD1    | 3.198        |
| 1V7N   | M_ARG_107 | NH1    | M_ASP_169 | OD2    | 3.983        |
| 1V7N   | M_ARG_107 | NH1    | N_GLU_78  | OE2    | 3.960        |
| 1V7N   | M_ARG_107 | NH2    | N_GLU_78  | OE1    | 3.607        |
| 1V7N   | M_ARG_107 | NH2    | N_GLU_78  | OE2    | 2.132        |
| 1V7N   | M_ARG_154 | NH1    | M_GLU_184 | OE1    | 3.775        |
| 1V7N   | M_ARG_154 | NH1    | M_GLU_184 | OE2    | 3.880        |
| 1V7N   | M_ARG_154 | NH2    | M_GLU_184 | OE1    | 2.821        |
| 1V7N   | M_HIS_188 | ND1    | M_ASP_150 | OD2    | 2.789        |
| 1V7N   | M_LYS_198 | NZ     | M_ASP_109 | OD1    | 2.627        |
| 1V7N   | M_LYS_198 | NZ     | M_ASP_109 | OD2    | 3.022        |
| 1V7N   | L_LYS_3   | NZ     | L_GLU_5   | OE1    | 2.717        |
| 1V7N   | L_ARG_38  | NH1    | L_GLU_46  | OE1    | 2.490        |
| 1V7N   | L_ARG_38  | NH1    | L_GLU_46  | OE2    | 3.766        |
| 1V7N   | L_ARG_38  | NH2    | L_ASP_92  | OD1    | 2.898        |
| 1V7N   | L_ARG_52  | NH1    | L_GLU_50  | OE2    | 3.407        |
| 1V7N   | L_LYS_54  | NZ     | L_ASP_76  | OD2    | 3.877        |
| 1V7N   | L_HIS_58  | NE2    | L_ASP_76  | OD2    | 3.223        |
| 1V7N   | L_LYS_67  | NZ     | L_GLU_64  | OE2    | 2.515        |

|      |           |     |           |     |       |
|------|-----------|-----|-----------|-----|-------|
| 1V7N | L_ARG_69  | NH1 | L_ASP_92  | OD1 | 3.853 |
| 1V7N | L_ARG_69  | NH1 | L_ASP_92  | OD2 | 3.813 |
| 1V7N | L_ARG_69  | NH2 | L_ASP_92  | OD1 | 3.126 |
| 1V7N | L_ARG_69  | NH2 | L_ASP_92  | OD2 | 2.285 |
| 1V7N | L_ARG_74  | NH2 | L_ASP_76  | OD1 | 3.069 |
| 1V7N | L_LYS_78  | NZ  | L_ASP_75  | OD2 | 3.595 |
| 1V7N | L_ARG_216 | NH1 | L_ASP_217 | OD1 | 3.402 |
| 1V7N | N_ARG_60  | NH1 | N_GLU_80  | OE2 | 3.770 |
| 1V7N | N_ARG_60  | NH1 | N_ASP_81  | OD1 | 3.278 |
| 1V7N | N_ARG_60  | NH1 | N_ASP_81  | OD2 | 2.829 |
| 1V7N | N_ARG_60  | NH2 | N_GLU_80  | OE2 | 3.679 |
| 1V7N | N_ARG_95  | NH1 | J_GLU_50  | OE1 | 3.631 |
| 1V7N | N_LYS_102 | NZ  | N_GLU_104 | OE1 | 3.217 |
| 1V7N | N_LYS_102 | NZ  | N_ASP_164 | OD1 | 2.603 |
| 1V7N | N_ARG_107 | NH1 | N_ASP_169 | OD2 | 2.506 |
| 1V7N | N_ARG_107 | NH2 | M_GLU_78  | OE1 | 2.980 |
| 1V7N | N_ARG_107 | NH2 | M_GLU_78  | OE2 | 2.369 |
| 1V7N | N_LYS_148 | NZ  | N_GLU_194 | OE1 | 3.525 |
| 1V7N | N_LYS_148 | NZ  | N_GLU_194 | OE2 | 3.387 |
| 1V7N | N_ARG_154 | NH1 | N_GLU_184 | OE1 | 3.587 |
| 1V7N | N_ARG_154 | NH2 | N_GLU_184 | OE1 | 2.367 |
| 1V7N | N_HIS_188 | ND1 | N_ASP_150 | OD2 | 2.601 |
| 1V7N | N_LYS_198 | NZ  | N_ASP_109 | OD1 | 3.661 |
| 1V7N | N_LYS_198 | NZ  | N_ASP_109 | OD2 | 2.822 |
| 1V7N | J_LYS_3   | NZ  | J_GLU_5   | OE1 | 2.975 |
| 1V7N | J_LYS_3   | NZ  | J_GLU_5   | OE2 | 2.953 |
| 1V7N | J_ARG_38  | NH1 | J_GLU_46  | OE1 | 2.786 |
| 1V7N | J_ARG_38  | NH2 | J_ASP_92  | OD1 | 2.704 |
| 1V7N | J_LYS_43  | NZ  | J_GLU_46  | OE1 | 2.811 |
| 1V7N | J_ARG_52  | NH1 | J_GLU_50  | OE2 | 3.959 |
| 1V7N | J_HIS_61  | NE2 | J_GLU_50  | OE2 | 3.467 |
| 1V7N | J_LYS_67  | NZ  | J_GLU_64  | OE2 | 2.606 |
| 1V7N | J_ARG_69  | NH2 | J_ASP_92  | OD1 | 2.762 |
| 1V7N | J_ARG_69  | NH2 | J_ASP_92  | OD2 | 3.189 |
| 1V7N | J_ARG_74  | NH2 | J_ASP_76  | OD1 | 2.889 |
| 1V7N | J_LYS_78  | NZ  | J_ASP_75  | OD2 | 3.061 |
| 1V7N | J_ARG_216 | NH2 | J_ASP_217 | OD1 | 3.973 |
| 1V7N | J_ARG_216 | NH2 | X_ASP_123 | OD2 | 3.982 |
| 1V7N | O_ARG_60  | NH1 | O_ASP_81  | OD1 | 2.582 |
| 1V7N | O_ARG_60  | NH1 | O_ASP_81  | OD2 | 2.736 |
| 1V7N | O_ARG_95  | NH1 | K_GLU_50  | OE1 | 2.735 |
| 1V7N | O_LYS_102 | NZ  | O_ASP_164 | OD1 | 3.384 |
| 1V7N | O_ARG_107 | NH1 | L_GLU_78  | OE1 | 3.650 |
| 1V7N | O_ARG_107 | NH1 | L_GLU_78  | OE2 | 3.114 |
| 1V7N | O_ARG_107 | NH1 | O_ASP_169 | OD2 | 3.206 |
| 1V7N | O_ARG_107 | NH2 | L_GLU_78  | OE2 | 2.402 |
| 1V7N | O_ARG_154 | NH1 | O_GLU_184 | OE1 | 2.811 |
| 1V7N | O_ARG_154 | NH1 | O_GLU_184 | OE2 | 2.989 |
| 1V7N | O_ARG_154 | NH2 | O_GLU_184 | OE1 | 2.352 |
| 1V7N | O_ARG_154 | NH2 | O_GLU_184 | OE2 | 3.668 |
| 1V7N | O_HIS_188 | ND1 | O_ASP_150 | OD2 | 2.853 |
| 1V7N | O_LYS_198 | NZ  | O_ASP_109 | OD1 | 3.907 |
| 1V7N | O_LYS_198 | NZ  | O_ASP_109 | OD2 | 2.580 |
| 1V7N | K_LYS_3   | NZ  | K_GLU_5   | OE1 | 3.714 |
| 1V7N | K_LYS_3   | NZ  | K_GLU_5   | OE2 | 3.152 |
| 1V7N | K_ARG_38  | NH1 | K_GLU_46  | OE1 | 2.302 |
| 1V7N | K_ARG_38  | NH1 | K_GLU_46  | OE2 | 3.483 |
| 1V7N | K_ARG_38  | NH2 | K_ASP_92  | OD1 | 3.795 |



|      |           |     |           |     |       |
|------|-----------|-----|-----------|-----|-------|
| 1V7N | K_ARG_38  | NH2 | K_ASP_92  | OD2 | 3.370 |
| 1V7N | K_LYS_43  | NZ  | K_GLU_46  | OE2 | 2.793 |
| 1V7N | K_ARG_52  | NH1 | K_GLU_50  | OE2 | 3.501 |
| 1V7N | K_HIS_58  | NE2 | K_ASP_76  | OD2 | 3.479 |
| 1V7N | K_ARG_69  | NH1 | K_ASP_92  | OD2 | 3.967 |
| 1V7N | K_ARG_69  | NH2 | K_ASP_92  | OD1 | 3.583 |
| 1V7N | K_ARG_69  | NH2 | K_ASP_92  | OD2 | 2.311 |
| 1V7N | K_ARG_74  | NH2 | K_ASP_76  | OD1 | 3.141 |
| 1V7N | K_ARG_74  | NH2 | K_ASP_76  | OD2 | 3.766 |
| 1V7N | K_LYS_78  | NZ  | K_ASP_75  | OD2 | 2.815 |
| 1V7N | K_ARG_216 | NH1 | K_ASP_217 | OD1 | 2.786 |
| 1V7N | V_LYS_59  | NZ  | V_GLU_56  | OE2 | 3.100 |
| 1V7N | V_ARG_98  | NH2 | H_ASP_31  | OD1 | 3.580 |
| 1V7N | V_LYS_138 | NZ  | V_ASP_62  | OD2 | 2.822 |
| 1V7N | X_LYS_59  | NZ  | X_GLU_56  | OE2 | 2.913 |
| 1V7N | X_ARG_98  | NH2 | I_ASP_31  | OD1 | 3.389 |
| 1V7N | X_ARG_117 | NH2 | X_ASP_45  | OD1 | 3.524 |
| 1V7N | X_HIS_121 | ND1 | J_ASP_217 | OD1 | 2.619 |
| 1V7N | X_HIS_121 | NE2 | J_ASP_217 | OD1 | 3.422 |
| 1V7N | X_LYS_138 | NZ  | X_ASP_62  | OD2 | 3.394 |
| 1V7N | Y_HIS_20  | ND1 | H_ASP_217 | OD1 | 3.368 |
| 1V7N | Y_HIS_20  | ND1 | H_ASP_217 | OD2 | 3.116 |
| 1V7N | Y_HIS_20  | NE2 | H_ASP_217 | OD1 | 3.862 |
| 1V7N | Y_HIS_33  | NE2 | Y_GLU_31  | OE1 | 3.707 |
| 1V7N | Y_LYS_59  | NZ  | Y_GLU_56  | OE1 | 3.270 |
| 1V7N | Y_LYS_59  | NZ  | Y_GLU_56  | OE2 | 2.783 |
| 1V7N | Y_HIS_121 | ND1 | I_ASP_217 | OD1 | 3.108 |
| 1V7N | Y_HIS_133 | ND1 | Y_ASP_45  | OD1 | 3.752 |
| 1V7N | Y_LYS_138 | NZ  | Y_ASP_45  | OD2 | 3.882 |
| 1V7N | Z_HIS_33  | ND1 | Z_GLU_31  | OE1 | 3.839 |
| 1V7N | Z_HIS_33  | NE2 | Z_GLU_31  | OE1 | 3.105 |
| 1V7N | Z_LYS_59  | NZ  | Z_GLU_56  | OE1 | 3.900 |
| 1V7N | Z_LYS_59  | NZ  | Z_GLU_56  | OE2 | 3.150 |
| 1V7N | Z_ARG_98  | NH2 | K_ASP_31  | OD1 | 3.622 |
| 1V7N | Z_HIS_133 | NE2 | Z_ASP_45  | OD2 | 3.937 |
| 1V7N | Z_LYS_138 | NZ  | Z_ASP_45  | OD1 | 2.983 |
| 1V7N | Z_ARG_140 | NH2 | M_GLU_212 | OE1 | 3.768 |

Table 221: 1V7N-specific salt bridging networks analysis. In this table, a PDB file is specified with a four-letter PDB ID, except that the names of the PDB files corresponding to the single NMR structural model split from the NMR ensemble is specified with a four-letter PDB ID in addition to a hyphen followed by the single NMR structural model numeric ID, the residue naming scheme is **Chain ID\_residue name\_residue number**,  $\angle ADH$  represents the angle formed by acceptor (A), donor (D) and hydrogen (H) ( $\angle ADH$ ).

| PDB ID | Residue A | Atom A | Residue B | Atom B | Distance (Å) |
|--------|-----------|--------|-----------|--------|--------------|
| 1VER   | A_ARG_25  | NH1    | A_ASP_4   | OD1    | 3.368        |
| 1VER   | A_LYS_40  | NZ     | A_GLU_76  | OE2    | 2.714        |
| 1VER   | A_ARG_54  | NH1    | A_ASP_77  | OD2    | 3.441        |
| 1VER   | A_ARG_54  | NH2    | A_ASP_77  | OD1    | 3.240        |
| 1VER   | A_ARG_54  | NH2    | A_ASP_77  | OD2    | 3.161        |
| 1VER   | A_ARG_74  | NH1    | A_ASP_72  | OD2    | 2.935        |
| 1VER   | A_LYS_102 | NZ     | A_GLU_46  | OE1    | 3.941        |
| 1VER   | A_LYS_102 | NZ     | A_GLU_46  | OE2    | 3.470        |

Table 222: 1VER-specific salt bridging networks analysis. In this table, a PDB file is specified with a four-letter PDB ID, except that the names of the PDB files corresponding to the single NMR structural model split from the NMR ensemble is specified with a four-letter PDB ID in addition to a hyphen followed by the single NMR structural model numeric ID, the residue naming scheme is **Chain ID\_residue name\_residue number**,  $\angle ADH$  represents the angle formed by acceptor (A), donor (D) and hydrogen (H) ( $\angle ADH$ ).

| PDB ID | Residue A | Atom A | Residue B | Atom B | Distance (Å) |
|--------|-----------|--------|-----------|--------|--------------|
| 1VES   | A_ARG_25  | NH1    | A_ASP_4   | OD2    | 3.079        |
| 1VES   | A_ARG_25  | NH1    | B_ASP_4   | OD1    | 3.636        |
| 1VES   | A_ARG_25  | NH1    | B_ASP_4   | OD2    | 2.836        |
| 1VES   | A_ARG_25  | NH2    | B_ASP_4   | OD1    | 2.879        |
| 1VES   | A_ARG_25  | NH2    | B_ASP_4   | OD2    | 3.552        |
| 1VES   | A_LYS_32  | NZ     | A_GLU_30  | OE2    | 2.725        |
| 1VES   | A_ARG_38  | NH2    | A_ASP_77  | OD1    | 3.118        |
| 1VES   | A_ARG_54  | NH1    | A_ASP_77  | OD1    | 3.920        |
| 1VES   | A_ARG_54  | NH1    | A_ASP_77  | OD2    | 2.727        |
| 1VES   | A_ARG_54  | NH2    | A_ASP_77  | OD1    | 3.109        |
| 1VES   | A_ARG_54  | NH2    | A_ASP_77  | OD2    | 3.297        |
| 1VES   | A_ARG_74  | NH1    | A_GLU_76  | OE2    | 3.745        |
| 1VES   | A_LYS_104 | NZ     | A_GLU_46  | OE1    | 2.629        |
| 1VES   | A_LYS_104 | NZ     | A_GLU_46  | OE2    | 3.276        |
| 1VES   | B_ARG_25  | NH1    | A_ASP_4   | OD1    | 3.762        |
| 1VES   | B_ARG_25  | NH1    | A_ASP_4   | OD2    | 2.782        |
| 1VES   | B_ARG_25  | NH1    | B_ASP_4   | OD2    | 3.050        |
| 1VES   | B_ARG_25  | NH2    | A_ASP_4   | OD1    | 3.070        |
| 1VES   | B_ARG_25  | NH2    | A_ASP_4   | OD2    | 3.548        |
| 1VES   | B_ARG_38  | NH2    | B_ASP_77  | OD1    | 3.081        |
| 1VES   | B_ARG_54  | NH1    | B_ASP_77  | OD2    | 2.889        |
| 1VES   | B_ARG_54  | NH2    | B_ASP_77  | OD1    | 3.186        |
| 1VES   | B_ARG_54  | NH2    | B_ASP_77  | OD2    | 3.405        |
| 1VES   | B_ARG_74  | NH1    | B_GLU_76  | OE1    | 3.458        |
| 1VES   | B_ARG_74  | NH2    | B_GLU_76  | OE1    | 3.401        |
| 1VES   | B_LYS_104 | NZ     | B_GLU_46  | OE1    | 2.701        |
| 1VES   | B_LYS_104 | NZ     | B_GLU_46  | OE2    | 2.906        |

Table 223: 1VES-specific salt bridging networks analysis. In this table, a PDB file is specified with a four-letter PDB ID, except that the names of the PDB files corresponding to the single NMR structural model split from the NMR ensemble is specified with a four-letter PDB ID in addition to a hyphen followed by the single NMR structural model numeric ID, the residue naming scheme is **Chain ID\_residue name\_residue number**,  $\angle ADH$  represents the angle formed by acceptor (A), donor (D) and hydrogen (H) ( $\angle ADH$ ).

| PDB ID | Residue A | Atom A | Residue B | Atom B | Distance (Å) |
|--------|-----------|--------|-----------|--------|--------------|
| 1VFA   | A_ARG_61  | NH2    | A_GLU_81  | OE2    | 3.353        |
| 1VFA   | A_ARG_61  | NH2    | A_ASP_82  | OD1    | 2.725        |
| 1VFA   | A_ARG_61  | NH2    | A_ASP_82  | OD2    | 3.247        |
| 1VFA   | A_ARG_96  | NH1    | B_GLU_98  | OE1    | 2.794        |
| 1VFA   | A_ARG_96  | NH1    | B_GLU_98  | OE2    | 3.600        |
| 1VFA   | A_ARG_96  | NH2    | B_GLU_98  | OE1    | 3.537        |
| 1VFA   | A_ARG_96  | NH2    | B_GLU_98  | OE2    | 2.928        |
| 1VFA   | A_LYS_103 | NZ     | A_GLU_105 | OE1    | 2.845        |
| 1VFA   | B_ARG_38  | NH1    | B_ASP_89  | OD1    | 2.914        |
| 1VFA   | B_ARG_38  | NH2    | B_GLU_46  | OE1    | 2.995        |
| 1VFA   | B_ARG_38  | NH2    | B_GLU_46  | OE2    | 3.956        |
| 1VFA   | B_ARG_38  | NH2    | B_ASP_89  | OD1    | 3.945        |
| 1VFA   | B_ARG_66  | NH1    | B_ASP_89  | OD1    | 3.137        |
| 1VFA   | B_ARG_66  | NH1    | B_ASP_89  | OD2    | 3.571        |
| 1VFA   | B_ARG_66  | NH2    | B_ASP_89  | OD1    | 3.559        |
| 1VFA   | B_ARG_66  | NH2    | B_ASP_89  | OD2    | 2.619        |
| 1VFA   | B_ARG_97  | NH2    | B_ASP_104 | OD1    | 3.679        |
| 1VFA   | B_ARG_97  | NH2    | B_ASP_104 | OD2    | 2.862        |
| 1VFA   | B_ARG_99  | NH1    | B_ASP_104 | OD2    | 3.881        |
| 1VFA   | B_ARG_99  | NH2    | B_ASP_100 | OD2    | 3.016        |

Table 224: 1VFA-specific salt bridging networks analysis. In this table, a PDB file is specified with a four-letter PDB ID, except that the names of the PDB files corresponding to the single NMR structural model split from the NMR ensemble is specified with a four-letter PDB ID in addition to a hyphen followed by the single NMR structural model numeric ID, the residue naming scheme is **Chain ID\_residue name\_residue number**,  $\angle ADH$  represents the angle formed by acceptor (A), donor (D) and hydrogen (H) ( $\angle ADH$ ).

| PDB ID | Residue A | Atom A | Residue B | Atom B | Distance (Å) |
|--------|-----------|--------|-----------|--------|--------------|
| 1VFB   | A_ARG_61  | NH2    | A_GLU_81  | OE2    | 3.736        |
| 1VFB   | A_ARG_61  | NH2    | A_ASP_82  | OD1    | 2.846        |
| 1VFB   | A_ARG_61  | NH2    | A_ASP_82  | OD2    | 3.553        |
| 1VFB   | A_ARG_96  | NH1    | B_GLU_98  | OE1    | 2.821        |
| 1VFB   | A_ARG_96  | NH1    | B_GLU_98  | OE2    | 3.695        |
| 1VFB   | A_ARG_96  | NH2    | B_GLU_98  | OE1    | 3.393        |
| 1VFB   | A_ARG_96  | NH2    | B_GLU_98  | OE2    | 2.813        |
| 1VFB   | A_LYS_107 | NZ     | A_GLU_17  | OE2    | 3.099        |
| 1VFB   | B_ARG_38  | NH1    | B_ASP_89  | OD1    | 3.000        |
| 1VFB   | B_ARG_38  | NH2    | B_GLU_46  | OE1    | 3.296        |
| 1VFB   | B_ARG_38  | NH2    | B_GLU_46  | OE2    | 3.076        |
| 1VFB   | B_ARG_38  | NH2    | B_ASP_89  | OD1    | 3.911        |
| 1VFB   | B_ARG_66  | NH1    | B_ASP_89  | OD1    | 3.700        |
| 1VFB   | B_ARG_66  | NH1    | B_ASP_89  | OD2    | 2.886        |
| 1VFB   | B_ARG_66  | NH2    | B_ASP_89  | OD1    | 2.927        |
| 1VFB   | B_ARG_66  | NH2    | B_ASP_89  | OD2    | 3.546        |
| 1VFB   | B_LYS_75  | NZ     | B_ASP_72  | OD2    | 3.347        |
| 1VFB   | B_ARG_97  | NH2    | B_ASP_104 | OD1    | 3.680        |
| 1VFB   | B_ARG_97  | NH2    | B_ASP_104 | OD2    | 2.861        |
| 1VFB   | B_ARG_102 | NH1    | B_ASP_100 | OD2    | 3.203        |
| 1VFB   | C_LYS_1   | NZ     | C_GLU_7   | OE2    | 3.235        |
| 1VFB   | C_ARG_61  | NH1    | C_ASP_48  | OD2    | 3.212        |
| 1VFB   | C_ARG_125 | NH1    | C_ASP_119 | OD1    | 3.267        |
| 1VFB   | C_ARG_125 | NH1    | C_ASP_119 | OD2    | 3.059        |
| 1VFB   | C_ARG_125 | NH2    | C_ASP_119 | OD2    | 3.016        |

Table 225: 1VFB-specific salt bridging networks analysis. In this table, a PDB file is specified with a four-letter PDB ID, except that the names of the PDB files corresponding to the single NMR structural model split from the NMR ensemble is specified with a four-letter PDB ID in addition to a hyphen followed by the single NMR structural model numeric ID, the residue naming scheme is **Chain ID\_residue name\_residue number**,  $\angle ADH$  represents the angle formed by acceptor (A), donor (D) and hydrogen (H) ( $\angle ADH$ ).

| PDB ID | Residue A | Atom A | Residue B | Atom B | Distance (Å) |
|--------|-----------|--------|-----------|--------|--------------|
| 1W72   | A_HIS_3   | ND1    | A_ASP_29  | OD1    | 3.652        |
| 1W72   | A_HIS_3   | ND1    | A_ASP_29  | OD2    | 2.584        |
| 1W72   | A_ARG_6   | NH1    | A_ASP_102 | OD1    | 2.915        |
| 1W72   | A_ARG_6   | NH2    | A_ASP_102 | OD1    | 2.976        |
| 1W72   | A_ARG_6   | NH2    | A_ASP_102 | OD2    | 3.593        |
| 1W72   | A_ARG_14  | NH1    | A_ASP_39  | OD1    | 3.691        |
| 1W72   | A_ARG_14  | NH1    | A_ASP_39  | OD2    | 2.979        |
| 1W72   | A_ARG_14  | NH2    | A_ASP_39  | OD1    | 3.402        |
| 1W72   | A_ARG_21  | NH1    | A_ASP_37  | OD1    | 3.986        |
| 1W72   | A_ARG_21  | NH2    | A_ASP_37  | OD1    | 3.181        |
| 1W72   | A_ARG_21  | NH2    | A_ASP_37  | OD2    | 2.787        |
| 1W72   | A_ARG_35  | NH1    | B_ASP_53  | OD1    | 2.945        |
| 1W72   | A_ARG_35  | NH2    | A_GLU_46  | OE2    | 3.408        |
| 1W72   | A_LYS_44  | NZ     | A_ASP_61  | OD1    | 3.998        |
| 1W72   | A_ARG_48  | NH1    | B_ASP_53  | OD2    | 3.978        |
| 1W72   | A_ARG_48  | NH2    | B_ASP_53  | OD1    | 3.455        |
| 1W72   | A_ARG_48  | NH2    | B_ASP_53  | OD2    | 2.916        |
| 1W72   | A_ARG_65  | NH1    | H_ASP_30  | OD1    | 3.409        |
| 1W72   | A_ARG_65  | NH1    | H_ASP_31  | OD1    | 2.977        |
| 1W72   | A_HIS_70  | NE2    | A_ASP_74  | OD1    | 3.569        |
| 1W72   | A_HIS_70  | NE2    | A_ASP_74  | OD2    | 2.953        |
| 1W72   | A_ARG_75  | NH1    | A_GLU_19  | OE1    | 3.767        |
| 1W72   | A_HIS_93  | ND1    | A_ASP_119 | OD1    | 3.369        |
| 1W72   | A_HIS_93  | ND1    | A_ASP_119 | OD2    | 2.599        |
| 1W72   | A_ARG_114 | NH1    | C_ASP_3   | OD2    | 3.999        |
| 1W72   | A_LYS_144 | NZ     | A_GLU_148 | OE1    | 3.900        |
| 1W72   | A_LYS_144 | NZ     | A_GLU_148 | OE2    | 2.626        |
| 1W72   | A_LYS_146 | NZ     | L_ASP_95A | OD1    | 3.112        |
| 1W72   | A_LYS_146 | NZ     | L_ASP_95A | OD2    | 3.996        |
| 1W72   | A_ARG_156 | NH1    | C_ASP_3   | OD1    | 3.704        |
| 1W72   | A_ARG_156 | NH1    | C_ASP_3   | OD2    | 2.953        |
| 1W72   | A_ARG_163 | NH1    | C_GLU_1   | OE1    | 3.400        |
| 1W72   | A_ARG_163 | NH2    | C_GLU_1   | OE1    | 3.293        |
| 1W72   | A_ARG_163 | NH2    | C_GLU_1   | OE2    | 3.482        |
| 1W72   | A_ARG_170 | NH1    | C_GLU_1   | OE2    | 3.205        |
| 1W72   | A_ARG_170 | NH2    | A_GLU_55  | OE1    | 3.864        |
| 1W72   | A_ARG_170 | NH2    | A_GLU_55  | OE2    | 3.639        |
| 1W72   | A_ARG_170 | NH2    | C_GLU_1   | OE2    | 2.677        |
| 1W72   | A_LYS_176 | NZ     | A_GLU_173 | OE2    | 3.940        |
| 1W72   | A_HIS_191 | NE2    | A_GLU_254 | OE2    | 3.120        |
| 1W72   | A_HIS_192 | NE2    | B_ASP_98  | OD1    | 3.224        |
| 1W72   | A_HIS_192 | NE2    | B_ASP_98  | OD2    | 2.823        |
| 1W72   | A_ARG_202 | NH2    | A_GLU_229 | OE1    | 3.772        |
| 1W72   | A_ARG_219 | NH1    | A_ASP_220 | OD2    | 3.707        |
| 1W72   | A_ARG_256 | NH1    | A_GLU_253 | OE1    | 3.148        |
| 1W72   | A_ARG_256 | NH2    | A_ASP_220 | OD1    | 3.691        |
| 1W72   | A_ARG_256 | NH2    | A_ASP_220 | OD2    | 2.725        |
| 1W72   | B_LYS_6   | NZ     | A_GLU_232 | OE1    | 3.881        |
| 1W72   | B_LYS_41  | NZ     | B_ASP_76  | OD1    | 3.260        |
| 1W72   | B_LYS_41  | NZ     | B_ASP_76  | OD2    | 2.923        |
| 1W72   | B_ARG_45  | NH1    | B_GLU_47  | OE1    | 3.217        |
| 1W72   | B_ARG_45  | NH2    | B_ASP_38  | OD1    | 3.659        |
| 1W72   | B_HIS_51  | ND1    | B_GLU_50  | OE2    | 3.875        |
| 1W72   | B_ARG_81  | NH2    | B_ASP_38  | OD2    | 3.262        |
| 1W72   | D_HIS_3   | ND1    | D_ASP_29  | OD1    | 3.695        |
| 1W72   | D_HIS_3   | ND1    | D_ASP_29  | OD2    | 2.674        |
| 1W72   | D_ARG_6   | NH1    | D_ASP_102 | OD1    | 2.917        |

|      |           |     |           |     |       |
|------|-----------|-----|-----------|-----|-------|
| 1W72 | D_ARG_6   | NH2 | D_ASP_102 | OD1 | 2.831 |
| 1W72 | D_ARG_6   | NH2 | D_ASP_102 | OD2 | 3.484 |
| 1W72 | D_ARG_14  | NH1 | D_ASP_39  | OD1 | 3.609 |
| 1W72 | D_ARG_14  | NH1 | D_ASP_39  | OD2 | 3.105 |
| 1W72 | D_ARG_14  | NH2 | D_ASP_39  | OD1 | 3.305 |
| 1W72 | D_ARG_21  | NH1 | D_ASP_39  | OD2 | 3.364 |
| 1W72 | D_ARG_21  | NH2 | D_ASP_37  | OD1 | 3.519 |
| 1W72 | D_ARG_21  | NH2 | D_ASP_37  | OD2 | 2.786 |
| 1W72 | D_ARG_35  | NH1 | D_GLU_46  | OE1 | 3.132 |
| 1W72 | D_ARG_35  | NH2 | D_ASP_37  | OD2 | 3.650 |
| 1W72 | D_ARG_35  | NH2 | E_ASP_53  | OD1 | 3.761 |
| 1W72 | D_ARG_48  | NH1 | D_GLU_46  | OE2 | 3.543 |
| 1W72 | D_ARG_65  | NH1 | I_ASP_30  | OD1 | 2.970 |
| 1W72 | D_ARG_65  | NH1 | I_ASP_31  | OD1 | 3.035 |
| 1W72 | D_HIS_70  | NE2 | D_ASP_74  | OD1 | 3.533 |
| 1W72 | D_HIS_70  | NE2 | D_ASP_74  | OD2 | 3.234 |
| 1W72 | D_ARG_75  | NH1 | D_GLU_19  | OE1 | 3.532 |
| 1W72 | D_ARG_75  | NH2 | D_GLU_19  | OE1 | 3.186 |
| 1W72 | D_HIS_93  | ND1 | D_ASP_119 | OD1 | 3.233 |
| 1W72 | D_HIS_93  | ND1 | D_ASP_119 | OD2 | 2.484 |
| 1W72 | D_LYS_144 | NZ  | D_GLU_148 | OE2 | 2.839 |
| 1W72 | D_LYS_146 | NZ  | M_ASP_95A | OD2 | 3.397 |
| 1W72 | D_ARG_156 | NH1 | F_ASP_3   | OD1 | 3.644 |
| 1W72 | D_ARG_156 | NH1 | F_ASP_3   | OD2 | 3.082 |
| 1W72 | D_ARG_157 | NH2 | D_GLU_154 | OE2 | 3.289 |
| 1W72 | D_ARG_163 | NH1 | F_GLU_1   | OE1 | 3.609 |
| 1W72 | D_ARG_163 | NH1 | F_GLU_1   | OE2 | 3.022 |
| 1W72 | D_ARG_163 | NH2 | D_ASP_166 | OD2 | 3.278 |
| 1W72 | D_ARG_170 | NH2 | D_GLU_55  | OE1 | 3.599 |
| 1W72 | D_ARG_170 | NH2 | D_GLU_55  | OE2 | 3.371 |
| 1W72 | D_HIS_191 | NE2 | D_GLU_254 | OE2 | 2.873 |
| 1W72 | D_HIS_192 | NE2 | E_ASP_98  | OD2 | 3.123 |
| 1W72 | D_ARG_219 | NH1 | D_ASP_220 | OD2 | 3.836 |
| 1W72 | D_ARG_256 | NH1 | D_ASP_220 | OD2 | 3.881 |
| 1W72 | D_ARG_256 | NH2 | D_GLU_253 | OE1 | 3.311 |
| 1W72 | E_LYS_6   | NZ  | D_GLU_232 | OE2 | 2.863 |
| 1W72 | E_LYS_41  | NZ  | E_ASP_76  | OD1 | 3.809 |
| 1W72 | E_LYS_41  | NZ  | E_ASP_76  | OD2 | 3.639 |
| 1W72 | E_ARG_45  | NH1 | E_ASP_38  | OD1 | 3.708 |
| 1W72 | E_ARG_81  | NH1 | E_ASP_38  | OD2 | 3.844 |
| 1W72 | H_ARG_38  | NH1 | H_ASP_86  | OD1 | 3.015 |
| 1W72 | H_ARG_38  | NH2 | H_GLU_46  | OE1 | 3.060 |
| 1W72 | H_ARG_38  | NH2 | H_GLU_46  | OE2 | 3.921 |
| 1W72 | H_ARG_38  | NH2 | H_ASP_86  | OD1 | 3.932 |
| 1W72 | H_ARG_66  | NH1 | H_ASP_86  | OD1 | 3.676 |
| 1W72 | H_ARG_66  | NH1 | H_ASP_86  | OD2 | 2.720 |
| 1W72 | H_ARG_66  | NH2 | H_ASP_86  | OD1 | 3.173 |
| 1W72 | H_ARG_66  | NH2 | H_ASP_86  | OD2 | 3.657 |
| 1W72 | H_ARG_83  | NH1 | H_GLU_85  | OE1 | 3.964 |
| 1W72 | H_ARG_94  | NH2 | H_ASP_101 | OD1 | 3.551 |
| 1W72 | H_ARG_94  | NH2 | H_ASP_101 | OD2 | 2.836 |
| 1W72 | H_LYS_145 | NZ  | L_GLU_124 | OE2 | 2.720 |
| 1W72 | H_LYS_221 | NZ  | L_GLU_123 | OE1 | 2.737 |
| 1W72 | H_LYS_221 | NZ  | L_GLU_123 | OE2 | 3.946 |
| 1W72 | H_LYS_222 | NZ  | H_GLU_226 | OE2 | 2.721 |
| 1W72 | I_ARG_38  | NH1 | I_ASP_86  | OD1 | 3.126 |
| 1W72 | I_ARG_38  | NH2 | I_GLU_46  | OE1 | 3.128 |
| 1W72 | I_ARG_38  | NH2 | I_GLU_46  | OE2 | 3.763 |

|      |           |     |           |     |       |
|------|-----------|-----|-----------|-----|-------|
| 1W72 | L_ARG_38  | NH2 | L_ASP_86  | OD1 | 3.826 |
| 1W72 | L_LYS_64  | NZ  | L_ASP_61  | OD1 | 2.896 |
| 1W72 | L_ARG_66  | NH1 | L_ASP_86  | OD1 | 3.873 |
| 1W72 | L_ARG_66  | NH1 | L_ASP_86  | OD2 | 2.731 |
| 1W72 | L_ARG_66  | NH2 | L_ASP_86  | OD1 | 3.149 |
| 1W72 | L_ARG_66  | NH2 | L_ASP_86  | OD2 | 3.465 |
| 1W72 | L_ARG_94  | NH2 | L_ASP_101 | OD1 | 3.478 |
| 1W72 | L_ARG_94  | NH2 | L_ASP_101 | OD2 | 2.930 |
| 1W72 | L_ARG_96  | NH1 | L_ASP_101 | OD2 | 3.483 |
| 1W72 | L_LYS_145 | NZ  | M_GLU_124 | OE2 | 2.470 |
| 1W72 | L_LYS_222 | NZ  | L_GLU_226 | OE2 | 3.445 |
| 1W72 | L_LYS_228 | NZ  | M_GLU_123 | OE2 | 3.514 |
| 1W72 | L_ARG_31  | NH2 | L_ASP_92  | OD2 | 2.894 |
| 1W72 | L_ARG_61  | NH1 | L_ASP_82  | OD1 | 3.611 |
| 1W72 | L_ARG_61  | NH1 | L_ASP_82  | OD2 | 2.785 |
| 1W72 | L_ARG_61  | NH2 | L_GLU_79  | OE1 | 2.992 |
| 1W72 | L_ARG_61  | NH2 | L_ASP_82  | OD1 | 3.068 |
| 1W72 | L_ARG_61  | NH2 | L_ASP_82  | OD2 | 3.602 |
| 1W72 | L_LYS_166 | NZ  | L_GLU_83  | OE2 | 2.718 |
| 1W72 | L_HIS_189 | ND1 | L_ASP_151 | OD2 | 2.787 |
| 1W72 | M_ARG_31  | NH2 | M_ASP_92  | OD2 | 3.047 |
| 1W72 | M_ARG_61  | NH1 | M_ASP_82  | OD1 | 3.754 |
| 1W72 | M_ARG_61  | NH1 | M_ASP_82  | OD2 | 2.671 |
| 1W72 | M_ARG_61  | NH2 | M_GLU_79  | OE1 | 3.828 |
| 1W72 | M_ARG_61  | NH2 | M_GLU_79  | OE2 | 3.741 |
| 1W72 | M_ARG_61  | NH2 | M_ASP_82  | OD1 | 2.860 |
| 1W72 | M_ARG_61  | NH2 | M_ASP_82  | OD2 | 3.245 |
| 1W72 | M_HIS_95B | NE2 | L_ASP_61  | OD2 | 3.924 |
| 1W72 | M_LYS_166 | NZ  | M_GLU_83  | OE2 | 2.783 |
| 1W72 | M_HIS_189 | ND1 | M_ASP_151 | OD2 | 2.728 |

Table 226: 1W72-specific salt bridging networks analysis. In this table, a PDB file is specified with a four-letter PDB ID, except that the names of the PDB files corresponding to the single NMR structural model split from the NMR ensemble is specified with a four-letter PDB ID in addition to a hyphen followed by the single NMR structural model numeric ID, the residue naming scheme is **Chain ID\_residue name\_residue number**,  $\angle ADH$  represents the angle formed by acceptor (A), donor (D) and hydrogen (H) ( $\angle ADH$ ).



| PDB ID | Residue A | Atom A | Residue B | Atom B | Distance (Å) |
|--------|-----------|--------|-----------|--------|--------------|
| 1WEJ   | L_HIS_30  | ND1    | F_GLU_104 | OE1    | 2.984        |
| 1WEJ   | L_HIS_30  | ND1    | F_GLU_104 | OE2    | 2.758        |
| 1WEJ   | L_ARG_61  | NH2    | L_GLU_81  | OE2    | 3.867        |
| 1WEJ   | L_ARG_61  | NH2    | L_ASP_82  | OD1    | 2.963        |
| 1WEJ   | L_ARG_61  | NH2    | L_ASP_82  | OD2    | 3.742        |
| 1WEJ   | L_LYS_142 | NZ     | L_ASP_143 | OD1    | 3.329        |
| 1WEJ   | L_LYS_147 | NZ     | L_GLU_154 | OE1    | 2.866        |
| 1WEJ   | L_LYS_149 | NZ     | L_GLU_195 | OE1    | 3.636        |
| 1WEJ   | L_LYS_149 | NZ     | L_GLU_195 | OE2    | 3.035        |
| 1WEJ   | L_ARG_155 | NH1    | L_GLU_185 | OE1    | 3.455        |
| 1WEJ   | L_ARG_155 | NH1    | L_GLU_185 | OE2    | 3.112        |
| 1WEJ   | L_ARG_155 | NH2    | L_GLU_185 | OE2    | 2.727        |
| 1WEJ   | L_HIS_189 | ND1    | L_ASP_151 | OD2    | 3.628        |
| 1WEJ   | L_HIS_189 | NE2    | L_GLU_185 | OE2    | 3.295        |
| 1WEJ   | L_LYS_199 | NZ     | L_ASP_110 | OD2    | 3.451        |
| 1WEJ   | H_ARG_40  | NH2    | H_GLU_89  | OE2    | 3.626        |
| 1WEJ   | H_ARG_50  | NH1    | F_GLU_62  | OE2    | 3.319        |
| 1WEJ   | H_ARG_50  | NH2    | F_GLU_62  | OE2    | 2.823        |
| 1WEJ   | H_LYS_67  | NZ     | H_ASP_90  | OD1    | 3.685        |
| 1WEJ   | H_LYS_67  | NZ     | H_ASP_90  | OD2    | 2.798        |
| 1WEJ   | H_LYS_212 | NZ     | L_GLU_123 | OE2    | 3.963        |
| 1WEJ   | F_LYS_60  | NZ     | H_ASP_100 | OD2    | 3.322        |
| 1WEJ   | F_LYS_87  | NZ     | F_GLU_90  | OE2    | 3.504        |
| 1WEJ   | F_LYS_88  | NZ     | F_GLU_92  | OE2    | 3.066        |
| 1WEJ   | F_LYS_99  | NZ     | F_GLU_61  | OE2    | 2.733        |

Table 227: 1WEJ-specific salt bridging networks analysis. In this table, a PDB file is specified with a four-letter PDB ID, except that the names of the PDB files corresponding to the single NMR structural model split from the NMR ensemble is specified with a four-letter PDB ID in addition to a hyphen followed by the single NMR structural model numeric ID, the residue naming scheme is **Chain ID\_residue name\_residue number**,  $\angle ADH$  represents the angle formed by acceptor (A), donor (D) and hydrogen (H) ( $\angle ADH$ ).

| PDB ID | Residue A | Atom A | Residue B | Atom B | Distance (Å) |
|--------|-----------|--------|-----------|--------|--------------|
| 1WZ1   | L_ARG_24  | NH1    | L_ASP_75  | OD2    | 3.952        |
| 1WZ1   | L_ARG_66  | NH1    | L_GLU_84  | OE1    | 3.457        |
| 1WZ1   | L_ARG_66  | NH1    | L_GLU_84  | OE2    | 3.613        |
| 1WZ1   | L_ARG_66  | NH2    | L_GLU_84  | OE2    | 3.590        |
| 1WZ1   | L_ARG_66  | NH2    | L_GLU_86  | OE2    | 2.822        |
| 1WZ1   | L_ARG_66  | NH2    | L_ASP_87  | OD1    | 2.607        |
| 1WZ1   | L_ARG_66  | NH2    | L_ASP_87  | OD2    | 3.494        |
| 1WZ1   | H_ARG_38  | NH1    | H_GLU_46  | OE1    | 3.212        |
| 1WZ1   | H_ARG_38  | NH1    | H_GLU_46  | OE2    | 3.069        |
| 1WZ1   | H_ARG_38  | NH2    | H_ASP_92  | OD2    | 2.708        |
| 1WZ1   | H_ARG_52  | NH1    | H_GLU_50  | OE2    | 3.191        |
| 1WZ1   | H_HIS_58  | NE2    | H_ASP_76  | OD2    | 3.006        |
| 1WZ1   | H_ARG_69  | NH1    | H_ASP_92  | OD1    | 3.703        |
| 1WZ1   | H_ARG_69  | NH1    | H_ASP_92  | OD2    | 3.712        |
| 1WZ1   | H_ARG_69  | NH2    | H_ASP_92  | OD1    | 2.195        |
| 1WZ1   | H_ARG_69  | NH2    | H_ASP_92  | OD2    | 3.555        |
| 1WZ1   | H_ARG_74  | NH2    | H_ASP_76  | OD1    | 3.331        |

Table 228: 1WZ1-specific salt bridging networks analysis. In this table, a PDB file is specified with a four-letter PDB ID, except that the names of the PDB files corresponding to the single NMR structural model split from the NMR ensemble is specified with a four-letter PDB ID in addition to a hyphen followed by the single NMR structural model numeric ID, the residue naming scheme is **Chain ID\_residue name\_residue number**,  $\angle ADH$  represents the angle formed by acceptor (A), donor (D) and hydrogen (H) ( $\angle ADH$ ).

| PDB ID | Residue A | Atom A | Residue B | Atom B | Distance (Å) |
|--------|-----------|--------|-----------|--------|--------------|
| 1XF2   | L_ARG_61  | NH2    | L_GLU_81  | OE2    | 3.419        |
| 1XF2   | L_ARG_61  | NH2    | L_ASP_82  | OD1    | 3.006        |
| 1XF2   | L_ARG_61  | NH2    | L_ASP_82  | OD2    | 3.455        |
| 1XF2   | L_LYS_149 | NZ     | L_GLU_195 | OE1    | 3.344        |
| 1XF2   | L_ARG_155 | NH1    | L_GLU_185 | OE2    | 3.754        |
| 1XF2   | L_ARG_155 | NH2    | L_GLU_185 | OE2    | 2.954        |
| 1XF2   | L_ARG_188 | NH1    | L_GLU_185 | OE1    | 2.837        |
| 1XF2   | L_HIS_189 | ND1    | L_ASP_151 | OD2    | 3.000        |
| 1XF2   | L_HIS_189 | NE2    | L_GLU_185 | OE2    | 3.246        |
| 1XF2   | L_ARG_211 | NH1    | L_GLU_187 | OE1    | 3.085        |
| 1XF2   | H_LYS_66  | NZ     | H_ASP_86  | OD1    | 2.700        |
| 1XF2   | H_LYS_66  | NZ     | H_ASP_86  | OD2    | 3.586        |
| 1XF2   | H_ARG_94  | NH2    | H_ASP_101 | OD1    | 3.923        |
| 1XF2   | H_ARG_94  | NH2    | H_ASP_101 | OD2    | 3.252        |
| 1XF2   | H_LYS_208 | NZ     | L_GLU_123 | OE1    | 3.369        |
| 1XF2   | H_LYS_208 | NZ     | L_GLU_123 | OE2    | 2.577        |
| 1XF2   | A_ARG_61  | NH1    | A_GLU_81  | OE2    | 3.119        |
| 1XF2   | A_ARG_61  | NH1    | A_ASP_82  | OD1    | 2.988        |
| 1XF2   | A_ARG_61  | NH1    | A_ASP_82  | OD2    | 3.665        |
| 1XF2   | A_LYS_149 | NZ     | A_GLU_195 | OE2    | 3.121        |
| 1XF2   | A_ARG_155 | NH1    | A_GLU_185 | OE1    | 3.880        |
| 1XF2   | A_ARG_155 | NH1    | A_GLU_185 | OE2    | 2.861        |
| 1XF2   | A_ARG_155 | NH2    | A_GLU_185 | OE2    | 2.971        |
| 1XF2   | A_ARG_188 | NH2    | A_GLU_185 | OE1    | 3.702        |
| 1XF2   | A_HIS_189 | ND1    | A_ASP_151 | OD2    | 2.794        |
| 1XF2   | A_LYS_199 | NZ     | A_ASP_110 | OD2    | 3.768        |
| 1XF2   | A_ARG_211 | NH1    | A_GLU_187 | OE2    | 3.554        |
| 1XF2   | B_LYS_66  | NZ     | B_ASP_86  | OD1    | 2.668        |
| 1XF2   | B_LYS_66  | NZ     | B_ASP_86  | OD2    | 3.588        |
| 1XF2   | B_ARG_94  | NH2    | B_ASP_101 | OD1    | 3.898        |
| 1XF2   | B_ARG_94  | NH2    | B_ASP_101 | OD2    | 2.974        |
| 1XF2   | B_LYS_208 | NZ     | A_GLU_123 | OE2    | 2.913        |

Table 229: 1XF2-specific salt bridging networks analysis. In this table, a PDB file is specified with a four-letter PDB ID, except that the names of the PDB files corresponding to the single NMR structural model split from the NMR ensemble is specified with a four-letter PDB ID in addition to a hyphen followed by the single NMR structural model numeric ID, the residue naming scheme is **Chain ID\_residue name\_residue number**,  $\angle ADH$  represents the angle formed by acceptor (A), donor (D) and hydrogen (H) ( $\angle ADH$ ).

| PDB ID | Residue A | Atom A | Residue B | Atom B | Distance (Å) |
|--------|-----------|--------|-----------|--------|--------------|
| 1XGY   | L.LYS_27  | NZ     | L.GLU_93  | OE1    | 3.138        |
| 1XGY   | L.LYS_27  | NZ     | L.GLU_93  | OE2    | 3.725        |
| 1XGY   | L.ARG_50  | NH2    | P.GLU_6   | OE1    | 2.621        |
| 1XGY   | L.ARG_61  | NH1    | L.ASP_82  | OD1    | 2.794        |
| 1XGY   | L.ARG_61  | NH1    | L.ASP_82  | OD2    | 2.267        |
| 1XGY   | L.ARG_61  | NH2    | L.GLU_79  | OE1    | 3.265        |
| 1XGY   | L.ARG_61  | NH2    | L.GLU_79  | OE2    | 3.639        |
| 1XGY   | L.ARG_61  | NH2    | L.GLU_81  | OE2    | 3.975        |
| 1XGY   | L.ARG_61  | NH2    | L.ASP_82  | OD1    | 3.476        |
| 1XGY   | L.ARG_61  | NH2    | L.ASP_82  | OD2    | 3.700        |
| 1XGY   | L.LYS_142 | NZ     | L.GLU_105 | OE1    | 3.607        |
| 1XGY   | L.LYS_147 | NZ     | L.GLU_195 | OE1    | 2.404        |
| 1XGY   | L.LYS_149 | NZ     | L.GLU_195 | OE1    | 3.987        |
| 1XGY   | L.LYS_149 | NZ     | L.GLU_195 | OE2    | 2.719        |
| 1XGY   | L.ARG_155 | NH1    | L.GLU_185 | OE2    | 3.616        |
| 1XGY   | L.ARG_155 | NH2    | L.GLU_185 | OE2    | 2.613        |
| 1XGY   | L.HIS_189 | ND1    | L.ASP_151 | OD2    | 3.191        |
| 1XGY   | L.LYS_199 | NZ     | L.ASP_110 | OD1    | 2.374        |
| 1XGY   | L.LYS_199 | NZ     | L.ASP_110 | OD2    | 2.995        |
| 1XGY   | H.ARG_40  | NH1    | H.GLU_85  | OE1    | 3.102        |
| 1XGY   | H.LYS_66  | NZ     | H.ASP_86  | OD1    | 3.962        |
| 1XGY   | H.LYS_66  | NZ     | H.ASP_86  | OD2    | 2.962        |
| 1XGY   | H.LYS_205 | NZ     | H.ASP_207 | OD1    | 3.695        |
| 1XGY   | H.LYS_208 | NZ     | L.GLU_123 | OE2    | 3.768        |
| 1XGY   | M.LYS_27  | NZ     | M.GLU_93  | OE1    | 2.941        |
| 1XGY   | M.LYS_27  | NZ     | M.GLU_93  | OE2    | 3.832        |
| 1XGY   | M.ARG_50  | NH2    | Q.GLU_6   | OE1    | 3.022        |
| 1XGY   | M.ARG_61  | NH1    | M.ASP_82  | OD1    | 3.884        |
| 1XGY   | M.ARG_61  | NH1    | M.ASP_82  | OD2    | 2.768        |
| 1XGY   | M.ARG_61  | NH2    | M.GLU_79  | OE1    | 3.581        |
| 1XGY   | M.ARG_61  | NH2    | M.GLU_79  | OE2    | 3.865        |
| 1XGY   | M.ARG_61  | NH2    | M.ASP_82  | OD1    | 3.106        |
| 1XGY   | M.ARG_61  | NH2    | M.ASP_82  | OD2    | 3.415        |
| 1XGY   | M.ARG_77  | NH1    | M.GLU_79  | OE2    | 3.806        |
| 1XGY   | M.LYS_142 | NZ     | M.GLU_105 | OE1    | 2.680        |
| 1XGY   | M.LYS_147 | NZ     | M.GLU_154 | OE1    | 3.126        |
| 1XGY   | M.LYS_147 | NZ     | M.GLU_154 | OE2    | 3.008        |
| 1XGY   | M.LYS_149 | NZ     | M.GLU_195 | OE1    | 3.612        |
| 1XGY   | M.LYS_149 | NZ     | M.GLU_195 | OE2    | 2.488        |
| 1XGY   | M.ARG_155 | NH1    | M.GLU_185 | OE2    | 3.086        |
| 1XGY   | M.ARG_155 | NH2    | M.GLU_185 | OE1    | 3.630        |
| 1XGY   | M.ARG_155 | NH2    | M.GLU_185 | OE2    | 2.772        |
| 1XGY   | M.HIS_189 | ND1    | M.ASP_151 | OD2    | 3.229        |
| 1XGY   | M.LYS_199 | NZ     | M.ASP_110 | OD1    | 2.140        |
| 1XGY   | M.LYS_199 | NZ     | M.ASP_110 | OD2    | 2.774        |
| 1XGY   | I.ARG_40  | NH1    | I.GLU_85  | OE2    | 3.888        |
| 1XGY   | I.LYS_66  | NZ     | I.ASP_86  | OD1    | 3.839        |
| 1XGY   | I.LYS_66  | NZ     | I.ASP_86  | OD2    | 2.661        |
| 1XGY   | I.LYS_205 | NZ     | I.ASP_207 | OD1    | 3.293        |
| 1XGY   | I.LYS_208 | NZ     | M.GLU_123 | OE2    | 3.551        |

---

Table 230: 1XGY-specific salt bridging networks analysis. In this table, a PDB file is specified with a four-letter PDB ID, except that the names of the PDB files corresponding to the single NMR structural model split from the NMR ensemble is specified with a four-letter PDB ID in addition to a hyphen followed by the single NMR structural model numeric ID, the residue naming scheme is **Chain ID\_residue name\_residue number**,  $\angle ADH$  represents the angle formed by acceptor (A), donor (D) and hydrogen (H) ( $\angle ADH$ ).

| PDB ID | Residue A | Atom A | Residue B | Atom B | Distance (Å) |
|--------|-----------|--------|-----------|--------|--------------|
| 1XIW   | A_LYS_52  | NZ     | A_ASP_48  | OD1    | 3.395        |
| 1XIW   | A_HIS_60  | ND1    | A_ASP_59  | OD1    | 3.757        |
| 1XIW   | A_HIS_60  | NE2    | A_ASP_59  | OD1    | 3.245        |
| 1XIW   | A_ARG_80  | NH1    | D_ASP_106 | OD2    | 2.879        |
| 1XIW   | A_ARG_80  | NH2    | A_GLU_35  | OE1    | 3.061        |
| 1XIW   | A_ARG_80  | NH2    | A_GLU_35  | OE2    | 3.325        |
| 1XIW   | A_ARG_94  | NH1    | A_GLU_68  | OE2    | 2.956        |
| 1XIW   | A_ARG_94  | NH2    | A_GLU_68  | OE2    | 3.474        |
| 1XIW   | A_ARG_94  | NH2    | B_GLU_7   | OE1    | 3.648        |
| 1XIW   | A_ARG_94  | NH2    | B_GLU_7   | OE2    | 2.974        |
| 1XIW   | B_LYS_2   | NZ     | A_ASP_42  | OD1    | 3.017        |
| 1XIW   | B_LYS_2   | NZ     | A_ASP_42  | OD2    | 2.678        |
| 1XIW   | B_ARG_11  | NH1    | B_ASP_38  | OD1    | 3.352        |
| 1XIW   | B_ARG_11  | NH1    | B_ASP_38  | OD2    | 3.240        |
| 1XIW   | B_ARG_36  | NH2    | B_GLU_6   | OE1    | 3.782        |
| 1XIW   | B_ARG_36  | NH2    | B_GLU_6   | OE2    | 2.940        |
| 1XIW   | B_ARG_42  | NH1    | B_GLU_7   | OE2    | 2.789        |
| 1XIW   | B_ARG_47  | NH2    | B_ASP_45  | OD2    | 3.150        |
| 1XIW   | C_ARG_25  | NH1    | C_ASP_71  | OD1    | 2.681        |
| 1XIW   | C_ARG_25  | NH1    | C_ASP_71  | OD2    | 3.457        |
| 1XIW   | C_ARG_31  | NH1    | A_ASP_86  | OD1    | 2.919        |
| 1XIW   | C_ARG_31  | NH1    | A_ASP_86  | OD2    | 3.491        |
| 1XIW   | C_ARG_31  | NH2    | A_ASP_86  | OD1    | 3.709        |
| 1XIW   | C_ARG_31  | NH2    | A_ASP_86  | OD2    | 2.755        |
| 1XIW   | C_ARG_54  | NH1    | F_GLU_6   | OE1    | 2.951        |
| 1XIW   | C_ARG_54  | NH2    | F_GLU_6   | OE1    | 3.193        |
| 1XIW   | C_ARG_54  | NH2    | F_GLU_6   | OE2    | 3.073        |
| 1XIW   | C_HIS_56  | ND1    | F_GLU_9   | OE1    | 3.139        |
| 1XIW   | C_HIS_56  | ND1    | F_GLU_9   | OE2    | 2.963        |
| 1XIW   | C_LYS_62  | NZ     | C_GLU_80  | OE1    | 2.741        |
| 1XIW   | C_LYS_62  | NZ     | C_ASP_83  | OD1    | 3.773        |
| 1XIW   | C_LYS_62  | NZ     | C_ASP_83  | OD2    | 2.726        |
| 1XIW   | D_LYS_55  | NZ     | A_ASP_57  | OD1    | 3.690        |
| 1XIW   | D_LYS_63  | NZ     | D_GLU_46  | OE1    | 2.923        |
| 1XIW   | D_LYS_63  | NZ     | D_GLU_46  | OE2    | 3.778        |
| 1XIW   | D_LYS_67  | NZ     | D_ASP_90  | OD1    | 3.837        |
| 1XIW   | D_LYS_67  | NZ     | D_ASP_90  | OD2    | 2.934        |
| 1XIW   | D_ARG_98  | NH2    | D_ASP_110 | OD1    | 3.519        |
| 1XIW   | D_ARG_98  | NH2    | D_ASP_110 | OD2    | 2.851        |
| 1XIW   | E_HIS_60  | ND1    | E_ASP_59  | OD1    | 3.485        |
| 1XIW   | E_HIS_60  | NE2    | E_ASP_59  | OD1    | 2.909        |
| 1XIW   | E_ARG_80  | NH1    | H_ASP_106 | OD2    | 2.741        |
| 1XIW   | E_ARG_80  | NH2    | E_GLU_35  | OE1    | 3.223        |
| 1XIW   | E_ARG_80  | NH2    | E_GLU_35  | OE2    | 2.970        |
| 1XIW   | E_ARG_94  | NH1    | E_GLU_68  | OE2    | 3.220        |
| 1XIW   | E_ARG_94  | NH2    | E_GLU_68  | OE2    | 2.578        |
| 1XIW   | E_ARG_94  | NH2    | F_GLU_7   | OE2    | 3.577        |
| 1XIW   | F_LYS_2   | NZ     | E_ASP_42  | OD1    | 3.079        |
| 1XIW   | F_LYS_2   | NZ     | E_ASP_42  | OD2    | 3.491        |
| 1XIW   | F_ARG_11  | NH1    | F_ASP_38  | OD1    | 3.262        |
| 1XIW   | F_ARG_11  | NH1    | F_ASP_38  | OD2    | 3.138        |
| 1XIW   | F_ARG_36  | NH2    | F_GLU_6   | OE1    | 3.809        |
| 1XIW   | F_ARG_36  | NH2    | F_GLU_6   | OE2    | 2.975        |
| 1XIW   | F_ARG_42  | NH2    | F_GLU_7   | OE2    | 3.760        |
| 1XIW   | F_ARG_47  | NH2    | F_ASP_45  | OD2    | 3.702        |
| 1XIW   | G_ARG_31  | NH1    | E_ASP_86  | OD1    | 3.076        |
| 1XIW   | G_ARG_31  | NH1    | E_ASP_86  | OD2    | 3.219        |

|      |          |     |           |     |       |
|------|----------|-----|-----------|-----|-------|
| 1XIW | G_ARG_31 | NH2 | E_ASP_86  | OD2 | 2.817 |
| 1XIW | G_ARG_54 | NH1 | B_GLU_6   | OE1 | 2.839 |
| 1XIW | G_ARG_54 | NH2 | B_GLU_6   | OE1 | 3.146 |
| 1XIW | G_ARG_54 | NH2 | B_GLU_6   | OE2 | 3.222 |
| 1XIW | G_HIS_56 | ND1 | B_GLU_9   | OE1 | 2.509 |
| 1XIW | G_HIS_56 | ND1 | B_GLU_9   | OE2 | 3.961 |
| 1XIW | G_LYS_62 | NZ  | G_GLU_80  | OE1 | 2.856 |
| 1XIW | G_LYS_62 | NZ  | G_ASP_83  | OD1 | 3.394 |
| 1XIW | G_LYS_62 | NZ  | G_ASP_83  | OD2 | 2.415 |
| 1XIW | H_LYS_67 | NZ  | H_ASP_90  | OD1 | 3.722 |
| 1XIW | H_LYS_67 | NZ  | H_ASP_90  | OD2 | 3.068 |
| 1XIW | H_ARG_98 | NH2 | H_ASP_110 | OD1 | 3.520 |
| 1XIW | H_ARG_98 | NH2 | H_ASP_110 | OD2 | 2.683 |

Table 231: 1XIW-specific salt bridging networks analysis. In this table, a PDB file is specified with a four-letter PDB ID, except that the names of the PDB files corresponding to the single NMR structural model split from the NMR ensemble is specified with a four-letter PDB ID in addition to a hyphen followed by the single NMR structural model numeric ID, the residue naming scheme is **Chain ID\_residue name\_residue number**,  $\angle ADH$  represents the angle formed by acceptor (A), donor (D) and hydrogen (H) ( $\angle ADH$ ).

| PDB ID | Residue A | Atom A | Residue B | Atom B | Distance (Å) |
|--------|-----------|--------|-----------|--------|--------------|
| 1YC7   | A_ARG_38  | NH1    | A_ASP_89  | OD1    | 2.902        |
| 1YC7   | A_ARG_38  | NH2    | A_GLU_46  | OE2    | 3.097        |
| 1YC7   | A_ARG_38  | NH2    | A_ASP_89  | OD1    | 3.949        |
| 1YC7   | A_LYS_64  | NZ     | A_ASP_61  | OD1    | 2.723        |
| 1YC7   | A_LYS_64  | NZ     | A_ASP_61  | OD2    | 3.957        |
| 1YC7   | A_ARG_66  | NH1    | A_ASP_89  | OD1    | 2.987        |
| 1YC7   | A_ARG_66  | NH1    | A_ASP_89  | OD2    | 3.524        |
| 1YC7   | A_ARG_66  | NH2    | A_ASP_89  | OD1    | 3.641        |
| 1YC7   | A_ARG_66  | NH2    | A_ASP_89  | OD2    | 2.704        |
| 1YC7   | B_ARG_38  | NH1    | B_ASP_89  | OD1    | 2.874        |
| 1YC7   | B_ARG_38  | NH2    | B_GLU_46  | OE2    | 3.356        |
| 1YC7   | B_ARG_38  | NH2    | B_ASP_89  | OD1    | 3.943        |
| 1YC7   | B_ARG_66  | NH1    | B_ASP_89  | OD1    | 3.049        |
| 1YC7   | B_ARG_66  | NH1    | B_ASP_89  | OD2    | 3.521        |
| 1YC7   | B_ARG_66  | NH2    | B_ASP_89  | OD1    | 3.788        |
| 1YC7   | B_ARG_66  | NH2    | B_ASP_89  | OD2    | 2.754        |

Table 232: 1YC7-specific salt bridging networks analysis. In this table, a PDB file is specified with a four-letter PDB ID, except that the names of the PDB files corresponding to the single NMR structural model split from the NMR ensemble is specified with a four-letter PDB ID in addition to a hyphen followed by the single NMR structural model numeric ID, the residue naming scheme is **Chain ID\_residue name\_residue number**,  $\angle ADH$  represents the angle formed by acceptor (A), donor (D) and hydrogen (H) ( $\angle ADH$ ).



| PDB ID | Residue A | Atom A | Residue B | Atom B | Distance (Å) |
|--------|-----------|--------|-----------|--------|--------------|
| 1YC8   | A_ARG_38  | NH1    | A_ASP_89  | OD1    | 2.913        |
| 1YC8   | A_ARG_38  | NH2    | A_GLU_46  | OE1    | 3.560        |
| 1YC8   | A_ARG_38  | NH2    | A_GLU_46  | OE2    | 3.758        |
| 1YC8   | A_LYS_64  | NZ     | A_ASP_61  | OD1    | 3.092        |
| 1YC8   | A_ARG_66  | NH1    | A_ASP_89  | OD1    | 2.701        |
| 1YC8   | A_ARG_66  | NH1    | A_ASP_89  | OD2    | 3.515        |
| 1YC8   | A_ARG_66  | NH2    | A_ASP_89  | OD1    | 3.553        |
| 1YC8   | A_ARG_66  | NH2    | A_ASP_89  | OD2    | 2.766        |
| 1YC8   | B_ARG_38  | NH1    | B_ASP_89  | OD1    | 2.947        |
| 1YC8   | B_ARG_38  | NH2    | B_GLU_46  | OE1    | 3.738        |
| 1YC8   | B_ARG_38  | NH2    | B_GLU_46  | OE2    | 3.326        |
| 1YC8   | B_ARG_38  | NH2    | B_ASP_89  | OD1    | 3.942        |
| 1YC8   | B_LYS_64  | NZ     | B_ASP_61  | OD1    | 2.743        |
| 1YC8   | B_ARG_66  | NH1    | B_ASP_89  | OD1    | 2.596        |
| 1YC8   | B_ARG_66  | NH1    | B_ASP_89  | OD2    | 2.980        |
| 1YC8   | B_ARG_66  | NH2    | B_ASP_89  | OD1    | 3.764        |
| 1YC8   | B_ARG_66  | NH2    | B_ASP_89  | OD2    | 2.564        |

Table 233: 1YC8-specific salt bridging networks analysis. In this table, a PDB file is specified with a four-letter PDB ID, except that the names of the PDB files corresponding to the single NMR structural model split from the NMR ensemble is specified with a four-letter PDB ID in addition to a hyphen followed by the single NMR structural model numeric ID, the residue naming scheme is **Chain ID\_residue name\_residue number**,  $\angle ADH$  represents the angle formed by acceptor (A), donor (D) and hydrogen (H) ( $\angle ADH$ ).

| PDB ID | Residue A | Atom A | Residue B  | Atom B | Distance (Å) |
|--------|-----------|--------|------------|--------|--------------|
| 1YEI   | L_LYS_24  | NZ     | L_ASP_70   | OD1    | 3.938        |
| 1YEI   | L_LYS_30  | NZ     | H_GLU_100B | OE1    | 2.979        |
| 1YEI   | L_LYS_45  | NZ     | H_ASP_101  | OD1    | 2.746        |
| 1YEI   | L_LYS_45  | NZ     | H_ASP_101  | OD2    | 3.891        |
| 1YEI   | L_ARG_46  | NH2    | L_ASP_55   | OD1    | 3.728        |
| 1YEI   | L_ARG_46  | NH2    | L_ASP_55   | OD2    | 2.823        |
| 1YEI   | L_ARG_46  | NH2    | H_ASP_101  | OD1    | 3.707        |
| 1YEI   | L_HIS_49  | ND1    | L_ASP_55   | OD1    | 2.748        |
| 1YEI   | L_HIS_49  | ND1    | L_ASP_55   | OD2    | 3.813        |
| 1YEI   | L_HIS_49  | NE2    | H_ASP_100C | OD1    | 3.542        |
| 1YEI   | L_ARG_61  | NH1    | L_ASP_82   | OD1    | 3.376        |
| 1YEI   | L_ARG_61  | NH1    | L_ASP_82   | OD2    | 2.794        |
| 1YEI   | L_ARG_61  | NH2    | L_ASP_82   | OD1    | 3.026        |
| 1YEI   | L_ARG_61  | NH2    | L_ASP_82   | OD2    | 3.859        |
| 1YEI   | L_ARG_77  | NH1    | L_GLU_79   | OE2    | 2.773        |
| 1YEI   | L_LYS_103 | NZ     | L_ASP_165  | OD1    | 3.211        |
| 1YEI   | L_LYS_149 | NZ     | L_GLU_195  | OE1    | 3.290        |
| 1YEI   | L_LYS_149 | NZ     | L_GLU_195  | OE2    | 3.378        |
| 1YEI   | L_ARG_155 | NH1    | L_GLU_185  | OE1    | 3.467        |
| 1YEI   | L_ARG_155 | NH1    | L_GLU_185  | OE2    | 2.801        |
| 1YEI   | L_ARG_155 | NH2    | L_GLU_185  | OE1    | 2.921        |
| 1YEI   | L_ARG_155 | NH2    | L_GLU_185  | OE2    | 3.794        |
| 1YEI   | L_LYS_183 | NZ     | L_GLU_187  | OE1    | 2.856        |
| 1YEI   | L_LYS_183 | NZ     | L_GLU_187  | OE2    | 3.649        |
| 1YEI   | L_HIS_189 | ND1    | L_ASP_151  | OD2    | 3.711        |
| 1YEI   | L_HIS_189 | NE2    | L_GLU_185  | OE2    | 2.707        |
| 1YEI   | L_LYS_199 | NZ     | L_ASP_110  | OD1    | 3.088        |
| 1YEI   | L_LYS_199 | NZ     | L_ASP_110  | OD2    | 3.565        |
| 1YEI   | H_LYS_62  | NZ     | H_GLU_46   | OE1    | 2.847        |
| 1YEI   | H_LYS_62  | NZ     | H_GLU_46   | OE2    | 3.937        |
| 1YEI   | H_LYS_64  | NZ     | H_GLU_61   | OE1    | 2.773        |
| 1YEI   | H_LYS_66  | NZ     | H_ASP_86   | OD1    | 3.924        |
| 1YEI   | H_LYS_66  | NZ     | H_ASP_86   | OD2    | 2.870        |
| 1YEI   | H_LYS_216 | NZ     | H_ASP_218  | OD1    | 3.297        |
| 1YEI   | H_LYS_216 | NZ     | H_ASP_218  | OD2    | 3.256        |

Table 234: 1YEI-specific salt bridging networks analysis. In this table, a PDB file is specified with a four-letter PDB ID, except that the names of the PDB files corresponding to the single NMR structural model split from the NMR ensemble is specified with a four-letter PDB ID in addition to a hyphen followed by the single NMR structural model numeric ID, the residue naming scheme is **Chain ID\_residue name\_residue number**,  $\angle ADH$  represents the angle formed by acceptor (A), donor (D) and hydrogen (H) ( $\angle ADH$ ).

| PDB ID | Residue A | Atom A | Residue B  | Atom B | Distance (Å) |
|--------|-----------|--------|------------|--------|--------------|
| 1YEJ   | L_LYS_24  | NZ     | L_ASP_70   | OD1    | 3.770        |
| 1YEJ   | L_LYS_45  | NZ     | H_ASP_101  | OD1    | 2.790        |
| 1YEJ   | L_LYS_45  | NZ     | H_ASP_101  | OD2    | 3.988        |
| 1YEJ   | L_ARG_46  | NH2    | L_ASP_55   | OD1    | 3.922        |
| 1YEJ   | L_ARG_46  | NH2    | L_ASP_55   | OD2    | 2.854        |
| 1YEJ   | L_ARG_46  | NH2    | H_ASP_101  | OD1    | 3.745        |
| 1YEJ   | L_HIS_49  | ND1    | L_ASP_55   | OD1    | 2.776        |
| 1YEJ   | L_HIS_49  | ND1    | L_ASP_55   | OD2    | 3.660        |
| 1YEJ   | L_HIS_49  | NE2    | H_ASP_100C | OD1    | 3.536        |
| 1YEJ   | L_LYS_53  | NZ     | H_ASP_100C | OD1    | 3.377        |
| 1YEJ   | L_LYS_53  | NZ     | H_ASP_100C | OD2    | 3.298        |
| 1YEJ   | L_ARG_61  | NH1    | L_ASP_82   | OD1    | 3.561        |
| 1YEJ   | L_ARG_61  | NH1    | L_ASP_82   | OD2    | 2.867        |
| 1YEJ   | L_ARG_61  | NH2    | L_ASP_82   | OD1    | 3.034        |
| 1YEJ   | L_ARG_61  | NH2    | L_ASP_82   | OD2    | 3.799        |
| 1YEJ   | L_ARG_77  | NH1    | L_GLU_79   | OE2    | 2.713        |
| 1YEJ   | L_LYS_103 | NZ     | L_ASP_165  | OD1    | 3.615        |
| 1YEJ   | L_LYS_149 | NZ     | L_GLU_195  | OE1    | 3.131        |
| 1YEJ   | L_LYS_149 | NZ     | L_GLU_195  | OE2    | 3.063        |
| 1YEJ   | L_ARG_155 | NH1    | L_GLU_185  | OE1    | 3.833        |
| 1YEJ   | L_ARG_155 | NH1    | L_GLU_185  | OE2    | 2.788        |
| 1YEJ   | L_ARG_155 | NH2    | L_GLU_185  | OE1    | 2.959        |
| 1YEJ   | L_ARG_155 | NH2    | L_GLU_185  | OE2    | 3.459        |
| 1YEJ   | L_LYS_183 | NZ     | L_ASP_184  | OD1    | 3.622        |
| 1YEJ   | L_LYS_183 | NZ     | L_GLU_187  | OE1    | 2.703        |
| 1YEJ   | L_LYS_183 | NZ     | L_GLU_187  | OE2    | 3.871        |
| 1YEJ   | L_HIS_189 | ND1    | L_ASP_151  | OD2    | 3.584        |
| 1YEJ   | L_HIS_189 | NE2    | L_GLU_185  | OE2    | 2.940        |
| 1YEJ   | L_LYS_199 | NZ     | L_ASP_110  | OD1    | 3.252        |
| 1YEJ   | L_LYS_199 | NZ     | L_ASP_110  | OD2    | 3.582        |
| 1YEJ   | L_ARG_211 | NH2    | L_GLU_213  | OE2    | 3.445        |
| 1YEJ   | H_LYS_62  | NZ     | H_GLU_46   | OE1    | 3.693        |
| 1YEJ   | H_LYS_62  | NZ     | H_GLU_46   | OE2    | 2.771        |
| 1YEJ   | H_LYS_64  | NZ     | H_GLU_61   | OE1    | 2.970        |
| 1YEJ   | H_LYS_66  | NZ     | H_ASP_86   | OD1    | 3.807        |
| 1YEJ   | H_LYS_66  | NZ     | H_ASP_86   | OD2    | 2.899        |
| 1YEJ   | H_LYS_220 | NZ     | H_GLU_222  | OE2    | 3.507        |

Table 235: 1YEJ-specific salt bridging networks analysis. In this table, a PDB file is specified with a four-letter PDB ID, except that the names of the PDB files corresponding to the single NMR structural model split from the NMR ensemble is specified with a four-letter PDB ID in addition to a hyphen followed by the single NMR structural model numeric ID, the residue naming scheme is **Chain ID\_residue name\_residue number**,  $\angle ADH$  represents the angle formed by acceptor (A), donor (D) and hydrogen (H) ( $\angle ADH$ ).

| PDB ID | Residue A | Atom A | Residue B  | Atom B | Distance (Å) |
|--------|-----------|--------|------------|--------|--------------|
| 1YEK   | L_LYS_30  | NZ     | H_GLU_100B | OE1    | 2.464        |
| 1YEK   | L_LYS_45  | NZ     | H_ASP_101  | OD1    | 2.830        |
| 1YEK   | L_ARG_46  | NH2    | L_ASP_55   | OD1    | 3.853        |
| 1YEK   | L_ARG_46  | NH2    | L_ASP_55   | OD2    | 2.868        |
| 1YEK   | L_ARG_46  | NH2    | H_ASP_101  | OD1    | 3.853        |
| 1YEK   | L_HIS_49  | ND1    | L_ASP_55   | OD1    | 2.761        |
| 1YEK   | L_HIS_49  | ND1    | L_ASP_55   | OD2    | 3.901        |
| 1YEK   | L_HIS_49  | NE2    | H_ASP_100C | OD1    | 3.610        |
| 1YEK   | L_ARG_61  | NH1    | L_ASP_82   | OD1    | 3.781        |
| 1YEK   | L_ARG_61  | NH1    | L_ASP_82   | OD2    | 2.826        |
| 1YEK   | L_ARG_61  | NH2    | L_ASP_82   | OD1    | 2.807        |
| 1YEK   | L_ARG_61  | NH2    | L_ASP_82   | OD2    | 3.333        |
| 1YEK   | L_ARG_77  | NH1    | L_GLU_79   | OE1    | 3.282        |
| 1YEK   | L_ARG_77  | NH1    | L_GLU_79   | OE2    | 3.016        |
| 1YEK   | L_LYS_103 | NZ     | L_ASP_165  | OD1    | 3.840        |
| 1YEK   | L_LYS_149 | NZ     | L_GLU_195  | OE1    | 3.270        |
| 1YEK   | L_LYS_149 | NZ     | L_GLU_195  | OE2    | 3.257        |
| 1YEK   | L_ARG_155 | NH1    | L_GLU_185  | OE1    | 3.905        |
| 1YEK   | L_ARG_155 | NH1    | L_GLU_185  | OE2    | 2.816        |
| 1YEK   | L_ARG_155 | NH2    | L_GLU_185  | OE1    | 3.007        |
| 1YEK   | L_ARG_155 | NH2    | L_GLU_185  | OE2    | 3.425        |
| 1YEK   | L_LYS_169 | NZ     | L_ASP_167  | OD1    | 3.838        |
| 1YEK   | L_LYS_183 | NZ     | L_ASP_184  | OD1    | 3.851        |
| 1YEK   | L_LYS_183 | NZ     | L_GLU_187  | OE1    | 2.883        |
| 1YEK   | L_HIS_189 | ND1    | L_ASP_151  | OD2    | 3.477        |
| 1YEK   | L_HIS_189 | NE2    | L_GLU_185  | OE2    | 2.892        |
| 1YEK   | L_LYS_199 | NZ     | L_ASP_110  | OD1    | 3.770        |
| 1YEK   | L_LYS_199 | NZ     | L_ASP_110  | OD2    | 3.854        |
| 1YEK   | L_ARG_211 | NH2    | L_GLU_213  | OE1    | 3.144        |
| 1YEK   | L_ARG_211 | NH2    | L_GLU_213  | OE2    | 3.561        |
| 1YEK   | H_LYS_62  | NZ     | H_GLU_46   | OE1    | 3.791        |
| 1YEK   | H_LYS_62  | NZ     | H_GLU_46   | OE2    | 2.855        |
| 1YEK   | H_LYS_64  | NZ     | H_GLU_61   | OE1    | 2.862        |
| 1YEK   | H_LYS_66  | NZ     | H_ASP_86   | OD1    | 3.789        |
| 1YEK   | H_LYS_66  | NZ     | H_ASP_86   | OD2    | 2.810        |
| 1YEK   | H_LYS_216 | NZ     | H_ASP_218  | OD1    | 2.879        |
| 1YEK   | H_LYS_216 | NZ     | H_ASP_218  | OD2    | 3.161        |
| 1YEK   | H_LYS_220 | NZ     | H_GLU_222  | OE1    | 3.196        |
| 1YEK   | H_LYS_220 | NZ     | H_GLU_222  | OE2    | 3.085        |

Table 236: 1YEK-specific salt bridging networks analysis. In this table, a PDB file is specified with a four-letter PDB ID, except that the names of the PDB files corresponding to the single NMR structural model split from the NMR ensemble is specified with a four-letter PDB ID in addition to a hyphen followed by the single NMR structural model numeric ID, the residue naming scheme is **Chain ID\_residue name\_residue number**,  $\angle ADH$  represents the angle formed by acceptor (A), donor (D) and hydrogen (H) ( $\angle ADH$ ).

| PDB ID | Residue A  | Atom A | Residue B  | Atom B | Distance (Å) |
|--------|------------|--------|------------|--------|--------------|
| 1YNT   | A_ARG_24   | NH1    | A_ASP_70   | OD1    | 3.062        |
| 1YNT   | A_ARG_24   | NH1    | C_ASP_1070 | OD2    | 3.114        |
| 1YNT   | A_ARG_24   | NH2    | C_ASP_1070 | OD2    | 3.728        |
| 1YNT   | A_ARG_61   | NH1    | A_ASP_82   | OD1    | 3.482        |
| 1YNT   | A_ARG_61   | NH1    | A_ASP_82   | OD2    | 2.608        |
| 1YNT   | A_ARG_61   | NH2    | A_ASP_82   | OD1    | 2.789        |
| 1YNT   | A_ARG_61   | NH2    | A_ASP_82   | OD2    | 2.940        |
| 1YNT   | A_LYS_142  | NZ     | A_GLU_105  | OE1    | 3.414        |
| 1YNT   | A_LYS_142  | NZ     | A_GLU_105  | OE2    | 3.809        |
| 1YNT   | A_LYS_149  | NZ     | A_GLU_195  | OE1    | 3.930        |
| 1YNT   | A_LYS_149  | NZ     | A_GLU_195  | OE2    | 3.328        |
| 1YNT   | A_ARG_155  | NH1    | A_GLU_185  | OE1    | 3.418        |
| 1YNT   | A_ARG_155  | NH2    | A_GLU_185  | OE1    | 2.764        |
| 1YNT   | A_ARG_155  | NH2    | A_GLU_185  | OE2    | 3.917        |
| 1YNT   | A_LYS_183  | NZ     | A_GLU_187  | OE1    | 3.129        |
| 1YNT   | A_LYS_183  | NZ     | A_GLU_187  | OE2    | 2.879        |
| 1YNT   | A_LYS_199  | NZ     | A_ASP_110  | OD1    | 3.520        |
| 1YNT   | A_LYS_199  | NZ     | A_ASP_110  | OD2    | 2.749        |
| 1YNT   | B_LYS_538  | NZ     | B_ASP_590  | OD1    | 3.512        |
| 1YNT   | B_LYS_563  | NZ     | A_ASP_1    | OD1    | 2.935        |
| 1YNT   | B_LYS_563  | NZ     | A_ASP_1    | OD2    | 3.384        |
| 1YNT   | B_ARG_598  | NH1    | B_ASP_606  | OD1    | 3.368        |
| 1YNT   | B_ARG_598  | NH1    | B_ASP_606  | OD2    | 3.829        |
| 1YNT   | B_LYS_713  | NZ     | A_GLU_123  | OE1    | 3.645        |
| 1YNT   | B_LYS_714  | NZ     | B_GLU_716  | OE1    | 2.761        |
| 1YNT   | B_LYS_714  | NZ     | B_GLU_716  | OE2    | 3.569        |
| 1YNT   | C_ARG_1024 | NH1    | A_ASP_70   | OD2    | 3.173        |
| 1YNT   | C_ARG_1024 | NH1    | C_ASP_1070 | OD1    | 3.033        |
| 1YNT   | C_ARG_1024 | NH2    | A_ASP_70   | OD2    | 3.802        |
| 1YNT   | C_ARG_1061 | NH1    | C_ASP_1082 | OD1    | 3.503        |
| 1YNT   | C_ARG_1061 | NH1    | C_ASP_1082 | OD2    | 2.533        |
| 1YNT   | C_ARG_1061 | NH2    | C_ASP_1082 | OD1    | 2.790        |
| 1YNT   | C_ARG_1061 | NH2    | C_ASP_1082 | OD2    | 2.886        |
| 1YNT   | C_LYS_1107 | NZ     | E_GLU_869  | OE1    | 3.719        |
| 1YNT   | C_LYS_1142 | NZ     | C_GLU_1105 | OE1    | 3.297        |
| 1YNT   | C_LYS_1142 | NZ     | C_GLU_1105 | OE2    | 3.821        |
| 1YNT   | C_LYS_1149 | NZ     | C_GLU_1195 | OE2    | 3.387        |
| 1YNT   | C_ARG_1155 | NH1    | C_GLU_1185 | OE1    | 3.385        |
| 1YNT   | C_ARG_1155 | NH2    | C_GLU_1185 | OE1    | 2.679        |
| 1YNT   | C_ARG_1155 | NH2    | C_GLU_1185 | OE2    | 3.830        |
| 1YNT   | C_LYS_1183 | NZ     | C_GLU_1187 | OE1    | 3.084        |
| 1YNT   | C_LYS_1183 | NZ     | C_GLU_1187 | OE2    | 2.801        |
| 1YNT   | C_LYS_1199 | NZ     | C_ASP_1110 | OD1    | 3.564        |
| 1YNT   | C_LYS_1199 | NZ     | C_ASP_1110 | OD2    | 2.804        |
| 1YNT   | D_LYS_1538 | NZ     | D_ASP_1590 | OD1    | 3.573        |
| 1YNT   | D_LYS_1563 | NZ     | C_ASP_1001 | OD1    | 2.913        |
| 1YNT   | D_LYS_1563 | NZ     | C_ASP_1001 | OD2    | 3.385        |
| 1YNT   | D_ARG_1598 | NH1    | D_ASP_1606 | OD1    | 3.332        |
| 1YNT   | D_ARG_1598 | NH1    | D_ASP_1606 | OD2    | 3.789        |
| 1YNT   | D_LYS_1713 | NZ     | C_GLU_1123 | OE1    | 3.557        |
| 1YNT   | D_LYS_1714 | NZ     | D_GLU_1716 | OE1    | 2.757        |
| 1YNT   | D_LYS_1714 | NZ     | D_GLU_1716 | OE2    | 3.550        |
| 1YNT   | E_LYS_824  | NZ     | A_ASP_143  | OD1    | 3.012        |
| 1YNT   | E_LYS_824  | NZ     | A_ASP_143  | OD2    | 3.238        |
| 1YNT   | E_LYS_833  | NZ     | A_ASP_17   | OD2    | 3.941        |
| 1YNT   | E_ARG_852  | NH1    | E_GLU_845  | OE1    | 3.602        |
| 1YNT   | E_ARG_852  | NH1    | E_GLU_849  | OE2    | 3.768        |

|      |            |     |            |     |       |
|------|------------|-----|------------|-----|-------|
| 1YNT | E.LYS.878  | NZ  | E.ASP.867  | OD2 | 2.972 |
| 1YNT | F.LYS.2036 | NZ  | F.ASP.2089 | OD2 | 3.981 |
| 1YNT | F.ARG.2051 | NH1 | F.ASP.2078 | OD1 | 3.866 |
| 1YNT | F.LYS.2115 | NZ  | F.ASP.2014 | OD1 | 3.292 |
| 1YNT | F.ARG.2141 | NH2 | F.GLU.2100 | OE2 | 3.866 |
| 1YNT | F.LYS.2154 | NZ  | F.GLU.2252 | OE1 | 3.701 |
| 1YNT | F.LYS.2154 | NZ  | F.GLU.2252 | OE2 | 3.571 |
| 1YNT | F.LYS.2169 | NZ  | F.ASP.2214 | OD1 | 3.970 |
| 1YNT | F.LYS.2231 | NZ  | F.GLU.2229 | OE2 | 3.851 |
| 1YNT | F.HIS.2245 | NE2 | F.GLU.2243 | OE2 | 3.227 |
| 1YNT | F.HIS.2246 | ND1 | F.ASP.2147 | OD1 | 3.500 |
| 1YNT | G.ARG.3051 | NH1 | G.ASP.3078 | OD1 | 3.903 |
| 1YNT | G.LYS.3115 | NZ  | G.ASP.3014 | OD1 | 3.279 |
| 1YNT | G.ARG.3141 | NH2 | G.GLU.3100 | OE2 | 3.839 |
| 1YNT | G.LYS.3169 | NZ  | G.ASP.3214 | OD1 | 3.964 |
| 1YNT | G.LYS.3231 | NZ  | G.GLU.3229 | OE2 | 3.832 |
| 1YNT | G.HIS.3245 | NE2 | G.GLU.3243 | OE2 | 3.216 |
| 1YNT | G.HIS.3246 | ND1 | G.ASP.3147 | OD1 | 3.543 |

Table 237: 1YNT-specific salt bridging networks analysis. In this table, a PDB file is specified with a four-letter PDB ID, except that the names of the PDB files corresponding to the single NMR structural model split from the NMR ensemble is specified with a four-letter PDB ID in addition to a hyphen followed by the single NMR structural model numeric ID, the residue naming scheme is **Chain ID\_residue name\_residue number**,  $\angle ADH$  represents the angle formed by acceptor (A), donor (D) and hydrogen (H) ( $\angle ADH$ ).

| PDB ID | Residue A | Atom A | Residue B | Atom B | Distance (Å) |
|--------|-----------|--------|-----------|--------|--------------|
| 1YQV   | L_ARG_46  | NH2    | H_ASP_101 | OD2    | 3.072        |
| 1YQV   | L_ARG_61  | NH2    | L_GLU_81  | OE2    | 3.786        |
| 1YQV   | L_ARG_61  | NH2    | L_ASP_82  | OD1    | 2.822        |
| 1YQV   | L_ARG_61  | NH2    | L_ASP_82  | OD2    | 3.604        |
| 1YQV   | L_LYS_103 | NZ     | L_GLU_105 | OE2    | 2.814        |
| 1YQV   | L_LYS_147 | NZ     | L_GLU_154 | OE1    | 3.872        |
| 1YQV   | L_LYS_149 | NZ     | L_GLU_195 | OE1    | 3.292        |
| 1YQV   | L_LYS_149 | NZ     | L_GLU_195 | OE2    | 3.231        |
| 1YQV   | L_ARG_155 | NH1    | L_GLU_185 | OE2    | 3.246        |
| 1YQV   | L_ARG_155 | NH2    | L_GLU_185 | OE1    | 3.852        |
| 1YQV   | L_ARG_155 | NH2    | L_GLU_185 | OE2    | 3.444        |
| 1YQV   | L_LYS_183 | NZ     | L_GLU_187 | OE1    | 3.191        |
| 1YQV   | L_LYS_183 | NZ     | L_GLU_187 | OE2    | 2.706        |
| 1YQV   | L_ARG_188 | NH2    | L_ASP_184 | OD2    | 3.511        |
| 1YQV   | L_HIS_189 | ND1    | L_ASP_151 | OD2    | 2.829        |
| 1YQV   | L_LYS_199 | NZ     | L_ASP_110 | OD2    | 3.414        |
| 1YQV   | H_ARG_40  | NH1    | H_GLU_85  | OE1    | 3.131        |
| 1YQV   | H_ARG_40  | NH2    | H_GLU_46  | OE1    | 3.444        |
| 1YQV   | H_ARG_62  | NH1    | H_GLU_46  | OE2    | 2.704        |
| 1YQV   | H_ARG_62  | NH2    | H_GLU_46  | OE1    | 3.964        |
| 1YQV   | H_ARG_62  | NH2    | H_GLU_46  | OE2    | 2.670        |
| 1YQV   | H_LYS_66  | NZ     | H_ASP_86  | OD1    | 3.613        |
| 1YQV   | H_LYS_66  | NZ     | H_ASP_86  | OD2    | 2.967        |
| 1YQV   | H_LYS_221 | NZ     | L_GLU_123 | OE1    | 3.123        |
| 1YQV   | H_LYS_221 | NZ     | L_GLU_123 | OE2    | 2.724        |
| 1YQV   | Y_LYS_1   | NZ     | Y_GLU_7   | OE1    | 3.896        |
| 1YQV   | Y_LYS_1   | NZ     | Y_GLU_7   | OE2    | 2.890        |
| 1YQV   | Y_LYS_13  | NZ     | Y_ASP_18  | OD2    | 3.870        |
| 1YQV   | Y_ARG_45  | NH1    | H_GLU_50  | OE1    | 3.514        |
| 1YQV   | Y_ARG_45  | NH1    | H_GLU_50  | OE2    | 2.957        |
| 1YQV   | Y_ARG_68  | NH1    | H_GLU_50  | OE1    | 2.746        |
| 1YQV   | Y_ARG_68  | NH1    | H_GLU_50  | OE2    | 3.759        |
| 1YQV   | Y_ARG_68  | NH2    | H_GLU_50  | OE1    | 3.492        |
| 1YQV   | Y_ARG_68  | NH2    | H_GLU_50  | OE2    | 2.963        |
| 1YQV   | Y_ARG_125 | NH1    | Y_ASP_119 | OD2    | 3.693        |
| 1YQV   | Y_ARG_125 | NH2    | Y_ASP_119 | OD1    | 3.830        |
| 1YQV   | Y_ARG_125 | NH2    | Y_ASP_119 | OD2    | 2.874        |

Table 238: 1YQV-specific salt bridging networks analysis. In this table, a PDB file is specified with a four-letter PDB ID, except that the names of the PDB files corresponding to the single NMR structural model split from the NMR ensemble is specified with a four-letter PDB ID in addition to a hyphen followed by the single NMR structural model numeric ID, the residue naming scheme is **Chain ID\_residue name\_residue number**,  $\angle ADH$  represents the angle formed by acceptor (A), donor (D) and hydrogen (H) ( $\angle ADH$ ).

| PDB ID | Residue A  | Atom A | Residue B   | Atom B | Distance (Å) |
|--------|------------|--------|-------------|--------|--------------|
| 1YYL   | G.LYS_121  | NZ     | G.GLU_429   | OE2    | 3.711        |
| 1YYL   | G.HIS_249  | NE2    | G.GLU_482   | OE1    | 2.847        |
| 1YYL   | G.LYS_282  | NZ     | G.GLU_275   | OE1    | 2.882        |
| 1YYL   | G.LYS_348  | NZ     | G.GLU_269   | OE1    | 2.580        |
| 1YYL   | G.LYS_357  | NZ     | G.GLU_466   | OE2    | 3.616        |
| 1YYL   | G.ARG_419  | NH1    | H.GLU_100D  | OE2    | 3.749        |
| 1YYL   | G.ARG_419  | NH2    | H.GLU_99    | OE2    | 2.852        |
| 1YYL   | G.ARG_419  | NH2    | H.GLU_100D  | OE1    | 3.510        |
| 1YYL   | G.ARG_419  | NH2    | H.GLU_100D  | OE2    | 2.773        |
| 1YYL   | G.ARG_456  | NH1    | G.GLU_466   | OE1    | 3.131        |
| 1YYL   | G.ARG_469  | NH2    | G.ASP_457   | OD1    | 3.629        |
| 1YYL   | G.ARG_469  | NH2    | G.ASP_457   | OD2    | 3.271        |
| 1YYL   | G.ARG_476  | NH1    | G.GLU_102   | OE1    | 3.069        |
| 1YYL   | G.ARG_476  | NH1    | G.GLU_102   | OE2    | 3.149        |
| 1YYL   | G.ARG_476  | NH2    | G.ASP_474   | OD1    | 3.673        |
| 1YYL   | G.ARG_476  | NH2    | G.ASP_474   | OD2    | 3.290        |
| 1YYL   | G.ARG_480  | NH1    | G.ASP_477   | OD1    | 2.475        |
| 1YYL   | L.ARG_24   | NH1    | L.GLU_70    | OE2    | 3.902        |
| 1YYL   | L.ARG_24   | NH2    | L.GLU_70    | OE2    | 2.664        |
| 1YYL   | L.ARG_61   | NH2    | L.GLU_81    | OE1    | 2.377        |
| 1YYL   | L.ARG_61   | NH2    | L.ASP_82    | OD1    | 2.888        |
| 1YYL   | L.ARG_61   | NH2    | L.ASP_82    | OD2    | 3.800        |
| 1YYL   | L.LYS_149  | NZ     | L.GLU_195   | OE1    | 3.064        |
| 1YYL   | L.HIS_189  | ND1    | L.ASP_151   | OD2    | 2.706        |
| 1YYL   | H.ARG_31   | NH2    | H.ASP_100A  | OD1    | 2.948        |
| 1YYL   | H.ARG_31   | NH2    | H.ASP_100A  | OD2    | 3.167        |
| 1YYL   | H.ARG_38   | NH1    | H.GLU_46    | OE1    | 3.897        |
| 1YYL   | H.ARG_38   | NH1    | H.GLU_46    | OE2    | 2.772        |
| 1YYL   | H.ARG_38   | NH2    | H.ASP_86    | OD2    | 3.486        |
| 1YYL   | H.ARG_50   | NH2    | H.GLU_97    | OE1    | 3.557        |
| 1YYL   | H.ARG_50   | NH2    | H.GLU_97    | OE2    | 2.825        |
| 1YYL   | H.ARG_66   | NH1    | H.ASP_86    | OD1    | 3.071        |
| 1YYL   | H.ARG_66   | NH2    | H.ASP_86    | OD1    | 3.527        |
| 1YYL   | H.ARG_66   | NH2    | H.ASP_86    | OD2    | 3.411        |
| 1YYL   | H.ARG_82A  | NH2    | H.GLU_81    | OE1    | 2.703        |
| 1YYL   | H.ARG_83   | NH2    | H.ASP_85    | OD1    | 3.539        |
| 1YYL   | H.ARG_83   | NH2    | H.ASP_85    | OD2    | 3.994        |
| 1YYL   | H.LYS_143  | NZ     | H.ASP_144   | OD1    | 3.315        |
| 1YYL   | H.LYS_209  | NZ     | L.GLU_123   | OE1    | 2.745        |
| 1YYL   | H.LYS_209  | NZ     | L.GLU_123   | OE2    | 3.202        |
| 1YYL   | H.LYS_210  | NZ     | H.GLU_212   | OE2    | 3.491        |
| 1YYL   | P.LYS_1121 | NZ     | P.GLU_1429  | OE1    | 3.348        |
| 1YYL   | P.LYS_1207 | NZ     | P.GLU_1381  | OE1    | 3.416        |
| 1YYL   | P.LYS_1207 | NZ     | P.GLU_1381  | OE2    | 2.566        |
| 1YYL   | P.LYS_1232 | NZ     | P.GLU_1351  | OE2    | 3.532        |
| 1YYL   | P.HIS_1249 | NE2    | P.GLU_1482  | OE1    | 3.004        |
| 1YYL   | P.LYS_1282 | NZ     | P.GLU_1275  | OE1    | 2.887        |
| 1YYL   | P.LYS_1348 | NZ     | P.GLU_1269  | OE1    | 3.461        |
| 1YYL   | P.LYS_1348 | NZ     | P.GLU_1351  | OE1    | 3.495        |
| 1YYL   | P.LYS_1357 | NZ     | P.GLU_1466  | OE1    | 3.122        |
| 1YYL   | P.ARG_1419 | NH1    | R.GLU_1100B | OE1    | 3.247        |
| 1YYL   | P.ARG_1419 | NH2    | R.GLU_1099  | OE1    | 2.456        |
| 1YYL   | P.ARG_1419 | NH2    | R.GLU_1100D | OE1    | 3.853        |
| 1YYL   | P.ARG_1456 | NH1    | P.GLU_1466  | OE1    | 3.752        |
| 1YYL   | P.ARG_1456 | NH1    | P.GLU_1466  | OE2    | 3.112        |
| 1YYL   | P.ARG_1469 | NH2    | P.ASP_1457  | OD1    | 3.096        |
| 1YYL   | P.ARG_1476 | NH1    | P.GLU_1102  | OE2    | 2.557        |



|      |             |     |             |     |       |
|------|-------------|-----|-------------|-----|-------|
| 1YYL | P_ARG_1476  | NH2 | P_ASP_1474  | OD2 | 3.225 |
| 1YYL | P_LYS_1487  | NZ  | P_GLU_1091  | OE2 | 3.909 |
| 1YYL | Q_ARG_1061  | NH2 | Q_GLU_1081  | OE1 | 3.180 |
| 1YYL | Q_ARG_1061  | NH2 | Q_ASP_1082  | OD1 | 3.173 |
| 1YYL | Q_ARG_1061  | NH2 | Q_ASP_1082  | OD2 | 3.802 |
| 1YYL | Q_ARG_1095B | NH2 | Q_ASP_1001  | OD1 | 3.399 |
| 1YYL | Q_ARG_1095B | NH2 | Q_ASP_1001  | OD2 | 3.231 |
| 1YYL | Q_LYS_1149  | NZ  | Q_GLU_1195  | OE1 | 2.952 |
| 1YYL | Q_LYS_1183  | NZ  | Q_GLU_1187  | OE1 | 3.809 |
| 1YYL | Q_LYS_1183  | NZ  | Q_GLU_1187  | OE2 | 3.019 |
| 1YYL | Q_HIS_1189  | ND1 | Q_ASP_1151  | OD2 | 3.098 |
| 1YYL | R_ARG_1031  | NH1 | R_GLU_1099  | OE2 | 3.928 |
| 1YYL | R_ARG_1031  | NH2 | R_GLU_1099  | OE2 | 3.597 |
| 1YYL | R_ARG_1031  | NH2 | R_ASP_1100A | OD1 | 3.501 |
| 1YYL | R_ARG_1038  | NH1 | R_GLU_1046  | OE2 | 3.535 |
| 1YYL | R_ARG_1038  | NH1 | R_ASP_1086  | OD2 | 3.751 |
| 1YYL | R_ARG_1038  | NH2 | R_ASP_1086  | OD2 | 2.896 |
| 1YYL | R_ARG_1050  | NH2 | R_GLU_1097  | OE2 | 3.268 |
| 1YYL | R_ARG_1066  | NH1 | R_ASP_1086  | OD1 | 3.056 |
| 1YYL | R_ARG_1066  | NH2 | R_ASP_1086  | OD1 | 3.383 |
| 1YYL | R_ARG_1066  | NH2 | R_ASP_1086  | OD2 | 3.344 |
| 1YYL | R_ARG_1082A | NH2 | R_GLU_1081  | OE1 | 2.841 |
| 1YYL | R_ARG_1083  | NH2 | R_ASP_1085  | OD1 | 3.521 |
| 1YYL | R_ARG_1083  | NH2 | R_ASP_1085  | OD2 | 3.389 |
| 1YYL | R_LYS_1143  | NZ  | R_ASP_1144  | OD2 | 3.941 |
| 1YYL | R_LYS_1201  | NZ  | H_GLU_10    | OE1 | 3.633 |
| 1YYL | R_LYS_1209  | NZ  | Q_GLU_1123  | OE2 | 3.934 |
| 1YYL | R_LYS_1210  | NZ  | R_GLU_1212  | OE2 | 3.311 |
| 1YYL | S_ARG_1009  | NH1 | P_ASP_1368  | OD2 | 3.204 |
| 1YYL | S_ARG_1009  | NH2 | P_ASP_1368  | OD2 | 2.930 |

Table 239: 1YYL-specific salt bridging networks analysis. In this table, a PDB file is specified with a four-letter PDB ID, except that the names of the PDB files corresponding to the single NMR structural model split from the NMR ensemble is specified with a four-letter PDB ID in addition to a hyphen followed by the single NMR structural model numeric ID, the residue naming scheme is **Chain ID\_residue name\_residue number**,  $\angle ADH$  represents the angle formed by acceptor (A), donor (D) and hydrogen (H) ( $\angle ADH$ ).

| PDB ID | Residue A  | Atom A | Residue B   | Atom B | Distance (Å) |
|--------|------------|--------|-------------|--------|--------------|
| 1YYM   | G.LYS_207  | NZ     | G.GLU_381   | OE2    | 3.762        |
| 1YYM   | G.HIS_249  | NE2    | G.GLU_482   | OE1    | 2.851        |
| 1YYM   | G.LYS_282  | NZ     | G.GLU_275   | OE1    | 2.507        |
| 1YYM   | G.LYS_348  | NZ     | G.GLU_269   | OE1    | 2.728        |
| 1YYM   | G.LYS_348  | NZ     | G.GLU_351   | OE1    | 3.554        |
| 1YYM   | G.LYS_348  | NZ     | G.GLU_351   | OE2    | 3.474        |
| 1YYM   | G.LYS_350  | NZ     | G.ASP_395   | OD2    | 3.297        |
| 1YYM   | G.ARG_419  | NH2    | H.GLU_99    | OE2    | 2.868        |
| 1YYM   | G.ARG_419  | NH2    | H.GLU_100D  | OE1    | 3.511        |
| 1YYM   | G.ARG_456  | NH1    | G.GLU_466   | OE1    | 3.106        |
| 1YYM   | G.ARG_469  | NH2    | G.ASP_457   | OD2    | 3.063        |
| 1YYM   | G.ARG_476  | NH1    | G.GLU_102   | OE1    | 3.223        |
| 1YYM   | G.ARG_476  | NH1    | G.GLU_102   | OE2    | 3.388        |
| 1YYM   | G.ARG_476  | NH2    | G.ASP_474   | OD1    | 3.743        |
| 1YYM   | G.ARG_476  | NH2    | G.ASP_474   | OD2    | 2.651        |
| 1YYM   | G.ARG_480  | NH1    | G.ASP_477   | OD1    | 2.715        |
| 1YYM   | L.ARG_61   | NH2    | L.GLU_81    | OE1    | 2.791        |
| 1YYM   | L.ARG_61   | NH2    | L.ASP_82    | OD1    | 3.065        |
| 1YYM   | L.ARG_61   | NH2    | L.ASP_82    | OD2    | 3.869        |
| 1YYM   | L.LYS_183  | NZ     | L.GLU_187   | OE1    | 3.511        |
| 1YYM   | L.HIS_189  | ND1    | L.ASP_151   | OD2    | 2.884        |
| 1YYM   | H.LYS_12   | NZ     | H.GLU_10    | OE1    | 3.907        |
| 1YYM   | H.ARG_31   | NH2    | H.ASP_100A  | OD1    | 3.488        |
| 1YYM   | H.ARG_31   | NH2    | H.ASP_100A  | OD2    | 3.551        |
| 1YYM   | H.ARG_38   | NH1    | H.GLU_46    | OE2    | 3.168        |
| 1YYM   | H.ARG_38   | NH2    | H.ASP_86    | OD2    | 3.293        |
| 1YYM   | H.ARG_50   | NH2    | H.GLU_97    | OE2    | 2.832        |
| 1YYM   | H.ARG_66   | NH1    | H.ASP_86    | OD1    | 3.105        |
| 1YYM   | H.ARG_66   | NH1    | H.ASP_86    | OD2    | 3.982        |
| 1YYM   | H.ARG_66   | NH2    | H.ASP_86    | OD1    | 3.852        |
| 1YYM   | H.ARG_66   | NH2    | H.ASP_86    | OD2    | 3.349        |
| 1YYM   | H.ARG_82A  | NH2    | H.GLU_81    | OE1    | 3.100        |
| 1YYM   | H.ARG_83   | NH2    | H.ASP_85    | OD1    | 3.328        |
| 1YYM   | H.ARG_83   | NH2    | H.ASP_85    | OD2    | 3.453        |
| 1YYM   | H.LYS_143  | NZ     | H.ASP_144   | OD1    | 3.488        |
| 1YYM   | H.LYS_143  | NZ     | H.ASP_144   | OD2    | 3.824        |
| 1YYM   | H.LYS_209  | NZ     | L.GLU_123   | OE1    | 2.715        |
| 1YYM   | H.LYS_209  | NZ     | L.GLU_123   | OE2    | 2.976        |
| 1YYM   | H.LYS_210  | NZ     | H.GLU_212   | OE2    | 3.803        |
| 1YYM   | P.LYS_1097 | NZ     | P.GLU_1275  | OE2    | 3.820        |
| 1YYM   | P.LYS_1207 | NZ     | P.GLU_1381  | OE1    | 3.711        |
| 1YYM   | P.LYS_1207 | NZ     | P.GLU_1381  | OE2    | 2.708        |
| 1YYM   | P.HIS_1249 | NE2    | P.GLU_1482  | OE1    | 3.026        |
| 1YYM   | P.LYS_1282 | NZ     | P.GLU_1275  | OE1    | 3.159        |
| 1YYM   | P.LYS_1348 | NZ     | P.GLU_1269  | OE1    | 3.365        |
| 1YYM   | P.LYS_1348 | NZ     | P.GLU_1351  | OE1    | 3.721        |
| 1YYM   | P.LYS_1357 | NZ     | P.GLU_1466  | OE1    | 3.358        |
| 1YYM   | P.ARG_1419 | NH1    | R.GLU_1100B | OE1    | 2.635        |
| 1YYM   | P.ARG_1419 | NH2    | R.GLU_1099  | OE1    | 3.192        |
| 1YYM   | P.ARG_1456 | NH1    | P.GLU_1466  | OE2    | 3.024        |
| 1YYM   | P.ARG_1469 | NH2    | P.ASP_1457  | OD1    | 3.346        |
| 1YYM   | P.ARG_1476 | NH1    | P.GLU_1102  | OE2    | 3.088        |
| 1YYM   | P.ARG_1476 | NH2    | P.ASP_1474  | OD1    | 3.920        |
| 1YYM   | P.ARG_1476 | NH2    | P.ASP_1474  | OD2    | 3.018        |
| 1YYM   | P.ARG_1480 | NH1    | P.ASP_1477  | OD1    | 3.891        |
| 1YYM   | Q.ARG_1061 | NH2    | Q.GLU_1081  | OE1    | 3.918        |
| 1YYM   | Q.ARG_1061 | NH2    | Q.ASP_1082  | OD1    | 2.770        |

|      |             |     |             |     |       |
|------|-------------|-----|-------------|-----|-------|
| 1YYM | Q_ARG_1061  | NH2 | Q_ASP_1082  | OD2 | 3.285 |
| 1YYM | Q_ARG_1095B | NH2 | Q_ASP_1001  | OD1 | 3.276 |
| 1YYM | Q_ARG_1095B | NH2 | Q_ASP_1001  | OD2 | 3.393 |
| 1YYM | Q_LYS_1149  | NZ  | Q_GLU_1195  | OE1 | 3.456 |
| 1YYM | Q_LYS_1183  | NZ  | Q_GLU_1187  | OE1 | 3.987 |
| 1YYM | Q_LYS_1183  | NZ  | Q_GLU_1187  | OE2 | 2.753 |
| 1YYM | Q_HIS_1189  | ND1 | Q_ASP_1151  | OD2 | 2.971 |
| 1YYM | R_ARG_1031  | NH2 | R_GLU_1099  | OE2 | 2.952 |
| 1YYM | R_ARG_1031  | NH2 | R_ASP_1100A | OD1 | 3.903 |
| 1YYM | R_ARG_1038  | NH1 | R_GLU_1046  | OE2 | 3.211 |
| 1YYM | R_ARG_1038  | NH2 | R_ASP_1086  | OD2 | 2.820 |
| 1YYM | R_ARG_1050  | NH2 | R_GLU_1097  | OE2 | 2.957 |
| 1YYM | R_ARG_1066  | NH1 | R_ASP_1086  | OD1 | 2.623 |
| 1YYM | R_ARG_1066  | NH1 | R_ASP_1086  | OD2 | 3.373 |
| 1YYM | R_ARG_1066  | NH2 | R_ASP_1086  | OD1 | 3.663 |
| 1YYM | R_ARG_1066  | NH2 | R_ASP_1086  | OD2 | 2.872 |
| 1YYM | R_ARG_1082A | NH2 | R_GLU_1081  | OE1 | 2.831 |
| 1YYM | R_ARG_1083  | NH1 | R_ASP_1085  | OD1 | 3.896 |
| 1YYM | R_ARG_1083  | NH1 | R_ASP_1085  | OD2 | 3.741 |
| 1YYM | R_ARG_1083  | NH2 | R_ASP_1085  | OD1 | 3.214 |
| 1YYM | R_ARG_1083  | NH2 | R_ASP_1085  | OD2 | 2.624 |
| 1YYM | R_LYS_1210  | NZ  | R_GLU_1212  | OE2 | 3.428 |
| 1YYM | S_ARG_1009  | NH1 | P_ASP_1368  | OD2 | 3.572 |
| 1YYM | S_ARG_1009  | NH2 | P_ASP_1368  | OD2 | 2.725 |

Table 240: 1YYM-specific salt bridging networks analysis. In this table, a PDB file is specified with a four-letter PDB ID, except that the names of the PDB files corresponding to the single NMR structural model split from the NMR ensemble is specified with a four-letter PDB ID in addition to a hyphen followed by the single NMR structural model numeric ID, the residue naming scheme is **Chain ID\_residue name\_residue number**,  $\angle ADH$  represents the angle formed by acceptor (A), donor (D) and hydrogen (H) ( $\angle ADH$ ).

| PDB ID | Residue A | Atom A | Residue B | Atom B | Distance (Å) |
|--------|-----------|--------|-----------|--------|--------------|
| 1YZZ   | A_ARG_38  | NH1    | A_ASP_89  | OD1    | 2.737        |
| 1YZZ   | A_ARG_38  | NH2    | A_GLU_46  | OE2    | 3.110        |
| 1YZZ   | A_ARG_38  | NH2    | A_ASP_89  | OD1    | 3.687        |
| 1YZZ   | A_ARG_66  | NH1    | A_ASP_89  | OD1    | 3.398        |
| 1YZZ   | A_ARG_66  | NH1    | A_ASP_89  | OD2    | 3.558        |
| 1YZZ   | A_ARG_66  | NH2    | A_ASP_89  | OD2    | 2.939        |
| 1YZZ   | B_ARG_38  | NH1    | B_ASP_89  | OD1    | 2.975        |
| 1YZZ   | B_ARG_38  | NH2    | B_GLU_46  | OE2    | 3.058        |
| 1YZZ   | B_LYS_64  | NZ     | B_ASP_61  | OD1    | 2.623        |
| 1YZZ   | B_ARG_66  | NH1    | B_ASP_89  | OD1    | 2.532        |
| 1YZZ   | B_ARG_66  | NH1    | B_ASP_89  | OD2    | 3.353        |
| 1YZZ   | B_ARG_66  | NH2    | B_ASP_89  | OD1    | 3.279        |
| 1YZZ   | B_ARG_66  | NH2    | B_ASP_89  | OD2    | 2.407        |

Table 241: 1YZZ-specific salt bridging networks analysis. In this table, a PDB file is specified with a four-letter PDB ID, except that the names of the PDB files corresponding to the single NMR structural model split from the NMR ensemble is specified with a four-letter PDB ID in addition to a hyphen followed by the single NMR structural model numeric ID, the residue naming scheme is **Chain ID\_residue name\_residue number**,  $\angle ADH$  represents the angle formed by acceptor (A), donor (D) and hydrogen (H) ( $\angle ADH$ ).

| PDB ID | Residue A | Atom A | Residue B | Atom B | Distance (Å) |
|--------|-----------|--------|-----------|--------|--------------|
| 1ZEA   | L.LYS_24  | NZ     | L.ASP_70  | OD1    | 2.669        |
| 1ZEA   | L.LYS_24  | NZ     | L.ASP_70  | OD2    | 2.887        |
| 1ZEA   | L.LYS_39  | NZ     | L.GLU_81  | OE1    | 3.641        |
| 1ZEA   | L.ARG_61  | NH1    | L.ASP_82  | OD1    | 3.651        |
| 1ZEA   | L.ARG_61  | NH1    | L.ASP_82  | OD2    | 2.744        |
| 1ZEA   | L.ARG_61  | NH2    | L.GLU_79  | OE1    | 3.732        |
| 1ZEA   | L.ARG_61  | NH2    | L.ASP_82  | OD1    | 3.003        |
| 1ZEA   | L.ARG_61  | NH2    | L.ASP_82  | OD2    | 3.574        |
| 1ZEA   | L.ARG_77  | NH2    | L.ASP_60  | OD2    | 3.436        |
| 1ZEA   | L.LYS_149 | NZ     | L.GLU_195 | OE1    | 2.851        |
| 1ZEA   | L.LYS_149 | NZ     | L.GLU_195 | OE2    | 3.548        |
| 1ZEA   | L.LYS_169 | NZ     | L.GLU_81  | OE2    | 3.652        |
| 1ZEA   | L.ARG_188 | NH2    | L.ASP_184 | OD1    | 2.975        |
| 1ZEA   | L.HIS_189 | ND1    | L.ASP_151 | OD2    | 2.735        |
| 1ZEA   | L.LYS_199 | NZ     | L.ASP_110 | OD2    | 3.834        |
| 1ZEA   | H.LYS_46  | NZ     | H.ASP_62  | OD2    | 2.871        |
| 1ZEA   | H.LYS_64  | NZ     | H.ASP_61  | OD1    | 3.284        |
| 1ZEA   | H.ARG_66  | NH1    | H.ASP_86  | OD1    | 3.918        |
| 1ZEA   | H.ARG_66  | NH1    | H.ASP_86  | OD2    | 2.875        |
| 1ZEA   | H.ARG_66  | NH2    | H.ASP_86  | OD1    | 2.957        |
| 1ZEA   | H.ARG_66  | NH2    | H.ASP_86  | OD2    | 3.243        |
| 1ZEA   | H.ARG_94  | NH2    | H.ASP_101 | OD1    | 3.691        |
| 1ZEA   | H.ARG_94  | NH2    | H.ASP_101 | OD2    | 2.853        |
| 1ZEA   | H.ARG_95  | NH1    | L.GLU_34  | OE1    | 2.842        |
| 1ZEA   | H.ARG_95  | NH1    | L.GLU_34  | OE2    | 3.642        |
| 1ZEA   | H.ARG_95  | NH2    | L.GLU_34  | OE1    | 3.613        |
| 1ZEA   | H.ARG_95  | NH2    | L.GLU_34  | OE2    | 2.859        |
| 1ZEA   | H.LYS_143 | NZ     | H.ASP_173 | OD2    | 3.046        |
| 1ZEA   | H.LYS_205 | NZ     | H.ASP_207 | OD1    | 2.729        |
| 1ZEA   | H.LYS_205 | NZ     | H.ASP_207 | OD2    | 3.512        |
| 1ZEA   | H.LYS_208 | NZ     | L.GLU_123 | OE2    | 2.817        |

Table 242: 1ZEA-specific salt bridging networks analysis. In this table, a PDB file is specified with a four-letter PDB ID, except that the names of the PDB files corresponding to the single NMR structural model split from the NMR ensemble is specified with a four-letter PDB ID in addition to a hyphen followed by the single NMR structural model numeric ID, the residue naming scheme is **Chain ID\_residue name\_residue number**,  $\angle ADH$  represents the angle formed by acceptor (A), donor (D) and hydrogen (H) ( $\angle ADH$ ).

| PDB ID | Residue A | Atom A | Residue B | Atom B | Distance (Å) |
|--------|-----------|--------|-----------|--------|--------------|
| 1ZMY   | A_ARG_38  | NH1    | A_ASP_90  | OD2    | 2.840        |
| 1ZMY   | A_ARG_38  | NH2    | A_GLU_46  | OE2    | 3.583        |
| 1ZMY   | A_ARG_38  | NH2    | A_ASP_90  | OD2    | 3.677        |
| 1ZMY   | A_LYS_65  | NZ     | A_ASP_62  | OD1    | 3.540        |
| 1ZMY   | A_ARG_67  | NH1    | A_ASP_90  | OD1    | 2.500        |
| 1ZMY   | A_ARG_67  | NH1    | A_ASP_90  | OD2    | 3.775        |
| 1ZMY   | A_ARG_67  | NH2    | A_ASP_90  | OD1    | 3.202        |
| 1ZMY   | A_ARG_67  | NH2    | A_ASP_90  | OD2    | 3.068        |
| 1ZMY   | L_LYS_1   | NZ     | L_GLU_7   | OE2    | 2.765        |
| 1ZMY   | L_LYS_13  | NZ     | L_ASP_18  | OD2    | 3.088        |
| 1ZMY   | L_ARG_61  | NH2    | L_ASP_48  | OD2    | 3.432        |
| 1ZMY   | M_LYS_1   | NZ     | M_GLU_7   | OE1    | 3.919        |
| 1ZMY   | M_LYS_1   | NZ     | M_GLU_7   | OE2    | 2.657        |
| 1ZMY   | M_LYS_13  | NZ     | M_ASP_18  | OD2    | 3.984        |

Table 243: 1ZMY-specific salt bridging networks analysis. In this table, a PDB file is specified with a four-letter PDB ID, except that the names of the PDB files corresponding to the single NMR structural model split from the NMR ensemble is specified with a four-letter PDB ID in addition to a hyphen followed by the single NMR structural model numeric ID, the residue naming scheme is **Chain ID\_residue name\_residue number**,  $\angle ADH$  represents the angle formed by acceptor (A), donor (D) and hydrogen (H) ( $\angle ADH$ ).

| PDB ID | Residue A | Atom A | Residue B | Atom B | Distance (Å) |
|--------|-----------|--------|-----------|--------|--------------|
| 2AAB   | L_ARG_24  | NH1    | L_ASP_70  | OD1    | 3.378        |
| 2AAB   | L_ARG_24  | NH1    | L_ASP_70  | OD2    | 3.076        |
| 2AAB   | L_ARG_61  | NH1    | L_GLU_79  | OE1    | 3.401        |
| 2AAB   | L_ARG_61  | NH1    | L_ASP_82  | OD1    | 2.799        |
| 2AAB   | L_ARG_61  | NH1    | L_ASP_82  | OD2    | 3.081        |
| 2AAB   | L_ARG_61  | NH2    | L_GLU_79  | OE1    | 3.087        |
| 2AAB   | L_LYS_93  | NZ     | L_GLU_27  | OE1    | 2.856        |
| 2AAB   | L_LYS_103 | NZ     | L_GLU_105 | OE2    | 3.933        |
| 2AAB   | L_LYS_149 | NZ     | L_GLU_195 | OE1    | 2.658        |
| 2AAB   | L_LYS_149 | NZ     | L_GLU_195 | OE2    | 3.769        |
| 2AAB   | L_ARG_155 | NH1    | L_GLU_185 | OE1    | 3.205        |
| 2AAB   | L_ARG_155 | NH2    | L_GLU_185 | OE1    | 3.657        |
| 2AAB   | L_ARG_155 | NH2    | L_GLU_185 | OE2    | 3.891        |
| 2AAB   | L_HIS_189 | ND1    | L_ASP_151 | OD2    | 2.588        |
| 2AAB   | H_ARG_38  | NH1    | H_ASP_86  | OD1    | 2.796        |
| 2AAB   | H_ARG_38  | NH2    | H_GLU_46  | OE1    | 2.650        |
| 2AAB   | H_ARG_38  | NH2    | H_GLU_46  | OE2    | 3.853        |
| 2AAB   | H_ARG_38  | NH2    | H_ASP_86  | OD1    | 3.953        |
| 2AAB   | H_LYS_64  | NZ     | H_ASP_61  | OD2    | 3.741        |
| 2AAB   | H_ARG_66  | NH1    | H_ASP_86  | OD1    | 3.938        |
| 2AAB   | H_ARG_66  | NH1    | H_ASP_86  | OD2    | 2.836        |
| 2AAB   | H_ARG_66  | NH2    | H_ASP_86  | OD1    | 3.107        |
| 2AAB   | H_ARG_66  | NH2    | H_ASP_86  | OD2    | 3.400        |
| 2AAB   | H_ARG_83  | NH1    | H_GLU_85  | OE1    | 3.354        |
| 2AAB   | H_ARG_83  | NH2    | H_GLU_85  | OE1    | 3.065        |
| 2AAB   | H_ARG_94  | NH2    | H_ASP_101 | OD1    | 3.332        |
| 2AAB   | H_ARG_94  | NH2    | H_ASP_101 | OD2    | 3.671        |
| 2AAB   | H_LYS_208 | NZ     | L_GLU_123 | OE1    | 3.545        |

Table 244: 2AAB-specific salt bridging networks analysis. In this table, a PDB file is specified with a four-letter PDB ID, except that the names of the PDB files corresponding to the single NMR structural model split from the NMR ensemble is specified with a four-letter PDB ID in addition to a hyphen followed by the single NMR structural model numeric ID, the residue naming scheme is **Chain ID\_residue name\_residue number**,  $\angle ADH$  represents the angle formed by acceptor (A), donor (D) and hydrogen (H) ( $\angle ADH$ ).

| PDB ID | Residue A | Atom A | Residue B | Atom B | Distance (Å) |
|--------|-----------|--------|-----------|--------|--------------|
| 2ARJ   | L_ARG_61  | NH1    | L_ASP_82  | OD1    | 2.599        |
| 2ARJ   | L_ARG_61  | NH1    | L_ASP_82  | OD2    | 2.529        |
| 2ARJ   | L_LYS_103 | NZ     | L_GLU_105 | OE2    | 2.787        |
| 2ARJ   | L_LYS_147 | NZ     | L_GLU_154 | OE1    | 3.563        |
| 2ARJ   | L_LYS_147 | NZ     | L_GLU_154 | OE2    | 3.021        |
| 2ARJ   | L_LYS_149 | NZ     | L_GLU_195 | OE1    | 3.558        |
| 2ARJ   | L_ARG_156 | NH1    | L_GLU_154 | OE1    | 3.520        |
| 2ARJ   | L_ARG_156 | NH1    | L_GLU_154 | OE2    | 3.250        |
| 2ARJ   | L_LYS_183 | NZ     | L_GLU_187 | OE1    | 3.507        |
| 2ARJ   | L_HIS_189 | ND1    | L_ASP_151 | OD2    | 3.253        |
| 2ARJ   | L_HIS_189 | NE2    | L_GLU_185 | OE2    | 2.888        |
| 2ARJ   | L_LYS_199 | NZ     | L_ASP_110 | OD1    | 3.590        |
| 2ARJ   | L_LYS_199 | NZ     | L_ASP_110 | OD2    | 2.881        |
| 2ARJ   | H_ARG_38  | NH1    | H_ASP_86  | OD1    | 2.915        |
| 2ARJ   | H_ARG_38  | NH2    | H_GLU_46  | OE2    | 3.238        |
| 2ARJ   | H_ARG_38  | NH2    | H_ASP_86  | OD1    | 3.950        |
| 2ARJ   | H_ARG_66  | NH1    | H_ASP_86  | OD2    | 3.425        |
| 2ARJ   | H_ARG_66  | NH2    | H_ASP_86  | OD1    | 2.734        |
| 2ARJ   | H_ARG_66  | NH2    | H_ASP_86  | OD2    | 2.913        |
| 2ARJ   | H_HIS_172 | NE2    | H_ASP_169 | OD1    | 3.945        |
| 2ARJ   | A_ARG_61  | NH1    | A_ASP_82  | OD1    | 2.811        |
| 2ARJ   | A_ARG_61  | NH1    | A_ASP_82  | OD2    | 2.467        |
| 2ARJ   | A_ARG_61  | NH2    | A_ASP_81  | OD2    | 3.853        |
| 2ARJ   | A_LYS_103 | NZ     | A_GLU_105 | OE2    | 3.414        |
| 2ARJ   | A_LYS_147 | NZ     | A_GLU_154 | OE2    | 2.780        |
| 2ARJ   | A_LYS_149 | NZ     | A_GLU_195 | OE1    | 3.948        |
| 2ARJ   | A_LYS_149 | NZ     | A_GLU_195 | OE2    | 3.695        |
| 2ARJ   | A_ARG_156 | NH1    | A_GLU_154 | OE1    | 2.977        |
| 2ARJ   | A_ARG_156 | NH1    | A_GLU_154 | OE2    | 3.024        |
| 2ARJ   | A_ARG_156 | NH2    | A_GLU_154 | OE1    | 3.339        |
| 2ARJ   | A_LYS_183 | NZ     | A_GLU_187 | OE1    | 3.790        |
| 2ARJ   | A_HIS_189 | ND1    | A_ASP_151 | OD2    | 3.869        |
| 2ARJ   | A_HIS_189 | NE2    | A_GLU_185 | OE2    | 2.726        |
| 2ARJ   | A_LYS_199 | NZ     | A_ASP_110 | OD1    | 3.226        |
| 2ARJ   | A_LYS_199 | NZ     | A_ASP_110 | OD2    | 2.734        |
| 2ARJ   | B_ARG_38  | NH1    | B_ASP_86  | OD1    | 2.957        |
| 2ARJ   | B_ARG_38  | NH2    | B_GLU_46  | OE1    | 3.840        |
| 2ARJ   | B_ARG_38  | NH2    | B_GLU_46  | OE2    | 3.335        |
| 2ARJ   | B_ARG_38  | NH2    | B_ASP_86  | OD1    | 3.960        |
| 2ARJ   | B_ARG_66  | NH1    | B_ASP_86  | OD2    | 3.486        |
| 2ARJ   | B_ARG_66  | NH2    | B_ASP_86  | OD1    | 2.770        |
| 2ARJ   | B_ARG_66  | NH2    | B_ASP_86  | OD2    | 2.899        |
| 2ARJ   | R_LYS_21  | NZ     | R_ASP_23  | OD2    | 3.940        |
| 2ARJ   | R_LYS_68  | NZ     | R_ASP_66  | OD2    | 3.453        |
| 2ARJ   | Q_LYS_21  | NZ     | Q_ASP_23  | OD1    | 3.938        |
| 2ARJ   | Q_LYS_21  | NZ     | Q_ASP_23  | OD2    | 3.026        |
| 2ARJ   | Q_LYS_68  | NZ     | Q_ASP_66  | OD2    | 2.542        |
| 2ARJ   | Q_LYS_121 | NZ     | Q_GLU_17  | OE1    | 3.957        |
| 2ARJ   | Q_LYS_121 | NZ     | Q_GLU_17  | OE2    | 3.774        |



---

Table 245: 2ARJ-specific salt bridging networks analysis. In this table, a PDB file is specified with a four-letter PDB ID, except that the names of the PDB files corresponding to the single NMR structural model split from the NMR ensemble is specified with a four-letter PDB ID in addition to a hyphen followed by the single NMR structural model numeric ID, the residue naming scheme is **Chain ID\_residue name\_residue number**,  $\angle ADH$  represents the angle formed by acceptor (A), donor (D) and hydrogen (H) ( $\angle ADH$ ).

| PDB ID | Residue A | Atom A | Residue B | Atom B | Distance (Å) |
|--------|-----------|--------|-----------|--------|--------------|
| 2B2X   | A_LYS_174 | NZ     | A_ASP_171 | OD1    | 3.646        |
| 2B2X   | A_ARG_175 | NH1    | A_ASP_171 | OD1    | 2.653        |
| 2B2X   | A_ARG_175 | NH2    | A_ASP_171 | OD1    | 3.756        |
| 2B2X   | A_HIS_196 | NE2    | A_GLU_236 | OE1    | 2.662        |
| 2B2X   | A_ARG_219 | NH2    | A_GLU_197 | OE2    | 3.539        |
| 2B2X   | A_ARG_222 | NH2    | A_GLU_192 | OE1    | 3.578        |
| 2B2X   | A_ARG_222 | NH2    | A_GLU_192 | OE2    | 3.205        |
| 2B2X   | A_ARG_234 | NH1    | A_ASP_231 | OD1    | 2.877        |
| 2B2X   | A_ARG_234 | NH2    | A_ASP_231 | OD1    | 3.527        |
| 2B2X   | A_ARG_234 | NH2    | A_ASP_272 | OD1    | 3.389        |
| 2B2X   | A_LYS_235 | NZ     | A_ASP_231 | OD2    | 2.623        |
| 2B2X   | A_ARG_242 | NH2    | A_GLU_236 | OE1    | 3.815        |
| 2B2X   | A_ARG_245 | NH2    | A_ASP_148 | OD2    | 2.857        |
| 2B2X   | A_ARG_246 | NH2    | A_GLU_240 | OE1    | 3.473        |
| 2B2X   | A_LYS_250 | NZ     | A_GLU_276 | OE2    | 3.894        |
| 2B2X   | A_HIS_261 | NE2    | H_ASP_101 | OD2    | 3.121        |
| 2B2X   | A_ARG_265 | NH2    | A_ASP_231 | OD2    | 3.021        |
| 2B2X   | A_ARG_280 | NH1    | A_GLU_274 | OE1    | 3.434        |
| 2B2X   | A_ARG_280 | NH2    | A_GLU_274 | OE1    | 2.884        |
| 2B2X   | A_HIS_288 | NE2    | A_ASP_257 | OD2    | 3.303        |
| 2B2X   | A_LYS_329 | NZ     | A_GLU_333 | OE1    | 2.878        |
| 2B2X   | A_LYS_329 | NZ     | A_GLU_333 | OE2    | 3.222        |
| 2B2X   | H_ARG_38  | NH1    | H_GLU_46  | OE1    | 2.704        |
| 2B2X   | H_ARG_38  | NH2    | H_ASP_89  | OD2    | 2.877        |
| 2B2X   | H_ARG_66  | NH1    | H_ASP_89  | OD1    | 2.835        |
| 2B2X   | H_ARG_66  | NH1    | H_ASP_89  | OD2    | 3.848        |
| 2B2X   | H_ARG_66  | NH2    | H_ASP_89  | OD1    | 3.615        |
| 2B2X   | H_ARG_66  | NH2    | H_ASP_89  | OD2    | 3.196        |
| 2B2X   | H_ARG_97  | NH2    | H_ASP_106 | OD1    | 3.043        |
| 2B2X   | H_ARG_97  | NH2    | H_ASP_106 | OD2    | 3.052        |
| 2B2X   | H_HIS_169 | NE2    | L_ASP_171 | OD2    | 3.832        |
| 2B2X   | H_LYS_213 | NZ     | L_GLU_127 | OE1    | 2.709        |
| 2B2X   | H_LYS_213 | NZ     | L_GLU_127 | OE2    | 3.416        |
| 2B2X   | L_HIS_31  | NE2    | A_GLU_259 | OE2    | 3.821        |
| 2B2X   | L_ARG_60  | NH2    | L_ASP_81  | OD1    | 2.811        |
| 2B2X   | L_ARG_60  | NH2    | L_ASP_81  | OD2    | 3.437        |
| 2B2X   | L_LYS_102 | NZ     | L_ASP_169 | OD1    | 3.045        |
| 2B2X   | L_LYS_153 | NZ     | L_GLU_199 | OE2    | 2.862        |
| 2B2X   | L_ARG_159 | NH2    | L_GLU_189 | OE1    | 3.544        |
| 2B2X   | L_LYS_187 | NZ     | L_GLU_191 | OE1    | 3.187        |
| 2B2X   | L_LYS_187 | NZ     | L_GLU_191 | OE2    | 3.179        |
| 2B2X   | L_HIS_193 | ND1    | L_ASP_155 | OD2    | 3.401        |
| 2B2X   | B_LYS_174 | NZ     | B_ASP_171 | OD1    | 3.653        |
| 2B2X   | B_LYS_174 | NZ     | B_ASP_171 | OD2    | 3.858        |
| 2B2X   | B_HIS_196 | NE2    | B_GLU_236 | OE1    | 2.785        |
| 2B2X   | B_ARG_219 | NH1    | B_GLU_197 | OE1    | 3.424        |
| 2B2X   | B_ARG_219 | NH1    | B_GLU_197 | OE2    | 2.578        |
| 2B2X   | B_ARG_222 | NH2    | B_GLU_192 | OE1    | 3.396        |
| 2B2X   | B_ARG_222 | NH2    | B_GLU_192 | OE2    | 3.088        |
| 2B2X   | B_ARG_234 | NH1    | B_ASP_231 | OD1    | 2.739        |
| 2B2X   | B_ARG_234 | NH1    | B_ASP_231 | OD2    | 3.550        |
| 2B2X   | B_ARG_234 | NH2    | B_ASP_231 | OD1    | 3.736        |
| 2B2X   | B_ARG_234 | NH2    | B_ASP_272 | OD1    | 3.791        |
| 2B2X   | B_LYS_235 | NZ     | B_ASP_231 | OD2    | 2.860        |
| 2B2X   | B_ARG_245 | NH2    | B_ASP_148 | OD1    | 3.373        |
| 2B2X   | B_HIS_261 | NE2    | L_ASP_101 | OD2    | 3.107        |
| 2B2X   | B_ARG_280 | NH1    | B_GLU_274 | OE1    | 3.062        |

|      |           |     |           |     |       |
|------|-----------|-----|-----------|-----|-------|
| 2B2X | B_ARG_280 | NH1 | B_GLU_274 | OE2 | 3.945 |
| 2B2X | B_ARG_280 | NH2 | B_GLU_274 | OE1 | 3.114 |
| 2B2X | B_HIS_288 | ND1 | B_ASP_257 | OD2 | 3.336 |
| 2B2X | B_LYS_329 | NZ  | B_GLU_333 | OE1 | 3.450 |
| 2B2X | B_LYS_329 | NZ  | B_GLU_333 | OE2 | 3.053 |
| 2B2X | I_ARG_38  | NH1 | I_GLU_46  | OE1 | 2.780 |
| 2B2X | I_ARG_38  | NH2 | I_ASP_89  | OD2 | 2.859 |
| 2B2X | I_ARG_66  | NH1 | I_ASP_89  | OD1 | 2.954 |
| 2B2X | I_ARG_66  | NH1 | I_ASP_89  | OD2 | 3.737 |
| 2B2X | I_ARG_66  | NH2 | I_ASP_89  | OD1 | 3.772 |
| 2B2X | I_ARG_66  | NH2 | I_ASP_89  | OD2 | 3.121 |
| 2B2X | I_ARG_97  | NH2 | I_ASP_106 | OD1 | 3.823 |
| 2B2X | I_ARG_97  | NH2 | I_ASP_106 | OD2 | 2.979 |
| 2B2X | I_HIS_169 | NE2 | M_ASP_171 | OD2 | 3.874 |
| 2B2X | I_LYS_213 | NZ  | M_GLU_127 | OE2 | 3.245 |
| 2B2X | M_HIS_31  | NE2 | B_GLU_259 | OE2 | 3.848 |
| 2B2X | M_ARG_60  | NH2 | M_GLU_80  | OE2 | 3.305 |
| 2B2X | M_ARG_60  | NH2 | M_ASP_81  | OD1 | 2.985 |
| 2B2X | M_ARG_60  | NH2 | M_ASP_81  | OD2 | 3.811 |
| 2B2X | M_LYS_102 | NZ  | M_ASP_169 | OD1 | 3.157 |
| 2B2X | M_LYS_146 | NZ  | M_GLU_104 | OE1 | 3.183 |
| 2B2X | M_LYS_151 | NZ  | M_GLU_158 | OE1 | 3.453 |
| 2B2X | M_LYS_187 | NZ  | M_GLU_191 | OE1 | 2.648 |
| 2B2X | M_LYS_187 | NZ  | M_GLU_191 | OE2 | 3.145 |
| 2B2X | M_HIS_193 | ND1 | M_ASP_155 | OD2 | 3.516 |

Table 246: 2B2X-specific salt bridging networks analysis. In this table, a PDB file is specified with a four-letter PDB ID, except that the names of the PDB files corresponding to the single NMR structural model split from the NMR ensemble is specified with a four-letter PDB ID in addition to a hyphen followed by the single NMR structural model numeric ID, the residue naming scheme is **Chain ID\_residue name\_residue number**,  $\angle ADH$  represents the angle formed by acceptor (A), donor (D) and hydrogen (H) ( $\angle ADH$ ).

| PDB ID | Residue A | Atom A | Residue B | Atom B | Distance (Å) |
|--------|-----------|--------|-----------|--------|--------------|
| 2B4C   | G_LYS_    | NZ     | G_ASP_    | OD1    | 3.338        |
| 2B4C   | G_LYS_    | NZ     | G_ASP_    | OD1    | 3.491        |
| 2B4C   | G_ARG_    | NH1    | H_ASP_    | OD2    | 3.237        |
| 2B4C   | G_ARG_    | NH2    | H_ASP_    | OD2    | 2.859        |
| 2B4C   | G_LYS_    | NZ     | G_GLU_    | OE2    | 3.048        |
| 2B4C   | G_LYS_    | NZ     | G_GLU_    | OE1    | 3.552        |
| 2B4C   | G_LYS_    | NZ     | G_GLU_    | OE2    | 3.954        |
| 2B4C   | G_ARG_    | NH2    | G_GLU_    | OE1    | 3.957        |
| 2B4C   | G_LYS_    | NZ     | G_GLU_    | OE1    | 3.503        |
| 2B4C   | G_ARG_    | NH1    | G_ASP_    | OD1    | 3.623        |
| 2B4C   | G_LYS_    | NZ     | H_ASP_    | OD2    | 2.598        |
| 2B4C   | G_ARG_    | NH1    | G_GLU_    | OE2    | 3.070        |
| 2B4C   | G_ARG_    | NH1    | G_ASP_    | OD1    | 3.468        |
| 2B4C   | G_ARG_    | NH2    | G_GLU_    | OE2    | 3.385        |
| 2B4C   | C_LYS_    | NZ     | C_GLU_    | OE1    | 3.632        |
| 2B4C   | C_LYS_    | NZ     | C_GLU_    | OE1    | 3.382        |
| 2B4C   | C_LYS_    | NZ     | C_GLU_    | OE2    | 3.763        |
| 2B4C   | C_LYS_    | NZ     | C_ASP_    | OD1    | 3.946        |
| 2B4C   | C_ARG_    | NH1    | C_ASP_    | OD2    | 3.370        |
| 2B4C   | C_ARG_    | NH2    | C_ASP_    | OD1    | 2.876        |
| 2B4C   | C_ARG_    | NH2    | C_ASP_    | OD2    | 3.161        |
| 2B4C   | C_ARG_    | NH1    | H_GLU_    | OE2    | 3.957        |
| 2B4C   | C_ARG_    | NH2    | H_GLU_    | OE2    | 3.405        |
| 2B4C   | C_ARG_    | NH1    | G_ASP_    | OD1    | 2.937        |
| 2B4C   | C_ARG_    | NH1    | G_ASP_    | OD2    | 3.245        |
| 2B4C   | L_LYS_39  | NZ     | L_GLU_81  | OE1    | 3.785        |
| 2B4C   | L_LYS_39  | NZ     | L_GLU_81  | OE2    | 3.605        |
| 2B4C   | L_ARG_61  | NH1    | L_GLU_79  | OE1    | 2.769        |
| 2B4C   | L_ARG_61  | NH1    | L_ASP_82  | OD1    | 3.180        |
| 2B4C   | L_ARG_61  | NH2    | L_GLU_79  | OE1    | 3.620        |
| 2B4C   | L_ARG_61  | NH2    | L_ASP_82  | OD1    | 3.064        |
| 2B4C   | L_ARG_61  | NH2    | L_ASP_82  | OD2    | 2.938        |
| 2B4C   | L_LYS_103 | NZ     | L_GLU_165 | OE1    | 3.532        |
| 2B4C   | L_LYS_103 | NZ     | L_GLU_165 | OE2    | 3.078        |
| 2B4C   | L_LYS_149 | NZ     | L_GLU_195 | OE1    | 2.786        |
| 2B4C   | L_LYS_149 | NZ     | L_GLU_195 | OE2    | 3.526        |
| 2B4C   | L_ARG_169 | NH2    | L_ASP_170 | OD2    | 3.503        |
| 2B4C   | L_HIS_189 | ND1    | L_ASP_151 | OD1    | 3.907        |
| 2B4C   | L_HIS_189 | NE2    | L_ASP_185 | OD2    | 3.165        |
| 2B4C   | L_ARG_211 | NH1    | L_GLU_187 | OE1    | 3.570        |
| 2B4C   | H_ARG_    | NH1    | H_ASP_    | OD2    | 3.124        |
| 2B4C   | H_ARG_    | NH2    | H_GLU_    | OE2    | 3.384        |
| 2B4C   | H_LYS_    | NZ     | L_GLU_    | OE1    | 3.365        |
| 2B4C   | H_ARG_    | NH1    | H_ASP_    | OD1    | 2.883        |
| 2B4C   | H_ARG_    | NH1    | H_ASP_    | OD2    | 3.887        |
| 2B4C   | H_ARG_    | NH2    | H_ASP_    | OD1    | 3.707        |
| 2B4C   | H_ARG_    | NH2    | H_ASP_    | OD2    | 3.345        |
| 2B4C   | H_ARG_    | NH1    | H_ASP_    | OD2    | 3.458        |
| 2B4C   | H_ARG_    | NH2    | H_ASP_    | OD2    | 2.912        |
| 2B4C   | H_LYS_143 | NZ     | H_ASP_144 | OD2    | 3.642        |
| 2B4C   | H_LYS_209 | NZ     | L_GLU_123 | OE2    | 3.837        |
| 2B4C   | H_LYS_210 | NZ     | H_GLU_212 | OE2    | 3.952        |

---

Table 247: 2B4C-specific salt bridging networks analysis. In this table, a PDB file is specified with a four-letter PDB ID, except that the names of the PDB files corresponding to the single NMR structural model split from the NMR ensemble is specified with a four-letter PDB ID in addition to a hyphen followed by the single NMR structural model numeric ID, the residue naming scheme is **Chain ID\_residue name\_residue number**,  $\angle ADH$  represents the angle formed by acceptor (A), donor (D) and hydrogen (H) ( $\angle ADH$ ).

| PDB ID | Residue A | Atom A | Residue B | Atom B | Distance (Å) |
|--------|-----------|--------|-----------|--------|--------------|
| 2BDN   | A_ARG_29  | NH2    | A_GLU_50  | OE1    | 2.816        |
| 2BDN   | A_LYS_56  | NZ     | H_ASP_52  | OD1    | 2.539        |
| 2BDN   | A_LYS_56  | NZ     | H_ASP_52  | OD2    | 3.792        |
| 2BDN   | A_LYS_58  | NZ     | A_ASP_62  | OD1    | 3.823        |
| 2BDN   | A_LYS_58  | NZ     | A_ASP_62  | OD2    | 3.097        |
| 2BDN   | L_LYS_24  | NZ     | L_ASP_70  | OD1    | 2.861        |
| 2BDN   | L_ARG_32  | NH1    | A_ASP_65  | OD1    | 3.196        |
| 2BDN   | L_ARG_32  | NH1    | A_ASP_68  | OD1    | 2.578        |
| 2BDN   | L_ARG_32  | NH2    | A_ASP_65  | OD1    | 2.774        |
| 2BDN   | L_ARG_61  | NH2    | L_GLU_81  | OE2    | 3.319        |
| 2BDN   | L_ARG_61  | NH2    | L_ASP_82  | OD1    | 2.963        |
| 2BDN   | L_ARG_61  | NH2    | L_ASP_82  | OD2    | 3.256        |
| 2BDN   | L_LYS_147 | NZ     | L_GLU_154 | OE1    | 3.710        |
| 2BDN   | L_LYS_147 | NZ     | L_GLU_154 | OE2    | 3.490        |
| 2BDN   | L_LYS_149 | NZ     | L_GLU_195 | OE1    | 3.088        |
| 2BDN   | L_LYS_149 | NZ     | L_GLU_195 | OE2    | 3.458        |
| 2BDN   | L_ARG_155 | NH1    | L_GLU_185 | OE2    | 3.304        |
| 2BDN   | L_ARG_155 | NH2    | L_GLU_185 | OE2    | 3.205        |
| 2BDN   | L_LYS_183 | NZ     | L_GLU_187 | OE1    | 3.602        |
| 2BDN   | L_LYS_183 | NZ     | L_GLU_187 | OE2    | 3.004        |
| 2BDN   | L_ARG_188 | NH1    | L_GLU_185 | OE1    | 3.733        |
| 2BDN   | L_HIS_189 | ND1    | L_GLU_185 | OE1    | 3.536        |
| 2BDN   | L_LYS_199 | NZ     | L_ASP_110 | OD1    | 2.836        |
| 2BDN   | L_LYS_199 | NZ     | L_ASP_110 | OD2    | 3.459        |
| 2BDN   | H_ARG_40  | NH1    | H_GLU_89  | OE1    | 3.907        |
| 2BDN   | H_ARG_40  | NH2    | H_GLU_46  | OE2    | 3.172        |
| 2BDN   | H_LYS_67  | NZ     | H_ASP_90  | OD1    | 3.376        |
| 2BDN   | H_LYS_67  | NZ     | H_ASP_90  | OD2    | 2.583        |
| 2BDN   | H_ARG_98  | NH1    | A_GLU_39  | OE2    | 3.155        |
| 2BDN   | H_ARG_98  | NH2    | H_ASP_105 | OD1    | 2.453        |
| 2BDN   | H_ARG_98  | NH2    | H_ASP_105 | OD2    | 3.385        |
| 2BDN   | H_LYS_212 | NZ     | L_GLU_123 | OE2    | 3.177        |

Table 248: 2BDN-specific salt bridging networks analysis. In this table, a PDB file is specified with a four-letter PDB ID, except that the names of the PDB files corresponding to the single NMR structural model split from the NMR ensemble is specified with a four-letter PDB ID in addition to a hyphen followed by the single NMR structural model numeric ID, the residue naming scheme is **Chain ID\_residue name\_residue number**,  $\angle ADH$  represents the angle formed by acceptor (A), donor (D) and hydrogen (H) ( $\angle ADH$ ).

| PDB ID | Residue A | Atom A | Residue B | Atom B | Distance (Å) |
|--------|-----------|--------|-----------|--------|--------------|
| 2BJM   | H_LYS_67  | NZ     | H_ASP_90  | OD2    | 3.645        |
| 2BJM   | L_ARG_63  | NH2    | L_ASP_84  | OD1    | 2.452        |
| 2BJM   | L_ARG_63  | NH2    | L_ASP_84  | OD2    | 2.754        |

Table 249: 2BJM-specific salt bridging networks analysis. In this table, a PDB file is specified with a four-letter PDB ID, except that the names of the PDB files corresponding to the single NMR structural model split from the NMR ensemble is specified with a four-letter PDB ID in addition to a hyphen followed by the single NMR structural model numeric ID, the residue naming scheme is **Chain ID\_residue name\_residue number**,  $\angle ADH$  represents the angle formed by acceptor (A), donor (D) and hydrogen (H) ( $\angle ADH$ ).

| PDB ID | Residue A | Atom A | Residue B | Atom B | Distance (Å) |
|--------|-----------|--------|-----------|--------|--------------|
| 2BRR   | H_LYS_46  | NZ     | H_ASP_62  | OD2    | 2.761        |
| 2BRR   | H_LYS_64  | NZ     | H_ASP_61  | OD1    | 3.587        |
| 2BRR   | H_ARG_66  | NH1    | H_ASP_86  | OD1    | 3.672        |
| 2BRR   | H_ARG_66  | NH1    | H_ASP_86  | OD2    | 2.665        |
| 2BRR   | H_ARG_66  | NH2    | H_ASP_86  | OD1    | 2.817        |
| 2BRR   | H_ARG_66  | NH2    | H_ASP_86  | OD2    | 3.203        |
| 2BRR   | H_ARG_94  | NH2    | H_ASP_101 | OD1    | 3.717        |
| 2BRR   | H_ARG_94  | NH2    | H_ASP_101 | OD2    | 2.794        |
| 2BRR   | H_ARG_213 | NH1    | L_GLU_123 | OE1    | 2.600        |
| 2BRR   | H_ARG_213 | NH1    | L_GLU_123 | OE2    | 3.932        |
| 2BRR   | H_ARG_213 | NH2    | L_GLU_123 | OE1    | 3.110        |
| 2BRR   | H_ARG_213 | NH2    | L_GLU_123 | OE2    | 3.029        |
| 2BRR   | L_ARG_61  | NH1    | L_GLU_79  | OE1    | 3.644        |
| 2BRR   | L_ARG_61  | NH1    | L_GLU_79  | OE2    | 3.599        |
| 2BRR   | L_ARG_61  | NH1    | L_GLU_81  | OE2    | 3.861        |
| 2BRR   | L_ARG_61  | NH2    | L_GLU_79  | OE1    | 3.852        |
| 2BRR   | L_ARG_61  | NH2    | L_GLU_81  | OE2    | 2.730        |
| 2BRR   | L_ARG_61  | NH2    | L_ASP_82  | OD1    | 2.665        |
| 2BRR   | L_ARG_61  | NH2    | L_ASP_82  | OD2    | 3.473        |
| 2BRR   | L_LYS_149 | NZ     | L_GLU_195 | OE1    | 3.904        |
| 2BRR   | L_LYS_149 | NZ     | L_GLU_195 | OE2    | 3.270        |
| 2BRR   | L_ARG_155 | NH2    | L_GLU_185 | OE1    | 3.742        |
| 2BRR   | L_LYS_183 | NZ     | L_ASP_184 | OD1    | 3.014        |
| 2BRR   | L_HIS_189 | ND1    | L_ASP_151 | OD2    | 2.911        |
| 2BRR   | L_ARG_211 | NH2    | L_GLU_187 | OE1    | 3.989        |
| 2BRR   | P_LYS_7   | NZ     | H_ASP_95  | OD1    | 3.067        |
| 2BRR   | P_LYS_7   | NZ     | H_ASP_95  | OD2    | 2.549        |
| 2BRR   | P_HIS_11  | ND1    | Y_ASP_95  | OD2    | 2.841        |
| 2BRR   | X_ARG_61  | NH1    | X_GLU_79  | OE1    | 3.351        |
| 2BRR   | X_ARG_61  | NH1    | X_GLU_79  | OE2    | 3.765        |
| 2BRR   | X_ARG_61  | NH1    | X_GLU_81  | OE2    | 3.529        |
| 2BRR   | X_ARG_61  | NH2    | X_GLU_79  | OE1    | 3.617        |
| 2BRR   | X_ARG_61  | NH2    | X_GLU_81  | OE2    | 2.522        |
| 2BRR   | X_ARG_61  | NH2    | X_ASP_82  | OD1    | 2.621        |
| 2BRR   | X_ARG_61  | NH2    | X_ASP_82  | OD2    | 3.589        |
| 2BRR   | X_LYS_103 | NZ     | X_GLU_105 | OE2    | 3.852        |
| 2BRR   | X_LYS_149 | NZ     | X_GLU_195 | OE1    | 3.717        |
| 2BRR   | X_LYS_149 | NZ     | X_GLU_195 | OE2    | 3.215        |
| 2BRR   | X_ARG_155 | NH1    | X_GLU_185 | OE2    | 2.695        |
| 2BRR   | X_ARG_155 | NH2    | X_GLU_185 | OE2    | 3.654        |
| 2BRR   | X_LYS_183 | NZ     | X_ASP_184 | OD1    | 3.269        |
| 2BRR   | Y_LYS_46  | NZ     | Y_ASP_62  | OD2    | 3.113        |
| 2BRR   | Y_LYS_64  | NZ     | Y_ASP_61  | OD1    | 3.329        |
| 2BRR   | Y_ARG_66  | NH1    | Y_ASP_86  | OD1    | 3.748        |
| 2BRR   | Y_ARG_66  | NH1    | Y_ASP_86  | OD2    | 2.611        |
| 2BRR   | Y_ARG_66  | NH2    | Y_GLU_85  | OE2    | 3.661        |
| 2BRR   | Y_ARG_66  | NH2    | Y_ASP_86  | OD1    | 2.891        |
| 2BRR   | Y_ARG_66  | NH2    | Y_ASP_86  | OD2    | 3.154        |
| 2BRR   | Y_ARG_94  | NH2    | Y_ASP_101 | OD1    | 3.703        |
| 2BRR   | Y_ARG_94  | NH2    | Y_ASP_101 | OD2    | 2.789        |
| 2BRR   | Y_LYS_208 | NZ     | X_GLU_123 | OE2    | 3.359        |
| 2BRR   | Y_ARG_213 | NH1    | X_GLU_123 | OE1    | 2.523        |
| 2BRR   | Y_ARG_213 | NH1    | X_GLU_123 | OE2    | 3.327        |
| 2BRR   | Y_ARG_213 | NH2    | X_GLU_123 | OE1    | 3.468        |
| 2BRR   | Y_ARG_213 | NH2    | X_GLU_123 | OE2    | 2.546        |



---

Table 250: 2BRR-specific salt bridging networks analysis. In this table, a PDB file is specified with a four-letter PDB ID, except that the names of the PDB files corresponding to the single NMR structural model split from the NMR ensemble is specified with a four-letter PDB ID in addition to a hyphen followed by the single NMR structural model numeric ID, the residue naming scheme is **Chain ID\_residue name\_residue number**,  $\angle ADH$  represents the angle formed by acceptor (A), donor (D) and hydrogen (H) ( $\angle ADH$ ).

| PDB ID | Residue A | Atom A | Residue B | Atom B | Distance (Å) |
|--------|-----------|--------|-----------|--------|--------------|
| 2COQ   | A_ARG_25  | NH1    | A_ASP_4   | OD1    | 2.687        |
| 2COQ   | A_ARG_25  | NH1    | A_ASP_4   | OD2    | 3.796        |
| 2COQ   | A_ARG_25  | NH2    | A_ASP_4   | OD1    | 3.959        |
| 2COQ   | A_ARG_54  | NH1    | A_ASP_77  | OD1    | 2.737        |
| 2COQ   | A_ARG_54  | NH1    | A_ASP_77  | OD2    | 3.255        |
| 2COQ   | A_ARG_54  | NH2    | A_ASP_77  | OD1    | 3.769        |
| 2COQ   | A_ARG_54  | NH2    | A_ASP_77  | OD2    | 2.959        |
| 2COQ   | A_ARG_74  | NH1    | A_ASP_72  | OD2    | 2.997        |
| 2COQ   | A_LYS_84  | NZ     | A_GLU_99  | OE1    | 2.795        |

Table 251: 2COQ-specific salt bridging networks analysis. In this table, a PDB file is specified with a four-letter PDB ID, except that the names of the PDB files corresponding to the single NMR structural model split from the NMR ensemble is specified with a four-letter PDB ID in addition to a hyphen followed by the single NMR structural model numeric ID, the residue naming scheme is **Chain ID\_residue name\_residue number**,  $\angle ADH$  represents the angle formed by acceptor (A), donor (D) and hydrogen (H) ( $\angle ADH$ ).

| PDB ID | Residue A | Atom A | Residue B | Atom B | Distance (Å) |
|--------|-----------|--------|-----------|--------|--------------|
| 2D03   | L_ARG_67  | NH1    | L_GLU_85  | OE1    | 3.502        |
| 2D03   | L_ARG_67  | NH2    | L_GLU_85  | OE1    | 3.293        |
| 2D03   | L_ARG_67  | NH2    | L_ASP_88  | OD1    | 2.725        |
| 2D03   | L_ARG_67  | NH2    | L_ASP_88  | OD2    | 3.706        |
| 2D03   | L_LYS_148 | NZ     | L_GLU_111 | OE2    | 3.675        |
| 2D03   | L_LYS_155 | NZ     | L_GLU_201 | OE1    | 3.930        |
| 2D03   | L_LYS_155 | NZ     | L_GLU_201 | OE2    | 2.490        |
| 2D03   | L_ARG_194 | NH1    | L_ASP_190 | OD2    | 3.257        |
| 2D03   | L_HIS_195 | ND1    | L_ASP_157 | OD2    | 2.581        |
| 2D03   | L_ARG_217 | NH1    | L_GLU_193 | OE2    | 3.351        |
| 2D03   | H_ARG_39  | NH1    | H_ASP_90  | OD1    | 2.887        |
| 2D03   | H_ARG_39  | NH2    | H_GLU_47  | OE1    | 3.007        |
| 2D03   | H_ARG_39  | NH2    | H_ASP_90  | OD1    | 3.668        |
| 2D03   | H_LYS_44  | NZ     | H_ASP_89  | OD2    | 2.726        |
| 2D03   | H_ARG_67  | NH1    | H_ASP_90  | OD1    | 3.817        |
| 2D03   | H_ARG_67  | NH1    | H_ASP_90  | OD2    | 2.856        |
| 2D03   | H_ARG_67  | NH2    | H_ASP_90  | OD1    | 2.855        |
| 2D03   | H_ARG_67  | NH2    | H_ASP_90  | OD2    | 3.320        |
| 2D03   | H_ARG_98  | NH2    | H_ASP_107 | OD1    | 3.817        |
| 2D03   | H_ARG_98  | NH2    | H_ASP_107 | OD2    | 2.632        |
| 2D03   | H_ARG_100 | NH1    | H_ASP_107 | OD2    | 3.028        |

Table 252: 2D03-specific salt bridging networks analysis. In this table, a PDB file is specified with a four-letter PDB ID, except that the names of the PDB files corresponding to the single NMR structural model split from the NMR ensemble is specified with a four-letter PDB ID in addition to a hyphen followed by the single NMR structural model numeric ID, the residue naming scheme is **Chain ID\_residue name\_residue number**,  $\angle ADH$  represents the angle formed by acceptor (A), donor (D) and hydrogen (H) ( $\angle ADH$ ).

| PDB ID | Residue A | Atom A | Residue B | Atom B | Distance (Å) |
|--------|-----------|--------|-----------|--------|--------------|
| 2DBL   | L_ARG_24  | NH1    | L_ASP_70  | OD1    | 3.462        |
| 2DBL   | L_ARG_61  | NH1    | L_ASP_82  | OD1    | 3.576        |
| 2DBL   | L_ARG_61  | NH1    | L_ASP_82  | OD2    | 3.889        |
| 2DBL   | L_ARG_61  | NH2    | L_GLU_81  | OE2    | 3.218        |
| 2DBL   | L_ARG_61  | NH2    | L_ASP_82  | OD1    | 2.842        |
| 2DBL   | L_ARG_61  | NH2    | L_ASP_82  | OD2    | 3.577        |
| 2DBL   | L_LYS_149 | NZ     | L_GLU_195 | OE1    | 3.270        |
| 2DBL   | L_LYS_149 | NZ     | L_GLU_195 | OE2    | 2.656        |
| 2DBL   | L_LYS_169 | NZ     | L_ASP_167 | OD1    | 3.936        |
| 2DBL   | L_LYS_183 | NZ     | L_GLU_187 | OE2    | 3.658        |
| 2DBL   | L_ARG_188 | NH1    | L_GLU_185 | OE1    | 3.115        |
| 2DBL   | L_ARG_188 | NH1    | L_GLU_185 | OE2    | 3.486        |
| 2DBL   | L_ARG_188 | NH2    | L_GLU_185 | OE1    | 3.398        |
| 2DBL   | L_HIS_189 | ND1    | L_ASP_151 | OD2    | 2.678        |
| 2DBL   | L_HIS_189 | NE2    | L_GLU_185 | OE2    | 3.450        |
| 2DBL   | L_LYS_199 | NZ     | L_ASP_110 | OD2    | 2.951        |
| 2DBL   | H_LYS_12  | NZ     | H_GLU_16  | OE1    | 3.932        |
| 2DBL   | H_LYS_46  | NZ     | H_ASP_62  | OD2    | 3.919        |
| 2DBL   | H_ARG_66  | NH2    | H_ASP_86  | OD1    | 2.889        |
| 2DBL   | H_ARG_66  | NH2    | H_ASP_86  | OD2    | 2.859        |
| 2DBL   | H_ARG_94  | NH1    | H_ASP_101 | OD1    | 3.455        |
| 2DBL   | H_ARG_94  | NH1    | H_ASP_101 | OD2    | 2.558        |
| 2DBL   | H_LYS_221 | NZ     | L_GLU_123 | OE2    | 3.660        |

Table 253: 2DBL-specific salt bridging networks analysis. In this table, a PDB file is specified with a four-letter PDB ID, except that the names of the PDB files corresponding to the single NMR structural model split from the NMR ensemble is specified with a four-letter PDB ID in addition to a hyphen followed by the single NMR structural model numeric ID, the residue naming scheme is **Chain ID\_residue name\_residue number**,  $\angle ADH$  represents the angle formed by acceptor (A), donor (D) and hydrogen (H) ( $\angle ADH$ ).

| PDB ID | Residue A | Atom A | Residue B | Atom B | Distance (Å) |
|--------|-----------|--------|-----------|--------|--------------|
| 2DLF   | L_ARG_24  | NH1    | L_ASP_70  | OD1    | 2.656        |
| 2DLF   | L_ARG_24  | NH2    | L_ASP_70  | OD1    | 3.467        |
| 2DLF   | L_ARG_61  | NH1    | L_ASP_82  | OD1    | 3.387        |
| 2DLF   | L_ARG_61  | NH1    | L_ASP_82  | OD2    | 2.663        |
| 2DLF   | L_ARG_61  | NH2    | L_GLU_79  | OE1    | 3.785        |
| 2DLF   | L_ARG_61  | NH2    | L_GLU_79  | OE2    | 3.705        |
| 2DLF   | L_ARG_61  | NH2    | L_ASP_82  | OD1    | 2.886        |
| 2DLF   | L_ARG_61  | NH2    | L_ASP_82  | OD2    | 3.503        |
| 2DLF   | H_ARG_38  | NH1    | H_ASP_86  | OD2    | 2.865        |
| 2DLF   | H_ARG_38  | NH2    | H_GLU_46  | OE2    | 3.124        |
| 2DLF   | H_ARG_38  | NH2    | H_ASP_86  | OD2    | 3.931        |
| 2DLF   | H_HIS_55  | NE2    | H_ASP_73  | OD1    | 3.901        |
| 2DLF   | H_HIS_55  | NE2    | H_ASP_73  | OD2    | 3.007        |
| 2DLF   | H_ARG_66  | NH1    | H_ASP_86  | OD1    | 2.819        |
| 2DLF   | H_ARG_66  | NH1    | H_ASP_86  | OD2    | 3.911        |
| 2DLF   | H_ARG_66  | NH2    | H_ASP_86  | OD1    | 3.370        |
| 2DLF   | H_ARG_66  | NH2    | H_ASP_86  | OD2    | 3.052        |
| 2DLF   | H_ARG_71  | NH2    | H_ASP_73  | OD1    | 3.380        |
| 2DLF   | H_LYS_75  | NZ     | H_ASP_72  | OD1    | 3.168        |

Table 254: 2DLF-specific salt bridging networks analysis. In this table, a PDB file is specified with a four-letter PDB ID, except that the names of the PDB files corresponding to the single NMR structural model split from the NMR ensemble is specified with a four-letter PDB ID in addition to a hyphen followed by the single NMR structural model numeric ID, the residue naming scheme is **Chain ID residue name residue number**,  $\angle ADH$  represents the angle formed by acceptor (A), donor (D) and hydrogen (H) ( $\angle ADH$ ).

| PDB ID | Residue A | Atom A | Residue B | Atom B | Distance (Å) |
|--------|-----------|--------|-----------|--------|--------------|
| 2DQC   | L_ARG_61  | NH2    | L_GLU_81  | OE2    | 2.947        |
| 2DQC   | L_ARG_61  | NH2    | L_ASP_82  | OD1    | 2.824        |
| 2DQC   | L_ARG_61  | NH2    | L_ASP_82  | OD2    | 3.557        |
| 2DQC   | L_LYS_103 | NZ     | L_GLU_105 | OE1    | 3.912        |
| 2DQC   | H_ARG_38  | NH1    | H_ASP_89  | OD1    | 2.829        |
| 2DQC   | H_ARG_38  | NH2    | H_GLU_46  | OE1    | 2.957        |
| 2DQC   | H_ARG_38  | NH2    | H_ASP_89  | OD1    | 3.436        |
| 2DQC   | H_ARG_66  | NH1    | H_ASP_89  | OD1    | 3.729        |
| 2DQC   | H_ARG_66  | NH1    | H_ASP_89  | OD2    | 3.006        |
| 2DQC   | H_ARG_66  | NH2    | H_ASP_89  | OD1    | 3.000        |
| 2DQC   | H_ARG_66  | NH2    | H_ASP_89  | OD2    | 3.596        |
| 2DQC   | H_LYS_75  | NZ     | H_ASP_72  | OD1    | 3.870        |
| 2DQC   | H_LYS_75  | NZ     | H_ASP_72  | OD2    | 2.592        |
| 2DQC   | Y_LYS_1   | NZ     | Y_GLU_7   | OE1    | 3.856        |
| 2DQC   | Y_LYS_1   | NZ     | Y_GLU_7   | OE2    | 2.924        |
| 2DQC   | Y_LYS_13  | NZ     | Y_ASP_18  | OD2    | 3.571        |
| 2DQC   | Y_ARG_61  | NH1    | Y_ASP_48  | OD2    | 2.731        |
| 2DQC   | Y_ARG_61  | NH2    | Y_ASP_48  | OD2    | 3.603        |
| 2DQC   | Y_ARG_68  | NH2    | Y_ASP_66  | OD2    | 3.942        |
| 2DQC   | Y_LYS_97  | NZ     | H_ASP_32  | OD1    | 2.612        |
| 2DQC   | Y_LYS_97  | NZ     | H_ASP_32  | OD2    | 3.998        |
| 2DQC   | Y_LYS_97  | NZ     | H_ASP_99  | OD1    | 3.500        |
| 2DQC   | Y_LYS_97  | NZ     | H_ASP_99  | OD2    | 2.637        |
| 2DQC   | Y_ARG_125 | NH1    | Y_ASP_119 | OD2    | 3.978        |
| 2DQC   | Y_ARG_125 | NH2    | Y_ASP_119 | OD1    | 3.933        |
| 2DQC   | Y_ARG_125 | NH2    | Y_ASP_119 | OD2    | 2.677        |

Table 255: 2DQC-specific salt bridging networks analysis. In this table, a PDB file is specified with a four-letter PDB ID, except that the names of the PDB files corresponding to the single NMR structural model split from the NMR ensemble is specified with a four-letter PDB ID in addition to a hyphen followed by the single NMR structural model numeric ID, the residue naming scheme is **Chain ID\_residue name\_residue number**,  $\angle ADH$  represents the angle formed by acceptor (A), donor (D) and hydrogen (H) ( $\angle ADH$ ).

| PDB ID | Residue A | Atom A | Residue B | Atom B | Distance (Å) |
|--------|-----------|--------|-----------|--------|--------------|
| 2DQD   | L_ARG_61  | NH1    | L_GLU_79  | OE1    | 3.706        |
| 2DQD   | L_ARG_61  | NH1    | L_GLU_79  | OE2    | 2.828        |
| 2DQD   | L_ARG_61  | NH1    | L_GLU_81  | OE2    | 3.927        |
| 2DQD   | L_ARG_61  | NH2    | L_GLU_79  | OE1    | 3.771        |
| 2DQD   | L_ARG_61  | NH2    | L_GLU_79  | OE2    | 3.992        |
| 2DQD   | L_ARG_61  | NH2    | L_GLU_81  | OE2    | 2.897        |
| 2DQD   | L_ARG_61  | NH2    | L_ASP_82  | OD1    | 2.786        |
| 2DQD   | L_ARG_61  | NH2    | L_ASP_82  | OD2    | 3.531        |
| 2DQD   | H_ARG_38  | NH1    | H_ASP_89  | OD1    | 2.878        |
| 2DQD   | H_ARG_38  | NH2    | H_GLU_46  | OE1    | 2.790        |
| 2DQD   | H_ARG_38  | NH2    | H_ASP_89  | OD1    | 3.572        |
| 2DQD   | H_ARG_66  | NH1    | H_ASP_89  | OD1    | 3.626        |
| 2DQD   | H_ARG_66  | NH1    | H_ASP_89  | OD2    | 2.940        |
| 2DQD   | H_ARG_66  | NH2    | H_ASP_89  | OD1    | 2.871        |
| 2DQD   | H_ARG_66  | NH2    | H_ASP_89  | OD2    | 3.563        |
| 2DQD   | H_LYS_75  | NZ     | H_ASP_72  | OD1    | 3.653        |
| 2DQD   | H_LYS_75  | NZ     | H_ASP_72  | OD2    | 2.566        |
| 2DQD   | Y_LYS_1   | NZ     | Y_GLU_7   | OE1    | 3.745        |
| 2DQD   | Y_LYS_1   | NZ     | Y_GLU_7   | OE2    | 2.721        |
| 2DQD   | Y_ARG_61  | NH2    | Y_ASP_48  | OD2    | 3.731        |
| 2DQD   | Y_LYS_97  | NZ     | H_ASP_32  | OD1    | 2.767        |
| 2DQD   | Y_LYS_97  | NZ     | H_ASP_32  | OD2    | 3.965        |
| 2DQD   | Y_LYS_97  | NZ     | H_ASP_99  | OD1    | 3.334        |
| 2DQD   | Y_LYS_97  | NZ     | H_ASP_99  | OD2    | 3.048        |
| 2DQD   | Y_ARG_125 | NH1    | Y_ASP_119 | OD2    | 3.233        |
| 2DQD   | Y_ARG_125 | NH2    | Y_ASP_119 | OD1    | 3.581        |
| 2DQD   | Y_ARG_125 | NH2    | Y_ASP_119 | OD2    | 3.417        |

Table 256: 2DQD-specific salt bridging networks analysis. In this table, a PDB file is specified with a four-letter PDB ID, except that the names of the PDB files corresponding to the single NMR structural model split from the NMR ensemble is specified with a four-letter PDB ID in addition to a hyphen followed by the single NMR structural model numeric ID, the residue naming scheme is **Chain ID\_residue name\_residue number**,  $\angle ADH$  represents the angle formed by acceptor (A), donor (D) and hydrogen (H) ( $\angle ADH$ ).

| PDB ID | Residue A | Atom A | Residue B | Atom B | Distance (Å) |
|--------|-----------|--------|-----------|--------|--------------|
| 2DQE   | L_ARG_61  | NH2    | L_GLU_81  | OE2    | 2.959        |
| 2DQE   | L_ARG_61  | NH2    | L_ASP_82  | OD1    | 2.845        |
| 2DQE   | L_ARG_61  | NH2    | L_ASP_82  | OD2    | 3.487        |
| 2DQE   | L_LYS_103 | NZ     | L_GLU_105 | OE2    | 3.264        |
| 2DQE   | H_ARG_38  | NH1    | H_ASP_89  | OD1    | 2.861        |
| 2DQE   | H_ARG_38  | NH2    | H_GLU_46  | OE1    | 2.782        |
| 2DQE   | H_ARG_38  | NH2    | H_ASP_89  | OD1    | 3.510        |
| 2DQE   | H_ARG_66  | NH1    | H_ASP_89  | OD1    | 3.735        |
| 2DQE   | H_ARG_66  | NH1    | H_ASP_89  | OD2    | 2.920        |
| 2DQE   | H_ARG_66  | NH2    | H_ASP_89  | OD1    | 2.982        |
| 2DQE   | H_ARG_66  | NH2    | H_ASP_89  | OD2    | 3.570        |
| 2DQE   | Y_LYS_1   | NZ     | Y_GLU_7   | OE2    | 2.773        |
| 2DQE   | Y_ARG_61  | NH1    | Y_ASP_48  | OD2    | 3.262        |
| 2DQE   | Y_ARG_61  | NH2    | Y_ASP_48  | OD2    | 3.792        |
| 2DQE   | Y_LYS_97  | NZ     | H_ASP_32  | OD1    | 2.650        |
| 2DQE   | Y_LYS_97  | NZ     | H_ASP_99  | OD1    | 3.314        |
| 2DQE   | Y_LYS_97  | NZ     | H_ASP_99  | OD2    | 2.899        |
| 2DQE   | Y_ARG_125 | NH1    | Y_ASP_119 | OD2    | 3.515        |
| 2DQE   | Y_ARG_125 | NH2    | Y_ASP_119 | OD1    | 3.565        |
| 2DQE   | Y_ARG_125 | NH2    | Y_ASP_119 | OD2    | 3.316        |

Table 257: 2DQE-specific salt bridging networks analysis. In this table, a PDB file is specified with a four-letter PDB ID, except that the names of the PDB files corresponding to the single NMR structural model split from the NMR ensemble is specified with a four-letter PDB ID in addition to a hyphen followed by the single NMR structural model numeric ID, the residue naming scheme is **Chain ID\_residue name\_residue number**,  $\angle ADH$  represents the angle formed by acceptor (A), donor (D) and hydrogen (H) ( $\angle ADH$ ).



| PDB ID | Residue A | Atom A | Residue B | Atom B | Distance (Å) |
|--------|-----------|--------|-----------|--------|--------------|
| 2DQF   | A_ARG_24  | NH1    | A_ASP_70  | OD1    | 2.550        |
| 2DQF   | A_ARG_24  | NH1    | A_ASP_70  | OD2    | 3.744        |
| 2DQF   | A_LYS_39  | NZ     | A_GLU_81  | OE2    | 2.959        |
| 2DQF   | A_ARG_45  | NH1    | E_ASP_1   | OD2    | 3.511        |
| 2DQF   | A_LYS_49  | NZ     | B_ASP_99  | OD1    | 3.470        |
| 2DQF   | A_ARG_61  | NH1    | A_GLU_79  | OE1    | 3.872        |
| 2DQF   | A_ARG_61  | NH1    | A_GLU_79  | OE2    | 2.799        |
| 2DQF   | A_ARG_61  | NH1    | E_ASP_27  | OD1    | 3.814        |
| 2DQF   | A_ARG_61  | NH2    | A_GLU_79  | OE1    | 3.614        |
| 2DQF   | A_ARG_61  | NH2    | A_GLU_79  | OE2    | 3.760        |
| 2DQF   | A_ARG_61  | NH2    | A_ASP_82  | OD1    | 2.799        |
| 2DQF   | A_ARG_61  | NH2    | A_ASP_82  | OD2    | 3.265        |
| 2DQF   | A_LYS_103 | NZ     | A_GLU_105 | OE2    | 3.654        |
| 2DQF   | B_ARG_38  | NH1    | B_ASP_89  | OD1    | 2.770        |
| 2DQF   | B_ARG_38  | NH2    | B_GLU_46  | OE1    | 2.742        |
| 2DQF   | B_ARG_38  | NH2    | B_ASP_89  | OD1    | 3.406        |
| 2DQF   | B_ARG_66  | NH1    | B_ASP_89  | OD1    | 3.473        |
| 2DQF   | B_ARG_66  | NH1    | B_ASP_89  | OD2    | 2.668        |
| 2DQF   | B_ARG_66  | NH2    | B_ASP_89  | OD1    | 2.704        |
| 2DQF   | B_ARG_66  | NH2    | B_ASP_89  | OD2    | 3.223        |
| 2DQF   | C_LYS_1   | NZ     | C_GLU_7   | OE1    | 3.699        |
| 2DQF   | C_LYS_1   | NZ     | C_GLU_7   | OE2    | 2.773        |
| 2DQF   | C_LYS_97  | NZ     | B_ASP_99  | OD1    | 3.543        |
| 2DQF   | C_LYS_97  | NZ     | B_ASP_99  | OD2    | 2.851        |
| 2DQF   | C_ARG_125 | NH1    | C_ASP_119 | OD2    | 3.803        |
| 2DQF   | C_ARG_125 | NH2    | C_ASP_119 | OD1    | 3.819        |
| 2DQF   | C_ARG_125 | NH2    | C_ASP_119 | OD2    | 3.276        |
| 2DQF   | D_LYS_39  | NZ     | B_ASP_1   | OD1    | 3.005        |
| 2DQF   | D_LYS_39  | NZ     | D_GLU_42  | OE2    | 3.387        |
| 2DQF   | D_LYS_39  | NZ     | D_GLU_81  | OE2    | 3.094        |
| 2DQF   | D_ARG_61  | NH1    | B_ASP_27  | OD1    | 3.581        |
| 2DQF   | D_ARG_61  | NH1    | D_GLU_79  | OE1    | 3.632        |
| 2DQF   | D_ARG_61  | NH1    | D_GLU_79  | OE2    | 2.878        |
| 2DQF   | D_ARG_61  | NH2    | D_GLU_79  | OE1    | 3.547        |
| 2DQF   | D_ARG_61  | NH2    | D_GLU_79  | OE2    | 3.942        |
| 2DQF   | D_ARG_61  | NH2    | D_ASP_82  | OD1    | 2.591        |
| 2DQF   | D_ARG_61  | NH2    | D_ASP_82  | OD2    | 3.479        |
| 2DQF   | E_ARG_38  | NH1    | E_ASP_89  | OD1    | 2.707        |
| 2DQF   | E_ARG_38  | NH2    | E_GLU_46  | OE1    | 2.703        |
| 2DQF   | E_ARG_38  | NH2    | E_ASP_89  | OD1    | 3.576        |
| 2DQF   | E_ARG_66  | NH1    | E_ASP_89  | OD1    | 3.354        |
| 2DQF   | E_ARG_66  | NH1    | E_ASP_89  | OD2    | 2.779        |
| 2DQF   | E_ARG_66  | NH2    | E_ASP_89  | OD1    | 2.920        |
| 2DQF   | E_ARG_66  | NH2    | E_ASP_89  | OD2    | 3.732        |
| 2DQF   | E_LYS_75  | NZ     | E_ASP_72  | OD1    | 3.480        |
| 2DQF   | E_LYS_75  | NZ     | E_ASP_72  | OD2    | 3.040        |
| 2DQF   | F_LYS_1   | NZ     | F_GLU_7   | OE1    | 3.776        |
| 2DQF   | F_LYS_1   | NZ     | F_GLU_7   | OE2    | 2.553        |
| 2DQF   | F_ARG_61  | NH1    | F_ASP_48  | OD1    | 3.965        |
| 2DQF   | F_ARG_61  | NH1    | F_ASP_48  | OD2    | 3.568        |
| 2DQF   | F_LYS_97  | NZ     | E_ASP_99  | OD2    | 3.165        |
| 2DQF   | F_ARG_125 | NH2    | F_ASP_119 | OD2    | 3.151        |

---

Table 258: 2DQF-specific salt bridging networks analysis. In this table, a PDB file is specified with a four-letter PDB ID, except that the names of the PDB files corresponding to the single NMR structural model split from the NMR ensemble is specified with a four-letter PDB ID in addition to a hyphen followed by the single NMR structural model numeric ID, the residue naming scheme is **Chain ID\_residue name\_residue number**,  $\angle ADH$  represents the angle formed by acceptor (A), donor (D) and hydrogen (H) ( $\angle ADH$ ).

| PDB ID | Residue A | Atom A | Residue B | Atom B | Distance (Å) |
|--------|-----------|--------|-----------|--------|--------------|
| 2DQG   | L_ARG_24  | NH1    | L_ASP_70  | OD2    | 2.455        |
| 2DQG   | L_ARG_24  | NH2    | L_ASP_70  | OD2    | 2.946        |
| 2DQG   | L_ARG_61  | NH1    | L_GLU_81  | OE1    | 3.776        |
| 2DQG   | L_ARG_61  | NH1    | L_GLU_81  | OE2    | 3.040        |
| 2DQG   | L_ARG_61  | NH1    | L_ASP_82  | OD1    | 2.735        |
| 2DQG   | L_ARG_61  | NH1    | L_ASP_82  | OD2    | 3.392        |
| 2DQG   | L_ARG_61  | NH2    | L_GLU_81  | OE2    | 3.998        |
| 2DQG   | H_ARG_38  | NH1    | H_ASP_89  | OD1    | 2.997        |
| 2DQG   | H_ARG_38  | NH2    | H_GLU_46  | OE1    | 2.883        |
| 2DQG   | H_ARG_38  | NH2    | H_ASP_89  | OD1    | 3.559        |
| 2DQG   | H_ARG_66  | NH1    | H_ASP_89  | OD1    | 3.739        |
| 2DQG   | H_ARG_66  | NH1    | H_ASP_89  | OD2    | 2.946        |
| 2DQG   | H_ARG_66  | NH2    | H_ASP_89  | OD1    | 2.769        |
| 2DQG   | H_ARG_66  | NH2    | H_ASP_89  | OD2    | 3.415        |
| 2DQG   | Y_LYS_1   | NZ     | Y_GLU_7   | OE1    | 2.718        |
| 2DQG   | Y_ARG_61  | NH1    | Y_ASP_48  | OD1    | 3.819        |
| 2DQG   | Y_ARG_61  | NH2    | Y_ASP_48  | OD1    | 3.754        |
| 2DQG   | Y_LYS_97  | NZ     | H_ASP_32  | OD1    | 3.992        |
| 2DQG   | Y_LYS_97  | NZ     | H_ASP_32  | OD2    | 2.695        |
| 2DQG   | Y_LYS_97  | NZ     | H_ASP_99  | OD1    | 3.156        |
| 2DQG   | Y_LYS_97  | NZ     | H_ASP_99  | OD2    | 3.019        |
| 2DQG   | Y_ARG_125 | NH2    | Y_ASP_119 | OD1    | 3.345        |
| 2DQG   | Y_ARG_125 | NH2    | Y_ASP_119 | OD2    | 2.899        |

Table 259: 2DQG-specific salt bridging networks analysis. In this table, a PDB file is specified with a four-letter PDB ID, except that the names of the PDB files corresponding to the single NMR structural model split from the NMR ensemble is specified with a four-letter PDB ID in addition to a hyphen followed by the single NMR structural model numeric ID, the residue naming scheme is **Chain ID\_residue name\_residue number**,  $\angle ADH$  represents the angle formed by acceptor (A), donor (D) and hydrogen (H) ( $\angle ADH$ ).

| PDB ID | Residue A | Atom A | Residue B | Atom B | Distance (Å) |
|--------|-----------|--------|-----------|--------|--------------|
| 2DQH   | L_ARG_61  | NH1    | L_GLU_81  | OE2    | 3.943        |
| 2DQH   | L_ARG_61  | NH2    | L_GLU_81  | OE2    | 2.998        |
| 2DQH   | L_ARG_61  | NH2    | L_ASP_82  | OD1    | 2.603        |
| 2DQH   | L_ARG_61  | NH2    | L_ASP_82  | OD2    | 3.284        |
| 2DQH   | L_LYS_103 | NZ     | L_GLU_105 | OE2    | 3.440        |
| 2DQH   | H_ARG_38  | NH1    | H_ASP_89  | OD1    | 3.065        |
| 2DQH   | H_ARG_38  | NH2    | H_GLU_46  | OE1    | 2.818        |
| 2DQH   | H_ARG_38  | NH2    | H_ASP_89  | OD1    | 3.616        |
| 2DQH   | H_ARG_66  | NH1    | H_ASP_89  | OD1    | 3.542        |
| 2DQH   | H_ARG_66  | NH1    | H_ASP_89  | OD2    | 2.882        |
| 2DQH   | H_ARG_66  | NH2    | H_ASP_89  | OD1    | 2.810        |
| 2DQH   | H_ARG_66  | NH2    | H_ASP_89  | OD2    | 3.639        |
| 2DQH   | Y_LYS_1   | NZ     | Y_GLU_7   | OE1    | 3.804        |
| 2DQH   | Y_LYS_1   | NZ     | Y_GLU_7   | OE2    | 2.722        |
| 2DQH   | Y_LYS_13  | NZ     | Y_ASP_18  | OD1    | 3.180        |
| 2DQH   | Y_ARG_61  | NH1    | Y_ASP_48  | OD2    | 3.913        |
| 2DQH   | Y_ARG_68  | NH2    | Y_ASP_66  | OD2    | 3.732        |
| 2DQH   | Y_LYS_97  | NZ     | H_ASP_32  | OD1    | 2.777        |
| 2DQH   | Y_LYS_97  | NZ     | H_ASP_99  | OD1    | 3.694        |
| 2DQH   | Y_LYS_97  | NZ     | H_ASP_99  | OD2    | 2.635        |
| 2DQH   | Y_ARG_125 | NH1    | Y_ASP_119 | OD2    | 3.546        |
| 2DQH   | Y_ARG_125 | NH2    | Y_ASP_119 | OD1    | 3.902        |
| 2DQH   | Y_ARG_125 | NH2    | Y_ASP_119 | OD2    | 3.500        |

Table 260: 2DQH-specific salt bridging networks analysis. In this table, a PDB file is specified with a four-letter PDB ID, except that the names of the PDB files corresponding to the single NMR structural model split from the NMR ensemble is specified with a four-letter PDB ID in addition to a hyphen followed by the single NMR structural model numeric ID, the residue naming scheme is **Chain ID\_residue name\_residue number**,  $\angle ADH$  represents the angle formed by acceptor (A), donor (D) and hydrogen (H) ( $\angle ADH$ ).

| PDB ID | Residue A | Atom A | Residue B | Atom B | Distance (Å) |
|--------|-----------|--------|-----------|--------|--------------|
| 2DQI   | L_LYS_49  | NZ     | H_ASP_99  | OD1    | 2.843        |
| 2DQI   | L_LYS_49  | NZ     | H_ASP_101 | OD1    | 3.541        |
| 2DQI   | L_LYS_49  | NZ     | H_ASP_101 | OD2    | 3.285        |
| 2DQI   | L_ARG_61  | NH2    | L_GLU_81  | OE2    | 2.840        |
| 2DQI   | L_ARG_61  | NH2    | L_ASP_82  | OD1    | 2.897        |
| 2DQI   | L_ARG_61  | NH2    | L_ASP_82  | OD2    | 3.427        |
| 2DQI   | L_LYS_103 | NZ     | L_GLU_105 | OE2    | 3.837        |
| 2DQI   | H_ARG_38  | NH1    | H_ASP_89  | OD1    | 2.893        |
| 2DQI   | H_ARG_38  | NH2    | H_GLU_46  | OE1    | 2.861        |
| 2DQI   | H_ARG_38  | NH2    | H_ASP_89  | OD1    | 3.612        |
| 2DQI   | H_ARG_66  | NH1    | H_ASP_89  | OD1    | 3.831        |
| 2DQI   | H_ARG_66  | NH1    | H_ASP_89  | OD2    | 3.064        |
| 2DQI   | H_ARG_66  | NH2    | H_ASP_89  | OD1    | 3.099        |
| 2DQI   | H_ARG_66  | NH2    | H_ASP_89  | OD2    | 3.699        |
| 2DQI   | H_LYS_75  | NZ     | H_ASP_72  | OD2    | 2.738        |
| 2DQI   | Y_LYS_1   | NZ     | Y_GLU_7   | OE2    | 3.385        |
| 2DQI   | Y_LYS_97  | NZ     | H_ASP_32  | OD1    | 2.729        |
| 2DQI   | Y_ARG_125 | NH1    | Y_ASP_119 | OD2    | 3.366        |
| 2DQI   | Y_ARG_125 | NH2    | Y_ASP_119 | OD1    | 3.841        |
| 2DQI   | Y_ARG_125 | NH2    | Y_ASP_119 | OD2    | 3.842        |

Table 261: 2DQI-specific salt bridging networks analysis. In this table, a PDB file is specified with a four-letter PDB ID, except that the names of the PDB files corresponding to the single NMR structural model split from the NMR ensemble is specified with a four-letter PDB ID in addition to a hyphen followed by the single NMR structural model numeric ID, the residue naming scheme is **Chain ID\_residue name\_residue number**,  $\angle ADH$  represents the angle formed by acceptor (A), donor (D) and hydrogen (H) ( $\angle ADH$ ).

| PDB ID | Residue A | Atom A | Residue B | Atom B | Distance (Å) |
|--------|-----------|--------|-----------|--------|--------------|
| 2DQJ   | L_ARG_61  | NH2    | L_GLU_81  | OE2    | 2.931        |
| 2DQJ   | L_ARG_61  | NH2    | L_ASP_82  | OD1    | 2.808        |
| 2DQJ   | L_ARG_61  | NH2    | L_ASP_82  | OD2    | 3.434        |
| 2DQJ   | L_LYS_103 | NZ     | L_GLU_105 | OE2    | 3.227        |
| 2DQJ   | H_ARG_38  | NH1    | H_ASP_89  | OD1    | 2.842        |
| 2DQJ   | H_ARG_38  | NH2    | H_GLU_46  | OE1    | 2.847        |
| 2DQJ   | H_ARG_38  | NH2    | H_ASP_89  | OD1    | 3.505        |
| 2DQJ   | H_ARG_66  | NH1    | H_ASP_89  | OD1    | 3.735        |
| 2DQJ   | H_ARG_66  | NH1    | H_ASP_89  | OD2    | 3.036        |
| 2DQJ   | H_ARG_66  | NH2    | H_ASP_89  | OD1    | 3.031        |
| 2DQJ   | H_ARG_66  | NH2    | H_ASP_89  | OD2    | 3.659        |
| 2DQJ   | Y_LYS_1   | NZ     | Y_GLU_7   | OE2    | 2.929        |
| 2DQJ   | Y_ARG_61  | NH1    | Y_ASP_48  | OD2    | 3.313        |
| 2DQJ   | Y_ARG_61  | NH2    | Y_ASP_48  | OD2    | 3.891        |
| 2DQJ   | Y_ARG_68  | NH2    | Y_ASP_66  | OD2    | 3.769        |
| 2DQJ   | Y_LYS_97  | NZ     | H_ASP_32  | OD1    | 2.638        |
| 2DQJ   | Y_LYS_97  | NZ     | H_ASP_32  | OD2    | 3.939        |
| 2DQJ   | Y_LYS_97  | NZ     | H_ASP_99  | OD1    | 3.482        |
| 2DQJ   | Y_LYS_97  | NZ     | H_ASP_99  | OD2    | 2.865        |
| 2DQJ   | Y_ARG_125 | NH1    | Y_ASP_119 | OD2    | 3.846        |
| 2DQJ   | Y_ARG_125 | NH2    | Y_ASP_119 | OD1    | 3.702        |
| 2DQJ   | Y_ARG_125 | NH2    | Y_ASP_119 | OD2    | 3.192        |

Table 262: 2DQJ-specific salt bridging networks analysis. In this table, a PDB file is specified with a four-letter PDB ID, except that the names of the PDB files corresponding to the single NMR structural model split from the NMR ensemble is specified with a four-letter PDB ID in addition to a hyphen followed by the single NMR structural model numeric ID, the residue naming scheme is **Chain ID\_residue name\_residue number**,  $\angle ADH$  represents the angle formed by acceptor (A), donor (D) and hydrogen (H) ( $\angle ADH$ ).

| PDB ID | Residue A  | Atom A | Residue B  | Atom B | Distance (Å) |
|--------|------------|--------|------------|--------|--------------|
| 2DQT   | L_LYS_50   | NZ     | L_ASP_30   | OD2    | 2.780        |
| 2DQT   | L_LYS_50   | NZ     | H_ASP_100C | OD1    | 3.056        |
| 2DQT   | L_ARG_61   | NH1    | L_GLU_79   | OE1    | 3.616        |
| 2DQT   | L_ARG_61   | NH2    | L_GLU_81   | OE1    | 3.572        |
| 2DQT   | L_ARG_61   | NH2    | L_ASP_82   | OD1    | 2.662        |
| 2DQT   | L_ARG_61   | NH2    | L_ASP_82   | OD2    | 3.115        |
| 2DQT   | L_ARG_77   | NH1    | L_GLU_79   | OE2    | 3.435        |
| 2DQT   | L_LYS_103  | NZ     | L_GLU_105  | OE2    | 3.442        |
| 2DQT   | L_LYS_149  | NZ     | L_GLU_195  | OE1    | 3.095        |
| 2DQT   | L_LYS_149  | NZ     | L_GLU_195  | OE2    | 3.166        |
| 2DQT   | L_ARG_155  | NH1    | L_GLU_185  | OE1    | 3.261        |
| 2DQT   | L_ARG_155  | NH1    | L_GLU_185  | OE2    | 3.888        |
| 2DQT   | L_ARG_155  | NH2    | L_GLU_185  | OE1    | 3.596        |
| 2DQT   | L_ARG_155  | NH2    | L_GLU_185  | OE2    | 2.765        |
| 2DQT   | L_LYS_183  | NZ     | L_GLU_187  | OE1    | 3.433        |
| 2DQT   | L_LYS_183  | NZ     | L_GLU_187  | OE2    | 2.630        |
| 2DQT   | L_ARG_188  | NH1    | L_ASP_184  | OD2    | 2.854        |
| 2DQT   | L_HIS_189  | ND1    | L_ASP_151  | OD2    | 2.914        |
| 2DQT   | L_HIS_189  | NE2    | L_GLU_185  | OE2    | 3.113        |
| 2DQT   | L_LYS_199  | NZ     | L_ASP_110  | OD2    | 3.558        |
| 2DQT   | H_ARG_38   | NH1    | H_GLU_46   | OE1    | 2.794        |
| 2DQT   | H_ARG_38   | NH2    | H_ASP_86   | OD1    | 2.704        |
| 2DQT   | H_LYS_64   | NZ     | H_ASP_61   | OD1    | 2.620        |
| 2DQT   | H_ARG_66   | NH1    | H_ASP_86   | OD1    | 3.819        |
| 2DQT   | H_ARG_66   | NH1    | H_ASP_86   | OD2    | 2.700        |
| 2DQT   | H_ARG_66   | NH2    | H_ASP_86   | OD1    | 2.983        |
| 2DQT   | H_ARG_66   | NH2    | H_ASP_86   | OD2    | 3.389        |
| 2DQT   | H_ARG_83   | NH2    | H_GLU_85   | OE1    | 3.980        |
| 2DQT   | H_ARG_83   | NH2    | H_GLU_85   | OE2    | 3.275        |
| 2DQT   | H_ARG_94   | NH2    | H_ASP_101  | OD1    | 3.570        |
| 2DQT   | H_ARG_94   | NH2    | H_ASP_101  | OD2    | 2.733        |
| 2DQT   | H_ARG_100B | NH2    | L_ASP_30   | OD1    | 3.486        |
| 2DQT   | H_ARG_100B | NH2    | L_ASP_30   | OD2    | 3.745        |

Table 263: 2DQT-specific salt bridging networks analysis. In this table, a PDB file is specified with a four-letter PDB ID, except that the names of the PDB files corresponding to the single NMR structural model split from the NMR ensemble is specified with a four-letter PDB ID in addition to a hyphen followed by the single NMR structural model numeric ID, the residue naming scheme is **Chain ID\_residue name\_residue number**,  $\angle ADH$  represents the angle formed by acceptor (A), donor (D) and hydrogen (H) ( $\angle ADH$ ).

| PDB ID | Residue A  | Atom A | Residue B  | Atom B | Distance (Å) |
|--------|------------|--------|------------|--------|--------------|
| 2DQU   | L_ARG_24   | NH1    | L_ASP_70   | OD1    | 3.427        |
| 2DQU   | L_LYS_50   | NZ     | H_ASP_100C | OD1    | 2.628        |
| 2DQU   | L_LYS_50   | NZ     | H_ASP_100C | OD2    | 3.616        |
| 2DQU   | L_ARG_61   | NH2    | L_GLU_79   | OE1    | 2.958        |
| 2DQU   | L_LYS_147  | NZ     | L_GLU_154  | OE1    | 3.676        |
| 2DQU   | L_LYS_147  | NZ     | L_GLU_154  | OE2    | 2.961        |
| 2DQU   | L_LYS_147  | NZ     | L_GLU_195  | OE2    | 3.938        |
| 2DQU   | L_LYS_149  | NZ     | L_GLU_195  | OE1    | 2.875        |
| 2DQU   | L_LYS_149  | NZ     | L_GLU_195  | OE2    | 3.568        |
| 2DQU   | L_LYS_183  | NZ     | L_GLU_187  | OE2    | 3.122        |
| 2DQU   | L_HIS_189  | ND1    | L_ASP_151  | OD2    | 3.386        |
| 2DQU   | L_HIS_189  | NE2    | L_GLU_185  | OE2    | 2.712        |
| 2DQU   | L_LYS_199  | NZ     | L_ASP_110  | OD2    | 3.230        |
| 2DQU   | H_ARG_38   | NH1    | H_GLU_46   | OE1    | 2.604        |
| 2DQU   | H_ARG_38   | NH1    | H_ASP_86   | OD1    | 3.950        |
| 2DQU   | H_ARG_38   | NH2    | H_ASP_86   | OD1    | 2.687        |
| 2DQU   | H_ARG_44   | NH2    | H_GLU_46   | OE1    | 2.549        |
| 2DQU   | H_ARG_44   | NH2    | H_GLU_46   | OE2    | 2.851        |
| 2DQU   | H_ARG_66   | NH1    | H_ASP_86   | OD1    | 3.787        |
| 2DQU   | H_ARG_66   | NH1    | H_ASP_86   | OD2    | 2.695        |
| 2DQU   | H_ARG_66   | NH2    | H_ASP_86   | OD1    | 2.995        |
| 2DQU   | H_ARG_66   | NH2    | H_ASP_86   | OD2    | 3.363        |
| 2DQU   | H_ARG_94   | NH2    | H_ASP_101  | OD1    | 3.556        |
| 2DQU   | H_ARG_94   | NH2    | H_ASP_101  | OD2    | 2.729        |
| 2DQU   | H_ARG_100B | NH2    | L_ASP_30   | OD2    | 2.721        |
| 2DQU   | H_LYS_208  | NZ     | L_GLU_123  | OE2    | 2.915        |
| 2DQU   | H_ARG_213  | NH1    | L_GLU_123  | OE1    | 3.471        |

Table 264: 2DQU-specific salt bridging networks analysis. In this table, a PDB file is specified with a four-letter PDB ID, except that the names of the PDB files corresponding to the single NMR structural model split from the NMR ensemble is specified with a four-letter PDB ID in addition to a hyphen followed by the single NMR structural model numeric ID, the residue naming scheme is **Chain ID\_residue name\_residue number**,  $\angle ADH$  represents the angle formed by acceptor (A), donor (D) and hydrogen (H) ( $\angle ADH$ ).



| PDB ID | Residue A | Atom A | Residue B | Atom B | Distance (Å) |
|--------|-----------|--------|-----------|--------|--------------|
| 2FB4   | L_ARG_53  | NH1    | L_ASP_59  | OD2    | 3.714        |
| 2FB4   | L_ARG_53  | NH2    | L_ASP_59  | OD1    | 3.808        |
| 2FB4   | L_ARG_60  | NH1    | L_GLU_80  | OE2    | 3.376        |
| 2FB4   | L_ARG_60  | NH2    | L_GLU_80  | OE2    | 2.766        |
| 2FB4   | L_ARG_60  | NH2    | L_ASP_81  | OD1    | 3.071        |
| 2FB4   | L_ARG_60  | NH2    | L_ASP_81  | OD2    | 2.621        |
| 2FB4   | L_LYS_104 | NZ     | L_ASP_84  | OD1    | 3.495        |
| 2FB4   | L_LYS_104 | NZ     | L_ASP_84  | OD2    | 2.981        |
| 2FB4   | L_HIS_190 | ND1    | L_ASP_153 | OD1    | 2.983        |
| 2FB4   | H_ARG_38  | NH1    | H_ASP_90  | OD1    | 2.997        |
| 2FB4   | H_ARG_38  | NH2    | H_GLU_46  | OE1    | 3.277        |
| 2FB4   | H_ARG_38  | NH2    | H_GLU_46  | OE2    | 3.164        |
| 2FB4   | H_ARG_38  | NH2    | H_ASP_90  | OD1    | 3.798        |
| 2FB4   | H_HIS_59  | NE2    | H_ASP_57  | OD1    | 3.817        |
| 2FB4   | H_ARG_67  | NH1    | H_ASP_90  | OD1    | 3.916        |
| 2FB4   | H_ARG_67  | NH1    | H_ASP_90  | OD2    | 2.836        |
| 2FB4   | H_ARG_67  | NH2    | H_ASP_90  | OD1    | 2.913        |
| 2FB4   | H_ARG_67  | NH2    | H_ASP_90  | OD2    | 3.297        |
| 2FB4   | H_ARG_72  | NH2    | H_ASP_74  | OD2    | 3.188        |
| 2FB4   | H_ARG_98  | NH2    | H_ASP_106 | OD1    | 2.760        |
| 2FB4   | H_ARG_98  | NH2    | H_ASP_106 | OD2    | 3.392        |
| 2FB4   | H_LYS_148 | NZ     | L_GLU_126 | OE2    | 2.805        |
| 2FB4   | H_LYS_214 | NZ     | L_GLU_125 | OE1    | 3.053        |
| 2FB4   | H_LYS_214 | NZ     | L_GLU_125 | OE2    | 2.759        |

Table 265: 2FB4-specific salt bridging networks analysis. In this table, a PDB file is specified with a four-letter PDB ID, except that the names of the PDB files corresponding to the single NMR structural model split from the NMR ensemble is specified with a four-letter PDB ID in addition to a hyphen followed by the single NMR structural model numeric ID, the residue naming scheme is **Chain ID\_residue name\_residue number**,  $\angle ADH$  represents the angle formed by acceptor (A), donor (D) and hydrogen (H) ( $\angle ADH$ ).

| PDB ID | Residue A | Atom A | Residue B | Atom B | Distance (Å) |
|--------|-----------|--------|-----------|--------|--------------|
| 2FD6   | A_HIS_29  | NE2    | A_ASP_12  | OD1    | 3.017        |
| 2FD6   | A_HIS_29  | NE2    | A_ASP_12  | OD2    | 3.253        |
| 2FD6   | A_HIS_41  | NE2    | A_ASP_12  | OD1    | 2.670        |
| 2FD6   | A_HIS_41  | NE2    | A_ASP_12  | OD2    | 3.732        |
| 2FD6   | A_ARG_69  | NH2    | A_ASP_65  | OD2    | 2.800        |
| 2FD6   | A_HIS_87  | ND1    | U_ASP_11  | OD2    | 3.705        |
| 2FD6   | A_ARG_88  | NH1    | A_ASP_90  | OD1    | 3.269        |
| 2FD6   | A_ARG_88  | NH1    | A_ASP_90  | OD2    | 2.893        |
| 2FD6   | L_LYS_53  | NZ     | L_GLU_50  | OE1    | 2.800        |
| 2FD6   | L_ARG_61  | NH1    | L_GLU_79  | OE1    | 3.611        |
| 2FD6   | L_ARG_61  | NH1    | L_GLU_79  | OE2    | 3.439        |
| 2FD6   | L_ARG_61  | NH2    | L_GLU_79  | OE1    | 3.617        |
| 2FD6   | L_ARG_61  | NH2    | L_GLU_81  | OE2    | 2.650        |
| 2FD6   | L_ARG_61  | NH2    | L_ASP_82  | OD1    | 2.824        |
| 2FD6   | L_ARG_61  | NH2    | L_ASP_82  | OD2    | 3.518        |
| 2FD6   | L_LYS_103 | NZ     | L_ASP_164 | OD1    | 3.838        |
| 2FD6   | L_LYS_146 | NZ     | L_GLU_153 | OE1    | 3.751        |
| 2FD6   | L_LYS_148 | NZ     | L_GLU_194 | OE1    | 2.730        |
| 2FD6   | L_LYS_148 | NZ     | L_GLU_194 | OE2    | 2.883        |
| 2FD6   | L_ARG_154 | NH1    | L_GLU_184 | OE1    | 3.569        |
| 2FD6   | L_ARG_154 | NH1    | L_GLU_184 | OE2    | 3.359        |
| 2FD6   | L_ARG_154 | NH2    | L_GLU_184 | OE1    | 2.421        |
| 2FD6   | L_ARG_154 | NH2    | L_GLU_184 | OE2    | 3.540        |
| 2FD6   | L_ARG_187 | NH1    | L_ASP_183 | OD1    | 3.359        |
| 2FD6   | L_HIS_188 | ND1    | L_ASP_150 | OD2    | 2.696        |
| 2FD6   | H_ARG_40  | NH1    | H_GLU_85  | OE1    | 2.850        |
| 2FD6   | H_ARG_40  | NH2    | H_GLU_85  | OE1    | 3.358        |
| 2FD6   | H_LYS_64  | NZ     | H_GLU_61  | OE1    | 3.156        |
| 2FD6   | H_LYS_66  | NZ     | H_ASP_86  | OD1    | 3.700        |
| 2FD6   | H_LYS_66  | NZ     | H_ASP_86  | OD2    | 2.976        |
| 2FD6   | H_ARG_94  | NH2    | H_ASP_101 | OD1    | 3.603        |
| 2FD6   | H_ARG_94  | NH2    | H_ASP_101 | OD2    | 2.621        |
| 2FD6   | H_HIS_98  | ND1    | L_GLU_50  | OE1    | 3.050        |
| 2FD6   | H_HIS_98  | ND1    | L_GLU_50  | OE2    | 3.997        |
| 2FD6   | H_LYS_203 | NZ     | L_GLU_122 | OE2    | 2.585        |
| 2FD6   | U_ARG_2   | NH2    | U_ASP_74  | OD1    | 3.037        |
| 2FD6   | U_ARG_2   | NH2    | U_ASP_74  | OD2    | 3.628        |
| 2FD6   | U_ARG_25  | NH1    | U_GLU_42  | OE2    | 3.105        |
| 2FD6   | U_ARG_25  | NH2    | U_GLU_42  | OE2    | 2.986        |
| 2FD6   | U_ARG_30  | NH2    | U_GLU_39  | OE1    | 3.610        |
| 2FD6   | U_LYS_50  | NZ     | U_ASP_254 | OD1    | 3.179        |
| 2FD6   | U_ARG_53  | NH1    | U_ASP_254 | OD1    | 3.463        |
| 2FD6   | U_ARG_53  | NH1    | U_ASP_254 | OD2    | 2.584        |
| 2FD6   | U_ARG_53  | NH2    | U_ASP_254 | OD2    | 3.352        |
| 2FD6   | U_HIS_128 | NE2    | U_GLU_183 | OE1    | 2.860        |
| 2FD6   | U_HIS_143 | NE2    | U_GLU_183 | OE1    | 3.388        |
| 2FD6   | U_HIS_143 | NE2    | U_GLU_183 | OE2    | 2.574        |
| 2FD6   | U_ARG_145 | NH2    | U_ASP_124 | OD2    | 3.333        |
| 2FD6   | U_LYS_175 | NZ     | U_GLU_94  | OE2    | 3.307        |
| 2FD6   | U_ARG_192 | NH1    | H_GLU_58  | OE2    | 2.359        |
| 2FD6   | U_ARG_192 | NH2    | H_GLU_58  | OE2    | 3.898        |
| 2FD6   | U_HIS_260 | NE2    | U_ASP_262 | OD1    | 3.106        |
| 2FD6   | U_HIS_260 | NE2    | U_ASP_262 | OD2    | 3.788        |

---

Table 266: 2FD6-specific salt bridging networks analysis. In this table, a PDB file is specified with a four-letter PDB ID, except that the names of the PDB files corresponding to the single NMR structural model split from the NMR ensemble is specified with a four-letter PDB ID in addition to a hyphen followed by the single NMR structural model numeric ID, the residue naming scheme is **Chain ID\_residue name\_residue number**,  $\angle ADH$  represents the angle formed by acceptor (A), donor (D) and hydrogen (H) ( $\angle ADH$ ).

| PDB ID | Residue A | Atom A | Residue B | Atom B | Distance (Å) |
|--------|-----------|--------|-----------|--------|--------------|
| 2FR4   | L_ARG_61  | NH2    | L_ASP_82  | OD1    | 2.807        |
| 2FR4   | L_ARG_61  | NH2    | L_ASP_82  | OD2    | 3.787        |
| 2FR4   | L_LYS_142 | NZ     | L_GLU_105 | OE1    | 2.764        |
| 2FR4   | L_LYS_142 | NZ     | L_GLU_105 | OE2    | 3.125        |
| 2FR4   | L_ARG_155 | NH2    | L_GLU_185 | OE1    | 3.754        |
| 2FR4   | L_ARG_155 | NH2    | L_GLU_185 | OE2    | 3.022        |
| 2FR4   | L_LYS_183 | NZ     | L_GLU_187 | OE1    | 3.253        |
| 2FR4   | L_LYS_183 | NZ     | L_GLU_187 | OE2    | 3.697        |
| 2FR4   | L_HIS_189 | ND1    | L_ASP_151 | OD2    | 3.437        |
| 2FR4   | L_HIS_189 | NE2    | L_GLU_185 | OE1    | 3.779        |
| 2FR4   | H_LYS_38  | NZ     | H_GLU_85  | OE1    | 3.892        |
| 2FR4   | H_LYS_64  | NZ     | H_GLU_61  | OE1    | 2.978        |
| 2FR4   | H_LYS_66  | NZ     | H_ASP_86  | OD1    | 2.719        |
| 2FR4   | H_LYS_66  | NZ     | H_ASP_86  | OD2    | 3.742        |
| 2FR4   | H_ARG_94  | NH2    | H_ASP_101 | OD1    | 3.962        |
| 2FR4   | H_ARG_94  | NH2    | H_ASP_101 | OD2    | 2.959        |
| 2FR4   | H_LYS_208 | NZ     | L_GLU_123 | OE2    | 3.199        |
| 2FR4   | A_ARG_61  | NH2    | A_ASP_82  | OD1    | 3.363        |
| 2FR4   | A_LYS_142 | NZ     | A_ASP_143 | OD1    | 3.736        |
| 2FR4   | A_LYS_142 | NZ     | A_ASP_143 | OD2    | 3.296        |
| 2FR4   | A_LYS_169 | NZ     | A_ASP_167 | OD1    | 3.777        |
| 2FR4   | A_LYS_183 | NZ     | A_GLU_187 | OE1    | 2.836        |
| 2FR4   | A_LYS_183 | NZ     | A_GLU_187 | OE2    | 3.027        |
| 2FR4   | A_HIS_189 | ND1    | A_ASP_151 | OD2    | 3.087        |
| 2FR4   | B_LYS_40  | NZ     | B_GLU_85  | OE1    | 3.845        |
| 2FR4   | B_LYS_62  | NZ     | B_GLU_46  | OE2    | 3.403        |
| 2FR4   | B_LYS_64  | NZ     | B_GLU_61  | OE2    | 2.733        |
| 2FR4   | B_LYS_66  | NZ     | B_ASP_86  | OD1    | 2.762        |
| 2FR4   | B_LYS_66  | NZ     | B_ASP_86  | OD2    | 3.704        |
| 2FR4   | B_ARG_94  | NH2    | B_ASP_101 | OD1    | 3.630        |
| 2FR4   | B_ARG_94  | NH2    | B_ASP_101 | OD2    | 2.755        |
| 2FR4   | B_LYS_208 | NZ     | A_GLU_123 | OE1    | 2.539        |

Table 267: 2FR4-specific salt bridging networks analysis. In this table, a PDB file is specified with a four-letter PDB ID, except that the names of the PDB files corresponding to the single NMR structural model split from the NMR ensemble is specified with a four-letter PDB ID in addition to a hyphen followed by the single NMR structural model numeric ID, the residue naming scheme is **Chain ID\_residue name\_residue number**,  $\angle ADH$  represents the angle formed by acceptor (A), donor (D) and hydrogen (H) ( $\angle ADH$ ).

| PDB ID | Residue A | Atom A | Residue B | Atom B | Distance (Å) |
|--------|-----------|--------|-----------|--------|--------------|
| 2H32   | A_ARG_25  | NH2    | A_ASP_27  | OD1    | 3.505        |
| 2H32   | A_ARG_25  | NH2    | A_ASP_27  | OD2    | 3.293        |
| 2H32   | A_HIS_28  | NE2    | A_ASP_27  | OD2    | 3.559        |
| 2H32   | A_ARG_51  | NH1    | A_ASP_57  | OD1    | 3.175        |
| 2H32   | A_ARG_51  | NH2    | A_ASP_57  | OD1    | 2.596        |
| 2H32   | A_ARG_67  | NH1    | A_ASP_90  | OD1    | 3.374        |
| 2H32   | A_ARG_67  | NH1    | A_ASP_90  | OD2    | 2.396        |
| 2H32   | A_ARG_67  | NH2    | A_ASP_90  | OD1    | 2.457        |
| 2H32   | A_ARG_67  | NH2    | A_ASP_90  | OD2    | 3.234        |
| 2H32   | A_ARG_110 | NH2    | A_GLU_109 | OE1    | 3.763        |
| 2H32   | B_ARG_153 | NH1    | B_ASP_115 | OD1    | 3.775        |
| 2H32   | H_LYS_12  | NZ     | H_GLU_16  | OE1    | 3.609        |
| 2H32   | H_LYS_13  | NZ     | H_GLU_16  | OE2    | 3.581        |
| 2H32   | H_ARG_38  | NH1    | H_GLU_46  | OE1    | 3.487        |
| 2H32   | H_ARG_38  | NH1    | H_GLU_46  | OE2    | 2.617        |
| 2H32   | H_ARG_59  | NH1    | A_GLU_106 | OE1    | 3.937        |
| 2H32   | H_ARG_59  | NH1    | A_GLU_106 | OE2    | 3.372        |
| 2H32   | H_ARG_59  | NH2    | A_GLU_106 | OE2    | 3.412        |
| 2H32   | H_ARG_98  | NH1    | H_ASP_107 | OD1    | 3.509        |
| 2H32   | H_ARG_98  | NH1    | H_ASP_107 | OD2    | 3.182        |
| 2H32   | H_LYS_162 | NZ     | H_ASP_168 | OD1    | 2.915        |
| 2H32   | H_LYS_162 | NZ     | H_ASP_168 | OD2    | 3.888        |
| 2H32   | H_LYS_183 | NZ     | H_ASP_151 | OD1    | 3.157        |
| 2H32   | H_LYS_183 | NZ     | H_ASP_151 | OD2    | 3.441        |
| 2H32   | H_HIS_204 | ND1    | H_GLU_203 | OE1    | 3.406        |
| 2H32   | H_HIS_204 | ND1    | H_GLU_203 | OE2    | 2.840        |

Table 268: 2H32-specific salt bridging networks analysis. In this table, a PDB file is specified with a four-letter PDB ID, except that the names of the PDB files corresponding to the single NMR structural model split from the NMR ensemble is specified with a four-letter PDB ID in addition to a hyphen followed by the single NMR structural model numeric ID, the residue naming scheme is **Chain ID\_residue name\_residue number**,  $\angle ADH$  represents the angle formed by acceptor (A), donor (D) and hydrogen (H) ( $\angle ADH$ ).

| PDB ID | Residue A | Atom A | Residue B | Atom B | Distance (Å) |
|--------|-----------|--------|-----------|--------|--------------|
| 2H9G   | A_ARG_24  | NH1    | A_ASP_70  | OD1    | 3.267        |
| 2H9G   | A_ARG_61  | NH2    | A_GLU_81  | OE1    | 3.875        |
| 2H9G   | A_ARG_61  | NH2    | A_ASP_82  | OD1    | 3.215        |
| 2H9G   | A_ARG_61  | NH2    | A_ASP_82  | OD2    | 3.850        |
| 2H9G   | A_LYS_103 | NZ     | A_GLU_105 | OE2    | 3.674        |
| 2H9G   | A_LYS_103 | NZ     | A_GLU_165 | OE1    | 2.740        |
| 2H9G   | A_LYS_103 | NZ     | A_GLU_165 | OE2    | 3.762        |
| 2H9G   | A_ARG_142 | NH1    | A_GLU_105 | OE1    | 3.505        |
| 2H9G   | A_ARG_142 | NH2    | A_GLU_105 | OE1    | 3.340        |
| 2H9G   | A_ARG_142 | NH2    | A_GLU_105 | OE2    | 3.102        |
| 2H9G   | A_LYS_149 | NZ     | A_GLU_195 | OE2    | 3.684        |
| 2H9G   | A_LYS_183 | NZ     | A_GLU_187 | OE1    | 2.832        |
| 2H9G   | A_LYS_183 | NZ     | A_GLU_187 | OE2    | 3.382        |
| 2H9G   | B_ARG_38  | NH1    | B_ASP_86  | OD1    | 2.752        |
| 2H9G   | B_ARG_38  | NH2    | B_GLU_46  | OE1    | 3.198        |
| 2H9G   | B_ARG_38  | NH2    | B_GLU_46  | OE2    | 3.634        |
| 2H9G   | B_ARG_38  | NH2    | B_ASP_86  | OD1    | 3.743        |
| 2H9G   | B_HIS_53  | ND1    | R_GLU_36  | OE2    | 3.471        |
| 2H9G   | B_ARG_66  | NH1    | B_ASP_86  | OD2    | 2.729        |
| 2H9G   | B_ARG_66  | NH2    | B_ASP_86  | OD1    | 3.172        |
| 2H9G   | B_ARG_66  | NH2    | B_ASP_86  | OD2    | 3.302        |
| 2H9G   | B_ARG_94  | NH2    | B_ASP_101 | OD2    | 3.035        |
| 2H9G   | B_LYS_143 | NZ     | B_ASP_144 | OD1    | 3.273        |
| 2H9G   | B_LYS_143 | NZ     | B_ASP_144 | OD2    | 3.261        |
| 2H9G   | B_LYS_209 | NZ     | A_GLU_123 | OE1    | 2.713        |
| 2H9G   | R_ARG_39  | NH2    | R_ASP_37  | OD2    | 2.798        |
| 2H9G   | R_ARG_104 | NH1    | R_ASP_122 | OD2    | 3.726        |
| 2H9G   | L_ARG_24  | NH1    | L_ASP_70  | OD1    | 2.993        |
| 2H9G   | L_ARG_24  | NH2    | L_ASP_70  | OD1    | 3.108        |
| 2H9G   | L_ARG_24  | NH2    | L_ASP_70  | OD2    | 3.776        |
| 2H9G   | L_ARG_61  | NH2    | L_GLU_81  | OE1    | 3.703        |
| 2H9G   | L_ARG_61  | NH2    | L_ASP_82  | OD1    | 3.174        |
| 2H9G   | L_ARG_61  | NH2    | L_ASP_82  | OD2    | 3.885        |
| 2H9G   | L_LYS_103 | NZ     | L_GLU_165 | OE1    | 2.850        |
| 2H9G   | L_LYS_103 | NZ     | L_GLU_165 | OE2    | 3.736        |
| 2H9G   | L_LYS_149 | NZ     | L_GLU_195 | OE2    | 3.720        |
| 2H9G   | L_LYS_183 | NZ     | L_GLU_187 | OE1    | 2.899        |
| 2H9G   | L_LYS_183 | NZ     | L_GLU_187 | OE2    | 2.665        |
| 2H9G   | H_ARG_38  | NH1    | H_ASP_86  | OD1    | 2.962        |
| 2H9G   | H_ARG_38  | NH2    | H_GLU_46  | OE1    | 3.123        |
| 2H9G   | H_ARG_38  | NH2    | H_GLU_46  | OE2    | 3.981        |
| 2H9G   | H_ARG_38  | NH2    | H_ASP_86  | OD1    | 3.869        |
| 2H9G   | H_LYS_64  | NZ     | H_ASP_61  | OD1    | 3.096        |
| 2H9G   | H_ARG_66  | NH1    | H_ASP_86  | OD1    | 3.877        |
| 2H9G   | H_ARG_66  | NH1    | H_ASP_86  | OD2    | 2.818        |
| 2H9G   | H_ARG_66  | NH2    | H_ASP_86  | OD1    | 3.235        |
| 2H9G   | H_ARG_66  | NH2    | H_ASP_86  | OD2    | 3.633        |
| 2H9G   | H_ARG_94  | NH2    | H_ASP_101 | OD2    | 3.129        |
| 2H9G   | H_LYS_143 | NZ     | H_ASP_144 | OD1    | 3.284        |
| 2H9G   | H_LYS_143 | NZ     | H_ASP_144 | OD2    | 3.199        |
| 2H9G   | H_LYS_209 | NZ     | L_GLU_123 | OE1    | 2.570        |

---

Table 269: 2H9G-specific salt bridging networks analysis. In this table, a PDB file is specified with a four-letter PDB ID, except that the names of the PDB files corresponding to the single NMR structural model split from the NMR ensemble is specified with a four-letter PDB ID in addition to a hyphen followed by the single NMR structural model numeric ID, the residue naming scheme is **Chain ID\_residue name\_residue number**,  $\angle ADH$  represents the angle formed by acceptor (A), donor (D) and hydrogen (H) ( $\angle ADH$ ).

| PDB ID | Residue A | Atom A | Residue B | Atom B | Distance (Å) |
|--------|-----------|--------|-----------|--------|--------------|
| 2HFG   | L_ARG_61  | NH2    | L_GLU_81  | OE2    | 3.934        |
| 2HFG   | L_ARG_61  | NH2    | L_ASP_82  | OD1    | 2.654        |
| 2HFG   | L_ARG_61  | NH2    | L_ASP_82  | OD2    | 3.306        |
| 2HFG   | L_LYS_148 | NZ     | L_GLU_194 | OE2    | 2.762        |
| 2HFG   | L_LYS_168 | NZ     | L_ASP_166 | OD1    | 2.951        |
| 2HFG   | L_LYS_168 | NZ     | L_ASP_166 | OD2    | 3.686        |
| 2HFG   | L_LYS_182 | NZ     | L_GLU_186 | OE1    | 3.789        |
| 2HFG   | H_ARG_38  | NH1    | H_ASP_86  | OD1    | 3.062        |
| 2HFG   | H_ARG_38  | NH2    | H_GLU_46  | OE1    | 2.864        |
| 2HFG   | H_ARG_38  | NH2    | H_GLU_46  | OE2    | 3.710        |
| 2HFG   | H_LYS_64  | NZ     | H_ASP_61  | OD1    | 3.871        |
| 2HFG   | H_ARG_66  | NH1    | H_ASP_86  | OD1    | 3.665        |
| 2HFG   | H_ARG_66  | NH1    | H_ASP_86  | OD2    | 2.735        |
| 2HFG   | H_ARG_66  | NH2    | H_ASP_86  | OD1    | 3.183        |
| 2HFG   | H_ARG_66  | NH2    | H_ASP_86  | OD2    | 3.738        |
| 2HFG   | H_ARG_83  | NH1    | H_GLU_85  | OE2    | 3.672        |
| 2HFG   | H_ARG_94  | NH2    | H_ASP_101 | OD1    | 3.612        |
| 2HFG   | H_ARG_94  | NH2    | H_ASP_101 | OD2    | 2.745        |
| 2HFG   | H_ARG_95  | NH2    | R_ASP_26  | OD1    | 2.783        |
| 2HFG   | H_ARG_95  | NH2    | R_ASP_26  | OD2    | 3.667        |
| 2HFG   | H_LYS_143 | NZ     | H_ASP_144 | OD1    | 3.062        |
| 2HFG   | H_LYS_143 | NZ     | H_ASP_144 | OD2    | 2.650        |
| 2HFG   | H_LYS_209 | NZ     | L_GLU_122 | OE1    | 3.336        |
| 2HFG   | H_LYS_209 | NZ     | L_GLU_122 | OE2    | 2.886        |

Table 270: 2HFG-specific salt bridging networks analysis. In this table, a PDB file is specified with a four-letter PDB ID, except that the names of the PDB files corresponding to the single NMR structural model split from the NMR ensemble is specified with a four-letter PDB ID in addition to a hyphen followed by the single NMR structural model numeric ID, the residue naming scheme is **Chain ID\_residue name\_residue number**,  $\angle ADH$  represents the angle formed by acceptor (A), donor (D) and hydrogen (H) ( $\angle ADH$ ).



| PDB ID | Residue A | Atom A | Residue B | Atom B | Distance (Å) |
|--------|-----------|--------|-----------|--------|--------------|
| 2HKF   | L_ARG_24  | NH2    | L_ASP_75  | OD2    | 3.672        |
| 2HKF   | L_LYS_44  | NZ     | L_GLU_86  | OE2    | 3.798        |
| 2HKF   | L_LYS_55  | NZ     | P_ASP_6   | OD1    | 2.651        |
| 2HKF   | L_ARG_66  | NH1    | L_GLU_84  | OE1    | 2.688        |
| 2HKF   | L_ARG_66  | NH1    | L_GLU_84  | OE2    | 3.893        |
| 2HKF   | L_ARG_66  | NH2    | L_GLU_84  | OE1    | 3.861        |
| 2HKF   | L_ARG_66  | NH2    | L_GLU_84  | OE2    | 3.865        |
| 2HKF   | L_ARG_66  | NH2    | L_GLU_86  | OE1    | 3.229        |
| 2HKF   | L_ARG_66  | NH2    | L_ASP_87  | OD1    | 2.449        |
| 2HKF   | L_ARG_66  | NH2    | L_ASP_87  | OD2    | 3.580        |
| 2HKF   | L_LYS_152 | NZ     | L_GLU_159 | OE1    | 3.074        |
| 2HKF   | L_LYS_152 | NZ     | L_GLU_159 | OE2    | 3.333        |
| 2HKF   | L_LYS_154 | NZ     | L_GLU_200 | OE1    | 3.172        |
| 2HKF   | L_LYS_154 | NZ     | L_GLU_200 | OE2    | 3.401        |
| 2HKF   | L_ARG_160 | NH1    | L_GLU_190 | OE1    | 2.551        |
| 2HKF   | L_ARG_160 | NH2    | L_GLU_190 | OE1    | 2.732        |
| 2HKF   | L_ARG_160 | NH2    | L_GLU_190 | OE2    | 3.200        |
| 2HKF   | L_ARG_193 | NH1    | L_ASP_189 | OD1    | 2.634        |
| 2HKF   | L_ARG_193 | NH1    | L_ASP_189 | OD2    | 3.330        |
| 2HKF   | L_ARG_193 | NH2    | L_ASP_189 | OD1    | 3.591        |
| 2HKF   | L_LYS_204 | NZ     | L_ASP_115 | OD2    | 3.829        |
| 2HKF   | H_ARG_38  | NH1    | H_ASP_92  | OD1    | 2.875        |
| 2HKF   | H_ARG_38  | NH2    | H_GLU_46  | OE1    | 3.030        |
| 2HKF   | H_ARG_38  | NH2    | H_GLU_46  | OE2    | 3.901        |
| 2HKF   | H_ARG_38  | NH2    | H_ASP_92  | OD1    | 3.900        |
| 2HKF   | H_ARG_50  | NH2    | P_GLU_5   | OE1    | 3.869        |
| 2HKF   | H_ARG_50  | NH2    | P_GLU_5   | OE2    | 2.886        |
| 2HKF   | H_ARG_52  | NH2    | P_GLU_5   | OE1    | 3.116        |
| 2HKF   | H_ARG_69  | NH1    | H_ASP_92  | OD1    | 3.597        |
| 2HKF   | H_ARG_69  | NH1    | H_ASP_92  | OD2    | 2.654        |
| 2HKF   | H_ARG_69  | NH2    | H_ASP_92  | OD1    | 2.988        |
| 2HKF   | H_ARG_69  | NH2    | H_ASP_92  | OD2    | 3.598        |
| 2HKF   | H_ARG_74  | NH1    | H_ASP_76  | OD1    | 3.578        |
| 2HKF   | H_LYS_214 | NZ     | L_GLU_128 | OE2    | 2.891        |

Table 271: 2HKF-specific salt bridging networks analysis. In this table, a PDB file is specified with a four-letter PDB ID, except that the names of the PDB files corresponding to the single NMR structural model split from the NMR ensemble is specified with a four-letter PDB ID in addition to a hyphen followed by the single NMR structural model numeric ID, the residue naming scheme is **Chain ID\_residue name\_residue number**,  $\angle ADH$  represents the angle formed by acceptor (A), donor (D) and hydrogen (H) ( $\angle ADH$ ).

| PDB ID | Residue A | Atom A | Residue B | Atom B | Distance (Å) |
|--------|-----------|--------|-----------|--------|--------------|
| 2HMG   | A_LYS_27  | NZ     | B_GLU_97  | OE1    | 2.762        |
| 2HMG   | A_LYS_27  | NZ     | B_GLU_97  | OE2    | 3.001        |
| 2HMG   | A_ARG_57  | NH1    | A_GLU_82  | OE1    | 2.651        |
| 2HMG   | A_ARG_57  | NH1    | A_GLU_82  | OE2    | 3.908        |
| 2HMG   | A_HIS_75  | ND1    | A_ASP_73  | OD1    | 3.346        |
| 2HMG   | A_HIS_75  | ND1    | A_ASP_73  | OD2    | 2.800        |
| 2HMG   | A_HIS_75  | NE2    | A_ASP_63  | OD1    | 3.583        |
| 2HMG   | A_ARG_90  | NH1    | A_ASP_60  | OD1    | 2.824        |
| 2HMG   | A_ARG_90  | NH1    | A_ASP_60  | OD2    | 3.456        |
| 2HMG   | A_ARG_109 | NH1    | B_GLU_67  | OE1    | 3.634        |
| 2HMG   | A_ARG_109 | NH1    | B_GLU_67  | OE2    | 2.959        |
| 2HMG   | A_ARG_109 | NH2    | A_GLU_89  | OE1    | 3.190        |
| 2HMG   | A_ARG_109 | NH2    | A_GLU_89  | OE2    | 2.530        |
| 2HMG   | A_ARG_141 | NH1    | A_ASP_77  | OD1    | 3.112        |
| 2HMG   | A_ARG_141 | NH1    | A_ASP_77  | OD2    | 2.766        |
| 2HMG   | A_ARG_141 | NH2    | A_ASP_146 | OD1    | 2.729        |
| 2HMG   | A_LYS_176 | NZ     | A_GLU_123 | OE1    | 2.634        |
| 2HMG   | A_LYS_176 | NZ     | A_GLU_123 | OE2    | 3.933        |
| 2HMG   | A_HIS_183 | NE2    | A_GLU_190 | OE1    | 3.669        |
| 2HMG   | A_ARG_208 | NH2    | A_ASP_241 | OD2    | 2.864        |
| 2HMG   | A_ARG_261 | NH1    | A_GLU_119 | OE1    | 2.807        |
| 2HMG   | A_ARG_261 | NH1    | A_GLU_119 | OE2    | 2.727        |
| 2HMG   | A_ARG_261 | NH2    | A_GLU_119 | OE1    | 2.881        |
| 2HMG   | A_LYS_264 | NZ     | A_ASP_85  | OD1    | 3.585        |
| 2HMG   | A_LYS_264 | NZ     | A_ASP_85  | OD2    | 2.732        |
| 2HMG   | A_ARG_269 | NH2    | B_GLU_67  | OE1    | 2.999        |
| 2HMG   | A_LYS_292 | NZ     | A_ASP_291 | OD1    | 3.659        |
| 2HMG   | A_LYS_299 | NZ     | B_GLU_69  | OE1    | 3.169        |
| 2HMG   | B_LYS_51  | NZ     | B_GLU_103 | OE2    | 3.601        |
| 2HMG   | B_ARG_54  | NH1    | F_GLU_97  | OE1    | 2.721        |
| 2HMG   | B_ARG_54  | NH2    | B_GLU_57  | OE1    | 2.859        |
| 2HMG   | B_ARG_54  | NH2    | B_GLU_57  | OE2    | 3.200        |
| 2HMG   | B_ARG_54  | NH2    | F_GLU_97  | OE1    | 3.280        |
| 2HMG   | B_LYS_62  | NZ     | F_ASP_86  | OD1    | 3.023        |
| 2HMG   | B_LYS_62  | NZ     | F_ASP_86  | OD2    | 2.718        |
| 2HMG   | B_LYS_62  | NZ     | F_ASP_90  | OD1    | 3.256        |
| 2HMG   | B_LYS_62  | NZ     | F_ASP_90  | OD2    | 2.780        |
| 2HMG   | B_HIS_64  | NE2    | F_ASP_79  | OD2    | 3.863        |
| 2HMG   | B_LYS_68  | NZ     | B_GLU_85  | OE1    | 3.214        |
| 2HMG   | B_LYS_68  | NZ     | B_GLU_85  | OE2    | 2.698        |
| 2HMG   | B_ARG_76  | NH1    | D_GLU_74  | OE1    | 3.508        |
| 2HMG   | B_ARG_76  | NH1    | D_GLU_74  | OE2    | 2.816        |
| 2HMG   | B_ARG_76  | NH1    | D_GLU_81  | OE1    | 2.774        |
| 2HMG   | B_ARG_76  | NH1    | D_GLU_81  | OE2    | 3.655        |
| 2HMG   | B_ARG_76  | NH2    | D_GLU_74  | OE1    | 2.915        |
| 2HMG   | B_ARG_76  | NH2    | D_GLU_74  | OE2    | 3.598        |
| 2HMG   | B_LYS_88  | NZ     | B_GLU_85  | OE1    | 3.844        |
| 2HMG   | B_LYS_117 | NZ     | B_GLU_114 | OE1    | 2.609        |
| 2HMG   | B_LYS_117 | NZ     | B_GLU_114 | OE2    | 3.322        |
| 2HMG   | B_ARG_123 | NH1    | F_GLU_132 | OE2    | 3.122        |
| 2HMG   | B_ARG_123 | NH2    | B_GLU_120 | OE1    | 2.604        |
| 2HMG   | B_ARG_123 | NH2    | B_GLU_120 | OE2    | 2.778        |
| 2HMG   | B_ARG_124 | NH1    | F_GLU_132 | OE1    | 3.544        |
| 2HMG   | B_ARG_124 | NH1    | F_GLU_132 | OE2    | 3.040        |
| 2HMG   | B_ARG_127 | NH2    | F_GLU_131 | OE1    | 2.502        |
| 2HMG   | B_ARG_153 | NH2    | B_GLU_150 | OE2    | 2.575        |
| 2HMG   | B_HIS_159 | NE2    | B_ASP_160 | OD1    | 3.987        |

|      |           |     |           |     |       |
|------|-----------|-----|-----------|-----|-------|
| 2HMG | B_HIS_159 | NE2 | B_ASP_160 | OD2 | 3.070 |
| 2HMG | B_ARG_163 | NH1 | F_GLU_131 | OE1 | 2.668 |
| 2HMG | B_ARG_163 | NH1 | F_GLU_131 | OE2 | 2.605 |
| 2HMG | B_ARG_170 | NH1 | B_GLU_128 | OE1 | 3.667 |
| 2HMG | B_ARG_170 | NH1 | D_GLU_128 | OE1 | 3.860 |
| 2HMG | B_ARG_170 | NH2 | B_GLU_131 | OE2 | 2.770 |
| 2HMG | B_ARG_170 | NH2 | D_GLU_128 | OE1 | 2.750 |
| 2HMG | B_ARG_170 | NH2 | D_GLU_128 | OE2 | 3.837 |
| 2HMG | C_LYS_27  | NZ  | D_GLU_97  | OE1 | 2.819 |
| 2HMG | C_LYS_27  | NZ  | D_GLU_97  | OE2 | 3.060 |
| 2HMG | C_ARG_57  | NH1 | C_GLU_82  | OE1 | 2.635 |
| 2HMG | C_ARG_57  | NH1 | C_GLU_82  | OE2 | 3.911 |
| 2HMG | C_HIS_75  | ND1 | C_ASP_73  | OD1 | 3.326 |
| 2HMG | C_HIS_75  | ND1 | C_ASP_73  | OD2 | 2.769 |
| 2HMG | C_HIS_75  | NE2 | C_ASP_63  | OD1 | 3.558 |
| 2HMG | C_ARG_90  | NH1 | C_ASP_60  | OD1 | 2.831 |
| 2HMG | C_ARG_90  | NH1 | C_ASP_60  | OD2 | 3.485 |
| 2HMG | C_ARG_109 | NH1 | D_GLU_67  | OE1 | 3.653 |
| 2HMG | C_ARG_109 | NH1 | D_GLU_67  | OE2 | 2.947 |
| 2HMG | C_ARG_109 | NH2 | C_GLU_89  | OE1 | 3.184 |
| 2HMG | C_ARG_109 | NH2 | C_GLU_89  | OE2 | 2.523 |
| 2HMG | C_ARG_141 | NH1 | C_ASP_77  | OD1 | 3.115 |
| 2HMG | C_ARG_141 | NH1 | C_ASP_77  | OD2 | 2.775 |
| 2HMG | C_ARG_141 | NH2 | C_ASP_146 | OD1 | 2.729 |
| 2HMG | C_LYS_176 | NZ  | C_GLU_123 | OE1 | 2.643 |
| 2HMG | C_LYS_176 | NZ  | C_GLU_123 | OE2 | 3.924 |
| 2HMG | C_HIS_183 | NE2 | C_GLU_190 | OE1 | 3.657 |
| 2HMG | C_ARG_208 | NH2 | C_ASP_241 | OD2 | 2.844 |
| 2HMG | C_ARG_261 | NH1 | C_GLU_119 | OE1 | 2.785 |
| 2HMG | C_ARG_261 | NH1 | C_GLU_119 | OE2 | 2.729 |
| 2HMG | C_ARG_261 | NH2 | C_GLU_119 | OE1 | 2.874 |
| 2HMG | C_LYS_264 | NZ  | C_ASP_85  | OD1 | 3.649 |
| 2HMG | C_LYS_264 | NZ  | C_ASP_85  | OD2 | 2.789 |
| 2HMG | C_ARG_269 | NH2 | D_GLU_67  | OE1 | 2.972 |
| 2HMG | C_LYS_292 | NZ  | C_ASP_291 | OD1 | 3.718 |
| 2HMG | C_LYS_299 | NZ  | D_GLU_69  | OE1 | 3.147 |
| 2HMG | D_LYS_51  | NZ  | D_GLU_103 | OE2 | 3.620 |
| 2HMG | D_ARG_54  | NH1 | B_GLU_97  | OE1 | 2.735 |
| 2HMG | D_ARG_54  | NH2 | B_GLU_97  | OE1 | 3.312 |
| 2HMG | D_ARG_54  | NH2 | D_GLU_57  | OE1 | 2.829 |
| 2HMG | D_ARG_54  | NH2 | D_GLU_57  | OE2 | 3.186 |
| 2HMG | D_LYS_62  | NZ  | B_ASP_86  | OD1 | 3.037 |
| 2HMG | D_LYS_62  | NZ  | B_ASP_86  | OD2 | 2.683 |
| 2HMG | D_LYS_62  | NZ  | B_ASP_90  | OD1 | 3.222 |
| 2HMG | D_LYS_62  | NZ  | B_ASP_90  | OD2 | 2.673 |
| 2HMG | D_HIS_64  | NE2 | B_ASP_79  | OD2 | 3.737 |
| 2HMG | D_LYS_68  | NZ  | D_GLU_85  | OE1 | 3.177 |
| 2HMG | D_LYS_68  | NZ  | D_GLU_85  | OE2 | 2.694 |
| 2HMG | D_ARG_76  | NH1 | F_GLU_74  | OE1 | 3.549 |
| 2HMG | D_ARG_76  | NH1 | F_GLU_74  | OE2 | 2.731 |
| 2HMG | D_ARG_76  | NH1 | F_GLU_81  | OE1 | 2.698 |
| 2HMG | D_ARG_76  | NH1 | F_GLU_81  | OE2 | 3.690 |
| 2HMG | D_ARG_76  | NH2 | F_GLU_74  | OE1 | 2.828 |
| 2HMG | D_ARG_76  | NH2 | F_GLU_74  | OE2 | 3.390 |
| 2HMG | D_LYS_88  | NZ  | D_GLU_85  | OE1 | 3.822 |
| 2HMG | D_LYS_117 | NZ  | D_GLU_114 | OE1 | 2.665 |
| 2HMG | D_LYS_117 | NZ  | D_GLU_114 | OE2 | 3.347 |
| 2HMG | D_ARG_123 | NH1 | B_GLU_132 | OE2 | 3.058 |

|      |           |     |           |     |       |
|------|-----------|-----|-----------|-----|-------|
| 2HMG | D_ARG_123 | NH2 | D_GLU_120 | OE1 | 2.590 |
| 2HMG | D_ARG_123 | NH2 | D_GLU_120 | OE2 | 2.762 |
| 2HMG | D_ARG_124 | NH1 | B_GLU_132 | OE1 | 3.508 |
| 2HMG | D_ARG_124 | NH1 | B_GLU_132 | OE2 | 3.040 |
| 2HMG | D_ARG_127 | NH2 | B_GLU_131 | OE1 | 2.517 |
| 2HMG | D_ARG_153 | NH2 | D_GLU_150 | OE1 | 2.574 |
| 2HMG | D_HIS_159 | NE2 | D_ASP_160 | OD2 | 3.088 |
| 2HMG | D_ARG_163 | NH1 | B_GLU_131 | OE1 | 2.667 |
| 2HMG | D_ARG_163 | NH1 | B_GLU_131 | OE2 | 2.648 |
| 2HMG | D_ARG_170 | NH1 | D_GLU_128 | OE1 | 3.661 |
| 2HMG | D_ARG_170 | NH1 | F_GLU_128 | OE1 | 3.974 |
| 2HMG | D_ARG_170 | NH2 | D_GLU_131 | OE2 | 2.792 |
| 2HMG | D_ARG_170 | NH2 | F_GLU_128 | OE1 | 2.843 |
| 2HMG | E_LYS_27  | NZ  | F_GLU_97  | OE1 | 2.743 |
| 2HMG | E_LYS_27  | NZ  | F_GLU_97  | OE2 | 3.029 |
| 2HMG | E_ARG_57  | NH1 | E_GLU_82  | OE1 | 2.650 |
| 2HMG | E_ARG_57  | NH1 | E_GLU_82  | OE2 | 3.908 |
| 2HMG | E_HIS_75  | ND1 | E_ASP_73  | OD1 | 3.328 |
| 2HMG | E_HIS_75  | ND1 | E_ASP_73  | OD2 | 2.787 |
| 2HMG | E_HIS_75  | NE2 | E_ASP_63  | OD1 | 3.573 |
| 2HMG | E_ARG_90  | NH1 | E_ASP_60  | OD1 | 2.857 |
| 2HMG | E_ARG_90  | NH1 | E_ASP_60  | OD2 | 3.460 |
| 2HMG | E_ARG_109 | NH1 | F_GLU_67  | OE1 | 3.629 |
| 2HMG | E_ARG_109 | NH1 | F_GLU_67  | OE2 | 2.891 |
| 2HMG | E_ARG_109 | NH2 | E_GLU_89  | OE1 | 3.184 |
| 2HMG | E_ARG_109 | NH2 | E_GLU_89  | OE2 | 2.485 |
| 2HMG | E_ARG_141 | NH1 | E_ASP_77  | OD1 | 3.113 |
| 2HMG | E_ARG_141 | NH1 | E_ASP_77  | OD2 | 2.782 |
| 2HMG | E_ARG_141 | NH2 | E_ASP_146 | OD1 | 2.726 |
| 2HMG | E_LYS_176 | NZ  | E_GLU_123 | OE1 | 2.651 |
| 2HMG | E_LYS_176 | NZ  | E_GLU_123 | OE2 | 3.954 |
| 2HMG | E_HIS_183 | NE2 | E_GLU_190 | OE1 | 3.654 |
| 2HMG | E_ARG_208 | NH2 | E_ASP_241 | OD2 | 2.863 |
| 2HMG | E_ARG_261 | NH1 | E_GLU_119 | OE1 | 2.815 |
| 2HMG | E_ARG_261 | NH1 | E_GLU_119 | OE2 | 2.721 |
| 2HMG | E_ARG_261 | NH2 | E_GLU_119 | OE1 | 2.908 |
| 2HMG | E_LYS_264 | NZ  | E_ASP_85  | OD1 | 3.640 |
| 2HMG | E_LYS_264 | NZ  | E_ASP_85  | OD2 | 2.756 |
| 2HMG | E_ARG_269 | NH2 | F_GLU_67  | OE1 | 2.967 |
| 2HMG | E_LYS_292 | NZ  | E_ASP_291 | OD1 | 3.670 |
| 2HMG | E_LYS_299 | NZ  | F_GLU_69  | OE1 | 3.127 |
| 2HMG | F_LYS_51  | NZ  | F_GLU_103 | OE2 | 3.629 |
| 2HMG | F_ARG_54  | NH1 | D_GLU_97  | OE1 | 2.701 |
| 2HMG | F_ARG_54  | NH2 | D_GLU_97  | OE1 | 3.310 |
| 2HMG | F_ARG_54  | NH2 | F_GLU_57  | OE1 | 2.831 |
| 2HMG | F_ARG_54  | NH2 | F_GLU_57  | OE2 | 3.190 |
| 2HMG | F_LYS_62  | NZ  | D_ASP_86  | OD1 | 2.945 |
| 2HMG | F_LYS_62  | NZ  | D_ASP_86  | OD2 | 2.624 |
| 2HMG | F_LYS_62  | NZ  | D_ASP_90  | OD1 | 3.290 |
| 2HMG | F_LYS_62  | NZ  | D_ASP_90  | OD2 | 2.741 |
| 2HMG | F_HIS_64  | NE2 | D_ASP_79  | OD2 | 3.679 |
| 2HMG | F_LYS_68  | NZ  | F_GLU_85  | OE1 | 3.184 |
| 2HMG | F_LYS_68  | NZ  | F_GLU_85  | OE2 | 2.666 |
| 2HMG | F_ARG_76  | NH1 | B_GLU_74  | OE1 | 3.499 |
| 2HMG | F_ARG_76  | NH1 | B_GLU_74  | OE2 | 2.732 |
| 2HMG | F_ARG_76  | NH1 | B_GLU_81  | OE1 | 2.710 |
| 2HMG | F_ARG_76  | NH1 | B_GLU_81  | OE2 | 3.754 |
| 2HMG | F_ARG_76  | NH2 | B_GLU_74  | OE1 | 2.743 |

|      |           |     |           |     |       |
|------|-----------|-----|-----------|-----|-------|
| 2HMG | F_ARG_76  | NH2 | B_GLU_74  | OE2 | 3.373 |
| 2HMG | F_LYS_88  | NZ  | F_GLU_85  | OE1 | 3.793 |
| 2HMG | F_LYS_117 | NZ  | F_GLU_114 | OE1 | 2.621 |
| 2HMG | F_LYS_117 | NZ  | F_GLU_114 | OE2 | 3.345 |
| 2HMG | F_ARG_123 | NH1 | D_GLU_132 | OE2 | 3.112 |
| 2HMG | F_ARG_123 | NH2 | F_GLU_120 | OE1 | 2.606 |
| 2HMG | F_ARG_123 | NH2 | F_GLU_120 | OE2 | 2.778 |
| 2HMG | F_ARG_124 | NH1 | D_GLU_132 | OE1 | 3.531 |
| 2HMG | F_ARG_124 | NH1 | D_GLU_132 | OE2 | 3.090 |
| 2HMG | F_ARG_127 | NH2 | D_GLU_131 | OE1 | 2.569 |
| 2HMG | F_HIS_159 | NE2 | F_ASP_160 | OD2 | 3.079 |
| 2HMG | F_ARG_163 | NH1 | D_GLU_131 | OE1 | 2.672 |
| 2HMG | F_ARG_163 | NH1 | D_GLU_131 | OE2 | 2.717 |
| 2HMG | F_ARG_170 | NH1 | B_GLU_128 | OE1 | 3.849 |
| 2HMG | F_ARG_170 | NH1 | F_GLU_128 | OE1 | 3.672 |
| 2HMG | F_ARG_170 | NH2 | B_GLU_128 | OE1 | 2.798 |
| 2HMG | F_ARG_170 | NH2 | B_GLU_128 | OE2 | 3.855 |
| 2HMG | F_ARG_170 | NH2 | F_GLU_131 | OE2 | 2.792 |

Table 272: 2HMG-specific salt bridging networks analysis. In this table, a PDB file is specified with a four-letter PDB ID, except that the names of the PDB files corresponding to the single NMR structural model split from the NMR ensemble is specified with a four-letter PDB ID in addition to a hyphen followed by the single NMR structural model numeric ID, the residue naming scheme is **Chain ID\_residue name\_residue number**,  $\angle ADH$  represents the angle formed by acceptor (A), donor (D) and hydrogen (H) ( $\angle ADH$ ).

| PDB ID | Residue A | Atom A | Residue B | Atom B | Distance (Å) |
|--------|-----------|--------|-----------|--------|--------------|
| 2HQ6   | A_LYS_14  | NZ     | A_ASP_25  | OD1    | 2.679        |
| 2HQ6   | A_LYS_14  | NZ     | A_ASP_25  | OD2    | 3.183        |
| 2HQ6   | A_LYS_14  | NZ     | A_GLU_27  | OE2    | 3.336        |
| 2HQ6   | A_LYS_18  | NZ     | A_GLU_165 | OE1    | 3.585        |
| 2HQ6   | A_ARG_56  | NH2    | A_GLU_153 | OE1    | 3.553        |
| 2HQ6   | A_ARG_95  | NH2    | A_GLU_8   | OE1    | 3.484        |
| 2HQ6   | A_ARG_95  | NH2    | A_GLU_8   | OE2    | 3.029        |
| 2HQ6   | A_HIS_107 | ND1    | A_ASP_85  | OD2    | 3.517        |
| 2HQ6   | A_ARG_119 | NH2    | A_ASP_121 | OD1    | 2.931        |
| 2HQ6   | A_ARG_119 | NH2    | A_ASP_121 | OD2    | 3.815        |
| 2HQ6   | A_LYS_132 | NZ     | A_GLU_27  | OE1    | 3.975        |

Table 273: 2HQ6-specific salt bridging networks analysis. In this table, a PDB file is specified with a four-letter PDB ID, except that the names of the PDB files corresponding to the single NMR structural model split from the NMR ensemble is specified with a four-letter PDB ID in addition to a hyphen followed by the single NMR structural model numeric ID, the residue naming scheme is **Chain ID\_residue name\_residue number**,  $\angle ADH$  represents the angle formed by acceptor (A), donor (D) and hydrogen (H) ( $\angle ADH$ ).

| PDB ID | Residue A | Atom A | Residue B  | Atom B | Distance (Å) |
|--------|-----------|--------|------------|--------|--------------|
| 2HRP   | L_ARG_24  | NH1    | L_ASP_70   | OD1    | 2.572        |
| 2HRP   | L_ARG_24  | NH1    | L_ASP_70   | OD2    | 3.000        |
| 2HRP   | L_ARG_24  | NH2    | L_ASP_70   | OD1    | 3.375        |
| 2HRP   | L_ARG_24  | NH2    | L_ASP_70   | OD2    | 3.315        |
| 2HRP   | L_LYS_30  | NZ     | H_ASP_100B | OD2    | 3.323        |
| 2HRP   | L_ARG_61  | NH1    | L_GLU_79   | OE1    | 3.245        |
| 2HRP   | L_ARG_61  | NH1    | L_GLU_79   | OE2    | 3.462        |
| 2HRP   | L_ARG_61  | NH1    | M_GLU_79   | OE1    | 2.692        |
| 2HRP   | L_ARG_61  | NH1    | M_GLU_79   | OE2    | 2.607        |
| 2HRP   | L_ARG_61  | NH2    | L_ASP_82   | OD1    | 2.560        |
| 2HRP   | L_ARG_61  | NH2    | L_ASP_82   | OD2    | 3.088        |
| 2HRP   | L_ARG_108 | NH1    | N_ASP_1    | OD1    | 3.613        |
| 2HRP   | L_ARG_108 | NH1    | N_ASP_1    | OD2    | 2.869        |
| 2HRP   | L_ARG_108 | NH2    | N_ASP_1    | OD1    | 3.306        |
| 2HRP   | L_ARG_108 | NH2    | N_ASP_1    | OD2    | 3.988        |
| 2HRP   | L_LYS_149 | NZ     | L_GLU_195  | OE1    | 3.493        |
| 2HRP   | L_ARG_155 | NH1    | L_GLU_185  | OE2    | 3.630        |
| 2HRP   | L_LYS_183 | NZ     | L_ASP_184  | OD1    | 3.230        |
| 2HRP   | L_LYS_183 | NZ     | L_GLU_187  | OE1    | 3.035        |
| 2HRP   | L_LYS_183 | NZ     | L_GLU_187  | OE2    | 3.729        |
| 2HRP   | L_ARG_188 | NH1    | L_GLU_185  | OE1    | 2.934        |
| 2HRP   | L_HIS_189 | ND1    | L_GLU_185  | OE1    | 3.671        |
| 2HRP   | L_HIS_189 | ND1    | L_GLU_185  | OE2    | 3.948        |
| 2HRP   | L_HIS_189 | NE2    | L_GLU_185  | OE1    | 3.865        |
| 2HRP   | L_LYS_199 | NZ     | L_ASP_110  | OD2    | 2.970        |
| 2HRP   | H_ARG_38  | NH1    | H_ASP_86   | OD1    | 2.821        |
| 2HRP   | H_ARG_38  | NH2    | H_GLU_46   | OE1    | 3.156        |
| 2HRP   | H_ARG_38  | NH2    | H_ASP_86   | OD1    | 3.790        |
| 2HRP   | H_ARG_66  | NH1    | H_ASP_86   | OD1    | 3.830        |
| 2HRP   | H_ARG_66  | NH1    | H_ASP_86   | OD2    | 2.641        |
| 2HRP   | H_ARG_66  | NH2    | H_ASP_86   | OD1    | 2.914        |
| 2HRP   | H_ARG_66  | NH2    | H_ASP_86   | OD2    | 3.262        |
| 2HRP   | H_ARG_83  | NH1    | H_GLU_85   | OE1    | 2.871        |
| 2HRP   | H_ARG_83  | NH1    | H_GLU_85   | OE2    | 3.696        |
| 2HRP   | H_ARG_94  | NH1    | H_ASP_101  | OD1    | 3.338        |
| 2HRP   | H_ARG_94  | NH1    | H_ASP_101  | OD2    | 2.708        |
| 2HRP   | H_ARG_100 | NH1    | H_ASP_100B | OD1    | 2.631        |
| 2HRP   | H_ARG_100 | NH1    | H_ASP_100B | OD2    | 2.982        |
| 2HRP   | H_LYS_205 | NZ     | N_ASP_207  | OD2    | 3.339        |
| 2HRP   | H_LYS_208 | NZ     | L_GLU_123  | OE1    | 2.834        |
| 2HRP   | M_ARG_24  | NH1    | M_ASP_70   | OD2    | 3.391        |
| 2HRP   | M_ARG_24  | NH2    | M_ASP_70   | OD2    | 3.532        |
| 2HRP   | M_LYS_30  | NZ     | N_ASP_100B | OD2    | 3.922        |
| 2HRP   | M_ARG_61  | NH1    | L_GLU_79   | OE1    | 2.827        |
| 2HRP   | M_ARG_61  | NH1    | L_GLU_79   | OE2    | 2.489        |
| 2HRP   | M_ARG_61  | NH1    | M_GLU_79   | OE1    | 3.762        |
| 2HRP   | M_ARG_61  | NH1    | M_GLU_79   | OE2    | 3.462        |
| 2HRP   | M_ARG_61  | NH2    | L_GLU_79   | OE1    | 3.658        |
| 2HRP   | M_ARG_61  | NH2    | M_GLU_79   | OE1    | 3.939        |
| 2HRP   | M_ARG_61  | NH2    | M_ASP_82   | OD1    | 2.828        |
| 2HRP   | M_ARG_61  | NH2    | M_ASP_82   | OD2    | 3.440        |
| 2HRP   | M_LYS_92  | NZ     | M_GLU_93   | OE2    | 2.546        |
| 2HRP   | M_ARG_108 | NH1    | H_ASP_1    | OD2    | 3.449        |
| 2HRP   | M_ARG_108 | NH1    | M_ASP_170  | OD2    | 3.998        |
| 2HRP   | M_LYS_149 | NZ     | M_GLU_195  | OE1    | 3.803        |
| 2HRP   | M_LYS_149 | NZ     | M_GLU_195  | OE2    | 2.914        |
| 2HRP   | M_ARG_155 | NH2    | M_GLU_185  | OE1    | 2.687        |

|      |           |     |           |     |       |
|------|-----------|-----|-----------|-----|-------|
| 2HRP | M_ARG_155 | NH2 | M_GLU_185 | OE2 | 3.383 |
| 2HRP | N_ARG_38  | NH1 | N_ASP_86  | OD1 | 2.969 |
| 2HRP | N_ARG_38  | NH2 | N_GLU_46  | OE1 | 3.031 |
| 2HRP | N_ARG_38  | NH2 | N_ASP_86  | OD1 | 3.858 |
| 2HRP | N_LYS_43  | NZ  | N_GLU_46  | OE1 | 3.283 |
| 2HRP | N_LYS_64  | NZ  | N_ASP_61  | OD1 | 3.922 |
| 2HRP | N_ARG_66  | NH1 | N_ASP_86  | OD1 | 3.805 |
| 2HRP | N_ARG_66  | NH1 | N_ASP_86  | OD2 | 2.812 |
| 2HRP | N_ARG_66  | NH2 | N_ASP_86  | OD1 | 2.794 |
| 2HRP | N_ARG_66  | NH2 | N_ASP_86  | OD2 | 3.248 |
| 2HRP | N_ARG_83  | NH1 | N_GLU_85  | OE2 | 3.361 |
| 2HRP | N_ARG_94  | NH2 | N_ASP_101 | OD1 | 3.720 |
| 2HRP | N_ARG_94  | NH2 | N_ASP_101 | OD2 | 2.978 |
| 2HRP | N_LYS_208 | NZ  | M_GLU_123 | OE1 | 2.875 |
| 2HRP | N_LYS_208 | NZ  | M_GLU_123 | OE2 | 3.117 |

Table 274: 2HRP-specific salt bridging networks analysis. In this table, a PDB file is specified with a four-letter PDB ID, except that the names of the PDB files corresponding to the single NMR structural model split from the NMR ensemble is specified with a four-letter PDB ID in addition to a hyphen followed by the single NMR structural model numeric ID, the residue naming scheme is **Chain ID\_residue name\_residue number**,  $\angle ADH$  represents the angle formed by acceptor (A), donor (D) and hydrogen (H) ( $\angle ADH$ ).



| PDB ID | Residue A | Atom A | Residue B | Atom B | Distance (Å) |
|--------|-----------|--------|-----------|--------|--------------|
| 2I24   | N_ARG_2   | NH1    | N_ASP_26  | OD2    | 2.648        |
| 2I24   | N_ARG_2   | NH2    | N_ASP_4   | OD1    | 3.932        |
| 2I24   | N_ARG_2   | NH2    | N_ASP_4   | OD2    | 2.968        |
| 2I24   | N_ARG_28  | NH2    | N_ASP_93  | OD1    | 2.817        |
| 2I24   | N_ARG_28  | NH2    | N_ASP_93  | OD2    | 3.512        |
| 2I24   | N_ARG_54  | NH1    | N_ASP_77  | OD1    | 3.458        |
| 2I24   | N_ARG_54  | NH1    | N_ASP_77  | OD2    | 2.886        |
| 2I24   | N_ARG_54  | NH2    | N_ASP_77  | OD1    | 2.870        |
| 2I24   | N_ARG_54  | NH2    | N_ASP_77  | OD2    | 3.606        |
| 2I24   | N_ARG_82  | NH2    | N_GLU_46  | OE1    | 2.871        |
| 2I24   | N_ARG_82  | NH2    | N_GLU_46  | OE2    | 3.583        |

Table 275: 2I24-specific salt bridging networks analysis. In this table, a PDB file is specified with a four-letter PDB ID, except that the names of the PDB files corresponding to the single NMR structural model split from the NMR ensemble is specified with a four-letter PDB ID in addition to a hyphen followed by the single NMR structural model numeric ID, the residue naming scheme is **Chain ID\_residue name\_residue number**,  $\angle ADH$  represents the angle formed by acceptor (A), donor (D) and hydrogen (H) ( $\angle ADH$ ).

| PDB ID | Residue A | Atom A | Residue B | Atom B | Distance (Å) |
|--------|-----------|--------|-----------|--------|--------------|
| 2I25   | N_ARG_2   | NH2    | N_ASP_4   | OD1    | 2.643        |
| 2I25   | N_ARG_2   | NH2    | N_ASP_4   | OD2    | 3.217        |
| 2I25   | N_ARG_25  | NH1    | O_ASP_101 | OD1    | 3.459        |
| 2I25   | N_ARG_25  | NH1    | O_ASP_101 | OD2    | 3.204        |
| 2I25   | N_ARG_25  | NH2    | N_ASP_4   | OD2    | 2.988        |
| 2I25   | N_ARG_25  | NH2    | O_ASP_101 | OD1    | 2.762        |
| 2I25   | N_ARG_25  | NH2    | O_ASP_101 | OD2    | 3.967        |
| 2I25   | N_ARG_28  | NH2    | N_ASP_26  | OD1    | 2.978        |
| 2I25   | N_ARG_54  | NH1    | N_ASP_77  | OD1    | 3.557        |
| 2I25   | N_ARG_54  | NH1    | N_ASP_77  | OD2    | 2.836        |
| 2I25   | N_ARG_54  | NH2    | N_ASP_77  | OD1    | 2.859        |
| 2I25   | N_ARG_54  | NH2    | N_ASP_77  | OD2    | 3.514        |
| 2I25   | N_ARG_82  | NH2    | N_GLU_46  | OE1    | 3.665        |
| 2I25   | N_ARG_82  | NH2    | N_GLU_46  | OE2    | 2.763        |
| 2I25   | N_ARG_88  | NH1    | N_GLU_86  | OE2    | 2.745        |
| 2I25   | N_ARG_88  | NH2    | L_ASP_101 | OD1    | 2.875        |
| 2I25   | N_ARG_88  | NH2    | L_ASP_101 | OD2    | 3.303        |
| 2I25   | L_LYS_1   | NZ     | L_GLU_7   | OE2    | 3.014        |
| 2I25   | L_ARG_61  | NH1    | L_ASP_48  | OD2    | 3.041        |
| 2I25   | L_ARG_61  | NH2    | N_ASP_101 | OD2    | 3.227        |
| 2I25   | L_ARG_73  | NH1    | N_GLU_86  | OE1    | 3.764        |
| 2I25   | L_ARG_73  | NH1    | N_GLU_86  | OE2    | 2.771        |
| 2I25   | L_ARG_112 | NH2    | N_ASP_93  | OD1    | 2.693        |
| 2I25   | O_ARG_25  | NH1    | O_ASP_4   | OD2    | 2.746        |
| 2I25   | O_ARG_28  | NH2    | O_ASP_26  | OD1    | 3.729        |
| 2I25   | O_ARG_28  | NH2    | O_ASP_26  | OD2    | 3.922        |
| 2I25   | O_ARG_44  | NH2    | N_GLU_57  | OE1    | 3.011        |
| 2I25   | O_ARG_54  | NH1    | O_ASP_77  | OD1    | 3.402        |
| 2I25   | O_ARG_54  | NH1    | O_ASP_77  | OD2    | 2.888        |
| 2I25   | O_ARG_54  | NH2    | O_ASP_77  | OD1    | 2.865        |
| 2I25   | O_ARG_54  | NH2    | O_ASP_77  | OD2    | 3.679        |
| 2I25   | O_ARG_82  | NH2    | O_GLU_46  | OE1    | 3.734        |
| 2I25   | O_ARG_82  | NH2    | O_GLU_46  | OE2    | 2.820        |
| 2I25   | O_ARG_88  | NH1    | O_GLU_86  | OE2    | 2.786        |
| 2I25   | O_ARG_88  | NH2    | M_ASP_101 | OD1    | 2.850        |
| 2I25   | O_ARG_88  | NH2    | M_ASP_101 | OD2    | 3.440        |
| 2I25   | M_LYS_1   | NZ     | M_GLU_7   | OE1    | 3.922        |
| 2I25   | M_LYS_1   | NZ     | M_GLU_7   | OE2    | 2.669        |
| 2I25   | M_ARG_61  | NH1    | M_ASP_48  | OD2    | 3.015        |
| 2I25   | M_ARG_61  | NH2    | O_ASP_101 | OD2    | 2.975        |
| 2I25   | M_ARG_73  | NH1    | O_GLU_86  | OE1    | 3.850        |
| 2I25   | M_ARG_73  | NH1    | O_GLU_86  | OE2    | 2.851        |
| 2I25   | M_ARG_112 | NH1    | O_ASP_93  | OD1    | 3.660        |
| 2I25   | M_ARG_112 | NH2    | O_ASP_93  | OD1    | 3.176        |
| 2I25   | M_ARG_125 | NH1    | M_ASP_119 | OD1    | 3.683        |
| 2I25   | M_ARG_125 | NH1    | M_ASP_119 | OD2    | 2.977        |
| 2I25   | M_ARG_125 | NH2    | M_ASP_119 | OD1    | 3.282        |
| 2I25   | M_ARG_125 | NH2    | M_ASP_119 | OD2    | 3.843        |

---

Table 276: 2I25-specific salt bridging networks analysis. In this table, a PDB file is specified with a four-letter PDB ID, except that the names of the PDB files corresponding to the single NMR structural model split from the NMR ensemble is specified with a four-letter PDB ID in addition to a hyphen followed by the single NMR structural model numeric ID, the residue naming scheme is **Chain ID\_residue name\_residue number**,  $\angle ADH$  represents the angle formed by acceptor (A), donor (D) and hydrogen (H) ( $\angle ADH$ ).

| PDB ID | Residue A | Atom A | Residue B | Atom B | Distance (Å) |
|--------|-----------|--------|-----------|--------|--------------|
| 2I26   | N_ARG_2   | NH1    | N_ASP_4   | OD2    | 3.516        |
| 2I26   | N_ARG_2   | NH2    | N_ASP_4   | OD1    | 3.612        |
| 2I26   | N_ARG_2   | NH2    | N_ASP_4   | OD2    | 3.274        |
| 2I26   | N_ARG_38  | NH2    | N_GLU_47  | OE2    | 3.790        |
| 2I26   | N_LYS_51  | NZ     | N_GLU_57  | OE1    | 3.254        |
| 2I26   | N_LYS_51  | NZ     | N_GLU_57  | OE2    | 3.781        |
| 2I26   | N_ARG_54  | NH1    | N_ASP_77  | OD1    | 3.540        |
| 2I26   | N_ARG_54  | NH1    | N_ASP_77  | OD2    | 3.097        |
| 2I26   | N_ARG_54  | NH2    | N_ASP_77  | OD1    | 2.953        |
| 2I26   | N_ARG_54  | NH2    | N_ASP_77  | OD2    | 3.934        |
| 2I26   | N_ARG_82  | NH2    | N_GLU_46  | OE1    | 3.207        |
| 2I26   | N_ARG_82  | NH2    | N_GLU_46  | OE2    | 3.809        |
| 2I26   | N_ARG_88  | NH1    | N_GLU_86  | OE2    | 2.847        |
| 2I26   | N_ARG_88  | NH2    | L_ASP_101 | OD1    | 3.268        |
| 2I26   | N_ARG_88  | NH2    | L_ASP_101 | OD2    | 3.652        |
| 2I26   | L_LYS_1   | NZ     | L_GLU_7   | OE2    | 3.495        |
| 2I26   | L_ARG_73  | NH1    | N_GLU_86  | OE2    | 3.511        |
| 2I26   | L_ARG_73  | NH2    | N_GLU_86  | OE1    | 3.590        |
| 2I26   | L_ARG_73  | NH2    | N_GLU_86  | OE2    | 3.542        |
| 2I26   | L_ARG_112 | NH1    | N_ASP_93  | OD2    | 3.838        |
| 2I26   | L_ARG_112 | NH2    | N_ASP_93  | OD2    | 3.391        |
| 2I26   | O_LYS_12  | NZ     | O_GLU_16  | OE1    | 2.500        |
| 2I26   | O_LYS_12  | NZ     | O_GLU_16  | OE2    | 3.336        |
| 2I26   | O_ARG_25  | NH2    | O_ASP_4   | OD1    | 3.978        |
| 2I26   | O_ARG_38  | NH1    | O_ASP_77  | OD1    | 3.853        |
| 2I26   | O_LYS_51  | NZ     | O_GLU_57  | OE1    | 2.746        |
| 2I26   | O_LYS_51  | NZ     | O_GLU_57  | OE2    | 3.677        |
| 2I26   | O_ARG_54  | NH1    | O_ASP_77  | OD1    | 3.513        |
| 2I26   | O_ARG_54  | NH1    | O_ASP_77  | OD2    | 3.061        |
| 2I26   | O_ARG_54  | NH2    | O_ASP_77  | OD1    | 3.014        |
| 2I26   | O_ARG_82  | NH2    | O_GLU_46  | OE1    | 3.607        |
| 2I26   | O_ARG_82  | NH2    | O_GLU_46  | OE2    | 2.938        |
| 2I26   | O_ARG_88  | NH1    | M_ASP_101 | OD1    | 2.648        |
| 2I26   | O_ARG_88  | NH1    | M_ASP_101 | OD2    | 2.840        |
| 2I26   | O_ARG_88  | NH2    | O_GLU_86  | OE2    | 3.407        |
| 2I26   | M_LYS_1   | NZ     | M_GLU_7   | OE2    | 2.378        |
| 2I26   | M_ARG_61  | NH1    | M_ASP_48  | OD2    | 3.000        |
| 2I26   | M_ARG_73  | NH1    | O_GLU_86  | OE1    | 2.832        |
| 2I26   | M_ARG_73  | NH1    | O_GLU_86  | OE2    | 3.677        |
| 2I26   | M_ARG_112 | NH1    | O_ASP_93  | OD2    | 3.127        |
| 2I26   | M_ARG_112 | NH2    | O_ASP_93  | OD2    | 3.198        |
| 2I26   | P_ARG_2   | NH1    | P_ASP_4   | OD2    | 3.455        |
| 2I26   | P_ARG_25  | NH1    | P_ASP_4   | OD2    | 3.288        |
| 2I26   | P_ARG_38  | NH1    | P_ASP_77  | OD1    | 3.296        |
| 2I26   | P_ARG_38  | NH2    | P_GLU_47  | OE2    | 3.357        |
| 2I26   | P_LYS_51  | NZ     | P_GLU_57  | OE1    | 2.842        |
| 2I26   | P_LYS_51  | NZ     | P_GLU_57  | OE2    | 3.265        |
| 2I26   | P_ARG_54  | NH1    | P_ASP_77  | OD1    | 3.557        |
| 2I26   | P_ARG_54  | NH1    | P_ASP_77  | OD2    | 3.011        |
| 2I26   | P_ARG_54  | NH2    | P_ASP_77  | OD1    | 2.936        |
| 2I26   | P_ARG_54  | NH2    | P_ASP_77  | OD2    | 3.842        |
| 2I26   | P_ARG_82  | NH2    | P_GLU_46  | OE1    | 3.185        |
| 2I26   | P_ARG_82  | NH2    | P_GLU_46  | OE2    | 3.977        |
| 2I26   | P_ARG_88  | NH1    | Q_ASP_101 | OD1    | 3.139        |
| 2I26   | P_ARG_88  | NH1    | Q_ASP_101 | OD2    | 3.016        |
| 2I26   | P_ARG_88  | NH2    | P_GLU_86  | OE2    | 3.489        |
| 2I26   | Q_LYS_1   | NZ     | Q_GLU_7   | OE1    | 3.316        |

|      |           |     |           |     |       |
|------|-----------|-----|-----------|-----|-------|
| 2I26 | Q_LYS_1   | NZ  | Q_GLU_7   | OE2 | 2.614 |
| 2I26 | Q_ARG_61  | NH1 | Q_ASP_48  | OD2 | 2.954 |
| 2I26 | Q_ARG_61  | NH2 | P_ASP_101 | OD2 | 3.115 |
| 2I26 | Q_ARG_73  | NH1 | P_GLU_86  | OE2 | 2.623 |
| 2I26 | Q_ARG_112 | NH1 | P_ASP_93  | OD2 | 3.805 |
| 2I26 | Q_ARG_112 | NH2 | P_ASP_93  | OD2 | 3.685 |

Table 277: 2I26-specific salt bridging networks analysis. In this table, a PDB file is specified with a four-letter PDB ID, except that the names of the PDB files corresponding to the single NMR structural model split from the NMR ensemble is specified with a four-letter PDB ID in addition to a hyphen followed by the single NMR structural model numeric ID, the residue naming scheme is **Chain ID\_residue name\_residue number**,  $\angle ADH$  represents the angle formed by acceptor (A), donor (D) and hydrogen (H) ( $\angle ADH$ ).

| PDB ID | Residue A | Atom A | Residue B | Atom B | Distance (Å) |
|--------|-----------|--------|-----------|--------|--------------|
| 2I27   | N_ARG_2   | NH1    | N_ASP_26  | OD2    | 2.576        |
| 2I27   | N_ARG_2   | NH2    | N_ASP_4   | OD1    | 3.448        |
| 2I27   | N_ARG_2   | NH2    | N_ASP_4   | OD2    | 2.863        |
| 2I27   | N_ARG_2   | NH2    | N_ASP_26  | OD2    | 3.218        |
| 2I27   | N_ARG_25  | NH1    | N_ASP_4   | OD2    | 2.953        |
| 2I27   | N_ARG_25  | NH2    | O_GLU_46  | OE2    | 3.350        |
| 2I27   | N_ARG_38  | NH1    | N_ASP_77  | OD1    | 3.382        |
| 2I27   | N_ARG_38  | NH2    | N_GLU_47  | OE2    | 3.845        |
| 2I27   | N_LYS_40  | NZ     | N_GLU_47  | OE1    | 3.628        |
| 2I27   | N_LYS_40  | NZ     | N_GLU_47  | OE2    | 3.547        |
| 2I27   | N_LYS_51  | NZ     | N_GLU_57  | OE1    | 2.697        |
| 2I27   | N_LYS_51  | NZ     | N_GLU_57  | OE2    | 3.720        |
| 2I27   | N_ARG_54  | NH1    | N_ASP_77  | OD2    | 3.203        |
| 2I27   | N_ARG_54  | NH2    | N_ASP_77  | OD1    | 3.149        |
| 2I27   | N_ARG_54  | NH2    | N_ASP_77  | OD2    | 3.554        |
| 2I27   | N_ARG_82  | NH2    | N_GLU_46  | OE1    | 3.563        |
| 2I27   | N_ARG_82  | NH2    | N_GLU_46  | OE2    | 3.008        |
| 2I27   | N_LYS_84  | NZ     | N_GLU_86  | OE2    | 3.122        |
| 2I27   | O_ARG_2   | NH1    | O_ASP_4   | OD1    | 3.181        |
| 2I27   | O_ARG_2   | NH1    | O_ASP_4   | OD2    | 2.592        |
| 2I27   | O_ARG_2   | NH1    | O_ASP_26  | OD1    | 3.779        |
| 2I27   | O_ARG_25  | NH1    | O_ASP_4   | OD2    | 2.830        |
| 2I27   | O_ARG_38  | NH1    | O_ASP_77  | OD1    | 3.942        |
| 2I27   | O_ARG_38  | NH2    | O_GLU_47  | OE1    | 3.232        |
| 2I27   | O_LYS_51  | NZ     | O_GLU_57  | OE1    | 2.589        |
| 2I27   | O_LYS_51  | NZ     | O_GLU_57  | OE2    | 3.473        |
| 2I27   | O_ARG_54  | NH1    | O_ASP_77  | OD1    | 3.892        |
| 2I27   | O_ARG_54  | NH1    | O_ASP_77  | OD2    | 2.920        |
| 2I27   | O_ARG_54  | NH2    | O_ASP_77  | OD1    | 2.998        |
| 2I27   | O_ARG_54  | NH2    | O_ASP_77  | OD2    | 3.435        |
| 2I27   | O_ARG_82  | NH2    | O_GLU_46  | OE1    | 3.189        |
| 2I27   | O_ARG_82  | NH2    | O_GLU_46  | OE2    | 3.126        |
| 2I27   | O_LYS_84  | NZ     | O_GLU_86  | OE2    | 2.951        |

Table 278: 2I27-specific salt bridging networks analysis. In this table, a PDB file is specified with a four-letter PDB ID, except that the names of the PDB files corresponding to the single NMR structural model split from the NMR ensemble is specified with a four-letter PDB ID in addition to a hyphen followed by the single NMR structural model numeric ID, the residue naming scheme is **Chain ID\_residue name\_residue number**,  $\angle ADH$  represents the angle formed by acceptor (A), donor (D) and hydrogen (H) ( $\angle ADH$ ).

| PDB ID | Residue A | Atom A | Residue B  | Atom B | Distance (Å) |
|--------|-----------|--------|------------|--------|--------------|
| 2I5Y   | G.LYS.121 | NZ     | G.GLU.429  | OE2    | 3.126        |
| 2I5Y   | G.LYS.207 | NZ     | G.GLU.381  | OE2    | 3.637        |
| 2I5Y   | G.HIS.249 | NE2    | G.GLU.482  | OE1    | 2.873        |
| 2I5Y   | G.LYS.282 | NZ     | G.GLU.275  | OE1    | 2.722        |
| 2I5Y   | G.LYS.348 | NZ     | G.GLU.269  | OE1    | 2.750        |
| 2I5Y   | G.LYS.348 | NZ     | G.GLU.351  | OE1    | 3.311        |
| 2I5Y   | G.LYS.348 | NZ     | G.GLU.351  | OE2    | 3.874        |
| 2I5Y   | G.ARG.419 | NH1    | H.GLU.100B | OE1    | 3.248        |
| 2I5Y   | G.ARG.419 | NH2    | H.GLU.99   | OE2    | 3.146        |
| 2I5Y   | G.ARG.419 | NH2    | H.GLU.100D | OE2    | 2.601        |
| 2I5Y   | G.ARG.456 | NH1    | G.GLU.466  | OE1    | 2.646        |
| 2I5Y   | G.ARG.469 | NH2    | G.ASP.457  | OD1    | 3.980        |
| 2I5Y   | G.ARG.469 | NH2    | G.ASP.457  | OD2    | 2.626        |
| 2I5Y   | G.ARG.476 | NH1    | G.GLU.102  | OE2    | 2.957        |
| 2I5Y   | G.ARG.476 | NH2    | G.ASP.474  | OD1    | 3.611        |
| 2I5Y   | G.ARG.476 | NH2    | G.ASP.474  | OD2    | 2.800        |
| 2I5Y   | G.ARG.480 | NH2    | G.ASP.477  | OD1    | 3.599        |
| 2I5Y   | L.ARG.24  | NH1    | L.GLU.70   | OE1    | 3.407        |
| 2I5Y   | L.ARG.24  | NH2    | L.GLU.70   | OE1    | 3.609        |
| 2I5Y   | L.ARG.24  | NH2    | L.GLU.70   | OE2    | 2.932        |
| 2I5Y   | L.ARG.61  | NH2    | L.GLU.81   | OE2    | 2.667        |
| 2I5Y   | L.ARG.61  | NH2    | L.ASP.82   | OD1    | 2.958        |
| 2I5Y   | L.ARG.61  | NH2    | L.ASP.82   | OD2    | 3.675        |
| 2I5Y   | L.LYS.149 | NZ     | L.GLU.195  | OE1    | 3.958        |
| 2I5Y   | L.LYS.183 | NZ     | L.GLU.187  | OE1    | 2.546        |
| 2I5Y   | L.HIS.189 | ND1    | L.ASP.151  | OD2    | 2.886        |
| 2I5Y   | H.ARG.31  | NH2    | H.ASP.100A | OD1    | 3.028        |
| 2I5Y   | H.ARG.31  | NH2    | H.ASP.100A | OD2    | 3.251        |
| 2I5Y   | H.ARG.38  | NH2    | H.ASP.86   | OD2    | 3.623        |
| 2I5Y   | H.ARG.50  | NH2    | H.GLU.97   | OE1    | 2.885        |
| 2I5Y   | H.ARG.66  | NH1    | H.ASP.86   | OD1    | 2.818        |
| 2I5Y   | H.ARG.66  | NH1    | H.ASP.86   | OD2    | 3.645        |
| 2I5Y   | H.ARG.66  | NH2    | H.ASP.86   | OD1    | 3.819        |
| 2I5Y   | H.ARG.66  | NH2    | H.ASP.86   | OD2    | 3.195        |
| 2I5Y   | H.LYS.73  | NZ     | H.ASP.55   | OD2    | 3.789        |
| 2I5Y   | H.ARG.82A | NH2    | H.GLU.81   | OE1    | 3.762        |
| 2I5Y   | H.ARG.83  | NH2    | H.ASP.85   | OD1    | 3.770        |
| 2I5Y   | H.ARG.83  | NH2    | H.ASP.85   | OD2    | 3.930        |
| 2I5Y   | H.LYS.143 | NZ     | H.ASP.144  | OD1    | 3.144        |
| 2I5Y   | H.LYS.143 | NZ     | H.ASP.144  | OD2    | 3.616        |
| 2I5Y   | H.LYS.201 | NZ     | R.GLU.10   | OE2    | 3.615        |
| 2I5Y   | H.LYS.209 | NZ     | L.GLU.123  | OE1    | 2.531        |
| 2I5Y   | H.LYS.209 | NZ     | L.GLU.123  | OE2    | 3.403        |
| 2I5Y   | H.LYS.210 | NZ     | H.GLU.212  | OE2    | 3.232        |
| 2I5Y   | P.LYS.117 | NZ     | P.ASP.113  | OD2    | 3.200        |
| 2I5Y   | P.LYS.121 | NZ     | P.GLU.429  | OE1    | 3.512        |
| 2I5Y   | P.LYS.207 | NZ     | P.GLU.381  | OE1    | 3.955        |
| 2I5Y   | P.LYS.207 | NZ     | P.GLU.381  | OE2    | 2.682        |
| 2I5Y   | P.LYS.231 | NZ     | P.GLU.268  | OE2    | 3.227        |
| 2I5Y   | P.LYS.232 | NZ     | P.GLU.269  | OE2    | 3.441        |
| 2I5Y   | P.HIS.249 | NE2    | P.GLU.482  | OE1    | 2.831        |
| 2I5Y   | P.LYS.282 | NZ     | P.GLU.275  | OE1    | 2.851        |
| 2I5Y   | P.LYS.348 | NZ     | P.GLU.269  | OE2    | 2.858        |
| 2I5Y   | P.LYS.357 | NZ     | P.GLU.466  | OE1    | 3.584        |
| 2I5Y   | P.ARG.419 | NH1    | R.GLU.99   | OE2    | 3.800        |
| 2I5Y   | P.ARG.419 | NH1    | R.GLU.100D | OE1    | 2.563        |
| 2I5Y   | P.ARG.419 | NH1    | R.GLU.100D | OE2    | 3.898        |

|      |           |     |            |     |       |
|------|-----------|-----|------------|-----|-------|
| 2I5Y | P_ARG_456 | NH1 | P_GLU_466  | OE1 | 3.726 |
| 2I5Y | P_ARG_456 | NH1 | P_GLU_466  | OE2 | 3.233 |
| 2I5Y | P_ARG_469 | NH2 | P_ASP_457  | OD1 | 3.175 |
| 2I5Y | P_ARG_476 | NH1 | P_ASP_474  | OD1 | 3.001 |
| 2I5Y | P_ARG_480 | NH1 | P_ASP_477  | OD1 | 3.430 |
| 2I5Y | P_LYS_487 | NZ  | P_GLU_91   | OE2 | 3.288 |
| 2I5Y | Q_ARG_24  | NH1 | Q_GLU_70   | OE2 | 3.564 |
| 2I5Y | Q_ARG_61  | NH2 | Q_GLU_81   | OE1 | 2.900 |
| 2I5Y | Q_ARG_61  | NH2 | Q_ASP_82   | OD1 | 2.991 |
| 2I5Y | Q_ARG_61  | NH2 | Q_ASP_82   | OD2 | 3.633 |
| 2I5Y | Q_ARG_95B | NH2 | Q_ASP_1    | OD2 | 3.695 |
| 2I5Y | Q_LYS_149 | NZ  | Q_GLU_195  | OE1 | 3.615 |
| 2I5Y | Q_LYS_149 | NZ  | Q_GLU_195  | OE2 | 3.356 |
| 2I5Y | Q_LYS_183 | NZ  | Q_GLU_187  | OE1 | 3.007 |
| 2I5Y | Q_LYS_183 | NZ  | Q_GLU_187  | OE2 | 3.247 |
| 2I5Y | Q_HIS_189 | ND1 | Q_ASP_151  | OD1 | 2.992 |
| 2I5Y | R_LYS_12  | NZ  | R_GLU_10   | OE2 | 3.536 |
| 2I5Y | R_ARG_31  | NH2 | R_ASP_100A | OD1 | 3.101 |
| 2I5Y | R_ARG_38  | NH1 | R_GLU_46   | OE2 | 3.641 |
| 2I5Y | R_ARG_38  | NH2 | R_ASP_86   | OD2 | 2.978 |
| 2I5Y | R_ARG_50  | NH2 | R_GLU_97   | OE2 | 2.640 |
| 2I5Y | R_ARG_66  | NH1 | R_ASP_86   | OD1 | 3.507 |
| 2I5Y | R_ARG_66  | NH2 | R_ASP_86   | OD1 | 3.587 |
| 2I5Y | R_ARG_66  | NH2 | R_ASP_86   | OD2 | 3.055 |
| 2I5Y | R_ARG_83  | NH2 | R_ASP_85   | OD1 | 3.357 |
| 2I5Y | R_ARG_83  | NH2 | R_ASP_85   | OD2 | 2.690 |
| 2I5Y | R_LYS_209 | NZ  | Q_GLU_123  | OE2 | 3.373 |
| 2I5Y | R_LYS_210 | NZ  | R_GLU_212  | OE1 | 3.854 |
| 2I5Y | S_ARG_9   | NH1 | P_ASP_368  | OD2 | 2.853 |
| 2I5Y | S_ARG_9   | NH2 | P_ASP_368  | OD2 | 3.453 |

Table 279: 2I5Y-specific salt bridging networks analysis. In this table, a PDB file is specified with a four-letter PDB ID, except that the names of the PDB files corresponding to the single NMR structural model split from the NMR ensemble is specified with a four-letter PDB ID in addition to a hyphen followed by the single NMR structural model numeric ID, the residue naming scheme is **Chain ID\_residue name\_residue number**,  $\angle ADH$  represents the angle formed by acceptor (A), donor (D) and hydrogen (H) ( $\angle ADH$ ).



| PDB ID | Residue A | Atom A | Residue B  | Atom B | Distance (Å) |
|--------|-----------|--------|------------|--------|--------------|
| 2I60   | G_LYS_85  | NZ     | G_GLU_87   | OE1    | 2.991        |
| 2I60   | G_LYS_97  | NZ     | G_GLU_275  | OE2    | 3.907        |
| 2I60   | G_LYS_121 | NZ     | G_GLU_429  | OE2    | 3.453        |
| 2I60   | G_LYS_207 | NZ     | G_GLU_381  | OE2    | 3.877        |
| 2I60   | G_LYS_231 | NZ     | G_GLU_268  | OE1    | 3.768        |
| 2I60   | G_HIS_249 | NE2    | G_GLU_482  | OE1    | 2.855        |
| 2I60   | G_LYS_282 | NZ     | G_GLU_275  | OE1    | 2.727        |
| 2I60   | G_LYS_348 | NZ     | G_GLU_269  | OE1    | 3.168        |
| 2I60   | G_LYS_350 | NZ     | G_ASP_395  | OD2    | 3.640        |
| 2I60   | G_ARG_419 | NH2    | H_GLU_99   | OE1    | 3.736        |
| 2I60   | G_ARG_419 | NH2    | H_GLU_99   | OE2    | 2.767        |
| 2I60   | G_ARG_419 | NH2    | H_GLU_100D | OE2    | 3.611        |
| 2I60   | G_ARG_456 | NH1    | G_GLU_466  | OE1    | 2.710        |
| 2I60   | G_ARG_456 | NH1    | G_GLU_466  | OE2    | 3.759        |
| 2I60   | G_ARG_469 | NH2    | G_ASP_457  | OD1    | 2.579        |
| 2I60   | G_ARG_469 | NH2    | G_ASP_457  | OD2    | 3.789        |
| 2I60   | G_ARG_476 | NH1    | G_GLU_102  | OE1    | 3.422        |
| 2I60   | G_ARG_476 | NH2    | G_ASP_474  | OD1    | 3.929        |
| 2I60   | G_ARG_476 | NH2    | G_ASP_474  | OD2    | 2.677        |
| 2I60   | G_ARG_480 | NH1    | G_ASP_477  | OD1    | 3.717        |
| 2I60   | L_ARG_24  | NH1    | L_GLU_70   | OE2    | 3.278        |
| 2I60   | L_ARG_24  | NH2    | L_GLU_70   | OE2    | 2.910        |
| 2I60   | L_ARG_61  | NH2    | L_GLU_81   | OE2    | 2.838        |
| 2I60   | L_ARG_61  | NH2    | L_ASP_82   | OD1    | 2.837        |
| 2I60   | L_ARG_61  | NH2    | L_ASP_82   | OD2    | 3.354        |
| 2I60   | L_LYS_149 | NZ     | L_GLU_195  | OE1    | 3.670        |
| 2I60   | H_ARG_31  | NH2    | H_ASP_100A | OD1    | 3.164        |
| 2I60   | H_ARG_31  | NH2    | H_ASP_100A | OD2    | 3.397        |
| 2I60   | H_ARG_38  | NH1    | H_GLU_46   | OE2    | 3.054        |
| 2I60   | H_ARG_38  | NH2    | H_ASP_86   | OD2    | 3.336        |
| 2I60   | H_ARG_50  | NH2    | H_GLU_97   | OE2    | 3.134        |
| 2I60   | H_ARG_66  | NH1    | H_ASP_86   | OD1    | 3.041        |
| 2I60   | H_ARG_66  | NH1    | H_ASP_86   | OD2    | 3.960        |
| 2I60   | H_ARG_66  | NH2    | H_ASP_86   | OD1    | 3.627        |
| 2I60   | H_ARG_66  | NH2    | H_ASP_86   | OD2    | 3.212        |
| 2I60   | H_ARG_82A | NH2    | H_GLU_81   | OE2    | 3.855        |
| 2I60   | H_ARG_83  | NH1    | H_ASP_85   | OD1    | 3.248        |
| 2I60   | H_ARG_83  | NH1    | H_ASP_85   | OD2    | 3.416        |
| 2I60   | H_LYS_143 | NZ     | H_ASP_144  | OD1    | 3.384        |
| 2I60   | H_LYS_209 | NZ     | L_GLU_123  | OE1    | 3.997        |
| 2I60   | H_LYS_210 | NZ     | H_GLU_212  | OE2    | 3.501        |
| 2I60   | P_LYS_121 | NZ     | P_GLU_429  | OE1    | 3.897        |
| 2I60   | P_LYS_207 | NZ     | P_GLU_381  | OE1    | 3.463        |
| 2I60   | P_LYS_207 | NZ     | P_GLU_381  | OE2    | 2.996        |
| 2I60   | P_HIS_249 | NE2    | P_GLU_482  | OE1    | 2.831        |
| 2I60   | P_LYS_282 | NZ     | P_GLU_275  | OE1    | 2.805        |
| 2I60   | P_LYS_348 | NZ     | P_GLU_269  | OE1    | 2.586        |
| 2I60   | P_LYS_357 | NZ     | P_GLU_466  | OE2    | 3.512        |
| 2I60   | P_ARG_419 | NH1    | R_GLU_100B | OE1    | 3.610        |
| 2I60   | P_ARG_419 | NH2    | R_GLU_99   | OE1    | 3.892        |
| 2I60   | P_ARG_456 | NH1    | P_GLU_466  | OE1    | 2.943        |
| 2I60   | P_ARG_456 | NH1    | P_GLU_466  | OE2    | 3.500        |
| 2I60   | P_ARG_469 | NH2    | P_ASP_457  | OD1    | 3.419        |
| 2I60   | P_ARG_476 | NH1    | P_GLU_102  | OE1    | 3.696        |
| 2I60   | P_ARG_476 | NH1    | P_GLU_102  | OE2    | 2.989        |
| 2I60   | P_ARG_476 | NH2    | P_ASP_474  | OD2    | 3.307        |
| 2I60   | P_ARG_480 | NH1    | P_ASP_477  | OD1    | 3.241        |

|      |           |     |            |     |       |
|------|-----------|-----|------------|-----|-------|
| 2I60 | Q_ARG_24  | NH1 | Q_GLU_70   | OE2 | 3.297 |
| 2I60 | Q_ARG_61  | NH2 | Q_GLU_81   | OE1 | 3.836 |
| 2I60 | Q_ARG_61  | NH2 | Q_ASP_82   | OD1 | 3.255 |
| 2I60 | Q_ARG_61  | NH2 | Q_ASP_82   | OD2 | 3.646 |
| 2I60 | Q_LYS_183 | NZ  | Q_GLU_187  | OE1 | 3.479 |
| 2I60 | Q_LYS_183 | NZ  | Q_GLU_187  | OE2 | 3.280 |
| 2I60 | Q_HIS_189 | ND1 | Q_ASP_151  | OD1 | 3.866 |
| 2I60 | R_ARG_31  | NH2 | R_ASP_100A | OD1 | 3.967 |
| 2I60 | R_ARG_31  | NH2 | R_ASP_100A | OD2 | 2.823 |
| 2I60 | R_ARG_38  | NH1 | R_GLU_46   | OE2 | 2.939 |
| 2I60 | R_ARG_38  | NH2 | R_ASP_86   | OD2 | 3.162 |
| 2I60 | R_ARG_50  | NH2 | R_GLU_97   | OE2 | 2.924 |
| 2I60 | R_ARG_66  | NH1 | R_ASP_86   | OD1 | 3.520 |
| 2I60 | R_ARG_66  | NH1 | R_ASP_86   | OD2 | 3.317 |
| 2I60 | R_ARG_66  | NH2 | R_ASP_86   | OD1 | 3.743 |
| 2I60 | R_ARG_66  | NH2 | R_ASP_86   | OD2 | 3.021 |
| 2I60 | R_ARG_82A | NH2 | R_GLU_81   | OE1 | 3.453 |
| 2I60 | R_ARG_83  | NH2 | R_ASP_85   | OD1 | 3.280 |
| 2I60 | R_LYS_143 | NZ  | R_ASP_144  | OD1 | 3.244 |
| 2I60 | R_LYS_143 | NZ  | R_ASP_144  | OD2 | 3.755 |
| 2I60 | R_LYS_209 | NZ  | Q_GLU_123  | OE2 | 3.485 |
| 2I60 | S_ARG_9   | NH1 | P_ASP_368  | OD2 | 3.268 |
| 2I60 | S_ARG_9   | NH2 | P_ASP_368  | OD1 | 3.938 |
| 2I60 | S_ARG_9   | NH2 | P_ASP_368  | OD2 | 2.664 |

Table 280: 2I60-specific salt bridging networks analysis. In this table, a PDB file is specified with a four-letter PDB ID, except that the names of the PDB files corresponding to the single NMR structural model split from the NMR ensemble is specified with a four-letter PDB ID in addition to a hyphen followed by the single NMR structural model numeric ID, the residue naming scheme is **Chain ID\_residue name\_residue number**,  $\angle ADH$  represents the angle formed by acceptor (A), donor (D) and hydrogen (H) ( $\angle ADH$ ).

| PDB ID | Residue A | Atom A | Residue B | Atom B | Distance (Å) |
|--------|-----------|--------|-----------|--------|--------------|
| 2IFF   | L_LYS_44  | NZ     | H_ASP_104 | OD1    | 2.935        |
| 2IFF   | L_ARG_45  | NH2    | H_ASP_104 | OD2    | 3.348        |
| 2IFF   | L_ARG_60  | NH2    | L_ASP_81  | OD1    | 2.794        |
| 2IFF   | L_ARG_60  | NH2    | L_ASP_81  | OD2    | 3.163        |
| 2IFF   | L_LYS_101 | NZ     | L_ASP_163 | OD1    | 3.641        |
| 2IFF   | L_LYS_105 | NZ     | L_GLU_17  | OE1    | 3.700        |
| 2IFF   | L_LYS_105 | NZ     | L_GLU_17  | OE2    | 3.218        |
| 2IFF   | L_ARG_106 | NH2    | L_ASP_168 | OD1    | 2.967        |
| 2IFF   | L_ARG_106 | NH2    | L_ASP_168 | OD2    | 3.027        |
| 2IFF   | L_LYS_147 | NZ     | L_GLU_193 | OE1    | 3.478        |
| 2IFF   | L_LYS_147 | NZ     | L_GLU_193 | OE2    | 3.002        |
| 2IFF   | L_LYS_181 | NZ     | L_GLU_185 | OE1    | 2.942        |
| 2IFF   | L_LYS_181 | NZ     | L_GLU_185 | OE2    | 3.794        |
| 2IFF   | L_ARG_186 | NH2    | L_ASP_182 | OD2    | 3.027        |
| 2IFF   | L_HIS_187 | ND1    | L_ASP_149 | OD2    | 3.188        |
| 2IFF   | L_HIS_196 | ND1    | L_ASP_141 | OD1    | 3.647        |
| 2IFF   | H_HIS_43  | ND1    | H_GLU_46  | OE1    | 3.306        |
| 2IFF   | H_HIS_43  | ND1    | H_GLU_46  | OE2    | 3.465        |
| 2IFF   | H_HIS_43  | NE2    | H_GLU_46  | OE2    | 3.940        |
| 2IFF   | H_LYS_65  | NZ     | H_GLU_62  | OE2    | 3.927        |
| 2IFF   | H_LYS_67  | NZ     | H_ASP_90  | OD1    | 3.416        |
| 2IFF   | H_LYS_67  | NZ     | H_ASP_90  | OD2    | 3.000        |
| 2IFF   | H_LYS_208 | NZ     | H_ASP_210 | OD1    | 3.142        |
| 2IFF   | H_LYS_208 | NZ     | H_ASP_210 | OD2    | 3.455        |
| 2IFF   | H_LYS_211 | NZ     | L_GLU_121 | OE1    | 3.040        |
| 2IFF   | H_LYS_211 | NZ     | L_GLU_121 | OE2    | 2.921        |
| 2IFF   | Y_LYS_1   | NZ     | Y_GLU_7   | OE1    | 2.914        |
| 2IFF   | Y_LYS_1   | NZ     | Y_GLU_7   | OE2    | 3.893        |
| 2IFF   | Y_LYS_13  | NZ     | Y_ASP_18  | OD2    | 3.220        |
| 2IFF   | Y_ARG_45  | NH1    | H_GLU_50  | OE1    | 3.425        |
| 2IFF   | Y_ARG_45  | NH1    | H_GLU_50  | OE2    | 2.959        |
| 2IFF   | Y_LYS_97  | NZ     | Y_ASP_101 | OD1    | 2.879        |
| 2IFF   | Y_ARG_125 | NH1    | Y_ASP_119 | OD2    | 3.485        |
| 2IFF   | Y_ARG_125 | NH2    | Y_ASP_119 | OD1    | 3.655        |
| 2IFF   | Y_ARG_125 | NH2    | Y_ASP_119 | OD2    | 2.761        |

Table 281: 2IFF-specific salt bridging networks analysis. In this table, a PDB file is specified with a four-letter PDB ID, except that the names of the PDB files corresponding to the single NMR structural model split from the NMR ensemble is specified with a four-letter PDB ID in addition to a hyphen followed by the single NMR structural model numeric ID, the residue naming scheme is **Chain ID\_residue name\_residue number**,  $\angle ADH$  represents the angle formed by acceptor (A), donor (D) and hydrogen (H) ( $\angle ADH$ ).

| PDB ID | Residue A | Atom A | Residue B | Atom B | Distance (Å) |
|--------|-----------|--------|-----------|--------|--------------|
| 2IG2   | L_ARG_60  | NH1    | L_GLU_80  | OE1    | 3.431        |
| 2IG2   | L_ARG_60  | NH2    | L_GLU_80  | OE1    | 2.806        |
| 2IG2   | L_ARG_60  | NH2    | L_ASP_81  | OD1    | 3.509        |
| 2IG2   | L_ARG_60  | NH2    | L_ASP_81  | OD2    | 2.584        |
| 2IG2   | L_LYS_104 | NZ     | L_ASP_84  | OD1    | 3.314        |
| 2IG2   | L_LYS_104 | NZ     | L_ASP_84  | OD2    | 2.687        |
| 2IG2   | L_LYS_112 | NZ     | L_GLU_200 | OE2    | 3.492        |
| 2IG2   | H_ARG_38  | NH1    | H_ASP_90  | OD2    | 3.025        |
| 2IG2   | H_ARG_38  | NH2    | H_GLU_46  | OE1    | 3.194        |
| 2IG2   | H_ARG_38  | NH2    | H_GLU_46  | OE2    | 3.026        |
| 2IG2   | H_ARG_67  | NH1    | H_ASP_90  | OD1    | 2.773        |
| 2IG2   | H_ARG_67  | NH2    | H_ASP_90  | OD1    | 2.946        |
| 2IG2   | H_ARG_67  | NH2    | H_ASP_90  | OD2    | 2.843        |
| 2IG2   | H_ARG_72  | NH1    | H_ASP_74  | OD2    | 3.016        |
| 2IG2   | H_ARG_98  | NH2    | H_ASP_106 | OD1    | 2.603        |
| 2IG2   | H_ARG_98  | NH2    | H_ASP_106 | OD2    | 3.320        |
| 2IG2   | H_LYS_148 | NZ     | L_GLU_126 | OE2    | 2.854        |
| 2IG2   | H_LYS_214 | NZ     | L_GLU_125 | OE1    | 3.816        |
| 2IG2   | H_LYS_214 | NZ     | L_GLU_125 | OE2    | 2.866        |
| 2IG2   | H_ARG_215 | NH1    | H_GLU_217 | OE1    | 2.857        |
| 2IG2   | H_ARG_215 | NH1    | H_GLU_217 | OE2    | 3.431        |
| 2IG2   | H_HIS_225 | ND1    | H_ASP_222 | OD1    | 2.822        |
| 2IG2   | H_HIS_225 | ND1    | H_ASP_222 | OD2    | 3.302        |

Table 282: 2IG2-specific salt bridging networks analysis. In this table, a PDB file is specified with a four-letter PDB ID, except that the names of the PDB files corresponding to the single NMR structural model split from the NMR ensemble is specified with a four-letter PDB ID in addition to a hyphen followed by the single NMR structural model numeric ID, the residue naming scheme is **Chain ID\_residue name\_residue number**,  $\angle ADH$  represents the angle formed by acceptor (A), donor (D) and hydrogen (H) ( $\angle ADH$ ).

| PDB ID | Residue A | Atom A | Residue B | Atom B | Distance (Å) |
|--------|-----------|--------|-----------|--------|--------------|
| 2IGF   | L_LYS_50  | NZ     | L_ASP_30  | OD1    | 3.055        |
| 2IGF   | L_LYS_50  | NZ     | L_ASP_30  | OD2    | 3.465        |
| 2IGF   | L_ARG_61  | NH1    | L_GLU_79  | OE2    | 3.565        |
| 2IGF   | L_ARG_61  | NH2    | L_ASP_82  | OD1    | 2.974        |
| 2IGF   | L_ARG_61  | NH2    | L_ASP_82  | OD2    | 2.588        |
| 2IGF   | L_LYS_149 | NZ     | L_GLU_195 | OE2    | 3.389        |
| 2IGF   | L_HIS_189 | ND1    | L_ASP_151 | OD2    | 3.248        |
| 2IGF   | L_ARG_211 | NH1    | L_GLU_187 | OE1    | 2.780        |
| 2IGF   | H_ARG_38  | NH1    | H_GLU_46  | OE1    | 3.128        |
| 2IGF   | H_ARG_38  | NH1    | H_GLU_46  | OE2    | 2.803        |
| 2IGF   | H_ARG_38  | NH2    | H_GLU_46  | OE2    | 3.695        |
| 2IGF   | H_ARG_38  | NH2    | H_ASP_86  | OD1    | 3.966        |
| 2IGF   | H_ARG_44  | NH1    | H_GLU_46  | OE1    | 3.519        |
| 2IGF   | H_ARG_44  | NH2    | H_GLU_46  | OE1    | 3.195        |
| 2IGF   | H_ARG_66  | NH1    | H_ASP_86  | OD2    | 3.364        |
| 2IGF   | H_ARG_66  | NH2    | H_ASP_86  | OD1    | 2.723        |
| 2IGF   | H_ARG_66  | NH2    | H_ASP_86  | OD2    | 3.057        |
| 2IGF   | H_ARG_94  | NH1    | H_ASP_101 | OD1    | 2.615        |
| 2IGF   | H_ARG_94  | NH1    | H_ASP_101 | OD2    | 2.615        |
| 2IGF   | H_LYS_221 | NZ     | L_GLU_123 | OE1    | 3.203        |
| 2IGF   | P_LYS_75  | NZ     | L_ASP_28  | OD1    | 3.253        |
| 2IGF   | P_LYS_75  | NZ     | L_ASP_28  | OD2    | 2.849        |
| 2IGF   | P_LYS_75  | NZ     | L_ASP_30  | OD2    | 3.458        |

Table 283: 2IGF-specific salt bridging networks analysis. In this table, a PDB file is specified with a four-letter PDB ID, except that the names of the PDB files corresponding to the single NMR structural model split from the NMR ensemble is specified with a four-letter PDB ID in addition to a hyphen followed by the single NMR structural model numeric ID, the residue naming scheme is **Chain ID\_residue name\_residue number**,  $\angle ADH$  represents the angle formed by acceptor (A), donor (D) and hydrogen (H) ( $\angle ADH$ ).

| PDB ID | Residue A | Atom A | Residue B | Atom B | Distance (Å) |
|--------|-----------|--------|-----------|--------|--------------|
| 2IHL   | A_LYS_1   | NZ     | A_GLU_7   | OE1    | 3.817        |
| 2IHL   | A_LYS_1   | NZ     | A_GLU_7   | OE2    | 2.767        |
| 2IHL   | A_LYS_19  | NZ     | A_ASP_18  | OD2    | 3.871        |
| 2IHL   | A_ARG_125 | NH1    | A_ASP_119 | OD2    | 2.708        |
| 2IHL   | A_ARG_125 | NH2    | A_ASP_119 | OD1    | 3.281        |
| 2IHL   | A_ARG_125 | NH2    | A_ASP_119 | OD2    | 2.935        |

Table 284: 2IHL-specific salt bridging networks analysis. In this table, a PDB file is specified with a four-letter PDB ID, except that the names of the PDB files corresponding to the single NMR structural model split from the NMR ensemble is specified with a four-letter PDB ID in addition to a hyphen followed by the single NMR structural model numeric ID, the residue naming scheme is **Chain ID\_residue name\_residue number**,  $\angle ADH$  represents the angle formed by acceptor (A), donor (D) and hydrogen (H) ( $\angle ADH$ ).

| PDB ID | Residue A | Atom A | Residue B | Atom B | Distance (Å) |
|--------|-----------|--------|-----------|--------|--------------|
| 2J4W   | D_LYS_427 | NZ     | D_GLU_435 | OE2    | 3.034        |
| 2J4W   | D_LYS_427 | NZ     | H_ASP_52A | OD1    | 3.478        |
| 2J4W   | D_LYS_427 | NZ     | H_ASP_52A | OD2    | 2.864        |
| 2J4W   | H_ARG_38  | NH1    | H_ASP_86  | OD1    | 2.975        |
| 2J4W   | H_ARG_38  | NH2    | H_GLU_46  | OE1    | 3.139        |
| 2J4W   | H_LYS_64  | NZ     | H_ASP_61  | OD1    | 3.371        |
| 2J4W   | H_ARG_66  | NH1    | H_ASP_86  | OD1    | 3.417        |
| 2J4W   | H_ARG_66  | NH1    | H_ASP_86  | OD2    | 3.943        |
| 2J4W   | H_ARG_66  | NH2    | H_ASP_86  | OD1    | 3.210        |
| 2J4W   | H_ARG_66  | NH2    | H_ASP_86  | OD2    | 2.467        |
| 2J4W   | H_LYS_221 | NZ     | L_GLU_123 | OE1    | 3.280        |
| 2J4W   | H_LYS_221 | NZ     | L_GLU_123 | OE2    | 3.313        |
| 2J4W   | L_ARG_61  | NH1    | L_GLU_79  | OE1    | 3.729        |
| 2J4W   | L_ARG_61  | NH1    | L_GLU_79  | OE2    | 3.488        |
| 2J4W   | L_ARG_61  | NH2    | L_GLU_79  | OE1    | 3.516        |
| 2J4W   | L_ARG_61  | NH2    | L_GLU_81  | OE1    | 2.766        |
| 2J4W   | L_ARG_61  | NH2    | L_ASP_82  | OD1    | 2.774        |
| 2J4W   | L_ARG_61  | NH2    | L_ASP_82  | OD2    | 3.759        |
| 2J4W   | L_LYS_142 | NZ     | L_GLU_105 | OE1    | 3.490        |
| 2J4W   | L_LYS_142 | NZ     | L_GLU_105 | OE2    | 3.345        |
| 2J4W   | L_LYS_149 | NZ     | L_GLU_195 | OE1    | 3.192        |
| 2J4W   | L_LYS_149 | NZ     | L_GLU_195 | OE2    | 3.504        |
| 2J4W   | L_LYS_183 | NZ     | L_GLU_187 | OE1    | 3.405        |
| 2J4W   | L_HIS_189 | ND1    | L_ASP_151 | OD2    | 3.005        |
| 2J4W   | L_LYS_199 | NZ     | L_ASP_110 | OD1    | 3.337        |
| 2J4W   | L_LYS_199 | NZ     | L_ASP_110 | OD2    | 2.705        |

Table 285: 2J4W-specific salt bridging networks analysis. In this table, a PDB file is specified with a four-letter PDB ID, except that the names of the PDB files corresponding to the single NMR structural model split from the NMR ensemble is specified with a four-letter PDB ID in addition to a hyphen followed by the single NMR structural model numeric ID, the residue naming scheme is **Chain ID\_residue name\_residue number**,  $\angle ADH$  represents the angle formed by acceptor (A), donor (D) and hydrogen (H) ( $\angle ADH$ ).

| PDB ID | Residue A | Atom A | Residue B | Atom B | Distance (Å) |
|--------|-----------|--------|-----------|--------|--------------|
| 2J5L   | A_LYS_485 | NZ     | A_ASP_493 | OD2    | 3.126        |
| 2J5L   | A_LYS_485 | NZ     | C_ASP_52A | OD1    | 3.476        |
| 2J5L   | A_LYS_485 | NZ     | C_ASP_52A | OD2    | 3.193        |
| 2J5L   | B_ARG_61  | NH1    | B_GLU_79  | OE1    | 3.650        |
| 2J5L   | B_ARG_61  | NH1    | B_GLU_81  | OE1    | 3.873        |
| 2J5L   | B_ARG_61  | NH2    | B_GLU_79  | OE1    | 3.530        |
| 2J5L   | B_ARG_61  | NH2    | B_GLU_81  | OE1    | 2.133        |
| 2J5L   | B_ARG_61  | NH2    | B_ASP_82  | OD1    | 3.268        |
| 2J5L   | B_ARG_61  | NH2    | B_ASP_82  | OD2    | 3.063        |
| 2J5L   | B_LYS_107 | NZ     | B_GLU_17  | OE1    | 3.863        |
| 2J5L   | B_LYS_142 | NZ     | B_GLU_105 | OE2    | 3.802        |
| 2J5L   | B_LYS_149 | NZ     | B_GLU_195 | OE1    | 3.695        |
| 2J5L   | B_LYS_149 | NZ     | B_GLU_195 | OE2    | 3.425        |
| 2J5L   | B_LYS_183 | NZ     | B_GLU_187 | OE1    | 3.637        |
| 2J5L   | B_HIS_    | ND1    | B_ASP_    | OD1    | 3.873        |
| 2J5L   | B_HIS_    | ND1    | B_ASP_    | OD2    | 2.683        |
| 2J5L   | B_LYS_199 | NZ     | B_ASP_110 | OD1    | 3.371        |
| 2J5L   | B_LYS_199 | NZ     | B_ASP_110 | OD2    | 3.451        |
| 2J5L   | B_ARG_    | NH2    | B_GLU_187 | OE2    | 3.792        |
| 2J5L   | C_LYS_13  | NZ     | C_GLU_113 | OE2    | 3.785        |
| 2J5L   | C_ARG_38  | NH1    | C_ASP_86  | OD1    | 3.392        |
| 2J5L   | C_ARG_38  | NH2    | C_GLU_46  | OE1    | 3.226        |
| 2J5L   | C_ARG_38  | NH2    | C_ASP_86  | OD1    | 3.787        |
| 2J5L   | C_LYS_64  | NZ     | C_ASP_61  | OD1    | 2.837        |
| 2J5L   | C_ARG_66  | NH2    | C_ASP_86  | OD1    | 3.420        |
| 2J5L   | C_ARG_66  | NH2    | C_ASP_86  | OD2    | 2.859        |

Table 286: 2J5L-specific salt bridging networks analysis. In this table, a PDB file is specified with a four-letter PDB ID, except that the names of the PDB files corresponding to the single NMR structural model split from the NMR ensemble is specified with a four-letter PDB ID in addition to a hyphen followed by the single NMR structural model numeric ID, the residue naming scheme is **Chain ID\_residue name\_residue number**,  $\angle ADH$  represents the angle formed by acceptor (A), donor (D) and hydrogen (H) ( $\angle ADH$ ).



| PDB ID | Residue A | Atom A | Residue B | Atom B | Distance (Å) |
|--------|-----------|--------|-----------|--------|--------------|
| 2JB6   | A_ARG_63  | NH1    | A_ASP_84  | OD1    | 3.533        |
| 2JB6   | A_ARG_63  | NH1    | A_ASP_84  | OD2    | 2.728        |
| 2JB6   | A_ARG_63  | NH2    | A_GLU_83  | OE2    | 3.226        |
| 2JB6   | A_ARG_63  | NH2    | A_ASP_84  | OD1    | 2.862        |
| 2JB6   | A_ARG_63  | NH2    | A_ASP_84  | OD2    | 3.549        |
| 2JB6   | A_LYS_115 | NZ     | A_GLU_203 | OE1    | 3.724        |
| 2JB6   | A_LYS_115 | NZ     | A_GLU_203 | OE2    | 2.595        |
| 2JB6   | A_LYS_171 | NZ     | A_GLU_85  | OE2    | 2.779        |
| 2JB6   | A_LYS_176 | NZ     | A_ASP_143 | OD2    | 3.821        |
| 2JB6   | B_ARG_38  | NH1    | B_GLU_46  | OE2    | 3.287        |
| 2JB6   | B_ARG_38  | NH2    | B_ASP_90  | OD1    | 2.735        |
| 2JB6   | B_LYS_63  | NZ     | B_GLU_46  | OE1    | 3.460        |
| 2JB6   | B_LYS_63  | NZ     | B_GLU_46  | OE2    | 2.655        |
| 2JB6   | B_ARG_67  | NH1    | B_ASP_90  | OD1    | 2.699        |
| 2JB6   | B_ARG_67  | NH1    | B_ASP_90  | OD2    | 3.291        |
| 2JB6   | B_ARG_67  | NH2    | B_ASP_90  | OD2    | 3.389        |
| 2JB6   | B_ARG_87  | NH2    | B_ASP_90  | OD1    | 3.736        |
| 2JB6   | B_LYS_150 | NZ     | B_ASP_151 | OD2    | 3.447        |
| 2JB6   | B_LYS_216 | NZ     | A_GLU_128 | OE2    | 3.078        |
| 2JB6   | H_LYS_19  | NZ     | H_GLU_82  | OE2    | 3.873        |
| 2JB6   | H_ARG_38  | NH1    | H_ASP_90  | OD1    | 3.271        |
| 2JB6   | H_ARG_38  | NH2    | H_GLU_46  | OE2    | 3.202        |
| 2JB6   | H_LYS_63  | NZ     | H_GLU_46  | OE1    | 3.407        |
| 2JB6   | H_LYS_63  | NZ     | H_GLU_46  | OE2    | 3.102        |
| 2JB6   | H_ARG_67  | NH1    | H_ASP_90  | OD1    | 2.780        |
| 2JB6   | H_ARG_67  | NH1    | H_ASP_90  | OD2    | 2.831        |
| 2JB6   | H_ARG_67  | NH2    | H_ASP_90  | OD1    | 3.259        |
| 2JB6   | H_LYS_150 | NZ     | H_ASP_151 | OD1    | 3.864        |
| 2JB6   | L_ARG_63  | NH1    | L_ASP_84  | OD1    | 3.793        |
| 2JB6   | L_ARG_63  | NH1    | L_ASP_84  | OD2    | 2.807        |
| 2JB6   | L_ARG_63  | NH2    | L_ASP_84  | OD1    | 2.677        |
| 2JB6   | L_ARG_63  | NH2    | L_ASP_84  | OD2    | 3.231        |
| 2JB6   | L_LYS_115 | NZ     | L_GLU_203 | OE2    | 3.325        |
| 2JB6   | L_LYS_154 | NZ     | L_GLU_208 | OE2    | 3.249        |
| 2JB6   | L_LYS_171 | NZ     | L_GLU_85  | OE2    | 2.744        |

Table 287: 2JB6-specific salt bridging networks analysis. In this table, a PDB file is specified with a four-letter PDB ID, except that the names of the PDB files corresponding to the single NMR structural model split from the NMR ensemble is specified with a four-letter PDB ID in addition to a hyphen followed by the single NMR structural model numeric ID, the residue naming scheme is **Chain ID\_residue name\_residue number**,  $\angle ADH$  represents the angle formed by acceptor (A), donor (D) and hydrogen (H) ( $\angle ADH$ ).

| PDB ID | Residue A | Atom A | Residue B | Atom B | Distance (Å) |
|--------|-----------|--------|-----------|--------|--------------|
| 2JEL   | L_ARG_24  | NH2    | L_ASP_70  | OD1    | 3.600        |
| 2JEL   | L_ARG_24  | NH2    | L_ASP_70  | OD2    | 3.545        |
| 2JEL   | L_LYS_50  | NZ     | H_GLU_98  | OE1    | 2.874        |
| 2JEL   | L_LYS_50  | NZ     | P_GLU_66  | OE1    | 3.050        |
| 2JEL   | L_LYS_50  | NZ     | P_GLU_66  | OE2    | 3.051        |
| 2JEL   | L_ARG_54  | NH2    | L_ASP_60  | OD1    | 2.887        |
| 2JEL   | L_ARG_61  | NH1    | L_ASP_82  | OD1    | 3.350        |
| 2JEL   | L_ARG_61  | NH1    | L_ASP_82  | OD2    | 2.775        |
| 2JEL   | L_ARG_61  | NH2    | L_GLU_81  | OE2    | 3.253        |
| 2JEL   | L_ARG_61  | NH2    | L_ASP_82  | OD1    | 3.113        |
| 2JEL   | L_ARG_61  | NH2    | L_ASP_82  | OD2    | 3.996        |
| 2JEL   | L_ARG_77  | NH1    | L_GLU_79  | OE2    | 3.110        |
| 2JEL   | L_LYS_103 | NZ     | L_ASP_165 | OD1    | 2.863        |
| 2JEL   | L_LYS_142 | NZ     | L_ASP_143 | OD1    | 3.795        |
| 2JEL   | L_LYS_142 | NZ     | L_ASP_143 | OD2    | 3.573        |
| 2JEL   | L_LYS_149 | NZ     | L_GLU_195 | OE1    | 3.417        |
| 2JEL   | L_LYS_149 | NZ     | L_GLU_195 | OE2    | 3.269        |
| 2JEL   | L_HIS_189 | ND1    | L_ASP_152 | OD1    | 3.014        |
| 2JEL   | L_LYS_199 | NZ     | L_ASP_110 | OD2    | 2.782        |
| 2JEL   | H_LYS_62  | NZ     | H_GLU_46  | OE1    | 3.175        |
| 2JEL   | H_LYS_62  | NZ     | H_GLU_46  | OE2    | 3.429        |
| 2JEL   | H_LYS_66  | NZ     | H_ASP_86  | OD1    | 3.906        |
| 2JEL   | H_LYS_66  | NZ     | H_ASP_86  | OD2    | 2.853        |
| 2JEL   | H_ARG_94  | NH2    | H_ASP_101 | OD2    | 2.854        |
| 2JEL   | H_LYS_218 | NZ     | H_ASP_220 | OD1    | 3.234        |
| 2JEL   | P_LYS_79  | NZ     | P_GLU_75  | OE2    | 2.896        |

Table 288: 2JEL-specific salt bridging networks analysis. In this table, a PDB file is specified with a four-letter PDB ID, except that the names of the PDB files corresponding to the single NMR structural model split from the NMR ensemble is specified with a four-letter PDB ID in addition to a hyphen followed by the single NMR structural model numeric ID, the residue naming scheme is **Chain ID\_residue name\_residue number**,  $\angle ADH$  represents the angle formed by acceptor (A), donor (D) and hydrogen (H) ( $\angle ADH$ ).

| PDB ID | Residue A | Atom A | Residue B | Atom B | Distance (Å) |
|--------|-----------|--------|-----------|--------|--------------|
| 2MCP   | L_ARG_67  | NH1    | L_ASP_88  | OD1    | 3.540        |
| 2MCP   | L_ARG_67  | NH1    | L_ASP_88  | OD2    | 2.647        |
| 2MCP   | L_ARG_67  | NH2    | L_GLU_87  | OE1    | 3.416        |
| 2MCP   | L_ARG_67  | NH2    | L_ASP_88  | OD1    | 2.658        |
| 2MCP   | L_ARG_67  | NH2    | L_ASP_88  | OD2    | 3.318        |
| 2MCP   | L_LYS_109 | NZ     | L_ASP_171 | OD1    | 3.858        |
| 2MCP   | L_LYS_148 | NZ     | L_ASP_149 | OD1    | 3.270        |
| 2MCP   | L_LYS_148 | NZ     | L_ASP_149 | OD2    | 2.997        |
| 2MCP   | L_LYS_155 | NZ     | L_GLU_201 | OE2    | 2.618        |
| 2MCP   | L_ARG_194 | NH1    | L_GLU_191 | OE2    | 3.915        |
| 2MCP   | L_HIS_195 | ND1    | L_ASP_157 | OD1    | 3.712        |
| 2MCP   | L_LYS_205 | NZ     | L_ASP_116 | OD2    | 3.742        |
| 2MCP   | H_ARG_38  | NH1    | H_ASP_92  | OD2    | 3.060        |
| 2MCP   | H_ARG_38  | NH2    | H_GLU_46  | OE1    | 3.610        |
| 2MCP   | H_ARG_38  | NH2    | H_GLU_46  | OE2    | 2.688        |
| 2MCP   | H_ARG_52  | NH2    | H_GLU_61  | OE1    | 2.754        |
| 2MCP   | H_ARG_69  | NH1    | H_ASP_92  | OD2    | 3.561        |
| 2MCP   | H_ARG_69  | NH2    | H_ASP_92  | OD1    | 2.431        |
| 2MCP   | H_ARG_69  | NH2    | H_ASP_92  | OD2    | 2.824        |
| 2MCP   | H_ARG_89  | NH2    | H_GLU_91  | OE1    | 3.538        |
| 2MCP   | H_ARG_89  | NH2    | H_GLU_91  | OE2    | 3.717        |
| 2MCP   | H_ARG_100 | NH1    | H_ASP_110 | OD1    | 2.497        |
| 2MCP   | H_ARG_100 | NH1    | H_ASP_110 | OD2    | 2.947        |
| 2MCP   | H_ARG_126 | NH1    | H_ASP_152 | OD2    | 3.242        |
| 2MCP   | H_ARG_184 | NH1    | H_ASP_152 | OD1    | 2.420        |
| 2MCP   | H_ARG_184 | NH1    | H_ASP_152 | OD2    | 2.976        |
| 2MCP   | H_LYS_205 | NZ     | H_ASP_219 | OD1    | 3.027        |
| 2MCP   | H_LYS_205 | NZ     | H_ASP_219 | OD2    | 3.236        |

Table 289: 2MCP-specific salt bridging networks analysis. In this table, a PDB file is specified with a four-letter PDB ID, except that the names of the PDB files corresponding to the single NMR structural model split from the NMR ensemble is specified with a four-letter PDB ID in addition to a hyphen followed by the single NMR structural model numeric ID, the residue naming scheme is **Chain ID\_residue name\_residue number**,  $\angle ADH$  represents the angle formed by acceptor (A), donor (D) and hydrogen (H) ( $\angle ADH$ ).

| PDB ID  | Residue A | Atom A | Residue B | Atom B | Distance (Å) |
|---------|-----------|--------|-----------|--------|--------------|
| 2MKL-1  | C_ARG_50  | NH1    | C_GLU_49  | OE2    | 3.937        |
| 2MKL-1  | C_ARG_50  | NH2    | C_GLU_49  | OE2    | 3.687        |
| 2MKL-1  | C_LYS_52  | NZ     | C_GLU_55  | OE1    | 2.974        |
| 2MKL-1  | C_LYS_104 | NZ     | C_ASP_80  | OD1    | 2.719        |
| 2MKL-10 | C_LYS_40  | NZ     | C_GLU_90  | OE1    | 3.590        |
| 2MKL-10 | C_LYS_40  | NZ     | C_GLU_90  | OE2    | 2.585        |
| 2MKL-10 | C_ARG_50  | NH2    | C_GLU_49  | OE2    | 3.606        |
| 2MKL-10 | C_LYS_65  | NZ     | C_ASP_6   | OD1    | 3.508        |
| 2MKL-10 | C_LYS_71  | NZ     | C_GLU_55  | OE2    | 3.851        |
| 2MKL-10 | C_LYS_104 | NZ     | C_ASP_80  | OD1    | 3.644        |

Table 290: 2MKL-1-specific salt bridging networks analysis. In this table, a PDB file is specified with a four-letter PDB ID, except that the names of the PDB files corresponding to the single NMR structural model split from the NMR ensemble is specified with a four-letter PDB ID in addition to a hyphen followed by the single NMR structural model numeric ID, the residue naming scheme is **Chain ID\_residue name\_residue number**,  $\angle ADH$  represents the angle formed by acceptor (A), donor (D) and hydrogen (H) ( $\angle ADH$ ).

| PDB ID  | Residue A | Atom A | Residue B | Atom B | Distance (Å) |
|---------|-----------|--------|-----------|--------|--------------|
| 2MKL-10 | C_LYS_40  | NZ     | C_GLU_90  | OE1    | 3.590        |
| 2MKL-10 | C_LYS_40  | NZ     | C_GLU_90  | OE2    | 2.585        |
| 2MKL-10 | C_ARG_50  | NH2    | C_GLU_49  | OE2    | 3.606        |
| 2MKL-10 | C_LYS_65  | NZ     | C_ASP_6   | OD1    | 3.508        |
| 2MKL-10 | C_LYS_71  | NZ     | C_GLU_55  | OE2    | 3.851        |
| 2MKL-10 | C_LYS_104 | NZ     | C_ASP_80  | OD1    | 3.644        |

Table 291: 2MKL-10-specific salt bridging networks analysis. In this table, a PDB file is specified with a four-letter PDB ID, except that the names of the PDB files corresponding to the single NMR structural model split from the NMR ensemble is specified with a four-letter PDB ID in addition to a hyphen followed by the single NMR structural model numeric ID, the residue naming scheme is **Chain ID\_residue name\_residue number**,  $\angle ADH$  represents the angle formed by acceptor (A), donor (D) and hydrogen (H) ( $\angle ADH$ ).

| PDB ID | Residue A | Atom A | Residue B | Atom B | Distance (Å) |
|--------|-----------|--------|-----------|--------|--------------|
| 2MKL-2 | C_ARG_50  | NH1    | C_GLU_78  | OE1    | 3.157        |
| 2MKL-2 | C_ARG_50  | NH1    | C_GLU_78  | OE2    | 2.728        |
| 2MKL-2 | C_LYS_65  | NZ     | C_ASP_6   | OD2    | 3.453        |
| 2MKL-2 | C_LYS_71  | NZ     | C_GLU_55  | OE1    | 2.717        |
| 2MKL-2 | C_LYS_104 | NZ     | C_ASP_80  | OD1    | 3.607        |

Table 292: 2MKL-2-specific salt bridging networks analysis. In this table, a PDB file is specified with a four-letter PDB ID, except that the names of the PDB files corresponding to the single NMR structural model split from the NMR ensemble is specified with a four-letter PDB ID in addition to a hyphen followed by the single NMR structural model numeric ID, the residue naming scheme is **Chain ID\_residue name\_residue number**,  $\angle ADH$  represents the angle formed by acceptor (A), donor (D) and hydrogen (H) ( $\angle ADH$ ).

| PDB ID | Residue A | Atom A | Residue B | Atom B | Distance (Å) |
|--------|-----------|--------|-----------|--------|--------------|
| 2MKL-3 | C_ARG_3   | NH1    | C_GLU_93  | OE1    | 2.682        |
| 2MKL-3 | C_ARG_3   | NH2    | C_GLU_93  | OE1    | 3.724        |
| 2MKL-3 | C_LYS_65  | NZ     | C_ASP_6   | OD2    | 3.268        |
| 2MKL-3 | C_LYS_71  | NZ     | C_GLU_55  | OE2    | 2.641        |
| 2MKL-3 | C_LYS_104 | NZ     | C_ASP_80  | OD1    | 2.606        |

Table 293: 2MKL-3-specific salt bridging networks analysis. In this table, a PDB file is specified with a four-letter PDB ID, except that the names of the PDB files corresponding to the single NMR structural model split from the NMR ensemble is specified with a four-letter PDB ID in addition to a hyphen followed by the single NMR structural model numeric ID, the residue naming scheme is **Chain ID\_residue name\_residue number**,  $\angle ADH$  represents the angle formed by acceptor (A), donor (D) and hydrogen (H) ( $\angle ADH$ ).

| PDB ID | Residue A | Atom A | Residue B | Atom B | Distance (Å) |
|--------|-----------|--------|-----------|--------|--------------|
| 2MKL-4 | C_ARG_50  | NH2    | C_GLU_78  | OE1    | 2.697        |
| 2MKL-4 | C_ARG_50  | NH2    | C_GLU_78  | OE2    | 3.554        |
| 2MKL-4 | C_LYS_71  | NZ     | C_GLU_55  | OE2    | 2.650        |

Table 294: 2MKL-4-specific salt bridging networks analysis. In this table, a PDB file is specified with a four-letter PDB ID, except that the names of the PDB files corresponding to the single NMR structural model split from the NMR ensemble is specified with a four-letter PDB ID in addition to a hyphen followed by the single NMR structural model numeric ID, the residue naming scheme is **Chain ID\_residue name\_residue number**,  $\angle ADH$  represents the angle formed by acceptor (A), donor (D) and hydrogen (H) ( $\angle ADH$ ).



| PDB ID | Residue A | Atom A | Residue B | Atom B | Distance (Å) |
|--------|-----------|--------|-----------|--------|--------------|
| 2MKL-5 | C_ARG_50  | NH1    | C_GLU_78  | OE1    | 3.904        |
| 2MKL-5 | C_ARG_50  | NH2    | C_GLU_78  | OE1    | 2.759        |
| 2MKL-5 | C_LYS_65  | NZ     | C_ASP_6   | OD2    | 2.680        |
| 2MKL-5 | C_LYS_104 | NZ     | C_ASP_80  | OD1    | 2.921        |

Table 295: 2MKL-5-specific salt bridging networks analysis. In this table, a PDB file is specified with a four-letter PDB ID, except that the names of the PDB files corresponding to the single NMR structural model split from the NMR ensemble is specified with a four-letter PDB ID in addition to a hyphen followed by the single NMR structural model numeric ID, the residue naming scheme is **Chain ID\_residue name\_residue number**,  $\angle ADH$  represents the angle formed by acceptor (A), donor (D) and hydrogen (H) ( $\angle ADH$ ).

| PDB ID | Residue A | Atom A | Residue B | Atom B | Distance (Å) |
|--------|-----------|--------|-----------|--------|--------------|
| 2MKL-6 | C_LYS_13  | NZ     | C_GLU_17  | OE1    | 3.559        |
| 2MKL-6 | C_LYS_13  | NZ     | C_GLU_17  | OE2    | 2.627        |
| 2MKL-6 | C_ARG_50  | NH1    | C_GLU_78  | OE2    | 3.662        |
| 2MKL-6 | C_ARG_50  | NH2    | C_GLU_78  | OE2    | 2.716        |
| 2MKL-6 | C_LYS_65  | NZ     | C_ASP_6   | OD2    | 2.594        |
| 2MKL-6 | C_LYS_71  | NZ     | C_GLU_55  | OE2    | 2.698        |
| 2MKL-6 | C_LYS_104 | NZ     | C_ASP_80  | OD1    | 2.644        |

Table 296: 2MKL-6-specific salt bridging networks analysis. In this table, a PDB file is specified with a four-letter PDB ID, except that the names of the PDB files corresponding to the single NMR structural model split from the NMR ensemble is specified with a four-letter PDB ID in addition to a hyphen followed by the single NMR structural model numeric ID, the residue naming scheme is **Chain ID\_residue name\_residue number**,  $\angle ADH$  represents the angle formed by acceptor (A), donor (D) and hydrogen (H) ( $\angle ADH$ ).

| PDB ID | Residue A | Atom A | Residue B | Atom B | Distance (Å) |
|--------|-----------|--------|-----------|--------|--------------|
| 2MKL-7 | C_ARG_3   | NH2    | C_ASP_6   | OD1    | 3.888        |
| 2MKL-7 | C_ARG_3   | NH2    | C_ASP_6   | OD2    | 2.720        |
| 2MKL-7 | C_LYS_52  | NZ     | C_GLU_55  | OE1    | 3.242        |
| 2MKL-7 | C_LYS_52  | NZ     | C_GLU_55  | OE2    | 2.760        |
| 2MKL-7 | C_LYS_65  | NZ     | C_ASP_6   | OD1    | 2.615        |

Table 297: 2MKL-7-specific salt bridging networks analysis. In this table, a PDB file is specified with a four-letter PDB ID, except that the names of the PDB files corresponding to the single NMR structural model split from the NMR ensemble is specified with a four-letter PDB ID in addition to a hyphen followed by the single NMR structural model numeric ID, the residue naming scheme is **Chain ID\_residue name\_residue number**,  $\angle ADH$  represents the angle formed by acceptor (A), donor (D) and hydrogen (H) ( $\angle ADH$ ).

| PDB ID | Residue A | Atom A | Residue B | Atom B | Distance (Å) |
|--------|-----------|--------|-----------|--------|--------------|
| 2MKL-8 | C_ARG_50  | NH1    | C_GLU_78  | OE1    | 3.617        |
| 2MKL-8 | C_ARG_50  | NH1    | C_GLU_78  | OE2    | 2.634        |
| 2MKL-8 | C_ARG_50  | NH2    | C_GLU_78  | OE1    | 3.131        |
| 2MKL-8 | C_ARG_50  | NH2    | C_GLU_78  | OE2    | 3.571        |
| 2MKL-8 | C_LYS_65  | NZ     | C_ASP_6   | OD1    | 3.884        |
| 2MKL-8 | C_LYS_65  | NZ     | C_ASP_6   | OD2    | 2.638        |
| 2MKL-8 | C_LYS_104 | NZ     | C_ASP_80  | OD1    | 2.614        |

Table 298: 2MKL-8-specific salt bridging networks analysis. In this table, a PDB file is specified with a four-letter PDB ID, except that the names of the PDB files corresponding to the single NMR structural model split from the NMR ensemble is specified with a four-letter PDB ID in addition to a hyphen followed by the single NMR structural model numeric ID, the residue naming scheme is **Chain ID\_residue name\_residue number**,  $\angle ADH$  represents the angle formed by acceptor (A), donor (D) and hydrogen (H) ( $\angle ADH$ ).

| PDB ID | Residue A | Atom A | Residue B | Atom B | Distance (Å) |
|--------|-----------|--------|-----------|--------|--------------|
| 2MKL-9 | C_ARG_50  | NH1    | C_GLU_78  | OE2    | 3.771        |
| 2MKL-9 | C_ARG_50  | NH2    | C_GLU_78  | OE2    | 2.683        |
| 2MKL-9 | C_LYS_65  | NZ     | C_ASP_6   | OD1    | 2.835        |
| 2MKL-9 | C_LYS_65  | NZ     | C_ASP_6   | OD2    | 2.746        |

Table 299: 2MKL-9-specific salt bridging networks analysis. In this table, a PDB file is specified with a four-letter PDB ID, except that the names of the PDB files corresponding to the single NMR structural model split from the NMR ensemble is specified with a four-letter PDB ID in addition to a hyphen followed by the single NMR structural model numeric ID, the residue naming scheme is **Chain ID\_residue name\_residue number**,  $\angle ADH$  represents the angle formed by acceptor (A), donor (D) and hydrogen (H) ( $\angle ADH$ ).

| PDB ID | Residue A | Atom A | Residue B | Atom B | Distance (Å) |
|--------|-----------|--------|-----------|--------|--------------|
| 2MTW   | A_LYS_16  | NZ     | A_ASP_13  | OD2    | 3.436        |

Table 300: 2MTW-specific salt bridging networks analysis. In this table, a PDB file is specified with a four-letter PDB ID, except that the names of the PDB files corresponding to the single NMR structural model split from the NMR ensemble is specified with a four-letter PDB ID in addition to a hyphen followed by the single NMR structural model numeric ID, the residue naming scheme is **Chain ID\_residue name\_residue number**,  $\angle ADH$  represents the angle formed by acceptor (A), donor (D) and hydrogen (H) ( $\angle ADH$ ).

| PDB ID | Residue A  | Atom A | Residue B  | Atom B | Distance (Å) |
|--------|------------|--------|------------|--------|--------------|
| 2NXY   | A.LYS.207  | NZ     | A.GLU.381  | OE1    | 3.502        |
| 2NXY   | A.LYS.207  | NZ     | A.GLU.381  | OE2    | 2.666        |
| 2NXY   | A.LYS.231  | NZ     | A.GLU.267  | OE1    | 3.733        |
| 2NXY   | A.HIS.249  | NE2    | A.GLU.482  | OE1    | 2.788        |
| 2NXY   | A.LYS.348  | NZ     | A.GLU.269  | OE2    | 2.765        |
| 2NXY   | A.LYS.348  | NZ     | A.GLU.351  | OE1    | 3.417        |
| 2NXY   | A.LYS.348  | NZ     | A.GLU.351  | OE2    | 3.879        |
| 2NXY   | A.LYS.357  | NZ     | A.GLU.464  | OE1    | 3.655        |
| 2NXY   | A.LYS.357  | NZ     | A.GLU.464  | OE2    | 2.914        |
| 2NXY   | A.ARG.419  | NH1    | D.GLU.3103 | OE2    | 3.305        |
| 2NXY   | A.ARG.419  | NH2    | D.GLU.3103 | OE2    | 2.288        |
| 2NXY   | A.ARG.456  | NH2    | A.GLU.466  | OE1    | 3.797        |
| 2NXY   | A.ARG.456  | NH2    | A.GLU.466  | OE2    | 3.132        |
| 2NXY   | A.ARG.469  | NH2    | A.ASP.457  | OD1    | 2.896        |
| 2NXY   | A.ARG.469  | NH2    | A.ASP.457  | OD2    | 3.967        |
| 2NXY   | A.ARG.476  | NH1    | A.ASP.474  | OD1    | 2.903        |
| 2NXY   | A.ARG.476  | NH1    | A.ASP.474  | OD2    | 3.603        |
| 2NXY   | A.ARG.480  | NH1    | A.ASP.477  | OD1    | 2.733        |
| 2NXY   | A.LYS.487  | NZ     | A.GLU.91   | OE2    | 2.870        |
| 2NXY   | B.LYS.1008 | NZ     | B.GLU.1119 | OE1    | 3.058        |
| 2NXY   | B.LYS.1029 | NZ     | A.ASP.279  | OD2    | 2.892        |
| 2NXY   | B.LYS.1029 | NZ     | B.GLU.1085 | OE1    | 3.597        |
| 2NXY   | B.LYS.1029 | NZ     | B.GLU.1085 | OE2    | 3.802        |
| 2NXY   | B.ARG.1054 | NH1    | B.ASP.1078 | OD1    | 3.769        |
| 2NXY   | B.ARG.1054 | NH1    | B.ASP.1078 | OD2    | 2.694        |
| 2NXY   | B.ARG.1054 | NH2    | B.ASP.1078 | OD1    | 2.766        |
| 2NXY   | B.ARG.1054 | NH2    | B.ASP.1078 | OD2    | 3.269        |
| 2NXY   | B.ARG.1058 | NH1    | B.GLU.1013 | OE1    | 3.012        |
| 2NXY   | B.ARG.1058 | NH1    | B.GLU.1013 | OE2    | 3.108        |
| 2NXY   | B.ARG.1058 | NH2    | B.GLU.1013 | OE2    | 2.848        |
| 2NXY   | B.ARG.1059 | NH1    | A.ASP.368  | OD1    | 3.350        |
| 2NXY   | B.ARG.1059 | NH1    | A.ASP.368  | OD2    | 2.835        |
| 2NXY   | B.ARG.1059 | NH2    | A.ASP.368  | OD1    | 2.856        |
| 2NXY   | B.ARG.1059 | NH2    | A.ASP.368  | OD2    | 3.647        |
| 2NXY   | B.LYS.1171 | NZ     | B.GLU.1169 | OE1    | 3.367        |
| 2NXY   | C.ARG.2061 | NH2    | C.GLU.2081 | OE2    | 3.328        |
| 2NXY   | C.ARG.2061 | NH2    | C.ASP.2082 | OD1    | 2.675        |
| 2NXY   | C.ARG.2061 | NH2    | C.ASP.2082 | OD2    | 3.402        |
| 2NXY   | C.LYS.2185 | NZ     | C.GLU.2189 | OE2    | 3.692        |
| 2NXY   | C.LYS.2190 | NZ     | C.ASP.2187 | OD1    | 3.154        |
| 2NXY   | C.HIS.2191 | ND1    | C.ASP.2153 | OD2    | 3.374        |
| 2NXY   | D.ARG.3031 | NH2    | D.GLU.3103 | OE1    | 3.976        |
| 2NXY   | D.ARG.3031 | NH2    | D.ASP.3105 | OD1    | 3.526        |
| 2NXY   | D.ARG.3031 | NH2    | D.ASP.3105 | OD2    | 3.213        |
| 2NXY   | D.ARG.3038 | NH1    | D.ASP.3090 | OD2    | 2.829        |
| 2NXY   | D.ARG.3038 | NH2    | D.GLU.3046 | OE2    | 2.946        |
| 2NXY   | D.ARG.3038 | NH2    | D.ASP.3090 | OD2    | 3.771        |
| 2NXY   | D.ARG.3050 | NH2    | D.GLU.3101 | OE2    | 2.808        |
| 2NXY   | D.HIS.3063 | NE2    | D.GLU.3046 | OE1    | 3.857        |
| 2NXY   | D.HIS.3063 | NE2    | D.GLU.3046 | OE2    | 2.872        |
| 2NXY   | D.ARG.3067 | NH1    | D.ASP.3090 | OD1    | 2.854        |
| 2NXY   | D.ARG.3067 | NH1    | D.ASP.3090 | OD2    | 3.874        |
| 2NXY   | D.ARG.3067 | NH2    | D.ASP.3090 | OD1    | 3.263        |
| 2NXY   | D.ARG.3067 | NH2    | D.ASP.3090 | OD2    | 2.885        |
| 2NXY   | D.ARG.3084 | NH1    | D.GLU.3082 | OE1    | 2.798        |
| 2NXY   | D.LYS.3158 | NZ     | D.ASP.3159 | OD1    | 3.389        |
| 2NXY   | D.LYS.3158 | NZ     | D.ASP.3159 | OD2    | 3.068        |

|      |            |    |            |     |       |
|------|------------|----|------------|-----|-------|
| 2NXY | D_LYS_3224 | NZ | C_GLU_2125 | OE2 | 3.113 |
| 2NXY | D_LYS_3225 | NZ | D_GLU_3227 | OE2 | 3.652 |

Table 301: 2NXY-specific salt bridging networks analysis. In this table, a PDB file is specified with a four-letter PDB ID, except that the names of the PDB files corresponding to the single NMR structural model split from the NMR ensemble is specified with a four-letter PDB ID in addition to a hyphen followed by the single NMR structural model numeric ID, the residue naming scheme is **Chain ID\_residue name\_residue number**,  $\angle ADH$  represents the angle formed by acceptor (A), donor (D) and hydrogen (H) ( $\angle ADH$ ).



| PDB ID | Residue A  | Atom A | Residue B  | Atom B | Distance (Å) |
|--------|------------|--------|------------|--------|--------------|
| 2NXZ   | A.LYS.207  | NZ     | A.GLU.381  | OE1    | 3.614        |
| 2NXZ   | A.LYS.207  | NZ     | A.GLU.381  | OE2    | 2.716        |
| 2NXZ   | A.HIS.249  | NE2    | A.GLU.482  | OE1    | 3.015        |
| 2NXZ   | A.LYS.348  | NZ     | A.GLU.269  | OE2    | 2.534        |
| 2NXZ   | A.LYS.348  | NZ     | A.GLU.351  | OE2    | 3.687        |
| 2NXZ   | A.ARG.419  | NH1    | D.GLU.3103 | OE2    | 3.647        |
| 2NXZ   | A.ARG.419  | NH2    | D.GLU.3103 | OE2    | 2.536        |
| 2NXZ   | A.ARG.456  | NH2    | A.GLU.466  | OE1    | 3.919        |
| 2NXZ   | A.ARG.456  | NH2    | A.GLU.466  | OE2    | 3.186        |
| 2NXZ   | A.ARG.469  | NH2    | A.ASP.457  | OD1    | 2.972        |
| 2NXZ   | A.ARG.469  | NH2    | A.ASP.457  | OD2    | 3.979        |
| 2NXZ   | A.ARG.476  | NH1    | A.ASP.474  | OD1    | 2.887        |
| 2NXZ   | A.ARG.476  | NH1    | A.ASP.474  | OD2    | 3.798        |
| 2NXZ   | A.ARG.480  | NH1    | A.ASP.477  | OD1    | 2.702        |
| 2NXZ   | A.LYS.487  | NZ     | A.GLU.91   | OE2    | 2.923        |
| 2NXZ   | B.LYS.1008 | NZ     | B.GLU.1119 | OE1    | 2.808        |
| 2NXZ   | B.LYS.1029 | NZ     | A.ASP.279  | OD2    | 3.046        |
| 2NXZ   | B.LYS.1029 | NZ     | B.GLU.1085 | OE1    | 3.780        |
| 2NXZ   | B.ARG.1054 | NH1    | B.ASP.1078 | OD1    | 3.891        |
| 2NXZ   | B.ARG.1054 | NH1    | B.ASP.1078 | OD2    | 2.802        |
| 2NXZ   | B.ARG.1054 | NH2    | B.ASP.1078 | OD1    | 2.919        |
| 2NXZ   | B.ARG.1054 | NH2    | B.ASP.1078 | OD2    | 3.323        |
| 2NXZ   | B.ARG.1058 | NH1    | B.GLU.1013 | OE1    | 3.851        |
| 2NXZ   | B.ARG.1058 | NH1    | B.GLU.1013 | OE2    | 3.822        |
| 2NXZ   | B.ARG.1058 | NH2    | B.GLU.1013 | OE1    | 3.720        |
| 2NXZ   | B.ARG.1058 | NH2    | B.GLU.1013 | OE2    | 2.745        |
| 2NXZ   | B.ARG.1059 | NH1    | A.ASP.368  | OD1    | 3.623        |
| 2NXZ   | B.ARG.1059 | NH1    | A.ASP.368  | OD2    | 3.029        |
| 2NXZ   | B.ARG.1059 | NH2    | A.ASP.368  | OD1    | 2.916        |
| 2NXZ   | B.ARG.1059 | NH2    | A.ASP.368  | OD2    | 3.612        |
| 2NXZ   | B.LYS.1171 | NZ     | B.GLU.1169 | OE1    | 2.773        |
| 2NXZ   | C.ARG.2024 | NH2    | C.GLU.2070 | OE2    | 3.227        |
| 2NXZ   | C.ARG.2061 | NH2    | C.GLU.2081 | OE2    | 3.424        |
| 2NXZ   | C.ARG.2061 | NH2    | C.ASP.2082 | OD1    | 2.628        |
| 2NXZ   | C.ARG.2061 | NH2    | C.ASP.2082 | OD2    | 3.308        |
| 2NXZ   | C.LYS.2185 | NZ     | C.GLU.2189 | OE2    | 3.904        |
| 2NXZ   | C.LYS.2190 | NZ     | C.ASP.2187 | OD1    | 3.130        |
| 2NXZ   | C.HIS.2191 | ND1    | C.ASP.2153 | OD2    | 3.486        |
| 2NXZ   | D.ARG.3031 | NH2    | D.GLU.3103 | OE1    | 3.879        |
| 2NXZ   | D.ARG.3031 | NH2    | D.ASP.3105 | OD1    | 3.392        |
| 2NXZ   | D.ARG.3031 | NH2    | D.ASP.3105 | OD2    | 3.171        |
| 2NXZ   | D.ARG.3038 | NH1    | D.ASP.3090 | OD2    | 2.879        |
| 2NXZ   | D.ARG.3038 | NH2    | D.GLU.3046 | OE1    | 3.581        |
| 2NXZ   | D.ARG.3038 | NH2    | D.GLU.3046 | OE2    | 3.314        |
| 2NXZ   | D.ARG.3038 | NH2    | D.ASP.3090 | OD2    | 3.776        |
| 2NXZ   | D.ARG.3050 | NH2    | D.GLU.3101 | OE2    | 2.731        |
| 2NXZ   | D.ARG.3067 | NH1    | D.ASP.3090 | OD1    | 2.950        |
| 2NXZ   | D.ARG.3067 | NH1    | D.ASP.3090 | OD2    | 3.870        |
| 2NXZ   | D.ARG.3067 | NH2    | D.ASP.3090 | OD1    | 3.342        |
| 2NXZ   | D.ARG.3067 | NH2    | D.ASP.3090 | OD2    | 2.876        |
| 2NXZ   | D.ARG.3084 | NH1    | D.GLU.3082 | OE1    | 2.896        |
| 2NXZ   | D.ARG.3087 | NH2    | D.ASP.3089 | OD2    | 3.888        |
| 2NXZ   | D.HIS.3117 | NE2    | D.GLU.3001 | OE1    | 3.258        |
| 2NXZ   | D.LYS.3158 | NZ     | D.ASP.3159 | OD1    | 3.552        |
| 2NXZ   | D.LYS.3158 | NZ     | D.ASP.3159 | OD2    | 3.527        |
| 2NXZ   | D.HIS.3179 | NE2    | C.ASP.2169 | OD2    | 3.986        |
| 2NXZ   | D.LYS.3224 | NZ     | C.GLU.2125 | OE1    | 3.503        |

|      |            |    |            |     |       |
|------|------------|----|------------|-----|-------|
| 2NXZ | D_LYS_3224 | NZ | C_GLU_2125 | OE2 | 2.801 |
| 2NXZ | D_LYS_3225 | NZ | D_GLU_3227 | OE2 | 3.804 |

Table 302: 2NXZ-specific salt bridging networks analysis. In this table, a PDB file is specified with a four-letter PDB ID, except that the names of the PDB files corresponding to the single NMR structural model split from the NMR ensemble is specified with a four-letter PDB ID in addition to a hyphen followed by the single NMR structural model numeric ID, the residue naming scheme is **Chain ID\_residue name\_residue number**,  $\angle ADH$  represents the angle formed by acceptor (A), donor (D) and hydrogen (H) ( $\angle ADH$ ).

| PDB ID | Residue A  | Atom A | Residue B  | Atom B | Distance (Å) |
|--------|------------|--------|------------|--------|--------------|
| 2NY0   | A.LYS.207  | NZ     | A.GLU.381  | OE1    | 3.809        |
| 2NY0   | A.LYS.207  | NZ     | A.GLU.381  | OE2    | 2.857        |
| 2NY0   | A.HIS.249  | NE2    | A.GLU.482  | OE1    | 2.815        |
| 2NY0   | A.LYS.337  | NZ     | A.GLU.293  | OE1    | 3.033        |
| 2NY0   | A.LYS.337  | NZ     | A.GLU.293  | OE2    | 3.370        |
| 2NY0   | A.LYS.348  | NZ     | A.GLU.269  | OE2    | 2.803        |
| 2NY0   | A.LYS.348  | NZ     | A.GLU.351  | OE1    | 3.817        |
| 2NY0   | A.LYS.348  | NZ     | A.GLU.351  | OE2    | 3.477        |
| 2NY0   | A.ARG.419  | NH1    | D.GLU.3103 | OE2    | 3.320        |
| 2NY0   | A.ARG.419  | NH2    | D.GLU.3103 | OE2    | 2.328        |
| 2NY0   | A.ARG.456  | NH2    | A.GLU.466  | OE1    | 3.843        |
| 2NY0   | A.ARG.456  | NH2    | A.GLU.466  | OE2    | 3.172        |
| 2NY0   | A.ARG.469  | NH2    | A.ASP.457  | OD1    | 3.138        |
| 2NY0   | A.ARG.469  | NH2    | A.ASP.457  | OD2    | 3.931        |
| 2NY0   | A.ARG.476  | NH1    | A.ASP.474  | OD1    | 3.150        |
| 2NY0   | A.ARG.476  | NH1    | A.ASP.474  | OD2    | 3.157        |
| 2NY0   | A.ARG.480  | NH1    | A.ASP.477  | OD1    | 2.991        |
| 2NY0   | A.LYS.487  | NZ     | A.GLU.91   | OE2    | 3.787        |
| 2NY0   | B.LYS.1008 | NZ     | B.GLU.1119 | OE1    | 2.749        |
| 2NY0   | B.LYS.1029 | NZ     | A.ASP.279  | OD2    | 2.858        |
| 2NY0   | B.LYS.1029 | NZ     | B.GLU.1085 | OE1    | 3.146        |
| 2NY0   | B.LYS.1029 | NZ     | B.GLU.1085 | OE2    | 3.532        |
| 2NY0   | B.ARG.1054 | NH1    | B.ASP.1078 | OD1    | 3.780        |
| 2NY0   | B.ARG.1054 | NH1    | B.ASP.1078 | OD2    | 2.599        |
| 2NY0   | B.ARG.1054 | NH2    | B.ASP.1078 | OD1    | 2.962        |
| 2NY0   | B.ARG.1054 | NH2    | B.ASP.1078 | OD2    | 3.339        |
| 2NY0   | B.ARG.1058 | NH1    | B.GLU.1013 | OE1    | 3.138        |
| 2NY0   | B.ARG.1058 | NH1    | B.GLU.1013 | OE2    | 3.075        |
| 2NY0   | B.ARG.1058 | NH2    | B.GLU.1013 | OE2    | 3.481        |
| 2NY0   | B.ARG.1059 | NH1    | A.ASP.368  | OD1    | 3.389        |
| 2NY0   | B.ARG.1059 | NH1    | A.ASP.368  | OD2    | 2.874        |
| 2NY0   | B.ARG.1059 | NH2    | A.ASP.368  | OD1    | 2.859        |
| 2NY0   | B.ARG.1059 | NH2    | A.ASP.368  | OD2    | 3.661        |
| 2NY0   | B.LYS.1171 | NZ     | B.GLU.1169 | OE1    | 3.740        |
| 2NY0   | C.ARG.2024 | NH2    | C.GLU.2070 | OE2    | 3.845        |
| 2NY0   | C.ARG.2061 | NH2    | C.GLU.2081 | OE2    | 3.765        |
| 2NY0   | C.ARG.2061 | NH2    | C.ASP.2082 | OD1    | 2.698        |
| 2NY0   | C.ARG.2061 | NH2    | C.ASP.2082 | OD2    | 3.430        |
| 2NY0   | C.LYS.2151 | NZ     | C.GLU.2197 | OE1    | 3.031        |
| 2NY0   | C.HIS.2191 | ND1    | C.ASP.2153 | OD2    | 3.524        |
| 2NY0   | D.LYS.3012 | NZ     | D.GLU.3010 | OE1    | 3.853        |
| 2NY0   | D.ARG.3031 | NH2    | D.ASP.3105 | OD1    | 3.446        |
| 2NY0   | D.ARG.3031 | NH2    | D.ASP.3105 | OD2    | 3.463        |
| 2NY0   | D.ARG.3038 | NH1    | D.ASP.3090 | OD2    | 2.827        |
| 2NY0   | D.ARG.3038 | NH2    | D.GLU.3046 | OE2    | 2.883        |
| 2NY0   | D.ARG.3038 | NH2    | D.ASP.3090 | OD2    | 3.849        |
| 2NY0   | D.ARG.3050 | NH2    | D.GLU.3101 | OE2    | 2.918        |
| 2NY0   | D.HIS.3063 | NE2    | D.GLU.3046 | OE2    | 3.738        |
| 2NY0   | D.ARG.3067 | NH1    | D.ASP.3090 | OD1    | 2.827        |
| 2NY0   | D.ARG.3067 | NH1    | D.ASP.3090 | OD2    | 3.838        |
| 2NY0   | D.ARG.3067 | NH2    | D.ASP.3090 | OD1    | 3.421        |
| 2NY0   | D.ARG.3067 | NH2    | D.ASP.3090 | OD2    | 3.091        |
| 2NY0   | D.ARG.3084 | NH1    | D.GLU.3082 | OE1    | 2.595        |
| 2NY0   | D.ARG.3087 | NH2    | D.ASP.3089 | OD2    | 3.920        |
| 2NY0   | D.HIS.3117 | NE2    | D.GLU.3001 | OE1    | 3.721        |
| 2NY0   | D.HIS.3117 | NE2    | D.GLU.3001 | OE2    | 3.707        |
| 2NY0   | D.LYS.3158 | NZ     | D.ASP.3159 | OD1    | 3.309        |

|      |            |    |            |     |       |
|------|------------|----|------------|-----|-------|
| 2NY0 | D_LYS_3158 | NZ | D_ASP_3159 | OD2 | 2.901 |
| 2NY0 | D_LYS_3224 | NZ | C_GLU_2125 | OE2 | 3.518 |
| 2NY0 | D_LYS_3225 | NZ | D_GLU_3227 | OE2 | 3.771 |

Table 303: 2NY0-specific salt bridging networks analysis. In this table, a PDB file is specified with a four-letter PDB ID, except that the names of the PDB files corresponding to the single NMR structural model split from the NMR ensemble is specified with a four-letter PDB ID in addition to a hyphen followed by the single NMR structural model numeric ID, the residue naming scheme is **Chain ID\_residue name\_residue number**,  $\angle ADH$  represents the angle formed by acceptor (A), donor (D) and hydrogen (H) ( $\angle ADH$ ).

| PDB ID | Residue A  | Atom A | Residue B  | Atom B | Distance (Å) |
|--------|------------|--------|------------|--------|--------------|
| 2NY1   | A.LYS.207  | NZ     | A.GLU.381  | OE1    | 3.601        |
| 2NY1   | A.LYS.207  | NZ     | A.GLU.381  | OE2    | 2.693        |
| 2NY1   | A.LYS.231  | NZ     | A.GLU.268  | OE2    | 3.557        |
| 2NY1   | A.HIS.249  | NE2    | A.GLU.482  | OE1    | 2.972        |
| 2NY1   | A.LYS.348  | NZ     | A.GLU.269  | OE2    | 2.629        |
| 2NY1   | A.LYS.348  | NZ     | A.GLU.351  | OE1    | 3.454        |
| 2NY1   | A.LYS.348  | NZ     | A.GLU.351  | OE2    | 3.942        |
| 2NY1   | A.LYS.357  | NZ     | A.GLU.466  | OE1    | 2.761        |
| 2NY1   | A.ARG.419  | NH1    | D.GLU.3103 | OE2    | 3.396        |
| 2NY1   | A.ARG.419  | NH2    | D.GLU.3103 | OE1    | 3.789        |
| 2NY1   | A.ARG.419  | NH2    | D.GLU.3103 | OE2    | 2.363        |
| 2NY1   | A.ARG.456  | NH2    | A.GLU.466  | OE2    | 3.471        |
| 2NY1   | A.ARG.469  | NH2    | A.ASP.457  | OD1    | 3.038        |
| 2NY1   | A.ARG.476  | NH1    | A.ASP.474  | OD1    | 2.963        |
| 2NY1   | A.ARG.476  | NH1    | A.ASP.474  | OD2    | 3.170        |
| 2NY1   | A.LYS.487  | NZ     | A.GLU.91   | OE1    | 2.543        |
| 2NY1   | B.LYS.1007 | NZ     | B.ASP.1010 | OD2    | 3.969        |
| 2NY1   | B.LYS.1008 | NZ     | B.GLU.1119 | OE1    | 3.276        |
| 2NY1   | B.LYS.1029 | NZ     | A.ASP.279  | OD2    | 3.031        |
| 2NY1   | B.LYS.1029 | NZ     | B.GLU.1085 | OE1    | 3.492        |
| 2NY1   | B.LYS.1029 | NZ     | B.GLU.1085 | OE2    | 3.928        |
| 2NY1   | B.ARG.1054 | NH1    | B.ASP.1078 | OD1    | 3.747        |
| 2NY1   | B.ARG.1054 | NH1    | B.ASP.1078 | OD2    | 2.698        |
| 2NY1   | B.ARG.1054 | NH2    | B.ASP.1078 | OD1    | 2.961        |
| 2NY1   | B.ARG.1054 | NH2    | B.ASP.1078 | OD2    | 3.434        |
| 2NY1   | B.ARG.1058 | NH1    | B.GLU.1013 | OE1    | 3.860        |
| 2NY1   | B.ARG.1058 | NH1    | B.GLU.1013 | OE2    | 3.051        |
| 2NY1   | B.ARG.1058 | NH2    | B.GLU.1013 | OE2    | 3.952        |
| 2NY1   | B.ARG.1059 | NH1    | A.ASP.368  | OD1    | 3.481        |
| 2NY1   | B.ARG.1059 | NH1    | A.ASP.368  | OD2    | 3.131        |
| 2NY1   | B.ARG.1059 | NH2    | A.ASP.368  | OD1    | 2.526        |
| 2NY1   | B.ARG.1059 | NH2    | A.ASP.368  | OD2    | 3.458        |
| 2NY1   | B.LYS.1171 | NZ     | B.GLU.1169 | OE1    | 2.799        |
| 2NY1   | C.ARG.2024 | NH1    | C.GLU.2070 | OE1    | 3.232        |
| 2NY1   | C.ARG.2061 | NH2    | C.GLU.2081 | OE2    | 3.250        |
| 2NY1   | C.ARG.2061 | NH2    | C.ASP.2082 | OD1    | 2.692        |
| 2NY1   | C.ARG.2061 | NH2    | C.ASP.2082 | OD2    | 3.384        |
| 2NY1   | C.LYS.2190 | NZ     | C.ASP.2187 | OD1    | 3.137        |
| 2NY1   | C.HIS.2191 | ND1    | C.ASP.2153 | OD2    | 3.008        |
| 2NY1   | D.ARG.3031 | NH2    | D.GLU.3103 | OE1    | 3.623        |
| 2NY1   | D.ARG.3031 | NH2    | D.ASP.3105 | OD1    | 3.228        |
| 2NY1   | D.ARG.3031 | NH2    | D.ASP.3105 | OD2    | 3.278        |
| 2NY1   | D.ARG.3038 | NH1    | D.GLU.3046 | OE1    | 3.615        |
| 2NY1   | D.ARG.3038 | NH1    | D.GLU.3046 | OE2    | 3.409        |
| 2NY1   | D.ARG.3038 | NH1    | D.ASP.3090 | OD2    | 3.757        |
| 2NY1   | D.ARG.3038 | NH2    | D.ASP.3090 | OD2    | 2.650        |
| 2NY1   | D.ARG.3050 | NH2    | D.GLU.3101 | OE2    | 2.827        |
| 2NY1   | D.HIS.3063 | ND1    | D.GLU.3046 | OE2    | 3.810        |
| 2NY1   | D.HIS.3063 | NE2    | D.GLU.3046 | OE2    | 2.146        |
| 2NY1   | D.ARG.3067 | NH1    | D.ASP.3090 | OD1    | 2.855        |
| 2NY1   | D.ARG.3067 | NH1    | D.ASP.3090 | OD2    | 3.809        |
| 2NY1   | D.ARG.3067 | NH2    | D.ASP.3090 | OD1    | 3.381        |
| 2NY1   | D.ARG.3067 | NH2    | D.ASP.3090 | OD2    | 3.002        |
| 2NY1   | D.ARG.3084 | NH1    | D.GLU.3082 | OE1    | 2.758        |
| 2NY1   | D.HIS.3117 | NE2    | D.GLU.3001 | OE1    | 3.822        |
| 2NY1   | D.LYS.3158 | NZ     | D.ASP.3159 | OD1    | 3.295        |
| 2NY1   | D.LYS.3158 | NZ     | D.ASP.3159 | OD2    | 2.966        |

|      |            |    |            |     |       |
|------|------------|----|------------|-----|-------|
| 2NY1 | D_LYS_3224 | NZ | C_GLU_2125 | OE1 | 3.100 |
| 2NY1 | D_LYS_3224 | NZ | C_GLU_2125 | OE2 | 3.945 |

Table 304: 2NY1-specific salt bridging networks analysis. In this table, a PDB file is specified with a four-letter PDB ID, except that the names of the PDB files corresponding to the single NMR structural model split from the NMR ensemble is specified with a four-letter PDB ID in addition to a hyphen followed by the single NMR structural model numeric ID, the residue naming scheme is **Chain ID\_residue name\_residue number**,  $\angle ADH$  represents the angle formed by acceptor (A), donor (D) and hydrogen (H) ( $\angle ADH$ ).

| PDB ID | Residue A  | Atom A | Residue B  | Atom B | Distance (Å) |
|--------|------------|--------|------------|--------|--------------|
| 2NY2   | A.LYS.207  | NZ     | A.GLU.381  | OE1    | 3.598        |
| 2NY2   | A.LYS.207  | NZ     | A.GLU.381  | OE2    | 2.704        |
| 2NY2   | A.HIS.249  | NE2    | A.GLU.482  | OE1    | 3.019        |
| 2NY2   | A.LYS.337  | NZ     | A.GLU.293  | OE1    | 2.850        |
| 2NY2   | A.LYS.337  | NZ     | A.GLU.293  | OE2    | 3.461        |
| 2NY2   | A.LYS.348  | NZ     | A.GLU.269  | OE2    | 2.783        |
| 2NY2   | A.LYS.348  | NZ     | A.GLU.351  | OE1    | 3.652        |
| 2NY2   | A.LYS.348  | NZ     | A.GLU.351  | OE2    | 3.603        |
| 2NY2   | A.LYS.357  | NZ     | A.GLU.466  | OE1    | 3.351        |
| 2NY2   | A.ARG.419  | NH1    | D.GLU.3103 | OE2    | 2.325        |
| 2NY2   | A.ARG.419  | NH2    | D.GLU.3103 | OE2    | 3.124        |
| 2NY2   | A.ARG.456  | NH2    | A.GLU.466  | OE1    | 3.779        |
| 2NY2   | A.ARG.456  | NH2    | A.GLU.466  | OE2    | 3.231        |
| 2NY2   | A.ARG.469  | NH2    | A.ASP.457  | OD1    | 2.829        |
| 2NY2   | A.ARG.469  | NH2    | A.ASP.457  | OD2    | 3.887        |
| 2NY2   | A.ARG.476  | NH2    | A.ASP.474  | OD1    | 3.619        |
| 2NY2   | A.ARG.476  | NH2    | A.ASP.474  | OD2    | 3.356        |
| 2NY2   | A.ARG.480  | NH2    | A.ASP.477  | OD1    | 3.946        |
| 2NY2   | A.LYS.487  | NZ     | A.GLU.91   | OE2    | 3.417        |
| 2NY2   | B.LYS.1008 | NZ     | B.GLU.1119 | OE1    | 3.204        |
| 2NY2   | B.LYS.1029 | NZ     | A.ASP.279  | OD2    | 2.981        |
| 2NY2   | B.LYS.1029 | NZ     | B.GLU.1085 | OE1    | 3.198        |
| 2NY2   | B.LYS.1029 | NZ     | B.GLU.1085 | OE2    | 3.665        |
| 2NY2   | B.ARG.1054 | NH1    | B.ASP.1078 | OD1    | 3.894        |
| 2NY2   | B.ARG.1054 | NH1    | B.ASP.1078 | OD2    | 2.718        |
| 2NY2   | B.ARG.1054 | NH2    | B.ASP.1078 | OD1    | 2.960        |
| 2NY2   | B.ARG.1054 | NH2    | B.ASP.1078 | OD2    | 3.298        |
| 2NY2   | B.ARG.1058 | NH1    | B.GLU.1013 | OE1    | 3.281        |
| 2NY2   | B.ARG.1058 | NH1    | B.GLU.1013 | OE2    | 2.757        |
| 2NY2   | B.ARG.1058 | NH2    | B.GLU.1013 | OE2    | 3.611        |
| 2NY2   | B.ARG.1059 | NH1    | A.ASP.368  | OD1    | 3.464        |
| 2NY2   | B.ARG.1059 | NH1    | A.ASP.368  | OD2    | 2.895        |
| 2NY2   | B.ARG.1059 | NH2    | A.ASP.368  | OD1    | 2.934        |
| 2NY2   | B.ARG.1059 | NH2    | A.ASP.368  | OD2    | 3.638        |
| 2NY2   | B.LYS.1171 | NZ     | B.GLU.1169 | OE1    | 3.055        |
| 2NY2   | C.ARG.2024 | NH1    | C.GLU.2070 | OE2    | 3.499        |
| 2NY2   | C.ARG.2061 | NH2    | C.GLU.2081 | OE2    | 3.670        |
| 2NY2   | C.ARG.2061 | NH2    | C.ASP.2082 | OD1    | 2.785        |
| 2NY2   | C.ARG.2061 | NH2    | C.ASP.2082 | OD2    | 3.417        |
| 2NY2   | C.LYS.2151 | NZ     | C.GLU.2197 | OE1    | 3.471        |
| 2NY2   | C.LYS.2185 | NZ     | C.GLU.2189 | OE2    | 3.651        |
| 2NY2   | C.LYS.2190 | NZ     | C.ASP.2187 | OD1    | 3.182        |
| 2NY2   | C.HIS.2191 | ND1    | C.ASP.2153 | OD2    | 3.206        |
| 2NY2   | D.ARG.3031 | NH2    | D.GLU.3103 | OE1    | 3.751        |
| 2NY2   | D.ARG.3031 | NH2    | D.ASP.3105 | OD1    | 3.389        |
| 2NY2   | D.ARG.3031 | NH2    | D.ASP.3105 | OD2    | 3.283        |
| 2NY2   | D.ARG.3038 | NH1    | D.ASP.3090 | OD2    | 2.806        |
| 2NY2   | D.ARG.3038 | NH2    | D.GLU.3046 | OE1    | 3.191        |
| 2NY2   | D.ARG.3038 | NH2    | D.GLU.3046 | OE2    | 3.670        |
| 2NY2   | D.ARG.3038 | NH2    | D.ASP.3090 | OD2    | 3.755        |
| 2NY2   | D.ARG.3050 | NH2    | D.GLU.3101 | OE1    | 3.994        |
| 2NY2   | D.ARG.3050 | NH2    | D.GLU.3101 | OE2    | 2.680        |
| 2NY2   | D.ARG.3067 | NH1    | D.ASP.3090 | OD1    | 2.784        |
| 2NY2   | D.ARG.3067 | NH1    | D.ASP.3090 | OD2    | 3.789        |
| 2NY2   | D.ARG.3067 | NH2    | D.ASP.3090 | OD1    | 3.313        |
| 2NY2   | D.ARG.3067 | NH2    | D.ASP.3090 | OD2    | 2.881        |
| 2NY2   | D.ARG.3084 | NH1    | D.GLU.3082 | OE1    | 2.941        |

|      |            |    |            |     |       |
|------|------------|----|------------|-----|-------|
| 2NY2 | D_LYS_3158 | NZ | D_ASP_3159 | OD1 | 3.305 |
| 2NY2 | D_LYS_3158 | NZ | D_ASP_3159 | OD2 | 3.053 |
| 2NY2 | D_LYS_3224 | NZ | C_GLU_2125 | OE2 | 2.721 |
| 2NY2 | D_LYS_3225 | NZ | D_GLU_3227 | OE2 | 3.413 |

Table 305: 2NY2-specific salt bridging networks analysis. In this table, a PDB file is specified with a four-letter PDB ID, except that the names of the PDB files corresponding to the single NMR structural model split from the NMR ensemble is specified with a four-letter PDB ID in addition to a hyphen followed by the single NMR structural model numeric ID, the residue naming scheme is **Chain ID\_residue name\_residue number**,  $\angle ADH$  represents the angle formed by acceptor (A), donor (D) and hydrogen (H) ( $\angle ADH$ ).



| PDB ID | Residue A  | Atom A | Residue B  | Atom B | Distance (Å) |
|--------|------------|--------|------------|--------|--------------|
| 2NY3   | A.LYS.207  | NZ     | A.GLU.381  | OE1    | 3.708        |
| 2NY3   | A.LYS.207  | NZ     | A.GLU.381  | OE2    | 2.801        |
| 2NY3   | A.HIS.249  | NE2    | A.GLU.482  | OE1    | 3.056        |
| 2NY3   | A.LYS.348  | NZ     | A.GLU.269  | OE2    | 2.607        |
| 2NY3   | A.LYS.348  | NZ     | A.GLU.351  | OE2    | 3.538        |
| 2NY3   | A.LYS.357  | NZ     | A.GLU.466  | OE1    | 3.160        |
| 2NY3   | A.ARG.419  | NH1    | D.GLU.3103 | OE2    | 3.671        |
| 2NY3   | A.ARG.419  | NH2    | D.GLU.3103 | OE1    | 3.681        |
| 2NY3   | A.ARG.419  | NH2    | D.GLU.3103 | OE2    | 2.058        |
| 2NY3   | A.ARG.456  | NH2    | A.GLU.466  | OE1    | 3.768        |
| 2NY3   | A.ARG.456  | NH2    | A.GLU.466  | OE2    | 3.134        |
| 2NY3   | A.ARG.469  | NH2    | A.ASP.457  | OD1    | 2.972        |
| 2NY3   | A.ARG.476  | NH1    | A.ASP.474  | OD1    | 2.845        |
| 2NY3   | A.ARG.476  | NH1    | A.ASP.474  | OD2    | 3.451        |
| 2NY3   | A.ARG.480  | NH1    | A.ASP.477  | OD1    | 2.886        |
| 2NY3   | A.LYS.487  | NZ     | A.GLU.91   | OE2    | 3.142        |
| 2NY3   | B.LYS.1008 | NZ     | B.GLU.1119 | OE1    | 3.194        |
| 2NY3   | B.LYS.1029 | NZ     | A.ASP.279  | OD2    | 3.124        |
| 2NY3   | B.LYS.1029 | NZ     | B.GLU.1085 | OE1    | 3.294        |
| 2NY3   | B.LYS.1029 | NZ     | B.GLU.1085 | OE2    | 3.406        |
| 2NY3   | B.ARG.1054 | NH1    | B.ASP.1078 | OD1    | 3.826        |
| 2NY3   | B.ARG.1054 | NH1    | B.ASP.1078 | OD2    | 2.678        |
| 2NY3   | B.ARG.1054 | NH2    | B.ASP.1078 | OD1    | 2.943        |
| 2NY3   | B.ARG.1054 | NH2    | B.ASP.1078 | OD2    | 3.308        |
| 2NY3   | B.ARG.1058 | NH1    | B.GLU.1013 | OE1    | 3.406        |
| 2NY3   | B.ARG.1058 | NH1    | B.GLU.1013 | OE2    | 3.310        |
| 2NY3   | B.ARG.1059 | NH1    | A.ASP.368  | OD1    | 2.775        |
| 2NY3   | B.ARG.1059 | NH1    | A.ASP.368  | OD2    | 3.550        |
| 2NY3   | B.ARG.1059 | NH2    | A.ASP.368  | OD1    | 3.449        |
| 2NY3   | B.ARG.1059 | NH2    | A.ASP.368  | OD2    | 2.862        |
| 2NY3   | B.LYS.1171 | NZ     | B.GLU.1169 | OE1    | 2.751        |
| 2NY3   | B.LYS.1171 | NZ     | B.GLU.1169 | OE2    | 3.911        |
| 2NY3   | C.ARG.2024 | NH1    | C.GLU.2070 | OE2    | 3.678        |
| 2NY3   | C.ARG.2061 | NH2    | C.GLU.2081 | OE2    | 3.396        |
| 2NY3   | C.ARG.2061 | NH2    | C.ASP.2082 | OD1    | 2.625        |
| 2NY3   | C.ARG.2061 | NH2    | C.ASP.2082 | OD2    | 3.244        |
| 2NY3   | C.ARG.2097 | NH1    | C.ASP.2001 | OD1    | 3.924        |
| 2NY3   | C.ARG.2097 | NH1    | C.ASP.2001 | OD2    | 3.626        |
| 2NY3   | C.LYS.2185 | NZ     | C.GLU.2189 | OE2    | 3.801        |
| 2NY3   | C.LYS.2190 | NZ     | C.ASP.2187 | OD1    | 3.285        |
| 2NY3   | C.HIS.2191 | ND1    | C.ASP.2153 | OD2    | 3.220        |
| 2NY3   | D.ARG.3031 | NH2    | D.GLU.3103 | OE1    | 3.899        |
| 2NY3   | D.ARG.3031 | NH2    | D.ASP.3105 | OD1    | 3.267        |
| 2NY3   | D.ARG.3031 | NH2    | D.ASP.3105 | OD2    | 3.028        |
| 2NY3   | D.ARG.3038 | NH1    | D.GLU.3046 | OE1    | 3.243        |
| 2NY3   | D.ARG.3038 | NH1    | D.GLU.3046 | OE2    | 3.575        |
| 2NY3   | D.ARG.3038 | NH1    | D.ASP.3090 | OD2    | 3.960        |
| 2NY3   | D.ARG.3038 | NH2    | D.ASP.3090 | OD2    | 2.751        |
| 2NY3   | D.ARG.3050 | NH2    | D.GLU.3101 | OE2    | 2.844        |
| 2NY3   | D.ARG.3067 | NH1    | D.ASP.3090 | OD1    | 2.783        |
| 2NY3   | D.ARG.3067 | NH1    | D.ASP.3090 | OD2    | 3.729        |
| 2NY3   | D.ARG.3067 | NH2    | D.ASP.3090 | OD1    | 3.344        |
| 2NY3   | D.ARG.3067 | NH2    | D.ASP.3090 | OD2    | 2.833        |
| 2NY3   | D.ARG.3084 | NH1    | D.GLU.3082 | OE1    | 2.996        |
| 2NY3   | D.HIS.3117 | NE2    | D.GLU.3001 | OE1    | 3.405        |
| 2NY3   | D.LYS.3158 | NZ     | D.ASP.3159 | OD1    | 3.506        |
| 2NY3   | D.LYS.3158 | NZ     | D.ASP.3159 | OD2    | 3.209        |

|      |            |    |            |     |       |
|------|------------|----|------------|-----|-------|
| 2NY3 | D_LYS_3224 | NZ | C_GLU_2125 | OE1 | 3.624 |
| 2NY3 | D_LYS_3224 | NZ | C_GLU_2125 | OE2 | 2.832 |
| 2NY3 | D_LYS_3225 | NZ | D_GLU_3227 | OE2 | 3.573 |

Table 306: 2NY3-specific salt bridging networks analysis. In this table, a PDB file is specified with a four-letter PDB ID, except that the names of the PDB files corresponding to the single NMR structural model split from the NMR ensemble is specified with a four-letter PDB ID in addition to a hyphen followed by the single NMR structural model numeric ID, the residue naming scheme is **Chain ID\_residue name\_residue number**,  $\angle ADH$  represents the angle formed by acceptor (A), donor (D) and hydrogen (H) ( $\angle ADH$ ).

| PDB ID | Residue A  | Atom A | Residue B  | Atom B | Distance (Å) |
|--------|------------|--------|------------|--------|--------------|
| 2NY4   | A.LYS.207  | NZ     | A.GLU.381  | OE1    | 3.731        |
| 2NY4   | A.LYS.207  | NZ     | A.GLU.381  | OE2    | 2.708        |
| 2NY4   | A.HIS.249  | NE2    | A.GLU.482  | OE1    | 2.936        |
| 2NY4   | A.LYS.348  | NZ     | A.GLU.269  | OE2    | 2.582        |
| 2NY4   | A.LYS.348  | NZ     | A.GLU.351  | OE2    | 3.483        |
| 2NY4   | A.ARG.419  | NH1    | D.GLU.3103 | OE2    | 3.167        |
| 2NY4   | A.ARG.419  | NH2    | D.GLU.3103 | OE2    | 2.562        |
| 2NY4   | A.ARG.456  | NH2    | A.GLU.466  | OE1    | 3.845        |
| 2NY4   | A.ARG.456  | NH2    | A.GLU.466  | OE2    | 3.077        |
| 2NY4   | A.ARG.469  | NH2    | A.ASP.457  | OD1    | 2.967        |
| 2NY4   | A.ARG.476  | NH1    | A.ASP.474  | OD1    | 3.082        |
| 2NY4   | A.ARG.476  | NH1    | A.ASP.474  | OD2    | 3.721        |
| 2NY4   | A.ARG.480  | NH2    | A.ASP.477  | OD1    | 3.706        |
| 2NY4   | A.LYS.487  | NZ     | A.GLU.91   | OE2    | 2.555        |
| 2NY4   | B.LYS.1008 | NZ     | B.GLU.1119 | OE1    | 3.022        |
| 2NY4   | B.LYS.1029 | NZ     | A.ASP.279  | OD2    | 3.126        |
| 2NY4   | B.LYS.1029 | NZ     | B.GLU.1085 | OE2    | 3.736        |
| 2NY4   | B.ARG.1054 | NH1    | B.ASP.1078 | OD1    | 3.885        |
| 2NY4   | B.ARG.1054 | NH1    | B.ASP.1078 | OD2    | 2.724        |
| 2NY4   | B.ARG.1054 | NH2    | B.ASP.1078 | OD1    | 2.927        |
| 2NY4   | B.ARG.1054 | NH2    | B.ASP.1078 | OD2    | 3.270        |
| 2NY4   | B.ARG.1058 | NH2    | B.GLU.1013 | OE1    | 3.510        |
| 2NY4   | B.ARG.1058 | NH2    | B.GLU.1013 | OE2    | 2.959        |
| 2NY4   | B.ARG.1059 | NH1    | A.ASP.368  | OD1    | 3.376        |
| 2NY4   | B.ARG.1059 | NH1    | A.ASP.368  | OD2    | 2.816        |
| 2NY4   | B.ARG.1059 | NH2    | A.ASP.368  | OD1    | 2.784        |
| 2NY4   | B.ARG.1059 | NH2    | A.ASP.368  | OD2    | 3.537        |
| 2NY4   | B.LYS.1171 | NZ     | B.GLU.1169 | OE1    | 2.831        |
| 2NY4   | C.ARG.2024 | NH2    | C.GLU.2070 | OE2    | 3.822        |
| 2NY4   | C.ARG.2061 | NH2    | C.GLU.2081 | OE2    | 3.356        |
| 2NY4   | C.ARG.2061 | NH2    | C.ASP.2082 | OD1    | 2.733        |
| 2NY4   | C.ARG.2061 | NH2    | C.ASP.2082 | OD2    | 3.375        |
| 2NY4   | C.LYS.2151 | NZ     | C.GLU.2197 | OE1    | 3.803        |
| 2NY4   | C.LYS.2190 | NZ     | C.ASP.2187 | OD1    | 3.227        |
| 2NY4   | C.HIS.2191 | ND1    | C.ASP.2153 | OD2    | 3.008        |
| 2NY4   | D.ARG.3031 | NH2    | D.ASP.3105 | OD1    | 3.479        |
| 2NY4   | D.ARG.3031 | NH2    | D.ASP.3105 | OD2    | 2.910        |
| 2NY4   | D.ARG.3038 | NH1    | D.ASP.3090 | OD2    | 2.802        |
| 2NY4   | D.ARG.3038 | NH2    | D.GLU.3046 | OE1    | 3.197        |
| 2NY4   | D.ARG.3038 | NH2    | D.GLU.3046 | OE2    | 3.685        |
| 2NY4   | D.ARG.3038 | NH2    | D.ASP.3090 | OD2    | 3.711        |
| 2NY4   | D.ARG.3050 | NH2    | D.GLU.3101 | OE2    | 2.802        |
| 2NY4   | D.HIS.3063 | ND1    | D.GLU.3046 | OE2    | 2.743        |
| 2NY4   | D.HIS.3063 | NE2    | D.GLU.3046 | OE2    | 3.513        |
| 2NY4   | D.ARG.3067 | NH1    | D.ASP.3090 | OD1    | 2.775        |
| 2NY4   | D.ARG.3067 | NH1    | D.ASP.3090 | OD2    | 3.804        |
| 2NY4   | D.ARG.3067 | NH2    | D.ASP.3090 | OD1    | 3.309        |
| 2NY4   | D.ARG.3067 | NH2    | D.ASP.3090 | OD2    | 2.883        |
| 2NY4   | D.ARG.3084 | NH1    | D.GLU.3082 | OE1    | 3.001        |
| 2NY4   | D.HIS.3117 | NE2    | D.GLU.3001 | OE2    | 3.655        |
| 2NY4   | D.LYS.3158 | NZ     | D.ASP.3159 | OD1    | 3.252        |
| 2NY4   | D.LYS.3158 | NZ     | D.ASP.3159 | OD2    | 2.781        |
| 2NY4   | D.LYS.3224 | NZ     | C.GLU.2125 | OE1    | 3.625        |
| 2NY4   | D.LYS.3224 | NZ     | C.GLU.2125 | OE2    | 3.179        |
| 2NY4   | D.LYS.3225 | NZ     | D.GLU.3227 | OE2    | 3.815        |

---

Table 307: 2NY4-specific salt bridging networks analysis. In this table, a PDB file is specified with a four-letter PDB ID, except that the names of the PDB files corresponding to the single NMR structural model split from the NMR ensemble is specified with a four-letter PDB ID in addition to a hyphen followed by the single NMR structural model numeric ID, the residue naming scheme is **Chain ID\_residue name\_residue number**,  $\angle ADH$  represents the angle formed by acceptor (A), donor (D) and hydrogen (H) ( $\angle ADH$ ).

| PDB ID | Residue A  | Atom A | Residue B  | Atom B | Distance (Å) |
|--------|------------|--------|------------|--------|--------------|
| 2NY5   | G.LYS.207  | NZ     | G.GLU.381  | OE1    | 3.510        |
| 2NY5   | G.LYS.207  | NZ     | G.GLU.381  | OE2    | 2.865        |
| 2NY5   | G.HIS.249  | NE2    | G.GLU.482  | OE1    | 2.564        |
| 2NY5   | G.LYS.348  | NZ     | G.GLU.269  | OE2    | 2.724        |
| 2NY5   | G.LYS.348  | NZ     | G.GLU.351  | OE1    | 3.888        |
| 2NY5   | G.LYS.357  | NZ     | G.GLU.466  | OE1    | 3.541        |
| 2NY5   | G.ARG.419  | NH2    | H.GLU.3103 | OE2    | 3.818        |
| 2NY5   | G.ARG.456  | NH2    | G.GLU.466  | OE2    | 3.080        |
| 2NY5   | G.ARG.469  | NH2    | G.ASP.457  | OD1    | 3.091        |
| 2NY5   | G.ARG.469  | NH2    | G.ASP.457  | OD2    | 3.726        |
| 2NY5   | G.ARG.476  | NH1    | G.ASP.474  | OD1    | 2.768        |
| 2NY5   | G.ARG.476  | NH1    | G.ASP.474  | OD2    | 3.024        |
| 2NY5   | G.ARG.480  | NH2    | G.ASP.477  | OD1    | 2.981        |
| 2NY5   | G.LYS.487  | NZ     | G.GLU.91   | OE2    | 2.768        |
| 2NY5   | C.LYS.1008 | NZ     | C.GLU.1119 | OE1    | 3.207        |
| 2NY5   | C.LYS.1029 | NZ     | G.ASP.279  | OD2    | 3.358        |
| 2NY5   | C.LYS.1029 | NZ     | C.GLU.1085 | OE1    | 3.759        |
| 2NY5   | C.ARG.1054 | NH1    | C.ASP.1078 | OD1    | 3.454        |
| 2NY5   | C.ARG.1054 | NH1    | C.ASP.1078 | OD2    | 3.024        |
| 2NY5   | C.ARG.1054 | NH2    | C.ASP.1078 | OD1    | 2.904        |
| 2NY5   | C.ARG.1054 | NH2    | C.ASP.1078 | OD2    | 3.790        |
| 2NY5   | C.ARG.1058 | NH1    | C.GLU.1013 | OE1    | 2.971        |
| 2NY5   | C.ARG.1058 | NH1    | C.GLU.1013 | OE2    | 3.085        |
| 2NY5   | C.ARG.1058 | NH2    | C.GLU.1013 | OE2    | 3.977        |
| 2NY5   | C.ARG.1059 | NH1    | G.ASP.368  | OD1    | 3.253        |
| 2NY5   | C.ARG.1059 | NH1    | G.ASP.368  | OD2    | 2.656        |
| 2NY5   | C.ARG.1059 | NH2    | G.ASP.368  | OD1    | 2.825        |
| 2NY5   | C.ARG.1059 | NH2    | G.ASP.368  | OD2    | 3.554        |
| 2NY5   | L.ARG.2024 | NH1    | L.GLU.2070 | OE2    | 3.011        |
| 2NY5   | L.ARG.2061 | NH2    | L.ASP.2082 | OD1    | 2.513        |
| 2NY5   | L.ARG.2061 | NH2    | L.ASP.2082 | OD2    | 3.250        |
| 2NY5   | L.LYS.2151 | NZ     | L.GLU.2197 | OE1    | 3.120        |
| 2NY5   | L.LYS.2151 | NZ     | L.GLU.2197 | OE2    | 3.898        |
| 2NY5   | L.LYS.2185 | NZ     | L.GLU.2189 | OE2    | 3.201        |
| 2NY5   | L.LYS.2190 | NZ     | L.ASP.2187 | OD1    | 3.698        |
| 2NY5   | L.HIS.2191 | ND1    | L.ASP.2153 | OD2    | 3.806        |
| 2NY5   | H.LYS.3012 | NZ     | H.GLU.3010 | OE1    | 3.934        |
| 2NY5   | H.LYS.3019 | NZ     | H.GLU.3082 | OE2    | 3.776        |
| 2NY5   | H.ARG.3031 | NH2    | H.ASP.3105 | OD1    | 3.319        |
| 2NY5   | H.ARG.3031 | NH2    | H.ASP.3105 | OD2    | 3.589        |
| 2NY5   | H.ARG.3038 | NH1    | H.ASP.3090 | OD2    | 2.958        |
| 2NY5   | H.ARG.3038 | NH2    | H.GLU.3046 | OE1    | 3.774        |
| 2NY5   | H.ARG.3038 | NH2    | H.GLU.3046 | OE2    | 3.269        |
| 2NY5   | H.ARG.3038 | NH2    | H.ASP.3090 | OD2    | 3.880        |
| 2NY5   | H.ARG.3050 | NH2    | H.GLU.3101 | OE2    | 2.904        |
| 2NY5   | H.HIS.3063 | NE2    | H.GLU.3046 | OE2    | 2.714        |
| 2NY5   | H.ARG.3067 | NH1    | H.ASP.3090 | OD1    | 2.954        |
| 2NY5   | H.ARG.3067 | NH1    | H.ASP.3090 | OD2    | 3.690        |
| 2NY5   | H.ARG.3067 | NH2    | H.ASP.3090 | OD1    | 3.799        |
| 2NY5   | H.ARG.3067 | NH2    | H.ASP.3090 | OD2    | 3.231        |
| 2NY5   | H.ARG.3084 | NH1    | H.GLU.3082 | OE1    | 2.806        |
| 2NY5   | H.ARG.3087 | NH2    | H.ASP.3089 | OD2    | 3.608        |
| 2NY5   | H.HIS.3117 | NE2    | H.GLU.3001 | OE2    | 3.918        |
| 2NY5   | H.LYS.3158 | NZ     | H.ASP.3159 | OD1    | 3.923        |
| 2NY5   | H.LYS.3158 | NZ     | H.ASP.3159 | OD2    | 3.240        |
| 2NY5   | H.LYS.3224 | NZ     | L.GLU.2125 | OE1    | 3.285        |
| 2NY5   | H.LYS.3224 | NZ     | L.GLU.2125 | OE2    | 3.364        |

---

Table 308: 2NY5-specific salt bridging networks analysis. In this table, a PDB file is specified with a four-letter PDB ID, except that the names of the PDB files corresponding to the single NMR structural model split from the NMR ensemble is specified with a four-letter PDB ID in addition to a hyphen followed by the single NMR structural model numeric ID, the residue naming scheme is **Chain ID\_residue name\_residue number**,  $\angle ADH$  represents the angle formed by acceptor (A), donor (D) and hydrogen (H) ( $\angle ADH$ ).

| PDB ID | Residue A  | Atom A | Residue B  | Atom B | Distance (Å) |
|--------|------------|--------|------------|--------|--------------|
| 2NY6   | A.LYS.207  | NZ     | A.GLU.381  | OE1    | 3.730        |
| 2NY6   | A.LYS.207  | NZ     | A.GLU.381  | OE2    | 2.822        |
| 2NY6   | A.HIS.249  | NE2    | A.GLU.482  | OE2    | 3.456        |
| 2NY6   | A.LYS.337  | NZ     | A.GLU.293  | OE1    | 3.079        |
| 2NY6   | A.LYS.337  | NZ     | A.GLU.293  | OE2    | 3.670        |
| 2NY6   | A.LYS.348  | NZ     | A.GLU.269  | OE2    | 3.288        |
| 2NY6   | A.LYS.357  | NZ     | A.GLU.466  | OE1    | 2.793        |
| 2NY6   | A.ARG.419  | NH2    | D.GLU.3103 | OE1    | 3.563        |
| 2NY6   | A.ARG.419  | NH2    | D.GLU.3103 | OE2    | 2.589        |
| 2NY6   | A.ARG.456  | NH2    | A.GLU.466  | OE1    | 3.680        |
| 2NY6   | A.ARG.456  | NH2    | A.GLU.466  | OE2    | 3.058        |
| 2NY6   | A.ARG.469  | NH2    | A.ASP.457  | OD1    | 2.900        |
| 2NY6   | A.ARG.469  | NH2    | A.ASP.457  | OD2    | 3.561        |
| 2NY6   | A.ARG.476  | NH1    | A.ASP.474  | OD1    | 2.511        |
| 2NY6   | A.ARG.476  | NH1    | A.ASP.474  | OD2    | 2.768        |
| 2NY6   | A.ARG.480  | NH2    | A.ASP.477  | OD1    | 2.891        |
| 2NY6   | A.LYS.487  | NZ     | A.GLU.91   | OE2    | 3.003        |
| 2NY6   | B.LYS.1008 | NZ     | B.GLU.1119 | OE1    | 2.791        |
| 2NY6   | B.LYS.1029 | NZ     | A.ASP.279  | OD2    | 3.061        |
| 2NY6   | B.LYS.1029 | NZ     | B.GLU.1085 | OE1    | 3.222        |
| 2NY6   | B.ARG.1054 | NH1    | B.ASP.1078 | OD1    | 3.684        |
| 2NY6   | B.ARG.1054 | NH1    | B.ASP.1078 | OD2    | 3.346        |
| 2NY6   | B.ARG.1054 | NH2    | B.ASP.1078 | OD1    | 2.747        |
| 2NY6   | B.ARG.1054 | NH2    | B.ASP.1078 | OD2    | 3.402        |
| 2NY6   | B.ARG.1058 | NH1    | B.GLU.1013 | OE1    | 3.563        |
| 2NY6   | B.ARG.1058 | NH2    | B.GLU.1013 | OE1    | 2.875        |
| 2NY6   | B.ARG.1058 | NH2    | B.GLU.1013 | OE2    | 2.875        |
| 2NY6   | B.ARG.1059 | NH1    | A.ASP.368  | OD1    | 2.945        |
| 2NY6   | B.ARG.1059 | NH1    | A.ASP.368  | OD2    | 2.767        |
| 2NY6   | B.ARG.1059 | NH2    | A.ASP.368  | OD1    | 3.097        |
| 2NY6   | B.LYS.1090 | NZ     | B.GLU.1085 | OE2    | 3.439        |
| 2NY6   | B.LYS.1171 | NZ     | B.GLU.1169 | OE1    | 3.858        |
| 2NY6   | C.ARG.2024 | NH1    | C.GLU.2070 | OE2    | 3.729        |
| 2NY6   | C.ARG.2061 | NH2    | C.GLU.2081 | OE2    | 3.042        |
| 2NY6   | C.ARG.2061 | NH2    | C.ASP.2082 | OD1    | 2.719        |
| 2NY6   | C.ARG.2061 | NH2    | C.ASP.2082 | OD2    | 3.011        |
| 2NY6   | C.ARG.2105 | NH1    | C.GLU.2107 | OE2    | 3.132        |
| 2NY6   | C.LYS.2151 | NZ     | C.GLU.2197 | OE1    | 3.256        |
| 2NY6   | C.LYS.2151 | NZ     | C.GLU.2197 | OE2    | 3.632        |
| 2NY6   | C.LYS.2185 | NZ     | C.GLU.2189 | OE2    | 3.738        |
| 2NY6   | C.LYS.2190 | NZ     | C.ASP.2187 | OD1    | 3.524        |
| 2NY6   | D.LYS.3012 | NZ     | D.GLU.3010 | OE1    | 3.730        |
| 2NY6   | D.ARG.3031 | NH2    | D.ASP.3105 | OD1    | 3.047        |
| 2NY6   | D.ARG.3031 | NH2    | D.ASP.3105 | OD2    | 3.789        |
| 2NY6   | D.ARG.3038 | NH1    | D.ASP.3090 | OD2    | 3.061        |
| 2NY6   | D.ARG.3038 | NH2    | D.GLU.3046 | OE2    | 3.246        |
| 2NY6   | D.ARG.3038 | NH2    | D.ASP.3090 | OD2    | 3.492        |
| 2NY6   | D.ARG.3050 | NH2    | D.GLU.3101 | OE2    | 2.217        |
| 2NY6   | D.HIS.3063 | ND1    | D.GLU.3046 | OE1    | 3.616        |
| 2NY6   | D.HIS.3063 | NE2    | D.GLU.3046 | OE1    | 2.623        |
| 2NY6   | D.ARG.3067 | NH1    | D.ASP.3090 | OD1    | 2.710        |
| 2NY6   | D.ARG.3067 | NH2    | D.ASP.3090 | OD1    | 3.291        |
| 2NY6   | D.ARG.3067 | NH2    | D.ASP.3090 | OD2    | 3.292        |
| 2NY6   | D.LYS.3074 | NZ     | D.ASP.3056 | OD2    | 3.513        |
| 2NY6   | D.ARG.3084 | NH1    | D.GLU.3082 | OE1    | 2.898        |
| 2NY6   | D.ARG.3087 | NH2    | D.ASP.3089 | OD2    | 3.510        |
| 2NY6   | D.HIS.3117 | ND1    | D.GLU.3001 | OE1    | 3.967        |

|      |            |     |            |     |       |
|------|------------|-----|------------|-----|-------|
| 2NY6 | D_HIS_3117 | NE2 | D_GLU_3001 | OE1 | 3.266 |
| 2NY6 | D_LYS_3158 | NZ  | D_ASP_3159 | OD1 | 3.626 |
| 2NY6 | D_LYS_3158 | NZ  | D_ASP_3159 | OD2 | 2.711 |
| 2NY6 | D_LYS_3224 | NZ  | C_GLU_2125 | OE1 | 3.158 |
| 2NY6 | D_LYS_3224 | NZ  | C_GLU_2125 | OE2 | 2.701 |

Table 309: 2NY6-specific salt bridging networks analysis. In this table, a PDB file is specified with a four-letter PDB ID, except that the names of the PDB files corresponding to the single NMR structural model split from the NMR ensemble is specified with a four-letter PDB ID in addition to a hyphen followed by the single NMR structural model numeric ID, the residue naming scheme is **Chain ID\_residue name\_residue number**,  $\angle ADH$  represents the angle formed by acceptor (A), donor (D) and hydrogen (H) ( $\angle ADH$ ).



| PDB ID | Residue A | Atom A | Residue B  | Atom B | Distance (Å) |
|--------|-----------|--------|------------|--------|--------------|
| 2NY7   | G_LYS_117 | NZ     | G_GLU_211  | OE1    | 2.565        |
| 2NY7   | G_LYS_117 | NZ     | G_GLU_211  | OE2    | 3.261        |
| 2NY7   | G_LYS_231 | NZ     | G_GLU_267  | OE1    | 3.791        |
| 2NY7   | G_LYS_231 | NZ     | G_GLU_267  | OE2    | 3.613        |
| 2NY7   | G_HIS_249 | NE2    | G_GLU_482  | OE2    | 3.021        |
| 2NY7   | G_LYS_337 | NZ     | G_GLU_293  | OE1    | 3.715        |
| 2NY7   | G_LYS_348 | NZ     | G_GLU_269  | OE1    | 3.162        |
| 2NY7   | G_LYS_348 | NZ     | G_GLU_269  | OE2    | 3.975        |
| 2NY7   | G_LYS_348 | NZ     | G_GLU_351  | OE1    | 3.003        |
| 2NY7   | G_LYS_357 | NZ     | G_GLU_466  | OE1    | 2.755        |
| 2NY7   | G_ARG_456 | NH1    | G_GLU_466  | OE1    | 3.969        |
| 2NY7   | G_ARG_456 | NH1    | G_GLU_466  | OE2    | 3.127        |
| 2NY7   | G_ARG_469 | NH2    | G_ASP_457  | OD2    | 2.950        |
| 2NY7   | G_ARG_480 | NH1    | G_ASP_99   | OD2    | 3.193        |
| 2NY7   | G_ARG_480 | NH1    | G_ASP_474  | OD1    | 3.425        |
| 2NY7   | G_ARG_480 | NH2    | G_ASP_474  | OD1    | 2.783        |
| 2NY7   | G_ARG_480 | NH2    | G_ASP_477  | OD2    | 2.839        |
| 2NY7   | G_LYS_487 | NZ     | G_GLU_91   | OE2    | 2.858        |
| 2NY7   | H_ARG_38  | NH1    | H_GLU_46   | OE1    | 2.977        |
| 2NY7   | H_ARG_38  | NH2    | H_ASP_86   | OD1    | 2.526        |
| 2NY7   | H_ARG_66  | NH1    | H_ASP_86   | OD1    | 3.144        |
| 2NY7   | H_ARG_66  | NH1    | H_ASP_86   | OD2    | 3.436        |
| 2NY7   | H_ARG_66  | NH2    | H_ASP_86   | OD1    | 3.533        |
| 2NY7   | H_ARG_66  | NH2    | H_ASP_86   | OD2    | 2.282        |
| 2NY7   | H_ARG_94  | NH2    | H_ASP_101  | OD2    | 2.976        |
| 2NY7   | H_LYS_145 | NZ     | H_ASP_146  | OD1    | 3.590        |
| 2NY7   | H_LYS_145 | NZ     | H_ASP_146  | OD2    | 3.675        |
| 2NY7   | H_LYS_221 | NZ     | L_GLU_123  | OE1    | 3.153        |
| 2NY7   | L_ARG_32  | NH1    | H_ASP_100F | OD2    | 2.962        |
| 2NY7   | L_ARG_61  | NH1    | L_ASP_82   | OD1    | 3.480        |
| 2NY7   | L_ARG_61  | NH1    | L_ASP_82   | OD2    | 2.630        |
| 2NY7   | L_ARG_61  | NH2    | L_GLU_81   | OE2    | 3.843        |
| 2NY7   | L_ARG_61  | NH2    | L_ASP_82   | OD1    | 3.037        |
| 2NY7   | L_ARG_61  | NH2    | L_ASP_82   | OD2    | 3.695        |
| 2NY7   | L_ARG_77  | NH1    | L_GLU_79   | OE2    | 3.409        |
| 2NY7   | L_LYS_149 | NZ     | L_GLU_195  | OE2    | 2.771        |

Table 310: 2NY7-specific salt bridging networks analysis. In this table, a PDB file is specified with a four-letter PDB ID, except that the names of the PDB files corresponding to the single NMR structural model split from the NMR ensemble is specified with a four-letter PDB ID in addition to a hyphen followed by the single NMR structural model numeric ID, the residue naming scheme is **Chain ID\_residue name\_residue number**,  $\angle ADH$  represents the angle formed by acceptor (A), donor (D) and hydrogen (H) ( $\angle ADH$ ).

| PDB ID | Residue A | Atom A | Residue B | Atom B | Distance (Å) |
|--------|-----------|--------|-----------|--------|--------------|
| 2OR9   | L.LYS_39  | NZ     | L.ASP_81  | OD1    | 2.675        |
| 2OR9   | L.LYS_39  | NZ     | L.ASP_81  | OD2    | 2.850        |
| 2OR9   | L.ARG_61  | NH1    | L.GLU_79  | OE1    | 3.065        |
| 2OR9   | L.ARG_61  | NH1    | L.ASP_82  | OD1    | 3.876        |
| 2OR9   | L.ARG_61  | NH2    | L.GLU_79  | OE1    | 3.933        |
| 2OR9   | L.ARG_61  | NH2    | L.ASP_82  | OD1    | 2.452        |
| 2OR9   | L.ARG_61  | NH2    | L.ASP_82  | OD2    | 2.431        |
| 2OR9   | L.LYS_103 | NZ     | L.ASP_165 | OD1    | 3.314        |
| 2OR9   | L.LYS_147 | NZ     | L.GLU_154 | OE1    | 3.105        |
| 2OR9   | L.LYS_149 | NZ     | L.GLU_195 | OE1    | 2.901        |
| 2OR9   | L.LYS_149 | NZ     | L.GLU_195 | OE2    | 3.775        |
| 2OR9   | L.ARG_155 | NH2    | L.GLU_185 | OE1    | 2.944        |
| 2OR9   | L.HIS_189 | ND1    | L.ASP_151 | OD2    | 3.316        |
| 2OR9   | L.LYS_199 | NZ     | L.ASP_110 | OD2    | 2.936        |
| 2OR9   | H.ARG_38  | NH1    | H.ASP_86  | OD1    | 2.712        |
| 2OR9   | H.ARG_38  | NH2    | H.GLU_46  | OE1    | 2.757        |
| 2OR9   | H.ARG_38  | NH2    | H.ASP_86  | OD1    | 3.623        |
| 2OR9   | H.ARG_53  | NH2    | P.GLU_8   | OE2    | 3.967        |
| 2OR9   | H.ARG_66  | NH2    | H.ASP_86  | OD1    | 2.780        |
| 2OR9   | H.ARG_66  | NH2    | H.ASP_86  | OD2    | 2.470        |
| 2OR9   | H.ARG_94  | NH2    | H.ASP_101 | OD1    | 3.716        |
| 2OR9   | H.ARG_94  | NH2    | H.ASP_101 | OD2    | 2.813        |
| 2OR9   | H.ARG_95  | NH2    | H.GLU_97  | OE1    | 3.064        |
| 2OR9   | H.ARG_95  | NH2    | H.GLU_97  | OE2    | 2.977        |
| 2OR9   | M.LYS_39  | NZ     | M.ASP_81  | OD1    | 2.510        |
| 2OR9   | M.LYS_39  | NZ     | M.ASP_81  | OD2    | 2.625        |
| 2OR9   | M.ARG_61  | NH1    | M.GLU_79  | OE1    | 3.146        |
| 2OR9   | M.ARG_61  | NH1    | M.ASP_82  | OD1    | 3.834        |
| 2OR9   | M.ARG_61  | NH2    | M.GLU_79  | OE1    | 3.978        |
| 2OR9   | M.ARG_61  | NH2    | M.ASP_82  | OD1    | 2.403        |
| 2OR9   | M.ARG_61  | NH2    | M.ASP_82  | OD2    | 2.459        |
| 2OR9   | M.LYS_92  | NZ     | M.GLU_93  | OE2    | 3.399        |
| 2OR9   | M.LYS_147 | NZ     | M.GLU_154 | OE1    | 3.668        |
| 2OR9   | M.LYS_149 | NZ     | M.GLU_195 | OE1    | 3.660        |
| 2OR9   | M.LYS_149 | NZ     | M.GLU_195 | OE2    | 3.945        |
| 2OR9   | M.ARG_155 | NH2    | M.GLU_185 | OE1    | 2.980        |
| 2OR9   | M.HIS_189 | ND1    | M.ASP_151 | OD2    | 2.969        |
| 2OR9   | M.LYS_199 | NZ     | M.ASP_110 | OD2    | 2.911        |
| 2OR9   | I.HIS_3   | NE2    | I.GLU_1   | OE1    | 2.704        |
| 2OR9   | I.HIS_3   | NE2    | I.GLU_1   | OE2    | 3.924        |
| 2OR9   | I.ARG_38  | NH1    | I.ASP_86  | OD1    | 2.804        |
| 2OR9   | I.ARG_38  | NH2    | I.GLU_46  | OE1    | 2.738        |
| 2OR9   | I.ARG_38  | NH2    | I.ASP_86  | OD1    | 3.727        |
| 2OR9   | I.ARG_66  | NH2    | I.ASP_86  | OD1    | 2.548        |
| 2OR9   | I.ARG_66  | NH2    | I.ASP_86  | OD2    | 2.491        |
| 2OR9   | I.ARG_94  | NH2    | I.ASP_101 | OD1    | 3.025        |
| 2OR9   | I.ARG_94  | NH2    | I.ASP_101 | OD2    | 2.934        |
| 2OR9   | I.ARG_95  | NH2    | I.GLU_97  | OE1    | 3.211        |
| 2OR9   | I.LYS_208 | NZ     | M.GLU_123 | OE2    | 3.803        |

---

Table 311: 2OR9-specific salt bridging networks analysis. In this table, a PDB file is specified with a four-letter PDB ID, except that the names of the PDB files corresponding to the single NMR structural model split from the NMR ensemble is specified with a four-letter PDB ID in addition to a hyphen followed by the single NMR structural model numeric ID, the residue naming scheme is **Chain ID\_residue name\_residue number**,  $\angle ADH$  represents the angle formed by acceptor (A), donor (D) and hydrogen (H) ( $\angle ADH$ ).

| PDB ID | Residue A | Atom A | Residue B | Atom B | Distance (Å) |
|--------|-----------|--------|-----------|--------|--------------|
| 2ORB   | L_LYS_39  | NZ     | L_ASP_81  | OD1    | 3.102        |
| 2ORB   | L_LYS_39  | NZ     | L_ASP_81  | OD2    | 2.922        |
| 2ORB   | L_ARG_61  | NH1    | L_GLU_79  | OE1    | 3.405        |
| 2ORB   | L_ARG_61  | NH1    | L_GLU_79  | OE2    | 3.954        |
| 2ORB   | L_ARG_61  | NH2    | L_GLU_79  | OE1    | 3.851        |
| 2ORB   | L_ARG_61  | NH2    | L_ASP_82  | OD1    | 2.602        |
| 2ORB   | L_ARG_61  | NH2    | L_ASP_82  | OD2    | 3.319        |
| 2ORB   | L_LYS_92  | NZ     | L_GLU_93  | OE2    | 2.584        |
| 2ORB   | L_LYS_103 | NZ     | L_ASP_165 | OD1    | 3.225        |
| 2ORB   | L_LYS_149 | NZ     | L_GLU_195 | OE1    | 3.600        |
| 2ORB   | L_ARG_155 | NH1    | L_GLU_185 | OE1    | 3.207        |
| 2ORB   | L_ARG_155 | NH2    | L_GLU_185 | OE1    | 2.465        |
| 2ORB   | L_ARG_155 | NH2    | L_GLU_185 | OE2    | 3.749        |
| 2ORB   | L_LYS_183 | NZ     | L_ASP_184 | OD2    | 3.348        |
| 2ORB   | L_ARG_211 | NH1    | L_GLU_187 | OE1    | 3.744        |
| 2ORB   | H_HIS_3   | ND1    | H_GLU_1   | OE1    | 3.990        |
| 2ORB   | H_HIS_3   | NE2    | H_GLU_1   | OE1    | 3.016        |
| 2ORB   | H_ARG_38  | NH1    | H_GLU_46  | OE1    | 3.421        |
| 2ORB   | H_ARG_38  | NH1    | H_GLU_46  | OE2    | 2.892        |
| 2ORB   | H_ARG_38  | NH2    | H_ASP_86  | OD1    | 2.745        |
| 2ORB   | H_LYS_64  | NZ     | H_ASP_61  | OD1    | 2.825        |
| 2ORB   | H_ARG_66  | NH1    | H_ASP_86  | OD2    | 2.863        |
| 2ORB   | H_ARG_66  | NH2    | H_ASP_86  | OD1    | 3.152        |
| 2ORB   | H_ARG_66  | NH2    | H_ASP_86  | OD2    | 3.464        |
| 2ORB   | H_ARG_94  | NH2    | H_ASP_101 | OD2    | 2.967        |
| 2ORB   | M_LYS_39  | NZ     | M_ASP_81  | OD1    | 3.035        |
| 2ORB   | M_LYS_39  | NZ     | M_ASP_81  | OD2    | 2.955        |
| 2ORB   | M_ARG_61  | NH1    | M_GLU_79  | OE1    | 3.351        |
| 2ORB   | M_ARG_61  | NH1    | M_GLU_79  | OE2    | 3.951        |
| 2ORB   | M_ARG_61  | NH2    | M_GLU_79  | OE1    | 3.841        |
| 2ORB   | M_ARG_61  | NH2    | M_ASP_82  | OD1    | 2.637        |
| 2ORB   | M_ARG_61  | NH2    | M_ASP_82  | OD2    | 3.364        |
| 2ORB   | M_LYS_103 | NZ     | M_ASP_165 | OD1    | 3.221        |
| 2ORB   | M_LYS_149 | NZ     | M_GLU_195 | OE1    | 3.434        |
| 2ORB   | M_ARG_155 | NH1    | M_GLU_185 | OE1    | 3.183        |
| 2ORB   | M_ARG_155 | NH2    | M_GLU_185 | OE1    | 2.497        |
| 2ORB   | M_ARG_155 | NH2    | M_GLU_185 | OE2    | 3.779        |
| 2ORB   | M_LYS_183 | NZ     | M_ASP_184 | OD2    | 3.320        |
| 2ORB   | M_ARG_211 | NH1    | M_GLU_187 | OE1    | 3.810        |
| 2ORB   | I_HIS_3   | NE2    | I_GLU_1   | OE1    | 2.997        |
| 2ORB   | I_ARG_38  | NH1    | I_GLU_46  | OE1    | 3.408        |
| 2ORB   | I_ARG_38  | NH1    | I_GLU_46  | OE2    | 2.958        |
| 2ORB   | I_ARG_38  | NH2    | I_ASP_86  | OD1    | 2.616        |
| 2ORB   | I_LYS_64  | NZ     | I_ASP_61  | OD1    | 2.889        |
| 2ORB   | I_ARG_66  | NH1    | I_ASP_86  | OD1    | 3.960        |
| 2ORB   | I_ARG_66  | NH1    | I_ASP_86  | OD2    | 2.821        |
| 2ORB   | I_ARG_66  | NH2    | I_ASP_86  | OD1    | 2.981        |
| 2ORB   | I_ARG_66  | NH2    | I_ASP_86  | OD2    | 3.330        |
| 2ORB   | I_ARG_94  | NH2    | I_ASP_101 | OD1    | 3.695        |
| 2ORB   | I_ARG_94  | NH2    | I_ASP_101 | OD2    | 3.090        |

---

Table 312: 2ORB-specific salt bridging networks analysis. In this table, a PDB file is specified with a four-letter PDB ID, except that the names of the PDB files corresponding to the single NMR structural model split from the NMR ensemble is specified with a four-letter PDB ID in addition to a hyphen followed by the single NMR structural model numeric ID, the residue naming scheme is **Chain ID\_residue name\_residue number**,  $\angle ADH$  represents the angle formed by acceptor (A), donor (D) and hydrogen (H) ( $\angle ADH$ ).

| PDB ID | Residue A | Atom A | Residue B | Atom B | Distance (Å) |
|--------|-----------|--------|-----------|--------|--------------|
| 2OSL   | L_HIS_33  | NE2    | H_ASP_105 | OD1    | 3.260        |
| 2OSL   | L_HIS_33  | NE2    | H_ASP_105 | OD2    | 2.885        |
| 2OSL   | L_ARG_60  | NH1    | L_GLU_78  | OE2    | 2.907        |
| 2OSL   | L_ARG_60  | NH2    | L_ASP_81  | OD1    | 2.573        |
| 2OSL   | L_ARG_60  | NH2    | L_ASP_81  | OD2    | 2.599        |
| 2OSL   | L_LYS_102 | NZ     | L_GLU_164 | OE1    | 3.278        |
| 2OSL   | L_LYS_102 | NZ     | L_GLU_164 | OE2    | 3.140        |
| 2OSL   | L_ARG_107 | NH2    | B_GLU_194 | OE2    | 3.976        |
| 2OSL   | L_LYS_187 | NZ     | L_ASP_184 | OD1    | 2.734        |
| 2OSL   | L_LYS_187 | NZ     | L_ASP_184 | OD2    | 3.949        |
| 2OSL   | L_HIS_188 | ND1    | L_ASP_150 | OD2    | 2.901        |
| 2OSL   | H_LYS_63  | NZ     | H_GLU_46  | OE1    | 3.906        |
| 2OSL   | H_LYS_63  | NZ     | H_GLU_46  | OE2    | 2.831        |
| 2OSL   | H_LYS_67  | NZ     | H_ASP_90  | OD1    | 3.942        |
| 2OSL   | H_LYS_67  | NZ     | H_ASP_90  | OD2    | 2.944        |
| 2OSL   | H_LYS_151 | NZ     | H_ASP_152 | OD1    | 3.605        |
| 2OSL   | H_LYS_151 | NZ     | H_ASP_152 | OD2    | 2.970        |
| 2OSL   | B_HIS_33  | ND1    | A_ASP_105 | OD2    | 3.615        |
| 2OSL   | B_HIS_33  | NE2    | A_ASP_105 | OD2    | 3.957        |
| 2OSL   | B_ARG_60  | NH1    | B_GLU_78  | OE1    | 3.239        |
| 2OSL   | B_ARG_60  | NH1    | B_GLU_78  | OE2    | 3.966        |
| 2OSL   | B_ARG_60  | NH2    | B_ASP_81  | OD1    | 2.569        |
| 2OSL   | B_ARG_60  | NH2    | B_ASP_81  | OD2    | 3.261        |
| 2OSL   | B_ARG_76  | NH2    | B_GLU_78  | OE1    | 3.595        |
| 2OSL   | B_LYS_102 | NZ     | B_GLU_104 | OE1    | 3.425        |
| 2OSL   | B_ARG_141 | NH2    | B_GLU_160 | OE1    | 3.816        |
| 2OSL   | B_HIS_188 | ND1    | B_ASP_150 | OD2    | 3.233        |
| 2OSL   | A_LYS_63  | NZ     | A_GLU_46  | OE1    | 2.696        |
| 2OSL   | A_LYS_67  | NZ     | A_ASP_90  | OD1    | 2.936        |
| 2OSL   | A_LYS_67  | NZ     | A_ASP_90  | OD2    | 2.944        |
| 2OSL   | A_LYS_151 | NZ     | A_ASP_152 | OD1    | 3.042        |
| 2OSL   | A_LYS_151 | NZ     | A_ASP_152 | OD2    | 3.081        |
| 2OSL   | A_LYS_217 | NZ     | B_GLU_122 | OE1    | 2.793        |

Table 313: 2OSL-specific salt bridging networks analysis. In this table, a PDB file is specified with a four-letter PDB ID, except that the names of the PDB files corresponding to the single NMR structural model split from the NMR ensemble is specified with a four-letter PDB ID in addition to a hyphen followed by the single NMR structural model numeric ID, the residue naming scheme is **Chain ID\_residue name\_residue number**,  $\angle ADH$  represents the angle formed by acceptor (A), donor (D) and hydrogen (H) ( $\angle ADH$ ).

| PDB ID | Residue A | Atom A | Residue B | Atom B | Distance (Å) |
|--------|-----------|--------|-----------|--------|--------------|
| 2OTU   | A_ARG_65  | NH1    | A_ASP_86  | OD1    | 3.180        |
| 2OTU   | A_ARG_65  | NH1    | A_ASP_86  | OD2    | 2.487        |
| 2OTU   | A_ARG_65  | NH2    | A_ASP_86  | OD1    | 3.397        |
| 2OTU   | A_ARG_65  | NH2    | A_ASP_86  | OD2    | 3.745        |
| 2OTU   | B_ARG_38  | NH1    | B_ASP_90  | OD1    | 2.946        |
| 2OTU   | B_ARG_38  | NH2    | B_GLU_46  | OE1    | 2.919        |
| 2OTU   | B_LYS_65  | NZ     | B_ASP_62  | OD1    | 3.442        |
| 2OTU   | B_ARG_67  | NH1    | B_ASP_90  | OD1    | 3.744        |
| 2OTU   | B_ARG_67  | NH1    | B_ASP_90  | OD2    | 2.752        |
| 2OTU   | B_ARG_67  | NH2    | B_ASP_90  | OD1    | 2.959        |
| 2OTU   | B_ARG_67  | NH2    | B_ASP_90  | OD2    | 3.506        |
| 2OTU   | B_LYS_87  | NZ     | F_ASP_31  | OD1    | 3.793        |
| 2OTU   | B_LYS_87  | NZ     | F_ASP_31  | OD2    | 2.711        |
| 2OTU   | C_ARG_65  | NH1    | C_ASP_86  | OD1    | 3.191        |
| 2OTU   | C_ARG_65  | NH1    | C_ASP_86  | OD2    | 2.444        |
| 2OTU   | C_ARG_65  | NH2    | C_GLU_85  | OE1    | 3.930        |
| 2OTU   | C_ARG_65  | NH2    | C_ASP_86  | OD1    | 3.938        |
| 2OTU   | C_ARG_65  | NH2    | C_ASP_86  | OD2    | 3.948        |
| 2OTU   | D_ARG_38  | NH1    | D_ASP_90  | OD1    | 2.961        |
| 2OTU   | D_ARG_38  | NH2    | D_GLU_46  | OE1    | 2.890        |
| 2OTU   | D_ARG_38  | NH2    | D_GLU_46  | OE2    | 3.975        |
| 2OTU   | D_ARG_38  | NH2    | D_ASP_90  | OD1    | 3.915        |
| 2OTU   | D_ARG_67  | NH1    | D_ASP_90  | OD1    | 3.940        |
| 2OTU   | D_ARG_67  | NH1    | D_ASP_90  | OD2    | 2.837        |
| 2OTU   | D_ARG_67  | NH2    | D_ASP_90  | OD1    | 2.974        |
| 2OTU   | D_ARG_67  | NH2    | D_ASP_90  | OD2    | 3.349        |
| 2OTU   | E_ARG_65  | NH1    | E_ASP_86  | OD1    | 3.707        |
| 2OTU   | E_ARG_65  | NH1    | E_ASP_86  | OD2    | 2.736        |
| 2OTU   | E_ARG_65  | NH2    | E_ASP_86  | OD1    | 3.658        |
| 2OTU   | E_ARG_65  | NH2    | E_ASP_86  | OD2    | 3.976        |
| 2OTU   | F_ARG_38  | NH1    | F_ASP_90  | OD1    | 2.925        |
| 2OTU   | F_ARG_38  | NH2    | F_GLU_46  | OE1    | 2.898        |
| 2OTU   | F_ARG_38  | NH2    | F_ASP_90  | OD1    | 3.956        |
| 2OTU   | F_LYS_65  | NZ     | F_ASP_62  | OD1    | 3.608        |
| 2OTU   | F_ARG_67  | NH1    | F_ASP_90  | OD1    | 3.636        |
| 2OTU   | F_ARG_67  | NH1    | F_ASP_90  | OD2    | 2.694        |
| 2OTU   | F_ARG_67  | NH2    | F_ASP_90  | OD1    | 2.962        |
| 2OTU   | F_ARG_67  | NH2    | F_ASP_90  | OD2    | 3.544        |
| 2OTU   | F_LYS_76  | NZ     | F_ASP_73  | OD1    | 3.979        |
| 2OTU   | F_ARG_100 | NH1    | E_ASP_60  | OD1    | 3.255        |
| 2OTU   | F_ARG_100 | NH1    | E_ASP_60  | OD2    | 3.915        |
| 2OTU   | G_ARG_65  | NH1    | G_ASP_86  | OD1    | 3.029        |
| 2OTU   | G_ARG_65  | NH1    | G_ASP_86  | OD2    | 2.451        |
| 2OTU   | G_ARG_65  | NH2    | G_GLU_85  | OE2    | 3.992        |
| 2OTU   | G_ARG_65  | NH2    | G_ASP_86  | OD1    | 2.757        |
| 2OTU   | G_ARG_65  | NH2    | G_ASP_86  | OD2    | 3.075        |
| 2OTU   | H_ARG_38  | NH1    | H_ASP_90  | OD1    | 2.927        |
| 2OTU   | H_ARG_38  | NH2    | H_GLU_46  | OE2    | 3.512        |
| 2OTU   | H_ARG_44  | NH1    | C_ASP_60  | OD1    | 3.017        |
| 2OTU   | H_ARG_44  | NH1    | C_ASP_60  | OD2    | 3.518        |
| 2OTU   | H_ARG_44  | NH2    | C_ASP_60  | OD1    | 3.945        |
| 2OTU   | H_ARG_44  | NH2    | C_ASP_60  | OD2    | 3.013        |
| 2OTU   | H_ARG_67  | NH1    | H_ASP_90  | OD1    | 3.843        |
| 2OTU   | H_ARG_67  | NH1    | H_ASP_90  | OD2    | 2.748        |
| 2OTU   | H_ARG_67  | NH2    | H_ASP_90  | OD1    | 3.051        |
| 2OTU   | H_ARG_67  | NH2    | H_ASP_90  | OD2    | 3.464        |
| 2OTU   | H_LYS_87  | NZ     | D_ASP_31  | OD1    | 3.910        |

|      |          |    |          |     |       |
|------|----------|----|----------|-----|-------|
| 2OTU | H.LYS_87 | NZ | D.ASP_31 | OD2 | 2.759 |
|------|----------|----|----------|-----|-------|

Table 314: 2OTU-specific salt bridging networks analysis. In this table, a PDB file is specified with a four-letter PDB ID, except that the names of the PDB files corresponding to the single NMR structural model split from the NMR ensemble is specified with a four-letter PDB ID in addition to a hyphen followed by the single NMR structural model numeric ID, the residue naming scheme is **Chain ID\_residue name\_residue number**,  $\angle ADH$  represents the angle formed by acceptor (A), donor (D) and hydrogen (H) ( $\angle ADH$ ).



| PDB ID | Residue A | Atom A | Residue B | Atom B | Distance (Å) |
|--------|-----------|--------|-----------|--------|--------------|
| 2OTW   | A_ARG_65  | NH1    | A_ASP_86  | OD1    | 2.815        |
| 2OTW   | A_ARG_65  | NH1    | A_ASP_86  | OD2    | 2.356        |
| 2OTW   | A_ARG_65  | NH2    | A_GLU_85  | OE2    | 3.711        |
| 2OTW   | A_ARG_65  | NH2    | A_ASP_86  | OD1    | 2.988        |
| 2OTW   | A_ARG_65  | NH2    | A_ASP_86  | OD2    | 3.514        |
| 2OTW   | B_ARG_38  | NH1    | B_ASP_90  | OD1    | 3.114        |
| 2OTW   | B_ARG_38  | NH2    | B_GLU_46  | OE1    | 3.177        |
| 2OTW   | B_ARG_38  | NH2    | B_GLU_46  | OE2    | 3.352        |
| 2OTW   | B_LYS_65  | NZ     | B_ASP_62  | OD1    | 3.341        |
| 2OTW   | B_ARG_67  | NH1    | B_ASP_90  | OD1    | 3.557        |
| 2OTW   | B_ARG_67  | NH1    | B_ASP_90  | OD2    | 2.723        |
| 2OTW   | B_ARG_67  | NH2    | B_ASP_90  | OD1    | 3.013        |
| 2OTW   | B_ARG_67  | NH2    | B_ASP_90  | OD2    | 3.717        |
| 2OTW   | B_LYS_87  | NZ     | D_ASP_31  | OD1    | 3.659        |
| 2OTW   | B_LYS_87  | NZ     | D_ASP_31  | OD2    | 2.671        |
| 2OTW   | B_ARG_100 | NH1    | A_ASP_60  | OD1    | 3.223        |
| 2OTW   | B_ARG_100 | NH1    | A_ASP_60  | OD2    | 3.943        |
| 2OTW   | C_ARG_65  | NH1    | C_ASP_86  | OD1    | 2.692        |
| 2OTW   | C_ARG_65  | NH1    | C_ASP_86  | OD2    | 2.598        |
| 2OTW   | D_ARG_38  | NH1    | D_ASP_90  | OD1    | 2.989        |
| 2OTW   | D_ARG_38  | NH2    | D_GLU_46  | OE1    | 2.871        |
| 2OTW   | D_ARG_38  | NH2    | D_GLU_46  | OE2    | 3.541        |
| 2OTW   | D_ARG_44  | NH2    | D_GLU_42  | OE1    | 3.918        |
| 2OTW   | D_ARG_67  | NH1    | D_ASP_90  | OD1    | 3.886        |
| 2OTW   | D_ARG_67  | NH1    | D_ASP_90  | OD2    | 2.722        |
| 2OTW   | D_ARG_67  | NH2    | D_ASP_90  | OD1    | 2.979        |
| 2OTW   | D_ARG_67  | NH2    | D_ASP_90  | OD2    | 3.322        |
| 2OTW   | D_ARG_100 | NH1    | C_ASP_60  | OD1    | 3.882        |
| 2OTW   | D_ARG_100 | NH1    | C_ASP_60  | OD2    | 3.653        |

Table 315: 2OTW-specific salt bridging networks analysis. In this table, a PDB file is specified with a four-letter PDB ID, except that the names of the PDB files corresponding to the single NMR structural model split from the NMR ensemble is specified with a four-letter PDB ID in addition to a hyphen followed by the single NMR structural model numeric ID, the residue naming scheme is **Chain ID\_residue name\_residue number**,  $\angle ADH$  represents the angle formed by acceptor (A), donor (D) and hydrogen (H) ( $\angle ADH$ ).

| PDB ID | Residue A | Atom A | Residue B | Atom B | Distance (Å) |
|--------|-----------|--------|-----------|--------|--------------|
| 2P8L   | A_ARG_24  | NH2    | A_GLU_70  | OE2    | 3.694        |
| 2P8L   | A_ARG_37  | NH1    | A_ASP_82  | OD1    | 2.662        |
| 2P8L   | A_ARG_61  | NH2    | A_ASP_82  | OD1    | 3.178        |
| 2P8L   | A_ARG_61  | NH2    | A_ASP_82  | OD2    | 3.399        |
| 2P8L   | A_HIS_96  | NE2    | C_ASP_5   | OD1    | 2.766        |
| 2P8L   | A_LYS_149 | NZ     | A_GLU_195 | OE1    | 3.348        |
| 2P8L   | A_LYS_149 | NZ     | A_GLU_195 | OE2    | 2.911        |
| 2P8L   | A_LYS_183 | NZ     | A_GLU_187 | OE1    | 3.209        |
| 2P8L   | A_LYS_183 | NZ     | A_GLU_187 | OE2    | 3.403        |
| 2P8L   | B_ARG_38  | NH1    | B_GLU_46  | OE1    | 2.804        |
| 2P8L   | B_ARG_38  | NH1    | B_GLU_46  | OE2    | 3.681        |
| 2P8L   | B_ARG_38  | NH2    | B_ASP_86  | OD1    | 2.496        |
| 2P8L   | B_LYS_57  | NZ     | B_ASP_55  | OD2    | 3.457        |
| 2P8L   | B_ARG_58  | NH1    | C_GLU_3   | OE1    | 1.911        |
| 2P8L   | B_ARG_58  | NH1    | C_GLU_3   | OE2    | 3.223        |
| 2P8L   | B_ARG_58  | NH2    | B_ASP_56  | OD1    | 3.758        |
| 2P8L   | B_ARG_58  | NH2    | B_ASP_56  | OD2    | 3.029        |
| 2P8L   | B_ARG_58  | NH2    | C_GLU_3   | OE1    | 3.943        |
| 2P8L   | B_ARG_66  | NH1    | B_ASP_86  | OD1    | 3.620        |
| 2P8L   | B_ARG_66  | NH1    | B_ASP_86  | OD2    | 3.879        |
| 2P8L   | B_ARG_66  | NH2    | B_ASP_86  | OD1    | 3.123        |
| 2P8L   | B_ARG_66  | NH2    | B_ASP_86  | OD2    | 2.431        |
| 2P8L   | B_LYS_71  | NZ     | B_ASP_55  | OD1    | 3.582        |
| 2P8L   | B_HIS_94  | ND1    | B_ASP_101 | OD1    | 2.660        |
| 2P8L   | B_HIS_94  | ND1    | B_ASP_101 | OD2    | 3.511        |
| 2P8L   | B_ARG_95  | NH1    | C_ASP_5   | OD1    | 2.951        |
| 2P8L   | B_ARG_95  | NH1    | C_ASP_5   | OD2    | 3.619        |
| 2P8L   | B_ARG_95  | NH2    | C_ASP_5   | OD1    | 3.420        |
| 2P8L   | B_ARG_95  | NH2    | C_ASP_5   | OD2    | 2.971        |
| 2P8L   | B_ARG_96  | NH1    | A_GLU_55  | OE1    | 3.236        |
| 2P8L   | B_ARG_96  | NH1    | A_GLU_55  | OE2    | 3.320        |
| 2P8L   | B_ARG_96  | NH1    | B_ASP_101 | OD2    | 3.133        |
| 2P8L   | B_ARG_96  | NH2    | A_GLU_55  | OE1    | 3.018        |
| 2P8L   | B_LYS_143 | NZ     | B_ASP_144 | OD1    | 3.794        |
| 2P8L   | B_LYS_209 | NZ     | A_GLU_123 | OE1    | 3.743        |
| 2P8L   | B_ARG_210 | NH1    | B_GLU_212 | OE1    | 2.518        |
| 2P8L   | B_ARG_210 | NH1    | B_GLU_212 | OE2    | 2.702        |
| 2P8L   | B_ARG_210 | NH2    | B_GLU_212 | OE1    | 2.760        |
| 2P8L   | C_LYS_6   | NZ     | B_ASP_54  | OD1    | 3.641        |
| 2P8L   | C_LYS_6   | NZ     | B_ASP_54  | OD2    | 3.025        |
| 2P8L   | C_LYS_6   | NZ     | B_ASP_56  | OD1    | 2.878        |

Table 316: 2P8L-specific salt bridging networks analysis. In this table, a PDB file is specified with a four-letter PDB ID, except that the names of the PDB files corresponding to the single NMR structural model split from the NMR ensemble is specified with a four-letter PDB ID in addition to a hyphen followed by the single NMR structural model numeric ID, the residue naming scheme is **Chain ID\_residue name\_residue number**,  $\angle ADH$  represents the angle formed by acceptor (A), donor (D) and hydrogen (H) ( $\angle ADH$ ).

| PDB ID | Residue A | Atom A | Residue B | Atom B | Distance (Å) |
|--------|-----------|--------|-----------|--------|--------------|
| 2P8M   | A_ARG_37  | NH1    | A_ASP_82  | OD1    | 2.839        |
| 2P8M   | A_ARG_61  | NH2    | A_ASP_82  | OD1    | 2.944        |
| 2P8M   | A_ARG_61  | NH2    | A_ASP_82  | OD2    | 3.371        |
| 2P8M   | A_HIS_96  | NE2    | C_ASP_3   | OD2    | 2.613        |
| 2P8M   | A_LYS_149 | NZ     | A_GLU_193 | OE1    | 3.222        |
| 2P8M   | A_LYS_149 | NZ     | A_GLU_195 | OE1    | 3.752        |
| 2P8M   | A_LYS_183 | NZ     | A_GLU_187 | OE2    | 2.931        |
| 2P8M   | A_LYS_190 | NZ     | A_GLU_213 | OE2    | 3.479        |
| 2P8M   | B_ARG_1   | NH2    | A_GLU_55  | OE2    | 3.915        |
| 2P8M   | B_ARG_38  | NH1    | B_GLU_46  | OE1    | 2.460        |
| 2P8M   | B_ARG_38  | NH1    | B_GLU_46  | OE2    | 3.000        |
| 2P8M   | B_ARG_38  | NH2    | B_ASP_86  | OD1    | 2.567        |
| 2P8M   | B_LYS_57  | NZ     | B_ASP_55  | OD1    | 3.800        |
| 2P8M   | B_LYS_57  | NZ     | B_ASP_55  | OD2    | 3.375        |
| 2P8M   | B_ARG_58  | NH1    | B_ASP_56  | OD1    | 2.812        |
| 2P8M   | B_ARG_58  | NH2    | C_GLU_1   | OE1    | 2.510        |
| 2P8M   | B_ARG_66  | NH1    | B_ASP_86  | OD1    | 3.550        |
| 2P8M   | B_ARG_66  | NH2    | B_ASP_86  | OD1    | 3.137        |
| 2P8M   | B_ARG_66  | NH2    | B_ASP_86  | OD2    | 2.617        |
| 2P8M   | B_HIS_94  | ND1    | B_ASP_101 | OD1    | 2.569        |
| 2P8M   | B_HIS_94  | ND1    | B_ASP_101 | OD2    | 3.296        |
| 2P8M   | B_ARG_95  | NH1    | C_ASP_3   | OD1    | 2.973        |
| 2P8M   | B_ARG_95  | NH1    | C_ASP_3   | OD2    | 3.042        |
| 2P8M   | B_ARG_95  | NH2    | C_ASP_3   | OD1    | 3.169        |
| 2P8M   | B_ARG_96  | NH1    | A_GLU_55  | OE1    | 3.351        |
| 2P8M   | B_ARG_96  | NH1    | A_GLU_55  | OE2    | 3.448        |
| 2P8M   | B_ARG_96  | NH1    | B_ASP_101 | OD2    | 3.545        |
| 2P8M   | B_ARG_96  | NH2    | A_GLU_55  | OE1    | 3.393        |
| 2P8M   | B_LYS_143 | NZ     | B_ASP_144 | OD1    | 3.820        |
| 2P8M   | B_LYS_143 | NZ     | B_ASP_144 | OD2    | 3.945        |
| 2P8M   | B_LYS_209 | NZ     | A_GLU_123 | OE1    | 3.649        |
| 2P8M   | B_ARG_210 | NH2    | B_GLU_212 | OE1    | 2.714        |
| 2P8M   | B_ARG_210 | NH2    | B_GLU_212 | OE2    | 3.508        |
| 2P8M   | C_LYS_4   | NZ     | B_ASP_54  | OD1    | 2.903        |
| 2P8M   | C_LYS_4   | NZ     | B_ASP_54  | OD2    | 2.371        |
| 2P8M   | C_LYS_4   | NZ     | B_ASP_56  | OD2    | 3.183        |

Table 317: 2P8M-specific salt bridging networks analysis. In this table, a PDB file is specified with a four-letter PDB ID, except that the names of the PDB files corresponding to the single NMR structural model split from the NMR ensemble is specified with a four-letter PDB ID in addition to a hyphen followed by the single NMR structural model numeric ID, the residue naming scheme is **Chain ID\_residue name\_residue number**,  $\angle ADH$  represents the angle formed by acceptor (A), donor (D) and hydrogen (H) ( $\angle ADH$ ).

| PDB ID | Residue A | Atom A | Residue B | Atom B | Distance (Å) |
|--------|-----------|--------|-----------|--------|--------------|
| 2P8P   | A_ARG_24  | NH1    | A_GLU_70  | OE2    | 3.886        |
| 2P8P   | A_ARG_24  | NH2    | A_GLU_70  | OE2    | 2.623        |
| 2P8P   | A_ARG_37  | NH1    | A_GLU_81  | OE1    | 3.668        |
| 2P8P   | A_ARG_37  | NH1    | A_GLU_81  | OE2    | 3.049        |
| 2P8P   | A_ARG_37  | NH1    | A_ASP_82  | OD1    | 3.193        |
| 2P8P   | A_ARG_37  | NH2    | A_GLU_81  | OE1    | 3.421        |
| 2P8P   | A_LYS_39  | NZ     | A_GLU_81  | OE1    | 3.598        |
| 2P8P   | A_ARG_61  | NH2    | A_GLU_81  | OE2    | 2.595        |
| 2P8P   | A_ARG_61  | NH2    | A_ASP_82  | OD1    | 3.431        |
| 2P8P   | A_HIS_96  | NE2    | C_ASP_3   | OD1    | 3.214        |
| 2P8P   | A_LYS_149 | NZ     | A_GLU_195 | OE1    | 3.534        |
| 2P8P   | A_LYS_183 | NZ     | A_GLU_187 | OE1    | 2.848        |
| 2P8P   | A_LYS_183 | NZ     | A_GLU_187 | OE2    | 3.221        |
| 2P8P   | A_LYS_188 | NZ     | A_ASP_185 | OD1    | 2.922        |
| 2P8P   | B_ARG_38  | NH1    | B_ASP_86  | OD1    | 2.794        |
| 2P8P   | B_ARG_38  | NH2    | B_GLU_46  | OE1    | 3.420        |
| 2P8P   | B_ARG_38  | NH2    | B_GLU_46  | OE2    | 3.340        |
| 2P8P   | B_ARG_38  | NH2    | B_ASP_86  | OD1    | 3.738        |
| 2P8P   | B_LYS_57  | NZ     | B_ASP_55  | OD1    | 3.547        |
| 2P8P   | B_LYS_57  | NZ     | B_ASP_55  | OD2    | 2.954        |
| 2P8P   | B_ARG_58  | NH1    | B_ASP_56  | OD1    | 2.448        |
| 2P8P   | B_ARG_58  | NH1    | B_ASP_56  | OD2    | 3.762        |
| 2P8P   | B_ARG_58  | NH2    | B_ASP_56  | OD1    | 3.457        |
| 2P8P   | B_ARG_58  | NH2    | B_ASP_56  | OD2    | 3.922        |
| 2P8P   | B_ARG_58  | NH2    | C_GLU_1   | OE2    | 3.147        |
| 2P8P   | B_ARG_66  | NH1    | B_ASP_86  | OD1    | 3.503        |
| 2P8P   | B_ARG_66  | NH1    | B_ASP_86  | OD2    | 3.962        |
| 2P8P   | B_ARG_66  | NH2    | B_ASP_86  | OD1    | 3.025        |
| 2P8P   | B_ARG_66  | NH2    | B_ASP_86  | OD2    | 2.685        |
| 2P8P   | B_LYS_71  | NZ     | B_ASP_55  | OD1    | 3.926        |
| 2P8P   | B_HIS_94  | ND1    | B_ASP_101 | OD1    | 2.554        |
| 2P8P   | B_HIS_94  | ND1    | B_ASP_101 | OD2    | 3.579        |
| 2P8P   | B_ARG_95  | NH1    | C_ASP_3   | OD1    | 2.805        |
| 2P8P   | B_ARG_95  | NH1    | C_ASP_3   | OD2    | 3.510        |
| 2P8P   | B_ARG_95  | NH2    | C_ASP_3   | OD1    | 3.459        |
| 2P8P   | B_ARG_95  | NH2    | C_ASP_3   | OD2    | 2.629        |
| 2P8P   | B_ARG_96  | NH1    | A_GLU_55  | OE1    | 3.239        |
| 2P8P   | B_ARG_96  | NH1    | A_GLU_55  | OE2    | 3.518        |
| 2P8P   | B_ARG_96  | NH1    | B_ASP_101 | OD2    | 2.782        |
| 2P8P   | B_ARG_96  | NH2    | A_GLU_55  | OE1    | 3.128        |
| 2P8P   | B_LYS_144 | NZ     | B_ASP_145 | OD1    | 3.635        |
| 2P8P   | B_LYS_144 | NZ     | B_ASP_145 | OD2    | 3.553        |
| 2P8P   | B_LYS_210 | NZ     | A_GLU_123 | OE1    | 3.349        |
| 2P8P   | B_LYS_210 | NZ     | A_GLU_123 | OE2    | 3.192        |
| 2P8P   | B_ARG_211 | NH1    | B_GLU_213 | OE1    | 3.506        |
| 2P8P   | B_ARG_211 | NH1    | B_GLU_213 | OE2    | 3.532        |
| 2P8P   | B_ARG_211 | NH2    | B_GLU_213 | OE1    | 2.609        |
| 2P8P   | B_ARG_211 | NH2    | B_GLU_213 | OE2    | 3.996        |
| 2P8P   | C_LYS_4   | NZ     | B_ASP_54  | OD1    | 3.623        |
| 2P8P   | C_LYS_4   | NZ     | B_ASP_54  | OD2    | 3.010        |
| 2P8P   | C_LYS_4   | NZ     | B_ASP_56  | OD2    | 2.836        |

---

Table 318: 2P8P-specific salt bridging networks analysis. In this table, a PDB file is specified with a four-letter PDB ID, except that the names of the PDB files corresponding to the single NMR structural model split from the NMR ensemble is specified with a four-letter PDB ID in addition to a hyphen followed by the single NMR structural model numeric ID, the residue naming scheme is **Chain ID\_residue name\_residue number**,  $\angle ADH$  represents the angle formed by acceptor (A), donor (D) and hydrogen (H) ( $\angle ADH$ ).

| PDB ID | Residue A | Atom A | Residue B | Atom B | Distance (Å) |
|--------|-----------|--------|-----------|--------|--------------|
| 2PR4   | L_ARG_37  | NH1    | L_ASP_82  | OD1    | 3.024        |
| 2PR4   | L_ARG_61  | NH2    | L_ASP_82  | OD1    | 2.716        |
| 2PR4   | L_ARG_61  | NH2    | L_ASP_82  | OD2    | 3.445        |
| 2PR4   | L_ARG_108 | NH1    | L_ASP_170 | OD1    | 3.583        |
| 2PR4   | L_LYS_149 | NZ     | L_GLU_195 | OE1    | 3.734        |
| 2PR4   | L_LYS_183 | NZ     | L_GLU_187 | OE2    | 2.711        |
| 2PR4   | L_LYS_190 | NZ     | L_ASP_151 | OD1    | 3.274        |
| 2PR4   | H_ARG_40  | NH1    | H_GLU_48  | OE1    | 3.002        |
| 2PR4   | H_ARG_40  | NH1    | H_ASP_91  | OD1    | 3.704        |
| 2PR4   | H_ARG_40  | NH2    | H_ASP_91  | OD1    | 2.605        |
| 2PR4   | H_ARG_60  | NH1    | H_ASP_58  | OD1    | 3.465        |
| 2PR4   | H_ARG_60  | NH1    | H_ASP_58  | OD2    | 3.213        |
| 2PR4   | H_ARG_68  | NH1    | H_ASP_91  | OD1    | 3.656        |
| 2PR4   | H_ARG_68  | NH1    | H_ASP_91  | OD2    | 3.886        |
| 2PR4   | H_ARG_68  | NH2    | H_ASP_91  | OD1    | 3.393        |
| 2PR4   | H_ARG_68  | NH2    | H_ASP_91  | OD2    | 2.646        |
| 2PR4   | H_HIS_99  | ND1    | H_ASP_120 | OD1    | 2.785        |
| 2PR4   | H_HIS_99  | ND1    | H_ASP_120 | OD2    | 3.650        |
| 2PR4   | H_ARG_101 | NH1    | L_GLU_55  | OE1    | 3.296        |
| 2PR4   | H_ARG_101 | NH1    | L_GLU_55  | OE2    | 3.376        |
| 2PR4   | H_ARG_101 | NH1    | H_ASP_120 | OD2    | 3.802        |
| 2PR4   | H_ARG_101 | NH2    | L_GLU_55  | OE1    | 3.286        |
| 2PR4   | H_LYS_162 | NZ     | H_ASP_163 | OD1    | 3.519        |
| 2PR4   | H_LYS_228 | NZ     | L_GLU_123 | OE1    | 3.151        |
| 2PR4   | H_ARG_229 | NH1    | H_GLU_231 | OE2    | 3.222        |
| 2PR4   | H_ARG_229 | NH2    | H_GLU_231 | OE1    | 3.609        |
| 2PR4   | H_ARG_229 | NH2    | H_GLU_231 | OE2    | 2.833        |

Table 319: 2PR4-specific salt bridging networks analysis. In this table, a PDB file is specified with a four-letter PDB ID, except that the names of the PDB files corresponding to the single NMR structural model split from the NMR ensemble is specified with a four-letter PDB ID in addition to a hyphen followed by the single NMR structural model numeric ID, the residue naming scheme is **Chain ID\_residue name\_residue number**,  $\angle ADH$  represents the angle formed by acceptor (A), donor (D) and hydrogen (H) ( $\angle ADH$ ).

| PDB ID | Residue A | Atom A | Residue B | Atom B | Distance (Å) |
|--------|-----------|--------|-----------|--------|--------------|
| 2Q8A   | A_ARG_128 | NH1    | A_GLU_343 | OE2    | 2.727        |
| 2Q8A   | A_ARG_128 | NH2    | A_GLU_256 | OE1    | 2.979        |
| 2Q8A   | A_ARG_128 | NH2    | A_GLU_256 | OE2    | 2.971        |
| 2Q8A   | A_LYS_203 | NZ     | L_ASP_32  | OD1    | 3.044        |
| 2Q8A   | A_LYS_203 | NZ     | L_ASP_32  | OD2    | 2.513        |
| 2Q8A   | A_LYS_245 | NZ     | A_GLU_213 | OE2    | 3.921        |
| 2Q8A   | A_LYS_245 | NZ     | A_ASP_242 | OD1    | 3.383        |
| 2Q8A   | A_LYS_245 | NZ     | A_ASP_242 | OD2    | 2.933        |
| 2Q8A   | A_ARG_270 | NH1    | A_ASP_178 | OD1    | 2.638        |
| 2Q8A   | A_ARG_270 | NH1    | A_ASP_178 | OD2    | 3.624        |
| 2Q8A   | A_LYS_292 | NZ     | A_GLU_133 | OE2    | 2.672        |
| 2Q8A   | A_ARG_304 | NH1    | A_GLU_436 | OE1    | 3.883        |
| 2Q8A   | A_ARG_304 | NH1    | A_GLU_436 | OE2    | 2.055        |
| 2Q8A   | A_ARG_304 | NH2    | A_GLU_436 | OE1    | 3.764        |
| 2Q8A   | A_ARG_304 | NH2    | A_GLU_436 | OE2    | 3.204        |
| 2Q8A   | A_LYS_311 | NZ     | A_ASP_322 | OD1    | 2.775        |
| 2Q8A   | A_LYS_311 | NZ     | A_ASP_322 | OD2    | 3.906        |
| 2Q8A   | A_LYS_339 | NZ     | A_GLU_336 | OE1    | 3.158        |
| 2Q8A   | A_LYS_339 | NZ     | A_GLU_336 | OE2    | 3.923        |
| 2Q8A   | A_LYS_364 | NZ     | A_GLU_361 | OE1    | 3.383        |
| 2Q8A   | A_LYS_364 | NZ     | A_GLU_361 | OE2    | 3.258        |
| 2Q8A   | A_LYS_368 | NZ     | A_ASP_227 | OD1    | 2.672        |
| 2Q8A   | A_LYS_368 | NZ     | A_ASP_227 | OD2    | 3.440        |
| 2Q8A   | A_LYS_391 | NZ     | A_ASP_134 | OD2    | 2.727        |
| 2Q8A   | A_HIS_433 | NE2    | A_GLU_436 | OE1    | 3.631        |
| 2Q8A   | L_ARG_54  | NH1    | L_ASP_60  | OD1    | 3.683        |
| 2Q8A   | L_ARG_61  | NH1    | L_ASP_82  | OD1    | 2.388        |
| 2Q8A   | L_ARG_61  | NH1    | L_ASP_82  | OD2    | 3.063        |
| 2Q8A   | L_ARG_61  | NH2    | L_GLU_81  | OE2    | 3.801        |
| 2Q8A   | L_ARG_96  | NH1    | A_ASP_204 | OD1    | 2.971        |
| 2Q8A   | L_ARG_96  | NH1    | A_ASP_204 | OD2    | 2.580        |
| 2Q8A   | L_ARG_96  | NH2    | A_ASP_204 | OD1    | 2.882        |
| 2Q8A   | L_ARG_96  | NH2    | A_ASP_204 | OD2    | 3.927        |
| 2Q8A   | L_ARG_96  | NH2    | H_GLU_59  | OE2    | 3.755        |
| 2Q8A   | L_LYS_103 | NZ     | L_ASP_165 | OD1    | 3.929        |
| 2Q8A   | L_HIS_189 | ND1    | L_ASP_151 | OD2    | 2.903        |
| 2Q8A   | L_LYS_199 | NZ     | L_ASP_110 | OD2    | 2.695        |
| 2Q8A   | H_HIS_35  | NE2    | A_ASP_204 | OD2    | 3.930        |
| 2Q8A   | H_ARG_50  | NH1    | H_ASP_52  | OD2    | 3.087        |
| 2Q8A   | H_ARG_50  | NH2    | H_GLU_59  | OE2    | 3.157        |
| 2Q8A   | H_LYS_63  | NZ     | H_GLU_46  | OE1    | 3.799        |
| 2Q8A   | H_LYS_67  | NZ     | H_ASP_90  | OD1    | 3.906        |
| 2Q8A   | H_LYS_67  | NZ     | H_ASP_90  | OD2    | 3.028        |

Table 320: 2Q8A-specific salt bridging networks analysis. In this table, a PDB file is specified with a four-letter PDB ID, except that the names of the PDB files corresponding to the single NMR structural model split from the NMR ensemble is specified with a four-letter PDB ID in addition to a hyphen followed by the single NMR structural model numeric ID, the residue naming scheme is **Chain ID\_residue name\_residue number**,  $\angle ADH$  represents the angle formed by acceptor (A), donor (D) and hydrogen (H) ( $\angle ADH$ ).

| PDB ID | Residue A | Atom A | Residue B | Atom B | Distance (Å) |
|--------|-----------|--------|-----------|--------|--------------|
| 2Q8B   | A_ARG_128 | NH1    | A_GLU_256 | OE1    | 3.040        |
| 2Q8B   | A_ARG_128 | NH1    | A_GLU_256 | OE2    | 3.000        |
| 2Q8B   | A_ARG_128 | NH2    | A_GLU_256 | OE1    | 3.059        |
| 2Q8B   | A_LYS_203 | NZ     | L_ASP_32  | OD1    | 3.779        |
| 2Q8B   | A_LYS_203 | NZ     | L_ASP_32  | OD2    | 2.847        |
| 2Q8B   | A_LYS_245 | NZ     | A_GLU_213 | OE2    | 2.777        |
| 2Q8B   | A_LYS_245 | NZ     | A_ASP_242 | OD2    | 3.887        |
| 2Q8B   | A_LYS_292 | NZ     | A_GLU_133 | OE1    | 3.902        |
| 2Q8B   | A_LYS_292 | NZ     | A_GLU_133 | OE2    | 2.733        |
| 2Q8B   | A_ARG_304 | NH1    | A_GLU_436 | OE1    | 3.770        |
| 2Q8B   | A_ARG_304 | NH1    | A_GLU_436 | OE2    | 2.007        |
| 2Q8B   | A_ARG_304 | NH2    | A_GLU_436 | OE2    | 3.545        |
| 2Q8B   | A_LYS_311 | NZ     | A_ASP_322 | OD1    | 2.853        |
| 2Q8B   | A_LYS_311 | NZ     | A_ASP_322 | OD2    | 3.778        |
| 2Q8B   | A_LYS_339 | NZ     | A_GLU_336 | OE1    | 2.983        |
| 2Q8B   | A_LYS_339 | NZ     | A_GLU_336 | OE2    | 3.511        |
| 2Q8B   | A_LYS_351 | NZ     | A_GLU_343 | OE2    | 2.663        |
| 2Q8B   | A_LYS_391 | NZ     | A_ASP_134 | OD1    | 3.749        |
| 2Q8B   | A_LYS_391 | NZ     | A_ASP_134 | OD2    | 2.808        |
| 2Q8B   | A_LYS_391 | NZ     | A_ASP_388 | OD1    | 3.545        |
| 2Q8B   | A_HIS_433 | NE2    | A_GLU_436 | OE1    | 3.672        |
| 2Q8B   | L_LYS_24  | NZ     | L_ASP_70  | OD1    | 3.418        |
| 2Q8B   | L_LYS_24  | NZ     | L_ASP_70  | OD2    | 3.406        |
| 2Q8B   | L_ARG_61  | NH1    | L_ASP_82  | OD1    | 2.518        |
| 2Q8B   | L_ARG_61  | NH1    | L_ASP_82  | OD2    | 3.346        |
| 2Q8B   | L_ARG_96  | NH1    | A_ASP_204 | OD1    | 3.458        |
| 2Q8B   | L_ARG_96  | NH1    | A_ASP_204 | OD2    | 2.952        |
| 2Q8B   | L_ARG_96  | NH2    | A_ASP_204 | OD1    | 2.667        |
| 2Q8B   | L_ARG_96  | NH2    | A_ASP_204 | OD2    | 3.462        |
| 2Q8B   | L_ARG_188 | NH1    | L_GLU_185 | OE1    | 3.851        |
| 2Q8B   | L_ARG_188 | NH1    | L_GLU_185 | OE2    | 2.847        |
| 2Q8B   | L_ARG_188 | NH2    | L_GLU_185 | OE2    | 3.891        |
| 2Q8B   | L_HIS_189 | ND1    | L_GLU_185 | OE2    | 3.560        |
| 2Q8B   | L_LYS_199 | NZ     | L_ASP_110 | OD2    | 3.181        |
| 2Q8B   | H_ARG_40  | NH1    | H_GLU_89  | OE2    | 2.969        |
| 2Q8B   | H_ARG_40  | NH2    | H_GLU_89  | OE2    | 3.558        |
| 2Q8B   | H_ARG_50  | NH2    | H_GLU_59  | OE2    | 2.874        |
| 2Q8B   | H_LYS_63  | NZ     | H_GLU_46  | OE1    | 2.715        |
| 2Q8B   | H_LYS_67  | NZ     | H_ASP_90  | OD1    | 3.762        |
| 2Q8B   | H_LYS_67  | NZ     | H_ASP_90  | OD2    | 3.011        |

Table 321: 2Q8B-specific salt bridging networks analysis. In this table, a PDB file is specified with a four-letter PDB ID, except that the names of the PDB files corresponding to the single NMR structural model split from the NMR ensemble is specified with a four-letter PDB ID in addition to a hyphen followed by the single NMR structural model numeric ID, the residue naming scheme is **Chain ID\_residue name\_residue number**,  $\angle ADH$  represents the angle formed by acceptor (A), donor (D) and hydrogen (H) ( $\angle ADH$ ).



| PDB ID | Residue A | Atom A | Residue B  | Atom B | Distance (Å) |
|--------|-----------|--------|------------|--------|--------------|
| 2QAD   | A.LYS.207 | NZ     | A.GLU.381  | OE1    | 3.156        |
| 2QAD   | A.LYS.207 | NZ     | A.GLU.381  | OE2    | 2.751        |
| 2QAD   | A.LYS.231 | NZ     | A.GLU.268  | OE2    | 3.310        |
| 2QAD   | A.LYS.232 | NZ     | A.GLU.269  | OE2    | 3.594        |
| 2QAD   | A.LYS.282 | NZ     | A.GLU.275  | OE2    | 3.989        |
| 2QAD   | A.LYS.348 | NZ     | A.GLU.269  | OE1    | 3.722        |
| 2QAD   | A.LYS.348 | NZ     | A.GLU.269  | OE2    | 3.126        |
| 2QAD   | A.ARG.419 | NH1    | A.ASP.325  | OD2    | 2.671        |
| 2QAD   | A.ARG.419 | NH2    | A.ASP.325  | OD2    | 3.673        |
| 2QAD   | A.ARG.456 | NH2    | A.GLU.466  | OE2    | 3.254        |
| 2QAD   | A.ARG.469 | NH2    | A.ASP.457  | OD2    | 3.733        |
| 2QAD   | A.ARG.476 | NH1    | A.ASP.474  | OD1    | 2.798        |
| 2QAD   | A.ARG.476 | NH2    | A.GLU.102  | OE2    | 3.950        |
| 2QAD   | A.ARG.480 | NH2    | A.ASP.477  | OD1    | 3.412        |
| 2QAD   | A.LYS.487 | NZ     | A.GLU.91   | OE1    | 3.356        |
| 2QAD   | A.LYS.487 | NZ     | A.GLU.91   | OE2    | 3.914        |
| 2QAD   | A.LYS.490 | NZ     | A.GLU.492  | OE2    | 3.426        |
| 2QAD   | B.ARG.54  | NH1    | B.ASP.78   | OD2    | 3.526        |
| 2QAD   | B.ARG.54  | NH2    | B.GLU.77   | OE2    | 3.474        |
| 2QAD   | B.ARG.54  | NH2    | B.ASP.78   | OD2    | 3.454        |
| 2QAD   | B.ARG.59  | NH1    | A.ASP.368  | OD1    | 3.394        |
| 2QAD   | B.ARG.59  | NH1    | A.ASP.368  | OD2    | 2.749        |
| 2QAD   | B.ARG.59  | NH2    | A.ASP.368  | OD1    | 3.764        |
| 2QAD   | B.LYS.72  | NZ     | B.ASP.56   | OD2    | 3.172        |
| 2QAD   | B.HIS.107 | ND1    | B.ASP.105  | OD2    | 3.915        |
| 2QAD   | C.LYS.39  | NZ     | C.ASP.81   | OD1    | 3.751        |
| 2QAD   | C.LYS.50  | NZ     | D.GLU.100F | OE2    | 2.989        |
| 2QAD   | C.LYS.55  | NZ     | D.ASP.101  | OD1    | 3.312        |
| 2QAD   | C.LYS.55  | NZ     | D.ASP.101  | OD2    | 3.736        |
| 2QAD   | C.ARG.61  | NH2    | C.ASP.82   | OD1    | 3.983        |
| 2QAD   | C.ARG.61  | NH2    | C.ASP.82   | OD2    | 3.945        |
| 2QAD   | C.LYS.103 | NZ     | C.GLU.165  | OE1    | 3.299        |
| 2QAD   | C.LYS.103 | NZ     | C.GLU.165  | OE2    | 3.201        |
| 2QAD   | C.LYS.183 | NZ     | C.GLU.187  | OE2    | 3.769        |
| 2QAD   | C.LYS.188 | NZ     | C.ASP.185  | OD1    | 3.463        |
| 2QAD   | C.HIS.189 | ND1    | C.ASP.151  | OD1    | 3.214        |
| 2QAD   | C.HIS.189 | ND1    | C.ASP.151  | OD2    | 3.260        |
| 2QAD   | D.ARG.38  | NH1    | D.GLU.46   | OE1    | 3.492        |
| 2QAD   | D.ARG.38  | NH1    | D.GLU.46   | OE2    | 3.474        |
| 2QAD   | D.ARG.62  | NH1    | D.GLU.46   | OE1    | 2.887        |
| 2QAD   | D.ARG.62  | NH1    | D.GLU.46   | OE2    | 2.924        |
| 2QAD   | D.ARG.62  | NH2    | D.GLU.46   | OE2    | 3.357        |
| 2QAD   | D.LYS.143 | NZ     | D.ASP.144  | OD1    | 2.885        |
| 2QAD   | D.LYS.143 | NZ     | D.ASP.144  | OD2    | 3.634        |
| 2QAD   | D.LYS.206 | NZ     | D.ASP.208  | OD1    | 3.117        |
| 2QAD   | D.LYS.209 | NZ     | D.GLU.212  | OE1    | 3.727        |
| 2QAD   | D.LYS.210 | NZ     | D.GLU.212  | OE2    | 3.492        |
| 2QAD   | E.LYS.207 | NZ     | E.GLU.381  | OE1    | 3.059        |
| 2QAD   | E.LYS.207 | NZ     | E.GLU.381  | OE2    | 2.916        |
| 2QAD   | E.LYS.231 | NZ     | E.GLU.268  | OE2    | 3.647        |
| 2QAD   | E.LYS.282 | NZ     | E.GLU.275  | OE1    | 3.736        |
| 2QAD   | E.LYS.282 | NZ     | E.GLU.275  | OE2    | 3.761        |
| 2QAD   | E.LYS.348 | NZ     | E.GLU.269  | OE1    | 3.968        |
| 2QAD   | E.LYS.348 | NZ     | E.GLU.269  | OE2    | 3.504        |
| 2QAD   | E.ARG.419 | NH1    | E.ASP.325  | OD2    | 2.690        |
| 2QAD   | E.ARG.419 | NH2    | E.ASP.325  | OD2    | 3.727        |
| 2QAD   | E.ARG.456 | NH2    | E.GLU.466  | OE2    | 3.894        |

|      |           |     |            |     |       |
|------|-----------|-----|------------|-----|-------|
| 2QAD | E_ARG_476 | NH1 | E_ASP_474  | OD1 | 3.116 |
| 2QAD | E_ARG_476 | NH2 | E_GLU_102  | OE1 | 3.845 |
| 2QAD | E_ARG_476 | NH2 | E_GLU_102  | OE2 | 3.739 |
| 2QAD | E_ARG_480 | NH2 | E_ASP_477  | OD1 | 3.576 |
| 2QAD | E_LYS_487 | NZ  | E_GLU_91   | OE1 | 3.899 |
| 2QAD | E_LYS_487 | NZ  | E_GLU_91   | OE2 | 3.462 |
| 2QAD | E_LYS_490 | NZ  | E_GLU_492  | OE2 | 3.971 |
| 2QAD | F_LYS_1   | NZ  | F_GLU_92   | OE1 | 3.829 |
| 2QAD | F_LYS_29  | NZ  | F_GLU_85   | OE1 | 3.902 |
| 2QAD | F_ARG_54  | NH1 | F_ASP_78   | OD2 | 3.625 |
| 2QAD | F_ARG_54  | NH2 | F_GLU_77   | OE2 | 3.363 |
| 2QAD | F_ARG_54  | NH2 | F_ASP_78   | OD2 | 3.440 |
| 2QAD | F_ARG_59  | NH1 | E_ASP_368  | OD1 | 2.855 |
| 2QAD | F_ARG_59  | NH1 | E_ASP_368  | OD2 | 2.624 |
| 2QAD | F_ARG_59  | NH2 | E_ASP_368  | OD1 | 3.681 |
| 2QAD | F_LYS_72  | NZ  | F_ASP_56   | OD2 | 3.168 |
| 2QAD | F_LYS_90  | NZ  | F_GLU_85   | OE2 | 3.437 |
| 2QAD | F_ARG_134 | NH1 | F_GLU_150  | OE1 | 3.188 |
| 2QAD | F_ARG_134 | NH2 | F_GLU_150  | OE1 | 2.761 |
| 2QAD | F_ARG_134 | NH2 | F_ASP_153  | OD1 | 2.906 |
| 2QAD | G_LYS_39  | NZ  | G_ASP_81   | OD1 | 3.605 |
| 2QAD | G_LYS_50  | NZ  | H_GLU_100F | OE2 | 3.151 |
| 2QAD | G_LYS_55  | NZ  | H_ASP_101  | OD1 | 3.191 |
| 2QAD | G_LYS_55  | NZ  | H_ASP_101  | OD2 | 3.496 |
| 2QAD | G_ARG_61  | NH2 | G_ASP_82   | OD1 | 3.464 |
| 2QAD | G_ARG_61  | NH2 | G_ASP_82   | OD2 | 3.576 |
| 2QAD | G_LYS_103 | NZ  | G_GLU_165  | OE1 | 3.223 |
| 2QAD | G_LYS_103 | NZ  | G_GLU_165  | OE2 | 3.176 |
| 2QAD | G_LYS_183 | NZ  | G_GLU_187  | OE2 | 2.926 |
| 2QAD | G_LYS_188 | NZ  | G_ASP_185  | OD1 | 3.437 |
| 2QAD | G_HIS_189 | ND1 | G_ASP_151  | OD1 | 3.455 |
| 2QAD | G_HIS_189 | ND1 | G_ASP_151  | OD2 | 2.830 |
| 2QAD | H_ARG_62  | NH1 | H_GLU_46   | OE1 | 2.833 |
| 2QAD | H_ARG_62  | NH1 | H_GLU_46   | OE2 | 2.981 |
| 2QAD | H_ARG_62  | NH2 | H_GLU_46   | OE1 | 3.733 |
| 2QAD | H_ARG_62  | NH2 | H_GLU_46   | OE2 | 3.274 |
| 2QAD | H_ARG_83  | NH2 | H_ASP_86   | OD1 | 3.458 |
| 2QAD | H_ARG_83  | NH2 | H_ASP_86   | OD2 | 2.513 |
| 2QAD | H_LYS_143 | NZ  | H_ASP_144  | OD1 | 2.852 |
| 2QAD | H_LYS_143 | NZ  | H_ASP_144  | OD2 | 3.707 |
| 2QAD | H_LYS_206 | NZ  | H_ASP_208  | OD1 | 2.954 |
| 2QAD | H_LYS_209 | NZ  | H_GLU_212  | OE1 | 3.668 |

Table 322: 2QAD-specific salt bridging networks analysis. In this table, a PDB file is specified with a four-letter PDB ID, except that the names of the PDB files corresponding to the single NMR structural model split from the NMR ensemble is specified with a four-letter PDB ID in addition to a hyphen followed by the single NMR structural model numeric ID, the residue naming scheme is **Chain ID\_residue name\_residue number**,  $\angle ADH$  represents the angle formed by acceptor (A), donor (D) and hydrogen (H) ( $\angle ADH$ ).

| PDB ID | Residue A | Atom A | Residue B | Atom B | Distance (Å) |
|--------|-----------|--------|-----------|--------|--------------|
| 2QQI   | A_ARG_305 | NH1    | A_GLU_312 | OE2    | 3.025        |
| 2QQI   | A_ARG_305 | NH2    | A_GLU_312 | OE2    | 3.597        |
| 2QQI   | A_LYS_347 | NZ     | A_GLU_312 | OE1    | 3.337        |
| 2QQI   | A_ARG_402 | NH2    | A_ASP_329 | OD1    | 3.538        |
| 2QQI   | A_ARG_402 | NH2    | A_ASP_329 | OD2    | 2.925        |
| 2QQI   | A_LYS_407 | NZ     | A_ASP_361 | OD1    | 3.110        |
| 2QQI   | A_LYS_407 | NZ     | A_ASP_361 | OD2    | 2.901        |
| 2QQI   | A_ARG_463 | NH2    | A_ASP_444 | OD1    | 2.807        |
| 2QQI   | A_ARG_513 | NH2    | A_GLU_483 | OE1    | 3.254        |
| 2QQI   | A_LYS_527 | NZ     | A_ASP_525 | OD1    | 2.652        |
| 2QQI   | A_LYS_527 | NZ     | A_ASP_525 | OD2    | 3.292        |
| 2QQI   | A_ARG_552 | NH1    | A_GLU_550 | OE1    | 3.271        |
| 2QQI   | A_ARG_552 | NH2    | A_GLU_550 | OE1    | 2.899        |
| 2QQI   | A_ARG_560 | NH2    | A_ASP_488 | OD1    | 3.697        |
| 2QQI   | A_ARG_560 | NH2    | A_ASP_488 | OD2    | 3.358        |

Table 323: 2QQI-specific salt bridging networks analysis. In this table, a PDB file is specified with a four-letter PDB ID, except that the names of the PDB files corresponding to the single NMR structural model split from the NMR ensemble is specified with a four-letter PDB ID in addition to a hyphen followed by the single NMR structural model numeric ID, the residue naming scheme is **Chain ID\_residue name\_residue number**,  $\angle ADH$  represents the angle formed by acceptor (A), donor (D) and hydrogen (H) ( $\angle ADH$ ).

| PDB ID | Residue A | Atom A | Residue B | Atom B | Distance (Å) |
|--------|-----------|--------|-----------|--------|--------------|
| 2QQM   | A_ARG_207 | NH2    | A_ASP_197 | OD1    | 2.822        |
| 2QQM   | A_ARG_207 | NH2    | A_ASP_197 | OD2    | 3.844        |
| 2QQM   | A_HIS_223 | NE2    | A_GLU_212 | OE1    | 2.681        |
| 2QQM   | A_ARG_226 | NH2    | A_GLU_212 | OE2    | 3.329        |
| 2QQM   | A_ARG_235 | NH2    | A_GLU_188 | OE2    | 3.062        |
| 2QQM   | A_ARG_237 | NH1    | A_GLU_285 | OE2    | 2.734        |
| 2QQM   | A_ARG_237 | NH2    | A_GLU_184 | OE2    | 3.025        |
| 2QQM   | A_ARG_237 | NH2    | A_GLU_285 | OE2    | 3.428        |
| 2QQM   | A_HIS_287 | ND1    | A_ASP_289 | OD1    | 3.807        |
| 2QQM   | A_HIS_287 | ND1    | A_ASP_289 | OD2    | 3.593        |
| 2QQM   | A_ARG_305 | NH1    | A_GLU_312 | OE1    | 2.993        |
| 2QQM   | A_ARG_305 | NH2    | A_GLU_312 | OE1    | 3.753        |
| 2QQM   | A_ARG_334 | NH1    | A_GLU_184 | OE1    | 2.860        |
| 2QQM   | A_ARG_334 | NH2    | A_GLU_184 | OE1    | 3.414        |
| 2QQM   | A_ARG_334 | NH2    | A_GLU_184 | OE2    | 3.144        |
| 2QQM   | A_LYS_347 | NZ     | A_GLU_312 | OE2    | 3.827        |
| 2QQM   | A_LYS_356 | NZ     | A_GLU_412 | OE1    | 3.925        |
| 2QQM   | A_ARG_402 | NH2    | A_ASP_329 | OD1    | 3.702        |
| 2QQM   | A_ARG_402 | NH2    | A_ASP_329 | OD2    | 3.069        |
| 2QQM   | A_LYS_407 | NZ     | A_ASP_361 | OD1    | 2.925        |
| 2QQM   | A_LYS_407 | NZ     | A_ASP_361 | OD2    | 3.013        |
| 2QQM   | A_ARG_463 | NH2    | A_ASP_444 | OD1    | 2.977        |
| 2QQM   | A_LYS_504 | NZ     | A_ASP_368 | OD2    | 3.089        |
| 2QQM   | A_ARG_513 | NH1    | A_GLU_541 | OE1    | 3.868        |
| 2QQM   | A_ARG_513 | NH2    | A_GLU_541 | OE1    | 3.920        |
| 2QQM   | A_LYS_514 | NZ     | A_GLU_541 | OE1    | 3.415        |
| 2QQM   | A_LYS_514 | NZ     | A_GLU_541 | OE2    | 3.311        |
| 2QQM   | A_LYS_536 | NZ     | A_ASP_531 | OD2    | 3.748        |
| 2QQM   | A_ARG_552 | NH1    | A_GLU_550 | OE1    | 3.256        |
| 2QQM   | A_ARG_552 | NH2    | A_GLU_550 | OE1    | 3.455        |
| 2QQM   | A_ARG_560 | NH2    | A_ASP_488 | OD1    | 3.975        |
| 2QQM   | A_ARG_560 | NH2    | A_ASP_488 | OD2    | 3.187        |

Table 324: 2QQM-specific salt bridging networks analysis. In this table, a PDB file is specified with a four-letter PDB ID, except that the names of the PDB files corresponding to the single NMR structural model split from the NMR ensemble is specified with a four-letter PDB ID in addition to a hyphen followed by the single NMR structural model numeric ID, the residue naming scheme is **Chain ID\_residue name\_residue number**,  $\angle ADH$  represents the angle formed by acceptor (A), donor (D) and hydrogen (H) ( $\angle ADH$ ).

| PDB ID | Residue A | Atom A | Residue B | Atom B | Distance (Å) |
|--------|-----------|--------|-----------|--------|--------------|
| 2QQN   | A_ARG_305 | NH1    | A_GLU_312 | OE1    | 3.596        |
| 2QQN   | A_LYS_347 | NZ     | A_GLU_312 | OE1    | 3.909        |
| 2QQN   | A_LYS_356 | NZ     | A_GLU_412 | OE1    | 3.215        |
| 2QQN   | A_ARG_402 | NH2    | A_ASP_329 | OD1    | 3.587        |
| 2QQN   | A_ARG_402 | NH2    | A_ASP_329 | OD2    | 3.150        |
| 2QQN   | A_LYS_407 | NZ     | A_ASP_361 | OD1    | 3.212        |
| 2QQN   | A_LYS_407 | NZ     | A_ASP_361 | OD2    | 2.958        |
| 2QQN   | H_ARG_38  | NH1    | H_ASP_86  | OD1    | 2.933        |
| 2QQN   | H_ARG_38  | NH2    | H_GLU_46  | OE1    | 3.167        |
| 2QQN   | H_ARG_38  | NH2    | H_ASP_86  | OD1    | 3.865        |
| 2QQN   | H_ARG_66  | NH1    | H_ASP_86  | OD1    | 3.782        |
| 2QQN   | H_ARG_66  | NH1    | H_ASP_86  | OD2    | 2.772        |
| 2QQN   | H_ARG_66  | NH2    | H_ASP_86  | OD1    | 3.232        |
| 2QQN   | H_ARG_66  | NH2    | H_ASP_86  | OD2    | 3.638        |
| 2QQN   | H_LYS_75  | NZ     | H_ASP_72  | OD2    | 3.885        |
| 2QQN   | H_ARG_94  | NH2    | H_ASP_101 | OD1    | 3.705        |
| 2QQN   | H_ARG_94  | NH2    | H_ASP_101 | OD2    | 2.999        |
| 2QQN   | H_LYS_143 | NZ     | H_ASP_144 | OD1    | 3.148        |
| 2QQN   | H_LYS_143 | NZ     | H_ASP_144 | OD2    | 2.751        |
| 2QQN   | H_LYS_206 | NZ     | H_ASP_208 | OD1    | 3.934        |
| 2QQN   | H_LYS_209 | NZ     | L_GLU_123 | OE1    | 2.782        |
| 2QQN   | H_LYS_209 | NZ     | L_GLU_123 | OE2    | 3.506        |
| 2QQN   | H_LYS_210 | NZ     | H_GLU_212 | OE1    | 3.071        |
| 2QQN   | H_LYS_210 | NZ     | H_GLU_212 | OE2    | 3.673        |
| 2QQN   | H_LYS_214 | NZ     | L_ASP_122 | OD1    | 3.854        |
| 2QQN   | L_ARG_61  | NH2    | L_GLU_81  | OE2    | 3.892        |
| 2QQN   | L_ARG_61  | NH2    | L_ASP_82  | OD1    | 2.963        |
| 2QQN   | L_ARG_61  | NH2    | L_ASP_82  | OD2    | 3.635        |
| 2QQN   | L_LYS_103 | NZ     | L_GLU_105 | OE2    | 3.304        |
| 2QQN   | L_LYS_103 | NZ     | L_GLU_165 | OE1    | 2.460        |
| 2QQN   | L_LYS_103 | NZ     | L_GLU_165 | OE2    | 3.133        |
| 2QQN   | L_ARG_142 | NH1    | L_GLU_105 | OE2    | 2.892        |
| 2QQN   | L_ARG_142 | NH2    | L_GLU_165 | OE2    | 3.206        |
| 2QQN   | L_LYS_149 | NZ     | L_GLU_195 | OE1    | 2.720        |
| 2QQN   | L_LYS_183 | NZ     | L_GLU_187 | OE1    | 3.367        |
| 2QQN   | L_LYS_183 | NZ     | L_GLU_187 | OE2    | 3.373        |
| 2QQN   | L_LYS_188 | NZ     | L_ASP_185 | OD1    | 3.017        |

Table 325: 2QQN-specific salt bridging networks analysis. In this table, a PDB file is specified with a four-letter PDB ID, except that the names of the PDB files corresponding to the single NMR structural model split from the NMR ensemble is specified with a four-letter PDB ID in addition to a hyphen followed by the single NMR structural model numeric ID, the residue naming scheme is **Chain ID\_residue name\_residue number**,  $\angle ADH$  represents the angle formed by acceptor (A), donor (D) and hydrogen (H) ( $\angle ADH$ ).

| PDB ID | Residue A | Atom A | Residue B | Atom B | Distance (Å) |
|--------|-----------|--------|-----------|--------|--------------|
| 2R29   | A_LYS_307 | NZ     | A_GLU_327 | OE2    | 3.953        |
| 2R29   | A_LYS_307 | NZ     | H_ASP_99  | OD1    | 2.956        |
| 2R29   | A_LYS_307 | NZ     | L_GLU_59  | OE1    | 3.335        |
| 2R29   | A_LYS_310 | NZ     | H_ASP_52  | OD1    | 3.449        |
| 2R29   | A_LYS_310 | NZ     | H_ASP_52  | OD2    | 2.764        |
| 2R29   | A_ARG_323 | NH2    | A_GLU_311 | OE2    | 3.982        |
| 2R29   | A_ARG_350 | NH1    | A_GLU_370 | OE1    | 2.411        |
| 2R29   | H_ARG_40  | NH2    | H_GLU_46  | OE2    | 3.642        |
| 2R29   | H_LYS_59  | NZ     | L_ASP_98  | OD2    | 3.485        |
| 2R29   | H_LYS_67  | NZ     | H_ASP_90  | OD1    | 3.208        |
| 2R29   | H_LYS_67  | NZ     | H_ASP_90  | OD2    | 3.049        |
| 2R29   | L_ARG_54  | NH2    | H_GLU_101 | OE1    | 3.814        |
| 2R29   | L_ARG_54  | NH2    | H_GLU_101 | OE2    | 3.270        |
| 2R29   | L_LYS_107 | NZ     | H_GLU_42  | OE1    | 3.937        |
| 2R29   | L_LYS_151 | NZ     | L_GLU_199 | OE1    | 2.854        |
| 2R29   | L_LYS_151 | NZ     | L_GLU_199 | OE2    | 3.268        |
| 2R29   | L_ARG_159 | NH2    | L_GLU_189 | OE1    | 3.854        |
| 2R29   | L_HIS_193 | ND1    | L_ASP_155 | OD2    | 2.763        |
| 2R29   | L_HIS_193 | NE2    | L_GLU_189 | OE1    | 3.126        |

Table 326: 2R29-specific salt bridging networks analysis. In this table, a PDB file is specified with a four-letter PDB ID, except that the names of the PDB files corresponding to the single NMR structural model split from the NMR ensemble is specified with a four-letter PDB ID in addition to a hyphen followed by the single NMR structural model numeric ID, the residue naming scheme is **Chain ID residue name residue number**,  $\angle ADH$  represents the angle formed by acceptor (A), donor (D) and hydrogen (H) ( $\angle ADH$ ).

| PDB ID | Residue A | Atom A | Residue B | Atom B | Distance (Å) |
|--------|-----------|--------|-----------|--------|--------------|
| 2R69   | A_LYS_307 | NZ     | H_ASP_99  | OD2    | 3.631        |
| 2R69   | A_HIS_317 | NE2    | A_GLU_368 | OE2    | 3.012        |
| 2R69   | A_LYS_344 | NZ     | A_GLU_338 | OE1    | 3.172        |
| 2R69   | A_ARG_345 | NH1    | A_ASP_341 | OD2    | 3.802        |
| 2R69   | H_LYS_38  | NZ     | H_ASP_90  | OD1    | 2.910        |
| 2R69   | H_LYS_38  | NZ     | H_ASP_90  | OD2    | 2.994        |
| 2R69   | H_ARG_40  | NH2    | H_GLU_46  | OE2    | 3.388        |
| 2R69   | H_LYS_59  | NZ     | L_ASP_98  | OD2    | 3.723        |
| 2R69   | H_LYS_67  | NZ     | H_ASP_90  | OD1    | 3.247        |
| 2R69   | H_LYS_67  | NZ     | H_ASP_90  | OD2    | 3.994        |
| 2R69   | H_LYS_211 | NZ     | L_GLU_127 | OE1    | 3.695        |
| 2R69   | H_LYS_211 | NZ     | L_GLU_127 | OE2    | 3.159        |
| 2R69   | L_ARG_31  | NH2    | A_GLU_311 | OE2    | 3.151        |
| 2R69   | L_LYS_43  | NZ     | L_ASP_85  | OD1    | 2.285        |
| 2R69   | L_LYS_43  | NZ     | L_ASP_85  | OD2    | 3.990        |
| 2R69   | L_ARG_54  | NH2    | H_GLU_101 | OE1    | 2.992        |
| 2R69   | L_ARG_54  | NH2    | H_GLU_101 | OE2    | 2.911        |
| 2R69   | L_ARG_72  | NH2    | L_ASP_74  | OD2    | 3.950        |
| 2R69   | L_ARG_112 | NH2    | L_ASP_174 | OD1    | 3.901        |
| 2R69   | L_LYS_151 | NZ     | L_GLU_158 | OE1    | 2.692        |
| 2R69   | L_LYS_151 | NZ     | L_GLU_158 | OE2    | 3.692        |
| 2R69   | L_LYS_153 | NZ     | L_GLU_199 | OE1    | 2.500        |
| 2R69   | L_LYS_153 | NZ     | L_GLU_199 | OE2    | 3.634        |
| 2R69   | L_ARG_159 | NH2    | L_GLU_189 | OE1    | 3.888        |
| 2R69   | L_ARG_159 | NH2    | L_GLU_189 | OE2    | 3.776        |
| 2R69   | L_HIS_193 | NE2    | L_GLU_189 | OE1    | 3.028        |

Table 327: 2R69-specific salt bridging networks analysis. In this table, a PDB file is specified with a four-letter PDB ID, except that the names of the PDB files corresponding to the single NMR structural model split from the NMR ensemble is specified with a four-letter PDB ID in addition to a hyphen followed by the single NMR structural model numeric ID, the residue naming scheme is **Chain ID\_residue name\_residue number**,  $\angle ADH$  represents the angle formed by acceptor (A), donor (D) and hydrogen (H) ( $\angle ADH$ ).

| PDB ID | Residue A | Atom A | Residue B | Atom B | Distance (Å) |
|--------|-----------|--------|-----------|--------|--------------|
| 2UYL   | A_ARG_24  | NH2    | A_ASP_75  | OD2    | 3.541        |
| 2UYL   | A_LYS_44  | NZ     | A_GLU_86  | OE1    | 3.928        |
| 2UYL   | A_LYS_55  | NZ     | A_ASP_35  | OD1    | 3.890        |
| 2UYL   | A_ARG_66  | NH1    | A_GLU_84  | OE2    | 3.593        |
| 2UYL   | A_ARG_66  | NH2    | A_GLU_84  | OE2    | 3.108        |
| 2UYL   | A_ARG_66  | NH2    | A_GLU_86  | OE2    | 3.573        |
| 2UYL   | A_ARG_66  | NH2    | A_ASP_87  | OD1    | 2.859        |
| 2UYL   | A_ARG_66  | NH2    | A_ASP_87  | OD2    | 3.807        |
| 2UYL   | A_ARG_101 | NH1    | B_GLU_99  | OE1    | 3.183        |
| 2UYL   | A_ARG_101 | NH1    | B_GLU_99  | OE2    | 3.530        |
| 2UYL   | A_ARG_101 | NH2    | B_GLU_99  | OE2    | 3.803        |
| 2UYL   | A_LYS_152 | NZ     | A_GLU_159 | OE2    | 3.364        |
| 2UYL   | A_LYS_154 | NZ     | A_GLU_200 | OE1    | 3.299        |
| 2UYL   | A_ARG_160 | NH2    | A_GLU_190 | OE1    | 2.667        |
| 2UYL   | A_ARG_160 | NH2    | A_GLU_190 | OE2    | 3.767        |
| 2UYL   | A_LYS_188 | NZ     | A_GLU_192 | OE1    | 3.100        |
| 2UYL   | A_HIS_194 | ND1    | A_ASP_156 | OD2    | 3.217        |
| 2UYL   | B_ARG_40  | NH1    | B_GLU_46  | OE2    | 3.963        |
| 2UYL   | B_ARG_40  | NH2    | B_ASP_89  | OD1    | 3.905        |
| 2UYL   | B_LYS_63  | NZ     | B_GLU_46  | OE1    | 2.751        |
| 2UYL   | B_LYS_63  | NZ     | B_GLU_46  | OE2    | 3.738        |
| 2UYL   | B_LYS_67  | NZ     | B_ASP_90  | OD1    | 2.822        |
| 2UYL   | B_LYS_67  | NZ     | B_ASP_90  | OD2    | 3.465        |
| 2UYL   | B_ARG_98  | NH2    | B_GLU_100 | OE2    | 3.144        |
| 2UYL   | M_ARG_24  | NH1    | M_ASP_75  | OD1    | 3.039        |
| 2UYL   | M_ARG_24  | NH1    | M_ASP_75  | OD2    | 2.784        |
| 2UYL   | M_ARG_24  | NH2    | M_ASP_75  | OD2    | 3.872        |
| 2UYL   | M_ARG_66  | NH1    | M_GLU_84  | OE1    | 3.248        |
| 2UYL   | M_ARG_66  | NH1    | M_GLU_84  | OE2    | 3.722        |
| 2UYL   | M_ARG_66  | NH2    | M_GLU_84  | OE2    | 3.790        |
| 2UYL   | M_ARG_66  | NH2    | M_GLU_86  | OE1    | 3.569        |
| 2UYL   | M_ARG_66  | NH2    | M_GLU_86  | OE2    | 3.070        |
| 2UYL   | M_ARG_66  | NH2    | M_ASP_87  | OD1    | 3.037        |
| 2UYL   | M_ARG_66  | NH2    | M_ASP_87  | OD2    | 3.967        |
| 2UYL   | M_ARG_101 | NH1    | N_GLU_99  | OE1    | 3.058        |
| 2UYL   | M_ARG_101 | NH1    | N_GLU_99  | OE2    | 3.775        |
| 2UYL   | M_ARG_101 | NH2    | N_GLU_99  | OE2    | 3.923        |
| 2UYL   | M_LYS_108 | NZ     | M_GLU_110 | OE1    | 3.809        |
| 2UYL   | M_LYS_152 | NZ     | M_GLU_159 | OE2    | 3.798        |
| 2UYL   | M_LYS_154 | NZ     | M_GLU_200 | OE1    | 2.830        |
| 2UYL   | M_ARG_160 | NH1    | M_GLU_190 | OE1    | 3.456        |
| 2UYL   | M_ARG_160 | NH2    | M_GLU_190 | OE1    | 2.573        |
| 2UYL   | M_ARG_160 | NH2    | M_GLU_190 | OE2    | 3.199        |
| 2UYL   | M_LYS_188 | NZ     | M_GLU_192 | OE2    | 3.865        |
| 2UYL   | M_HIS_194 | ND1    | M_ASP_156 | OD2    | 2.773        |
| 2UYL   | N_LYS_63  | NZ     | N_GLU_46  | OE1    | 2.897        |
| 2UYL   | N_LYS_67  | NZ     | N_ASP_90  | OD1    | 2.827        |
| 2UYL   | N_LYS_67  | NZ     | N_ASP_90  | OD2    | 3.442        |
| 2UYL   | N_ARG_98  | NH2    | N_GLU_100 | OE1    | 2.786        |
| 2UYL   | N_ARG_98  | NH2    | N_GLU_100 | OE2    | 3.617        |
| 2UYL   | N_HIS_170 | NE2    | M_ASP_172 | OD1    | 3.811        |
| 2UYL   | V_ARG_24  | NH1    | V_ASP_75  | OD1    | 3.803        |
| 2UYL   | V_ARG_24  | NH2    | V_ASP_75  | OD1    | 2.930        |
| 2UYL   | V_ARG_24  | NH2    | V_ASP_75  | OD2    | 3.669        |
| 2UYL   | V_LYS_44  | NZ     | V_GLU_86  | OE1    | 2.905        |
| 2UYL   | V_LYS_55  | NZ     | V_ASP_35  | OD2    | 3.201        |
| 2UYL   | V_ARG_66  | NH1    | V_GLU_84  | OE1    | 3.900        |



|      |           |     |           |     |       |
|------|-----------|-----|-----------|-----|-------|
| 2UYL | V_ARG_66  | NH2 | V_GLU_84  | OE2 | 3.992 |
| 2UYL | V_ARG_66  | NH2 | V_GLU_86  | OE2 | 3.799 |
| 2UYL | V_ARG_66  | NH2 | V_ASP_87  | OD1 | 2.834 |
| 2UYL | V_ARG_66  | NH2 | V_ASP_87  | OD2 | 3.258 |
| 2UYL | V_ARG_101 | NH1 | W_GLU_99  | OE1 | 2.958 |
| 2UYL | V_ARG_101 | NH1 | W_GLU_99  | OE2 | 3.417 |
| 2UYL | V_ARG_101 | NH2 | W_GLU_99  | OE2 | 3.369 |
| 2UYL | V_LYS_108 | NZ  | V_ASP_170 | OD1 | 3.736 |
| 2UYL | V_LYS_154 | NZ  | V_GLU_200 | OE1 | 2.621 |
| 2UYL | V_LYS_154 | NZ  | V_GLU_200 | OE2 | 3.889 |
| 2UYL | V_ARG_160 | NH1 | V_GLU_190 | OE1 | 3.166 |
| 2UYL | V_ARG_160 | NH2 | V_GLU_190 | OE1 | 3.294 |
| 2UYL | V_ARG_160 | NH2 | V_GLU_190 | OE2 | 3.839 |
| 2UYL | V_HIS_194 | ND1 | V_ASP_156 | OD2 | 2.891 |
| 2UYL | V_LYS_204 | NZ  | V_ASP_115 | OD1 | 3.190 |
| 2UYL | W_LYS_63  | NZ  | W_GLU_46  | OE1 | 2.810 |
| 2UYL | W_LYS_63  | NZ  | W_GLU_46  | OE2 | 3.935 |
| 2UYL | W_LYS_67  | NZ  | W_ASP_90  | OD1 | 3.006 |
| 2UYL | W_LYS_67  | NZ  | W_ASP_90  | OD2 | 3.683 |
| 2UYL | W_ARG_98  | NH2 | W_GLU_100 | OE2 | 3.033 |
| 2UYL | X_ARG_24  | NH1 | X_ASP_75  | OD1 | 3.584 |
| 2UYL | X_ARG_24  | NH2 | X_ASP_75  | OD1 | 3.267 |
| 2UYL | X_LYS_55  | NZ  | X_ASP_35  | OD2 | 3.064 |
| 2UYL | X_ARG_66  | NH1 | X_GLU_84  | OE1 | 3.245 |
| 2UYL | X_ARG_66  | NH1 | X_GLU_84  | OE2 | 3.798 |
| 2UYL | X_ARG_66  | NH2 | X_GLU_84  | OE1 | 3.726 |
| 2UYL | X_ARG_66  | NH2 | X_GLU_84  | OE2 | 3.244 |
| 2UYL | X_ARG_66  | NH2 | X_GLU_86  | OE1 | 3.815 |
| 2UYL | X_ARG_66  | NH2 | X_GLU_86  | OE2 | 2.779 |
| 2UYL | X_ARG_101 | NH1 | Y_GLU_99  | OE1 | 2.789 |
| 2UYL | X_ARG_101 | NH1 | Y_GLU_99  | OE2 | 3.483 |
| 2UYL | X_ARG_101 | NH2 | Y_GLU_99  | OE2 | 3.405 |
| 2UYL | X_LYS_152 | NZ  | X_GLU_200 | OE2 | 3.544 |
| 2UYL | X_LYS_154 | NZ  | X_GLU_200 | OE1 | 3.293 |
| 2UYL | X_LYS_188 | NZ  | X_GLU_192 | OE1 | 3.104 |
| 2UYL | X_LYS_188 | NZ  | X_GLU_192 | OE2 | 3.213 |
| 2UYL | X_HIS_194 | ND1 | X_ASP_156 | OD2 | 3.029 |
| 2UYL | X_LYS_204 | NZ  | X_ASP_115 | OD1 | 2.823 |
| 2UYL | X_LYS_204 | NZ  | X_ASP_115 | OD2 | 3.875 |
| 2UYL | Y_LYS_63  | NZ  | Y_GLU_46  | OE1 | 3.237 |
| 2UYL | Y_LYS_63  | NZ  | Y_GLU_46  | OE2 | 3.539 |
| 2UYL | Y_LYS_67  | NZ  | Y_ASP_90  | OD1 | 2.881 |
| 2UYL | Y_LYS_67  | NZ  | Y_ASP_90  | OD2 | 3.582 |
| 2UYL | Y_ARG_98  | NH2 | Y_GLU_100 | OE1 | 2.856 |
| 2UYL | Y_ARG_98  | NH2 | Y_GLU_100 | OE2 | 3.603 |

Table 328: 2UYL-specific salt bridging networks analysis. In this table, a PDB file is specified with a four-letter PDB ID, except that the names of the PDB files corresponding to the single NMR structural model split from the NMR ensemble is specified with a four-letter PDB ID in addition to a hyphen followed by the single NMR structural model numeric ID, the residue naming scheme is **Chain ID\_residue name\_residue number**,  $\angle ADH$  represents the angle formed by acceptor (A), donor (D) and hydrogen (H) ( $\angle ADH$ ).

| PDB ID | Residue A | Atom A | Residue B | Atom B | Distance (Å) |
|--------|-----------|--------|-----------|--------|--------------|
| 2VC2   | A_HIS_30  | ND1    | A_GLU_136 | OE1    | 3.993        |
| 2VC2   | A_ARG_77  | NH1    | H_ASP_102 | OD1    | 3.536        |
| 2VC2   | A_ARG_77  | NH1    | H_ASP_102 | OD2    | 3.007        |
| 2VC2   | A_ARG_77  | NH2    | H_ASP_102 | OD1    | 2.794        |
| 2VC2   | A_ARG_77  | NH2    | H_ASP_102 | OD2    | 3.630        |
| 2VC2   | A_LYS_88  | NZ     | A_ASP_71  | OD2    | 3.044        |
| 2VC2   | A_LYS_88  | NZ     | A_GLU_75  | OE2    | 3.709        |
| 2VC2   | A_ARG_153 | NH1    | A_GLU_157 | OE1    | 3.976        |
| 2VC2   | A_ARG_153 | NH1    | A_GLU_157 | OE2    | 3.374        |
| 2VC2   | A_ARG_153 | NH2    | A_GLU_120 | OE1    | 3.288        |
| 2VC2   | A_ARG_153 | NH2    | A_GLU_120 | OE2    | 3.798        |
| 2VC2   | A_ARG_165 | NH1    | A_GLU_123 | OE2    | 3.067        |
| 2VC2   | A_ARG_165 | NH2    | A_ASP_163 | OD1    | 2.956        |
| 2VC2   | A_ARG_165 | NH2    | A_ASP_163 | OD2    | 3.881        |
| 2VC2   | A_ARG_279 | NH2    | A_GLU_268 | OE2    | 3.656        |
| 2VC2   | A_ARG_303 | NH2    | A_ASP_301 | OD2    | 3.119        |
| 2VC2   | A_ARG_327 | NH1    | A_GLU_283 | OE1    | 3.141        |
| 2VC2   | A_ARG_327 | NH1    | A_GLU_283 | OE2    | 3.525        |
| 2VC2   | A_ARG_422 | NH1    | A_ASP_24  | OD1    | 2.995        |
| 2VC2   | A_ARG_422 | NH1    | A_ASP_24  | OD2    | 3.442        |
| 2VC2   | B_ARG_67  | NH1    | B_GLU_65  | OE1    | 3.348        |
| 2VC2   | B_LYS_72  | NZ     | B_ASP_109 | OD1    | 2.615        |
| 2VC2   | B_LYS_72  | NZ     | B_ASP_109 | OD2    | 3.592        |
| 2VC2   | B_ARG_87  | NH2    | B_GLU_65  | OE2    | 3.439        |
| 2VC2   | B_ARG_105 | NH1    | B_ASP_71  | OD1    | 3.409        |
| 2VC2   | B_LYS_159 | NZ     | B_ASP_224 | OD1    | 3.836        |
| 2VC2   | B_LYS_159 | NZ     | B_ASP_224 | OD2    | 2.792        |
| 2VC2   | B_LYS_209 | NZ     | B_GLU_206 | OE2    | 3.718        |
| 2VC2   | B_ARG_214 | NH1    | B_ASP_179 | OD1    | 3.968        |
| 2VC2   | B_ARG_214 | NH1    | B_ASP_179 | OD2    | 2.988        |
| 2VC2   | B_ARG_214 | NH2    | B_ASP_179 | OD1    | 3.866        |
| 2VC2   | B_ARG_214 | NH2    | B_ASP_179 | OD2    | 3.629        |
| 2VC2   | B_ARG_216 | NH2    | A_GLU_123 | OE2    | 3.081        |
| 2VC2   | B_ARG_239 | NH2    | B_ASP_113 | OD2    | 3.274        |
| 2VC2   | B_HIS_244 | NE2    | B_ASP_113 | OD1    | 3.820        |
| 2VC2   | B_LYS_253 | NZ     | A_ASP_232 | OD2    | 2.805        |
| 2VC2   | B_HIS_255 | ND1    | B_ASP_259 | OD2    | 2.957        |
| 2VC2   | B_HIS_255 | NE2    | B_ASP_158 | OD2    | 3.335        |
| 2VC2   | B_HIS_255 | NE2    | B_ASP_217 | OD1    | 3.717        |
| 2VC2   | B_HIS_255 | NE2    | B_ASP_217 | OD2    | 2.761        |
| 2VC2   | B_HIS_274 | NE2    | B_ASP_270 | OD1    | 2.976        |
| 2VC2   | B_HIS_274 | NE2    | B_ASP_270 | OD2    | 2.687        |
| 2VC2   | B_LYS_298 | NZ     | B_GLU_297 | OE2    | 3.182        |
| 2VC2   | B_LYS_302 | NZ     | B_ASP_233 | OD1    | 3.549        |
| 2VC2   | B_LYS_302 | NZ     | B_ASP_233 | OD2    | 3.146        |
| 2VC2   | B_LYS_354 | NZ     | B_GLU_356 | OE1    | 3.116        |
| 2VC2   | B_ARG_360 | NH2    | B_GLU_358 | OE2    | 3.412        |
| 2VC2   | B_ARG_404 | NH1    | B_GLU_364 | OE2    | 3.062        |
| 2VC2   | B_ARG_404 | NH2    | B_GLU_364 | OE2    | 3.029        |
| 2VC2   | B_LYS_412 | NZ     | B_GLU_365 | OE1    | 2.695        |
| 2VC2   | B_LYS_412 | NZ     | B_GLU_365 | OE2    | 3.221        |
| 2VC2   | H_LYS_38  | NZ     | H_ASP_90  | OD1    | 3.582        |
| 2VC2   | H_ARG_40  | NH2    | H_GLU_46  | OE1    | 3.291        |
| 2VC2   | H_ARG_40  | NH2    | H_GLU_46  | OE2    | 3.920        |
| 2VC2   | H_LYS_67  | NZ     | H_ASP_90  | OD2    | 2.912        |
| 2VC2   | H_LYS_214 | NZ     | L_GLU_123 | OE2    | 3.240        |
| 2VC2   | H_LYS_215 | NZ     | H_GLU_217 | OE1    | 3.925        |

|      |           |     |           |     |       |
|------|-----------|-----|-----------|-----|-------|
| 2VC2 | L_HIS_24  | ND1 | L_ASP_70  | OD1 | 2.720 |
| 2VC2 | L_HIS_24  | ND1 | L_ASP_70  | OD2 | 3.328 |
| 2VC2 | L_LYS_39  | NZ  | L_GLU_81  | OE2 | 3.318 |
| 2VC2 | L_ARG_61  | NH2 | L_ASP_82  | OD1 | 3.251 |
| 2VC2 | L_ARG_61  | NH2 | L_ASP_82  | OD2 | 3.737 |
| 2VC2 | L_LYS_103 | NZ  | L_ASP_85  | OD1 | 2.978 |
| 2VC2 | L_LYS_103 | NZ  | L_ASP_85  | OD2 | 2.787 |
| 2VC2 | L_LYS_149 | NZ  | L_GLU_195 | OE1 | 2.774 |
| 2VC2 | L_LYS_149 | NZ  | L_GLU_195 | OE2 | 3.388 |
| 2VC2 | L_ARG_155 | NH1 | L_GLU_185 | OE1 | 3.167 |
| 2VC2 | L_ARG_155 | NH1 | L_GLU_185 | OE2 | 3.736 |
| 2VC2 | L_ARG_155 | NH2 | L_GLU_185 | OE2 | 3.256 |
| 2VC2 | L_HIS_189 | ND1 | L_ASP_151 | OD1 | 2.726 |
| 2VC2 | L_LYS_199 | NZ  | L_ASP_110 | OD2 | 3.011 |

Table 329: 2VC2-specific salt bridging networks analysis. In this table, a PDB file is specified with a four-letter PDB ID, except that the names of the PDB files corresponding to the single NMR structural model split from the NMR ensemble is specified with a four-letter PDB ID in addition to a hyphen followed by the single NMR structural model numeric ID, the residue naming scheme is **Chain ID\_residue name\_residue number**,  $\angle ADH$  represents the angle formed by acceptor (A), donor (D) and hydrogen (H) ( $\angle ADH$ ).

| PDB ID | Residue A | Atom A | Residue B | Atom B | Distance (Å) |
|--------|-----------|--------|-----------|--------|--------------|
| 2VDK   | A_HIS_30  | ND1    | A_GLU_136 | OE1    | 3.867        |
| 2VDK   | A_ARG_77  | NH1    | H_ASP_102 | OD1    | 3.535        |
| 2VDK   | A_ARG_77  | NH1    | H_ASP_102 | OD2    | 3.168        |
| 2VDK   | A_ARG_77  | NH2    | H_ASP_102 | OD1    | 2.738        |
| 2VDK   | A_ARG_77  | NH2    | H_ASP_102 | OD2    | 3.673        |
| 2VDK   | A_LYS_88  | NZ     | A_ASP_71  | OD1    | 3.934        |
| 2VDK   | A_LYS_88  | NZ     | A_GLU_75  | OE2    | 3.775        |
| 2VDK   | A_ARG_153 | NH1    | A_GLU_157 | OE1    | 3.920        |
| 2VDK   | A_ARG_153 | NH1    | A_GLU_157 | OE2    | 3.540        |
| 2VDK   | A_ARG_153 | NH2    | A_GLU_120 | OE1    | 3.575        |
| 2VDK   | A_ARG_153 | NH2    | A_GLU_120 | OE2    | 3.437        |
| 2VDK   | A_ARG_165 | NH1    | A_GLU_123 | OE1    | 3.551        |
| 2VDK   | A_ARG_165 | NH1    | A_GLU_123 | OE2    | 3.025        |
| 2VDK   | A_ARG_165 | NH2    | A_ASP_163 | OD1    | 2.867        |
| 2VDK   | A_ARG_165 | NH2    | A_ASP_163 | OD2    | 3.841        |
| 2VDK   | A_ARG_279 | NH2    | A_GLU_268 | OE2    | 3.830        |
| 2VDK   | A_ARG_317 | NH2    | A_GLU_315 | OE1    | 3.703        |
| 2VDK   | A_ARG_327 | NH1    | A_GLU_283 | OE1    | 2.969        |
| 2VDK   | A_ARG_327 | NH1    | A_GLU_283 | OE2    | 3.151        |
| 2VDK   | A_ARG_422 | NH1    | A_ASP_24  | OD1    | 2.982        |
| 2VDK   | A_ARG_422 | NH1    | A_ASP_24  | OD2    | 3.550        |
| 2VDK   | B_ARG_62  | NH2    | B_GLU_60  | OE2    | 3.869        |
| 2VDK   | B_ARG_67  | NH1    | B_GLU_65  | OE1    | 3.128        |
| 2VDK   | B_LYS_72  | NZ     | B_ASP_109 | OD1    | 2.883        |
| 2VDK   | B_LYS_72  | NZ     | B_ASP_109 | OD2    | 3.231        |
| 2VDK   | B_ARG_87  | NH2    | B_GLU_65  | OE2    | 3.747        |
| 2VDK   | B_ARG_105 | NH1    | B_ASP_71  | OD1    | 3.501        |
| 2VDK   | B_LYS_159 | NZ     | B_ASP_224 | OD1    | 3.871        |
| 2VDK   | B_LYS_159 | NZ     | B_ASP_224 | OD2    | 2.724        |
| 2VDK   | B_LYS_209 | NZ     | B_GLU_206 | OE2    | 3.427        |
| 2VDK   | B_ARG_214 | NH1    | B_ASP_179 | OD1    | 2.883        |
| 2VDK   | B_ARG_214 | NH1    | B_ASP_179 | OD2    | 3.837        |
| 2VDK   | B_ARG_214 | NH2    | B_ASP_179 | OD1    | 3.373        |
| 2VDK   | B_ARG_214 | NH2    | B_ASP_179 | OD2    | 3.883        |
| 2VDK   | B_ARG_216 | NH2    | A_GLU_123 | OE2    | 3.072        |
| 2VDK   | B_ARG_239 | NH2    | B_ASP_113 | OD2    | 2.945        |
| 2VDK   | B_HIS_244 | NE2    | B_ASP_113 | OD1    | 3.799        |
| 2VDK   | B_LYS_253 | NZ     | A_ASP_232 | OD2    | 2.921        |
| 2VDK   | B_HIS_255 | ND1    | B_ASP_259 | OD2    | 2.885        |
| 2VDK   | B_HIS_255 | NE2    | B_ASP_158 | OD2    | 3.290        |
| 2VDK   | B_HIS_255 | NE2    | B_ASP_217 | OD1    | 3.718        |
| 2VDK   | B_HIS_255 | NE2    | B_ASP_217 | OD2    | 2.719        |
| 2VDK   | B_HIS_274 | NE2    | B_ASP_270 | OD1    | 3.028        |
| 2VDK   | B_HIS_274 | NE2    | B_ASP_270 | OD2    | 2.677        |
| 2VDK   | B_LYS_298 | NZ     | B_GLU_297 | OE2    | 3.464        |
| 2VDK   | B_LYS_302 | NZ     | B_ASP_233 | OD1    | 3.247        |
| 2VDK   | B_LYS_302 | NZ     | B_ASP_233 | OD2    | 2.825        |
| 2VDK   | B_LYS_354 | NZ     | B_GLU_356 | OE1    | 2.748        |
| 2VDK   | B_LYS_354 | NZ     | B_GLU_356 | OE2    | 3.777        |
| 2VDK   | B_ARG_360 | NH2    | B_GLU_358 | OE1    | 3.701        |
| 2VDK   | B_ARG_360 | NH2    | B_GLU_358 | OE2    | 3.427        |
| 2VDK   | B_ARG_404 | NH1    | B_GLU_364 | OE2    | 3.192        |
| 2VDK   | B_ARG_404 | NH2    | B_GLU_364 | OE2    | 3.127        |
| 2VDK   | B_LYS_412 | NZ     | B_GLU_365 | OE1    | 2.671        |
| 2VDK   | B_LYS_412 | NZ     | B_GLU_365 | OE2    | 3.186        |
| 2VDK   | H_LYS_38  | NZ     | H_GLU_46  | OE1    | 3.930        |
| 2VDK   | H_ARG_40  | NH2    | H_GLU_46  | OE1    | 3.206        |

|      |           |     |           |     |       |
|------|-----------|-----|-----------|-----|-------|
| 2VDK | H_ARG_40  | NH2 | H_GLU_46  | OE2 | 3.861 |
| 2VDK | H_LYS_67  | NZ  | H_ASP_90  | OD1 | 3.807 |
| 2VDK | H_LYS_67  | NZ  | H_ASP_90  | OD2 | 2.831 |
| 2VDK | H_LYS_214 | NZ  | L_GLU_123 | OE2 | 3.461 |
| 2VDK | H_LYS_215 | NZ  | H_GLU_217 | OE1 | 3.919 |
| 2VDK | L_HIS_24  | ND1 | L_ASP_70  | OD1 | 2.714 |
| 2VDK | L_HIS_24  | ND1 | L_ASP_70  | OD2 | 3.907 |
| 2VDK | L_LYS_39  | NZ  | L_GLU_81  | OE2 | 3.076 |
| 2VDK | L_ARG_61  | NH2 | L_ASP_82  | OD1 | 3.150 |
| 2VDK | L_ARG_61  | NH2 | L_ASP_82  | OD2 | 3.695 |
| 2VDK | L_LYS_103 | NZ  | L_ASP_85  | OD1 | 3.316 |
| 2VDK | L_LYS_103 | NZ  | L_ASP_85  | OD2 | 3.639 |
| 2VDK | L_LYS_147 | NZ  | L_GLU_154 | OE1 | 3.768 |
| 2VDK | L_LYS_147 | NZ  | L_GLU_154 | OE2 | 3.469 |
| 2VDK | L_LYS_149 | NZ  | L_GLU_195 | OE1 | 3.051 |
| 2VDK | L_LYS_149 | NZ  | L_GLU_195 | OE2 | 3.550 |
| 2VDK | L_ARG_155 | NH1 | L_GLU_185 | OE1 | 3.070 |
| 2VDK | L_ARG_155 | NH1 | L_GLU_185 | OE2 | 3.757 |
| 2VDK | L_ARG_155 | NH2 | L_GLU_185 | OE1 | 3.874 |
| 2VDK | L_ARG_155 | NH2 | L_GLU_185 | OE2 | 3.166 |
| 2VDK | L_HIS_189 | ND1 | L_ASP_151 | OD1 | 2.842 |
| 2VDK | L_LYS_199 | NZ  | L_ASP_110 | OD2 | 3.918 |

Table 330: 2VDK-specific salt bridging networks analysis. In this table, a PDB file is specified with a four-letter PDB ID, except that the names of the PDB files corresponding to the single NMR structural model split from the NMR ensemble is specified with a four-letter PDB ID in addition to a hyphen followed by the single NMR structural model numeric ID, the residue naming scheme is **Chain ID\_residue name\_residue number**,  $\angle ADH$  represents the angle formed by acceptor (A), donor (D) and hydrogen (H) ( $\angle ADH$ ).

| PDB ID | Residue A | Atom A | Residue B | Atom B | Distance (Å) |
|--------|-----------|--------|-----------|--------|--------------|
| 2VDL   | A_HIS_30  | ND1    | A_GLU_136 | OE1    | 3.983        |
| 2VDL   | A_ARG_77  | NH1    | H_ASP_102 | OD1    | 3.566        |
| 2VDL   | A_ARG_77  | NH1    | H_ASP_102 | OD2    | 3.106        |
| 2VDL   | A_ARG_77  | NH2    | H_ASP_102 | OD1    | 2.722        |
| 2VDL   | A_ARG_77  | NH2    | H_ASP_102 | OD2    | 3.538        |
| 2VDL   | A_LYS_88  | NZ     | A_ASP_71  | OD2    | 3.901        |
| 2VDL   | A_LYS_88  | NZ     | A_GLU_75  | OE2    | 3.727        |
| 2VDL   | A_ARG_153 | NH2    | A_GLU_120 | OE1    | 3.211        |
| 2VDL   | A_ARG_153 | NH2    | A_GLU_120 | OE2    | 3.450        |
| 2VDL   | A_ARG_165 | NH1    | A_GLU_123 | OE1    | 3.959        |
| 2VDL   | A_ARG_165 | NH1    | A_GLU_123 | OE2    | 2.984        |
| 2VDL   | A_ARG_165 | NH2    | A_ASP_163 | OD1    | 2.925        |
| 2VDL   | A_ARG_165 | NH2    | A_ASP_163 | OD2    | 3.806        |
| 2VDL   | A_ARG_279 | NH2    | A_GLU_268 | OE2    | 3.603        |
| 2VDL   | A_ARG_317 | NH2    | A_GLU_315 | OE1    | 3.612        |
| 2VDL   | A_ARG_327 | NH1    | A_GLU_283 | OE1    | 2.900        |
| 2VDL   | A_ARG_327 | NH1    | A_GLU_283 | OE2    | 3.367        |
| 2VDL   | A_ARG_422 | NH1    | A_ASP_24  | OD1    | 2.923        |
| 2VDL   | A_ARG_422 | NH1    | A_ASP_24  | OD2    | 3.362        |
| 2VDL   | B_ARG_62  | NH2    | B_GLU_60  | OE2    | 3.680        |
| 2VDL   | B_ARG_67  | NH1    | B_GLU_65  | OE1    | 3.332        |
| 2VDL   | B_LYS_72  | NZ     | B_ASP_109 | OD1    | 2.951        |
| 2VDL   | B_LYS_72  | NZ     | B_ASP_109 | OD2    | 3.006        |
| 2VDL   | B_ARG_105 | NH1    | B_ASP_71  | OD1    | 3.378        |
| 2VDL   | B_LYS_159 | NZ     | B_ASP_224 | OD1    | 3.910        |
| 2VDL   | B_LYS_159 | NZ     | B_ASP_224 | OD2    | 2.697        |
| 2VDL   | B_ARG_214 | NH1    | B_ASP_179 | OD1    | 3.402        |
| 2VDL   | B_ARG_214 | NH1    | B_ASP_179 | OD2    | 3.426        |
| 2VDL   | B_ARG_214 | NH2    | B_ASP_179 | OD1    | 3.763        |
| 2VDL   | B_ARG_214 | NH2    | B_ASP_179 | OD2    | 3.522        |
| 2VDL   | B_ARG_216 | NH2    | A_GLU_123 | OE2    | 3.160        |
| 2VDL   | B_ARG_239 | NH2    | B_ASP_113 | OD2    | 2.965        |
| 2VDL   | B_HIS_244 | NE2    | B_ASP_113 | OD1    | 3.758        |
| 2VDL   | B_LYS_253 | NZ     | A_ASP_232 | OD2    | 2.886        |
| 2VDL   | B_HIS_255 | ND1    | B_ASP_259 | OD2    | 2.838        |
| 2VDL   | B_HIS_255 | NE2    | B_ASP_158 | OD2    | 3.301        |
| 2VDL   | B_HIS_255 | NE2    | B_ASP_217 | OD1    | 3.748        |
| 2VDL   | B_HIS_255 | NE2    | B_ASP_217 | OD2    | 2.696        |
| 2VDL   | B_HIS_274 | NE2    | B_ASP_270 | OD1    | 3.004        |
| 2VDL   | B_HIS_274 | NE2    | B_ASP_270 | OD2    | 2.721        |
| 2VDL   | B_LYS_298 | NZ     | B_GLU_297 | OE2    | 3.472        |
| 2VDL   | B_LYS_302 | NZ     | B_ASP_233 | OD1    | 3.054        |
| 2VDL   | B_LYS_302 | NZ     | B_ASP_233 | OD2    | 3.066        |
| 2VDL   | B_LYS_354 | NZ     | B_GLU_356 | OE1    | 2.717        |
| 2VDL   | B_ARG_360 | NH2    | B_GLU_358 | OE1    | 3.910        |
| 2VDL   | B_ARG_360 | NH2    | B_GLU_358 | OE2    | 3.469        |
| 2VDL   | B_ARG_404 | NH1    | B_GLU_364 | OE2    | 3.049        |
| 2VDL   | B_ARG_404 | NH2    | B_GLU_364 | OE2    | 3.073        |
| 2VDL   | B_LYS_417 | NZ     | B_GLU_358 | OE2    | 3.933        |
| 2VDL   | H_ARG_40  | NH2    | H_GLU_46  | OE1    | 3.013        |
| 2VDL   | H_ARG_40  | NH2    | H_GLU_46  | OE2    | 3.976        |
| 2VDL   | H_LYS_59  | NZ     | A_GLU_117 | OE2    | 3.964        |
| 2VDL   | H_LYS_67  | NZ     | H_ASP_90  | OD1    | 3.729        |
| 2VDL   | H_LYS_67  | NZ     | H_ASP_90  | OD2    | 2.693        |
| 2VDL   | H_LYS_214 | NZ     | L_GLU_123 | OE2    | 3.400        |
| 2VDL   | L_HIS_24  | ND1    | L_ASP_70  | OD1    | 2.670        |
| 2VDL   | L_HIS_24  | ND1    | L_ASP_70  | OD2    | 3.843        |

|      |           |     |           |     |       |
|------|-----------|-----|-----------|-----|-------|
| 2VDL | L_ARG_61  | NH2 | L_ASP_82  | OD1 | 3.133 |
| 2VDL | L_ARG_61  | NH2 | L_ASP_82  | OD2 | 3.618 |
| 2VDL | L_LYS_103 | NZ  | L_ASP_85  | OD1 | 3.222 |
| 2VDL | L_LYS_103 | NZ  | L_ASP_85  | OD2 | 3.662 |
| 2VDL | L_LYS_147 | NZ  | L_GLU_154 | OE1 | 3.870 |
| 2VDL | L_LYS_149 | NZ  | L_GLU_195 | OE1 | 3.028 |
| 2VDL | L_LYS_149 | NZ  | L_GLU_195 | OE2 | 3.950 |
| 2VDL | L_ARG_155 | NH1 | L_GLU_185 | OE1 | 3.118 |
| 2VDL | L_ARG_155 | NH1 | L_GLU_185 | OE2 | 3.879 |
| 2VDL | L_ARG_155 | NH2 | L_GLU_185 | OE1 | 3.756 |
| 2VDL | L_ARG_155 | NH2 | L_GLU_185 | OE2 | 3.072 |
| 2VDL | L_HIS_189 | ND1 | L_ASP_151 | OD1 | 2.876 |
| 2VDL | L_LYS_199 | NZ  | L_ASP_110 | OD2 | 3.382 |

Table 331: 2VDL-specific salt bridging networks analysis. In this table, a PDB file is specified with a four-letter PDB ID, except that the names of the PDB files corresponding to the single NMR structural model split from the NMR ensemble is specified with a four-letter PDB ID in addition to a hyphen followed by the single NMR structural model numeric ID, the residue naming scheme is **Chain ID\_residue name\_residue number**,  $\angle ADH$  represents the angle formed by acceptor (A), donor (D) and hydrogen (H) ( $\angle ADH$ ).

| PDB ID | Residue A | Atom A | Residue B | Atom B | Distance (Å) |
|--------|-----------|--------|-----------|--------|--------------|
| 2VDM   | A_HIS_30  | ND1    | A_GLU_136 | OE1    | 3.623        |
| 2VDM   | A_ARG_77  | NH1    | H_ASP_102 | OD1    | 3.512        |
| 2VDM   | A_ARG_77  | NH1    | H_ASP_102 | OD2    | 3.196        |
| 2VDM   | A_ARG_77  | NH2    | H_ASP_102 | OD1    | 2.762        |
| 2VDM   | A_ARG_77  | NH2    | H_ASP_102 | OD2    | 3.757        |
| 2VDM   | A_LYS_88  | NZ     | A_ASP_71  | OD1    | 3.506        |
| 2VDM   | A_LYS_88  | NZ     | A_GLU_75  | OE2    | 3.717        |
| 2VDM   | A_ARG_153 | NH1    | A_GLU_157 | OE2    | 3.526        |
| 2VDM   | A_ARG_153 | NH2    | A_GLU_120 | OE1    | 3.629        |
| 2VDM   | A_ARG_153 | NH2    | A_GLU_120 | OE2    | 3.472        |
| 2VDM   | A_ARG_165 | NH1    | A_GLU_123 | OE1    | 3.954        |
| 2VDM   | A_ARG_165 | NH1    | A_GLU_123 | OE2    | 2.915        |
| 2VDM   | A_ARG_165 | NH2    | A_ASP_163 | OD1    | 2.984        |
| 2VDM   | A_ARG_279 | NH2    | A_GLU_268 | OE2    | 3.711        |
| 2VDM   | A_ARG_317 | NH2    | A_GLU_315 | OE1    | 3.553        |
| 2VDM   | A_ARG_327 | NH1    | A_GLU_283 | OE1    | 3.196        |
| 2VDM   | A_ARG_327 | NH1    | A_GLU_283 | OE2    | 3.335        |
| 2VDM   | A_ARG_422 | NH1    | A_ASP_24  | OD1    | 2.877        |
| 2VDM   | A_ARG_422 | NH1    | A_ASP_24  | OD2    | 3.314        |
| 2VDM   | B_ARG_62  | NH2    | B_GLU_60  | OE2    | 3.866        |
| 2VDM   | B_LYS_72  | NZ     | B_ASP_109 | OD1    | 2.865        |
| 2VDM   | B_LYS_72  | NZ     | B_ASP_109 | OD2    | 3.109        |
| 2VDM   | B_ARG_91  | NH2    | B_GLU_60  | OE1    | 3.150        |
| 2VDM   | B_ARG_105 | NH1    | B_ASP_71  | OD1    | 3.646        |
| 2VDM   | B_LYS_159 | NZ     | B_ASP_224 | OD1    | 3.821        |
| 2VDM   | B_LYS_159 | NZ     | B_ASP_224 | OD2    | 2.737        |
| 2VDM   | B_LYS_209 | NZ     | B_GLU_206 | OE2    | 3.484        |
| 2VDM   | B_ARG_214 | NH1    | B_ASP_179 | OD2    | 3.120        |
| 2VDM   | B_ARG_216 | NH2    | A_GLU_123 | OE2    | 2.982        |
| 2VDM   | B_ARG_239 | NH2    | B_ASP_113 | OD2    | 3.117        |
| 2VDM   | B_HIS_244 | NE2    | B_ASP_113 | OD1    | 3.810        |
| 2VDM   | B_LYS_253 | NZ     | A_ASP_232 | OD2    | 3.306        |
| 2VDM   | B_HIS_255 | ND1    | B_ASP_259 | OD2    | 2.883        |
| 2VDM   | B_HIS_255 | NE2    | B_ASP_158 | OD2    | 3.162        |
| 2VDM   | B_HIS_255 | NE2    | B_ASP_217 | OD1    | 3.723        |
| 2VDM   | B_HIS_255 | NE2    | B_ASP_217 | OD2    | 2.768        |
| 2VDM   | B_HIS_274 | NE2    | B_ASP_270 | OD1    | 3.033        |
| 2VDM   | B_HIS_274 | NE2    | B_ASP_270 | OD2    | 2.759        |
| 2VDM   | B_HIS_280 | ND1    | B_ASP_278 | OD2    | 3.990        |
| 2VDM   | B_LYS_298 | NZ     | B_GLU_297 | OE2    | 3.783        |
| 2VDM   | B_LYS_302 | NZ     | B_ASP_233 | OD1    | 3.512        |
| 2VDM   | B_LYS_302 | NZ     | B_ASP_233 | OD2    | 3.089        |
| 2VDM   | B_LYS_354 | NZ     | B_GLU_356 | OE1    | 2.934        |
| 2VDM   | B_LYS_354 | NZ     | B_GLU_356 | OE2    | 3.448        |
| 2VDM   | B_ARG_360 | NH2    | B_GLU_358 | OE2    | 3.602        |
| 2VDM   | B_LYS_390 | NZ     | B_ASP_393 | OD1    | 3.190        |
| 2VDM   | B_ARG_404 | NH1    | B_GLU_364 | OE2    | 3.379        |
| 2VDM   | B_ARG_404 | NH2    | B_GLU_364 | OE2    | 3.556        |
| 2VDM   | B_LYS_412 | NZ     | B_GLU_365 | OE1    | 2.778        |
| 2VDM   | B_LYS_412 | NZ     | B_GLU_365 | OE2    | 3.744        |
| 2VDM   | B_LYS_417 | NZ     | B_GLU_358 | OE2    | 3.687        |
| 2VDM   | H_ARG_40  | NH2    | H_GLU_46  | OE1    | 3.139        |
| 2VDM   | H_LYS_67  | NZ     | H_ASP_90  | OD1    | 3.953        |
| 2VDM   | H_LYS_67  | NZ     | H_ASP_90  | OD2    | 2.810        |
| 2VDM   | H_LYS_214 | NZ     | L_GLU_123 | OE2    | 3.334        |
| 2VDM   | H_LYS_215 | NZ     | H_GLU_217 | OE1    | 3.652        |
| 2VDM   | L_HIS_24  | ND1    | L_ASP_70  | OD1    | 2.661        |



|      |           |     |           |     |       |
|------|-----------|-----|-----------|-----|-------|
| 2VDM | L_HIS_24  | ND1 | L_ASP_70  | OD2 | 3.812 |
| 2VDM | L_LYS_39  | NZ  | L_GLU_81  | OE2 | 3.325 |
| 2VDM | L_ARG_61  | NH2 | L_ASP_79  | OD1 | 3.812 |
| 2VDM | L_ARG_61  | NH2 | L_ASP_82  | OD1 | 3.292 |
| 2VDM | L_ARG_61  | NH2 | L_ASP_82  | OD2 | 3.719 |
| 2VDM | L_LYS_103 | NZ  | L_ASP_85  | OD1 | 2.836 |
| 2VDM | L_LYS_103 | NZ  | L_ASP_85  | OD2 | 3.351 |
| 2VDM | L_LYS_147 | NZ  | L_GLU_154 | OE1 | 3.824 |
| 2VDM | L_LYS_147 | NZ  | L_GLU_154 | OE2 | 3.630 |
| 2VDM | L_LYS_149 | NZ  | L_GLU_195 | OE1 | 3.194 |
| 2VDM | L_LYS_149 | NZ  | L_GLU_195 | OE2 | 3.563 |
| 2VDM | L_ARG_155 | NH1 | L_GLU_185 | OE1 | 3.186 |
| 2VDM | L_ARG_155 | NH2 | L_GLU_185 | OE1 | 3.687 |
| 2VDM | L_ARG_155 | NH2 | L_GLU_185 | OE2 | 3.288 |
| 2VDM | L_HIS_189 | ND1 | L_ASP_151 | OD1 | 2.728 |
| 2VDM | L_LYS_199 | NZ  | L_ASP_110 | OD2 | 3.757 |

Table 332: 2VDM-specific salt bridging networks analysis. In this table, a PDB file is specified with a four-letter PDB ID, except that the names of the PDB files corresponding to the single NMR structural model split from the NMR ensemble is specified with a four-letter PDB ID in addition to a hyphen followed by the single NMR structural model numeric ID, the residue naming scheme is **Chain ID\_residue name\_residue number**,  $\angle ADH$  represents the angle formed by acceptor (A), donor (D) and hydrogen (H) ( $\angle ADH$ ).

| PDB ID | Residue A | Atom A | Residue B | Atom B | Distance (Å) |
|--------|-----------|--------|-----------|--------|--------------|
| 2VDN   | A_HIS_30  | ND1    | A_GLU_136 | OE1    | 3.948        |
| 2VDN   | A_ARG_77  | NH1    | H_ASP_102 | OD1    | 3.491        |
| 2VDN   | A_ARG_77  | NH1    | H_ASP_102 | OD2    | 3.169        |
| 2VDN   | A_ARG_77  | NH2    | H_ASP_102 | OD1    | 2.808        |
| 2VDN   | A_ARG_77  | NH2    | H_ASP_102 | OD2    | 3.762        |
| 2VDN   | A_LYS_88  | NZ     | A_ASP_71  | OD1    | 3.146        |
| 2VDN   | A_LYS_88  | NZ     | A_GLU_75  | OE2    | 3.755        |
| 2VDN   | A_ARG_153 | NH1    | A_GLU_157 | OE2    | 3.732        |
| 2VDN   | A_ARG_153 | NH2    | A_GLU_120 | OE1    | 3.385        |
| 2VDN   | A_ARG_153 | NH2    | A_GLU_120 | OE2    | 3.434        |
| 2VDN   | A_ARG_165 | NH1    | A_GLU_123 | OE1    | 3.564        |
| 2VDN   | A_ARG_165 | NH1    | A_GLU_123 | OE2    | 3.322        |
| 2VDN   | A_ARG_165 | NH2    | A_ASP_163 | OD1    | 2.897        |
| 2VDN   | A_ARG_165 | NH2    | A_ASP_163 | OD2    | 3.963        |
| 2VDN   | A_ARG_317 | NH2    | A_GLU_315 | OE1    | 3.869        |
| 2VDN   | A_ARG_327 | NH1    | A_GLU_283 | OE1    | 3.115        |
| 2VDN   | A_ARG_327 | NH1    | A_GLU_283 | OE2    | 3.543        |
| 2VDN   | A_ARG_422 | NH1    | A_ASP_24  | OD1    | 2.918        |
| 2VDN   | A_ARG_422 | NH1    | A_ASP_24  | OD2    | 3.024        |
| 2VDN   | A_ARG_422 | NH2    | A_ASP_24  | OD2    | 3.873        |
| 2VDN   | B_ARG_62  | NH2    | B_GLU_60  | OE1    | 3.892        |
| 2VDN   | B_ARG_62  | NH2    | B_GLU_60  | OE2    | 3.874        |
| 2VDN   | B_ARG_67  | NH1    | B_GLU_65  | OE1    | 3.311        |
| 2VDN   | B_LYS_72  | NZ     | B_ASP_109 | OD1    | 2.643        |
| 2VDN   | B_LYS_72  | NZ     | B_ASP_109 | OD2    | 3.617        |
| 2VDN   | B_ARG_87  | NH2    | B_GLU_65  | OE2    | 3.986        |
| 2VDN   | B_ARG_91  | NH1    | B_GLU_60  | OE2    | 3.487        |
| 2VDN   | B_ARG_91  | NH2    | B_GLU_60  | OE2    | 3.817        |
| 2VDN   | B_ARG_105 | NH1    | B_ASP_71  | OD1    | 3.631        |
| 2VDN   | B_LYS_159 | NZ     | B_ASP_224 | OD1    | 3.745        |
| 2VDN   | B_LYS_159 | NZ     | B_ASP_224 | OD2    | 2.600        |
| 2VDN   | B_LYS_209 | NZ     | B_GLU_206 | OE2    | 3.458        |
| 2VDN   | B_ARG_214 | NH1    | B_ASP_179 | OD2    | 2.971        |
| 2VDN   | B_ARG_214 | NH2    | B_ASP_179 | OD2    | 3.917        |
| 2VDN   | B_ARG_216 | NH2    | A_GLU_123 | OE2    | 2.995        |
| 2VDN   | B_ARG_239 | NH2    | B_ASP_113 | OD2    | 3.167        |
| 2VDN   | B_HIS_244 | NE2    | B_ASP_113 | OD1    | 3.751        |
| 2VDN   | B_HIS_255 | ND1    | B_ASP_259 | OD2    | 2.831        |
| 2VDN   | B_HIS_255 | NE2    | B_ASP_158 | OD2    | 3.236        |
| 2VDN   | B_HIS_255 | NE2    | B_ASP_217 | OD1    | 3.761        |
| 2VDN   | B_HIS_255 | NE2    | B_ASP_217 | OD2    | 2.725        |
| 2VDN   | B_HIS_274 | NE2    | B_ASP_270 | OD1    | 3.136        |
| 2VDN   | B_HIS_274 | NE2    | B_ASP_270 | OD2    | 2.767        |
| 2VDN   | B_HIS_280 | ND1    | B_ASP_278 | OD2    | 3.961        |
| 2VDN   | B_LYS_302 | NZ     | B_ASP_233 | OD1    | 3.616        |
| 2VDN   | B_LYS_302 | NZ     | B_ASP_233 | OD2    | 3.020        |
| 2VDN   | B_LYS_354 | NZ     | B_GLU_356 | OE1    | 2.617        |
| 2VDN   | B_ARG_360 | NH2    | B_GLU_358 | OE2    | 3.301        |
| 2VDN   | B_LYS_390 | NZ     | B_ASP_393 | OD1    | 3.452        |
| 2VDN   | B_ARG_404 | NH1    | B_GLU_364 | OE2    | 3.371        |
| 2VDN   | B_ARG_404 | NH2    | B_GLU_364 | OE2    | 2.851        |
| 2VDN   | B_LYS_412 | NZ     | B_GLU_365 | OE1    | 2.766        |
| 2VDN   | B_LYS_412 | NZ     | B_GLU_365 | OE2    | 3.273        |
| 2VDN   | B_LYS_412 | NZ     | B_GLU_409 | OE2    | 3.840        |
| 2VDN   | B_LYS_417 | NZ     | B_GLU_358 | OE2    | 3.820        |
| 2VDN   | H_ARG_40  | NH2    | H_GLU_46  | OE1    | 3.092        |
| 2VDN   | H_LYS_67  | NZ     | H_ASP_90  | OD1    | 3.750        |

|      |           |     |           |     |       |
|------|-----------|-----|-----------|-----|-------|
| 2VDN | H_LYS_67  | NZ  | H_ASP_90  | OD2 | 2.688 |
| 2VDN | H_LYS_214 | NZ  | L_GLU_123 | OE2 | 3.685 |
| 2VDN | H_LYS_215 | NZ  | H_GLU_217 | OE1 | 3.744 |
| 2VDN | L_HIS_24  | ND1 | L_ASP_70  | OD1 | 2.783 |
| 2VDN | L_LYS_39  | NZ  | L_GLU_81  | OE2 | 3.138 |
| 2VDN | L_ARG_61  | NH2 | L_ASP_82  | OD1 | 3.159 |
| 2VDN | L_ARG_61  | NH2 | L_ASP_82  | OD2 | 3.820 |
| 2VDN | L_LYS_103 | NZ  | L_ASP_85  | OD1 | 3.058 |
| 2VDN | L_LYS_103 | NZ  | L_ASP_85  | OD2 | 3.355 |
| 2VDN | L_LYS_147 | NZ  | L_GLU_154 | OE1 | 3.309 |
| 2VDN | L_LYS_147 | NZ  | L_GLU_154 | OE2 | 3.600 |
| 2VDN | L_LYS_149 | NZ  | L_GLU_195 | OE1 | 3.164 |
| 2VDN | L_LYS_149 | NZ  | L_GLU_195 | OE2 | 3.705 |
| 2VDN | L_ARG_155 | NH1 | L_GLU_185 | OE1 | 3.044 |
| 2VDN | L_ARG_155 | NH1 | L_GLU_185 | OE2 | 3.873 |
| 2VDN | L_ARG_155 | NH2 | L_GLU_185 | OE1 | 3.640 |
| 2VDN | L_ARG_155 | NH2 | L_GLU_185 | OE2 | 3.207 |
| 2VDN | L_LYS_199 | NZ  | L_ASP_110 | OD2 | 3.394 |

Table 333: 2VDN-specific salt bridging networks analysis. In this table, a PDB file is specified with a four-letter PDB ID, except that the names of the PDB files corresponding to the single NMR structural model split from the NMR ensemble is specified with a four-letter PDB ID in addition to a hyphen followed by the single NMR structural model numeric ID, the residue naming scheme is **Chain ID\_residue name\_residue number**,  $\angle ADH$  represents the angle formed by acceptor (A), donor (D) and hydrogen (H) ( $\angle ADH$ ).

| PDB ID | Residue A | Atom A | Residue B | Atom B | Distance (Å) |
|--------|-----------|--------|-----------|--------|--------------|
| 2VDO   | A_HIS_30  | ND1    | A_GLU_136 | OE1    | 3.920        |
| 2VDO   | A_ARG_77  | NH1    | H_ASP_102 | OD1    | 3.703        |
| 2VDO   | A_ARG_77  | NH1    | H_ASP_102 | OD2    | 3.042        |
| 2VDO   | A_ARG_77  | NH2    | H_ASP_102 | OD1    | 2.789        |
| 2VDO   | A_ARG_77  | NH2    | H_ASP_102 | OD2    | 3.375        |
| 2VDO   | A_LYS_88  | NZ     | A_GLU_75  | OE2    | 3.810        |
| 2VDO   | A_ARG_153 | NH1    | A_GLU_157 | OE2    | 3.784        |
| 2VDO   | A_ARG_153 | NH2    | A_GLU_120 | OE1    | 3.533        |
| 2VDO   | A_ARG_153 | NH2    | A_GLU_120 | OE2    | 3.754        |
| 2VDO   | A_ARG_165 | NH1    | A_GLU_123 | OE1    | 3.613        |
| 2VDO   | A_ARG_165 | NH1    | A_GLU_123 | OE2    | 3.354        |
| 2VDO   | A_ARG_165 | NH2    | A_ASP_163 | OD1    | 2.853        |
| 2VDO   | A_ARG_165 | NH2    | A_ASP_163 | OD2    | 3.749        |
| 2VDO   | A_ARG_279 | NH2    | A_GLU_268 | OE2    | 3.621        |
| 2VDO   | A_ARG_303 | NH2    | A_ASP_301 | OD2    | 3.328        |
| 2VDO   | A_ARG_317 | NH2    | A_GLU_315 | OE1    | 3.691        |
| 2VDO   | A_ARG_327 | NH1    | A_GLU_283 | OE1    | 3.064        |
| 2VDO   | A_ARG_327 | NH1    | A_GLU_283 | OE2    | 3.315        |
| 2VDO   | A_ARG_422 | NH1    | A_ASP_24  | OD1    | 3.045        |
| 2VDO   | A_ARG_422 | NH1    | A_ASP_24  | OD2    | 3.220        |
| 2VDO   | A_ARG_422 | NH2    | A_ASP_24  | OD2    | 3.964        |
| 2VDO   | B_LYS_72  | NZ     | B_ASP_109 | OD1    | 2.524        |
| 2VDO   | B_LYS_72  | NZ     | B_ASP_109 | OD2    | 3.663        |
| 2VDO   | B_ARG_91  | NH1    | B_GLU_60  | OE1    | 3.543        |
| 2VDO   | B_ARG_105 | NH1    | B_ASP_71  | OD1    | 3.285        |
| 2VDO   | B_LYS_159 | NZ     | B_ASP_224 | OD1    | 3.842        |
| 2VDO   | B_LYS_159 | NZ     | B_ASP_224 | OD2    | 2.647        |
| 2VDO   | B_LYS_209 | NZ     | B_GLU_206 | OE2    | 3.221        |
| 2VDO   | B_ARG_214 | NH1    | B_ASP_179 | OD1    | 3.754        |
| 2VDO   | B_ARG_214 | NH1    | B_ASP_179 | OD2    | 2.724        |
| 2VDO   | B_ARG_216 | NH2    | A_GLU_123 | OE2    | 3.092        |
| 2VDO   | B_ARG_239 | NH2    | B_ASP_113 | OD2    | 2.947        |
| 2VDO   | B_HIS_244 | NE2    | B_ASP_113 | OD1    | 3.778        |
| 2VDO   | B_LYS_253 | NZ     | A_ASP_232 | OD2    | 2.836        |
| 2VDO   | B_HIS_255 | ND1    | B_ASP_259 | OD2    | 2.644        |
| 2VDO   | B_HIS_255 | NE2    | B_ASP_158 | OD2    | 3.337        |
| 2VDO   | B_HIS_255 | NE2    | B_ASP_217 | OD1    | 3.680        |
| 2VDO   | B_HIS_255 | NE2    | B_ASP_217 | OD2    | 2.699        |
| 2VDO   | B_HIS_274 | NE2    | B_ASP_270 | OD1    | 3.105        |
| 2VDO   | B_HIS_274 | NE2    | B_ASP_270 | OD2    | 2.754        |
| 2VDO   | B_HIS_280 | ND1    | B_ASP_278 | OD2    | 3.796        |
| 2VDO   | B_LYS_298 | NZ     | B_GLU_297 | OE2    | 3.249        |
| 2VDO   | B_LYS_302 | NZ     | B_ASP_233 | OD1    | 3.475        |
| 2VDO   | B_LYS_302 | NZ     | B_ASP_233 | OD2    | 3.319        |
| 2VDO   | B_LYS_354 | NZ     | B_GLU_356 | OE1    | 2.694        |
| 2VDO   | B_LYS_390 | NZ     | B_ASP_393 | OD1    | 2.830        |
| 2VDO   | B_LYS_390 | NZ     | B_ASP_393 | OD2    | 3.993        |
| 2VDO   | B_ARG_404 | NH1    | B_GLU_364 | OE2    | 3.382        |
| 2VDO   | B_ARG_404 | NH2    | B_GLU_364 | OE2    | 2.912        |
| 2VDO   | C_LYS_406 | NZ     | A_ASP_224 | OD1    | 2.673        |
| 2VDO   | C_LYS_406 | NZ     | A_ASP_224 | OD2    | 3.263        |
| 2VDO   | H_ARG_40  | NH2    | H_GLU_46  | OE1    | 3.274        |
| 2VDO   | H_LYS_67  | NZ     | H_ASP_90  | OD1    | 3.624        |
| 2VDO   | H_LYS_67  | NZ     | H_ASP_90  | OD2    | 2.582        |
| 2VDO   | L_HIS_24  | ND1    | L_ASP_70  | OD1    | 2.820        |
| 2VDO   | L_HIS_24  | ND1    | L_ASP_70  | OD2    | 3.898        |
| 2VDO   | L_LYS_39  | NZ     | L_GLU_81  | OE1    | 3.127        |

|      |           |     |           |     |       |
|------|-----------|-----|-----------|-----|-------|
| 2VDO | L_ARG_61  | NH2 | L_ASP_82  | OD1 | 3.036 |
| 2VDO | L_ARG_61  | NH2 | L_ASP_82  | OD2 | 3.553 |
| 2VDO | L_LYS_103 | NZ  | L_ASP_85  | OD1 | 3.186 |
| 2VDO | L_LYS_103 | NZ  | L_ASP_85  | OD2 | 3.792 |
| 2VDO | L_LYS_147 | NZ  | L_GLU_154 | OE1 | 3.276 |
| 2VDO | L_LYS_147 | NZ  | L_GLU_154 | OE2 | 3.435 |
| 2VDO | L_LYS_149 | NZ  | L_GLU_195 | OE1 | 3.199 |
| 2VDO | L_LYS_149 | NZ  | L_GLU_195 | OE2 | 3.780 |
| 2VDO | L_HIS_189 | ND1 | L_ASP_151 | OD1 | 2.775 |
| 2VDO | L_LYS_199 | NZ  | L_ASP_110 | OD2 | 3.339 |

Table 334: 2VDO-specific salt bridging networks analysis. In this table, a PDB file is specified with a four-letter PDB ID, except that the names of the PDB files corresponding to the single NMR structural model split from the NMR ensemble is specified with a four-letter PDB ID in addition to a hyphen followed by the single NMR structural model numeric ID, the residue naming scheme is **Chain ID\_residue name\_residue number**,  $\angle ADH$  represents the angle formed by acceptor (A), donor (D) and hydrogen (H) ( $\angle ADH$ ).

| PDB ID | Residue A | Atom A | Residue B | Atom B | Distance (Å) |
|--------|-----------|--------|-----------|--------|--------------|
| 2VDP   | A_HIS_30  | ND1    | A_GLU_136 | OE1    | 3.660        |
| 2VDP   | A_ARG_77  | NH1    | H_ASP_102 | OD1    | 3.519        |
| 2VDP   | A_ARG_77  | NH1    | H_ASP_102 | OD2    | 3.089        |
| 2VDP   | A_ARG_77  | NH2    | H_ASP_102 | OD1    | 2.733        |
| 2VDP   | A_ARG_77  | NH2    | H_ASP_102 | OD2    | 3.585        |
| 2VDP   | A_LYS_88  | NZ     | A_ASP_71  | OD1    | 3.039        |
| 2VDP   | A_LYS_88  | NZ     | A_GLU_75  | OE2    | 3.920        |
| 2VDP   | A_ARG_153 | NH1    | A_GLU_157 | OE1    | 3.962        |
| 2VDP   | A_ARG_153 | NH1    | A_GLU_157 | OE2    | 3.572        |
| 2VDP   | A_ARG_153 | NH2    | A_GLU_120 | OE1    | 3.448        |
| 2VDP   | A_ARG_153 | NH2    | A_GLU_120 | OE2    | 3.842        |
| 2VDP   | A_ARG_165 | NH1    | A_GLU_123 | OE2    | 2.955        |
| 2VDP   | A_ARG_165 | NH2    | A_ASP_163 | OD1    | 2.890        |
| 2VDP   | A_ARG_165 | NH2    | A_ASP_163 | OD2    | 3.894        |
| 2VDP   | A_ARG_279 | NH2    | A_GLU_268 | OE2    | 3.568        |
| 2VDP   | A_ARG_303 | NH2    | A_ASP_301 | OD2    | 3.133        |
| 2VDP   | A_ARG_317 | NH2    | A_GLU_315 | OE1    | 3.662        |
| 2VDP   | A_ARG_327 | NH1    | A_GLU_283 | OE1    | 3.008        |
| 2VDP   | A_ARG_327 | NH1    | A_GLU_283 | OE2    | 3.186        |
| 2VDP   | A_ARG_422 | NH1    | A_ASP_24  | OD1    | 3.204        |
| 2VDP   | A_ARG_422 | NH1    | A_ASP_24  | OD2    | 3.337        |
| 2VDP   | B_LYS_72  | NZ     | B_ASP_109 | OD1    | 2.827        |
| 2VDP   | B_LYS_72  | NZ     | B_ASP_109 | OD2    | 3.031        |
| 2VDP   | B_ARG_105 | NH1    | B_ASP_71  | OD1    | 3.982        |
| 2VDP   | B_LYS_159 | NZ     | B_ASP_224 | OD1    | 3.737        |
| 2VDP   | B_LYS_159 | NZ     | B_ASP_224 | OD2    | 2.652        |
| 2VDP   | B_ARG_214 | NH1    | B_ASP_179 | OD1    | 3.890        |
| 2VDP   | B_ARG_214 | NH1    | B_ASP_179 | OD2    | 2.793        |
| 2VDP   | B_ARG_214 | NH2    | B_ASP_179 | OD1    | 3.782        |
| 2VDP   | B_ARG_214 | NH2    | B_ASP_179 | OD2    | 3.940        |
| 2VDP   | B_ARG_216 | NH2    | A_GLU_123 | OE2    | 3.038        |
| 2VDP   | B_ARG_239 | NH2    | B_ASP_113 | OD2    | 3.143        |
| 2VDP   | B_HIS_244 | NE2    | B_ASP_113 | OD1    | 3.933        |
| 2VDP   | B_LYS_253 | NZ     | A_ASP_232 | OD2    | 2.914        |
| 2VDP   | B_HIS_255 | ND1    | B_ASP_259 | OD2    | 2.924        |
| 2VDP   | B_HIS_255 | NE2    | B_ASP_158 | OD2    | 3.261        |
| 2VDP   | B_HIS_255 | NE2    | B_ASP_217 | OD1    | 3.670        |
| 2VDP   | B_HIS_255 | NE2    | B_ASP_217 | OD2    | 2.811        |
| 2VDP   | B_HIS_274 | NE2    | B_ASP_270 | OD1    | 2.909        |
| 2VDP   | B_HIS_274 | NE2    | B_ASP_270 | OD2    | 2.812        |
| 2VDP   | B_HIS_280 | ND1    | B_ASP_278 | OD2    | 3.653        |
| 2VDP   | B_LYS_298 | NZ     | B_GLU_297 | OE2    | 3.585        |
| 2VDP   | B_LYS_302 | NZ     | B_ASP_233 | OD1    | 3.588        |
| 2VDP   | B_LYS_302 | NZ     | B_ASP_233 | OD2    | 3.086        |
| 2VDP   | B_LYS_354 | NZ     | B_GLU_356 | OE1    | 2.651        |
| 2VDP   | B_ARG_360 | NH2    | B_GLU_358 | OE2    | 3.559        |
| 2VDP   | B_LYS_390 | NZ     | B_ASP_393 | OD1    | 2.846        |
| 2VDP   | B_LYS_412 | NZ     | B_GLU_365 | OE1    | 2.691        |
| 2VDP   | B_LYS_412 | NZ     | B_GLU_365 | OE2    | 3.358        |
| 2VDP   | C_LYS_406 | NZ     | A_ASP_224 | OD1    | 2.604        |
| 2VDP   | C_LYS_406 | NZ     | A_ASP_224 | OD2    | 3.297        |
| 2VDP   | H_ARG_40  | NH2    | H_GLU_46  | OE1    | 3.121        |
| 2VDP   | H_LYS_67  | NZ     | H_ASP_90  | OD1    | 3.700        |
| 2VDP   | H_LYS_67  | NZ     | H_ASP_90  | OD2    | 2.763        |
| 2VDP   | H_LYS_214 | NZ     | L_GLU_123 | OE2    | 3.425        |
| 2VDP   | L_HIS_24  | ND1    | L_ASP_70  | OD1    | 2.731        |
| 2VDP   | L_HIS_24  | ND1    | L_ASP_70  | OD2    | 3.759        |

|      |           |     |           |     |       |
|------|-----------|-----|-----------|-----|-------|
| 2VDP | L_LYS_39  | NZ  | L_GLU_81  | OE1 | 3.012 |
| 2VDP | L_ARG_61  | NH2 | L_ASP_82  | OD1 | 3.212 |
| 2VDP | L_ARG_61  | NH2 | L_ASP_82  | OD2 | 3.647 |
| 2VDP | L_LYS_103 | NZ  | L_ASP_85  | OD1 | 3.404 |
| 2VDP | L_LYS_103 | NZ  | L_ASP_85  | OD2 | 3.147 |
| 2VDP | L_LYS_147 | NZ  | L_GLU_154 | OE1 | 3.927 |
| 2VDP | L_LYS_147 | NZ  | L_GLU_154 | OE2 | 3.984 |
| 2VDP | L_LYS_149 | NZ  | L_GLU_195 | OE1 | 3.337 |
| 2VDP | L_LYS_149 | NZ  | L_GLU_195 | OE2 | 3.651 |
| 2VDP | L_ARG_155 | NH1 | L_GLU_185 | OE1 | 3.124 |
| 2VDP | L_ARG_155 | NH1 | L_GLU_185 | OE2 | 3.854 |
| 2VDP | L_ARG_155 | NH2 | L_GLU_185 | OE1 | 3.803 |
| 2VDP | L_ARG_155 | NH2 | L_GLU_185 | OE2 | 3.129 |
| 2VDP | L_HIS_189 | ND1 | L_ASP_151 | OD1 | 3.064 |
| 2VDP | L_LYS_199 | NZ  | L_ASP_110 | OD2 | 3.415 |

Table 335: 2VDP-specific salt bridging networks analysis. In this table, a PDB file is specified with a four-letter PDB ID, except that the names of the PDB files corresponding to the single NMR structural model split from the NMR ensemble is specified with a four-letter PDB ID in addition to a hyphen followed by the single NMR structural model numeric ID, the residue naming scheme is **Chain ID\_residue name\_residue number**,  $\angle ADH$  represents the angle formed by acceptor (A), donor (D) and hydrogen (H) ( $\angle ADH$ ).

| PDB ID | Residue A | Atom A | Residue B | Atom B | Distance (Å) |
|--------|-----------|--------|-----------|--------|--------------|
| 2VDQ   | A_ARG_77  | NH1    | H_ASP_102 | OD1    | 3.603        |
| 2VDQ   | A_ARG_77  | NH1    | H_ASP_102 | OD2    | 3.057        |
| 2VDQ   | A_ARG_77  | NH2    | H_ASP_102 | OD1    | 2.765        |
| 2VDQ   | A_ARG_77  | NH2    | H_ASP_102 | OD2    | 3.398        |
| 2VDQ   | A_LYS_88  | NZ     | A_GLU_75  | OE2    | 3.857        |
| 2VDQ   | A_ARG_153 | NH1    | A_GLU_157 | OE2    | 3.540        |
| 2VDQ   | A_ARG_153 | NH2    | A_GLU_120 | OE1    | 3.469        |
| 2VDQ   | A_ARG_153 | NH2    | A_GLU_120 | OE2    | 3.910        |
| 2VDQ   | A_ARG_165 | NH1    | A_GLU_123 | OE1    | 3.775        |
| 2VDQ   | A_ARG_165 | NH1    | A_GLU_123 | OE2    | 3.560        |
| 2VDQ   | A_ARG_165 | NH2    | A_ASP_163 | OD1    | 2.874        |
| 2VDQ   | A_ARG_165 | NH2    | A_ASP_163 | OD2    | 3.776        |
| 2VDQ   | A_ARG_279 | NH2    | A_GLU_268 | OE2    | 3.474        |
| 2VDQ   | A_ARG_317 | NH2    | A_GLU_315 | OE1    | 3.631        |
| 2VDQ   | A_ARG_327 | NH1    | A_GLU_283 | OE1    | 3.069        |
| 2VDQ   | A_ARG_327 | NH1    | A_GLU_283 | OE2    | 3.317        |
| 2VDQ   | A_ARG_422 | NH1    | A_ASP_24  | OD1    | 2.959        |
| 2VDQ   | A_ARG_422 | NH1    | A_ASP_24  | OD2    | 3.217        |
| 2VDQ   | B_ARG_67  | NH1    | B_GLU_65  | OE1    | 3.626        |
| 2VDQ   | B_LYS_72  | NZ     | B_ASP_109 | OD1    | 2.465        |
| 2VDQ   | B_LYS_72  | NZ     | B_ASP_109 | OD2    | 3.694        |
| 2VDQ   | B_ARG_91  | NH1    | B_GLU_60  | OE1    | 3.580        |
| 2VDQ   | B_ARG_91  | NH2    | B_GLU_60  | OE1    | 2.967        |
| 2VDQ   | B_ARG_105 | NH1    | B_ASP_71  | OD1    | 3.573        |
| 2VDQ   | B_LYS_159 | NZ     | B_ASP_224 | OD1    | 3.868        |
| 2VDQ   | B_LYS_159 | NZ     | B_ASP_224 | OD2    | 2.786        |
| 2VDQ   | B_LYS_209 | NZ     | B_GLU_206 | OE2    | 3.302        |
| 2VDQ   | B_ARG_214 | NH1    | B_ASP_179 | OD1    | 3.942        |
| 2VDQ   | B_ARG_214 | NH1    | B_ASP_179 | OD2    | 2.723        |
| 2VDQ   | B_ARG_216 | NH2    | A_GLU_123 | OE2    | 2.900        |
| 2VDQ   | B_ARG_239 | NH2    | B_ASP_113 | OD2    | 2.900        |
| 2VDQ   | B_HIS_244 | NE2    | B_ASP_113 | OD1    | 3.769        |
| 2VDQ   | B_LYS_253 | NZ     | A_ASP_232 | OD2    | 3.522        |
| 2VDQ   | B_HIS_255 | ND1    | B_ASP_259 | OD2    | 2.795        |
| 2VDQ   | B_HIS_255 | NE2    | B_ASP_158 | OD2    | 3.253        |
| 2VDQ   | B_HIS_255 | NE2    | B_ASP_217 | OD1    | 3.618        |
| 2VDQ   | B_HIS_255 | NE2    | B_ASP_217 | OD2    | 2.719        |
| 2VDQ   | B_HIS_274 | NE2    | B_ASP_270 | OD1    | 3.015        |
| 2VDQ   | B_HIS_274 | NE2    | B_ASP_270 | OD2    | 2.786        |
| 2VDQ   | B_HIS_280 | ND1    | B_ASP_278 | OD2    | 3.936        |
| 2VDQ   | B_LYS_298 | NZ     | B_GLU_297 | OE2    | 3.339        |
| 2VDQ   | B_LYS_302 | NZ     | B_ASP_233 | OD1    | 3.182        |
| 2VDQ   | B_LYS_302 | NZ     | B_ASP_233 | OD2    | 3.177        |
| 2VDQ   | B_LYS_354 | NZ     | B_GLU_356 | OE1    | 2.632        |
| 2VDQ   | B_ARG_360 | NH2    | B_GLU_358 | OE2    | 3.805        |
| 2VDQ   | B_LYS_390 | NZ     | B_ASP_393 | OD1    | 2.810        |
| 2VDQ   | B_LYS_390 | NZ     | B_ASP_393 | OD2    | 3.977        |
| 2VDQ   | B_ARG_404 | NH1    | B_GLU_364 | OE2    | 3.193        |
| 2VDQ   | B_ARG_404 | NH2    | B_GLU_364 | OE2    | 3.023        |
| 2VDQ   | B_ARG_447 | NH2    | B_GLU_442 | OE1    | 3.552        |
| 2VDQ   | C_ARG_408 | NH1    | A_ASP_224 | OD1    | 3.059        |
| 2VDQ   | C_ARG_408 | NH1    | A_ASP_224 | OD2    | 3.490        |
| 2VDQ   | C_ARG_408 | NH2    | A_ASP_224 | OD1    | 3.054        |
| 2VDQ   | C_ARG_408 | NH2    | A_ASP_224 | OD2    | 3.761        |
| 2VDQ   | H_ARG_40  | NH2    | H_GLU_46  | OE1    | 3.061        |
| 2VDQ   | H_LYS_59  | NZ     | A_GLU_117 | OE2    | 3.921        |
| 2VDQ   | H_LYS_67  | NZ     | H_ASP_90  | OD1    | 3.616        |



|      |           |     |           |     |       |
|------|-----------|-----|-----------|-----|-------|
| 2VDQ | H_LYS_67  | NZ  | H_ASP_90  | OD2 | 2.592 |
| 2VDQ | H_LYS_214 | NZ  | L_GLU_123 | OE2 | 3.223 |
| 2VDQ | L_HIS_24  | ND1 | L_ASP_70  | OD1 | 2.751 |
| 2VDQ | L_HIS_24  | ND1 | L_ASP_70  | OD2 | 3.828 |
| 2VDQ | L_LYS_39  | NZ  | L_GLU_81  | OE2 | 3.151 |
| 2VDQ | L_ARG_61  | NH2 | L_ASP_82  | OD1 | 2.929 |
| 2VDQ | L_ARG_61  | NH2 | L_ASP_82  | OD2 | 3.560 |
| 2VDQ | L_LYS_103 | NZ  | L_ASP_85  | OD1 | 3.020 |
| 2VDQ | L_LYS_103 | NZ  | L_ASP_85  | OD2 | 3.466 |
| 2VDQ | L_LYS_149 | NZ  | L_GLU_195 | OE1 | 3.063 |
| 2VDQ | L_LYS_149 | NZ  | L_GLU_195 | OE2 | 3.588 |
| 2VDQ | L_HIS_189 | ND1 | L_ASP_151 | OD1 | 2.754 |
| 2VDQ | L_LYS_199 | NZ  | L_ASP_110 | OD2 | 3.557 |

Table 336: 2VDQ-specific salt bridging networks analysis. In this table, a PDB file is specified with a four-letter PDB ID, except that the names of the PDB files corresponding to the single NMR structural model split from the NMR ensemble is specified with a four-letter PDB ID in addition to a hyphen followed by the single NMR structural model numeric ID, the residue naming scheme is **Chain ID** **residue name** **residue number**,  $\angle ADH$  represents the angle formed by acceptor (A), donor (D) and hydrogen (H) ( $\angle ADH$ ).

| PDB ID | Residue A | Atom A | Residue B | Atom B | Distance (Å) |
|--------|-----------|--------|-----------|--------|--------------|
| 2VDR   | A_HIS_30  | ND1    | A_GLU_136 | OE1    | 3.834        |
| 2VDR   | A_ARG_77  | NH1    | H_ASP_102 | OD1    | 3.703        |
| 2VDR   | A_ARG_77  | NH1    | H_ASP_102 | OD2    | 3.091        |
| 2VDR   | A_ARG_77  | NH2    | H_ASP_102 | OD1    | 2.791        |
| 2VDR   | A_ARG_77  | NH2    | H_ASP_102 | OD2    | 3.414        |
| 2VDR   | A_LYS_88  | NZ     | A_GLU_75  | OE2    | 3.555        |
| 2VDR   | A_ARG_153 | NH1    | A_GLU_157 | OE2    | 3.722        |
| 2VDR   | A_ARG_153 | NH2    | A_GLU_120 | OE1    | 3.592        |
| 2VDR   | A_ARG_153 | NH2    | A_GLU_120 | OE2    | 3.473        |
| 2VDR   | A_ARG_165 | NH1    | A_GLU_123 | OE1    | 3.684        |
| 2VDR   | A_ARG_165 | NH1    | A_GLU_123 | OE2    | 3.385        |
| 2VDR   | A_ARG_165 | NH2    | A_ASP_163 | OD1    | 2.924        |
| 2VDR   | A_ARG_165 | NH2    | A_ASP_163 | OD2    | 3.830        |
| 2VDR   | A_ARG_279 | NH2    | A_GLU_268 | OE2    | 3.601        |
| 2VDR   | A_ARG_303 | NH2    | A_ASP_301 | OD2    | 3.138        |
| 2VDR   | A_ARG_317 | NH2    | A_GLU_315 | OE1    | 3.881        |
| 2VDR   | A_ARG_327 | NH1    | A_GLU_283 | OE1    | 2.937        |
| 2VDR   | A_ARG_327 | NH1    | A_GLU_283 | OE2    | 3.446        |
| 2VDR   | A_ARG_422 | NH1    | A_ASP_24  | OD1    | 3.228        |
| 2VDR   | A_ARG_422 | NH1    | A_ASP_24  | OD2    | 3.380        |
| 2VDR   | A_ARG_422 | NH2    | A_ASP_24  | OD1    | 3.926        |
| 2VDR   | A_ARG_422 | NH2    | A_ASP_24  | OD2    | 3.754        |
| 2VDR   | B_LYS_72  | NZ     | B_ASP_109 | OD1    | 2.563        |
| 2VDR   | B_ARG_91  | NH1    | B_GLU_60  | OE1    | 3.916        |
| 2VDR   | B_ARG_91  | NH2    | B_GLU_60  | OE1    | 2.976        |
| 2VDR   | B_ARG_105 | NH1    | B_ASP_71  | OD1    | 3.494        |
| 2VDR   | B_LYS_159 | NZ     | B_ASP_224 | OD1    | 3.854        |
| 2VDR   | B_LYS_159 | NZ     | B_ASP_224 | OD2    | 2.660        |
| 2VDR   | B_LYS_209 | NZ     | B_GLU_206 | OE2    | 3.062        |
| 2VDR   | B_ARG_214 | NH1    | B_ASP_179 | OD2    | 2.701        |
| 2VDR   | B_ARG_216 | NH2    | A_GLU_123 | OE2    | 2.956        |
| 2VDR   | B_ARG_239 | NH2    | B_ASP_113 | OD2    | 2.921        |
| 2VDR   | B_HIS_244 | NE2    | B_ASP_113 | OD1    | 3.852        |
| 2VDR   | B_LYS_253 | NZ     | A_ASP_232 | OD2    | 3.191        |
| 2VDR   | B_HIS_255 | ND1    | B_ASP_259 | OD2    | 2.853        |
| 2VDR   | B_HIS_255 | NE2    | B_ASP_158 | OD2    | 3.204        |
| 2VDR   | B_HIS_255 | NE2    | B_ASP_217 | OD1    | 3.553        |
| 2VDR   | B_HIS_255 | NE2    | B_ASP_217 | OD2    | 2.706        |
| 2VDR   | B_HIS_274 | NE2    | B_ASP_270 | OD1    | 3.093        |
| 2VDR   | B_HIS_274 | NE2    | B_ASP_270 | OD2    | 2.677        |
| 2VDR   | B_HIS_280 | ND1    | B_ASP_278 | OD2    | 3.699        |
| 2VDR   | B_LYS_298 | NZ     | B_GLU_297 | OE2    | 3.371        |
| 2VDR   | B_LYS_302 | NZ     | B_ASP_233 | OD1    | 3.473        |
| 2VDR   | B_LYS_302 | NZ     | B_ASP_233 | OD2    | 2.921        |
| 2VDR   | B_LYS_354 | NZ     | B_GLU_356 | OE1    | 2.603        |
| 2VDR   | B_ARG_360 | NH2    | B_GLU_358 | OE2    | 3.500        |
| 2VDR   | B_LYS_390 | NZ     | B_ASP_393 | OD1    | 2.719        |
| 2VDR   | B_ARG_404 | NH1    | B_GLU_364 | OE2    | 3.173        |
| 2VDR   | B_ARG_404 | NH2    | B_GLU_364 | OE2    | 3.177        |
| 2VDR   | C_ARG_408 | NH1    | A_ASP_224 | OD1    | 3.062        |
| 2VDR   | C_ARG_408 | NH1    | A_ASP_224 | OD2    | 3.850        |
| 2VDR   | C_ARG_408 | NH2    | A_ASP_224 | OD1    | 3.028        |
| 2VDR   | C_ARG_408 | NH2    | A_ASP_224 | OD2    | 3.839        |
| 2VDR   | H_ARG_40  | NH2    | H_GLU_46  | OE1    | 3.176        |
| 2VDR   | H_LYS_67  | NZ     | H_ASP_90  | OD1    | 3.584        |
| 2VDR   | H_LYS_67  | NZ     | H_ASP_90  | OD2    | 2.527        |
| 2VDR   | H_LYS_214 | NZ     | L_GLU_123 | OE2    | 3.860        |

|      |           |     |           |     |       |
|------|-----------|-----|-----------|-----|-------|
| 2VDR | L_HIS_24  | ND1 | L_ASP_70  | OD1 | 2.825 |
| 2VDR | L_HIS_24  | ND1 | L_ASP_70  | OD2 | 3.852 |
| 2VDR | L_ARG_61  | NH2 | L_ASP_82  | OD1 | 2.979 |
| 2VDR | L_ARG_61  | NH2 | L_ASP_82  | OD2 | 3.650 |
| 2VDR | L_LYS_103 | NZ  | L_ASP_85  | OD1 | 3.110 |
| 2VDR | L_LYS_103 | NZ  | L_ASP_85  | OD2 | 3.591 |
| 2VDR | L_LYS_149 | NZ  | L_GLU_195 | OE1 | 2.973 |
| 2VDR | L_LYS_149 | NZ  | L_GLU_195 | OE2 | 3.700 |
| 2VDR | L_ARG_155 | NH1 | L_GLU_185 | OE1 | 3.211 |
| 2VDR | L_ARG_155 | NH1 | L_GLU_185 | OE2 | 3.858 |
| 2VDR | L_ARG_155 | NH2 | L_GLU_185 | OE1 | 3.840 |
| 2VDR | L_ARG_155 | NH2 | L_GLU_185 | OE2 | 3.062 |
| 2VDR | L_HIS_189 | ND1 | L_ASP_151 | OD1 | 2.610 |
| 2VDR | L_LYS_199 | NZ  | L_ASP_110 | OD2 | 3.796 |

Table 337: 2VDR-specific salt bridging networks analysis. In this table, a PDB file is specified with a four-letter PDB ID, except that the names of the PDB files corresponding to the single NMR structural model split from the NMR ensemble is specified with a four-letter PDB ID in addition to a hyphen followed by the single NMR structural model numeric ID, the residue naming scheme is **Chain ID\_residue name\_residue number**,  $\angle ADH$  represents the angle formed by acceptor (A), donor (D) and hydrogen (H) ( $\angle ADH$ ).

| PDB ID | Residue A | Atom A | Residue B | Atom B | Distance (Å) |
|--------|-----------|--------|-----------|--------|--------------|
| 2VIR   | A_ARG_    | NH2    | A_GLU_    | OE2    | 3.607        |
| 2VIR   | A_ARG_    | NH2    | A_ASP_    | OD1    | 3.333        |
| 2VIR   | A_ARG_    | NH2    | A_ASP_    | OD2    | 3.123        |
| 2VIR   | A_LYS_152 | NZ     | A_GLU_206 | OE1    | 3.754        |
| 2VIR   | A_HIS_191 | ND1    | A_ASP_154 | OD2    | 2.799        |
| 2VIR   | B_HIS_    | NE2    | B_ASP_    | OD1    | 3.115        |
| 2VIR   | B_ARG_    | NH1    | B_GLU_    | OE1    | 2.667        |
| 2VIR   | B_ARG_    | NH2    | B_ASP_    | OD1    | 2.935        |
| 2VIR   | B_ARG_    | NH1    | B_ASP_    | OD1    | 3.962        |
| 2VIR   | B_ARG_    | NH2    | B_ASP_    | OD1    | 3.249        |
| 2VIR   | B_ARG_    | NH2    | B_ASP_    | OD2    | 2.668        |
| 2VIR   | B_LYS_    | NZ     | B_ASP_    | OD1    | 3.397        |
| 2VIR   | B_LYS_    | NZ     | B_ASP_    | OD2    | 3.134        |
| 2VIR   | B_ARG_    | NH2    | B_ASP_    | OD1    | 3.596        |
| 2VIR   | B_ARG_    | NH2    | B_ASP_    | OD2    | 2.875        |
| 2VIR   | B_LYS_    | NZ     | A_GLU_127 | OE2    | 3.017        |
| 2VIR   | B_HIS_173 | NE2    | A_ASP_141 | OD1    | 3.726        |
| 2VIR   | B_HIS_173 | NE2    | A_ASP_141 | OD2    | 3.076        |
| 2VIR   | B_LYS_217 | NZ     | A_GLU_126 | OE2    | 3.903        |
| 2VIR   | C_LYS_    | NZ     | C_ASP_    | OD1    | 3.597        |
| 2VIR   | C_LYS_    | NZ     | C_ASP_    | OD2    | 3.554        |
| 2VIR   | C_HIS_    | NE2    | C_GLU_    | OE1    | 3.437        |
| 2VIR   | C_HIS_    | NE2    | C_GLU_    | OE2    | 2.908        |
| 2VIR   | C_ARG_    | NH1    | C_GLU_    | OE2    | 3.901        |
| 2VIR   | C_ARG_    | NH2    | C_GLU_    | OE2    | 2.550        |
| 2VIR   | C_HIS_    | ND1    | C_ASP_    | OD1    | 2.834        |
| 2VIR   | C_HIS_    | NE2    | C_ASP_    | OD1    | 3.558        |
| 2VIR   | C_ARG_    | NH2    | C_ASP_    | OD1    | 3.792        |
| 2VIR   | C_ARG_    | NH2    | C_ASP_    | OD2    | 2.918        |
| 2VIR   | C_LYS_    | NZ     | C_ASP_    | OD1    | 2.776        |
| 2VIR   | C_ARG_    | NH1    | C_GLU_    | OE1    | 2.706        |
| 2VIR   | C_ARG_    | NH1    | C_GLU_    | OE2    | 2.891        |
| 2VIR   | C_ARG_    | NH2    | C_GLU_    | OE1    | 3.747        |
| 2VIR   | C_ARG_    | NH2    | C_ASP_    | OD1    | 2.621        |
| 2VIR   | C_ARG_    | NH2    | C_ASP_    | OD2    | 3.048        |
| 2VIR   | C_LYS_    | NZ     | C_GLU_    | OE2    | 3.095        |
| 2VIR   | C_LYS_    | NZ     | C_ASP_    | OD1    | 3.929        |
| 2VIR   | C_ARG_    | NH2    | C_ASP_    | OD2    | 3.709        |
| 2VIR   | C_LYS_    | NZ     | C_ASP_    | OD1    | 3.380        |
| 2VIR   | C_LYS_    | NZ     | C_ASP_    | OD2    | 2.593        |
| 2VIR   | C_ARG_    | NH1    | C_GLU_    | OE1    | 3.911        |
| 2VIR   | C_ARG_    | NH2    | C_GLU_    | OE1    | 3.735        |
| 2VIR   | C_LYS_    | NZ     | C_ASP_    | OD1    | 3.157        |

Table 338: 2VIR-specific salt bridging networks analysis. In this table, a PDB file is specified with a four-letter PDB ID, except that the names of the PDB files corresponding to the single NMR structural model split from the NMR ensemble is specified with a four-letter PDB ID in addition to a hyphen followed by the single NMR structural model numeric ID, the residue naming scheme is **Chain ID\_residue name\_residue number**,  $\angle ADH$  represents the angle formed by acceptor (A), donor (D) and hydrogen (H) ( $\angle ADH$ ).

| PDB ID | Residue A | Atom A | Residue B | Atom B | Distance (Å) |
|--------|-----------|--------|-----------|--------|--------------|
| 2VIS   | A_ARG_    | NH2    | A_GLU_    | OE2    | 3.528        |
| 2VIS   | A_ARG_    | NH2    | A_ASP_    | OD1    | 3.225        |
| 2VIS   | A_ARG_    | NH2    | A_ASP_    | OD2    | 3.101        |
| 2VIS   | A_LYS_152 | NZ     | A_GLU_206 | OE1    | 3.762        |
| 2VIS   | A_HIS_191 | ND1    | A_ASP_154 | OD2    | 2.830        |
| 2VIS   | B_HIS_    | NE2    | B_ASP_    | OD1    | 3.059        |
| 2VIS   | B_ARG_    | NH1    | B_GLU_    | OE1    | 2.654        |
| 2VIS   | B_ARG_    | NH2    | B_ASP_    | OD1    | 3.129        |
| 2VIS   | B_ARG_    | NH1    | B_ASP_    | OD1    | 3.798        |
| 2VIS   | B_ARG_    | NH2    | B_ASP_    | OD1    | 3.126        |
| 2VIS   | B_ARG_    | NH2    | B_ASP_    | OD2    | 2.566        |
| 2VIS   | B_LYS_    | NZ     | B_ASP_    | OD1    | 3.701        |
| 2VIS   | B_LYS_    | NZ     | B_ASP_    | OD2    | 3.019        |
| 2VIS   | B_ARG_    | NH2    | B_ASP_    | OD1    | 3.616        |
| 2VIS   | B_ARG_    | NH2    | B_ASP_    | OD2    | 2.750        |
| 2VIS   | B_LYS_    | NZ     | A_GLU_127 | OE2    | 2.999        |
| 2VIS   | B_HIS_173 | NE2    | A_ASP_141 | OD1    | 3.763        |
| 2VIS   | B_HIS_173 | NE2    | A_ASP_141 | OD2    | 3.158        |
| 2VIS   | B_LYS_217 | NZ     | A_GLU_126 | OE2    | 3.709        |
| 2VIS   | C_LYS_    | NZ     | C_ASP_    | OD1    | 3.551        |
| 2VIS   | C_LYS_    | NZ     | C_ASP_    | OD2    | 3.585        |
| 2VIS   | C_HIS_    | NE2    | C_GLU_    | OE1    | 3.359        |
| 2VIS   | C_HIS_    | NE2    | C_GLU_    | OE2    | 2.830        |
| 2VIS   | C_ARG_    | NH1    | C_GLU_    | OE2    | 3.968        |
| 2VIS   | C_ARG_    | NH2    | C_GLU_    | OE2    | 2.722        |
| 2VIS   | C_HIS_    | ND1    | C_ASP_    | OD1    | 2.788        |
| 2VIS   | C_HIS_    | NE2    | C_ASP_    | OD1    | 3.544        |
| 2VIS   | C_ARG_    | NH2    | C_ASP_    | OD1    | 3.769        |
| 2VIS   | C_ARG_    | NH2    | C_ASP_    | OD2    | 2.897        |
| 2VIS   | C_LYS_    | NZ     | C_ASP_    | OD1    | 2.890        |
| 2VIS   | C_ARG_    | NH1    | C_GLU_    | OE1    | 2.736        |
| 2VIS   | C_ARG_    | NH1    | C_GLU_    | OE2    | 2.823        |
| 2VIS   | C_ARG_    | NH2    | C_GLU_    | OE1    | 3.753        |
| 2VIS   | C_ARG_    | NH2    | C_ASP_    | OD1    | 2.729        |
| 2VIS   | C_ARG_    | NH2    | C_ASP_    | OD2    | 2.980        |
| 2VIS   | C_LYS_    | NZ     | C_GLU_    | OE2    | 3.175        |
| 2VIS   | C_LYS_    | NZ     | C_ASP_    | OD1    | 3.910        |
| 2VIS   | C_HIS_    | NE2    | C_GLU_    | OE2    | 3.842        |
| 2VIS   | C_ARG_    | NH2    | C_ASP_    | OD2    | 3.593        |
| 2VIS   | C_LYS_    | NZ     | C_ASP_    | OD1    | 3.401        |
| 2VIS   | C_LYS_    | NZ     | C_ASP_    | OD2    | 2.618        |
| 2VIS   | C_LYS_    | NZ     | C_ASP_    | OD1    | 3.801        |
| 2VIS   | C_ARG_    | NH1    | C_GLU_    | OE1    | 3.717        |
| 2VIS   | C_ARG_    | NH2    | C_GLU_    | OE1    | 3.508        |
| 2VIS   | C_LYS_    | NZ     | C_ASP_    | OD1    | 3.060        |
| 2VIS   | C_LYS_    | NZ     | C_ASP_    | OD2    | 3.941        |

---

Table 339: 2VIS-specific salt bridging networks analysis. In this table, a PDB file is specified with a four-letter PDB ID, except that the names of the PDB files corresponding to the single NMR structural model split from the NMR ensemble is specified with a four-letter PDB ID in addition to a hyphen followed by the single NMR structural model numeric ID, the residue naming scheme is **Chain ID\_residue name\_residue number**,  $\angle ADH$  represents the angle formed by acceptor (A), donor (D) and hydrogen (H) ( $\angle ADH$ ).

| PDB ID | Residue A | Atom A | Residue B | Atom B | Distance (Å) |
|--------|-----------|--------|-----------|--------|--------------|
| 2VIT   | A_ARG_    | NH1    | A_ASP_    | OD2    | 3.967        |
| 2VIT   | A_ARG_    | NH2    | A_GLU_    | OE2    | 3.548        |
| 2VIT   | A_ARG_    | NH2    | A_ASP_    | OD1    | 3.241        |
| 2VIT   | A_ARG_    | NH2    | A_ASP_    | OD2    | 3.098        |
| 2VIT   | A_LYS_152 | NZ     | A_GLU_206 | OE1    | 3.712        |
| 2VIT   | A_HIS_191 | ND1    | A_ASP_154 | OD2    | 2.838        |
| 2VIT   | B_HIS_    | NE2    | B_ASP_    | OD1    | 2.907        |
| 2VIT   | B_ARG_    | NH1    | B_GLU_    | OE1    | 2.629        |
| 2VIT   | B_ARG_    | NH2    | B_ASP_    | OD1    | 2.987        |
| 2VIT   | B_ARG_    | NH1    | B_ASP_    | OD1    | 3.943        |
| 2VIT   | B_ARG_    | NH2    | B_ASP_    | OD1    | 3.230        |
| 2VIT   | B_ARG_    | NH2    | B_ASP_    | OD2    | 2.635        |
| 2VIT   | B_LYS_    | NZ     | B_ASP_    | OD1    | 3.471        |
| 2VIT   | B_LYS_    | NZ     | B_ASP_    | OD2    | 3.207        |
| 2VIT   | B_ARG_    | NH2    | B_ASP_    | OD1    | 3.554        |
| 2VIT   | B_ARG_    | NH2    | B_ASP_    | OD2    | 2.686        |
| 2VIT   | B_LYS_    | NZ     | A_GLU_127 | OE2    | 2.939        |
| 2VIT   | B_HIS_173 | NE2    | A_ASP_141 | OD1    | 3.614        |
| 2VIT   | B_HIS_173 | NE2    | A_ASP_141 | OD2    | 3.333        |
| 2VIT   | B_LYS_217 | NZ     | A_GLU_126 | OE2    | 3.872        |
| 2VIT   | C_LYS_    | NZ     | C_ASP_    | OD1    | 3.503        |
| 2VIT   | C_LYS_    | NZ     | C_ASP_    | OD2    | 3.623        |
| 2VIT   | C_HIS_    | NE2    | C_GLU_    | OE1    | 3.344        |
| 2VIT   | C_HIS_    | NE2    | C_GLU_    | OE2    | 2.697        |
| 2VIT   | C_ARG_    | NH2    | C_GLU_    | OE2    | 2.611        |
| 2VIT   | C_HIS_    | ND1    | C_ASP_    | OD1    | 2.743        |
| 2VIT   | C_HIS_    | ND1    | C_ASP_    | OD2    | 3.981        |
| 2VIT   | C_HIS_    | NE2    | C_ASP_    | OD1    | 3.636        |
| 2VIT   | C_ARG_    | NH2    | C_ASP_    | OD1    | 3.818        |
| 2VIT   | C_ARG_    | NH2    | C_ASP_    | OD2    | 2.935        |
| 2VIT   | C_LYS_    | NZ     | C_ASP_    | OD1    | 2.814        |
| 2VIT   | C_ARG_    | NH1    | C_GLU_    | OE1    | 2.724        |
| 2VIT   | C_ARG_    | NH1    | C_GLU_    | OE2    | 3.066        |
| 2VIT   | C_ARG_    | NH2    | C_GLU_    | OE1    | 3.650        |
| 2VIT   | C_ARG_    | NH2    | C_ASP_    | OD1    | 2.732        |
| 2VIT   | C_ARG_    | NH2    | C_ASP_    | OD2    | 2.999        |
| 2VIT   | C_LYS_    | NZ     | C_GLU_    | OE2    | 3.169        |
| 2VIT   | C_LYS_    | NZ     | C_ASP_    | OD1    | 3.896        |
| 2VIT   | C_ARG_    | NH2    | C_ASP_    | OD2    | 3.650        |
| 2VIT   | C_LYS_    | NZ     | C_ASP_    | OD1    | 3.387        |
| 2VIT   | C_LYS_    | NZ     | C_ASP_    | OD2    | 2.696        |
| 2VIT   | C_ARG_    | NH2    | C_GLU_    | OE1    | 3.981        |
| 2VIT   | C_LYS_    | NZ     | C_ASP_    | OD1    | 3.143        |

Table 340: 2VIT-specific salt bridging networks analysis. In this table, a PDB file is specified with a four-letter PDB ID, except that the names of the PDB files corresponding to the single NMR structural model split from the NMR ensemble is specified with a four-letter PDB ID in addition to a hyphen followed by the single NMR structural model numeric ID, the residue naming scheme is **Chain ID\_residue name\_residue number**,  $\angle ADH$  represents the angle formed by acceptor (A), donor (D) and hydrogen (H) ( $\angle ADH$ ).

| PDB ID | Residue A | Atom A | Residue B | Atom B | Distance (Å) |
|--------|-----------|--------|-----------|--------|--------------|
| 2VIU   | A_LYS_27  | NZ     | B_GLU_97  | OE1    | 3.686        |
| 2VIU   | A_LYS_27  | NZ     | B_GLU_97  | OE2    | 2.721        |
| 2VIU   | A_ARG_57  | NH1    | A_GLU_82  | OE1    | 3.419        |
| 2VIU   | A_ARG_57  | NH2    | A_GLU_82  | OE1    | 2.696        |
| 2VIU   | A_ARG_57  | NH2    | A_GLU_82  | OE2    | 3.793        |
| 2VIU   | A_HIS_75  | ND1    | A_ASP_73  | OD1    | 2.756        |
| 2VIU   | A_HIS_75  | ND1    | A_ASP_73  | OD2    | 3.587        |
| 2VIU   | A_HIS_75  | NE2    | A_ASP_63  | OD1    | 3.916        |
| 2VIU   | A_ARG_90  | NH2    | A_ASP_60  | OD1    | 3.851        |
| 2VIU   | A_ARG_90  | NH2    | A_ASP_60  | OD2    | 3.197        |
| 2VIU   | A_ARG_109 | NH1    | B_GLU_67  | OE1    | 3.978        |
| 2VIU   | A_ARG_109 | NH1    | B_GLU_67  | OE2    | 3.053        |
| 2VIU   | A_ARG_109 | NH2    | A_GLU_89  | OE1    | 2.928        |
| 2VIU   | A_ARG_141 | NH2    | A_ASP_77  | OD1    | 2.769        |
| 2VIU   | A_ARG_141 | NH2    | A_ASP_77  | OD2    | 2.741        |
| 2VIU   | A_LYS_176 | NZ     | A_GLU_123 | OE2    | 2.681        |
| 2VIU   | A_HIS_183 | NE2    | A_GLU_190 | OE2    | 3.745        |
| 2VIU   | A_ARG_207 | NH1    | A_ASP_241 | OD1    | 3.937        |
| 2VIU   | A_ARG_208 | NH1    | A_ASP_241 | OD2    | 3.116        |
| 2VIU   | A_LYS_238 | NZ     | A_ASP_175 | OD2    | 3.292        |
| 2VIU   | A_ARG_261 | NH2    | A_GLU_119 | OE1    | 3.027        |
| 2VIU   | A_ARG_261 | NH2    | A_GLU_119 | OE2    | 2.600        |
| 2VIU   | A_LYS_264 | NZ     | A_ASP_85  | OD1    | 3.975        |
| 2VIU   | A_LYS_264 | NZ     | A_ASP_85  | OD2    | 3.658        |
| 2VIU   | A_ARG_269 | NH1    | B_GLU_67  | OE1    | 2.986        |
| 2VIU   | A_LYS_292 | NZ     | A_ASP_291 | OD2    | 3.041        |
| 2VIU   | A_LYS_310 | NZ     | B_ASP_90  | OD1    | 2.868        |
| 2VIU   | A_LYS_315 | NZ     | A_GLU_41  | OE1    | 3.081        |
| 2VIU   | B_LYS_51  | NZ     | B_GLU_103 | OE1    | 2.786        |
| 2VIU   | B_LYS_68  | NZ     | B_GLU_85  | OE1    | 3.467        |
| 2VIU   | B_LYS_68  | NZ     | B_GLU_85  | OE2    | 2.818        |
| 2VIU   | B_LYS_117 | NZ     | B_GLU_114 | OE1    | 3.690        |
| 2VIU   | B_LYS_117 | NZ     | B_GLU_114 | OE2    | 2.769        |
| 2VIU   | B_ARG_123 | NH1    | B_GLU_120 | OE1    | 2.873        |
| 2VIU   | B_ARG_123 | NH1    | B_GLU_120 | OE2    | 3.282        |
| 2VIU   | B_ARG_153 | NH2    | B_GLU_150 | OE1    | 2.715        |
| 2VIU   | B_HIS_159 | NE2    | B_ASP_160 | OD1    | 3.760        |
| 2VIU   | B_HIS_159 | NE2    | B_ASP_160 | OD2    | 3.318        |
| 2VIU   | B_ARG_170 | NH1    | B_GLU_128 | OE1    | 2.843        |
| 2VIU   | B_ARG_170 | NH2    | B_GLU_128 | OE1    | 3.875        |
| 2VIU   | B_ARG_170 | NH2    | B_GLU_131 | OE2    | 3.472        |

Table 341: 2VIU-specific salt bridging networks analysis. In this table, a PDB file is specified with a four-letter PDB ID, except that the names of the PDB files corresponding to the single NMR structural model split from the NMR ensemble is specified with a four-letter PDB ID in addition to a hyphen followed by the single NMR structural model numeric ID, the residue naming scheme is **Chain ID\_residue name\_residue number**,  $\angle ADH$  represents the angle formed by acceptor (A), donor (D) and hydrogen (H) ( $\angle ADH$ ).



| PDB ID | Residue A | Atom A | Residue B | Atom B | Distance (Å) |
|--------|-----------|--------|-----------|--------|--------------|
| 2VXS   | A_ARG_55  | NH2    | A_GLU_57  | OE2    | 3.745        |
| 2VXS   | A_HIS_86  | ND1    | A_ASP_84  | OD1    | 2.794        |
| 2VXS   | A_HIS_86  | ND1    | A_ASP_84  | OD2    | 3.861        |
| 2VXS   | B_ARG_46  | NH1    | B_ASP_42  | OD2    | 2.944        |
| 2VXS   | B_ARG_55  | NH2    | B_GLU_57  | OE2    | 2.792        |
| 2VXS   | B_HIS_86  | ND1    | B_ASP_84  | OD1    | 3.029        |
| 2VXS   | B_HIS_86  | ND1    | B_ASP_84  | OD2    | 3.887        |
| 2VXS   | C_HIS_86  | ND1    | C_ASP_84  | OD1    | 2.647        |
| 2VXS   | C_HIS_86  | ND1    | C_ASP_84  | OD2    | 3.590        |
| 2VXS   | C_LYS_114 | NZ     | C_GLU_95  | OE2    | 3.592        |
| 2VXS   | D_ARG_46  | NH1    | D_ASP_42  | OD2    | 3.642        |
| 2VXS   | D_ARG_55  | NH2    | D_GLU_57  | OE2    | 3.715        |
| 2VXS   | D_ARG_61  | NH1    | D_ASP_58  | OD2    | 3.553        |
| 2VXS   | D_ARG_61  | NH2    | D_ASP_58  | OD2    | 2.803        |
| 2VXS   | D_HIS_86  | ND1    | D_ASP_84  | OD1    | 2.787        |
| 2VXS   | D_HIS_86  | ND1    | D_ASP_84  | OD2    | 3.565        |
| 2VXS   | H_ARG_38  | NH1    | H_ASP_86  | OD1    | 3.009        |
| 2VXS   | H_ARG_38  | NH2    | H_GLU_46  | OE1    | 3.046        |
| 2VXS   | H_ARG_38  | NH2    | H_GLU_46  | OE2    | 3.669        |
| 2VXS   | H_ARG_38  | NH2    | H_ASP_86  | OD1    | 3.964        |
| 2VXS   | H_LYS_64  | NZ     | H_ASP_61  | OD1    | 3.737        |
| 2VXS   | H_ARG_66  | NH1    | H_ASP_86  | OD1    | 3.951        |
| 2VXS   | H_ARG_66  | NH1    | H_ASP_86  | OD2    | 2.759        |
| 2VXS   | H_ARG_66  | NH2    | H_ASP_86  | OD1    | 3.290        |
| 2VXS   | H_ARG_66  | NH2    | H_ASP_86  | OD2    | 3.569        |
| 2VXS   | H_LYS_143 | NZ     | L_GLU_125 | OE2    | 2.772        |
| 2VXS   | L_ARG_38  | NH1    | L_ASP_86  | OD1    | 3.106        |
| 2VXS   | L_ARG_38  | NH2    | L_GLU_46  | OE1    | 3.024        |
| 2VXS   | L_ARG_38  | NH2    | L_GLU_46  | OE2    | 3.297        |
| 2VXS   | L_ARG_38  | NH2    | L_ASP_86  | OD1    | 3.845        |
| 2VXS   | L_LYS_64  | NZ     | L_ASP_61  | OD1    | 3.015        |
| 2VXS   | L_ARG_66  | NH1    | L_ASP_86  | OD1    | 3.881        |
| 2VXS   | L_ARG_66  | NH1    | L_ASP_86  | OD2    | 2.775        |
| 2VXS   | L_ARG_66  | NH2    | L_ASP_86  | OD1    | 2.818        |
| 2VXS   | L_ARG_66  | NH2    | L_ASP_86  | OD2    | 3.215        |
| 2VXS   | L_LYS_143 | NZ     | L_ASP_144 | OD1    | 3.889        |
| 2VXS   | L_LYS_210 | NZ     | L_GLU_212 | OE1    | 2.766        |
| 2VXS   | L_LYS_214 | NZ     | M_GLU_124 | OE1    | 3.186        |
| 2VXS   | J_ARG_    | NH1    | J_ASP_    | OD1    | 2.755        |
| 2VXS   | J_ARG_    | NH2    | J_GLU_    | OE1    | 3.312        |
| 2VXS   | J_ARG_    | NH2    | J_GLU_    | OE2    | 3.407        |
| 2VXS   | J_ARG_    | NH2    | J_ASP_    | OD1    | 3.826        |
| 2VXS   | J_LYS_64  | NZ     | J_ASP_    | OD1    | 3.275        |
| 2VXS   | J_ARG_    | NH1    | J_ASP_    | OD1    | 3.912        |
| 2VXS   | J_ARG_    | NH1    | J_ASP_    | OD2    | 2.751        |
| 2VXS   | J_ARG_    | NH2    | J_ASP_    | OD1    | 3.250        |
| 2VXS   | J_ARG_    | NH2    | J_ASP_    | OD2    | 3.560        |
| 2VXS   | J_LYS_    | NZ     | J_ASP_    | OD1    | 3.641        |
| 2VXS   | J_LYS_206 | NZ     | J_ASP_208 | OD1    | 3.503        |
| 2VXS   | J_LYS_    | NZ     | N_GLU_    | OE1    | 2.922        |
| 2VXS   | K_ARG_38  | NH1    | K_ASP_86  | OD1    | 3.239        |
| 2VXS   | K_ARG_38  | NH2    | K_GLU_46  | OE1    | 3.227        |
| 2VXS   | K_ARG_38  | NH2    | K_GLU_46  | OE2    | 3.826        |
| 2VXS   | K_ARG_38  | NH2    | K_ASP_86  | OD1    | 3.916        |
| 2VXS   | K_LYS_64  | NZ     | K_ASP_61  | OD1    | 3.799        |
| 2VXS   | K_ARG_66  | NH1    | K_ASP_86  | OD1    | 3.713        |
| 2VXS   | K_ARG_66  | NH1    | K_ASP_86  | OD2    | 2.833        |

|      |           |     |           |     |       |
|------|-----------|-----|-----------|-----|-------|
| 2VXS | K_ARG_66  | NH2 | K_ASP_86  | OD1 | 2.845 |
| 2VXS | K_ARG_66  | NH2 | K_ASP_86  | OD2 | 3.489 |
| 2VXS | K_LYS_210 | NZ  | K_GLU_212 | OE1 | 3.930 |
| 2VXS | K_LYS_214 | NZ  | O_GLU_124 | OE1 | 3.391 |
| 2VXS | L_ARG_54  | NH1 | L_ASP_60  | OD1 | 3.471 |
| 2VXS | L_ARG_61  | NH2 | L_ASP_82  | OD1 | 2.601 |
| 2VXS | L_ARG_61  | NH2 | L_ASP_82  | OD2 | 2.642 |
| 2VXS | L_LYS_103 | NZ  | L_ASP_85  | OD1 | 3.412 |
| 2VXS | L_LYS_167 | NZ  | L_GLU_83  | OE1 | 3.289 |
| 2VXS | L_LYS_172 | NZ  | L_ASP_139 | OD1 | 3.795 |
| 2VXS | L_HIS_189 | ND1 | L_ASP_152 | OD2 | 2.849 |
| 2VXS | M_ARG_61  | NH1 | M_ASP_82  | OD1 | 3.983 |
| 2VXS | M_ARG_61  | NH2 | M_ASP_82  | OD1 | 2.482 |
| 2VXS | M_ARG_61  | NH2 | M_ASP_82  | OD2 | 2.420 |
| 2VXS | M_LYS_103 | NZ  | M_ASP_85  | OD1 | 3.469 |
| 2VXS | M_LYS_167 | NZ  | M_GLU_83  | OE1 | 2.810 |
| 2VXS | M_HIS_189 | ND1 | M_ASP_152 | OD2 | 3.666 |
| 2VXS | M_HIS_198 | NE2 | M_GLU_199 | OE2 | 3.892 |
| 2VXS | N_ARG_61  | NH2 | N_ASP_    | OD1 | 2.670 |
| 2VXS | N_ARG_61  | NH2 | N_ASP_    | OD2 | 2.989 |
| 2VXS | N_LYS_    | NZ  | N_ASP_    | OD1 | 3.427 |
| 2VXS | N_LYS_    | NZ  | J_ASP_    | OD2 | 3.949 |
| 2VXS | N_LYS_    | NZ  | N_GLU_    | OE1 | 2.677 |
| 2VXS | N_HIS_    | ND1 | N_ASP_    | OD2 | 3.568 |
| 2VXS | O_ARG_61  | NH2 | O_ASP_82  | OD1 | 2.574 |
| 2VXS | O_ARG_61  | NH2 | O_ASP_82  | OD2 | 2.733 |
| 2VXS | O_LYS_103 | NZ  | O_ASP_85  | OD1 | 2.839 |
| 2VXS | O_LYS_103 | NZ  | O_ASP_85  | OD2 | 3.719 |
| 2VXS | O_LYS_167 | NZ  | O_GLU_83  | OE1 | 3.622 |
| 2VXS | O_LYS_167 | NZ  | O_GLU_83  | OE2 | 3.743 |
| 2VXS | O_HIS_189 | ND1 | O_ASP_152 | OD2 | 3.412 |
| 2VXS | O_HIS_198 | NE2 | O_GLU_199 | OE2 | 3.877 |

Table 342: 2VXS-specific salt bridging networks analysis. In this table, a PDB file is specified with a four-letter PDB ID, except that the names of the PDB files corresponding to the single NMR structural model split from the NMR ensemble is specified with a four-letter PDB ID in addition to a hyphen followed by the single NMR structural model numeric ID, the residue naming scheme is **Chain ID\_residue name\_residue number**,  $\angle ADH$  represents the angle formed by acceptor (A), donor (D) and hydrogen (H) ( $\angle ADH$ ).

| PDB ID | Residue A | Atom A | Residue B | Atom B | Distance (Å) |
|--------|-----------|--------|-----------|--------|--------------|
| 2VXT   | H.LYS_62  | NZ     | H.GLU_46  | OE1    | 3.909        |
| 2VXT   | H.LYS_62  | NZ     | H.GLU_46  | OE2    | 2.756        |
| 2VXT   | H.LYS_66  | NZ     | H.ASP_86  | OD1    | 3.652        |
| 2VXT   | H.LYS_66  | NZ     | H.ASP_86  | OD2    | 2.674        |
| 2VXT   | H.ARG_94  | NH2    | I.GLU_179 | OE1    | 2.816        |
| 2VXT   | H.ARG_94  | NH2    | I.GLU_179 | OE2    | 3.466        |
| 2VXT   | H.ARG_101 | NH1    | I.GLU_179 | OE1    | 2.914        |
| 2VXT   | H.LYS_208 | NZ     | L.GLU_123 | OE2    | 2.940        |
| 2VXT   | I.LYS_44  | NZ     | I.GLU_42  | OE1    | 3.741        |
| 2VXT   | I.ARG_49  | NH2    | I.ASP_71  | OD1    | 3.048        |
| 2VXT   | I.LYS_106 | NZ     | I.GLU_121 | OE1    | 3.321        |
| 2VXT   | I.HIS_145 | NE2    | H.ASP_50  | OD1    | 2.753        |
| 2VXT   | I.LYS_148 | NZ     | H.ASP_56  | OD2    | 2.664        |
| 2VXT   | I.LYS_175 | NZ     | I.ASP_182 | OD1    | 3.559        |
| 2VXT   | I.LYS_175 | NZ     | I.ASP_182 | OD2    | 2.678        |
| 2VXT   | L.ARG_46  | NH2    | L.ASP_55  | OD1    | 2.847        |
| 2VXT   | L.ARG_46  | NH2    | L.ASP_55  | OD2    | 3.641        |
| 2VXT   | L.ARG_61  | NH1    | L.GLU_79  | OE2    | 3.449        |
| 2VXT   | L.ARG_61  | NH2    | L.GLU_81  | OE2    | 3.316        |
| 2VXT   | L.ARG_61  | NH2    | L.ASP_82  | OD1    | 2.855        |
| 2VXT   | L.ARG_61  | NH2    | L.ASP_82  | OD2    | 3.570        |
| 2VXT   | L.ARG_66  | NH2    | L.ASP_28  | OD1    | 3.957        |
| 2VXT   | L.ARG_155 | NH1    | L.GLU_185 | OE1    | 3.695        |
| 2VXT   | L.ARG_155 | NH1    | L.GLU_185 | OE2    | 2.926        |
| 2VXT   | L.ARG_155 | NH2    | L.GLU_185 | OE1    | 3.294        |
| 2VXT   | L.ARG_155 | NH2    | L.GLU_185 | OE2    | 3.952        |
| 2VXT   | L.LYS_199 | NZ     | L.ASP_110 | OD1    | 3.760        |
| 2VXT   | L.LYS_199 | NZ     | L.ASP_110 | OD2    | 2.706        |

Table 343: 2VXT-specific salt bridging networks analysis. In this table, a PDB file is specified with a four-letter PDB ID, except that the names of the PDB files corresponding to the single NMR structural model split from the NMR ensemble is specified with a four-letter PDB ID in addition to a hyphen followed by the single NMR structural model numeric ID, the residue naming scheme is **Chain ID\_residue name\_residue number**,  $\angle ADH$  represents the angle formed by acceptor (A), donor (D) and hydrogen (H) ( $\angle ADH$ ).

| PDB ID | Residue A | Atom A | Residue B | Atom B | Distance (Å) |
|--------|-----------|--------|-----------|--------|--------------|
| 2VXU   | H.LYS_43  | NZ     | L.ASP_85  | OD1    | 3.097        |
| 2VXU   | H.LYS_62  | NZ     | H.GLU_46  | OE1    | 3.879        |
| 2VXU   | H.LYS_62  | NZ     | H.GLU_46  | OE2    | 2.639        |
| 2VXU   | H.LYS_66  | NZ     | H.ASP_86  | OD2    | 3.095        |
| 2VXU   | I.LYS_62  | NZ     | I.GLU_46  | OE1    | 3.778        |
| 2VXU   | I.LYS_62  | NZ     | I.GLU_46  | OE2    | 2.481        |
| 2VXU   | I.LYS_66  | NZ     | I.ASP_86  | OD1    | 3.703        |
| 2VXU   | I.LYS_66  | NZ     | I.ASP_86  | OD2    | 2.733        |
| 2VXU   | I.LYS_208 | NZ     | M.GLU_123 | OE1    | 2.734        |
| 2VXU   | I.LYS_208 | NZ     | M.GLU_123 | OE2    | 2.893        |
| 2VXU   | L.ARG_24  | NH2    | L.ASP_70  | OD1    | 3.272        |
| 2VXU   | L.ARG_24  | NH2    | L.ASP_70  | OD2    | 2.791        |
| 2VXU   | L.ARG_46  | NH2    | L.ASP_55  | OD1    | 2.844        |
| 2VXU   | L.ARG_46  | NH2    | L.ASP_55  | OD2    | 3.772        |
| 2VXU   | L.ARG_61  | NH2    | L.GLU_81  | OE2    | 3.219        |
| 2VXU   | L.ARG_61  | NH2    | L.ASP_82  | OD1    | 3.151        |
| 2VXU   | L.ARG_61  | NH2    | L.ASP_82  | OD2    | 3.745        |
| 2VXU   | L.ARG_66  | NH2    | L.ASP_28  | OD1    | 3.861        |
| 2VXU   | L.LYS_142 | NZ     | L.ASP_143 | OD1    | 3.748        |
| 2VXU   | L.LYS_199 | NZ     | L.ASP_110 | OD2    | 3.400        |
| 2VXU   | M.ARG_24  | NH2    | M.ASP_70  | OD1    | 3.639        |
| 2VXU   | M.ARG_24  | NH2    | M.ASP_70  | OD2    | 3.054        |
| 2VXU   | M.ARG_46  | NH2    | M.ASP_55  | OD1    | 2.799        |
| 2VXU   | M.ARG_46  | NH2    | M.ASP_55  | OD2    | 3.746        |
| 2VXU   | M.ARG_61  | NH1    | M.GLU_79  | OE2    | 3.549        |
| 2VXU   | M.ARG_61  | NH2    | M.GLU_81  | OE2    | 3.079        |
| 2VXU   | M.ARG_61  | NH2    | M.ASP_82  | OD1    | 2.801        |
| 2VXU   | M.ARG_61  | NH2    | M.ASP_82  | OD2    | 3.460        |
| 2VXU   | M.ARG_66  | NH2    | M.ASP_28  | OD1    | 3.960        |
| 2VXU   | M.LYS_107 | NZ     | M.GLU_17  | OE1    | 3.246        |
| 2VXU   | M.LYS_107 | NZ     | M.GLU_17  | OE2    | 2.558        |
| 2VXU   | M.LYS_142 | NZ     | M.ASP_143 | OD1    | 3.635        |
| 2VXU   | M.ARG_155 | NH1    | M.GLU_185 | OE1    | 3.951        |
| 2VXU   | M.ARG_155 | NH1    | M.GLU_185 | OE2    | 2.762        |
| 2VXU   | M.ARG_155 | NH2    | M.GLU_185 | OE1    | 3.497        |
| 2VXU   | M.ARG_155 | NH2    | M.GLU_185 | OE2    | 3.662        |
| 2VXU   | M.HIS_189 | ND1    | M.ASP_151 | OD2    | 2.958        |

Table 344: 2VXU-specific salt bridging networks analysis. In this table, a PDB file is specified with a four-letter PDB ID, except that the names of the PDB files corresponding to the single NMR structural model split from the NMR ensemble is specified with a four-letter PDB ID in addition to a hyphen followed by the single NMR structural model numeric ID, the residue naming scheme is **Chain ID\_residue name\_residue number**,  $\angle ADH$  represents the angle formed by acceptor (A), donor (D) and hydrogen (H) ( $\angle ADH$ ).

| PDB ID | Residue A | Atom A | Residue B | Atom B | Distance (Å) |
|--------|-----------|--------|-----------|--------|--------------|
| 2VXV   | H_ARG_38  | NH2    | H_GLU_46  | OE1    | 2.913        |
| 2VXV   | H_ARG_38  | NH2    | H_GLU_46  | OE2    | 3.297        |
| 2VXV   | H_ARG_58  | NH2    | H_GLU_56  | OE2    | 2.796        |
| 2VXV   | H_ARG_94  | NH2    | H_ASP_101 | OD1    | 3.566        |
| 2VXV   | H_ARG_94  | NH2    | H_ASP_101 | OD2    | 2.867        |
| 2VXV   | H_LYS_143 | NZ     | H_ASP_144 | OD1    | 3.484        |
| 2VXV   | H_LYS_214 | NZ     | L_ASP_122 | OD1    | 3.721        |
| 2VXV   | H_LYS_214 | NZ     | L_ASP_122 | OD2    | 2.868        |
| 2VXV   | L_ARG_61  | NH2    | L_GLU_81  | OE2    | 3.747        |
| 2VXV   | L_ARG_61  | NH2    | L_ASP_82  | OD1    | 2.862        |
| 2VXV   | L_ARG_61  | NH2    | L_ASP_82  | OD2    | 3.507        |
| 2VXV   | L_HIS_189 | ND1    | L_ASP_151 | OD2    | 2.974        |

Table 345: 2VXV-specific salt bridging networks analysis. In this table, a PDB file is specified with a four-letter PDB ID, except that the names of the PDB files corresponding to the single NMR structural model split from the NMR ensemble is specified with a four-letter PDB ID in addition to a hyphen followed by the single NMR structural model numeric ID, the residue naming scheme is **Chain ID** **residue name** **residue number**,  $\angle ADH$  represents the angle formed by acceptor (A), donor (D) and hydrogen (H) ( $\angle ADH$ ).

| PDB ID | Residue A | Atom A | Residue B | Atom B | Distance (Å) |
|--------|-----------|--------|-----------|--------|--------------|
| 2XEF   | A_HIS_56  | NE2    | A_GLU_408 | OE2    | 2.799        |
| 2XEF   | A_LYS_59  | NZ     | A_ASP_63  | OD1    | 3.841        |
| 2XEF   | A_LYS_59  | NZ     | A_ASP_63  | OD2    | 3.009        |
| 2XEF   | A_ARG_181 | NH1    | A_GLU_183 | OE2    | 3.625        |
| 2XEF   | A_ARG_181 | NH2    | A_ASP_184 | OD1    | 2.949        |
| 2XEF   | A_ARG_181 | NH2    | A_ASP_184 | OD2    | 3.602        |
| 2XEF   | A_ARG_190 | NH1    | A_ASP_714 | OD1    | 2.918        |
| 2XEF   | A_ARG_190 | NH1    | A_ASP_714 | OD2    | 3.597        |
| 2XEF   | A_ARG_190 | NH2    | A_ASP_714 | OD1    | 3.579        |
| 2XEF   | A_ARG_190 | NH2    | A_ASP_714 | OD2    | 2.730        |
| 2XEF   | A_ARG_204 | NH1    | A_ASP_233 | OD2    | 3.163        |
| 2XEF   | A_ARG_255 | NH1    | A_GLU_145 | OE1    | 2.685        |
| 2XEF   | A_ARG_255 | NH2    | A_GLU_145 | OE1    | 2.757        |
| 2XEF   | A_LYS_341 | NZ     | A_ASP_173 | OD1    | 3.395        |
| 2XEF   | A_LYS_341 | NZ     | A_ASP_173 | OD2    | 3.841        |
| 2XEF   | A_LYS_343 | NZ     | A_GLU_171 | OE1    | 2.875        |
| 2XEF   | A_HIS_345 | ND1    | A_GLU_137 | OE2    | 3.926        |
| 2XEF   | A_HIS_345 | NE2    | A_GLU_137 | OE1    | 3.980        |
| 2XEF   | A_HIS_345 | NE2    | A_GLU_137 | OE2    | 3.120        |
| 2XEF   | A_ARG_354 | NH2    | A_ASP_114 | OD1    | 3.536        |
| 2XEF   | A_ARG_354 | NH2    | A_ASP_114 | OD2    | 2.909        |
| 2XEF   | A_ARG_363 | NH2    | A_ASP_106 | OD1    | 3.752        |
| 2XEF   | A_ARG_370 | NH1    | A_ASP_369 | OD1    | 3.987        |
| 2XEF   | A_ARG_370 | NH1    | A_ASP_369 | OD2    | 3.614        |
| 2XEF   | A_ARG_370 | NH2    | A_ASP_666 | OD1    | 2.894        |
| 2XEF   | A_ARG_370 | NH2    | A_ASP_666 | OD2    | 3.631        |
| 2XEF   | A_HIS_377 | ND1    | A_ASP_379 | OD1    | 2.940        |
| 2XEF   | A_HIS_377 | ND1    | A_GLU_424 | OE1    | 3.983        |
| 2XEF   | A_HIS_377 | NE2    | A_ASP_387 | OD1    | 3.185        |
| 2XEF   | A_HIS_377 | NE2    | A_GLU_424 | OE1    | 3.244        |
| 2XEF   | A_HIS_377 | NE2    | A_GLU_425 | OE2    | 3.914        |
| 2XEF   | A_HIS_377 | NE2    | A_ASP_453 | OD1    | 3.247        |
| 2XEF   | A_HIS_377 | NE2    | A_ASP_453 | OD2    | 3.086        |
| 2XEF   | A_ARG_378 | NH2    | A_ASP_422 | OD1    | 3.926        |
| 2XEF   | A_ARG_378 | NH2    | A_ASP_422 | OD2    | 3.342        |
| 2XEF   | A_ARG_400 | NH1    | A_GLU_64  | OE2    | 3.095        |
| 2XEF   | A_ARG_400 | NH1    | A_GLU_397 | OE1    | 3.701        |
| 2XEF   | A_ARG_400 | NH1    | A_GLU_397 | OE2    | 2.838        |
| 2XEF   | A_ARG_400 | NH2    | A_GLU_64  | OE2    | 2.882        |
| 2XEF   | A_LYS_406 | NZ     | A_ASP_106 | OD1    | 3.218        |
| 2XEF   | A_ARG_411 | NH1    | A_ASP_106 | OD1    | 3.513        |
| 2XEF   | A_ARG_411 | NH1    | A_ASP_106 | OD2    | 2.703        |
| 2XEF   | A_ARG_411 | NH2    | A_ASP_106 | OD1    | 2.830        |
| 2XEF   | A_ARG_411 | NH2    | A_ASP_106 | OD2    | 3.623        |
| 2XEF   | A_ARG_413 | NH2    | A_GLU_367 | OE2    | 3.405        |
| 2XEF   | A_ARG_414 | NH2    | A_GLU_367 | OE2    | 3.182        |
| 2XEF   | A_ARG_463 | NH1    | A_GLU_457 | OE1    | 3.344        |
| 2XEF   | A_ARG_463 | NH1    | A_GLU_457 | OE2    | 3.045        |
| 2XEF   | A_ARG_463 | NH2    | A_ASP_465 | OD2    | 2.862        |
| 2XEF   | A_LYS_491 | NZ     | A_GLU_495 | OE2    | 3.112        |
| 2XEF   | A_LYS_500 | NZ     | A_ASP_485 | OD2    | 2.872        |
| 2XEF   | A_ARG_527 | NH1    | A_GLU_436 | OE1    | 2.777        |
| 2XEF   | A_ARG_527 | NH2    | A_GLU_436 | OE1    | 2.984        |
| 2XEF   | A_ARG_536 | NH1    | A_GLU_457 | OE1    | 2.900        |
| 2XEF   | A_HIS_553 | NE2    | A_ASP_387 | OD2    | 2.946        |
| 2XEF   | A_HIS_553 | NE2    | A_GLU_425 | OE1    | 3.142        |
| 2XEF   | A_HIS_553 | NE2    | A_GLU_425 | OE2    | 3.233        |

|      |           |     |           |     |       |
|------|-----------|-----|-----------|-----|-------|
| 2XEF | A_HIS_573 | ND1 | A_ASP_567 | OD2 | 2.719 |
| 2XEF | A_ARG_598 | NH2 | A_ASP_596 | OD1 | 3.762 |
| 2XEF | A_ARG_598 | NH2 | A_ASP_596 | OD2 | 2.978 |
| 2XEF | A_LYS_606 | NZ  | A_GLU_505 | OE1 | 3.281 |
| 2XEF | A_LYS_606 | NZ  | A_GLU_505 | OE2 | 3.681 |
| 2XEF | A_LYS_610 | NZ  | A_GLU_703 | OE2 | 2.847 |
| 2XEF | A_HIS_618 | NE2 | A_GLU_716 | OE1 | 3.725 |
| 2XEF | A_LYS_637 | NZ  | A_GLU_641 | OE1 | 3.067 |
| 2XEF | A_LYS_637 | NZ  | A_GLU_641 | OE2 | 3.880 |
| 2XEF | A_ARG_684 | NH2 | A_ASP_710 | OD2 | 3.381 |
| 2XEF | A_HIS_689 | NE2 | A_GLU_672 | OE2 | 2.802 |
| 2XEF | A_ARG_730 | NH2 | A_GLU_727 | OE1 | 3.848 |
| 2XEF | A_ARG_730 | NH2 | A_GLU_727 | OE2 | 3.085 |

Table 346: 2XEF-specific salt bridging networks analysis. In this table, a PDB file is specified with a four-letter PDB ID, except that the names of the PDB files corresponding to the single NMR structural model split from the NMR ensemble is specified with a four-letter PDB ID in addition to a hyphen followed by the single NMR structural model numeric ID, the residue naming scheme is **Chain ID\_residue name\_residue number**,  $\angle ADH$  represents the angle formed by acceptor (A), donor (D) and hydrogen (H) ( $\angle ADH$ ).

| PDB ID | Residue A | Atom A | Residue B | Atom B | Distance (Å) |
|--------|-----------|--------|-----------|--------|--------------|
| 2XEG   | A_HIS_56  | ND1    | A_GLU_408 | OE2    | 3.766        |
| 2XEG   | A_HIS_56  | NE2    | A_GLU_408 | OE2    | 3.847        |
| 2XEG   | A_LYS_59  | NZ     | A_ASP_63  | OD1    | 3.760        |
| 2XEG   | A_LYS_59  | NZ     | A_ASP_63  | OD2    | 2.920        |
| 2XEG   | A_ARG_181 | NH1    | A_GLU_183 | OE2    | 3.616        |
| 2XEG   | A_ARG_181 | NH2    | A_ASP_184 | OD1    | 2.935        |
| 2XEG   | A_ARG_181 | NH2    | A_ASP_184 | OD2    | 3.536        |
| 2XEG   | A_ARG_190 | NH1    | A_ASP_714 | OD1    | 2.995        |
| 2XEG   | A_ARG_190 | NH1    | A_ASP_714 | OD2    | 3.628        |
| 2XEG   | A_ARG_190 | NH2    | A_ASP_714 | OD1    | 3.604        |
| 2XEG   | A_ARG_190 | NH2    | A_ASP_714 | OD2    | 2.717        |
| 2XEG   | A_ARG_204 | NH1    | A_ASP_233 | OD1    | 3.945        |
| 2XEG   | A_ARG_204 | NH1    | A_ASP_233 | OD2    | 3.115        |
| 2XEG   | A_ARG_255 | NH1    | A_GLU_145 | OE1    | 2.705        |
| 2XEG   | A_ARG_255 | NH2    | A_GLU_145 | OE1    | 2.760        |
| 2XEG   | A_LYS_341 | NZ     | A_ASP_173 | OD1    | 3.295        |
| 2XEG   | A_LYS_341 | NZ     | A_ASP_173 | OD2    | 3.942        |
| 2XEG   | A_HIS_345 | ND1    | A_GLU_137 | OE2    | 3.875        |
| 2XEG   | A_HIS_345 | NE2    | A_GLU_137 | OE2    | 3.207        |
| 2XEG   | A_ARG_354 | NH2    | A_ASP_114 | OD1    | 3.519        |
| 2XEG   | A_ARG_354 | NH2    | A_ASP_114 | OD2    | 2.914        |
| 2XEG   | A_ARG_363 | NH2    | A_ASP_106 | OD1    | 3.705        |
| 2XEG   | A_ARG_370 | NH1    | A_ASP_369 | OD1    | 3.956        |
| 2XEG   | A_ARG_370 | NH1    | A_ASP_369 | OD2    | 3.628        |
| 2XEG   | A_ARG_370 | NH2    | A_ASP_666 | OD1    | 2.842        |
| 2XEG   | A_ARG_370 | NH2    | A_ASP_666 | OD2    | 3.618        |
| 2XEG   | A_HIS_377 | ND1    | A_ASP_379 | OD1    | 2.925        |
| 2XEG   | A_HIS_377 | NE2    | A_ASP_387 | OD1    | 3.241        |
| 2XEG   | A_HIS_377 | NE2    | A_GLU_424 | OE1    | 3.209        |
| 2XEG   | A_HIS_377 | NE2    | A_GLU_425 | OE2    | 3.926        |
| 2XEG   | A_HIS_377 | NE2    | A_ASP_453 | OD1    | 3.264        |
| 2XEG   | A_HIS_377 | NE2    | A_ASP_453 | OD2    | 3.104        |
| 2XEG   | A_ARG_378 | NH2    | A_ASP_422 | OD1    | 3.876        |
| 2XEG   | A_ARG_378 | NH2    | A_ASP_422 | OD2    | 3.238        |
| 2XEG   | A_ARG_400 | NH1    | A_GLU_64  | OE2    | 3.039        |
| 2XEG   | A_ARG_400 | NH1    | A_GLU_397 | OE1    | 3.703        |
| 2XEG   | A_ARG_400 | NH1    | A_GLU_397 | OE2    | 2.812        |
| 2XEG   | A_ARG_400 | NH2    | A_GLU_64  | OE2    | 2.850        |
| 2XEG   | A_LYS_406 | NZ     | A_ASP_106 | OD1    | 3.308        |
| 2XEG   | A_ARG_411 | NH1    | A_ASP_106 | OD1    | 3.560        |
| 2XEG   | A_ARG_411 | NH1    | A_ASP_106 | OD2    | 2.790        |
| 2XEG   | A_ARG_411 | NH2    | A_ASP_106 | OD1    | 2.807        |
| 2XEG   | A_ARG_411 | NH2    | A_ASP_106 | OD2    | 3.629        |
| 2XEG   | A_ARG_413 | NH2    | A_GLU_367 | OE2    | 3.344        |
| 2XEG   | A_ARG_414 | NH2    | A_GLU_367 | OE2    | 3.206        |
| 2XEG   | A_LYS_491 | NZ     | A_GLU_495 | OE2    | 3.175        |
| 2XEG   | A_LYS_500 | NZ     | A_ASP_485 | OD2    | 2.873        |
| 2XEG   | A_ARG_527 | NH1    | A_GLU_436 | OE1    | 2.787        |
| 2XEG   | A_ARG_527 | NH2    | A_GLU_436 | OE1    | 2.964        |
| 2XEG   | A_ARG_536 | NH1    | A_GLU_457 | OE1    | 2.897        |
| 2XEG   | A_HIS_553 | NE2    | A_ASP_387 | OD2    | 2.992        |
| 2XEG   | A_HIS_553 | NE2    | A_GLU_425 | OE1    | 3.084        |
| 2XEG   | A_HIS_553 | NE2    | A_GLU_425 | OE2    | 3.216        |
| 2XEG   | A_HIS_573 | ND1    | A_ASP_567 | OD2    | 2.723        |
| 2XEG   | A_ARG_598 | NH2    | A_ASP_596 | OD1    | 3.731        |
| 2XEG   | A_ARG_598 | NH2    | A_ASP_596 | OD2    | 2.927        |
| 2XEG   | A_LYS_606 | NZ     | A_GLU_505 | OE1    | 3.338        |



|      |           |     |           |     |       |
|------|-----------|-----|-----------|-----|-------|
| 2XEG | A_LYS_606 | NZ  | A_GLU_505 | OE2 | 3.829 |
| 2XEG | A_HIS_618 | NE2 | A_GLU_716 | OE1 | 3.759 |
| 2XEG | A_LYS_637 | NZ  | A_GLU_641 | OE1 | 2.943 |
| 2XEG | A_LYS_637 | NZ  | A_GLU_641 | OE2 | 3.902 |
| 2XEG | A_ARG_684 | NH2 | A_ASP_710 | OD2 | 3.396 |
| 2XEG | A_HIS_689 | NE2 | A_GLU_672 | OE2 | 2.814 |

Table 347: 2XEG-specific salt bridging networks analysis. In this table, a PDB file is specified with a four-letter PDB ID, except that the names of the PDB files corresponding to the single NMR structural model split from the NMR ensemble is specified with a four-letter PDB ID in addition to a hyphen followed by the single NMR structural model numeric ID, the residue naming scheme is **Chain ID\_residue name\_residue number**,  $\angle ADH$  represents the angle formed by acceptor (A), donor (D) and hydrogen (H) ( $\angle ADH$ ).

| PDB ID | Residue A | Atom A | Residue B | Atom B | Distance (Å) |
|--------|-----------|--------|-----------|--------|--------------|
| 2XEI   | A_HIS_56  | NE2    | A_GLU_408 | OE2    | 2.969        |
| 2XEI   | A_LYS_59  | NZ     | A_ASP_63  | OD2    | 2.953        |
| 2XEI   | A_ARG_181 | NH1    | A_GLU_183 | OE2    | 3.722        |
| 2XEI   | A_ARG_181 | NH2    | A_ASP_184 | OD1    | 2.939        |
| 2XEI   | A_ARG_181 | NH2    | A_ASP_184 | OD2    | 3.606        |
| 2XEI   | A_LYS_187 | NZ     | A_ASP_316 | OD2    | 3.720        |
| 2XEI   | A_ARG_190 | NH1    | A_ASP_714 | OD1    | 2.931        |
| 2XEI   | A_ARG_190 | NH1    | A_ASP_714 | OD2    | 3.551        |
| 2XEI   | A_ARG_190 | NH2    | A_ASP_714 | OD1    | 3.589        |
| 2XEI   | A_ARG_190 | NH2    | A_ASP_714 | OD2    | 2.720        |
| 2XEI   | A_ARG_204 | NH1    | A_ASP_233 | OD1    | 3.976        |
| 2XEI   | A_ARG_204 | NH1    | A_ASP_233 | OD2    | 3.187        |
| 2XEI   | A_ARG_255 | NH1    | A_GLU_145 | OE1    | 2.647        |
| 2XEI   | A_ARG_255 | NH2    | A_GLU_145 | OE1    | 2.713        |
| 2XEI   | A_LYS_304 | NZ     | A_GLU_307 | OE2    | 3.381        |
| 2XEI   | A_LYS_341 | NZ     | A_ASP_173 | OD1    | 3.842        |
| 2XEI   | A_LYS_343 | NZ     | A_GLU_171 | OE1    | 3.105        |
| 2XEI   | A_HIS_345 | NE2    | A_GLU_137 | OE1    | 3.939        |
| 2XEI   | A_HIS_345 | NE2    | A_GLU_137 | OE2    | 2.664        |
| 2XEI   | A_ARG_354 | NH2    | A_ASP_114 | OD1    | 3.459        |
| 2XEI   | A_ARG_354 | NH2    | A_ASP_114 | OD2    | 2.831        |
| 2XEI   | A_ARG_363 | NH2    | A_ASP_106 | OD1    | 3.622        |
| 2XEI   | A_ARG_370 | NH1    | A_ASP_369 | OD2    | 3.552        |
| 2XEI   | A_ARG_370 | NH2    | A_ASP_666 | OD1    | 2.830        |
| 2XEI   | A_ARG_370 | NH2    | A_ASP_666 | OD2    | 3.553        |
| 2XEI   | A_HIS_377 | ND1    | A_ASP_379 | OD1    | 2.915        |
| 2XEI   | A_HIS_377 | ND1    | A_GLU_424 | OE1    | 3.971        |
| 2XEI   | A_HIS_377 | NE2    | A_ASP_387 | OD1    | 3.175        |
| 2XEI   | A_HIS_377 | NE2    | A_GLU_424 | OE1    | 3.231        |
| 2XEI   | A_HIS_377 | NE2    | A_GLU_425 | OE2    | 3.821        |
| 2XEI   | A_HIS_377 | NE2    | A_ASP_453 | OD1    | 3.238        |
| 2XEI   | A_HIS_377 | NE2    | A_ASP_453 | OD2    | 3.140        |
| 2XEI   | A_ARG_378 | NH2    | A_ASP_422 | OD1    | 3.870        |
| 2XEI   | A_ARG_378 | NH2    | A_ASP_422 | OD2    | 3.255        |
| 2XEI   | A_ARG_400 | NH1    | A_GLU_64  | OE2    | 2.965        |
| 2XEI   | A_ARG_400 | NH1    | A_GLU_397 | OE1    | 3.705        |
| 2XEI   | A_ARG_400 | NH1    | A_GLU_397 | OE2    | 2.906        |
| 2XEI   | A_ARG_400 | NH2    | A_GLU_64  | OE2    | 2.816        |
| 2XEI   | A_LYS_406 | NZ     | A_ASP_106 | OD1    | 3.048        |
| 2XEI   | A_ARG_411 | NH1    | A_ASP_106 | OD1    | 3.535        |
| 2XEI   | A_ARG_411 | NH1    | A_ASP_106 | OD2    | 2.723        |
| 2XEI   | A_ARG_411 | NH2    | A_ASP_106 | OD1    | 2.835        |
| 2XEI   | A_ARG_411 | NH2    | A_ASP_106 | OD2    | 3.617        |
| 2XEI   | A_ARG_413 | NH2    | A_GLU_367 | OE2    | 3.221        |
| 2XEI   | A_ARG_414 | NH2    | A_GLU_367 | OE2    | 3.265        |
| 2XEI   | A_ARG_463 | NH1    | A_GLU_457 | OE1    | 3.475        |
| 2XEI   | A_ARG_463 | NH1    | A_GLU_457 | OE2    | 3.028        |
| 2XEI   | A_ARG_463 | NH2    | A_ASP_465 | OD1    | 3.828        |
| 2XEI   | A_ARG_463 | NH2    | A_ASP_465 | OD2    | 2.781        |
| 2XEI   | A_LYS_491 | NZ     | A_GLU_495 | OE2    | 3.533        |
| 2XEI   | A_LYS_500 | NZ     | A_ASP_485 | OD2    | 2.834        |
| 2XEI   | A_ARG_527 | NH1    | A_GLU_436 | OE1    | 2.782        |
| 2XEI   | A_ARG_527 | NH2    | A_GLU_436 | OE1    | 2.914        |
| 2XEI   | A_ARG_536 | NH2    | A_GLU_457 | OE1    | 2.981        |
| 2XEI   | A_HIS_553 | NE2    | A_ASP_387 | OD2    | 2.945        |
| 2XEI   | A_HIS_553 | NE2    | A_GLU_425 | OE1    | 3.184        |
| 2XEI   | A_HIS_553 | NE2    | A_GLU_425 | OE2    | 3.250        |

|      |           |     |           |     |       |
|------|-----------|-----|-----------|-----|-------|
| 2XEI | A_HIS_573 | ND1 | A_ASP_567 | OD2 | 2.635 |
| 2XEI | A_ARG_598 | NH2 | A_ASP_596 | OD1 | 3.686 |
| 2XEI | A_ARG_598 | NH2 | A_ASP_596 | OD2 | 2.928 |
| 2XEI | A_LYS_606 | NZ  | A_GLU_505 | OE2 | 2.921 |
| 2XEI | A_LYS_610 | NZ  | A_GLU_703 | OE2 | 2.865 |
| 2XEI | A_LYS_637 | NZ  | A_GLU_641 | OE1 | 2.954 |
| 2XEI | A_LYS_637 | NZ  | A_GLU_641 | OE2 | 3.988 |
| 2XEI | A_ARG_684 | NH2 | A_ASP_710 | OD2 | 3.374 |
| 2XEI | A_HIS_689 | NE2 | A_GLU_672 | OE2 | 2.779 |
| 2XEI | A_ARG_730 | NH2 | A_GLU_727 | OE1 | 3.881 |
| 2XEI | A_ARG_730 | NH2 | A_GLU_727 | OE2 | 3.068 |

Table 348: 2XEI-specific salt bridging networks analysis. In this table, a PDB file is specified with a four-letter PDB ID, except that the names of the PDB files corresponding to the single NMR structural model split from the NMR ensemble is specified with a four-letter PDB ID in addition to a hyphen followed by the single NMR structural model numeric ID, the residue naming scheme is **Chain ID\_residue name\_residue number**,  $\angle ADH$  represents the angle formed by acceptor (A), donor (D) and hydrogen (H) ( $\angle ADH$ ).

| PDB ID | Residue A | Atom A | Residue B | Atom B | Distance (Å) |
|--------|-----------|--------|-----------|--------|--------------|
| 2XEJ   | A_HIS_56  | ND1    | A_GLU_408 | OE2    | 3.595        |
| 2XEJ   | A_HIS_56  | NE2    | A_GLU_408 | OE2    | 3.649        |
| 2XEJ   | A_LYS_59  | NZ     | A_ASP_63  | OD1    | 3.833        |
| 2XEJ   | A_LYS_59  | NZ     | A_ASP_63  | OD2    | 3.161        |
| 2XEJ   | A_ARG_181 | NH1    | A_GLU_183 | OE2    | 3.636        |
| 2XEJ   | A_ARG_181 | NH2    | A_ASP_184 | OD1    | 3.044        |
| 2XEJ   | A_ARG_181 | NH2    | A_ASP_184 | OD2    | 3.609        |
| 2XEJ   | A_ARG_190 | NH1    | A_ASP_714 | OD1    | 2.993        |
| 2XEJ   | A_ARG_190 | NH1    | A_ASP_714 | OD2    | 3.604        |
| 2XEJ   | A_ARG_190 | NH2    | A_ASP_714 | OD1    | 3.611        |
| 2XEJ   | A_ARG_190 | NH2    | A_ASP_714 | OD2    | 2.731        |
| 2XEJ   | A_ARG_204 | NH1    | A_ASP_233 | OD1    | 3.963        |
| 2XEJ   | A_ARG_204 | NH1    | A_ASP_233 | OD2    | 3.162        |
| 2XEJ   | A_ARG_255 | NH1    | A_GLU_145 | OE1    | 2.709        |
| 2XEJ   | A_ARG_255 | NH2    | A_GLU_145 | OE1    | 2.779        |
| 2XEJ   | A_LYS_304 | NZ     | A_GLU_307 | OE2    | 3.882        |
| 2XEJ   | A_LYS_341 | NZ     | A_ASP_173 | OD1    | 3.630        |
| 2XEJ   | A_HIS_345 | NE2    | A_GLU_137 | OE1    | 3.939        |
| 2XEJ   | A_HIS_345 | NE2    | A_GLU_137 | OE2    | 3.101        |
| 2XEJ   | A_ARG_354 | NH2    | A_ASP_114 | OD1    | 3.439        |
| 2XEJ   | A_ARG_354 | NH2    | A_ASP_114 | OD2    | 2.884        |
| 2XEJ   | A_ARG_363 | NH2    | A_ASP_106 | OD1    | 3.838        |
| 2XEJ   | A_ARG_370 | NH1    | A_ASP_369 | OD1    | 3.947        |
| 2XEJ   | A_ARG_370 | NH1    | A_ASP_369 | OD2    | 3.540        |
| 2XEJ   | A_ARG_370 | NH2    | A_ASP_666 | OD1    | 2.915        |
| 2XEJ   | A_ARG_370 | NH2    | A_ASP_666 | OD2    | 3.607        |
| 2XEJ   | A_HIS_377 | ND1    | A_ASP_379 | OD1    | 2.947        |
| 2XEJ   | A_HIS_377 | ND1    | A_GLU_424 | OE1    | 3.959        |
| 2XEJ   | A_HIS_377 | NE2    | A_ASP_387 | OD1    | 3.198        |
| 2XEJ   | A_HIS_377 | NE2    | A_GLU_424 | OE1    | 3.200        |
| 2XEJ   | A_HIS_377 | NE2    | A_GLU_425 | OE2    | 3.909        |
| 2XEJ   | A_HIS_377 | NE2    | A_ASP_453 | OD1    | 3.288        |
| 2XEJ   | A_HIS_377 | NE2    | A_ASP_453 | OD2    | 3.106        |
| 2XEJ   | A_ARG_378 | NH2    | A_ASP_422 | OD1    | 3.906        |
| 2XEJ   | A_ARG_378 | NH2    | A_ASP_422 | OD2    | 3.305        |
| 2XEJ   | A_ARG_400 | NH1    | A_GLU_64  | OE2    | 3.030        |
| 2XEJ   | A_ARG_400 | NH1    | A_GLU_397 | OE1    | 3.701        |
| 2XEJ   | A_ARG_400 | NH1    | A_GLU_397 | OE2    | 2.808        |
| 2XEJ   | A_ARG_400 | NH2    | A_GLU_64  | OE2    | 2.879        |
| 2XEJ   | A_LYS_406 | NZ     | A_ASP_106 | OD1    | 3.327        |
| 2XEJ   | A_ARG_411 | NH1    | A_ASP_106 | OD1    | 3.525        |
| 2XEJ   | A_ARG_411 | NH1    | A_ASP_106 | OD2    | 2.766        |
| 2XEJ   | A_ARG_411 | NH2    | A_ASP_106 | OD1    | 2.901        |
| 2XEJ   | A_ARG_411 | NH2    | A_ASP_106 | OD2    | 3.711        |
| 2XEJ   | A_ARG_413 | NH2    | A_GLU_367 | OE2    | 3.406        |
| 2XEJ   | A_ARG_414 | NH2    | A_GLU_367 | OE2    | 3.157        |
| 2XEJ   | A_ARG_463 | NH1    | A_GLU_457 | OE1    | 3.276        |
| 2XEJ   | A_ARG_463 | NH1    | A_GLU_457 | OE2    | 3.003        |
| 2XEJ   | A_ARG_463 | NH2    | A_ASP_465 | OD1    | 3.986        |
| 2XEJ   | A_ARG_463 | NH2    | A_ASP_465 | OD2    | 2.863        |
| 2XEJ   | A_LYS_491 | NZ     | A_GLU_495 | OE2    | 3.392        |
| 2XEJ   | A_LYS_500 | NZ     | A_ASP_485 | OD2    | 2.873        |
| 2XEJ   | A_ARG_527 | NH1    | A_GLU_436 | OE1    | 2.804        |
| 2XEJ   | A_ARG_527 | NH2    | A_GLU_436 | OE1    | 3.018        |
| 2XEJ   | A_ARG_536 | NH1    | A_GLU_457 | OE1    | 2.942        |
| 2XEJ   | A_HIS_553 | NE2    | A_ASP_387 | OD2    | 2.982        |
| 2XEJ   | A_HIS_553 | NE2    | A_GLU_425 | OE1    | 3.077        |

|      |           |     |           |     |       |
|------|-----------|-----|-----------|-----|-------|
| 2XEJ | A_HIS_553 | NE2 | A_GLU_425 | OE2 | 3.221 |
| 2XEJ | A_HIS_573 | ND1 | A_ASP_567 | OD2 | 2.723 |
| 2XEJ | A_ARG_598 | NH2 | A_ASP_596 | OD1 | 3.718 |
| 2XEJ | A_ARG_598 | NH2 | A_ASP_596 | OD2 | 2.988 |
| 2XEJ | A_LYS_606 | NZ  | A_GLU_505 | OE1 | 3.097 |
| 2XEJ | A_LYS_606 | NZ  | A_GLU_505 | OE2 | 3.795 |
| 2XEJ | A_LYS_610 | NZ  | A_GLU_703 | OE2 | 2.940 |
| 2XEJ | A_HIS_618 | NE2 | A_GLU_716 | OE1 | 3.742 |
| 2XEJ | A_LYS_637 | NZ  | A_GLU_641 | OE1 | 2.900 |
| 2XEJ | A_LYS_637 | NZ  | A_GLU_641 | OE2 | 3.785 |
| 2XEJ | A_ARG_684 | NH2 | A_ASP_710 | OD2 | 3.390 |
| 2XEJ | A_HIS_689 | NE2 | A_GLU_672 | OE2 | 2.745 |

Table 349: 2XEJ-specific salt bridging networks analysis. In this table, a PDB file is specified with a four-letter PDB ID, except that the names of the PDB files corresponding to the single NMR structural model split from the NMR ensemble is specified with a four-letter PDB ID in addition to a hyphen followed by the single NMR structural model numeric ID, the residue naming scheme is **Chain ID\_residue name\_residue number**,  $\angle ADH$  represents the angle formed by acceptor (A), donor (D) and hydrogen (H) ( $\angle ADH$ ).

| PDB ID | Residue A | Atom A | Residue B | Atom B | Distance (Å) |
|--------|-----------|--------|-----------|--------|--------------|
| 2XZQ   | H_ARG_40  | NH1    | H_GLU_89  | OE2    | 3.454        |
| 2XZQ   | H_ARG_40  | NH2    | H_GLU_89  | OE2    | 2.650        |
| 2XZQ   | H_LYS_65  | NZ     | H_GLU_62  | OE1    | 2.508        |
| 2XZQ   | H_LYS_65  | NZ     | H_GLU_62  | OE2    | 3.892        |
| 2XZQ   | H_LYS_67  | NZ     | H_ASP_90  | OD1    | 3.800        |
| 2XZQ   | H_LYS_67  | NZ     | H_ASP_90  | OD2    | 3.016        |
| 2XZQ   | H_ARG_98  | NH1    | H_ASP_108 | OD1    | 3.377        |
| 2XZQ   | H_ARG_98  | NH1    | H_ASP_108 | OD2    | 2.748        |
| 2XZQ   | H_LYS_150 | NZ     | L_GLU_127 | OE2    | 3.822        |
| 2XZQ   | H_LYS_212 | NZ     | H_ASP_214 | OD1    | 3.314        |
| 2XZQ   | H_LYS_215 | NZ     | L_GLU_126 | OE2    | 2.689        |
| 2XZQ   | L_ARG_23  | NH1    | L_ASP_71  | OD1    | 3.290        |
| 2XZQ   | L_ARG_23  | NH1    | L_ASP_71  | OD2    | 3.939        |
| 2XZQ   | L_ARG_23  | NH2    | L_ASP_71  | OD1    | 2.856        |
| 2XZQ   | L_ARG_23  | NH2    | L_ASP_71  | OD2    | 3.986        |
| 2XZQ   | L_HIS_44  | ND1    | L_GLU_40  | OE2    | 3.471        |
| 2XZQ   | L_ARG_63  | NH2    | L_ASP_84  | OD1    | 2.551        |
| 2XZQ   | L_ARG_63  | NH2    | L_ASP_84  | OD2    | 3.490        |
| 2XZQ   | L_LYS_105 | NZ     | L_GLU_85  | OE2    | 3.885        |
| 2XZQ   | L_LYS_113 | NZ     | L_GLU_201 | OE1    | 2.868        |

Table 350: 2XZQ-specific salt bridging networks analysis. In this table, a PDB file is specified with a four-letter PDB ID, except that the names of the PDB files corresponding to the single NMR structural model split from the NMR ensemble is specified with a four-letter PDB ID in addition to a hyphen followed by the single NMR structural model numeric ID, the residue naming scheme is **Chain ID\_residue name\_residue number**,  $\angle ADH$  represents the angle formed by acceptor (A), donor (D) and hydrogen (H) ( $\angle ADH$ ).

| PDB ID | Residue A | Atom A | Residue B | Atom B | Distance (Å) |
|--------|-----------|--------|-----------|--------|--------------|
| 2Y06   | H_LYS_63  | NZ     | H_GLU_46  | OE1    | 3.321        |
| 2Y06   | H_LYS_63  | NZ     | H_GLU_46  | OE2    | 2.855        |
| 2Y06   | H_LYS_67  | NZ     | H_ASP_90  | OD2    | 3.290        |
| 2Y06   | H_ARG_98  | NH1    | H_ASP_108 | OD1    | 3.019        |
| 2Y06   | H_ARG_98  | NH1    | H_ASP_108 | OD2    | 3.194        |
| 2Y06   | H_LYS_215 | NZ     | L_GLU_126 | OE2    | 2.373        |
| 2Y06   | L_ARG_23  | NH1    | L_ASP_71  | OD1    | 3.453        |
| 2Y06   | L_ARG_23  | NH2    | L_ASP_71  | OD1    | 2.764        |
| 2Y06   | L_ARG_63  | NH2    | L_ASP_84  | OD1    | 2.907        |
| 2Y06   | L_ARG_63  | NH2    | L_ASP_84  | OD2    | 3.632        |
| 2Y06   | L_LYS_113 | NZ     | L_GLU_201 | OE1    | 3.332        |
| 2Y06   | L_LYS_169 | NZ     | L_GLU_85  | OE2    | 3.628        |

Table 351: 2Y06-specific salt bridging networks analysis. In this table, a PDB file is specified with a four-letter PDB ID, except that the names of the PDB files corresponding to the single NMR structural model split from the NMR ensemble is specified with a four-letter PDB ID in addition to a hyphen followed by the single NMR structural model numeric ID, the residue naming scheme is **Chain ID** **residue name** **residue number**,  $\angle ADH$  represents the angle formed by acceptor (A), donor (D) and hydrogen (H) ( $\angle ADH$ ).

| PDB ID | Residue A | Atom A | Residue B | Atom B | Distance (Å) |
|--------|-----------|--------|-----------|--------|--------------|
| 2Y07   | H_LYS_67  | NZ     | H_ASP_90  | OD1    | 3.687        |
| 2Y07   | H_LYS_67  | NZ     | H_ASP_90  | OD2    | 2.861        |
| 2Y07   | H_ARG_98  | NH1    | H_ASP_108 | OD1    | 3.962        |
| 2Y07   | H_ARG_98  | NH1    | H_ASP_108 | OD2    | 2.823        |
| 2Y07   | H_LYS_215 | NZ     | L_GLU_126 | OE2    | 2.390        |
| 2Y07   | L_ARG_23  | NH1    | L_ASP_71  | OD1    | 3.698        |
| 2Y07   | L_ARG_23  | NH1    | L_ASP_71  | OD2    | 3.356        |
| 2Y07   | L_ARG_23  | NH2    | L_ASP_71  | OD1    | 2.962        |
| 2Y07   | L_ARG_23  | NH2    | L_ASP_71  | OD2    | 2.784        |
| 2Y07   | L_ARG_63  | NH2    | L_GLU_82  | OE2    | 3.307        |
| 2Y07   | L_ARG_63  | NH2    | L_ASP_83  | OD1    | 2.727        |
| 2Y07   | L_ARG_63  | NH2    | L_ASP_83  | OD2    | 3.778        |
| 2Y07   | L_LYS_113 | NZ     | L_GLU_201 | OE1    | 3.255        |
| 2Y07   | L_LYS_113 | NZ     | L_GLU_201 | OE2    | 3.532        |
| 2Y07   | L_HIS_200 | NE2    | L_GLU_201 | OE1    | 3.946        |
| 2Y07   | L_ARG_211 | NH1    | L_GLU_189 | OE1    | 3.826        |

Table 352: 2Y07-specific salt bridging networks analysis. In this table, a PDB file is specified with a four-letter PDB ID, except that the names of the PDB files corresponding to the single NMR structural model split from the NMR ensemble is specified with a four-letter PDB ID in addition to a hyphen followed by the single NMR structural model numeric ID, the residue naming scheme is **Chain ID\_residue name\_residue number**,  $\angle ADH$  represents the angle formed by acceptor (A), donor (D) and hydrogen (H) ( $\angle ADH$ ).



| PDB ID | Residue A | Atom A | Residue B | Atom B | Distance (Å) |
|--------|-----------|--------|-----------|--------|--------------|
| 2Y36   | H_ARG_40  | NH1    | H_GLU_89  | OE1    | 3.909        |
| 2Y36   | H_ARG_40  | NH1    | H_GLU_89  | OE2    | 3.356        |
| 2Y36   | H_ARG_40  | NH2    | H_GLU_89  | OE2    | 2.875        |
| 2Y36   | H_LYS_65  | NZ     | H_GLU_62  | OE1    | 2.983        |
| 2Y36   | H_LYS_67  | NZ     | H_ASP_90  | OD2    | 3.261        |
| 2Y36   | H_ARG_98  | NH1    | H_ASP_108 | OD1    | 3.408        |
| 2Y36   | H_ARG_98  | NH1    | H_ASP_108 | OD2    | 2.494        |
| 2Y36   | H_LYS_150 | NZ     | L_GLU_127 | OE2    | 3.849        |
| 2Y36   | H_LYS_215 | NZ     | L_GLU_126 | OE2    | 2.707        |
| 2Y36   | L_ARG_23  | NH1    | L_ASP_71  | OD2    | 3.674        |
| 2Y36   | L_ARG_23  | NH2    | L_ASP_71  | OD1    | 3.148        |
| 2Y36   | L_ARG_23  | NH2    | L_ASP_71  | OD2    | 3.652        |
| 2Y36   | L_ARG_63  | NH2    | L_GLU_83  | OE2    | 3.566        |
| 2Y36   | L_ARG_63  | NH2    | L_ASP_84  | OD1    | 2.616        |
| 2Y36   | L_ARG_63  | NH2    | L_ASP_84  | OD2    | 3.443        |
| 2Y36   | L_LYS_113 | NZ     | L_GLU_201 | OE1    | 3.248        |
| 2Y36   | L_HIS_191 | NE2    | L_ASP_154 | OD2    | 3.845        |

Table 353: 2Y36-specific salt bridging networks analysis. In this table, a PDB file is specified with a four-letter PDB ID, except that the names of the PDB files corresponding to the single NMR structural model split from the NMR ensemble is specified with a four-letter PDB ID in addition to a hyphen followed by the single NMR structural model numeric ID, the residue naming scheme is **Chain ID\_residue name\_residue number**,  $\angle ADH$  represents the angle formed by acceptor (A), donor (D) and hydrogen (H) ( $\angle ADH$ ).

| PDB ID | Residue A | Atom A | Residue B | Atom B | Distance (Å) |
|--------|-----------|--------|-----------|--------|--------------|
| 2Y7S   | A_LYS_27  | NZ     | A_ASP_25  | OD2    | 3.076        |
| 2Y7S   | A_LYS_45  | NZ     | A_GLU_83  | OE1    | 2.864        |
| 2Y7S   | A_LYS_47  | NZ     | A_GLU_54  | OE1    | 3.042        |
| 2Y7S   | A_LYS_67  | NZ     | A_ASP_28  | OD1    | 3.289        |
| 2Y7S   | A_LYS_67  | NZ     | A_ASP_28  | OD2    | 2.809        |
| 2Y7S   | A_ARG_75  | NH1    | A_GLU_95  | OE1    | 2.862        |
| 2Y7S   | A_ARG_75  | NH1    | A_GLU_95  | OE2    | 3.954        |
| 2Y7S   | A_ARG_80  | NH1    | A_GLU_44  | OE1    | 2.923        |
| 2Y7S   | A_ARG_80  | NH1    | A_GLU_44  | OE2    | 3.022        |
| 2Y7S   | A_ARG_80  | NH2    | A_GLU_92  | OE1    | 3.248        |
| 2Y7S   | A_ARG_127 | NH1    | A_ASP_159 | OD1    | 3.706        |
| 2Y7S   | A_ARG_127 | NH1    | A_ASP_159 | OD2    | 2.895        |
| 2Y7S   | A_ARG_127 | NH1    | B_GLU_118 | OE1    | 3.457        |
| 2Y7S   | A_ARG_127 | NH2    | A_GLU_112 | OE1    | 3.963        |
| 2Y7S   | A_ARG_127 | NH2    | A_GLU_112 | OE2    | 2.936        |
| 2Y7S   | A_ARG_127 | NH2    | A_ASP_159 | OD1    | 2.847        |
| 2Y7S   | A_ARG_127 | NH2    | A_ASP_159 | OD2    | 3.582        |
| 2Y7S   | A_ARG_130 | NH1    | A_GLU_92  | OE1    | 3.851        |
| 2Y7S   | A_ARG_130 | NH1    | A_GLU_92  | OE2    | 3.019        |
| 2Y7S   | A_ARG_130 | NH2    | A_GLU_92  | OE1    | 3.136        |
| 2Y7S   | A_ARG_130 | NH2    | A_GLU_92  | OE2    | 3.650        |
| 2Y7S   | A_ARG_152 | NH1    | A_GLU_150 | OE1    | 3.228        |
| 2Y7S   | A_ARG_152 | NH2    | A_GLU_150 | OE1    | 3.600        |
| 2Y7S   | A_LYS_179 | NZ     | A_GLU_181 | OE1    | 3.798        |
| 2Y7S   | A_LYS_179 | NZ     | A_GLU_181 | OE2    | 3.366        |
| 2Y7S   | A_LYS_218 | NZ     | A_GLU_216 | OE1    | 3.816        |
| 2Y7S   | A_LYS_218 | NZ     | B_ASP_85  | OD1    | 3.014        |
| 2Y7S   | A_LYS_240 | NZ     | A_GLU_217 | OE1    | 3.163        |
| 2Y7S   | A_LYS_240 | NZ     | A_GLU_217 | OE2    | 3.626        |
| 2Y7S   | A_LYS_253 | NZ     | A_ASP_71  | OD1    | 3.458        |
| 2Y7S   | A_LYS_253 | NZ     | A_ASP_71  | OD2    | 2.809        |
| 2Y7S   | B_ARG_41  | NH2    | A_GLU_238 | OE2    | 2.757        |
| 2Y7S   | B_LYS_42  | NZ     | B_ASP_37  | OD1    | 3.966        |
| 2Y7S   | B_LYS_47  | NZ     | B_GLU_54  | OE1    | 3.576        |
| 2Y7S   | B_LYS_47  | NZ     | B_GLU_54  | OE2    | 3.620        |
| 2Y7S   | B_LYS_67  | NZ     | B_ASP_28  | OD1    | 3.186        |
| 2Y7S   | B_LYS_67  | NZ     | B_ASP_28  | OD2    | 3.425        |
| 2Y7S   | B_ARG_75  | NH1    | B_GLU_95  | OE2    | 2.817        |
| 2Y7S   | B_ARG_80  | NH1    | B_GLU_44  | OE1    | 3.002        |
| 2Y7S   | B_ARG_80  | NH1    | B_GLU_44  | OE2    | 3.573        |
| 2Y7S   | B_ARG_80  | NH2    | B_GLU_92  | OE1    | 2.824        |
| 2Y7S   | B_HIS_103 | ND1    | B_GLU_137 | OE1    | 2.807        |
| 2Y7S   | B_HIS_119 | NE2    | B_ASP_116 | OD2    | 3.821        |
| 2Y7S   | B_LYS_122 | NZ     | B_ASP_116 | OD2    | 3.879        |
| 2Y7S   | B_ARG_127 | NH1    | B_ASP_159 | OD1    | 3.795        |
| 2Y7S   | B_ARG_127 | NH1    | B_ASP_159 | OD2    | 2.884        |
| 2Y7S   | B_ARG_127 | NH2    | B_GLU_112 | OE1    | 3.910        |
| 2Y7S   | B_ARG_127 | NH2    | B_GLU_112 | OE2    | 2.774        |
| 2Y7S   | B_ARG_127 | NH2    | B_ASP_159 | OD1    | 2.931        |
| 2Y7S   | B_ARG_127 | NH2    | B_ASP_159 | OD2    | 3.540        |
| 2Y7S   | B_ARG_130 | NH1    | B_GLU_92  | OE1    | 3.502        |
| 2Y7S   | B_ARG_130 | NH1    | B_GLU_92  | OE2    | 2.814        |
| 2Y7S   | B_ARG_130 | NH2    | B_GLU_92  | OE1    | 3.119        |
| 2Y7S   | B_ARG_130 | NH2    | B_GLU_92  | OE2    | 3.783        |
| 2Y7S   | B_LYS_148 | NZ     | B_ASP_170 | OD2    | 3.415        |
| 2Y7S   | B_ARG_152 | NH1    | B_GLU_150 | OE1    | 2.822        |
| 2Y7S   | B_ARG_152 | NH2    | B_GLU_150 | OE1    | 3.268        |

|      |           |     |           |     |       |
|------|-----------|-----|-----------|-----|-------|
| 2Y7S | B_LYS_173 | NZ  | B_ASP_170 | OD2 | 3.896 |
| 2Y7S | B_LYS_179 | NZ  | B_GLU_181 | OE1 | 3.992 |
| 2Y7S | B_LYS_179 | NZ  | B_GLU_181 | OE2 | 3.341 |
| 2Y7S | B_LYS_198 | NZ  | B_GLU_196 | OE1 | 3.898 |
| 2Y7S | B_HIS_204 | ND1 | B_ASP_200 | OD2 | 3.949 |
| 2Y7S | B_ARG_212 | NH2 | B_ASP_210 | OD2 | 3.869 |
| 2Y7S | B_LYS_218 | NZ  | B_GLU_187 | OE1 | 3.745 |
| 2Y7S | B_LYS_218 | NZ  | B_GLU_216 | OE2 | 3.499 |
| 2Y7S | B_LYS_253 | NZ  | B_ASP_71  | OD1 | 3.851 |
| 2Y7S | B_LYS_253 | NZ  | B_ASP_71  | OD2 | 3.059 |

Table 354: 2Y7S-specific salt bridging networks analysis. In this table, a PDB file is specified with a four-letter PDB ID, except that the names of the PDB files corresponding to the single NMR structural model split from the NMR ensemble is specified with a four-letter PDB ID in addition to a hyphen followed by the single NMR structural model numeric ID, the residue naming scheme is **Chain ID\_residue name\_residue number**,  $\angle ADH$  represents the angle formed by acceptor (A), donor (D) and hydrogen (H) ( $\angle ADH$ ).

| PDB ID | Residue A | Atom A | Residue B | Atom B | Distance (Å) |
|--------|-----------|--------|-----------|--------|--------------|
| 2YPV   | A_HIS_26  | ND1    | A_ASP_25  | OD1    | 3.615        |
| 2YPV   | A_LYS_47  | NZ     | A_GLU_54  | OE2    | 3.265        |
| 2YPV   | A_LYS_67  | NZ     | A_ASP_28  | OD1    | 3.119        |
| 2YPV   | A_LYS_67  | NZ     | A_ASP_28  | OD2    | 2.907        |
| 2YPV   | A_ARG_80  | NH1    | A_GLU_44  | OE1    | 3.085        |
| 2YPV   | A_ARG_80  | NH1    | A_GLU_44  | OE2    | 3.642        |
| 2YPV   | A_ARG_80  | NH2    | A_GLU_92  | OE2    | 3.509        |
| 2YPV   | A_HIS_103 | ND1    | A_GLU_137 | OE1    | 2.799        |
| 2YPV   | A_HIS_103 | ND1    | A_GLU_137 | OE2    | 3.510        |
| 2YPV   | A_ARG_127 | NH1    | A_ASP_160 | OD1    | 3.664        |
| 2YPV   | A_ARG_127 | NH1    | A_ASP_160 | OD2    | 2.748        |
| 2YPV   | A_ARG_127 | NH2    | A_GLU_112 | OE1    | 3.713        |
| 2YPV   | A_ARG_127 | NH2    | A_GLU_112 | OE2    | 2.780        |
| 2YPV   | A_ARG_127 | NH2    | A_ASP_160 | OD1    | 2.809        |
| 2YPV   | A_ARG_127 | NH2    | A_ASP_160 | OD2    | 3.468        |
| 2YPV   | A_ARG_130 | NH2    | L_ASP_92  | OD1    | 2.916        |
| 2YPV   | A_ARG_149 | NH2    | A_ASP_171 | OD2    | 2.711        |
| 2YPV   | A_LYS_180 | NZ     | A_GLU_182 | OE1    | 3.802        |
| 2YPV   | A_LYS_180 | NZ     | A_GLU_182 | OE2    | 3.312        |
| 2YPV   | A_ARG_204 | NH2    | A_ASP_142 | OD1    | 2.851        |
| 2YPV   | A_ARG_204 | NH2    | A_ASP_142 | OD2    | 3.577        |
| 2YPV   | A_HIS_205 | ND1    | A_ASP_201 | OD2    | 3.920        |
| 2YPV   | A_LYS_219 | NZ     | H_ASP_52  | OD2    | 3.469        |
| 2YPV   | A_LYS_241 | NZ     | H_ASP_99  | OD2    | 2.741        |
| 2YPV   | A_ARG_247 | NH1    | A_GLU_188 | OE2    | 3.707        |
| 2YPV   | A_LYS_254 | NZ     | A_ASP_71  | OD1    | 3.594        |
| 2YPV   | A_LYS_254 | NZ     | A_ASP_71  | OD2    | 2.807        |
| 2YPV   | H_LYS_54  | NZ     | H_ASP_31  | OD1    | 2.744        |
| 2YPV   | H_LYS_67  | NZ     | H_ASP_90  | OD1    | 3.738        |
| 2YPV   | H_LYS_67  | NZ     | H_ASP_90  | OD2    | 2.816        |
| 2YPV   | H_LYS_214 | NZ     | L_GLU_123 | OE1    | 2.788        |
| 2YPV   | H_LYS_214 | NZ     | L_GLU_123 | OE2    | 2.975        |
| 2YPV   | L_HIS_30  | ND1    | L_ASP_28  | OD1    | 3.934        |
| 2YPV   | L_HIS_30  | ND1    | L_ASP_92  | OD1    | 3.607        |
| 2YPV   | L_HIS_30  | ND1    | L_ASP_92  | OD2    | 2.797        |
| 2YPV   | L_HIS_30  | NE2    | L_ASP_28  | OD2    | 3.772        |
| 2YPV   | L_ARG_50  | NH2    | A_GLU_239 | OE1    | 3.110        |
| 2YPV   | L_ARG_50  | NH2    | A_GLU_239 | OE2    | 3.975        |
| 2YPV   | L_ARG_61  | NH1    | L_GLU_79  | OE1    | 3.426        |
| 2YPV   | L_ARG_61  | NH1    | L_GLU_81  | OE2    | 3.737        |
| 2YPV   | L_ARG_61  | NH1    | L_ASP_82  | OD1    | 2.772        |
| 2YPV   | L_ARG_61  | NH1    | L_ASP_82  | OD2    | 3.085        |
| 2YPV   | L_ARG_61  | NH2    | L_GLU_79  | OE1    | 2.918        |
| 2YPV   | L_ARG_61  | NH2    | L_GLU_79  | OE2    | 3.335        |
| 2YPV   | L_ARG_61  | NH2    | L_GLU_81  | OE2    | 3.973        |
| 2YPV   | L_LYS_149 | NZ     | L_GLU_195 | OE1    | 2.918        |
| 2YPV   | L_LYS_149 | NZ     | L_GLU_195 | OE2    | 3.889        |
| 2YPV   | L_HIS_189 | ND1    | L_ASP_151 | OD2    | 2.963        |
| 2YPV   | L_LYS_199 | NZ     | L_ASP_110 | OD2    | 3.962        |

---

Table 355: 2YPV-specific salt bridging networks analysis. In this table, a PDB file is specified with a four-letter PDB ID, except that the names of the PDB files corresponding to the single NMR structural model split from the NMR ensemble is specified with a four-letter PDB ID in addition to a hyphen followed by the single NMR structural model numeric ID, the residue naming scheme is **Chain ID\_residue name\_residue number**,  $\angle ADH$  represents the angle formed by acceptor (A), donor (D) and hydrogen (H) ( $\angle ADH$ ).

| PDB ID | Residue A | Atom A | Residue B | Atom B | Distance (Å) |
|--------|-----------|--------|-----------|--------|--------------|
| 2YWY   | A_ARG_33  | NH2    | A_ASP_35  | OD1    | 3.217        |
| 2YWY   | A_LYS_48  | NZ     | A_ASP_35  | OD1    | 3.576        |
| 2YWY   | A_LYS_48  | NZ     | A_ASP_35  | OD2    | 2.413        |
| 2YWY   | A_LYS_48  | NZ     | B_GLU_32  | OE1    | 3.306        |
| 2YWY   | A_LYS_48  | NZ     | B_GLU_32  | OE2    | 2.998        |
| 2YWY   | A_ARG_54  | NH1    | A_ASP_77  | OD1    | 3.047        |
| 2YWY   | A_ARG_54  | NH1    | A_ASP_77  | OD2    | 3.216        |
| 2YWY   | A_ARG_54  | NH2    | A_ASP_77  | OD1    | 3.942        |
| 2YWY   | A_ARG_54  | NH2    | A_ASP_77  | OD2    | 2.619        |
| 2YWY   | A_LYS_61  | NZ     | B_GLU_57  | OE1    | 2.550        |
| 2YWY   | A_LYS_61  | NZ     | B_GLU_57  | OE2    | 3.211        |
| 2YWY   | A_LYS_82  | NZ     | C_ASP_89  | OD1    | 3.260        |
| 2YWY   | A_LYS_102 | NZ     | A_GLU_46  | OE1    | 2.844        |
| 2YWY   | A_LYS_102 | NZ     | A_GLU_46  | OE2    | 2.777        |
| 2YWY   | B_LYS_25  | NZ     | B_ASP_4   | OD1    | 3.823        |
| 2YWY   | B_ARG_33  | NH2    | A_GLU_32  | OE1    | 3.506        |
| 2YWY   | B_ARG_33  | NH2    | B_ASP_35  | OD1    | 3.061        |
| 2YWY   | B_ARG_33  | NH2    | B_ASP_35  | OD2    | 3.585        |
| 2YWY   | B_ARG_38  | NH2    | B_ASP_77  | OD1    | 2.791        |
| 2YWY   | B_LYS_48  | NZ     | A_GLU_32  | OE1    | 3.520        |
| 2YWY   | B_LYS_48  | NZ     | A_GLU_32  | OE2    | 2.757        |
| 2YWY   | B_ARG_54  | NH1    | B_ASP_77  | OD2    | 3.038        |
| 2YWY   | B_ARG_54  | NH2    | B_ASP_77  | OD1    | 2.760        |
| 2YWY   | B_ARG_54  | NH2    | B_ASP_77  | OD2    | 2.618        |
| 2YWY   | B_LYS_61  | NZ     | A_GLU_57  | OE1    | 3.086        |
| 2YWY   | B_LYS_102 | NZ     | B_GLU_46  | OE1    | 3.457        |
| 2YWY   | C_LYS_12  | NZ     | C_GLU_16  | OE2    | 3.484        |
| 2YWY   | C_ARG_33  | NH2    | C_ASP_35  | OD1    | 3.627        |
| 2YWY   | C_LYS_48  | NZ     | C_ASP_35  | OD2    | 3.144        |
| 2YWY   | C_LYS_48  | NZ     | D_GLU_32  | OE1    | 2.723        |
| 2YWY   | C_LYS_48  | NZ     | D_GLU_32  | OE2    | 3.404        |
| 2YWY   | C_ARG_54  | NH1    | C_ASP_77  | OD1    | 2.958        |
| 2YWY   | C_ARG_54  | NH1    | C_ASP_77  | OD2    | 3.216        |
| 2YWY   | C_ARG_54  | NH2    | C_ASP_77  | OD1    | 3.555        |
| 2YWY   | C_ARG_54  | NH2    | C_ASP_77  | OD2    | 2.224        |
| 2YWY   | C_LYS_61  | NZ     | D_GLU_57  | OE1    | 2.801        |
| 2YWY   | C_LYS_61  | NZ     | D_GLU_57  | OE2    | 3.948        |
| 2YWY   | C_ARG_74  | NH1    | C_ASP_77  | OD2    | 3.935        |
| 2YWY   | C_LYS_102 | NZ     | C_GLU_46  | OE1    | 3.626        |
| 2YWY   | D_ARG_33  | NH2    | D_ASP_35  | OD1    | 3.658        |
| 2YWY   | D_ARG_38  | NH2    | D_ASP_77  | OD1    | 2.919        |
| 2YWY   | D_LYS_48  | NZ     | C_GLU_32  | OE1    | 3.239        |
| 2YWY   | D_LYS_48  | NZ     | C_GLU_32  | OE2    | 2.447        |
| 2YWY   | D_ARG_54  | NH1    | D_ASP_77  | OD1    | 3.877        |
| 2YWY   | D_ARG_54  | NH1    | D_ASP_77  | OD2    | 2.884        |
| 2YWY   | D_ARG_54  | NH2    | D_ASP_77  | OD1    | 2.689        |
| 2YWY   | D_ARG_54  | NH2    | D_ASP_77  | OD2    | 3.195        |
| 2YWY   | D_LYS_61  | NZ     | C_GLU_57  | OE1    | 2.837        |
| 2YWY   | D_LYS_61  | NZ     | C_GLU_57  | OE2    | 3.637        |
| 2YWY   | D_ARG_71  | NH1    | D_ASP_72  | OD1    | 2.537        |
| 2YWY   | D_ARG_71  | NH1    | D_ASP_72  | OD2    | 3.727        |
| 2YWY   | D_ARG_71  | NH2    | D_ASP_72  | OD1    | 3.924        |
| 2YWY   | D_LYS_102 | NZ     | D_GLU_46  | OE1    | 3.940        |

---

Table 356: 2YWY-specific salt bridging networks analysis. In this table, a PDB file is specified with a four-letter PDB ID, except that the names of the PDB files corresponding to the single NMR structural model split from the NMR ensemble is specified with a four-letter PDB ID in addition to a hyphen followed by the single NMR structural model numeric ID, the residue naming scheme is **Chain ID\_residue name\_residue number**,  $\angle ADH$  represents the angle formed by acceptor (A), donor (D) and hydrogen (H) ( $\angle ADH$ ).

| PDB ID | Residue A | Atom A | Residue B | Atom B | Distance (Å) |
|--------|-----------|--------|-----------|--------|--------------|
| 2YWZ   | A_ARG_8   | NH1    | A_ASP_4   | OD2    | 3.114        |
| 2YWZ   | A_LYS_25  | NZ     | A_ASP_4   | OD1    | 3.407        |
| 2YWZ   | A_ARG_54  | NH1    | A_ASP_77  | OD1    | 3.632        |
| 2YWZ   | A_ARG_54  | NH1    | A_ASP_77  | OD2    | 2.888        |
| 2YWZ   | A_ARG_54  | NH2    | A_ASP_77  | OD1    | 3.024        |
| 2YWZ   | A_ARG_54  | NH2    | A_ASP_77  | OD2    | 3.599        |
| 2YWZ   | A_ARG_74  | NH1    | A_ASP_72  | OD2    | 2.842        |
| 2YWZ   | A_LYS_82  | NZ     | A_GLU_46  | OE1    | 3.217        |
| 2YWZ   | A_LYS_82  | NZ     | A_GLU_46  | OE2    | 3.322        |
| 2YWZ   | A_LYS_82  | NZ     | A_GLU_102 | OE1    | 3.820        |
| 2YWZ   | A_LYS_82  | NZ     | A_GLU_102 | OE2    | 3.005        |

Table 357: 2YWZ-specific salt bridging networks analysis. In this table, a PDB file is specified with a four-letter PDB ID, except that the names of the PDB files corresponding to the single NMR structural model split from the NMR ensemble is specified with a four-letter PDB ID in addition to a hyphen followed by the single NMR structural model numeric ID, the residue naming scheme is **Chain ID\_residue name\_residue number**,  $\angle ADH$  represents the angle formed by acceptor (A), donor (D) and hydrogen (H) ( $\angle ADH$ ).



| PDB ID | Residue A | Atom A | Residue B  | Atom B | Distance (Å) |
|--------|-----------|--------|------------|--------|--------------|
| 2ZCH   | P_HIS.57  | ND1    | P_ASP.102  | OD1    | 3.188        |
| 2ZCH   | P_HIS.57  | ND1    | P_ASP.102  | OD2    | 2.701        |
| 2ZCH   | P_HIS.70  | NE2    | P_GLU.21   | OE1    | 3.047        |
| 2ZCH   | P_LYS.119 | NZ     | P_ASP.116  | OD1    | 3.130        |
| 2ZCH   | P_LYS.178 | NZ     | H_ASP.96   | OD1    | 3.502        |
| 2ZCH   | P_LYS.178 | NZ     | H_ASP.96   | OD2    | 3.400        |
| 2ZCH   | P_ARG.185 | NH2    | P_ASP.159  | OD1    | 3.236        |
| 2ZCH   | P_ARG.185 | NH2    | P_ASP.159  | OD2    | 3.391        |
| 2ZCH   | P_LYS.188 | NZ     | P_ASP.159  | OD2    | 3.769        |
| 2ZCH   | P_LYS.230 | NZ     | P_GLU.129  | OE1    | 3.520        |
| 2ZCH   | P_LYS.230 | NZ     | P_GLU.129  | OE2    | 2.924        |
| 2ZCH   | P_ARG.235 | NH1    | L_ASP.28   | OD2    | 2.443        |
| 2ZCH   | P_ARG.235 | NH2    | L_ASP.28   | OD2    | 3.166        |
| 2ZCH   | P_LYS.236 | NZ     | H_GLU.100C | OE2    | 3.089        |
| 2ZCH   | P_LYS.239 | NZ     | P_ASP.240  | OD1    | 3.042        |
| 2ZCH   | L_LYS.24  | NZ     | L_ASP.70   | OD1    | 3.285        |
| 2ZCH   | L_LYS.24  | NZ     | L_ASP.70   | OD2    | 3.649        |
| 2ZCH   | L_ARG.61  | NH1    | L_ASP.82   | OD2    | 2.822        |
| 2ZCH   | L_ARG.61  | NH2    | L_GLU.79   | OE1    | 3.619        |
| 2ZCH   | L_ARG.61  | NH2    | L_GLU.81   | OE2    | 3.092        |
| 2ZCH   | L_ARG.61  | NH2    | L_ASP.82   | OD1    | 3.377        |
| 2ZCH   | L_ARG.61  | NH2    | L_ASP.82   | OD2    | 3.215        |
| 2ZCH   | L_LYS.103 | NZ     | L_ASP.165  | OD1    | 2.730        |
| 2ZCH   | L_LYS.147 | NZ     | L_GLU.195  | OE1    | 3.268        |
| 2ZCH   | L_ARG.155 | NH1    | L_GLU.185  | OE2    | 3.338        |
| 2ZCH   | L_HIS.189 | ND1    | L_GLU.185  | OE1    | 3.822        |
| 2ZCH   | L_LYS.199 | NZ     | L_ASP.110  | OD1    | 3.298        |
| 2ZCH   | L_ARG.211 | NH2    | L_GLU.187  | OE2    | 2.494        |
| 2ZCH   | H_ARG.38  | NH1    | H_GLU.46   | OE1    | 3.046        |
| 2ZCH   | H_ARG.38  | NH2    | H_ASP.86   | OD1    | 3.480        |
| 2ZCH   | H_ARG.40  | NH1    | H_GLU.85   | OE2    | 3.170        |
| 2ZCH   | H_ARG.40  | NH2    | H_GLU.85   | OE2    | 3.818        |
| 2ZCH   | H_ARG.50  | NH1    | H_GLU.100C | OE1    | 3.902        |
| 2ZCH   | H_ARG.50  | NH2    | L_ASP.94   | OD1    | 2.658        |
| 2ZCH   | H_ARG.50  | NH2    | L_ASP.94   | OD2    | 2.887        |
| 2ZCH   | H_LYS.66  | NZ     | H_ASP.86   | OD1    | 3.386        |
| 2ZCH   | H_ARG.94  | NH2    | H_ASP.101  | OD1    | 3.421        |
| 2ZCH   | H_ARG.94  | NH2    | H_ASP.101  | OD2    | 2.694        |
| 2ZCH   | H_LYS.208 | NZ     | L_GLU.123  | OE1    | 3.921        |
| 2ZCH   | H_LYS.208 | NZ     | L_GLU.123  | OE2    | 3.396        |

Table 358: 2ZCH-specific salt bridging networks analysis. In this table, a PDB file is specified with a four-letter PDB ID, except that the names of the PDB files corresponding to the single NMR structural model split from the NMR ensemble is specified with a four-letter PDB ID in addition to a hyphen followed by the single NMR structural model numeric ID, the residue naming scheme is **Chain ID\_residue name\_residue number**,  $\angle ADH$  represents the angle formed by acceptor (A), donor (D) and hydrogen (H) ( $\angle ADH$ ).

| PDB ID | Residue A | Atom A | Residue B | Atom B | Distance (Å) |
|--------|-----------|--------|-----------|--------|--------------|
| 2ZCK   | P_HIS_25  | NE2    | P_GLU_77  | OE2    | 3.078        |
| 2ZCK   | P_HIS_57  | ND1    | P_ASP_102 | OD1    | 3.235        |
| 2ZCK   | P_HIS_57  | ND1    | P_ASP_102 | OD2    | 2.810        |
| 2ZCK   | P_ARG_69  | NH2    | P_GLU_77  | OE1    | 3.765        |
| 2ZCK   | P_HIS_70  | NE2    | P_GLU_21  | OE1    | 3.922        |
| 2ZCK   | P_ARG_95G | NH2    | P_GLU_218 | OE2    | 2.834        |
| 2ZCK   | P_LYS_178 | NZ     | H_ASP_96  | OD1    | 3.892        |
| 2ZCK   | P_LYS_178 | NZ     | H_ASP_96  | OD2    | 3.060        |
| 2ZCK   | P_ARG_185 | NH2    | P_ASP_159 | OD1    | 2.897        |
| 2ZCK   | P_ARG_185 | NH2    | P_ASP_159 | OD2    | 3.599        |
| 2ZCK   | P_LYS_188 | NZ     | P_ASP_159 | OD2    | 3.306        |
| 2ZCK   | P_LYS_231 | NZ     | P_GLU_129 | OE1    | 3.939        |
| 2ZCK   | P_ARG_236 | NH2    | L_ASP_28  | OD1    | 3.496        |
| 2ZCK   | P_LYS_240 | NZ     | P_ASP_241 | OD1    | 3.131        |
| 2ZCK   | L_ARG_61  | NH1    | L_ASP_82  | OD1    | 3.643        |
| 2ZCK   | L_ARG_61  | NH1    | L_ASP_82  | OD2    | 2.898        |
| 2ZCK   | L_ARG_61  | NH2    | L_GLU_79  | OE1    | 3.648        |
| 2ZCK   | L_ARG_61  | NH2    | L_GLU_81  | OE2    | 3.878        |
| 2ZCK   | L_ARG_61  | NH2    | L_ASP_82  | OD1    | 3.492        |
| 2ZCK   | L_LYS_103 | NZ     | L_ASP_165 | OD1    | 3.500        |
| 2ZCK   | L_LYS_183 | NZ     | L_GLU_187 | OE1    | 3.434        |
| 2ZCK   | L_LYS_183 | NZ     | L_GLU_187 | OE2    | 3.899        |
| 2ZCK   | L_ARG_188 | NH1    | L_GLU_185 | OE2    | 3.774        |
| 2ZCK   | L_ARG_188 | NH2    | L_ASP_184 | OD1    | 3.893        |
| 2ZCK   | L_HIS_189 | ND1    | L_GLU_185 | OE1    | 3.762        |
| 2ZCK   | L_HIS_189 | ND1    | L_GLU_185 | OE2    | 3.555        |
| 2ZCK   | H_ARG_38  | NH1    | H_GLU_46  | OE1    | 3.860        |
| 2ZCK   | H_ARG_38  | NH1    | H_GLU_46  | OE2    | 3.777        |
| 2ZCK   | H_ARG_38  | NH2    | H_ASP_86  | OD1    | 2.988        |
| 2ZCK   | H_ARG_50  | NH2    | L_ASP_94  | OD1    | 3.095        |
| 2ZCK   | H_ARG_50  | NH2    | L_ASP_94  | OD2    | 2.679        |
| 2ZCK   | H_ARG_94  | NH2    | H_ASP_101 | OD1    | 3.492        |
| 2ZCK   | H_ARG_94  | NH2    | H_ASP_101 | OD2    | 2.952        |
| 2ZCK   | H_LYS_208 | NZ     | L_GLU_123 | OE2    | 2.731        |
| 2ZCK   | H_ARG_213 | NH1    | H_ASP_214 | OD2    | 3.175        |
| 2ZCK   | H_ARG_213 | NH2    | H_ASP_214 | OD2    | 2.814        |

Table 359: 2ZCK-specific salt bridging networks analysis. In this table, a PDB file is specified with a four-letter PDB ID, except that the names of the PDB files corresponding to the single NMR structural model split from the NMR ensemble is specified with a four-letter PDB ID in addition to a hyphen followed by the single NMR structural model numeric ID, the residue naming scheme is **Chain ID\_residue name\_residue number**,  $\angle ADH$  represents the angle formed by acceptor (A), donor (D) and hydrogen (H) ( $\angle ADH$ ).

| PDB ID | Residue A | Atom A | Residue B | Atom B | Distance (Å) |
|--------|-----------|--------|-----------|--------|--------------|
| 2ZCL   | P_HIS_57  | ND1    | P_ASP_102 | OD1    | 3.443        |
| 2ZCL   | P_HIS_57  | ND1    | P_ASP_102 | OD2    | 2.832        |
| 2ZCL   | P_HIS_70  | ND1    | P_GLU_77  | OE2    | 3.941        |
| 2ZCL   | P_HIS_70  | NE2    | P_GLU_21  | OE2    | 3.315        |
| 2ZCL   | P_LYS_175 | NZ     | P_ASP_98  | OD1    | 2.885        |
| 2ZCL   | P_LYS_178 | NZ     | H_ASP_96  | OD1    | 3.272        |
| 2ZCL   | P_LYS_178 | NZ     | H_ASP_96  | OD2    | 2.771        |
| 2ZCL   | P_ARG_185 | NH1    | P_ASP_159 | OD1    | 3.520        |
| 2ZCL   | P_ARG_185 | NH1    | P_ASP_159 | OD2    | 3.828        |
| 2ZCL   | P_ARG_235 | NH2    | L_ASP_28  | OD1    | 3.392        |
| 2ZCL   | P_LYS_239 | NZ     | P_ASP_240 | OD1    | 3.379        |
| 2ZCL   | L_LYS_24  | NZ     | L_ASP_70  | OD1    | 3.131        |
| 2ZCL   | L_LYS_24  | NZ     | L_ASP_70  | OD2    | 3.129        |
| 2ZCL   | L_ARG_61  | NH1    | L_ASP_82  | OD2    | 2.822        |
| 2ZCL   | L_ARG_61  | NH2    | L_GLU_79  | OE1    | 3.403        |
| 2ZCL   | L_ARG_61  | NH2    | L_GLU_81  | OE2    | 3.290        |
| 2ZCL   | L_ARG_61  | NH2    | L_ASP_82  | OD1    | 3.751        |
| 2ZCL   | L_ARG_61  | NH2    | L_ASP_82  | OD2    | 3.541        |
| 2ZCL   | L_LYS_103 | NZ     | L_ASP_165 | OD1    | 3.980        |
| 2ZCL   | L_ARG_108 | NH1    | L_ASP_170 | OD2    | 3.834        |
| 2ZCL   | L_HIS_189 | ND1    | L_GLU_185 | OE1    | 2.939        |
| 2ZCL   | L_LYS_199 | NZ     | L_ASP_110 | OD2    | 3.830        |
| 2ZCL   | L_ARG_211 | NH1    | L_GLU_187 | OE1    | 2.851        |
| 2ZCL   | H_ARG_38  | NH2    | H_ASP_86  | OD2    | 3.902        |
| 2ZCL   | H_ARG_50  | NH2    | L_ASP_94  | OD1    | 3.155        |
| 2ZCL   | H_ARG_50  | NH2    | L_ASP_94  | OD2    | 2.864        |
| 2ZCL   | H_LYS_64  | NZ     | H_GLU_61  | OE1    | 3.636        |
| 2ZCL   | H_ARG_94  | NH2    | H_ASP_101 | OD1    | 3.425        |
| 2ZCL   | H_ARG_94  | NH2    | H_ASP_101 | OD2    | 2.661        |

Table 360: 2ZCL-specific salt bridging networks analysis. In this table, a PDB file is specified with a four-letter PDB ID, except that the names of the PDB files corresponding to the single NMR structural model split from the NMR ensemble is specified with a four-letter PDB ID in addition to a hyphen followed by the single NMR structural model numeric ID, the residue naming scheme is **Chain ID\_residue name\_residue number**,  $\angle ADH$  represents the angle formed by acceptor (A), donor (D) and hydrogen (H) ( $\angle ADH$ ).

| PDB ID | Residue A | Atom A | Residue B | Atom B | Distance (Å) |
|--------|-----------|--------|-----------|--------|--------------|
| 2ZNW   | A_ARG_61  | NH1    | A_GLU_81  | OE2    | 3.724        |
| 2ZNW   | A_ARG_61  | NH2    | A_GLU_81  | OE1    | 3.857        |
| 2ZNW   | A_ARG_61  | NH2    | A_GLU_81  | OE2    | 2.689        |
| 2ZNW   | A_ARG_61  | NH2    | A_ASP_82  | OD1    | 2.714        |
| 2ZNW   | A_ARG_61  | NH2    | A_ASP_82  | OD2    | 3.434        |
| 2ZNW   | A_LYS_103 | NZ     | A_GLU_105 | OE1    | 2.950        |
| 2ZNW   | A_LYS_103 | NZ     | A_GLU_105 | OE2    | 3.174        |
| 2ZNW   | A_ARG_160 | NH1    | A_ASP_211 | OD1    | 2.916        |
| 2ZNW   | A_ARG_160 | NH2    | A_GLU_168 | OE1    | 2.840        |
| 2ZNW   | A_ARG_160 | NH2    | A_ASP_211 | OD1    | 3.551        |
| 2ZNW   | A_ARG_188 | NH1    | A_ASP_211 | OD1    | 3.826        |
| 2ZNW   | A_ARG_188 | NH1    | A_ASP_211 | OD2    | 3.091        |
| 2ZNW   | A_ARG_188 | NH2    | A_ASP_211 | OD1    | 3.128        |
| 2ZNW   | A_ARG_188 | NH2    | A_ASP_211 | OD2    | 3.623        |
| 2ZNW   | A_LYS_197 | NZ     | A_ASP_194 | OD2    | 3.664        |
| 2ZNW   | Y_LYS_1   | NZ     | Y_GLU_7   | OE2    | 2.868        |
| 2ZNW   | Y_ARG_61  | NH2    | Y_ASP_48  | OD2    | 3.340        |
| 2ZNW   | Y_LYS_97  | NZ     | A_ASP_154 | OD1    | 2.612        |
| 2ZNW   | Y_LYS_97  | NZ     | A_ASP_154 | OD2    | 3.786        |
| 2ZNW   | Y_LYS_97  | NZ     | A_ASP_221 | OD1    | 3.143        |
| 2ZNW   | Y_LYS_97  | NZ     | A_ASP_221 | OD2    | 3.719        |
| 2ZNW   | Y_LYS_116 | NZ     | B_ASP_203 | OD1    | 2.664        |
| 2ZNW   | Y_ARG_125 | NH1    | Y_ASP_119 | OD2    | 2.994        |
| 2ZNW   | Y_ARG_125 | NH2    | Y_ASP_119 | OD1    | 3.200        |
| 2ZNW   | Y_ARG_125 | NH2    | Y_ASP_119 | OD2    | 3.148        |
| 2ZNW   | B_LYS_39  | NZ     | B_GLU_81  | OE1    | 2.664        |
| 2ZNW   | B_ARG_45  | NH2    | B_GLU_42  | OE1    | 3.967        |
| 2ZNW   | B_ARG_61  | NH1    | B_GLU_79  | OE1    | 2.886        |
| 2ZNW   | B_ARG_61  | NH1    | B_GLU_81  | OE2    | 3.684        |
| 2ZNW   | B_ARG_61  | NH2    | B_GLU_79  | OE1    | 3.980        |
| 2ZNW   | B_ARG_61  | NH2    | B_GLU_81  | OE2    | 2.740        |
| 2ZNW   | B_ARG_61  | NH2    | B_ASP_82  | OD1    | 2.575        |
| 2ZNW   | B_ARG_61  | NH2    | B_ASP_82  | OD2    | 3.124        |
| 2ZNW   | B_LYS_103 | NZ     | B_GLU_105 | OE2    | 3.056        |
| 2ZNW   | B_ARG_160 | NH1    | B_ASP_211 | OD1    | 2.739        |
| 2ZNW   | B_ARG_160 | NH2    | B_GLU_168 | OE1    | 2.827        |
| 2ZNW   | B_ARG_160 | NH2    | B_ASP_211 | OD1    | 3.579        |
| 2ZNW   | B_ARG_188 | NH1    | B_ASP_211 | OD2    | 3.191        |
| 2ZNW   | B_ARG_188 | NH2    | B_ASP_211 | OD1    | 3.246        |
| 2ZNW   | B_ARG_188 | NH2    | B_ASP_211 | OD2    | 3.554        |
| 2ZNW   | Z_LYS_1   | NZ     | Z_GLU_7   | OE2    | 2.784        |
| 2ZNW   | Z_ARG_61  | NH1    | Z_ASP_48  | OD2    | 2.495        |
| 2ZNW   | Z_ARG_61  | NH2    | Z_ASP_48  | OD2    | 3.711        |
| 2ZNW   | Z_ARG_68  | NH2    | Z_ASP_66  | OD2    | 2.978        |
| 2ZNW   | Z_LYS_97  | NZ     | B_ASP_154 | OD1    | 3.042        |
| 2ZNW   | Z_LYS_97  | NZ     | B_ASP_221 | OD1    | 2.782        |
| 2ZNW   | Z_LYS_97  | NZ     | B_ASP_221 | OD2    | 3.319        |
| 2ZNW   | Z_LYS_116 | NZ     | A_ASP_203 | OD1    | 2.989        |
| 2ZNW   | Z_ARG_125 | NH1    | Z_ASP_119 | OD2    | 3.101        |
| 2ZNW   | Z_ARG_125 | NH2    | Z_ASP_119 | OD1    | 3.435        |
| 2ZNW   | Z_ARG_125 | NH2    | Z_ASP_119 | OD2    | 3.343        |

---

Table 361: 2ZNW-specific salt bridging networks analysis. In this table, a PDB file is specified with a four-letter PDB ID, except that the names of the PDB files corresponding to the single NMR structural model split from the NMR ensemble is specified with a four-letter PDB ID in addition to a hyphen followed by the single NMR structural model numeric ID, the residue naming scheme is **Chain ID\_residue name\_residue number**,  $\angle ADH$  represents the angle formed by acceptor (A), donor (D) and hydrogen (H) ( $\angle ADH$ ).

| PDB ID | Residue A | Atom A | Residue B | Atom B | Distance (Å) |
|--------|-----------|--------|-----------|--------|--------------|
| 2ZNX   | A_ARG_61  | NH2    | A_GLU_81  | OE1    | 3.274        |
| 2ZNX   | A_ARG_61  | NH2    | A_GLU_81  | OE2    | 3.380        |
| 2ZNX   | A_ARG_61  | NH2    | A_ASP_82  | OD1    | 2.710        |
| 2ZNX   | A_ARG_61  | NH2    | A_ASP_82  | OD2    | 3.576        |
| 2ZNX   | A_ARG_160 | NH1    | A_ASP_211 | OD1    | 2.745        |
| 2ZNX   | A_ARG_160 | NH2    | A_GLU_168 | OE1    | 2.794        |
| 2ZNX   | A_ARG_160 | NH2    | A_ASP_211 | OD1    | 3.557        |
| 2ZNX   | A_ARG_188 | NH1    | A_ASP_211 | OD1    | 3.903        |
| 2ZNX   | A_ARG_188 | NH1    | A_ASP_211 | OD2    | 3.003        |
| 2ZNX   | A_ARG_188 | NH2    | A_ASP_211 | OD1    | 3.102        |
| 2ZNX   | A_ARG_188 | NH2    | A_ASP_211 | OD2    | 3.513        |
| 2ZNX   | A_LYS_197 | NZ     | A_ASP_194 | OD2    | 3.759        |
| 2ZNX   | Y_LYS_1   | NZ     | Y_GLU_7   | OE2    | 2.738        |
| 2ZNX   | Y_ARG_61  | NH2    | Y_ASP_48  | OD2    | 3.990        |
| 2ZNX   | Y_LYS_97  | NZ     | A_ASP_154 | OD1    | 2.701        |
| 2ZNX   | Y_LYS_97  | NZ     | A_ASP_221 | OD1    | 2.716        |
| 2ZNX   | Y_LYS_97  | NZ     | A_ASP_221 | OD2    | 3.355        |
| 2ZNX   | Y_LYS_116 | NZ     | B_ASP_203 | OD1    | 3.871        |
| 2ZNX   | Y_LYS_116 | NZ     | B_ASP_203 | OD2    | 2.956        |
| 2ZNX   | Y_ARG_125 | NH1    | Y_ASP_119 | OD2    | 3.017        |
| 2ZNX   | Y_ARG_125 | NH2    | Y_ASP_119 | OD1    | 3.028        |
| 2ZNX   | Y_ARG_125 | NH2    | Y_ASP_119 | OD2    | 3.017        |
| 2ZNX   | B_LYS_39  | NZ     | B_GLU_81  | OE1    | 3.694        |
| 2ZNX   | B_LYS_39  | NZ     | B_GLU_81  | OE2    | 3.627        |
| 2ZNX   | B_ARG_61  | NH1    | B_GLU_79  | OE1    | 3.548        |
| 2ZNX   | B_ARG_61  | NH1    | B_GLU_79  | OE2    | 3.265        |
| 2ZNX   | B_ARG_61  | NH2    | B_GLU_81  | OE1    | 3.903        |
| 2ZNX   | B_ARG_61  | NH2    | B_GLU_81  | OE2    | 3.625        |
| 2ZNX   | B_ARG_61  | NH2    | B_ASP_82  | OD1    | 2.303        |
| 2ZNX   | B_ARG_61  | NH2    | B_ASP_82  | OD2    | 3.001        |
| 2ZNX   | B_LYS_103 | NZ     | B_GLU_105 | OE1    | 3.986        |
| 2ZNX   | B_LYS_103 | NZ     | B_GLU_105 | OE2    | 2.781        |
| 2ZNX   | B_LYS_135 | NZ     | Y_ASP_119 | OD2    | 3.744        |
| 2ZNX   | B_ARG_160 | NH1    | B_ASP_211 | OD1    | 2.901        |
| 2ZNX   | B_ARG_160 | NH2    | B_GLU_168 | OE1    | 2.918        |
| 2ZNX   | B_ARG_160 | NH2    | B_ASP_211 | OD1    | 3.424        |
| 2ZNX   | B_ARG_188 | NH1    | B_ASP_211 | OD1    | 3.668        |
| 2ZNX   | B_ARG_188 | NH1    | B_ASP_211 | OD2    | 2.960        |
| 2ZNX   | B_ARG_188 | NH2    | B_ASP_211 | OD1    | 2.965        |
| 2ZNX   | B_ARG_188 | NH2    | B_ASP_211 | OD2    | 3.589        |
| 2ZNX   | Z_LYS_1   | NZ     | Z_GLU_7   | OE2    | 2.717        |
| 2ZNX   | Z_ARG_68  | NH2    | Z_ASP_66  | OD2    | 2.870        |
| 2ZNX   | Z_LYS_97  | NZ     | B_ASP_154 | OD1    | 2.804        |
| 2ZNX   | Z_LYS_97  | NZ     | B_ASP_221 | OD1    | 3.005        |
| 2ZNX   | Z_LYS_97  | NZ     | B_ASP_221 | OD2    | 3.520        |
| 2ZNX   | Z_LYS_116 | NZ     | A_ASP_203 | OD1    | 3.699        |
| 2ZNX   | Z_LYS_116 | NZ     | A_ASP_203 | OD2    | 3.427        |
| 2ZNX   | Z_ARG_125 | NH1    | Z_ASP_119 | OD2    | 3.079        |
| 2ZNX   | Z_ARG_125 | NH2    | Z_ASP_119 | OD1    | 3.710        |
| 2ZNX   | Z_ARG_125 | NH2    | Z_ASP_119 | OD2    | 3.679        |

---

Table 362: 2ZNX-specific salt bridging networks analysis. In this table, a PDB file is specified with a four-letter PDB ID, except that the names of the PDB files corresponding to the single NMR structural model split from the NMR ensemble is specified with a four-letter PDB ID in addition to a hyphen followed by the single NMR structural model numeric ID, the residue naming scheme is **Chain ID\_residue name\_residue number**,  $\angle ADH$  represents the angle formed by acceptor (A), donor (D) and hydrogen (H) ( $\angle ADH$ ).

| PDB ID | Residue A | Atom A | Residue B | Atom B | Distance (Å) |
|--------|-----------|--------|-----------|--------|--------------|
| 2ZPK   | L_ARG_61  | NH2    | L_GLU_81  | OE2    | 3.597        |
| 2ZPK   | L_ARG_61  | NH2    | L_ASP_82  | OD1    | 2.750        |
| 2ZPK   | L_ARG_61  | NH2    | L_ASP_82  | OD2    | 3.576        |
| 2ZPK   | L_HIS_95  | NE2    | H_ASP_62  | OD1    | 3.977        |
| 2ZPK   | L_LYS_111 | NZ     | L_GLU_199 | OE1    | 3.322        |
| 2ZPK   | L_HIS_189 | ND1    | L_ASP_152 | OD2    | 2.821        |
| 2ZPK   | H_LYS_64  | NZ     | H_GLU_61  | OE1    | 2.974        |
| 2ZPK   | H_ARG_66  | NH1    | H_ASP_86  | OD1    | 3.749        |
| 2ZPK   | H_ARG_66  | NH1    | H_ASP_86  | OD2    | 2.760        |
| 2ZPK   | H_ARG_66  | NH2    | H_ASP_86  | OD1    | 2.842        |
| 2ZPK   | H_ARG_66  | NH2    | H_ASP_86  | OD2    | 3.335        |
| 2ZPK   | H_LYS_143 | NZ     | L_GLU_125 | OE2    | 2.882        |
| 2ZPK   | H_LYS_208 | NZ     | L_GLU_124 | OE2    | 3.548        |
| 2ZPK   | M_LYS_39  | NZ     | M_GLU_81  | OE2    | 3.913        |
| 2ZPK   | M_HIS_42  | ND1    | M_GLU_38  | OE2    | 3.014        |
| 2ZPK   | M_ARG_61  | NH2    | M_GLU_81  | OE1    | 3.031        |
| 2ZPK   | M_ARG_61  | NH2    | M_ASP_82  | OD1    | 2.872        |
| 2ZPK   | M_ARG_61  | NH2    | M_ASP_82  | OD2    | 3.561        |
| 2ZPK   | I_LYS_46  | NZ     | I_ASP_62  | OD1    | 3.734        |
| 2ZPK   | I_ARG_66  | NH1    | I_ASP_86  | OD1    | 3.902        |
| 2ZPK   | I_ARG_66  | NH1    | I_ASP_86  | OD2    | 2.665        |
| 2ZPK   | I_ARG_66  | NH2    | I_ASP_86  | OD1    | 2.915        |
| 2ZPK   | I_ARG_66  | NH2    | I_ASP_86  | OD2    | 3.188        |
| 2ZPK   | I_LYS_143 | NZ     | M_GLU_125 | OE2    | 2.672        |
| 2ZPK   | I_LYS_208 | NZ     | M_GLU_124 | OE2    | 3.137        |

Table 363: 2ZPK-specific salt bridging networks analysis. In this table, a PDB file is specified with a four-letter PDB ID, except that the names of the PDB files corresponding to the single NMR structural model split from the NMR ensemble is specified with a four-letter PDB ID in addition to a hyphen followed by the single NMR structural model numeric ID, the residue naming scheme is **Chain ID\_residue name\_residue number**,  $\angle ADH$  represents the angle formed by acceptor (A), donor (D) and hydrogen (H) ( $\angle ADH$ ).



| PDB ID | Residue A | Atom A | Residue B | Atom B | Distance (Å) |
|--------|-----------|--------|-----------|--------|--------------|
| 32C2   | A_ARG_24  | NH1    | A_ASP_74  | OD2    | 3.409        |
| 32C2   | A_ARG_65  | NH1    | A_GLU_83  | OE1    | 3.875        |
| 32C2   | A_ARG_65  | NH1    | A_ASP_86  | OD1    | 3.841        |
| 32C2   | A_ARG_65  | NH1    | A_ASP_86  | OD2    | 3.487        |
| 32C2   | A_ARG_65  | NH2    | A_GLU_83  | OE1    | 2.370        |
| 32C2   | A_ARG_65  | NH2    | A_GLU_83  | OE2    | 3.913        |
| 32C2   | A_ARG_65  | NH2    | A_ASP_86  | OD1    | 3.622        |
| 32C2   | A_LYS_106 | NZ     | A_GLU_108 | OE2    | 3.990        |
| 32C2   | A_LYS_152 | NZ     | A_GLU_198 | OE1    | 2.795        |
| 32C2   | A_LYS_152 | NZ     | A_GLU_198 | OE2    | 3.245        |
| 32C2   | A_ARG_158 | NH2    | A_GLU_188 | OE2    | 2.691        |
| 32C2   | A_LYS_186 | NZ     | A_GLU_190 | OE1    | 3.548        |
| 32C2   | A_HIS_192 | NE2    | A_ASP_154 | OD2    | 3.916        |
| 32C2   | A_LYS_202 | NZ     | A_ASP_113 | OD1    | 3.644        |
| 32C2   | A_LYS_202 | NZ     | A_ASP_113 | OD2    | 3.444        |
| 32C2   | B_ARG_39  | NH1    | B_ASP_90  | OD1    | 2.671        |
| 32C2   | B_ARG_39  | NH2    | B_GLU_47  | OE1    | 3.125        |
| 32C2   | B_ARG_39  | NH2    | B_ASP_90  | OD1    | 3.482        |
| 32C2   | B_ARG_67  | NH1    | B_ASP_90  | OD1    | 3.556        |
| 32C2   | B_ARG_67  | NH1    | B_ASP_90  | OD2    | 3.694        |
| 32C2   | B_ARG_67  | NH2    | B_ASP_90  | OD1    | 3.933        |
| 32C2   | B_ARG_67  | NH2    | B_ASP_90  | OD2    | 2.676        |
| 32C2   | B_LYS_76  | NZ     | B_ASP_73  | OD1    | 3.680        |
| 32C2   | B_LYS_76  | NZ     | B_ASP_73  | OD2    | 2.879        |
| 32C2   | B_LYS_214 | NZ     | A_GLU_126 | OE1    | 3.056        |
| 32C2   | B_LYS_214 | NZ     | A_GLU_126 | OE2    | 3.702        |

Table 364: 32C2-specific salt bridging networks analysis. In this table, a PDB file is specified with a four-letter PDB ID, except that the names of the PDB files corresponding to the single NMR structural model split from the NMR ensemble is specified with a four-letter PDB ID in addition to a hyphen followed by the single NMR structural model numeric ID, the residue naming scheme is **Chain ID\_residue name\_residue number**,  $\angle ADH$  represents the angle formed by acceptor (A), donor (D) and hydrogen (H) ( $\angle ADH$ ).

| PDB ID | Residue A | Atom A | Residue B | Atom B | Distance (Å) |
|--------|-----------|--------|-----------|--------|--------------|
| 3A67   | L_ARG_61  | NH2    | L_GLU_81  | OE2    | 2.941        |
| 3A67   | L_ARG_61  | NH2    | L_ASP_82  | OD1    | 2.851        |
| 3A67   | L_ARG_61  | NH2    | L_ASP_82  | OD2    | 3.509        |
| 3A67   | L_LYS_103 | NZ     | L_GLU_105 | OE2    | 3.056        |
| 3A67   | H_ARG_38  | NH1    | H_ASP_89  | OD1    | 2.872        |
| 3A67   | H_ARG_38  | NH2    | H_GLU_46  | OE1    | 2.908        |
| 3A67   | H_ARG_38  | NH2    | H_ASP_89  | OD1    | 3.548        |
| 3A67   | H_ARG_66  | NH1    | H_ASP_89  | OD1    | 3.735        |
| 3A67   | H_ARG_66  | NH1    | H_ASP_89  | OD2    | 3.043        |
| 3A67   | H_ARG_66  | NH2    | H_ASP_89  | OD1    | 2.999        |
| 3A67   | H_ARG_66  | NH2    | H_ASP_89  | OD2    | 3.634        |
| 3A67   | Y_LYS_1   | NZ     | Y_GLU_7   | OE2    | 3.083        |
| 3A67   | Y_ARG_61  | NH2    | Y_ASP_48  | OD2    | 3.340        |
| 3A67   | Y_ARG_68  | NH2    | Y_ASP_66  | OD2    | 3.751        |
| 3A67   | Y_LYS_96  | NZ     | L_ASP_31  | OD1    | 2.774        |
| 3A67   | Y_LYS_96  | NZ     | L_ASP_31  | OD2    | 3.727        |
| 3A67   | Y_LYS_97  | NZ     | H_ASP_32  | OD1    | 2.657        |
| 3A67   | Y_LYS_97  | NZ     | H_ASP_99  | OD1    | 3.291        |
| 3A67   | Y_LYS_97  | NZ     | H_ASP_99  | OD2    | 2.885        |
| 3A67   | Y_ARG_125 | NH1    | Y_ASP_119 | OD2    | 2.827        |
| 3A67   | Y_ARG_125 | NH2    | Y_ASP_119 | OD1    | 3.106        |
| 3A67   | Y_ARG_125 | NH2    | Y_ASP_119 | OD2    | 3.044        |

Table 365: 3A67-specific salt bridging networks analysis. In this table, a PDB file is specified with a four-letter PDB ID, except that the names of the PDB files corresponding to the single NMR structural model split from the NMR ensemble is specified with a four-letter PDB ID in addition to a hyphen followed by the single NMR structural model numeric ID, the residue naming scheme is **Chain ID\_residue name\_residue number**,  $\angle ADH$  represents the angle formed by acceptor (A), donor (D) and hydrogen (H) ( $\angle ADH$ ).

| PDB ID | Residue A | Atom A | Residue B | Atom B | Distance (Å) |
|--------|-----------|--------|-----------|--------|--------------|
| 3A6B   | L_ARG_61  | NH2    | L_GLU_81  | OE2    | 2.699        |
| 3A6B   | L_ARG_61  | NH2    | L_ASP_82  | OD1    | 2.827        |
| 3A6B   | L_ARG_61  | NH2    | L_ASP_82  | OD2    | 3.489        |
| 3A6B   | L_LYS_103 | NZ     | L_GLU_105 | OE2    | 2.854        |
| 3A6B   | H_ARG_38  | NH1    | H_ASP_89  | OD1    | 2.881        |
| 3A6B   | H_ARG_38  | NH2    | H_GLU_46  | OE1    | 2.870        |
| 3A6B   | H_ARG_38  | NH2    | H_ASP_89  | OD1    | 3.597        |
| 3A6B   | H_ARG_66  | NH1    | H_ASP_89  | OD1    | 3.690        |
| 3A6B   | H_ARG_66  | NH1    | H_ASP_89  | OD2    | 3.008        |
| 3A6B   | H_ARG_66  | NH2    | H_ASP_89  | OD1    | 2.915        |
| 3A6B   | H_ARG_66  | NH2    | H_ASP_89  | OD2    | 3.568        |
| 3A6B   | Y_LYS_1   | NZ     | Y_GLU_7   | OE2    | 3.049        |
| 3A6B   | Y_ARG_61  | NH1    | Y_ASP_48  | OD1    | 3.308        |
| 3A6B   | Y_ARG_61  | NH1    | Y_ASP_48  | OD2    | 2.807        |
| 3A6B   | Y_ARG_61  | NH2    | Y_ASP_48  | OD2    | 3.969        |
| 3A6B   | Y_LYS_96  | NZ     | L_ASP_32  | OD1    | 2.734        |
| 3A6B   | Y_LYS_97  | NZ     | H_ASP_32  | OD1    | 2.700        |
| 3A6B   | Y_LYS_97  | NZ     | H_ASP_32  | OD2    | 3.941        |
| 3A6B   | Y_LYS_97  | NZ     | H_ASP_99  | OD1    | 2.956        |
| 3A6B   | Y_LYS_97  | NZ     | H_ASP_99  | OD2    | 3.259        |
| 3A6B   | Y_ARG_125 | NH1    | Y_ASP_119 | OD2    | 3.668        |
| 3A6B   | Y_ARG_125 | NH2    | Y_ASP_119 | OD1    | 3.613        |
| 3A6B   | Y_ARG_125 | NH2    | Y_ASP_119 | OD2    | 3.218        |

Table 366: 3A6B-specific salt bridging networks analysis. In this table, a PDB file is specified with a four-letter PDB ID, except that the names of the PDB files corresponding to the single NMR structural model split from the NMR ensemble is specified with a four-letter PDB ID in addition to a hyphen followed by the single NMR structural model numeric ID, the residue naming scheme is **Chain ID\_residue name\_residue number**,  $\angle ADH$  represents the angle formed by acceptor (A), donor (D) and hydrogen (H) ( $\angle ADH$ ).

| PDB ID | Residue A | Atom A | Residue B | Atom B | Distance (Å) |
|--------|-----------|--------|-----------|--------|--------------|
| 3A6C   | L_ARG_61  | NH1    | L_GLU_81  | OE2    | 3.920        |
| 3A6C   | L_ARG_61  | NH2    | L_GLU_81  | OE2    | 2.707        |
| 3A6C   | L_ARG_61  | NH2    | L_ASP_82  | OD1    | 2.812        |
| 3A6C   | L_ARG_61  | NH2    | L_ASP_82  | OD2    | 3.543        |
| 3A6C   | L_LYS_103 | NZ     | L_GLU_105 | OE2    | 3.380        |
| 3A6C   | H_ARG_38  | NH1    | H_ASP_89  | OD1    | 2.907        |
| 3A6C   | H_ARG_38  | NH2    | H_GLU_46  | OE1    | 2.827        |
| 3A6C   | H_ARG_38  | NH2    | H_ASP_89  | OD1    | 3.601        |
| 3A6C   | H_ARG_66  | NH1    | H_ASP_89  | OD1    | 3.604        |
| 3A6C   | H_ARG_66  | NH1    | H_ASP_89  | OD2    | 2.873        |
| 3A6C   | H_ARG_66  | NH2    | H_ASP_89  | OD1    | 2.870        |
| 3A6C   | H_ARG_66  | NH2    | H_ASP_89  | OD2    | 3.526        |
| 3A6C   | Y_LYS_1   | NZ     | Y_GLU_7   | OE1    | 3.880        |
| 3A6C   | Y_LYS_1   | NZ     | Y_GLU_7   | OE2    | 2.870        |
| 3A6C   | Y_ARG_61  | NH1    | Y_ASP_48  | OD2    | 2.954        |
| 3A6C   | Y_ARG_61  | NH2    | Y_ASP_48  | OD2    | 3.848        |
| 3A6C   | Y_ARG_68  | NH2    | Y_ASP_66  | OD2    | 3.805        |
| 3A6C   | Y_LYS_97  | NZ     | H_ASP_32  | OD1    | 2.672        |
| 3A6C   | Y_LYS_97  | NZ     | H_ASP_32  | OD2    | 3.916        |
| 3A6C   | Y_LYS_97  | NZ     | H_ASP_99  | OD1    | 2.965        |
| 3A6C   | Y_LYS_97  | NZ     | H_ASP_99  | OD2    | 3.291        |
| 3A6C   | Y_ARG_125 | NH1    | Y_ASP_119 | OD2    | 3.478        |
| 3A6C   | Y_ARG_125 | NH2    | Y_ASP_119 | OD1    | 3.773        |
| 3A6C   | Y_ARG_125 | NH2    | Y_ASP_119 | OD2    | 3.566        |

Table 367: 3A6C-specific salt bridging networks analysis. In this table, a PDB file is specified with a four-letter PDB ID, except that the names of the PDB files corresponding to the single NMR structural model split from the NMR ensemble is specified with a four-letter PDB ID in addition to a hyphen followed by the single NMR structural model numeric ID, the residue naming scheme is **Chain ID\_residue name\_residue number**,  $\angle ADH$  represents the angle formed by acceptor (A), donor (D) and hydrogen (H) ( $\angle ADH$ ).

| PDB ID | Residue A | Atom A | Residue B | Atom B | Distance (Å) |
|--------|-----------|--------|-----------|--------|--------------|
| 3AUV   | A_ARG_72  | NH2    | A_GLU_92  | OE2    | 3.439        |
| 3AUV   | A_ARG_72  | NH2    | A_ASP_93  | OD1    | 2.723        |
| 3AUV   | A_ARG_72  | NH2    | A_ASP_93  | OD2    | 3.631        |
| 3AUV   | A_LYS_114 | NZ     | A_GLU_116 | OE1    | 3.774        |
| 3AUV   | A_LYS_114 | NZ     | A_GLU_116 | OE2    | 3.679        |
| 3AUV   | A_ARG_172 | NH1    | A_ASP_224 | OD2    | 2.750        |
| 3AUV   | A_ARG_172 | NH2    | A_GLU_180 | OE1    | 2.793        |
| 3AUV   | A_ARG_172 | NH2    | A_GLU_180 | OE2    | 3.594        |
| 3AUV   | A_ARG_172 | NH2    | A_ASP_224 | OD2    | 3.992        |
| 3AUV   | A_ARG_201 | NH1    | A_ASP_224 | OD1    | 2.699        |
| 3AUV   | A_ARG_201 | NH1    | A_ASP_224 | OD2    | 3.899        |
| 3AUV   | A_ARG_201 | NH2    | A_ASP_224 | OD1    | 3.500        |
| 3AUV   | A_ARG_201 | NH2    | A_ASP_224 | OD2    | 3.246        |
| 3AUV   | A_ARG_232 | NH2    | A_ASP_242 | OD1    | 2.869        |
| 3AUV   | A_ARG_232 | NH2    | A_ASP_242 | OD2    | 3.766        |
| 3AUV   | B_ARG_72  | NH2    | B_GLU_92  | OE2    | 3.579        |
| 3AUV   | B_ARG_72  | NH2    | B_ASP_93  | OD1    | 2.590        |
| 3AUV   | B_ARG_72  | NH2    | B_ASP_93  | OD2    | 3.569        |
| 3AUV   | B_LYS_114 | NZ     | B_GLU_116 | OE1    | 3.722        |
| 3AUV   | B_LYS_114 | NZ     | B_GLU_116 | OE2    | 3.387        |
| 3AUV   | B_ARG_172 | NH1    | B_ASP_224 | OD2    | 2.806        |
| 3AUV   | B_ARG_172 | NH2    | B_GLU_180 | OE1    | 2.717        |
| 3AUV   | B_ARG_172 | NH2    | B_GLU_180 | OE2    | 3.567        |
| 3AUV   | B_ARG_201 | NH1    | B_ASP_224 | OD1    | 2.684        |
| 3AUV   | B_ARG_201 | NH1    | B_ASP_224 | OD2    | 3.823        |
| 3AUV   | B_ARG_201 | NH2    | B_ASP_224 | OD1    | 3.593        |
| 3AUV   | B_ARG_201 | NH2    | B_ASP_224 | OD2    | 3.291        |
| 3AUV   | B_LYS_210 | NZ     | B_ASP_207 | OD1    | 3.963        |
| 3AUV   | B_ARG_232 | NH2    | B_ASP_242 | OD1    | 2.862        |
| 3AUV   | B_ARG_232 | NH2    | B_ASP_242 | OD2    | 3.702        |
| 3AUV   | C_ARG_72  | NH2    | C_GLU_92  | OE2    | 3.470        |
| 3AUV   | C_ARG_72  | NH2    | C_ASP_93  | OD1    | 2.695        |
| 3AUV   | C_ARG_72  | NH2    | C_ASP_93  | OD2    | 3.642        |
| 3AUV   | C_LYS_114 | NZ     | C_GLU_116 | OE1    | 3.676        |
| 3AUV   | C_LYS_114 | NZ     | C_GLU_116 | OE2    | 3.581        |
| 3AUV   | C_ARG_172 | NH1    | C_ASP_224 | OD2    | 2.837        |
| 3AUV   | C_ARG_172 | NH2    | C_GLU_180 | OE1    | 2.666        |
| 3AUV   | C_ARG_172 | NH2    | C_GLU_180 | OE2    | 3.575        |
| 3AUV   | C_ARG_201 | NH1    | C_ASP_224 | OD1    | 2.642        |
| 3AUV   | C_ARG_201 | NH1    | C_ASP_224 | OD2    | 3.881        |
| 3AUV   | C_ARG_201 | NH2    | C_ASP_224 | OD1    | 3.488        |
| 3AUV   | C_ARG_201 | NH2    | C_ASP_224 | OD2    | 3.269        |
| 3AUV   | C_ARG_232 | NH2    | C_ASP_242 | OD1    | 2.909        |
| 3AUV   | C_ARG_232 | NH2    | C_ASP_242 | OD2    | 3.643        |
| 3AUV   | D_ARG_72  | NH2    | D_GLU_92  | OE2    | 3.526        |
| 3AUV   | D_ARG_72  | NH2    | D_ASP_93  | OD1    | 2.640        |
| 3AUV   | D_ARG_72  | NH2    | D_ASP_93  | OD2    | 3.608        |
| 3AUV   | D_LYS_114 | NZ     | D_GLU_116 | OE1    | 3.727        |
| 3AUV   | D_LYS_114 | NZ     | D_GLU_116 | OE2    | 3.600        |
| 3AUV   | D_ARG_172 | NH1    | D_ASP_224 | OD2    | 2.810        |
| 3AUV   | D_ARG_172 | NH2    | D_GLU_180 | OE1    | 2.707        |
| 3AUV   | D_ARG_172 | NH2    | D_GLU_180 | OE2    | 3.528        |
| 3AUV   | D_ARG_201 | NH1    | D_ASP_224 | OD1    | 2.734        |
| 3AUV   | D_ARG_201 | NH1    | D_ASP_224 | OD2    | 3.954        |
| 3AUV   | D_ARG_201 | NH2    | D_ASP_224 | OD1    | 3.560        |
| 3AUV   | D_ARG_201 | NH2    | D_ASP_224 | OD2    | 3.357        |
| 3AUV   | D_ARG_232 | NH2    | D_ASP_242 | OD1    | 2.882        |

|      |           |     |           |     |       |
|------|-----------|-----|-----------|-----|-------|
| 3AUV | D_ARG_232 | NH2 | D_ASP_242 | OD2 | 3.743 |
| 3AUV | E_ARG_72  | NH2 | E_GLU_92  | OE2 | 3.531 |
| 3AUV | E_ARG_72  | NH2 | E_ASP_93  | OD1 | 2.643 |
| 3AUV | E_ARG_72  | NH2 | E_ASP_93  | OD2 | 3.543 |
| 3AUV | E_LYS_114 | NZ  | E_GLU_116 | OE1 | 3.794 |
| 3AUV | E_LYS_114 | NZ  | E_GLU_116 | OE2 | 3.627 |
| 3AUV | E_ARG_172 | NH1 | E_ASP_224 | OD2 | 2.874 |
| 3AUV | E_ARG_172 | NH2 | E_GLU_180 | OE1 | 2.698 |
| 3AUV | E_ARG_172 | NH2 | E_GLU_180 | OE2 | 3.466 |
| 3AUV | E_ARG_201 | NH1 | E_ASP_224 | OD1 | 2.747 |
| 3AUV | E_ARG_201 | NH1 | E_ASP_224 | OD2 | 3.871 |
| 3AUV | E_ARG_201 | NH2 | E_ASP_224 | OD1 | 3.622 |
| 3AUV | E_ARG_201 | NH2 | E_ASP_224 | OD2 | 3.262 |
| 3AUV | E_ARG_232 | NH2 | E_ASP_242 | OD1 | 2.876 |
| 3AUV | E_ARG_232 | NH2 | E_ASP_242 | OD2 | 3.697 |
| 3AUV | F_ARG_72  | NH2 | F_GLU_92  | OE2 | 3.450 |
| 3AUV | F_ARG_72  | NH2 | F_ASP_93  | OD1 | 2.646 |
| 3AUV | F_ARG_72  | NH2 | F_ASP_93  | OD2 | 3.561 |
| 3AUV | F_LYS_114 | NZ  | F_GLU_116 | OE1 | 3.643 |
| 3AUV | F_LYS_114 | NZ  | F_GLU_116 | OE2 | 3.465 |
| 3AUV | F_ARG_172 | NH1 | F_ASP_224 | OD2 | 2.862 |
| 3AUV | F_ARG_172 | NH2 | F_GLU_180 | OE1 | 2.639 |
| 3AUV | F_ARG_172 | NH2 | F_GLU_180 | OE2 | 3.493 |
| 3AUV | F_ARG_201 | NH1 | F_ASP_224 | OD1 | 2.716 |
| 3AUV | F_ARG_201 | NH2 | F_ASP_224 | OD1 | 3.519 |
| 3AUV | F_ARG_201 | NH2 | F_ASP_224 | OD2 | 3.349 |
| 3AUV | F_LYS_210 | NZ  | F_ASP_207 | OD1 | 3.959 |
| 3AUV | F_ARG_232 | NH2 | F_ASP_242 | OD1 | 2.985 |
| 3AUV | F_ARG_232 | NH2 | F_ASP_242 | OD2 | 3.837 |

Table 368: 3AUV-specific salt bridging networks analysis. In this table, a PDB file is specified with a four-letter PDB ID, except that the names of the PDB files corresponding to the single NMR structural model split from the NMR ensemble is specified with a four-letter PDB ID in addition to a hyphen followed by the single NMR structural model numeric ID, the residue naming scheme is **Chain ID\_residue name\_residue number**,  $\angle ADH$  represents the angle formed by acceptor (A), donor (D) and hydrogen (H) ( $\angle ADH$ ).

| PDB ID | Residue A | Atom A | Residue B | Atom B | Distance (Å) |
|--------|-----------|--------|-----------|--------|--------------|
| 3B9K   | L_ARG_61  | NH1    | L_GLU_81  | OE2    | 3.453        |
| 3B9K   | L_ARG_61  | NH1    | L_ASP_82  | OD1    | 2.335        |
| 3B9K   | L_ARG_61  | NH1    | L_ASP_82  | OD2    | 3.046        |
| 3B9K   | L_ARG_61  | NH2    | L_GLU_81  | OE2    | 2.771        |
| 3B9K   | L_LYS_149 | NZ     | L_GLU_195 | OE1    | 3.690        |
| 3B9K   | L_LYS_149 | NZ     | L_GLU_195 | OE2    | 2.757        |
| 3B9K   | L_HIS_189 | ND1    | L_ASP_151 | OD2    | 2.589        |
| 3B9K   | L_LYS_199 | NZ     | L_ASP_110 | OD1    | 3.618        |
| 3B9K   | H_ARG_38  | NH1    | H_ASP_86  | OD1    | 2.944        |
| 3B9K   | H_ARG_38  | NH2    | H_GLU_46  | OE1    | 3.373        |
| 3B9K   | H_ARG_38  | NH2    | H_ASP_86  | OD1    | 3.659        |
| 3B9K   | H_ARG_66  | NH1    | H_ASP_86  | OD1    | 3.550        |
| 3B9K   | H_ARG_66  | NH2    | H_ASP_86  | OD1    | 3.185        |
| 3B9K   | H_ARG_66  | NH2    | H_ASP_86  | OD2    | 2.639        |
| 3B9K   | H_HIS_172 | NE2    | H_ASP_167 | OD1    | 3.568        |
| 3B9K   | H_LYS_221 | NZ     | L_GLU_123 | OE1    | 2.886        |
| 3B9K   | A_ARG_8   | NH1    | A_GLU_6   | OE2    | 3.916        |
| 3B9K   | A_LYS_13  | NZ     | B_ASP_42  | OD2    | 3.894        |
| 3B9K   | B_LYS_17  | NZ     | B_GLU_72  | OE1    | 3.264        |
| 3B9K   | B_LYS_27  | NZ     | H_ASP_32  | OD1    | 2.409        |
| 3B9K   | B_ARG_35  | NH2    | B_ASP_92  | OD2    | 2.954        |
| 3B9K   | B_ARG_37  | NH1    | B_ASP_39  | OD1    | 3.890        |
| 3B9K   | B_ARG_37  | NH2    | B_GLU_46  | OE1    | 3.384        |
| 3B9K   | B_ARG_37  | NH2    | B_GLU_46  | OE2    | 3.762        |
| 3B9K   | B_ARG_37  | NH2    | B_ASP_64  | OD1    | 3.954        |
| 3B9K   | B_ARG_37  | NH2    | B_ASP_64  | OD2    | 3.329        |
| 3B9K   | B_LYS_43  | NZ     | B_GLU_36  | OE2    | 3.566        |
| 3B9K   | B_ARG_77  | NH1    | B_GLU_21  | OE2    | 3.466        |
| 3B9K   | B_ARG_77  | NH2    | L_ASP_92  | OD1    | 3.184        |
| 3B9K   | B_ARG_77  | NH2    | B_GLU_21  | OE2    | 3.014        |
| 3B9K   | B_ARG_78  | NH2    | L_ASP_92  | OD1    | 2.834        |
| 3B9K   | B_LYS_103 | NZ     | A_ASP_66  | OD1    | 3.058        |
| 3B9K   | C_ARG_    | NH1    | C_GLU_81  | OE2    | 3.400        |
| 3B9K   | C_ARG_    | NH1    | C_ASP_82  | OD1    | 2.519        |
| 3B9K   | C_ARG_    | NH1    | C_ASP_    | OD2    | 2.958        |
| 3B9K   | C_ARG_    | NH2    | C_GLU_81  | OE2    | 2.927        |
| 3B9K   | C_LYS_149 | NZ     | C_GLU_195 | OE2    | 3.057        |
| 3B9K   | C_LYS_183 | NZ     | C_GLU_187 | OE1    | 2.738        |
| 3B9K   | C_HIS_189 | ND1    | C_ASP_151 | OD1    | 3.967        |
| 3B9K   | C_HIS_189 | ND1    | C_ASP_151 | OD2    | 2.217        |
| 3B9K   | C_LYS_    | NZ     | C_ASP_    | OD1    | 3.537        |
| 3B9K   | C_LYS_    | NZ     | C_ASP_    | OD2    | 2.778        |
| 3B9K   | D_ARG_38  | NH1    | D_ASP_86  | OD1    | 2.985        |
| 3B9K   | D_ARG_38  | NH2    | D_GLU_46  | OE1    | 3.027        |
| 3B9K   | D_ARG_38  | NH2    | D_ASP_86  | OD1    | 3.686        |
| 3B9K   | D_ARG_66  | NH1    | D_ASP_86  | OD1    | 3.146        |
| 3B9K   | D_ARG_66  | NH1    | D_ASP_86  | OD2    | 3.512        |
| 3B9K   | D_ARG_66  | NH2    | D_ASP_86  | OD1    | 3.576        |
| 3B9K   | D_ARG_66  | NH2    | D_ASP_86  | OD2    | 2.412        |
| 3B9K   | D_ARG_96  | NH1    | D_GLU_97  | OE2    | 2.918        |
| 3B9K   | D_ARG_96  | NH2    | D_GLU_97  | OE2    | 3.934        |
| 3B9K   | D_HIS_172 | NE2    | D_ASP_167 | OD1    | 2.867        |
| 3B9K   | D_LYS_221 | NZ     | C_GLU_123 | OE1    | 3.178        |
| 3B9K   | E_ARG_8   | NH1    | E_GLU_27  | OE1    | 3.719        |
| 3B9K   | E_ARG_8   | NH2    | E_GLU_27  | OE1    | 3.635        |
| 3B9K   | E_LYS_    | NZ     | E_ASP_23  | OD1    | 3.889        |
| 3B9K   | F_LYS_27  | NZ     | D_ASP_32  | OD1    | 2.318        |

|      |           |     |          |     |       |
|------|-----------|-----|----------|-----|-------|
| 3B9K | F_ARG_35  | NH2 | F_ASP_39 | OD2 | 3.634 |
| 3B9K | F_ARG_35  | NH2 | F_ASP_92 | OD2 | 2.801 |
| 3B9K | F_ARG_37  | NH1 | F_ASP_39 | OD2 | 3.691 |
| 3B9K | F_ARG_37  | NH2 | F_GLU_46 | OE1 | 3.350 |
| 3B9K | F_ARG_77  | NH1 | F_GLU_21 | OE2 | 3.321 |
| 3B9K | F_ARG_77  | NH2 | C_ASP_92 | OD1 | 2.984 |
| 3B9K | F_ARG_77  | NH2 | F_GLU_21 | OE2 | 3.185 |
| 3B9K | F_ARG_78  | NH2 | C_ASP_92 | OD1 | 3.141 |
| 3B9K | F_ARG_78  | NH2 | C_ASP_92 | OD2 | 3.951 |
| 3B9K | F_LYS_103 | NZ  | E_ASP_   | OD1 | 3.044 |

Table 369: 3B9K-specific salt bridging networks analysis. In this table, a PDB file is specified with a four-letter PDB ID, except that the names of the PDB files corresponding to the single NMR structural model split from the NMR ensemble is specified with a four-letter PDB ID in addition to a hyphen followed by the single NMR structural model numeric ID, the residue naming scheme is **Chain ID\_residue name\_residue number**,  $\angle ADH$  represents the angle formed by acceptor (A), donor (D) and hydrogen (H) ( $\angle ADH$ ).



| PDB ID | Residue A | Atom A | Residue B | Atom B | Distance (Å) |
|--------|-----------|--------|-----------|--------|--------------|
| 3BDY   | H_ARG_38  | NH1    | H_ASP_86  | OD1    | 2.999        |
| 3BDY   | H_ARG_38  | NH2    | H_GLU_46  | OE1    | 2.808        |
| 3BDY   | H_ARG_38  | NH2    | H_GLU_46  | OE2    | 3.622        |
| 3BDY   | H_ARG_66  | NH1    | H_ASP_86  | OD1    | 3.951        |
| 3BDY   | H_ARG_66  | NH1    | H_ASP_86  | OD2    | 3.006        |
| 3BDY   | H_ARG_66  | NH2    | H_ASP_86  | OD1    | 3.023        |
| 3BDY   | H_ARG_66  | NH2    | H_ASP_86  | OD2    | 3.512        |
| 3BDY   | H_ARG_94  | NH2    | H_ASP_103 | OD1    | 3.777        |
| 3BDY   | H_ARG_94  | NH2    | H_ASP_103 | OD2    | 3.008        |
| 3BDY   | H_LYS_145 | NZ     | H_ASP_146 | OD1    | 3.125        |
| 3BDY   | H_LYS_145 | NZ     | H_ASP_146 | OD2    | 3.665        |
| 3BDY   | H_LYS_211 | NZ     | L_GLU_123 | OE2    | 2.706        |
| 3BDY   | L_ARG_24  | NH1    | L_ASP_70  | OD1    | 2.932        |
| 3BDY   | L_ARG_24  | NH1    | L_ASP_70  | OD2    | 3.729        |
| 3BDY   | L_ARG_27D | NH2    | L_ASP_70  | OD2    | 3.711        |
| 3BDY   | L_ARG_61  | NH2    | L_GLU_81  | OE1    | 3.501        |
| 3BDY   | L_ARG_61  | NH2    | L_ASP_82  | OD1    | 2.848        |
| 3BDY   | L_ARG_61  | NH2    | L_ASP_82  | OD2    | 3.523        |
| 3BDY   | L_HIS_189 | ND1    | L_ASP_151 | OD2    | 2.958        |
| 3BDY   | V_ARG_56  | NH1    | V_GLU_38  | OE1    | 3.008        |
| 3BDY   | V_ARG_56  | NH1    | V_GLU_38  | OE2    | 3.618        |
| 3BDY   | V_ARG_56  | NH2    | V_GLU_38  | OE1    | 3.690        |
| 3BDY   | V_ARG_82  | NH2    | V_GLU_42  | OE1    | 3.019        |
| 3BDY   | V_ARG_82  | NH2    | V_GLU_42  | OE2    | 3.920        |
| 3BDY   | V_LYS_84  | NZ     | V_GLU_44  | OE2    | 3.490        |
| 3BDY   | V_LYS_    | NZ     | V_GLU_    | OE1    | 2.740        |
| 3BDY   | V_ARG_    | NH1    | V_GLU_    | OE1    | 3.312        |
| 3BDY   | V_ARG_    | NH1    | V_GLU_    | OE2    | 3.557        |

Table 370: 3BDY-specific salt bridging networks analysis. In this table, a PDB file is specified with a four-letter PDB ID, except that the names of the PDB files corresponding to the single NMR structural model split from the NMR ensemble is specified with a four-letter PDB ID in addition to a hyphen followed by the single NMR structural model numeric ID, the residue naming scheme is **Chain ID\_residue name\_residue number**,  $\angle ADH$  represents the angle formed by acceptor (A), donor (D) and hydrogen (H) ( $\angle ADH$ ).

| PDB ID | Residue A | Atom A | Residue B | Atom B | Distance (Å) |
|--------|-----------|--------|-----------|--------|--------------|
| 3BE1   | A_ARG_25  | NH2    | A_ASP_22  | OD1    | 3.635        |
| 3BE1   | A_ARG_25  | NH2    | A_ASP_22  | OD2    | 3.334        |
| 3BE1   | A_HIS_66  | NE2    | A_ASP_96  | OD2    | 3.628        |
| 3BE1   | A_ARG_81  | NH2    | A_GLU_57  | OE1    | 3.307        |
| 3BE1   | A_ARG_121 | NH1    | A_ASP_189 | OD1    | 2.843        |
| 3BE1   | A_ARG_121 | NH1    | A_ASP_189 | OD2    | 3.507        |
| 3BE1   | A_ARG_135 | NH2    | A_ASP_96  | OD1    | 3.481        |
| 3BE1   | A_ARG_135 | NH2    | A_ASP_96  | OD2    | 3.295        |
| 3BE1   | A_ARG_166 | NH1    | A_ASP_143 | OD2    | 3.604        |
| 3BE1   | A_ARG_166 | NH2    | A_ASP_143 | OD1    | 3.395        |
| 3BE1   | A_ARG_166 | NH2    | A_ASP_143 | OD2    | 3.597        |
| 3BE1   | A_HIS_171 | ND1    | A_GLU_185 | OE1    | 2.686        |
| 3BE1   | A_ARG_204 | NH1    | A_ASP_149 | OD2    | 3.810        |
| 3BE1   | A_ARG_204 | NH2    | A_GLU_125 | OE1    | 3.119        |
| 3BE1   | A_ARG_204 | NH2    | A_GLU_125 | OE2    | 3.480        |
| 3BE1   | A_HIS_215 | ND1    | A_GLU_216 | OE2    | 3.902        |
| 3BE1   | A_HIS_238 | ND1    | A_GLU_243 | OE1    | 2.848        |
| 3BE1   | A_HIS_238 | ND1    | A_GLU_243 | OE2    | 3.970        |
| 3BE1   | A_ARG_308 | NH2    | A_ASP_285 | OD1    | 3.913        |
| 3BE1   | A_HIS_327 | NE2    | A_GLU_341 | OE2    | 3.469        |
| 3BE1   | A_ARG_332 | NH2    | A_GLU_357 | OE2    | 2.835        |
| 3BE1   | A_LYS_346 | NZ     | A_GLU_382 | OE1    | 3.395        |
| 3BE1   | A_LYS_346 | NZ     | A_GLU_382 | OE2    | 3.325        |
| 3BE1   | A_LYS_347 | NZ     | A_GLU_299 | OE1    | 3.844        |
| 3BE1   | A_LYS_347 | NZ     | A_GLU_383 | OE1    | 2.990        |
| 3BE1   | A_LYS_347 | NZ     | A_GLU_383 | OE2    | 3.026        |
| 3BE1   | A_ARG_410 | NH1    | A_GLU_438 | OE2    | 3.687        |
| 3BE1   | A_ARG_410 | NH2    | A_GLU_383 | OE1    | 3.367        |
| 3BE1   | A_ARG_410 | NH2    | A_GLU_383 | OE2    | 3.274        |
| 3BE1   | A_ARG_412 | NH1    | A_GLU_299 | OE1    | 3.591        |
| 3BE1   | A_ARG_412 | NH1    | A_GLU_299 | OE2    | 3.484        |
| 3BE1   | A_ARG_437 | NH1    | A_GLU_438 | OE1    | 3.301        |
| 3BE1   | A_ARG_465 | NH2    | A_GLU_438 | OE1    | 3.503        |
| 3BE1   | A_ARG_477 | NH1    | A_GLU_485 | OE1    | 3.451        |
| 3BE1   | A_ARG_477 | NH2    | A_GLU_481 | OE1    | 3.986        |
| 3BE1   | A_ARG_477 | NH2    | A_GLU_485 | OE1    | 3.615        |
| 3BE1   | A_ARG_477 | NH2    | A_GLU_485 | OE2    | 3.180        |
| 3BE1   | A_ARG_514 | NH2    | A_GLU_531 | OE1    | 3.183        |
| 3BE1   | A_ARG_523 | NH1    | A_GLU_531 | OE1    | 3.371        |
| 3BE1   | A_ARG_523 | NH1    | A_GLU_531 | OE2    | 3.636        |
| 3BE1   | A_LYS_593 | NZ     | A_ASP_570 | OD1    | 2.769        |
| 3BE1   | A_LYS_593 | NZ     | A_ASP_570 | OD2    | 2.849        |
| 3BE1   | H_ARG_38  | NH1    | H_ASP_86  | OD1    | 3.053        |
| 3BE1   | H_ARG_38  | NH2    | H_GLU_46  | OE1    | 3.297        |
| 3BE1   | H_ARG_38  | NH2    | H_ASP_86  | OD1    | 3.486        |
| 3BE1   | H_ARG_50  | NH1    | A_ASP_560 | OD2    | 3.215        |
| 3BE1   | H_ARG_50  | NH2    | A_GLU_558 | OE1    | 3.092        |
| 3BE1   | H_ARG_50  | NH2    | A_GLU_558 | OE2    | 3.263        |
| 3BE1   | H_ARG_50  | NH2    | A_ASP_560 | OD1    | 3.492        |
| 3BE1   | H_ARG_50  | NH2    | A_ASP_560 | OD2    | 3.175        |
| 3BE1   | H_ARG_66  | NH1    | H_ASP_86  | OD2    | 3.082        |
| 3BE1   | H_ARG_66  | NH2    | H_ASP_86  | OD1    | 3.252        |
| 3BE1   | H_ARG_66  | NH2    | H_ASP_86  | OD2    | 3.284        |
| 3BE1   | H_ARG_94  | NH2    | H_ASP_103 | OD1    | 3.969        |
| 3BE1   | H_ARG_94  | NH2    | H_ASP_103 | OD2    | 3.289        |
| 3BE1   | L_ARG_24  | NH1    | L_ASP_70  | OD1    | 3.044        |
| 3BE1   | L_ARG_61  | NH2    | L_GLU_81  | OE1    | 3.206        |

|      |           |     |           |     |       |
|------|-----------|-----|-----------|-----|-------|
| 3BE1 | L_ARG_61  | NH2 | L_ASP_82  | OD1 | 2.979 |
| 3BE1 | L_ARG_61  | NH2 | L_ASP_82  | OD2 | 3.663 |
| 3BE1 | L_LYS_149 | NZ  | L_GLU_195 | OE2 | 2.739 |
| 3BE1 | L_LYS_183 | NZ  | L_GLU_187 | OE2 | 3.540 |
| 3BE1 | L_LYS_188 | NZ  | L_ASP_185 | OD1 | 3.780 |
| 3BE1 | L_HIS_189 | ND1 | L_ASP_151 | OD1 | 3.324 |
| 3BE1 | L_HIS_189 | ND1 | L_ASP_151 | OD2 | 2.626 |
| 3BE1 | L_ARG_211 | NH2 | L_GLU_187 | OE1 | 3.516 |

Table 371: 3BE1-specific salt bridging networks analysis. In this table, a PDB file is specified with a four-letter PDB ID, except that the names of the PDB files corresponding to the single NMR structural model split from the NMR ensemble is specified with a four-letter PDB ID in addition to a hyphen followed by the single NMR structural model numeric ID, the residue naming scheme is **Chain ID\_residue name\_residue number**,  $\angle ADH$  represents the angle formed by acceptor (A), donor (D) and hydrogen (H) ( $\angle ADH$ ).

| PDB ID | Residue A | Atom A | Residue B | Atom B | Distance (Å) |
|--------|-----------|--------|-----------|--------|--------------|
| 3BGF   | S_ARG_342 | NH2    | S_ASP_385 | OD1    | 3.676        |
| 3BGF   | S_ARG_342 | NH2    | S_ASP_385 | OD2    | 3.162        |
| 3BGF   | S_ARG_426 | NH1    | H_ASP_56  | OD1    | 3.504        |
| 3BGF   | S_ARG_426 | NH1    | H_ASP_56  | OD2    | 2.403        |
| 3BGF   | S_LYS_439 | NZ     | S_ASP_480 | OD1    | 3.797        |
| 3BGF   | S_LYS_439 | NZ     | A_ASP_480 | OD2    | 3.161        |
| 3BGF   | S_ARG_441 | NH2    | S_ASP_454 | OD1    | 2.963        |
| 3BGF   | S_ARG_444 | NH2    | S_GLU_452 | OE2    | 3.267        |
| 3BGF   | S_ARG_444 | NH2    | S_ASP_454 | OD2    | 3.815        |
| 3BGF   | S_LYS_447 | NZ     | S_ASP_407 | OD1    | 3.987        |
| 3BGF   | S_LYS_447 | NZ     | S_ASP_407 | OD2    | 3.876        |
| 3BGF   | S_ARG_449 | NH2    | S_GLU_452 | OE1    | 3.535        |
| 3BGF   | S_ARG_495 | NH2    | S_ASP_429 | OD1    | 3.362        |
| 3BGF   | S_ARG_495 | NH2    | S_ASP_429 | OD2    | 3.615        |
| 3BGF   | A_ARG_342 | NH2    | A_ASP_385 | OD1    | 3.423        |
| 3BGF   | A_ARG_342 | NH2    | A_ASP_385 | OD2    | 2.961        |
| 3BGF   | A_LYS_390 | NZ     | A_ASP_393 | OD1    | 3.583        |
| 3BGF   | A_LYS_390 | NZ     | A_ASP_393 | OD2    | 3.966        |
| 3BGF   | A_LYS_439 | NZ     | S_ASP_480 | OD2    | 2.520        |
| 3BGF   | A_LYS_439 | NZ     | A_ASP_480 | OD1    | 3.180        |
| 3BGF   | A_ARG_441 | NH2    | A_ASP_454 | OD1    | 3.440        |
| 3BGF   | A_ARG_444 | NH2    | A_GLU_452 | OE2    | 3.371        |
| 3BGF   | A_ARG_444 | NH2    | A_ASP_454 | OD2    | 3.730        |
| 3BGF   | A_LYS_447 | NZ     | A_ASP_407 | OD1    | 2.877        |
| 3BGF   | A_LYS_447 | NZ     | A_ASP_407 | OD2    | 2.805        |
| 3BGF   | A_ARG_495 | NH2    | A_ASP_429 | OD1    | 3.108        |
| 3BGF   | A_ARG_495 | NH2    | A_ASP_429 | OD2    | 2.922        |
| 3BGF   | L_ARG_24  | NH2    | L_ASP_70  | OD1    | 3.258        |
| 3BGF   | L_ARG_24  | NH2    | L_ASP_70  | OD2    | 2.893        |
| 3BGF   | L_ARG_46  | NH1    | L_ASP_55  | OD1    | 3.016        |
| 3BGF   | L_ARG_46  | NH1    | L_ASP_55  | OD2    | 3.557        |
| 3BGF   | L_ARG_61  | NH1    | L_GLU_79  | OE1    | 3.984        |
| 3BGF   | L_ARG_61  | NH1    | L_GLU_79  | OE2    | 3.405        |
| 3BGF   | L_ARG_61  | NH2    | L_ASP_82  | OD1    | 2.650        |
| 3BGF   | L_ARG_61  | NH2    | L_ASP_82  | OD2    | 2.907        |
| 3BGF   | L_ARG_66  | NH2    | L_GLU_28  | OE2    | 2.738        |
| 3BGF   | L_LYS_149 | NZ     | L_GLU_195 | OE1    | 3.683        |
| 3BGF   | L_LYS_149 | NZ     | L_GLU_195 | OE2    | 3.129        |
| 3BGF   | L_HIS_189 | ND1    | L_ASP_151 | OD1    | 2.696        |
| 3BGF   | H_ARG_33  | NH1    | H_ASP_56  | OD2    | 3.848        |
| 3BGF   | H_HIS_35  | NE2    | H_GLU_95  | OE1    | 2.884        |
| 3BGF   | H_LYS_38  | NZ     | H_ASP_86  | OD1    | 3.661        |
| 3BGF   | H_LYS_62  | NZ     | H_GLU_46  | OE1    | 2.635        |
| 3BGF   | H_LYS_62  | NZ     | H_GLU_46  | OE2    | 3.712        |
| 3BGF   | H_LYS_66  | NZ     | H_ASP_86  | OD1    | 3.553        |
| 3BGF   | H_LYS_66  | NZ     | H_ASP_86  | OD2    | 2.671        |
| 3BGF   | H_ARG_94  | NH1    | H_ASP_101 | OD1    | 2.347        |
| 3BGF   | H_ARG_94  | NH1    | H_ASP_101 | OD2    | 3.381        |
| 3BGF   | H_LYS_210 | NZ     | L_GLU_123 | OE1    | 3.997        |
| 3BGF   | H_LYS_211 | NZ     | H_GLU_213 | OE2    | 3.764        |
| 3BGF   | C_ARG_24  | NH2    | C_ASP_70  | OD1    | 3.766        |
| 3BGF   | C_ARG_46  | NH1    | C_ASP_55  | OD1    | 2.965        |
| 3BGF   | C_ARG_61  | NH1    | C_GLU_79  | OE1    | 3.352        |
| 3BGF   | C_ARG_61  | NH1    | C_GLU_79  | OE2    | 3.278        |
| 3BGF   | C_ARG_61  | NH2    | C_GLU_81  | OE2    | 3.045        |
| 3BGF   | C_ARG_61  | NH2    | C_ASP_82  | OD1    | 2.379        |
| 3BGF   | C_ARG_61  | NH2    | C_ASP_82  | OD2    | 2.905        |

|      |            |     |           |     |       |
|------|------------|-----|-----------|-----|-------|
| 3BGF | C_ARG_66   | NH2 | C_GLU_28  | OE1 | 3.607 |
| 3BGF | C_ARG_66   | NH2 | C_GLU_28  | OE2 | 2.938 |
| 3BGF | C_LYS_142  | NZ  | C_GLU_105 | OE1 | 3.341 |
| 3BGF | C_LYS_149  | NZ  | C_GLU_195 | OE1 | 3.352 |
| 3BGF | C_LYS_149  | NZ  | C_GLU_195 | OE2 | 3.898 |
| 3BGF | C_ARG_155  | NH2 | C_GLU_185 | OE2 | 3.481 |
| 3BGF | C_LYS_199  | NZ  | C_ASP_110 | OD2 | 3.825 |
| 3BGF | B_HIS_35   | NE2 | B_GLU_95  | OE1 | 2.642 |
| 3BGF | B_LYS_38   | NZ  | B_ASP_86  | OD1 | 3.591 |
| 3BGF | B_LYS_62   | NZ  | B_GLU_46  | OE1 | 2.547 |
| 3BGF | B_LYS_62   | NZ  | B_GLU_46  | OE2 | 3.280 |
| 3BGF | B_LYS_66   | NZ  | B_ASP_86  | OD1 | 3.814 |
| 3BGF | B_LYS_66   | NZ  | B_ASP_86  | OD2 | 2.805 |
| 3BGF | B_ARG_94   | NH1 | B_ASP_101 | OD1 | 2.357 |
| 3BGF | B_ARG_94   | NH1 | B_ASP_101 | OD2 | 2.930 |
| 3BGF | B_ARG_100B | NH1 | B_ASP_101 | OD1 | 3.816 |

Table 372: 3BGF-specific salt bridging networks analysis. In this table, a PDB file is specified with a four-letter PDB ID, except that the names of the PDB files corresponding to the single NMR structural model split from the NMR ensemble is specified with a four-letter PDB ID in addition to a hyphen followed by the single NMR structural model numeric ID, the residue naming scheme is **Chain ID\_residue name\_residue number**,  $\angle ADH$  represents the angle formed by acceptor (A), donor (D) and hydrogen (H) ( $\angle ADH$ ).

| PDB ID | Residue A | Atom A | Residue B | Atom B | Distance (Å) |
|--------|-----------|--------|-----------|--------|--------------|
| 3BIK   | A_ARG_84  | NH1    | A_ASP_108 | OD1    | 2.911        |
| 3BIK   | A_ARG_84  | NH1    | A_ASP_108 | OD2    | 3.517        |
| 3BIK   | A_ARG_84  | NH2    | A_ASP_108 | OD1    | 3.587        |
| 3BIK   | A_ARG_84  | NH2    | A_ASP_108 | OD2    | 2.826        |
| 3BIK   | A_LYS_105 | NZ     | A_ASP_103 | OD2    | 3.863        |
| 3BIK   | A_ARG_113 | NH2    | B_GLU_136 | OE2    | 3.149        |
| 3BIK   | A_LYS_124 | NZ     | A_ASP_122 | OD1    | 3.019        |
| 3BIK   | A_LYS_124 | NZ     | A_ASP_122 | OD2    | 3.912        |
| 3BIK   | A_ARG_125 | NH2    | B_GLU_136 | OE1    | 3.033        |
| 3BIK   | A_ARG_125 | NH2    | B_GLU_136 | OE2    | 3.001        |
| 3BIK   | A_ARG_198 | NH1    | A_GLU_152 | OE1    | 3.772        |
| 3BIK   | A_ARG_198 | NH2    | A_GLU_152 | OE1    | 3.590        |
| 3BIK   | A_ARG_213 | NH1    | A_GLU_218 | OE2    | 3.954        |
| 3BIK   | A_ARG_213 | NH2    | A_GLU_218 | OE1    | 3.723        |
| 3BIK   | A_ARG_213 | NH2    | A_GLU_218 | OE2    | 3.505        |
| 3BIK   | A_HIS_220 | NE2    | A_GLU_218 | OE1    | 3.627        |
| 3BIK   | A_HIS_220 | NE2    | A_GLU_218 | OE2    | 3.391        |
| 3BIK   | B_ARG_33  | NH1    | B_GLU_135 | OE2    | 3.354        |
| 3BIK   | B_ARG_94  | NH1    | B_ASP_117 | OD1    | 3.896        |
| 3BIK   | B_ARG_94  | NH1    | B_ASP_117 | OD2    | 2.841        |
| 3BIK   | B_ARG_94  | NH2    | B_ASP_92  | OD2    | 2.969        |
| 3BIK   | B_ARG_94  | NH2    | B_ASP_117 | OD1    | 3.201        |
| 3BIK   | B_ARG_94  | NH2    | B_ASP_117 | OD2    | 3.582        |
| 3BIK   | B_ARG_103 | NH2    | B_GLU_61  | OE1    | 3.685        |
| 3BIK   | B_HIS_104 | NE2    | B_ASP_105 | OD1    | 3.734        |
| 3BIK   | C_ARG_33  | NH2    | C_GLU_135 | OE2    | 3.450        |
| 3BIK   | C_ARG_94  | NH1    | C_ASP_117 | OD1    | 3.747        |
| 3BIK   | C_ARG_94  | NH1    | C_ASP_117 | OD2    | 2.682        |
| 3BIK   | C_ARG_94  | NH2    | C_ASP_92  | OD2    | 3.003        |
| 3BIK   | C_ARG_94  | NH2    | C_ASP_117 | OD1    | 2.982        |
| 3BIK   | C_ARG_94  | NH2    | C_ASP_117 | OD2    | 3.409        |
| 3BIK   | C_HIS_104 | ND1    | C_ASP_105 | OD1    | 2.573        |
| 3BIK   | C_HIS_104 | ND1    | C_ASP_105 | OD2    | 3.992        |
| 3BIK   | C_ARG_114 | NH1    | C_ASP_92  | OD2    | 3.856        |
| 3BIK   | C_ARG_115 | NH1    | C_GLU_146 | OE1    | 3.596        |
| 3BIK   | C_HIS_129 | NE2    | C_ASP_62  | OD1    | 3.754        |

Table 373: 3BIK-specific salt bridging networks analysis. In this table, a PDB file is specified with a four-letter PDB ID, except that the names of the PDB files corresponding to the single NMR structural model split from the NMR ensemble is specified with a four-letter PDB ID in addition to a hyphen followed by the single NMR structural model numeric ID, the residue naming scheme is **Chain ID\_residue name\_residue number**,  $\angle ADH$  represents the angle formed by acceptor (A), donor (D) and hydrogen (H) ( $\angle ADH$ ).

| PDB ID | Residue A | Atom A | Residue B | Atom B | Distance (Å) |
|--------|-----------|--------|-----------|--------|--------------|
| 3BIS   | A_ARG_84  | NH1    | A_ASP_108 | OD1    | 2.733        |
| 3BIS   | A_ARG_84  | NH1    | A_ASP_108 | OD2    | 3.411        |
| 3BIS   | A_ARG_84  | NH2    | A_ASP_108 | OD1    | 3.339        |
| 3BIS   | A_ARG_84  | NH2    | A_ASP_108 | OD2    | 2.608        |
| 3BIS   | A_LYS_105 | NZ     | A_GLU_187 | OE1    | 3.664        |
| 3BIS   | A_LYS_124 | NZ     | A_ASP_122 | OD1    | 3.773        |
| 3BIS   | A_ARG_140 | NH2    | A_GLU_152 | OE1    | 3.939        |
| 3BIS   | A_ARG_186 | NH1    | A_GLU_158 | OE1    | 2.989        |
| 3BIS   | A_ARG_186 | NH1    | A_GLU_158 | OE2    | 3.114        |
| 3BIS   | A_LYS_189 | NZ     | A_GLU_188 | OE1    | 3.362        |
| 3BIS   | A_ARG_198 | NH1    | A_GLU_150 | OE1    | 3.697        |
| 3BIS   | A_ARG_198 | NH1    | A_GLU_150 | OE2    | 2.793        |
| 3BIS   | A_ARG_198 | NH2    | A_GLU_152 | OE2    | 2.965        |
| 3BIS   | A_ARG_212 | NH2    | A_GLU_217 | OE1    | 3.792        |
| 3BIS   | A_HIS_220 | NE2    | A_GLU_218 | OE1    | 2.735        |
| 3BIS   | B_ARG_84  | NH1    | B_ASP_108 | OD1    | 3.434        |
| 3BIS   | B_ARG_84  | NH1    | B_ASP_108 | OD2    | 3.455        |
| 3BIS   | B_ARG_84  | NH2    | B_ASP_108 | OD2    | 2.983        |
| 3BIS   | B_LYS_105 | NZ     | B_GLU_188 | OE2    | 3.684        |
| 3BIS   | B_ARG_113 | NH2    | B_GLU_58  | OE1    | 3.749        |
| 3BIS   | B_LYS_124 | NZ     | B_ASP_122 | OD1    | 3.846        |
| 3BIS   | B_ARG_140 | NH2    | B_GLU_152 | OE2    | 3.790        |
| 3BIS   | B_ARG_198 | NH1    | B_GLU_150 | OE1    | 2.555        |
| 3BIS   | B_ARG_212 | NH2    | B_GLU_164 | OE1    | 3.367        |
| 3BIS   | B_ARG_213 | NH2    | B_GLU_218 | OE2    | 3.315        |

Table 374: 3BIS-specific salt bridging networks analysis. In this table, a PDB file is specified with a four-letter PDB ID, except that the names of the PDB files corresponding to the single NMR structural model split from the NMR ensemble is specified with a four-letter PDB ID in addition to a hyphen followed by the single NMR structural model numeric ID, the residue naming scheme is **Chain ID\_residue name\_residue number**,  $\angle ADH$  represents the angle formed by acceptor (A), donor (D) and hydrogen (H) ( $\angle ADH$ ).

| PDB ID | Residue A | Atom A | Residue B | Atom B | Distance (Å) |
|--------|-----------|--------|-----------|--------|--------------|
| 3BKY   | H_LYS_38  | NZ     | H_ASP_90  | OD1    | 3.615        |
| 3BKY   | H_LYS_63  | NZ     | H_GLU_46  | OE1    | 3.943        |
| 3BKY   | H_LYS_63  | NZ     | H_GLU_46  | OE2    | 3.735        |
| 3BKY   | H_LYS_67  | NZ     | H_ASP_90  | OD2    | 2.780        |
| 3BKY   | H_ARG_98  | NH1    | H_ASP_110 | OD1    | 3.350        |
| 3BKY   | H_ARG_98  | NH2    | H_ASP_110 | OD1    | 3.826        |
| 3BKY   | H_LYS_138 | NZ     | L_GLU_212 | OE2    | 2.743        |
| 3BKY   | H_LYS_152 | NZ     | H_ASP_153 | OD1    | 3.472        |
| 3BKY   | H_LYS_152 | NZ     | H_ASP_153 | OD2    | 3.466        |
| 3BKY   | L_ARG_60  | NH2    | L_GLU_80  | OE2    | 3.597        |
| 3BKY   | L_ARG_60  | NH2    | L_ASP_81  | OD1    | 2.516        |
| 3BKY   | L_ARG_60  | NH2    | L_ASP_81  | OD2    | 3.432        |
| 3BKY   | L_ARG_76  | NH1    | L_GLU_78  | OE1    | 2.817        |
| 3BKY   | L_LYS_102 | NZ     | L_GLU_164 | OE1    | 3.978        |
| 3BKY   | L_LYS_182 | NZ     | L_GLU_186 | OE1    | 3.284        |
| 3BKY   | L_LYS_187 | NZ     | L_ASP_184 | OD1    | 3.336        |
| 3BKY   | L_HIS_188 | ND1    | L_ASP_150 | OD2    | 2.994        |

Table 375: 3BKY-specific salt bridging networks analysis. In this table, a PDB file is specified with a four-letter PDB ID, except that the names of the PDB files corresponding to the single NMR structural model split from the NMR ensemble is specified with a four-letter PDB ID in addition to a hyphen followed by the single NMR structural model numeric ID, the residue naming scheme is **Chain ID\_residue name\_residue number**,  $\angle ADH$  represents the angle formed by acceptor (A), donor (D) and hydrogen (H) ( $\angle ADH$ ).



| PDB ID | Residue A | Atom A | Residue B | Atom B | Distance (Å) |
|--------|-----------|--------|-----------|--------|--------------|
| 3BO8   | A_HIS_3   | ND1    | A_ASP_29  | OD1    | 3.478        |
| 3BO8   | A_HIS_3   | ND1    | A_ASP_29  | OD2    | 2.703        |
| 3BO8   | A_ARG_6   | NH1    | A_ASP_102 | OD1    | 2.861        |
| 3BO8   | A_ARG_6   | NH2    | A_ASP_102 | OD1    | 2.772        |
| 3BO8   | A_ARG_6   | NH2    | A_ASP_102 | OD2    | 3.556        |
| 3BO8   | A_ARG_14  | NH1    | A_ASP_39  | OD1    | 3.690        |
| 3BO8   | A_ARG_14  | NH1    | A_ASP_39  | OD2    | 2.892        |
| 3BO8   | A_ARG_14  | NH2    | A_ASP_39  | OD1    | 3.076        |
| 3BO8   | A_ARG_14  | NH2    | A_ASP_39  | OD2    | 3.735        |
| 3BO8   | A_ARG_21  | NH1    | A_ASP_39  | OD2    | 3.805        |
| 3BO8   | A_ARG_21  | NH2    | A_ASP_37  | OD1    | 3.686        |
| 3BO8   | A_ARG_21  | NH2    | A_ASP_37  | OD2    | 2.860        |
| 3BO8   | A_ARG_35  | NH1    | A_ASP_37  | OD2    | 3.901        |
| 3BO8   | A_ARG_35  | NH1    | B_ASP_53  | OD1    | 3.541        |
| 3BO8   | A_ARG_35  | NH2    | A_GLU_46  | OE2    | 3.239        |
| 3BO8   | A_ARG_48  | NH1    | B_ASP_53  | OD1    | 3.101        |
| 3BO8   | A_ARG_48  | NH1    | B_ASP_53  | OD2    | 3.041        |
| 3BO8   | A_ARG_48  | NH2    | B_ASP_53  | OD1    | 3.771        |
| 3BO8   | A_ARG_48  | NH2    | B_ASP_53  | OD2    | 3.368        |
| 3BO8   | A_HIS_70  | NE2    | A_ASP_74  | OD1    | 3.486        |
| 3BO8   | A_HIS_70  | NE2    | A_ASP_74  | OD2    | 3.411        |
| 3BO8   | A_ARG_75  | NH1    | A_GLU_19  | OE1    | 2.819        |
| 3BO8   | A_HIS_93  | ND1    | A_ASP_119 | OD1    | 3.501        |
| 3BO8   | A_HIS_93  | ND1    | A_ASP_119 | OD2    | 2.724        |
| 3BO8   | A_ARG_111 | NH2    | A_GLU_128 | OE1    | 3.927        |
| 3BO8   | A_ARG_114 | NH2    | A_ASP_116 | OD1    | 3.531        |
| 3BO8   | A_ARG_114 | NH2    | A_ASP_116 | OD2    | 3.063        |
| 3BO8   | A_LYS_144 | NZ     | A_GLU_148 | OE1    | 3.974        |
| 3BO8   | A_LYS_144 | NZ     | A_GLU_148 | OE2    | 2.691        |
| 3BO8   | A_ARG_156 | NH1    | C_ASP_3   | OD1    | 3.842        |
| 3BO8   | A_ARG_156 | NH1    | C_ASP_3   | OD2    | 2.711        |
| 3BO8   | A_ARG_163 | NH1    | A_ASP_166 | OD2    | 3.922        |
| 3BO8   | A_ARG_163 | NH2    | C_GLU_1   | OE1    | 3.484        |
| 3BO8   | A_ARG_163 | NH2    | C_GLU_1   | OE2    | 2.848        |
| 3BO8   | A_ARG_170 | NH1    | C_GLU_1   | OE2    | 2.801        |
| 3BO8   | A_ARG_170 | NH2    | A_GLU_55  | OE1    | 3.555        |
| 3BO8   | A_ARG_170 | NH2    | A_GLU_55  | OE2    | 3.453        |
| 3BO8   | A_ARG_170 | NH2    | C_GLU_1   | OE2    | 3.023        |
| 3BO8   | A_LYS_176 | NZ     | A_GLU_173 | OE2    | 3.954        |
| 3BO8   | A_HIS_191 | NE2    | A_GLU_254 | OE2    | 2.780        |
| 3BO8   | A_HIS_192 | NE2    | B_ASP_98  | OD1    | 3.566        |
| 3BO8   | A_HIS_192 | NE2    | B_ASP_98  | OD2    | 3.950        |
| 3BO8   | A_ARG_256 | NH1    | A_GLU_253 | OE1    | 2.918        |
| 3BO8   | A_ARG_256 | NH2    | A_ASP_220 | OD1    | 3.803        |
| 3BO8   | A_ARG_256 | NH2    | A_ASP_220 | OD2    | 2.636        |
| 3BO8   | B_LYS_75  | NZ     | B_GLU_74  | OE1    | 3.603        |
| 3BO8   | B_ARG_81  | NH2    | B_ASP_38  | OD2    | 2.762        |

---

Table 376: 3BO8-specific salt bridging networks analysis. In this table, a PDB file is specified with a four-letter PDB ID, except that the names of the PDB files corresponding to the single NMR structural model split from the NMR ensemble is specified with a four-letter PDB ID in addition to a hyphen followed by the single NMR structural model numeric ID, the residue naming scheme is **Chain ID\_residue name\_residue number**,  $\angle ADH$  represents the angle formed by acceptor (A), donor (D) and hydrogen (H) ( $\angle ADH$ ).

| PDB ID | Residue A | Atom A | Residue B | Atom B | Distance (Å) |
|--------|-----------|--------|-----------|--------|--------------|
| 3BT2   | A_HIS_29  | NE2    | A_ASP_12  | OD1    | 2.667        |
| 3BT2   | A_HIS_29  | NE2    | A_ASP_12  | OD2    | 2.134        |
| 3BT2   | A_HIS_41  | NE2    | A_ASP_12  | OD1    | 3.088        |
| 3BT2   | A_HIS_41  | NE2    | A_ASP_12  | OD2    | 2.030        |
| 3BT2   | A_ARG_69  | NH2    | A_ASP_65  | OD2    | 3.423        |
| 3BT2   | A_HIS_87  | ND1    | U_ASP_11  | OD2    | 3.629        |
| 3BT2   | A_ARG_88  | NH1    | A_ASP_90  | OD1    | 3.618        |
| 3BT2   | A_ARG_88  | NH1    | A_ASP_90  | OD2    | 3.108        |
| 3BT2   | A_ARG_108 | NH1    | A_ASP_106 | OD1    | 3.445        |
| 3BT2   | A_ARG_108 | NH1    | A_ASP_106 | OD2    | 2.718        |
| 3BT2   | A_ARG_108 | NH2    | A_ASP_106 | OD2    | 3.817        |
| 3BT2   | A_ARG_110 | NH2    | A_GLU_125 | OE1    | 3.432        |
| 3BT2   | L_LYS_53  | NZ     | L_GLU_50  | OE1    | 2.553        |
| 3BT2   | L_ARG_61  | NH1    | L_GLU_79  | OE1    | 2.871        |
| 3BT2   | L_ARG_61  | NH1    | L_GLU_79  | OE2    | 3.194        |
| 3BT2   | L_ARG_61  | NH2    | L_GLU_79  | OE1    | 3.460        |
| 3BT2   | L_ARG_61  | NH2    | L_GLU_81  | OE2    | 3.022        |
| 3BT2   | L_ARG_61  | NH2    | L_ASP_82  | OD1    | 3.009        |
| 3BT2   | L_ARG_61  | NH2    | L_ASP_82  | OD2    | 3.824        |
| 3BT2   | L_LYS_103 | NZ     | L_ASP_164 | OD1    | 3.404        |
| 3BT2   | L_LYS_148 | NZ     | L_GLU_194 | OE1    | 3.204        |
| 3BT2   | L_LYS_148 | NZ     | L_GLU_194 | OE2    | 3.996        |
| 3BT2   | L_ARG_154 | NH1    | L_GLU_184 | OE1    | 3.573        |
| 3BT2   | L_ARG_154 | NH1    | L_GLU_184 | OE2    | 2.970        |
| 3BT2   | L_ARG_154 | NH2    | L_GLU_184 | OE1    | 2.853        |
| 3BT2   | L_ARG_154 | NH2    | L_GLU_184 | OE2    | 3.786        |
| 3BT2   | L_ARG_187 | NH1    | L_ASP_183 | OD1    | 3.352        |
| 3BT2   | L_HIS_188 | ND1    | L_ASP_150 | OD2    | 2.836        |
| 3BT2   | H_ARG_40  | NH1    | H_GLU_85  | OE1    | 3.704        |
| 3BT2   | H_ARG_40  | NH2    | H_GLU_85  | OE2    | 3.856        |
| 3BT2   | H_LYS_64  | NZ     | H_GLU_61  | OE1    | 2.698        |
| 3BT2   | H_LYS_64  | NZ     | H_GLU_61  | OE2    | 3.977        |
| 3BT2   | H_LYS_66  | NZ     | H_ASP_86  | OD1    | 3.311        |
| 3BT2   | H_LYS_66  | NZ     | H_ASP_86  | OD2    | 2.587        |
| 3BT2   | H_ARG_94  | NH2    | H_ASP_101 | OD1    | 3.593        |
| 3BT2   | H_ARG_94  | NH2    | H_ASP_101 | OD2    | 2.737        |
| 3BT2   | H_HIS_98  | ND1    | L_GLU_50  | OE1    | 2.845        |
| 3BT2   | H_HIS_98  | ND1    | L_GLU_50  | OE2    | 2.191        |
| 3BT2   | H_HIS_98  | NE2    | L_GLU_50  | OE1    | 3.301        |
| 3BT2   | H_HIS_98  | NE2    | L_GLU_50  | OE2    | 3.904        |
| 3BT2   | H_LYS_203 | NZ     | L_GLU_122 | OE2    | 3.715        |
| 3BT2   | U_ARG_2   | NH2    | U_ASP_74  | OD2    | 3.379        |
| 3BT2   | U_LYS_7   | NZ     | U_ASP_11  | OD1    | 3.738        |
| 3BT2   | U_ARG_25  | NH1    | U_GLU_42  | OE2    | 3.052        |
| 3BT2   | U_ARG_25  | NH2    | U_GLU_42  | OE2    | 3.321        |
| 3BT2   | U_LYS_50  | NZ     | U_ASP_254 | OD2    | 2.962        |
| 3BT2   | U_ARG_53  | NH1    | U_ASP_254 | OD2    | 3.811        |
| 3BT2   | U_ARG_91  | NH1    | B_ASP_22  | OD1    | 3.502        |
| 3BT2   | U_ARG_91  | NH1    | B_ASP_22  | OD2    | 3.574        |
| 3BT2   | U_ARG_91  | NH2    | B_ASP_22  | OD1    | 3.066        |
| 3BT2   | U_HIS_128 | ND1    | U_GLU_183 | OE1    | 3.844        |
| 3BT2   | U_HIS_128 | ND1    | U_GLU_183 | OE2    | 3.947        |
| 3BT2   | U_HIS_128 | NE2    | U_GLU_183 | OE1    | 2.249        |
| 3BT2   | U_HIS_128 | NE2    | U_GLU_183 | OE2    | 1.923        |
| 3BT2   | U_HIS_143 | NE2    | U_GLU_183 | OE1    | 3.609        |
| 3BT2   | U_HIS_143 | NE2    | U_GLU_183 | OE2    | 1.958        |
| 3BT2   | U_ARG_145 | NH2    | U_ASP_124 | OD2    | 3.397        |

|      |           |     |           |     |       |
|------|-----------|-----|-----------|-----|-------|
| 3BT2 | U_LYS_175 | NZ  | U_GLU_94  | OE1 | 3.795 |
| 3BT2 | U_ARG_192 | NH1 | H_GLU_58  | OE2 | 2.836 |
| 3BT2 | U_HIS_260 | ND1 | U_ASP_262 | OD1 | 3.731 |

Table 377: 3BT2-specific salt bridging networks analysis. In this table, a PDB file is specified with a four-letter PDB ID, except that the names of the PDB files corresponding to the single NMR structural model split from the NMR ensemble is specified with a four-letter PDB ID in addition to a hyphen followed by the single NMR structural model numeric ID, the residue naming scheme is **Chain ID\_residue name\_residue number**,  $\angle ADH$  represents the angle formed by acceptor (A), donor (D) and hydrogen (H) ( $\angle ADH$ ).

| PDB ID | Residue A | Atom A | Residue B | Atom B | Distance (Å) |
|--------|-----------|--------|-----------|--------|--------------|
| 3BZ4   | A_LYS_27  | NZ     | E_ASP_1   | OD1    | 3.348        |
| 3BZ4   | A_LYS_27  | NZ     | E_ASP_1   | OD2    | 3.551        |
| 3BZ4   | A_HIS_27D | ND1    | A_ASP_28  | OD1    | 3.339        |
| 3BZ4   | A_HIS_27D | ND1    | A_ASP_28  | OD2    | 3.472        |
| 3BZ4   | A_ARG_61  | NH1    | A_ASP_82  | OD1    | 3.791        |
| 3BZ4   | A_ARG_61  | NH1    | A_ASP_82  | OD2    | 2.748        |
| 3BZ4   | A_ARG_61  | NH2    | A_GLU_79  | OE1    | 3.444        |
| 3BZ4   | A_ARG_61  | NH2    | A_GLU_81  | OE2    | 3.683        |
| 3BZ4   | A_ARG_61  | NH2    | A_ASP_82  | OD1    | 2.925        |
| 3BZ4   | A_ARG_61  | NH2    | A_ASP_82  | OD2    | 3.346        |
| 3BZ4   | A_ARG_96  | NH2    | B_GLU_50  | OE1    | 3.591        |
| 3BZ4   | A_ARG_96  | NH2    | B_GLU_50  | OE2    | 2.914        |
| 3BZ4   | A_LYS_147 | NZ     | A_GLU_154 | OE1    | 3.729        |
| 3BZ4   | A_LYS_149 | NZ     | A_GLU_195 | OE1    | 3.803        |
| 3BZ4   | A_LYS_149 | NZ     | A_GLU_195 | OE2    | 2.957        |
| 3BZ4   | A_ARG_155 | NH1    | A_GLU_185 | OE1    | 3.022        |
| 3BZ4   | A_ARG_188 | NH2    | A_ASP_184 | OD1    | 2.966        |
| 3BZ4   | A_ARG_188 | NH2    | A_ASP_184 | OD2    | 3.794        |
| 3BZ4   | A_HIS_189 | ND1    | A_ASP_151 | OD2    | 3.568        |
| 3BZ4   | B_ARG_38  | NH1    | B_ASP_86  | OD1    | 2.836        |
| 3BZ4   | B_ARG_38  | NH2    | B_GLU_46  | OE1    | 3.315        |
| 3BZ4   | B_ARG_38  | NH2    | B_GLU_46  | OE2    | 3.392        |
| 3BZ4   | B_ARG_38  | NH2    | B_ASP_86  | OD1    | 3.736        |
| 3BZ4   | B_ARG_52  | NH2    | B_GLU_50  | OE2    | 2.961        |
| 3BZ4   | B_LYS_64  | NZ     | B_GLU_61  | OE1    | 2.578        |
| 3BZ4   | B_LYS_64  | NZ     | B_GLU_61  | OE2    | 3.962        |
| 3BZ4   | B_LYS_66  | NZ     | B_ASP_86  | OD1    | 3.832        |
| 3BZ4   | B_LYS_66  | NZ     | B_ASP_86  | OD2    | 2.772        |
| 3BZ4   | B_ARG_71  | NH2    | B_ASP_73  | OD1    | 3.536        |
| 3BZ4   | B_LYS_75  | NZ     | B_ASP_72  | OD2    | 3.736        |
| 3BZ4   | B_LYS_210 | NZ     | A_GLU_123 | OE2    | 2.839        |
| 3BZ4   | C_LYS_27  | NZ     | C_GLU_93  | OE1    | 2.862        |
| 3BZ4   | C_LYS_27  | NZ     | C_GLU_93  | OE2    | 3.387        |
| 3BZ4   | C_HIS_27D | ND1    | C_ASP_28  | OD1    | 3.351        |
| 3BZ4   | C_HIS_27D | ND1    | C_ASP_28  | OD2    | 3.496        |
| 3BZ4   | C_LYS_39  | NZ     | C_GLU_81  | OE2    | 3.178        |
| 3BZ4   | C_ARG_61  | NH1    | C_ASP_82  | OD1    | 3.875        |
| 3BZ4   | C_ARG_61  | NH1    | C_ASP_82  | OD2    | 2.759        |
| 3BZ4   | C_ARG_61  | NH2    | C_GLU_79  | OE1    | 3.734        |
| 3BZ4   | C_ARG_61  | NH2    | C_GLU_79  | OE2    | 3.949        |
| 3BZ4   | C_ARG_61  | NH2    | C_ASP_82  | OD1    | 3.042        |
| 3BZ4   | C_ARG_61  | NH2    | C_ASP_82  | OD2    | 3.345        |
| 3BZ4   | C_ARG_96  | NH2    | D_GLU_50  | OE1    | 3.615        |
| 3BZ4   | C_ARG_96  | NH2    | D_GLU_50  | OE2    | 2.938        |
| 3BZ4   | C_LYS_103 | NZ     | C_ASP_165 | OD1    | 3.993        |
| 3BZ4   | C_LYS_147 | NZ     | C_GLU_195 | OE1    | 3.076        |
| 3BZ4   | C_LYS_149 | NZ     | C_GLU_195 | OE2    | 2.853        |
| 3BZ4   | C_ARG_155 | NH1    | C_GLU_185 | OE2    | 3.198        |
| 3BZ4   | C_ARG_155 | NH2    | C_GLU_185 | OE1    | 2.972        |
| 3BZ4   | C_ARG_155 | NH2    | C_GLU_185 | OE2    | 3.144        |
| 3BZ4   | C_HIS_189 | ND1    | C_ASP_151 | OD2    | 3.072        |
| 3BZ4   | D_LYS_3   | NZ     | D_GLU_5   | OE1    | 3.731        |
| 3BZ4   | D_ARG_38  | NH1    | D_ASP_86  | OD1    | 2.733        |
| 3BZ4   | D_ARG_38  | NH2    | D_GLU_46  | OE1    | 3.389        |
| 3BZ4   | D_ARG_38  | NH2    | D_GLU_46  | OE2    | 3.315        |
| 3BZ4   | D_ARG_38  | NH2    | D_ASP_86  | OD1    | 3.699        |
| 3BZ4   | D_ARG_52  | NH2    | D_GLU_50  | OE2    | 2.968        |

|      |           |     |           |     |       |
|------|-----------|-----|-----------|-----|-------|
| 3BZ4 | D_ARG_71  | NH2 | D_ASP_73  | OD1 | 3.463 |
| 3BZ4 | D_ARG_83  | NH1 | D_GLU_85  | OE2 | 3.445 |
| 3BZ4 | D_ARG_83  | NH2 | D_GLU_85  | OE2 | 3.957 |
| 3BZ4 | D_ARG_83  | NH2 | D_ASP_86  | OD1 | 2.967 |
| 3BZ4 | D_ARG_83  | NH2 | D_ASP_86  | OD2 | 3.511 |
| 3BZ4 | D_LYS_210 | NZ  | C_GLU_123 | OE2 | 2.929 |
| 3BZ4 | E_LYS_27  | NZ  | E_GLU_93  | OE1 | 2.598 |
| 3BZ4 | E_LYS_27  | NZ  | E_GLU_93  | OE2 | 3.386 |
| 3BZ4 | E_HIS_27D | ND1 | E_ASP_28  | OD1 | 3.329 |
| 3BZ4 | E_HIS_27D | ND1 | E_ASP_28  | OD2 | 3.369 |
| 3BZ4 | E_ARG_61  | NH1 | E_ASP_82  | OD1 | 3.767 |
| 3BZ4 | E_ARG_61  | NH1 | E_ASP_82  | OD2 | 2.681 |
| 3BZ4 | E_ARG_61  | NH2 | E_GLU_79  | OE1 | 3.679 |
| 3BZ4 | E_ARG_61  | NH2 | E_GLU_79  | OE2 | 3.909 |
| 3BZ4 | E_ARG_61  | NH2 | E_ASP_82  | OD1 | 2.988 |
| 3BZ4 | E_ARG_61  | NH2 | E_ASP_82  | OD2 | 3.375 |
| 3BZ4 | E_ARG_96  | NH2 | F_GLU_50  | OE1 | 3.659 |
| 3BZ4 | E_ARG_96  | NH2 | F_GLU_50  | OE2 | 3.062 |
| 3BZ4 | E_LYS_103 | NZ  | E_ASP_165 | OD1 | 3.694 |
| 3BZ4 | E_LYS_142 | NZ  | E_GLU_105 | OE1 | 2.683 |
| 3BZ4 | E_LYS_147 | NZ  | E_GLU_154 | OE1 | 3.191 |
| 3BZ4 | E_LYS_149 | NZ  | E_GLU_195 | OE2 | 3.492 |
| 3BZ4 | E_ARG_155 | NH1 | E_GLU_185 | OE2 | 2.852 |
| 3BZ4 | E_ARG_155 | NH2 | E_GLU_185 | OE1 | 3.247 |
| 3BZ4 | E_ARG_155 | NH2 | E_GLU_185 | OE2 | 3.385 |
| 3BZ4 | E_LYS_183 | NZ  | E_GLU_187 | OE1 | 3.938 |
| 3BZ4 | E_ARG_188 | NH1 | E_ASP_184 | OD1 | 2.897 |
| 3BZ4 | E_HIS_189 | ND1 | E_ASP_151 | OD2 | 2.915 |
| 3BZ4 | E_LYS_199 | NZ  | E_ASP_110 | OD2 | 3.617 |
| 3BZ4 | F_ARG_38  | NH1 | F_ASP_86  | OD1 | 2.816 |
| 3BZ4 | F_ARG_38  | NH2 | F_GLU_46  | OE1 | 3.339 |
| 3BZ4 | F_ARG_38  | NH2 | F_GLU_46  | OE2 | 3.116 |
| 3BZ4 | F_ARG_38  | NH2 | F_ASP_86  | OD1 | 3.767 |
| 3BZ4 | F_ARG_52  | NH2 | F_GLU_50  | OE2 | 2.956 |
| 3BZ4 | F_LYS_66  | NZ  | F_ASP_86  | OD1 | 3.548 |
| 3BZ4 | F_LYS_66  | NZ  | F_ASP_86  | OD2 | 2.726 |
| 3BZ4 | F_ARG_71  | NH2 | F_ASP_73  | OD1 | 3.320 |
| 3BZ4 | F_LYS_75  | NZ  | F_ASP_72  | OD2 | 3.820 |
| 3BZ4 | F_LYS_210 | NZ  | E_GLU_123 | OE2 | 2.855 |
| 3BZ4 | G_LYS_27  | NZ  | G_GLU_93  | OE1 | 3.193 |
| 3BZ4 | G_LYS_27  | NZ  | G_GLU_93  | OE2 | 3.324 |
| 3BZ4 | G_HIS_27D | ND1 | G_ASP_28  | OD1 | 3.438 |
| 3BZ4 | G_HIS_27D | ND1 | G_ASP_28  | OD2 | 3.691 |
| 3BZ4 | G_LYS_39  | NZ  | G_GLU_81  | OE2 | 3.982 |
| 3BZ4 | G_ARG_61  | NH1 | G_ASP_82  | OD1 | 3.687 |
| 3BZ4 | G_ARG_61  | NH1 | G_ASP_82  | OD2 | 2.777 |
| 3BZ4 | G_ARG_61  | NH2 | G_GLU_79  | OE1 | 3.890 |
| 3BZ4 | G_ARG_61  | NH2 | G_GLU_81  | OE2 | 3.793 |
| 3BZ4 | G_ARG_61  | NH2 | G_ASP_82  | OD1 | 3.189 |
| 3BZ4 | G_ARG_61  | NH2 | G_ASP_82  | OD2 | 3.680 |
| 3BZ4 | G_ARG_96  | NH2 | H_GLU_50  | OE1 | 3.659 |
| 3BZ4 | G_ARG_96  | NH2 | H_GLU_50  | OE2 | 3.021 |
| 3BZ4 | G_LYS_147 | NZ  | C_GLU_154 | OE1 | 3.559 |
| 3BZ4 | G_LYS_149 | NZ  | G_GLU_195 | OE1 | 3.699 |
| 3BZ4 | G_LYS_149 | NZ  | G_GLU_195 | OE2 | 3.854 |
| 3BZ4 | G_ARG_188 | NH1 | G_ASP_184 | OD1 | 3.650 |
| 3BZ4 | G_HIS_189 | ND1 | G_ASP_151 | OD2 | 3.087 |
| 3BZ4 | G_LYS_199 | NZ  | G_ASP_110 | OD2 | 3.816 |

|      |          |     |          |     |       |
|------|----------|-----|----------|-----|-------|
| 3BZ4 | H_ARG_38 | NH1 | H_ASP_86 | OD1 | 2.822 |
| 3BZ4 | H_ARG_38 | NH2 | H_GLU_46 | OE1 | 3.285 |
| 3BZ4 | H_ARG_38 | NH2 | H_GLU_46 | OE2 | 3.289 |
| 3BZ4 | H_ARG_38 | NH2 | H_ASP_86 | OD1 | 3.691 |
| 3BZ4 | H_ARG_52 | NH2 | H_GLU_50 | OE2 | 3.000 |
| 3BZ4 | H_LYS_66 | NZ  | H_ASP_86 | OD1 | 3.582 |
| 3BZ4 | H_LYS_66 | NZ  | H_ASP_86 | OD2 | 2.709 |
| 3BZ4 | H_ARG_71 | NH2 | H_ASP_73 | OD1 | 3.418 |

Table 378: 3BZ4-specific salt bridging networks analysis. In this table, a PDB file is specified with a four-letter PDB ID, except that the names of the PDB files corresponding to the single NMR structural model split from the NMR ensemble is specified with a four-letter PDB ID in addition to a hyphen followed by the single NMR structural model numeric ID, the residue naming scheme is **Chain ID\_residue name\_residue number**,  $\angle ADH$  represents the angle formed by acceptor (A), donor (D) and hydrogen (H) ( $\angle ADH$ ).

| PDB ID | Residue A | Atom A | Residue B | Atom B | Distance (Å) |
|--------|-----------|--------|-----------|--------|--------------|
| 3C09   | L_ARG_60  | NH2    | L_ASP_81  | OD1    | 3.198        |
| 3C09   | L_ARG_60  | NH2    | L_ASP_81  | OD2    | 3.773        |
| 3C09   | L_HIS_93  | NE2    | D_ASP_434 | OD1    | 2.739        |
| 3C09   | L_HIS_93  | NE2    | D_ASP_434 | OD2    | 3.466        |
| 3C09   | L_HIS_188 | ND1    | L_ASP_150 | OD1    | 3.925        |
| 3C09   | H_HIS_32  | NE2    | H_ASP_100 | OD2    | 3.604        |
| 3C09   | H_HIS_32  | NE2    | H_ASP_102 | OD1    | 3.701        |
| 3C09   | H_ARG_38  | NH2    | H_GLU_46  | OE1    | 2.766        |
| 3C09   | H_ARG_38  | NH2    | H_GLU_46  | OE2    | 3.957        |
| 3C09   | H_ARG_57  | NH2    | D_GLU_431 | OE1    | 3.682        |
| 3C09   | H_LYS_151 | NZ     | H_ASP_152 | OD2    | 3.689        |
| 3C09   | A_HIS_346 | NE2    | A_ASP_344 | OD2    | 3.992        |
| 3C09   | A_HIS_394 | NE2    | A_ASP_369 | OD1    | 3.580        |
| 3C09   | A_ARG_403 | NH1    | A_GLU_376 | OE1    | 2.815        |
| 3C09   | A_ARG_403 | NH1    | A_GLU_376 | OE2    | 3.396        |
| 3C09   | A_LYS_407 | NZ     | A_ASP_434 | OD2    | 3.026        |
| 3C09   | A_ARG_427 | NH1    | A_GLU_397 | OE1    | 3.943        |
| 3C09   | A_ARG_427 | NH2    | A_ASP_392 | OD2    | 3.700        |
| 3C09   | A_ARG_427 | NH2    | A_ASP_498 | OD1    | 3.376        |
| 3C09   | A_LYS_454 | NZ     | C_ASP_100 | OD1    | 2.467        |
| 3C09   | A_LYS_463 | NZ     | B_ASP_49  | OD2    | 2.856        |
| 3C09   | B_ARG_60  | NH2    | B_ASP_81  | OD1    | 2.668        |
| 3C09   | B_ARG_60  | NH2    | B_ASP_81  | OD2    | 3.698        |
| 3C09   | B_HIS_93  | NE2    | A_ASP_434 | OD1    | 2.346        |
| 3C09   | C_LYS_12  | NZ     | C_GLU_10  | OE1    | 3.298        |
| 3C09   | C_HIS_32  | NE2    | C_ASP_102 | OD1    | 3.417        |
| 3C09   | C_HIS_35  | ND1    | C_GLU_50  | OE2    | 3.377        |
| 3C09   | C_HIS_35  | NE2    | C_GLU_50  | OE2    | 3.892        |
| 3C09   | C_ARG_38  | NH1    | C_ASP_90  | OD1    | 3.955        |
| 3C09   | C_ARG_38  | NH2    | C_GLU_46  | OE1    | 2.986        |
| 3C09   | C_ARG_38  | NH2    | C_GLU_46  | OE2    | 3.298        |
| 3C09   | D_HIS_394 | ND1    | D_ASP_369 | OD1    | 3.451        |
| 3C09   | D_ARG_403 | NH2    | D_GLU_376 | OE1    | 3.699        |
| 3C09   | D_ARG_403 | NH2    | D_GLU_376 | OE2    | 3.471        |
| 3C09   | D_LYS_407 | NZ     | D_ASP_434 | OD1    | 3.698        |
| 3C09   | D_LYS_407 | NZ     | D_ASP_434 | OD2    | 2.480        |
| 3C09   | D_LYS_454 | NZ     | H_ASP_100 | OD2    | 3.482        |
| 3C09   | D_LYS_463 | NZ     | L_ASP_49  | OD2    | 3.418        |

Table 379: 3C09-specific salt bridging networks analysis. In this table, a PDB file is specified with a four-letter PDB ID, except that the names of the PDB files corresponding to the single NMR structural model split from the NMR ensemble is specified with a four-letter PDB ID in addition to a hyphen followed by the single NMR structural model numeric ID, the residue naming scheme is **Chain ID\_residue name\_residue number**,  $\angle ADH$  represents the angle formed by acceptor (A), donor (D) and hydrogen (H) ( $\angle ADH$ ).



| PDB ID | Residue A | Atom A | Residue B | Atom B | Distance (Å) |
|--------|-----------|--------|-----------|--------|--------------|
| 3C5S   | A_ARG_61  | NH1    | A_ASP_82  | OD2    | 3.030        |
| 3C5S   | A_ARG_61  | NH2    | A_GLU_79  | OE2    | 3.851        |
| 3C5S   | A_ARG_61  | NH2    | A_ASP_82  | OD1    | 3.184        |
| 3C5S   | A_ARG_61  | NH2    | A_ASP_82  | OD2    | 3.437        |
| 3C5S   | A_ARG_96  | NH2    | B_GLU_50  | OE1    | 3.517        |
| 3C5S   | A_ARG_96  | NH2    | B_GLU_50  | OE2    | 2.932        |
| 3C5S   | A_LYS_103 | NZ     | A_ASP_165 | OD1    | 3.305        |
| 3C5S   | A_LYS_147 | NZ     | A_GLU_154 | OE1    | 2.905        |
| 3C5S   | A_LYS_149 | NZ     | A_GLU_195 | OE1    | 2.670        |
| 3C5S   | A_ARG_188 | NH1    | A_ASP_184 | OD1    | 2.405        |
| 3C5S   | A_LYS_199 | NZ     | A_ASP_110 | OD1    | 3.889        |
| 3C5S   | A_LYS_199 | NZ     | A_ASP_110 | OD2    | 2.335        |
| 3C5S   | B_LYS_3   | NZ     | B_GLU_5   | OE1    | 3.341        |
| 3C5S   | B_ARG_38  | NH1    | B_ASP_86  | OD1    | 2.908        |
| 3C5S   | B_ARG_38  | NH2    | B_GLU_46  | OE1    | 3.058        |
| 3C5S   | B_ARG_38  | NH2    | B_ASP_86  | OD1    | 3.943        |
| 3C5S   | B_LYS_43  | NZ     | B_GLU_46  | OE2    | 2.800        |
| 3C5S   | B_ARG_52  | NH2    | B_GLU_50  | OE2    | 2.999        |
| 3C5S   | B_LYS_64  | NZ     | B_GLU_61  | OE1    | 2.552        |
| 3C5S   | B_LYS_64  | NZ     | B_GLU_61  | OE2    | 3.116        |
| 3C5S   | B_ARG_71  | NH2    | B_ASP_73  | OD1    | 3.320        |
| 3C5S   | B_LYS_75  | NZ     | B_ASP_72  | OD2    | 3.056        |
| 3C5S   | B_ARG_83  | NH2    | B_ASP_86  | OD1    | 3.087        |
| 3C5S   | B_ARG_83  | NH2    | B_ASP_86  | OD2    | 3.434        |
| 3C5S   | B_LYS_210 | NZ     | A_GLU_123 | OE2    | 3.553        |
| 3C5S   | C_ARG_61  | NH1    | C_ASP_82  | OD1    | 3.085        |
| 3C5S   | C_ARG_61  | NH2    | C_GLU_79  | OE1    | 3.892        |
| 3C5S   | C_ARG_61  | NH2    | C_GLU_79  | OE2    | 3.694        |
| 3C5S   | C_ARG_61  | NH2    | C_GLU_81  | OE2    | 2.868        |
| 3C5S   | C_ARG_61  | NH2    | C_ASP_82  | OD1    | 3.573        |
| 3C5S   | C_ARG_61  | NH2    | C_ASP_82  | OD2    | 3.274        |
| 3C5S   | C_ARG_96  | NH2    | D_GLU_50  | OE1    | 3.571        |
| 3C5S   | C_ARG_96  | NH2    | D_GLU_50  | OE2    | 2.973        |
| 3C5S   | C_LYS_103 | NZ     | C_ASP_165 | OD1    | 3.149        |
| 3C5S   | C_LYS_142 | NZ     | C_GLU_105 | OE2    | 3.286        |
| 3C5S   | C_LYS_147 | NZ     | C_GLU_154 | OE1    | 2.994        |
| 3C5S   | C_LYS_149 | NZ     | C_GLU_195 | OE1    | 2.716        |
| 3C5S   | C_LYS_149 | NZ     | C_GLU_195 | OE2    | 3.839        |
| 3C5S   | C_ARG_155 | NH1    | C_GLU_185 | OE1    | 3.904        |
| 3C5S   | C_ARG_155 | NH2    | C_GLU_185 | OE1    | 3.268        |
| 3C5S   | C_ARG_188 | NH2    | C_ASP_184 | OD2    | 3.258        |
| 3C5S   | C_HIS_189 | ND1    | C_ASP_151 | OD2    | 2.806        |
| 3C5S   | C_LYS_199 | NZ     | C_ASP_110 | OD2    | 2.615        |
| 3C5S   | C_ARG_211 | NH1    | C_GLU_187 | OE1    | 3.163        |
| 3C5S   | D_LYS_3   | NZ     | D_GLU_5   | OE2    | 3.300        |
| 3C5S   | D_ARG_38  | NH1    | D_ASP_86  | OD1    | 2.823        |
| 3C5S   | D_ARG_38  | NH2    | D_GLU_46  | OE1    | 3.094        |
| 3C5S   | D_ARG_38  | NH2    | D_GLU_46  | OE2    | 3.865        |
| 3C5S   | D_ARG_38  | NH2    | D_ASP_86  | OD1    | 3.695        |
| 3C5S   | D_ARG_52  | NH2    | D_GLU_50  | OE2    | 2.971        |
| 3C5S   | D_LYS_66  | NZ     | D_ASP_86  | OD1    | 3.839        |
| 3C5S   | D_LYS_66  | NZ     | D_ASP_86  | OD2    | 2.657        |
| 3C5S   | D_ARG_71  | NH2    | D_ASP_73  | OD1    | 3.461        |

---

Table 380: 3C5S-specific salt bridging networks analysis. In this table, a PDB file is specified with a four-letter PDB ID, except that the names of the PDB files corresponding to the single NMR structural model split from the NMR ensemble is specified with a four-letter PDB ID in addition to a hyphen followed by the single NMR structural model numeric ID, the residue naming scheme is **Chain ID\_residue name\_residue number**,  $\angle ADH$  represents the angle formed by acceptor (A), donor (D) and hydrogen (H) ( $\angle ADH$ ).

| PDB ID | Residue A | Atom A | Residue B | Atom B | Distance (Å) |
|--------|-----------|--------|-----------|--------|--------------|
| 3C6S   | A_LYS_27  | NZ     | F_GLU_61  | OE1    | 2.945        |
| 3C6S   | A_HIS_27D | NE2    | A_ASP_28  | OD2    | 3.782        |
| 3C6S   | A_ARG_61  | NH1    | A_ASP_82  | OD1    | 3.871        |
| 3C6S   | A_ARG_61  | NH1    | A_ASP_82  | OD2    | 2.772        |
| 3C6S   | A_ARG_61  | NH2    | A_GLU_79  | OE1    | 3.467        |
| 3C6S   | A_ARG_61  | NH2    | A_GLU_81  | OE2    | 3.840        |
| 3C6S   | A_ARG_61  | NH2    | A_ASP_82  | OD1    | 3.008        |
| 3C6S   | A_ARG_61  | NH2    | A_ASP_82  | OD2    | 3.321        |
| 3C6S   | A_ARG_96  | NH2    | B_GLU_50  | OE1    | 3.551        |
| 3C6S   | A_ARG_96  | NH2    | B_GLU_50  | OE2    | 2.936        |
| 3C6S   | A_LYS_103 | NZ     | A_ASP_165 | OD1    | 3.865        |
| 3C6S   | A_LYS_147 | NZ     | A_GLU_154 | OE1    | 3.762        |
| 3C6S   | A_LYS_149 | NZ     | A_GLU_195 | OE1    | 3.629        |
| 3C6S   | A_LYS_149 | NZ     | A_GLU_195 | OE2    | 3.115        |
| 3C6S   | A_ARG_155 | NH1    | A_GLU_185 | OE1    | 2.818        |
| 3C6S   | A_ARG_155 | NH1    | A_GLU_185 | OE2    | 3.763        |
| 3C6S   | A_ARG_155 | NH2    | A_GLU_185 | OE1    | 3.570        |
| 3C6S   | A_ARG_155 | NH2    | A_GLU_185 | OE2    | 3.121        |
| 3C6S   | A_HIS_189 | ND1    | A_ASP_151 | OD2    | 3.710        |
| 3C6S   | B_LYS_3   | NZ     | B_GLU_5   | OE1    | 3.976        |
| 3C6S   | B_ARG_38  | NH1    | B_ASP_86  | OD1    | 2.860        |
| 3C6S   | B_ARG_38  | NH2    | B_GLU_46  | OE1    | 3.287        |
| 3C6S   | B_ARG_38  | NH2    | B_GLU_46  | OE2    | 3.192        |
| 3C6S   | B_ARG_38  | NH2    | B_ASP_86  | OD1    | 3.858        |
| 3C6S   | B_ARG_52  | NH2    | B_GLU_50  | OE2    | 3.018        |
| 3C6S   | B_LYS_64  | NZ     | B_GLU_61  | OE1    | 3.776        |
| 3C6S   | B_LYS_66  | NZ     | B_ASP_86  | OD1    | 3.351        |
| 3C6S   | B_LYS_66  | NZ     | B_ASP_86  | OD2    | 2.603        |
| 3C6S   | B_ARG_71  | NH2    | B_ASP_73  | OD1    | 3.493        |
| 3C6S   | B_ARG_83  | NH2    | B_GLU_85  | OE2    | 3.633        |
| 3C6S   | B_LYS_207 | NZ     | B_ASP_209 | OD2    | 3.344        |
| 3C6S   | B_LYS_210 | NZ     | A_GLU_123 | OE2    | 2.871        |
| 3C6S   | C_HIS_27D | NE2    | C_ASP_28  | OD2    | 3.911        |
| 3C6S   | C_LYS_39  | NZ     | C_GLU_81  | OE2    | 2.611        |
| 3C6S   | C_ARG_61  | NH1    | C_ASP_82  | OD1    | 3.977        |
| 3C6S   | C_ARG_61  | NH1    | C_ASP_82  | OD2    | 2.797        |
| 3C6S   | C_ARG_61  | NH2    | C_GLU_79  | OE1    | 3.899        |
| 3C6S   | C_ARG_61  | NH2    | C_ASP_82  | OD1    | 3.285        |
| 3C6S   | C_ARG_61  | NH2    | C_ASP_82  | OD2    | 3.465        |
| 3C6S   | C_ARG_96  | NH2    | D_GLU_50  | OE1    | 3.699        |
| 3C6S   | C_ARG_96  | NH2    | D_GLU_50  | OE2    | 2.915        |
| 3C6S   | C_LYS_149 | NZ     | C_GLU_195 | OE2    | 3.377        |
| 3C6S   | C_ARG_155 | NH1    | C_GLU_185 | OE1    | 2.919        |
| 3C6S   | C_ARG_155 | NH2    | C_GLU_185 | OE1    | 3.617        |
| 3C6S   | C_ARG_155 | NH2    | C_GLU_185 | OE2    | 3.372        |
| 3C6S   | C_LYS_183 | NZ     | C_GLU_187 | OE1    | 3.948        |
| 3C6S   | C_ARG_188 | NH1    | C_ASP_184 | OD1    | 3.896        |
| 3C6S   | C_ARG_188 | NH1    | C_ASP_184 | OD2    | 3.104        |
| 3C6S   | C_ARG_188 | NH2    | C_GLU_185 | OE1    | 3.688        |
| 3C6S   | C_HIS_189 | ND1    | C_ASP_151 | OD2    | 2.779        |
| 3C6S   | C_LYS_199 | NZ     | C_ASP_110 | OD2    | 3.859        |
| 3C6S   | D_LYS_3   | NZ     | D_GLU_5   | OE1    | 2.880        |
| 3C6S   | D_LYS_3   | NZ     | D_GLU_5   | OE2    | 3.546        |
| 3C6S   | D_ARG_38  | NH1    | D_ASP_86  | OD1    | 2.816        |
| 3C6S   | D_ARG_38  | NH2    | D_GLU_46  | OE1    | 3.293        |
| 3C6S   | D_ARG_38  | NH2    | D_GLU_46  | OE2    | 3.209        |
| 3C6S   | D_ARG_38  | NH2    | D_ASP_86  | OD1    | 3.686        |

|      |           |     |           |     |       |
|------|-----------|-----|-----------|-----|-------|
| 3C6S | D_ARG_52  | NH2 | D_GLU_50  | OE2 | 2.953 |
| 3C6S | D_LYS_64  | NZ  | D_GLU_61  | OE1 | 2.522 |
| 3C6S | D_LYS_66  | NZ  | D_ASP_86  | OD1 | 3.557 |
| 3C6S | D_LYS_66  | NZ  | D_ASP_86  | OD2 | 2.620 |
| 3C6S | D_ARG_71  | NH2 | D_ASP_73  | OD1 | 3.499 |
| 3C6S | D_LYS_115 | NZ  | H_GLU_85  | OE1 | 3.000 |
| 3C6S | D_LYS_115 | NZ  | H_GLU_85  | OE2 | 3.884 |
| 3C6S | D_LYS_210 | NZ  | C_GLU_123 | OE2 | 2.801 |
| 3C6S | E_LYS_27  | NZ  | A_ASP_1   | OD1 | 3.387 |
| 3C6S | E_LYS_27  | NZ  | A_ASP_1   | OD2 | 3.431 |
| 3C6S | E_HIS_27D | NE2 | E_ASP_28  | OD2 | 3.987 |
| 3C6S | E_ARG_61  | NH1 | E_ASP_82  | OD1 | 3.693 |
| 3C6S | E_ARG_61  | NH1 | E_ASP_82  | OD2 | 2.790 |
| 3C6S | E_ARG_61  | NH2 | E_GLU_79  | OE1 | 3.369 |
| 3C6S | E_ARG_61  | NH2 | E_GLU_81  | OE2 | 3.772 |
| 3C6S | E_ARG_61  | NH2 | E_ASP_82  | OD1 | 2.890 |
| 3C6S | E_ARG_61  | NH2 | E_ASP_82  | OD2 | 3.360 |
| 3C6S | E_ARG_96  | NH2 | F_GLU_50  | OE1 | 3.703 |
| 3C6S | E_ARG_96  | NH2 | F_GLU_50  | OE2 | 3.164 |
| 3C6S | E_LYS_149 | NZ  | E_GLU_195 | OE1 | 3.276 |
| 3C6S | E_LYS_149 | NZ  | E_GLU_195 | OE2 | 3.217 |
| 3C6S | E_ARG_155 | NH1 | E_GLU_185 | OE2 | 3.054 |
| 3C6S | E_ARG_155 | NH2 | E_GLU_185 | OE1 | 3.295 |
| 3C6S | E_ARG_155 | NH2 | E_GLU_185 | OE2 | 3.558 |
| 3C6S | E_LYS_183 | NZ  | E_GLU_187 | OE1 | 3.890 |
| 3C6S | E_ARG_188 | NH1 | E_ASP_184 | OD1 | 3.999 |
| 3C6S | E_ARG_188 | NH1 | E_ASP_184 | OD2 | 2.649 |
| 3C6S | E_ARG_188 | NH2 | E_GLU_185 | OE2 | 3.771 |
| 3C6S | E_HIS_189 | ND1 | E_ASP_151 | OD2 | 2.858 |
| 3C6S | E_LYS_199 | NZ  | E_ASP_110 | OD2 | 3.786 |
| 3C6S | F_ARG_38  | NH1 | F_ASP_86  | OD1 | 2.884 |
| 3C6S | F_ARG_38  | NH2 | F_GLU_46  | OE1 | 3.272 |
| 3C6S | F_ARG_38  | NH2 | F_GLU_46  | OE2 | 3.427 |
| 3C6S | F_ARG_38  | NH2 | F_ASP_86  | OD1 | 3.691 |
| 3C6S | F_ARG_52  | NH2 | F_GLU_50  | OE2 | 2.936 |
| 3C6S | F_LYS_64  | NZ  | F_GLU_61  | OE1 | 3.674 |
| 3C6S | F_LYS_64  | NZ  | F_GLU_61  | OE2 | 3.896 |
| 3C6S | F_LYS_66  | NZ  | F_ASP_86  | OD1 | 3.774 |
| 3C6S | F_LYS_66  | NZ  | F_ASP_86  | OD2 | 2.770 |
| 3C6S | F_ARG_71  | NH2 | F_ASP_73  | OD1 | 3.453 |
| 3C6S | F_LYS_207 | NZ  | F_ASP_209 | OD1 | 2.611 |
| 3C6S | F_LYS_207 | NZ  | F_ASP_209 | OD2 | 3.473 |
| 3C6S | F_LYS_210 | NZ  | E_GLU_123 | OE2 | 3.016 |
| 3C6S | G_LYS_27  | NZ  | G_GLU_93  | OE1 | 2.636 |
| 3C6S | G_LYS_27  | NZ  | G_GLU_93  | OE2 | 3.112 |
| 3C6S | G_HIS_27D | NE2 | G_ASP_28  | OD2 | 3.978 |
| 3C6S | G_ARG_61  | NH1 | G_ASP_82  | OD2 | 2.808 |
| 3C6S | G_ARG_61  | NH2 | G_GLU_79  | OE1 | 3.851 |
| 3C6S | G_ARG_61  | NH2 | G_ASP_82  | OD1 | 3.155 |
| 3C6S | G_ARG_61  | NH2 | G_ASP_82  | OD2 | 3.092 |
| 3C6S | G_ARG_96  | NH2 | H_GLU_50  | OE1 | 3.733 |
| 3C6S | G_ARG_96  | NH2 | H_GLU_50  | OE2 | 2.958 |
| 3C6S | G_LYS_147 | NZ  | G_GLU_154 | OE2 | 3.966 |
| 3C6S | G_LYS_149 | NZ  | G_GLU_195 | OE1 | 3.546 |
| 3C6S | G_LYS_149 | NZ  | G_GLU_195 | OE2 | 3.011 |
| 3C6S | G_ARG_155 | NH1 | G_GLU_185 | OE2 | 3.226 |
| 3C6S | G_LYS_169 | NZ  | G_GLU_81  | OE1 | 2.347 |
| 3C6S | G_LYS_169 | NZ  | G_GLU_81  | OE2 | 3.920 |

|      |           |     |           |     |       |
|------|-----------|-----|-----------|-----|-------|
| 3C6S | G_ARG_188 | NH2 | G_GLU_185 | OE1 | 2.920 |
| 3C6S | G_HIS_189 | ND1 | G_ASP_151 | OD2 | 3.004 |
| 3C6S | G_HIS_189 | NE2 | G_GLU_185 | OE1 | 3.998 |
| 3C6S | G_LYS_199 | NZ  | G_ASP_110 | OD2 | 3.920 |
| 3C6S | H_LYS_3   | NZ  | H_GLU_5   | OE1 | 2.755 |
| 3C6S | H_ARG_38  | NH1 | H_ASP_86  | OD1 | 2.900 |
| 3C6S | H_ARG_38  | NH2 | H_GLU_46  | OE1 | 3.369 |
| 3C6S | H_ARG_38  | NH2 | H_GLU_46  | OE2 | 3.273 |
| 3C6S | H_ARG_38  | NH2 | H_ASP_86  | OD1 | 3.683 |
| 3C6S | H_ARG_52  | NH2 | H_GLU_50  | OE2 | 3.044 |
| 3C6S | H_ARG_71  | NH2 | H_ASP_73  | OD1 | 3.344 |
| 3C6S | H_LYS_75  | NZ  | H_ASP_72  | OD2 | 3.808 |
| 3C6S | H_ARG_83  | NH1 | H_GLU_85  | OE2 | 3.502 |
| 3C6S | H_ARG_83  | NH2 | H_ASP_86  | OD1 | 2.979 |
| 3C6S | H_ARG_83  | NH2 | H_ASP_86  | OD2 | 3.571 |
| 3C6S | H_LYS_210 | NZ  | G_GLU_123 | OE2 | 2.402 |

Table 381: 3C6S-specific salt bridging networks analysis. In this table, a PDB file is specified with a four-letter PDB ID, except that the names of the PDB files corresponding to the single NMR structural model split from the NMR ensemble is specified with a four-letter PDB ID in addition to a hyphen followed by the single NMR structural model numeric ID, the residue naming scheme is **Chain ID\_residue name\_residue number**,  $\angle ADH$  represents the angle formed by acceptor (A), donor (D) and hydrogen (H) ( $\angle ADH$ ).

| PDB ID | Residue A | Atom A | Residue B | Atom B | Distance (Å) |
|--------|-----------|--------|-----------|--------|--------------|
| 3CVH   | A_HIS_3   | ND1    | A_ASP_29  | OD1    | 3.340        |
| 3CVH   | A_HIS_3   | ND1    | A_ASP_29  | OD2    | 3.186        |
| 3CVH   | A_ARG_6   | NH2    | A_ASP_30  | OD1    | 3.294        |
| 3CVH   | A_ARG_14  | NH1    | A_ASP_39  | OD2    | 2.927        |
| 3CVH   | A_ARG_14  | NH2    | A_ASP_39  | OD1    | 3.777        |
| 3CVH   | A_ARG_14  | NH2    | A_ASP_39  | OD2    | 2.767        |
| 3CVH   | A_ARG_21  | NH2    | A_ASP_37  | OD1    | 3.377        |
| 3CVH   | A_ARG_21  | NH2    | A_ASP_37  | OD2    | 2.615        |
| 3CVH   | A_ARG_35  | NH1    | A_GLU_32  | OE1    | 2.677        |
| 3CVH   | A_ARG_35  | NH1    | A_GLU_32  | OE2    | 2.491        |
| 3CVH   | A_ARG_44  | NH2    | A_GLU_61  | OE1    | 2.791        |
| 3CVH   | A_ARG_48  | NH1    | B_ASP_53  | OD2    | 3.820        |
| 3CVH   | A_ARG_48  | NH2    | A_GLU_32  | OE2    | 3.651        |
| 3CVH   | A_ARG_48  | NH2    | B_ASP_53  | OD2    | 2.637        |
| 3CVH   | A_ARG_62  | NH1    | L_GLU_26  | OE1    | 3.514        |
| 3CVH   | A_ARG_62  | NH1    | L_GLU_26  | OE2    | 3.458        |
| 3CVH   | A_ARG_62  | NH2    | L_GLU_26  | OE1    | 3.664        |
| 3CVH   | A_LYS_66  | NZ     | A_GLU_63  | OE1    | 2.982        |
| 3CVH   | A_LYS_66  | NZ     | A_GLU_63  | OE2    | 3.930        |
| 3CVH   | A_ARG_75  | NH1    | A_GLU_19  | OE1    | 2.649        |
| 3CVH   | A_ARG_75  | NH1    | A_GLU_71  | OE1    | 3.442        |
| 3CVH   | A_ARG_75  | NH2    | A_GLU_19  | OE1    | 3.819        |
| 3CVH   | A_ARG_75  | NH2    | A_GLU_71  | OE1    | 3.726        |
| 3CVH   | A_HIS_93  | ND1    | A_ASP_119 | OD1    | 3.615        |
| 3CVH   | A_HIS_93  | ND1    | A_ASP_119 | OD2    | 2.743        |
| 3CVH   | A_ARG_108 | NH2    | M_GLU_223 | OE2    | 3.938        |
| 3CVH   | A_ARG_155 | NH2    | A_GLU_152 | OE1    | 3.097        |
| 3CVH   | A_ARG_155 | NH2    | A_GLU_152 | OE2    | 2.655        |
| 3CVH   | A_ARG_157 | NH2    | A_GLU_161 | OE2    | 3.326        |
| 3CVH   | A_ARG_170 | NH2    | A_GLU_55  | OE1    | 2.438        |
| 3CVH   | A_ARG_170 | NH2    | A_GLU_55  | OE2    | 3.042        |
| 3CVH   | A_ARG_181 | NH2    | A_ASP_183 | OD2    | 3.102        |
| 3CVH   | A_HIS_192 | ND1    | B_ASP_98  | OD2    | 3.410        |
| 3CVH   | B_LYS_3   | NZ     | B_ASP_59  | OD2    | 3.798        |
| 3CVH   | B_LYS_19  | NZ     | B_GLU_16  | OE1    | 3.984        |
| 3CVH   | B_LYS_83  | NZ     | B_GLU_36  | OE1    | 3.948        |
| 3CVH   | C_LYS_7   | NZ     | H_ASP_49  | OD1    | 3.577        |
| 3CVH   | C_LYS_7   | NZ     | H_ASP_49  | OD2    | 3.552        |
| 3CVH   | H_LYS_37  | NZ     | H_ASP_89  | OD1    | 4.000        |
| 3CVH   | H_LYS_66  | NZ     | H_ASP_89  | OD1    | 3.905        |
| 3CVH   | H_LYS_66  | NZ     | H_ASP_89  | OD2    | 2.944        |
| 3CVH   | H_LYS_98  | NZ     | H_ASP_34  | OD1    | 3.326        |
| 3CVH   | H_LYS_98  | NZ     | H_ASP_34  | OD2    | 3.016        |
| 3CVH   | H_LYS_98  | NZ     | H_ASP_49  | OD2    | 3.605        |
| 3CVH   | H_LYS_215 | NZ     | L_GLU_122 | OE2    | 2.643        |
| 3CVH   | L_LYS_23  | NZ     | L_ASP_69  | OD1    | 2.944        |
| 3CVH   | L_LYS_23  | NZ     | L_ASP_69  | OD2    | 3.859        |
| 3CVH   | L_ARG_60  | NH1    | L_GLU_80  | OE1    | 3.977        |
| 3CVH   | L_ARG_60  | NH2    | L_GLU_80  | OE1    | 3.053        |
| 3CVH   | L_ARG_60  | NH2    | L_ASP_81  | OD1    | 3.208        |
| 3CVH   | L_ARG_60  | NH2    | L_ASP_81  | OD2    | 2.613        |
| 3CVH   | L_ARG_67  | NH2    | L_ASP_27  | OD1    | 3.678        |
| 3CVH   | L_ARG_67  | NH2    | L_ASP_27  | OD2    | 2.811        |
| 3CVH   | L_LYS_146 | NZ     | L_GLU_153 | OE1    | 3.893        |
| 3CVH   | L_LYS_146 | NZ     | L_GLU_153 | OE2    | 3.978        |
| 3CVH   | L_LYS_148 | NZ     | L_GLU_194 | OE1    | 3.826        |
| 3CVH   | L_ARG_154 | NH1    | L_GLU_184 | OE1    | 3.751        |

|      |           |     |           |     |       |
|------|-----------|-----|-----------|-----|-------|
| 3CVH | L_LYS_182 | NZ  | L_GLU_186 | OE1 | 3.005 |
| 3CVH | L_LYS_182 | NZ  | L_GLU_186 | OE2 | 3.813 |
| 3CVH | L_ARG_187 | NH2 | L_ASP_183 | OD1 | 3.139 |
| 3CVH | L_ARG_187 | NH2 | L_ASP_183 | OD2 | 2.810 |
| 3CVH | L_LYS_198 | NZ  | L_ASP_109 | OD2 | 3.543 |
| 3CVH | M_HIS_3   | ND1 | M_ASP_29  | OD1 | 2.963 |
| 3CVH | M_HIS_3   | ND1 | M_ASP_29  | OD2 | 2.771 |
| 3CVH | M_ARG_14  | NH1 | M_ASP_39  | OD1 | 3.573 |
| 3CVH | M_ARG_14  | NH2 | M_ASP_39  | OD1 | 2.587 |
| 3CVH | M_ARG_21  | NH1 | M_ASP_39  | OD2 | 3.455 |
| 3CVH | M_ARG_21  | NH2 | M_ASP_37  | OD1 | 3.446 |
| 3CVH | M_ARG_21  | NH2 | M_ASP_37  | OD2 | 2.717 |
| 3CVH | M_ARG_21  | NH2 | M_ASP_39  | OD2 | 3.712 |
| 3CVH | M_ARG_35  | NH2 | M_GLU_32  | OE1 | 3.151 |
| 3CVH | M_ARG_35  | NH2 | M_GLU_32  | OE2 | 3.351 |
| 3CVH | M_ARG_48  | NH1 | M_GLU_46  | OE1 | 3.444 |
| 3CVH | M_ARG_48  | NH1 | M_GLU_46  | OE2 | 3.832 |
| 3CVH | M_ARG_48  | NH1 | N_ASP_53  | OD2 | 3.601 |
| 3CVH | M_ARG_48  | NH2 | M_GLU_32  | OE2 | 3.692 |
| 3CVH | M_ARG_48  | NH2 | N_ASP_53  | OD2 | 2.621 |
| 3CVH | M_ARG_50  | NH2 | M_GLU_53  | OE2 | 3.272 |
| 3CVH | M_ARG_62  | NH1 | R_GLU_26  | OE1 | 3.418 |
| 3CVH | M_ARG_62  | NH2 | R_GLU_26  | OE1 | 3.162 |
| 3CVH | M_ARG_62  | NH2 | R_GLU_26  | OE2 | 2.706 |
| 3CVH | M_LYS_66  | NZ  | M_GLU_63  | OE1 | 3.245 |
| 3CVH | M_ARG_75  | NH1 | M_GLU_19  | OE1 | 3.628 |
| 3CVH | M_ARG_75  | NH2 | M_GLU_71  | OE1 | 3.921 |
| 3CVH | M_ARG_75  | NH2 | M_GLU_71  | OE2 | 2.545 |
| 3CVH | M_HIS_93  | ND1 | M_ASP_119 | OD1 | 3.830 |
| 3CVH | M_HIS_93  | ND1 | M_ASP_119 | OD2 | 2.828 |
| 3CVH | M_ARG_108 | NH2 | A_GLU_223 | OE1 | 3.207 |
| 3CVH | M_ARG_108 | NH2 | A_GLU_223 | OE2 | 3.250 |
| 3CVH | M_ARG_111 | NH1 | M_GLU_128 | OE2 | 3.369 |
| 3CVH | M_ARG_111 | NH2 | M_GLU_128 | OE2 | 2.639 |
| 3CVH | M_HIS_145 | ND1 | M_GLU_148 | OE1 | 3.811 |
| 3CVH | M_ARG_155 | NH2 | M_GLU_152 | OE1 | 3.335 |
| 3CVH | M_ARG_155 | NH2 | M_GLU_152 | OE2 | 2.756 |
| 3CVH | M_ARG_157 | NH2 | M_GLU_161 | OE1 | 2.814 |
| 3CVH | M_ARG_157 | NH2 | M_GLU_161 | OE2 | 3.333 |
| 3CVH | M_ARG_169 | NH1 | A_GLU_268 | OE2 | 3.364 |
| 3CVH | M_ARG_170 | NH2 | M_GLU_55  | OE1 | 2.487 |
| 3CVH | M_ARG_170 | NH2 | M_GLU_55  | OE2 | 3.462 |
| 3CVH | M_ARG_181 | NH2 | M_ASP_183 | OD2 | 3.222 |
| 3CVH | N_LYS_83  | NZ  | N_GLU_36  | OE1 | 2.685 |
| 3CVH | N_LYS_83  | NZ  | N_GLU_36  | OE2 | 3.981 |
| 3CVH | O_LYS_7   | NZ  | Q_ASP_49  | OD1 | 3.648 |
| 3CVH | O_LYS_7   | NZ  | Q_ASP_49  | OD2 | 3.052 |
| 3CVH | Q_LYS_37  | NZ  | Q_ASP_89  | OD1 | 3.997 |
| 3CVH | Q_LYS_98  | NZ  | Q_ASP_34  | OD1 | 3.064 |
| 3CVH | Q_LYS_98  | NZ  | Q_ASP_34  | OD2 | 2.433 |
| 3CVH | Q_LYS_98  | NZ  | Q_ASP_49  | OD2 | 3.431 |
| 3CVH | Q_LYS_215 | NZ  | R_GLU_122 | OE1 | 3.557 |
| 3CVH | R_ARG_60  | NH1 | R_ASP_81  | OD1 | 3.125 |
| 3CVH | R_ARG_60  | NH1 | R_ASP_81  | OD2 | 2.738 |
| 3CVH | R_ARG_60  | NH2 | R_GLU_80  | OE1 | 3.793 |
| 3CVH | R_LYS_102 | NZ  | R_ASP_164 | OD1 | 3.388 |
| 3CVH | R_LYS_141 | NZ  | R_GLU_104 | OE1 | 3.136 |
| 3CVH | R_LYS_148 | NZ  | R_GLU_194 | OE1 | 3.875 |

|      |           |     |           |     |       |
|------|-----------|-----|-----------|-----|-------|
| 3CVH | R_ARG_154 | NH2 | R_GLU_184 | OE1 | 3.709 |
| 3CVH | R_HIS_188 | ND1 | R_ASP_150 | OD2 | 3.342 |
| 3CVH | R_HIS_188 | NE2 | R_GLU_184 | OE2 | 3.904 |

Table 382: 3CVH-specific salt bridging networks analysis. In this table, a PDB file is specified with a four-letter PDB ID, except that the names of the PDB files corresponding to the single NMR structural model split from the NMR ensemble is specified with a four-letter PDB ID in addition to a hyphen followed by the single NMR structural model numeric ID, the residue naming scheme is **Chain ID\_residue name\_residue number**,  $\angle ADH$  represents the angle formed by acceptor (A), donor (D) and hydrogen (H) ( $\angle ADH$ ).



| PDB ID | Residue A | Atom A | Residue B | Atom B | Distance (Å) |
|--------|-----------|--------|-----------|--------|--------------|
| 3CXD   | L_ARG_61  | NH2    | L_GLU_81  | OE2    | 3.336        |
| 3CXD   | L_ARG_61  | NH2    | L_ASP_82  | OD1    | 3.305        |
| 3CXD   | L_ARG_61  | NH2    | L_ASP_82  | OD2    | 2.791        |
| 3CXD   | L_LYS_147 | NZ     | L_GLU_154 | OE2    | 3.401        |
| 3CXD   | L_LYS_149 | NZ     | L_GLU_195 | OE2    | 2.939        |
| 3CXD   | L_ARG_155 | NH1    | L_GLU_185 | OE1    | 3.386        |
| 3CXD   | L_ARG_155 | NH2    | L_GLU_185 | OE1    | 3.845        |
| 3CXD   | L_ARG_155 | NH2    | L_GLU_185 | OE2    | 3.314        |
| 3CXD   | L_ARG_188 | NH2    | L_ASP_184 | OD1    | 3.219        |
| 3CXD   | L_HIS_189 | ND1    | L_ASP_151 | OD2    | 2.794        |
| 3CXD   | L_LYS_199 | NZ     | L_ASP_110 | OD1    | 3.656        |
| 3CXD   | L_LYS_199 | NZ     | L_ASP_110 | OD2    | 3.337        |
| 3CXD   | H_ARG_38  | NH1    | H_GLU_46  | OE1    | 3.619        |
| 3CXD   | H_ARG_38  | NH1    | H_GLU_46  | OE2    | 2.600        |
| 3CXD   | H_ARG_38  | NH2    | H_ASP_92  | OD1    | 2.807        |
| 3CXD   | H_ARG_52  | NH1    | P_ASP_47  | OD1    | 3.830        |
| 3CXD   | H_ARG_52  | NH1    | P_ASP_47  | OD2    | 3.528        |
| 3CXD   | H_LYS_67  | NZ     | H_ASP_64  | OD1    | 2.806        |
| 3CXD   | H_ARG_69  | NH1    | H_ASP_92  | OD2    | 2.720        |
| 3CXD   | H_ARG_69  | NH2    | H_ASP_92  | OD1    | 3.121        |
| 3CXD   | H_ARG_69  | NH2    | H_ASP_92  | OD2    | 2.861        |
| 3CXD   | H_ARG_74  | NH2    | H_ASP_76  | OD1    | 3.600        |
| 3CXD   | H_ARG_100 | NH2    | H_ASP_104 | OD1    | 3.226        |
| 3CXD   | H_ARG_100 | NH2    | H_ASP_104 | OD2    | 2.671        |

Table 383: 3CXD-specific salt bridging networks analysis. In this table, a PDB file is specified with a four-letter PDB ID, except that the names of the PDB files corresponding to the single NMR structural model split from the NMR ensemble is specified with a four-letter PDB ID in addition to a hyphen followed by the single NMR structural model numeric ID, the residue naming scheme is **Chain ID\_residue name\_residue number**,  $\angle ADH$  represents the angle formed by acceptor (A), donor (D) and hydrogen (H) ( $\angle ADH$ ).

| PDB ID | Residue A | Atom A | Residue B | Atom B | Distance (Å) |
|--------|-----------|--------|-----------|--------|--------------|
| 3D0L   | A_ARG_37  | NH1    | A_GLU_81  | OE2    | 3.366        |
| 3D0L   | A_ARG_37  | NH1    | A_ASP_82  | OD1    | 2.929        |
| 3D0L   | A_ARG_37  | NH2    | A_GLU_81  | OE2    | 3.080        |
| 3D0L   | A_ARG_61  | NH2    | A_GLU_81  | OE1    | 3.374        |
| 3D0L   | A_ARG_61  | NH2    | A_ASP_82  | OD1    | 2.776        |
| 3D0L   | A_ARG_61  | NH2    | A_ASP_82  | OD2    | 3.420        |
| 3D0L   | A_HIS_96  | NE2    | C_ASP_5   | OD1    | 3.014        |
| 3D0L   | A_LYS_149 | NZ     | A_GLU_195 | OE1    | 3.487        |
| 3D0L   | A_LYS_183 | NZ     | A_GLU_187 | OE2    | 3.124        |
| 3D0L   | A_LYS_190 | NZ     | A_GLU_213 | OE2    | 3.283        |
| 3D0L   | B_ARG_38  | NH1    | B_GLU_46  | OE1    | 2.512        |
| 3D0L   | B_ARG_38  | NH1    | B_GLU_46  | OE2    | 3.477        |
| 3D0L   | B_ARG_38  | NH2    | B_ASP_86  | OD1    | 2.546        |
| 3D0L   | B_LYS_57  | NZ     | B_ASP_55  | OD2    | 3.516        |
| 3D0L   | B_ARG_58  | NH1    | B_ASP_56  | OD1    | 2.533        |
| 3D0L   | B_ARG_58  | NH1    | B_ASP_56  | OD2    | 3.774        |
| 3D0L   | B_ARG_58  | NH2    | B_ASP_56  | OD1    | 3.951        |
| 3D0L   | B_ARG_58  | NH2    | C_GLU_3   | OE1    | 3.473        |
| 3D0L   | B_ARG_58  | NH2    | C_GLU_3   | OE2    | 3.109        |
| 3D0L   | B_ARG_66  | NH1    | B_ASP_86  | OD1    | 3.615        |
| 3D0L   | B_ARG_66  | NH2    | B_ASP_86  | OD1    | 3.276        |
| 3D0L   | B_ARG_66  | NH2    | B_ASP_86  | OD2    | 2.898        |
| 3D0L   | B_HIS_94  | ND1    | B_ASP_101 | OD1    | 2.602        |
| 3D0L   | B_HIS_94  | ND1    | B_ASP_101 | OD2    | 3.437        |
| 3D0L   | B_ARG_95  | NH1    | C_ASP_5   | OD1    | 2.695        |
| 3D0L   | B_ARG_95  | NH1    | C_ASP_5   | OD2    | 3.449        |
| 3D0L   | B_ARG_95  | NH2    | C_ASP_5   | OD1    | 3.596        |
| 3D0L   | B_ARG_95  | NH2    | C_ASP_5   | OD2    | 3.078        |
| 3D0L   | B_ARG_96  | NH1    | A_GLU_55  | OE1    | 3.284        |
| 3D0L   | B_ARG_96  | NH1    | A_GLU_55  | OE2    | 3.522        |
| 3D0L   | B_ARG_96  | NH1    | B_ASP_101 | OD2    | 3.433        |
| 3D0L   | B_ARG_96  | NH2    | A_GLU_55  | OE1    | 3.455        |
| 3D0L   | B_LYS_143 | NZ     | B_ASP_144 | OD1    | 3.418        |
| 3D0L   | B_LYS_143 | NZ     | B_ASP_144 | OD2    | 3.784        |
| 3D0L   | B_ARG_210 | NH2    | B_GLU_212 | OE1    | 2.865        |
| 3D0L   | C_LYS_6   | NZ     | B_ASP_54  | OD1    | 2.251        |
| 3D0L   | C_LYS_6   | NZ     | B_ASP_54  | OD2    | 2.930        |
| 3D0L   | C_LYS_6   | NZ     | B_ASP_56  | OD2    | 3.751        |

Table 384: 3D0L-specific salt bridging networks analysis. In this table, a PDB file is specified with a four-letter PDB ID, except that the names of the PDB files corresponding to the single NMR structural model split from the NMR ensemble is specified with a four-letter PDB ID in addition to a hyphen followed by the single NMR structural model numeric ID, the residue naming scheme is **Chain ID\_residue name\_residue number**,  $\angle ADH$  represents the angle formed by acceptor (A), donor (D) and hydrogen (H) ( $\angle ADH$ ).

| PDB ID | Residue A | Atom A | Residue B | Atom B | Distance (Å) |
|--------|-----------|--------|-----------|--------|--------------|
| 3D0V   | A_ARG_37  | NH1    | A_ASP_82  | OD1    | 2.771        |
| 3D0V   | A_ARG_61  | NH2    | A_GLU_81  | OE2    | 3.952        |
| 3D0V   | A_ARG_61  | NH2    | A_ASP_82  | OD1    | 2.926        |
| 3D0V   | A_ARG_61  | NH2    | A_ASP_82  | OD2    | 3.288        |
| 3D0V   | A_ARG_79  | NH1    | A_GLU_81  | OE2    | 3.015        |
| 3D0V   | A_ARG_79  | NH2    | A_GLU_81  | OE2    | 2.700        |
| 3D0V   | A_HIS_96  | NE2    | C_ASP_5   | OD1    | 2.775        |
| 3D0V   | A_LYS_149 | NZ     | A_GLU_195 | OE1    | 3.493        |
| 3D0V   | A_LYS_149 | NZ     | A_GLU_195 | OE2    | 3.064        |
| 3D0V   | A_LYS_183 | NZ     | A_GLU_187 | OE2    | 3.032        |
| 3D0V   | A_ARG_211 | NH1    | A_GLU_187 | OE1    | 3.976        |
| 3D0V   | B_ARG_38  | NH1    | B_GLU_46  | OE1    | 2.804        |
| 3D0V   | B_ARG_38  | NH1    | B_GLU_46  | OE2    | 3.705        |
| 3D0V   | B_ARG_38  | NH2    | B_ASP_86  | OD1    | 2.434        |
| 3D0V   | B_LYS_57  | NZ     | B_ASP_55  | OD1    | 3.625        |
| 3D0V   | B_LYS_57  | NZ     | B_ASP_55  | OD2    | 3.392        |
| 3D0V   | B_ARG_58  | NH1    | B_ASP_56  | OD1    | 3.726        |
| 3D0V   | B_ARG_58  | NH1    | B_ASP_56  | OD2    | 2.549        |
| 3D0V   | B_ARG_58  | NH2    | B_ASP_56  | OD2    | 3.911        |
| 3D0V   | B_ARG_58  | NH2    | C_GLU_3   | OE1    | 2.733        |
| 3D0V   | B_ARG_66  | NH1    | B_ASP_86  | OD1    | 3.446        |
| 3D0V   | B_ARG_66  | NH1    | B_ASP_86  | OD2    | 3.728        |
| 3D0V   | B_ARG_66  | NH2    | B_ASP_86  | OD1    | 3.289        |
| 3D0V   | B_ARG_66  | NH2    | B_ASP_86  | OD2    | 2.373        |
| 3D0V   | B_HIS_94  | ND1    | B_ASP_101 | OD1    | 2.627        |
| 3D0V   | B_HIS_94  | ND1    | B_ASP_101 | OD2    | 3.607        |
| 3D0V   | B_ARG_95  | NH1    | C_ASP_5   | OD1    | 2.808        |
| 3D0V   | B_ARG_95  | NH1    | C_ASP_5   | OD2    | 3.484        |
| 3D0V   | B_ARG_95  | NH2    | C_ASP_5   | OD1    | 3.359        |
| 3D0V   | B_ARG_95  | NH2    | C_ASP_5   | OD2    | 2.831        |
| 3D0V   | B_ARG_96  | NH1    | A_GLU_55  | OE1    | 3.250        |
| 3D0V   | B_ARG_96  | NH1    | A_GLU_55  | OE2    | 3.216        |
| 3D0V   | B_ARG_96  | NH1    | B_ASP_101 | OD2    | 3.014        |
| 3D0V   | B_ARG_96  | NH2    | A_GLU_55  | OE1    | 3.184        |
| 3D0V   | B_LYS_143 | NZ     | B_ASP_144 | OD1    | 3.460        |
| 3D0V   | B_LYS_143 | NZ     | B_ASP_144 | OD2    | 3.988        |
| 3D0V   | B_LYS_209 | NZ     | A_GLU_123 | OE1    | 3.487        |
| 3D0V   | B_ARG_210 | NH1    | B_GLU_212 | OE1    | 2.267        |
| 3D0V   | B_ARG_210 | NH2    | B_GLU_212 | OE1    | 3.360        |
| 3D0V   | C_LYS_6   | NZ     | B_ASP_54  | OD1    | 3.609        |
| 3D0V   | C_LYS_6   | NZ     | B_ASP_54  | OD2    | 2.826        |
| 3D0V   | C_LYS_6   | NZ     | B_ASP_56  | OD1    | 3.006        |

Table 385: 3D0V-specific salt bridging networks analysis. In this table, a PDB file is specified with a four-letter PDB ID, except that the names of the PDB files corresponding to the single NMR structural model split from the NMR ensemble is specified with a four-letter PDB ID in addition to a hyphen followed by the single NMR structural model numeric ID, the residue naming scheme is **Chain ID\_residue name\_residue number**,  $\angle ADH$  represents the angle formed by acceptor (A), donor (D) and hydrogen (H) ( $\angle ADH$ ).

| PDB ID | Residue A | Atom A | Residue B | Atom B | Distance (Å) |
|--------|-----------|--------|-----------|--------|--------------|
| 3D9A   | C_LYS_601 | NZ     | C_GLU_607 | OE2    | 3.151        |
| 3D9A   | C_LYS_697 | NZ     | H_ASP_332 | OD2    | 2.741        |
| 3D9A   | C_LYS_697 | NZ     | H_ASP_399 | OD1    | 2.864        |
| 3D9A   | C_LYS_697 | NZ     | H_ASP_399 | OD2    | 3.300        |
| 3D9A   | L_ARG_24  | NH2    | L_ASP_70  | OD1    | 3.000        |
| 3D9A   | L_ARG_24  | NH2    | L_ASP_70  | OD2    | 3.752        |
| 3D9A   | L_ARG_61  | NH1    | L_GLU_79  | OE1    | 3.658        |
| 3D9A   | L_ARG_61  | NH1    | L_GLU_79  | OE2    | 3.448        |
| 3D9A   | L_ARG_61  | NH2    | L_GLU_79  | OE1    | 3.298        |
| 3D9A   | L_ARG_61  | NH2    | L_ASP_82  | OD1    | 2.829        |
| 3D9A   | L_ARG_61  | NH2    | L_ASP_82  | OD2    | 3.674        |
| 3D9A   | L_LYS_147 | NZ     | L_GLU_154 | OE1    | 3.943        |
| 3D9A   | L_LYS_149 | NZ     | L_GLU_195 | OE2    | 3.477        |
| 3D9A   | L_LYS_169 | NZ     | L_ASP_167 | OD2    | 3.989        |
| 3D9A   | L_LYS_199 | NZ     | L_ASP_110 | OD1    | 3.878        |
| 3D9A   | L_LYS_199 | NZ     | L_ASP_110 | OD2    | 3.357        |
| 3D9A   | H_ARG_338 | NH1    | H_ASP_389 | OD1    | 2.834        |
| 3D9A   | H_ARG_338 | NH2    | H_GLU_346 | OE1    | 2.922        |
| 3D9A   | H_ARG_338 | NH2    | H_ASP_389 | OD1    | 3.583        |
| 3D9A   | H_ARG_366 | NH1    | H_ASP_389 | OD1    | 2.956        |
| 3D9A   | H_ARG_366 | NH1    | H_ASP_389 | OD2    | 3.486        |
| 3D9A   | H_ARG_366 | NH2    | H_ASP_389 | OD1    | 3.662        |
| 3D9A   | H_ARG_366 | NH2    | H_ASP_389 | OD2    | 2.925        |
| 3D9A   | H_LYS_508 | NZ     | L_GLU_123 | OE1    | 3.029        |
| 3D9A   | H_LYS_508 | NZ     | L_GLU_123 | OE2    | 3.809        |

Table 386: 3D9A-specific salt bridging networks analysis. In this table, a PDB file is specified with a four-letter PDB ID, except that the names of the PDB files corresponding to the single NMR structural model split from the NMR ensemble is specified with a four-letter PDB ID in addition to a hyphen followed by the single NMR structural model numeric ID, the residue naming scheme is **Chain ID\_residue name\_residue number**,  $\angle ADH$  represents the angle formed by acceptor (A), donor (D) and hydrogen (H) ( $\angle ADH$ ).

| PDB ID | Residue A | Atom A | Residue B | Atom B | Distance (Å) |
|--------|-----------|--------|-----------|--------|--------------|
| 3DRO   | A_ARG_37  | NH1    | A_ASP_82  | OD1    | 2.782        |
| 3DRO   | A_ARG_61  | NH2    | A_ASP_82  | OD1    | 2.866        |
| 3DRO   | A_ARG_61  | NH2    | A_ASP_82  | OD2    | 3.498        |
| 3DRO   | A_ARG_107 | NH1    | A_ASP_17  | OD2    | 3.044        |
| 3DRO   | A_ARG_107 | NH2    | A_ASP_17  | OD2    | 3.360        |
| 3DRO   | A_LYS_149 | NZ     | A_GLU_195 | OE2    | 3.983        |
| 3DRO   | A_LYS_183 | NZ     | A_GLU_187 | OE1    | 3.983        |
| 3DRO   | A_LYS_183 | NZ     | A_GLU_187 | OE2    | 3.458        |
| 3DRO   | A_LYS_188 | NZ     | A_ASP_185 | OD1    | 3.977        |
| 3DRO   | A_LYS_190 | NZ     | A_GLU_213 | OE2    | 3.164        |
| 3DRO   | B_ARG_1   | NH1    | B_ASP_101 | OD2    | 3.834        |
| 3DRO   | B_ARG_38  | NH1    | B_GLU_46  | OE1    | 2.549        |
| 3DRO   | B_ARG_38  | NH1    | B_GLU_46  | OE2    | 3.279        |
| 3DRO   | B_ARG_38  | NH2    | B_GLU_46  | OE1    | 3.448        |
| 3DRO   | B_ARG_38  | NH2    | B_ASP_86  | OD1    | 3.555        |
| 3DRO   | B_ARG_58  | NH1    | B_ASP_56  | OD2    | 3.804        |
| 3DRO   | B_ARG_66  | NH1    | B_ASP_86  | OD1    | 3.732        |
| 3DRO   | B_ARG_66  | NH2    | B_ASP_86  | OD1    | 3.385        |
| 3DRO   | B_ARG_66  | NH2    | B_ASP_86  | OD2    | 2.816        |
| 3DRO   | B_HIS_94  | ND1    | B_ASP_101 | OD1    | 2.877        |
| 3DRO   | B_HIS_94  | ND1    | B_ASP_101 | OD2    | 3.841        |
| 3DRO   | B_ARG_95  | NH1    | P_ASP_5   | OD1    | 3.590        |
| 3DRO   | B_ARG_95  | NH1    | P_ASP_5   | OD2    | 3.370        |
| 3DRO   | B_ARG_95  | NH2    | P_ASP_5   | OD2    | 3.007        |
| 3DRO   | B_ARG_96  | NH1    | B_ASP_101 | OD2    | 2.827        |
| 3DRO   | B_ARG_96  | NH2    | A_GLU_55  | OE1    | 2.727        |
| 3DRO   | B_ARG_96  | NH2    | A_GLU_55  | OE2    | 3.426        |
| 3DRO   | B_ARG_96  | NH2    | B_ASP_101 | OD2    | 3.688        |
| 3DRO   | B_LYS_143 | NZ     | B_ASP_144 | OD1    | 3.378        |
| 3DRO   | B_LYS_143 | NZ     | B_ASP_144 | OD2    | 3.463        |
| 3DRO   | B_LYS_209 | NZ     | A_GLU_123 | OE1    | 3.782        |
| 3DRO   | B_ARG_210 | NH2    | B_GLU_212 | OE1    | 3.532        |
| 3DRO   | P_LYS_6   | NZ     | B_ASP_54  | OD1    | 2.913        |
| 3DRO   | P_LYS_6   | NZ     | B_ASP_54  | OD2    | 3.775        |
| 3DRO   | P_LYS_6   | NZ     | B_ASP_56  | OD1    | 3.330        |
| 3DRO   | P_LYS_6   | NZ     | B_ASP_56  | OD2    | 3.868        |

Table 387: 3DRO-specific salt bridging networks analysis. In this table, a PDB file is specified with a four-letter PDB ID, except that the names of the PDB files corresponding to the single NMR structural model split from the NMR ensemble is specified with a four-letter PDB ID in addition to a hyphen followed by the single NMR structural model numeric ID, the residue naming scheme is **Chain ID\_residue name\_residue number**,  $\angle ADH$  represents the angle formed by acceptor (A), donor (D) and hydrogen (H) ( $\angle ADH$ ).

| PDB ID | Residue A | Atom A | Residue B | Atom B | Distance (Å) |
|--------|-----------|--------|-----------|--------|--------------|
| 3DRQ   | A_ARG_37  | NH1    | A_ASP_82  | OD1    | 2.863        |
| 3DRQ   | A_LYS_39  | NZ     | A_GLU_81  | OE1    | 2.913        |
| 3DRQ   | A_ARG_61  | NH2    | A_ASP_82  | OD1    | 2.860        |
| 3DRQ   | A_ARG_61  | NH2    | A_ASP_82  | OD2    | 3.418        |
| 3DRQ   | A_HIS_96  | NE2    | C_ASP_5   | OD1    | 2.866        |
| 3DRQ   | A_ARG_107 | NH1    | A_ASP_17  | OD2    | 3.572        |
| 3DRQ   | A_LYS_149 | NZ     | A_GLU_195 | OE1    | 3.681        |
| 3DRQ   | A_LYS_183 | NZ     | A_GLU_187 | OE2    | 3.873        |
| 3DRQ   | A_LYS_190 | NZ     | A_GLU_213 | OE2    | 3.586        |
| 3DRQ   | B_ARG_1   | NH1    | B_ASP_101 | OD2    | 3.864        |
| 3DRQ   | B_ARG_38  | NH1    | B_GLU_46  | OE1    | 2.536        |
| 3DRQ   | B_ARG_38  | NH1    | B_GLU_46  | OE2    | 3.423        |
| 3DRQ   | B_ARG_38  | NH2    | B_ASP_86  | OD1    | 2.585        |
| 3DRQ   | B_LYS_57  | NZ     | B_ASP_55  | OD2    | 3.992        |
| 3DRQ   | B_ARG_58  | NH1    | B_ASP_56  | OD2    | 3.411        |
| 3DRQ   | B_ARG_58  | NH2    | C_GLU_3   | OE1    | 3.516        |
| 3DRQ   | B_ARG_66  | NH1    | B_ASP_86  | OD1    | 3.694        |
| 3DRQ   | B_ARG_66  | NH2    | B_ASP_86  | OD1    | 3.360        |
| 3DRQ   | B_ARG_66  | NH2    | B_ASP_86  | OD2    | 2.903        |
| 3DRQ   | B_HIS_94  | ND1    | B_ASP_101 | OD1    | 2.538        |
| 3DRQ   | B_HIS_94  | ND1    | B_ASP_101 | OD2    | 3.527        |
| 3DRQ   | B_ARG_95  | NH1    | C_ASP_5   | OD1    | 2.806        |
| 3DRQ   | B_ARG_95  | NH1    | C_ASP_5   | OD2    | 3.209        |
| 3DRQ   | B_ARG_95  | NH2    | C_ASP_5   | OD1    | 3.572        |
| 3DRQ   | B_ARG_95  | NH2    | C_ASP_5   | OD2    | 2.688        |
| 3DRQ   | B_ARG_96  | NH1    | A_GLU_55  | OE1    | 2.721        |
| 3DRQ   | B_ARG_96  | NH1    | A_GLU_55  | OE2    | 2.397        |
| 3DRQ   | B_ARG_96  | NH1    | B_ASP_101 | OD2    | 3.478        |
| 3DRQ   | B_ARG_96  | NH2    | A_GLU_55  | OE1    | 3.293        |
| 3DRQ   | B_LYS_143 | NZ     | B_ASP_144 | OD1    | 3.320        |
| 3DRQ   | B_LYS_143 | NZ     | B_ASP_144 | OD2    | 3.881        |
| 3DRQ   | B_LYS_209 | NZ     | A_GLU_123 | OE1    | 3.837        |
| 3DRQ   | C_LYS_6   | NZ     | B_ASP_54  | OD1    | 2.921        |
| 3DRQ   | C_LYS_6   | NZ     | B_ASP_54  | OD2    | 2.342        |
| 3DRQ   | C_LYS_6   | NZ     | B_ASP_56  | OD1    | 3.006        |

Table 388: 3DRQ-specific salt bridging networks analysis. In this table, a PDB file is specified with a four-letter PDB ID, except that the names of the PDB files corresponding to the single NMR structural model split from the NMR ensemble is specified with a four-letter PDB ID in addition to a hyphen followed by the single NMR structural model numeric ID, the residue naming scheme is **Chain ID\_residue name\_residue number**,  $\angle ADH$  represents the angle formed by acceptor (A), donor (D) and hydrogen (H) ( $\angle ADH$ ).

| PDB ID | Residue A | Atom A | Residue B | Atom B | Distance (Å) |
|--------|-----------|--------|-----------|--------|--------------|
| 3DSF   | L_ARG_61  | NH1    | L_GLU_81  | OE2    | 3.610        |
| 3DSF   | L_ARG_61  | NH2    | L_GLU_81  | OE2    | 2.775        |
| 3DSF   | L_ARG_61  | NH2    | L_ASP_82  | OD1    | 3.453        |
| 3DSF   | L_ARG_61  | NH2    | L_ASP_82  | OD2    | 2.517        |
| 3DSF   | L_LYS_147 | NZ     | L_GLU_154 | OE2    | 3.411        |
| 3DSF   | L_LYS_149 | NZ     | L_GLU_195 | OE2    | 3.065        |
| 3DSF   | L_ARG_155 | NH1    | L_GLU_185 | OE1    | 3.133        |
| 3DSF   | L_ARG_155 | NH2    | L_GLU_185 | OE1    | 3.886        |
| 3DSF   | L_ARG_155 | NH2    | L_GLU_185 | OE2    | 3.560        |
| 3DSF   | L_ARG_188 | NH2    | L_ASP_184 | OD1    | 3.232        |
| 3DSF   | L_HIS_189 | ND1    | L_ASP_151 | OD2    | 2.709        |
| 3DSF   | L_LYS_199 | NZ     | L_ASP_110 | OD1    | 3.100        |
| 3DSF   | L_LYS_199 | NZ     | L_ASP_110 | OD2    | 2.808        |
| 3DSF   | H_ARG_38  | NH1    | H_GLU_46  | OE1    | 3.258        |
| 3DSF   | H_ARG_38  | NH1    | H_GLU_46  | OE2    | 2.451        |
| 3DSF   | H_ARG_38  | NH2    | H_ASP_92  | OD1    | 2.841        |
| 3DSF   | H_ARG_52  | NH1    | P_ASP_47  | OD2    | 3.172        |
| 3DSF   | H_LYS_67  | NZ     | H_ASP_64  | OD1    | 3.269        |
| 3DSF   | H_ARG_69  | NH1    | H_ASP_92  | OD2    | 2.681        |
| 3DSF   | H_ARG_69  | NH2    | H_ASP_92  | OD1    | 3.011        |
| 3DSF   | H_ARG_69  | NH2    | H_ASP_92  | OD2    | 3.022        |
| 3DSF   | H_ARG_74  | NH2    | H_ASP_76  | OD1    | 3.842        |
| 3DSF   | H_ARG_100 | NH2    | H_ASP_104 | OD1    | 3.055        |
| 3DSF   | H_ARG_100 | NH2    | H_ASP_104 | OD2    | 2.952        |

Table 389: 3DSF-specific salt bridging networks analysis. In this table, a PDB file is specified with a four-letter PDB ID, except that the names of the PDB files corresponding to the single NMR structural model split from the NMR ensemble is specified with a four-letter PDB ID in addition to a hyphen followed by the single NMR structural model numeric ID, the residue naming scheme is **Chain ID\_residue name\_residue number**,  $\angle ADH$  represents the angle formed by acceptor (A), donor (D) and hydrogen (H) ( $\angle ADH$ ).

| PDB ID | Residue A | Atom A | Residue B | Atom B | Distance (Å) |
|--------|-----------|--------|-----------|--------|--------------|
| 3EBA   | A_ARG_49  | NH1    | A_ASP_52  | OD1    | 3.900        |
| 3EBA   | A_ARG_64  | NH1    | A_ASP_87  | OD1    | 3.739        |
| 3EBA   | A_ARG_64  | NH1    | A_ASP_87  | OD2    | 2.820        |
| 3EBA   | A_ARG_64  | NH2    | A_ASP_87  | OD1    | 2.913        |
| 3EBA   | A_ARG_64  | NH2    | A_ASP_87  | OD2    | 3.515        |
| 3EBA   | A_LYS_84  | NZ     | A_GLU_86  | OE1    | 3.206        |
| 3EBA   | B_LYS_69  | NZ     | B_ASP_67  | OD2    | 3.295        |
| 3EBA   | B_LYS_97  | NZ     | A_GLU_97  | OE2    | 3.240        |
| 3EBA   | B_ARG_101 | NH1    | A_ASP_109 | OD1    | 3.083        |
| 3EBA   | B_ARG_101 | NH1    | A_ASP_109 | OD2    | 2.691        |
| 3EBA   | B_ARG_101 | NH2    | A_ASP_109 | OD1    | 3.308        |
| 3EBA   | B_ARG_101 | NH2    | A_ASP_109 | OD2    | 3.134        |

Table 390: 3EBA-specific salt bridging networks analysis. In this table, a PDB file is specified with a four-letter PDB ID, except that the names of the PDB files corresponding to the single NMR structural model split from the NMR ensemble is specified with a four-letter PDB ID in addition to a hyphen followed by the single NMR structural model numeric ID, the residue naming scheme is **Chain ID** **residue name** **residue number**,  $\angle ADH$  represents the angle formed by acceptor (A), donor (D) and hydrogen (H) ( $\angle ADH$ ).



| PDB ID | Residue A | Atom A | Residue B | Atom B | Distance (Å) |
|--------|-----------|--------|-----------|--------|--------------|
| 3EOA   | L_ARG_24  | NH2    | L_ASP_70  | OD1    | 3.574        |
| 3EOA   | L_ARG_24  | NH2    | L_ASP_70  | OD2    | 2.606        |
| 3EOA   | L_ARG_61  | NH1    | L_GLU_81  | OE2    | 3.484        |
| 3EOA   | L_ARG_61  | NH1    | L_ASP_82  | OD1    | 3.804        |
| 3EOA   | L_LYS_149 | NZ     | L_GLU_195 | OE1    | 2.415        |
| 3EOA   | H_ARG_38  | NH1    | H_ASP_90  | OD1    | 2.905        |
| 3EOA   | H_ARG_38  | NH2    | H_GLU_46  | OE2    | 3.821        |
| 3EOA   | H_ARG_38  | NH2    | H_ASP_90  | OD1    | 3.860        |
| 3EOA   | H_ARG_67  | NH1    | H_ASP_90  | OD2    | 2.949        |
| 3EOA   | H_ARG_67  | NH2    | H_ASP_90  | OD1    | 3.556        |
| 3EOA   | H_ARG_67  | NH2    | H_ASP_90  | OD2    | 3.648        |
| 3EOA   | H_ARG_87  | NH1    | H_GLU_89  | OE1    | 2.782        |
| 3EOA   | H_ARG_98  | NH1    | H_ASP_109 | OD2    | 2.755        |
| 3EOA   | H_LYS_151 | NZ     | H_ASP_152 | OD1    | 3.488        |
| 3EOA   | H_LYS_151 | NZ     | H_ASP_152 | OD2    | 3.869        |
| 3EOA   | H_LYS_217 | NZ     | L_GLU_123 | OE2    | 3.037        |
| 3EOA   | L_LYS_149 | NZ     | L_ASP_145 | OD1    | 2.783        |
| 3EOA   | L_LYS_149 | NZ     | L_ASP_145 | OD2    | 2.826        |
| 3EOA   | L_LYS_155 | NZ     | L_ASP_152 | OD1    | 3.581        |
| 3EOA   | L_LYS_155 | NZ     | L_ASP_193 | OD1    | 2.723        |
| 3EOA   | L_LYS_159 | NZ     | L_ASP_156 | OD1    | 3.990        |
| 3EOA   | L_LYS_159 | NZ     | L_ASP_193 | OD2    | 3.917        |
| 3EOA   | L_LYS_178 | NZ     | L_GLU_180 | OE1    | 3.466        |
| 3EOA   | L_LYS_197 | NZ     | H_ASP_55  | OD1    | 3.170        |
| 3EOA   | L_LYS_197 | NZ     | H_GLU_57  | OE1    | 2.719        |
| 3EOA   | L_HIS_198 | NE2    | H_GLU_57  | OE1    | 3.638        |
| 3EOA   | L_HIS_198 | NE2    | H_GLU_57  | OE2    | 3.098        |
| 3EOA   | L_ARG_221 | NH1    | L_GLU_223 | OE2    | 3.700        |
| 3EOA   | L_ARG_227 | NH2    | L_ASP_131 | OD2    | 2.628        |
| 3EOA   | L_LYS_252 | NZ     | L_ASP_249 | OD2    | 3.806        |
| 3EOA   | A_ARG_61  | NH1    | A_GLU_81  | OE2    | 3.839        |
| 3EOA   | A_ARG_61  | NH1    | A_ASP_82  | OD1    | 2.580        |
| 3EOA   | A_ARG_61  | NH1    | A_ASP_82  | OD2    | 3.564        |
| 3EOA   | A_LYS_103 | NZ     | A_GLU_165 | OE1    | 3.460        |
| 3EOA   | A_LYS_103 | NZ     | A_GLU_165 | OE2    | 3.931        |
| 3EOA   | A_LYS_    | NZ     | A_GLU_    | OE1    | 3.399        |
| 3EOA   | A_LYS_    | NZ     | A_GLU_    | OE2    | 3.445        |
| 3EOA   | A_LYS_    | NZ     | A_GLU_    | OE2    | 3.194        |
| 3EOA   | A_ARG_    | NH2    | A_GLU_    | OE2    | 3.408        |
| 3EOA   | B_ARG_38  | NH1    | B_ASP_90  | OD1    | 2.938        |
| 3EOA   | B_ARG_38  | NH2    | B_GLU_46  | OE2    | 3.688        |
| 3EOA   | B_ARG_38  | NH2    | B_ASP_90  | OD1    | 3.785        |
| 3EOA   | B_ARG_67  | NH1    | B_ASP_90  | OD1    | 3.358        |
| 3EOA   | B_ARG_67  | NH1    | B_ASP_90  | OD2    | 2.533        |
| 3EOA   | B_ARG_67  | NH2    | B_ASP_90  | OD1    | 3.191        |
| 3EOA   | B_ARG_67  | NH2    | B_ASP_90  | OD2    | 3.831        |
| 3EOA   | B_ARG_98  | NH1    | B_ASP_109 | OD1    | 3.621        |
| 3EOA   | B_ARG_98  | NH1    | B_ASP_109 | OD2    | 2.877        |
| 3EOA   | B_LYS_    | NZ     | A_GLU_    | OE2    | 3.673        |
| 3EOA   | J_LYS_149 | NZ     | J_ASP_145 | OD1    | 3.029        |
| 3EOA   | J_LYS_149 | NZ     | J_GLU_293 | OE2    | 2.826        |
| 3EOA   | J_LYS_155 | NZ     | J_ASP_193 | OD1    | 2.719        |
| 3EOA   | J_LYS_159 | NZ     | J_ASP_193 | OD2    | 3.556        |
| 3EOA   | J_LYS_178 | NZ     | J_GLU_180 | OE1    | 3.070        |
| 3EOA   | J_LYS_178 | NZ     | J_GLU_180 | OE2    | 3.956        |
| 3EOA   | J_LYS_197 | NZ     | B_ASP_55  | OD1    | 2.626        |
| 3EOA   | J_LYS_197 | NZ     | B_ASP_55  | OD2    | 2.997        |

|      |           |     |           |     |       |
|------|-----------|-----|-----------|-----|-------|
| 3EOA | J_LYS_197 | NZ  | B_GLU_57  | OE1 | 2.784 |
| 3EOA | J_HIS_198 | NE2 | B_GLU_57  | OE1 | 3.322 |
| 3EOA | J_HIS_198 | NE2 | B_GLU_57  | OE2 | 2.793 |
| 3EOA | J_ARG_221 | NH1 | J_GLU_223 | OE1 | 3.385 |
| 3EOA | J_ARG_221 | NH2 | J_GLU_218 | OE1 | 3.711 |
| 3EOA | J_ARG_227 | NH2 | J_ASP_131 | OD2 | 3.169 |
| 3EOA | J_LYS_232 | NZ  | J_ASP_253 | OD1 | 3.326 |

Table 391: 3EOA-specific salt bridging networks analysis. In this table, a PDB file is specified with a four-letter PDB ID, except that the names of the PDB files corresponding to the single NMR structural model split from the NMR ensemble is specified with a four-letter PDB ID in addition to a hyphen followed by the single NMR structural model numeric ID, the residue naming scheme is **Chain ID\_residue name\_residue number**,  $\angle ADH$  represents the angle formed by acceptor (A), donor (D) and hydrogen (H) ( $\angle ADH$ ).

| PDB ID | Residue A | Atom A | Residue B | Atom B | Distance (Å) |
|--------|-----------|--------|-----------|--------|--------------|
| 3EOB   | L_ARG_24  | NH2    | L_ASP_70  | OD2    | 3.407        |
| 3EOB   | L_ARG_61  | NH1    | L_ASP_82  | OD1    | 3.432        |
| 3EOB   | L_ARG_108 | NH2    | L_ASP_170 | OD1    | 2.979        |
| 3EOB   | L_LYS_149 | NZ     | L_GLU_195 | OE1    | 3.677        |
| 3EOB   | H_ARG_38  | NH1    | H_ASP_90  | OD1    | 3.001        |
| 3EOB   | H_ARG_38  | NH2    | H_GLU_46  | OE2    | 3.103        |
| 3EOB   | H_ARG_38  | NH2    | H_ASP_90  | OD1    | 3.672        |
| 3EOB   | H_LYS_63  | NZ     | H_GLU_46  | OE1    | 3.646        |
| 3EOB   | H_ARG_67  | NH1    | H_ASP_90  | OD1    | 3.982        |
| 3EOB   | H_ARG_67  | NH1    | H_ASP_90  | OD2    | 2.820        |
| 3EOB   | H_ARG_67  | NH2    | H_ASP_90  | OD1    | 3.369        |
| 3EOB   | H_ARG_67  | NH2    | H_ASP_90  | OD2    | 3.450        |
| 3EOB   | H_ARG_87  | NH1    | H_GLU_89  | OE1    | 3.348        |
| 3EOB   | H_ARG_98  | NH1    | H_ASP_109 | OD2    | 2.860        |
| 3EOB   | H_LYS_217 | NZ     | L_GLU_123 | OE2    | 3.176        |
| 3EOB   | L_LYS_149 | NZ     | L_ASP_145 | OD1    | 3.604        |
| 3EOB   | L_LYS_149 | NZ     | L_ASP_145 | OD2    | 2.585        |
| 3EOB   | L_LYS_155 | NZ     | L_ASP_193 | OD1    | 3.215        |
| 3EOB   | L_LYS_159 | NZ     | L_ASP_193 | OD2    | 3.529        |
| 3EOB   | L_LYS_178 | NZ     | L_GLU_180 | OE1    | 3.871        |
| 3EOB   | L_LYS_197 | NZ     | H_GLU_57  | OE1    | 2.792        |
| 3EOB   | L_LYS_197 | NZ     | H_GLU_57  | OE2    | 3.051        |
| 3EOB   | L_HIS_198 | ND1    | H_GLU_57  | OE2    | 3.691        |
| 3EOB   | L_HIS_198 | NE2    | H_GLU_57  | OE1    | 2.182        |
| 3EOB   | L_HIS_198 | NE2    | H_GLU_57  | OE2    | 2.522        |
| 3EOB   | L_ARG_221 | NH1    | L_GLU_223 | OE1    | 2.856        |
| 3EOB   | L_ARG_227 | NH2    | L_ASP_131 | OD2    | 2.963        |
| 3EOB   | L_LYS_232 | NZ     | L_ASP_253 | OD1    | 3.583        |
| 3EOB   | L_HIS_264 | NE2    | J_GLU_241 | OE1    | 2.369        |
| 3EOB   | L_HIS_264 | NE2    | J_GLU_241 | OE2    | 2.595        |
| 3EOB   | L_HIS_275 | ND1    | L_GLU_272 | OE2    | 3.714        |
| 3EOB   | A_ARG_24  | NH2    | A_ASP_70  | OD1    | 3.782        |
| 3EOB   | A_ARG_24  | NH2    | A_ASP_70  | OD2    | 3.414        |
| 3EOB   | A_ARG_61  | NH1    | A_GLU_81  | OE2    | 3.358        |
| 3EOB   | A_ARG_61  | NH1    | A_ASP_82  | OD1    | 2.901        |
| 3EOB   | A_ARG_61  | NH1    | A_ASP_82  | OD2    | 3.391        |
| 3EOB   | A_ARG_108 | NH2    | A_ASP_170 | OD1    | 3.529        |
| 3EOB   | A_LYS_    | NZ     | A_GLU_    | OE1    | 3.265        |
| 3EOB   | B_ARG_38  | NH1    | B_ASP_90  | OD1    | 3.354        |
| 3EOB   | B_ARG_38  | NH2    | B_GLU_46  | OE2    | 3.502        |
| 3EOB   | B_ARG_38  | NH2    | B_ASP_90  | OD1    | 3.996        |
| 3EOB   | B_LYS_63  | NZ     | B_GLU_46  | OE1    | 3.294        |
| 3EOB   | B_ARG_67  | NH1    | B_ASP_90  | OD2    | 2.904        |
| 3EOB   | B_ARG_67  | NH2    | B_ASP_90  | OD1    | 3.362        |
| 3EOB   | B_ARG_67  | NH2    | B_ASP_90  | OD2    | 3.179        |
| 3EOB   | B_ARG_87  | NH1    | B_GLU_89  | OE1    | 2.946        |
| 3EOB   | B_ARG_98  | NH1    | B_ASP_109 | OD2    | 3.051        |
| 3EOB   | B_LYS_    | NZ     | A_GLU_    | OE1    | 3.788        |
| 3EOB   | B_LYS_    | NZ     | A_GLU_    | OE2    | 3.219        |
| 3EOB   | J_LYS_149 | NZ     | J_ASP_145 | OD1    | 2.827        |
| 3EOB   | J_LYS_149 | NZ     | J_ASP_145 | OD2    | 3.169        |
| 3EOB   | J_LYS_155 | NZ     | J_ASP_193 | OD1    | 3.290        |
| 3EOB   | J_LYS_159 | NZ     | J_ASP_193 | OD1    | 3.983        |
| 3EOB   | J_LYS_159 | NZ     | J_ASP_193 | OD2    | 2.888        |
| 3EOB   | J_LYS_197 | NZ     | B_ASP_55  | OD1    | 3.833        |
| 3EOB   | J_LYS_197 | NZ     | B_GLU_57  | OE1    | 2.107        |
| 3EOB   | J_LYS_197 | NZ     | B_GLU_57  | OE2    | 3.802        |

|      |           |     |           |     |       |
|------|-----------|-----|-----------|-----|-------|
| 3EOB | J_HIS_198 | ND1 | B_GLU_57  | OE2 | 3.839 |
| 3EOB | J_HIS_198 | NE2 | B_GLU_57  | OE1 | 2.356 |
| 3EOB | J_HIS_198 | NE2 | B_GLU_57  | OE2 | 2.609 |
| 3EOB | J_ARG_221 | NH1 | J_GLU_223 | OE1 | 3.220 |
| 3EOB | J_ARG_227 | NH2 | J_ASP_131 | OD2 | 2.997 |
| 3EOB | J_LYS_232 | NZ  | J_ASP_253 | OD1 | 3.217 |
| 3EOB | J_HIS_264 | NE2 | I_GLU_241 | OE1 | 2.434 |
| 3EOB | J_HIS_264 | NE2 | I_GLU_241 | OE2 | 2.722 |
| 3EOB | J_LYS_294 | NZ  | J_ASP_290 | OD2 | 3.936 |

Table 392: 3EOB-specific salt bridging networks analysis. In this table, a PDB file is specified with a four-letter PDB ID, except that the names of the PDB files corresponding to the single NMR structural model split from the NMR ensemble is specified with a four-letter PDB ID in addition to a hyphen followed by the single NMR structural model numeric ID, the residue naming scheme is **Chain ID\_residue name\_residue number**,  $\angle ADH$  represents the angle formed by acceptor (A), donor (D) and hydrogen (H) ( $\angle ADH$ ).

| PDB ID | Residue A  | Atom A | Residue B  | Atom B | Distance (Å) |
|--------|------------|--------|------------|--------|--------------|
| 3ESU   | F_ARG_61   | NH2    | F_GLU_81   | OE2    | 3.099        |
| 3ESU   | F_ARG_61   | NH2    | F_ASP_82   | OD1    | 2.818        |
| 3ESU   | F_ARG_61   | NH2    | F_ASP_82   | OD2    | 3.481        |
| 3ESU   | F_LYS_103  | NZ     | F_GLU_105  | OE2    | 3.657        |
| 3ESU   | F_LYS_1038 | NZ     | F_ASP_1086 | OD1    | 3.978        |
| 3ESU   | F_LYS_1062 | NZ     | F_GLU_1046 | OE1    | 2.626        |
| 3ESU   | F_LYS_1062 | NZ     | F_GLU_1046 | OE2    | 3.804        |
| 3ESU   | F_LYS_1066 | NZ     | F_ASP_1086 | OD1    | 3.810        |
| 3ESU   | F_LYS_1066 | NZ     | F_ASP_1086 | OD2    | 2.823        |
| 3ESU   | F_ARG_1094 | NH1    | F_ASP_1024 | OD2    | 2.978        |

Table 393: 3ESU-specific salt bridging networks analysis. In this table, a PDB file is specified with a four-letter PDB ID, except that the names of the PDB files corresponding to the single NMR structural model split from the NMR ensemble is specified with a four-letter PDB ID in addition to a hyphen followed by the single NMR structural model numeric ID, the residue naming scheme is **Chain ID\_residue name\_residue number**,  $\angle ADH$  represents the angle formed by acceptor (A), donor (D) and hydrogen (H) ( $\angle ADH$ ).

| PDB ID | Residue A  | Atom A | Residue B  | Atom B | Distance (Å) |
|--------|------------|--------|------------|--------|--------------|
| 3ESV   | F_LYS_0    | NZ     | G_ASP_1054 | OD1    | 3.499        |
| 3ESV   | F_LYS_0    | NZ     | G_ASP_1054 | OD2    | 2.774        |
| 3ESV   | F_LYS_0    | NZ     | G_ASP_1056 | OD2    | 3.090        |
| 3ESV   | F_ARG_61   | NH1    | F_GLU_79   | OE1    | 3.359        |
| 3ESV   | F_ARG_61   | NH2    | F_GLU_79   | OE1    | 3.662        |
| 3ESV   | F_ARG_61   | NH2    | F_GLU_81   | OE2    | 3.198        |
| 3ESV   | F_ARG_61   | NH2    | F_ASP_82   | OD1    | 2.780        |
| 3ESV   | F_ARG_61   | NH2    | F_ASP_82   | OD2    | 3.438        |
| 3ESV   | F_LYS_1066 | NZ     | F_ASP_1086 | OD1    | 3.900        |
| 3ESV   | F_LYS_1066 | NZ     | F_ASP_1086 | OD2    | 2.918        |
| 3ESV   | F_ARG_1094 | NH1    | F_ASP_1101 | OD2    | 3.844        |
| 3ESV   | F_ARG_1094 | NH2    | F_ASP_1101 | OD2    | 3.978        |
| 3ESV   | F_ARG_1099 | NH2    | F_ASP_1101 | OD2    | 3.038        |
| 3ESV   | G_ARG_53   | NH1    | F_ASP_1056 | OD1    | 2.802        |
| 3ESV   | G_ARG_53   | NH2    | F_ASP_1056 | OD1    | 3.489        |
| 3ESV   | G_ARG_61   | NH1    | G_GLU_79   | OE1    | 2.958        |
| 3ESV   | G_ARG_61   | NH2    | G_GLU_79   | OE1    | 3.174        |
| 3ESV   | G_ARG_61   | NH2    | G_GLU_81   | OE1    | 2.849        |
| 3ESV   | G_ARG_61   | NH2    | G_ASP_82   | OD1    | 2.663        |
| 3ESV   | G_ARG_61   | NH2    | G_ASP_82   | OD2    | 3.554        |
| 3ESV   | G_LYS_103  | NZ     | G_GLU_105  | OE1    | 3.664        |
| 3ESV   | G_LYS_1066 | NZ     | G_ASP_1086 | OD1    | 3.520        |
| 3ESV   | G_LYS_1066 | NZ     | G_ASP_1086 | OD2    | 2.664        |
| 3ESV   | G_ARG_1099 | NH2    | G_ASP_1101 | OD2    | 3.345        |

Table 394: 3ESV-specific salt bridging networks analysis. In this table, a PDB file is specified with a four-letter PDB ID, except that the names of the PDB files corresponding to the single NMR structural model split from the NMR ensemble is specified with a four-letter PDB ID in addition to a hyphen followed by the single NMR structural model numeric ID, the residue naming scheme is **Chain ID\_residue name\_residue number**,  $\angle ADH$  represents the angle formed by acceptor (A), donor (D) and hydrogen (H) ( $\angle ADH$ ).

| PDB ID | Residue A  | Atom A | Residue B  | Atom B | Distance (Å) |
|--------|------------|--------|------------|--------|--------------|
| 3ET9   | F_ARG_61   | NH2    | F_GLU_81   | OE2    | 3.021        |
| 3ET9   | F_ARG_61   | NH2    | F_ASP_82   | OD1    | 2.714        |
| 3ET9   | F_ARG_61   | NH2    | F_ASP_82   | OD2    | 3.090        |
| 3ET9   | F_LYS_103  | NZ     | F_GLU_105  | OE1    | 3.734        |
| 3ET9   | F_LYS_1038 | NZ     | F_ASP_1086 | OD1    | 3.668        |
| 3ET9   | F_LYS_1062 | NZ     | F_GLU_1046 | OE1    | 3.916        |
| 3ET9   | F_LYS_1066 | NZ     | F_ASP_1086 | OD2    | 3.146        |
| 3ET9   | F_ARG_1094 | NH1    | F_ASP_1024 | OD1    | 3.640        |
| 3ET9   | F_ARG_1094 | NH1    | F_ASP_1024 | OD2    | 2.893        |

Table 395: 3ET9-specific salt bridging networks analysis. In this table, a PDB file is specified with a four-letter PDB ID, except that the names of the PDB files corresponding to the single NMR structural model split from the NMR ensemble is specified with a four-letter PDB ID in addition to a hyphen followed by the single NMR structural model numeric ID, the residue naming scheme is **Chain ID\_residue name\_residue number**,  $\angle ADH$  represents the angle formed by acceptor (A), donor (D) and hydrogen (H) ( $\angle ADH$ ).

| PDB ID | Residue A  | Atom A | Residue B  | Atom B | Distance (Å) |
|--------|------------|--------|------------|--------|--------------|
| 3ETB   | F_ARG_24   | NH1    | G_ASP_70   | OD1    | 3.579        |
| 3ETB   | F_ARG_24   | NH1    | G_ASP_70   | OD2    | 3.034        |
| 3ETB   | F_ARG_24   | NH2    | G_ASP_70   | OD1    | 3.608        |
| 3ETB   | F_ARG_24   | NH2    | G_ASP_70   | OD2    | 3.774        |
| 3ETB   | F_ARG_30   | NH1    | J_ASP_658  | OD2    | 3.129        |
| 3ETB   | F_ARG_53   | NH1    | J_GLU_654  | OE1    | 3.838        |
| 3ETB   | F_ARG_53   | NH2    | J_GLU_654  | OE1    | 3.771        |
| 3ETB   | F_ARG_61   | NH1    | F_GLU_79   | OE2    | 3.574        |
| 3ETB   | F_ARG_61   | NH2    | F_GLU_79   | OE1    | 3.945        |
| 3ETB   | F_ARG_61   | NH2    | F_ASP_82   | OD1    | 2.649        |
| 3ETB   | F_ARG_61   | NH2    | F_ASP_82   | OD2    | 2.469        |
| 3ETB   | F_ARG_1050 | NH2    | J_ASP_683  | OD2    | 3.114        |
| 3ETB   | F_LYS_1062 | NZ     | F_GLU_1046 | OE1    | 3.184        |
| 3ETB   | F_LYS_1062 | NZ     | F_GLU_1046 | OE2    | 3.847        |
| 3ETB   | F_LYS_1066 | NZ     | F_ASP_1086 | OD2    | 3.203        |
| 3ETB   | F_ARG_1094 | NH1    | F_ASP_1101 | OD1    | 2.832        |
| 3ETB   | G_ARG_24   | NH1    | F_ASP_70   | OD1    | 3.633        |
| 3ETB   | G_ARG_24   | NH1    | F_ASP_70   | OD2    | 3.127        |
| 3ETB   | G_ARG_24   | NH2    | F_ASP_70   | OD1    | 3.702        |
| 3ETB   | G_ARG_24   | NH2    | F_ASP_70   | OD2    | 3.878        |
| 3ETB   | G_ARG_30   | NH1    | K_ASP_658  | OD2    | 3.266        |
| 3ETB   | G_ARG_53   | NH2    | K_ASP_648  | OD2    | 3.972        |
| 3ETB   | G_ARG_53   | NH2    | K_GLU_654  | OE1    | 3.990        |
| 3ETB   | G_ARG_61   | NH1    | G_GLU_79   | OE2    | 3.534        |
| 3ETB   | G_ARG_61   | NH2    | G_GLU_79   | OE1    | 3.999        |
| 3ETB   | G_ARG_61   | NH2    | G_ASP_82   | OD1    | 2.660        |
| 3ETB   | G_ARG_61   | NH2    | G_ASP_82   | OD2    | 2.433        |
| 3ETB   | G_ARG_1050 | NH2    | K_ASP_683  | OD1    | 3.853        |
| 3ETB   | G_ARG_1050 | NH2    | K_ASP_683  | OD2    | 2.796        |
| 3ETB   | G_LYS_1062 | NZ     | G_GLU_1046 | OE1    | 3.161        |
| 3ETB   | G_LYS_1062 | NZ     | G_GLU_1046 | OE2    | 3.812        |
| 3ETB   | G_LYS_1066 | NZ     | G_ASP_1086 | OD2    | 3.138        |
| 3ETB   | G_ARG_1094 | NH1    | G_ASP_1101 | OD1    | 2.918        |
| 3ETB   | H_ARG_24   | NH1    | L_ASP_70   | OD1    | 3.544        |
| 3ETB   | H_ARG_24   | NH1    | L_ASP_70   | OD2    | 3.118        |
| 3ETB   | H_ARG_24   | NH2    | L_ASP_70   | OD1    | 3.662        |
| 3ETB   | H_ARG_24   | NH2    | L_ASP_70   | OD2    | 3.905        |
| 3ETB   | H_ARG_30   | NH1    | L_ASP_658  | OD1    | 3.824        |
| 3ETB   | H_ARG_30   | NH1    | L_ASP_658  | OD2    | 2.913        |
| 3ETB   | H_ARG_53   | NH1    | L_GLU_654  | OE1    | 3.771        |
| 3ETB   | H_ARG_53   | NH2    | L_GLU_654  | OE1    | 3.669        |
| 3ETB   | H_ARG_61   | NH1    | H_GLU_79   | OE2    | 3.579        |
| 3ETB   | H_ARG_61   | NH2    | H_GLU_79   | OE1    | 3.984        |
| 3ETB   | H_ARG_61   | NH2    | H_ASP_82   | OD1    | 2.635        |
| 3ETB   | H_ARG_61   | NH2    | H_ASP_82   | OD2    | 2.472        |
| 3ETB   | H_ARG_1050 | NH2    | L_ASP_683  | OD2    | 3.159        |
| 3ETB   | H_LYS_1062 | NZ     | H_GLU_1046 | OE1    | 3.123        |
| 3ETB   | H_LYS_1062 | NZ     | H_GLU_1046 | OE2    | 3.731        |
| 3ETB   | H_LYS_1066 | NZ     | H_ASP_1086 | OD1    | 3.989        |
| 3ETB   | H_LYS_1066 | NZ     | H_ASP_1086 | OD2    | 3.171        |
| 3ETB   | H_ARG_1094 | NH1    | H_ASP_1101 | OD1    | 2.766        |
| 3ETB   | I_ARG_24   | NH1    | H_ASP_70   | OD1    | 3.448        |
| 3ETB   | I_ARG_24   | NH1    | H_ASP_70   | OD2    | 2.998        |
| 3ETB   | I_ARG_24   | NH2    | H_ASP_70   | OD1    | 3.537        |
| 3ETB   | I_ARG_24   | NH2    | H_ASP_70   | OD2    | 3.789        |
| 3ETB   | I_ARG_30   | NH1    | M_ASP_658  | OD2    | 3.315        |
| 3ETB   | I_ARG_53   | NH1    | M_GLU_654  | OE1    | 3.885        |



|      |            |     |            |     |       |
|------|------------|-----|------------|-----|-------|
| 3ETB | I_ARG_53   | NH2 | M_GLU_654  | OE1 | 3.890 |
| 3ETB | I_ARG_61   | NH1 | I_GLU_79   | OE2 | 3.590 |
| 3ETB | I_ARG_61   | NH2 | I_ASP_82   | OD1 | 2.608 |
| 3ETB | I_ARG_61   | NH2 | I_ASP_82   | OD2 | 2.422 |
| 3ETB | I_ARG_1050 | NH2 | M_ASP_683  | OD2 | 3.093 |
| 3ETB | I_LYS_1062 | NZ  | I_GLU_1046 | OE1 | 3.276 |
| 3ETB | I_LYS_1062 | NZ  | I_GLU_1046 | OE2 | 3.841 |
| 3ETB | I_LYS_1066 | NZ  | I_ASP_1086 | OD1 | 3.951 |
| 3ETB | I_LYS_1066 | NZ  | I_ASP_1086 | OD2 | 3.038 |
| 3ETB | I_ARG_1094 | NH1 | I_ASP_1101 | OD1 | 2.853 |
| 3ETB | J_HIS_597  | ND1 | J_GLU_704  | OE2 | 3.548 |
| 3ETB | J_HIS_597  | NE2 | J_ASP_608  | OD1 | 2.727 |
| 3ETB | J_LYS_613  | NZ  | J_GLU_609  | OE1 | 3.973 |
| 3ETB | J_LYS_633  | NZ  | J_ASP_634  | OD1 | 3.253 |
| 3ETB | J_LYS_653  | NZ  | G_ASP_17   | OD1 | 2.972 |
| 3ETB | J_ARG_659  | NH1 | J_ASP_661  | OD1 | 3.263 |
| 3ETB | J_ARG_659  | NH1 | J_ASP_661  | OD2 | 3.124 |
| 3ETB | J_ARG_659  | NH2 | J_ASP_661  | OD1 | 3.589 |
| 3ETB | J_ARG_669  | NH2 | J_ASP_671  | OD1 | 3.245 |
| 3ETB | J_ARG_669  | NH2 | J_ASP_671  | OD2 | 3.457 |
| 3ETB | J_LYS_679  | NZ  | J_GLU_625  | OE1 | 3.523 |
| 3ETB | J_LYS_684  | NZ  | F_ASP_1054 | OD1 | 3.728 |
| 3ETB | J_LYS_684  | NZ  | F_ASP_1054 | OD2 | 3.401 |
| 3ETB | J_LYS_684  | NZ  | F_ASP_1056 | OD1 | 3.220 |
| 3ETB | J_LYS_684  | NZ  | F_ASP_1056 | OD2 | 3.481 |
| 3ETB | K_HIS_597  | ND1 | K_GLU_704  | OE2 | 3.588 |
| 3ETB | K_HIS_597  | NE2 | K_ASP_608  | OD1 | 2.693 |
| 3ETB | K_HIS_597  | NE2 | K_ASP_608  | OD2 | 3.992 |
| 3ETB | K_LYS_613  | NZ  | K_GLU_609  | OE1 | 3.913 |
| 3ETB | K_LYS_633  | NZ  | K_ASP_634  | OD1 | 3.167 |
| 3ETB | K_LYS_653  | NZ  | F_ASP_17   | OD1 | 3.083 |
| 3ETB | K_ARG_659  | NH1 | K_ASP_661  | OD1 | 3.380 |
| 3ETB | K_ARG_659  | NH1 | K_ASP_661  | OD2 | 3.241 |
| 3ETB | K_ARG_659  | NH2 | K_ASP_661  | OD1 | 3.692 |
| 3ETB | K_ARG_669  | NH2 | K_ASP_671  | OD1 | 3.263 |
| 3ETB | K_ARG_669  | NH2 | K_ASP_671  | OD2 | 3.367 |
| 3ETB | K_LYS_679  | NZ  | K_GLU_625  | OE1 | 3.601 |
| 3ETB | K_LYS_684  | NZ  | G_ASP_1054 | OD1 | 3.379 |
| 3ETB | K_LYS_684  | NZ  | G_ASP_1054 | OD2 | 3.075 |
| 3ETB | K_LYS_684  | NZ  | G_ASP_1056 | OD1 | 3.162 |
| 3ETB | K_LYS_684  | NZ  | G_ASP_1056 | OD2 | 3.578 |
| 3ETB | L_HIS_597  | ND1 | L_GLU_704  | OE2 | 3.614 |
| 3ETB | L_HIS_597  | NE2 | L_ASP_608  | OD1 | 2.704 |
| 3ETB | L_LYS_613  | NZ  | L_GLU_609  | OE1 | 3.941 |
| 3ETB | L_LYS_633  | NZ  | L_ASP_634  | OD1 | 3.041 |
| 3ETB | L_LYS_653  | NZ  | I_ASP_17   | OD1 | 2.978 |
| 3ETB | L_ARG_659  | NH1 | L_ASP_661  | OD1 | 3.373 |
| 3ETB | L_ARG_659  | NH1 | L_ASP_661  | OD2 | 3.245 |
| 3ETB | L_ARG_659  | NH2 | L_ASP_661  | OD1 | 3.600 |
| 3ETB | L_ARG_669  | NH2 | L_ASP_671  | OD1 | 3.400 |
| 3ETB | L_ARG_669  | NH2 | L_ASP_671  | OD2 | 3.495 |
| 3ETB | L_LYS_679  | NZ  | L_GLU_625  | OE1 | 3.532 |
| 3ETB | L_LYS_684  | NZ  | H_ASP_1056 | OD1 | 3.616 |
| 3ETB | L_LYS_684  | NZ  | H_ASP_1056 | OD2 | 3.187 |
| 3ETB | M_HIS_597  | ND1 | M_GLU_704  | OE2 | 3.644 |
| 3ETB | M_HIS_597  | NE2 | M_ASP_608  | OD1 | 2.880 |
| 3ETB | M_LYS_613  | NZ  | M_GLU_609  | OE1 | 3.907 |
| 3ETB | M_LYS_633  | NZ  | M_ASP_634  | OD1 | 3.141 |

|      |           |     |            |     |       |
|------|-----------|-----|------------|-----|-------|
| 3ETB | M_LYS_653 | NZ  | H_ASP_17   | OD1 | 3.060 |
| 3ETB | M_ARG_659 | NH1 | M_ASP_661  | OD1 | 3.383 |
| 3ETB | M_ARG_659 | NH1 | M_ASP_661  | OD2 | 3.234 |
| 3ETB | M_ARG_659 | NH2 | M_ASP_661  | OD1 | 3.730 |
| 3ETB | M_ARG_669 | NH2 | M_ASP_671  | OD1 | 3.256 |
| 3ETB | M_ARG_669 | NH2 | M_ASP_671  | OD2 | 3.369 |
| 3ETB | M_LYS_679 | NZ  | M_GLU_625  | OE1 | 3.500 |
| 3ETB | M_LYS_684 | NZ  | I_ASP_1054 | OD1 | 3.625 |
| 3ETB | M_LYS_684 | NZ  | I_ASP_1054 | OD2 | 3.167 |
| 3ETB | M_LYS_684 | NZ  | I_ASP_1056 | OD1 | 3.241 |
| 3ETB | M_LYS_684 | NZ  | I_ASP_1056 | OD2 | 3.478 |

Table 396: 3ETB-specific salt bridging networks analysis. In this table, a PDB file is specified with a four-letter PDB ID, except that the names of the PDB files corresponding to the single NMR structural model split from the NMR ensemble is specified with a four-letter PDB ID in addition to a hyphen followed by the single NMR structural model numeric ID, the residue naming scheme is **Chain ID\_residue name\_residue number**,  $\angle ADH$  represents the angle formed by acceptor (A), donor (D) and hydrogen (H) ( $\angle ADH$ ).

| PDB ID | Residue A | Atom A | Residue B | Atom B | Distance (Å) |
|--------|-----------|--------|-----------|--------|--------------|
| 3EYV   | L_LYS_55  | NZ     | H_ASP_102 | OD2    | 3.565        |
| 3EYV   | L_ARG_66  | NH2    | L_GLU_86  | OE2    | 3.710        |
| 3EYV   | L_ARG_66  | NH2    | L_ASP_87  | OD1    | 2.915        |
| 3EYV   | L_ARG_66  | NH2    | L_ASP_87  | OD2    | 3.931        |
| 3EYV   | L_LYS_108 | NZ     | L_GLU_170 | OE1    | 3.179        |
| 3EYV   | L_LYS_154 | NZ     | L_GLU_200 | OE2    | 3.356        |
| 3EYV   | L_LYS_188 | NZ     | L_GLU_192 | OE1    | 3.296        |
| 3EYV   | L_LYS_188 | NZ     | L_GLU_192 | OE2    | 2.586        |
| 3EYV   | L_HIS_194 | ND1    | L_ASP_156 | OD2    | 2.824        |
| 3EYV   | L_HIS_194 | NE2    | L_ASP_190 | OD1    | 3.486        |
| 3EYV   | H_ARG_38  | NH1    | H_ASP_90  | OD1    | 2.819        |
| 3EYV   | H_ARG_38  | NH2    | H_GLU_46  | OE1    | 3.776        |
| 3EYV   | H_ARG_38  | NH2    | H_GLU_46  | OE2    | 3.233        |
| 3EYV   | H_ARG_38  | NH2    | H_ASP_90  | OD1    | 3.948        |
| 3EYV   | H_LYS_65  | NZ     | H_ASP_59  | OD1    | 2.876        |
| 3EYV   | H_ARG_67  | NH1    | H_ASP_90  | OD1    | 3.779        |
| 3EYV   | H_ARG_67  | NH1    | H_ASP_90  | OD2    | 2.779        |
| 3EYV   | H_ARG_67  | NH2    | H_ASP_90  | OD1    | 3.386        |
| 3EYV   | H_ARG_67  | NH2    | H_ASP_90  | OD2    | 3.752        |
| 3EYV   | H_ARG_101 | NH1    | H_ASP_31  | OD2    | 3.262        |
| 3EYV   | H_ARG_101 | NH2    | H_ASP_31  | OD2    | 3.521        |
| 3EYV   | H_LYS_149 | NZ     | H_ASP_150 | OD1    | 3.279        |
| 3EYV   | H_LYS_149 | NZ     | H_ASP_150 | OD2    | 3.718        |
| 3EYV   | H_LYS_212 | NZ     | H_ASP_214 | OD1    | 3.958        |
| 3EYV   | H_LYS_212 | NZ     | H_ASP_214 | OD2    | 2.546        |
| 3EYV   | H_LYS_215 | NZ     | L_GLU_128 | OE2    | 3.627        |
| 3EYV   | H_LYS_216 | NZ     | H_GLU_218 | OE2    | 3.932        |
| 3EYV   | A_LYS_55  | NZ     | B_ASP_102 | OD2    | 3.151        |
| 3EYV   | A_ARG_66  | NH2    | A_GLU_86  | OE2    | 3.631        |
| 3EYV   | A_ARG_66  | NH2    | A_ASP_87  | OD1    | 3.103        |
| 3EYV   | A_ARG_66  | NH2    | A_ASP_87  | OD2    | 3.416        |
| 3EYV   | A_LYS_108 | NZ     | A_GLU_170 | OE1    | 3.086        |
| 3EYV   | A_LYS_108 | NZ     | A_GLU_170 | OE2    | 3.645        |
| 3EYV   | A_LYS_154 | NZ     | A_GLU_200 | OE1    | 3.963        |
| 3EYV   | A_LYS_154 | NZ     | A_GLU_200 | OE2    | 2.945        |
| 3EYV   | A_LYS_193 | NZ     | A_ASP_190 | OD1    | 3.557        |
| 3EYV   | A_HIS_194 | ND1    | A_ASP_156 | OD1    | 2.892        |
| 3EYV   | B_ARG_38  | NH1    | B_ASP_90  | OD1    | 2.718        |
| 3EYV   | B_ARG_38  | NH2    | B_GLU_46  | OE1    | 3.428        |
| 3EYV   | B_ARG_38  | NH2    | B_GLU_46  | OE2    | 3.023        |
| 3EYV   | B_ARG_38  | NH2    | B_ASP_90  | OD1    | 3.972        |
| 3EYV   | B_LYS_65  | NZ     | B_ASP_59  | OD1    | 2.790        |
| 3EYV   | B_ARG_67  | NH1    | B_ASP_90  | OD1    | 3.866        |
| 3EYV   | B_ARG_67  | NH1    | B_ASP_90  | OD2    | 2.720        |
| 3EYV   | B_ARG_67  | NH2    | B_ASP_90  | OD1    | 3.285        |
| 3EYV   | B_ARG_67  | NH2    | B_ASP_90  | OD2    | 3.497        |
| 3EYV   | B_ARG_87  | NH1    | B_GLU_89  | OE1    | 3.883        |
| 3EYV   | B_ARG_101 | NH1    | B_ASP_31  | OD2    | 3.502        |
| 3EYV   | B_LYS_220 | NZ     | A_ASP_127 | OD2    | 3.402        |

---

Table 397: 3EYV-specific salt bridging networks analysis. In this table, a PDB file is specified with a four-letter PDB ID, except that the names of the PDB files corresponding to the single NMR structural model split from the NMR ensemble is specified with a four-letter PDB ID in addition to a hyphen followed by the single NMR structural model numeric ID, the residue naming scheme is **Chain ID\_residue name\_residue number**,  $\angle ADH$  represents the angle formed by acceptor (A), donor (D) and hydrogen (H) ( $\angle ADH$ ).

| PDB ID | Residue A | Atom A | Residue B | Atom B | Distance (Å) |
|--------|-----------|--------|-----------|--------|--------------|
| 3FMG   | L_LYS_50  | NZ     | H_ASP_106 | OD1    | 3.132        |
| 3FMG   | L_ARG_61  | NH1    | L_ASP_82  | OD1    | 3.084        |
| 3FMG   | L_ARG_61  | NH1    | L_ASP_82  | OD2    | 2.397        |
| 3FMG   | L_ARG_61  | NH2    | L_GLU_81  | OE2    | 3.990        |
| 3FMG   | L_ARG_61  | NH2    | L_ASP_82  | OD2    | 3.861        |
| 3FMG   | L_LYS_103 | NZ     | L_GLU_105 | OE2    | 2.781        |
| 3FMG   | L_LYS_103 | NZ     | L_ASP_165 | OD1    | 3.422        |
| 3FMG   | L_LYS_103 | NZ     | L_ASP_165 | OD2    | 3.673        |
| 3FMG   | L_LYS_147 | NZ     | L_GLU_154 | OE1    | 3.671        |
| 3FMG   | L_LYS_149 | NZ     | L_GLU_195 | OE1    | 2.879        |
| 3FMG   | L_LYS_149 | NZ     | L_GLU_195 | OE2    | 3.536        |
| 3FMG   | L_ARG_155 | NH1    | L_GLU_185 | OE2    | 3.733        |
| 3FMG   | L_ARG_155 | NH2    | L_GLU_185 | OE2    | 3.838        |
| 3FMG   | L_LYS_169 | NZ     | L_ASP_167 | OD1    | 3.814        |
| 3FMG   | L_LYS_183 | NZ     | L_GLU_187 | OE1    | 3.890        |
| 3FMG   | L_LYS_183 | NZ     | L_GLU_187 | OE2    | 3.515        |
| 3FMG   | L_HIS_189 | ND1    | L_ASP_151 | OD2    | 3.000        |
| 3FMG   | L_HIS_189 | NE2    | L_GLU_185 | OE1    | 3.777        |
| 3FMG   | L_LYS_199 | NZ     | L_ASP_110 | OD1    | 3.137        |
| 3FMG   | L_LYS_199 | NZ     | L_ASP_110 | OD2    | 3.503        |
| 3FMG   | H_LYS_19  | NZ     | H_GLU_10  | OE1    | 2.764        |
| 3FMG   | H_LYS_19  | NZ     | H_GLU_10  | OE2    | 2.857        |
| 3FMG   | H_LYS_38  | NZ     | H_ASP_92  | OD1    | 3.712        |
| 3FMG   | H_LYS_64  | NZ     | L_ASP_1   | OD2    | 3.241        |
| 3FMG   | H_LYS_68  | NZ     | H_ASP_92  | OD1    | 3.504        |
| 3FMG   | H_LYS_68  | NZ     | H_ASP_92  | OD2    | 2.490        |
| 3FMG   | H_ARG_100 | NH1    | H_ASP_111 | OD1    | 2.791        |
| 3FMG   | H_ARG_100 | NH1    | H_ASP_111 | OD2    | 3.868        |
| 3FMG   | H_ARG_100 | NH2    | H_ASP_111 | OD1    | 3.539        |
| 3FMG   | H_ARG_100 | NH2    | H_ASP_111 | OD2    | 3.163        |
| 3FMG   | H_HIS_102 | ND1    | H_ASP_111 | OD2    | 2.692        |
| 3FMG   | H_HIS_108 | ND1    | H_GLU_35  | OE1    | 3.839        |
| 3FMG   | H_HIS_108 | ND1    | H_GLU_50  | OE1    | 3.875        |
| 3FMG   | H_HIS_108 | ND1    | H_GLU_50  | OE2    | 3.683        |
| 3FMG   | H_HIS_108 | NE2    | H_GLU_50  | OE1    | 3.647        |
| 3FMG   | H_LYS_125 | NZ     | H_ASP_193 | OD2    | 3.410        |
| 3FMG   | H_LYS_228 | NZ     | H_ASP_230 | OD1    | 2.777        |
| 3FMG   | A_LYS_143 | NZ     | A_GLU_88  | OE1    | 3.153        |
| 3FMG   | A_LYS_183 | NZ     | A_ASP_228 | OD2    | 3.491        |
| 3FMG   | A_LYS_194 | NZ     | A_GLU_217 | OE2    | 2.678        |
| 3FMG   | A_LYS_250 | NZ     | A_ASP_179 | OD1    | 3.375        |
| 3FMG   | A_LYS_251 | NZ     | A_ASP_157 | OD1    | 2.865        |
| 3FMG   | A_LYS_251 | NZ     | A_ASP_157 | OD2    | 3.990        |
| 3FMG   | A_ARG_255 | NH1    | A_GLU_162 | OE1    | 3.900        |
| 3FMG   | A_ARG_255 | NH1    | A_GLU_162 | OE2    | 3.506        |
| 3FMG   | A_ARG_255 | NH2    | A_GLU_162 | OE1    | 3.265        |
| 3FMG   | A_ARG_283 | NH1    | A_GLU_256 | OE1    | 2.718        |
| 3FMG   | A_ARG_283 | NH1    | A_GLU_256 | OE2    | 3.791        |
| 3FMG   | A_ARG_283 | NH2    | A_GLU_256 | OE1    | 3.447        |
| 3FMG   | A_ARG_283 | NH2    | A_GLU_256 | OE2    | 2.994        |
| 3FMG   | A_LYS_312 | NZ     | A_GLU_282 | OE1    | 3.755        |
| 3FMG   | A_LYS_312 | NZ     | A_GLU_282 | OE2    | 3.300        |

---

Table 398: 3FMG-specific salt bridging networks analysis. In this table, a PDB file is specified with a four-letter PDB ID, except that the names of the PDB files corresponding to the single NMR structural model split from the NMR ensemble is specified with a four-letter PDB ID in addition to a hyphen followed by the single NMR structural model numeric ID, the residue naming scheme is **Chain ID\_residue name\_residue number**,  $\angle ADH$  represents the angle formed by acceptor (A), donor (D) and hydrogen (H) ( $\angle ADH$ ).

| PDB ID | Residue A | Atom A | Residue B | Atom B | Distance (Å) |
|--------|-----------|--------|-----------|--------|--------------|
| 3G39   | A_ARG_57  | NH2    | A_ASP_59  | OD1    | 3.706        |
| 3G39   | A_ARG_57  | NH2    | A_ASP_59  | OD2    | 2.784        |
| 3G39   | A_ARG_125 | NH2    | A_GLU_159 | OE1    | 3.701        |
| 3G39   | A_ARG_125 | NH2    | A_GLU_159 | OE2    | 2.699        |
| 3G39   | A_ARG_155 | NH2    | A_ASP_143 | OD1    | 3.190        |
| 3G39   | A_ARG_155 | NH2    | A_ASP_143 | OD2    | 3.105        |

Table 399: 3G39-specific salt bridging networks analysis. In this table, a PDB file is specified with a four-letter PDB ID, except that the names of the PDB files corresponding to the single NMR structural model split from the NMR ensemble is specified with a four-letter PDB ID in addition to a hyphen followed by the single NMR structural model numeric ID, the residue naming scheme is **Chain ID\_residue name\_residue number**,  $\angle ADH$  represents the angle formed by acceptor (A), donor (D) and hydrogen (H) ( $\angle ADH$ ).

| PDB ID | Residue A | Atom A | Residue B | Atom B | Distance (Å) |
|--------|-----------|--------|-----------|--------|--------------|
| 3G3A   | A_ARG_57  | NH2    | A_ASP_59  | OD2    | 3.133        |
| 3G3A   | A_ARG_155 | NH1    | A_ASP_143 | OD1    | 3.039        |
| 3G3A   | A_ARG_155 | NH1    | A_ASP_143 | OD2    | 3.682        |
| 3G3A   | B_LYS_1   | NZ     | B_GLU_7   | OE2    | 2.851        |
| 3G3A   | B_ARG_61  | NH2    | A_ASP_59  | OD2    | 3.447        |
| 3G3A   | B_ARG_73  | NH1    | A_ASP_61  | OD1    | 2.630        |
| 3G3A   | B_ARG_73  | NH1    | A_ASP_61  | OD2    | 3.494        |
| 3G3A   | B_ARG_73  | NH2    | A_ASP_59  | OD2    | 3.260        |
| 3G3A   | B_ARG_73  | NH2    | A_ASP_61  | OD1    | 3.287        |
| 3G3A   | B_ARG_73  | NH2    | A_ASP_61  | OD2    | 2.479        |
| 3G3A   | B_LYS_97  | NZ     | B_ASP_101 | OD1    | 3.864        |
| 3G3A   | B_LYS_97  | NZ     | B_ASP_101 | OD2    | 3.365        |
| 3G3A   | B_ARG_112 | NH1    | A_ASP_141 | OD1    | 3.611        |
| 3G3A   | B_ARG_112 | NH1    | A_ASP_141 | OD2    | 2.906        |
| 3G3A   | B_ARG_112 | NH2    | A_ASP_141 | OD1    | 2.901        |
| 3G3A   | B_ARG_112 | NH2    | A_ASP_141 | OD2    | 3.689        |
| 3G3A   | B_ARG_112 | NH2    | A_ASP_143 | OD2    | 3.389        |
| 3G3A   | C_LYS_43  | NZ     | C_GLU_45  | OE2    | 3.006        |
| 3G3A   | C_ARG_57  | NH2    | C_ASP_59  | OD1    | 3.619        |
| 3G3A   | C_ARG_57  | NH2    | C_ASP_59  | OD2    | 2.899        |
| 3G3A   | C_ARG_94  | NH2    | C_ASP_119 | OD1    | 3.786        |
| 3G3A   | C_ARG_155 | NH1    | C_ASP_143 | OD1    | 2.753        |
| 3G3A   | C_ARG_155 | NH1    | C_ASP_143 | OD2    | 3.605        |
| 3G3A   | D_LYS_1   | NZ     | D_GLU_7   | OE1    | 3.499        |
| 3G3A   | D_LYS_1   | NZ     | D_GLU_7   | OE2    | 2.566        |
| 3G3A   | D_ARG_61  | NH1    | C_ASP_59  | OD2    | 3.676        |
| 3G3A   | D_ARG_61  | NH2    | C_ASP_59  | OD1    | 3.900        |
| 3G3A   | D_ARG_61  | NH2    | C_ASP_59  | OD2    | 3.137        |
| 3G3A   | D_ARG_73  | NH1    | C_ASP_61  | OD1    | 3.720        |
| 3G3A   | D_ARG_73  | NH1    | C_ASP_61  | OD2    | 2.705        |
| 3G3A   | D_ARG_73  | NH2    | C_ASP_59  | OD2    | 2.913        |
| 3G3A   | D_ARG_73  | NH2    | C_ASP_61  | OD1    | 2.638        |
| 3G3A   | D_ARG_73  | NH2    | C_ASP_61  | OD2    | 3.209        |
| 3G3A   | D_LYS_97  | NZ     | D_ASP_101 | OD1    | 3.653        |
| 3G3A   | D_LYS_97  | NZ     | D_ASP_101 | OD2    | 2.889        |
| 3G3A   | D_ARG_112 | NH1    | C_ASP_141 | OD1    | 3.483        |
| 3G3A   | D_ARG_112 | NH1    | C_ASP_141 | OD2    | 2.837        |
| 3G3A   | D_ARG_112 | NH2    | C_ASP_141 | OD1    | 2.752        |
| 3G3A   | D_ARG_112 | NH2    | C_ASP_141 | OD2    | 3.622        |
| 3G3A   | D_ARG_112 | NH2    | C_ASP_143 | OD2    | 3.602        |
| 3G3A   | E_ARG_57  | NH2    | E_ASP_59  | OD1    | 3.565        |
| 3G3A   | E_ARG_57  | NH2    | E_ASP_59  | OD2    | 3.054        |
| 3G3A   | E_ARG_155 | NH1    | E_ASP_143 | OD1    | 2.889        |
| 3G3A   | F_LYS_1   | NZ     | F_GLU_7   | OE2    | 2.598        |
| 3G3A   | F_ARG_61  | NH1    | E_ASP_59  | OD2    | 3.922        |
| 3G3A   | F_ARG_61  | NH2    | E_ASP_59  | OD1    | 3.681        |
| 3G3A   | F_ARG_61  | NH2    | E_ASP_59  | OD2    | 2.804        |
| 3G3A   | F_ARG_73  | NH1    | E_ASP_61  | OD1    | 3.367        |
| 3G3A   | F_ARG_73  | NH1    | E_ASP_61  | OD2    | 2.915        |
| 3G3A   | F_ARG_73  | NH2    | E_ASP_59  | OD2    | 2.686        |
| 3G3A   | F_ARG_73  | NH2    | E_ASP_61  | OD1    | 2.874        |
| 3G3A   | F_ARG_73  | NH2    | E_ASP_61  | OD2    | 3.960        |
| 3G3A   | F_LYS_97  | NZ     | F_ASP_101 | OD1    | 3.077        |
| 3G3A   | F_LYS_97  | NZ     | F_ASP_101 | OD2    | 2.523        |
| 3G3A   | F_ARG_112 | NH1    | E_ASP_141 | OD1    | 3.733        |
| 3G3A   | F_ARG_112 | NH1    | E_ASP_141 | OD2    | 3.195        |
| 3G3A   | F_ARG_112 | NH2    | E_ASP_141 | OD1    | 3.001        |



|      |           |     |           |     |       |
|------|-----------|-----|-----------|-----|-------|
| 3G3A | F_ARG_112 | NH2 | E_ASP_141 | OD2 | 3.839 |
| 3G3A | F_ARG_112 | NH2 | E_ASP_143 | OD2 | 3.491 |
| 3G3A | G_ARG_57  | NH2 | G_ASP_59  | OD1 | 3.304 |
| 3G3A | G_ARG_57  | NH2 | G_ASP_59  | OD2 | 2.668 |
| 3G3A | G_ARG_125 | NH2 | G_GLU_159 | OE1 | 3.890 |
| 3G3A | G_ARG_125 | NH2 | G_GLU_159 | OE2 | 3.239 |
| 3G3A | G_ARG_155 | NH1 | G_ASP_143 | OD1 | 3.004 |
| 3G3A | G_ARG_155 | NH1 | G_ASP_143 | OD2 | 3.791 |
| 3G3A | H_LYS_1   | NZ  | H_GLU_7   | OE2 | 2.729 |
| 3G3A | H_LYS_13  | NZ  | H_ASP_18  | OD2 | 3.987 |
| 3G3A | H_ARG_61  | NH2 | G_ASP_59  | OD2 | 3.367 |
| 3G3A | H_ARG_73  | NH1 | G_ASP_59  | OD2 | 3.259 |
| 3G3A | H_ARG_73  | NH2 | G_ASP_59  | OD2 | 3.473 |
| 3G3A | H_ARG_73  | NH2 | G_ASP_61  | OD1 | 2.486 |
| 3G3A | H_ARG_73  | NH2 | G_ASP_61  | OD2 | 2.698 |
| 3G3A | H_ARG_112 | NH1 | G_ASP_141 | OD1 | 3.280 |
| 3G3A | H_ARG_112 | NH1 | G_ASP_143 | OD2 | 3.578 |
| 3G3A | H_ARG_112 | NH2 | G_ASP_141 | OD1 | 3.102 |
| 3G3A | H_ARG_112 | NH2 | G_ASP_141 | OD2 | 2.609 |

Table 400: 3G3A-specific salt bridging networks analysis. In this table, a PDB file is specified with a four-letter PDB ID, except that the names of the PDB files corresponding to the single NMR structural model split from the NMR ensemble is specified with a four-letter PDB ID in addition to a hyphen followed by the single NMR structural model numeric ID, the residue naming scheme is **Chain ID\_residue name\_residue number**,  $\angle ADH$  represents the angle formed by acceptor (A), donor (D) and hydrogen (H) ( $\angle ADH$ ).

| PDB ID | Residue A | Atom A | Residue B | Atom B | Distance (Å) |
|--------|-----------|--------|-----------|--------|--------------|
| 3G3B   | A.LYS_43  | NZ     | A.GLU_45  | OE1    | 2.858        |
| 3G3B   | A.LYS_43  | NZ     | A.GLU_45  | OE2    | 2.415        |
| 3G3B   | A.ARG_57  | NH2    | A.ASP_59  | OD1    | 3.729        |
| 3G3B   | A.ARG_57  | NH2    | A.ASP_59  | OD2    | 2.852        |
| 3G3B   | A.HIS_142 | ND1    | A.ASP_143 | OD1    | 3.605        |
| 3G3B   | A.ARG_155 | NH1    | A.ASP_143 | OD1    | 2.852        |
| 3G3B   | B.LYS_1   | NZ     | B.GLU_7   | OE1    | 3.921        |
| 3G3B   | B.LYS_1   | NZ     | B.GLU_7   | OE2    | 2.875        |
| 3G3B   | B.ARG_61  | NH2    | A.ASP_59  | OD1    | 3.551        |
| 3G3B   | B.ARG_61  | NH2    | A.ASP_59  | OD2    | 3.590        |
| 3G3B   | B.ARG_73  | NH1    | A.ASP_61  | OD1    | 2.527        |
| 3G3B   | B.ARG_73  | NH1    | A.ASP_61  | OD2    | 3.439        |
| 3G3B   | B.ARG_73  | NH2    | A.ASP_59  | OD2    | 2.967        |
| 3G3B   | B.ARG_73  | NH2    | A.ASP_61  | OD1    | 3.469        |
| 3G3B   | B.ARG_73  | NH2    | A.ASP_61  | OD2    | 2.765        |
| 3G3B   | B.ARG_112 | NH1    | A.ASP_141 | OD1    | 3.569        |
| 3G3B   | B.ARG_112 | NH1    | A.ASP_141 | OD2    | 2.625        |
| 3G3B   | B.ARG_112 | NH2    | A.ASP_141 | OD1    | 2.926        |
| 3G3B   | B.ARG_112 | NH2    | A.ASP_141 | OD2    | 3.538        |
| 3G3B   | B.ARG_112 | NH2    | A.ASP_143 | OD2    | 3.804        |
| 3G3B   | B.ARG_125 | NH1    | B.ASP_119 | OD1    | 3.478        |
| 3G3B   | B.ARG_125 | NH1    | B.ASP_119 | OD2    | 3.346        |
| 3G3B   | C.LYS_43  | NZ     | C.GLU_45  | OE1    | 3.803        |
| 3G3B   | C.LYS_43  | NZ     | C.GLU_45  | OE2    | 3.490        |
| 3G3B   | C.ARG_57  | NH2    | C.ASP_59  | OD1    | 3.660        |
| 3G3B   | C.ARG_57  | NH2    | C.ASP_59  | OD2    | 2.836        |
| 3G3B   | C.HIS_142 | NE2    | C.ASP_143 | OD1    | 3.850        |
| 3G3B   | C.ARG_155 | NH2    | C.ASP_143 | OD1    | 2.863        |
| 3G3B   | C.ARG_155 | NH2    | C.ASP_143 | OD2    | 3.947        |
| 3G3B   | D.LYS_1   | NZ     | D.GLU_7   | OE2    | 2.651        |
| 3G3B   | D.LYS_13  | NZ     | D.ASP_18  | OD2    | 3.185        |
| 3G3B   | D.ARG_61  | NH2    | C.ASP_59  | OD1    | 3.954        |
| 3G3B   | D.ARG_73  | NH1    | C.ASP_61  | OD1    | 2.753        |
| 3G3B   | D.ARG_73  | NH1    | C.ASP_61  | OD2    | 3.824        |
| 3G3B   | D.ARG_73  | NH2    | C.ASP_59  | OD2    | 3.136        |
| 3G3B   | D.ARG_73  | NH2    | C.ASP_61  | OD1    | 3.224        |
| 3G3B   | D.ARG_73  | NH2    | C.ASP_61  | OD2    | 2.702        |
| 3G3B   | D.ARG_112 | NH1    | C.ASP_141 | OD1    | 3.812        |
| 3G3B   | D.ARG_112 | NH1    | C.ASP_141 | OD2    | 2.690        |
| 3G3B   | D.ARG_112 | NH2    | C.ASP_141 | OD1    | 2.826        |
| 3G3B   | D.ARG_112 | NH2    | C.ASP_141 | OD2    | 3.301        |
| 3G3B   | D.ARG_112 | NH2    | C.ASP_143 | OD2    | 3.656        |
| 3G3B   | D.ARG_125 | NH2    | D.ASP_119 | OD1    | 2.448        |
| 3G3B   | D.ARG_125 | NH2    | D.ASP_119 | OD2    | 3.449        |
| 3G3B   | E.ARG_57  | NH2    | E.ASP_59  | OD1    | 3.602        |
| 3G3B   | E.ARG_57  | NH2    | E.ASP_59  | OD2    | 2.890        |
| 3G3B   | E.HIS_142 | ND1    | E.ASP_143 | OD1    | 3.479        |
| 3G3B   | E.ARG_155 | NH2    | E.ASP_143 | OD1    | 3.325        |
| 3G3B   | F.LYS_1   | NZ     | F.GLU_7   | OE1    | 3.789        |
| 3G3B   | F.LYS_1   | NZ     | F.GLU_7   | OE2    | 2.690        |
| 3G3B   | F.ARG_61  | NH2    | E.ASP_59  | OD2    | 3.820        |
| 3G3B   | F.ARG_73  | NH1    | E.ASP_61  | OD1    | 2.535        |
| 3G3B   | F.ARG_73  | NH1    | E.ASP_61  | OD2    | 3.949        |
| 3G3B   | F.ARG_73  | NH2    | E.ASP_59  | OD2    | 2.812        |
| 3G3B   | F.ARG_73  | NH2    | E.ASP_61  | OD1    | 3.056        |
| 3G3B   | F.ARG_73  | NH2    | E.ASP_61  | OD2    | 2.934        |
| 3G3B   | F.ARG_112 | NH1    | E.ASP_141 | OD2    | 2.714        |

|      |           |     |           |     |       |
|------|-----------|-----|-----------|-----|-------|
| 3G3B | F_ARG_112 | NH2 | E_ASP_141 | OD1 | 3.020 |
| 3G3B | F_ARG_112 | NH2 | E_ASP_141 | OD2 | 3.176 |
| 3G3B | F_ARG_112 | NH2 | E_ASP_143 | OD2 | 3.737 |
| 3G3B | G_ARG_57  | NH2 | G_ASP_59  | OD1 | 3.515 |
| 3G3B | G_ARG_57  | NH2 | G_ASP_59  | OD2 | 3.110 |
| 3G3B | G_HIS_142 | NE2 | G_ASP_143 | OD1 | 3.761 |
| 3G3B | G_ARG_155 | NH2 | G_ASP_143 | OD1 | 2.619 |
| 3G3B | G_ARG_155 | NH2 | G_ASP_143 | OD2 | 3.786 |
| 3G3B | H_LYS_1   | NZ  | H_GLU_7   | OE1 | 3.238 |
| 3G3B | H_LYS_1   | NZ  | H_GLU_7   | OE2 | 2.526 |
| 3G3B | H_ARG_61  | NH1 | H_ASP_48  | OD2 | 3.554 |
| 3G3B | H_ARG_73  | NH1 | G_ASP_61  | OD1 | 2.839 |
| 3G3B | H_ARG_73  | NH1 | G_ASP_61  | OD2 | 3.791 |
| 3G3B | H_ARG_73  | NH2 | G_ASP_59  | OD2 | 2.431 |
| 3G3B | H_ARG_73  | NH2 | G_ASP_61  | OD1 | 3.464 |
| 3G3B | H_ARG_73  | NH2 | G_ASP_61  | OD2 | 2.896 |
| 3G3B | H_ARG_112 | NH1 | G_ASP_141 | OD1 | 3.676 |
| 3G3B | H_ARG_112 | NH1 | G_ASP_141 | OD2 | 2.564 |
| 3G3B | H_ARG_112 | NH2 | G_ASP_141 | OD1 | 2.813 |
| 3G3B | H_ARG_112 | NH2 | G_ASP_141 | OD2 | 3.280 |
| 3G3B | H_ARG_112 | NH2 | G_ASP_143 | OD2 | 3.506 |

Table 401: 3G3B-specific salt bridging networks analysis. In this table, a PDB file is specified with a four-letter PDB ID, except that the names of the PDB files corresponding to the single NMR structural model split from the NMR ensemble is specified with a four-letter PDB ID in addition to a hyphen followed by the single NMR structural model numeric ID, the residue naming scheme is **Chain ID\_residue name\_residue number**,  $\angle ADH$  represents the angle formed by acceptor (A), donor (D) and hydrogen (H) ( $\angle ADH$ ).

| PDB ID | Residue A | Atom A | Residue B | Atom B | Distance (Å) |
|--------|-----------|--------|-----------|--------|--------------|
| 3GGW   | A_LYS_27  | NZ     | A_GLU_93  | OE1    | 3.004        |
| 3GGW   | A_LYS_27  | NZ     | A_GLU_93  | OE2    | 3.494        |
| 3GGW   | A_HIS_27D | ND1    | A_ASP_28  | OD1    | 3.397        |
| 3GGW   | A_HIS_27D | ND1    | A_ASP_28  | OD2    | 3.638        |
| 3GGW   | A_ARG_61  | NH1    | A_ASP_82  | OD1    | 3.619        |
| 3GGW   | A_ARG_61  | NH1    | A_ASP_82  | OD2    | 2.849        |
| 3GGW   | A_ARG_61  | NH2    | A_GLU_79  | OE1    | 3.759        |
| 3GGW   | A_ARG_61  | NH2    | A_ASP_82  | OD1    | 2.856        |
| 3GGW   | A_ARG_61  | NH2    | A_ASP_82  | OD2    | 3.530        |
| 3GGW   | A_ARG_96  | NH2    | B_GLU_50  | OE1    | 3.590        |
| 3GGW   | A_ARG_96  | NH2    | B_GLU_50  | OE2    | 2.762        |
| 3GGW   | A_ARG_155 | NH1    | A_GLU_185 | OE1    | 3.605        |
| 3GGW   | A_ARG_188 | NH2    | A_GLU_185 | OE2    | 2.743        |
| 3GGW   | A_HIS_189 | ND1    | A_GLU_185 | OE1    | 3.933        |
| 3GGW   | A_LYS_199 | NZ     | A_ASP_110 | OD2    | 3.552        |
| 3GGW   | B_ARG_38  | NH1    | B_ASP_86  | OD1    | 2.900        |
| 3GGW   | B_ARG_38  | NH2    | B_GLU_46  | OE1    | 3.283        |
| 3GGW   | B_ARG_38  | NH2    | B_GLU_46  | OE2    | 3.311        |
| 3GGW   | B_ARG_38  | NH2    | B_ASP_86  | OD1    | 3.834        |
| 3GGW   | B_LYS_43  | NZ     | B_GLU_42  | OE2    | 3.946        |
| 3GGW   | B_ARG_52  | NH1    | E_ASP_4   | OD2    | 3.092        |
| 3GGW   | B_LYS_64  | NZ     | B_GLU_61  | OE1    | 3.190        |
| 3GGW   | B_LYS_66  | NZ     | B_ASP_86  | OD1    | 3.381        |
| 3GGW   | B_LYS_66  | NZ     | B_ASP_86  | OD2    | 2.679        |
| 3GGW   | B_ARG_71  | NH2    | B_ASP_73  | OD1    | 3.573        |
| 3GGW   | B_ARG_83  | NH1    | B_GLU_85  | OE1    | 3.507        |
| 3GGW   | B_LYS_207 | NZ     | B_ASP_209 | OD1    | 3.783        |
| 3GGW   | B_LYS_207 | NZ     | B_ASP_209 | OD2    | 2.712        |
| 3GGW   | B_LYS_210 | NZ     | A_GLU_123 | OE2    | 3.208        |
| 3GGW   | C_ARG_24  | NH2    | C_ASP_70  | OD2    | 3.799        |
| 3GGW   | C_LYS_27  | NZ     | C_GLU_93  | OE1    | 2.551        |
| 3GGW   | C_HIS_27D | ND1    | C_ASP_28  | OD1    | 3.282        |
| 3GGW   | C_HIS_27D | ND1    | C_ASP_28  | OD2    | 3.541        |
| 3GGW   | C_LYS_39  | NZ     | C_GLU_81  | OE2    | 2.827        |
| 3GGW   | C_ARG_61  | NH1    | C_ASP_82  | OD1    | 3.646        |
| 3GGW   | C_ARG_61  | NH1    | C_ASP_82  | OD2    | 2.827        |
| 3GGW   | C_ARG_61  | NH2    | C_GLU_79  | OE1    | 3.494        |
| 3GGW   | C_ARG_61  | NH2    | C_GLU_79  | OE2    | 3.557        |
| 3GGW   | C_ARG_61  | NH2    | C_ASP_82  | OD1    | 2.827        |
| 3GGW   | C_ARG_61  | NH2    | C_ASP_82  | OD2    | 3.383        |
| 3GGW   | C_ARG_96  | NH2    | D_GLU_50  | OE1    | 3.555        |
| 3GGW   | C_ARG_96  | NH2    | D_GLU_50  | OE2    | 2.962        |
| 3GGW   | C_LYS_142 | NZ     | C_GLU_105 | OE1    | 3.612        |
| 3GGW   | C_ARG_155 | NH1    | C_GLU_185 | OE1    | 2.976        |
| 3GGW   | C_ARG_155 | NH1    | C_GLU_185 | OE2    | 3.624        |
| 3GGW   | C_ARG_155 | NH2    | C_GLU_185 | OE1    | 3.679        |
| 3GGW   | C_ARG_155 | NH2    | C_GLU_185 | OE2    | 2.798        |
| 3GGW   | C_LYS_183 | NZ     | C_GLU_187 | OE1    | 2.937        |
| 3GGW   | C_LYS_183 | NZ     | C_GLU_187 | OE2    | 3.524        |
| 3GGW   | C_ARG_188 | NH2    | C_ASP_184 | OD1    | 3.157        |
| 3GGW   | C_ARG_188 | NH2    | C_ASP_184 | OD2    | 3.938        |
| 3GGW   | C_LYS_199 | NZ     | C_ASP_110 | OD2    | 3.525        |
| 3GGW   | D_ARG_38  | NH1    | D_ASP_86  | OD1    | 2.856        |
| 3GGW   | D_ARG_38  | NH2    | D_GLU_46  | OE1    | 3.438        |
| 3GGW   | D_ARG_38  | NH2    | D_GLU_46  | OE2    | 3.122        |
| 3GGW   | D_ARG_38  | NH2    | D_ASP_86  | OD1    | 3.653        |
| 3GGW   | D_ARG_52  | NH1    | F_ASP_4   | OD2    | 3.127        |

|      |           |     |           |     |       |
|------|-----------|-----|-----------|-----|-------|
| 3GGW | D_LYS_64  | NZ  | D_GLU_61  | OE1 | 2.566 |
| 3GGW | D_LYS_64  | NZ  | D_GLU_61  | OE2 | 3.883 |
| 3GGW | D_LYS_66  | NZ  | D_ASP_86  | OD1 | 3.597 |
| 3GGW | D_LYS_66  | NZ  | D_ASP_86  | OD2 | 2.711 |
| 3GGW | D_ARG_71  | NH2 | D_ASP_73  | OD1 | 3.666 |
| 3GGW | D_LYS_210 | NZ  | C_GLU_123 | OE2 | 2.871 |
| 3GGW | D_ARG_215 | NH2 | C_GLU_213 | OE1 | 3.834 |
| 3GGW | D_ARG_215 | NH2 | C_GLU_213 | OE2 | 2.618 |

Table 402: 3GGW-specific salt bridging networks analysis. In this table, a PDB file is specified with a four-letter PDB ID, except that the names of the PDB files corresponding to the single NMR structural model split from the NMR ensemble is specified with a four-letter PDB ID in addition to a hyphen followed by the single NMR structural model numeric ID, the residue naming scheme is **Chain ID\_residue name\_residue number**,  $\angle ADH$  represents the angle formed by acceptor (A), donor (D) and hydrogen (H) ( $\angle ADH$ ).

| PDB ID | Residue A | Atom A | Residue B  | Atom B | Distance (Å) |
|--------|-----------|--------|------------|--------|--------------|
| 3GHB   | L_ARG_61  | NH1    | L_ASP_82   | OD1    | 3.774        |
| 3GHB   | L_ARG_61  | NH1    | L_ASP_82   | OD2    | 2.845        |
| 3GHB   | L_ARG_61  | NH2    | L_ASP_82   | OD1    | 2.959        |
| 3GHB   | L_ARG_61  | NH2    | L_ASP_82   | OD2    | 3.458        |
| 3GHB   | L_LYS_110 | NZ     | L_GLU_198  | OE1    | 2.584        |
| 3GHB   | L_HIS_188 | NE2    | L_ASP_151  | OD2    | 3.966        |
| 3GHB   | H_ARG_38  | NH1    | H_ASP_86   | OD1    | 2.865        |
| 3GHB   | H_ARG_38  | NH2    | H_GLU_46   | OE1    | 2.815        |
| 3GHB   | H_ARG_38  | NH2    | H_GLU_46   | OE2    | 3.771        |
| 3GHB   | H_ARG_50  | NH1    | H_ASP_58   | OD2    | 3.042        |
| 3GHB   | H_ARG_66  | NH1    | H_ASP_86   | OD1    | 3.838        |
| 3GHB   | H_ARG_66  | NH1    | H_ASP_86   | OD2    | 2.797        |
| 3GHB   | H_ARG_66  | NH2    | H_ASP_86   | OD1    | 3.183        |
| 3GHB   | H_ARG_66  | NH2    | H_ASP_86   | OD2    | 3.533        |
| 3GHB   | H_ARG_71  | NH2    | H_ASP_73   | OD1    | 3.367        |
| 3GHB   | H_LYS_83  | NZ     | H_GLU_85   | OE2    | 3.603        |
| 3GHB   | H_LYS_143 | NZ     | L_GLU_124  | OE2    | 2.614        |
| 3GHB   | H_LYS_209 | NZ     | L_GLU_123  | OE1    | 2.751        |
| 3GHB   | H_LYS_209 | NZ     | L_GLU_123  | OE2    | 3.411        |
| 3GHB   | P_LYS_305 | NZ     | H_GLU_100E | OE1    | 3.508        |
| 3GHB   | P_LYS_305 | NZ     | H_ASP_100F | OD2    | 3.835        |
| 3GHB   | M_ARG_61  | NH1    | M_ASP_82   | OD1    | 3.907        |
| 3GHB   | M_ARG_61  | NH1    | M_ASP_82   | OD2    | 3.095        |
| 3GHB   | M_ARG_61  | NH2    | M_ASP_82   | OD1    | 2.973        |
| 3GHB   | M_ARG_61  | NH2    | M_ASP_82   | OD2    | 3.466        |
| 3GHB   | M_LYS_110 | NZ     | M_GLU_198  | OE1    | 2.627        |
| 3GHB   | I_ARG_38  | NH1    | I_ASP_86   | OD1    | 2.974        |
| 3GHB   | I_ARG_38  | NH2    | I_GLU_46   | OE1    | 2.852        |
| 3GHB   | I_ARG_38  | NH2    | I_GLU_46   | OE2    | 3.761        |
| 3GHB   | I_ARG_38  | NH2    | I_ASP_86   | OD1    | 3.952        |
| 3GHB   | I_ARG_50  | NH1    | I_ASP_58   | OD2    | 2.747        |
| 3GHB   | I_ARG_66  | NH1    | I_ASP_86   | OD1    | 3.695        |
| 3GHB   | I_ARG_66  | NH1    | I_ASP_86   | OD2    | 2.620        |
| 3GHB   | I_ARG_66  | NH2    | I_ASP_86   | OD1    | 3.166        |
| 3GHB   | I_ARG_66  | NH2    | I_ASP_86   | OD2    | 3.599        |
| 3GHB   | I_ARG_71  | NH2    | I_ASP_73   | OD1    | 3.399        |
| 3GHB   | I_LYS_75  | NZ     | I_ASP_72   | OD2    | 3.232        |
| 3GHB   | I_LYS_143 | NZ     | M_GLU_124  | OE2    | 2.607        |
| 3GHB   | I_LYS_209 | NZ     | M_GLU_123  | OE1    | 2.988        |
| 3GHB   | I_LYS_209 | NZ     | M_GLU_123  | OE2    | 3.773        |
| 3GHB   | I_ARG_210 | NH1    | I_GLU_212  | OE2    | 3.691        |
| 3GHB   | Q_LYS_305 | NZ     | I_ASP_100F | OD1    | 3.174        |

Table 403: 3GHB-specific salt bridging networks analysis. In this table, a PDB file is specified with a four-letter PDB ID, except that the names of the PDB files corresponding to the single NMR structural model split from the NMR ensemble is specified with a four-letter PDB ID in addition to a hyphen followed by the single NMR structural model numeric ID, the residue naming scheme is **Chain ID\_residue name\_residue number**,  $\angle ADH$  represents the angle formed by acceptor (A), donor (D) and hydrogen (H) ( $\angle ADH$ ).

| PDB ID | Residue A | Atom A | Residue B  | Atom B | Distance (Å) |
|--------|-----------|--------|------------|--------|--------------|
| 3GHE   | L_LYS_53  | NZ     | L_ASP_50   | OD2    | 3.235        |
| 3GHE   | L_ARG_61  | NH1    | L_ASP_82   | OD1    | 2.784        |
| 3GHE   | L_ARG_61  | NH1    | L_ASP_82   | OD2    | 3.800        |
| 3GHE   | L_ARG_61  | NH2    | L_ASP_82   | OD1    | 3.483        |
| 3GHE   | L_ARG_61  | NH2    | L_ASP_82   | OD2    | 3.001        |
| 3GHE   | L_LYS_149 | NZ     | L_GLU_203  | OE2    | 2.932        |
| 3GHE   | H_ARG_38  | NH1    | H_ASP_86   | OD1    | 3.169        |
| 3GHE   | H_ARG_38  | NH2    | H_GLU_46   | OE1    | 2.908        |
| 3GHE   | H_LYS_64  | NZ     | H_ASP_61   | OD2    | 2.560        |
| 3GHE   | H_ARG_66  | NH1    | H_ASP_86   | OD2    | 2.889        |
| 3GHE   | H_ARG_66  | NH2    | H_ASP_86   | OD1    | 2.967        |
| 3GHE   | H_ARG_66  | NH2    | H_ASP_86   | OD2    | 3.314        |
| 3GHE   | H_ARG_94  | NH2    | H_ASP_101  | OD1    | 2.641        |
| 3GHE   | H_ARG_94  | NH2    | H_ASP_101  | OD2    | 3.324        |
| 3GHE   | H_LYS_143 | NZ     | L_GLU_124  | OE2    | 2.684        |
| 3GHE   | H_LYS_209 | NZ     | L_GLU_123  | OE1    | 2.541        |
| 3GHE   | H_LYS_209 | NZ     | L_GLU_123  | OE2    | 3.149        |
| 3GHE   | H_ARG_210 | NH1    | H_GLU_212  | OE2    | 2.984        |
| 3GHE   | H_ARG_210 | NH2    | H_GLU_212  | OE2    | 3.330        |
| 3GHE   | P_ARG_304 | NH1    | H_ASP_100A | OD1    | 3.397        |
| 3GHE   | P_ARG_304 | NH2    | H_ASP_100A | OD1    | 3.243        |
| 3GHE   | P_ARG_304 | NH2    | H_ASP_100A | OD2    | 3.833        |
| 3GHE   | P_HIS_308 | ND1    | H_ASP_100H | OD2    | 3.415        |
| 3GHE   | P_ARG_315 | NH1    | H_GLU_95   | OE1    | 3.518        |
| 3GHE   | P_ARG_315 | NH1    | H_GLU_95   | OE2    | 2.720        |
| 3GHE   | P_ARG_315 | NH2    | H_GLU_95   | OE2    | 3.104        |

Table 404: 3GHE-specific salt bridging networks analysis. In this table, a PDB file is specified with a four-letter PDB ID, except that the names of the PDB files corresponding to the single NMR structural model split from the NMR ensemble is specified with a four-letter PDB ID in addition to a hyphen followed by the single NMR structural model numeric ID, the residue naming scheme is **Chain ID\_residue name\_residue number**,  $\angle ADH$  represents the angle formed by acceptor (A), donor (D) and hydrogen (H) ( $\angle ADH$ ).

| PDB ID | Residue A | Atom A | Residue B | Atom B | Distance (Å) |
|--------|-----------|--------|-----------|--------|--------------|
| 3GJF   | A_HIS_3   | NE2    | A_ASP_29  | OD2    | 3.680        |
| 3GJF   | A_ARG_6   | NH1    | A_ASP_102 | OD1    | 3.006        |
| 3GJF   | A_ARG_14  | NH1    | A_ASP_39  | OD1    | 3.408        |
| 3GJF   | A_ARG_14  | NH1    | A_ASP_39  | OD2    | 2.727        |
| 3GJF   | A_ARG_14  | NH2    | A_ASP_39  | OD1    | 2.801        |
| 3GJF   | A_ARG_14  | NH2    | A_ASP_39  | OD2    | 3.691        |
| 3GJF   | A_ARG_17  | NH1    | A_ASP_39  | OD2    | 3.993        |
| 3GJF   | A_ARG_21  | NH1    | A_ASP_39  | OD2    | 3.840        |
| 3GJF   | A_ARG_21  | NH2    | A_ASP_37  | OD1    | 3.518        |
| 3GJF   | A_ARG_21  | NH2    | A_ASP_37  | OD2    | 2.869        |
| 3GJF   | A_ARG_35  | NH1    | A_GLU_46  | OE2    | 3.379        |
| 3GJF   | A_ARG_35  | NH2    | A_GLU_46  | OE2    | 2.626        |
| 3GJF   | A_ARG_44  | NH1    | A_ASP_61  | OD1    | 3.185        |
| 3GJF   | A_ARG_44  | NH2    | A_ASP_61  | OD1    | 2.672        |
| 3GJF   | A_ARG_48  | NH2    | B_ASP_53  | OD2    | 3.786        |
| 3GJF   | A_ARG_65  | NH1    | L_ASP_52  | OD1    | 3.134        |
| 3GJF   | A_ARG_65  | NH1    | L_ASP_52  | OD2    | 3.382        |
| 3GJF   | A_ARG_65  | NH2    | L_ASP_52  | OD1    | 2.989        |
| 3GJF   | A_ARG_65  | NH2    | L_ASP_52  | OD2    | 3.338        |
| 3GJF   | A_LYS_66  | NZ     | A_GLU_63  | OE2    | 2.881        |
| 3GJF   | A_ARG_75  | NH1    | A_GLU_19  | OE1    | 2.951        |
| 3GJF   | A_ARG_75  | NH1    | A_GLU_19  | OE2    | 2.915        |
| 3GJF   | A_HIS_93  | ND1    | A_ASP_119 | OD1    | 3.615        |
| 3GJF   | A_HIS_93  | ND1    | A_ASP_119 | OD2    | 2.772        |
| 3GJF   | A_ARG_97  | NH2    | A_ASP_77  | OD2    | 3.819        |
| 3GJF   | A_ARG_111 | NH1    | A_GLU_128 | OE1    | 3.014        |
| 3GJF   | A_ARG_111 | NH1    | A_GLU_128 | OE2    | 3.991        |
| 3GJF   | A_LYS_121 | NZ     | A_ASP_137 | OD1    | 2.725        |
| 3GJF   | A_LYS_144 | NZ     | A_GLU_148 | OE2    | 2.717        |
| 3GJF   | A_HIS_151 | ND1    | A_GLU_154 | OE1    | 3.544        |
| 3GJF   | A_ARG_170 | NH2    | A_GLU_55  | OE1    | 2.781        |
| 3GJF   | A_ARG_170 | NH2    | A_GLU_55  | OE2    | 3.295        |
| 3GJF   | A_LYS_176 | NZ     | A_GLU_177 | OE2    | 2.868        |
| 3GJF   | A_ARG_181 | NH2    | A_ASP_183 | OD2    | 3.746        |
| 3GJF   | A_HIS_191 | ND1    | A_GLU_254 | OE2    | 3.677        |
| 3GJF   | A_HIS_191 | NE2    | A_GLU_254 | OE2    | 3.660        |
| 3GJF   | A_ARG_219 | NH1    | A_GLU_222 | OE2    | 3.609        |
| 3GJF   | B_ARG_45  | NH1    | B_ASP_38  | OD1    | 3.417        |
| 3GJF   | B_ARG_81  | NH1    | B_ASP_38  | OD2    | 3.146        |
| 3GJF   | D_HIS_3   | NE2    | D_ASP_29  | OD2    | 3.680        |
| 3GJF   | D_ARG_6   | NH1    | D_ASP_102 | OD1    | 2.883        |
| 3GJF   | D_ARG_14  | NH1    | D_ASP_39  | OD1    | 3.632        |
| 3GJF   | D_ARG_14  | NH1    | D_ASP_39  | OD2    | 2.832        |
| 3GJF   | D_ARG_14  | NH2    | D_ASP_39  | OD1    | 2.791        |
| 3GJF   | D_ARG_14  | NH2    | D_ASP_39  | OD2    | 3.560        |
| 3GJF   | D_ARG_21  | NH2    | D_ASP_37  | OD1    | 3.457        |
| 3GJF   | D_ARG_21  | NH2    | D_ASP_37  | OD2    | 2.717        |
| 3GJF   | D_ARG_35  | NH1    | D_GLU_46  | OE1    | 2.983        |
| 3GJF   | D_ARG_35  | NH2    | E_ASP_53  | OD1    | 3.050        |
| 3GJF   | D_ARG_35  | NH2    | E_ASP_53  | OD2    | 3.940        |
| 3GJF   | D_ARG_44  | NH1    | D_ASP_61  | OD1    | 3.254        |
| 3GJF   | D_ARG_44  | NH2    | D_ASP_61  | OD1    | 2.599        |
| 3GJF   | D_ARG_48  | NH2    | E_ASP_53  | OD1    | 3.764        |
| 3GJF   | D_ARG_48  | NH2    | E_ASP_53  | OD2    | 3.452        |
| 3GJF   | D_ARG_65  | NH1    | K_ASP_52  | OD1    | 3.173        |
| 3GJF   | D_ARG_65  | NH1    | K_ASP_52  | OD2    | 3.530        |
| 3GJF   | D_ARG_65  | NH2    | K_ASP_52  | OD1    | 3.166        |



|      |           |     |           |     |       |
|------|-----------|-----|-----------|-----|-------|
| 3GJF | D_ARG_65  | NH2 | K_ASP_52  | OD2 | 2.445 |
| 3GJF | D_LYS_66  | NZ  | D_GLU_63  | OE1 | 3.919 |
| 3GJF | D_LYS_66  | NZ  | D_GLU_63  | OE2 | 2.898 |
| 3GJF | D_ARG_82  | NH1 | D_GLU_89  | OE1 | 3.854 |
| 3GJF | D_ARG_82  | NH1 | D_GLU_89  | OE2 | 3.318 |
| 3GJF | D_ARG_82  | NH2 | D_GLU_89  | OE2 | 3.224 |
| 3GJF | D_HIS_93  | ND1 | D_ASP_119 | OD1 | 3.533 |
| 3GJF | D_HIS_93  | ND1 | D_ASP_119 | OD2 | 2.640 |
| 3GJF | D_ARG_97  | NH2 | D_ASP_77  | OD2 | 3.677 |
| 3GJF | D_LYS_144 | NZ  | D_GLU_148 | OE1 | 3.748 |
| 3GJF | D_LYS_144 | NZ  | D_GLU_148 | OE2 | 2.769 |
| 3GJF | D_ARG_170 | NH2 | D_GLU_55  | OE1 | 2.756 |
| 3GJF | D_ARG_170 | NH2 | D_GLU_55  | OE2 | 3.140 |
| 3GJF | D_LYS_176 | NZ  | D_GLU_177 | OE1 | 2.829 |
| 3GJF | D_ARG_181 | NH2 | D_ASP_183 | OD2 | 3.518 |
| 3GJF | D_HIS_191 | NE2 | D_GLU_254 | OE2 | 3.719 |
| 3GJF | E_LYS_6   | NZ  | D_GLU_232 | OE1 | 3.774 |
| 3GJF | E_LYS_6   | NZ  | D_GLU_232 | OE2 | 2.502 |
| 3GJF | E_ARG_45  | NH1 | E_ASP_38  | OD1 | 3.925 |
| 3GJF | E_ARG_81  | NH1 | E_ASP_38  | OD2 | 3.008 |
| 3GJF | L_HIS_51  | ND1 | L_ASP_52  | OD2 | 2.609 |
| 3GJF | L_ARG_56  | NH1 | L_ASP_62  | OD1 | 3.571 |
| 3GJF | L_ARG_63  | NH1 | L_ASP_84  | OD1 | 2.750 |
| 3GJF | L_ARG_63  | NH1 | L_ASP_84  | OD2 | 3.305 |
| 3GJF | L_ARG_63  | NH2 | L_ASP_84  | OD1 | 3.570 |
| 3GJF | L_ARG_63  | NH2 | L_ASP_84  | OD2 | 2.571 |
| 3GJF | K_HIS_51  | ND1 | K_ASP_52  | OD2 | 2.643 |
| 3GJF | K_ARG_56  | NH1 | K_ASP_62  | OD1 | 3.501 |
| 3GJF | K_ARG_63  | NH2 | K_GLU_83  | OE1 | 3.808 |
| 3GJF | K_ARG_63  | NH2 | K_ASP_84  | OD1 | 2.545 |
| 3GJF | K_ARG_63  | NH2 | K_ASP_84  | OD2 | 3.209 |
| 3GJF | K_LYS_169 | NZ  | K_GLU_85  | OE1 | 2.843 |
| 3GJF | H_ARG_38  | NH1 | H_ASP_90  | OD1 | 2.830 |
| 3GJF | H_ARG_38  | NH2 | H_GLU_46  | OE1 | 3.081 |
| 3GJF | H_ARG_38  | NH2 | H_GLU_46  | OE2 | 3.817 |
| 3GJF | H_ARG_38  | NH2 | H_ASP_90  | OD1 | 3.756 |
| 3GJF | H_ARG_67  | NH1 | H_ASP_90  | OD1 | 3.830 |
| 3GJF | H_ARG_67  | NH1 | H_ASP_90  | OD2 | 2.795 |
| 3GJF | H_ARG_67  | NH2 | H_ASP_90  | OD1 | 3.041 |
| 3GJF | H_ARG_67  | NH2 | H_ASP_90  | OD2 | 3.477 |
| 3GJF | H_LYS_216 | NZ  | H_GLU_218 | OE2 | 2.600 |
| 3GJF | M_ARG_38  | NH1 | M_ASP_90  | OD1 | 2.821 |
| 3GJF | M_ARG_38  | NH2 | M_GLU_46  | OE1 | 3.436 |
| 3GJF | M_ARG_38  | NH2 | M_GLU_46  | OE2 | 2.897 |
| 3GJF | M_ARG_38  | NH2 | M_ASP_90  | OD1 | 3.855 |
| 3GJF | M_LYS_65  | NZ  | M_ASP_62  | OD1 | 3.858 |
| 3GJF | M_ARG_67  | NH1 | M_ASP_90  | OD1 | 3.892 |
| 3GJF | M_ARG_67  | NH1 | M_ASP_90  | OD2 | 2.801 |
| 3GJF | M_ARG_67  | NH2 | M_ASP_90  | OD1 | 3.068 |
| 3GJF | M_ARG_67  | NH2 | M_ASP_90  | OD2 | 3.441 |
| 3GJF | M_LYS_215 | NZ  | K_GLU_126 | OE1 | 3.244 |
| 3GJF | M_LYS_215 | NZ  | K_GLU_126 | OE2 | 2.553 |

---

Table 405: 3GJF-specific salt bridging networks analysis. In this table, a PDB file is specified with a four-letter PDB ID, except that the names of the PDB files corresponding to the single NMR structural model split from the NMR ensemble is specified with a four-letter PDB ID in addition to a hyphen followed by the single NMR structural model numeric ID, the residue naming scheme is **Chain ID\_residue name\_residue number**,  $\angle ADH$  represents the angle formed by acceptor (A), donor (D) and hydrogen (H) ( $\angle ADH$ ).

| PDB ID | Residue A | Atom A | Residue B | Atom B | Distance (Å) |
|--------|-----------|--------|-----------|--------|--------------|
| 3GNM   | L_ARG_66  | NH1    | L_ASP_87  | OD1    | 3.577        |
| 3GNM   | L_ARG_66  | NH1    | L_ASP_87  | OD2    | 2.682        |
| 3GNM   | L_ARG_66  | NH2    | L_GLU_84  | OE1    | 3.405        |
| 3GNM   | L_ARG_66  | NH2    | L_ASP_87  | OD1    | 2.573        |
| 3GNM   | L_ARG_66  | NH2    | L_ASP_87  | OD2    | 3.204        |
| 3GNM   | L_LYS_152 | NZ     | L_GLU_159 | OE1    | 3.752        |
| 3GNM   | L_LYS_154 | NZ     | L_GLU_200 | OE1    | 2.730        |
| 3GNM   | L_ARG_160 | NH1    | L_GLU_190 | OE2    | 3.689        |
| 3GNM   | L_ARG_160 | NH2    | L_GLU_190 | OE2    | 2.931        |
| 3GNM   | L_LYS_188 | NZ     | L_GLU_192 | OE1    | 3.327        |
| 3GNM   | L_LYS_188 | NZ     | L_GLU_192 | OE2    | 3.845        |
| 3GNM   | L_LYS_204 | NZ     | L_ASP_115 | OD2    | 2.734        |
| 3GNM   | H_ARG_40  | NH2    | H_GLU_89  | OE1    | 3.735        |
| 3GNM   | H_ARG_65  | NH2    | H_ASP_66  | OD1    | 3.349        |
| 3GNM   | H_ARG_65  | NH2    | H_ASP_66  | OD2    | 3.203        |
| 3GNM   | H_LYS_67  | NZ     | H_ASP_90  | OD1    | 3.628        |
| 3GNM   | H_LYS_67  | NZ     | H_ASP_90  | OD2    | 2.714        |
| 3GNM   | H_ARG_98  | NH2    | H_ASP_106 | OD1    | 3.662        |
| 3GNM   | H_ARG_98  | NH2    | H_ASP_106 | OD2    | 2.562        |
| 3GNM   | H_ARG_169 | NH1    | L_ASP_172 | OD1    | 3.348        |
| 3GNM   | H_ARG_169 | NH2    | L_ASP_172 | OD1    | 3.542        |
| 3GNM   | H_ARG_169 | NH2    | L_ASP_175 | OD1    | 3.297        |
| 3GNM   | H_LYS_213 | NZ     | L_GLU_128 | OE1    | 2.721        |
| 3GNM   | H_LYS_213 | NZ     | L_GLU_128 | OE2    | 3.840        |

Table 406: 3GNM-specific salt bridging networks analysis. In this table, a PDB file is specified with a four-letter PDB ID, except that the names of the PDB files corresponding to the single NMR structural model split from the NMR ensemble is specified with a four-letter PDB ID in addition to a hyphen followed by the single NMR structural model numeric ID, the residue naming scheme is **Chain ID\_residue name\_residue number**,  $\angle ADH$  represents the angle formed by acceptor (A), donor (D) and hydrogen (H) ( $\angle ADH$ ).

| PDB ID | Residue A | Atom A | Residue B  | Atom B | Distance (Å) |
|--------|-----------|--------|------------|--------|--------------|
| 3GO1   | L_ARG_61  | NH1    | L_ASP_82   | OD1    | 3.138        |
| 3GO1   | L_ARG_61  | NH1    | L_ASP_82   | OD2    | 3.572        |
| 3GO1   | L_ARG_61  | NH2    | L_ASP_82   | OD1    | 3.465        |
| 3GO1   | L_ARG_61  | NH2    | L_ASP_82   | OD2    | 2.449        |
| 3GO1   | L_LYS_166 | NZ     | L_GLU_83   | OE2    | 2.723        |
| 3GO1   | L_HIS_188 | ND1    | L_ASP_151  | OD2    | 3.200        |
| 3GO1   | H_ARG_38  | NH1    | H_ASP_86   | OD1    | 2.757        |
| 3GO1   | H_ARG_38  | NH2    | H_GLU_46   | OE1    | 3.013        |
| 3GO1   | H_ARG_38  | NH2    | H_ASP_86   | OD1    | 3.570        |
| 3GO1   | H_ARG_66  | NH1    | H_ASP_86   | OD1    | 3.680        |
| 3GO1   | H_ARG_66  | NH1    | H_ASP_86   | OD2    | 3.112        |
| 3GO1   | H_ARG_66  | NH2    | H_ASP_86   | OD1    | 2.980        |
| 3GO1   | H_ARG_66  | NH2    | H_ASP_86   | OD2    | 3.607        |
| 3GO1   | H_LYS_143 | NZ     | H_ASP_144  | OD1    | 3.162        |
| 3GO1   | H_LYS_143 | NZ     | H_ASP_144  | OD2    | 3.468        |
| 3GO1   | H_LYS_209 | NZ     | L_GLU_123  | OE1    | 2.728        |
| 3GO1   | H_LYS_209 | NZ     | L_GLU_123  | OE2    | 3.471        |
| 3GO1   | P_LYS_305 | NZ     | L_ASP_51   | OD1    | 2.931        |
| 3GO1   | P_ARG_315 | NH1    | H_GLU_95   | OE2    | 3.127        |
| 3GO1   | P_ARG_315 | NH2    | H_GLU_95   | OE2    | 2.921        |
| 3GO1   | P_ARG_315 | NH2    | H_ASP_100A | OD2    | 3.393        |

Table 407: 3GO1-specific salt bridging networks analysis. In this table, a PDB file is specified with a four-letter PDB ID, except that the names of the PDB files corresponding to the single NMR structural model split from the NMR ensemble is specified with a four-letter PDB ID in addition to a hyphen followed by the single NMR structural model numeric ID, the residue naming scheme is **Chain ID\_residue name\_residue number**,  $\angle ADH$  represents the angle formed by acceptor (A), donor (D) and hydrogen (H) ( $\angle ADH$ ).

| PDB ID | Residue A | Atom A | Residue B | Atom B | Distance (Å) |
|--------|-----------|--------|-----------|--------|--------------|
| 3HAE   | A_HIS_3   | NE2    | A_ASP_29  | OD2    | 3.587        |
| 3HAE   | A_ARG_6   | NH1    | A_ASP_102 | OD1    | 2.847        |
| 3HAE   | A_ARG_6   | NH2    | A_ASP_102 | OD1    | 3.019        |
| 3HAE   | A_ARG_6   | NH2    | A_ASP_102 | OD2    | 3.923        |
| 3HAE   | A_ARG_14  | NH1    | A_ASP_39  | OD1    | 3.472        |
| 3HAE   | A_ARG_14  | NH1    | A_ASP_39  | OD2    | 3.188        |
| 3HAE   | A_ARG_14  | NH2    | A_ASP_39  | OD1    | 2.664        |
| 3HAE   | A_ARG_14  | NH2    | A_ASP_39  | OD2    | 3.862        |
| 3HAE   | A_ARG_21  | NH2    | A_ASP_37  | OD1    | 3.621        |
| 3HAE   | A_ARG_21  | NH2    | A_ASP_37  | OD2    | 2.935        |
| 3HAE   | A_ARG_35  | NH1    | B_ASP_53  | OD1    | 3.527        |
| 3HAE   | A_ARG_35  | NH1    | B_ASP_53  | OD2    | 2.844        |
| 3HAE   | A_ARG_35  | NH2    | A_GLU_46  | OE2    | 3.050        |
| 3HAE   | A_ARG_44  | NH1    | A_ASP_61  | OD1    | 3.254        |
| 3HAE   | A_ARG_44  | NH2    | A_ASP_61  | OD1    | 3.535        |
| 3HAE   | A_ARG_48  | NH2    | B_ASP_53  | OD2    | 3.583        |
| 3HAE   | A_ARG_65  | NH1    | L_ASP_52  | OD1    | 3.495        |
| 3HAE   | A_ARG_65  | NH1    | L_ASP_52  | OD2    | 2.908        |
| 3HAE   | A_ARG_65  | NH2    | L_ASP_52  | OD1    | 3.452        |
| 3HAE   | A_ARG_65  | NH2    | L_ASP_52  | OD2    | 3.099        |
| 3HAE   | A_LYS_66  | NZ     | A_GLU_63  | OE1    | 3.753        |
| 3HAE   | A_LYS_66  | NZ     | A_GLU_63  | OE2    | 2.237        |
| 3HAE   | A_HIS_93  | ND1    | A_ASP_119 | OD1    | 3.412        |
| 3HAE   | A_HIS_93  | ND1    | A_ASP_119 | OD2    | 2.765        |
| 3HAE   | A_ARG_97  | NH2    | A_ASP_77  | OD2    | 3.602        |
| 3HAE   | A_ARG_111 | NH1    | A_GLU_128 | OE1    | 2.647        |
| 3HAE   | A_LYS_121 | NZ     | A_ASP_137 | OD1    | 3.114        |
| 3HAE   | A_LYS_144 | NZ     | A_GLU_148 | OE1    | 3.429        |
| 3HAE   | A_LYS_144 | NZ     | A_GLU_148 | OE2    | 3.081        |
| 3HAE   | A_HIS_151 | ND1    | A_GLU_154 | OE1    | 3.731        |
| 3HAE   | A_ARG_170 | NH2    | A_GLU_55  | OE1    | 3.140        |
| 3HAE   | A_ARG_170 | NH2    | A_GLU_55  | OE2    | 3.964        |
| 3HAE   | A_ARG_256 | NH2    | A_ASP_220 | OD1    | 2.688        |
| 3HAE   | B_LYS_6   | NZ     | A_GLU_232 | OE2    | 2.622        |
| 3HAE   | B_ARG_81  | NH1    | B_ASP_38  | OD2    | 2.783        |
| 3HAE   | D_ARG_6   | NH2    | D_ASP_102 | OD1    | 2.556        |
| 3HAE   | D_ARG_6   | NH2    | D_ASP_102 | OD2    | 2.949        |
| 3HAE   | D_ARG_14  | NH1    | D_ASP_39  | OD2    | 3.857        |
| 3HAE   | D_ARG_14  | NH2    | D_ASP_39  | OD1    | 2.936        |
| 3HAE   | D_ARG_14  | NH2    | D_ASP_39  | OD2    | 3.916        |
| 3HAE   | D_ARG_21  | NH1    | D_ASP_37  | OD2    | 3.671        |
| 3HAE   | D_ARG_21  | NH2    | D_ASP_37  | OD2    | 3.722        |
| 3HAE   | D_ARG_21  | NH2    | D_ASP_39  | OD2    | 3.808        |
| 3HAE   | D_ARG_35  | NH1    | D_GLU_46  | OE2    | 3.262        |
| 3HAE   | D_ARG_35  | NH1    | E_ASP_53  | OD1    | 3.949        |
| 3HAE   | D_ARG_35  | NH1    | E_ASP_53  | OD2    | 3.963        |
| 3HAE   | D_ARG_35  | NH2    | E_ASP_53  | OD1    | 3.106        |
| 3HAE   | D_ARG_44  | NH1    | D_ASP_61  | OD1    | 3.859        |
| 3HAE   | D_ARG_44  | NH2    | D_ASP_61  | OD1    | 2.693        |
| 3HAE   | D_ARG_48  | NH2    | E_ASP_53  | OD2    | 3.593        |
| 3HAE   | D_ARG_65  | NH1    | G_ASP_52  | OD1    | 3.201        |
| 3HAE   | D_ARG_65  | NH2    | G_ASP_52  | OD1    | 2.885        |
| 3HAE   | D_ARG_65  | NH2    | G_ASP_52  | OD2    | 3.031        |
| 3HAE   | D_LYS_66  | NZ     | D_GLU_63  | OE2    | 2.605        |
| 3HAE   | D_ARG_75  | NH1    | D_GLU_19  | OE1    | 3.280        |
| 3HAE   | D_ARG_75  | NH1    | D_GLU_19  | OE2    | 3.330        |
| 3HAE   | D_ARG_75  | NH2    | D_GLU_19  | OE2    | 2.623        |

|      |           |     |           |     |       |
|------|-----------|-----|-----------|-----|-------|
| 3HAE | D_ARG_82  | NH1 | D_GLU_89  | OE2 | 3.821 |
| 3HAE | D_ARG_82  | NH2 | D_GLU_89  | OE2 | 2.676 |
| 3HAE | D_HIS_93  | ND1 | D_ASP_119 | OD1 | 3.379 |
| 3HAE | D_HIS_93  | ND1 | D_ASP_119 | OD2 | 3.104 |
| 3HAE | D_ARG_97  | NH2 | D_ASP_77  | OD2 | 3.161 |
| 3HAE | D_ARG_108 | NH2 | D_ASP_106 | OD2 | 3.619 |
| 3HAE | D_ARG_111 | NH1 | D_GLU_128 | OE1 | 3.567 |
| 3HAE | D_ARG_111 | NH2 | D_GLU_128 | OE1 | 3.292 |
| 3HAE | D_LYS_144 | NZ  | D_GLU_148 | OE2 | 3.433 |
| 3HAE | D_HIS_151 | ND1 | D_GLU_154 | OE1 | 3.330 |
| 3HAE | D_ARG_170 | NH2 | D_GLU_55  | OE1 | 2.334 |
| 3HAE | D_ARG_170 | NH2 | D_GLU_55  | OE2 | 3.072 |
| 3HAE | D_LYS_176 | NZ  | D_GLU_177 | OE2 | 3.306 |
| 3HAE | D_ARG_181 | NH2 | D_ASP_183 | OD2 | 3.347 |
| 3HAE | D_ARG_256 | NH2 | D_ASP_220 | OD1 | 2.715 |
| 3HAE | E_LYS_41  | NZ  | E_ASP_76  | OD2 | 3.802 |
| 3HAE | E_ARG_81  | NH1 | E_ASP_38  | OD2 | 3.706 |
| 3HAE | J_HIS_3   | NE2 | J_ASP_29  | OD2 | 3.809 |
| 3HAE | J_ARG_6   | NH1 | J_ASP_102 | OD1 | 2.906 |
| 3HAE | J_ARG_6   | NH1 | J_ASP_102 | OD2 | 3.945 |
| 3HAE | J_ARG_6   | NH2 | J_ASP_102 | OD1 | 2.506 |
| 3HAE | J_ARG_14  | NH1 | J_ASP_39  | OD1 | 3.669 |
| 3HAE | J_ARG_14  | NH1 | J_ASP_39  | OD2 | 2.840 |
| 3HAE | J_ARG_14  | NH2 | J_ASP_39  | OD1 | 2.935 |
| 3HAE | J_ARG_14  | NH2 | J_ASP_39  | OD2 | 3.651 |
| 3HAE | J_ARG_21  | NH2 | J_ASP_37  | OD1 | 3.222 |
| 3HAE | J_ARG_21  | NH2 | J_ASP_37  | OD2 | 2.441 |
| 3HAE | J_ARG_35  | NH1 | J_GLU_46  | OE1 | 3.957 |
| 3HAE | J_ARG_35  | NH1 | J_GLU_46  | OE2 | 2.953 |
| 3HAE | J_ARG_35  | NH2 | K_ASP_53  | OD1 | 3.520 |
| 3HAE | J_ARG_44  | NH1 | J_ASP_61  | OD1 | 3.422 |
| 3HAE | J_ARG_44  | NH2 | J_ASP_61  | OD1 | 3.290 |
| 3HAE | J_ARG_48  | NH2 | K_ASP_53  | OD1 | 3.945 |
| 3HAE | J_ARG_48  | NH2 | K_ASP_53  | OD2 | 3.051 |
| 3HAE | J_ARG_65  | NH1 | N_ASP_52  | OD1 | 3.749 |
| 3HAE | J_ARG_65  | NH2 | N_ASP_52  | OD1 | 2.440 |
| 3HAE | J_ARG_65  | NH2 | N_ASP_52  | OD2 | 2.989 |
| 3HAE | J_LYS_66  | NZ  | J_GLU_63  | OE1 | 2.982 |
| 3HAE | J_LYS_66  | NZ  | J_GLU_63  | OE2 | 2.809 |
| 3HAE | J_HIS_93  | ND1 | J_ASP_119 | OD1 | 3.377 |
| 3HAE | J_HIS_93  | ND1 | J_ASP_119 | OD2 | 2.805 |
| 3HAE | J_ARG_108 | NH2 | J_ASP_106 | OD1 | 3.482 |
| 3HAE | J_ARG_108 | NH2 | J_ASP_106 | OD2 | 3.608 |
| 3HAE | J_LYS_121 | NZ  | J_ASP_137 | OD1 | 3.426 |
| 3HAE | J_HIS_151 | ND1 | J_GLU_154 | OE1 | 3.986 |
| 3HAE | J_ARG_170 | NH2 | J_GLU_55  | OE1 | 2.482 |
| 3HAE | J_ARG_170 | NH2 | J_GLU_55  | OE2 | 3.313 |
| 3HAE | J_ARG_181 | NH2 | J_ASP_183 | OD2 | 3.327 |
| 3HAE | J_HIS_191 | ND1 | J_GLU_254 | OE2 | 3.434 |
| 3HAE | J_ARG_256 | NH2 | J_ASP_220 | OD1 | 3.258 |
| 3HAE | K_ARG_81  | NH1 | K_ASP_38  | OD2 | 2.492 |
| 3HAE | P_HIS_3   | NE2 | P_ASP_29  | OD2 | 3.769 |
| 3HAE | P_ARG_6   | NH1 | P_ASP_102 | OD1 | 2.755 |
| 3HAE | P_ARG_6   | NH2 | P_ASP_102 | OD1 | 3.424 |
| 3HAE | P_ARG_14  | NH1 | P_ASP_39  | OD1 | 3.423 |
| 3HAE | P_ARG_14  | NH1 | P_ASP_39  | OD2 | 3.000 |
| 3HAE | P_ARG_14  | NH2 | P_ASP_39  | OD1 | 2.960 |
| 3HAE | P_ARG_14  | NH2 | P_ASP_39  | OD2 | 3.984 |

|      |           |     |           |     |       |
|------|-----------|-----|-----------|-----|-------|
| 3HAE | P_ARG_21  | NH2 | P_ASP_37  | OD1 | 3.733 |
| 3HAE | P_ARG_21  | NH2 | P_ASP_37  | OD2 | 3.125 |
| 3HAE | P_ARG_35  | NH1 | P_GLU_46  | OE2 | 3.659 |
| 3HAE | P_ARG_35  | NH1 | Q_ASP_53  | OD2 | 3.921 |
| 3HAE | P_ARG_35  | NH2 | P_GLU_46  | OE2 | 2.679 |
| 3HAE | P_ARG_44  | NH1 | P_ASP_61  | OD1 | 3.128 |
| 3HAE | P_ARG_44  | NH2 | P_ASP_61  | OD1 | 3.068 |
| 3HAE | P_ARG_48  | NH2 | Q_ASP_53  | OD1 | 3.566 |
| 3HAE | P_ARG_48  | NH2 | Q_ASP_53  | OD2 | 2.872 |
| 3HAE | P_ARG_65  | NH1 | S_ASP_52  | OD1 | 3.579 |
| 3HAE | P_ARG_65  | NH1 | S_ASP_52  | OD2 | 3.466 |
| 3HAE | P_ARG_65  | NH2 | S_ASP_52  | OD1 | 3.120 |
| 3HAE | P_ARG_65  | NH2 | S_ASP_52  | OD2 | 2.826 |
| 3HAE | P_LYS_66  | NZ  | P_GLU_63  | OE1 | 3.514 |
| 3HAE | P_LYS_66  | NZ  | P_GLU_63  | OE2 | 3.135 |
| 3HAE | P_HIS_93  | ND1 | P_ASP_119 | OD1 | 3.199 |
| 3HAE | P_HIS_93  | ND1 | P_ASP_119 | OD2 | 2.626 |
| 3HAE | P_ARG_97  | NH2 | P_ASP_77  | OD2 | 3.656 |
| 3HAE | P_ARG_108 | NH2 | P_ASP_106 | OD1 | 3.268 |
| 3HAE | P_ARG_108 | NH2 | P_ASP_106 | OD2 | 2.709 |
| 3HAE | P_ARG_111 | NH1 | P_GLU_128 | OE1 | 3.578 |
| 3HAE | P_LYS_144 | NZ  | P_GLU_148 | OE1 | 3.286 |
| 3HAE | P_HIS_151 | ND1 | P_GLU_154 | OE1 | 3.029 |
| 3HAE | P_ARG_157 | NH2 | P_GLU_161 | OE1 | 3.353 |
| 3HAE | P_ARG_157 | NH2 | P_GLU_161 | OE2 | 3.284 |
| 3HAE | P_ARG_170 | NH1 | P_GLU_55  | OE1 | 3.443 |
| 3HAE | P_ARG_170 | NH1 | P_GLU_55  | OE2 | 3.001 |
| 3HAE | P_ARG_170 | NH2 | P_GLU_55  | OE1 | 3.201 |
| 3HAE | P_ARG_170 | NH2 | P_GLU_55  | OE2 | 3.200 |
| 3HAE | P_ARG_181 | NH2 | P_ASP_183 | OD2 | 3.944 |
| 3HAE | P_HIS_191 | ND1 | P_GLU_254 | OE2 | 3.652 |
| 3HAE | P_HIS_191 | NE2 | P_GLU_254 | OE2 | 3.983 |
| 3HAE | P_ARG_256 | NH2 | P_ASP_220 | OD2 | 2.906 |
| 3HAE | Q_LYS_6   | NZ  | P_GLU_232 | OE2 | 3.965 |
| 3HAE | Q_ARG_45  | NH1 | Q_ASP_38  | OD1 | 3.784 |
| 3HAE | Q_ARG_45  | NH2 | Q_GLU_47  | OE1 | 3.894 |
| 3HAE | Q_LYS_75  | NZ  | Q_GLU_74  | OE2 | 3.176 |
| 3HAE | L_HIS_51  | ND1 | L_ASP_52  | OD2 | 3.196 |
| 3HAE | L_ARG_63  | NH1 | L_GLU_83  | OE1 | 3.861 |
| 3HAE | L_ARG_63  | NH1 | L_ASP_84  | OD1 | 3.672 |
| 3HAE | L_ARG_63  | NH1 | L_ASP_84  | OD2 | 3.946 |
| 3HAE | L_ARG_63  | NH2 | L_ASP_84  | OD1 | 2.766 |
| 3HAE | L_ARG_63  | NH2 | L_ASP_84  | OD2 | 2.158 |
| 3HAE | L_HIS_87  | ND1 | L_ASP_105 | OD1 | 3.871 |
| 3HAE | L_HIS_87  | NE2 | L_ASP_105 | OD1 | 3.639 |
| 3HAE | L_LYS_169 | NZ  | L_GLU_85  | OE1 | 2.871 |
| 3HAE | G_HIS_51  | ND1 | G_ASP_52  | OD2 | 2.400 |
| 3HAE | G_ARG_63  | NH1 | G_ASP_84  | OD1 | 3.142 |
| 3HAE | G_ARG_63  | NH1 | G_ASP_84  | OD2 | 3.199 |
| 3HAE | G_ARG_63  | NH2 | G_ASP_84  | OD1 | 3.746 |
| 3HAE | G_ARG_63  | NH2 | G_ASP_84  | OD2 | 2.857 |
| 3HAE | G_LYS_169 | NZ  | G_GLU_85  | OE1 | 2.988 |
| 3HAE | N_HIS_51  | ND1 | N_ASP_52  | OD2 | 2.806 |
| 3HAE | N_ARG_63  | NH1 | N_ASP_84  | OD1 | 3.108 |
| 3HAE | N_ARG_63  | NH1 | N_ASP_84  | OD2 | 3.603 |
| 3HAE | N_ARG_63  | NH2 | N_ASP_84  | OD1 | 3.712 |
| 3HAE | N_ARG_63  | NH2 | N_ASP_84  | OD2 | 2.760 |
| 3HAE | N_HIS_87  | ND1 | N_ASP_105 | OD1 | 3.966 |

|      |           |     |           |     |       |
|------|-----------|-----|-----------|-----|-------|
| 3HAE | N_HIS_87  | NE2 | N_ASP_105 | OD1 | 3.798 |
| 3HAE | N_LYS_132 | NZ  | O_ASP_150 | OD2 | 3.615 |
| 3HAE | N_LYS_169 | NZ  | N_GLU_85  | OE1 | 3.035 |
| 3HAE | N_LYS_169 | NZ  | N_GLU_85  | OE2 | 3.916 |
| 3HAE | S_HIS_51  | ND1 | S_ASP_52  | OD2 | 2.614 |
| 3HAE | S_ARG_63  | NH1 | S_ASP_84  | OD1 | 3.147 |
| 3HAE | S_ARG_63  | NH1 | S_ASP_84  | OD2 | 3.129 |
| 3HAE | S_ARG_63  | NH2 | S_ASP_84  | OD1 | 3.845 |
| 3HAE | S_ARG_63  | NH2 | S_ASP_84  | OD2 | 2.474 |
| 3HAE | S_HIS_87  | ND1 | S_ASP_105 | OD1 | 3.612 |
| 3HAE | S_HIS_87  | NE2 | S_ASP_105 | OD1 | 3.221 |
| 3HAE | S_LYS_169 | NZ  | S_GLU_85  | OE2 | 3.086 |
| 3HAE | S_LYS_174 | NZ  | S_ASP_141 | OD2 | 3.360 |
| 3HAE | H_ARG_38  | NH1 | H_ASP_90  | OD1 | 3.222 |
| 3HAE | H_ARG_38  | NH2 | H_GLU_46  | OE1 | 3.510 |
| 3HAE | H_ARG_38  | NH2 | H_GLU_46  | OE2 | 2.712 |
| 3HAE | H_ARG_38  | NH2 | H_ASP_90  | OD1 | 4.000 |
| 3HAE | H_LYS_65  | NZ  | H_ASP_62  | OD1 | 3.122 |
| 3HAE | H_ARG_67  | NH1 | H_ASP_90  | OD1 | 3.984 |
| 3HAE | H_ARG_67  | NH1 | H_ASP_90  | OD2 | 2.555 |
| 3HAE | H_ARG_67  | NH2 | H_ASP_90  | OD1 | 2.773 |
| 3HAE | H_ARG_67  | NH2 | H_ASP_90  | OD2 | 2.913 |
| 3HAE | H_LYS_76  | NZ  | H_ASP_73  | OD1 | 3.678 |
| 3HAE | H_LYS_215 | NZ  | L_GLU_126 | OE1 | 3.537 |
| 3HAE | H_LYS_215 | NZ  | L_GLU_126 | OE2 | 3.674 |
| 3HAE | L_ARG_38  | NH1 | L_ASP_90  | OD1 | 3.105 |
| 3HAE | L_ARG_38  | NH2 | L_GLU_46  | OE1 | 3.780 |
| 3HAE | L_ARG_38  | NH2 | L_GLU_46  | OE2 | 2.913 |
| 3HAE | L_ARG_38  | NH2 | L_ASP_90  | OD1 | 3.959 |
| 3HAE | L_LYS_65  | NZ  | L_ASP_62  | OD1 | 2.989 |
| 3HAE | L_ARG_67  | NH1 | L_ASP_90  | OD2 | 2.847 |
| 3HAE | L_ARG_67  | NH2 | L_ASP_90  | OD1 | 2.911 |
| 3HAE | L_ARG_67  | NH2 | L_ASP_90  | OD2 | 3.060 |
| 3HAE | L_LYS_76  | NZ  | L_ASP_73  | OD1 | 3.921 |
| 3HAE | L_LYS_149 | NZ  | L_ASP_150 | OD1 | 3.830 |
| 3HAE | L_LYS_212 | NZ  | L_ASP_214 | OD1 | 2.825 |
| 3HAE | L_LYS_212 | NZ  | L_ASP_214 | OD2 | 3.108 |
| 3HAE | L_LYS_215 | NZ  | G_GLU_126 | OE1 | 3.678 |
| 3HAE | L_LYS_216 | NZ  | L_GLU_218 | OE2 | 3.121 |
| 3HAE | O_ARG_38  | NH1 | O_ASP_90  | OD1 | 2.713 |
| 3HAE | O_ARG_38  | NH2 | O_GLU_46  | OE1 | 3.369 |
| 3HAE | O_ARG_38  | NH2 | O_GLU_46  | OE2 | 3.065 |
| 3HAE | O_ARG_38  | NH2 | O_ASP_90  | OD1 | 3.703 |
| 3HAE | O_ARG_67  | NH1 | O_ASP_90  | OD2 | 2.733 |
| 3HAE | O_ARG_67  | NH2 | O_ASP_90  | OD1 | 3.178 |
| 3HAE | O_ARG_67  | NH2 | O_ASP_90  | OD2 | 3.173 |
| 3HAE | O_LYS_215 | NZ  | N_GLU_126 | OE2 | 3.736 |
| 3HAE | O_LYS_216 | NZ  | O_GLU_218 | OE2 | 3.610 |
| 3HAE | T_ARG_38  | NH1 | T_ASP_90  | OD1 | 3.080 |
| 3HAE | T_ARG_38  | NH2 | T_GLU_46  | OE1 | 3.373 |
| 3HAE | T_ARG_38  | NH2 | T_GLU_46  | OE2 | 2.779 |
| 3HAE | T_ARG_38  | NH2 | T_ASP_90  | OD1 | 3.979 |
| 3HAE | T_ARG_67  | NH1 | T_ASP_90  | OD2 | 2.923 |
| 3HAE | T_ARG_67  | NH2 | T_ASP_90  | OD1 | 3.524 |
| 3HAE | T_ARG_67  | NH2 | T_ASP_90  | OD2 | 3.612 |
| 3HAE | T_LYS_212 | NZ  | T_ASP_214 | OD1 | 3.968 |
| 3HAE | T_LYS_215 | NZ  | S_GLU_126 | OE1 | 2.660 |
| 3HAE | T_LYS_215 | NZ  | S_GLU_126 | OE2 | 3.779 |



|      |           |    |           |     |       |
|------|-----------|----|-----------|-----|-------|
| 3HAE | T_LYS_216 | NZ | T_GLU_218 | OE2 | 3.675 |
|------|-----------|----|-----------|-----|-------|

Table 408: 3HAE-specific salt bridging networks analysis. In this table, a PDB file is specified with a four-letter PDB ID, except that the names of the PDB files corresponding to the single NMR structural model split from the NMR ensemble is specified with a four-letter PDB ID in addition to a hyphen followed by the single NMR structural model numeric ID, the residue naming scheme is **Chain ID\_residue name\_residue number**,  $\angle ADH$  represents the angle formed by acceptor (A), donor (D) and hydrogen (H) ( $\angle ADH$ ).

| PDB ID | Residue A | Atom A | Residue B | Atom B | Distance (Å) |
|--------|-----------|--------|-----------|--------|--------------|
| 3HFM   | L_HIS_34  | ND1    | H_ASP_99  | OD1    | 3.756        |
| 3HFM   | L_HIS_34  | ND1    | H_ASP_99  | OD2    | 3.698        |
| 3HFM   | L_LYS_49  | NZ     | H_ASP_99  | OD1    | 3.423        |
| 3HFM   | L_ARG_61  | NH1    | L_ASP_82  | OD1    | 2.585        |
| 3HFM   | L_ARG_61  | NH1    | L_ASP_82  | OD2    | 2.332        |
| 3HFM   | L_ARG_61  | NH2    | L_GLU_79  | OE1    | 3.732        |
| 3HFM   | L_ARG_108 | NH1    | L_ASP_170 | OD1    | 3.833        |
| 3HFM   | L_LYS_142 | NZ     | L_GLU_105 | OE2    | 3.995        |
| 3HFM   | L_LYS_147 | NZ     | L_GLU_154 | OE2    | 3.463        |
| 3HFM   | L_LYS_149 | NZ     | L_GLU_195 | OE1    | 3.304        |
| 3HFM   | L_LYS_149 | NZ     | L_GLU_195 | OE2    | 3.873        |
| 3HFM   | L_HIS_189 | ND1    | L_ASP_151 | OD1    | 2.425        |
| 3HFM   | L_LYS_199 | NZ     | L_ASP_110 | OD2    | 3.937        |
| 3HFM   | H_ARG_38  | NH1    | H_ASP_89  | OD2    | 3.586        |
| 3HFM   | H_ARG_38  | NH2    | H_GLU_46  | OE1    | 3.434        |
| 3HFM   | H_ARG_38  | NH2    | H_GLU_46  | OE2    | 2.361        |
| 3HFM   | H_ARG_66  | NH1    | H_ASP_89  | OD1    | 2.908        |
| 3HFM   | H_ARG_66  | NH1    | H_ASP_89  | OD2    | 3.682        |
| 3HFM   | H_ARG_66  | NH2    | H_ASP_89  | OD1    | 3.356        |
| 3HFM   | H_ARG_66  | NH2    | H_ASP_89  | OD2    | 2.574        |
| 3HFM   | H_LYS_209 | NZ     | L_GLU_123 | OE1    | 2.622        |
| 3HFM   | H_ARG_213 | NH2    | L_GLU_123 | OE1    | 3.991        |
| 3HFM   | Y_LYS_1   | NZ     | Y_GLU_7   | OE1    | 2.881        |
| 3HFM   | Y_LYS_1   | NZ     | Y_GLU_7   | OE2    | 2.663        |
| 3HFM   | Y_LYS_97  | NZ     | H_ASP_32  | OD1    | 3.609        |
| 3HFM   | Y_ARG_125 | NH1    | Y_ASP_119 | OD2    | 3.874        |

Table 409: 3HFM-specific salt bridging networks analysis. In this table, a PDB file is specified with a four-letter PDB ID, except that the names of the PDB files corresponding to the single NMR structural model split from the NMR ensemble is specified with a four-letter PDB ID in addition to a hyphen followed by the single NMR structural model numeric ID, the residue naming scheme is **Chain ID\_residue name\_residue number**,  $\angle ADH$  represents the angle formed by acceptor (A), donor (D) and hydrogen (H) ( $\angle ADH$ ).

| PDB ID | Residue A | Atom A | Residue B | Atom B | Distance (Å) |
|--------|-----------|--------|-----------|--------|--------------|
| 3HI6   | A_LYS_155 | NZ     | A_ASP_193 | OD1    | 2.768        |
| 3HI6   | A_LYS_178 | NZ     | A_GLU_180 | OE1    | 3.586        |
| 3HI6   | A_ARG_221 | NH1    | A_GLU_218 | OE1    | 3.057        |
| 3HI6   | A_ARG_227 | NH2    | A_ASP_131 | OD1    | 2.862        |
| 3HI6   | A_LYS_252 | NZ     | A_ASP_249 | OD2    | 3.996        |
| 3HI6   | A_LYS_287 | NZ     | A_GLU_301 | OE1    | 3.340        |
| 3HI6   | A_LYS_287 | NZ     | A_GLU_301 | OE2    | 2.773        |
| 3HI6   | A_LYS_304 | NZ     | A_GLU_301 | OE2    | 2.760        |
| 3HI6   | B_LYS_155 | NZ     | B_ASP_193 | OD1    | 3.786        |
| 3HI6   | B_LYS_159 | NZ     | B_ASP_193 | OD1    | 3.099        |
| 3HI6   | B_LYS_159 | NZ     | B_ASP_193 | OD2    | 3.154        |
| 3HI6   | B_LYS_178 | NZ     | B_GLU_180 | OE1    | 2.889        |
| 3HI6   | B_ARG_221 | NH1    | B_GLU_223 | OE2    | 2.829        |
| 3HI6   | B_ARG_221 | NH2    | B_GLU_218 | OE1    | 3.646        |
| 3HI6   | B_ARG_227 | NH2    | B_ASP_131 | OD1    | 2.921        |
| 3HI6   | B_LYS_304 | NZ     | B_GLU_301 | OE2    | 3.130        |
| 3HI6   | H_ARG_38  | NH1    | H_ASP_90  | OD1    | 3.103        |
| 3HI6   | H_ARG_38  | NH2    | H_GLU_46  | OE1    | 3.371        |
| 3HI6   | H_ARG_38  | NH2    | H_GLU_46  | OE2    | 3.628        |
| 3HI6   | H_LYS_65  | NZ     | H_ASP_62  | OD1    | 3.388        |
| 3HI6   | H_ARG_67  | NH1    | H_ASP_90  | OD1    | 3.897        |
| 3HI6   | H_ARG_67  | NH1    | H_ASP_90  | OD2    | 2.936        |
| 3HI6   | H_ARG_67  | NH2    | H_ASP_90  | OD1    | 3.035        |
| 3HI6   | H_ARG_67  | NH2    | H_ASP_90  | OD2    | 3.561        |
| 3HI6   | H_LYS_150 | NZ     | H_ASP_151 | OD1    | 3.237        |
| 3HI6   | H_LYS_150 | NZ     | H_ASP_151 | OD2    | 3.331        |
| 3HI6   | H_LYS_216 | NZ     | L_GLU_122 | OE1    | 2.896        |
| 3HI6   | H_LYS_216 | NZ     | L_GLU_122 | OE2    | 3.887        |
| 3HI6   | H_ARG_217 | NH2    | H_GLU_219 | OE1    | 3.060        |
| 3HI6   | L_ARG_61  | NH2    | L_ASP_82  | OD1    | 2.928        |
| 3HI6   | L_ARG_61  | NH2    | L_ASP_82  | OD2    | 3.639        |
| 3HI6   | L_LYS_102 | NZ     | L_GLU_164 | OE1    | 3.006        |
| 3HI6   | L_LYS_102 | NZ     | L_GLU_164 | OE2    | 3.181        |
| 3HI6   | L_LYS_106 | NZ     | L_ASP_17  | OD2    | 3.521        |
| 3HI6   | L_ARG_141 | NH1    | L_GLU_164 | OE2    | 3.935        |
| 3HI6   | L_HIS_188 | ND1    | L_ASP_150 | OD2    | 2.681        |
| 3HI6   | X_ARG_38  | NH1    | X_ASP_90  | OD1    | 2.944        |
| 3HI6   | X_ARG_38  | NH2    | X_GLU_46  | OE1    | 3.305        |
| 3HI6   | X_ARG_38  | NH2    | X_GLU_46  | OE2    | 3.929        |
| 3HI6   | X_ARG_38  | NH2    | X_ASP_90  | OD1    | 3.837        |
| 3HI6   | X_ARG_67  | NH1    | X_ASP_90  | OD2    | 3.146        |
| 3HI6   | X_ARG_67  | NH2    | X_ASP_90  | OD1    | 3.168        |
| 3HI6   | X_ARG_67  | NH2    | X_ASP_90  | OD2    | 3.554        |
| 3HI6   | X_LYS_150 | NZ     | X_ASP_151 | OD2    | 3.620        |
| 3HI6   | X_LYS_216 | NZ     | Y_GLU_122 | OE1    | 3.212        |
| 3HI6   | Y_ARG_    | NH1    | Y_ASP_70  | OD1    | 2.911        |
| 3HI6   | Y_ARG_    | NH1    | Y_ASP_70  | OD2    | 3.450        |
| 3HI6   | Y_ARG_    | NH2    | Y_ASP_70  | OD1    | 3.656        |
| 3HI6   | Y_ARG_61  | NH2    | Y_GLU_81  | OE1    | 3.524        |
| 3HI6   | Y_ARG_61  | NH2    | Y_ASP_82  | OD1    | 2.775        |
| 3HI6   | Y_ARG_61  | NH2    | Y_ASP_82  | OD2    | 3.667        |
| 3HI6   | Y_HIS_188 | ND1    | Y_ASP_150 | OD2    | 3.043        |

---

Table 410: 3HI6-specific salt bridging networks analysis. In this table, a PDB file is specified with a four-letter PDB ID, except that the names of the PDB files corresponding to the single NMR structural model split from the NMR ensemble is specified with a four-letter PDB ID in addition to a hyphen followed by the single NMR structural model numeric ID, the residue naming scheme is **Chain ID\_residue name\_residue number**,  $\angle ADH$  represents the angle formed by acceptor (A), donor (D) and hydrogen (H) ( $\angle ADH$ ).

| PDB ID | Residue A | Atom A | Residue B | Atom B | Distance (Å) |
|--------|-----------|--------|-----------|--------|--------------|
| 3HMG   | A_LYS_27  | NZ     | A_ASP_32  | OD2    | 2.671        |
| 3HMG   | A_HIS_56  | ND1    | A_ASP_85  | OD2    | 3.968        |
| 3HMG   | A_ARG_57  | NH1    | A_GLU_82  | OE1    | 2.607        |
| 3HMG   | A_ARG_57  | NH1    | A_GLU_82  | OE2    | 3.527        |
| 3HMG   | A_HIS_75  | ND1    | A_ASP_73  | OD1    | 3.517        |
| 3HMG   | A_HIS_75  | ND1    | A_ASP_73  | OD2    | 2.768        |
| 3HMG   | A_HIS_75  | NE2    | A_ASP_63  | OD1    | 3.581        |
| 3HMG   | A_ARG_90  | NH1    | A_ASP_60  | OD1    | 2.768        |
| 3HMG   | A_ARG_90  | NH1    | A_ASP_60  | OD2    | 3.650        |
| 3HMG   | A_LYS_92  | NZ     | A_ASP_271 | OD2    | 3.725        |
| 3HMG   | A_ARG_109 | NH1    | B_GLU_67  | OE1    | 3.372        |
| 3HMG   | A_ARG_109 | NH1    | B_GLU_67  | OE2    | 2.849        |
| 3HMG   | A_ARG_109 | NH2    | A_GLU_89  | OE1    | 3.268        |
| 3HMG   | A_ARG_109 | NH2    | A_GLU_89  | OE2    | 2.513        |
| 3HMG   | A_ARG_141 | NH1    | A_ASP_77  | OD1    | 2.813        |
| 3HMG   | A_ARG_141 | NH1    | A_ASP_77  | OD2    | 3.101        |
| 3HMG   | A_LYS_176 | NZ     | A_GLU_123 | OE1    | 2.594        |
| 3HMG   | A_LYS_176 | NZ     | A_GLU_123 | OE2    | 3.871        |
| 3HMG   | A_HIS_183 | NE2    | A_GLU_190 | OE1    | 3.525        |
| 3HMG   | A_ARG_208 | NH2    | A_ASP_241 | OD2    | 2.755        |
| 3HMG   | A_LYS_238 | NZ     | A_ASP_175 | OD1    | 2.646        |
| 3HMG   | A_LYS_238 | NZ     | A_ASP_175 | OD2    | 3.452        |
| 3HMG   | A_LYS_238 | NZ     | F_GLU_72  | OE2    | 2.747        |
| 3HMG   | A_ARG_261 | NH1    | A_GLU_119 | OE1    | 2.789        |
| 3HMG   | A_ARG_261 | NH1    | A_GLU_119 | OE2    | 2.604        |
| 3HMG   | A_ARG_261 | NH2    | A_GLU_119 | OE1    | 3.241        |
| 3HMG   | A_LYS_264 | NZ     | A_ASP_85  | OD1    | 3.861        |
| 3HMG   | A_LYS_264 | NZ     | A_ASP_85  | OD2    | 2.924        |
| 3HMG   | A_ARG_269 | NH2    | B_GLU_67  | OE1    | 2.883        |
| 3HMG   | A_LYS_292 | NZ     | A_ASP_291 | OD1    | 2.917        |
| 3HMG   | A_LYS_299 | NZ     | B_GLU_69  | OE1    | 3.233        |
| 3HMG   | A_LYS_310 | NZ     | B_ASP_90  | OD1    | 2.577        |
| 3HMG   | A_LYS_315 | NZ     | A_GLU_41  | OE2    | 3.626        |
| 3HMG   | B_ARG_25  | NH1    | A_GLU_325 | OE1    | 3.777        |
| 3HMG   | B_LYS_51  | NZ     | B_GLU_103 | OE2    | 2.839        |
| 3HMG   | B_ARG_54  | NH1    | F_GLU_97  | OE1    | 2.798        |
| 3HMG   | B_ARG_54  | NH2    | B_GLU_57  | OE1    | 2.910        |
| 3HMG   | B_ARG_54  | NH2    | B_GLU_57  | OE2    | 3.325        |
| 3HMG   | B_ARG_54  | NH2    | F_GLU_97  | OE1    | 3.127        |
| 3HMG   | B_LYS_62  | NZ     | F_ASP_86  | OD1    | 2.986        |
| 3HMG   | B_LYS_62  | NZ     | F_ASP_86  | OD2    | 2.761        |
| 3HMG   | B_LYS_62  | NZ     | F_ASP_90  | OD1    | 3.490        |
| 3HMG   | B_LYS_62  | NZ     | F_ASP_90  | OD2    | 2.774        |
| 3HMG   | B_HIS_64  | NE2    | F_ASP_79  | OD1    | 3.991        |
| 3HMG   | B_HIS_64  | NE2    | F_ASP_79  | OD2    | 3.618        |
| 3HMG   | B_LYS_68  | NZ     | B_GLU_85  | OE1    | 3.186        |
| 3HMG   | B_LYS_68  | NZ     | B_GLU_85  | OE2    | 2.686        |
| 3HMG   | B_ARG_76  | NH1    | D_GLU_74  | OE1    | 3.445        |
| 3HMG   | B_ARG_76  | NH1    | D_GLU_74  | OE2    | 2.823        |
| 3HMG   | B_ARG_76  | NH1    | D_GLU_81  | OE1    | 2.738        |
| 3HMG   | B_ARG_76  | NH1    | D_GLU_81  | OE2    | 3.615        |
| 3HMG   | B_ARG_76  | NH2    | D_GLU_74  | OE1    | 2.830        |
| 3HMG   | B_ARG_76  | NH2    | D_GLU_74  | OE2    | 3.630        |
| 3HMG   | B_LYS_117 | NZ     | B_GLU_114 | OE1    | 2.569        |
| 3HMG   | B_LYS_117 | NZ     | B_GLU_114 | OE2    | 3.024        |
| 3HMG   | B_ARG_123 | NH1    | F_GLU_132 | OE2    | 3.281        |
| 3HMG   | B_ARG_123 | NH2    | B_GLU_120 | OE1    | 2.630        |

|      |           |     |           |     |       |
|------|-----------|-----|-----------|-----|-------|
| 3HMG | B_ARG_123 | NH2 | B_GLU_120 | OE2 | 3.334 |
| 3HMG | B_ARG_124 | NH1 | F_GLU_132 | OE1 | 3.422 |
| 3HMG | B_ARG_124 | NH1 | F_GLU_132 | OE2 | 3.128 |
| 3HMG | B_ARG_124 | NH2 | B_GLU_120 | OE1 | 3.713 |
| 3HMG | B_ARG_127 | NH2 | F_GLU_131 | OE1 | 2.404 |
| 3HMG | B_ARG_153 | NH2 | B_GLU_150 | OE2 | 2.579 |
| 3HMG | B_HIS_159 | NE2 | B_ASP_160 | OD2 | 3.179 |
| 3HMG | B_ARG_163 | NH1 | F_GLU_131 | OE1 | 2.713 |
| 3HMG | B_ARG_163 | NH1 | F_GLU_131 | OE2 | 2.661 |
| 3HMG | B_ARG_170 | NH1 | B_GLU_128 | OE1 | 2.573 |
| 3HMG | B_ARG_170 | NH2 | B_GLU_131 | OE2 | 2.707 |
| 3HMG | B_ARG_170 | NH2 | D_GLU_128 | OE1 | 3.667 |
| 3HMG | B_ARG_170 | NH2 | D_GLU_128 | OE2 | 3.704 |
| 3HMG | C_LYS_27  | NZ  | C_ASP_32  | OD2 | 2.666 |
| 3HMG | C_HIS_56  | ND1 | C_ASP_85  | OD2 | 3.933 |
| 3HMG | C_ARG_57  | NH1 | C_GLU_82  | OE1 | 2.582 |
| 3HMG | C_ARG_57  | NH1 | C_GLU_82  | OE2 | 3.551 |
| 3HMG | C_HIS_75  | ND1 | C_ASP_73  | OD1 | 3.511 |
| 3HMG | C_HIS_75  | ND1 | C_ASP_73  | OD2 | 2.757 |
| 3HMG | C_HIS_75  | NE2 | C_ASP_63  | OD1 | 3.577 |
| 3HMG | C_ARG_90  | NH1 | C_ASP_60  | OD1 | 2.751 |
| 3HMG | C_ARG_90  | NH1 | C_ASP_60  | OD2 | 3.640 |
| 3HMG | C_LYS_92  | NZ  | C_ASP_271 | OD2 | 3.710 |
| 3HMG | C_ARG_109 | NH1 | D_GLU_67  | OE1 | 3.376 |
| 3HMG | C_ARG_109 | NH1 | D_GLU_67  | OE2 | 2.842 |
| 3HMG | C_ARG_109 | NH2 | C_GLU_89  | OE1 | 3.278 |
| 3HMG | C_ARG_109 | NH2 | C_GLU_89  | OE2 | 2.563 |
| 3HMG | C_ARG_141 | NH1 | C_ASP_77  | OD1 | 2.813 |
| 3HMG | C_ARG_141 | NH1 | C_ASP_77  | OD2 | 3.109 |
| 3HMG | C_LYS_176 | NZ  | C_GLU_123 | OE1 | 2.579 |
| 3HMG | C_LYS_176 | NZ  | C_GLU_123 | OE2 | 3.881 |
| 3HMG | C_HIS_183 | NE2 | C_GLU_190 | OE1 | 3.534 |
| 3HMG | C_ARG_208 | NH2 | C_ASP_241 | OD2 | 2.719 |
| 3HMG | C_LYS_238 | NZ  | B_GLU_72  | OE2 | 2.625 |
| 3HMG | C_LYS_238 | NZ  | C_ASP_175 | OD1 | 2.646 |
| 3HMG | C_LYS_238 | NZ  | C_ASP_175 | OD2 | 3.428 |
| 3HMG | C_ARG_261 | NH1 | C_GLU_119 | OE1 | 2.776 |
| 3HMG | C_ARG_261 | NH1 | C_GLU_119 | OE2 | 2.620 |
| 3HMG | C_ARG_261 | NH2 | C_GLU_119 | OE1 | 3.254 |
| 3HMG | C_LYS_264 | NZ  | C_ASP_85  | OD1 | 3.851 |
| 3HMG | C_LYS_264 | NZ  | C_ASP_85  | OD2 | 2.872 |
| 3HMG | C_ARG_269 | NH2 | D_GLU_67  | OE1 | 2.813 |
| 3HMG | C_LYS_292 | NZ  | C_ASP_291 | OD1 | 2.970 |
| 3HMG | C_LYS_299 | NZ  | D_GLU_69  | OE1 | 3.251 |
| 3HMG | C_LYS_310 | NZ  | D_ASP_90  | OD1 | 2.544 |
| 3HMG | C_LYS_315 | NZ  | C_GLU_41  | OE2 | 3.625 |
| 3HMG | D_LYS_51  | NZ  | D_GLU_103 | OE2 | 2.876 |
| 3HMG | D_ARG_54  | NH1 | B_GLU_97  | OE1 | 2.804 |
| 3HMG | D_ARG_54  | NH2 | B_GLU_97  | OE1 | 3.138 |
| 3HMG | D_ARG_54  | NH2 | D_GLU_57  | OE1 | 2.911 |
| 3HMG | D_ARG_54  | NH2 | D_GLU_57  | OE2 | 3.348 |
| 3HMG | D_LYS_62  | NZ  | B_ASP_86  | OD1 | 2.985 |
| 3HMG | D_LYS_62  | NZ  | B_ASP_86  | OD2 | 2.721 |
| 3HMG | D_LYS_62  | NZ  | B_ASP_90  | OD1 | 3.453 |
| 3HMG | D_LYS_62  | NZ  | B_ASP_90  | OD2 | 2.701 |
| 3HMG | D_HIS_64  | NE2 | B_ASP_79  | OD1 | 3.960 |
| 3HMG | D_HIS_64  | NE2 | B_ASP_79  | OD2 | 3.444 |
| 3HMG | D_LYS_68  | NZ  | D_GLU_85  | OE1 | 3.145 |

|      |           |     |           |     |       |
|------|-----------|-----|-----------|-----|-------|
| 3HMG | D_LYS_68  | NZ  | D_GLU_85  | OE2 | 2.743 |
| 3HMG | D_ARG_76  | NH1 | F_GLU_74  | OE1 | 3.513 |
| 3HMG | D_ARG_76  | NH1 | F_GLU_74  | OE2 | 2.767 |
| 3HMG | D_ARG_76  | NH1 | F_GLU_81  | OE1 | 2.643 |
| 3HMG | D_ARG_76  | NH1 | F_GLU_81  | OE2 | 3.636 |
| 3HMG | D_ARG_76  | NH2 | F_GLU_74  | OE1 | 2.766 |
| 3HMG | D_ARG_76  | NH2 | F_GLU_74  | OE2 | 3.449 |
| 3HMG | D_LYS_117 | NZ  | D_GLU_114 | OE1 | 2.579 |
| 3HMG | D_LYS_117 | NZ  | D_GLU_114 | OE2 | 3.024 |
| 3HMG | D_ARG_123 | NH1 | B_GLU_132 | OE2 | 3.299 |
| 3HMG | D_ARG_123 | NH2 | D_GLU_120 | OE1 | 2.630 |
| 3HMG | D_ARG_123 | NH2 | D_GLU_120 | OE2 | 3.353 |
| 3HMG | D_ARG_124 | NH1 | B_GLU_132 | OE1 | 3.459 |
| 3HMG | D_ARG_124 | NH1 | B_GLU_132 | OE2 | 3.169 |
| 3HMG | D_ARG_124 | NH2 | D_GLU_120 | OE1 | 3.725 |
| 3HMG | D_ARG_127 | NH2 | B_GLU_131 | OE1 | 2.449 |
| 3HMG | D_ARG_153 | NH2 | D_GLU_150 | OE1 | 2.831 |
| 3HMG | D_HIS_159 | NE2 | D_ASP_160 | OD2 | 3.206 |
| 3HMG | D_ARG_163 | NH1 | B_GLU_131 | OE1 | 2.694 |
| 3HMG | D_ARG_163 | NH1 | B_GLU_131 | OE2 | 2.707 |
| 3HMG | D_ARG_170 | NH1 | D_GLU_128 | OE1 | 2.604 |
| 3HMG | D_ARG_170 | NH2 | D_GLU_131 | OE2 | 2.731 |
| 3HMG | D_ARG_170 | NH2 | F_GLU_128 | OE1 | 3.716 |
| 3HMG | D_ARG_170 | NH2 | F_GLU_128 | OE2 | 3.859 |
| 3HMG | E_LYS_27  | NZ  | E_ASP_32  | OD2 | 2.652 |
| 3HMG | E_HIS_56  | ND1 | E_ASP_85  | OD2 | 3.934 |
| 3HMG | E_ARG_57  | NH1 | E_GLU_82  | OE1 | 2.626 |
| 3HMG | E_ARG_57  | NH1 | E_GLU_82  | OE2 | 3.570 |
| 3HMG | E_HIS_75  | ND1 | E_ASP_73  | OD1 | 3.497 |
| 3HMG | E_HIS_75  | ND1 | E_ASP_73  | OD2 | 2.783 |
| 3HMG | E_HIS_75  | NE2 | E_ASP_63  | OD1 | 3.565 |
| 3HMG | E_ARG_90  | NH1 | E_ASP_60  | OD1 | 2.760 |
| 3HMG | E_ARG_90  | NH1 | E_ASP_60  | OD2 | 3.651 |
| 3HMG | E_LYS_92  | NZ  | E_ASP_271 | OD2 | 3.691 |
| 3HMG | E_ARG_109 | NH1 | F_GLU_67  | OE1 | 3.402 |
| 3HMG | E_ARG_109 | NH1 | F_GLU_67  | OE2 | 2.841 |
| 3HMG | E_ARG_109 | NH2 | E_GLU_89  | OE1 | 3.254 |
| 3HMG | E_ARG_109 | NH2 | E_GLU_89  | OE2 | 2.493 |
| 3HMG | E_ARG_141 | NH1 | E_ASP_77  | OD1 | 2.813 |
| 3HMG | E_ARG_141 | NH1 | E_ASP_77  | OD2 | 3.105 |
| 3HMG | E_LYS_176 | NZ  | E_GLU_123 | OE1 | 2.615 |
| 3HMG | E_LYS_176 | NZ  | E_GLU_123 | OE2 | 3.893 |
| 3HMG | E_HIS_183 | NE2 | E_GLU_190 | OE1 | 3.535 |
| 3HMG | E_ARG_208 | NH2 | E_ASP_241 | OD2 | 2.774 |
| 3HMG | E_LYS_238 | NZ  | D_GLU_72  | OE2 | 2.745 |
| 3HMG | E_LYS_238 | NZ  | E_ASP_175 | OD1 | 2.643 |
| 3HMG | E_LYS_238 | NZ  | E_ASP_175 | OD2 | 3.469 |
| 3HMG | E_ARG_261 | NH1 | E_GLU_119 | OE1 | 2.788 |
| 3HMG | E_ARG_261 | NH1 | E_GLU_119 | OE2 | 2.617 |
| 3HMG | E_ARG_261 | NH2 | E_GLU_119 | OE1 | 3.257 |
| 3HMG | E_LYS_264 | NZ  | E_ASP_85  | OD1 | 3.857 |
| 3HMG | E_LYS_264 | NZ  | E_ASP_85  | OD2 | 2.875 |
| 3HMG | E_ARG_269 | NH2 | F_GLU_67  | OE1 | 2.840 |
| 3HMG | E_LYS_292 | NZ  | E_ASP_291 | OD1 | 2.926 |
| 3HMG | E_LYS_299 | NZ  | F_GLU_69  | OE1 | 3.192 |
| 3HMG | E_LYS_310 | NZ  | F_ASP_90  | OD1 | 2.563 |
| 3HMG | E_LYS_315 | NZ  | E_GLU_41  | OE2 | 3.619 |
| 3HMG | F_ARG_25  | NH1 | E_GLU_325 | OE2 | 3.879 |

|      |           |     |           |     |       |
|------|-----------|-----|-----------|-----|-------|
| 3HMG | F_ARG_25  | NH2 | E_GLU_325 | OE2 | 3.668 |
| 3HMG | F_LYS_51  | NZ  | F_GLU_103 | OE2 | 2.823 |
| 3HMG | F_ARG_54  | NH1 | D_GLU_97  | OE1 | 2.700 |
| 3HMG | F_ARG_54  | NH2 | D_GLU_97  | OE1 | 3.155 |
| 3HMG | F_ARG_54  | NH2 | F_GLU_57  | OE1 | 2.900 |
| 3HMG | F_ARG_54  | NH2 | F_GLU_57  | OE2 | 3.295 |
| 3HMG | F_LYS_62  | NZ  | D_ASP_86  | OD1 | 2.928 |
| 3HMG | F_LYS_62  | NZ  | D_ASP_86  | OD2 | 2.697 |
| 3HMG | F_LYS_62  | NZ  | D_ASP_90  | OD1 | 3.563 |
| 3HMG | F_LYS_62  | NZ  | D_ASP_90  | OD2 | 2.800 |
| 3HMG | F_HIS_64  | NE2 | D_ASP_79  | OD1 | 3.875 |
| 3HMG | F_HIS_64  | NE2 | D_ASP_79  | OD2 | 3.441 |
| 3HMG | F_LYS_68  | NZ  | F_GLU_85  | OE1 | 3.194 |
| 3HMG | F_LYS_68  | NZ  | F_GLU_85  | OE2 | 2.724 |
| 3HMG | F_ARG_76  | NH1 | B_GLU_74  | OE1 | 3.414 |
| 3HMG | F_ARG_76  | NH1 | B_GLU_74  | OE2 | 2.793 |
| 3HMG | F_ARG_76  | NH1 | B_GLU_81  | OE1 | 2.687 |
| 3HMG | F_ARG_76  | NH1 | B_GLU_81  | OE2 | 3.711 |
| 3HMG | F_ARG_76  | NH2 | B_GLU_74  | OE1 | 2.734 |
| 3HMG | F_ARG_76  | NH2 | B_GLU_74  | OE2 | 3.548 |
| 3HMG | F_LYS_117 | NZ  | F_GLU_114 | OE1 | 2.569 |
| 3HMG | F_LYS_117 | NZ  | F_GLU_114 | OE2 | 3.073 |
| 3HMG | F_ARG_123 | NH1 | D_GLU_132 | OE2 | 3.319 |
| 3HMG | F_ARG_123 | NH2 | F_GLU_120 | OE1 | 2.637 |
| 3HMG | F_ARG_123 | NH2 | F_GLU_120 | OE2 | 3.351 |
| 3HMG | F_ARG_124 | NH1 | D_GLU_132 | OE1 | 3.517 |
| 3HMG | F_ARG_124 | NH1 | D_GLU_132 | OE2 | 3.294 |
| 3HMG | F_ARG_124 | NH1 | F_GLU_120 | OE1 | 3.989 |
| 3HMG | F_ARG_124 | NH2 | F_GLU_120 | OE1 | 3.690 |
| 3HMG | F_ARG_127 | NH2 | D_GLU_131 | OE1 | 2.559 |
| 3HMG | F_HIS_159 | NE2 | F_ASP_160 | OD2 | 3.217 |
| 3HMG | F_ARG_163 | NH1 | D_GLU_131 | OE1 | 2.673 |
| 3HMG | F_ARG_163 | NH1 | D_GLU_131 | OE2 | 2.666 |
| 3HMG | F_ARG_170 | NH1 | F_GLU_128 | OE1 | 2.616 |
| 3HMG | F_ARG_170 | NH2 | B_GLU_128 | OE1 | 3.705 |
| 3HMG | F_ARG_170 | NH2 | B_GLU_128 | OE2 | 3.753 |
| 3HMG | F_ARG_170 | NH2 | F_GLU_131 | OE2 | 2.717 |

Table 411: 3HMG-specific salt bridging networks analysis. In this table, a PDB file is specified with a four-letter PDB ID, except that the names of the PDB files corresponding to the single NMR structural model split from the NMR ensemble is specified with a four-letter PDB ID in addition to a hyphen followed by the single NMR structural model numeric ID, the residue naming scheme is **Chain ID\_residue name\_residue number**,  $\angle ADH$  represents the angle formed by acceptor (A), donor (D) and hydrogen (H) ( $\angle ADH$ ).



| PDB ID | Residue A | Atom A | Residue B | Atom B | Distance (Å) |
|--------|-----------|--------|-----------|--------|--------------|
| 3HZK   | A_LYS_24  | NZ     | A_ASP_70  | OD1    | 3.032        |
| 3HZK   | A_LYS_24  | NZ     | A_ASP_70  | OD2    | 3.302        |
| 3HZK   | A_ARG_61  | NH1    | A_ASP_82  | OD1    | 2.826        |
| 3HZK   | A_ARG_61  | NH1    | A_ASP_82  | OD2    | 3.622        |
| 3HZK   | A_ARG_95  | NH2    | B_ASP_95  | OD1    | 3.611        |
| 3HZK   | A_ARG_95  | NH2    | B_ASP_95  | OD2    | 2.795        |
| 3HZK   | A_LYS_102 | NZ     | A_GLU_104 | OE1    | 3.918        |
| 3HZK   | A_LYS_148 | NZ     | A_GLU_194 | OE1    | 3.895        |
| 3HZK   | A_LYS_148 | NZ     | A_GLU_194 | OE2    | 3.185        |
| 3HZK   | A_ARG_154 | NH1    | A_GLU_184 | OE1    | 3.701        |
| 3HZK   | A_ARG_154 | NH2    | A_GLU_184 | OE1    | 3.490        |
| 3HZK   | A_LYS_182 | NZ     | A_GLU_186 | OE1    | 2.645        |
| 3HZK   | A_LYS_182 | NZ     | A_GLU_186 | OE2    | 3.525        |
| 3HZK   | A_HIS_188 | ND1    | A_ASP_150 | OD2    | 3.092        |
| 3HZK   | A_LYS_198 | NZ     | A_ASP_109 | OD2    | 3.722        |
| 3HZK   | B_ARG_38  | NH1    | B_ASP_86  | OD2    | 2.994        |
| 3HZK   | B_ARG_38  | NH2    | B_GLU_46  | OE1    | 3.036        |
| 3HZK   | B_ARG_38  | NH2    | B_GLU_46  | OE2    | 3.939        |
| 3HZK   | B_ARG_38  | NH2    | B_ASP_86  | OD2    | 3.973        |
| 3HZK   | B_ARG_52  | NH1    | B_GLU_58  | OE2    | 2.780        |
| 3HZK   | B_ARG_52  | NH2    | B_GLU_58  | OE2    | 3.087        |
| 3HZK   | B_ARG_66  | NH1    | B_ASP_86  | OD1    | 2.850        |
| 3HZK   | B_ARG_66  | NH1    | B_ASP_86  | OD2    | 3.686        |
| 3HZK   | B_ARG_66  | NH2    | B_ASP_86  | OD1    | 3.613        |
| 3HZK   | B_ARG_66  | NH2    | B_ASP_86  | OD2    | 2.940        |
| 3HZK   | B_ARG_94  | NH2    | B_ASP_101 | OD1    | 3.902        |
| 3HZK   | B_ARG_94  | NH2    | B_ASP_101 | OD2    | 2.967        |
| 3HZK   | B_LYS_207 | NZ     | A_GLU_122 | OE2    | 3.993        |

Table 412: 3HZK-specific salt bridging networks analysis. In this table, a PDB file is specified with a four-letter PDB ID, except that the names of the PDB files corresponding to the single NMR structural model split from the NMR ensemble is specified with a four-letter PDB ID in addition to a hyphen followed by the single NMR structural model numeric ID, the residue naming scheme is **Chain ID\_residue name\_residue number**,  $\angle ADH$  represents the angle formed by acceptor (A), donor (D) and hydrogen (H) ( $\angle ADH$ ).

| PDB ID | Residue A | Atom A | Residue B  | Atom B | Distance (Å) |
|--------|-----------|--------|------------|--------|--------------|
| 3HZM   | A_LYS_24  | NZ     | A_ASP_70   | OD1    | 2.853        |
| 3HZM   | A_LYS_24  | NZ     | A_ASP_70   | OD2    | 3.528        |
| 3HZM   | A_LYS_39  | NZ     | A_GLU_81   | OE2    | 3.193        |
| 3HZM   | A_ARG_61  | NH1    | A_GLU_81   | OE1    | 3.361        |
| 3HZM   | A_ARG_61  | NH1    | A_ASP_82   | OD1    | 2.891        |
| 3HZM   | A_ARG_61  | NH1    | A_ASP_82   | OD2    | 3.592        |
| 3HZM   | A_ARG_95  | NH2    | B_ASP_95   | OD1    | 3.493        |
| 3HZM   | A_ARG_95  | NH2    | B_ASP_95   | OD2    | 2.771        |
| 3HZM   | A_ARG_95  | NH2    | B_ASP_100E | OD1    | 3.831        |
| 3HZM   | A_LYS_146 | NZ     | A_GLU_153  | OE2    | 3.706        |
| 3HZM   | A_LYS_148 | NZ     | A_GLU_194  | OE1    | 3.173        |
| 3HZM   | A_LYS_148 | NZ     | A_GLU_194  | OE2    | 2.785        |
| 3HZM   | A_ARG_154 | NH1    | A_GLU_184  | OE2    | 3.270        |
| 3HZM   | A_LYS_182 | NZ     | A_GLU_186  | OE1    | 3.833        |
| 3HZM   | A_LYS_182 | NZ     | A_GLU_186  | OE2    | 3.992        |
| 3HZM   | A_ARG_187 | NH2    | A_GLU_184  | OE1    | 3.077        |
| 3HZM   | A_HIS_188 | ND1    | A_ASP_150  | OD2    | 3.055        |
| 3HZM   | A_HIS_188 | NE2    | A_GLU_184  | OE1    | 3.680        |
| 3HZM   | A_HIS_188 | NE2    | A_GLU_184  | OE2    | 3.167        |
| 3HZM   | A_LYS_198 | NZ     | A_ASP_109  | OD2    | 3.763        |
| 3HZM   | B_ARG_38  | NH1    | B_ASP_86   | OD2    | 2.747        |
| 3HZM   | B_ARG_38  | NH2    | B_GLU_46   | OE1    | 2.957        |
| 3HZM   | B_ARG_38  | NH2    | B_GLU_46   | OE2    | 3.921        |
| 3HZM   | B_ARG_38  | NH2    | B_ASP_86   | OD2    | 3.860        |
| 3HZM   | B_ARG_52  | NH1    | B_GLU_58   | OE2    | 2.944        |
| 3HZM   | B_ARG_52  | NH2    | B_GLU_58   | OE2    | 2.835        |
| 3HZM   | B_ARG_66  | NH1    | B_ASP_86   | OD1    | 2.764        |
| 3HZM   | B_ARG_66  | NH1    | B_ASP_86   | OD2    | 3.758        |
| 3HZM   | B_ARG_66  | NH2    | B_ASP_86   | OD1    | 3.543        |
| 3HZM   | B_ARG_66  | NH2    | B_ASP_86   | OD2    | 3.021        |
| 3HZM   | B_ARG_94  | NH2    | B_ASP_101  | OD1    | 3.649        |
| 3HZM   | B_ARG_94  | NH2    | B_ASP_101  | OD2    | 2.613        |
| 3HZM   | B_LYS_207 | NZ     | A_GLU_122  | OE2    | 3.353        |

Table 413: 3HZM-specific salt bridging networks analysis. In this table, a PDB file is specified with a four-letter PDB ID, except that the names of the PDB files corresponding to the single NMR structural model split from the NMR ensemble is specified with a four-letter PDB ID in addition to a hyphen followed by the single NMR structural model numeric ID, the residue naming scheme is **Chain ID\_residue name\_residue number**,  $\angle ADH$  represents the angle formed by acceptor (A), donor (D) and hydrogen (H) ( $\angle ADH$ ).

| PDB ID | Residue A | Atom A | Residue B  | Atom B | Distance (Å) |
|--------|-----------|--------|------------|--------|--------------|
| 3HZV   | A_LYS_24  | NZ     | A_ASP_70   | OD1    | 3.175        |
| 3HZV   | A_LYS_24  | NZ     | A_ASP_70   | OD2    | 3.513        |
| 3HZV   | A_LYS_39  | NZ     | A_GLU_81   | OE2    | 2.855        |
| 3HZV   | A_ARG_61  | NH1    | A_GLU_81   | OE1    | 3.565        |
| 3HZV   | A_ARG_61  | NH1    | A_ASP_82   | OD1    | 2.789        |
| 3HZV   | A_ARG_61  | NH1    | A_ASP_82   | OD2    | 3.461        |
| 3HZV   | A_ARG_95  | NH2    | B_ASP_95   | OD1    | 3.498        |
| 3HZV   | A_ARG_95  | NH2    | B_ASP_95   | OD2    | 2.821        |
| 3HZV   | A_ARG_95  | NH2    | B_ASP_100E | OD1    | 3.905        |
| 3HZV   | A_LYS_148 | NZ     | A_GLU_194  | OE1    | 3.263        |
| 3HZV   | A_LYS_148 | NZ     | A_GLU_194  | OE2    | 3.225        |
| 3HZV   | A_LYS_182 | NZ     | A_GLU_186  | OE1    | 3.453        |
| 3HZV   | A_ARG_187 | NH2    | A_GLU_184  | OE1    | 2.816        |
| 3HZV   | A_HIS_188 | ND1    | A_ASP_150  | OD2    | 2.755        |
| 3HZV   | A_HIS_188 | NE2    | A_GLU_184  | OE1    | 3.971        |
| 3HZV   | A_HIS_188 | NE2    | A_GLU_184  | OE2    | 3.358        |
| 3HZV   | A_LYS_198 | NZ     | A_ASP_109  | OD2    | 3.800        |
| 3HZV   | B_ARG_38  | NH1    | B_ASP_86   | OD2    | 2.840        |
| 3HZV   | B_ARG_38  | NH2    | B_GLU_46   | OE1    | 3.130        |
| 3HZV   | B_ARG_38  | NH2    | B_ASP_86   | OD2    | 3.863        |
| 3HZV   | B_ARG_52  | NH1    | B_GLU_58   | OE2    | 2.906        |
| 3HZV   | B_ARG_52  | NH2    | B_GLU_58   | OE2    | 2.746        |
| 3HZV   | B_ARG_66  | NH1    | B_ASP_86   | OD1    | 2.687        |
| 3HZV   | B_ARG_66  | NH1    | B_ASP_86   | OD2    | 3.671        |
| 3HZV   | B_ARG_66  | NH2    | B_ASP_86   | OD1    | 3.381        |
| 3HZV   | B_ARG_66  | NH2    | B_ASP_86   | OD2    | 2.850        |
| 3HZV   | B_ARG_94  | NH2    | B_ASP_101  | OD1    | 3.676        |
| 3HZV   | B_ARG_94  | NH2    | B_ASP_101  | OD2    | 2.608        |
| 3HZV   | B_LYS_207 | NZ     | A_GLU_122  | OE2    | 3.521        |

Table 414: 3HZV-specific salt bridging networks analysis. In this table, a PDB file is specified with a four-letter PDB ID, except that the names of the PDB files corresponding to the single NMR structural model split from the NMR ensemble is specified with a four-letter PDB ID in addition to a hyphen followed by the single NMR structural model numeric ID, the residue naming scheme is **Chain ID\_residue name\_residue number**,  $\angle ADH$  represents the angle formed by acceptor (A), donor (D) and hydrogen (H) ( $\angle ADH$ ).

| PDB ID | Residue A | Atom A | Residue B  | Atom B | Distance (Å) |
|--------|-----------|--------|------------|--------|--------------|
| 3HZY   | A_LYS_24  | NZ     | A_ASP_70   | OD1    | 2.966        |
| 3HZY   | A_LYS_24  | NZ     | A_ASP_70   | OD2    | 3.808        |
| 3HZY   | A_LYS_39  | NZ     | A_GLU_81   | OE2    | 3.561        |
| 3HZY   | A_ARG_54  | NH2    | A_ASP_60   | OD2    | 3.979        |
| 3HZY   | A_ARG_61  | NH1    | A_ASP_82   | OD1    | 2.810        |
| 3HZY   | A_ARG_61  | NH1    | A_ASP_82   | OD2    | 3.525        |
| 3HZY   | A_ARG_95  | NH2    | B_ASP_95   | OD1    | 3.688        |
| 3HZY   | A_ARG_95  | NH2    | B_ASP_95   | OD2    | 3.045        |
| 3HZY   | A_ARG_95  | NH2    | B_ASP_100E | OD1    | 3.820        |
| 3HZY   | A_LYS_146 | NZ     | A_GLU_153  | OE2    | 3.963        |
| 3HZY   | A_LYS_148 | NZ     | A_GLU_194  | OE1    | 2.878        |
| 3HZY   | A_LYS_148 | NZ     | A_GLU_194  | OE2    | 3.571        |
| 3HZY   | A_ARG_154 | NH1    | A_GLU_184  | OE2    | 3.171        |
| 3HZY   | A_ARG_187 | NH2    | A_GLU_184  | OE1    | 2.952        |
| 3HZY   | A_HIS_188 | ND1    | A_ASP_150  | OD2    | 3.206        |
| 3HZY   | A_HIS_188 | NE2    | A_GLU_184  | OE2    | 3.220        |
| 3HZY   | A_LYS_198 | NZ     | A_ASP_109  | OD2    | 3.836        |
| 3HZY   | B_LYS_3   | NZ     | B_GLU_1    | OE2    | 3.921        |
| 3HZY   | B_ARG_38  | NH1    | B_ASP_86   | OD2    | 2.721        |
| 3HZY   | B_ARG_38  | NH2    | B_ASP_86   | OD2    | 3.756        |
| 3HZY   | B_ARG_52  | NH1    | B_GLU_58   | OE2    | 2.797        |
| 3HZY   | B_ARG_52  | NH2    | B_GLU_58   | OE2    | 2.569        |
| 3HZY   | B_ARG_66  | NH1    | B_ASP_86   | OD1    | 2.833        |
| 3HZY   | B_ARG_66  | NH1    | B_ASP_86   | OD2    | 3.703        |
| 3HZY   | B_ARG_66  | NH2    | B_ASP_86   | OD1    | 3.472        |
| 3HZY   | B_ARG_66  | NH2    | B_ASP_86   | OD2    | 2.924        |
| 3HZY   | B_ARG_94  | NH2    | B_ASP_101  | OD1    | 3.400        |
| 3HZY   | B_ARG_94  | NH2    | B_ASP_101  | OD2    | 2.530        |
| 3HZY   | B_LYS_207 | NZ     | A_GLU_122  | OE2    | 3.902        |

Table 415: 3HZY-specific salt bridging networks analysis. In this table, a PDB file is specified with a four-letter PDB ID, except that the names of the PDB files corresponding to the single NMR structural model split from the NMR ensemble is specified with a four-letter PDB ID in addition to a hyphen followed by the single NMR structural model numeric ID, the residue naming scheme is **Chain ID\_residue name\_residue number**,  $\angle ADH$  represents the angle formed by acceptor (A), donor (D) and hydrogen (H) ( $\angle ADH$ ).

| PDB ID | Residue A | Atom A | Residue B  | Atom B | Distance (Å) |
|--------|-----------|--------|------------|--------|--------------|
| 3I02   | A_ARG_61  | NH1    | A_ASP_82   | OD1    | 3.000        |
| 3I02   | A_ARG_61  | NH1    | A_ASP_82   | OD2    | 3.958        |
| 3I02   | A_ARG_95  | NH2    | B_ASP_95   | OD2    | 3.028        |
| 3I02   | A_LYS_102 | NZ     | A_GLU_104  | OE2    | 2.902        |
| 3I02   | A_LYS_146 | NZ     | A_GLU_194  | OE2    | 2.628        |
| 3I02   | A_LYS_148 | NZ     | A_GLU_194  | OE2    | 3.134        |
| 3I02   | A_ARG_154 | NH1    | A_GLU_184  | OE2    | 3.155        |
| 3I02   | A_LYS_182 | NZ     | A_ASP_183  | OD1    | 3.921        |
| 3I02   | A_LYS_182 | NZ     | A_GLU_186  | OE2    | 2.799        |
| 3I02   | A_ARG_187 | NH2    | A_GLU_184  | OE1    | 2.793        |
| 3I02   | A_HIS_188 | ND1    | A_ASP_150  | OD2    | 3.259        |
| 3I02   | A_LYS_198 | NZ     | A_ASP_109  | OD1    | 3.541        |
| 3I02   | A_LYS_198 | NZ     | A_ASP_109  | OD2    | 3.982        |
| 3I02   | B_ARG_38  | NH1    | B_ASP_86   | OD2    | 2.730        |
| 3I02   | B_ARG_38  | NH2    | B_GLU_46   | OE1    | 3.082        |
| 3I02   | B_ARG_38  | NH2    | B_GLU_46   | OE2    | 3.832        |
| 3I02   | B_ARG_38  | NH2    | B_ASP_86   | OD2    | 3.854        |
| 3I02   | B_ARG_52  | NH1    | B_ASP_58   | OD2    | 3.947        |
| 3I02   | B_ARG_52  | NH2    | B_ASP_58   | OD2    | 3.567        |
| 3I02   | B_ARG_66  | NH1    | B_ASP_86   | OD1    | 2.819        |
| 3I02   | B_ARG_66  | NH1    | B_ASP_86   | OD2    | 3.716        |
| 3I02   | B_ARG_66  | NH2    | B_ASP_86   | OD1    | 3.582        |
| 3I02   | B_ARG_66  | NH2    | B_ASP_86   | OD2    | 3.033        |
| 3I02   | B_ARG_94  | NH2    | B_ASP_101  | OD2    | 2.982        |
| 3I02   | B_ARG_98  | NH1    | B_ASP_100  | OD2    | 3.749        |
| 3I02   | B_ARG_98  | NH2    | B_ASP_100  | OD2    | 3.470        |
| 3I02   | B_ARG_98  | NH2    | B_ASP_100A | OD1    | 3.832        |
| 3I02   | B_ARG_98  | NH2    | B_ASP_100A | OD2    | 3.991        |
| 3I02   | C_LYS_24  | NZ     | C_ASP_70   | OD2    | 3.426        |
| 3I02   | C_ARG_61  | NH1    | C_ASP_82   | OD1    | 2.423        |
| 3I02   | C_ARG_61  | NH1    | C_ASP_82   | OD2    | 3.328        |
| 3I02   | C_ARG_95  | NH2    | D_ASP_95   | OD1    | 3.601        |
| 3I02   | C_ARG_95  | NH2    | D_ASP_95   | OD2    | 2.826        |
| 3I02   | C_LYS_102 | NZ     | C_GLU_104  | OE2    | 3.372        |
| 3I02   | C_ARG_187 | NH2    | C_GLU_184  | OE1    | 2.763        |
| 3I02   | C_HIS_188 | NE2    | C_GLU_184  | OE2    | 3.413        |
| 3I02   | C_LYS_198 | NZ     | C_ASP_109  | OD1    | 3.870        |
| 3I02   | C_LYS_198 | NZ     | C_ASP_109  | OD2    | 2.949        |
| 3I02   | D_ARG_38  | NH1    | D_ASP_86   | OD2    | 2.646        |
| 3I02   | D_ARG_38  | NH2    | D_GLU_46   | OE1    | 2.952        |
| 3I02   | D_ARG_38  | NH2    | D_GLU_46   | OE2    | 3.936        |
| 3I02   | D_ARG_38  | NH2    | D_ASP_86   | OD2    | 3.805        |
| 3I02   | D_ARG_52  | NH1    | D_ASP_58   | OD2    | 3.197        |
| 3I02   | D_ARG_52  | NH2    | D_ASP_58   | OD2    | 2.792        |
| 3I02   | D_ARG_66  | NH1    | D_ASP_86   | OD1    | 2.833        |
| 3I02   | D_ARG_66  | NH1    | D_ASP_86   | OD2    | 3.584        |
| 3I02   | D_ARG_66  | NH2    | D_ASP_86   | OD1    | 3.662        |
| 3I02   | D_ARG_66  | NH2    | D_ASP_86   | OD2    | 2.930        |
| 3I02   | D_ARG_94  | NH2    | D_ASP_101  | OD2    | 2.660        |
| 3I02   | D_ARG_97  | NH2    | D_ASP_100A | OD2    | 3.024        |
| 3I02   | D_LYS_208 | NZ     | C_GLU_122  | OE2    | 3.585        |

---

Table 416: 3I02-specific salt bridging networks analysis. In this table, a PDB file is specified with a four-letter PDB ID, except that the names of the PDB files corresponding to the single NMR structural model split from the NMR ensemble is specified with a four-letter PDB ID in addition to a hyphen followed by the single NMR structural model numeric ID, the residue naming scheme is **Chain ID\_residue name\_residue number**,  $\angle ADH$  represents the angle formed by acceptor (A), donor (D) and hydrogen (H) ( $\angle ADH$ ).

| PDB ID | Residue A | Atom A | Residue B | Atom B | Distance (Å) |
|--------|-----------|--------|-----------|--------|--------------|
| 3I9G   | H_ARG_38  | NH2    | H_GLU_46  | OE1    | 2.845        |
| 3I9G   | H_ARG_38  | NH2    | H_GLU_46  | OE2    | 3.261        |
| 3I9G   | H_ARG_53  | NH2    | H_ASP_31  | OD1    | 2.786        |
| 3I9G   | H_ARG_94  | NH1    | H_ASP_101 | OD1    | 3.167        |
| 3I9G   | H_ARG_94  | NH1    | H_ASP_101 | OD2    | 3.902        |
| 3I9G   | H_LYS_143 | NZ     | H_ASP_144 | OD1    | 3.018        |
| 3I9G   | H_LYS_143 | NZ     | H_ASP_144 | OD2    | 2.935        |
| 3I9G   | H_ARG_210 | NH2    | H_GLU_212 | OE2    | 2.989        |
| 3I9G   | L_LYS_42  | NZ     | L_GLU_39  | OE1    | 2.937        |
| 3I9G   | L_ARG_61  | NH2    | L_GLU_81  | OE1    | 3.841        |
| 3I9G   | L_ARG_61  | NH2    | L_ASP_82  | OD1    | 2.775        |
| 3I9G   | L_ARG_61  | NH2    | L_ASP_82  | OD2    | 3.368        |
| 3I9G   | L_LYS_149 | NZ     | L_GLU_195 | OE1    | 3.806        |
| 3I9G   | L_LYS_149 | NZ     | L_GLU_195 | OE2    | 3.005        |
| 3I9G   | L_LYS_183 | NZ     | L_GLU_187 | OE1    | 3.717        |
| 3I9G   | L_LYS_183 | NZ     | L_GLU_187 | OE2    | 3.176        |

Table 417: 3I9G-specific salt bridging networks analysis. In this table, a PDB file is specified with a four-letter PDB ID, except that the names of the PDB files corresponding to the single NMR structural model split from the NMR ensemble is specified with a four-letter PDB ID in addition to a hyphen followed by the single NMR structural model numeric ID, the residue naming scheme is **Chain ID\_residue name\_residue number**,  $\angle ADH$  represents the angle formed by acceptor (A), donor (D) and hydrogen (H) ( $\angle ADH$ ).

| PDB ID | Residue A | Atom A | Residue B | Atom B | Distance (Å) |
|--------|-----------|--------|-----------|--------|--------------|
| 3IET   | A_LYS_50  | NZ     | X_GLU_8   | OE1    | 3.701        |
| 3IET   | A_LYS_50  | NZ     | X_GLU_8   | OE2    | 3.403        |
| 3IET   | A_ARG_61  | NH1    | A_GLU_79  | OE1    | 3.211        |
| 3IET   | A_ARG_61  | NH1    | A_GLU_79  | OE2    | 3.820        |
| 3IET   | A_ARG_61  | NH2    | A_ASP_82  | OD1    | 3.553        |
| 3IET   | A_ARG_61  | NH2    | A_ASP_82  | OD2    | 2.781        |
| 3IET   | A_LYS_149 | NZ     | A_GLU_195 | OE1    | 2.884        |
| 3IET   | A_LYS_149 | NZ     | A_GLU_195 | OE2    | 3.548        |
| 3IET   | A_ARG_155 | NH1    | A_GLU_185 | OE2    | 3.262        |
| 3IET   | A_LYS_183 | NZ     | A_GLU_187 | OE1    | 3.582        |
| 3IET   | A_LYS_183 | NZ     | A_GLU_187 | OE2    | 3.667        |
| 3IET   | A_ARG_188 | NH1    | A_GLU_185 | OE1    | 3.150        |
| 3IET   | A_HIS_189 | ND1    | A_ASP_151 | OD1    | 2.682        |
| 3IET   | A_HIS_189 | NE2    | A_GLU_185 | OE1    | 3.596        |
| 3IET   | A_HIS_189 | NE2    | A_GLU_185 | OE2    | 3.220        |
| 3IET   | A_LYS_199 | NZ     | A_ASP_110 | OD1    | 3.761        |
| 3IET   | A_LYS_199 | NZ     | A_ASP_110 | OD2    | 3.765        |
| 3IET   | B_ARG_38  | NH1    | B_GLU_46  | OE1    | 3.404        |
| 3IET   | B_ARG_38  | NH1    | B_GLU_46  | OE2    | 3.350        |
| 3IET   | B_ARG_38  | NH2    | B_ASP_86  | OD1    | 2.967        |
| 3IET   | B_LYS_43  | NZ     | B_GLU_46  | OE1    | 3.606        |
| 3IET   | B_LYS_43  | NZ     | B_GLU_46  | OE2    | 2.694        |
| 3IET   | B_ARG_52  | NH1    | B_GLU_50  | OE1    | 3.452        |
| 3IET   | B_HIS_55  | NE2    | B_ASP_73  | OD1    | 2.597        |
| 3IET   | B_HIS_55  | NE2    | B_ASP_73  | OD2    | 3.551        |
| 3IET   | B_LYS_64  | NZ     | B_GLU_61  | OE1    | 2.971        |
| 3IET   | B_ARG_66  | NH1    | B_ASP_86  | OD1    | 2.974        |
| 3IET   | B_ARG_66  | NH1    | B_ASP_86  | OD2    | 3.464        |
| 3IET   | B_ARG_66  | NH2    | B_ASP_86  | OD1    | 3.752        |
| 3IET   | B_ARG_66  | NH2    | B_ASP_86  | OD2    | 2.865        |
| 3IET   | B_ARG_71  | NH1    | B_ASP_73  | OD2    | 3.338        |
| 3IET   | B_ARG_83  | NH2    | B_GLU_85  | OE2    | 3.927        |
| 3IET   | B_LYS_96  | NZ     | B_ASP_31  | OD2    | 3.537        |
| 3IET   | B_ARG_98  | NH1    | B_ASP_35  | OD1    | 2.639        |
| 3IET   | B_ARG_98  | NH1    | B_ASP_35  | OD2    | 3.020        |
| 3IET   | B_ARG_98  | NH1    | B_GLU_50  | OE2    | 3.794        |
| 3IET   | B_LYS_208 | NZ     | A_GLU_123 | OE1    | 3.818        |
| 3IET   | C_ARG_54  | NH2    | C_ASP_60  | OD2    | 3.637        |
| 3IET   | C_ARG_61  | NH1    | C_GLU_79  | OE1    | 3.085        |
| 3IET   | C_ARG_61  | NH2    | C_GLU_79  | OE1    | 3.940        |
| 3IET   | C_ARG_61  | NH2    | C_ASP_82  | OD1    | 2.938        |
| 3IET   | C_ARG_61  | NH2    | C_ASP_82  | OD2    | 3.003        |
| 3IET   | C_LYS_147 | NZ     | C_GLU_154 | OE1    | 3.272        |
| 3IET   | C_LYS_149 | NZ     | C_GLU_195 | OE2    | 3.728        |
| 3IET   | C_ARG_188 | NH1    | C_GLU_185 | OE1    | 3.678        |
| 3IET   | C_HIS_189 | ND1    | C_ASP_151 | OD1    | 2.372        |
| 3IET   | C_HIS_189 | NE2    | C_GLU_185 | OE1    | 3.376        |
| 3IET   | C_HIS_189 | NE2    | C_GLU_185 | OE2    | 2.388        |
| 3IET   | C_LYS_199 | NZ     | C_ASP_110 | OD1    | 3.614        |
| 3IET   | D_ARG_38  | NH1    | D_GLU_46  | OE1    | 3.769        |
| 3IET   | D_ARG_38  | NH1    | D_GLU_46  | OE2    | 3.554        |
| 3IET   | D_ARG_38  | NH2    | D_ASP_86  | OD1    | 3.017        |
| 3IET   | D_ARG_52  | NH1    | D_GLU_50  | OE1    | 3.520        |
| 3IET   | D_HIS_55  | ND1    | A_ASP_143 | OD1    | 3.412        |
| 3IET   | D_HIS_55  | ND1    | A_ASP_143 | OD2    | 3.385        |
| 3IET   | D_HIS_55  | NE2    | D_ASP_73  | OD1    | 2.773        |
| 3IET   | D_HIS_55  | NE2    | D_ASP_73  | OD2    | 3.630        |



|      |           |     |           |     |       |
|------|-----------|-----|-----------|-----|-------|
| 3IET | D_LYS_64  | NZ  | D_GLU_61  | OE1 | 2.801 |
| 3IET | D_LYS_64  | NZ  | D_GLU_61  | OE2 | 3.652 |
| 3IET | D_ARG_66  | NH1 | D_ASP_86  | OD1 | 2.949 |
| 3IET | D_ARG_66  | NH1 | D_ASP_86  | OD2 | 3.534 |
| 3IET | D_ARG_66  | NH2 | D_ASP_86  | OD1 | 3.686 |
| 3IET | D_ARG_66  | NH2 | D_ASP_86  | OD2 | 2.898 |
| 3IET | D_ARG_71  | NH1 | D_ASP_73  | OD2 | 3.179 |
| 3IET | D_LYS_75  | NZ  | D_ASP_72  | OD1 | 3.887 |
| 3IET | D_LYS_75  | NZ  | D_ASP_72  | OD2 | 3.840 |
| 3IET | D_LYS_96  | NZ  | D_ASP_31  | OD2 | 3.952 |
| 3IET | D_ARG_98  | NH1 | D_ASP_35  | OD1 | 2.733 |
| 3IET | D_ARG_98  | NH1 | D_ASP_35  | OD2 | 2.840 |
| 3IET | D_LYS_114 | NZ  | D_ASP_173 | OD2 | 3.662 |
| 3IET | D_LYS_208 | NZ  | C_GLU_123 | OE2 | 3.321 |
| 3IET | D_LYS_209 | NZ  | D_GLU_211 | OE1 | 3.547 |

Table 418: 3IET-specific salt bridging networks analysis. In this table, a PDB file is specified with a four-letter PDB ID, except that the names of the PDB files corresponding to the single NMR structural model split from the NMR ensemble is specified with a four-letter PDB ID in addition to a hyphen followed by the single NMR structural model numeric ID, the residue naming scheme is **Chain ID\_residue name\_residue number**,  $\angle ADH$  represents the angle formed by acceptor (A), donor (D) and hydrogen (H) ( $\angle ADH$ ).

| PDB ID | Residue A | Atom A | Residue B | Atom B | Distance (Å) |
|--------|-----------|--------|-----------|--------|--------------|
| 3IF1   | A_ARG_24  | NH1    | A_ASP_70  | OD2    | 3.644        |
| 3IF1   | A_ARG_24  | NH2    | A_ASP_70  | OD2    | 3.131        |
| 3IF1   | A_ARG_61  | NH1    | A_GLU_79  | OE1    | 3.948        |
| 3IF1   | A_ARG_61  | NH1    | A_GLU_79  | OE2    | 3.315        |
| 3IF1   | A_ARG_61  | NH2    | A_ASP_82  | OD1    | 2.825        |
| 3IF1   | A_ARG_61  | NH2    | A_ASP_82  | OD2    | 2.702        |
| 3IF1   | A_LYS_142 | NZ     | A_GLU_105 | OE2    | 3.983        |
| 3IF1   | A_LYS_147 | NZ     | A_GLU_154 | OE1    | 3.522        |
| 3IF1   | A_LYS_149 | NZ     | A_GLU_195 | OE1    | 2.902        |
| 3IF1   | A_ARG_155 | NH1    | A_GLU_185 | OE2    | 2.578        |
| 3IF1   | A_ARG_188 | NH1    | A_GLU_185 | OE1    | 3.024        |
| 3IF1   | A_HIS_189 | ND1    | A_ASP_151 | OD1    | 2.587        |
| 3IF1   | A_HIS_189 | NE2    | A_GLU_185 | OE1    | 3.887        |
| 3IF1   | A_HIS_189 | NE2    | A_GLU_185 | OE2    | 3.017        |
| 3IF1   | A_LYS_199 | NZ     | A_ASP_110 | OD1    | 2.811        |
| 3IF1   | A_LYS_199 | NZ     | A_ASP_110 | OD2    | 3.664        |
| 3IF1   | B_ARG_38  | NH1    | B_GLU_46  | OE1    | 3.546        |
| 3IF1   | B_ARG_38  | NH1    | B_GLU_46  | OE2    | 3.505        |
| 3IF1   | B_ARG_38  | NH1    | B_ASP_86  | OD1    | 3.939        |
| 3IF1   | B_ARG_38  | NH2    | B_ASP_86  | OD1    | 3.024        |
| 3IF1   | B_LYS_43  | NZ     | B_GLU_46  | OE1    | 3.786        |
| 3IF1   | B_LYS_43  | NZ     | B_GLU_46  | OE2    | 2.709        |
| 3IF1   | B_ARG_52  | NH1    | B_GLU_50  | OE1    | 3.600        |
| 3IF1   | B_HIS_55  | NE2    | B_ASP_73  | OD1    | 2.678        |
| 3IF1   | B_HIS_55  | NE2    | B_ASP_73  | OD2    | 3.590        |
| 3IF1   | B_LYS_64  | NZ     | B_GLU_61  | OE1    | 3.313        |
| 3IF1   | B_ARG_66  | NH1    | B_ASP_86  | OD1    | 3.142        |
| 3IF1   | B_ARG_66  | NH1    | B_ASP_86  | OD2    | 3.480        |
| 3IF1   | B_ARG_66  | NH2    | B_ASP_86  | OD1    | 3.813        |
| 3IF1   | B_ARG_66  | NH2    | B_ASP_86  | OD2    | 2.708        |
| 3IF1   | B_ARG_71  | NH1    | B_ASP_73  | OD2    | 3.261        |
| 3IF1   | B_LYS_96  | NZ     | B_ASP_31  | OD2    | 3.416        |
| 3IF1   | B_ARG_98  | NH1    | B_ASP_35  | OD1    | 2.801        |
| 3IF1   | B_ARG_98  | NH1    | B_ASP_35  | OD2    | 2.999        |
| 3IF1   | B_ARG_98  | NH1    | B_GLU_50  | OE1    | 3.809        |
| 3IF1   | B_ARG_98  | NH1    | B_GLU_50  | OE2    | 3.524        |
| 3IF1   | B_ARG_98  | NH2    | B_GLU_50  | OE1    | 3.792        |
| 3IF1   | B_ARG_98  | NH2    | B_GLU_50  | OE2    | 3.692        |
| 3IF1   | C_ARG_24  | NH1    | C_ASP_70  | OD2    | 3.431        |
| 3IF1   | C_ARG_24  | NH2    | C_ASP_70  | OD2    | 2.995        |
| 3IF1   | C_ARG_61  | NH1    | C_GLU_79  | OE2    | 3.277        |
| 3IF1   | C_ARG_61  | NH2    | C_ASP_82  | OD1    | 2.778        |
| 3IF1   | C_ARG_61  | NH2    | C_ASP_82  | OD2    | 2.710        |
| 3IF1   | C_LYS_147 | NZ     | C_GLU_154 | OE1    | 3.247        |
| 3IF1   | C_LYS_149 | NZ     | C_GLU_195 | OE1    | 3.400        |
| 3IF1   | C_ARG_155 | NH1    | C_GLU_185 | OE2    | 2.578        |
| 3IF1   | C_ARG_188 | NH1    | C_GLU_185 | OE1    | 2.910        |
| 3IF1   | C_HIS_189 | ND1    | C_ASP_151 | OD1    | 2.543        |
| 3IF1   | C_HIS_189 | NE2    | C_GLU_185 | OE2    | 2.831        |
| 3IF1   | C_LYS_199 | NZ     | C_ASP_110 | OD1    | 2.846        |
| 3IF1   | C_LYS_199 | NZ     | C_ASP_110 | OD2    | 3.766        |
| 3IF1   | D_ARG_38  | NH1    | D_GLU_46  | OE1    | 3.513        |
| 3IF1   | D_ARG_38  | NH1    | D_GLU_46  | OE2    | 3.484        |
| 3IF1   | D_ARG_38  | NH2    | D_ASP_86  | OD1    | 3.055        |
| 3IF1   | D_LYS_43  | NZ     | D_GLU_46  | OE1    | 3.762        |
| 3IF1   | D_LYS_43  | NZ     | D_GLU_46  | OE2    | 3.359        |
| 3IF1   | D_ARG_52  | NH1    | D_GLU_50  | OE1    | 3.903        |

|      |           |     |           |     |       |
|------|-----------|-----|-----------|-----|-------|
| 3IF1 | D_LYS_52B | NZ  | A_ASP_143 | OD2 | 3.658 |
| 3IF1 | D_HIS_55  | ND1 | A_ASP_143 | OD1 | 3.559 |
| 3IF1 | D_HIS_55  | ND1 | A_ASP_143 | OD2 | 3.251 |
| 3IF1 | D_HIS_55  | NE2 | D_ASP_73  | OD1 | 2.642 |
| 3IF1 | D_HIS_55  | NE2 | D_ASP_73  | OD2 | 3.393 |
| 3IF1 | D_LYS_64  | NZ  | D_GLU_61  | OE1 | 3.366 |
| 3IF1 | D_ARG_66  | NH1 | D_ASP_86  | OD1 | 2.982 |
| 3IF1 | D_ARG_66  | NH1 | D_ASP_86  | OD2 | 3.435 |
| 3IF1 | D_ARG_66  | NH2 | D_ASP_86  | OD1 | 3.897 |
| 3IF1 | D_ARG_66  | NH2 | D_ASP_86  | OD2 | 2.982 |
| 3IF1 | D_ARG_71  | NH1 | D_ASP_73  | OD2 | 3.435 |
| 3IF1 | D_ARG_98  | NH1 | D_ASP_35  | OD1 | 2.797 |
| 3IF1 | D_ARG_98  | NH1 | D_ASP_35  | OD2 | 2.984 |
| 3IF1 | D_ARG_98  | NH1 | D_GLU_50  | OE1 | 3.619 |
| 3IF1 | D_ARG_98  | NH1 | D_GLU_50  | OE2 | 3.743 |
| 3IF1 | D_ARG_98  | NH2 | D_GLU_50  | OE1 | 3.809 |
| 3IF1 | D_ARG_98  | NH2 | D_GLU_50  | OE2 | 3.688 |
| 3IF1 | D_LYS_209 | NZ  | D_GLU_211 | OE1 | 3.626 |
| 3IF1 | D_LYS_209 | NZ  | D_GLU_211 | OE2 | 3.891 |

Table 419: 3IF1-specific salt bridging networks analysis. In this table, a PDB file is specified with a four-letter PDB ID, except that the names of the PDB files corresponding to the single NMR structural model split from the NMR ensemble is specified with a four-letter PDB ID in addition to a hyphen followed by the single NMR structural model numeric ID, the residue naming scheme is **Chain ID\_residue name\_residue number**,  $\angle ADH$  represents the angle formed by acceptor (A), donor (D) and hydrogen (H) ( $\angle ADH$ ).

| PDB ID | Residue A | Atom A | Residue B  | Atom B | Distance (Å) |
|--------|-----------|--------|------------|--------|--------------|
| 3IJH   | A_ARG_54  | NH1    | A_ASP_60   | OD1    | 3.984        |
| 3IJH   | A_ARG_61  | NH1    | A_ASP_82   | OD1    | 3.244        |
| 3IJH   | A_ARG_61  | NH1    | A_ASP_82   | OD2    | 2.314        |
| 3IJH   | A_ARG_61  | NH2    | A_ASP_82   | OD1    | 3.682        |
| 3IJH   | A_ARG_95  | NH2    | B_ASP_95   | OD1    | 3.392        |
| 3IJH   | A_ARG_95  | NH2    | B_ASP_95   | OD2    | 2.832        |
| 3IJH   | A_ARG_95  | NH2    | B_GLU_100E | OE1    | 3.920        |
| 3IJH   | A_LYS_148 | NZ     | A_GLU_194  | OE1    | 3.527        |
| 3IJH   | A_LYS_148 | NZ     | A_GLU_194  | OE2    | 2.720        |
| 3IJH   | A_ARG_154 | NH2    | A_GLU_184  | OE2    | 3.756        |
| 3IJH   | A_HIS_188 | ND1    | A_ASP_150  | OD2    | 2.926        |
| 3IJH   | A_LYS_198 | NZ     | A_ASP_109  | OD2    | 3.088        |
| 3IJH   | B_ARG_38  | NH1    | B_ASP_86   | OD2    | 2.842        |
| 3IJH   | B_ARG_38  | NH2    | B_GLU_46   | OE1    | 3.209        |
| 3IJH   | B_ARG_38  | NH2    | B_ASP_86   | OD2    | 3.896        |
| 3IJH   | B_ARG_52  | NH1    | B_GLU_58   | OE2    | 2.824        |
| 3IJH   | B_ARG_52  | NH2    | B_GLU_58   | OE2    | 3.202        |
| 3IJH   | B_ARG_66  | NH1    | B_ASP_86   | OD1    | 2.813        |
| 3IJH   | B_ARG_66  | NH1    | B_ASP_86   | OD2    | 3.750        |
| 3IJH   | B_ARG_66  | NH2    | B_ASP_86   | OD1    | 3.334        |
| 3IJH   | B_ARG_66  | NH2    | B_ASP_86   | OD2    | 2.758        |
| 3IJH   | B_ARG_83  | NH1    | B_ASP_86   | OD2    | 3.914        |
| 3IJH   | B_ARG_164 | NH1    | A_ASP_166  | OD1    | 3.428        |
| 3IJH   | B_ARG_164 | NH2    | A_ASP_166  | OD1    | 3.938        |
| 3IJH   | B_LYS_208 | NZ     | A_GLU_122  | OE1    | 2.744        |
| 3IJH   | C_LYS_24  | NZ     | C_ASP_70   | OD2    | 3.835        |
| 3IJH   | C_ARG_54  | NH1    | C_ASP_60   | OD1    | 3.972        |
| 3IJH   | C_ARG_61  | NH1    | C_ASP_82   | OD1    | 2.606        |
| 3IJH   | C_ARG_61  | NH1    | C_ASP_82   | OD2    | 2.580        |
| 3IJH   | C_ARG_95  | NH2    | D_ASP_95   | OD1    | 3.394        |
| 3IJH   | C_ARG_95  | NH2    | D_ASP_95   | OD2    | 2.734        |
| 3IJH   | C_LYS_102 | NZ     | C_GLU_104  | OE2    | 3.655        |
| 3IJH   | C_LYS_146 | NZ     | C_GLU_153  | OE2    | 3.796        |
| 3IJH   | C_LYS_148 | NZ     | C_GLU_194  | OE1    | 3.503        |
| 3IJH   | C_LYS_148 | NZ     | C_GLU_194  | OE2    | 3.158        |
| 3IJH   | C_LYS_198 | NZ     | C_ASP_109  | OD2    | 3.332        |
| 3IJH   | D_ARG_38  | NH1    | D_ASP_86   | OD2    | 2.796        |
| 3IJH   | D_ARG_38  | NH2    | D_GLU_46   | OE1    | 3.273        |
| 3IJH   | D_ARG_38  | NH2    | D_ASP_86   | OD2    | 3.880        |
| 3IJH   | D_ARG_52  | NH1    | D_GLU_58   | OE2    | 2.836        |
| 3IJH   | D_ARG_52  | NH2    | D_GLU_58   | OE2    | 3.043        |
| 3IJH   | D_ARG_66  | NH1    | D_ASP_86   | OD1    | 2.773        |
| 3IJH   | D_ARG_66  | NH1    | D_ASP_86   | OD2    | 3.767        |
| 3IJH   | D_ARG_66  | NH2    | D_ASP_86   | OD1    | 3.326        |
| 3IJH   | D_ARG_66  | NH2    | D_ASP_86   | OD2    | 2.861        |
| 3IJH   | D_ARG_83  | NH1    | D_GLU_85   | OE2    | 2.756        |
| 3IJH   | D_ARG_164 | NH1    | C_ASP_166  | OD1    | 3.593        |
| 3IJH   | D_ARG_164 | NH2    | C_ASP_166  | OD1    | 3.440        |
| 3IJH   | D_ARG_209 | NH1    | D_GLU_211  | OE2    | 3.993        |
| 3IJH   | D_ARG_209 | NH2    | D_GLU_211  | OE1    | 3.933        |

---

Table 420: 3IJH-specific salt bridging networks analysis. In this table, a PDB file is specified with a four-letter PDB ID, except that the names of the PDB files corresponding to the single NMR structural model split from the NMR ensemble is specified with a four-letter PDB ID in addition to a hyphen followed by the single NMR structural model numeric ID, the residue naming scheme is **Chain ID\_residue name\_residue number**,  $\angle ADH$  represents the angle formed by acceptor (A), donor (D) and hydrogen (H) ( $\angle ADH$ ).

| PDB ID | Residue A | Atom A | Residue B  | Atom B | Distance (Å) |
|--------|-----------|--------|------------|--------|--------------|
| 3IJS   | A_ARG_61  | NH1    | A_ASP_82   | OD1    | 2.832        |
| 3IJS   | A_ARG_61  | NH1    | A_ASP_82   | OD2    | 2.527        |
| 3IJS   | A_ARG_61  | NH2    | A_GLU_81   | OE1    | 3.669        |
| 3IJS   | A_ARG_61  | NH2    | A_ASP_82   | OD1    | 3.818        |
| 3IJS   | A_ARG_95  | NH2    | B_ASP_95   | OD1    | 3.603        |
| 3IJS   | A_ARG_95  | NH2    | B_ASP_95   | OD2    | 3.018        |
| 3IJS   | A_ARG_95  | NH2    | B_GLU_100E | OE1    | 3.734        |
| 3IJS   | A_LYS_102 | NZ     | A_GLU_104  | OE2    | 3.940        |
| 3IJS   | A_LYS_146 | NZ     | A_GLU_153  | OE2    | 3.777        |
| 3IJS   | A_LYS_148 | NZ     | A_GLU_194  | OE1    | 3.285        |
| 3IJS   | A_LYS_148 | NZ     | A_GLU_194  | OE2    | 2.974        |
| 3IJS   | A_LYS_182 | NZ     | A_GLU_186  | OE1    | 2.825        |
| 3IJS   | A_LYS_182 | NZ     | A_GLU_186  | OE2    | 2.949        |
| 3IJS   | A_HIS_188 | ND1    | A_ASP_150  | OD2    | 2.814        |
| 3IJS   | A_LYS_198 | NZ     | A_ASP_109  | OD2    | 3.057        |
| 3IJS   | B_ARG_38  | NH1    | B_ASP_86   | OD2    | 2.852        |
| 3IJS   | B_ARG_38  | NH2    | B_GLU_46   | OE1    | 3.406        |
| 3IJS   | B_ARG_38  | NH2    | B_ASP_86   | OD2    | 3.872        |
| 3IJS   | B_ARG_52  | NH1    | B_GLU_58   | OE2    | 2.821        |
| 3IJS   | B_ARG_52  | NH2    | B_GLU_58   | OE2    | 2.883        |
| 3IJS   | B_ARG_66  | NH1    | B_ASP_86   | OD1    | 2.838        |
| 3IJS   | B_ARG_66  | NH1    | B_ASP_86   | OD2    | 3.824        |
| 3IJS   | B_ARG_66  | NH2    | B_ASP_86   | OD1    | 3.278        |
| 3IJS   | B_ARG_66  | NH2    | B_ASP_86   | OD2    | 2.729        |
| 3IJS   | B_ARG_83  | NH1    | B_GLU_85   | OE2    | 3.989        |
| 3IJS   | B_ARG_164 | NH1    | A_ASP_166  | OD1    | 3.855        |
| 3IJS   | B_LYS_208 | NZ     | A_GLU_122  | OE1    | 2.963        |
| 3IJS   | C_ARG_54  | NH1    | C_ASP_60   | OD2    | 3.567        |
| 3IJS   | C_ARG_61  | NH1    | C_ASP_82   | OD1    | 2.893        |
| 3IJS   | C_ARG_61  | NH1    | C_ASP_82   | OD2    | 3.574        |
| 3IJS   | C_ARG_95  | NH2    | D_ASP_95   | OD1    | 3.466        |
| 3IJS   | C_ARG_95  | NH2    | D_ASP_95   | OD2    | 2.795        |
| 3IJS   | C_ARG_95  | NH2    | D_GLU_100E | OE1    | 3.752        |
| 3IJS   | C_LYS_102 | NZ     | C_GLU_104  | OE2    | 3.639        |
| 3IJS   | C_LYS_146 | NZ     | C_GLU_153  | OE1    | 3.935        |
| 3IJS   | C_LYS_148 | NZ     | C_GLU_194  | OE2    | 3.029        |
| 3IJS   | C_ARG_154 | NH2    | C_GLU_184  | OE2    | 3.755        |
| 3IJS   | C_HIS_188 | ND1    | C_ASP_150  | OD2    | 3.093        |
| 3IJS   | C_LYS_198 | NZ     | C_ASP_109  | OD2    | 3.489        |
| 3IJS   | D_ARG_38  | NH1    | D_ASP_86   | OD2    | 2.884        |
| 3IJS   | D_ARG_38  | NH2    | D_GLU_46   | OE1    | 3.237        |
| 3IJS   | D_ARG_38  | NH2    | D_GLU_46   | OE2    | 3.977        |
| 3IJS   | D_ARG_52  | NH1    | D_GLU_58   | OE2    | 3.033        |
| 3IJS   | D_ARG_52  | NH2    | D_GLU_58   | OE2    | 3.006        |
| 3IJS   | D_ARG_66  | NH1    | D_ASP_86   | OD1    | 2.827        |
| 3IJS   | D_ARG_66  | NH1    | D_ASP_86   | OD2    | 3.633        |
| 3IJS   | D_ARG_66  | NH2    | D_ASP_86   | OD1    | 3.506        |
| 3IJS   | D_ARG_66  | NH2    | D_ASP_86   | OD2    | 2.897        |
| 3IJS   | D_ARG_164 | NH1    | C_ASP_166  | OD1    | 3.815        |
| 3IJS   | D_ARG_164 | NH2    | C_ASP_166  | OD1    | 3.576        |
| 3IJS   | D_LYS_208 | NZ     | C_GLU_122  | OE1    | 3.219        |
| 3IJS   | D_LYS_208 | NZ     | C_GLU_122  | OE2    | 2.679        |
| 3IJS   | D_ARG_209 | NH1    | D_GLU_211  | OE2    | 2.704        |

---

Table 421: 3IJS-specific salt bridging networks analysis. In this table, a PDB file is specified with a four-letter PDB ID, except that the names of the PDB files corresponding to the single NMR structural model split from the NMR ensemble is specified with a four-letter PDB ID in addition to a hyphen followed by the single NMR structural model numeric ID, the residue naming scheme is **Chain ID\_residue name\_residue number**,  $\angle ADH$  represents the angle formed by acceptor (A), donor (D) and hydrogen (H) ( $\angle ADH$ ).

| PDB ID | Residue A | Atom A | Residue B  | Atom B | Distance (Å) |
|--------|-----------|--------|------------|--------|--------------|
| 3IJY   | A_LYS_24  | NZ     | A_ASP_70   | OD2    | 3.532        |
| 3IJY   | A_ARG_54  | NH1    | A_ASP_60   | OD1    | 3.326        |
| 3IJY   | A_ARG_54  | NH2    | A_ASP_60   | OD1    | 3.494        |
| 3IJY   | A_ARG_61  | NH1    | A_ASP_82   | OD1    | 2.847        |
| 3IJY   | A_ARG_61  | NH1    | A_ASP_82   | OD2    | 2.458        |
| 3IJY   | A_ARG_61  | NH2    | A_GLU_81   | OE1    | 3.326        |
| 3IJY   | A_ARG_61  | NH2    | A_ASP_82   | OD1    | 3.959        |
| 3IJY   | A_ARG_95  | NH2    | B_ASP_95   | OD1    | 3.420        |
| 3IJY   | A_ARG_95  | NH2    | B_ASP_95   | OD2    | 2.800        |
| 3IJY   | A_ARG_95  | NH2    | B_GLU_100E | OE1    | 3.751        |
| 3IJY   | A_LYS_148 | NZ     | A_GLU_194  | OE1    | 3.793        |
| 3IJY   | A_LYS_148 | NZ     | A_GLU_194  | OE2    | 3.098        |
| 3IJY   | A_HIS_188 | ND1    | A_ASP_150  | OD2    | 3.295        |
| 3IJY   | A_LYS_198 | NZ     | A_ASP_109  | OD1    | 3.840        |
| 3IJY   | A_LYS_198 | NZ     | A_ASP_109  | OD2    | 3.869        |
| 3IJY   | B_ARG_38  | NH1    | B_ASP_86   | OD2    | 2.847        |
| 3IJY   | B_ARG_38  | NH2    | B_GLU_46   | OE1    | 3.463        |
| 3IJY   | B_ARG_38  | NH2    | B_ASP_86   | OD2    | 3.755        |
| 3IJY   | B_ARG_52  | NH1    | B_GLU_58   | OE2    | 3.349        |
| 3IJY   | B_ARG_52  | NH2    | B_GLU_58   | OE2    | 3.866        |
| 3IJY   | B_ARG_66  | NH1    | B_ASP_86   | OD1    | 3.730        |
| 3IJY   | B_ARG_66  | NH2    | B_ASP_86   | OD1    | 2.942        |
| 3IJY   | B_ARG_66  | NH2    | B_ASP_86   | OD2    | 2.730        |
| 3IJY   | B_ARG_83  | NH1    | B_GLU_85   | OE2    | 3.920        |
| 3IJY   | B_ARG_83  | NH1    | B_ASP_86   | OD2    | 3.633        |
| 3IJY   | B_ARG_164 | NH2    | A_ASP_166  | OD1    | 3.730        |
| 3IJY   | B_ARG_164 | NH2    | A_ASP_166  | OD2    | 3.693        |
| 3IJY   | B_LYS_208 | NZ     | A_GLU_122  | OE1    | 2.748        |
| 3IJY   | B_ARG_209 | NH2    | B_GLU_211  | OE2    | 3.922        |
| 3IJY   | C_ARG_54  | NH1    | C_ASP_60   | OD1    | 3.685        |
| 3IJY   | C_ARG_61  | NH1    | C_ASP_82   | OD1    | 2.672        |
| 3IJY   | C_ARG_61  | NH1    | C_ASP_82   | OD2    | 2.698        |
| 3IJY   | C_ARG_95  | NH2    | D_ASP_95   | OD1    | 2.992        |
| 3IJY   | C_ARG_95  | NH2    | D_ASP_95   | OD2    | 2.767        |
| 3IJY   | C_ARG_95  | NH2    | D_GLU_100E | OE1    | 3.905        |
| 3IJY   | C_LYS_102 | NZ     | C_GLU_104  | OE2    | 3.111        |
| 3IJY   | C_LYS_148 | NZ     | C_GLU_194  | OE1    | 3.624        |
| 3IJY   | C_LYS_148 | NZ     | C_GLU_194  | OE2    | 2.838        |
| 3IJY   | C_ARG_154 | NH1    | C_GLU_184  | OE2    | 3.667        |
| 3IJY   | D_ARG_38  | NH1    | D_ASP_86   | OD2    | 3.093        |
| 3IJY   | D_ARG_38  | NH2    | D_GLU_46   | OE1    | 3.401        |
| 3IJY   | D_ARG_52  | NH1    | D_GLU_58   | OE2    | 3.273        |
| 3IJY   | D_ARG_52  | NH2    | D_GLU_58   | OE2    | 3.154        |
| 3IJY   | D_ARG_66  | NH1    | D_ASP_86   | OD1    | 2.831        |
| 3IJY   | D_ARG_66  | NH1    | D_ASP_86   | OD2    | 3.858        |
| 3IJY   | D_ARG_66  | NH2    | D_ASP_86   | OD1    | 3.574        |
| 3IJY   | D_ARG_66  | NH2    | D_ASP_86   | OD2    | 3.130        |
| 3IJY   | D_ARG_83  | NH1    | D_GLU_85   | OE2    | 2.929        |
| 3IJY   | D_ARG_164 | NH2    | C_ASP_166  | OD1    | 3.199        |
| 3IJY   | D_ARG_209 | NH1    | D_GLU_211  | OE2    | 2.725        |



---

Table 422: 3IJY-specific salt bridging networks analysis. In this table, a PDB file is specified with a four-letter PDB ID, except that the names of the PDB files corresponding to the single NMR structural model split from the NMR ensemble is specified with a four-letter PDB ID in addition to a hyphen followed by the single NMR structural model numeric ID, the residue naming scheme is **Chain ID\_residue name\_residue number**,  $\angle ADH$  represents the angle formed by acceptor (A), donor (D) and hydrogen (H) ( $\angle ADH$ ).

| PDB ID | Residue A | Atom A | Residue B  | Atom B | Distance (Å) |
|--------|-----------|--------|------------|--------|--------------|
| 3IKC   | A_ARG_54  | NH1    | A_ASP_60   | OD1    | 3.615        |
| 3IKC   | A_ARG_54  | NH2    | A_ASP_60   | OD1    | 3.863        |
| 3IKC   | A_ARG_61  | NH1    | A_ASP_82   | OD1    | 2.899        |
| 3IKC   | A_ARG_61  | NH1    | A_ASP_82   | OD2    | 2.400        |
| 3IKC   | A_ARG_61  | NH2    | A_GLU_81   | OE1    | 3.912        |
| 3IKC   | A_ARG_61  | NH2    | A_ASP_82   | OD1    | 3.699        |
| 3IKC   | A_ARG_95  | NH2    | B_ASP_95   | OD1    | 3.326        |
| 3IKC   | A_ARG_95  | NH2    | B_ASP_95   | OD2    | 2.867        |
| 3IKC   | A_ARG_95  | NH2    | B_GLU_100E | OE1    | 3.865        |
| 3IKC   | A_LYS_148 | NZ     | A_GLU_194  | OE1    | 3.579        |
| 3IKC   | A_LYS_148 | NZ     | A_GLU_194  | OE2    | 2.692        |
| 3IKC   | A_ARG_154 | NH2    | A_GLU_184  | OE2    | 3.624        |
| 3IKC   | A_HIS_188 | ND1    | A_ASP_150  | OD2    | 2.784        |
| 3IKC   | A_LYS_198 | NZ     | A_ASP_109  | OD2    | 3.594        |
| 3IKC   | B_ARG_38  | NH1    | B_ASP_86   | OD2    | 2.851        |
| 3IKC   | B_ARG_38  | NH2    | B_GLU_46   | OE1    | 3.629        |
| 3IKC   | B_ARG_38  | NH2    | B_GLU_46   | OE2    | 3.974        |
| 3IKC   | B_ARG_38  | NH2    | B_ASP_86   | OD2    | 3.641        |
| 3IKC   | B_ARG_52  | NH1    | B_GLU_58   | OE2    | 2.895        |
| 3IKC   | B_ARG_52  | NH2    | B_GLU_58   | OE2    | 3.215        |
| 3IKC   | B_ARG_66  | NH1    | B_ASP_86   | OD1    | 3.007        |
| 3IKC   | B_ARG_66  | NH2    | B_ASP_86   | OD1    | 3.019        |
| 3IKC   | B_ARG_66  | NH2    | B_ASP_86   | OD2    | 2.604        |
| 3IKC   | B_ARG_83  | NH1    | B_ASP_86   | OD2    | 3.982        |
| 3IKC   | B_LYS_208 | NZ     | A_GLU_122  | OE1    | 3.042        |
| 3IKC   | C_LYS_24  | NZ     | C_ASP_70   | OD2    | 3.866        |
| 3IKC   | C_ARG_54  | NH1    | C_ASP_60   | OD1    | 3.727        |
| 3IKC   | C_ARG_61  | NH1    | C_ASP_82   | OD1    | 2.574        |
| 3IKC   | C_ARG_61  | NH1    | C_ASP_82   | OD2    | 2.683        |
| 3IKC   | C_ARG_95  | NH2    | D_ASP_95   | OD1    | 3.250        |
| 3IKC   | C_ARG_95  | NH2    | D_ASP_95   | OD2    | 2.670        |
| 3IKC   | C_LYS_102 | NZ     | C_GLU_104  | OE2    | 3.309        |
| 3IKC   | C_LYS_148 | NZ     | C_GLU_194  | OE1    | 3.402        |
| 3IKC   | C_LYS_148 | NZ     | C_GLU_194  | OE2    | 2.783        |
| 3IKC   | C_ARG_154 | NH1    | C_GLU_184  | OE2    | 3.991        |
| 3IKC   | C_LYS_198 | NZ     | C_ASP_109  | OD2    | 3.716        |
| 3IKC   | D_ARG_38  | NH1    | D_ASP_86   | OD2    | 2.796        |
| 3IKC   | D_ARG_38  | NH2    | D_GLU_46   | OE1    | 3.035        |
| 3IKC   | D_ARG_38  | NH2    | D_GLU_46   | OE2    | 3.845        |
| 3IKC   | D_ARG_52  | NH1    | D_GLU_58   | OE2    | 2.859        |
| 3IKC   | D_ARG_52  | NH2    | D_GLU_58   | OE2    | 3.107        |
| 3IKC   | D_ARG_66  | NH1    | D_ASP_86   | OD1    | 2.890        |
| 3IKC   | D_ARG_66  | NH1    | D_ASP_86   | OD2    | 3.713        |
| 3IKC   | D_ARG_66  | NH2    | D_ASP_86   | OD1    | 3.634        |
| 3IKC   | D_ARG_66  | NH2    | D_ASP_86   | OD2    | 3.025        |
| 3IKC   | D_ARG_83  | NH1    | D_GLU_85   | OE2    | 2.787        |
| 3IKC   | D_ARG_164 | NH1    | C_ASP_166  | OD1    | 3.903        |
| 3IKC   | D_ARG_164 | NH2    | C_ASP_166  | OD1    | 3.107        |
| 3IKC   | D_ARG_209 | NH1    | D_GLU_211  | OE2    | 3.689        |
| 3IKC   | D_ARG_209 | NH2    | D_GLU_211  | OE1    | 3.739        |

---

Table 423: 3IKC-specific salt bridging networks analysis. In this table, a PDB file is specified with a four-letter PDB ID, except that the names of the PDB files corresponding to the single NMR structural model split from the NMR ensemble is specified with a four-letter PDB ID in addition to a hyphen followed by the single NMR structural model numeric ID, the residue naming scheme is **Chain ID\_residue name\_residue number**,  $\angle ADH$  represents the angle formed by acceptor (A), donor (D) and hydrogen (H) ( $\angle ADH$ ).

| PDB ID | Residue A | Atom A | Residue B | Atom B | Distance (Å) |
|--------|-----------|--------|-----------|--------|--------------|
| 3IU3   | A_ARG_29  | NH2    | K_ASP_6   | OD1    | 2.779        |
| 3IU3   | A_HIS_33  | ND1    | A_ASP_97  | OD1    | 3.722        |
| 3IU3   | A_HIS_33  | NE2    | A_ASP_97  | OD1    | 3.462        |
| 3IU3   | A_LYS_36  | NZ     | A_ASP_88  | OD1    | 3.600        |
| 3IU3   | A_ARG_96  | NH2    | A_ASP_103 | OD1    | 3.718        |
| 3IU3   | A_ARG_96  | NH2    | A_ASP_103 | OD2    | 2.602        |
| 3IU3   | A_LYS_211 | NZ     | B_GLU_120 | OE1    | 2.457        |
| 3IU3   | B_LYS_52  | NZ     | B_ASP_49  | OD2    | 3.235        |
| 3IU3   | B_ARG_60  | NH1    | B_GLU_80  | OE2    | 3.898        |
| 3IU3   | B_ARG_60  | NH1    | B_ASP_81  | OD1    | 2.333        |
| 3IU3   | B_ARG_60  | NH1    | B_ASP_81  | OD2    | 2.901        |
| 3IU3   | B_ARG_60  | NH2    | B_GLU_78  | OE1    | 3.558        |
| 3IU3   | B_ARG_60  | NH2    | B_GLU_78  | OE2    | 3.050        |
| 3IU3   | B_ARG_90  | NH1    | B_ASP_49  | OD1    | 2.801        |
| 3IU3   | B_ARG_90  | NH1    | K_ASP_56  | OD2    | 3.059        |
| 3IU3   | B_ARG_90  | NH2    | B_ASP_49  | OD1    | 2.779        |
| 3IU3   | B_LYS_100 | NZ     | B_GLU_162 | OE1    | 3.331        |
| 3IU3   | B_LYS_100 | NZ     | B_GLU_162 | OE2    | 3.171        |
| 3IU3   | B_LYS_146 | NZ     | B_GLU_192 | OE1    | 3.006        |
| 3IU3   | B_LYS_146 | NZ     | B_GLU_192 | OE2    | 3.977        |
| 3IU3   | B_HIS_186 | ND1    | B_ASP_148 | OD2    | 3.079        |
| 3IU3   | C_ARG_29  | NH1    | J_ASP_6   | OD1    | 3.038        |
| 3IU3   | C_ARG_29  | NH1    | J_ASP_6   | OD2    | 3.788        |
| 3IU3   | C_ARG_29  | NH2    | J_ASP_6   | OD1    | 3.464        |
| 3IU3   | C_HIS_33  | ND1    | C_ASP_97  | OD2    | 3.423        |
| 3IU3   | C_HIS_33  | NE2    | C_ASP_97  | OD2    | 3.493        |
| 3IU3   | C_ARG_38  | NH2    | C_GLU_87  | OE2    | 3.961        |
| 3IU3   | C_LYS_61  | NZ     | C_GLU_44  | OE2    | 2.894        |
| 3IU3   | C_LYS_65  | NZ     | C_ASP_88  | OD2    | 3.093        |
| 3IU3   | C_LYS_67  | NZ     | C_GLU_80  | OE2    | 3.813        |
| 3IU3   | C_ARG_96  | NH1    | C_ASP_103 | OD1    | 3.896        |
| 3IU3   | C_ARG_96  | NH1    | C_ASP_103 | OD2    | 2.604        |
| 3IU3   | C_LYS_145 | NZ     | C_ASP_146 | OD1    | 3.489        |
| 3IU3   | C_LYS_145 | NZ     | C_ASP_146 | OD2    | 3.988        |
| 3IU3   | C_LYS_211 | NZ     | D_GLU_120 | OE2    | 3.231        |
| 3IU3   | C_ARG_212 | NH1    | C_GLU_214 | OE1    | 3.436        |
| 3IU3   | C_ARG_212 | NH1    | C_GLU_214 | OE2    | 3.171        |
| 3IU3   | D_LYS_52  | NZ     | D_ASP_49  | OD2    | 2.969        |
| 3IU3   | D_ARG_60  | NH1    | D_GLU_78  | OE1    | 3.425        |
| 3IU3   | D_ARG_60  | NH1    | D_GLU_78  | OE2    | 3.777        |
| 3IU3   | D_ARG_60  | NH2    | D_GLU_78  | OE1    | 3.729        |
| 3IU3   | D_ARG_60  | NH2    | D_ASP_81  | OD1    | 2.613        |
| 3IU3   | D_ARG_60  | NH2    | D_ASP_81  | OD2    | 3.360        |
| 3IU3   | D_ARG_90  | NH1    | D_ASP_49  | OD1    | 2.486        |
| 3IU3   | D_ARG_90  | NH1    | D_ASP_49  | OD2    | 3.966        |
| 3IU3   | D_ARG_90  | NH2    | D_ASP_49  | OD1    | 2.791        |
| 3IU3   | D_ARG_90  | NH2    | J_ASP_56  | OD2    | 3.101        |
| 3IU3   | D_LYS_100 | NZ     | D_GLU_162 | OE1    | 3.352        |
| 3IU3   | D_LYS_100 | NZ     | D_GLU_162 | OE2    | 3.241        |
| 3IU3   | D_ARG_139 | NH2    | D_GLU_102 | OE1    | 3.961        |
| 3IU3   | D_ARG_139 | NH2    | D_GLU_102 | OE2    | 2.898        |
| 3IU3   | D_LYS_146 | NZ     | D_GLU_192 | OE1    | 3.339        |
| 3IU3   | D_HIS_186 | ND1    | D_ASP_148 | OD2    | 3.055        |
| 3IU3   | H_ARG_29  | NH1    | I_ASP_6   | OD1    | 3.964        |
| 3IU3   | H_ARG_29  | NH1    | I_ASP_6   | OD2    | 3.865        |
| 3IU3   | H_ARG_29  | NH2    | I_ASP_6   | OD1    | 2.749        |
| 3IU3   | H_ARG_29  | NH2    | I_ASP_6   | OD2    | 3.378        |

|      |           |     |           |     |       |
|------|-----------|-----|-----------|-----|-------|
| 3IU3 | H_HIS_33  | ND1 | H_ASP_97  | OD2 | 3.649 |
| 3IU3 | H_HIS_33  | NE2 | H_ASP_97  | OD2 | 3.672 |
| 3IU3 | H_ARG_38  | NH2 | H_GLU_87  | OE2 | 3.294 |
| 3IU3 | H_LYS_65  | NZ  | H_ASP_88  | OD1 | 3.023 |
| 3IU3 | H_LYS_65  | NZ  | H_ASP_88  | OD2 | 2.754 |
| 3IU3 | H_ARG_96  | NH2 | H_ASP_103 | OD1 | 3.935 |
| 3IU3 | H_ARG_96  | NH2 | H_ASP_103 | OD2 | 2.794 |
| 3IU3 | H_HIS_166 | NE2 | L_ASP_164 | OD1 | 3.898 |
| 3IU3 | H_LYS_211 | NZ  | L_GLU_120 | OE2 | 3.694 |
| 3IU3 | L_ARG_29  | NH2 | L_ASP_56  | OD2 | 3.164 |
| 3IU3 | L_LYS_52  | NZ  | L_ASP_49  | OD2 | 2.964 |
| 3IU3 | L_ARG_60  | NH1 | L_GLU_78  | OE1 | 3.113 |
| 3IU3 | L_ARG_60  | NH1 | L_GLU_78  | OE2 | 3.592 |
| 3IU3 | L_ARG_60  | NH2 | L_GLU_78  | OE1 | 3.507 |
| 3IU3 | L_ARG_60  | NH2 | L_GLU_80  | OE1 | 3.605 |
| 3IU3 | L_ARG_60  | NH2 | L_ASP_81  | OD1 | 2.623 |
| 3IU3 | L_ARG_60  | NH2 | L_ASP_81  | OD2 | 3.232 |
| 3IU3 | L_ARG_90  | NH1 | L_ASP_49  | OD1 | 2.693 |
| 3IU3 | L_ARG_90  | NH2 | L_ASP_49  | OD1 | 2.879 |
| 3IU3 | L_ARG_90  | NH2 | L_ASP_56  | OD1 | 2.806 |
| 3IU3 | L_LYS_100 | NZ  | L_GLU_102 | OE2 | 3.519 |
| 3IU3 | L_LYS_100 | NZ  | L_GLU_162 | OE1 | 3.094 |
| 3IU3 | L_LYS_100 | NZ  | L_GLU_162 | OE2 | 3.091 |
| 3IU3 | L_ARG_139 | NH1 | L_GLU_102 | OE2 | 3.791 |
| 3IU3 | L_ARG_139 | NH2 | L_GLU_102 | OE1 | 3.338 |
| 3IU3 | L_ARG_139 | NH2 | L_GLU_102 | OE2 | 2.994 |
| 3IU3 | L_LYS_185 | NZ  | L_ASP_182 | OD1 | 3.411 |
| 3IU3 | L_HIS_186 | ND1 | L_ASP_148 | OD2 | 2.793 |
| 3IU3 | L_ARG_36  | NH1 | H_ASP_55  | OD1 | 3.819 |
| 3IU3 | L_ARG_36  | NH2 | H_ASP_55  | OD1 | 3.008 |
| 3IU3 | L_ARG_36  | NH2 | H_ASP_55  | OD2 | 2.747 |
| 3IU3 | L_ARG_117 | NH2 | L_GLU_106 | OE2 | 3.361 |
| 3IU3 | I_HIS_120 | NE2 | L_ASP_4   | OD2 | 3.993 |
| 3IU3 | J_ARG_117 | NH2 | J_GLU_113 | OE1 | 3.255 |
| 3IU3 | J_ARG_117 | NH2 | J_GLU_113 | OE2 | 3.394 |
| 3IU3 | K_LYS_16  | NZ  | K_GLU_116 | OE1 | 3.890 |
| 3IU3 | K_ARG_117 | NH2 | K_GLU_113 | OE1 | 3.765 |
| 3IU3 | K_ARG_117 | NH2 | K_GLU_113 | OE2 | 3.085 |
| 3IU3 | K_HIS_120 | NE2 | K_ASP_4   | OD1 | 3.824 |

Table 424: 3IU3-specific salt bridging networks analysis. In this table, a PDB file is specified with a four-letter PDB ID, except that the names of the PDB files corresponding to the single NMR structural model split from the NMR ensemble is specified with a four-letter PDB ID in addition to a hyphen followed by the single NMR structural model numeric ID, the residue naming scheme is **Chain ID\_residue name\_residue number**,  $\angle ADH$  represents the angle formed by acceptor (A), donor (D) and hydrogen (H) ( $\angle ADH$ ).

| PDB ID | Residue A | Atom A | Residue B | Atom B | Distance (Å) |
|--------|-----------|--------|-----------|--------|--------------|
| 3IU4   | H_ARG_38  | NH1    | H_ASP_86  | OD1    | 2.694        |
| 3IU4   | H_ARG_38  | NH2    | H_GLU_46  | OE1    | 2.936        |
| 3IU4   | H_ARG_38  | NH2    | H_GLU_46  | OE2    | 3.977        |
| 3IU4   | H_ARG_38  | NH2    | H_ASP_86  | OD1    | 3.682        |
| 3IU4   | H_ARG_66  | NH1    | H_ASP_86  | OD1    | 3.618        |
| 3IU4   | H_ARG_66  | NH1    | H_ASP_86  | OD2    | 2.904        |
| 3IU4   | H_ARG_66  | NH2    | H_ASP_86  | OD1    | 2.858        |
| 3IU4   | H_ARG_66  | NH2    | H_ASP_86  | OD2    | 3.468        |
| 3IU4   | H_LYS_143 | NZ     | H_ASP_144 | OD1    | 3.173        |
| 3IU4   | H_LYS_143 | NZ     | H_ASP_144 | OD2    | 3.097        |
| 3IU4   | H_LYS_210 | NZ     | H_GLU_212 | OE2    | 3.515        |
| 3IU4   | L_ARG_54  | NH2    | L_ASP_60  | OD1    | 3.494        |
| 3IU4   | L_ARG_61  | NH2    | L_ASP_82  | OD1    | 2.721        |
| 3IU4   | L_ARG_61  | NH2    | L_ASP_82  | OD2    | 3.542        |
| 3IU4   | L_LYS_103 | NZ     | L_GLU_165 | OE1    | 2.777        |
| 3IU4   | L_LYS_103 | NZ     | L_GLU_165 | OE2    | 3.441        |
| 3IU4   | L_LYS_149 | NZ     | L_GLU_195 | OE2    | 3.735        |
| 3IU4   | L_LYS_190 | NZ     | L_GLU_213 | OE2    | 2.585        |

Table 425: 3IU4-specific salt bridging networks analysis. In this table, a PDB file is specified with a four-letter PDB ID, except that the names of the PDB files corresponding to the single NMR structural model split from the NMR ensemble is specified with a four-letter PDB ID in addition to a hyphen followed by the single NMR structural model numeric ID, the residue naming scheme is **Chain ID\_residue name\_residue number**,  $\angle ADH$  represents the angle formed by acceptor (A), donor (D) and hydrogen (H) ( $\angle ADH$ ).

| PDB ID | Residue A | Atom A | Residue B | Atom B | Distance (Å) |
|--------|-----------|--------|-----------|--------|--------------|
| 3IVK   | L_ARG_25  | NH2    | L_ASP_71  | OD1    | 3.565        |
| 3IVK   | L_ARG_25  | NH2    | L_ASP_71  | OD2    | 3.118        |
| 3IVK   | L_ARG_62  | NH2    | L_GLU_82  | OE1    | 3.240        |
| 3IVK   | L_ARG_62  | NH2    | L_ASP_83  | OD1    | 3.041        |
| 3IVK   | L_ARG_62  | NH2    | L_ASP_83  | OD2    | 3.362        |
| 3IVK   | L_LYS_104 | NZ     | L_GLU_106 | OE2    | 2.881        |
| 3IVK   | L_ARG_143 | NH1    | L_GLU_106 | OE2    | 2.980        |
| 3IVK   | L_LYS_150 | NZ     | L_GLU_196 | OE2    | 2.646        |
| 3IVK   | H_ARG_41  | NH1    | H_ASP_93  | OD1    | 2.697        |
| 3IVK   | H_ARG_41  | NH2    | H_GLU_49  | OE1    | 3.359        |
| 3IVK   | H_ARG_41  | NH2    | H_GLU_49  | OE2    | 3.688        |
| 3IVK   | H_ARG_41  | NH2    | H_ASP_93  | OD1    | 3.849        |
| 3IVK   | H_ARG_70  | NH1    | H_ASP_93  | OD2    | 2.963        |
| 3IVK   | H_ARG_70  | NH2    | H_ASP_93  | OD1    | 2.795        |
| 3IVK   | H_ARG_70  | NH2    | H_ASP_93  | OD2    | 2.668        |
| 3IVK   | H_LYS_79  | NZ     | H_ASP_76  | OD2    | 3.978        |
| 3IVK   | H_ARG_101 | NH2    | H_ASP_113 | OD2    | 3.051        |
| 3IVK   | H_ARG_107 | NH1    | H_ASP_113 | OD2    | 3.782        |
| 3IVK   | H_LYS_155 | NZ     | H_ASP_156 | OD1    | 3.783        |
| 3IVK   | H_LYS_155 | NZ     | H_ASP_156 | OD2    | 3.283        |
| 3IVK   | H_LYS_218 | NZ     | H_ASP_220 | OD1    | 3.490        |
| 3IVK   | H_LYS_218 | NZ     | H_ASP_220 | OD2    | 3.548        |
| 3IVK   | H_LYS_222 | NZ     | H_GLU_224 | OE1    | 3.186        |
| 3IVK   | H_LYS_222 | NZ     | H_GLU_224 | OE2    | 3.235        |
| 3IVK   | B_ARG_25  | NH2    | B_ASP_71  | OD1    | 3.579        |
| 3IVK   | B_ARG_25  | NH2    | B_ASP_71  | OD2    | 3.085        |
| 3IVK   | B_ARG_62  | NH2    | B_GLU_82  | OE1    | 3.276        |
| 3IVK   | B_ARG_62  | NH2    | B_ASP_83  | OD1    | 3.056        |
| 3IVK   | B_ARG_62  | NH2    | B_ASP_83  | OD2    | 3.370        |
| 3IVK   | B_LYS_104 | NZ     | B_GLU_106 | OE2    | 2.879        |
| 3IVK   | B_ARG_143 | NH1    | B_GLU_106 | OE2    | 2.970        |
| 3IVK   | B_LYS_150 | NZ     | B_GLU_196 | OE2    | 2.638        |
| 3IVK   | A_ARG_41  | NH1    | A_ASP_93  | OD1    | 2.649        |
| 3IVK   | A_ARG_41  | NH2    | A_GLU_49  | OE1    | 3.405        |
| 3IVK   | A_ARG_41  | NH2    | A_GLU_49  | OE2    | 3.702        |
| 3IVK   | A_ARG_41  | NH2    | A_ASP_93  | OD1    | 3.815        |
| 3IVK   | A_ARG_70  | NH1    | A_ASP_93  | OD2    | 2.973        |
| 3IVK   | A_ARG_70  | NH2    | A_ASP_93  | OD1    | 2.836        |
| 3IVK   | A_ARG_70  | NH2    | A_ASP_93  | OD2    | 2.675        |
| 3IVK   | A_LYS_79  | NZ     | A_ASP_76  | OD2    | 3.988        |
| 3IVK   | A_ARG_101 | NH2    | A_ASP_113 | OD2    | 3.070        |
| 3IVK   | A_ARG_107 | NH1    | A_ASP_113 | OD2    | 3.837        |
| 3IVK   | A_LYS_155 | NZ     | A_ASP_156 | OD1    | 3.802        |
| 3IVK   | A_LYS_155 | NZ     | A_ASP_156 | OD2    | 3.283        |
| 3IVK   | A_LYS_218 | NZ     | A_ASP_220 | OD1    | 3.505        |
| 3IVK   | A_LYS_218 | NZ     | A_ASP_220 | OD2    | 3.577        |
| 3IVK   | A_LYS_222 | NZ     | A_GLU_224 | OE1    | 3.213        |
| 3IVK   | A_LYS_222 | NZ     | A_GLU_224 | OE2    | 3.240        |

---

Table 426: 3IVK-specific salt bridging networks analysis. In this table, a PDB file is specified with a four-letter PDB ID, except that the names of the PDB files corresponding to the single NMR structural model split from the NMR ensemble is specified with a four-letter PDB ID in addition to a hyphen followed by the single NMR structural model numeric ID, the residue naming scheme is **Chain ID\_residue name\_residue number**,  $\angle ADH$  represents the angle formed by acceptor (A), donor (D) and hydrogen (H) ( $\angle ADH$ ).



| PDB ID | Residue A | Atom A | Residue B | Atom B | Distance (Å) |
|--------|-----------|--------|-----------|--------|--------------|
| 3J5M   | A_LYS_46  | NZ     | A_GLU_492 | OE1    | 3.718        |
| 3J5M   | A_LYS_46  | NZ     | A_GLU_492 | OE2    | 2.915        |
| 3J5M   | A_HIS_66  | ND1    | A_GLU_64  | OE2    | 3.151        |
| 3J5M   | A_ARG_143 | NH2    | A_GLU_145 | OE1    | 2.805        |
| 3J5M   | A_ARG_143 | NH2    | A_GLU_145 | OE2    | 3.445        |
| 3J5M   | A_LYS_229 | NZ     | A_GLU_83  | OE1    | 2.907        |
| 3J5M   | A_LYS_231 | NZ     | A_GLU_268 | OE2    | 2.874        |
| 3J5M   | A_HIS_249 | NE2    | A_GLU_482 | OE1    | 3.482        |
| 3J5M   | A_LYS_282 | NZ     | A_GLU_275 | OE1    | 2.857        |
| 3J5M   | A_LYS_282 | NZ     | A_GLU_275 | OE2    | 3.935        |
| 3J5M   | A_LYS_344 | NZ     | A_GLU_340 | OE2    | 3.897        |
| 3J5M   | A_LYS_421 | NZ     | A_GLU_145 | OE2    | 3.812        |
| 3J5M   | A_ARG_429 | NH2    | D_ASP_74  | OD1    | 3.207        |
| 3J5M   | A_ARG_429 | NH2    | D_ASP_74  | OD2    | 3.203        |
| 3J5M   | A_ARG_456 | NH1    | A_GLU_466 | OE1    | 2.968        |
| 3J5M   | A_ARG_476 | NH2    | A_ASP_474 | OD1    | 3.858        |
| 3J5M   | A_ARG_480 | NH1    | A_ASP_477 | OD1    | 2.834        |
| 3J5M   | A_LYS_487 | NZ     | A_GLU_91  | OE2    | 2.895        |
| 3J5M   | C_ARG_54  | NH2    | C_ASP_60  | OD1    | 2.987        |
| 3J5M   | C_ARG_61  | NH1    | C_GLU_79  | OE2    | 3.926        |
| 3J5M   | C_ARG_61  | NH2    | C_GLU_79  | OE1    | 3.624        |
| 3J5M   | C_ARG_61  | NH2    | C_ASP_82  | OD1    | 3.040        |
| 3J5M   | C_ARG_61  | NH2    | C_ASP_82  | OD2    | 3.088        |
| 3J5M   | C_ARG_103 | NH2    | C_GLU_165 | OE1    | 2.814        |
| 3J5M   | C_ARG_142 | NH1    | C_GLU_165 | OE1    | 3.243        |
| 3J5M   | C_ARG_142 | NH2    | C_GLU_105 | OE2    | 3.198        |
| 3J5M   | C_LYS_149 | NZ     | C_GLU_195 | OE1    | 3.376        |
| 3J5M   | C_LYS_149 | NZ     | C_GLU_195 | OE2    | 2.944        |
| 3J5M   | C_HIS_189 | ND1    | C_ASP_151 | OD2    | 2.803        |
| 3J5M   | D_ARG_19  | NH1    | D_ASP_81  | OD2    | 3.870        |
| 3J5M   | D_ARG_19  | NH2    | D_ASP_81  | OD2    | 3.177        |
| 3J5M   | D_ARG_31  | NH2    | D_ASP_27  | OD2    | 3.998        |
| 3J5M   | D_ARG_38  | NH1    | D_ASP_86  | OD1    | 2.857        |
| 3J5M   | D_ARG_38  | NH2    | D_GLU_46  | OE2    | 2.922        |
| 3J5M   | D_LYS_52  | NZ     | A_ASP_474 | OD2    | 2.827        |
| 3J5M   | D_LYS_52  | NZ     | D_GLU_33  | OE2    | 3.615        |
| 3J5M   | D_ARG_64  | NH2    | A_ASP_457 | OD2    | 3.079        |
| 3J5M   | D_ARG_73  | NH2    | D_GLU_30  | OE1    | 2.847        |
| 3J5M   | D_ARG_73  | NH2    | D_GLU_30  | OE2    | 3.839        |
| 3J5M   | D_LYS_209 | NZ     | C_GLU_123 | OE1    | 3.480        |
| 3J5M   | D_LYS_209 | NZ     | C_GLU_123 | OE2    | 2.844        |
| 3J5M   | D_LYS_214 | NZ     | C_ASP_122 | OD2    | 2.841        |
| 3J5M   | E_LYS_46  | NZ     | E_GLU_492 | OE1    | 3.718        |
| 3J5M   | E_LYS_46  | NZ     | E_GLU_492 | OE2    | 2.915        |
| 3J5M   | E_HIS_66  | ND1    | E_GLU_64  | OE2    | 3.151        |
| 3J5M   | E_ARG_143 | NH2    | E_GLU_145 | OE1    | 2.804        |
| 3J5M   | E_ARG_143 | NH2    | E_GLU_145 | OE2    | 3.444        |
| 3J5M   | E_LYS_229 | NZ     | E_GLU_83  | OE1    | 2.907        |
| 3J5M   | E_LYS_231 | NZ     | E_GLU_268 | OE2    | 2.874        |
| 3J5M   | E_HIS_249 | NE2    | E_GLU_482 | OE1    | 3.482        |
| 3J5M   | E_LYS_282 | NZ     | E_GLU_275 | OE1    | 2.858        |
| 3J5M   | E_LYS_282 | NZ     | E_GLU_275 | OE2    | 3.935        |
| 3J5M   | E_LYS_344 | NZ     | E_GLU_340 | OE2    | 3.897        |
| 3J5M   | E_LYS_421 | NZ     | E_GLU_145 | OE2    | 3.812        |
| 3J5M   | E_ARG_429 | NH2    | H_ASP_74  | OD1    | 3.207        |
| 3J5M   | E_ARG_429 | NH2    | H_ASP_74  | OD2    | 3.202        |
| 3J5M   | E_ARG_456 | NH1    | E_GLU_466 | OE1    | 2.967        |

|      |           |     |           |     |       |
|------|-----------|-----|-----------|-----|-------|
| 3J5M | E_ARG_476 | NH2 | E_ASP_474 | OD1 | 3.859 |
| 3J5M | E_ARG_480 | NH1 | E_ASP_477 | OD1 | 2.834 |
| 3J5M | E_LYS_487 | NZ  | E_GLU_91  | OE2 | 2.894 |
| 3J5M | G_ARG_54  | NH2 | G_ASP_60  | OD1 | 2.988 |
| 3J5M | G_ARG_61  | NH1 | G_GLU_79  | OE2 | 3.925 |
| 3J5M | G_ARG_61  | NH2 | G_GLU_79  | OE1 | 3.624 |
| 3J5M | G_ARG_61  | NH2 | G_ASP_82  | OD1 | 3.040 |
| 3J5M | G_ARG_61  | NH2 | G_ASP_82  | OD2 | 3.087 |
| 3J5M | G_ARG_103 | NH2 | G_GLU_165 | OE1 | 2.814 |
| 3J5M | G_ARG_142 | NH1 | G_GLU_165 | OE1 | 3.243 |
| 3J5M | G_ARG_142 | NH2 | G_GLU_105 | OE2 | 3.199 |
| 3J5M | G_LYS_149 | NZ  | G_GLU_195 | OE1 | 3.376 |
| 3J5M | G_LYS_149 | NZ  | G_GLU_195 | OE2 | 2.944 |
| 3J5M | G_HIS_189 | ND1 | G_ASP_151 | OD2 | 2.802 |
| 3J5M | H_ARG_19  | NH1 | H_ASP_81  | OD2 | 3.869 |
| 3J5M | H_ARG_19  | NH2 | H_ASP_81  | OD2 | 3.177 |
| 3J5M | H_ARG_31  | NH2 | H_ASP_27  | OD2 | 3.998 |
| 3J5M | H_ARG_38  | NH1 | H_ASP_86  | OD1 | 2.857 |
| 3J5M | H_ARG_38  | NH2 | H_GLU_46  | OE2 | 2.922 |
| 3J5M | H_LYS_52  | NZ  | E_ASP_474 | OD2 | 2.827 |
| 3J5M | H_LYS_52  | NZ  | H_GLU_33  | OE2 | 3.614 |
| 3J5M | H_ARG_64  | NH2 | E_ASP_457 | OD2 | 3.078 |
| 3J5M | H_ARG_73  | NH2 | H_GLU_30  | OE1 | 2.847 |
| 3J5M | H_ARG_73  | NH2 | H_GLU_30  | OE2 | 3.840 |
| 3J5M | H_LYS_209 | NZ  | G_GLU_123 | OE1 | 3.479 |
| 3J5M | H_LYS_209 | NZ  | G_GLU_123 | OE2 | 2.843 |
| 3J5M | H_LYS_214 | NZ  | G_ASP_122 | OD2 | 2.842 |
| 3J5M | I_LYS_46  | NZ  | I_GLU_492 | OE1 | 3.718 |
| 3J5M | I_LYS_46  | NZ  | I_GLU_492 | OE2 | 2.915 |
| 3J5M | I_HIS_66  | ND1 | I_GLU_64  | OE2 | 3.151 |
| 3J5M | I_ARG_143 | NH2 | I_GLU_145 | OE1 | 2.805 |
| 3J5M | I_ARG_143 | NH2 | I_GLU_145 | OE2 | 3.445 |
| 3J5M | I_LYS_229 | NZ  | I_GLU_83  | OE1 | 2.907 |
| 3J5M | I_LYS_231 | NZ  | I_GLU_268 | OE2 | 2.875 |
| 3J5M | I_HIS_249 | NE2 | I_GLU_482 | OE1 | 3.482 |
| 3J5M | I_LYS_282 | NZ  | I_GLU_275 | OE1 | 2.857 |
| 3J5M | I_LYS_282 | NZ  | I_GLU_275 | OE2 | 3.934 |
| 3J5M | I_LYS_344 | NZ  | I_GLU_340 | OE2 | 3.896 |
| 3J5M | I_LYS_421 | NZ  | I_GLU_145 | OE2 | 3.811 |
| 3J5M | I_ARG_429 | NH2 | L_ASP_74  | OD1 | 3.207 |
| 3J5M | I_ARG_429 | NH2 | L_ASP_74  | OD2 | 3.202 |
| 3J5M | I_ARG_456 | NH1 | I_GLU_466 | OE1 | 2.967 |
| 3J5M | I_ARG_476 | NH2 | L_ASP_474 | OD1 | 3.859 |
| 3J5M | I_ARG_480 | NH1 | L_ASP_477 | OD1 | 2.834 |
| 3J5M | I_LYS_487 | NZ  | I_GLU_91  | OE2 | 2.895 |
| 3J5M | K_ARG_54  | NH2 | K_ASP_60  | OD1 | 2.987 |
| 3J5M | K_ARG_61  | NH1 | K_GLU_79  | OE2 | 3.926 |
| 3J5M | K_ARG_61  | NH2 | K_GLU_79  | OE1 | 3.624 |
| 3J5M | K_ARG_61  | NH2 | K_ASP_82  | OD1 | 3.041 |
| 3J5M | K_ARG_61  | NH2 | K_ASP_82  | OD2 | 3.088 |
| 3J5M | K_ARG_103 | NH2 | K_GLU_165 | OE1 | 2.814 |
| 3J5M | K_ARG_142 | NH1 | K_GLU_165 | OE1 | 3.243 |
| 3J5M | K_ARG_142 | NH2 | K_GLU_105 | OE2 | 3.198 |
| 3J5M | K_LYS_149 | NZ  | K_GLU_195 | OE1 | 3.376 |
| 3J5M | K_LYS_149 | NZ  | K_GLU_195 | OE2 | 2.944 |
| 3J5M | K_HIS_189 | ND1 | K_ASP_151 | OD2 | 2.803 |
| 3J5M | L_ARG_19  | NH1 | L_ASP_81  | OD2 | 3.870 |
| 3J5M | L_ARG_19  | NH2 | L_ASP_81  | OD2 | 3.177 |

|      |           |     |           |     |       |
|------|-----------|-----|-----------|-----|-------|
| 3J5M | L_ARG_31  | NH2 | L_ASP_27  | OD2 | 3.998 |
| 3J5M | L_ARG_38  | NH1 | L_ASP_86  | OD1 | 2.857 |
| 3J5M | L_ARG_38  | NH2 | L_GLU_46  | OE2 | 2.922 |
| 3J5M | L_LYS_52  | NZ  | L_ASP_474 | OD2 | 2.827 |
| 3J5M | L_LYS_52  | NZ  | L_GLU_33  | OE2 | 3.615 |
| 3J5M | L_ARG_64  | NH2 | L_ASP_457 | OD2 | 3.078 |
| 3J5M | L_ARG_73  | NH2 | L_GLU_30  | OE1 | 2.847 |
| 3J5M | L_ARG_73  | NH2 | L_GLU_30  | OE2 | 3.839 |
| 3J5M | L_LYS_209 | NZ  | K_GLU_123 | OE1 | 3.480 |
| 3J5M | L_LYS_209 | NZ  | K_GLU_123 | OE2 | 2.844 |
| 3J5M | L_LYS_214 | NZ  | K_ASP_122 | OD2 | 2.841 |

Table 427: 3J5M-specific salt bridging networks analysis. In this table, a PDB file is specified with a four-letter PDB ID, except that the names of the PDB files corresponding to the single NMR structural model split from the NMR ensemble is specified with a four-letter PDB ID in addition to a hyphen followed by the single NMR structural model numeric ID, the residue naming scheme is **Chain ID\_residue name\_residue number**,  $\angle ADH$  represents the angle formed by acceptor (A), donor (D) and hydrogen (H) ( $\angle ADH$ ).

| PDB ID | Residue A | Atom A | Residue B | Atom B | Distance (Å) |
|--------|-----------|--------|-----------|--------|--------------|
| 3J70   | A_ARG_38  | NH1    | A_ASP_86  | OD1    | 3.866        |
| 3J70   | A_ARG_38  | NH2    | A_GLU_46  | OE1    | 2.795        |
| 3J70   | A_ARG_38  | NH2    | A_ASP_86  | OD1    | 2.823        |
| 3J70   | A_LYS_62  | NZ     | A_GLU_46  | OE2    | 2.813        |
| 3J70   | A_ARG_64  | NH2    | B_ASP_1   | OD1    | 2.676        |
| 3J70   | A_ARG_66  | NH2    | A_ASP_86  | OD2    | 2.896        |
| 3J70   | A_ARG_83  | NH2    | A_GLU_85  | OE2    | 3.748        |
| 3J70   | A_LYS_209 | NZ     | B_GLU_123 | OE1    | 3.744        |
| 3J70   | A_LYS_209 | NZ     | B_GLU_123 | OE2    | 2.604        |
| 3J70   | A_LYS_210 | NZ     | A_GLU_212 | OE1    | 3.567        |
| 3J70   | A_LYS_214 | NZ     | A_GLU_212 | OE1    | 3.762        |
| 3J70   | A_LYS_214 | NZ     | A_GLU_212 | OE2    | 3.583        |
| 3J70   | B_ARG_61  | NH2    | B_ASP_82  | OD1    | 2.797        |
| 3J70   | B_ARG_61  | NH2    | B_ASP_82  | OD2    | 2.800        |
| 3J70   | B_LYS_103 | NZ     | B_GLU_165 | OE1    | 2.848        |
| 3J70   | B_LYS_103 | NZ     | B_GLU_165 | OE2    | 3.750        |
| 3J70   | B_ARG_108 | NH1    | B_ASP_170 | OD2    | 3.189        |
| 3J70   | B_LYS_149 | NZ     | B_GLU_195 | OE1    | 3.334        |
| 3J70   | B_LYS_149 | NZ     | B_GLU_195 | OE2    | 2.862        |
| 3J70   | C_LYS_8   | NZ     | C_GLU_119 | OE1    | 2.764        |
| 3J70   | C_HIS_27  | ND1    | C_GLU_85  | OE1    | 3.187        |
| 3J70   | C_LYS_29  | NZ     | C_GLU_85  | OE1    | 3.965        |
| 3J70   | C_LYS_29  | NZ     | D_ASP_279 | OD2    | 2.704        |
| 3J70   | C_LYS_46  | NZ     | C_ASP_56  | OD1    | 2.811        |
| 3J70   | C_LYS_50  | NZ     | C_GLU_77  | OE1    | 2.765        |
| 3J70   | C_LYS_50  | NZ     | C_GLU_77  | OE2    | 3.345        |
| 3J70   | C_ARG_54  | NH1    | C_ASP_78  | OD2    | 2.875        |
| 3J70   | C_ARG_54  | NH2    | C_ASP_78  | OD1    | 2.822        |
| 3J70   | C_ARG_54  | NH2    | C_ASP_78  | OD2    | 2.827        |
| 3J70   | C_ARG_59  | NH1    | D_ASP_368 | OD1    | 3.842        |
| 3J70   | C_ARG_59  | NH1    | D_ASP_368 | OD2    | 2.986        |
| 3J70   | C_ARG_59  | NH2    | D_ASP_368 | OD1    | 2.621        |
| 3J70   | C_ARG_59  | NH2    | D_ASP_368 | OD2    | 3.173        |
| 3J70   | C_LYS_72  | NZ     | C_ASP_56  | OD2    | 2.565        |
| 3J70   | C_LYS_90  | NZ     | C_GLU_85  | OE2    | 2.709        |
| 3J70   | C_HIS_107 | ND1    | C_ASP_105 | OD2    | 3.850        |
| 3J70   | C_ARG_134 | NH2    | C_ASP_153 | OD1    | 3.650        |
| 3J70   | C_ARG_134 | NH2    | C_ASP_153 | OD2    | 3.960        |
| 3J70   | D_LYS_46  | NZ     | D_GLU_492 | OE1    | 2.843        |
| 3J70   | D_LYS_46  | NZ     | D_GLU_492 | OE2    | 2.835        |
| 3J70   | D_LYS_130 | NZ     | D_GLU_150 | OE2    | 2.774        |
| 3J70   | D_ARG_146 | NH1    | C_GLU_169 | OE1    | 2.841        |
| 3J70   | D_ARG_146 | NH1    | C_GLU_169 | OE2    | 2.796        |
| 3J70   | D_ARG_146 | NH2    | C_GLU_169 | OE1    | 3.599        |
| 3J70   | D_LYS_171 | NZ     | C_GLU_13  | OE1    | 3.949        |
| 3J70   | D_LYS_192 | NZ     | D_ASP_137 | OD2    | 2.718        |
| 3J70   | D_LYS_207 | NZ     | D_GLU_381 | OE2    | 2.776        |
| 3J70   | D_HIS_249 | NE2    | D_GLU_482 | OE1    | 2.775        |
| 3J70   | D_LYS_282 | NZ     | D_ASP_279 | OD1    | 2.794        |
| 3J70   | D_LYS_322 | NZ     | A_ASP_95  | OD2    | 2.908        |
| 3J70   | D_ARG_327 | NH2    | A_ASP_52  | OD2    | 3.286        |
| 3J70   | D_LYS_337 | NZ     | D_GLU_293 | OE2    | 2.865        |
| 3J70   | D_LYS_348 | NZ     | D_GLU_269 | OE1    | 2.779        |
| 3J70   | D_LYS_348 | NZ     | D_GLU_269 | OE2    | 3.998        |
| 3J70   | D_ARG_419 | NH1    | A_ASP_54  | OD1    | 3.985        |
| 3J70   | D_ARG_456 | NH1    | D_GLU_466 | OE1    | 2.870        |
| 3J70   | D_ARG_456 | NH1    | D_GLU_466 | OE2    | 2.877        |

|      |           |     |           |     |       |
|------|-----------|-----|-----------|-----|-------|
| 3J70 | D_ARG_469 | NH1 | D_ASP_457 | OD1 | 2.823 |
| 3J70 | D_ARG_469 | NH1 | D_ASP_457 | OD2 | 3.449 |
| 3J70 | D_ARG_469 | NH2 | D_ASP_457 | OD2 | 3.357 |
| 3J70 | D_ARG_476 | NH1 | D_ASP_474 | OD1 | 2.860 |
| 3J70 | D_ARG_480 | NH1 | D_ASP_474 | OD2 | 2.862 |
| 3J70 | D_ARG_480 | NH1 | D_ASP_477 | OD1 | 2.641 |
| 3J70 | D_ARG_480 | NH1 | D_ASP_477 | OD2 | 3.954 |
| 3J70 | D_ARG_480 | NH2 | D_ASP_474 | OD2 | 3.415 |
| 3J70 | D_LYS_487 | NZ  | D_GLU_47  | OE2 | 3.606 |
| 3J70 | D_LYS_487 | NZ  | D_GLU_91  | OE2 | 2.796 |
| 3J70 | M_ARG_38  | NH1 | M_ASP_86  | OD1 | 3.866 |
| 3J70 | M_ARG_38  | NH2 | M_GLU_46  | OE1 | 2.795 |
| 3J70 | M_ARG_38  | NH2 | M_ASP_86  | OD1 | 2.824 |
| 3J70 | M_LYS_62  | NZ  | M_GLU_46  | OE2 | 2.814 |
| 3J70 | M_ARG_64  | NH2 | N_ASP_1   | OD1 | 2.677 |
| 3J70 | M_ARG_66  | NH2 | M_ASP_86  | OD2 | 2.896 |
| 3J70 | M_ARG_83  | NH2 | M_GLU_85  | OE2 | 3.748 |
| 3J70 | M_LYS_209 | NZ  | N_GLU_123 | OE1 | 3.744 |
| 3J70 | M_LYS_209 | NZ  | N_GLU_123 | OE2 | 2.604 |
| 3J70 | M_LYS_210 | NZ  | M_GLU_212 | OE1 | 3.567 |
| 3J70 | M_LYS_214 | NZ  | M_GLU_212 | OE1 | 3.762 |
| 3J70 | M_LYS_214 | NZ  | M_GLU_212 | OE2 | 3.583 |
| 3J70 | N_ARG_61  | NH2 | N_ASP_82  | OD1 | 2.798 |
| 3J70 | N_ARG_61  | NH2 | N_ASP_82  | OD2 | 2.800 |
| 3J70 | N_LYS_103 | NZ  | N_GLU_165 | OE1 | 2.848 |
| 3J70 | N_LYS_103 | NZ  | N_GLU_165 | OE2 | 3.750 |
| 3J70 | N_ARG_108 | NH1 | N_ASP_170 | OD2 | 3.190 |
| 3J70 | N_LYS_149 | NZ  | N_GLU_195 | OE1 | 3.334 |
| 3J70 | N_LYS_149 | NZ  | N_GLU_195 | OE2 | 2.861 |
| 3J70 | O_LYS_8   | NZ  | O_GLU_119 | OE1 | 2.765 |
| 3J70 | O_HIS_27  | ND1 | O_GLU_85  | OE1 | 3.187 |
| 3J70 | O_LYS_29  | NZ  | O_GLU_85  | OE1 | 3.964 |
| 3J70 | O_LYS_29  | NZ  | P_ASP_279 | OD2 | 2.704 |
| 3J70 | O_LYS_46  | NZ  | O_ASP_56  | OD1 | 2.811 |
| 3J70 | O_LYS_50  | NZ  | O_GLU_77  | OE1 | 2.765 |
| 3J70 | O_LYS_50  | NZ  | O_GLU_77  | OE2 | 3.346 |
| 3J70 | O_ARG_54  | NH1 | O_ASP_78  | OD2 | 2.875 |
| 3J70 | O_ARG_54  | NH2 | O_ASP_78  | OD1 | 2.822 |
| 3J70 | O_ARG_54  | NH2 | O_ASP_78  | OD2 | 2.827 |
| 3J70 | O_ARG_59  | NH1 | P_ASP_368 | OD1 | 3.842 |
| 3J70 | O_ARG_59  | NH1 | P_ASP_368 | OD2 | 2.986 |
| 3J70 | O_ARG_59  | NH2 | P_ASP_368 | OD1 | 2.620 |
| 3J70 | O_ARG_59  | NH2 | P_ASP_368 | OD2 | 3.173 |
| 3J70 | O_LYS_72  | NZ  | O_ASP_56  | OD2 | 2.565 |
| 3J70 | O_LYS_90  | NZ  | O_GLU_85  | OE2 | 2.709 |
| 3J70 | O_HIS_107 | ND1 | O_ASP_105 | OD2 | 3.851 |
| 3J70 | O_ARG_134 | NH2 | O_ASP_153 | OD1 | 3.650 |
| 3J70 | O_ARG_134 | NH2 | O_ASP_153 | OD2 | 3.960 |
| 3J70 | P_LYS_46  | NZ  | P_GLU_492 | OE1 | 2.843 |
| 3J70 | P_LYS_46  | NZ  | P_GLU_492 | OE2 | 2.835 |
| 3J70 | P_LYS_130 | NZ  | P_GLU_150 | OE2 | 2.774 |
| 3J70 | P_ARG_146 | NH1 | O_GLU_169 | OE1 | 2.841 |
| 3J70 | P_ARG_146 | NH1 | O_GLU_169 | OE2 | 2.796 |
| 3J70 | P_ARG_146 | NH2 | O_GLU_169 | OE1 | 3.599 |
| 3J70 | P_LYS_171 | NZ  | O_GLU_13  | OE1 | 3.948 |
| 3J70 | P_LYS_192 | NZ  | P_ASP_137 | OD2 | 2.718 |
| 3J70 | P_LYS_207 | NZ  | P_GLU_381 | OE2 | 2.776 |
| 3J70 | P_HIS_249 | NE2 | P_GLU_482 | OE1 | 2.775 |

|      |           |     |           |     |       |
|------|-----------|-----|-----------|-----|-------|
| 3J70 | P_LYS_282 | NZ  | P_ASP_279 | OD1 | 2.794 |
| 3J70 | P_LYS_322 | NZ  | M_ASP_95  | OD2 | 2.909 |
| 3J70 | P_ARG_327 | NH2 | M_ASP_52  | OD2 | 3.286 |
| 3J70 | P_LYS_337 | NZ  | P_GLU_293 | OE2 | 2.865 |
| 3J70 | P_LYS_348 | NZ  | P_GLU_269 | OE1 | 2.779 |
| 3J70 | P_LYS_348 | NZ  | P_GLU_269 | OE2 | 3.999 |
| 3J70 | P_ARG_419 | NH1 | M_ASP_54  | OD1 | 3.985 |
| 3J70 | P_ARG_456 | NH1 | P_GLU_466 | OE1 | 2.870 |
| 3J70 | P_ARG_456 | NH1 | P_GLU_466 | OE2 | 2.877 |
| 3J70 | P_ARG_469 | NH1 | P_ASP_457 | OD1 | 2.823 |
| 3J70 | P_ARG_469 | NH1 | P_ASP_457 | OD2 | 3.450 |
| 3J70 | P_ARG_469 | NH2 | P_ASP_457 | OD2 | 3.357 |
| 3J70 | P_ARG_476 | NH1 | P_ASP_474 | OD1 | 2.859 |
| 3J70 | P_ARG_480 | NH1 | P_ASP_474 | OD2 | 2.862 |
| 3J70 | P_ARG_480 | NH1 | P_ASP_477 | OD1 | 2.642 |
| 3J70 | P_ARG_480 | NH1 | P_ASP_477 | OD2 | 3.954 |
| 3J70 | P_ARG_480 | NH2 | P_ASP_474 | OD2 | 3.415 |
| 3J70 | P_LYS_487 | NZ  | P_GLU_47  | OE2 | 3.605 |
| 3J70 | P_LYS_487 | NZ  | P_GLU_91  | OE2 | 2.797 |
| 3J70 | R_ARG_38  | NH1 | R_ASP_86  | OD1 | 3.866 |
| 3J70 | R_ARG_38  | NH2 | R_GLU_46  | OE1 | 2.795 |
| 3J70 | R_ARG_38  | NH2 | R_ASP_86  | OD1 | 2.824 |
| 3J70 | R_LYS_62  | NZ  | R_GLU_46  | OE2 | 2.814 |
| 3J70 | R_ARG_64  | NH2 | S_ASP_1   | OD1 | 2.677 |
| 3J70 | R_ARG_66  | NH2 | R_ASP_86  | OD2 | 2.896 |
| 3J70 | R_ARG_83  | NH2 | R_GLU_85  | OE2 | 3.748 |
| 3J70 | R_LYS_209 | NZ  | S_GLU_123 | OE1 | 3.743 |
| 3J70 | R_LYS_209 | NZ  | S_GLU_123 | OE2 | 2.603 |
| 3J70 | R_LYS_210 | NZ  | R_GLU_212 | OE1 | 3.567 |
| 3J70 | R_LYS_214 | NZ  | R_GLU_212 | OE1 | 3.762 |
| 3J70 | R_LYS_214 | NZ  | R_GLU_212 | OE2 | 3.584 |
| 3J70 | S_ARG_61  | NH2 | S_ASP_82  | OD1 | 2.798 |
| 3J70 | S_ARG_61  | NH2 | S_ASP_82  | OD2 | 2.800 |
| 3J70 | S_LYS_103 | NZ  | S_GLU_165 | OE1 | 2.848 |
| 3J70 | S_LYS_103 | NZ  | S_GLU_165 | OE2 | 3.750 |
| 3J70 | S_ARG_108 | NH1 | S_ASP_170 | OD2 | 3.190 |
| 3J70 | S_LYS_149 | NZ  | S_GLU_195 | OE1 | 3.334 |
| 3J70 | S_LYS_149 | NZ  | S_GLU_195 | OE2 | 2.862 |
| 3J70 | T_LYS_8   | NZ  | T_GLU_119 | OE1 | 2.764 |
| 3J70 | T_HIS_27  | ND1 | T_GLU_85  | OE1 | 3.187 |
| 3J70 | T_LYS_29  | NZ  | T_GLU_85  | OE1 | 3.965 |
| 3J70 | T_LYS_29  | NZ  | U_ASP_279 | OD2 | 2.704 |
| 3J70 | T_LYS_46  | NZ  | T_ASP_56  | OD1 | 2.811 |
| 3J70 | T_LYS_50  | NZ  | T_GLU_77  | OE1 | 2.766 |
| 3J70 | T_LYS_50  | NZ  | T_GLU_77  | OE2 | 3.346 |
| 3J70 | T_ARG_54  | NH1 | T_ASP_78  | OD2 | 2.876 |
| 3J70 | T_ARG_54  | NH2 | T_ASP_78  | OD1 | 2.822 |
| 3J70 | T_ARG_54  | NH2 | T_ASP_78  | OD2 | 2.826 |
| 3J70 | T_ARG_59  | NH1 | U_ASP_368 | OD1 | 3.842 |
| 3J70 | T_ARG_59  | NH1 | U_ASP_368 | OD2 | 2.986 |
| 3J70 | T_ARG_59  | NH2 | U_ASP_368 | OD1 | 2.621 |
| 3J70 | T_ARG_59  | NH2 | U_ASP_368 | OD2 | 3.174 |
| 3J70 | T_LYS_72  | NZ  | T_ASP_56  | OD2 | 2.565 |
| 3J70 | T_LYS_90  | NZ  | T_GLU_85  | OE2 | 2.710 |
| 3J70 | T_HIS_107 | ND1 | T_ASP_105 | OD2 | 3.850 |
| 3J70 | T_ARG_134 | NH2 | T_ASP_153 | OD1 | 3.650 |
| 3J70 | T_ARG_134 | NH2 | T_ASP_153 | OD2 | 3.960 |
| 3J70 | U_LYS_46  | NZ  | U_GLU_492 | OE1 | 2.842 |

|      |           |     |           |     |       |
|------|-----------|-----|-----------|-----|-------|
| 3J70 | U_LYS_46  | NZ  | U_GLU_492 | OE2 | 2.835 |
| 3J70 | U_LYS_130 | NZ  | U_GLU_150 | OE2 | 2.774 |
| 3J70 | U_ARG_146 | NH1 | T_GLU_169 | OE1 | 2.840 |
| 3J70 | U_ARG_146 | NH1 | T_GLU_169 | OE2 | 2.796 |
| 3J70 | U_ARG_146 | NH2 | T_GLU_169 | OE1 | 3.599 |
| 3J70 | U_LYS_171 | NZ  | T_GLU_13  | OE1 | 3.949 |
| 3J70 | U_LYS_192 | NZ  | U_ASP_137 | OD2 | 2.718 |
| 3J70 | U_LYS_207 | NZ  | U_GLU_381 | OE2 | 2.777 |
| 3J70 | U_HIS_249 | NE2 | U_GLU_482 | OE1 | 2.776 |
| 3J70 | U_LYS_282 | NZ  | U_ASP_279 | OD1 | 2.794 |
| 3J70 | U_LYS_322 | NZ  | R_ASP_95  | OD2 | 2.909 |
| 3J70 | U_ARG_327 | NH2 | R_ASP_52  | OD2 | 3.287 |
| 3J70 | U_LYS_337 | NZ  | U_GLU_293 | OE2 | 2.865 |
| 3J70 | U_LYS_348 | NZ  | U_GLU_269 | OE1 | 2.778 |
| 3J70 | U_LYS_348 | NZ  | U_GLU_269 | OE2 | 3.998 |
| 3J70 | U_ARG_419 | NH1 | R_ASP_54  | OD1 | 3.985 |
| 3J70 | U_ARG_456 | NH1 | U_GLU_466 | OE1 | 2.869 |
| 3J70 | U_ARG_456 | NH1 | U_GLU_466 | OE2 | 2.877 |
| 3J70 | U_ARG_469 | NH1 | U_ASP_457 | OD1 | 2.823 |
| 3J70 | U_ARG_469 | NH1 | U_ASP_457 | OD2 | 3.449 |
| 3J70 | U_ARG_469 | NH2 | U_ASP_457 | OD2 | 3.356 |
| 3J70 | U_ARG_476 | NH1 | U_ASP_474 | OD1 | 2.860 |
| 3J70 | U_ARG_480 | NH1 | U_ASP_474 | OD2 | 2.861 |
| 3J70 | U_ARG_480 | NH1 | U_ASP_477 | OD1 | 2.641 |
| 3J70 | U_ARG_480 | NH1 | U_ASP_477 | OD2 | 3.954 |
| 3J70 | U_ARG_480 | NH2 | U_ASP_474 | OD2 | 3.415 |
| 3J70 | U_LYS_487 | NZ  | U_GLU_47  | OE2 | 3.606 |
| 3J70 | U_LYS_487 | NZ  | U_GLU_91  | OE2 | 2.796 |

Table 428: 3J70-specific salt bridging networks analysis. In this table, a PDB file is specified with a four-letter PDB ID, except that the names of the PDB files corresponding to the single NMR structural model split from the NMR ensemble is specified with a four-letter PDB ID in addition to a hyphen followed by the single NMR structural model numeric ID, the residue naming scheme is **Chain ID\_residue name\_residue number**,  $\angle ADH$  represents the angle formed by acceptor (A), donor (D) and hydrogen (H) ( $\angle ADH$ ).

| PDB ID | Residue A | Atom A | Residue B | Atom B | Distance (Å) |
|--------|-----------|--------|-----------|--------|--------------|
| 3JCC   | A_LYS_46  | NZ     | A_GLU_492 | OE1    | 3.517        |
| 3JCC   | A_LYS_227 | NZ     | A_GLU_83  | OE2    | 3.448        |
| 3JCC   | A_ARG_429 | NH2    | D_ASP_63  | OD2    | 3.854        |
| 3JCC   | A_ARG_456 | NH2    | A_GLU_466 | OE1    | 3.660        |
| 3JCC   | A_ARG_456 | NH2    | A_GLU_466 | OE2    | 3.547        |
| 3JCC   | A_ARG_469 | NH2    | A_ASP_457 | OD2    | 3.023        |
| 3JCC   | A_ARG_476 | NH1    | A_ASP_474 | OD1    | 3.399        |
| 3JCC   | A_ARG_476 | NH1    | A_ASP_474 | OD2    | 2.964        |
| 3JCC   | A_ARG_480 | NH2    | A_ASP_477 | OD1    | 2.803        |
| 3JCC   | A_LYS_485 | NZ     | A_GLU_267 | OE2    | 3.722        |
| 3JCC   | A_LYS_487 | NZ     | A_ASP_47  | OD2    | 3.970        |
| 3JCC   | B_ARG_61  | NH1    | B_ASP_82  | OD2    | 2.931        |
| 3JCC   | B_ARG_61  | NH2    | B_ASP_82  | OD1    | 3.215        |
| 3JCC   | B_ARG_61  | NH2    | B_ASP_82  | OD2    | 3.003        |
| 3JCC   | B_HIS_189 | ND1    | B_ASP_152 | OD2    | 2.901        |
| 3JCC   | C_ARG_38  | NH1    | C_ASP_86  | OD1    | 2.894        |
| 3JCC   | C_ARG_38  | NH2    | C_GLU_46  | OE1    | 2.884        |
| 3JCC   | C_ARG_38  | NH2    | C_ASP_86  | OD1    | 3.828        |
| 3JCC   | C_ARG_66  | NH1    | C_ASP_86  | OD1    | 3.699        |
| 3JCC   | C_ARG_66  | NH1    | C_ASP_86  | OD2    | 2.932        |
| 3JCC   | C_ARG_66  | NH2    | C_ASP_86  | OD1    | 3.002        |
| 3JCC   | C_ARG_66  | NH2    | C_ASP_86  | OD2    | 3.413        |
| 3JCC   | C_LYS_73  | NZ     | C_ASP_53  | OD1    | 3.190        |
| 3JCC   | C_LYS_73  | NZ     | C_ASP_53  | OD2    | 3.723        |
| 3JCC   | C_LYS_207 | NZ     | B_GLU_124 | OE1    | 3.629        |
| 3JCC   | D_LYS_8   | NZ     | D_GLU_119 | OE1    | 3.039        |
| 3JCC   | D_LYS_8   | NZ     | D_GLU_119 | OE2    | 3.886        |
| 3JCC   | D_LYS_29  | NZ     | D_GLU_85  | OE1    | 2.956        |
| 3JCC   | D_LYS_29  | NZ     | D_GLU_85  | OE2    | 3.072        |
| 3JCC   | D_ARG_54  | NH1    | D_ASP_78  | OD2    | 2.902        |
| 3JCC   | D_ARG_54  | NH2    | D_ASP_78  | OD1    | 3.053        |
| 3JCC   | D_ARG_54  | NH2    | D_ASP_78  | OD2    | 2.965        |
| 3JCC   | D_ARG_58  | NH1    | D_GLU_13  | OE1    | 3.576        |
| 3JCC   | D_ARG_58  | NH1    | D_GLU_13  | OE2    | 3.174        |
| 3JCC   | D_ARG_58  | NH2    | D_GLU_13  | OE1    | 2.940        |
| 3JCC   | D_ARG_58  | NH2    | D_GLU_13  | OE2    | 3.860        |
| 3JCC   | D_ARG_59  | NH2    | A_ASP_368 | OD1    | 2.961        |
| 3JCC   | D_ARG_59  | NH2    | A_ASP_368 | OD2    | 3.986        |
| 3JCC   | E_LYS_46  | NZ     | E_GLU_492 | OE1    | 3.569        |
| 3JCC   | E_LYS_46  | NZ     | E_GLU_492 | OE2    | 3.703        |
| 3JCC   | E_LYS_97  | NZ     | E_GLU_275 | OE2    | 3.827        |
| 3JCC   | E_LYS_227 | NZ     | E_GLU_83  | OE1    | 3.969        |
| 3JCC   | E_LYS_227 | NZ     | E_GLU_83  | OE2    | 3.697        |
| 3JCC   | E_LYS_282 | NZ     | E_GLU_275 | OE1    | 3.981        |
| 3JCC   | E_ARG_298 | NH2    | E_GLU_381 | OE1    | 3.660        |
| 3JCC   | E_ARG_298 | NH2    | E_GLU_381 | OE2    | 3.777        |
| 3JCC   | E_LYS_305 | NZ     | E_ASP_321 | OD2    | 3.131        |
| 3JCC   | E_ARG_456 | NH1    | E_GLU_466 | OE1    | 3.660        |
| 3JCC   | E_ARG_456 | NH1    | E_GLU_466 | OE2    | 3.969        |
| 3JCC   | E_ARG_456 | NH2    | E_GLU_466 | OE1    | 3.908        |
| 3JCC   | E_ARG_456 | NH2    | E_GLU_466 | OE2    | 3.604        |
| 3JCC   | E_ARG_469 | NH1    | E_ASP_457 | OD1    | 3.767        |
| 3JCC   | E_ARG_480 | NH1    | E_ASP_477 | OD1    | 3.074        |
| 3JCC   | E_LYS_485 | NZ     | E_GLU_267 | OE2    | 3.897        |
| 3JCC   | E_LYS_487 | NZ     | E_ASP_47  | OD2    | 3.681        |
| 3JCC   | E_LYS_490 | NZ     | E_GLU_49  | OE2    | 2.934        |
| 3JCC   | I_LYS_46  | NZ     | I_GLU_492 | OE1    | 3.919        |



|      |           |     |           |     |       |
|------|-----------|-----|-----------|-----|-------|
| 3JCC | I_ARG_166 | NH2 | I_ASP_167 | OD2 | 3.510 |
| 3JCC | I_LYS_227 | NZ  | I_GLU_83  | OE2 | 3.974 |
| 3JCC | I_LYS_305 | NZ  | I_ASP_321 | OD2 | 3.762 |
| 3JCC | I_ARG_456 | NH2 | I_GLU_466 | OE1 | 3.385 |
| 3JCC | I_ARG_456 | NH2 | I_GLU_466 | OE2 | 3.431 |
| 3JCC | I_ARG_476 | NH1 | I_ASP_474 | OD2 | 3.645 |
| 3JCC | I_ARG_480 | NH1 | I_ASP_477 | OD1 | 3.186 |
| 3JCC | I_LYS_490 | NZ  | I_GLU_49  | OE2 | 3.753 |

Table 429: 3JCC-specific salt bridging networks analysis. In this table, a PDB file is specified with a four-letter PDB ID, except that the names of the PDB files corresponding to the single NMR structural model split from the NMR ensemble is specified with a four-letter PDB ID in addition to a hyphen followed by the single NMR structural model numeric ID, the residue naming scheme is **Chain ID\_residue name\_residue number**,  $\angle ADH$  represents the angle formed by acceptor (A), donor (D) and hydrogen (H) ( $\angle ADH$ ).

| PDB ID | Residue A | Atom A | Residue B | Atom B | Distance (Å) |
|--------|-----------|--------|-----------|--------|--------------|
| 3KS0   | L_ARG_63  | NH2    | L_GLU_83  | OE2    | 3.743        |
| 3KS0   | L_ARG_63  | NH2    | L_ASP_84  | OD1    | 3.432        |
| 3KS0   | L_ARG_63  | NH2    | L_ASP_84  | OD2    | 3.922        |
| 3KS0   | L_LYS_113 | NZ     | L_GLU_201 | OE1    | 3.009        |
| 3KS0   | H_ARG_38  | NH1    | H_ASP_89  | OD1    | 2.927        |
| 3KS0   | H_ARG_38  | NH2    | H_GLU_46  | OE1    | 2.737        |
| 3KS0   | H_LYS_39  | NZ     | L_GLU_40  | OE1    | 3.686        |
| 3KS0   | H_LYS_39  | NZ     | L_GLU_40  | OE2    | 2.843        |
| 3KS0   | H_ARG_66  | NH1    | H_ASP_89  | OD1    | 2.901        |
| 3KS0   | H_ARG_66  | NH1    | H_ASP_89  | OD2    | 3.003        |
| 3KS0   | H_ARG_66  | NH2    | H_ASP_89  | OD1    | 3.781        |
| 3KS0   | H_ARG_97  | NH2    | H_ASP_105 | OD1    | 3.237        |
| 3KS0   | H_ARG_97  | NH2    | H_ASP_105 | OD2    | 2.854        |
| 3KS0   | H_LYS_147 | NZ     | L_GLU_127 | OE2    | 3.112        |
| 3KS0   | H_LYS_212 | NZ     | L_GLU_126 | OE1    | 3.920        |
| 3KS0   | H_LYS_212 | NZ     | L_GLU_126 | OE2    | 3.042        |
| 3KS0   | A_LYS_18  | NZ     | A_GLU_15  | OE2    | 3.032        |
| 3KS0   | A_HIS_19  | ND1    | A_GLU_15  | OE1    | 3.858        |
| 3KS0   | A_HIS_19  | NE2    | A_GLU_15  | OE1    | 3.591        |
| 3KS0   | A_HIS_19  | NE2    | A_ASP_24  | OD1    | 3.901        |
| 3KS0   | A_HIS_19  | NE2    | A_ASP_24  | OD2    | 3.803        |
| 3KS0   | A_LYS_79  | NZ     | A_ASP_35  | OD2    | 3.088        |
| 3KS0   | A_LYS_80  | NZ     | A_ASP_72  | OD1    | 2.255        |
| 3KS0   | A_LYS_80  | NZ     | A_ASP_72  | OD2    | 3.580        |
| 3KS0   | J_ARG_63  | NH2    | J_GLU_83  | OE2    | 3.774        |
| 3KS0   | J_ARG_63  | NH2    | J_ASP_84  | OD1    | 2.968        |
| 3KS0   | J_ARG_63  | NH2    | J_ASP_84  | OD2    | 3.838        |
| 3KS0   | J_LYS_113 | NZ     | J_GLU_201 | OE1    | 3.035        |
| 3KS0   | J_HIS_191 | NE2    | J_ASP_154 | OD2    | 3.977        |
| 3KS0   | K_ARG_38  | NH1    | K_ASP_89  | OD1    | 2.723        |
| 3KS0   | K_ARG_38  | NH2    | K_GLU_46  | OE1    | 2.728        |
| 3KS0   | K_ARG_38  | NH2    | K_GLU_46  | OE2    | 3.919        |
| 3KS0   | K_LYS_39  | NZ     | J_GLU_40  | OE1    | 3.754        |
| 3KS0   | K_LYS_39  | NZ     | J_GLU_40  | OE2    | 2.934        |
| 3KS0   | K_ARG_66  | NH1    | K_ASP_89  | OD1    | 3.466        |
| 3KS0   | K_ARG_66  | NH1    | K_ASP_89  | OD2    | 2.993        |
| 3KS0   | K_ARG_66  | NH2    | K_ASP_89  | OD1    | 3.246        |
| 3KS0   | K_ARG_97  | NH1    | K_ASP_27  | OD2    | 3.899        |
| 3KS0   | K_ARG_97  | NH2    | K_ASP_105 | OD1    | 3.477        |
| 3KS0   | K_ARG_97  | NH2    | K_ASP_105 | OD2    | 3.126        |
| 3KS0   | K_LYS_147 | NZ     | J_GLU_127 | OE2    | 3.169        |
| 3KS0   | K_LYS_212 | NZ     | J_GLU_126 | OE1    | 3.344        |
| 3KS0   | K_LYS_212 | NZ     | J_GLU_126 | OE2    | 2.562        |
| 3KS0   | B_LYS_18  | NZ     | B_GLU_15  | OE2    | 3.407        |
| 3KS0   | B_HIS_19  | NE2    | B_GLU_15  | OE1    | 3.733        |
| 3KS0   | B_HIS_19  | NE2    | B_ASP_24  | OD1    | 3.929        |
| 3KS0   | B_LYS_79  | NZ     | B_ASP_35  | OD2    | 3.032        |
| 3KS0   | B_LYS_80  | NZ     | B_ASP_72  | OD1    | 2.482        |
| 3KS0   | B_LYS_80  | NZ     | B_ASP_72  | OD2    | 3.798        |

---

Table 430: 3KS0-specific salt bridging networks analysis. In this table, a PDB file is specified with a four-letter PDB ID, except that the names of the PDB files corresponding to the single NMR structural model split from the NMR ensemble is specified with a four-letter PDB ID in addition to a hyphen followed by the single NMR structural model numeric ID, the residue naming scheme is **Chain ID\_residue name\_residue number**,  $\angle ADH$  represents the angle formed by acceptor (A), donor (D) and hydrogen (H) ( $\angle ADH$ ).

| PDB ID | Residue A | Atom A | Residue B | Atom B | Distance (Å) |
|--------|-----------|--------|-----------|--------|--------------|
| 3L7E   | L_ARG_61  | NH1    | L_ASP_82  | OD1    | 3.610        |
| 3L7E   | L_ARG_61  | NH1    | L_ASP_82  | OD2    | 2.820        |
| 3L7E   | L_ARG_61  | NH2    | L_GLU_79  | OE1    | 3.380        |
| 3L7E   | L_ARG_61  | NH2    | L_GLU_79  | OE2    | 3.052        |
| 3L7E   | L_ARG_61  | NH2    | L_ASP_82  | OD1    | 3.146        |
| 3L7E   | L_ARG_61  | NH2    | L_ASP_82  | OD2    | 3.585        |
| 3L7E   | L_LYS_103 | NZ     | L_GLU_165 | OE1    | 2.700        |
| 3L7E   | L_LYS_145 | NZ     | L_GLU_161 | OE1    | 3.739        |
| 3L7E   | L_LYS_145 | NZ     | L_GLU_161 | OE2    | 2.941        |
| 3L7E   | L_LYS_149 | NZ     | L_GLU_195 | OE2    | 3.782        |
| 3L7E   | H_ARG_40  | NH1    | H_ASP_91  | OD1    | 2.619        |
| 3L7E   | H_ARG_40  | NH2    | H_GLU_48  | OE1    | 3.221        |
| 3L7E   | H_ARG_40  | NH2    | H_ASP_91  | OD1    | 3.670        |
| 3L7E   | H_ARG_68  | NH1    | H_ASP_91  | OD1    | 3.997        |
| 3L7E   | H_ARG_68  | NH1    | H_ASP_91  | OD2    | 3.070        |
| 3L7E   | H_ARG_68  | NH2    | H_ASP_91  | OD1    | 3.385        |
| 3L7E   | H_ARG_68  | NH2    | H_ASP_91  | OD2    | 3.481        |
| 3L7E   | H_ARG_99  | NH2    | H_ASP_109 | OD1    | 3.758        |
| 3L7E   | H_ARG_99  | NH2    | H_ASP_109 | OD2    | 2.966        |
| 3L7E   | H_LYS_151 | NZ     | H_ASP_152 | OD1    | 3.202        |
| 3L7E   | H_LYS_151 | NZ     | H_ASP_152 | OD2    | 3.603        |
| 3L7E   | H_LYS_214 | NZ     | H_ASP_216 | OD2    | 3.774        |
| 3L7E   | H_LYS_217 | NZ     | L_GLU_123 | OE1    | 3.175        |
| 3L7E   | H_LYS_218 | NZ     | H_GLU_220 | OE2    | 2.784        |
| 3L7E   | A_ARG_61  | NH1    | A_ASP_82  | OD1    | 3.894        |
| 3L7E   | A_ARG_61  | NH1    | A_ASP_82  | OD2    | 2.738        |
| 3L7E   | A_ARG_61  | NH2    | A_GLU_79  | OE1    | 3.630        |
| 3L7E   | A_ARG_61  | NH2    | A_GLU_79  | OE2    | 3.597        |
| 3L7E   | A_ARG_61  | NH2    | A_ASP_82  | OD1    | 2.858        |
| 3L7E   | A_ARG_61  | NH2    | A_ASP_82  | OD2    | 3.208        |
| 3L7E   | A_LYS_103 | NZ     | A_GLU_165 | OE1    | 2.858        |
| 3L7E   | A_LYS_103 | NZ     | A_GLU_165 | OE2    | 3.136        |
| 3L7E   | A_LYS_149 | NZ     | A_GLU_195 | OE1    | 2.753        |
| 3L7E   | A_ARG_211 | NH2    | A_GLU_187 | OE2    | 3.405        |
| 3L7E   | B_ARG_40  | NH1    | B_ASP_91  | OD1    | 2.997        |
| 3L7E   | B_ARG_40  | NH2    | B_GLU_48  | OE1    | 3.270        |
| 3L7E   | B_ARG_40  | NH2    | B_GLU_48  | OE2    | 3.888        |
| 3L7E   | B_ARG_40  | NH2    | B_ASP_91  | OD1    | 3.815        |
| 3L7E   | B_LYS_59  | NZ     | B_ASP_57  | OD1    | 3.071        |
| 3L7E   | B_LYS_59  | NZ     | B_ASP_57  | OD2    | 3.376        |
| 3L7E   | B_ARG_68  | NH1    | B_ASP_91  | OD2    | 3.159        |
| 3L7E   | B_ARG_68  | NH2    | B_ASP_91  | OD1    | 2.945        |
| 3L7E   | B_ARG_68  | NH2    | B_ASP_91  | OD2    | 2.970        |
| 3L7E   | B_ARG_99  | NH2    | B_ASP_109 | OD1    | 3.495        |
| 3L7E   | B_ARG_99  | NH2    | B_ASP_109 | OD2    | 2.485        |
| 3L7E   | B_LYS_151 | NZ     | B_ASP_152 | OD1    | 3.115        |
| 3L7E   | B_LYS_151 | NZ     | B_ASP_152 | OD2    | 3.672        |
| 3L7E   | B_LYS_217 | NZ     | A_GLU_123 | OE1    | 2.697        |
| 3L7E   | B_LYS_217 | NZ     | A_GLU_123 | OE2    | 3.970        |
| 3L7E   | B_LYS_218 | NZ     | B_GLU_220 | OE2    | 3.907        |

---

Table 431: 3L7E-specific salt bridging networks analysis. In this table, a PDB file is specified with a four-letter PDB ID, except that the names of the PDB files corresponding to the single NMR structural model split from the NMR ensemble is specified with a four-letter PDB ID in addition to a hyphen followed by the single NMR structural model numeric ID, the residue naming scheme is **Chain ID\_residue name\_residue number**,  $\angle ADH$  represents the angle formed by acceptor (A), donor (D) and hydrogen (H) ( $\angle ADH$ ).

| PDB ID | Residue A  | Atom A | Residue B  | Atom B | Distance (Å) |
|--------|------------|--------|------------|--------|--------------|
| 3LZF   | A_LYS_53   | NZ     | A_ASP_276  | OD1    | 3.007        |
| 3LZF   | A_LYS_63   | NZ     | A_GLU_75   | OE1    | 3.244        |
| 3LZF   | A_ARG_109  | NH1    | A_GLU_89   | OE1    | 2.815        |
| 3LZF   | A_ARG_109  | NH1    | A_GLU_89   | OE2    | 3.490        |
| 3LZF   | A_ARG_109  | NH2    | A_GLU_89   | OE1    | 3.694        |
| 3LZF   | A_ARG_109  | NH2    | A_GLU_89   | OE2    | 3.025        |
| 3LZF   | A_ARG_109  | NH2    | B_GLU_69   | OE1    | 3.970        |
| 3LZF   | A_ARG_109  | NH2    | B_GLU_69   | OE2    | 2.555        |
| 3LZF   | A_LYS_133A | NZ     | A_GLU_131  | OE1    | 3.911        |
| 3LZF   | A_ARG_149  | NH2    | A_ASP_77   | OD1    | 3.274        |
| 3LZF   | A_ARG_149  | NH2    | A_ASP_77   | OD2    | 2.737        |
| 3LZF   | A_LYS_157  | NZ     | H_ASP_52   | OD1    | 3.712        |
| 3LZF   | A_LYS_157  | NZ     | H_ASP_52   | OD2    | 3.952        |
| 3LZF   | A_LYS_157  | NZ     | H_ASP_54   | OD2    | 2.960        |
| 3LZF   | A_LYS_163  | NZ     | A_GLU_246  | OE1    | 3.633        |
| 3LZF   | A_LYS_166  | NZ     | L_ASP_93   | OD1    | 2.890        |
| 3LZF   | A_LYS_166  | NZ     | L_ASP_93   | OD2    | 2.667        |
| 3LZF   | A_LYS_174  | NZ     | A_GLU_119  | OE1    | 2.507        |
| 3LZF   | A_LYS_174  | NZ     | A_GLU_119  | OE2    | 3.039        |
| 3LZF   | A_HIS_184  | ND1    | A_GLU_216  | OE1    | 3.917        |
| 3LZF   | A_LYS_208  | NZ     | A_GLU_238  | OE2    | 3.278        |
| 3LZF   | A_ARG_262  | NH2    | A_GLU_175  | OE1    | 3.039        |
| 3LZF   | A_ARG_262  | NH2    | A_GLU_175  | OE2    | 3.035        |
| 3LZF   | A_ARG_310  | NH1    | B_ASP_90   | OD1    | 2.412        |
| 3LZF   | A_ARG_310  | NH2    | B_ASP_90   | OD1    | 3.228        |
| 3LZF   | A_ARG_315  | NH1    | A_ASP_24   | OD2    | 3.770        |
| 3LZF   | A_ARG_321  | NH1    | A_GLU_31   | OE1    | 3.446        |
| 3LZF   | A_ARG_321  | NH1    | A_GLU_31   | OE2    | 3.361        |
| 3LZF   | B_LYS_51   | NZ     | B_GLU_103  | OE1    | 2.812        |
| 3LZF   | B_LYS_68   | NZ     | A_GLU_110  | OE1    | 3.290        |
| 3LZF   | B_LYS_68   | NZ     | A_GLU_110  | OE2    | 2.778        |
| 3LZF   | B_LYS_82   | NZ     | B_ASP_86   | OD2    | 3.052        |
| 3LZF   | B_ARG_116  | NH2    | B_GLU_120  | OE1    | 3.732        |
| 3LZF   | B_ARG_116  | NH2    | B_GLU_120  | OE2    | 3.831        |
| 3LZF   | B_LYS_123  | NZ     | B_GLU_132  | OE2    | 2.843        |
| 3LZF   | B_LYS_143  | NZ     | B_GLU_29   | OE1    | 3.843        |
| 3LZF   | B_LYS_143  | NZ     | B_GLU_29   | OE2    | 3.948        |
| 3LZF   | B_ARG_153  | NH2    | B_GLU_150  | OE2    | 3.778        |
| 3LZF   | H_ARG_38   | NH1    | H_ASP_86   | OD1    | 2.752        |
| 3LZF   | H_ARG_38   | NH2    | H_GLU_46   | OE1    | 2.805        |
| 3LZF   | H_ARG_38   | NH2    | H_ASP_86   | OD1    | 3.834        |
| 3LZF   | H_ARG_66   | NH1    | H_ASP_86   | OD2    | 3.179        |
| 3LZF   | H_ARG_66   | NH2    | H_ASP_86   | OD1    | 3.026        |
| 3LZF   | H_ARG_66   | NH2    | H_ASP_86   | OD2    | 3.038        |
| 3LZF   | H_LYS_71   | NZ     | H_ASP_55   | OD1    | 2.502        |
| 3LZF   | H_ARG_94   | NH2    | H_ASP_101  | OD2    | 2.420        |
| 3LZF   | H_ARG_97   | NH1    | H_ASP_52   | OD1    | 2.811        |
| 3LZF   | H_ARG_97   | NH1    | H_ASP_52   | OD2    | 3.899        |
| 3LZF   | H_ARG_97   | NH2    | H_ASP_52   | OD1    | 2.854        |
| 3LZF   | H_ARG_97   | NH2    | H_ASP_52   | OD2    | 2.731        |
| 3LZF   | H_ARG_97   | NH2    | H_ASP_53   | OD1    | 2.942        |
| 3LZF   | H_ARG_100D | NH2    | H_ASP_100A | OD2    | 2.691        |
| 3LZF   | H_LYS_145  | NZ     | H_ASP_146  | OD1    | 3.565        |
| 3LZF   | H_LYS_221  | NZ     | L_GLU_123  | OE2    | 3.483        |
| 3LZF   | L_ARG_61   | NH2    | L_ASP_82   | OD1    | 3.298        |
| 3LZF   | L_ARG_61   | NH2    | L_ASP_82   | OD2    | 3.277        |
| 3LZF   | L_LYS_103  | NZ     | L_ASP_85   | OD1    | 3.336        |

| 3LZF | L.LYS_166 | NZ  | L.GLU_83 | OE1 | 2.813 |
|------|-----------|-----|----------|-----|-------|
| 3LZF | L.HIS_189 | ND1 | L.ASP_   | OD2 | 3.741 |

Table 432: 3LZF-specific salt bridging networks analysis. In this table, a PDB file is specified with a four-letter PDB ID, except that the names of the PDB files corresponding to the single NMR structural model split from the NMR ensemble is specified with a four-letter PDB ID in addition to a hyphen followed by the single NMR structural model numeric ID, the residue naming scheme is **Chain ID\_residue name\_residue number**,  $\angle ADH$  represents the angle formed by acceptor (A), donor (D) and hydrogen (H) ( $\angle ADH$ ).

| PDB ID | Residue A | Atom A | Residue B | Atom B | Distance (Å) |
|--------|-----------|--------|-----------|--------|--------------|
| 3M18   | A_ARG_55  | NH1    | A_ASP_80  | OD1    | 3.709        |
| 3M18   | A_ARG_136 | NH2    | A_GLU_134 | OE2    | 2.915        |
| 3M18   | A_LYS_232 | NZ     | A_ASP_230 | OD1    | 3.832        |
| 3M18   | A_LYS_232 | NZ     | A_ASP_230 | OD2    | 2.770        |
| 3M18   | A_ARG_235 | NH2    | A_ASP_224 | OD1    | 3.588        |
| 3M18   | A_ARG_235 | NH2    | A_ASP_224 | OD2    | 3.213        |
| 3M18   | B_LYS_1   | NZ     | B_GLU_7   | OE2    | 2.569        |
| 3M18   | B_LYS_13  | NZ     | B_ASP_18  | OD2    | 3.673        |
| 3M18   | B_ARG_61  | NH1    | B_ASP_48  | OD2    | 3.299        |
| 3M18   | B_ARG_125 | NH1    | B_ASP_119 | OD2    | 3.044        |
| 3M18   | B_ARG_125 | NH2    | B_ASP_119 | OD1    | 3.195        |
| 3M18   | B_ARG_125 | NH2    | B_ASP_119 | OD2    | 3.443        |

Table 433: 3M18-specific salt bridging networks analysis. In this table, a PDB file is specified with a four-letter PDB ID, except that the names of the PDB files corresponding to the single NMR structural model split from the NMR ensemble is specified with a four-letter PDB ID in addition to a hyphen followed by the single NMR structural model numeric ID, the residue naming scheme is **Chain ID residue name residue number**,  $\angle ADH$  represents the angle formed by acceptor (A), donor (D) and hydrogen (H) ( $\angle ADH$ ).



| PDB ID | Residue A | Atom A | Residue B | Atom B | Distance (Å) |
|--------|-----------|--------|-----------|--------|--------------|
| 3M19   | A_LYS_59  | NZ     | A_GLU_37  | OE2    | 3.221        |
| 3M19   | A_HIS_104 | ND1    | A_ASP_79  | OD1    | 3.554        |
| 3M19   | A_HIS_104 | NE2    | A_ASP_79  | OD1    | 3.514        |
| 3M19   | A_HIS_104 | NE2    | A_ASP_79  | OD2    | 3.839        |
| 3M19   | A_ARG_128 | NH1    | A_ASP_103 | OD2    | 3.998        |
| 3M19   | A_ARG_128 | NH2    | A_ASP_103 | OD2    | 3.816        |
| 3M19   | A_ARG_136 | NH2    | A_GLU_134 | OE2    | 2.501        |
| 3M19   | A_LYS_243 | NZ     | A_GLU_245 | OE2    | 3.905        |
| 3M19   | B_HIS_104 | ND1    | B_ASP_79  | OD1    | 3.606        |
| 3M19   | B_HIS_104 | NE2    | B_ASP_79  | OD1    | 3.640        |
| 3M19   | B_HIS_104 | NE2    | B_ASP_79  | OD2    | 3.894        |
| 3M19   | B_ARG_128 | NH1    | B_ASP_103 | OD2    | 3.698        |
| 3M19   | B_ARG_128 | NH2    | B_ASP_103 | OD2    | 3.517        |
| 3M19   | B_ARG_136 | NH2    | B_GLU_134 | OE1    | 2.918        |
| 3M19   | B_ARG_136 | NH2    | B_GLU_134 | OE2    | 3.574        |
| 3M19   | B_LYS_152 | NZ     | B_ASP_127 | OD1    | 3.986        |
| 3M19   | B_LYS_152 | NZ     | B_ASP_127 | OD2    | 3.666        |
| 3M19   | B_ARG_194 | NH2    | B_ASP_191 | OD2    | 3.254        |

Table 434: 3M19-specific salt bridging networks analysis. In this table, a PDB file is specified with a four-letter PDB ID, except that the names of the PDB files corresponding to the single NMR structural model split from the NMR ensemble is specified with a four-letter PDB ID in addition to a hyphen followed by the single NMR structural model numeric ID, the residue naming scheme is **Chain ID\_residue name\_residue number**,  $\angle ADH$  represents the angle formed by acceptor (A), donor (D) and hydrogen (H) ( $\angle ADH$ ).

| PDB ID | Residue A  | Atom A | Residue B | Atom B | Distance (Å) |
|--------|------------|--------|-----------|--------|--------------|
| 3MLR   | L_LYS_27   | NZ     | L_ASP_92  | OD1    | 2.852        |
| 3MLR   | L_LYS_31   | NZ     | L_ASP_30  | OD1    | 3.628        |
| 3MLR   | L_LYS_31   | NZ     | L_ASP_30  | OD2    | 3.071        |
| 3MLR   | L_ARG_61   | NH1    | L_ASP_82  | OD1    | 3.647        |
| 3MLR   | L_ARG_61   | NH1    | L_ASP_82  | OD2    | 2.892        |
| 3MLR   | L_ARG_61   | NH2    | L_ASP_82  | OD1    | 2.845        |
| 3MLR   | L_ARG_61   | NH2    | L_ASP_82  | OD2    | 3.527        |
| 3MLR   | L_LYS_66   | NZ     | L_ASP_51  | OD1    | 3.042        |
| 3MLR   | L_LYS_66   | NZ     | L_ASP_51  | OD2    | 3.142        |
| 3MLR   | L_ARG_106A | NH2    | L_ASP_85  | OD1    | 3.458        |
| 3MLR   | L_ARG_106A | NH2    | L_ASP_85  | OD2    | 3.111        |
| 3MLR   | L_LYS_153  | NZ     | L_GLU_207 | OE2    | 3.546        |
| 3MLR   | H_ARG_38   | NH2    | H_GLU_46  | OE1    | 2.819        |
| 3MLR   | H_ARG_94   | NH2    | H_ASP_101 | OD1    | 3.334        |
| 3MLR   | H_ARG_94   | NH2    | H_ASP_101 | OD2    | 2.709        |
| 3MLR   | H_LYS_129  | NZ     | L_ASP_142 | OD2    | 3.806        |
| 3MLR   | H_LYS_209  | NZ     | L_GLU_127 | OE2    | 3.182        |
| 3MLR   | P_LYS_304  | NZ     | H_ASP_31  | OD1    | 3.470        |
| 3MLR   | P_LYS_305  | NZ     | H_ASP_54  | OD1    | 2.683        |
| 3MLR   | P_LYS_305  | NZ     | H_ASP_54  | OD2    | 3.624        |
| 3MLR   | P_LYS_305  | NZ     | H_ASP_56  | OD2    | 3.011        |

Table 435: 3MLR-specific salt bridging networks analysis. In this table, a PDB file is specified with a four-letter PDB ID, except that the names of the PDB files corresponding to the single NMR structural model split from the NMR ensemble is specified with a four-letter PDB ID in addition to a hyphen followed by the single NMR structural model numeric ID, the residue naming scheme is **Chain ID\_residue name\_residue number**,  $\angle ADH$  represents the angle formed by acceptor (A), donor (D) and hydrogen (H) ( $\angle ADH$ ).

| PDB ID | Residue A  | Atom A | Residue B | Atom B | Distance (Å) |
|--------|------------|--------|-----------|--------|--------------|
| 3MLS   | L_LYS_27   | NZ     | L_ASP_92  | OD1    | 3.433        |
| 3MLS   | L_LYS_27   | NZ     | L_ASP_92  | OD2    | 3.469        |
| 3MLS   | L_LYS_31   | NZ     | L_ASP_30  | OD1    | 3.032        |
| 3MLS   | L_LYS_31   | NZ     | L_ASP_30  | OD2    | 2.898        |
| 3MLS   | L_ARG_61   | NH1    | L_ASP_82  | OD1    | 3.401        |
| 3MLS   | L_ARG_61   | NH2    | L_ASP_82  | OD1    | 3.515        |
| 3MLS   | L_ARG_61   | NH2    | L_ASP_82  | OD2    | 3.451        |
| 3MLS   | L_LYS_66   | NZ     | L_ASP_51  | OD1    | 3.260        |
| 3MLS   | L_LYS_66   | NZ     | L_ASP_51  | OD2    | 3.251        |
| 3MLS   | L_LYS_69   | NZ     | L_ASP_29  | OD1    | 3.080        |
| 3MLS   | L_ARG_106A | NH2    | L_ASP_85  | OD1    | 3.981        |
| 3MLS   | L_ARG_106A | NH2    | L_ASP_85  | OD2    | 3.840        |
| 3MLS   | H_ARG_38   | NH1    | H_ASP_86  | OD1    | 3.821        |
| 3MLS   | H_ARG_38   | NH2    | H_GLU_46  | OE1    | 3.613        |
| 3MLS   | H_ARG_38   | NH2    | H_GLU_46  | OE2    | 3.084        |
| 3MLS   | H_LYS_73   | NZ     | H_ASP_53  | OD1    | 3.435        |
| 3MLS   | H_LYS_73   | NZ     | L_ASP_31  | OD1    | 3.962        |
| 3MLS   | H_LYS_73   | NZ     | L_ASP_31  | OD2    | 2.716        |
| 3MLS   | H_LYS_73   | NZ     | L_ASP_53  | OD1    | 3.242        |
| 3MLS   | H_LYS_73   | NZ     | L_ASP_53  | OD2    | 3.339        |
| 3MLS   | H_ARG_94   | NH2    | H_ASP_101 | OD1    | 2.712        |
| 3MLS   | H_ARG_94   | NH2    | H_ASP_101 | OD2    | 2.782        |
| 3MLS   | H_LYS_117  | NZ     | J_GLU_10  | OE1    | 3.515        |
| 3MLS   | H_LYS_143  | NZ     | L_GLU_128 | OE2    | 2.664        |
| 3MLS   | H_LYS_209  | NZ     | L_GLU_127 | OE1    | 2.677        |
| 3MLS   | H_LYS_210  | NZ     | H_GLU_212 | OE2    | 2.981        |
| 3MLS   | P_ARG_11   | NH1    | H_GLU_99  | OE1    | 3.690        |
| 3MLS   | P_ARG_11   | NH1    | H_GLU_99  | OE2    | 3.548        |
| 3MLS   | P_ARG_11   | NH2    | H_GLU_99  | OE1    | 3.097        |
| 3MLS   | P_ARG_11   | NH2    | H_GLU_99  | OE2    | 3.355        |
| 3MLS   | P_LYS_12   | NZ     | H_ASP_54  | OD1    | 3.420        |
| 3MLS   | P_LYS_12   | NZ     | H_ASP_54  | OD2    | 2.807        |
| 3MLS   | P_LYS_12   | NZ     | H_ASP_56  | OD1    | 3.833        |
| 3MLS   | P_LYS_12   | NZ     | H_ASP_56  | OD2    | 3.175        |
| 3MLS   | M_LYS_27   | NZ     | M_ASP_92  | OD1    | 2.791        |
| 3MLS   | M_LYS_27   | NZ     | M_ASP_92  | OD2    | 3.981        |
| 3MLS   | M_LYS_31   | NZ     | M_ASP_30  | OD1    | 2.980        |
| 3MLS   | M_LYS_31   | NZ     | M_ASP_30  | OD2    | 3.022        |
| 3MLS   | M_ARG_61   | NH1    | M_ASP_82  | OD2    | 2.881        |
| 3MLS   | M_ARG_61   | NH2    | M_ASP_82  | OD1    | 3.067        |
| 3MLS   | M_ARG_61   | NH2    | M_ASP_82  | OD2    | 3.143        |
| 3MLS   | M_LYS_66   | NZ     | M_ASP_51  | OD1    | 3.245        |
| 3MLS   | M_LYS_66   | NZ     | M_ASP_51  | OD2    | 3.348        |
| 3MLS   | M_LYS_69   | NZ     | M_ASP_29  | OD1    | 3.369        |
| 3MLS   | M_ARG_106A | NH2    | M_ASP_85  | OD1    | 3.977        |
| 3MLS   | M_ARG_106A | NH2    | M_ASP_85  | OD2    | 3.547        |
| 3MLS   | M_LYS_170  | NZ     | M_GLU_83  | OE1    | 3.910        |
| 3MLS   | I_ARG_38   | NH2    | I_GLU_46  | OE1    | 2.757        |
| 3MLS   | I_ARG_38   | NH2    | I_GLU_46  | OE2    | 3.394        |
| 3MLS   | I_ARG_94   | NH2    | I_ASP_101 | OD1    | 3.196        |
| 3MLS   | I_ARG_94   | NH2    | I_ASP_101 | OD2    | 2.556        |
| 3MLS   | I_LYS_143  | NZ     | M_GLU_128 | OE2    | 2.744        |
| 3MLS   | I_LYS_210  | NZ     | I_GLU_212 | OE2    | 3.234        |
| 3MLS   | Q_LYS_12   | NZ     | I_ASP_54  | OD1    | 2.683        |
| 3MLS   | Q_LYS_12   | NZ     | I_ASP_54  | OD2    | 3.484        |
| 3MLS   | Q_LYS_12   | NZ     | I_ASP_56  | OD1    | 3.650        |
| 3MLS   | N_LYS_27   | NZ     | N_ASP_92  | OD1    | 2.638        |

|      |            |     |           |     |       |
|------|------------|-----|-----------|-----|-------|
| 3MLS | N_LYS_27   | NZ  | N_ASP_92  | OD2 | 3.279 |
| 3MLS | N_LYS_31   | NZ  | N_ASP_92  | OD1 | 3.789 |
| 3MLS | N_ARG_61   | NH1 | N_ASP_82  | OD1 | 3.670 |
| 3MLS | N_ARG_61   | NH1 | N_ASP_82  | OD2 | 2.886 |
| 3MLS | N_ARG_61   | NH2 | N_ASP_82  | OD1 | 2.936 |
| 3MLS | N_ARG_61   | NH2 | N_ASP_82  | OD2 | 3.467 |
| 3MLS | N_LYS_66   | NZ  | N_ASP_51  | OD1 | 2.940 |
| 3MLS | N_LYS_66   | NZ  | N_ASP_51  | OD2 | 2.905 |
| 3MLS | N_LYS_69   | NZ  | N_ASP_26  | OD2 | 3.361 |
| 3MLS | N_LYS_97   | NZ  | J_GLU_64  | OE2 | 3.402 |
| 3MLS | N_ARG_106A | NH1 | N_ASP_85  | OD1 | 3.854 |
| 3MLS | N_ARG_106A | NH2 | N_ASP_85  | OD1 | 3.571 |
| 3MLS | N_ARG_106A | NH2 | N_ASP_85  | OD2 | 3.057 |
| 3MLS | N_LYS_153  | NZ  | N_GLU_207 | OE2 | 2.702 |
| 3MLS | N_HIS_192  | ND1 | N_ASP_155 | OD1 | 2.942 |
| 3MLS | N_LYS_193  | NZ  | N_ASP_155 | OD1 | 3.885 |
| 3MLS | N_LYS_193  | NZ  | N_ASP_155 | OD2 | 3.535 |
| 3MLS | J_ARG_38   | NH2 | J_GLU_46  | OE1 | 3.096 |
| 3MLS | J_ARG_38   | NH2 | J_GLU_46  | OE2 | 3.226 |
| 3MLS | J_ARG_94   | NH2 | J_ASP_101 | OD1 | 3.116 |
| 3MLS | J_ARG_94   | NH2 | J_ASP_101 | OD2 | 2.667 |
| 3MLS | J_LYS_117  | NZ  | H_GLU_10  | OE1 | 3.984 |
| 3MLS | J_LYS_209  | NZ  | N_GLU_127 | OE2 | 3.428 |
| 3MLS | J_LYS_210  | NZ  | J_GLU_212 | OE1 | 2.956 |
| 3MLS | J_LYS_210  | NZ  | J_GLU_212 | OE2 | 3.284 |
| 3MLS | R_LYS_12   | NZ  | J_ASP_54  | OD1 | 2.569 |
| 3MLS | R_LYS_12   | NZ  | J_ASP_54  | OD2 | 3.629 |
| 3MLS | R_LYS_12   | NZ  | J_ASP_56  | OD2 | 2.975 |
| 3MLS | O_LYS_27   | NZ  | O_ASP_92  | OD1 | 3.055 |
| 3MLS | O_LYS_27   | NZ  | O_ASP_92  | OD2 | 3.636 |
| 3MLS | O_LYS_31   | NZ  | O_ASP_30  | OD1 | 3.500 |
| 3MLS | O_LYS_31   | NZ  | O_ASP_30  | OD2 | 3.178 |
| 3MLS | O_ARG_61   | NH1 | O_ASP_82  | OD1 | 3.846 |
| 3MLS | O_ARG_61   | NH1 | O_ASP_82  | OD2 | 3.018 |
| 3MLS | O_ARG_61   | NH2 | O_ASP_82  | OD1 | 2.964 |
| 3MLS | O_ARG_61   | NH2 | O_ASP_82  | OD2 | 3.525 |
| 3MLS | O_LYS_66   | NZ  | O_ASP_51  | OD1 | 3.127 |
| 3MLS | O_LYS_66   | NZ  | O_ASP_51  | OD2 | 3.042 |
| 3MLS | O_LYS_69   | NZ  | O_ASP_26  | OD1 | 3.632 |
| 3MLS | O_LYS_69   | NZ  | O_ASP_29  | OD2 | 3.396 |
| 3MLS | O_ARG_106A | NH2 | O_ASP_85  | OD1 | 3.674 |
| 3MLS | O_ARG_106A | NH2 | O_ASP_85  | OD2 | 3.358 |
| 3MLS | O_LYS_153  | NZ  | O_GLU_207 | OE1 | 2.594 |
| 3MLS | O_HIS_192  | NE2 | O_ASP_155 | OD2 | 3.869 |
| 3MLS | K_ARG_38   | NH2 | K_GLU_46  | OE1 | 2.675 |
| 3MLS | K_ARG_38   | NH2 | K_GLU_46  | OE2 | 3.386 |
| 3MLS | K_ARG_94   | NH1 | K_ASP_101 | OD1 | 2.987 |
| 3MLS | K_ARG_94   | NH1 | K_ASP_101 | OD2 | 2.783 |
| 3MLS | K_LYS_117  | NZ  | L_GLU_10  | OE1 | 3.985 |
| 3MLS | K_LYS_210  | NZ  | K_GLU_212 | OE1 | 3.047 |
| 3MLS | S_LYS_12   | NZ  | K_ASP_54  | OD1 | 2.573 |
| 3MLS | S_LYS_12   | NZ  | K_ASP_54  | OD2 | 3.736 |
| 3MLS | S_LYS_12   | NZ  | K_ASP_56  | OD2 | 3.122 |

---

Table 436: 3MLS-specific salt bridging networks analysis. In this table, a PDB file is specified with a four-letter PDB ID, except that the names of the PDB files corresponding to the single NMR structural model split from the NMR ensemble is specified with a four-letter PDB ID in addition to a hyphen followed by the single NMR structural model numeric ID, the residue naming scheme is **Chain ID\_residue name\_residue number**,  $\angle ADH$  represents the angle formed by acceptor (A), donor (D) and hydrogen (H) ( $\angle ADH$ ).

| PDB ID | Residue A  | Atom A | Residue B | Atom B | Distance (Å) |
|--------|------------|--------|-----------|--------|--------------|
| 3MLT   | L.LYS_27   | NZ     | L.ASP_26  | OD1    | 2.656        |
| 3MLT   | L.LYS_31   | NZ     | L.ASP_92  | OD1    | 3.056        |
| 3MLT   | L.ARG_61   | NH1    | L.ASP_82  | OD1    | 3.939        |
| 3MLT   | L.ARG_61   | NH1    | L.ASP_82  | OD2    | 2.821        |
| 3MLT   | L.ARG_61   | NH2    | L.ASP_82  | OD1    | 2.818        |
| 3MLT   | L.ARG_61   | NH2    | L.ASP_82  | OD2    | 3.100        |
| 3MLT   | L.LYS_66   | NZ     | L.ASP_51  | OD1    | 2.985        |
| 3MLT   | L.ARG_106A | NH2    | L.ASP_85  | OD1    | 3.829        |
| 3MLT   | L.ARG_106A | NH2    | L.ASP_85  | OD2    | 3.125        |
| 3MLT   | H.ARG_38   | NH2    | H.GLU_46  | OE1    | 3.303        |
| 3MLT   | H.ARG_38   | NH2    | H.GLU_46  | OE2    | 2.941        |
| 3MLT   | H.ARG_94   | NH2    | H.ASP_101 | OD1    | 3.578        |
| 3MLT   | H.ARG_94   | NH2    | H.ASP_101 | OD2    | 2.428        |
| 3MLT   | P.ARG_304  | NH1    | H.ASP_31  | OD1    | 2.766        |
| 3MLT   | P.LYS_305  | NZ     | H.ASP_54  | OD1    | 2.503        |
| 3MLT   | P.LYS_305  | NZ     | H.ASP_54  | OD2    | 3.276        |
| 3MLT   | P.LYS_305  | NZ     | H.ASP_56  | OD2    | 2.482        |
| 3MLT   | A.ARG_61   | NH1    | A.ASP_82  | OD1    | 3.737        |
| 3MLT   | A.ARG_61   | NH1    | A.ASP_82  | OD2    | 2.967        |
| 3MLT   | A.ARG_61   | NH2    | A.ASP_82  | OD1    | 2.371        |
| 3MLT   | A.ARG_61   | NH2    | A.ASP_82  | OD2    | 3.018        |
| 3MLT   | A.LYS_66   | NZ     | A.ASP_51  | OD1    | 2.928        |
| 3MLT   | A.LYS_66   | NZ     | A.ASP_51  | OD2    | 3.040        |
| 3MLT   | A.LYS_69   | NZ     | A.ASP_26  | OD2    | 2.462        |
| 3MLT   | A.ARG_106A | NH2    | A.ASP_85  | OD1    | 3.818        |
| 3MLT   | A.ARG_106A | NH2    | A.ASP_85  | OD2    | 2.999        |
| 3MLT   | A.LYS_114  | NZ     | A.GLU_202 | OE2    | 3.077        |
| 3MLT   | B.ARG_38   | NH2    | B.GLU_46  | OE1    | 3.094        |
| 3MLT   | B.ARG_38   | NH2    | B.GLU_46  | OE2    | 3.367        |
| 3MLT   | B.ARG_94   | NH2    | B.ASP_101 | OD1    | 3.119        |
| 3MLT   | B.ARG_94   | NH2    | B.ASP_101 | OD2    | 2.679        |
| 3MLT   | B.LYS_209  | NZ     | A.GLU_127 | OE2    | 3.807        |
| 3MLT   | C.LYS_305  | NZ     | B.ASP_54  | OD1    | 3.099        |
| 3MLT   | C.LYS_305  | NZ     | B.ASP_54  | OD2    | 3.737        |
| 3MLT   | C.LYS_305  | NZ     | B.ASP_56  | OD2    | 3.095        |
| 3MLT   | D.LYS_27   | NZ     | D.ASP_92  | OD1    | 3.259        |
| 3MLT   | D.LYS_27   | NZ     | D.ASP_92  | OD2    | 3.970        |
| 3MLT   | D.ARG_61   | NH1    | D.ASP_82  | OD1    | 3.697        |
| 3MLT   | D.ARG_61   | NH1    | D.ASP_82  | OD2    | 3.252        |
| 3MLT   | D.ARG_61   | NH2    | D.ASP_82  | OD1    | 2.341        |
| 3MLT   | D.ARG_61   | NH2    | D.ASP_82  | OD2    | 3.303        |
| 3MLT   | D.LYS_66   | NZ     | D.ASP_51  | OD1    | 3.307        |
| 3MLT   | D.ARG_106A | NH1    | D.ASP_85  | OD1    | 3.298        |
| 3MLT   | D.ARG_106A | NH1    | D.ASP_85  | OD2    | 2.670        |
| 3MLT   | E.ARG_38   | NH2    | E.GLU_46  | OE1    | 2.985        |
| 3MLT   | E.ARG_38   | NH2    | E.GLU_46  | OE2    | 2.979        |
| 3MLT   | E.LYS_73   | NZ     | E.ASP_53  | OD1    | 3.727        |
| 3MLT   | E.ARG_94   | NH2    | E.ASP_101 | OD1    | 3.644        |
| 3MLT   | E.ARG_94   | NH2    | E.ASP_101 | OD2    | 2.588        |
| 3MLT   | E.LYS_143  | NZ     | E.ASP_144 | OD1    | 3.787        |
| 3MLT   | E.LYS_209  | NZ     | D.GLU_127 | OE2    | 3.591        |
| 3MLT   | E.LYS_210  | NZ     | E.GLU_212 | OE2    | 3.760        |
| 3MLT   | G.LYS_27   | NZ     | G.ASP_92  | OD2    | 2.642        |
| 3MLT   | G.ARG_61   | NH1    | G.ASP_82  | OD1    | 3.714        |
| 3MLT   | G.ARG_61   | NH1    | G.ASP_82  | OD2    | 2.758        |
| 3MLT   | G.ARG_61   | NH2    | G.ASP_82  | OD1    | 2.637        |
| 3MLT   | G.ARG_61   | NH2    | G.ASP_82  | OD2    | 2.852        |

|      |            |     |           |     |       |
|------|------------|-----|-----------|-----|-------|
| 3MLT | G_LYS_66   | NZ  | G_ASP_51  | OD1 | 3.206 |
| 3MLT | G_LYS_66   | NZ  | G_ASP_51  | OD2 | 2.686 |
| 3MLT | G_LYS_69   | NZ  | G_ASP_26  | OD2 | 3.323 |
| 3MLT | G_ARG_106A | NH2 | G_ASP_85  | OD1 | 3.421 |
| 3MLT | G_ARG_106A | NH2 | G_ASP_85  | OD2 | 2.884 |
| 3MLT | G_LYS_153  | NZ  | G_GLU_207 | OE2 | 2.787 |
| 3MLT | I_ARG_38   | NH2 | I_GLU_46  | OE1 | 3.057 |
| 3MLT | I_ARG_38   | NH2 | I_GLU_46  | OE2 | 3.429 |
| 3MLT | I_LYS_73   | NZ  | I_ASP_53  | OD1 | 3.113 |
| 3MLT | I_ARG_94   | NH2 | I_ASP_101 | OD1 | 3.494 |
| 3MLT | I_ARG_94   | NH2 | I_ASP_101 | OD2 | 2.793 |
| 3MLT | I_LYS_209  | NZ  | G_GLU_127 | OE2 | 3.669 |
| 3MLT | I_LYS_210  | NZ  | I_GLU_212 | OE2 | 3.480 |

Table 437: 3MLT-specific salt bridging networks analysis. In this table, a PDB file is specified with a four-letter PDB ID, except that the names of the PDB files corresponding to the single NMR structural model split from the NMR ensemble is specified with a four-letter PDB ID in addition to a hyphen followed by the single NMR structural model numeric ID, the residue naming scheme is **Chain ID** **residue name** **residue number**,  $\angle ADH$  represents the angle formed by acceptor (A), donor (D) and hydrogen (H) ( $\angle ADH$ ).

| PDB ID | Residue A  | Atom A | Residue B | Atom B | Distance (Å) |
|--------|------------|--------|-----------|--------|--------------|
| 3MLU   | L_LYS_27   | NZ     | L_ASP_92  | OD1    | 2.977        |
| 3MLU   | L_LYS_27   | NZ     | L_ASP_92  | OD2    | 3.686        |
| 3MLU   | L_LYS_31   | NZ     | L_ASP_30  | OD1    | 2.935        |
| 3MLU   | L_ARG_61   | NH1    | L_ASP_82  | OD1    | 3.030        |
| 3MLU   | L_ARG_61   | NH1    | L_ASP_82  | OD2    | 2.397        |
| 3MLU   | L_ARG_61   | NH2    | L_ASP_82  | OD1    | 3.188        |
| 3MLU   | L_ARG_61   | NH2    | L_ASP_82  | OD2    | 3.941        |
| 3MLU   | L_LYS_66   | NZ     | L_ASP_51  | OD1    | 3.330        |
| 3MLU   | L_LYS_66   | NZ     | L_ASP_51  | OD2    | 3.601        |
| 3MLU   | L_LYS_69   | NZ     | L_ASP_29  | OD1    | 3.656        |
| 3MLU   | L_ARG_106A | NH1    | L_ASP_85  | OD1    | 2.728        |
| 3MLU   | L_ARG_106A | NH1    | L_ASP_85  | OD2    | 2.846        |
| 3MLU   | L_ARG_106A | NH2    | L_ASP_85  | OD2    | 3.672        |
| 3MLU   | L_LYS_133  | NZ     | H_ASP_144 | OD2    | 3.641        |
| 3MLU   | H_ARG_38   | NH2    | H_GLU_46  | OE1    | 2.684        |
| 3MLU   | H_ARG_38   | NH2    | H_GLU_46  | OE2    | 3.582        |
| 3MLU   | H_ARG_94   | NH2    | H_ASP_101 | OD1    | 3.350        |
| 3MLU   | H_ARG_94   | NH2    | H_ASP_101 | OD2    | 2.802        |
| 3MLU   | H_LYS_143  | NZ     | H_ASP_144 | OD1    | 3.930        |
| 3MLU   | P_LYS_305  | NZ     | H_ASP_54  | OD1    | 2.586        |
| 3MLU   | P_LYS_305  | NZ     | H_ASP_54  | OD2    | 3.496        |
| 3MLU   | P_LYS_305  | NZ     | H_ASP_56  | OD2    | 3.684        |

Table 438: 3MLU-specific salt bridging networks analysis. In this table, a PDB file is specified with a four-letter PDB ID, except that the names of the PDB files corresponding to the single NMR structural model split from the NMR ensemble is specified with a four-letter PDB ID in addition to a hyphen followed by the single NMR structural model numeric ID, the residue naming scheme is **Chain ID\_residue name\_residue number**,  $\angle ADH$  represents the angle formed by acceptor (A), donor (D) and hydrogen (H) ( $\angle ADH$ ).



| PDB ID | Residue A  | Atom A | Residue B | Atom B | Distance (Å) |
|--------|------------|--------|-----------|--------|--------------|
| 3MLV   | L_LYS_27   | NZ     | L_ASP_92  | OD1    | 2.732        |
| 3MLV   | L_LYS_27   | NZ     | L_ASP_92  | OD2    | 3.328        |
| 3MLV   | L_LYS_31   | NZ     | L_ASP_30  | OD1    | 3.535        |
| 3MLV   | L_LYS_31   | NZ     | L_ASP_30  | OD2    | 3.503        |
| 3MLV   | L_ARG_61   | NH1    | L_ASP_82  | OD1    | 3.622        |
| 3MLV   | L_ARG_61   | NH1    | L_ASP_82  | OD2    | 2.916        |
| 3MLV   | L_ARG_61   | NH2    | L_ASP_82  | OD1    | 2.553        |
| 3MLV   | L_ARG_61   | NH2    | L_ASP_82  | OD2    | 3.370        |
| 3MLV   | L_LYS_66   | NZ     | L_ASP_51  | OD1    | 3.119        |
| 3MLV   | L_LYS_66   | NZ     | L_ASP_51  | OD2    | 3.196        |
| 3MLV   | L_LYS_69   | NZ     | L_ASP_26  | OD1    | 3.247        |
| 3MLV   | L_ARG_106A | NH2    | L_ASP_85  | OD2    | 3.095        |
| 3MLV   | L_LYS_153  | NZ     | L_GLU_207 | OE2    | 3.705        |
| 3MLV   | H_ARG_38   | NH2    | H_GLU_46  | OE1    | 2.542        |
| 3MLV   | H_LYS_73   | NZ     | H_ASP_53  | OD1    | 3.402        |
| 3MLV   | H_ARG_94   | NH2    | H_ASP_101 | OD1    | 2.930        |
| 3MLV   | H_ARG_94   | NH2    | H_ASP_101 | OD2    | 2.968        |
| 3MLV   | P_ARG_304  | NH1    | H_ASP_31  | OD1    | 3.750        |
| 3MLV   | P_LYS_305  | NZ     | H_ASP_54  | OD1    | 2.508        |
| 3MLV   | P_LYS_305  | NZ     | H_ASP_54  | OD2    | 3.477        |
| 3MLV   | P_LYS_305  | NZ     | H_ASP_56  | OD2    | 2.918        |
| 3MLV   | M_LYS_27   | NZ     | M_ASP_92  | OD1    | 3.721        |
| 3MLV   | M_LYS_27   | NZ     | M_ASP_92  | OD2    | 3.379        |
| 3MLV   | M_LYS_31   | NZ     | M_ASP_30  | OD1    | 3.507        |
| 3MLV   | M_LYS_31   | NZ     | M_ASP_30  | OD2    | 3.277        |
| 3MLV   | M_ARG_54   | NH1    | M_GLU_60  | OE1    | 3.723        |
| 3MLV   | M_ARG_61   | NH1    | M_ASP_82  | OD2    | 2.841        |
| 3MLV   | M_ARG_61   | NH2    | M_ASP_82  | OD1    | 2.635        |
| 3MLV   | M_ARG_61   | NH2    | M_ASP_82  | OD2    | 2.881        |
| 3MLV   | M_LYS_66   | NZ     | M_ASP_51  | OD1    | 2.909        |
| 3MLV   | M_LYS_66   | NZ     | M_ASP_51  | OD2    | 3.135        |
| 3MLV   | M_LYS_97   | NZ     | N_GLU_64  | OE1    | 2.901        |
| 3MLV   | M_ARG_106A | NH1    | M_ASP_85  | OD1    | 3.025        |
| 3MLV   | M_ARG_106A | NH1    | M_ASP_85  | OD2    | 3.882        |
| 3MLV   | M_LYS_133  | NZ     | M_GLU_128 | OE2    | 3.108        |
| 3MLV   | M_LYS_153  | NZ     | M_GLU_207 | OE1    | 3.506        |
| 3MLV   | M_LYS_153  | NZ     | M_GLU_207 | OE2    | 2.957        |
| 3MLV   | N_ARG_38   | NH2    | N_GLU_46  | OE1    | 3.294        |
| 3MLV   | N_ARG_38   | NH2    | N_GLU_46  | OE2    | 3.518        |
| 3MLV   | N_HIS_58   | NE2    | N_ASP_56  | OD1    | 3.956        |
| 3MLV   | N_ARG_94   | NH2    | N_ASP_101 | OD1    | 2.759        |
| 3MLV   | N_ARG_94   | NH2    | N_ASP_101 | OD2    | 2.721        |
| 3MLV   | N_LYS_117  | NZ     | N_ASP_144 | OD2    | 3.293        |
| 3MLV   | N_LYS_210  | NZ     | N_GLU_212 | OE1    | 3.364        |
| 3MLV   | Q_ARG_304  | NH1    | N_GLU_99  | OE2    | 3.900        |
| 3MLV   | Q_ARG_304  | NH2    | N_GLU_99  | OE2    | 3.849        |
| 3MLV   | Q_LYS_305  | NZ     | N_ASP_54  | OD1    | 3.154        |
| 3MLV   | Q_LYS_305  | NZ     | N_ASP_54  | OD2    | 3.686        |
| 3MLV   | Q_LYS_305  | NZ     | N_ASP_56  | OD2    | 2.702        |

---

Table 439: 3MLV-specific salt bridging networks analysis. In this table, a PDB file is specified with a four-letter PDB ID, except that the names of the PDB files corresponding to the single NMR structural model split from the NMR ensemble is specified with a four-letter PDB ID in addition to a hyphen followed by the single NMR structural model numeric ID, the residue naming scheme is **Chain ID\_residue name\_residue number**,  $\angle ADH$  represents the angle formed by acceptor (A), donor (D) and hydrogen (H) ( $\angle ADH$ ).

| PDB ID | Residue A | Atom A | Residue B  | Atom B | Distance (Å) |
|--------|-----------|--------|------------|--------|--------------|
| 3MLW   | L_ARG_50  | NH1    | H_ASP_100G | OD1    | 2.178        |
| 3MLW   | L_ARG_50  | NH1    | H_ASP_100G | OD2    | 3.432        |
| 3MLW   | L_ARG_61  | NH1    | L_ASP_82   | OD1    | 3.181        |
| 3MLW   | L_ARG_61  | NH1    | L_ASP_82   | OD2    | 2.655        |
| 3MLW   | L_ARG_61  | NH2    | L_ASP_82   | OD1    | 3.279        |
| 3MLW   | L_ARG_61  | NH2    | L_ASP_82   | OD2    | 3.991        |
| 3MLW   | L_LYS_66  | NZ     | L_ASP_51   | OD1    | 3.270        |
| 3MLW   | L_LYS_66  | NZ     | L_ASP_51   | OD2    | 3.246        |
| 3MLW   | L_ARG_95  | NH2    | L_ASP_95D  | OD1    | 3.851        |
| 3MLW   | L_ARG_95  | NH2    | L_ASP_95D  | OD2    | 3.710        |
| 3MLW   | L_LYS_129 | NZ     | H_ASP_144  | OD2    | 3.472        |
| 3MLW   | L_HIS_188 | ND1    | L_ASP_151  | OD1    | 3.480        |
| 3MLW   | H_LYS_12  | NZ     | H_GLU_10   | OE2    | 3.873        |
| 3MLW   | H_ARG_38  | NH2    | H_GLU_46   | OE2    | 2.598        |
| 3MLW   | H_ARG_58  | NH1    | L_ASP_95D  | OD1    | 3.535        |
| 3MLW   | H_ARG_58  | NH1    | L_ASP_95D  | OD2    | 2.585        |
| 3MLW   | H_ARG_66  | NH1    | H_GLU_83   | OE1    | 3.904        |
| 3MLW   | H_ARG_66  | NH1    | H_ASP_86   | OD1    | 3.710        |
| 3MLW   | H_ARG_66  | NH1    | H_ASP_86   | OD2    | 3.995        |
| 3MLW   | H_ARG_66  | NH2    | H_GLU_83   | OE1    | 3.901        |
| 3MLW   | H_ARG_66  | NH2    | H_ASP_86   | OD1    | 3.540        |
| 3MLW   | H_ARG_66  | NH2    | H_ASP_86   | OD2    | 2.479        |
| 3MLW   | H_LYS_143 | NZ     | H_ASP_144  | OD1    | 3.302        |
| 3MLW   | H_LYS_210 | NZ     | H_GLU_212  | OE2    | 3.365        |
| 3MLW   | P_LYS_303 | NZ     | H_ASP_31   | OD2    | 3.075        |
| 3MLW   | P_ARG_304 | NH1    | H_ASP_31   | OD1    | 3.646        |
| 3MLW   | P_LYS_305 | NZ     | H_ASP_54   | OD1    | 3.646        |
| 3MLW   | P_LYS_305 | NZ     | H_ASP_54   | OD2    | 2.863        |
| 3MLW   | P_LYS_305 | NZ     | H_ASP_56   | OD1    | 3.537        |
| 3MLW   | P_ARG_315 | NH1    | L_ASP_93   | OD1    | 2.718        |
| 3MLW   | P_ARG_315 | NH1    | L_ASP_93   | OD2    | 3.239        |
| 3MLW   | M_ARG_50  | NH2    | L_ASP_100G | OD1    | 2.708        |
| 3MLW   | M_ARG_50  | NH2    | L_ASP_100G | OD2    | 3.923        |
| 3MLW   | M_ARG_54  | NH2    | M_ASP_60   | OD2    | 3.038        |
| 3MLW   | M_ARG_61  | NH1    | M_ASP_82   | OD1    | 3.703        |
| 3MLW   | M_ARG_61  | NH1    | M_ASP_82   | OD2    | 2.485        |
| 3MLW   | M_ARG_61  | NH2    | M_ASP_82   | OD1    | 3.327        |
| 3MLW   | M_ARG_61  | NH2    | M_ASP_82   | OD2    | 3.484        |
| 3MLW   | M_LYS_66  | NZ     | M_ASP_51   | OD1    | 3.422        |
| 3MLW   | M_LYS_66  | NZ     | M_ASP_51   | OD2    | 3.571        |
| 3MLW   | M_ARG_95  | NH2    | M_ASP_95D  | OD1    | 3.135        |
| 3MLW   | M_ARG_95  | NH2    | M_ASP_95D  | OD2    | 3.399        |
| 3MLW   | M_LYS_149 | NZ     | M_GLU_203  | OE1    | 3.625        |
| 3MLW   | I_LYS_12  | NZ     | I_GLU_10   | OE2    | 3.682        |
| 3MLW   | I_ARG_58  | NH1    | M_ASP_95D  | OD1    | 2.653        |
| 3MLW   | I_ARG_58  | NH1    | M_ASP_95D  | OD2    | 3.643        |
| 3MLW   | I_ARG_66  | NH1    | L_ASP_86   | OD1    | 3.246        |
| 3MLW   | I_ARG_66  | NH1    | L_ASP_86   | OD2    | 3.692        |
| 3MLW   | I_ARG_66  | NH2    | L_ASP_86   | OD1    | 3.577        |
| 3MLW   | I_ARG_66  | NH2    | L_ASP_86   | OD2    | 2.544        |
| 3MLW   | I_LYS_143 | NZ     | L_ASP_144  | OD1    | 3.053        |
| 3MLW   | I_LYS_209 | NZ     | M_GLU_123  | OE1    | 2.581        |
| 3MLW   | I_LYS_209 | NZ     | M_GLU_123  | OE2    | 3.213        |
| 3MLW   | I_LYS_210 | NZ     | I_GLU_212  | OE1    | 3.364        |
| 3MLW   | Q_LYS_305 | NZ     | L_ASP_54   | OD2    | 3.005        |
| 3MLW   | Q_LYS_305 | NZ     | L_ASP_56   | OD1    | 2.747        |
| 3MLW   | Q_ARG_315 | NH1    | M_ASP_93   | OD1    | 3.021        |

---

Table 440: 3MLW-specific salt bridging networks analysis. In this table, a PDB file is specified with a four-letter PDB ID, except that the names of the PDB files corresponding to the single NMR structural model split from the NMR ensemble is specified with a four-letter PDB ID in addition to a hyphen followed by the single NMR structural model numeric ID, the residue naming scheme is **Chain ID\_residue name\_residue number**,  $\angle ADH$  represents the angle formed by acceptor (A), donor (D) and hydrogen (H) ( $\angle ADH$ ).

| PDB ID | Residue A  | Atom A | Residue B  | Atom B | Distance (Å) |
|--------|------------|--------|------------|--------|--------------|
| 3MLX   | L_LYS_53   | NZ     | L_GLU_50   | OE1    | 2.558        |
| 3MLX   | L_ARG_61   | NH1    | L_ASP_82   | OD1    | 3.582        |
| 3MLX   | L_ARG_61   | NH1    | L_ASP_82   | OD2    | 2.890        |
| 3MLX   | L_ARG_61   | NH2    | L_ASP_82   | OD1    | 2.629        |
| 3MLX   | L_ARG_61   | NH2    | L_ASP_82   | OD2    | 3.257        |
| 3MLX   | L_LYS_110  | NZ     | L_GLU_198  | OE1    | 3.541        |
| 3MLX   | L_LYS_110  | NZ     | L_GLU_198  | OE2    | 2.823        |
| 3MLX   | L_ARG_189  | NH1    | L_ASP_151  | OD2    | 3.869        |
| 3MLX   | H_ARG_38   | NH1    | H_ASP_86   | OD1    | 2.668        |
| 3MLX   | H_ARG_38   | NH2    | H_GLU_46   | OE1    | 2.979        |
| 3MLX   | H_ARG_38   | NH2    | H_ASP_86   | OD1    | 3.494        |
| 3MLX   | H_ARG_66   | NH1    | H_ASP_86   | OD1    | 3.775        |
| 3MLX   | H_ARG_66   | NH1    | H_ASP_86   | OD2    | 3.101        |
| 3MLX   | H_ARG_66   | NH2    | H_ASP_86   | OD1    | 3.040        |
| 3MLX   | H_ARG_66   | NH2    | H_ASP_86   | OD2    | 3.650        |
| 3MLX   | H_ARG_94   | NH2    | H_ASP_101  | OD1    | 3.962        |
| 3MLX   | H_ARG_94   | NH2    | H_ASP_101  | OD2    | 2.675        |
| 3MLX   | H_HIS_100  | NE2    | H_GLU_98   | OE1    | 3.039        |
| 3MLX   | H_ARG_100D | NH1    | H_ASP_100B | OD1    | 3.189        |
| 3MLX   | H_ARG_100D | NH1    | H_ASP_100B | OD2    | 2.525        |
| 3MLX   | H_ARG_100D | NH2    | H_ASP_100B | OD2    | 3.445        |
| 3MLX   | H_LYS_143  | NZ     | L_GLU_124  | OE2    | 3.021        |
| 3MLX   | H_LYS_143  | NZ     | H_ASP_144  | OD2    | 3.971        |
| 3MLX   | H_LYS_210  | NZ     | H_GLU_212  | OE1    | 3.310        |
| 3MLX   | P_HIS_308  | ND1    | H_GLU_98   | OE2    | 3.800        |
| 3MLX   | P_HIS_308  | NE2    | H_GLU_98   | OE2    | 3.892        |
| 3MLX   | M_LYS_53   | NZ     | M_GLU_50   | OE1    | 2.998        |
| 3MLX   | M_ARG_61   | NH1    | M_ASP_82   | OD1    | 3.548        |
| 3MLX   | M_ARG_61   | NH1    | M_ASP_82   | OD2    | 2.848        |
| 3MLX   | M_ARG_61   | NH2    | M_ASP_82   | OD1    | 2.885        |
| 3MLX   | M_ARG_61   | NH2    | M_ASP_82   | OD2    | 3.369        |
| 3MLX   | M_LYS_110  | NZ     | M_GLU_198  | OE1    | 3.722        |
| 3MLX   | M_LYS_110  | NZ     | M_GLU_198  | OE2    | 2.779        |
| 3MLX   | I_ARG_38   | NH1    | I_ASP_86   | OD1    | 2.800        |
| 3MLX   | I_ARG_38   | NH2    | I_GLU_46   | OE1    | 2.963        |
| 3MLX   | I_ARG_38   | NH2    | I_ASP_86   | OD1    | 3.764        |
| 3MLX   | I_ARG_66   | NH1    | I_ASP_86   | OD1    | 3.651        |
| 3MLX   | I_ARG_66   | NH1    | I_ASP_86   | OD2    | 3.063        |
| 3MLX   | I_ARG_66   | NH2    | I_ASP_86   | OD1    | 2.826        |
| 3MLX   | I_ARG_66   | NH2    | I_ASP_86   | OD2    | 3.585        |
| 3MLX   | I_ARG_94   | NH2    | I_ASP_101  | OD1    | 3.940        |
| 3MLX   | I_ARG_94   | NH2    | I_ASP_101  | OD2    | 2.619        |
| 3MLX   | I_ARG_100D | NH2    | I_ASP_100B | OD1    | 3.500        |
| 3MLX   | I_LYS_143  | NZ     | M_GLU_124  | OE2    | 2.608        |
| 3MLX   | I_LYS_214  | NZ     | M_GLU_123  | OE1    | 3.588        |
| 3MLX   | Q_HIS_308  | ND1    | I_GLU_98   | OE1    | 3.280        |

---

Table 441: 3MLX-specific salt bridging networks analysis. In this table, a PDB file is specified with a four-letter PDB ID, except that the names of the PDB files corresponding to the single NMR structural model split from the NMR ensemble is specified with a four-letter PDB ID in addition to a hyphen followed by the single NMR structural model numeric ID, the residue naming scheme is **Chain ID\_residue name\_residue number**,  $\angle ADH$  represents the angle formed by acceptor (A), donor (D) and hydrogen (H) ( $\angle ADH$ ).

| PDB ID | Residue A  | Atom A | Residue B  | Atom B | Distance (Å) |
|--------|------------|--------|------------|--------|--------------|
| 3MLY   | L_LYS_53   | NZ     | L_GLU_50   | OE1    | 2.642        |
| 3MLY   | L_ARG_61   | NH1    | L_ASP_82   | OD1    | 3.644        |
| 3MLY   | L_ARG_61   | NH1    | L_ASP_82   | OD2    | 2.899        |
| 3MLY   | L_ARG_61   | NH2    | L_ASP_82   | OD1    | 2.860        |
| 3MLY   | L_ARG_61   | NH2    | L_ASP_82   | OD2    | 3.465        |
| 3MLY   | L_LYS_110  | NZ     | L_GLU_198  | OE2    | 2.940        |
| 3MLY   | L_ARG_189  | NH1    | L_ASP_151  | OD2    | 3.794        |
| 3MLY   | L_ARG_189  | NH2    | L_ASP_151  | OD1    | 3.939        |
| 3MLY   | L_ARG_189  | NH2    | L_ASP_151  | OD2    | 3.922        |
| 3MLY   | H_ARG_38   | NH1    | H_ASP_86   | OD1    | 2.772        |
| 3MLY   | H_ARG_38   | NH2    | H_GLU_46   | OE1    | 3.019        |
| 3MLY   | H_ARG_38   | NH2    | H_ASP_86   | OD1    | 3.609        |
| 3MLY   | H_ARG_66   | NH1    | H_ASP_86   | OD1    | 3.669        |
| 3MLY   | H_ARG_66   | NH1    | H_ASP_86   | OD2    | 3.034        |
| 3MLY   | H_ARG_66   | NH2    | H_ASP_86   | OD1    | 2.918        |
| 3MLY   | H_ARG_66   | NH2    | H_ASP_86   | OD2    | 3.605        |
| 3MLY   | H_ARG_94   | NH2    | H_ASP_101  | OD1    | 3.843        |
| 3MLY   | H_ARG_94   | NH2    | H_ASP_101  | OD2    | 2.725        |
| 3MLY   | H_ARG_100D | NH1    | H_ASP_100B | OD1    | 3.662        |
| 3MLY   | H_ARG_100D | NH1    | H_ASP_100B | OD2    | 2.984        |
| 3MLY   | H_ARG_100D | NH2    | H_ASP_100B | OD2    | 3.444        |
| 3MLY   | H_LYS_143  | NZ     | L_GLU_124  | OE2    | 3.991        |
| 3MLY   | H_LYS_143  | NZ     | H_ASP_144  | OD1    | 3.690        |
| 3MLY   | H_LYS_143  | NZ     | H_ASP_144  | OD2    | 3.304        |
| 3MLY   | H_LYS_210  | NZ     | H_GLU_212  | OE1    | 3.480        |
| 3MLY   | H_LYS_214  | NZ     | L_GLU_123  | OE1    | 3.745        |
| 3MLY   | P_LYS_308  | NZ     | L_GLU_50   | OE1    | 3.397        |
| 3MLY   | P_LYS_308  | NZ     | L_GLU_50   | OE2    | 3.390        |
| 3MLY   | M_LYS_53   | NZ     | M_GLU_50   | OE1    | 3.091        |
| 3MLY   | M_ARG_61   | NH1    | M_ASP_82   | OD1    | 3.807        |
| 3MLY   | M_ARG_61   | NH1    | M_ASP_82   | OD2    | 2.828        |
| 3MLY   | M_ARG_61   | NH2    | M_ASP_82   | OD1    | 2.920        |
| 3MLY   | M_ARG_61   | NH2    | M_ASP_82   | OD2    | 3.357        |
| 3MLY   | M_LYS_110  | NZ     | M_GLU_198  | OE1    | 3.945        |
| 3MLY   | M_LYS_110  | NZ     | M_GLU_198  | OE2    | 2.680        |
| 3MLY   | I_ARG_38   | NH1    | I_ASP_86   | OD1    | 2.750        |
| 3MLY   | I_ARG_38   | NH2    | I_GLU_46   | OE1    | 3.018        |
| 3MLY   | I_ARG_38   | NH2    | I_ASP_86   | OD1    | 3.672        |
| 3MLY   | I_ARG_66   | NH1    | I_ASP_86   | OD1    | 3.657        |
| 3MLY   | I_ARG_66   | NH1    | I_ASP_86   | OD2    | 2.961        |
| 3MLY   | I_ARG_66   | NH2    | I_ASP_86   | OD1    | 2.888        |
| 3MLY   | I_ARG_66   | NH2    | I_ASP_86   | OD2    | 3.536        |
| 3MLY   | I_ARG_94   | NH2    | I_ASP_101  | OD1    | 3.875        |
| 3MLY   | I_ARG_94   | NH2    | I_ASP_101  | OD2    | 2.678        |
| 3MLY   | I_ARG_100D | NH2    | I_ASP_100B | OD1    | 3.986        |
| 3MLY   | I_ARG_100D | NH2    | I_ASP_100B | OD2    | 3.120        |
| 3MLY   | I_LYS_143  | NZ     | M_GLU_124  | OE2    | 2.661        |
| 3MLY   | I_LYS_214  | NZ     | M_GLU_123  | OE1    | 3.594        |

---

Table 442: 3MLY-specific salt bridging networks analysis. In this table, a PDB file is specified with a four-letter PDB ID, except that the names of the PDB files corresponding to the single NMR structural model split from the NMR ensemble is specified with a four-letter PDB ID in addition to a hyphen followed by the single NMR structural model numeric ID, the residue naming scheme is **Chain ID\_residue name\_residue number**,  $\angle ADH$  represents the angle formed by acceptor (A), donor (D) and hydrogen (H) ( $\angle ADH$ ).



| PDB ID | Residue A | Atom A | Residue B | Atom B | Distance (Å) |
|--------|-----------|--------|-----------|--------|--------------|
| 3MLZ   | L_LYS_    | NZ     | L_GLU_    | OE1    | 2.997        |
| 3MLZ   | L_ARG_    | NH1    | L_ASP_    | OD1    | 3.594        |
| 3MLZ   | L_ARG_    | NH1    | L_ASP_    | OD2    | 2.458        |
| 3MLZ   | L_ARG_    | NH2    | L_ASP_    | OD1    | 3.627        |
| 3MLZ   | L_ARG_    | NH2    | L_ASP_    | OD2    | 3.688        |
| 3MLZ   | H_ARG_    | NH1    | H_ASP_    | OD1    | 2.831        |
| 3MLZ   | H_ARG_    | NH2    | H_GLU_    | OE1    | 2.975        |
| 3MLZ   | H_ARG_    | NH2    | H_GLU_    | OE2    | 3.939        |
| 3MLZ   | H_ARG_    | NH2    | H_ASP_    | OD1    | 3.724        |
| 3MLZ   | H_ARG_    | NH1    | H_ASP_    | OD1    | 3.168        |
| 3MLZ   | H_ARG_    | NH1    | H_ASP_    | OD2    | 2.769        |
| 3MLZ   | H_ARG_    | NH2    | H_ASP_    | OD1    | 2.975        |
| 3MLZ   | H_ARG_    | NH2    | H_ASP_    | OD2    | 3.884        |
| 3MLZ   | H_ARG_    | NH2    | H_ASP_    | OD1    | 3.878        |
| 3MLZ   | H_ARG_    | NH2    | H_ASP_    | OD2    | 3.028        |
| 3MLZ   | H_HIS_    | ND1    | H_ASP_    | OD2    | 3.791        |
| 3MLZ   | H_HIS_    | NE2    | H_GLU_    | OE1    | 3.406        |
| 3MLZ   | H_HIS_    | NE2    | H_GLU_    | OE2    | 3.681        |
| 3MLZ   | H_ARG_    | NH2    | H_ASP_    | OD2    | 2.582        |
| 3MLZ   | H_LYS_    | NZ     | L_GLU_    | OE1    | 3.724        |
| 3MLZ   | H_LYS_    | NZ     | L_GLU_    | OE2    | 3.184        |
| 3MLZ   | H_LYS_    | NZ     | L_GLU_    | OE2    | 2.805        |
| 3MLZ   | H_LYS_    | NZ     | L_GLU_    | OE1    | 3.039        |
| 3MLZ   | H_LYS_    | NZ     | L_GLU_    | OE2    | 3.262        |

Table 443: 3MLZ-specific salt bridging networks analysis. In this table, a PDB file is specified with a four-letter PDB ID, except that the names of the PDB files corresponding to the single NMR structural model split from the NMR ensemble is specified with a four-letter PDB ID in addition to a hyphen followed by the single NMR structural model numeric ID, the residue naming scheme is **Chain ID\_residue name\_residue number**,  $\angle ADH$  represents the angle formed by acceptor (A), donor (D) and hydrogen (H) ( $\angle ADH$ ).

| PDB ID | Residue A | Atom A | Residue B | Atom B | Distance (Å) |
|--------|-----------|--------|-----------|--------|--------------|
| 3NFP   | A_ARG_33  | NH1    | K_ASP_4   | OD1    | 3.227        |
| 3NFP   | A_ARG_33  | NH2    | K_ASP_6   | OD1    | 3.995        |
| 3NFP   | A_ARG_33  | NH2    | K_ASP_6   | OD2    | 2.804        |
| 3NFP   | A_HIS_35  | NE2    | K_ASP_4   | OD1    | 3.568        |
| 3NFP   | A_HIS_35  | NE2    | K_ASP_4   | OD2    | 3.384        |
| 3NFP   | A_ARG_38  | NH1    | A_GLU_46  | OE1    | 3.521        |
| 3NFP   | A_ARG_38  | NH1    | A_GLU_46  | OE2    | 2.606        |
| 3NFP   | A_ARG_38  | NH2    | A_GLU_46  | OE1    | 3.385        |
| 3NFP   | A_ARG_38  | NH2    | A_GLU_46  | OE2    | 3.747        |
| 3NFP   | A_LYS_63  | NZ     | A_GLU_46  | OE1    | 3.380        |
| 3NFP   | A_LYS_67  | NZ     | A_ASP_90  | OD2    | 3.506        |
| 3NFP   | A_LYS_146 | NZ     | A_ASP_147 | OD1    | 3.848        |
| 3NFP   | A_LYS_146 | NZ     | A_ASP_147 | OD2    | 3.462        |
| 3NFP   | B_LYS_38  | NZ     | B_ASP_80  | OD1    | 3.548        |
| 3NFP   | B_LYS_38  | NZ     | B_ASP_80  | OD2    | 3.365        |
| 3NFP   | B_ARG_60  | NH2    | B_ASP_81  | OD1    | 2.805        |
| 3NFP   | B_ARG_60  | NH2    | B_ASP_81  | OD2    | 3.684        |
| 3NFP   | B_LYS_125 | NZ     | B_GLU_122 | OE1    | 3.467        |
| 3NFP   | B_LYS_148 | NZ     | B_GLU_194 | OE1    | 2.803        |
| 3NFP   | B_LYS_148 | NZ     | B_GLU_194 | OE2    | 3.777        |
| 3NFP   | B_HIS_188 | ND1    | B_ASP_150 | OD2    | 2.700        |
| 3NFP   | H_ARG_33  | NH1    | I_ASP_4   | OD2    | 2.868        |
| 3NFP   | H_ARG_33  | NH2    | I_ASP_6   | OD2    | 3.531        |
| 3NFP   | H_HIS_35  | NE2    | I_ASP_4   | OD1    | 3.314        |
| 3NFP   | H_HIS_35  | NE2    | I_ASP_4   | OD2    | 3.660        |
| 3NFP   | H_ARG_38  | NH2    | H_GLU_46  | OE1    | 3.221        |
| 3NFP   | H_ARG_38  | NH2    | H_GLU_46  | OE2    | 2.659        |
| 3NFP   | H_LYS_67  | NZ     | H_ASP_90  | OD2    | 3.005        |
| 3NFP   | H_LYS_212 | NZ     | L_GLU_122 | OE1    | 3.767        |
| 3NFP   | L_LYS_38  | NZ     | L_ASP_80  | OD1    | 3.309        |
| 3NFP   | L_ARG_60  | NH2    | L_ASP_81  | OD1    | 2.888        |
| 3NFP   | L_ARG_60  | NH2    | L_ASP_81  | OD2    | 3.365        |
| 3NFP   | L_LYS_148 | NZ     | L_GLU_194 | OE1    | 3.812        |
| 3NFP   | L_LYS_148 | NZ     | L_GLU_194 | OE2    | 2.763        |
| 3NFP   | L_LYS_182 | NZ     | L_GLU_186 | OE2    | 3.310        |
| 3NFP   | L_HIS_188 | ND1    | L_ASP_150 | OD2    | 3.342        |
| 3NFP   | I_ARG_117 | NH2    | I_GLU_113 | OE1    | 3.200        |
| 3NFP   | I_ARG_117 | NH2    | I_GLU_113 | OE2    | 2.798        |
| 3NFP   | I_HIS_120 | NE2    | H_GLU_59  | OE1    | 3.799        |
| 3NFP   | I_HIS_120 | NE2    | H_GLU_59  | OE2    | 3.285        |
| 3NFP   | K_ARG_117 | NH1    | K_GLU_106 | OE2    | 2.607        |
| 3NFP   | K_ARG_117 | NH2    | K_GLU_113 | OE1    | 3.049        |
| 3NFP   | K_ARG_117 | NH2    | K_GLU_113 | OE2    | 2.896        |
| 3NFP   | K_HIS_120 | NE2    | A_GLU_59  | OE2    | 3.393        |

Table 444: 3NFP-specific salt bridging networks analysis. In this table, a PDB file is specified with a four-letter PDB ID, except that the names of the PDB files corresponding to the single NMR structural model split from the NMR ensemble is specified with a four-letter PDB ID in addition to a hyphen followed by the single NMR structural model numeric ID, the residue naming scheme is **Chain ID\_residue name\_residue number**,  $\angle ADH$  represents the angle formed by acceptor (A), donor (D) and hydrogen (H) ( $\angle ADH$ ).

| PDB ID | Residue A | Atom A | Residue B | Atom B | Distance (Å) |
|--------|-----------|--------|-----------|--------|--------------|
| 3NGB   | G_LYS_46  | NZ     | G_GLU_492 | OE1    | 3.975        |
| 3NGB   | G_LYS_    | NZ     | G_GLU_    | OE1    | 3.767        |
| 3NGB   | G_HIS_    | NE2    | G_GLU_    | OE1    | 3.641        |
| 3NGB   | G_HIS_    | ND1    | G_GLU_    | OE2    | 2.917        |
| 3NGB   | G_LYS_97  | NZ     | G_GLU_275 | OE2    | 3.810        |
| 3NGB   | G_LYS_97  | NZ     | H_ASP_99  | OD2    | 3.903        |
| 3NGB   | G_LYS_    | NZ     | G_GLU_    | OE1    | 3.983        |
| 3NGB   | G_LYS_    | NZ     | G_GLU_    | OE2    | 3.483        |
| 3NGB   | G_HIS_    | NE2    | G_GLU_    | OE1    | 3.355        |
| 3NGB   | G_LYS_282 | NZ     | G_GLU_275 | OE1    | 3.701        |
| 3NGB   | G_ARG_456 | NH1    | G_GLU_466 | OE2    | 3.510        |
| 3NGB   | G_ARG_469 | NH2    | G_ASP_457 | OD1    | 2.956        |
| 3NGB   | G_LYS_476 | NZ     | G_GLU_102 | OE1    | 2.614        |
| 3NGB   | G_ARG_480 | NH1    | G_ASP_477 | OD1    | 2.964        |
| 3NGB   | G_ARG_480 | NH2    | G_GLU_102 | OE2    | 3.814        |
| 3NGB   | G_LYS_487 | NZ     | G_ASP_47  | OD1    | 2.938        |
| 3NGB   | G_LYS_487 | NZ     | G_ASP_47  | OD2    | 3.396        |
| 3NGB   | G_LYS_487 | NZ     | G_GLU_91  | OE1    | 2.798        |
| 3NGB   | H_LYS_12  | NZ     | H_GLU_16  | OE2    | 3.621        |
| 3NGB   | H_ARG_38  | NH1    | H_GLU_46  | OE1    | 3.003        |
| 3NGB   | H_ARG_38  | NH2    | H_ASP_86  | OD1    | 2.813        |
| 3NGB   | H_ARG_66  | NH1    | H_ASP_86  | OD1    | 3.475        |
| 3NGB   | H_ARG_66  | NH2    | H_ASP_86  | OD1    | 2.969        |
| 3NGB   | H_ARG_66  | NH2    | H_ASP_86  | OD2    | 2.693        |
| 3NGB   | H_ARG_71  | NH1    | G_ASP_368 | OD1    | 3.623        |
| 3NGB   | H_ARG_71  | NH1    | G_ASP_368 | OD2    | 3.004        |
| 3NGB   | H_ARG_71  | NH2    | G_ASP_368 | OD1    | 2.815        |
| 3NGB   | H_ARG_71  | NH2    | G_ASP_368 | OD2    | 3.723        |
| 3NGB   | H_ARG_82A | NH1    | H_GLU_81  | OE2    | 3.784        |
| 3NGB   | H_LYS_209 | NZ     | L_GLU_125 | OE1    | 3.421        |
| 3NGB   | H_LYS_209 | NZ     | L_GLU_125 | OE2    | 3.841        |
| 3NGB   | H_LYS_210 | NZ     | H_GLU_212 | OE2    | 3.426        |
| 3NGB   | L_ARG_61  | NH1    | L_ASP_82  | OD2    | 2.817        |
| 3NGB   | L_ARG_61  | NH2    | L_ASP_82  | OD1    | 3.422        |
| 3NGB   | L_ARG_61  | NH2    | L_ASP_82  | OD2    | 2.949        |
| 3NGB   | L_LYS_109 | NZ     | L_GLU_17  | OE1    | 3.534        |
| 3NGB   | L_LYS_151 | NZ     | L_GLU_197 | OE2    | 3.936        |
| 3NGB   | L_HIS_191 | ND1    | L_ASP_153 | OD2    | 2.883        |
| 3NGB   | L_HIS_191 | NE2    | L_ASP_187 | OD2    | 3.579        |
| 3NGB   | L_ARG_213 | NH2    | L_GLU_189 | OE1    | 2.766        |
| 3NGB   | A_LYS_46  | NZ     | A_GLU_492 | OE1    | 3.410        |
| 3NGB   | A_HIS_66  | ND1    | A_GLU_64  | OE2    | 2.775        |
| 3NGB   | A_LYS_97  | NZ     | B_ASP_99  | OD2    | 3.768        |
| 3NGB   | A_LYS_207 | NZ     | A_GLU_381 | OE1    | 3.837        |
| 3NGB   | A_LYS_207 | NZ     | A_GLU_381 | OE2    | 2.908        |
| 3NGB   | A_LYS_231 | NZ     | A_GLU_267 | OE2    | 3.487        |
| 3NGB   | A_HIS_249 | NE2    | A_GLU_482 | OE1    | 3.108        |
| 3NGB   | A_LYS_282 | NZ     | A_GLU_275 | OE1    | 3.363        |
| 3NGB   | A_LYS_343 | NZ     | A_GLU_405 | OE2    | 2.857        |
| 3NGB   | A_LYS_348 | NZ     | A_GLU_269 | OE1    | 3.929        |
| 3NGB   | A_LYS_348 | NZ     | A_GLU_269 | OE2    | 3.717        |
| 3NGB   | A_ARG_456 | NH1    | A_GLU_466 | OE1    | 3.489        |
| 3NGB   | A_ARG_469 | NH2    | A_ASP_457 | OD1    | 2.818        |
| 3NGB   | A_LYS_476 | NZ     | A_GLU_102 | OE1    | 2.746        |
| 3NGB   | A_ARG_480 | NH1    | A_ASP_477 | OD1    | 3.036        |
| 3NGB   | A_ARG_480 | NH2    | A_GLU_102 | OE2    | 3.823        |
| 3NGB   | A_LYS_487 | NZ     | A_ASP_47  | OD1    | 3.201        |

|      |           |     |           |     |       |
|------|-----------|-----|-----------|-----|-------|
| 3NGB | A_LYS_487 | NZ  | A_ASP_47  | OD2 | 3.287 |
| 3NGB | A_LYS_487 | NZ  | A_GLU_91  | OE1 | 2.776 |
| 3NGB | B_LYS_12  | NZ  | B_GLU_16  | OE2 | 3.669 |
| 3NGB | B_ARG_38  | NH1 | B_ASP_86  | OD1 | 3.017 |
| 3NGB | B_ARG_38  | NH2 | B_GLU_46  | OE1 | 3.330 |
| 3NGB | B_ARG_38  | NH2 | B_GLU_46  | OE2 | 3.608 |
| 3NGB | B_ARG_38  | NH2 | B_ASP_86  | OD1 | 3.928 |
| 3NGB | B_ARG_66  | NH1 | B_ASP_86  | OD1 | 3.986 |
| 3NGB | B_ARG_66  | NH2 | B_ASP_86  | OD1 | 3.009 |
| 3NGB | B_ARG_66  | NH2 | B_ASP_86  | OD2 | 2.581 |
| 3NGB | B_ARG_71  | NH1 | A_ASP_368 | OD1 | 3.647 |
| 3NGB | B_ARG_71  | NH1 | A_ASP_368 | OD2 | 2.944 |
| 3NGB | B_ARG_71  | NH2 | A_ASP_368 | OD1 | 2.895 |
| 3NGB | B_ARG_71  | NH2 | A_ASP_368 | OD2 | 3.718 |
| 3NGB | B_ARG_82A | NH1 | B_GLU_81  | OE2 | 3.349 |
| 3NGB | B_HIS_102 | NE2 | B_GLU_101 | OE1 | 3.498 |
| 3NGB | B_LYS_209 | NZ  | C_GLU_125 | OE1 | 2.774 |
| 3NGB | B_LYS_209 | NZ  | C_GLU_125 | OE2 | 2.799 |
| 3NGB | C_ARG_61  | NH1 | C_ASP_82  | OD2 | 2.721 |
| 3NGB | C_ARG_61  | NH2 | C_GLU_79  | OE1 | 3.703 |
| 3NGB | C_ARG_61  | NH2 | C_ASP_82  | OD1 | 3.248 |
| 3NGB | C_ARG_61  | NH2 | C_ASP_82  | OD2 | 2.976 |
| 3NGB | C_LYS_109 | NZ  | C_GLU_17  | OE1 | 3.524 |
| 3NGB | C_LYS_151 | NZ  | C_GLU_197 | OE2 | 3.960 |
| 3NGB | C_LYS_185 | NZ  | C_GLU_189 | OE2 | 3.711 |
| 3NGB | C_HIS_191 | ND1 | C_ASP_153 | OD2 | 2.841 |
| 3NGB | C_ARG_213 | NH2 | C_GLU_189 | OE1 | 2.808 |
| 3NGB | D_LYS_46  | NZ  | D_GLU_492 | OE1 | 2.932 |
| 3NGB | D_HIS_66  | ND1 | D_GLU_64  | OE2 | 2.933 |
| 3NGB | D_LYS_97  | NZ  | D_GLU_275 | OE2 | 3.702 |
| 3NGB | D_LYS_97  | NZ  | E_ASP_99  | OD1 | 3.709 |
| 3NGB | D_LYS_207 | NZ  | D_GLU_381 | OE1 | 3.872 |
| 3NGB | D_LYS_207 | NZ  | D_GLU_381 | OE2 | 3.299 |
| 3NGB | D_LYS_231 | NZ  | D_GLU_267 | OE2 | 3.490 |
| 3NGB | D_HIS_249 | NE2 | D_GLU_482 | OE1 | 3.177 |
| 3NGB | D_LYS_282 | NZ  | D_GLU_275 | OE1 | 2.984 |
| 3NGB | D_LYS_282 | NZ  | D_GLU_275 | OE2 | 3.901 |
| 3NGB | D_ARG_327 | NH1 | D_ASP_325 | OD1 | 3.823 |
| 3NGB | D_LYS_348 | NZ  | D_GLU_269 | OE2 | 3.794 |
| 3NGB | D_LYS_348 | NZ  | D_GLU_351 | OE1 | 3.701 |
| 3NGB | D_ARG_456 | NH1 | D_GLU_466 | OE2 | 3.539 |
| 3NGB | D_ARG_469 | NH2 | D_ASP_457 | OD1 | 2.868 |
| 3NGB | D_LYS_476 | NZ  | D_GLU_102 | OE1 | 2.805 |
| 3NGB | D_LYS_476 | NZ  | D_GLU_102 | OE2 | 3.737 |
| 3NGB | D_ARG_480 | NH1 | D_ASP_477 | OD1 | 2.794 |
| 3NGB | D_LYS_487 | NZ  | D_ASP_47  | OD1 | 3.083 |
| 3NGB | D_LYS_487 | NZ  | D_ASP_47  | OD2 | 3.202 |
| 3NGB | D_LYS_487 | NZ  | D_GLU_91  | OE1 | 2.774 |
| 3NGB | E_LYS_12  | NZ  | E_GLU_16  | OE2 | 3.601 |
| 3NGB | E_ARG_38  | NH1 | E_GLU_46  | OE1 | 2.881 |
| 3NGB | E_ARG_38  | NH2 | E_ASP_86  | OD1 | 2.976 |
| 3NGB | E_ARG_53  | NH2 | E_ASP_31  | OD1 | 3.658 |
| 3NGB | E_ARG_66  | NH2 | E_ASP_86  | OD1 | 2.908 |
| 3NGB | E_ARG_66  | NH2 | E_ASP_86  | OD2 | 2.859 |
| 3NGB | E_ARG_71  | NH1 | D_ASP_368 | OD1 | 3.715 |
| 3NGB | E_ARG_71  | NH1 | D_ASP_368 | OD2 | 3.074 |
| 3NGB | E_ARG_71  | NH2 | D_ASP_368 | OD1 | 3.026 |
| 3NGB | E_ARG_71  | NH2 | D_ASP_368 | OD2 | 3.848 |

|      |           |     |           |     |       |
|------|-----------|-----|-----------|-----|-------|
| 3NGB | E_ARG_82A | NH1 | E_GLU_81  | OE2 | 3.296 |
| 3NGB | E_LYS_    | NZ  | E_ASP_    | OD1 | 3.774 |
| 3NGB | E_HIS_164 | ND1 | F_ASP_169 | OD1 | 3.984 |
| 3NGB | E_LYS_    | NZ  | F_GLU_    | OE1 | 3.345 |
| 3NGB | E_LYS_    | NZ  | F_GLU_    | OE2 | 2.927 |
| 3NGB | F_ARG_61  | NH1 | F_ASP_82  | OD2 | 3.066 |
| 3NGB | F_ARG_61  | NH2 | F_ASP_82  | OD1 | 3.415 |
| 3NGB | F_ARG_61  | NH2 | F_ASP_82  | OD2 | 2.796 |
| 3NGB | F_LYS_109 | NZ  | F_GLU_17  | OE1 | 3.447 |
| 3NGB | F_HIS_    | ND1 | F_ASP_    | OD2 | 2.855 |
| 3NGB | F_ARG_    | NH1 | F_GLU_    | OE1 | 3.426 |
| 3NGB | I_LYS_46  | NZ  | I_GLU_492 | OE1 | 3.345 |
| 3NGB | I_LYS_97  | NZ  | J_ASP_99  | OD1 | 3.443 |
| 3NGB | I_LYS_207 | NZ  | I_GLU_381 | OE1 | 3.684 |
| 3NGB | I_LYS_207 | NZ  | I_GLU_381 | OE2 | 3.363 |
| 3NGB | I_HIS_249 | NE2 | I_GLU_482 | OE1 | 3.245 |
| 3NGB | I_LYS_282 | NZ  | I_GLU_275 | OE1 | 3.040 |
| 3NGB | I_LYS_348 | NZ  | I_GLU_269 | OE2 | 3.888 |
| 3NGB | I_LYS_348 | NZ  | I_GLU_351 | OE1 | 3.585 |
| 3NGB | I_ARG_456 | NH1 | I_GLU_466 | OE1 | 3.750 |
| 3NGB | I_ARG_456 | NH1 | I_GLU_466 | OE2 | 3.932 |
| 3NGB | I_ARG_469 | NH2 | I_ASP_457 | OD1 | 3.266 |
| 3NGB | I_LYS_476 | NZ  | I_GLU_102 | OE1 | 2.886 |
| 3NGB | I_LYS_476 | NZ  | I_GLU_102 | OE2 | 3.914 |
| 3NGB | I_ARG_480 | NH1 | I_ASP_477 | OD1 | 2.955 |
| 3NGB | I_LYS_487 | NZ  | I_ASP_47  | OD1 | 2.972 |
| 3NGB | I_LYS_487 | NZ  | I_ASP_47  | OD2 | 3.331 |
| 3NGB | I_LYS_487 | NZ  | I_GLU_91  | OE1 | 3.195 |
| 3NGB | J_LYS_12  | NZ  | J_GLU_16  | OE2 | 3.692 |
| 3NGB | J_ARG_19  | NH1 | J_GLU_81  | OE1 | 3.898 |
| 3NGB | J_ARG_38  | NH1 | J_GLU_46  | OE1 | 3.036 |
| 3NGB | J_ARG_38  | NH1 | J_GLU_46  | OE2 | 3.958 |
| 3NGB | J_ARG_38  | NH2 | J_ASP_86  | OD1 | 3.148 |
| 3NGB | J_ARG_53  | NH2 | J_ASP_31  | OD1 | 3.422 |
| 3NGB | J_ARG_66  | NH2 | J_ASP_86  | OD1 | 2.966 |
| 3NGB | J_ARG_66  | NH2 | J_ASP_86  | OD2 | 2.680 |
| 3NGB | J_ARG_71  | NH1 | I_ASP_368 | OD1 | 3.645 |
| 3NGB | J_ARG_71  | NH1 | I_ASP_368 | OD2 | 3.125 |
| 3NGB | J_ARG_71  | NH2 | I_ASP_368 | OD1 | 3.120 |
| 3NGB | J_ARG_82A | NH1 | J_GLU_81  | OE2 | 3.471 |
| 3NGB | J_HIS_102 | NE2 | J_GLU_101 | OE1 | 3.491 |
| 3NGB | J_LYS_143 | NZ  | J_ASP_144 | OD1 | 3.698 |
| 3NGB | J_LYS_209 | NZ  | K_GLU_125 | OE1 | 2.929 |
| 3NGB | J_LYS_209 | NZ  | K_GLU_125 | OE2 | 3.060 |
| 3NGB | J_LYS_210 | NZ  | J_GLU_212 | OE2 | 3.040 |
| 3NGB | J_LYS_214 | NZ  | K_ASP_124 | OD1 | 3.305 |
| 3NGB | K_ARG_24  | NH1 | K_ASP_70  | OD1 | 3.807 |
| 3NGB | K_ARG_24  | NH2 | K_ASP_70  | OD1 | 3.052 |
| 3NGB | K_ARG_61  | NH1 | K_ASP_82  | OD2 | 2.794 |
| 3NGB | K_ARG_61  | NH2 | K_GLU_79  | OE2 | 3.644 |
| 3NGB | K_ARG_61  | NH2 | K_ASP_82  | OD1 | 3.448 |
| 3NGB | K_ARG_61  | NH2 | K_ASP_82  | OD2 | 3.147 |
| 3NGB | K_LYS_109 | NZ  | K_GLU_17  | OE1 | 3.600 |
| 3NGB | K_LYS_151 | NZ  | K_GLU_197 | OE2 | 2.833 |
| 3NGB | K_LYS_185 | NZ  | K_GLU_189 | OE2 | 3.051 |

---

Table 445: 3NGB-specific salt bridging networks analysis. In this table, a PDB file is specified with a four-letter PDB ID, except that the names of the PDB files corresponding to the single NMR structural model split from the NMR ensemble is specified with a four-letter PDB ID in addition to a hyphen followed by the single NMR structural model numeric ID, the residue naming scheme is **Chain ID\_residue name\_residue number**,  $\angle ADH$  represents the angle formed by acceptor (A), donor (D) and hydrogen (H) ( $\angle ADH$ ).

| PDB ID | Residue A | Atom A | Residue B | Atom B | Distance (Å) |
|--------|-----------|--------|-----------|--------|--------------|
| 3NH7   | H_ARG_38  | NH1    | H_ASP_90  | OD1    | 3.170        |
| 3NH7   | H_ARG_38  | NH2    | H_GLU_46  | OE1    | 2.648        |
| 3NH7   | H_ARG_38  | NH2    | H_GLU_46  | OE2    | 3.155        |
| 3NH7   | H_LYS_65  | NZ     | H_ASP_62  | OD1    | 3.429        |
| 3NH7   | H_ARG_67  | NH1    | H_ASP_90  | OD1    | 3.942        |
| 3NH7   | H_ARG_67  | NH1    | H_ASP_90  | OD2    | 3.259        |
| 3NH7   | H_ARG_67  | NH2    | H_ASP_90  | OD1    | 3.009        |
| 3NH7   | H_ARG_67  | NH2    | H_ASP_90  | OD2    | 3.648        |
| 3NH7   | H_ARG_98  | NH1    | H_ASP_108 | OD1    | 3.173        |
| 3NH7   | H_ARG_98  | NH1    | H_ASP_108 | OD2    | 2.691        |
| 3NH7   | H_ARG_98  | NH1    | A_ASP_67  | OD2    | 3.819        |
| 3NH7   | H_ARG_98  | NH2    | A_ASP_67  | OD1    | 2.850        |
| 3NH7   | H_ARG_98  | NH2    | A_ASP_67  | OD2    | 2.389        |
| 3NH7   | H_ARG_100 | NH2    | A_GLU_64  | OE2    | 3.004        |
| 3NH7   | H_HIS_102 | ND1    | A_GLU_64  | OE1    | 2.378        |
| 3NH7   | H_ARG_104 | NH2    | A_GLU_81  | OE1    | 3.515        |
| 3NH7   | H_ARG_104 | NH2    | A_GLU_81  | OE2    | 2.462        |
| 3NH7   | H_HIS_109 | ND1    | H_ASP_108 | OD1    | 3.252        |
| 3NH7   | H_HIS_109 | ND1    | H_ASP_108 | OD2    | 3.832        |
| 3NH7   | H_LYS_216 | NZ     | L_GLU_125 | OE2    | 3.557        |
| 3NH7   | H_LYS_217 | NZ     | H_GLU_219 | OE2    | 2.342        |
| 3NH7   | L_ARG_60  | NH1    | L_ASP_81  | OD1    | 2.484        |
| 3NH7   | L_ARG_60  | NH1    | L_ASP_81  | OD2    | 2.037        |
| 3NH7   | L_ARG_60  | NH2    | L_GLU_80  | OE2    | 3.016        |
| 3NH7   | L_ARG_60  | NH2    | L_ASP_81  | OD1    | 3.954        |
| 3NH7   | L_LYS_112 | NZ     | L_GLU_200 | OE1    | 3.379        |
| 3NH7   | L_HIS_190 | ND1    | L_ASP_153 | OD2    | 3.719        |
| 3NH7   | A_LYS_79  | NZ     | L_ASP_50  | OD1    | 3.333        |
| 3NH7   | A_LYS_79  | NZ     | L_ASP_50  | OD2    | 3.058        |
| 3NH7   | A_LYS_92  | NZ     | H_GLU_99  | OE1    | 3.975        |
| 3NH7   | A_LYS_92  | NZ     | H_GLU_99  | OE2    | 3.561        |
| 3NH7   | A_ARG_96  | NH1    | A_GLU_65  | OE1    | 3.606        |
| 3NH7   | A_ARG_96  | NH1    | A_GLU_65  | OE2    | 2.868        |
| 3NH7   | I_ARG_38  | NH1    | I_ASP_90  | OD1    | 2.985        |
| 3NH7   | I_ARG_38  | NH2    | I_GLU_46  | OE1    | 2.998        |
| 3NH7   | I_ARG_38  | NH2    | I_GLU_46  | OE2    | 3.375        |
| 3NH7   | I_LYS_65  | NZ     | I_ASP_62  | OD1    | 3.472        |
| 3NH7   | I_ARG_67  | NH1    | I_ASP_90  | OD1    | 3.848        |
| 3NH7   | I_ARG_67  | NH1    | I_ASP_90  | OD2    | 2.660        |
| 3NH7   | I_ARG_67  | NH2    | I_ASP_90  | OD1    | 2.985        |
| 3NH7   | I_ARG_67  | NH2    | I_ASP_90  | OD2    | 3.250        |
| 3NH7   | I_ARG_98  | NH1    | I_ASP_108 | OD1    | 3.301        |
| 3NH7   | I_ARG_98  | NH1    | I_ASP_108 | OD2    | 2.609        |
| 3NH7   | I_ARG_98  | NH1    | B_ASP_67  | OD2    | 3.924        |
| 3NH7   | I_ARG_98  | NH2    | B_ASP_67  | OD1    | 3.388        |
| 3NH7   | I_ARG_98  | NH2    | B_ASP_67  | OD2    | 2.296        |
| 3NH7   | I_ARG_100 | NH2    | B_GLU_64  | OE2    | 2.996        |
| 3NH7   | I_HIS_102 | ND1    | B_GLU_64  | OE1    | 2.707        |
| 3NH7   | I_ARG_104 | NH2    | B_GLU_81  | OE1    | 3.637        |
| 3NH7   | I_ARG_104 | NH2    | B_GLU_81  | OE2    | 2.502        |
| 3NH7   | I_HIS_109 | ND1    | I_ASP_108 | OD1    | 3.553        |
| 3NH7   | I_HIS_109 | ND1    | I_ASP_108 | OD2    | 3.821        |
| 3NH7   | I_LYS_216 | NZ     | M_GLU_125 | OE1    | 3.301        |
| 3NH7   | I_LYS_216 | NZ     | M_GLU_125 | OE2    | 3.320        |
| 3NH7   | I_LYS_217 | NZ     | I_GLU_219 | OE2    | 3.028        |
| 3NH7   | M_ARG_60  | NH1    | M_ASP_81  | OD1    | 2.461        |
| 3NH7   | M_ARG_60  | NH1    | M_ASP_81  | OD2    | 1.882        |

|      |           |     |           |     |       |
|------|-----------|-----|-----------|-----|-------|
| 3NH7 | M_ARG_60  | NH2 | M_GLU_80  | OE2 | 3.159 |
| 3NH7 | M_ARG_60  | NH2 | M_ASP_81  | OD1 | 3.816 |
| 3NH7 | M_LYS_112 | NZ  | M_GLU_200 | OE1 | 3.202 |
| 3NH7 | M_HIS_190 | ND1 | M_ASP_153 | OD2 | 3.749 |
| 3NH7 | B_LYS_79  | NZ  | M_ASP_50  | OD1 | 3.625 |
| 3NH7 | B_LYS_79  | NZ  | M_ASP_50  | OD2 | 2.953 |
| 3NH7 | B_LYS_92  | NZ  | I_GLU_99  | OE1 | 3.831 |
| 3NH7 | B_LYS_92  | NZ  | I_GLU_99  | OE2 | 3.683 |
| 3NH7 | B_ARG_96  | NH1 | B_GLU_65  | OE1 | 3.695 |
| 3NH7 | B_ARG_96  | NH1 | B_GLU_65  | OE2 | 2.714 |
| 3NH7 | J_ARG_38  | NH1 | J_ASP_90  | OD1 | 2.984 |
| 3NH7 | J_ARG_38  | NH2 | J_GLU_46  | OE1 | 2.989 |
| 3NH7 | J_ARG_38  | NH2 | J_GLU_46  | OE2 | 3.443 |
| 3NH7 | J_LYS_65  | NZ  | J_ASP_62  | OD1 | 3.599 |
| 3NH7 | J_ARG_67  | NH1 | J_ASP_90  | OD1 | 3.748 |
| 3NH7 | J_ARG_67  | NH1 | J_ASP_90  | OD2 | 2.498 |
| 3NH7 | J_ARG_67  | NH2 | J_ASP_90  | OD1 | 3.051 |
| 3NH7 | J_ARG_67  | NH2 | J_ASP_90  | OD2 | 3.237 |
| 3NH7 | J_ARG_98  | NH1 | J_ASP_108 | OD1 | 3.197 |
| 3NH7 | J_ARG_98  | NH1 | J_ASP_108 | OD2 | 2.669 |
| 3NH7 | J_ARG_98  | NH1 | C_ASP_67  | OD2 | 3.893 |
| 3NH7 | J_ARG_98  | NH2 | C_ASP_67  | OD1 | 3.313 |
| 3NH7 | J_ARG_98  | NH2 | C_ASP_67  | OD2 | 2.401 |
| 3NH7 | J_ARG_100 | NH2 | C_GLU_64  | OE2 | 3.173 |
| 3NH7 | J_HIS_102 | ND1 | C_GLU_64  | OE1 | 2.668 |
| 3NH7 | J_ARG_104 | NH2 | C_GLU_81  | OE1 | 3.595 |
| 3NH7 | J_ARG_104 | NH2 | C_GLU_81  | OE2 | 2.634 |
| 3NH7 | J_HIS_109 | ND1 | J_ASP_108 | OD1 | 3.604 |
| 3NH7 | J_HIS_109 | ND1 | J_ASP_108 | OD2 | 3.993 |
| 3NH7 | J_LYS_216 | NZ  | N_GLU_125 | OE1 | 2.816 |
| 3NH7 | J_LYS_216 | NZ  | N_GLU_125 | OE2 | 3.044 |
| 3NH7 | J_LYS_217 | NZ  | J_GLU_219 | OE2 | 3.134 |
| 3NH7 | N_ARG_60  | NH1 | N_ASP_81  | OD1 | 2.494 |
| 3NH7 | N_ARG_60  | NH1 | N_ASP_81  | OD2 | 2.049 |
| 3NH7 | N_ARG_60  | NH2 | N_GLU_80  | OE2 | 3.067 |
| 3NH7 | N_ARG_60  | NH2 | N_ASP_81  | OD1 | 3.767 |
| 3NH7 | N_LYS_112 | NZ  | N_GLU_200 | OE1 | 3.295 |
| 3NH7 | N_HIS_190 | ND1 | N_ASP_153 | OD2 | 3.738 |
| 3NH7 | C_LYS_79  | NZ  | N_ASP_50  | OD1 | 3.064 |
| 3NH7 | C_LYS_79  | NZ  | N_ASP_50  | OD2 | 3.315 |
| 3NH7 | C_LYS_92  | NZ  | J_GLU_99  | OE1 | 3.721 |
| 3NH7 | C_LYS_92  | NZ  | J_GLU_99  | OE2 | 3.806 |
| 3NH7 | C_ARG_96  | NH1 | C_GLU_65  | OE1 | 3.714 |
| 3NH7 | C_ARG_96  | NH1 | C_GLU_65  | OE2 | 2.792 |
| 3NH7 | K_ARG_38  | NH1 | K_ASP_90  | OD1 | 2.979 |
| 3NH7 | K_ARG_38  | NH2 | K_GLU_46  | OE1 | 2.902 |
| 3NH7 | K_ARG_38  | NH2 | K_GLU_46  | OE2 | 3.544 |
| 3NH7 | K_LYS_65  | NZ  | K_ASP_62  | OD1 | 3.572 |
| 3NH7 | K_ARG_67  | NH1 | K_ASP_90  | OD1 | 3.729 |
| 3NH7 | K_ARG_67  | NH1 | K_ASP_90  | OD2 | 2.672 |
| 3NH7 | K_ARG_67  | NH2 | K_ASP_90  | OD1 | 2.973 |
| 3NH7 | K_ARG_67  | NH2 | K_ASP_90  | OD2 | 3.433 |
| 3NH7 | K_ARG_98  | NH1 | K_ASP_108 | OD1 | 3.399 |
| 3NH7 | K_ARG_98  | NH1 | K_ASP_108 | OD2 | 2.677 |
| 3NH7 | K_ARG_98  | NH1 | D_ASP_67  | OD2 | 3.348 |
| 3NH7 | K_ARG_98  | NH2 | D_ASP_67  | OD1 | 3.350 |
| 3NH7 | K_ARG_98  | NH2 | D_ASP_67  | OD2 | 2.647 |
| 3NH7 | K_ARG_100 | NH2 | D_GLU_64  | OE2 | 3.101 |



|      |           |     |           |     |       |
|------|-----------|-----|-----------|-----|-------|
| 3NH7 | K_HIS_102 | ND1 | D_GLU_64  | OE1 | 2.313 |
| 3NH7 | K_ARG_104 | NH2 | D_GLU_81  | OE1 | 3.830 |
| 3NH7 | K_ARG_104 | NH2 | D_GLU_81  | OE2 | 2.800 |
| 3NH7 | K_HIS_109 | ND1 | K_ASP_108 | OD1 | 3.611 |
| 3NH7 | K_HIS_109 | ND1 | K_ASP_108 | OD2 | 3.969 |
| 3NH7 | K_LYS_216 | NZ  | O_GLU_125 | OE1 | 3.159 |
| 3NH7 | K_LYS_216 | NZ  | O_GLU_125 | OE2 | 3.376 |
| 3NH7 | K_LYS_217 | NZ  | K_GLU_219 | OE2 | 3.149 |
| 3NH7 | O_ARG_60  | NH1 | O_ASP_81  | OD1 | 2.503 |
| 3NH7 | O_ARG_60  | NH1 | O_ASP_81  | OD2 | 2.023 |
| 3NH7 | O_ARG_60  | NH2 | O_GLU_80  | OE2 | 3.060 |
| 3NH7 | O_LYS_112 | NZ  | O_GLU_200 | OE1 | 3.202 |
| 3NH7 | O_HIS_190 | ND1 | O_ASP_153 | OD2 | 3.736 |
| 3NH7 | D_LYS_79  | NZ  | O_ASP_50  | OD1 | 3.661 |
| 3NH7 | D_LYS_79  | NZ  | O_ASP_50  | OD2 | 3.355 |
| 3NH7 | D_LYS_92  | NZ  | K_GLU_99  | OE1 | 3.766 |
| 3NH7 | D_LYS_92  | NZ  | K_GLU_99  | OE2 | 3.832 |
| 3NH7 | D_ARG_96  | NH1 | D_GLU_65  | OE1 | 3.668 |
| 3NH7 | D_ARG_96  | NH1 | D_GLU_65  | OE2 | 2.730 |

Table 446: 3NH7-specific salt bridging networks analysis. In this table, a PDB file is specified with a four-letter PDB ID, except that the names of the PDB files corresponding to the single NMR structural model split from the NMR ensemble is specified with a four-letter PDB ID in addition to a hyphen followed by the single NMR structural model numeric ID, the residue naming scheme is **Chain ID\_residue name\_residue number**,  $\angle ADH$  represents the angle formed by acceptor (A), donor (D) and hydrogen (H) ( $\angle ADH$ ).

| PDB ID | Residue A | Atom A | Residue B | Atom B | Distance (Å) |
|--------|-----------|--------|-----------|--------|--------------|
| 3NZ8   | A_LYS_62  | NZ     | A_GLU_46  | OE2    | 3.140        |
| 3NZ8   | A_LYS_64  | NZ     | A_GLU_61  | OE2    | 2.792        |
| 3NZ8   | A_ARG_94  | NH2    | A_ASP_101 | OD1    | 3.538        |
| 3NZ8   | A_ARG_94  | NH2    | A_ASP_101 | OD2    | 2.636        |
| 3NZ8   | A_HIS_164 | NE2    | B_ASP_167 | OD1    | 3.115        |
| 3NZ8   | A_LYS_208 | NZ     | B_GLU_123 | OE2    | 3.283        |
| 3NZ8   | B_ARG_24  | NH2    | B_ASP_70  | OD1    | 3.560        |
| 3NZ8   | B_LYS_39  | NZ     | B_GLU_81  | OE1    | 3.652        |
| 3NZ8   | B_ARG_61  | NH1    | B_ASP_82  | OD1    | 3.498        |
| 3NZ8   | B_ARG_61  | NH1    | B_ASP_82  | OD2    | 3.472        |
| 3NZ8   | B_ARG_61  | NH2    | B_GLU_79  | OE1    | 3.670        |
| 3NZ8   | B_ARG_61  | NH2    | B_ASP_82  | OD1    | 3.552        |
| 3NZ8   | B_ARG_61  | NH2    | B_ASP_82  | OD2    | 2.363        |
| 3NZ8   | B_HIS_189 | ND1    | B_ASP_151 | OD2    | 2.708        |
| 3NZ8   | B_LYS_199 | NZ     | B_ASP_110 | OD2    | 2.820        |
| 3NZ8   | H_LYS_62  | NZ     | H_GLU_46  | OE1    | 3.871        |
| 3NZ8   | H_LYS_62  | NZ     | H_GLU_46  | OE2    | 3.041        |
| 3NZ8   | H_LYS_64  | NZ     | H_GLU_61  | OE1    | 2.981        |
| 3NZ8   | H_ARG_94  | NH2    | H_ASP_101 | OD1    | 2.752        |
| 3NZ8   | H_ARG_94  | NH2    | H_ASP_101 | OD2    | 3.572        |
| 3NZ8   | H_LYS_208 | NZ     | L_GLU_123 | OE2    | 3.808        |
| 3NZ8   | L_ARG_61  | NH1    | L_GLU_79  | OE1    | 3.401        |
| 3NZ8   | L_ARG_61  | NH2    | L_GLU_79  | OE1    | 3.938        |
| 3NZ8   | L_ARG_61  | NH2    | L_ASP_82  | OD1    | 2.739        |
| 3NZ8   | L_ARG_61  | NH2    | L_ASP_82  | OD2    | 2.929        |
| 3NZ8   | L_LYS_103 | NZ     | L_ASP_165 | OD1    | 2.546        |
| 3NZ8   | L_LYS_147 | NZ     | L_GLU_154 | OE2    | 3.916        |
| 3NZ8   | L_LYS_149 | NZ     | L_GLU_195 | OE2    | 3.208        |
| 3NZ8   | L_ARG_155 | NH1    | L_GLU_185 | OE1    | 3.404        |
| 3NZ8   | L_ARG_155 | NH2    | L_GLU_185 | OE1    | 2.909        |
| 3NZ8   | L_ARG_155 | NH2    | L_GLU_185 | OE2    | 2.942        |
| 3NZ8   | L_LYS_183 | NZ     | L_GLU_187 | OE1    | 3.631        |
| 3NZ8   | L_LYS_183 | NZ     | L_GLU_187 | OE2    | 3.993        |
| 3NZ8   | L_HIS_189 | ND1    | L_ASP_151 | OD2    | 2.961        |
| 3NZ8   | L_HIS_189 | NE2    | L_GLU_185 | OE2    | 3.576        |

Table 447: 3NZ8-specific salt bridging networks analysis. In this table, a PDB file is specified with a four-letter PDB ID, except that the names of the PDB files corresponding to the single NMR structural model split from the NMR ensemble is specified with a four-letter PDB ID in addition to a hyphen followed by the single NMR structural model numeric ID, the residue naming scheme is **Chain ID\_residue name\_residue number**,  $\angle ADH$  represents the angle formed by acceptor (A), donor (D) and hydrogen (H) ( $\angle ADH$ ).

| PDB ID | Residue A | Atom A | Residue B | Atom B | Distance (Å) |
|--------|-----------|--------|-----------|--------|--------------|
| 3O2D   | L_ARG_61  | NH1    | L_GLU_81  | OE2    | 3.060        |
| 3O2D   | L_ARG_61  | NH1    | L_ASP_82  | OD1    | 2.620        |
| 3O2D   | L_ARG_61  | NH1    | L_ASP_82  | OD2    | 3.291        |
| 3O2D   | L_ARG_61  | NH2    | L_GLU_81  | OE2    | 3.508        |
| 3O2D   | L_ARG_95  | NH1    | H_GLU_95  | OE2    | 2.847        |
| 3O2D   | L_ARG_95  | NH2    | H_GLU_95  | OE2    | 3.717        |
| 3O2D   | L_LYS_102 | NZ     | L_GLU_164 | OE1    | 3.911        |
| 3O2D   | L_LYS_148 | NZ     | L_GLU_194 | OE1    | 2.853        |
| 3O2D   | L_HIS_188 | ND1    | L_ASP_150 | OD2    | 3.198        |
| 3O2D   | L_HIS_188 | NE2    | L_ASP_184 | OD1    | 3.050        |
| 3O2D   | L_ARG_210 | NH2    | L_GLU_186 | OE1    | 3.119        |
| 3O2D   | H_HIS_35  | NE2    | H_GLU_95  | OE2    | 2.861        |
| 3O2D   | H_ARG_38  | NH2    | H_ASP_46  | OD2    | 3.124        |
| 3O2D   | H_LYS_66  | NZ     | H_ASP_86  | OD1    | 2.870        |
| 3O2D   | H_LYS_66  | NZ     | H_ASP_86  | OD2    | 2.859        |
| 3O2D   | H_ARG_83  | NH1    | H_GLU_85  | OE2    | 3.005        |
| 3O2D   | H_ARG_83  | NH2    | H_ASP_86  | OD1    | 3.533        |
| 3O2D   | H_LYS_143 | NZ     | H_ASP_144 | OD1    | 3.677        |
| 3O2D   | H_LYS_209 | NZ     | L_GLU_122 | OE1    | 2.503        |
| 3O2D   | H_LYS_209 | NZ     | L_GLU_122 | OE2    | 3.547        |
| 3O2D   | H_ARG_210 | NH1    | H_GLU_212 | OE2    | 3.400        |
| 3O2D   | A_LYS_8   | NZ     | A_GLU_119 | OE1    | 3.898        |
| 3O2D   | A_LYS_8   | NZ     | A_GLU_119 | OE2    | 2.918        |
| 3O2D   | A_HIS_27  | NE2    | A_GLU_85  | OE1    | 3.858        |
| 3O2D   | A_LYS_29  | NZ     | A_GLU_85  | OE1    | 3.824        |
| 3O2D   | A_ARG_54  | NH1    | A_ASP_78  | OD1    | 3.603        |
| 3O2D   | A_ARG_54  | NH1    | A_ASP_78  | OD2    | 2.872        |
| 3O2D   | A_ARG_54  | NH2    | A_ASP_78  | OD1    | 3.001        |
| 3O2D   | A_ARG_54  | NH2    | A_ASP_78  | OD2    | 3.706        |
| 3O2D   | A_LYS_90  | NZ     | A_GLU_92  | OE1    | 3.860        |
| 3O2D   | A_ARG_134 | NH1    | A_GLU_150 | OE1    | 3.461        |
| 3O2D   | A_LYS_171 | NZ     | A_GLU_169 | OE1    | 3.959        |

Table 448: 3O2D-specific salt bridging networks analysis. In this table, a PDB file is specified with a four-letter PDB ID, except that the names of the PDB files corresponding to the single NMR structural model split from the NMR ensemble is specified with a four-letter PDB ID in addition to a hyphen followed by the single NMR structural model numeric ID, the residue naming scheme is **Chain ID\_residue name\_residue number**,  $\angle ADH$  represents the angle formed by acceptor (A), donor (D) and hydrogen (H) ( $\angle ADH$ ).

| PDB ID | Residue A | Atom A | Residue B | Atom B | Distance (Å) |
|--------|-----------|--------|-----------|--------|--------------|
| 3O41   | L_LYS_39  | NZ     | L_GLU_81  | OE1    | 3.974        |
| 3O41   | L_ARG_61  | NH1    | L_GLU_79  | OE1    | 3.261        |
| 3O41   | L_ARG_61  | NH1    | L_GLU_79  | OE2    | 3.697        |
| 3O41   | L_ARG_61  | NH1    | L_GLU_81  | OE2    | 3.860        |
| 3O41   | L_ARG_61  | NH2    | L_GLU_79  | OE2    | 3.810        |
| 3O41   | L_ARG_61  | NH2    | L_GLU_81  | OE2    | 2.759        |
| 3O41   | L_ARG_61  | NH2    | L_ASP_82  | OD1    | 2.918        |
| 3O41   | L_ARG_61  | NH2    | L_ASP_82  | OD2    | 3.904        |
| 3O41   | L_LYS_149 | NZ     | L_GLU_195 | OE1    | 2.951        |
| 3O41   | L_LYS_149 | NZ     | L_GLU_195 | OE2    | 3.097        |
| 3O41   | L_ARG_155 | NH2    | L_GLU_185 | OE2    | 3.569        |
| 3O41   | L_HIS_189 | ND1    | L_ASP_151 | OD2    | 3.090        |
| 3O41   | L_LYS_199 | NZ     | L_ASP_110 | OD2    | 3.725        |
| 3O41   | H_ARG_38  | NH1    | H_ASP_86  | OD1    | 2.779        |
| 3O41   | H_ARG_38  | NH2    | H_GLU_46  | OE1    | 3.126        |
| 3O41   | H_ARG_38  | NH2    | H_ASP_86  | OD1    | 3.703        |
| 3O41   | H_LYS_57  | NZ     | H_ASP_55  | OD1    | 3.135        |
| 3O41   | H_LYS_57  | NZ     | H_ASP_55  | OD2    | 3.981        |
| 3O41   | H_ARG_58  | NH1    | H_ASP_56  | OD1    | 2.885        |
| 3O41   | H_ARG_58  | NH1    | H_ASP_56  | OD2    | 2.978        |
| 3O41   | H_ARG_58  | NH2    | H_ASP_56  | OD2    | 2.836        |
| 3O41   | H_ARG_66  | NH1    | H_ASP_86  | OD1    | 3.749        |
| 3O41   | H_ARG_66  | NH1    | H_ASP_86  | OD2    | 2.911        |
| 3O41   | H_ARG_66  | NH2    | H_ASP_86  | OD1    | 2.994        |
| 3O41   | H_ARG_66  | NH2    | H_ASP_86  | OD2    | 3.466        |
| 3O41   | H_ARG_94  | NH1    | A_GLU_191 | OE1    | 2.970        |
| 3O41   | H_ARG_94  | NH1    | A_GLU_191 | OE2    | 3.394        |
| 3O41   | H_ARG_94  | NH2    | A_GLU_191 | OE1    | 3.744        |
| 3O41   | H_ARG_94  | NH2    | A_GLU_191 | OE2    | 2.660        |
| 3O41   | H_LYS_208 | NZ     | L_GLU_123 | OE2    | 3.054        |
| 3O41   | A_ARG_38  | NH1    | A_ASP_86  | OD1    | 2.874        |
| 3O41   | A_ARG_38  | NH2    | A_GLU_46  | OE1    | 2.942        |
| 3O41   | A_ARG_38  | NH2    | A_ASP_86  | OD1    | 3.757        |
| 3O41   | A_LYS_57  | NZ     | A_ASP_55  | OD1    | 3.432        |
| 3O41   | A_LYS_57  | NZ     | A_ASP_55  | OD2    | 3.491        |
| 3O41   | A_ARG_58  | NH1    | A_ASP_56  | OD1    | 2.791        |
| 3O41   | A_ARG_58  | NH1    | A_ASP_56  | OD2    | 3.222        |
| 3O41   | A_ARG_58  | NH2    | A_ASP_56  | OD1    | 3.748        |
| 3O41   | A_ARG_58  | NH2    | A_ASP_56  | OD2    | 2.672        |
| 3O41   | A_ARG_66  | NH1    | A_ASP_86  | OD1    | 3.581        |
| 3O41   | A_ARG_66  | NH1    | A_ASP_86  | OD2    | 2.922        |
| 3O41   | A_ARG_66  | NH2    | A_ASP_86  | OD1    | 2.880        |
| 3O41   | A_ARG_66  | NH2    | A_ASP_86  | OD2    | 3.514        |
| 3O41   | A_ARG_75  | NH1    | A_ASP_72  | OD2    | 2.827        |
| 3O41   | A_LYS_208 | NZ     | B_GLU_123 | OE2    | 2.651        |
| 3O41   | B_ARG_24  | NH1    | B_ASP_70  | OD1    | 3.055        |
| 3O41   | B_ARG_24  | NH1    | B_ASP_70  | OD2    | 2.756        |
| 3O41   | B_LYS_39  | NZ     | B_GLU_81  | OE1    | 3.471        |
| 3O41   | B_ARG_61  | NH1    | B_GLU_79  | OE1    | 3.277        |
| 3O41   | B_ARG_61  | NH1    | B_GLU_79  | OE2    | 3.207        |
| 3O41   | B_ARG_61  | NH2    | B_GLU_79  | OE2    | 3.637        |
| 3O41   | B_ARG_61  | NH2    | B_GLU_81  | OE2    | 3.110        |
| 3O41   | B_ARG_61  | NH2    | B_ASP_82  | OD1    | 2.801        |
| 3O41   | B_ARG_61  | NH2    | B_ASP_82  | OD2    | 3.822        |
| 3O41   | B_LYS_149 | NZ     | B_GLU_195 | OE2    | 3.553        |
| 3O41   | B_ARG_155 | NH2    | B_GLU_185 | OE1    | 3.463        |
| 3O41   | B_ARG_155 | NH2    | B_GLU_185 | OE2    | 2.863        |

|      |           |     |           |     |       |
|------|-----------|-----|-----------|-----|-------|
| 3O41 | B_HIS_189 | ND1 | B_ASP_151 | OD2 | 3.087 |
| 3O41 | B_LYS_199 | NZ  | B_ASP_110 | OD2 | 3.995 |
| 3O41 | P_LYS_433 | NZ  | H_ASP_54  | OD1 | 3.659 |
| 3O41 | P_LYS_433 | NZ  | H_ASP_54  | OD2 | 2.887 |
| 3O41 | P_LYS_433 | NZ  | H_ASP_56  | OD2 | 2.760 |
| 3O41 | C_LYS_433 | NZ  | A_ASP_54  | OD1 | 3.503 |
| 3O41 | C_LYS_433 | NZ  | A_ASP_54  | OD2 | 2.671 |
| 3O41 | C_LYS_433 | NZ  | A_ASP_56  | OD2 | 2.936 |

Table 449: 3O41-specific salt bridging networks analysis. In this table, a PDB file is specified with a four-letter PDB ID, except that the names of the PDB files corresponding to the single NMR structural model split from the NMR ensemble is specified with a four-letter PDB ID in addition to a hyphen followed by the single NMR structural model numeric ID, the residue naming scheme is **Chain ID\_residue name\_residue number**,  $\angle ADH$  represents the angle formed by acceptor (A), donor (D) and hydrogen (H) ( $\angle ADH$ ).

| PDB ID | Residue A | Atom A | Residue B | Atom B | Distance (Å) |
|--------|-----------|--------|-----------|--------|--------------|
| 3O45   | L_LYS_39  | NZ     | L_GLU_81  | OE1    | 3.955        |
| 3O45   | L_ARG_61  | NH1    | L_GLU_79  | OE1    | 3.563        |
| 3O45   | L_ARG_61  | NH1    | L_GLU_79  | OE2    | 3.651        |
| 3O45   | L_ARG_61  | NH2    | L_GLU_79  | OE2    | 3.980        |
| 3O45   | L_ARG_61  | NH2    | L_GLU_81  | OE2    | 2.981        |
| 3O45   | L_ARG_61  | NH2    | L_ASP_82  | OD1    | 2.891        |
| 3O45   | L_LYS_149 | NZ     | L_GLU_195 | OE1    | 3.064        |
| 3O45   | L_LYS_149 | NZ     | L_GLU_195 | OE2    | 2.826        |
| 3O45   | L_ARG_155 | NH2    | L_GLU_185 | OE2    | 2.881        |
| 3O45   | L_HIS_189 | ND1    | L_ASP_151 | OD2    | 3.388        |
| 3O45   | L_LYS_199 | NZ     | L_ASP_110 | OD2    | 3.915        |
| 3O45   | H_ARG_38  | NH1    | H_ASP_86  | OD1    | 2.834        |
| 3O45   | H_ARG_38  | NH2    | H_GLU_46  | OE1    | 3.512        |
| 3O45   | H_ARG_38  | NH2    | H_ASP_86  | OD1    | 3.614        |
| 3O45   | H_LYS_57  | NZ     | H_ASP_55  | OD1    | 2.960        |
| 3O45   | H_LYS_57  | NZ     | H_ASP_55  | OD2    | 3.684        |
| 3O45   | H_ARG_58  | NH1    | H_ASP_56  | OD1    | 2.872        |
| 3O45   | H_ARG_58  | NH1    | H_ASP_56  | OD2    | 2.820        |
| 3O45   | H_ARG_58  | NH2    | H_ASP_56  | OD2    | 3.333        |
| 3O45   | H_ARG_66  | NH1    | H_ASP_86  | OD2    | 2.963        |
| 3O45   | H_ARG_66  | NH2    | H_ASP_86  | OD1    | 3.158        |
| 3O45   | H_ARG_66  | NH2    | H_ASP_86  | OD2    | 3.218        |
| 3O45   | H_LYS_71  | NZ     | H_ASP_55  | OD1    | 3.837        |
| 3O45   | H_ARG_94  | NH1    | A_GLU_191 | OE1    | 3.085        |
| 3O45   | H_ARG_94  | NH1    | A_GLU_191 | OE2    | 3.621        |
| 3O45   | H_ARG_94  | NH2    | A_GLU_191 | OE1    | 3.709        |
| 3O45   | H_ARG_94  | NH2    | A_GLU_191 | OE2    | 2.802        |
| 3O45   | H_LYS_208 | NZ     | L_GLU_123 | OE2    | 3.033        |
| 3O45   | A_ARG_38  | NH1    | A_ASP_86  | OD1    | 2.784        |
| 3O45   | A_ARG_38  | NH2    | A_GLU_46  | OE1    | 3.151        |
| 3O45   | A_ARG_38  | NH2    | A_ASP_86  | OD1    | 3.920        |
| 3O45   | A_LYS_57  | NZ     | A_ASP_55  | OD1    | 3.779        |
| 3O45   | A_LYS_57  | NZ     | A_ASP_55  | OD2    | 3.231        |
| 3O45   | A_ARG_58  | NH1    | A_ASP_56  | OD1    | 2.824        |
| 3O45   | A_ARG_58  | NH1    | A_ASP_56  | OD2    | 3.062        |
| 3O45   | A_ARG_58  | NH2    | A_ASP_56  | OD2    | 2.817        |
| 3O45   | A_ARG_66  | NH1    | A_ASP_86  | OD2    | 2.985        |
| 3O45   | A_ARG_66  | NH2    | A_ASP_86  | OD1    | 2.861        |
| 3O45   | A_ARG_66  | NH2    | A_ASP_86  | OD2    | 3.279        |
| 3O45   | A_LYS_71  | NZ     | A_ASP_55  | OD1    | 3.913        |
| 3O45   | A_ARG_75  | NH1    | A_ASP_72  | OD2    | 3.016        |
| 3O45   | A_LYS_208 | NZ     | B_GLU_123 | OE2    | 2.878        |
| 3O45   | B_ARG_24  | NH1    | B_ASP_70  | OD1    | 2.848        |
| 3O45   | B_ARG_24  | NH1    | B_ASP_70  | OD2    | 2.930        |
| 3O45   | B_LYS_39  | NZ     | B_GLU_81  | OE1    | 3.627        |
| 3O45   | B_ARG_61  | NH1    | B_GLU_79  | OE1    | 3.550        |
| 3O45   | B_ARG_61  | NH1    | B_GLU_79  | OE2    | 3.481        |
| 3O45   | B_ARG_61  | NH2    | B_GLU_79  | OE2    | 3.674        |
| 3O45   | B_ARG_61  | NH2    | B_GLU_81  | OE2    | 3.283        |
| 3O45   | B_ARG_61  | NH2    | B_ASP_82  | OD1    | 2.929        |
| 3O45   | B_ARG_61  | NH2    | B_ASP_82  | OD2    | 3.946        |
| 3O45   | B_LYS_149 | NZ     | B_GLU_195 | OE2    | 3.399        |
| 3O45   | B_ARG_155 | NH2    | B_GLU_185 | OE1    | 3.860        |
| 3O45   | B_ARG_155 | NH2    | B_GLU_185 | OE2    | 2.997        |
| 3O45   | B_HIS_189 | ND1    | B_ASP_151 | OD2    | 3.113        |
| 3O45   | B_LYS_199 | NZ     | B_ASP_110 | OD2    | 3.896        |
| 3O45   | P_LYS_433 | NZ     | H_ASP_54  | OD1    | 3.518        |

|      |           |    |          |     |       |
|------|-----------|----|----------|-----|-------|
| 3O45 | P_LYS_433 | NZ | H_ASP_54 | OD2 | 2.818 |
| 3O45 | P_LYS_433 | NZ | H_ASP_56 | OD2 | 2.927 |
| 3O45 | C_LYS_433 | NZ | A_ASP_54 | OD1 | 3.297 |
| 3O45 | C_LYS_433 | NZ | A_ASP_54 | OD2 | 2.723 |
| 3O45 | C_LYS_433 | NZ | A_ASP_56 | OD2 | 2.899 |

Table 450: 3O45-specific salt bridging networks analysis. In this table, a PDB file is specified with a four-letter PDB ID, except that the names of the PDB files corresponding to the single NMR structural model split from the NMR ensemble is specified with a four-letter PDB ID in addition to a hyphen followed by the single NMR structural model numeric ID, the residue naming scheme is **Chain ID\_residue name\_residue number**,  $\angle ADH$  represents the angle formed by acceptor (A), donor (D) and hydrogen (H) ( $\angle ADH$ ).

| PDB ID | Residue A | Atom A | Residue B | Atom B | Distance (Å) |
|--------|-----------|--------|-----------|--------|--------------|
| 3OJD   | A_ARG_61  | NH2    | A_GLU_81  | OE1    | 3.519        |
| 3OJD   | A_ARG_61  | NH2    | A_ASP_82  | OD1    | 2.711        |
| 3OJD   | A_ARG_61  | NH2    | A_ASP_82  | OD2    | 3.501        |
| 3OJD   | A_LYS_149 | NZ     | A_GLU_195 | OE1    | 3.123        |
| 3OJD   | A_LYS_149 | NZ     | A_GLU_195 | OE2    | 3.726        |
| 3OJD   | A_ARG_155 | NH2    | A_GLU_185 | OE2    | 2.919        |
| 3OJD   | A_LYS_183 | NZ     | A_GLU_187 | OE2    | 3.320        |
| 3OJD   | A_HIS_189 | ND1    | A_ASP_151 | OD2    | 2.920        |
| 3OJD   | A_HIS_189 | NE2    | A_GLU_185 | OE1    | 3.630        |
| 3OJD   | B_LYS_13  | NZ     | B_GLU_16  | OE2    | 2.846        |
| 3OJD   | B_LYS_64  | NZ     | B_ASP_61  | OD1    | 3.166        |
| 3OJD   | B_ARG_66  | NH1    | B_ASP_86  | OD1    | 3.558        |
| 3OJD   | B_ARG_66  | NH1    | B_ASP_86  | OD2    | 2.686        |
| 3OJD   | B_ARG_66  | NH2    | B_ASP_86  | OD1    | 2.934        |
| 3OJD   | B_ARG_66  | NH2    | B_ASP_86  | OD2    | 3.558        |
| 3OJD   | B_LYS_83  | NZ     | B_GLU_85  | OE1    | 3.736        |
| 3OJD   | B_LYS_83  | NZ     | B_GLU_85  | OE2    | 2.635        |
| 3OJD   | B_ARG_94  | NH2    | B_ASP_101 | OD1    | 2.661        |
| 3OJD   | B_ARG_94  | NH2    | B_ASP_101 | OD2    | 3.562        |
| 3OJD   | B_LYS_205 | NZ     | B_ASP_207 | OD1    | 3.219        |
| 3OJD   | B_LYS_205 | NZ     | B_ASP_207 | OD2    | 3.147        |
| 3OJD   | B_LYS_208 | NZ     | A_GLU_123 | OE2    | 3.588        |
| 3OJD   | B_ARG_213 | NH1    | A_GLU_213 | OE2    | 3.118        |
| 3OJD   | B_ARG_213 | NH2    | A_GLU_213 | OE2    | 3.609        |

Table 451: 3OJD-specific salt bridging networks analysis. In this table, a PDB file is specified with a four-letter PDB ID, except that the names of the PDB files corresponding to the single NMR structural model split from the NMR ensemble is specified with a four-letter PDB ID in addition to a hyphen followed by the single NMR structural model numeric ID, the residue naming scheme is **Chain ID\_residue name\_residue number**,  $\angle ADH$  represents the angle formed by acceptor (A), donor (D) and hydrogen (H) ( $\angle ADH$ ).



| PDB ID | Residue A | Atom A | Residue B | Atom B | Distance (Å) |
|--------|-----------|--------|-----------|--------|--------------|
| 3P0V   | L_ARG_61  | NH2    | L_GLU_81  | OE2    | 3.980        |
| 3P0V   | L_ARG_61  | NH2    | L_ASP_82  | OD1    | 2.725        |
| 3P0V   | L_ARG_61  | NH2    | L_ASP_82  | OD2    | 3.097        |
| 3P0V   | L_LYS_103 | NZ     | L_GLU_165 | OE2    | 2.532        |
| 3P0V   | L_LYS_149 | NZ     | L_GLU_195 | OE1    | 3.890        |
| 3P0V   | L_LYS_149 | NZ     | L_GLU_195 | OE2    | 2.540        |
| 3P0V   | L_LYS_188 | NZ     | L_ASP_185 | OD1    | 3.371        |
| 3P0V   | H_HIS_35  | NE2    | H_GLU_50  | OE1    | 3.401        |
| 3P0V   | H_HIS_35  | NE2    | H_GLU_95  | OE2    | 3.628        |
| 3P0V   | H_ARG_38  | NH1    | H_ASP_86  | OD1    | 2.715        |
| 3P0V   | H_ARG_38  | NH2    | H_GLU_46  | OE1    | 3.599        |
| 3P0V   | H_ARG_38  | NH2    | H_ASP_86  | OD1    | 3.530        |
| 3P0V   | H_LYS_64  | NZ     | H_ASP_58  | OD1    | 3.681        |
| 3P0V   | H_ARG_66  | NH1    | H_ASP_86  | OD1    | 3.613        |
| 3P0V   | H_ARG_66  | NH1    | H_ASP_86  | OD2    | 3.306        |
| 3P0V   | H_ARG_66  | NH2    | H_ASP_86  | OD1    | 3.888        |
| 3P0V   | H_ARG_83  | NH1    | H_GLU_85  | OE2    | 3.227        |
| 3P0V   | H_ARG_94  | NH2    | H_ASP_32  | OD2    | 3.649        |
| 3P0V   | H_ARG_97  | NH1    | H_ASP_32  | OD1    | 3.877        |
| 3P0V   | H_ARG_97  | NH1    | H_ASP_32  | OD2    | 3.520        |
| 3P0V   | H_LYS_143 | NZ     | H_ASP_144 | OD2    | 3.455        |
| 3P0V   | M_ARG_24  | NH1    | M_ASP_70  | OD1    | 2.624        |
| 3P0V   | M_ARG_61  | NH2    | M_GLU_81  | OE2    | 3.977        |
| 3P0V   | M_ARG_61  | NH2    | M_ASP_82  | OD1    | 2.677        |
| 3P0V   | M_ARG_61  | NH2    | M_ASP_82  | OD2    | 3.250        |
| 3P0V   | M_LYS_103 | NZ     | M_GLU_165 | OE2    | 2.754        |
| 3P0V   | M_LYS_149 | NZ     | M_GLU_195 | OE2    | 2.947        |
| 3P0V   | M_LYS_188 | NZ     | M_ASP_185 | OD1    | 3.655        |
| 3P0V   | I_HIS_35  | NE2    | I_GLU_50  | OE1    | 3.344        |
| 3P0V   | I_HIS_35  | NE2    | I_GLU_95  | OE2    | 3.386        |
| 3P0V   | I_ARG_38  | NH1    | I_ASP_86  | OD1    | 2.831        |
| 3P0V   | I_ARG_38  | NH2    | I_GLU_46  | OE1    | 3.289        |
| 3P0V   | I_ARG_38  | NH2    | I_GLU_46  | OE2    | 3.805        |
| 3P0V   | I_ARG_38  | NH2    | I_ASP_86  | OD1    | 3.779        |
| 3P0V   | I_LYS_64  | NZ     | I_ASP_58  | OD1    | 3.535        |
| 3P0V   | I_ARG_66  | NH1    | I_ASP_86  | OD1    | 3.463        |
| 3P0V   | I_ARG_66  | NH1    | I_ASP_86  | OD2    | 3.181        |
| 3P0V   | I_ARG_66  | NH2    | I_ASP_86  | OD1    | 3.209        |
| 3P0V   | I_ARG_66  | NH2    | I_ASP_86  | OD2    | 3.655        |
| 3P0V   | I_ARG_83  | NH1    | I_GLU_85  | OE2    | 2.465        |
| 3P0V   | I_ARG_94  | NH2    | I_ASP_32  | OD1    | 3.895        |
| 3P0V   | I_ARG_94  | NH2    | I_ASP_32  | OD2    | 3.368        |
| 3P0V   | I_LYS_143 | NZ     | I_ASP_144 | OD2    | 3.595        |

Table 452: 3P0V-specific salt bridging networks analysis. In this table, a PDB file is specified with a four-letter PDB ID, except that the names of the PDB files corresponding to the single NMR structural model split from the NMR ensemble is specified with a four-letter PDB ID in addition to a hyphen followed by the single NMR structural model numeric ID, the residue naming scheme is **Chain ID\_residue name\_residue number**,  $\angle ADH$  represents the angle formed by acceptor (A), donor (D) and hydrogen (H) ( $\angle ADH$ ).

| PDB ID | Residue A | Atom A | Residue B | Atom B | Distance (Å) |
|--------|-----------|--------|-----------|--------|--------------|
| 3P0Y   | A_LYS_322 | NZ     | A_ASP_323 | OD1    | 3.929        |
| 3P0Y   | A_LYS_372 | NZ     | A_ASP_369 | OD1    | 3.817        |
| 3P0Y   | A_LYS_372 | NZ     | A_GLU_397 | OE2    | 3.911        |
| 3P0Y   | A_HIS_394 | NE2    | A_ASP_369 | OD1    | 3.176        |
| 3P0Y   | A_ARG_403 | NH2    | A_GLU_376 | OE2    | 3.071        |
| 3P0Y   | A_LYS_407 | NZ     | A_ASP_434 | OD2    | 2.888        |
| 3P0Y   | A_ARG_427 | NH1    | A_ASP_392 | OD2    | 3.627        |
| 3P0Y   | A_ARG_427 | NH1    | A_ASP_498 | OD1    | 3.045        |
| 3P0Y   | A_ARG_427 | NH2    | A_GLU_397 | OE1    | 3.220        |
| 3P0Y   | A_LYS_455 | NZ     | A_GLU_489 | OE1    | 3.791        |
| 3P0Y   | A_LYS_455 | NZ     | A_GLU_489 | OE2    | 3.520        |
| 3P0Y   | A_LYS_463 | NZ     | H_GLU_95  | OE2    | 2.859        |
| 3P0Y   | A_LYS_465 | NZ     | H_GLU_50  | OE1    | 2.656        |
| 3P0Y   | A_LYS_465 | NZ     | H_GLU_50  | OE2    | 3.845        |
| 3P0Y   | A_LYS_465 | NZ     | H_GLU_95  | OE1    | 2.777        |
| 3P0Y   | A_LYS_465 | NZ     | H_GLU_95  | OE2    | 3.671        |
| 3P0Y   | H_HIS_35  | NE2    | H_GLU_50  | OE1    | 3.331        |
| 3P0Y   | H_HIS_35  | NE2    | H_GLU_95  | OE1    | 3.467        |
| 3P0Y   | H_ARG_38  | NH1    | H_ASP_86  | OD1    | 2.814        |
| 3P0Y   | H_ARG_38  | NH2    | H_GLU_46  | OE1    | 3.115        |
| 3P0Y   | H_ARG_38  | NH2    | H_GLU_46  | OE2    | 3.997        |
| 3P0Y   | H_ARG_38  | NH2    | H_ASP_86  | OD1    | 3.796        |
| 3P0Y   | H_LYS_64  | NZ     | H_ASP_61  | OD1    | 3.749        |
| 3P0Y   | H_ARG_66  | NH1    | H_ASP_86  | OD1    | 3.756        |
| 3P0Y   | H_ARG_66  | NH1    | H_ASP_86  | OD2    | 2.816        |
| 3P0Y   | H_ARG_66  | NH2    | H_ASP_86  | OD1    | 3.074        |
| 3P0Y   | H_ARG_66  | NH2    | H_ASP_86  | OD2    | 3.530        |
| 3P0Y   | H_LYS_75  | NZ     | H_ASP_72  | OD2    | 3.063        |
| 3P0Y   | H_ARG_94  | NH2    | H_ASP_101 | OD1    | 3.544        |
| 3P0Y   | H_ARG_94  | NH2    | H_ASP_101 | OD2    | 2.757        |
| 3P0Y   | H_ARG_97  | NH1    | A_ASP_436 | OD1    | 2.876        |
| 3P0Y   | H_ARG_97  | NH1    | A_ASP_436 | OD2    | 3.533        |
| 3P0Y   | H_ARG_97  | NH2    | A_ASP_436 | OD1    | 3.647        |
| 3P0Y   | H_ARG_97  | NH2    | A_ASP_436 | OD2    | 2.823        |
| 3P0Y   | H_LYS_143 | NZ     | H_ASP_144 | OD1    | 3.090        |
| 3P0Y   | H_LYS_143 | NZ     | H_ASP_144 | OD2    | 3.144        |
| 3P0Y   | H_LYS_209 | NZ     | L_GLU_123 | OE1    | 2.674        |
| 3P0Y   | H_LYS_209 | NZ     | L_GLU_123 | OE2    | 3.317        |
| 3P0Y   | H_LYS_210 | NZ     | H_GLU_212 | OE1    | 3.756        |
| 3P0Y   | L_ARG_61  | NH2    | L_GLU_81  | OE2    | 3.697        |
| 3P0Y   | L_ARG_61  | NH2    | L_ASP_82  | OD1    | 2.833        |
| 3P0Y   | L_ARG_61  | NH2    | L_ASP_82  | OD2    | 3.670        |
| 3P0Y   | L_LYS_149 | NZ     | L_GLU_195 | OE1    | 2.821        |
| 3P0Y   | L_HIS_189 | ND1    | L_ASP_151 | OD2    | 3.174        |
| 3P0Y   | L_LYS_190 | NZ     | L_GLU_213 | OE2    | 3.914        |

Table 453: 3P0Y-specific salt bridging networks analysis. In this table, a PDB file is specified with a four-letter PDB ID, except that the names of the PDB files corresponding to the single NMR structural model split from the NMR ensemble is specified with a four-letter PDB ID in addition to a hyphen followed by the single NMR structural model numeric ID, the residue naming scheme is **Chain ID\_residue name\_residue number**,  $\angle ADH$  represents the angle formed by acceptor (A), donor (D) and hydrogen (H) ( $\angle ADH$ ).

| PDB ID | Residue A | Atom A | Residue B | Atom B | Distance (Å) |
|--------|-----------|--------|-----------|--------|--------------|
| 3P11   | H_HIS_35  | NE2    | H_GLU_50  | OE1    | 3.507        |
| 3P11   | H_HIS_35  | NE2    | H_GLU_95  | OE2    | 3.809        |
| 3P11   | H_ARG_38  | NH1    | H_ASP_86  | OD1    | 3.036        |
| 3P11   | H_ARG_38  | NH2    | H_GLU_46  | OE1    | 2.678        |
| 3P11   | H_ARG_38  | NH2    | H_GLU_46  | OE2    | 3.985        |
| 3P11   | H_LYS_64  | NZ     | H_ASP_58  | OD1    | 3.516        |
| 3P11   | H_ARG_66  | NH1    | H_ASP_86  | OD2    | 3.567        |
| 3P11   | H_ARG_66  | NH2    | H_ASP_86  | OD1    | 3.699        |
| 3P11   | H_ARG_94  | NH1    | H_ASP_101 | OD1    | 3.477        |
| 3P11   | H_ARG_94  | NH1    | H_ASP_101 | OD2    | 3.282        |
| 3P11   | H_ARG_94  | NH2    | H_ASP_32  | OD2    | 3.500        |
| 3P11   | H_ARG_97  | NH1    | H_ASP_32  | OD1    | 3.837        |
| 3P11   | L_ARG_24  | NH1    | L_ASP_70  | OD2    | 3.972        |
| 3P11   | L_ARG_61  | NH1    | L_GLU_81  | OE2    | 3.937        |
| 3P11   | L_ARG_61  | NH2    | L_GLU_81  | OE2    | 3.076        |
| 3P11   | L_ARG_61  | NH2    | L_ASP_82  | OD1    | 2.965        |
| 3P11   | L_ARG_61  | NH2    | L_ASP_82  | OD2    | 3.758        |
| 3P11   | L_LYS_103 | NZ     | L_GLU_105 | OE1    | 3.365        |
| 3P11   | L_LYS_103 | NZ     | L_GLU_165 | OE2    | 2.876        |
| 3P11   | L_LYS_183 | NZ     | L_GLU_187 | OE1    | 2.907        |
| 3P11   | A_HIS_51  | ND1    | A_GLU_74  | OE1    | 3.956        |
| 3P11   | A_ARG_62  | NH1    | A_GLU_38  | OE1    | 3.231        |
| 3P11   | A_ARG_62  | NH2    | A_GLU_63  | OE2    | 3.811        |
| 3P11   | A_ARG_87  | NH1    | A_GLU_63  | OE1    | 3.389        |
| 3P11   | A_ARG_116 | NH1    | A_ASP_182 | OD1    | 3.330        |
| 3P11   | A_ARG_116 | NH1    | A_ASP_182 | OD2    | 2.794        |
| 3P11   | A_LYS_    | NZ     | A_GLU_131 | OE1    | 3.633        |
| 3P11   | A_ARG_    | NH2    | A_ASP_134 | OD2    | 3.573        |
| 3P11   | A_HIS_209 | NE2    | A_ASP_221 | OD1    | 3.391        |
| 3P11   | A_LYS_260 | NZ     | A_ASP_232 | OD1    | 3.022        |
| 3P11   | A_LYS_290 | NZ     | A_ASP_278 | OD1    | 2.957        |
| 3P11   | A_ARG_402 | NH1    | A_GLU_373 | OE1    | 3.428        |
| 3P11   | A_ARG_441 | NH1    | H_ASP_58  | OD2    | 3.356        |
| 3P11   | A_ARG_441 | NH1    | L_GLU_94  | OE1    | 2.859        |
| 3P11   | A_ARG_441 | NH1    | L_GLU_94  | OE2    | 3.310        |
| 3P11   | A_ARG_441 | NH2    | L_GLU_94  | OE2    | 3.075        |
| 3P11   | A_ARG_456 | NH1    | A_GLU_429 | OE1    | 3.324        |
| 3P11   | A_ARG_456 | NH2    | A_GLU_429 | OE1    | 3.225        |
| 3P11   | A_LYS_466 | NZ     | H_GLU_95  | OE1    | 2.568        |
| 3P11   | A_LYS_466 | NZ     | H_GLU_95  | OE2    | 3.227        |
| 3P11   | A_HIS_467 | ND1    | H_GLU_50  | OE2    | 3.466        |
| 3P11   | A_HIS_467 | ND1    | L_GLU_94  | OE2    | 3.926        |
| 3P11   | A_HIS_467 | NE2    | H_GLU_50  | OE1    | 3.754        |
| 3P11   | A_HIS_467 | NE2    | H_GLU_50  | OE2    | 3.679        |
| 3P11   | A_HIS_467 | NE2    | H_GLU_95  | OE2    | 3.533        |
| 3P11   | A_ARG_469 | NH1    | A_GLU_477 | OE1    | 3.032        |
| 3P11   | A_ARG_469 | NH2    | A_ASP_473 | OD2    | 3.365        |
| 3P11   | A_ARG_469 | NH2    | A_GLU_477 | OE1    | 3.595        |
| 3P11   | A_ARG_469 | NH2    | A_GLU_477 | OE2    | 3.199        |

---

Table 454: 3P11-specific salt bridging networks analysis. In this table, a PDB file is specified with a four-letter PDB ID, except that the names of the PDB files corresponding to the single NMR structural model split from the NMR ensemble is specified with a four-letter PDB ID in addition to a hyphen followed by the single NMR structural model numeric ID, the residue naming scheme is **Chain ID\_residue name\_residue number**,  $\angle ADH$  represents the angle formed by acceptor (A), donor (D) and hydrogen (H) ( $\angle ADH$ ).

| PDB ID | Residue A | Atom A | Residue B | Atom B | Distance (Å) |
|--------|-----------|--------|-----------|--------|--------------|
| 3PGF   | A_LYS_15  | NZ     | A_ASP_14  | OD1    | 2.931        |
| 3PGF   | A_LYS_15  | NZ     | A_GLU_111 | OE2    | 3.982        |
| 3PGF   | A_LYS_26  | NZ     | A_ASP_30  | OD2    | 2.898        |
| 3PGF   | A_LYS_83  | NZ     | A_ASP_87  | OD1    | 3.179        |
| 3PGF   | A_ARG_98  | NH1    | A_ASP_95  | OD1    | 2.849        |
| 3PGF   | A_LYS_140 | NZ     | A_ASP_136 | OD1    | 3.415        |
| 3PGF   | A_LYS_140 | NZ     | A_ASP_136 | OD2    | 2.764        |
| 3PGF   | A_HIS_203 | ND1    | A_ASP_136 | OD2    | 2.718        |
| 3PGF   | A_LYS_251 | NZ     | A_ASP_164 | OD1    | 3.745        |
| 3PGF   | A_LYS_251 | NZ     | A_ASP_164 | OD2    | 2.761        |
| 3PGF   | A_ARG_316 | NH1    | A_ASP_236 | OD1    | 3.984        |
| 3PGF   | A_ARG_316 | NH1    | A_ASP_236 | OD2    | 3.954        |
| 3PGF   | A_ARG_316 | NH2    | A_ASP_314 | OD2    | 2.795        |
| 3PGF   | A_LYS_326 | NZ     | A_GLU_322 | OE2    | 2.961        |
| 3PGF   | H_ARG_38  | NH1    | H_ASP_86  | OD1    | 3.038        |
| 3PGF   | H_ARG_38  | NH2    | H_GLU_46  | OE1    | 2.948        |
| 3PGF   | H_ARG_66  | NH1    | H_ASP_86  | OD1    | 3.643        |
| 3PGF   | H_ARG_66  | NH1    | H_ASP_86  | OD2    | 2.938        |
| 3PGF   | H_ARG_66  | NH2    | H_ASP_86  | OD1    | 3.135        |
| 3PGF   | H_ARG_66  | NH2    | H_ASP_86  | OD2    | 3.904        |
| 3PGF   | H_ARG_94  | NH2    | H_ASP_101 | OD1    | 3.471        |
| 3PGF   | H_ARG_94  | NH2    | H_ASP_101 | OD2    | 2.638        |
| 3PGF   | L_ARG_24  | NH1    | L_ASP_70  | OD1    | 3.567        |
| 3PGF   | L_ARG_24  | NH1    | L_ASP_70  | OD2    | 3.066        |
| 3PGF   | L_ARG_61  | NH2    | L_GLU_81  | OE2    | 3.869        |
| 3PGF   | L_ARG_61  | NH2    | L_ASP_82  | OD1    | 2.691        |
| 3PGF   | L_ARG_61  | NH2    | L_ASP_82  | OD2    | 3.502        |
| 3PGF   | L_ARG_66  | NH1    | A_GLU_309 | OE2    | 3.045        |
| 3PGF   | L_ARG_66  | NH2    | A_GLU_309 | OE2    | 2.501        |
| 3PGF   | L_LYS_149 | NZ     | L_GLU_195 | OE2    | 3.143        |
| 3PGF   | L_LYS_190 | NZ     | L_GLU_213 | OE2    | 3.299        |

Table 455: 3PGF-specific salt bridging networks analysis. In this table, a PDB file is specified with a four-letter PDB ID, except that the names of the PDB files corresponding to the single NMR structural model split from the NMR ensemble is specified with a four-letter PDB ID in addition to a hyphen followed by the single NMR structural model numeric ID, the residue naming scheme is **Chain ID\_residue name\_residue number**,  $\angle ADH$  represents the angle formed by acceptor (A), donor (D) and hydrogen (H) ( $\angle ADH$ ).

| PDB ID | Residue A | Atom A | Residue B | Atom B | Distance (Å) |
|--------|-----------|--------|-----------|--------|--------------|
| 3PNW   | A_ARG_62  | NH2    | A_GLU_82  | OE2    | 2.760        |
| 3PNW   | A_ARG_62  | NH2    | A_ASP_83  | OD1    | 3.251        |
| 3PNW   | A_LYS_106 | NZ     | A_GLU_168 | OE1    | 3.588        |
| 3PNW   | A_LYS_106 | NZ     | A_GLU_168 | OE2    | 3.143        |
| 3PNW   | A_LYS_152 | NZ     | A_GLU_198 | OE1    | 3.462        |
| 3PNW   | A_HIS_192 | ND1    | A_ASP_154 | OD2    | 2.766        |
| 3PNW   | B_ARG_41  | NH1    | B_GLU_49  | OE1    | 3.120        |
| 3PNW   | B_ARG_41  | NH1    | B_GLU_49  | OE2    | 3.686        |
| 3PNW   | B_ARG_41  | NH1    | B_ASP_93  | OD1    | 3.860        |
| 3PNW   | B_ARG_41  | NH2    | B_ASP_93  | OD1    | 2.838        |
| 3PNW   | B_ARG_70  | NH1    | B_ASP_93  | OD1    | 3.254        |
| 3PNW   | B_ARG_70  | NH1    | B_ASP_93  | OD2    | 3.946        |
| 3PNW   | B_ARG_70  | NH2    | B_ASP_93  | OD1    | 3.639        |
| 3PNW   | B_ARG_70  | NH2    | B_ASP_93  | OD2    | 2.902        |
| 3PNW   | B_LYS_79  | NZ     | B_ASP_76  | OD2    | 2.841        |
| 3PNW   | B_ARG_90  | NH1    | B_GLU_92  | OE1    | 3.741        |
| 3PNW   | B_ARG_101 | NH2    | B_ASP_117 | OD2    | 3.317        |
| 3PNW   | B_ARG_104 | NH1    | C_GLU_599 | OE1    | 3.048        |
| 3PNW   | B_LYS_159 | NZ     | B_ASP_160 | OD1    | 3.439        |
| 3PNW   | C_LYS_557 | NZ     | C_ASP_560 | OD1    | 3.049        |
| 3PNW   | C_LYS_557 | NZ     | C_ASP_560 | OD2    | 3.693        |
| 3PNW   | C_LYS_590 | NZ     | C_GLU_576 | OE1    | 3.383        |
| 3PNW   | D_ARG_25  | NH1    | J_GLU_82  | OE1    | 2.858        |
| 3PNW   | D_ARG_25  | NH1    | J_GLU_82  | OE2    | 3.430        |
| 3PNW   | D_ARG_25  | NH2    | J_GLU_82  | OE1    | 3.626        |
| 3PNW   | D_ARG_25  | NH2    | J_GLU_82  | OE2    | 3.034        |
| 3PNW   | D_ARG_62  | NH2    | D_GLU_82  | OE2    | 3.353        |
| 3PNW   | D_ARG_62  | NH2    | D_ASP_83  | OD1    | 3.192        |
| 3PNW   | D_ARG_62  | NH2    | D_ASP_83  | OD2    | 3.678        |
| 3PNW   | D_ARG_145 | NH1    | D_GLU_108 | OE2    | 3.475        |
| 3PNW   | D_ARG_145 | NH2    | D_GLU_108 | OE1    | 3.526        |
| 3PNW   | D_ARG_145 | NH2    | D_GLU_108 | OE2    | 3.197        |
| 3PNW   | D_LYS_152 | NZ     | D_GLU_198 | OE1    | 3.454        |
| 3PNW   | D_LYS_152 | NZ     | D_GLU_198 | OE2    | 3.452        |
| 3PNW   | D_LYS_186 | NZ     | D_GLU_190 | OE1    | 3.419        |
| 3PNW   | D_LYS_186 | NZ     | D_GLU_190 | OE2    | 2.925        |
| 3PNW   | D_HIS_192 | ND1    | D_ASP_154 | OD2    | 2.749        |
| 3PNW   | E_ARG_41  | NH1    | E_GLU_49  | OE1    | 3.072        |
| 3PNW   | E_ARG_41  | NH1    | E_GLU_49  | OE2    | 3.615        |
| 3PNW   | E_ARG_41  | NH1    | E_ASP_93  | OD1    | 3.772        |
| 3PNW   | E_ARG_41  | NH2    | E_ASP_93  | OD1    | 2.776        |
| 3PNW   | E_LYS_68  | NZ     | E_ASP_65  | OD1    | 2.738        |
| 3PNW   | E_ARG_70  | NH1    | E_ASP_93  | OD1    | 3.047        |
| 3PNW   | E_ARG_70  | NH1    | E_ASP_93  | OD2    | 3.582        |
| 3PNW   | E_ARG_70  | NH2    | E_ASP_93  | OD1    | 3.597        |
| 3PNW   | E_ARG_70  | NH2    | E_ASP_93  | OD2    | 2.576        |
| 3PNW   | E_LYS_79  | NZ     | E_ASP_76  | OD2    | 2.902        |
| 3PNW   | E_ARG_101 | NH2    | E_ASP_117 | OD2    | 3.400        |
| 3PNW   | E_ARG_104 | NH1    | F_GLU_599 | OE2    | 2.653        |
| 3PNW   | E_LYS_159 | NZ     | E_ASP_160 | OD1    | 3.050        |
| 3PNW   | E_LYS_159 | NZ     | E_ASP_160 | OD2    | 2.633        |
| 3PNW   | F_LYS_590 | NZ     | F_GLU_576 | OE2    | 3.831        |
| 3PNW   | G_ARG_25  | NH1    | G_ASP_71  | OD1    | 3.445        |
| 3PNW   | G_ARG_25  | NH1    | G_ASP_71  | OD2    | 2.863        |
| 3PNW   | G_ARG_62  | NH2    | G_GLU_82  | OE2    | 3.208        |
| 3PNW   | G_ARG_62  | NH2    | G_ASP_83  | OD1    | 2.937        |
| 3PNW   | G_ARG_62  | NH2    | G_ASP_83  | OD2    | 3.584        |

|      |           |     |           |     |       |
|------|-----------|-----|-----------|-----|-------|
| 3PNW | G_LYS_106 | NZ  | G_GLU_168 | OE1 | 2.721 |
| 3PNW | G_LYS_106 | NZ  | G_GLU_168 | OE2 | 3.243 |
| 3PNW | G_LYS_152 | NZ  | G_GLU_198 | OE2 | 3.706 |
| 3PNW | G_LYS_186 | NZ  | G_GLU_190 | OE2 | 3.219 |
| 3PNW | G_HIS_192 | ND1 | G_ASP_154 | OD2 | 3.161 |
| 3PNW | G_HIS_192 | NE2 | G_ASP_188 | OD1 | 3.976 |
| 3PNW | H_ARG_41  | NH1 | H_GLU_49  | OE1 | 3.103 |
| 3PNW | H_ARG_41  | NH1 | H_GLU_49  | OE2 | 3.667 |
| 3PNW | H_ARG_41  | NH1 | H_ASP_93  | OD1 | 3.761 |
| 3PNW | H_ARG_41  | NH2 | H_ASP_93  | OD1 | 2.861 |
| 3PNW | H_LYS_68  | NZ  | H_ASP_65  | OD1 | 2.900 |
| 3PNW | H_ARG_70  | NH1 | H_ASP_93  | OD1 | 3.098 |
| 3PNW | H_ARG_70  | NH1 | H_ASP_93  | OD2 | 3.479 |
| 3PNW | H_ARG_70  | NH2 | H_ASP_93  | OD1 | 3.791 |
| 3PNW | H_ARG_70  | NH2 | H_ASP_93  | OD2 | 2.662 |
| 3PNW | H_LYS_79  | NZ  | H_ASP_76  | OD2 | 3.008 |
| 3PNW | H_ARG_90  | NH1 | H_GLU_92  | OE2 | 3.922 |
| 3PNW | H_ARG_101 | NH2 | H_ASP_117 | OD2 | 3.291 |
| 3PNW | H_ARG_104 | NH1 | L_GLU_599 | OE1 | 3.020 |
| 3PNW | H_LYS_159 | NZ  | H_ASP_160 | OD1 | 3.348 |
| 3PNW | H_LYS_159 | NZ  | H_ASP_160 | OD2 | 3.221 |
| 3PNW | L_LYS_590 | NZ  | L_GLU_576 | OE1 | 3.342 |
| 3PNW | J_ARG_25  | NH2 | J_ASP_71  | OD1 | 3.699 |
| 3PNW | J_ARG_62  | NH2 | J_GLU_82  | OE2 | 3.268 |
| 3PNW | J_ARG_62  | NH2 | J_ASP_83  | OD1 | 3.032 |
| 3PNW | J_ARG_62  | NH2 | J_ASP_83  | OD2 | 3.641 |
| 3PNW | J_LYS_106 | NZ  | J_GLU_168 | OE1 | 2.693 |
| 3PNW | J_LYS_106 | NZ  | J_GLU_168 | OE2 | 3.468 |
| 3PNW | J_ARG_145 | NH1 | J_GLU_108 | OE1 | 3.314 |
| 3PNW | J_ARG_145 | NH1 | J_GLU_108 | OE2 | 2.910 |
| 3PNW | J_ARG_145 | NH2 | J_GLU_108 | OE1 | 3.149 |
| 3PNW | J_LYS_152 | NZ  | J_GLU_198 | OE2 | 2.718 |
| 3PNW | J_HIS_192 | ND1 | J_ASP_154 | OD2 | 2.849 |
| 3PNW | J_ARG_214 | NH2 | J_GLU_190 | OE1 | 3.561 |
| 3PNW | K_ARG_41  | NH1 | K_GLU_49  | OE1 | 3.097 |
| 3PNW | K_ARG_41  | NH1 | K_GLU_49  | OE2 | 3.636 |
| 3PNW | K_ARG_41  | NH1 | K_ASP_93  | OD1 | 3.969 |
| 3PNW | K_ARG_41  | NH2 | K_ASP_93  | OD1 | 2.946 |
| 3PNW | K_LYS_68  | NZ  | K_ASP_65  | OD1 | 2.902 |
| 3PNW | K_ARG_70  | NH1 | K_ASP_93  | OD1 | 3.172 |
| 3PNW | K_ARG_70  | NH1 | K_ASP_93  | OD2 | 3.777 |
| 3PNW | K_ARG_70  | NH2 | K_ASP_93  | OD1 | 3.650 |
| 3PNW | K_ARG_70  | NH2 | K_ASP_93  | OD2 | 2.817 |
| 3PNW | K_LYS_79  | NZ  | K_ASP_76  | OD2 | 3.145 |
| 3PNW | K_ARG_101 | NH2 | K_ASP_117 | OD2 | 3.216 |
| 3PNW | K_ARG_104 | NH1 | L_GLU_599 | OE1 | 2.888 |
| 3PNW | K_ARG_104 | NH1 | L_GLU_599 | OE2 | 2.772 |
| 3PNW | K_ARG_104 | NH2 | L_GLU_599 | OE2 | 3.083 |
| 3PNW | K_LYS_159 | NZ  | K_ASP_160 | OD1 | 3.020 |
| 3PNW | K_LYS_159 | NZ  | K_ASP_160 | OD2 | 2.839 |
| 3PNW | M_ARG_62  | NH2 | M_GLU_82  | OE2 | 2.988 |
| 3PNW | M_ARG_62  | NH2 | M_ASP_83  | OD1 | 2.932 |
| 3PNW | M_ARG_62  | NH2 | M_ASP_83  | OD2 | 3.718 |
| 3PNW | M_LYS_106 | NZ  | M_GLU_168 | OE1 | 3.752 |
| 3PNW | M_LYS_106 | NZ  | M_GLU_168 | OE2 | 2.837 |
| 3PNW | M_LYS_152 | NZ  | M_GLU_198 | OE1 | 3.636 |
| 3PNW | M_LYS_152 | NZ  | M_GLU_198 | OE2 | 3.599 |
| 3PNW | M_LYS_191 | NZ  | M_ASP_188 | OD1 | 2.912 |

|      |           |     |           |     |       |
|------|-----------|-----|-----------|-----|-------|
| 3PNW | M_HIS_192 | ND1 | M_ASP_154 | OD2 | 3.108 |
| 3PNW | N_ARG_41  | NH1 | N_GLU_49  | OE1 | 3.141 |
| 3PNW | N_ARG_41  | NH1 | N_GLU_49  | OE2 | 3.699 |
| 3PNW | N_ARG_41  | NH1 | N_ASP_93  | OD1 | 3.824 |
| 3PNW | N_ARG_41  | NH2 | N_ASP_93  | OD1 | 2.841 |
| 3PNW | N_ARG_70  | NH1 | N_ASP_93  | OD1 | 3.199 |
| 3PNW | N_ARG_70  | NH1 | N_ASP_93  | OD2 | 3.846 |
| 3PNW | N_ARG_70  | NH2 | N_ASP_93  | OD1 | 3.653 |
| 3PNW | N_ARG_70  | NH2 | N_ASP_93  | OD2 | 2.921 |
| 3PNW | N_LYS_79  | NZ  | N_ASP_76  | OD2 | 2.793 |
| 3PNW | N_ARG_101 | NH2 | N_ASP_117 | OD2 | 3.225 |
| 3PNW | N_LYS_159 | NZ  | N_ASP_160 | OD1 | 3.030 |
| 3PNW | N_LYS_159 | NZ  | N_ASP_160 | OD2 | 3.040 |
| 3PNW | O_LYS_557 | NZ  | O_ASP_560 | OD1 | 3.174 |
| 3PNW | O_LYS_557 | NZ  | O_ASP_560 | OD2 | 3.756 |
| 3PNW | P_ARG_25  | NH2 | P_ASP_71  | OD1 | 3.282 |
| 3PNW | P_ARG_25  | NH2 | P_ASP_71  | OD2 | 3.069 |
| 3PNW | P_ARG_62  | NH2 | P_GLU_82  | OE2 | 3.510 |
| 3PNW | P_ARG_62  | NH2 | P_ASP_83  | OD1 | 2.765 |
| 3PNW | P_ARG_62  | NH2 | P_ASP_83  | OD2 | 3.484 |
| 3PNW | P_LYS_106 | NZ  | P_GLU_108 | OE2 | 3.990 |
| 3PNW | P_LYS_106 | NZ  | P_GLU_168 | OE1 | 2.957 |
| 3PNW | P_LYS_106 | NZ  | P_GLU_168 | OE2 | 2.919 |
| 3PNW | P_LYS_152 | NZ  | P_GLU_198 | OE1 | 3.282 |
| 3PNW | P_LYS_186 | NZ  | P_GLU_190 | OE1 | 3.349 |
| 3PNW | P_LYS_186 | NZ  | P_GLU_190 | OE2 | 3.801 |
| 3PNW | Q_ARG_41  | NH1 | Q_GLU_49  | OE1 | 2.971 |
| 3PNW | Q_ARG_41  | NH1 | Q_GLU_49  | OE2 | 3.698 |
| 3PNW | Q_ARG_41  | NH1 | Q_ASP_93  | OD1 | 3.890 |
| 3PNW | Q_ARG_41  | NH2 | Q_ASP_93  | OD1 | 2.813 |
| 3PNW | Q_LYS_68  | NZ  | Q_ASP_65  | OD1 | 2.792 |
| 3PNW | Q_ARG_70  | NH1 | Q_ASP_93  | OD1 | 3.070 |
| 3PNW | Q_ARG_70  | NH1 | Q_ASP_93  | OD2 | 3.435 |
| 3PNW | Q_ARG_70  | NH2 | Q_ASP_93  | OD1 | 3.828 |
| 3PNW | Q_ARG_70  | NH2 | Q_ASP_93  | OD2 | 2.681 |
| 3PNW | Q_LYS_79  | NZ  | Q_ASP_76  | OD2 | 3.067 |
| 3PNW | Q_ARG_101 | NH2 | Q_ASP_117 | OD2 | 3.288 |
| 3PNW | Q_ARG_104 | NH1 | R_GLU_599 | OE1 | 3.284 |
| 3PNW | Q_LYS_159 | NZ  | Q_ASP_160 | OD1 | 2.929 |
| 3PNW | Q_LYS_159 | NZ  | Q_ASP_160 | OD2 | 2.916 |
| 3PNW | R_LYS_590 | NZ  | R_GLU_576 | OE1 | 3.429 |
| 3PNW | S_ARG_62  | NH2 | S_GLU_82  | OE2 | 3.335 |
| 3PNW | S_ARG_62  | NH2 | S_ASP_83  | OD1 | 3.032 |
| 3PNW | S_LYS_106 | NZ  | S_GLU_168 | OE1 | 2.994 |
| 3PNW | S_LYS_106 | NZ  | S_GLU_168 | OE2 | 3.350 |
| 3PNW | S_LYS_186 | NZ  | S_GLU_190 | OE2 | 3.826 |
| 3PNW | S_HIS_192 | ND1 | S_ASP_154 | OD2 | 2.873 |
| 3PNW | S_ARG_214 | NH2 | S_GLU_190 | OE1 | 3.425 |
| 3PNW | T_ARG_41  | NH1 | T_GLU_49  | OE1 | 3.208 |
| 3PNW | T_ARG_41  | NH1 | T_GLU_49  | OE2 | 3.692 |
| 3PNW | T_ARG_41  | NH1 | T_ASP_93  | OD1 | 3.888 |
| 3PNW | T_ARG_41  | NH2 | T_ASP_93  | OD1 | 2.764 |
| 3PNW | T_ARG_70  | NH1 | T_ASP_93  | OD1 | 2.873 |
| 3PNW | T_ARG_70  | NH1 | T_ASP_93  | OD2 | 3.677 |
| 3PNW | T_ARG_70  | NH2 | T_ASP_93  | OD1 | 3.433 |
| 3PNW | T_ARG_70  | NH2 | T_ASP_93  | OD2 | 2.704 |
| 3PNW | T_LYS_79  | NZ  | T_ASP_76  | OD2 | 2.965 |
| 3PNW | T_ARG_101 | NH2 | T_ASP_117 | OD2 | 3.568 |



|      |           |     |           |     |       |
|------|-----------|-----|-----------|-----|-------|
| 3PNW | T_ARG_104 | NH1 | U_GLU_599 | OE2 | 2.955 |
| 3PNW | T_LYS_159 | NZ  | T_ASP_160 | OD1 | 2.985 |
| 3PNW | T_LYS_159 | NZ  | T_ASP_160 | OD2 | 2.572 |
| 3PNW | U_LYS_590 | NZ  | U_GLU_576 | OE1 | 3.326 |
| 3PNW | V_ARG_62  | NH2 | V_GLU_82  | OE2 | 3.071 |
| 3PNW | V_ARG_62  | NH2 | V_ASP_83  | OD1 | 3.114 |
| 3PNW | V_ARG_62  | NH2 | V_ASP_83  | OD2 | 3.749 |
| 3PNW | V_LYS_106 | NZ  | V_GLU_168 | OE1 | 3.033 |
| 3PNW | V_LYS_106 | NZ  | V_GLU_168 | OE2 | 2.809 |
| 3PNW | V_LYS_152 | NZ  | V_GLU_198 | OE1 | 3.564 |
| 3PNW | V_LYS_152 | NZ  | V_GLU_198 | OE2 | 3.540 |
| 3PNW | V_LYS_186 | NZ  | V_GLU_190 | OE1 | 3.466 |
| 3PNW | V_HIS_192 | ND1 | V_ASP_154 | OD2 | 2.830 |
| 3PNW | W_ARG_41  | NH1 | W_GLU_49  | OE1 | 3.191 |
| 3PNW | W_ARG_41  | NH1 | W_GLU_49  | OE2 | 3.754 |
| 3PNW | W_ARG_41  | NH1 | W_ASP_93  | OD1 | 3.797 |
| 3PNW | W_ARG_41  | NH2 | W_ASP_93  | OD1 | 2.759 |
| 3PNW | W_ARG_70  | NH1 | W_ASP_93  | OD1 | 3.055 |
| 3PNW | W_ARG_70  | NH1 | W_ASP_93  | OD2 | 3.508 |
| 3PNW | W_ARG_70  | NH2 | W_ASP_93  | OD1 | 3.808 |
| 3PNW | W_ARG_70  | NH2 | W_ASP_93  | OD2 | 2.825 |
| 3PNW | W_LYS_79  | NZ  | W_ASP_76  | OD2 | 3.031 |
| 3PNW | W_ARG_101 | NH2 | W_ASP_117 | OD2 | 3.265 |
| 3PNW | W_ARG_104 | NH2 | X_GLU_599 | OE2 | 3.113 |
| 3PNW | W_LYS_159 | NZ  | W_ASP_160 | OD1 | 3.077 |
| 3PNW | W_LYS_159 | NZ  | W_ASP_160 | OD2 | 3.386 |
| 3PNW | X_LYS_590 | NZ  | X_GLU_576 | OE1 | 3.570 |

Table 456: 3PNW-specific salt bridging networks analysis. In this table, a PDB file is specified with a four-letter PDB ID, except that the names of the PDB files corresponding to the single NMR structural model split from the NMR ensemble is specified with a four-letter PDB ID in addition to a hyphen followed by the single NMR structural model numeric ID, the residue naming scheme is **Chain ID\_residue name\_residue number**,  $\angle ADH$  represents the angle formed by acceptor (A), donor (D) and hydrogen (H) ( $\angle ADH$ ).

| PDB ID | Residue A | Atom A | Residue B | Atom B | Distance (Å) |
|--------|-----------|--------|-----------|--------|--------------|
| 3PP4   | H_ARG_38  | NH1    | H_ASP_90  | OD1    | 2.857        |
| 3PP4   | H_ARG_38  | NH2    | H_ASP_90  | OD1    | 3.876        |
| 3PP4   | H_ARG_50  | NH2    | H_ASP_59  | OD2    | 3.031        |
| 3PP4   | H_LYS_63  | NZ     | H_GLU_46  | OE1    | 3.948        |
| 3PP4   | H_ARG_67  | NH1    | H_ASP_90  | OD1    | 3.622        |
| 3PP4   | H_ARG_67  | NH1    | H_ASP_90  | OD2    | 2.862        |
| 3PP4   | H_ARG_67  | NH2    | H_ASP_90  | OD1    | 2.967        |
| 3PP4   | H_ARG_67  | NH2    | H_ASP_90  | OD2    | 3.587        |
| 3PP4   | H_ARG_87  | NH2    | H_GLU_89  | OE2    | 3.547        |
| 3PP4   | H_LYS_149 | NZ     | H_ASP_150 | OD1    | 3.507        |
| 3PP4   | H_LYS_215 | NZ     | L_GLU_128 | OE1    | 3.038        |
| 3PP4   | H_LYS_215 | NZ     | L_GLU_128 | OE2    | 2.948        |
| 3PP4   | L_LYS_27  | NZ     | L_GLU_98  | OE1    | 2.607        |
| 3PP4   | L_LYS_27  | NZ     | L_GLU_98  | OE2    | 3.934        |
| 3PP4   | L_ARG_66  | NH2    | L_ASP_87  | OD1    | 2.843        |
| 3PP4   | L_ARG_66  | NH2    | L_ASP_87  | OD2    | 3.715        |
| 3PP4   | L_LYS_108 | NZ     | L_GLU_170 | OE1    | 2.761        |
| 3PP4   | L_LYS_108 | NZ     | L_GLU_170 | OE2    | 3.634        |
| 3PP4   | L_ARG_147 | NH1    | L_GLU_110 | OE1    | 3.275        |
| 3PP4   | L_ARG_147 | NH1    | L_GLU_110 | OE2    | 3.845        |
| 3PP4   | L_ARG_147 | NH2    | L_GLU_110 | OE1    | 3.278        |
| 3PP4   | L_ARG_147 | NH2    | L_GLU_110 | OE2    | 2.614        |
| 3PP4   | L_LYS_154 | NZ     | L_GLU_200 | OE1    | 2.680        |
| 3PP4   | L_LYS_188 | NZ     | L_GLU_192 | OE2    | 3.037        |
| 3PP4   | L_HIS_194 | ND1    | L_ASP_156 | OD2    | 3.533        |
| 3PP4   | P_LYS_175 | NZ     | H_ASP_57  | OD2    | 3.518        |

Table 457: 3PP4-specific salt bridging networks analysis. In this table, a PDB file is specified with a four-letter PDB ID, except that the names of the PDB files corresponding to the single NMR structural model split from the NMR ensemble is specified with a four-letter PDB ID in addition to a hyphen followed by the single NMR structural model numeric ID, the residue naming scheme is **Chain ID\_residue name\_residue number**,  $\angle ADH$  represents the angle formed by acceptor (A), donor (D) and hydrogen (H) ( $\angle ADH$ ).

| PDB ID | Residue A | Atom A | Residue B | Atom B | Distance (Å) |
|--------|-----------|--------|-----------|--------|--------------|
| 3Q3G   | C_ARG_67  | NH1    | C_GLU_87  | OE2    | 3.777        |
| 3Q3G   | C_ARG_67  | NH1    | C_ASP_88  | OD1    | 2.749        |
| 3Q3G   | C_ARG_67  | NH1    | C_ASP_88  | OD2    | 3.177        |
| 3Q3G   | C_ARG_67  | NH2    | C_GLU_87  | OE2    | 3.999        |
| 3Q3G   | C_LYS_109 | NZ     | D_GLU_44  | OE1    | 3.620        |
| 3Q3G   | C_LYS_113 | NZ     | C_GLU_17  | OE1    | 3.434        |
| 3Q3G   | C_LYS_113 | NZ     | C_GLU_17  | OE2    | 3.287        |
| 3Q3G   | C_LYS_153 | NZ     | C_GLU_160 | OE2    | 3.996        |
| 3Q3G   | C_LYS_153 | NZ     | C_GLU_201 | OE1    | 3.776        |
| 3Q3G   | C_LYS_155 | NZ     | C_GLU_201 | OE2    | 3.559        |
| 3Q3G   | C_ARG_161 | NH2    | C_GLU_191 | OE2    | 3.538        |
| 3Q3G   | C_LYS_205 | NZ     | C_ASP_116 | OD1    | 3.501        |
| 3Q3G   | C_LYS_205 | NZ     | C_ASP_116 | OD2    | 3.005        |
| 3Q3G   | D_LYS_21  | NZ     | H_GLU_202 | OE2    | 2.633        |
| 3Q3G   | D_ARG_42  | NH1    | D_GLU_48  | OE1    | 3.596        |
| 3Q3G   | D_ARG_52  | NH1    | G_GLU_179 | OE2    | 3.405        |
| 3Q3G   | D_ARG_52  | NH2    | G_GLU_178 | OE1    | 2.845        |
| 3Q3G   | D_ARG_52  | NH2    | G_GLU_179 | OE2    | 2.628        |
| 3Q3G   | D_LYS_69  | NZ     | D_ASP_92  | OD1    | 3.860        |
| 3Q3G   | D_LYS_69  | NZ     | D_ASP_92  | OD2    | 2.915        |
| 3Q3G   | D_LYS_219 | NZ     | C_GLU_129 | OE2    | 3.237        |
| 3Q3G   | G_ARG_152 | NH1    | G_ASP_149 | OD1    | 2.824        |
| 3Q3G   | G_LYS_166 | NZ     | G_GLU_320 | OE1    | 3.506        |
| 3Q3G   | G_ARG_196 | NH1    | G_GLU_155 | OE1    | 2.640        |
| 3Q3G   | G_ARG_196 | NH1    | G_GLU_155 | OE2    | 3.732        |
| 3Q3G   | G_ARG_196 | NH2    | G_GLU_155 | OE1    | 3.730        |
| 3Q3G   | G_ARG_196 | NH2    | G_GLU_155 | OE2    | 3.858        |
| 3Q3G   | G_ARG_196 | NH2    | G_GLU_162 | OE1    | 2.809        |
| 3Q3G   | G_ARG_208 | NH1    | D_GLU_101 | OE1    | 3.693        |
| 3Q3G   | G_ARG_208 | NH1    | D_GLU_101 | OE2    | 2.792        |
| 3Q3G   | G_ARG_208 | NH1    | G_GLU_178 | OE2    | 2.763        |
| 3Q3G   | G_ARG_208 | NH2    | D_GLU_101 | OE1    | 2.994        |
| 3Q3G   | G_ARG_208 | NH2    | D_GLU_101 | OE2    | 3.045        |
| 3Q3G   | G_LYS_217 | NZ     | G_GLU_221 | OE2    | 3.531        |
| 3Q3G   | G_ARG_220 | NH2    | G_GLU_258 | OE1    | 3.606        |
| 3Q3G   | G_ARG_220 | NH2    | G_GLU_258 | OE2    | 3.754        |
| 3Q3G   | G_ARG_230 | NH1    | G_ASP_132 | OD1    | 3.893        |
| 3Q3G   | G_ARG_230 | NH1    | G_ASP_134 | OD1    | 2.660        |
| 3Q3G   | G_ARG_230 | NH2    | G_ASP_132 | OD1    | 3.914        |
| 3Q3G   | G_LYS_235 | NZ     | G_GLU_262 | OE1    | 3.889        |
| 3Q3G   | G_ARG_266 | NH1    | G_ASP_260 | OD1    | 2.915        |
| 3Q3G   | G_ARG_266 | NH2    | G_ASP_260 | OD1    | 3.197        |
| 3Q3G   | G_LYS_279 | NZ     | G_GLU_244 | OE2    | 3.345        |
| 3Q3G   | G_LYS_306 | NZ     | G_GLU_303 | OE2    | 2.592        |
| 3Q3G   | G_ARG_313 | NH2    | G_GLU_314 | OE2    | 2.833        |
| 3Q3G   | A_ARG_67  | NH1    | A_GLU_87  | OE2    | 3.721        |
| 3Q3G   | A_ARG_67  | NH1    | A_ASP_88  | OD1    | 2.647        |
| 3Q3G   | A_ARG_67  | NH1    | A_ASP_88  | OD2    | 3.126        |
| 3Q3G   | A_ARG_67  | NH2    | A_GLU_87  | OE2    | 3.644        |
| 3Q3G   | A_LYS_113 | NZ     | A_GLU_17  | OE1    | 3.382        |
| 3Q3G   | A_LYS_113 | NZ     | A_GLU_17  | OE2    | 3.288        |
| 3Q3G   | A_LYS_153 | NZ     | A_GLU_201 | OE1    | 3.786        |
| 3Q3G   | A_ARG_161 | NH1    | A_GLU_191 | OE2    | 3.907        |
| 3Q3G   | A_ARG_161 | NH2    | A_GLU_191 | OE2    | 2.992        |
| 3Q3G   | A_LYS_205 | NZ     | A_ASP_116 | OD1    | 3.527        |
| 3Q3G   | A_LYS_205 | NZ     | A_ASP_116 | OD2    | 2.946        |
| 3Q3G   | B_LYS_21  | NZ     | K_GLU_202 | OE2    | 2.668        |

|      |           |     |           |     |       |
|------|-----------|-----|-----------|-----|-------|
| 3Q3G | B_ARG_42  | NH2 | B_GLU_91  | OE2 | 2.813 |
| 3Q3G | B_ARG_52  | NH1 | E_GLU_179 | OE2 | 3.409 |
| 3Q3G | B_ARG_52  | NH2 | E_GLU_178 | OE1 | 2.858 |
| 3Q3G | B_ARG_52  | NH2 | E_GLU_179 | OE2 | 2.617 |
| 3Q3G | B_LYS_69  | NZ  | B_ASP_92  | OD1 | 3.850 |
| 3Q3G | B_LYS_69  | NZ  | B_ASP_92  | OD2 | 2.909 |
| 3Q3G | B_LYS_219 | NZ  | A_GLU_129 | OE2 | 3.294 |
| 3Q3G | E_ARG_152 | NH1 | E_ASP_149 | OD1 | 2.849 |
| 3Q3G | E_ARG_196 | NH1 | E_GLU_155 | OE2 | 3.730 |
| 3Q3G | E_ARG_196 | NH2 | E_GLU_162 | OE1 | 2.828 |
| 3Q3G | E_ARG_208 | NH1 | B_GLU_101 | OE1 | 3.701 |
| 3Q3G | E_ARG_208 | NH1 | B_GLU_101 | OE2 | 2.888 |
| 3Q3G | E_ARG_208 | NH1 | E_GLU_178 | OE2 | 2.758 |
| 3Q3G | E_ARG_208 | NH2 | B_GLU_101 | OE1 | 3.046 |
| 3Q3G | E_ARG_208 | NH2 | B_GLU_101 | OE2 | 3.227 |
| 3Q3G | E_LYS_217 | NZ  | E_GLU_221 | OE2 | 3.514 |
| 3Q3G | E_ARG_220 | NH2 | E_GLU_258 | OE1 | 3.606 |
| 3Q3G | E_ARG_220 | NH2 | E_GLU_258 | OE2 | 3.748 |
| 3Q3G | E_ARG_230 | NH1 | E_ASP_132 | OD1 | 3.896 |
| 3Q3G | E_ARG_230 | NH1 | E_ASP_134 | OD1 | 2.958 |
| 3Q3G | E_ARG_230 | NH2 | E_ASP_132 | OD1 | 3.948 |
| 3Q3G | E_LYS_235 | NZ  | E_GLU_262 | OE1 | 3.891 |
| 3Q3G | E_ARG_266 | NH1 | E_ASP_260 | OD1 | 2.728 |
| 3Q3G | E_ARG_266 | NH2 | E_ASP_260 | OD1 | 3.401 |
| 3Q3G | E_ARG_276 | NH1 | E_ASP_273 | OD1 | 3.848 |
| 3Q3G | E_LYS_306 | NZ  | E_GLU_303 | OE1 | 3.875 |
| 3Q3G | E_LYS_306 | NZ  | E_GLU_303 | OE2 | 2.953 |
| 3Q3G | E_ARG_313 | NH2 | E_GLU_314 | OE2 | 2.838 |
| 3Q3G | F_ARG_67  | NH1 | F_GLU_87  | OE2 | 3.457 |
| 3Q3G | F_ARG_67  | NH1 | F_ASP_88  | OD1 | 2.936 |
| 3Q3G | F_ARG_67  | NH1 | F_ASP_88  | OD2 | 3.406 |
| 3Q3G | F_ARG_67  | NH2 | F_GLU_87  | OE2 | 3.930 |
| 3Q3G | F_LYS_113 | NZ  | F_GLU_17  | OE1 | 3.384 |
| 3Q3G | F_LYS_113 | NZ  | F_GLU_17  | OE2 | 3.304 |
| 3Q3G | F_LYS_153 | NZ  | F_GLU_201 | OE1 | 3.790 |
| 3Q3G | F_LYS_155 | NZ  | F_GLU_160 | OE2 | 3.570 |
| 3Q3G | F_ARG_161 | NH1 | F_GLU_191 | OE2 | 3.911 |
| 3Q3G | F_ARG_161 | NH2 | F_GLU_191 | OE2 | 3.286 |
| 3Q3G | F_LYS_205 | NZ  | F_ASP_116 | OD1 | 3.529 |
| 3Q3G | F_LYS_205 | NZ  | F_ASP_116 | OD2 | 2.950 |
| 3Q3G | H_LYS_40  | NZ  | H_ASP_92  | OD1 | 3.981 |
| 3Q3G | H_ARG_42  | NH2 | H_GLU_91  | OE2 | 3.153 |
| 3Q3G | H_ARG_52  | NH1 | L_GLU_179 | OE2 | 3.532 |
| 3Q3G | H_ARG_52  | NH2 | L_GLU_178 | OE1 | 2.972 |
| 3Q3G | H_ARG_52  | NH2 | L_GLU_179 | OE2 | 2.629 |
| 3Q3G | H_LYS_61  | NZ  | L_GLU_179 | OE2 | 3.923 |
| 3Q3G | H_LYS_69  | NZ  | H_ASP_92  | OD1 | 3.838 |
| 3Q3G | H_LYS_69  | NZ  | H_ASP_92  | OD2 | 2.905 |
| 3Q3G | H_LYS_219 | NZ  | F_GLU_129 | OE2 | 3.319 |
| 3Q3G | I_ARG_152 | NH1 | I_ASP_149 | OD1 | 2.842 |
| 3Q3G | I_ARG_196 | NH1 | L_GLU_155 | OE1 | 2.643 |
| 3Q3G | I_ARG_196 | NH1 | L_GLU_155 | OE2 | 3.755 |
| 3Q3G | I_ARG_196 | NH2 | L_GLU_155 | OE1 | 3.725 |
| 3Q3G | I_ARG_196 | NH2 | L_GLU_155 | OE2 | 3.863 |
| 3Q3G | I_ARG_196 | NH2 | L_GLU_162 | OE1 | 2.829 |
| 3Q3G | I_ARG_208 | NH1 | H_GLU_101 | OE1 | 3.704 |
| 3Q3G | I_ARG_208 | NH1 | H_GLU_101 | OE2 | 2.809 |
| 3Q3G | I_ARG_208 | NH1 | L_GLU_178 | OE2 | 2.759 |

|      |           |     |           |     |       |
|------|-----------|-----|-----------|-----|-------|
| 3Q3G | I_ARG_208 | NH2 | H_GLU_101 | OE1 | 3.098 |
| 3Q3G | I_ARG_208 | NH2 | H_GLU_101 | OE2 | 3.125 |
| 3Q3G | I_LYS_217 | NZ  | I_GLU_221 | OE2 | 3.508 |
| 3Q3G | I_ARG_220 | NH2 | I_GLU_258 | OE1 | 3.602 |
| 3Q3G | I_ARG_220 | NH2 | I_GLU_258 | OE2 | 3.748 |
| 3Q3G | I_ARG_230 | NH1 | I_ASP_132 | OD1 | 3.884 |
| 3Q3G | I_ARG_230 | NH1 | I_ASP_134 | OD1 | 2.627 |
| 3Q3G | I_ARG_230 | NH2 | I_ASP_132 | OD1 | 3.901 |
| 3Q3G | I_LYS_235 | NZ  | I_GLU_262 | OE1 | 3.888 |
| 3Q3G | I_ARG_266 | NH1 | I_ASP_260 | OD1 | 2.847 |
| 3Q3G | I_ARG_266 | NH2 | I_ASP_260 | OD1 | 3.632 |
| 3Q3G | I_ARG_276 | NH1 | I_ASP_273 | OD1 | 3.306 |
| 3Q3G | I_ARG_293 | NH1 | I_ASP_294 | OD1 | 2.569 |
| 3Q3G | I_ARG_293 | NH1 | I_ASP_294 | OD2 | 3.199 |
| 3Q3G | I_ARG_293 | NH2 | I_ASP_294 | OD2 | 3.674 |
| 3Q3G | I_LYS_306 | NZ  | I_GLU_303 | OE2 | 2.953 |
| 3Q3G | I_ARG_313 | NH2 | I_GLU_314 | OE2 | 2.841 |
| 3Q3G | J_ARG_67  | NH1 | J_GLU_87  | OE2 | 3.904 |
| 3Q3G | J_ARG_67  | NH1 | J_ASP_88  | OD1 | 2.685 |
| 3Q3G | J_ARG_67  | NH1 | J_ASP_88  | OD2 | 2.963 |
| 3Q3G | J_ARG_67  | NH2 | J_GLU_87  | OE2 | 3.860 |
| 3Q3G | J_LYS_109 | NZ  | K_GLU_44  | OE1 | 3.972 |
| 3Q3G | J_LYS_113 | NZ  | J_GLU_17  | OE1 | 3.413 |
| 3Q3G | J_LYS_113 | NZ  | J_GLU_17  | OE2 | 3.281 |
| 3Q3G | J_LYS_153 | NZ  | J_GLU_201 | OE1 | 3.780 |
| 3Q3G | J_LYS_155 | NZ  | J_GLU_201 | OE2 | 2.804 |
| 3Q3G | J_ARG_161 | NH1 | J_GLU_191 | OE2 | 3.912 |
| 3Q3G | J_ARG_161 | NH2 | J_GLU_191 | OE2 | 3.262 |
| 3Q3G | J_LYS_205 | NZ  | J_ASP_116 | OD1 | 3.511 |
| 3Q3G | J_LYS_205 | NZ  | J_ASP_116 | OD2 | 2.982 |
| 3Q3G | K_LYS_40  | NZ  | K_ASP_92  | OD1 | 3.980 |
| 3Q3G | K_ARG_52  | NH1 | L_GLU_179 | OE2 | 3.394 |
| 3Q3G | K_ARG_52  | NH2 | L_GLU_178 | OE1 | 2.871 |
| 3Q3G | K_ARG_52  | NH2 | L_GLU_179 | OE2 | 2.626 |
| 3Q3G | K_LYS_69  | NZ  | K_ASP_92  | OD1 | 3.854 |
| 3Q3G | K_LYS_69  | NZ  | K_ASP_92  | OD2 | 2.911 |
| 3Q3G | K_LYS_219 | NZ  | J_GLU_129 | OE2 | 3.216 |
| 3Q3G | L_ARG_152 | NH1 | L_ASP_149 | OD1 | 2.835 |
| 3Q3G | L_ARG_196 | NH1 | L_GLU_155 | OE1 | 2.611 |
| 3Q3G | L_ARG_196 | NH1 | L_GLU_155 | OE2 | 3.736 |
| 3Q3G | L_ARG_196 | NH2 | L_GLU_155 | OE1 | 3.784 |
| 3Q3G | L_ARG_196 | NH2 | L_GLU_162 | OE1 | 2.844 |
| 3Q3G | L_ARG_208 | NH1 | K_GLU_101 | OE1 | 3.706 |
| 3Q3G | L_ARG_208 | NH1 | K_GLU_101 | OE2 | 2.777 |
| 3Q3G | L_ARG_208 | NH1 | L_GLU_178 | OE2 | 2.802 |
| 3Q3G | L_ARG_208 | NH2 | K_GLU_101 | OE1 | 3.099 |
| 3Q3G | L_ARG_208 | NH2 | K_GLU_101 | OE2 | 3.162 |
| 3Q3G | L_LYS_217 | NZ  | L_GLU_221 | OE2 | 3.517 |
| 3Q3G | L_ARG_220 | NH2 | L_GLU_258 | OE1 | 3.603 |
| 3Q3G | L_ARG_220 | NH2 | L_GLU_258 | OE2 | 3.763 |
| 3Q3G | L_ARG_230 | NH1 | L_ASP_132 | OD1 | 3.881 |
| 3Q3G | L_ARG_230 | NH1 | L_ASP_134 | OD1 | 2.707 |
| 3Q3G | L_ARG_230 | NH1 | L_ASP_134 | OD2 | 3.460 |
| 3Q3G | L_ARG_230 | NH2 | L_ASP_132 | OD1 | 3.905 |
| 3Q3G | L_LYS_235 | NZ  | L_GLU_262 | OE1 | 3.906 |
| 3Q3G | L_ARG_266 | NH1 | L_ASP_260 | OD1 | 2.751 |
| 3Q3G | L_ARG_266 | NH2 | L_ASP_260 | OD1 | 2.771 |
| 3Q3G | L_ARG_266 | NH2 | L_ASP_260 | OD2 | 3.493 |

|      |           |     |           |     |       |
|------|-----------|-----|-----------|-----|-------|
| 3Q3G | L_ARG_276 | NH2 | L_ASP_273 | OD1 | 3.904 |
| 3Q3G | L_ARG_276 | NH2 | L_ASP_273 | OD2 | 3.992 |
| 3Q3G | L_ARG_281 | NH1 | L_GLU_278 | OE2 | 3.655 |
| 3Q3G | L_LYS_306 | NZ  | L_GLU_303 | OE2 | 3.422 |
| 3Q3G | L_ARG_313 | NH2 | L_GLU_314 | OE2 | 2.844 |

Table 458: 3Q3G-specific salt bridging networks analysis. In this table, a PDB file is specified with a four-letter PDB ID, except that the names of the PDB files corresponding to the single NMR structural model split from the NMR ensemble is specified with a four-letter PDB ID in addition to a hyphen followed by the single NMR structural model numeric ID, the residue naming scheme is **Chain ID\_residue name\_residue number**,  $\angle ADH$  represents the angle formed by acceptor (A), donor (D) and hydrogen (H) ( $\angle ADH$ ).

| PDB ID | Residue A | Atom A | Residue B | Atom B | Distance (Å) |
|--------|-----------|--------|-----------|--------|--------------|
| 3QA3   | C_LYS_24  | NZ     | C_ASP_76  | OD2    | 3.522        |
| 3QA3   | C_ARG_67  | NH1    | C_GLU_87  | OE2    | 3.269        |
| 3QA3   | C_ARG_67  | NH1    | C_ASP_88  | OD1    | 2.660        |
| 3QA3   | C_ARG_67  | NH1    | C_ASP_88  | OD2    | 2.924        |
| 3QA3   | C_ARG_67  | NH2    | C_GLU_87  | OE2    | 3.168        |
| 3QA3   | C_LYS_109 | NZ     | C_ASP_171 | OD1    | 3.926        |
| 3QA3   | C_LYS_109 | NZ     | D_GLU_44  | OE1    | 3.919        |
| 3QA3   | C_LYS_113 | NZ     | C_GLU_17  | OE1    | 3.598        |
| 3QA3   | C_LYS_113 | NZ     | C_GLU_17  | OE2    | 3.105        |
| 3QA3   | C_LYS_155 | NZ     | C_GLU_201 | OE2    | 3.611        |
| 3QA3   | C_ARG_161 | NH2    | C_GLU_191 | OE2    | 3.603        |
| 3QA3   | C_LYS_189 | NZ     | C_GLU_193 | OE1    | 3.703        |
| 3QA3   | C_LYS_205 | NZ     | C_ASP_116 | OD1    | 3.367        |
| 3QA3   | C_LYS_205 | NZ     | C_ASP_116 | OD2    | 2.961        |
| 3QA3   | C_ARG_217 | NH1    | C_GLU_193 | OE2    | 3.785        |
| 3QA3   | D_LYS_21  | NZ     | B_GLU_202 | OE2    | 2.710        |
| 3QA3   | D_LYS_40  | NZ     | D_ASP_92  | OD1    | 3.621        |
| 3QA3   | D_ARG_42  | NH2    | D_GLU_91  | OE1    | 3.456        |
| 3QA3   | D_ARG_52  | NH1    | G_GLU_179 | OE2    | 3.492        |
| 3QA3   | D_ARG_52  | NH2    | G_GLU_178 | OE1    | 3.012        |
| 3QA3   | D_ARG_52  | NH2    | G_GLU_179 | OE2    | 2.776        |
| 3QA3   | D_LYS_61  | NZ     | G_GLU_179 | OE1    | 3.896        |
| 3QA3   | D_LYS_61  | NZ     | G_GLU_179 | OE2    | 3.867        |
| 3QA3   | D_LYS_69  | NZ     | D_ASP_92  | OD2    | 3.339        |
| 3QA3   | D_LYS_219 | NZ     | C_GLU_129 | OE2    | 3.586        |
| 3QA3   | G_ARG_151 | NH1    | G_GLU_155 | OE1    | 3.186        |
| 3QA3   | G_ARG_151 | NH1    | G_GLU_155 | OE2    | 3.465        |
| 3QA3   | G_ARG_152 | NH1    | G_ASP_149 | OD1    | 3.120        |
| 3QA3   | G_ARG_196 | NH2    | G_GLU_162 | OE1    | 3.407        |
| 3QA3   | G_ARG_208 | NH1    | D_GLU_101 | OE1    | 3.094        |
| 3QA3   | G_ARG_208 | NH1    | D_GLU_101 | OE2    | 3.755        |
| 3QA3   | G_ARG_208 | NH1    | G_GLU_178 | OE2    | 2.905        |
| 3QA3   | G_ARG_208 | NH2    | D_GLU_101 | OE1    | 2.802        |
| 3QA3   | G_LYS_217 | NZ     | G_GLU_221 | OE1    | 3.238        |
| 3QA3   | G_LYS_217 | NZ     | G_GLU_221 | OE2    | 3.591        |
| 3QA3   | G_ARG_220 | NH2    | G_GLU_258 | OE1    | 3.098        |
| 3QA3   | G_ARG_220 | NH2    | G_GLU_258 | OE2    | 3.589        |
| 3QA3   | G_ARG_230 | NH1    | G_ASP_134 | OD1    | 2.776        |
| 3QA3   | G_LYS_235 | NZ     | G_GLU_262 | OE1    | 3.322        |
| 3QA3   | G_ARG_266 | NH1    | G_ASP_260 | OD1    | 3.130        |
| 3QA3   | G_ARG_266 | NH2    | G_ASP_260 | OD1    | 3.273        |
| 3QA3   | G_ARG_266 | NH2    | G_ASP_260 | OD2    | 3.917        |
| 3QA3   | G_ARG_281 | NH1    | G_GLU_278 | OE2    | 3.336        |
| 3QA3   | G_ARG_293 | NH2    | G_ASP_294 | OD2    | 3.535        |
| 3QA3   | G_LYS_306 | NZ     | F_GLU_61  | OE1    | 2.676        |
| 3QA3   | G_LYS_306 | NZ     | F_GLU_61  | OE2    | 3.962        |
| 3QA3   | G_ARG_313 | NH2    | G_GLU_314 | OE2    | 3.236        |
| 3QA3   | A_LYS_24  | NZ     | A_ASP_76  | OD2    | 3.526        |
| 3QA3   | A_ARG_67  | NH1    | A_GLU_87  | OE2    | 3.266        |
| 3QA3   | A_ARG_67  | NH1    | A_ASP_88  | OD1    | 2.659        |
| 3QA3   | A_ARG_67  | NH1    | A_ASP_88  | OD2    | 2.926        |
| 3QA3   | A_ARG_67  | NH2    | A_GLU_87  | OE2    | 3.154        |
| 3QA3   | A_LYS_109 | NZ     | A_ASP_171 | OD1    | 3.971        |
| 3QA3   | A_LYS_113 | NZ     | A_GLU_17  | OE1    | 3.580        |
| 3QA3   | A_LYS_113 | NZ     | A_GLU_17  | OE2    | 3.100        |
| 3QA3   | A_LYS_155 | NZ     | A_GLU_201 | OE2    | 2.971        |
| 3QA3   | A_LYS_205 | NZ     | A_ASP_116 | OD1    | 3.377        |

|      |           |     |           |     |       |
|------|-----------|-----|-----------|-----|-------|
| 3QA3 | A_LYS_205 | NZ  | A_ASP_116 | OD2 | 2.963 |
| 3QA3 | B_LYS_40  | NZ  | B_ASP_92  | OD1 | 3.602 |
| 3QA3 | B_ARG_52  | NH1 | E_GLU_179 | OE2 | 3.674 |
| 3QA3 | B_ARG_52  | NH2 | E_GLU_178 | OE1 | 3.139 |
| 3QA3 | B_ARG_52  | NH2 | E_GLU_179 | OE2 | 2.772 |
| 3QA3 | B_LYS_61  | NZ  | E_GLU_179 | OE1 | 3.626 |
| 3QA3 | B_LYS_61  | NZ  | E_GLU_179 | OE2 | 3.531 |
| 3QA3 | B_LYS_69  | NZ  | B_ASP_92  | OD2 | 3.326 |
| 3QA3 | B_LYS_219 | NZ  | A_GLU_129 | OE2 | 3.689 |
| 3QA3 | E_ARG_152 | NH1 | E_ASP_149 | OD1 | 3.421 |
| 3QA3 | E_ARG_152 | NH1 | E_GLU_303 | OE2 | 3.891 |
| 3QA3 | E_ARG_196 | NH1 | E_GLU_155 | OE2 | 2.779 |
| 3QA3 | E_ARG_196 | NH1 | E_GLU_162 | OE1 | 3.631 |
| 3QA3 | E_ARG_196 | NH2 | E_GLU_155 | OE1 | 3.951 |
| 3QA3 | E_ARG_196 | NH2 | E_GLU_155 | OE2 | 3.547 |
| 3QA3 | E_ARG_196 | NH2 | E_GLU_162 | OE1 | 3.609 |
| 3QA3 | E_ARG_208 | NH1 | B_GLU_101 | OE1 | 3.112 |
| 3QA3 | E_ARG_208 | NH1 | B_GLU_101 | OE2 | 3.639 |
| 3QA3 | E_ARG_208 | NH1 | E_GLU_178 | OE1 | 3.992 |
| 3QA3 | E_ARG_208 | NH1 | E_GLU_178 | OE2 | 2.905 |
| 3QA3 | E_ARG_208 | NH2 | B_GLU_101 | OE1 | 2.913 |
| 3QA3 | E_ARG_208 | NH2 | B_GLU_101 | OE2 | 3.978 |
| 3QA3 | E_LYS_217 | NZ  | E_GLU_221 | OE1 | 3.240 |
| 3QA3 | E_LYS_217 | NZ  | E_GLU_221 | OE2 | 3.588 |
| 3QA3 | E_ARG_220 | NH2 | E_GLU_258 | OE1 | 3.091 |
| 3QA3 | E_ARG_220 | NH2 | E_GLU_258 | OE2 | 3.588 |
| 3QA3 | E_ARG_230 | NH1 | E_ASP_134 | OD1 | 2.769 |
| 3QA3 | E_LYS_235 | NZ  | E_GLU_262 | OE1 | 3.320 |
| 3QA3 | E_ARG_266 | NH1 | E_ASP_260 | OD1 | 3.181 |
| 3QA3 | E_ARG_266 | NH2 | E_ASP_260 | OD1 | 3.305 |
| 3QA3 | E_ARG_281 | NH1 | E_GLU_278 | OE2 | 2.753 |
| 3QA3 | F_LYS_24  | NZ  | F_ASP_76  | OD2 | 3.520 |
| 3QA3 | F_ARG_67  | NH1 | F_GLU_87  | OE2 | 3.259 |
| 3QA3 | F_ARG_67  | NH1 | F_ASP_88  | OD1 | 2.663 |
| 3QA3 | F_ARG_67  | NH1 | F_ASP_88  | OD2 | 2.926 |
| 3QA3 | F_ARG_67  | NH2 | F_GLU_87  | OE2 | 3.150 |
| 3QA3 | F_LYS_113 | NZ  | F_GLU_17  | OE1 | 3.577 |
| 3QA3 | F_LYS_113 | NZ  | F_GLU_17  | OE2 | 3.091 |
| 3QA3 | F_LYS_153 | NZ  | F_GLU_201 | OE1 | 3.153 |
| 3QA3 | F_LYS_155 | NZ  | F_GLU_201 | OE1 | 3.670 |
| 3QA3 | F_LYS_155 | NZ  | F_GLU_201 | OE2 | 3.187 |
| 3QA3 | F_HIS_195 | ND1 | F_ASP_157 | OD2 | 2.743 |
| 3QA3 | F_LYS_205 | NZ  | F_ASP_116 | OD1 | 3.352 |
| 3QA3 | F_LYS_205 | NZ  | F_ASP_116 | OD2 | 2.987 |
| 3QA3 | F_ARG_217 | NH1 | F_GLU_193 | OE2 | 3.646 |
| 3QA3 | H_LYS_21  | NZ  | K_GLU_202 | OE1 | 2.630 |
| 3QA3 | H_LYS_40  | NZ  | H_ASP_92  | OD1 | 3.607 |
| 3QA3 | H_ARG_52  | NH1 | L_GLU_179 | OE2 | 3.536 |
| 3QA3 | H_ARG_52  | NH2 | L_GLU_178 | OE1 | 3.079 |
| 3QA3 | H_ARG_52  | NH2 | L_GLU_179 | OE2 | 2.753 |
| 3QA3 | H_LYS_61  | NZ  | L_GLU_179 | OE1 | 3.833 |
| 3QA3 | H_LYS_61  | NZ  | L_GLU_179 | OE2 | 3.714 |
| 3QA3 | H_LYS_69  | NZ  | H_ASP_92  | OD2 | 3.333 |
| 3QA3 | H_LYS_219 | NZ  | F_GLU_129 | OE2 | 3.683 |
| 3QA3 | I_ARG_151 | NH1 | L_GLU_155 | OE1 | 3.176 |
| 3QA3 | I_ARG_151 | NH1 | L_GLU_155 | OE2 | 3.423 |
| 3QA3 | I_ARG_152 | NH1 | I_ASP_149 | OD1 | 3.295 |
| 3QA3 | I_ARG_208 | NH1 | H_GLU_101 | OE1 | 2.952 |



|      |           |     |           |     |       |
|------|-----------|-----|-----------|-----|-------|
| 3QA3 | I_ARG_208 | NH1 | H_GLU_101 | OE2 | 3.280 |
| 3QA3 | I_ARG_208 | NH1 | L_GLU_178 | OE2 | 2.910 |
| 3QA3 | I_ARG_208 | NH2 | H_GLU_101 | OE1 | 2.858 |
| 3QA3 | I_ARG_208 | NH2 | H_GLU_101 | OE2 | 3.749 |
| 3QA3 | I_LYS_217 | NZ  | L_GLU_221 | OE1 | 3.237 |
| 3QA3 | I_LYS_217 | NZ  | L_GLU_221 | OE2 | 3.599 |
| 3QA3 | I_ARG_220 | NH2 | L_GLU_258 | OE1 | 3.094 |
| 3QA3 | I_ARG_220 | NH2 | L_GLU_258 | OE2 | 3.593 |
| 3QA3 | I_ARG_230 | NH1 | L_ASP_134 | OD1 | 2.778 |
| 3QA3 | I_LYS_235 | NZ  | L_GLU_262 | OE1 | 3.330 |
| 3QA3 | I_ARG_266 | NH1 | L_ASP_260 | OD1 | 2.823 |
| 3QA3 | I_ARG_266 | NH2 | L_ASP_260 | OD1 | 2.813 |
| 3QA3 | I_ARG_266 | NH2 | L_ASP_260 | OD2 | 3.696 |
| 3QA3 | I_ARG_293 | NH2 | L_ASP_294 | OD2 | 3.520 |
| 3QA3 | I_LYS_306 | NZ  | C_GLU_61  | OE1 | 3.836 |
| 3QA3 | J_LYS_24  | NZ  | J_ASP_76  | OD2 | 3.532 |
| 3QA3 | J_ARG_67  | NH1 | J_GLU_87  | OE2 | 3.263 |
| 3QA3 | J_ARG_67  | NH1 | J_ASP_88  | OD1 | 2.670 |
| 3QA3 | J_ARG_67  | NH1 | J_ASP_88  | OD2 | 2.921 |
| 3QA3 | J_ARG_67  | NH2 | J_GLU_87  | OE2 | 3.148 |
| 3QA3 | J_LYS_109 | NZ  | K_GLU_44  | OE1 | 3.982 |
| 3QA3 | J_LYS_113 | NZ  | J_GLU_17  | OE1 | 3.620 |
| 3QA3 | J_LYS_113 | NZ  | J_GLU_17  | OE2 | 3.124 |
| 3QA3 | J_LYS_205 | NZ  | J_ASP_116 | OD1 | 3.342 |
| 3QA3 | J_LYS_205 | NZ  | J_ASP_116 | OD2 | 2.981 |
| 3QA3 | K_LYS_40  | NZ  | K_ASP_92  | OD1 | 3.624 |
| 3QA3 | K_ARG_52  | NH1 | L_GLU_179 | OE2 | 3.477 |
| 3QA3 | K_ARG_52  | NH2 | L_GLU_178 | OE1 | 3.052 |
| 3QA3 | K_ARG_52  | NH2 | L_GLU_179 | OE2 | 2.734 |
| 3QA3 | K_LYS_61  | NZ  | L_GLU_179 | OE1 | 3.839 |
| 3QA3 | K_LYS_61  | NZ  | L_GLU_179 | OE2 | 3.819 |
| 3QA3 | K_LYS_69  | NZ  | K_ASP_92  | OD2 | 3.339 |
| 3QA3 | K_LYS_219 | NZ  | J_GLU_129 | OE2 | 3.538 |
| 3QA3 | L_ARG_152 | NH1 | L_ASP_149 | OD1 | 3.084 |
| 3QA3 | L_LYS_165 | NZ  | L_GLU_162 | OE2 | 3.035 |
| 3QA3 | L_ARG_196 | NH2 | L_GLU_162 | OE1 | 3.491 |
| 3QA3 | L_ARG_208 | NH1 | K_GLU_101 | OE1 | 3.296 |
| 3QA3 | L_ARG_208 | NH1 | K_GLU_101 | OE2 | 3.152 |
| 3QA3 | L_ARG_208 | NH1 | L_GLU_178 | OE1 | 3.993 |
| 3QA3 | L_ARG_208 | NH1 | L_GLU_178 | OE2 | 2.907 |
| 3QA3 | L_ARG_208 | NH2 | K_GLU_101 | OE1 | 3.120 |
| 3QA3 | L_ARG_208 | NH2 | K_GLU_101 | OE2 | 3.548 |
| 3QA3 | L_LYS_217 | NZ  | L_GLU_221 | OE1 | 3.242 |
| 3QA3 | L_LYS_217 | NZ  | L_GLU_221 | OE2 | 3.595 |
| 3QA3 | L_ARG_220 | NH2 | L_GLU_258 | OE1 | 3.097 |
| 3QA3 | L_ARG_220 | NH2 | L_GLU_258 | OE2 | 3.600 |
| 3QA3 | L_ARG_230 | NH1 | L_ASP_134 | OD1 | 2.780 |
| 3QA3 | L_LYS_235 | NZ  | L_GLU_262 | OE1 | 3.332 |
| 3QA3 | L_ARG_266 | NH1 | L_ASP_260 | OD1 | 2.676 |
| 3QA3 | L_ARG_266 | NH2 | L_ASP_260 | OD1 | 3.599 |
| 3QA3 | L_LYS_279 | NZ  | L_GLU_244 | OE1 | 3.218 |
| 3QA3 | L_LYS_279 | NZ  | L_GLU_244 | OE2 | 3.599 |
| 3QA3 | L_ARG_281 | NH1 | L_GLU_278 | OE2 | 2.973 |
| 3QA3 | L_ARG_293 | NH2 | L_ASP_294 | OD2 | 3.523 |

---

Table 459: 3QA3-specific salt bridging networks analysis. In this table, a PDB file is specified with a four-letter PDB ID, except that the names of the PDB files corresponding to the single NMR structural model split from the NMR ensemble is specified with a four-letter PDB ID in addition to a hyphen followed by the single NMR structural model numeric ID, the residue naming scheme is **Chain ID\_residue name\_residue number**,  $\angle ADH$  represents the angle formed by acceptor (A), donor (D) and hydrogen (H) ( $\angle ADH$ ).

| PDB ID | Residue A | Atom A | Residue B | Atom B | Distance (Å) |
|--------|-----------|--------|-----------|--------|--------------|
| 3QG6   | A_ARG.61  | NH1    | A_ASP.82  | OD1    | 3.432        |
| 3QG6   | A_ARG.61  | NH1    | A_ASP.82  | OD2    | 2.717        |
| 3QG6   | A_ARG.61  | NH2    | A_GLU.79  | OE1    | 3.943        |
| 3QG6   | A_ARG.61  | NH2    | A_ASP.82  | OD1    | 3.288        |
| 3QG6   | A_ARG.61  | NH2    | A_ASP.82  | OD2    | 3.964        |
| 3QG6   | A_LYS.142 | NZ     | A_GLU.105 | OE1    | 3.461        |
| 3QG6   | A_LYS.142 | NZ     | A_GLU.105 | OE2    | 3.669        |
| 3QG6   | A_LYS.147 | NZ     | A_GLU.154 | OE1    | 3.545        |
| 3QG6   | A_LYS.149 | NZ     | A_GLU.195 | OE1    | 2.687        |
| 3QG6   | A_LYS.149 | NZ     | A_GLU.195 | OE2    | 3.955        |
| 3QG6   | A_ARG.155 | NH1    | A_GLU.185 | OE1    | 3.832        |
| 3QG6   | A_ARG.155 | NH1    | A_GLU.185 | OE2    | 3.376        |
| 3QG6   | A_ARG.155 | NH2    | A_GLU.185 | OE1    | 3.065        |
| 3QG6   | A_ARG.155 | NH2    | A_GLU.185 | OE2    | 3.907        |
| 3QG6   | A_LYS.183 | NZ     | A_GLU.187 | OE1    | 3.106        |
| 3QG6   | A_LYS.183 | NZ     | A_GLU.187 | OE2    | 3.334        |
| 3QG6   | A_ARG.188 | NH1    | H_ASP.86  | OD2    | 3.997        |
| 3QG6   | A_ARG.188 | NH2    | H_ASP.86  | OD1    | 3.422        |
| 3QG6   | A_HIS.189 | ND1    | A_ASP.151 | OD2    | 2.899        |
| 3QG6   | A_HIS.189 | NE2    | A_GLU.185 | OE2    | 3.272        |
| 3QG6   | A_HIS.189 | NE2    | H_GLU.85  | OE1    | 3.361        |
| 3QG6   | A_HIS.189 | NE2    | H_GLU.85  | OE2    | 3.215        |
| 3QG6   | A_LYS.199 | NZ     | A_ASP.110 | OD2    | 3.955        |
| 3QG6   | B_ARG.38  | NH1    | B_ASP.86  | OD1    | 2.928        |
| 3QG6   | B_ARG.38  | NH2    | B_GLU.46  | OE1    | 2.323        |
| 3QG6   | B_LYS.44  | NZ     | B_GLU.46  | OE2    | 3.659        |
| 3QG6   | B_LYS.44  | NZ     | L_ASP.151 | OD2    | 2.912        |
| 3QG6   | B_LYS.64  | NZ     | L_GLU.187 | OE1    | 3.778        |
| 3QG6   | B_LYS.75  | NZ     | B_ASP.72  | OD2    | 3.646        |
| 3QG6   | B_ARG.94  | NH2    | B_ASP.101 | OD2    | 2.932        |
| 3QG6   | B_LYS.221 | NZ     | A_GLU.123 | OE1    | 2.433        |
| 3QG6   | H_ARG.38  | NH1    | H_ASP.86  | OD1    | 2.717        |
| 3QG6   | H_ARG.38  | NH2    | H_GLU.46  | OE1    | 2.691        |
| 3QG6   | H_ARG.38  | NH2    | H_ASP.86  | OD1    | 3.824        |
| 3QG6   | H_LYS.44  | NZ     | A_ASP.151 | OD2    | 2.924        |
| 3QG6   | H_LYS.44  | NZ     | H_GLU.46  | OE2    | 3.702        |
| 3QG6   | H_LYS.64  | NZ     | A_GLU.187 | OE1    | 3.924        |
| 3QG6   | H_LYS.75  | NZ     | H_ASP.72  | OD2    | 3.688        |
| 3QG6   | H_ARG.94  | NH1    | H_ASP.101 | OD2    | 2.954        |
| 3QG6   | H_LYS.221 | NZ     | L_GLU.123 | OE1    | 2.733        |
| 3QG6   | L_ARG.61  | NH1    | L_ASP.82  | OD1    | 2.705        |
| 3QG6   | L_ARG.61  | NH1    | L_ASP.82  | OD2    | 2.689        |
| 3QG6   | L_ARG.61  | NH2    | L_GLU.79  | OE1    | 3.908        |
| 3QG6   | L_ARG.61  | NH2    | L_GLU.79  | OE2    | 3.936        |
| 3QG6   | L_LYS.142 | NZ     | L_GLU.105 | OE1    | 3.323        |
| 3QG6   | L_LYS.142 | NZ     | L_GLU.105 | OE2    | 3.219        |
| 3QG6   | L_LYS.147 | NZ     | L_GLU.154 | OE1    | 3.582        |
| 3QG6   | L_LYS.149 | NZ     | L_GLU.195 | OE1    | 2.845        |
| 3QG6   | L_ARG.155 | NH1    | L_GLU.185 | OE1    | 3.862        |
| 3QG6   | L_ARG.155 | NH1    | L_GLU.185 | OE2    | 3.392        |
| 3QG6   | L_ARG.155 | NH2    | L_GLU.185 | OE1    | 3.092        |
| 3QG6   | L_ARG.155 | NH2    | L_GLU.185 | OE2    | 3.899        |
| 3QG6   | L_LYS.183 | NZ     | L_GLU.187 | OE1    | 3.324        |
| 3QG6   | L_LYS.183 | NZ     | L_GLU.187 | OE2    | 3.444        |
| 3QG6   | L_HIS.189 | ND1    | L_ASP.151 | OD2    | 2.895        |
| 3QG6   | L_HIS.189 | NE2    | B_GLU.85  | OE1    | 3.320        |
| 3QG6   | L_HIS.189 | NE2    | B_GLU.85  | OE2    | 3.623        |

|      |           |     |           |     |       |
|------|-----------|-----|-----------|-----|-------|
| 3QG6 | L_HIS_189 | NE2 | L_GLU_185 | OE2 | 3.346 |
| 3QG6 | L_LYS_199 | NZ  | L_ASP_110 | OD2 | 3.663 |

Table 460: 3QG6-specific salt bridging networks analysis. In this table, a PDB file is specified with a four-letter PDB ID, except that the names of the PDB files corresponding to the single NMR structural model split from the NMR ensemble is specified with a four-letter PDB ID in addition to a hyphen followed by the single NMR structural model numeric ID, the residue naming scheme is **Chain ID\_residue name\_residue number**,  $\angle ADH$  represents the angle formed by acceptor (A), donor (D) and hydrogen (H) ( $\angle ADH$ ).

| PDB ID | Residue A | Atom A | Residue B | Atom B | Distance (Å) |
|--------|-----------|--------|-----------|--------|--------------|
| 3QG7   | H_ARG_38  | NH1    | H_ASP_86  | OD1    | 2.959        |
| 3QG7   | H_ARG_38  | NH2    | H_GLU_46  | OE1    | 2.726        |
| 3QG7   | H_ARG_94  | NH2    | H_ASP_101 | OD2    | 3.399        |
| 3QG7   | H_LYS_221 | NZ     | L_GLU_123 | OE2    | 2.769        |
| 3QG7   | H_LYS_222 | NZ     | H_GLU_226 | OE2    | 3.925        |
| 3QG7   | L_ARG_61  | NH1    | L_ASP_82  | OD2    | 3.032        |
| 3QG7   | L_ARG_61  | NH2    | L_GLU_79  | OE1    | 3.794        |
| 3QG7   | L_ARG_61  | NH2    | L_ASP_82  | OD1    | 3.231        |
| 3QG7   | L_ARG_61  | NH2    | L_ASP_82  | OD2    | 3.013        |
| 3QG7   | L_LYS_103 | NZ     | L_ASP_165 | OD1    | 3.787        |
| 3QG7   | L_LYS_147 | NZ     | L_GLU_195 | OE1    | 3.261        |
| 3QG7   | L_LYS_149 | NZ     | L_GLU_195 | OE1    | 3.464        |
| 3QG7   | L_LYS_149 | NZ     | L_GLU_195 | OE2    | 2.727        |
| 3QG7   | L_ARG_155 | NH1    | L_GLU_185 | OE1    | 2.977        |
| 3QG7   | L_LYS_183 | NZ     | L_GLU_187 | OE1    | 2.941        |
| 3QG7   | L_LYS_183 | NZ     | L_GLU_187 | OE2    | 2.894        |
| 3QG7   | L_LYS_199 | NZ     | L_ASP_110 | OD2    | 3.998        |

Table 461: 3QG7-specific salt bridging networks analysis. In this table, a PDB file is specified with a four-letter PDB ID, except that the names of the PDB files corresponding to the single NMR structural model split from the NMR ensemble is specified with a four-letter PDB ID in addition to a hyphen followed by the single NMR structural model numeric ID, the residue naming scheme is **Chain ID\_residue name\_residue number**,  $\angle ADH$  represents the angle formed by acceptor (A), donor (D) and hydrogen (H) ( $\angle ADH$ ).

| PDB ID | Residue A | Atom A | Residue B | Atom B | Distance (Å) |
|--------|-----------|--------|-----------|--------|--------------|
| 3QO1   | A_ARG_24  | NH1    | A_ASP_75  | OD1    | 3.412        |
| 3QO1   | A_ARG_24  | NH2    | A_ASP_75  | OD1    | 2.963        |
| 3QO1   | A_ARG_31  | NH1    | A_ASP_37  | OD1    | 3.003        |
| 3QO1   | A_ARG_31  | NH2    | A_ASP_33  | OD1    | 3.693        |
| 3QO1   | A_ARG_31  | NH2    | A_ASP_33  | OD2    | 3.104        |
| 3QO1   | A_HIS_35  | ND1    | A_ASP_33  | OD1    | 3.949        |
| 3QO1   | A_HIS_35  | ND1    | A_ASP_33  | OD2    | 3.517        |
| 3QO1   | A_LYS_44  | NZ     | A_GLU_86  | OE1    | 3.342        |
| 3QO1   | A_ARG_59  | NH2    | A_ASP_65  | OD1    | 3.479        |
| 3QO1   | A_ARG_66  | NH2    | A_ASP_87  | OD1    | 2.560        |
| 3QO1   | A_ARG_66  | NH2    | A_ASP_87  | OD2    | 2.753        |
| 3QO1   | B_ARG_38  | NH1    | B_GLU_46  | OE1    | 3.400        |
| 3QO1   | B_ARG_38  | NH1    | B_ASP_92  | OD1    | 3.707        |
| 3QO1   | B_ARG_38  | NH2    | B_ASP_92  | OD1    | 2.890        |
| 3QO1   | B_LYS_52  | NZ     | B_GLU_56  | OE2    | 2.709        |
| 3QO1   | B_ARG_53  | NH1    | B_GLU_56  | OE1    | 3.115        |
| 3QO1   | B_ARG_69  | NH1    | B_ASP_92  | OD1    | 3.910        |
| 3QO1   | B_ARG_69  | NH1    | B_ASP_92  | OD2    | 2.658        |
| 3QO1   | B_ARG_69  | NH2    | B_ASP_92  | OD1    | 3.220        |
| 3QO1   | B_ARG_69  | NH2    | B_ASP_92  | OD2    | 3.334        |
| 3QO1   | B_ARG_74  | NH1    | B_ASP_58  | OD1    | 2.936        |
| 3QO1   | B_ARG_74  | NH2    | B_ASP_58  | OD1    | 3.003        |
| 3QO1   | B_ARG_74  | NH2    | B_ASP_58  | OD2    | 3.404        |
| 3QO1   | B_ARG_74  | NH2    | B_ASP_76  | OD1    | 3.459        |
| 3QO1   | B_ARG_74  | NH2    | B_ASP_76  | OD2    | 2.806        |
| 3QO1   | B_ARG_101 | NH1    | A_GLU_39  | OE1    | 3.830        |
| 3QO1   | B_ARG_101 | NH1    | A_GLU_39  | OE2    | 2.711        |
| 3QO1   | B_ARG_101 | NH2    | A_GLU_39  | OE1    | 2.782        |
| 3QO1   | B_ARG_101 | NH2    | A_GLU_39  | OE2    | 3.238        |
| 3QO1   | B_LYS_149 | NZ     | B_ASP_150 | OD1    | 3.291        |
| 3QO1   | B_LYS_149 | NZ     | B_ASP_150 | OD2    | 3.610        |
| 3QO1   | B_LYS_215 | NZ     | A_GLU_128 | OE1    | 3.939        |
| 3QO1   | B_ARG_216 | NH2    | B_GLU_218 | OE2    | 3.982        |

Table 462: 3QO1-specific salt bridging networks analysis. In this table, a PDB file is specified with a four-letter PDB ID, except that the names of the PDB files corresponding to the single NMR structural model split from the NMR ensemble is specified with a four-letter PDB ID in addition to a hyphen followed by the single NMR structural model numeric ID, the residue naming scheme is **Chain ID\_residue name\_residue number**,  $\angle ADH$  represents the angle formed by acceptor (A), donor (D) and hydrogen (H) ( $\angle ADH$ ).

| PDB ID | Residue A | Atom A | Residue B | Atom B | Distance (Å) |
|--------|-----------|--------|-----------|--------|--------------|
| 3QUM   | P_ARG_36  | NH1    | A_ASP_94  | OD2    | 3.603        |
| 3QUM   | P_ARG_36  | NH1    | B_GLU_58  | OE1    | 3.234        |
| 3QUM   | P_ARG_36  | NH1    | B_GLU_58  | OE2    | 3.373        |
| 3QUM   | P_ARG_36  | NH2    | B_GLU_58  | OE1    | 3.423        |
| 3QUM   | P_HIS_57  | ND1    | P_ASP_102 | OD1    | 3.257        |
| 3QUM   | P_HIS_57  | ND1    | P_ASP_102 | OD2    | 2.714        |
| 3QUM   | P_LYS_62  | NZ     | B_GLU_58  | OE2    | 3.762        |
| 3QUM   | P_LYS_119 | NZ     | H_ASP_54  | OD1    | 2.788        |
| 3QUM   | P_LYS_119 | NZ     | H_ASP_54  | OD2    | 3.700        |
| 3QUM   | P_LYS_119 | NZ     | H_ASP_56  | OD2    | 3.000        |
| 3QUM   | P_LYS_230 | NZ     | P_GLU_129 | OE1    | 3.910        |
| 3QUM   | P_LYS_236 | NZ     | P_ASP_240 | OD1    | 3.355        |
| 3QUM   | P_LYS_236 | NZ     | P_ASP_240 | OD2    | 3.879        |
| 3QUM   | L_ARG_24  | NH2    | L_ASP_70  | OD2    | 3.454        |
| 3QUM   | L_LYS_27  | NZ     | L_GLU_93  | OE2    | 2.631        |
| 3QUM   | L_ARG_50  | NH2    | P_GLU_23  | OE1    | 2.715        |
| 3QUM   | L_ARG_61  | NH1    | L_ASP_82  | OD1    | 3.063        |
| 3QUM   | L_ARG_61  | NH1    | L_ASP_82  | OD2    | 2.700        |
| 3QUM   | L_ARG_61  | NH2    | L_GLU_79  | OE1    | 3.466        |
| 3QUM   | L_LYS_149 | NZ     | L_GLU_195 | OE1    | 3.180        |
| 3QUM   | L_LYS_149 | NZ     | L_GLU_195 | OE2    | 2.848        |
| 3QUM   | L_HIS_189 | ND1    | L_ASP_151 | OD1    | 3.513        |
| 3QUM   | L_HIS_189 | ND1    | L_ASP_151 | OD2    | 3.827        |
| 3QUM   | H_ARG_50  | NH1    | H_ASP_95  | OD2    | 2.461        |
| 3QUM   | H_LYS_62  | NZ     | H_GLU_46  | OE1    | 2.726        |
| 3QUM   | H_LYS_66  | NZ     | H_ASP_86  | OD1    | 3.700        |
| 3QUM   | H_LYS_66  | NZ     | H_ASP_86  | OD2    | 2.890        |
| 3QUM   | H_ARG_94  | NH2    | H_ASP_101 | OD1    | 3.980        |
| 3QUM   | H_ARG_94  | NH2    | H_ASP_101 | OD2    | 2.778        |
| 3QUM   | H_ARG_98  | NH2    | P_ASP_159 | OD1    | 3.868        |
| 3QUM   | H_ARG_98  | NH2    | P_ASP_159 | OD2    | 3.474        |
| 3QUM   | H_HIS_164 | NE2    | L_ASP_167 | OD1    | 3.746        |
| 3QUM   | H_LYS_208 | NZ     | L_GLU_123 | OE1    | 3.317        |
| 3QUM   | A_ARG_61  | NH1    | A_ASP_82  | OD2    | 2.784        |
| 3QUM   | A_ARG_61  | NH2    | A_ASP_82  | OD2    | 3.879        |
| 3QUM   | A_ARG_68  | NH2    | A_ASP_27C | OD2    | 3.611        |
| 3QUM   | A_ARG_188 | NH1    | A_GLU_185 | OE1    | 3.541        |
| 3QUM   | A_ARG_188 | NH1    | A_GLU_185 | OE2    | 2.650        |
| 3QUM   | A_HIS_189 | ND1    | A_ASP_151 | OD2    | 3.524        |
| 3QUM   | A_HIS_189 | NE2    | A_GLU_185 | OE1    | 3.506        |
| 3QUM   | A_LYS_207 | NZ     | M_ASP_70  | OD2    | 3.646        |
| 3QUM   | B_ARG_40  | NH1    | B_GLU_85  | OE2    | 3.723        |
| 3QUM   | B_LYS_62  | NZ     | A_ASP_1   | OD1    | 3.967        |
| 3QUM   | B_LYS_62  | NZ     | A_ASP_1   | OD2    | 3.654        |
| 3QUM   | B_LYS_64  | NZ     | B_ASP_65  | OD1    | 3.709        |
| 3QUM   | B_LYS_64  | NZ     | B_ASP_65  | OD2    | 3.188        |
| 3QUM   | B_ARG_94  | NH2    | B_ASP_102 | OD1    | 3.002        |
| 3QUM   | B_ARG_94  | NH2    | B_ASP_102 | OD2    | 3.802        |
| 3QUM   | B_LYS_209 | NZ     | A_GLU_123 | OE1    | 3.994        |
| 3QUM   | B_LYS_209 | NZ     | A_GLU_123 | OE2    | 2.553        |
| 3QUM   | Q_HIS_57  | ND1    | Q_ASP_102 | OD2    | 3.489        |
| 3QUM   | Q_ARG_69  | NH1    | Q_GLU_77  | OE1    | 2.522        |
| 3QUM   | Q_ARG_69  | NH2    | Q_GLU_77  | OE1    | 2.832        |
| 3QUM   | Q_LYS_119 | NZ     | K_ASP_54  | OD1    | 3.579        |
| 3QUM   | Q_LYS_119 | NZ     | K_ASP_54  | OD2    | 2.557        |
| 3QUM   | Q_LYS_119 | NZ     | K_ASP_56  | OD2    | 3.138        |
| 3QUM   | Q_LYS_230 | NZ     | Q_GLU_129 | OE2    | 2.982        |

|      |           |     |           |     |       |
|------|-----------|-----|-----------|-----|-------|
| 3QUM | M_ARG_24  | NH2 | B_ASP_131 | OD1 | 2.867 |
| 3QUM | M_ARG_24  | NH2 | B_ASP_131 | OD2 | 3.402 |
| 3QUM | M_ARG_50  | NH1 | Q_GLU_21  | OE2 | 3.456 |
| 3QUM | M_ARG_50  | NH2 | Q_GLU_21  | OE2 | 3.792 |
| 3QUM | M_ARG_61  | NH1 | M_GLU_79  | OE1 | 2.865 |
| 3QUM | M_ARG_61  | NH1 | M_GLU_79  | OE2 | 3.959 |
| 3QUM | M_ARG_61  | NH2 | M_GLU_79  | OE1 | 3.169 |
| 3QUM | M_ARG_61  | NH2 | M_ASP_82  | OD1 | 2.669 |
| 3QUM | M_ARG_61  | NH2 | M_ASP_82  | OD2 | 2.826 |
| 3QUM | M_LYS_183 | NZ  | M_GLU_187 | OE1 | 3.466 |
| 3QUM | K_ARG_50  | NH1 | K_ASP_95  | OD2 | 2.549 |
| 3QUM | K_LYS_58  | NZ  | Q_ASP_116 | OD2 | 3.811 |
| 3QUM | K_LYS_58  | NZ  | K_ASP_56  | OD1 | 3.915 |
| 3QUM | K_LYS_58  | NZ  | K_ASP_56  | OD2 | 3.991 |
| 3QUM | K_LYS_62  | NZ  | M_ASP_1   | OD1 | 2.803 |
| 3QUM | K_LYS_66  | NZ  | K_ASP_86  | OD1 | 3.473 |
| 3QUM | K_LYS_66  | NZ  | K_ASP_86  | OD2 | 3.448 |
| 3QUM | K_ARG_94  | NH2 | K_ASP_101 | OD1 | 2.367 |
| 3QUM | K_ARG_94  | NH2 | K_ASP_101 | OD2 | 2.940 |
| 3QUM | K_ARG_98  | NH2 | Q_ASP_159 | OD2 | 3.098 |
| 3QUM | K_LYS_208 | NZ  | M_GLU_123 | OE1 | 3.358 |
| 3QUM | K_ARG_213 | NH2 | K_ASP_214 | OD2 | 3.796 |
| 3QUM | C_ARG_24  | NH1 | C_ASP_70  | OD1 | 3.778 |
| 3QUM | C_ARG_24  | NH1 | C_ASP_70  | OD2 | 2.622 |
| 3QUM | C_ARG_24  | NH2 | C_ASP_70  | OD1 | 2.926 |
| 3QUM | C_ARG_24  | NH2 | C_ASP_70  | OD2 | 3.340 |
| 3QUM | C_LYS_39  | NZ  | C_ASP_81  | OD1 | 2.883 |
| 3QUM | C_ARG_61  | NH1 | C_GLU_79  | OE1 | 2.943 |
| 3QUM | C_ARG_61  | NH1 | C_ASP_82  | OD2 | 3.848 |
| 3QUM | C_ARG_61  | NH2 | C_ASP_82  | OD1 | 3.376 |
| 3QUM | C_ARG_61  | NH2 | C_ASP_82  | OD2 | 3.578 |
| 3QUM | C_LYS_142 | NZ  | C_GLU_105 | OE1 | 2.648 |
| 3QUM | C_LYS_142 | NZ  | C_GLU_105 | OE2 | 3.163 |
| 3QUM | C_LYS_147 | NZ  | C_GLU_195 | OE2 | 3.770 |
| 3QUM | C_LYS_149 | NZ  | C_GLU_195 | OE1 | 2.711 |
| 3QUM | C_LYS_149 | NZ  | C_GLU_195 | OE2 | 3.595 |
| 3QUM | C_ARG_188 | NH1 | C_GLU_185 | OE1 | 3.368 |
| 3QUM | D_LYS_38  | NZ  | D_GLU_46  | OE2 | 3.663 |
| 3QUM | D_ARG_40  | NH1 | D_GLU_85  | OE1 | 2.968 |
| 3QUM | D_LYS_66  | NZ  | D_ASP_86  | OD1 | 3.445 |
| 3QUM | D_ARG_94  | NH2 | D_ASP_102 | OD2 | 2.430 |
| 3QUM | D_ARG_97  | NH1 | C_GLU_55  | OE1 | 3.578 |
| 3QUM | D_ARG_97  | NH1 | C_GLU_55  | OE2 | 3.784 |
| 3QUM | D_ARG_97  | NH2 | Q_GLU_110 | OE2 | 3.547 |

Table 463: 3QUM-specific salt bridging networks analysis. In this table, a PDB file is specified with a four-letter PDB ID, except that the names of the PDB files corresponding to the single NMR structural model split from the NMR ensemble is specified with a four-letter PDB ID in addition to a hyphen followed by the single NMR structural model numeric ID, the residue naming scheme is **Chain ID\_residue name\_residue number**,  $\angle ADH$  represents the angle formed by acceptor (A), donor (D) and hydrogen (H) ( $\angle ADH$ ).



| PDB ID | Residue A | Atom A | Residue B | Atom B | Distance (Å) |
|--------|-----------|--------|-----------|--------|--------------|
| 3R08   | L_ARG_61  | NH1    | L_GLU_79  | OE1    | 3.254        |
| 3R08   | L_ARG_61  | NH1    | L_GLU_79  | OE2    | 3.378        |
| 3R08   | L_ARG_61  | NH2    | L_GLU_79  | OE1    | 2.676        |
| 3R08   | L_ARG_61  | NH2    | L_GLU_81  | OE2    | 3.468        |
| 3R08   | L_ARG_61  | NH2    | L_ASP_82  | OD1    | 3.777        |
| 3R08   | L_ARG_61  | NH2    | L_ASP_82  | OD2    | 3.454        |
| 3R08   | L_LYS_103 | NZ     | L_ASP_165 | OD1    | 3.486        |
| 3R08   | L_LYS_142 | NZ     | L_GLU_105 | OE1    | 3.662        |
| 3R08   | L_LYS_147 | NZ     | L_GLU_195 | OE1    | 2.773        |
| 3R08   | L_LYS_155 | NZ     | L_ASP_185 | OD2    | 3.988        |
| 3R08   | L_ARG_156 | NH1    | L_GLU_154 | OE2    | 3.311        |
| 3R08   | L_LYS_183 | NZ     | L_GLU_187 | OE2    | 3.914        |
| 3R08   | L_ARG_188 | NH1    | L_ASP_185 | OD1    | 3.352        |
| 3R08   | L_HIS_189 | ND1    | L_ASP_151 | OD2    | 3.760        |
| 3R08   | L_HIS_189 | NE2    | L_ASP_185 | OD1    | 3.852        |
| 3R08   | L_LYS_199 | NZ     | L_ASP_110 | OD2    | 3.241        |
| 3R08   | L_LYS_207 | NZ     | H_ASP_129 | OD1    | 3.653        |
| 3R08   | L_LYS_207 | NZ     | H_ASP_129 | OD2    | 2.868        |
| 3R08   | L_ARG_211 | NH1    | L_GLU_187 | OE1    | 3.899        |
| 3R08   | L_ARG_211 | NH2    | L_GLU_187 | OE1    | 3.052        |
| 3R08   | H_ARG_38  | NH1    | H_ASP_86  | OD1    | 3.285        |
| 3R08   | H_ARG_38  | NH2    | H_GLU_46  | OE1    | 3.027        |
| 3R08   | H_ARG_43  | NH1    | H_GLU_46  | OE1    | 3.166        |
| 3R08   | H_ARG_43  | NH1    | H_GLU_46  | OE2    | 2.679        |
| 3R08   | H_ARG_43  | NH2    | H_GLU_46  | OE1    | 3.767        |
| 3R08   | H_ARG_43  | NH2    | H_GLU_46  | OE2    | 3.517        |
| 3R08   | H_LYS_58  | NZ     | E_GLU_4   | OE2    | 3.175        |
| 3R08   | H_ARG_66  | NH1    | H_ASP_86  | OD1    | 3.453        |
| 3R08   | H_ARG_66  | NH1    | H_ASP_86  | OD2    | 3.405        |
| 3R08   | H_LYS_83  | NZ     | H_GLU_85  | OE2    | 3.138        |
| 3R08   | H_ARG_94  | NH2    | H_ASP_96  | OD1    | 3.331        |
| 3R08   | H_ARG_94  | NH2    | H_ASP_96  | OD2    | 3.042        |
| 3R08   | H_LYS_99  | NZ     | L_ASP_56  | OD2    | 3.746        |
| 3R08   | E_HIS_45  | ND1    | E_ASP_43  | OD2    | 3.535        |
| 3R08   | E_LYS_69  | NZ     | E_GLU_4   | OE1    | 2.708        |
| 3R08   | E_LYS_76  | NZ     | E_GLU_53  | OE2    | 3.300        |

Table 464: 3R08-specific salt bridging networks analysis. In this table, a PDB file is specified with a four-letter PDB ID, except that the names of the PDB files corresponding to the single NMR structural model split from the NMR ensemble is specified with a four-letter PDB ID in addition to a hyphen followed by the single NMR structural model numeric ID, the residue naming scheme is **Chain ID\_residue name\_residue number**,  $\angle ADH$  represents the angle formed by acceptor (A), donor (D) and hydrogen (H) ( $\angle ADH$ ).

| PDB ID | Residue A | Atom A | Residue B  | Atom B | Distance (Å) |
|--------|-----------|--------|------------|--------|--------------|
| 3SE8   | G.HIS.66  | ND1    | G.GLU.64   | OE2    | 2.819        |
| 3SE8   | G.LYS.207 | NZ     | G.GLU.381  | OE1    | 3.451        |
| 3SE8   | G.LYS.207 | NZ     | G.GLU.381  | OE2    | 2.740        |
| 3SE8   | G.LYS.231 | NZ     | G.GLU.267  | OE1    | 3.718        |
| 3SE8   | G.HIS.249 | NE2    | G.GLU.482  | OE1    | 2.997        |
| 3SE8   | G.LYS.282 | NZ     | G.GLU.275  | OE1    | 2.928        |
| 3SE8   | G.LYS.282 | NZ     | H.ASP.100C | OD2    | 3.668        |
| 3SE8   | G.LYS.343 | NZ     | G.GLU.347  | OE1    | 3.295        |
| 3SE8   | G.LYS.348 | NZ     | G.GLU.269  | OE2    | 2.902        |
| 3SE8   | G.LYS.348 | NZ     | G.GLU.351  | OE1    | 2.955        |
| 3SE8   | G.LYS.348 | NZ     | G.GLU.351  | OE2    | 3.971        |
| 3SE8   | G.LYS.350 | NZ     | G.GLU.347  | OE1    | 3.922        |
| 3SE8   | G.LYS.357 | NZ     | G.GLU.466  | OE2    | 3.935        |
| 3SE8   | G.ARG.379 | NH2    | G.ASP.211  | OD1    | 3.636        |
| 3SE8   | G.ARG.379 | NH2    | G.ASP.211  | OD2    | 3.899        |
| 3SE8   | G.ARG.456 | NH1    | G.GLU.466  | OE1    | 3.921        |
| 3SE8   | G.ARG.469 | NH2    | G.ASP.457  | OD1    | 2.926        |
| 3SE8   | G.ARG.469 | NH2    | G.ASP.457  | OD2    | 3.898        |
| 3SE8   | G.LYS.476 | NZ     | G.GLU.102  | OE1    | 2.540        |
| 3SE8   | G.ARG.480 | NH1    | G.ASP.477  | OD1    | 2.656        |
| 3SE8   | G.LYS.487 | NZ     | G.ASP.47   | OD1    | 2.902        |
| 3SE8   | G.LYS.487 | NZ     | G.GLU.91   | OE1    | 2.578        |
| 3SE8   | H.LYS.19  | NZ     | H.GLU.81   | OE1    | 3.800        |
| 3SE8   | H.ARG.38  | NH1    | H.GLU.46   | OE1    | 2.640        |
| 3SE8   | H.ARG.38  | NH1    | H.ASP.86   | OD1    | 3.748        |
| 3SE8   | H.ARG.38  | NH2    | H.ASP.86   | OD1    | 2.672        |
| 3SE8   | H.ARG.66  | NH1    | H.ASP.86   | OD1    | 3.543        |
| 3SE8   | H.ARG.66  | NH1    | H.ASP.86   | OD2    | 3.893        |
| 3SE8   | H.ARG.66  | NH2    | H.ASP.86   | OD1    | 3.365        |
| 3SE8   | H.ARG.66  | NH2    | H.ASP.86   | OD2    | 2.596        |
| 3SE8   | H.ARG.71  | NH1    | G.ASP.368  | OD1    | 3.115        |
| 3SE8   | H.ARG.71  | NH1    | G.ASP.368  | OD2    | 3.763        |
| 3SE8   | H.ARG.71  | NH2    | G.ASP.368  | OD1    | 3.733        |
| 3SE8   | H.ARG.71  | NH2    | G.ASP.368  | OD2    | 2.907        |
| 3SE8   | H.LYS.143 | NZ     | H.ASP.144  | OD1    | 3.313        |
| 3SE8   | H.LYS.143 | NZ     | H.ASP.144  | OD2    | 3.811        |
| 3SE8   | H.LYS.209 | NZ     | L.GLU.123  | OE1    | 3.768        |
| 3SE8   | H.LYS.210 | NZ     | H.GLU.212  | OE1    | 2.816        |
| 3SE8   | H.LYS.210 | NZ     | H.GLU.212  | OE2    | 3.024        |
| 3SE8   | L.LYS.24  | NZ     | L.ASP.70   | OD1    | 2.618        |
| 3SE8   | L.LYS.24  | NZ     | L.ASP.70   | OD2    | 3.708        |
| 3SE8   | L.ARG.39  | NH1    | L.GLU.81   | OE1    | 3.909        |
| 3SE8   | L.ARG.53  | NH1    | L.ASP.50   | OD2    | 3.743        |
| 3SE8   | L.ARG.61  | NH2    | L.ASP.82   | OD1    | 2.770        |
| 3SE8   | L.ARG.61  | NH2    | L.ASP.82   | OD2    | 3.437        |
| 3SE8   | L.ARG.142 | NH1    | L.GLU.103  | OE1    | 3.000        |
| 3SE8   | L.ARG.142 | NH1    | L.GLU.103  | OE2    | 3.759        |
| 3SE8   | L.ARG.142 | NH2    | L.GLU.103  | OE1    | 3.192        |
| 3SE8   | L.ARG.142 | NH2    | L.GLU.103  | OE2    | 2.840        |
| 3SE8   | L.ARG.142 | NH2    | L.GLU.105  | OE2    | 3.734        |
| 3SE8   | L.LYS.188 | NZ     | L.ASP.185  | OD2    | 3.776        |

---

Table 465: 3SE8-specific salt bridging networks analysis. In this table, a PDB file is specified with a four-letter PDB ID, except that the names of the PDB files corresponding to the single NMR structural model split from the NMR ensemble is specified with a four-letter PDB ID in addition to a hyphen followed by the single NMR structural model numeric ID, the residue naming scheme is **Chain ID\_residue name\_residue number**,  $\angle ADH$  represents the angle formed by acceptor (A), donor (D) and hydrogen (H) ( $\angle ADH$ ).

| PDB ID | Residue A | Atom A | Residue B | Atom B | Distance (Å) |
|--------|-----------|--------|-----------|--------|--------------|
| 3SE9   | G_HIS_66  | ND1    | G_GLU_64  | OE2    | 2.728        |
| 3SE9   | G_LYS_207 | NZ     | G_GLU_381 | OE1    | 3.396        |
| 3SE9   | G_LYS_207 | NZ     | G_GLU_381 | OE2    | 3.043        |
| 3SE9   | G_HIS_249 | NE2    | G_GLU_482 | OE1    | 3.086        |
| 3SE9   | G_LYS_282 | NZ     | G_GLU_275 | OE1    | 3.135        |
| 3SE9   | G_LYS_343 | NZ     | G_GLU_347 | OE2    | 2.995        |
| 3SE9   | G_LYS_348 | NZ     | G_GLU_269 | OE2    | 3.584        |
| 3SE9   | G_LYS_348 | NZ     | G_GLU_351 | OE1    | 3.691        |
| 3SE9   | G_LYS_357 | NZ     | G_GLU_466 | OE1    | 3.212        |
| 3SE9   | G_ARG_456 | NH1    | G_GLU_466 | OE2    | 2.713        |
| 3SE9   | G_ARG_469 | NH1    | G_ASP_457 | OD1    | 2.966        |
| 3SE9   | G_ARG_469 | NH1    | G_ASP_457 | OD2    | 3.436        |
| 3SE9   | G_LYS_476 | NZ     | G_GLU_102 | OE1    | 2.755        |
| 3SE9   | G_LYS_476 | NZ     | G_GLU_102 | OE2    | 3.946        |
| 3SE9   | G_ARG_480 | NH1    | G_ASP_477 | OD1    | 3.009        |
| 3SE9   | G_ARG_480 | NH2    | G_GLU_102 | OE2    | 3.763        |
| 3SE9   | G_LYS_487 | NZ     | G_ASP_47  | OD1    | 2.626        |
| 3SE9   | G_LYS_487 | NZ     | G_ASP_47  | OD2    | 3.721        |
| 3SE9   | G_LYS_487 | NZ     | G_GLU_91  | OE1    | 2.626        |
| 3SE9   | H_ARG_19  | NH2    | H_ASP_81  | OD1    | 3.575        |
| 3SE9   | H_ARG_19  | NH2    | H_ASP_81  | OD2    | 3.127        |
| 3SE9   | H_ARG_31  | NH2    | H_GLU_30  | OE2    | 3.962        |
| 3SE9   | H_ARG_38  | NH1    | H_ASP_86  | OD1    | 2.864        |
| 3SE9   | H_ARG_38  | NH2    | H_GLU_46  | OE1    | 3.505        |
| 3SE9   | H_ARG_64  | NH1    | G_ASP_457 | OD2    | 3.853        |
| 3SE9   | H_ARG_64  | NH2    | G_ASP_457 | OD1    | 3.358        |
| 3SE9   | H_ARG_64  | NH2    | G_ASP_457 | OD2    | 3.280        |
| 3SE9   | H_ARG_66  | NH1    | H_ASP_62  | OD1    | 3.472        |
| 3SE9   | H_ARG_66  | NH1    | H_ASP_62  | OD2    | 2.990        |
| 3SE9   | H_ARG_66  | NH1    | H_ASP_86  | OD1    | 3.657        |
| 3SE9   | H_ARG_66  | NH1    | H_ASP_86  | OD2    | 3.617        |
| 3SE9   | H_ARG_66  | NH2    | H_ASP_86  | OD1    | 3.675        |
| 3SE9   | H_ARG_66  | NH2    | H_ASP_86  | OD2    | 2.373        |
| 3SE9   | H_ARG_71  | NH1    | G_ASP_368 | OD1    | 3.515        |
| 3SE9   | H_ARG_71  | NH1    | G_ASP_368 | OD2    | 2.768        |
| 3SE9   | H_ARG_71  | NH2    | G_ASP_368 | OD1    | 3.012        |
| 3SE9   | H_ARG_71  | NH2    | G_ASP_368 | OD2    | 3.769        |
| 3SE9   | H_ARG_94  | NH2    | H_ASP_101 | OD1    | 2.737        |
| 3SE9   | H_ARG_94  | NH2    | H_ASP_101 | OD2    | 3.906        |
| 3SE9   | H_LYS_143 | NZ     | H_ASP_144 | OD1    | 3.511        |
| 3SE9   | H_LYS_209 | NZ     | L_GLU_123 | OE1    | 3.388        |
| 3SE9   | H_LYS_214 | NZ     | L_ASP_122 | OD1    | 3.332        |
| 3SE9   | L_ARG_61  | NH1    | L_ASP_82  | OD1    | 2.919        |
| 3SE9   | L_ARG_61  | NH1    | L_ASP_82  | OD2    | 3.116        |
| 3SE9   | L_LYS_183 | NZ     | L_GLU_187 | OE1    | 2.818        |
| 3SE9   | L_HIS_189 | ND1    | L_ASP_151 | OD2    | 2.887        |

---

Table 466: 3SE9-specific salt bridging networks analysis. In this table, a PDB file is specified with a four-letter PDB ID, except that the names of the PDB files corresponding to the single NMR structural model split from the NMR ensemble is specified with a four-letter PDB ID in addition to a hyphen followed by the single NMR structural model numeric ID, the residue naming scheme is **Chain ID\_residue name\_residue number**,  $\angle ADH$  represents the angle formed by acceptor (A), donor (D) and hydrogen (H) ( $\angle ADH$ ).

| PDB ID | Residue A | Atom A | Residue B | Atom B | Distance (Å) |
|--------|-----------|--------|-----------|--------|--------------|
| 3SGD   | L_LYS_24  | NZ     | L_ASP_75  | OD1    | 2.783        |
| 3SGD   | L_ARG_51  | NH2    | L_ASP_60  | OD1    | 3.495        |
| 3SGD   | L_ARG_51  | NH2    | L_ASP_60  | OD2    | 3.021        |
| 3SGD   | L_ARG_66  | NH1    | L_ASP_87  | OD1    | 3.680        |
| 3SGD   | L_ARG_66  | NH1    | L_ASP_87  | OD2    | 2.782        |
| 3SGD   | L_ARG_66  | NH2    | L_GLU_84  | OE1    | 3.767        |
| 3SGD   | L_ARG_66  | NH2    | L_ASP_87  | OD1    | 2.989        |
| 3SGD   | L_ARG_66  | NH2    | L_ASP_87  | OD2    | 3.564        |
| 3SGD   | L_HIS_98  | ND1    | L_ASP_31  | OD2    | 3.644        |
| 3SGD   | L_LYS_152 | NZ     | L_GLU_159 | OE1    | 3.644        |
| 3SGD   | L_LYS_152 | NZ     | L_GLU_159 | OE2    | 3.885        |
| 3SGD   | L_LYS_154 | NZ     | L_GLU_200 | OE1    | 3.346        |
| 3SGD   | L_LYS_154 | NZ     | L_GLU_200 | OE2    | 3.354        |
| 3SGD   | L_ARG_160 | NH2    | L_GLU_190 | OE1    | 2.808        |
| 3SGD   | L_ARG_160 | NH2    | L_GLU_190 | OE2    | 2.668        |
| 3SGD   | L_ARG_193 | NH1    | L_ASP_189 | OD2    | 2.692        |
| 3SGD   | L_ARG_193 | NH2    | L_GLU_190 | OE2    | 3.962        |
| 3SGD   | L_HIS_194 | ND1    | L_ASP_156 | OD2    | 2.735        |
| 3SGD   | L_HIS_194 | NE2    | L_GLU_190 | OE2    | 3.628        |
| 3SGD   | L_LYS_204 | NZ     | L_ASP_115 | OD2    | 3.348        |
| 3SGD   | L_LYS_204 | NZ     | J_ASP_75  | OD1    | 3.665        |
| 3SGD   | L_LYS_204 | NZ     | J_ASP_75  | OD2    | 3.246        |
| 3SGD   | H_ARG_38  | NH1    | H_ASP_92  | OD2    | 2.803        |
| 3SGD   | H_ARG_38  | NH2    | H_GLU_46  | OE2    | 3.026        |
| 3SGD   | H_ARG_38  | NH2    | H_ASP_92  | OD2    | 3.826        |
| 3SGD   | H_LYS_43  | NZ     | J_ASP_68  | OD1    | 3.910        |
| 3SGD   | H_ARG_69  | NH1    | H_ASP_92  | OD1    | 2.725        |
| 3SGD   | H_ARG_69  | NH1    | H_ASP_92  | OD2    | 3.812        |
| 3SGD   | H_ARG_69  | NH2    | H_ASP_92  | OD1    | 3.411        |
| 3SGD   | H_ARG_69  | NH2    | H_ASP_92  | OD2    | 3.054        |
| 3SGD   | H_ARG_74  | NH2    | H_ASP_76  | OD1    | 3.619        |
| 3SGD   | H_LYS_210 | NZ     | L_GLU_128 | OE1    | 3.898        |
| 3SGD   | L_LYS_24  | NZ     | L_ASP_75  | OD1    | 3.796        |
| 3SGD   | L_LYS_24  | NZ     | L_ASP_75  | OD2    | 2.962        |
| 3SGD   | L_ARG_44  | NH2    | L_GLU_86  | OE2    | 3.752        |
| 3SGD   | L_ARG_51  | NH2    | L_ASP_60  | OD1    | 2.717        |
| 3SGD   | L_ARG_51  | NH2    | L_ASP_60  | OD2    | 3.541        |
| 3SGD   | L_ARG_66  | NH1    | L_ASP_87  | OD1    | 3.518        |
| 3SGD   | L_ARG_66  | NH1    | L_ASP_87  | OD2    | 2.585        |
| 3SGD   | L_ARG_66  | NH2    | L_GLU_84  | OE1    | 3.635        |
| 3SGD   | L_ARG_66  | NH2    | L_GLU_86  | OE1    | 3.914        |
| 3SGD   | L_ARG_66  | NH2    | L_GLU_86  | OE2    | 3.879        |
| 3SGD   | L_ARG_66  | NH2    | L_ASP_87  | OD1    | 2.899        |
| 3SGD   | L_ARG_66  | NH2    | L_ASP_87  | OD2    | 3.479        |
| 3SGD   | L_ARG_82  | NH1    | L_GLU_84  | OE2    | 2.800        |
| 3SGD   | L_ARG_82  | NH2    | L_GLU_84  | OE2    | 3.178        |
| 3SGD   | L_LYS_154 | NZ     | L_GLU_200 | OE1    | 3.141        |
| 3SGD   | L_LYS_154 | NZ     | L_GLU_200 | OE2    | 2.988        |
| 3SGD   | L_LYS_174 | NZ     | L_ASP_172 | OD1    | 3.706        |
| 3SGD   | L_LYS_174 | NZ     | L_ASP_172 | OD2    | 3.091        |
| 3SGD   | L_LYS_174 | NZ     | L_ASP_175 | OD1    | 3.919        |
| 3SGD   | L_ARG_193 | NH2    | L_ASP_189 | OD2    | 2.737        |
| 3SGD   | L_HIS_194 | ND1    | L_ASP_156 | OD2    | 2.901        |
| 3SGD   | L_LYS_204 | NZ     | L_ASP_115 | OD2    | 3.676        |
| 3SGD   | J_LYS_19  | NZ     | L_ASP_148 | OD1    | 3.248        |
| 3SGD   | J_LYS_19  | NZ     | L_ASP_148 | OD2    | 2.952        |
| 3SGD   | J_ARG_38  | NH1    | J_ASP_92  | OD2    | 2.794        |

|      |          |     |          |     |       |
|------|----------|-----|----------|-----|-------|
| 3SGD | J_ARG_38 | NH2 | J_GLU_46 | OE1 | 3.737 |
| 3SGD | J_ARG_38 | NH2 | J_GLU_46 | OE2 | 2.952 |
| 3SGD | J_ARG_38 | NH2 | J_ASP_92 | OD2 | 3.905 |
| 3SGD | J_ARG_69 | NH1 | J_ASP_92 | OD1 | 2.689 |
| 3SGD | J_ARG_69 | NH1 | J_ASP_92 | OD2 | 3.808 |
| 3SGD | J_ARG_69 | NH2 | J_ASP_92 | OD1 | 3.488 |
| 3SGD | J_ARG_69 | NH2 | J_ASP_92 | OD2 | 3.217 |
| 3SGD | J_ARG_74 | NH2 | J_ASP_76 | OD1 | 3.467 |

Table 467: 3SGD-specific salt bridging networks analysis. In this table, a PDB file is specified with a four-letter PDB ID, except that the names of the PDB files corresponding to the single NMR structural model split from the NMR ensemble is specified with a four-letter PDB ID in addition to a hyphen followed by the single NMR structural model numeric ID, the residue naming scheme is **Chain ID\_residue name\_residue number**,  $\angle ADH$  represents the angle formed by acceptor (A), donor (D) and hydrogen (H) ( $\angle ADH$ ).

| PDB ID | Residue A | Atom A | Residue B  | Atom B | Distance (Å) |
|--------|-----------|--------|------------|--------|--------------|
| 3SKJ   | L_ARG_24  | NH1    | L_GLU_70   | OE1    | 3.770        |
| 3SKJ   | L_ARG_61  | NH2    | L_ASP_82   | OD1    | 2.965        |
| 3SKJ   | L_ARG_61  | NH2    | L_ASP_82   | OD2    | 3.776        |
| 3SKJ   | L_ARG_96  | NH1    | H_GLU_100I | OE1    | 2.505        |
| 3SKJ   | L_ARG_96  | NH1    | H_GLU_100I | OE2    | 2.799        |
| 3SKJ   | L_LYS_103 | NZ     | L_GLU_165  | OE1    | 2.601        |
| 3SKJ   | L_LYS_103 | NZ     | L_GLU_165  | OE2    | 3.499        |
| 3SKJ   | L_HIS_189 | ND1    | L_ASP_151  | OD2    | 3.871        |
| 3SKJ   | L_ARG_211 | NH2    | L_GLU_187  | OE2    | 3.617        |
| 3SKJ   | H_HIS_31  | ND1    | H_ASP_96   | OD2    | 2.640        |
| 3SKJ   | H_HIS_31  | NE2    | E_GLU_133  | OE2    | 3.297        |
| 3SKJ   | H_ARG_38  | NH1    | H_ASP_86   | OD1    | 2.911        |
| 3SKJ   | H_ARG_38  | NH2    | H_GLU_46   | OE1    | 3.116        |
| 3SKJ   | H_ARG_38  | NH2    | H_GLU_46   | OE2    | 3.301        |
| 3SKJ   | H_ARG_38  | NH2    | H_ASP_86   | OD1    | 3.993        |
| 3SKJ   | H_ARG_50  | NH1    | H_GLU_100I | OE1    | 3.128        |
| 3SKJ   | H_LYS_64  | NZ     | H_ASP_61   | OD2    | 3.941        |
| 3SKJ   | H_ARG_66  | NH1    | H_ASP_86   | OD1    | 3.677        |
| 3SKJ   | H_ARG_66  | NH2    | H_ASP_86   | OD1    | 3.495        |
| 3SKJ   | H_ARG_66  | NH2    | H_ASP_86   | OD2    | 2.568        |
| 3SKJ   | H_HIS_161 | NE2    | L_ASP_167  | OD2    | 3.763        |
| 3SKJ   | H_LYS_206 | NZ     | L_GLU_123  | OE1    | 2.501        |
| 3SKJ   | H_LYS_206 | NZ     | L_GLU_123  | OE2    | 3.323        |
| 3SKJ   | H_ARG_207 | NH1    | H_GLU_209  | OE2    | 3.580        |
| 3SKJ   | M_ARG_24  | NH1    | M_GLU_70   | OE1    | 3.068        |
| 3SKJ   | M_ARG_24  | NH1    | M_GLU_70   | OE2    | 3.024        |
| 3SKJ   | M_ARG_24  | NH2    | M_GLU_70   | OE1    | 3.407        |
| 3SKJ   | M_LYS_39  | NZ     | M_ASP_81   | OD1    | 2.568        |
| 3SKJ   | M_ARG_61  | NH2    | M_ASP_82   | OD1    | 2.991        |
| 3SKJ   | M_ARG_61  | NH2    | M_ASP_82   | OD2    | 2.909        |
| 3SKJ   | M_ARG_96  | NH2    | I_GLU_100I | OE1    | 3.081        |
| 3SKJ   | M_ARG_96  | NH2    | I_GLU_100I | OE2    | 3.831        |
| 3SKJ   | M_LYS_103 | NZ     | M_GLU_165  | OE2    | 3.149        |
| 3SKJ   | M_LYS_149 | NZ     | M_GLU_195  | OE2    | 3.240        |
| 3SKJ   | M_LYS_188 | NZ     | M_ASP_185  | OD2    | 3.381        |
| 3SKJ   | I_ARG_38  | NH1    | I_ASP_86   | OD1    | 2.866        |
| 3SKJ   | I_ARG_38  | NH2    | I_GLU_46   | OE1    | 3.262        |
| 3SKJ   | I_ARG_38  | NH2    | I_GLU_46   | OE2    | 3.203        |
| 3SKJ   | I_LYS_43  | NZ     | L_ASP_1    | OD1    | 3.862        |
| 3SKJ   | I_ARG_50  | NH1    | I_GLU_100I | OE1    | 3.217        |
| 3SKJ   | I_ARG_50  | NH1    | I_GLU_100I | OE2    | 3.198        |
| 3SKJ   | I_ARG_66  | NH1    | I_ASP_86   | OD1    | 3.975        |
| 3SKJ   | I_ARG_66  | NH1    | I_ASP_86   | OD2    | 2.891        |
| 3SKJ   | I_ARG_66  | NH2    | I_ASP_86   | OD1    | 3.263        |
| 3SKJ   | I_ARG_66  | NH2    | I_ASP_86   | OD2    | 3.539        |
| 3SKJ   | I_ARG_83  | NH1    | I_GLU_85   | OE1    | 3.307        |
| 3SKJ   | I_ARG_83  | NH1    | I_GLU_85   | OE2    | 3.711        |
| 3SKJ   | I_LYS_140 | NZ     | I_ASP_141  | OD1    | 2.912        |
| 3SKJ   | I_LYS_140 | NZ     | I_ASP_141  | OD2    | 3.281        |
| 3SKJ   | I_LYS_211 | NZ     | M_ASP_122  | OD2    | 3.816        |
| 3SKJ   | I_LYS_211 | NZ     | M_GLU_123  | OE1    | 3.612        |
| 3SKJ   | E_LYS_112 | NZ     | E_ASP_54   | OD1    | 3.156        |
| 3SKJ   | E_ARG_144 | NH1    | E_GLU_142  | OE1    | 3.346        |
| 3SKJ   | E_ARG_144 | NH2    | E_ASP_119  | OD1    | 3.475        |
| 3SKJ   | E_ARG_144 | NH2    | E_GLU_142  | OE1    | 3.494        |
| 3SKJ   | E_ARG_171 | NH1    | E_GLU_73   | OE1    | 3.665        |
| 3SKJ   | E_ARG_171 | NH1    | E_GLU_73   | OE2    | 3.183        |



|      |           |     |          |     |       |
|------|-----------|-----|----------|-----|-------|
| 3SKJ | E_ARG_171 | NH2 | E_GLU_4  | OE1 | 2.631 |
| 3SKJ | E_LYS_176 | NZ  | E_GLU_66 | OE2 | 2.522 |

Table 468: 3SKJ-specific salt bridging networks analysis. In this table, a PDB file is specified with a four-letter PDB ID, except that the names of the PDB files corresponding to the single NMR structural model split from the NMR ensemble is specified with a four-letter PDB ID in addition to a hyphen followed by the single NMR structural model numeric ID, the residue naming scheme is **Chain ID\_residue name\_residue number**,  $\angle ADH$  represents the angle formed by acceptor (A), donor (D) and hydrogen (H) ( $\angle ADH$ ).

| PDB ID | Residue A  | Atom A | Residue B  | Atom B | Distance (Å) |
|--------|------------|--------|------------|--------|--------------|
| 3SY0   | A_LYS_24   | NZ     | A_ASP_70   | OD1    | 2.683        |
| 3SY0   | A_LYS_24   | NZ     | A_ASP_70   | OD2    | 3.488        |
| 3SY0   | A_LYS_39   | NZ     | A_GLU_81   | OE1    | 2.857        |
| 3SY0   | A_ARG_61   | NH1    | A_GLU_81   | OE2    | 3.627        |
| 3SY0   | A_ARG_61   | NH1    | A_ASP_82   | OD1    | 2.753        |
| 3SY0   | A_ARG_61   | NH1    | A_ASP_82   | OD2    | 3.623        |
| 3SY0   | A_ARG_95   | NH2    | B_ASP_95   | OD1    | 3.609        |
| 3SY0   | A_ARG_95   | NH2    | B_ASP_95   | OD2    | 2.821        |
| 3SY0   | A_LYS_146  | NZ     | A_GLU_194  | OE2    | 3.742        |
| 3SY0   | A_LYS_148  | NZ     | A_GLU_194  | OE1    | 2.676        |
| 3SY0   | A_LYS_148  | NZ     | A_GLU_194  | OE2    | 2.913        |
| 3SY0   | A_LYS_182  | NZ     | A_GLU_186  | OE1    | 2.287        |
| 3SY0   | A_LYS_182  | NZ     | A_GLU_186  | OE2    | 3.835        |
| 3SY0   | A_ARG_187  | NH2    | A_GLU_184  | OE1    | 2.876        |
| 3SY0   | A_HIS_188  | ND1    | A_ASP_150  | OD2    | 2.895        |
| 3SY0   | A_HIS_188  | NE2    | A_GLU_184  | OE2    | 2.965        |
| 3SY0   | A_LYS_198  | NZ     | A_ASP_109  | OD2    | 3.892        |
| 3SY0   | B_ARG_38   | NH1    | B_ASP_86   | OD2    | 2.779        |
| 3SY0   | B_ARG_38   | NH2    | B_GLU_46   | OE1    | 3.151        |
| 3SY0   | B_ARG_38   | NH2    | B_GLU_46   | OE2    | 4.000        |
| 3SY0   | B_ARG_38   | NH2    | B_ASP_86   | OD2    | 3.804        |
| 3SY0   | B_ARG_52   | NH1    | B_GLU_56   | OE2    | 2.894        |
| 3SY0   | B_ARG_52   | NH2    | B_GLU_56   | OE2    | 3.121        |
| 3SY0   | B_ARG_64   | NH1    | B_ASP_86   | OD1    | 2.875        |
| 3SY0   | B_ARG_64   | NH1    | B_ASP_86   | OD2    | 3.721        |
| 3SY0   | B_ARG_64   | NH2    | B_ASP_86   | OD1    | 3.464        |
| 3SY0   | B_ARG_64   | NH2    | B_ASP_86   | OD2    | 2.919        |
| 3SY0   | B_HIS_96   | ND1    | B_GLU_100A | OE2    | 3.230        |
| 3SY0   | B_HIS_96   | NE2    | B_GLU_100A | OE2    | 3.820        |
| 3SY0   | B_ARG_100B | NH1    | A_GLU_55   | OE1    | 2.843        |
| 3SY0   | B_ARG_100B | NH1    | A_GLU_55   | OE2    | 3.786        |
| 3SY0   | B_LYS_206  | NZ     | A_GLU_122  | OE1    | 3.980        |

Table 469: 3SY0-specific salt bridging networks analysis. In this table, a PDB file is specified with a four-letter PDB ID, except that the names of the PDB files corresponding to the single NMR structural model split from the NMR ensemble is specified with a four-letter PDB ID in addition to a hyphen followed by the single NMR structural model numeric ID, the residue naming scheme is **Chain ID\_residue name\_residue number**,  $\angle ADH$  represents the angle formed by acceptor (A), donor (D) and hydrogen (H) ( $\angle ADH$ ).

| PDB ID | Residue A  | Atom A | Residue B  | Atom B | Distance (Å) |
|--------|------------|--------|------------|--------|--------------|
| 3T4Y   | A_LYS_24   | NZ     | A_ASP_70   | OD1    | 2.903        |
| 3T4Y   | A_LYS_24   | NZ     | A_ASP_70   | OD2    | 3.502        |
| 3T4Y   | A_LYS_39   | NZ     | A_GLU_81   | OE2    | 3.124        |
| 3T4Y   | A_ARG_61   | NH1    | A_GLU_81   | OE1    | 3.284        |
| 3T4Y   | A_ARG_61   | NH1    | A_ASP_82   | OD1    | 2.653        |
| 3T4Y   | A_ARG_61   | NH1    | A_ASP_82   | OD2    | 3.419        |
| 3T4Y   | A_ARG_95   | NH2    | B_ASP_95   | OD1    | 3.796        |
| 3T4Y   | A_ARG_95   | NH2    | B_ASP_95   | OD2    | 2.951        |
| 3T4Y   | A_LYS_148  | NZ     | A_GLU_194  | OE1    | 2.908        |
| 3T4Y   | A_LYS_148  | NZ     | A_GLU_194  | OE2    | 3.013        |
| 3T4Y   | A_ARG_187  | NH2    | A_GLU_184  | OE1    | 2.855        |
| 3T4Y   | A_HIS_188  | ND1    | A_ASP_150  | OD2    | 2.865        |
| 3T4Y   | A_HIS_188  | NE2    | A_GLU_184  | OE2    | 2.755        |
| 3T4Y   | B_ARG_38   | NH1    | B_ASP_86   | OD2    | 2.806        |
| 3T4Y   | B_ARG_38   | NH2    | B_GLU_46   | OE1    | 3.203        |
| 3T4Y   | B_ARG_38   | NH2    | B_GLU_85   | OE2    | 3.852        |
| 3T4Y   | B_ARG_38   | NH2    | B_ASP_86   | OD2    | 3.884        |
| 3T4Y   | B_ARG_52   | NH1    | B_GLU_56   | OE2    | 2.817        |
| 3T4Y   | B_ARG_52   | NH2    | B_GLU_56   | OE2    | 2.987        |
| 3T4Y   | B_ARG_64   | NH1    | B_ASP_86   | OD1    | 2.822        |
| 3T4Y   | B_ARG_64   | NH1    | B_ASP_86   | OD2    | 3.726        |
| 3T4Y   | B_ARG_64   | NH2    | B_ASP_86   | OD1    | 3.460        |
| 3T4Y   | B_ARG_64   | NH2    | B_ASP_86   | OD2    | 2.866        |
| 3T4Y   | B_HIS_96   | ND1    | B_GLU_100A | OE2    | 3.510        |
| 3T4Y   | B_HIS_96   | NE2    | B_GLU_100A | OE2    | 3.981        |
| 3T4Y   | B_ARG_100B | NH1    | A_GLU_55   | OE1    | 3.824        |
| 3T4Y   | B_ARG_100B | NH1    | A_GLU_55   | OE2    | 2.840        |
| 3T4Y   | B_LYS_206  | NZ     | A_GLU_122  | OE2    | 2.652        |

Table 470: 3T4Y-specific salt bridging networks analysis. In this table, a PDB file is specified with a four-letter PDB ID, except that the names of the PDB files corresponding to the single NMR structural model split from the NMR ensemble is specified with a four-letter PDB ID in addition to a hyphen followed by the single NMR structural model numeric ID, the residue naming scheme is **Chain ID\_residue name\_residue number**,  $\angle ADH$  represents the angle formed by acceptor (A), donor (D) and hydrogen (H) ( $\angle ADH$ ).

| PDB ID | Residue A  | Atom A | Residue B  | Atom B | Distance (Å) |
|--------|------------|--------|------------|--------|--------------|
| 3T65   | B_ARG_38   | NH1    | B_ASP_86   | OD2    | 2.756        |
| 3T65   | B_ARG_38   | NH2    | B_GLU_46   | OE1    | 3.099        |
| 3T65   | B_ARG_38   | NH2    | B_GLU_85   | OE1    | 3.408        |
| 3T65   | B_ARG_38   | NH2    | B_ASP_86   | OD2    | 3.896        |
| 3T65   | B_ARG_52   | NH1    | B_GLU_56   | OE2    | 2.912        |
| 3T65   | B_ARG_52   | NH2    | B_GLU_56   | OE2    | 3.090        |
| 3T65   | B_ARG_64   | NH1    | B_ASP_86   | OD1    | 2.927        |
| 3T65   | B_ARG_64   | NH1    | B_ASP_86   | OD2    | 3.734        |
| 3T65   | B_ARG_64   | NH2    | B_ASP_86   | OD1    | 3.486        |
| 3T65   | B_ARG_64   | NH2    | B_ASP_86   | OD2    | 2.925        |
| 3T65   | B_HIS_96   | ND1    | B_GLU_100A | OE2    | 3.351        |
| 3T65   | B_HIS_96   | NE2    | B_GLU_100A | OE2    | 3.804        |
| 3T65   | B_ARG_100B | NH1    | A_GLU_55   | OE1    | 3.841        |
| 3T65   | B_ARG_100B | NH1    | A_GLU_55   | OE2    | 2.883        |
| 3T65   | A_LYS_24   | NZ     | A_ASP_70   | OD1    | 2.811        |
| 3T65   | A_LYS_24   | NZ     | A_ASP_70   | OD2    | 3.571        |
| 3T65   | A_LYS_39   | NZ     | A_GLU_81   | OE2    | 3.467        |
| 3T65   | A_ARG_54   | NH2    | A_ASP_60   | OD1    | 3.593        |
| 3T65   | A_ARG_61   | NH1    | A_GLU_81   | OE1    | 3.085        |
| 3T65   | A_ARG_61   | NH1    | A_ASP_82   | OD1    | 2.841        |
| 3T65   | A_ARG_61   | NH1    | A_ASP_82   | OD2    | 3.657        |
| 3T65   | A_ARG_95   | NH2    | B_ASP_95   | OD1    | 3.666        |
| 3T65   | A_ARG_95   | NH2    | B_ASP_95   | OD2    | 2.866        |
| 3T65   | A_LYS_146  | NZ     | A_GLU_153  | OE2    | 3.733        |
| 3T65   | A_LYS_148  | NZ     | A_GLU_194  | OE1    | 2.726        |
| 3T65   | A_LYS_148  | NZ     | A_GLU_194  | OE2    | 3.149        |
| 3T65   | A_LYS_182  | NZ     | A_GLU_186  | OE1    | 3.601        |
| 3T65   | A_LYS_182  | NZ     | A_GLU_186  | OE2    | 3.775        |
| 3T65   | A_ARG_187  | NH2    | A_GLU_184  | OE1    | 2.825        |
| 3T65   | A_HIS_188  | ND1    | A_ASP_150  | OD2    | 2.935        |
| 3T65   | A_HIS_188  | NE2    | A_GLU_184  | OE2    | 2.940        |
| 3T65   | A_LYS_198  | NZ     | A_ASP_109  | OD2    | 3.914        |

Table 471: 3T65-specific salt bridging networks analysis. In this table, a PDB file is specified with a four-letter PDB ID, except that the names of the PDB files corresponding to the single NMR structural model split from the NMR ensemble is specified with a four-letter PDB ID in addition to a hyphen followed by the single NMR structural model numeric ID, the residue naming scheme is **Chain ID\_residue name\_residue number**,  $\angle ADH$  represents the angle formed by acceptor (A), donor (D) and hydrogen (H) ( $\angle ADH$ ).

| PDB ID | Residue A  | Atom A | Residue B  | Atom B | Distance (Å) |
|--------|------------|--------|------------|--------|--------------|
| 3T77   | A_LYS_24   | NZ     | A_ASP_70   | OD1    | 2.759        |
| 3T77   | A_LYS_24   | NZ     | A_ASP_70   | OD2    | 3.590        |
| 3T77   | A_LYS_39   | NZ     | A_GLU_81   | OE1    | 3.726        |
| 3T77   | A_ARG_61   | NH2    | A_GLU_81   | OE2    | 3.966        |
| 3T77   | A_ARG_61   | NH2    | A_ASP_82   | OD1    | 2.868        |
| 3T77   | A_ARG_61   | NH2    | A_ASP_82   | OD2    | 3.521        |
| 3T77   | A_ARG_95   | NH2    | B_ASP_95   | OD1    | 3.723        |
| 3T77   | A_ARG_95   | NH2    | B_ASP_95   | OD2    | 2.997        |
| 3T77   | A_LYS_102  | NZ     | A_GLU_104  | OE1    | 3.775        |
| 3T77   | A_LYS_102  | NZ     | A_GLU_104  | OE2    | 3.007        |
| 3T77   | A_LYS_148  | NZ     | A_GLU_194  | OE1    | 3.783        |
| 3T77   | A_LYS_148  | NZ     | A_GLU_194  | OE2    | 2.306        |
| 3T77   | A_LYS_182  | NZ     | A_GLU_186  | OE1    | 3.731        |
| 3T77   | A_ARG_187  | NH2    | A_GLU_184  | OE1    | 2.585        |
| 3T77   | A_HIS_188  | ND1    | A_ASP_150  | OD2    | 3.031        |
| 3T77   | A_HIS_188  | NE2    | A_GLU_184  | OE2    | 2.771        |
| 3T77   | A_LYS_198  | NZ     | A_ASP_109  | OD1    | 3.952        |
| 3T77   | B_ARG_38   | NH1    | B_ASP_86   | OD2    | 2.829        |
| 3T77   | B_ARG_38   | NH2    | B_GLU_46   | OE1    | 3.138        |
| 3T77   | B_ARG_38   | NH2    | B_ASP_86   | OD2    | 3.744        |
| 3T77   | B_ARG_52   | NH1    | B_GLU_56   | OE2    | 2.717        |
| 3T77   | B_ARG_52   | NH2    | B_GLU_56   | OE2    | 3.056        |
| 3T77   | B_ARG_64   | NH1    | B_ASP_86   | OD1    | 2.807        |
| 3T77   | B_ARG_64   | NH1    | B_ASP_86   | OD2    | 3.626        |
| 3T77   | B_ARG_64   | NH2    | B_ASP_86   | OD1    | 3.476        |
| 3T77   | B_ARG_64   | NH2    | B_ASP_86   | OD2    | 2.870        |
| 3T77   | B_HIS_96   | ND1    | B_GLU_100A | OE1    | 3.974        |
| 3T77   | B_HIS_96   | NE2    | B_GLU_100A | OE1    | 2.416        |
| 3T77   | B_ARG_100B | NH1    | A_GLU_55   | OE1    | 3.125        |
| 3T77   | B_ARG_100B | NH1    | A_GLU_55   | OE2    | 2.687        |
| 3T77   | B_LYS_206  | NZ     | A_GLU_122  | OE2    | 3.917        |

Table 472: 3T77-specific salt bridging networks analysis. In this table, a PDB file is specified with a four-letter PDB ID, except that the names of the PDB files corresponding to the single NMR structural model split from the NMR ensemble is specified with a four-letter PDB ID in addition to a hyphen followed by the single NMR structural model numeric ID, the residue naming scheme is **Chain ID\_residue name\_residue number**,  $\angle ADH$  represents the angle formed by acceptor (A), donor (D) and hydrogen (H) ( $\angle ADH$ ).

| PDB ID | Residue A | Atom A | Residue B | Atom B | Distance (Å) |
|--------|-----------|--------|-----------|--------|--------------|
| 3THM   | L_ARG_31  | NH1    | L_ASP_94  | OD1    | 2.844        |
| 3THM   | L_ARG_31  | NH1    | L_ASP_94  | OD2    | 2.885        |
| 3THM   | L_ARG_55  | NH1    | L_ASP_61  | OD2    | 3.667        |
| 3THM   | L_ARG_62  | NH2    | L_ASP_83  | OD1    | 3.471        |
| 3THM   | L_ARG_62  | NH2    | L_ASP_83  | OD2    | 2.633        |
| 3THM   | L_ARG_77  | NH1    | L_ASP_78  | OD2    | 2.791        |
| 3THM   | L_HIS_192 | ND1    | L_ASP_155 | OD1    | 2.840        |
| 3THM   | L_ARG_193 | NH1    | L_ASP_155 | OD2    | 3.695        |
| 3THM   | L_ARG_193 | NH2    | L_ASP_155 | OD1    | 3.787        |
| 3THM   | H_ARG_40  | NH1    | H_ASP_96  | OD1    | 2.763        |
| 3THM   | H_ARG_40  | NH2    | H_GLU_48  | OE1    | 3.112        |
| 3THM   | H_ARG_40  | NH2    | H_ASP_96  | OD1    | 3.732        |
| 3THM   | H_ARG_73  | NH1    | H_ASP_96  | OD1    | 3.781        |
| 3THM   | H_ARG_73  | NH1    | H_ASP_96  | OD2    | 3.095        |
| 3THM   | H_ARG_73  | NH2    | H_ASP_96  | OD1    | 2.910        |
| 3THM   | H_ARG_73  | NH2    | H_ASP_96  | OD2    | 3.508        |
| 3THM   | H_LYS_82  | NZ     | H_ASP_79  | OD2    | 3.975        |
| 3THM   | H_ARG_104 | NH2    | H_ASP_120 | OD1    | 3.520        |
| 3THM   | H_ARG_104 | NH2    | H_ASP_120 | OD2    | 2.748        |
| 3THM   | H_LYS_225 | NZ     | H_ASP_227 | OD2    | 3.663        |
| 3THM   | H_LYS_229 | NZ     | H_GLU_231 | OE1    | 3.584        |
| 3THM   | F_HIS_38  | ND1    | F_ASP_56  | OD1    | 3.082        |
| 3THM   | F_HIS_38  | ND1    | F_ASP_56  | OD2    | 2.768        |
| 3THM   | F_LYS_45  | NZ     | L_GLU_97  | OE2    | 3.172        |
| 3THM   | F_LYS_53  | NZ     | F_GLU_63  | OE1    | 2.774        |
| 3THM   | F_LYS_78  | NZ     | L_ASP_52  | OD1    | 3.702        |
| 3THM   | F_ARG_112 | NH2    | F_GLU_98  | OE1    | 3.774        |

Table 473: 3THM-specific salt bridging networks analysis. In this table, a PDB file is specified with a four-letter PDB ID, except that the names of the PDB files corresponding to the single NMR structural model split from the NMR ensemble is specified with a four-letter PDB ID in addition to a hyphen followed by the single NMR structural model numeric ID, the residue naming scheme is **Chain ID\_residue name\_residue number**,  $\angle ADH$  represents the angle formed by acceptor (A), donor (D) and hydrogen (H) ( $\angle ADH$ ).

| PDB ID | Residue A | Atom A | Residue B | Atom B | Distance (Å) |
|--------|-----------|--------|-----------|--------|--------------|
| 3TJE   | L_ARG_31  | NH1    | L_ASP_94  | OD1    | 2.809        |
| 3TJE   | L_ARG_62  | NH1    | L_ASP_83  | OD1    | 3.626        |
| 3TJE   | L_ARG_62  | NH1    | L_ASP_83  | OD2    | 2.774        |
| 3TJE   | L_ARG_62  | NH2    | L_ASP_83  | OD1    | 2.866        |
| 3TJE   | L_ARG_62  | NH2    | L_ASP_83  | OD2    | 3.498        |
| 3TJE   | L_ARG_77  | NH1    | L_ASP_78  | OD2    | 2.738        |
| 3TJE   | L_ARG_77  | NH2    | L_ASP_61  | OD2    | 3.491        |
| 3TJE   | L_LYS_114 | NZ     | L_GLU_202 | OE2    | 3.788        |
| 3TJE   | H_ARG_40  | NH1    | H_ASP_96  | OD1    | 2.839        |
| 3TJE   | H_ARG_40  | NH2    | H_GLU_48  | OE1    | 3.044        |
| 3TJE   | H_ARG_40  | NH2    | H_ASP_96  | OD1    | 3.722        |
| 3TJE   | H_ARG_73  | NH1    | H_ASP_96  | OD1    | 3.710        |
| 3TJE   | H_ARG_73  | NH1    | H_ASP_96  | OD2    | 2.838        |
| 3TJE   | H_ARG_73  | NH2    | H_ASP_96  | OD1    | 2.943        |
| 3TJE   | H_ARG_73  | NH2    | H_ASP_96  | OD2    | 3.439        |
| 3TJE   | H_ARG_104 | NH2    | H_ASP_120 | OD1    | 3.469        |
| 3TJE   | H_ARG_104 | NH2    | H_ASP_120 | OD2    | 2.676        |
| 3TJE   | H_LYS_225 | NZ     | H_ASP_227 | OD2    | 3.295        |
| 3TJE   | H_LYS_229 | NZ     | H_GLU_231 | OE1    | 3.568        |
| 3TJE   | F_LYS_53  | NZ     | F_GLU_63  | OE1    | 2.653        |
| 3TJE   | F_HIS_95  | ND1    | F_ASP_92  | OD2    | 3.202        |
| 3TJE   | F_ARG_105 | NH1    | F_GLU_71  | OE1    | 3.450        |
| 3TJE   | F_ARG_105 | NH1    | F_GLU_71  | OE2    | 3.955        |
| 3TJE   | F_ARG_105 | NH2    | F_GLU_71  | OE2    | 3.995        |
| 3TJE   | F_LYS_110 | NZ     | F_GLU_100 | OE1    | 2.868        |
| 3TJE   | F_LYS_110 | NZ     | F_GLU_100 | OE2    | 3.645        |
| 3TJE   | F_ARG_112 | NH2    | F_GLU_98  | OE2    | 3.462        |
| 3TJE   | F_LYS_114 | NZ     | F_GLU_93  | OE2    | 3.047        |
| 3TJE   | F_HIS_126 | NE2    | F_ASP_128 | OD1    | 3.055        |
| 3TJE   | F_HIS_126 | NE2    | F_ASP_128 | OD2    | 3.467        |

Table 474: 3TJE-specific salt bridging networks analysis. In this table, a PDB file is specified with a four-letter PDB ID, except that the names of the PDB files corresponding to the single NMR structural model split from the NMR ensemble is specified with a four-letter PDB ID in addition to a hyphen followed by the single NMR structural model numeric ID, the residue naming scheme is **Chain ID\_residue name\_residue number**,  $\angle ADH$  represents the angle formed by acceptor (A), donor (D) and hydrogen (H) ( $\angle ADH$ ).

| PDB ID | Residue A  | Atom A | Residue B  | Atom B | Distance (Å) |
|--------|------------|--------|------------|--------|--------------|
| 3U1S   | L_LYS_24   | NZ     | L_ASP_70   | OD2    | 3.165        |
| 3U1S   | L_HIS_27D  | NE2    | H_ASP_100B | OD2    | 2.859        |
| 3U1S   | L_ARG_61   | NH1    | L_ASP_82   | OD1    | 3.331        |
| 3U1S   | L_ARG_61   | NH1    | L_ASP_82   | OD2    | 2.471        |
| 3U1S   | L_ARG_61   | NH2    | L_GLU_79   | OE1    | 3.597        |
| 3U1S   | L_ARG_61   | NH2    | L_GLU_79   | OE2    | 3.692        |
| 3U1S   | L_ARG_61   | NH2    | L_ASP_82   | OD1    | 2.705        |
| 3U1S   | L_ARG_61   | NH2    | L_ASP_82   | OD2    | 3.338        |
| 3U1S   | L_LYS_149  | NZ     | L_GLU_195  | OE2    | 2.775        |
| 3U1S   | L_HIS_189  | ND1    | L_ASP_151  | OD2    | 3.043        |
| 3U1S   | H_LYS_12   | NZ     | H_GLU_10   | OE2    | 3.798        |
| 3U1S   | H_ARG_38   | NH1    | H_ASP_86   | OD1    | 2.812        |
| 3U1S   | H_ARG_38   | NH2    | H_GLU_46   | OE1    | 3.161        |
| 3U1S   | H_ARG_38   | NH2    | H_ASP_86   | OD1    | 3.811        |
| 3U1S   | H_HIS_52A  | ND1    | H_GLU_52B  | OE1    | 3.637        |
| 3U1S   | H_HIS_52A  | NE2    | H_ASP_33   | OD1    | 3.943        |
| 3U1S   | H_HIS_52A  | NE2    | H_GLU_52B  | OE1    | 3.544        |
| 3U1S   | H_HIS_52A  | NE2    | H_GLU_52B  | OE2    | 3.663        |
| 3U1S   | H_LYS_60   | NZ     | H_GLU_46   | OE1    | 3.515        |
| 3U1S   | H_LYS_60   | NZ     | H_GLU_46   | OE2    | 2.683        |
| 3U1S   | H_ARG_64   | NH1    | H_ASP_86   | OD1    | 3.631        |
| 3U1S   | H_ARG_64   | NH1    | H_ASP_86   | OD2    | 3.169        |
| 3U1S   | H_ARG_64   | NH2    | H_ASP_86   | OD1    | 2.578        |
| 3U1S   | H_ARG_64   | NH2    | H_ASP_86   | OD2    | 3.420        |
| 3U1S   | H_LYS_97   | NZ     | H_ASP_33   | OD1    | 2.873        |
| 3U1S   | H_LYS_97   | NZ     | H_ASP_33   | OD2    | 3.430        |
| 3U1S   | H_LYS_97   | NZ     | H_GLU_52B  | OE1    | 2.747        |
| 3U1S   | H_LYS_97   | NZ     | H_GLU_52B  | OE2    | 3.729        |
| 3U1S   | H_ARG_99   | NH1    | H_GLU_52B  | OE1    | 3.885        |
| 3U1S   | H_ARG_99   | NH1    | H_GLU_52B  | OE2    | 3.932        |
| 3U1S   | H_ARG_99   | NH1    | H_ASP_53   | OD1    | 2.841        |
| 3U1S   | H_ARG_99   | NH1    | H_ASP_53   | OD2    | 3.415        |
| 3U1S   | H_ARG_99   | NH2    | H_ASP_53   | OD1    | 3.710        |
| 3U1S   | H_ARG_99   | NH2    | H_ASP_53   | OD2    | 2.972        |
| 3U1S   | H_ARG_99   | NH2    | H_ASP_100R | OD1    | 3.526        |
| 3U1S   | H_ARG_99   | NH2    | H_ASP_100R | OD2    | 2.851        |
| 3U1S   | H_ARG_100A | NH1    | H_GLU_100N | OE2    | 3.328        |
| 3U1S   | H_LYS_211  | NZ     | H_ASP_213  | OD1    | 2.712        |
| 3U1S   | H_LYS_211  | NZ     | H_ASP_213  | OD2    | 3.729        |
| 3U1S   | H_LYS_214  | NZ     | L_GLU_123  | OE1    | 3.475        |
| 3U1S   | H_LYS_215  | NZ     | H_GLU_217  | OE2    | 3.772        |

Table 475: 3U1S-specific salt bridging networks analysis. In this table, a PDB file is specified with a four-letter PDB ID, except that the names of the PDB files corresponding to the single NMR structural model split from the NMR ensemble is specified with a four-letter PDB ID in addition to a hyphen followed by the single NMR structural model numeric ID, the residue naming scheme is **Chain ID\_residue name\_residue number**,  $\angle ADH$  represents the angle formed by acceptor (A), donor (D) and hydrogen (H) ( $\angle ADH$ ).



| PDB ID | Residue A | Atom A | Residue B  | Atom B | Distance (Å) |
|--------|-----------|--------|------------|--------|--------------|
| 3U2S   | H_ARG_31  | NH1    | H_ASP_100L | OD2    | 3.978        |
| 3U2S   | H_ARG_31  | NH2    | H_ASP_100L | OD1    | 3.963        |
| 3U2S   | H_ARG_31  | NH2    | H_ASP_100L | OD2    | 2.965        |
| 3U2S   | H_HIS_35  | NE2    | H_GLU_95   | OE1    | 2.640        |
| 3U2S   | H_ARG_38  | NH1    | H_ASP_86   | OD1    | 2.839        |
| 3U2S   | H_ARG_38  | NH2    | H_GLU_46   | OE1    | 3.925        |
| 3U2S   | H_ARG_38  | NH2    | H_GLU_46   | OE2    | 2.923        |
| 3U2S   | H_ARG_38  | NH2    | H_ASP_86   | OD1    | 3.911        |
| 3U2S   | H_LYS_52  | NZ     | H_ASP_100I | OD2    | 3.366        |
| 3U2S   | H_ARG_66  | NH1    | H_ASP_86   | OD1    | 3.572        |
| 3U2S   | H_ARG_66  | NH1    | H_ASP_86   | OD2    | 2.527        |
| 3U2S   | H_ARG_66  | NH2    | H_ASP_86   | OD1    | 2.931        |
| 3U2S   | H_ARG_66  | NH2    | H_ASP_86   | OD2    | 3.433        |
| 3U2S   | H_ARG_94  | NH2    | H_ASP_101  | OD1    | 3.597        |
| 3U2S   | H_ARG_94  | NH2    | H_ASP_101  | OD2    | 2.850        |
| 3U2S   | L_LYS_53  | NZ     | L_ASP_50   | OD2    | 2.841        |
| 3U2S   | L_ARG_54  | NH2    | C_ASP_167  | OD1    | 3.525        |
| 3U2S   | L_ARG_54  | NH2    | C_ASP_167  | OD2    | 3.282        |
| 3U2S   | L_ARG_61  | NH1    | L_ASP_82   | OD1    | 3.649        |
| 3U2S   | L_ARG_61  | NH1    | L_ASP_82   | OD2    | 2.861        |
| 3U2S   | L_ARG_61  | NH2    | L_ASP_82   | OD1    | 2.965        |
| 3U2S   | L_ARG_61  | NH2    | L_ASP_82   | OD2    | 3.572        |
| 3U2S   | L_LYS_66  | NZ     | L_GLU_31   | OE2    | 2.988        |
| 3U2S   | L_ARG_95A | NH1    | H_ASP_61   | OD1    | 2.794        |
| 3U2S   | L_ARG_95A | NH1    | H_ASP_61   | OD2    | 3.373        |
| 3U2S   | L_ARG_95A | NH2    | H_ASP_61   | OD1    | 2.338        |
| 3U2S   | L_ARG_96  | NH2    | H_GLU_95   | OE1    | 3.743        |
| 3U2S   | L_ARG_96  | NH2    | H_GLU_95   | OE2    | 2.869        |
| 3U2S   | L_LYS_129 | NZ     | H_ASP_144  | OD1    | 3.881        |
| 3U2S   | L_HIS_188 | ND1    | L_ASP_151  | OD2    | 3.681        |
| 3U2S   | G_ARG_168 | NH2    | H_ASP_100L | OD1    | 3.358        |
| 3U2S   | G_ARG_168 | NH2    | H_ASP_100L | OD2    | 3.104        |
| 3U2S   | G_LYS_171 | NZ     | H_ASP_100I | OD1    | 3.178        |
| 3U2S   | A_ARG_31  | NH2    | A_ASP_100L | OD1    | 3.437        |
| 3U2S   | A_ARG_31  | NH2    | A_ASP_100L | OD2    | 3.464        |
| 3U2S   | A_HIS_35  | NE2    | A_GLU_95   | OE1    | 2.700        |
| 3U2S   | A_ARG_38  | NH1    | A_ASP_86   | OD1    | 2.886        |
| 3U2S   | A_ARG_38  | NH2    | A_GLU_46   | OE1    | 3.872        |
| 3U2S   | A_ARG_38  | NH2    | A_GLU_46   | OE2    | 2.898        |
| 3U2S   | A_ARG_38  | NH2    | A_ASP_86   | OD1    | 3.831        |
| 3U2S   | A_LYS_52  | NZ     | A_ASP_100I | OD2    | 3.513        |
| 3U2S   | A_ARG_66  | NH1    | A_ASP_86   | OD1    | 3.554        |
| 3U2S   | A_ARG_66  | NH1    | A_ASP_86   | OD2    | 2.481        |
| 3U2S   | A_ARG_66  | NH2    | A_ASP_86   | OD1    | 3.013        |
| 3U2S   | A_ARG_66  | NH2    | A_ASP_86   | OD2    | 3.477        |
| 3U2S   | A_ARG_83  | NH1    | A_GLU_85   | OE1    | 2.914        |
| 3U2S   | A_ARG_94  | NH2    | A_ASP_101  | OD1    | 3.528        |
| 3U2S   | A_ARG_94  | NH2    | A_ASP_101  | OD2    | 2.897        |
| 3U2S   | A_LYS_143 | NZ     | B_GLU_124  | OE2    | 3.550        |
| 3U2S   | B_LYS_53  | NZ     | B_ASP_50   | OD2    | 2.754        |
| 3U2S   | B_ARG_61  | NH1    | B_ASP_82   | OD1    | 3.698        |
| 3U2S   | B_ARG_61  | NH1    | B_ASP_82   | OD2    | 2.775        |
| 3U2S   | B_ARG_61  | NH2    | B_ASP_82   | OD1    | 2.930        |
| 3U2S   | B_ARG_61  | NH2    | B_ASP_82   | OD2    | 3.413        |
| 3U2S   | B_LYS_66  | NZ     | B_GLU_31   | OE2    | 3.053        |
| 3U2S   | B_ARG_95A | NH1    | A_ASP_61   | OD1    | 2.632        |
| 3U2S   | B_ARG_95A | NH1    | A_ASP_61   | OD2    | 3.483        |

|      |           |     |            |     |       |
|------|-----------|-----|------------|-----|-------|
| 3U2S | B_ARG_95A | NH2 | A_ASP_61   | OD1 | 3.270 |
| 3U2S | B_ARG_96  | NH2 | A_GLU_95   | OE1 | 3.738 |
| 3U2S | B_ARG_96  | NH2 | A_GLU_95   | OE2 | 2.983 |
| 3U2S | C_ARG_168 | NH2 | A_ASP_100L | OD1 | 2.424 |
| 3U2S | C_ARG_168 | NH2 | A_ASP_100L | OD2 | 3.228 |
| 3U2S | C_LYS_169 | NZ  | C_ASP_223  | OD1 | 3.001 |
| 3U2S | C_LYS_169 | NZ  | C_ASP_223  | OD2 | 3.464 |
| 3U2S | C_LYS_169 | NZ  | C_GLU_239  | OE2 | 2.484 |
| 3U2S | C_LYS_171 | NZ  | A_ASP_100I | OD1 | 3.279 |

Table 476: 3U2S-specific salt bridging networks analysis. In this table, a PDB file is specified with a four-letter PDB ID, except that the names of the PDB files corresponding to the single NMR structural model split from the NMR ensemble is specified with a four-letter PDB ID in addition to a hyphen followed by the single NMR structural model numeric ID, the residue naming scheme is **Chain ID\_residue name\_residue number**,  $\angle ADH$  represents the angle formed by acceptor (A), donor (D) and hydrogen (H) ( $\angle ADH$ ).

| PDB ID | Residue A | Atom A | Residue B | Atom B | Distance (Å) |
|--------|-----------|--------|-----------|--------|--------------|
| 3U36   | H_HIS_35  | NE2    | H_GLU_95  | OE1    | 2.791        |
| 3U36   | H_ARG_38  | NH1    | H_ASP_86  | OD1    | 3.091        |
| 3U36   | H_ARG_38  | NH2    | H_GLU_46  | OE2    | 3.256        |
| 3U36   | H_ARG_66  | NH1    | H_ASP_86  | OD1    | 3.636        |
| 3U36   | H_ARG_66  | NH1    | H_ASP_86  | OD2    | 2.875        |
| 3U36   | H_ARG_66  | NH2    | H_ASP_86  | OD1    | 3.304        |
| 3U36   | H_ARG_66  | NH2    | H_ASP_86  | OD2    | 3.804        |
| 3U36   | H_ARG_83  | NH1    | H_GLU_85  | OE2    | 3.153        |
| 3U36   | H_ARG_94  | NH2    | H_ASP_101 | OD1    | 3.359        |
| 3U36   | H_ARG_94  | NH2    | H_ASP_101 | OD2    | 2.948        |
| 3U36   | H_LYS_210 | NZ     | H_GLU_212 | OE1    | 3.728        |
| 3U36   | L_LYS_53  | NZ     | L_ASP_50  | OD2    | 3.306        |
| 3U36   | L_ARG_61  | NH1    | L_ASP_82  | OD1    | 3.774        |
| 3U36   | L_ARG_61  | NH1    | L_ASP_82  | OD2    | 2.558        |
| 3U36   | L_ARG_61  | NH2    | L_ASP_82  | OD1    | 2.956        |
| 3U36   | L_ARG_61  | NH2    | L_ASP_82  | OD2    | 3.131        |
| 3U36   | L_LYS_66  | NZ     | L_GLU_31  | OE1    | 3.601        |
| 3U36   | L_LYS_66  | NZ     | L_GLU_31  | OE2    | 3.328        |
| 3U36   | L_LYS_89  | NZ     | H_GLU_95  | OE1    | 3.857        |
| 3U36   | L_ARG_95A | NH1    | H_ASP_61  | OD1    | 3.290        |
| 3U36   | L_ARG_95A | NH1    | H_ASP_61  | OD2    | 1.959        |
| 3U36   | L_ARG_95A | NH2    | H_ASP_61  | OD1    | 3.530        |
| 3U36   | L_ARG_95A | NH2    | H_ASP_61  | OD2    | 3.624        |
| 3U36   | L_ARG_96  | NH2    | H_GLU_95  | OE2    | 3.606        |
| 3U36   | L_HIS_188 | ND1    | L_ASP_151 | OD2    | 3.797        |
| 3U36   | A_HIS_35  | NE2    | A_GLU_95  | OE1    | 2.797        |
| 3U36   | A_ARG_38  | NH1    | A_ASP_86  | OD1    | 3.094        |
| 3U36   | A_ARG_38  | NH2    | A_GLU_46  | OE1    | 3.989        |
| 3U36   | A_ARG_38  | NH2    | A_GLU_46  | OE2    | 3.229        |
| 3U36   | A_ARG_66  | NH1    | A_ASP_86  | OD1    | 3.636        |
| 3U36   | A_ARG_66  | NH1    | A_ASP_86  | OD2    | 2.878        |
| 3U36   | A_ARG_66  | NH2    | A_ASP_86  | OD1    | 3.312        |
| 3U36   | A_ARG_66  | NH2    | A_ASP_86  | OD2    | 3.805        |
| 3U36   | A_ARG_83  | NH1    | A_GLU_85  | OE2    | 3.159        |
| 3U36   | A_ARG_94  | NH2    | A_ASP_101 | OD1    | 3.386        |
| 3U36   | A_ARG_94  | NH2    | A_ASP_101 | OD2    | 2.941        |
| 3U36   | A_LYS_210 | NZ     | A_GLU_212 | OE1    | 3.743        |
| 3U36   | B_LYS_53  | NZ     | B_ASP_50  | OD2    | 3.349        |
| 3U36   | B_ARG_61  | NH1    | B_ASP_82  | OD1    | 3.756        |
| 3U36   | B_ARG_61  | NH1    | B_ASP_82  | OD2    | 2.547        |
| 3U36   | B_ARG_61  | NH2    | B_ASP_82  | OD1    | 2.945        |
| 3U36   | B_ARG_61  | NH2    | B_ASP_82  | OD2    | 3.139        |
| 3U36   | B_LYS_66  | NZ     | B_GLU_31  | OE1    | 3.580        |
| 3U36   | B_LYS_66  | NZ     | B_GLU_31  | OE2    | 3.318        |
| 3U36   | B_LYS_89  | NZ     | A_GLU_95  | OE1    | 3.772        |
| 3U36   | B_ARG_95A | NH1    | A_ASP_61  | OD1    | 3.519        |
| 3U36   | B_ARG_95A | NH1    | A_ASP_61  | OD2    | 2.198        |
| 3U36   | B_ARG_95A | NH2    | A_ASP_61  | OD1    | 3.831        |
| 3U36   | B_ARG_95A | NH2    | A_ASP_61  | OD2    | 3.817        |
| 3U36   | B_ARG_96  | NH2    | A_GLU_95  | OE2    | 3.395        |
| 3U36   | B_LYS_129 | NZ     | A_ASP_144 | OD1    | 3.769        |
| 3U36   | B_HIS_188 | ND1    | B_ASP_151 | OD2    | 3.839        |
| 3U36   | C_HIS_35  | NE2    | C_GLU_95  | OE1    | 2.789        |
| 3U36   | C_ARG_38  | NH1    | C_ASP_86  | OD1    | 3.079        |
| 3U36   | C_ARG_38  | NH2    | C_GLU_46  | OE2    | 3.262        |
| 3U36   | C_ARG_38  | NH2    | C_ASP_86  | OD1    | 3.997        |
| 3U36   | C_ARG_66  | NH1    | C_ASP_86  | OD1    | 3.625        |

|      |           |     |           |     |       |
|------|-----------|-----|-----------|-----|-------|
| 3U36 | C_ARG_66  | NH1 | C_ASP_86  | OD2 | 2.865 |
| 3U36 | C_ARG_66  | NH2 | C_ASP_86  | OD1 | 3.335 |
| 3U36 | C_ARG_66  | NH2 | C_ASP_86  | OD2 | 3.835 |
| 3U36 | C_ARG_83  | NH1 | C_GLU_85  | OE2 | 3.161 |
| 3U36 | C_ARG_94  | NH2 | C_ASP_101 | OD1 | 3.358 |
| 3U36 | C_ARG_94  | NH2 | C_ASP_101 | OD2 | 2.963 |
| 3U36 | C_LYS_210 | NZ  | C_GLU_212 | OE1 | 3.726 |
| 3U36 | D_LYS_53  | NZ  | D_ASP_50  | OD2 | 3.331 |
| 3U36 | D_ARG_61  | NH1 | D_ASP_82  | OD1 | 3.763 |
| 3U36 | D_ARG_61  | NH1 | D_ASP_82  | OD2 | 2.558 |
| 3U36 | D_ARG_61  | NH2 | D_ASP_82  | OD1 | 2.940 |
| 3U36 | D_ARG_61  | NH2 | D_ASP_82  | OD2 | 3.134 |
| 3U36 | D_LYS_66  | NZ  | D_GLU_31  | OE1 | 3.617 |
| 3U36 | D_LYS_66  | NZ  | D_GLU_31  | OE2 | 3.349 |
| 3U36 | D_LYS_89  | NZ  | C_GLU_95  | OE1 | 3.877 |
| 3U36 | D_ARG_95A | NH1 | C_ASP_61  | OD1 | 3.266 |
| 3U36 | D_ARG_95A | NH1 | C_ASP_61  | OD2 | 2.045 |
| 3U36 | D_ARG_95A | NH2 | C_ASP_61  | OD1 | 3.629 |
| 3U36 | D_ARG_95A | NH2 | C_ASP_61  | OD2 | 3.782 |
| 3U36 | D_ARG_96  | NH2 | C_GLU_95  | OE2 | 3.569 |
| 3U36 | D_HIS_188 | ND1 | D_ASP_151 | OD2 | 3.779 |
| 3U36 | E_HIS_35  | NE2 | E_GLU_95  | OE1 | 2.788 |
| 3U36 | E_ARG_38  | NH1 | E_ASP_86  | OD1 | 3.110 |
| 3U36 | E_ARG_38  | NH2 | E_GLU_46  | OE2 | 3.229 |
| 3U36 | E_ARG_66  | NH1 | E_ASP_86  | OD1 | 3.638 |
| 3U36 | E_ARG_66  | NH1 | E_ASP_86  | OD2 | 2.884 |
| 3U36 | E_ARG_66  | NH2 | E_ASP_86  | OD1 | 3.328 |
| 3U36 | E_ARG_66  | NH2 | E_ASP_86  | OD2 | 3.837 |
| 3U36 | E_ARG_83  | NH1 | E_GLU_85  | OE2 | 3.161 |
| 3U36 | E_ARG_94  | NH2 | E_ASP_101 | OD1 | 3.373 |
| 3U36 | E_ARG_94  | NH2 | E_ASP_101 | OD2 | 2.982 |
| 3U36 | E_LYS_210 | NZ  | E_GLU_212 | OE1 | 3.712 |
| 3U36 | F_LYS_53  | NZ  | F_ASP_50  | OD2 | 3.348 |
| 3U36 | F_ARG_61  | NH1 | F_ASP_82  | OD1 | 3.756 |
| 3U36 | F_ARG_61  | NH1 | F_ASP_82  | OD2 | 2.549 |
| 3U36 | F_ARG_61  | NH2 | F_ASP_82  | OD1 | 2.945 |
| 3U36 | F_ARG_61  | NH2 | F_ASP_82  | OD2 | 3.125 |
| 3U36 | F_LYS_66  | NZ  | F_GLU_31  | OE1 | 3.599 |
| 3U36 | F_LYS_66  | NZ  | F_GLU_31  | OE2 | 3.326 |
| 3U36 | F_ARG_95A | NH1 | E_ASP_61  | OD1 | 3.076 |
| 3U36 | F_ARG_95A | NH1 | E_ASP_61  | OD2 | 1.876 |
| 3U36 | F_ARG_95A | NH2 | E_ASP_61  | OD1 | 3.424 |
| 3U36 | F_ARG_95A | NH2 | E_ASP_61  | OD2 | 3.670 |
| 3U36 | F_ARG_96  | NH2 | E_GLU_95  | OE2 | 3.739 |
| 3U36 | F_HIS_188 | ND1 | F_ASP_151 | OD2 | 3.814 |

Table 477: 3U36-specific salt bridging networks analysis. In this table, a PDB file is specified with a four-letter PDB ID, except that the names of the PDB files corresponding to the single NMR structural model split from the NMR ensemble is specified with a four-letter PDB ID in addition to a hyphen followed by the single NMR structural model numeric ID, the residue naming scheme is **Chain ID\_residue name\_residue number**,  $\angle ADH$  represents the angle formed by acceptor (A), donor (D) and hydrogen (H) ( $\angle ADH$ ).

| PDB ID | Residue A | Atom A | Residue B | Atom B | Distance (Å) |
|--------|-----------|--------|-----------|--------|--------------|
| 3UBX   | A_ARG_21  | NH2    | A_GLU_92  | OE1    | 3.225        |
| 3UBX   | A_ARG_21  | NH2    | A_GLU_92  | OE2    | 2.650        |
| 3UBX   | A_ARG_25  | NH2    | A_ASP_27  | OD1    | 3.138        |
| 3UBX   | A_ARG_25  | NH2    | A_ASP_27  | OD2    | 3.670        |
| 3UBX   | A_ARG_25  | NH2    | A_ASP_43  | OD2    | 3.995        |
| 3UBX   | A_ARG_39  | NH2    | B_ASP_53  | OD2    | 3.336        |
| 3UBX   | A_LYS_51  | NZ     | A_GLU_243 | OE1    | 2.918        |
| 3UBX   | A_LYS_51  | NZ     | A_GLU_243 | OE2    | 3.104        |
| 3UBX   | A_HIS_203 | ND1    | A_ASP_252 | OD1    | 3.478        |
| 3UBX   | A_ARG_204 | NH1    | A_GLU_258 | OE2    | 2.763        |
| 3UBX   | A_ARG_204 | NH2    | A_GLU_258 | OE2    | 2.916        |
| 3UBX   | A_ARG_264 | NH2    | A_ASP_274 | OD2    | 3.397        |
| 3UBX   | A_LYS_266 | NZ     | A_ASP_274 | OD2    | 2.636        |
| 3UBX   | A_HIS_282 | NE2    | B_ASP_98  | OD1    | 3.815        |
| 3UBX   | A_HIS_282 | NE2    | B_ASP_98  | OD2    | 3.128        |
| 3UBX   | B_ARG_12  | NH2    | A_ASP_242 | OD1    | 3.715        |
| 3UBX   | B_ARG_12  | NH2    | A_ASP_242 | OD2    | 3.324        |
| 3UBX   | B_LYS_19  | NZ     | B_GLU_16  | OE1    | 3.108        |
| 3UBX   | B_LYS_19  | NZ     | B_GLU_16  | OE2    | 3.855        |
| 3UBX   | B_LYS_    | NZ     | B_ASP_76  | OD2    | 3.469        |
| 3UBX   | B_HIS_67  | NE2    | B_GLU_50  | OE1    | 3.182        |
| 3UBX   | D_ARG_21  | NH2    | D_GLU_92  | OE1    | 3.198        |
| 3UBX   | D_ARG_21  | NH2    | D_GLU_92  | OE2    | 2.624        |
| 3UBX   | D_ARG_    | NH2    | D_ASP_    | OD1    | 3.097        |
| 3UBX   | D_ARG_    | NH2    | D_ASP_    | OD2    | 3.631        |
| 3UBX   | D_ARG_    | NH2    | E_ASP_    | OD2    | 3.464        |
| 3UBX   | D_LYS_    | NZ     | D_GLU_    | OE1    | 2.938        |
| 3UBX   | D_LYS_    | NZ     | D_GLU_    | OE2    | 3.121        |
| 3UBX   | D_HIS_    | ND1    | D_ASP_    | OD1    | 3.543        |
| 3UBX   | D_ARG_    | NH1    | D_GLU_    | OE2    | 2.718        |
| 3UBX   | D_ARG_    | NH2    | D_GLU_    | OE2    | 2.872        |
| 3UBX   | D_ARG_    | NH2    | D_ASP_    | OD2    | 3.382        |
| 3UBX   | D_LYS_    | NZ     | D_ASP_    | OD2    | 2.644        |
| 3UBX   | D_HIS_    | NE2    | E_ASP_    | OD1    | 3.963        |
| 3UBX   | D_HIS_    | NE2    | E_ASP_    | OD2    | 3.193        |
| 3UBX   | E_ARG_    | NH2    | D_ASP_    | OD1    | 3.594        |
| 3UBX   | E_ARG_    | NH2    | D_ASP_    | OD2    | 3.257        |
| 3UBX   | E_LYS_    | NZ     | E_GLU_    | OE1    | 3.157        |
| 3UBX   | E_LYS_    | NZ     | E_GLU_    | OE2    | 3.909        |
| 3UBX   | E_HIS_    | ND1    | D_GLU_97  | OE1    | 3.846        |
| 3UBX   | E_LYS_    | NZ     | E_ASP_    | OD2    | 3.547        |
| 3UBX   | E_HIS_    | NE2    | E_GLU_    | OE1    | 3.185        |
| 3UBX   | L_ARG_32  | NH2    | A_ASP_80  | OD1    | 3.479        |
| 3UBX   | L_ARG_32  | NH2    | A_ASP_80  | OD2    | 3.348        |
| 3UBX   | L_ARG_32  | NH2    | A_ASP_153 | OD2    | 3.795        |
| 3UBX   | L_ARG_61  | NH2    | L_ASP_82  | OD1    | 2.895        |
| 3UBX   | L_ARG_61  | NH2    | L_ASP_82  | OD2    | 3.241        |
| 3UBX   | L_LYS_103 | NZ     | L_ASP_165 | OD1    | 3.380        |
| 3UBX   | L_LYS_142 | NZ     | L_GLU_105 | OE1    | 2.881        |
| 3UBX   | L_LYS_142 | NZ     | L_GLU_105 | OE2    | 3.829        |
| 3UBX   | L_LYS_    | NZ     | L_GLU_    | OE1    | 3.629        |
| 3UBX   | L_LYS_    | NZ     | L_GLU_    | OE2    | 3.666        |
| 3UBX   | L_ARG_    | NH1    | L_GLU_    | OE2    | 3.855        |
| 3UBX   | L_LYS_169 | NZ     | L_GLU_81  | OE1    | 3.852        |
| 3UBX   | L_LYS_169 | NZ     | L_GLU_81  | OE2    | 3.096        |
| 3UBX   | L_HIS_    | NE2    | L_GLU_    | OE2    | 3.994        |
| 3UBX   | L_LYS_    | NZ     | L_ASP_    | OD2    | 3.189        |

|      |           |     |           |     |       |
|------|-----------|-----|-----------|-----|-------|
| 3UBX | H_LYS_12  | NZ  | H_GLU_10  | OE2 | 3.934 |
| 3UBX | H_LYS_65  | NZ  | H_ASP_62  | OD1 | 3.945 |
| 3UBX | H_ARG_67  | NH2 | H_ASP_90  | OD1 | 2.984 |
| 3UBX | H_ARG_67  | NH2 | H_ASP_90  | OD2 | 2.362 |
| 3UBX | H_ARG_103 | NH2 | A_ASP_80  | OD1 | 2.578 |
| 3UBX | H_LYS_215 | NZ  | L_GLU_123 | OE1 | 3.082 |
| 3UBX | H_LYS_215 | NZ  | L_GLU_123 | OE2 | 3.481 |
| 3UBX | I_ARG_32  | NH2 | D_ASP_80  | OD1 | 3.383 |
| 3UBX | I_ARG_32  | NH2 | D_ASP_80  | OD2 | 3.294 |
| 3UBX | I_ARG_32  | NH2 | D_ASP_153 | OD2 | 3.950 |
| 3UBX | I_ARG_61  | NH2 | I_ASP_82  | OD1 | 2.893 |
| 3UBX | I_ARG_61  | NH2 | I_ASP_82  | OD2 | 3.343 |
| 3UBX | I_LYS_103 | NZ  | I_ASP_165 | OD1 | 3.385 |
| 3UBX | I_LYS_142 | NZ  | I_GLU_105 | OE1 | 2.848 |
| 3UBX | I_LYS_142 | NZ  | I_GLU_105 | OE2 | 3.795 |
| 3UBX | I_LYS_149 | NZ  | I_GLU_195 | OE1 | 3.611 |
| 3UBX | I_LYS_149 | NZ  | I_GLU_195 | OE2 | 3.678 |
| 3UBX | I_ARG_155 | NH1 | I_GLU_185 | OE2 | 3.804 |
| 3UBX | I_LYS_169 | NZ  | L_GLU_81  | OE1 | 3.837 |
| 3UBX | I_LYS_169 | NZ  | L_GLU_81  | OE2 | 3.130 |
| 3UBX | I_LYS_199 | NZ  | I_ASP_110 | OD2 | 3.216 |
| 3UBX | G_LYS_12  | NZ  | G_GLU_10  | OE2 | 3.983 |
| 3UBX | G_ARG_67  | NH2 | G_ASP_90  | OD1 | 3.006 |
| 3UBX | G_ARG_67  | NH2 | G_ASP_90  | OD2 | 2.366 |
| 3UBX | G_ARG_103 | NH2 | D_ASP_80  | OD1 | 2.614 |
| 3UBX | G_LYS_215 | NZ  | I_GLU_123 | OE1 | 3.204 |
| 3UBX | G_LYS_215 | NZ  | I_GLU_123 | OE2 | 3.514 |

Table 478: 3UBX-specific salt bridging networks analysis. In this table, a PDB file is specified with a four-letter PDB ID, except that the names of the PDB files corresponding to the single NMR structural model split from the NMR ensemble is specified with a four-letter PDB ID in addition to a hyphen followed by the single NMR structural model numeric ID, the residue naming scheme is **Chain ID\_residue name\_residue number**,  $\angle ADH$  represents the angle formed by acceptor (A), donor (D) and hydrogen (H) ( $\angle ADH$ ).

| PDB ID | Residue A | Atom A | Residue B | Atom B | Distance (Å) |
|--------|-----------|--------|-----------|--------|--------------|
| 3UJI   | L_LYS_53  | NZ     | L_GLU_50  | OE1    | 2.671        |
| 3UJI   | L_ARG_61  | NH2    | L_ASP_82  | OD1    | 2.783        |
| 3UJI   | L_ARG_61  | NH2    | L_ASP_82  | OD2    | 3.833        |
| 3UJI   | L_LYS_66  | NZ     | L_ASP_51  | OD1    | 2.934        |
| 3UJI   | L_LYS_66  | NZ     | L_ASP_51  | OD2    | 3.132        |
| 3UJI   | L_LYS_103 | NZ     | L_ASP_85  | OD1    | 2.947        |
| 3UJI   | L_LYS_103 | NZ     | L_ASP_85  | OD2    | 3.475        |
| 3UJI   | L_LYS_110 | NZ     | L_GLU_198 | OE1    | 2.866        |
| 3UJI   | L_LYS_110 | NZ     | L_GLU_198 | OE2    | 3.915        |
| 3UJI   | L_HIS_188 | ND1    | L_ASP_151 | OD2    | 3.040        |
| 3UJI   | L_LYS_189 | NZ     | L_ASP_151 | OD1    | 3.884        |
| 3UJI   | H_LYS_12  | NZ     | H_GLU_16  | OE1    | 3.975        |
| 3UJI   | H_LYS_73  | NZ     | H_ASP_53  | OD2    | 3.330        |
| 3UJI   | H_ARG_94  | NH2    | H_ASP_101 | OD1    | 3.451        |
| 3UJI   | H_ARG_94  | NH2    | H_ASP_101 | OD2    | 2.842        |
| 3UJI   | H_LYS_143 | NZ     | L_GLU_124 | OE2    | 2.632        |
| 3UJI   | H_LYS_206 | NZ     | H_ASP_208 | OD1    | 3.500        |
| 3UJI   | H_LYS_209 | NZ     | L_GLU_123 | OE1    | 3.097        |
| 3UJI   | H_LYS_209 | NZ     | L_GLU_123 | OE2    | 2.701        |
| 3UJI   | H_LYS_210 | NZ     | H_GLU_212 | OE1    | 3.946        |
| 3UJI   | H_LYS_210 | NZ     | H_GLU_212 | OE2    | 3.699        |
| 3UJI   | P_LYS_305 | NZ     | H_ASP_54  | OD1    | 2.722        |
| 3UJI   | P_LYS_305 | NZ     | H_ASP_54  | OD2    | 3.687        |
| 3UJI   | P_LYS_305 | NZ     | H_ASP_56  | OD2    | 2.744        |
| 3UJI   | P_HIS_308 | ND1    | H_GLU_98  | OE1    | 2.731        |
| 3UJI   | P_HIS_308 | ND1    | H_GLU_98  | OE2    | 3.371        |

Table 479: 3UJI-specific salt bridging networks analysis. In this table, a PDB file is specified with a four-letter PDB ID, except that the names of the PDB files corresponding to the single NMR structural model split from the NMR ensemble is specified with a four-letter PDB ID in addition to a hyphen followed by the single NMR structural model numeric ID, the residue naming scheme is **Chain ID\_residue name\_residue number**,  $\angle ADH$  represents the angle formed by acceptor (A), donor (D) and hydrogen (H) ( $\angle ADH$ ).

| PDB ID | Residue A | Atom A | Residue B | Atom B | Distance (Å) |
|--------|-----------|--------|-----------|--------|--------------|
| 3UJJ   | L_LYS_39  | NZ     | L_ASP_81  | OD2    | 3.776        |
| 3UJJ   | L_ARG_61  | NH1    | L_ASP_81  | OD1    | 3.440        |
| 3UJJ   | L_ARG_61  | NH1    | L_ASP_82  | OD1    | 2.656        |
| 3UJJ   | L_ARG_61  | NH1    | L_ASP_82  | OD2    | 3.380        |
| 3UJJ   | L_ARG_66  | NH2    | L_ASP_51  | OD1    | 3.920        |
| 3UJJ   | L_ARG_66  | NH2    | L_ASP_51  | OD2    | 2.951        |
| 3UJJ   | H_ARG_38  | NH2    | H_GLU_46  | OE1    | 3.170        |
| 3UJJ   | H_ARG_38  | NH2    | H_GLU_46  | OE2    | 3.073        |
| 3UJJ   | H_ARG_58  | NH2    | H_ASP_56  | OD1    | 3.555        |
| 3UJJ   | H_ARG_58  | NH2    | H_ASP_56  | OD2    | 2.847        |
| 3UJJ   | H_LYS_143 | NZ     | H_ASP_144 | OD1    | 2.864        |
| 3UJJ   | H_LYS_143 | NZ     | H_ASP_144 | OD2    | 2.969        |
| 3UJJ   | H_LYS_209 | NZ     | L_GLU_123 | OE1    | 2.859        |
| 3UJJ   | H_LYS_209 | NZ     | L_GLU_123 | OE2    | 2.771        |
| 3UJJ   | H_LYS_210 | NZ     | H_GLU_212 | OE2    | 2.981        |
| 3UJJ   | P_LYS_305 | NZ     | H_ASP_54  | OD1    | 3.600        |
| 3UJJ   | P_LYS_305 | NZ     | H_ASP_54  | OD2    | 2.628        |
| 3UJJ   | P_LYS_305 | NZ     | H_ASP_56  | OD2    | 2.857        |
| 3UJJ   | P_ARG_308 | NH2    | L_GLU_50  | OE2    | 2.898        |

Table 480: 3UJJ-specific salt bridging networks analysis. In this table, a PDB file is specified with a four-letter PDB ID, except that the names of the PDB files corresponding to the single NMR structural model split from the NMR ensemble is specified with a four-letter PDB ID in addition to a hyphen followed by the single NMR structural model numeric ID, the residue naming scheme is **Chain ID** **residue name** **residue number**,  $\angle ADH$  represents the angle formed by acceptor (A), donor (D) and hydrogen (H) ( $\angle ADH$ ).



| PDB ID | Residue A | Atom A | Residue B | Atom B | Distance (Å) |
|--------|-----------|--------|-----------|--------|--------------|
| 3UJT   | H_LYS_19  | NZ     | H_ASP_78  | OD1    | 2.829        |
| 3UJT   | H_HIS_35  | ND1    | H_GLU_50  | OE1    | 3.828        |
| 3UJT   | H_HIS_35  | NE2    | H_GLU_50  | OE1    | 3.223        |
| 3UJT   | H_ARG_40  | NH1    | H_GLU_85  | OE2    | 3.140        |
| 3UJT   | H_LYS_64  | NZ     | H_GLU_61  | OE1    | 2.811        |
| 3UJT   | H_LYS_66  | NZ     | H_ASP_86  | OD1    | 3.766        |
| 3UJT   | H_LYS_66  | NZ     | H_ASP_86  | OD2    | 2.865        |
| 3UJT   | H_LYS_143 | NZ     | M_ASP_60  | OD2    | 3.914        |
| 3UJT   | H_LYS_208 | NZ     | L_GLU_123 | OE2    | 2.966        |
| 3UJT   | H_LYS_209 | NZ     | H_GLU_211 | OE2    | 3.384        |
| 3UJT   | L_ARG_61  | NH2    | L_ASP_82  | OD1    | 2.769        |
| 3UJT   | L_ARG_61  | NH2    | L_ASP_82  | OD2    | 3.414        |
| 3UJT   | L_LYS_103 | NZ     | L_ASP_85  | OD1    | 3.942        |
| 3UJT   | L_LYS_149 | NZ     | L_GLU_195 | OE2    | 3.036        |
| 3UJT   | L_ARG_155 | NH1    | L_GLU_185 | OE1    | 2.986        |
| 3UJT   | L_ARG_155 | NH2    | L_GLU_185 | OE1    | 3.804        |
| 3UJT   | L_LYS_183 | NZ     | L_GLU_187 | OE1    | 3.131        |
| 3UJT   | L_LYS_183 | NZ     | L_GLU_187 | OE2    | 3.169        |
| 3UJT   | L_HIS_189 | ND1    | L_ASP_151 | OD2    | 3.929        |
| 3UJT   | L_HIS_35  | ND1    | L_GLU_50  | OE1    | 3.921        |
| 3UJT   | L_HIS_35  | NE2    | L_GLU_50  | OE1    | 3.458        |
| 3UJT   | L_ARG_40  | NH1    | L_GLU_85  | OE1    | 3.716        |
| 3UJT   | L_LYS_66  | NZ     | L_ASP_86  | OD1    | 3.625        |
| 3UJT   | L_LYS_66  | NZ     | L_ASP_86  | OD2    | 2.830        |
| 3UJT   | L_HIS_164 | NE2    | M_ASP_167 | OD1    | 3.917        |
| 3UJT   | L_LYS_208 | NZ     | M_GLU_123 | OE2    | 3.024        |
| 3UJT   | L_LYS_209 | NZ     | L_GLU_211 | OE2    | 3.830        |
| 3UJT   | M_LYS_39  | NZ     | M_GLU_81  | OE2    | 3.196        |
| 3UJT   | M_ARG_61  | NH2    | M_GLU_81  | OE1    | 3.337        |
| 3UJT   | M_ARG_61  | NH2    | M_ASP_82  | OD1    | 2.863        |
| 3UJT   | M_ARG_61  | NH2    | M_ASP_82  | OD2    | 3.614        |
| 3UJT   | M_LYS_103 | NZ     | M_GLU_105 | OE2    | 3.799        |
| 3UJT   | M_LYS_147 | NZ     | M_GLU_154 | OE1    | 3.066        |
| 3UJT   | M_LYS_149 | NZ     | M_GLU_195 | OE2    | 3.255        |
| 3UJT   | M_LYS_183 | NZ     | M_GLU_187 | OE1    | 3.301        |
| 3UJT   | M_HIS_189 | ND1    | M_ASP_151 | OD2    | 2.746        |
| 3UJT   | M_LYS_199 | NZ     | M_ASP_110 | OD2    | 3.794        |

Table 481: 3UJT-specific salt bridging networks analysis. In this table, a PDB file is specified with a four-letter PDB ID, except that the names of the PDB files corresponding to the single NMR structural model split from the NMR ensemble is specified with a four-letter PDB ID in addition to a hyphen followed by the single NMR structural model numeric ID, the residue naming scheme is **Chain ID\_residue name\_residue number**,  $\angle ADH$  represents the angle formed by acceptor (A), donor (D) and hydrogen (H) ( $\angle ADH$ ).

| PDB ID | Residue A | Atom A | Residue B | Atom B | Distance (Å) |
|--------|-----------|--------|-----------|--------|--------------|
| 3UO1   | H_ARG_38  | NH1    | H_ASP_90  | OD1    | 3.119        |
| 3UO1   | H_ARG_38  | NH2    | H_GLU_46  | OE1    | 3.165        |
| 3UO1   | H_ARG_67  | NH1    | H_ASP_90  | OD2    | 2.918        |
| 3UO1   | H_ARG_67  | NH2    | H_ASP_90  | OD1    | 3.039        |
| 3UO1   | H_ARG_67  | NH2    | H_ASP_90  | OD2    | 3.214        |
| 3UO1   | H_ARG_87  | NH1    | H_GLU_89  | OE2    | 3.676        |
| 3UO1   | H_ARG_98  | NH2    | H_ASP_105 | OD1    | 3.545        |
| 3UO1   | H_ARG_98  | NH2    | H_ASP_105 | OD2    | 2.915        |
| 3UO1   | H_LYS_147 | NZ     | H_GLU_175 | OE2    | 3.203        |
| 3UO1   | H_LYS_212 | NZ     | L_GLU_127 | OE2    | 2.634        |
| 3UO1   | L_ARG_24  | NH2    | L_ASP_75  | OD1    | 3.866        |
| 3UO1   | L_ARG_66  | NH1    | L_ASP_87  | OD1    | 3.885        |
| 3UO1   | L_ARG_66  | NH1    | L_ASP_87  | OD2    | 2.800        |
| 3UO1   | L_ARG_66  | NH2    | L_GLU_84  | OE1    | 3.875        |
| 3UO1   | L_ARG_66  | NH2    | L_GLU_84  | OE2    | 3.880        |
| 3UO1   | L_ARG_66  | NH2    | L_ASP_87  | OD1    | 3.014        |
| 3UO1   | L_ARG_66  | NH2    | L_ASP_87  | OD2    | 3.371        |
| 3UO1   | L_LYS_153 | NZ     | L_GLU_199 | OE1    | 3.850        |
| 3UO1   | L_LYS_153 | NZ     | L_GLU_199 | OE2    | 3.003        |
| 3UO1   | L_ARG_159 | NH1    | L_GLU_189 | OE1    | 3.609        |
| 3UO1   | L_ARG_159 | NH2    | L_GLU_189 | OE1    | 3.559        |
| 3UO1   | L_ARG_192 | NH2    | L_ASP_188 | OD1    | 3.033        |
| 3UO1   | L_HIS_193 | ND1    | L_ASP_155 | OD2    | 2.858        |
| 3UO1   | L_LYS_203 | NZ     | L_ASP_114 | OD2    | 3.912        |

Table 482: 3UO1-specific salt bridging networks analysis. In this table, a PDB file is specified with a four-letter PDB ID, except that the names of the PDB files corresponding to the single NMR structural model split from the NMR ensemble is specified with a four-letter PDB ID in addition to a hyphen followed by the single NMR structural model numeric ID, the residue naming scheme is **Chain ID\_residue name\_residue number**,  $\angle ADH$  represents the angle formed by acceptor (A), donor (D) and hydrogen (H) ( $\angle ADH$ ).

| PDB ID | Residue A | Atom A | Residue B | Atom B | Distance (Å) |
|--------|-----------|--------|-----------|--------|--------------|
| 3UYR   | H_ARG_38  | NH1    | H_ASP_90  | OD1    | 3.056        |
| 3UYR   | H_ARG_38  | NH2    | H_GLU_46  | OE1    | 3.014        |
| 3UYR   | H_ARG_67  | NH1    | H_ASP_90  | OD2    | 3.083        |
| 3UYR   | H_ARG_67  | NH2    | H_ASP_90  | OD1    | 3.206        |
| 3UYR   | H_ARG_67  | NH2    | H_ASP_90  | OD2    | 3.238        |
| 3UYR   | H_ARG_98  | NH2    | H_ASP_105 | OD1    | 3.584        |
| 3UYR   | H_ARG_98  | NH2    | H_ASP_105 | OD2    | 2.920        |
| 3UYR   | H_LYS_212 | NZ     | L_GLU_127 | OE2    | 2.869        |
| 3UYR   | H_LYS_213 | NZ     | H_GLU_215 | OE2    | 3.848        |
| 3UYR   | L_ARG_24  | NH1    | L_ASP_75  | OD1    | 3.439        |
| 3UYR   | L_ARG_59  | NH1    | L_ASP_65  | OD1    | 3.730        |
| 3UYR   | L_ARG_66  | NH1    | L_ASP_87  | OD1    | 3.905        |
| 3UYR   | L_ARG_66  | NH1    | L_ASP_87  | OD2    | 2.920        |
| 3UYR   | L_ARG_66  | NH2    | L_GLU_84  | OE1    | 3.701        |
| 3UYR   | L_ARG_66  | NH2    | L_GLU_84  | OE2    | 3.783        |
| 3UYR   | L_ARG_66  | NH2    | L_ASP_87  | OD1    | 3.182        |
| 3UYR   | L_ARG_66  | NH2    | L_ASP_87  | OD2    | 3.579        |
| 3UYR   | L_LYS_153 | NZ     | L_GLU_199 | OE2    | 3.046        |
| 3UYR   | L_ARG_192 | NH2    | L_ASP_188 | OD1    | 3.145        |
| 3UYR   | L_HIS_193 | ND1    | L_ASP_155 | OD2    | 2.932        |
| 3UYR   | L_LYS_203 | NZ     | L_ASP_114 | OD2    | 3.650        |

Table 483: 3UYR-specific salt bridging networks analysis. In this table, a PDB file is specified with a four-letter PDB ID, except that the names of the PDB files corresponding to the single NMR structural model split from the NMR ensemble is specified with a four-letter PDB ID in addition to a hyphen followed by the single NMR structural model numeric ID, the residue naming scheme is **Chain ID\_residue name\_residue number**,  $\angle ADH$  represents the angle formed by acceptor (A), donor (D) and hydrogen (H) ( $\angle ADH$ ).

| PDB ID | Residue A | Atom A | Residue B | Atom B | Distance (Å) |
|--------|-----------|--------|-----------|--------|--------------|
| 3V4P   | A_HIS_28  | NE2    | A_ASP_138 | OD1    | 3.437        |
| 3V4P   | A_ARG_57  | NH2    | A_GLU_69  | OE1    | 3.613        |
| 3V4P   | A_ARG_57  | NH2    | A_GLU_69  | OE2    | 3.235        |
| 3V4P   | A_LYS_126 | NZ     | A_GLU_88  | OE1    | 3.906        |
| 3V4P   | A_LYS_126 | NZ     | A_GLU_88  | OE2    | 3.280        |
| 3V4P   | A_LYS_157 | NZ     | A_GLU_160 | OE1    | 3.915        |
| 3V4P   | A_LYS_203 | NZ     | A_GLU_255 | OE2    | 3.829        |
| 3V4P   | A_ARG_228 | NH1    | A_GLU_234 | OE2    | 3.256        |
| 3V4P   | A_ARG_228 | NH2    | A_GLU_234 | OE2    | 3.842        |
| 3V4P   | A_HIS_242 | NE2    | A_GLU_243 | OE1    | 3.925        |
| 3V4P   | A_LYS_247 | NZ     | A_GLU_263 | OE2    | 2.474        |
| 3V4P   | A_LYS_265 | NZ     | A_GLU_243 | OE2    | 3.624        |
| 3V4P   | A_ARG_305 | NH1    | A_ASP_329 | OD1    | 2.732        |
| 3V4P   | A_ARG_305 | NH2    | A_ASP_329 | OD1    | 2.778        |
| 3V4P   | A_ARG_305 | NH2    | A_ASP_329 | OD2    | 3.464        |
| 3V4P   | A_LYS_330 | NZ     | A_GLU_360 | OE1    | 3.537        |
| 3V4P   | A_LYS_330 | NZ     | A_ASP_361 | OD1    | 3.264        |
| 3V4P   | A_LYS_330 | NZ     | A_ASP_361 | OD2    | 3.668        |
| 3V4P   | A_ARG_334 | NH1    | A_GLU_337 | OE1    | 3.017        |
| 3V4P   | A_ARG_334 | NH1    | A_GLU_337 | OE2    | 2.987        |
| 3V4P   | A_ARG_334 | NH2    | A_GLU_302 | OE2    | 3.593        |
| 3V4P   | A_ARG_384 | NH1    | A_GLU_386 | OE1    | 3.396        |
| 3V4P   | A_ARG_384 | NH2    | A_GLU_360 | OE1    | 2.505        |
| 3V4P   | A_ARG_384 | NH2    | A_ASP_361 | OD2    | 3.166        |
| 3V4P   | A_ARG_384 | NH2    | A_GLU_386 | OE1    | 3.325        |
| 3V4P   | A_ARG_429 | NH2    | A_ASP_408 | OD2    | 3.082        |
| 3V4P   | A_ARG_499 | NH1    | A_ASP_489 | OD2    | 3.923        |
| 3V4P   | A_ARG_499 | NH1    | A_ASP_537 | OD2    | 3.979        |
| 3V4P   | A_ARG_532 | NH1    | A_ASP_534 | OD2    | 3.421        |
| 3V4P   | A_LYS_533 | NZ     | A_GLU_455 | OE1    | 3.724        |
| 3V4P   | A_LYS_533 | NZ     | A_GLU_455 | OE2    | 3.681        |
| 3V4P   | A_ARG_536 | NH2    | A_ASP_534 | OD1    | 3.784        |
| 3V4P   | A_LYS_574 | NZ     | A_ASP_375 | OD1    | 2.978        |
| 3V4P   | B_ARG_108 | NH2    | B_GLU_450 | OE1    | 2.652        |
| 3V4P   | B_ARG_110 | NH1    | B_GLU_85  | OE1    | 3.635        |
| 3V4P   | B_ARG_110 | NH2    | B_GLU_450 | OE2    | 3.758        |
| 3V4P   | B_ARG_124 | NH2    | B_ASP_89  | OD1    | 3.110        |
| 3V4P   | B_ARG_124 | NH2    | B_ASP_89  | OD2    | 3.634        |
| 3V4P   | B_LYS_146 | NZ     | B_GLU_202 | OE2    | 2.939        |
| 3V4P   | B_LYS_180 | NZ     | B_ASP_244 | OD1    | 3.554        |
| 3V4P   | B_LYS_180 | NZ     | B_ASP_244 | OD2    | 2.740        |
| 3V4P   | B_ARG_194 | NH1    | H_ASP_102 | OD1    | 2.860        |
| 3V4P   | B_ARG_194 | NH1    | H_ASP_102 | OD2    | 2.764        |
| 3V4P   | B_ARG_200 | NH2    | H_ASP_102 | OD1    | 3.172        |
| 3V4P   | B_ARG_259 | NH2    | B_ASP_134 | OD1    | 2.676        |
| 3V4P   | B_HIS_274 | ND1    | B_ASP_278 | OD2    | 2.831        |
| 3V4P   | B_HIS_274 | NE2    | B_ASP_179 | OD2    | 3.371        |
| 3V4P   | B_HIS_274 | NE2    | B_ASP_237 | OD2    | 2.863        |
| 3V4P   | B_HIS_293 | NE2    | B_ASP_289 | OD1    | 2.750        |
| 3V4P   | B_HIS_293 | NE2    | B_ASP_289 | OD2    | 2.939        |
| 3V4P   | B_ARG_302 | NH2    | B_GLU_305 | OE1    | 3.376        |
| 3V4P   | B_ARG_399 | NH1    | B_GLU_390 | OE1    | 3.166        |
| 3V4P   | B_ARG_399 | NH1    | B_GLU_390 | OE2    | 2.988        |
| 3V4P   | B_ARG_399 | NH2    | B_GLU_390 | OE2    | 3.915        |
| 3V4P   | B_LYS_402 | NZ     | B_GLU_404 | OE2    | 3.864        |
| 3V4P   | B_HIS_434 | NE2    | B_GLU_432 | OE1    | 3.790        |
| 3V4P   | B_ARG_439 | NH2    | B_GLU_377 | OE1    | 3.416        |

|      |           |     |           |     |       |
|------|-----------|-----|-----------|-----|-------|
| 3V4P | B_HIS_452 | ND1 | B_GLU_450 | OE2 | 3.943 |
| 3V4P | C_HIS_28  | NE2 | C_ASP_138 | OD1 | 3.435 |
| 3V4P | C_ARG_57  | NH2 | C_GLU_69  | OE1 | 3.610 |
| 3V4P | C_ARG_57  | NH2 | C_GLU_69  | OE2 | 3.231 |
| 3V4P | C_LYS_126 | NZ  | C_GLU_88  | OE1 | 3.915 |
| 3V4P | C_LYS_126 | NZ  | C_GLU_88  | OE2 | 3.295 |
| 3V4P | C_LYS_157 | NZ  | C_GLU_160 | OE1 | 3.917 |
| 3V4P | C_LYS_203 | NZ  | C_GLU_255 | OE2 | 3.826 |
| 3V4P | C_ARG_228 | NH1 | C_GLU_234 | OE2 | 3.252 |
| 3V4P | C_ARG_228 | NH2 | C_GLU_234 | OE2 | 3.840 |
| 3V4P | C_HIS_242 | NE2 | C_GLU_243 | OE1 | 3.935 |
| 3V4P | C_LYS_247 | NZ  | C_GLU_263 | OE2 | 2.476 |
| 3V4P | C_LYS_265 | NZ  | C_GLU_243 | OE2 | 3.624 |
| 3V4P | C_ARG_305 | NH1 | C_ASP_329 | OD1 | 2.736 |
| 3V4P | C_ARG_305 | NH2 | C_ASP_329 | OD1 | 2.777 |
| 3V4P | C_ARG_305 | NH2 | C_ASP_329 | OD2 | 3.462 |
| 3V4P | C_LYS_330 | NZ  | C_GLU_360 | OE1 | 3.551 |
| 3V4P | C_LYS_330 | NZ  | C_ASP_361 | OD1 | 3.262 |
| 3V4P | C_LYS_330 | NZ  | C_ASP_361 | OD2 | 3.668 |
| 3V4P | C_ARG_334 | NH1 | C_GLU_337 | OE1 | 3.021 |
| 3V4P | C_ARG_334 | NH1 | C_GLU_337 | OE2 | 2.997 |
| 3V4P | C_ARG_334 | NH2 | C_GLU_302 | OE2 | 3.598 |
| 3V4P | C_ARG_384 | NH1 | C_GLU_386 | OE1 | 3.393 |
| 3V4P | C_ARG_384 | NH2 | C_GLU_360 | OE1 | 2.506 |
| 3V4P | C_ARG_384 | NH2 | C_ASP_361 | OD2 | 3.170 |
| 3V4P | C_ARG_384 | NH2 | C_GLU_386 | OE1 | 3.316 |
| 3V4P | C_ARG_429 | NH2 | C_ASP_408 | OD2 | 3.082 |
| 3V4P | C_ARG_499 | NH1 | C_ASP_489 | OD2 | 3.928 |
| 3V4P | C_ARG_499 | NH1 | C_ASP_537 | OD2 | 3.667 |
| 3V4P | C_ARG_532 | NH1 | C_ASP_534 | OD2 | 3.504 |
| 3V4P | C_LYS_533 | NZ  | C_GLU_455 | OE1 | 3.658 |
| 3V4P | C_ARG_536 | NH2 | C_ASP_534 | OD1 | 3.773 |
| 3V4P | C_LYS_574 | NZ  | C_ASP_375 | OD1 | 3.893 |
| 3V4P | D_ARG_108 | NH2 | D_GLU_450 | OE1 | 2.653 |
| 3V4P | D_ARG_110 | NH1 | D_GLU_85  | OE1 | 3.633 |
| 3V4P | D_ARG_110 | NH2 | D_GLU_450 | OE2 | 3.756 |
| 3V4P | D_ARG_124 | NH2 | D_ASP_89  | OD1 | 3.117 |
| 3V4P | D_ARG_124 | NH2 | D_ASP_89  | OD2 | 3.640 |
| 3V4P | D_LYS_146 | NZ  | D_GLU_202 | OE2 | 2.944 |
| 3V4P | D_LYS_180 | NZ  | D_ASP_244 | OD1 | 3.559 |
| 3V4P | D_LYS_180 | NZ  | D_ASP_244 | OD2 | 2.747 |
| 3V4P | D_ARG_194 | NH1 | M_ASP_102 | OD1 | 2.738 |
| 3V4P | D_ARG_194 | NH1 | M_ASP_102 | OD2 | 2.760 |
| 3V4P | D_ARG_200 | NH2 | M_ASP_102 | OD1 | 3.233 |
| 3V4P | D_ARG_259 | NH2 | D_ASP_134 | OD1 | 2.676 |
| 3V4P | D_HIS_274 | ND1 | D_ASP_278 | OD2 | 2.837 |
| 3V4P | D_HIS_274 | NE2 | D_ASP_179 | OD2 | 3.371 |
| 3V4P | D_HIS_274 | NE2 | D_ASP_237 | OD2 | 2.865 |
| 3V4P | D_HIS_293 | NE2 | D_ASP_289 | OD1 | 2.751 |
| 3V4P | D_HIS_293 | NE2 | D_ASP_289 | OD2 | 2.938 |
| 3V4P | D_ARG_302 | NH2 | D_GLU_305 | OE1 | 3.367 |
| 3V4P | D_ARG_399 | NH1 | D_GLU_390 | OE1 | 3.160 |
| 3V4P | D_ARG_399 | NH1 | D_GLU_390 | OE2 | 2.983 |
| 3V4P | D_ARG_399 | NH2 | D_GLU_390 | OE2 | 3.909 |
| 3V4P | D_LYS_402 | NZ  | D_GLU_404 | OE2 | 3.866 |
| 3V4P | D_HIS_434 | NE2 | D_GLU_432 | OE1 | 3.794 |
| 3V4P | D_ARG_439 | NH2 | D_GLU_377 | OE1 | 3.413 |
| 3V4P | D_HIS_452 | ND1 | D_GLU_450 | OE2 | 3.942 |

|      |           |     |           |     |       |
|------|-----------|-----|-----------|-----|-------|
| 3V4P | H_HIS_35  | ND1 | H_GLU_50  | OE1 | 3.827 |
| 3V4P | H_ARG_40  | NH1 | H_GLU_46  | OE2 | 3.925 |
| 3V4P | H_ARG_40  | NH2 | H_GLU_46  | OE2 | 3.891 |
| 3V4P | H_LYS_63  | NZ  | H_GLU_46  | OE1 | 3.617 |
| 3V4P | H_LYS_67  | NZ  | H_ASP_90  | OD1 | 3.016 |
| 3V4P | H_LYS_67  | NZ  | H_ASP_90  | OD2 | 2.785 |
| 3V4P | H_ARG_98  | NH2 | H_ASP_109 | OD1 | 3.538 |
| 3V4P | H_ARG_98  | NH2 | H_ASP_109 | OD2 | 2.869 |
| 3V4P | H_LYS_151 | NZ  | H_GLU_179 | OE1 | 3.924 |
| 3V4P | H_LYS_151 | NZ  | H_GLU_179 | OE2 | 3.342 |
| 3V4P | H_HIS_172 | ND1 | L_ASP_172 | OD2 | 3.780 |
| 3V4P | H_LYS_216 | NZ  | L_GLU_128 | OE2 | 3.270 |
| 3V4P | L_ARG_24  | NH2 | L_ASP_75  | OD2 | 3.872 |
| 3V4P | L_ARG_66  | NH2 | L_GLU_86  | OE1 | 3.540 |
| 3V4P | L_ARG_66  | NH2 | L_ASP_87  | OD1 | 2.923 |
| 3V4P | L_ARG_66  | NH2 | L_ASP_87  | OD2 | 3.479 |
| 3V4P | L_HIS_194 | ND1 | L_ASP_156 | OD1 | 3.668 |
| 3V4P | L_HIS_194 | ND1 | L_ASP_156 | OD2 | 3.022 |
| 3V4P | M_HIS_35  | ND1 | M_GLU_50  | OE1 | 3.826 |
| 3V4P | M_ARG_40  | NH1 | M_GLU_46  | OE2 | 3.929 |
| 3V4P | M_ARG_40  | NH2 | M_GLU_46  | OE2 | 3.895 |
| 3V4P | M_LYS_63  | NZ  | M_GLU_46  | OE1 | 3.628 |
| 3V4P | M_LYS_67  | NZ  | M_ASP_90  | OD1 | 3.021 |
| 3V4P | M_LYS_67  | NZ  | M_ASP_90  | OD2 | 2.783 |
| 3V4P | M_ARG_98  | NH2 | M_ASP_109 | OD1 | 3.527 |
| 3V4P | M_ARG_98  | NH2 | M_ASP_109 | OD2 | 2.863 |
| 3V4P | M_LYS_151 | NZ  | M_GLU_179 | OE1 | 3.922 |
| 3V4P | M_LYS_151 | NZ  | M_GLU_179 | OE2 | 3.343 |
| 3V4P | M_HIS_172 | ND1 | N_ASP_172 | OD2 | 3.600 |
| 3V4P | M_LYS_216 | NZ  | N_GLU_128 | OE2 | 3.408 |
| 3V4P | N_ARG_24  | NH2 | N_ASP_75  | OD2 | 3.878 |
| 3V4P | N_ARG_66  | NH2 | N_GLU_86  | OE1 | 3.541 |
| 3V4P | N_ARG_66  | NH2 | N_ASP_87  | OD1 | 2.925 |
| 3V4P | N_ARG_66  | NH2 | N_ASP_87  | OD2 | 3.479 |
| 3V4P | N_HIS_194 | ND1 | N_ASP_156 | OD1 | 3.669 |
| 3V4P | N_HIS_194 | ND1 | N_ASP_156 | OD2 | 3.021 |

Table 484: 3V4P-specific salt bridging networks analysis. In this table, a PDB file is specified with a four-letter PDB ID, except that the names of the PDB files corresponding to the single NMR structural model split from the NMR ensemble is specified with a four-letter PDB ID in addition to a hyphen followed by the single NMR structural model numeric ID, the residue naming scheme is **Chain ID\_residue name\_residue number**,  $\angle ADH$  represents the angle formed by acceptor (A), donor (D) and hydrogen (H) ( $\angle ADH$ ).

| PDB ID | Residue A | Atom A | Residue B | Atom B | Distance (Å) |
|--------|-----------|--------|-----------|--------|--------------|
| 3V4U   | H_ARG_38  | NH1    | H_ASP_90  | OD1    | 3.026        |
| 3V4U   | H_ARG_38  | NH2    | H_GLU_46  | OE1    | 2.923        |
| 3V4U   | H_ARG_38  | NH2    | H_ASP_90  | OD1    | 3.942        |
| 3V4U   | H_ARG_67  | NH1    | H_ASP_90  | OD2    | 3.062        |
| 3V4U   | H_ARG_67  | NH2    | H_ASP_90  | OD1    | 3.515        |
| 3V4U   | H_ARG_67  | NH2    | H_ASP_90  | OD2    | 3.172        |
| 3V4U   | H_ARG_98  | NH2    | H_ASP_105 | OD1    | 3.657        |
| 3V4U   | H_ARG_98  | NH2    | H_ASP_105 | OD2    | 3.151        |
| 3V4U   | H_LYS_147 | NZ     | H_GLU_175 | OE2    | 2.827        |
| 3V4U   | H_LYS_212 | NZ     | L_GLU_127 | OE2    | 2.667        |
| 3V4U   | L_ARG_24  | NH2    | L_ASP_75  | OD1    | 3.756        |
| 3V4U   | L_ARG_66  | NH1    | L_ASP_87  | OD1    | 3.777        |
| 3V4U   | L_ARG_66  | NH1    | L_ASP_87  | OD2    | 2.819        |
| 3V4U   | L_ARG_66  | NH2    | L_GLU_84  | OE1    | 3.720        |
| 3V4U   | L_ARG_66  | NH2    | L_GLU_84  | OE2    | 3.860        |
| 3V4U   | L_ARG_66  | NH2    | L_ASP_87  | OD1    | 2.775        |
| 3V4U   | L_ARG_66  | NH2    | L_ASP_87  | OD2    | 3.243        |
| 3V4U   | L_LYS_153 | NZ     | L_GLU_199 | OE1    | 3.350        |
| 3V4U   | L_LYS_153 | NZ     | L_GLU_199 | OE2    | 2.923        |
| 3V4U   | L_ARG_159 | NH1    | L_GLU_189 | OE1    | 2.754        |
| 3V4U   | L_ARG_159 | NH2    | L_GLU_189 | OE1    | 3.366        |
| 3V4U   | L_LYS_187 | NZ     | L_GLU_191 | OE2    | 3.065        |
| 3V4U   | L_ARG_192 | NH2    | L_ASP_188 | OD1    | 3.394        |

Table 485: 3V4U-specific salt bridging networks analysis. In this table, a PDB file is specified with a four-letter PDB ID, except that the names of the PDB files corresponding to the single NMR structural model split from the NMR ensemble is specified with a four-letter PDB ID in addition to a hyphen followed by the single NMR structural model numeric ID, the residue naming scheme is **Chain ID\_residue name\_residue number**,  $\angle ADH$  represents the angle formed by acceptor (A), donor (D) and hydrogen (H) ( $\angle ADH$ ).

| PDB ID | Residue A | Atom A | Residue B | Atom B | Distance (Å) |
|--------|-----------|--------|-----------|--------|--------------|
| 3V4V   | A_HIS_28  | NE2    | A_ASP_138 | OD1    | 3.625        |
| 3V4V   | A_ARG_57  | NH2    | A_GLU_69  | OE2    | 3.446        |
| 3V4V   | A_LYS_126 | NZ     | A_GLU_88  | OE1    | 3.984        |
| 3V4V   | A_LYS_126 | NZ     | A_GLU_88  | OE2    | 3.844        |
| 3V4V   | A_LYS_157 | NZ     | A_GLU_160 | OE1    | 3.707        |
| 3V4V   | A_LYS_203 | NZ     | A_GLU_255 | OE2    | 4.000        |
| 3V4V   | A_ARG_228 | NH2    | A_GLU_234 | OE2    | 3.810        |
| 3V4V   | A_HIS_242 | NE2    | A_GLU_243 | OE1    | 3.962        |
| 3V4V   | A_LYS_247 | NZ     | A_GLU_263 | OE2    | 2.864        |
| 3V4V   | A_ARG_301 | NH2    | A_GLU_302 | OE1    | 3.852        |
| 3V4V   | A_ARG_305 | NH1    | A_ASP_329 | OD1    | 2.728        |
| 3V4V   | A_ARG_305 | NH2    | A_ASP_329 | OD1    | 2.929        |
| 3V4V   | A_ARG_305 | NH2    | A_ASP_329 | OD2    | 3.468        |
| 3V4V   | A_LYS_330 | NZ     | A_GLU_360 | OE1    | 3.937        |
| 3V4V   | A_LYS_330 | NZ     | A_ASP_361 | OD1    | 3.025        |
| 3V4V   | A_LYS_330 | NZ     | A_ASP_361 | OD2    | 3.585        |
| 3V4V   | A_ARG_334 | NH1    | A_GLU_337 | OE1    | 3.450        |
| 3V4V   | A_ARG_334 | NH1    | A_GLU_337 | OE2    | 3.152        |
| 3V4V   | A_ARG_334 | NH2    | A_GLU_302 | OE2    | 3.584        |
| 3V4V   | A_ARG_384 | NH1    | A_GLU_386 | OE1    | 3.340        |
| 3V4V   | A_ARG_384 | NH2    | A_GLU_360 | OE1    | 2.718        |
| 3V4V   | A_ARG_384 | NH2    | A_ASP_361 | OD2    | 3.178        |
| 3V4V   | A_ARG_384 | NH2    | A_GLU_386 | OE1    | 2.970        |
| 3V4V   | A_ARG_429 | NH2    | A_ASP_408 | OD2    | 2.821        |
| 3V4V   | A_ARG_499 | NH1    | A_ASP_489 | OD2    | 3.736        |
| 3V4V   | A_ARG_499 | NH1    | A_ASP_537 | OD2    | 3.000        |
| 3V4V   | A_ARG_499 | NH2    | A_ASP_537 | OD2    | 3.346        |
| 3V4V   | A_ARG_532 | NH1    | A_ASP_534 | OD2    | 3.643        |
| 3V4V   | A_LYS_533 | NZ     | A_GLU_455 | OE1    | 3.618        |
| 3V4V   | A_ARG_536 | NH2    | A_ASP_534 | OD1    | 3.812        |
| 3V4V   | A_LYS_574 | NZ     | A_ASP_375 | OD1    | 3.230        |
| 3V4V   | A_LYS_574 | NZ     | A_ASP_375 | OD2    | 3.530        |
| 3V4V   | B_ARG_108 | NH2    | B_GLU_450 | OE1    | 2.540        |
| 3V4V   | B_ARG_110 | NH1    | B_GLU_85  | OE1    | 3.653        |
| 3V4V   | B_ARG_110 | NH2    | B_GLU_450 | OE2    | 3.788        |
| 3V4V   | B_ARG_124 | NH2    | B_ASP_89  | OD1    | 3.503        |
| 3V4V   | B_LYS_180 | NZ     | B_ASP_244 | OD1    | 3.343        |
| 3V4V   | B_LYS_180 | NZ     | B_ASP_244 | OD2    | 2.615        |
| 3V4V   | B_ARG_194 | NH1    | H_ASP_102 | OD1    | 2.874        |
| 3V4V   | B_ARG_194 | NH1    | H_ASP_102 | OD2    | 3.211        |
| 3V4V   | B_ARG_200 | NH2    | H_ASP_102 | OD1    | 3.237        |
| 3V4V   | B_ARG_259 | NH2    | B_ASP_134 | OD1    | 2.874        |
| 3V4V   | B_HIS_274 | ND1    | B_ASP_278 | OD2    | 3.045        |
| 3V4V   | B_HIS_274 | NE2    | B_ASP_179 | OD2    | 3.250        |
| 3V4V   | B_HIS_274 | NE2    | B_ASP_237 | OD2    | 3.128        |
| 3V4V   | B_HIS_293 | NE2    | B_ASP_289 | OD1    | 2.625        |
| 3V4V   | B_HIS_293 | NE2    | B_ASP_289 | OD2    | 2.924        |
| 3V4V   | B_ARG_302 | NH2    | B_GLU_305 | OE1    | 3.474        |
| 3V4V   | B_ARG_399 | NH1    | B_GLU_390 | OE1    | 2.982        |
| 3V4V   | B_ARG_399 | NH1    | B_GLU_390 | OE2    | 2.814        |
| 3V4V   | B_ARG_399 | NH2    | B_GLU_390 | OE2    | 3.187        |
| 3V4V   | B_LYS_402 | NZ     | B_GLU_404 | OE2    | 3.543        |
| 3V4V   | B_HIS_434 | NE2    | B_GLU_432 | OE1    | 3.549        |
| 3V4V   | B_ARG_439 | NH2    | B_GLU_377 | OE1    | 3.529        |
| 3V4V   | B_HIS_452 | ND1    | B_GLU_450 | OE2    | 3.839        |
| 3V4V   | H_HIS_35  | ND1    | H_GLU_50  | OE1    | 3.868        |
| 3V4V   | H_HIS_35  | NE2    | H_GLU_50  | OE1    | 3.873        |



|      |           |     |           |     |       |
|------|-----------|-----|-----------|-----|-------|
| 3V4V | H_ARG_40  | NH2 | H_GLU_89  | OE1 | 3.118 |
| 3V4V | H_LYS_63  | NZ  | H_GLU_46  | OE1 | 3.657 |
| 3V4V | H_LYS_67  | NZ  | H_ASP_90  | OD1 | 2.996 |
| 3V4V | H_LYS_67  | NZ  | H_ASP_90  | OD2 | 2.684 |
| 3V4V | H_ARG_98  | NH2 | H_ASP_109 | OD1 | 3.554 |
| 3V4V | H_ARG_98  | NH2 | H_ASP_109 | OD2 | 2.682 |
| 3V4V | H_LYS_151 | NZ  | H_GLU_179 | OE2 | 3.864 |
| 3V4V | H_HIS_172 | ND1 | L_ASP_172 | OD1 | 3.644 |
| 3V4V | H_LYS_216 | NZ  | L_GLU_128 | OE2 | 3.607 |
| 3V4V | L_ARG_66  | NH2 | L_GLU_86  | OE1 | 3.477 |
| 3V4V | L_ARG_66  | NH2 | L_ASP_87  | OD1 | 3.326 |
| 3V4V | L_ARG_66  | NH2 | L_ASP_87  | OD2 | 3.224 |
| 3V4V | L_LYS_152 | NZ  | L_GLU_200 | OE2 | 3.741 |
| 3V4V | L_HIS_194 | ND1 | L_ASP_156 | OD1 | 3.854 |
| 3V4V | L_HIS_194 | ND1 | L_ASP_156 | OD2 | 2.969 |
| 3V4V | C_HIS_28  | NE2 | C_ASP_138 | OD1 | 3.619 |
| 3V4V | C_ARG_57  | NH2 | C_GLU_69  | OE2 | 3.454 |
| 3V4V | C_LYS_126 | NZ  | C_GLU_88  | OE1 | 3.966 |
| 3V4V | C_LYS_126 | NZ  | C_GLU_88  | OE2 | 3.832 |
| 3V4V | C_LYS_157 | NZ  | C_GLU_160 | OE1 | 3.712 |
| 3V4V | C_ARG_228 | NH2 | C_GLU_234 | OE2 | 3.809 |
| 3V4V | C_HIS_242 | NE2 | C_GLU_243 | OE1 | 3.957 |
| 3V4V | C_LYS_247 | NZ  | C_GLU_263 | OE2 | 2.858 |
| 3V4V | C_ARG_301 | NH2 | C_GLU_302 | OE1 | 3.856 |
| 3V4V | C_ARG_305 | NH1 | C_ASP_329 | OD1 | 2.717 |
| 3V4V | C_ARG_305 | NH2 | C_ASP_329 | OD1 | 2.917 |
| 3V4V | C_ARG_305 | NH2 | C_ASP_329 | OD2 | 3.457 |
| 3V4V | C_LYS_330 | NZ  | C_GLU_360 | OE1 | 3.928 |
| 3V4V | C_LYS_330 | NZ  | C_ASP_361 | OD1 | 3.024 |
| 3V4V | C_LYS_330 | NZ  | C_ASP_361 | OD2 | 3.579 |
| 3V4V | C_ARG_334 | NH1 | C_GLU_337 | OE1 | 3.446 |
| 3V4V | C_ARG_334 | NH1 | C_GLU_337 | OE2 | 3.179 |
| 3V4V | C_ARG_334 | NH2 | C_GLU_302 | OE2 | 3.589 |
| 3V4V | C_ARG_373 | NH2 | C_GLU_575 | OE2 | 3.832 |
| 3V4V | C_ARG_384 | NH1 | C_GLU_386 | OE1 | 3.331 |
| 3V4V | C_ARG_384 | NH2 | C_GLU_360 | OE1 | 2.721 |
| 3V4V | C_ARG_384 | NH2 | C_ASP_361 | OD2 | 3.178 |
| 3V4V | C_ARG_384 | NH2 | C_GLU_386 | OE1 | 2.966 |
| 3V4V | C_ARG_429 | NH2 | C_ASP_408 | OD2 | 2.836 |
| 3V4V | C_ARG_499 | NH1 | C_ASP_489 | OD2 | 3.733 |
| 3V4V | C_ARG_499 | NH1 | C_ASP_537 | OD2 | 3.002 |
| 3V4V | C_ARG_499 | NH2 | C_ASP_537 | OD2 | 3.340 |
| 3V4V | C_ARG_532 | NH1 | C_ASP_534 | OD2 | 3.655 |
| 3V4V | C_LYS_533 | NZ  | C_GLU_455 | OE1 | 3.182 |
| 3V4V | C_LYS_533 | NZ  | C_GLU_455 | OE2 | 3.301 |
| 3V4V | C_ARG_536 | NH2 | C_ASP_534 | OD1 | 3.809 |
| 3V4V | C_LYS_573 | NZ  | C_ASP_577 | OD1 | 3.849 |
| 3V4V | C_LYS_574 | NZ  | C_ASP_346 | OD2 | 3.367 |
| 3V4V | C_LYS_574 | NZ  | C_ASP_348 | OD2 | 3.730 |
| 3V4V | D_ARG_108 | NH2 | D_GLU_450 | OE1 | 2.539 |
| 3V4V | D_ARG_110 | NH1 | D_GLU_85  | OE1 | 3.659 |
| 3V4V | D_ARG_110 | NH2 | D_GLU_450 | OE2 | 3.785 |
| 3V4V | D_ARG_124 | NH2 | D_ASP_89  | OD1 | 3.506 |
| 3V4V | D_LYS_146 | NZ  | D_GLU_202 | OE2 | 3.999 |
| 3V4V | D_LYS_180 | NZ  | D_ASP_244 | OD1 | 3.344 |
| 3V4V | D_LYS_180 | NZ  | D_ASP_244 | OD2 | 2.642 |
| 3V4V | D_ARG_194 | NH1 | M_ASP_102 | OD1 | 2.657 |
| 3V4V | D_ARG_194 | NH1 | M_ASP_102 | OD2 | 2.923 |

|      |           |     |           |     |       |
|------|-----------|-----|-----------|-----|-------|
| 3V4V | D_ARG_200 | NH2 | M_ASP_102 | OD1 | 3.070 |
| 3V4V | D_ARG_259 | NH2 | D_ASP_134 | OD1 | 2.871 |
| 3V4V | D_HIS_274 | ND1 | D_ASP_278 | OD2 | 3.033 |
| 3V4V | D_HIS_274 | NE2 | D_ASP_179 | OD2 | 3.229 |
| 3V4V | D_HIS_274 | NE2 | D_ASP_237 | OD2 | 3.108 |
| 3V4V | D_HIS_293 | NE2 | D_ASP_289 | OD1 | 2.628 |
| 3V4V | D_HIS_293 | NE2 | D_ASP_289 | OD2 | 2.920 |
| 3V4V | D_ARG_302 | NH2 | D_GLU_305 | OE1 | 3.475 |
| 3V4V | D_ARG_399 | NH1 | D_GLU_390 | OE1 | 2.981 |
| 3V4V | D_ARG_399 | NH1 | D_GLU_390 | OE2 | 2.805 |
| 3V4V | D_ARG_399 | NH2 | D_GLU_390 | OE2 | 3.180 |
| 3V4V | D_LYS_402 | NZ  | D_GLU_404 | OE2 | 3.526 |
| 3V4V | D_HIS_434 | NE2 | D_GLU_432 | OE1 | 3.565 |
| 3V4V | D_ARG_439 | NH2 | D_GLU_377 | OE1 | 3.517 |
| 3V4V | D_HIS_452 | ND1 | D_GLU_450 | OE2 | 3.844 |
| 3V4V | M_HIS_35  | ND1 | M_GLU_50  | OE1 | 3.871 |
| 3V4V | M_HIS_35  | NE2 | M_GLU_50  | OE1 | 3.860 |
| 3V4V | M_ARG_40  | NH2 | M_GLU_89  | OE1 | 3.456 |
| 3V4V | M_LYS_63  | NZ  | M_GLU_46  | OE1 | 3.661 |
| 3V4V | M_LYS_67  | NZ  | M_ASP_90  | OD1 | 2.998 |
| 3V4V | M_LYS_67  | NZ  | M_ASP_90  | OD2 | 2.683 |
| 3V4V | M_ARG_98  | NH2 | M_ASP_109 | OD1 | 3.565 |
| 3V4V | M_ARG_98  | NH2 | M_ASP_109 | OD2 | 2.672 |
| 3V4V | M_LYS_151 | NZ  | M_GLU_179 | OE2 | 3.863 |
| 3V4V | M_HIS_172 | ND1 | N_ASP_172 | OD1 | 3.594 |
| 3V4V | M_LYS_216 | NZ  | N_GLU_128 | OE2 | 3.217 |
| 3V4V | N_ARG_66  | NH2 | N_GLU_86  | OE1 | 3.488 |
| 3V4V | N_ARG_66  | NH2 | N_ASP_87  | OD1 | 3.328 |
| 3V4V | N_ARG_66  | NH2 | N_ASP_87  | OD2 | 3.226 |
| 3V4V | N_LYS_152 | NZ  | N_GLU_200 | OE2 | 3.759 |
| 3V4V | N_HIS_194 | ND1 | N_ASP_156 | OD1 | 3.862 |
| 3V4V | N_HIS_194 | ND1 | N_ASP_156 | OD2 | 2.969 |

Table 486: 3V4V-specific salt bridging networks analysis. In this table, a PDB file is specified with a four-letter PDB ID, except that the names of the PDB files corresponding to the single NMR structural model split from the NMR ensemble is specified with a four-letter PDB ID in addition to a hyphen followed by the single NMR structural model numeric ID, the residue naming scheme is **Chain ID\_residue name\_residue number**,  $\angle ADH$  represents the angle formed by acceptor (A), donor (D) and hydrogen (H) ( $\angle ADH$ ).

| PDB ID | Residue A | Atom A | Residue B | Atom B | Distance (Å) |
|--------|-----------|--------|-----------|--------|--------------|
| 3V52   | H_ARG_38  | NH1    | H_ASP_90  | OD1    | 3.011        |
| 3V52   | H_ARG_38  | NH2    | H_GLU_46  | OE1    | 2.934        |
| 3V52   | H_ARG_67  | NH1    | H_ASP_90  | OD2    | 3.055        |
| 3V52   | H_ARG_67  | NH2    | H_ASP_90  | OD1    | 3.178        |
| 3V52   | H_ARG_67  | NH2    | H_ASP_90  | OD2    | 3.296        |
| 3V52   | H_ARG_98  | NH2    | H_ASP_105 | OD1    | 3.591        |
| 3V52   | H_ARG_98  | NH2    | H_ASP_105 | OD2    | 2.829        |
| 3V52   | H_LYS_212 | NZ     | L_GLU_127 | OE2    | 2.929        |
| 3V52   | H_LYS_213 | NZ     | H_GLU_215 | OE2    | 3.959        |
| 3V52   | L_ARG_66  | NH1    | L_ASP_87  | OD1    | 3.858        |
| 3V52   | L_ARG_66  | NH1    | L_ASP_87  | OD2    | 2.692        |
| 3V52   | L_ARG_66  | NH2    | L_GLU_84  | OE1    | 3.797        |
| 3V52   | L_ARG_66  | NH2    | L_GLU_84  | OE2    | 3.912        |
| 3V52   | L_ARG_66  | NH2    | L_ASP_87  | OD1    | 3.033        |
| 3V52   | L_ARG_66  | NH2    | L_ASP_87  | OD2    | 3.323        |
| 3V52   | L_LYS_153 | NZ     | L_GLU_199 | OE2    | 2.980        |
| 3V52   | L_ARG_159 | NH1    | L_GLU_189 | OE1    | 3.150        |
| 3V52   | L_ARG_159 | NH2    | L_GLU_189 | OE1    | 2.854        |
| 3V52   | L_ARG_192 | NH2    | L_ASP_188 | OD1    | 3.092        |
| 3V52   | L_ARG_192 | NH2    | L_ASP_188 | OD2    | 3.931        |
| 3V52   | L_HIS_193 | ND1    | L_ASP_155 | OD2    | 2.916        |
| 3V52   | L_LYS_203 | NZ     | L_ASP_114 | OD2    | 2.574        |

Table 487: 3V52-specific salt bridging networks analysis. In this table, a PDB file is specified with a four-letter PDB ID, except that the names of the PDB files corresponding to the single NMR structural model split from the NMR ensemble is specified with a four-letter PDB ID in addition to a hyphen followed by the single NMR structural model numeric ID, the residue naming scheme is **Chain ID\_residue name\_residue number**,  $\angle ADH$  represents the angle formed by acceptor (A), donor (D) and hydrogen (H) ( $\angle ADH$ ).

| PDB ID | Residue A | Atom A | Residue B | Atom B | Distance (Å) |
|--------|-----------|--------|-----------|--------|--------------|
| 3V6F   | A_ARG_38  | NH1    | A_ASP_86  | OD1    | 2.911        |
| 3V6F   | A_ARG_38  | NH2    | A_GLU_46  | OE1    | 3.291        |
| 3V6F   | A_ARG_38  | NH2    | A_GLU_46  | OE2    | 3.661        |
| 3V6F   | A_ARG_38  | NH2    | A_ASP_86  | OD1    | 3.667        |
| 3V6F   | A_LYS_64  | NZ     | A_ASP_61  | OD1    | 2.842        |
| 3V6F   | A_ARG_66  | NH1    | A_ASP_86  | OD1    | 3.978        |
| 3V6F   | A_ARG_66  | NH1    | A_ASP_86  | OD2    | 2.845        |
| 3V6F   | A_ARG_66  | NH2    | A_ASP_86  | OD1    | 3.048        |
| 3V6F   | A_ARG_66  | NH2    | A_ASP_86  | OD2    | 3.388        |
| 3V6F   | A_LYS_75  | NZ     | A_ASP_72  | OD2    | 3.618        |
| 3V6F   | A_ARG_94  | NH1    | A_ASP_106 | OD1    | 3.312        |
| 3V6F   | A_ARG_94  | NH1    | A_ASP_106 | OD2    | 3.358        |
| 3V6F   | A_LYS_213 | NZ     | B_GLU_130 | OE1    | 3.799        |
| 3V6F   | B_ARG_60  | NH1    | B_ASP_66  | OD1    | 3.189        |
| 3V6F   | B_ARG_60  | NH2    | B_ASP_66  | OD1    | 3.662        |
| 3V6F   | B_ARG_67  | NH2    | B_ASP_88  | OD1    | 2.925        |
| 3V6F   | B_ARG_67  | NH2    | B_ASP_88  | OD2    | 3.716        |
| 3V6F   | B_ARG_162 | NH1    | B_GLU_192 | OE2    | 3.473        |
| 3V6F   | B_ARG_195 | NH1    | B_GLU_192 | OE1    | 3.435        |
| 3V6F   | B_ARG_195 | NH1    | B_GLU_192 | OE2    | 2.954        |
| 3V6F   | B_HIS_196 | ND1    | B_GLU_192 | OE2    | 3.778        |
| 3V6F   | C_ARG_38  | NH1    | C_ASP_86  | OD1    | 2.982        |
| 3V6F   | C_ARG_38  | NH2    | C_GLU_46  | OE1    | 3.377        |
| 3V6F   | C_ARG_38  | NH2    | C_GLU_46  | OE2    | 3.714        |
| 3V6F   | C_ARG_38  | NH2    | C_ASP_86  | OD1    | 3.729        |
| 3V6F   | C_LYS_64  | NZ     | C_ASP_61  | OD1    | 2.824        |
| 3V6F   | C_ARG_66  | NH1    | C_ASP_86  | OD1    | 3.704        |
| 3V6F   | C_ARG_66  | NH1    | C_ASP_86  | OD2    | 2.748        |
| 3V6F   | C_ARG_66  | NH2    | C_ASP_86  | OD1    | 3.318        |
| 3V6F   | C_ARG_66  | NH2    | C_ASP_86  | OD2    | 3.791        |
| 3V6F   | C_LYS_75  | NZ     | C_ASP_72  | OD2    | 3.653        |
| 3V6F   | C_ARG_94  | NH1    | C_ASP_106 | OD1    | 3.027        |
| 3V6F   | C_ARG_94  | NH1    | C_ASP_106 | OD2    | 2.907        |
| 3V6F   | C_LYS_213 | NZ     | D_GLU_130 | OE1    | 3.956        |
| 3V6F   | D_ARG_60  | NH1    | D_ASP_66  | OD1    | 3.192        |
| 3V6F   | D_ARG_60  | NH2    | D_ASP_66  | OD1    | 3.669        |
| 3V6F   | D_ARG_67  | NH2    | D_ASP_88  | OD1    | 2.880        |
| 3V6F   | D_ARG_67  | NH2    | D_ASP_88  | OD2    | 3.702        |
| 3V6F   | D_ARG_162 | NH1    | D_GLU_192 | OE2    | 3.490        |
| 3V6F   | D_ARG_195 | NH1    | D_GLU_192 | OE1    | 3.464        |
| 3V6F   | D_ARG_195 | NH1    | D_GLU_192 | OE2    | 2.977        |
| 3V6F   | D_HIS_196 | ND1    | D_GLU_192 | OE2    | 3.829        |
| 3V6F   | E_ARG_38  | NH1    | E_ASP_86  | OD1    | 2.938        |
| 3V6F   | E_ARG_38  | NH2    | E_GLU_46  | OE1    | 3.288        |
| 3V6F   | E_ARG_38  | NH2    | E_GLU_46  | OE2    | 3.689        |
| 3V6F   | E_ARG_38  | NH2    | E_ASP_86  | OD1    | 3.691        |
| 3V6F   | E_LYS_64  | NZ     | E_ASP_61  | OD1    | 3.118        |
| 3V6F   | E_ARG_66  | NH1    | E_ASP_86  | OD1    | 3.831        |
| 3V6F   | E_ARG_66  | NH1    | E_ASP_86  | OD2    | 2.617        |
| 3V6F   | E_ARG_66  | NH2    | E_ASP_86  | OD1    | 2.929        |
| 3V6F   | E_ARG_66  | NH2    | E_ASP_86  | OD2    | 3.284        |
| 3V6F   | E_LYS_75  | NZ     | E_ASP_72  | OD2    | 3.617        |
| 3V6F   | E_ARG_94  | NH1    | E_ASP_106 | OD1    | 3.312        |
| 3V6F   | E_ARG_94  | NH1    | E_ASP_106 | OD2    | 3.177        |
| 3V6F   | E_LYS_213 | NZ     | F_GLU_130 | OE1    | 3.763        |
| 3V6F   | F_ARG_60  | NH1    | F_ASP_66  | OD1    | 3.236        |
| 3V6F   | F_ARG_60  | NH2    | F_ASP_66  | OD1    | 3.718        |

|      |           |     |           |     |       |
|------|-----------|-----|-----------|-----|-------|
| 3V6F | F_ARG_67  | NH2 | F_ASP_88  | OD1 | 2.889 |
| 3V6F | F_ARG_67  | NH2 | F_ASP_88  | OD2 | 3.693 |
| 3V6F | F_LYS_114 | NZ  | F_GLU_17  | OE1 | 3.958 |
| 3V6F | F_ARG_162 | NH1 | F_GLU_192 | OE2 | 3.447 |
| 3V6F | F_ARG_195 | NH1 | F_GLU_192 | OE1 | 3.438 |
| 3V6F | F_ARG_195 | NH1 | F_GLU_192 | OE2 | 2.943 |
| 3V6F | F_HIS_196 | ND1 | F_GLU_192 | OE2 | 3.828 |
| 3V6F | H_ARG_38  | NH1 | H_ASP_86  | OD1 | 2.929 |
| 3V6F | H_ARG_38  | NH2 | H_GLU_46  | OE1 | 3.278 |
| 3V6F | H_ARG_38  | NH2 | H_GLU_46  | OE2 | 3.715 |
| 3V6F | H_ARG_38  | NH2 | H_ASP_86  | OD1 | 3.746 |
| 3V6F | H_LYS_64  | NZ  | H_ASP_61  | OD1 | 2.949 |
| 3V6F | H_ARG_66  | NH1 | H_ASP_86  | OD1 | 3.602 |
| 3V6F | H_ARG_66  | NH1 | H_ASP_86  | OD2 | 2.554 |
| 3V6F | H_ARG_66  | NH2 | H_ASP_86  | OD1 | 2.925 |
| 3V6F | H_ARG_66  | NH2 | H_ASP_86  | OD2 | 3.444 |
| 3V6F | H_LYS_75  | NZ  | H_ASP_72  | OD2 | 3.633 |
| 3V6F | H_ARG_94  | NH1 | H_ASP_106 | OD1 | 3.513 |
| 3V6F | H_ARG_94  | NH1 | H_ASP_106 | OD2 | 2.779 |
| 3V6F | H_HIS_169 | NE2 | L_ASP_174 | OD1 | 3.656 |
| 3V6F | L_ARG_60  | NH1 | L_ASP_66  | OD1 | 3.201 |
| 3V6F | L_ARG_60  | NH2 | L_ASP_66  | OD1 | 3.668 |
| 3V6F | L_ARG_67  | NH2 | L_ASP_88  | OD1 | 2.904 |
| 3V6F | L_ARG_67  | NH2 | L_ASP_88  | OD2 | 3.773 |
| 3V6F | L_ARG_162 | NH1 | L_GLU_192 | OE2 | 3.508 |
| 3V6F | L_ARG_195 | NH1 | L_GLU_192 | OE1 | 3.445 |
| 3V6F | L_ARG_195 | NH1 | L_GLU_192 | OE2 | 2.967 |
| 3V6F | L_HIS_196 | ND1 | L_GLU_192 | OE2 | 3.834 |

Table 488: 3V6F-specific salt bridging networks analysis. In this table, a PDB file is specified with a four-letter PDB ID, except that the names of the PDB files corresponding to the single NMR structural model split from the NMR ensemble is specified with a four-letter PDB ID in addition to a hyphen followed by the single NMR structural model numeric ID, the residue naming scheme is **Chain ID\_residue name\_residue number**,  $\angle ADH$  represents the angle formed by acceptor (A), donor (D) and hydrogen (H) ( $\angle ADH$ ).

| PDB ID | Residue A | Atom A | Residue B | Atom B | Distance (Å) |
|--------|-----------|--------|-----------|--------|--------------|
| 3WII   | L_ARG_24  | NH1    | L_ASP_70  | OD1    | 3.918        |
| 3WII   | L_ARG_24  | NH1    | L_ASP_70  | OD2    | 2.824        |
| 3WII   | L_ARG_61  | NH1    | L_GLU_81  | OE1    | 3.206        |
| 3WII   | L_ARG_61  | NH1    | L_ASP_82  | OD1    | 2.733        |
| 3WII   | L_ARG_61  | NH1    | L_ASP_82  | OD2    | 3.500        |
| 3WII   | L_LYS_103 | NZ     | L_GLU_105 | OE2    | 3.849        |
| 3WII   | L_LYS_149 | NZ     | L_GLU_195 | OE1    | 3.529        |
| 3WII   | L_LYS_149 | NZ     | L_GLU_195 | OE2    | 2.994        |
| 3WII   | L_ARG_155 | NH1    | L_GLU_185 | OE2    | 3.108        |
| 3WII   | L_ARG_155 | NH2    | L_GLU_185 | OE1    | 3.573        |
| 3WII   | L_ARG_155 | NH2    | L_GLU_185 | OE2    | 3.738        |
| 3WII   | L_LYS_183 | NZ     | L_GLU_187 | OE1    | 2.854        |
| 3WII   | L_LYS_183 | NZ     | L_GLU_187 | OE2    | 2.954        |
| 3WII   | L_HIS_189 | ND1    | L_ASP_151 | OD2    | 2.633        |
| 3WII   | L_LYS_199 | NZ     | L_GLU_110 | OE2    | 3.646        |
| 3WII   | H_LYS_67  | NZ     | H_ASP_90  | OD1    | 3.761        |
| 3WII   | H_LYS_67  | NZ     | H_ASP_90  | OD2    | 2.892        |
| 3WII   | H_ARG_98  | NH2    | H_ASP_107 | OD1    | 3.653        |
| 3WII   | H_ARG_98  | NH2    | H_ASP_107 | OD2    | 2.796        |
| 3WII   | H_LYS_214 | NZ     | L_GLU_123 | OE2    | 3.755        |
| 3WII   | H_LYS_215 | NZ     | H_GLU_217 | OE2    | 3.819        |
| 3WII   | M_ARG_61  | NH1    | M_GLU_81  | OE1    | 3.086        |
| 3WII   | M_ARG_61  | NH1    | M_ASP_82  | OD1    | 2.841        |
| 3WII   | M_ARG_61  | NH1    | M_ASP_82  | OD2    | 3.629        |
| 3WII   | M_LYS_103 | NZ     | M_GLU_105 | OE2    | 3.685        |
| 3WII   | M_LYS_147 | NZ     | M_GLU_154 | OE1    | 3.932        |
| 3WII   | M_LYS_149 | NZ     | M_GLU_195 | OE1    | 3.414        |
| 3WII   | M_LYS_149 | NZ     | M_GLU_195 | OE2    | 2.992        |
| 3WII   | M_ARG_155 | NH1    | M_GLU_185 | OE2    | 3.084        |
| 3WII   | M_ARG_155 | NH2    | M_GLU_185 | OE1    | 3.729        |
| 3WII   | M_ARG_155 | NH2    | M_GLU_185 | OE2    | 3.794        |
| 3WII   | M_HIS_189 | ND1    | M_ASP_151 | OD2    | 2.674        |
| 3WII   | I_LYS_67  | NZ     | I_ASP_90  | OD1    | 3.687        |
| 3WII   | I_LYS_67  | NZ     | I_ASP_90  | OD2    | 2.807        |
| 3WII   | I_ARG_98  | NH2    | I_ASP_107 | OD1    | 3.645        |
| 3WII   | I_ARG_98  | NH2    | I_ASP_107 | OD2    | 2.793        |
| 3WII   | I_LYS_214 | NZ     | M_GLU_123 | OE1    | 2.678        |
| 3WII   | I_LYS_214 | NZ     | M_GLU_123 | OE2    | 3.619        |
| 3WII   | I_LYS_215 | NZ     | I_GLU_217 | OE2    | 3.670        |

Table 489: 3WII-specific salt bridging networks analysis. In this table, a PDB file is specified with a four-letter PDB ID, except that the names of the PDB files corresponding to the single NMR structural model split from the NMR ensemble is specified with a four-letter PDB ID in addition to a hyphen followed by the single NMR structural model numeric ID, the residue naming scheme is **Chain ID\_residue name\_residue number**,  $\angle ADH$  represents the angle formed by acceptor (A), donor (D) and hydrogen (H) ( $\angle ADH$ ).

| PDB ID | Residue A | Atom A | Residue B | Atom B | Distance (Å) |
|--------|-----------|--------|-----------|--------|--------------|
| 3WN5   | A_ARG_255 | NH1    | A_ASP_249 | OD1    | 2.832        |
| 3WN5   | A_HIS_285 | NE2    | A_GLU_283 | OE2    | 3.642        |
| 3WN5   | A_LYS_317 | NZ     | A_ASP_312 | OD1    | 2.941        |
| 3WN5   | A_LYS_320 | NZ     | A_GLU_333 | OE1    | 3.207        |
| 3WN5   | A_LYS_338 | NZ     | A_GLU_430 | OE1    | 3.924        |
| 3WN5   | A_LYS_338 | NZ     | A_GLU_430 | OE2    | 3.222        |
| 3WN5   | A_LYS_370 | NZ     | B_GLU_357 | OE2    | 3.815        |
| 3WN5   | A_LYS_409 | NZ     | B_ASP_399 | OD2    | 3.327        |
| 3WN5   | A_ARG_416 | NH1    | A_GLU_388 | OE1    | 3.624        |
| 3WN5   | A_ARG_416 | NH1    | A_GLU_388 | OE2    | 3.234        |
| 3WN5   | A_ARG_416 | NH2    | A_GLU_388 | OE1    | 2.983        |
| 3WN5   | A_ARG_416 | NH2    | A_GLU_388 | OE2    | 3.949        |
| 3WN5   | B_LYS_248 | NZ     | B_GLU_380 | OE1    | 2.957        |
| 3WN5   | B_LYS_248 | NZ     | B_GLU_380 | OE2    | 3.881        |
| 3WN5   | B_ARG_255 | NH1    | B_ASP_249 | OD1    | 2.667        |
| 3WN5   | B_HIS_285 | NE2    | B_GLU_283 | OE2    | 2.816        |
| 3WN5   | B_LYS_317 | NZ     | B_ASP_312 | OD1    | 3.123        |
| 3WN5   | B_LYS_320 | NZ     | B_GLU_333 | OE1    | 3.014        |
| 3WN5   | B_LYS_338 | NZ     | B_GLU_430 | OE1    | 3.374        |
| 3WN5   | B_LYS_370 | NZ     | A_GLU_357 | OE1    | 3.801        |
| 3WN5   | B_LYS_409 | NZ     | A_ASP_399 | OD1    | 3.830        |
| 3WN5   | B_LYS_409 | NZ     | A_ASP_399 | OD2    | 3.511        |
| 3WN5   | B_ARG_416 | NH1    | B_GLU_388 | OE1    | 2.996        |
| 3WN5   | B_ARG_416 | NH1    | B_GLU_388 | OE2    | 3.505        |
| 3WN5   | B_ARG_416 | NH2    | B_GLU_388 | OE1    | 3.528        |
| 3WN5   | B_ARG_416 | NH2    | B_GLU_388 | OE2    | 2.698        |
| 3WN5   | C_LYS_4   | NZ     | C_ASP_77  | OD1    | 3.098        |
| 3WN5   | C_LYS_4   | NZ     | C_ASP_77  | OD2    | 2.841        |
| 3WN5   | C_ARG_67  | NH1    | C_GLU_65  | OE1    | 3.514        |
| 3WN5   | C_HIS_84  | ND1    | C_GLU_163 | OE1    | 3.890        |
| 3WN5   | C_HIS_84  | NE2    | C_GLU_82  | OE1    | 2.954        |
| 3WN5   | C_HIS_104 | NE2    | C_ASP_135 | OD2    | 2.827        |
| 3WN5   | C_HIS_108 | ND1    | C_ASP_20  | OD2    | 3.561        |
| 3WN5   | C_HIS_108 | NE2    | C_ASP_20  | OD1    | 3.787        |
| 3WN5   | C_LYS_117 | NZ     | B_ASP_265 | OD2    | 2.853        |
| 3WN5   | C_ARG_127 | NH1    | C_ASP_145 | OD1    | 3.210        |
| 3WN5   | C_ARG_127 | NH2    | C_ASP_145 | OD1    | 3.171        |
| 3WN5   | C_HIS_131 | NE2    | B_ASP_270 | OD1    | 3.342        |
| 3WN5   | C_HIS_131 | NE2    | B_ASP_270 | OD2    | 2.619        |
| 3WN5   | D_LYS_248 | NZ     | D_GLU_380 | OE1    | 2.793        |
| 3WN5   | D_LYS_248 | NZ     | D_GLU_380 | OE2    | 3.908        |
| 3WN5   | D_HIS_268 | NE2    | D_GLU_294 | OE2    | 3.025        |
| 3WN5   | D_HIS_285 | NE2    | D_GLU_283 | OE2    | 3.554        |
| 3WN5   | D_LYS_317 | NZ     | D_ASP_312 | OD1    | 2.899        |
| 3WN5   | D_LYS_320 | NZ     | D_GLU_333 | OE1    | 3.733        |
| 3WN5   | D_LYS_338 | NZ     | D_GLU_430 | OE1    | 3.660        |
| 3WN5   | D_LYS_338 | NZ     | D_GLU_430 | OE2    | 3.172        |
| 3WN5   | D_ARG_344 | NH1    | D_ASP_401 | OD2    | 3.301        |
| 3WN5   | D_LYS_370 | NZ     | E_GLU_357 | OE2    | 3.279        |
| 3WN5   | D_LYS_409 | NZ     | E_ASP_399 | OD2    | 3.246        |
| 3WN5   | D_ARG_416 | NH2    | D_GLU_388 | OE1    | 2.919        |
| 3WN5   | D_ARG_416 | NH2    | D_GLU_388 | OE2    | 3.802        |
| 3WN5   | E_LYS_248 | NZ     | E_GLU_380 | OE1    | 2.911        |
| 3WN5   | E_ARG_255 | NH1    | E_ASP_249 | OD1    | 3.513        |
| 3WN5   | E_HIS_285 | NE2    | E_GLU_283 | OE2    | 3.997        |
| 3WN5   | E_LYS_320 | NZ     | E_GLU_333 | OE1    | 3.266        |
| 3WN5   | E_LYS_338 | NZ     | E_GLU_430 | OE1    | 3.039        |

|      |           |     |           |     |       |
|------|-----------|-----|-----------|-----|-------|
| 3WN5 | E_LYS_338 | NZ  | E_GLU_430 | OE2 | 3.495 |
| 3WN5 | E_ARG_344 | NH1 | E_ASP_401 | OD2 | 3.679 |
| 3WN5 | E_LYS_370 | NZ  | D_GLU_357 | OE1 | 3.843 |
| 3WN5 | E_LYS_409 | NZ  | D_ASP_399 | OD2 | 2.789 |
| 3WN5 | E_ARG_416 | NH1 | E_GLU_388 | OE1 | 2.774 |
| 3WN5 | E_ARG_416 | NH2 | E_GLU_388 | OE1 | 3.165 |
| 3WN5 | E_ARG_416 | NH2 | E_GLU_388 | OE2 | 3.510 |
| 3WN5 | F_HIS_84  | ND1 | F_GLU_163 | OE1 | 3.205 |
| 3WN5 | F_HIS_84  | NE2 | F_GLU_82  | OE1 | 3.100 |
| 3WN5 | F_HIS_104 | NE2 | F_ASP_135 | OD2 | 2.820 |
| 3WN5 | F_HIS_108 | ND1 | F_ASP_20  | OD2 | 3.674 |
| 3WN5 | F_HIS_108 | NE2 | F_ASP_20  | OD1 | 3.365 |
| 3WN5 | F_HIS_108 | NE2 | F_ASP_20  | OD2 | 3.881 |
| 3WN5 | F_LYS_117 | NZ  | E_ASP_265 | OD2 | 3.157 |
| 3WN5 | F_ARG_127 | NH1 | F_ASP_145 | OD1 | 3.151 |
| 3WN5 | F_ARG_127 | NH2 | F_ASP_145 | OD1 | 3.144 |
| 3WN5 | F_HIS_131 | NE2 | E_ASP_270 | OD2 | 2.923 |
| 3WN5 | F_LYS_140 | NZ  | F_GLU_100 | OE1 | 3.841 |

Table 490: 3WN5-specific salt bridging networks analysis. In this table, a PDB file is specified with a four-letter PDB ID, except that the names of the PDB files corresponding to the single NMR structural model split from the NMR ensemble is specified with a four-letter PDB ID in addition to a hyphen followed by the single NMR structural model numeric ID, the residue naming scheme is **Chain ID\_residue name\_residue number**,  $\angle ADH$  represents the angle formed by acceptor (A), donor (D) and hydrogen (H) ( $\angle ADH$ ).



| PDB ID | Residue A | Atom A | Residue B | Atom B | Distance (Å) |
|--------|-----------|--------|-----------|--------|--------------|
| 3X0E   | A_LYS_124 | NZ     | A_ASP_195 | OD1    | 3.186        |
| 3X0E   | A_LYS_124 | NZ     | A_ASP_195 | OD2    | 2.999        |
| 3X0E   | A_LYS_187 | NZ     | A_ASP_155 | OD1    | 2.836        |
| 3X0E   | A_LYS_187 | NZ     | A_ASP_155 | OD2    | 3.800        |
| 3X0E   | A_HIS_191 | NE2    | A_ASP_128 | OD1    | 2.835        |
| 3X0E   | A_HIS_191 | NE2    | A_ASP_128 | OD2    | 3.342        |
| 3X0E   | B_LYS_124 | NZ     | B_ASP_195 | OD1    | 2.748        |
| 3X0E   | B_LYS_124 | NZ     | B_ASP_195 | OD2    | 3.043        |
| 3X0E   | B_LYS_144 | NZ     | B_ASP_138 | OD2    | 3.823        |
| 3X0E   | B_HIS_191 | NE2    | B_ASP_128 | OD1    | 2.682        |
| 3X0E   | B_HIS_191 | NE2    | B_ASP_128 | OD2    | 3.448        |

Table 491: 3X0E-specific salt bridging networks analysis. In this table, a PDB file is specified with a four-letter PDB ID, except that the names of the PDB files corresponding to the single NMR structural model split from the NMR ensemble is specified with a four-letter PDB ID in addition to a hyphen followed by the single NMR structural model numeric ID, the residue naming scheme is **Chain ID\_residue name\_residue number**,  $\angle ADH$  represents the angle formed by acceptor (A), donor (D) and hydrogen (H) ( $\angle ADH$ ).

| PDB ID | Residue A | Atom A | Residue B | Atom B | Distance (Å) |
|--------|-----------|--------|-----------|--------|--------------|
| 3X0F   | A_LYS_124 | NZ     | A_ASP_195 | OD1    | 2.914        |
| 3X0F   | A_LYS_124 | NZ     | A_ASP_195 | OD2    | 3.712        |
| 3X0F   | A_LYS_148 | NZ     | A_GLU_152 | OE2    | 2.835        |
| 3X0F   | A_ARG_171 | NH2    | A_ASP_138 | OD1    | 3.978        |
| 3X0F   | A_ARG_171 | NH2    | A_ASP_138 | OD2    | 3.900        |
| 3X0F   | A_HIS_191 | NE2    | A_ASP_128 | OD1    | 2.650        |
| 3X0F   | A_HIS_191 | NE2    | A_ASP_128 | OD2    | 3.274        |
| 3X0F   | B_LYS_124 | NZ     | B_ASP_195 | OD2    | 3.594        |
| 3X0F   | B_ARG_171 | NH2    | B_ASP_138 | OD1    | 2.531        |
| 3X0F   | B_HIS_191 | NE2    | B_ASP_128 | OD1    | 2.685        |
| 3X0F   | B_HIS_191 | NE2    | B_ASP_128 | OD2    | 3.306        |

Table 492: 3X0F-specific salt bridging networks analysis. In this table, a PDB file is specified with a four-letter PDB ID, except that the names of the PDB files corresponding to the single NMR structural model split from the NMR ensemble is specified with a four-letter PDB ID in addition to a hyphen followed by the single NMR structural model numeric ID, the residue naming scheme is **Chain ID\_residue name\_residue number**,  $\angle ADH$  represents the angle formed by acceptor (A), donor (D) and hydrogen (H) ( $\angle ADH$ ).

| PDB ID | Residue A | Atom A | Residue B | Atom B | Distance (Å) |
|--------|-----------|--------|-----------|--------|--------------|
| 4A6Y   | A_ARG_23  | NH1    | A_ASP_71  | OD1    | 3.205        |
| 4A6Y   | A_ARG_23  | NH1    | A_ASP_71  | OD2    | 3.345        |
| 4A6Y   | A_ARG_23  | NH2    | A_ASP_71  | OD2    | 3.364        |
| 4A6Y   | A_ARG_63  | NH2    | A_GLU_83  | OE2    | 2.831        |
| 4A6Y   | A_ARG_63  | NH2    | A_ASP_84  | OD1    | 3.057        |
| 4A6Y   | A_ARG_63  | NH2    | A_ASP_84  | OD2    | 3.695        |
| 4A6Y   | A_LYS_72  | NZ     | A_ASP_71  | OD1    | 3.673        |
| 4A6Y   | A_ARG_186 | NH2    | H_ASP_180 | OD2    | 3.656        |
| 4A6Y   | A_ARG_190 | NH1    | H_GLU_89  | OE2    | 3.969        |
| 4A6Y   | A_HIS_191 | ND1    | A_ASP_154 | OD2    | 3.123        |
| 4A6Y   | A_ARG_211 | NH2    | A_GLU_189 | OE1    | 3.962        |
| 4A6Y   | A_ARG_211 | NH2    | A_GLU_189 | OE2    | 2.597        |
| 4A6Y   | B_ARG_40  | NH1    | B_GLU_89  | OE1    | 2.984        |
| 4A6Y   | B_ARG_40  | NH1    | B_GLU_89  | OE2    | 3.972        |
| 4A6Y   | B_ARG_40  | NH2    | B_GLU_89  | OE1    | 3.630        |
| 4A6Y   | B_LYS_65  | NZ     | B_GLU_62  | OE1    | 3.475        |
| 4A6Y   | B_LYS_67  | NZ     | B_ASP_90  | OD1    | 3.299        |
| 4A6Y   | B_LYS_67  | NZ     | B_ASP_90  | OD2    | 3.248        |
| 4A6Y   | B_ARG_98  | NH2    | B_ASP_108 | OD1    | 3.444        |
| 4A6Y   | B_ARG_98  | NH2    | B_ASP_108 | OD2    | 3.726        |
| 4A6Y   | B_LYS_150 | NZ     | A_GLU_127 | OE2    | 3.258        |
| 4A6Y   | H_LYS_38  | NZ     | H_ASP_90  | OD1    | 3.850        |
| 4A6Y   | H_ARG_40  | NH2    | H_GLU_89  | OE1    | 2.546        |
| 4A6Y   | H_ARG_40  | NH2    | H_GLU_89  | OE2    | 3.778        |
| 4A6Y   | H_LYS_67  | NZ     | H_ASP_90  | OD1    | 3.781        |
| 4A6Y   | H_LYS_67  | NZ     | H_ASP_90  | OD2    | 3.430        |
| 4A6Y   | H_ARG_98  | NH2    | H_ASP_108 | OD1    | 3.889        |
| 4A6Y   | H_ARG_98  | NH2    | H_ASP_108 | OD2    | 2.725        |
| 4A6Y   | H_LYS_150 | NZ     | L_GLU_127 | OE2    | 3.131        |
| 4A6Y   | H_HIS_171 | NE2    | L_ASP_141 | OD1    | 3.968        |
| 4A6Y   | L_ARG_63  | NH2    | L_ASP_84  | OD1    | 3.284        |
| 4A6Y   | L_LYS_113 | NZ     | L_GLU_201 | OE2    | 3.880        |
| 4A6Y   | L_ARG_190 | NH2    | B_GLU_89  | OE2    | 3.440        |
| 4A6Y   | L_HIS_191 | ND1    | L_ASP_154 | OD2    | 2.878        |

Table 493: 4A6Y-specific salt bridging networks analysis. In this table, a PDB file is specified with a four-letter PDB ID, except that the names of the PDB files corresponding to the single NMR structural model split from the NMR ensemble is specified with a four-letter PDB ID in addition to a hyphen followed by the single NMR structural model numeric ID, the residue naming scheme is **Chain ID\_residue name\_residue number**,  $\angle ADH$  represents the angle formed by acceptor (A), donor (D) and hydrogen (H) ( $\angle ADH$ ).

| PDB ID | Residue A | Atom A | Residue B | Atom B | Distance (Å) |
|--------|-----------|--------|-----------|--------|--------------|
| 4AG4   | A_ARG_40  | NH1    | A_ASP_68  | OD2    | 3.311        |
| 4AG4   | A_ARG_40  | NH2    | A_ASP_68  | OD1    | 3.723        |
| 4AG4   | A_ARG_40  | NH2    | A_ASP_68  | OD2    | 3.146        |
| 4AG4   | A_ARG_60  | NH1    | A_ASP_55  | OD1    | 3.893        |
| 4AG4   | A_ARG_60  | NH2    | A_ASP_55  | OD1    | 2.714        |
| 4AG4   | A_ARG_60  | NH2    | A_ASP_55  | OD2    | 2.648        |
| 4AG4   | A_ARG_63  | NH2    | A_ASP_44  | OD1    | 3.060        |
| 4AG4   | A_ARG_105 | NH2    | A_GLU_113 | OE1    | 2.869        |
| 4AG4   | A_ARG_105 | NH2    | A_GLU_113 | OE2    | 2.817        |
| 4AG4   | A_ARG_119 | NH1    | A_GLU_83  | OE1    | 3.220        |
| 4AG4   | A_ARG_119 | NH1    | A_GLU_83  | OE2    | 3.262        |
| 4AG4   | A_ARG_119 | NH2    | A_GLU_83  | OE1    | 3.601        |
| 4AG4   | A_ARG_124 | NH1    | A_ASP_216 | OD2    | 3.269        |
| 4AG4   | A_ARG_124 | NH2    | A_ASP_216 | OD1    | 3.026        |
| 4AG4   | A_ARG_124 | NH2    | A_ASP_216 | OD2    | 2.840        |
| 4AG4   | A_ARG_162 | NH1    | A_ASP_90  | OD1    | 2.607        |
| 4AG4   | A_ARG_162 | NH1    | A_ASP_90  | OD2    | 3.377        |
| 4AG4   | A_ARG_162 | NH2    | A_ASP_90  | OD1    | 3.110        |
| 4AG4   | A_ARG_162 | NH2    | A_ASP_90  | OD2    | 2.698        |
| 4AG4   | A_ARG_242 | NH2    | A_ASP_240 | OD1    | 3.701        |
| 4AG4   | A_ARG_242 | NH2    | A_ASP_240 | OD2    | 3.113        |
| 4AG4   | A_ARG_278 | NH2    | A_ASP_275 | OD1    | 3.438        |
| 4AG4   | A_ARG_278 | NH2    | A_ASP_275 | OD2    | 3.642        |
| 4AG4   | A_ARG_304 | NH2    | A_GLU_302 | OE1    | 3.291        |
| 4AG4   | A_ARG_307 | NH2    | A_GLU_314 | OE2    | 3.264        |
| 4AG4   | A_ARG_330 | NH2    | A_ASP_328 | OD2    | 3.952        |
| 4AG4   | A_ARG_332 | NH1    | A_ASP_328 | OD2    | 3.874        |
| 4AG4   | A_ARG_349 | NH1    | A_GLU_269 | OE2    | 2.534        |
| 4AG4   | H_LYS_62  | NZ     | H_GLU_46  | OE1    | 3.542        |
| 4AG4   | H_LYS_62  | NZ     | H_GLU_46  | OE2    | 3.611        |
| 4AG4   | H_ARG_94  | NH2    | H_ASP_101 | OD1    | 3.424        |
| 4AG4   | H_ARG_94  | NH2    | H_ASP_101 | OD2    | 2.703        |
| 4AG4   | H_LYS_208 | NZ     | L_GLU_123 | OE2    | 2.708        |
| 4AG4   | L_ARG_61  | NH1    | L_GLU_81  | OE2    | 3.821        |
| 4AG4   | L_ARG_61  | NH2    | L_GLU_81  | OE2    | 3.157        |
| 4AG4   | L_ARG_61  | NH2    | L_ASP_82  | OD1    | 2.518        |
| 4AG4   | L_ARG_61  | NH2    | L_ASP_82  | OD2    | 3.022        |
| 4AG4   | L_LYS_103 | NZ     | L_GLU_105 | OE2    | 3.708        |
| 4AG4   | L_LYS_103 | NZ     | L_ASP_165 | OD1    | 3.872        |
| 4AG4   | L_LYS_103 | NZ     | L_ASP_165 | OD2    | 3.264        |
| 4AG4   | L_LYS_147 | NZ     | L_GLU_154 | OE1    | 3.276        |
| 4AG4   | L_ARG_155 | NH2    | L_GLU_185 | OE1    | 3.301        |
| 4AG4   | L_HIS_189 | ND1    | L_ASP_151 | OD2    | 2.672        |
| 4AG4   | L_LYS_199 | NZ     | L_ASP_110 | OD2    | 3.556        |

Table 494: 4AG4-specific salt bridging networks analysis. In this table, a PDB file is specified with a four-letter PDB ID, except that the names of the PDB files corresponding to the single NMR structural model split from the NMR ensemble is specified with a four-letter PDB ID in addition to a hyphen followed by the single NMR structural model numeric ID, the residue naming scheme is **Chain ID\_residue name\_residue number**,  $\angle ADH$  represents the angle formed by acceptor (A), donor (D) and hydrogen (H) ( $\angle ADH$ ).

| PDB ID | Residue A | Atom A | Residue B | Atom B | Distance (Å) |
|--------|-----------|--------|-----------|--------|--------------|
| 4B50   | A_ARG_38  | NH1    | A_ASP_86  | OD1    | 2.836        |
| 4B50   | A_ARG_38  | NH2    | A_GLU_46  | OE1    | 3.561        |
| 4B50   | A_ARG_38  | NH2    | A_ASP_86  | OD1    | 3.779        |
| 4B50   | A_ARG_66  | NH1    | A_ASP_86  | OD1    | 3.976        |
| 4B50   | A_ARG_66  | NH1    | A_ASP_86  | OD2    | 2.773        |
| 4B50   | A_ARG_66  | NH2    | A_ASP_86  | OD1    | 3.265        |
| 4B50   | A_ARG_66  | NH2    | A_ASP_86  | OD2    | 3.358        |
| 4B50   | A_ARG_93  | NH1    | A_GLU_95  | OE2    | 3.608        |
| 4B50   | A_ARG_93  | NH2    | A_GLU_95  | OE2    | 3.523        |
| 4B50   | A_ARG_93  | NH2    | A_ASP_101 | OD1    | 3.368        |
| 4B50   | A_ARG_93  | NH2    | A_ASP_101 | OD2    | 2.912        |

Table 495: 4B50-specific salt bridging networks analysis. In this table, a PDB file is specified with a four-letter PDB ID, except that the names of the PDB files corresponding to the single NMR structural model split from the NMR ensemble is specified with a four-letter PDB ID in addition to a hyphen followed by the single NMR structural model numeric ID, the residue naming scheme is **Chain ID\_residue name\_residue number**,  $\angle ADH$  represents the angle formed by acceptor (A), donor (D) and hydrogen (H) ( $\angle ADH$ ).

| PDB ID | Residue A | Atom A | Residue B | Atom B | Distance (Å) |
|--------|-----------|--------|-----------|--------|--------------|
| 4BH7   | A_ARG_24  | NH1    | A_ASP_70  | OD1    | 3.258        |
| 4BH7   | A_ARG_24  | NH1    | A_ASP_70  | OD2    | 3.469        |
| 4BH7   | A_ARG_24  | NH2    | A_ASP_70  | OD2    | 3.985        |
| 4BH7   | A_ARG_61  | NH1    | A_GLU_79  | OE1    | 2.456        |
| 4BH7   | A_ARG_61  | NH1    | A_GLU_79  | OE2    | 3.328        |
| 4BH7   | A_ARG_61  | NH2    | A_GLU_79  | OE1    | 3.232        |
| 4BH7   | A_ARG_61  | NH2    | A_GLU_81  | OE1    | 3.871        |
| 4BH7   | A_ARG_61  | NH2    | A_ASP_82  | OD1    | 3.092        |
| 4BH7   | A_ARG_61  | NH2    | A_ASP_82  | OD2    | 3.325        |
| 4BH7   | A_LYS_103 | NZ     | A_ASP_165 | OD1    | 3.734        |
| 4BH7   | A_LYS_147 | NZ     | A_GLU_154 | OE2    | 3.502        |
| 4BH7   | A_LYS_149 | NZ     | A_GLU_195 | OE1    | 3.693        |
| 4BH7   | A_LYS_149 | NZ     | A_GLU_195 | OE2    | 2.842        |
| 4BH7   | A_ARG_155 | NH1    | A_GLU_185 | OE1    | 3.587        |
| 4BH7   | A_ARG_155 | NH1    | A_GLU_185 | OE2    | 2.731        |
| 4BH7   | A_ARG_155 | NH2    | A_GLU_185 | OE1    | 3.886        |
| 4BH7   | A_LYS_183 | NZ     | A_GLU_187 | OE2    | 3.868        |
| 4BH7   | A_LYS_199 | NZ     | A_ASP_110 | OD1    | 3.983        |
| 4BH7   | A_LYS_199 | NZ     | A_ASP_110 | OD2    | 3.698        |
| 4BH7   | B_LYS_38  | NZ     | B_ASP_90  | OD1    | 3.793        |
| 4BH7   | B_ARG_40  | NH2    | B_GLU_89  | OE1    | 3.542        |
| 4BH7   | B_ARG_40  | NH2    | B_GLU_89  | OE2    | 2.796        |
| 4BH7   | B_LYS_63  | NZ     | B_GLU_46  | OE1    | 3.614        |
| 4BH7   | B_LYS_63  | NZ     | B_GLU_46  | OE2    | 2.841        |
| 4BH7   | B_ARG_98  | NH2    | B_ASP_109 | OD1    | 3.844        |
| 4BH7   | B_ARG_98  | NH2    | B_ASP_109 | OD2    | 2.412        |

Table 496: 4BH7-specific salt bridging networks analysis. In this table, a PDB file is specified with a four-letter PDB ID, except that the names of the PDB files corresponding to the single NMR structural model split from the NMR ensemble is specified with a four-letter PDB ID in addition to a hyphen followed by the single NMR structural model numeric ID, the residue naming scheme is **Chain ID\_residue name\_residue number**,  $\angle ADH$  represents the angle formed by acceptor (A), donor (D) and hydrogen (H) ( $\angle ADH$ ).

| PDB ID | Residue A | Atom A | Residue B | Atom B | Distance (Å) |
|--------|-----------|--------|-----------|--------|--------------|
| 4BH8   | A_ARG_24  | NH2    | A_ASP_70  | OD2    | 3.331        |
| 4BH8   | A_ARG_61  | NH1    | A_GLU_79  | OE1    | 3.277        |
| 4BH8   | A_ARG_61  | NH2    | A_GLU_79  | OE1    | 3.420        |
| 4BH8   | A_ARG_61  | NH2    | A_GLU_81  | OE2    | 3.313        |
| 4BH8   | A_ARG_61  | NH2    | A_ASP_82  | OD1    | 2.737        |
| 4BH8   | A_ARG_61  | NH2    | A_ASP_82  | OD2    | 3.137        |
| 4BH8   | A_LYS_103 | NZ     | A_ASP_165 | OD1    | 3.847        |
| 4BH8   | A_LYS_142 | NZ     | A_ASP_143 | OD1    | 3.850        |
| 4BH8   | A_LYS_147 | NZ     | A_GLU_154 | OE1    | 3.754        |
| 4BH8   | A_LYS_149 | NZ     | A_GLU_195 | OE1    | 3.565        |
| 4BH8   | A_LYS_149 | NZ     | A_GLU_195 | OE2    | 2.762        |
| 4BH8   | A_ARG_155 | NH1    | A_GLU_185 | OE2    | 2.660        |
| 4BH8   | A_ARG_155 | NH2    | A_GLU_185 | OE1    | 3.812        |
| 4BH8   | A_ARG_155 | NH2    | A_GLU_185 | OE2    | 3.243        |
| 4BH8   | A_LYS_183 | NZ     | A_GLU_187 | OE1    | 2.950        |
| 4BH8   | A_LYS_183 | NZ     | A_GLU_187 | OE2    | 3.305        |
| 4BH8   | A_LYS_199 | NZ     | A_ASP_110 | OD1    | 3.983        |
| 4BH8   | A_LYS_199 | NZ     | A_ASP_110 | OD2    | 3.388        |
| 4BH8   | B_ARG_40  | NH1    | B_GLU_89  | OE1    | 3.007        |
| 4BH8   | B_ARG_40  | NH2    | B_GLU_46  | OE1    | 3.740        |
| 4BH8   | B_LYS_63  | NZ     | B_GLU_46  | OE1    | 3.869        |
| 4BH8   | B_LYS_63  | NZ     | B_GLU_46  | OE2    | 2.693        |
| 4BH8   | B_ARG_98  | NH2    | B_ASP_109 | OD1    | 3.876        |
| 4BH8   | B_ARG_98  | NH2    | B_ASP_109 | OD2    | 2.532        |

Table 497: 4BH8-specific salt bridging networks analysis. In this table, a PDB file is specified with a four-letter PDB ID, except that the names of the PDB files corresponding to the single NMR structural model split from the NMR ensemble is specified with a four-letter PDB ID in addition to a hyphen followed by the single NMR structural model numeric ID, the residue naming scheme is **Chain ID\_residue name\_residue number**,  $\angle ADH$  represents the angle formed by acceptor (A), donor (D) and hydrogen (H) ( $\angle ADH$ ).

| PDB ID | Residue A | Atom A | Residue B | Atom B | Distance (Å) |
|--------|-----------|--------|-----------|--------|--------------|
| 4C83   | A_HIS_35  | NE2    | A_ASP_95  | OD1    | 2.464        |
| 4C83   | A_ARG_38  | NH1    | A_ASP_86  | OD1    | 3.261        |
| 4C83   | A_ARG_38  | NH2    | A_GLU_46  | OE1    | 3.691        |
| 4C83   | A_ARG_38  | NH2    | A_GLU_46  | OE2    | 3.824        |
| 4C83   | A_ARG_66  | NH1    | A_ASP_86  | OD1    | 3.704        |
| 4C83   | A_ARG_66  | NH1    | A_ASP_86  | OD2    | 2.349        |
| 4C83   | A_ARG_66  | NH2    | A_ASP_86  | OD1    | 3.078        |
| 4C83   | A_ARG_66  | NH2    | A_ASP_86  | OD2    | 3.279        |
| 4C83   | A_ARG_83  | NH2    | A_GLU_85  | OE2    | 3.570        |
| 4C83   | A_ARG_94  | NH1    | A_GLU_96  | OE1    | 2.827        |
| 4C83   | A_ARG_94  | NH1    | A_GLU_96  | OE2    | 2.141        |
| 4C83   | B_LYS_53  | NZ     | B_ASP_50  | OD1    | 3.953        |
| 4C83   | B_LYS_53  | NZ     | B_ASP_50  | OD2    | 3.875        |
| 4C83   | B_ARG_61  | NH1    | B_GLU_79  | OE1    | 3.356        |
| 4C83   | B_ARG_61  | NH1    | B_ASP_82  | OD1    | 3.496        |
| 4C83   | B_ARG_61  | NH1    | B_ASP_82  | OD2    | 2.349        |
| 4C83   | B_ARG_61  | NH2    | B_GLU_79  | OE1    | 3.840        |
| 4C83   | B_ARG_61  | NH2    | B_ASP_82  | OD1    | 2.878        |
| 4C83   | B_ARG_61  | NH2    | B_ASP_82  | OD2    | 3.259        |
| 4C83   | B_LYS_103 | NZ     | B_GLU_105 | OE1    | 3.618        |
| 4C83   | B_LYS_103 | NZ     | B_GLU_105 | OE2    | 3.871        |
| 4C83   | B_LYS_147 | NZ     | B_GLU_154 | OE2    | 3.593        |
| 4C83   | B_LYS_149 | NZ     | B_GLU_195 | OE1    | 2.933        |
| 4C83   | B_LYS_149 | NZ     | B_GLU_195 | OE2    | 2.669        |
| 4C83   | B_ARG_155 | NH2    | B_GLU_185 | OE2    | 3.551        |
| 4C83   | B_ARG_188 | NH1    | B_GLU_185 | OE1    | 3.402        |
| 4C83   | C_HIS_35  | NE2    | C_ASP_95  | OD1    | 2.757        |
| 4C83   | C_ARG_38  | NH1    | C_ASP_86  | OD1    | 3.096        |
| 4C83   | C_ARG_38  | NH2    | C_GLU_46  | OE1    | 3.335        |
| 4C83   | C_ARG_38  | NH2    | C_ASP_86  | OD1    | 3.866        |
| 4C83   | C_ARG_66  | NH1    | C_ASP_86  | OD2    | 3.260        |
| 4C83   | C_ARG_66  | NH2    | C_ASP_86  | OD1    | 2.653        |
| 4C83   | C_ARG_66  | NH2    | C_ASP_86  | OD2    | 1.985        |
| 4C83   | C_ARG_94  | NH1    | C_GLU_96  | OE1    | 3.930        |
| 4C83   | C_ARG_94  | NH1    | C_GLU_96  | OE2    | 1.996        |
| 4C83   | C_ARG_94  | NH2    | C_GLU_96  | OE2    | 3.476        |
| 4C83   | C_LYS_208 | NZ     | D_GLU_123 | OE1    | 2.304        |
| 4C83   | C_LYS_208 | NZ     | D_GLU_123 | OE2    | 2.598        |
| 4C83   | D_LYS_53  | NZ     | D_ASP_50  | OD2    | 3.324        |
| 4C83   | D_ARG_61  | NH1    | D_GLU_79  | OE1    | 3.777        |
| 4C83   | D_ARG_61  | NH1    | D_ASP_82  | OD1    | 2.299        |
| 4C83   | D_ARG_61  | NH1    | D_ASP_82  | OD2    | 2.134        |
| 4C83   | D_ARG_61  | NH2    | D_GLU_79  | OE1    | 3.916        |
| 4C83   | D_ARG_61  | NH2    | D_ASP_82  | OD1    | 3.608        |
| 4C83   | D_LYS_103 | NZ     | D_GLU_105 | OE2    | 3.442        |
| 4C83   | D_LYS_103 | NZ     | D_ASP_165 | OD1    | 3.353        |
| 4C83   | D_LYS_147 | NZ     | D_GLU_154 | OE2    | 3.595        |
| 4C83   | D_LYS_149 | NZ     | D_GLU_195 | OE1    | 3.533        |
| 4C83   | D_LYS_149 | NZ     | D_GLU_195 | OE2    | 2.856        |
| 4C83   | D_ARG_155 | NH2    | D_GLU_185 | OE2    | 3.932        |
| 4C83   | D_LYS_183 | NZ     | D_ASP_184 | OD1    | 3.344        |
| 4C83   | D_HIS_189 | ND1    | D_ASP_151 | OD2    | 2.752        |
| 4C83   | D_LYS_199 | NZ     | D_ASP_110 | OD1    | 3.795        |



---

Table 498: 4C83-specific salt bridging networks analysis. In this table, a PDB file is specified with a four-letter PDB ID, except that the names of the PDB files corresponding to the single NMR structural model split from the NMR ensemble is specified with a four-letter PDB ID in addition to a hyphen followed by the single NMR structural model numeric ID, the residue naming scheme is **Chain ID\_residue name\_residue number**,  $\angle ADH$  represents the angle formed by acceptor (A), donor (D) and hydrogen (H) ( $\angle ADH$ ).

| PDB ID | Residue A | Atom A | Residue B | Atom B | Distance (Å) |
|--------|-----------|--------|-----------|--------|--------------|
| 4CJD   | A_LYS_35  | NZ     | A_ASP_31  | OD1    | 3.731        |
| 4CJD   | A_LYS_35  | NZ     | A_ASP_31  | OD2    | 2.727        |
| 4CJD   | A_LYS_52  | NZ     | A_ASP_55  | OD1    | 2.992        |
| 4CJD   | A_ARG_68  | NH1    | A_ASP_74  | OD1    | 3.693        |
| 4CJD   | A_ARG_68  | NH1    | A_ASP_74  | OD2    | 3.009        |
| 4CJD   | A_ARG_68  | NH2    | A_ASP_74  | OD1    | 2.966        |
| 4CJD   | A_ARG_68  | NH2    | A_ASP_74  | OD2    | 3.665        |
| 4CJD   | A_LYS_76  | NZ     | A_GLU_72  | OE2    | 3.775        |

Table 499: 4CJD-specific salt bridging networks analysis. In this table, a PDB file is specified with a four-letter PDB ID, except that the names of the PDB files corresponding to the single NMR structural model split from the NMR ensemble is specified with a four-letter PDB ID in addition to a hyphen followed by the single NMR structural model numeric ID, the residue naming scheme is **Chain ID\_residue name\_residue number**,  $\angle ADH$  represents the angle formed by acceptor (A), donor (D) and hydrogen (H) ( $\angle ADH$ ).

| PDB ID | Residue A | Atom A | Residue B | Atom B | Distance (Å) |
|--------|-----------|--------|-----------|--------|--------------|
| 4DAG   | A_ARG_40  | NH2    | A_ASP_336 | OD1    | 2.596        |
| 4DAG   | A_ARG_40  | NH2    | A_ASP_336 | OD2    | 3.693        |
| 4DAG   | A_ARG_91  | NH1    | A_GLU_92  | OE1    | 3.086        |
| 4DAG   | A_ARG_248 | NH1    | A_ASP_224 | OD2    | 2.986        |
| 4DAG   | A_ARG_252 | NH2    | A_ASP_224 | OD1    | 2.791        |
| 4DAG   | A_ARG_304 | NH2    | A_ASP_306 | OD2    | 3.086        |
| 4DAG   | A_LYS_312 | NZ     | A_GLU_345 | OE1    | 3.422        |
| 4DAG   | A_HIS_332 | NE2    | A_ASP_280 | OD1    | 3.787        |
| 4DAG   | H_ARG_38  | NH1    | H_GLU_46  | OE2    | 3.364        |
| 4DAG   | H_ARG_38  | NH2    | H_ASP_89  | OD1    | 3.055        |
| 4DAG   | H_ARG_66  | NH1    | H_ASP_89  | OD1    | 3.443        |
| 4DAG   | H_ARG_66  | NH1    | H_ASP_89  | OD2    | 3.823        |
| 4DAG   | H_ARG_66  | NH2    | H_ASP_89  | OD1    | 3.179        |
| 4DAG   | H_ARG_66  | NH2    | H_ASP_89  | OD2    | 2.772        |
| 4DAG   | H_LYS_75  | NZ     | H_ASP_72  | OD2    | 3.891        |
| 4DAG   | H_ARG_97  | NH2    | H_ASP_110 | OD2    | 2.600        |
| 4DAG   | H_ARG_101 | NH2    | A_GLU_33  | OE1    | 3.620        |
| 4DAG   | H_ARG_101 | NH2    | A_GLU_33  | OE2    | 2.107        |
| 4DAG   | H_LYS_152 | NZ     | H_ASP_153 | OD2    | 3.881        |
| 4DAG   | L_LYS_46  | NZ     | A_ASP_414 | OD1    | 3.558        |
| 4DAG   | L_LYS_46  | NZ     | A_ASP_414 | OD2    | 3.550        |
| 4DAG   | L_LYS_50  | NZ     | L_ASP_111 | OD1    | 3.845        |
| 4DAG   | L_ARG_80  | NH2    | L_ASP_101 | OD1    | 3.368        |
| 4DAG   | L_ARG_80  | NH2    | L_ASP_101 | OD2    | 3.445        |
| 4DAG   | L_LYS_186 | NZ     | L_GLU_102 | OE1    | 3.649        |
| 4DAG   | L_LYS_186 | NZ     | L_GLU_102 | OE2    | 2.377        |

Table 500: 4DAG-specific salt bridging networks analysis. In this table, a PDB file is specified with a four-letter PDB ID, except that the names of the PDB files corresponding to the single NMR structural model split from the NMR ensemble is specified with a four-letter PDB ID in addition to a hyphen followed by the single NMR structural model numeric ID, the residue naming scheme is **Chain ID\_residue name\_residue number**,  $\angle ADH$  represents the angle formed by acceptor (A), donor (D) and hydrogen (H) ( $\angle ADH$ ).

| PDB ID | Residue A | Atom A | Residue B | Atom B | Distance (Å) |
|--------|-----------|--------|-----------|--------|--------------|
| 4DGV   | H_HIS_35  | NE2    | H_ASP_95  | OD2    | 2.670        |
| 4DGV   | H_ARG_38  | NH1    | H_ASP_86  | OD1    | 2.801        |
| 4DGV   | H_ARG_38  | NH2    | H_GLU_46  | OE1    | 3.005        |
| 4DGV   | H_ARG_38  | NH2    | H_GLU_46  | OE2    | 3.829        |
| 4DGV   | H_ARG_38  | NH2    | H_ASP_86  | OD1    | 3.806        |
| 4DGV   | H_ARG_64  | NH1    | H_ASP_61  | OD1    | 2.727        |
| 4DGV   | H_ARG_64  | NH2    | H_ASP_61  | OD1    | 2.493        |
| 4DGV   | H_ARG_66  | NH1    | H_ASP_86  | OD1    | 3.757        |
| 4DGV   | H_ARG_66  | NH1    | H_ASP_86  | OD2    | 2.704        |
| 4DGV   | H_ARG_66  | NH2    | H_ASP_86  | OD1    | 3.075        |
| 4DGV   | H_ARG_66  | NH2    | H_ASP_86  | OD2    | 3.481        |
| 4DGV   | H_ARG_94  | NH2    | H_ASP_101 | OD1    | 3.600        |
| 4DGV   | H_ARG_94  | NH2    | H_ASP_101 | OD2    | 2.840        |
| 4DGV   | H_LYS_143 | NZ     | H_ASP_144 | OD1    | 3.303        |
| 4DGV   | H_LYS_143 | NZ     | H_ASP_144 | OD2    | 3.171        |
| 4DGV   | H_LYS_209 | NZ     | L_GLU_123 | OE1    | 2.915        |
| 4DGV   | H_LYS_209 | NZ     | L_GLU_123 | OE2    | 3.422        |
| 4DGV   | H_LYS_210 | NZ     | H_GLU_212 | OE2    | 3.411        |
| 4DGV   | L_ARG_61  | NH1    | L_ASP_82  | OD2    | 2.699        |
| 4DGV   | L_ARG_61  | NH2    | L_GLU_79  | OE1    | 3.439        |
| 4DGV   | L_ARG_61  | NH2    | L_GLU_79  | OE2    | 3.431        |
| 4DGV   | L_ARG_61  | NH2    | L_ASP_82  | OD1    | 3.032        |
| 4DGV   | L_ARG_61  | NH2    | L_ASP_82  | OD2    | 3.080        |
| 4DGV   | L_LYS_149 | NZ     | L_GLU_195 | OE1    | 3.591        |
| 4DGV   | L_LYS_149 | NZ     | L_GLU_195 | OE2    | 3.604        |
| 4DGV   | L_HIS_189 | ND1    | L_ASP_151 | OD2    | 3.493        |

Table 501: 4DGV-specific salt bridging networks analysis. In this table, a PDB file is specified with a four-letter PDB ID, except that the names of the PDB files corresponding to the single NMR structural model split from the NMR ensemble is specified with a four-letter PDB ID in addition to a hyphen followed by the single NMR structural model numeric ID, the residue naming scheme is **Chain ID\_residue name\_residue number**,  $\angle ADH$  represents the angle formed by acceptor (A), donor (D) and hydrogen (H) ( $\angle ADH$ ).

| PDB ID | Residue A | Atom A | Residue B | Atom B | Distance (Å) |
|--------|-----------|--------|-----------|--------|--------------|
| 4DGY   | H_HIS_35  | NE2    | H_ASP_95  | OD2    | 2.790        |
| 4DGY   | H_ARG_38  | NH1    | H_ASP_86  | OD1    | 2.922        |
| 4DGY   | H_ARG_38  | NH2    | H_GLU_46  | OE1    | 2.965        |
| 4DGY   | H_ARG_38  | NH2    | H_GLU_46  | OE2    | 3.707        |
| 4DGY   | H_LYS_43  | NZ     | H_GLU_85  | OE1    | 3.738        |
| 4DGY   | H_ARG_64  | NH1    | H_ASP_61  | OD1    | 2.545        |
| 4DGY   | H_ARG_64  | NH2    | H_ASP_61  | OD1    | 3.007        |
| 4DGY   | H_ARG_66  | NH1    | H_ASP_86  | OD1    | 3.675        |
| 4DGY   | H_ARG_66  | NH1    | H_ASP_86  | OD2    | 2.708        |
| 4DGY   | H_ARG_66  | NH2    | H_ASP_86  | OD1    | 3.089        |
| 4DGY   | H_ARG_66  | NH2    | H_ASP_86  | OD2    | 3.611        |
| 4DGY   | H_LYS_83  | NZ     | H_GLU_85  | OE2    | 2.758        |
| 4DGY   | H_ARG_94  | NH2    | H_ASP_101 | OD1    | 3.594        |
| 4DGY   | H_ARG_94  | NH2    | H_ASP_101 | OD2    | 2.861        |
| 4DGY   | H_LYS_143 | NZ     | H_ASP_144 | OD1    | 3.074        |
| 4DGY   | H_LYS_143 | NZ     | H_ASP_144 | OD2    | 3.615        |
| 4DGY   | H_LYS_210 | NZ     | H_GLU_212 | OE1    | 3.786        |
| 4DGY   | H_LYS_214 | NZ     | L_ASP_122 | OD1    | 3.699        |
| 4DGY   | H_LYS_214 | NZ     | L_ASP_122 | OD2    | 2.517        |
| 4DGY   | L_ARG_61  | NH2    | L_ASP_82  | OD1    | 2.957        |
| 4DGY   | L_ARG_61  | NH2    | L_ASP_82  | OD2    | 3.558        |
| 4DGY   | L_LYS_149 | NZ     | L_GLU_195 | OE1    | 2.631        |
| 4DGY   | L_HIS_189 | ND1    | L_ASP_185 | OD1    | 2.991        |
| 4DGY   | L_ARG_211 | NH1    | L_GLU_187 | OE1    | 3.660        |

Table 502: 4DGY-specific salt bridging networks analysis. In this table, a PDB file is specified with a four-letter PDB ID, except that the names of the PDB files corresponding to the single NMR structural model split from the NMR ensemble is specified with a four-letter PDB ID in addition to a hyphen followed by the single NMR structural model numeric ID, the residue naming scheme is **Chain ID\_residue name\_residue number**,  $\angle ADH$  represents the angle formed by acceptor (A), donor (D) and hydrogen (H) ( $\angle ADH$ ).

| PDB ID | Residue A | Atom A | Residue B | Atom B | Distance (Å) |
|--------|-----------|--------|-----------|--------|--------------|
| 4E9O   | X_LYS_13  | NZ     | X_ASP_83  | OD1    | 2.596        |
| 4E9O   | X_LYS_13  | NZ     | X_ASP_83  | OD2    | 3.399        |
| 4E9O   | X_HIS_80  | ND1    | X_GLU_90  | OE1    | 3.847        |
| 4E9O   | X_HIS_80  | ND1    | X_GLU_90  | OE2    | 3.037        |
| 4E9O   | X_LYS_100 | NZ     | X_ASP_112 | OD2    | 2.817        |
| 4E9O   | X_HIS_110 | NE2    | X_GLU_106 | OE2    | 2.743        |
| 4E9O   | X_HIS_192 | ND1    | X_ASP_194 | OD1    | 3.800        |
| 4E9O   | X_HIS_192 | ND1    | X_ASP_194 | OD2    | 3.793        |
| 4E9O   | X_HIS_192 | NE2    | X_ASP_125 | OD1    | 3.109        |
| 4E9O   | X_ARG_200 | NH1    | X_ASP_74  | OD1    | 3.919        |
| 4E9O   | X_ARG_200 | NH2    | X_ASP_74  | OD1    | 3.092        |

Table 503: 4E9O-specific salt bridging networks analysis. In this table, a PDB file is specified with a four-letter PDB ID, except that the names of the PDB files corresponding to the single NMR structural model split from the NMR ensemble is specified with a four-letter PDB ID in addition to a hyphen followed by the single NMR structural model numeric ID, the residue naming scheme is **Chain ID\_residue name\_residue number**,  $\angle ADH$  represents the angle formed by acceptor (A), donor (D) and hydrogen (H) ( $\angle ADH$ ).

| PDB ID | Residue A | Atom A | Residue B | Atom B | Distance (Å) |
|--------|-----------|--------|-----------|--------|--------------|
| 4EBQ   | H_ARG_41  | NH2    | H_GLU_90  | OE2    | 3.943        |
| 4EBQ   | H_LYS_64  | NZ     | H_GLU_47  | OE1    | 3.182        |
| 4EBQ   | H_LYS_68  | NZ     | H_ASP_91  | OD1    | 3.801        |
| 4EBQ   | H_LYS_68  | NZ     | H_ASP_91  | OD2    | 2.849        |
| 4EBQ   | H_ARG_99  | NH2    | H_ASP_108 | OD1    | 3.551        |
| 4EBQ   | H_ARG_99  | NH2    | H_ASP_108 | OD2    | 2.902        |
| 4EBQ   | H_LYS_215 | NZ     | L_GLU_123 | OE2    | 2.960        |
| 4EBQ   | H_LYS_216 | NZ     | H_GLU_218 | OE2    | 3.694        |
| 4EBQ   | L_ARG_61  | NH1    | L_GLU_79  | OE1    | 3.472        |
| 4EBQ   | L_ARG_61  | NH1    | L_GLU_79  | OE2    | 3.398        |
| 4EBQ   | L_ARG_61  | NH2    | L_GLU_79  | OE1    | 3.555        |
| 4EBQ   | L_ARG_61  | NH2    | L_GLU_81  | OE2    | 2.928        |
| 4EBQ   | L_ARG_61  | NH2    | L_ASP_82  | OD1    | 2.828        |
| 4EBQ   | L_ARG_61  | NH2    | L_ASP_82  | OD2    | 3.746        |
| 4EBQ   | L_LYS_149 | NZ     | L_GLU_195 | OE1    | 3.126        |
| 4EBQ   | L_HIS_189 | ND1    | L_ASP_151 | OD2    | 2.598        |
| 4EBQ   | L_HIS_198 | NE2    | L_ASP_143 | OD1    | 3.201        |
| 4EBQ   | L_HIS_198 | NE2    | L_ASP_143 | OD2    | 3.999        |
| 4EBQ   | L_ARG_211 | NH1    | L_GLU_187 | OE1    | 3.580        |

Table 504: 4EBQ-specific salt bridging networks analysis. In this table, a PDB file is specified with a four-letter PDB ID, except that the names of the PDB files corresponding to the single NMR structural model split from the NMR ensemble is specified with a four-letter PDB ID in addition to a hyphen followed by the single NMR structural model numeric ID, the residue naming scheme is **Chain ID residue name residue number**,  $\angle ADH$  represents the angle formed by acceptor (A), donor (D) and hydrogen (H) ( $\angle ADH$ ).

| PDB ID | Residue A | Atom A | Residue B | Atom B | Distance (Å) |
|--------|-----------|--------|-----------|--------|--------------|
| 4EDW   | V_LYS_25  | NZ     | V_GLU_55  | OE2    | 2.812        |
| 4EDW   | V_ARG_59  | NH1    | V_ASP_16  | OD2    | 3.820        |
| 4EDW   | V_ARG_69  | NH1    | V_ASP_16  | OD2    | 3.587        |
| 4EDW   | V_ARG_69  | NH1    | V_ASP_65  | OD2    | 3.446        |
| 4EDW   | V_ARG_69  | NH2    | V_ASP_16  | OD1    | 2.627        |
| 4EDW   | V_ARG_69  | NH2    | V_ASP_16  | OD2    | 3.468        |
| 4EDW   | V_HIS_75  | ND1    | V_ASP_72  | OD2    | 3.959        |
| 4EDW   | V_HIS_84  | NE2    | V_ASP_105 | OD1    | 3.310        |
| 4EDW   | V_ARG_100 | NH2    | V_ASP_93  | OD2    | 3.018        |
| 4EDW   | L_ARG_61  | NH2    | L_GLU_81  | OE2    | 3.755        |
| 4EDW   | L_ARG_61  | NH2    | L_ASP_82  | OD1    | 3.001        |
| 4EDW   | L_LYS_149 | NZ     | L_GLU_195 | OE1    | 3.988        |
| 4EDW   | L_LYS_149 | NZ     | L_GLU_195 | OE2    | 3.571        |
| 4EDW   | H_ARG_38  | NH1    | H_ASP_86  | OD1    | 2.786        |
| 4EDW   | H_ARG_38  | NH2    | H_GLU_46  | OE1    | 3.202        |
| 4EDW   | H_ARG_38  | NH2    | H_GLU_46  | OE2    | 3.836        |
| 4EDW   | H_ARG_38  | NH2    | H_ASP_86  | OD1    | 3.735        |
| 4EDW   | H_LYS_64  | NZ     | H_ASP_58  | OD1    | 3.460        |
| 4EDW   | H_ARG_66  | NH1    | H_ASP_86  | OD1    | 3.705        |
| 4EDW   | H_ARG_66  | NH1    | H_ASP_86  | OD2    | 3.011        |
| 4EDW   | H_ARG_66  | NH2    | H_ASP_86  | OD1    | 3.297        |
| 4EDW   | H_ARG_66  | NH2    | H_ASP_86  | OD2    | 3.810        |
| 4EDW   | H_ARG_94  | NH1    | H_ASP_101 | OD1    | 3.531        |
| 4EDW   | H_ARG_94  | NH1    | H_ASP_101 | OD2    | 3.123        |
| 4EDW   | H_LYS_143 | NZ     | H_ASP_144 | OD1    | 3.362        |
| 4EDW   | H_LYS_143 | NZ     | H_ASP_144 | OD2    | 3.438        |
| 4EDW   | H_LYS_206 | NZ     | H_ASP_199 | OD1    | 3.486        |
| 4EDW   | H_LYS_206 | NZ     | H_ASP_199 | OD2    | 3.672        |
| 4EDW   | H_LYS_209 | NZ     | L_GLU_123 | OE2    | 2.707        |

Table 505: 4EDW-specific salt bridging networks analysis. In this table, a PDB file is specified with a four-letter PDB ID, except that the names of the PDB files corresponding to the single NMR structural model split from the NMR ensemble is specified with a four-letter PDB ID in addition to a hyphen followed by the single NMR structural model numeric ID, the residue naming scheme is **Chain ID\_residue name\_residue number**,  $\angle ADH$  represents the angle formed by acceptor (A), donor (D) and hydrogen (H) ( $\angle ADH$ ).



| PDB ID | Residue A | Atom A | Residue B | Atom B | Distance (Å) |
|--------|-----------|--------|-----------|--------|--------------|
| 4EDX   | W.LYS_25  | NZ     | W.GLU_55  | OE1    | 3.801        |
| 4EDX   | W.LYS_25  | NZ     | W.GLU_55  | OE2    | 2.552        |
| 4EDX   | W.LYS_32  | NZ     | H.ASP_58  | OD1    | 2.886        |
| 4EDX   | W.LYS_32  | NZ     | H.ASP_58  | OD2    | 2.677        |
| 4EDX   | W.LYS_34  | NZ     | W.ASP_93  | OD1    | 3.065        |
| 4EDX   | W.LYS_34  | NZ     | W.ASP_93  | OD2    | 3.190        |
| 4EDX   | W.ARG_69  | NH1    | W.ASP_16  | OD1    | 3.423        |
| 4EDX   | W.ARG_69  | NH1    | W.ASP_16  | OD2    | 3.292        |
| 4EDX   | W.ARG_69  | NH2    | W.ASP_16  | OD1    | 3.501        |
| 4EDX   | W.ARG_69  | NH2    | W.ASP_16  | OD2    | 3.076        |
| 4EDX   | W.HIS_75  | ND1    | W.ASP_72  | OD1    | 2.972        |
| 4EDX   | W.HIS_75  | ND1    | W.ASP_72  | OD2    | 2.422        |
| 4EDX   | W.HIS_75  | NE2    | W.ASP_72  | OD1    | 3.095        |
| 4EDX   | W.HIS_75  | NE2    | W.ASP_72  | OD2    | 3.906        |
| 4EDX   | W.HIS_84  | NE2    | W.ASP_105 | OD1    | 3.552        |
| 4EDX   | A.ARG_24  | NH1    | A.ASP_70  | OD1    | 2.849        |
| 4EDX   | A.ARG_24  | NH1    | A.ASP_70  | OD2    | 3.069        |
| 4EDX   | A.ARG_53  | NH1    | W.GLU_11  | OE1    | 2.795        |
| 4EDX   | A.ARG_61  | NH1    | A.GLU_79  | OE1    | 3.710        |
| 4EDX   | A.ARG_61  | NH1    | A.GLU_79  | OE2    | 3.737        |
| 4EDX   | A.ARG_61  | NH2    | A.GLU_81  | OE2    | 3.420        |
| 4EDX   | A.ARG_61  | NH2    | A.ASP_82  | OD1    | 2.960        |
| 4EDX   | A.ARG_61  | NH2    | A.ASP_82  | OD2    | 3.581        |
| 4EDX   | A.LYS_142 | NZ     | A.ASP_143 | OD2    | 3.962        |
| 4EDX   | A.LYS_149 | NZ     | A.GLU_195 | OE1    | 3.345        |
| 4EDX   | A.ARG_155 | NH1    | A.GLU_185 | OE2    | 3.186        |
| 4EDX   | A.ARG_155 | NH2    | A.GLU_185 | OE1    | 3.161        |
| 4EDX   | A.ARG_155 | NH2    | A.GLU_185 | OE2    | 3.235        |
| 4EDX   | A.HIS_189 | ND1    | A.ASP_151 | OD2    | 2.695        |
| 4EDX   | A.LYS_199 | NZ     | A.ASP_110 | OD2    | 3.513        |
| 4EDX   | B.ARG_38  | NH1    | B.ASP_86  | OD1    | 2.727        |
| 4EDX   | B.ARG_38  | NH2    | B.GLU_46  | OE1    | 3.309        |
| 4EDX   | B.ARG_38  | NH2    | B.GLU_46  | OE2    | 3.547        |
| 4EDX   | B.ARG_38  | NH2    | B.ASP_86  | OD1    | 3.872        |
| 4EDX   | B.ARG_66  | NH1    | B.ASP_86  | OD1    | 3.949        |
| 4EDX   | B.ARG_66  | NH2    | B.ASP_86  | OD1    | 3.356        |
| 4EDX   | B.ARG_66  | NH2    | B.ASP_86  | OD2    | 2.590        |
| 4EDX   | B.ARG_83  | NH1    | B.ASP_85  | OD2    | 3.918        |
| 4EDX   | B.ARG_94  | NH2    | B.ASP_101 | OD1    | 3.751        |
| 4EDX   | B.ARG_94  | NH2    | B.ASP_101 | OD2    | 2.789        |
| 4EDX   | B.LYS_221 | NZ     | A.GLU_123 | OE2    | 3.878        |
| 4EDX   | V.LYS_25  | NZ     | V.GLU_55  | OE2    | 2.718        |
| 4EDX   | V.LYS_32  | NZ     | B.ASP_58  | OD1    | 3.117        |
| 4EDX   | V.LYS_32  | NZ     | B.ASP_58  | OD2    | 2.681        |
| 4EDX   | V.LYS_34  | NZ     | V.ASP_93  | OD1    | 2.694        |
| 4EDX   | V.LYS_34  | NZ     | V.ASP_93  | OD2    | 3.572        |
| 4EDX   | V.ARG_69  | NH1    | V.ASP_16  | OD1    | 3.521        |
| 4EDX   | V.HIS_75  | ND1    | V.ASP_72  | OD2    | 2.859        |
| 4EDX   | V.HIS_84  | NE2    | V.ASP_105 | OD1    | 3.612        |
| 4EDX   | V.LYS_88  | NZ     | B.ASP_54  | OD2    | 3.805        |
| 4EDX   | V.ARG_100 | NH1    | V.ASP_30  | OD2    | 3.837        |
| 4EDX   | L.ARG_24  | NH1    | L.ASP_70  | OD1    | 2.767        |
| 4EDX   | L.ARG_24  | NH1    | L.ASP_70  | OD2    | 3.056        |
| 4EDX   | L.ARG_53  | NH1    | V.GLU_11  | OE1    | 3.269        |
| 4EDX   | L.ARG_61  | NH1    | L.GLU_79  | OE1    | 3.421        |
| 4EDX   | L.ARG_61  | NH1    | L.GLU_79  | OE2    | 3.637        |
| 4EDX   | L.ARG_61  | NH2    | L.GLU_79  | OE1    | 3.585        |

|      |           |     |           |     |       |
|------|-----------|-----|-----------|-----|-------|
| 4EDX | L_ARG_61  | NH2 | L_GLU_81  | OE1 | 3.985 |
| 4EDX | L_ARG_61  | NH2 | L_GLU_81  | OE2 | 3.833 |
| 4EDX | L_ARG_61  | NH2 | L_ASP_82  | OD1 | 3.225 |
| 4EDX | L_LYS_149 | NZ  | L_GLU_195 | OE1 | 3.431 |
| 4EDX | L_LYS_149 | NZ  | L_GLU_195 | OE2 | 2.686 |
| 4EDX | L_ARG_155 | NH1 | L_GLU_185 | OE1 | 3.892 |
| 4EDX | L_ARG_155 | NH1 | L_GLU_185 | OE2 | 3.334 |
| 4EDX | L_ARG_155 | NH2 | L_GLU_185 | OE1 | 3.107 |
| 4EDX | L_ARG_155 | NH2 | L_GLU_185 | OE2 | 3.593 |
| 4EDX | L_LYS_199 | NZ  | L_ASP_110 | OD2 | 2.658 |
| 4EDX | L_ARG_211 | NH1 | L_GLU_187 | OE1 | 3.902 |
| 4EDX | H_ARG_38  | NH1 | H_ASP_86  | OD1 | 2.944 |
| 4EDX | H_ARG_38  | NH2 | H_GLU_46  | OE1 | 3.536 |
| 4EDX | H_ARG_38  | NH2 | H_GLU_46  | OE2 | 3.204 |
| 4EDX | H_ARG_66  | NH2 | H_ASP_86  | OD1 | 3.277 |
| 4EDX | H_ARG_66  | NH2 | H_ASP_86  | OD2 | 2.900 |
| 4EDX | H_ARG_94  | NH2 | H_ASP_101 | OD1 | 3.827 |
| 4EDX | H_ARG_94  | NH2 | H_ASP_101 | OD2 | 3.037 |
| 4EDX | H_LYS_221 | NZ  | L_GLU_123 | OE2 | 3.893 |
| 4EDX | H_LYS_222 | NZ  | H_GLU_226 | OE2 | 3.370 |

Table 506: 4EDX-specific salt bridging networks analysis. In this table, a PDB file is specified with a four-letter PDB ID, except that the names of the PDB files corresponding to the single NMR structural model split from the NMR ensemble is specified with a four-letter PDB ID in addition to a hyphen followed by the single NMR structural model numeric ID, the residue naming scheme is **Chain ID\_residue name\_residue number**,  $\angle ADH$  represents the angle formed by acceptor (A), donor (D) and hydrogen (H) ( $\angle ADH$ ).

| PDB ID | Residue A | Atom A | Residue B | Atom B | Distance (Å) |
|--------|-----------|--------|-----------|--------|--------------|
| 4ETQ   | H_ARG_41  | NH1    | H_GLU_90  | OE1    | 3.867        |
| 4ETQ   | H_ARG_41  | NH2    | H_GLU_90  | OE1    | 3.122        |
| 4ETQ   | H_ARG_60  | NH1    | C_ASP_179 | OD1    | 3.609        |
| 4ETQ   | H_ARG_60  | NH2    | C_ASP_179 | OD1    | 3.375        |
| 4ETQ   | H_LYS_68  | NZ     | H_ASP_91  | OD2    | 3.125        |
| 4ETQ   | H_ARG_99  | NH2    | H_ASP_108 | OD1    | 3.442        |
| 4ETQ   | H_ARG_99  | NH2    | H_ASP_108 | OD2    | 2.818        |
| 4ETQ   | H_ARG_103 | NH1    | C_GLU_217 | OE1    | 3.862        |
| 4ETQ   | H_ARG_103 | NH1    | C_GLU_217 | OE2    | 2.754        |
| 4ETQ   | H_ARG_103 | NH2    | C_GLU_217 | OE2    | 2.933        |
| 4ETQ   | H_LYS_215 | NZ     | L_GLU_123 | OE2    | 3.075        |
| 4ETQ   | L_ARG_61  | NH1    | L_GLU_79  | OE1    | 3.879        |
| 4ETQ   | L_ARG_61  | NH1    | L_GLU_79  | OE2    | 3.227        |
| 4ETQ   | L_ARG_61  | NH2    | L_GLU_81  | OE1    | 3.581        |
| 4ETQ   | L_ARG_61  | NH2    | L_ASP_82  | OD1    | 2.731        |
| 4ETQ   | L_ARG_61  | NH2    | L_ASP_82  | OD2    | 3.292        |
| 4ETQ   | L_LYS_142 | NZ     | L_GLU_105 | OE2    | 3.174        |
| 4ETQ   | L_LYS_147 | NZ     | L_GLU_195 | OE2    | 3.710        |
| 4ETQ   | L_LYS_149 | NZ     | L_GLU_195 | OE1    | 3.106        |
| 4ETQ   | L_ARG_155 | NH2    | L_GLU_185 | OE1    | 3.585        |
| 4ETQ   | L_ARG_155 | NH2    | L_GLU_185 | OE2    | 2.828        |
| 4ETQ   | L_LYS_183 | NZ     | L_GLU_187 | OE1    | 3.169        |
| 4ETQ   | L_LYS_183 | NZ     | L_GLU_187 | OE2    | 2.853        |
| 4ETQ   | L_HIS_189 | ND1    | L_ASP_151 | OD2    | 2.872        |
| 4ETQ   | L_LYS_199 | NZ     | L_ASP_110 | OD2    | 3.675        |
| 4ETQ   | A_LYS_39  | NZ     | A_GLU_90  | OE1    | 3.180        |
| 4ETQ   | A_LYS_39  | NZ     | A_GLU_90  | OE2    | 3.761        |
| 4ETQ   | A_LYS_68  | NZ     | A_ASP_91  | OD1    | 3.615        |
| 4ETQ   | A_LYS_68  | NZ     | A_ASP_91  | OD2    | 2.627        |
| 4ETQ   | A_ARG_99  | NH2    | A_ASP_108 | OD1    | 3.812        |
| 4ETQ   | A_ARG_99  | NH2    | A_ASP_108 | OD2    | 2.756        |
| 4ETQ   | A_ARG_103 | NH1    | X_GLU_217 | OE1    | 2.753        |
| 4ETQ   | A_ARG_103 | NH1    | X_GLU_217 | OE2    | 3.565        |
| 4ETQ   | A_ARG_103 | NH2    | X_GLU_217 | OE1    | 2.983        |
| 4ETQ   | A_ARG_103 | NH2    | X_GLU_217 | OE2    | 3.995        |
| 4ETQ   | A_LYS_215 | NZ     | B_GLU_123 | OE2    | 3.774        |
| 4ETQ   | B_ARG_61  | NH1    | B_GLU_79  | OE1    | 3.950        |
| 4ETQ   | B_ARG_61  | NH1    | B_GLU_79  | OE2    | 3.355        |
| 4ETQ   | B_ARG_61  | NH2    | B_GLU_81  | OE2    | 3.928        |
| 4ETQ   | B_ARG_61  | NH2    | B_ASP_82  | OD1    | 2.543        |
| 4ETQ   | B_ARG_61  | NH2    | B_ASP_82  | OD2    | 3.461        |
| 4ETQ   | B_LYS_149 | NZ     | B_GLU_195 | OE1    | 3.167        |
| 4ETQ   | B_ARG_155 | NH1    | B_GLU_185 | OE1    | 3.157        |
| 4ETQ   | B_ARG_155 | NH1    | B_GLU_185 | OE2    | 3.489        |
| 4ETQ   | B_ARG_155 | NH2    | B_GLU_185 | OE2    | 3.114        |
| 4ETQ   | B_LYS_183 | NZ     | B_GLU_187 | OE1    | 3.261        |
| 4ETQ   | B_LYS_183 | NZ     | B_GLU_187 | OE2    | 2.751        |
| 4ETQ   | B_HIS_189 | ND1    | B_ASP_151 | OD2    | 2.691        |
| 4ETQ   | B_LYS_199 | NZ     | B_ASP_110 | OD2    | 3.415        |
| 4ETQ   | X_LYS_14  | NZ     | X_GLU_11  | OE1    | 2.773        |
| 4ETQ   | X_LYS_14  | NZ     | X_GLU_11  | OE2    | 3.470        |
| 4ETQ   | X_HIS_27  | NE2    | X_ASP_25  | OD1    | 3.152        |
| 4ETQ   | X_HIS_27  | NE2    | X_ASP_25  | OD2    | 2.861        |
| 4ETQ   | X_ARG_44  | NH1    | A_GLU_56  | OE1    | 3.611        |
| 4ETQ   | X_ARG_44  | NH1    | A_GLU_56  | OE2    | 3.023        |
| 4ETQ   | X_HIS_80  | ND1    | X_GLU_90  | OE1    | 3.588        |
| 4ETQ   | X_HIS_80  | ND1    | X_GLU_90  | OE2    | 2.761        |

|      |           |     |           |     |       |
|------|-----------|-----|-----------|-----|-------|
| 4ETQ | X_LYS_100 | NZ  | X_ASP_112 | OD2 | 2.820 |
| 4ETQ | X_LYS_108 | NZ  | A_GLU_58  | OE2 | 3.014 |
| 4ETQ | X_LYS_108 | NZ  | X_GLU_105 | OE2 | 3.377 |
| 4ETQ | X_LYS_109 | NZ  | X_GLU_106 | OE1 | 3.662 |
| 4ETQ | X_HIS_110 | NE2 | X_GLU_106 | OE2 | 3.990 |
| 4ETQ | X_HIS_192 | ND1 | X_ASP_194 | OD1 | 3.490 |
| 4ETQ | X_HIS_192 | NE2 | X_ASP_125 | OD2 | 3.701 |
| 4ETQ | X_ARG_200 | NH1 | X_ASP_74  | OD1 | 3.672 |
| 4ETQ | X_ARG_200 | NH2 | X_ASP_74  | OD1 | 3.193 |
| 4ETQ | X_ARG_220 | NH1 | A_ASP_105 | OD1 | 3.937 |
| 4ETQ | X_ARG_220 | NH2 | A_ASP_105 | OD1 | 2.929 |
| 4ETQ | C_HIS_27  | NE2 | C_ASP_25  | OD2 | 2.566 |
| 4ETQ | C_ARG_44  | NH1 | H_GLU_56  | OE1 | 2.601 |
| 4ETQ | C_HIS_80  | ND1 | C_GLU_90  | OE1 | 3.837 |
| 4ETQ | C_HIS_80  | ND1 | C_GLU_90  | OE2 | 2.937 |
| 4ETQ | C_LYS_100 | NZ  | C_ASP_112 | OD1 | 3.753 |
| 4ETQ | C_LYS_100 | NZ  | C_ASP_112 | OD2 | 2.909 |
| 4ETQ | C_LYS_109 | NZ  | C_GLU_106 | OE1 | 3.550 |
| 4ETQ | C_HIS_110 | ND1 | C_GLU_106 | OE2 | 3.980 |
| 4ETQ | C_HIS_192 | ND1 | C_ASP_194 | OD2 | 3.346 |
| 4ETQ | C_HIS_192 | NE2 | C_ASP_125 | OD1 | 3.763 |
| 4ETQ | C_ARG_200 | NH1 | C_ASP_74  | OD1 | 3.594 |
| 4ETQ | C_ARG_200 | NH2 | C_ASP_74  | OD1 | 3.106 |
| 4ETQ | C_ARG_220 | NH1 | H_ASP_105 | OD1 | 3.872 |
| 4ETQ | C_ARG_220 | NH2 | H_ASP_105 | OD1 | 3.103 |

Table 507: 4ETQ-specific salt bridging networks analysis. In this table, a PDB file is specified with a four-letter PDB ID, except that the names of the PDB files corresponding to the single NMR structural model split from the NMR ensemble is specified with a four-letter PDB ID in addition to a hyphen followed by the single NMR structural model numeric ID, the residue naming scheme is **Chain ID\_residue name\_residue number**,  $\angle ADH$  represents the angle formed by acceptor (A), donor (D) and hydrogen (H) ( $\angle ADH$ ).

| PDB ID | Residue A | Atom A | Residue B | Atom B | Distance (Å) |
|--------|-----------|--------|-----------|--------|--------------|
| 4F33   | A_LYS_39  | NZ     | A_ASP_83  | OD1    | 2.996        |
| 4F33   | A_LYS_53  | NZ     | A_ASP_50  | OD2    | 3.806        |
| 4F33   | A_ARG_61  | NH1    | A_GLU_79  | OE1    | 3.342        |
| 4F33   | A_ARG_61  | NH1    | A_GLU_79  | OE2    | 3.490        |
| 4F33   | A_ARG_61  | NH2    | A_GLU_79  | OE1    | 3.654        |
| 4F33   | A_ARG_61  | NH2    | A_GLU_81  | OE2    | 3.050        |
| 4F33   | A_ARG_61  | NH2    | A_ASP_82  | OD1    | 2.710        |
| 4F33   | A_ARG_61  | NH2    | A_ASP_82  | OD2    | 3.535        |
| 4F33   | A_LYS_103 | NZ     | A_GLU_165 | OE1    | 3.608        |
| 4F33   | A_LYS_103 | NZ     | A_GLU_165 | OE2    | 2.863        |
| 4F33   | A_LYS_149 | NZ     | A_GLU_195 | OE1    | 2.590        |
| 4F33   | A_LYS_149 | NZ     | A_GLU_195 | OE2    | 3.755        |
| 4F33   | A_LYS_183 | NZ     | A_GLU_187 | OE1    | 2.975        |
| 4F33   | A_LYS_183 | NZ     | A_GLU_187 | OE2    | 2.979        |
| 4F33   | A_LYS_188 | NZ     | A_ASP_185 | OD1    | 3.192        |
| 4F33   | A_HIS_189 | ND1    | A_ASP_151 | OD2    | 3.095        |
| 4F33   | B_LYS_19  | NZ     | B_ASP_82  | OD1    | 2.810        |
| 4F33   | B_LYS_19  | NZ     | B_ASP_82  | OD2    | 3.855        |
| 4F33   | B_LYS_63  | NZ     | B_GLU_46  | OE1    | 3.902        |
| 4F33   | B_LYS_63  | NZ     | B_GLU_46  | OE2    | 2.703        |
| 4F33   | B_LYS_67  | NZ     | B_ASP_90  | OD1    | 3.672        |
| 4F33   | B_LYS_67  | NZ     | B_ASP_90  | OD2    | 2.735        |
| 4F33   | B_ARG_98  | NH2    | B_ASP_107 | OD1    | 3.642        |
| 4F33   | B_ARG_98  | NH2    | B_ASP_107 | OD2    | 2.737        |
| 4F33   | B_ARG_104 | NH1    | B_ASP_107 | OD2    | 2.783        |
| 4F33   | B_ARG_104 | NH2    | B_ASP_102 | OD1    | 3.769        |
| 4F33   | B_ARG_104 | NH2    | B_ASP_102 | OD2    | 2.871        |
| 4F33   | B_LYS_149 | NZ     | B_ASP_150 | OD1    | 3.476        |
| 4F33   | B_LYS_212 | NZ     | B_ASP_214 | OD1    | 2.935        |
| 4F33   | B_LYS_212 | NZ     | B_ASP_214 | OD2    | 3.480        |
| 4F33   | B_LYS_215 | NZ     | A_GLU_123 | OE1    | 2.676        |
| 4F33   | B_LYS_215 | NZ     | A_GLU_123 | OE2    | 3.528        |
| 4F33   | B_LYS_216 | NZ     | B_GLU_218 | OE2    | 3.538        |
| 4F33   | C_LYS_39  | NZ     | C_ASP_83  | OD1    | 3.023        |
| 4F33   | C_ARG_61  | NH1    | C_GLU_79  | OE1    | 3.546        |
| 4F33   | C_ARG_61  | NH1    | C_GLU_79  | OE2    | 3.480        |
| 4F33   | C_ARG_61  | NH2    | C_GLU_79  | OE1    | 3.378        |
| 4F33   | C_ARG_61  | NH2    | C_GLU_81  | OE2    | 3.030        |
| 4F33   | C_ARG_61  | NH2    | C_ASP_82  | OD1    | 2.905        |
| 4F33   | C_ARG_61  | NH2    | C_ASP_82  | OD2    | 3.629        |
| 4F33   | C_LYS_103 | NZ     | C_GLU_165 | OE1    | 3.632        |
| 4F33   | C_LYS_103 | NZ     | C_GLU_165 | OE2    | 2.738        |
| 4F33   | C_LYS_149 | NZ     | C_GLU_195 | OE1    | 2.670        |
| 4F33   | C_LYS_149 | NZ     | C_GLU_195 | OE2    | 3.770        |
| 4F33   | C_LYS_183 | NZ     | C_GLU_187 | OE1    | 2.957        |
| 4F33   | C_LYS_183 | NZ     | C_GLU_187 | OE2    | 3.355        |
| 4F33   | C_HIS_189 | ND1    | C_ASP_151 | OD2    | 3.653        |
| 4F33   | D_LYS_19  | NZ     | D_ASP_82  | OD1    | 2.919        |
| 4F33   | D_LYS_19  | NZ     | D_ASP_82  | OD2    | 3.318        |
| 4F33   | D_LYS_63  | NZ     | D_GLU_46  | OE1    | 3.665        |
| 4F33   | D_LYS_63  | NZ     | D_GLU_46  | OE2    | 2.603        |
| 4F33   | D_LYS_67  | NZ     | D_ASP_90  | OD1    | 3.611        |
| 4F33   | D_LYS_67  | NZ     | D_ASP_90  | OD2    | 2.762        |
| 4F33   | D_ARG_98  | NH2    | D_ASP_107 | OD1    | 3.663        |
| 4F33   | D_ARG_98  | NH2    | D_ASP_107 | OD2    | 2.741        |
| 4F33   | D_ARG_104 | NH1    | D_ASP_107 | OD2    | 2.826        |
| 4F33   | D_ARG_104 | NH2    | D_ASP_102 | OD1    | 3.818        |

|      |           |     |           |     |       |
|------|-----------|-----|-----------|-----|-------|
| 4F33 | D_ARG_104 | NH2 | D_ASP_102 | OD2 | 2.913 |
| 4F33 | D_LYS_149 | NZ  | D_ASP_150 | OD1 | 3.466 |
| 4F33 | D_LYS_149 | NZ  | D_ASP_150 | OD2 | 3.828 |
| 4F33 | D_LYS_212 | NZ  | D_ASP_214 | OD1 | 2.938 |
| 4F33 | D_LYS_212 | NZ  | D_ASP_214 | OD2 | 3.473 |
| 4F33 | D_LYS_215 | NZ  | C_GLU_123 | OE1 | 2.787 |
| 4F33 | D_LYS_215 | NZ  | C_GLU_123 | OE2 | 3.695 |
| 4F33 | D_LYS_216 | NZ  | D_GLU_218 | OE2 | 3.391 |
| 4F33 | E_LYS_39  | NZ  | E_ASP_83  | OD1 | 2.874 |
| 4F33 | E_LYS_53  | NZ  | E_ASP_50  | OD2 | 3.486 |
| 4F33 | E_ARG_61  | NH1 | E_GLU_79  | OE1 | 3.890 |
| 4F33 | E_ARG_61  | NH1 | E_GLU_79  | OE2 | 3.753 |
| 4F33 | E_ARG_61  | NH2 | E_GLU_79  | OE1 | 3.703 |
| 4F33 | E_ARG_61  | NH2 | E_GLU_81  | OE2 | 3.201 |
| 4F33 | E_ARG_61  | NH2 | E_ASP_82  | OD1 | 2.824 |
| 4F33 | E_ARG_61  | NH2 | E_ASP_82  | OD2 | 3.545 |
| 4F33 | E_LYS_103 | NZ  | E_GLU_165 | OE1 | 3.553 |
| 4F33 | E_LYS_103 | NZ  | E_GLU_165 | OE2 | 3.041 |
| 4F33 | E_LYS_149 | NZ  | E_GLU_195 | OE1 | 2.766 |
| 4F33 | E_LYS_149 | NZ  | E_GLU_195 | OE2 | 3.971 |
| 4F33 | E_LYS_183 | NZ  | E_GLU_187 | OE1 | 3.278 |
| 4F33 | E_LYS_183 | NZ  | E_GLU_187 | OE2 | 2.769 |
| 4F33 | E_LYS_188 | NZ  | E_ASP_185 | OD1 | 3.409 |
| 4F33 | E_HIS_189 | ND1 | E_ASP_151 | OD2 | 3.133 |
| 4F33 | F_LYS_19  | NZ  | F_ASP_82  | OD1 | 3.043 |
| 4F33 | F_LYS_63  | NZ  | F_GLU_46  | OE1 | 3.844 |
| 4F33 | F_LYS_63  | NZ  | F_GLU_46  | OE2 | 2.677 |
| 4F33 | F_LYS_67  | NZ  | F_ASP_90  | OD1 | 3.822 |
| 4F33 | F_LYS_67  | NZ  | F_ASP_90  | OD2 | 2.975 |
| 4F33 | F_ARG_98  | NH2 | F_ASP_107 | OD1 | 3.603 |
| 4F33 | F_ARG_98  | NH2 | F_ASP_107 | OD2 | 2.766 |
| 4F33 | F_ARG_104 | NH1 | F_ASP_107 | OD2 | 2.837 |
| 4F33 | F_ARG_104 | NH2 | F_ASP_102 | OD1 | 3.766 |
| 4F33 | F_ARG_104 | NH2 | F_ASP_102 | OD2 | 2.901 |
| 4F33 | F_LYS_149 | NZ  | F_ASP_150 | OD1 | 3.004 |
| 4F33 | F_LYS_149 | NZ  | F_ASP_150 | OD2 | 3.043 |
| 4F33 | F_LYS_212 | NZ  | D_ASP_214 | OD2 | 3.519 |
| 4F33 | F_LYS_212 | NZ  | F_ASP_214 | OD1 | 3.366 |
| 4F33 | F_LYS_212 | NZ  | F_ASP_214 | OD2 | 3.190 |
| 4F33 | F_LYS_215 | NZ  | E_GLU_123 | OE1 | 2.609 |
| 4F33 | F_LYS_215 | NZ  | E_GLU_123 | OE2 | 3.626 |
| 4F33 | G_LYS_39  | NZ  | G_ASP_83  | OD1 | 2.914 |
| 4F33 | G_LYS_53  | NZ  | G_ASP_50  | OD2 | 3.491 |
| 4F33 | G_ARG_61  | NH1 | G_GLU_79  | OE1 | 3.696 |
| 4F33 | G_ARG_61  | NH1 | G_GLU_79  | OE2 | 3.825 |
| 4F33 | G_ARG_61  | NH2 | G_GLU_79  | OE1 | 3.720 |
| 4F33 | G_ARG_61  | NH2 | G_GLU_81  | OE2 | 2.958 |
| 4F33 | G_ARG_61  | NH2 | G_ASP_82  | OD1 | 2.734 |
| 4F33 | G_ARG_61  | NH2 | G_ASP_82  | OD2 | 3.619 |
| 4F33 | G_LYS_103 | NZ  | G_GLU_165 | OE1 | 3.422 |
| 4F33 | G_LYS_103 | NZ  | G_GLU_165 | OE2 | 2.954 |
| 4F33 | G_LYS_149 | NZ  | G_GLU_195 | OE1 | 3.155 |
| 4F33 | G_LYS_183 | NZ  | G_GLU_187 | OE1 | 3.171 |
| 4F33 | G_LYS_183 | NZ  | G_GLU_187 | OE2 | 3.240 |
| 4F33 | G_HIS_189 | ND1 | G_ASP_151 | OD2 | 2.855 |
| 4F33 | H_LYS_19  | NZ  | H_ASP_82  | OD1 | 2.977 |
| 4F33 | H_LYS_19  | NZ  | H_ASP_82  | OD2 | 3.331 |
| 4F33 | H_LYS_63  | NZ  | H_GLU_46  | OE1 | 3.962 |

|      |           |     |           |     |       |
|------|-----------|-----|-----------|-----|-------|
| 4F33 | H_LYS_63  | NZ  | H_GLU_46  | OE2 | 2.721 |
| 4F33 | H_LYS_67  | NZ  | H_ASP_90  | OD1 | 3.773 |
| 4F33 | H_LYS_67  | NZ  | H_ASP_90  | OD2 | 2.822 |
| 4F33 | H_ARG_98  | NH2 | H_ASP_107 | OD1 | 3.660 |
| 4F33 | H_ARG_98  | NH2 | H_ASP_107 | OD2 | 2.794 |
| 4F33 | H_ARG_104 | NH1 | H_ASP_107 | OD2 | 2.850 |
| 4F33 | H_ARG_104 | NH2 | H_ASP_102 | OD1 | 3.752 |
| 4F33 | H_ARG_104 | NH2 | H_ASP_102 | OD2 | 2.926 |
| 4F33 | H_LYS_149 | NZ  | H_ASP_150 | OD1 | 3.202 |
| 4F33 | H_LYS_149 | NZ  | H_ASP_150 | OD2 | 3.778 |
| 4F33 | H_LYS_212 | NZ  | H_ASP_214 | OD1 | 3.294 |
| 4F33 | H_LYS_212 | NZ  | H_ASP_214 | OD2 | 3.751 |
| 4F33 | H_LYS_215 | NZ  | G_GLU_123 | OE1 | 2.968 |
| 4F33 | H_LYS_215 | NZ  | G_GLU_123 | OE2 | 3.966 |

Table 508: 4F33-specific salt bridging networks analysis. In this table, a PDB file is specified with a four-letter PDB ID, except that the names of the PDB files corresponding to the single NMR structural model split from the NMR ensemble is specified with a four-letter PDB ID in addition to a hyphen followed by the single NMR structural model numeric ID, the residue naming scheme is **Chain ID\_residue name\_residue number**,  $\angle ADH$  represents the angle formed by acceptor (A), donor (D) and hydrogen (H) ( $\angle ADH$ ).

| PDB ID | Residue A | Atom A | Residue B | Atom B | Distance (Å) |
|--------|-----------|--------|-----------|--------|--------------|
| 4F3F   | A_LYS_39  | NZ     | A_ASP_83  | OD1    | 3.139        |
| 4F3F   | A_LYS_53  | NZ     | A_ASP_50  | OD2    | 3.180        |
| 4F3F   | A_ARG_61  | NH1    | A_GLU_79  | OE1    | 3.186        |
| 4F3F   | A_ARG_61  | NH2    | A_GLU_79  | OE1    | 3.636        |
| 4F3F   | A_ARG_61  | NH2    | A_GLU_81  | OE2    | 2.949        |
| 4F3F   | A_ARG_61  | NH2    | A_ASP_82  | OD1    | 2.598        |
| 4F3F   | A_ARG_61  | NH2    | A_ASP_82  | OD2    | 3.459        |
| 4F3F   | A_HIS_94  | NE2    | C_GLU_18  | OE1    | 3.664        |
| 4F3F   | A_HIS_94  | NE2    | C_GLU_18  | OE2    | 3.880        |
| 4F3F   | A_LYS_103 | NZ     | A_GLU_165 | OE1    | 2.677        |
| 4F3F   | A_LYS_103 | NZ     | A_GLU_165 | OE2    | 3.463        |
| 4F3F   | A_LYS_126 | NZ     | A_ASP_122 | OD2    | 3.488        |
| 4F3F   | A_LYS_149 | NZ     | A_GLU_195 | OE1    | 3.346        |
| 4F3F   | A_LYS_149 | NZ     | A_GLU_195 | OE2    | 3.599        |
| 4F3F   | A_LYS_188 | NZ     | A_ASP_185 | OD1    | 3.466        |
| 4F3F   | A_HIS_189 | ND1    | A_ASP_151 | OD2    | 2.913        |
| 4F3F   | B_LYS_67  | NZ     | B_ASP_90  | OD1    | 3.515        |
| 4F3F   | B_LYS_67  | NZ     | B_ASP_90  | OD2    | 2.923        |
| 4F3F   | B_ARG_98  | NH2    | B_ASP_107 | OD1    | 3.433        |
| 4F3F   | B_ARG_98  | NH2    | B_ASP_107 | OD2    | 2.792        |
| 4F3F   | B_LYS_149 | NZ     | B_ASP_150 | OD1    | 3.423        |
| 4F3F   | B_LYS_149 | NZ     | B_ASP_150 | OD2    | 3.482        |
| 4F3F   | C_LYS_11  | NZ     | C_GLU_27  | OE1    | 3.675        |
| 4F3F   | C_LYS_11  | NZ     | C_GLU_27  | OE2    | 2.987        |
| 4F3F   | C_LYS_24  | NZ     | A_ASP_50  | OD1    | 2.832        |
| 4F3F   | C_LYS_24  | NZ     | A_ASP_50  | OD2    | 3.865        |
| 4F3F   | C_ARG_43  | NH2    | C_GLU_15  | OE2    | 2.883        |
| 4F3F   | C_LYS_60  | NZ     | C_GLU_29  | OE1    | 3.765        |
| 4F3F   | C_LYS_60  | NZ     | C_GLU_29  | OE2    | 3.687        |

Table 509: 4F3F-specific salt bridging networks analysis. In this table, a PDB file is specified with a four-letter PDB ID, except that the names of the PDB files corresponding to the single NMR structural model split from the NMR ensemble is specified with a four-letter PDB ID in addition to a hyphen followed by the single NMR structural model numeric ID, the residue naming scheme is **Chain ID\_residue name\_residue number**,  $\angle ADH$  represents the angle formed by acceptor (A), donor (D) and hydrogen (H) ( $\angle ADH$ ).



| PDB ID | Residue A | Atom A | Residue B | Atom B | Distance (Å) |
|--------|-----------|--------|-----------|--------|--------------|
| 4FFV   | A_ARG_39  | NH1    | A_ASP_45  | OD1    | 3.963        |
| 4FFV   | A_ARG_39  | NH1    | A_ASP_45  | OD2    | 2.719        |
| 4FFV   | A_ARG_39  | NH2    | A_ASP_45  | OD1    | 3.080        |
| 4FFV   | A_ARG_39  | NH2    | A_ASP_45  | OD2    | 3.080        |
| 4FFV   | A_ARG_59  | NH2    | A_ASP_102 | OD1    | 3.051        |
| 4FFV   | A_ARG_109 | NH1    | A_GLU_65  | OE1    | 3.268        |
| 4FFV   | A_ARG_109 | NH1    | A_GLU_65  | OE2    | 3.741        |
| 4FFV   | A_ARG_109 | NH2    | A_GLU_65  | OE1    | 2.989        |
| 4FFV   | A_LYS_120 | NZ     | A_ASP_740 | OD2    | 3.330        |
| 4FFV   | A_ARG_123 | NH2    | A_GLU_203 | OE1    | 3.682        |
| 4FFV   | A_ARG_123 | NH2    | A_GLU_203 | OE2    | 2.712        |
| 4FFV   | A_HIS_160 | ND1    | A_ASP_108 | OD2    | 2.635        |
| 4FFV   | A_HIS_160 | NE2    | A_GLU_175 | OE1    | 3.358        |
| 4FFV   | A_HIS_160 | NE2    | A_GLU_175 | OE2    | 2.796        |
| 4FFV   | A_LYS_161 | NZ     | A_ASP_272 | OD1    | 2.746        |
| 4FFV   | A_LYS_161 | NZ     | A_ASP_272 | OD2    | 3.688        |
| 4FFV   | A_ARG_182 | NH1    | A_ASP_169 | OD1    | 3.856        |
| 4FFV   | A_ARG_182 | NH1    | A_ASP_169 | OD2    | 2.767        |
| 4FFV   | A_ARG_182 | NH2    | A_ASP_169 | OD2    | 3.302        |
| 4FFV   | A_ARG_308 | NH2    | A_ASP_327 | OD2    | 3.552        |
| 4FFV   | A_ARG_316 | NH1    | A_ASP_295 | OD2    | 3.083        |
| 4FFV   | A_ARG_316 | NH2    | A_GLU_669 | OE1    | 3.538        |
| 4FFV   | A_ARG_316 | NH2    | A_GLU_669 | OE2    | 2.880        |
| 4FFV   | A_ARG_354 | NH2    | A_GLU_404 | OE1    | 2.806        |
| 4FFV   | A_HIS_361 | NE2    | A_GLU_359 | OE2    | 3.865        |
| 4FFV   | A_LYS_371 | NZ     | A_GLU_345 | OE1    | 3.266        |
| 4FFV   | A_LYS_380 | NZ     | A_ASP_589 | OD1    | 3.110        |
| 4FFV   | A_LYS_380 | NZ     | A_ASP_589 | OD2    | 3.542        |
| 4FFV   | A_HIS_381 | NE2    | A_ASP_375 | OD2    | 3.813        |
| 4FFV   | A_LYS_443 | NZ     | A_GLU_422 | OE1    | 2.784        |
| 4FFV   | A_LYS_443 | NZ     | A_GLU_422 | OE2    | 3.590        |
| 4FFV   | A_LYS_513 | NZ     | A_ASP_557 | OD1    | 3.202        |
| 4FFV   | A_LYS_514 | NZ     | A_ASP_516 | OD2    | 3.647        |
| 4FFV   | A_ARG_524 | NH1    | A_GLU_425 | OE1    | 3.869        |
| 4FFV   | A_LYS_555 | NZ     | A_ASP_546 | OD1    | 3.412        |
| 4FFV   | A_LYS_555 | NZ     | A_ASP_546 | OD2    | 3.059        |
| 4FFV   | A_ARG_561 | NH1    | A_ASP_557 | OD1    | 2.919        |
| 4FFV   | A_ARG_561 | NH1    | A_ASP_557 | OD2    | 3.499        |
| 4FFV   | A_ARG_561 | NH2    | A_ASP_557 | OD1    | 3.437        |
| 4FFV   | A_ARG_561 | NH2    | A_ASP_557 | OD2    | 2.894        |
| 4FFV   | A_ARG_582 | NH2    | A_GLU_605 | OE2    | 3.235        |
| 4FFV   | A_ARG_582 | NH2    | A_ASP_606 | OD1    | 2.825        |
| 4FFV   | A_ARG_582 | NH2    | A_ASP_606 | OD2    | 3.726        |
| 4FFV   | A_LYS_597 | NZ     | A_ASP_679 | OD1    | 2.818        |
| 4FFV   | A_LYS_597 | NZ     | A_ASP_679 | OD2    | 3.476        |
| 4FFV   | A_ARG_624 | NH2    | A_ASP_621 | OD2    | 3.551        |
| 4FFV   | A_LYS_649 | NZ     | A_GLU_700 | OE2    | 3.425        |
| 4FFV   | A_ARG_659 | NH1    | A_GLU_661 | OE1    | 2.918        |
| 4FFV   | A_ARG_659 | NH1    | A_GLU_661 | OE2    | 3.900        |
| 4FFV   | A_ARG_659 | NH2    | B_GLU_242 | OE2    | 2.683        |
| 4FFV   | A_LYS_697 | NZ     | A_GLU_694 | OE1    | 2.696        |
| 4FFV   | A_HIS_705 | NE2    | A_ASP_709 | OD2    | 3.369        |
| 4FFV   | A_HIS_741 | ND1    | A_ASP_709 | OD1    | 3.395        |
| 4FFV   | A_HIS_741 | ND1    | A_ASP_709 | OD2    | 2.789        |
| 4FFV   | A_HIS_755 | ND1    | B_ASP_730 | OD1    | 2.996        |
| 4FFV   | B_ARG_39  | NH1    | B_ASP_45  | OD1    | 2.616        |
| 4FFV   | B_ARG_39  | NH1    | B_ASP_45  | OD2    | 3.948        |

|      |           |     |           |     |       |
|------|-----------|-----|-----------|-----|-------|
| 4FFV | B_ARG_39  | NH2 | B_ASP_45  | OD1 | 3.428 |
| 4FFV | B_ARG_39  | NH2 | B_ASP_45  | OD2 | 3.350 |
| 4FFV | B_ARG_59  | NH2 | B_ASP_102 | OD1 | 2.946 |
| 4FFV | B_ARG_109 | NH2 | B_GLU_65  | OE1 | 2.873 |
| 4FFV | B_ARG_109 | NH2 | B_GLU_65  | OE2 | 3.587 |
| 4FFV | B_ARG_123 | NH2 | B_GLU_203 | OE1 | 3.775 |
| 4FFV | B_ARG_123 | NH2 | B_GLU_203 | OE2 | 2.935 |
| 4FFV | B_HIS_160 | ND1 | B_ASP_108 | OD2 | 2.803 |
| 4FFV | B_HIS_160 | NE2 | B_GLU_175 | OE1 | 2.723 |
| 4FFV | B_HIS_160 | NE2 | B_GLU_175 | OE2 | 3.449 |
| 4FFV | B_LYS_161 | NZ  | B_ASP_272 | OD1 | 2.924 |
| 4FFV | B_ARG_182 | NH2 | B_ASP_169 | OD1 | 2.817 |
| 4FFV | B_ARG_308 | NH1 | B_ASP_327 | OD1 | 2.983 |
| 4FFV | B_ARG_308 | NH1 | B_ASP_327 | OD2 | 2.869 |
| 4FFV | B_ARG_316 | NH1 | B_GLU_669 | OE1 | 3.104 |
| 4FFV | B_ARG_316 | NH1 | B_GLU_669 | OE2 | 3.019 |
| 4FFV | B_ARG_316 | NH2 | B_ASP_295 | OD2 | 3.354 |
| 4FFV | B_ARG_354 | NH2 | B_GLU_404 | OE1 | 2.935 |
| 4FFV | B_LYS_371 | NZ  | B_GLU_345 | OE1 | 2.807 |
| 4FFV | B_LYS_467 | NZ  | B_GLU_80  | OE2 | 3.637 |
| 4FFV | B_ARG_485 | NH2 | B_ASP_488 | OD1 | 2.633 |
| 4FFV | B_LYS_513 | NZ  | B_ASP_557 | OD1 | 3.220 |
| 4FFV | B_ARG_524 | NH1 | B_GLU_425 | OE1 | 3.953 |
| 4FFV | B_ARG_524 | NH2 | B_GLU_425 | OE1 | 3.954 |
| 4FFV | B_LYS_555 | NZ  | B_ASP_546 | OD1 | 3.219 |
| 4FFV | B_LYS_555 | NZ  | B_ASP_546 | OD2 | 3.109 |
| 4FFV | B_ARG_561 | NH1 | B_ASP_557 | OD1 | 2.961 |
| 4FFV | B_ARG_561 | NH1 | B_ASP_557 | OD2 | 3.596 |
| 4FFV | B_ARG_561 | NH2 | B_ASP_557 | OD1 | 3.466 |
| 4FFV | B_ARG_561 | NH2 | B_ASP_557 | OD2 | 2.798 |
| 4FFV | B_ARG_582 | NH2 | B_ASP_606 | OD1 | 2.846 |
| 4FFV | B_ARG_582 | NH2 | B_ASP_606 | OD2 | 3.802 |
| 4FFV | B_ARG_612 | NH1 | B_GLU_609 | OE2 | 3.858 |
| 4FFV | B_LYS_623 | NZ  | B_ASP_621 | OD1 | 3.779 |
| 4FFV | B_ARG_624 | NH1 | B_ASP_621 | OD2 | 2.973 |
| 4FFV | B_ARG_659 | NH1 | B_GLU_661 | OE1 | 3.697 |
| 4FFV | B_ARG_659 | NH1 | B_GLU_661 | OE2 | 2.842 |
| 4FFV | B_ARG_659 | NH2 | A_GLU_242 | OE2 | 2.592 |
| 4FFV | B_LYS_697 | NZ  | B_GLU_694 | OE2 | 3.213 |
| 4FFV | B_HIS_705 | NE2 | B_ASP_709 | OD2 | 3.391 |
| 4FFV | B_HIS_741 | ND1 | B_ASP_709 | OD1 | 3.377 |
| 4FFV | B_HIS_741 | ND1 | B_ASP_709 | OD2 | 2.794 |
| 4FFV | B_HIS_755 | ND1 | A_ASP_730 | OD1 | 2.989 |
| 4FFV | B_HIS_755 | ND1 | A_ASP_730 | OD2 | 3.942 |
| 4FFV | C_ARG_60  | NH2 | C_GLU_78  | OE2 | 2.738 |
| 4FFV | C_LYS_146 | NZ  | C_GLU_153 | OE2 | 3.897 |
| 4FFV | D_LYS_54  | NZ  | B_GLU_89  | OE1 | 3.460 |
| 4FFV | D_LYS_54  | NZ  | B_GLU_89  | OE2 | 3.556 |
| 4FFV | D_LYS_54  | NZ  | D_ASP_31  | OD1 | 3.816 |
| 4FFV | D_LYS_63  | NZ  | D_GLU_46  | OE2 | 3.471 |
| 4FFV | D_LYS_67  | NZ  | D_ASP_90  | OD2 | 2.846 |
| 4FFV | D_ARG_98  | NH2 | D_ASP_105 | OD1 | 3.968 |
| 4FFV | D_ARG_98  | NH2 | D_ASP_105 | OD2 | 2.804 |
| 4FFV | D_LYS_209 | NZ  | D_ASP_211 | OD1 | 3.459 |
| 4FFV | L_ARG_60  | NH1 | L_GLU_78  | OE2 | 3.980 |
| 4FFV | L_ARG_60  | NH2 | L_GLU_80  | OE2 | 2.908 |
| 4FFV | L_ARG_76  | NH1 | L_GLU_78  | OE2 | 3.920 |
| 4FFV | L_ARG_76  | NH2 | L_GLU_78  | OE2 | 3.454 |

|      |           |     |           |     |       |
|------|-----------|-----|-----------|-----|-------|
| 4FFV | L_LYS_146 | NZ  | L_GLU_153 | OE2 | 3.863 |
| 4FFV | L_LYS_148 | NZ  | L_GLU_194 | OE1 | 3.895 |
| 4FFV | L_LYS_168 | NZ  | L_ASP_169 | OD2 | 3.641 |
| 4FFV | H_LYS_54  | NZ  | A_GLU_89  | OE1 | 3.584 |
| 4FFV | H_LYS_54  | NZ  | A_GLU_89  | OE2 | 3.871 |
| 4FFV | H_LYS_63  | NZ  | H_GLU_46  | OE2 | 3.768 |
| 4FFV | H_LYS_67  | NZ  | H_ASP_90  | OD1 | 2.976 |
| 4FFV | H_LYS_67  | NZ  | H_ASP_90  | OD2 | 3.578 |
| 4FFV | H_ARG_98  | NH1 | H_ASP_105 | OD1 | 3.804 |
| 4FFV | H_ARG_98  | NH1 | H_ASP_105 | OD2 | 3.268 |
| 4FFV | H_ARG_98  | NH2 | H_ASP_105 | OD2 | 3.823 |
| 4FFV | H_HIS_168 | NE2 | L_ASP_166 | OD1 | 3.178 |
| 4FFV | H_HIS_168 | NE2 | L_ASP_166 | OD2 | 3.870 |
| 4FFV | H_LYS_209 | NZ  | H_ASP_211 | OD1 | 3.064 |

Table 510: 4FFV-specific salt bridging networks analysis. In this table, a PDB file is specified with a four-letter PDB ID, except that the names of the PDB files corresponding to the single NMR structural model split from the NMR ensemble is specified with a four-letter PDB ID in addition to a hyphen followed by the single NMR structural model numeric ID, the residue naming scheme is **Chain ID\_residue name\_residue number**,  $\angle ADH$  represents the angle formed by acceptor (A), donor (D) and hydrogen (H) ( $\angle ADH$ ).

| PDB ID | Residue A | Atom A | Residue B | Atom B | Distance (Å) |
|--------|-----------|--------|-----------|--------|--------------|
| 4FFW   | A_ARG_39  | NH2    | A_ASP_45  | OD1    | 3.225        |
| 4FFW   | A_ARG_39  | NH2    | A_ASP_45  | OD2    | 2.703        |
| 4FFW   | A_ARG_109 | NH1    | A_GLU_65  | OE1    | 3.415        |
| 4FFW   | A_ARG_109 | NH1    | A_GLU_65  | OE2    | 3.525        |
| 4FFW   | A_ARG_109 | NH2    | A_GLU_65  | OE1    | 3.203        |
| 4FFW   | A_LYS_120 | NZ     | A_ASP_740 | OD2    | 3.434        |
| 4FFW   | A_ARG_123 | NH2    | A_GLU_203 | OE2    | 3.187        |
| 4FFW   | A_HIS_160 | NE2    | A_ASP_108 | OD2    | 3.962        |
| 4FFW   | A_LYS_161 | NZ     | A_ASP_272 | OD1    | 2.704        |
| 4FFW   | A_ARG_182 | NH1    | A_ASP_169 | OD2    | 2.886        |
| 4FFW   | A_ARG_308 | NH2    | A_ASP_327 | OD2    | 3.670        |
| 4FFW   | A_ARG_316 | NH1    | A_ASP_295 | OD2    | 3.273        |
| 4FFW   | A_ARG_316 | NH2    | A_GLU_669 | OE1    | 3.641        |
| 4FFW   | A_ARG_316 | NH2    | A_GLU_669 | OE2    | 2.963        |
| 4FFW   | A_ARG_354 | NH2    | A_GLU_404 | OE1    | 3.227        |
| 4FFW   | A_HIS_361 | NE2    | A_GLU_359 | OE2    | 3.514        |
| 4FFW   | A_LYS_371 | NZ     | A_GLU_345 | OE1    | 2.680        |
| 4FFW   | A_LYS_380 | NZ     | A_ASP_589 | OD1    | 3.098        |
| 4FFW   | A_LYS_380 | NZ     | A_ASP_589 | OD2    | 2.829        |
| 4FFW   | A_LYS_443 | NZ     | A_GLU_422 | OE1    | 2.937        |
| 4FFW   | A_LYS_513 | NZ     | A_ASP_557 | OD1    | 3.106        |
| 4FFW   | A_ARG_524 | NH1    | A_GLU_425 | OE1    | 2.739        |
| 4FFW   | A_LYS_555 | NZ     | A_ASP_546 | OD1    | 3.312        |
| 4FFW   | A_ARG_561 | NH1    | A_ASP_557 | OD1    | 2.928        |
| 4FFW   | A_ARG_561 | NH1    | A_ASP_557 | OD2    | 3.570        |
| 4FFW   | A_ARG_561 | NH2    | A_ASP_557 | OD1    | 3.591        |
| 4FFW   | A_ARG_561 | NH2    | A_ASP_557 | OD2    | 3.082        |
| 4FFW   | A_ARG_582 | NH2    | A_GLU_605 | OE2    | 3.554        |
| 4FFW   | A_ARG_582 | NH2    | A_ASP_606 | OD1    | 3.161        |
| 4FFW   | A_ARG_582 | NH2    | A_ASP_606 | OD2    | 3.803        |
| 4FFW   | A_LYS_597 | NZ     | A_ASP_679 | OD1    | 2.982        |
| 4FFW   | A_ARG_624 | NH2    | A_ASP_621 | OD2    | 3.236        |
| 4FFW   | A_LYS_649 | NZ     | A_GLU_700 | OE2    | 3.883        |
| 4FFW   | A_ARG_659 | NH1    | A_GLU_661 | OE1    | 3.045        |
| 4FFW   | A_ARG_659 | NH2    | B_GLU_242 | OE2    | 3.187        |
| 4FFW   | A_LYS_697 | NZ     | A_GLU_694 | OE1    | 3.166        |
| 4FFW   | A_HIS_705 | NE2    | A_ASP_709 | OD2    | 3.560        |
| 4FFW   | A_HIS_741 | ND1    | A_ASP_709 | OD1    | 3.680        |
| 4FFW   | A_HIS_741 | ND1    | A_ASP_709 | OD2    | 2.834        |
| 4FFW   | A_HIS_755 | ND1    | B_ASP_730 | OD1    | 3.111        |
| 4FFW   | B_ARG_39  | NH1    | B_ASP_45  | OD1    | 3.148        |
| 4FFW   | B_ARG_39  | NH2    | B_ASP_45  | OD1    | 3.305        |
| 4FFW   | B_ARG_39  | NH2    | B_ASP_45  | OD2    | 3.479        |
| 4FFW   | B_ARG_59  | NH2    | B_ASP_102 | OD1    | 3.000        |
| 4FFW   | B_ARG_109 | NH2    | B_GLU_65  | OE1    | 3.413        |
| 4FFW   | B_ARG_109 | NH2    | B_GLU_65  | OE2    | 3.745        |
| 4FFW   | B_LYS_120 | NZ     | B_ASP_740 | OD2    | 3.578        |
| 4FFW   | B_ARG_123 | NH2    | B_GLU_203 | OE2    | 2.505        |
| 4FFW   | B_HIS_160 | ND1    | B_ASP_108 | OD2    | 3.785        |
| 4FFW   | B_HIS_160 | NE2    | B_GLU_175 | OE1    | 2.698        |
| 4FFW   | B_HIS_160 | NE2    | B_GLU_175 | OE2    | 3.643        |
| 4FFW   | B_LYS_161 | NZ     | B_ASP_272 | OD1    | 3.156        |
| 4FFW   | B_ARG_182 | NH2    | B_ASP_169 | OD1    | 2.942        |
| 4FFW   | B_ARG_308 | NH1    | B_ASP_327 | OD1    | 3.218        |
| 4FFW   | B_ARG_308 | NH1    | B_ASP_327 | OD2    | 2.634        |
| 4FFW   | B_ARG_316 | NH1    | B_GLU_669 | OE1    | 2.973        |
| 4FFW   | B_ARG_316 | NH1    | B_GLU_669 | OE2    | 3.097        |

|      |           |     |           |     |       |
|------|-----------|-----|-----------|-----|-------|
| 4FFW | B_ARG_316 | NH2 | B_ASP_295 | OD2 | 3.399 |
| 4FFW | B_LYS_330 | NZ  | B_ASP_307 | OD2 | 3.516 |
| 4FFW | B_ARG_354 | NH2 | B_GLU_404 | OE1 | 2.920 |
| 4FFW | B_ARG_356 | NH2 | B_ASP_300 | OD2 | 3.885 |
| 4FFW | B_LYS_371 | NZ  | B_GLU_345 | OE1 | 2.782 |
| 4FFW | B_LYS_371 | NZ  | B_GLU_345 | OE2 | 3.778 |
| 4FFW | B_LYS_380 | NZ  | B_ASP_589 | OD2 | 3.568 |
| 4FFW | B_ARG_485 | NH2 | B_ASP_488 | OD1 | 3.387 |
| 4FFW | B_LYS_513 | NZ  | B_ASP_557 | OD1 | 3.212 |
| 4FFW | B_LYS_514 | NZ  | B_ASP_516 | OD1 | 3.257 |
| 4FFW | B_ARG_524 | NH1 | B_GLU_425 | OE1 | 3.639 |
| 4FFW | B_LYS_555 | NZ  | B_ASP_546 | OD1 | 3.368 |
| 4FFW | B_ARG_561 | NH1 | B_ASP_557 | OD1 | 3.049 |
| 4FFW | B_ARG_561 | NH1 | B_ASP_557 | OD2 | 3.722 |
| 4FFW | B_ARG_561 | NH2 | B_ASP_557 | OD1 | 3.485 |
| 4FFW | B_ARG_561 | NH2 | B_ASP_557 | OD2 | 3.243 |
| 4FFW | B_ARG_582 | NH2 | B_ASP_606 | OD1 | 3.041 |
| 4FFW | B_LYS_597 | NZ  | B_ASP_679 | OD1 | 3.641 |
| 4FFW | B_LYS_623 | NZ  | B_ASP_621 | OD1 | 3.750 |
| 4FFW | B_ARG_624 | NH1 | B_ASP_621 | OD2 | 3.247 |
| 4FFW | B_ARG_659 | NH1 | B_GLU_661 | OE2 | 2.930 |
| 4FFW | B_ARG_659 | NH2 | A_GLU_242 | OE2 | 3.068 |
| 4FFW | B_ARG_670 | NH2 | B_GLU_204 | OE1 | 3.913 |
| 4FFW | B_HIS_705 | NE2 | B_ASP_709 | OD2 | 3.534 |
| 4FFW | B_HIS_741 | ND1 | B_ASP_709 | OD1 | 3.671 |
| 4FFW | B_HIS_741 | ND1 | B_ASP_709 | OD2 | 2.858 |
| 4FFW | C_ARG_60  | NH2 | C_GLU_80  | OE2 | 3.345 |
| 4FFW | C_LYS_146 | NZ  | C_GLU_153 | OE1 | 3.486 |
| 4FFW | C_LYS_146 | NZ  | C_GLU_153 | OE2 | 3.680 |
| 4FFW | C_ARG_154 | NH1 | C_GLU_184 | OE2 | 3.454 |
| 4FFW | C_ARG_154 | NH2 | C_GLU_184 | OE2 | 3.842 |
| 4FFW | C_LYS_182 | NZ  | C_GLU_186 | OE2 | 2.882 |
| 4FFW | D_LYS_54  | NZ  | B_GLU_89  | OE1 | 3.085 |
| 4FFW | D_LYS_54  | NZ  | B_GLU_89  | OE2 | 3.381 |
| 4FFW | D_LYS_63  | NZ  | D_GLU_46  | OE2 | 3.795 |
| 4FFW | D_LYS_67  | NZ  | D_ASP_90  | OD2 | 2.893 |
| 4FFW | D_ARG_98  | NH2 | D_ASP_105 | OD1 | 3.888 |
| 4FFW | D_ARG_98  | NH2 | D_ASP_105 | OD2 | 3.038 |
| 4FFW | H_LYS_54  | NZ  | A_GLU_89  | OE1 | 3.517 |
| 4FFW | H_LYS_54  | NZ  | A_GLU_89  | OE2 | 3.666 |
| 4FFW | H_LYS_63  | NZ  | H_GLU_46  | OE2 | 3.928 |
| 4FFW | H_ARG_98  | NH2 | H_ASP_105 | OD1 | 3.858 |
| 4FFW | H_ARG_98  | NH2 | H_ASP_105 | OD2 | 3.152 |
| 4FFW | H_HIS_168 | NE2 | L_ASP_166 | OD1 | 3.737 |
| 4FFW | L_ARG_60  | NH1 | L_GLU_78  | OE2 | 3.910 |
| 4FFW | L_ARG_60  | NH2 | L_GLU_80  | OE2 | 3.325 |
| 4FFW | L_ARG_60  | NH2 | L_ASP_81  | OD1 | 2.865 |
| 4FFW | L_ARG_60  | NH2 | L_ASP_81  | OD2 | 3.727 |
| 4FFW | L_LYS_    | NZ  | L_GLU_    | OE2 | 3.349 |

---

Table 511: 4FFW-specific salt bridging networks analysis. In this table, a PDB file is specified with a four-letter PDB ID, except that the names of the PDB files corresponding to the single NMR structural model split from the NMR ensemble is specified with a four-letter PDB ID in addition to a hyphen followed by the single NMR structural model numeric ID, the residue naming scheme is **Chain ID\_residue name\_residue number**,  $\angle ADH$  represents the angle formed by acceptor (A), donor (D) and hydrogen (H) ( $\angle ADH$ ).

| PDB ID | Residue A | Atom A | Residue B | Atom B | Distance (Å) |
|--------|-----------|--------|-----------|--------|--------------|
| 4FQH   | H_ARG_38  | NH1    | H_ASP_86  | OD1    | 2.793        |
| 4FQH   | H_ARG_38  | NH2    | H_ASP_86  | OD1    | 3.878        |
| 4FQH   | H_LYS_62  | NZ     | H_ASP_46  | OD2    | 3.060        |
| 4FQH   | H_ARG_66  | NH1    | H_ASP_86  | OD1    | 3.673        |
| 4FQH   | H_ARG_66  | NH1    | H_ASP_86  | OD2    | 2.888        |
| 4FQH   | H_ARG_66  | NH2    | H_ASP_86  | OD1    | 2.891        |
| 4FQH   | H_ARG_66  | NH2    | H_ASP_86  | OD2    | 3.511        |
| 4FQH   | H_ARG_94  | NH1    | H_ASP_101 | OD1    | 3.949        |
| 4FQH   | H_ARG_94  | NH1    | H_ASP_101 | OD2    | 3.141        |
| 4FQH   | H_ARG_94  | NH2    | H_ASP_101 | OD1    | 3.729        |
| 4FQH   | H_ARG_94  | NH2    | H_ASP_101 | OD2    | 3.721        |
| 4FQH   | H_LYS_143 | NZ     | L_GLU_124 | OE2    | 2.906        |
| 4FQH   | H_LYS_214 | NZ     | L_GLU_123 | OE1    | 3.752        |
| 4FQH   | H_LYS_214 | NZ     | L_GLU_123 | OE2    | 2.217        |
| 4FQH   | L_ARG_30  | NH1    | L_ASP_93  | OD2    | 3.341        |
| 4FQH   | L_ARG_31  | NH1    | L_ASP_93  | OD1    | 2.902        |
| 4FQH   | L_ARG_31  | NH1    | L_ASP_93  | OD2    | 3.963        |
| 4FQH   | L_ARG_61  | NH2    | L_ASP_82  | OD1    | 2.708        |
| 4FQH   | L_ARG_61  | NH2    | L_ASP_82  | OD2    | 3.349        |
| 4FQH   | L_HIS_188 | ND1    | L_ASP_151 | OD1    | 2.726        |
| 4FQH   | A_ARG_38  | NH1    | A_ASP_86  | OD1    | 2.939        |
| 4FQH   | A_LYS_62  | NZ     | A_ASP_46  | OD1    | 3.347        |
| 4FQH   | A_LYS_62  | NZ     | A_ASP_46  | OD2    | 2.737        |
| 4FQH   | A_ARG_66  | NH1    | A_ASP_86  | OD1    | 3.497        |
| 4FQH   | A_ARG_66  | NH1    | A_ASP_86  | OD2    | 2.905        |
| 4FQH   | A_ARG_66  | NH2    | A_ASP_86  | OD1    | 2.643        |
| 4FQH   | A_ARG_66  | NH2    | A_ASP_86  | OD2    | 3.511        |
| 4FQH   | A_LYS_143 | NZ     | A_ASP_144 | OD2    | 3.998        |
| 4FQH   | A_LYS_143 | NZ     | B_GLU_124 | OE2    | 3.049        |
| 4FQH   | A_LYS_214 | NZ     | B_GLU_123 | OE1    | 3.132        |
| 4FQH   | B_ARG_31  | NH2    | B_ASP_93  | OD1    | 2.853        |
| 4FQH   | B_ARG_61  | NH2    | B_ASP_82  | OD1    | 2.666        |
| 4FQH   | B_ARG_61  | NH2    | B_ASP_82  | OD2    | 3.538        |

Table 512: 4FQH-specific salt bridging networks analysis. In this table, a PDB file is specified with a four-letter PDB ID, except that the names of the PDB files corresponding to the single NMR structural model split from the NMR ensemble is specified with a four-letter PDB ID in addition to a hyphen followed by the single NMR structural model numeric ID, the residue naming scheme is **Chain ID\_residue name\_residue number**,  $\angle ADH$  represents the angle formed by acceptor (A), donor (D) and hydrogen (H) ( $\angle ADH$ ).

| PDB ID | Residue A | Atom A | Residue B | Atom B | Distance (Å) |
|--------|-----------|--------|-----------|--------|--------------|
| 4FQI   | A_LYS_45  | NZ     | A_ASP_41  | OD1    | 3.116        |
| 4FQI   | A_LYS_45  | NZ     | A_ASP_41  | OD2    | 2.607        |
| 4FQI   | A_LYS_46  | NZ     | A_GLU_44  | OE1    | 2.647        |
| 4FQI   | A_LYS_46  | NZ     | A_GLU_44  | OE2    | 3.567        |
| 4FQI   | A_ARG_62  | NH1    | A_GLU_78  | OE1    | 3.913        |
| 4FQI   | A_ARG_62  | NH1    | A_GLU_78  | OE2    | 3.007        |
| 4FQI   | A_LYS_90  | NZ     | A_GLU_273 | OE1    | 2.798        |
| 4FQI   | A_LYS_109 | NZ     | A_GLU_89  | OE1    | 2.835        |
| 4FQI   | A_LYS_109 | NZ     | A_GLU_89  | OE2    | 3.759        |
| 4FQI   | A_LYS_109 | NZ     | B_GLU_69  | OE1    | 2.615        |
| 4FQI   | A_LYS_109 | NZ     | B_GLU_69  | OE2    | 3.205        |
| 4FQI   | A_ARG_149 | NH2    | A_ASP_77  | OD1    | 3.711        |
| 4FQI   | A_ARG_149 | NH2    | A_ASP_77  | OD2    | 2.863        |
| 4FQI   | A_HIS_184 | NE2    | A_GLU_231 | OE1    | 2.822        |
| 4FQI   | A_ARG_216 | NH1    | A_GLU_231 | OE1    | 3.982        |
| 4FQI   | A_ARG_216 | NH2    | A_GLU_231 | OE1    | 3.265        |
| 4FQI   | A_LYS_259 | NZ     | A_GLU_119 | OE1    | 3.578        |
| 4FQI   | A_LYS_261 | NZ     | A_GLU_83A | OE1    | 3.943        |
| 4FQI   | A_LYS_261 | NZ     | A_GLU_83A | OE2    | 2.598        |
| 4FQI   | A_LYS_262 | NZ     | A_ASP_175 | OD2    | 3.224        |
| 4FQI   | A_LYS_269 | NZ     | A_GLU_89  | OE1    | 2.759        |
| 4FQI   | A_LYS_307 | NZ     | B_GLU_64  | OE2    | 3.371        |
| 4FQI   | A_LYS_310 | NZ     | B_ASP_90  | OD1    | 2.687        |
| 4FQI   | A_LYS_310 | NZ     | B_ASP_90  | OD2    | 3.739        |
| 4FQI   | B_LYS_51  | NZ     | B_GLU_103 | OE1    | 2.743        |
| 4FQI   | B_ARG_68  | NH1    | B_GLU_85  | OE2    | 3.042        |
| 4FQI   | B_LYS_82  | NZ     | B_ASP_86  | OD2    | 2.769        |
| 4FQI   | B_ARG_123 | NH2    | B_ASP_120 | OD1    | 3.250        |
| 4FQI   | B_ARG_153 | NH2    | B_GLU_150 | OE2    | 2.775        |
| 4FQI   | B_ARG_167 | NH2    | B_GLU_164 | OE1    | 3.918        |
| 4FQI   | B_ARG_167 | NH2    | B_GLU_164 | OE2    | 2.444        |
| 4FQI   | B_ARG_170 | NH1    | B_ASP_128 | OD1    | 3.871        |
| 4FQI   | B_ARG_170 | NH1    | B_ASP_128 | OD2    | 3.616        |
| 4FQI   | B_ARG_170 | NH2    | B_ASP_128 | OD2    | 3.649        |
| 4FQI   | H_ARG_38  | NH1    | H_ASP_86  | OD1    | 2.837        |
| 4FQI   | H_ARG_38  | NH2    | H_ASP_86  | OD1    | 3.841        |
| 4FQI   | H_LYS_62  | NZ     | H_ASP_46  | OD1    | 3.985        |
| 4FQI   | H_LYS_62  | NZ     | H_ASP_46  | OD2    | 2.950        |
| 4FQI   | H_ARG_66  | NH1    | H_ASP_86  | OD1    | 3.456        |
| 4FQI   | H_ARG_66  | NH1    | H_ASP_86  | OD2    | 2.873        |
| 4FQI   | H_ARG_66  | NH2    | H_ASP_86  | OD1    | 2.889        |
| 4FQI   | H_ARG_66  | NH2    | H_ASP_86  | OD2    | 3.655        |
| 4FQI   | H_LYS_143 | NZ     | L_GLU_124 | OE2    | 2.947        |
| 4FQI   | H_LYS_206 | NZ     | H_ASP_208 | OD1    | 2.657        |
| 4FQI   | H_LYS_206 | NZ     | H_ASP_208 | OD2    | 3.897        |
| 4FQI   | L_ARG_30  | NH1    | L_ASP_93  | OD2    | 2.748        |
| 4FQI   | L_ARG_30  | NH2    | L_ASP_93  | OD2    | 3.772        |
| 4FQI   | L_ARG_31  | NH2    | L_ASP_93  | OD1    | 2.914        |
| 4FQI   | L_ARG_31  | NH2    | L_ASP_93  | OD2    | 3.671        |
| 4FQI   | L_ARG_61  | NH2    | L_GLU_81  | OE2    | 3.854        |
| 4FQI   | L_ARG_61  | NH2    | L_ASP_82  | OD1    | 2.818        |
| 4FQI   | L_ARG_61  | NH2    | L_ASP_82  | OD2    | 3.558        |



---

Table 513: 4FQI-specific salt bridging networks analysis. In this table, a PDB file is specified with a four-letter PDB ID, except that the names of the PDB files corresponding to the single NMR structural model split from the NMR ensemble is specified with a four-letter PDB ID in addition to a hyphen followed by the single NMR structural model numeric ID, the residue naming scheme is **Chain ID\_residue name\_residue number**,  $\angle ADH$  represents the angle formed by acceptor (A), donor (D) and hydrogen (H) ( $\angle ADH$ ).

| PDB ID | Residue A | Atom A | Residue B | Atom B | Distance (Å) |
|--------|-----------|--------|-----------|--------|--------------|
| 4G6A   | C_ARG_38  | NH1    | C_ASP_86  | OD1    | 2.901        |
| 4G6A   | C_ARG_38  | NH2    | C_GLU_46  | OE1    | 2.973        |
| 4G6A   | C_ARG_38  | NH2    | C_ASP_86  | OD1    | 3.508        |
| 4G6A   | C_ARG_64  | NH1    | D_ASP_94  | OD1    | 3.792        |
| 4G6A   | C_ARG_64  | NH1    | D_ASP_94  | OD2    | 3.701        |
| 4G6A   | C_ARG_66  | NH1    | C_ASP_86  | OD1    | 3.401        |
| 4G6A   | C_ARG_66  | NH1    | C_ASP_86  | OD2    | 2.759        |
| 4G6A   | C_ARG_66  | NH2    | C_ASP_86  | OD1    | 2.824        |
| 4G6A   | C_ARG_66  | NH2    | C_ASP_86  | OD2    | 3.567        |
| 4G6A   | C_LYS_143 | NZ     | C_ASP_144 | OD1    | 3.200        |
| 4G6A   | C_LYS_143 | NZ     | C_ASP_144 | OD2    | 3.786        |
| 4G6A   | C_LYS_209 | NZ     | D_GLU_123 | OE1    | 2.784        |
| 4G6A   | C_LYS_209 | NZ     | D_GLU_123 | OE2    | 3.529        |
| 4G6A   | C_LYS_210 | NZ     | C_GLU_212 | OE2    | 3.247        |
| 4G6A   | D_ARG_18  | NH2    | D_ASP_76  | OD2    | 2.934        |
| 4G6A   | D_ARG_18  | NH2    | L_GLU_27  | OE2    | 3.721        |
| 4G6A   | D_LYS_39  | NZ     | D_ASP_81  | OD1    | 2.823        |
| 4G6A   | D_ARG_61  | NH1    | D_ASP_82  | OD1    | 3.328        |
| 4G6A   | D_ARG_61  | NH1    | D_ASP_82  | OD2    | 2.369        |
| 4G6A   | D_ARG_61  | NH2    | D_ASP_82  | OD1    | 2.953        |
| 4G6A   | D_ARG_61  | NH2    | D_ASP_82  | OD2    | 3.506        |
| 4G6A   | D_LYS_149 | NZ     | D_GLU_195 | OE1    | 3.087        |
| 4G6A   | D_LYS_183 | NZ     | D_GLU_187 | OE1    | 3.747        |
| 4G6A   | D_LYS_183 | NZ     | D_GLU_187 | OE2    | 3.452        |
| 4G6A   | D_LYS_188 | NZ     | D_ASP_185 | OD1    | 3.129        |
| 4G6A   | D_HIS_189 | ND1    | D_ASP_151 | OD2    | 3.322        |
| 4G6A   | D_LYS_190 | NZ     | D_GLU_213 | OE2    | 2.978        |
| 4G6A   | H_ARG_38  | NH1    | H_ASP_86  | OD1    | 3.081        |
| 4G6A   | H_ARG_38  | NH2    | H_GLU_46  | OE1    | 3.078        |
| 4G6A   | H_ARG_38  | NH2    | H_ASP_86  | OD1    | 3.738        |
| 4G6A   | H_ARG_64  | NH2    | L_ASP_94  | OD1    | 3.443        |
| 4G6A   | H_ARG_64  | NH2    | L_ASP_94  | OD2    | 3.275        |
| 4G6A   | H_ARG_66  | NH1    | H_ASP_86  | OD1    | 3.684        |
| 4G6A   | H_ARG_66  | NH1    | H_ASP_86  | OD2    | 3.528        |
| 4G6A   | H_ARG_66  | NH2    | H_ASP_86  | OD1    | 2.640        |
| 4G6A   | H_ARG_66  | NH2    | H_ASP_86  | OD2    | 3.507        |
| 4G6A   | H_LYS_143 | NZ     | H_ASP_144 | OD1    | 3.327        |
| 4G6A   | H_LYS_143 | NZ     | H_ASP_144 | OD2    | 3.934        |
| 4G6A   | H_LYS_206 | NZ     | H_ASP_208 | OD1    | 2.915        |
| 4G6A   | H_LYS_206 | NZ     | H_ASP_208 | OD2    | 3.666        |
| 4G6A   | H_LYS_209 | NZ     | L_GLU_123 | OE1    | 2.940        |
| 4G6A   | H_LYS_209 | NZ     | L_GLU_123 | OE2    | 3.622        |
| 4G6A   | H_LYS_210 | NZ     | H_GLU_212 | OE2    | 3.489        |
| 4G6A   | L_ARG_18  | NH2    | L_ASP_76  | OD2    | 3.695        |
| 4G6A   | L_LYS_39  | NZ     | L_ASP_81  | OD1    | 2.869        |
| 4G6A   | L_LYS_39  | NZ     | L_ASP_81  | OD2    | 3.930        |
| 4G6A   | L_ARG_61  | NH1    | L_ASP_82  | OD1    | 3.564        |
| 4G6A   | L_ARG_61  | NH1    | L_ASP_82  | OD2    | 2.948        |
| 4G6A   | L_ARG_61  | NH2    | L_ASP_82  | OD1    | 3.384        |
| 4G6A   | L_LYS_149 | NZ     | L_GLU_195 | OE2    | 3.404        |
| 4G6A   | L_LYS_183 | NZ     | L_GLU_187 | OE1    | 3.001        |
| 4G6A   | L_LYS_183 | NZ     | L_GLU_187 | OE2    | 3.388        |
| 4G6A   | L_LYS_190 | NZ     | L_GLU_213 | OE2    | 3.611        |

---

Table 514: 4G6A-specific salt bridging networks analysis. In this table, a PDB file is specified with a four-letter PDB ID, except that the names of the PDB files corresponding to the single NMR structural model split from the NMR ensemble is specified with a four-letter PDB ID in addition to a hyphen followed by the single NMR structural model numeric ID, the residue naming scheme is **Chain ID\_residue name\_residue number**,  $\angle ADH$  represents the angle formed by acceptor (A), donor (D) and hydrogen (H) ( $\angle ADH$ ).

| PDB ID | Residue A | Atom A | Residue B  | Atom B | Distance (Å) |
|--------|-----------|--------|------------|--------|--------------|
| 4G6F   | H_ARG_38  | NH1    | H_ASP_86   | OD1    | 2.906        |
| 4G6F   | H_ARG_38  | NH2    | H_GLU_46   | OE1    | 3.116        |
| 4G6F   | H_ARG_38  | NH2    | H_GLU_46   | OE2    | 3.531        |
| 4G6F   | H_ARG_38  | NH2    | H_ASP_86   | OD1    | 3.904        |
| 4G6F   | H_ARG_50  | NH1    | H_ASP_58   | OD2    | 3.658        |
| 4G6F   | H_ARG_50  | NH1    | H_GLU_100J | OE1    | 3.226        |
| 4G6F   | H_ARG_50  | NH1    | H_GLU_100J | OE2    | 2.985        |
| 4G6F   | H_ARG_50  | NH2    | H_ASP_58   | OD2    | 2.110        |
| 4G6F   | H_ARG_66  | NH1    | H_ASP_86   | OD1    | 3.936        |
| 4G6F   | H_ARG_66  | NH1    | H_ASP_86   | OD2    | 2.633        |
| 4G6F   | H_ARG_66  | NH2    | H_ASP_86   | OD1    | 3.136        |
| 4G6F   | H_ARG_66  | NH2    | H_ASP_86   | OD2    | 3.299        |
| 4G6F   | H_ARG_83  | NH2    | H_GLU_85   | OE1    | 3.916        |
| 4G6F   | H_ARG_94  | NH2    | H_ASP_102  | OD2    | 3.304        |
| 4G6F   | H_LYS_143 | NZ     | H_ASP_144  | OD2    | 3.573        |
| 4G6F   | H_LYS_143 | NZ     | L_GLU_125  | OE2    | 3.341        |
| 4G6F   | H_LYS_209 | NZ     | L_GLU_124  | OE1    | 3.080        |
| 4G6F   | H_LYS_209 | NZ     | L_GLU_124  | OE2    | 2.558        |
| 4G6F   | H_ARG_210 | NH1    | H_GLU_212  | OE2    | 3.716        |
| 4G6F   | B_ARG_38  | NH1    | B_ASP_86   | OD1    | 3.151        |
| 4G6F   | B_ARG_38  | NH2    | B_GLU_46   | OE1    | 3.414        |
| 4G6F   | B_ARG_38  | NH2    | B_GLU_46   | OE2    | 3.922        |
| 4G6F   | B_ARG_50  | NH1    | B_ASP_58   | OD2    | 3.630        |
| 4G6F   | B_ARG_50  | NH1    | B_GLU_100J | OE1    | 3.222        |
| 4G6F   | B_ARG_50  | NH1    | B_GLU_100J | OE2    | 2.975        |
| 4G6F   | B_ARG_50  | NH2    | B_ASP_58   | OD2    | 2.343        |
| 4G6F   | B_ARG_66  | NH1    | B_ASP_86   | OD1    | 3.598        |
| 4G6F   | B_ARG_66  | NH1    | B_ASP_86   | OD2    | 2.769        |
| 4G6F   | B_ARG_66  | NH2    | B_ASP_86   | OD1    | 2.916        |
| 4G6F   | B_ARG_66  | NH2    | B_ASP_86   | OD2    | 3.570        |
| 4G6F   | B_ARG_83  | NH2    | B_GLU_85   | OE1    | 3.938        |
| 4G6F   | B_ARG_94  | NH2    | B_ASP_102  | OD2    | 3.253        |
| 4G6F   | B_LYS_143 | NZ     | D_GLU_125  | OE2    | 2.735        |
| 4G6F   | B_LYS_209 | NZ     | D_GLU_124  | OE1    | 3.470        |
| 4G6F   | B_LYS_209 | NZ     | D_GLU_124  | OE2    | 2.107        |
| 4G6F   | L_ARG_29  | NH1    | L_ASP_26   | OD1    | 3.314        |
| 4G6F   | L_HIS_31  | ND1    | H_GLU_100I | OE2    | 2.912        |
| 4G6F   | L_ARG_54  | NH1    | L_ASP_60   | OD1    | 3.621        |
| 4G6F   | L_ARG_61  | NH2    | L_GLU_81   | OE1    | 3.555        |
| 4G6F   | L_ARG_61  | NH2    | L_ASP_82   | OD1    | 2.760        |
| 4G6F   | L_ARG_61  | NH2    | L_ASP_82   | OD2    | 3.527        |
| 4G6F   | L_ARG_91  | NH1    | H_GLU_100J | OE2    | 2.715        |
| 4G6F   | L_ARG_91  | NH2    | H_GLU_100J | OE2    | 2.951        |
| 4G6F   | L_LYS_103 | NZ     | L_ASP_83   | OD1    | 2.500        |
| 4G6F   | L_LYS_111 | NZ     | L_GLU_199  | OE1    | 3.003        |
| 4G6F   | L_LYS_150 | NZ     | L_GLU_204  | OE2    | 2.904        |
| 4G6F   | D_HIS_31  | ND1    | B_GLU_100I | OE2    | 2.954        |
| 4G6F   | D_ARG_54  | NH1    | D_ASP_60   | OD1    | 3.426        |
| 4G6F   | D_ARG_61  | NH2    | D_ASP_82   | OD1    | 2.776        |
| 4G6F   | D_ARG_61  | NH2    | D_ASP_82   | OD2    | 3.304        |
| 4G6F   | D_ARG_91  | NH1    | B_GLU_100J | OE2    | 2.854        |
| 4G6F   | D_ARG_91  | NH2    | B_GLU_100J | OE2    | 2.880        |
| 4G6F   | D_ARG_95B | NH2    | B_ASP_58   | OD1    | 3.343        |
| 4G6F   | D_LYS_103 | NZ     | D_ASP_83   | OD1    | 2.777        |
| 4G6F   | D_LYS_111 | NZ     | D_GLU_199  | OE1    | 3.031        |
| 4G6F   | D_LYS_150 | NZ     | D_GLU_204  | OE1    | 3.970        |
| 4G6F   | D_LYS_150 | NZ     | D_GLU_204  | OE2    | 2.492        |

|      |           |     |           |     |       |
|------|-----------|-----|-----------|-----|-------|
| 4G6F | D_LYS_167 | NZ  | D_ASP_83  | OD2 | 3.935 |
| 4G6F | D_LYS_172 | NZ  | D_ASP_139 | OD2 | 3.592 |
| 4G6F | D_ARG_190 | NH2 | D_ASP_152 | OD2 | 3.898 |
| 4G6F | P_LYS_665 | NZ  | P_GLU_662 | OE2 | 3.965 |
| 4G6F | F_LYS_665 | NZ  | F_GLU_662 | OE1 | 3.301 |
| 4G6F | F_LYS_665 | NZ  | F_GLU_662 | OE2 | 2.956 |

Table 515: 4G6F-specific salt bridging networks analysis. In this table, a PDB file is specified with a four-letter PDB ID, except that the names of the PDB files corresponding to the single NMR structural model split from the NMR ensemble is specified with a four-letter PDB ID in addition to a hyphen followed by the single NMR structural model numeric ID, the residue naming scheme is **Chain ID\_residue name\_residue number**,  $\angle ADH$  represents the angle formed by acceptor (A), donor (D) and hydrogen (H) ( $\angle ADH$ ).

| PDB ID | Residue A | Atom A | Residue B | Atom B | Distance (Å) |
|--------|-----------|--------|-----------|--------|--------------|
| 4GMT   | L_LYS_24  | NZ     | L_ASP_70  | OD1    | 3.260        |
| 4GMT   | L_LYS_24  | NZ     | L_ASP_70  | OD2    | 3.149        |
| 4GMT   | L_ARG_61  | NH2    | L_GLU_81  | OE2    | 3.799        |
| 4GMT   | L_ARG_61  | NH2    | L_ASP_82  | OD1    | 3.260        |
| 4GMT   | L_ARG_61  | NH2    | L_ASP_82  | OD2    | 2.628        |
| 4GMT   | L_ARG_108 | NH1    | L_ASP_170 | OD1    | 3.942        |
| 4GMT   | L_LYS_142 | NZ     | L_ASP_143 | OD1    | 3.297        |
| 4GMT   | L_LYS_142 | NZ     | L_ASP_143 | OD2    | 2.972        |
| 4GMT   | L_LYS_147 | NZ     | L_GLU_195 | OE1    | 3.733        |
| 4GMT   | L_LYS_149 | NZ     | L_GLU_195 | OE2    | 3.437        |
| 4GMT   | L_ARG_155 | NH1    | L_GLU_185 | OE2    | 3.030        |
| 4GMT   | L_ARG_155 | NH2    | L_GLU_185 | OE1    | 3.075        |
| 4GMT   | L_ARG_155 | NH2    | L_GLU_185 | OE2    | 2.988        |
| 4GMT   | L_HIS_189 | ND1    | L_ASP_151 | OD2    | 3.653        |
| 4GMT   | L_LYS_199 | NZ     | L_ASP_110 | OD2    | 2.866        |
| 4GMT   | L_ARG_211 | NH1    | L_GLU_187 | OE2    | 3.717        |
| 4GMT   | H_LYS_12  | NZ     | H_GLU_10  | OE1    | 3.698        |
| 4GMT   | H_ARG_40  | NH1    | H_GLU_85  | OE1    | 3.459        |
| 4GMT   | H_ARG_40  | NH2    | H_GLU_85  | OE1    | 3.548        |
| 4GMT   | H_LYS_64  | NZ     | H_GLU_61  | OE1    | 3.355        |
| 4GMT   | H_LYS_64  | NZ     | H_GLU_61  | OE2    | 3.496        |
| 4GMT   | H_LYS_66  | NZ     | H_ASP_86  | OD2    | 3.279        |
| 4GMT   | H_HIS_164 | NE2    | L_ASP_167 | OD2    | 3.650        |
| 4GMT   | H_LYS_205 | NZ     | H_ASP_207 | OD1    | 2.972        |
| 4GMT   | H_LYS_205 | NZ     | H_ASP_207 | OD2    | 3.617        |
| 4GMT   | M_ARG_61  | NH1    | M_GLU_81  | OE2    | 3.800        |
| 4GMT   | M_ARG_61  | NH2    | M_GLU_81  | OE2    | 3.404        |
| 4GMT   | M_ARG_61  | NH2    | M_ASP_82  | OD1    | 3.417        |
| 4GMT   | M_ARG_61  | NH2    | M_ASP_82  | OD2    | 2.761        |
| 4GMT   | M_LYS_103 | NZ     | M_GLU_85  | OE1    | 3.664        |
| 4GMT   | M_LYS_107 | NZ     | M_ASP_17  | OD2    | 3.878        |
| 4GMT   | M_LYS_142 | NZ     | M_ASP_143 | OD1    | 2.867        |
| 4GMT   | M_ARG_155 | NH1    | M_GLU_185 | OE1    | 3.423        |
| 4GMT   | M_ARG_188 | NH2    | M_GLU_185 | OE2    | 2.544        |
| 4GMT   | M_LYS_199 | NZ     | M_ASP_110 | OD2    | 3.054        |
| 4GMT   | I_LYS_38  | NZ     | I_GLU_46  | OE1    | 3.821        |
| 4GMT   | I_ARG_40  | NH1    | I_GLU_85  | OE1    | 2.810        |
| 4GMT   | I_ARG_40  | NH2    | I_GLU_85  | OE1    | 3.101        |
| 4GMT   | I_ARG_40  | NH2    | I_GLU_85  | OE2    | 3.496        |
| 4GMT   | I_LYS_64  | NZ     | I_GLU_61  | OE1    | 2.992        |
| 4GMT   | I_LYS_66  | NZ     | I_ASP_86  | OD1    | 3.775        |
| 4GMT   | I_LYS_66  | NZ     | I_ASP_86  | OD2    | 3.105        |
| 4GMT   | I_LYS_205 | NZ     | I_ASP_207 | OD1    | 3.730        |

Table 516: 4GMT-specific salt bridging networks analysis. In this table, a PDB file is specified with a four-letter PDB ID, except that the names of the PDB files corresponding to the single NMR structural model split from the NMR ensemble is specified with a four-letter PDB ID in addition to a hyphen followed by the single NMR structural model numeric ID, the residue naming scheme is **Chain ID\_residue name\_residue number**,  $\angle ADH$  represents the angle formed by acceptor (A), donor (D) and hydrogen (H) ( $\angle ADH$ ).

| PDB ID | Residue A | Atom A | Residue B | Atom B | Distance (Å) |
|--------|-----------|--------|-----------|--------|--------------|
| 4GXU   | A_LYS_    | NZ     | F_GLU_    | OE1    | 3.529        |
| 4GXU   | A_LYS_    | NZ     | F_GLU_    | OE2    | 3.469        |
| 4GXU   | A_LYS_53  | NZ     | A_ASP_276 | OD1    | 3.005        |
| 4GXU   | A_LYS_    | NZ     | A_GLU_75  | OE1    | 2.922        |
| 4GXU   | A_ARG_109 | NH1    | A_GLU_89  | OE1    | 2.638        |
| 4GXU   | A_ARG_109 | NH1    | A_GLU_89  | OE2    | 3.793        |
| 4GXU   | A_ARG_109 | NH2    | A_GLU_89  | OE1    | 3.235        |
| 4GXU   | A_ARG_109 | NH2    | A_GLU_89  | OE2    | 3.010        |
| 4GXU   | A_ARG_109 | NH2    | B_GLU_69  | OE1    | 3.987        |
| 4GXU   | A_ARG_109 | NH2    | B_GLU_69  | OE2    | 3.286        |
| 4GXU   | A_ARG_149 | NH2    | A_ASP_77  | OD1    | 3.644        |
| 4GXU   | A_ARG_149 | NH2    | A_ASP_77  | OD2    | 2.613        |
| 4GXU   | A_LYS_163 | NZ     | A_GLU_246 | OE1    | 2.988        |
| 4GXU   | A_LYS_163 | NZ     | A_GLU_246 | OE2    | 3.949        |
| 4GXU   | A_LYS_174 | NZ     | A_GLU_119 | OE1    | 2.547        |
| 4GXU   | A_LYS_174 | NZ     | A_GLU_119 | OE2    | 3.226        |
| 4GXU   | A_LYS_208 | NZ     | A_GLU_238 | OE1    | 3.242        |
| 4GXU   | A_LYS_208 | NZ     | A_GLU_238 | OE2    | 3.214        |
| 4GXU   | A_ARG_262 | NH2    | A_GLU_175 | OE1    | 3.438        |
| 4GXU   | A_ARG_262 | NH2    | A_GLU_175 | OE2    | 2.905        |
| 4GXU   | A_ARG_    | NH1    | B_ASP_    | OD1    | 2.648        |
| 4GXU   | A_ARG_    | NH2    | B_ASP_    | OD1    | 2.545        |
| 4GXU   | A_ARG_    | NH1    | A_GLU_    | OE2    | 3.223        |
| 4GXU   | A_ARG_    | NH2    | A_GLU_    | OE2    | 3.931        |
| 4GXU   | B_LYS_    | NZ     | B_GLU_    | OE1    | 2.602        |
| 4GXU   | B_LYS_58  | NZ     | B_GLU_57  | OE1    | 3.935        |
| 4GXU   | B_LYS_58  | NZ     | D_GLU_97  | OE1    | 3.748        |
| 4GXU   | B_LYS_68  | NZ     | A_GLU_110 | OE2    | 3.492        |
| 4GXU   | B_ARG_76  | NH1    | F_GLU_74  | OE1    | 3.015        |
| 4GXU   | B_ARG_76  | NH1    | F_GLU_74  | OE2    | 2.935        |
| 4GXU   | B_ARG_76  | NH2    | E_GLU_107 | OE2    | 3.559        |
| 4GXU   | B_ARG_76  | NH2    | F_GLU_74  | OE2    | 2.547        |
| 4GXU   | B_LYS_83  | NZ     | F_ASP_85  | OD1    | 3.431        |
| 4GXU   | B_LYS_83  | NZ     | F_ASP_85  | OD2    | 3.614        |
| 4GXU   | B_ARG_    | NH2    | D_ASP_    | OD2    | 3.432        |
| 4GXU   | B_ARG_    | NH1    | F_GLU_    | OE1    | 3.168        |
| 4GXU   | B_ARG_    | NH2    | F_GLU_    | OE1    | 3.085        |
| 4GXU   | B_ARG_    | NH2    | F_GLU_    | OE2    | 3.110        |
| 4GXU   | B_LYS_    | NZ     | B_GLU_    | OE1    | 3.038        |
| 4GXU   | B_LYS_    | NZ     | B_GLU_    | OE2    | 3.952        |
| 4GXU   | B_ARG_    | NH1    | B_GLU_    | OE2    | 2.823        |
| 4GXU   | B_LYS_    | NZ     | B_GLU_    | OE1    | 3.999        |
| 4GXU   | C_LYS_32  | NZ     | B_GLU_57  | OE1    | 3.823        |
| 4GXU   | C_LYS_32  | NZ     | B_GLU_57  | OE2    | 3.681        |
| 4GXU   | C_LYS_    | NZ     | C_ASP_276 | OD1    | 3.258        |
| 4GXU   | C_LYS_63  | NZ     | C_GLU_75  | OE1    | 3.089        |
| 4GXU   | C_ARG_109 | NH1    | C_GLU_89  | OE1    | 2.661        |
| 4GXU   | C_ARG_109 | NH1    | C_GLU_89  | OE2    | 3.514        |
| 4GXU   | C_ARG_109 | NH2    | C_GLU_89  | OE1    | 3.287        |
| 4GXU   | C_ARG_109 | NH2    | C_GLU_89  | OE2    | 2.852        |
| 4GXU   | C_ARG_109 | NH2    | D_GLU_69  | OE1    | 3.507        |
| 4GXU   | C_ARG_109 | NH2    | D_GLU_69  | OE2    | 3.205        |
| 4GXU   | C_ARG_149 | NH2    | C_ASP_77  | OD1    | 3.970        |
| 4GXU   | C_ARG_149 | NH2    | C_ASP_77  | OD2    | 3.229        |
| 4GXU   | C_LYS_163 | NZ     | C_GLU_246 | OE1    | 3.356        |
| 4GXU   | C_LYS_    | NZ     | C_GLU_119 | OE1    | 2.755        |
| 4GXU   | C_LYS_    | NZ     | C_GLU_119 | OE2    | 2.730        |

|      |           |     |           |     |       |
|------|-----------|-----|-----------|-----|-------|
| 4GXU | C_LYS_208 | NZ  | C_GLU_238 | OE1 | 3.337 |
| 4GXU | C_LYS_208 | NZ  | C_GLU_238 | OE2 | 3.528 |
| 4GXU | C_LYS_    | NZ  | C_GLU_    | OE2 | 3.454 |
| 4GXU | C_ARG_310 | NH1 | D_ASP_90  | OD1 | 3.385 |
| 4GXU | C_ARG_310 | NH2 | D_ASP_90  | OD1 | 3.336 |
| 4GXU | C_ARG_321 | NH1 | C_GLU_31  | OE2 | 3.152 |
| 4GXU | C_ARG_321 | NH2 | C_GLU_31  | OE2 | 3.675 |
| 4GXU | D_HIS_    | NE2 | D_ASP_    | OD1 | 3.647 |
| 4GXU | D_LYS_    | NZ  | D_GLU_    | OE1 | 2.571 |
| 4GXU | D_LYS_    | NZ  | D_GLU_    | OE1 | 3.860 |
| 4GXU | D_LYS_68  | NZ  | C_GLU_110 | OE2 | 3.981 |
| 4GXU | D_ARG_76  | NH1 | B_GLU_74  | OE1 | 2.948 |
| 4GXU | D_ARG_76  | NH1 | B_GLU_74  | OE2 | 3.453 |
| 4GXU | D_ARG_76  | NH2 | A_GLU_107 | OE2 | 3.465 |
| 4GXU | D_ARG_76  | NH2 | B_GLU_74  | OE1 | 3.835 |
| 4GXU | D_ARG_76  | NH2 | B_GLU_74  | OE2 | 2.916 |
| 4GXU | D_LYS_83  | NZ  | B_ASP_85  | OD1 | 3.057 |
| 4GXU | D_LYS_83  | NZ  | B_ASP_85  | OD2 | 3.527 |
| 4GXU | D_ARG_    | NH2 | F_ASP_    | OD2 | 3.392 |
| 4GXU | D_ARG_    | NH1 | B_GLU_    | OE1 | 2.743 |
| 4GXU | D_ARG_    | NH1 | B_GLU_    | OE2 | 3.931 |
| 4GXU | D_ARG_    | NH2 | B_GLU_    | OE1 | 2.897 |
| 4GXU | D_ARG_    | NH2 | B_GLU_    | OE2 | 2.579 |
| 4GXU | D_ARG_    | NH2 | D_GLU_    | OE2 | 3.558 |
| 4GXU | D_LYS_    | NZ  | D_GLU_    | OE1 | 3.191 |
| 4GXU | D_LYS_    | NZ  | D_GLU_    | OE2 | 3.786 |
| 4GXU | D_ARG_    | NH1 | D_GLU_    | OE2 | 2.518 |
| 4GXU | D_LYS_    | NZ  | D_GLU_    | OE1 | 3.949 |
| 4GXU | E_LYS_    | NZ  | D_GLU_    | OE1 | 3.848 |
| 4GXU | E_LYS_    | NZ  | D_GLU_    | OE2 | 3.549 |
| 4GXU | E_LYS_    | NZ  | E_ASP_    | OD1 | 3.280 |
| 4GXU | E_LYS_    | NZ  | E_GLU_    | OE1 | 3.829 |
| 4GXU | E_LYS_    | NZ  | E_GLU_    | OE1 | 2.868 |
| 4GXU | E_ARG_109 | NH1 | E_GLU_89  | OE1 | 2.836 |
| 4GXU | E_ARG_109 | NH1 | E_GLU_89  | OE2 | 3.830 |
| 4GXU | E_ARG_109 | NH2 | E_GLU_89  | OE1 | 3.271 |
| 4GXU | E_ARG_109 | NH2 | E_GLU_89  | OE2 | 2.995 |
| 4GXU | E_ARG_109 | NH2 | F_GLU_69  | OE1 | 3.819 |
| 4GXU | E_ARG_109 | NH2 | F_GLU_69  | OE2 | 3.459 |
| 4GXU | E_ARG_149 | NH2 | E_ASP_77  | OD2 | 3.169 |
| 4GXU | E_LYS_163 | NZ  | E_GLU_246 | OE1 | 3.757 |
| 4GXU | E_LYS_    | NZ  | E_GLU_    | OE1 | 2.406 |
| 4GXU | E_LYS_    | NZ  | E_GLU_    | OE2 | 3.375 |
| 4GXU | E_LYS_208 | NZ  | E_GLU_    | OE1 | 3.387 |
| 4GXU | E_LYS_208 | NZ  | E_GLU_238 | OE2 | 3.285 |
| 4GXU | E_ARG_262 | NH2 | E_GLU_    | OE1 | 3.936 |
| 4GXU | E_ARG_262 | NH2 | E_GLU_    | OE2 | 3.458 |
| 4GXU | E_LYS_    | NZ  | E_GLU_    | OE2 | 3.797 |
| 4GXU | E_ARG_310 | NH1 | F_ASP_90  | OD1 | 2.704 |
| 4GXU | E_ARG_310 | NH2 | F_ASP_90  | OD1 | 2.770 |
| 4GXU | E_ARG_    | NH1 | E_GLU_    | OE1 | 3.512 |
| 4GXU | E_ARG_    | NH1 | E_GLU_    | OE2 | 2.851 |
| 4GXU | E_ARG_    | NH2 | E_GLU_    | OE2 | 3.048 |
| 4GXU | F_LYS_    | NZ  | F_GLU_    | OE1 | 2.531 |
| 4GXU | F_LYS_    | NZ  | B_GLU_    | OE1 | 3.893 |
| 4GXU | F_LYS_68  | NZ  | E_GLU_110 | OE2 | 3.968 |
| 4GXU | F_ARG_76  | NH1 | D_GLU_74  | OE1 | 2.787 |
| 4GXU | F_ARG_76  | NH1 | D_GLU_74  | OE2 | 3.366 |



|      |          |     |           |     |       |
|------|----------|-----|-----------|-----|-------|
| 4GXU | F_ARG_76 | NH2 | C_GLU_107 | OE2 | 3.548 |
| 4GXU | F_ARG_76 | NH2 | D_GLU_74  | OE1 | 3.616 |
| 4GXU | F_ARG_76 | NH2 | D_GLU_74  | OE2 | 2.732 |
| 4GXU | F_LYS_83 | NZ  | D_ASP_85  | OD1 | 3.339 |
| 4GXU | F_LYS_83 | NZ  | D_ASP_85  | OD2 | 3.717 |
| 4GXU | F_ARG_   | NH2 | B_ASP_    | OD2 | 3.670 |
| 4GXU | F_ARG_   | NH1 | D_GLU_    | OE1 | 3.077 |
| 4GXU | F_ARG_   | NH2 | D_GLU_    | OE1 | 2.952 |
| 4GXU | F_ARG_   | NH2 | D_GLU_    | OE2 | 3.074 |
| 4GXU | F_ARG_   | NH2 | F_GLU_    | OE2 | 3.328 |
| 4GXU | F_LYS_   | NZ  | F_GLU_    | OE1 | 3.535 |
| 4GXU | F_LYS_   | NZ  | F_GLU_    | OE2 | 3.712 |
| 4GXU | F_ARG_   | NH1 | F_GLU_    | OE2 | 2.854 |
| 4GXU | G_LYS_   | NZ  | J_GLU_    | OE1 | 3.601 |
| 4GXU | G_LYS_   | NZ  | J_GLU_    | OE2 | 3.403 |
| 4GXU | G_LYS_   | NZ  | G_ASP_    | OD1 | 3.005 |
| 4GXU | G_LYS_   | NZ  | G_GLU_    | OE1 | 2.980 |
| 4GXU | G_ARG_   | NH1 | G_GLU_    | OE1 | 2.812 |
| 4GXU | G_ARG_   | NH1 | G_GLU_    | OE2 | 3.396 |
| 4GXU | G_ARG_   | NH2 | G_GLU_    | OE1 | 3.672 |
| 4GXU | G_ARG_   | NH2 | G_GLU_    | OE2 | 2.896 |
| 4GXU | G_ARG_   | NH2 | H_GLU_    | OE2 | 3.183 |
| 4GXU | G_ARG_   | NH2 | G_ASP_    | OD1 | 3.470 |
| 4GXU | G_ARG_   | NH2 | G_ASP_    | OD2 | 2.671 |
| 4GXU | G_LYS_   | NZ  | G_GLU_    | OE1 | 3.089 |
| 4GXU | G_LYS_   | NZ  | G_GLU_    | OE2 | 3.833 |
| 4GXU | G_LYS_   | NZ  | G_GLU_    | OE1 | 2.593 |
| 4GXU | G_LYS_   | NZ  | G_GLU_    | OE2 | 3.863 |
| 4GXU | G_LYS_   | NZ  | G_GLU_    | OE1 | 3.478 |
| 4GXU | G_ARG_   | NH2 | G_GLU_    | OE1 | 3.819 |
| 4GXU | G_ARG_   | NH2 | G_GLU_    | OE2 | 3.300 |
| 4GXU | G_ARG_   | NH1 | H_ASP_    | OD1 | 2.337 |
| 4GXU | G_ARG_   | NH2 | H_ASP_    | OD1 | 2.900 |
| 4GXU | G_ARG_   | NH1 | G_ASP_    | OD1 | 3.664 |
| 4GXU | G_ARG_   | NH1 | G_GLU_    | OE1 | 3.532 |
| 4GXU | G_ARG_   | NH1 | G_GLU_    | OE2 | 3.002 |
| 4GXU | G_ARG_   | NH2 | G_GLU_    | OE2 | 3.072 |
| 4GXU | H_HIS_   | NE2 | H_ASP_    | OD1 | 3.881 |
| 4GXU | H_LYS_   | NZ  | H_GLU_    | OE1 | 2.920 |
| 4GXU | H_LYS_   | NZ  | L_GLU_    | OE1 | 3.639 |
| 4GXU | H_LYS_   | NZ  | G_GLU_    | OE2 | 3.438 |
| 4GXU | H_ARG_   | NH1 | J_GLU_    | OE1 | 2.612 |
| 4GXU | H_ARG_   | NH1 | J_GLU_    | OE2 | 3.374 |
| 4GXU | H_ARG_   | NH2 | L_GLU_    | OE2 | 3.506 |
| 4GXU | H_ARG_   | NH2 | J_GLU_    | OE1 | 3.326 |
| 4GXU | H_ARG_   | NH2 | J_GLU_    | OE2 | 2.517 |
| 4GXU | H_LYS_   | NZ  | J_ASP_    | OD1 | 2.938 |
| 4GXU | H_LYS_   | NZ  | J_ASP_    | OD2 | 3.368 |
| 4GXU | H_ARG_   | NH2 | L_ASP_    | OD2 | 3.212 |
| 4GXU | H_ARG_   | NH1 | J_GLU_    | OE1 | 3.044 |
| 4GXU | H_ARG_   | NH2 | J_GLU_    | OE1 | 2.714 |
| 4GXU | H_ARG_   | NH2 | J_GLU_    | OE2 | 3.067 |
| 4GXU | H_LYS_   | NZ  | H_GLU_    | OE1 | 3.090 |
| 4GXU | H_ARG_   | NH1 | H_GLU_    | OE2 | 2.508 |
| 4GXU | H_LYS_   | NZ  | H_GLU_    | OE1 | 3.808 |
| 4GXU | H_LYS_   | NZ  | H_GLU_    | OE2 | 3.001 |
| 4GXU | I_LYS_   | NZ  | L_GLU_    | OE1 | 3.747 |
| 4GXU | I_LYS_   | NZ  | L_GLU_    | OE2 | 3.353 |

|      |        |     |        |     |       |
|------|--------|-----|--------|-----|-------|
| 4GXU | I.LYS_ | NZ  | I.ASP_ | OD1 | 3.170 |
| 4GXU | I.LYS_ | NZ  | I.GLU_ | OE1 | 2.809 |
| 4GXU | I.ARG_ | NH1 | I.GLU_ | OE1 | 2.622 |
| 4GXU | I.ARG_ | NH1 | I.GLU_ | OE2 | 3.326 |
| 4GXU | I.ARG_ | NH2 | I.GLU_ | OE1 | 3.446 |
| 4GXU | I.ARG_ | NH2 | I.GLU_ | OE2 | 2.752 |
| 4GXU | I.ARG_ | NH2 | J.GLU_ | OE1 | 3.762 |
| 4GXU | I.ARG_ | NH2 | J.GLU_ | OE2 | 2.924 |
| 4GXU | I.ARG_ | NH2 | I.ASP_ | OD1 | 3.969 |
| 4GXU | I.ARG_ | NH2 | I.ASP_ | OD2 | 2.932 |
| 4GXU | I.LYS_ | NZ  | I.GLU_ | OE1 | 3.315 |
| 4GXU | I.LYS_ | NZ  | I.GLU_ | OE2 | 3.981 |
| 4GXU | I.LYS_ | NZ  | I.GLU_ | OE1 | 2.410 |
| 4GXU | I.LYS_ | NZ  | I.GLU_ | OE2 | 3.536 |
| 4GXU | I.LYS_ | NZ  | I.GLU_ | OE1 | 3.215 |
| 4GXU | I.ARG_ | NH2 | I.GLU_ | OE2 | 3.984 |
| 4GXU | I.LYS_ | NZ  | I.GLU_ | OE1 | 3.949 |
| 4GXU | I.LYS_ | NZ  | I.GLU_ | OE2 | 3.673 |
| 4GXU | I.ARG_ | NH1 | J.ASP_ | OD1 | 2.388 |
| 4GXU | I.ARG_ | NH2 | J.ASP_ | OD1 | 2.649 |
| 4GXU | I.ARG_ | NH1 | I.GLU_ | OE1 | 3.395 |
| 4GXU | I.ARG_ | NH1 | I.GLU_ | OE2 | 2.991 |
| 4GXU | I.ARG_ | NH2 | I.GLU_ | OE2 | 3.022 |
| 4GXU | J.HIS_ | NE2 | J.ASP_ | OD1 | 3.723 |
| 4GXU | J.LYS_ | NZ  | J.GLU_ | OE1 | 2.696 |
| 4GXU | J.LYS_ | NZ  | H.GLU_ | OE1 | 3.949 |
| 4GXU | J.LYS_ | NZ  | I.GLU_ | OE2 | 3.674 |
| 4GXU | J.ARG_ | NH1 | L.GLU_ | OE1 | 2.912 |
| 4GXU | J.ARG_ | NH1 | L.GLU_ | OE2 | 3.322 |
| 4GXU | J.ARG_ | NH2 | K.GLU_ | OE2 | 3.542 |
| 4GXU | J.ARG_ | NH2 | L.GLU_ | OE1 | 3.621 |
| 4GXU | J.ARG_ | NH2 | L.GLU_ | OE2 | 2.520 |
| 4GXU | J.LYS_ | NZ  | L.ASP_ | OD1 | 3.139 |
| 4GXU | J.LYS_ | NZ  | L.ASP_ | OD2 | 3.566 |
| 4GXU | J.ARG_ | NH2 | H.ASP_ | OD2 | 3.270 |
| 4GXU | J.ARG_ | NH1 | L.GLU_ | OE1 | 3.377 |
| 4GXU | J.ARG_ | NH2 | J.GLU_ | OE2 | 3.805 |
| 4GXU | J.ARG_ | NH2 | L.GLU_ | OE1 | 2.504 |
| 4GXU | J.ARG_ | NH2 | L.GLU_ | OE2 | 3.208 |
| 4GXU | J.LYS_ | NZ  | J.GLU_ | OE1 | 3.200 |
| 4GXU | J.LYS_ | NZ  | J.GLU_ | OE2 | 3.922 |
| 4GXU | J.ARG_ | NH1 | J.GLU_ | OE2 | 2.706 |
| 4GXU | J.LYS_ | NZ  | J.GLU_ | OE1 | 3.514 |
| 4GXU | J.LYS_ | NZ  | J.GLU_ | OE2 | 3.322 |
| 4GXU | K.LYS_ | NZ  | H.GLU_ | OE2 | 3.068 |
| 4GXU | K.LYS_ | NZ  | K.ASP_ | OD1 | 3.466 |
| 4GXU | K.LYS_ | NZ  | K.GLU_ | OE1 | 2.616 |
| 4GXU | K.ARG_ | NH1 | K.GLU_ | OE1 | 2.847 |
| 4GXU | K.ARG_ | NH1 | K.GLU_ | OE2 | 3.789 |
| 4GXU | K.ARG_ | NH2 | K.GLU_ | OE1 | 3.337 |
| 4GXU | K.ARG_ | NH2 | K.GLU_ | OE2 | 2.934 |
| 4GXU | K.ARG_ | NH2 | L.GLU_ | OE1 | 3.835 |
| 4GXU | K.ARG_ | NH2 | L.GLU_ | OE2 | 3.159 |
| 4GXU | K.ARG_ | NH2 | K.ASP_ | OD1 | 3.461 |
| 4GXU | K.ARG_ | NH2 | K.ASP_ | OD2 | 2.584 |
| 4GXU | K.LYS_ | NZ  | K.GLU_ | OE1 | 2.688 |
| 4GXU | K.LYS_ | NZ  | K.GLU_ | OE2 | 3.997 |
| 4GXU | K.LYS_ | NZ  | K.GLU_ | OE1 | 3.262 |

|      |           |     |           |     |       |
|------|-----------|-----|-----------|-----|-------|
| 4GXU | K_LYS_    | NZ  | K_GLU_    | OE2 | 2.919 |
| 4GXU | K_ARG_    | NH2 | K_GLU_    | OE1 | 3.557 |
| 4GXU | K_ARG_    | NH2 | K_GLU_    | OE2 | 3.243 |
| 4GXU | K_ARG_    | NH1 | L_ASP_    | OD1 | 2.447 |
| 4GXU | K_ARG_    | NH2 | L_ASP_    | OD1 | 2.754 |
| 4GXU | K_ARG_    | NH1 | K_GLU_    | OE1 | 3.546 |
| 4GXU | K_ARG_    | NH1 | K_GLU_    | OE2 | 2.807 |
| 4GXU | K_ARG_    | NH2 | K_GLU_    | OE2 | 3.397 |
| 4GXU | L_LYS_    | NZ  | L_GLU_    | OE1 | 2.769 |
| 4GXU | L_LYS_    | NZ  | J_GLU_    | OE1 | 3.674 |
| 4GXU | L_LYS_    | NZ  | L_GLU_    | OE1 | 3.962 |
| 4GXU | L_LYS_    | NZ  | K_GLU_    | OE2 | 3.305 |
| 4GXU | L_ARG_    | NH1 | H_GLU_    | OE1 | 2.958 |
| 4GXU | L_ARG_    | NH1 | H_GLU_    | OE2 | 3.138 |
| 4GXU | L_ARG_    | NH2 | G_GLU_    | OE2 | 3.886 |
| 4GXU | L_ARG_    | NH2 | H_GLU_    | OE1 | 3.887 |
| 4GXU | L_ARG_    | NH2 | H_GLU_    | OE2 | 2.595 |
| 4GXU | L_LYS_    | NZ  | H_ASP_    | OD1 | 2.732 |
| 4GXU | L_LYS_    | NZ  | H_ASP_    | OD2 | 3.190 |
| 4GXU | L_ARG_    | NH2 | J_ASP_    | OD2 | 3.583 |
| 4GXU | L_ARG_    | NH1 | H_GLU_    | OE1 | 3.044 |
| 4GXU | L_ARG_    | NH2 | H_GLU_    | OE1 | 2.477 |
| 4GXU | L_ARG_    | NH2 | H_GLU_    | OE2 | 3.036 |
| 4GXU | L_ARG_    | NH2 | L_GLU_    | OE2 | 3.856 |
| 4GXU | L_LYS_    | NZ  | L_GLU_    | OE1 | 2.914 |
| 4GXU | L_LYS_    | NZ  | L_GLU_    | OE2 | 3.773 |
| 4GXU | L_LYS_    | NZ  | L_GLU_    | OE2 | 3.996 |
| 4GXU | L_LYS_    | NZ  | L_GLU_    | OE1 | 3.816 |
| 4GXU | L_ARG_    | NH1 | L_GLU_    | OE1 | 3.472 |
| 4GXU | L_LYS_    | NZ  | L_GLU_    | OE1 | 3.566 |
| 4GXU | M_ARG_    | NH2 | H_GLU_    | OE2 | 3.356 |
| 4GXU | M_HIS_35  | NE2 | M_GLU_95  | OE1 | 2.618 |
| 4GXU | M_ARG_    | NH1 | M_ASP_    | OD1 | 2.787 |
| 4GXU | M_ARG_    | NH2 | M_GLU_46  | OE1 | 3.155 |
| 4GXU | M_ARG_    | NH2 | M_GLU_46  | OE2 | 3.384 |
| 4GXU | M_ARG_    | NH2 | M_ASP_    | OD1 | 3.807 |
| 4GXU | M_ARG_    | NH1 | M_ASP_    | OD1 | 2.866 |
| 4GXU | M_ARG_    | NH1 | M_ASP_    | OD1 | 3.767 |
| 4GXU | M_ARG_    | NH1 | M_ASP_    | OD2 | 2.685 |
| 4GXU | M_ARG_    | NH2 | M_ASP_    | OD1 | 3.010 |
| 4GXU | M_ARG_    | NH2 | M_ASP_    | OD2 | 3.446 |
| 4GXU | M_LYS_    | NZ  | N_GLU_    | OE2 | 2.851 |
| 4GXU | M_LYS_    | NZ  | N_GLU_    | OE1 | 3.371 |
| 4GXU | M_ARG_210 | NH1 | M_GLU_212 | OE2 | 3.375 |
| 4GXU | N_ARG_61  | NH1 | N_ASP_82  | OD1 | 3.079 |
| 4GXU | N_ARG_61  | NH1 | N_ASP_82  | OD2 | 3.905 |
| 4GXU | N_ARG_61  | NH2 | N_ASP_82  | OD1 | 3.806 |
| 4GXU | N_ARG_61  | NH2 | N_ASP_82  | OD2 | 3.473 |
| 4GXU | N_HIS_95C | NE2 | N_ASP_92  | OD2 | 3.978 |
| 4GXU | N_LYS_149 | NZ  | N_GLU_203 | OE1 | 3.458 |
| 4GXU | N_LYS_149 | NZ  | N_GLU_203 | OE2 | 3.365 |
| 4GXU | N_LYS_    | NZ  | N_GLU_    | OE2 | 3.800 |
| 4GXU | N_ARG_189 | NH2 | N_ASP_151 | OD2 | 3.992 |
| 4GXU | O_HIS_35  | NE2 | O_GLU_95  | OE1 | 2.632 |
| 4GXU | O_ARG_38  | NH1 | O_ASP_86  | OD1 | 2.799 |
| 4GXU | O_ARG_38  | NH2 | O_GLU_46  | OE1 | 3.065 |
| 4GXU | O_ARG_38  | NH2 | O_GLU_46  | OE2 | 3.637 |
| 4GXU | O_ARG_38  | NH2 | O_ASP_86  | OD1 | 3.453 |

|      |           |     |           |     |       |
|------|-----------|-----|-----------|-----|-------|
| 4GXU | O_ARG_55  | NH1 | O_ASP_53  | OD1 | 3.043 |
| 4GXU | O_ARG_66  | NH1 | O_ASP_86  | OD2 | 2.898 |
| 4GXU | O_ARG_66  | NH2 | O_ASP_86  | OD1 | 3.023 |
| 4GXU | O_ARG_66  | NH2 | O_ASP_86  | OD2 | 2.955 |
| 4GXU | P_ARG_61  | NH1 | P_ASP_82  | OD1 | 2.845 |
| 4GXU | P_ARG_61  | NH2 | P_ASP_82  | OD1 | 3.213 |
| 4GXU | P_ARG_61  | NH2 | P_ASP_82  | OD2 | 3.256 |
| 4GXU | P_HIS_95C | NE2 | P_ASP_92  | OD2 | 3.801 |
| 4GXU | Q_HIS_35  | NE2 | Q_GLU_95  | OE1 | 2.629 |
| 4GXU | Q_ARG_38  | NH1 | Q_ASP_    | OD1 | 2.771 |
| 4GXU | Q_ARG_38  | NH2 | Q_GLU_46  | OE1 | 3.023 |
| 4GXU | Q_ARG_38  | NH2 | Q_GLU_46  | OE2 | 3.310 |
| 4GXU | Q_ARG_38  | NH2 | Q_ASP_    | OD1 | 3.767 |
| 4GXU | Q_ARG_    | NH1 | Q_ASP_53  | OD1 | 2.937 |
| 4GXU | Q_ARG_    | NH1 | Q_ASP_    | OD2 | 3.290 |
| 4GXU | Q_ARG_    | NH2 | Q_ASP_    | OD1 | 3.283 |
| 4GXU | Q_ARG_    | NH2 | Q_ASP_    | OD2 | 3.512 |
| 4GXU | Q_LYS_143 | NZ  | R_GLU_124 | OE2 | 3.025 |
| 4GXU | Q_LYS_209 | NZ  | R_GLU_123 | OE1 | 3.619 |
| 4GXU | Q_LYS_209 | NZ  | R_GLU_123 | OE2 | 3.564 |
| 4GXU | Q_ARG_210 | NH1 | Q_GLU_212 | OE2 | 3.790 |
| 4GXU | R_ARG_61  | NH1 | R_ASP_82  | OD1 | 3.111 |
| 4GXU | R_ARG_61  | NH2 | R_ASP_82  | OD1 | 3.457 |
| 4GXU | R_ARG_61  | NH2 | R_ASP_82  | OD2 | 3.282 |
| 4GXU | R_HIS_95C | NE2 | R_ASP_92  | OD2 | 3.471 |
| 4GXU | R_LYS_103 | NZ  | R_GLU_83  | OE1 | 3.281 |
| 4GXU | R_LYS_149 | NZ  | R_GLU_203 | OE1 | 3.940 |
| 4GXU | R_LYS_149 | NZ  | R_GLU_203 | OE2 | 3.587 |
| 4GXU | R_LYS_166 | NZ  | R_GLU_83  | OE1 | 3.059 |
| 4GXU | R_ARG_189 | NH2 | R_ASP_151 | OD2 | 3.874 |
| 4GXU | S_HIS_    | NE2 | S_GLU_    | OE1 | 2.529 |
| 4GXU | S_ARG_    | NH1 | S_ASP_    | OD1 | 2.740 |
| 4GXU | S_ARG_    | NH2 | S_GLU_    | OE1 | 3.285 |
| 4GXU | S_ARG_    | NH2 | S_GLU_    | OE2 | 3.746 |
| 4GXU | S_ARG_    | NH2 | S_ASP_    | OD1 | 2.949 |
| 4GXU | S_ARG_    | NH1 | S_ASP_    | OD1 | 3.061 |
| 4GXU | S_ARG_    | NH1 | S_ASP_    | OD2 | 3.313 |
| 4GXU | S_ARG_    | NH2 | S_ASP_    | OD1 | 3.673 |
| 4GXU | S_ARG_    | NH2 | S_ASP_    | OD2 | 3.715 |
| 4GXU | T_ARG_    | NH1 | T_ASP_    | OD1 | 3.011 |
| 4GXU | T_ARG_    | NH1 | T_ASP_    | OD2 | 3.957 |
| 4GXU | T_ARG_    | NH2 | T_GLU_    | OE2 | 3.945 |
| 4GXU | T_ARG_    | NH2 | T_ASP_    | OD1 | 3.986 |
| 4GXU | T_ARG_    | NH2 | T_ASP_    | OD2 | 3.749 |
| 4GXU | T_HIS_    | NE2 | T_ASP_    | OD1 | 3.982 |
| 4GXU | T_HIS_    | NE2 | T_ASP_    | OD2 | 3.480 |
| 4GXU | U_HIS_    | NE2 | U_GLU_    | OE1 | 2.653 |
| 4GXU | U_ARG_    | NH1 | U_ASP_    | OD1 | 2.802 |
| 4GXU | U_ARG_    | NH2 | U_GLU_    | OE1 | 3.190 |
| 4GXU | U_ARG_    | NH2 | U_GLU_    | OE2 | 3.845 |
| 4GXU | U_ARG_    | NH2 | U_ASP_    | OD1 | 3.446 |
| 4GXU | U_ARG_    | NH1 | U_ASP_    | OD1 | 2.649 |
| 4GXU | U_ARG_    | NH1 | U_ASP_    | OD1 | 3.706 |
| 4GXU | U_ARG_    | NH1 | U_ASP_    | OD2 | 2.832 |
| 4GXU | U_ARG_    | NH2 | U_ASP_    | OD1 | 3.260 |
| 4GXU | U_ARG_    | NH2 | U_ASP_    | OD2 | 3.829 |
| 4GXU | V_ARG_    | NH1 | V_ASP_    | OD1 | 2.994 |
| 4GXU | V_ARG_    | NH1 | V_ASP_    | OD2 | 3.811 |

|      |        |     |        |     |       |
|------|--------|-----|--------|-----|-------|
| 4GXU | V_ARG_ | NH2 | V_GLU_ | OE2 | 3.535 |
| 4GXU | V_ARG_ | NH2 | V_ASP_ | OD1 | 3.986 |
| 4GXU | V_ARG_ | NH2 | V_ASP_ | OD2 | 3.677 |
| 4GXU | V_HIS_ | NE2 | V_ASP_ | OD2 | 3.617 |
| 4GXU | V_LYS_ | NZ  | V_GLU_ | OE1 | 3.869 |
| 4GXU | W_HIS_ | NE2 | W_GLU_ | OE1 | 2.707 |
| 4GXU | W_ARG_ | NH1 | W_ASP_ | OD1 | 3.050 |
| 4GXU | W_ARG_ | NH2 | W_GLU_ | OE1 | 2.832 |
| 4GXU | W_ARG_ | NH2 | W_GLU_ | OE2 | 3.553 |
| 4GXU | W_ARG_ | NH2 | W_ASP_ | OD1 | 3.987 |
| 4GXU | W_ARG_ | NH1 | W_ASP_ | OD1 | 3.089 |
| 4GXU | W_ARG_ | NH1 | W_ASP_ | OD2 | 3.168 |
| 4GXU | W_ARG_ | NH2 | W_ASP_ | OD1 | 3.409 |
| 4GXU | W_ARG_ | NH2 | W_ASP_ | OD2 | 3.720 |
| 4GXU | X_ARG_ | NH1 | X_ASP_ | OD1 | 2.797 |
| 4GXU | X_ARG_ | NH1 | X_ASP_ | OD2 | 3.814 |
| 4GXU | X_ARG_ | NH2 | X_GLU_ | OE2 | 3.994 |
| 4GXU | X_ARG_ | NH2 | X_ASP_ | OD1 | 3.445 |
| 4GXU | X_ARG_ | NH2 | X_ASP_ | OD2 | 3.232 |
| 4GXU | X_HIS_ | NE2 | X_ASP_ | OD2 | 3.599 |
| 4GXU | X_LYS_ | NZ  | X_GLU_ | OE1 | 3.798 |

Table 517: 4GXU-specific salt bridging networks analysis. In this table, a PDB file is specified with a four-letter PDB ID, except that the names of the PDB files corresponding to the single NMR structural model split from the NMR ensemble is specified with a four-letter PDB ID in addition to a hyphen followed by the single NMR structural model numeric ID, the residue naming scheme is **Chain ID\_residue name\_residue number**,  $\angle ADH$  represents the angle formed by acceptor (A), donor (D) and hydrogen (H) ( $\angle ADH$ ).

| PDB ID | Residue A  | Atom A | Residue B  | Atom B | Distance (Å) |
|--------|------------|--------|------------|--------|--------------|
| 4GXV   | H_HIS_35   | NE2    | H_GLU_95   | OE1    | 2.785        |
| 4GXV   | H_ARG_38   | NH1    | H_ASP_86   | OD1    | 3.019        |
| 4GXV   | H_ARG_38   | NH2    | H_GLU_46   | OE1    | 2.905        |
| 4GXV   | H_LYS_64   | NZ     | H_ASP_61   | OD2    | 3.173        |
| 4GXV   | H_ARG_66   | NH1    | H_ASP_86   | OD1    | 3.703        |
| 4GXV   | H_ARG_66   | NH1    | H_ASP_86   | OD2    | 2.746        |
| 4GXV   | H_ARG_66   | NH2    | H_ASP_86   | OD1    | 2.952        |
| 4GXV   | H_ARG_66   | NH2    | H_ASP_86   | OD2    | 3.509        |
| 4GXV   | H_ARG_83   | NH2    | H_GLU_85   | OE2    | 3.727        |
| 4GXV   | H_HIS_100C | ND1    | H_ASP_100B | OD1    | 3.205        |
| 4GXV   | H_LYS_143  | NZ     | L_GLU_124  | OE2    | 2.866        |
| 4GXV   | H_LYS_209  | NZ     | L_GLU_123  | OE1    | 3.472        |
| 4GXV   | H_LYS_209  | NZ     | L_GLU_123  | OE2    | 2.731        |
| 4GXV   | L_ARG_61   | NH2    | L_GLU_81   | OE2    | 3.689        |
| 4GXV   | L_ARG_61   | NH2    | L_ASP_82   | OD1    | 3.502        |
| 4GXV   | L_ARG_61   | NH2    | L_ASP_82   | OD2    | 2.802        |
| 4GXV   | L_HIS_35   | NE2    | L_GLU_95   | OE1    | 2.829        |
| 4GXV   | L_ARG_38   | NH1    | L_ASP_86   | OD1    | 2.848        |
| 4GXV   | L_ARG_38   | NH2    | L_GLU_46   | OE1    | 2.855        |
| 4GXV   | L_ARG_38   | NH2    | L_GLU_46   | OE2    | 3.582        |
| 4GXV   | L_ARG_38   | NH2    | L_ASP_86   | OD1    | 3.824        |
| 4GXV   | L_ARG_55   | NH1    | L_ASP_53   | OD1    | 3.307        |
| 4GXV   | L_ARG_66   | NH1    | L_ASP_86   | OD1    | 3.857        |
| 4GXV   | L_ARG_66   | NH1    | L_ASP_86   | OD2    | 2.776        |
| 4GXV   | L_ARG_66   | NH2    | L_ASP_86   | OD1    | 2.973        |
| 4GXV   | L_ARG_66   | NH2    | L_ASP_86   | OD2    | 3.413        |
| 4GXV   | L_LYS_143  | NZ     | M_GLU_124  | OE2    | 2.455        |
| 4GXV   | L_LYS_209  | NZ     | M_GLU_123  | OE1    | 2.930        |
| 4GXV   | L_LYS_209  | NZ     | M_GLU_123  | OE2    | 3.487        |
| 4GXV   | L_ARG_210  | NH1    | L_GLU_212  | OE2    | 3.879        |
| 4GXV   | M_ARG_61   | NH1    | M_ASP_82   | OD1    | 2.653        |
| 4GXV   | M_ARG_61   | NH1    | M_ASP_82   | OD2    | 3.622        |
| 4GXV   | M_ARG_61   | NH2    | M_ASP_82   | OD1    | 3.282        |
| 4GXV   | M_ARG_61   | NH2    | M_ASP_82   | OD2    | 2.922        |
| 4GXV   | M_HIS_95C  | NE2    | M_ASP_92   | OD2    | 3.598        |
| 4GXV   | M_LYS_149  | NZ     | M_GLU_203  | OE1    | 2.967        |
| 4GXV   | M_LYS_149  | NZ     | M_GLU_203  | OE2    | 3.317        |
| 4GXV   | M_LYS_186  | NZ     | M_GLU_183  | OE2    | 3.984        |

Table 518: 4GXV-specific salt bridging networks analysis. In this table, a PDB file is specified with a four-letter PDB ID, except that the names of the PDB files corresponding to the single NMR structural model split from the NMR ensemble is specified with a four-letter PDB ID in addition to a hyphen followed by the single NMR structural model numeric ID, the residue naming scheme is **Chain ID\_residue name\_residue number**,  $\angle ADH$  represents the angle formed by acceptor (A), donor (D) and hydrogen (H) ( $\angle ADH$ ).

| PDB ID | Residue A | Atom A | Residue B | Atom B | Distance (Å) |
|--------|-----------|--------|-----------|--------|--------------|
| 4GXX   | A_LYS_32  | NZ     | D_GLU_57  | OE1    | 3.386        |
| 4GXX   | A_LYS_53  | NZ     | A_ASP_276 | OD1    | 2.754        |
| 4GXX   | A_LYS_63  | NZ     | A_GLU_75  | OE1    | 2.652        |
| 4GXX   | A_ARG_109 | NH1    | A_GLU_89  | OE1    | 2.892        |
| 4GXX   | A_ARG_109 | NH1    | A_GLU_89  | OE2    | 3.475        |
| 4GXX   | A_ARG_109 | NH2    | A_GLU_89  | OE1    | 3.797        |
| 4GXX   | A_ARG_109 | NH2    | A_GLU_89  | OE2    | 3.059        |
| 4GXX   | A_ARG_109 | NH2    | B_GLU_69  | OE2    | 3.594        |
| 4GXX   | A_ARG_149 | NH2    | A_ASP_77  | OD1    | 3.790        |
| 4GXX   | A_ARG_149 | NH2    | A_ASP_77  | OD2    | 2.838        |
| 4GXX   | A_LYS_163 | NZ     | A_GLU_246 | OE1    | 3.535        |
| 4GXX   | A_LYS_163 | NZ     | A_GLU_246 | OE2    | 2.771        |
| 4GXX   | A_LYS_174 | NZ     | A_GLU_119 | OE1    | 2.872        |
| 4GXX   | A_LYS_174 | NZ     | A_GLU_119 | OE2    | 3.399        |
| 4GXX   | A_HIS_183 | NE2    | A_GLU_190 | OE2    | 3.881        |
| 4GXX   | A_ARG_262 | NH2    | A_GLU_175 | OE1    | 2.990        |
| 4GXX   | A_ARG_262 | NH2    | A_GLU_175 | OE2    | 3.463        |
| 4GXX   | A_LYS_280 | NZ     | A_GLU_304 | OE2    | 3.580        |
| 4GXX   | A_ARG_310 | NH1    | B_ASP_90  | OD1    | 2.488        |
| 4GXX   | A_ARG_310 | NH2    | B_ASP_90  | OD1    | 2.951        |
| 4GXX   | A_ARG_315 | NH1    | A_ASP_24  | OD1    | 3.593        |
| 4GXX   | A_ARG_315 | NH1    | A_ASP_24  | OD2    | 3.965        |
| 4GXX   | A_ARG_321 | NH1    | A_GLU_31  | OE1    | 3.882        |
| 4GXX   | A_ARG_321 | NH1    | A_GLU_31  | OE2    | 3.177        |
| 4GXX   | A_ARG_321 | NH2    | A_GLU_31  | OE2    | 3.764        |
| 4GXX   | B_LYS_51  | NZ     | B_GLU_103 | OE1    | 3.113        |
| 4GXX   | B_LYS_58  | NZ     | B_GLU_57  | OE1    | 3.239        |
| 4GXX   | B_LYS_58  | NZ     | F_GLU_97  | OE1    | 3.721        |
| 4GXX   | B_LYS_68  | NZ     | A_GLU_110 | OE2    | 2.734        |
| 4GXX   | B_ARG_76  | NH1    | D_GLU_74  | OE1    | 2.782        |
| 4GXX   | B_ARG_76  | NH1    | D_GLU_74  | OE2    | 3.511        |
| 4GXX   | B_ARG_76  | NH2    | C_GLU_107 | OE2    | 3.651        |
| 4GXX   | B_ARG_76  | NH2    | D_GLU_74  | OE1    | 3.625        |
| 4GXX   | B_ARG_76  | NH2    | D_GLU_74  | OE2    | 2.818        |
| 4GXX   | B_LYS_82  | NZ     | B_ASP_86  | OD1    | 3.639        |
| 4GXX   | B_LYS_82  | NZ     | B_ASP_86  | OD2    | 2.969        |
| 4GXX   | B_LYS_83  | NZ     | D_ASP_85  | OD1    | 2.661        |
| 4GXX   | B_LYS_83  | NZ     | D_ASP_85  | OD2    | 3.421        |
| 4GXX   | B_ARG_106 | NH2    | F_ASP_109 | OD2    | 3.780        |
| 4GXX   | B_ARG_116 | NH2    | B_GLU_120 | OE2    | 3.845        |
| 4GXX   | B_ARG_116 | NH2    | D_GLU_120 | OE1    | 2.669        |
| 4GXX   | B_LYS_123 | NZ     | B_GLU_132 | OE1    | 2.906        |
| 4GXX   | B_LYS_123 | NZ     | B_GLU_132 | OE2    | 3.252        |
| 4GXX   | B_LYS_    | NZ     | B_GLU_    | OE1    | 3.764        |
| 4GXX   | B_LYS_    | NZ     | B_GLU_139 | OE2    | 3.010        |
| 4GXX   | B_LYS_    | NZ     | B_GLU_    | OE1    | 3.439        |
| 4GXX   | B_ARG_153 | NH1    | B_GLU_150 | OE2    | 2.852        |
| 4GXX   | C_LYS_32  | NZ     | F_GLU_57  | OE2    | 3.165        |
| 4GXX   | C_LYS_53  | NZ     | C_ASP_276 | OD1    | 3.539        |
| 4GXX   | C_LYS_63  | NZ     | C_GLU_75  | OE2    | 3.863        |
| 4GXX   | C_ARG_109 | NH1    | C_GLU_89  | OE1    | 2.866        |
| 4GXX   | C_ARG_109 | NH1    | C_GLU_89  | OE2    | 3.437        |
| 4GXX   | C_ARG_109 | NH2    | C_GLU_89  | OE1    | 3.601        |
| 4GXX   | C_ARG_109 | NH2    | C_GLU_89  | OE2    | 2.826        |
| 4GXX   | C_ARG_109 | NH2    | D_GLU_69  | OE1    | 3.802        |
| 4GXX   | C_ARG_109 | NH2    | D_GLU_69  | OE2    | 3.427        |
| 4GXX   | C_ARG_149 | NH2    | C_ASP_77  | OD1    | 3.699        |

|      |           |     |           |     |       |
|------|-----------|-----|-----------|-----|-------|
| 4GXX | C_ARG_149 | NH2 | C_ASP_77  | OD2 | 2.803 |
| 4GXX | C_LYS_174 | NZ  | C_GLU_119 | OE1 | 3.067 |
| 4GXX | C_LYS_174 | NZ  | C_GLU_119 | OE2 | 3.650 |
| 4GXX | C_LYS_208 | NZ  | C_GLU_238 | OE1 | 3.321 |
| 4GXX | C_LYS_208 | NZ  | C_GLU_238 | OE2 | 3.002 |
| 4GXX | C_ARG_262 | NH2 | C_GLU_175 | OE1 | 3.519 |
| 4GXX | C_ARG_262 | NH2 | C_GLU_175 | OE2 | 2.926 |
| 4GXX | C_LYS_280 | NZ  | C_GLU_304 | OE1 | 3.956 |
| 4GXX | C_ARG_310 | NH1 | D_ASP_90  | OD1 | 2.336 |
| 4GXX | C_ARG_310 | NH2 | D_ASP_86  | OD1 | 3.727 |
| 4GXX | C_ARG_310 | NH2 | D_ASP_90  | OD1 | 3.012 |
| 4GXX | C_ARG_315 | NH1 | C_ASP_24  | OD2 | 3.922 |
| 4GXX | D_LYS_51  | NZ  | D_GLU_103 | OE1 | 2.595 |
| 4GXX | D_LYS_58  | NZ  | B_GLU_97  | OE1 | 3.529 |
| 4GXX | D_LYS_68  | NZ  | C_GLU_110 | OE2 | 2.872 |
| 4GXX | D_ARG_76  | NH1 | F_GLU_74  | OE1 | 2.910 |
| 4GXX | D_ARG_76  | NH1 | F_GLU_74  | OE2 | 3.571 |
| 4GXX | D_ARG_76  | NH2 | E_GLU_107 | OE2 | 3.622 |
| 4GXX | D_ARG_76  | NH2 | F_GLU_74  | OE1 | 3.615 |
| 4GXX | D_ARG_76  | NH2 | F_GLU_74  | OE2 | 2.803 |
| 4GXX | D_LYS_83  | NZ  | F_ASP_85  | OD1 | 2.774 |
| 4GXX | D_LYS_83  | NZ  | F_ASP_85  | OD2 | 3.514 |
| 4GXX | D_ARG_106 | NH2 | B_ASP_109 | OD2 | 3.920 |
| 4GXX | D_ARG_116 | NH1 | F_GLU_120 | OE1 | 3.357 |
| 4GXX | D_ARG_116 | NH2 | D_GLU_120 | OE1 | 3.858 |
| 4GXX | D_ARG_116 | NH2 | F_GLU_120 | OE1 | 3.225 |
| 4GXX | D_ARG_116 | NH2 | F_GLU_120 | OE2 | 3.007 |
| 4GXX | D_LYS_123 | NZ  | D_GLU_132 | OE1 | 3.074 |
| 4GXX | D_LYS_123 | NZ  | D_GLU_132 | OE2 | 3.639 |
| 4GXX | D_LYS_131 | NZ  | D_GLU_139 | OE2 | 3.654 |
| 4GXX | D_ARG_153 | NH1 | D_GLU_150 | OE2 | 2.580 |
| 4GXX | E_LYS_32  | NZ  | B_GLU_57  | OE2 | 3.237 |
| 4GXX | E_LYS_53  | NZ  | E_ASP_276 | OD1 | 3.134 |
| 4GXX | E_LYS_63  | NZ  | E_GLU_75  | OE1 | 2.624 |
| 4GXX | E_ARG_109 | NH1 | E_GLU_89  | OE1 | 2.778 |
| 4GXX | E_ARG_109 | NH1 | E_GLU_89  | OE2 | 3.312 |
| 4GXX | E_ARG_109 | NH2 | E_GLU_89  | OE1 | 3.734 |
| 4GXX | E_ARG_109 | NH2 | E_GLU_89  | OE2 | 2.889 |
| 4GXX | E_ARG_109 | NH2 | F_GLU_69  | OE1 | 3.858 |
| 4GXX | E_ARG_109 | NH2 | F_GLU_69  | OE2 | 2.773 |
| 4GXX | E_ARG_149 | NH2 | E_ASP_77  | OD1 | 3.759 |
| 4GXX | E_ARG_149 | NH2 | E_ASP_77  | OD2 | 2.793 |
| 4GXX | E_LYS_163 | NZ  | E_GLU_246 | OE1 | 3.415 |
| 4GXX | E_LYS_174 | NZ  | E_GLU_119 | OE1 | 2.751 |
| 4GXX | E_LYS_174 | NZ  | E_GLU_119 | OE2 | 3.791 |
| 4GXX | E_LYS_208 | NZ  | E_GLU_238 | OE1 | 3.310 |
| 4GXX | E_LYS_208 | NZ  | E_GLU_238 | OE2 | 3.144 |
| 4GXX | E_ARG_262 | NH2 | E_GLU_175 | OE1 | 3.412 |
| 4GXX | E_ARG_262 | NH2 | E_GLU_175 | OE2 | 3.052 |
| 4GXX | E_ARG_310 | NH1 | F_ASP_90  | OD1 | 2.470 |
| 4GXX | E_ARG_310 | NH2 | F_ASP_90  | OD1 | 2.925 |
| 4GXX | E_ARG_315 | NH1 | E_ASP_24  | OD1 | 3.908 |
| 4GXX | E_ARG_321 | NH1 | E_GLU_31  | OE1 | 3.912 |
| 4GXX | E_ARG_321 | NH1 | E_GLU_31  | OE2 | 2.977 |
| 4GXX | E_ARG_321 | NH2 | E_GLU_31  | OE2 | 3.461 |
| 4GXX | F_HIS_26  | NE2 | F_ASP_146 | OD1 | 3.842 |
| 4GXX | F_LYS_51  | NZ  | F_GLU_103 | OE1 | 2.680 |
| 4GXX | F_LYS_58  | NZ  | D_GLU_97  | OE1 | 3.142 |



|      |           |     |           |     |       |
|------|-----------|-----|-----------|-----|-------|
| 4GXX | F_LYS_68  | NZ  | E_GLU_110 | OE2 | 2.982 |
| 4GXX | F_ARG_76  | NH1 | B_GLU_74  | OE1 | 2.798 |
| 4GXX | F_ARG_76  | NH1 | B_GLU_74  | OE2 | 3.572 |
| 4GXX | F_ARG_76  | NH2 | A_GLU_107 | OE2 | 3.644 |
| 4GXX | F_ARG_76  | NH2 | B_GLU_74  | OE1 | 3.566 |
| 4GXX | F_ARG_76  | NH2 | B_GLU_74  | OE2 | 2.823 |
| 4GXX | F_LYS_83  | NZ  | B_ASP_85  | OD1 | 2.859 |
| 4GXX | F_LYS_83  | NZ  | B_ASP_85  | OD2 | 3.462 |
| 4GXX | F_ARG_106 | NH2 | D_ASP_109 | OD2 | 3.576 |
| 4GXX | F_ARG_116 | NH1 | B_GLU_120 | OE1 | 2.775 |
| 4GXX | F_ARG_116 | NH1 | B_GLU_120 | OE2 | 3.643 |
| 4GXX | F_ARG_116 | NH2 | B_GLU_120 | OE1 | 3.285 |
| 4GXX | F_ARG_116 | NH2 | B_GLU_120 | OE2 | 2.552 |
| 4GXX | F_ARG_116 | NH2 | F_GLU_120 | OE2 | 3.662 |
| 4GXX | F_LYS_123 | NZ  | F_GLU_132 | OE1 | 2.969 |
| 4GXX | F_LYS_123 | NZ  | F_GLU_132 | OE2 | 3.560 |
| 4GXX | F_LYS_    | NZ  | F_GLU_139 | OE2 | 3.889 |
| 4GXX | F_ARG_153 | NH1 | F_GLU_150 | OE2 | 2.818 |
| 4GXX | F_LYS_    | NZ  | F_GLU_    | OE1 | 3.562 |
| 4GXX | F_LYS_    | NZ  | F_GLU_    | OE2 | 3.737 |

Table 519: 4GXX-specific salt bridging networks analysis. In this table, a PDB file is specified with a four-letter PDB ID, except that the names of the PDB files corresponding to the single NMR structural model split from the NMR ensemble is specified with a four-letter PDB ID in addition to a hyphen followed by the single NMR structural model numeric ID, the residue naming scheme is **Chain ID\_residue name\_residue number**,  $\angle ADH$  represents the angle formed by acceptor (A), donor (D) and hydrogen (H) ( $\angle ADH$ ).

| PDB ID | Residue A | Atom A | Residue B | Atom B | Distance (Å) |
|--------|-----------|--------|-----------|--------|--------------|
| 4H0G   | A_LYS_64  | NZ     | A_GLU_47  | OE1    | 3.762        |
| 4H0G   | A_LYS_64  | NZ     | A_GLU_47  | OE2    | 3.209        |
| 4H0G   | A_LYS_68  | NZ     | A_ASP_91  | OD1    | 2.637        |
| 4H0G   | A_LYS_68  | NZ     | A_ASP_91  | OD2    | 2.768        |
| 4H0G   | A_ARG_99  | NH2    | A_ASP_108 | OD1    | 3.595        |
| 4H0G   | A_ARG_99  | NH2    | A_ASP_108 | OD2    | 3.122        |
| 4H0G   | A_ARG_205 | NH2    | A_ASP_226 | OD1    | 2.570        |
| 4H0G   | A_ARG_205 | NH2    | A_ASP_226 | OD2    | 3.224        |
| 4H0G   | A_LYS_247 | NZ     | A_GLU_249 | OE1    | 2.645        |

Table 520: 4H0G-specific salt bridging networks analysis. In this table, a PDB file is specified with a four-letter PDB ID, except that the names of the PDB files corresponding to the single NMR structural model split from the NMR ensemble is specified with a four-letter PDB ID in addition to a hyphen followed by the single NMR structural model numeric ID, the residue naming scheme is **Chain ID\_residue name\_residue number**,  $\angle ADH$  represents the angle formed by acceptor (A), donor (D) and hydrogen (H) ( $\angle ADH$ ).

| PDB ID | Residue A | Atom A | Residue B | Atom B | Distance (Å) |
|--------|-----------|--------|-----------|--------|--------------|
| 4H0H   | B_LYS_64  | NZ     | B_GLU_47  | OE2    | 2.501        |
| 4H0H   | B_LYS_68  | NZ     | B_ASP_91  | OD1    | 3.545        |
| 4H0H   | B_LYS_68  | NZ     | B_ASP_91  | OD2    | 2.692        |
| 4H0H   | B_ARG_99  | NH2    | B_ASP_108 | OD1    | 3.511        |
| 4H0H   | B_ARG_99  | NH2    | B_ASP_108 | OD2    | 2.749        |
| 4H0H   | B_ARG_163 | NH1    | B_ASP_214 | OD1    | 3.546        |
| 4H0H   | B_ARG_163 | NH2    | B_ASP_214 | OD1    | 3.756        |
| 4H0H   | B_ARG_205 | NH1    | B_GLU_223 | OE2    | 3.240        |
| 4H0H   | B_ARG_205 | NH2    | B_GLU_223 | OE1    | 3.635        |
| 4H0H   | B_ARG_205 | NH2    | B_GLU_223 | OE2    | 3.897        |
| 4H0H   | B_ARG_205 | NH2    | B_GLU_225 | OE1    | 2.872        |
| 4H0H   | B_ARG_205 | NH2    | B_ASP_226 | OD1    | 2.832        |
| 4H0H   | B_ARG_205 | NH2    | B_ASP_226 | OD2    | 3.613        |
| 4H0H   | B_ARG_221 | NH2    | B_GLU_223 | OE2    | 2.851        |

Table 521: 4H0H-specific salt bridging networks analysis. In this table, a PDB file is specified with a four-letter PDB ID, except that the names of the PDB files corresponding to the single NMR structural model split from the NMR ensemble is specified with a four-letter PDB ID in addition to a hyphen followed by the single NMR structural model numeric ID, the residue naming scheme is **Chain ID\_residue name\_residue number**,  $\angle ADH$  represents the angle formed by acceptor (A), donor (D) and hydrogen (H) ( $\angle ADH$ ).

| PDB ID | Residue A | Atom A | Residue B | Atom B | Distance (Å) |
|--------|-----------|--------|-----------|--------|--------------|
| 4H0I   | A_LYS_68  | NZ     | A_ASP_91  | OD1    | 3.664        |
| 4H0I   | A_LYS_68  | NZ     | A_ASP_91  | OD2    | 2.815        |
| 4H0I   | A_ARG_99  | NH2    | A_ASP_108 | OD1    | 3.509        |
| 4H0I   | A_ARG_99  | NH2    | A_ASP_108 | OD2    | 2.911        |
| 4H0I   | A_ARG_163 | NH2    | A_ASP_214 | OD1    | 2.763        |
| 4H0I   | A_ARG_205 | NH1    | A_GLU_223 | OE2    | 3.851        |
| 4H0I   | A_ARG_205 | NH2    | A_GLU_225 | OE2    | 2.757        |
| 4H0I   | A_ARG_205 | NH2    | A_ASP_226 | OD1    | 3.005        |
| 4H0I   | A_ARG_205 | NH2    | A_ASP_226 | OD2    | 3.508        |
| 4H0I   | A_ARG_221 | NH2    | A_GLU_223 | OE2    | 3.683        |
| 4H0I   | A_LYS_247 | NZ     | A_GLU_249 | OE1    | 3.405        |
| 4H0I   | A_LYS_247 | NZ     | A_GLU_249 | OE2    | 3.892        |

Table 522: 4H0I-specific salt bridging networks analysis. In this table, a PDB file is specified with a four-letter PDB ID, except that the names of the PDB files corresponding to the single NMR structural model split from the NMR ensemble is specified with a four-letter PDB ID in addition to a hyphen followed by the single NMR structural model numeric ID, the residue naming scheme is **Chain ID** **residue name** **residue number**,  $\angle ADH$  represents the angle formed by acceptor (A), donor (D) and hydrogen (H) ( $\angle ADH$ ).

| PDB ID | Residue A | Atom A | Residue B | Atom B | Distance (Å) |
|--------|-----------|--------|-----------|--------|--------------|
| 4H8W   | G_HIS_66  | ND1    | G_GLU_64  | OE2    | 2.743        |
| 4H8W   | G_LYS_207 | NZ     | G_GLU_381 | OE1    | 3.361        |
| 4H8W   | G_LYS_207 | NZ     | G_GLU_381 | OE2    | 2.825        |
| 4H8W   | G_LYS_227 | NZ     | G_GLU_83  | OE1    | 3.758        |
| 4H8W   | G_LYS_231 | NZ     | G_GLU_267 | OE1    | 2.924        |
| 4H8W   | G_HIS_249 | NE2    | G_GLU_482 | OE1    | 2.960        |
| 4H8W   | G_LYS_282 | NZ     | G_GLU_275 | OE1    | 2.895        |
| 4H8W   | G_LYS_343 | NZ     | G_GLU_347 | OE2    | 3.998        |
| 4H8W   | G_LYS_348 | NZ     | G_GLU_269 | OE1    | 3.647        |
| 4H8W   | G_LYS_348 | NZ     | G_GLU_269 | OE2    | 3.325        |
| 4H8W   | G_LYS_348 | NZ     | G_GLU_351 | OE2    | 2.761        |
| 4H8W   | G_ARG_379 | NH1    | G_ASP_211 | OD2    | 3.811        |
| 4H8W   | G_ARG_456 | NH1    | G_GLU_466 | OE1    | 2.922        |
| 4H8W   | G_ARG_456 | NH1    | G_GLU_466 | OE2    | 3.660        |
| 4H8W   | G_ARG_469 | NH2    | G_ASP_457 | OD1    | 3.748        |
| 4H8W   | G_ARG_469 | NH2    | G_ASP_457 | OD2    | 2.810        |
| 4H8W   | G_LYS_476 | NZ     | G_GLU_102 | OE1    | 3.752        |
| 4H8W   | G_ARG_480 | NH1    | G_ASP_477 | OD1    | 2.732        |
| 4H8W   | G_LYS_485 | NZ     | G_GLU_267 | OE2    | 3.866        |
| 4H8W   | G_LYS_487 | NZ     | G_ASP_47  | OD1    | 2.663        |
| 4H8W   | G_LYS_487 | NZ     | G_ASP_47  | OD2    | 3.551        |
| 4H8W   | G_LYS_487 | NZ     | G_GLU_91  | OE1    | 3.873        |
| 4H8W   | G_LYS_487 | NZ     | G_GLU_91  | OE2    | 3.127        |
| 4H8W   | H_ARG_38  | NH1    | H_ASP_86  | OD2    | 2.753        |
| 4H8W   | H_ARG_38  | NH2    | H_GLU_46  | OE1    | 2.942        |
| 4H8W   | H_ARG_38  | NH2    | H_GLU_46  | OE2    | 3.785        |
| 4H8W   | H_ARG_38  | NH2    | H_ASP_86  | OD2    | 3.820        |
| 4H8W   | H_ARG_55  | NH1    | G_ASP_107 | OD1    | 3.623        |
| 4H8W   | H_ARG_55  | NH1    | G_ASP_107 | OD2    | 3.025        |
| 4H8W   | H_ARG_66  | NH1    | H_ASP_86  | OD1    | 3.602        |
| 4H8W   | H_ARG_66  | NH1    | H_ASP_86  | OD2    | 3.242        |
| 4H8W   | H_ARG_66  | NH2    | H_ASP_86  | OD1    | 2.663        |
| 4H8W   | H_ARG_66  | NH2    | H_ASP_86  | OD2    | 3.744        |
| 4H8W   | H_LYS_94  | NZ     | H_ASP_101 | OD1    | 3.932        |
| 4H8W   | H_LYS_94  | NZ     | H_ASP_101 | OD2    | 3.783        |
| 4H8W   | H_LYS_209 | NZ     | L_GLU_124 | OE1    | 2.673        |
| 4H8W   | H_LYS_209 | NZ     | L_GLU_124 | OE2    | 2.808        |
| 4H8W   | H_ARG_210 | NH2    | H_GLU_212 | OE2    | 3.750        |
| 4H8W   | L_ARG_61  | NH1    | L_ASP_82  | OD1    | 3.642        |
| 4H8W   | L_ARG_61  | NH1    | L_ASP_82  | OD2    | 2.727        |
| 4H8W   | L_ARG_61  | NH2    | L_ASP_82  | OD1    | 2.875        |
| 4H8W   | L_ARG_61  | NH2    | L_ASP_82  | OD2    | 3.419        |
| 4H8W   | L_LYS_167 | NZ     | L_GLU_83  | OE1    | 3.479        |
| 4H8W   | L_LYS_167 | NZ     | L_GLU_83  | OE2    | 2.659        |
| 4H8W   | L_ARG_190 | NH1    | L_ASP_152 | OD1    | 3.209        |
| 4H8W   | L_ARG_190 | NH1    | L_ASP_152 | OD2    | 3.525        |
| 4H8W   | C_LYS_8   | NZ     | C_GLU_119 | OE1    | 2.938        |
| 4H8W   | C_LYS_29  | NZ     | C_GLU_85  | OE1    | 3.161        |
| 4H8W   | C_LYS_29  | NZ     | C_GLU_85  | OE2    | 3.156        |
| 4H8W   | C_ARG_54  | NH1    | C_ASP_78  | OD1    | 3.760        |
| 4H8W   | C_ARG_54  | NH1    | C_ASP_78  | OD2    | 2.826        |
| 4H8W   | C_ARG_54  | NH2    | C_ASP_78  | OD1    | 2.862        |
| 4H8W   | C_ARG_54  | NH2    | C_ASP_78  | OD2    | 3.438        |
| 4H8W   | C_ARG_58  | NH2    | C_GLU_13  | OE1    | 3.422        |
| 4H8W   | C_ARG_58  | NH2    | C_GLU_13  | OE2    | 2.940        |
| 4H8W   | C_ARG_59  | NH1    | G_ASP_368 | OD1    | 2.952        |
| 4H8W   | C_ARG_59  | NH1    | G_ASP_368 | OD2    | 3.318        |

|      |           |     |           |     |       |
|------|-----------|-----|-----------|-----|-------|
| 4H8W | C_ARG_59  | NH2 | G_ASP_368 | OD1 | 3.741 |
| 4H8W | C_ARG_59  | NH2 | G_ASP_368 | OD2 | 2.611 |
| 4H8W | C_ARG_134 | NH1 | C_GLU_150 | OE2 | 3.466 |
| 4H8W | C_ARG_134 | NH2 | C_GLU_150 | OE2 | 2.720 |
| 4H8W | C_ARG_134 | NH2 | C_ASP_153 | OD1 | 2.923 |
| 4H8W | C_ARG_134 | NH2 | C_ASP_153 | OD2 | 3.632 |

Table 523: 4H8W-specific salt bridging networks analysis. In this table, a PDB file is specified with a four-letter PDB ID, except that the names of the PDB files corresponding to the single NMR structural model split from the NMR ensemble is specified with a four-letter PDB ID in addition to a hyphen followed by the single NMR structural model numeric ID, the residue naming scheme is **Chain ID\_residue name\_residue number**,  $\angle ADH$  represents the angle formed by acceptor (A), donor (D) and hydrogen (H) ( $\angle ADH$ ).

| PDB ID | Residue A | Atom A | Residue B | Atom B | Distance (Å) |
|--------|-----------|--------|-----------|--------|--------------|
| 4HF5   | A_LYS_45  | NZ     | A_ASP_41  | OD1    | 3.023        |
| 4HF5   | A_LYS_45  | NZ     | A_ASP_41  | OD2    | 2.738        |
| 4HF5   | A_LYS_50  | NZ     | A_GLU_275 | OE1    | 3.846        |
| 4HF5   | A_LYS_109 | NZ     | A_GLU_89  | OE1    | 3.835        |
| 4HF5   | A_LYS_109 | NZ     | B_GLU_69  | OE1    | 3.017        |
| 4HF5   | A_LYS_119 | NZ     | A_GLU_255 | OE2    | 3.751        |
| 4HF5   | A_LYS_123 | NZ     | A_GLU_255 | OE1    | 3.191        |
| 4HF5   | A_ARG_137 | NH1    | H_ASP_97  | OD2    | 2.969        |
| 4HF5   | A_ARG_137 | NH2    | H_ASP_97  | OD1    | 3.008        |
| 4HF5   | A_ARG_137 | NH2    | H_ASP_97  | OD2    | 2.797        |
| 4HF5   | A_HIS_183 | NE2    | A_GLU_190 | OE2    | 3.373        |
| 4HF5   | A_HIS_184 | NE2    | A_GLU_231 | OE1    | 3.723        |
| 4HF5   | A_LYS_262 | NZ     | A_GLU_83  | OE1    | 3.426        |
| 4HF5   | A_LYS_262 | NZ     | A_GLU_83  | OE2    | 2.633        |
| 4HF5   | A_ARG_263 | NH1    | A_GLU_174 | OE2    | 3.471        |
| 4HF5   | A_ARG_263 | NH2    | A_GLU_174 | OE2    | 2.803        |
| 4HF5   | A_LYS_269 | NZ     | A_GLU_89  | OE1    | 3.758        |
| 4HF5   | A_LYS_269 | NZ     | B_GLU_69  | OE1    | 2.931        |
| 4HF5   | A_LYS_269 | NZ     | B_GLU_69  | OE2    | 3.200        |
| 4HF5   | A_LYS_280 | NZ     | A_GLU_278 | OE2    | 2.927        |
| 4HF5   | A_LYS_307 | NZ     | B_GLU_64  | OE2    | 3.558        |
| 4HF5   | A_LYS_310 | NZ     | B_ASP_90  | OD1    | 2.877        |
| 4HF5   | A_ARG_321 | NH1    | A_GLU_31  | OE1    | 2.994        |
| 4HF5   | A_ARG_321 | NH1    | A_GLU_31  | OE2    | 2.844        |
| 4HF5   | A_ARG_321 | NH2    | A_GLU_31  | OE1    | 3.793        |
| 4HF5   | B_LYS_51  | NZ     | B_GLU_103 | OE1    | 3.501        |
| 4HF5   | B_ARG_75  | NH1    | B_GLU_78  | OE1    | 2.803        |
| 4HF5   | B_ARG_75  | NH1    | B_GLU_78  | OE2    | 3.443        |
| 4HF5   | B_ARG_75  | NH2    | B_GLU_78  | OE1    | 2.681        |
| 4HF5   | B_LYS_82  | NZ     | B_ASP_86  | OD1    | 3.014        |
| 4HF5   | B_ARG_123 | NH1    | B_ASP_120 | OD2    | 3.836        |
| 4HF5   | B_LYS_143 | NZ     | A_ASP_11  | OD2    | 3.934        |
| 4HF5   | B_ARG_170 | NH2    | B_ASP_128 | OD2    | 3.090        |
| 4HF5   | H_ARG_38  | NH1    | H_ASP_86  | OD1    | 3.397        |
| 4HF5   | H_ARG_38  | NH2    | H_GLU_46  | OE1    | 3.432        |
| 4HF5   | H_ARG_38  | NH2    | H_GLU_46  | OE2    | 3.377        |
| 4HF5   | H_ARG_64  | NH1    | H_ASP_61  | OD1    | 3.700        |
| 4HF5   | H_ARG_64  | NH2    | H_ASP_61  | OD1    | 3.901        |
| 4HF5   | H_ARG_66  | NH1    | H_ASP_86  | OD1    | 3.656        |
| 4HF5   | H_ARG_66  | NH2    | H_ASP_86  | OD1    | 2.847        |
| 4HF5   | H_ARG_66  | NH2    | H_ASP_86  | OD2    | 2.651        |
| 4HF5   | H_LYS_75  | NZ     | H_ASP_72  | OD1    | 3.287        |
| 4HF5   | H_ARG_94  | NH2    | H_ASP_101 | OD1    | 3.485        |
| 4HF5   | H_ARG_94  | NH2    | H_ASP_101 | OD2    | 2.891        |
| 4HF5   | H_LYS_143 | NZ     | H_ASP_144 | OD1    | 2.973        |
| 4HF5   | H_LYS_143 | NZ     | H_ASP_144 | OD2    | 2.934        |
| 4HF5   | L_HIS_53  | ND1    | L_GLU_52  | OE1    | 3.652        |
| 4HF5   | L_HIS_53  | NE2    | L_GLU_52  | OE1    | 3.847        |
| 4HF5   | L_ARG_54  | NH2    | L_ASP_60  | OD1    | 2.781        |
| 4HF5   | L_ARG_61  | NH2    | L_ASP_82  | OD1    | 3.562        |
| 4HF5   | L_LYS_66  | NZ     | L_ASP_51  | OD1    | 3.019        |
| 4HF5   | L_LYS_66  | NZ     | L_ASP_51  | OD2    | 3.023        |
| 4HF5   | L_LYS_103 | NZ     | L_ASP_85  | OD1    | 3.547        |
| 4HF5   | L_LYS_103 | NZ     | L_ASP_85  | OD2    | 2.955        |

---

Table 524: 4HF5-specific salt bridging networks analysis. In this table, a PDB file is specified with a four-letter PDB ID, except that the names of the PDB files corresponding to the single NMR structural model split from the NMR ensemble is specified with a four-letter PDB ID in addition to a hyphen followed by the single NMR structural model numeric ID, the residue naming scheme is **Chain ID\_residue name\_residue number**,  $\angle ADH$  represents the angle formed by acceptor (A), donor (D) and hydrogen (H) ( $\angle ADH$ ).



| PDB ID | Residue A | Atom A | Residue B | Atom B | Distance (Å) |
|--------|-----------|--------|-----------|--------|--------------|
| 4HGK   | A_HIS_9   | ND1    | A_GLU_6   | OE2    | 3.257        |
| 4HGK   | A_HIS_9   | ND1    | A_ASP_13  | OD2    | 3.915        |
| 4HGK   | A_HIS_9   | NE2    | A_ASP_13  | OD1    | 3.802        |
| 4HGK   | A_HIS_9   | NE2    | A_ASP_13  | OD2    | 2.774        |
| 4HGK   | A_ARG_10  | NH1    | A_ASP_255 | OD2    | 2.741        |
| 4HGK   | A_ARG_10  | NH2    | A_GLU_6   | OE2    | 3.561        |
| 4HGK   | A_LYS_12  | NZ     | A_GLU_57  | OE2    | 2.562        |
| 4HGK   | A_LYS_51  | NZ     | A_GLU_16  | OE1    | 2.813        |
| 4HGK   | A_HIS_67  | ND1    | A_ASP_249 | OD1    | 3.864        |
| 4HGK   | A_HIS_67  | NE2    | A_ASP_249 | OD1    | 2.767        |
| 4HGK   | A_HIS_67  | NE2    | A_ASP_249 | OD2    | 3.220        |
| 4HGK   | A_LYS_73  | NZ     | A_GLU_45  | OE1    | 3.064        |
| 4HGK   | A_ARG_98  | NH1    | A_ASP_72  | OD1    | 2.860        |
| 4HGK   | A_ARG_98  | NH2    | A_ASP_72  | OD1    | 3.120        |
| 4HGK   | A_ARG_98  | NH2    | A_GLU_95  | OE2    | 2.998        |
| 4HGK   | A_HIS_105 | NE2    | A_GLU_86  | OE1    | 3.472        |
| 4HGK   | A_ARG_117 | NH2    | A_ASP_183 | OD1    | 3.422        |
| 4HGK   | A_ARG_117 | NH2    | A_ASP_183 | OD2    | 3.534        |
| 4HGK   | A_ARG_144 | NH1    | A_GLU_141 | OE1    | 3.085        |
| 4HGK   | A_ARG_145 | NH2    | A_GLU_141 | OE1    | 2.935        |
| 4HGK   | A_ARG_160 | NH1    | A_GLU_285 | OE2    | 3.710        |
| 4HGK   | A_LYS_162 | NZ     | A_GLU_131 | OE2    | 3.380        |
| 4HGK   | A_LYS_174 | NZ     | A_ASP_121 | OD1    | 3.589        |
| 4HGK   | A_LYS_181 | NZ     | A_GLU_167 | OE1    | 2.954        |
| 4HGK   | A_LYS_181 | NZ     | A_GLU_167 | OE2    | 3.073        |
| 4HGK   | A_ARG_186 | NH1    | A_ASP_187 | OD1    | 3.404        |
| 4HGK   | A_LYS_190 | NZ     | A_GLU_425 | OE1    | 3.698        |
| 4HGK   | A_LYS_190 | NZ     | A_GLU_425 | OE2    | 3.906        |
| 4HGK   | A_ARG_209 | NH1    | A_ASP_324 | OD1    | 3.792        |
| 4HGK   | A_ARG_209 | NH2    | A_ASP_324 | OD1    | 3.124        |
| 4HGK   | A_ARG_209 | NH2    | A_GLU_354 | OE1    | 3.847        |
| 4HGK   | A_ARG_209 | NH2    | A_GLU_354 | OE2    | 3.387        |
| 4HGK   | A_LYS_212 | NZ     | A_GLU_208 | OE2    | 3.796        |
| 4HGK   | A_LYS_225 | NZ     | A_ASP_296 | OD1    | 3.782        |
| 4HGK   | A_LYS_225 | NZ     | A_ASP_296 | OD2    | 3.781        |
| 4HGK   | A_LYS_233 | NZ     | A_ASP_237 | OD1    | 3.352        |
| 4HGK   | A_LYS_233 | NZ     | A_ASP_237 | OD2    | 2.652        |
| 4HGK   | A_LYS_240 | NZ     | A_ASP_256 | OD2    | 3.517        |
| 4HGK   | A_ARG_257 | NH1    | A_GLU_153 | OE2    | 3.027        |
| 4HGK   | A_ARG_257 | NH2    | A_GLU_153 | OE2    | 2.860        |
| 4HGK   | A_LYS_274 | NZ     | A_GLU_294 | OE1    | 3.878        |
| 4HGK   | A_LYS_274 | NZ     | A_GLU_294 | OE2    | 3.129        |
| 4HGK   | A_HIS_288 | ND1    | A_GLU_153 | OE1    | 2.949        |
| 4HGK   | A_HIS_288 | ND1    | A_GLU_153 | OE2    | 3.659        |
| 4HGK   | A_LYS_323 | NZ     | A_GLU_358 | OE1    | 2.748        |
| 4HGK   | A_LYS_323 | NZ     | A_GLU_358 | OE2    | 3.753        |
| 4HGK   | A_ARG_336 | NH1    | A_GLU_333 | OE1    | 2.887        |
| 4HGK   | A_ARG_336 | NH1    | A_GLU_333 | OE2    | 3.968        |
| 4HGK   | A_ARG_337 | NH1    | A_GLU_333 | OE1    | 2.815        |
| 4HGK   | A_ARG_337 | NH2    | A_GLU_333 | OE1    | 3.771        |
| 4HGK   | A_ARG_348 | NH1    | A_GLU_450 | OE2    | 3.559        |
| 4HGK   | A_ARG_348 | NH2    | A_GLU_450 | OE2    | 2.854        |
| 4HGK   | A_LYS_378 | NZ     | A_ASP_375 | OD1    | 3.797        |
| 4HGK   | A_ARG_428 | NH2    | A_GLU_425 | OE2    | 3.049        |
| 4HGK   | A_ARG_485 | NH1    | A_GLU_383 | OE2    | 3.444        |
| 4HGK   | A_ARG_485 | NH2    | A_GLU_383 | OE1    | 2.699        |
| 4HGK   | A_ARG_485 | NH2    | A_GLU_383 | OE2    | 3.000        |

|      |           |     |           |     |       |
|------|-----------|-----|-----------|-----|-------|
| 4HGK | A_ARG_485 | NH2 | A_GLU_450 | OE2 | 3.657 |
| 4HGK | B_LYS_4   | NZ  | B_GLU_57  | OE1 | 3.991 |
| 4HGK | B_HIS_9   | ND1 | B_GLU_6   | OE2 | 3.774 |
| 4HGK | B_HIS_9   | NE2 | B_ASP_13  | OD2 | 2.894 |
| 4HGK | B_ARG_10  | NH1 | B_ASP_255 | OD2 | 2.787 |
| 4HGK | B_ARG_10  | NH2 | B_GLU_6   | OE2 | 3.189 |
| 4HGK | B_LYS_12  | NZ  | B_GLU_57  | OE1 | 3.527 |
| 4HGK | B_LYS_12  | NZ  | B_GLU_57  | OE2 | 3.163 |
| 4HGK | B_LYS_51  | NZ  | B_GLU_16  | OE1 | 2.848 |
| 4HGK | B_HIS_67  | ND1 | B_ASP_249 | OD1 | 3.381 |
| 4HGK | B_HIS_67  | NE2 | B_ASP_249 | OD1 | 2.384 |
| 4HGK | B_HIS_67  | NE2 | B_ASP_249 | OD2 | 2.929 |
| 4HGK | B_LYS_73  | NZ  | B_GLU_45  | OE1 | 3.090 |
| 4HGK | B_ARG_98  | NH1 | B_ASP_72  | OD1 | 2.872 |
| 4HGK | B_ARG_98  | NH2 | B_ASP_72  | OD1 | 3.149 |
| 4HGK | B_ARG_98  | NH2 | B_GLU_95  | OE2 | 3.021 |
| 4HGK | B_HIS_105 | NE2 | B_GLU_86  | OE1 | 3.473 |
| 4HGK | B_ARG_117 | NH1 | B_ASP_183 | OD1 | 3.152 |
| 4HGK | B_ARG_117 | NH2 | B_ASP_183 | OD1 | 2.607 |
| 4HGK | B_ARG_117 | NH2 | B_ASP_183 | OD2 | 3.783 |
| 4HGK | B_ARG_144 | NH1 | B_GLU_141 | OE1 | 3.094 |
| 4HGK | B_ARG_145 | NH2 | B_GLU_141 | OE1 | 2.948 |
| 4HGK | B_ARG_160 | NH1 | B_GLU_285 | OE2 | 3.974 |
| 4HGK | B_LYS_162 | NZ  | B_GLU_131 | OE2 | 3.359 |
| 4HGK | B_LYS_181 | NZ  | B_GLU_167 | OE1 | 2.749 |
| 4HGK | B_LYS_181 | NZ  | B_GLU_167 | OE2 | 2.805 |
| 4HGK | B_LYS_205 | NZ  | B_GLU_465 | OE2 | 3.218 |
| 4HGK | B_ARG_209 | NH2 | B_ASP_324 | OD1 | 3.305 |
| 4HGK | B_ARG_209 | NH2 | B_GLU_354 | OE2 | 3.723 |
| 4HGK | B_LYS_225 | NZ  | B_ASP_296 | OD1 | 3.981 |
| 4HGK | B_LYS_233 | NZ  | B_ASP_237 | OD1 | 3.425 |
| 4HGK | B_LYS_233 | NZ  | B_ASP_237 | OD2 | 2.618 |
| 4HGK | B_LYS_240 | NZ  | B_ASP_256 | OD2 | 3.510 |
| 4HGK | B_HIS_247 | NE2 | B_ASP_249 | OD2 | 3.558 |
| 4HGK | B_ARG_257 | NH1 | B_GLU_153 | OE1 | 3.383 |
| 4HGK | B_ARG_257 | NH2 | B_GLU_153 | OE1 | 2.959 |
| 4HGK | B_LYS_262 | NZ  | B_GLU_266 | OE1 | 3.407 |
| 4HGK | B_LYS_262 | NZ  | B_GLU_266 | OE2 | 3.772 |
| 4HGK | B_LYS_274 | NZ  | B_GLU_294 | OE1 | 3.883 |
| 4HGK | B_LYS_274 | NZ  | B_GLU_294 | OE2 | 3.144 |
| 4HGK | B_HIS_288 | ND1 | B_GLU_153 | OE1 | 3.601 |
| 4HGK | B_HIS_288 | ND1 | B_GLU_153 | OE2 | 2.554 |
| 4HGK | B_LYS_317 | NZ  | B_ASP_314 | OD2 | 3.790 |
| 4HGK | B_LYS_323 | NZ  | B_GLU_358 | OE1 | 2.750 |
| 4HGK | B_LYS_323 | NZ  | B_GLU_358 | OE2 | 3.753 |
| 4HGK | B_ARG_336 | NH1 | B_GLU_333 | OE1 | 2.876 |
| 4HGK | B_ARG_336 | NH1 | B_GLU_333 | OE2 | 3.980 |
| 4HGK | B_ARG_337 | NH1 | B_GLU_333 | OE1 | 2.817 |
| 4HGK | B_ARG_337 | NH2 | B_GLU_333 | OE1 | 3.764 |
| 4HGK | B_ARG_348 | NH1 | B_GLU_450 | OE2 | 3.585 |
| 4HGK | B_ARG_348 | NH2 | B_GLU_450 | OE2 | 2.871 |
| 4HGK | B_LYS_378 | NZ  | B_ASP_375 | OD1 | 3.753 |
| 4HGK | B_LYS_389 | NZ  | B_GLU_393 | OE1 | 3.466 |
| 4HGK | B_ARG_445 | NH1 | B_GLU_442 | OE2 | 3.842 |
| 4HGK | B_ARG_445 | NH2 | B_GLU_442 | OE2 | 3.028 |
| 4HGK | B_ARG_485 | NH1 | B_GLU_383 | OE2 | 3.455 |
| 4HGK | B_ARG_485 | NH2 | B_GLU_383 | OE1 | 2.708 |
| 4HGK | B_ARG_485 | NH2 | B_GLU_383 | OE2 | 3.008 |

|      |           |     |           |     |       |
|------|-----------|-----|-----------|-----|-------|
| 4HGK | B_ARG_485 | NH2 | B_GLU_450 | OE2 | 3.644 |
| 4HGK | C_ARG_21  | NH1 | C_ASP_45  | OD2 | 2.805 |
| 4HGK | C_ARG_21  | NH2 | C_ASP_23  | OD2 | 3.642 |
| 4HGK | C_ARG_21  | NH2 | C_ASP_45  | OD2 | 3.962 |
| 4HGK | C_LYS_65  | NZ  | B_GLU_230 | OE1 | 3.917 |
| 4HGK | C_LYS_65  | NZ  | C_ASP_113 | OD2 | 3.638 |
| 4HGK | C_ARG_73  | NH2 | C_ASP_96  | OD1 | 2.911 |
| 4HGK | C_ARG_73  | NH2 | C_ASP_96  | OD2 | 3.688 |
| 4HGK | C_ARG_103 | NH1 | B_GLU_230 | OE1 | 3.099 |
| 4HGK | C_ARG_103 | NH2 | B_GLU_230 | OE1 | 3.263 |
| 4HGK | C_ARG_103 | NH2 | B_GLU_230 | OE2 | 3.968 |
| 4HGK | C_ARG_103 | NH2 | C_ASP_113 | OD1 | 3.388 |
| 4HGK | C_ARG_103 | NH2 | C_ASP_113 | OD2 | 2.979 |
| 4HGK | D_ARG_21  | NH1 | D_ASP_45  | OD2 | 2.813 |
| 4HGK | D_ARG_21  | NH2 | D_ASP_45  | OD2 | 3.945 |
| 4HGK | D_ARG_27  | NH1 | D_ASP_23  | OD1 | 3.814 |
| 4HGK | D_ARG_57  | NH2 | D_ASP_96  | OD1 | 3.778 |
| 4HGK | D_LYS_65  | NZ  | A_GLU_230 | OE1 | 3.741 |
| 4HGK | D_LYS_65  | NZ  | D_ASP_113 | OD2 | 3.664 |
| 4HGK | D_ARG_73  | NH2 | D_ASP_96  | OD1 | 3.000 |
| 4HGK | D_ARG_73  | NH2 | D_ASP_96  | OD2 | 3.124 |
| 4HGK | D_ARG_103 | NH1 | A_GLU_230 | OE1 | 3.115 |
| 4HGK | D_ARG_103 | NH2 | A_GLU_230 | OE1 | 3.112 |
| 4HGK | D_ARG_103 | NH2 | A_GLU_230 | OE2 | 3.907 |
| 4HGK | D_ARG_103 | NH2 | D_ASP_113 | OD1 | 3.384 |
| 4HGK | D_ARG_103 | NH2 | D_ASP_113 | OD2 | 2.984 |

Table 525: 4HGK-specific salt bridging networks analysis. In this table, a PDB file is specified with a four-letter PDB ID, except that the names of the PDB files corresponding to the single NMR structural model split from the NMR ensemble is specified with a four-letter PDB ID in addition to a hyphen followed by the single NMR structural model numeric ID, the residue naming scheme is **Chain ID\_residue name\_residue number**,  $\angle ADH$  represents the angle formed by acceptor (A), donor (D) and hydrogen (H) ( $\angle ADH$ ).

| PDB ID | Residue A | Atom A | Residue B | Atom B | Distance (Å) |
|--------|-----------|--------|-----------|--------|--------------|
| 4HH9   | A_ARG_54  | NH1    | C_ASP_50  | OD2    | 3.238        |
| 4HH9   | A_ARG_54  | NH2    | C_ASP_50  | OD2    | 3.183        |
| 4HH9   | A_ARG_61  | NH1    | A_GLU_79  | OE1    | 3.519        |
| 4HH9   | A_ARG_61  | NH1    | A_GLU_79  | OE2    | 3.676        |
| 4HH9   | A_ARG_61  | NH2    | A_GLU_79  | OE1    | 3.286        |
| 4HH9   | A_ARG_61  | NH2    | A_GLU_81  | OE1    | 3.129        |
| 4HH9   | A_ARG_61  | NH2    | A_ASP_82  | OD1    | 3.001        |
| 4HH9   | A_ARG_61  | NH2    | A_ASP_82  | OD2    | 3.679        |
| 4HH9   | A_ARG_91  | NH2    | A_ASP_50  | OD1    | 2.827        |
| 4HH9   | A_LYS_149 | NZ     | A_GLU_195 | OE1    | 3.346        |
| 4HH9   | A_LYS_183 | NZ     | A_GLU_187 | OE2    | 3.477        |
| 4HH9   | B_HIS_35  | NE2    | B_GLU_95  | OE2    | 2.800        |
| 4HH9   | B_ARG_38  | NH1    | B_ASP_86  | OD1    | 2.849        |
| 4HH9   | B_ARG_38  | NH2    | B_ASP_86  | OD1    | 3.956        |
| 4HH9   | B_LYS_64  | NZ     | B_ASP_61  | OD1    | 2.675        |
| 4HH9   | B_ARG_66  | NH1    | B_ASP_86  | OD1    | 3.513        |
| 4HH9   | B_ARG_66  | NH1    | B_ASP_86  | OD2    | 3.921        |
| 4HH9   | B_ARG_66  | NH2    | B_ASP_86  | OD1    | 3.293        |
| 4HH9   | B_ARG_66  | NH2    | B_ASP_86  | OD2    | 2.337        |
| 4HH9   | B_LYS_75  | NZ     | B_ASP_72  | OD2    | 2.839        |
| 4HH9   | B_ARG_94  | NH2    | B_ASP_101 | OD1    | 3.522        |
| 4HH9   | B_ARG_94  | NH2    | B_ASP_101 | OD2    | 2.685        |
| 4HH9   | B_LYS_143 | NZ     | B_ASP_144 | OD1    | 3.830        |
| 4HH9   | B_LYS_209 | NZ     | A_GLU_123 | OE1    | 3.274        |
| 4HH9   | B_LYS_209 | NZ     | A_GLU_123 | OE2    | 3.488        |
| 4HH9   | B_LYS_214 | NZ     | A_ASP_122 | OD1    | 3.788        |
| 4HH9   | C_ARG_24  | NH2    | C_ASP_70  | OD2    | 3.842        |
| 4HH9   | C_ARG_54  | NH1    | A_ASP_50  | OD2    | 2.782        |
| 4HH9   | C_ARG_54  | NH2    | A_ASP_50  | OD2    | 3.752        |
| 4HH9   | C_ARG_61  | NH1    | C_GLU_79  | OE1    | 3.726        |
| 4HH9   | C_ARG_61  | NH1    | C_GLU_79  | OE2    | 3.687        |
| 4HH9   | C_ARG_61  | NH2    | C_GLU_79  | OE1    | 3.548        |
| 4HH9   | C_ARG_61  | NH2    | C_GLU_81  | OE1    | 3.056        |
| 4HH9   | C_ARG_61  | NH2    | C_ASP_82  | OD1    | 2.727        |
| 4HH9   | C_ARG_61  | NH2    | C_ASP_82  | OD2    | 3.346        |
| 4HH9   | C_ARG_91  | NH2    | C_ASP_50  | OD1    | 2.719        |
| 4HH9   | C_LYS_149 | NZ     | C_GLU_195 | OE1    | 3.641        |
| 4HH9   | C_LYS_149 | NZ     | C_GLU_195 | OE2    | 3.059        |
| 4HH9   | C_HIS_189 | NE2    | C_ASP_151 | OD2    | 3.983        |
| 4HH9   | C_ARG_211 | NH1    | C_GLU_187 | OE1    | 3.912        |
| 4HH9   | D_HIS_35  | NE2    | D_GLU_95  | OE2    | 2.710        |
| 4HH9   | D_ARG_38  | NH1    | D_ASP_86  | OD1    | 2.846        |
| 4HH9   | D_ARG_38  | NH2    | D_ASP_86  | OD1    | 3.935        |
| 4HH9   | D_ARG_66  | NH1    | D_ASP_86  | OD1    | 3.013        |
| 4HH9   | D_ARG_66  | NH1    | D_ASP_86  | OD2    | 3.359        |
| 4HH9   | D_ARG_66  | NH2    | D_ASP_86  | OD1    | 3.871        |
| 4HH9   | D_ARG_66  | NH2    | D_ASP_86  | OD2    | 2.760        |
| 4HH9   | D_ARG_94  | NH2    | D_ASP_101 | OD1    | 3.831        |
| 4HH9   | D_ARG_94  | NH2    | D_ASP_101 | OD2    | 2.965        |
| 4HH9   | D_LYS_129 | NZ     | C_GLU_213 | OE1    | 3.401        |
| 4HH9   | D_LYS_129 | NZ     | C_GLU_213 | OE2    | 3.163        |
| 4HH9   | D_LYS_143 | NZ     | D_ASP_144 | OD1    | 3.474        |
| 4HH9   | D_LYS_143 | NZ     | D_ASP_144 | OD2    | 3.679        |
| 4HH9   | D_LYS_209 | NZ     | C_GLU_123 | OE2    | 3.057        |
| 4HH9   | D_LYS_210 | NZ     | D_GLU_212 | OE1    | 3.242        |
| 4HH9   | D_LYS_214 | NZ     | C_ASP_122 | OD2    | 3.367        |

---

Table 526: 4HH9-specific salt bridging networks analysis. In this table, a PDB file is specified with a four-letter PDB ID, except that the names of the PDB files corresponding to the single NMR structural model split from the NMR ensemble is specified with a four-letter PDB ID in addition to a hyphen followed by the single NMR structural model numeric ID, the residue naming scheme is **Chain ID\_residue name\_residue number**,  $\angle ADH$  represents the angle formed by acceptor (A), donor (D) and hydrogen (H) ( $\angle ADH$ ).

| PDB ID | Residue A | Atom A | Residue B | Atom B | Distance (Å) |
|--------|-----------|--------|-----------|--------|--------------|
| 4HHA   | A_ARG_61  | NH1    | A_GLU_79  | OE1    | 3.133        |
| 4HHA   | A_ARG_61  | NH2    | A_GLU_79  | OE1    | 3.839        |
| 4HHA   | A_ARG_61  | NH2    | A_ASP_82  | OD1    | 2.950        |
| 4HHA   | A_ARG_61  | NH2    | A_ASP_82  | OD2    | 3.472        |
| 4HHA   | A_ARG_91  | NH2    | A_ASP_50  | OD1    | 2.826        |
| 4HHA   | A_ARG_103 | NH1    | A_GLU_105 | OE1    | 3.652        |
| 4HHA   | A_ARG_103 | NH2    | A_GLU_105 | OE1    | 3.992        |
| 4HHA   | A_LYS_107 | NZ     | A_GLU_17  | OE1    | 3.316        |
| 4HHA   | A_LYS_107 | NZ     | A_GLU_17  | OE2    | 3.376        |
| 4HHA   | A_LYS_149 | NZ     | A_GLU_195 | OE2    | 2.569        |
| 4HHA   | A_ARG_211 | NH1    | A_GLU_187 | OE1    | 2.769        |
| 4HHA   | B_HIS_32  | ND1    | P_GLU_1   | OE1    | 4.000        |
| 4HHA   | B_HIS_32  | NE2    | P_GLU_1   | OE1    | 3.076        |
| 4HHA   | B_HIS_32  | NE2    | P_GLU_1   | OE2    | 2.639        |
| 4HHA   | B_HIS_35  | NE2    | B_GLU_95  | OE2    | 2.765        |
| 4HHA   | B_ARG_38  | NH1    | B_ASP_86  | OD1    | 2.958        |
| 4HHA   | B_ARG_66  | NH1    | B_ASP_86  | OD1    | 3.061        |
| 4HHA   | B_ARG_66  | NH1    | B_ASP_86  | OD2    | 3.374        |
| 4HHA   | B_ARG_66  | NH2    | B_ASP_86  | OD1    | 3.930        |
| 4HHA   | B_ARG_66  | NH2    | B_ASP_86  | OD2    | 2.793        |
| 4HHA   | B_ARG_87  | NH2    | B_GLU_148 | OE1    | 3.817        |
| 4HHA   | B_ARG_87  | NH2    | B_GLU_148 | OE2    | 3.007        |
| 4HHA   | B_ARG_94  | NH1    | P_GLU_1   | OE2    | 3.723        |
| 4HHA   | B_ARG_94  | NH2    | B_ASP_101 | OD1    | 3.771        |
| 4HHA   | B_ARG_94  | NH2    | B_ASP_101 | OD2    | 2.779        |
| 4HHA   | B_ARG_94  | NH2    | P_GLU_1   | OE2    | 3.026        |
| 4HHA   | B_LYS_143 | NZ     | B_ASP_144 | OD1    | 3.788        |
| 4HHA   | B_HIS_164 | NE2    | A_ASP_167 | OD1    | 3.917        |
| 4HHA   | B_LYS_209 | NZ     | A_GLU_123 | OE2    | 2.754        |
| 4HHA   | B_LYS_210 | NZ     | B_GLU_212 | OE1    | 3.348        |

Table 527: 4HHA-specific salt bridging networks analysis. In this table, a PDB file is specified with a four-letter PDB ID, except that the names of the PDB files corresponding to the single NMR structural model split from the NMR ensemble is specified with a four-letter PDB ID in addition to a hyphen followed by the single NMR structural model numeric ID, the residue naming scheme is **Chain ID\_residue name\_residue number**,  $\angle ADH$  represents the angle formed by acceptor (A), donor (D) and hydrogen (H) ( $\angle ADH$ ).

| PDB ID | Residue A | Atom A | Residue B | Atom B | Distance (Å) |
|--------|-----------|--------|-----------|--------|--------------|
| 4HIE   | A_ARG_24  | NH1    | A_ASP_70  | OD2    | 2.822        |
| 4HIE   | A_ARG_61  | NH2    | A_GLU_81  | OE1    | 3.581        |
| 4HIE   | A_ARG_61  | NH2    | A_ASP_82  | OD1    | 2.932        |
| 4HIE   | A_ARG_61  | NH2    | A_ASP_82  | OD2    | 3.691        |
| 4HIE   | A_ARG_91  | NH2    | B_GLU_95  | OE1    | 3.457        |
| 4HIE   | A_ARG_91  | NH2    | B_GLU_95  | OE2    | 3.317        |
| 4HIE   | A_LYS_188 | NZ     | A_ASP_185 | OD1    | 3.766        |
| 4HIE   | B_HIS_35  | NE2    | B_GLU_95  | OE2    | 2.692        |
| 4HIE   | B_ARG_38  | NH2    | B_GLU_46  | OE1    | 3.053        |
| 4HIE   | B_ARG_38  | NH2    | B_GLU_46  | OE2    | 3.761        |
| 4HIE   | B_ARG_66  | NH1    | B_ASP_86  | OD1    | 2.947        |
| 4HIE   | B_ARG_66  | NH1    | B_ASP_86  | OD2    | 3.482        |
| 4HIE   | B_ARG_66  | NH2    | B_ASP_86  | OD1    | 3.793        |
| 4HIE   | B_ARG_66  | NH2    | B_ASP_86  | OD2    | 2.815        |
| 4HIE   | B_LYS_94  | NZ     | B_ASP_101 | OD1    | 3.259        |
| 4HIE   | B_LYS_94  | NZ     | B_ASP_101 | OD2    | 2.919        |
| 4HIE   | B_LYS_143 | NZ     | B_ASP_144 | OD1    | 3.226        |
| 4HIE   | B_LYS_143 | NZ     | B_ASP_144 | OD2    | 3.341        |
| 4HIE   | B_LYS_201 | NZ     | B_ASP_199 | OD2    | 3.632        |

Table 528: 4HIE-specific salt bridging networks analysis. In this table, a PDB file is specified with a four-letter PDB ID, except that the names of the PDB files corresponding to the single NMR structural model split from the NMR ensemble is specified with a four-letter PDB ID in addition to a hyphen followed by the single NMR structural model numeric ID, the residue naming scheme is **Chain ID residue name residue number**,  $\angle ADH$  represents the angle formed by acceptor (A), donor (D) and hydrogen (H) ( $\angle ADH$ ).

| PDB ID | Residue A | Atom A | Residue B | Atom B | Distance (Å) |
|--------|-----------|--------|-----------|--------|--------------|
| 4HIH   | A_ARG_24  | NH1    | A_ASP_70  | OD1    | 3.074        |
| 4HIH   | A_ARG_24  | NH1    | A_ASP_70  | OD2    | 2.888        |
| 4HIH   | A_ARG_61  | NH2    | A_GLU_81  | OE1    | 3.240        |
| 4HIH   | A_ARG_61  | NH2    | A_ASP_82  | OD1    | 2.810        |
| 4HIH   | A_ARG_61  | NH2    | A_ASP_82  | OD2    | 3.489        |
| 4HIH   | A_ARG_91  | NH2    | B_GLU_95  | OE1    | 3.470        |
| 4HIH   | A_ARG_91  | NH2    | B_GLU_95  | OE2    | 3.314        |
| 4HIH   | A_LYS_107 | NZ     | A_GLU_17  | OE1    | 3.699        |
| 4HIH   | A_LYS_149 | NZ     | A_GLU_195 | OE1    | 3.559        |
| 4HIH   | A_LYS_169 | NZ     | A_ASP_170 | OD2    | 3.069        |
| 4HIH   | A_LYS_188 | NZ     | A_ASP_185 | OD1    | 3.565        |
| 4HIH   | A_ARG_211 | NH1    | A_GLU_187 | OE1    | 3.810        |
| 4HIH   | B_HIS_35  | NE2    | B_GLU_95  | OE2    | 2.814        |
| 4HIH   | B_ARG_38  | NH2    | B_GLU_46  | OE1    | 3.181        |
| 4HIH   | B_ARG_38  | NH2    | B_GLU_46  | OE2    | 3.797        |
| 4HIH   | B_ARG_55  | NH1    | B_ASP_53  | OD1    | 3.769        |
| 4HIH   | B_ARG_55  | NH1    | B_ASP_53  | OD2    | 3.363        |
| 4HIH   | B_ARG_66  | NH1    | B_ASP_86  | OD1    | 3.461        |
| 4HIH   | B_ARG_66  | NH2    | B_ASP_86  | OD1    | 3.186        |
| 4HIH   | B_ARG_66  | NH2    | B_ASP_86  | OD2    | 2.400        |
| 4HIH   | B_LYS_94  | NZ     | B_ASP_101 | OD1    | 3.233        |
| 4HIH   | B_LYS_94  | NZ     | B_ASP_101 | OD2    | 2.906        |
| 4HIH   | B_LYS_143 | NZ     | B_ASP_144 | OD1    | 3.210        |
| 4HIH   | B_LYS_143 | NZ     | B_ASP_144 | OD2    | 3.587        |
| 4HIH   | B_LYS_209 | NZ     | A_GLU_123 | OE1    | 2.853        |
| 4HIH   | B_LYS_209 | NZ     | A_GLU_123 | OE2    | 3.685        |
| 4HIH   | C_ARG_24  | NH1    | C_ASP_70  | OD2    | 2.725        |
| 4HIH   | C_ARG_24  | NH2    | C_ASP_70  | OD2    | 2.940        |
| 4HIH   | C_ARG_61  | NH2    | C_ASP_82  | OD1    | 3.061        |
| 4HIH   | C_ARG_61  | NH2    | C_ASP_82  | OD2    | 3.666        |
| 4HIH   | C_ARG_91  | NH2    | D_GLU_95  | OE1    | 3.527        |
| 4HIH   | C_ARG_91  | NH2    | D_GLU_95  | OE2    | 3.339        |
| 4HIH   | C_LYS_169 | NZ     | C_ASP_167 | OD1    | 3.850        |
| 4HIH   | C_LYS_169 | NZ     | C_ASP_170 | OD2    | 3.306        |
| 4HIH   | C_LYS_183 | NZ     | C_GLU_187 | OE2    | 3.644        |
| 4HIH   | C_LYS_188 | NZ     | C_ASP_185 | OD1    | 3.956        |
| 4HIH   | C_ARG_211 | NH1    | C_GLU_187 | OE1    | 3.874        |
| 4HIH   | D_HIS_35  | NE2    | D_GLU_95  | OE2    | 2.717        |
| 4HIH   | D_ARG_38  | NH2    | D_GLU_46  | OE1    | 2.906        |
| 4HIH   | D_ARG_38  | NH2    | D_GLU_46  | OE2    | 3.704        |
| 4HIH   | D_ARG_55  | NH1    | D_ASP_53  | OD2    | 3.143        |
| 4HIH   | D_LYS_64  | NZ     | D_ASP_61  | OD1    | 3.074        |
| 4HIH   | D_ARG_66  | NH1    | D_ASP_86  | OD1    | 3.418        |
| 4HIH   | D_ARG_66  | NH1    | D_ASP_86  | OD2    | 3.903        |
| 4HIH   | D_ARG_66  | NH2    | D_ASP_86  | OD1    | 3.186        |
| 4HIH   | D_ARG_66  | NH2    | D_ASP_86  | OD2    | 2.280        |
| 4HIH   | D_LYS_94  | NZ     | D_ASP_101 | OD1    | 3.190        |
| 4HIH   | D_LYS_94  | NZ     | D_ASP_101 | OD2    | 2.845        |
| 4HIH   | D_LYS_143 | NZ     | D_ASP_144 | OD1    | 2.994        |
| 4HIH   | D_LYS_143 | NZ     | D_ASP_144 | OD2    | 3.430        |
| 4HIH   | D_LYS_209 | NZ     | C_GLU_123 | OE1    | 2.616        |
| 4HIH   | D_LYS_209 | NZ     | C_GLU_123 | OE2    | 2.820        |



---

Table 529: 4HHH-specific salt bridging networks analysis. In this table, a PDB file is specified with a four-letter PDB ID, except that the names of the PDB files corresponding to the single NMR structural model split from the NMR ensemble is specified with a four-letter PDB ID in addition to a hyphen followed by the single NMR structural model numeric ID, the residue naming scheme is **Chain ID\_residue name\_residue number**,  $\angle ADH$  represents the angle formed by acceptor (A), donor (D) and hydrogen (H) ( $\angle ADH$ ).

| PDB ID | Residue A | Atom A | Residue B | Atom B | Distance (Å) |
|--------|-----------|--------|-----------|--------|--------------|
| 4HII   | A_ARG_24  | NH1    | A_ASP_70  | OD1    | 2.503        |
| 4HII   | A_ARG_24  | NH1    | A_ASP_70  | OD2    | 2.815        |
| 4HII   | A_ARG_61  | NH2    | A_GLU_81  | OE1    | 2.820        |
| 4HII   | A_ARG_61  | NH2    | A_ASP_82  | OD1    | 3.181        |
| 4HII   | A_ARG_61  | NH2    | A_ASP_82  | OD2    | 3.709        |
| 4HII   | A_ARG_91  | NH2    | B_GLU_95  | OE1    | 3.439        |
| 4HII   | A_ARG_91  | NH2    | B_GLU_95  | OE2    | 3.542        |
| 4HII   | A_LYS_107 | NZ     | A_GLU_17  | OE1    | 3.144        |
| 4HII   | A_LYS_107 | NZ     | A_GLU_17  | OE2    | 3.461        |
| 4HII   | A_LYS_183 | NZ     | A_GLU_187 | OE2    | 3.590        |
| 4HII   | B_HIS_35  | NE2    | B_GLU_95  | OE2    | 2.635        |
| 4HII   | B_ARG_38  | NH2    | B_GLU_46  | OE1    | 3.115        |
| 4HII   | B_ARG_38  | NH2    | B_GLU_46  | OE2    | 3.676        |
| 4HII   | B_ARG_55  | NH1    | B_ASP_53  | OD2    | 2.693        |
| 4HII   | B_LYS_64  | NZ     | B_ASP_61  | OD1    | 3.295        |
| 4HII   | B_ARG_66  | NH1    | B_ASP_86  | OD1    | 3.781        |
| 4HII   | B_ARG_66  | NH2    | B_ASP_86  | OD1    | 3.392        |
| 4HII   | B_ARG_66  | NH2    | B_ASP_86  | OD2    | 2.480        |
| 4HII   | B_LYS_94  | NZ     | B_ASP_101 | OD1    | 3.440        |
| 4HII   | B_LYS_94  | NZ     | B_ASP_101 | OD2    | 3.082        |
| 4HII   | B_LYS_143 | NZ     | B_ASP_144 | OD1    | 3.286        |
| 4HII   | B_LYS_143 | NZ     | B_ASP_144 | OD2    | 3.429        |
| 4HII   | B_LYS_201 | NZ     | B_ASP_199 | OD2    | 3.171        |
| 4HII   | B_LYS_209 | NZ     | A_GLU_123 | OE1    | 2.845        |
| 4HII   | B_LYS_209 | NZ     | A_GLU_123 | OE2    | 2.723        |
| 4HII   | C_ARG_24  | NH1    | C_ASP_70  | OD2    | 2.819        |
| 4HII   | C_ARG_24  | NH2    | C_ASP_70  | OD2    | 3.355        |
| 4HII   | C_ARG_61  | NH2    | C_ASP_82  | OD1    | 3.075        |
| 4HII   | C_ARG_61  | NH2    | C_ASP_82  | OD2    | 3.678        |
| 4HII   | C_ARG_91  | NH1    | D_GLU_95  | OE2    | 3.915        |
| 4HII   | C_ARG_91  | NH2    | D_GLU_95  | OE1    | 3.687        |
| 4HII   | C_ARG_91  | NH2    | D_GLU_95  | OE2    | 3.380        |
| 4HII   | C_ARG_211 | NH1    | C_GLU_187 | OE1    | 3.789        |
| 4HII   | D_HIS_35  | NE2    | D_GLU_95  | OE2    | 2.645        |
| 4HII   | D_ARG_38  | NH2    | D_GLU_46  | OE1    | 2.570        |
| 4HII   | D_ARG_38  | NH2    | D_GLU_46  | OE2    | 3.392        |
| 4HII   | D_ARG_55  | NH1    | D_ASP_53  | OD2    | 3.825        |
| 4HII   | D_LYS_64  | NZ     | D_ASP_61  | OD1    | 2.713        |
| 4HII   | D_ARG_66  | NH1    | D_ASP_86  | OD1    | 3.823        |
| 4HII   | D_ARG_66  | NH2    | D_ASP_86  | OD1    | 2.954        |
| 4HII   | D_ARG_66  | NH2    | D_ASP_86  | OD2    | 2.357        |
| 4HII   | D_LYS_94  | NZ     | D_ASP_101 | OD1    | 3.250        |
| 4HII   | D_LYS_94  | NZ     | D_ASP_101 | OD2    | 2.971        |
| 4HII   | D_LYS_143 | NZ     | D_ASP_144 | OD1    | 3.120        |
| 4HII   | D_LYS_143 | NZ     | D_ASP_144 | OD2    | 3.351        |
| 4HII   | D_LYS_201 | NZ     | D_ASP_199 | OD2    | 3.563        |

---

Table 530: 4HII-specific salt bridging networks analysis. In this table, a PDB file is specified with a four-letter PDB ID, except that the names of the PDB files corresponding to the single NMR structural model split from the NMR ensemble is specified with a four-letter PDB ID in addition to a hyphen followed by the single NMR structural model numeric ID, the residue naming scheme is **Chain ID\_residue name\_residue number**,  $\angle ADH$  represents the angle formed by acceptor (A), donor (D) and hydrogen (H) ( $\angle ADH$ ).

| PDB ID | Residue A | Atom A | Residue B | Atom B | Distance (Å) |
|--------|-----------|--------|-----------|--------|--------------|
| 4HIJ   | A_ARG_24  | NH1    | A_ASP_70  | OD2    | 2.299        |
| 4HIJ   | A_ARG_24  | NH2    | A_ASP_70  | OD2    | 3.791        |
| 4HIJ   | A_ARG_61  | NH2    | A_GLU_81  | OE1    | 2.950        |
| 4HIJ   | A_ARG_61  | NH2    | A_ASP_82  | OD1    | 3.410        |
| 4HIJ   | A_ARG_61  | NH2    | A_ASP_82  | OD2    | 3.898        |
| 4HIJ   | A_ARG_91  | NH1    | B_GLU_95  | OE2    | 3.962        |
| 4HIJ   | A_ARG_91  | NH2    | B_GLU_95  | OE1    | 3.390        |
| 4HIJ   | A_ARG_91  | NH2    | B_GLU_95  | OE2    | 3.274        |
| 4HIJ   | A_LYS_107 | NZ     | A_GLU_17  | OE1    | 3.611        |
| 4HIJ   | B_HIS_35  | NE2    | B_GLU_95  | OE2    | 2.959        |
| 4HIJ   | B_ARG_38  | NH1    | B_ASP_86  | OD1    | 3.073        |
| 4HIJ   | B_ARG_38  | NH2    | B_GLU_46  | OE1    | 3.833        |
| 4HIJ   | B_ARG_66  | NH2    | B_ASP_86  | OD1    | 3.357        |
| 4HIJ   | B_ARG_66  | NH2    | B_ASP_86  | OD2    | 2.483        |
| 4HIJ   | B_LYS_94  | NZ     | B_ASP_101 | OD1    | 3.665        |
| 4HIJ   | B_LYS_94  | NZ     | B_ASP_101 | OD2    | 3.228        |
| 4HIJ   | B_LYS_143 | NZ     | B_ASP_144 | OD1    | 3.068        |
| 4HIJ   | B_LYS_143 | NZ     | B_ASP_144 | OD2    | 3.410        |
| 4HIJ   | B_LYS_201 | NZ     | B_ASP_199 | OD2    | 3.924        |
| 4HIJ   | C_ARG_24  | NH1    | C_ASP_70  | OD1    | 2.906        |
| 4HIJ   | C_ARG_24  | NH1    | C_ASP_70  | OD2    | 2.387        |
| 4HIJ   | C_ARG_24  | NH2    | C_ASP_70  | OD2    | 3.911        |
| 4HIJ   | C_ARG_61  | NH2    | C_ASP_82  | OD1    | 3.100        |
| 4HIJ   | C_ARG_61  | NH2    | C_ASP_82  | OD2    | 3.911        |
| 4HIJ   | C_ARG_91  | NH2    | D_GLU_95  | OE1    | 3.772        |
| 4HIJ   | C_ARG_91  | NH2    | D_GLU_95  | OE2    | 3.260        |
| 4HIJ   | C_ARG_211 | NH1    | C_GLU_187 | OE1    | 3.642        |
| 4HIJ   | D_HIS_35  | NE2    | D_GLU_95  | OE2    | 3.142        |
| 4HIJ   | D_ARG_38  | NH1    | D_GLU_46  | OE1    | 2.836        |
| 4HIJ   | D_ARG_38  | NH1    | D_GLU_46  | OE2    | 3.204        |
| 4HIJ   | D_ARG_38  | NH2    | D_GLU_46  | OE1    | 2.304        |
| 4HIJ   | D_ARG_38  | NH2    | D_GLU_46  | OE2    | 3.866        |
| 4HIJ   | D_ARG_66  | NH1    | D_ASP_86  | OD1    | 3.893        |
| 4HIJ   | D_ARG_66  | NH2    | D_ASP_86  | OD1    | 3.106        |
| 4HIJ   | D_ARG_66  | NH2    | D_ASP_86  | OD2    | 2.216        |
| 4HIJ   | D_ARG_83  | NH1    | D_GLU_85  | OE1    | 3.248        |
| 4HIJ   | D_LYS_94  | NZ     | D_ASP_101 | OD1    | 3.449        |
| 4HIJ   | D_LYS_94  | NZ     | D_ASP_101 | OD2    | 2.903        |
| 4HIJ   | D_LYS_143 | NZ     | D_ASP_144 | OD1    | 3.444        |
| 4HIJ   | D_LYS_201 | NZ     | D_ASP_199 | OD2    | 3.897        |
| 4HIJ   | D_LYS_209 | NZ     | C_GLU_123 | OE2    | 3.644        |

Table 531: 4HIJ-specific salt bridging networks analysis. In this table, a PDB file is specified with a four-letter PDB ID, except that the names of the PDB files corresponding to the single NMR structural model split from the NMR ensemble is specified with a four-letter PDB ID in addition to a hyphen followed by the single NMR structural model numeric ID, the residue naming scheme is **Chain ID\_residue name\_residue number**,  $\angle ADH$  represents the angle formed by acceptor (A), donor (D) and hydrogen (H) ( $\angle ADH$ ).

| PDB ID | Residue A | Atom A | Residue B | Atom B | Distance (Å) |
|--------|-----------|--------|-----------|--------|--------------|
| 4HK0   | A_ARG_38  | NH1    | A_ASP_90  | OD1    | 3.774        |
| 4HK0   | A_ARG_38  | NH2    | A_GLU_46  | OE1    | 3.385        |
| 4HK0   | A_LYS_63  | NZ     | A_GLU_46  | OE1    | 3.620        |
| 4HK0   | A_LYS_63  | NZ     | A_GLU_46  | OE2    | 2.816        |
| 4HK0   | A_ARG_98  | NH1    | A_ASP_114 | OD1    | 2.925        |
| 4HK0   | A_ARG_98  | NH1    | A_ASP_114 | OD2    | 2.908        |
| 4HK0   | A_LYS_156 | NZ     | A_ASP_157 | OD2    | 3.983        |
| 4HK0   | A_LYS_222 | NZ     | B_GLU_125 | OE2    | 2.735        |
| 4HK0   | B_HIS_33  | ND1    | B_ASP_49  | OD1    | 3.937        |
| 4HK0   | B_ARG_53  | NH2    | B_GLU_59  | OE1    | 3.235        |
| 4HK0   | B_ARG_60  | NH1    | B_ASP_81  | OD1    | 3.686        |
| 4HK0   | B_ARG_60  | NH1    | B_ASP_81  | OD2    | 2.420        |
| 4HK0   | B_ARG_60  | NH2    | B_GLU_78  | OE1    | 3.881        |
| 4HK0   | B_ARG_60  | NH2    | B_GLU_78  | OE2    | 3.957        |
| 4HK0   | B_ARG_60  | NH2    | B_ASP_81  | OD1    | 2.791        |
| 4HK0   | B_ARG_60  | NH2    | B_ASP_81  | OD2    | 3.073        |
| 4HK0   | B_LYS_168 | NZ     | B_GLU_82  | OE1    | 2.997        |
| 4HK0   | C_LYS_12  | NZ     | C_GLU_10  | OE1    | 3.899        |
| 4HK0   | C_ARG_38  | NH1    | C_ASP_90  | OD1    | 3.244        |
| 4HK0   | C_ARG_38  | NH2    | C_GLU_46  | OE1    | 3.777        |
| 4HK0   | C_LYS_63  | NZ     | C_GLU_46  | OE1    | 3.276        |
| 4HK0   | C_LYS_63  | NZ     | C_GLU_46  | OE2    | 3.058        |
| 4HK0   | C_ARG_98  | NH1    | C_ASP_114 | OD1    | 3.138        |
| 4HK0   | C_ARG_98  | NH1    | C_ASP_114 | OD2    | 3.046        |
| 4HK0   | C_ARG_104 | NH2    | D_ASP_95  | OD2    | 3.573        |
| 4HK0   | C_ARG_223 | NH1    | C_GLU_225 | OE2    | 2.198        |
| 4HK0   | D_HIS_33  | ND1    | D_ASP_49  | OD1    | 3.742        |
| 4HK0   | D_ARG_60  | NH1    | D_ASP_81  | OD1    | 3.821        |
| 4HK0   | D_ARG_60  | NH1    | D_ASP_81  | OD2    | 2.677        |
| 4HK0   | D_ARG_60  | NH2    | D_GLU_78  | OE1    | 3.974        |
| 4HK0   | D_ARG_60  | NH2    | D_GLU_78  | OE2    | 3.744        |
| 4HK0   | D_ARG_60  | NH2    | D_ASP_81  | OD1    | 2.869        |
| 4HK0   | D_ARG_60  | NH2    | D_ASP_81  | OD2    | 3.194        |
| 4HK0   | D_LYS_104 | NZ     | B_ASP_50  | OD1    | 3.601        |
| 4HK0   | D_LYS_104 | NZ     | B_ASP_50  | OD2    | 2.755        |
| 4HK0   | D_LYS_168 | NZ     | D_GLU_82  | OE1    | 2.591        |
| 4HK0   | D_LYS_168 | NZ     | D_GLU_82  | OE2    | 3.531        |

Table 532: 4HK0-specific salt bridging networks analysis. In this table, a PDB file is specified with a four-letter PDB ID, except that the names of the PDB files corresponding to the single NMR structural model split from the NMR ensemble is specified with a four-letter PDB ID in addition to a hyphen followed by the single NMR structural model numeric ID, the residue naming scheme is **Chain ID\_residue name\_residue number**,  $\angle ADH$  represents the angle formed by acceptor (A), donor (D) and hydrogen (H) ( $\angle ADH$ ).

| PDB ID | Residue A | Atom A | Residue B | Atom B | Distance (Å) |
|--------|-----------|--------|-----------|--------|--------------|
| 4HK3   | J_LYS_12  | NZ     | J_GLU_10  | OE1    | 3.915        |
| 4HK3   | J_ARG_38  | NH2    | J_GLU_46  | OE1    | 2.769        |
| 4HK3   | J_ARG_38  | NH2    | J_GLU_46  | OE2    | 3.282        |
| 4HK3   | J_LYS_63  | NZ     | J_GLU_46  | OE2    | 2.332        |
| 4HK3   | J_ARG_87  | NH1    | J_ASP_89  | OD2    | 2.971        |
| 4HK3   | J_ARG_87  | NH2    | J_ASP_89  | OD2    | 3.577        |
| 4HK3   | J_ARG_98  | NH2    | J_ASP_114 | OD2    | 3.696        |
| 4HK3   | J_LYS_222 | NZ     | N_GLU_125 | OE2    | 3.801        |
| 4HK3   | N_ARG_60  | NH1    | N_ASP_81  | OD1    | 3.992        |
| 4HK3   | N_ARG_60  | NH1    | N_ASP_81  | OD2    | 2.782        |
| 4HK3   | N_ARG_60  | NH2    | N_GLU_78  | OE1    | 3.386        |
| 4HK3   | N_ARG_60  | NH2    | N_ASP_81  | OD1    | 3.085        |
| 4HK3   | N_ARG_60  | NH2    | N_ASP_81  | OD2    | 3.312        |
| 4HK3   | N_LYS_168 | NZ     | N_GLU_82  | OE1    | 3.394        |
| 4HK3   | N_HIS_190 | ND1    | N_ASP_153 | OD2    | 3.547        |
| 4HK3   | N_ARG_191 | NH2    | N_ASP_153 | OD1    | 3.900        |

Table 533: 4HK3-specific salt bridging networks analysis. In this table, a PDB file is specified with a four-letter PDB ID, except that the names of the PDB files corresponding to the single NMR structural model split from the NMR ensemble is specified with a four-letter PDB ID in addition to a hyphen followed by the single NMR structural model numeric ID, the residue naming scheme is **Chain ID\_residue name\_residue number**,  $\angle ADH$  represents the angle formed by acceptor (A), donor (D) and hydrogen (H) ( $\angle ADH$ ).

| PDB ID | Residue A | Atom A | Residue B | Atom B | Distance (Å) |
|--------|-----------|--------|-----------|--------|--------------|
| 4HKB   | J_ARG_12  | NH2    | J_GLU_10  | OE1    | 3.239        |
| 4HKB   | J_ARG_12  | NH2    | J_GLU_10  | OE2    | 3.220        |
| 4HKB   | J_LYS_19  | NZ     | J_GLU_82  | OE1    | 3.848        |
| 4HKB   | J_LYS_23  | NZ     | C_ASP_73  | OD1    | 3.505        |
| 4HKB   | J_ARG_38  | NH1    | J_ASP_90  | OD1    | 3.980        |
| 4HKB   | J_ARG_38  | NH2    | J_GLU_46  | OE1    | 3.646        |
| 4HKB   | J_LYS_63  | NZ     | J_GLU_46  | OE1    | 3.117        |
| 4HKB   | J_LYS_63  | NZ     | J_GLU_46  | OE2    | 3.110        |
| 4HKB   | J_ARG_72  | NH2    | A_GLU_10  | OE1    | 3.065        |
| 4HKB   | J_ARG_72  | NH2    | A_GLU_10  | OE2    | 2.664        |
| 4HKB   | J_ARG_87  | NH1    | J_ASP_89  | OD2    | 3.926        |
| 4HKB   | J_ARG_87  | NH2    | J_ASP_89  | OD2    | 2.996        |
| 4HKB   | J_ARG_98  | NH2    | J_ASP_114 | OD2    | 3.564        |
| 4HKB   | J_LYS_222 | NZ     | N_GLU_125 | OE1    | 3.188        |
| 4HKB   | J_LYS_222 | NZ     | N_GLU_125 | OE2    | 3.564        |
| 4HKB   | A_ARG_12  | NH2    | A_GLU_10  | OE1    | 3.493        |
| 4HKB   | A_ARG_12  | NH2    | A_GLU_10  | OE2    | 3.910        |
| 4HKB   | A_LYS_19  | NZ     | A_GLU_82  | OE2    | 2.857        |
| 4HKB   | A_LYS_63  | NZ     | A_GLU_46  | OE1    | 2.508        |
| 4HKB   | A_LYS_63  | NZ     | A_GLU_46  | OE2    | 3.155        |
| 4HKB   | A_ARG_72  | NH2    | C_GLU_10  | OE1    | 3.154        |
| 4HKB   | A_ARG_72  | NH2    | C_GLU_10  | OE2    | 2.755        |
| 4HKB   | A_ARG_87  | NH2    | A_ASP_90  | OD1    | 3.948        |
| 4HKB   | A_ARG_98  | NH1    | A_ASP_114 | OD2    | 3.306        |
| 4HKB   | A_LYS_156 | NZ     | B_GLU_126 | OE2    | 3.919        |
| 4HKB   | A_LYS_222 | NZ     | B_GLU_125 | OE1    | 3.019        |
| 4HKB   | A_LYS_222 | NZ     | B_GLU_125 | OE2    | 3.903        |
| 4HKB   | C_LYS_63  | NZ     | E_ASP_89  | OD1    | 3.939        |
| 4HKB   | C_LYS_63  | NZ     | E_ASP_89  | OD2    | 3.374        |
| 4HKB   | C_ARG_87  | NH2    | E_ASP_90  | OD1    | 3.045        |
| 4HKB   | C_ARG_87  | NH2    | E_ASP_90  | OD2    | 2.962        |
| 4HKB   | C_ARG_98  | NH2    | C_ASP_114 | OD2    | 3.961        |
| 4HKB   | C_LYS_222 | NZ     | D_GLU_125 | OE1    | 3.332        |
| 4HKB   | C_LYS_222 | NZ     | D_GLU_125 | OE2    | 3.836        |
| 4HKB   | E_LYS_23  | NZ     | G_ASP_73  | OD1    | 2.630        |
| 4HKB   | E_ARG_38  | NH2    | E_GLU_46  | OE1    | 2.965        |
| 4HKB   | E_LYS_63  | NZ     | C_ASP_89  | OD1    | 3.625        |
| 4HKB   | E_LYS_63  | NZ     | C_ASP_89  | OD2    | 3.095        |
| 4HKB   | E_ARG_72  | NH1    | I_GLU_10  | OE1    | 2.874        |
| 4HKB   | E_ARG_72  | NH1    | I_GLU_10  | OE2    | 2.849        |
| 4HKB   | E_ARG_87  | NH1    | C_ASP_90  | OD1    | 3.489        |
| 4HKB   | E_ARG_87  | NH1    | C_ASP_90  | OD2    | 3.954        |
| 4HKB   | E_ARG_87  | NH2    | C_ASP_90  | OD1    | 3.930        |
| 4HKB   | E_ARG_87  | NH2    | C_ASP_90  | OD2    | 3.219        |
| 4HKB   | E_ARG_98  | NH1    | E_ASP_114 | OD1    | 3.817        |
| 4HKB   | E_ARG_98  | NH2    | E_ASP_114 | OD1    | 3.776        |
| 4HKB   | E_ARG_98  | NH2    | E_ASP_114 | OD2    | 3.131        |
| 4HKB   | E_LYS_222 | NZ     | F_GLU_125 | OE2    | 3.327        |
| 4HKB   | G_ARG_12  | NH2    | G_GLU_10  | OE1    | 3.730        |
| 4HKB   | G_LYS_63  | NZ     | G_GLU_46  | OE1    | 3.337        |
| 4HKB   | G_LYS_63  | NZ     | G_GLU_46  | OE2    | 2.386        |
| 4HKB   | G_ARG_87  | NH1    | J_ASP_90  | OD1    | 3.108        |
| 4HKB   | G_ARG_87  | NH1    | J_ASP_90  | OD2    | 3.912        |
| 4HKB   | G_ARG_87  | NH2    | J_ASP_90  | OD2    | 3.607        |
| 4HKB   | G_ARG_98  | NH1    | G_ASP_114 | OD1    | 3.184        |
| 4HKB   | G_ARG_98  | NH1    | G_ASP_114 | OD2    | 2.840        |
| 4HKB   | I_ARG_12  | NH1    | I_GLU_10  | OE2    | 3.852        |

|      |           |     |           |     |       |
|------|-----------|-----|-----------|-----|-------|
| 4HKB | I_ARG_12  | NH2 | I_GLU_10  | OE1 | 2.937 |
| 4HKB | I_ARG_12  | NH2 | I_GLU_10  | OE2 | 2.684 |
| 4HKB | I_LYS_63  | NZ  | I_GLU_46  | OE1 | 3.642 |
| 4HKB | I_LYS_63  | NZ  | I_GLU_46  | OE2 | 2.727 |
| 4HKB | I_ARG_72  | NH2 | G_GLU_10  | OE1 | 3.560 |
| 4HKB | I_ARG_72  | NH2 | G_GLU_10  | OE2 | 2.553 |
| 4HKB | I_ARG_87  | NH2 | I_ASP_90  | OD1 | 3.524 |
| 4HKB | I_ARG_98  | NH1 | I_ASP_114 | OD1 | 2.891 |
| 4HKB | I_ARG_98  | NH1 | I_ASP_114 | OD2 | 2.660 |
| 4HKB | I_LYS_222 | NZ  | K_GLU_125 | OE2 | 3.211 |
| 4HKB | N_ARG_29  | NH1 | J_ASP_107 | OD1 | 3.664 |
| 4HKB | N_ARG_29  | NH1 | J_ASP_107 | OD2 | 2.469 |
| 4HKB | N_ARG_31  | NH1 | N_ASP_33  | OD2 | 3.836 |
| 4HKB | N_ARG_31  | NH2 | N_ASP_33  | OD1 | 2.568 |
| 4HKB | N_ARG_31  | NH2 | N_ASP_33  | OD2 | 3.159 |
| 4HKB | N_ARG_60  | NH1 | N_GLU_78  | OE1 | 3.549 |
| 4HKB | N_ARG_60  | NH2 | N_GLU_78  | OE1 | 3.300 |
| 4HKB | N_ARG_60  | NH2 | N_GLU_78  | OE2 | 3.943 |
| 4HKB | N_ARG_60  | NH2 | N_ASP_81  | OD1 | 3.653 |
| 4HKB | N_ARG_60  | NH2 | N_ASP_81  | OD2 | 3.144 |
| 4HKB | N_ARG_76  | NH2 | N_GLU_59  | OE1 | 3.931 |
| 4HKB | N_LYS_104 | NZ  | N_ASP_84  | OD1 | 3.498 |
| 4HKB | N_LYS_131 | NZ  | J_ASP_157 | OD2 | 3.951 |
| 4HKB | B_ARG_29  | NH1 | A_ASP_107 | OD2 | 3.659 |
| 4HKB | B_LYS_30  | NZ  | B_ASP_91  | OD1 | 3.949 |
| 4HKB | B_ARG_31  | NH2 | B_ASP_33  | OD1 | 3.960 |
| 4HKB | B_ARG_31  | NH2 | B_ASP_33  | OD2 | 3.759 |
| 4HKB | B_ARG_60  | NH1 | B_GLU_78  | OE2 | 3.613 |
| 4HKB | B_ARG_60  | NH2 | B_ASP_81  | OD1 | 3.250 |
| 4HKB | B_ARG_60  | NH2 | B_ASP_81  | OD2 | 3.168 |
| 4HKB | D_ARG_29  | NH1 | C_ASP_107 | OD2 | 3.254 |
| 4HKB | D_LYS_30  | NZ  | D_ASP_91  | OD1 | 2.419 |
| 4HKB | D_ARG_60  | NH1 | D_ASP_81  | OD2 | 3.419 |
| 4HKB | D_ARG_60  | NH2 | D_ASP_81  | OD1 | 2.947 |
| 4HKB | D_ARG_60  | NH2 | D_ASP_81  | OD2 | 2.756 |
| 4HKB | D_LYS_173 | NZ  | D_ASP_140 | OD1 | 3.957 |
| 4HKB | F_ARG_60  | NH1 | F_GLU_78  | OE2 | 3.243 |
| 4HKB | F_ARG_60  | NH1 | F_ASP_81  | OD2 | 3.702 |
| 4HKB | F_ARG_60  | NH2 | F_GLU_78  | OE2 | 3.760 |
| 4HKB | F_ARG_60  | NH2 | F_ASP_81  | OD1 | 3.084 |
| 4HKB | F_ARG_60  | NH2 | F_ASP_81  | OD2 | 2.449 |
| 4HKB | H_ARG_29  | NH1 | G_ASP_107 | OD2 | 3.325 |
| 4HKB | H_ARG_29  | NH2 | G_ASP_107 | OD2 | 3.189 |
| 4HKB | H_LYS_30  | NZ  | H_ASP_91  | OD1 | 3.082 |
| 4HKB | H_ARG_31  | NH1 | H_ASP_33  | OD1 | 3.793 |
| 4HKB | H_ARG_31  | NH1 | H_ASP_33  | OD2 | 3.908 |
| 4HKB | H_ARG_31  | NH2 | H_ASP_33  | OD1 | 2.388 |
| 4HKB | H_ARG_31  | NH2 | H_ASP_33  | OD2 | 3.779 |
| 4HKB | H_ARG_60  | NH1 | H_GLU_78  | OE1 | 3.666 |
| 4HKB | H_ARG_60  | NH2 | H_GLU_78  | OE1 | 3.977 |
| 4HKB | H_ARG_60  | NH2 | H_ASP_81  | OD1 | 2.952 |
| 4HKB | H_ARG_60  | NH2 | H_ASP_81  | OD2 | 3.391 |
| 4HKB | K_ARG_31  | NH1 | I_ASP_107 | OD2 | 3.242 |
| 4HKB | K_ARG_60  | NH1 | K_GLU_78  | OE1 | 2.918 |
| 4HKB | K_ARG_60  | NH1 | K_ASP_81  | OD2 | 3.967 |
| 4HKB | K_ARG_60  | NH2 | K_GLU_78  | OE1 | 3.867 |
| 4HKB | K_ARG_60  | NH2 | K_ASP_81  | OD1 | 3.109 |
| 4HKB | K_ARG_60  | NH2 | K_ASP_81  | OD2 | 3.013 |



|      |           |    |          |     |       |
|------|-----------|----|----------|-----|-------|
| 4HKB | K_LYS_168 | NZ | K_GLU_82 | OE1 | 3.989 |
|------|-----------|----|----------|-----|-------|

Table 534: 4HKB-specific salt bridging networks analysis. In this table, a PDB file is specified with a four-letter PDB ID, except that the names of the PDB files corresponding to the single NMR structural model split from the NMR ensemble is specified with a four-letter PDB ID in addition to a hyphen followed by the single NMR structural model numeric ID, the residue naming scheme is **Chain ID\_residue name\_residue number**,  $\angle ADH$  represents the angle formed by acceptor (A), donor (D) and hydrogen (H) ( $\angle ADH$ ).

| PDB ID | Residue A | Atom A | Residue B | Atom B | Distance (Å) |
|--------|-----------|--------|-----------|--------|--------------|
| 4HKX   | E_LYS_86  | NZ     | E_GLU_90  | OE2    | 3.670        |
| 4HKX   | E_ARG_106 | NH1    | E_GLU_85  | OE1    | 2.849        |
| 4HKX   | E_ARG_106 | NH1    | E_GLU_85  | OE2    | 3.341        |
| 4HKX   | E_ARG_117 | NH2    | E_GLU_72  | OE1    | 2.670        |
| 4HKX   | E_ARG_117 | NH2    | E_GLU_72  | OE2    | 3.532        |
| 4HKX   | E_ARG_192 | NH1    | B_ASP_95  | OD2    | 3.293        |
| 4HKX   | E_ARG_192 | NH2    | E_GLU_198 | OE1    | 3.620        |
| 4HKX   | E_ARG_192 | NH2    | E_GLU_198 | OE2    | 3.387        |
| 4HKX   | E_HIS_208 | NE2    | E_GLU_238 | OE2    | 2.261        |
| 4HKX   | E_LYS_219 | NZ     | E_GLU_227 | OE1    | 3.854        |
| 4HKX   | E_LYS_219 | NZ     | B_ASP_93  | OD1    | 2.877        |
| 4HKX   | E_LYS_219 | NZ     | B_ASP_93  | OD2    | 3.792        |
| 4HKX   | E_LYS_222 | NZ     | E_ASP_225 | OD1    | 3.665        |
| 4HKX   | E_ARG_255 | NH2    | E_GLU_119 | OE2    | 3.522        |
| 4HKX   | E_ARG_262 | NH1    | E_GLU_175 | OE2    | 3.705        |
| 4HKX   | E_ARG_262 | NH2    | E_GLU_175 | OE1    | 3.350        |
| 4HKX   | E_ARG_262 | NH2    | E_GLU_175 | OE2    | 2.626        |
| 4HKX   | A_ARG_12  | NH1    | A_GLU_10  | OE1    | 2.383        |
| 4HKX   | A_ARG_12  | NH2    | A_GLU_10  | OE1    | 3.758        |
| 4HKX   | A_ARG_38  | NH1    | A_ASP_90  | OD1    | 3.193        |
| 4HKX   | A_ARG_38  | NH2    | A_GLU_46  | OE1    | 3.363        |
| 4HKX   | A_LYS_63  | NZ     | A_GLU_46  | OE1    | 3.731        |
| 4HKX   | A_LYS_63  | NZ     | A_GLU_46  | OE2    | 3.103        |
| 4HKX   | A_ARG_87  | NH2    | A_ASP_89  | OD2    | 3.799        |
| 4HKX   | A_ARG_98  | NH1    | A_ASP_114 | OD1    | 3.449        |
| 4HKX   | A_ARG_98  | NH1    | A_ASP_114 | OD2    | 2.980        |
| 4HKX   | A_LYS_222 | NZ     | B_GLU_125 | OE1    | 3.981        |
| 4HKX   | B_ARG_29  | NH2    | A_ASP_107 | OD2    | 3.853        |
| 4HKX   | B_ARG_31  | NH1    | B_ASP_33  | OD1    | 2.677        |
| 4HKX   | B_ARG_31  | NH1    | B_ASP_33  | OD2    | 2.578        |
| 4HKX   | B_ARG_60  | NH1    | B_ASP_81  | OD1    | 3.864        |
| 4HKX   | B_ARG_60  | NH1    | B_ASP_81  | OD2    | 2.652        |
| 4HKX   | B_ARG_60  | NH2    | B_GLU_78  | OE1    | 3.882        |
| 4HKX   | B_ARG_60  | NH2    | B_GLU_78  | OE2    | 3.841        |
| 4HKX   | B_ARG_60  | NH2    | B_ASP_81  | OD1    | 3.111        |
| 4HKX   | B_ARG_60  | NH2    | B_ASP_81  | OD2    | 3.335        |
| 4HKX   | B_LYS_104 | NZ     | B_ASP_84  | OD1    | 2.803        |
| 4HKX   | B_LYS_104 | NZ     | B_ASP_84  | OD2    | 3.287        |
| 4HKX   | B_LYS_112 | NZ     | B_GLU_200 | OE1    | 2.796        |
| 4HKX   | B_LYS_131 | NZ     | A_ASP_157 | OD2    | 3.310        |
| 4HKX   | B_HIS_190 | ND1    | B_ASP_153 | OD2    | 3.199        |

Table 535: 4HKX-specific salt bridging networks analysis. In this table, a PDB file is specified with a four-letter PDB ID, except that the names of the PDB files corresponding to the single NMR structural model split from the NMR ensemble is specified with a four-letter PDB ID in addition to a hyphen followed by the single NMR structural model numeric ID, the residue naming scheme is **Chain ID\_residue name\_residue number**,  $\angle ADH$  represents the angle formed by acceptor (A), donor (D) and hydrogen (H) ( $\angle ADH$ ).

| PDB ID | Residue A | Atom A | Residue B | Atom B | Distance (Å) |
|--------|-----------|--------|-----------|--------|--------------|
| 4HLZ   | A_LYS_45  | NZ     | A_ASP_41  | OD1    | 3.467        |
| 4HLZ   | A_LYS_45  | NZ     | A_ASP_41  | OD2    | 2.740        |
| 4HLZ   | A_LYS_50  | NZ     | A_GLU_275 | OE1    | 3.453        |
| 4HLZ   | A_ARG_94  | NH1    | A_ASP_63  | OD1    | 3.722        |
| 4HLZ   | A_ARG_94  | NH1    | A_ASP_63  | OD2    | 2.940        |
| 4HLZ   | A_LYS_109 | NZ     | A_GLU_89  | OE1    | 2.563        |
| 4HLZ   | A_LYS_109 | NZ     | A_GLU_89  | OE2    | 3.402        |
| 4HLZ   | A_LYS_109 | NZ     | B_GLU_69  | OE1    | 3.478        |
| 4HLZ   | A_LYS_109 | NZ     | B_GLU_69  | OE2    | 2.999        |
| 4HLZ   | A_LYS_119 | NZ     | A_GLU_255 | OE2    | 3.868        |
| 4HLZ   | A_LYS_123 | NZ     | A_GLU_255 | OE1    | 3.335        |
| 4HLZ   | A_LYS_123 | NZ     | A_GLU_255 | OE2    | 2.676        |
| 4HLZ   | A_ARG_149 | NH1    | A_ASP_77  | OD2    | 3.932        |
| 4HLZ   | A_ARG_149 | NH2    | A_ASP_77  | OD1    | 3.367        |
| 4HLZ   | A_ARG_149 | NH2    | A_ASP_77  | OD2    | 2.770        |
| 4HLZ   | A_LYS_165 | NZ     | A_GLU_246 | OE1    | 3.809        |
| 4HLZ   | A_HIS_184 | NE2    | A_GLU_231 | OE1    | 3.401        |
| 4HLZ   | A_ARG_263 | NH2    | A_GLU_174 | OE1    | 3.264        |
| 4HLZ   | A_LYS_269 | NZ     | A_GLU_89  | OE1    | 3.398        |
| 4HLZ   | A_LYS_310 | NZ     | B_ASP_90  | OD1    | 2.429        |
| 4HLZ   | A_LYS_310 | NZ     | B_ASP_90  | OD2    | 3.948        |
| 4HLZ   | A_LYS_313 | NZ     | A_ASP_27  | OD2    | 3.590        |
| 4HLZ   | A_ARG_321 | NH1    | A_GLU_31  | OE1    | 3.534        |
| 4HLZ   | A_ARG_321 | NH1    | A_GLU_31  | OE2    | 3.033        |
| 4HLZ   | A_ARG_321 | NH2    | A_GLU_31  | OE1    | 2.812        |
| 4HLZ   | A_ARG_321 | NH2    | A_GLU_31  | OE2    | 3.752        |
| 4HLZ   | B_LYS_51  | NZ     | B_GLU_103 | OE1    | 2.548        |
| 4HLZ   | B_LYS_58  | NZ     | F_GLU_97  | OE1    | 3.865        |
| 4HLZ   | B_LYS_58  | NZ     | F_GLU_97  | OE2    | 3.885        |
| 4HLZ   | B_ARG_75  | NH1    | B_GLU_78  | OE1    | 2.253        |
| 4HLZ   | B_ARG_75  | NH1    | B_GLU_78  | OE2    | 3.633        |
| 4HLZ   | B_ARG_76  | NH1    | D_GLU_74  | OE1    | 2.838        |
| 4HLZ   | B_ARG_76  | NH1    | D_GLU_74  | OE2    | 3.993        |
| 4HLZ   | B_ARG_76  | NH2    | D_GLU_74  | OE1    | 3.145        |
| 4HLZ   | B_ARG_76  | NH2    | D_GLU_74  | OE2    | 2.917        |
| 4HLZ   | B_LYS_82  | NZ     | B_ASP_86  | OD1    | 3.774        |
| 4HLZ   | B_LYS_82  | NZ     | B_ASP_86  | OD2    | 2.458        |
| 4HLZ   | B_LYS_83  | NZ     | D_GLU_85  | OE2    | 2.459        |
| 4HLZ   | B_ARG_106 | NH2    | F_ASP_109 | OD2    | 3.278        |
| 4HLZ   | B_ARG_123 | NH2    | B_ASP_120 | OD1    | 3.032        |
| 4HLZ   | B_LYS_131 | NZ     | B_GLU_139 | OE2    | 3.861        |
| 4HLZ   | B_LYS_143 | NZ     | A_ASP_11  | OD1    | 3.527        |
| 4HLZ   | B_LYS_143 | NZ     | A_ASP_11  | OD2    | 3.714        |
| 4HLZ   | B_LYS_143 | NZ     | B_ASP_29  | OD1    | 3.825        |
| 4HLZ   | B_LYS_143 | NZ     | B_ASP_29  | OD2    | 2.836        |
| 4HLZ   | B_ARG_170 | NH1    | B_ASP_128 | OD2    | 3.529        |
| 4HLZ   | B_ARG_170 | NH2    | B_ASP_128 | OD2    | 3.130        |
| 4HLZ   | C_ARG_32  | NH1    | F_GLU_57  | OE1    | 3.413        |
| 4HLZ   | C_LYS_45  | NZ     | C_ASP_41  | OD1    | 3.408        |
| 4HLZ   | C_LYS_45  | NZ     | C_ASP_41  | OD2    | 2.813        |
| 4HLZ   | C_LYS_90  | NZ     | C_ASP_63  | OD1    | 3.022        |
| 4HLZ   | C_LYS_90  | NZ     | C_ASP_63  | OD2    | 3.647        |
| 4HLZ   | C_ARG_94  | NH1    | C_GLU_75  | OE1    | 3.383        |
| 4HLZ   | C_ARG_94  | NH1    | C_ASP_95  | OD1    | 3.179        |
| 4HLZ   | C_ARG_94  | NH1    | C_ASP_95  | OD2    | 3.935        |
| 4HLZ   | C_LYS_109 | NZ     | C_GLU_89  | OE1    | 2.906        |
| 4HLZ   | C_LYS_109 | NZ     | C_GLU_89  | OE2    | 3.287        |

|      |           |     |            |     |       |
|------|-----------|-----|------------|-----|-------|
| 4HLZ | C_LYS_109 | NZ  | D_GLU_69   | OE1 | 2.904 |
| 4HLZ | C_LYS_109 | NZ  | D_GLU_69   | OE2 | 3.394 |
| 4HLZ | C_ARG_126 | NH2 | C_ASP_125  | OD2 | 3.430 |
| 4HLZ | C_ARG_149 | NH1 | C_ASP_77   | OD2 | 3.631 |
| 4HLZ | C_ARG_149 | NH2 | C_ASP_77   | OD1 | 3.636 |
| 4HLZ | C_ARG_149 | NH2 | C_ASP_77   | OD2 | 2.529 |
| 4HLZ | C_HIS_184 | NE2 | C_GLU_231  | OE1 | 3.054 |
| 4HLZ | C_ARG_263 | NH2 | C_GLU_174  | OE1 | 2.955 |
| 4HLZ | C_ARG_263 | NH2 | C_GLU_174  | OE2 | 3.891 |
| 4HLZ | C_LYS_269 | NZ  | C_GLU_89   | OE1 | 2.769 |
| 4HLZ | C_LYS_310 | NZ  | D_ASP_86   | OD2 | 2.827 |
| 4HLZ | C_LYS_310 | NZ  | D_ASP_90   | OD1 | 2.357 |
| 4HLZ | C_LYS_310 | NZ  | D_ASP_90   | OD2 | 3.459 |
| 4HLZ | C_LYS_313 | NZ  | C_ASP_27   | OD2 | 2.972 |
| 4HLZ | C_ARG_321 | NH1 | C_GLU_31   | OE1 | 3.468 |
| 4HLZ | C_ARG_321 | NH1 | C_GLU_31   | OE2 | 3.239 |
| 4HLZ | C_ARG_321 | NH2 | C_GLU_31   | OE1 | 3.056 |
| 4HLZ | C_ARG_321 | NH2 | C_GLU_31   | OE2 | 3.827 |
| 4HLZ | D_LYS_51  | NZ  | D_GLU_103  | OE1 | 2.956 |
| 4HLZ | D_LYS_58  | NZ  | B_GLU_97   | OE1 | 2.796 |
| 4HLZ | D_LYS_58  | NZ  | D_GLU_57   | OE2 | 3.744 |
| 4HLZ | D_ARG_75  | NH1 | D_GLU_78   | OE1 | 3.640 |
| 4HLZ | D_ARG_75  | NH1 | D_GLU_78   | OE2 | 2.859 |
| 4HLZ | D_ARG_76  | NH1 | F_GLU_74   | OE1 | 3.279 |
| 4HLZ | D_ARG_76  | NH1 | F_GLU_74   | OE2 | 2.976 |
| 4HLZ | D_ARG_76  | NH2 | E_GLU_107  | OE2 | 3.277 |
| 4HLZ | D_ARG_76  | NH2 | F_GLU_74   | OE2 | 2.480 |
| 4HLZ | D_LYS_83  | NZ  | F_GLU_85   | OE2 | 2.714 |
| 4HLZ | D_ARG_106 | NH2 | B_ASP_109  | OD2 | 3.865 |
| 4HLZ | D_LYS_116 | NZ  | D_ASP_120  | OD2 | 3.998 |
| 4HLZ | D_ARG_123 | NH2 | D_ASP_120  | OD1 | 2.808 |
| 4HLZ | D_LYS_131 | NZ  | F_ASP_128  | OD1 | 3.317 |
| 4HLZ | D_LYS_167 | NZ  | D_GLU_164  | OE1 | 2.593 |
| 4HLZ | E_LYS_45  | NZ  | E_ASP_41   | OD1 | 3.643 |
| 4HLZ | E_LYS_45  | NZ  | E_ASP_41   | OD2 | 2.964 |
| 4HLZ | E_LYS_90  | NZ  | E_ASP_63   | OD1 | 3.784 |
| 4HLZ | E_LYS_109 | NZ  | E_GLU_89   | OE1 | 3.198 |
| 4HLZ | E_LYS_109 | NZ  | E_GLU_89   | OE2 | 3.420 |
| 4HLZ | E_LYS_109 | NZ  | F_GLU_69   | OE1 | 2.572 |
| 4HLZ | E_LYS_109 | NZ  | F_GLU_69   | OE2 | 3.930 |
| 4HLZ | E_LYS_123 | NZ  | E_GLU_255  | OE1 | 3.027 |
| 4HLZ | E_ARG_149 | NH2 | E_ASP_77   | OD1 | 3.597 |
| 4HLZ | E_ARG_149 | NH2 | E_ASP_77   | OD2 | 3.190 |
| 4HLZ | E_HIS_183 | NE2 | E_GLU_190  | OE2 | 3.927 |
| 4HLZ | E_LYS_259 | NZ  | E_GLU_116C | OE1 | 3.783 |
| 4HLZ | E_LYS_259 | NZ  | E_GLU_116C | OE2 | 3.326 |
| 4HLZ | E_LYS_269 | NZ  | E_GLU_89   | OE1 | 3.197 |
| 4HLZ | E_LYS_280 | NZ  | E_GLU_304  | OE1 | 3.278 |
| 4HLZ | E_LYS_310 | NZ  | F_ASP_86   | OD1 | 3.890 |
| 4HLZ | E_LYS_310 | NZ  | F_ASP_90   | OD1 | 3.800 |
| 4HLZ | E_ARG_321 | NH1 | E_GLU_31   | OE1 | 3.413 |
| 4HLZ | E_ARG_321 | NH1 | E_GLU_31   | OE2 | 2.743 |
| 4HLZ | E_ARG_321 | NH2 | E_GLU_31   | OE1 | 3.001 |
| 4HLZ | E_ARG_321 | NH2 | E_GLU_31   | OE2 | 3.732 |
| 4HLZ | F_LYS_51  | NZ  | F_GLU_103  | OE1 | 2.737 |
| 4HLZ | F_LYS_58  | NZ  | D_GLU_97   | OE1 | 3.641 |
| 4HLZ | F_ARG_75  | NH1 | F_GLU_78   | OE1 | 2.620 |
| 4HLZ | F_ARG_75  | NH2 | F_GLU_78   | OE1 | 3.832 |

|      |           |     |           |     |       |
|------|-----------|-----|-----------|-----|-------|
| 4HLZ | F_ARG_76  | NH1 | B_GLU_74  | OE1 | 3.514 |
| 4HLZ | F_ARG_76  | NH1 | B_GLU_74  | OE2 | 3.227 |
| 4HLZ | F_ARG_76  | NH2 | B_GLU_74  | OE1 | 3.962 |
| 4HLZ | F_ARG_76  | NH2 | B_GLU_74  | OE2 | 2.467 |
| 4HLZ | F_ARG_106 | NH1 | F_GLU_103 | OE2 | 3.652 |
| 4HLZ | F_LYS_116 | NZ  | F_ASP_120 | OD2 | 2.737 |
| 4HLZ | F_ARG_123 | NH2 | F_ASP_120 | OD1 | 2.964 |
| 4HLZ | F_LYS_131 | NZ  | F_GLU_139 | OE1 | 3.361 |
| 4HLZ | F_LYS_131 | NZ  | F_GLU_139 | OE2 | 3.419 |
| 4HLZ | F_LYS_143 | NZ  | F_ASP_29  | OD1 | 2.830 |
| 4HLZ | F_ARG_170 | NH1 | F_ASP_128 | OD2 | 3.604 |
| 4HLZ | F_ARG_170 | NH2 | F_ASP_128 | OD2 | 3.330 |
| 4HLZ | G_ARG_38  | NH1 | G_ASP_86  | OD1 | 3.271 |
| 4HLZ | G_ARG_38  | NH2 | G_GLU_46  | OE1 | 3.356 |
| 4HLZ | G_ARG_38  | NH2 | G_GLU_46  | OE2 | 3.777 |
| 4HLZ | G_ARG_38  | NH2 | G_ASP_86  | OD1 | 3.890 |
| 4HLZ | G_ARG_52  | NH2 | G_ASP_32  | OD1 | 2.343 |
| 4HLZ | G_ARG_52  | NH2 | G_ASP_32  | OD2 | 3.536 |
| 4HLZ | G_ARG_66  | NH1 | G_ASP_86  | OD1 | 3.326 |
| 4HLZ | G_ARG_66  | NH1 | G_ASP_86  | OD2 | 2.639 |
| 4HLZ | G_ARG_66  | NH2 | G_ASP_86  | OD1 | 3.814 |
| 4HLZ | G_ARG_83  | NH1 | G_GLU_85  | OE1 | 3.950 |
| 4HLZ | H_ARG_63  | NH2 | H_ASP_84  | OD1 | 2.596 |
| 4HLZ | H_ARG_63  | NH2 | H_ASP_84  | OD2 | 2.745 |
| 4HLZ | H_LYS_144 | NZ  | H_GLU_107 | OE1 | 3.903 |
| 4HLZ | H_LYS_144 | NZ  | H_GLU_107 | OE2 | 3.652 |
| 4HLZ | H_LYS_151 | NZ  | H_GLU_197 | OE1 | 3.384 |
| 4HLZ | H_LYS_151 | NZ  | H_GLU_197 | OE2 | 3.081 |
| 4HLZ | H_LYS_201 | NZ  | H_ASP_112 | OD2 | 3.156 |
| 4HLZ | H_ARG_213 | NH2 | H_GLU_189 | OE1 | 2.950 |
| 4HLZ | I_ARG_38  | NH1 | I_ASP_86  | OD2 | 2.915 |
| 4HLZ | I_ARG_38  | NH2 | I_GLU_46  | OE1 | 3.111 |
| 4HLZ | I_ARG_38  | NH2 | I_GLU_46  | OE2 | 3.673 |
| 4HLZ | I_ARG_38  | NH2 | I_ASP_86  | OD2 | 3.591 |
| 4HLZ | I_ARG_52  | NH2 | I_ASP_32  | OD1 | 2.561 |
| 4HLZ | I_ARG_52  | NH2 | I_ASP_32  | OD2 | 3.549 |
| 4HLZ | I_ARG_66  | NH1 | I_ASP_86  | OD1 | 2.650 |
| 4HLZ | I_ARG_66  | NH1 | I_ASP_86  | OD2 | 3.900 |
| 4HLZ | I_ARG_66  | NH2 | I_ASP_86  | OD1 | 3.129 |
| 4HLZ | I_ARG_66  | NH2 | I_ASP_86  | OD2 | 2.801 |
| 4HLZ | I_ARG_71  | NH2 | I_ASP_31  | OD2 | 3.990 |
| 4HLZ | I_ARG_83  | NH2 | I_GLU_85  | OE1 | 3.778 |
| 4HLZ | I_LYS_96  | NZ  | D_ASP_46  | OD1 | 2.912 |
| 4HLZ | I_LYS_96  | NZ  | D_ASP_46  | OD2 | 3.655 |
| 4HLZ | I_LYS_205 | NZ  | I_ASP_207 | OD1 | 2.427 |
| 4HLZ | I_LYS_208 | NZ  | J_GLU_125 | OE2 | 3.495 |
| 4HLZ | I_ARG_213 | NH2 | J_GLU_125 | OE1 | 3.227 |
| 4HLZ | I_ARG_213 | NH2 | J_GLU_125 | OE2 | 3.829 |
| 4HLZ | J_ARG_63  | NH2 | J_ASP_84  | OD2 | 2.740 |
| 4HLZ | J_LYS_149 | NZ  | J_GLU_156 | OE2 | 3.758 |
| 4HLZ | J_LYS_151 | NZ  | J_GLU_197 | OE2 | 2.583 |
| 4HLZ | J_ARG_157 | NH2 | J_GLU_187 | OE1 | 3.252 |
| 4HLZ | J_ARG_190 | NH1 | J_ASP_186 | OD2 | 3.881 |
| 4HLZ | J_ARG_190 | NH2 | J_ASP_186 | OD2 | 3.287 |
| 4HLZ | J_LYS_201 | NZ  | J_ASP_112 | OD1 | 3.693 |
| 4HLZ | J_LYS_201 | NZ  | J_ASP_112 | OD2 | 2.715 |
| 4HLZ | K_ARG_38  | NH1 | K_ASP_86  | OD2 | 2.904 |
| 4HLZ | K_ARG_38  | NH2 | K_GLU_46  | OE1 | 3.825 |

|      |           |     |           |     |       |
|------|-----------|-----|-----------|-----|-------|
| 4HLZ | K_ARG_38  | NH2 | K_GLU_46  | OE2 | 3.374 |
| 4HLZ | K_ARG_38  | NH2 | K_ASP_86  | OD2 | 3.795 |
| 4HLZ | K_ARG_52  | NH2 | K_ASP_32  | OD2 | 3.514 |
| 4HLZ | K_ARG_66  | NH1 | K_ASP_86  | OD1 | 2.524 |
| 4HLZ | K_ARG_66  | NH2 | K_ASP_86  | OD1 | 2.641 |
| 4HLZ | K_ARG_66  | NH2 | K_ASP_86  | OD2 | 2.778 |
| 4HLZ | L_ARG_63  | NH2 | L_ASP_84  | OD1 | 3.511 |
| 4HLZ | L_ARG_63  | NH2 | L_ASP_84  | OD2 | 3.426 |
| 4HLZ | L_LYS_151 | NZ  | L_GLU_197 | OE2 | 3.915 |

Table 536: 4HLZ-specific salt bridging networks analysis. In this table, a PDB file is specified with a four-letter PDB ID, except that the names of the PDB files corresponding to the single NMR structural model split from the NMR ensemble is specified with a four-letter PDB ID in addition to a hyphen followed by the single NMR structural model numeric ID, the residue naming scheme is **Chain ID\_residue name\_residue number**,  $\angle ADH$  represents the angle formed by acceptor (A), donor (D) and hydrogen (H) ( $\angle ADH$ ).

| PDB ID | Residue A | Atom A | Residue B | Atom B | Distance (Å) |
|--------|-----------|--------|-----------|--------|--------------|
| 4HMG   | A.LYS_27  | NZ     | B.GLU_97  | OE1    | 2.795        |
| 4HMG   | A.LYS_27  | NZ     | B.GLU_97  | OE2    | 3.247        |
| 4HMG   | A.LYS_50  | NZ     | A.ASP_275 | OD1    | 2.738        |
| 4HMG   | A.HIS_56  | NE2    | A.GLU_280 | OE2    | 3.458        |
| 4HMG   | A.ARG_57  | NH1    | A.GLU_82  | OE1    | 2.930        |
| 4HMG   | A.ARG_57  | NH1    | A.GLU_82  | OE2    | 3.739        |
| 4HMG   | A.ARG_57  | NH2    | A.GLU_82  | OE1    | 3.316        |
| 4HMG   | A.HIS_75  | ND1    | A.ASP_73  | OD1    | 2.731        |
| 4HMG   | A.HIS_75  | ND1    | A.ASP_73  | OD2    | 3.421        |
| 4HMG   | A.HIS_75  | NE2    | A.ASP_63  | OD1    | 3.435        |
| 4HMG   | A.ARG_90  | NH1    | A.ASP_60  | OD1    | 2.846        |
| 4HMG   | A.ARG_90  | NH1    | A.ASP_60  | OD2    | 3.713        |
| 4HMG   | A.ARG_109 | NH1    | B.GLU_67  | OE1    | 3.584        |
| 4HMG   | A.ARG_109 | NH1    | B.GLU_67  | OE2    | 2.773        |
| 4HMG   | A.ARG_109 | NH2    | A.GLU_89  | OE1    | 3.290        |
| 4HMG   | A.ARG_109 | NH2    | A.GLU_89  | OE2    | 2.543        |
| 4HMG   | A.ARG_141 | NH1    | A.ASP_77  | OD1    | 2.714        |
| 4HMG   | A.ARG_141 | NH1    | A.ASP_77  | OD2    | 3.370        |
| 4HMG   | A.ARG_141 | NH2    | A.ASP_77  | OD1    | 2.707        |
| 4HMG   | A.LYS_176 | NZ     | A.GLU_123 | OE1    | 2.555        |
| 4HMG   | A.LYS_176 | NZ     | A.GLU_123 | OE2    | 3.715        |
| 4HMG   | A.HIS_183 | NE2    | A.GLU_190 | OE1    | 3.735        |
| 4HMG   | A.ARG_207 | NH2    | A.ASP_241 | OD1    | 3.612        |
| 4HMG   | A.ARG_208 | NH2    | A.ASP_241 | OD1    | 3.591        |
| 4HMG   | A.ARG_208 | NH2    | A.ASP_241 | OD2    | 2.706        |
| 4HMG   | A.LYS_238 | NZ     | A.ASP_175 | OD1    | 2.945        |
| 4HMG   | A.LYS_238 | NZ     | A.ASP_175 | OD2    | 2.559        |
| 4HMG   | A.LYS_238 | NZ     | F.GLU_72  | OE2    | 2.782        |
| 4HMG   | A.ARG_261 | NH1    | A.GLU_119 | OE1    | 3.272        |
| 4HMG   | A.ARG_261 | NH1    | A.GLU_119 | OE2    | 3.090        |
| 4HMG   | A.ARG_261 | NH2    | A.GLU_119 | OE1    | 2.807        |
| 4HMG   | A.ARG_261 | NH2    | A.GLU_119 | OE2    | 2.795        |
| 4HMG   | A.LYS_264 | NZ     | A.ASP_85  | OD1    | 3.254        |
| 4HMG   | A.LYS_264 | NZ     | A.ASP_85  | OD2    | 2.704        |
| 4HMG   | A.ARG_269 | NH2    | B.GLU_67  | OE1    | 2.783        |
| 4HMG   | A.LYS_292 | NZ     | A.ASP_291 | OD1    | 2.976        |
| 4HMG   | A.LYS_292 | NZ     | A.ASP_291 | OD2    | 2.795        |
| 4HMG   | A.LYS_310 | NZ     | B.ASP_90  | OD1    | 3.350        |
| 4HMG   | A.LYS_310 | NZ     | B.ASP_90  | OD2    | 2.711        |
| 4HMG   | A.LYS_315 | NZ     | A.GLU_41  | OE2    | 3.691        |
| 4HMG   | B.LYS_51  | NZ     | B.GLU_103 | OE2    | 2.574        |
| 4HMG   | B.ARG_54  | NH1    | F.GLU_97  | OE1    | 3.078        |
| 4HMG   | B.ARG_54  | NH2    | B.GLU_57  | OE1    | 2.870        |
| 4HMG   | B.ARG_54  | NH2    | B.GLU_57  | OE2    | 3.339        |
| 4HMG   | B.ARG_54  | NH2    | E.ASP_32  | OD2    | 3.863        |
| 4HMG   | B.ARG_54  | NH2    | F.GLU_97  | OE1    | 3.088        |
| 4HMG   | B.LYS_62  | NZ     | F.ASP_86  | OD1    | 2.890        |
| 4HMG   | B.LYS_62  | NZ     | F.ASP_86  | OD2    | 2.630        |
| 4HMG   | B.LYS_62  | NZ     | F.ASP_90  | OD1    | 3.620        |
| 4HMG   | B.LYS_62  | NZ     | F.ASP_90  | OD2    | 3.931        |
| 4HMG   | B.HIS_64  | NE2    | F.ASP_79  | OD2    | 3.785        |
| 4HMG   | B.LYS_68  | NZ     | B.GLU_85  | OE1    | 2.990        |
| 4HMG   | B.LYS_68  | NZ     | B.GLU_85  | OE2    | 2.568        |
| 4HMG   | B.ARG_76  | NH1    | D.GLU_74  | OE1    | 2.796        |
| 4HMG   | B.ARG_76  | NH1    | D.GLU_74  | OE2    | 3.711        |
| 4HMG   | B.ARG_76  | NH1    | D.GLU_81  | OE1    | 2.672        |
| 4HMG   | B.ARG_76  | NH1    | D.GLU_81  | OE2    | 3.308        |

|      |           |     |           |     |       |
|------|-----------|-----|-----------|-----|-------|
| 4HMG | B_ARG_76  | NH2 | D_GLU_74  | OE1 | 3.404 |
| 4HMG | B_ARG_76  | NH2 | D_GLU_74  | OE2 | 2.827 |
| 4HMG | B_LYS_117 | NZ  | B_GLU_114 | OE1 | 2.600 |
| 4HMG | B_LYS_117 | NZ  | B_GLU_114 | OE2 | 3.394 |
| 4HMG | B_ARG_123 | NH1 | F_GLU_132 | OE2 | 3.178 |
| 4HMG | B_ARG_123 | NH2 | B_GLU_120 | OE1 | 2.819 |
| 4HMG | B_ARG_123 | NH2 | B_GLU_120 | OE2 | 2.567 |
| 4HMG | B_ARG_124 | NH1 | F_GLU_132 | OE1 | 3.359 |
| 4HMG | B_ARG_124 | NH1 | F_GLU_132 | OE2 | 3.102 |
| 4HMG | B_ARG_124 | NH2 | B_GLU_120 | OE2 | 3.559 |
| 4HMG | B_ARG_127 | NH2 | F_GLU_131 | OE1 | 2.525 |
| 4HMG | B_LYS_143 | NZ  | B_ASP_145 | OD2 | 3.353 |
| 4HMG | B_HIS_159 | NE2 | B_ASP_160 | OD1 | 3.910 |
| 4HMG | B_HIS_159 | NE2 | B_ASP_160 | OD2 | 3.133 |
| 4HMG | B_ARG_163 | NH1 | F_GLU_131 | OE1 | 3.338 |
| 4HMG | B_ARG_163 | NH1 | F_GLU_131 | OE2 | 2.796 |
| 4HMG | B_ARG_163 | NH2 | F_GLU_131 | OE1 | 2.694 |
| 4HMG | B_ARG_163 | NH2 | F_GLU_131 | OE2 | 3.492 |
| 4HMG | B_ARG_170 | NH1 | B_GLU_128 | OE1 | 2.770 |
| 4HMG | B_ARG_170 | NH2 | B_GLU_131 | OE2 | 2.764 |
| 4HMG | B_ARG_170 | NH2 | D_GLU_128 | OE1 | 3.784 |
| 4HMG | B_ARG_170 | NH2 | D_GLU_128 | OE2 | 3.698 |
| 4HMG | C_LYS_27  | NZ  | D_GLU_97  | OE1 | 2.789 |
| 4HMG | C_LYS_27  | NZ  | D_GLU_97  | OE2 | 3.246 |
| 4HMG | C_LYS_50  | NZ  | C_ASP_275 | OD1 | 2.725 |
| 4HMG | C_HIS_56  | NE2 | C_GLU_280 | OE2 | 3.428 |
| 4HMG | C_ARG_57  | NH1 | C_GLU_82  | OE1 | 2.906 |
| 4HMG | C_ARG_57  | NH1 | C_GLU_82  | OE2 | 3.723 |
| 4HMG | C_ARG_57  | NH2 | C_GLU_82  | OE1 | 3.281 |
| 4HMG | C_HIS_75  | ND1 | C_ASP_73  | OD1 | 2.703 |
| 4HMG | C_HIS_75  | ND1 | C_ASP_73  | OD2 | 3.384 |
| 4HMG | C_HIS_75  | NE2 | C_ASP_63  | OD1 | 3.436 |
| 4HMG | C_ARG_90  | NH1 | C_ASP_60  | OD1 | 2.839 |
| 4HMG | C_ARG_90  | NH1 | C_ASP_60  | OD2 | 3.741 |
| 4HMG | C_ARG_109 | NH1 | D_GLU_67  | OE1 | 3.616 |
| 4HMG | C_ARG_109 | NH1 | D_GLU_67  | OE2 | 2.791 |
| 4HMG | C_ARG_109 | NH2 | C_GLU_89  | OE1 | 3.304 |
| 4HMG | C_ARG_109 | NH2 | C_GLU_89  | OE2 | 2.531 |
| 4HMG | C_ARG_141 | NH1 | C_ASP_77  | OD1 | 2.711 |
| 4HMG | C_ARG_141 | NH1 | C_ASP_77  | OD2 | 3.370 |
| 4HMG | C_ARG_141 | NH2 | C_ASP_77  | OD1 | 2.681 |
| 4HMG | C_LYS_176 | NZ  | C_GLU_123 | OE1 | 2.557 |
| 4HMG | C_LYS_176 | NZ  | C_GLU_123 | OE2 | 3.685 |
| 4HMG | C_HIS_183 | NE2 | C_GLU_190 | OE1 | 3.742 |
| 4HMG | C_ARG_207 | NH2 | C_ASP_241 | OD1 | 3.569 |
| 4HMG | C_ARG_208 | NH2 | C_ASP_241 | OD1 | 3.571 |
| 4HMG | C_ARG_208 | NH2 | C_ASP_241 | OD2 | 2.695 |
| 4HMG | C_LYS_238 | NZ  | B_GLU_72  | OE2 | 2.606 |
| 4HMG | C_LYS_238 | NZ  | C_ASP_175 | OD1 | 2.940 |
| 4HMG | C_LYS_238 | NZ  | C_ASP_175 | OD2 | 2.570 |
| 4HMG | C_ARG_261 | NH1 | C_GLU_119 | OE1 | 3.250 |
| 4HMG | C_ARG_261 | NH1 | C_GLU_119 | OE2 | 3.087 |
| 4HMG | C_ARG_261 | NH2 | C_GLU_119 | OE1 | 2.811 |
| 4HMG | C_ARG_261 | NH2 | C_GLU_119 | OE2 | 2.823 |
| 4HMG | C_LYS_264 | NZ  | C_ASP_85  | OD1 | 3.271 |
| 4HMG | C_LYS_264 | NZ  | C_ASP_85  | OD2 | 2.729 |
| 4HMG | C_ARG_269 | NH2 | D_GLU_67  | OE1 | 2.764 |
| 4HMG | C_LYS_292 | NZ  | C_ASP_291 | OD1 | 2.981 |



|      |           |     |           |     |       |
|------|-----------|-----|-----------|-----|-------|
| 4HMG | C_LYS_292 | NZ  | C_ASP_291 | OD2 | 2.812 |
| 4HMG | C_LYS_310 | NZ  | D_ASP_90  | OD1 | 3.321 |
| 4HMG | C_LYS_310 | NZ  | D_ASP_90  | OD2 | 2.697 |
| 4HMG | C_LYS_315 | NZ  | C_GLU_41  | OE2 | 3.694 |
| 4HMG | C_LYS_326 | NZ  | D_GLU_15  | OE1 | 3.836 |
| 4HMG | C_LYS_326 | NZ  | D_GLU_15  | OE2 | 2.684 |
| 4HMG | D_LYS_51  | NZ  | D_GLU_103 | OE2 | 2.595 |
| 4HMG | D_ARG_54  | NH1 | B_GLU_97  | OE1 | 3.076 |
| 4HMG | D_ARG_54  | NH2 | A_ASP_32  | OD2 | 3.995 |
| 4HMG | D_ARG_54  | NH2 | B_GLU_97  | OE1 | 3.112 |
| 4HMG | D_ARG_54  | NH2 | D_GLU_57  | OE1 | 2.847 |
| 4HMG | D_ARG_54  | NH2 | D_GLU_57  | OE2 | 3.364 |
| 4HMG | D_LYS_62  | NZ  | B_ASP_86  | OD1 | 2.940 |
| 4HMG | D_LYS_62  | NZ  | B_ASP_86  | OD2 | 2.591 |
| 4HMG | D_LYS_62  | NZ  | B_ASP_90  | OD1 | 3.586 |
| 4HMG | D_LYS_62  | NZ  | B_ASP_90  | OD2 | 3.891 |
| 4HMG | D_HIS_64  | NE2 | B_ASP_79  | OD2 | 3.731 |
| 4HMG | D_LYS_68  | NZ  | D_GLU_85  | OE1 | 2.969 |
| 4HMG | D_LYS_68  | NZ  | D_GLU_85  | OE2 | 2.606 |
| 4HMG | D_ARG_76  | NH1 | F_GLU_74  | OE1 | 2.745 |
| 4HMG | D_ARG_76  | NH1 | F_GLU_74  | OE2 | 3.756 |
| 4HMG | D_ARG_76  | NH1 | F_GLU_81  | OE1 | 2.644 |
| 4HMG | D_ARG_76  | NH1 | F_GLU_81  | OE2 | 3.314 |
| 4HMG | D_ARG_76  | NH2 | F_GLU_74  | OE1 | 3.255 |
| 4HMG | D_ARG_76  | NH2 | F_GLU_74  | OE2 | 2.777 |
| 4HMG | D_LYS_117 | NZ  | D_GLU_114 | OE1 | 2.606 |
| 4HMG | D_LYS_117 | NZ  | D_GLU_114 | OE2 | 3.387 |
| 4HMG | D_ARG_123 | NH1 | B_GLU_132 | OE2 | 3.157 |
| 4HMG | D_ARG_123 | NH2 | D_GLU_120 | OE1 | 2.828 |
| 4HMG | D_ARG_123 | NH2 | D_GLU_120 | OE2 | 2.538 |
| 4HMG | D_ARG_124 | NH1 | B_GLU_132 | OE1 | 3.347 |
| 4HMG | D_ARG_124 | NH1 | B_GLU_132 | OE2 | 3.074 |
| 4HMG | D_ARG_124 | NH2 | D_GLU_120 | OE2 | 3.592 |
| 4HMG | D_ARG_127 | NH2 | B_GLU_131 | OE1 | 2.541 |
| 4HMG | D_LYS_143 | NZ  | D_ASP_145 | OD2 | 3.357 |
| 4HMG | D_HIS_159 | NE2 | D_ASP_160 | OD1 | 3.925 |
| 4HMG | D_HIS_159 | NE2 | D_ASP_160 | OD2 | 3.140 |
| 4HMG | D_ARG_163 | NH1 | B_GLU_131 | OE1 | 3.321 |
| 4HMG | D_ARG_163 | NH1 | B_GLU_131 | OE2 | 2.801 |
| 4HMG | D_ARG_163 | NH2 | B_GLU_131 | OE1 | 2.729 |
| 4HMG | D_ARG_163 | NH2 | B_GLU_131 | OE2 | 3.526 |
| 4HMG | D_ARG_170 | NH1 | D_GLU_128 | OE1 | 2.798 |
| 4HMG | D_ARG_170 | NH2 | D_GLU_131 | OE2 | 2.778 |
| 4HMG | D_ARG_170 | NH2 | F_GLU_128 | OE1 | 3.859 |
| 4HMG | D_ARG_170 | NH2 | F_GLU_128 | OE2 | 3.829 |
| 4HMG | E_LYS_27  | NZ  | F_GLU_97  | OE1 | 2.764 |
| 4HMG | E_LYS_27  | NZ  | F_GLU_97  | OE2 | 3.247 |
| 4HMG | E_LYS_50  | NZ  | E_ASP_275 | OD1 | 2.749 |
| 4HMG | E_HIS_56  | NE2 | E_GLU_280 | OE2 | 3.460 |
| 4HMG | E_ARG_57  | NH1 | E_GLU_82  | OE1 | 2.908 |
| 4HMG | E_ARG_57  | NH1 | E_GLU_82  | OE2 | 3.750 |
| 4HMG | E_ARG_57  | NH2 | E_GLU_82  | OE1 | 3.320 |
| 4HMG | E_HIS_75  | ND1 | E_ASP_73  | OD1 | 2.714 |
| 4HMG | E_HIS_75  | ND1 | E_ASP_73  | OD2 | 3.391 |
| 4HMG | E_HIS_75  | NE2 | E_ASP_63  | OD1 | 3.445 |
| 4HMG | E_ARG_90  | NH1 | E_ASP_60  | OD1 | 2.880 |
| 4HMG | E_ARG_90  | NH1 | E_ASP_60  | OD2 | 3.726 |
| 4HMG | E_ARG_109 | NH1 | F_GLU_67  | OE1 | 3.614 |

|      |           |     |           |     |       |
|------|-----------|-----|-----------|-----|-------|
| 4HMG | E_ARG_109 | NH1 | F_GLU_67  | OE2 | 2.773 |
| 4HMG | E_ARG_109 | NH2 | E_GLU_89  | OE1 | 3.299 |
| 4HMG | E_ARG_109 | NH2 | E_GLU_89  | OE2 | 2.546 |
| 4HMG | E_ARG_141 | NH1 | E_ASP_77  | OD1 | 2.709 |
| 4HMG | E_ARG_141 | NH1 | E_ASP_77  | OD2 | 3.383 |
| 4HMG | E_ARG_141 | NH2 | E_ASP_77  | OD1 | 2.687 |
| 4HMG | E_LYS_176 | NZ  | E_GLU_123 | OE1 | 2.598 |
| 4HMG | E_LYS_176 | NZ  | E_GLU_123 | OE2 | 3.726 |
| 4HMG | E_HIS_183 | NE2 | E_GLU_190 | OE1 | 3.747 |
| 4HMG | E_ARG_207 | NH2 | E_ASP_241 | OD1 | 3.575 |
| 4HMG | E_ARG_208 | NH2 | E_ASP_241 | OD1 | 3.603 |
| 4HMG | E_ARG_208 | NH2 | E_ASP_241 | OD2 | 2.770 |
| 4HMG | E_LYS_238 | NZ  | D_GLU_72  | OE2 | 2.707 |
| 4HMG | E_LYS_238 | NZ  | E_ASP_175 | OD1 | 2.946 |
| 4HMG | E_LYS_238 | NZ  | E_ASP_175 | OD2 | 2.555 |
| 4HMG | E_ARG_261 | NH1 | E_GLU_119 | OE1 | 3.244 |
| 4HMG | E_ARG_261 | NH1 | E_GLU_119 | OE2 | 3.073 |
| 4HMG | E_ARG_261 | NH2 | E_GLU_119 | OE1 | 2.813 |
| 4HMG | E_ARG_261 | NH2 | E_GLU_119 | OE2 | 2.815 |
| 4HMG | E_LYS_264 | NZ  | E_ASP_85  | OD1 | 3.266 |
| 4HMG | E_LYS_264 | NZ  | E_ASP_85  | OD2 | 2.734 |
| 4HMG | E_ARG_269 | NH2 | F_GLU_67  | OE1 | 2.739 |
| 4HMG | E_LYS_292 | NZ  | E_ASP_291 | OD1 | 3.009 |
| 4HMG | E_LYS_292 | NZ  | E_ASP_291 | OD2 | 2.847 |
| 4HMG | E_LYS_310 | NZ  | F_ASP_90  | OD1 | 3.300 |
| 4HMG | E_LYS_310 | NZ  | F_ASP_90  | OD2 | 2.685 |
| 4HMG | E_LYS_315 | NZ  | E_GLU_41  | OE2 | 3.689 |
| 4HMG | F_ARG_25  | NH1 | E_GLU_325 | OE1 | 3.853 |
| 4HMG | F_LYS_51  | NZ  | F_GLU_103 | OE2 | 2.620 |
| 4HMG | F_ARG_54  | NH1 | D_GLU_97  | OE1 | 3.052 |
| 4HMG | F_ARG_54  | NH2 | C_ASP_32  | OD2 | 3.923 |
| 4HMG | F_ARG_54  | NH2 | D_GLU_97  | OE1 | 3.130 |
| 4HMG | F_ARG_54  | NH2 | F_GLU_57  | OE1 | 2.861 |
| 4HMG | F_ARG_54  | NH2 | F_GLU_57  | OE2 | 3.350 |
| 4HMG | F_LYS_62  | NZ  | D_ASP_86  | OD1 | 2.900 |
| 4HMG | F_LYS_62  | NZ  | D_ASP_86  | OD2 | 2.597 |
| 4HMG | F_LYS_62  | NZ  | D_ASP_90  | OD1 | 3.664 |
| 4HMG | F_LYS_62  | NZ  | D_ASP_90  | OD2 | 3.951 |
| 4HMG | F_HIS_64  | NE2 | D_ASP_79  | OD2 | 3.646 |
| 4HMG | F_LYS_68  | NZ  | F_GLU_85  | OE1 | 3.007 |
| 4HMG | F_LYS_68  | NZ  | F_GLU_85  | OE2 | 2.563 |
| 4HMG | F_ARG_76  | NH1 | B_GLU_74  | OE1 | 2.714 |
| 4HMG | F_ARG_76  | NH1 | B_GLU_74  | OE2 | 3.687 |
| 4HMG | F_ARG_76  | NH1 | B_GLU_81  | OE1 | 2.651 |
| 4HMG | F_ARG_76  | NH1 | B_GLU_81  | OE2 | 3.434 |
| 4HMG | F_ARG_76  | NH2 | B_GLU_74  | OE1 | 3.281 |
| 4HMG | F_ARG_76  | NH2 | B_GLU_74  | OE2 | 2.711 |
| 4HMG | F_LYS_117 | NZ  | F_GLU_114 | OE1 | 2.613 |
| 4HMG | F_LYS_117 | NZ  | F_GLU_114 | OE2 | 3.409 |
| 4HMG | F_ARG_123 | NH1 | D_GLU_132 | OE2 | 3.178 |
| 4HMG | F_ARG_123 | NH2 | F_GLU_120 | OE1 | 2.836 |
| 4HMG | F_ARG_123 | NH2 | F_GLU_120 | OE2 | 2.539 |
| 4HMG | F_ARG_124 | NH1 | D_GLU_132 | OE1 | 3.402 |
| 4HMG | F_ARG_124 | NH1 | D_GLU_132 | OE2 | 3.132 |
| 4HMG | F_ARG_124 | NH2 | F_GLU_120 | OE2 | 3.562 |
| 4HMG | F_ARG_127 | NH2 | D_GLU_131 | OE1 | 2.579 |
| 4HMG | F_LYS_143 | NZ  | F_ASP_145 | OD2 | 3.346 |
| 4HMG | F_ARG_153 | NH2 | F_GLU_150 | OE1 | 2.613 |

|      |           |     |           |     |       |
|------|-----------|-----|-----------|-----|-------|
| 4HMG | F_HIS_159 | NE2 | F_ASP_160 | OD1 | 3.932 |
| 4HMG | F_HIS_159 | NE2 | F_ASP_160 | OD2 | 3.131 |
| 4HMG | F_ARG_163 | NH1 | D_GLU_131 | OE1 | 3.299 |
| 4HMG | F_ARG_163 | NH1 | D_GLU_131 | OE2 | 2.816 |
| 4HMG | F_ARG_163 | NH2 | D_GLU_131 | OE1 | 2.752 |
| 4HMG | F_ARG_163 | NH2 | D_GLU_131 | OE2 | 3.575 |
| 4HMG | F_ARG_170 | NH1 | F_GLU_128 | OE1 | 2.781 |
| 4HMG | F_ARG_170 | NH2 | B_GLU_128 | OE1 | 3.815 |
| 4HMG | F_ARG_170 | NH2 | B_GLU_128 | OE2 | 3.719 |
| 4HMG | F_ARG_170 | NH2 | F_GLU_131 | OE2 | 2.764 |

Table 537: 4HMG-specific salt bridging networks analysis. In this table, a PDB file is specified with a four-letter PDB ID, except that the names of the PDB files corresponding to the single NMR structural model split from the NMR ensemble is specified with a four-letter PDB ID in addition to a hyphen followed by the single NMR structural model numeric ID, the residue naming scheme is **Chain ID\_residue name\_residue number**,  $\angle ADH$  represents the angle formed by acceptor (A), donor (D) and hydrogen (H) ( $\angle ADH$ ).

| PDB ID | Residue A | Atom A | Residue B | Atom B | Distance (Å) |
|--------|-----------|--------|-----------|--------|--------------|
| 4HWB   | A_ARG_230 | NH2    | H_ASP_56  | OD2    | 3.246        |
| 4HWB   | A_ARG_285 | NH2    | A_GLU_237 | OE1    | 2.762        |
| 4HWB   | A_ARG_285 | NH2    | A_GLU_237 | OE2    | 3.252        |
| 4HWB   | A_ARG_287 | NH2    | A_GLU_235 | OE1    | 2.730        |
| 4HWB   | A_ARG_287 | NH2    | A_GLU_235 | OE2    | 3.307        |
| 4HWB   | H_ARG_39  | NH2    | H_GLU_47  | OE2    | 3.027        |
| 4HWB   | H_ARG_99  | NH2    | H_ASP_107 | OD1    | 3.362        |
| 4HWB   | H_ARG_99  | NH2    | H_ASP_107 | OD2    | 2.612        |
| 4HWB   | H_LYS_149 | NZ     | H_ASP_150 | OD1    | 3.433        |
| 4HWB   | H_LYS_149 | NZ     | H_ASP_150 | OD2    | 3.050        |
| 4HWB   | H_LYS_215 | NZ     | L_GLU_120 | OE2    | 3.469        |
| 4HWB   | L_ARG_24  | NH1    | L_ASP_71  | OD2    | 3.912        |
| 4HWB   | L_ARG_62  | NH2    | L_GLU_82  | OE1    | 3.563        |
| 4HWB   | L_ARG_62  | NH2    | L_ASP_83  | OD1    | 3.123        |
| 4HWB   | L_ARG_62  | NH2    | L_ASP_83  | OD2    | 3.996        |
| 4HWB   | L_LYS_146 | NZ     | L_GLU_192 | OE2    | 2.824        |
| 4HWB   | L_LYS_180 | NZ     | L_GLU_184 | OE2    | 3.810        |
| 4HWB   | L_HIS_186 | ND1    | L_ASP_148 | OD2    | 3.236        |

Table 538: 4HWB-specific salt bridging networks analysis. In this table, a PDB file is specified with a four-letter PDB ID, except that the names of the PDB files corresponding to the single NMR structural model split from the NMR ensemble is specified with a four-letter PDB ID in addition to a hyphen followed by the single NMR structural model numeric ID, the residue naming scheme is **Chain ID\_residue name\_residue number**,  $\angle ADH$  represents the angle formed by acceptor (A), donor (D) and hydrogen (H) ( $\angle ADH$ ).

| PDB ID | Residue A | Atom A | Residue B | Atom B | Distance (Å) |
|--------|-----------|--------|-----------|--------|--------------|
| 4HXA   | L_HIS_34  | ND1    | L_ASP_50  | OD2    | 3.892        |
| 4HXA   | L_ARG_61  | NH1    | L_GLU_79  | OE1    | 3.572        |
| 4HXA   | L_ARG_61  | NH1    | L_GLU_79  | OE2    | 3.959        |
| 4HXA   | L_ARG_61  | NH2    | L_GLU_79  | OE1    | 3.712        |
| 4HXA   | L_ARG_61  | NH2    | L_GLU_81  | OE2    | 2.919        |
| 4HXA   | L_ARG_61  | NH2    | L_ASP_82  | OD1    | 2.910        |
| 4HXA   | L_ARG_61  | NH2    | L_ASP_82  | OD2    | 3.687        |
| 4HXA   | L_LYS_103 | NZ     | L_ASP_165 | OD1    | 3.306        |
| 4HXA   | L_LYS_142 | NZ     | L_GLU_105 | OE1    | 2.359        |
| 4HXA   | L_LYS_142 | NZ     | L_GLU_105 | OE2    | 3.217        |
| 4HXA   | L_LYS_147 | NZ     | L_GLU_154 | OE2    | 3.699        |
| 4HXA   | L_LYS_183 | NZ     | L_GLU_187 | OE1    | 2.855        |
| 4HXA   | L_LYS_183 | NZ     | L_GLU_187 | OE2    | 3.206        |
| 4HXA   | L_HIS_189 | ND1    | L_ASP_151 | OD1    | 2.656        |
| 4HXA   | L_LYS_199 | NZ     | L_ASP_110 | OD1    | 2.782        |
| 4HXA   | H_ARG_33  | NH2    | H_ASP_53  | OD2    | 3.146        |
| 4HXA   | H_ARG_38  | NH1    | H_ASP_86  | OD1    | 2.911        |
| 4HXA   | H_ARG_38  | NH2    | H_GLU_46  | OE1    | 3.220        |
| 4HXA   | H_ARG_38  | NH2    | H_GLU_46  | OE2    | 3.961        |
| 4HXA   | H_ARG_38  | NH2    | H_ASP_86  | OD1    | 3.758        |
| 4HXA   | H_ARG_66  | NH1    | H_ASP_86  | OD1    | 3.213        |
| 4HXA   | H_ARG_66  | NH1    | H_ASP_86  | OD2    | 3.541        |
| 4HXA   | H_ARG_66  | NH2    | H_ASP_86  | OD1    | 3.547        |
| 4HXA   | H_ARG_66  | NH2    | H_ASP_86  | OD2    | 2.335        |
| 4HXA   | H_ARG_71  | NH2    | H_ASP_73  | OD2    | 3.421        |
| 4HXA   | H_LYS_75  | NZ     | H_ASP_72  | OD1    | 2.706        |
| 4HXA   | H_ARG_94  | NH2    | H_ASP_101 | OD1    | 2.566        |
| 4HXA   | H_ARG_94  | NH2    | H_ASP_101 | OD2    | 3.802        |
| 4HXA   | H_ARG_98  | NH1    | L_ASP_50  | OD1    | 2.959        |
| 4HXA   | H_ARG_98  | NH1    | L_ASP_50  | OD2    | 3.607        |
| 4HXA   | H_HIS_164 | NE2    | L_ASP_167 | OD1    | 3.601        |
| 4HXA   | H_LYS_205 | NZ     | H_ASP_207 | OD1    | 3.339        |
| 4HXA   | H_LYS_205 | NZ     | H_ASP_207 | OD2    | 2.614        |

Table 539: 4HXA-specific salt bridging networks analysis. In this table, a PDB file is specified with a four-letter PDB ID, except that the names of the PDB files corresponding to the single NMR structural model split from the NMR ensemble is specified with a four-letter PDB ID in addition to a hyphen followed by the single NMR structural model numeric ID, the residue naming scheme is **Chain ID\_residue name\_residue number**,  $\angle ADH$  represents the angle formed by acceptor (A), donor (D) and hydrogen (H) ( $\angle ADH$ ).

| PDB ID | Residue A | Atom A | Residue B | Atom B | Distance (Å) |
|--------|-----------|--------|-----------|--------|--------------|
| 4HXB   | L_ARG_61  | NH1    | L_ASP_82  | OD1    | 3.754        |
| 4HXB   | L_ARG_61  | NH1    | L_ASP_82  | OD2    | 2.851        |
| 4HXB   | L_ARG_61  | NH2    | L_GLU_79  | OE2    | 3.892        |
| 4HXB   | L_ARG_61  | NH2    | L_GLU_81  | OE2    | 3.579        |
| 4HXB   | L_ARG_61  | NH2    | L_ASP_82  | OD1    | 2.893        |
| 4HXB   | L_ARG_61  | NH2    | L_ASP_82  | OD2    | 3.275        |
| 4HXB   | L_LYS_147 | NZ     | L_GLU_195 | OE2    | 2.100        |
| 4HXB   | L_LYS_149 | NZ     | L_GLU_195 | OE1    | 2.509        |
| 4HXB   | L_LYS_149 | NZ     | L_GLU_195 | OE2    | 3.644        |
| 4HXB   | L_ARG_155 | NH1    | L_GLU_185 | OE2    | 3.650        |
| 4HXB   | L_ARG_155 | NH2    | L_GLU_185 | OE1    | 2.787        |
| 4HXB   | L_ARG_155 | NH2    | L_GLU_185 | OE2    | 2.877        |
| 4HXB   | L_LYS_183 | NZ     | L_GLU_187 | OE1    | 3.719        |
| 4HXB   | L_HIS_189 | ND1    | L_ASP_151 | OD2    | 2.591        |
| 4HXB   | L_HIS_189 | NE2    | L_GLU_185 | OE2    | 3.681        |
| 4HXB   | L_LYS_199 | NZ     | L_ASP_110 | OD2    | 3.163        |
| 4HXB   | H_LYS_12  | NZ     | H_GLU_10  | OE2    | 3.536        |
| 4HXB   | H_LYS_46  | NZ     | H_ASP_62  | OD2    | 2.395        |
| 4HXB   | H_LYS_64  | NZ     | H_GLU_61  | OE1    | 2.630        |
| 4HXB   | H_LYS_64  | NZ     | H_GLU_61  | OE2    | 2.953        |
| 4HXB   | H_ARG_66  | NH1    | H_ASP_86  | OD1    | 3.620        |
| 4HXB   | H_ARG_66  | NH1    | H_ASP_86  | OD2    | 2.850        |
| 4HXB   | H_ARG_66  | NH2    | H_ASP_86  | OD1    | 2.767        |
| 4HXB   | H_ARG_66  | NH2    | H_ASP_86  | OD2    | 3.484        |
| 4HXB   | H_LYS_83  | NZ     | H_GLU_85  | OE1    | 2.634        |
| 4HXB   | H_ARG_94  | NH1    | H_ASP_101 | OD1    | 3.226        |
| 4HXB   | H_ARG_94  | NH1    | H_ASP_101 | OD2    | 2.767        |
| 4HXB   | H_ARG_96  | NH1    | L_ASP_94  | OD1    | 3.212        |
| 4HXB   | H_ARG_96  | NH1    | L_ASP_94  | OD2    | 2.665        |
| 4HXB   | H_ARG_96  | NH2    | L_ASP_94  | OD1    | 2.669        |
| 4HXB   | H_ARG_96  | NH2    | L_ASP_94  | OD2    | 3.708        |

Table 540: 4HXB-specific salt bridging networks analysis. In this table, a PDB file is specified with a four-letter PDB ID, except that the names of the PDB files corresponding to the single NMR structural model split from the NMR ensemble is specified with a four-letter PDB ID in addition to a hyphen followed by the single NMR structural model numeric ID, the residue naming scheme is **Chain ID\_residue name\_residue number**,  $\angle ADH$  represents the angle formed by acceptor (A), donor (D) and hydrogen (H) ( $\angle ADH$ ).

| PDB ID | Residue A | Atom A | Residue B | Atom B | Distance (Å) |
|--------|-----------|--------|-----------|--------|--------------|
| 4I2X   | A_LYS_24  | NZ     | A_ASP_70  | OD1    | 3.809        |
| 4I2X   | A_ARG_61  | NH2    | A_ASP_82  | OD1    | 2.612        |
| 4I2X   | A_ARG_61  | NH2    | A_ASP_82  | OD2    | 3.075        |
| 4I2X   | A_LYS_147 | NZ     | A_GLU_154 | OE2    | 3.876        |
| 4I2X   | A_LYS_149 | NZ     | A_GLU_195 | OE2    | 3.016        |
| 4I2X   | A_ARG_155 | NH2    | A_GLU_185 | OE1    | 2.492        |
| 4I2X   | A_LYS_199 | NZ     | A_ASP_110 | OD2    | 3.998        |
| 4I2X   | A_ARG_211 | NH1    | A_GLU_187 | OE1    | 2.914        |
| 4I2X   | B_LYS_38  | NZ     | B_ASP_90  | OD1    | 3.997        |
| 4I2X   | B_LYS_59  | NZ     | E_GLU_10  | OE2    | 3.418        |
| 4I2X   | B_LYS_65  | NZ     | E_ASP_208 | OD1    | 3.256        |
| 4I2X   | B_LYS_67  | NZ     | B_ASP_90  | OD1    | 3.836        |
| 4I2X   | B_LYS_67  | NZ     | B_ASP_90  | OD2    | 2.957        |
| 4I2X   | B_LYS_214 | NZ     | A_GLU_123 | OE2    | 3.742        |
| 4I2X   | C_ARG_61  | NH2    | C_GLU_81  | OE2    | 3.536        |
| 4I2X   | C_ARG_61  | NH2    | C_ASP_82  | OD1    | 2.611        |
| 4I2X   | C_ARG_61  | NH2    | C_ASP_82  | OD2    | 3.223        |
| 4I2X   | C_LYS_147 | NZ     | C_GLU_154 | OE2    | 3.881        |
| 4I2X   | C_LYS_147 | NZ     | C_GLU_195 | OE1    | 3.855        |
| 4I2X   | C_LYS_149 | NZ     | C_GLU_195 | OE2    | 3.745        |
| 4I2X   | C_ARG_155 | NH1    | C_GLU_185 | OE1    | 3.098        |
| 4I2X   | C_ARG_155 | NH2    | C_GLU_185 | OE1    | 2.928        |
| 4I2X   | C_LYS_183 | NZ     | C_GLU_187 | OE2    | 3.224        |
| 4I2X   | C_LYS_199 | NZ     | C_ASP_110 | OD1    | 3.402        |
| 4I2X   | C_LYS_199 | NZ     | C_ASP_110 | OD2    | 3.168        |
| 4I2X   | C_ARG_211 | NH1    | C_GLU_187 | OE1    | 3.303        |
| 4I2X   | D_ARG_40  | NH1    | D_GLU_89  | OE1    | 3.368        |
| 4I2X   | D_ARG_40  | NH2    | D_GLU_89  | OE1    | 3.617        |
| 4I2X   | D_LYS_63  | NZ     | C_ASP_1   | OD2    | 3.656        |
| 4I2X   | D_LYS_65  | NZ     | F_ASP_208 | OD1    | 3.848        |
| 4I2X   | D_LYS_67  | NZ     | D_ASP_90  | OD1    | 3.613        |
| 4I2X   | D_LYS_67  | NZ     | D_ASP_90  | OD2    | 3.084        |
| 4I2X   | D_HIS_170 | ND1    | C_ASP_167 | OD2    | 3.958        |
| 4I2X   | D_LYS_211 | NZ     | D_ASP_213 | OD1    | 3.197        |
| 4I2X   | D_LYS_214 | NZ     | C_GLU_123 | OE2    | 3.815        |
| 4I2X   | E_HIS_24  | ND1    | E_GLU_10  | OE1    | 3.035        |
| 4I2X   | E_ARG_40  | NH2    | E_GLU_47  | OE1    | 3.242        |
| 4I2X   | E_ARG_40  | NH2    | E_GLU_47  | OE2    | 3.478        |
| 4I2X   | E_ARG_46  | NH1    | E_GLU_103 | OE1    | 2.979        |
| 4I2X   | E_ARG_46  | NH2    | E_GLU_103 | OE1    | 3.021        |
| 4I2X   | E_ARG_59  | NH1    | E_ASP_85  | OD1    | 2.932        |
| 4I2X   | E_ARG_59  | NH1    | E_ASP_85  | OD2    | 3.555        |
| 4I2X   | E_ARG_59  | NH2    | E_ASP_85  | OD1    | 3.558        |
| 4I2X   | E_ARG_59  | NH2    | E_ASP_85  | OD2    | 2.755        |
| 4I2X   | E_HIS_143 | ND1    | E_GLU_141 | OE1    | 3.000        |
| 4I2X   | E_HIS_143 | ND1    | E_GLU_141 | OE2    | 3.158        |
| 4I2X   | E_LYS_153 | NZ     | E_GLU_160 | OE1    | 3.145        |
| 4I2X   | E_LYS_153 | NZ     | E_GLU_160 | OE2    | 3.307        |
| 4I2X   | E_LYS_156 | NZ     | E_ASP_188 | OD2    | 3.753        |
| 4I2X   | E_LYS_156 | NZ     | E_ASP_191 | OD1    | 3.430        |
| 4I2X   | E_LYS_156 | NZ     | E_ASP_191 | OD2    | 2.599        |
| 4I2X   | E_ARG_180 | NH2    | E_ASP_169 | OD2    | 3.719        |
| 4I2X   | E_ARG_193 | NH1    | E_GLU_274 | OE2    | 3.753        |
| 4I2X   | E_ARG_193 | NH2    | E_GLU_274 | OE2    | 2.935        |
| 4I2X   | E_ARG_211 | NH2    | E_GLU_199 | OE2    | 2.968        |
| 4I2X   | E_ARG_221 | NH1    | E_ASP_306 | OD2    | 2.386        |
| 4I2X   | E_ARG_246 | NH1    | E_GLU_227 | OE1    | 3.432        |

|      |           |     |           |     |       |
|------|-----------|-----|-----------|-----|-------|
| 4I2X | E_ARG_266 | NH1 | E_GLU_259 | OE2 | 2.959 |
| 4I2X | F_HIS_24  | ND1 | F_GLU_10  | OE1 | 3.383 |
| 4I2X | F_ARG_40  | NH2 | F_GLU_47  | OE1 | 2.707 |
| 4I2X | F_ARG_40  | NH2 | F_GLU_47  | OE2 | 3.337 |
| 4I2X | F_ARG_46  | NH1 | F_GLU_103 | OE1 | 3.160 |
| 4I2X | F_ARG_46  | NH1 | F_GLU_103 | OE2 | 3.864 |
| 4I2X | F_ARG_46  | NH2 | F_GLU_103 | OE1 | 3.013 |
| 4I2X | F_ARG_59  | NH1 | F_ASP_85  | OD1 | 2.871 |
| 4I2X | F_ARG_59  | NH1 | F_ASP_85  | OD2 | 2.922 |
| 4I2X | F_ARG_59  | NH2 | F_ASP_85  | OD1 | 3.943 |
| 4I2X | F_ARG_59  | NH2 | F_ASP_85  | OD2 | 2.928 |
| 4I2X | F_HIS_143 | ND1 | F_GLU_141 | OE1 | 2.771 |
| 4I2X | F_HIS_143 | ND1 | F_GLU_141 | OE2 | 3.495 |
| 4I2X | F_LYS_156 | NZ  | F_ASP_188 | OD2 | 3.315 |
| 4I2X | F_LYS_156 | NZ  | F_ASP_191 | OD2 | 3.515 |
| 4I2X | F_ARG_180 | NH1 | E_GLU_47  | OE1 | 3.834 |
| 4I2X | F_ARG_211 | NH2 | F_GLU_199 | OE2 | 2.770 |
| 4I2X | F_ARG_221 | NH1 | F_ASP_306 | OD2 | 2.711 |
| 4I2X | F_ARG_246 | NH1 | F_GLU_227 | OE1 | 2.969 |
| 4I2X | F_ARG_266 | NH1 | F_GLU_259 | OE2 | 3.157 |

Table 541: 4I2X-specific salt bridging networks analysis. In this table, a PDB file is specified with a four-letter PDB ID, except that the names of the PDB files corresponding to the single NMR structural model split from the NMR ensemble is specified with a four-letter PDB ID in addition to a hyphen followed by the single NMR structural model numeric ID, the residue naming scheme is **Chain ID\_residue name\_residue number**,  $\angle ADH$  represents the angle formed by acceptor (A), donor (D) and hydrogen (H) ( $\angle ADH$ ).



| PDB ID | Residue A | Atom A | Residue B | Atom B | Distance (Å) |
|--------|-----------|--------|-----------|--------|--------------|
| 4I3R   | G_LYS_282 | NZ     | H_GLU_33  | OE1    | 3.996        |
| 4I3R   | G_LYS_282 | NZ     | H_GLU_33  | OE2    | 2.684        |
| 4I3R   | G_LYS_351 | NZ     | G_GLU_269 | OE1    | 3.563        |
| 4I3R   | G_ARG_456 | NH1    | G_GLU_466 | OE1    | 3.067        |
| 4I3R   | G_ARG_469 | NH2    | G_ASP_457 | OD1    | 3.936        |
| 4I3R   | G_ARG_469 | NH2    | G_ASP_457 | OD2    | 2.877        |
| 4I3R   | H_ARG_19  | NH1    | H_ASP_81  | OD1    | 3.627        |
| 4I3R   | H_ARG_19  | NH1    | H_ASP_81  | OD2    | 3.350        |
| 4I3R   | H_ARG_38  | NH1    | H_ASP_86  | OD1    | 3.177        |
| 4I3R   | H_ARG_38  | NH2    | H_GLU_46  | OE1    | 3.721        |
| 4I3R   | H_ARG_38  | NH2    | H_ASP_86  | OD1    | 3.995        |
| 4I3R   | H_LYS_52  | NZ     | H_GLU_33  | OE2    | 3.671        |
| 4I3R   | H_ARG_64  | NH2    | G_ASP_457 | OD1    | 3.551        |
| 4I3R   | H_ARG_64  | NH2    | G_ASP_457 | OD2    | 3.482        |
| 4I3R   | H_ARG_66  | NH1    | H_ASP_62  | OD1    | 3.277        |
| 4I3R   | H_ARG_66  | NH1    | H_ASP_62  | OD2    | 3.049        |
| 4I3R   | H_ARG_66  | NH1    | H_ASP_86  | OD1    | 3.545        |
| 4I3R   | H_ARG_66  | NH1    | H_ASP_86  | OD2    | 3.903        |
| 4I3R   | H_ARG_66  | NH2    | H_ASP_86  | OD1    | 3.310        |
| 4I3R   | H_ARG_66  | NH2    | H_ASP_86  | OD2    | 2.449        |
| 4I3R   | H_ARG_71  | NH1    | G_ASP_368 | OD1    | 3.996        |
| 4I3R   | H_ARG_71  | NH1    | G_ASP_368 | OD2    | 2.319        |
| 4I3R   | H_ARG_71  | NH2    | G_ASP_368 | OD1    | 3.997        |
| 4I3R   | H_ARG_71  | NH2    | G_ASP_368 | OD2    | 3.530        |
| 4I3R   | H_ARG_94  | NH1    | H_ASP_101 | OD1    | 2.785        |
| 4I3R   | H_ARG_94  | NH1    | H_ASP_101 | OD2    | 2.504        |
| 4I3R   | H_LYS_96  | NZ     | H_ASP_101 | OD2    | 3.693        |
| 4I3R   | H_LYS_143 | NZ     | H_ASP_144 | OD1    | 3.690        |
| 4I3R   | H_LYS_143 | NZ     | H_ASP_144 | OD2    | 3.274        |
| 4I3R   | H_LYS_206 | NZ     | H_ASP_208 | OD1    | 3.805        |
| 4I3R   | H_LYS_209 | NZ     | L_GLU_123 | OE2    | 2.484        |
| 4I3R   | L_LYS_39  | NZ     | L_GLU_81  | OE1    | 3.444        |
| 4I3R   | L_ARG_54  | NH2    | L_ASP_60  | OD1    | 2.979        |
| 4I3R   | L_ARG_61  | NH1    | L_ASP_82  | OD1    | 2.605        |
| 4I3R   | L_ARG_61  | NH1    | L_ASP_82  | OD2    | 2.581        |
| 4I3R   | L_ARG_61  | NH2    | L_GLU_79  | OE1    | 3.506        |
| 4I3R   | L_ARG_61  | NH2    | L_GLU_79  | OE2    | 3.423        |
| 4I3R   | L_ARG_103 | NH1    | L_GLU_105 | OE2    | 3.685        |
| 4I3R   | L_ARG_107 | NH2    | L_GLU_17  | OE1    | 3.953        |
| 4I3R   | L_ARG_107 | NH2    | L_GLU_17  | OE2    | 3.600        |
| 4I3R   | L_LYS_149 | NZ     | L_GLU_195 | OE2    | 3.690        |
| 4I3R   | L_LYS_183 | NZ     | L_GLU_187 | OE2    | 3.197        |

Table 542: 4I3R-specific salt bridging networks analysis. In this table, a PDB file is specified with a four-letter PDB ID, except that the names of the PDB files corresponding to the single NMR structural model split from the NMR ensemble is specified with a four-letter PDB ID in addition to a hyphen followed by the single NMR structural model numeric ID, the residue naming scheme is **Chain ID\_residue name\_residue number**,  $\angle ADH$  represents the angle formed by acceptor (A), donor (D) and hydrogen (H) ( $\angle ADH$ ).

| PDB ID | Residue A | Atom A | Residue B | Atom B | Distance (Å) |
|--------|-----------|--------|-----------|--------|--------------|
| 4I3S   | G_LYS_282 | NZ     | G_GLU_275 | OE1    | 3.977        |
| 4I3S   | G_LYS_282 | NZ     | H_GLU_33  | OE1    | 3.669        |
| 4I3S   | G_LYS_282 | NZ     | H_GLU_33  | OE2    | 3.690        |
| 4I3S   | G_ARG_456 | NH1    | G_GLU_466 | OE2    | 3.826        |
| 4I3S   | G_ARG_469 | NH2    | G_ASP_457 | OD2    | 3.288        |
| 4I3S   | H_ARG_19  | NH1    | H_ASP_81  | OD2    | 3.959        |
| 4I3S   | H_ARG_31  | NH1    | H_ASP_27  | OD2    | 3.996        |
| 4I3S   | H_ARG_31  | NH2    | H_ASP_27  | OD2    | 3.298        |
| 4I3S   | H_ARG_38  | NH1    | H_ASP_86  | OD1    | 2.791        |
| 4I3S   | H_ARG_38  | NH2    | H_GLU_46  | OE1    | 3.972        |
| 4I3S   | H_ARG_38  | NH2    | H_ASP_86  | OD1    | 3.641        |
| 4I3S   | H_ARG_64  | NH2    | G_ASP_457 | OD1    | 3.430        |
| 4I3S   | H_ARG_64  | NH2    | G_ASP_457 | OD2    | 3.082        |
| 4I3S   | H_ARG_66  | NH1    | H_ASP_86  | OD1    | 3.764        |
| 4I3S   | H_ARG_66  | NH1    | H_ASP_86  | OD2    | 3.474        |
| 4I3S   | H_ARG_66  | NH2    | H_ASP_62  | OD2    | 3.970        |
| 4I3S   | H_ARG_66  | NH2    | H_ASP_86  | OD1    | 2.906        |
| 4I3S   | H_ARG_66  | NH2    | H_ASP_86  | OD2    | 3.336        |
| 4I3S   | H_ARG_71  | NH1    | G_ASP_368 | OD1    | 3.370        |
| 4I3S   | H_ARG_71  | NH1    | G_ASP_368 | OD2    | 3.053        |
| 4I3S   | H_ARG_71  | NH2    | G_ASP_368 | OD1    | 3.484        |
| 4I3S   | H_ARG_94  | NH1    | H_ASP_101 | OD1    | 3.080        |
| 4I3S   | H_ARG_94  | NH1    | H_ASP_101 | OD2    | 2.812        |
| 4I3S   | H_LYS_209 | NZ     | L_GLU_123 | OE1    | 2.882        |
| 4I3S   | L_ARG_54  | NH1    | L_ASP_60  | OD1    | 3.742        |
| 4I3S   | L_ARG_54  | NH2    | L_ASP_60  | OD1    | 3.363        |
| 4I3S   | L_ARG_61  | NH1    | L_GLU_79  | OE2    | 2.892        |
| 4I3S   | L_ARG_61  | NH2    | L_ASP_82  | OD1    | 3.478        |
| 4I3S   | L_ARG_103 | NH1    | L_GLU_105 | OE1    | 3.837        |
| 4I3S   | L_ARG_211 | NH1    | L_GLU_187 | OE1    | 3.303        |
| 4I3S   | L_ARG_211 | NH2    | L_GLU_187 | OE1    | 3.109        |

Table 543: 4I3S-specific salt bridging networks analysis. In this table, a PDB file is specified with a four-letter PDB ID, except that the names of the PDB files corresponding to the single NMR structural model split from the NMR ensemble is specified with a four-letter PDB ID in addition to a hyphen followed by the single NMR structural model numeric ID, the residue naming scheme is **Chain ID\_residue name\_residue number**,  $\angle ADH$  represents the angle formed by acceptor (A), donor (D) and hydrogen (H) ( $\angle ADH$ ).

| PDB ID | Residue A | Atom A | Residue B | Atom B | Distance (Å) |
|--------|-----------|--------|-----------|--------|--------------|
| 4JAM   | H_LYS_13  | NZ     | H_GLU_16  | OE2    | 3.105        |
| 4JAM   | H_ARG_38  | NH1    | H_ASP_86  | OD1    | 2.909        |
| 4JAM   | H_ARG_38  | NH2    | H_GLU_46  | OE2    | 3.439        |
| 4JAM   | H_ARG_38  | NH2    | H_ASP_86  | OD1    | 3.603        |
| 4JAM   | H_ARG_66  | NH1    | H_ASP_86  | OD1    | 3.959        |
| 4JAM   | H_ARG_66  | NH1    | H_ASP_86  | OD2    | 3.260        |
| 4JAM   | H_ARG_66  | NH2    | H_ASP_86  | OD1    | 2.963        |
| 4JAM   | H_ARG_66  | NH2    | H_ASP_86  | OD2    | 3.519        |
| 4JAM   | H_LYS_143 | NZ     | H_ASP_144 | OD1    | 2.996        |
| 4JAM   | H_LYS_143 | NZ     | H_ASP_144 | OD2    | 3.461        |
| 4JAM   | H_LYS_209 | NZ     | L_GLU_123 | OE2    | 3.865        |
| 4JAM   | H_LYS_210 | NZ     | H_GLU_212 | OE2    | 3.818        |
| 4JAM   | L_LYS_53  | NZ     | L_GLU_50  | OE1    | 2.810        |
| 4JAM   | L_ARG_54  | NH1    | L_ASP_60  | OD1    | 3.496        |
| 4JAM   | L_ARG_54  | NH2    | L_ASP_60  | OD1    | 3.753        |
| 4JAM   | L_ARG_61  | NH2    | L_ASP_82  | OD1    | 2.928        |
| 4JAM   | L_ARG_61  | NH2    | L_ASP_82  | OD2    | 3.591        |
| 4JAM   | L_LYS_110 | NZ     | L_GLU_198 | OE1    | 2.600        |
| 4JAM   | L_LYS_110 | NZ     | L_GLU_198 | OE2    | 3.111        |
| 4JAM   | L_LYS_149 | NZ     | L_GLU_203 | OE1    | 2.760        |
| 4JAM   | A_ARG_38  | NH1    | A_ASP_86  | OD1    | 2.792        |
| 4JAM   | A_ARG_38  | NH2    | A_GLU_46  | OE1    | 3.309        |
| 4JAM   | A_ARG_38  | NH2    | A_ASP_86  | OD1    | 3.667        |
| 4JAM   | A_ARG_66  | NH1    | A_ASP_86  | OD1    | 3.551        |
| 4JAM   | A_ARG_66  | NH1    | A_ASP_86  | OD2    | 3.941        |
| 4JAM   | A_ARG_66  | NH2    | A_ASP_86  | OD1    | 3.154        |
| 4JAM   | A_ARG_66  | NH2    | A_ASP_86  | OD2    | 2.339        |
| 4JAM   | A_LYS_143 | NZ     | A_ASP_144 | OD1    | 3.127        |
| 4JAM   | A_LYS_143 | NZ     | A_ASP_144 | OD2    | 3.610        |
| 4JAM   | A_LYS_206 | NZ     | A_ASP_208 | OD1    | 2.503        |
| 4JAM   | A_LYS_206 | NZ     | A_ASP_208 | OD2    | 3.012        |
| 4JAM   | A_LYS_209 | NZ     | B_GLU_123 | OE2    | 3.814        |
| 4JAM   | A_LYS_210 | NZ     | A_GLU_212 | OE2    | 3.874        |
| 4JAM   | B_LYS_53  | NZ     | B_GLU_50  | OE1    | 2.752        |
| 4JAM   | B_ARG_61  | NH2    | B_ASP_82  | OD1    | 2.903        |
| 4JAM   | B_ARG_61  | NH2    | B_ASP_82  | OD2    | 3.571        |
| 4JAM   | B_LYS_110 | NZ     | B_GLU_198 | OE2    | 3.885        |
| 4JAM   | B_LYS_149 | NZ     | B_GLU_203 | OE1    | 3.006        |
| 4JAM   | B_ARG_189 | NH1    | B_ASP_151 | OD1    | 3.987        |
| 4JAM   | B_ARG_189 | NH1    | B_ASP_151 | OD2    | 3.937        |

Table 544: 4JAM-specific salt bridging networks analysis. In this table, a PDB file is specified with a four-letter PDB ID, except that the names of the PDB files corresponding to the single NMR structural model split from the NMR ensemble is specified with a four-letter PDB ID in addition to a hyphen followed by the single NMR structural model numeric ID, the residue naming scheme is **Chain ID\_residue name\_residue number**,  $\angle ADH$  represents the angle formed by acceptor (A), donor (D) and hydrogen (H) ( $\angle ADH$ ).

| PDB ID | Residue A | Atom A | Residue B | Atom B | Distance (Å) |
|--------|-----------|--------|-----------|--------|--------------|
| 4JAN   | G_LYS_282 | NZ     | G_GLU_275 | OE1    | 3.474        |
| 4JAN   | G_LYS_360 | NZ     | G_GLU_362 | OE1    | 3.523        |
| 4JAN   | G_ARG_456 | NH1    | G_GLU_466 | OE1    | 3.351        |
| 4JAN   | G_ARG_456 | NH1    | G_GLU_466 | OE2    | 3.176        |
| 4JAN   | G_ARG_469 | NH2    | G_GLU_362 | OE2    | 3.387        |
| 4JAN   | H_ARG_38  | NH1    | H_ASP_86  | OD1    | 3.352        |
| 4JAN   | H_ARG_38  | NH2    | H_GLU_46  | OE1    | 3.075        |
| 4JAN   | H_ARG_66  | NH1    | H_ASP_86  | OD1    | 3.928        |
| 4JAN   | H_ARG_66  | NH1    | H_ASP_86  | OD2    | 3.649        |
| 4JAN   | H_ARG_66  | NH2    | H_ASP_86  | OD1    | 2.680        |
| 4JAN   | H_ARG_66  | NH2    | H_ASP_86  | OD2    | 3.194        |
| 4JAN   | H_ARG_97  | NH2    | G_ASP_368 | OD2    | 2.609        |
| 4JAN   | H_ARG_97  | NH2    | G_GLU_370 | OE1    | 2.554        |
| 4JAN   | H_LYS_143 | NZ     | H_ASP_144 | OD2    | 3.820        |
| 4JAN   | H_LYS_143 | NZ     | L_GLU_124 | OE2    | 3.811        |
| 4JAN   | H_LYS_209 | NZ     | L_GLU_123 | OE1    | 2.888        |
| 4JAN   | L_LYS_53  | NZ     | L_GLU_50  | OE1    | 2.884        |
| 4JAN   | L_ARG_61  | NH2    | L_ASP_82  | OD1    | 2.695        |
| 4JAN   | L_ARG_61  | NH2    | L_ASP_82  | OD2    | 3.778        |
| 4JAN   | L_ARG_107 | NH1    | L_GLU_83  | OE1    | 3.896        |
| 4JAN   | L_LYS_110 | NZ     | L_GLU_198 | OE1    | 2.837        |
| 4JAN   | L_LYS_129 | NZ     | H_ASP_144 | OD2    | 3.458        |
| 4JAN   | L_LYS_344 | NZ     | L_GLU_290 | OE1    | 3.334        |
| 4JAN   | L_LYS_357 | NZ     | L_ASP_464 | OD1    | 2.885        |
| 4JAN   | L_LYS_360 | NZ     | L_GLU_362 | OE1    | 3.054        |
| 4JAN   | L_ARG_456 | NH1    | L_GLU_466 | OE1    | 3.190        |
| 4JAN   | L_ARG_456 | NH1    | L_GLU_466 | OE2    | 3.591        |
| 4JAN   | L_ARG_469 | NH1    | L_GLU_362 | OE2    | 3.886        |
| 4JAN   | L_ARG_469 | NH2    | L_GLU_362 | OE2    | 3.292        |
| 4JAN   | L_ARG_469 | NH2    | L_ASP_457 | OD2    | 3.746        |
| 4JAN   | A_ARG_38  | NH1    | A_ASP_86  | OD1    | 3.100        |
| 4JAN   | A_ARG_38  | NH2    | A_GLU_46  | OE1    | 2.957        |
| 4JAN   | A_ARG_38  | NH2    | A_ASP_86  | OD1    | 3.991        |
| 4JAN   | A_LYS_43  | NZ     | A_ASP_86  | OD1    | 3.939        |
| 4JAN   | A_ARG_66  | NH1    | A_ASP_86  | OD2    | 3.380        |
| 4JAN   | A_ARG_66  | NH2    | A_ASP_86  | OD1    | 3.178        |
| 4JAN   | A_ARG_66  | NH2    | A_ASP_86  | OD2    | 3.385        |
| 4JAN   | A_ARG_97  | NH2    | L_ASP_368 | OD1    | 2.825        |
| 4JAN   | A_ARG_97  | NH2    | L_ASP_368 | OD2    | 3.792        |
| 4JAN   | A_ARG_97  | NH2    | L_GLU_370 | OE1    | 3.106        |
| 4JAN   | A_LYS_143 | NZ     | A_ASP_144 | OD1    | 3.191        |
| 4JAN   | A_LYS_143 | NZ     | A_ASP_144 | OD2    | 3.150        |
| 4JAN   | A_LYS_209 | NZ     | B_GLU_123 | OE1    | 3.788        |
| 4JAN   | A_LYS_209 | NZ     | B_GLU_123 | OE2    | 3.189        |
| 4JAN   | A_LYS_210 | NZ     | A_GLU_212 | OE2    | 3.659        |
| 4JAN   | B_LYS_53  | NZ     | B_GLU_50  | OE1    | 2.587        |
| 4JAN   | B_ARG_61  | NH2    | B_ASP_82  | OD1    | 2.736        |
| 4JAN   | B_ARG_61  | NH2    | B_ASP_82  | OD2    | 3.458        |
| 4JAN   | B_HIS_188 | NE2    | B_ASP_151 | OD2    | 3.951        |

---

Table 545: 4JAN-specific salt bridging networks analysis. In this table, a PDB file is specified with a four-letter PDB ID, except that the names of the PDB files corresponding to the single NMR structural model split from the NMR ensemble is specified with a four-letter PDB ID in addition to a hyphen followed by the single NMR structural model numeric ID, the residue naming scheme is **Chain ID\_residue name\_residue number**,  $\angle ADH$  represents the angle formed by acceptor (A), donor (D) and hydrogen (H) ( $\angle ADH$ ).

| PDB ID | Residue A  | Atom A | Residue B | Atom B | Distance (Å) |
|--------|------------|--------|-----------|--------|--------------|
| 4JHA   | H_ARG_30   | NH2    | H_GLU_73  | OE1    | 2.826        |
| 4JHA   | H_ARG_30   | NH2    | H_GLU_73  | OE2    | 3.416        |
| 4JHA   | H_ARG_38   | NH1    | H_ASP_86  | OD1    | 2.732        |
| 4JHA   | H_ARG_38   | NH2    | H_GLU_85  | OE1    | 3.002        |
| 4JHA   | H_ARG_38   | NH2    | H_ASP_86  | OD1    | 3.574        |
| 4JHA   | H_LYS_62   | NZ     | H_GLU_46  | OE1    | 3.088        |
| 4JHA   | H_LYS_62   | NZ     | H_GLU_46  | OE2    | 3.359        |
| 4JHA   | H_LYS_62   | NZ     | H_GLU_85  | OE1    | 3.798        |
| 4JHA   | H_ARG_66   | NH1    | H_ASP_86  | OD1    | 3.556        |
| 4JHA   | H_ARG_66   | NH1    | H_ASP_86  | OD2    | 2.912        |
| 4JHA   | H_ARG_66   | NH2    | H_GLU_85  | OE1    | 3.941        |
| 4JHA   | H_ARG_66   | NH2    | H_GLU_85  | OE2    | 3.694        |
| 4JHA   | H_ARG_66   | NH2    | H_ASP_86  | OD1    | 2.845        |
| 4JHA   | H_ARG_66   | NH2    | H_ASP_86  | OD2    | 3.591        |
| 4JHA   | H_ARG_83   | NH1    | H_GLU_85  | OE2    | 3.452        |
| 4JHA   | H_HIS_100G | ND1    | H_GLU_95  | OE1    | 2.690        |
| 4JHA   | H_HIS_100G | ND1    | H_GLU_95  | OE2    | 3.485        |
| 4JHA   | H_LYS_143  | NZ     | H_ASP_144 | OD1    | 3.717        |
| 4JHA   | L_ARG_61   | NH2    | L_GLU_81  | OE2    | 3.203        |
| 4JHA   | L_ARG_61   | NH2    | L_ASP_82  | OD1    | 2.990        |
| 4JHA   | L_ARG_61   | NH2    | L_ASP_82  | OD2    | 3.835        |
| 4JHA   | L_LYS_103  | NZ     | L_GLU_165 | OE1    | 3.560        |
| 4JHA   | L_HIS_189  | ND1    | L_ASP_151 | OD1    | 3.067        |
| 4JHA   | L_HIS_189  | ND1    | L_ASP_151 | OD2    | 2.332        |

Table 546: 4JHA-specific salt bridging networks analysis. In this table, a PDB file is specified with a four-letter PDB ID, except that the names of the PDB files corresponding to the single NMR structural model split from the NMR ensemble is specified with a four-letter PDB ID in addition to a hyphen followed by the single NMR structural model numeric ID, the residue naming scheme is **Chain ID\_residue name\_residue number**,  $\angle ADH$  represents the angle formed by acceptor (A), donor (D) and hydrogen (H) ( $\angle ADH$ ).

| PDB ID | Residue A  | Atom A | Residue B | Atom B | Distance (Å) |
|--------|------------|--------|-----------|--------|--------------|
| 4JHW   | H_LYS_12   | NZ     | H_GLU_10  | OE1    | 3.774        |
| 4JHW   | H_LYS_12   | NZ     | H_GLU_10  | OE2    | 3.410        |
| 4JHW   | H_ARG_30   | NH2    | H_GLU_73  | OE1    | 3.253        |
| 4JHW   | H_ARG_30   | NH2    | H_GLU_73  | OE2    | 3.595        |
| 4JHW   | H_ARG_38   | NH1    | H_ASP_86  | OD1    | 2.933        |
| 4JHW   | H_ARG_38   | NH2    | H_GLU_85  | OE1    | 3.397        |
| 4JHW   | H_LYS_62   | NZ     | H_GLU_46  | OE1    | 3.508        |
| 4JHW   | H_LYS_62   | NZ     | H_GLU_46  | OE2    | 3.235        |
| 4JHW   | H_ARG_66   | NH1    | H_ASP_86  | OD1    | 3.796        |
| 4JHW   | H_ARG_66   | NH1    | H_ASP_86  | OD2    | 3.522        |
| 4JHW   | H_ARG_66   | NH2    | H_ASP_86  | OD1    | 3.083        |
| 4JHW   | H_ARG_83   | NH1    | H_GLU_85  | OE2    | 3.470        |
| 4JHW   | H_HIS_100G | ND1    | H_GLU_95  | OE1    | 2.582        |
| 4JHW   | H_HIS_100G | ND1    | H_GLU_95  | OE2    | 3.471        |
| 4JHW   | H_LYS_143  | NZ     | H_ASP_144 | OD1    | 3.702        |
| 4JHW   | L_ARG_61   | NH2    | L_GLU_81  | OE2    | 2.896        |
| 4JHW   | L_ARG_61   | NH2    | L_ASP_82  | OD1    | 3.273        |
| 4JHW   | L_ARG_61   | NH2    | L_ASP_82  | OD2    | 3.811        |
| 4JHW   | L_LYS_103  | NZ     | L_GLU_165 | OE1    | 3.410        |
| 4JHW   | L_LYS_103  | NZ     | L_GLU_165 | OE2    | 3.764        |
| 4JHW   | L_HIS_189  | ND1    | L_ASP_151 | OD1    | 3.229        |
| 4JHW   | L_HIS_189  | ND1    | L_ASP_151 | OD2    | 2.338        |
| 4JHW   | F_ARG_49   | NH2    | F_ASP_368 | OD1    | 3.536        |
| 4JHW   | F_LYS_85   | NZ     | F_GLU_82  | OE1    | 3.836        |
| 4JHW   | F_LYS_166  | NZ     | F_GLU_163 | OE2    | 3.574        |
| 4JHW   | F_LYS_168  | NZ     | F_GLU_294 | OE1    | 3.244        |
| 4JHW   | F_LYS_176  | NZ     | F_ASP_263 | OD2    | 3.508        |
| 4JHW   | F_LYS_191  | NZ     | F_GLU_60  | OE2    | 3.607        |
| 4JHW   | F_LYS_191  | NZ     | F_ASP_194 | OD2    | 3.605        |
| 4JHW   | F_LYS_196  | NZ     | F_GLU_60  | OE1    | 2.692        |
| 4JHW   | F_LYS_209  | NZ     | H_ASP_101 | OD2    | 3.535        |
| 4JHW   | F_LYS_209  | NZ     | L_GLU_55  | OE1    | 2.845        |
| 4JHW   | F_LYS_209  | NZ     | L_GLU_55  | OE2    | 3.356        |
| 4JHW   | F_ARG_229  | NH1    | F_GLU_256 | OE1    | 3.739        |
| 4JHW   | F_ARG_229  | NH1    | F_GLU_256 | OE2    | 3.024        |
| 4JHW   | F_ARG_229  | NH2    | F_GLU_256 | OE1    | 2.796        |
| 4JHW   | F_ARG_229  | NH2    | F_GLU_256 | OE2    | 3.605        |
| 4JHW   | F_ARG_235  | NH2    | F_GLU_236 | OE2    | 3.517        |
| 4JHW   | F_ARG_336  | NH2    | F_ASP_338 | OD1    | 3.908        |
| 4JHW   | F_ARG_336  | NH2    | F_ASP_338 | OD2    | 3.114        |
| 4JHW   | F_ARG_364  | NH1    | F_ASP_310 | OD1    | 2.617        |
| 4JHW   | F_ARG_364  | NH2    | F_ASP_310 | OD1    | 2.621        |
| 4JHW   | F_LYS_433  | NZ     | F_ASP_440 | OD2    | 3.857        |
| 4JHW   | F_LYS_461  | NZ     | F_ASP_448 | OD1    | 2.628        |
| 4JHW   | F_LYS_498  | NZ     | F_GLU_487 | OE1    | 3.211        |
| 4JHW   | F_LYS_498  | NZ     | F_GLU_487 | OE2    | 3.707        |
| 4JHW   | F_ARG_507  | NH1    | F_GLU_511 | OE2    | 3.100        |

---

Table 547: 4JHW-specific salt bridging networks analysis. In this table, a PDB file is specified with a four-letter PDB ID, except that the names of the PDB files corresponding to the single NMR structural model split from the NMR ensemble is specified with a four-letter PDB ID in addition to a hyphen followed by the single NMR structural model numeric ID, the residue naming scheme is **Chain ID\_residue name\_residue number**,  $\angle ADH$  represents the angle formed by acceptor (A), donor (D) and hydrogen (H) ( $\angle ADH$ ).



| PDB ID | Residue A | Atom A | Residue B | Atom B | Distance (Å) |
|--------|-----------|--------|-----------|--------|--------------|
| 4JO1   | L_LYS_39  | NZ     | L_ASP_81  | OD2    | 2.927        |
| 4JO1   | L_LYS_53  | NZ     | L_ASP_50  | OD1    | 2.687        |
| 4JO1   | L_ARG_61  | NH1    | L_ASP_82  | OD1    | 2.727        |
| 4JO1   | L_ARG_61  | NH1    | L_ASP_82  | OD2    | 3.457        |
| 4JO1   | L_ARG_61  | NH2    | L_ASP_82  | OD1    | 3.476        |
| 4JO1   | L_ARG_61  | NH2    | L_ASP_82  | OD2    | 2.757        |
| 4JO1   | L_LYS_138 | NZ     | L_ASP_169 | OD1    | 2.582        |
| 4JO1   | L_LYS_162 | NZ     | L_ASP_142 | OD1    | 2.686        |
| 4JO1   | L_LYS_162 | NZ     | L_ASP_142 | OD2    | 3.695        |
| 4JO1   | H_ARG_38  | NH1    | H_ASP_86  | OD2    | 2.789        |
| 4JO1   | H_ARG_38  | NH2    | H_GLU_46  | OE1    | 3.151        |
| 4JO1   | H_ARG_38  | NH2    | H_ASP_86  | OD2    | 3.780        |
| 4JO1   | H_ARG_66  | NH1    | H_ASP_86  | OD1    | 2.959        |
| 4JO1   | H_ARG_66  | NH1    | H_ASP_86  | OD2    | 3.751        |
| 4JO1   | H_ARG_66  | NH2    | H_ASP_86  | OD1    | 3.523        |
| 4JO1   | H_ARG_66  | NH2    | H_ASP_86  | OD2    | 3.003        |
| 4JO1   | P_ARG_304 | NH1    | H_ASP_34  | OD1    | 3.045        |
| 4JO1   | P_ARG_304 | NH1    | H_ASP_34  | OD2    | 3.346        |
| 4JO1   | P_ARG_304 | NH2    | H_ASP_34  | OD2    | 2.892        |
| 4JO1   | M_LYS_39  | NZ     | M_ASP_81  | OD2    | 2.924        |
| 4JO1   | M_LYS_53  | NZ     | M_ASP_50  | OD1    | 2.678        |
| 4JO1   | M_ARG_61  | NH1    | M_ASP_82  | OD1    | 2.722        |
| 4JO1   | M_ARG_61  | NH1    | M_ASP_82  | OD2    | 3.406        |
| 4JO1   | M_ARG_61  | NH2    | M_ASP_82  | OD1    | 3.488        |
| 4JO1   | M_ARG_61  | NH2    | M_ASP_82  | OD2    | 2.707        |
| 4JO1   | M_LYS_138 | NZ     | M_ASP_169 | OD1    | 2.539        |
| 4JO1   | M_LYS_162 | NZ     | M_ASP_142 | OD1    | 2.679        |
| 4JO1   | M_LYS_162 | NZ     | M_ASP_142 | OD2    | 3.651        |
| 4JO1   | I_ARG_38  | NH1    | I_ASP_86  | OD2    | 2.786        |
| 4JO1   | I_ARG_38  | NH2    | I_GLU_46  | OE1    | 3.154        |
| 4JO1   | I_ARG_38  | NH2    | I_ASP_86  | OD2    | 3.771        |
| 4JO1   | I_ARG_66  | NH1    | I_ASP_86  | OD1    | 3.031        |
| 4JO1   | I_ARG_66  | NH1    | I_ASP_86  | OD2    | 3.805        |
| 4JO1   | I_ARG_66  | NH2    | I_ASP_86  | OD1    | 3.492        |
| 4JO1   | I_ARG_66  | NH2    | I_ASP_86  | OD2    | 2.959        |
| 4JO1   | Q_ARG_304 | NH1    | I_ASP_34  | OD1    | 2.949        |
| 4JO1   | Q_ARG_304 | NH1    | I_ASP_34  | OD2    | 3.344        |
| 4JO1   | Q_ARG_304 | NH2    | I_ASP_34  | OD1    | 3.946        |
| 4JO1   | Q_ARG_304 | NH2    | I_ASP_34  | OD2    | 2.878        |

Table 548: 4JO1-specific salt bridging networks analysis. In this table, a PDB file is specified with a four-letter PDB ID, except that the names of the PDB files corresponding to the single NMR structural model split from the NMR ensemble is specified with a four-letter PDB ID in addition to a hyphen followed by the single NMR structural model numeric ID, the residue naming scheme is **Chain ID\_residue name\_residue number**,  $\angle ADH$  represents the angle formed by acceptor (A), donor (D) and hydrogen (H) ( $\angle ADH$ ).

| PDB ID | Residue A | Atom A | Residue B | Atom B | Distance (Å) |
|--------|-----------|--------|-----------|--------|--------------|
| 4JO2   | L_LYS_39  | NZ     | L_ASP_81  | OD2    | 2.922        |
| 4JO2   | L_LYS_53  | NZ     | L_ASP_50  | OD1    | 3.017        |
| 4JO2   | L_ARG_61  | NH1    | L_ASP_82  | OD1    | 3.605        |
| 4JO2   | L_ARG_61  | NH1    | L_ASP_82  | OD2    | 2.772        |
| 4JO2   | L_ARG_61  | NH2    | L_ASP_82  | OD1    | 3.007        |
| 4JO2   | L_ARG_61  | NH2    | L_ASP_82  | OD2    | 3.330        |
| 4JO2   | L_LYS_138 | NZ     | L_ASP_169 | OD2    | 3.573        |
| 4JO2   | L_LYS_162 | NZ     | L_ASP_142 | OD2    | 3.171        |
| 4JO2   | H_ARG_38  | NH1    | H_ASP_86  | OD2    | 2.606        |
| 4JO2   | H_ARG_38  | NH2    | H_GLU_46  | OE1    | 2.897        |
| 4JO2   | H_ARG_38  | NH2    | H_ASP_86  | OD2    | 3.987        |
| 4JO2   | H_ARG_66  | NH1    | H_ASP_86  | OD1    | 2.938        |
| 4JO2   | H_ARG_66  | NH1    | H_ASP_86  | OD2    | 3.840        |
| 4JO2   | H_ARG_66  | NH2    | H_ASP_86  | OD1    | 3.186        |
| 4JO2   | H_ARG_66  | NH2    | H_ASP_86  | OD2    | 2.917        |
| 4JO2   | P_ARG_304 | NH1    | H_ASP_34  | OD1    | 2.726        |
| 4JO2   | P_ARG_304 | NH1    | H_ASP_34  | OD2    | 3.333        |
| 4JO2   | P_ARG_304 | NH2    | H_ASP_34  | OD1    | 3.721        |
| 4JO2   | P_ARG_304 | NH2    | H_ASP_34  | OD2    | 2.854        |
| 4JO2   | M_LYS_39  | NZ     | M_ASP_81  | OD1    | 3.476        |
| 4JO2   | M_LYS_39  | NZ     | M_ASP_81  | OD2    | 3.290        |
| 4JO2   | M_LYS_53  | NZ     | M_ASP_50  | OD2    | 3.292        |
| 4JO2   | M_ARG_61  | NH1    | M_ASP_82  | OD1    | 3.140        |
| 4JO2   | M_ARG_61  | NH1    | M_ASP_82  | OD2    | 3.618        |
| 4JO2   | M_ARG_61  | NH2    | M_ASP_82  | OD1    | 3.726        |
| 4JO2   | M_ARG_61  | NH2    | M_ASP_82  | OD2    | 2.780        |
| 4JO2   | M_LYS_138 | NZ     | M_ASP_169 | OD2    | 2.742        |
| 4JO2   | M_LYS_162 | NZ     | M_ASP_142 | OD1    | 3.921        |
| 4JO2   | M_LYS_162 | NZ     | M_ASP_142 | OD2    | 3.385        |
| 4JO2   | I_ARG_38  | NH1    | I_ASP_86  | OD2    | 2.900        |
| 4JO2   | I_ARG_38  | NH2    | I_GLU_46  | OE1    | 3.086        |
| 4JO2   | I_ARG_38  | NH2    | I_ASP_86  | OD2    | 3.924        |
| 4JO2   | I_ARG_66  | NH1    | I_ASP_86  | OD1    | 2.929        |
| 4JO2   | I_ARG_66  | NH1    | I_ASP_86  | OD2    | 3.643        |
| 4JO2   | I_ARG_66  | NH2    | I_ASP_86  | OD1    | 3.202        |
| 4JO2   | I_ARG_66  | NH2    | I_ASP_86  | OD2    | 2.584        |
| 4JO2   | I_LYS_199 | NZ     | I_ASP_201 | OD1    | 3.625        |
| 4JO2   | I_LYS_199 | NZ     | I_ASP_201 | OD2    | 3.197        |
| 4JO2   | Q_ARG_304 | NH1    | I_ASP_34  | OD1    | 2.965        |
| 4JO2   | Q_ARG_304 | NH1    | I_ASP_34  | OD2    | 3.252        |
| 4JO2   | Q_ARG_304 | NH2    | I_ASP_34  | OD2    | 3.328        |

Table 549: 4JO2-specific salt bridging networks analysis. In this table, a PDB file is specified with a four-letter PDB ID, except that the names of the PDB files corresponding to the single NMR structural model split from the NMR ensemble is specified with a four-letter PDB ID in addition to a hyphen followed by the single NMR structural model numeric ID, the residue naming scheme is **Chain ID\_residue name\_residue number**,  $\angle ADH$  represents the angle formed by acceptor (A), donor (D) and hydrogen (H) ( $\angle ADH$ ).

| PDB ID | Residue A | Atom A | Residue B | Atom B | Distance (Å) |
|--------|-----------|--------|-----------|--------|--------------|
| 4JO3   | L_LYS_39  | NZ     | L_ASP_81  | OD1    | 3.210        |
| 4JO3   | L_LYS_39  | NZ     | L_ASP_81  | OD2    | 3.108        |
| 4JO3   | L_ARG_61  | NH1    | L_ASP_82  | OD1    | 3.683        |
| 4JO3   | L_ARG_61  | NH1    | L_ASP_82  | OD2    | 2.743        |
| 4JO3   | L_ARG_61  | NH2    | L_ASP_82  | OD1    | 2.826        |
| 4JO3   | L_ARG_61  | NH2    | L_ASP_82  | OD2    | 3.482        |
| 4JO3   | L_LYS_162 | NZ     | L_ASP_142 | OD1    | 2.811        |
| 4JO3   | L_LYS_162 | NZ     | L_ASP_142 | OD2    | 3.312        |
| 4JO3   | H_ARG_38  | NH1    | H_ASP_86  | OD2    | 2.684        |
| 4JO3   | H_ARG_38  | NH2    | H_GLU_46  | OE1    | 3.692        |
| 4JO3   | H_ARG_38  | NH2    | H_ASP_86  | OD2    | 3.553        |
| 4JO3   | H_ARG_54  | NH1    | P_GLU_321 | OE1    | 3.970        |
| 4JO3   | H_ARG_66  | NH1    | H_ASP_86  | OD1    | 2.860        |
| 4JO3   | H_ARG_66  | NH1    | H_ASP_86  | OD2    | 3.702        |
| 4JO3   | H_ARG_66  | NH2    | H_ASP_86  | OD1    | 3.555        |
| 4JO3   | H_ARG_66  | NH2    | H_ASP_86  | OD2    | 3.007        |
| 4JO3   | H_ARG_94  | NH1    | H_ASP_101 | OD1    | 2.669        |
| 4JO3   | H_ARG_94  | NH1    | H_ASP_101 | OD2    | 3.152        |
| 4JO3   | P_ARG_327 | NH1    | L_ASP_1   | OD1    | 2.994        |
| 4JO3   | P_ARG_327 | NH2    | L_ASP_1   | OD1    | 2.732        |
| 4JO3   | P_ARG_327 | NH2    | L_GLU_27  | OE1    | 3.272        |
| 4JO3   | P_ARG_327 | NH2    | L_GLU_27  | OE2    | 3.099        |
| 4JO3   | M_LYS_39  | NZ     | M_ASP_81  | OD1    | 3.363        |
| 4JO3   | M_LYS_39  | NZ     | M_ASP_81  | OD2    | 3.485        |
| 4JO3   | M_ARG_61  | NH1    | M_ASP_82  | OD1    | 3.977        |
| 4JO3   | M_ARG_61  | NH1    | M_ASP_82  | OD2    | 2.819        |
| 4JO3   | M_ARG_61  | NH2    | M_ASP_82  | OD1    | 2.923        |
| 4JO3   | M_ARG_61  | NH2    | M_ASP_82  | OD2    | 3.229        |
| 4JO3   | M_LYS_162 | NZ     | M_ASP_142 | OD1    | 3.056        |
| 4JO3   | M_LYS_162 | NZ     | M_ASP_142 | OD2    | 3.799        |
| 4JO3   | I_ARG_38  | NH1    | I_ASP_86  | OD2    | 2.673        |
| 4JO3   | I_ARG_38  | NH2    | I_GLU_46  | OE1    | 3.528        |
| 4JO3   | I_ARG_38  | NH2    | I_GLU_46  | OE2    | 3.898        |
| 4JO3   | I_ARG_38  | NH2    | I_ASP_86  | OD2    | 3.887        |
| 4JO3   | I_ARG_66  | NH1    | I_ASP_86  | OD1    | 3.159        |
| 4JO3   | I_ARG_66  | NH1    | I_ASP_86  | OD2    | 3.577        |
| 4JO3   | I_ARG_66  | NH2    | I_ASP_86  | OD1    | 3.570        |
| 4JO3   | I_ARG_66  | NH2    | I_ASP_86  | OD2    | 2.893        |
| 4JO3   | I_ARG_94  | NH1    | I_ASP_101 | OD1    | 2.954        |
| 4JO3   | I_ARG_94  | NH1    | I_ASP_101 | OD2    | 3.750        |
| 4JO3   | Q_ARG_327 | NH1    | M_ASP_1   | OD1    | 3.248        |
| 4JO3   | Q_ARG_327 | NH2    | M_ASP_1   | OD1    | 2.447        |
| 4JO3   | Q_ARG_327 | NH2    | M_ASP_1   | OD2    | 3.524        |
| 4JO3   | Q_ARG_327 | NH2    | M_GLU_27  | OE1    | 3.837        |
| 4JO3   | Q_ARG_327 | NH2    | M_GLU_27  | OE2    | 3.723        |

Table 550: 4JO3-specific salt bridging networks analysis. In this table, a PDB file is specified with a four-letter PDB ID, except that the names of the PDB files corresponding to the single NMR structural model split from the NMR ensemble is specified with a four-letter PDB ID in addition to a hyphen followed by the single NMR structural model numeric ID, the residue naming scheme is **Chain ID\_residue name\_residue number**,  $\angle ADH$  represents the angle formed by acceptor (A), donor (D) and hydrogen (H) ( $\angle ADH$ ).

| PDB ID | Residue A | Atom A | Residue B | Atom B | Distance (Å) |
|--------|-----------|--------|-----------|--------|--------------|
| 4JO4   | L.LYS_39  | NZ     | L.ASP_81  | OD1    | 3.937        |
| 4JO4   | L.LYS_39  | NZ     | L.ASP_81  | OD2    | 3.155        |
| 4JO4   | L.ARG_61  | NH1    | L.ASP_82  | OD1    | 3.796        |
| 4JO4   | L.ARG_61  | NH1    | L.ASP_82  | OD2    | 2.750        |
| 4JO4   | L.ARG_61  | NH2    | L.ASP_82  | OD1    | 3.079        |
| 4JO4   | L.ARG_61  | NH2    | L.ASP_82  | OD2    | 3.445        |
| 4JO4   | L.LYS_162 | NZ     | L.ASP_142 | OD1    | 2.940        |
| 4JO4   | L.LYS_162 | NZ     | L.ASP_142 | OD2    | 3.881        |
| 4JO4   | H.ARG_38  | NH1    | H.ASP_86  | OD2    | 2.736        |
| 4JO4   | H.ARG_38  | NH2    | H.GLU_46  | OE1    | 3.500        |
| 4JO4   | H.ARG_38  | NH2    | H.GLU_46  | OE2    | 3.857        |
| 4JO4   | H.ARG_38  | NH2    | H.ASP_86  | OD2    | 3.761        |
| 4JO4   | H.ARG_66  | NH1    | H.ASP_86  | OD1    | 2.970        |
| 4JO4   | H.ARG_66  | NH1    | H.ASP_86  | OD2    | 3.623        |
| 4JO4   | H.ARG_66  | NH2    | H.ASP_86  | OD1    | 3.534        |
| 4JO4   | H.ARG_66  | NH2    | H.ASP_86  | OD2    | 2.909        |
| 4JO4   | H.ARG_94  | NH1    | H.ASP_101 | OD1    | 2.897        |
| 4JO4   | H.ARG_94  | NH1    | H.ASP_101 | OD2    | 3.447        |
| 4JO4   | M.LYS_39  | NZ     | M.ASP_81  | OD1    | 2.860        |
| 4JO4   | M.LYS_39  | NZ     | M.ASP_81  | OD2    | 3.880        |
| 4JO4   | M.ARG_61  | NH1    | M.ASP_82  | OD1    | 3.524        |
| 4JO4   | M.ARG_61  | NH1    | M.ASP_82  | OD2    | 2.695        |
| 4JO4   | M.ARG_61  | NH2    | M.ASP_82  | OD1    | 2.799        |
| 4JO4   | M.ARG_61  | NH2    | M.ASP_82  | OD2    | 3.460        |
| 4JO4   | M.LYS_162 | NZ     | M.ASP_142 | OD1    | 2.860        |
| 4JO4   | M.LYS_162 | NZ     | M.ASP_142 | OD2    | 3.801        |
| 4JO4   | I.ARG_38  | NH1    | I.ASP_86  | OD2    | 2.762        |
| 4JO4   | I.ARG_38  | NH2    | I.GLU_46  | OE1    | 3.585        |
| 4JO4   | I.ARG_38  | NH2    | I.GLU_46  | OE2    | 3.974        |
| 4JO4   | I.ARG_38  | NH2    | I.ASP_86  | OD2    | 3.717        |
| 4JO4   | I.ARG_66  | NH1    | I.ASP_86  | OD1    | 2.993        |
| 4JO4   | I.ARG_66  | NH1    | I.ASP_86  | OD2    | 3.710        |
| 4JO4   | I.ARG_66  | NH2    | I.ASP_86  | OD1    | 3.487        |
| 4JO4   | I.ARG_66  | NH2    | I.ASP_86  | OD2    | 2.841        |
| 4JO4   | I.ARG_94  | NH1    | I.ASP_101 | OD1    | 3.375        |
| 4JO4   | I.ARG_94  | NH1    | I.ASP_101 | OD2    | 2.907        |

Table 551: 4JO4-specific salt bridging networks analysis. In this table, a PDB file is specified with a four-letter PDB ID, except that the names of the PDB files corresponding to the single NMR structural model split from the NMR ensemble is specified with a four-letter PDB ID in addition to a hyphen followed by the single NMR structural model numeric ID, the residue naming scheme is **Chain ID\_residue name\_residue number**,  $\angle ADH$  represents the angle formed by acceptor (A), donor (D) and hydrogen (H) ( $\angle ADH$ ).

| PDB ID | Residue A | Atom A | Residue B | Atom B | Distance (Å) |
|--------|-----------|--------|-----------|--------|--------------|
| 4K24   | A_LYS_46  | NZ     | U_GLU_33  | OE2    | 3.632        |
| 4K24   | A_LYS_46  | NZ     | U_GLU_36  | OE2    | 2.856        |
| 4K24   | A_ARG_69  | NH1    | A_ASP_65  | OD2    | 2.685        |
| 4K24   | A_HIS_87  | ND1    | U_ASP_11  | OD1    | 3.994        |
| 4K24   | A_ARG_88  | NH1    | A_ASP_90  | OD1    | 2.450        |
| 4K24   | A_ARG_88  | NH1    | A_ASP_90  | OD2    | 2.041        |
| 4K24   | A_ARG_88  | NH2    | A_ASP_90  | OD2    | 3.515        |
| 4K24   | A_ARG_108 | NH2    | A_ASP_106 | OD1    | 3.775        |
| 4K24   | A_ARG_109 | NH2    | A_GLU_125 | OE1    | 3.204        |
| 4K24   | A_ARG_109 | NH2    | A_GLU_125 | OE2    | 3.379        |
| 4K24   | A_ARG_110 | NH2    | A_GLU_125 | OE1    | 3.434        |
| 4K24   | B_LYS_6   | NZ     | B_GLU_38  | OE1    | 3.295        |
| 4K24   | B_LYS_6   | NZ     | B_GLU_38  | OE2    | 3.051        |
| 4K24   | H_LYS_62  | NZ     | L_ASP_1   | OD1    | 3.610        |
| 4K24   | H_ARG_66  | NH2    | H_ASP_86  | OD1    | 3.579        |
| 4K24   | H_ARG_66  | NH2    | H_ASP_86  | OD2    | 3.959        |
| 4K24   | H_ARG_94  | NH2    | H_ASP_101 | OD2    | 3.501        |
| 4K24   | H_LYS_205 | NZ     | H_ASP_207 | OD1    | 3.964        |
| 4K24   | H_LYS_208 | NZ     | L_GLU_123 | OE1    | 2.286        |
| 4K24   | H_LYS_208 | NZ     | L_GLU_123 | OE2    | 3.345        |
| 4K24   | L_ARG_46  | NH2    | L_ASP_55  | OD1    | 2.623        |
| 4K24   | L_ARG_46  | NH2    | L_ASP_55  | OD2    | 2.874        |
| 4K24   | L_ARG_61  | NH1    | L_GLU_79  | OE1    | 3.659        |
| 4K24   | L_ARG_61  | NH1    | L_ASP_82  | OD2    | 3.380        |
| 4K24   | L_ARG_61  | NH2    | L_GLU_79  | OE1    | 2.490        |
| 4K24   | L_ARG_61  | NH2    | L_GLU_79  | OE2    | 3.979        |
| 4K24   | L_ARG_61  | NH2    | L_ASP_82  | OD1    | 3.491        |
| 4K24   | L_ARG_61  | NH2    | L_ASP_82  | OD2    | 3.569        |
| 4K24   | L_LYS_142 | NZ     | L_ASP_143 | OD1    | 3.088        |
| 4K24   | L_LYS_147 | NZ     | L_GLU_154 | OE1    | 3.964        |
| 4K24   | L_LYS_147 | NZ     | L_GLU_154 | OE2    | 3.385        |
| 4K24   | L_LYS_147 | NZ     | L_GLU_195 | OE2    | 3.600        |
| 4K24   | L_HIS_189 | ND1    | L_GLU_185 | OE2    | 3.464        |
| 4K24   | L_HIS_189 | NE2    | L_ASP_151 | OD2    | 3.905        |
| 4K24   | L_ARG_211 | NH1    | L_GLU_187 | OE1    | 3.878        |
| 4K24   | L_ARG_211 | NH2    | L_GLU_187 | OE1    | 2.437        |
| 4K24   | U_ARG_25  | NH1    | U_GLU_42  | OE2    | 3.583        |
| 4K24   | U_ARG_25  | NH1    | U_GLU_68  | OE1    | 3.761        |
| 4K24   | U_ARG_25  | NH2    | U_GLU_42  | OE2    | 3.008        |
| 4K24   | U_ARG_30  | NH1    | U_GLU_37  | OE2    | 3.811        |
| 4K24   | U_ARG_30  | NH2    | U_GLU_37  | OE1    | 3.105        |
| 4K24   | U_ARG_30  | NH2    | U_GLU_37  | OE2    | 2.352        |
| 4K24   | U_LYS_50  | NZ     | U_GLU_68  | OE2    | 3.702        |
| 4K24   | U_LYS_50  | NZ     | U_ASP_254 | OD1    | 3.827        |
| 4K24   | U_ARG_53  | NH1    | U_ASP_254 | OD1    | 3.567        |
| 4K24   | U_ARG_53  | NH1    | U_ASP_254 | OD2    | 3.288        |
| 4K24   | U_ARG_53  | NH2    | U_ASP_254 | OD1    | 3.503        |
| 4K24   | U_ARG_53  | NH2    | U_ASP_254 | OD2    | 3.622        |
| 4K24   | U_LYS_62  | NZ     | U_GLU_33  | OE1    | 3.765        |
| 4K24   | U_ARG_91  | NH1    | B_ASP_22  | OD2    | 3.233        |
| 4K24   | U_ARG_91  | NH2    | B_ASP_22  | OD1    | 3.988        |
| 4K24   | U_ARG_91  | NH2    | B_ASP_22  | OD2    | 3.635        |
| 4K24   | U_HIS_143 | ND1    | U_GLU_106 | OE2    | 3.213        |
| 4K24   | U_ARG_145 | NH1    | U_ASP_124 | OD1    | 3.705        |
| 4K24   | U_ARG_145 | NH2    | U_ASP_124 | OD1    | 2.588        |
| 4K24   | U_ARG_145 | NH2    | U_ASP_124 | OD2    | 3.556        |
| 4K24   | U_LYS_175 | NZ     | U_GLU_178 | OE2    | 3.964        |

---

Table 552: 4K24-specific salt bridging networks analysis. In this table, a PDB file is specified with a four-letter PDB ID, except that the names of the PDB files corresponding to the single NMR structural model split from the NMR ensemble is specified with a four-letter PDB ID in addition to a hyphen followed by the single NMR structural model numeric ID, the residue naming scheme is **Chain ID\_residue name\_residue number**,  $\angle ADH$  represents the angle formed by acceptor (A), donor (D) and hydrogen (H) ( $\angle ADH$ ).

| PDB ID | Residue A | Atom A | Residue B | Atom B | Distance (Å) |
|--------|-----------|--------|-----------|--------|--------------|
| 4K2U   | A_LYS_    | NZ     | A_GLU_    | OE1    | 3.768        |
| 4K2U   | A_LYS_    | NZ     | A_GLU_    | OE2    | 2.609        |
| 4K2U   | A_ARG_    | NH1    | A_ASP_    | OD1    | 2.573        |
| 4K2U   | A_ARG_    | NH1    | A_ASP_    | OD2    | 3.255        |
| 4K2U   | A_LYS_    | NZ     | A_ASP_    | OD1    | 2.738        |
| 4K2U   | A_LYS_    | NZ     | A_ASP_    | OD1    | 3.468        |
| 4K2U   | A_ARG_    | NH1    | A_ASP_    | OD2    | 2.783        |
| 4K2U   | A_ARG_    | NH2    | A_ASP_    | OD2    | 2.667        |
| 4K2U   | A_ARG_    | NH2    | A_GLU_    | OE1    | 3.027        |
| 4K2U   | A_ARG_    | NH2    | A_GLU_    | OE2    | 3.639        |
| 4K2U   | A_ARG_    | NH1    | A_ASP_    | OD2    | 3.283        |
| 4K2U   | A_ARG_    | NH2    | A_ASP_    | OD1    | 3.700        |
| 4K2U   | A_ARG_    | NH2    | A_ASP_    | OD2    | 2.890        |
| 4K2U   | A_ARG_    | NH2    | A_ASP_    | OD2    | 3.924        |
| 4K2U   | A_LYS_    | NZ     | A_GLU_    | OE1    | 3.682        |
| 4K2U   | A_LYS_    | NZ     | A_GLU_    | OE2    | 3.521        |
| 4K2U   | A_LYS_    | NZ     | A_ASP_    | OD2    | 3.301        |
| 4K2U   | A_LYS_    | NZ     | A_ASP_    | OD2    | 3.690        |
| 4K2U   | A_ARG_    | NH1    | A_GLU_    | OE1    | 3.492        |
| 4K2U   | A_ARG_    | NH1    | A_GLU_    | OE2    | 3.531        |
| 4K2U   | A_ARG_    | NH2    | A_GLU_    | OE1    | 3.963        |
| 4K2U   | A_ARG_    | NH2    | A_GLU_    | OE2    | 2.886        |
| 4K2U   | A_HIS_    | NE2    | A_GLU_    | OE1    | 3.170        |
| 4K2U   | A_LYS_    | NZ     | A_GLU_    | OE1    | 3.297        |
| 4K2U   | A_LYS_    | NZ     | A_GLU_    | OE2    | 3.450        |
| 4K2U   | A_ARG_    | NH1    | A_ASP_    | OD1    | 3.497        |
| 4K2U   | A_ARG_    | NH2    | A_ASP_    | OD1    | 3.758        |
| 4K2U   | B_LYS_    | NZ     | B_GLU_    | OE1    | 3.571        |
| 4K2U   | B_LYS_    | NZ     | B_GLU_    | OE2    | 2.646        |
| 4K2U   | B_ARG_    | NH1    | B_ASP_    | OD1    | 2.642        |
| 4K2U   | B_ARG_    | NH1    | B_ASP_    | OD2    | 3.466        |
| 4K2U   | B_LYS_    | NZ     | B_ASP_    | OD1    | 2.561        |
| 4K2U   | B_ARG_    | NH1    | B_ASP_    | OD2    | 2.664        |
| 4K2U   | B_ARG_    | NH2    | B_ASP_    | OD2    | 2.621        |
| 4K2U   | B_ARG_    | NH2    | B_GLU_    | OE1    | 3.057        |
| 4K2U   | B_ARG_    | NH2    | B_GLU_    | OE2    | 3.570        |
| 4K2U   | B_ARG_    | NH1    | B_ASP_    | OD2    | 3.462        |
| 4K2U   | B_ARG_    | NH2    | B_ASP_    | OD1    | 3.706        |
| 4K2U   | B_ARG_    | NH2    | B_ASP_    | OD2    | 3.043        |
| 4K2U   | B_ARG_    | NH2    | B_ASP_    | OD2    | 3.804        |
| 4K2U   | B_LYS_    | NZ     | B_GLU_    | OE1    | 3.474        |
| 4K2U   | B_LYS_    | NZ     | B_GLU_    | OE2    | 3.437        |
| 4K2U   | B_LYS_    | NZ     | B_GLU_    | OE2    | 3.372        |
| 4K2U   | B_LYS_    | NZ     | B_ASP_    | OD2    | 3.125        |
| 4K2U   | B_ARG_    | NH1    | B_GLU_    | OE2    | 2.841        |
| 4K2U   | B_ARG_    | NH2    | B_GLU_    | OE1    | 3.192        |
| 4K2U   | B_ARG_    | NH2    | B_GLU_    | OE2    | 3.341        |
| 4K2U   | B_LYS_    | NZ     | B_GLU_    | OE1    | 3.826        |
| 4K2U   | B_HIS_    | NE2    | B_GLU_    | OE1    | 3.714        |
| 4K2U   | B_LYS_    | NZ     | B_GLU_    | OE1    | 3.312        |
| 4K2U   | B_LYS_    | NZ     | B_GLU_    | OE2    | 3.705        |
| 4K2U   | B_ARG_    | NH1    | B_ASP_    | OD1    | 3.090        |
| 4K2U   | B_ARG_    | NH2    | B_ASP_    | OD1    | 3.461        |
| 4K2U   | B_LYS_    | NZ     | B_GLU_    | OE2    | 3.384        |
| 4K2U   | B_LYS_    | NZ     | B_ASP_    | OD1    | 3.229        |
| 4K2U   | B_LYS_    | NZ     | B_ASP_    | OD2    | 2.796        |
| 4K2U   | H_ARG_    | NH1    | H_GLU_    | OE1    | 3.927        |

|      |        |     |        |     |       |
|------|--------|-----|--------|-----|-------|
| 4K2U | H_LYS_ | NZ  | H_ASP_ | OD1 | 3.481 |
| 4K2U | H_LYS_ | NZ  | H_ASP_ | OD2 | 3.636 |
| 4K2U | H_LYS_ | NZ  | L_ASP_ | OD2 | 2.646 |
| 4K2U | H_LYS_ | NZ  | H_ASP_ | OD1 | 3.694 |
| 4K2U | H_LYS_ | NZ  | H_ASP_ | OD2 | 2.669 |
| 4K2U | H_ARG_ | NH2 | H_ASP_ | OD1 | 3.475 |
| 4K2U | H_ARG_ | NH2 | H_GLU_ | OE1 | 2.820 |
| 4K2U | H_LYS_ | NZ  | L_GLU_ | OE2 | 3.160 |
| 4K2U | L_ARG_ | NH1 | L_GLU_ | OE1 | 3.521 |
| 4K2U | L_ARG_ | NH2 | L_GLU_ | OE1 | 2.623 |
| 4K2U | L_LYS_ | NZ  | L_ASP_ | OD1 | 3.612 |
| 4K2U | L_LYS_ | NZ  | L_ASP_ | OD2 | 3.457 |
| 4K2U | L_LYS_ | NZ  | M_ASP_ | OD2 | 2.895 |
| 4K2U | L_LYS_ | NZ  | L_ASP_ | OD1 | 3.839 |
| 4K2U | L_LYS_ | NZ  | L_ASP_ | OD2 | 2.840 |
| 4K2U | L_ARG_ | NH2 | L_ASP_ | OD1 | 3.888 |
| 4K2U | L_ARG_ | NH2 | L_GLU_ | OE1 | 2.738 |
| 4K2U | L_ARG_ | NH1 | L_ASP_ | OD1 | 2.627 |
| 4K2U | L_ARG_ | NH1 | L_ASP_ | OD2 | 2.684 |
| 4K2U | L_ARG_ | NH1 | A_GLU_ | OE1 | 2.808 |
| 4K2U | L_ARG_ | NH1 | A_GLU_ | OE2 | 3.439 |
| 4K2U | L_ARG_ | NH2 | A_GLU_ | OE1 | 3.591 |
| 4K2U | L_ARG_ | NH2 | A_GLU_ | OE2 | 2.619 |
| 4K2U | L_ARG_ | NH1 | L_GLU_ | OE1 | 3.276 |
| 4K2U | L_ARG_ | NH1 | L_GLU_ | OE2 | 3.602 |
| 4K2U | L_ARG_ | NH2 | L_GLU_ | OE2 | 3.191 |
| 4K2U | L_ARG_ | NH2 | L_GLU_ | OE1 | 3.486 |
| 4K2U | L_ARG_ | NH2 | L_ASP_ | OD1 | 3.236 |
| 4K2U | L_ARG_ | NH2 | L_ASP_ | OD2 | 3.657 |
| 4K2U | L_LYS_ | NZ  | L_GLU_ | OE1 | 3.754 |
| 4K2U | L_LYS_ | NZ  | L_GLU_ | OE2 | 2.528 |
| 4K2U | L_ARG_ | NH1 | L_GLU_ | OE2 | 3.762 |
| 4K2U | L_ARG_ | NH2 | L_GLU_ | OE1 | 3.990 |
| 4K2U | L_ARG_ | NH2 | L_GLU_ | OE2 | 2.325 |
| 4K2U | L_HIS_ | ND1 | L_ASP_ | OD2 | 2.555 |
| 4K2U | M_ARG_ | NH1 | M_ASP_ | OD1 | 2.384 |
| 4K2U | M_ARG_ | NH1 | M_ASP_ | OD2 | 3.237 |
| 4K2U | M_ARG_ | NH1 | B_GLU_ | OE1 | 2.744 |
| 4K2U | M_ARG_ | NH1 | B_GLU_ | OE2 | 3.321 |
| 4K2U | M_ARG_ | NH2 | B_GLU_ | OE1 | 3.489 |
| 4K2U | M_ARG_ | NH2 | B_GLU_ | OE2 | 2.673 |
| 4K2U | M_HIS_ | ND1 | L_GLU_ | OE2 | 3.997 |
| 4K2U | M_ARG_ | NH1 | M_GLU_ | OE2 | 3.472 |
| 4K2U | M_ARG_ | NH2 | M_GLU_ | OE2 | 3.787 |
| 4K2U | M_ARG_ | NH2 | M_GLU_ | OE1 | 3.410 |
| 4K2U | M_ARG_ | NH2 | M_ASP_ | OD1 | 3.140 |
| 4K2U | M_ARG_ | NH2 | M_ASP_ | OD1 | 3.175 |
| 4K2U | M_LYS_ | NZ  | M_GLU_ | OE1 | 3.487 |
| 4K2U | M_LYS_ | NZ  | M_GLU_ | OE2 | 2.899 |
| 4K2U | M_HIS_ | ND1 | M_ASP_ | OD2 | 2.547 |



---

Table 553: 4K2U-specific salt bridging networks analysis. In this table, a PDB file is specified with a four-letter PDB ID, except that the names of the PDB files corresponding to the single NMR structural model split from the NMR ensemble is specified with a four-letter PDB ID in addition to a hyphen followed by the single NMR structural model numeric ID, the residue naming scheme is **Chain ID\_residue name\_residue number**,  $\angle ADH$  represents the angle formed by acceptor (A), donor (D) and hydrogen (H) ( $\angle ADH$ ).

| PDB ID | Residue A  | Atom A | Residue B  | Atom B | Distance (Å) |
|--------|------------|--------|------------|--------|--------------|
| 4KI5   | C_HIS_35   | NE2    | C_GLU_99   | OE1    | 2.952        |
| 4KI5   | C_LYS_46   | NZ     | C_ASP_63   | OD2    | 2.850        |
| 4KI5   | C_LYS_65   | NZ     | C_ASP_62   | OD1    | 3.382        |
| 4KI5   | C_ARG_67   | NH1    | C_ASP_90   | OD1    | 3.757        |
| 4KI5   | C_ARG_67   | NH1    | C_ASP_90   | OD2    | 2.867        |
| 4KI5   | C_ARG_67   | NH2    | C_ASP_90   | OD1    | 3.010        |
| 4KI5   | C_ARG_67   | NH2    | C_ASP_90   | OD2    | 3.538        |
| 4KI5   | C_ARG_98   | NH1    | C_ASP_100  | OD1    | 3.340        |
| 4KI5   | C_LYS_211  | NZ     | D_GLU_122  | OE2    | 2.907        |
| 4KI5   | C_ARG_216  | NH2    | C_GLU_214  | OE1    | 3.340        |
| 4KI5   | D_ARG_60   | NH2    | D_GLU_80   | OE2    | 3.447        |
| 4KI5   | D_ARG_60   | NH2    | D_ASP_81   | OD1    | 2.653        |
| 4KI5   | D_ARG_60   | NH2    | D_ASP_81   | OD2    | 3.443        |
| 4KI5   | D_LYS_102  | NZ     | D_ASP_164  | OD1    | 3.660        |
| 4KI5   | D_LYS_102  | NZ     | D_ASP_164  | OD2    | 3.125        |
| 4KI5   | D_LYS_146  | NZ     | D_GLU_153  | OE1    | 3.729        |
| 4KI5   | D_LYS_148  | NZ     | D_GLU_194  | OE1    | 2.836        |
| 4KI5   | D_ARG_154  | NH1    | D_GLU_184  | OE1    | 3.010        |
| 4KI5   | D_ARG_154  | NH2    | D_GLU_184  | OE1    | 3.600        |
| 4KI5   | D_LYS_182  | NZ     | D_GLU_186  | OE2    | 3.376        |
| 4KI5   | D_HIS_188  | ND1    | D_ASP_150  | OD2    | 2.808        |
| 4KI5   | D_HIS_197  | ND1    | D_ASP_142  | OD1    | 2.559        |
| 4KI5   | D_HIS_197  | ND1    | D_ASP_142  | OD2    | 3.147        |
| 4KI5   | E_ARG_40   | NH2    | E_GLU_89   | OE2    | 3.648        |
| 4KI5   | E_ARG_63   | NH1    | E_GLU_46   | OE2    | 2.566        |
| 4KI5   | E_LYS_65   | NZ     | E_GLU_62   | OE1    | 3.306        |
| 4KI5   | E_LYS_65   | NZ     | E_GLU_62   | OE2    | 3.510        |
| 4KI5   | E_LYS_67   | NZ     | E_ASP_90   | OD1    | 3.938        |
| 4KI5   | E_LYS_67   | NZ     | E_ASP_90   | OD2    | 2.897        |
| 4KI5   | E_ARG_98   | NH2    | E_ASP_110  | OD1    | 3.380        |
| 4KI5   | E_ARG_98   | NH2    | E_ASP_110  | OD2    | 2.498        |
| 4KI5   | E_LYS_217  | NZ     | F_GLU_123  | OE2    | 3.401        |
| 4KI5   | E_LYS_218  | NZ     | E_GLU_220  | OE2    | 3.129        |
| 4KI5   | E_ARG_222  | NH1    | F_GLU_123  | OE1    | 3.106        |
| 4KI5   | E_ARG_222  | NH1    | F_GLU_123  | OE2    | 3.925        |
| 4KI5   | E_ARG_222  | NH2    | F_GLU_123  | OE1    | 3.823        |
| 4KI5   | E_ARG_222  | NH2    | F_GLU_123  | OE2    | 3.234        |
| 4KI5   | F_ARG_24   | NH2    | F_ASP_70   | OD1    | 3.045        |
| 4KI5   | F_ARG_24   | NH2    | F_ASP_70   | OD2    | 2.870        |
| 4KI5   | F_ARG_46   | NH2    | F_ASP_55   | OD2    | 3.256        |
| 4KI5   | F_ARG_61   | NH1    | F_ASP_79   | OD2    | 3.671        |
| 4KI5   | F_ARG_61   | NH2    | F_ASP_79   | OD2    | 3.651        |
| 4KI5   | F_ARG_61   | NH2    | F_ASP_82   | OD1    | 2.633        |
| 4KI5   | F_ARG_61   | NH2    | F_ASP_82   | OD2    | 3.268        |
| 4KI5   | F_ARG_66   | NH1    | F_GLU_28   | OE2    | 3.847        |
| 4KI5   | F_ARG_66   | NH2    | F_GLU_28   | OE2    | 3.615        |
| 4KI5   | F_LYS_103  | NZ     | F_ASP_165  | OD1    | 3.937        |
| 4KI5   | F_LYS_103  | NZ     | F_ASP_165  | OD2    | 3.643        |
| 4KI5   | F_LYS_149  | NZ     | F_GLU_195  | OE1    | 2.911        |
| 4KI5   | F_ARG_155  | NH1    | F_GLU_185  | OE2    | 3.880        |
| 4KI5   | F_ARG_155  | NH2    | F_GLU_185  | OE2    | 2.938        |
| 4KI5   | F_LYS_169  | NZ     | F_GLU_81   | OE2    | 3.864        |
| 4KI5   | F_LYS_183  | NZ     | F_ASP_184  | OD1    | 2.750        |
| 4KI5   | F_HIS_189  | ND1    | F_ASP_151  | OD2    | 2.998        |
| 4KI5   | F_ARG_211  | NH2    | F_GLU_187  | OE1    | 3.825        |
| 4KI5   | M_ARG_2209 | NH2    | M_ASP_2187 | OD2    | 2.570        |
| 4KI5   | M_ARG_2215 | NH1    | C_ASP_100  | OD1    | 2.868        |

|      |            |     |            |     |       |
|------|------------|-----|------------|-----|-------|
| 4KI5 | M_ARG_2215 | NH1 | C_ASP_100  | OD2 | 3.241 |
| 4KI5 | M_ARG_2215 | NH2 | C_ASP_100  | OD1 | 3.324 |
| 4KI5 | M_ARG_2215 | NH2 | C_ASP_100  | OD2 | 2.939 |
| 4KI5 | M_ARG_2215 | NH2 | C_ASP_101  | OD2 | 3.819 |
| 4KI5 | M_LYS_2227 | NZ  | E_GLU_50   | OE1 | 3.493 |
| 4KI5 | M_ARG_2304 | NH2 | M_ASP_2233 | OD1 | 3.696 |
| 4KI5 | M_ARG_2304 | NH2 | M_ASP_2233 | OD2 | 3.280 |

Table 554: 4KI5-specific salt bridging networks analysis. In this table, a PDB file is specified with a four-letter PDB ID, except that the names of the PDB files corresponding to the single NMR structural model split from the NMR ensemble is specified with a four-letter PDB ID in addition to a hyphen followed by the single NMR structural model numeric ID, the residue naming scheme is **Chain ID\_residue name\_residue number**,  $\angle ADH$  represents the angle formed by acceptor (A), donor (D) and hydrogen (H) ( $\angle ADH$ ).

| PDB ID | Residue A | Atom A | Residue B | Atom B | Distance (Å) |
|--------|-----------|--------|-----------|--------|--------------|
| 4KJY   | A.LYS_39  | NZ     | B.ASP_100 | OD1    | 2.809        |
| 4KJY   | A.LYS_41  | NZ     | A.GLU_97  | OE2    | 2.999        |
| 4KJY   | A.LYS_41  | NZ     | A.GLU_106 | OE1    | 2.835        |
| 4KJY   | A.ARG_45  | NH1    | A.ASP_62  | OD1    | 3.701        |
| 4KJY   | A.ARG_45  | NH1    | A.ASP_62  | OD2    | 2.667        |
| 4KJY   | A.ARG_45  | NH2    | A.ASP_62  | OD2    | 2.900        |
| 4KJY   | A.HIS_90  | NE2    | A.ASP_62  | OD2    | 3.464        |
| 4KJY   | A.ARG_103 | NH2    | A.GLU_100 | OE1    | 3.259        |
| 4KJY   | A.ARG_103 | NH2    | A.GLU_100 | OE2    | 3.050        |
| 4KJY   | B.ARG_46  | NH1    | B.GLU_102 | OE1    | 3.091        |
| 4KJY   | B.ARG_46  | NH2    | B.GLU_102 | OE1    | 3.045        |
| 4KJY   | B.ARG_53  | NH1    | A.GLU_97  | OE2    | 3.571        |
| 4KJY   | B.ARG_53  | NH1    | A.GLU_106 | OE1    | 3.135        |
| 4KJY   | B.ARG_59  | NH1    | B.ASP_85  | OD1    | 3.565        |
| 4KJY   | B.ARG_59  | NH2    | B.ASP_85  | OD1    | 3.099        |
| 4KJY   | B.ARG_59  | NH2    | B.ASP_85  | OD2    | 2.288        |
| 4KJY   | B.ARG_68  | NH1    | B.GLU_65  | OE1    | 3.402        |
| 4KJY   | B.ARG_68  | NH2    | B.GLU_65  | OE1    | 3.828        |
| 4KJY   | B.ARG_69  | NH1    | A.GLU_35  | OE1    | 2.737        |
| 4KJY   | B.ARG_69  | NH1    | A.GLU_35  | OE2    | 3.607        |
| 4KJY   | B.ARG_69  | NH1    | A.GLU_100 | OE2    | 2.961        |
| 4KJY   | B.ARG_69  | NH2    | A.GLU_35  | OE1    | 3.476        |
| 4KJY   | B.ARG_69  | NH2    | A.GLU_35  | OE2    | 2.813        |
| 4KJY   | B.LYS_96  | NZ     | A.GLU_97  | OE1    | 2.567        |
| 4KJY   | B.LYS_96  | NZ     | B.ASP_100 | OD1    | 3.158        |
| 4KJY   | B.LYS_96  | NZ     | B.ASP_100 | OD2    | 2.571        |
| 4KJY   | B.LYS_104 | NZ     | B.GLU_3   | OE1    | 3.935        |
| 4KJY   | B.LYS_104 | NZ     | B.GLU_3   | OE2    | 3.416        |
| 4KJY   | C.LYS_41  | NZ     | C.GLU_97  | OE2    | 2.660        |
| 4KJY   | C.LYS_41  | NZ     | C.GLU_106 | OE1    | 2.848        |
| 4KJY   | C.ARG_45  | NH1    | C.ASP_62  | OD2    | 3.404        |
| 4KJY   | C.ARG_45  | NH2    | C.ASP_62  | OD1    | 3.143        |
| 4KJY   | C.ARG_45  | NH2    | C.ASP_62  | OD2    | 3.381        |
| 4KJY   | C.LYS_67  | NZ     | C.GLU_69  | OE1    | 3.854        |
| 4KJY   | C.LYS_67  | NZ     | C.GLU_69  | OE2    | 2.799        |
| 4KJY   | C.LYS_81  | NZ     | C.GLU_69  | OE2    | 2.680        |
| 4KJY   | C.HIS_90  | NE2    | C.ASP_62  | OD2    | 3.141        |
| 4KJY   | C.ARG_103 | NH2    | C.GLU_100 | OE1    | 3.185        |
| 4KJY   | C.ARG_103 | NH2    | C.GLU_100 | OE2    | 3.021        |
| 4KJY   | D.ARG_40  | NH1    | A.GLU_29  | OE1    | 3.310        |
| 4KJY   | D.ARG_40  | NH2    | A.GLU_29  | OE1    | 3.253        |
| 4KJY   | D.ARG_40  | NH2    | A.GLU_29  | OE2    | 2.999        |
| 4KJY   | D.ARG_40  | NH2    | B.GLU_70  | OE1    | 3.440        |
| 4KJY   | D.ARG_46  | NH1    | D.GLU_102 | OE1    | 3.026        |
| 4KJY   | D.ARG_46  | NH2    | D.GLU_102 | OE1    | 2.981        |
| 4KJY   | D.ARG_53  | NH1    | C.GLU_97  | OE2    | 3.949        |
| 4KJY   | D.ARG_53  | NH2    | C.GLU_104 | OE1    | 3.112        |
| 4KJY   | D.ARG_53  | NH2    | C.GLU_104 | OE2    | 3.607        |
| 4KJY   | D.ARG_59  | NH1    | D.ASP_85  | OD1    | 3.248        |
| 4KJY   | D.ARG_59  | NH2    | D.ASP_85  | OD1    | 3.278        |
| 4KJY   | D.ARG_59  | NH2    | D.ASP_85  | OD2    | 2.654        |
| 4KJY   | D.ARG_68  | NH2    | D.GLU_65  | OE1    | 2.908        |
| 4KJY   | D.ARG_69  | NH1    | C.GLU_35  | OE1    | 2.786        |
| 4KJY   | D.ARG_69  | NH1    | C.GLU_35  | OE2    | 3.903        |
| 4KJY   | D.ARG_69  | NH1    | C.GLU_100 | OE2    | 3.005        |
| 4KJY   | D.ARG_69  | NH2    | C.GLU_35  | OE1    | 3.286        |
| 4KJY   | D.ARG_69  | NH2    | C.GLU_35  | OE2    | 2.868        |

|      |           |    |           |     |       |
|------|-----------|----|-----------|-----|-------|
| 4KJY | D_LYS_96  | NZ | C_GLU_97  | OE1 | 2.747 |
| 4KJY | D_LYS_96  | NZ | D_ASP_100 | OD1 | 3.105 |
| 4KJY | D_LYS_96  | NZ | D_ASP_100 | OD2 | 2.750 |
| 4KJY | D_LYS_104 | NZ | D_GLU_3   | OE1 | 2.954 |

Table 555: 4KJY-specific salt bridging networks analysis. In this table, a PDB file is specified with a four-letter PDB ID, except that the names of the PDB files corresponding to the single NMR structural model split from the NMR ensemble is specified with a four-letter PDB ID in addition to a hyphen followed by the single NMR structural model numeric ID, the residue naming scheme is **Chain ID\_residue name\_residue number**,  $\angle ADH$  represents the angle formed by acceptor (A), donor (D) and hydrogen (H) ( $\angle ADH$ ).

| PDB ID | Residue A | Atom A | Residue B | Atom B | Distance (Å) |
|--------|-----------|--------|-----------|--------|--------------|
| 4KPH   | L_LYS_39  | NZ     | L_GLU_81  | OE1    | 3.604        |
| 4KPH   | L_ARG_61  | NH1    | L_ASP_82  | OD1    | 3.220        |
| 4KPH   | L_ARG_61  | NH1    | L_ASP_82  | OD2    | 2.394        |
| 4KPH   | L_ARG_61  | NH2    | L_GLU_79  | OE1    | 3.711        |
| 4KPH   | L_ARG_61  | NH2    | L_GLU_79  | OE2    | 3.781        |
| 4KPH   | L_ARG_61  | NH2    | L_ASP_82  | OD1    | 2.574        |
| 4KPH   | L_ARG_61  | NH2    | L_ASP_82  | OD2    | 3.380        |
| 4KPH   | L_ARG_61  | NH2    | L_GLU_85  | OE2    | 3.345        |
| 4KPH   | L_LYS_103 | NZ     | L_ASP_85  | OD1    | 2.968        |
| 4KPH   | L_LYS_103 | NZ     | L_ASP_85  | OD2    | 3.649        |
| 4KPH   | L_LYS_147 | NZ     | L_GLU_154 | OE2    | 3.845        |
| 4KPH   | L_LYS_149 | NZ     | L_GLU_195 | OE1    | 3.580        |
| 4KPH   | L_LYS_149 | NZ     | L_GLU_195 | OE2    | 2.888        |
| 4KPH   | L_ARG_155 | NH1    | L_GLU_185 | OE2    | 3.834        |
| 4KPH   | L_LYS_169 | NZ     | L_GLU_81  | OE2    | 3.946        |
| 4KPH   | L_ARG_188 | NH1    | L_GLU_185 | OE1    | 2.941        |
| 4KPH   | L_ARG_188 | NH2    | L_GLU_185 | OE1    | 3.830        |
| 4KPH   | L_HIS_189 | ND1    | L_ASP_151 | OD2    | 3.425        |
| 4KPH   | L_HIS_189 | NE2    | L_GLU_185 | OE2    | 3.271        |
| 4KPH   | L_LYS_199 | NZ     | L_ASP_110 | OD2    | 3.817        |
| 4KPH   | H_ARG_38  | NH1    | H_ASP_86  | OD1    | 2.609        |
| 4KPH   | H_ARG_38  | NH2    | H_GLU_46  | OE2    | 2.879        |
| 4KPH   | H_ARG_38  | NH2    | H_ASP_86  | OD1    | 3.494        |
| 4KPH   | H_ARG_66  | NH1    | H_ASP_86  | OD1    | 3.691        |
| 4KPH   | H_ARG_66  | NH1    | H_ASP_86  | OD2    | 3.301        |
| 4KPH   | H_ARG_66  | NH2    | H_ASP_86  | OD1    | 2.689        |
| 4KPH   | H_ARG_66  | NH2    | H_ASP_86  | OD2    | 2.980        |
| 4KPH   | H_LYS_75  | NZ     | H_ASP_72  | OD2    | 2.680        |
| 4KPH   | H_LYS_208 | NZ     | L_GLU_123 | OE2    | 2.903        |
| 4KPH   | M_LYS_39  | NZ     | M_GLU_81  | OE1    | 3.784        |
| 4KPH   | M_ARG_61  | NH1    | M_ASP_82  | OD1    | 3.526        |
| 4KPH   | M_ARG_61  | NH1    | M_ASP_82  | OD2    | 2.643        |
| 4KPH   | M_ARG_61  | NH2    | M_GLU_79  | OE1    | 3.955        |
| 4KPH   | M_ARG_61  | NH2    | M_GLU_79  | OE2    | 3.623        |
| 4KPH   | M_ARG_61  | NH2    | M_ASP_82  | OD1    | 2.593        |
| 4KPH   | M_ARG_61  | NH2    | M_ASP_82  | OD2    | 3.290        |
| 4KPH   | I_ARG_38  | NH1    | I_ASP_86  | OD1    | 2.756        |
| 4KPH   | I_ARG_38  | NH2    | I_GLU_46  | OE1    | 2.881        |
| 4KPH   | I_ARG_38  | NH2    | I_ASP_86  | OD1    | 3.615        |
| 4KPH   | I_ARG_66  | NH1    | I_ASP_86  | OD1    | 3.166        |
| 4KPH   | I_ARG_66  | NH1    | I_ASP_86  | OD2    | 2.662        |
| 4KPH   | I_ARG_66  | NH2    | I_ASP_86  | OD1    | 3.175        |
| 4KPH   | I_ARG_66  | NH2    | I_ASP_86  | OD2    | 3.816        |
| 4KPH   | I_LYS_75  | NZ     | I_ASP_72  | OD2    | 2.592        |
| 4KPH   | I_LYS_208 | NZ     | M_GLU_123 | OE2    | 2.312        |

Table 556: 4KPH-specific salt bridging networks analysis. In this table, a PDB file is specified with a four-letter PDB ID, except that the names of the PDB files corresponding to the single NMR structural model split from the NMR ensemble is specified with a four-letter PDB ID in addition to a hyphen followed by the single NMR structural model numeric ID, the residue naming scheme is **Chain ID\_residue name\_residue number**,  $\angle ADH$  represents the angle formed by acceptor (A), donor (D) and hydrogen (H) ( $\angle ADH$ ).

| PDB ID | Residue A | Atom A | Residue B | Atom B | Distance (Å) |
|--------|-----------|--------|-----------|--------|--------------|
| 4KRL   | B_ARG_19  | NH2    | B_ASP_80  | OD2    | 3.165        |
| 4KRL   | B_ARG_30  | NH1    | A_ASP_355 | OD1    | 3.258        |
| 4KRL   | B_ARG_30  | NH1    | A_ASP_355 | OD2    | 2.275        |
| 4KRL   | B_ARG_30  | NH2    | A_ASP_355 | OD1    | 3.549        |
| 4KRL   | B_ARG_30  | NH2    | A_ASP_355 | OD2    | 3.938        |
| 4KRL   | B_ARG_38  | NH1    | B_ASP_90  | OD2    | 3.344        |
| 4KRL   | B_ARG_38  | NH2    | B_GLU_46  | OE1    | 2.859        |
| 4KRL   | B_ARG_38  | NH2    | B_ASP_90  | OD2    | 3.931        |
| 4KRL   | B_ARG_67  | NH1    | B_ASP_90  | OD1    | 2.738        |
| 4KRL   | B_ARG_67  | NH1    | B_ASP_90  | OD2    | 3.832        |
| 4KRL   | B_ARG_67  | NH2    | B_ASP_90  | OD1    | 3.067        |
| 4KRL   | B_ARG_67  | NH2    | B_ASP_90  | OD2    | 2.979        |
| 4KRL   | A_ARG_353 | NH1    | B_GLU_110 | OE1    | 2.654        |
| 4KRL   | A_ARG_353 | NH2    | B_ASP_112 | OD1    | 3.873        |
| 4KRL   | A_ARG_353 | NH2    | B_ASP_112 | OD2    | 2.978        |
| 4KRL   | A_LYS_372 | NZ     | A_GLU_397 | OE2    | 2.311        |
| 4KRL   | A_HIS_394 | NE2    | A_ASP_369 | OD1    | 3.965        |
| 4KRL   | A_ARG_403 | NH1    | A_GLU_376 | OE1    | 2.323        |
| 4KRL   | A_ARG_403 | NH1    | A_GLU_376 | OE2    | 3.739        |
| 4KRL   | A_LYS_407 | NZ     | A_ASP_434 | OD1    | 3.147        |
| 4KRL   | A_LYS_407 | NZ     | A_ASP_434 | OD2    | 3.510        |
| 4KRL   | A_ARG_427 | NH1    | A_GLU_397 | OE1    | 3.352        |
| 4KRL   | A_ARG_427 | NH2    | A_GLU_495 | OE1    | 3.797        |
| 4KRL   | A_ARG_427 | NH2    | A_ASP_498 | OD1    | 2.739        |
| 4KRL   | A_ARG_427 | NH2    | A_ASP_498 | OD2    | 3.969        |
| 4KRL   | A_LYS_455 | NZ     | A_GLU_489 | OE2    | 3.930        |
| 4KRL   | A_LYS_463 | NZ     | A_ASP_436 | OD2    | 3.876        |

Table 557: 4KRL-specific salt bridging networks analysis. In this table, a PDB file is specified with a four-letter PDB ID, except that the names of the PDB files corresponding to the single NMR structural model split from the NMR ensemble is specified with a four-letter PDB ID in addition to a hyphen followed by the single NMR structural model numeric ID, the residue naming scheme is **Chain ID\_residue name\_residue number**,  $\angle ADH$  represents the angle formed by acceptor (A), donor (D) and hydrogen (H) ( $\angle ADH$ ).

| PDB ID | Residue A | Atom A | Residue B | Atom B | Distance (Å) |
|--------|-----------|--------|-----------|--------|--------------|
| 4KRM   | A_HIS_334 | ND1    | A_GLU_320 | OE1    | 3.977        |
| 4KRM   | A_HIS_334 | ND1    | A_GLU_320 | OE2    | 2.370        |
| 4KRM   | A_HIS_334 | NE2    | A_GLU_320 | OE2    | 3.990        |
| 4KRM   | A_ARG_353 | NH1    | B_GLU_110 | OE1    | 2.811        |
| 4KRM   | A_ARG_353 | NH2    | B_ASP_112 | OD1    | 3.965        |
| 4KRM   | A_ARG_353 | NH2    | B_ASP_112 | OD2    | 2.932        |
| 4KRM   | A_LYS_372 | NZ     | A_GLU_397 | OE2    | 3.950        |
| 4KRM   | A_ARG_390 | NH1    | A_ASP_369 | OD1    | 3.291        |
| 4KRM   | A_ARG_390 | NH2    | A_ASP_369 | OD1    | 3.166        |
| 4KRM   | A_ARG_390 | NH2    | A_ASP_369 | OD2    | 3.036        |
| 4KRM   | A_HIS_394 | ND1    | A_ASP_392 | OD1    | 3.439        |
| 4KRM   | A_HIS_394 | ND1    | A_ASP_392 | OD2    | 3.192        |
| 4KRM   | A_HIS_394 | ND1    | A_GLU_397 | OE1    | 3.878        |
| 4KRM   | A_HIS_394 | NE2    | A_ASP_392 | OD2    | 2.923        |
| 4KRM   | A_ARG_403 | NH2    | A_GLU_376 | OE1    | 2.698        |
| 4KRM   | A_LYS_407 | NZ     | A_ASP_434 | OD1    | 2.923        |
| 4KRM   | A_LYS_407 | NZ     | H_GLU_5   | OE1    | 3.498        |
| 4KRM   | A_LYS_407 | NZ     | H_GLU_5   | OE2    | 3.022        |
| 4KRM   | A_LYS_463 | NZ     | A_ASP_436 | OD2    | 3.346        |
| 4KRM   | B_ARG_19  | NH2    | B_ASP_80  | OD1    | 2.971        |
| 4KRM   | B_ARG_30  | NH1    | A_ASP_355 | OD1    | 3.162        |
| 4KRM   | B_ARG_30  | NH1    | A_ASP_355 | OD2    | 2.423        |
| 4KRM   | B_ARG_30  | NH2    | A_ASP_355 | OD1    | 3.525        |
| 4KRM   | B_ARG_38  | NH1    | B_ASP_90  | OD2    | 2.849        |
| 4KRM   | B_ARG_38  | NH2    | B_GLU_46  | OE1    | 3.190        |
| 4KRM   | B_ARG_38  | NH2    | B_ASP_90  | OD2    | 3.870        |
| 4KRM   | B_ARG_67  | NH1    | B_ASP_90  | OD1    | 2.285        |
| 4KRM   | B_ARG_67  | NH1    | B_ASP_90  | OD2    | 3.184        |
| 4KRM   | B_ARG_67  | NH2    | B_ASP_90  | OD2    | 3.620        |
| 4KRM   | C_LYS_310 | NZ     | C_GLU_308 | OE2    | 3.505        |
| 4KRM   | C_HIS_334 | ND1    | C_GLU_320 | OE1    | 3.487        |
| 4KRM   | C_ARG_353 | NH1    | D_GLU_110 | OE1    | 2.866        |
| 4KRM   | C_ARG_353 | NH2    | D_ASP_112 | OD2    | 3.218        |
| 4KRM   | C_LYS_372 | NZ     | C_GLU_397 | OE2    | 3.670        |
| 4KRM   | C_HIS_394 | NE2    | C_GLU_397 | OE1    | 2.760        |
| 4KRM   | C_HIS_394 | NE2    | C_GLU_397 | OE2    | 3.646        |
| 4KRM   | C_ARG_403 | NH1    | C_GLU_376 | OE1    | 2.996        |
| 4KRM   | C_ARG_403 | NH2    | C_GLU_431 | OE2    | 3.962        |
| 4KRM   | C_LYS_407 | NZ     | C_ASP_434 | OD1    | 2.908        |
| 4KRM   | C_ARG_427 | NH1    | C_GLU_397 | OE1    | 3.430        |
| 4KRM   | C_ARG_427 | NH2    | C_ASP_498 | OD1    | 2.428        |
| 4KRM   | C_ARG_427 | NH2    | C_ASP_498 | OD2    | 3.809        |
| 4KRM   | C_LYS_455 | NZ     | C_GLU_489 | OE1    | 2.730        |
| 4KRM   | C_LYS_455 | NZ     | C_GLU_489 | OE2    | 3.273        |
| 4KRM   | C_LYS_463 | NZ     | C_ASP_436 | OD2    | 3.365        |
| 4KRM   | D_ARG_19  | NH2    | D_ASP_80  | OD1    | 3.355        |
| 4KRM   | D_ARG_19  | NH2    | D_ASP_80  | OD2    | 3.916        |
| 4KRM   | D_ARG_30  | NH1    | C_ASP_355 | OD1    | 3.295        |
| 4KRM   | D_ARG_30  | NH1    | C_ASP_355 | OD2    | 2.452        |
| 4KRM   | D_ARG_30  | NH2    | C_ASP_355 | OD1    | 3.096        |
| 4KRM   | D_ARG_30  | NH2    | C_ASP_355 | OD2    | 3.699        |
| 4KRM   | D_ARG_38  | NH1    | D_ASP_90  | OD2    | 3.036        |
| 4KRM   | D_ARG_38  | NH2    | D_GLU_46  | OE1    | 3.135        |
| 4KRM   | D_ARG_67  | NH2    | D_ASP_90  | OD1    | 2.355        |
| 4KRM   | D_ARG_67  | NH2    | D_ASP_90  | OD2    | 3.277        |
| 4KRM   | E_HIS_334 | ND1    | E_GLU_320 | OE2    | 2.610        |
| 4KRM   | E_ARG_353 | NH1    | F_GLU_110 | OE1    | 2.855        |



|      |           |     |           |     |       |
|------|-----------|-----|-----------|-----|-------|
| 4KRM | E_ARG_353 | NH2 | F_ASP_112 | OD2 | 2.965 |
| 4KRM | E_LYS_372 | NZ  | E_GLU_397 | OE2 | 3.677 |
| 4KRM | E_LYS_375 | NZ  | E_GLU_308 | OE2 | 3.450 |
| 4KRM | E_ARG_390 | NH1 | E_ASP_369 | OD1 | 3.281 |
| 4KRM | E_HIS_394 | ND1 | E_GLU_397 | OE1 | 3.143 |
| 4KRM | E_HIS_394 | ND1 | E_GLU_397 | OE2 | 3.895 |
| 4KRM | E_HIS_394 | NE2 | E_GLU_397 | OE1 | 3.783 |
| 4KRM | E_HIS_394 | NE2 | E_GLU_397 | OE2 | 3.447 |
| 4KRM | E_ARG_403 | NH1 | E_GLU_376 | OE1 | 2.574 |
| 4KRM | E_ARG_403 | NH1 | E_GLU_376 | OE2 | 3.773 |
| 4KRM | E_LYS_407 | NZ  | E_ASP_434 | OD1 | 2.654 |
| 4KRM | E_LYS_407 | NZ  | E_ASP_434 | OD2 | 3.337 |
| 4KRM | E_LYS_407 | NZ  | L_GLU_5   | OE1 | 3.054 |
| 4KRM | E_LYS_407 | NZ  | L_GLU_5   | OE2 | 2.995 |
| 4KRM | E_ARG_427 | NH1 | E_GLU_495 | OE1 | 3.905 |
| 4KRM | E_ARG_427 | NH1 | E_ASP_498 | OD1 | 3.791 |
| 4KRM | E_ARG_427 | NH2 | E_ASP_498 | OD1 | 2.763 |
| 4KRM | E_ARG_427 | NH2 | E_ASP_498 | OD2 | 3.959 |
| 4KRM | F_ARG_19  | NH2 | F_ASP_80  | OD1 | 2.815 |
| 4KRM | F_ARG_30  | NH1 | E_ASP_355 | OD1 | 3.119 |
| 4KRM | F_ARG_30  | NH1 | E_ASP_355 | OD2 | 2.396 |
| 4KRM | F_ARG_30  | NH2 | E_ASP_355 | OD1 | 3.504 |
| 4KRM | F_ARG_38  | NH1 | F_ASP_90  | OD2 | 2.948 |
| 4KRM | F_ARG_38  | NH2 | F_GLU_46  | OE1 | 2.970 |
| 4KRM | F_ARG_38  | NH2 | F_ASP_90  | OD2 | 3.609 |
| 4KRM | F_ARG_67  | NH1 | F_ASP_90  | OD1 | 3.689 |
| 4KRM | F_ARG_67  | NH1 | F_ASP_90  | OD2 | 3.954 |
| 4KRM | F_ARG_67  | NH2 | F_ASP_90  | OD1 | 2.190 |
| 4KRM | F_ARG_67  | NH2 | F_ASP_90  | OD2 | 3.534 |
| 4KRM | G_LYS_310 | NZ  | G_GLU_376 | OE2 | 3.271 |
| 4KRM | G_ARG_353 | NH1 | H_GLU_110 | OE1 | 3.021 |
| 4KRM | G_ARG_353 | NH2 | H_ASP_112 | OD2 | 3.118 |
| 4KRM | G_LYS_372 | NZ  | G_GLU_397 | OE1 | 3.892 |
| 4KRM | G_LYS_372 | NZ  | G_GLU_397 | OE2 | 2.517 |
| 4KRM | G_LYS_375 | NZ  | G_GLU_308 | OE2 | 2.881 |
| 4KRM | G_HIS_394 | ND1 | G_GLU_397 | OE1 | 3.232 |
| 4KRM | G_ARG_403 | NH1 | G_GLU_376 | OE1 | 2.469 |
| 4KRM | G_LYS_407 | NZ  | B_GLU_5   | OE1 | 3.493 |
| 4KRM | G_LYS_407 | NZ  | B_GLU_5   | OE2 | 2.984 |
| 4KRM | G_LYS_407 | NZ  | G_ASP_434 | OD1 | 2.773 |
| 4KRM | G_ARG_427 | NH1 | G_GLU_397 | OE1 | 2.912 |
| 4KRM | G_ARG_427 | NH2 | G_ASP_392 | OD2 | 3.305 |
| 4KRM | G_ARG_427 | NH2 | G_ASP_498 | OD1 | 3.141 |
| 4KRM | G_LYS_463 | NZ  | G_ASP_436 | OD2 | 2.681 |
| 4KRM | G_ARG_497 | NH2 | G_GLU_495 | OE1 | 3.599 |
| 4KRM | H_ARG_19  | NH2 | H_ASP_80  | OD1 | 3.560 |
| 4KRM | H_ARG_19  | NH2 | H_ASP_80  | OD2 | 3.970 |
| 4KRM | H_ARG_27  | NH1 | G_ASP_323 | OD1 | 2.688 |
| 4KRM | H_ARG_27  | NH2 | G_ASP_323 | OD1 | 3.952 |
| 4KRM | H_ARG_30  | NH1 | G_ASP_355 | OD1 | 3.358 |
| 4KRM | H_ARG_30  | NH1 | G_ASP_355 | OD2 | 2.448 |
| 4KRM | H_ARG_30  | NH2 | G_ASP_355 | OD1 | 3.423 |
| 4KRM | H_ARG_30  | NH2 | G_ASP_355 | OD2 | 3.935 |
| 4KRM | H_ARG_38  | NH1 | H_ASP_90  | OD2 | 2.777 |
| 4KRM | H_ARG_38  | NH2 | H_GLU_46  | OE1 | 3.420 |
| 4KRM | H_ARG_38  | NH2 | H_ASP_90  | OD2 | 3.551 |
| 4KRM | H_ARG_67  | NH1 | H_ASP_90  | OD2 | 3.818 |
| 4KRM | H_ARG_67  | NH2 | H_ASP_90  | OD1 | 2.298 |

|      |           |     |           |     |       |
|------|-----------|-----|-----------|-----|-------|
| 4KRM | H_ARG_67  | NH2 | H_ASP_90  | OD2 | 3.171 |
| 4KRM | I_ARG_353 | NH1 | J_GLU_110 | OE1 | 2.862 |
| 4KRM | I_ARG_353 | NH2 | J_ASP_112 | OD2 | 2.998 |
| 4KRM | I_ARG_390 | NH2 | L_ASP_369 | OD1 | 2.686 |
| 4KRM | I_ARG_390 | NH2 | L_ASP_369 | OD2 | 3.689 |
| 4KRM | I_ARG_403 | NH1 | I_GLU_376 | OE1 | 2.441 |
| 4KRM | I_LYS_407 | NZ  | L_ASP_434 | OD2 | 3.279 |
| 4KRM | I_ARG_427 | NH1 | I_GLU_397 | OE1 | 3.054 |
| 4KRM | I_ARG_427 | NH2 | L_ASP_498 | OD1 | 3.187 |
| 4KRM | I_LYS_463 | NZ  | L_ASP_436 | OD2 | 3.450 |
| 4KRM | J_ARG_19  | NH2 | J_ASP_80  | OD1 | 3.277 |
| 4KRM | J_ARG_30  | NH1 | L_ASP_355 | OD1 | 3.164 |
| 4KRM | J_ARG_30  | NH1 | L_ASP_355 | OD2 | 2.382 |
| 4KRM | J_ARG_30  | NH2 | L_ASP_355 | OD1 | 3.707 |
| 4KRM | J_ARG_38  | NH1 | J_ASP_90  | OD2 | 2.970 |
| 4KRM | J_ARG_38  | NH2 | J_GLU_46  | OE1 | 3.503 |
| 4KRM | J_ARG_38  | NH2 | J_ASP_90  | OD2 | 3.921 |
| 4KRM | J_ARG_54  | NH1 | J_ASP_56  | OD1 | 3.183 |
| 4KRM | J_ARG_54  | NH1 | J_ASP_56  | OD2 | 2.886 |
| 4KRM | J_ARG_54  | NH2 | J_ASP_56  | OD2 | 3.668 |
| 4KRM | J_ARG_67  | NH1 | J_ASP_90  | OD1 | 3.429 |
| 4KRM | J_ARG_67  | NH1 | J_ASP_90  | OD2 | 3.042 |
| 4KRM | J_ARG_67  | NH2 | J_ASP_90  | OD1 | 2.611 |
| 4KRM | J_ARG_67  | NH2 | J_ASP_90  | OD2 | 3.747 |
| 4KRM | K_HIS_334 | ND1 | K_GLU_320 | OE2 | 3.444 |
| 4KRM | K_ARG_353 | NH1 | L_GLU_110 | OE1 | 2.887 |
| 4KRM | K_ARG_353 | NH1 | L_ASP_112 | OD2 | 3.973 |
| 4KRM | K_ARG_353 | NH2 | L_ASP_112 | OD2 | 2.890 |
| 4KRM | K_LYS_375 | NZ  | K_GLU_400 | OE2 | 3.857 |
| 4KRM | K_HIS_394 | ND1 | K_GLU_397 | OE1 | 3.459 |
| 4KRM | K_HIS_394 | NE2 | K_GLU_397 | OE1 | 3.631 |
| 4KRM | K_HIS_394 | NE2 | K_GLU_397 | OE2 | 3.863 |
| 4KRM | K_ARG_403 | NH1 | K_GLU_376 | OE1 | 3.745 |
| 4KRM | K_ARG_403 | NH1 | K_GLU_376 | OE2 | 2.249 |
| 4KRM | K_LYS_407 | NZ  | K_ASP_434 | OD1 | 3.042 |
| 4KRM | K_LYS_407 | NZ  | K_ASP_434 | OD2 | 3.679 |
| 4KRM | K_ARG_427 | NH2 | K_ASP_498 | OD1 | 3.193 |
| 4KRM | L_ARG_19  | NH2 | L_ASP_80  | OD1 | 3.556 |
| 4KRM | L_ARG_30  | NH1 | K_ASP_355 | OD1 | 3.487 |
| 4KRM | L_ARG_30  | NH1 | K_ASP_355 | OD2 | 2.441 |
| 4KRM | L_ARG_30  | NH2 | K_ASP_355 | OD1 | 3.452 |
| 4KRM | L_ARG_30  | NH2 | K_ASP_355 | OD2 | 3.835 |
| 4KRM | L_ARG_38  | NH1 | L_ASP_90  | OD2 | 3.094 |
| 4KRM | L_ARG_38  | NH2 | L_GLU_46  | OE1 | 3.277 |
| 4KRM | L_ARG_67  | NH1 | L_ASP_90  | OD1 | 3.933 |
| 4KRM | L_ARG_67  | NH1 | L_ASP_90  | OD2 | 3.289 |
| 4KRM | L_ARG_67  | NH2 | L_ASP_90  | OD1 | 2.604 |
| 4KRM | L_ARG_67  | NH2 | L_ASP_90  | OD2 | 3.420 |

---

Table 558: 4KRM-specific salt bridging networks analysis. In this table, a PDB file is specified with a four-letter PDB ID, except that the names of the PDB files corresponding to the single NMR structural model split from the NMR ensemble is specified with a four-letter PDB ID in addition to a hyphen followed by the single NMR structural model numeric ID, the residue naming scheme is **Chain ID\_residue name\_residue number**,  $\angle ADH$  represents the angle formed by acceptor (A), donor (D) and hydrogen (H) ( $\angle ADH$ ).

| PDB ID | Residue A | Atom A | Residue B | Atom B | Distance (Å) |
|--------|-----------|--------|-----------|--------|--------------|
| 4KRO   | A_ARG_310 | NH2    | A_GLU_376 | OE2    | 2.978        |
| 4KRO   | A_HIS_394 | NE2    | A_ASP_369 | OD1    | 3.673        |
| 4KRO   | A_ARG_403 | NH1    | A_GLU_376 | OE1    | 2.481        |
| 4KRO   | A_ARG_403 | NH1    | A_GLU_376 | OE2    | 3.999        |
| 4KRO   | A_ARG_403 | NH2    | B_ASP_118 | OD2    | 3.168        |
| 4KRO   | A_ARG_405 | NH2    | B_ASP_118 | OD1    | 3.123        |
| 4KRO   | A_ARG_405 | NH2    | B_ASP_118 | OD2    | 3.849        |
| 4KRO   | A_LYS_407 | NZ     | A_ASP_434 | OD1    | 3.794        |
| 4KRO   | A_LYS_407 | NZ     | A_ASP_434 | OD2    | 2.246        |
| 4KRO   | A_ARG_427 | NH1    | A_GLU_397 | OE1    | 3.467        |
| 4KRO   | A_ARG_427 | NH2    | A_ASP_498 | OD1    | 2.615        |
| 4KRO   | A_LYS_443 | NZ     | D_ASP_58  | OD1    | 2.597        |
| 4KRO   | A_LYS_443 | NZ     | D_ASP_58  | OD2    | 3.457        |
| 4KRO   | A_LYS_465 | NZ     | D_ASP_103 | OD2    | 2.400        |
| 4KRO   | A_LYS_476 | NZ     | A_GLU_472 | OE1    | 3.768        |
| 4KRO   | A_ARG_503 | NH1    | A_ASP_513 | OD1    | 3.566        |
| 4KRO   | A_ARG_507 | NH2    | A_GLU_524 | OE1    | 3.712        |
| 4KRO   | A_HIS_594 | NE2    | A_ASP_588 | OD1    | 2.943        |
| 4KRO   | B_ARG_27  | NH1    | A_GLU_431 | OE1    | 3.073        |
| 4KRO   | B_ARG_27  | NH2    | A_GLU_431 | OE1    | 3.933        |
| 4KRO   | B_ARG_113 | NH1    | B_ASP_116 | OD2    | 3.449        |
| 4KRO   | B_ARG_113 | NH2    | B_ASP_116 | OD1    | 2.666        |
| 4KRO   | B_ARG_113 | NH2    | B_ASP_116 | OD2    | 3.479        |
| 4KRO   | C_LYS_49  | NZ     | D_GLU_105 | OE2    | 3.247        |
| 4KRO   | C_ARG_61  | NH1    | C_GLU_79  | OE2    | 3.404        |
| 4KRO   | C_ARG_61  | NH2    | C_GLU_81  | OE2    | 3.298        |
| 4KRO   | C_ARG_61  | NH2    | C_ASP_82  | OD1    | 2.644        |
| 4KRO   | C_ARG_61  | NH2    | C_ASP_82  | OD2    | 3.807        |
| 4KRO   | C_LYS_103 | NZ     | C_GLU_165 | OE1    | 3.774        |
| 4KRO   | C_LYS_103 | NZ     | C_GLU_165 | OE2    | 3.693        |
| 4KRO   | D_ARG_38  | NH1    | D_ASP_89  | OD1    | 3.529        |
| 4KRO   | D_ARG_38  | NH2    | D_GLU_46  | OE1    | 2.983        |
| 4KRO   | D_ARG_38  | NH2    | D_GLU_46  | OE2    | 3.441        |
| 4KRO   | D_ARG_66  | NH1    | D_ASP_89  | OD2    | 3.598        |
| 4KRO   | D_ARG_66  | NH2    | D_ASP_89  | OD1    | 2.749        |
| 4KRO   | D_ARG_66  | NH2    | D_ASP_89  | OD2    | 3.332        |
| 4KRO   | D_LYS_149 | NZ     | D_ASP_150 | OD1    | 3.048        |
| 4KRO   | D_LYS_149 | NZ     | D_ASP_150 | OD2    | 2.797        |

Table 559: 4KRO-specific salt bridging networks analysis. In this table, a PDB file is specified with a four-letter PDB ID, except that the names of the PDB files corresponding to the single NMR structural model split from the NMR ensemble is specified with a four-letter PDB ID in addition to a hyphen followed by the single NMR structural model numeric ID, the residue naming scheme is **Chain ID\_residue name\_residue number**,  $\angle ADH$  represents the angle formed by acceptor (A), donor (D) and hydrogen (H) ( $\angle ADH$ ).

| PDB ID | Residue A | Atom A | Residue B | Atom B | Distance (Å) |
|--------|-----------|--------|-----------|--------|--------------|
| 4KRP   | A_ARG_310 | NH2    | A_GLU_376 | OE1    | 3.735        |
| 4KRP   | A_ARG_310 | NH2    | A_GLU_376 | OE2    | 2.935        |
| 4KRP   | A_HIS_394 | NE2    | A_ASP_369 | OD1    | 3.309        |
| 4KRP   | A_ARG_403 | NH1    | A_GLU_376 | OE1    | 2.285        |
| 4KRP   | A_ARG_403 | NH2    | B_ASP_115 | OD2    | 3.818        |
| 4KRP   | A_ARG_405 | NH1    | B_GLU_113 | OE1    | 2.923        |
| 4KRP   | A_ARG_405 | NH2    | B_GLU_113 | OE1    | 3.376        |
| 4KRP   | A_ARG_405 | NH2    | B_ASP_115 | OD1    | 2.626        |
| 4KRP   | A_LYS_407 | NZ     | A_ASP_434 | OD2    | 2.386        |
| 4KRP   | A_ARG_427 | NH2    | A_ASP_392 | OD2    | 3.997        |
| 4KRP   | A_ARG_427 | NH2    | A_ASP_498 | OD1    | 2.593        |
| 4KRP   | A_ARG_427 | NH2    | A_ASP_498 | OD2    | 3.626        |
| 4KRP   | A_LYS_443 | NZ     | D_ASP_58  | OD1    | 2.649        |
| 4KRP   | A_LYS_443 | NZ     | D_ASP_58  | OD2    | 3.951        |
| 4KRP   | A_LYS_455 | NZ     | A_GLU_489 | OE1    | 2.953        |
| 4KRP   | A_LYS_455 | NZ     | A_GLU_489 | OE2    | 2.814        |
| 4KRP   | A_LYS_463 | NZ     | A_ASP_436 | OD2    | 3.639        |
| 4KRP   | A_LYS_465 | NZ     | D_ASP_103 | OD2    | 2.931        |
| 4KRP   | A_ARG_497 | NH2    | A_GLU_495 | OE1    | 3.513        |
| 4KRP   | A_ARG_507 | NH2    | A_GLU_524 | OE1    | 3.179        |
| 4KRP   | A_ARG_550 | NH1    | A_GLU_527 | OE2    | 2.828        |
| 4KRP   | A_ARG_550 | NH2    | A_GLU_527 | OE1    | 3.298        |
| 4KRP   | A_ARG_550 | NH2    | A_GLU_527 | OE2    | 2.540        |
| 4KRP   | A_HIS_560 | NE2    | A_GLU_537 | OE1    | 3.908        |
| 4KRP   | A_LYS_585 | NZ     | A_ASP_563 | OD1    | 2.533        |
| 4KRP   | C_LYS_49  | NZ     | C_GLU_53  | OE1    | 2.808        |
| 4KRP   | C_ARG_61  | NH1    | C_GLU_79  | OE2    | 3.577        |
| 4KRP   | C_ARG_61  | NH2    | C_GLU_79  | OE1    | 3.975        |
| 4KRP   | C_ARG_61  | NH2    | C_GLU_81  | OE1    | 3.909        |
| 4KRP   | C_ARG_61  | NH2    | C_GLU_81  | OE2    | 3.782        |
| 4KRP   | C_ARG_61  | NH2    | C_ASP_82  | OD1    | 2.795        |
| 4KRP   | C_ARG_61  | NH2    | C_ASP_82  | OD2    | 3.835        |
| 4KRP   | C_LYS_103 | NZ     | C_GLU_105 | OE2    | 2.819        |
| 4KRP   | C_LYS_149 | NZ     | C_GLU_195 | OE1    | 2.866        |
| 4KRP   | D_ARG_38  | NH1    | D_ASP_89  | OD1    | 2.914        |
| 4KRP   | D_ARG_38  | NH2    | D_GLU_46  | OE1    | 3.258        |
| 4KRP   | D_ARG_38  | NH2    | D_ASP_89  | OD1    | 3.860        |
| 4KRP   | D_ARG_66  | NH1    | D_ASP_89  | OD1    | 3.718        |
| 4KRP   | D_ARG_66  | NH1    | D_ASP_89  | OD2    | 3.786        |
| 4KRP   | D_ARG_66  | NH2    | D_ASP_89  | OD1    | 2.586        |
| 4KRP   | D_ARG_66  | NH2    | D_ASP_89  | OD2    | 3.503        |
| 4KRP   | D_LYS_149 | NZ     | D_ASP_150 | OD1    | 3.078        |
| 4KRP   | D_LYS_149 | NZ     | D_ASP_150 | OD2    | 2.845        |
| 4KRP   | B_ARG_27  | NH1    | A_GLU_431 | OE1    | 3.144        |
| 4KRP   | B_ARG_27  | NH2    | B_GLU_1   | OE2    | 3.797        |

Table 560: 4KRP-specific salt bridging networks analysis. In this table, a PDB file is specified with a four-letter PDB ID, except that the names of the PDB files corresponding to the single NMR structural model split from the NMR ensemble is specified with a four-letter PDB ID in addition to a hyphen followed by the single NMR structural model numeric ID, the residue naming scheme is **Chain ID\_residue name\_residue number**,  $\angle ADH$  represents the angle formed by acceptor (A), donor (D) and hydrogen (H) ( $\angle ADH$ ).

| PDB ID | Residue A | Atom A | Residue B | Atom B | Distance (Å) |
|--------|-----------|--------|-----------|--------|--------------|
| 4KV5   | C_LYS_26  | NZ     | C_ASP_23  | OD2    | 3.341        |
| 4KV5   | C_LYS_60  | NZ     | G_ASP_56  | OD2    | 3.911        |
| 4KV5   | C_LYS_60  | NZ     | G_GLU_74  | OE2    | 3.252        |
| 4KV5   | C_ARG_94  | NH1    | E_ASP_231 | OD2    | 3.776        |
| 4KV5   | C_ARG_107 | NH1    | C_GLU_84  | OE1    | 2.912        |
| 4KV5   | D_LYS_26  | NZ     | D_ASP_23  | OD2    | 3.617        |
| 4KV5   | D_LYS_60  | NZ     | E_GLU_74  | OE2    | 3.237        |
| 4KV5   | D_ARG_107 | NH1    | D_GLU_84  | OE1    | 2.427        |
| 4KV5   | D_ARG_107 | NH1    | D_GLU_84  | OE2    | 3.699        |
| 4KV5   | A_LYS_26  | NZ     | A_ASP_23  | OD1    | 3.905        |
| 4KV5   | A_LYS_26  | NZ     | A_ASP_23  | OD2    | 3.181        |
| 4KV5   | A_ARG_94  | NH1    | H_ASP_231 | OD2    | 3.628        |
| 4KV5   | A_ARG_107 | NH1    | A_GLU_84  | OE1    | 2.439        |
| 4KV5   | A_ARG_107 | NH1    | A_GLU_84  | OE2    | 3.529        |
| 4KV5   | B_LYS_26  | NZ     | B_ASP_23  | OD2    | 3.176        |
| 4KV5   | B_LYS_60  | NZ     | H_ASP_56  | OD2    | 3.938        |
| 4KV5   | B_LYS_60  | NZ     | H_GLU_74  | OE2    | 3.524        |
| 4KV5   | B_ARG_107 | NH1    | B_GLU_84  | OE1    | 2.808        |
| 4KV5   | B_ARG_107 | NH1    | B_GLU_84  | OE2    | 3.463        |
| 4KV5   | J_LYS_12  | NZ     | J_GLU_10  | OE1    | 3.764        |
| 4KV5   | J_ARG_38  | NH1    | J_ASP_90  | OD1    | 3.233        |
| 4KV5   | J_ARG_38  | NH2    | J_GLU_46  | OE1    | 3.110        |
| 4KV5   | J_ARG_38  | NH2    | J_ASP_90  | OD1    | 3.659        |
| 4KV5   | J_ARG_63  | NH1    | J_GLU_138 | OE2    | 3.309        |
| 4KV5   | J_ARG_63  | NH2    | J_GLU_46  | OE1    | 3.549        |
| 4KV5   | J_ARG_63  | NH2    | J_GLU_46  | OE2    | 2.611        |
| 4KV5   | J_ARG_67  | NH1    | J_ASP_90  | OD2    | 3.363        |
| 4KV5   | J_ARG_67  | NH2    | J_ASP_90  | OD1    | 3.304        |
| 4KV5   | J_ARG_67  | NH2    | J_ASP_90  | OD2    | 3.334        |
| 4KV5   | J_ARG_161 | NH1    | J_ASP_208 | OD2    | 3.042        |
| 4KV5   | J_ARG_199 | NH1    | J_GLU_217 | OE2    | 3.577        |
| 4KV5   | J_ARG_199 | NH1    | J_GLU_219 | OE1    | 3.495        |
| 4KV5   | J_ARG_199 | NH1    | J_ASP_220 | OD1    | 2.798        |
| 4KV5   | J_ARG_199 | NH1    | J_ASP_220 | OD2    | 3.031        |
| 4KV5   | J_ARG_199 | NH2    | J_GLU_217 | OE1    | 3.655        |
| 4KV5   | H_LYS_12  | NZ     | H_GLU_10  | OE1    | 3.355        |
| 4KV5   | H_ARG_38  | NH1    | H_ASP_90  | OD1    | 3.401        |
| 4KV5   | H_ARG_38  | NH2    | H_GLU_46  | OE1    | 3.103        |
| 4KV5   | H_ARG_38  | NH2    | H_ASP_90  | OD1    | 3.880        |
| 4KV5   | H_ARG_63  | NH1    | H_GLU_138 | OE2    | 3.222        |
| 4KV5   | H_ARG_63  | NH2    | H_GLU_46  | OE1    | 3.904        |
| 4KV5   | H_ARG_63  | NH2    | H_GLU_46  | OE2    | 3.081        |
| 4KV5   | H_ARG_67  | NH1    | H_ASP_90  | OD2    | 3.586        |
| 4KV5   | H_ARG_67  | NH2    | H_ASP_90  | OD1    | 3.193        |
| 4KV5   | H_ARG_67  | NH2    | H_ASP_90  | OD2    | 3.057        |
| 4KV5   | H_ARG_161 | NH1    | H_ASP_208 | OD1    | 3.304        |
| 4KV5   | H_ARG_161 | NH1    | H_ASP_208 | OD2    | 2.542        |
| 4KV5   | H_LYS_177 | NZ     | H_GLU_219 | OE2    | 3.873        |
| 4KV5   | H_ARG_199 | NH1    | H_GLU_219 | OE1    | 3.591        |
| 4KV5   | H_ARG_199 | NH1    | H_ASP_220 | OD1    | 2.535        |
| 4KV5   | H_ARG_199 | NH1    | H_ASP_220 | OD2    | 2.810        |
| 4KV5   | H_ARG_199 | NH2    | H_GLU_217 | OE1    | 3.657        |
| 4KV5   | E_LYS_12  | NZ     | E_GLU_10  | OE1    | 3.582        |
| 4KV5   | E_ARG_38  | NH1    | E_ASP_90  | OD1    | 3.243        |
| 4KV5   | E_ARG_38  | NH2    | E_GLU_46  | OE1    | 3.194        |
| 4KV5   | E_ARG_38  | NH2    | E_ASP_90  | OD1    | 3.863        |
| 4KV5   | E_ARG_63  | NH1    | E_GLU_138 | OE2    | 3.426        |

|      |           |     |           |     |       |
|------|-----------|-----|-----------|-----|-------|
| 4KV5 | E_ARG_63  | NH2 | E_GLU_46  | OE1 | 3.563 |
| 4KV5 | E_ARG_63  | NH2 | E_GLU_46  | OE2 | 3.213 |
| 4KV5 | E_ARG_67  | NH1 | E_ASP_90  | OD2 | 3.666 |
| 4KV5 | E_ARG_67  | NH2 | E_ASP_90  | OD1 | 2.990 |
| 4KV5 | E_ARG_67  | NH2 | E_ASP_90  | OD2 | 3.041 |
| 4KV5 | E_ARG_161 | NH1 | E_ASP_208 | OD1 | 3.920 |
| 4KV5 | E_ARG_161 | NH1 | E_ASP_208 | OD2 | 2.895 |
| 4KV5 | E_LYS_177 | NZ  | E_GLU_219 | OE2 | 3.890 |
| 4KV5 | E_ARG_199 | NH1 | E_GLU_217 | OE2 | 3.831 |
| 4KV5 | E_ARG_199 | NH1 | E_GLU_219 | OE1 | 3.226 |
| 4KV5 | E_ARG_199 | NH1 | E_ASP_220 | OD1 | 3.288 |
| 4KV5 | E_ARG_199 | NH1 | E_ASP_220 | OD2 | 3.702 |
| 4KV5 | E_ARG_199 | NH2 | E_GLU_217 | OE1 | 3.523 |
| 4KV5 | G_LYS_12  | NZ  | G_GLU_10  | OE1 | 3.677 |
| 4KV5 | G_ARG_38  | NH1 | G_ASP_90  | OD1 | 3.460 |
| 4KV5 | G_ARG_38  | NH2 | G_GLU_46  | OE1 | 2.859 |
| 4KV5 | G_ARG_38  | NH2 | G_ASP_90  | OD1 | 3.976 |
| 4KV5 | G_ARG_63  | NH1 | G_GLU_138 | OE2 | 3.087 |
| 4KV5 | G_ARG_63  | NH2 | G_GLU_46  | OE1 | 3.637 |
| 4KV5 | G_ARG_63  | NH2 | G_GLU_46  | OE2 | 2.834 |
| 4KV5 | G_ARG_67  | NH1 | G_ASP_90  | OD2 | 3.423 |
| 4KV5 | G_ARG_67  | NH2 | G_ASP_90  | OD1 | 3.401 |
| 4KV5 | G_ARG_67  | NH2 | G_ASP_90  | OD2 | 3.441 |
| 4KV5 | G_ARG_161 | NH1 | G_ASP_208 | OD1 | 3.631 |
| 4KV5 | G_ARG_161 | NH1 | G_ASP_208 | OD2 | 2.851 |
| 4KV5 | G_ARG_199 | NH1 | G_GLU_217 | OE2 | 3.903 |
| 4KV5 | G_ARG_199 | NH1 | G_GLU_219 | OE1 | 3.208 |
| 4KV5 | G_ARG_199 | NH1 | G_GLU_219 | OE2 | 3.799 |
| 4KV5 | G_ARG_199 | NH1 | G_ASP_220 | OD1 | 3.065 |
| 4KV5 | G_ARG_199 | NH1 | G_ASP_220 | OD2 | 3.673 |
| 4KV5 | G_ARG_199 | NH2 | G_GLU_217 | OE1 | 3.544 |

Table 561: 4KV5-specific salt bridging networks analysis. In this table, a PDB file is specified with a four-letter PDB ID, except that the names of the PDB files corresponding to the single NMR structural model split from the NMR ensemble is specified with a four-letter PDB ID in addition to a hyphen followed by the single NMR structural model numeric ID, the residue naming scheme is **Chain ID\_residue name\_residue number**,  $\angle ADH$  represents the angle formed by acceptor (A), donor (D) and hydrogen (H) ( $\angle ADH$ ).

| PDB ID | Residue A | Atom A | Residue B | Atom B | Distance (Å) |
|--------|-----------|--------|-----------|--------|--------------|
| 4KXZ   | A_ARG_26  | NH1    | A_ASP_27  | OD1    | 3.110        |
| 4KXZ   | A_ARG_26  | NH1    | A_ASP_27  | OD2    | 2.701        |
| 4KXZ   | A_ARG_60  | NH2    | J_GLU_74  | OE1    | 3.804        |
| 4KXZ   | A_LYS_107 | NZ     | A_GLU_84  | OE1    | 2.831        |
| 4KXZ   | A_LYS_110 | NZ     | A_ASP_55  | OD1    | 3.869        |
| 4KXZ   | A_LYS_110 | NZ     | A_ASP_55  | OD2    | 3.509        |
| 4KXZ   | B_ARG_26  | NH1    | B_ASP_27  | OD1    | 3.225        |
| 4KXZ   | B_ARG_26  | NH1    | B_ASP_27  | OD2    | 2.899        |
| 4KXZ   | B_LYS_37  | NZ     | B_GLU_35  | OE2    | 3.695        |
| 4KXZ   | B_ARG_60  | NH2    | H_ASP_56  | OD1    | 3.585        |
| 4KXZ   | B_ARG_60  | NH2    | H_GLU_74  | OE1    | 3.374        |
| 4KXZ   | B_ARG_60  | NH2    | H_GLU_74  | OE2    | 3.199        |
| 4KXZ   | B_LYS_107 | NZ     | B_GLU_84  | OE1    | 2.748        |
| 4KXZ   | D_ARG_26  | NH1    | D_ASP_27  | OD1    | 3.954        |
| 4KXZ   | D_ARG_26  | NH1    | D_ASP_27  | OD2    | 3.663        |
| 4KXZ   | D_LYS_37  | NZ     | D_GLU_35  | OE1    | 2.767        |
| 4KXZ   | D_LYS_37  | NZ     | D_GLU_35  | OE2    | 3.981        |
| 4KXZ   | D_ARG_60  | NH1    | N_GLU_74  | OE2    | 3.775        |
| 4KXZ   | D_ARG_60  | NH2    | N_GLU_74  | OE2    | 2.746        |
| 4KXZ   | D_LYS_110 | NZ     | D_ASP_55  | OD1    | 3.900        |
| 4KXZ   | D_LYS_110 | NZ     | D_ASP_55  | OD2    | 3.944        |
| 4KXZ   | E_ARG_26  | NH1    | E_ASP_27  | OD1    | 3.052        |
| 4KXZ   | E_ARG_26  | NH1    | E_ASP_27  | OD2    | 2.752        |
| 4KXZ   | E_LYS_37  | NZ     | E_GLU_35  | OE1    | 2.815        |
| 4KXZ   | E_ARG_60  | NH1    | Q_GLU_74  | OE1    | 3.619        |
| 4KXZ   | E_LYS_107 | NZ     | E_GLU_84  | OE1    | 2.833        |
| 4KXZ   | E_LYS_110 | NZ     | E_ASP_55  | OD1    | 3.262        |
| 4KXZ   | E_LYS_110 | NZ     | E_ASP_55  | OD2    | 3.430        |
| 4KXZ   | H_LYS_12  | NZ     | H_GLU_10  | OE1    | 3.843        |
| 4KXZ   | H_ARG_38  | NH1    | H_ASP_90  | OD1    | 2.815        |
| 4KXZ   | H_ARG_38  | NH2    | H_GLU_46  | OE2    | 3.360        |
| 4KXZ   | H_ARG_38  | NH2    | H_ASP_90  | OD1    | 3.535        |
| 4KXZ   | H_ARG_63  | NH1    | H_GLU_46  | OE2    | 2.772        |
| 4KXZ   | H_ARG_67  | NH1    | H_ASP_90  | OD1    | 3.629        |
| 4KXZ   | H_ARG_67  | NH1    | H_ASP_90  | OD2    | 2.716        |
| 4KXZ   | H_ARG_67  | NH2    | H_ASP_90  | OD1    | 3.064        |
| 4KXZ   | H_ARG_67  | NH2    | H_ASP_90  | OD2    | 3.651        |
| 4KXZ   | H_LYS_150 | NZ     | H_ASP_151 | OD1    | 3.357        |
| 4KXZ   | H_LYS_150 | NZ     | H_ASP_151 | OD2    | 3.542        |
| 4KXZ   | H_LYS_208 | NZ     | H_ASP_206 | OD2    | 3.838        |
| 4KXZ   | H_HIS_219 | NE2    | Q_ASP_56  | OD2    | 3.789        |
| 4KXZ   | H_HIS_223 | ND1    | Q_GLU_82  | OE1    | 3.688        |
| 4KXZ   | H_HIS_223 | ND1    | Q_GLU_82  | OE2    | 3.984        |
| 4KXZ   | H_HIS_223 | ND1    | L_ASP_123 | OD1    | 3.085        |
| 4KXZ   | H_HIS_223 | NE2    | Q_GLU_82  | OE2    | 3.368        |
| 4KXZ   | H_HIS_223 | NE2    | L_ASP_123 | OD1    | 3.457        |
| 4KXZ   | J_LYS_12  | NZ     | J_GLU_10  | OE1    | 3.778        |
| 4KXZ   | J_ARG_38  | NH1    | J_ASP_90  | OD1    | 3.085        |
| 4KXZ   | J_ARG_38  | NH2    | J_GLU_46  | OE1    | 3.558        |
| 4KXZ   | J_ARG_38  | NH2    | J_ASP_90  | OD1    | 3.950        |
| 4KXZ   | J_ARG_63  | NH1    | J_GLU_46  | OE2    | 2.664        |
| 4KXZ   | J_ARG_67  | NH1    | J_ASP_90  | OD1    | 3.719        |
| 4KXZ   | J_ARG_67  | NH1    | J_ASP_90  | OD2    | 2.552        |
| 4KXZ   | J_ARG_67  | NH2    | J_ASP_90  | OD1    | 2.776        |
| 4KXZ   | J_ARG_67  | NH2    | J_ASP_90  | OD2    | 3.166        |
| 4KXZ   | J_LYS_150 | NZ     | J_ASP_151 | OD1    | 3.358        |
| 4KXZ   | J_LYS_150 | NZ     | J_ASP_151 | OD2    | 3.511        |



|      |           |     |           |     |       |
|------|-----------|-----|-----------|-----|-------|
| 4KXZ | J_LYS_208 | NZ  | J_ASP_206 | OD2 | 3.900 |
| 4KXZ | J_LYS_216 | NZ  | I_GLU_124 | OE1 | 2.736 |
| 4KXZ | J_LYS_216 | NZ  | I_GLU_124 | OE2 | 3.105 |
| 4KXZ | N_LYS_12  | NZ  | N_GLU_10  | OE1 | 3.790 |
| 4KXZ | N_ARG_38  | NH1 | N_ASP_90  | OD1 | 3.020 |
| 4KXZ | N_ARG_38  | NH2 | N_GLU_46  | OE1 | 3.356 |
| 4KXZ | N_ARG_38  | NH2 | N_ASP_90  | OD1 | 3.762 |
| 4KXZ | N_ARG_63  | NH1 | N_GLU_46  | OE2 | 2.704 |
| 4KXZ | N_ARG_67  | NH1 | N_ASP_90  | OD1 | 3.612 |
| 4KXZ | N_ARG_67  | NH1 | N_ASP_90  | OD2 | 2.733 |
| 4KXZ | N_ARG_67  | NH2 | N_ASP_90  | OD1 | 3.034 |
| 4KXZ | N_ARG_67  | NH2 | N_ASP_90  | OD2 | 3.633 |
| 4KXZ | N_ARG_87  | NH2 | N_GLU_89  | OE1 | 3.697 |
| 4KXZ | N_LYS_150 | NZ  | N_ASP_151 | OD1 | 3.348 |
| 4KXZ | N_LYS_150 | NZ  | N_ASP_151 | OD2 | 3.490 |
| 4KXZ | N_LYS_208 | NZ  | N_ASP_206 | OD2 | 3.916 |
| 4KXZ | N_HIS_219 | NE2 | J_ASP_56  | OD2 | 3.889 |
| 4KXZ | N_HIS_223 | ND1 | J_GLU_82  | OE1 | 3.240 |
| 4KXZ | N_HIS_223 | ND1 | M_ASP_123 | OD1 | 3.197 |
| 4KXZ | N_HIS_223 | NE2 | J_GLU_82  | OE1 | 3.650 |
| 4KXZ | N_HIS_223 | NE2 | J_GLU_82  | OE2 | 3.394 |
| 4KXZ | N_HIS_223 | NE2 | M_ASP_123 | OD1 | 3.310 |
| 4KXZ | Q_LYS_12  | NZ  | Q_GLU_10  | OE1 | 3.907 |
| 4KXZ | Q_ARG_38  | NH1 | Q_ASP_90  | OD1 | 3.058 |
| 4KXZ | Q_ARG_38  | NH2 | Q_GLU_46  | OE1 | 3.407 |
| 4KXZ | Q_ARG_38  | NH2 | Q_ASP_90  | OD1 | 3.856 |
| 4KXZ | Q_ARG_63  | NH1 | Q_GLU_46  | OE2 | 2.707 |
| 4KXZ | Q_ARG_67  | NH1 | Q_ASP_90  | OD1 | 3.587 |
| 4KXZ | Q_ARG_67  | NH1 | Q_ASP_90  | OD2 | 2.735 |
| 4KXZ | Q_ARG_67  | NH2 | Q_ASP_90  | OD1 | 3.009 |
| 4KXZ | Q_ARG_67  | NH2 | Q_ASP_90  | OD2 | 3.660 |
| 4KXZ | Q_LYS_150 | NZ  | Q_ASP_151 | OD1 | 3.335 |
| 4KXZ | Q_LYS_150 | NZ  | Q_ASP_151 | OD2 | 3.512 |
| 4KXZ | Q_LYS_208 | NZ  | Q_ASP_206 | OD2 | 3.889 |
| 4KXZ | I_ARG_24  | NH1 | I_ASP_71  | OD1 | 3.813 |
| 4KXZ | I_ARG_24  | NH2 | I_ASP_71  | OD1 | 3.864 |
| 4KXZ | I_ARG_24  | NH2 | I_ASP_71  | OD2 | 3.073 |
| 4KXZ | I_ARG_55  | NH1 | I_ASP_61  | OD1 | 3.473 |
| 4KXZ | I_ARG_62  | NH1 | I_GLU_82  | OE1 | 3.700 |
| 4KXZ | I_ARG_62  | NH1 | I_ASP_83  | OD1 | 3.621 |
| 4KXZ | I_ARG_62  | NH1 | I_ASP_83  | OD2 | 2.958 |
| 4KXZ | I_LYS_108 | NZ  | I_GLU_17  | OE2 | 3.073 |
| 4KXZ | I_LYS_150 | NZ  | I_GLU_196 | OE1 | 2.905 |
| 4KXZ | I_HIS_190 | ND1 | I_ASP_152 | OD1 | 2.847 |
| 4KXZ | I_HIS_190 | NE2 | I_ASP_186 | OD1 | 3.845 |
| 4KXZ | L_ARG_24  | NH1 | L_ASP_71  | OD1 | 3.783 |
| 4KXZ | L_ARG_24  | NH2 | L_ASP_71  | OD1 | 3.857 |
| 4KXZ | L_ARG_24  | NH2 | L_ASP_71  | OD2 | 3.080 |
| 4KXZ | L_ARG_62  | NH1 | L_GLU_82  | OE1 | 3.794 |
| 4KXZ | L_ARG_62  | NH1 | L_ASP_83  | OD1 | 3.459 |
| 4KXZ | L_ARG_62  | NH1 | L_ASP_83  | OD2 | 2.664 |
| 4KXZ | L_ARG_78  | NH2 | L_ASP_61  | OD1 | 3.145 |
| 4KXZ | L_ARG_104 | NH1 | L_GLU_166 | OE1 | 3.969 |
| 4KXZ | L_LYS_127 | NZ  | L_GLU_124 | OE1 | 3.662 |
| 4KXZ | L_LYS_127 | NZ  | L_GLU_124 | OE2 | 3.133 |
| 4KXZ | L_LYS_150 | NZ  | L_GLU_196 | OE1 | 2.895 |
| 4KXZ | L_HIS_190 | ND1 | L_ASP_152 | OD1 | 3.069 |
| 4KXZ | L_HIS_190 | NE2 | L_ASP_186 | OD1 | 3.912 |

|      |           |     |           |     |       |
|------|-----------|-----|-----------|-----|-------|
| 4KXZ | M_ARG_24  | NH1 | M_ASP_71  | OD1 | 3.817 |
| 4KXZ | M_ARG_24  | NH2 | M_ASP_71  | OD1 | 3.870 |
| 4KXZ | M_ARG_24  | NH2 | M_ASP_71  | OD2 | 3.074 |
| 4KXZ | M_ARG_62  | NH1 | M_GLU_82  | OE1 | 3.945 |
| 4KXZ | M_ARG_62  | NH1 | M_ASP_83  | OD1 | 2.966 |
| 4KXZ | M_ARG_62  | NH1 | M_ASP_83  | OD2 | 2.505 |
| 4KXZ | M_ARG_104 | NH1 | M_GLU_166 | OE1 | 3.774 |
| 4KXZ | M_LYS_127 | NZ  | M_GLU_124 | OE1 | 3.654 |
| 4KXZ | M_LYS_127 | NZ  | M_GLU_124 | OE2 | 3.133 |
| 4KXZ | M_LYS_150 | NZ  | M_GLU_196 | OE1 | 2.934 |
| 4KXZ | M_HIS_190 | ND1 | M_ASP_152 | OD1 | 2.804 |
| 4KXZ | M_HIS_190 | NE2 | M_ASP_186 | OD1 | 3.796 |
| 4KXZ | P_ARG_24  | NH1 | P_ASP_71  | OD1 | 3.864 |
| 4KXZ | P_ARG_24  | NH2 | P_ASP_71  | OD1 | 3.911 |
| 4KXZ | P_ARG_24  | NH2 | P_ASP_71  | OD2 | 3.105 |
| 4KXZ | P_ARG_62  | NH1 | P_GLU_82  | OE1 | 3.797 |
| 4KXZ | P_ARG_62  | NH1 | P_ASP_83  | OD1 | 3.211 |
| 4KXZ | P_ARG_62  | NH1 | P_ASP_83  | OD2 | 2.770 |
| 4KXZ | P_ARG_104 | NH1 | P_GLU_166 | OE1 | 3.937 |
| 4KXZ | P_LYS_127 | NZ  | P_GLU_124 | OE1 | 3.704 |
| 4KXZ | P_LYS_127 | NZ  | P_GLU_124 | OE2 | 3.171 |
| 4KXZ | P_LYS_150 | NZ  | P_GLU_196 | OE1 | 2.899 |
| 4KXZ | P_HIS_190 | ND1 | P_ASP_186 | OD1 | 3.702 |

Table 562: 4KXZ-specific salt bridging networks analysis. In this table, a PDB file is specified with a four-letter PDB ID, except that the names of the PDB files corresponding to the single NMR structural model split from the NMR ensemble is specified with a four-letter PDB ID in addition to a hyphen followed by the single NMR structural model numeric ID, the residue naming scheme is **Chain ID\_residue name\_residue number**,  $\angle ADH$  represents the angle formed by acceptor (A), donor (D) and hydrogen (H) ( $\angle ADH$ ).

| PDB ID | Residue A | Atom A | Residue B | Atom B | Distance (Å) |
|--------|-----------|--------|-----------|--------|--------------|
| 4LQF   | A_HIS_113 | NE2    | A_GLU_129 | OE1    | 3.149        |
| 4LQF   | A_HIS_113 | NE2    | A_GLU_129 | OE2    | 3.669        |
| 4LQF   | A_ARG_176 | NH1    | A_GLU_174 | OE1    | 2.869        |
| 4LQF   | A_ARG_176 | NH2    | A_GLU_174 | OE1    | 2.927        |
| 4LQF   | H_ARG_38  | NH1    | H_ASP_90  | OD1    | 2.938        |
| 4LQF   | H_ARG_38  | NH2    | H_GLU_46  | OE1    | 3.480        |
| 4LQF   | H_ARG_38  | NH2    | H_GLU_46  | OE2    | 3.018        |
| 4LQF   | H_ARG_38  | NH2    | H_ASP_90  | OD1    | 3.987        |
| 4LQF   | H_LYS_65  | NZ     | H_ASP_62  | OD1    | 3.431        |
| 4LQF   | H_ARG_67  | NH1    | H_ASP_90  | OD1    | 3.786        |
| 4LQF   | H_ARG_67  | NH1    | H_ASP_90  | OD2    | 2.716        |
| 4LQF   | H_ARG_67  | NH2    | H_ASP_90  | OD1    | 2.856        |
| 4LQF   | H_ARG_67  | NH2    | H_ASP_90  | OD2    | 3.328        |
| 4LQF   | H_ARG_98  | NH2    | H_ASP_105 | OD1    | 3.789        |
| 4LQF   | H_ARG_98  | NH2    | H_ASP_105 | OD2    | 2.616        |
| 4LQF   | H_LYS_212 | NZ     | L_GLU_129 | OE1    | 2.714        |
| 4LQF   | H_LYS_212 | NZ     | L_GLU_129 | OE2    | 3.879        |
| 4LQF   | H_LYS_213 | NZ     | H_GLU_215 | OE2    | 3.811        |
| 4LQF   | L_ARG_24  | NH2    | L_ASP_75  | OD1    | 3.452        |
| 4LQF   | L_LYS_55  | NZ     | A_ASP_170 | OD2    | 2.731        |
| 4LQF   | L_ARG_59  | NH2    | L_ASP_65  | OD1    | 3.368        |
| 4LQF   | L_ARG_66  | NH1    | L_GLU_84  | OE1    | 3.227        |
| 4LQF   | L_ARG_66  | NH2    | L_GLU_84  | OE1    | 3.232        |
| 4LQF   | L_ARG_66  | NH2    | L_GLU_86  | OE1    | 3.495        |
| 4LQF   | L_ARG_66  | NH2    | L_ASP_87  | OD1    | 2.884        |
| 4LQF   | L_ARG_66  | NH2    | L_ASP_87  | OD2    | 3.750        |
| 4LQF   | L_LYS_109 | NZ     | L_ASP_171 | OD1    | 3.085        |
| 4LQF   | L_LYS_153 | NZ     | L_GLU_201 | OE2    | 3.416        |
| 4LQF   | L_LYS_155 | NZ     | L_GLU_201 | OE1    | 2.827        |
| 4LQF   | L_LYS_155 | NZ     | L_GLU_201 | OE2    | 3.989        |
| 4LQF   | L_ARG_161 | NH1    | L_GLU_191 | OE2    | 2.916        |
| 4LQF   | L_ARG_161 | NH2    | L_GLU_191 | OE2    | 3.407        |
| 4LQF   | L_LYS_189 | NZ     | L_ASP_190 | OD1    | 2.644        |
| 4LQF   | L_HIS_195 | ND1    | L_ASP_157 | OD2    | 2.742        |
| 4LQF   | L_HIS_195 | NE2    | L_GLU_191 | OE2    | 3.503        |
| 4LQF   | L_LYS_205 | NZ     | L_ASP_116 | OD1    | 3.781        |
| 4LQF   | L_LYS_205 | NZ     | L_ASP_116 | OD2    | 2.661        |

Table 563: 4LQF-specific salt bridging networks analysis. In this table, a PDB file is specified with a four-letter PDB ID, except that the names of the PDB files corresponding to the single NMR structural model split from the NMR ensemble is specified with a four-letter PDB ID in addition to a hyphen followed by the single NMR structural model numeric ID, the residue naming scheme is **Chain ID\_residue name\_residue number**,  $\angle ADH$  represents the angle formed by acceptor (A), donor (D) and hydrogen (H) ( $\angle ADH$ ).

| PDB ID | Residue A | Atom A | Residue B | Atom B | Distance (Å) |
|--------|-----------|--------|-----------|--------|--------------|
| 4LSS   | G.LYS_46  | NZ     | G.GLU_492 | OE2    | 3.983        |
| 4LSS   | G.LYS_59  | NZ     | G.ASP_57  | OD1    | 3.236        |
| 4LSS   | G.LYS_59  | NZ     | G.ASP_57  | OD2    | 3.806        |
| 4LSS   | G.HIS_66  | ND1    | G.GLU_64  | OE2    | 2.739        |
| 4LSS   | G.LYS_97  | NZ     | G.GLU_275 | OE2    | 2.397        |
| 4LSS   | G.LYS_97  | NZ     | H.ASP_99  | OD2    | 3.791        |
| 4LSS   | G.LYS_207 | NZ     | G.GLU_381 | OE1    | 3.905        |
| 4LSS   | G.LYS_207 | NZ     | G.GLU_381 | OE2    | 3.089        |
| 4LSS   | G.LYS_229 | NZ     | G.GLU_83  | OE2    | 3.491        |
| 4LSS   | G.HIS_249 | NE2    | G.GLU_482 | OE1    | 3.577        |
| 4LSS   | G.LYS_282 | NZ     | G.GLU_275 | OE1    | 3.241        |
| 4LSS   | G.ARG_335 | NH2    | G.ASP_412 | OD2    | 3.767        |
| 4LSS   | G.LYS_351 | NZ     | G.GLU_269 | OE2    | 3.712        |
| 4LSS   | G.ARG_419 | NH2    | G.ASP_325 | OD1    | 3.444        |
| 4LSS   | G.ARG_419 | NH2    | G.ASP_325 | OD2    | 2.969        |
| 4LSS   | G.ARG_429 | NH1    | G.ASP_113 | OD1    | 3.219        |
| 4LSS   | G.ARG_429 | NH1    | G.ASP_113 | OD2    | 3.237        |
| 4LSS   | G.ARG_429 | NH2    | G.ASP_113 | OD2    | 2.924        |
| 4LSS   | G.ARG_456 | NH1    | G.GLU_466 | OE1    | 3.330        |
| 4LSS   | G.ARG_469 | NH2    | G.ASP_457 | OD2    | 2.938        |
| 4LSS   | G.ARG_476 | NH1    | G.GLU_102 | OE1    | 3.477        |
| 4LSS   | G.ARG_476 | NH1    | G.GLU_102 | OE2    | 3.366        |
| 4LSS   | G.ARG_476 | NH2    | G.ASP_474 | OD2    | 3.933        |
| 4LSS   | G.ARG_476 | NH2    | H.ASP_31  | OD1    | 3.839        |
| 4LSS   | G.ARG_480 | NH1    | G.ASP_477 | OD1    | 2.752        |
| 4LSS   | G.LYS_485 | NZ     | G.GLU_267 | OE2    | 3.906        |
| 4LSS   | G.LYS_487 | NZ     | G.GLU_91  | OE1    | 2.643        |
| 4LSS   | H.ARG_19  | NH2    | H.GLU_81  | OE1    | 3.566        |
| 4LSS   | H.ARG_38  | NH1    | H.ASP_86  | OD1    | 3.014        |
| 4LSS   | H.ARG_38  | NH2    | H.GLU_46  | OE1    | 3.219        |
| 4LSS   | H.ARG_38  | NH2    | H.ASP_86  | OD1    | 3.812        |
| 4LSS   | H.ARG_53  | NH2    | H.ASP_31  | OD1    | 3.384        |
| 4LSS   | H.ARG_61  | NH2    | G.GLU_466 | OE1    | 3.951        |
| 4LSS   | H.ARG_66  | NH1    | H.ASP_86  | OD1    | 3.855        |
| 4LSS   | H.ARG_66  | NH2    | H.ASP_86  | OD1    | 2.799        |
| 4LSS   | H.ARG_66  | NH2    | H.ASP_86  | OD2    | 2.736        |
| 4LSS   | H.ARG_71  | NH1    | G.ASP_368 | OD1    | 3.719        |
| 4LSS   | H.ARG_71  | NH1    | G.ASP_368 | OD2    | 3.126        |
| 4LSS   | H.ARG_71  | NH2    | G.ASP_368 | OD1    | 3.278        |
| 4LSS   | H.ARG_82A | NH1    | H.GLU_81  | OE2    | 3.430        |
| 4LSS   | H.LYS_209 | NZ     | L.GLU_125 | OE1    | 3.429        |
| 4LSS   | H.LYS_209 | NZ     | L.GLU_125 | OE2    | 3.562        |
| 4LSS   | H.LYS_210 | NZ     | H.GLU_212 | OE2    | 3.090        |
| 4LSS   | L.ARG_24  | NH2    | L.ASP_70  | OD1    | 3.687        |
| 4LSS   | L.ARG_24  | NH2    | L.ASP_70  | OD2    | 3.435        |
| 4LSS   | L.ARG_54  | NH1    | L.ASP_60  | OD2    | 3.825        |
| 4LSS   | L.ARG_61  | NH1    | L.ASP_82  | OD1    | 3.979        |
| 4LSS   | L.ARG_61  | NH1    | L.ASP_82  | OD2    | 2.997        |
| 4LSS   | L.ARG_61  | NH2    | L.GLU_79  | OE1    | 3.337        |
| 4LSS   | L.ARG_61  | NH2    | L.ASP_82  | OD1    | 3.196        |
| 4LSS   | L.ARG_61  | NH2    | L.ASP_82  | OD2    | 3.376        |
| 4LSS   | L.LYS_109 | NZ     | L.GLU_17  | OE1    | 3.541        |
| 4LSS   | L.LYS_109 | NZ     | L.GLU_17  | OE2    | 3.227        |
| 4LSS   | L.LYS_109 | NZ     | L.ASP_107 | OD1    | 3.475        |
| 4LSS   | L.LYS_151 | NZ     | L.GLU_197 | OE2    | 3.341        |

---

Table 564: 4LSS-specific salt bridging networks analysis. In this table, a PDB file is specified with a four-letter PDB ID, except that the names of the PDB files corresponding to the single NMR structural model split from the NMR ensemble is specified with a four-letter PDB ID in addition to a hyphen followed by the single NMR structural model numeric ID, the residue naming scheme is **Chain ID\_residue name\_residue number**,  $\angle ADH$  represents the angle formed by acceptor (A), donor (D) and hydrogen (H) ( $\angle ADH$ ).

| PDB ID | Residue A | Atom A | Residue B | Atom B | Distance (Å) |
|--------|-----------|--------|-----------|--------|--------------|
| 4LST   | G_HIS_66  | ND1    | G_GLU_64  | OE1    | 3.932        |
| 4LST   | G_HIS_66  | ND1    | G_GLU_64  | OE2    | 2.793        |
| 4LST   | G_LYS_207 | NZ     | G_GLU_381 | OE1    | 2.992        |
| 4LST   | G_LYS_207 | NZ     | G_GLU_381 | OE2    | 2.424        |
| 4LST   | G_HIS_249 | NE2    | G_GLU_482 | OE1    | 3.272        |
| 4LST   | G_LYS_282 | NZ     | G_GLU_275 | OE1    | 2.940        |
| 4LST   | G_LYS_357 | NZ     | G_ASP_461 | OD2    | 3.749        |
| 4LST   | G_LYS_357 | NZ     | G_ASP_464 | OD1    | 3.358        |
| 4LST   | G_LYS_357 | NZ     | L_GLU_1   | OE1    | 2.783        |
| 4LST   | G_LYS_360 | NZ     | G_GLU_362 | OE1    | 3.583        |
| 4LST   | G_ARG_419 | NH2    | G_ASP_325 | OD1    | 3.855        |
| 4LST   | G_ARG_419 | NH2    | G_ASP_325 | OD2    | 3.169        |
| 4LST   | G_ARG_456 | NH1    | G_GLU_466 | OE1    | 3.211        |
| 4LST   | G_ARG_469 | NH1    | G_GLU_362 | OE2    | 3.557        |
| 4LST   | G_ARG_469 | NH2    | G_GLU_362 | OE2    | 3.437        |
| 4LST   | G_ARG_469 | NH2    | G_ASP_457 | OD2    | 3.388        |
| 4LST   | G_ARG_476 | NH1    | G_ASP_474 | OD1    | 3.272        |
| 4LST   | G_ARG_476 | NH1    | G_ASP_474 | OD2    | 2.826        |
| 4LST   | G_ARG_480 | NH1    | G_ASP_477 | OD1    | 3.383        |
| 4LST   | H_LYS_12  | NZ     | H_GLU_16  | OE2    | 3.461        |
| 4LST   | H_ARG_38  | NH1    | H_ASP_86  | OD1    | 2.980        |
| 4LST   | H_ARG_38  | NH2    | H_GLU_46  | OE1    | 3.044        |
| 4LST   | H_ARG_38  | NH2    | H_ASP_86  | OD1    | 3.692        |
| 4LST   | H_LYS_43  | NZ     | H_ASP_85  | OD1    | 3.823        |
| 4LST   | H_ARG_53  | NH1    | H_ASP_31  | OD1    | 3.186        |
| 4LST   | H_ARG_53  | NH2    | H_ASP_31  | OD1    | 3.110        |
| 4LST   | H_ARG_61  | NH1    | G_GLU_466 | OE1    | 3.812        |
| 4LST   | H_ARG_61  | NH2    | G_ASP_461 | OD1    | 2.947        |
| 4LST   | H_ARG_66  | NH1    | H_ASP_86  | OD1    | 3.435        |
| 4LST   | H_ARG_66  | NH2    | H_ASP_86  | OD1    | 2.875        |
| 4LST   | H_ARG_66  | NH2    | H_ASP_86  | OD2    | 2.791        |
| 4LST   | H_ARG_71  | NH1    | G_ASP_368 | OD1    | 3.527        |
| 4LST   | H_ARG_71  | NH1    | G_ASP_368 | OD2    | 2.632        |
| 4LST   | H_ARG_71  | NH2    | G_ASP_368 | OD1    | 2.939        |
| 4LST   | H_ARG_71  | NH2    | G_ASP_368 | OD2    | 3.624        |
| 4LST   | H_ARG_82A | NH1    | H_GLU_81  | OE2    | 3.069        |
| 4LST   | H_HIS_102 | NE2    | H_GLU_101 | OE1    | 3.589        |
| 4LST   | H_LYS_143 | NZ     | H_ASP_144 | OD2    | 3.387        |
| 4LST   | H_LYS_209 | NZ     | L_GLU_125 | OE2    | 3.921        |
| 4LST   | H_LYS_214 | NZ     | L_ASP_124 | OD1    | 3.010        |
| 4LST   | H_LYS_214 | NZ     | L_ASP_124 | OD2    | 3.020        |
| 4LST   | L_ARG_24  | NH1    | L_ASP_70  | OD1    | 3.104        |
| 4LST   | L_ARG_24  | NH1    | L_ASP_70  | OD2    | 3.678        |
| 4LST   | L_ARG_61  | NH1    | L_ASP_82  | OD1    | 3.975        |
| 4LST   | L_ARG_61  | NH1    | L_ASP_82  | OD2    | 2.621        |
| 4LST   | L_ARG_61  | NH2    | L_GLU_79  | OE1    | 3.426        |
| 4LST   | L_ARG_61  | NH2    | L_ASP_82  | OD1    | 3.303        |
| 4LST   | L_ARG_61  | NH2    | L_ASP_82  | OD2    | 3.231        |
| 4LST   | L_LYS_109 | NZ     | L_GLU_17  | OE1    | 2.684        |
| 4LST   | L_LYS_185 | NZ     | L_GLU_189 | OE2    | 3.865        |

---

Table 565: 4LST-specific salt bridging networks analysis. In this table, a PDB file is specified with a four-letter PDB ID, except that the names of the PDB files corresponding to the single NMR structural model split from the NMR ensemble is specified with a four-letter PDB ID in addition to a hyphen followed by the single NMR structural model numeric ID, the residue naming scheme is **Chain ID\_residue name\_residue number**,  $\angle ADH$  represents the angle formed by acceptor (A), donor (D) and hydrogen (H) ( $\angle ADH$ ).

| PDB ID | Residue A | Atom A | Residue B | Atom B | Distance (Å) |
|--------|-----------|--------|-----------|--------|--------------|
| 4LU5   | A_HIS_113 | NE2    | A_GLU_129 | OE2    | 3.983        |
| 4LU5   | A_LYS_161 | NZ     | A_ASP_146 | OD1    | 3.296        |
| 4LU5   | A_LYS_161 | NZ     | A_GLU_149 | OE1    | 3.749        |
| 4LU5   | A_LYS_161 | NZ     | A_GLU_149 | OE2    | 3.934        |
| 4LU5   | A_ARG_176 | NH1    | A_ASP_150 | OD1    | 2.940        |
| 4LU5   | A_ARG_176 | NH2    | A_GLU_174 | OE1    | 2.726        |
| 4LU5   | B_HIS_113 | ND1    | B_ASP_115 | OD1    | 3.948        |
| 4LU5   | B_LYS_161 | NZ     | B_ASP_146 | OD1    | 3.334        |
| 4LU5   | B_LYS_161 | NZ     | B_GLU_149 | OE2    | 3.499        |
| 4LU5   | B_ARG_176 | NH1    | B_ASP_150 | OD2    | 3.286        |
| 4LU5   | B_ARG_176 | NH2    | B_GLU_174 | OE1    | 3.070        |
| 4LU5   | H_ARG_38  | NH1    | H_ASP_90  | OD1    | 2.792        |
| 4LU5   | H_ARG_38  | NH2    | H_GLU_46  | OE1    | 3.705        |
| 4LU5   | H_ARG_38  | NH2    | H_ASP_90  | OD1    | 3.789        |
| 4LU5   | H_ARG_44  | NH1    | H_GLU_42  | OE2    | 3.479        |
| 4LU5   | H_ARG_44  | NH2    | H_GLU_46  | OE2    | 3.762        |
| 4LU5   | H_LYS_65  | NZ     | H_ASP_62  | OD1    | 3.768        |
| 4LU5   | H_ARG_67  | NH1    | H_ASP_90  | OD1    | 3.815        |
| 4LU5   | H_ARG_67  | NH1    | H_ASP_90  | OD2    | 2.768        |
| 4LU5   | H_ARG_67  | NH2    | H_ASP_90  | OD1    | 2.850        |
| 4LU5   | H_ARG_67  | NH2    | H_ASP_90  | OD2    | 3.112        |
| 4LU5   | H_ARG_98  | NH2    | B_ASP_168 | OD2    | 3.392        |
| 4LU5   | H_LYS_208 | NZ     | L_GLU_128 | OE1    | 3.058        |
| 4LU5   | H_LYS_208 | NZ     | L_GLU_128 | OE2    | 3.445        |
| 4LU5   | H_LYS_209 | NZ     | H_GLU_211 | OE1    | 2.959        |
| 4LU5   | L_ARG_51  | NH1    | H_ASP_101 | OD1    | 3.227        |
| 4LU5   | L_ARG_51  | NH2    | H_ASP_101 | OD1    | 2.925        |
| 4LU5   | L_ARG_51  | NH2    | L_ASP_60  | OD1    | 2.906        |
| 4LU5   | L_ARG_51  | NH2    | L_ASP_60  | OD2    | 3.008        |
| 4LU5   | L_ARG_66  | NH1    | L_GLU_84  | OE1    | 3.197        |
| 4LU5   | L_ARG_66  | NH1    | L_GLU_84  | OE2    | 3.353        |
| 4LU5   | L_ARG_66  | NH2    | L_ASP_87  | OD1    | 2.665        |
| 4LU5   | L_ARG_66  | NH2    | L_ASP_87  | OD2    | 2.880        |
| 4LU5   | L_ARG_82  | NH2    | L_GLU_84  | OE2    | 3.688        |
| 4LU5   | L_LYS_108 | NZ     | L_GLU_110 | OE2    | 3.434        |
| 4LU5   | L_LYS_154 | NZ     | L_GLU_200 | OE1    | 3.567        |
| 4LU5   | L_ARG_160 | NH2    | L_GLU_190 | OE1    | 3.714        |
| 4LU5   | L_ARG_160 | NH2    | L_GLU_190 | OE2    | 2.875        |
| 4LU5   | L_LYS_174 | NZ     | L_GLU_86  | OE2    | 3.749        |
| 4LU5   | L_LYS_188 | NZ     | L_GLU_192 | OE1    | 2.486        |
| 4LU5   | L_HIS_194 | ND1    | L_ASP_156 | OD2    | 2.594        |
| 4LU5   | L_LYS_204 | NZ     | L_ASP_115 | OD2    | 3.897        |
| 4LU5   | I_ARG_38  | NH1    | I_ASP_90  | OD1    | 2.773        |
| 4LU5   | I_ARG_38  | NH2    | I_GLU_46  | OE1    | 3.420        |
| 4LU5   | I_ARG_38  | NH2    | I_ASP_90  | OD1    | 3.756        |
| 4LU5   | I_ARG_44  | NH1    | I_GLU_42  | OE1    | 3.393        |
| 4LU5   | I_ARG_44  | NH1    | I_GLU_42  | OE2    | 2.926        |
| 4LU5   | I_ARG_44  | NH2    | I_GLU_42  | OE2    | 3.842        |
| 4LU5   | I_ARG_44  | NH2    | I_GLU_46  | OE2    | 3.631        |
| 4LU5   | I_LYS_65  | NZ     | I_ASP_62  | OD1    | 3.327        |
| 4LU5   | I_ARG_67  | NH1    | I_ASP_90  | OD1    | 3.710        |
| 4LU5   | I_ARG_67  | NH1    | I_ASP_90  | OD2    | 2.762        |
| 4LU5   | I_ARG_67  | NH2    | I_ASP_90  | OD1    | 2.979        |
| 4LU5   | I_ARG_67  | NH2    | I_ASP_90  | OD2    | 3.184        |
| 4LU5   | I_ARG_98  | NH2    | A_ASP_168 | OD2    | 3.317        |
| 4LU5   | I_LYS_209 | NZ     | I_GLU_211 | OE2    | 3.549        |
| 4LU5   | M_LYS_24  | NZ     | M_ASP_75  | OD1    | 3.847        |



|      |           |     |           |     |       |
|------|-----------|-----|-----------|-----|-------|
| 4LU5 | M_ARG_51  | NH1 | I_ASP_101 | OD2 | 3.086 |
| 4LU5 | M_ARG_51  | NH2 | I_ASP_101 | OD1 | 3.927 |
| 4LU5 | M_ARG_51  | NH2 | I_ASP_101 | OD2 | 2.770 |
| 4LU5 | M_ARG_51  | NH2 | M_ASP_60  | OD1 | 3.599 |
| 4LU5 | M_ARG_51  | NH2 | M_ASP_60  | OD2 | 3.102 |
| 4LU5 | M_ARG_66  | NH1 | M_GLU_84  | OE1 | 3.699 |
| 4LU5 | M_ARG_66  | NH1 | M_GLU_84  | OE2 | 3.904 |
| 4LU5 | M_ARG_66  | NH2 | M_ASP_87  | OD1 | 2.686 |
| 4LU5 | M_ARG_66  | NH2 | M_ASP_87  | OD2 | 3.050 |
| 4LU5 | M_ARG_82  | NH1 | M_GLU_84  | OE2 | 2.836 |
| 4LU5 | M_LYS_152 | NZ  | M_GLU_200 | OE2 | 3.478 |
| 4LU5 | M_LYS_154 | NZ  | M_GLU_200 | OE1 | 3.458 |
| 4LU5 | M_LYS_154 | NZ  | M_GLU_200 | OE2 | 3.926 |
| 4LU5 | M_ARG_160 | NH1 | M_GLU_190 | OE2 | 3.887 |
| 4LU5 | M_ARG_160 | NH2 | M_GLU_190 | OE2 | 2.853 |
| 4LU5 | M_LYS_188 | NZ  | M_GLU_192 | OE1 | 3.556 |
| 4LU5 | M_ARG_193 | NH1 | M_ASP_189 | OD2 | 3.951 |
| 4LU5 | M_HIS_194 | ND1 | M_ASP_156 | OD2 | 2.781 |
| 4LU5 | M_LYS_204 | NZ  | M_ASP_115 | OD2 | 3.771 |

Table 566: 4LU5-specific salt bridging networks analysis. In this table, a PDB file is specified with a four-letter PDB ID, except that the names of the PDB files corresponding to the single NMR structural model split from the NMR ensemble is specified with a four-letter PDB ID in addition to a hyphen followed by the single NMR structural model numeric ID, the residue naming scheme is **Chain ID\_residue name\_residue number**,  $\angle ADH$  represents the angle formed by acceptor (A), donor (D) and hydrogen (H) ( $\angle ADH$ ).

| PDB ID | Residue A | Atom A | Residue B | Atom B | Distance (Å) |
|--------|-----------|--------|-----------|--------|--------------|
| 4M1D   | L_ARG_61  | NH1    | L_ASP_82  | OD1    | 3.859        |
| 4M1D   | L_ARG_61  | NH1    | L_ASP_82  | OD2    | 2.922        |
| 4M1D   | L_ARG_61  | NH2    | L_ASP_82  | OD1    | 2.932        |
| 4M1D   | L_ARG_61  | NH2    | L_ASP_82  | OD2    | 3.341        |
| 4M1D   | L_LYS_103 | NZ     | L_GLU_83  | OE2    | 3.169        |
| 4M1D   | L_LYS_110 | NZ     | L_GLU_198 | OE1    | 2.670        |
| 4M1D   | L_LYS_129 | NZ     | H_ASP_144 | OD2    | 3.436        |
| 4M1D   | L_LYS_149 | NZ     | L_GLU_203 | OE2    | 3.944        |
| 4M1D   | H_ARG_38  | NH1    | H_ASP_86  | OD1    | 2.929        |
| 4M1D   | H_ARG_38  | NH2    | H_GLU_46  | OE1    | 3.018        |
| 4M1D   | H_ARG_38  | NH2    | H_GLU_46  | OE2    | 3.822        |
| 4M1D   | H_ARG_38  | NH2    | H_ASP_86  | OD1    | 3.988        |
| 4M1D   | H_ARG_50  | NH1    | H_ASP_58  | OD2    | 2.819        |
| 4M1D   | H_ARG_66  | NH1    | H_ASP_86  | OD1    | 3.809        |
| 4M1D   | H_ARG_66  | NH1    | H_ASP_86  | OD2    | 2.702        |
| 4M1D   | H_ARG_66  | NH2    | H_ASP_86  | OD1    | 3.069        |
| 4M1D   | H_ARG_66  | NH2    | H_ASP_86  | OD2    | 3.476        |
| 4M1D   | H_ARG_71  | NH2    | H_ASP_73  | OD1    | 3.470        |
| 4M1D   | H_LYS_143 | NZ     | L_GLU_124 | OE2    | 2.547        |
| 4M1D   | H_LYS_209 | NZ     | L_GLU_123 | OE1    | 2.798        |
| 4M1D   | H_LYS_209 | NZ     | L_GLU_123 | OE2    | 2.782        |
| 4M1D   | P_ARG_315 | NH2    | H_ASP_95  | OD2    | 3.175        |
| 4M1D   | M_ARG_61  | NH1    | M_ASP_82  | OD1    | 3.820        |
| 4M1D   | M_ARG_61  | NH1    | M_ASP_82  | OD2    | 2.675        |
| 4M1D   | M_ARG_61  | NH2    | M_ASP_82  | OD1    | 2.789        |
| 4M1D   | M_ARG_61  | NH2    | M_ASP_82  | OD2    | 3.154        |
| 4M1D   | M_LYS_149 | NZ     | M_GLU_203 | OE2    | 3.156        |
| 4M1D   | I_ARG_38  | NH1    | I_ASP_86  | OD1    | 2.903        |
| 4M1D   | I_ARG_38  | NH2    | I_GLU_46  | OE1    | 3.115        |
| 4M1D   | I_ARG_38  | NH2    | I_GLU_46  | OE2    | 3.904        |
| 4M1D   | I_ARG_38  | NH2    | I_ASP_86  | OD1    | 3.856        |
| 4M1D   | I_ARG_50  | NH1    | I_ASP_58  | OD2    | 2.888        |
| 4M1D   | I_ARG_66  | NH1    | I_ASP_86  | OD1    | 3.904        |
| 4M1D   | I_ARG_66  | NH1    | I_ASP_86  | OD2    | 2.765        |
| 4M1D   | I_ARG_66  | NH2    | I_ASP_86  | OD1    | 3.096        |
| 4M1D   | I_ARG_66  | NH2    | I_ASP_86  | OD2    | 3.440        |
| 4M1D   | I_ARG_71  | NH2    | I_ASP_73  | OD1    | 3.398        |
| 4M1D   | I_LYS_209 | NZ     | M_GLU_123 | OE1    | 3.060        |
| 4M1D   | I_LYS_209 | NZ     | M_GLU_123 | OE2    | 2.485        |
| 4M1D   | I_ARG_210 | NH1    | I_GLU_212 | OE2    | 3.506        |
| 4M1D   | Q_ARG_315 | NH2    | I_ASP_95  | OD2    | 3.051        |

Table 567: 4M1D-specific salt bridging networks analysis. In this table, a PDB file is specified with a four-letter PDB ID, except that the names of the PDB files corresponding to the single NMR structural model split from the NMR ensemble is specified with a four-letter PDB ID in addition to a hyphen followed by the single NMR structural model numeric ID, the residue naming scheme is **Chain ID\_residue name\_residue number**,  $\angle ADH$  represents the angle formed by acceptor (A), donor (D) and hydrogen (H) ( $\angle ADH$ ).

| PDB ID | Residue A | Atom A | Residue B | Atom B | Distance (Å) |
|--------|-----------|--------|-----------|--------|--------------|
| 4M1G   | L_ARG_62  | NH2    | L_GLU_82  | OE2    | 3.764        |
| 4M1G   | L_ARG_62  | NH2    | L_ASP_83  | OD1    | 2.800        |
| 4M1G   | L_ARG_62  | NH2    | L_ASP_83  | OD2    | 3.468        |
| 4M1G   | L_LYS_104 | NZ     | L_ASP_166 | OD1    | 2.839        |
| 4M1G   | L_LYS_143 | NZ     | L_GLU_106 | OE1    | 2.794        |
| 4M1G   | L_LYS_143 | NZ     | L_GLU_106 | OE2    | 3.443        |
| 4M1G   | L_LYS_150 | NZ     | L_GLU_196 | OE1    | 3.090        |
| 4M1G   | L_LYS_150 | NZ     | L_GLU_196 | OE2    | 3.774        |
| 4M1G   | L_ARG_156 | NH1    | L_GLU_186 | OE2    | 2.941        |
| 4M1G   | L_ARG_189 | NH2    | L_ASP_185 | OD2    | 3.981        |
| 4M1G   | L_HIS_190 | ND1    | L_ASP_152 | OD2    | 2.973        |
| 4M1G   | L_LYS_200 | NZ     | L_ASP_111 | OD2    | 3.784        |
| 4M1G   | H_ARG_38  | NH1    | H_GLU_46  | OE1    | 3.046        |
| 4M1G   | H_ARG_38  | NH1    | H_ASP_89  | OD1    | 3.832        |
| 4M1G   | H_ARG_38  | NH2    | H_ASP_89  | OD1    | 2.835        |
| 4M1G   | H_ARG_66  | NH1    | H_ASP_89  | OD1    | 3.787        |
| 4M1G   | H_ARG_66  | NH1    | H_ASP_89  | OD2    | 2.752        |
| 4M1G   | H_ARG_66  | NH2    | H_ASP_89  | OD1    | 2.894        |
| 4M1G   | H_ARG_66  | NH2    | H_ASP_89  | OD2    | 3.336        |
| 4M1G   | H_LYS_97  | NZ     | H_ASP_106 | OD1    | 3.138        |
| 4M1G   | H_LYS_97  | NZ     | H_ASP_106 | OD2    | 2.944        |
| 4M1G   | H_LYS_210 | NZ     | H_ASP_212 | OD2    | 3.380        |
| 4M1G   | H_LYS_213 | NZ     | L_GLU_124 | OE2    | 2.837        |
| 4M1G   | H_ARG_218 | NH2    | L_GLU_124 | OE1    | 2.657        |
| 4M1G   | H_ARG_218 | NH2    | L_GLU_124 | OE2    | 3.648        |
| 4M1G   | A_LYS_161 | NZ     | H_ASP_31  | OD1    | 3.895        |
| 4M1G   | A_LYS_161 | NZ     | A_ASP_146 | OD1    | 2.636        |
| 4M1G   | A_ARG_176 | NH2    | A_GLU_174 | OE2    | 2.901        |
| 4M1G   | B_LYS_161 | NZ     | B_ASP_146 | OD1    | 3.297        |
| 4M1G   | B_ARG_176 | NH1    | B_GLU_174 | OE1    | 3.072        |
| 4M1G   | B_ARG_176 | NH2    | B_ASP_150 | OD1    | 3.937        |
| 4M1G   | B_ARG_176 | NH2    | B_GLU_174 | OE1    | 3.174        |

Table 568: 4M1G-specific salt bridging networks analysis. In this table, a PDB file is specified with a four-letter PDB ID, except that the names of the PDB files corresponding to the single NMR structural model split from the NMR ensemble is specified with a four-letter PDB ID in addition to a hyphen followed by the single NMR structural model numeric ID, the residue naming scheme is **Chain ID\_residue name\_residue number**,  $\angle ADH$  represents the angle formed by acceptor (A), donor (D) and hydrogen (H) ( $\angle ADH$ ).

| PDB ID | Residue A | Atom A | Residue B | Atom B | Distance (Å) |
|--------|-----------|--------|-----------|--------|--------------|
| 4M3J   | A_ARG.66  | NH1    | A_ASP.89  | OD1    | 2.995        |
| 4M3J   | A_ARG.66  | NH1    | A_ASP.89  | OD2    | 3.290        |
| 4M3J   | A_ARG.66  | NH2    | A_ASP.89  | OD1    | 3.827        |
| 4M3J   | A_ARG.66  | NH2    | A_ASP.89  | OD2    | 2.608        |
| 4M3J   | B_ARG.19  | NH2    | B_GLU.81  | OE2    | 4.000        |
| 4M3J   | B_ARG.38  | NH1    | B_ASP.89  | OD1    | 2.933        |
| 4M3J   | B_ARG.38  | NH2    | B_GLU.46  | OE2    | 3.526        |
| 4M3J   | B_ARG.66  | NH1    | B_ASP.89  | OD1    | 2.977        |
| 4M3J   | B_ARG.66  | NH1    | B_ASP.89  | OD2    | 3.346        |
| 4M3J   | B_ARG.66  | NH2    | B_ASP.89  | OD1    | 3.861        |
| 4M3J   | B_ARG.66  | NH2    | B_ASP.89  | OD2    | 2.734        |

Table 569: 4M3J-specific salt bridging networks analysis. In this table, a PDB file is specified with a four-letter PDB ID, except that the names of the PDB files corresponding to the single NMR structural model split from the NMR ensemble is specified with a four-letter PDB ID in addition to a hyphen followed by the single NMR structural model numeric ID, the residue naming scheme is **Chain ID\_residue name\_residue number**,  $\angle ADH$  represents the angle formed by acceptor (A), donor (D) and hydrogen (H) ( $\angle ADH$ ).

| PDB ID | Residue A | Atom A | Residue B | Atom B | Distance (Å) |
|--------|-----------|--------|-----------|--------|--------------|
| 4M3K   | A_LYS_43  | NZ     | A_GLU_64  | OE1    | 3.810        |
| 4M3K   | A_LYS_43  | NZ     | A_GLU_64  | OE2    | 3.952        |
| 4M3K   | A_ARG_61  | NH2    | A_GLU_37  | OE1    | 2.874        |
| 4M3K   | A_ARG_61  | NH2    | A_GLU_37  | OE2    | 2.937        |
| 4M3K   | A_LYS_73  | NZ     | A_GLU_166 | OE2    | 3.458        |
| 4M3K   | A_ARG_128 | NH2    | A_ASP_124 | OD1    | 2.865        |
| 4M3K   | A_ARG_128 | NH2    | A_ASP_124 | OD2    | 3.740        |
| 4M3K   | A_LYS_149 | NZ     | A_GLU_163 | OE2    | 2.784        |
| 4M3K   | A_LYS_154 | NZ     | A_GLU_151 | OE1    | 3.231        |
| 4M3K   | A_ARG_164 | NH2    | A_ASP_179 | OD2    | 2.865        |
| 4M3K   | A_ARG_184 | NH2    | A_ASP_63  | OD1    | 3.681        |
| 4M3K   | A_ARG_184 | NH2    | A_ASP_63  | OD2    | 2.944        |
| 4M3K   | A_ARG_204 | NH1    | A_GLU_196 | OE2    | 2.953        |
| 4M3K   | A_ARG_204 | NH2    | A_GLU_196 | OE2    | 3.454        |
| 4M3K   | A_LYS_212 | NZ     | A_GLU_230 | OE2    | 3.176        |
| 4M3K   | A_ARG_213 | NH2    | A_ASP_124 | OD2    | 3.388        |
| 4M3K   | A_ARG_213 | NH2    | A_ASP_209 | OD2    | 3.177        |
| 4M3K   | A_ARG_244 | NH2    | A_ASP_276 | OD1    | 3.324        |
| 4M3K   | A_ARG_244 | NH2    | A_ASP_276 | OD2    | 3.717        |
| 4M3K   | A_ARG_267 | NH2    | A_ASP_41  | OD2    | 2.755        |
| 4M3K   | A_LYS_277 | NZ     | A_GLU_281 | OE2    | 3.368        |
| 4M3K   | A_LYS_284 | NZ     | A_GLU_281 | OE2    | 3.066        |
| 4M3K   | A_LYS_288 | NZ     | A_ASP_32  | OD1    | 3.999        |
| 4M3K   | B_ARG_38  | NH1    | B_ASP_89  | OD1    | 2.927        |
| 4M3K   | B_ARG_38  | NH2    | B_GLU_46  | OE2    | 3.059        |
| 4M3K   | B_ARG_66  | NH1    | B_ASP_89  | OD1    | 3.228        |
| 4M3K   | B_ARG_66  | NH1    | B_ASP_89  | OD2    | 3.507        |
| 4M3K   | B_ARG_66  | NH2    | B_ASP_89  | OD1    | 3.903        |
| 4M3K   | B_ARG_66  | NH2    | B_ASP_89  | OD2    | 2.748        |

Table 570: 4M3K-specific salt bridging networks analysis. In this table, a PDB file is specified with a four-letter PDB ID, except that the names of the PDB files corresponding to the single NMR structural model split from the NMR ensemble is specified with a four-letter PDB ID in addition to a hyphen followed by the single NMR structural model numeric ID, the residue naming scheme is **Chain ID\_residue name\_residue number**,  $\angle ADH$  represents the angle formed by acceptor (A), donor (D) and hydrogen (H) ( $\angle ADH$ ).

| PDB ID | Residue A | Atom A | Residue B | Atom B | Distance (Å) |
|--------|-----------|--------|-----------|--------|--------------|
| 4M5Y   | H_ARG_38  | NH1    | H_ASP_86  | OD1    | 2.740        |
| 4M5Y   | H_ARG_38  | NH2    | H_GLU_46  | OE1    | 3.005        |
| 4M5Y   | H_ARG_38  | NH2    | H_GLU_46  | OE2    | 3.867        |
| 4M5Y   | H_ARG_38  | NH2    | H_ASP_86  | OD1    | 3.427        |
| 4M5Y   | H_LYS_60  | NZ     | H_GLU_46  | OE2    | 3.961        |
| 4M5Y   | H_ARG_66  | NH1    | H_ASP_86  | OD1    | 3.597        |
| 4M5Y   | H_ARG_66  | NH1    | H_ASP_86  | OD2    | 3.103        |
| 4M5Y   | H_ARG_66  | NH2    | H_ASP_86  | OD1    | 3.032        |
| 4M5Y   | H_ARG_66  | NH2    | H_ASP_86  | OD2    | 3.612        |
| 4M5Y   | H_ARG_94  | NH2    | H_ASP_101 | OD1    | 3.590        |
| 4M5Y   | H_ARG_94  | NH2    | H_ASP_101 | OD2    | 2.687        |
| 4M5Y   | H_LYS_143 | NZ     | L_GLU_124 | OE2    | 2.602        |
| 4M5Y   | H_ARG_210 | NH1    | H_GLU_212 | OE2    | 3.298        |
| 4M5Y   | L_ARG_61  | NH1    | L_ASP_82  | OD1    | 3.807        |
| 4M5Y   | L_ARG_61  | NH1    | L_ASP_82  | OD2    | 2.837        |
| 4M5Y   | L_ARG_61  | NH2    | L_GLU_79  | OE1    | 3.774        |
| 4M5Y   | L_ARG_61  | NH2    | L_GLU_79  | OE2    | 3.834        |
| 4M5Y   | L_ARG_61  | NH2    | L_ASP_82  | OD1    | 2.987        |
| 4M5Y   | L_ARG_61  | NH2    | L_ASP_82  | OD2    | 3.453        |
| 4M5Y   | L_LYS_103 | NZ     | L_ASP_85  | OD1    | 2.950        |
| 4M5Y   | L_LYS_103 | NZ     | L_ASP_85  | OD2    | 3.655        |
| 4M5Y   | L_LYS_166 | NZ     | L_GLU_83  | OE1    | 3.021        |
| 4M5Y   | I_ARG_38  | NH1    | I_ASP_86  | OD1    | 2.800        |
| 4M5Y   | I_ARG_38  | NH2    | I_GLU_46  | OE1    | 3.015        |
| 4M5Y   | I_ARG_38  | NH2    | I_GLU_46  | OE2    | 3.972        |
| 4M5Y   | I_ARG_38  | NH2    | I_ASP_86  | OD1    | 3.483        |
| 4M5Y   | I_LYS_60  | NZ     | I_GLU_46  | OE2    | 3.961        |
| 4M5Y   | I_ARG_66  | NH1    | I_ASP_86  | OD1    | 3.585        |
| 4M5Y   | I_ARG_66  | NH1    | I_ASP_86  | OD2    | 3.054        |
| 4M5Y   | I_ARG_66  | NH2    | I_ASP_86  | OD1    | 3.004        |
| 4M5Y   | I_ARG_66  | NH2    | I_ASP_86  | OD2    | 3.622        |
| 4M5Y   | I_ARG_94  | NH2    | I_ASP_101 | OD1    | 3.599        |
| 4M5Y   | I_ARG_94  | NH2    | I_ASP_101 | OD2    | 2.713        |
| 4M5Y   | I_LYS_143 | NZ     | M_GLU_124 | OE2    | 2.668        |
| 4M5Y   | I_ARG_210 | NH2    | I_GLU_212 | OE1    | 3.354        |
| 4M5Y   | I_ARG_210 | NH2    | I_GLU_212 | OE2    | 2.881        |
| 4M5Y   | M_ARG_61  | NH1    | M_ASP_82  | OD1    | 3.838        |
| 4M5Y   | M_ARG_61  | NH1    | M_ASP_82  | OD2    | 2.829        |
| 4M5Y   | M_ARG_61  | NH2    | M_GLU_79  | OE1    | 3.888        |
| 4M5Y   | M_ARG_61  | NH2    | M_GLU_79  | OE2    | 3.912        |
| 4M5Y   | M_ARG_61  | NH2    | M_ASP_82  | OD1    | 2.982        |
| 4M5Y   | M_ARG_61  | NH2    | M_ASP_82  | OD2    | 3.418        |
| 4M5Y   | M_LYS_103 | NZ     | M_ASP_85  | OD1    | 2.936        |
| 4M5Y   | M_LYS_103 | NZ     | M_ASP_85  | OD2    | 3.698        |
| 4M5Y   | M_LYS_166 | NZ     | M_GLU_83  | OE1    | 2.838        |

Table 571: 4M5Y-specific salt bridging networks analysis. In this table, a PDB file is specified with a four-letter PDB ID, except that the names of the PDB files corresponding to the single NMR structural model split from the NMR ensemble is specified with a four-letter PDB ID in addition to a hyphen followed by the single NMR structural model numeric ID, the residue naming scheme is **Chain ID\_residue name\_residue number**,  $\angle ADH$  represents the angle formed by acceptor (A), donor (D) and hydrogen (H) ( $\angle ADH$ ).

| PDB ID | Residue A | Atom A | Residue B | Atom B | Distance (Å) |
|--------|-----------|--------|-----------|--------|--------------|
| 4M7J   | H_ARG_38  | NH1    | H_ASP_86  | OD1    | 2.851        |
| 4M7J   | H_ARG_38  | NH2    | H_GLU_46  | OE1    | 2.998        |
| 4M7J   | H_ARG_38  | NH2    | H_GLU_46  | OE2    | 3.979        |
| 4M7J   | H_ARG_38  | NH2    | H_ASP_86  | OD1    | 3.844        |
| 4M7J   | H_ARG_66  | NH1    | H_ASP_86  | OD1    | 3.723        |
| 4M7J   | H_ARG_66  | NH1    | H_ASP_86  | OD2    | 2.912        |
| 4M7J   | H_ARG_66  | NH2    | H_ASP_86  | OD1    | 2.833        |
| 4M7J   | H_ARG_66  | NH2    | H_ASP_86  | OD2    | 3.435        |
| 4M7J   | H_ARG_94  | NH2    | H_ASP_100 | OD1    | 2.757        |
| 4M7J   | H_ARG_94  | NH2    | H_ASP_100 | OD2    | 3.594        |
| 4M7J   | H_LYS_208 | NZ     | L_GLU_123 | OE1    | 3.727        |
| 4M7J   | H_LYS_208 | NZ     | L_GLU_123 | OE2    | 3.593        |
| 4M7J   | L_ARG_24  | NH2    | L_ASP_70  | OD1    | 2.939        |
| 4M7J   | L_ARG_24  | NH2    | L_ASP_70  | OD2    | 3.255        |
| 4M7J   | L_ARG_61  | NH1    | L_GLU_79  | OE1    | 3.494        |
| 4M7J   | L_ARG_61  | NH1    | L_GLU_79  | OE2    | 3.711        |
| 4M7J   | L_ARG_61  | NH1    | L_GLU_81  | OE2    | 3.788        |
| 4M7J   | L_ARG_61  | NH2    | L_GLU_79  | OE1    | 3.751        |
| 4M7J   | L_ARG_61  | NH2    | L_GLU_81  | OE2    | 3.003        |
| 4M7J   | L_ARG_61  | NH2    | L_ASP_82  | OD1    | 2.487        |
| 4M7J   | L_ARG_61  | NH2    | L_ASP_82  | OD2    | 3.268        |
| 4M7J   | L_LYS_103 | NZ     | L_GLU_105 | OE1    | 3.663        |
| 4M7J   | L_LYS_142 | NZ     | L_GLU_105 | OE1    | 3.970        |
| 4M7J   | L_LYS_149 | NZ     | L_GLU_195 | OE2    | 3.349        |
| 4M7J   | L_ARG_155 | NH1    | L_GLU_185 | OE1    | 3.230        |
| 4M7J   | L_ARG_155 | NH1    | L_GLU_185 | OE2    | 3.937        |
| 4M7J   | L_ARG_155 | NH2    | L_GLU_185 | OE1    | 3.656        |
| 4M7J   | L_ARG_155 | NH2    | L_GLU_185 | OE2    | 2.916        |
| 4M7J   | L_HIS_189 | ND1    | L_ASP_151 | OD2    | 3.046        |
| 4M7J   | L_LYS_199 | NZ     | L_ASP_110 | OD1    | 3.848        |
| 4M7J   | L_LYS_199 | NZ     | L_ASP_110 | OD2    | 2.665        |

Table 572: 4M7J-specific salt bridging networks analysis. In this table, a PDB file is specified with a four-letter PDB ID, except that the names of the PDB files corresponding to the single NMR structural model split from the NMR ensemble is specified with a four-letter PDB ID in addition to a hyphen followed by the single NMR structural model numeric ID, the residue naming scheme is **Chain ID\_residue name\_residue number**,  $\angle ADH$  represents the angle formed by acceptor (A), donor (D) and hydrogen (H) ( $\angle ADH$ ).

| PDB ID | Residue A | Atom A | Residue B | Atom B | Distance (Å) |
|--------|-----------|--------|-----------|--------|--------------|
| 4M7Z   | B_ARG_38  | NH1    | B_ASP_86  | OD1    | 2.932        |
| 4M7Z   | B_ARG_38  | NH2    | B_ASP_86  | OD1    | 3.472        |
| 4M7Z   | B_ARG_66  | NH1    | B_ASP_86  | OD2    | 3.153        |
| 4M7Z   | B_ARG_66  | NH2    | B_ASP_86  | OD1    | 2.921        |
| 4M7Z   | B_ARG_66  | NH2    | B_ASP_86  | OD2    | 2.946        |
| 4M7Z   | B_LYS_208 | NZ     | C_GLU_123 | OE1    | 3.318        |
| 4M7Z   | B_LYS_208 | NZ     | C_GLU_123 | OE2    | 3.881        |
| 4M7Z   | H_ARG_38  | NH1    | H_ASP_86  | OD1    | 2.917        |
| 4M7Z   | H_ARG_38  | NH2    | H_ASP_86  | OD1    | 3.458        |
| 4M7Z   | H_ARG_66  | NH1    | H_ASP_86  | OD2    | 3.181        |
| 4M7Z   | H_ARG_66  | NH2    | H_ASP_86  | OD1    | 2.909        |
| 4M7Z   | H_ARG_66  | NH2    | H_ASP_86  | OD2    | 2.975        |
| 4M7Z   | H_LYS_208 | NZ     | L_GLU_123 | OE1    | 3.192        |
| 4M7Z   | C_ARG_54  | NH2    | C_ASP_60  | OD1    | 3.316        |
| 4M7Z   | C_ARG_61  | NH1    | C_GLU_79  | OE1    | 3.863        |
| 4M7Z   | C_ARG_61  | NH2    | C_GLU_79  | OE1    | 3.870        |
| 4M7Z   | C_ARG_61  | NH2    | C_ASP_82  | OD1    | 2.761        |
| 4M7Z   | C_ARG_61  | NH2    | C_ASP_82  | OD2    | 3.263        |
| 4M7Z   | C_LYS_103 | NZ     | C_ASP_165 | OD1    | 2.648        |
| 4M7Z   | C_LYS_103 | NZ     | C_ASP_165 | OD2    | 3.360        |
| 4M7Z   | C_LYS_142 | NZ     | C_GLU_105 | OE2    | 2.662        |
| 4M7Z   | C_LYS_149 | NZ     | C_GLU_195 | OE2    | 3.957        |
| 4M7Z   | C_ARG_155 | NH2    | C_GLU_185 | OE1    | 3.931        |
| 4M7Z   | C_LYS_183 | NZ     | C_GLU_187 | OE1    | 3.956        |
| 4M7Z   | C_LYS_183 | NZ     | C_GLU_187 | OE2    | 2.784        |
| 4M7Z   | C_ARG_188 | NH2    | C_GLU_185 | OE2    | 2.653        |
| 4M7Z   | C_HIS_189 | ND1    | C_ASP_151 | OD2    | 2.788        |
| 4M7Z   | C_HIS_189 | NE2    | C_GLU_185 | OE1    | 2.917        |
| 4M7Z   | C_LYS_199 | NZ     | C_ASP_110 | OD1    | 3.655        |
| 4M7Z   | C_LYS_199 | NZ     | C_ASP_110 | OD2    | 3.049        |
| 4M7Z   | L_ARG_24  | NH2    | L_ASP_70  | OD1    | 3.791        |
| 4M7Z   | L_ARG_54  | NH2    | L_ASP_60  | OD1    | 3.293        |
| 4M7Z   | L_ARG_61  | NH1    | L_GLU_79  | OE1    | 3.704        |
| 4M7Z   | L_ARG_61  | NH1    | L_GLU_79  | OE2    | 3.709        |
| 4M7Z   | L_ARG_61  | NH2    | L_ASP_82  | OD1    | 2.705        |
| 4M7Z   | L_ARG_61  | NH2    | L_ASP_82  | OD2    | 2.341        |
| 4M7Z   | L_LYS_103 | NZ     | L_ASP_165 | OD1    | 2.672        |
| 4M7Z   | L_LYS_103 | NZ     | L_ASP_165 | OD2    | 3.377        |
| 4M7Z   | L_LYS_142 | NZ     | L_GLU_105 | OE1    | 3.125        |
| 4M7Z   | L_LYS_147 | NZ     | L_GLU_195 | OE1    | 3.579        |
| 4M7Z   | L_LYS_149 | NZ     | L_GLU_195 | OE2    | 3.946        |
| 4M7Z   | L_ARG_155 | NH1    | L_GLU_185 | OE2    | 3.594        |
| 4M7Z   | L_ARG_155 | NH2    | L_GLU_185 | OE2    | 2.584        |
| 4M7Z   | L_LYS_183 | NZ     | L_GLU_187 | OE1    | 3.987        |
| 4M7Z   | L_LYS_183 | NZ     | L_GLU_187 | OE2    | 2.788        |
| 4M7Z   | L_HIS_189 | ND1    | L_ASP_151 | OD2    | 2.804        |
| 4M7Z   | L_LYS_199 | NZ     | L_ASP_110 | OD1    | 3.668        |
| 4M7Z   | L_LYS_199 | NZ     | L_ASP_110 | OD2    | 3.056        |



---

Table 573: 4M7Z-specific salt bridging networks analysis. In this table, a PDB file is specified with a four-letter PDB ID, except that the names of the PDB files corresponding to the single NMR structural model split from the NMR ensemble is specified with a four-letter PDB ID in addition to a hyphen followed by the single NMR structural model numeric ID, the residue naming scheme is **Chain ID\_residue name\_residue number**,  $\angle ADH$  represents the angle formed by acceptor (A), donor (D) and hydrogen (H) ( $\angle ADH$ ).

| PDB ID | Residue A | Atom A | Residue B | Atom B | Distance (Å) |
|--------|-----------|--------|-----------|--------|--------------|
| 4M93   | L_ARG_24  | NH1    | L_ASP_70  | OD1    | 3.616        |
| 4M93   | L_ARG_24  | NH2    | L_ASP_70  | OD1    | 3.168        |
| 4M93   | L_ARG_24  | NH2    | L_ASP_70  | OD2    | 3.984        |
| 4M93   | L_ARG_61  | NH1    | L_GLU_79  | OE1    | 2.878        |
| 4M93   | L_ARG_61  | NH1    | L_GLU_79  | OE2    | 3.335        |
| 4M93   | L_ARG_61  | NH2    | L_GLU_79  | OE1    | 2.843        |
| 4M93   | L_ARG_61  | NH2    | L_GLU_81  | OE1    | 3.821        |
| 4M93   | L_ARG_61  | NH2    | L_ASP_82  | OD1    | 2.762        |
| 4M93   | L_ARG_61  | NH2    | L_ASP_82  | OD2    | 3.319        |
| 4M93   | L_LYS_103 | NZ     | L_GLU_105 | OE1    | 3.651        |
| 4M93   | L_LYS_142 | NZ     | L_GLU_105 | OE2    | 3.741        |
| 4M93   | L_LYS_147 | NZ     | L_GLU_154 | OE2    | 3.291        |
| 4M93   | L_LYS_149 | NZ     | L_GLU_195 | OE1    | 3.825        |
| 4M93   | L_LYS_149 | NZ     | L_GLU_195 | OE2    | 2.937        |
| 4M93   | L_ARG_155 | NH1    | L_GLU_185 | OE1    | 3.047        |
| 4M93   | L_ARG_155 | NH2    | L_GLU_185 | OE1    | 3.711        |
| 4M93   | L_ARG_155 | NH2    | L_GLU_185 | OE2    | 3.785        |
| 4M93   | L_HIS_189 | ND1    | L_ASP_151 | OD2    | 3.324        |
| 4M93   | H_ARG_38  | NH1    | H_ASP_86  | OD1    | 2.784        |
| 4M93   | H_ARG_38  | NH2    | H_GLU_46  | OE1    | 2.935        |
| 4M93   | H_ARG_38  | NH2    | H_GLU_46  | OE2    | 3.934        |
| 4M93   | H_ARG_38  | NH2    | H_ASP_86  | OD1    | 3.972        |
| 4M93   | H_ARG_66  | NH1    | H_ASP_86  | OD1    | 3.479        |
| 4M93   | H_ARG_66  | NH1    | H_ASP_86  | OD2    | 2.918        |
| 4M93   | H_ARG_66  | NH2    | H_ASP_86  | OD1    | 2.693        |
| 4M93   | H_ARG_66  | NH2    | H_ASP_86  | OD2    | 3.421        |
| 4M93   | H_LYS_208 | NZ     | L_GLU_123 | OE1    | 3.795        |
| 4M93   | C_ARG_24  | NH1    | C_ASP_70  | OD1    | 3.167        |
| 4M93   | C_ARG_61  | NH1    | C_GLU_79  | OE1    | 3.833        |
| 4M93   | C_ARG_61  | NH1    | C_GLU_79  | OE2    | 3.475        |
| 4M93   | C_ARG_61  | NH2    | C_GLU_79  | OE1    | 3.979        |
| 4M93   | C_ARG_61  | NH2    | C_GLU_81  | OE1    | 3.225        |
| 4M93   | C_ARG_61  | NH2    | C_ASP_82  | OD1    | 2.620        |
| 4M93   | C_ARG_61  | NH2    | C_ASP_82  | OD2    | 3.543        |
| 4M93   | C_LYS_149 | NZ     | C_GLU_195 | OE2    | 3.911        |
| 4M93   | C_ARG_155 | NH1    | C_GLU_185 | OE1    | 2.917        |
| 4M93   | C_LYS_169 | NZ     | C_ASP_170 | OD1    | 2.606        |
| 4M93   | C_LYS_183 | NZ     | C_GLU_187 | OE2    | 3.968        |
| 4M93   | C_HIS_189 | ND1    | C_ASP_151 | OD2    | 2.956        |
| 4M93   | C_LYS_199 | NZ     | C_ASP_110 | OD2    | 3.011        |
| 4M93   | B_ARG_38  | NH1    | B_ASP_86  | OD1    | 2.720        |
| 4M93   | B_ARG_38  | NH2    | B_GLU_46  | OE1    | 3.263        |
| 4M93   | B_ARG_38  | NH2    | B_ASP_86  | OD1    | 3.854        |
| 4M93   | B_ARG_66  | NH1    | B_ASP_86  | OD1    | 3.675        |
| 4M93   | B_ARG_66  | NH1    | B_ASP_86  | OD2    | 3.114        |
| 4M93   | B_ARG_66  | NH2    | B_ASP_86  | OD1    | 2.983        |
| 4M93   | B_ARG_66  | NH2    | B_ASP_86  | OD2    | 3.452        |
| 4M93   | B_LYS_208 | NZ     | C_GLU_123 | OE1    | 3.203        |

---

Table 574: 4M93-specific salt bridging networks analysis. In this table, a PDB file is specified with a four-letter PDB ID, except that the names of the PDB files corresponding to the single NMR structural model split from the NMR ensemble is specified with a four-letter PDB ID in addition to a hyphen followed by the single NMR structural model numeric ID, the residue naming scheme is **Chain ID\_residue name\_residue number**,  $\angle ADH$  represents the angle formed by acceptor (A), donor (D) and hydrogen (H) ( $\angle ADH$ ).

| PDB ID | Residue A | Atom A | Residue B | Atom B | Distance (Å) |
|--------|-----------|--------|-----------|--------|--------------|
| 4MA1   | B_LYS_5   | NZ     | F_GLU_187 | OE1    | 3.315        |
| 4MA1   | B_ARG_38  | NH1    | B_ASP_86  | OD1    | 2.969        |
| 4MA1   | B_ARG_38  | NH2    | B_GLU_46  | OE1    | 3.713        |
| 4MA1   | B_ARG_66  | NH1    | B_ASP_86  | OD1    | 3.588        |
| 4MA1   | B_ARG_66  | NH1    | B_ASP_86  | OD2    | 2.940        |
| 4MA1   | B_ARG_66  | NH2    | B_ASP_86  | OD1    | 2.611        |
| 4MA1   | B_ARG_66  | NH2    | B_ASP_86  | OD2    | 3.400        |
| 4MA1   | B_LYS_208 | NZ     | C_GLU_123 | OE1    | 3.857        |
| 4MA1   | E_ARG_38  | NH1    | E_ASP_86  | OD1    | 3.045        |
| 4MA1   | E_ARG_38  | NH2    | E_GLU_46  | OE1    | 3.606        |
| 4MA1   | E_ARG_38  | NH2    | E_ASP_86  | OD1    | 3.907        |
| 4MA1   | E_ARG_66  | NH1    | E_ASP_86  | OD2    | 3.475        |
| 4MA1   | E_ARG_66  | NH2    | E_ASP_86  | OD1    | 2.678        |
| 4MA1   | E_ARG_66  | NH2    | E_ASP_86  | OD2    | 3.064        |
| 4MA1   | H_ARG_38  | NH1    | H_ASP_86  | OD1    | 2.748        |
| 4MA1   | H_ARG_38  | NH2    | H_GLU_46  | OE1    | 3.316        |
| 4MA1   | H_ARG_38  | NH2    | H_GLU_46  | OE2    | 3.996        |
| 4MA1   | H_ARG_38  | NH2    | H_ASP_86  | OD1    | 3.832        |
| 4MA1   | H_ARG_66  | NH1    | H_ASP_86  | OD1    | 3.691        |
| 4MA1   | H_ARG_66  | NH1    | H_ASP_86  | OD2    | 2.891        |
| 4MA1   | H_ARG_66  | NH2    | H_ASP_86  | OD1    | 2.643        |
| 4MA1   | H_ARG_66  | NH2    | H_ASP_86  | OD2    | 3.187        |
| 4MA1   | H_LYS_208 | NZ     | L_GLU_123 | OE1    | 3.752        |
| 4MA1   | C_ARG_61  | NH1    | C_GLU_79  | OE1    | 3.057        |
| 4MA1   | C_ARG_61  | NH2    | C_GLU_79  | OE1    | 3.843        |
| 4MA1   | C_ARG_61  | NH2    | C_GLU_81  | OE1    | 3.130        |
| 4MA1   | C_ARG_61  | NH2    | C_ASP_82  | OD1    | 2.795        |
| 4MA1   | C_ARG_61  | NH2    | C_ASP_82  | OD2    | 3.615        |
| 4MA1   | C_LYS_103 | NZ     | C_GLU_105 | OE1    | 2.684        |
| 4MA1   | C_LYS_142 | NZ     | C_GLU_105 | OE1    | 3.393        |
| 4MA1   | C_LYS_142 | NZ     | C_GLU_105 | OE2    | 3.621        |
| 4MA1   | C_LYS_149 | NZ     | C_GLU_195 | OE1    | 2.926        |
| 4MA1   | C_ARG_155 | NH1    | C_GLU_185 | OE1    | 3.289        |
| 4MA1   | C_ARG_155 | NH1    | C_GLU_185 | OE2    | 3.515        |
| 4MA1   | C_ARG_155 | NH2    | C_GLU_185 | OE2    | 3.110        |
| 4MA1   | C_LYS_183 | NZ     | C_GLU_187 | OE2    | 3.186        |
| 4MA1   | C_HIS_189 | ND1    | C_ASP_151 | OD2    | 3.088        |
| 4MA1   | C_LYS_199 | NZ     | C_ASP_110 | OD2    | 3.151        |
| 4MA1   | F_ARG_24  | NH2    | F_ASP_70  | OD2    | 2.964        |
| 4MA1   | F_ARG_61  | NH1    | F_GLU_79  | OE1    | 3.869        |
| 4MA1   | F_ARG_61  | NH1    | F_GLU_79  | OE2    | 3.320        |
| 4MA1   | F_ARG_61  | NH2    | F_GLU_79  | OE1    | 3.924        |
| 4MA1   | F_ARG_61  | NH2    | F_GLU_81  | OE2    | 3.033        |
| 4MA1   | F_ARG_61  | NH2    | F_ASP_82  | OD1    | 2.712        |
| 4MA1   | F_ARG_61  | NH2    | F_ASP_82  | OD2    | 3.811        |
| 4MA1   | F_ARG_77  | NH2    | F_GLU_79  | OE2    | 3.716        |
| 4MA1   | F_LYS_103 | NZ     | F_GLU_105 | OE2    | 2.828        |
| 4MA1   | F_LYS_142 | NZ     | F_GLU_105 | OE1    | 3.726        |
| 4MA1   | F_LYS_142 | NZ     | F_GLU_105 | OE2    | 3.145        |
| 4MA1   | F_LYS_149 | NZ     | F_GLU_195 | OE2    | 2.884        |
| 4MA1   | F_ARG_155 | NH1    | F_GLU_185 | OE1    | 3.214        |
| 4MA1   | F_ARG_155 | NH1    | F_GLU_185 | OE2    | 3.510        |
| 4MA1   | F_ARG_155 | NH2    | F_GLU_185 | OE2    | 2.964        |
| 4MA1   | F_LYS_183 | NZ     | F_GLU_187 | OE2    | 3.006        |
| 4MA1   | F_HIS_189 | ND1    | F_ASP_151 | OD2    | 2.997        |
| 4MA1   | F_LYS_199 | NZ     | F_ASP_110 | OD2    | 3.201        |
| 4MA1   | L_ARG_61  | NH1    | L_GLU_79  | OE2    | 3.784        |

|      |           |     |           |     |       |
|------|-----------|-----|-----------|-----|-------|
| 4MA1 | L_ARG_61  | NH2 | L_GLU_79  | OE2 | 3.895 |
| 4MA1 | L_ARG_61  | NH2 | L_GLU_81  | OE1 | 3.533 |
| 4MA1 | L_ARG_61  | NH2 | L_ASP_82  | OD1 | 2.756 |
| 4MA1 | L_ARG_61  | NH2 | L_ASP_82  | OD2 | 3.629 |
| 4MA1 | L_LYS_142 | NZ  | L_GLU_105 | OE1 | 2.731 |
| 4MA1 | L_LYS_142 | NZ  | L_GLU_105 | OE2 | 3.970 |
| 4MA1 | L_LYS_149 | NZ  | L_GLU_195 | OE1 | 3.692 |
| 4MA1 | L_LYS_149 | NZ  | L_GLU_195 | OE2 | 2.968 |
| 4MA1 | L_ARG_155 | NH1 | L_GLU_185 | OE1 | 3.117 |
| 4MA1 | L_ARG_155 | NH1 | L_GLU_185 | OE2 | 3.471 |
| 4MA1 | L_ARG_155 | NH2 | L_GLU_185 | OE2 | 3.260 |
| 4MA1 | L_LYS_183 | NZ  | L_GLU_187 | OE2 | 3.272 |
| 4MA1 | L_HIS_189 | ND1 | L_ASP_151 | OD2 | 2.941 |
| 4MA1 | L_LYS_199 | NZ  | L_ASP_110 | OD2 | 3.106 |

Table 575: 4MA1-specific salt bridging networks analysis. In this table, a PDB file is specified with a four-letter PDB ID, except that the names of the PDB files corresponding to the single NMR structural model split from the NMR ensemble is specified with a four-letter PDB ID in addition to a hyphen followed by the single NMR structural model numeric ID, the residue naming scheme is **Chain ID\_residue name\_residue number**,  $\angle ADH$  represents the angle formed by acceptor (A), donor (D) and hydrogen (H) ( $\angle ADH$ ).

| PDB ID | Residue A | Atom A | Residue B | Atom B | Distance (Å) |
|--------|-----------|--------|-----------|--------|--------------|
| 4N0Y   | H_LYS_12  | NZ     | H_GLU_10  | OE1    | 3.602        |
| 4N0Y   | H_HIS_35  | NE2    | H_ASP_95  | OD2    | 2.820        |
| 4N0Y   | H_ARG_38  | NH1    | H_ASP_86  | OD1    | 2.849        |
| 4N0Y   | H_ARG_38  | NH2    | H_ASP_86  | OD1    | 3.733        |
| 4N0Y   | H_ARG_62  | NH1    | H_GLU_46  | OE1    | 3.633        |
| 4N0Y   | H_ARG_62  | NH1    | H_GLU_46  | OE2    | 2.564        |
| 4N0Y   | H_ARG_66  | NH1    | H_ASP_86  | OD1    | 3.587        |
| 4N0Y   | H_ARG_66  | NH1    | H_ASP_86  | OD2    | 2.986        |
| 4N0Y   | H_ARG_66  | NH2    | H_ASP_86  | OD1    | 2.907        |
| 4N0Y   | H_ARG_66  | NH2    | H_ASP_86  | OD2    | 3.646        |
| 4N0Y   | H_LYS_143 | NZ     | H_ASP_144 | OD1    | 3.625        |
| 4N0Y   | H_LYS_143 | NZ     | H_ASP_144 | OD2    | 3.475        |
| 4N0Y   | H_LYS_209 | NZ     | L_GLU_123 | OE1    | 2.939        |
| 4N0Y   | H_LYS_210 | NZ     | H_GLU_212 | OE1    | 3.922        |
| 4N0Y   | L_ARG_61  | NH2    | L_GLU_81  | OE2    | 3.404        |
| 4N0Y   | L_ARG_61  | NH2    | L_ASP_82  | OD1    | 2.584        |
| 4N0Y   | L_ARG_61  | NH2    | L_ASP_82  | OD2    | 3.315        |
| 4N0Y   | L_LYS_110 | NZ     | L_GLU_198 | OE1    | 3.860        |

Table 576: 4N0Y-specific salt bridging networks analysis. In this table, a PDB file is specified with a four-letter PDB ID, except that the names of the PDB files corresponding to the single NMR structural model split from the NMR ensemble is specified with a four-letter PDB ID in addition to a hyphen followed by the single NMR structural model numeric ID, the residue naming scheme is **Chain ID\_residue name\_residue number**,  $\angle ADH$  represents the angle formed by acceptor (A), donor (D) and hydrogen (H) ( $\angle ADH$ ).

| PDB ID | Residue A | Atom A | Residue B | Atom B | Distance (Å) |
|--------|-----------|--------|-----------|--------|--------------|
| 4N1H   | A_LYS_35  | NZ     | A_ASP_32  | OD1    | 2.685        |
| 4N1H   | A_ARG_61  | NH2    | A_GLU_37  | OE1    | 3.246        |
| 4N1H   | A_ARG_61  | NH2    | A_GLU_37  | OE2    | 3.574        |
| 4N1H   | A_LYS_73  | NZ     | A_GLU_166 | OE1    | 3.851        |
| 4N1H   | A_LYS_111 | NZ     | C_GLU_202 | OE1    | 3.097        |
| 4N1H   | A_LYS_111 | NZ     | C_GLU_202 | OE2    | 2.712        |
| 4N1H   | A_HIS_112 | ND1    | C_GLU_205 | OE2    | 3.407        |
| 4N1H   | A_HIS_112 | NE2    | C_GLU_202 | OE1    | 2.950        |
| 4N1H   | A_HIS_112 | NE2    | C_GLU_205 | OE2    | 3.971        |
| 4N1H   | A_ARG_128 | NH1    | C_GLU_89  | OE1    | 3.101        |
| 4N1H   | A_ARG_128 | NH2    | A_ASP_124 | OD1    | 3.594        |
| 4N1H   | A_ARG_128 | NH2    | A_ASP_124 | OD2    | 3.398        |
| 4N1H   | A_LYS_149 | NZ     | A_GLU_163 | OE1    | 3.271        |
| 4N1H   | A_LYS_150 | NZ     | B_ASP_115 | OD2    | 2.748        |
| 4N1H   | A_ARG_153 | NH2    | B_ASP_106 | OD1    | 3.262        |
| 4N1H   | A_ARG_153 | NH2    | B_ASP_106 | OD2    | 3.262        |
| 4N1H   | A_LYS_154 | NZ     | A_GLU_151 | OE1    | 3.414        |
| 4N1H   | A_LYS_154 | NZ     | A_GLU_151 | OE2    | 2.635        |
| 4N1H   | A_ARG_164 | NH2    | A_ASP_179 | OD2    | 2.730        |
| 4N1H   | A_ARG_184 | NH2    | A_ASP_63  | OD1    | 3.800        |
| 4N1H   | A_ARG_184 | NH2    | A_ASP_63  | OD2    | 3.087        |
| 4N1H   | A_ARG_204 | NH2    | A_GLU_196 | OE2    | 3.365        |
| 4N1H   | A_LYS_212 | NZ     | A_GLU_230 | OE2    | 3.115        |
| 4N1H   | A_ARG_213 | NH2    | A_ASP_209 | OD1    | 2.990        |
| 4N1H   | A_ARG_213 | NH2    | A_ASP_209 | OD2    | 2.705        |
| 4N1H   | A_ARG_222 | NH2    | A_ASP_233 | OD1    | 3.305        |
| 4N1H   | A_ARG_244 | NH2    | A_ASP_276 | OD1    | 3.949        |
| 4N1H   | A_ARG_244 | NH2    | A_ASP_276 | OD2    | 3.570        |
| 4N1H   | A_ARG_267 | NH2    | A_ASP_41  | OD2    | 3.599        |
| 4N1H   | A_LYS_284 | NZ     | A_GLU_281 | OE1    | 3.697        |
| 4N1H   | A_LYS_284 | NZ     | A_GLU_281 | OE2    | 2.598        |
| 4N1H   | B_ARG_38  | NH1    | B_ASP_90  | OD1    | 3.247        |
| 4N1H   | B_ARG_38  | NH2    | B_GLU_46  | OE2    | 3.382        |
| 4N1H   | B_ARG_38  | NH2    | B_ASP_90  | OD1    | 3.865        |
| 4N1H   | B_ARG_67  | NH2    | B_ASP_90  | OD1    | 2.723        |
| 4N1H   | B_ARG_67  | NH2    | B_ASP_90  | OD2    | 2.861        |
| 4N1H   | C_LYS_43  | NZ     | C_GLU_64  | OE2    | 2.688        |
| 4N1H   | C_ARG_61  | NH2    | C_GLU_37  | OE1    | 2.807        |
| 4N1H   | C_ARG_61  | NH2    | C_GLU_37  | OE2    | 3.294        |
| 4N1H   | C_LYS_73  | NZ     | C_GLU_166 | OE2    | 3.581        |
| 4N1H   | C_LYS_149 | NZ     | C_GLU_163 | OE1    | 3.581        |
| 4N1H   | C_LYS_149 | NZ     | C_GLU_163 | OE2    | 3.310        |
| 4N1H   | C_LYS_149 | NZ     | D_ASP_106 | OD1    | 3.587        |
| 4N1H   | C_LYS_149 | NZ     | D_ASP_106 | OD2    | 3.735        |
| 4N1H   | C_LYS_150 | NZ     | D_ASP_115 | OD1    | 3.157        |
| 4N1H   | C_ARG_153 | NH2    | D_ASP_106 | OD1    | 2.772        |
| 4N1H   | C_LYS_154 | NZ     | C_GLU_151 | OE1    | 3.966        |
| 4N1H   | C_LYS_154 | NZ     | C_GLU_151 | OE2    | 3.090        |
| 4N1H   | C_ARG_164 | NH2    | C_ASP_179 | OD2    | 2.708        |
| 4N1H   | C_ARG_204 | NH2    | A_GLU_121 | OE2    | 3.425        |
| 4N1H   | C_LYS_212 | NZ     | C_GLU_230 | OE2    | 3.370        |
| 4N1H   | C_ARG_213 | NH2    | C_ASP_209 | OD2    | 2.965        |
| 4N1H   | C_ARG_222 | NH2    | C_ASP_233 | OD1    | 3.546        |
| 4N1H   | C_ARG_244 | NH2    | C_ASP_276 | OD1    | 3.134        |
| 4N1H   | C_ARG_267 | NH2    | C_ASP_41  | OD2    | 2.979        |
| 4N1H   | C_LYS_277 | NZ     | C_GLU_281 | OE2    | 3.711        |
| 4N1H   | C_LYS_284 | NZ     | C_GLU_281 | OE1    | 3.788        |

|      |           |     |           |     |       |
|------|-----------|-----|-----------|-----|-------|
| 4N1H | C_LYS_284 | NZ  | C_GLU_281 | OE2 | 2.689 |
| 4N1H | D_ARG_38  | NH1 | D_ASP_90  | OD1 | 2.942 |
| 4N1H | D_ARG_38  | NH2 | D_ASP_90  | OD1 | 3.612 |
| 4N1H | D_ARG_45  | NH1 | D_GLU_111 | OE1 | 3.652 |
| 4N1H | D_ARG_45  | NH1 | D_GLU_111 | OE2 | 3.043 |
| 4N1H | D_LYS_65  | NZ  | D_ASP_62  | OD1 | 2.639 |
| 4N1H | D_LYS_65  | NZ  | D_ASP_62  | OD2 | 3.577 |
| 4N1H | D_ARG_67  | NH1 | D_ASP_90  | OD1 | 2.750 |
| 4N1H | D_ARG_67  | NH1 | D_ASP_90  | OD2 | 3.293 |
| 4N1H | D_ARG_67  | NH2 | D_ASP_90  | OD1 | 3.769 |
| 4N1H | D_ARG_67  | NH2 | D_ASP_90  | OD2 | 2.732 |

Table 577: 4N1H-specific salt bridging networks analysis. In this table, a PDB file is specified with a four-letter PDB ID, except that the names of the PDB files corresponding to the single NMR structural model split from the NMR ensemble is specified with a four-letter PDB ID in addition to a hyphen followed by the single NMR structural model numeric ID, the residue naming scheme is **Chain ID\_residue name\_residue number**,  $\angle ADH$  represents the angle formed by acceptor (A), donor (D) and hydrogen (H) ( $\angle ADH$ ).



| PDB ID | Residue A | Atom A | Residue B | Atom B | Distance (Å) |
|--------|-----------|--------|-----------|--------|--------------|
| 4NBX   | A.LYS_31  | NZ     | A.GLU_20  | OE1    | 3.754        |
| 4NBX   | A.LYS_31  | NZ     | A.GLU_20  | OE2    | 2.760        |
| 4NBX   | A.ARG_75  | NH2    | A.ASP_65  | OD1    | 3.378        |
| 4NBX   | B.ARG_34  | NH1    | B.ASP_39  | OD2    | 2.728        |
| 4NBX   | B.ARG_34  | NH2    | B.ASP_39  | OD2    | 3.692        |
| 4NBX   | B.ARG_45  | NH1    | B.ASP_97  | OD1    | 3.021        |
| 4NBX   | B.ARG_45  | NH2    | B.GLU_53  | OE2    | 3.422        |
| 4NBX   | B.ARG_52  | NH2    | B.ASP_115 | OD1    | 3.103        |
| 4NBX   | B.ARG_52  | NH2    | B.ASP_115 | OD2    | 3.478        |
| 4NBX   | B.ARG_74  | NH1    | B.ASP_97  | OD1    | 3.854        |
| 4NBX   | B.ARG_74  | NH1    | B.ASP_97  | OD2    | 2.776        |
| 4NBX   | B.ARG_74  | NH2    | B.ASP_97  | OD1    | 2.873        |
| 4NBX   | B.ARG_74  | NH2    | B.ASP_97  | OD2    | 3.326        |
| 4NBX   | B.LYS_83  | NZ     | B.ASP_80  | OD2    | 3.208        |
| 4NBX   | B.ARG_114 | NH2    | B.GLU_116 | OE1    | 3.887        |

Table 578: 4NBX-specific salt bridging networks analysis. In this table, a PDB file is specified with a four-letter PDB ID, except that the names of the PDB files corresponding to the single NMR structural model split from the NMR ensemble is specified with a four-letter PDB ID in addition to a hyphen followed by the single NMR structural model numeric ID, the residue naming scheme is **Chain ID\_residue name\_residue number**,  $\angle ADH$  represents the angle formed by acceptor (A), donor (D) and hydrogen (H) ( $\angle ADH$ ).

| PDB ID | Residue A | Atom A | Residue B | Atom B | Distance (Å) |
|--------|-----------|--------|-----------|--------|--------------|
| 4NBY   | A_LYS_42  | NZ     | A_GLU_97  | OE1    | 2.799        |
| 4NBY   | A_LYS_149 | NZ     | A_GLU_138 | OE1    | 2.480        |
| 4NBY   | A_LYS_149 | NZ     | A_GLU_138 | OE2    | 3.061        |
| 4NBY   | A_ARG_193 | NH2    | A_ASP_183 | OD1    | 3.347        |
| 4NBY   | B_ARG_34  | NH1    | B_ASP_39  | OD1    | 2.677        |
| 4NBY   | B_ARG_34  | NH2    | B_ASP_39  | OD1    | 3.790        |
| 4NBY   | B_ARG_45  | NH1    | B_ASP_97  | OD1    | 2.996        |
| 4NBY   | B_ARG_45  | NH2    | B_GLU_53  | OE2    | 3.496        |
| 4NBY   | B_ARG_52  | NH2    | B_ASP_115 | OD2    | 3.092        |
| 4NBY   | B_ARG_74  | NH1    | B_ASP_97  | OD1    | 3.798        |
| 4NBY   | B_ARG_74  | NH1    | B_ASP_97  | OD2    | 2.779        |
| 4NBY   | B_ARG_74  | NH2    | B_ASP_97  | OD1    | 2.996        |
| 4NBY   | B_ARG_74  | NH2    | B_ASP_97  | OD2    | 3.496        |
| 4NBY   | C_ARG_34  | NH1    | C_ASP_39  | OD1    | 2.785        |
| 4NBY   | C_ARG_34  | NH2    | C_ASP_39  | OD1    | 3.629        |
| 4NBY   | C_ARG_45  | NH1    | C_ASP_97  | OD1    | 2.914        |
| 4NBY   | C_ARG_45  | NH2    | C_GLU_53  | OE2    | 3.403        |
| 4NBY   | C_ARG_45  | NH2    | C_ASP_97  | OD1    | 3.956        |
| 4NBY   | C_LYS_72  | NZ     | C_ASP_69  | OD1    | 3.359        |
| 4NBY   | C_ARG_74  | NH1    | C_ASP_97  | OD1    | 3.947        |
| 4NBY   | C_ARG_74  | NH1    | C_ASP_97  | OD2    | 2.935        |
| 4NBY   | C_ARG_74  | NH2    | C_ASP_97  | OD1    | 2.957        |
| 4NBY   | C_ARG_74  | NH2    | C_ASP_97  | OD2    | 3.430        |
| 4NBY   | C_LYS_83  | NZ     | C_ASP_80  | OD2    | 3.758        |

Table 579: 4NBY-specific salt bridging networks analysis. In this table, a PDB file is specified with a four-letter PDB ID, except that the names of the PDB files corresponding to the single NMR structural model split from the NMR ensemble is specified with a four-letter PDB ID in addition to a hyphen followed by the single NMR structural model numeric ID, the residue naming scheme is **Chain ID\_residue name\_residue number**,  $\angle ADH$  represents the angle formed by acceptor (A), donor (D) and hydrogen (H) ( $\angle ADH$ ).

| PDB ID | Residue A | Atom A | Residue B | Atom B | Distance (Å) |
|--------|-----------|--------|-----------|--------|--------------|
| 4NBZ   | A_LYS_31  | NZ     | A_GLU_20  | OE2    | 2.992        |
| 4NBZ   | A_ARG_75  | NH2    | A_ASP_65  | OD2    | 3.115        |
| 4NBZ   | B_ARG_38  | NH1    | B_ASP_90  | OD1    | 2.831        |
| 4NBZ   | B_ARG_38  | NH2    | B_GLU_46  | OE2    | 3.420        |
| 4NBZ   | B_ARG_38  | NH2    | B_ASP_90  | OD1    | 3.761        |
| 4NBZ   | B_ARG_67  | NH1    | B_ASP_90  | OD1    | 3.836        |
| 4NBZ   | B_ARG_67  | NH1    | B_ASP_90  | OD2    | 2.796        |
| 4NBZ   | B_ARG_67  | NH2    | B_ASP_90  | OD1    | 3.068        |
| 4NBZ   | B_ARG_67  | NH2    | B_ASP_90  | OD2    | 3.514        |
| 4NBZ   | B_ARG_104 | NH1    | B_ASP_107 | OD2    | 2.788        |
| 4NBZ   | B_ARG_104 | NH1    | B_GLU_110 | OE2    | 2.708        |
| 4NBZ   | B_ARG_104 | NH2    | B_ASP_107 | OD2    | 3.003        |
| 4NBZ   | C_LYS_31  | NZ     | C_GLU_20  | OE2    | 3.958        |
| 4NBZ   | C_ARG_75  | NH2    | C_ASP_65  | OD2    | 3.050        |
| 4NBZ   | D_ARG_38  | NH1    | D_ASP_90  | OD1    | 2.888        |
| 4NBZ   | D_ARG_38  | NH2    | D_ASP_90  | OD1    | 3.800        |
| 4NBZ   | D_ARG_67  | NH1    | D_ASP_90  | OD1    | 3.887        |
| 4NBZ   | D_ARG_67  | NH1    | D_ASP_90  | OD2    | 2.770        |
| 4NBZ   | D_ARG_67  | NH2    | D_ASP_90  | OD1    | 3.220        |
| 4NBZ   | D_ARG_67  | NH2    | D_ASP_90  | OD2    | 3.516        |
| 4NBZ   | D_ARG_104 | NH1    | D_ASP_107 | OD2    | 3.039        |
| 4NBZ   | D_ARG_104 | NH2    | D_ASP_107 | OD2    | 2.649        |
| 4NBZ   | D_ARG_104 | NH2    | D_GLU_110 | OE2    | 2.846        |

Table 580: 4NBZ-specific salt bridging networks analysis. In this table, a PDB file is specified with a four-letter PDB ID, except that the names of the PDB files corresponding to the single NMR structural model split from the NMR ensemble is specified with a four-letter PDB ID in addition to a hyphen followed by the single NMR structural model numeric ID, the residue naming scheme is **Chain ID\_residue name\_residue number**,  $\angle ADH$  represents the angle formed by acceptor (A), donor (D) and hydrogen (H) ( $\angle ADH$ ).

| PDB ID | Residue A | Atom A | Residue B | Atom B | Distance (Å) |
|--------|-----------|--------|-----------|--------|--------------|
| 4NC0   | A_LYS_20  | NZ     | A_ASP_18  | OD2    | 3.612        |
| 4NC0   | A_LYS_21  | NZ     | A_ASP_69  | OD2    | 3.571        |
| 4NC0   | A_ARG_102 | NH2    | A_ASP_92  | OD1    | 3.131        |
| 4NC0   | A_LYS_149 | NZ     | A_GLU_138 | OE1    | 3.144        |
| 4NC0   | A_LYS_149 | NZ     | A_GLU_138 | OE2    | 3.032        |
| 4NC0   | B_ARG_38  | NH1    | B_ASP_90  | OD1    | 2.856        |
| 4NC0   | B_ARG_38  | NH2    | B_GLU_46  | OE2    | 3.008        |
| 4NC0   | B_ARG_38  | NH2    | B_ASP_90  | OD1    | 3.917        |
| 4NC0   | B_ARG_67  | NH1    | B_ASP_90  | OD1    | 3.847        |
| 4NC0   | B_ARG_67  | NH1    | B_ASP_90  | OD2    | 2.731        |
| 4NC0   | B_ARG_67  | NH2    | B_ASP_90  | OD1    | 3.092        |
| 4NC0   | B_ARG_67  | NH2    | B_ASP_90  | OD2    | 3.455        |
| 4NC0   | B_ARG_104 | NH2    | B_GLU_110 | OE2    | 3.883        |

Table 581: 4NC0-specific salt bridging networks analysis. In this table, a PDB file is specified with a four-letter PDB ID, except that the names of the PDB files corresponding to the single NMR structural model split from the NMR ensemble is specified with a four-letter PDB ID in addition to a hyphen followed by the single NMR structural model numeric ID, the residue naming scheme is **Chain ID\_residue name\_residue number**,  $\angle ADH$  represents the angle formed by acceptor (A), donor (D) and hydrogen (H) ( $\angle ADH$ ).

| PDB ID | Residue A | Atom A | Residue B | Atom B | Distance (Å) |
|--------|-----------|--------|-----------|--------|--------------|
| 4NC1   | A_LYS_122 | NZ     | A_GLU_84  | OE1    | 3.788        |
| 4NC1   | A_ARG_133 | NH1    | D_ASP_115 | OD2    | 3.145        |
| 4NC1   | A_LYS_149 | NZ     | A_GLU_138 | OE2    | 3.865        |
| 4NC1   | C_ARG_34  | NH1    | C_ASP_39  | OD1    | 2.542        |
| 4NC1   | C_ARG_34  | NH2    | C_ASP_39  | OD1    | 3.596        |
| 4NC1   | C_ARG_45  | NH1    | C_ASP_97  | OD1    | 3.313        |
| 4NC1   | C_ARG_45  | NH2    | C_GLU_53  | OE2    | 3.315        |
| 4NC1   | C_ARG_52  | NH2    | C_ASP_115 | OD2    | 3.087        |
| 4NC1   | C_LYS_72  | NZ     | C_ASP_69  | OD1    | 2.940        |
| 4NC1   | C_ARG_74  | NH1    | C_ASP_97  | OD2    | 3.393        |
| 4NC1   | C_ARG_74  | NH2    | C_ASP_97  | OD1    | 3.034        |
| 4NC1   | C_ARG_74  | NH2    | C_ASP_97  | OD2    | 3.018        |
| 4NC1   | C_ARG_114 | NH1    | D_ASP_115 | OD1    | 3.051        |
| 4NC1   | C_ARG_114 | NH1    | D_ASP_115 | OD2    | 3.046        |
| 4NC1   | C_ARG_114 | NH2    | D_ASP_115 | OD1    | 2.896        |
| 4NC1   | E_ARG_38  | NH1    | E_ASP_90  | OD1    | 3.159        |
| 4NC1   | E_ARG_38  | NH2    | E_GLU_46  | OE2    | 3.512        |
| 4NC1   | E_ARG_38  | NH2    | E_ASP_90  | OD1    | 3.704        |
| 4NC1   | E_ARG_67  | NH1    | E_ASP_90  | OD1    | 3.858        |
| 4NC1   | E_ARG_67  | NH1    | E_ASP_90  | OD2    | 2.770        |
| 4NC1   | E_ARG_67  | NH2    | E_ASP_90  | OD1    | 2.972        |
| 4NC1   | E_ARG_67  | NH2    | E_ASP_90  | OD2    | 3.415        |
| 4NC1   | E_LYS_87  | NZ     | E_GLU_89  | OE2    | 3.782        |
| 4NC1   | E_ARG_104 | NH1    | E_ASP_107 | OD1    | 2.648        |
| 4NC1   | E_ARG_104 | NH1    | E_GLU_110 | OE2    | 3.366        |
| 4NC1   | E_ARG_104 | NH2    | E_ASP_107 | OD1    | 3.918        |
| 4NC1   | B_HIS_63  | ND1    | B_GLU_84  | OE1    | 3.153        |
| 4NC1   | B_HIS_63  | ND1    | B_GLU_84  | OE2    | 3.732        |
| 4NC1   | B_ARG_102 | NH1    | B_ASP_92  | OD1    | 3.669        |
| 4NC1   | B_ARG_102 | NH1    | B_ASP_92  | OD2    | 3.606        |
| 4NC1   | B_ARG_102 | NH2    | B_ASP_92  | OD1    | 3.288        |
| 4NC1   | B_ARG_133 | NH2    | C_ASP_115 | OD2    | 3.404        |
| 4NC1   | B_LYS_149 | NZ     | B_GLU_138 | OE1    | 3.187        |
| 4NC1   | B_LYS_149 | NZ     | B_GLU_138 | OE2    | 3.383        |
| 4NC1   | B_LYS_154 | NZ     | B_ASP_152 | OD2    | 3.007        |
| 4NC1   | D_ARG_34  | NH1    | D_ASP_39  | OD1    | 2.692        |
| 4NC1   | D_ARG_34  | NH2    | D_ASP_39  | OD1    | 3.446        |
| 4NC1   | D_ARG_45  | NH1    | D_ASP_97  | OD1    | 3.007        |
| 4NC1   | D_ARG_45  | NH2    | D_GLU_53  | OE2    | 3.250        |
| 4NC1   | D_ARG_52  | NH2    | D_ASP_115 | OD2    | 2.993        |
| 4NC1   | D_ARG_63  | NH1    | B_ASP_112 | OD2    | 3.125        |
| 4NC1   | D_LYS_72  | NZ     | D_ASP_69  | OD1    | 2.783        |
| 4NC1   | D_ARG_74  | NH1    | D_ASP_97  | OD1    | 3.561        |
| 4NC1   | D_ARG_74  | NH1    | D_ASP_97  | OD2    | 2.537        |
| 4NC1   | D_ARG_74  | NH2    | D_ASP_97  | OD1    | 2.939        |
| 4NC1   | D_ARG_74  | NH2    | D_ASP_97  | OD2    | 3.487        |
| 4NC1   | D_ARG_114 | NH1    | C_ASP_115 | OD1    | 2.908        |
| 4NC1   | D_ARG_114 | NH2    | C_ASP_115 | OD1    | 2.942        |
| 4NC1   | F_ARG_38  | NH1    | F_ASP_90  | OD1    | 2.906        |
| 4NC1   | F_ARG_38  | NH2    | F_GLU_46  | OE2    | 3.353        |
| 4NC1   | F_LYS_65  | NZ     | F_ASP_62  | OD1    | 3.606        |
| 4NC1   | F_ARG_67  | NH1    | F_ASP_90  | OD1    | 3.956        |
| 4NC1   | F_ARG_67  | NH1    | F_ASP_90  | OD2    | 2.763        |
| 4NC1   | F_ARG_67  | NH2    | F_ASP_90  | OD1    | 2.876        |
| 4NC1   | F_ARG_67  | NH2    | F_ASP_90  | OD2    | 3.144        |
| 4NC1   | F_ARG_104 | NH2    | F_ASP_107 | OD1    | 2.987        |

---

Table 582: 4NC1-specific salt bridging networks analysis. In this table, a PDB file is specified with a four-letter PDB ID, except that the names of the PDB files corresponding to the single NMR structural model split from the NMR ensemble is specified with a four-letter PDB ID in addition to a hyphen followed by the single NMR structural model numeric ID, the residue naming scheme is **Chain ID\_residue name\_residue number**,  $\angle ADH$  represents the angle formed by acceptor (A), donor (D) and hydrogen (H) ( $\angle ADH$ ).

| PDB ID | Residue A | Atom A | Residue B | Atom B | Distance (Å) |
|--------|-----------|--------|-----------|--------|--------------|
| 4NC2   | A_LYS_41  | NZ     | A_GLU_78  | OE1    | 2.781        |
| 4NC2   | A_LYS_41  | NZ     | A_GLU_78  | OE2    | 3.286        |
| 4NC2   | A_HIS_67  | ND1    | A_GLU_76  | OE1    | 3.371        |
| 4NC2   | A_HIS_67  | ND1    | A_GLU_76  | OE2    | 3.155        |
| 4NC2   | A_ARG_92  | NH2    | A_ASP_87  | OD1    | 3.549        |
| 4NC2   | A_ARG_92  | NH2    | A_ASP_87  | OD2    | 3.725        |
| 4NC2   | B_ARG_38  | NH1    | B_ASP_89  | OD1    | 2.682        |
| 4NC2   | B_ARG_38  | NH2    | B_GLU_46  | OE2    | 3.122        |
| 4NC2   | B_ARG_38  | NH2    | B_ASP_89  | OD1    | 3.705        |
| 4NC2   | B_ARG_66  | NH1    | B_ASP_89  | OD2    | 2.844        |
| 4NC2   | B_ARG_66  | NH2    | B_ASP_89  | OD1    | 3.155        |
| 4NC2   | B_ARG_66  | NH2    | B_ASP_89  | OD2    | 3.294        |
| 4NC2   | B_LYS_86  | NZ     | B_GLU_88  | OE1    | 3.812        |
| 4NC2   | B_ARG_104 | NH2    | B_ASP_102 | OD1    | 3.825        |
| 4NC2   | B_ARG_104 | NH2    | B_ASP_102 | OD2    | 2.662        |

Table 583: 4NC2-specific salt bridging networks analysis. In this table, a PDB file is specified with a four-letter PDB ID, except that the names of the PDB files corresponding to the single NMR structural model split from the NMR ensemble is specified with a four-letter PDB ID in addition to a hyphen followed by the single NMR structural model numeric ID, the residue naming scheme is **Chain ID\_residue name\_residue number**,  $\angle ADH$  represents the angle formed by acceptor (A), donor (D) and hydrogen (H) ( $\angle ADH$ ).

| PDB ID | Residue A | Atom A | Residue B | Atom B | Distance (Å) |
|--------|-----------|--------|-----------|--------|--------------|
| 4NGH   | L_ARG_54  | NH2    | L_ASP_60  | OD1    | 3.463        |
| 4NGH   | L_ARG_61  | NH1    | L_GLU_79  | OE1    | 3.684        |
| 4NGH   | L_ARG_61  | NH2    | L_GLU_81  | OE2    | 3.634        |
| 4NGH   | L_ARG_61  | NH2    | L_ASP_82  | OD1    | 2.877        |
| 4NGH   | L_ARG_61  | NH2    | L_ASP_82  | OD2    | 3.482        |
| 4NGH   | L_LYS_188 | NZ     | L_ASP_185 | OD2    | 3.961        |
| 4NGH   | L_HIS_189 | ND1    | L_ASP_151 | OD2    | 3.057        |
| 4NGH   | H_ARG_38  | NH1    | H_ASP_86  | OD1    | 3.532        |
| 4NGH   | H_ARG_38  | NH2    | H_ASP_86  | OD1    | 2.824        |
| 4NGH   | H_ARG_62  | NH2    | H_GLU_46  | OE1    | 2.983        |
| 4NGH   | H_ARG_66  | NH1    | H_ASP_86  | OD1    | 3.419        |
| 4NGH   | H_ARG_66  | NH1    | H_ASP_86  | OD2    | 2.324        |
| 4NGH   | H_ARG_66  | NH2    | H_ASP_86  | OD1    | 3.466        |
| 4NGH   | H_ARG_66  | NH2    | H_ASP_86  | OD2    | 3.699        |
| 4NGH   | H_LYS_145 | NZ     | H_ASP_146 | OD1    | 3.519        |
| 4NGH   | H_LYS_145 | NZ     | H_ASP_146 | OD2    | 3.560        |
| 4NGH   | H_LYS_228 | NZ     | L_ASP_122 | OD1    | 3.887        |

Table 584: 4NGH-specific salt bridging networks analysis. In this table, a PDB file is specified with a four-letter PDB ID, except that the names of the PDB files corresponding to the single NMR structural model split from the NMR ensemble is specified with a four-letter PDB ID in addition to a hyphen followed by the single NMR structural model numeric ID, the residue naming scheme is **Chain ID\_residue name\_residue number**,  $\angle ADH$  represents the angle formed by acceptor (A), donor (D) and hydrogen (H) ( $\angle ADH$ ).



| PDB ID | Residue A | Atom A | Residue B | Atom B | Distance (Å) |
|--------|-----------|--------|-----------|--------|--------------|
| 4NHC   | L_ARG_24  | NH1    | L_ASP_70  | OD2    | 3.488        |
| 4NHC   | L_ARG_24  | NH2    | L_ASP_70  | OD1    | 2.813        |
| 4NHC   | L_ARG_24  | NH2    | L_ASP_70  | OD2    | 3.633        |
| 4NHC   | L_ARG_61  | NH1    | L_GLU_81  | OE2    | 3.514        |
| 4NHC   | L_ARG_61  | NH2    | L_GLU_81  | OE2    | 3.347        |
| 4NHC   | L_ARG_61  | NH2    | L_ASP_82  | OD1    | 2.882        |
| 4NHC   | L_ARG_61  | NH2    | L_ASP_82  | OD2    | 3.443        |
| 4NHC   | L_LYS_103 | NZ     | L_GLU_165 | OE1    | 3.841        |
| 4NHC   | L_HIS_189 | ND1    | L_ASP_151 | OD2    | 3.138        |
| 4NHC   | H_ARG_38  | NH1    | H_GLU_46  | OE2    | 3.463        |
| 4NHC   | H_ARG_38  | NH1    | H_ASP_86  | OD1    | 3.758        |
| 4NHC   | H_ARG_38  | NH2    | H_ASP_86  | OD1    | 2.917        |
| 4NHC   | H_ARG_62  | NH1    | H_GLU_46  | OE1    | 2.931        |
| 4NHC   | H_ARG_62  | NH1    | H_GLU_46  | OE2    | 3.111        |
| 4NHC   | H_ARG_66  | NH1    | H_ASP_86  | OD1    | 2.881        |
| 4NHC   | H_ARG_66  | NH1    | H_ASP_86  | OD2    | 2.433        |
| 4NHC   | H_LYS_145 | NZ     | H_ASP_146 | OD1    | 3.579        |
| 4NHC   | H_LYS_145 | NZ     | H_ASP_146 | OD2    | 3.804        |
| 4NHC   | H_LYS_222 | NZ     | H_GLU_226 | OE1    | 3.793        |

Table 585: 4NHC-specific salt bridging networks analysis. In this table, a PDB file is specified with a four-letter PDB ID, except that the names of the PDB files corresponding to the single NMR structural model split from the NMR ensemble is specified with a four-letter PDB ID in addition to a hyphen followed by the single NMR structural model numeric ID, the residue naming scheme is **Chain ID** **residue name** **residue number**,  $\angle ADH$  represents the angle formed by acceptor (A), donor (D) and hydrogen (H) ( $\angle ADH$ ).

| PDB ID | Residue A | Atom A | Residue B | Atom B | Distance (Å) |
|--------|-----------|--------|-----------|--------|--------------|
| 4NIK   | A_ARG_35  | NH2    | A_ASP_29  | OD2    | 3.085        |
| 4NIK   | A_ARG_41  | NH2    | A_ASP_70  | OD2    | 3.597        |
| 4NIK   | A_ARG_145 | NH1    | A_ASP_136 | OD2    | 2.773        |
| 4NIK   | A_LYS_153 | NZ     | B_ASP_104 | OD1    | 3.730        |
| 4NIK   | A_LYS_153 | NZ     | B_ASP_104 | OD2    | 2.794        |
| 4NIK   | A_LYS_153 | NZ     | B_GLU_186 | OE2    | 2.639        |
| 4NIK   | A_LYS_189 | NZ     | A_GLU_186 | OE2    | 3.854        |
| 4NIK   | A_LYS_206 | NZ     | A_GLU_204 | OE1    | 3.160        |
| 4NIK   | A_LYS_213 | NZ     | A_ASP_181 | OD1    | 3.738        |
| 4NIK   | A_LYS_221 | NZ     | A_GLU_225 | OE1    | 3.992        |
| 4NIK   | B_ARG_40  | NH1    | B_ASP_92  | OD1    | 3.000        |
| 4NIK   | B_ARG_40  | NH2    | B_GLU_48  | OE1    | 3.129        |
| 4NIK   | B_ARG_40  | NH2    | B_ASP_92  | OD1    | 3.930        |
| 4NIK   | B_ARG_69  | NH1    | B_ASP_92  | OD2    | 3.600        |
| 4NIK   | B_ARG_69  | NH2    | B_ASP_92  | OD1    | 3.146        |
| 4NIK   | B_ARG_69  | NH2    | B_ASP_92  | OD2    | 2.929        |
| 4NIK   | B_ARG_100 | NH2    | B_ASP_107 | OD2    | 2.770        |
| 4NIK   | B_ARG_197 | NH1    | B_ASP_218 | OD1    | 2.833        |
| 4NIK   | B_ARG_197 | NH1    | B_ASP_218 | OD2    | 3.035        |
| 4NIK   | B_LYS_202 | NZ     | B_ASP_187 | OD1    | 2.979        |
| 4NIK   | B_LYS_202 | NZ     | B_ASP_187 | OD2    | 3.172        |

Table 586: 4NIK-specific salt bridging networks analysis. In this table, a PDB file is specified with a four-letter PDB ID, except that the names of the PDB files corresponding to the single NMR structural model split from the NMR ensemble is specified with a four-letter PDB ID in addition to a hyphen followed by the single NMR structural model numeric ID, the residue naming scheme is **Chain ID\_residue name\_residue number**,  $\angle ADH$  represents the angle formed by acceptor (A), donor (D) and hydrogen (H) ( $\angle ADH$ ).

| PDB ID | Residue A | Atom A | Residue B | Atom B | Distance (Å) |
|--------|-----------|--------|-----------|--------|--------------|
| 4NZR   | H_ARG_38  | NH1    | H_ASP_86  | OD1    | 2.731        |
| 4NZR   | H_ARG_38  | NH2    | H_GLU_46  | OE1    | 2.782        |
| 4NZR   | H_ARG_38  | NH2    | H_ASP_86  | OD1    | 3.585        |
| 4NZR   | H_LYS_43  | NZ     | H_GLU_46  | OE1    | 3.101        |
| 4NZR   | H_HIS_52  | NE2    | H_ASP_31G | OD1    | 2.604        |
| 4NZR   | H_LYS_60  | NZ     | H_GLU_46  | OE2    | 3.047        |
| 4NZR   | H_LYS_60  | NZ     | L_GLU_1   | OE1    | 3.647        |
| 4NZR   | H_ARG_66  | NH1    | H_ASP_86  | OD1    | 3.620        |
| 4NZR   | H_ARG_66  | NH1    | H_ASP_86  | OD2    | 2.979        |
| 4NZR   | H_ARG_66  | NH2    | H_ASP_86  | OD1    | 3.027        |
| 4NZR   | H_ARG_66  | NH2    | H_ASP_86  | OD2    | 3.661        |
| 4NZR   | H_ARG_94  | NH2    | H_ASP_101 | OD1    | 3.578        |
| 4NZR   | H_ARG_94  | NH2    | H_ASP_101 | OD2    | 2.728        |
| 4NZR   | H_ARG_96  | NH2    | H_ASP_101 | OD2    | 2.950        |
| 4NZR   | H_HIS_97  | NE2    | L_GLU_50  | OE2    | 3.635        |
| 4NZR   | H_HIS_98  | NE2    | L_GLU_50  | OE1    | 2.875        |
| 4NZR   | H_HIS_172 | NE2    | L_ASP_167 | OD2    | 3.398        |
| 4NZR   | H_LYS_221 | NZ     | L_GLU_123 | OE2    | 2.989        |
| 4NZR   | H_ARG_222 | NH2    | H_GLU_226 | OE1    | 3.956        |
| 4NZR   | H_ARG_222 | NH2    | H_GLU_226 | OE2    | 3.389        |
| 4NZR   | L_ARG_24  | NH2    | L_GLU_70  | OE1    | 3.307        |
| 4NZR   | L_ARG_61  | NH1    | L_ASP_82  | OD1    | 3.803        |
| 4NZR   | L_ARG_61  | NH1    | L_ASP_82  | OD2    | 2.705        |
| 4NZR   | L_ARG_61  | NH2    | L_ASP_82  | OD1    | 2.855        |
| 4NZR   | L_ARG_61  | NH2    | L_ASP_82  | OD2    | 3.226        |
| 4NZR   | L_LYS_103 | NZ     | L_GLU_165 | OE1    | 3.228        |
| 4NZR   | L_LYS_183 | NZ     | L_GLU_187 | OE1    | 3.271        |
| 4NZR   | L_LYS_183 | NZ     | L_GLU_187 | OE2    | 3.181        |
| 4NZR   | L_LYS_188 | NZ     | L_ASP_185 | OD1    | 3.734        |
| 4NZR   | L_HIS_189 | ND1    | L_ASP_151 | OD2    | 2.848        |
| 4NZR   | M_LYS_114 | NZ     | L_GLU_17  | OE1    | 3.119        |
| 4NZR   | M_LYS_130 | NZ     | M_ASP_87  | OD2    | 3.899        |
| 4NZR   | M_LYS_141 | NZ     | M_GLU_124 | OE1    | 3.708        |
| 4NZR   | M_LYS_141 | NZ     | M_GLU_124 | OE2    | 2.958        |
| 4NZR   | M_ARG_167 | NH2    | M_ASP_339 | OD1    | 2.843        |
| 4NZR   | M_LYS_218 | NZ     | M_GLU_261 | OE1    | 3.674        |
| 4NZR   | M_LYS_218 | NZ     | M_GLU_261 | OE2    | 3.033        |
| 4NZR   | M_LYS_242 | NZ     | M_GLU_261 | OE1    | 2.962        |
| 4NZR   | M_LYS_249 | NZ     | M_ASP_250 | OD1    | 2.926        |
| 4NZR   | M_LYS_249 | NZ     | M_ASP_250 | OD2    | 3.476        |
| 4NZR   | M_ARG_269 | NH1    | M_ASP_217 | OD2    | 2.818        |
| 4NZR   | M_ARG_269 | NH2    | M_ASP_217 | OD2    | 3.169        |
| 4NZR   | M_LYS_289 | NZ     | M_GLU_311 | OE1    | 2.888        |
| 4NZR   | M_LYS_289 | NZ     | M_GLU_313 | OE1    | 3.192        |
| 4NZR   | M_LYS_289 | NZ     | M_GLU_313 | OE2    | 2.704        |
| 4NZR   | M_LYS_370 | NZ     | M_GLU_420 | OE1    | 2.609        |
| 4NZR   | M_ARG_380 | NH1    | M_GLU_383 | OE1    | 2.654        |
| 4NZR   | M_ARG_380 | NH1    | M_GLU_383 | OE2    | 3.072        |
| 4NZR   | M_ARG_381 | NH2    | M_GLU_162 | OE1    | 2.997        |
| 4NZR   | M_ARG_384 | NH2    | L_GLU_81  | OE1    | 3.444        |
| 4NZR   | M_ARG_384 | NH2    | L_GLU_81  | OE2    | 3.239        |
| 4NZR   | M_LYS_397 | NZ     | M_ASP_396 | OD1    | 2.896        |
| 4NZR   | M_LYS_397 | NZ     | M_ASP_396 | OD2    | 3.739        |
| 4NZR   | M_ARG_416 | NH1    | M_GLU_464 | OE1    | 3.487        |
| 4NZR   | M_ARG_416 | NH1    | M_GLU_464 | OE2    | 2.684        |
| 4NZR   | M_ARG_416 | NH2    | M_ASP_412 | OD1    | 3.736        |
| 4NZR   | M_ARG_416 | NH2    | M_GLU_464 | OE1    | 2.883        |

|      |           |     |           |     |       |
|------|-----------|-----|-----------|-----|-------|
| 4NZR | M_ARG_416 | NH2 | M_GLU_464 | OE2 | 3.634 |
| 4NZR | M_LYS_419 | NZ  | M_GLU_451 | OE2 | 3.987 |
| 4NZR | M_ARG_430 | NH1 | M_ASP_411 | OD1 | 2.838 |
| 4NZR | M_ARG_430 | NH1 | M_ASP_411 | OD2 | 3.179 |
| 4NZR | M_ARG_430 | NH2 | M_ASP_408 | OD1 | 3.554 |
| 4NZR | M_ARG_430 | NH2 | M_ASP_411 | OD1 | 3.944 |
| 4NZR | M_ARG_430 | NH2 | M_ASP_411 | OD2 | 2.828 |
| 4NZR | M_ARG_438 | NH2 | M_ASP_396 | OD2 | 3.613 |
| 4NZR | M_ARG_454 | NH1 | M_ASP_412 | OD1 | 2.790 |
| 4NZR | M_ARG_454 | NH2 | M_ASP_412 | OD1 | 3.325 |
| 4NZR | M_ARG_457 | NH1 | H_ASP_31E | OD1 | 2.958 |
| 4NZR | M_ARG_457 | NH1 | H_ASP_31E | OD2 | 3.096 |
| 4NZR | M_ARG_457 | NH2 | H_ASP_31E | OD1 | 3.746 |
| 4NZR | M_ARG_457 | NH2 | H_ASP_31E | OD2 | 2.554 |

Table 587: 4NZR-specific salt bridging networks analysis. In this table, a PDB file is specified with a four-letter PDB ID, except that the names of the PDB files corresponding to the single NMR structural model split from the NMR ensemble is specified with a four-letter PDB ID in addition to a hyphen followed by the single NMR structural model numeric ID, the residue naming scheme is **Chain ID\_residue name\_residue number**,  $\angle ADH$  represents the angle formed by acceptor (A), donor (D) and hydrogen (H) ( $\angle ADH$ ).

| PDB ID | Residue A | Atom A | Residue B | Atom B | Distance (Å) |
|--------|-----------|--------|-----------|--------|--------------|
| 4NZZ   | M_ARG_99  | NH1    | M_GLU_162 | OE1    | 3.515        |
| 4NZZ   | M_ARG_99  | NH1    | M_GLU_162 | OE2    | 2.816        |
| 4NZZ   | M_ARG_99  | NH2    | M_GLU_162 | OE1    | 2.782        |
| 4NZZ   | M_ARG_99  | NH2    | M_GLU_162 | OE2    | 3.647        |
| 4NZZ   | M_ARG_99  | NH2    | L ASP_60  | OD1    | 3.096        |
| 4NZZ   | M_LYS_130 | NZ     | M_GLU_85  | OE2    | 3.790        |
| 4NZZ   | M_LYS_141 | NZ     | M_GLU_124 | OE1    | 3.986        |
| 4NZZ   | M_LYS_141 | NZ     | M_GLU_124 | OE2    | 3.262        |
| 4NZZ   | M_ARG_167 | NH2    | M ASP_339 | OD1    | 3.102        |
| 4NZZ   | M_ARG_185 | NH2    | M_GLU_313 | OE2    | 3.948        |
| 4NZZ   | M_ARG_192 | NH2    | M ASP_189 | OD1    | 3.955        |
| 4NZZ   | M_LYS_218 | NZ     | M_GLU_261 | OE1    | 3.101        |
| 4NZZ   | M_LYS_218 | NZ     | M_GLU_261 | OE2    | 2.614        |
| 4NZZ   | M_LYS_242 | NZ     | M_GLU_261 | OE1    | 2.807        |
| 4NZZ   | M_LYS_249 | NZ     | M ASP_250 | OD1    | 3.040        |
| 4NZZ   | M_LYS_249 | NZ     | M ASP_250 | OD2    | 3.872        |
| 4NZZ   | M_LYS_255 | NZ     | M ASP_259 | OD1    | 3.504        |
| 4NZZ   | M_LYS_255 | NZ     | M ASP_259 | OD2    | 2.413        |
| 4NZZ   | M_LYS_289 | NZ     | M_GLU_311 | OE1    | 2.933        |
| 4NZZ   | M_LYS_289 | NZ     | M_GLU_313 | OE1    | 3.576        |
| 4NZZ   | M_LYS_289 | NZ     | M_GLU_313 | OE2    | 2.891        |
| 4NZZ   | M_LYS_370 | NZ     | M_GLU_420 | OE1    | 2.990        |
| 4NZZ   | M_ARG_380 | NH1    | M_GLU_383 | OE1    | 2.676        |
| 4NZZ   | M_ARG_380 | NH1    | M_GLU_383 | OE2    | 2.970        |
| 4NZZ   | M_ARG_381 | NH2    | M_GLU_162 | OE1    | 3.002        |
| 4NZZ   | M_ARG_384 | NH2    | L_GLU_81  | OE1    | 3.193        |
| 4NZZ   | M_ARG_384 | NH2    | L_GLU_81  | OE2    | 3.684        |
| 4NZZ   | M_LYS_397 | NZ     | M ASP_396 | OD1    | 2.602        |
| 4NZZ   | M_LYS_397 | NZ     | M ASP_396 | OD2    | 3.737        |
| 4NZZ   | M_ARG_416 | NH2    | M ASP_412 | OD2    | 3.317        |
| 4NZZ   | M_LYS_419 | NZ     | M_GLU_451 | OE2    | 3.820        |
| 4NZZ   | M_ARG_430 | NH1    | M ASP_408 | OD1    | 3.883        |
| 4NZZ   | M_ARG_430 | NH2    | M ASP_408 | OD1    | 2.461        |
| 4NZZ   | M_ARG_430 | NH2    | M ASP_411 | OD2    | 3.064        |
| 4NZZ   | M_ARG_438 | NH1    | M_GLU_426 | OE1    | 2.584        |
| 4NZZ   | M_ARG_438 | NH2    | M_GLU_426 | OE1    | 3.586        |
| 4NZZ   | M_ARG_438 | NH2    | M_GLU_427 | OE1    | 3.398        |
| 4NZZ   | M_ARG_454 | NH2    | M ASP_408 | OD1    | 3.446        |
| 4NZZ   | M_ARG_454 | NH2    | M ASP_411 | OD2    | 3.646        |
| 4NZZ   | H_LYS_19  | NZ     | H_GLU_81  | OE1    | 3.595        |
| 4NZZ   | H_ARG_38  | NH1    | H ASP_86  | OD1    | 2.816        |
| 4NZZ   | H_ARG_38  | NH2    | H ASP_86  | OD1    | 3.377        |
| 4NZZ   | H_LYS_62  | NZ     | H ASP_46  | OD1    | 3.175        |
| 4NZZ   | H_LYS_62  | NZ     | H ASP_46  | OD2    | 3.992        |
| 4NZZ   | H_ARG_66  | NH1    | H ASP_86  | OD2    | 3.140        |
| 4NZZ   | H_ARG_66  | NH2    | H ASP_86  | OD1    | 2.815        |
| 4NZZ   | H_ARG_66  | NH2    | H ASP_86  | OD2    | 3.193        |
| 4NZZ   | H_LYS_145 | NZ     | L_GLU_124 | OE2    | 2.541        |
| 4NZZ   | H_LYS_218 | NZ     | H ASP_220 | OD2    | 3.664        |
| 4NZZ   | L_ARG_31  | NH1    | L ASP_93  | OD1    | 3.320        |
| 4NZZ   | L_ARG_31  | NH1    | L ASP_93  | OD2    | 2.823        |
| 4NZZ   | L_ARG_61  | NH1    | L ASP_82  | OD1    | 3.965        |
| 4NZZ   | L_ARG_61  | NH1    | L ASP_82  | OD2    | 2.961        |
| 4NZZ   | L_ARG_61  | NH2    | L ASP_82  | OD1    | 2.857        |
| 4NZZ   | L_ARG_61  | NH2    | L ASP_82  | OD2    | 3.259        |
| 4NZZ   | L_LYS_149 | NZ     | L_GLU_206 | OE1    | 3.814        |
| 4NZZ   | L_LYS_166 | NZ     | L_GLU_83  | OE2    | 3.236        |

---

Table 588: 4NZZ-specific salt bridging networks analysis. In this table, a PDB file is specified with a four-letter PDB ID, except that the names of the PDB files corresponding to the single NMR structural model split from the NMR ensemble is specified with a four-letter PDB ID in addition to a hyphen followed by the single NMR structural model numeric ID, the residue naming scheme is **Chain ID\_residue name\_residue number**,  $\angle ADH$  represents the angle formed by acceptor (A), donor (D) and hydrogen (H) ( $\angle ADH$ ).

| PDB ID | Residue A  | Atom A | Residue B | Atom B | Distance (Å) |
|--------|------------|--------|-----------|--------|--------------|
| 4NZU   | L_ARG_61   | NH2    | L_GLU_81  | OE2    | 3.339        |
| 4NZU   | L_ARG_61   | NH2    | L_ASP_82  | OD1    | 2.846        |
| 4NZU   | L_ARG_61   | NH2    | L_ASP_82  | OD2    | 3.553        |
| 4NZU   | L_HIS_90   | NE2    | L_ASP_93  | OD1    | 3.539        |
| 4NZU   | L_LYS_149  | NZ     | L_GLU_195 | OE1    | 2.806        |
| 4NZU   | L_LYS_169  | NZ     | L_ASP_170 | OD2    | 3.815        |
| 4NZU   | L_HIS_189  | ND1    | L_ASP_151 | OD2    | 3.001        |
| 4NZU   | L_HIS_189  | NE2    | L_ASP_185 | OD1    | 3.093        |
| 4NZU   | L_ARG_211  | NH1    | L_GLU_187 | OE1    | 3.760        |
| 4NZU   | H_ARG_38   | NH1    | H_ASP_86  | OD1    | 2.872        |
| 4NZU   | H_ARG_38   | NH2    | H_GLU_46  | OE2    | 3.007        |
| 4NZU   | H_ARG_38   | NH2    | H_ASP_86  | OD1    | 3.843        |
| 4NZU   | H_ARG_66   | NH1    | H_ASP_86  | OD1    | 3.832        |
| 4NZU   | H_ARG_66   | NH1    | H_ASP_86  | OD2    | 2.798        |
| 4NZU   | H_ARG_66   | NH2    | H_ASP_86  | OD1    | 3.266        |
| 4NZU   | H_ARG_66   | NH2    | H_ASP_86  | OD2    | 3.679        |
| 4NZU   | H_ARG_94   | NH2    | H_ASP_97  | OD1    | 2.847        |
| 4NZU   | H_LYS_100E | NZ     | L_ASP_50  | OD1    | 3.991        |
| 4NZU   | H_LYS_100E | NZ     | L_ASP_50  | OD2    | 2.752        |
| 4NZU   | H_LYS_145  | NZ     | H_ASP_146 | OD1    | 3.213        |
| 4NZU   | H_LYS_145  | NZ     | H_ASP_146 | OD2    | 3.743        |
| 4NZU   | H_LYS_218  | NZ     | H_ASP_220 | OD1    | 3.972        |
| 4NZU   | H_LYS_218  | NZ     | H_ASP_220 | OD2    | 3.728        |
| 4NZU   | H_LYS_221  | NZ     | L_GLU_123 | OE2    | 2.899        |

Table 589: 4NZU-specific salt bridging networks analysis. In this table, a PDB file is specified with a four-letter PDB ID, except that the names of the PDB files corresponding to the single NMR structural model split from the NMR ensemble is specified with a four-letter PDB ID in addition to a hyphen followed by the single NMR structural model numeric ID, the residue naming scheme is **Chain ID\_residue name\_residue number**,  $\angle ADH$  represents the angle formed by acceptor (A), donor (D) and hydrogen (H) ( $\angle ADH$ ).

| PDB ID | Residue A  | Atom A | Residue B | Atom B | Distance (Å) |
|--------|------------|--------|-----------|--------|--------------|
| 4O5L   | L_ARG_61   | NH1    | L_ASP_82  | OD1    | 3.592        |
| 4O5L   | L_ARG_61   | NH1    | L_ASP_82  | OD2    | 2.774        |
| 4O5L   | L_ARG_61   | NH2    | L_ASP_82  | OD1    | 2.915        |
| 4O5L   | L_ARG_61   | NH2    | L_ASP_82  | OD2    | 3.469        |
| 4O5L   | H_LYS_12   | NZ     | H_GLU_10  | OE2    | 3.928        |
| 4O5L   | H_ARG_38   | NH1    | H_ASP_86  | OD1    | 2.874        |
| 4O5L   | H_ARG_38   | NH2    | H_GLU_46  | OE1    | 3.001        |
| 4O5L   | H_ARG_38   | NH2    | H_ASP_86  | OD1    | 3.839        |
| 4O5L   | H_LYS_62   | NZ     | H_GLU_46  | OE1    | 3.697        |
| 4O5L   | H_LYS_62   | NZ     | H_GLU_46  | OE2    | 2.608        |
| 4O5L   | H_ARG_66   | NH1    | H_ASP_86  | OD1    | 3.710        |
| 4O5L   | H_ARG_66   | NH1    | H_ASP_86  | OD2    | 2.867        |
| 4O5L   | H_ARG_66   | NH2    | H_ASP_86  | OD1    | 2.964        |
| 4O5L   | H_ARG_66   | NH2    | H_ASP_86  | OD2    | 3.444        |
| 4O5L   | H_LYS_100I | NZ     | L_ASP_93  | OD1    | 2.723        |
| 4O5L   | H_LYS_100I | NZ     | L_ASP_93  | OD2    | 3.455        |
| 4O5L   | H_LYS_210  | NZ     | H_GLU_212 | OE2    | 3.158        |

Table 590: 4O5L-specific salt bridging networks analysis. In this table, a PDB file is specified with a four-letter PDB ID, except that the names of the PDB files corresponding to the single NMR structural model split from the NMR ensemble is specified with a four-letter PDB ID in addition to a hyphen followed by the single NMR structural model numeric ID, the residue naming scheme is **Chain ID\_residue name\_residue number**,  $\angle ADH$  represents the angle formed by acceptor (A), donor (D) and hydrogen (H) ( $\angle ADH$ ).



| PDB ID | Residue A | Atom A | Residue B  | Atom B | Distance (Å) |
|--------|-----------|--------|------------|--------|--------------|
| 4OLU   | G.HIS.66  | ND1    | G.GLU.64   | OE1    | 3.959        |
| 4OLU   | G.HIS.66  | ND1    | G.GLU.64   | OE2    | 2.779        |
| 4OLU   | G.LYS.97  | NZ     | G.GLU.275  | OE2    | 3.740        |
| 4OLU   | G.LYS.97  | NZ     | H.ASP.100B | OD1    | 3.513        |
| 4OLU   | G.LYS.97  | NZ     | H.ASP.100B | OD2    | 2.385        |
| 4OLU   | G.LYS.207 | NZ     | G.GLU.381  | OE1    | 3.549        |
| 4OLU   | G.LYS.207 | NZ     | G.GLU.381  | OE2    | 2.955        |
| 4OLU   | G.HIS.249 | NE2    | G.GLU.482  | OE1    | 2.876        |
| 4OLU   | G.LYS.282 | NZ     | G.GLU.275  | OE1    | 3.870        |
| 4OLU   | G.LYS.343 | NZ     | G.GLU.347  | OE2    | 2.649        |
| 4OLU   | G.LYS.348 | NZ     | G.GLU.269  | OE2    | 3.261        |
| 4OLU   | G.LYS.350 | NZ     | G.GLU.347  | OE2    | 3.965        |
| 4OLU   | G.LYS.357 | NZ     | G.GLU.466  | OE2    | 3.506        |
| 4OLU   | G.ARG.379 | NH2    | G.ASP.211  | OD1    | 3.811        |
| 4OLU   | G.ARG.456 | NH1    | G.GLU.466  | OE1    | 3.682        |
| 4OLU   | G.ARG.469 | NH2    | G.ASP.457  | OD1    | 3.894        |
| 4OLU   | G.ARG.469 | NH2    | G.ASP.457  | OD2    | 2.873        |
| 4OLU   | G.LYS.476 | NZ     | G.GLU.102  | OE1    | 2.812        |
| 4OLU   | G.LYS.476 | NZ     | G.GLU.102  | OE2    | 3.887        |
| 4OLU   | G.ARG.480 | NH1    | G.ASP.477  | OD1    | 2.835        |
| 4OLU   | G.LYS.487 | NZ     | G.ASP.47   | OD1    | 2.977        |
| 4OLU   | G.LYS.487 | NZ     | G.ASP.47   | OD2    | 3.556        |
| 4OLU   | G.LYS.487 | NZ     | G.GLU.91   | OE1    | 2.775        |
| 4OLU   | H.ARG.19  | NH2    | H.GLU.81   | OE1    | 3.190        |
| 4OLU   | H.ARG.38  | NH1    | H.ASP.86   | OD1    | 2.943        |
| 4OLU   | H.ARG.38  | NH2    | H.GLU.46   | OE1    | 2.821        |
| 4OLU   | H.ARG.38  | NH2    | H.GLU.46   | OE2    | 3.765        |
| 4OLU   | H.ARG.38  | NH2    | H.ASP.86   | OD1    | 3.966        |
| 4OLU   | H.ARG.61  | NH1    | G.GLU.466  | OE1    | 2.734        |
| 4OLU   | H.ARG.66  | NH2    | H.ASP.86   | OD1    | 3.375        |
| 4OLU   | H.ARG.66  | NH2    | H.ASP.86   | OD2    | 3.135        |
| 4OLU   | H.ARG.71  | NH1    | G.ASP.368  | OD1    | 3.753        |
| 4OLU   | H.ARG.71  | NH1    | G.ASP.368  | OD2    | 2.863        |
| 4OLU   | H.ARG.71  | NH2    | G.ASP.368  | OD1    | 3.092        |
| 4OLU   | H.ARG.71  | NH2    | G.ASP.368  | OD2    | 3.692        |
| 4OLU   | H.ARG.82A | NH1    | H.GLU.81   | OE2    | 3.267        |
| 4OLU   | H.HIS.102 | NE2    | H.GLU.101  | OE1    | 3.618        |
| 4OLU   | H.LYS.143 | NZ     | H.ASP.144  | OD1    | 3.446        |
| 4OLU   | H.LYS.209 | NZ     | L.GLU.125  | OE1    | 3.927        |
| 4OLU   | H.LYS.209 | NZ     | L.GLU.125  | OE2    | 3.166        |
| 4OLU   | H.LYS.210 | NZ     | H.GLU.212  | OE1    | 3.680        |
| 4OLU   | L.ARG.24  | NH1    | L.ASP.70   | OD1    | 3.438        |
| 4OLU   | L.ARG.24  | NH1    | L.ASP.70   | OD2    | 3.910        |
| 4OLU   | L.ARG.24  | NH2    | L.ASP.70   | OD1    | 3.381        |
| 4OLU   | L.ARG.24  | NH2    | L.ASP.70   | OD2    | 3.367        |
| 4OLU   | L.ARG.61  | NH1    | L.ASP.82   | OD1    | 3.876        |
| 4OLU   | L.ARG.61  | NH1    | L.ASP.82   | OD2    | 2.552        |
| 4OLU   | L.ARG.61  | NH2    | L.GLU.79   | OE1    | 3.652        |
| 4OLU   | L.ARG.61  | NH2    | L.GLU.79   | OE2    | 3.968        |
| 4OLU   | L.ARG.61  | NH2    | L.ASP.82   | OD1    | 3.189        |
| 4OLU   | L.ARG.61  | NH2    | L.ASP.82   | OD2    | 3.276        |
| 4OLU   | L.LYS.109 | NZ     | L.GLU.17   | OE2    | 3.752        |
| 4OLU   | L.LYS.151 | NZ     | L.GLU.197  | OE1    | 3.524        |

---

Table 591: 4OLU-specific salt bridging networks analysis. In this table, a PDB file is specified with a four-letter PDB ID, except that the names of the PDB files corresponding to the single NMR structural model split from the NMR ensemble is specified with a four-letter PDB ID in addition to a hyphen followed by the single NMR structural model numeric ID, the residue naming scheme is **Chain ID\_residue name\_residue number**,  $\angle ADH$  represents the angle formed by acceptor (A), donor (D) and hydrogen (H) ( $\angle ADH$ ).

| PDB ID | Residue A | Atom A | Residue B  | Atom B | Distance (Å) |
|--------|-----------|--------|------------|--------|--------------|
| 4OLV   | G.HIS.66  | ND1    | G.GLU.64   | OE1    | 3.978        |
| 4OLV   | G.HIS.66  | ND1    | G.GLU.64   | OE2    | 2.916        |
| 4OLV   | G.LYS.97  | NZ     | G.GLU.275  | OE1    | 3.722        |
| 4OLV   | G.LYS.97  | NZ     | G.GLU.275  | OE2    | 2.587        |
| 4OLV   | G.LYS.97  | NZ     | H.ASP.100B | OD1    | 3.067        |
| 4OLV   | G.LYS.97  | NZ     | H.ASP.100B | OD2    | 2.942        |
| 4OLV   | G.LYS.207 | NZ     | G.GLU.381  | OE1    | 3.681        |
| 4OLV   | G.LYS.207 | NZ     | G.GLU.381  | OE2    | 2.814        |
| 4OLV   | G.HIS.249 | NE2    | G.GLU.482  | OE1    | 2.670        |
| 4OLV   | G.LYS.282 | NZ     | G.GLU.275  | OE1    | 3.553        |
| 4OLV   | G.LYS.343 | NZ     | G.GLU.347  | OE2    | 2.439        |
| 4OLV   | G.LYS.348 | NZ     | G.GLU.269  | OE2    | 3.240        |
| 4OLV   | G.LYS.357 | NZ     | G.GLU.466  | OE2    | 3.394        |
| 4OLV   | G.ARG.456 | NH1    | G.GLU.466  | OE1    | 3.770        |
| 4OLV   | G.ARG.469 | NH2    | G.ASP.457  | OD2    | 3.028        |
| 4OLV   | G.LYS.476 | NZ     | G.GLU.102  | OE1    | 2.934        |
| 4OLV   | G.LYS.476 | NZ     | G.GLU.102  | OE2    | 3.534        |
| 4OLV   | G.ARG.480 | NH1    | G.ASP.477  | OD1    | 2.701        |
| 4OLV   | G.ARG.480 | NH2    | G.GLU.102  | OE2    | 3.998        |
| 4OLV   | G.LYS.487 | NZ     | G.ASP.47   | OD1    | 3.089        |
| 4OLV   | G.LYS.487 | NZ     | G.ASP.47   | OD2    | 3.641        |
| 4OLV   | G.LYS.487 | NZ     | G.GLU.91   | OE1    | 2.653        |
| 4OLV   | H.ARG.19  | NH2    | H.GLU.81   | OE1    | 3.551        |
| 4OLV   | H.ARG.38  | NH1    | H.ASP.86   | OD1    | 2.917        |
| 4OLV   | H.ARG.38  | NH2    | H.GLU.46   | OE1    | 2.756        |
| 4OLV   | H.ARG.38  | NH2    | H.GLU.46   | OE2    | 3.739        |
| 4OLV   | H.ARG.38  | NH2    | H.ASP.86   | OD1    | 3.920        |
| 4OLV   | H.ARG.61  | NH1    | G.GLU.466  | OE1    | 2.769        |
| 4OLV   | H.ARG.66  | NH1    | H.ASP.86   | OD1    | 3.961        |
| 4OLV   | H.ARG.66  | NH2    | H.ASP.86   | OD1    | 3.054        |
| 4OLV   | H.ARG.66  | NH2    | H.ASP.86   | OD2    | 2.735        |
| 4OLV   | H.ARG.71  | NH1    | G.ASP.368  | OD1    | 3.700        |
| 4OLV   | H.ARG.71  | NH1    | G.ASP.368  | OD2    | 2.815        |
| 4OLV   | H.ARG.71  | NH2    | G.ASP.368  | OD1    | 3.136        |
| 4OLV   | H.ARG.71  | NH2    | G.ASP.368  | OD2    | 3.717        |
| 4OLV   | H.ARG.82A | NH1    | H.GLU.81   | OE1    | 3.993        |
| 4OLV   | H.ARG.82A | NH1    | H.GLU.81   | OE2    | 3.151        |
| 4OLV   | H.HIS.102 | NE2    | H.GLU.101  | OE1    | 3.357        |
| 4OLV   | H.LYS.209 | NZ     | L.GLU.125  | OE1    | 3.978        |
| 4OLV   | H.LYS.209 | NZ     | L.GLU.125  | OE2    | 3.214        |
| 4OLV   | H.LYS.210 | NZ     | H.GLU.212  | OE1    | 2.484        |
| 4OLV   | L.ARG.24  | NH2    | L.ASP.70   | OD1    | 3.226        |
| 4OLV   | L.ARG.24  | NH2    | L.ASP.70   | OD2    | 2.875        |
| 4OLV   | L.ARG.61  | NH1    | L.ASP.82   | OD1    | 3.700        |
| 4OLV   | L.ARG.61  | NH1    | L.ASP.82   | OD2    | 2.636        |
| 4OLV   | L.ARG.61  | NH2    | L.GLU.79   | OE1    | 3.645        |
| 4OLV   | L.ARG.61  | NH2    | L.GLU.79   | OE2    | 3.982        |
| 4OLV   | L.ARG.61  | NH2    | L.ASP.82   | OD1    | 3.217        |
| 4OLV   | L.ARG.61  | NH2    | L.ASP.82   | OD2    | 3.476        |
| 4OLV   | L.LYS.109 | NZ     | L.GLU.17   | OE2    | 2.752        |
| 4OLV   | L.LYS.151 | NZ     | L.GLU.197  | OE1    | 3.476        |
| 4OLV   | L.LYS.151 | NZ     | L.GLU.197  | OE2    | 3.958        |

---

Table 592: 4OLV-specific salt bridging networks analysis. In this table, a PDB file is specified with a four-letter PDB ID, except that the names of the PDB files corresponding to the single NMR structural model split from the NMR ensemble is specified with a four-letter PDB ID in addition to a hyphen followed by the single NMR structural model numeric ID, the residue naming scheme is **Chain ID\_residue name\_residue number**,  $\angle ADH$  represents the angle formed by acceptor (A), donor (D) and hydrogen (H) ( $\angle ADH$ ).

| PDB ID | Residue A  | Atom A | Residue B  | Atom B | Distance (Å) |
|--------|------------|--------|------------|--------|--------------|
| 4OLW   | G.HIS_66   | ND1    | G.GLU_64   | OE2    | 2.882        |
| 4OLW   | G.LYS_97   | NZ     | G.GLU_275  | OE1    | 3.783        |
| 4OLW   | G.LYS_97   | NZ     | G.GLU_275  | OE2    | 2.873        |
| 4OLW   | G.LYS_97   | NZ     | H.ASP_100B | OD1    | 3.637        |
| 4OLW   | G.LYS_97   | NZ     | H.ASP_100B | OD2    | 3.575        |
| 4OLW   | G.LYS_207  | NZ     | G.GLU_381  | OE1    | 3.441        |
| 4OLW   | G.LYS_207  | NZ     | G.GLU_381  | OE2    | 3.248        |
| 4OLW   | G.HIS_249  | NE2    | G.GLU_482  | OE1    | 2.947        |
| 4OLW   | G.LYS_343  | NZ     | G.GLU_347  | OE2    | 2.661        |
| 4OLW   | G.LYS_348  | NZ     | G.GLU_269  | OE2    | 2.637        |
| 4OLW   | G.LYS_348  | NZ     | G.GLU_351  | OE1    | 2.952        |
| 4OLW   | G.LYS_357  | NZ     | G.GLU_466  | OE2    | 3.143        |
| 4OLW   | G.ARG_379  | NH2    | G.ASP_211  | OD2    | 3.654        |
| 4OLW   | G.ARG_469  | NH2    | G.ASP_457  | OD2    | 3.245        |
| 4OLW   | G.LYS_476  | NZ     | G.GLU_102  | OE1    | 2.987        |
| 4OLW   | G.LYS_476  | NZ     | G.GLU_102  | OE2    | 3.972        |
| 4OLW   | G.ARG_480  | NH1    | G.ASP_477  | OD1    | 2.768        |
| 4OLW   | G.ARG_480  | NH2    | G.GLU_102  | OE2    | 3.752        |
| 4OLW   | G.LYS_487  | NZ     | G.ASP_47   | OD1    | 3.005        |
| 4OLW   | G.LYS_487  | NZ     | G.ASP_47   | OD2    | 3.475        |
| 4OLW   | G.LYS_487  | NZ     | G.GLU_91   | OE1    | 2.972        |
| 4OLW   | H.ARG_19   | NH2    | H.GLU_81   | OE1    | 3.633        |
| 4OLW   | H.ARG_38   | NH1    | H.ASP_86   | OD1    | 2.849        |
| 4OLW   | H.ARG_38   | NH2    | H.GLU_46   | OE1    | 3.103        |
| 4OLW   | H.ARG_38   | NH2    | H.GLU_46   | OE2    | 3.816        |
| 4OLW   | H.ARG_38   | NH2    | H.ASP_86   | OD1    | 3.655        |
| 4OLW   | H.ARG_61   | NH1    | G.GLU_466  | OE1    | 2.598        |
| 4OLW   | H.ARG_61   | NH2    | G.GLU_466  | OE1    | 3.969        |
| 4OLW   | H.ARG_66   | NH2    | H.ASP_86   | OD1    | 2.804        |
| 4OLW   | H.ARG_66   | NH2    | H.ASP_86   | OD2    | 2.718        |
| 4OLW   | H.ARG_71   | NH1    | G.ASP_368  | OD1    | 3.570        |
| 4OLW   | H.ARG_71   | NH1    | G.ASP_368  | OD2    | 2.966        |
| 4OLW   | H.ARG_71   | NH2    | G.ASP_368  | OD1    | 3.028        |
| 4OLW   | H.ARG_71   | NH2    | G.ASP_368  | OD2    | 3.898        |
| 4OLW   | H.ARG_82A  | NH1    | H.GLU_81   | OE2    | 3.263        |
| 4OLW   | H.ARG_100A | NH2    | G.GLU_106  | OE1    | 3.908        |
| 4OLW   | H.HIS_102  | NE2    | H.GLU_101  | OE1    | 3.698        |
| 4OLW   | H.LYS_209  | NZ     | L.GLU_125  | OE1    | 2.861        |
| 4OLW   | H.LYS_209  | NZ     | L.GLU_125  | OE2    | 2.764        |
| 4OLW   | H.LYS_210  | NZ     | H.GLU_212  | OE1    | 3.770        |
| 4OLW   | H.LYS_214  | NZ     | L.ASP_124  | OD1    | 3.031        |
| 4OLW   | H.LYS_214  | NZ     | L.ASP_124  | OD2    | 3.691        |
| 4OLW   | L.ARG_24   | NH1    | L.ASP_70   | OD1    | 3.761        |
| 4OLW   | L.ARG_24   | NH1    | L.ASP_70   | OD2    | 3.911        |
| 4OLW   | L.ARG_24   | NH2    | L.ASP_70   | OD1    | 3.614        |
| 4OLW   | L.ARG_24   | NH2    | L.ASP_70   | OD2    | 3.428        |
| 4OLW   | L.ARG_61   | NH1    | L.ASP_82   | OD2    | 2.747        |
| 4OLW   | L.ARG_61   | NH2    | L.GLU_79   | OE1    | 3.693        |
| 4OLW   | L.ARG_61   | NH2    | L.GLU_79   | OE2    | 3.864        |
| 4OLW   | L.ARG_61   | NH2    | L.ASP_82   | OD1    | 3.396        |
| 4OLW   | L.ARG_61   | NH2    | L.ASP_82   | OD2    | 2.990        |
| 4OLW   | L.LYS_109  | NZ     | L.GLU_17   | OE2    | 2.961        |

---

Table 593: 4OLW-specific salt bridging networks analysis. In this table, a PDB file is specified with a four-letter PDB ID, except that the names of the PDB files corresponding to the single NMR structural model split from the NMR ensemble is specified with a four-letter PDB ID in addition to a hyphen followed by the single NMR structural model numeric ID, the residue naming scheme is **Chain ID\_residue name\_residue number**,  $\angle ADH$  represents the angle formed by acceptor (A), donor (D) and hydrogen (H) ( $\angle ADH$ ).

| PDB ID | Residue A  | Atom A | Residue B  | Atom B | Distance (Å) |
|--------|------------|--------|------------|--------|--------------|
| 4OLX   | G.HIS.66   | ND1    | G.GLU.64   | OE1    | 3.879        |
| 4OLX   | G.HIS.66   | ND1    | G.GLU.64   | OE2    | 2.717        |
| 4OLX   | G.LYS.97   | NZ     | G.GLU.275  | OE2    | 3.052        |
| 4OLX   | G.LYS.97   | NZ     | H.ASP.100B | OD1    | 3.339        |
| 4OLX   | G.LYS.97   | NZ     | H.ASP.100B | OD2    | 2.904        |
| 4OLX   | G.LYS.121  | NZ     | G.ASP.113  | OD1    | 3.856        |
| 4OLX   | G.LYS.207  | NZ     | G.GLU.381  | OE1    | 3.451        |
| 4OLX   | G.LYS.207  | NZ     | G.GLU.381  | OE2    | 3.129        |
| 4OLX   | G.HIS.249  | NE2    | G.GLU.482  | OE1    | 3.186        |
| 4OLX   | G.LYS.282  | NZ     | G.GLU.275  | OE1    | 3.971        |
| 4OLX   | G.LYS.343  | NZ     | G.GLU.347  | OE2    | 2.614        |
| 4OLX   | G.LYS.348  | NZ     | G.GLU.269  | OE2    | 2.682        |
| 4OLX   | G.LYS.348  | NZ     | G.GLU.351  | OE1    | 3.091        |
| 4OLX   | G.ARG.379  | NH2    | G.ASP.211  | OD2    | 3.162        |
| 4OLX   | G.ARG.456  | NH1    | G.GLU.466  | OE1    | 3.738        |
| 4OLX   | G.ARG.469  | NH2    | G.ASP.457  | OD2    | 3.011        |
| 4OLX   | G.LYS.476  | NZ     | G.GLU.102  | OE1    | 2.845        |
| 4OLX   | G.LYS.476  | NZ     | G.GLU.102  | OE2    | 3.693        |
| 4OLX   | G.ARG.480  | NH1    | G.ASP.477  | OD1    | 2.869        |
| 4OLX   | G.LYS.487  | NZ     | G.ASP.47   | OD1    | 2.956        |
| 4OLX   | G.LYS.487  | NZ     | G.ASP.47   | OD2    | 3.569        |
| 4OLX   | G.LYS.487  | NZ     | G.GLU.91   | OE1    | 2.836        |
| 4OLX   | H.ARG.19   | NH2    | H.GLU.81   | OE1    | 3.130        |
| 4OLX   | H.ARG.38   | NH1    | H.ASP.86   | OD1    | 2.798        |
| 4OLX   | H.ARG.38   | NH2    | H.GLU.46   | OE1    | 2.957        |
| 4OLX   | H.ARG.38   | NH2    | H.GLU.46   | OE2    | 3.969        |
| 4OLX   | H.ARG.38   | NH2    | H.ASP.86   | OD1    | 3.641        |
| 4OLX   | H.ARG.61   | NH1    | G.GLU.466  | OE1    | 2.655        |
| 4OLX   | H.ARG.66   | NH1    | H.ASP.86   | OD1    | 3.694        |
| 4OLX   | H.ARG.66   | NH2    | H.ASP.86   | OD1    | 2.980        |
| 4OLX   | H.ARG.66   | NH2    | H.ASP.86   | OD2    | 2.792        |
| 4OLX   | H.ARG.71   | NH1    | G.ASP.368  | OD1    | 3.883        |
| 4OLX   | H.ARG.71   | NH1    | G.ASP.368  | OD2    | 2.896        |
| 4OLX   | H.ARG.71   | NH2    | G.ASP.368  | OD1    | 3.066        |
| 4OLX   | H.ARG.71   | NH2    | G.ASP.368  | OD2    | 3.572        |
| 4OLX   | H.ARG.82A  | NH1    | H.GLU.81   | OE2    | 3.153        |
| 4OLX   | H.ARG.100A | NH2    | G.GLU.106  | OE1    | 3.646        |
| 4OLX   | H.HIS.102  | NE2    | H.GLU.101  | OE1    | 3.407        |
| 4OLX   | H.LYS.209  | NZ     | L.GLU.125  | OE2    | 3.132        |
| 4OLX   | H.LYS.210  | NZ     | H.GLU.212  | OE1    | 3.806        |
| 4OLX   | L.ARG.24   | NH1    | L.ASP.70   | OD1    | 3.727        |
| 4OLX   | L.ARG.24   | NH1    | L.ASP.70   | OD2    | 3.694        |
| 4OLX   | L.ARG.24   | NH2    | L.ASP.70   | OD1    | 3.311        |
| 4OLX   | L.ARG.24   | NH2    | L.ASP.70   | OD2    | 3.200        |
| 4OLX   | L.ARG.61   | NH1    | L.ASP.82   | OD1    | 3.778        |
| 4OLX   | L.ARG.61   | NH1    | L.ASP.82   | OD2    | 2.580        |
| 4OLX   | L.ARG.61   | NH2    | L.GLU.79   | OE1    | 3.684        |
| 4OLX   | L.ARG.61   | NH2    | L.GLU.79   | OE2    | 3.925        |
| 4OLX   | L.ARG.61   | NH2    | L.ASP.82   | OD1    | 3.428        |
| 4OLX   | L.ARG.61   | NH2    | L.ASP.82   | OD2    | 3.600        |
| 4OLX   | L.LYS.109  | NZ     | L.GLU.17   | OE2    | 3.701        |

---

Table 594: 4OLX-specific salt bridging networks analysis. In this table, a PDB file is specified with a four-letter PDB ID, except that the names of the PDB files corresponding to the single NMR structural model split from the NMR ensemble is specified with a four-letter PDB ID in addition to a hyphen followed by the single NMR structural model numeric ID, the residue naming scheme is **Chain ID\_residue name\_residue number**,  $\angle ADH$  represents the angle formed by acceptor (A), donor (D) and hydrogen (H) ( $\angle ADH$ ).



| PDB ID | Residue A | Atom A | Residue B  | Atom B | Distance (Å) |
|--------|-----------|--------|------------|--------|--------------|
| 4OLY   | G.HIS.66  | ND1    | G.GLU.64   | OE1    | 3.788        |
| 4OLY   | G.HIS.66  | ND1    | G.GLU.64   | OE2    | 2.753        |
| 4OLY   | G.LYS.97  | NZ     | G.GLU.275  | OE2    | 3.627        |
| 4OLY   | G.LYS.97  | NZ     | H.ASP.100B | OD1    | 3.240        |
| 4OLY   | G.LYS.97  | NZ     | H.ASP.100B | OD2    | 2.829        |
| 4OLY   | G.LYS.207 | NZ     | G.GLU.381  | OE1    | 3.205        |
| 4OLY   | G.LYS.207 | NZ     | G.GLU.381  | OE2    | 2.631        |
| 4OLY   | G.HIS.249 | NE2    | G.GLU.482  | OE1    | 3.173        |
| 4OLY   | G.LYS.343 | NZ     | G.GLU.347  | OE2    | 2.662        |
| 4OLY   | G.LYS.348 | NZ     | G.GLU.269  | OE2    | 3.719        |
| 4OLY   | G.LYS.350 | NZ     | G.GLU.347  | OE2    | 3.790        |
| 4OLY   | G.LYS.357 | NZ     | G.GLU.466  | OE2    | 3.515        |
| 4OLY   | G.ARG.379 | NH1    | G.ASP.211  | OD2    | 3.852        |
| 4OLY   | G.ARG.379 | NH2    | G.ASP.211  | OD2    | 2.543        |
| 4OLY   | G.ARG.456 | NH1    | G.GLU.466  | OE1    | 3.658        |
| 4OLY   | G.ARG.469 | NH2    | G.ASP.457  | OD1    | 3.982        |
| 4OLY   | G.ARG.469 | NH2    | G.ASP.457  | OD2    | 2.914        |
| 4OLY   | G.LYS.476 | NZ     | G.GLU.102  | OE1    | 2.927        |
| 4OLY   | G.LYS.476 | NZ     | G.GLU.102  | OE2    | 3.744        |
| 4OLY   | G.ARG.480 | NH1    | G.ASP.477  | OD1    | 2.751        |
| 4OLY   | G.LYS.487 | NZ     | G.ASP.47   | OD1    | 3.049        |
| 4OLY   | G.LYS.487 | NZ     | G.ASP.47   | OD2    | 3.763        |
| 4OLY   | G.LYS.487 | NZ     | G.GLU.91   | OE1    | 2.756        |
| 4OLY   | H.ARG.19  | NH2    | H.GLU.81   | OE1    | 3.423        |
| 4OLY   | H.ARG.38  | NH1    | H.ASP.86   | OD1    | 2.745        |
| 4OLY   | H.ARG.38  | NH2    | H.GLU.46   | OE1    | 2.979        |
| 4OLY   | H.ARG.38  | NH2    | H.GLU.46   | OE2    | 3.847        |
| 4OLY   | H.ARG.38  | NH2    | H.ASP.86   | OD1    | 3.687        |
| 4OLY   | H.ARG.61  | NH1    | G.GLU.466  | OE1    | 2.641        |
| 4OLY   | H.ARG.66  | NH1    | H.ASP.86   | OD1    | 3.641        |
| 4OLY   | H.ARG.66  | NH2    | H.ASP.86   | OD1    | 3.013        |
| 4OLY   | H.ARG.66  | NH2    | H.ASP.86   | OD2    | 2.555        |
| 4OLY   | H.ARG.71  | NH1    | G.ASP.368  | OD1    | 3.538        |
| 4OLY   | H.ARG.71  | NH1    | G.ASP.368  | OD2    | 2.816        |
| 4OLY   | H.ARG.71  | NH2    | G.ASP.368  | OD1    | 3.002        |
| 4OLY   | H.ARG.71  | NH2    | G.ASP.368  | OD2    | 3.765        |
| 4OLY   | H.ARG.82A | NH1    | H.GLU.81   | OE2    | 3.546        |
| 4OLY   | H.HIS.102 | NE2    | H.GLU.101  | OE1    | 3.748        |
| 4OLY   | H.LYS.209 | NZ     | L.GLU.125  | OE1    | 3.888        |
| 4OLY   | H.LYS.209 | NZ     | L.GLU.125  | OE2    | 3.336        |
| 4OLY   | H.LYS.210 | NZ     | H.GLU.212  | OE1    | 3.837        |
| 4OLY   | L.ARG.24  | NH1    | L.ASP.70   | OD1    | 3.758        |
| 4OLY   | L.ARG.24  | NH1    | L.ASP.70   | OD2    | 3.814        |
| 4OLY   | L.ARG.24  | NH2    | L.ASP.70   | OD1    | 3.375        |
| 4OLY   | L.ARG.24  | NH2    | L.ASP.70   | OD2    | 3.161        |
| 4OLY   | L.ARG.61  | NH1    | L.ASP.82   | OD2    | 2.658        |
| 4OLY   | L.ARG.61  | NH2    | L.GLU.79   | OE1    | 3.938        |
| 4OLY   | L.ARG.61  | NH2    | L.ASP.82   | OD1    | 3.043        |
| 4OLY   | L.ARG.61  | NH2    | L.ASP.82   | OD2    | 2.970        |

---

Table 595: 4OLY-specific salt bridging networks analysis. In this table, a PDB file is specified with a four-letter PDB ID, except that the names of the PDB files corresponding to the single NMR structural model split from the NMR ensemble is specified with a four-letter PDB ID in addition to a hyphen followed by the single NMR structural model numeric ID, the residue naming scheme is **Chain ID\_residue name\_residue number**,  $\angle ADH$  represents the angle formed by acceptor (A), donor (D) and hydrogen (H) ( $\angle ADH$ ).

| PDB ID | Residue A | Atom A | Residue B  | Atom B | Distance (Å) |
|--------|-----------|--------|------------|--------|--------------|
| 4OLZ   | G.HIS.66  | ND1    | G.GLU.64   | OE1    | 3.923        |
| 4OLZ   | G.HIS.66  | ND1    | G.GLU.64   | OE2    | 2.689        |
| 4OLZ   | G.LYS.97  | NZ     | G.GLU.275  | OE1    | 3.801        |
| 4OLZ   | G.LYS.97  | NZ     | G.GLU.275  | OE2    | 2.401        |
| 4OLZ   | G.LYS.97  | NZ     | H.ASP.100B | OD1    | 3.552        |
| 4OLZ   | G.LYS.97  | NZ     | H.ASP.100B | OD2    | 3.545        |
| 4OLZ   | G.LYS.207 | NZ     | G.GLU.381  | OE1    | 3.397        |
| 4OLZ   | G.LYS.207 | NZ     | G.GLU.381  | OE2    | 3.037        |
| 4OLZ   | G.HIS.249 | NE2    | G.GLU.482  | OE1    | 2.924        |
| 4OLZ   | G.LYS.282 | NZ     | G.GLU.275  | OE1    | 3.959        |
| 4OLZ   | G.LYS.343 | NZ     | G.GLU.347  | OE2    | 2.767        |
| 4OLZ   | G.LYS.348 | NZ     | G.GLU.269  | OE2    | 2.968        |
| 4OLZ   | G.LYS.348 | NZ     | G.GLU.351  | OE1    | 3.207        |
| 4OLZ   | G.ARG.379 | NH2    | G.ASP.211  | OD2    | 3.935        |
| 4OLZ   | G.ARG.469 | NH2    | G.ASP.457  | OD1    | 3.787        |
| 4OLZ   | G.ARG.469 | NH2    | G.ASP.457  | OD2    | 2.835        |
| 4OLZ   | G.LYS.476 | NZ     | G.GLU.102  | OE1    | 2.783        |
| 4OLZ   | G.LYS.476 | NZ     | G.GLU.102  | OE2    | 3.635        |
| 4OLZ   | G.ARG.480 | NH1    | G.ASP.477  | OD1    | 2.745        |
| 4OLZ   | G.LYS.487 | NZ     | G.ASP.47   | OD1    | 2.885        |
| 4OLZ   | G.LYS.487 | NZ     | G.ASP.47   | OD2    | 3.377        |
| 4OLZ   | G.LYS.487 | NZ     | G.GLU.91   | OE1    | 2.760        |
| 4OLZ   | H.ARG.19  | NH2    | H.GLU.81   | OE1    | 3.284        |
| 4OLZ   | H.ARG.38  | NH1    | H.ASP.86   | OD1    | 2.920        |
| 4OLZ   | H.ARG.38  | NH2    | H.GLU.46   | OE1    | 3.145        |
| 4OLZ   | H.ARG.38  | NH2    | H.ASP.86   | OD1    | 3.640        |
| 4OLZ   | H.ARG.61  | NH1    | G.GLU.466  | OE1    | 2.620        |
| 4OLZ   | H.ARG.66  | NH2    | H.ASP.86   | OD1    | 2.412        |
| 4OLZ   | H.ARG.66  | NH2    | H.ASP.86   | OD2    | 3.005        |
| 4OLZ   | H.ARG.71  | NH1    | G.ASP.368  | OD1    | 3.472        |
| 4OLZ   | H.ARG.71  | NH1    | G.ASP.368  | OD2    | 2.715        |
| 4OLZ   | H.ARG.71  | NH2    | G.ASP.368  | OD1    | 2.877        |
| 4OLZ   | H.ARG.71  | NH2    | G.ASP.368  | OD2    | 3.685        |
| 4OLZ   | H.ARG.82A | NH1    | H.GLU.81   | OE2    | 3.365        |
| 4OLZ   | H.HIS.102 | NE2    | H.GLU.101  | OE1    | 3.537        |
| 4OLZ   | H.LYS.143 | NZ     | H.ASP.144  | OD1    | 3.616        |
| 4OLZ   | H.LYS.209 | NZ     | L.GLU.125  | OE1    | 3.703        |
| 4OLZ   | H.LYS.209 | NZ     | L.GLU.125  | OE2    | 3.063        |
| 4OLZ   | H.LYS.210 | NZ     | H.GLU.212  | OE1    | 3.813        |
| 4OLZ   | H.LYS.214 | NZ     | L.ASP.124  | OD1    | 3.528        |
| 4OLZ   | H.LYS.214 | NZ     | L.ASP.124  | OD2    | 3.896        |
| 4OLZ   | L.ARG.24  | NH2    | L.ASP.70   | OD1    | 3.107        |
| 4OLZ   | L.ARG.24  | NH2    | L.ASP.70   | OD2    | 2.518        |
| 4OLZ   | L.ARG.61  | NH1    | L.ASP.82   | OD1    | 3.951        |
| 4OLZ   | L.ARG.61  | NH1    | L.ASP.82   | OD2    | 2.771        |
| 4OLZ   | L.ARG.61  | NH2    | L.GLU.79   | OE1    | 3.245        |
| 4OLZ   | L.ARG.61  | NH2    | L.GLU.79   | OE2    | 3.953        |
| 4OLZ   | L.ARG.61  | NH2    | L.ASP.82   | OD1    | 3.377        |
| 4OLZ   | L.ARG.61  | NH2    | L.ASP.82   | OD2    | 3.458        |
| 4OLZ   | L.LYS.109 | NZ     | L.GLU.17   | OE2    | 2.896        |

---

Table 596: 4OLZ-specific salt bridging networks analysis. In this table, a PDB file is specified with a four-letter PDB ID, except that the names of the PDB files corresponding to the single NMR structural model split from the NMR ensemble is specified with a four-letter PDB ID in addition to a hyphen followed by the single NMR structural model numeric ID, the residue naming scheme is **Chain ID\_residue name\_residue number**,  $\angle ADH$  represents the angle formed by acceptor (A), donor (D) and hydrogen (H) ( $\angle ADH$ ).

| PDB ID | Residue A | Atom A | Residue B  | Atom B | Distance (Å) |
|--------|-----------|--------|------------|--------|--------------|
| 4OM0   | G.HIS.66  | ND1    | G.GLU.64   | OE1    | 3.833        |
| 4OM0   | G.HIS.66  | ND1    | G.GLU.64   | OE2    | 2.725        |
| 4OM0   | G.LYS.97  | NZ     | G.GLU.275  | OE1    | 3.804        |
| 4OM0   | G.LYS.97  | NZ     | G.GLU.275  | OE2    | 2.555        |
| 4OM0   | G.LYS.97  | NZ     | H.ASP.100B | OD1    | 3.843        |
| 4OM0   | G.LYS.97  | NZ     | H.ASP.100B | OD2    | 3.296        |
| 4OM0   | G.LYS.207 | NZ     | G.GLU.381  | OE1    | 3.664        |
| 4OM0   | G.LYS.207 | NZ     | G.GLU.381  | OE2    | 3.001        |
| 4OM0   | G.HIS.249 | NE2    | G.GLU.482  | OE1    | 3.206        |
| 4OM0   | G.LYS.282 | NZ     | G.GLU.275  | OE1    | 3.687        |
| 4OM0   | G.LYS.343 | NZ     | G.GLU.347  | OE2    | 2.544        |
| 4OM0   | G.LYS.348 | NZ     | G.GLU.269  | OE2    | 2.992        |
| 4OM0   | G.LYS.348 | NZ     | G.GLU.351  | OE1    | 3.079        |
| 4OM0   | G.ARG.379 | NH2    | G.ASP.211  | OD1    | 3.805        |
| 4OM0   | G.ARG.469 | NH2    | G.ASP.457  | OD1    | 3.868        |
| 4OM0   | G.ARG.469 | NH2    | G.ASP.457  | OD2    | 2.885        |
| 4OM0   | G.LYS.476 | NZ     | G.GLU.102  | OE1    | 2.824        |
| 4OM0   | G.ARG.480 | NH1    | G.ASP.477  | OD1    | 2.762        |
| 4OM0   | G.ARG.480 | NH2    | G.GLU.102  | OE2    | 3.978        |
| 4OM0   | G.LYS.487 | NZ     | G.ASP.47   | OD1    | 2.993        |
| 4OM0   | G.LYS.487 | NZ     | G.ASP.47   | OD2    | 3.296        |
| 4OM0   | G.LYS.487 | NZ     | G.GLU.91   | OE1    | 2.866        |
| 4OM0   | H.ARG.19  | NH2    | H.GLU.81   | OE1    | 3.635        |
| 4OM0   | H.ARG.38  | NH1    | H.ASP.86   | OD1    | 2.891        |
| 4OM0   | H.ARG.38  | NH2    | H.GLU.46   | OE1    | 3.152        |
| 4OM0   | H.ARG.38  | NH2    | H.GLU.46   | OE2    | 3.952        |
| 4OM0   | H.ARG.38  | NH2    | H.ASP.86   | OD1    | 3.799        |
| 4OM0   | H.ARG.61  | NH1    | G.GLU.466  | OE1    | 2.871        |
| 4OM0   | H.ARG.66  | NH1    | H.ASP.86   | OD1    | 3.542        |
| 4OM0   | H.ARG.66  | NH2    | H.ASP.86   | OD1    | 3.067        |
| 4OM0   | H.ARG.66  | NH2    | H.ASP.86   | OD2    | 2.679        |
| 4OM0   | H.ARG.71  | NH1    | G.ASP.368  | OD1    | 3.724        |
| 4OM0   | H.ARG.71  | NH1    | G.ASP.368  | OD2    | 2.771        |
| 4OM0   | H.ARG.71  | NH2    | G.ASP.368  | OD1    | 3.189        |
| 4OM0   | H.ARG.71  | NH2    | G.ASP.368  | OD2    | 3.713        |
| 4OM0   | H.ARG.82A | NH1    | H.GLU.81   | OE2    | 3.957        |
| 4OM0   | H.HIS.102 | NE2    | H.GLU.101  | OE1    | 3.389        |
| 4OM0   | H.LYS.143 | NZ     | H.ASP.144  | OD1    | 3.715        |
| 4OM0   | H.LYS.209 | NZ     | L.GLU.125  | OE2    | 3.121        |
| 4OM0   | H.LYS.210 | NZ     | H.GLU.212  | OE1    | 3.995        |
| 4OM0   | L.ARG.24  | NH1    | L.ASP.70   | OD1    | 3.645        |
| 4OM0   | L.ARG.24  | NH1    | L.ASP.70   | OD2    | 3.913        |
| 4OM0   | L.ARG.24  | NH2    | L.ASP.70   | OD1    | 3.504        |
| 4OM0   | L.ARG.24  | NH2    | L.ASP.70   | OD2    | 3.395        |
| 4OM0   | L.ARG.61  | NH1    | L.ASP.82   | OD1    | 3.878        |
| 4OM0   | L.ARG.61  | NH1    | L.ASP.82   | OD2    | 2.597        |
| 4OM0   | L.ARG.61  | NH2    | L.GLU.79   | OE1    | 3.542        |
| 4OM0   | L.ARG.61  | NH2    | L.GLU.79   | OE2    | 3.993        |
| 4OM0   | L.ARG.61  | NH2    | L.ASP.82   | OD1    | 3.348        |
| 4OM0   | L.ARG.61  | NH2    | L.ASP.82   | OD2    | 3.442        |

---

Table 597: 4OM0-specific salt bridging networks analysis. In this table, a PDB file is specified with a four-letter PDB ID, except that the names of the PDB files corresponding to the single NMR structural model split from the NMR ensemble is specified with a four-letter PDB ID in addition to a hyphen followed by the single NMR structural model numeric ID, the residue naming scheme is **Chain ID\_residue name\_residue number**,  $\angle ADH$  represents the angle formed by acceptor (A), donor (D) and hydrogen (H) ( $\angle ADH$ ).

| PDB ID | Residue A | Atom A | Residue B  | Atom B | Distance (Å) |
|--------|-----------|--------|------------|--------|--------------|
| 4OM1   | G.HIS.66  | ND1    | G.GLU.64   | OE1    | 3.968        |
| 4OM1   | G.HIS.66  | ND1    | G.GLU.64   | OE2    | 2.708        |
| 4OM1   | G.LYS.97  | NZ     | G.GLU.275  | OE1    | 3.600        |
| 4OM1   | G.LYS.97  | NZ     | G.GLU.275  | OE2    | 2.568        |
| 4OM1   | G.LYS.97  | NZ     | H.ASP.100B | OD1    | 3.927        |
| 4OM1   | G.LYS.97  | NZ     | H.ASP.100B | OD2    | 3.635        |
| 4OM1   | G.LYS.207 | NZ     | G.GLU.381  | OE1    | 3.308        |
| 4OM1   | G.LYS.207 | NZ     | G.GLU.381  | OE2    | 2.686        |
| 4OM1   | G.HIS.249 | NE2    | G.GLU.482  | OE1    | 3.036        |
| 4OM1   | G.LYS.282 | NZ     | G.GLU.275  | OE1    | 3.818        |
| 4OM1   | G.LYS.343 | NZ     | G.GLU.347  | OE2    | 2.690        |
| 4OM1   | G.LYS.348 | NZ     | G.GLU.351  | OE1    | 3.702        |
| 4OM1   | G.LYS.357 | NZ     | G.GLU.466  | OE2    | 2.685        |
| 4OM1   | G.LYS.357 | NZ     | L.GLU.1    | OE2    | 3.763        |
| 4OM1   | G.ARG.379 | NH2    | G.ASP.211  | OD2    | 3.954        |
| 4OM1   | G.ARG.456 | NH1    | G.GLU.466  | OE1    | 3.023        |
| 4OM1   | G.ARG.469 | NH2    | G.ASP.457  | OD1    | 3.972        |
| 4OM1   | G.ARG.469 | NH2    | G.ASP.457  | OD2    | 2.755        |
| 4OM1   | G.LYS.476 | NZ     | G.GLU.102  | OE1    | 2.848        |
| 4OM1   | G.LYS.476 | NZ     | G.GLU.102  | OE2    | 3.744        |
| 4OM1   | G.ARG.480 | NH1    | G.ASP.477  | OD1    | 2.846        |
| 4OM1   | G.LYS.487 | NZ     | G.ASP.47   | OD1    | 2.990        |
| 4OM1   | G.LYS.487 | NZ     | G.ASP.47   | OD2    | 3.195        |
| 4OM1   | G.LYS.487 | NZ     | G.GLU.91   | OE1    | 2.549        |
| 4OM1   | H.ARG.19  | NH2    | H.GLU.81   | OE1    | 3.387        |
| 4OM1   | H.ARG.38  | NH1    | H.ASP.86   | OD1    | 2.946        |
| 4OM1   | H.ARG.38  | NH2    | H.GLU.46   | OE1    | 2.854        |
| 4OM1   | H.ARG.38  | NH2    | H.GLU.46   | OE2    | 3.922        |
| 4OM1   | H.ARG.38  | NH2    | H.ASP.86   | OD1    | 3.859        |
| 4OM1   | H.ARG.66  | NH1    | H.ASP.86   | OD1    | 3.431        |
| 4OM1   | H.ARG.66  | NH2    | H.ASP.86   | OD1    | 2.947        |
| 4OM1   | H.ARG.66  | NH2    | H.ASP.86   | OD2    | 2.686        |
| 4OM1   | H.ARG.71  | NH1    | G.ASP.368  | OD1    | 3.565        |
| 4OM1   | H.ARG.71  | NH1    | G.ASP.368  | OD2    | 2.752        |
| 4OM1   | H.ARG.71  | NH2    | G.ASP.368  | OD1    | 3.031        |
| 4OM1   | H.ARG.71  | NH2    | G.ASP.368  | OD2    | 3.734        |
| 4OM1   | H.ARG.82A | NH1    | H.GLU.81   | OE2    | 3.380        |
| 4OM1   | H.LYS.96  | NZ     | H.GLU.101  | OE1    | 3.890        |
| 4OM1   | H.LYS.96  | NZ     | H.GLU.101  | OE2    | 3.816        |
| 4OM1   | H.HIS.102 | NE2    | H.GLU.101  | OE1    | 3.730        |
| 4OM1   | H.LYS.209 | NZ     | L.GLU.125  | OE1    | 3.639        |
| 4OM1   | H.LYS.209 | NZ     | L.GLU.125  | OE2    | 3.008        |
| 4OM1   | H.LYS.210 | NZ     | H.GLU.212  | OE1    | 3.752        |
| 4OM1   | L.ARG.24  | NH2    | L.ASP.70   | OD1    | 3.182        |
| 4OM1   | L.ARG.24  | NH2    | L.ASP.70   | OD2    | 2.699        |
| 4OM1   | L.ARG.61  | NH1    | L.ASP.82   | OD1    | 3.829        |
| 4OM1   | L.ARG.61  | NH1    | L.ASP.82   | OD2    | 2.671        |
| 4OM1   | L.ARG.61  | NH2    | L.GLU.79   | OE1    | 3.602        |
| 4OM1   | L.ARG.61  | NH2    | L.GLU.79   | OE2    | 3.954        |
| 4OM1   | L.ARG.61  | NH2    | L.ASP.82   | OD1    | 3.243        |
| 4OM1   | L.ARG.61  | NH2    | L.ASP.82   | OD2    | 3.379        |
| 4OM1   | L.LYS.109 | NZ     | L.GLU.17   | OE1    | 3.450        |
| 4OM1   | L.LYS.109 | NZ     | L.GLU.17   | OE2    | 2.771        |
| 4OM1   | L.HIS.191 | ND1    | L.ASP.153  | OD2    | 2.919        |

---

Table 598: 4OM1-specific salt bridging networks analysis. In this table, a PDB file is specified with a four-letter PDB ID, except that the names of the PDB files corresponding to the single NMR structural model split from the NMR ensemble is specified with a four-letter PDB ID in addition to a hyphen followed by the single NMR structural model numeric ID, the residue naming scheme is **Chain ID\_residue name\_residue number**,  $\angle ADH$  represents the angle formed by acceptor (A), donor (D) and hydrogen (H) ( $\angle ADH$ ).



| PDB ID | Residue A | Atom A | Residue B | Atom B | Distance (Å) |
|--------|-----------|--------|-----------|--------|--------------|
| 4OT1   | A_ARG_131 | NH1    | A_GLU_422 | OE2    | 3.994        |
| 4OT1   | A_ARG_357 | NH2    | A_ASP_122 | OD2    | 2.900        |
| 4OT1   | A_LYS_378 | NZ     | A_ASP_362 | OD1    | 3.505        |
| 4OT1   | A_LYS_378 | NZ     | A_ASP_362 | OD2    | 3.358        |
| 4OT1   | A_LYS_379 | NZ     | A_GLU_359 | OE2    | 2.737        |
| 4OT1   | A_ARG_393 | NH1    | A_ASP_390 | OD1    | 2.905        |
| 4OT1   | A_ARG_393 | NH2    | A_ASP_390 | OD1    | 2.768        |
| 4OT1   | A_LYS_435 | NZ     | A_GLU_413 | OE2    | 2.567        |
| 4OT1   | H_ARG_12  | NH1    | H_GLU_10  | OE1    | 3.166        |
| 4OT1   | H_ARG_12  | NH2    | H_GLU_10  | OE1    | 3.283        |
| 4OT1   | H_LYS_30  | NZ     | H_ASP_31  | OD1    | 3.047        |
| 4OT1   | H_ARG_38  | NH1    | H_ASP_90  | OD1    | 2.615        |
| 4OT1   | H_ARG_38  | NH2    | H_GLU_46  | OE1    | 3.314        |
| 4OT1   | H_ARG_38  | NH2    | H_ASP_90  | OD1    | 3.679        |
| 4OT1   | H_LYS_63  | NZ     | H_GLU_46  | OE1    | 3.385        |
| 4OT1   | H_LYS_63  | NZ     | H_GLU_46  | OE2    | 2.667        |
| 4OT1   | H_ARG_67  | NH1    | H_ASP_90  | OD1    | 3.883        |
| 4OT1   | H_ARG_67  | NH1    | H_ASP_90  | OD2    | 3.033        |
| 4OT1   | H_ARG_67  | NH2    | H_ASP_90  | OD1    | 3.016        |
| 4OT1   | H_ARG_67  | NH2    | H_ASP_90  | OD2    | 3.552        |
| 4OT1   | H_ARG_87  | NH2    | H_ASP_89  | OD1    | 3.432        |
| 4OT1   | H_ARG_87  | NH2    | H_ASP_89  | OD2    | 2.704        |
| 4OT1   | H_ARG_98  | NH2    | H_ASP_119 | OD1    | 3.496        |
| 4OT1   | H_ARG_98  | NH2    | H_ASP_119 | OD2    | 2.884        |
| 4OT1   | H_HIS_115 | ND1    | H_ASP_99  | OD1    | 2.738        |
| 4OT1   | H_HIS_115 | ND1    | H_ASP_99  | OD2    | 3.714        |
| 4OT1   | H_LYS_161 | NZ     | L_GLU_127 | OE2    | 2.572        |
| 4OT1   | H_LYS_227 | NZ     | L_GLU_126 | OE1    | 2.521        |
| 4OT1   | H_LYS_227 | NZ     | L_GLU_126 | OE2    | 3.241        |
| 4OT1   | L_LYS_54  | NZ     | L_ASP_51  | OD2    | 3.014        |
| 4OT1   | L_ARG_55  | NH1    | L_ASP_61  | OD1    | 3.917        |
| 4OT1   | L_ARG_62  | NH1    | L_ASP_83  | OD1    | 2.721        |
| 4OT1   | L_ARG_62  | NH1    | L_ASP_83  | OD2    | 3.462        |
| 4OT1   | L_ARG_62  | NH2    | L_ASP_83  | OD1    | 3.562        |
| 4OT1   | L_ARG_62  | NH2    | L_ASP_83  | OD2    | 2.996        |
| 4OT1   | L_LYS_67  | NZ     | A_GLU_361 | OE2    | 3.026        |
| 4OT1   | L_LYS_152 | NZ     | L_GLU_206 | OE1    | 3.999        |
| 4OT1   | L_LYS_152 | NZ     | L_GLU_206 | OE2    | 2.900        |

Table 599: 4OT1-specific salt bridging networks analysis. In this table, a PDB file is specified with a four-letter PDB ID, except that the names of the PDB files corresponding to the single NMR structural model split from the NMR ensemble is specified with a four-letter PDB ID in addition to a hyphen followed by the single NMR structural model numeric ID, the residue naming scheme is **Chain ID\_residue name\_residue number**,  $\angle ADH$  represents the angle formed by acceptor (A), donor (D) and hydrogen (H) ( $\angle ADH$ ).

| PDB ID | Residue A | Atom A | Residue B | Atom B | Distance (Å) |
|--------|-----------|--------|-----------|--------|--------------|
| 4OTX   | L_ARG_54  | NH1    | L_ASP_60  | OD1    | 3.335        |
| 4OTX   | L_ARG_54  | NH2    | L_ASP_60  | OD1    | 2.587        |
| 4OTX   | L_ARG_61  | NH2    | L_GLU_81  | OE1    | 3.052        |
| 4OTX   | L_ARG_61  | NH2    | L_ASP_82  | OD1    | 2.662        |
| 4OTX   | L_ARG_61  | NH2    | L_ASP_82  | OD2    | 3.622        |
| 4OTX   | L_LYS_149 | NZ     | L_GLU_195 | OE1    | 3.784        |
| 4OTX   | L_HIS_189 | ND1    | L_ASP_151 | OD2    | 2.906        |
| 4OTX   | H_LYS_62  | NZ     | H_GLU_46  | OE1    | 3.813        |
| 4OTX   | H_LYS_62  | NZ     | H_GLU_46  | OE2    | 2.843        |
| 4OTX   | H_LYS_66  | NZ     | H_ASP_86  | OD1    | 3.726        |
| 4OTX   | H_LYS_66  | NZ     | H_ASP_86  | OD2    | 2.772        |
| 4OTX   | M_LYS_24  | NZ     | M_ASP_70  | OD1    | 3.831        |
| 4OTX   | M_ARG_54  | NH2    | M_ASP_60  | OD1    | 3.076        |
| 4OTX   | M_ARG_61  | NH2    | M_GLU_81  | OE2    | 2.931        |
| 4OTX   | M_ARG_61  | NH2    | M_ASP_82  | OD1    | 2.705        |
| 4OTX   | M_ARG_61  | NH2    | M_ASP_82  | OD2    | 3.780        |
| 4OTX   | M_ARG_155 | NH1    | M_GLU_185 | OE2    | 2.645        |
| 4OTX   | M_ARG_155 | NH2    | M_GLU_185 | OE1    | 3.700        |
| 4OTX   | M_ARG_155 | NH2    | M_GLU_185 | OE2    | 3.518        |
| 4OTX   | M_HIS_189 | ND1    | M_ASP_151 | OD2    | 2.662        |
| 4OTX   | M_ARG_211 | NH1    | M_GLU_187 | OE2    | 3.522        |
| 4OTX   | I_LYS_62  | NZ     | I_GLU_46  | OE2    | 2.424        |
| 4OTX   | I_LYS_66  | NZ     | I_ASP_86  | OD2    | 2.972        |
| 4OTX   | I_ARG_94  | NH2    | I_ASP_101 | OD2    | 3.905        |
| 4OTX   | I_LYS_209 | NZ     | I_GLU_211 | OE1    | 3.618        |

Table 600: 4OTX-specific salt bridging networks analysis. In this table, a PDB file is specified with a four-letter PDB ID, except that the names of the PDB files corresponding to the single NMR structural model split from the NMR ensemble is specified with a four-letter PDB ID in addition to a hyphen followed by the single NMR structural model numeric ID, the residue naming scheme is **Chain ID\_residue name\_residue number**,  $\angle ADH$  represents the angle formed by acceptor (A), donor (D) and hydrogen (H) ( $\angle ADH$ ).

| PDB ID | Residue A | Atom A | Residue B | Atom B | Distance (Å) |
|--------|-----------|--------|-----------|--------|--------------|
| 4P49   | A_LYS_33  | NZ     | A_GLU_76  | OE2    | 3.764        |
| 4P49   | A_ARG_56  | NH2    | A_GLU_76  | OE1    | 3.151        |
| 4P49   | A_ARG_56  | NH2    | A_ASP_77  | OD1    | 2.851        |
| 4P49   | A_ARG_56  | NH2    | A_ASP_77  | OD2    | 3.564        |
| 4P49   | A_ARG_158 | NH1    | A_ASP_211 | OD1    | 2.929        |
| 4P49   | A_ARG_158 | NH2    | A_GLU_166 | OE1    | 3.049        |
| 4P49   | A_ARG_158 | NH2    | A_ASP_211 | OD1    | 3.847        |
| 4P49   | A_ARG_188 | NH1    | A_ASP_211 | OD1    | 3.709        |
| 4P49   | A_ARG_188 | NH1    | A_ASP_211 | OD2    | 2.796        |
| 4P49   | A_ARG_188 | NH2    | A_ASP_211 | OD1    | 2.980        |
| 4P49   | A_ARG_188 | NH2    | A_ASP_211 | OD2    | 3.547        |
| 4P49   | A_ARG_219 | NH2    | A_ASP_232 | OD1    | 3.462        |
| 4P49   | A_ARG_219 | NH2    | A_ASP_232 | OD2    | 2.815        |
| 4P49   | A_HIS_221 | ND1    | A_ASP_232 | OD2    | 2.753        |
| 4P49   | A_HIS_236 | ND1    | A_GLU_126 | OE1    | 3.338        |
| 4P49   | A_HIS_236 | NE2    | A_ASP_125 | OD1    | 2.678        |
| 4P49   | A_HIS_236 | NE2    | A_GLU_126 | OE1    | 3.576        |

Table 601: 4P49-specific salt bridging networks analysis. In this table, a PDB file is specified with a four-letter PDB ID, except that the names of the PDB files corresponding to the single NMR structural model split from the NMR ensemble is specified with a four-letter PDB ID in addition to a hyphen followed by the single NMR structural model numeric ID, the residue naming scheme is **Chain ID\_residue name\_residue number**,  $\angle ADH$  represents the angle formed by acceptor (A), donor (D) and hydrogen (H) ( $\angle ADH$ ).

| PDB ID | Residue A | Atom A | Residue B | Atom B | Distance (Å) |
|--------|-----------|--------|-----------|--------|--------------|
| 4P9H   | C_LYS_7   | NZ     | C_ASP_10  | OD2    | 3.690        |
| 4P9H   | C_LYS_8   | NZ     | C_GLU_119 | OE1    | 3.955        |
| 4P9H   | C_LYS_8   | NZ     | C_GLU_119 | OE2    | 2.953        |
| 4P9H   | C_LYS_29  | NZ     | C_GLU_85  | OE1    | 3.562        |
| 4P9H   | C_LYS_29  | NZ     | C_GLU_85  | OE2    | 3.697        |
| 4P9H   | C_ARG_54  | NH1    | C_ASP_78  | OD2    | 2.976        |
| 4P9H   | C_ARG_54  | NH2    | C_ASP_78  | OD1    | 3.086        |
| 4P9H   | C_ARG_54  | NH2    | C_ASP_78  | OD2    | 2.930        |
| 4P9H   | C_ARG_58  | NH1    | C_GLU_13  | OE1    | 2.881        |
| 4P9H   | C_ARG_58  | NH1    | C_GLU_13  | OE2    | 2.882        |
| 4P9H   | C_ARG_58  | NH2    | C_GLU_13  | OE2    | 3.671        |
| 4P9H   | C_ARG_59  | NH1    | G_ASP_368 | OD1    | 2.832        |
| 4P9H   | C_ARG_59  | NH1    | G_ASP_368 | OD2    | 3.395        |
| 4P9H   | C_ARG_59  | NH2    | G_ASP_368 | OD1    | 3.561        |
| 4P9H   | C_ARG_59  | NH2    | G_ASP_368 | OD2    | 2.514        |
| 4P9H   | C_LYS_171 | NZ     | C_GLU_169 | OE2    | 3.618        |
| 4P9H   | G_HIS_66  | ND1    | G_GLU_64  | OE1    | 3.936        |
| 4P9H   | G_HIS_66  | ND1    | G_GLU_64  | OE2    | 2.459        |
| 4P9H   | G_LYS_227 | NZ     | G_GLU_83  | OE2    | 3.669        |
| 4P9H   | G_HIS_249 | NE2    | G_GLU_482 | OE1    | 2.955        |
| 4P9H   | G_LYS_282 | NZ     | G_GLU_275 | OE1    | 3.022        |
| 4P9H   | G_LYS_282 | NZ     | G_GLU_275 | OE2    | 3.961        |
| 4P9H   | G_LYS_348 | NZ     | G_GLU_269 | OE1    | 2.726        |
| 4P9H   | G_LYS_348 | NZ     | G_GLU_351 | OE1    | 3.154        |
| 4P9H   | G_LYS_348 | NZ     | G_GLU_351 | OE2    | 3.034        |
| 4P9H   | G_LYS_357 | NZ     | G_GLU_466 | OE2    | 2.986        |
| 4P9H   | G_ARG_456 | NH1    | G_GLU_466 | OE1    | 3.795        |
| 4P9H   | G_ARG_456 | NH1    | G_GLU_466 | OE2    | 3.185        |
| 4P9H   | G_ARG_469 | NH2    | G_ASP_457 | OD2    | 3.218        |
| 4P9H   | G_LYS_476 | NZ     | G_GLU_102 | OE1    | 2.706        |
| 4P9H   | G_ARG_480 | NH1    | G_ASP_477 | OD1    | 3.014        |
| 4P9H   | G_ARG_480 | NH2    | G_GLU_102 | OE2    | 3.549        |
| 4P9H   | G_LYS_487 | NZ     | G_ASP_47  | OD1    | 3.793        |
| 4P9H   | G_LYS_487 | NZ     | G_ASP_47  | OD2    | 2.540        |
| 4P9H   | G_LYS_487 | NZ     | G_GLU_91  | OE2    | 2.794        |
| 4P9H   | H_ARG_38  | NH1    | H_ASP_86  | OD1    | 2.679        |
| 4P9H   | H_ARG_38  | NH2    | H_GLU_46  | OE1    | 3.970        |
| 4P9H   | H_ARG_38  | NH2    | H_ASP_86  | OD1    | 3.498        |
| 4P9H   | H_HIS_61  | NE2    | L_ASP_1   | OD2    | 3.817        |
| 4P9H   | H_ARG_66  | NH2    | H_ASP_86  | OD1    | 2.897        |
| 4P9H   | H_ARG_66  | NH2    | H_ASP_86  | OD2    | 2.412        |
| 4P9H   | H_LYS_143 | NZ     | H_ASP_144 | OD1    | 3.073        |
| 4P9H   | H_LYS_143 | NZ     | H_ASP_144 | OD2    | 2.969        |
| 4P9H   | L_ARG_24  | NH2    | L_ASP_70  | OD1    | 3.255        |
| 4P9H   | L_ARG_61  | NH1    | L_GLU_81  | OE2    | 3.724        |
| 4P9H   | L_ARG_61  | NH1    | L_ASP_82  | OD1    | 3.931        |
| 4P9H   | L_ARG_61  | NH1    | L_ASP_82  | OD2    | 2.983        |
| 4P9H   | L_ARG_61  | NH2    | L_GLU_81  | OE2    | 2.893        |
| 4P9H   | L_ARG_61  | NH2    | L_ASP_82  | OD1    | 3.839        |

---

Table 602: 4P9H-specific salt bridging networks analysis. In this table, a PDB file is specified with a four-letter PDB ID, except that the names of the PDB files corresponding to the single NMR structural model split from the NMR ensemble is specified with a four-letter PDB ID in addition to a hyphen followed by the single NMR structural model numeric ID, the residue naming scheme is **Chain ID\_residue name\_residue number**,  $\angle ADH$  represents the angle formed by acceptor (A), donor (D) and hydrogen (H) ( $\angle ADH$ ).

| PDB ID | Residue A | Atom A | Residue B | Atom B | Distance (Å) |
|--------|-----------|--------|-----------|--------|--------------|
| 4PTT   | A_ARG_24  | NH1    | A_ASP_70  | OD1    | 3.965        |
| 4PTT   | A_ARG_24  | NH1    | A_ASP_70  | OD2    | 3.009        |
| 4PTT   | A_ARG_53  | NH1    | A_ASP_50  | OD2    | 3.791        |
| 4PTT   | A_ARG_53  | NH2    | A_ASP_50  | OD2    | 2.752        |
| 4PTT   | A_ARG_61  | NH1    | A_GLU_79  | OE1    | 3.274        |
| 4PTT   | A_ARG_61  | NH2    | A_GLU_79  | OE1    | 3.194        |
| 4PTT   | A_ARG_61  | NH2    | A_GLU_81  | OE1    | 3.963        |
| 4PTT   | A_ARG_61  | NH2    | A_ASP_82  | OD1    | 2.721        |
| 4PTT   | A_ARG_61  | NH2    | A_ASP_82  | OD2    | 3.451        |
| 4PTT   | A_ARG_91  | NH2    | B_GLU_95  | OE1    | 3.477        |
| 4PTT   | A_ARG_91  | NH2    | B_GLU_95  | OE2    | 3.208        |
| 4PTT   | A_LYS_107 | NZ     | A_GLU_17  | OE1    | 3.991        |
| 4PTT   | A_LYS_107 | NZ     | A_GLU_17  | OE2    | 3.451        |
| 4PTT   | A_LYS_149 | NZ     | A_GLU_195 | OE1    | 2.707        |
| 4PTT   | A_LYS_149 | NZ     | A_GLU_195 | OE2    | 2.811        |
| 4PTT   | A_LYS_188 | NZ     | A_ASP_185 | OD1    | 3.692        |
| 4PTT   | A_ARG_211 | NH1    | A_GLU_187 | OE1    | 3.911        |
| 4PTT   | B_HIS_32  | ND1    | B_ASP_97  | OD1    | 3.351        |
| 4PTT   | B_HIS_32  | NE2    | B_ASP_97  | OD1    | 3.881        |
| 4PTT   | B_HIS_35  | NE2    | B_GLU_95  | OE2    | 2.791        |
| 4PTT   | B_ARG_38  | NH1    | B_ASP_86  | OD1    | 2.956        |
| 4PTT   | B_ARG_38  | NH2    | B_GLU_46  | OE1    | 3.058        |
| 4PTT   | B_ARG_38  | NH2    | B_GLU_46  | OE2    | 3.774        |
| 4PTT   | B_ARG_66  | NH1    | B_ASP_86  | OD1    | 3.031        |
| 4PTT   | B_ARG_66  | NH1    | B_ASP_86  | OD2    | 3.456        |
| 4PTT   | B_ARG_66  | NH2    | B_ASP_86  | OD1    | 3.848        |
| 4PTT   | B_ARG_66  | NH2    | B_ASP_86  | OD2    | 2.768        |
| 4PTT   | B_LYS_94  | NZ     | B_ASP_97  | OD1    | 2.735        |
| 4PTT   | B_LYS_94  | NZ     | B_ASP_97  | OD2    | 3.827        |
| 4PTT   | B_LYS_94  | NZ     | B_ASP_101 | OD1    | 3.084        |
| 4PTT   | B_LYS_94  | NZ     | B_ASP_101 | OD2    | 2.853        |
| 4PTT   | B_LYS_143 | NZ     | B_ASP_144 | OD1    | 3.257        |
| 4PTT   | B_LYS_143 | NZ     | B_ASP_144 | OD2    | 3.722        |
| 4PTT   | B_LYS_209 | NZ     | A_GLU_123 | OE2    | 3.476        |
| 4PTT   | B_ARG_210 | NH1    | B_GLU_212 | OE2    | 3.500        |
| 4PTT   | B_ARG_210 | NH2    | B_GLU_212 | OE2    | 2.861        |

Table 603: 4PTT-specific salt bridging networks analysis. In this table, a PDB file is specified with a four-letter PDB ID, except that the names of the PDB files corresponding to the single NMR structural model split from the NMR ensemble is specified with a four-letter PDB ID in addition to a hyphen followed by the single NMR structural model numeric ID, the residue naming scheme is **Chain ID\_residue name\_residue number**,  $\angle ADH$  represents the angle formed by acceptor (A), donor (D) and hydrogen (H) ( $\angle ADH$ ).

| PDB ID | Residue A | Atom A | Residue B | Atom B | Distance (Å) |
|--------|-----------|--------|-----------|--------|--------------|
| 4PTU   | A_ARG_24  | NH1    | A_ASP_70  | OD2    | 3.705        |
| 4PTU   | A_ARG_53  | NH1    | A_ASP_50  | OD2    | 3.480        |
| 4PTU   | A_ARG_53  | NH2    | A_ASP_50  | OD2    | 2.718        |
| 4PTU   | A_ARG_61  | NH1    | A_GLU_79  | OE1    | 3.172        |
| 4PTU   | A_ARG_61  | NH2    | A_GLU_79  | OE1    | 3.200        |
| 4PTU   | A_ARG_61  | NH2    | A_ASP_82  | OD1    | 2.746        |
| 4PTU   | A_ARG_61  | NH2    | A_ASP_82  | OD2    | 3.514        |
| 4PTU   | A_ARG_91  | NH2    | B_GLU_95  | OE1    | 3.438        |
| 4PTU   | A_ARG_91  | NH2    | B_GLU_95  | OE2    | 3.334        |
| 4PTU   | A_LYS_107 | NZ     | A_GLU_17  | OE1    | 3.740        |
| 4PTU   | A_LYS_107 | NZ     | A_GLU_17  | OE2    | 3.243        |
| 4PTU   | A_LYS_149 | NZ     | A_GLU_195 | OE1    | 3.016        |
| 4PTU   | A_LYS_149 | NZ     | A_GLU_195 | OE2    | 3.379        |
| 4PTU   | A_LYS_183 | NZ     | A_GLU_187 | OE1    | 2.720        |
| 4PTU   | A_LYS_188 | NZ     | A_ASP_185 | OD1    | 3.765        |
| 4PTU   | A_HIS_189 | ND1    | A_ASP_151 | OD2    | 3.327        |
| 4PTU   | B_HIS_32  | ND1    | B_ASP_97  | OD1    | 3.387        |
| 4PTU   | B_HIS_32  | NE2    | B_ASP_97  | OD1    | 3.899        |
| 4PTU   | B_HIS_35  | NE2    | B_GLU_95  | OE2    | 2.750        |
| 4PTU   | B_ARG_38  | NH1    | B_ASP_86  | OD1    | 2.924        |
| 4PTU   | B_ARG_38  | NH2    | B_GLU_46  | OE1    | 3.021        |
| 4PTU   | B_ARG_38  | NH2    | B_GLU_46  | OE2    | 3.729        |
| 4PTU   | B_ARG_38  | NH2    | B_ASP_86  | OD1    | 3.966        |
| 4PTU   | B_ARG_66  | NH1    | B_ASP_86  | OD1    | 3.085        |
| 4PTU   | B_ARG_66  | NH1    | B_ASP_86  | OD2    | 3.410        |
| 4PTU   | B_ARG_66  | NH2    | B_ASP_86  | OD1    | 3.877        |
| 4PTU   | B_ARG_66  | NH2    | B_ASP_86  | OD2    | 2.723        |
| 4PTU   | B_LYS_94  | NZ     | B_ASP_97  | OD1    | 2.781        |
| 4PTU   | B_LYS_94  | NZ     | B_ASP_97  | OD2    | 3.846        |
| 4PTU   | B_LYS_94  | NZ     | B_ASP_101 | OD1    | 3.172        |
| 4PTU   | B_LYS_94  | NZ     | B_ASP_101 | OD2    | 2.801        |
| 4PTU   | B_LYS_143 | NZ     | B_ASP_144 | OD1    | 3.236        |
| 4PTU   | B_LYS_143 | NZ     | B_ASP_144 | OD2    | 3.531        |
| 4PTU   | B_LYS_209 | NZ     | A_GLU_123 | OE1    | 3.628        |
| 4PTU   | B_ARG_210 | NH1    | B_GLU_212 | OE2    | 3.352        |

Table 604: 4PTU-specific salt bridging networks analysis. In this table, a PDB file is specified with a four-letter PDB ID, except that the names of the PDB files corresponding to the single NMR structural model split from the NMR ensemble is specified with a four-letter PDB ID in addition to a hyphen followed by the single NMR structural model numeric ID, the residue naming scheme is **Chain ID\_residue name\_residue number**,  $\angle ADH$  represents the angle formed by acceptor (A), donor (D) and hydrogen (H) ( $\angle ADH$ ).

| PDB ID | Residue A | Atom A | Residue B  | Atom B | Distance (Å) |
|--------|-----------|--------|------------|--------|--------------|
| 4Q6I   | A_ARG_24  | NH2    | A_ASP_70   | OD1    | 3.547        |
| 4Q6I   | A_LYS_49  | NZ     | A_GLU_55   | OE1    | 3.733        |
| 4Q6I   | A_LYS_49  | NZ     | B_ASP_100A | OD1    | 2.964        |
| 4Q6I   | A_ARG_61  | NH1    | A_GLU_79   | OE1    | 3.355        |
| 4Q6I   | A_ARG_61  | NH1    | A_GLU_79   | OE2    | 3.338        |
| 4Q6I   | A_ARG_61  | NH1    | A_GLU_81   | OE2    | 3.926        |
| 4Q6I   | A_ARG_61  | NH2    | A_GLU_79   | OE2    | 3.547        |
| 4Q6I   | A_ARG_61  | NH2    | A_GLU_81   | OE2    | 3.022        |
| 4Q6I   | A_ARG_61  | NH2    | A_ASP_82   | OD1    | 2.927        |
| 4Q6I   | A_ARG_61  | NH2    | A_ASP_82   | OD2    | 3.845        |
| 4Q6I   | A_LYS_103 | NZ     | A_GLU_105  | OE2    | 3.808        |
| 4Q6I   | A_LYS_142 | NZ     | A_GLU_105  | OE1    | 3.421        |
| 4Q6I   | A_LYS_142 | NZ     | A_GLU_105  | OE2    | 2.841        |
| 4Q6I   | A_LYS_147 | NZ     | A_GLU_154  | OE1    | 3.796        |
| 4Q6I   | A_LYS_149 | NZ     | A_GLU_195  | OE1    | 3.162        |
| 4Q6I   | A_LYS_149 | NZ     | A_GLU_195  | OE2    | 3.016        |
| 4Q6I   | A_ARG_155 | NH1    | A_GLU_185  | OE2    | 3.506        |
| 4Q6I   | A_HIS_189 | ND1    | A_ASP_151  | OD2    | 2.954        |
| 4Q6I   | B_HIS_66  | ND1    | B_ASP_61   | OD1    | 3.699        |
| 4Q6I   | B_HIS_66  | ND1    | B_ASP_61   | OD2    | 3.085        |
| 4Q6I   | B_HIS_66  | NE2    | B_ASP_86   | OD1    | 3.906        |
| 4Q6I   | B_HIS_66  | NE2    | B_ASP_86   | OD2    | 2.658        |
| 4Q6I   | B_ARG_94  | NH2    | B_ASP_101  | OD1    | 3.897        |
| 4Q6I   | B_ARG_94  | NH2    | B_ASP_101  | OD2    | 2.713        |
| 4Q6I   | B_LYS_208 | NZ     | A_GLU_123  | OE2    | 2.822        |
| 4Q6I   | C_LYS_8   | NZ     | C_GLU_119  | OE1    | 2.805        |
| 4Q6I   | C_HIS_27  | NE2    | C_GLU_85   | OE1    | 3.053        |
| 4Q6I   | C_LYS_50  | NZ     | C_GLU_77   | OE2    | 3.944        |
| 4Q6I   | C_LYS_50  | NZ     | L_GLU_93   | OE2    | 2.549        |
| 4Q6I   | C_ARG_54  | NH1    | C_ASP_78   | OD2    | 2.778        |
| 4Q6I   | C_ARG_54  | NH2    | C_ASP_78   | OD1    | 3.552        |
| 4Q6I   | C_ARG_54  | NH2    | C_ASP_78   | OD2    | 3.385        |
| 4Q6I   | C_ARG_134 | NH1    | C_GLU_150  | OE1    | 2.907        |
| 4Q6I   | C_ARG_134 | NH1    | C_GLU_150  | OE2    | 3.926        |
| 4Q6I   | C_LYS_136 | NZ     | C_ASP_153  | OD1    | 3.102        |
| 4Q6I   | C_LYS_136 | NZ     | C_ASP_153  | OD2    | 3.702        |
| 4Q6I   | C_LYS_167 | NZ     | C_GLU_169  | OE2    | 3.766        |
| 4Q6I   | C_LYS_181 | NZ     | G_GLU_56   | OE1    | 2.499        |
| 4Q6I   | D_ARG_24  | NH2    | D_ASP_70   | OD1    | 3.494        |
| 4Q6I   | D_LYS_49  | NZ     | D_GLU_55   | OE1    | 3.186        |
| 4Q6I   | D_LYS_49  | NZ     | D_GLU_55   | OE2    | 3.674        |
| 4Q6I   | D_LYS_49  | NZ     | E_ASP_100A | OD1    | 3.008        |
| 4Q6I   | D_ARG_61  | NH1    | D_GLU_79   | OE1    | 3.297        |
| 4Q6I   | D_ARG_61  | NH1    | D_GLU_79   | OE2    | 3.483        |
| 4Q6I   | D_ARG_61  | NH2    | D_GLU_79   | OE2    | 3.497        |
| 4Q6I   | D_ARG_61  | NH2    | D_GLU_81   | OE2    | 3.188        |
| 4Q6I   | D_ARG_61  | NH2    | D_ASP_82   | OD1    | 3.128        |
| 4Q6I   | D_ARG_61  | NH2    | D_ASP_82   | OD2    | 3.997        |
| 4Q6I   | D_LYS_142 | NZ     | D_GLU_105  | OE1    | 3.699        |
| 4Q6I   | D_LYS_142 | NZ     | D_GLU_105  | OE2    | 2.690        |
| 4Q6I   | D_LYS_147 | NZ     | D_GLU_154  | OE1    | 3.636        |
| 4Q6I   | D_LYS_149 | NZ     | D_GLU_195  | OE1    | 3.195        |
| 4Q6I   | D_LYS_149 | NZ     | D_GLU_195  | OE2    | 2.990        |
| 4Q6I   | D_ARG_155 | NH1    | D_GLU_185  | OE2    | 3.476        |
| 4Q6I   | D_ARG_155 | NH2    | D_GLU_185  | OE2    | 3.858        |
| 4Q6I   | D_HIS_189 | ND1    | D_ASP_151  | OD2    | 2.792        |
| 4Q6I   | E_HIS_66  | ND1    | E_ASP_61   | OD1    | 3.611        |



|      |           |     |            |     |       |
|------|-----------|-----|------------|-----|-------|
| 4Q6I | E_HIS.66  | ND1 | E_ASP.61   | OD2 | 3.049 |
| 4Q6I | E_HIS.66  | NE2 | E_ASP.86   | OD1 | 3.914 |
| 4Q6I | E_HIS.66  | NE2 | E_ASP.86   | OD2 | 2.560 |
| 4Q6I | E_ARG.94  | NH2 | E_ASP.101  | OD1 | 3.957 |
| 4Q6I | E_ARG.94  | NH2 | E_ASP.101  | OD2 | 2.680 |
| 4Q6I | E_LYS.208 | NZ  | D_GLU.123  | OE2 | 3.047 |
| 4Q6I | F_ARG.24  | NH2 | F_ASP.70   | OD1 | 3.340 |
| 4Q6I | F_ARG.24  | NH2 | F_ASP.70   | OD2 | 3.665 |
| 4Q6I | F_LYS.49  | NZ  | F_GLU.55   | OE1 | 3.518 |
| 4Q6I | F_LYS.49  | NZ  | G_ASP.100A | OD1 | 3.146 |
| 4Q6I | F_ARG.61  | NH1 | F_GLU.79   | OE1 | 3.116 |
| 4Q6I | F_ARG.61  | NH1 | F_GLU.79   | OE2 | 3.200 |
| 4Q6I | F_ARG.61  | NH2 | F_GLU.79   | OE2 | 3.435 |
| 4Q6I | F_ARG.61  | NH2 | F_GLU.81   | OE2 | 3.194 |
| 4Q6I | F_ARG.61  | NH2 | F_ASP.82   | OD1 | 2.864 |
| 4Q6I | F_ARG.61  | NH2 | F_ASP.82   | OD2 | 3.691 |
| 4Q6I | F_LYS.103 | NZ  | F_GLU.105  | OE2 | 3.989 |
| 4Q6I | F_LYS.142 | NZ  | F_GLU.105  | OE1 | 3.572 |
| 4Q6I | F_LYS.142 | NZ  | F_GLU.105  | OE2 | 2.671 |
| 4Q6I | F_LYS.147 | NZ  | F_GLU.154  | OE1 | 3.784 |
| 4Q6I | F_LYS.149 | NZ  | F_GLU.195  | OE1 | 3.282 |
| 4Q6I | F_LYS.149 | NZ  | F_GLU.195  | OE2 | 2.913 |
| 4Q6I | F_ARG.155 | NH1 | F_GLU.185  | OE2 | 3.619 |
| 4Q6I | F_ARG.155 | NH2 | F_GLU.185  | OE2 | 3.997 |
| 4Q6I | F_HIS.189 | ND1 | F_ASP.151  | OD2 | 2.927 |
| 4Q6I | G_HIS.66  | ND1 | G_ASP.61   | OD1 | 3.622 |
| 4Q6I | G_HIS.66  | ND1 | G_ASP.61   | OD2 | 3.038 |
| 4Q6I | G_HIS.66  | NE2 | G_ASP.86   | OD1 | 3.886 |
| 4Q6I | G_HIS.66  | NE2 | G_ASP.86   | OD2 | 2.589 |
| 4Q6I | G_ARG.94  | NH2 | G_ASP.101  | OD1 | 3.834 |
| 4Q6I | G_ARG.94  | NH2 | G_ASP.101  | OD2 | 2.611 |
| 4Q6I | G_LYS.208 | NZ  | F_GLU.123  | OE2 | 3.409 |
| 4Q6I | H_HIS.66  | ND1 | H_ASP.61   | OD1 | 3.559 |
| 4Q6I | H_HIS.66  | ND1 | H_ASP.61   | OD2 | 2.808 |
| 4Q6I | H_HIS.66  | NE2 | H_ASP.86   | OD1 | 3.762 |
| 4Q6I | H_HIS.66  | NE2 | H_ASP.86   | OD2 | 2.594 |
| 4Q6I | H_ARG.94  | NH2 | H_ASP.101  | OD1 | 3.987 |
| 4Q6I | H_ARG.94  | NH2 | H_ASP.101  | OD2 | 2.731 |
| 4Q6I | H_LYS.208 | NZ  | L_GLU.123  | OE2 | 3.045 |
| 4Q6I | I_LYS.8   | NZ  | I_GLU.119  | OE1 | 2.686 |
| 4Q6I | I_LYS.8   | NZ  | I_GLU.119  | OE2 | 3.813 |
| 4Q6I | I_HIS.27  | NE2 | I_GLU.85   | OE1 | 3.108 |
| 4Q6I | I_LYS.50  | NZ  | F_GLU.93   | OE2 | 2.473 |
| 4Q6I | I_LYS.50  | NZ  | I_GLU.77   | OE2 | 3.955 |
| 4Q6I | I_ARG.54  | NH1 | I_ASP.78   | OD2 | 2.649 |
| 4Q6I | I_ARG.54  | NH2 | I_ASP.78   | OD1 | 3.358 |
| 4Q6I | I_ARG.54  | NH2 | I_ASP.78   | OD2 | 3.298 |
| 4Q6I | I_ARG.134 | NH1 | I_GLU.150  | OE1 | 2.570 |
| 4Q6I | I_ARG.134 | NH1 | I_GLU.150  | OE2 | 3.190 |
| 4Q6I | I_LYS.136 | NZ  | I_ASP.153  | OD1 | 2.871 |
| 4Q6I | I_LYS.136 | NZ  | I_ASP.153  | OD2 | 3.533 |
| 4Q6I | I_LYS.167 | NZ  | I_GLU.169  | OE2 | 3.738 |
| 4Q6I | I_LYS.181 | NZ  | H_GLU.56   | OE1 | 3.345 |
| 4Q6I | J_LYS.8   | NZ  | J_GLU.119  | OE1 | 2.575 |
| 4Q6I | J_LYS.8   | NZ  | J_GLU.119  | OE2 | 3.660 |
| 4Q6I | J_HIS.27  | NE2 | J_GLU.85   | OE1 | 3.112 |
| 4Q6I | J_LYS.50  | NZ  | D_GLU.93   | OE2 | 2.666 |
| 4Q6I | J_LYS.50  | NZ  | J_GLU.77   | OE2 | 3.985 |

|      |           |     |            |     |       |
|------|-----------|-----|------------|-----|-------|
| 4Q6I | J_ARG_54  | NH1 | J_ASP_78   | OD2 | 2.642 |
| 4Q6I | J_ARG_54  | NH2 | J_ASP_78   | OD1 | 3.414 |
| 4Q6I | J_ARG_54  | NH2 | J_ASP_78   | OD2 | 3.086 |
| 4Q6I | J_ARG_134 | NH1 | J_GLU_150  | OE1 | 3.114 |
| 4Q6I | J_LYS_136 | NZ  | J_ASP_153  | OD1 | 2.951 |
| 4Q6I | J_LYS_136 | NZ  | J_ASP_153  | OD2 | 3.722 |
| 4Q6I | J_LYS_167 | NZ  | J_GLU_169  | OE2 | 3.737 |
| 4Q6I | K_LYS_8   | NZ  | K_GLU_119  | OE1 | 2.674 |
| 4Q6I | K_LYS_8   | NZ  | K_GLU_119  | OE2 | 3.835 |
| 4Q6I | K_HIS_27  | NE2 | K_GLU_85   | OE1 | 2.922 |
| 4Q6I | K_LYS_50  | NZ  | A_GLU_93   | OE2 | 2.835 |
| 4Q6I | K_LYS_50  | NZ  | K_GLU_77   | OE2 | 3.766 |
| 4Q6I | K_ARG_54  | NH1 | K_ASP_78   | OD2 | 2.757 |
| 4Q6I | K_ARG_54  | NH2 | K_ASP_78   | OD1 | 3.522 |
| 4Q6I | K_ARG_54  | NH2 | K_ASP_78   | OD2 | 3.092 |
| 4Q6I | K_ARG_134 | NH1 | K_GLU_150  | OE1 | 2.737 |
| 4Q6I | K_ARG_134 | NH1 | K_GLU_150  | OE2 | 2.516 |
| 4Q6I | K_LYS_136 | NZ  | K_ASP_153  | OD1 | 3.074 |
| 4Q6I | K_LYS_136 | NZ  | K_ASP_153  | OD2 | 3.548 |
| 4Q6I | L_ARG_24  | NH2 | L_ASP_70   | OD1 | 3.386 |
| 4Q6I | L_ARG_24  | NH2 | L_ASP_70   | OD2 | 3.804 |
| 4Q6I | L_LYS_49  | NZ  | H_ASP_100A | OD1 | 3.063 |
| 4Q6I | L_LYS_49  | NZ  | L_GLU_55   | OE1 | 3.608 |
| 4Q6I | L_ARG_61  | NH1 | L_GLU_79   | OE1 | 3.293 |
| 4Q6I | L_ARG_61  | NH1 | L_GLU_79   | OE2 | 3.453 |
| 4Q6I | L_ARG_61  | NH2 | L_GLU_79   | OE2 | 3.533 |
| 4Q6I | L_ARG_61  | NH2 | L_GLU_81   | OE2 | 3.058 |
| 4Q6I | L_ARG_61  | NH2 | L_ASP_82   | OD1 | 3.103 |
| 4Q6I | L_LYS_142 | NZ  | L_GLU_105  | OE1 | 3.663 |
| 4Q6I | L_LYS_142 | NZ  | L_GLU_105  | OE2 | 2.645 |
| 4Q6I | L_LYS_147 | NZ  | L_GLU_154  | OE1 | 3.681 |
| 4Q6I | L_LYS_149 | NZ  | L_GLU_195  | OE1 | 3.252 |
| 4Q6I | L_LYS_149 | NZ  | L_GLU_195  | OE2 | 2.874 |
| 4Q6I | L_ARG_155 | NH1 | L_GLU_185  | OE2 | 3.717 |
| 4Q6I | L_ARG_155 | NH2 | L_GLU_185  | OE2 | 3.978 |
| 4Q6I | L_HIS_189 | ND1 | L_ASP_151  | OD2 | 2.862 |

Table 605: 4Q6I-specific salt bridging networks analysis. In this table, a PDB file is specified with a four-letter PDB ID, except that the names of the PDB files corresponding to the single NMR structural model split from the NMR ensemble is specified with a four-letter PDB ID in addition to a hyphen followed by the single NMR structural model numeric ID, the residue naming scheme is **Chain ID\_residue name\_residue number**,  $\angle ADH$  represents the angle formed by acceptor (A), donor (D) and hydrogen (H) ( $\angle ADH$ ).

| PDB ID | Residue A | Atom A | Residue B | Atom B | Distance (Å) |
|--------|-----------|--------|-----------|--------|--------------|
| 4Q97   | A_LYS_181 | NZ     | A_GLU_215 | OE1    | 3.508        |
| 4Q97   | A_LYS_181 | NZ     | A_GLU_215 | OE2    | 2.452        |
| 4Q97   | A_ARG_218 | NH2    | A_GLU_215 | OE1    | 3.903        |
| 4Q97   | A_ARG_240 | NH2    | A_GLU_238 | OE1    | 2.864        |
| 4Q97   | A_ARG_240 | NH2    | A_GLU_238 | OE2    | 3.199        |
| 4Q97   | B_LYS_181 | NZ     | B_GLU_215 | OE1    | 3.498        |
| 4Q97   | B_LYS_181 | NZ     | B_GLU_215 | OE2    | 2.431        |
| 4Q97   | B_ARG_218 | NH2    | B_GLU_215 | OE1    | 3.910        |
| 4Q97   | B_ARG_240 | NH2    | B_GLU_238 | OE1    | 2.853        |
| 4Q97   | B_ARG_240 | NH2    | B_GLU_238 | OE2    | 3.203        |

Table 606: 4Q97-specific salt bridging networks analysis. In this table, a PDB file is specified with a four-letter PDB ID, except that the names of the PDB files corresponding to the single NMR structural model split from the NMR ensemble is specified with a four-letter PDB ID in addition to a hyphen followed by the single NMR structural model numeric ID, the residue naming scheme is **Chain ID\_residue name\_residue number**,  $\angle ADH$  represents the angle formed by acceptor (A), donor (D) and hydrogen (H) ( $\angle ADH$ ).

| PDB ID | Residue A | Atom A | Residue B | Atom B | Distance (Å) |
|--------|-----------|--------|-----------|--------|--------------|
| 4Q9B   | A_ARG_250 | NH1    | A_GLU_268 | OE2    | 2.895        |
| 4Q9B   | A_ARG_288 | NH1    | A_GLU_316 | OE1    | 3.608        |
| 4Q9B   | A_ARG_288 | NH1    | A_GLU_316 | OE2    | 2.926        |
| 4Q9B   | A_ARG_288 | NH2    | A_GLU_316 | OE1    | 2.765        |
| 4Q9B   | A_ARG_288 | NH2    | A_GLU_316 | OE2    | 3.617        |
| 4Q9B   | A_ARG_309 | NH1    | A_GLU_295 | OE1    | 2.883        |
| 4Q9B   | A_ARG_309 | NH1    | A_GLU_295 | OE2    | 3.399        |
| 4Q9B   | A_ARG_309 | NH1    | B_GLU_255 | OE1    | 3.484        |
| 4Q9B   | A_ARG_309 | NH1    | B_GLU_255 | OE2    | 2.912        |
| 4Q9B   | A_ARG_309 | NH2    | B_GLU_255 | OE2    | 3.212        |
| 4Q9B   | A_ARG_339 | NH2    | A_GLU_322 | OE1    | 3.788        |
| 4Q9B   | A_ARG_339 | NH2    | A_GLU_322 | OE2    | 2.973        |
| 4Q9B   | A_ARG_341 | NH1    | A_GLU_322 | OE2    | 3.129        |
| 4Q9B   | B_ARG_250 | NH1    | B_GLU_268 | OE2    | 2.773        |
| 4Q9B   | B_ARG_288 | NH1    | B_GLU_316 | OE1    | 3.649        |
| 4Q9B   | B_ARG_288 | NH1    | B_GLU_316 | OE2    | 2.767        |
| 4Q9B   | B_ARG_288 | NH2    | B_GLU_316 | OE1    | 2.902        |
| 4Q9B   | B_ARG_288 | NH2    | B_GLU_316 | OE2    | 3.570        |
| 4Q9B   | B_ARG_309 | NH1    | A_GLU_255 | OE1    | 3.145        |
| 4Q9B   | B_ARG_309 | NH1    | A_GLU_255 | OE2    | 2.858        |
| 4Q9B   | B_ARG_309 | NH1    | B_GLU_295 | OE1    | 3.156        |
| 4Q9B   | B_ARG_309 | NH1    | B_GLU_295 | OE2    | 3.958        |
| 4Q9B   | B_ARG_309 | NH2    | B_GLU_295 | OE1    | 2.549        |
| 4Q9B   | B_ARG_339 | NH2    | B_GLU_322 | OE1    | 2.438        |
| 4Q9B   | B_ARG_339 | NH2    | B_GLU_322 | OE2    | 3.097        |
| 4Q9B   | B_ARG_341 | NH2    | B_GLU_322 | OE2    | 2.672        |

Table 607: 4Q9B-specific salt bridging networks analysis. In this table, a PDB file is specified with a four-letter PDB ID, except that the names of the PDB files corresponding to the single NMR structural model split from the NMR ensemble is specified with a four-letter PDB ID in addition to a hyphen followed by the single NMR structural model numeric ID, the residue naming scheme is **Chain ID\_residue name\_residue number**,  $\angle ADH$  represents the angle formed by acceptor (A), donor (D) and hydrogen (H) ( $\angle ADH$ ).

| PDB ID | Residue A | Atom A | Residue B | Atom B | Distance (Å) |
|--------|-----------|--------|-----------|--------|--------------|
| 4Q9C   | A_LYS_388 | NZ     | A_GLU_422 | OE1    | 3.305        |
| 4Q9C   | A_LYS_428 | NZ     | A_ASP_390 | OD2    | 3.566        |

Table 608: 4Q9C-specific salt bridging networks analysis. In this table, a PDB file is specified with a four-letter PDB ID, except that the names of the PDB files corresponding to the single NMR structural model split from the NMR ensemble is specified with a four-letter PDB ID in addition to a hyphen followed by the single NMR structural model numeric ID, the residue naming scheme is **Chain ID\_residue name\_residue number**,  $\angle ADH$  represents the angle formed by acceptor (A), donor (D) and hydrogen (H) ( $\angle ADH$ ).

| PDB ID | Residue A | Atom A | Residue B | Atom B | Distance (Å) |
|--------|-----------|--------|-----------|--------|--------------|
| 4QEX   | A_LYS_17  | NZ     | A_GLU_71  | OE1    | 3.725        |
| 4QEX   | A_LYS_17  | NZ     | A_GLU_71  | OE2    | 2.956        |
| 4QEX   | A_ARG_18  | NH1    | A_ASP_39  | OD1    | 2.342        |
| 4QEX   | A_ARG_18  | NH1    | A_ASP_39  | OD2    | 2.888        |
| 4QEX   | A_ARG_18  | NH2    | A_ASP_39  | OD1    | 3.858        |
| 4QEX   | A_LYS_19  | NZ     | A_ASP_80  | OD1    | 2.818        |
| 4QEX   | A_LYS_19  | NZ     | A_ASP_80  | OD2    | 3.469        |
| 4QEX   | A_LYS_26  | NZ     | A_ASP_108 | OD1    | 3.934        |
| 4QEX   | A_ARG_40  | NH1    | A_ASP_97  | OD2    | 2.989        |
| 4QEX   | A_ARG_40  | NH2    | A_ASP_97  | OD2    | 2.794        |
| 4QEX   | A_ARG_40  | NH2    | A_GLU_182 | OE1    | 3.072        |
| 4QEX   | A_ARG_40  | NH2    | A_GLU_182 | OE2    | 3.122        |
| 4QEX   | A_ARG_41  | NH1    | A_ASP_108 | OD2    | 2.767        |
| 4QEX   | A_ARG_41  | NH2    | A_ASP_106 | OD1    | 3.672        |
| 4QEX   | A_ARG_41  | NH2    | A_ASP_106 | OD2    | 2.658        |
| 4QEX   | A_ARG_41  | NH2    | A_ASP_108 | OD2    | 3.573        |
| 4QEX   | A_LYS_61  | NZ     | A_GLU_146 | OE2    | 3.762        |
| 4QEX   | A_LYS_78  | NZ     | A_ASP_90  | OD1    | 3.235        |
| 4QEX   | A_ARG_140 | NH1    | A_GLU_117 | OE2    | 3.439        |
| 4QEX   | A_LYS_141 | NZ     | A_GLU_172 | OE1    | 3.378        |
| 4QEX   | A_HIS_159 | NE2    | A_GLU_158 | OE2    | 3.794        |
| 4QEX   | A_LYS_181 | NZ     | A_GLU_173 | OE1    | 3.704        |
| 4QEX   | A_LYS_181 | NZ     | A_GLU_173 | OE2    | 3.359        |
| 4QEX   | A_ARG_191 | NH2    | A_ASP_263 | OD2    | 3.924        |
| 4QEX   | A_ARG_194 | NH2    | A_GLU_190 | OE2    | 3.371        |
| 4QEX   | A_LYS_199 | NZ     | A_GLU_276 | OE2    | 3.126        |
| 4QEX   | A_LYS_230 | NZ     | A_ASP_274 | OD1    | 3.711        |
| 4QEX   | A_LYS_230 | NZ     | A_ASP_274 | OD2    | 3.195        |
| 4QEX   | A_LYS_284 | NZ     | A_ASP_309 | OD2    | 3.762        |
| 4QEX   | A_LYS_284 | NZ     | A_ASP_312 | OD1    | 3.824        |
| 4QEX   | A_LYS_284 | NZ     | A_ASP_312 | OD2    | 2.849        |
| 4QEX   | A_LYS_320 | NZ     | A_ASP_311 | OD1    | 3.730        |
| 4QEX   | A_LYS_333 | NZ     | A_GLU_331 | OE1    | 2.647        |
| 4QEX   | A_LYS_341 | NZ     | A_GLU_545 | OE1    | 3.181        |
| 4QEX   | A_LYS_341 | NZ     | A_GLU_545 | OE2    | 2.966        |
| 4QEX   | A_LYS_341 | NZ     | H_ASP_53  | OD1    | 3.875        |
| 4QEX   | A_ARG_348 | NH1    | A_ASP_405 | OD2    | 3.055        |
| 4QEX   | A_ARG_348 | NH2    | A_ASP_405 | OD2    | 2.876        |
| 4QEX   | A_ARG_348 | NH2    | A_GLU_488 | OE1    | 3.045        |
| 4QEX   | A_ARG_348 | NH2    | A_GLU_488 | OE2    | 3.938        |
| 4QEX   | A_ARG_349 | NH2    | A_ASP_414 | OD1    | 3.531        |
| 4QEX   | A_ARG_349 | NH2    | A_ASP_414 | OD2    | 2.996        |
| 4QEX   | A_LYS_384 | NZ     | A_GLU_306 | OE1    | 3.997        |
| 4QEX   | A_LYS_384 | NZ     | A_GLU_306 | OE2    | 3.752        |
| 4QEX   | A_ARG_385 | NH2    | A_ASP_324 | OD1    | 3.155        |
| 4QEX   | A_LYS_386 | NZ     | A_GLU_351 | OE1    | 3.481        |
| 4QEX   | A_LYS_386 | NZ     | A_GLU_351 | OE2    | 3.992        |
| 4QEX   | A_ARG_422 | NH2    | H_ASP_97  | OD2    | 3.116        |
| 4QEX   | A_LYS_423 | NZ     | A_ASP_358 | OD1    | 3.415        |
| 4QEX   | A_LYS_423 | NZ     | A_ASP_358 | OD2    | 3.036        |
| 4QEX   | A_LYS_427 | NZ     | A_ASP_362 | OD1    | 2.843        |
| 4QEX   | A_ARG_437 | NH2    | A_ASP_442 | OD2    | 3.346        |
| 4QEX   | A_LYS_443 | NZ     | A_ASP_447 | OD1    | 3.941        |
| 4QEX   | A_LYS_443 | NZ     | A_ASP_447 | OD2    | 2.889        |
| 4QEX   | A_ARG_484 | NH1    | A_ASP_408 | OD2    | 3.149        |
| 4QEX   | A_ARG_484 | NH2    | A_ASP_405 | OD1    | 3.156        |
| 4QEX   | A_ARG_484 | NH2    | A_ASP_405 | OD2    | 3.109        |

|      |           |     |           |     |       |
|------|-----------|-----|-----------|-----|-------|
| 4QEX | A_ARG_484 | NH2 | A_ASP_408 | OD2 | 3.711 |
| 4QEX | A_LYS_497 | NZ  | A_GLU_582 | OE1 | 2.757 |
| 4QEX | A_LYS_531 | NZ  | A_GLU_535 | OE2 | 3.270 |
| 4QEX | A_LYS_532 | NZ  | A_GLU_535 | OE1 | 3.348 |
| 4QEX | A_LYS_532 | NZ  | A_GLU_535 | OE2 | 3.847 |
| 4QEX | A_LYS_573 | NZ  | A_GLU_394 | OE2 | 3.110 |
| 4QEX | L_ARG_18  | NH2 | L_ASP_76  | OD1 | 3.851 |
| 4QEX | L_ARG_24  | NH2 | L_ASP_70  | OD2 | 3.377 |
| 4QEX | L_LYS_27  | NZ  | L_GLU_93  | OE1 | 3.354 |
| 4QEX | L_ARG_39  | NH1 | L_ASP_81  | OD1 | 3.904 |
| 4QEX | L_ARG_61  | NH1 | L_ASP_82  | OD1 | 2.872 |
| 4QEX | L_ARG_61  | NH1 | L_ASP_82  | OD2 | 2.775 |
| 4QEX | L_ARG_61  | NH2 | L_GLU_79  | OE1 | 3.798 |
| 4QEX | L_ARG_61  | NH2 | L_ASP_82  | OD1 | 2.840 |
| 4QEX | L_ARG_61  | NH2 | L_ASP_82  | OD2 | 3.147 |
| 4QEX | L_LYS_149 | NZ  | L_GLU_154 | OE1 | 3.545 |
| 4QEX | L_ARG_155 | NH2 | L_GLU_185 | OE2 | 3.880 |
| 4QEX | L_HIS_189 | ND1 | L_ASP_151 | OD2 | 3.464 |
| 4QEX | L_LYS_199 | NZ  | L_ASP_110 | OD2 | 3.727 |
| 4QEX | H_LYS_38  | NZ  | H_ASP_86  | OD1 | 3.545 |
| 4QEX | H_LYS_62  | NZ  | H_ASP_46  | OD1 | 3.147 |
| 4QEX | H_LYS_62  | NZ  | H_ASP_46  | OD2 | 3.315 |
| 4QEX | H_LYS_66  | NZ  | H_ASP_86  | OD2 | 3.686 |
| 4QEX | H_ARG_82A | NH2 | H_GLU_81  | OE1 | 3.257 |
| 4QEX | B_LYS_17  | NZ  | B_GLU_71  | OE1 | 3.723 |
| 4QEX | B_LYS_17  | NZ  | B_GLU_71  | OE2 | 2.955 |
| 4QEX | B_ARG_18  | NH1 | B_ASP_39  | OD1 | 2.348 |
| 4QEX | B_ARG_18  | NH1 | B_ASP_39  | OD2 | 2.891 |
| 4QEX | B_ARG_18  | NH2 | B_ASP_39  | OD1 | 3.859 |
| 4QEX | B_LYS_19  | NZ  | B_ASP_80  | OD1 | 2.821 |
| 4QEX | B_LYS_19  | NZ  | B_ASP_80  | OD2 | 3.471 |
| 4QEX | B_LYS_26  | NZ  | B_ASP_108 | OD1 | 3.946 |
| 4QEX | B_ARG_40  | NH1 | B_ASP_97  | OD2 | 2.987 |
| 4QEX | B_ARG_40  | NH2 | B_ASP_97  | OD2 | 2.795 |
| 4QEX | B_ARG_40  | NH2 | B_GLU_182 | OE1 | 3.067 |
| 4QEX | B_ARG_40  | NH2 | B_GLU_182 | OE2 | 3.120 |
| 4QEX | B_ARG_41  | NH1 | B_ASP_108 | OD2 | 2.740 |
| 4QEX | B_ARG_41  | NH2 | B_ASP_106 | OD1 | 3.677 |
| 4QEX | B_ARG_41  | NH2 | B_ASP_106 | OD2 | 2.651 |
| 4QEX | B_ARG_41  | NH2 | B_ASP_108 | OD2 | 3.554 |
| 4QEX | B_LYS_61  | NZ  | B_GLU_146 | OE2 | 3.752 |
| 4QEX | B_LYS_78  | NZ  | B_ASP_90  | OD1 | 3.242 |
| 4QEX | B_LYS_125 | NZ  | B_GLU_130 | OE1 | 3.909 |
| 4QEX | B_ARG_140 | NH1 | B_GLU_117 | OE2 | 3.438 |
| 4QEX | B_LYS_141 | NZ  | B_GLU_172 | OE1 | 3.375 |
| 4QEX | B_HIS_159 | NE2 | B_GLU_158 | OE2 | 3.791 |
| 4QEX | B_LYS_181 | NZ  | B_GLU_173 | OE1 | 3.691 |
| 4QEX | B_LYS_181 | NZ  | B_GLU_173 | OE2 | 3.345 |
| 4QEX | B_ARG_191 | NH2 | B_ASP_263 | OD2 | 3.920 |
| 4QEX | B_ARG_194 | NH2 | B_GLU_190 | OE2 | 3.366 |
| 4QEX | B_LYS_199 | NZ  | B_GLU_276 | OE2 | 3.126 |
| 4QEX | B_LYS_230 | NZ  | B_ASP_274 | OD1 | 3.714 |
| 4QEX | B_LYS_230 | NZ  | B_ASP_274 | OD2 | 3.188 |
| 4QEX | B_LYS_284 | NZ  | B_ASP_309 | OD2 | 3.751 |
| 4QEX | B_LYS_284 | NZ  | B_ASP_312 | OD1 | 3.816 |
| 4QEX | B_LYS_284 | NZ  | B_ASP_312 | OD2 | 2.842 |
| 4QEX | B_LYS_320 | NZ  | B_ASP_311 | OD1 | 3.720 |
| 4QEX | B_LYS_333 | NZ  | B_GLU_331 | OE1 | 2.649 |

|      |           |     |           |     |       |
|------|-----------|-----|-----------|-----|-------|
| 4QEX | B_LYS_341 | NZ  | B_GLU_545 | OE1 | 3.179 |
| 4QEX | B_LYS_341 | NZ  | B_GLU_545 | OE2 | 2.971 |
| 4QEX | B_ARG_348 | NH1 | B_ASP_405 | OD2 | 3.038 |
| 4QEX | B_ARG_348 | NH2 | B_ASP_405 | OD2 | 2.871 |
| 4QEX | B_ARG_348 | NH2 | B_GLU_488 | OE1 | 3.051 |
| 4QEX | B_ARG_348 | NH2 | B_GLU_488 | OE2 | 3.938 |
| 4QEX | B_ARG_349 | NH2 | B_ASP_414 | OD1 | 3.521 |
| 4QEX | B_ARG_349 | NH2 | B_ASP_414 | OD2 | 2.994 |
| 4QEX | B_LYS_384 | NZ  | B_GLU_306 | OE2 | 3.763 |
| 4QEX | B_ARG_385 | NH2 | B_ASP_324 | OD1 | 3.156 |
| 4QEX | B_LYS_386 | NZ  | B_GLU_351 | OE1 | 3.485 |
| 4QEX | B_LYS_386 | NZ  | B_GLU_351 | OE2 | 3.984 |
| 4QEX | B_LYS_423 | NZ  | B_ASP_358 | OD1 | 3.425 |
| 4QEX | B_LYS_423 | NZ  | B_ASP_358 | OD2 | 3.036 |
| 4QEX | B_LYS_427 | NZ  | B_ASP_362 | OD1 | 2.827 |
| 4QEX | B_ARG_437 | NH2 | B_ASP_442 | OD2 | 3.351 |
| 4QEX | B_LYS_443 | NZ  | B_ASP_447 | OD1 | 3.938 |
| 4QEX | B_LYS_443 | NZ  | B_ASP_447 | OD2 | 2.877 |
| 4QEX | B_ARG_484 | NH1 | B_ASP_408 | OD2 | 3.150 |
| 4QEX | B_ARG_484 | NH2 | B_ASP_405 | OD1 | 3.172 |
| 4QEX | B_ARG_484 | NH2 | B_ASP_405 | OD2 | 3.124 |
| 4QEX | B_ARG_484 | NH2 | B_ASP_408 | OD2 | 3.702 |
| 4QEX | B_LYS_497 | NZ  | B_GLU_582 | OE1 | 2.759 |
| 4QEX | B_LYS_531 | NZ  | B_GLU_535 | OE2 | 3.281 |
| 4QEX | B_LYS_532 | NZ  | B_GLU_535 | OE1 | 3.369 |
| 4QEX | B_LYS_532 | NZ  | B_GLU_535 | OE2 | 3.868 |
| 4QEX | B_LYS_573 | NZ  | B_GLU_394 | OE2 | 3.119 |
| 4QEX | M_ARG_18  | NH2 | M_ASP_76  | OD1 | 3.849 |
| 4QEX | M_ARG_24  | NH2 | M_ASP_70  | OD2 | 3.380 |
| 4QEX | M_LYS_27  | NZ  | M_GLU_93  | OE1 | 3.352 |
| 4QEX | M_ARG_39  | NH1 | M_ASP_81  | OD1 | 3.900 |
| 4QEX | M_ARG_61  | NH1 | M_ASP_82  | OD1 | 2.873 |
| 4QEX | M_ARG_61  | NH1 | M_ASP_82  | OD2 | 2.791 |
| 4QEX | M_ARG_61  | NH2 | M_GLU_79  | OE1 | 3.795 |
| 4QEX | M_ARG_61  | NH2 | M_ASP_82  | OD1 | 2.843 |
| 4QEX | M_ARG_61  | NH2 | M_ASP_82  | OD2 | 3.151 |
| 4QEX | M_LYS_149 | NZ  | M_GLU_154 | OE1 | 3.545 |
| 4QEX | M_ARG_155 | NH2 | M_GLU_185 | OE2 | 3.873 |
| 4QEX | M_HIS_189 | ND1 | M_ASP_151 | OD2 | 3.467 |
| 4QEX | M_LYS_199 | NZ  | M_ASP_110 | OD2 | 3.724 |
| 4QEX | I_LYS_38  | NZ  | I_ASP_86  | OD1 | 3.550 |
| 4QEX | I_LYS_62  | NZ  | I_ASP_46  | OD1 | 3.149 |
| 4QEX | I_LYS_62  | NZ  | I_ASP_46  | OD2 | 3.316 |
| 4QEX | I_LYS_66  | NZ  | I_ASP_86  | OD2 | 3.689 |
| 4QEX | I_ARG_82A | NH2 | I_GLU_81  | OE1 | 3.265 |

Table 609: 4QEX-specific salt bridging networks analysis. In this table, a PDB file is specified with a four-letter PDB ID, except that the names of the PDB files corresponding to the single NMR structural model split from the NMR ensemble is specified with a four-letter PDB ID in addition to a hyphen followed by the single NMR structural model numeric ID, the residue naming scheme is **Chain ID\_residue name\_residue number**,  $\angle ADH$  represents the angle formed by acceptor (A), donor (D) and hydrogen (H) ( $\angle ADH$ ).



| PDB ID | Residue A | Atom A | Residue B | Atom B | Distance (Å) |
|--------|-----------|--------|-----------|--------|--------------|
| 4QHU   | L_LYS_30  | NZ     | L_ASP_29  | OD1    | 3.579        |
| 4QHU   | L_LYS_30  | NZ     | L_ASP_91  | OD2    | 3.632        |
| 4QHU   | L_ARG_60  | NH2    | L_GLU_80  | OE2    | 3.111        |
| 4QHU   | L_ARG_60  | NH2    | L_ASP_81  | OD1    | 2.567        |
| 4QHU   | L_ARG_60  | NH2    | L_ASP_81  | OD2    | 3.488        |
| 4QHU   | L_LYS_104 | NZ     | L_ASP_84  | OD1    | 3.091        |
| 4QHU   | L_LYS_104 | NZ     | L_ASP_84  | OD2    | 3.639        |
| 4QHU   | L_LYS_151 | NZ     | L_GLU_205 | OE1    | 3.904        |
| 4QHU   | L_LYS_151 | NZ     | L_GLU_205 | OE2    | 3.118        |
| 4QHU   | L_LYS_168 | NZ     | L_GLU_82  | OE2    | 2.712        |
| 4QHU   | L_ARG_191 | NH2    | L_ASP_153 | OD1    | 3.474        |
| 4QHU   | L_ARG_191 | NH2    | L_ASP_153 | OD2    | 3.847        |
| 4QHU   | H_ARG_38  | NH1    | H_ASP_90  | OD1    | 2.949        |
| 4QHU   | H_ARG_38  | NH2    | H_GLU_46  | OE1    | 3.628        |
| 4QHU   | H_ARG_38  | NH2    | H_GLU_46  | OE2    | 3.083        |
| 4QHU   | H_ARG_38  | NH2    | H_ASP_90  | OD1    | 3.976        |
| 4QHU   | H_LYS_65  | NZ     | H_ASP_62  | OD1    | 2.679        |
| 4QHU   | H_ARG_67  | NH1    | H_ASP_90  | OD1    | 3.783        |
| 4QHU   | H_ARG_67  | NH1    | H_ASP_90  | OD2    | 2.761        |
| 4QHU   | H_ARG_67  | NH2    | H_ASP_90  | OD1    | 3.192        |
| 4QHU   | H_ARG_67  | NH2    | H_ASP_90  | OD2    | 3.606        |
| 4QHU   | H_LYS_76  | NZ     | H_ASP_73  | OD2    | 3.381        |
| 4QHU   | H_ARG_98  | NH1    | H_ASP_103 | OD1    | 3.756        |
| 4QHU   | H_ARG_98  | NH1    | H_ASP_103 | OD2    | 2.704        |
| 4QHU   | H_LYS_208 | NZ     | H_ASP_210 | OD1    | 3.995        |
| 4QHU   | A_LYS_30  | NZ     | A_ASP_91  | OD2    | 4.000        |
| 4QHU   | A_ARG_60  | NH1    | A_GLU_80  | OE2    | 3.278        |
| 4QHU   | A_ARG_60  | NH1    | A_ASP_81  | OD1    | 2.573        |
| 4QHU   | A_ARG_60  | NH1    | A_ASP_81  | OD2    | 3.449        |
| 4QHU   | A_LYS_104 | NZ     | A_ASP_84  | OD1    | 3.029        |
| 4QHU   | A_LYS_104 | NZ     | A_ASP_84  | OD2    | 3.813        |
| 4QHU   | A_LYS_168 | NZ     | A_GLU_82  | OE1    | 3.026        |
| 4QHU   | A_HIS_190 | ND1    | A_ASP_153 | OD2    | 2.727        |
| 4QHU   | A_ARG_191 | NH1    | A_ASP_153 | OD1    | 3.616        |
| 4QHU   | A_ARG_191 | NH2    | A_ASP_153 | OD1    | 3.771        |
| 4QHU   | A_ARG_191 | NH2    | A_ASP_153 | OD2    | 3.954        |
| 4QHU   | B_ARG_38  | NH1    | B_ASP_90  | OD1    | 2.780        |
| 4QHU   | B_ARG_38  | NH2    | B_GLU_46  | OE1    | 3.193        |
| 4QHU   | B_ARG_38  | NH2    | B_GLU_46  | OE2    | 3.721        |
| 4QHU   | B_ARG_38  | NH2    | B_ASP_90  | OD1    | 3.946        |
| 4QHU   | B_LYS_65  | NZ     | B_ASP_62  | OD1    | 3.086        |
| 4QHU   | B_ARG_67  | NH1    | B_ASP_90  | OD1    | 3.968        |
| 4QHU   | B_ARG_67  | NH1    | B_ASP_90  | OD2    | 2.779        |
| 4QHU   | B_ARG_67  | NH2    | B_ASP_90  | OD1    | 3.132        |
| 4QHU   | B_ARG_67  | NH2    | B_ASP_90  | OD2    | 3.380        |
| 4QHU   | B_ARG_98  | NH2    | B_ASP_103 | OD1    | 3.608        |
| 4QHU   | B_ARG_98  | NH2    | B_ASP_103 | OD2    | 2.836        |
| 4QHU   | B_LYS_145 | NZ     | A_GLU_126 | OE2    | 2.821        |
| 4QHU   | B_LYS_212 | NZ     | B_GLU_214 | OE2    | 3.019        |
| 4QHU   | C_ARG_20  | NH2    | C_ASP_15  | OD1    | 3.523        |
| 4QHU   | C_HIS_29  | ND1    | D_GLU_113 | OE1    | 3.672        |
| 4QHU   | C_ARG_31  | NH1    | D_GLU_113 | OE2    | 3.297        |
| 4QHU   | C_ARG_31  | NH2    | D_GLU_113 | OE1    | 3.241        |
| 4QHU   | C_ARG_31  | NH2    | D_GLU_113 | OE2    | 3.844        |
| 4QHU   | C_ARG_39  | NH1    | L_ASP_52  | OD1    | 3.835        |
| 4QHU   | C_ARG_39  | NH1    | L_ASP_52  | OD2    | 2.646        |
| 4QHU   | C_ARG_46  | NH1    | C_ASP_42  | OD1    | 3.319        |

|      |           |     |           |     |       |
|------|-----------|-----|-----------|-----|-------|
| 4QHU | C_ARG_55  | NH1 | L_ASP_49  | OD1 | 2.860 |
| 4QHU | C_ARG_55  | NH1 | L_ASP_49  | OD2 | 3.543 |
| 4QHU | C_ARG_55  | NH1 | C_GLU_57  | OE2 | 3.286 |
| 4QHU | C_ARG_55  | NH2 | C_GLU_57  | OE2 | 2.950 |
| 4QHU | C_HIS_86  | ND1 | C_ASP_84  | OD1 | 2.680 |
| 4QHU | C_ARG_100 | NH1 | C_ASP_58  | OD2 | 2.953 |
| 4QHU | C_ARG_100 | NH2 | C_ASP_58  | OD1 | 3.928 |
| 4QHU | C_ARG_100 | NH2 | C_ASP_58  | OD2 | 3.080 |
| 4QHU | C_ARG_111 | NH1 | C_GLU_102 | OE2 | 2.856 |
| 4QHU | D_ARG_46  | NH1 | D_ASP_42  | OD1 | 3.904 |
| 4QHU | D_ARG_55  | NH1 | D_GLU_57  | OE1 | 2.360 |
| 4QHU | D_ARG_55  | NH2 | D_GLU_57  | OE1 | 3.394 |
| 4QHU | D_HIS_86  | ND1 | D_ASP_84  | OD1 | 2.832 |
| 4QHU | D_ARG_100 | NH1 | D_ASP_58  | OD1 | 3.905 |
| 4QHU | D_ARG_100 | NH1 | D_ASP_58  | OD2 | 3.109 |
| 4QHU | D_ARG_100 | NH2 | D_ASP_58  | OD2 | 3.081 |
| 4QHU | D_ARG_100 | NH2 | D_GLU_113 | OE2 | 3.668 |
| 4QHU | D_LYS_114 | NZ  | D_GLU_95  | OE2 | 2.739 |

Table 610: 4QHU-specific salt bridging networks analysis. In this table, a PDB file is specified with a four-letter PDB ID, except that the names of the PDB files corresponding to the single NMR structural model split from the NMR ensemble is specified with a four-letter PDB ID in addition to a hyphen followed by the single NMR structural model numeric ID, the residue naming scheme is **Chain ID\_residue name\_residue number**,  $\angle ADH$  represents the angle formed by acceptor (A), donor (D) and hydrogen (H) ( $\angle ADH$ ).

| PDB ID | Residue A | Atom A | Residue B | Atom B | Distance (Å) |
|--------|-----------|--------|-----------|--------|--------------|
| 4QTI   | H_ARG_38  | NH2    | H_GLU_46  | OE1    | 3.681        |
| 4QTI   | H_ARG_38  | NH2    | H_GLU_46  | OE2    | 2.663        |
| 4QTI   | H_LYS_67  | NZ     | H_ASP_90  | OD1    | 3.556        |
| 4QTI   | H_LYS_67  | NZ     | H_ASP_90  | OD2    | 2.827        |
| 4QTI   | H_ARG_98  | NH2    | H_ASP_110 | OD2    | 3.023        |
| 4QTI   | H_LYS_217 | NZ     | L_GLU_123 | OE2    | 2.684        |
| 4QTI   | L_ARG_24  | NH1    | L_ASP_70  | OD1    | 3.175        |
| 4QTI   | L_ARG_24  | NH1    | L_ASP_70  | OD2    | 2.707        |
| 4QTI   | L_ARG_24  | NH2    | L_ASP_70  | OD1    | 3.394        |
| 4QTI   | L_ARG_24  | NH2    | L_ASP_70  | OD2    | 3.619        |
| 4QTI   | L_ARG_46  | NH2    | L_ASP_55  | OD1    | 2.886        |
| 4QTI   | L_ARG_46  | NH2    | L_ASP_55  | OD2    | 3.715        |
| 4QTI   | L_ARG_61  | NH2    | L_ASP_82  | OD1    | 2.723        |
| 4QTI   | L_ARG_61  | NH2    | L_ASP_82  | OD2    | 3.112        |
| 4QTI   | L_ARG_66  | NH1    | L_ASP_28  | OD2    | 3.786        |
| 4QTI   | L_LYS_103 | NZ     | L_GLU_105 | OE1    | 2.889        |
| 4QTI   | L_LYS_103 | NZ     | L_GLU_105 | OE2    | 3.497        |
| 4QTI   | L_LYS_147 | NZ     | L_GLU_154 | OE1    | 3.641        |
| 4QTI   | L_LYS_149 | NZ     | L_GLU_195 | OE1    | 2.748        |
| 4QTI   | L_ARG_188 | NH2    | L_ASP_184 | OD1    | 3.219        |
| 4QTI   | L_HIS_189 | ND1    | L_ASP_151 | OD2    | 3.900        |
| 4QTI   | L_LYS_199 | NZ     | L_ASP_110 | OD2    | 3.524        |
| 4QTI   | L_ARG_211 | NH2    | L_GLU_187 | OE2    | 2.655        |
| 4QTI   | U_ARG_2   | NH1    | U_GLU_16  | OE1    | 3.772        |
| 4QTI   | U_ARG_2   | NH1    | U_GLU_16  | OE2    | 3.501        |
| 4QTI   | U_ARG_25  | NH2    | U_GLU_42  | OE2    | 3.368        |
| 4QTI   | U_LYS_50  | NZ     | U_GLU_230 | OE2    | 3.973        |
| 4QTI   | U_ARG_53  | NH1    | U_ASP_254 | OD2    | 3.882        |
| 4QTI   | U_ARG_53  | NH2    | U_ASP_254 | OD1    | 3.258        |
| 4QTI   | U_ARG_58  | NH2    | H_ASP_103 | OD2    | 2.819        |
| 4QTI   | U_ARG_89  | NH1    | H_ASP_99  | OD2    | 3.048        |
| 4QTI   | U_ARG_91  | NH1    | H_ASP_99  | OD1    | 2.759        |
| 4QTI   | U_ARG_91  | NH1    | H_ASP_99  | OD2    | 2.751        |
| 4QTI   | U_ARG_91  | NH2    | H_ASP_99  | OD2    | 3.786        |
| 4QTI   | U_ARG_116 | NH1    | H_ASP_103 | OD2    | 3.777        |
| 4QTI   | U_ARG_116 | NH2    | H_ASP_103 | OD1    | 3.889        |
| 4QTI   | U_HIS_143 | NE2    | U_GLU_183 | OE2    | 3.484        |
| 4QTI   | U_LYS_175 | NZ     | U_GLU_94  | OE2    | 2.662        |
| 4QTI   | U_LYS_198 | NZ     | U_ASP_163 | OD1    | 2.860        |
| 4QTI   | U_LYS_198 | NZ     | U_ASP_163 | OD2    | 3.382        |
| 4QTI   | U_ARG_239 | NH1    | U_ASP_277 | OD1    | 2.952        |
| 4QTI   | U_ARG_239 | NH1    | U_ASP_277 | OD2    | 3.438        |
| 4QTI   | U_ARG_239 | NH2    | U_ASP_277 | OD1    | 3.749        |
| 4QTI   | U_ARG_239 | NH2    | U_ASP_277 | OD2    | 2.737        |
| 4QTI   | U_HIS_273 | ND1    | U_ASP_275 | OD1    | 3.694        |
| 4QTI   | U_HIS_273 | ND1    | U_ASP_275 | OD2    | 3.712        |

---

Table 611: 4QTI-specific salt bridging networks analysis. In this table, a PDB file is specified with a four-letter PDB ID, except that the names of the PDB files corresponding to the single NMR structural model split from the NMR ensemble is specified with a four-letter PDB ID in addition to a hyphen followed by the single NMR structural model numeric ID, the residue naming scheme is **Chain ID\_residue name\_residue number**,  $\angle ADH$  represents the angle formed by acceptor (A), donor (D) and hydrogen (H) ( $\angle ADH$ ).

| PDB ID | Residue A | Atom A | Residue B | Atom B | Distance (Å) |
|--------|-----------|--------|-----------|--------|--------------|
| 4QXG   | H_ARG_38  | NH1    | H_GLU_46  | OE1    | 3.582        |
| 4QXG   | H_ARG_38  | NH1    | H_GLU_46  | OE2    | 3.109        |
| 4QXG   | H_ARG_38  | NH2    | H_ASP_90  | OD1    | 3.835        |
| 4QXG   | H_LYS_87  | NZ     | H_ASP_90  | OD1    | 2.584        |
| 4QXG   | H_LYS_87  | NZ     | H_ASP_90  | OD2    | 3.997        |
| 4QXG   | H_ARG_98  | NH2    | H_ASP_100 | OD2    | 3.302        |
| 4QXG   | H_ARG_98  | NH2    | H_ASP_105 | OD1    | 3.741        |
| 4QXG   | H_ARG_98  | NH2    | H_ASP_105 | OD2    | 2.750        |
| 4QXG   | H_LYS_147 | NZ     | H_ASP_148 | OD1    | 3.049        |
| 4QXG   | H_LYS_147 | NZ     | H_ASP_148 | OD2    | 3.141        |
| 4QXG   | H_LYS_213 | NZ     | L_GLU_124 | OE2    | 3.477        |
| 4QXG   | L_ARG_24  | NH2    | L_ASP_71  | OD2    | 3.349        |
| 4QXG   | L_ARG_55  | NH1    | L_ASP_61  | OD1    | 3.811        |
| 4QXG   | L_ARG_55  | NH2    | L_ASP_61  | OD1    | 3.150        |
| 4QXG   | L_ARG_62  | NH2    | L_GLU_82  | OE2    | 3.622        |
| 4QXG   | L_ARG_62  | NH2    | L_ASP_83  | OD1    | 2.986        |
| 4QXG   | L_ARG_62  | NH2    | L_ASP_83  | OD2    | 3.699        |
| 4QXG   | L_LYS_150 | NZ     | L_GLU_196 | OE1    | 2.605        |
| 4QXG   | L_HIS_190 | ND1    | L_ASP_152 | OD2    | 2.741        |
| 4QXG   | L_LYS_191 | NZ     | L_GLU_214 | OE1    | 3.615        |
| 4QXG   | L_LYS_191 | NZ     | L_GLU_214 | OE2    | 3.288        |

Table 612: 4QXG-specific salt bridging networks analysis. In this table, a PDB file is specified with a four-letter PDB ID, except that the names of the PDB files corresponding to the single NMR structural model split from the NMR ensemble is specified with a four-letter PDB ID in addition to a hyphen followed by the single NMR structural model numeric ID, the residue naming scheme is **Chain ID\_residue name\_residue number**,  $\angle ADH$  represents the angle formed by acceptor (A), donor (D) and hydrogen (H) ( $\angle ADH$ ).

| PDB ID | Residue A | Atom A | Residue B | Atom B | Distance (Å) |
|--------|-----------|--------|-----------|--------|--------------|
| 4R2G   | E_LYS_121 | NZ     | E_GLU_429 | OE2    | 2.858        |
| 4R2G   | E_LYS_236 | NZ     | E_ASP_275 | OD1    | 2.708        |
| 4R2G   | E_HIS_249 | NE2    | E_GLU_482 | OE1    | 3.748        |
| 4R2G   | E_LYS_269 | NZ     | E_GLU_347 | OE1    | 3.075        |
| 4R2G   | E_ARG_298 | NH1    | E_GLU_381 | OE1    | 3.375        |
| 4R2G   | E_ARG_298 | NH1    | E_GLU_381 | OE2    | 2.613        |
| 4R2G   | E_LYS_348 | NZ     | E_GLU_351 | OE1    | 3.563        |
| 4R2G   | E_LYS_357 | NZ     | E_GLU_466 | OE1    | 3.854        |
| 4R2G   | E_ARG_456 | NH1    | E_GLU_466 | OE1    | 3.060        |
| 4R2G   | E_ARG_456 | NH1    | E_GLU_466 | OE2    | 3.336        |
| 4R2G   | E_ARG_469 | NH2    | E_ASP_457 | OD2    | 2.761        |
| 4R2G   | E_ARG_476 | NH1    | E_GLU_102 | OE1    | 3.512        |
| 4R2G   | E_ARG_476 | NH1    | E_GLU_102 | OE2    | 3.993        |
| 4R2G   | E_ARG_476 | NH2    | E_ASP_474 | OD1    | 3.762        |
| 4R2G   | E_ARG_476 | NH2    | E_ASP_474 | OD2    | 3.245        |
| 4R2G   | E_ARG_480 | NH1    | E_ASP_477 | OD1    | 2.966        |
| 4R2G   | F_LYS_8   | NZ     | F_GLU_119 | OE1    | 2.961        |
| 4R2G   | F_LYS_8   | NZ     | F_GLU_119 | OE2    | 3.833        |
| 4R2G   | F_LYS_29  | NZ     | E_ASP_279 | OD2    | 2.979        |
| 4R2G   | F_LYS_29  | NZ     | F_GLU_85  | OE1    | 3.831        |
| 4R2G   | F_ARG_54  | NH1    | F_ASP_78  | OD1    | 3.678        |
| 4R2G   | F_ARG_54  | NH1    | F_ASP_78  | OD2    | 2.955        |
| 4R2G   | F_ARG_54  | NH2    | F_ASP_78  | OD1    | 3.395        |
| 4R2G   | F_ARG_54  | NH2    | F_ASP_78  | OD2    | 3.824        |
| 4R2G   | F_ARG_58  | NH1    | F_GLU_13  | OE1    | 3.679        |
| 4R2G   | F_ARG_58  | NH1    | F_GLU_13  | OE2    | 2.912        |
| 4R2G   | F_ARG_58  | NH2    | F_GLU_13  | OE2    | 3.429        |
| 4R2G   | F_ARG_59  | NH1    | E_ASP_368 | OD1    | 2.950        |
| 4R2G   | F_ARG_59  | NH1    | E_ASP_368 | OD2    | 2.577        |
| 4R2G   | F_ARG_59  | NH2    | E_ASP_368 | OD2    | 3.352        |
| 4R2G   | F_LYS_90  | NZ     | F_GLU_85  | OE2    | 3.878        |
| 4R2G   | P_ARG_31  | NH2    | P_ASP_66A | OD1    | 3.703        |
| 4R2G   | P_ARG_61  | NH1    | P_GLU_79  | OE1    | 3.610        |
| 4R2G   | P_ARG_61  | NH1    | P_ASP_82  | OD1    | 2.724        |
| 4R2G   | P_ARG_61  | NH1    | P_ASP_82  | OD2    | 2.827        |
| 4R2G   | P_ARG_61  | NH2    | P_ASP_82  | OD2    | 2.747        |
| 4R2G   | P_ARG_103 | NH2    | P_ASP_85  | OD1    | 3.554        |
| 4R2G   | P_ARG_103 | NH2    | P_ASP_85  | OD2    | 3.072        |
| 4R2G   | P_LYS_167 | NZ     | P_GLU_83  | OE2    | 2.375        |
| 4R2G   | Q_ARG_38  | NH1    | Q_ASP_86  | OD1    | 2.531        |
| 4R2G   | Q_ARG_38  | NH2    | Q_GLU_46  | OE2    | 3.197        |
| 4R2G   | Q_ARG_38  | NH2    | Q_ASP_86  | OD1    | 3.417        |
| 4R2G   | Q_ARG_66  | NH1    | Q_ASP_86  | OD2    | 3.138        |
| 4R2G   | Q_ARG_66  | NH2    | Q_ASP_86  | OD1    | 3.109        |
| 4R2G   | Q_ARG_66  | NH2    | Q_ASP_86  | OD2    | 3.353        |
| 4R2G   | Q_ARG_71  | NH2    | Q_GLU_55  | OE1    | 2.657        |
| 4R2G   | Q_ARG_96  | NH1    | Q_ASP_101 | OD2    | 2.840        |
| 4R2G   | Q_ARG_96  | NH2    | Q_ASP_101 | OD1    | 3.076        |
| 4R2G   | Q_ARG_96  | NH2    | Q_ASP_101 | OD2    | 2.587        |
| 4R2G   | Q_ARG_100 | NH2    | P_ASP_66A | OD2    | 2.815        |
| 4R2G   | Q_LYS_227 | NZ     | P_GLU_124 | OE2    | 3.083        |
| 4R2G   | B_LYS_29  | NZ     | O_ASP_279 | OD2    | 3.448        |
| 4R2G   | B_ARG_54  | NH1    | B_ASP_78  | OD1    | 2.279        |
| 4R2G   | B_ARG_54  | NH1    | B_ASP_78  | OD2    | 2.720        |
| 4R2G   | B_ARG_54  | NH2    | B_ASP_78  | OD1    | 3.403        |
| 4R2G   | B_ARG_54  | NH2    | B_ASP_78  | OD2    | 1.961        |
| 4R2G   | B_ARG_58  | NH1    | B_GLU_13  | OE2    | 3.274        |

|      |           |     |           |     |       |
|------|-----------|-----|-----------|-----|-------|
| 4R2G | B_ARG_58  | NH2 | B_GLU_13  | OE2 | 3.415 |
| 4R2G | B_ARG_59  | NH1 | O_ASP_368 | OD1 | 2.838 |
| 4R2G | B_ARG_59  | NH1 | O_ASP_368 | OD2 | 3.428 |
| 4R2G | B_ARG_59  | NH2 | O_ASP_368 | OD1 | 3.471 |
| 4R2G | B_ARG_59  | NH2 | O_ASP_368 | OD2 | 2.776 |
| 4R2G | B_ARG_134 | NH1 | B_ASP_153 | OD1 | 3.163 |
| 4R2G | B_ARG_134 | NH2 | B_ASP_153 | OD1 | 3.693 |
| 4R2G | C_ARG_31  | NH1 | C_ASP_66A | OD1 | 3.082 |
| 4R2G | C_ARG_54  | NH1 | C_GLU_60  | OE2 | 3.362 |
| 4R2G | C_ARG_61  | NH1 | C_GLU_79  | OE1 | 3.445 |
| 4R2G | C_ARG_61  | NH1 | C_ASP_82  | OD1 | 3.443 |
| 4R2G | C_ARG_61  | NH1 | C_ASP_82  | OD2 | 2.957 |
| 4R2G | C_ARG_61  | NH2 | C_ASP_82  | OD2 | 3.224 |
| 4R2G | C_ARG_103 | NH1 | C_ASP_85  | OD1 | 3.613 |
| 4R2G | C_ARG_103 | NH2 | C_ASP_85  | OD2 | 3.803 |
| 4R2G | C_LYS_167 | NZ  | C_GLU_83  | OE2 | 3.124 |
| 4R2G | C_HIS_189 | ND1 | C_ASP_152 | OD1 | 3.916 |
| 4R2G | C_HIS_189 | ND1 | C_ASP_152 | OD2 | 2.449 |
| 4R2G | D_ARG_13  | NH2 | D_GLU_16  | OE1 | 3.234 |
| 4R2G | D_ARG_13  | NH2 | D_GLU_16  | OE2 | 2.237 |
| 4R2G | D_ARG_38  | NH1 | D_ASP_86  | OD1 | 2.671 |
| 4R2G | D_ARG_38  | NH2 | D_GLU_46  | OE1 | 3.784 |
| 4R2G | D_ARG_38  | NH2 | D_GLU_46  | OE2 | 3.013 |
| 4R2G | D_ARG_38  | NH2 | D_ASP_86  | OD1 | 3.766 |
| 4R2G | D_ARG_66  | NH1 | D_ASP_86  | OD1 | 3.577 |
| 4R2G | D_ARG_66  | NH1 | D_ASP_86  | OD2 | 3.981 |
| 4R2G | D_ARG_66  | NH2 | D_ASP_86  | OD1 | 3.085 |
| 4R2G | D_ARG_66  | NH2 | D_ASP_86  | OD2 | 3.712 |
| 4R2G | D_ARG_71  | NH2 | D_GLU_55  | OE1 | 2.726 |
| 4R2G | D_ARG_71  | NH2 | D_GLU_55  | OE2 | 3.442 |
| 4R2G | D_ARG_96  | NH1 | D_ASP_101 | OD2 | 3.369 |
| 4R2G | D_ARG_100 | NH2 | C_ASP_66A | OD2 | 3.131 |
| 4R2G | D_LYS_227 | NZ  | C_GLU_124 | OE1 | 3.473 |
| 4R2G | D_LYS_227 | NZ  | C_GLU_124 | OE2 | 3.405 |
| 4R2G | H_LYS_8   | NZ  | H_GLU_119 | OE1 | 2.920 |
| 4R2G | H_LYS_8   | NZ  | H_GLU_119 | OE2 | 3.405 |
| 4R2G | H_LYS_29  | NZ  | H_GLU_85  | OE1 | 3.621 |
| 4R2G | H_LYS_29  | NZ  | H_GLU_85  | OE2 | 3.077 |
| 4R2G | H_LYS_29  | NZ  | K_ASP_279 | OD1 | 2.934 |
| 4R2G | H_LYS_46  | NZ  | H_ASP_56  | OD2 | 3.403 |
| 4R2G | H_ARG_54  | NH1 | H_ASP_78  | OD1 | 3.987 |
| 4R2G | H_ARG_54  | NH1 | H_ASP_78  | OD2 | 2.782 |
| 4R2G | H_ARG_54  | NH2 | H_ASP_78  | OD1 | 2.816 |
| 4R2G | H_ARG_54  | NH2 | H_ASP_78  | OD2 | 3.143 |
| 4R2G | H_ARG_59  | NH1 | K_ASP_368 | OD1 | 2.502 |
| 4R2G | H_ARG_59  | NH1 | K_ASP_368 | OD2 | 3.259 |
| 4R2G | H_LYS_90  | NZ  | H_GLU_85  | OE2 | 3.434 |
| 4R2G | H_LYS_171 | NZ  | H_GLU_169 | OE1 | 3.154 |
| 4R2G | I_ARG_31  | NH1 | I_ASP_66A | OD1 | 3.172 |
| 4R2G | I_ARG_61  | NH1 | I_ASP_82  | OD1 | 2.991 |
| 4R2G | I_ARG_61  | NH1 | I_ASP_82  | OD2 | 3.035 |
| 4R2G | I_ARG_61  | NH2 | I_ASP_82  | OD2 | 2.782 |
| 4R2G | I_ARG_103 | NH1 | I_ASP_85  | OD1 | 2.492 |
| 4R2G | I_ARG_103 | NH1 | I_ASP_85  | OD2 | 3.056 |
| 4R2G | I_ARG_103 | NH2 | I_ASP_85  | OD1 | 3.464 |
| 4R2G | I_ARG_103 | NH2 | I_ASP_85  | OD2 | 3.445 |
| 4R2G | I_LYS_167 | NZ  | I_GLU_83  | OE1 | 3.520 |
| 4R2G | I_LYS_167 | NZ  | I_GLU_83  | OE2 | 3.546 |

|      |           |     |           |     |       |
|------|-----------|-----|-----------|-----|-------|
| 4R2G | I_HIS_189 | ND1 | I_ASP_152 | OD2 | 3.243 |
| 4R2G | J_ARG_38  | NH1 | J_ASP_86  | OD1 | 2.814 |
| 4R2G | J_ARG_38  | NH2 | J_GLU_46  | OE1 | 3.964 |
| 4R2G | J_ARG_38  | NH2 | J_GLU_46  | OE2 | 3.167 |
| 4R2G | J_ARG_38  | NH2 | J_ASP_86  | OD1 | 3.659 |
| 4R2G | J_ARG_66  | NH1 | J_ASP_86  | OD1 | 3.625 |
| 4R2G | J_ARG_66  | NH1 | J_ASP_86  | OD2 | 3.378 |
| 4R2G | J_ARG_66  | NH2 | J_ASP_86  | OD1 | 2.765 |
| 4R2G | J_ARG_66  | NH2 | J_ASP_86  | OD2 | 3.353 |
| 4R2G | J_ARG_71  | NH1 | J_GLU_55  | OE1 | 3.851 |
| 4R2G | J_ARG_96  | NH2 | J_ASP_101 | OD1 | 3.956 |
| 4R2G | J_ARG_96  | NH2 | J_ASP_101 | OD2 | 3.793 |
| 4R2G | J_ARG_100 | NH2 | I_ASP_66A | OD2 | 3.189 |
| 4R2G | J_LYS_161 | NZ  | I_GLU_125 | OE2 | 3.537 |
| 4R2G | L_LYS_8   | NZ  | L_GLU_119 | OE1 | 3.207 |
| 4R2G | L_LYS_29  | NZ  | L_GLU_85  | OE2 | 3.720 |
| 4R2G | L_LYS_29  | NZ  | A_ASP_279 | OD1 | 3.450 |
| 4R2G | L_ARG_54  | NH1 | L_ASP_78  | OD1 | 3.725 |
| 4R2G | L_ARG_54  | NH1 | L_ASP_78  | OD2 | 2.856 |
| 4R2G | L_ARG_54  | NH2 | L_ASP_78  | OD1 | 3.320 |
| 4R2G | L_ARG_54  | NH2 | L_ASP_78  | OD2 | 3.657 |
| 4R2G | L_ARG_59  | NH1 | A_ASP_368 | OD1 | 2.642 |
| 4R2G | L_ARG_59  | NH1 | A_ASP_368 | OD2 | 2.825 |
| 4R2G | L_ARG_59  | NH2 | A_ASP_368 | OD1 | 3.793 |
| 4R2G | L_ARG_59  | NH2 | A_ASP_368 | OD2 | 2.422 |
| 4R2G | L_LYS_90  | NZ  | L_GLU_85  | OE1 | 3.363 |
| 4R2G | M_ARG_31  | NH1 | M_ASP_66A | OD1 | 2.301 |
| 4R2G | M_ARG_31  | NH2 | M_ASP_66A | OD1 | 3.968 |
| 4R2G | M_ARG_61  | NH1 | M_GLU_79  | OE1 | 3.516 |
| 4R2G | M_ARG_61  | NH1 | M_ASP_82  | OD1 | 3.186 |
| 4R2G | M_ARG_61  | NH1 | M_ASP_82  | OD2 | 3.220 |
| 4R2G | M_ARG_61  | NH2 | M_ASP_82  | OD1 | 3.607 |
| 4R2G | M_ARG_61  | NH2 | M_ASP_82  | OD2 | 2.287 |
| 4R2G | M_ARG_103 | NH2 | M_ASP_85  | OD1 | 3.750 |
| 4R2G | M_ARG_103 | NH2 | M_ASP_85  | OD2 | 2.638 |
| 4R2G | M_LYS_167 | NZ  | M_GLU_83  | OE2 | 3.138 |
| 4R2G | M_HIS_189 | ND1 | M_ASP_152 | OD2 | 3.175 |
| 4R2G | M_LYS_190 | NZ  | M_ASP_152 | OD1 | 3.703 |
| 4R2G | M_LYS_190 | NZ  | M_ASP_152 | OD2 | 3.996 |
| 4R2G | N_ARG_38  | NH1 | N_ASP_86  | OD1 | 2.735 |
| 4R2G | N_ARG_38  | NH2 | N_GLU_46  | OE2 | 2.998 |
| 4R2G | N_ARG_38  | NH2 | N_ASP_86  | OD1 | 3.645 |
| 4R2G | N_ARG_66  | NH1 | N_ASP_86  | OD1 | 3.424 |
| 4R2G | N_ARG_66  | NH1 | N_ASP_86  | OD2 | 3.369 |
| 4R2G | N_ARG_66  | NH2 | N_ASP_86  | OD1 | 3.057 |
| 4R2G | N_ARG_66  | NH2 | N_ASP_86  | OD2 | 3.652 |
| 4R2G | N_ARG_71  | NH2 | N_GLU_55  | OE1 | 3.590 |
| 4R2G | N_ARG_71  | NH2 | N_GLU_55  | OE2 | 2.787 |
| 4R2G | N_ARG_96  | NH2 | N_ASP_101 | OD2 | 3.284 |
| 4R2G | N_ARG_100 | NH2 | M_ASP_66A | OD2 | 3.592 |
| 4R2G | N_LYS_161 | NZ  | M_GLU_125 | OE2 | 2.706 |
| 4R2G | N_LYS_228 | NZ  | N_GLU_230 | OE2 | 3.127 |
| 4R2G | O_LYS_121 | NZ  | O_ASP_113 | OD1 | 3.734 |
| 4R2G | O_LYS_121 | NZ  | O_GLU_429 | OE2 | 2.953 |
| 4R2G | O_LYS_231 | NZ  | O_GLU_267 | OE1 | 3.348 |
| 4R2G | O_LYS_236 | NZ  | O_ASP_275 | OD1 | 3.482 |
| 4R2G | O_HIS_249 | NE2 | O_GLU_482 | OE1 | 3.152 |
| 4R2G | O_LYS_282 | NZ  | O_ASP_275 | OD2 | 3.470 |



|      |           |     |            |     |       |
|------|-----------|-----|------------|-----|-------|
| 4R2G | O_ARG_298 | NH1 | O_GLU_381  | OE1 | 3.809 |
| 4R2G | O_ARG_327 | NH1 | D_GLU_100I | OE2 | 3.858 |
| 4R2G | O_LYS_348 | NZ  | O_GLU_351  | OE1 | 3.344 |
| 4R2G | O_LYS_348 | NZ  | O_GLU_351  | OE2 | 3.244 |
| 4R2G | O_LYS_357 | NZ  | O_GLU_466  | OE1 | 3.349 |
| 4R2G | O_LYS_400 | NZ  | O_ASP_397  | OD2 | 3.952 |
| 4R2G | O_ARG_456 | NH2 | O_GLU_466  | OE2 | 3.589 |
| 4R2G | O_ARG_469 | NH2 | O_ASP_457  | OD1 | 3.913 |
| 4R2G | O_ARG_469 | NH2 | O_ASP_457  | OD2 | 2.731 |
| 4R2G | O_ARG_476 | NH1 | O_ASP_474  | OD1 | 3.974 |
| 4R2G | O_ARG_476 | NH2 | O_ASP_474  | OD1 | 3.817 |
| 4R2G | O_ARG_476 | NH2 | O_ASP_474  | OD2 | 3.016 |
| 4R2G | O_ARG_480 | NH1 | O_ASP_477  | OD1 | 3.400 |
| 4R2G | A_LYS_121 | NZ  | A_ASP_113  | OD1 | 3.373 |
| 4R2G | A_LYS_236 | NZ  | A_ASP_275  | OD1 | 3.935 |
| 4R2G | A_LYS_236 | NZ  | A_ASP_275  | OD2 | 3.895 |
| 4R2G | A_ARG_298 | NH2 | A_GLU_381  | OE2 | 3.354 |
| 4R2G | A_ARG_327 | NH1 | N_GLU_100I | OE1 | 3.235 |
| 4R2G | A_LYS_348 | NZ  | A_GLU_351  | OE1 | 3.114 |
| 4R2G | A_LYS_348 | NZ  | A_GLU_351  | OE2 | 3.018 |
| 4R2G | A_LYS_357 | NZ  | A_GLU_466  | OE1 | 3.762 |
| 4R2G | A_ARG_456 | NH2 | A_GLU_466  | OE1 | 3.604 |
| 4R2G | A_ARG_456 | NH2 | A_GLU_466  | OE2 | 3.481 |
| 4R2G | A_ARG_469 | NH2 | A_ASP_457  | OD2 | 3.008 |
| 4R2G | A_ARG_476 | NH2 | A_ASP_474  | OD2 | 3.246 |
| 4R2G | A_ARG_480 | NH1 | A_ASP_477  | OD1 | 3.318 |
| 4R2G | K_LYS_121 | NZ  | K_GLU_429  | OE2 | 2.599 |
| 4R2G | K_LYS_236 | NZ  | K_ASP_275  | OD1 | 3.419 |
| 4R2G | K_HIS_249 | NE2 | K_GLU_482  | OE1 | 3.520 |
| 4R2G | K_ARG_298 | NH1 | K_GLU_381  | OE2 | 3.970 |
| 4R2G | K_ARG_298 | NH2 | K_GLU_381  | OE2 | 3.778 |
| 4R2G | K_LYS_348 | NZ  | K_GLU_351  | OE1 | 3.371 |
| 4R2G | K_LYS_348 | NZ  | K_GLU_351  | OE2 | 3.265 |
| 4R2G | K_ARG_350 | NH2 | K_ASP_397  | OD1 | 3.693 |
| 4R2G | K_LYS_357 | NZ  | K_GLU_466  | OE2 | 3.015 |
| 4R2G | K_ARG_469 | NH2 | K_ASP_457  | OD2 | 3.592 |
| 4R2G | K_ARG_476 | NH1 | K_ASP_474  | OD2 | 3.916 |
| 4R2G | K_ARG_476 | NH2 | K_ASP_474  | OD2 | 3.188 |
| 4R2G | K_ARG_480 | NH1 | K_ASP_477  | OD1 | 2.647 |
| 4R2G | K_LYS_487 | NZ  | K_ASP_92   | OD1 | 3.177 |

Table 613: 4R2G-specific salt bridging networks analysis. In this table, a PDB file is specified with a four-letter PDB ID, except that the names of the PDB files corresponding to the single NMR structural model split from the NMR ensemble is specified with a four-letter PDB ID in addition to a hyphen followed by the single NMR structural model numeric ID, the residue naming scheme is **Chain ID\_residue name\_residue number**,  $\angle ADH$  represents the angle formed by acceptor (A), donor (D) and hydrogen (H) ( $\angle ADH$ ).

| PDB ID | Residue A | Atom A | Residue B | Atom B | Distance (Å) |
|--------|-----------|--------|-----------|--------|--------------|
| 4R4H   | A_HIS_66  | ND1    | A_GLU_64  | OE1    | 3.252        |
| 4R4H   | A_LYS_207 | NZ     | A_GLU_380 | OE1    | 3.742        |
| 4R4H   | A_LYS_207 | NZ     | A_GLU_380 | OE2    | 3.215        |
| 4R4H   | A_HIS_249 | NE2    | A_GLU_482 | OE1    | 2.873        |
| 4R4H   | A_LYS_348 | NZ     | A_ASP_269 | OD2    | 3.101        |
| 4R4H   | A_LYS_348 | NZ     | A_GLU_351 | OE1    | 3.859        |
| 4R4H   | A_LYS_356 | NZ     | A_GLU_466 | OE2    | 2.887        |
| 4R4H   | A_ARG_455 | NH1    | A_GLU_466 | OE1    | 3.185        |
| 4R4H   | A_ARG_455 | NH1    | A_GLU_466 | OE2    | 3.399        |
| 4R4H   | A_ARG_469 | NH2    | A_ASP_456 | OD2    | 3.413        |
| 4R4H   | A_ARG_476 | NH1    | A_ASP_474 | OD1    | 3.458        |
| 4R4H   | A_ARG_480 | NH1    | A_ASP_477 | OD1    | 2.787        |
| 4R4H   | A_LYS_487 | NZ     | A_GLU_47  | OE2    | 3.588        |
| 4R4H   | A_LYS_487 | NZ     | A_GLU_91  | OE2    | 2.837        |
| 4R4H   | B_LYS_7   | NZ     | B_ASP_10  | OD2    | 3.666        |
| 4R4H   | B_LYS_29  | NZ     | A_ASP_279 | OD1    | 2.795        |
| 4R4H   | B_LYS_29  | NZ     | B_GLU_85  | OE1    | 3.423        |
| 4R4H   | B_LYS_29  | NZ     | B_GLU_85  | OE2    | 3.572        |
| 4R4H   | B_ARG_54  | NH1    | B_ASP_78  | OD2    | 2.980        |
| 4R4H   | B_ARG_54  | NH2    | B_ASP_78  | OD1    | 3.209        |
| 4R4H   | B_ARG_54  | NH2    | B_ASP_78  | OD2    | 3.205        |
| 4R4H   | B_ARG_58  | NH1    | B_GLU_13  | OE1    | 3.001        |
| 4R4H   | B_ARG_58  | NH1    | B_GLU_13  | OE2    | 3.359        |
| 4R4H   | B_ARG_58  | NH2    | B_GLU_13  | OE2    | 3.123        |
| 4R4H   | B_ARG_59  | NH1    | A_ASP_367 | OD1    | 3.294        |
| 4R4H   | B_ARG_59  | NH1    | A_ASP_367 | OD2    | 3.409        |
| 4R4H   | B_ARG_59  | NH2    | A_ASP_367 | OD2    | 3.834        |
| 4R4H   | B_LYS_171 | NZ     | B_GLU_169 | OE1    | 3.963        |
| 4R4H   | B_LYS_171 | NZ     | B_GLU_169 | OE2    | 3.179        |
| 4R4H   | L_ARG_61  | NH2    | L_GLU_81  | OE2    | 2.783        |
| 4R4H   | L_ARG_61  | NH2    | L_ASP_82  | OD1    | 3.470        |
| 4R4H   | L_LYS_    | NZ     | L_GLU_    | OE1    | 2.933        |
| 4R4H   | L_HIS_    | ND1    | L_ASP_    | OD2    | 2.805        |
| 4R4H   | L_HIS_    | NE2    | L_ASP_    | OD1    | 3.352        |
| 4R4H   | H_HIS_32  | ND1    | H_GLU_27  | OE2    | 3.036        |
| 4R4H   | H_HIS_32  | NE2    | H_GLU_27  | OE2    | 3.485        |
| 4R4H   | H_ARG_38  | NH1    | H_ASP_89  | OD1    | 3.491        |
| 4R4H   | H_ARG_38  | NH2    | H_GLU_46  | OE1    | 3.502        |
| 4R4H   | H_ARG_38  | NH2    | H_GLU_46  | OE2    | 3.452        |
| 4R4H   | H_LYS_52  | NZ     | A_ASP_78  | OD1    | 3.615        |
| 4R4H   | H_ARG_66  | NH1    | H_ASP_89  | OD2    | 3.497        |
| 4R4H   | H_ARG_66  | NH2    | H_ASP_89  | OD1    | 3.408        |
| 4R4H   | H_ARG_66  | NH2    | H_ASP_89  | OD2    | 3.604        |
| 4R4H   | H_LYS_75  | NZ     | H_ASP_72  | OD2    | 3.924        |
| 4R4H   | H_ARG_97  | NH1    | H_GLU_27  | OE1    | 2.972        |
| 4R4H   | H_ARG_97  | NH1    | H_GLU_27  | OE2    | 2.769        |
| 4R4H   | H_ARG_98  | NH1    | H_GLU_50  | OE1    | 3.064        |
| 4R4H   | H_ARG_98  | NH1    | H_GLU_50  | OE2    | 3.007        |
| 4R4H   | H_LYS_    | NZ     | H_ASP_    | OD1    | 2.850        |
| 4R4H   | H_LYS_    | NZ     | H_ASP_    | OD2    | 3.439        |
| 4R4H   | H_LYS_    | NZ     | H_GLU_    | OE2    | 3.585        |
| 4R4H   | H_LYS_    | NZ     | L_ASP_    | OD2    | 3.470        |

---

Table 614: 4R4H-specific salt bridging networks analysis. In this table, a PDB file is specified with a four-letter PDB ID, except that the names of the PDB files corresponding to the single NMR structural model split from the NMR ensemble is specified with a four-letter PDB ID in addition to a hyphen followed by the single NMR structural model numeric ID, the residue naming scheme is **Chain ID\_residue name\_residue number**,  $\angle ADH$  represents the angle formed by acceptor (A), donor (D) and hydrogen (H) ( $\angle ADH$ ).

| PDB ID | Residue A | Atom A | Residue B | Atom B | Distance (Å) |
|--------|-----------|--------|-----------|--------|--------------|
| 4R7D   | A_ARG_39  | NH1    | A_ASP_90  | OD1    | 2.757        |
| 4R7D   | A_ARG_39  | NH2    | A_GLU_47  | OE1    | 3.609        |
| 4R7D   | A_ARG_39  | NH2    | A_GLU_47  | OE2    | 3.143        |
| 4R7D   | A_ARG_39  | NH2    | A_ASP_90  | OD1    | 3.533        |
| 4R7D   | A_LYS_65  | NZ     | A_ASP_59  | OD1    | 3.382        |
| 4R7D   | A_ARG_67  | NH1    | A_ASP_90  | OD2    | 3.363        |
| 4R7D   | A_ARG_67  | NH2    | A_ASP_90  | OD1    | 3.104        |
| 4R7D   | A_ARG_67  | NH2    | A_ASP_90  | OD2    | 3.445        |
| 4R7D   | A_LYS_76  | NZ     | A_ASP_73  | OD2    | 3.850        |
| 4R7D   | A_LYS_148 | NZ     | A_ASP_149 | OD1    | 3.326        |
| 4R7D   | A_LYS_148 | NZ     | A_ASP_149 | OD2    | 3.734        |
| 4R7D   | A_LYS_214 | NZ     | B_GLU_123 | OE1    | 3.736        |
| 4R7D   | B_ARG_61  | NH1    | B_GLU_81  | OE1    | 3.280        |
| 4R7D   | B_ARG_61  | NH1    | B_ASP_82  | OD1    | 2.669        |
| 4R7D   | B_ARG_61  | NH1    | B_ASP_82  | OD2    | 3.082        |
| 4R7D   | B_ARG_61  | NH2    | B_GLU_81  | OE1    | 3.146        |
| 4R7D   | B_LYS_107 | NZ     | D_ASP_9   | OD2    | 3.947        |
| 4R7D   | B_LYS_126 | NZ     | B_ASP_122 | OD1    | 2.338        |
| 4R7D   | B_ARG_142 | NH1    | B_GLU_143 | OE1    | 3.636        |
| 4R7D   | B_ARG_142 | NH2    | B_GLU_105 | OE1    | 3.989        |
| 4R7D   | B_LYS_149 | NZ     | B_GLU_195 | OE1    | 3.373        |
| 4R7D   | B_LYS_149 | NZ     | B_GLU_195 | OE2    | 3.135        |
| 4R7D   | B_HIS_189 | ND1    | B_ASP_151 | OD2    | 2.870        |
| 4R7D   | C_ARG_39  | NH1    | C_ASP_90  | OD1    | 2.627        |
| 4R7D   | C_ARG_39  | NH2    | C_GLU_47  | OE2    | 3.405        |
| 4R7D   | C_ARG_39  | NH2    | C_ASP_90  | OD1    | 3.918        |
| 4R7D   | C_ARG_67  | NH1    | C_ASP_90  | OD1    | 3.705        |
| 4R7D   | C_ARG_67  | NH1    | C_ASP_90  | OD2    | 3.301        |
| 4R7D   | C_ARG_67  | NH2    | C_ASP_90  | OD1    | 3.685        |
| 4R7D   | C_LYS_99  | NZ     | C_ASP_103 | OD2    | 3.216        |
| 4R7D   | C_LYS_148 | NZ     | C_ASP_149 | OD1    | 3.368        |
| 4R7D   | C_LYS_211 | NZ     | C_ASP_213 | OD1    | 2.945        |
| 4R7D   | D_LYS_18  | NZ     | B_ASP_70  | OD2    | 3.792        |
| 4R7D   | D_HIS_32  | NE2    | D_ASP_31  | OD1    | 3.817        |
| 4R7D   | D_ARG_61  | NH2    | D_ASP_82  | OD1    | 2.539        |
| 4R7D   | D_ARG_61  | NH2    | D_ASP_82  | OD2    | 3.670        |
| 4R7D   | D_LYS_103 | NZ     | D_GLU_165 | OE1    | 3.985        |
| 4R7D   | D_LYS_107 | NZ     | B_ASP_9   | OD2    | 3.503        |
| 4R7D   | D_HIS_189 | ND1    | D_ASP_151 | OD2    | 2.473        |
| 4R7D   | E_ARG_39  | NH1    | E_ASP_90  | OD1    | 2.896        |
| 4R7D   | E_ARG_39  | NH2    | E_GLU_47  | OE1    | 3.759        |
| 4R7D   | E_ARG_39  | NH2    | E_GLU_47  | OE2    | 3.092        |
| 4R7D   | E_ARG_67  | NH1    | E_ASP_90  | OD1    | 3.553        |
| 4R7D   | E_ARG_67  | NH1    | E_ASP_90  | OD2    | 3.603        |
| 4R7D   | E_ARG_67  | NH2    | E_ASP_90  | OD1    | 3.329        |
| 4R7D   | E_ARG_67  | NH2    | E_ASP_90  | OD2    | 3.799        |
| 4R7D   | E_LYS_76  | NZ     | E_ASP_73  | OD2    | 3.684        |
| 4R7D   | E_LYS_148 | NZ     | E_ASP_149 | OD2    | 2.850        |
| 4R7D   | E_LYS_214 | NZ     | F_GLU_123 | OE1    | 3.862        |
| 4R7D   | E_LYS_214 | NZ     | F_GLU_123 | OE2    | 3.571        |
| 4R7D   | E_ARG_215 | NH1    | E_GLU_217 | OE1    | 3.936        |
| 4R7D   | E_ARG_215 | NH1    | E_GLU_217 | OE2    | 3.249        |
| 4R7D   | E_ARG_215 | NH2    | E_GLU_217 | OE1    | 2.728        |
| 4R7D   | E_ARG_215 | NH2    | E_GLU_217 | OE2    | 3.501        |
| 4R7D   | F_LYS_16  | NZ     | F_GLU_79  | OE2    | 3.230        |
| 4R7D   | F_HIS_32  | NE2    | F_ASP_31  | OD1    | 3.921        |
| 4R7D   | F_ARG_61  | NH2    | F_ASP_82  | OD1    | 2.326        |

|      |           |     |           |     |       |
|------|-----------|-----|-----------|-----|-------|
| 4R7D | F_ARG_61  | NH2 | F_ASP_82  | OD2 | 2.732 |
| 4R7D | F_LYS_103 | NZ  | F_GLU_165 | OE1 | 3.918 |
| 4R7D | F_LYS_103 | NZ  | F_GLU_165 | OE2 | 3.931 |
| 4R7D | F_LYS_149 | NZ  | F_GLU_195 | OE1 | 3.595 |
| 4R7D | F_LYS_149 | NZ  | F_GLU_195 | OE2 | 3.164 |
| 4R7D | F_LYS_169 | NZ  | F_GLU_81  | OE2 | 3.685 |
| 4R7D | G_ARG_39  | NH1 | G_ASP_90  | OD1 | 2.853 |
| 4R7D | G_ARG_39  | NH2 | G_GLU_47  | OE2 | 2.958 |
| 4R7D | G_ARG_39  | NH2 | G_ASP_90  | OD1 | 3.467 |
| 4R7D | G_LYS_65  | NZ  | G_ASP_59  | OD1 | 3.423 |
| 4R7D | G_ARG_67  | NH1 | G_ASP_90  | OD1 | 3.986 |
| 4R7D | G_ARG_67  | NH1 | G_ASP_90  | OD2 | 3.243 |
| 4R7D | G_ARG_67  | NH2 | G_ASP_90  | OD1 | 2.698 |
| 4R7D | G_ARG_67  | NH2 | G_ASP_90  | OD2 | 3.350 |
| 4R7D | G_LYS_99  | NZ  | G_ASP_103 | OD2 | 3.638 |
| 4R7D | G_LYS_148 | NZ  | G_ASP_149 | OD2 | 2.977 |
| 4R7D | H_HIS_32  | NE2 | H_ASP_31  | OD1 | 3.837 |
| 4R7D | H_ARG_61  | NH1 | H_GLU_79  | OE1 | 3.684 |
| 4R7D | H_ARG_61  | NH2 | H_GLU_81  | OE1 | 3.325 |
| 4R7D | H_ARG_61  | NH2 | H_ASP_82  | OD1 | 2.892 |
| 4R7D | H_ARG_61  | NH2 | H_ASP_82  | OD2 | 3.435 |
| 4R7D | H_LYS_126 | NZ  | H_ASP_122 | OD2 | 3.954 |
| 4R7D | H_ARG_142 | NH1 | H_GLU_143 | OE1 | 3.953 |
| 4R7D | H_ARG_142 | NH2 | H_GLU_105 | OE2 | 3.620 |
| 4R7D | H_LYS_149 | NZ  | H_GLU_195 | OE2 | 2.396 |
| 4R7D | H_LYS_183 | NZ  | H_GLU_187 | OE2 | 3.853 |
| 4R7D | H_LYS_188 | NZ  | H_ASP_185 | OD1 | 3.959 |
| 4R7D | H_HIS_189 | ND1 | H_ASP_151 | OD2 | 2.743 |
| 4R7D | I_ARG_39  | NH1 | I_ASP_90  | OD1 | 2.779 |
| 4R7D | I_ARG_39  | NH2 | I_GLU_47  | OE2 | 3.308 |
| 4R7D | I_ARG_39  | NH2 | I_ASP_90  | OD1 | 3.305 |
| 4R7D | I_LYS_65  | NZ  | I_ASP_59  | OD1 | 3.650 |
| 4R7D | I_ARG_67  | NH1 | I_ASP_90  | OD2 | 3.228 |
| 4R7D | I_ARG_67  | NH2 | I_ASP_90  | OD1 | 2.929 |
| 4R7D | I_ARG_67  | NH2 | I_ASP_90  | OD2 | 3.207 |
| 4R7D | I_HIS_169 | NE2 | J_ASP_167 | OD1 | 3.970 |
| 4R7D | I_LYS_211 | NZ  | I_ASP_213 | OD1 | 3.549 |
| 4R7D | J_LYS_16  | NZ  | J_GLU_79  | OE2 | 3.737 |
| 4R7D | J_LYS_18  | NZ  | N_ASP_70  | OD1 | 3.913 |
| 4R7D | J_ARG_24  | NH2 | N_GLU_17  | OE1 | 3.275 |
| 4R7D | J_ARG_24  | NH2 | N_GLU_17  | OE2 | 2.135 |
| 4R7D | J_ARG_61  | NH1 | J_GLU_79  | OE1 | 3.344 |
| 4R7D | J_ARG_61  | NH1 | J_GLU_79  | OE2 | 3.871 |
| 4R7D | J_ARG_61  | NH2 | J_GLU_81  | OE1 | 3.710 |
| 4R7D | J_ARG_61  | NH2 | J_ASP_82  | OD1 | 3.792 |
| 4R7D | J_HIS_189 | ND1 | J_ASP_151 | OD2 | 3.674 |
| 4R7D | K_ARG_39  | NH1 | K_ASP_90  | OD1 | 3.019 |
| 4R7D | K_ARG_39  | NH2 | K_GLU_47  | OE1 | 3.928 |
| 4R7D | K_ARG_39  | NH2 | K_GLU_47  | OE2 | 3.206 |
| 4R7D | K_ARG_39  | NH2 | K_ASP_90  | OD1 | 3.749 |
| 4R7D | K_ARG_67  | NH1 | K_ASP_90  | OD1 | 3.223 |
| 4R7D | K_ARG_67  | NH1 | K_ASP_90  | OD2 | 3.237 |
| 4R7D | K_ARG_67  | NH2 | K_ASP_90  | OD1 | 3.233 |
| 4R7D | K_LYS_76  | NZ  | K_ASP_73  | OD2 | 3.794 |
| 4R7D | K_LYS_99  | NZ  | K_ASP_103 | OD1 | 2.821 |
| 4R7D | K_LYS_148 | NZ  | K_ASP_149 | OD2 | 3.160 |
| 4R7D | K_HIS_169 | NE2 | L_ASP_167 | OD2 | 3.666 |
| 4R7D | K_LYS_214 | NZ  | L_GLU_123 | OE1 | 3.074 |

|      |           |     |           |     |       |
|------|-----------|-----|-----------|-----|-------|
| 4R7D | L_HIS_32  | NE2 | L_ASP_31  | OD1 | 3.658 |
| 4R7D | L_LYS_49  | NZ  | K_ASP_100 | OD2 | 3.591 |
| 4R7D | L_ARG_61  | NH2 | L_GLU_79  | OE1 | 3.885 |
| 4R7D | L_ARG_61  | NH2 | L_GLU_79  | OE2 | 3.873 |
| 4R7D | L_LYS_149 | NZ  | L_GLU_195 | OE1 | 3.728 |
| 4R7D | L_LYS_149 | NZ  | L_GLU_195 | OE2 | 3.660 |
| 4R7D | L_LYS_188 | NZ  | L_ASP_185 | OD1 | 3.757 |
| 4R7D | L_HIS_189 | ND1 | L_ASP_151 | OD2 | 2.882 |
| 4R7D | M_ARG_39  | NH1 | M_ASP_90  | OD1 | 2.741 |
| 4R7D | M_ARG_39  | NH2 | M_GLU_47  | OE2 | 3.151 |
| 4R7D | M_ARG_39  | NH2 | M_ASP_90  | OD1 | 3.559 |
| 4R7D | M_LYS_65  | NZ  | M_ASP_59  | OD1 | 3.528 |
| 4R7D | M_ARG_67  | NH1 | M_ASP_90  | OD2 | 3.446 |
| 4R7D | M_ARG_67  | NH2 | M_ASP_90  | OD1 | 3.853 |
| 4R7D | M_LYS_76  | NZ  | M_ASP_73  | OD2 | 3.604 |
| 4R7D | M_LYS_99  | NZ  | M_ASP_103 | OD2 | 2.528 |
| 4R7D | M_LYS_148 | NZ  | M_ASP_149 | OD1 | 3.371 |
| 4R7D | M_LYS_211 | NZ  | M_ASP_213 | OD1 | 3.991 |
| 4R7D | M_LYS_214 | NZ  | N_GLU_123 | OE1 | 3.058 |
| 4R7D | M_LYS_214 | NZ  | N_GLU_123 | OE2 | 2.866 |
| 4R7D | M_ARG_215 | NH2 | M_GLU_217 | OE1 | 3.754 |
| 4R7D | N_ARG_61  | NH1 | N_GLU_79  | OE1 | 3.461 |
| 4R7D | N_LYS_103 | NZ  | N_GLU_165 | OE1 | 3.691 |
| 4R7D | N_LYS_107 | NZ  | J_ASP_9   | OD2 | 3.244 |
| 4R7D | N_LYS_149 | NZ  | N_GLU_195 | OE1 | 3.733 |
| 4R7D | N_LYS_149 | NZ  | N_GLU_195 | OE2 | 3.015 |
| 4R7D | N_HIS_189 | ND1 | N_ASP_151 | OD2 | 2.626 |
| 4R7D | O_ARG_39  | NH1 | O_ASP_90  | OD1 | 2.621 |
| 4R7D | O_ARG_39  | NH2 | O_GLU_47  | OE2 | 2.902 |
| 4R7D | O_ARG_39  | NH2 | O_ASP_90  | OD1 | 3.952 |
| 4R7D | O_ARG_67  | NH1 | O_ASP_90  | OD2 | 3.648 |
| 4R7D | O_ARG_67  | NH2 | O_ASP_90  | OD1 | 2.490 |
| 4R7D | O_ARG_67  | NH2 | O_ASP_90  | OD2 | 2.748 |
| 4R7D | O_LYS_76  | NZ  | O_ASP_73  | OD2 | 3.837 |
| 4R7D | O_LYS_214 | NZ  | P_GLU_123 | OE1 | 2.454 |
| 4R7D | O_LYS_214 | NZ  | P_GLU_123 | OE2 | 3.167 |
| 4R7D | O_ARG_215 | NH1 | O_GLU_217 | OE1 | 2.819 |
| 4R7D | O_ARG_215 | NH1 | O_GLU_217 | OE2 | 2.975 |
| 4R7D | O_ARG_215 | NH2 | O_GLU_217 | OE1 | 3.432 |
| 4R7D | P_LYS_16  | NZ  | P_GLU_79  | OE2 | 3.343 |
| 4R7D | P_ARG_61  | NH2 | P_ASP_82  | OD1 | 2.934 |
| 4R7D | P_ARG_61  | NH2 | P_ASP_82  | OD2 | 3.314 |
| 4R7D | P_ARG_142 | NH1 | P_GLU_143 | OE1 | 3.551 |
| 4R7D | P_ARG_142 | NH2 | P_GLU_105 | OE1 | 3.275 |
| 4R7D | P_ARG_142 | NH2 | P_GLU_105 | OE2 | 3.523 |
| 4R7D | P_LYS_149 | NZ  | P_GLU_195 | OE1 | 3.907 |
| 4R7D | P_LYS_149 | NZ  | P_GLU_195 | OE2 | 2.589 |
| 4R7D | P_HIS_189 | ND1 | P_ASP_151 | OD2 | 3.283 |

---

Table 615: 4R7D-specific salt bridging networks analysis. In this table, a PDB file is specified with a four-letter PDB ID, except that the names of the PDB files corresponding to the single NMR structural model split from the NMR ensemble is specified with a four-letter PDB ID in addition to a hyphen followed by the single NMR structural model numeric ID, the residue naming scheme is **Chain ID\_residue name\_residue number**,  $\angle ADH$  represents the angle formed by acceptor (A), donor (D) and hydrogen (H) ( $\angle ADH$ ).

| PDB ID | Residue A | Atom A | Residue B | Atom B | Distance (Å) |
|--------|-----------|--------|-----------|--------|--------------|
| 4R7N   | A_ARG_39  | NH1    | A_ASP_90  | OD1    | 2.825        |
| 4R7N   | A_ARG_39  | NH2    | A_GLU_47  | OE2    | 3.023        |
| 4R7N   | A_ARG_39  | NH2    | A_ASP_90  | OD1    | 3.603        |
| 4R7N   | A_ARG_67  | NH1    | A_ASP_90  | OD1    | 3.650        |
| 4R7N   | A_ARG_67  | NH1    | A_ASP_90  | OD2    | 2.898        |
| 4R7N   | A_ARG_67  | NH2    | A_ASP_90  | OD1    | 3.091        |
| 4R7N   | A_ARG_67  | NH2    | A_ASP_90  | OD2    | 3.794        |
| 4R7N   | A_ARG_98  | NH1    | A_ASP_100 | OD2    | 3.775        |
| 4R7N   | A_ARG_98  | NH2    | A_ASP_100 | OD2    | 2.512        |
| 4R7N   | A_LYS_148 | NZ     | A_ASP_149 | OD1    | 2.897        |
| 4R7N   | A_LYS_148 | NZ     | A_ASP_149 | OD2    | 2.755        |
| 4R7N   | A_LYS_214 | NZ     | B_GLU_123 | OE1    | 3.674        |
| 4R7N   | A_LYS_214 | NZ     | B_GLU_123 | OE2    | 3.683        |
| 4R7N   | B_LYS_16  | NZ     | B_GLU_79  | OE1    | 3.765        |
| 4R7N   | B_LYS_16  | NZ     | B_GLU_79  | OE2    | 3.236        |
| 4R7N   | B_ARG_24  | NH2    | J_GLU_17  | OE1    | 3.625        |
| 4R7N   | B_ARG_24  | NH2    | J_GLU_17  | OE2    | 2.355        |
| 4R7N   | B_ARG_61  | NH1    | B_GLU_81  | OE1    | 3.359        |
| 4R7N   | B_ARG_61  | NH2    | B_GLU_81  | OE1    | 3.738        |
| 4R7N   | B_ARG_61  | NH2    | B_ASP_82  | OD1    | 2.397        |
| 4R7N   | B_ARG_61  | NH2    | B_ASP_82  | OD2    | 3.170        |
| 4R7N   | B_LYS_103 | NZ     | B_GLU_165 | OE1    | 3.820        |
| 4R7N   | B_LYS_107 | NZ     | J_ASP_9   | OD2    | 3.605        |
| 4R7N   | B_LYS_149 | NZ     | B_GLU_195 | OE2    | 2.745        |
| 4R7N   | C_ARG_39  | NH1    | C_ASP_90  | OD1    | 2.845        |
| 4R7N   | C_ARG_39  | NH2    | C_GLU_47  | OE2    | 2.963        |
| 4R7N   | C_ARG_39  | NH2    | C_ASP_90  | OD1    | 3.701        |
| 4R7N   | C_ARG_67  | NH1    | C_ASP_90  | OD1    | 3.078        |
| 4R7N   | C_ARG_67  | NH1    | C_ASP_90  | OD2    | 2.222        |
| 4R7N   | C_ARG_67  | NH2    | C_ASP_90  | OD1    | 2.771        |
| 4R7N   | C_ARG_67  | NH2    | C_ASP_90  | OD2    | 3.580        |
| 4R7N   | C_LYS_76  | NZ     | C_ASP_73  | OD2    | 2.761        |
| 4R7N   | C_ARG_98  | NH2    | C_ASP_100 | OD2    | 3.773        |
| 4R7N   | C_LYS_211 | NZ     | C_ASP_213 | OD1    | 3.637        |
| 4R7N   | C_LYS_214 | NZ     | D_GLU_123 | OE1    | 2.537        |
| 4R7N   | C_LYS_214 | NZ     | D_GLU_123 | OE2    | 3.321        |
| 4R7N   | C_ARG_215 | NH1    | C_GLU_217 | OE2    | 3.613        |
| 4R7N   | C_ARG_215 | NH2    | C_GLU_217 | OE1    | 3.821        |
| 4R7N   | C_ARG_215 | NH2    | C_GLU_217 | OE2    | 3.518        |
| 4R7N   | D_ARG_24  | NH2    | F_GLU_17  | OE1    | 3.787        |
| 4R7N   | D_ARG_24  | NH2    | F_GLU_17  | OE2    | 2.414        |
| 4R7N   | D_ARG_61  | NH1    | D_GLU_81  | OE1    | 3.464        |
| 4R7N   | D_ARG_61  | NH1    | D_ASP_82  | OD1    | 2.853        |
| 4R7N   | D_ARG_61  | NH1    | D_ASP_82  | OD2    | 3.611        |
| 4R7N   | D_ARG_61  | NH2    | D_GLU_81  | OE1    | 3.128        |
| 4R7N   | D_LYS_103 | NZ     | D_GLU_165 | OE1    | 3.770        |
| 4R7N   | D_LYS_107 | NZ     | F_ASP_9   | OD2    | 3.633        |
| 4R7N   | D_LYS_149 | NZ     | D_GLU_195 | OE2    | 3.176        |
| 4R7N   | D_HIS_189 | ND1    | D_ASP_151 | OD2    | 3.153        |
| 4R7N   | E_ARG_39  | NH1    | E_ASP_90  | OD1    | 2.803        |
| 4R7N   | E_ARG_39  | NH2    | E_GLU_47  | OE1    | 3.978        |
| 4R7N   | E_ARG_39  | NH2    | E_GLU_47  | OE2    | 3.076        |
| 4R7N   | E_ARG_39  | NH2    | E_ASP_90  | OD1    | 3.735        |
| 4R7N   | E_LYS_65  | NZ     | E_ASP_59  | OD1    | 3.735        |
| 4R7N   | E_ARG_67  | NH1    | E_ASP_90  | OD1    | 3.124        |
| 4R7N   | E_ARG_67  | NH1    | E_ASP_90  | OD2    | 3.240        |
| 4R7N   | E_ARG_98  | NH1    | E_ASP_100 | OD2    | 3.090        |



|      |           |     |           |     |       |
|------|-----------|-----|-----------|-----|-------|
| 4R7N | E_ARG_98  | NH2 | E_ASP_100 | OD2 | 2.869 |
| 4R7N | E_HIS_169 | NE2 | F_ASP_167 | OD1 | 3.616 |
| 4R7N | E_HIS_169 | NE2 | F_ASP_167 | OD2 | 3.474 |
| 4R7N | E_LYS_214 | NZ  | F_GLU_123 | OE2 | 3.072 |
| 4R7N | F_LYS_16  | NZ  | F_GLU_79  | OE1 | 3.193 |
| 4R7N | F_LYS_16  | NZ  | F_GLU_79  | OE2 | 2.766 |
| 4R7N | F_ARG_24  | NH2 | D_GLU_17  | OE1 | 3.696 |
| 4R7N | F_ARG_24  | NH2 | D_GLU_17  | OE2 | 2.325 |
| 4R7N | F_ARG_61  | NH2 | F_GLU_81  | OE2 | 3.726 |
| 4R7N | F_ARG_61  | NH2 | F_ASP_82  | OD1 | 2.275 |
| 4R7N | F_ARG_61  | NH2 | F_ASP_82  | OD2 | 3.114 |
| 4R7N | F_LYS_103 | NZ  | F_GLU_165 | OE1 | 3.429 |
| 4R7N | F_LYS_107 | NZ  | D_ASP_9   | OD2 | 3.641 |
| 4R7N | F_ARG_142 | NH1 | F_GLU_143 | OE1 | 3.991 |
| 4R7N | F_ARG_142 | NH2 | F_GLU_105 | OE1 | 3.315 |
| 4R7N | F_LYS_149 | NZ  | F_GLU_195 | OE1 | 3.479 |
| 4R7N | F_LYS_149 | NZ  | F_GLU_195 | OE2 | 2.946 |
| 4R7N | G_ARG_39  | NH1 | G_ASP_90  | OD1 | 2.781 |
| 4R7N | G_ARG_39  | NH2 | G_GLU_47  | OE1 | 3.904 |
| 4R7N | G_ARG_39  | NH2 | G_GLU_47  | OE2 | 2.981 |
| 4R7N | G_ARG_39  | NH2 | G_ASP_90  | OD1 | 3.571 |
| 4R7N | G_LYS_65  | NZ  | G_ASP_59  | OD1 | 3.786 |
| 4R7N | G_ARG_67  | NH1 | G_ASP_90  | OD1 | 3.700 |
| 4R7N | G_ARG_67  | NH1 | G_ASP_90  | OD2 | 2.751 |
| 4R7N | G_ARG_67  | NH2 | G_ASP_90  | OD1 | 3.048 |
| 4R7N | G_ARG_67  | NH2 | G_ASP_90  | OD2 | 3.620 |
| 4R7N | G_ARG_98  | NH1 | G_ASP_100 | OD1 | 3.954 |
| 4R7N | G_ARG_98  | NH1 | G_ASP_100 | OD2 | 2.296 |
| 4R7N | G_ARG_98  | NH2 | G_ASP_100 | OD2 | 3.918 |
| 4R7N | G_LYS_214 | NZ  | H_GLU_123 | OE1 | 2.389 |
| 4R7N | G_LYS_214 | NZ  | H_GLU_123 | OE2 | 3.440 |
| 4R7N | G_ARG_215 | NH2 | G_GLU_217 | OE2 | 3.692 |
| 4R7N | H_LYS_16  | NZ  | H_GLU_79  | OE1 | 3.784 |
| 4R7N | H_LYS_16  | NZ  | H_GLU_79  | OE2 | 3.778 |
| 4R7N | H_ARG_24  | NH2 | L_GLU_17  | OE1 | 3.413 |
| 4R7N | H_ARG_24  | NH2 | L_GLU_17  | OE2 | 2.312 |
| 4R7N | H_ARG_61  | NH1 | H_GLU_81  | OE1 | 3.674 |
| 4R7N | H_ARG_61  | NH1 | H_ASP_82  | OD1 | 2.998 |
| 4R7N | H_ARG_61  | NH1 | H_ASP_82  | OD2 | 3.659 |
| 4R7N | H_ARG_61  | NH2 | H_GLU_81  | OE1 | 3.398 |
| 4R7N | H_LYS_103 | NZ  | H_GLU_165 | OE1 | 3.531 |
| 4R7N | H_LYS_149 | NZ  | H_GLU_195 | OE2 | 2.677 |
| 4R7N | I_ARG_39  | NH1 | I_ASP_90  | OD1 | 2.559 |
| 4R7N | I_ARG_39  | NH2 | I_GLU_47  | OE2 | 3.220 |
| 4R7N | I_ARG_39  | NH2 | I_ASP_90  | OD1 | 3.236 |
| 4R7N | I_ARG_67  | NH1 | I_ASP_90  | OD1 | 3.787 |
| 4R7N | I_ARG_67  | NH1 | I_ASP_90  | OD2 | 2.994 |
| 4R7N | I_ARG_67  | NH2 | I_ASP_90  | OD1 | 2.852 |
| 4R7N | I_ARG_67  | NH2 | I_ASP_90  | OD2 | 3.576 |
| 4R7N | I_ARG_98  | NH1 | I_ASP_100 | OD2 | 3.172 |
| 4R7N | I_ARG_98  | NH2 | I_ASP_100 | OD2 | 3.171 |
| 4R7N | I_LYS_214 | NZ  | J_GLU_123 | OE1 | 3.635 |
| 4R7N | I_LYS_214 | NZ  | J_GLU_123 | OE2 | 2.942 |
| 4R7N | J_ARG_24  | NH2 | B_GLU_17  | OE1 | 3.555 |
| 4R7N | J_ARG_24  | NH2 | B_GLU_17  | OE2 | 2.304 |
| 4R7N | J_ARG_61  | NH1 | J_ASP_82  | OD1 | 2.881 |
| 4R7N | J_ARG_61  | NH1 | J_ASP_82  | OD2 | 2.940 |
| 4R7N | J_ARG_142 | NH2 | J_GLU_105 | OE1 | 3.516 |

|      |           |     |           |     |       |
|------|-----------|-----|-----------|-----|-------|
| 4R7N | J_LYS_149 | NZ  | J_GLU_195 | OE1 | 2.936 |
| 4R7N | K_ARG_39  | NH1 | K_ASP_90  | OD1 | 2.585 |
| 4R7N | K_ARG_39  | NH2 | K_GLU_47  | OE2 | 3.296 |
| 4R7N | K_ARG_39  | NH2 | K_ASP_90  | OD1 | 3.354 |
| 4R7N | K_ARG_67  | NH1 | K_ASP_90  | OD1 | 3.756 |
| 4R7N | K_ARG_67  | NH1 | K_ASP_90  | OD2 | 2.865 |
| 4R7N | K_ARG_67  | NH2 | K_ASP_90  | OD1 | 3.074 |
| 4R7N | K_ARG_67  | NH2 | K_ASP_90  | OD2 | 3.668 |
| 4R7N | K_ARG_98  | NH2 | K_ASP_100 | OD2 | 3.706 |
| 4R7N | K_LYS_148 | NZ  | K_ASP_149 | OD1 | 2.955 |
| 4R7N | K_LYS_148 | NZ  | K_ASP_149 | OD2 | 2.836 |
| 4R7N | K_LYS_214 | NZ  | L_GLU_123 | OE2 | 3.794 |
| 4R7N | K_ARG_215 | NH2 | K_GLU_217 | OE2 | 2.789 |
| 4R7N | L_LYS_16  | NZ  | L_GLU_79  | OE1 | 3.348 |
| 4R7N | L_LYS_16  | NZ  | L_GLU_79  | OE2 | 3.110 |
| 4R7N | L_ARG_24  | NH2 | H_GLU_17  | OE1 | 3.531 |
| 4R7N | L_ARG_24  | NH2 | H_GLU_17  | OE2 | 2.313 |
| 4R7N | L_ARG_61  | NH1 | L_ASP_82  | OD1 | 3.398 |
| 4R7N | L_ARG_61  | NH1 | L_ASP_82  | OD2 | 2.327 |
| 4R7N | L_ARG_61  | NH2 | L_ASP_82  | OD1 | 2.642 |
| 4R7N | L_ARG_61  | NH2 | L_ASP_82  | OD2 | 3.265 |
| 4R7N | L_LYS_103 | NZ  | L_GLU_165 | OE1 | 3.773 |
| 4R7N | L_LYS_149 | NZ  | L_GLU_195 | OE1 | 3.879 |
| 4R7N | L_LYS_149 | NZ  | L_GLU_195 | OE2 | 3.013 |
| 4R7N | M_ARG_39  | NH1 | M_ASP_90  | OD1 | 2.831 |
| 4R7N | M_ARG_39  | NH2 | M_GLU_47  | OE2 | 3.008 |
| 4R7N | M_ARG_39  | NH2 | M_ASP_90  | OD1 | 3.609 |
| 4R7N | M_ARG_67  | NH1 | M_ASP_90  | OD2 | 3.507 |
| 4R7N | M_ARG_67  | NH2 | M_ASP_90  | OD1 | 3.326 |
| 4R7N | M_ARG_67  | NH2 | M_ASP_90  | OD2 | 3.775 |
| 4R7N | M_LYS_76  | NZ  | M_ASP_73  | OD1 | 3.417 |
| 4R7N | M_LYS_76  | NZ  | M_ASP_73  | OD2 | 3.788 |
| 4R7N | M_ARG_98  | NH1 | M_ASP_100 | OD2 | 2.760 |
| 4R7N | M_ARG_98  | NH2 | M_ASP_100 | OD2 | 2.685 |
| 4R7N | M_LYS_148 | NZ  | M_ASP_149 | OD1 | 2.958 |
| 4R7N | M_LYS_148 | NZ  | M_ASP_149 | OD2 | 2.802 |
| 4R7N | N_ARG_24  | NH2 | P_GLU_17  | OE1 | 3.814 |
| 4R7N | N_ARG_24  | NH2 | P_GLU_17  | OE2 | 2.289 |
| 4R7N | N_ARG_61  | NH1 | N_GLU_79  | OE1 | 2.882 |
| 4R7N | N_ARG_61  | NH1 | N_ASP_82  | OD1 | 2.547 |
| 4R7N | N_ARG_61  | NH1 | N_ASP_82  | OD2 | 3.212 |
| 4R7N | N_ARG_61  | NH2 | N_GLU_79  | OE1 | 3.252 |
| 4R7N | N_LYS_103 | NZ  | N_GLU_165 | OE1 | 3.332 |
| 4R7N | N_LYS_107 | NZ  | P_ASP_9   | OD2 | 3.591 |
| 4R7N | N_LYS_149 | NZ  | N_GLU_195 | OE1 | 2.916 |
| 4R7N | N_HIS_189 | ND1 | N_ASP_151 | OD2 | 2.809 |
| 4R7N | N_LYS_190 | NZ  | N_GLU_187 | OE1 | 3.890 |
| 4R7N | O_ARG_39  | NH1 | O_ASP_90  | OD1 | 2.710 |
| 4R7N | O_ARG_39  | NH2 | O_GLU_47  | OE1 | 3.778 |
| 4R7N | O_ARG_39  | NH2 | O_GLU_47  | OE2 | 2.955 |
| 4R7N | O_ARG_39  | NH2 | O_ASP_90  | OD1 | 3.975 |
| 4R7N | O_ARG_67  | NH1 | O_ASP_90  | OD1 | 3.623 |
| 4R7N | O_ARG_67  | NH1 | O_ASP_90  | OD2 | 2.994 |
| 4R7N | O_ARG_67  | NH2 | O_ASP_90  | OD1 | 3.294 |
| 4R7N | O_ARG_98  | NH2 | O_ASP_100 | OD2 | 3.721 |
| 4R7N | O_HIS_169 | NE2 | P_ASP_167 | OD2 | 3.725 |
| 4R7N | P_ARG_24  | NH2 | N_GLU_17  | OE1 | 3.525 |
| 4R7N | P_ARG_24  | NH2 | N_GLU_17  | OE2 | 2.277 |

|      |           |     |           |     |       |
|------|-----------|-----|-----------|-----|-------|
| 4R7N | P_ARG_61  | NH1 | P_GLU_79  | OE1 | 2.179 |
| 4R7N | P_ARG_61  | NH1 | P_GLU_79  | OE2 | 3.956 |
| 4R7N | P_ARG_61  | NH2 | P_GLU_79  | OE1 | 3.623 |
| 4R7N | P_LYS_103 | NZ  | P_GLU_165 | OE1 | 3.040 |
| 4R7N | P_ARG_108 | NH1 | P_GLU_105 | OE2 | 2.550 |
| 4R7N | P_ARG_108 | NH2 | P_GLU_105 | OE2 | 3.860 |
| 4R7N | P_LYS_149 | NZ  | P_GLU_195 | OE1 | 3.164 |
| 4R7N | P_LYS_149 | NZ  | P_GLU_195 | OE2 | 3.343 |
| 4R7N | P_LYS_188 | NZ  | P_ASP_185 | OD1 | 3.703 |
| 4R7N | P_HIS_189 | ND1 | P_ASP_151 | OD2 | 2.247 |
| 4R7N | Q_ARG_39  | NH1 | Q_ASP_90  | OD1 | 2.764 |
| 4R7N | Q_ARG_39  | NH2 | Q_GLU_47  | OE1 | 3.665 |
| 4R7N | Q_ARG_39  | NH2 | Q_GLU_47  | OE2 | 2.481 |
| 4R7N | Q_ARG_67  | NH2 | Q_ASP_90  | OD1 | 3.614 |
| 4R7N | Q_ARG_67  | NH2 | Q_ASP_90  | OD2 | 2.212 |
| 4R7N | Q_ARG_98  | NH1 | Q_ASP_100 | OD2 | 2.913 |
| 4R7N | Q_ARG_98  | NH2 | Q_ASP_100 | OD2 | 2.616 |
| 4R7N | Q_LYS_148 | NZ  | Q_ASP_149 | OD1 | 3.127 |
| 4R7N | Q_LYS_148 | NZ  | Q_ASP_149 | OD2 | 2.663 |
| 4R7N | Q_LYS_211 | NZ  | G_ASP_213 | OD2 | 3.009 |
| 4R7N | Q_LYS_214 | NZ  | R_GLU_123 | OE1 | 3.438 |
| 4R7N | Q_LYS_214 | NZ  | R_GLU_123 | OE2 | 3.002 |
| 4R7N | Q_ARG_215 | NH2 | Q_GLU_217 | OE2 | 3.165 |
| 4R7N | R_ARG_61  | NH2 | R_ASP_82  | OD1 | 3.978 |
| 4R7N | R_LYS_103 | NZ  | R_GLU_165 | OE1 | 2.945 |
| 4R7N | R_LYS_103 | NZ  | R_GLU_165 | OE2 | 3.633 |
| 4R7N | R_LYS_145 | NZ  | F_ASP_93  | OD2 | 3.627 |
| 4R7N | R_LYS_149 | NZ  | R_GLU_195 | OE1 | 3.543 |
| 4R7N | R_LYS_149 | NZ  | R_GLU_195 | OE2 | 2.531 |
| 4R7N | R_LYS_188 | NZ  | R_ASP_185 | OD1 | 2.716 |
| 4R7N | R_LYS_188 | NZ  | R_ASP_185 | OD2 | 3.719 |
| 4R7N | S_ARG_39  | NH1 | S_ASP_90  | OD1 | 2.779 |
| 4R7N | S_ARG_39  | NH2 | S_GLU_47  | OE2 | 3.044 |
| 4R7N | S_ARG_39  | NH2 | S_ASP_90  | OD1 | 3.585 |
| 4R7N | S_ARG_67  | NH1 | S_ASP_90  | OD1 | 3.352 |
| 4R7N | S_ARG_67  | NH1 | S_ASP_90  | OD2 | 2.290 |
| 4R7N | S_ARG_67  | NH2 | S_ASP_90  | OD1 | 2.345 |
| 4R7N | S_ARG_67  | NH2 | S_ASP_90  | OD2 | 3.063 |
| 4R7N | S_ARG_98  | NH1 | S_ASP_100 | OD2 | 2.688 |
| 4R7N | S_ARG_98  | NH2 | S_ASP_100 | OD2 | 2.786 |
| 4R7N | S_LYS_148 | NZ  | S_ASP_149 | OD1 | 3.013 |
| 4R7N | S_LYS_148 | NZ  | S_ASP_149 | OD2 | 2.778 |
| 4R7N | S_LYS_214 | NZ  | T_GLU_123 | OE1 | 3.934 |
| 4R7N | S_LYS_214 | NZ  | T_GLU_123 | OE2 | 3.931 |
| 4R7N | T_LYS_16  | NZ  | T_GLU_79  | OE1 | 3.838 |
| 4R7N | T_LYS_16  | NZ  | T_GLU_79  | OE2 | 3.370 |
| 4R7N | T_ARG_61  | NH1 | T_GLU_81  | OE1 | 3.260 |
| 4R7N | T_ARG_61  | NH2 | T_GLU_81  | OE1 | 3.615 |
| 4R7N | T_ARG_61  | NH2 | T_ASP_82  | OD1 | 2.440 |
| 4R7N | T_ARG_61  | NH2 | T_ASP_82  | OD2 | 3.240 |
| 4R7N | T_LYS_103 | NZ  | T_GLU_165 | OE1 | 3.688 |
| 4R7N | T_LYS_149 | NZ  | T_GLU_195 | OE2 | 2.601 |

---

Table 616: 4R7N-specific salt bridging networks analysis. In this table, a PDB file is specified with a four-letter PDB ID, except that the names of the PDB files corresponding to the single NMR structural model split from the NMR ensemble is specified with a four-letter PDB ID in addition to a hyphen followed by the single NMR structural model numeric ID, the residue naming scheme is **Chain ID\_residue name\_residue number**,  $\angle ADH$  represents the angle formed by acceptor (A), donor (D) and hydrogen (H) ( $\angle ADH$ ).

| PDB ID | Residue A | Atom A | Residue B | Atom B | Distance (Å) |
|--------|-----------|--------|-----------|--------|--------------|
| 4R9Y   | L_ARG_86  | NH2    | L_ASP_107 | OD1    | 3.056        |
| 4R9Y   | L_ARG_86  | NH2    | L_ASP_107 | OD2    | 2.747        |
| 4R9Y   | L_LYS_128 | NZ     | L_ASP_190 | OD2    | 3.847        |
| 4R9Y   | L_LYS_174 | NZ     | L_GLU_220 | OE1    | 2.876        |
| 4R9Y   | L_ARG_180 | NH2    | L_GLU_210 | OE2    | 3.355        |
| 4R9Y   | L_HIS_214 | ND1    | L_GLU_210 | OE1    | 3.897        |
| 4R9Y   | H_LYS_37  | NZ     | H_GLU_45  | OE1    | 2.976        |
| 4R9Y   | H_ARG_66  | NH1    | H_GLU_88  | OE2    | 2.888        |
| 4R9Y   | H_ARG_66  | NH2    | H_GLU_88  | OE2    | 3.617        |
| 4R9Y   | H_LYS_214 | NZ     | L_GLU_148 | OE2    | 2.745        |
| 4R9Y   | B_LYS_50  | NZ     | B_GLU_28  | OE2    | 3.071        |
| 4R9Y   | A_LYS_50  | NZ     | A_GLU_28  | OE2    | 2.662        |
| 4R9Y   | M_ARG_79  | NH2    | M_ASP_85  | OD1    | 3.700        |
| 4R9Y   | M_ARG_86  | NH2    | M_ASP_107 | OD1    | 2.946        |
| 4R9Y   | M_ARG_86  | NH2    | M_ASP_107 | OD2    | 2.694        |
| 4R9Y   | M_LYS_128 | NZ     | M_ASP_190 | OD1    | 3.808        |
| 4R9Y   | M_LYS_128 | NZ     | M_ASP_190 | OD2    | 3.124        |
| 4R9Y   | M_LYS_    | NZ     | M_GLU_    | OE1    | 3.152        |
| 4R9Y   | M_ARG_    | NH2    | M_GLU_    | OE2    | 3.203        |
| 4R9Y   | M_HIS_    | ND1    | M_GLU_    | OE1    | 3.630        |
| 4R9Y   | M_LYS_    | NZ     | M_ASP_    | OD1    | 3.535        |
| 4R9Y   | M_LYS_    | NZ     | M_ASP_    | OD2    | 3.766        |
| 4R9Y   | N_LYS_37  | NZ     | N_GLU_45  | OE1    | 2.708        |
| 4R9Y   | N_ARG_66  | NH1    | N_GLU_88  | OE2    | 3.382        |
| 4R9Y   | N_ARG_66  | NH2    | N_GLU_88  | OE2    | 3.864        |
| 4R9Y   | N_LYS_    | NZ     | M_GLU_    | OE2    | 3.272        |

Table 617: 4R9Y-specific salt bridging networks analysis. In this table, a PDB file is specified with a four-letter PDB ID, except that the names of the PDB files corresponding to the single NMR structural model split from the NMR ensemble is specified with a four-letter PDB ID in addition to a hyphen followed by the single NMR structural model numeric ID, the residue naming scheme is **Chain ID\_residue name\_residue number**,  $\angle ADH$  represents the angle formed by acceptor (A), donor (D) and hydrogen (H) ( $\angle ADH$ ).

| PDB ID | Residue A | Atom A | Residue B | Atom B | Distance (Å) |
|--------|-----------|--------|-----------|--------|--------------|
| 4RAU   | A_ARG_39  | NH1    | A_ASP_84  | OD1    | 3.918        |
| 4RAU   | A_ARG_63  | NH1    | A_ASP_84  | OD1    | 3.252        |
| 4RAU   | A_ARG_63  | NH1    | A_ASP_84  | OD2    | 2.474        |
| 4RAU   | A_ARG_63  | NH2    | A_GLU_81  | OE1    | 3.641        |
| 4RAU   | A_LYS_95  | NZ     | C_ASP_7   | OD1    | 3.997        |
| 4RAU   | A_LYS_95  | NZ     | C_ASP_7   | OD2    | 3.077        |
| 4RAU   | A_LYS_105 | NZ     | A_ASP_167 | OD1    | 3.803        |
| 4RAU   | A_LYS_144 | NZ     | A_GLU_107 | OE1    | 3.648        |
| 4RAU   | A_LYS_149 | NZ     | A_GLU_156 | OE1    | 3.640        |
| 4RAU   | A_LYS_149 | NZ     | A_GLU_156 | OE2    | 3.515        |
| 4RAU   | A_LYS_151 | NZ     | A_GLU_197 | OE1    | 3.640        |
| 4RAU   | A_LYS_151 | NZ     | A_GLU_197 | OE2    | 2.823        |
| 4RAU   | A_LYS_185 | NZ     | A_GLU_189 | OE1    | 3.707        |
| 4RAU   | A_LYS_185 | NZ     | A_GLU_189 | OE2    | 3.597        |
| 4RAU   | A_HIS_191 | ND1    | A_ASP_153 | OD2    | 2.734        |
| 4RAU   | A_LYS_201 | NZ     | A_ASP_112 | OD2    | 3.033        |
| 4RAU   | B_ARG_40  | NH1    | B_ASP_92  | OD1    | 3.503        |
| 4RAU   | B_ARG_40  | NH2    | B_GLU_48  | OE1    | 3.720        |
| 4RAU   | B_ARG_40  | NH2    | B_GLU_48  | OE2    | 3.277        |
| 4RAU   | B_ARG_46  | NH1    | B_GLU_44  | OE1    | 3.716        |
| 4RAU   | B_ARG_69  | NH1    | B_ASP_92  | OD2    | 2.694        |
| 4RAU   | B_ARG_69  | NH2    | B_ASP_92  | OD1    | 3.312        |
| 4RAU   | B_ARG_69  | NH2    | B_ASP_92  | OD2    | 3.295        |
| 4RAU   | B_ARG_89  | NH1    | B_GLU_91  | OE1    | 3.989        |
| 4RAU   | B_ARG_100 | NH2    | B_ASP_109 | OD1    | 3.691        |
| 4RAU   | B_ARG_100 | NH2    | B_ASP_109 | OD2    | 2.652        |
| 4RAU   | D_ARG_39  | NH1    | D_ASP_84  | OD1    | 3.919        |
| 4RAU   | D_ARG_63  | NH1    | D_ASP_84  | OD1    | 3.251        |
| 4RAU   | D_ARG_63  | NH1    | D_ASP_84  | OD2    | 2.476        |
| 4RAU   | D_ARG_63  | NH2    | D_GLU_81  | OE1    | 3.630        |
| 4RAU   | D_LYS_95  | NZ     | F_ASP_7   | OD1    | 3.860        |
| 4RAU   | D_LYS_105 | NZ     | D_ASP_167 | OD1    | 3.863        |
| 4RAU   | D_LYS_144 | NZ     | D_GLU_107 | OE1    | 3.652        |
| 4RAU   | D_LYS_149 | NZ     | D_GLU_156 | OE1    | 3.639        |
| 4RAU   | D_LYS_149 | NZ     | D_GLU_156 | OE2    | 3.516        |
| 4RAU   | D_LYS_151 | NZ     | D_GLU_197 | OE1    | 3.630        |
| 4RAU   | D_LYS_151 | NZ     | D_GLU_197 | OE2    | 2.814        |
| 4RAU   | D_LYS_185 | NZ     | D_GLU_189 | OE1    | 3.707        |
| 4RAU   | D_LYS_185 | NZ     | D_GLU_189 | OE2    | 3.596        |
| 4RAU   | D_HIS_191 | ND1    | D_ASP_153 | OD2    | 2.728        |
| 4RAU   | D_LYS_201 | NZ     | D_ASP_112 | OD2    | 3.033        |
| 4RAU   | E_ARG_40  | NH1    | E_ASP_92  | OD1    | 3.503        |
| 4RAU   | E_ARG_40  | NH2    | E_GLU_48  | OE1    | 3.725        |
| 4RAU   | E_ARG_40  | NH2    | E_GLU_48  | OE2    | 3.283        |
| 4RAU   | E_ARG_46  | NH1    | E_GLU_44  | OE1    | 3.723        |
| 4RAU   | E_ARG_69  | NH1    | E_ASP_92  | OD2    | 2.692        |
| 4RAU   | E_ARG_69  | NH2    | E_ASP_92  | OD1    | 3.311        |
| 4RAU   | E_ARG_69  | NH2    | E_ASP_92  | OD2    | 3.296        |
| 4RAU   | E_ARG_89  | NH1    | E_GLU_91  | OE1    | 3.988        |
| 4RAU   | E_ARG_100 | NH2    | E_ASP_109 | OD1    | 3.682        |
| 4RAU   | E_ARG_100 | NH2    | E_ASP_109 | OD2    | 2.642        |
| 4RAU   | G_ARG_39  | NH1    | G_ASP_84  | OD1    | 3.926        |
| 4RAU   | G_LYS_41  | NZ     | G_GLU_83  | OE2    | 3.332        |
| 4RAU   | G_ARG_63  | NH1    | G_ASP_84  | OD1    | 3.251        |
| 4RAU   | G_ARG_63  | NH1    | G_ASP_84  | OD2    | 2.480        |
| 4RAU   | G_ARG_63  | NH2    | G_GLU_81  | OE1    | 3.649        |
| 4RAU   | G_LYS_95  | NZ     | I_ASP_7   | OD1    | 3.805        |

|      |           |     |           |     |       |
|------|-----------|-----|-----------|-----|-------|
| 4RAU | G_LYS_95  | NZ  | I_ASP_7   | OD2 | 2.755 |
| 4RAU | G_LYS_105 | NZ  | G_ASP_167 | OD1 | 3.810 |
| 4RAU | G_LYS_144 | NZ  | G_GLU_107 | OE1 | 3.652 |
| 4RAU | G_LYS_149 | NZ  | G_GLU_156 | OE1 | 3.643 |
| 4RAU | G_LYS_149 | NZ  | G_GLU_156 | OE2 | 3.517 |
| 4RAU | G_LYS_151 | NZ  | G_GLU_197 | OE1 | 3.632 |
| 4RAU | G_LYS_151 | NZ  | G_GLU_197 | OE2 | 2.815 |
| 4RAU | G_LYS_185 | NZ  | G_GLU_189 | OE1 | 3.707 |
| 4RAU | G_LYS_185 | NZ  | G_GLU_189 | OE2 | 3.598 |
| 4RAU | G_HIS_191 | ND1 | G_ASP_153 | OD2 | 2.730 |
| 4RAU | G_LYS_201 | NZ  | G_ASP_112 | OD2 | 3.033 |
| 4RAU | H_ARG_40  | NH1 | H_ASP_92  | OD1 | 3.494 |
| 4RAU | H_ARG_40  | NH2 | H_GLU_48  | OE1 | 3.724 |
| 4RAU | H_ARG_40  | NH2 | H_GLU_48  | OE2 | 3.281 |
| 4RAU | H_ARG_46  | NH1 | H_GLU_44  | OE1 | 3.700 |
| 4RAU | H_ARG_69  | NH1 | H_ASP_92  | OD2 | 2.699 |
| 4RAU | H_ARG_69  | NH2 | H_ASP_92  | OD1 | 3.317 |
| 4RAU | H_ARG_69  | NH2 | H_ASP_92  | OD2 | 3.297 |
| 4RAU | H_ARG_89  | NH1 | H_GLU_91  | OE1 | 3.985 |
| 4RAU | H_ARG_100 | NH2 | H_ASP_109 | OD1 | 3.685 |
| 4RAU | H_ARG_100 | NH2 | H_ASP_109 | OD2 | 2.644 |
| 4RAU | J_ARG_39  | NH1 | J_ASP_84  | OD1 | 3.913 |
| 4RAU | J_ARG_63  | NH1 | J_ASP_84  | OD1 | 3.253 |
| 4RAU | J_ARG_63  | NH1 | J_ASP_84  | OD2 | 2.480 |
| 4RAU | J_ARG_63  | NH2 | J_GLU_81  | OE1 | 3.649 |
| 4RAU | J_LYS_105 | NZ  | J_ASP_167 | OD1 | 3.805 |
| 4RAU | J_LYS_144 | NZ  | J_GLU_107 | OE1 | 3.646 |
| 4RAU | J_LYS_149 | NZ  | J_GLU_156 | OE1 | 3.641 |
| 4RAU | J_LYS_149 | NZ  | J_GLU_156 | OE2 | 3.516 |
| 4RAU | J_LYS_151 | NZ  | J_GLU_197 | OE1 | 3.631 |
| 4RAU | J_LYS_151 | NZ  | J_GLU_197 | OE2 | 2.814 |
| 4RAU | J_LYS_171 | NZ  | J_ASP_169 | OD2 | 3.647 |
| 4RAU | J_LYS_185 | NZ  | J_GLU_189 | OE1 | 3.708 |
| 4RAU | J_LYS_185 | NZ  | J_GLU_189 | OE2 | 3.602 |
| 4RAU | J_HIS_191 | ND1 | J_ASP_153 | OD2 | 2.728 |
| 4RAU | J_LYS_201 | NZ  | J_ASP_112 | OD2 | 3.034 |
| 4RAU | K_ARG_40  | NH1 | K_ASP_92  | OD1 | 3.498 |
| 4RAU | K_ARG_40  | NH2 | K_GLU_48  | OE1 | 3.722 |
| 4RAU | K_ARG_40  | NH2 | K_GLU_48  | OE2 | 3.276 |
| 4RAU | K_ARG_46  | NH1 | K_GLU_44  | OE1 | 3.698 |
| 4RAU | K_ARG_69  | NH1 | K_ASP_92  | OD2 | 2.699 |
| 4RAU | K_ARG_69  | NH2 | K_ASP_92  | OD1 | 3.319 |
| 4RAU | K_ARG_69  | NH2 | K_ASP_92  | OD2 | 3.299 |
| 4RAU | K_ARG_89  | NH1 | K_GLU_91  | OE1 | 3.987 |
| 4RAU | K_ARG_100 | NH2 | K_ASP_109 | OD1 | 3.690 |
| 4RAU | K_ARG_100 | NH2 | K_ASP_109 | OD2 | 2.645 |
| 4RAU | K_LYS_216 | NZ  | J_GLU_125 | OE2 | 3.935 |
| 4RAU | M_ARG_39  | NH1 | M_ASP_84  | OD1 | 3.922 |
| 4RAU | M_ARG_63  | NH1 | M_ASP_84  | OD1 | 3.250 |
| 4RAU | M_ARG_63  | NH1 | M_ASP_84  | OD2 | 2.472 |
| 4RAU | M_ARG_63  | NH2 | M_GLU_81  | OE1 | 3.646 |
| 4RAU | M_LYS_105 | NZ  | M_ASP_167 | OD1 | 3.861 |
| 4RAU | M_LYS_149 | NZ  | M_GLU_156 | OE1 | 3.646 |
| 4RAU | M_LYS_149 | NZ  | M_GLU_156 | OE2 | 3.522 |
| 4RAU | M_LYS_151 | NZ  | M_GLU_197 | OE1 | 3.627 |
| 4RAU | M_LYS_151 | NZ  | M_GLU_197 | OE2 | 2.809 |
| 4RAU | M_LYS_185 | NZ  | M_GLU_189 | OE1 | 3.710 |
| 4RAU | M_LYS_185 | NZ  | M_GLU_189 | OE2 | 3.598 |

|      |           |     |           |     |       |
|------|-----------|-----|-----------|-----|-------|
| 4RAU | M_HIS_191 | ND1 | M_ASP_153 | OD2 | 2.731 |
| 4RAU | M_LYS_201 | NZ  | M_ASP_112 | OD2 | 3.028 |
| 4RAU | N_ARG_40  | NH1 | N_ASP_92  | OD1 | 3.508 |
| 4RAU | N_ARG_40  | NH2 | N_GLU_48  | OE1 | 3.718 |
| 4RAU | N_ARG_40  | NH2 | N_GLU_48  | OE2 | 3.273 |
| 4RAU | N_ARG_46  | NH2 | N_GLU_44  | OE1 | 2.944 |
| 4RAU | N_ARG_69  | NH1 | N_ASP_92  | OD2 | 2.695 |
| 4RAU | N_ARG_69  | NH2 | N_ASP_92  | OD1 | 3.318 |
| 4RAU | N_ARG_69  | NH2 | N_ASP_92  | OD2 | 3.302 |
| 4RAU | N_ARG_89  | NH1 | N_GLU_91  | OE1 | 3.987 |
| 4RAU | N_ARG_100 | NH2 | N_ASP_109 | OD1 | 3.684 |
| 4RAU | N_ARG_100 | NH2 | N_ASP_109 | OD2 | 2.647 |
| 4RAU | O_ARG_49  | NH2 | X_ASP_7   | OD1 | 2.993 |
| 4RAU | O_ARG_49  | NH2 | X_ASP_7   | OD2 | 3.647 |
| 4RAU | P_ARG_39  | NH1 | P_ASP_84  | OD1 | 3.913 |
| 4RAU | P_ARG_63  | NH1 | P_ASP_84  | OD1 | 3.257 |
| 4RAU | P_ARG_63  | NH1 | P_ASP_84  | OD2 | 2.479 |
| 4RAU | P_ARG_63  | NH2 | P_GLU_81  | OE1 | 3.679 |
| 4RAU | P_LYS_    | NZ  | R_ASP_    | OD1 | 3.104 |
| 4RAU | P_LYS_105 | NZ  | P_ASP_167 | OD1 | 3.844 |
| 4RAU | P_LYS_144 | NZ  | P_GLU_107 | OE1 | 3.654 |
| 4RAU | P_LYS_149 | NZ  | P_GLU_156 | OE1 | 3.641 |
| 4RAU | P_LYS_149 | NZ  | P_GLU_156 | OE2 | 3.516 |
| 4RAU | P_LYS_151 | NZ  | P_GLU_197 | OE1 | 3.629 |
| 4RAU | P_LYS_151 | NZ  | P_GLU_197 | OE2 | 2.811 |
| 4RAU | P_LYS_185 | NZ  | P_GLU_189 | OE1 | 3.705 |
| 4RAU | P_LYS_185 | NZ  | P_GLU_189 | OE2 | 3.595 |
| 4RAU | P_HIS_191 | ND1 | P_ASP_153 | OD2 | 2.722 |
| 4RAU | P_LYS_201 | NZ  | P_ASP_112 | OD2 | 3.034 |
| 4RAU | Q_ARG_40  | NH1 | Q_ASP_92  | OD1 | 3.502 |
| 4RAU | Q_ARG_40  | NH2 | Q_GLU_48  | OE1 | 3.727 |
| 4RAU | Q_ARG_40  | NH2 | Q_GLU_48  | OE2 | 3.276 |
| 4RAU | Q_ARG_46  | NH1 | Q_GLU_44  | OE1 | 3.700 |
| 4RAU | Q_ARG_69  | NH1 | Q_ASP_92  | OD2 | 2.695 |
| 4RAU | Q_ARG_69  | NH2 | Q_ASP_92  | OD1 | 3.314 |
| 4RAU | Q_ARG_69  | NH2 | Q_ASP_92  | OD2 | 3.297 |
| 4RAU | Q_ARG_89  | NH1 | Q_GLU_91  | OE1 | 3.990 |
| 4RAU | Q_ARG_100 | NH2 | Q_ASP_109 | OD1 | 3.684 |
| 4RAU | Q_ARG_100 | NH2 | Q_ASP_109 | OD2 | 2.645 |
| 4RAU | S_ARG_39  | NH2 | S_ASP_84  | OD1 | 2.426 |
| 4RAU | S_ARG_63  | NH1 | S_ASP_84  | OD1 | 3.257 |
| 4RAU | S_ARG_63  | NH1 | S_ASP_84  | OD2 | 2.480 |
| 4RAU | S_ARG_63  | NH2 | S_GLU_81  | OE1 | 3.645 |
| 4RAU | S_LYS_105 | NZ  | S_ASP_167 | OD1 | 3.810 |
| 4RAU | S_LYS_144 | NZ  | S_GLU_107 | OE1 | 3.627 |
| 4RAU | S_LYS_149 | NZ  | S_GLU_156 | OE1 | 3.640 |
| 4RAU | S_LYS_149 | NZ  | S_GLU_156 | OE2 | 3.514 |
| 4RAU | S_LYS_151 | NZ  | S_GLU_197 | OE1 | 3.630 |
| 4RAU | S_LYS_151 | NZ  | S_GLU_197 | OE2 | 2.813 |
| 4RAU | S_LYS_185 | NZ  | S_GLU_189 | OE1 | 3.708 |
| 4RAU | S_LYS_185 | NZ  | S_GLU_189 | OE2 | 3.598 |
| 4RAU | S_HIS_191 | ND1 | S_ASP_153 | OD2 | 2.725 |
| 4RAU | S_LYS_201 | NZ  | S_ASP_112 | OD2 | 3.035 |
| 4RAU | T_ARG_40  | NH1 | T_ASP_92  | OD1 | 3.503 |
| 4RAU | T_ARG_40  | NH2 | T_GLU_48  | OE1 | 3.728 |
| 4RAU | T_ARG_40  | NH2 | T_GLU_48  | OE2 | 3.283 |
| 4RAU | T_ARG_46  | NH1 | T_GLU_44  | OE1 | 3.699 |
| 4RAU | T_ARG_69  | NH1 | T_ASP_92  | OD2 | 2.696 |



|      |           |     |           |     |       |
|------|-----------|-----|-----------|-----|-------|
| 4RAU | T_ARG_69  | NH2 | T_ASP_92  | OD1 | 3.316 |
| 4RAU | T_ARG_69  | NH2 | T_ASP_92  | OD2 | 3.295 |
| 4RAU | T_ARG_89  | NH1 | T_GLU_91  | OE1 | 3.989 |
| 4RAU | T_ARG_100 | NH2 | T_ASP_109 | OD1 | 3.693 |
| 4RAU | T_ARG_100 | NH2 | T_ASP_109 | OD2 | 2.653 |
| 4RAU | V_ARG_39  | NH1 | V_ASP_84  | OD1 | 3.915 |
| 4RAU | V_ARG_63  | NH1 | V_ASP_84  | OD1 | 3.255 |
| 4RAU | V_ARG_63  | NH1 | V_ASP_84  | OD2 | 2.479 |
| 4RAU | V_ARG_63  | NH2 | V_GLU_81  | OE1 | 3.648 |
| 4RAU | V_LYS_95  | NZ  | X_ASP_7   | OD1 | 3.972 |
| 4RAU | V_LYS_95  | NZ  | X_ASP_7   | OD2 | 3.050 |
| 4RAU | V_LYS_105 | NZ  | V_ASP_167 | OD1 | 3.821 |
| 4RAU | V_LYS_144 | NZ  | V_GLU_107 | OE1 | 3.639 |
| 4RAU | V_LYS_149 | NZ  | V_GLU_156 | OE1 | 3.641 |
| 4RAU | V_LYS_149 | NZ  | V_GLU_156 | OE2 | 3.514 |
| 4RAU | V_LYS_151 | NZ  | V_GLU_197 | OE1 | 3.631 |
| 4RAU | V_LYS_151 | NZ  | V_GLU_197 | OE2 | 2.814 |
| 4RAU | V_LYS_185 | NZ  | V_GLU_189 | OE1 | 3.708 |
| 4RAU | V_LYS_185 | NZ  | V_GLU_189 | OE2 | 3.599 |
| 4RAU | V_HIS_191 | ND1 | V_ASP_153 | OD2 | 2.732 |
| 4RAU | V_LYS_201 | NZ  | V_ASP_112 | OD2 | 3.032 |
| 4RAU | W_ARG_40  | NH1 | W_ASP_92  | OD1 | 3.502 |
| 4RAU | W_ARG_40  | NH2 | W_GLU_48  | OE1 | 3.718 |
| 4RAU | W_ARG_40  | NH2 | W_GLU_48  | OE2 | 3.275 |
| 4RAU | W_ARG_46  | NH1 | W_GLU_44  | OE1 | 3.702 |
| 4RAU | W_ARG_69  | NH1 | W_ASP_92  | OD2 | 2.696 |
| 4RAU | W_ARG_69  | NH2 | W_ASP_92  | OD1 | 3.317 |
| 4RAU | W_ARG_69  | NH2 | W_ASP_92  | OD2 | 3.298 |
| 4RAU | W_ARG_89  | NH1 | W_GLU_91  | OE1 | 3.988 |
| 4RAU | W_ARG_100 | NH2 | W_ASP_109 | OD1 | 3.693 |
| 4RAU | W_ARG_100 | NH2 | W_ASP_109 | OD2 | 2.652 |
| 4RAU | X_ARG_49  | NH2 | O_ASP_7   | OD1 | 2.791 |
| 4RAU | X_ARG_49  | NH2 | O_ASP_7   | OD2 | 3.699 |

Table 618: 4RAU-specific salt bridging networks analysis. In this table, a PDB file is specified with a four-letter PDB ID, except that the names of the PDB files corresponding to the single NMR structural model split from the NMR ensemble is specified with a four-letter PDB ID in addition to a hyphen followed by the single NMR structural model numeric ID, the residue naming scheme is **Chain ID\_residue name\_residue number**,  $\angle ADH$  represents the angle formed by acceptor (A), donor (D) and hydrogen (H) ( $\angle ADH$ ).

| PDB ID | Residue A | Atom A | Residue B | Atom B | Distance (Å) |
|--------|-----------|--------|-----------|--------|--------------|
| 4RRP   | A_ARG_24  | NH2    | A_ASP_70  | OD1    | 3.536        |
| 4RRP   | A_ARG_24  | NH2    | A_ASP_70  | OD2    | 3.877        |
| 4RRP   | A_ARG_61  | NH2    | A_GLU_81  | OE2    | 3.090        |
| 4RRP   | A_ARG_61  | NH2    | A_ASP_82  | OD1    | 2.844        |
| 4RRP   | A_ARG_61  | NH2    | A_ASP_82  | OD2    | 3.386        |
| 4RRP   | A_LYS_149 | NZ     | A_GLU_195 | OE1    | 2.796        |
| 4RRP   | A_LYS_149 | NZ     | A_GLU_195 | OE2    | 3.574        |
| 4RRP   | A_LYS_169 | NZ     | A_ASP_167 | OD1    | 3.364        |
| 4RRP   | A_LYS_169 | NZ     | A_ASP_167 | OD2    | 3.265        |
| 4RRP   | A_LYS_183 | NZ     | A_GLU_187 | OE1    | 3.356        |
| 4RRP   | A_LYS_183 | NZ     | A_GLU_187 | OE2    | 2.482        |
| 4RRP   | A_LYS_188 | NZ     | A_ASP_185 | OD1    | 3.338        |
| 4RRP   | G_ARG_38  | NH1    | G_ASP_86  | OD1    | 3.090        |
| 4RRP   | G_ARG_38  | NH2    | G_GLU_46  | OE1    | 3.292        |
| 4RRP   | G_ARG_38  | NH2    | G_GLU_46  | OE2    | 3.713        |
| 4RRP   | G_ARG_38  | NH2    | G_ASP_86  | OD1    | 3.929        |
| 4RRP   | G_LYS_64  | NZ     | G_ASP_61  | OD1    | 3.718        |
| 4RRP   | G_ARG_66  | NH1    | G_ASP_86  | OD1    | 3.753        |
| 4RRP   | G_ARG_66  | NH1    | G_ASP_86  | OD2    | 2.642        |
| 4RRP   | G_ARG_66  | NH2    | G_ASP_86  | OD1    | 3.093        |
| 4RRP   | G_ARG_66  | NH2    | G_ASP_86  | OD2    | 3.474        |
| 4RRP   | G_LYS_75  | NZ     | G_ASP_72  | OD2    | 3.613        |
| 4RRP   | G_ARG_94  | NH1    | G_ASP_101 | OD2    | 2.572        |
| 4RRP   | G_LYS_143 | NZ     | G_ASP_144 | OD1    | 3.513        |
| 4RRP   | G_LYS_143 | NZ     | G_ASP_144 | OD2    | 3.377        |
| 4RRP   | G_LYS_214 | NZ     | A_ASP_122 | OD1    | 3.271        |
| 4RRP   | G_LYS_214 | NZ     | A_ASP_122 | OD2    | 3.253        |
| 4RRP   | B_ARG_24  | NH1    | B_ASP_70  | OD1    | 2.974        |
| 4RRP   | B_ARG_24  | NH2    | B_ASP_70  | OD1    | 3.509        |
| 4RRP   | B_ARG_24  | NH2    | B_ASP_70  | OD2    | 3.520        |
| 4RRP   | B_ARG_61  | NH1    | Q_GLU_32  | OE1    | 3.055        |
| 4RRP   | B_ARG_61  | NH1    | Q_GLU_32  | OE2    | 3.683        |
| 4RRP   | B_ARG_61  | NH2    | B_GLU_81  | OE2    | 3.319        |
| 4RRP   | B_ARG_61  | NH2    | B_ASP_82  | OD1    | 2.867        |
| 4RRP   | B_ARG_61  | NH2    | B_ASP_82  | OD2    | 3.594        |
| 4RRP   | B_ARG_61  | NH2    | Q_GLU_32  | OE2    | 3.637        |
| 4RRP   | B_LYS_103 | NZ     | B_GLU_165 | OE1    | 2.902        |
| 4RRP   | B_LYS_103 | NZ     | B_GLU_165 | OE2    | 2.974        |
| 4RRP   | B_LYS_149 | NZ     | B_GLU_195 | OE2    | 2.877        |
| 4RRP   | B_LYS_188 | NZ     | B_ASP_185 | OD1    | 3.756        |
| 4RRP   | B_HIS_189 | ND1    | B_ASP_151 | OD2    | 3.126        |
| 4RRP   | H_ARG_38  | NH1    | H_ASP_86  | OD1    | 2.743        |
| 4RRP   | H_ARG_38  | NH2    | H_GLU_46  | OE1    | 3.267        |
| 4RRP   | H_ARG_38  | NH2    | H_GLU_46  | OE2    | 3.655        |
| 4RRP   | H_ARG_38  | NH2    | H_ASP_86  | OD1    | 3.792        |
| 4RRP   | H_ARG_66  | NH1    | H_ASP_86  | OD2    | 2.961        |
| 4RRP   | H_ARG_66  | NH2    | H_ASP_86  | OD1    | 3.400        |
| 4RRP   | H_ARG_66  | NH2    | H_ASP_86  | OD2    | 3.201        |
| 4RRP   | H_ARG_94  | NH2    | H_ASP_101 | OD1    | 3.922        |
| 4RRP   | H_ARG_94  | NH2    | H_ASP_101 | OD2    | 2.800        |
| 4RRP   | H_LYS_143 | NZ     | H_ASP_144 | OD1    | 3.372        |
| 4RRP   | H_LYS_143 | NZ     | H_ASP_144 | OD2    | 3.115        |
| 4RRP   | H_LYS_210 | NZ     | H_GLU_212 | OE2    | 3.908        |
| 4RRP   | C_ARG_24  | NH1    | C_ASP_70  | OD1    | 3.210        |
| 4RRP   | C_ARG_24  | NH1    | C_ASP_70  | OD2    | 3.811        |
| 4RRP   | C_ARG_24  | NH2    | C_ASP_70  | OD1    | 3.266        |
| 4RRP   | C_ARG_24  | NH2    | C_ASP_70  | OD2    | 3.021        |

|      |           |     |           |     |       |
|------|-----------|-----|-----------|-----|-------|
| 4RRP | C_ARG_61  | NH2 | C_GLU_81  | OE2 | 3.872 |
| 4RRP | C_ARG_61  | NH2 | C_ASP_82  | OD1 | 2.499 |
| 4RRP | C_ARG_61  | NH2 | C_ASP_82  | OD2 | 3.003 |
| 4RRP | C_LYS_103 | NZ  | C_GLU_105 | OE1 | 2.759 |
| 4RRP | C_LYS_103 | NZ  | C_GLU_165 | OE1 | 3.916 |
| 4RRP | C_LYS_188 | NZ  | C_ASP_185 | OD1 | 3.719 |
| 4RRP | I_ARG_38  | NH1 | I_ASP_86  | OD1 | 3.037 |
| 4RRP | I_ARG_38  | NH2 | I_GLU_46  | OE1 | 3.102 |
| 4RRP | I_ARG_38  | NH2 | I_GLU_46  | OE2 | 3.753 |
| 4RRP | I_LYS_64  | NZ  | I_ASP_61  | OD1 | 2.958 |
| 4RRP | I_ARG_66  | NH1 | I_ASP_86  | OD1 | 3.306 |
| 4RRP | I_ARG_66  | NH1 | I_ASP_86  | OD2 | 3.894 |
| 4RRP | I_ARG_66  | NH2 | I_ASP_86  | OD1 | 3.160 |
| 4RRP | I_ARG_66  | NH2 | I_ASP_86  | OD2 | 2.282 |
| 4RRP | I_ARG_94  | NH1 | I_ASP_101 | OD2 | 2.705 |
| 4RRP | I_LYS_143 | NZ  | I_ASP_144 | OD1 | 3.710 |
| 4RRP | D_ARG_24  | NH2 | D_ASP_70  | OD1 | 3.941 |
| 4RRP | D_ARG_61  | NH2 | D_GLU_81  | OE2 | 3.108 |
| 4RRP | D_ARG_61  | NH2 | D_ASP_82  | OD1 | 2.819 |
| 4RRP | D_ARG_61  | NH2 | D_ASP_82  | OD2 | 3.344 |
| 4RRP | D_LYS_103 | NZ  | D_GLU_165 | OE1 | 3.545 |
| 4RRP | D_LYS_103 | NZ  | D_GLU_165 | OE2 | 3.420 |
| 4RRP | D_LYS_149 | NZ  | D_GLU_195 | OE2 | 2.585 |
| 4RRP | D_LYS_188 | NZ  | D_ASP_185 | OD1 | 2.752 |
| 4RRP | D_HIS_189 | ND1 | D_ASP_151 | OD2 | 3.191 |
| 4RRP | J_ARG_38  | NH1 | J_ASP_86  | OD1 | 3.091 |
| 4RRP | J_ARG_38  | NH2 | J_GLU_46  | OE1 | 3.176 |
| 4RRP | J_ARG_38  | NH2 | J_ASP_86  | OD1 | 3.697 |
| 4RRP | J_ARG_66  | NH1 | J_ASP_86  | OD1 | 3.907 |
| 4RRP | J_ARG_66  | NH1 | J_ASP_86  | OD2 | 2.891 |
| 4RRP | J_ARG_66  | NH2 | J_ASP_86  | OD1 | 2.922 |
| 4RRP | J_ARG_66  | NH2 | J_ASP_86  | OD2 | 3.426 |
| 4RRP | J_ARG_83  | NH1 | J_GLU_85  | OE2 | 3.812 |
| 4RRP | J_ARG_94  | NH2 | J_ASP_101 | OD1 | 3.162 |
| 4RRP | J_LYS_143 | NZ  | J_ASP_144 | OD1 | 3.206 |
| 4RRP | J_LYS_143 | NZ  | J_ASP_144 | OD2 | 3.279 |
| 4RRP | J_LYS_210 | NZ  | J_GLU_212 | OE2 | 3.248 |
| 4RRP | J_LYS_214 | NZ  | D_ASP_122 | OD1 | 3.176 |
| 4RRP | J_LYS_214 | NZ  | D_ASP_122 | OD2 | 2.924 |
| 4RRP | E_ARG_24  | NH1 | E_ASP_70  | OD1 | 3.504 |
| 4RRP | E_ARG_24  | NH1 | E_ASP_70  | OD2 | 2.757 |
| 4RRP | E_ARG_24  | NH2 | E_ASP_70  | OD1 | 3.612 |
| 4RRP | E_ARG_24  | NH2 | E_ASP_70  | OD2 | 3.877 |
| 4RRP | E_ARG_61  | NH2 | E_GLU_81  | OE2 | 3.265 |
| 4RRP | E_ARG_61  | NH2 | E_ASP_82  | OD1 | 2.971 |
| 4RRP | E_ARG_61  | NH2 | E_ASP_82  | OD2 | 3.278 |
| 4RRP | E_LYS_103 | NZ  | E_GLU_165 | OE1 | 3.997 |
| 4RRP | E_ARG_108 | NH1 | E_ASP_170 | OD1 | 3.279 |
| 4RRP | E_LYS_188 | NZ  | E_ASP_185 | OD1 | 3.369 |
| 4RRP | E_HIS_189 | ND1 | E_ASP_151 | OD2 | 3.342 |
| 4RRP | K_ARG_38  | NH1 | K_ASP_86  | OD1 | 3.316 |
| 4RRP | K_ARG_38  | NH2 | K_GLU_46  | OE1 | 3.348 |
| 4RRP | K_ARG_38  | NH2 | K_GLU_46  | OE2 | 3.150 |
| 4RRP | K_ARG_38  | NH2 | K_ASP_86  | OD1 | 3.806 |
| 4RRP | K_ARG_66  | NH1 | K_ASP_86  | OD1 | 3.794 |
| 4RRP | K_ARG_66  | NH1 | K_ASP_86  | OD2 | 2.585 |
| 4RRP | K_ARG_94  | NH2 | K_ASP_101 | OD2 | 3.065 |
| 4RRP | K_LYS_143 | NZ  | K_ASP_144 | OD1 | 3.052 |

|      |           |     |           |     |       |
|------|-----------|-----|-----------|-----|-------|
| 4RRP | K_LYS_143 | NZ  | K_ASP_144 | OD2 | 3.747 |
| 4RRP | K_LYS_210 | NZ  | K_GLU_212 | OE2 | 3.209 |
| 4RRP | F_ARG_24  | NH1 | F_ASP_70  | OD1 | 3.513 |
| 4RRP | F_ARG_24  | NH2 | F_ASP_70  | OD1 | 3.347 |
| 4RRP | F_ARG_24  | NH2 | F_ASP_70  | OD2 | 3.453 |
| 4RRP | F_ARG_61  | NH2 | F_GLU_81  | OE2 | 3.201 |
| 4RRP | F_ARG_61  | NH2 | F_ASP_82  | OD1 | 3.111 |
| 4RRP | F_ARG_61  | NH2 | F_ASP_82  | OD2 | 2.880 |
| 4RRP | F_LYS_183 | NZ  | F_GLU_187 | OE2 | 3.854 |
| 4RRP | F_HIS_189 | ND1 | F_ASP_151 | OD2 | 3.499 |
| 4RRP | L_ARG_38  | NH1 | L_ASP_86  | OD1 | 2.782 |
| 4RRP | L_ARG_38  | NH2 | L_GLU_46  | OE1 | 2.958 |
| 4RRP | L_ARG_38  | NH2 | L_GLU_46  | OE2 | 3.099 |
| 4RRP | L_ARG_38  | NH2 | L_ASP_86  | OD1 | 3.809 |
| 4RRP | L_ARG_66  | NH1 | L_ASP_86  | OD2 | 3.387 |
| 4RRP | L_ARG_66  | NH2 | L_ASP_86  | OD1 | 3.433 |
| 4RRP | L_ARG_66  | NH2 | L_ASP_86  | OD2 | 3.328 |
| 4RRP | L_ARG_94  | NH1 | L_ASP_101 | OD1 | 2.541 |
| 4RRP | L_ARG_94  | NH2 | L_ASP_101 | OD1 | 3.963 |
| 4RRP | L_HIS_164 | NE2 | F_ASP_167 | OD1 | 3.853 |
| 4RRP | L_LYS_214 | NZ  | F_ASP_122 | OD2 | 3.247 |
| 4RRP | M_LYS_10  | NZ  | M_GLU_25  | OE2 | 2.815 |
| 4RRP | M_LYS_10  | NZ  | N_GLU_29  | OE1 | 3.876 |
| 4RRP | M_LYS_10  | NZ  | N_GLU_29  | OE2 | 3.237 |
| 4RRP | M_LYS_41  | NZ  | M_GLU_39  | OE1 | 3.872 |
| 4RRP | M_ARG_104 | NH1 | M_ASP_102 | OD2 | 2.905 |
| 4RRP | M_ARG_104 | NH2 | M_ASP_102 | OD2 | 3.495 |
| 4RRP | M_ARG_108 | NH2 | M_GLU_105 | OE1 | 3.086 |
| 4RRP | M_ARG_108 | NH2 | M_GLU_105 | OE2 | 3.305 |
| 4RRP | M_ARG_123 | NH1 | M_GLU_120 | OE1 | 3.669 |
| 4RRP | M_ARG_123 | NH1 | M_GLU_120 | OE2 | 3.750 |
| 4RRP | M_HIS_134 | ND1 | M_ASP_118 | OD2 | 2.756 |
| 4RRP | M_HIS_134 | ND1 | M_GLU_119 | OE1 | 3.923 |
| 4RRP | N_LYS_10  | NZ  | M_GLU_29  | OE1 | 3.319 |
| 4RRP | N_LYS_10  | NZ  | M_GLU_29  | OE2 | 2.389 |
| 4RRP | N_LYS_10  | NZ  | N_GLU_25  | OE1 | 2.628 |
| 4RRP | N_HIS_36  | ND1 | N_ASP_102 | OD1 | 3.589 |
| 4RRP | N_HIS_36  | ND1 | N_ASP_102 | OD2 | 3.342 |
| 4RRP | N_ARG_104 | NH1 | N_ASP_102 | OD2 | 2.932 |
| 4RRP | N_ARG_104 | NH2 | N_ASP_102 | OD2 | 3.308 |
| 4RRP | N_ARG_108 | NH2 | N_GLU_105 | OE1 | 3.337 |
| 4RRP | N_ARG_108 | NH2 | N_GLU_105 | OE2 | 2.984 |
| 4RRP | O_LYS_10  | NZ  | O_GLU_25  | OE2 | 3.092 |
| 4RRP | O_LYS_35  | NZ  | O_GLU_156 | OE2 | 3.793 |
| 4RRP | O_LYS_41  | NZ  | O_GLU_56  | OE1 | 3.628 |
| 4RRP | O_LYS_71  | NZ  | O_GLU_25  | OE2 | 3.721 |
| 4RRP | O_ARG_104 | NH1 | O_ASP_102 | OD2 | 3.187 |
| 4RRP | O_ARG_104 | NH2 | O_ASP_102 | OD2 | 2.791 |
| 4RRP | O_ARG_108 | NH2 | O_GLU_105 | OE2 | 3.068 |
| 4RRP | O_ARG_123 | NH1 | Q_ASP_54  | OD1 | 3.356 |
| 4RRP | O_ARG_123 | NH1 | Q_ASP_54  | OD2 | 3.533 |
| 4RRP | O_ARG_123 | NH2 | O_GLU_120 | OE1 | 3.551 |
| 4RRP | O_ARG_123 | NH2 | Q_ASP_54  | OD2 | 3.134 |
| 4RRP | O_HIS_134 | ND1 | O_ASP_118 | OD1 | 3.804 |
| 4RRP | O_HIS_134 | ND1 | O_ASP_118 | OD2 | 2.643 |
| 4RRP | O_HIS_134 | NE2 | N_GLU_121 | OE1 | 3.780 |
| 4RRP | O_HIS_134 | NE2 | N_GLU_121 | OE2 | 3.192 |
| 4RRP | O_ARG_145 | NH2 | Q_GLU_116 | OE1 | 3.921 |

|      |           |     |           |     |       |
|------|-----------|-----|-----------|-----|-------|
| 4RRP | O_ARG_145 | NH2 | Q_GLU_116 | OE2 | 3.324 |
| 4RRP | P_LYS_10  | NZ  | P_GLU_25  | OE2 | 2.613 |
| 4RRP | P_HIS_36  | ND1 | P_ASP_102 | OD1 | 3.540 |
| 4RRP | P_HIS_36  | NE2 | P_ASP_102 | OD2 | 3.863 |
| 4RRP | P_ARG_49  | NH1 | P_GLU_88  | OE2 | 3.737 |
| 4RRP | P_HIS_53  | ND1 | P_ASP_54  | OD1 | 3.310 |
| 4RRP | P_ARG_104 | NH1 | P_ASP_102 | OD2 | 2.923 |
| 4RRP | P_ARG_104 | NH2 | P_ASP_102 | OD2 | 3.980 |
| 4RRP | P_ARG_108 | NH2 | P_GLU_105 | OE1 | 2.888 |
| 4RRP | P_ARG_108 | NH2 | P_GLU_105 | OE2 | 3.217 |
| 4RRP | P_ARG_123 | NH2 | P_GLU_120 | OE1 | 2.430 |
| 4RRP | P_HIS_134 | ND1 | P_ASP_118 | OD1 | 3.512 |
| 4RRP | P_HIS_134 | ND1 | P_ASP_118 | OD2 | 2.998 |
| 4RRP | P_HIS_134 | ND1 | P_GLU_119 | OE2 | 3.490 |
| 4RRP | P_HIS_134 | NE2 | P_ASP_133 | OD2 | 3.140 |
| 4RRP | Q_LYS_10  | NZ  | Q_GLU_25  | OE2 | 2.946 |
| 4RRP | Q_HIS_36  | NE2 | Q_ASP_102 | OD2 | 3.552 |
| 4RRP | Q_LYS_41  | NZ  | Q_GLU_56  | OE1 | 3.618 |
| 4RRP | Q_HIS_53  | ND1 | Q_GLU_88  | OE2 | 3.194 |
| 4RRP | Q_ARG_104 | NH1 | Q_ASP_102 | OD1 | 3.295 |
| 4RRP | Q_ARG_108 | NH2 | Q_GLU_105 | OE1 | 3.208 |
| 4RRP | Q_ARG_108 | NH2 | Q_GLU_105 | OE2 | 3.290 |
| 4RRP | Q_ARG_123 | NH1 | Q_GLU_120 | OE1 | 3.019 |
| 4RRP | Q_HIS_134 | ND1 | Q_ASP_118 | OD1 | 3.096 |
| 4RRP | Q_HIS_134 | ND1 | Q_ASP_118 | OD2 | 3.045 |
| 4RRP | Q_ARG_145 | NH1 | O_GLU_116 | OE2 | 3.050 |
| 4RRP | Q_ARG_145 | NH2 | O_GLU_116 | OE2 | 3.244 |
| 4RRP | R_LYS_10  | NZ  | R_GLU_25  | OE2 | 2.771 |
| 4RRP | R_LYS_41  | NZ  | R_GLU_56  | OE2 | 3.957 |
| 4RRP | R_LYS_71  | NZ  | R_GLU_25  | OE1 | 3.947 |
| 4RRP | R_LYS_71  | NZ  | R_GLU_25  | OE2 | 3.610 |
| 4RRP | R_ARG_104 | NH1 | R_ASP_102 | OD2 | 3.150 |
| 4RRP | R_ARG_104 | NH2 | R_ASP_102 | OD2 | 3.913 |
| 4RRP | R_ARG_108 | NH2 | R_GLU_105 | OE1 | 3.360 |
| 4RRP | R_ARG_108 | NH2 | R_GLU_105 | OE2 | 3.892 |
| 4RRP | R_HIS_134 | NE2 | R_GLU_119 | OE2 | 3.581 |

Table 619: 4RRP-specific salt bridging networks analysis. In this table, a PDB file is specified with a four-letter PDB ID, except that the names of the PDB files corresponding to the single NMR structural model split from the NMR ensemble is specified with a four-letter PDB ID in addition to a hyphen followed by the single NMR structural model numeric ID, the residue naming scheme is **Chain ID\_residue name\_residue number**,  $\angle ADH$  represents the angle formed by acceptor (A), donor (D) and hydrogen (H) ( $\angle ADH$ ).

| PDB ID | Residue A | Atom A | Residue B | Atom B | Distance (Å) |
|--------|-----------|--------|-----------|--------|--------------|
| 4TRP   | H_LYS_63  | NZ     | H_GLU_46  | OE1    | 3.694        |
| 4TRP   | H_LYS_63  | NZ     | H_GLU_46  | OE2    | 2.776        |
| 4TRP   | H_ARG_67  | NH1    | H_ASP_90  | OD1    | 3.592        |
| 4TRP   | H_ARG_67  | NH1    | H_ASP_90  | OD2    | 2.874        |
| 4TRP   | H_ARG_67  | NH2    | H_ASP_90  | OD1    | 2.862        |
| 4TRP   | H_ARG_67  | NH2    | H_ASP_90  | OD2    | 3.539        |
| 4TRP   | H_LYS_208 | NZ     | L_GLU_129 | OE2    | 3.281        |
| 4TRP   | H_LYS_209 | NZ     | H_GLU_211 | OE1    | 3.661        |
| 4TRP   | H_LYS_209 | NZ     | H_GLU_211 | OE2    | 3.286        |
| 4TRP   | L_ARG_66  | NH2    | L_GLU_86  | OE1    | 3.076        |
| 4TRP   | L_ARG_66  | NH2    | L_ASP_87  | OD1    | 2.816        |
| 4TRP   | L_ARG_66  | NH2    | L_ASP_87  | OD2    | 3.551        |
| 4TRP   | L_LYS_153 | NZ     | L_GLU_160 | OE1    | 2.821        |
| 4TRP   | L_LYS_153 | NZ     | L_GLU_160 | OE2    | 3.459        |
| 4TRP   | L_LYS_155 | NZ     | L_GLU_201 | OE1    | 2.685        |
| 4TRP   | L_LYS_155 | NZ     | L_GLU_201 | OE2    | 3.225        |
| 4TRP   | L_ARG_161 | NH1    | L_GLU_191 | OE1    | 3.775        |
| 4TRP   | L_ARG_161 | NH1    | L_GLU_191 | OE2    | 2.926        |
| 4TRP   | L_ARG_161 | NH2    | L_GLU_191 | OE1    | 3.592        |
| 4TRP   | L_ARG_161 | NH2    | L_GLU_191 | OE2    | 3.079        |
| 4TRP   | L_ARG_194 | NH1    | L_ASP_190 | OD2    | 2.875        |
| 4TRP   | L_HIS_195 | ND1    | L_ASP_157 | OD2    | 2.604        |
| 4TRP   | L_LYS_205 | NZ     | L_ASP_116 | OD1    | 3.811        |
| 4TRP   | L_LYS_205 | NZ     | L_ASP_116 | OD2    | 3.031        |

Table 620: 4TRP-specific salt bridging networks analysis. In this table, a PDB file is specified with a four-letter PDB ID, except that the names of the PDB files corresponding to the single NMR structural model split from the NMR ensemble is specified with a four-letter PDB ID in addition to a hyphen followed by the single NMR structural model numeric ID, the residue naming scheme is **Chain ID\_residue name\_residue number**,  $\angle ADH$  represents the angle formed by acceptor (A), donor (D) and hydrogen (H) ( $\angle ADH$ ).

| PDB ID | Residue A | Atom A | Residue B | Atom B | Distance (Å) |
|--------|-----------|--------|-----------|--------|--------------|
| 4TUJ   | A_ARG_38  | NH1    | A_ASP_90  | OD1    | 2.738        |
| 4TUJ   | A_ARG_38  | NH2    | A_GLU_46  | OE1    | 3.121        |
| 4TUJ   | A_ARG_38  | NH2    | A_ASP_90  | OD1    | 3.886        |
| 4TUJ   | A_ARG_67  | NH1    | A_ASP_90  | OD1    | 3.524        |
| 4TUJ   | A_ARG_67  | NH1    | A_ASP_90  | OD2    | 2.860        |
| 4TUJ   | A_ARG_67  | NH2    | A_ASP_90  | OD1    | 3.074        |
| 4TUJ   | A_ARG_67  | NH2    | A_ASP_90  | OD2    | 3.761        |
| 4TUJ   | B_ARG_59  | NH1    | B_ASP_65  | OD1    | 3.932        |
| 4TUJ   | B_ARG_66  | NH1    | B_GLU_84  | OE1    | 3.650        |
| 4TUJ   | B_ARG_66  | NH1    | B_GLU_84  | OE2    | 3.183        |
| 4TUJ   | B_ARG_66  | NH2    | B_GLU_84  | OE1    | 3.557        |
| 4TUJ   | B_ARG_66  | NH2    | B_GLU_86  | OE1    | 2.800        |
| 4TUJ   | B_ARG_66  | NH2    | B_ASP_87  | OD1    | 2.741        |
| 4TUJ   | B_ARG_66  | NH2    | B_ASP_87  | OD2    | 3.500        |
| 4TUJ   | B_LYS_153 | NZ     | B_GLU_160 | OE1    | 2.671        |
| 4TUJ   | B_LYS_153 | NZ     | B_GLU_160 | OE2    | 2.941        |
| 4TUJ   | B_LYS_155 | NZ     | B_GLU_201 | OE1    | 2.816        |
| 4TUJ   | B_LYS_155 | NZ     | B_GLU_201 | OE2    | 3.174        |
| 4TUJ   | B_HIS_195 | ND1    | B_ASP_157 | OD2    | 3.098        |
| 4TUJ   | B_LYS_205 | NZ     | B_ASP_116 | OD1    | 3.715        |
| 4TUJ   | B_LYS_205 | NZ     | B_ASP_116 | OD2    | 2.602        |
| 4TUJ   | C_ARG_38  | NH1    | C_ASP_90  | OD1    | 2.708        |
| 4TUJ   | C_ARG_38  | NH2    | C_GLU_46  | OE1    | 3.153        |
| 4TUJ   | C_ARG_38  | NH2    | C_ASP_90  | OD1    | 3.791        |
| 4TUJ   | C_ARG_67  | NH1    | C_ASP_90  | OD1    | 3.571        |
| 4TUJ   | C_ARG_67  | NH1    | C_ASP_90  | OD2    | 2.878        |
| 4TUJ   | C_ARG_67  | NH2    | C_ASP_90  | OD1    | 2.853        |
| 4TUJ   | C_ARG_67  | NH2    | C_ASP_90  | OD2    | 3.465        |
| 4TUJ   | D_ARG_66  | NH1    | D_GLU_84  | OE1    | 3.649        |
| 4TUJ   | D_ARG_66  | NH1    | D_GLU_84  | OE2    | 3.433        |
| 4TUJ   | D_ARG_66  | NH2    | D_GLU_84  | OE1    | 3.528        |
| 4TUJ   | D_ARG_66  | NH2    | D_ASP_87  | OD1    | 2.665        |
| 4TUJ   | D_ARG_66  | NH2    | D_ASP_87  | OD2    | 3.342        |
| 4TUJ   | D_LYS_148 | NZ     | D_GLU_111 | OE1    | 2.802        |
| 4TUJ   | D_LYS_148 | NZ     | D_GLU_111 | OE2    | 3.509        |
| 4TUJ   | D_LYS_155 | NZ     | D_GLU_201 | OE1    | 2.443        |
| 4TUJ   | D_LYS_155 | NZ     | D_GLU_201 | OE2    | 3.654        |

Table 621: 4TUJ-specific salt bridging networks analysis. In this table, a PDB file is specified with a four-letter PDB ID, except that the names of the PDB files corresponding to the single NMR structural model split from the NMR ensemble is specified with a four-letter PDB ID in addition to a hyphen followed by the single NMR structural model numeric ID, the residue naming scheme is **Chain ID\_residue name\_residue number**,  $\angle ADH$  represents the angle formed by acceptor (A), donor (D) and hydrogen (H) ( $\angle ADH$ ).

| PDB ID | Residue A | Atom A | Residue B | Atom B | Distance (Å) |
|--------|-----------|--------|-----------|--------|--------------|
| 4TUK   | H_ARG_38  | NH1    | H_ASP_90  | OD1    | 2.774        |
| 4TUK   | H_ARG_38  | NH2    | H_GLU_46  | OE1    | 2.957        |
| 4TUK   | H_ARG_38  | NH2    | H_ASP_90  | OD1    | 3.936        |
| 4TUK   | H_LYS_63  | NZ     | H_GLU_46  | OE1    | 3.702        |
| 4TUK   | H_LYS_63  | NZ     | H_GLU_46  | OE2    | 2.804        |
| 4TUK   | H_ARG_67  | NH1    | H_ASP_90  | OD1    | 3.628        |
| 4TUK   | H_ARG_67  | NH1    | H_ASP_90  | OD2    | 2.878        |
| 4TUK   | H_ARG_67  | NH2    | H_ASP_90  | OD1    | 2.889        |
| 4TUK   | H_ARG_67  | NH2    | H_ASP_90  | OD2    | 3.540        |
| 4TUK   | H_LYS_208 | NZ     | L_GLU_129 | OE2    | 3.061        |
| 4TUK   | L_ARG_24  | NH2    | L_ASP_75  | OD2    | 3.142        |
| 4TUK   | L_ARG_66  | NH2    | L_GLU_86  | OE1    | 3.710        |
| 4TUK   | L_ARG_66  | NH2    | L_GLU_86  | OE2    | 3.717        |
| 4TUK   | L_ARG_66  | NH2    | L_ASP_87  | OD1    | 2.787        |
| 4TUK   | L_ARG_66  | NH2    | L_ASP_87  | OD2    | 3.636        |
| 4TUK   | L_LYS_148 | NZ     | L_GLU_111 | OE1    | 3.533        |
| 4TUK   | L_LYS_148 | NZ     | L_GLU_111 | OE2    | 2.823        |
| 4TUK   | L_LYS_153 | NZ     | L_GLU_160 | OE1    | 2.835        |
| 4TUK   | L_LYS_153 | NZ     | L_GLU_160 | OE2    | 3.347        |
| 4TUK   | L_LYS_155 | NZ     | L_GLU_201 | OE1    | 2.857        |
| 4TUK   | L_LYS_155 | NZ     | L_GLU_201 | OE2    | 3.381        |
| 4TUK   | L_HIS_195 | ND1    | L_ASP_157 | OD2    | 2.878        |
| 4TUK   | L_LYS_205 | NZ     | L_ASP_116 | OD1    | 3.635        |
| 4TUK   | L_LYS_205 | NZ     | L_ASP_116 | OD2    | 3.012        |

Table 622: 4TUK-specific salt bridging networks analysis. In this table, a PDB file is specified with a four-letter PDB ID, except that the names of the PDB files corresponding to the single NMR structural model split from the NMR ensemble is specified with a four-letter PDB ID in addition to a hyphen followed by the single NMR structural model numeric ID, the residue naming scheme is **Chain ID\_residue name\_residue number**,  $\angle ADH$  represents the angle formed by acceptor (A), donor (D) and hydrogen (H) ( $\angle ADH$ ).



| PDB ID | Residue A | Atom A | Residue B | Atom B | Distance (Å) |
|--------|-----------|--------|-----------|--------|--------------|
| 4TUL   | H_ARG_38  | NH1    | H_ASP_90  | OD1    | 2.759        |
| 4TUL   | H_ARG_38  | NH2    | H_GLU_46  | OE1    | 2.795        |
| 4TUL   | H_ARG_38  | NH2    | H_GLU_46  | OE2    | 3.616        |
| 4TUL   | H_LYS_63  | NZ     | H_GLU_46  | OE1    | 3.726        |
| 4TUL   | H_LYS_63  | NZ     | H_GLU_46  | OE2    | 2.751        |
| 4TUL   | H_ARG_67  | NH1    | H_ASP_90  | OD1    | 3.442        |
| 4TUL   | H_ARG_67  | NH1    | H_ASP_90  | OD2    | 2.779        |
| 4TUL   | H_ARG_67  | NH2    | H_ASP_90  | OD1    | 2.973        |
| 4TUL   | H_ARG_67  | NH2    | H_ASP_90  | OD2    | 3.614        |
| 4TUL   | H_LYS_205 | NZ     | H_ASP_207 | OD2    | 3.859        |
| 4TUL   | H_LYS_208 | NZ     | L_GLU_129 | OE1    | 3.059        |
| 4TUL   | H_LYS_208 | NZ     | L_GLU_129 | OE2    | 2.741        |
| 4TUL   | H_LYS_209 | NZ     | H_GLU_211 | OE2    | 3.869        |
| 4TUL   | L_ARG_66  | NH1    | L_GLU_84  | OE1    | 3.630        |
| 4TUL   | L_ARG_66  | NH2    | L_GLU_84  | OE1    | 3.505        |
| 4TUL   | L_ARG_66  | NH2    | L_GLU_84  | OE2    | 3.947        |
| 4TUL   | L_ARG_66  | NH2    | L_ASP_87  | OD1    | 2.922        |
| 4TUL   | L_ARG_66  | NH2    | L_ASP_87  | OD2    | 3.565        |
| 4TUL   | L_LYS_148 | NZ     | L_GLU_111 | OE1    | 2.732        |
| 4TUL   | L_LYS_148 | NZ     | L_GLU_111 | OE2    | 3.835        |
| 4TUL   | L_LYS_153 | NZ     | L_GLU_160 | OE1    | 2.798        |
| 4TUL   | L_LYS_153 | NZ     | L_GLU_160 | OE2    | 3.593        |
| 4TUL   | L_LYS_155 | NZ     | L_GLU_201 | OE1    | 2.684        |
| 4TUL   | L_LYS_155 | NZ     | L_GLU_201 | OE2    | 3.268        |
| 4TUL   | L_HIS_195 | ND1    | L_ASP_157 | OD2    | 2.731        |
| 4TUL   | L_LYS_205 | NZ     | L_ASP_116 | OD1    | 3.657        |
| 4TUL   | L_LYS_205 | NZ     | L_ASP_116 | OD2    | 2.664        |

Table 623: 4TUL-specific salt bridging networks analysis. In this table, a PDB file is specified with a four-letter PDB ID, except that the names of the PDB files corresponding to the single NMR structural model split from the NMR ensemble is specified with a four-letter PDB ID in addition to a hyphen followed by the single NMR structural model numeric ID, the residue naming scheme is **Chain ID\_residue name\_residue number**,  $\angle ADH$  represents the angle formed by acceptor (A), donor (D) and hydrogen (H) ( $\angle ADH$ ).

| PDB ID | Residue A | Atom A | Residue B | Atom B | Distance (Å) |
|--------|-----------|--------|-----------|--------|--------------|
| 4TUO   | A_ARG_38  | NH1    | A_ASP_90  | OD1    | 2.863        |
| 4TUO   | A_ARG_38  | NH2    | A_GLU_46  | OE1    | 3.170        |
| 4TUO   | A_ARG_38  | NH2    | A_ASP_90  | OD1    | 3.978        |
| 4TUO   | A_LYS_63  | NZ     | A_GLU_46  | OE1    | 3.760        |
| 4TUO   | A_LYS_63  | NZ     | A_GLU_46  | OE2    | 2.759        |
| 4TUO   | A_ARG_67  | NH1    | A_ASP_90  | OD1    | 3.571        |
| 4TUO   | A_ARG_67  | NH1    | A_ASP_90  | OD2    | 2.889        |
| 4TUO   | A_ARG_67  | NH2    | A_ASP_90  | OD1    | 3.053        |
| 4TUO   | A_ARG_67  | NH2    | A_ASP_90  | OD2    | 3.693        |
| 4TUO   | A_LYS_208 | NZ     | B_GLU_129 | OE1    | 3.043        |
| 4TUO   | B_ARG_66  | NH1    | B_GLU_84  | OE2    | 3.371        |
| 4TUO   | B_ARG_66  | NH2    | B_GLU_84  | OE1    | 3.783        |
| 4TUO   | B_ARG_66  | NH2    | B_GLU_86  | OE1    | 2.770        |
| 4TUO   | B_ARG_66  | NH2    | B_ASP_87  | OD1    | 2.806        |
| 4TUO   | B_ARG_66  | NH2    | B_ASP_87  | OD2    | 3.596        |
| 4TUO   | B_ARG_82  | NH1    | B_GLU_84  | OE2    | 3.609        |
| 4TUO   | B_LYS_153 | NZ     | B_GLU_160 | OE1    | 3.151        |
| 4TUO   | B_LYS_153 | NZ     | C_GLU_10  | OE2    | 3.051        |
| 4TUO   | B_LYS_155 | NZ     | B_GLU_201 | OE1    | 2.809        |
| 4TUO   | B_LYS_155 | NZ     | B_GLU_201 | OE2    | 3.457        |
| 4TUO   | B_ARG_161 | NH1    | B_GLU_191 | OE1    | 3.847        |
| 4TUO   | B_ARG_161 | NH1    | B_GLU_191 | OE2    | 3.170        |
| 4TUO   | B_ARG_161 | NH2    | B_GLU_191 | OE1    | 3.069        |
| 4TUO   | B_ARG_161 | NH2    | B_GLU_191 | OE2    | 3.668        |
| 4TUO   | B_HIS_195 | ND1    | B_ASP_157 | OD2    | 3.859        |
| 4TUO   | B_LYS_205 | NZ     | B_ASP_116 | OD1    | 3.307        |
| 4TUO   | B_LYS_205 | NZ     | B_ASP_116 | OD2    | 3.070        |
| 4TUO   | C_ARG_38  | NH1    | C_ASP_90  | OD1    | 2.853        |
| 4TUO   | C_ARG_38  | NH2    | C_GLU_46  | OE1    | 3.152        |
| 4TUO   | C_LYS_63  | NZ     | C_GLU_46  | OE1    | 3.805        |
| 4TUO   | C_LYS_63  | NZ     | C_GLU_46  | OE2    | 2.709        |
| 4TUO   | C_ARG_67  | NH1    | C_ASP_90  | OD1    | 3.699        |
| 4TUO   | C_ARG_67  | NH1    | C_ASP_90  | OD2    | 2.901        |
| 4TUO   | C_ARG_67  | NH2    | C_ASP_90  | OD1    | 3.051        |
| 4TUO   | C_ARG_67  | NH2    | C_ASP_90  | OD2    | 3.598        |
| 4TUO   | C_LYS_208 | NZ     | D_GLU_129 | OE1    | 2.720        |
| 4TUO   | C_LYS_208 | NZ     | D_GLU_129 | OE2    | 3.136        |
| 4TUO   | C_LYS_209 | NZ     | C_GLU_211 | OE2    | 2.713        |
| 4TUO   | D_ARG_66  | NH1    | D_GLU_84  | OE1    | 3.352        |
| 4TUO   | D_ARG_66  | NH1    | D_GLU_84  | OE2    | 3.741        |
| 4TUO   | D_ARG_66  | NH2    | D_GLU_84  | OE2    | 3.775        |
| 4TUO   | D_ARG_66  | NH2    | D_GLU_86  | OE2    | 3.297        |
| 4TUO   | D_ARG_66  | NH2    | D_ASP_87  | OD1    | 2.690        |
| 4TUO   | D_ARG_66  | NH2    | D_ASP_87  | OD2    | 3.681        |
| 4TUO   | D_LYS_148 | NZ     | D_GLU_111 | OE1    | 3.722        |
| 4TUO   | D_LYS_148 | NZ     | D_GLU_111 | OE2    | 2.538        |
| 4TUO   | D_LYS_153 | NZ     | D_GLU_160 | OE1    | 3.774        |
| 4TUO   | D_LYS_155 | NZ     | D_GLU_201 | OE1    | 3.955        |
| 4TUO   | D_ARG_161 | NH1    | D_GLU_191 | OE1    | 3.866        |
| 4TUO   | D_ARG_194 | NH1    | D_ASP_190 | OD1    | 3.370        |
| 4TUO   | D_ARG_194 | NH1    | D_ASP_190 | OD2    | 2.866        |
| 4TUO   | D_HIS_195 | ND1    | D_ASP_157 | OD2    | 3.872        |
| 4TUO   | D_HIS_195 | NE2    | D_GLU_191 | OE1    | 2.622        |
| 4TUO   | D_LYS_205 | NZ     | D_ASP_116 | OD1    | 3.469        |
| 4TUO   | D_LYS_205 | NZ     | D_ASP_116 | OD2    | 2.762        |

---

Table 624: 4TUO-specific salt bridging networks analysis. In this table, a PDB file is specified with a four-letter PDB ID, except that the names of the PDB files corresponding to the single NMR structural model split from the NMR ensemble is specified with a four-letter PDB ID in addition to a hyphen followed by the single NMR structural model numeric ID, the residue naming scheme is **Chain ID\_residue name\_residue number**,  $\angle ADH$  represents the angle formed by acceptor (A), donor (D) and hydrogen (H) ( $\angle ADH$ ).

| PDB ID | Residue A | Atom A | Residue B | Atom B | Distance (Å) |
|--------|-----------|--------|-----------|--------|--------------|
| 4U0Q   | A_HIS_187 | NE2    | A_ASP_183 | OD1    | 2.822        |
| 4U0Q   | A_HIS_187 | NE2    | A_ASP_183 | OD2    | 3.914        |
| 4U0Q   | A_LYS_211 | NZ     | A_GLU_215 | OE2    | 3.825        |
| 4U0Q   | A_LYS_221 | NZ     | A_ASP_172 | OD1    | 3.037        |
| 4U0Q   | A_HIS_240 | NE2    | A_GLU_168 | OE1    | 2.387        |
| 4U0Q   | A_HIS_240 | NE2    | A_GLU_168 | OE2    | 3.627        |
| 4U0Q   | A_LYS_302 | NZ     | A_ASP_305 | OD1    | 3.987        |
| 4U0Q   | A_LYS_302 | NZ     | A_ASP_305 | OD2    | 2.715        |
| 4U0Q   | A_LYS_310 | NZ     | A_ASP_230 | OD2    | 2.731        |
| 4U0Q   | A_LYS_366 | NZ     | A_GLU_362 | OE1    | 3.983        |
| 4U0Q   | A_HIS_414 | NE2    | A_GLU_391 | OE1    | 2.780        |
| 4U0Q   | A_HIS_414 | NE2    | A_GLU_391 | OE2    | 3.302        |
| 4U0Q   | A_ARG_423 | NH2    | A_ASP_162 | OD2    | 3.272        |
| 4U0Q   | A_HIS_427 | NE2    | A_ASP_162 | OD1    | 3.792        |
| 4U0Q   | A_LYS_434 | NZ     | A_GLU_465 | OE2    | 2.539        |
| 4U0Q   | A_LYS_436 | NZ     | A_ASP_440 | OD1    | 3.388        |
| 4U0Q   | A_LYS_436 | NZ     | A_ASP_440 | OD2    | 3.258        |
| 4U0Q   | A_LYS_441 | NZ     | A_ASP_461 | OD1    | 2.915        |
| 4U0Q   | A_LYS_441 | NZ     | A_ASP_461 | OD2    | 3.189        |
| 4U0Q   | A_LYS_441 | NZ     | A_GLU_465 | OE1    | 3.453        |
| 4U0Q   | A_ARG_458 | NH2    | A_GLU_454 | OE1    | 3.364        |
| 4U0Q   | A_ARG_476 | NH1    | A_ASP_473 | OD1    | 3.385        |
| 4U0Q   | A_LYS_486 | NZ     | A_GLU_239 | OE1    | 3.379        |
| 4U0Q   | A_LYS_486 | NZ     | A_GLU_239 | OE2    | 2.794        |
| 4U0Q   | A_HIS_489 | NE2    | A_GLU_168 | OE1    | 2.333        |
| 4U0Q   | A_HIS_489 | NE2    | A_GLU_239 | OE1    | 3.275        |
| 4U0Q   | A_HIS_495 | NE2    | D_GLU_31  | OE1    | 3.802        |
| 4U0Q   | A_HIS_495 | NE2    | D_GLU_31  | OE2    | 2.620        |
| 4U0Q   | A_HIS_496 | ND1    | D_GLU_31  | OE1    | 3.680        |
| 4U0Q   | B_HIS_53  | ND1    | B_GLU_64  | OE1    | 2.648        |
| 4U0Q   | B_HIS_53  | ND1    | B_GLU_64  | OE2    | 3.336        |
| 4U0Q   | B_ARG_54  | NH2    | B_GLU_92  | OE1    | 2.778        |
| 4U0Q   | B_ARG_54  | NH2    | B_GLU_92  | OE2    | 3.437        |
| 4U0Q   | B_LYS_148 | NZ     | B_GLU_155 | OE2    | 3.304        |
| 4U0Q   | B_ARG_157 | NH1    | B_ASP_179 | OD2    | 3.570        |
| 4U0Q   | B_ARG_157 | NH2    | B_ASP_179 | OD1    | 2.730        |
| 4U0Q   | B_ARG_157 | NH2    | B_ASP_179 | OD2    | 2.748        |
| 4U0Q   | B_HIS_170 | ND1    | D_GLU_172 | OE1    | 2.788        |
| 4U0Q   | B_HIS_170 | NE2    | B_GLU_168 | OE1    | 3.394        |
| 4U0Q   | B_ARG_184 | NH2    | B_ASP_147 | OD2    | 3.560        |
| 4U0Q   | C_HIS_187 | NE2    | C_ASP_183 | OD1    | 2.825        |
| 4U0Q   | C_HIS_187 | NE2    | C_ASP_183 | OD2    | 3.905        |
| 4U0Q   | C_LYS_211 | NZ     | C_GLU_215 | OE2    | 3.781        |
| 4U0Q   | C_LYS_221 | NZ     | C_ASP_172 | OD1    | 3.043        |
| 4U0Q   | C_HIS_240 | NE2    | C_GLU_168 | OE1    | 2.360        |
| 4U0Q   | C_HIS_240 | NE2    | C_GLU_168 | OE2    | 3.605        |
| 4U0Q   | C_LYS_310 | NZ     | C_ASP_230 | OD2    | 2.754        |
| 4U0Q   | C_LYS_327 | NZ     | C_ASP_331 | OD1    | 3.020        |
| 4U0Q   | C_LYS_327 | NZ     | C_ASP_331 | OD2    | 3.351        |
| 4U0Q   | C_LYS_411 | NZ     | C_ASP_408 | OD1    | 3.493        |
| 4U0Q   | C_HIS_414 | NE2    | C_GLU_391 | OE2    | 3.600        |
| 4U0Q   | C_ARG_423 | NH2    | C_ASP_162 | OD2    | 3.190        |
| 4U0Q   | C_HIS_427 | NE2    | C_ASP_162 | OD1    | 3.751        |
| 4U0Q   | C_LYS_434 | NZ     | C_GLU_465 | OE2    | 2.762        |
| 4U0Q   | C_LYS_436 | NZ     | C_ASP_440 | OD1    | 3.394        |
| 4U0Q   | C_LYS_436 | NZ     | C_ASP_440 | OD2    | 3.260        |
| 4U0Q   | C_LYS_441 | NZ     | C_ASP_461 | OD1    | 3.208        |

|      |           |     |           |     |       |
|------|-----------|-----|-----------|-----|-------|
| 4U0Q | C_LYS_441 | NZ  | C_ASP_461 | OD2 | 2.815 |
| 4U0Q | C_LYS_441 | NZ  | C_GLU_465 | OE1 | 3.460 |
| 4U0Q | C_ARG_476 | NH2 | C_ASP_473 | OD1 | 2.770 |
| 4U0Q | C_LYS_486 | NZ  | C_GLU_239 | OE1 | 3.354 |
| 4U0Q | C_LYS_486 | NZ  | C_GLU_239 | OE2 | 2.814 |
| 4U0Q | C_HIS_489 | NE2 | C_GLU_168 | OE1 | 2.335 |
| 4U0Q | C_HIS_489 | NE2 | C_GLU_239 | OE1 | 3.280 |
| 4U0Q | C_HIS_495 | ND1 | B_ASP_32  | OD2 | 3.411 |
| 4U0Q | D_HIS_53  | ND1 | D_GLU_64  | OE1 | 2.807 |
| 4U0Q | D_HIS_53  | ND1 | D_GLU_64  | OE2 | 3.881 |
| 4U0Q | D_ARG_54  | NH2 | D_GLU_92  | OE1 | 2.781 |
| 4U0Q | D_ARG_54  | NH2 | D_GLU_92  | OE2 | 3.453 |
| 4U0Q | D_LYS_63  | NZ  | D_ASP_65  | OD1 | 3.005 |
| 4U0Q | D_LYS_63  | NZ  | D_ASP_65  | OD2 | 3.008 |
| 4U0Q | D_ARG_106 | NH1 | D_GLU_129 | OE1 | 2.747 |
| 4U0Q | D_ARG_106 | NH1 | D_GLU_129 | OE2 | 3.871 |
| 4U0Q | D_LYS_148 | NZ  | D_GLU_155 | OE2 | 3.319 |
| 4U0Q | D_ARG_157 | NH1 | D_ASP_179 | OD1 | 3.344 |
| 4U0Q | D_ARG_157 | NH1 | D_ASP_179 | OD2 | 2.708 |
| 4U0Q | D_ARG_157 | NH2 | D_GLU_155 | OE1 | 3.810 |
| 4U0Q | D_ARG_157 | NH2 | D_ASP_179 | OD1 | 2.790 |
| 4U0Q | D_ARG_157 | NH2 | D_ASP_179 | OD2 | 3.368 |
| 4U0Q | D_HIS_170 | ND1 | B_GLU_172 | OE1 | 2.879 |
| 4U0Q | D_HIS_170 | ND1 | B_GLU_172 | OE2 | 2.959 |
| 4U0Q | D_HIS_170 | NE2 | D_GLU_168 | OE1 | 3.465 |
| 4U0Q | D_ARG_184 | NH2 | D_ASP_147 | OD2 | 3.553 |
| 4U0Q | D_LYS_191 | NZ  | C_GLU_362 | OE2 | 3.108 |

Table 625: 4U0Q-specific salt bridging networks analysis. In this table, a PDB file is specified with a four-letter PDB ID, except that the names of the PDB files corresponding to the single NMR structural model split from the NMR ensemble is specified with a four-letter PDB ID in addition to a hyphen followed by the single NMR structural model numeric ID, the residue naming scheme is **Chain ID\_residue name\_residue number**,  $\angle ADH$  represents the angle formed by acceptor (A), donor (D) and hydrogen (H) ( $\angle ADH$ ).

| PDB ID | Residue A | Atom A | Residue B | Atom B | Distance (Å) |
|--------|-----------|--------|-----------|--------|--------------|
| 4U3X   | A_ARG_38  | NH1    | A_ASP_90  | OD1    | 2.898        |
| 4U3X   | A_ARG_67  | NH1    | A_ASP_90  | OD1    | 3.886        |
| 4U3X   | A_ARG_67  | NH1    | A_ASP_90  | OD2    | 2.695        |
| 4U3X   | A_ARG_67  | NH2    | A_ASP_90  | OD1    | 3.163        |
| 4U3X   | A_ARG_67  | NH2    | A_ASP_90  | OD2    | 3.392        |
| 4U3X   | A_LYS_98  | NZ     | A_GLU_32  | OE2    | 3.316        |
| 4U3X   | A_HIS_106 | NE2    | B_GLU_35  | OE1    | 2.597        |
| 4U3X   | A_HIS_106 | NE2    | B_GLU_35  | OE2    | 3.650        |
| 4U3X   | B_LYS_1   | NZ     | B_GLU_7   | OE1    | 2.763        |
| 4U3X   | B_LYS_1   | NZ     | B_GLU_7   | OE2    | 3.987        |
| 4U3X   | B_ARG_61  | NH1    | A_ASP_33  | OD2    | 2.723        |
| 4U3X   | B_ARG_61  | NH2    | A_ASP_33  | OD2    | 2.983        |
| 4U3X   | B_ARG_112 | NH2    | A_ASP_109 | OD1    | 3.763        |
| 4U3X   | B_ARG_112 | NH2    | A_ASP_109 | OD2    | 3.035        |
| 4U3X   | B_ARG_125 | NH1    | B_ASP_119 | OD2    | 3.378        |
| 4U3X   | B_ARG_125 | NH2    | B_ASP_119 | OD1    | 3.266        |
| 4U3X   | B_ARG_125 | NH2    | B_ASP_119 | OD2    | 3.781        |
| 4U3X   | C_ARG_38  | NH1    | C_ASP_90  | OD1    | 3.008        |
| 4U3X   | C_ARG_38  | NH2    | C_ASP_90  | OD1    | 3.918        |
| 4U3X   | C_ARG_67  | NH1    | C_ASP_90  | OD1    | 3.636        |
| 4U3X   | C_ARG_67  | NH1    | C_ASP_90  | OD2    | 3.951        |
| 4U3X   | C_ARG_67  | NH2    | C_ASP_90  | OD1    | 3.430        |
| 4U3X   | C_ARG_67  | NH2    | C_ASP_90  | OD2    | 2.349        |
| 4U3X   | C_LYS_98  | NZ     | C_GLU_32  | OE1    | 3.558        |
| 4U3X   | C_LYS_98  | NZ     | C_GLU_32  | OE2    | 2.950        |
| 4U3X   | C_HIS_106 | NE2    | D_GLU_35  | OE1    | 2.720        |
| 4U3X   | C_HIS_106 | NE2    | D_GLU_35  | OE2    | 3.669        |
| 4U3X   | D_LYS_1   | NZ     | D_GLU_7   | OE1    | 3.339        |
| 4U3X   | D_LYS_1   | NZ     | D_GLU_7   | OE2    | 2.952        |
| 4U3X   | D_LYS_13  | NZ     | D_ASP_18  | OD2    | 3.704        |
| 4U3X   | D_ARG_61  | NH1    | C_ASP_33  | OD2    | 3.116        |
| 4U3X   | D_ARG_61  | NH2    | C_ASP_33  | OD2    | 3.400        |
| 4U3X   | D_ARG_112 | NH2    | C_ASP_109 | OD2    | 3.567        |
| 4U3X   | D_ARG_125 | NH1    | D_ASP_119 | OD1    | 3.983        |
| 4U3X   | D_ARG_125 | NH1    | D_ASP_119 | OD2    | 3.205        |
| 4U3X   | D_ARG_125 | NH2    | D_ASP_119 | OD1    | 3.233        |
| 4U3X   | D_ARG_125 | NH2    | D_ASP_119 | OD2    | 3.715        |

Table 626: 4U3X-specific salt bridging networks analysis. In this table, a PDB file is specified with a four-letter PDB ID, except that the names of the PDB files corresponding to the single NMR structural model split from the NMR ensemble is specified with a four-letter PDB ID in addition to a hyphen followed by the single NMR structural model numeric ID, the residue naming scheme is **Chain ID\_residue name\_residue number**,  $\angle ADH$  represents the angle formed by acceptor (A), donor (D) and hydrogen (H) ( $\angle ADH$ ).

| PDB ID | Residue A | Atom A | Residue B  | Atom B | Distance (Å) |
|--------|-----------|--------|------------|--------|--------------|
| 4U6G   | H_ARG_38  | NH1    | H_ASP_86   | OD1    | 3.182        |
| 4U6G   | H_ARG_38  | NH2    | H_GLU_46   | OE1    | 3.518        |
| 4U6G   | H_ARG_38  | NH2    | H_GLU_46   | OE2    | 3.054        |
| 4U6G   | H_ARG_50  | NH1    | H_ASP_58   | OD2    | 3.942        |
| 4U6G   | H_ARG_50  | NH1    | H_GLU_100J | OE1    | 3.369        |
| 4U6G   | H_ARG_50  | NH1    | H_GLU_100J | OE2    | 2.951        |
| 4U6G   | H_ARG_50  | NH2    | H_ASP_58   | OD2    | 2.415        |
| 4U6G   | H_ARG_66  | NH1    | H_ASP_86   | OD2    | 3.486        |
| 4U6G   | H_ARG_66  | NH2    | H_ASP_86   | OD1    | 3.579        |
| 4U6G   | H_ARG_66  | NH2    | H_ASP_86   | OD2    | 3.807        |
| 4U6G   | H_ARG_94  | NH2    | H_ASP_102  | OD1    | 2.954        |
| 4U6G   | H_LYS_143 | NZ     | L_GLU_125  | OE2    | 3.603        |
| 4U6G   | H_LYS_209 | NZ     | L_GLU_124  | OE1    | 2.829        |
| 4U6G   | H_LYS_209 | NZ     | L_GLU_124  | OE2    | 2.866        |
| 4U6G   | H_ARG_210 | NH1    | H_GLU_212  | OE2    | 3.692        |
| 4U6G   | H_ARG_210 | NH2    | H_GLU_212  | OE2    | 3.652        |
| 4U6G   | L_ARG_29  | NH1    | L_ASP_26   | OD1    | 3.440        |
| 4U6G   | L_HIS_31  | ND1    | H_GLU_100I | OE2    | 3.196        |
| 4U6G   | L_ARG_54  | NH1    | L_ASP_60   | OD1    | 3.819        |
| 4U6G   | L_ARG_61  | NH1    | B_GLU_81   | OE1    | 3.298        |
| 4U6G   | L_ARG_61  | NH2    | L_ASP_82   | OD1    | 3.284        |
| 4U6G   | L_ARG_61  | NH2    | L_ASP_82   | OD2    | 3.928        |
| 4U6G   | L_ARG_91  | NH1    | H_GLU_100J | OE1    | 3.679        |
| 4U6G   | L_ARG_91  | NH1    | H_GLU_100J | OE2    | 3.478        |
| 4U6G   | L_ARG_91  | NH2    | H_GLU_100J | OE2    | 3.428        |
| 4U6G   | L_LYS_93  | NZ     | L_GLU_3    | OE2    | 3.425        |
| 4U6G   | L_LYS_103 | NZ     | L_ASP_83   | OD1    | 2.775        |
| 4U6G   | L_LYS_150 | NZ     | L_GLU_204  | OE2    | 3.294        |
| 4U6G   | A_ARG_38  | NH1    | A_ASP_86   | OD1    | 3.130        |
| 4U6G   | A_ARG_38  | NH2    | A_GLU_46   | OE2    | 3.390        |
| 4U6G   | A_ARG_50  | NH1    | A_GLU_100J | OE1    | 2.748        |
| 4U6G   | A_ARG_50  | NH1    | A_GLU_100J | OE2    | 2.961        |
| 4U6G   | A_ARG_50  | NH2    | A_ASP_58   | OD2    | 2.646        |
| 4U6G   | A_ARG_50  | NH2    | A_GLU_100J | OE2    | 3.684        |
| 4U6G   | A_ARG_66  | NH1    | A_ASP_86   | OD2    | 3.552        |
| 4U6G   | A_ARG_66  | NH2    | A_ASP_86   | OD1    | 3.394        |
| 4U6G   | A_ARG_66  | NH2    | A_ASP_86   | OD2    | 3.979        |
| 4U6G   | A_ARG_94  | NH2    | A_ASP_102  | OD1    | 2.808        |
| 4U6G   | A_LYS_143 | NZ     | B_GLU_125  | OE2    | 3.217        |
| 4U6G   | A_LYS_201 | NZ     | H_ASP_30   | OD1    | 3.983        |
| 4U6G   | A_LYS_209 | NZ     | B_GLU_124  | OE1    | 2.769        |
| 4U6G   | A_LYS_209 | NZ     | B_GLU_124  | OE2    | 3.063        |
| 4U6G   | B_ARG_29  | NH1    | B_ASP_26   | OD1    | 3.536        |
| 4U6G   | B_HIS_31  | ND1    | A_GLU_100I | OE2    | 3.102        |
| 4U6G   | B_ARG_54  | NH1    | B_ASP_60   | OD1    | 3.700        |
| 4U6G   | B_ARG_61  | NH2    | B_GLU_81   | OE1    | 3.869        |
| 4U6G   | B_ARG_61  | NH2    | B_ASP_82   | OD1    | 3.159        |
| 4U6G   | B_ARG_61  | NH2    | B_ASP_82   | OD2    | 3.682        |
| 4U6G   | B_ARG_91  | NH1    | A_GLU_100J | OE1    | 3.587        |
| 4U6G   | B_ARG_91  | NH1    | A_GLU_100J | OE2    | 3.310        |
| 4U6G   | B_ARG_91  | NH2    | A_GLU_100J | OE2    | 3.407        |
| 4U6G   | B_LYS_103 | NZ     | B_ASP_83   | OD1    | 2.873        |
| 4U6G   | B_LYS_111 | NZ     | B_GLU_199  | OE1    | 3.272        |
| 4U6G   | B_LYS_150 | NZ     | B_GLU_204  | OE1    | 3.711        |
| 4U6G   | B_LYS_150 | NZ     | B_GLU_204  | OE2    | 3.254        |

---

Table 627: 4U6G-specific salt bridging networks analysis. In this table, a PDB file is specified with a four-letter PDB ID, except that the names of the PDB files corresponding to the single NMR structural model split from the NMR ensemble is specified with a four-letter PDB ID in addition to a hyphen followed by the single NMR structural model numeric ID, the residue naming scheme is **Chain ID\_residue name\_residue number**,  $\angle ADH$  represents the angle formed by acceptor (A), donor (D) and hydrogen (H) ( $\angle ADH$ ).



| PDB ID | Residue A | Atom A | Residue B | Atom B | Distance (Å) |
|--------|-----------|--------|-----------|--------|--------------|
| 4U6V   | H_HIS_35  | NE2    | H_ASP_98  | OD1    | 3.305        |
| 4U6V   | H_HIS_35  | NE2    | H_ASP_98  | OD2    | 2.654        |
| 4U6V   | H_ARG_38  | NH1    | H_ASP_89  | OD2    | 2.858        |
| 4U6V   | H_ARG_38  | NH2    | H_GLU_46  | OE1    | 3.188        |
| 4U6V   | H_ARG_38  | NH2    | H_GLU_46  | OE2    | 3.968        |
| 4U6V   | H_ARG_38  | NH2    | H_ASP_89  | OD2    | 3.604        |
| 4U6V   | H_ARG_66  | NH1    | H_ASP_89  | OD1    | 2.752        |
| 4U6V   | H_ARG_66  | NH1    | H_ASP_89  | OD2    | 3.786        |
| 4U6V   | H_ARG_66  | NH2    | H_ASP_89  | OD1    | 3.455        |
| 4U6V   | H_ARG_66  | NH2    | H_ASP_89  | OD2    | 2.979        |
| 4U6V   | H_ARG_97  | NH2    | H_ASP_110 | OD2    | 2.478        |
| 4U6V   | H_ARG_99  | NH2    | H_ASP_110 | OD1    | 3.312        |
| 4U6V   | H_ARG_99  | NH2    | L_GLU_55  | OE1    | 2.660        |
| 4U6V   | H_ARG_99  | NH2    | L_GLU_55  | OE2    | 2.823        |
| 4U6V   | H_HIS_105 | NE2    | A_ASP_183 | OD1    | 3.150        |
| 4U6V   | H_HIS_105 | NE2    | A_ASP_183 | OD2    | 3.236        |
| 4U6V   | H_LYS_152 | NZ     | H_ASP_153 | OD1    | 3.594        |
| 4U6V   | H_LYS_152 | NZ     | H_ASP_153 | OD2    | 3.480        |
| 4U6V   | H_LYS_215 | NZ     | H_ASP_217 | OD1    | 3.333        |
| 4U6V   | H_LYS_215 | NZ     | H_ASP_217 | OD2    | 3.285        |
| 4U6V   | H_LYS_218 | NZ     | L_GLU_122 | OE1    | 2.258        |
| 4U6V   | H_LYS_218 | NZ     | L_GLU_122 | OE2    | 3.923        |
| 4U6V   | H_ARG_219 | NH1    | H_GLU_221 | OE1    | 3.555        |
| 4U6V   | L_ARG_24  | NH2    | L_GLU_70  | OE1    | 3.373        |
| 4U6V   | L_LYS_39  | NZ     | L_ASP_81  | OD1    | 3.062        |
| 4U6V   | L_LYS_39  | NZ     | L_ASP_81  | OD2    | 3.255        |
| 4U6V   | L_ARG_61  | NH2    | L_ASP_82  | OD1    | 2.876        |
| 4U6V   | L_ARG_61  | NH2    | L_ASP_82  | OD2    | 3.235        |
| 4U6V   | L_ARG_141 | NH1    | L_GLU_164 | OE2    | 3.480        |
| 4U6V   | L_ARG_141 | NH2    | L_GLU_104 | OE1    | 3.162        |
| 4U6V   | L_ARG_141 | NH2    | L_GLU_104 | OE2    | 3.384        |
| 4U6V   | L_ARG_141 | NH2    | L_GLU_164 | OE1    | 3.915        |
| 4U6V   | L_ARG_141 | NH2    | L_GLU_164 | OE2    | 3.880        |
| 4U6V   | L_LYS_148 | NZ     | L_GLU_194 | OE2    | 3.817        |
| 4U6V   | L_LYS_187 | NZ     | L_ASP_184 | OD1    | 3.136        |
| 4U6V   | A_LYS_36  | NZ     | A_GLU_280 | OE1    | 3.134        |
| 4U6V   | A_LYS_46  | NZ     | A_ASP_44  | OD2    | 3.954        |
| 4U6V   | A_LYS_51  | NZ     | A_ASP_44  | OD2    | 3.960        |
| 4U6V   | A_LYS_51  | NZ     | A_GLU_289 | OE2    | 3.066        |
| 4U6V   | A_ARG_56  | NH2    | A_ASP_227 | OD1    | 3.348        |
| 4U6V   | A_ARG_56  | NH2    | A_ASP_227 | OD2    | 2.841        |
| 4U6V   | A_LYS_85  | NZ     | A_GLU_250 | OE2    | 3.967        |
| 4U6V   | A_ARG_104 | NH2    | A_ASP_100 | OD1    | 3.350        |
| 4U6V   | A_ARG_104 | NH2    | A_ASP_100 | OD2    | 2.842        |
| 4U6V   | A_LYS_147 | NZ     | A_GLU_111 | OE1    | 3.728        |
| 4U6V   | A_LYS_163 | NZ     | A_ASP_162 | OD2    | 3.943        |
| 4U6V   | A_LYS_164 | NZ     | A_GLU_158 | OE1    | 3.750        |
| 4U6V   | A_ARG_184 | NH2    | A_ASP_254 | OD1    | 2.848        |
| 4U6V   | A_ARG_184 | NH2    | A_ASP_254 | OD2    | 2.966        |
| 4U6V   | A_ARG_184 | NH2    | A_ASP_272 | OD1    | 2.573        |
| 4U6V   | A_ARG_200 | NH1    | H_ASP_56  | OD1    | 3.722        |
| 4U6V   | A_ARG_200 | NH1    | H_ASP_56  | OD2    | 3.481        |
| 4U6V   | A_LYS_205 | NZ     | A_GLU_70  | OE1    | 3.668        |
| 4U6V   | A_LYS_205 | NZ     | A_GLU_70  | OE2    | 3.472        |
| 4U6V   | A_ARG_236 | NH1    | A_ASP_44  | OD1    | 3.407        |
| 4U6V   | A_ARG_236 | NH2    | A_ASP_44  | OD1    | 3.125        |
| 4U6V   | A_ARG_251 | NH2    | A_ASP_276 | OD2    | 3.363        |

|      |           |     |           |     |       |
|------|-----------|-----|-----------|-----|-------|
| 4U6V | A_ARG_253 | NH2 | A_ASP_276 | OD1 | 2.926 |
| 4U6V | A_ARG_253 | NH2 | A_ASP_276 | OD2 | 3.227 |
| 4U6V | A_LYS_266 | NZ  | L_ASP_93  | OD1 | 2.981 |
| 4U6V | A_LYS_271 | NZ  | A_ASP_185 | OD1 | 2.718 |
| 4U6V | A_LYS_273 | NZ  | A_ASP_255 | OD2 | 3.278 |
| 4U6V | A_ARG_277 | NH2 | A_GLU_250 | OE1 | 2.466 |
| 4U6V | A_ARG_281 | NH2 | A_ASP_246 | OD1 | 2.738 |
| 4U6V | K_HIS_35  | NE2 | K_ASP_98  | OD1 | 3.310 |
| 4U6V | K_HIS_35  | NE2 | K_ASP_98  | OD2 | 2.683 |
| 4U6V | K_ARG_38  | NH1 | K_ASP_89  | OD2 | 2.844 |
| 4U6V | K_ARG_38  | NH2 | K_GLU_46  | OE1 | 3.203 |
| 4U6V | K_ARG_38  | NH2 | K_GLU_46  | OE2 | 3.978 |
| 4U6V | K_ARG_38  | NH2 | K_ASP_89  | OD2 | 3.616 |
| 4U6V | K_ARG_66  | NH1 | K_ASP_89  | OD1 | 2.744 |
| 4U6V | K_ARG_66  | NH1 | K_ASP_89  | OD2 | 3.770 |
| 4U6V | K_ARG_66  | NH2 | K_ASP_89  | OD1 | 3.441 |
| 4U6V | K_ARG_66  | NH2 | K_ASP_89  | OD2 | 2.968 |
| 4U6V | K_ARG_97  | NH2 | K_ASP_110 | OD2 | 2.501 |
| 4U6V | K_ARG_99  | NH2 | K_ASP_110 | OD1 | 3.302 |
| 4U6V | K_ARG_99  | NH2 | M_GLU_55  | OE1 | 2.606 |
| 4U6V | K_ARG_99  | NH2 | M_GLU_55  | OE2 | 2.857 |
| 4U6V | K_HIS_105 | NE2 | B_ASP_183 | OD1 | 2.992 |
| 4U6V | K_HIS_105 | NE2 | B_ASP_183 | OD2 | 3.142 |
| 4U6V | K_LYS_152 | NZ  | K_ASP_153 | OD1 | 3.584 |
| 4U6V | K_LYS_152 | NZ  | K_ASP_153 | OD2 | 3.467 |
| 4U6V | K_LYS_215 | NZ  | K_ASP_217 | OD1 | 3.339 |
| 4U6V | K_LYS_215 | NZ  | K_ASP_217 | OD2 | 3.278 |
| 4U6V | K_LYS_218 | NZ  | M_GLU_122 | OE1 | 2.653 |
| 4U6V | K_ARG_219 | NH1 | K_GLU_221 | OE1 | 3.551 |
| 4U6V | M_ARG_24  | NH2 | M_GLU_70  | OE1 | 3.369 |
| 4U6V | M_LYS_39  | NZ  | M_ASP_81  | OD1 | 3.066 |
| 4U6V | M_LYS_39  | NZ  | M_ASP_81  | OD2 | 3.241 |
| 4U6V | M_ARG_61  | NH2 | M_ASP_82  | OD1 | 2.871 |
| 4U6V | M_ARG_61  | NH2 | M_ASP_82  | OD2 | 3.232 |
| 4U6V | M_ARG_141 | NH1 | M_GLU_164 | OE2 | 3.486 |
| 4U6V | M_ARG_141 | NH2 | M_GLU_104 | OE1 | 3.180 |
| 4U6V | M_ARG_141 | NH2 | M_GLU_104 | OE2 | 3.454 |
| 4U6V | M_ARG_141 | NH2 | M_GLU_164 | OE1 | 3.895 |
| 4U6V | M_ARG_141 | NH2 | M_GLU_164 | OE2 | 3.876 |
| 4U6V | M_LYS_148 | NZ  | M_GLU_194 | OE1 | 3.300 |
| 4U6V | M_LYS_168 | NZ  | M_ASP_166 | OD1 | 3.534 |
| 4U6V | M_LYS_168 | NZ  | M_ASP_169 | OD2 | 3.988 |
| 4U6V | M_LYS_187 | NZ  | M_ASP_184 | OD1 | 3.129 |
| 4U6V | M_HIS_188 | ND1 | M_ASP_150 | OD2 | 3.072 |
| 4U6V | B_LYS_36  | NZ  | B_GLU_280 | OE1 | 3.143 |
| 4U6V | B_LYS_46  | NZ  | B_ASP_44  | OD2 | 3.962 |
| 4U6V | B_LYS_51  | NZ  | B_ASP_44  | OD2 | 3.959 |
| 4U6V | B_LYS_51  | NZ  | B_GLU_289 | OE2 | 3.068 |
| 4U6V | B_ARG_56  | NH2 | B_ASP_227 | OD1 | 3.358 |
| 4U6V | B_ARG_56  | NH2 | B_ASP_227 | OD2 | 2.849 |
| 4U6V | B_LYS_85  | NZ  | B_GLU_250 | OE2 | 3.970 |
| 4U6V | B_ARG_104 | NH2 | B_ASP_100 | OD1 | 3.340 |
| 4U6V | B_ARG_104 | NH2 | B_ASP_100 | OD2 | 2.845 |
| 4U6V | B_LYS_147 | NZ  | B_GLU_111 | OE1 | 3.726 |
| 4U6V | B_LYS_163 | NZ  | B_ASP_162 | OD2 | 3.942 |
| 4U6V | B_LYS_164 | NZ  | B_GLU_158 | OE1 | 3.594 |
| 4U6V | B_ARG_184 | NH2 | B_ASP_254 | OD1 | 2.852 |
| 4U6V | B_ARG_184 | NH2 | B_ASP_254 | OD2 | 2.960 |

|      |           |     |           |     |       |
|------|-----------|-----|-----------|-----|-------|
| 4U6V | B_ARG_184 | NH2 | B_ASP_272 | OD1 | 2.585 |
| 4U6V | B_ARG_200 | NH1 | K_ASP_56  | OD1 | 3.809 |
| 4U6V | B_ARG_200 | NH1 | K_ASP_56  | OD2 | 3.557 |
| 4U6V | B_LYS_205 | NZ  | B_GLU_70  | OE1 | 3.673 |
| 4U6V | B_LYS_205 | NZ  | B_GLU_70  | OE2 | 3.473 |
| 4U6V | B_ARG_236 | NH1 | B_ASP_44  | OD1 | 3.418 |
| 4U6V | B_ARG_236 | NH2 | B_ASP_44  | OD1 | 3.133 |
| 4U6V | B_ARG_251 | NH2 | B_ASP_276 | OD2 | 3.376 |
| 4U6V | B_ARG_253 | NH2 | B_ASP_276 | OD1 | 2.931 |
| 4U6V | B_ARG_253 | NH2 | B_ASP_276 | OD2 | 3.222 |
| 4U6V | B_LYS_266 | NZ  | M_ASP_93  | OD1 | 3.145 |
| 4U6V | B_LYS_271 | NZ  | B_ASP_185 | OD1 | 2.724 |
| 4U6V | B_LYS_273 | NZ  | B_ASP_255 | OD2 | 3.277 |
| 4U6V | B_ARG_277 | NH2 | B_GLU_250 | OE1 | 2.460 |
| 4U6V | B_ARG_281 | NH2 | B_ASP_246 | OD1 | 2.737 |

Table 628: 4U6V-specific salt bridging networks analysis. In this table, a PDB file is specified with a four-letter PDB ID, except that the names of the PDB files corresponding to the single NMR structural model split from the NMR ensemble is specified with a four-letter PDB ID in addition to a hyphen followed by the single NMR structural model numeric ID, the residue naming scheme is **Chain ID\_residue name\_residue number**,  $\angle ADH$  represents the angle formed by acceptor (A), donor (D) and hydrogen (H) ( $\angle ADH$ ).

| PDB ID | Residue A | Atom A | Residue B  | Atom B | Distance (Å) |
|--------|-----------|--------|------------|--------|--------------|
| 4UAO   | A_ARG_73  | NH2    | A_GLU_201  | OE1    | 3.924        |
| 4UAO   | A_ARG_73  | NH2    | A_GLU_201  | OE2    | 3.498        |
| 4UAO   | A_ARG_120 | NH1    | A_GLU_123  | OE1    | 3.546        |
| 4UAO   | A_ARG_120 | NH1    | A_ASP_216  | OD2    | 3.693        |
| 4UAO   | A_ARG_120 | NH2    | A_GLU_123  | OE1    | 3.780        |
| 4UAO   | A_LYS_122 | NZ     | A_ASP_216  | OD2    | 2.797        |
| 4UAO   | A_LYS_190 | NZ     | A_ASP_158  | OD2    | 3.237        |
| 4UAO   | A_LYS_190 | NZ     | A_GLU_187  | OE2    | 3.980        |
| 4UAO   | A_LYS_237 | NZ     | A_GLU_78   | OE1    | 3.297        |
| 4UAO   | A_ARG_249 | NH1    | A_GLU_187  | OE1    | 3.415        |
| 4UAO   | A_ARG_249 | NH1    | A_GLU_381  | OE1    | 3.557        |
| 4UAO   | A_ARG_249 | NH1    | A_GLU_381  | OE2    | 3.345        |
| 4UAO   | A_ARG_249 | NH2    | A_GLU_187  | OE1    | 3.981        |
| 4UAO   | A_LYS_250 | NZ     | A_GLU_381  | OE2    | 3.404        |
| 4UAO   | A_LYS_256 | NZ     | A_GLU_267  | OE1    | 2.830        |
| 4UAO   | A_LYS_256 | NZ     | A_GLU_267  | OE2    | 3.541        |
| 4UAO   | A_ARG_277 | NH1    | A_GLU_275  | OE1    | 2.891        |
| 4UAO   | A_ARG_280 | NH1    | A_ASP_230  | OD1    | 2.845        |
| 4UAO   | A_ARG_280 | NH1    | A_ASP_230  | OD2    | 3.123        |
| 4UAO   | A_ARG_280 | NH2    | A_ASP_230  | OD2    | 3.328        |
| 4UAO   | A_ARG_284 | NH2    | A_ASP_224  | OD1    | 3.788        |
| 4UAO   | A_ARG_284 | NH2    | A_ASP_224  | OD2    | 3.066        |
| 4UAO   | A_ARG_296 | NH2    | A_GLU_288  | OE1    | 2.772        |
| 4UAO   | A_ARG_317 | NH1    | C_GLU_100B | OE2    | 3.537        |
| 4UAO   | A_ARG_317 | NH2    | C_GLU_100B | OE1    | 3.794        |
| 4UAO   | A_ARG_317 | NH2    | C_GLU_100B | OE2    | 2.800        |
| 4UAO   | A_LYS_336 | NZ     | A_ASP_79   | OD1    | 2.775        |
| 4UAO   | A_LYS_336 | NZ     | A_ASP_79   | OD2    | 3.272        |
| 4UAO   | A_LYS_353 | NZ     | A_GLU_273  | OE1    | 3.628        |
| 4UAO   | A_LYS_360 | NZ     | A_ASP_63   | OD1    | 3.580        |
| 4UAO   | A_LYS_360 | NZ     | A_ASP_63   | OD2    | 3.421        |
| 4UAO   | B_ARG_61  | NH2    | B_ASP_82   | OD1    | 3.532        |
| 4UAO   | B_ARG_66  | NH2    | B_ASP_28   | OD1    | 3.432        |
| 4UAO   | B_LYS_92  | NZ     | B_ASP_28   | OD2    | 3.374        |
| 4UAO   | B_ARG_103 | NH2    | B_ASP_165  | OD1    | 2.738        |
| 4UAO   | B_ARG_108 | NH1    | B_ASP_170  | OD2    | 3.952        |
| 4UAO   | B_LYS_149 | NZ     | B_GLU_195  | OE2    | 3.010        |
| 4UAO   | B_ARG_155 | NH1    | B_ASP_157  | OD1    | 3.116        |
| 4UAO   | B_ARG_155 | NH1    | B_ASP_185  | OD2    | 3.521        |
| 4UAO   | B_ARG_155 | NH2    | B_ASP_185  | OD1    | 3.054        |
| 4UAO   | B_ARG_155 | NH2    | B_ASP_185  | OD2    | 3.232        |
| 4UAO   | B_HIS_189 | ND1    | B_ASP_185  | OD1    | 3.890        |
| 4UAO   | B_LYS_199 | NZ     | B_ASP_110  | OD1    | 3.495        |
| 4UAO   | B_LYS_199 | NZ     | B_ASP_110  | OD2    | 3.079        |
| 4UAO   | C_ARG_38  | NH1    | C_ASP_86   | OD1    | 3.163        |
| 4UAO   | C_ARG_38  | NH2    | C_GLU_46   | OE1    | 3.888        |
| 4UAO   | C_ARG_38  | NH2    | C_GLU_46   | OE2    | 3.064        |
| 4UAO   | C_ARG_38  | NH2    | C_ASP_86   | OD1    | 3.804        |
| 4UAO   | C_ARG_56  | NH1    | A_GLU_81   | OE2    | 2.819        |
| 4UAO   | C_ARG_56  | NH2    | A_ASP_174  | OD1    | 3.129        |
| 4UAO   | C_ARG_56  | NH2    | A_ASP_174  | OD2    | 2.857        |
| 4UAO   | C_ARG_66  | NH1    | C_GLU_83   | OE1    | 3.463        |
| 4UAO   | C_ARG_66  | NH1    | C_ASP_86   | OD1    | 2.970        |
| 4UAO   | C_ARG_66  | NH1    | C_ASP_86   | OD2    | 2.789        |
| 4UAO   | C_ARG_66  | NH2    | C_GLU_83   | OE1    | 3.731        |
| 4UAO   | C_ARG_94  | NH1    | C_GLU_100B | OE1    | 2.986        |
| 4UAO   | C_ARG_94  | NH1    | C_ASP_101  | OD1    | 3.545        |

|      |          |     |            |     |       |
|------|----------|-----|------------|-----|-------|
| 4UAO | C_ARG_94 | NH1 | C_ASP_101  | OD2 | 3.032 |
| 4UAO | C_ARG_95 | NH1 | C_ASP_100C | OD2 | 2.956 |
| 4UAO | C_ARG_95 | NH2 | A_GLU_173  | OE2 | 3.027 |

Table 629: 4UAO-specific salt bridging networks analysis. In this table, a PDB file is specified with a four-letter PDB ID, except that the names of the PDB files corresponding to the single NMR structural model split from the NMR ensemble is specified with a four-letter PDB ID in addition to a hyphen followed by the single NMR structural model numeric ID, the residue naming scheme is **Chain ID\_residue name\_residue number**,  $\angle ADH$  represents the angle formed by acceptor (A), donor (D) and hydrogen (H) ( $\angle ADH$ ).

| PDB ID | Residue A | Atom A | Residue B | Atom B | Distance (Å) |
|--------|-----------|--------|-----------|--------|--------------|
| 4UV6   | A_ARG_73  | NH1    | A_GLU_201 | OE1    | 2.994        |
| 4UV6   | A_ARG_73  | NH1    | A_GLU_201 | OE2    | 3.932        |
| 4UV6   | A_ARG_73  | NH2    | A_GLU_201 | OE1    | 3.217        |
| 4UV6   | A_ARG_73  | NH2    | A_GLU_201 | OE2    | 2.666        |
| 4UV6   | A_ARG_73  | NH2    | A_GLU_288 | OE2    | 3.591        |
| 4UV6   | A_ARG_120 | NH1    | A_GLU_123 | OE2    | 3.707        |
| 4UV6   | A_ARG_120 | NH2    | A_ASP_216 | OD1    | 3.645        |
| 4UV6   | A_LYS_122 | NZ     | A_ASP_216 | OD1    | 3.360        |
| 4UV6   | A_ARG_146 | NH2    | A_ASP_133 | OD2    | 3.248        |
| 4UV6   | A_LYS_148 | NZ     | A_GLU_145 | OE2    | 3.128        |
| 4UV6   | A_LYS_190 | NZ     | A_ASP_158 | OD2    | 3.666        |
| 4UV6   | A_LYS_222 | NZ     | A_GLU_104 | OE2    | 2.916        |
| 4UV6   | A_LYS_237 | NZ     | A_GLU_78  | OE1    | 2.996        |
| 4UV6   | A_LYS_237 | NZ     | A_GLU_78  | OE2    | 3.806        |
| 4UV6   | A_LYS_246 | NZ     | A_ASP_242 | OD2    | 3.993        |
| 4UV6   | A_ARG_249 | NH1    | A_GLU_187 | OE1    | 3.777        |
| 4UV6   | A_ARG_249 | NH1    | A_GLU_187 | OE2    | 2.741        |
| 4UV6   | A_ARG_249 | NH2    | A_GLU_187 | OE1    | 2.790        |
| 4UV6   | A_ARG_249 | NH2    | A_GLU_187 | OE2    | 3.285        |
| 4UV6   | A_ARG_249 | NH2    | A_GLU_381 | OE1    | 3.049        |
| 4UV6   | A_ARG_249 | NH2    | A_GLU_381 | OE2    | 2.841        |
| 4UV6   | A_LYS_256 | NZ     | A_GLU_267 | OE1    | 3.465        |
| 4UV6   | A_LYS_256 | NZ     | A_GLU_267 | OE2    | 3.209        |
| 4UV6   | A_LYS_256 | NZ     | A_ASP_367 | OD2    | 3.488        |
| 4UV6   | A_ARG_277 | NH2    | A_GLU_275 | OE2    | 3.331        |
| 4UV6   | A_ARG_280 | NH1    | A_ASP_230 | OD1    | 2.732        |
| 4UV6   | A_ARG_280 | NH1    | A_ASP_230 | OD2    | 3.546        |
| 4UV6   | A_ARG_280 | NH2    | A_GLU_227 | OE1    | 3.879        |
| 4UV6   | A_ARG_280 | NH2    | A_ASP_230 | OD1    | 3.530        |
| 4UV6   | A_ARG_280 | NH2    | A_ASP_230 | OD2    | 2.776        |
| 4UV6   | A_ARG_284 | NH2    | A_ASP_224 | OD1    | 3.612        |
| 4UV6   | A_ARG_284 | NH2    | A_ASP_224 | OD2    | 3.190        |
| 4UV6   | A_ARG_296 | NH2    | A_GLU_288 | OE2    | 3.629        |
| 4UV6   | A_ARG_313 | NH1    | A_GLU_310 | OE1    | 2.851        |
| 4UV6   | A_ARG_313 | NH1    | A_GLU_310 | OE2    | 3.172        |
| 4UV6   | A_LYS_321 | NZ     | A_ASP_318 | OD1    | 3.965        |
| 4UV6   | A_LYS_336 | NZ     | A_ASP_79  | OD1    | 3.453        |
| 4UV6   | A_LYS_336 | NZ     | A_ASP_79  | OD2    | 3.112        |
| 4UV6   | A_LYS_336 | NZ     | A_ASP_333 | OD1    | 3.782        |
| 4UV6   | A_HIS_378 | NE2    | A_GLU_381 | OE2    | 3.710        |
| 4UV6   | B_ARG_73  | NH1    | B_GLU_201 | OE1    | 3.228        |
| 4UV6   | B_ARG_73  | NH2    | B_GLU_201 | OE1    | 3.286        |
| 4UV6   | B_ARG_73  | NH2    | B_GLU_201 | OE2    | 2.695        |
| 4UV6   | B_ARG_73  | NH2    | B_GLU_288 | OE2    | 3.736        |
| 4UV6   | B_LYS_148 | NZ     | B_GLU_145 | OE2    | 3.156        |
| 4UV6   | B_ARG_180 | NH2    | A_GLU_396 | OE2    | 2.784        |
| 4UV6   | B_LYS_190 | NZ     | B_ASP_158 | OD2    | 3.677        |
| 4UV6   | B_LYS_222 | NZ     | B_GLU_104 | OE2    | 2.924        |
| 4UV6   | B_LYS_237 | NZ     | B_GLU_78  | OE1    | 2.994        |
| 4UV6   | B_LYS_237 | NZ     | B_GLU_78  | OE2    | 3.805        |
| 4UV6   | B_LYS_246 | NZ     | B_ASP_242 | OD2    | 3.993        |
| 4UV6   | B_ARG_249 | NH1    | B_GLU_187 | OE1    | 3.799        |
| 4UV6   | B_ARG_249 | NH1    | B_GLU_187 | OE2    | 2.742        |
| 4UV6   | B_ARG_249 | NH2    | B_GLU_187 | OE1    | 2.790        |
| 4UV6   | B_ARG_249 | NH2    | B_GLU_187 | OE2    | 3.296        |
| 4UV6   | B_ARG_249 | NH2    | B_GLU_381 | OE1    | 3.038        |
| 4UV6   | B_ARG_249 | NH2    | B_GLU_381 | OE2    | 2.812        |

|      |           |     |           |     |       |
|------|-----------|-----|-----------|-----|-------|
| 4UV6 | B_LYS_256 | NZ  | B_GLU_267 | OE1 | 3.476 |
| 4UV6 | B_LYS_256 | NZ  | B_GLU_267 | OE2 | 3.242 |
| 4UV6 | B_LYS_256 | NZ  | B_ASP_367 | OD2 | 3.465 |
| 4UV6 | B_ARG_277 | NH2 | B_GLU_275 | OE2 | 3.309 |
| 4UV6 | B_ARG_280 | NH1 | B_ASP_230 | OD1 | 2.709 |
| 4UV6 | B_ARG_280 | NH1 | B_ASP_230 | OD2 | 3.518 |
| 4UV6 | B_ARG_280 | NH2 | B_GLU_227 | OE2 | 3.911 |
| 4UV6 | B_ARG_280 | NH2 | B_ASP_230 | OD1 | 3.525 |
| 4UV6 | B_ARG_280 | NH2 | B_ASP_230 | OD2 | 2.745 |
| 4UV6 | B_ARG_284 | NH2 | B_ASP_224 | OD1 | 3.584 |
| 4UV6 | B_ARG_284 | NH2 | B_ASP_224 | OD2 | 3.156 |
| 4UV6 | B_ARG_313 | NH1 | B_GLU_310 | OE1 | 2.951 |
| 4UV6 | B_ARG_313 | NH1 | B_GLU_310 | OE2 | 2.848 |
| 4UV6 | B_ARG_313 | NH2 | A_GLU_60  | OE1 | 2.768 |
| 4UV6 | B_LYS_321 | NZ  | B_ASP_318 | OD1 | 3.922 |
| 4UV6 | B_LYS_336 | NZ  | B_ASP_79  | OD2 | 3.702 |
| 4UV6 | B_LYS_336 | NZ  | B_ASP_333 | OD1 | 3.823 |
| 4UV6 | B_HIS_378 | NE2 | B_GLU_381 | OE2 | 3.739 |

Table 630: 4UV6-specific salt bridging networks analysis. In this table, a PDB file is specified with a four-letter PDB ID, except that the names of the PDB files corresponding to the single NMR structural model split from the NMR ensemble is specified with a four-letter PDB ID in addition to a hyphen followed by the single NMR structural model numeric ID, the residue naming scheme is **Chain ID\_residue name\_residue number**,  $\angle ADH$  represents the angle formed by acceptor (A), donor (D) and hydrogen (H) ( $\angle ADH$ ).

| PDB ID | Residue A | Atom A | Residue B | Atom B | Distance (Å) |
|--------|-----------|--------|-----------|--------|--------------|
| 4WEU   | D_ARG_838 | NH1    | D_ASP_890 | OD1    | 3.018        |
| 4WEU   | D_ARG_838 | NH2    | D_GLU_846 | OE1    | 2.933        |
| 4WEU   | D_ARG_838 | NH2    | D_GLU_846 | OE2    | 3.823        |
| 4WEU   | D_ARG_867 | NH1    | D_ASP_890 | OD1    | 3.567        |
| 4WEU   | D_ARG_867 | NH1    | D_ASP_890 | OD2    | 2.686        |
| 4WEU   | D_ARG_867 | NH2    | D_ASP_890 | OD1    | 2.946        |
| 4WEU   | D_ARG_867 | NH2    | D_ASP_890 | OD2    | 3.615        |
| 4WEU   | D_LYS_887 | NZ     | A_GLU_145 | OE1    | 3.143        |
| 4WEU   | A_LYS_49  | NZ     | A_GLU_240 | OE2    | 2.906        |
| 4WEU   | A_ARG_64  | NH1    | A_GLU_26  | OE2    | 3.571        |
| 4WEU   | A_LYS_66  | NZ     | A_GLU_26  | OE1    | 3.929        |
| 4WEU   | A_ARG_96  | NH1    | A_GLU_94  | OE2    | 3.701        |
| 4WEU   | A_ARG_96  | NH1    | B_GLU_94  | OE1    | 3.636        |
| 4WEU   | A_ARG_96  | NH1    | B_GLU_94  | OE2    | 3.058        |
| 4WEU   | A_ARG_96  | NH2    | B_GLU_94  | OE1    | 2.949        |
| 4WEU   | A_ARG_96  | NH2    | B_GLU_94  | OE2    | 3.852        |
| 4WEU   | A_LYS_104 | NZ     | A_GLU_101 | OE1    | 3.418        |
| 4WEU   | A_LYS_120 | NZ     | A_GLU_89  | OE1    | 2.914        |
| 4WEU   | A_ARG_136 | NH1    | D_GLU_889 | OE1    | 2.898        |
| 4WEU   | A_ARG_136 | NH2    | A_GLU_145 | OE1    | 3.553        |
| 4WEU   | A_HIS_155 | NE2    | A_GLU_152 | OE2    | 2.869        |
| 4WEU   | A_LYS_172 | NZ     | A_GLU_170 | OE2    | 3.445        |
| 4WEU   | B_LYS_49  | NZ     | B_GLU_240 | OE1    | 3.611        |
| 4WEU   | B_LYS_49  | NZ     | B_GLU_240 | OE2    | 3.160        |
| 4WEU   | B_ARG_64  | NH1    | B_GLU_26  | OE2    | 3.559        |
| 4WEU   | B_LYS_66  | NZ     | B_GLU_26  | OE1    | 3.923        |
| 4WEU   | B_ARG_96  | NH1    | A_GLU_94  | OE1    | 3.754        |
| 4WEU   | B_ARG_96  | NH1    | A_GLU_94  | OE2    | 2.795        |
| 4WEU   | B_ARG_96  | NH1    | B_GLU_94  | OE2    | 3.704        |
| 4WEU   | B_ARG_96  | NH2    | A_GLU_94  | OE1    | 2.707        |
| 4WEU   | B_ARG_96  | NH2    | A_GLU_94  | OE2    | 3.344        |
| 4WEU   | B_LYS_120 | NZ     | B_GLU_89  | OE1    | 2.742        |
| 4WEU   | B_ARG_136 | NH2    | B_GLU_145 | OE1    | 3.533        |
| 4WEU   | B_HIS_155 | NE2    | B_GLU_152 | OE1    | 3.472        |
| 4WEU   | B_HIS_155 | NE2    | B_GLU_152 | OE2    | 2.880        |
| 4WEU   | B_LYS_172 | NZ     | B_GLU_170 | OE2    | 3.468        |
| 4WEU   | B_ARG_198 | NH1    | B_GLU_67  | OE2    | 2.375        |
| 4WEU   | B_ARG_198 | NH2    | B_GLU_67  | OE2    | 3.911        |
| 4WEU   | E_ARG_838 | NH1    | E_ASP_890 | OD1    | 3.012        |
| 4WEU   | E_ARG_838 | NH2    | E_GLU_846 | OE1    | 2.950        |
| 4WEU   | E_ARG_838 | NH2    | E_GLU_846 | OE2    | 3.817        |
| 4WEU   | E_ARG_867 | NH1    | E_ASP_890 | OD1    | 3.574        |
| 4WEU   | E_ARG_867 | NH1    | E_ASP_890 | OD2    | 2.661        |
| 4WEU   | E_ARG_867 | NH2    | E_ASP_890 | OD1    | 2.927        |
| 4WEU   | E_ARG_867 | NH2    | E_ASP_890 | OD2    | 3.566        |

Table 631: 4WEU-specific salt bridging networks analysis. In this table, a PDB file is specified with a four-letter PDB ID, except that the names of the PDB files corresponding to the single NMR structural model split from the NMR ensemble is specified with a four-letter PDB ID in addition to a hyphen followed by the single NMR structural model numeric ID, the residue naming scheme is **Chain ID\_residue name\_residue number**,  $\angle ADH$  represents the angle formed by acceptor (A), donor (D) and hydrogen (H) ( $\angle ADH$ ).



| PDB ID | Residue A | Atom A | Residue B | Atom B | Distance (Å) |
|--------|-----------|--------|-----------|--------|--------------|
| 4WHT   | A_ARG_38  | NH1    | A_ASP_90  | OD1    | 2.990        |
| 4WHT   | A_ARG_38  | NH2    | A_GLU_46  | OE1    | 2.993        |
| 4WHT   | A_ARG_38  | NH2    | A_GLU_89  | OE1    | 3.403        |
| 4WHT   | A_ARG_61  | NH2    | A_GLU_46  | OE2    | 3.778        |
| 4WHT   | A_LYS_65  | NZ     | A_ASP_62  | OD1    | 3.169        |
| 4WHT   | A_ARG_67  | NH1    | A_ASP_90  | OD1    | 3.859        |
| 4WHT   | A_ARG_67  | NH1    | A_ASP_90  | OD2    | 2.717        |
| 4WHT   | A_ARG_67  | NH2    | A_GLU_89  | OE1    | 3.463        |
| 4WHT   | A_ARG_67  | NH2    | A_ASP_90  | OD1    | 3.102        |
| 4WHT   | A_ARG_67  | NH2    | A_ASP_90  | OD2    | 3.428        |
| 4WHT   | A_ARG_98  | NH1    | A_ASP_100 | OD1    | 3.573        |
| 4WHT   | A_ARG_98  | NH1    | A_ASP_100 | OD2    | 2.704        |
| 4WHT   | A_LYS_207 | NZ     | B_GLU_127 | OE1    | 2.607        |
| 4WHT   | A_LYS_207 | NZ     | B_GLU_127 | OE2    | 3.670        |
| 4WHT   | C_ARG_38  | NH1    | C_ASP_90  | OD1    | 2.946        |
| 4WHT   | C_ARG_38  | NH2    | C_GLU_46  | OE1    | 2.996        |
| 4WHT   | C_ARG_38  | NH2    | C_GLU_89  | OE1    | 3.393        |
| 4WHT   | C_ARG_61  | NH2    | C_GLU_46  | OE2    | 3.777        |
| 4WHT   | C_LYS_65  | NZ     | C_ASP_62  | OD1    | 3.197        |
| 4WHT   | C_ARG_67  | NH1    | C_ASP_90  | OD1    | 3.881        |
| 4WHT   | C_ARG_67  | NH1    | C_ASP_90  | OD2    | 2.676        |
| 4WHT   | C_ARG_67  | NH2    | C_GLU_89  | OE1    | 3.528        |
| 4WHT   | C_ARG_67  | NH2    | C_ASP_90  | OD1    | 3.088        |
| 4WHT   | C_ARG_67  | NH2    | C_ASP_90  | OD2    | 3.360        |
| 4WHT   | C_ARG_98  | NH2    | C_ASP_100 | OD1    | 3.559        |
| 4WHT   | C_ARG_98  | NH2    | C_ASP_100 | OD2    | 2.716        |
| 4WHT   | C_LYS_204 | NZ     | C_ASP_206 | OD1    | 2.994        |
| 4WHT   | C_LYS_204 | NZ     | C_ASP_206 | OD2    | 3.710        |
| 4WHT   | C_LYS_207 | NZ     | D_GLU_127 | OE1    | 3.293        |
| 4WHT   | E_ARG_38  | NH1    | E_ASP_90  | OD1    | 2.955        |
| 4WHT   | E_ARG_38  | NH2    | E_GLU_46  | OE1    | 2.986        |
| 4WHT   | E_ARG_38  | NH2    | E_GLU_89  | OE1    | 3.434        |
| 4WHT   | E_ARG_61  | NH2    | E_GLU_46  | OE2    | 3.795        |
| 4WHT   | E_LYS_65  | NZ     | E_ASP_62  | OD1    | 3.160        |
| 4WHT   | E_ARG_67  | NH1    | E_ASP_90  | OD1    | 3.902        |
| 4WHT   | E_ARG_67  | NH1    | E_ASP_90  | OD2    | 2.757        |
| 4WHT   | E_ARG_67  | NH2    | E_GLU_89  | OE1    | 3.512        |
| 4WHT   | E_ARG_67  | NH2    | E_ASP_90  | OD1    | 3.132        |
| 4WHT   | E_ARG_67  | NH2    | E_ASP_90  | OD2    | 3.444        |
| 4WHT   | E_ARG_98  | NH2    | E_ASP_100 | OD1    | 3.535        |
| 4WHT   | E_ARG_98  | NH2    | E_ASP_100 | OD2    | 2.656        |
| 4WHT   | E_LYS_204 | NZ     | E_ASP_206 | OD1    | 2.987        |
| 4WHT   | E_LYS_204 | NZ     | E_ASP_206 | OD2    | 3.777        |
| 4WHT   | E_LYS_207 | NZ     | F_GLU_127 | OE1    | 3.118        |
| 4WHT   | G_ARG_38  | NH1    | G_ASP_90  | OD1    | 2.947        |
| 4WHT   | G_ARG_38  | NH2    | G_GLU_46  | OE1    | 2.995        |
| 4WHT   | G_ARG_61  | NH2    | G_GLU_46  | OE2    | 3.807        |
| 4WHT   | G_LYS_65  | NZ     | G_ASP_62  | OD1    | 3.270        |
| 4WHT   | G_ARG_67  | NH1    | G_ASP_90  | OD1    | 3.770        |
| 4WHT   | G_ARG_67  | NH1    | G_ASP_90  | OD2    | 2.706        |
| 4WHT   | G_ARG_67  | NH2    | G_ASP_90  | OD1    | 3.124        |
| 4WHT   | G_ARG_67  | NH2    | G_ASP_90  | OD2    | 3.413        |
| 4WHT   | G_ARG_98  | NH2    | G_ASP_100 | OD1    | 3.568        |
| 4WHT   | G_ARG_98  | NH2    | G_ASP_100 | OD2    | 2.686        |
| 4WHT   | G_LYS_204 | NZ     | G_ASP_206 | OD1    | 2.980        |
| 4WHT   | G_LYS_204 | NZ     | G_ASP_206 | OD2    | 3.681        |
| 4WHT   | G_LYS_204 | NZ     | U_ASP_206 | OD2    | 3.854        |

|      |           |     |           |     |       |
|------|-----------|-----|-----------|-----|-------|
| 4WHT | I_ARG_38  | NH1 | I_ASP_90  | OD1 | 2.871 |
| 4WHT | I_ARG_38  | NH2 | I_GLU_46  | OE1 | 3.011 |
| 4WHT | I_ARG_38  | NH2 | I_ASP_90  | OD1 | 3.937 |
| 4WHT | I_ARG_61  | NH2 | I_GLU_46  | OE2 | 3.804 |
| 4WHT | I_LYS_65  | NZ  | I_ASP_62  | OD1 | 3.703 |
| 4WHT | I_LYS_65  | NZ  | R_GLU_84  | OE2 | 3.044 |
| 4WHT | I_ARG_67  | NH1 | I_ASP_90  | OD1 | 3.990 |
| 4WHT | I_ARG_67  | NH1 | I_ASP_90  | OD2 | 2.725 |
| 4WHT | I_ARG_67  | NH2 | I_ASP_90  | OD1 | 3.173 |
| 4WHT | I_ARG_67  | NH2 | I_ASP_90  | OD2 | 3.289 |
| 4WHT | I_ARG_98  | NH2 | I_ASP_100 | OD1 | 3.524 |
| 4WHT | I_ARG_98  | NH2 | I_ASP_100 | OD2 | 2.670 |
| 4WHT | I_LYS_207 | NZ  | J_GLU_127 | OE1 | 2.774 |
| 4WHT | I_LYS_207 | NZ  | J_GLU_127 | OE2 | 3.846 |
| 4WHT | J_ARG_24  | NH1 | J_ASP_75  | OD1 | 2.778 |
| 4WHT | J_ARG_24  | NH1 | J_ASP_75  | OD2 | 3.695 |
| 4WHT | J_ARG_66  | NH2 | J_ASP_87  | OD1 | 2.769 |
| 4WHT | J_ARG_66  | NH2 | J_ASP_87  | OD2 | 3.342 |
| 4WHT | J_LYS_153 | NZ  | J_GLU_199 | OE1 | 3.137 |
| 4WHT | J_LYS_153 | NZ  | J_GLU_199 | OE2 | 3.249 |
| 4WHT | J_ARG_159 | NH1 | J_ASP_189 | OD1 | 3.763 |
| 4WHT | J_ARG_159 | NH1 | J_ASP_189 | OD2 | 2.878 |
| 4WHT | J_ARG_159 | NH2 | J_ASP_189 | OD1 | 2.936 |
| 4WHT | J_ARG_159 | NH2 | J_ASP_189 | OD2 | 3.572 |
| 4WHT | J_LYS_187 | NZ  | J_GLU_191 | OE1 | 2.768 |
| 4WHT | J_HIS_193 | ND1 | J_ASP_189 | OD1 | 3.761 |
| 4WHT | J_LYS_203 | NZ  | J_ASP_114 | OD2 | 2.967 |
| 4WHT | K_ARG_38  | NH1 | K_GLU_89  | OE1 | 3.948 |
| 4WHT | K_ARG_38  | NH1 | K_ASP_90  | OD1 | 2.761 |
| 4WHT | K_ARG_38  | NH2 | K_GLU_46  | OE1 | 2.930 |
| 4WHT | K_ARG_38  | NH2 | K_GLU_89  | OE1 | 3.349 |
| 4WHT | K_LYS_65  | NZ  | K_ASP_62  | OD1 | 3.187 |
| 4WHT | K_ARG_67  | NH1 | K_ASP_90  | OD1 | 3.739 |
| 4WHT | K_ARG_67  | NH1 | K_ASP_90  | OD2 | 2.796 |
| 4WHT | K_ARG_67  | NH2 | K_GLU_89  | OE1 | 3.552 |
| 4WHT | K_ARG_67  | NH2 | K_ASP_90  | OD1 | 3.403 |
| 4WHT | K_ARG_67  | NH2 | K_ASP_90  | OD2 | 3.608 |
| 4WHT | K_ARG_98  | NH2 | K_ASP_100 | OD1 | 3.517 |
| 4WHT | K_ARG_98  | NH2 | K_ASP_100 | OD2 | 2.664 |
| 4WHT | K_LYS_204 | NZ  | K_ASP_206 | OD1 | 2.984 |
| 4WHT | K_LYS_204 | NZ  | K_ASP_206 | OD2 | 3.680 |
| 4WHT | K_LYS_207 | NZ  | L_GLU_127 | OE1 | 2.813 |
| 4WHT | M_ARG_38  | NH1 | M_ASP_90  | OD1 | 2.959 |
| 4WHT | M_ARG_38  | NH2 | M_GLU_46  | OE1 | 2.979 |
| 4WHT | M_ARG_38  | NH2 | M_GLU_89  | OE1 | 3.377 |
| 4WHT | M_ARG_61  | NH2 | M_GLU_46  | OE2 | 3.777 |
| 4WHT | M_LYS_65  | NZ  | M_ASP_62  | OD1 | 3.185 |
| 4WHT | M_ARG_67  | NH1 | M_ASP_90  | OD1 | 3.861 |
| 4WHT | M_ARG_67  | NH1 | M_ASP_90  | OD2 | 2.742 |
| 4WHT | M_ARG_67  | NH2 | M_GLU_89  | OE1 | 3.527 |
| 4WHT | M_ARG_67  | NH2 | M_ASP_90  | OD1 | 3.102 |
| 4WHT | M_ARG_67  | NH2 | M_ASP_90  | OD2 | 3.458 |
| 4WHT | M_ARG_98  | NH2 | M_ASP_100 | OD1 | 3.946 |
| 4WHT | M_ARG_98  | NH2 | M_ASP_100 | OD2 | 3.534 |
| 4WHT | M_LYS_204 | NZ  | K_ASP_206 | OD2 | 2.701 |
| 4WHT | M_LYS_207 | NZ  | N_GLU_127 | OE1 | 3.186 |
| 4WHT | O_ARG_38  | NH1 | O_ASP_90  | OD1 | 2.964 |
| 4WHT | O_ARG_38  | NH2 | O_GLU_46  | OE1 | 3.022 |

|      |           |     |           |     |       |
|------|-----------|-----|-----------|-----|-------|
| 4WHT | O_ARG_38  | NH2 | O_GLU_89  | OE1 | 3.336 |
| 4WHT | O_ARG_61  | NH2 | O_GLU_46  | OE2 | 3.788 |
| 4WHT | O_LYS_65  | NZ  | O_ASP_62  | OD1 | 3.252 |
| 4WHT | O_ARG_67  | NH1 | O_ASP_90  | OD1 | 3.841 |
| 4WHT | O_ARG_67  | NH1 | O_ASP_90  | OD2 | 2.724 |
| 4WHT | O_ARG_67  | NH2 | O_GLU_89  | OE1 | 3.541 |
| 4WHT | O_ARG_67  | NH2 | O_ASP_90  | OD1 | 3.068 |
| 4WHT | O_ARG_67  | NH2 | O_ASP_90  | OD2 | 3.434 |
| 4WHT | O_ARG_98  | NH2 | O_ASP_100 | OD1 | 3.531 |
| 4WHT | O_ARG_98  | NH2 | O_ASP_100 | OD2 | 2.711 |
| 4WHT | O_LYS_204 | NZ  | O_ASP_206 | OD1 | 2.964 |
| 4WHT | O_LYS_204 | NZ  | O_ASP_206 | OD2 | 3.737 |
| 4WHT | O_LYS_207 | NZ  | P_GLU_127 | OE1 | 3.812 |
| 4WHT | O_LYS_207 | NZ  | P_GLU_127 | OE2 | 2.822 |
| 4WHT | Q_ARG_38  | NH1 | Q_ASP_90  | OD1 | 2.935 |
| 4WHT | Q_ARG_38  | NH2 | Q_GLU_46  | OE1 | 3.059 |
| 4WHT | Q_ARG_38  | NH2 | Q_ASP_90  | OD1 | 3.866 |
| 4WHT | Q_ARG_61  | NH2 | Q_GLU_46  | OE2 | 3.813 |
| 4WHT | Q_LYS_65  | NZ  | Q_ASP_62  | OD1 | 3.159 |
| 4WHT | Q_ARG_67  | NH1 | Q_ASP_90  | OD1 | 3.892 |
| 4WHT | Q_ARG_67  | NH1 | Q_ASP_90  | OD2 | 2.790 |
| 4WHT | Q_ARG_67  | NH2 | Q_ASP_90  | OD1 | 3.108 |
| 4WHT | Q_ARG_67  | NH2 | Q_ASP_90  | OD2 | 3.473 |
| 4WHT | Q_ARG_98  | NH2 | Q_ASP_100 | OD1 | 3.545 |
| 4WHT | Q_ARG_98  | NH2 | Q_ASP_100 | OD2 | 2.754 |
| 4WHT | Q_LYS_207 | NZ  | R_GLU_127 | OE1 | 2.572 |
| 4WHT | Q_LYS_207 | NZ  | R_GLU_127 | OE2 | 3.627 |
| 4WHT | S_ARG_38  | NH1 | S_ASP_90  | OD1 | 2.866 |
| 4WHT | S_ARG_38  | NH2 | S_GLU_46  | OE1 | 2.984 |
| 4WHT | S_ARG_38  | NH2 | S_GLU_89  | OE1 | 3.382 |
| 4WHT | S_ARG_38  | NH2 | S_ASP_90  | OD1 | 3.993 |
| 4WHT | S_ARG_61  | NH2 | S_GLU_46  | OE1 | 3.723 |
| 4WHT | S_ARG_61  | NH2 | S_GLU_46  | OE2 | 3.200 |
| 4WHT | S_ARG_67  | NH1 | S_ASP_90  | OD2 | 2.809 |
| 4WHT | S_ARG_67  | NH2 | S_GLU_89  | OE1 | 3.479 |
| 4WHT | S_ARG_67  | NH2 | S_ASP_90  | OD1 | 3.317 |
| 4WHT | S_ARG_67  | NH2 | S_ASP_90  | OD2 | 3.452 |
| 4WHT | S_LYS_76  | NZ  | S_ASP_73  | OD2 | 2.618 |
| 4WHT | S_ARG_98  | NH2 | S_ASP_100 | OD1 | 3.534 |
| 4WHT | S_ARG_98  | NH2 | S_ASP_100 | OD2 | 2.742 |
| 4WHT | S_LYS_204 | NZ  | S_ASP_206 | OD1 | 3.164 |
| 4WHT | S_LYS_207 | NZ  | T_GLU_127 | OE1 | 3.197 |
| 4WHT | U_ARG_38  | NH1 | U_ASP_90  | OD1 | 2.992 |
| 4WHT | U_ARG_38  | NH2 | U_GLU_46  | OE1 | 3.032 |
| 4WHT | U_ARG_38  | NH2 | U_GLU_89  | OE1 | 3.377 |
| 4WHT | U_ARG_61  | NH2 | U_GLU_46  | OE2 | 3.808 |
| 4WHT | U_LYS_65  | NZ  | U_ASP_62  | OD1 | 3.172 |
| 4WHT | U_ARG_67  | NH1 | U_ASP_90  | OD1 | 3.855 |
| 4WHT | U_ARG_67  | NH1 | U_ASP_90  | OD2 | 2.721 |
| 4WHT | U_ARG_67  | NH2 | U_GLU_89  | OE1 | 3.526 |
| 4WHT | U_ARG_67  | NH2 | U_ASP_90  | OD1 | 3.080 |
| 4WHT | U_ARG_67  | NH2 | U_ASP_90  | OD2 | 3.418 |
| 4WHT | U_ARG_98  | NH2 | U_ASP_100 | OD1 | 3.455 |
| 4WHT | U_ARG_98  | NH2 | U_ASP_100 | OD2 | 2.628 |
| 4WHT | U_LYS_204 | NZ  | G_ASP_206 | OD2 | 3.954 |
| 4WHT | U_LYS_204 | NZ  | U_ASP_206 | OD1 | 2.956 |
| 4WHT | U_LYS_204 | NZ  | U_ASP_206 | OD2 | 3.682 |
| 4WHT | U_LYS_207 | NZ  | V_GLU_127 | OE1 | 3.622 |

|      |           |     |           |     |       |
|------|-----------|-----|-----------|-----|-------|
| 4WHT | X_ARG_38  | NH1 | X_ASP_90  | OD1 | 2.631 |
| 4WHT | X_ARG_38  | NH2 | X_GLU_46  | OE1 | 3.058 |
| 4WHT | X_ARG_38  | NH2 | X_GLU_46  | OE2 | 3.652 |
| 4WHT | X_ARG_38  | NH2 | X_ASP_90  | OD1 | 3.918 |
| 4WHT | X_ARG_61  | NH2 | X_GLU_46  | OE2 | 3.153 |
| 4WHT | X_LYS_65  | NZ  | X_ASP_62  | OD1 | 3.157 |
| 4WHT | X_ARG_67  | NH1 | X_ASP_90  | OD1 | 3.978 |
| 4WHT | X_ARG_67  | NH1 | X_ASP_90  | OD2 | 2.777 |
| 4WHT | X_ARG_67  | NH2 | X_ASP_90  | OD1 | 3.272 |
| 4WHT | X_ARG_67  | NH2 | X_ASP_90  | OD2 | 3.480 |
| 4WHT | X_ARG_98  | NH2 | X_ASP_100 | OD1 | 3.516 |
| 4WHT | X_ARG_98  | NH2 | X_ASP_100 | OD2 | 2.709 |
| 4WHT | X_LYS_207 | NZ  | Y_GLU_127 | OE2 | 2.718 |
| 4WHT | B_ARG_24  | NH1 | B_ASP_75  | OD1 | 2.804 |
| 4WHT | B_ARG_24  | NH1 | B_ASP_75  | OD2 | 3.712 |
| 4WHT | B_ARG_66  | NH2 | B_ASP_87  | OD1 | 2.784 |
| 4WHT | B_ARG_66  | NH2 | B_ASP_87  | OD2 | 3.450 |
| 4WHT | B_LYS_111 | NZ  | J_GLU_73  | OE2 | 3.842 |
| 4WHT | B_LYS_153 | NZ  | B_GLU_199 | OE1 | 3.076 |
| 4WHT | B_LYS_153 | NZ  | B_GLU_199 | OE2 | 3.271 |
| 4WHT | B_ARG_159 | NH1 | B_ASP_189 | OD1 | 3.800 |
| 4WHT | B_ARG_159 | NH1 | B_ASP_189 | OD2 | 2.909 |
| 4WHT | B_ARG_159 | NH2 | B_ASP_189 | OD1 | 2.972 |
| 4WHT | B_ARG_159 | NH2 | B_ASP_189 | OD2 | 3.584 |
| 4WHT | B_LYS_    | NZ  | B_GLU_    | OE1 | 2.805 |
| 4WHT | B_HIS_193 | ND1 | B_ASP_155 | OD2 | 3.362 |
| 4WHT | B_HIS_193 | NE2 | B_ASP_189 | OD1 | 3.524 |
| 4WHT | B_LYS_203 | NZ  | B_ASP_114 | OD2 | 2.836 |
| 4WHT | D_ARG_24  | NH1 | D_ASP_75  | OD1 | 2.773 |
| 4WHT | D_ARG_24  | NH1 | D_ASP_75  | OD2 | 3.816 |
| 4WHT | D_ARG_44  | NH1 | D_GLU_86  | OE2 | 3.678 |
| 4WHT | D_ARG_44  | NH2 | D_GLU_86  | OE2 | 2.752 |
| 4WHT | D_ARG_66  | NH2 | D_ASP_87  | OD1 | 2.868 |
| 4WHT | D_ARG_66  | NH2 | D_ASP_87  | OD2 | 3.621 |
| 4WHT | D_LYS_151 | NZ  | D_GLU_199 | OE2 | 3.961 |
| 4WHT | D_LYS_151 | NZ  | L_GLU_191 | OE2 | 3.259 |
| 4WHT | D_LYS_153 | NZ  | D_GLU_199 | OE1 | 3.094 |
| 4WHT | D_LYS_153 | NZ  | D_GLU_199 | OE2 | 3.252 |
| 4WHT | D_ARG_159 | NH1 | D_ASP_189 | OD1 | 3.780 |
| 4WHT | D_ARG_159 | NH1 | D_ASP_189 | OD2 | 2.927 |
| 4WHT | D_ARG_159 | NH2 | D_ASP_189 | OD1 | 2.960 |
| 4WHT | D_ARG_159 | NH2 | D_ASP_189 | OD2 | 3.602 |
| 4WHT | D_LYS_187 | NZ  | I_GLU_114 | OE1 | 3.576 |
| 4WHT | D_LYS_187 | NZ  | I_GLU_114 | OE2 | 3.498 |
| 4WHT | D_LYS_187 | NZ  | D_GLU_191 | OE1 | 2.796 |
| 4WHT | D_HIS_193 | ND1 | D_ASP_189 | OD1 | 3.687 |
| 4WHT | D_LYS_203 | NZ  | D_ASP_114 | OD2 | 2.798 |
| 4WHT | F_ARG_24  | NH1 | F_ASP_75  | OD1 | 2.809 |
| 4WHT | F_ARG_24  | NH1 | F_ASP_75  | OD2 | 3.755 |
| 4WHT | F_ARG_66  | NH2 | F_GLU_86  | OE1 | 3.638 |
| 4WHT | F_ARG_66  | NH2 | F_GLU_86  | OE2 | 3.286 |
| 4WHT | F_ARG_66  | NH2 | F_ASP_87  | OD1 | 2.757 |
| 4WHT | F_ARG_66  | NH2 | F_ASP_87  | OD2 | 3.450 |
| 4WHT | F_LYS_151 | NZ  | F_GLU_199 | OE2 | 3.084 |
| 4WHT | F_LYS_153 | NZ  | F_GLU_199 | OE1 | 3.224 |
| 4WHT | F_LYS_153 | NZ  | F_GLU_199 | OE2 | 3.396 |
| 4WHT | F_ARG_159 | NH1 | F_ASP_189 | OD1 | 3.759 |
| 4WHT | F_ARG_159 | NH1 | F_ASP_189 | OD2 | 2.800 |

|      |           |     |           |     |       |
|------|-----------|-----|-----------|-----|-------|
| 4WHT | F_ARG_159 | NH2 | F_ASP_189 | OD1 | 2.952 |
| 4WHT | F_ARG_159 | NH2 | F_ASP_189 | OD2 | 3.529 |
| 4WHT | F_ARG_160 | NH2 | F_GLU_158 | OE2 | 3.114 |
| 4WHT | F_LYS_187 | NZ  | F_GLU_191 | OE1 | 2.776 |
| 4WHT | F_HIS_193 | ND1 | F_ASP_155 | OD2 | 3.338 |
| 4WHT | F_HIS_193 | NE2 | F_ASP_189 | OD1 | 3.541 |
| 4WHT | H_ARG_24  | NH1 | H_ASP_75  | OD1 | 2.789 |
| 4WHT | H_ARG_24  | NH1 | H_ASP_75  | OD2 | 3.775 |
| 4WHT | H_ARG_66  | NH1 | Q_ASP_62  | OD2 | 3.949 |
| 4WHT | H_ARG_66  | NH2 | H_ASP_87  | OD1 | 2.787 |
| 4WHT | H_ARG_66  | NH2 | H_ASP_87  | OD2 | 3.453 |
| 4WHT | H_LYS_151 | NZ  | H_GLU_199 | OE2 | 3.589 |
| 4WHT | H_LYS_153 | NZ  | H_GLU_199 | OE1 | 3.108 |
| 4WHT | H_LYS_153 | NZ  | H_GLU_199 | OE2 | 3.315 |
| 4WHT | H_ARG_159 | NH1 | H_ASP_189 | OD1 | 3.818 |
| 4WHT | H_ARG_159 | NH1 | H_ASP_189 | OD2 | 2.990 |
| 4WHT | H_ARG_159 | NH2 | H_ASP_189 | OD1 | 2.984 |
| 4WHT | H_ARG_159 | NH2 | H_ASP_189 | OD2 | 3.636 |
| 4WHT | H_LYS_187 | NZ  | H_GLU_191 | OE1 | 2.806 |
| 4WHT | H_HIS_193 | ND1 | H_ASP_155 | OD2 | 3.385 |
| 4WHT | H_HIS_193 | NE2 | H_ASP_189 | OD1 | 3.584 |
| 4WHT | H_LYS_203 | NZ  | H_ASP_114 | OD2 | 2.843 |
| 4WHT | L_ARG_24  | NH1 | L_ASP_75  | OD1 | 2.813 |
| 4WHT | L_ARG_24  | NH1 | L_ASP_75  | OD2 | 3.652 |
| 4WHT | L_ARG_66  | NH2 | L_ASP_87  | OD1 | 2.659 |
| 4WHT | L_ARG_66  | NH2 | L_ASP_87  | OD2 | 3.387 |
| 4WHT | L_LYS_151 | NZ  | L_GLU_158 | OE1 | 3.149 |
| 4WHT | L_LYS_151 | NZ  | L_GLU_158 | OE2 | 3.351 |
| 4WHT | L_LYS_153 | NZ  | L_GLU_199 | OE1 | 3.106 |
| 4WHT | L_LYS_153 | NZ  | L_GLU_199 | OE2 | 3.200 |
| 4WHT | L_ARG_159 | NH1 | L_ASP_189 | OD1 | 3.780 |
| 4WHT | L_ARG_159 | NH1 | L_ASP_189 | OD2 | 2.946 |
| 4WHT | L_ARG_159 | NH2 | L_ASP_189 | OD1 | 2.925 |
| 4WHT | L_ARG_159 | NH2 | L_ASP_189 | OD2 | 3.602 |
| 4WHT | L_LYS_187 | NZ  | L_GLU_191 | OE1 | 2.795 |
| 4WHT | L_HIS_193 | ND1 | L_ASP_155 | OD2 | 3.400 |
| 4WHT | L_HIS_193 | NE2 | L_ASP_189 | OD1 | 3.590 |
| 4WHT | L_LYS_203 | NZ  | L_ASP_114 | OD2 | 2.774 |
| 4WHT | N_ARG_24  | NH1 | N_ASP_75  | OD1 | 3.802 |
| 4WHT | N_ARG_24  | NH1 | N_ASP_75  | OD2 | 3.728 |
| 4WHT | N_ARG_66  | NH2 | N_ASP_87  | OD1 | 2.772 |
| 4WHT | N_ARG_66  | NH2 | N_ASP_87  | OD2 | 3.477 |
| 4WHT | N_LYS_151 | NZ  | N_GLU_199 | OE2 | 3.991 |
| 4WHT | N_LYS_153 | NZ  | N_GLU_199 | OE1 | 3.073 |
| 4WHT | N_LYS_153 | NZ  | N_GLU_199 | OE2 | 3.236 |
| 4WHT | N_ARG_159 | NH1 | N_ASP_189 | OD2 | 3.146 |
| 4WHT | N_ARG_159 | NH2 | N_ASP_189 | OD1 | 2.954 |
| 4WHT | N_ARG_159 | NH2 | N_ASP_189 | OD2 | 3.533 |
| 4WHT | N_ARG_160 | NH2 | N_GLU_158 | OE1 | 2.762 |
| 4WHT | N_LYS_187 | NZ  | K_GLU_114 | OE1 | 3.270 |
| 4WHT | N_LYS_187 | NZ  | K_GLU_114 | OE2 | 3.221 |
| 4WHT | N_LYS_187 | NZ  | N_GLU_191 | OE1 | 2.851 |
| 4WHT | N_HIS_193 | ND1 | N_ASP_189 | OD1 | 3.702 |
| 4WHT | N_LYS_203 | NZ  | N_ASP_147 | OD2 | 3.088 |
| 4WHT | P_ARG_24  | NH1 | P_ASP_75  | OD1 | 2.762 |
| 4WHT | P_ARG_24  | NH1 | P_ASP_75  | OD2 | 3.651 |
| 4WHT | P_ARG_66  | NH2 | P_ASP_87  | OD1 | 2.759 |
| 4WHT | P_ARG_66  | NH2 | P_ASP_87  | OD2 | 3.423 |

|      |           |     |           |     |       |
|------|-----------|-----|-----------|-----|-------|
| 4WHT | P_LYS_151 | NZ  | P_GLU_199 | OE1 | 3.866 |
| 4WHT | P_LYS_153 | NZ  | P_GLU_199 | OE1 | 3.110 |
| 4WHT | P_LYS_153 | NZ  | P_GLU_199 | OE2 | 3.243 |
| 4WHT | P_ARG_159 | NH1 | P_ASP_189 | OD1 | 3.789 |
| 4WHT | P_ARG_159 | NH1 | P_ASP_189 | OD2 | 2.890 |
| 4WHT | P_ARG_159 | NH2 | P_ASP_189 | OD1 | 2.989 |
| 4WHT | P_ARG_159 | NH2 | P_ASP_189 | OD2 | 3.601 |
| 4WHT | P_LYS_187 | NZ  | P_GLU_191 | OE1 | 2.785 |
| 4WHT | P_HIS_193 | ND1 | P_ASP_155 | OD2 | 3.395 |
| 4WHT | P_HIS_193 | NE2 | P_ASP_189 | OD1 | 3.524 |
| 4WHT | R_ARG_24  | NH1 | R_ASP_75  | OD1 | 2.839 |
| 4WHT | R_ARG_24  | NH1 | R_ASP_75  | OD2 | 3.562 |
| 4WHT | R_ARG_66  | NH2 | R_ASP_87  | OD1 | 2.765 |
| 4WHT | R_ARG_66  | NH2 | R_ASP_87  | OD2 | 3.213 |
| 4WHT | R_LYS_153 | NZ  | R_GLU_199 | OE1 | 3.156 |
| 4WHT | R_LYS_153 | NZ  | R_GLU_199 | OE2 | 3.439 |
| 4WHT | R_ARG_159 | NH1 | R_ASP_189 | OD1 | 3.788 |
| 4WHT | R_ARG_159 | NH1 | R_ASP_189 | OD2 | 2.882 |
| 4WHT | R_ARG_159 | NH2 | R_ASP_189 | OD1 | 2.978 |
| 4WHT | R_ARG_159 | NH2 | R_ASP_189 | OD2 | 3.578 |
| 4WHT | R_LYS_187 | NZ  | R_GLU_191 | OE1 | 2.817 |
| 4WHT | R_HIS_193 | ND1 | R_ASP_189 | OD1 | 3.674 |
| 4WHT | R_LYS_203 | NZ  | R_ASP_114 | OD2 | 2.819 |
| 4WHT | T_ARG_24  | NH1 | T_ASP_75  | OD1 | 2.790 |
| 4WHT | T_ARG_24  | NH1 | T_ASP_75  | OD2 | 3.795 |
| 4WHT | T_ARG_66  | NH2 | T_ASP_87  | OD1 | 2.749 |
| 4WHT | T_ARG_66  | NH2 | T_ASP_87  | OD2 | 3.461 |
| 4WHT | T_LYS_153 | NZ  | T_GLU_199 | OE1 | 3.110 |
| 4WHT | T_LYS_153 | NZ  | T_GLU_199 | OE2 | 3.186 |
| 4WHT | T_ARG_159 | NH1 | T_ASP_189 | OD1 | 3.798 |
| 4WHT | T_ARG_159 | NH1 | T_ASP_189 | OD2 | 2.872 |
| 4WHT | T_ARG_159 | NH2 | T_ASP_189 | OD1 | 3.018 |
| 4WHT | T_ARG_159 | NH2 | T_ASP_189 | OD2 | 3.596 |
| 4WHT | T_LYS_187 | NZ  | T_GLU_191 | OE1 | 3.436 |
| 4WHT | T_LYS_187 | NZ  | T_GLU_191 | OE2 | 3.114 |
| 4WHT | T_HIS_193 | ND1 | T_ASP_155 | OD2 | 2.632 |
| 4WHT | T_HIS_193 | NE2 | T_ASP_189 | OD1 | 3.485 |
| 4WHT | T_LYS_203 | NZ  | T_ASP_114 | OD2 | 2.869 |
| 4WHT | V_ARG_66  | NH2 | V_ASP_87  | OD1 | 2.798 |
| 4WHT | V_ARG_66  | NH2 | V_ASP_87  | OD2 | 3.518 |
| 4WHT | V_LYS_151 | NZ  | V_GLU_199 | OE2 | 2.908 |
| 4WHT | V_LYS_153 | NZ  | V_GLU_199 | OE1 | 3.090 |
| 4WHT | V_LYS_153 | NZ  | V_GLU_199 | OE2 | 3.267 |
| 4WHT | V_ARG_159 | NH1 | V_ASP_189 | OD1 | 3.784 |
| 4WHT | V_ARG_159 | NH1 | V_ASP_189 | OD2 | 2.899 |
| 4WHT | V_ARG_159 | NH2 | V_ASP_189 | OD1 | 2.972 |
| 4WHT | V_ARG_159 | NH2 | V_ASP_189 | OD2 | 3.593 |
| 4WHT | V_LYS_187 | NZ  | G_GLU_114 | OE1 | 3.353 |
| 4WHT | V_LYS_187 | NZ  | G_GLU_114 | OE2 | 3.189 |
| 4WHT | V_LYS_187 | NZ  | V_GLU_191 | OE1 | 2.841 |
| 4WHT | V_HIS_193 | NE2 | V_ASP_189 | OD1 | 3.541 |
| 4WHT | Y_ARG_24  | NH1 | Y_ASP_75  | OD1 | 3.206 |
| 4WHT | Y_ARG_24  | NH1 | Y_ASP_75  | OD2 | 2.692 |
| 4WHT | Y_ARG_66  | NH2 | Y_GLU_86  | OE2 | 3.955 |
| 4WHT | Y_ARG_66  | NH2 | Y_ASP_87  | OD1 | 2.832 |
| 4WHT | Y_ARG_66  | NH2 | Y_ASP_87  | OD2 | 3.932 |
| 4WHT | Y_LYS_153 | NZ  | Y_GLU_199 | OE1 | 3.170 |
| 4WHT | Y_LYS_153 | NZ  | Y_GLU_199 | OE2 | 2.813 |

|      |           |     |           |     |       |
|------|-----------|-----|-----------|-----|-------|
| 4WHT | Y_ARG_159 | NH1 | Y_GLU_158 | OE1 | 3.340 |
| 4WHT | Y_ARG_160 | NH1 | Y_ASP_165 | OD2 | 3.538 |
| 4WHT | Y_ARG_160 | NH2 | Y_ASP_165 | OD2 | 3.332 |
| 4WHT | Y_HIS_193 | ND1 | Y_ASP_155 | OD2 | 3.964 |
| 4WHT | Y_LYS_203 | NZ  | Y_ASP_114 | OD2 | 2.871 |

Table 632: 4WHT-specific salt bridging networks analysis. In this table, a PDB file is specified with a four-letter PDB ID, except that the names of the PDB files corresponding to the single NMR structural model split from the NMR ensemble is specified with a four-letter PDB ID in addition to a hyphen followed by the single NMR structural model numeric ID, the residue naming scheme is **Chain ID\_residue name\_residue number**,  $\angle ADH$  represents the angle formed by acceptor (A), donor (D) and hydrogen (H) ( $\angle ADH$ ).

| PDB ID | Residue A | Atom A | Residue B | Atom B | Distance (Å) |
|--------|-----------|--------|-----------|--------|--------------|
| 4WHY   | G_ARG_38  | NH1    | G_ASP_90  | OD1    | 3.796        |
| 4WHY   | G_ARG_38  | NH2    | G_GLU_46  | OE1    | 3.426        |
| 4WHY   | G_ARG_38  | NH2    | G_GLU_89  | OE1    | 3.357        |
| 4WHY   | G_ARG_61  | NH2    | G_GLU_46  | OE2    | 3.723        |
| 4WHY   | G_LYS_65  | NZ     | G_ASP_62  | OD1    | 2.662        |
| 4WHY   | G_ARG_67  | NH1    | G_ASP_90  | OD1    | 3.682        |
| 4WHY   | G_ARG_67  | NH1    | G_ASP_90  | OD2    | 2.803        |
| 4WHY   | G_ARG_67  | NH2    | G_GLU_89  | OE1    | 3.560        |
| 4WHY   | G_ARG_67  | NH2    | G_ASP_90  | OD1    | 3.140        |
| 4WHY   | G_ARG_67  | NH2    | G_ASP_90  | OD2    | 3.738        |
| 4WHY   | G_ARG_98  | NH2    | G_ASP_100 | OD1    | 3.694        |
| 4WHY   | G_ARG_98  | NH2    | G_ASP_100 | OD2    | 2.760        |
| 4WHY   | H_ARG_24  | NH1    | H_ASP_75  | OD1    | 3.176        |
| 4WHY   | H_ARG_24  | NH1    | H_ASP_75  | OD2    | 3.772        |
| 4WHY   | H_ARG_24  | NH2    | H_ASP_75  | OD1    | 3.589        |
| 4WHY   | H_ARG_66  | NH2    | H_GLU_86  | OE2    | 3.670        |
| 4WHY   | H_ARG_66  | NH2    | H_ASP_87  | OD1    | 2.742        |
| 4WHY   | H_ARG_66  | NH2    | H_ASP_87  | OD2    | 3.368        |
| 4WHY   | H_LYS_153 | NZ     | H_GLU_199 | OE1    | 2.781        |
| 4WHY   | H_ARG_159 | NH1    | H_ASP_161 | OD2    | 3.986        |
| 4WHY   | H_ARG_159 | NH2    | H_ASP_189 | OD2    | 3.516        |
| 4WHY   | H_LYS_187 | NZ     | H_GLU_191 | OE1    | 3.190        |
| 4WHY   | H_HIS_193 | NE2    | H_ASP_189 | OD1    | 2.905        |
| 4WHY   | H_LYS_203 | NZ     | H_ASP_114 | OD2    | 2.769        |
| 4WHY   | I_ARG_38  | NH1    | I_ASP_90  | OD1    | 2.978        |
| 4WHY   | I_ARG_38  | NH2    | I_GLU_46  | OE1    | 3.414        |
| 4WHY   | I_ARG_38  | NH2    | I_GLU_89  | OE1    | 3.357        |
| 4WHY   | I_ARG_38  | NH2    | I_ASP_90  | OD1    | 3.749        |
| 4WHY   | I_ARG_61  | NH2    | I_GLU_46  | OE2    | 3.662        |
| 4WHY   | I_LYS_65  | NZ     | I_ASP_62  | OD1    | 2.662        |
| 4WHY   | I_ARG_67  | NH1    | I_ASP_90  | OD1    | 3.785        |
| 4WHY   | I_ARG_67  | NH1    | I_ASP_90  | OD2    | 2.958        |
| 4WHY   | I_ARG_67  | NH2    | I_GLU_89  | OE1    | 3.554        |
| 4WHY   | I_ARG_67  | NH2    | I_ASP_90  | OD1    | 3.099        |
| 4WHY   | I_ARG_67  | NH2    | I_ASP_90  | OD2    | 3.665        |
| 4WHY   | I_ARG_98  | NH2    | I_ASP_100 | OD1    | 3.706        |
| 4WHY   | I_ARG_98  | NH2    | I_ASP_100 | OD2    | 2.729        |
| 4WHY   | I_LYS_204 | NZ     | I_ASP_206 | OD1    | 3.011        |
| 4WHY   | I_LYS_204 | NZ     | I_ASP_206 | OD2    | 3.199        |
| 4WHY   | J_ARG_24  | NH1    | J_ASP_75  | OD1    | 3.069        |
| 4WHY   | J_ARG_24  | NH2    | J_ASP_75  | OD1    | 3.630        |
| 4WHY   | J_ARG_66  | NH1    | J_GLU_84  | OE1    | 3.874        |
| 4WHY   | J_ARG_66  | NH2    | J_GLU_86  | OE2    | 3.624        |
| 4WHY   | J_ARG_66  | NH2    | J_ASP_87  | OD1    | 2.726        |
| 4WHY   | J_ARG_66  | NH2    | J_ASP_87  | OD2    | 3.349        |
| 4WHY   | J_LYS_153 | NZ     | J_GLU_199 | OE1    | 3.490        |
| 4WHY   | J_LYS_153 | NZ     | J_GLU_199 | OE2    | 3.292        |
| 4WHY   | J_ARG_159 | NH1    | J_ASP_189 | OD2    | 3.515        |
| 4WHY   | J_ARG_159 | NH2    | J_ASP_189 | OD1    | 3.310        |
| 4WHY   | J_ARG_159 | NH2    | J_ASP_189 | OD2    | 3.228        |
| 4WHY   | J_LYS_187 | NZ     | J_GLU_191 | OE1    | 3.198        |
| 4WHY   | J_HIS_193 | NE2    | J_ASP_189 | OD1    | 2.893        |
| 4WHY   | J_LYS_203 | NZ     | J_ASP_114 | OD2    | 2.763        |
| 4WHY   | K_ARG_38  | NH1    | K_ASP_90  | OD1    | 2.916        |
| 4WHY   | K_ARG_38  | NH2    | K_GLU_46  | OE1    | 3.411        |
| 4WHY   | K_ARG_38  | NH2    | K_GLU_89  | OE1    | 3.357        |
| 4WHY   | K_ARG_38  | NH2    | K_ASP_90  | OD1    | 3.663        |



|      |           |     |           |     |       |
|------|-----------|-----|-----------|-----|-------|
| 4WHY | K_LYS_43  | NZ  | K_GLU_46  | OE2 | 3.479 |
| 4WHY | K_ARG_61  | NH2 | K_GLU_46  | OE1 | 3.975 |
| 4WHY | K_ARG_61  | NH2 | K_GLU_46  | OE2 | 3.699 |
| 4WHY | K_LYS_65  | NZ  | K_ASP_62  | OD1 | 2.646 |
| 4WHY | K_ARG_67  | NH1 | K_ASP_90  | OD2 | 3.001 |
| 4WHY | K_ARG_67  | NH2 | K_GLU_89  | OE1 | 3.597 |
| 4WHY | K_ARG_67  | NH2 | K_ASP_90  | OD1 | 3.410 |
| 4WHY | K_ARG_67  | NH2 | K_ASP_90  | OD2 | 3.539 |
| 4WHY | K_ARG_98  | NH2 | K_ASP_100 | OD1 | 3.492 |
| 4WHY | K_ARG_98  | NH2 | K_ASP_100 | OD2 | 2.572 |
| 4WHY | K_LYS_204 | NZ  | G_ASP_206 | OD2 | 3.182 |
| 4WHY | K_LYS_204 | NZ  | K_ASP_206 | OD1 | 3.046 |
| 4WHY | K_LYS_204 | NZ  | K_ASP_206 | OD2 | 3.729 |
| 4WHY | K_LYS_207 | NZ  | L_GLU_127 | OE1 | 3.798 |
| 4WHY | L_ARG_66  | NH1 | L_GLU_84  | OE2 | 3.906 |
| 4WHY | L_ARG_66  | NH2 | L_GLU_86  | OE2 | 3.615 |
| 4WHY | L_ARG_66  | NH2 | L_ASP_87  | OD1 | 2.731 |
| 4WHY | L_ARG_66  | NH2 | L_ASP_87  | OD2 | 3.360 |
| 4WHY | L_LYS_153 | NZ  | L_GLU_199 | OE1 | 3.524 |
| 4WHY | L_LYS_153 | NZ  | L_GLU_199 | OE2 | 3.214 |
| 4WHY | L_ARG_159 | NH1 | L_ASP_189 | OD1 | 3.322 |
| 4WHY | L_ARG_159 | NH1 | L_ASP_189 | OD2 | 2.478 |
| 4WHY | L_ARG_159 | NH2 | L_ASP_189 | OD1 | 3.410 |
| 4WHY | L_ARG_159 | NH2 | L_ASP_189 | OD2 | 3.993 |
| 4WHY | L_LYS_187 | NZ  | G_GLU_114 | OE1 | 3.275 |
| 4WHY | L_LYS_187 | NZ  | G_GLU_114 | OE2 | 3.634 |
| 4WHY | L_LYS_187 | NZ  | L_GLU_191 | OE1 | 3.202 |
| 4WHY | L_HIS_193 | NE2 | L_ASP_189 | OD1 | 2.644 |
| 4WHY | M_ARG_38  | NH1 | M_ASP_90  | OD1 | 3.063 |
| 4WHY | M_ARG_38  | NH2 | M_GLU_46  | OE1 | 3.415 |
| 4WHY | M_ARG_38  | NH2 | M_GLU_89  | OE1 | 3.380 |
| 4WHY | M_ARG_61  | NH2 | M_GLU_46  | OE2 | 3.734 |
| 4WHY | M_LYS_65  | NZ  | M_ASP_62  | OD1 | 2.631 |
| 4WHY | M_ARG_67  | NH1 | M_ASP_90  | OD1 | 3.787 |
| 4WHY | M_ARG_67  | NH1 | M_ASP_90  | OD2 | 2.862 |
| 4WHY | M_ARG_67  | NH2 | M_GLU_89  | OE1 | 3.563 |
| 4WHY | M_ARG_67  | NH2 | M_ASP_90  | OD1 | 3.288 |
| 4WHY | M_ARG_67  | NH2 | M_ASP_90  | OD2 | 3.753 |
| 4WHY | M_ARG_87  | NH1 | M_GLU_89  | OE1 | 3.642 |
| 4WHY | M_ARG_87  | NH1 | M_GLU_89  | OE2 | 2.644 |
| 4WHY | M_ARG_98  | NH2 | M_ASP_100 | OD1 | 3.669 |
| 4WHY | M_ARG_98  | NH2 | M_ASP_100 | OD2 | 2.644 |
| 4WHY | M_LYS_207 | NZ  | N_GLU_127 | OE1 | 3.795 |
| 4WHY | N_ARG_24  | NH1 | N_ASP_75  | OD1 | 3.064 |
| 4WHY | N_ARG_24  | NH2 | N_ASP_75  | OD1 | 3.627 |
| 4WHY | N_ARG_66  | NH1 | N_GLU_84  | OE1 | 3.806 |
| 4WHY | N_ARG_66  | NH2 | N_GLU_86  | OE2 | 3.626 |
| 4WHY | N_ARG_66  | NH2 | N_ASP_87  | OD1 | 2.746 |
| 4WHY | N_ARG_66  | NH2 | N_ASP_87  | OD2 | 3.352 |
| 4WHY | N_LYS_153 | NZ  | N_GLU_199 | OE1 | 3.388 |
| 4WHY | N_LYS_153 | NZ  | N_GLU_199 | OE2 | 3.311 |
| 4WHY | N_ARG_159 | NH1 | N_ASP_189 | OD1 | 3.704 |
| 4WHY | N_ARG_159 | NH1 | N_ASP_189 | OD2 | 2.785 |
| 4WHY | N_ARG_159 | NH2 | N_ASP_189 | OD2 | 3.806 |
| 4WHY | N_LYS_187 | NZ  | L_GLU_114 | OE1 | 2.397 |
| 4WHY | N_LYS_187 | NZ  | L_GLU_114 | OE2 | 3.551 |
| 4WHY | N_LYS_187 | NZ  | N_GLU_191 | OE1 | 3.175 |
| 4WHY | N_HIS_193 | NE2 | N_ASP_189 | OD1 | 2.893 |

|      |           |    |           |     |       |
|------|-----------|----|-----------|-----|-------|
| 4WHY | N_LYS_203 | NZ | N_ASP_114 | OD2 | 2.778 |
|------|-----------|----|-----------|-----|-------|

Table 633: 4WHY-specific salt bridging networks analysis. In this table, a PDB file is specified with a four-letter PDB ID, except that the names of the PDB files corresponding to the single NMR structural model split from the NMR ensemble is specified with a four-letter PDB ID in addition to a hyphen followed by the single NMR structural model numeric ID, the residue naming scheme is **Chain ID\_residue name\_residue number**,  $\angle ADH$  represents the angle formed by acceptor (A), donor (D) and hydrogen (H) ( $\angle ADH$ ).

| PDB ID | Residue A | Atom A | Residue B | Atom B | Distance (Å) |
|--------|-----------|--------|-----------|--------|--------------|
| 4WUU   | A_HIS_3   | ND1    | A_ASP_29  | OD1    | 3.341        |
| 4WUU   | A_HIS_3   | ND1    | A_ASP_29  | OD2    | 2.929        |
| 4WUU   | A_ARG_6   | NH2    | A_ASP_102 | OD1    | 3.941        |
| 4WUU   | A_ARG_6   | NH2    | A_ASP_102 | OD2    | 3.738        |
| 4WUU   | A_ARG_14  | NH2    | A_ASP_39  | OD1    | 3.219        |
| 4WUU   | A_ARG_14  | NH2    | A_ASP_39  | OD2    | 2.950        |
| 4WUU   | A_ARG_21  | NH1    | A_ASP_39  | OD2    | 2.675        |
| 4WUU   | A_ARG_21  | NH2    | A_ASP_37  | OD2    | 3.480        |
| 4WUU   | A_ARG_35  | NH1    | B_ASP_53  | OD1    | 3.025        |
| 4WUU   | A_ARG_35  | NH1    | B_ASP_53  | OD2    | 3.278        |
| 4WUU   | A_ARG_35  | NH2    | A_GLU_46  | OE1    | 3.105        |
| 4WUU   | A_ARG_44  | NH1    | A_ASP_61  | OD1    | 3.882        |
| 4WUU   | A_ARG_44  | NH2    | A_ASP_61  | OD1    | 3.159        |
| 4WUU   | A_ARG_48  | NH2    | B_ASP_53  | OD1    | 3.607        |
| 4WUU   | A_ARG_48  | NH2    | B_ASP_53  | OD2    | 3.368        |
| 4WUU   | A_HIS_74  | ND1    | A_ASP_77  | OD2    | 3.868        |
| 4WUU   | A_ARG_75  | NH1    | A_GLU_19  | OE2    | 3.917        |
| 4WUU   | A_ARG_82  | NH1    | A_GLU_89  | OE2    | 3.819        |
| 4WUU   | A_ARG_82  | NH2    | A_GLU_89  | OE2    | 3.766        |
| 4WUU   | A_HIS_93  | ND1    | A_ASP_119 | OD1    | 3.903        |
| 4WUU   | A_HIS_93  | ND1    | A_ASP_119 | OD2    | 3.323        |
| 4WUU   | A_ARG_111 | NH2    | A_ASP_102 | OD2    | 3.306        |
| 4WUU   | A_ARG_157 | NH1    | A_GLU_161 | OE1    | 3.446        |
| 4WUU   | A_ARG_157 | NH1    | A_GLU_161 | OE2    | 3.465        |
| 4WUU   | A_ARG_157 | NH2    | A_GLU_161 | OE1    | 3.936        |
| 4WUU   | A_ARG_170 | NH2    | A_GLU_55  | OE1    | 3.101        |
| 4WUU   | A_ARG_170 | NH2    | A_GLU_55  | OE2    | 3.506        |
| 4WUU   | A_ARG_181 | NH1    | A_ASP_183 | OD2    | 3.977        |
| 4WUU   | A_HIS_191 | NE2    | A_GLU_254 | OE2    | 3.880        |
| 4WUU   | A_HIS_197 | ND1    | A_GLU_198 | OE1    | 3.876        |
| 4WUU   | B_ARG_3   | NH2    | B_ASP_59  | OD1    | 3.704        |
| 4WUU   | B_LYS_19  | NZ     | B_GLU_16  | OE1    | 3.969        |
| 4WUU   | B_LYS_19  | NZ     | B_GLU_16  | OE2    | 3.703        |
| 4WUU   | B_ARG_45  | NH2    | B_GLU_47  | OE2    | 2.936        |
| 4WUU   | B_LYS_94  | NZ     | B_GLU_77  | OE2    | 3.352        |
| 4WUU   | D_ARG_62  | NH2    | D_GLU_82  | OE2    | 3.196        |
| 4WUU   | D_ARG_62  | NH2    | D_ASP_83  | OD1    | 2.858        |
| 4WUU   | D_ARG_62  | NH2    | D_ASP_83  | OD2    | 3.260        |
| 4WUU   | D_LYS_114 | NZ     | D_GLU_202 | OE1    | 2.842        |
| 4WUU   | E_LYS_12  | NZ     | E_GLU_16  | OE2    | 3.576        |
| 4WUU   | E_ARG_38  | NH2    | E_GLU_46  | OE1    | 2.721        |
| 4WUU   | E_ARG_38  | NH2    | E_GLU_46  | OE2    | 3.649        |
| 4WUU   | E_ARG_50  | NH1    | A_GLU_166 | OE2    | 3.181        |
| 4WUU   | E_ARG_50  | NH2    | A_GLU_166 | OE1    | 3.839        |
| 4WUU   | E_ARG_50  | NH2    | A_GLU_166 | OE2    | 2.671        |
| 4WUU   | E_LYS_87  | NZ     | E_ASP_90  | OD1    | 3.097        |
| 4WUU   | E_ARG_98  | NH2    | E_ASP_109 | OD2    | 3.982        |
| 4WUU   | E_ARG_218 | NH1    | E_GLU_220 | OE1    | 3.981        |
| 4WUU   | E_ARG_218 | NH2    | E_GLU_220 | OE1    | 3.055        |

---

Table 634: 4WUU-specific salt bridging networks analysis. In this table, a PDB file is specified with a four-letter PDB ID, except that the names of the PDB files corresponding to the single NMR structural model split from the NMR ensemble is specified with a four-letter PDB ID in addition to a hyphen followed by the single NMR structural model numeric ID, the residue naming scheme is **Chain ID\_residue name\_residue number**,  $\angle ADH$  represents the angle formed by acceptor (A), donor (D) and hydrogen (H) ( $\angle ADH$ ).

| PDB ID | Residue A | Atom A | Residue B | Atom B | Distance (Å) |
|--------|-----------|--------|-----------|--------|--------------|
| 4XVJ   | A_ARG_1   | NH2    | L_ASP_51  | OD1    | 3.482        |
| 4XVJ   | H_ARG_38  | NH1    | H_ASP_90  | OD2    | 3.020        |
| 4XVJ   | H_ARG_38  | NH2    | H_GLU_46  | OE1    | 2.936        |
| 4XVJ   | H_LYS_65  | NZ     | H_ASP_62  | OD1    | 3.256        |
| 4XVJ   | H_ARG_67  | NH1    | H_ASP_90  | OD1    | 2.560        |
| 4XVJ   | H_ARG_67  | NH1    | H_ASP_90  | OD2    | 3.768        |
| 4XVJ   | H_ARG_67  | NH2    | H_ASP_90  | OD1    | 3.378        |
| 4XVJ   | H_ARG_67  | NH2    | H_ASP_90  | OD2    | 3.034        |
| 4XVJ   | H_ARG_98  | NH2    | H_ASP_115 | OD1    | 3.741        |
| 4XVJ   | H_ARG_98  | NH2    | H_ASP_115 | OD2    | 2.973        |
| 4XVJ   | L_LYS_17  | NZ     | L_ASP_75  | OD2    | 3.177        |
| 4XVJ   | L_ARG_62  | NH1    | L_ASP_83  | OD1    | 3.002        |
| 4XVJ   | L_ARG_62  | NH1    | L_ASP_83  | OD2    | 3.479        |
| 4XVJ   | L_ARG_62  | NH2    | L_ASP_83  | OD1    | 3.793        |
| 4XVJ   | L_ARG_62  | NH2    | L_ASP_83  | OD2    | 2.894        |

Table 635: 4XVJ-specific salt bridging networks analysis. In this table, a PDB file is specified with a four-letter PDB ID, except that the names of the PDB files corresponding to the single NMR structural model split from the NMR ensemble is specified with a four-letter PDB ID in addition to a hyphen followed by the single NMR structural model numeric ID, the residue naming scheme is **Chain ID\_residue name\_residue number**,  $\angle ADH$  represents the angle formed by acceptor (A), donor (D) and hydrogen (H) ( $\angle ADH$ ).

| PDB ID | Residue A | Atom A | Residue B | Atom B | Distance (Å) |
|--------|-----------|--------|-----------|--------|--------------|
| 4YHP   | P_LYS_4   | NZ     | H_ASP_62  | OD1    | 3.318        |
| 4YHP   | A_ARG_38  | NH1    | A_ASP_90  | OD1    | 2.967        |
| 4YHP   | A_ARG_38  | NH2    | A_GLU_46  | OE1    | 2.987        |
| 4YHP   | A_ARG_67  | NH1    | A_ASP_90  | OD1    | 3.983        |
| 4YHP   | A_ARG_67  | NH1    | A_ASP_90  | OD2    | 2.902        |
| 4YHP   | A_ARG_67  | NH2    | A_ASP_90  | OD1    | 2.805        |
| 4YHP   | A_ARG_67  | NH2    | A_ASP_90  | OD2    | 3.034        |
| 4YHP   | A_LYS_76  | NZ     | A_ASP_73  | OD1    | 3.954        |
| 4YHP   | A_LYS_76  | NZ     | A_ASP_73  | OD2    | 3.046        |
| 4YHP   | A_ARG_98  | NH2    | A_ASP_109 | OD1    | 3.450        |
| 4YHP   | A_ARG_98  | NH2    | A_ASP_109 | OD2    | 2.693        |
| 4YHP   | A_LYS_151 | NZ     | A_ASP_152 | OD1    | 3.053        |
| 4YHP   | A_LYS_151 | NZ     | A_ASP_152 | OD2    | 3.629        |
| 4YHP   | A_LYS_214 | NZ     | A_ASP_216 | OD1    | 3.351        |
| 4YHP   | A_LYS_218 | NZ     | A_GLU_220 | OE2    | 2.671        |
| 4YHP   | A_LYS_222 | NZ     | B_ASP_123 | OD2    | 3.677        |
| 4YHP   | B_ARG_53  | NH2    | B_GLU_59  | OE1    | 3.593        |
| 4YHP   | B_ARG_60  | NH1    | B_ASP_81  | OD1    | 3.610        |
| 4YHP   | B_ARG_60  | NH1    | B_ASP_81  | OD2    | 2.819        |
| 4YHP   | B_ARG_60  | NH2    | B_GLU_78  | OE2    | 3.931        |
| 4YHP   | B_ARG_60  | NH2    | B_ASP_81  | OD1    | 3.172        |
| 4YHP   | B_ARG_60  | NH2    | B_ASP_81  | OD2    | 3.721        |
| 4YHP   | B_LYS_104 | NZ     | B_ASP_84  | OD1    | 3.453        |
| 4YHP   | B_LYS_104 | NZ     | B_GLU_166 | OE2    | 3.500        |
| 4YHP   | B_LYS_150 | NZ     | B_GLU_196 | OE1    | 3.634        |
| 4YHP   | B_LYS_150 | NZ     | B_GLU_196 | OE2    | 3.240        |
| 4YHP   | B_LYS_184 | NZ     | B_GLU_188 | OE1    | 3.665        |
| 4YHP   | B_LYS_184 | NZ     | B_GLU_188 | OE2    | 2.296        |
| 4YHP   | Q_LYS_4   | NZ     | C_ASP_62  | OD1    | 3.313        |
| 4YHP   | C_ARG_38  | NH1    | C_ASP_90  | OD1    | 2.918        |
| 4YHP   | C_ARG_38  | NH2    | C_GLU_46  | OE1    | 2.810        |
| 4YHP   | C_ARG_38  | NH2    | C_ASP_90  | OD1    | 3.983        |
| 4YHP   | C_ARG_67  | NH1    | C_ASP_90  | OD1    | 3.935        |
| 4YHP   | C_ARG_67  | NH1    | C_ASP_90  | OD2    | 2.912        |
| 4YHP   | C_ARG_67  | NH2    | C_ASP_90  | OD1    | 3.223        |
| 4YHP   | C_ARG_67  | NH2    | C_ASP_90  | OD2    | 3.530        |
| 4YHP   | C_ARG_98  | NH2    | C_ASP_109 | OD1    | 3.729        |
| 4YHP   | C_ARG_98  | NH2    | C_ASP_109 | OD2    | 2.531        |
| 4YHP   | C_LYS_151 | NZ     | C_ASP_152 | OD1    | 3.396        |
| 4YHP   | C_LYS_151 | NZ     | C_ASP_152 | OD2    | 3.552        |
| 4YHP   | C_LYS_218 | NZ     | C_GLU_220 | OE2    | 3.718        |
| 4YHP   | C_LYS_222 | NZ     | D_ASP_123 | OD1    | 3.776        |
| 4YHP   | C_LYS_222 | NZ     | D_ASP_123 | OD2    | 3.442        |
| 4YHP   | D_ARG_60  | NH1    | D_ASP_81  | OD1    | 3.548        |
| 4YHP   | D_ARG_60  | NH1    | D_ASP_81  | OD2    | 2.563        |
| 4YHP   | D_ARG_60  | NH2    | D_GLU_78  | OE1    | 3.956        |
| 4YHP   | D_ARG_60  | NH2    | D_ASP_81  | OD1    | 3.366        |
| 4YHP   | D_ARG_60  | NH2    | D_ASP_81  | OD2    | 3.671        |
| 4YHP   | D_LYS_104 | NZ     | D_ASP_84  | OD1    | 3.616        |
| 4YHP   | D_LYS_104 | NZ     | D_ASP_84  | OD2    | 3.921        |
| 4YHP   | D_LYS_104 | NZ     | D_GLU_166 | OE1    | 3.541        |
| 4YHP   | D_LYS_104 | NZ     | D_GLU_166 | OE2    | 2.873        |
| 4YHP   | D_LYS_150 | NZ     | D_GLU_196 | OE1    | 3.981        |
| 4YHP   | D_LYS_150 | NZ     | D_GLU_196 | OE2    | 2.313        |
| 4YHP   | D_LYS_189 | NZ     | D_ASP_186 | OD1    | 2.853        |
| 4YHP   | D_HIS_190 | ND1    | D_ASP_152 | OD2    | 2.771        |
| 4YHP   | D_HIS_190 | NE2    | L_GLU_59  | OE2    | 2.478        |

|      |           |     |           |     |       |
|------|-----------|-----|-----------|-----|-------|
| 4YHP | E_ARG_38  | NH1 | E_ASP_90  | OD1 | 3.131 |
| 4YHP | E_ARG_38  | NH2 | E_GLU_46  | OE1 | 2.855 |
| 4YHP | E_ARG_67  | NH1 | E_ASP_90  | OD1 | 3.715 |
| 4YHP | E_ARG_67  | NH1 | E_ASP_90  | OD2 | 2.746 |
| 4YHP | E_ARG_67  | NH2 | E_ASP_90  | OD1 | 3.053 |
| 4YHP | E_ARG_67  | NH2 | E_ASP_90  | OD2 | 3.561 |
| 4YHP | E_ARG_98  | NH2 | E_ASP_109 | OD1 | 3.385 |
| 4YHP | E_ARG_98  | NH2 | E_ASP_109 | OD2 | 2.631 |
| 4YHP | E_LYS_151 | NZ  | E_ASP_152 | OD1 | 3.289 |
| 4YHP | E_LYS_151 | NZ  | E_ASP_152 | OD2 | 3.442 |
| 4YHP | E_LYS_222 | NZ  | F_ASP_123 | OD1 | 3.304 |
| 4YHP | E_LYS_222 | NZ  | F_ASP_123 | OD2 | 2.842 |
| 4YHP | H_ARG_38  | NH1 | H_ASP_90  | OD1 | 2.947 |
| 4YHP | H_ARG_38  | NH2 | H_GLU_46  | OE1 | 2.947 |
| 4YHP | H_ARG_38  | NH2 | H_ASP_90  | OD1 | 3.968 |
| 4YHP | H_ARG_67  | NH1 | H_ASP_90  | OD1 | 3.789 |
| 4YHP | H_ARG_67  | NH1 | H_ASP_90  | OD2 | 2.848 |
| 4YHP | H_ARG_67  | NH2 | H_ASP_90  | OD1 | 3.026 |
| 4YHP | H_ARG_67  | NH2 | H_ASP_90  | OD2 | 3.449 |
| 4YHP | H_LYS_76  | NZ  | H_ASP_73  | OD2 | 3.599 |
| 4YHP | H_ARG_98  | NH2 | H_ASP_109 | OD1 | 3.571 |
| 4YHP | H_ARG_98  | NH2 | H_ASP_109 | OD2 | 2.451 |
| 4YHP | H_LYS_151 | NZ  | H_ASP_152 | OD1 | 3.964 |
| 4YHP | H_LYS_151 | NZ  | H_ASP_152 | OD2 | 3.805 |
| 4YHP | H_LYS_218 | NZ  | H_GLU_220 | OE1 | 3.935 |
| 4YHP | L_ARG_60  | NH1 | L_ASP_81  | OD1 | 3.435 |
| 4YHP | L_ARG_60  | NH1 | L_ASP_81  | OD2 | 2.451 |
| 4YHP | L_ARG_60  | NH2 | L_GLU_78  | OE2 | 3.891 |
| 4YHP | L_ARG_60  | NH2 | L_ASP_81  | OD1 | 3.204 |
| 4YHP | L_ARG_60  | NH2 | L_ASP_81  | OD2 | 3.593 |
| 4YHP | L_LYS_104 | NZ  | L_ASP_84  | OD1 | 2.935 |
| 4YHP | L_LYS_104 | NZ  | L_ASP_84  | OD2 | 3.845 |
| 4YHP | L_LYS_104 | NZ  | L_GLU_166 | OE2 | 3.174 |
| 4YHP | L_LYS_150 | NZ  | L_GLU_196 | OE2 | 2.309 |
| 4YHP | L_LYS_189 | NZ  | L_ASP_186 | OD1 | 2.837 |
| 4YHP | L_HIS_190 | ND1 | L_ASP_152 | OD2 | 2.727 |
| 4YHP | F_HIS_33  | ND1 | F_ASP_49  | OD1 | 3.954 |
| 4YHP | F_ARG_60  | NH1 | F_ASP_81  | OD1 | 3.515 |
| 4YHP | F_ARG_60  | NH1 | F_ASP_81  | OD2 | 2.794 |
| 4YHP | F_ARG_60  | NH2 | F_GLU_78  | OE2 | 3.996 |
| 4YHP | F_ARG_60  | NH2 | F_ASP_81  | OD1 | 3.303 |
| 4YHP | F_ARG_60  | NH2 | F_ASP_81  | OD2 | 3.936 |
| 4YHP | F_LYS_104 | NZ  | F_ASP_84  | OD1 | 3.436 |
| 4YHP | F_LYS_104 | NZ  | F_GLU_166 | OE2 | 3.438 |
| 4YHP | F_HIS_190 | ND1 | F_ASP_152 | OD2 | 3.922 |

Table 636: 4YHP-specific salt bridging networks analysis. In this table, a PDB file is specified with a four-letter PDB ID, except that the names of the PDB files corresponding to the single NMR structural model split from the NMR ensemble is specified with a four-letter PDB ID in addition to a hyphen followed by the single NMR structural model numeric ID, the residue naming scheme is **Chain ID\_residue name\_residue number**,  $\angle ADH$  represents the angle formed by acceptor (A), donor (D) and hydrogen (H) ( $\angle ADH$ ).

| PDB ID | Residue A | Atom A | Residue B | Atom B | Distance (Å) |
|--------|-----------|--------|-----------|--------|--------------|
| 4YHY   | C_HIS_33  | ND1    | C_ASP_49  | OD1    | 3.834        |
| 4YHY   | C_ARG_60  | NH1    | C_ASP_81  | OD1    | 3.547        |
| 4YHY   | C_ARG_60  | NH1    | C_ASP_81  | OD2    | 2.684        |
| 4YHY   | C_ARG_60  | NH2    | C_GLU_78  | OE1    | 3.841        |
| 4YHY   | C_ARG_60  | NH2    | C_ASP_81  | OD1    | 2.796        |
| 4YHY   | C_ARG_60  | NH2    | C_ASP_81  | OD2    | 3.359        |
| 4YHY   | C_LYS_104 | NZ     | C_ASP_84  | OD1    | 3.080        |
| 4YHY   | C_LYS_104 | NZ     | C_ASP_84  | OD2    | 3.747        |
| 4YHY   | C_LYS_104 | NZ     | C_GLU_166 | OE1    | 3.855        |
| 4YHY   | C_LYS_104 | NZ     | C_GLU_166 | OE2    | 3.371        |
| 4YHY   | C_LYS_184 | NZ     | C_GLU_188 | OE1    | 2.479        |
| 4YHY   | C_LYS_184 | NZ     | C_GLU_188 | OE2    | 3.850        |
| 4YHY   | C_LYS_189 | NZ     | C_ASP_186 | OD1    | 3.979        |
| 4YHY   | C_HIS_190 | ND1    | C_ASP_152 | OD2    | 3.638        |
| 4YHY   | B_ARG_38  | NH1    | B_ASP_90  | OD1    | 2.962        |
| 4YHY   | B_ARG_38  | NH2    | B_GLU_46  | OE1    | 3.075        |
| 4YHY   | B_ARG_38  | NH2    | B_ASP_90  | OD1    | 3.920        |
| 4YHY   | B_ARG_67  | NH1    | B_ASP_90  | OD1    | 3.667        |
| 4YHY   | B_ARG_67  | NH1    | B_ASP_90  | OD2    | 2.922        |
| 4YHY   | B_ARG_67  | NH2    | B_ASP_90  | OD1    | 2.906        |
| 4YHY   | B_ARG_67  | NH2    | B_ASP_90  | OD2    | 3.527        |
| 4YHY   | B_ARG_98  | NH2    | B_ASP_109 | OD1    | 3.412        |
| 4YHY   | B_ARG_98  | NH2    | B_ASP_109 | OD2    | 2.741        |
| 4YHY   | B_LYS_151 | NZ     | B_ASP_152 | OD1    | 3.708        |
| 4YHY   | B_LYS_151 | NZ     | B_ASP_152 | OD2    | 3.789        |
| 4YHY   | B_LYS_218 | NZ     | B_GLU_220 | OE2    | 3.937        |
| 4YHY   | H_ARG_38  | NH1    | H_ASP_90  | OD1    | 2.943        |
| 4YHY   | H_ARG_38  | NH2    | H_GLU_46  | OE1    | 3.065        |
| 4YHY   | H_ARG_38  | NH2    | H_ASP_90  | OD1    | 3.927        |
| 4YHY   | H_ARG_67  | NH1    | H_ASP_90  | OD1    | 3.683        |
| 4YHY   | H_ARG_67  | NH1    | H_ASP_90  | OD2    | 2.873        |
| 4YHY   | H_ARG_67  | NH2    | H_ASP_90  | OD1    | 2.953        |
| 4YHY   | H_ARG_67  | NH2    | H_ASP_90  | OD2    | 3.520        |
| 4YHY   | H_ARG_98  | NH2    | H_ASP_109 | OD1    | 3.446        |
| 4YHY   | H_ARG_98  | NH2    | H_ASP_109 | OD2    | 2.805        |
| 4YHY   | H_LYS_151 | NZ     | H_ASP_152 | OD1    | 3.926        |
| 4YHY   | L_HIS_33  | ND1    | L_ASP_49  | OD1    | 3.834        |
| 4YHY   | L_ARG_60  | NH1    | L_ASP_81  | OD1    | 3.514        |
| 4YHY   | L_ARG_60  | NH1    | L_ASP_81  | OD2    | 2.687        |
| 4YHY   | L_ARG_60  | NH2    | L_GLU_78  | OE1    | 3.800        |
| 4YHY   | L_ARG_60  | NH2    | L_ASP_81  | OD1    | 2.830        |
| 4YHY   | L_ARG_60  | NH2    | L_ASP_81  | OD2    | 3.411        |
| 4YHY   | L_LYS_104 | NZ     | L_ASP_84  | OD1    | 3.118        |
| 4YHY   | L_LYS_104 | NZ     | L_ASP_84  | OD2    | 3.782        |
| 4YHY   | L_LYS_104 | NZ     | L_GLU_166 | OE1    | 3.846        |
| 4YHY   | L_LYS_104 | NZ     | L_GLU_166 | OE2    | 3.435        |
| 4YHY   | L_LYS_184 | NZ     | L_GLU_188 | OE1    | 2.816        |
| 4YHY   | L_LYS_189 | NZ     | L_ASP_186 | OD1    | 3.965        |
| 4YHY   | L_HIS_190 | ND1    | L_ASP_152 | OD2    | 3.667        |



---

Table 637: 4YHY-specific salt bridging networks analysis. In this table, a PDB file is specified with a four-letter PDB ID, except that the names of the PDB files corresponding to the single NMR structural model split from the NMR ensemble is specified with a four-letter PDB ID in addition to a hyphen followed by the single NMR structural model numeric ID, the residue naming scheme is **Chain ID\_residue name\_residue number**,  $\angle ADH$  represents the angle formed by acceptor (A), donor (D) and hydrogen (H) ( $\angle ADH$ ).

| PDB ID | Residue A | Atom A | Residue B | Atom B | Distance (Å) |
|--------|-----------|--------|-----------|--------|--------------|
| 4YHZ   | H_ARG_38  | NH1    | H_ASP_90  | OD1    | 3.041        |
| 4YHZ   | H_ARG_38  | NH2    | H_GLU_46  | OE1    | 2.993        |
| 4YHZ   | H_ARG_67  | NH1    | H_ASP_90  | OD1    | 3.565        |
| 4YHZ   | H_ARG_67  | NH1    | H_ASP_90  | OD2    | 2.787        |
| 4YHZ   | H_ARG_67  | NH2    | H_ASP_90  | OD1    | 3.041        |
| 4YHZ   | H_ARG_67  | NH2    | H_ASP_90  | OD2    | 3.647        |
| 4YHZ   | H_ARG_98  | NH2    | H_ASP_109 | OD1    | 3.319        |
| 4YHZ   | H_ARG_98  | NH2    | H_ASP_109 | OD2    | 2.731        |
| 4YHZ   | H_ARG_102 | NH1    | L_ASP_52  | OD2    | 3.952        |
| 4YHZ   | H_LYS_151 | NZ     | H_ASP_152 | OD1    | 3.146        |
| 4YHZ   | H_LYS_151 | NZ     | H_ASP_152 | OD2    | 3.730        |
| 4YHZ   | H_LYS_218 | NZ     | H_GLU_220 | OE2    | 2.294        |
| 4YHZ   | L_ARG_60  | NH1    | L_ASP_81  | OD1    | 3.699        |
| 4YHZ   | L_ARG_60  | NH1    | L_ASP_81  | OD2    | 2.763        |
| 4YHZ   | L_ARG_60  | NH2    | L_GLU_78  | OE2    | 3.725        |
| 4YHZ   | L_ARG_60  | NH2    | L_ASP_81  | OD1    | 2.809        |
| 4YHZ   | L_ARG_60  | NH2    | L_ASP_81  | OD2    | 3.312        |
| 4YHZ   | L_LYS_104 | NZ     | L_ASP_84  | OD1    | 2.930        |
| 4YHZ   | L_LYS_104 | NZ     | L_ASP_84  | OD2    | 3.859        |
| 4YHZ   | L_LYS_104 | NZ     | L_GLU_166 | OE2    | 3.711        |
| 4YHZ   | L_LYS_150 | NZ     | L_GLU_196 | OE1    | 3.382        |
| 4YHZ   | L_LYS_150 | NZ     | L_GLU_196 | OE2    | 3.096        |
| 4YHZ   | L_LYS_189 | NZ     | L_ASP_186 | OD1    | 3.342        |

Table 638: 4YHZ-specific salt bridging networks analysis. In this table, a PDB file is specified with a four-letter PDB ID, except that the names of the PDB files corresponding to the single NMR structural model split from the NMR ensemble is specified with a four-letter PDB ID in addition to a hyphen followed by the single NMR structural model numeric ID, the residue naming scheme is **Chain ID\_residue name\_residue number**,  $\angle ADH$  represents the angle formed by acceptor (A), donor (D) and hydrogen (H) ( $\angle ADH$ ).

| PDB ID | Residue A | Atom A | Residue B | Atom B | Distance (Å) |
|--------|-----------|--------|-----------|--------|--------------|
| 4YNY   | A_ARG.57  | NH1    | A_ASP.109 | OD1    | 2.933        |
| 4YNY   | A_ARG.57  | NH2    | A_GLU.65  | OE1    | 3.525        |
| 4YNY   | A_ARG.57  | NH2    | A_GLU.65  | OE2    | 3.243        |
| 4YNY   | A_ARG.57  | NH2    | A_ASP.109 | OD1    | 3.948        |
| 4YNY   | A_ARG.86  | NH1    | A_ASP.109 | OD1    | 3.716        |
| 4YNY   | A_ARG.86  | NH1    | A_ASP.109 | OD2    | 2.746        |
| 4YNY   | A_ARG.86  | NH2    | A_ASP.109 | OD1    | 3.047        |
| 4YNY   | A_ARG.86  | NH2    | A_ASP.109 | OD2    | 3.560        |
| 4YNY   | A_ARG.106 | NH2    | A_GLU.108 | OE1    | 3.999        |
| 4YNY   | A_LYS.117 | NZ     | A_ASP.124 | OD1    | 3.494        |
| 4YNY   | A_LYS.117 | NZ     | A_ASP.124 | OD2    | 2.864        |
| 4YNY   | A_LYS.166 | NZ     | B_GLU.146 | OE2    | 2.702        |
| 4YNY   | B_LYS.73  | NZ     | B_ASP.72  | OD2    | 3.025        |
| 4YNY   | B_ARG.81  | NH1    | B_ASP.104 | OD1    | 3.819        |
| 4YNY   | B_ARG.81  | NH1    | B_ASP.104 | OD2    | 2.603        |
| 4YNY   | B_ARG.81  | NH2    | B_ASP.104 | OD1    | 2.915        |
| 4YNY   | B_ARG.81  | NH2    | B_ASP.104 | OD2    | 3.187        |
| 4YNY   | B_LYS.132 | NZ     | B_GLU.219 | OE2    | 3.320        |
| 4YNY   | B_LYS.188 | NZ     | B_GLU.105 | OE1    | 3.576        |
| 4YNY   | B_LYS.188 | NZ     | B_GLU.105 | OE2    | 2.488        |
| 4YNY   | B_LYS.192 | NZ     | B_ASP.160 | OD1    | 3.032        |
| 4YNY   | B_ARG.200 | NH2    | B_ASP.182 | OD1    | 3.555        |
| 4YNY   | B_ARG.200 | NH2    | B_ASP.182 | OD2    | 2.866        |
| 4YNY   | C_ARG.57  | NH1    | C_ASP.109 | OD1    | 2.834        |
| 4YNY   | C_ARG.57  | NH2    | C_GLU.65  | OE1    | 3.680        |
| 4YNY   | C_ARG.57  | NH2    | C_GLU.65  | OE2    | 3.119        |
| 4YNY   | C_ARG.57  | NH2    | C_ASP.109 | OD1    | 3.921        |
| 4YNY   | C_ARG.86  | NH1    | C_ASP.109 | OD1    | 3.790        |
| 4YNY   | C_ARG.86  | NH1    | C_ASP.109 | OD2    | 2.710        |
| 4YNY   | C_ARG.86  | NH2    | C_ASP.109 | OD1    | 3.106        |
| 4YNY   | C_ARG.86  | NH2    | C_ASP.109 | OD2    | 3.542        |
| 4YNY   | C_LYS.117 | NZ     | C_ASP.124 | OD1    | 3.354        |
| 4YNY   | C_LYS.117 | NZ     | C_ASP.124 | OD2    | 2.744        |
| 4YNY   | C_LYS.166 | NZ     | D_GLU.146 | OE2    | 2.776        |
| 4YNY   | D_LYS.73  | NZ     | D_ASP.72  | OD1    | 3.416        |
| 4YNY   | D_ARG.81  | NH1    | D_ASP.104 | OD1    | 3.697        |
| 4YNY   | D_ARG.81  | NH1    | D_ASP.104 | OD2    | 2.693        |
| 4YNY   | D_ARG.81  | NH2    | D_ASP.104 | OD1    | 2.906        |
| 4YNY   | D_ARG.81  | NH2    | D_ASP.104 | OD2    | 3.380        |
| 4YNY   | D_LYS.188 | NZ     | D_GLU.105 | OE1    | 3.077        |
| 4YNY   | D_LYS.192 | NZ     | D_ASP.160 | OD2    | 3.867        |
| 4YNY   | D_ARG.200 | NH2    | D_ASP.182 | OD1    | 3.317        |
| 4YNY   | D_ARG.200 | NH2    | D_ASP.182 | OD2    | 3.323        |

Table 639: 4YNY-specific salt bridging networks analysis. In this table, a PDB file is specified with a four-letter PDB ID, except that the names of the PDB files corresponding to the single NMR structural model split from the NMR ensemble is specified with a four-letter PDB ID in addition to a hyphen followed by the single NMR structural model numeric ID, the residue naming scheme is **Chain ID\_residue name\_residue number**,  $\angle ADH$  represents the angle formed by acceptor (A), donor (D) and hydrogen (H) ( $\angle ADH$ ).

| PDB ID | Residue A | Atom A | Residue B | Atom B | Distance (Å) |
|--------|-----------|--------|-----------|--------|--------------|
| 4YO0   | A_ARG_57  | NH1    | A_ASP_109 | OD1    | 3.022        |
| 4YO0   | A_ARG_57  | NH2    | A_GLU_65  | OE1    | 3.398        |
| 4YO0   | A_LYS_76  | NZ     | E_ASP_11  | OD1    | 3.807        |
| 4YO0   | A_LYS_76  | NZ     | E_ASP_11  | OD2    | 3.094        |
| 4YO0   | A_ARG_86  | NH1    | A_ASP_109 | OD1    | 3.794        |
| 4YO0   | A_ARG_86  | NH1    | A_ASP_109 | OD2    | 2.742        |
| 4YO0   | A_ARG_86  | NH2    | A_ASP_109 | OD1    | 2.929        |
| 4YO0   | A_ARG_86  | NH2    | A_ASP_109 | OD2    | 3.356        |
| 4YO0   | A_LYS_95  | NZ     | A_ASP_92  | OD2    | 3.971        |
| 4YO0   | A_LYS_117 | NZ     | A_ASP_124 | OD1    | 3.329        |
| 4YO0   | A_LYS_117 | NZ     | A_ASP_124 | OD2    | 2.540        |
| 4YO0   | A_LYS_166 | NZ     | B_GLU_146 | OE2    | 2.816        |
| 4YO0   | B_ARG_81  | NH2    | B_ASP_104 | OD1    | 2.781        |
| 4YO0   | B_ARG_81  | NH2    | B_ASP_104 | OD2    | 3.330        |
| 4YO0   | B_LYS_188 | NZ     | B_GLU_105 | OE2    | 2.712        |
| 4YO0   | B_LYS_192 | NZ     | B_ASP_160 | OD1    | 3.003        |
| 4YO0   | B_ARG_200 | NH1    | B_ASP_182 | OD1    | 3.660        |
| 4YO0   | B_ARG_200 | NH1    | B_ASP_182 | OD2    | 2.289        |
| 4YO0   | C_ARG_57  | NH1    | C_ASP_109 | OD1    | 2.959        |
| 4YO0   | C_ARG_57  | NH2    | C_GLU_65  | OE1    | 3.257        |
| 4YO0   | C_ARG_57  | NH2    | C_ASP_109 | OD1    | 3.982        |
| 4YO0   | C_LYS_76  | NZ     | F_GLU_10  | OE2    | 3.111        |
| 4YO0   | C_LYS_76  | NZ     | F_ASP_11  | OD1    | 3.515        |
| 4YO0   | C_LYS_76  | NZ     | F_ASP_11  | OD2    | 2.782        |
| 4YO0   | C_ARG_86  | NH1    | C_ASP_109 | OD1    | 3.789        |
| 4YO0   | C_ARG_86  | NH1    | C_ASP_109 | OD2    | 2.778        |
| 4YO0   | C_ARG_86  | NH2    | C_ASP_109 | OD1    | 2.949        |
| 4YO0   | C_ARG_86  | NH2    | C_ASP_109 | OD2    | 3.459        |
| 4YO0   | C_LYS_117 | NZ     | C_ASP_124 | OD1    | 3.359        |
| 4YO0   | C_LYS_117 | NZ     | C_ASP_124 | OD2    | 2.756        |
| 4YO0   | C_LYS_166 | NZ     | D_GLU_146 | OE2    | 2.660        |
| 4YO0   | C_LYS_231 | NZ     | D_GLU_145 | OE1    | 3.828        |
| 4YO0   | C_LYS_231 | NZ     | D_GLU_145 | OE2    | 3.815        |
| 4YO0   | D_LYS_188 | NZ     | D_GLU_105 | OE1    | 2.881        |
| 4YO0   | D_LYS_192 | NZ     | D_ASP_160 | OD1    | 2.854        |
| 4YO0   | D_ARG_200 | NH1    | D_ASP_182 | OD2    | 2.726        |

Table 640: 4YO0-specific salt bridging networks analysis. In this table, a PDB file is specified with a four-letter PDB ID, except that the names of the PDB files corresponding to the single NMR structural model split from the NMR ensemble is specified with a four-letter PDB ID in addition to a hyphen followed by the single NMR structural model numeric ID, the residue naming scheme is **Chain ID\_residue name\_residue number**,  $\angle ADH$  represents the angle formed by acceptor (A), donor (D) and hydrogen (H) ( $\angle ADH$ ).

| PDB ID | Residue A | Atom A | Residue B | Atom B | Distance (Å) |
|--------|-----------|--------|-----------|--------|--------------|
| 4Z0X   | A_LYS_30  | NZ     | A_ASP_91  | OD1    | 2.897        |
| 4Z0X   | A_ARG_60  | NH1    | A_ASP_81  | OD1    | 3.753        |
| 4Z0X   | A_ARG_60  | NH1    | A_ASP_81  | OD2    | 2.721        |
| 4Z0X   | A_ARG_60  | NH2    | A_ASP_81  | OD1    | 3.000        |
| 4Z0X   | A_ARG_60  | NH2    | A_ASP_81  | OD2    | 3.078        |
| 4Z0X   | B_LYS_37  | NZ     | B_GLU_35  | OE1    | 3.057        |
| 4Z0X   | B_ARG_63  | NH1    | B_ASP_115 | OD1    | 2.995        |
| 4Z0X   | B_ARG_63  | NH2    | B_GLU_71  | OE2    | 3.549        |
| 4Z0X   | B_ARG_63  | NH2    | B_ASP_115 | OD1    | 3.828        |
| 4Z0X   | B_ARG_92  | NH1    | B_ASP_115 | OD1    | 3.502        |
| 4Z0X   | B_ARG_92  | NH1    | B_ASP_115 | OD2    | 2.905        |
| 4Z0X   | B_ARG_92  | NH2    | B_ASP_115 | OD1    | 2.679        |
| 4Z0X   | B_ARG_92  | NH2    | B_ASP_115 | OD2    | 3.355        |
| 4Z0X   | B_ARG_123 | NH1    | B_ASP_132 | OD1    | 3.837        |
| 4Z0X   | C_LYS_446 | NZ     | A_ASP_50  | OD1    | 3.873        |
| 4Z0X   | C_LYS_446 | NZ     | A_ASP_50  | OD2    | 2.440        |

Table 641: 4Z0X-specific salt bridging networks analysis. In this table, a PDB file is specified with a four-letter PDB ID, except that the names of the PDB files corresponding to the single NMR structural model split from the NMR ensemble is specified with a four-letter PDB ID in addition to a hyphen followed by the single NMR structural model numeric ID, the residue naming scheme is **Chain ID\_residue name\_residue number**,  $\angle ADH$  represents the angle formed by acceptor (A), donor (D) and hydrogen (H) ( $\angle ADH$ ).

| PDB ID | Residue A | Atom A | Residue B | Atom B | Distance (Å) |
|--------|-----------|--------|-----------|--------|--------------|
| 4ZD3   | H_ARG_43  | NH2    | H_GLU_51  | OE1    | 2.895        |
| 4ZD3   | H_ARG_43  | NH2    | H_GLU_51  | OE2    | 3.597        |
| 4ZD3   | H_ARG_66  | NH2    | H_ASP_64  | OD1    | 3.286        |
| 4ZD3   | H_ARG_66  | NH2    | H_ASP_64  | OD2    | 2.638        |
| 4ZD3   | H_ARG_106 | NH2    | H_ASP_116 | OD1    | 3.450        |
| 4ZD3   | H_ARG_106 | NH2    | H_ASP_116 | OD2    | 3.904        |
| 4ZD3   | H_HIS_108 | ND1    | H_ASP_116 | OD1    | 3.941        |
| 4ZD3   | H_HIS_108 | ND1    | H_ASP_116 | OD2    | 2.771        |
| 4ZD3   | H_HIS_108 | NE2    | L_GLU_68  | OE1    | 2.549        |
| 4ZD3   | H_HIS_108 | NE2    | L_GLU_68  | OE2    | 3.986        |
| 4ZD3   | H_LYS_158 | NZ     | H_ASP_159 | OD1    | 3.455        |
| 4ZD3   | H_LYS_158 | NZ     | H_ASP_159 | OD2    | 3.407        |
| 4ZD3   | H_LYS_224 | NZ     | L_GLU_143 | OE2    | 2.997        |
| 4ZD3   | L_ARG_75  | NH2    | L_ASP_98  | OD1    | 2.930        |
| 4ZD3   | L_ARG_75  | NH2    | L_ASP_98  | OD2    | 3.672        |
| 4ZD3   | L_LYS_123 | NZ     | L_GLU_185 | OE2    | 3.206        |
| 4ZD3   | L_ARG_128 | NH2    | L_ASP_190 | OD1    | 3.816        |
| 4ZD3   | L_LYS_169 | NZ     | L_GLU_215 | OE1    | 2.511        |

Table 642: 4ZD3-specific salt bridging networks analysis. In this table, a PDB file is specified with a four-letter PDB ID, except that the names of the PDB files corresponding to the single NMR structural model split from the NMR ensemble is specified with a four-letter PDB ID in addition to a hyphen followed by the single NMR structural model numeric ID, the residue naming scheme is **Chain ID\_residue name\_residue number**,  $\angle ADH$  represents the angle formed by acceptor (A), donor (D) and hydrogen (H) ( $\angle ADH$ ).

| PDB ID | Residue A | Atom A | Residue B | Atom B | Distance (Å) |
|--------|-----------|--------|-----------|--------|--------------|
| 4ZFF   | A_ARG_38  | NH1    | A_ASP_86  | OD1    | 2.818        |
| 4ZFF   | A_ARG_38  | NH2    | A_GLU_46  | OE2    | 2.795        |
| 4ZFF   | A_ARG_66  | NH1    | A_ASP_86  | OD1    | 3.744        |
| 4ZFF   | A_ARG_66  | NH1    | A_ASP_86  | OD2    | 2.802        |
| 4ZFF   | A_ARG_66  | NH2    | A_ASP_86  | OD1    | 2.833        |
| 4ZFF   | A_ARG_66  | NH2    | A_ASP_86  | OD2    | 3.432        |
| 4ZFF   | A_LYS_75  | NZ     | A_ASP_72  | OD2    | 3.517        |
| 4ZFF   | A_ARG_94  | NH2    | A_ASP_101 | OD1    | 2.782        |
| 4ZFF   | A_ARG_94  | NH2    | A_ASP_101 | OD2    | 3.644        |
| 4ZFF   | A_LYS_143 | NZ     | A_ASP_144 | OD2    | 3.566        |
| 4ZFF   | A_LYS_209 | NZ     | B_GLU_123 | OE1    | 3.193        |
| 4ZFF   | B_ARG_61  | NH1    | B_GLU_81  | OE2    | 3.817        |
| 4ZFF   | B_ARG_61  | NH1    | B_ASP_82  | OD1    | 2.656        |
| 4ZFF   | B_ARG_61  | NH1    | B_ASP_82  | OD2    | 3.672        |
| 4ZFF   | B_LYS_149 | NZ     | B_GLU_195 | OE2    | 2.800        |
| 4ZFF   | B_HIS_189 | ND1    | B_ASP_151 | OD1    | 3.097        |
| 4ZFF   | B_HIS_189 | ND1    | B_ASP_151 | OD2    | 3.583        |
| 4ZFF   | C_ARG_23  | NH1    | D_GLU_30  | OE1    | 3.414        |
| 4ZFF   | C_ARG_56  | NH1    | C_GLU_38  | OE2    | 3.486        |
| 4ZFF   | C_ARG_56  | NH2    | C_GLU_38  | OE1    | 2.778        |
| 4ZFF   | C_ARG_56  | NH2    | C_GLU_38  | OE2    | 3.528        |
| 4ZFF   | C_ARG_82  | NH2    | C_GLU_42  | OE1    | 3.647        |
| 4ZFF   | C_ARG_82  | NH2    | C_GLU_42  | OE2    | 2.877        |
| 4ZFF   | C_HIS_99  | NE2    | C_GLU_73  | OE2    | 3.973        |
| 4ZFF   | C_ARG_105 | NH2    | C_GLU_103 | OE1    | 3.895        |
| 4ZFF   | C_ARG_105 | NH2    | C_GLU_103 | OE2    | 2.902        |
| 4ZFF   | C_LYS_107 | NZ     | C_GLU_64  | OE1    | 3.791        |
| 4ZFF   | C_LYS_107 | NZ     | C_GLU_64  | OE2    | 3.768        |
| 4ZFF   | D_ARG_23  | NH2    | D_ASP_19  | OD2    | 3.386        |
| 4ZFF   | D_ARG_56  | NH1    | D_GLU_38  | OE2    | 3.530        |
| 4ZFF   | D_ARG_56  | NH2    | D_GLU_38  | OE1    | 2.807        |
| 4ZFF   | D_ARG_56  | NH2    | D_GLU_38  | OE2    | 3.533        |
| 4ZFF   | D_ARG_82  | NH1    | D_GLU_42  | OE1    | 2.977        |
| 4ZFF   | D_ARG_82  | NH1    | D_GLU_42  | OE2    | 3.475        |
| 4ZFF   | D_LYS_84  | NZ     | D_GLU_44  | OE1    | 2.813        |
| 4ZFF   | D_LYS_84  | NZ     | D_GLU_44  | OE2    | 3.787        |
| 4ZFF   | D_HIS_99  | NE2    | D_GLU_73  | OE2    | 3.971        |
| 4ZFF   | D_ARG_105 | NH2    | D_GLU_103 | OE1    | 3.892        |
| 4ZFF   | D_ARG_105 | NH2    | D_GLU_103 | OE2    | 2.901        |
| 4ZFF   | D_LYS_107 | NZ     | D_GLU_64  | OE1    | 3.795        |
| 4ZFF   | D_LYS_107 | NZ     | D_GLU_64  | OE2    | 3.756        |
| 4ZFF   | H_ARG_38  | NH1    | H_ASP_86  | OD1    | 3.173        |
| 4ZFF   | H_ARG_38  | NH2    | H_GLU_46  | OE2    | 3.109        |
| 4ZFF   | H_ARG_66  | NH1    | H_ASP_86  | OD1    | 3.724        |
| 4ZFF   | H_ARG_66  | NH1    | H_ASP_86  | OD2    | 2.802        |
| 4ZFF   | H_ARG_66  | NH2    | H_ASP_86  | OD1    | 2.829        |
| 4ZFF   | H_ARG_66  | NH2    | H_ASP_86  | OD2    | 3.437        |
| 4ZFF   | H_LYS_75  | NZ     | H_ASP_72  | OD2    | 3.526        |
| 4ZFF   | H_ARG_94  | NH2    | H_ASP_101 | OD1    | 2.747        |
| 4ZFF   | H_ARG_94  | NH2    | H_ASP_101 | OD2    | 3.634        |
| 4ZFF   | H_LYS_143 | NZ     | H_ASP_144 | OD2    | 3.565        |
| 4ZFF   | H_LYS_209 | NZ     | L_GLU_123 | OE1    | 3.731        |
| 4ZFF   | L_ARG_61  | NH1    | L_GLU_81  | OE2    | 3.489        |
| 4ZFF   | L_ARG_61  | NH1    | L_ASP_82  | OD1    | 2.794        |
| 4ZFF   | L_ARG_61  | NH1    | L_ASP_82  | OD2    | 3.847        |
| 4ZFF   | L_LYS_    | NZ     | L_GLU_195 | OE1    | 3.785        |
| 4ZFF   | L_LYS_    | NZ     | L_GLU_195 | OE2    | 2.790        |

| 4ZFF | L_LYS_ | NZ  | L_ASP_ | OD1 | 3.960 |
|------|--------|-----|--------|-----|-------|
| 4ZFF | L_HIS_ | ND1 | L_ASP_ | OD1 | 3.345 |

Table 643: 4ZFF-specific salt bridging networks analysis. In this table, a PDB file is specified with a four-letter PDB ID, except that the names of the PDB files corresponding to the single NMR structural model split from the NMR ensemble is specified with a four-letter PDB ID in addition to a hyphen followed by the single NMR structural model numeric ID, the residue naming scheme is **Chain ID\_residue name\_residue number**,  $\angle ADH$  represents the angle formed by acceptor (A), donor (D) and hydrogen (H) ( $\angle ADH$ ).



| PDB ID | Residue A | Atom A | Residue B | Atom B | Distance (Å) |
|--------|-----------|--------|-----------|--------|--------------|
| 4ZFG   | A_ARG_282 | NH1    | A_GLU_286 | OE2    | 2.789        |
| 4ZFG   | A_ARG_337 | NH2    | A_GLU_341 | OE2    | 3.147        |
| 4ZFG   | A_LYS_343 | NZ     | A_GLU_395 | OE1    | 3.481        |
| 4ZFG   | A_LYS_343 | NZ     | A_GLU_395 | OE2    | 2.744        |
| 4ZFG   | A_ARG_400 | NH2    | A_ASP_422 | OD1    | 3.271        |
| 4ZFG   | A_LYS_478 | NZ     | A_ASP_377 | OD1    | 2.811        |
| 4ZFG   | H_ARG_38  | NH1    | H_ASP_86  | OD1    | 2.945        |
| 4ZFG   | H_ARG_38  | NH2    | H_GLU_46  | OE1    | 3.779        |
| 4ZFG   | H_ARG_38  | NH2    | H_GLU_46  | OE2    | 2.970        |
| 4ZFG   | H_ARG_38  | NH2    | H_ASP_86  | OD1    | 3.795        |
| 4ZFG   | H_ARG_66  | NH1    | H_ASP_86  | OD1    | 3.748        |
| 4ZFG   | H_ARG_66  | NH1    | H_ASP_86  | OD2    | 2.697        |
| 4ZFG   | H_ARG_66  | NH2    | H_ASP_86  | OD1    | 3.191        |
| 4ZFG   | H_ARG_66  | NH2    | H_ASP_86  | OD2    | 3.631        |
| 4ZFG   | H_ARG_94  | NH2    | H_ASP_101 | OD1    | 2.815        |
| 4ZFG   | H_ARG_94  | NH2    | H_ASP_101 | OD2    | 3.685        |
| 4ZFG   | H_LYS_143 | NZ     | H_ASP_144 | OD1    | 3.369        |
| 4ZFG   | H_LYS_143 | NZ     | H_ASP_144 | OD2    | 3.092        |
| 4ZFG   | H_LYS_209 | NZ     | L_GLU_123 | OE1    | 2.808        |
| 4ZFG   | H_LYS_210 | NZ     | H_GLU_212 | OE1    | 3.187        |
| 4ZFG   | H_LYS_210 | NZ     | H_GLU_212 | OE2    | 3.341        |
| 4ZFG   | L_ARG_61  | NH2    | L_GLU_81  | OE2    | 3.382        |
| 4ZFG   | L_ARG_61  | NH2    | L_ASP_82  | OD1    | 2.847        |
| 4ZFG   | L_ARG_61  | NH2    | L_ASP_82  | OD2    | 3.547        |
| 4ZFG   | L_LYS_149 | NZ     | L_GLU_195 | OE1    | 2.802        |
| 4ZFG   | L_HIS_189 | ND1    | L_ASP_151 | OD2    | 3.313        |

Table 644: 4ZFG-specific salt bridging networks analysis. In this table, a PDB file is specified with a four-letter PDB ID, except that the names of the PDB files corresponding to the single NMR structural model split from the NMR ensemble is specified with a four-letter PDB ID in addition to a hyphen followed by the single NMR structural model numeric ID, the residue naming scheme is **Chain ID\_residue name\_residue number**,  $\angle ADH$  represents the angle formed by acceptor (A), donor (D) and hydrogen (H) ( $\angle ADH$ ).

| PDB ID | Residue A | Atom A | Residue B | Atom B | Distance (Å) |
|--------|-----------|--------|-----------|--------|--------------|
| 4ZFO   | F_HIS_19  | NE2    | A_GLU_50  | OE1    | 2.994        |
| 4ZFO   | F_HIS_19  | NE2    | A_GLU_50  | OE2    | 3.320        |
| 4ZFO   | L_LYS_24  | NZ     | L_ASP_70  | OD1    | 2.843        |
| 4ZFO   | L_LYS_24  | NZ     | L_ASP_70  | OD2    | 3.681        |
| 4ZFO   | L_ARG_41  | NH1    | L_GLU_165 | OE1    | 2.854        |
| 4ZFO   | L_ARG_41  | NH1    | L_GLU_165 | OE2    | 3.771        |
| 4ZFO   | L_ARG_41  | NH2    | L_GLU_165 | OE1    | 3.602        |
| 4ZFO   | L_ARG_41  | NH2    | L_GLU_165 | OE2    | 3.007        |
| 4ZFO   | L_ARG_61  | NH1    | L_GLU_81  | OE2    | 3.554        |
| 4ZFO   | L_ARG_61  | NH1    | L_ASP_82  | OD1    | 2.833        |
| 4ZFO   | L_ARG_61  | NH1    | L_ASP_82  | OD2    | 3.587        |
| 4ZFO   | L_LYS_149 | NZ     | L_GLU_195 | OE2    | 3.249        |
| 4ZFO   | L_HIS_189 | ND1    | L_ASP_151 | OD2    | 2.754        |
| 4ZFO   | H_ARG_38  | NH1    | H_ASP_90  | OD1    | 2.859        |
| 4ZFO   | H_ARG_38  | NH2    | H_GLU_46  | OE2    | 3.054        |
| 4ZFO   | H_ARG_38  | NH2    | H_ASP_90  | OD1    | 3.757        |
| 4ZFO   | H_ARG_39  | NH1    | L_GLU_85  | OE2    | 3.425        |
| 4ZFO   | H_ARG_39  | NH2    | L_GLU_85  | OE1    | 3.703        |
| 4ZFO   | H_ARG_39  | NH2    | L_GLU_85  | OE2    | 2.644        |
| 4ZFO   | H_LYS_67  | NZ     | H_ASP_90  | OD1    | 3.687        |
| 4ZFO   | H_LYS_67  | NZ     | H_ASP_90  | OD2    | 2.794        |
| 4ZFO   | H_LYS_150 | NZ     | H_ASP_151 | OD1    | 3.394        |
| 4ZFO   | H_LYS_216 | NZ     | L_GLU_123 | OE2    | 3.666        |
| 4ZFO   | H_ARG_217 | NH2    | H_GLU_219 | OE1    | 3.524        |
| 4ZFO   | B_LYS_24  | NZ     | B_ASP_70  | OD1    | 2.732        |
| 4ZFO   | B_LYS_24  | NZ     | B_ASP_70  | OD2    | 3.699        |
| 4ZFO   | B_ARG_61  | NH1    | B_GLU_81  | OE1    | 3.604        |
| 4ZFO   | B_ARG_61  | NH1    | B_ASP_82  | OD1    | 2.928        |
| 4ZFO   | B_ARG_61  | NH1    | B_ASP_82  | OD2    | 3.562        |
| 4ZFO   | B_LYS_103 | NZ     | B_GLU_165 | OE1    | 3.091        |
| 4ZFO   | B_LYS_103 | NZ     | B_GLU_165 | OE2    | 2.652        |
| 4ZFO   | B_LYS_149 | NZ     | B_GLU_195 | OE1    | 2.655        |
| 4ZFO   | B_LYS_149 | NZ     | B_GLU_195 | OE2    | 3.647        |
| 4ZFO   | B_LYS_183 | NZ     | B_GLU_187 | OE2    | 3.657        |
| 4ZFO   | B_LYS_188 | NZ     | B_ASP_185 | OD1    | 2.524        |
| 4ZFO   | B_HIS_189 | ND1    | B_ASP_151 | OD2    | 2.980        |
| 4ZFO   | A_ARG_31  | NH1    | A_ASP_102 | OD1    | 3.536        |
| 4ZFO   | A_ARG_31  | NH1    | A_ASP_102 | OD2    | 2.769        |
| 4ZFO   | A_ARG_38  | NH1    | A_ASP_90  | OD1    | 2.884        |
| 4ZFO   | A_ARG_38  | NH2    | A_GLU_46  | OE1    | 3.650        |
| 4ZFO   | A_ARG_38  | NH2    | A_GLU_46  | OE2    | 2.886        |
| 4ZFO   | A_ARG_38  | NH2    | A_ASP_90  | OD1    | 3.988        |
| 4ZFO   | A_ARG_39  | NH1    | B_GLU_85  | OE1    | 3.845        |
| 4ZFO   | A_ARG_39  | NH2    | B_GLU_85  | OE1    | 2.855        |
| 4ZFO   | A_ARG_39  | NH2    | B_GLU_85  | OE2    | 3.746        |
| 4ZFO   | A_LYS_67  | NZ     | A_ASP_90  | OD1    | 3.473        |
| 4ZFO   | A_LYS_67  | NZ     | A_ASP_90  | OD2    | 2.764        |
| 4ZFO   | A_LYS_150 | NZ     | A_ASP_151 | OD1    | 3.442        |
| 4ZFO   | K_HIS_19  | NE2    | H_GLU_50  | OE1    | 2.755        |
| 4ZFO   | K_HIS_19  | NE2    | H_GLU_50  | OE2    | 3.392        |

---

Table 645: 4ZFO-specific salt bridging networks analysis. In this table, a PDB file is specified with a four-letter PDB ID, except that the names of the PDB files corresponding to the single NMR structural model split from the NMR ensemble is specified with a four-letter PDB ID in addition to a hyphen followed by the single NMR structural model numeric ID, the residue naming scheme is **Chain ID\_residue name\_residue number**,  $\angle ADH$  represents the angle formed by acceptor (A), donor (D) and hydrogen (H) ( $\angle ADH$ ).

| PDB ID | Residue A | Atom A | Residue B | Atom B | Distance (Å) |
|--------|-----------|--------|-----------|--------|--------------|
| 4ZH7   | A_ARG_32  | NH1    | A_ASP_28  | OD1    | 2.616        |
| 4ZH7   | A_ARG_32  | NH1    | A_ASP_28  | OD2    | 2.970        |
| 4ZH7   | A_LYS_155 | NZ     | A_GLU_151 | OE2    | 3.235        |
| 4ZH7   | A_ARG_169 | NH2    | A_ASP_257 | OD2    | 3.147        |
| 4ZH7   | A_LYS_175 | NZ     | A_GLU_176 | OE2    | 3.803        |
| 4ZH7   | A_LYS_251 | NZ     | A_GLU_253 | OE1    | 3.001        |
| 4ZH7   | A_LYS_251 | NZ     | A_GLU_253 | OE2    | 3.952        |
| 4ZH7   | A_LYS_313 | NZ     | A_ASP_317 | OD2    | 2.913        |
| 4ZH7   | A_LYS_343 | NZ     | A_ASP_350 | OD1    | 3.604        |
| 4ZH7   | A_LYS_343 | NZ     | A_ASP_350 | OD2    | 2.780        |
| 4ZH7   | A_LYS_366 | NZ     | A_GLU_320 | OE2    | 2.717        |
| 4ZH7   | A_LYS_437 | NZ     | A_GLU_381 | OE1    | 3.484        |
| 4ZH7   | A_LYS_437 | NZ     | A_GLU_381 | OE2    | 3.811        |
| 4ZH7   | A_ARG_466 | NH2    | A_ASP_458 | OD1    | 2.975        |
| 4ZH7   | A_ARG_466 | NH2    | A_ASP_458 | OD2    | 3.143        |

Table 646: 4ZH7-specific salt bridging networks analysis. In this table, a PDB file is specified with a four-letter PDB ID, except that the names of the PDB files corresponding to the single NMR structural model split from the NMR ensemble is specified with a four-letter PDB ID in addition to a hyphen followed by the single NMR structural model numeric ID, the residue naming scheme is **Chain ID\_residue name\_residue number**,  $\angle ADH$  represents the angle formed by acceptor (A), donor (D) and hydrogen (H) ( $\angle ADH$ ).

| PDB ID | Residue A  | Atom A | Residue B  | Atom B | Distance (Å) |
|--------|------------|--------|------------|--------|--------------|
| 5A2I   | H_ARG_38   | NH1    | H_ASP_86   | OD1    | 2.884        |
| 5A2I   | H_ARG_38   | NH2    | H_GLU_46   | OE1    | 3.128        |
| 5A2I   | H_ARG_38   | NH2    | H_GLU_46   | OE2    | 3.996        |
| 5A2I   | H_ARG_38   | NH2    | H_ASP_86   | OD1    | 3.809        |
| 5A2I   | H_ARG_52   | NH1    | H_GLU_50   | OE2    | 2.458        |
| 5A2I   | H_HIS_58   | ND1    | H_GLU_50   | OE2    | 2.942        |
| 5A2I   | H_ARG_66   | NH1    | H_ASP_86   | OD1    | 3.097        |
| 5A2I   | H_ARG_66   | NH1    | H_ASP_86   | OD2    | 3.703        |
| 5A2I   | H_ARG_66   | NH2    | H_ASP_86   | OD1    | 3.277        |
| 5A2I   | H_ARG_66   | NH2    | H_ASP_86   | OD2    | 2.349        |
| 5A2I   | H_ARG_71   | NH2    | H_ASP_73   | OD1    | 3.396        |
| 5A2I   | H_ARG_1024 | NH1    | H_ASP_1069 | OD2    | 3.870        |
| 5A2I   | H_ARG_1024 | NH2    | H_ASP_1069 | OD1    | 2.961        |
| 5A2I   | H_ARG_1024 | NH2    | H_ASP_1069 | OD2    | 3.137        |
| 5A2I   | H_HIS_1042 | ND1    | H_GLU_1038 | OE2    | 3.431        |
| 5A2I   | H_HIS_1042 | ND1    | H_ASP_1041 | OD1    | 3.140        |
| 5A2I   | H_HIS_1042 | NE2    | H_ASP_1041 | OD1    | 2.854        |
| 5A2I   | H_ARG_1061 | NH2    | H_GLU_1081 | OE2    | 3.967        |
| 5A2I   | H_ARG_1061 | NH2    | H_ASP_1082 | OD1    | 2.886        |
| 5A2I   | H_ARG_1061 | NH2    | H_ASP_1082 | OD2    | 3.803        |

Table 647: 5A2I-specific salt bridging networks analysis. In this table, a PDB file is specified with a four-letter PDB ID, except that the names of the PDB files corresponding to the single NMR structural model split from the NMR ensemble is specified with a four-letter PDB ID in addition to a hyphen followed by the single NMR structural model numeric ID, the residue naming scheme is **Chain ID\_residue name\_residue number**,  $\angle ADH$  represents the angle formed by acceptor (A), donor (D) and hydrogen (H) ( $\angle ADH$ ).

| PDB ID | Residue A  | Atom A | Residue B  | Atom B | Distance (Å) |
|--------|------------|--------|------------|--------|--------------|
| 5A2J   | H_ARG_38   | NH1    | H_ASP_86   | OD1    | 2.875        |
| 5A2J   | H_ARG_38   | NH2    | H_GLU_46   | OE1    | 3.145        |
| 5A2J   | H_ARG_38   | NH2    | H_GLU_46   | OE2    | 3.372        |
| 5A2J   | H_ARG_38   | NH2    | H_ASP_86   | OD1    | 3.987        |
| 5A2J   | H_LYS_43   | NZ     | H_GLU_46   | OE1    | 3.646        |
| 5A2J   | H_LYS_43   | NZ     | H_GLU_85   | OE1    | 2.765        |
| 5A2J   | H_ARG_52   | NH2    | H_GLU_50   | OE2    | 2.945        |
| 5A2J   | H_ARG_66   | NH1    | H_ASP_86   | OD1    | 3.341        |
| 5A2J   | H_ARG_66   | NH1    | H_ASP_86   | OD2    | 3.539        |
| 5A2J   | H_ARG_66   | NH2    | H_ASP_86   | OD1    | 3.626        |
| 5A2J   | H_ARG_66   | NH2    | H_ASP_86   | OD2    | 2.364        |
| 5A2J   | H_ARG_71   | NH2    | H_ASP_73   | OD1    | 3.334        |
| 5A2J   | H_LYS_75   | NZ     | H_ASP_72   | OD2    | 3.979        |
| 5A2J   | H_ARG_83   | NH1    | H_GLU_85   | OE2    | 3.360        |
| 5A2J   | H_ARG_1024 | NH1    | H_ASP_1069 | OD1    | 3.811        |
| 5A2J   | H_ARG_1024 | NH1    | H_ASP_1069 | OD2    | 2.838        |
| 5A2J   | H_ARG_1024 | NH2    | H_ASP_1069 | OD1    | 3.142        |
| 5A2J   | H_ARG_1024 | NH2    | H_ASP_1069 | OD2    | 3.430        |
| 5A2J   | H_HIS_1042 | ND1    | H_GLU_1038 | OE2    | 3.360        |
| 5A2J   | H_ARG_1061 | NH2    | H_GLU_1081 | OE2    | 3.894        |
| 5A2J   | H_ARG_1061 | NH2    | H_ASP_1082 | OD1    | 2.853        |
| 5A2J   | H_ARG_1061 | NH2    | H_ASP_1082 | OD2    | 3.674        |

Table 648: 5A2J-specific salt bridging networks analysis. In this table, a PDB file is specified with a four-letter PDB ID, except that the names of the PDB files corresponding to the single NMR structural model split from the NMR ensemble is specified with a four-letter PDB ID in addition to a hyphen followed by the single NMR structural model numeric ID, the residue naming scheme is **Chain ID\_residue name\_residue number**,  $\angle ADH$  represents the angle formed by acceptor (A), donor (D) and hydrogen (H) ( $\angle ADH$ ).

| PDB ID | Residue A  | Atom A | Residue B  | Atom B | Distance (Å) |
|--------|------------|--------|------------|--------|--------------|
| 5A2K   | H_ARG_38   | NH1    | H_ASP_86   | OD1    | 2.875        |
| 5A2K   | H_ARG_38   | NH2    | H_GLU_46   | OE1    | 2.994        |
| 5A2K   | H_ARG_38   | NH2    | H_GLU_46   | OE2    | 3.664        |
| 5A2K   | H_ARG_38   | NH2    | H_ASP_86   | OD1    | 3.944        |
| 5A2K   | H_LYS_43   | NZ     | H_GLU_46   | OE1    | 3.807        |
| 5A2K   | H_LYS_43   | NZ     | H_GLU_85   | OE1    | 3.399        |
| 5A2K   | H_ARG_52   | NH1    | H_GLU_50   | OE1    | 3.946        |
| 5A2K   | H_ARG_52   | NH1    | H_GLU_50   | OE2    | 2.653        |
| 5A2K   | H_HIS_58   | ND1    | H_GLU_50   | OE2    | 2.712        |
| 5A2K   | H_ARG_66   | NH1    | H_ASP_86   | OD1    | 3.221        |
| 5A2K   | H_ARG_66   | NH1    | H_ASP_86   | OD2    | 3.625        |
| 5A2K   | H_ARG_66   | NH2    | H_ASP_86   | OD1    | 3.474        |
| 5A2K   | H_ARG_66   | NH2    | H_ASP_86   | OD2    | 2.358        |
| 5A2K   | H_ARG_71   | NH2    | H_ASP_73   | OD1    | 3.340        |
| 5A2K   | H_ARG_83   | NH1    | H_GLU_85   | OE2    | 3.612        |
| 5A2K   | H_HIS_1042 | ND1    | H_GLU_1038 | OE2    | 3.466        |
| 5A2K   | H_HIS_1042 | NE2    | H_ASP_1041 | OD1    | 3.782        |
| 5A2K   | H_ARG_1061 | NH2    | H_GLU_1081 | OE2    | 3.980        |
| 5A2K   | H_ARG_1061 | NH2    | H_ASP_1082 | OD1    | 2.834        |
| 5A2K   | H_ARG_1061 | NH2    | H_ASP_1082 | OD2    | 3.700        |

Table 649: 5A2K-specific salt bridging networks analysis. In this table, a PDB file is specified with a four-letter PDB ID, except that the names of the PDB files corresponding to the single NMR structural model split from the NMR ensemble is specified with a four-letter PDB ID in addition to a hyphen followed by the single NMR structural model numeric ID, the residue naming scheme is **Chain ID\_residue name\_residue number**,  $\angle ADH$  represents the angle formed by acceptor (A), donor (D) and hydrogen (H) ( $\angle ADH$ ).

| PDB ID | Residue A  | Atom A | Residue B  | Atom B | Distance (Å) |
|--------|------------|--------|------------|--------|--------------|
| 5A2L   | H_ARG_38   | NH1    | H_ASP_86   | OD1    | 2.857        |
| 5A2L   | H_ARG_38   | NH2    | H_GLU_46   | OE1    | 3.272        |
| 5A2L   | H_ARG_38   | NH2    | H_GLU_46   | OE2    | 3.166        |
| 5A2L   | H_ARG_38   | NH2    | H_ASP_86   | OD1    | 3.882        |
| 5A2L   | H_LYS_43   | NZ     | H_GLU_46   | OE1    | 2.594        |
| 5A2L   | H_LYS_43   | NZ     | H_GLU_46   | OE2    | 3.749        |
| 5A2L   | H_LYS_43   | NZ     | H_GLU_85   | OE1    | 3.820        |
| 5A2L   | H_ARG_52   | NH1    | H_GLU_50   | OE2    | 2.656        |
| 5A2L   | H_HIS_58   | ND1    | H_GLU_50   | OE2    | 2.623        |
| 5A2L   | H_ARG_66   | NH1    | H_ASP_86   | OD1    | 3.373        |
| 5A2L   | H_ARG_66   | NH1    | H_ASP_86   | OD2    | 3.769        |
| 5A2L   | H_ARG_66   | NH2    | H_ASP_86   | OD1    | 3.135        |
| 5A2L   | H_ARG_66   | NH2    | H_ASP_86   | OD2    | 2.092        |
| 5A2L   | H_ARG_71   | NH2    | H_ASP_73   | OD1    | 3.516        |
| 5A2L   | H_ARG_83   | NH1    | H_GLU_85   | OE2    | 3.111        |
| 5A2L   | H_ARG_1024 | NH1    | H_ASP_1069 | OD2    | 3.824        |
| 5A2L   | H_ARG_1024 | NH2    | H_ASP_1069 | OD1    | 3.107        |
| 5A2L   | H_ARG_1024 | NH2    | H_ASP_1069 | OD2    | 2.735        |
| 5A2L   | H_HIS_1042 | ND1    | H_GLU_1038 | OE2    | 3.532        |
| 5A2L   | H_ARG_1061 | NH2    | H_GLU_1081 | OE2    | 3.627        |
| 5A2L   | H_ARG_1061 | NH2    | H_ASP_1082 | OD1    | 2.860        |
| 5A2L   | H_ARG_1061 | NH2    | H_ASP_1082 | OD2    | 3.701        |
| 5A2L   | H_LYS_1103 | NZ     | H_GLU_1083 | OE2    | 3.909        |

Table 650: 5A2L-specific salt bridging networks analysis. In this table, a PDB file is specified with a four-letter PDB ID, except that the names of the PDB files corresponding to the single NMR structural model split from the NMR ensemble is specified with a four-letter PDB ID in addition to a hyphen followed by the single NMR structural model numeric ID, the residue naming scheme is **Chain ID\_residue name\_residue number**,  $\angle ADH$  represents the angle formed by acceptor (A), donor (D) and hydrogen (H) ( $\angle ADH$ ).



| PDB ID | Residue A | Atom A | Residue B  | Atom B | Distance (Å) |
|--------|-----------|--------|------------|--------|--------------|
| 5A7X   | A_LYS.121 | NZ     | A_GLU.429  | OE1    | 3.568        |
| 5A7X   | A_LYS.121 | NZ     | A_GLU.429  | OE2    | 2.734        |
| 5A7X   | A_LYS.207 | NZ     | A_GLU.381  | OE1    | 3.945        |
| 5A7X   | A_LYS.207 | NZ     | A_GLU.381  | OE2    | 3.126        |
| 5A7X   | A_LYS.232 | NZ     | A_GLU.351  | OE1    | 3.994        |
| 5A7X   | A_HIS.249 | NE2    | A_GLU.482  | OE1    | 3.525        |
| 5A7X   | A_LYS.282 | NZ     | A_GLU.275  | OE1    | 3.953        |
| 5A7X   | A_LYS.282 | NZ     | A_GLU.275  | OE2    | 2.643        |
| 5A7X   | A_LYS.348 | NZ     | A_GLU.269  | OE1    | 3.207        |
| 5A7X   | A_LYS.348 | NZ     | A_GLU.351  | OE1    | 3.940        |
| 5A7X   | A_LYS.348 | NZ     | A_GLU.351  | OE2    | 3.259        |
| 5A7X   | A_LYS.350 | NZ     | A_ASP.395  | OD2    | 3.580        |
| 5A7X   | A_LYS.357 | NZ     | A_GLU.466  | OE2    | 3.719        |
| 5A7X   | A_ARG.419 | NH1    | D_GLU.100B | OE1    | 3.000        |
| 5A7X   | A_ARG.419 | NH1    | D_GLU.100B | OE2    | 3.675        |
| 5A7X   | A_ARG.419 | NH2    | D_GLU.99   | OE1    | 2.292        |
| 5A7X   | A_ARG.419 | NH2    | D_GLU.100B | OE2    | 3.969        |
| 5A7X   | A_ARG.456 | NH2    | A_GLU.466  | OE1    | 3.535        |
| 5A7X   | A_ARG.456 | NH2    | A_GLU.466  | OE2    | 3.469        |
| 5A7X   | A_ARG.469 | NH2    | A_ASP.457  | OD2    | 3.234        |
| 5A7X   | A_ARG.476 | NH1    | A_ASP.474  | OD1    | 3.441        |
| 5A7X   | A_ARG.476 | NH2    | A_GLU.102  | OE1    | 3.296        |
| 5A7X   | A_ARG.476 | NH2    | A_GLU.102  | OE2    | 3.010        |
| 5A7X   | A_LYS.487 | NZ     | A_GLU.91   | OE1    | 3.525        |
| 5A7X   | A_LYS.490 | NZ     | A_GLU.492  | OE1    | 3.300        |
| 5A7X   | B_LYS.29  | NZ     | B_GLU.85   | OE1    | 2.833        |
| 5A7X   | B_LYS.29  | NZ     | B_GLU.85   | OE2    | 3.848        |
| 5A7X   | B_LYS.35  | NZ     | A_ASP.457  | OD1    | 3.741        |
| 5A7X   | B_ARG.54  | NH1    | B_ASP.78   | OD1    | 3.987        |
| 5A7X   | B_ARG.54  | NH1    | B_ASP.78   | OD2    | 2.755        |
| 5A7X   | B_ARG.54  | NH2    | B_ASP.78   | OD1    | 2.666        |
| 5A7X   | B_ARG.54  | NH2    | B_ASP.78   | OD2    | 2.988        |
| 5A7X   | B_ARG.59  | NH1    | A_ASP.368  | OD1    | 3.154        |
| 5A7X   | B_ARG.59  | NH1    | A_ASP.368  | OD2    | 3.344        |
| 5A7X   | B_ARG.59  | NH2    | A_ASP.368  | OD1    | 2.976        |
| 5A7X   | B_ARG.59  | NH2    | A_ASP.368  | OD2    | 2.433        |
| 5A7X   | B_HIS.107 | ND1    | B_ASP.105  | OD1    | 3.166        |
| 5A7X   | B_HIS.107 | ND1    | B_ASP.105  | OD2    | 2.892        |
| 5A7X   | B_ARG.134 | NH2    | B_ASP.153  | OD1    | 3.765        |
| 5A7X   | B_LYS.136 | NZ     | B_GLU.150  | OE2    | 3.886        |
| 5A7X   | B_LYS.136 | NZ     | B_ASP.153  | OD1    | 3.937        |
| 5A7X   | B_LYS.136 | NZ     | B_ASP.153  | OD2    | 2.987        |
| 5A7X   | B_LYS.171 | NZ     | B_GLU.169  | OE2    | 2.874        |
| 5A7X   | C_ARG.61  | NH2    | C_GLU.81   | OE2    | 3.127        |
| 5A7X   | C_ARG.61  | NH2    | C_ASP.82   | OD1    | 3.575        |
| 5A7X   | C_ARG.95B | NH2    | C_ASP.1    | OD2    | 2.985        |
| 5A7X   | C_HIS.189 | ND1    | C_ASP.151  | OD2    | 2.584        |
| 5A7X   | C_HIS.189 | NE2    | C_ASP.185  | OD1    | 2.801        |
| 5A7X   | C_HIS.189 | NE2    | C_ASP.185  | OD2    | 3.600        |
| 5A7X   | C_ARG.211 | NH1    | C_GLU.187  | OE1    | 3.852        |
| 5A7X   | D_ARG.31  | NH2    | D_ASP.100A | OD1    | 3.069        |
| 5A7X   | D_ARG.31  | NH2    | D_ASP.100A | OD2    | 3.614        |
| 5A7X   | D_ARG.38  | NH1    | D_GLU.46   | OE1    | 2.778        |
| 5A7X   | D_ARG.38  | NH1    | D_GLU.46   | OE2    | 3.341        |
| 5A7X   | D_ARG.38  | NH2    | D_ASP.86   | OD1    | 2.685        |
| 5A7X   | D_ARG.50  | NH2    | D_GLU.97   | OE2    | 2.331        |
| 5A7X   | D_ARG.66  | NH1    | D_ASP.86   | OD2    | 3.597        |

|      |           |     |            |     |       |
|------|-----------|-----|------------|-----|-------|
| 5A7X | D_ARG_66  | NH2 | D_ASP_86   | OD1 | 2.740 |
| 5A7X | D_ARG_66  | NH2 | D_ASP_86   | OD2 | 2.415 |
| 5A7X | D_LYS_73  | NZ  | D_ASP_55   | OD1 | 2.968 |
| 5A7X | D_ARG_82A | NH2 | D_GLU_81   | OE1 | 3.271 |
| 5A7X | D_LYS_143 | NZ  | D_ASP_144  | OD1 | 2.614 |
| 5A7X | D_LYS_143 | NZ  | D_ASP_144  | OD2 | 3.235 |
| 5A7X | D_HIS_164 | NE2 | C_ASP_167  | OD1 | 3.880 |
| 5A7X | D_HIS_164 | NE2 | C_ASP_167  | OD2 | 2.506 |
| 5A7X | D_LYS_206 | NZ  | D_ASP_208  | OD1 | 3.965 |
| 5A7X | D_LYS_209 | NZ  | C_GLU_123  | OE1 | 3.513 |
| 5A7X | D_LYS_209 | NZ  | C_GLU_123  | OE2 | 3.583 |
| 5A7X | E_LYS_121 | NZ  | E_GLU_429  | OE1 | 3.567 |
| 5A7X | E_LYS_121 | NZ  | E_GLU_429  | OE2 | 2.734 |
| 5A7X | E_LYS_207 | NZ  | E_GLU_381  | OE1 | 3.946 |
| 5A7X | E_LYS_207 | NZ  | E_GLU_381  | OE2 | 3.125 |
| 5A7X | E_LYS_232 | NZ  | E_GLU_351  | OE1 | 3.995 |
| 5A7X | E_HIS_249 | NE2 | E_GLU_482  | OE1 | 3.525 |
| 5A7X | E_LYS_282 | NZ  | E_GLU_275  | OE1 | 3.954 |
| 5A7X | E_LYS_282 | NZ  | E_GLU_275  | OE2 | 2.642 |
| 5A7X | E_LYS_348 | NZ  | E_GLU_269  | OE1 | 3.207 |
| 5A7X | E_LYS_348 | NZ  | E_GLU_351  | OE1 | 3.941 |
| 5A7X | E_LYS_348 | NZ  | E_GLU_351  | OE2 | 3.259 |
| 5A7X | E_LYS_350 | NZ  | E_ASP_395  | OD2 | 3.580 |
| 5A7X | E_LYS_357 | NZ  | E_GLU_466  | OE2 | 3.719 |
| 5A7X | E_ARG_419 | NH1 | H_GLU_100B | OE1 | 2.998 |
| 5A7X | E_ARG_419 | NH1 | H_GLU_100B | OE2 | 3.674 |
| 5A7X | E_ARG_419 | NH2 | H_GLU_99   | OE1 | 2.293 |
| 5A7X | E_ARG_419 | NH2 | H_GLU_100B | OE2 | 3.968 |
| 5A7X | E_ARG_456 | NH2 | E_GLU_466  | OE1 | 3.536 |
| 5A7X | E_ARG_456 | NH2 | E_GLU_466  | OE2 | 3.468 |
| 5A7X | E_ARG_469 | NH2 | E_ASP_457  | OD2 | 3.234 |
| 5A7X | E_ARG_476 | NH1 | E_ASP_474  | OD1 | 3.440 |
| 5A7X | E_ARG_476 | NH2 | E_GLU_102  | OE1 | 3.296 |
| 5A7X | E_ARG_476 | NH2 | E_GLU_102  | OE2 | 3.010 |
| 5A7X | E_LYS_487 | NZ  | E_GLU_91   | OE1 | 3.524 |
| 5A7X | E_LYS_490 | NZ  | E_GLU_492  | OE1 | 3.301 |
| 5A7X | F_LYS_29  | NZ  | F_GLU_85   | OE1 | 2.832 |
| 5A7X | F_LYS_29  | NZ  | F_GLU_85   | OE2 | 3.847 |
| 5A7X | F_LYS_35  | NZ  | E_ASP_457  | OD1 | 3.741 |
| 5A7X | F_ARG_54  | NH1 | F_ASP_78   | OD1 | 3.987 |
| 5A7X | F_ARG_54  | NH1 | F_ASP_78   | OD2 | 2.755 |
| 5A7X | F_ARG_54  | NH2 | F_ASP_78   | OD1 | 2.666 |
| 5A7X | F_ARG_54  | NH2 | F_ASP_78   | OD2 | 2.988 |
| 5A7X | F_ARG_59  | NH1 | E_ASP_368  | OD1 | 3.154 |
| 5A7X | F_ARG_59  | NH1 | E_ASP_368  | OD2 | 3.343 |
| 5A7X | F_ARG_59  | NH2 | E_ASP_368  | OD1 | 2.977 |
| 5A7X | F_ARG_59  | NH2 | E_ASP_368  | OD2 | 2.434 |
| 5A7X | F_HIS_107 | ND1 | F_ASP_105  | OD1 | 3.166 |
| 5A7X | F_HIS_107 | ND1 | F_ASP_105  | OD2 | 2.891 |
| 5A7X | F_ARG_134 | NH2 | F_ASP_153  | OD1 | 3.765 |
| 5A7X | F_LYS_136 | NZ  | F_GLU_150  | OE2 | 3.883 |
| 5A7X | F_LYS_136 | NZ  | F_ASP_153  | OD1 | 3.936 |
| 5A7X | F_LYS_136 | NZ  | F_ASP_153  | OD2 | 2.987 |
| 5A7X | F_LYS_171 | NZ  | F_GLU_169  | OE2 | 2.875 |
| 5A7X | G_ARG_61  | NH2 | G_GLU_81   | OE2 | 3.126 |
| 5A7X | G_ARG_61  | NH2 | G_ASP_82   | OD1 | 3.576 |
| 5A7X | G_ARG_95B | NH2 | G_ASP_1    | OD2 | 2.984 |
| 5A7X | G_HIS_189 | ND1 | G_ASP_151  | OD2 | 2.584 |

|      |           |     |            |     |       |
|------|-----------|-----|------------|-----|-------|
| 5A7X | G_HIS_189 | NE2 | G_ASP_185  | OD1 | 2.802 |
| 5A7X | G_HIS_189 | NE2 | G_ASP_185  | OD2 | 3.599 |
| 5A7X | G_ARG_211 | NH1 | G_GLU_187  | OE1 | 3.852 |
| 5A7X | H_ARG_31  | NH2 | H_ASP_100A | OD1 | 3.070 |
| 5A7X | H_ARG_31  | NH2 | H_ASP_100A | OD2 | 3.615 |
| 5A7X | H_ARG_38  | NH1 | H_GLU_46   | OE1 | 2.780 |
| 5A7X | H_ARG_38  | NH1 | H_GLU_46   | OE2 | 3.343 |
| 5A7X | H_ARG_38  | NH2 | H_ASP_86   | OD1 | 2.684 |
| 5A7X | H_ARG_50  | NH2 | H_GLU_97   | OE2 | 2.333 |
| 5A7X | H_ARG_66  | NH1 | H_ASP_86   | OD2 | 3.598 |
| 5A7X | H_ARG_66  | NH2 | H_ASP_86   | OD1 | 2.739 |
| 5A7X | H_ARG_66  | NH2 | H_ASP_86   | OD2 | 2.416 |
| 5A7X | H_LYS_73  | NZ  | H_ASP_55   | OD1 | 2.968 |
| 5A7X | H_ARG_82A | NH2 | H_GLU_81   | OE1 | 3.271 |
| 5A7X | H_LYS_143 | NZ  | H_ASP_144  | OD1 | 2.614 |
| 5A7X | H_LYS_143 | NZ  | H_ASP_144  | OD2 | 3.234 |
| 5A7X | H_HIS_164 | NE2 | G_ASP_167  | OD1 | 3.880 |
| 5A7X | H_HIS_164 | NE2 | G_ASP_167  | OD2 | 2.505 |
| 5A7X | H_LYS_206 | NZ  | H_ASP_208  | OD1 | 3.966 |
| 5A7X | H_LYS_209 | NZ  | G_GLU_123  | OE1 | 3.512 |
| 5A7X | H_LYS_209 | NZ  | G_GLU_123  | OE2 | 3.584 |
| 5A7X | I_LYS_121 | NZ  | I_GLU_429  | OE1 | 3.568 |
| 5A7X | I_LYS_121 | NZ  | I_GLU_429  | OE2 | 2.736 |
| 5A7X | I_LYS_207 | NZ  | I_GLU_381  | OE1 | 3.945 |
| 5A7X | I_LYS_207 | NZ  | I_GLU_381  | OE2 | 3.127 |
| 5A7X | I_LYS_232 | NZ  | I_GLU_351  | OE1 | 3.995 |
| 5A7X | I_HIS_249 | NE2 | I_GLU_482  | OE1 | 3.525 |
| 5A7X | I_LYS_282 | NZ  | I_GLU_275  | OE1 | 3.953 |
| 5A7X | I_LYS_282 | NZ  | I_GLU_275  | OE2 | 2.643 |
| 5A7X | I_LYS_348 | NZ  | I_GLU_269  | OE1 | 3.206 |
| 5A7X | I_LYS_348 | NZ  | I_GLU_351  | OE1 | 3.941 |
| 5A7X | I_LYS_348 | NZ  | I_GLU_351  | OE2 | 3.259 |
| 5A7X | I_LYS_350 | NZ  | I_ASP_395  | OD2 | 3.579 |
| 5A7X | I_LYS_357 | NZ  | I_GLU_466  | OE2 | 3.720 |
| 5A7X | I_ARG_419 | NH1 | L_GLU_100B | OE1 | 2.999 |
| 5A7X | I_ARG_419 | NH1 | L_GLU_100B | OE2 | 3.675 |
| 5A7X | I_ARG_419 | NH2 | L_GLU_99   | OE1 | 2.293 |
| 5A7X | I_ARG_419 | NH2 | L_GLU_100B | OE2 | 3.968 |
| 5A7X | I_ARG_456 | NH2 | I_GLU_466  | OE1 | 3.536 |
| 5A7X | I_ARG_456 | NH2 | I_GLU_466  | OE2 | 3.468 |
| 5A7X | I_ARG_469 | NH2 | I_ASP_457  | OD2 | 3.234 |
| 5A7X | I_ARG_476 | NH1 | I_ASP_474  | OD1 | 3.441 |
| 5A7X | I_ARG_476 | NH2 | I_GLU_102  | OE1 | 3.297 |
| 5A7X | I_ARG_476 | NH2 | I_GLU_102  | OE2 | 3.009 |
| 5A7X | I_LYS_487 | NZ  | I_GLU_91   | OE1 | 3.523 |
| 5A7X | I_LYS_490 | NZ  | I_GLU_492  | OE1 | 3.300 |
| 5A7X | J_LYS_29  | NZ  | J_GLU_85   | OE1 | 2.833 |
| 5A7X | J_LYS_29  | NZ  | J_GLU_85   | OE2 | 3.848 |
| 5A7X | J_LYS_35  | NZ  | I_ASP_457  | OD1 | 3.740 |
| 5A7X | J_ARG_54  | NH1 | J_ASP_78   | OD1 | 3.987 |
| 5A7X | J_ARG_54  | NH1 | J_ASP_78   | OD2 | 2.755 |
| 5A7X | J_ARG_54  | NH2 | J_ASP_78   | OD1 | 2.665 |
| 5A7X | J_ARG_54  | NH2 | J_ASP_78   | OD2 | 2.989 |
| 5A7X | J_ARG_59  | NH1 | I_ASP_368  | OD1 | 3.154 |
| 5A7X | J_ARG_59  | NH1 | I_ASP_368  | OD2 | 3.344 |
| 5A7X | J_ARG_59  | NH2 | I_ASP_368  | OD1 | 2.976 |
| 5A7X | J_ARG_59  | NH2 | I_ASP_368  | OD2 | 2.433 |
| 5A7X | J_HIS_107 | ND1 | J_ASP_105  | OD1 | 3.166 |

|      |            |     |            |     |       |
|------|------------|-----|------------|-----|-------|
| 5A7X | J_HIS_107  | ND1 | J_ASP_105  | OD2 | 2.892 |
| 5A7X | J_ARG_134  | NH2 | J_ASP_153  | OD1 | 3.765 |
| 5A7X | J_LYS_136  | NZ  | J_GLU_150  | OE2 | 3.885 |
| 5A7X | J_LYS_136  | NZ  | J_ASP_153  | OD1 | 3.936 |
| 5A7X | J_LYS_136  | NZ  | J_ASP_153  | OD2 | 2.987 |
| 5A7X | J_LYS_171  | NZ  | J_GLU_169  | OE2 | 2.873 |
| 5A7X | K_ARG_61   | NH2 | K_GLU_81   | OE2 | 3.128 |
| 5A7X | K_ARG_61   | NH2 | K_ASP_82   | OD1 | 3.577 |
| 5A7X | K_ARG_95B  | NH2 | K_ASP_1    | OD2 | 2.985 |
| 5A7X | K_HIS_189  | ND1 | K_ASP_151  | OD2 | 2.584 |
| 5A7X | K_HIS_189  | NE2 | K_ASP_185  | OD1 | 2.801 |
| 5A7X | K_HIS_189  | NE2 | K_ASP_185  | OD2 | 3.597 |
| 5A7X | K_ARG_211  | NH1 | K_GLU_187  | OE1 | 3.851 |
| 5A7X | L_ARG_31   | NH2 | L_ASP_100A | OD1 | 3.070 |
| 5A7X | L_ARG_31   | NH2 | L_ASP_100A | OD2 | 3.615 |
| 5A7X | L_ARG_38   | NH1 | L_GLU_46   | OE1 | 2.779 |
| 5A7X | L_ARG_38   | NH1 | L_GLU_46   | OE2 | 3.342 |
| 5A7X | L_ARG_38   | NH2 | L_ASP_86   | OD1 | 2.685 |
| 5A7X | L_ARG_50   | NH2 | L_GLU_97   | OE2 | 2.332 |
| 5A7X | L_ARG_66   | NH1 | L_ASP_86   | OD2 | 3.598 |
| 5A7X | L_ARG_66   | NH2 | L_ASP_86   | OD1 | 2.739 |
| 5A7X | L_ARG_66   | NH2 | L_ASP_86   | OD2 | 2.415 |
| 5A7X | L_LYS_73   | NZ  | L_ASP_55   | OD1 | 2.968 |
| 5A7X | L_ARG_82A  | NH2 | L_GLU_81   | OE1 | 3.271 |
| 5A7X | L_LYS_143  | NZ  | L_ASP_144  | OD1 | 2.615 |
| 5A7X | L_LYS_143  | NZ  | L_ASP_144  | OD2 | 3.236 |
| 5A7X | L_HIS_164  | NE2 | K_ASP_167  | OD1 | 3.880 |
| 5A7X | L_HIS_164  | NE2 | K_ASP_167  | OD2 | 2.504 |
| 5A7X | L_LYS_206  | NZ  | L_ASP_208  | OD1 | 3.966 |
| 5A7X | L_LYS_209  | NZ  | K_GLU_123  | OE1 | 3.514 |
| 5A7X | L_LYS_209  | NZ  | K_GLU_123  | OE2 | 3.585 |
| 5A7X | M_ARG_24   | NH2 | M_ASP_70   | OD1 | 3.351 |
| 5A7X | M_ARG_24   | NH2 | M_ASP_70   | OD2 | 2.877 |
| 5A7X | M_ARG_61   | NH1 | M_ASP_82   | OD1 | 3.079 |
| 5A7X | M_ARG_61   | NH1 | M_ASP_82   | OD2 | 3.077 |
| 5A7X | M_ARG_61   | NH2 | M_GLU_81   | OE2 | 3.862 |
| 5A7X | M_LYS_103  | NZ  | M_GLU_165  | OE1 | 3.804 |
| 5A7X | M_LYS_149  | NZ  | M_GLU_195  | OE1 | 2.746 |
| 5A7X | M_LYS_149  | NZ  | M_GLU_195  | OE2 | 3.963 |
| 5A7X | M_LYS_183  | NZ  | M_GLU_187  | OE2 | 2.699 |
| 5A7X | M_HIS_189  | ND1 | M_ASP_151  | OD1 | 3.975 |
| 5A7X | M_HIS_189  | ND1 | M_ASP_151  | OD2 | 2.261 |
| 5A7X | N_ARG_38   | NH1 | N_ASP_86   | OD1 | 3.024 |
| 5A7X | N_ARG_38   | NH2 | N_GLU_46   | OE1 | 3.886 |
| 5A7X | N_ARG_66   | NH1 | N_ASP_86   | OD1 | 3.550 |
| 5A7X | N_ARG_66   | NH1 | N_ASP_86   | OD2 | 2.799 |
| 5A7X | N_ARG_66   | NH2 | N_ASP_86   | OD1 | 2.933 |
| 5A7X | N_ARG_66   | NH2 | N_ASP_86   | OD2 | 3.625 |
| 5A7X | N_LYS_82A  | NZ  | N_GLU_81   | OE2 | 2.705 |
| 5A7X | N_HIS_100F | ND1 | N_ASP_100G | OD2 | 3.940 |
| 5A7X | N_LYS_143  | NZ  | N_ASP_144  | OD1 | 3.370 |
| 5A7X | N_LYS_143  | NZ  | N_ASP_144  | OD2 | 3.506 |
| 5A7X | N_LYS_206  | NZ  | N_ASP_208  | OD2 | 3.418 |
| 5A7X | O_ARG_24   | NH2 | O_ASP_70   | OD1 | 3.351 |
| 5A7X | O_ARG_24   | NH2 | O_ASP_70   | OD2 | 2.877 |
| 5A7X | O_ARG_61   | NH1 | O_ASP_82   | OD1 | 3.079 |
| 5A7X | O_ARG_61   | NH1 | O_ASP_82   | OD2 | 3.077 |
| 5A7X | O_ARG_61   | NH2 | O_GLU_81   | OE2 | 3.862 |

|      |            |     |            |     |       |
|------|------------|-----|------------|-----|-------|
| 5A7X | O_LYS_103  | NZ  | O_GLU_165  | OE1 | 3.804 |
| 5A7X | O_LYS_149  | NZ  | O_GLU_195  | OE1 | 2.747 |
| 5A7X | O_LYS_149  | NZ  | O_GLU_195  | OE2 | 3.963 |
| 5A7X | O_LYS_183  | NZ  | O_GLU_187  | OE2 | 2.699 |
| 5A7X | O_HIS_189  | ND1 | O_ASP_151  | OD1 | 3.974 |
| 5A7X | O_HIS_189  | ND1 | O_ASP_151  | OD2 | 2.260 |
| 5A7X | P_ARG_38   | NH1 | P_ASP_86   | OD1 | 3.023 |
| 5A7X | P_ARG_38   | NH2 | P_GLU_46   | OE1 | 3.886 |
| 5A7X | P_ARG_66   | NH1 | P_ASP_86   | OD1 | 3.549 |
| 5A7X | P_ARG_66   | NH1 | P_ASP_86   | OD2 | 2.799 |
| 5A7X | P_ARG_66   | NH2 | P_ASP_86   | OD1 | 2.932 |
| 5A7X | P_ARG_66   | NH2 | P_ASP_86   | OD2 | 3.625 |
| 5A7X | P_LYS_82A  | NZ  | P_GLU_81   | OE2 | 2.706 |
| 5A7X | P_HIS_100F | ND1 | P_ASP_100G | OD2 | 3.938 |
| 5A7X | P_LYS_143  | NZ  | P_ASP_144  | OD1 | 3.371 |
| 5A7X | P_LYS_143  | NZ  | P_ASP_144  | OD2 | 3.506 |
| 5A7X | P_LYS_206  | NZ  | P_ASP_208  | OD2 | 3.418 |
| 5A7X | Q_ARG_24   | NH2 | Q_ASP_70   | OD1 | 3.350 |
| 5A7X | Q_ARG_24   | NH2 | Q_ASP_70   | OD2 | 2.876 |
| 5A7X | Q_ARG_61   | NH1 | Q_ASP_82   | OD1 | 3.081 |
| 5A7X | Q_ARG_61   | NH1 | Q_ASP_82   | OD2 | 3.078 |
| 5A7X | Q_ARG_61   | NH2 | Q_GLU_81   | OE2 | 3.863 |
| 5A7X | Q_LYS_103  | NZ  | Q_GLU_165  | OE1 | 3.804 |
| 5A7X | Q_LYS_149  | NZ  | Q_GLU_195  | OE1 | 2.747 |
| 5A7X | Q_LYS_149  | NZ  | Q_GLU_195  | OE2 | 3.963 |
| 5A7X | Q_LYS_183  | NZ  | Q_GLU_187  | OE2 | 2.698 |
| 5A7X | Q_HIS_189  | ND1 | Q_ASP_151  | OD1 | 3.974 |
| 5A7X | Q_HIS_189  | ND1 | Q_ASP_151  | OD2 | 2.260 |
| 5A7X | R_ARG_38   | NH1 | R_ASP_86   | OD1 | 3.024 |
| 5A7X | R_ARG_38   | NH2 | R_GLU_46   | OE1 | 3.886 |
| 5A7X | R_ARG_66   | NH1 | R_ASP_86   | OD1 | 3.548 |
| 5A7X | R_ARG_66   | NH1 | R_ASP_86   | OD2 | 2.798 |
| 5A7X | R_ARG_66   | NH2 | R_ASP_86   | OD1 | 2.932 |
| 5A7X | R_ARG_66   | NH2 | R_ASP_86   | OD2 | 3.625 |
| 5A7X | R_LYS_82A  | NZ  | R_GLU_81   | OE2 | 2.705 |
| 5A7X | R_HIS_100F | ND1 | R_ASP_100G | OD2 | 3.938 |
| 5A7X | R_LYS_143  | NZ  | R_ASP_144  | OD1 | 3.370 |
| 5A7X | R_LYS_143  | NZ  | R_ASP_144  | OD2 | 3.506 |
| 5A7X | R_LYS_206  | NZ  | R_ASP_208  | OD2 | 3.419 |

Table 651: 5A7X-specific salt bridging networks analysis. In this table, a PDB file is specified with a four-letter PDB ID, except that the names of the PDB files corresponding to the single NMR structural model split from the NMR ensemble is specified with a four-letter PDB ID in addition to a hyphen followed by the single NMR structural model numeric ID, the residue naming scheme is **Chain ID\_residue name\_residue number**,  $\angle ADH$  represents the angle formed by acceptor (A), donor (D) and hydrogen (H) ( $\angle ADH$ ).

| PDB ID | Residue A | Atom A | Residue B  | Atom B | Distance (Å) |
|--------|-----------|--------|------------|--------|--------------|
| 5A8H   | A_LYS.121 | NZ     | A_GLU.429  | OE1    | 3.567        |
| 5A8H   | A_LYS.121 | NZ     | A_GLU.429  | OE2    | 2.735        |
| 5A8H   | A_LYS.207 | NZ     | A_GLU.381  | OE1    | 3.945        |
| 5A8H   | A_LYS.207 | NZ     | A_GLU.381  | OE2    | 3.126        |
| 5A8H   | A_LYS.232 | NZ     | A_GLU.351  | OE1    | 3.995        |
| 5A8H   | A_HIS.249 | NE2    | A_GLU.482  | OE1    | 3.525        |
| 5A8H   | A_LYS.282 | NZ     | A_GLU.275  | OE1    | 3.954        |
| 5A8H   | A_LYS.282 | NZ     | A_GLU.275  | OE2    | 2.643        |
| 5A8H   | A_LYS.348 | NZ     | A_GLU.269  | OE1    | 3.206        |
| 5A8H   | A_LYS.348 | NZ     | A_GLU.351  | OE1    | 3.941        |
| 5A8H   | A_LYS.348 | NZ     | A_GLU.351  | OE2    | 3.259        |
| 5A8H   | A_LYS.350 | NZ     | A_ASP.395  | OD2    | 3.579        |
| 5A8H   | A_LYS.357 | NZ     | A_GLU.466  | OE2    | 3.720        |
| 5A8H   | A_ARG.419 | NH1    | D_GLU.100B | OE1    | 2.999        |
| 5A8H   | A_ARG.419 | NH1    | D_GLU.100B | OE2    | 3.674        |
| 5A8H   | A_ARG.419 | NH2    | D_GLU.99   | OE1    | 2.292        |
| 5A8H   | A_ARG.419 | NH2    | D_GLU.100B | OE2    | 3.968        |
| 5A8H   | A_ARG.456 | NH2    | A_GLU.466  | OE1    | 3.537        |
| 5A8H   | A_ARG.456 | NH2    | A_GLU.466  | OE2    | 3.468        |
| 5A8H   | A_ARG.469 | NH2    | A_ASP.457  | OD2    | 3.234        |
| 5A8H   | A_ARG.476 | NH1    | A_ASP.474  | OD1    | 3.441        |
| 5A8H   | A_ARG.476 | NH2    | A_GLU.102  | OE1    | 3.296        |
| 5A8H   | A_ARG.476 | NH2    | A_GLU.102  | OE2    | 3.009        |
| 5A8H   | A_LYS.487 | NZ     | A_GLU.91   | OE1    | 3.523        |
| 5A8H   | A_LYS.490 | NZ     | A_GLU.492  | OE1    | 3.301        |
| 5A8H   | B_LYS.29  | NZ     | B_GLU.85   | OE1    | 2.833        |
| 5A8H   | B_LYS.29  | NZ     | B_GLU.85   | OE2    | 3.848        |
| 5A8H   | B_LYS.35  | NZ     | A_ASP.457  | OD1    | 3.740        |
| 5A8H   | B_ARG.54  | NH1    | B_ASP.78   | OD1    | 3.987        |
| 5A8H   | B_ARG.54  | NH1    | B_ASP.78   | OD2    | 2.755        |
| 5A8H   | B_ARG.54  | NH2    | B_ASP.78   | OD1    | 2.665        |
| 5A8H   | B_ARG.54  | NH2    | B_ASP.78   | OD2    | 2.988        |
| 5A8H   | B_ARG.59  | NH1    | A_ASP.368  | OD1    | 3.154        |
| 5A8H   | B_ARG.59  | NH1    | A_ASP.368  | OD2    | 3.342        |
| 5A8H   | B_ARG.59  | NH2    | A_ASP.368  | OD1    | 2.977        |
| 5A8H   | B_ARG.59  | NH2    | A_ASP.368  | OD2    | 2.433        |
| 5A8H   | B_HIS.107 | ND1    | B_ASP.105  | OD1    | 3.166        |
| 5A8H   | B_HIS.107 | ND1    | B_ASP.105  | OD2    | 2.891        |
| 5A8H   | B_ARG.134 | NH2    | B_ASP.153  | OD1    | 3.766        |
| 5A8H   | B_LYS.136 | NZ     | B_GLU.150  | OE2    | 3.884        |
| 5A8H   | B_LYS.136 | NZ     | B_ASP.153  | OD1    | 3.937        |
| 5A8H   | B_LYS.136 | NZ     | B_ASP.153  | OD2    | 2.986        |
| 5A8H   | B_LYS.171 | NZ     | B_GLU.169  | OE2    | 2.874        |
| 5A8H   | C_ARG.61  | NH2    | C_GLU.81   | OE2    | 3.127        |
| 5A8H   | C_ARG.61  | NH2    | C_ASP.82   | OD1    | 3.576        |
| 5A8H   | C_ARG.95B | NH2    | C_ASP.1    | OD2    | 2.985        |
| 5A8H   | C_HIS.189 | ND1    | C_ASP.151  | OD2    | 2.585        |
| 5A8H   | C_HIS.189 | NE2    | C_ASP.185  | OD1    | 2.803        |
| 5A8H   | C_HIS.189 | NE2    | C_ASP.185  | OD2    | 3.599        |
| 5A8H   | C_ARG.211 | NH1    | C_GLU.187  | OE1    | 3.851        |
| 5A8H   | D_ARG.31  | NH2    | D_ASP.100A | OD1    | 3.070        |
| 5A8H   | D_ARG.31  | NH2    | D_ASP.100A | OD2    | 3.615        |
| 5A8H   | D_ARG.38  | NH1    | D_GLU.46   | OE1    | 2.779        |
| 5A8H   | D_ARG.38  | NH1    | D_GLU.46   | OE2    | 3.342        |
| 5A8H   | D_ARG.38  | NH2    | D_ASP.86   | OD1    | 2.684        |
| 5A8H   | D_ARG.50  | NH2    | D_GLU.97   | OE2    | 2.333        |
| 5A8H   | D_ARG.66  | NH1    | D_ASP.86   | OD2    | 3.597        |

|      |            |     |            |     |       |
|------|------------|-----|------------|-----|-------|
| 5A8H | D_ARG_66   | NH2 | D_ASP_86   | OD1 | 2.739 |
| 5A8H | D_ARG_66   | NH2 | D_ASP_86   | OD2 | 2.414 |
| 5A8H | D_LYS_73   | NZ  | D_ASP_55   | OD1 | 2.968 |
| 5A8H | D_ARG_82A  | NH2 | D_GLU_81   | OE1 | 3.271 |
| 5A8H | D_LYS_143  | NZ  | D_ASP_144  | OD1 | 2.615 |
| 5A8H | D_LYS_143  | NZ  | D_ASP_144  | OD2 | 3.235 |
| 5A8H | D_HIS_164  | NE2 | C_ASP_167  | OD1 | 3.880 |
| 5A8H | D_HIS_164  | NE2 | C_ASP_167  | OD2 | 2.505 |
| 5A8H | D_LYS_206  | NZ  | D_ASP_208  | OD1 | 3.966 |
| 5A8H | D_LYS_209  | NZ  | C_GLU_123  | OE1 | 3.514 |
| 5A8H | D_LYS_209  | NZ  | C_GLU_123  | OE2 | 3.584 |
| 5A8H | E_ARG_24   | NH2 | E_ASP_70   | OD1 | 3.351 |
| 5A8H | E_ARG_24   | NH2 | E_ASP_70   | OD2 | 2.876 |
| 5A8H | E_ARG_61   | NH1 | E_ASP_82   | OD1 | 3.079 |
| 5A8H | E_ARG_61   | NH1 | E_ASP_82   | OD2 | 3.077 |
| 5A8H | E_ARG_61   | NH2 | E_GLU_81   | OE2 | 3.862 |
| 5A8H | E_LYS_103  | NZ  | E_GLU_165  | OE1 | 3.805 |
| 5A8H | E_LYS_149  | NZ  | E_GLU_195  | OE1 | 2.746 |
| 5A8H | E_LYS_149  | NZ  | E_GLU_195  | OE2 | 3.963 |
| 5A8H | E_LYS_183  | NZ  | E_GLU_187  | OE2 | 2.699 |
| 5A8H | E_HIS_189  | ND1 | E_ASP_151  | OD1 | 3.975 |
| 5A8H | E_HIS_189  | ND1 | E_ASP_151  | OD2 | 2.260 |
| 5A8H | F_ARG_38   | NH1 | F_ASP_86   | OD1 | 3.024 |
| 5A8H | F_ARG_38   | NH2 | F_GLU_46   | OE1 | 3.885 |
| 5A8H | F_ARG_66   | NH1 | F_ASP_86   | OD1 | 3.548 |
| 5A8H | F_ARG_66   | NH1 | F_ASP_86   | OD2 | 2.798 |
| 5A8H | F_ARG_66   | NH2 | F_ASP_86   | OD1 | 2.933 |
| 5A8H | F_ARG_66   | NH2 | F_ASP_86   | OD2 | 3.625 |
| 5A8H | F_LYS_82A  | NZ  | F_GLU_81   | OE2 | 2.706 |
| 5A8H | F_LYS_100  | NZ  | A_GLU_91   | OE1 | 3.015 |
| 5A8H | F_LYS_100  | NZ  | A_GLU_91   | OE2 | 3.536 |
| 5A8H | F_HIS_100F | ND1 | F_ASP_100G | OD2 | 3.939 |
| 5A8H | F_LYS_143  | NZ  | F_ASP_144  | OD1 | 3.370 |
| 5A8H | F_LYS_143  | NZ  | F_ASP_144  | OD2 | 3.507 |
| 5A8H | F_LYS_206  | NZ  | F_ASP_208  | OD2 | 3.418 |
| 5A8H | G_LYS_121  | NZ  | G_GLU_429  | OE1 | 3.567 |
| 5A8H | G_LYS_121  | NZ  | G_GLU_429  | OE2 | 2.734 |
| 5A8H | G_LYS_207  | NZ  | G_GLU_381  | OE1 | 3.945 |
| 5A8H | G_LYS_207  | NZ  | G_GLU_381  | OE2 | 3.127 |
| 5A8H | G_LYS_232  | NZ  | G_GLU_351  | OE1 | 3.995 |
| 5A8H | G_HIS_249  | NE2 | G_GLU_482  | OE1 | 3.524 |
| 5A8H | G_LYS_282  | NZ  | G_GLU_275  | OE1 | 3.953 |
| 5A8H | G_LYS_282  | NZ  | G_GLU_275  | OE2 | 2.642 |
| 5A8H | G_LYS_348  | NZ  | G_GLU_269  | OE1 | 3.206 |
| 5A8H | G_LYS_348  | NZ  | G_GLU_351  | OE1 | 3.942 |
| 5A8H | G_LYS_348  | NZ  | G_GLU_351  | OE2 | 3.260 |
| 5A8H | G_LYS_350  | NZ  | G_ASP_395  | OD2 | 3.580 |
| 5A8H | G_LYS_357  | NZ  | G_GLU_466  | OE2 | 3.719 |
| 5A8H | G_ARG_419  | NH1 | J_GLU_100B | OE1 | 2.998 |
| 5A8H | G_ARG_419  | NH1 | J_GLU_100B | OE2 | 3.675 |
| 5A8H | G_ARG_419  | NH2 | J_GLU_99   | OE1 | 2.292 |
| 5A8H | G_ARG_419  | NH2 | J_GLU_100B | OE2 | 3.969 |
| 5A8H | G_ARG_456  | NH2 | G_GLU_466  | OE1 | 3.536 |
| 5A8H | G_ARG_456  | NH2 | G_GLU_466  | OE2 | 3.469 |
| 5A8H | G_ARG_469  | NH2 | G_ASP_457  | OD2 | 3.234 |
| 5A8H | G_ARG_476  | NH1 | G_ASP_474  | OD1 | 3.441 |
| 5A8H | G_ARG_476  | NH2 | G_GLU_102  | OE1 | 3.297 |
| 5A8H | G_ARG_476  | NH2 | G_GLU_102  | OE2 | 3.010 |

|      |           |     |            |     |       |
|------|-----------|-----|------------|-----|-------|
| 5A8H | G_LYS_487 | NZ  | G_GLU_91   | OE1 | 3.524 |
| 5A8H | G_LYS_490 | NZ  | G_GLU_492  | OE1 | 3.300 |
| 5A8H | H_LYS_29  | NZ  | H_GLU_85   | OE1 | 2.833 |
| 5A8H | H_LYS_29  | NZ  | H_GLU_85   | OE2 | 3.847 |
| 5A8H | H_LYS_35  | NZ  | G_ASP_457  | OD1 | 3.741 |
| 5A8H | H_ARG_54  | NH1 | H_ASP_78   | OD1 | 3.987 |
| 5A8H | H_ARG_54  | NH1 | H_ASP_78   | OD2 | 2.755 |
| 5A8H | H_ARG_54  | NH2 | H_ASP_78   | OD1 | 2.666 |
| 5A8H | H_ARG_54  | NH2 | H_ASP_78   | OD2 | 2.989 |
| 5A8H | H_ARG_59  | NH1 | G_ASP_368  | OD1 | 3.154 |
| 5A8H | H_ARG_59  | NH1 | G_ASP_368  | OD2 | 3.343 |
| 5A8H | H_ARG_59  | NH2 | G_ASP_368  | OD1 | 2.977 |
| 5A8H | H_ARG_59  | NH2 | G_ASP_368  | OD2 | 2.433 |
| 5A8H | H_HIS_107 | ND1 | H_ASP_105  | OD1 | 3.165 |
| 5A8H | H_HIS_107 | ND1 | H_ASP_105  | OD2 | 2.890 |
| 5A8H | H_ARG_134 | NH2 | H_ASP_153  | OD1 | 3.766 |
| 5A8H | H_LYS_136 | NZ  | H_GLU_150  | OE2 | 3.885 |
| 5A8H | H_LYS_136 | NZ  | H_ASP_153  | OD1 | 3.936 |
| 5A8H | H_LYS_136 | NZ  | H_ASP_153  | OD2 | 2.987 |
| 5A8H | H_LYS_171 | NZ  | H_GLU_169  | OE2 | 2.874 |
| 5A8H | I_ARG_61  | NH2 | I_GLU_81   | OE2 | 3.127 |
| 5A8H | I_ARG_61  | NH2 | I_ASP_82   | OD1 | 3.576 |
| 5A8H | I_ARG_95B | NH2 | I_ASP_1    | OD2 | 2.985 |
| 5A8H | I_HIS_189 | ND1 | I_ASP_151  | OD2 | 2.585 |
| 5A8H | I_HIS_189 | NE2 | I_ASP_185  | OD1 | 2.802 |
| 5A8H | I_HIS_189 | NE2 | I_ASP_185  | OD2 | 3.598 |
| 5A8H | I_ARG_211 | NH1 | I_GLU_187  | OE1 | 3.851 |
| 5A8H | J_ARG_31  | NH2 | J_ASP_100A | OD1 | 3.070 |
| 5A8H | J_ARG_31  | NH2 | J_ASP_100A | OD2 | 3.615 |
| 5A8H | J_ARG_38  | NH1 | J_GLU_46   | OE1 | 2.778 |
| 5A8H | J_ARG_38  | NH1 | J_GLU_46   | OE2 | 3.342 |
| 5A8H | J_ARG_38  | NH2 | J_ASP_86   | OD1 | 2.685 |
| 5A8H | J_ARG_50  | NH2 | J_GLU_97   | OE2 | 2.333 |
| 5A8H | J_ARG_66  | NH1 | J_ASP_86   | OD2 | 3.597 |
| 5A8H | J_ARG_66  | NH2 | J_ASP_86   | OD1 | 2.739 |
| 5A8H | J_ARG_66  | NH2 | J_ASP_86   | OD2 | 2.414 |
| 5A8H | J_LYS_73  | NZ  | J_ASP_55   | OD1 | 2.968 |
| 5A8H | J_ARG_82A | NH2 | J_GLU_81   | OE1 | 3.271 |
| 5A8H | J_LYS_143 | NZ  | J_ASP_144  | OD1 | 2.615 |
| 5A8H | J_LYS_143 | NZ  | J_ASP_144  | OD2 | 3.235 |
| 5A8H | J_HIS_164 | NE2 | I_ASP_167  | OD1 | 3.881 |
| 5A8H | J_HIS_164 | NE2 | I_ASP_167  | OD2 | 2.505 |
| 5A8H | J_LYS_206 | NZ  | J_ASP_208  | OD1 | 3.966 |
| 5A8H | J_LYS_209 | NZ  | I_GLU_123  | OE1 | 3.513 |
| 5A8H | J_LYS_209 | NZ  | I_GLU_123  | OE2 | 3.584 |
| 5A8H | K_ARG_24  | NH2 | K_ASP_70   | OD1 | 3.351 |
| 5A8H | K_ARG_24  | NH2 | K_ASP_70   | OD2 | 2.876 |
| 5A8H | K_ARG_61  | NH1 | K_ASP_82   | OD1 | 3.079 |
| 5A8H | K_ARG_61  | NH1 | K_ASP_82   | OD2 | 3.077 |
| 5A8H | K_ARG_61  | NH2 | K_GLU_81   | OE2 | 3.862 |
| 5A8H | K_LYS_103 | NZ  | K_GLU_165  | OE1 | 3.804 |
| 5A8H | K_LYS_149 | NZ  | K_GLU_195  | OE1 | 2.745 |
| 5A8H | K_LYS_149 | NZ  | K_GLU_195  | OE2 | 3.962 |
| 5A8H | K_LYS_183 | NZ  | K_GLU_187  | OE2 | 2.699 |
| 5A8H | K_HIS_189 | ND1 | K_ASP_151  | OD1 | 3.974 |
| 5A8H | K_HIS_189 | ND1 | K_ASP_151  | OD2 | 2.260 |
| 5A8H | L_ARG_38  | NH1 | L_ASP_86   | OD1 | 3.025 |
| 5A8H | L_ARG_38  | NH2 | L_GLU_46   | OE1 | 3.886 |



|      |            |     |            |     |       |
|------|------------|-----|------------|-----|-------|
| 5A8H | L_ARG_66   | NH1 | L_ASP_86   | OD1 | 3.549 |
| 5A8H | L_ARG_66   | NH1 | L_ASP_86   | OD2 | 2.799 |
| 5A8H | L_ARG_66   | NH2 | L_ASP_86   | OD1 | 2.933 |
| 5A8H | L_ARG_66   | NH2 | L_ASP_86   | OD2 | 3.625 |
| 5A8H | L_LYS_82A  | NZ  | L_GLU_81   | OE2 | 2.706 |
| 5A8H | L_LYS_100  | NZ  | G_GLU_87   | OE1 | 2.922 |
| 5A8H | L_LYS_100  | NZ  | G_GLU_87   | OE2 | 3.552 |
| 5A8H | L_HIS_100E | NE2 | G_GLU_91   | OE2 | 3.049 |
| 5A8H | L_HIS_100F | ND1 | L_ASP_100G | OD2 | 3.939 |
| 5A8H | L_LYS_143  | NZ  | L_ASP_144  | OD1 | 3.369 |
| 5A8H | L_LYS_143  | NZ  | L_ASP_144  | OD2 | 3.505 |
| 5A8H | L_LYS_206  | NZ  | L_ASP_208  | OD2 | 3.418 |
| 5A8H | M_LYS_121  | NZ  | M_GLU_429  | OE1 | 3.568 |
| 5A8H | M_LYS_121  | NZ  | M_GLU_429  | OE2 | 2.734 |
| 5A8H | M_LYS_207  | NZ  | M_GLU_381  | OE1 | 3.945 |
| 5A8H | M_LYS_207  | NZ  | M_GLU_381  | OE2 | 3.127 |
| 5A8H | M_LYS_232  | NZ  | M_GLU_351  | OE1 | 3.995 |
| 5A8H | M_HIS_249  | NE2 | M_GLU_482  | OE1 | 3.525 |
| 5A8H | M_LYS_282  | NZ  | M_GLU_275  | OE1 | 3.953 |
| 5A8H | M_LYS_282  | NZ  | M_GLU_275  | OE2 | 2.642 |
| 5A8H | M_LYS_348  | NZ  | M_GLU_269  | OE1 | 3.206 |
| 5A8H | M_LYS_348  | NZ  | M_GLU_351  | OE1 | 3.941 |
| 5A8H | M_LYS_348  | NZ  | M_GLU_351  | OE2 | 3.259 |
| 5A8H | M_LYS_350  | NZ  | M_ASP_395  | OD2 | 3.579 |
| 5A8H | M_LYS_357  | NZ  | M_GLU_466  | OE2 | 3.719 |
| 5A8H | M_ARG_419  | NH1 | P_GLU_100B | OE1 | 2.999 |
| 5A8H | M_ARG_419  | NH1 | P_GLU_100B | OE2 | 3.675 |
| 5A8H | M_ARG_419  | NH2 | P_GLU_99   | OE1 | 2.292 |
| 5A8H | M_ARG_419  | NH2 | P_GLU_100B | OE2 | 3.969 |
| 5A8H | M_ARG_456  | NH2 | M_GLU_466  | OE1 | 3.537 |
| 5A8H | M_ARG_456  | NH2 | M_GLU_466  | OE2 | 3.469 |
| 5A8H | M_ARG_469  | NH2 | M_ASP_457  | OD2 | 3.235 |
| 5A8H | M_ARG_476  | NH1 | M_ASP_474  | OD1 | 3.441 |
| 5A8H | M_ARG_476  | NH2 | M_GLU_102  | OE1 | 3.296 |
| 5A8H | M_ARG_476  | NH2 | M_GLU_102  | OE2 | 3.009 |
| 5A8H | M_LYS_487  | NZ  | M_GLU_91   | OE1 | 3.525 |
| 5A8H | M_LYS_490  | NZ  | M_GLU_492  | OE1 | 3.300 |
| 5A8H | N_LYS_29   | NZ  | N_GLU_85   | OE1 | 2.833 |
| 5A8H | N_LYS_29   | NZ  | N_GLU_85   | OE2 | 3.848 |
| 5A8H | N_LYS_35   | NZ  | M_ASP_457  | OD1 | 3.741 |
| 5A8H | N_ARG_54   | NH1 | N_ASP_78   | OD1 | 3.987 |
| 5A8H | N_ARG_54   | NH1 | N_ASP_78   | OD2 | 2.755 |
| 5A8H | N_ARG_54   | NH2 | N_ASP_78   | OD1 | 2.666 |
| 5A8H | N_ARG_54   | NH2 | N_ASP_78   | OD2 | 2.989 |
| 5A8H | N_ARG_59   | NH1 | M_ASP_368  | OD1 | 3.154 |
| 5A8H | N_ARG_59   | NH1 | M_ASP_368  | OD2 | 3.343 |
| 5A8H | N_ARG_59   | NH2 | M_ASP_368  | OD1 | 2.977 |
| 5A8H | N_ARG_59   | NH2 | M_ASP_368  | OD2 | 2.433 |
| 5A8H | N_HIS_107  | ND1 | N_ASP_105  | OD1 | 3.166 |
| 5A8H | N_HIS_107  | ND1 | N_ASP_105  | OD2 | 2.891 |
| 5A8H | N_ARG_134  | NH2 | N_ASP_153  | OD1 | 3.765 |
| 5A8H | N_LYS_136  | NZ  | N_GLU_150  | OE2 | 3.885 |
| 5A8H | N_LYS_136  | NZ  | N_ASP_153  | OD1 | 3.936 |
| 5A8H | N_LYS_136  | NZ  | N_ASP_153  | OD2 | 2.986 |
| 5A8H | N_LYS_171  | NZ  | N_GLU_169  | OE2 | 2.873 |
| 5A8H | O_ARG_61   | NH2 | O_GLU_81   | OE2 | 3.127 |
| 5A8H | O_ARG_61   | NH2 | O_ASP_82   | OD1 | 3.576 |
| 5A8H | O_ARG_95B  | NH2 | O_ASP_1    | OD2 | 2.985 |

|      |            |     |            |     |       |
|------|------------|-----|------------|-----|-------|
| 5A8H | O_LYS.145  | NZ  | C_GLU.17   | OE1 | 3.474 |
| 5A8H | O_LYS.145  | NZ  | C_GLU.17   | OE2 | 2.123 |
| 5A8H | O_HIS.189  | ND1 | O_ASP.151  | OD2 | 2.585 |
| 5A8H | O_HIS.189  | NE2 | O_ASP.185  | OD1 | 2.802 |
| 5A8H | O_HIS.189  | NE2 | O_ASP.185  | OD2 | 3.598 |
| 5A8H | O_ARG.211  | NH1 | O_GLU.187  | OE1 | 3.851 |
| 5A8H | P_ARG.31   | NH2 | P_ASP.100A | OD1 | 3.070 |
| 5A8H | P_ARG.31   | NH2 | P_ASP.100A | OD2 | 3.615 |
| 5A8H | P_ARG.38   | NH1 | P_GLU.46   | OE1 | 2.780 |
| 5A8H | P_ARG.38   | NH1 | P_GLU.46   | OE2 | 3.342 |
| 5A8H | P_ARG.38   | NH2 | P_ASP.86   | OD1 | 2.685 |
| 5A8H | P_ARG.50   | NH2 | P_GLU.97   | OE2 | 2.332 |
| 5A8H | P_ARG.66   | NH1 | P_ASP.86   | OD2 | 3.598 |
| 5A8H | P_ARG.66   | NH2 | P_ASP.86   | OD1 | 2.740 |
| 5A8H | P_ARG.66   | NH2 | P_ASP.86   | OD2 | 2.415 |
| 5A8H | P_LYS.73   | NZ  | P_ASP.55   | OD1 | 2.967 |
| 5A8H | P_ARG.82A  | NH2 | P_GLU.81   | OE1 | 3.272 |
| 5A8H | P_LYS.143  | NZ  | P_ASP.144  | OD1 | 2.615 |
| 5A8H | P_LYS.143  | NZ  | P_ASP.144  | OD2 | 3.235 |
| 5A8H | P_HIS.164  | NE2 | O_ASP.167  | OD1 | 3.881 |
| 5A8H | P_HIS.164  | NE2 | O_ASP.167  | OD2 | 2.505 |
| 5A8H | P_LYS.206  | NZ  | P_ASP.208  | OD1 | 3.966 |
| 5A8H | P_LYS.209  | NZ  | O_GLU.123  | OE1 | 3.514 |
| 5A8H | P_LYS.209  | NZ  | O_GLU.123  | OE2 | 3.584 |
| 5A8H | Q_ARG.24   | NH2 | Q_ASP.70   | OD1 | 3.351 |
| 5A8H | Q_ARG.24   | NH2 | Q_ASP.70   | OD2 | 2.877 |
| 5A8H | Q_ARG.61   | NH1 | Q_ASP.82   | OD1 | 3.079 |
| 5A8H | Q_ARG.61   | NH1 | Q_ASP.82   | OD2 | 3.077 |
| 5A8H | Q_ARG.61   | NH2 | Q_GLU.81   | OE2 | 3.861 |
| 5A8H | Q_LYS.103  | NZ  | Q_GLU.165  | OE1 | 3.805 |
| 5A8H | Q_LYS.149  | NZ  | Q_GLU.195  | OE1 | 2.746 |
| 5A8H | Q_LYS.149  | NZ  | Q_GLU.195  | OE2 | 3.963 |
| 5A8H | Q_LYS.183  | NZ  | Q_GLU.187  | OE2 | 2.700 |
| 5A8H | Q_HIS.189  | ND1 | Q_ASP.151  | OD1 | 3.975 |
| 5A8H | Q_HIS.189  | ND1 | Q_ASP.151  | OD2 | 2.261 |
| 5A8H | R_ARG.38   | NH1 | R_ASP.86   | OD1 | 3.024 |
| 5A8H | R_ARG.38   | NH2 | R_GLU.46   | OE1 | 3.885 |
| 5A8H | R_ARG.66   | NH1 | R_ASP.86   | OD1 | 3.548 |
| 5A8H | R_ARG.66   | NH1 | R_ASP.86   | OD2 | 2.798 |
| 5A8H | R_ARG.66   | NH2 | R_ASP.86   | OD1 | 2.932 |
| 5A8H | R_ARG.66   | NH2 | R_ASP.86   | OD2 | 3.625 |
| 5A8H | R_LYS.82A  | NZ  | R_GLU.81   | OE2 | 2.706 |
| 5A8H | R_HIS.100E | ND1 | M_GLU.87   | OE2 | 2.709 |
| 5A8H | R_HIS.100E | NE2 | M_GLU.87   | OE2 | 3.097 |
| 5A8H | R_HIS.100F | ND1 | R_ASP.100G | OD2 | 3.938 |
| 5A8H | R_LYS.143  | NZ  | R_ASP.144  | OD1 | 3.369 |
| 5A8H | R_LYS.143  | NZ  | R_ASP.144  | OD2 | 3.506 |
| 5A8H | R_LYS.206  | NZ  | R_ASP.208  | OD2 | 3.418 |

Table 652: 5A8H-specific salt bridging networks analysis. In this table, a PDB file is specified with a four-letter PDB ID, except that the names of the PDB files corresponding to the single NMR structural model split from the NMR ensemble is specified with a four-letter PDB ID in addition to a hyphen followed by the single NMR structural model numeric ID, the residue naming scheme is **Chain ID\_residue name\_residue number**,  $\angle ADH$  represents the angle formed by acceptor (A), donor (D) and hydrogen (H) ( $\angle ADH$ ).

| PDB ID | Residue A | Atom A | Residue B | Atom B | Distance (Å) |
|--------|-----------|--------|-----------|--------|--------------|
| 5AZE   | L_HIS_36  | NE2    | H_GLU_105 | OE2    | 2.756        |
| 5AZE   | L_ARG_63  | NH2    | L_GLU_83  | OE1    | 3.980        |
| 5AZE   | L_ARG_63  | NH2    | L_GLU_83  | OE2    | 3.863        |
| 5AZE   | L_ARG_63  | NH2    | L_ASP_84  | OD1    | 2.738        |
| 5AZE   | L_ARG_63  | NH2    | L_ASP_84  | OD2    | 3.659        |
| 5AZE   | L_LYS_154 | NZ     | L_GLU_208 | OE1    | 3.064        |
| 5AZE   | L_LYS_154 | NZ     | L_GLU_208 | OE2    | 3.679        |
| 5AZE   | L_HIS_193 | ND1    | L_ASP_156 | OD2    | 2.884        |
| 5AZE   | H_LYS_12  | NZ     | H_GLU_10  | OE1    | 3.838        |
| 5AZE   | H_HIS_35  | NE2    | H_ASP_99  | OD1    | 3.262        |
| 5AZE   | H_ARG_38  | NH1    | H_GLU_46  | OE1    | 2.776        |
| 5AZE   | H_ARG_38  | NH2    | H_ASP_90  | OD1    | 2.628        |
| 5AZE   | H_ARG_67  | NH1    | H_ASP_90  | OD1    | 3.423        |
| 5AZE   | H_ARG_67  | NH1    | H_ASP_90  | OD2    | 3.983        |
| 5AZE   | H_ARG_67  | NH2    | H_ASP_90  | OD1    | 3.299        |
| 5AZE   | H_ARG_67  | NH2    | H_ASP_90  | OD2    | 2.559        |
| 5AZE   | H_ARG_98  | NH2    | H_ASP_109 | OD1    | 3.795        |
| 5AZE   | H_ARG_98  | NH2    | H_ASP_109 | OD2    | 3.043        |
| 5AZE   | H_LYS_137 | NZ     | L_ASP_143 | OD2    | 2.939        |
| 5AZE   | H_LYS_214 | NZ     | H_ASP_216 | OD1    | 3.542        |
| 5AZE   | H_LYS_214 | NZ     | H_ASP_216 | OD2    | 3.113        |
| 5AZE   | H_LYS_217 | NZ     | L_GLU_128 | OE2    | 2.701        |

Table 653: 5AZE-specific salt bridging networks analysis. In this table, a PDB file is specified with a four-letter PDB ID, except that the names of the PDB files corresponding to the single NMR structural model split from the NMR ensemble is specified with a four-letter PDB ID in addition to a hyphen followed by the single NMR structural model numeric ID, the residue naming scheme is **Chain ID\_residue name\_residue number**,  $\angle ADH$  represents the angle formed by acceptor (A), donor (D) and hydrogen (H) ( $\angle ADH$ ).

| PDB ID | Residue A | Atom A | Residue B | Atom B | Distance (Å) |
|--------|-----------|--------|-----------|--------|--------------|
| 5BW7   | A_LYS_248 | NZ     | A_GLU_380 | OE1    | 3.595        |
| 5BW7   | A_LYS_248 | NZ     | A_GLU_380 | OE2    | 2.687        |
| 5BW7   | A_ARG_255 | NH2    | A_ASP_249 | OD2    | 3.416        |
| 5BW7   | A_HIS_285 | NE2    | A_GLU_283 | OE2    | 3.140        |
| 5BW7   | A_ARG_292 | NH2    | A_GLU_272 | OE1    | 3.982        |
| 5BW7   | A_ARG_292 | NH2    | A_GLU_272 | OE2    | 2.655        |
| 5BW7   | A_LYS_317 | NZ     | A_ASP_312 | OD1    | 3.705        |
| 5BW7   | A_LYS_320 | NZ     | A_GLU_333 | OE2    | 3.392        |
| 5BW7   | A_LYS_338 | NZ     | A_GLU_430 | OE1    | 3.180        |
| 5BW7   | A_LYS_338 | NZ     | A_GLU_430 | OE2    | 3.249        |
| 5BW7   | A_LYS_370 | NZ     | B_GLU_357 | OE2    | 3.993        |
| 5BW7   | A_LYS_409 | NZ     | B_ASP_399 | OD1    | 3.864        |
| 5BW7   | A_LYS_409 | NZ     | B_ASP_399 | OD2    | 2.990        |
| 5BW7   | A_ARG_416 | NH1    | A_GLU_388 | OE1    | 2.970        |
| 5BW7   | A_ARG_416 | NH1    | A_GLU_388 | OE2    | 3.913        |
| 5BW7   | A_ARG_416 | NH2    | A_GLU_388 | OE1    | 3.370        |
| 5BW7   | A_ARG_416 | NH2    | A_GLU_388 | OE2    | 2.800        |
| 5BW7   | B_LYS_248 | NZ     | B_GLU_380 | OE1    | 3.958        |
| 5BW7   | B_LYS_248 | NZ     | B_GLU_380 | OE2    | 2.755        |
| 5BW7   | B_ARG_255 | NH2    | B_ASP_249 | OD1    | 2.907        |
| 5BW7   | B_HIS_268 | NE2    | B_GLU_294 | OE1    | 3.100        |
| 5BW7   | B_HIS_268 | NE2    | B_GLU_294 | OE2    | 3.206        |
| 5BW7   | B_ARG_301 | NH1    | B_GLU_293 | OE1    | 3.024        |
| 5BW7   | B_LYS_317 | NZ     | B_ASP_312 | OD1    | 3.532        |
| 5BW7   | B_LYS_320 | NZ     | B_GLU_333 | OE1    | 2.787        |
| 5BW7   | B_LYS_320 | NZ     | B_GLU_333 | OE2    | 3.803        |
| 5BW7   | B_LYS_338 | NZ     | B_GLU_430 | OE1    | 3.215        |
| 5BW7   | B_LYS_338 | NZ     | B_GLU_430 | OE2    | 3.370        |
| 5BW7   | B_ARG_344 | NH1    | B_ASP_401 | OD2    | 3.270        |
| 5BW7   | B_LYS_370 | NZ     | A_GLU_357 | OE2    | 3.748        |
| 5BW7   | B_LYS_409 | NZ     | A_ASP_399 | OD1    | 3.328        |
| 5BW7   | B_LYS_409 | NZ     | A_ASP_399 | OD2    | 2.988        |
| 5BW7   | B_ARG_416 | NH1    | B_GLU_388 | OE1    | 3.138        |
| 5BW7   | B_ARG_416 | NH1    | B_GLU_388 | OE2    | 3.904        |
| 5BW7   | B_ARG_416 | NH2    | B_GLU_388 | OE1    | 3.540        |
| 5BW7   | B_ARG_416 | NH2    | B_GLU_388 | OE2    | 2.872        |
| 5BW7   | C_ARG_18  | NH1    | C_GLU_85  | OE1    | 3.505        |
| 5BW7   | C_HIS_87  | NE2    | C_GLU_85  | OE1    | 2.748        |
| 5BW7   | C_ARG_97  | NH2    | C_ASP_104 | OD2    | 2.992        |
| 5BW7   | C_HIS_107 | NE2    | C_ASP_138 | OD2    | 2.660        |
| 5BW7   | C_HIS_111 | NE2    | C_ASP_23  | OD1    | 2.716        |
| 5BW7   | C_HIS_111 | NE2    | C_ASP_23  | OD2    | 3.022        |
| 5BW7   | C_LYS_120 | NZ     | A_ASP_265 | OD2    | 2.730        |
| 5BW7   | C_ARG_130 | NH1    | C_ASP_148 | OD1    | 3.404        |
| 5BW7   | C_ARG_130 | NH2    | C_ASP_148 | OD1    | 3.221        |
| 5BW7   | C_LYS_131 | NZ     | A_GLU_269 | OE1    | 3.414        |
| 5BW7   | C_LYS_131 | NZ     | A_GLU_269 | OE2    | 2.642        |

---

Table 654: 5BW7-specific salt bridging networks analysis. In this table, a PDB file is specified with a four-letter PDB ID, except that the names of the PDB files corresponding to the single NMR structural model split from the NMR ensemble is specified with a four-letter PDB ID in addition to a hyphen followed by the single NMR structural model numeric ID, the residue naming scheme is **Chain ID\_residue name\_residue number**,  $\angle ADH$  represents the angle formed by acceptor (A), donor (D) and hydrogen (H) ( $\angle ADH$ ).

| PDB ID | Residue A | Atom A | Residue B | Atom B | Distance (Å) |
|--------|-----------|--------|-----------|--------|--------------|
| 5CMA   | A_ARG_45  | NH2    | A_GLU_42  | OE2    | 3.432        |
| 5CMA   | A_ARG_61  | NH1    | A_ASP_82  | OD1    | 3.594        |
| 5CMA   | A_ARG_61  | NH1    | A_ASP_82  | OD2    | 2.573        |
| 5CMA   | A_LYS_149 | NZ     | A_GLU_195 | OE1    | 3.918        |
| 5CMA   | A_LYS_149 | NZ     | A_GLU_195 | OE2    | 3.051        |
| 5CMA   | A_LYS_183 | NZ     | A_GLU_187 | OE1    | 2.559        |
| 5CMA   | A_LYS_183 | NZ     | A_GLU_187 | OE2    | 3.255        |
| 5CMA   | A_HIS_189 | ND1    | A_ASP_151 | OD2    | 2.867        |
| 5CMA   | B_ARG_38  | NH1    | B_ASP_90  | OD1    | 3.651        |
| 5CMA   | B_ARG_38  | NH2    | B_GLU_46  | OE2    | 3.149        |
| 5CMA   | B_ARG_40  | NH1    | B_GLU_89  | OE2    | 3.793        |
| 5CMA   | B_LYS_67  | NZ     | B_ASP_90  | OD1    | 3.746        |
| 5CMA   | B_LYS_67  | NZ     | B_ASP_90  | OD2    | 3.140        |
| 5CMA   | B_LYS_148 | NZ     | B_ASP_149 | OD1    | 2.890        |
| 5CMA   | B_LYS_148 | NZ     | B_ASP_149 | OD2    | 3.271        |
| 5CMA   | B_LYS_214 | NZ     | A_GLU_123 | OE1    | 2.706        |
| 5CMA   | B_LYS_214 | NZ     | A_GLU_123 | OE2    | 3.531        |
| 5CMA   | B_ARG_215 | NH2    | B_GLU_217 | OE2    | 3.910        |

Table 655: 5CMA-specific salt bridging networks analysis. In this table, a PDB file is specified with a four-letter PDB ID, except that the names of the PDB files corresponding to the single NMR structural model split from the NMR ensemble is specified with a four-letter PDB ID in addition to a hyphen followed by the single NMR structural model numeric ID, the residue naming scheme is **Chain ID\_residue name\_residue number**,  $\angle ADH$  represents the angle formed by acceptor (A), donor (D) and hydrogen (H) ( $\angle ADH$ ).

| PDB ID | Residue A | Atom A | Residue B | Atom B | Distance (Å) |
|--------|-----------|--------|-----------|--------|--------------|
| 5CP3   | A_LYS_24  | NZ     | A_ASP_75  | OD1    | 2.942        |
| 5CP3   | A_ARG_51  | NH2    | A_ASP_60  | OD2    | 3.029        |
| 5CP3   | A_ARG_62  | NH2    | A_ASP_60  | OD1    | 3.616        |
| 5CP3   | A_ARG_62  | NH2    | A_ASP_60  | OD2    | 2.822        |
| 5CP3   | A_ARG_66  | NH1    | A_ASP_87  | OD1    | 3.163        |
| 5CP3   | A_ARG_66  | NH1    | A_ASP_87  | OD2    | 2.516        |
| 5CP3   | A_ARG_66  | NH2    | A_ASP_87  | OD1    | 2.966        |
| 5CP3   | A_ARG_66  | NH2    | A_ASP_87  | OD2    | 3.742        |
| 5CP3   | A_LYS_154 | NZ     | A_GLU_200 | OE1    | 3.304        |
| 5CP3   | A_LYS_154 | NZ     | A_GLU_200 | OE2    | 3.326        |
| 5CP3   | A_ARG_160 | NH2    | A_GLU_190 | OE1    | 3.660        |
| 5CP3   | A_HIS_194 | ND1    | A_ASP_156 | OD2    | 3.197        |
| 5CP3   | A_LYS_204 | NZ     | A_GLU_115 | OE2    | 2.402        |
| 5CP3   | H_ARG_39  | NH1    | H_ASP_90  | OD1    | 2.626        |
| 5CP3   | H_ARG_39  | NH2    | H_GLU_47  | OE1    | 2.850        |
| 5CP3   | H_ARG_39  | NH2    | H_ASP_90  | OD1    | 3.448        |
| 5CP3   | H_ARG_67  | NH1    | H_ASP_90  | OD1    | 3.807        |
| 5CP3   | H_ARG_67  | NH1    | H_ASP_90  | OD2    | 2.888        |
| 5CP3   | H_ARG_67  | NH2    | H_ASP_90  | OD1    | 3.094        |
| 5CP3   | H_ARG_67  | NH2    | H_ASP_90  | OD2    | 3.526        |
| 5CP3   | H_LYS_207 | NZ     | A_GLU_128 | OE2    | 2.762        |

Table 656: 5CP3-specific salt bridging networks analysis. In this table, a PDB file is specified with a four-letter PDB ID, except that the names of the PDB files corresponding to the single NMR structural model split from the NMR ensemble is specified with a four-letter PDB ID in addition to a hyphen followed by the single NMR structural model numeric ID, the residue naming scheme is **Chain ID\_residue name\_residue number**,  $\angle ADH$  represents the angle formed by acceptor (A), donor (D) and hydrogen (H) ( $\angle ADH$ ).



| PDB ID | Residue A | Atom A | Residue B | Atom B | Distance (Å) |
|--------|-----------|--------|-----------|--------|--------------|
| 5CP7   | A_LYS_24  | NZ     | A_ASP_75  | OD1    | 3.319        |
| 5CP7   | A_LYS_24  | NZ     | A_ASP_75  | OD2    | 2.961        |
| 5CP7   | A_ARG_51  | NH2    | A_ASP_60  | OD1    | 2.851        |
| 5CP7   | A_ARG_62  | NH1    | A_ASP_60  | OD1    | 3.820        |
| 5CP7   | A_ARG_62  | NH1    | A_ASP_60  | OD2    | 3.151        |
| 5CP7   | A_ARG_62  | NH2    | A_ASP_60  | OD2    | 3.961        |
| 5CP7   | A_ARG_66  | NH1    | A_ASP_87  | OD1    | 3.341        |
| 5CP7   | A_ARG_66  | NH1    | A_ASP_87  | OD2    | 2.576        |
| 5CP7   | A_ARG_66  | NH2    | A_ASP_87  | OD1    | 2.858        |
| 5CP7   | A_ARG_66  | NH2    | A_ASP_87  | OD2    | 3.668        |
| 5CP7   | A_LYS_154 | NZ     | A_GLU_200 | OE1    | 3.247        |
| 5CP7   | A_LYS_154 | NZ     | A_GLU_200 | OE2    | 3.620        |
| 5CP7   | A_ARG_160 | NH2    | A_GLU_190 | OE1    | 3.902        |
| 5CP7   | A_HIS_194 | ND1    | A_ASP_156 | OD1    | 2.879        |
| 5CP7   | A_LYS_204 | NZ     | A_ASP_115 | OD2    | 3.110        |
| 5CP7   | B_ARG_39  | NH1    | B_ASP_90  | OD1    | 2.860        |
| 5CP7   | B_ARG_39  | NH2    | B_GLU_47  | OE1    | 2.798        |
| 5CP7   | B_ARG_39  | NH2    | B_ASP_90  | OD1    | 3.702        |
| 5CP7   | B_ARG_67  | NH1    | B_ASP_90  | OD1    | 3.401        |
| 5CP7   | B_ARG_67  | NH1    | B_ASP_90  | OD2    | 3.152        |
| 5CP7   | B_ARG_67  | NH2    | B_ASP_90  | OD1    | 2.884        |
| 5CP7   | B_ARG_67  | NH2    | B_ASP_90  | OD2    | 3.459        |
| 5CP7   | B_LYS_76  | NZ     | B_ASP_73  | OD1    | 3.357        |
| 5CP7   | B_LYS_76  | NZ     | B_ASP_73  | OD2    | 2.651        |
| 5CP7   | B_LYS_204 | NZ     | B_ASP_206 | OD1    | 2.613        |
| 5CP7   | B_LYS_204 | NZ     | B_ASP_206 | OD2    | 3.566        |
| 5CP7   | B_LYS_207 | NZ     | C_GLU_128 | OE2    | 3.335        |
| 5CP7   | C_LYS_24  | NZ     | C_ASP_75  | OD1    | 2.777        |
| 5CP7   | C_ARG_51  | NH2    | C_ASP_60  | OD1    | 2.666        |
| 5CP7   | C_LYS_58  | NZ     | H_ASP_1   | OD1    | 3.663        |
| 5CP7   | C_LYS_58  | NZ     | H_ASP_1   | OD2    | 3.316        |
| 5CP7   | C_ARG_62  | NH1    | C_ASP_60  | OD1    | 3.272        |
| 5CP7   | C_ARG_62  | NH1    | C_ASP_60  | OD2    | 2.754        |
| 5CP7   | C_ARG_66  | NH1    | C_GLU_84  | OE2    | 3.677        |
| 5CP7   | C_ARG_66  | NH2    | C_GLU_86  | OE1    | 3.796        |
| 5CP7   | C_ARG_66  | NH2    | C_ASP_87  | OD1    | 3.282        |
| 5CP7   | C_ARG_66  | NH2    | C_ASP_87  | OD2    | 3.388        |
| 5CP7   | C_LYS_154 | NZ     | C_GLU_200 | OE1    | 3.236        |
| 5CP7   | C_LYS_154 | NZ     | C_GLU_200 | OE2    | 3.406        |
| 5CP7   | C_HIS_194 | ND1    | C_ASP_156 | OD1    | 3.216        |
| 5CP7   | D_ARG_39  | NH1    | D_ASP_90  | OD1    | 3.144        |
| 5CP7   | D_ARG_39  | NH2    | D_GLU_47  | OE1    | 2.804        |
| 5CP7   | D_ARG_39  | NH2    | D_ASP_90  | OD1    | 3.507        |
| 5CP7   | D_ARG_67  | NH1    | D_ASP_90  | OD1    | 3.613        |
| 5CP7   | D_ARG_67  | NH1    | D_ASP_90  | OD2    | 2.972        |
| 5CP7   | D_ARG_67  | NH2    | D_ASP_90  | OD1    | 2.843        |
| 5CP7   | D_ARG_67  | NH2    | D_ASP_90  | OD2    | 3.447        |
| 5CP7   | D_LYS_207 | NZ     | E_GLU_128 | OE2    | 2.825        |
| 5CP7   | E_LYS_24  | NZ     | E_ASP_75  | OD1    | 2.820        |
| 5CP7   | E_LYS_24  | NZ     | E_ASP_75  | OD2    | 3.689        |
| 5CP7   | E_ARG_44  | NH1    | E_ASP_87  | OD1    | 3.971        |
| 5CP7   | E_LYS_50  | NZ     | E_ASP_60  | OD2    | 2.506        |
| 5CP7   | E_ARG_51  | NH2    | E_ASP_60  | OD1    | 2.623        |
| 5CP7   | E_ARG_66  | NH2    | E_GLU_84  | OE1    | 2.942        |
| 5CP7   | E_ARG_66  | NH2    | E_ASP_87  | OD1    | 3.262        |
| 5CP7   | E_ARG_66  | NH2    | E_ASP_87  | OD2    | 2.428        |
| 5CP7   | E_ARG_193 | NH2    | E_GLU_190 | OE1    | 3.878        |

|      |           |     |           |     |       |
|------|-----------|-----|-----------|-----|-------|
| 5CP7 | E_HIS_194 | ND1 | E_ASP_156 | OD1 | 3.868 |
| 5CP7 | E_LYS_204 | NZ  | E_ASP_115 | OD2 | 2.617 |
| 5CP7 | F_ARG_39  | NH1 | F_ASP_90  | OD1 | 3.469 |
| 5CP7 | F_ARG_39  | NH2 | F_GLU_47  | OE1 | 2.925 |
| 5CP7 | F_ARG_67  | NH1 | F_ASP_90  | OD1 | 3.818 |
| 5CP7 | F_ARG_67  | NH1 | F_ASP_90  | OD2 | 2.761 |
| 5CP7 | F_ARG_67  | NH2 | F_ASP_90  | OD1 | 2.929 |
| 5CP7 | F_ARG_67  | NH2 | F_ASP_90  | OD2 | 3.414 |
| 5CP7 | F_LYS_76  | NZ  | F_ASP_73  | OD2 | 2.874 |
| 5CP7 | F_HIS_163 | ND1 | G_ASP_172 | OD2 | 3.652 |
| 5CP7 | F_LYS_207 | NZ  | G_GLU_128 | OE2 | 3.951 |
| 5CP7 | G_ARG_44  | NH1 | G_GLU_86  | OE2 | 3.392 |
| 5CP7 | G_ARG_51  | NH2 | G_ASP_60  | OD1 | 3.311 |
| 5CP7 | G_ARG_66  | NH1 | G_GLU_84  | OE1 | 3.858 |
| 5CP7 | G_ARG_66  | NH1 | G_GLU_84  | OE2 | 3.754 |
| 5CP7 | G_ARG_66  | NH2 | G_GLU_84  | OE2 | 3.523 |
| 5CP7 | G_ARG_66  | NH2 | G_ASP_87  | OD1 | 3.495 |
| 5CP7 | G_ARG_66  | NH2 | G_ASP_87  | OD2 | 3.175 |
| 5CP7 | G_ARG_82  | NH2 | G_ASP_65  | OD1 | 3.926 |
| 5CP7 | G_LYS_152 | NZ  | G_GLU_159 | OE1 | 3.709 |
| 5CP7 | G_ARG_160 | NH1 | G_GLU_190 | OE1 | 3.944 |
| 5CP7 | G_LYS_204 | NZ  | G_ASP_115 | OD2 | 3.779 |
| 5CP7 | H_ARG_39  | NH1 | H_ASP_90  | OD1 | 2.809 |
| 5CP7 | H_ARG_39  | NH2 | H_GLU_47  | OE1 | 3.145 |
| 5CP7 | H_ARG_39  | NH2 | H_ASP_90  | OD1 | 3.745 |
| 5CP7 | H_ARG_67  | NH1 | H_ASP_90  | OD1 | 3.710 |
| 5CP7 | H_ARG_67  | NH1 | H_ASP_90  | OD2 | 3.464 |
| 5CP7 | H_ARG_67  | NH2 | H_ASP_90  | OD1 | 2.784 |
| 5CP7 | H_ARG_67  | NH2 | H_ASP_90  | OD2 | 3.529 |
| 5CP7 | H_LYS_207 | NZ  | A_GLU_128 | OE2 | 3.290 |

Table 657: 5CP7-specific salt bridging networks analysis. In this table, a PDB file is specified with a four-letter PDB ID, except that the names of the PDB files corresponding to the single NMR structural model split from the NMR ensemble is specified with a four-letter PDB ID in addition to a hyphen followed by the single NMR structural model numeric ID, the residue naming scheme is **Chain ID\_residue name\_residue number**,  $\angle ADH$  represents the angle formed by acceptor (A), donor (D) and hydrogen (H) ( $\angle ADH$ ).

| PDB ID | Residue A  | Atom A | Residue B  | Atom B | Distance (Å) |
|--------|------------|--------|------------|--------|--------------|
| 5DFV   | A.LYS.116  | NZ     | A.ASP.117  | OD2    | 3.422        |
| 5DFV   | A.LYS.124  | NZ     | A.ASP.195  | OD1    | 3.196        |
| 5DFV   | A.LYS.124  | NZ     | A.ASP.195  | OD2    | 2.771        |
| 5DFV   | A.LYS.171  | NZ     | C.ASP.288  | OD1    | 3.582        |
| 5DFV   | A.LYS.171  | NZ     | C.ASP.288  | OD2    | 2.737        |
| 5DFV   | A.LYS.171  | NZ     | C.ASP.290  | OD2    | 2.874        |
| 5DFV   | A.HIS.191  | NE2    | A.ASP.128  | OD1    | 3.031        |
| 5DFV   | A.HIS.191  | NE2    | A.ASP.128  | OD2    | 2.615        |
| 5DFV   | B.LYS.124  | NZ     | B.ASP.195  | OD1    | 2.682        |
| 5DFV   | B.LYS.124  | NZ     | B.ASP.195  | OD2    | 3.204        |
| 5DFV   | B.LYS.171  | NZ     | E.ASP.288  | OD1    | 3.695        |
| 5DFV   | B.LYS.171  | NZ     | E.ASP.288  | OD2    | 3.653        |
| 5DFV   | B.LYS.171  | NZ     | E.ASP.290  | OD2    | 2.646        |
| 5DFV   | B.HIS.191  | NE2    | B.ASP.128  | OD1    | 2.625        |
| 5DFV   | B.HIS.191  | NE2    | B.ASP.128  | OD2    | 3.194        |
| 5DFV   | C.LYS.203  | NZ     | C.ASP.324  | OD1    | 3.802        |
| 5DFV   | C.ARG.251  | NH2    | C.GLU.351  | OE1    | 2.978        |
| 5DFV   | C.ARG.251  | NH2    | C.GLU.351  | OE2    | 3.038        |
| 5DFV   | C.LYS.301  | NZ     | C.ASP.324  | OD1    | 3.240        |
| 5DFV   | C.LYS.301  | NZ     | C.ASP.324  | OD2    | 2.740        |
| 5DFV   | C.ARG.398  | NH1    | C.ASP.394  | OD1    | 2.945        |
| 5DFV   | C.ARG.398  | NH1    | C.ASP.394  | OD2    | 3.790        |
| 5DFV   | C.ARG.398  | NH2    | D.GLU.698  | OE1    | 3.277        |
| 5DFV   | C.LYS.1095 | NZ     | C.GLU.1097 | OE1    | 3.280        |
| 5DFV   | C.ARG.1099 | NH1    | C.GLU.1097 | OE1    | 3.200        |
| 5DFV   | C.ARG.1099 | NH2    | C.GLU.1097 | OE1    | 3.340        |
| 5DFV   | C.ARG.1099 | NH2    | C.GLU.1097 | OE2    | 3.202        |
| 5DFV   | D.ARG.551  | NH1    | D.ASP.716  | OD1    | 3.170        |
| 5DFV   | D.ARG.551  | NH1    | D.ASP.716  | OD2    | 3.766        |
| 5DFV   | D.ARG.551  | NH2    | D.ASP.716  | OD1    | 3.082        |
| 5DFV   | D.ARG.551  | NH2    | D.ASP.716  | OD2    | 3.372        |
| 5DFV   | D.LYS.556  | NZ     | D.GLU.755  | OE1    | 3.326        |
| 5DFV   | D.ARG.705  | NH1    | D.GLU.725  | OE2    | 3.117        |
| 5DFV   | D.ARG.705  | NH1    | D.GLU.727  | OE2    | 3.146        |
| 5DFV   | D.ARG.705  | NH1    | D.ASP.728  | OD2    | 3.659        |
| 5DFV   | D.ARG.705  | NH2    | D.GLU.725  | OE1    | 3.510        |
| 5DFV   | D.ARG.705  | NH2    | D.GLU.725  | OE2    | 3.133        |
| 5DFV   | D.LYS.2039 | NZ     | D.GLU.2087 | OE1    | 3.958        |
| 5DFV   | D.LYS.2041 | NZ     | D.GLU.2087 | OE1    | 3.712        |
| 5DFV   | D.LYS.2041 | NZ     | D.GLU.2087 | OE2    | 2.836        |
| 5DFV   | D.LYS.2091 | NZ     | D.ASP.2002 | OD1    | 3.903        |
| 5DFV   | D.ARG.2103 | NH1    | D.GLU.2079 | OE1    | 3.925        |
| 5DFV   | E.ARG.251  | NH2    | E.GLU.351  | OE1    | 2.986        |
| 5DFV   | E.ARG.251  | NH2    | E.GLU.351  | OE2    | 2.952        |
| 5DFV   | E.LYS.301  | NZ     | E.ASP.324  | OD2    | 2.835        |
| 5DFV   | E.ARG.398  | NH1    | F.GLU.698  | OE2    | 3.319        |
| 5DFV   | E.ARG.398  | NH2    | E.ASP.394  | OD1    | 3.919        |
| 5DFV   | E.ARG.398  | NH2    | E.ASP.394  | OD2    | 2.696        |
| 5DFV   | E.LYS.1094 | NZ     | F.GLU.2015 | OE1    | 3.713        |
| 5DFV   | E.LYS.1095 | NZ     | E.GLU.1097 | OE1    | 2.895        |
| 5DFV   | E.ARG.1099 | NH1    | F.GLU.2105 | OE2    | 3.679        |
| 5DFV   | F.ARG.551  | NH1    | F.ASP.716  | OD2    | 3.150        |
| 5DFV   | F.LYS.556  | NZ     | F.GLU.755  | OE1    | 2.676        |
| 5DFV   | F.LYS.556  | NZ     | F.GLU.755  | OE2    | 3.758        |
| 5DFV   | F.LYS.615  | NZ     | F.GLU.698  | OE2    | 3.399        |
| 5DFV   | F.ARG.705  | NH1    | F.GLU.727  | OE2    | 3.693        |
| 5DFV   | F.ARG.705  | NH1    | F.ASP.728  | OD1    | 3.492        |

|      |            |     |            |     |       |
|------|------------|-----|------------|-----|-------|
| 5DFV | F_ARG_705  | NH1 | F_ASP_728  | OD2 | 3.045 |
| 5DFV | F_LYS_2041 | NZ  | F_GLU_2087 | OE1 | 3.680 |
| 5DFV | F_LYS_2041 | NZ  | F_GLU_2087 | OE2 | 2.777 |
| 5DFV | F_LYS_2091 | NZ  | F_ASP_2002 | OD1 | 2.898 |
| 5DFV | F_LYS_2091 | NZ  | F_ASP_2002 | OD2 | 2.887 |

Table 658: 5DFV-specific salt bridging networks analysis. In this table, a PDB file is specified with a four-letter PDB ID, except that the names of the PDB files corresponding to the single NMR structural model split from the NMR ensemble is specified with a four-letter PDB ID in addition to a hyphen followed by the single NMR structural model numeric ID, the residue naming scheme is **Chain ID\_residue name\_residue number**,  $\angle ADH$  represents the angle formed by acceptor (A), donor (D) and hydrogen (H) ( $\angle ADH$ ).

| PDB ID | Residue A | Atom A | Residue B | Atom B | Distance (Å) |
|--------|-----------|--------|-----------|--------|--------------|
| 5DFW   | A_LYS_124 | NZ     | A_ASP_195 | OD1    | 3.150        |
| 5DFW   | A_LYS_124 | NZ     | A_ASP_195 | OD2    | 3.337        |
| 5DFW   | A_LYS_171 | NZ     | H_ASP_156 | OD2    | 2.691        |
| 5DFW   | A_LYS_171 | NZ     | H_ASP_253 | OD1    | 2.751        |
| 5DFW   | A_LYS_171 | NZ     | H_ASP_253 | OD2    | 3.799        |
| 5DFW   | A_LYS_187 | NZ     | A_ASP_155 | OD2    | 3.976        |
| 5DFW   | A_HIS_191 | NE2    | A_ASP_128 | OD1    | 3.407        |
| 5DFW   | A_HIS_191 | NE2    | A_ASP_128 | OD2    | 2.578        |
| 5DFW   | A_LYS_193 | NZ     | A_ASP_155 | OD1    | 3.885        |
| 5DFW   | H_LYS_203 | NZ     | H_ASP_324 | OD1    | 3.276        |
| 5DFW   | H_ARG_251 | NH2    | A_ASP_138 | OD1    | 3.392        |
| 5DFW   | H_ARG_251 | NH2    | A_ASP_138 | OD2    | 2.698        |
| 5DFW   | H_LYS_292 | NZ     | A_ASP_138 | OD1    | 3.884        |
| 5DFW   | H_LYS_292 | NZ     | A_ASP_138 | OD2    | 2.950        |
| 5DFW   | H_LYS_292 | NZ     | A_ASP_139 | OD1    | 3.019        |
| 5DFW   | H_LYS_296 | NZ     | H_ASP_294 | OD1    | 3.151        |
| 5DFW   | H_LYS_301 | NZ     | H_ASP_324 | OD1    | 3.890        |
| 5DFW   | H_LYS_301 | NZ     | H_ASP_324 | OD2    | 3.833        |
| 5DFW   | H_ARG_705 | NH1    | H_GLU_727 | OE2    | 3.307        |
| 5DFW   | H_ARG_705 | NH2    | H_ASP_728 | OD2    | 2.557        |
| 5DFW   | H_LYS_806 | NZ     | H_GLU_808 | OE2    | 3.023        |

Table 659: 5DFW-specific salt bridging networks analysis. In this table, a PDB file is specified with a four-letter PDB ID, except that the names of the PDB files corresponding to the single NMR structural model split from the NMR ensemble is specified with a four-letter PDB ID in addition to a hyphen followed by the single NMR structural model numeric ID, the residue naming scheme is **Chain ID\_residue name\_residue number**,  $\angle ADH$  represents the angle formed by acceptor (A), donor (D) and hydrogen (H) ( $\angle ADH$ ).

| PDB ID | Residue A | Atom A | Residue B  | Atom B | Distance (Å) |
|--------|-----------|--------|------------|--------|--------------|
| 5DMI   | A_LYS_46  | NZ     | L_ASP_31   | OD1    | 2.761        |
| 5DMI   | A_LYS_46  | NZ     | L_ASP_31   | OD2    | 3.234        |
| 5DMI   | A_HIS_76  | ND1    | H_ASP_100A | OD2    | 3.977        |
| 5DMI   | A_HIS_78  | ND1    | A_GLU_74   | OE1    | 3.991        |
| 5DMI   | A_HIS_78  | NE2    | A_GLU_74   | OE2    | 3.806        |
| 5DMI   | H_ARG_66  | NH1    | H_ASP_86   | OD1    | 3.834        |
| 5DMI   | H_ARG_66  | NH1    | H_ASP_86   | OD2    | 2.698        |
| 5DMI   | H_ARG_66  | NH2    | H_ASP_86   | OD1    | 3.014        |
| 5DMI   | H_ARG_66  | NH2    | H_ASP_86   | OD2    | 2.861        |
| 5DMI   | H_LYS_221 | NZ     | L_GLU_123  | OE2    | 3.105        |
| 5DMI   | L_ARG_45  | NH1    | L_GLU_42   | OE1    | 2.998        |
| 5DMI   | L_ARG_45  | NH1    | L_GLU_42   | OE2    | 3.354        |
| 5DMI   | L_ARG_45  | NH2    | L_GLU_42   | OE1    | 2.809        |
| 5DMI   | L_ARG_61  | NH1    | L_GLU_81   | OE1    | 3.011        |
| 5DMI   | L_ARG_61  | NH1    | L_ASP_82   | OD1    | 2.794        |
| 5DMI   | L_ARG_61  | NH1    | L_ASP_82   | OD2    | 3.657        |
| 5DMI   | L_ARG_61  | NH2    | L_GLU_79   | OE1    | 3.312        |
| 5DMI   | L_ARG_61  | NH2    | L_GLU_79   | OE2    | 3.348        |
| 5DMI   | L_LYS_103 | NZ     | L_GLU_105  | OE1    | 3.441        |
| 5DMI   | L_LYS_103 | NZ     | L_GLU_165  | OE2    | 3.954        |
| 5DMI   | L_LYS_149 | NZ     | L_GLU_195  | OE2    | 2.814        |
| 5DMI   | L_LYS_183 | NZ     | L_GLU_187  | OE1    | 2.795        |
| 5DMI   | L_LYS_188 | NZ     | L_ASP_185  | OD1    | 2.852        |
| 5DMI   | L_ARG_211 | NH1    | L_GLU_187  | OE2    | 3.522        |

Table 660: 5DMI-specific salt bridging networks analysis. In this table, a PDB file is specified with a four-letter PDB ID, except that the names of the PDB files corresponding to the single NMR structural model split from the NMR ensemble is specified with a four-letter PDB ID in addition to a hyphen followed by the single NMR structural model numeric ID, the residue naming scheme is **Chain ID\_residue name\_residue number**,  $\angle ADH$  represents the angle formed by acceptor (A), donor (D) and hydrogen (H) ( $\angle ADH$ ).

| PDB ID | Residue A | Atom A | Residue B | Atom B | Distance (Å) |
|--------|-----------|--------|-----------|--------|--------------|
| 5DMJ   | A_HIS_78  | NE2    | A_GLU_74  | OE2    | 3.682        |
| 5DMJ   | A_HIS_162 | NE2    | A_GLU_159 | OE1    | 3.307        |
| 5DMJ   | B_ARG_38  | NH1    | B_GLU_46  | OE1    | 3.733        |
| 5DMJ   | B_ARG_38  | NH1    | B_GLU_46  | OE2    | 3.183        |
| 5DMJ   | B_ARG_38  | NH1    | B_ASP_86  | OD1    | 3.833        |
| 5DMJ   | B_ARG_38  | NH2    | B_ASP_86  | OD1    | 2.916        |
| 5DMJ   | B_ARG_66  | NH1    | B_ASP_86  | OD1    | 3.274        |
| 5DMJ   | B_ARG_66  | NH1    | B_ASP_86  | OD2    | 2.599        |
| 5DMJ   | B_ARG_66  | NH2    | B_ASP_86  | OD1    | 3.293        |
| 5DMJ   | B_ARG_83  | NH2    | G_ASP_72  | OD1    | 3.449        |
| 5DMJ   | B_LYS_94  | NZ     | B_ASP_102 | OD1    | 3.363        |
| 5DMJ   | D_HIS_78  | NE2    | D_GLU_74  | OE2    | 3.689        |
| 5DMJ   | D_ARG_123 | NH1    | D_ASP_140 | OD2    | 3.071        |
| 5DMJ   | D_HIS_162 | NE2    | D_GLU_159 | OE1    | 3.282        |
| 5DMJ   | D_LYS_181 | NZ     | D_ASP_180 | OD2    | 3.498        |
| 5DMJ   | E_ARG_38  | NH1    | E_GLU_46  | OE1    | 3.747        |
| 5DMJ   | E_ARG_38  | NH1    | E_GLU_46  | OE2    | 3.182        |
| 5DMJ   | E_ARG_38  | NH1    | E_ASP_86  | OD1    | 3.846        |
| 5DMJ   | E_ARG_38  | NH2    | E_ASP_86  | OD1    | 2.939        |
| 5DMJ   | E_ARG_66  | NH1    | E_ASP_86  | OD1    | 3.321        |
| 5DMJ   | E_ARG_66  | NH1    | E_ASP_86  | OD2    | 2.623        |
| 5DMJ   | E_ARG_66  | NH2    | E_ASP_86  | OD1    | 3.325        |
| 5DMJ   | E_LYS_75  | NZ     | E_ASP_72  | OD2    | 3.917        |
| 5DMJ   | E_LYS_94  | NZ     | E_ASP_102 | OD1    | 3.533        |
| 5DMJ   | F_HIS_78  | NE2    | F_GLU_74  | OE2    | 3.703        |
| 5DMJ   | F_HIS_162 | NE2    | F_GLU_159 | OE1    | 3.306        |
| 5DMJ   | G_ARG_38  | NH1    | G_GLU_46  | OE1    | 3.769        |
| 5DMJ   | G_ARG_38  | NH1    | G_GLU_46  | OE2    | 3.178        |
| 5DMJ   | G_ARG_38  | NH1    | G_ASP_86  | OD1    | 3.862        |
| 5DMJ   | G_ARG_38  | NH2    | G_ASP_86  | OD1    | 2.937        |
| 5DMJ   | G_ARG_66  | NH1    | G_ASP_86  | OD1    | 3.324        |
| 5DMJ   | G_ARG_66  | NH1    | G_ASP_86  | OD2    | 2.634        |
| 5DMJ   | G_ARG_66  | NH2    | G_ASP_86  | OD1    | 3.327        |
| 5DMJ   | G_LYS_75  | NZ     | B_GLU_85  | OE1    | 3.187        |
| 5DMJ   | G_LYS_94  | NZ     | G_ASP_102 | OD1    | 3.775        |

Table 661: 5DMJ-specific salt bridging networks analysis. In this table, a PDB file is specified with a four-letter PDB ID, except that the names of the PDB files corresponding to the single NMR structural model split from the NMR ensemble is specified with a four-letter PDB ID in addition to a hyphen followed by the single NMR structural model numeric ID, the residue naming scheme is **Chain ID\_residue name\_residue number**,  $\angle ADH$  represents the angle formed by acceptor (A), donor (D) and hydrogen (H) ( $\angle ADH$ ).

| PDB ID | Residue A | Atom A | Residue B | Atom B | Distance (Å) |
|--------|-----------|--------|-----------|--------|--------------|
| 5DWU   | B_ARG_377 | NH2    | B_ASP_379 | OD1    | 3.390        |
| 5DWU   | B_ARG_407 | NH1    | B_ASP_435 | OD1    | 2.835        |
| 5DWU   | B_ARG_407 | NH2    | B_ASP_435 | OD1    | 3.962        |
| 5DWU   | H_ARG_38  | NH1    | H_ASP_90  | OD1    | 2.590        |
| 5DWU   | H_ARG_38  | NH2    | H_GLU_46  | OE1    | 2.502        |
| 5DWU   | H_ARG_52  | NH1    | A_ASP_107 | OD1    | 3.435        |
| 5DWU   | H_ARG_52  | NH1    | A_ASP_107 | OD2    | 2.568        |
| 5DWU   | H_ARG_52  | NH2    | A_ASP_107 | OD1    | 2.685        |
| 5DWU   | H_ARG_52  | NH2    | A_ASP_107 | OD2    | 3.250        |
| 5DWU   | H_ARG_98  | NH2    | H_ASP_105 | OD2    | 3.961        |
| 5DWU   | L_ARG_61  | NH1    | L_ASP_82  | OD1    | 3.900        |
| 5DWU   | L_ARG_61  | NH2    | L_ASP_82  | OD1    | 2.608        |
| 5DWU   | L_ARG_61  | NH2    | L_ASP_82  | OD2    | 2.917        |
| 5DWU   | L_HIS_189 | ND1    | L_ASP_151 | OD2    | 3.598        |

Table 662: 5DWU-specific salt bridging networks analysis. In this table, a PDB file is specified with a four-letter PDB ID, except that the names of the PDB files corresponding to the single NMR structural model split from the NMR ensemble is specified with a four-letter PDB ID in addition to a hyphen followed by the single NMR structural model numeric ID, the residue naming scheme is **Chain ID\_residue name\_residue number**,  $\angle ADH$  represents the angle formed by acceptor (A), donor (D) and hydrogen (H) ( $\angle ADH$ ).



| PDB ID | Residue A | Atom A | Residue B | Atom B | Distance (Å) |
|--------|-----------|--------|-----------|--------|--------------|
| 5ERW   | A_LYS_12  | NZ     | A_GLU_10  | OE1    | 2.949        |
| 5ERW   | A_ARG_38  | NH1    | A_ASP_90  | OD1    | 2.885        |
| 5ERW   | A_ARG_38  | NH2    | A_GLU_46  | OE1    | 3.486        |
| 5ERW   | A_ARG_38  | NH2    | A_GLU_46  | OE2    | 3.818        |
| 5ERW   | A_ARG_38  | NH2    | A_ASP_90  | OD1    | 3.778        |
| 5ERW   | A_ARG_67  | NH1    | A_ASP_90  | OD2    | 2.657        |
| 5ERW   | A_ARG_67  | NH2    | A_ASP_90  | OD1    | 3.007        |
| 5ERW   | A_ARG_67  | NH2    | A_ASP_90  | OD2    | 3.030        |
| 5ERW   | A_ARG_87  | NH1    | A_GLU_89  | OE2    | 3.913        |
| 5ERW   | A_ARG_103 | NH1    | B_ASP_49  | OD2    | 2.990        |
| 5ERW   | A_LYS_214 | NZ     | B_GLU_122 | OE1    | 2.490        |
| 5ERW   | B_LYS_30  | NZ     | B_ASP_91  | OD1    | 2.653        |
| 5ERW   | B_HIS_33  | ND1    | B_ASP_49  | OD1    | 3.753        |
| 5ERW   | B_ARG_60  | NH2    | B_ASP_81  | OD1    | 2.998        |
| 5ERW   | B_ARG_60  | NH2    | B_ASP_81  | OD2    | 2.524        |
| 5ERW   | B_LYS_102 | NZ     | B_ASP_84  | OD1    | 3.442        |
| 5ERW   | B_LYS_102 | NZ     | B_ASP_84  | OD2    | 3.632        |
| 5ERW   | B_LYS_102 | NZ     | B_ASP_164 | OD1    | 3.634        |
| 5ERW   | B_LYS_146 | NZ     | B_GLU_153 | OE1    | 2.547        |
| 5ERW   | B_LYS_146 | NZ     | B_GLU_153 | OE2    | 3.654        |
| 5ERW   | B_LYS_148 | NZ     | B_GLU_194 | OE1    | 3.651        |
| 5ERW   | B_LYS_148 | NZ     | B_GLU_194 | OE2    | 2.963        |
| 5ERW   | B_ARG_154 | NH1    | B_GLU_184 | OE1    | 3.549        |
| 5ERW   | B_LYS_168 | NZ     | B_ASP_166 | OD2    | 3.760        |
| 5ERW   | B_LYS_182 | NZ     | B_GLU_186 | OE1    | 3.952        |
| 5ERW   | B_LYS_182 | NZ     | B_GLU_186 | OE2    | 2.341        |
| 5ERW   | B_HIS_188 | ND1    | B_ASP_150 | OD2    | 2.455        |
| 5ERW   | B_LYS_198 | NZ     | B_ASP_109 | OD1    | 3.278        |
| 5ERW   | B_LYS_198 | NZ     | B_ASP_109 | OD2    | 2.412        |
| 5ERW   | C_LYS_446 | NZ     | B_ASP_50  | OD1    | 3.926        |
| 5ERW   | C_LYS_446 | NZ     | B_ASP_50  | OD2    | 2.398        |

Table 663: 5ERW-specific salt bridging networks analysis. In this table, a PDB file is specified with a four-letter PDB ID, except that the names of the PDB files corresponding to the single NMR structural model split from the NMR ensemble is specified with a four-letter PDB ID in addition to a hyphen followed by the single NMR structural model numeric ID, the residue naming scheme is **Chain ID\_residue name\_residue number**,  $\angle ADH$  represents the angle formed by acceptor (A), donor (D) and hydrogen (H) ( $\angle ADH$ ).

| PDB ID | Residue A | Atom A | Residue B | Atom B | Distance (Å) |
|--------|-----------|--------|-----------|--------|--------------|
| 5EZI   | H_ARG_45  | NH2    | H_ASP_42  | OD2    | 3.860        |
| 5EZI   | H_ARG_52  | NH1    | H_GLU_60  | OE1    | 3.045        |
| 5EZI   | H_ARG_52  | NH1    | H_ASP_104 | OD1    | 3.782        |
| 5EZI   | H_ARG_52  | NH2    | H_ASP_104 | OD1    | 2.793        |
| 5EZI   | H_LYS_79  | NZ     | H_ASP_80  | OD1    | 3.553        |
| 5EZI   | H_LYS_79  | NZ     | H_ASP_80  | OD2    | 3.228        |
| 5EZI   | H_LYS_81  | NZ     | H_ASP_104 | OD1    | 3.557        |
| 5EZI   | H_LYS_81  | NZ     | H_ASP_104 | OD2    | 2.766        |
| 5EZI   | H_ARG_112 | NH2    | H_ASP_121 | OD1    | 3.513        |
| 5EZI   | H_ARG_112 | NH2    | H_ASP_121 | OD2    | 2.756        |
| 5EZI   | L_ARG_54  | NH1    | L_ASP_56  | OD2    | 3.800        |
| 5EZI   | L_ARG_54  | NH2    | L_ASP_56  | OD1    | 3.697        |
| 5EZI   | L_ARG_54  | NH2    | L_ASP_56  | OD2    | 2.546        |
| 5EZI   | L_ARG_78  | NH2    | L_ASP_84  | OD1    | 3.854        |
| 5EZI   | L_ARG_85  | NH2    | L_GLU_105 | OE2    | 3.655        |
| 5EZI   | L_ARG_85  | NH2    | L_ASP_106 | OD1    | 2.746        |
| 5EZI   | L_ARG_85  | NH2    | L_ASP_106 | OD2    | 3.689        |
| 5EZI   | L_ARG_120 | NH1    | H_GLU_64  | OE1    | 3.561        |
| 5EZI   | L_ARG_120 | NH1    | H_GLU_64  | OE2    | 2.826        |
| 5EZI   | L_LYS_166 | NZ     | L_GLU_129 | OE2    | 3.752        |
| 5EZI   | L_LYS_173 | NZ     | L_GLU_219 | OE1    | 3.356        |
| 5EZI   | L_LYS_173 | NZ     | L_GLU_219 | OE2    | 2.974        |
| 5EZI   | L_ARG_179 | NH1    | L_GLU_209 | OE1    | 3.490        |
| 5EZI   | L_ARG_179 | NH1    | L_GLU_209 | OE2    | 3.054        |
| 5EZI   | L_ARG_179 | NH2    | L_GLU_209 | OE1    | 3.322        |
| 5EZI   | L_HIS_213 | ND1    | L_ASP_175 | OD2    | 3.083        |
| 5EZI   | L_LYS_223 | NZ     | L_ASP_134 | OD2    | 3.368        |

Table 664: 5EZI-specific salt bridging networks analysis. In this table, a PDB file is specified with a four-letter PDB ID, except that the names of the PDB files corresponding to the single NMR structural model split from the NMR ensemble is specified with a four-letter PDB ID in addition to a hyphen followed by the single NMR structural model numeric ID, the residue naming scheme is **Chain ID\_residue name\_residue number**,  $\angle ADH$  represents the angle formed by acceptor (A), donor (D) and hydrogen (H) ( $\angle ADH$ ).

| PDB ID | Residue A | Atom A | Residue B | Atom B | Distance (Å) |
|--------|-----------|--------|-----------|--------|--------------|
| 5EZJ   | A_ARG_52  | NH1    | A_GLU_60  | OE1    | 2.978        |
| 5EZJ   | A_ARG_52  | NH1    | A_ASP_104 | OD1    | 3.803        |
| 5EZJ   | A_ARG_52  | NH2    | A_ASP_104 | OD1    | 2.735        |
| 5EZJ   | A_LYS_79  | NZ     | A_ASP_80  | OD1    | 3.518        |
| 5EZJ   | A_LYS_79  | NZ     | A_ASP_80  | OD2    | 2.915        |
| 5EZJ   | A_LYS_81  | NZ     | A_ASP_104 | OD1    | 3.567        |
| 5EZJ   | A_LYS_81  | NZ     | A_ASP_104 | OD2    | 2.848        |
| 5EZJ   | A_ARG_112 | NH2    | A_ASP_121 | OD1    | 2.747        |
| 5EZJ   | A_ARG_112 | NH2    | A_ASP_121 | OD2    | 3.431        |
| 5EZJ   | A_LYS_228 | NZ     | B_GLU_147 | OE1    | 3.274        |
| 5EZJ   | A_LYS_229 | NZ     | A_GLU_231 | OE2    | 3.771        |
| 5EZJ   | B_LYS_48  | NZ     | B_ASP_94  | OD1    | 3.784        |
| 5EZJ   | B_LYS_48  | NZ     | B_ASP_94  | OD2    | 2.891        |
| 5EZJ   | B_ARG_54  | NH2    | B_ASP_56  | OD1    | 3.856        |
| 5EZJ   | B_ARG_54  | NH2    | B_ASP_56  | OD2    | 2.671        |
| 5EZJ   | B_ARG_78  | NH2    | B_ASP_84  | OD1    | 3.656        |
| 5EZJ   | B_ARG_85  | NH1    | B_ASP_106 | OD1    | 2.928        |
| 5EZJ   | B_ARG_85  | NH1    | B_ASP_106 | OD2    | 3.850        |
| 5EZJ   | B_ARG_120 | NH1    | A_GLU_64  | OE1    | 3.637        |
| 5EZJ   | B_ARG_120 | NH1    | A_GLU_64  | OE2    | 2.843        |
| 5EZJ   | B_LYS_127 | NZ     | B_GLU_129 | OE1    | 3.869        |
| 5EZJ   | B_LYS_173 | NZ     | B_GLU_219 | OE1    | 3.389        |
| 5EZJ   | B_LYS_173 | NZ     | B_GLU_219 | OE2    | 2.427        |
| 5EZJ   | B_ARG_179 | NH1    | B_GLU_209 | OE1    | 3.217        |
| 5EZJ   | B_ARG_179 | NH1    | B_GLU_209 | OE2    | 3.402        |
| 5EZJ   | B_ARG_179 | NH2    | B_GLU_209 | OE1    | 3.880        |
| 5EZJ   | B_ARG_179 | NH2    | B_GLU_209 | OE2    | 2.776        |
| 5EZJ   | B_HIS_213 | ND1    | B_ASP_175 | OD2    | 3.143        |

Table 665: 5EZJ-specific salt bridging networks analysis. In this table, a PDB file is specified with a four-letter PDB ID, except that the names of the PDB files corresponding to the single NMR structural model split from the NMR ensemble is specified with a four-letter PDB ID in addition to a hyphen followed by the single NMR structural model numeric ID, the residue naming scheme is **Chain ID\_residue name\_residue number**,  $\angle ADH$  represents the angle formed by acceptor (A), donor (D) and hydrogen (H) ( $\angle ADH$ ).

| PDB ID | Residue A | Atom A | Residue B | Atom B | Distance (Å) |
|--------|-----------|--------|-----------|--------|--------------|
| 5EZL   | A_ARG_45  | NH2    | A_ASP_42  | OD2    | 3.885        |
| 5EZL   | A_ARG_52  | NH1    | A_GLU_60  | OE1    | 3.345        |
| 5EZL   | A_ARG_52  | NH1    | A_ASP_104 | OD1    | 3.820        |
| 5EZL   | A_ARG_52  | NH2    | A_ASP_104 | OD1    | 2.908        |
| 5EZL   | A_LYS_81  | NZ     | A_ASP_104 | OD1    | 3.524        |
| 5EZL   | A_LYS_81  | NZ     | A_ASP_104 | OD2    | 2.698        |
| 5EZL   | A_ARG_112 | NH1    | A_ASP_121 | OD2    | 2.196        |
| 5EZL   | A_LYS_228 | NZ     | B_GLU_147 | OE1    | 3.314        |
| 5EZL   | A_LYS_229 | NZ     | A_GLU_231 | OE2    | 2.784        |
| 5EZL   | B_ARG_54  | NH2    | B_ASP_56  | OD1    | 3.684        |
| 5EZL   | B_ARG_54  | NH2    | B_ASP_56  | OD2    | 2.960        |
| 5EZL   | B_ARG_78  | NH2    | B_ASP_84  | OD1    | 3.876        |
| 5EZL   | B_ARG_85  | NH1    | B_ASP_106 | OD1    | 2.623        |
| 5EZL   | B_ARG_85  | NH1    | B_ASP_106 | OD2    | 2.985        |
| 5EZL   | B_ARG_120 | NH1    | A_GLU_64  | OE1    | 3.901        |
| 5EZL   | B_ARG_120 | NH1    | A_GLU_64  | OE2    | 2.804        |
| 5EZL   | B_LYS_127 | NZ     | B_GLU_129 | OE2    | 3.626        |
| 5EZL   | B_LYS_173 | NZ     | B_GLU_219 | OE1    | 3.456        |
| 5EZL   | B_LYS_173 | NZ     | B_GLU_219 | OE2    | 2.709        |
| 5EZL   | B_LYS_223 | NZ     | B_ASP_134 | OD2    | 3.131        |
| 5EZL   | H_ARG_52  | NH1    | H_GLU_60  | OE1    | 3.219        |
| 5EZL   | H_ARG_52  | NH1    | H_GLU_60  | OE2    | 3.769        |
| 5EZL   | H_ARG_52  | NH1    | H_ASP_104 | OD1    | 3.785        |
| 5EZL   | H_ARG_52  | NH2    | H_ASP_104 | OD1    | 3.045        |
| 5EZL   | H_LYS_81  | NZ     | H_ASP_104 | OD1    | 3.442        |
| 5EZL   | H_LYS_81  | NZ     | H_ASP_104 | OD2    | 2.623        |
| 5EZL   | H_ARG_112 | NH1    | H_ASP_121 | OD1    | 3.400        |
| 5EZL   | H_ARG_112 | NH1    | H_ASP_121 | OD2    | 2.409        |
| 5EZL   | H_LYS_228 | NZ     | L_GLU_147 | OE2    | 3.445        |
| 5EZL   | H_LYS_229 | NZ     | H_GLU_231 | OE2    | 2.742        |
| 5EZL   | L_ARG_54  | NH2    | L_ASP_56  | OD1    | 3.764        |
| 5EZL   | L_ARG_54  | NH2    | L_ASP_56  | OD2    | 2.783        |
| 5EZL   | L_LYS_63  | NZ     | L_GLU_105 | OE1    | 3.769        |
| 5EZL   | L_ARG_78  | NH1    | L_ASP_84  | OD1    | 3.894        |
| 5EZL   | L_ARG_78  | NH2    | L_ASP_84  | OD1    | 3.679        |
| 5EZL   | L_ARG_85  | NH2    | L_GLU_105 | OE1    | 3.813        |
| 5EZL   | L_ARG_85  | NH2    | L_GLU_105 | OE2    | 3.287        |
| 5EZL   | L_ARG_85  | NH2    | L_ASP_106 | OD1    | 3.191        |
| 5EZL   | L_ARG_85  | NH2    | L_ASP_106 | OD2    | 3.915        |
| 5EZL   | L_ARG_120 | NH1    | H_GLU_64  | OE1    | 3.668        |
| 5EZL   | L_ARG_120 | NH1    | H_GLU_64  | OE2    | 2.626        |
| 5EZL   | L_LYS_127 | NZ     | L_ASP_189 | OD1    | 3.123        |
| 5EZL   | L_LYS_173 | NZ     | L_GLU_219 | OE2    | 2.984        |
| 5EZL   | L_LYS_223 | NZ     | L_ASP_134 | OD2    | 3.564        |

Table 666: 5EZL-specific salt bridging networks analysis. In this table, a PDB file is specified with a four-letter PDB ID, except that the names of the PDB files corresponding to the single NMR structural model split from the NMR ensemble is specified with a four-letter PDB ID in addition to a hyphen followed by the single NMR structural model numeric ID, the residue naming scheme is **Chain ID\_residue name\_residue number**,  $\angle ADH$  represents the angle formed by acceptor (A), donor (D) and hydrogen (H) ( $\angle ADH$ ).

| PDB ID | Residue A | Atom A | Residue B | Atom B | Distance (Å) |
|--------|-----------|--------|-----------|--------|--------------|
| 5EZN   | A_ARG_58  | NH1    | E_ASP_336 | OD2    | 3.940        |
| 5EZN   | A_ARG_58  | NH2    | E_ASP_336 | OD2    | 2.479        |
| 5EZN   | A_HIS_76  | ND1    | A_ASP_92  | OD2    | 3.010        |
| 5EZN   | A_HIS_76  | NE2    | A_GLU_74  | OE2    | 3.795        |
| 5EZN   | A_LYS_81  | NZ     | A_GLU_59  | OE1    | 3.642        |
| 5EZN   | A_LYS_95  | NZ     | A_ASP_92  | OD2    | 2.550        |
| 5EZN   | A_ARG_102 | NH2    | A_ASP_67  | OD2    | 3.108        |
| 5EZN   | A_HIS_104 | NE2    | A_ASP_121 | OD1    | 3.856        |
| 5EZN   | A_HIS_134 | NE2    | A_ASP_98  | OD2    | 3.544        |
| 5EZN   | A_LYS_188 | NZ     | A_GLU_123 | OE1    | 3.017        |
| 5EZN   | E_LYS_204 | NZ     | A_GLU_113 | OE1    | 2.243        |
| 5EZN   | E_LYS_204 | NZ     | A_GLU_113 | OE2    | 3.142        |
| 5EZN   | E_LYS_215 | NZ     | E_GLU_265 | OE2    | 3.398        |
| 5EZN   | E_LYS_220 | NZ     | E_ASP_245 | OD2    | 3.852        |
| 5EZN   | E_ARG_229 | NH2    | E_ASP_282 | OD1    | 2.680        |
| 5EZN   | E_ARG_229 | NH2    | E_ASP_282 | OD2    | 3.870        |
| 5EZN   | E_HIS_240 | NE2    | E_ASP_282 | OD1    | 3.980        |
| 5EZN   | E_LYS_251 | NZ     | B_GLU_72  | OE2    | 3.130        |
| 5EZN   | E_ARG_271 | NH1    | E_GLU_257 | OE2    | 3.148        |
| 5EZN   | E_LYS_334 | NZ     | E_GLU_337 | OE1    | 3.441        |
| 5EZN   | E_LYS_334 | NZ     | E_GLU_337 | OE2    | 3.486        |
| 5EZN   | B_ARG_36  | NH1    | B_GLU_38  | OE2    | 3.346        |
| 5EZN   | B_LYS_69  | NZ     | B_GLU_72  | OE1    | 2.194        |
| 5EZN   | B_LYS_69  | NZ     | B_GLU_74  | OE1    | 3.478        |
| 5EZN   | B_HIS_76  | ND1    | B_ASP_92  | OD2    | 3.694        |
| 5EZN   | B_LYS_81  | NZ     | B_GLU_59  | OE2    | 2.979        |
| 5EZN   | B_ARG_102 | NH2    | B_ASP_67  | OD2    | 3.883        |
| 5EZN   | B_HIS_134 | ND1    | B_GLU_148 | OE1    | 3.830        |
| 5EZN   | B_HIS_134 | NE2    | B_GLU_148 | OE1    | 3.515        |
| 5EZN   | B_ARG_135 | NH1    | G_GLU_206 | OE2    | 3.927        |
| 5EZN   | B_ARG_135 | NH2    | G_GLU_206 | OE2    | 3.596        |
| 5EZN   | G_LYS_204 | NZ     | B_GLU_112 | OE1    | 2.749        |
| 5EZN   | G_LYS_204 | NZ     | B_GLU_112 | OE2    | 3.972        |
| 5EZN   | G_LYS_204 | NZ     | B_GLU_113 | OE2    | 3.260        |
| 5EZN   | G_LYS_215 | NZ     | G_ASP_194 | OD1    | 3.377        |
| 5EZN   | G_LYS_215 | NZ     | G_ASP_194 | OD2    | 2.294        |
| 5EZN   | G_ARG_229 | NH1    | G_ASP_282 | OD1    | 3.051        |
| 5EZN   | G_ARG_229 | NH2    | G_ASP_282 | OD1    | 3.739        |
| 5EZN   | G_HIS_240 | NE2    | G_ASP_282 | OD1    | 3.769        |
| 5EZN   | G_LYS_262 | NZ     | G_GLU_265 | OE1    | 3.917        |
| 5EZN   | G_LYS_316 | NZ     | G_GLU_302 | OE2    | 2.834        |
| 5EZN   | G_LYS_334 | NZ     | G_GLU_337 | OE1    | 3.582        |
| 5EZN   | G_LYS_334 | NZ     | G_GLU_337 | OE2    | 2.552        |
| 5EZN   | G_ARG_339 | NH2    | G_ASP_336 | OD2    | 3.484        |

Table 667: 5EZN-specific salt bridging networks analysis. In this table, a PDB file is specified with a four-letter PDB ID, except that the names of the PDB files corresponding to the single NMR structural model split from the NMR ensemble is specified with a four-letter PDB ID in addition to a hyphen followed by the single NMR structural model numeric ID, the residue naming scheme is **Chain ID\_residue name\_residue number**,  $\angle ADH$  represents the angle formed by acceptor (A), donor (D) and hydrogen (H) ( $\angle ADH$ ).

| PDB ID | Residue A | Atom A | Residue B | Atom B | Distance (Å) |
|--------|-----------|--------|-----------|--------|--------------|
| 5EZO   | H_ARG_56  | NH1    | H_GLU_64  | OE1    | 3.259        |
| 5EZO   | H_ARG_56  | NH1    | H_ASP_108 | OD1    | 3.756        |
| 5EZO   | H_ARG_56  | NH2    | H_ASP_108 | OD1    | 2.964        |
| 5EZO   | H_LYS_85  | NZ     | H_ASP_108 | OD1    | 3.343        |
| 5EZO   | H_LYS_85  | NZ     | H_ASP_108 | OD2    | 3.101        |
| 5EZO   | H_ARG_116 | NH1    | H_ASP_125 | OD1    | 3.598        |
| 5EZO   | H_ARG_116 | NH1    | H_ASP_125 | OD2    | 2.331        |
| 5EZO   | H_LYS_232 | NZ     | L_GLU_143 | OE1    | 3.314        |
| 5EZO   | H_LYS_232 | NZ     | L_GLU_143 | OE2    | 2.456        |
| 5EZO   | H_LYS_233 | NZ     | H_GLU_235 | OE2    | 3.779        |
| 5EZO   | L_ARG_50  | NH1    | A_ASP_66  | OD1    | 3.943        |
| 5EZO   | L_ARG_50  | NH1    | A_ASP_66  | OD2    | 3.721        |
| 5EZO   | L_LYS_59  | NZ     | L_GLU_101 | OE1    | 3.526        |
| 5EZO   | L_ARG_74  | NH1    | L_ASP_80  | OD1    | 3.915        |
| 5EZO   | L_ARG_81  | NH1    | L_GLU_101 | OE2    | 3.291        |
| 5EZO   | L_ARG_81  | NH1    | L_ASP_102 | OD1    | 3.399        |
| 5EZO   | L_ARG_81  | NH1    | L_ASP_102 | OD2    | 3.360        |
| 5EZO   | L_ARG_81  | NH2    | L_GLU_101 | OE2    | 3.105        |
| 5EZO   | L_ARG_116 | NH1    | H_GLU_68  | OE1    | 3.718        |
| 5EZO   | L_ARG_116 | NH1    | H_GLU_68  | OE2    | 2.774        |
| 5EZO   | L_LYS_123 | NZ     | L_ASP_185 | OD1    | 3.241        |
| 5EZO   | L_LYS_123 | NZ     | L_ASP_185 | OD2    | 3.353        |
| 5EZO   | L_LYS_219 | NZ     | L_ASP_130 | OD2    | 3.420        |
| 5EZO   | A_ARG_36  | NH1    | A_GLU_38  | OE2    | 2.554        |
| 5EZO   | A_LYS_43  | NZ     | A_ASP_85  | OD2    | 3.209        |
| 5EZO   | A_HIS_76  | ND1    | A_ASP_92  | OD2    | 2.596        |
| 5EZO   | A_LYS_81  | NZ     | A_GLU_59  | OE2    | 2.928        |
| 5EZO   | A_ARG_102 | NH2    | A_ASP_67  | OD2    | 2.790        |
| 5EZO   | A_LYS_129 | NZ     | A_GLU_122 | OE2    | 3.798        |
| 5EZO   | A_HIS_134 | ND1    | A_GLU_148 | OE1    | 3.764        |
| 5EZO   | A_ARG_135 | NH1    | A_GLU_206 | OE2    | 3.876        |
| 5EZO   | A_ARG_135 | NH2    | A_GLU_206 | OE2    | 3.659        |
| 5EZO   | A_LYS_186 | NZ     | A_ASP_195 | OD1    | 2.722        |
| 5EZO   | A_LYS_192 | NZ     | A_ASP_217 | OD2    | 3.683        |
| 5EZO   | A_LYS_204 | NZ     | A_GLU_112 | OE1    | 3.269        |
| 5EZO   | A_LYS_204 | NZ     | A_GLU_113 | OE2    | 3.314        |
| 5EZO   | A_ARG_229 | NH2    | A_ASP_282 | OD1    | 2.774        |
| 5EZO   | A_ARG_229 | NH2    | A_ASP_282 | OD2    | 3.510        |
| 5EZO   | A_HIS_240 | NE2    | A_ASP_282 | OD1    | 3.983        |
| 5EZO   | A_ARG_271 | NH1    | A_GLU_257 | OE1    | 3.813        |
| 5EZO   | A_LYS_316 | NZ     | A_GLU_302 | OE2    | 3.408        |
| 5EZO   | A_LYS_334 | NZ     | A_GLU_337 | OE1    | 3.354        |
| 5EZO   | A_LYS_334 | NZ     | A_GLU_337 | OE2    | 2.671        |
| 5EZO   | A_ARG_339 | NH2    | A_ASP_336 | OD2    | 3.220        |

Table 668: 5EZO-specific salt bridging networks analysis. In this table, a PDB file is specified with a four-letter PDB ID, except that the names of the PDB files corresponding to the single NMR structural model split from the NMR ensemble is specified with a four-letter PDB ID in addition to a hyphen followed by the single NMR structural model numeric ID, the residue naming scheme is **Chain ID\_residue name\_residue number**,  $\angle ADH$  represents the angle formed by acceptor (A), donor (D) and hydrogen (H) ( $\angle ADH$ ).

| PDB ID | Residue A | Atom A | Residue B | Atom B | Distance (Å) |
|--------|-----------|--------|-----------|--------|--------------|
| 5GGV   | L_ARG_24  | NH1    | L_ASP_70  | OD1    | 2.800        |
| 5GGV   | L_ARG_24  | NH1    | L_ASP_70  | OD2    | 3.234        |
| 5GGV   | L_ARG_24  | NH2    | L_ASP_70  | OD1    | 3.597        |
| 5GGV   | L_ARG_61  | NH2    | L_GLU_81  | OE2    | 3.323        |
| 5GGV   | L_ARG_61  | NH2    | L_ASP_82  | OD1    | 2.670        |
| 5GGV   | L_ARG_61  | NH2    | L_ASP_82  | OD2    | 3.226        |
| 5GGV   | L_LYS_149 | NZ     | L_GLU_195 | OE1    | 3.933        |
| 5GGV   | L_LYS_183 | NZ     | L_GLU_187 | OE2    | 3.997        |
| 5GGV   | L_HIS_189 | ND1    | L_ASP_151 | OD2    | 2.820        |
| 5GGV   | L_LYS_190 | NZ     | L_GLU_213 | OE2    | 2.696        |
| 5GGV   | H_HIS_35  | NE2    | H_ASP_99  | OD2    | 2.983        |
| 5GGV   | H_ARG_38  | NH1    | H_ASP_90  | OD1    | 2.864        |
| 5GGV   | H_ARG_38  | NH2    | H_GLU_46  | OE1    | 3.166        |
| 5GGV   | H_ARG_38  | NH2    | H_ASP_90  | OD1    | 3.783        |
| 5GGV   | H_ARG_67  | NH1    | H_ASP_90  | OD1    | 3.548        |
| 5GGV   | H_ARG_67  | NH1    | H_ASP_90  | OD2    | 3.804        |
| 5GGV   | H_ARG_67  | NH2    | H_ASP_90  | OD1    | 3.503        |
| 5GGV   | H_ARG_67  | NH2    | H_ASP_90  | OD2    | 2.364        |
| 5GGV   | H_LYS_76  | NZ     | H_ASP_73  | OD2    | 3.976        |
| 5GGV   | H_ARG_98  | NH2    | H_ASP_113 | OD1    | 3.862        |
| 5GGV   | H_ARG_98  | NH2    | H_ASP_113 | OD2    | 2.927        |
| 5GGV   | H_ARG_101 | NH1    | Y_GLU_97  | OE2    | 3.572        |
| 5GGV   | H_LYS_155 | NZ     | H_ASP_156 | OD1    | 3.101        |
| 5GGV   | H_LYS_155 | NZ     | H_ASP_156 | OD2    | 3.435        |
| 5GGV   | H_LYS_221 | NZ     | L_GLU_123 | OE1    | 2.304        |
| 5GGV   | H_LYS_221 | NZ     | L_GLU_123 | OE2    | 3.975        |

Table 669: 5GGV-specific salt bridging networks analysis. In this table, a PDB file is specified with a four-letter PDB ID, except that the names of the PDB files corresponding to the single NMR structural model split from the NMR ensemble is specified with a four-letter PDB ID in addition to a hyphen followed by the single NMR structural model numeric ID, the residue naming scheme is **Chain ID\_residue name\_residue number**,  $\angle ADH$  represents the angle formed by acceptor (A), donor (D) and hydrogen (H) ( $\angle ADH$ ).

| PDB ID | Residue A | Atom A | Residue B | Atom B | Distance (Å) |
|--------|-----------|--------|-----------|--------|--------------|
| 5GKR   | A_ARG_38  | NH1    | A_ASP_86  | OD1    | 2.742        |
| 5GKR   | A_ARG_38  | NH2    | A_GLU_46  | OE1    | 2.810        |
| 5GKR   | A_ARG_38  | NH2    | A_ASP_86  | OD1    | 3.641        |
| 5GKR   | A_ARG_66  | NH1    | A_ASP_86  | OD1    | 3.332        |
| 5GKR   | A_ARG_66  | NH1    | A_ASP_86  | OD2    | 3.801        |
| 5GKR   | A_ARG_66  | NH2    | A_ASP_86  | OD1    | 3.354        |
| 5GKR   | A_ARG_66  | NH2    | A_ASP_86  | OD2    | 2.729        |
| 5GKR   | A_ARG_94  | NH1    | A_ASP_101 | OD1    | 3.700        |
| 5GKR   | A_ARG_94  | NH1    | A_ASP_101 | OD2    | 2.566        |
| 5GKR   | A_LYS_143 | NZ     | B_GLU_125 | OE2    | 2.806        |
| 5GKR   | A_LYS_201 | NZ     | A_ASP_199 | OD2    | 2.935        |
| 5GKR   | A_LYS_206 | NZ     | A_ASP_199 | OD1    | 3.198        |
| 5GKR   | A_LYS_209 | NZ     | B_GLU_124 | OE1    | 2.825        |
| 5GKR   | A_LYS_209 | NZ     | B_GLU_124 | OE2    | 3.325        |
| 5GKR   | B_LYS_53  | NZ     | B_ASP_50  | OD2    | 3.716        |
| 5GKR   | B_ARG_61  | NH2    | B_GLU_81  | OE2    | 3.803        |
| 5GKR   | B_ARG_61  | NH2    | B_ASP_82  | OD1    | 2.896        |
| 5GKR   | B_ARG_61  | NH2    | B_ASP_82  | OD2    | 3.817        |
| 5GKR   | B_LYS_130 | NZ     | A_ASP_144 | OD2    | 3.639        |
| 5GKR   | B_LYS_164 | NZ     | B_ASP_85  | OD2    | 2.873        |
| 5GKR   | B_HIS_189 | ND1    | B_ASP_152 | OD2    | 3.078        |
| 5GKR   | C_ARG_38  | NH1    | C_ASP_86  | OD1    | 2.720        |
| 5GKR   | C_ARG_38  | NH2    | C_GLU_46  | OE2    | 2.991        |
| 5GKR   | C_ARG_38  | NH2    | C_ASP_86  | OD1    | 3.638        |
| 5GKR   | C_ARG_66  | NH1    | C_ASP_86  | OD1    | 3.317        |
| 5GKR   | C_ARG_66  | NH1    | C_ASP_86  | OD2    | 3.769        |
| 5GKR   | C_ARG_66  | NH2    | C_ASP_86  | OD1    | 3.362        |
| 5GKR   | C_ARG_66  | NH2    | C_ASP_86  | OD2    | 2.717        |
| 5GKR   | C_ARG_94  | NH2    | C_ASP_101 | OD1    | 3.797        |
| 5GKR   | C_ARG_94  | NH2    | C_ASP_101 | OD2    | 2.747        |
| 5GKR   | C_LYS_143 | NZ     | D_GLU_125 | OE2    | 2.591        |
| 5GKR   | C_LYS_206 | NZ     | C_ASP_199 | OD1    | 3.203        |
| 5GKR   | C_LYS_209 | NZ     | D_GLU_124 | OE1    | 2.486        |
| 5GKR   | C_LYS_209 | NZ     | D_GLU_124 | OE2    | 2.893        |
| 5GKR   | D_LYS_53  | NZ     | D_ASP_50  | OD2    | 3.715        |
| 5GKR   | D_ARG_61  | NH1    | D_ASP_82  | OD1    | 3.020        |
| 5GKR   | D_ARG_61  | NH1    | D_ASP_82  | OD2    | 3.903        |
| 5GKR   | D_LYS_130 | NZ     | C_ASP_144 | OD2    | 3.574        |
| 5GKR   | D_LYS_164 | NZ     | D_ASP_85  | OD2    | 2.940        |
| 5GKR   | D_ARG_190 | NH2    | D_ASP_152 | OD1    | 3.635        |

Table 670: 5GKR-specific salt bridging networks analysis. In this table, a PDB file is specified with a four-letter PDB ID, except that the names of the PDB files corresponding to the single NMR structural model split from the NMR ensemble is specified with a four-letter PDB ID in addition to a hyphen followed by the single NMR structural model numeric ID, the residue naming scheme is **Chain ID\_residue name\_residue number**,  $\angle ADH$  represents the angle formed by acceptor (A), donor (D) and hydrogen (H) ( $\angle ADH$ ).



| PDB ID | Residue A | Atom A | Residue B | Atom B | Distance (Å) |
|--------|-----------|--------|-----------|--------|--------------|
| 5GKS   | A_ARG_38  | NH1    | A_ASP_86  | OD1    | 2.822        |
| 5GKS   | A_ARG_38  | NH2    | A_GLU_46  | OE1    | 2.937        |
| 5GKS   | A_ARG_38  | NH2    | A_ASP_86  | OD1    | 3.692        |
| 5GKS   | A_ARG_66  | NH1    | A_ASP_86  | OD1    | 3.105        |
| 5GKS   | A_ARG_66  | NH1    | A_ASP_86  | OD2    | 3.788        |
| 5GKS   | A_ARG_66  | NH2    | A_ASP_86  | OD1    | 3.456        |
| 5GKS   | A_ARG_66  | NH2    | A_ASP_86  | OD2    | 2.799        |
| 5GKS   | A_ARG_94  | NH1    | A_ASP_101 | OD1    | 3.889        |
| 5GKS   | A_ARG_94  | NH1    | A_ASP_101 | OD2    | 2.710        |
| 5GKS   | A_ARG_96  | NH2    | A_ASP_101 | OD2    | 3.709        |
| 5GKS   | A_LYS_143 | NZ     | A_ASP_144 | OD1    | 3.345        |
| 5GKS   | A_LYS_143 | NZ     | A_ASP_144 | OD2    | 3.710        |
| 5GKS   | A_LYS_    | NZ     | A_ASP_    | OD2    | 3.919        |
| 5GKS   | A_LYS_    | NZ     | B_GLU_124 | OE1    | 3.518        |
| 5GKS   | A_LYS_    | NZ     | B_GLU_124 | OE2    | 2.790        |
| 5GKS   | B_LYS_53  | NZ     | B_ASP_50  | OD2    | 3.623        |
| 5GKS   | B_ARG_    | NH1    | B_ASP_    | OD1    | 2.870        |
| 5GKS   | B_ARG_    | NH1    | B_ASP_82  | OD2    | 3.493        |
| 5GKS   | B_LYS_111 | NZ     | B_GLU_199 | OE1    | 3.161        |
| 5GKS   | B_LYS_130 | NZ     | A_ASP_144 | OD2    | 3.783        |
| 5GKS   | B_LYS_150 | NZ     | B_GLU_204 | OE2    | 3.960        |
| 5GKS   | B_LYS_164 | NZ     | B_ASP_85  | OD2    | 3.552        |
| 5GKS   | B_HIS_189 | ND1    | B_ASP_152 | OD2    | 3.043        |
| 5GKS   | C_ARG_    | NH1    | C_ASP_    | OD1    | 2.746        |
| 5GKS   | C_ARG_    | NH2    | C_GLU_    | OE1    | 3.164        |
| 5GKS   | C_ARG_    | NH2    | C_ASP_    | OD1    | 3.556        |
| 5GKS   | C_ARG_66  | NH1    | C_ASP_    | OD1    | 3.136        |
| 5GKS   | C_ARG_66  | NH1    | C_ASP_    | OD2    | 3.770        |
| 5GKS   | C_ARG_66  | NH2    | C_ASP_    | OD1    | 3.522        |
| 5GKS   | C_ARG_66  | NH2    | C_ASP_    | OD2    | 2.841        |
| 5GKS   | C_ARG_    | NH1    | C_ASP_    | OD1    | 3.682        |
| 5GKS   | C_ARG_    | NH1    | C_ASP_    | OD2    | 2.656        |
| 5GKS   | C_ARG_    | NH2    | C_ASP_    | OD2    | 3.498        |
| 5GKS   | C_LYS_    | NZ     | C_ASP_    | OD1    | 3.276        |
| 5GKS   | C_LYS_    | NZ     | C_ASP_    | OD2    | 3.251        |
| 5GKS   | C_LYS_    | NZ     | C_ASP_    | OD2    | 3.224        |
| 5GKS   | C_LYS_    | NZ     | C_ASP_    | OD1    | 3.903        |
| 5GKS   | C_LYS_    | NZ     | C_ASP_    | OD2    | 3.334        |
| 5GKS   | C_LYS_    | NZ     | D_GLU_    | OE1    | 3.455        |
| 5GKS   | C_LYS_    | NZ     | D_GLU_    | OE2    | 2.665        |
| 5GKS   | D_LYS_    | NZ     | D_ASP_    | OD2    | 3.974        |
| 5GKS   | D_ARG_    | NH1    | D_ASP_    | OD1    | 2.964        |
| 5GKS   | D_ARG_    | NH1    | D_GLU_    | OE2    | 3.512        |
| 5GKS   | D_ARG_    | NH1    | D_ASP_    | OD1    | 2.891        |
| 5GKS   | D_ARG_    | NH1    | D_ASP_    | OD2    | 3.896        |
| 5GKS   | D_LYS_    | NZ     | D_GLU_    | OE1    | 2.751        |
| 5GKS   | D_LYS_    | NZ     | D_GLU_    | OE2    | 3.899        |
| 5GKS   | D_HIS_189 | ND1    | D_ASP_152 | OD2    | 3.002        |

---

Table 671: 5GKS-specific salt bridging networks analysis. In this table, a PDB file is specified with a four-letter PDB ID, except that the names of the PDB files corresponding to the single NMR structural model split from the NMR ensemble is specified with a four-letter PDB ID in addition to a hyphen followed by the single NMR structural model numeric ID, the residue naming scheme is **Chain ID\_residue name\_residue number**,  $\angle ADH$  represents the angle formed by acceptor (A), donor (D) and hydrogen (H) ( $\angle ADH$ ).

| PDB ID | Residue A | Atom A | Residue B | Atom B | Distance (Å) |
|--------|-----------|--------|-----------|--------|--------------|
| 5HDQ   | A_HIS_40  | NE2    | A_ASP_58  | OD1    | 2.837        |
| 5HDQ   | A_HIS_50  | NE2    | A_GLU_189 | OE2    | 3.103        |
| 5HDQ   | A_HIS_50  | NE2    | A_ASP_264 | OD1    | 3.865        |
| 5HDQ   | A_HIS_50  | NE2    | A_ASP_264 | OD2    | 3.335        |
| 5HDQ   | A_HIS_123 | ND1    | A_ASP_121 | OD2    | 2.936        |
| 5HDQ   | A_HIS_123 | NE2    | A_GLU_189 | OE1    | 3.291        |
| 5HDQ   | A_HIS_123 | NE2    | A_GLU_189 | OE2    | 3.492        |
| 5HDQ   | A_HIS_123 | NE2    | A_ASP_264 | OD1    | 2.880        |
| 5HDQ   | A_HIS_123 | NE2    | A_ASP_264 | OD2    | 3.860        |
| 5HDQ   | A_HIS_149 | ND1    | A_ASP_146 | OD1    | 3.055        |
| 5HDQ   | A_HIS_149 | ND1    | A_ASP_146 | OD2    | 2.834        |
| 5HDQ   | A_LYS_172 | NZ     | A_ASP_129 | OD1    | 3.820        |
| 5HDQ   | A_LYS_193 | NZ     | A_GLU_208 | OE2    | 3.325        |
| 5HDQ   | A_HIS_230 | ND1    | A_GLU_181 | OE1    | 3.289        |
| 5HDQ   | A_HIS_234 | ND1    | H_ASP_97  | OD2    | 3.865        |
| 5HDQ   | A_LYS_243 | NZ     | A_GLU_260 | OE2    | 3.481        |
| 5HDQ   | A_LYS_254 | NZ     | A_GLU_251 | OE1    | 3.552        |
| 5HDQ   | A_LYS_278 | NZ     | A_ASP_274 | OD1    | 2.808        |
| 5HDQ   | A_HIS_288 | NE2    | A_ASP_177 | OD1    | 3.242        |
| 5HDQ   | A_HIS_288 | NE2    | A_ASP_177 | OD2    | 3.881        |
| 5HDQ   | H_LYS_62  | NZ     | H_GLU_46  | OE1    | 3.737        |
| 5HDQ   | H_LYS_62  | NZ     | H_GLU_46  | OE2    | 2.605        |
| 5HDQ   | H_LYS_66  | NZ     | H_ASP_86  | OD1    | 3.893        |
| 5HDQ   | H_LYS_66  | NZ     | H_ASP_86  | OD2    | 2.747        |
| 5HDQ   | H_ARG_94  | NH1    | H_ASP_101 | OD1    | 3.466        |
| 5HDQ   | H_ARG_94  | NH1    | H_ASP_101 | OD2    | 2.979        |
| 5HDQ   | H_LYS_95  | NZ     | A_ASP_256 | OD2    | 3.739        |
| 5HDQ   | H_LYS_208 | NZ     | L_GLU_123 | OE1    | 2.947        |
| 5HDQ   | L_LYS_24  | NZ     | L_ASP_70  | OD2    | 2.740        |
| 5HDQ   | L_ARG_54  | NH1    | L_ASP_60  | OD1    | 3.546        |
| 5HDQ   | L_ARG_61  | NH1    | L_GLU_81  | OE1    | 3.772        |
| 5HDQ   | L_ARG_61  | NH1    | L_ASP_82  | OD1    | 2.690        |
| 5HDQ   | L_ARG_61  | NH1    | L_ASP_82  | OD2    | 3.697        |
| 5HDQ   | L_LYS_103 | NZ     | L_GLU_105 | OE2    | 3.387        |
| 5HDQ   | L_LYS_142 | NZ     | L_GLU_105 | OE1    | 3.286        |
| 5HDQ   | L_LYS_142 | NZ     | L_GLU_105 | OE2    | 2.974        |
| 5HDQ   | L_LYS_149 | NZ     | L_GLU_195 | OE2    | 3.652        |
| 5HDQ   | L_LYS_183 | NZ     | L_GLU_187 | OE1    | 2.880        |
| 5HDQ   | L_LYS_183 | NZ     | L_GLU_187 | OE2    | 3.085        |
| 5HDQ   | L_HIS_189 | ND1    | L_ASP_151 | OD2    | 2.925        |
| 5HDQ   | L_HIS_189 | NE2    | L_GLU_185 | OE1    | 3.931        |
| 5HDQ   | L_HIS_189 | NE2    | L_GLU_185 | OE2    | 3.287        |

Table 672: 5HDQ-specific salt bridging networks analysis. In this table, a PDB file is specified with a four-letter PDB ID, except that the names of the PDB files corresponding to the single NMR structural model split from the NMR ensemble is specified with a four-letter PDB ID in addition to a hyphen followed by the single NMR structural model numeric ID, the residue naming scheme is **Chain ID\_residue name\_residue number**,  $\angle ADH$  represents the angle formed by acceptor (A), donor (D) and hydrogen (H) ( $\angle ADH$ ).

| PDB ID | Residue A | Atom A | Residue B | Atom B | Distance (Å) |
|--------|-----------|--------|-----------|--------|--------------|
| 5HMG   | A_LYS_27  | NZ     | B_GLU_97  | OE1    | 2.931        |
| 5HMG   | A_LYS_27  | NZ     | B_GLU_97  | OE2    | 3.005        |
| 5HMG   | A_HIS_56  | ND1    | A_ASP_85  | OD2    | 3.602        |
| 5HMG   | A_ARG_57  | NH1    | A_GLU_82  | OE1    | 2.653        |
| 5HMG   | A_ARG_57  | NH1    | A_GLU_82  | OE2    | 3.746        |
| 5HMG   | A_HIS_75  | ND1    | A_ASP_73  | OD1    | 3.505        |
| 5HMG   | A_HIS_75  | ND1    | A_ASP_73  | OD2    | 2.667        |
| 5HMG   | A_HIS_75  | NE2    | A_ASP_63  | OD1    | 3.736        |
| 5HMG   | A_ARG_90  | NH1    | A_ASP_60  | OD1    | 2.782        |
| 5HMG   | A_ARG_90  | NH1    | A_ASP_60  | OD2    | 3.490        |
| 5HMG   | A_ARG_109 | NH1    | B_GLU_67  | OE1    | 2.841        |
| 5HMG   | A_ARG_109 | NH1    | B_GLU_67  | OE2    | 3.185        |
| 5HMG   | A_ARG_109 | NH2    | A_GLU_89  | OE1    | 2.955        |
| 5HMG   | A_ARG_109 | NH2    | A_GLU_89  | OE2    | 2.579        |
| 5HMG   | A_ARG_141 | NH1    | A_ASP_77  | OD1    | 3.382        |
| 5HMG   | A_ARG_141 | NH1    | A_ASP_77  | OD2    | 3.145        |
| 5HMG   | A_ARG_141 | NH2    | A_ASP_77  | OD1    | 2.618        |
| 5HMG   | A_ARG_141 | NH2    | A_ASP_77  | OD2    | 2.942        |
| 5HMG   | A_LYS_176 | NZ     | A_GLU_123 | OE1    | 2.608        |
| 5HMG   | A_LYS_176 | NZ     | A_GLU_123 | OE2    | 3.621        |
| 5HMG   | A_HIS_183 | NE2    | A_GLU_190 | OE1    | 3.761        |
| 5HMG   | A_ARG_207 | NH2    | A_ASP_241 | OD1    | 3.512        |
| 5HMG   | A_ARG_261 | NH1    | A_GLU_119 | OE1    | 3.028        |
| 5HMG   | A_ARG_261 | NH1    | A_GLU_119 | OE2    | 3.069        |
| 5HMG   | A_ARG_261 | NH2    | A_GLU_119 | OE1    | 2.801        |
| 5HMG   | A_ARG_261 | NH2    | A_GLU_119 | OE2    | 2.923        |
| 5HMG   | A_LYS_264 | NZ     | A_ASP_85  | OD1    | 3.963        |
| 5HMG   | A_LYS_264 | NZ     | A_ASP_85  | OD2    | 2.713        |
| 5HMG   | A_ARG_269 | NH1    | B_GLU_67  | OE1    | 3.577        |
| 5HMG   | A_ARG_269 | NH2    | B_GLU_67  | OE1    | 3.220        |
| 5HMG   | A_LYS_292 | NZ     | A_ASP_291 | OD1    | 2.545        |
| 5HMG   | A_LYS_299 | NZ     | B_GLU_69  | OE1    | 3.343        |
| 5HMG   | A_LYS_310 | NZ     | B_ASP_86  | OD1    | 3.434        |
| 5HMG   | A_LYS_310 | NZ     | B_ASP_90  | OD1    | 2.661        |
| 5HMG   | A_LYS_315 | NZ     | A_GLU_41  | OE2    | 2.757        |
| 5HMG   | B_LYS_51  | NZ     | B_GLU_103 | OE2    | 2.773        |
| 5HMG   | B_ARG_54  | NH1    | F_GLU_97  | OE1    | 2.843        |
| 5HMG   | B_ARG_54  | NH2    | B_GLU_57  | OE2    | 3.728        |
| 5HMG   | B_ARG_54  | NH2    | F_GLU_97  | OE1    | 2.937        |
| 5HMG   | B_LYS_58  | NZ     | B_GLU_57  | OE1    | 3.084        |
| 5HMG   | B_LYS_58  | NZ     | B_GLU_57  | OE2    | 3.561        |
| 5HMG   | B_LYS_58  | NZ     | F_GLU_97  | OE1    | 3.606        |
| 5HMG   | B_LYS_58  | NZ     | F_GLU_97  | OE2    | 3.524        |
| 5HMG   | B_LYS_62  | NZ     | F_ASP_86  | OD1    | 3.085        |
| 5HMG   | B_LYS_62  | NZ     | F_ASP_86  | OD2    | 2.792        |
| 5HMG   | B_LYS_62  | NZ     | F_ASP_90  | OD1    | 3.679        |
| 5HMG   | B_LYS_62  | NZ     | F_ASP_90  | OD2    | 2.748        |
| 5HMG   | B_HIS_64  | NE2    | F_ASP_79  | OD2    | 3.617        |
| 5HMG   | B_LYS_68  | NZ     | B_GLU_85  | OE1    | 3.409        |
| 5HMG   | B_LYS_68  | NZ     | B_GLU_85  | OE2    | 2.733        |
| 5HMG   | B_ARG_76  | NH1    | D_GLU_74  | OE1    | 3.275        |
| 5HMG   | B_ARG_76  | NH1    | D_GLU_74  | OE2    | 2.882        |
| 5HMG   | B_ARG_76  | NH1    | D_GLU_81  | OE1    | 2.781        |
| 5HMG   | B_ARG_76  | NH1    | D_GLU_81  | OE2    | 3.484        |
| 5HMG   | B_ARG_76  | NH2    | D_GLU_74  | OE1    | 2.814        |
| 5HMG   | B_ARG_76  | NH2    | D_GLU_74  | OE2    | 3.691        |
| 5HMG   | B_LYS_117 | NZ     | B_GLU_114 | OE1    | 2.674        |

|      |           |     |           |     |       |
|------|-----------|-----|-----------|-----|-------|
| 5HMG | B_LYS_117 | NZ  | B_GLU_114 | OE2 | 3.512 |
| 5HMG | B_ARG_123 | NH1 | B_GLU_120 | OE1 | 3.893 |
| 5HMG | B_ARG_123 | NH1 | F_GLU_132 | OE2 | 3.002 |
| 5HMG | B_ARG_123 | NH2 | B_GLU_120 | OE1 | 2.612 |
| 5HMG | B_ARG_123 | NH2 | B_GLU_120 | OE2 | 3.339 |
| 5HMG | B_ARG_124 | NH1 | B_GLU_120 | OE1 | 3.640 |
| 5HMG | B_ARG_124 | NH1 | F_GLU_132 | OE1 | 3.424 |
| 5HMG | B_ARG_124 | NH1 | F_GLU_132 | OE2 | 3.265 |
| 5HMG | B_ARG_124 | NH2 | B_GLU_120 | OE1 | 3.919 |
| 5HMG | B_ARG_127 | NH2 | F_GLU_131 | OE1 | 2.537 |
| 5HMG | B_LYS_143 | NZ  | B_ASP_145 | OD1 | 2.698 |
| 5HMG | B_ARG_153 | NH2 | B_GLU_150 | OE1 | 3.021 |
| 5HMG | B_HIS_159 | NE2 | B_ASP_160 | OD2 | 3.062 |
| 5HMG | B_ARG_163 | NH1 | F_GLU_131 | OE1 | 2.770 |
| 5HMG | B_ARG_163 | NH1 | F_GLU_131 | OE2 | 2.532 |
| 5HMG | B_ARG_170 | NH1 | B_GLU_128 | OE1 | 3.922 |
| 5HMG | B_ARG_170 | NH1 | B_GLU_131 | OE2 | 3.597 |
| 5HMG | B_ARG_170 | NH1 | D_GLU_128 | OE1 | 3.169 |
| 5HMG | B_ARG_170 | NH1 | D_GLU_128 | OE2 | 3.597 |
| 5HMG | B_ARG_170 | NH2 | B_GLU_128 | OE1 | 3.011 |
| 5HMG | C_LYS_27  | NZ  | D_GLU_97  | OE1 | 2.934 |
| 5HMG | C_LYS_27  | NZ  | D_GLU_97  | OE2 | 2.988 |
| 5HMG | C_HIS_56  | ND1 | C_ASP_85  | OD2 | 3.578 |
| 5HMG | C_ARG_57  | NH1 | C_GLU_82  | OE1 | 2.634 |
| 5HMG | C_ARG_57  | NH1 | C_GLU_82  | OE2 | 3.752 |
| 5HMG | C_HIS_75  | ND1 | C_ASP_73  | OD1 | 3.515 |
| 5HMG | C_HIS_75  | ND1 | C_ASP_73  | OD2 | 2.678 |
| 5HMG | C_HIS_75  | NE2 | C_ASP_63  | OD1 | 3.699 |
| 5HMG | C_ARG_90  | NH1 | C_ASP_60  | OD1 | 2.783 |
| 5HMG | C_ARG_90  | NH1 | C_ASP_60  | OD2 | 3.521 |
| 5HMG | C_ARG_109 | NH1 | D_GLU_67  | OE1 | 2.853 |
| 5HMG | C_ARG_109 | NH1 | D_GLU_67  | OE2 | 3.184 |
| 5HMG | C_ARG_109 | NH2 | C_GLU_89  | OE1 | 2.925 |
| 5HMG | C_ARG_109 | NH2 | C_GLU_89  | OE2 | 2.571 |
| 5HMG | C_ARG_141 | NH1 | C_ASP_77  | OD1 | 3.417 |
| 5HMG | C_ARG_141 | NH1 | C_ASP_77  | OD2 | 3.195 |
| 5HMG | C_ARG_141 | NH2 | C_ASP_77  | OD1 | 2.635 |
| 5HMG | C_ARG_141 | NH2 | C_ASP_77  | OD2 | 2.953 |
| 5HMG | C_LYS_176 | NZ  | C_GLU_123 | OE1 | 2.578 |
| 5HMG | C_LYS_176 | NZ  | C_GLU_123 | OE2 | 3.604 |
| 5HMG | C_HIS_183 | NE2 | C_GLU_190 | OE1 | 3.762 |
| 5HMG | C_ARG_207 | NH2 | C_ASP_241 | OD1 | 3.485 |
| 5HMG | C_ARG_261 | NH1 | C_GLU_119 | OE1 | 3.007 |
| 5HMG | C_ARG_261 | NH1 | C_GLU_119 | OE2 | 3.058 |
| 5HMG | C_ARG_261 | NH2 | C_GLU_119 | OE1 | 2.812 |
| 5HMG | C_ARG_261 | NH2 | C_GLU_119 | OE2 | 2.915 |
| 5HMG | C_LYS_264 | NZ  | C_ASP_85  | OD1 | 3.974 |
| 5HMG | C_LYS_264 | NZ  | C_ASP_85  | OD2 | 2.709 |
| 5HMG | C_ARG_269 | NH1 | D_GLU_67  | OE1 | 3.552 |
| 5HMG | C_ARG_269 | NH2 | D_GLU_67  | OE1 | 3.173 |
| 5HMG | C_LYS_292 | NZ  | C_ASP_291 | OD1 | 2.561 |
| 5HMG | C_LYS_299 | NZ  | D_GLU_69  | OE1 | 3.348 |
| 5HMG | C_LYS_310 | NZ  | D_ASP_86  | OD1 | 3.449 |
| 5HMG | C_LYS_310 | NZ  | D_ASP_90  | OD1 | 2.638 |
| 5HMG | C_LYS_315 | NZ  | C_GLU_41  | OE2 | 2.755 |
| 5HMG | D_LYS_51  | NZ  | D_GLU_103 | OE2 | 2.776 |
| 5HMG | D_ARG_54  | NH1 | B_GLU_97  | OE1 | 2.819 |
| 5HMG | D_ARG_54  | NH2 | B_GLU_97  | OE1 | 2.943 |

|      |           |     |           |     |       |
|------|-----------|-----|-----------|-----|-------|
| 5HMG | D_ARG_54  | NH2 | D_GLU_57  | OE2 | 3.747 |
| 5HMG | D_LYS_58  | NZ  | B_GLU_97  | OE1 | 3.646 |
| 5HMG | D_LYS_58  | NZ  | B_GLU_97  | OE2 | 3.528 |
| 5HMG | D_LYS_58  | NZ  | D_GLU_57  | OE1 | 3.109 |
| 5HMG | D_LYS_58  | NZ  | D_GLU_57  | OE2 | 3.568 |
| 5HMG | D_LYS_62  | NZ  | B_ASP_86  | OD1 | 3.110 |
| 5HMG | D_LYS_62  | NZ  | B_ASP_86  | OD2 | 2.718 |
| 5HMG | D_LYS_62  | NZ  | B_ASP_90  | OD1 | 3.686 |
| 5HMG | D_LYS_62  | NZ  | B_ASP_90  | OD2 | 2.685 |
| 5HMG | D_HIS_64  | NE2 | B_ASP_79  | OD2 | 3.446 |
| 5HMG | D_LYS_68  | NZ  | D_GLU_85  | OE1 | 3.418 |
| 5HMG | D_LYS_68  | NZ  | D_GLU_85  | OE2 | 2.785 |
| 5HMG | D_ARG_76  | NH1 | F_GLU_74  | OE1 | 3.349 |
| 5HMG | D_ARG_76  | NH1 | F_GLU_74  | OE2 | 2.805 |
| 5HMG | D_ARG_76  | NH1 | F_GLU_81  | OE1 | 2.685 |
| 5HMG | D_ARG_76  | NH1 | F_GLU_81  | OE2 | 3.513 |
| 5HMG | D_ARG_76  | NH2 | F_GLU_74  | OE1 | 2.710 |
| 5HMG | D_ARG_76  | NH2 | F_GLU_74  | OE2 | 3.478 |
| 5HMG | D_LYS_117 | NZ  | D_GLU_114 | OE1 | 2.687 |
| 5HMG | D_LYS_117 | NZ  | D_GLU_114 | OE2 | 3.495 |
| 5HMG | D_ARG_123 | NH1 | B_GLU_132 | OE2 | 2.981 |
| 5HMG | D_ARG_123 | NH1 | D_GLU_120 | OE1 | 3.874 |
| 5HMG | D_ARG_123 | NH2 | D_GLU_120 | OE1 | 2.616 |
| 5HMG | D_ARG_123 | NH2 | D_GLU_120 | OE2 | 3.345 |
| 5HMG | D_ARG_124 | NH1 | B_GLU_132 | OE1 | 3.466 |
| 5HMG | D_ARG_124 | NH1 | B_GLU_132 | OE2 | 3.303 |
| 5HMG | D_ARG_124 | NH1 | D_GLU_120 | OE1 | 3.636 |
| 5HMG | D_ARG_124 | NH2 | D_GLU_120 | OE1 | 3.931 |
| 5HMG | D_ARG_127 | NH2 | B_GLU_131 | OE1 | 2.578 |
| 5HMG | D_LYS_143 | NZ  | D_ASP_145 | OD1 | 2.713 |
| 5HMG | D_ARG_153 | NH2 | D_GLU_150 | OE1 | 2.620 |
| 5HMG | D_HIS_159 | NE2 | D_ASP_160 | OD2 | 3.088 |
| 5HMG | D_ARG_163 | NH1 | B_GLU_131 | OE1 | 2.694 |
| 5HMG | D_ARG_163 | NH1 | B_GLU_131 | OE2 | 2.571 |
| 5HMG | D_ARG_170 | NH1 | D_GLU_128 | OE1 | 3.949 |
| 5HMG | D_ARG_170 | NH1 | D_GLU_131 | OE2 | 3.612 |
| 5HMG | D_ARG_170 | NH1 | F_GLU_128 | OE1 | 3.252 |
| 5HMG | D_ARG_170 | NH1 | F_GLU_128 | OE2 | 3.705 |
| 5HMG | D_ARG_170 | NH2 | D_GLU_128 | OE1 | 3.068 |
| 5HMG | E_LYS_27  | NZ  | F_GLU_97  | OE1 | 2.935 |
| 5HMG | E_LYS_27  | NZ  | F_GLU_97  | OE2 | 3.012 |
| 5HMG | E_HIS_56  | ND1 | E_ASP_85  | OD2 | 3.574 |
| 5HMG | E_ARG_57  | NH1 | E_GLU_82  | OE1 | 2.672 |
| 5HMG | E_ARG_57  | NH1 | E_GLU_82  | OE2 | 3.760 |
| 5HMG | E_HIS_75  | ND1 | E_ASP_73  | OD1 | 3.480 |
| 5HMG | E_HIS_75  | ND1 | E_ASP_73  | OD2 | 2.665 |
| 5HMG | E_HIS_75  | NE2 | E_ASP_63  | OD1 | 3.721 |
| 5HMG | E_ARG_90  | NH1 | E_ASP_60  | OD1 | 2.808 |
| 5HMG | E_ARG_90  | NH1 | E_ASP_60  | OD2 | 3.495 |
| 5HMG | E_ARG_109 | NH1 | F_GLU_67  | OE1 | 2.825 |
| 5HMG | E_ARG_109 | NH1 | F_GLU_67  | OE2 | 3.180 |
| 5HMG | E_ARG_109 | NH2 | E_GLU_89  | OE1 | 2.931 |
| 5HMG | E_ARG_109 | NH2 | E_GLU_89  | OE2 | 2.544 |
| 5HMG | E_ARG_141 | NH1 | E_ASP_77  | OD1 | 3.401 |
| 5HMG | E_ARG_141 | NH1 | E_ASP_77  | OD2 | 3.198 |
| 5HMG | E_ARG_141 | NH2 | E_ASP_77  | OD1 | 2.626 |
| 5HMG | E_ARG_141 | NH2 | E_ASP_77  | OD2 | 2.960 |
| 5HMG | E_LYS_176 | NZ  | E_GLU_123 | OE1 | 2.587 |

|      |           |     |           |     |       |
|------|-----------|-----|-----------|-----|-------|
| 5HMG | E_LYS_176 | NZ  | E_GLU_123 | OE2 | 3.609 |
| 5HMG | E_HIS_183 | NE2 | E_GLU_190 | OE1 | 3.758 |
| 5HMG | E_ARG_207 | NH2 | E_ASP_241 | OD1 | 3.508 |
| 5HMG | E_ARG_261 | NH1 | E_GLU_119 | OE1 | 2.998 |
| 5HMG | E_ARG_261 | NH1 | E_GLU_119 | OE2 | 3.065 |
| 5HMG | E_ARG_261 | NH2 | E_GLU_119 | OE1 | 2.789 |
| 5HMG | E_ARG_261 | NH2 | E_GLU_119 | OE2 | 2.904 |
| 5HMG | E_LYS_264 | NZ  | E_ASP_85  | OD1 | 3.978 |
| 5HMG | E_LYS_264 | NZ  | E_ASP_85  | OD2 | 2.713 |
| 5HMG | E_ARG_269 | NH1 | F_GLU_67  | OE1 | 3.584 |
| 5HMG | E_ARG_269 | NH2 | F_GLU_67  | OE1 | 3.233 |
| 5HMG | E_LYS_292 | NZ  | E_ASP_291 | OD1 | 2.537 |
| 5HMG | E_LYS_299 | NZ  | F_GLU_69  | OE1 | 3.318 |
| 5HMG | E_LYS_310 | NZ  | F_ASP_86  | OD1 | 3.440 |
| 5HMG | E_LYS_310 | NZ  | F_ASP_90  | OD1 | 2.621 |
| 5HMG | E_LYS_315 | NZ  | E_GLU_41  | OE2 | 2.747 |
| 5HMG | F_LYS_51  | NZ  | F_GLU_103 | OE2 | 2.774 |
| 5HMG | F_ARG_54  | NH1 | D_GLU_97  | OE1 | 2.726 |
| 5HMG | F_ARG_54  | NH2 | D_GLU_97  | OE1 | 2.912 |
| 5HMG | F_ARG_54  | NH2 | F_GLU_57  | OE2 | 3.744 |
| 5HMG | F_LYS_58  | NZ  | D_GLU_97  | OE1 | 3.765 |
| 5HMG | F_LYS_58  | NZ  | D_GLU_97  | OE2 | 3.593 |
| 5HMG | F_LYS_58  | NZ  | F_GLU_57  | OE1 | 3.108 |
| 5HMG | F_LYS_58  | NZ  | F_GLU_57  | OE2 | 3.569 |
| 5HMG | F_LYS_62  | NZ  | D_ASP_86  | OD1 | 3.013 |
| 5HMG | F_LYS_62  | NZ  | D_ASP_86  | OD2 | 2.694 |
| 5HMG | F_LYS_62  | NZ  | D_ASP_90  | OD1 | 3.718 |
| 5HMG | F_LYS_62  | NZ  | D_ASP_90  | OD2 | 2.750 |
| 5HMG | F_HIS_64  | NE2 | D_ASP_79  | OD1 | 3.885 |
| 5HMG | F_HIS_64  | NE2 | D_ASP_79  | OD2 | 3.364 |
| 5HMG | F_LYS_68  | NZ  | F_GLU_85  | OE1 | 3.382 |
| 5HMG | F_LYS_68  | NZ  | F_GLU_85  | OE2 | 2.722 |
| 5HMG | F_ARG_76  | NH1 | B_GLU_74  | OE1 | 3.251 |
| 5HMG | F_ARG_76  | NH1 | B_GLU_74  | OE2 | 2.826 |
| 5HMG | F_ARG_76  | NH1 | B_GLU_81  | OE1 | 2.735 |
| 5HMG | F_ARG_76  | NH1 | B_GLU_81  | OE2 | 3.601 |
| 5HMG | F_ARG_76  | NH2 | B_GLU_74  | OE1 | 2.649 |
| 5HMG | F_ARG_76  | NH2 | B_GLU_74  | OE2 | 3.569 |
| 5HMG | F_LYS_117 | NZ  | F_GLU_114 | OE1 | 2.666 |
| 5HMG | F_LYS_117 | NZ  | F_GLU_114 | OE2 | 3.516 |
| 5HMG | F_ARG_123 | NH1 | D_GLU_132 | OE2 | 2.992 |
| 5HMG | F_ARG_123 | NH1 | F_GLU_120 | OE1 | 3.906 |
| 5HMG | F_ARG_123 | NH2 | F_GLU_120 | OE1 | 2.639 |
| 5HMG | F_ARG_123 | NH2 | F_GLU_120 | OE2 | 3.377 |
| 5HMG | F_ARG_124 | NH1 | D_GLU_132 | OE1 | 3.514 |
| 5HMG | F_ARG_124 | NH1 | D_GLU_132 | OE2 | 3.395 |
| 5HMG | F_ARG_124 | NH1 | F_GLU_120 | OE1 | 3.630 |
| 5HMG | F_ARG_124 | NH2 | F_GLU_120 | OE1 | 3.883 |
| 5HMG | F_ARG_127 | NH2 | D_GLU_131 | OE1 | 2.609 |
| 5HMG | F_LYS_143 | NZ  | F_ASP_145 | OD1 | 2.695 |
| 5HMG | F_HIS_159 | NE2 | F_ASP_160 | OD2 | 3.088 |
| 5HMG | F_ARG_163 | NH1 | D_GLU_131 | OE1 | 2.712 |
| 5HMG | F_ARG_163 | NH1 | D_GLU_131 | OE2 | 2.596 |
| 5HMG | F_ARG_170 | NH1 | B_GLU_128 | OE1 | 3.210 |
| 5HMG | F_ARG_170 | NH1 | B_GLU_128 | OE2 | 3.530 |
| 5HMG | F_ARG_170 | NH1 | F_GLU_128 | OE1 | 3.950 |
| 5HMG | F_ARG_170 | NH1 | F_GLU_131 | OE2 | 3.600 |
| 5HMG | F_ARG_170 | NH2 | F_GLU_128 | OE1 | 3.064 |

---

Table 673: 5HMG-specific salt bridging networks analysis. In this table, a PDB file is specified with a four-letter PDB ID, except that the names of the PDB files corresponding to the single NMR structural model split from the NMR ensemble is specified with a four-letter PDB ID in addition to a hyphen followed by the single NMR structural model numeric ID, the residue naming scheme is **Chain ID\_residue name\_residue number**,  $\angle ADH$  represents the angle formed by acceptor (A), donor (D) and hydrogen (H) ( $\angle ADH$ ).



| PDB ID | Residue A | Atom A | Residue B | Atom B | Distance (Å) |
|--------|-----------|--------|-----------|--------|--------------|
| 5I4F   | A_LYS_64  | NZ     | A_GLU_47  | OE2    | 2.666        |
| 5I4F   | A_LYS_68  | NZ     | A_ASP_91  | OD1    | 3.548        |
| 5I4F   | A_LYS_68  | NZ     | A_ASP_91  | OD2    | 2.948        |
| 5I4F   | A_ARG_99  | NH2    | A_ASP_108 | OD1    | 3.501        |
| 5I4F   | A_ARG_99  | NH2    | A_ASP_108 | OD2    | 2.781        |
| 5I4F   | A_ARG_198 | NH2    | A_ASP_204 | OD1    | 3.850        |
| 5I4F   | A_ARG_205 | NH1    | A_GLU_223 | OE2    | 3.321        |
| 5I4F   | A_ARG_205 | NH2    | A_GLU_223 | OE1    | 3.768        |
| 5I4F   | A_ARG_205 | NH2    | A_GLU_223 | OE2    | 3.756        |
| 5I4F   | A_ARG_205 | NH2    | A_GLU_225 | OE2    | 2.829        |
| 5I4F   | A_ARG_205 | NH2    | A_ASP_226 | OD1    | 2.710        |
| 5I4F   | A_ARG_205 | NH2    | A_ASP_226 | OD2    | 3.577        |

Table 674: 5I4F-specific salt bridging networks analysis. In this table, a PDB file is specified with a four-letter PDB ID, except that the names of the PDB files corresponding to the single NMR structural model split from the NMR ensemble is specified with a four-letter PDB ID in addition to a hyphen followed by the single NMR structural model numeric ID, the residue naming scheme is **Chain ID** **residue name** **residue number**,  $\angle ADH$  represents the angle formed by acceptor (A), donor (D) and hydrogen (H) ( $\angle ADH$ ).

| PDB ID | Residue A | Atom A | Residue B | Atom B | Distance (Å) |
|--------|-----------|--------|-----------|--------|--------------|
| 5I76   | A_ARG_24  | NH1    | A_ASP_70  | OD2    | 3.774        |
| 5I76   | A_LYS_49  | NZ     | A_GLU_53  | OE1    | 2.941        |
| 5I76   | A_LYS_49  | NZ     | B_GLU_105 | OE1    | 3.995        |
| 5I76   | A_ARG_61  | NH1    | A_GLU_79  | OE2    | 3.393        |
| 5I76   | A_ARG_61  | NH1    | A_GLU_81  | OE2    | 3.803        |
| 5I76   | A_ARG_61  | NH2    | A_GLU_79  | OE2    | 3.760        |
| 5I76   | A_ARG_61  | NH2    | A_GLU_81  | OE2    | 2.766        |
| 5I76   | A_ARG_61  | NH2    | A_ASP_82  | OD1    | 2.773        |
| 5I76   | A_ARG_61  | NH2    | A_ASP_82  | OD2    | 3.589        |
| 5I76   | A_LYS_103 | NZ     | A_GLU_165 | OE1    | 3.841        |
| 5I76   | A_LYS_145 | NZ     | A_GLU_143 | OE1    | 3.548        |
| 5I76   | A_LYS_145 | NZ     | A_GLU_143 | OE2    | 2.870        |
| 5I76   | A_LYS_149 | NZ     | A_GLU_195 | OE1    | 2.637        |
| 5I76   | A_HIS_189 | ND1    | A_ASP_151 | OD2    | 3.111        |
| 5I76   | A_HIS_189 | NE2    | A_ASP_185 | OD1    | 3.124        |
| 5I76   | B_ARG_38  | NH1    | B_ASP_89  | OD1    | 2.810        |
| 5I76   | B_ARG_38  | NH2    | B_GLU_46  | OE1    | 3.124        |
| 5I76   | B_ARG_38  | NH2    | B_ASP_89  | OD1    | 3.773        |
| 5I76   | B_ARG_66  | NH1    | B_ASP_89  | OD1    | 3.709        |
| 5I76   | B_ARG_66  | NH1    | B_ASP_89  | OD2    | 2.960        |
| 5I76   | B_ARG_66  | NH2    | B_ASP_89  | OD1    | 2.836        |
| 5I76   | B_ARG_66  | NH2    | B_ASP_89  | OD2    | 3.415        |
| 5I76   | B_LYS_149 | NZ     | B_ASP_150 | OD1    | 3.571        |
| 5I76   | B_LYS_215 | NZ     | A_GLU_123 | OE1    | 2.731        |
| 5I76   | B_LYS_215 | NZ     | A_GLU_123 | OE2    | 2.888        |
| 5I76   | B_ARG_216 | NH2    | B_GLU_218 | OE1    | 2.687        |
| 5I76   | B_LYS_220 | NZ     | A_ASP_122 | OD2    | 3.474        |
| 5I76   | C_ARG_24  | NH1    | A_ASP_70  | OD1    | 3.725        |
| 5I76   | C_ARG_24  | NH1    | A_ASP_70  | OD2    | 2.949        |
| 5I76   | C_ARG_24  | NH1    | C_ASP_70  | OD1    | 3.422        |
| 5I76   | C_ARG_24  | NH2    | A_ASP_70  | OD1    | 3.138        |
| 5I76   | C_ARG_24  | NH2    | A_ASP_70  | OD2    | 3.394        |
| 5I76   | C_LYS_49  | NZ     | C_GLU_53  | OE1    | 2.642        |
| 5I76   | C_ARG_61  | NH1    | C_GLU_79  | OE2    | 3.544        |
| 5I76   | C_ARG_61  | NH1    | C_GLU_81  | OE2    | 3.961        |
| 5I76   | C_ARG_61  | NH2    | C_GLU_79  | OE2    | 3.781        |
| 5I76   | C_ARG_61  | NH2    | C_GLU_81  | OE2    | 2.825        |
| 5I76   | C_ARG_61  | NH2    | C_ASP_82  | OD1    | 2.761        |
| 5I76   | C_ARG_61  | NH2    | C_ASP_82  | OD2    | 3.560        |
| 5I76   | C_LYS_103 | NZ     | C_ASP_85  | OD1    | 3.711        |
| 5I76   | C_LYS_103 | NZ     | C_ASP_85  | OD2    | 3.969        |
| 5I76   | C_LYS_103 | NZ     | C_GLU_165 | OE1    | 3.241        |
| 5I76   | C_LYS_103 | NZ     | C_GLU_165 | OE2    | 3.658        |
| 5I76   | C_LYS_149 | NZ     | C_GLU_195 | OE1    | 2.493        |
| 5I76   | C_LYS_183 | NZ     | C_GLU_187 | OE1    | 3.091        |
| 5I76   | C_LYS_183 | NZ     | C_GLU_187 | OE2    | 3.350        |
| 5I76   | C_HIS_189 | ND1    | C_ASP_151 | OD2    | 2.352        |
| 5I76   | D_ARG_38  | NH1    | D_ASP_89  | OD1    | 2.883        |
| 5I76   | D_ARG_38  | NH2    | D_GLU_46  | OE1    | 3.400        |
| 5I76   | D_ARG_38  | NH2    | D_ASP_89  | OD1    | 3.880        |
| 5I76   | D_ARG_66  | NH1    | D_ASP_89  | OD1    | 3.587        |
| 5I76   | D_ARG_66  | NH1    | D_ASP_89  | OD2    | 2.851        |
| 5I76   | D_ARG_66  | NH2    | D_ASP_89  | OD1    | 2.736        |
| 5I76   | D_ARG_66  | NH2    | D_ASP_89  | OD2    | 3.459        |
| 5I76   | D_LYS_149 | NZ     | D_ASP_150 | OD1    | 2.862        |
| 5I76   | D_LYS_149 | NZ     | D_ASP_150 | OD2    | 2.853        |
| 5I76   | D_LYS_215 | NZ     | C_GLU_123 | OE1    | 2.596        |

|      |           |    |           |     |       |
|------|-----------|----|-----------|-----|-------|
| 5I76 | D_LYS_215 | NZ | C_GLU_123 | OE2 | 3.738 |
|------|-----------|----|-----------|-----|-------|

Table 675: 5I76-specific salt bridging networks analysis. In this table, a PDB file is specified with a four-letter PDB ID, except that the names of the PDB files corresponding to the single NMR structural model split from the NMR ensemble is specified with a four-letter PDB ID in addition to a hyphen followed by the single NMR structural model numeric ID, the residue naming scheme is **Chain ID\_residue name\_residue number**,  $\angle ADH$  represents the angle formed by acceptor (A), donor (D) and hydrogen (H) ( $\angle ADH$ ).

| PDB ID | Residue A | Atom A | Residue B | Atom B | Distance (Å) |
|--------|-----------|--------|-----------|--------|--------------|
| 5IHL   | A_HIS_78  | NE2    | A_ASP_69  | OD1    | 3.151        |
| 5IHL   | A_HIS_78  | NE2    | A_GLU_74  | OE1    | 3.112        |
| 5IHL   | A_HIS_78  | NE2    | A_GLU_74  | OE2    | 3.476        |
| 5IHL   | A_LYS_81  | NZ     | A_ASP_100 | OD2    | 3.844        |
| 5IHL   | A_ARG_123 | NH1    | A_ASP_140 | OD2    | 3.023        |
| 5IHL   | A_ARG_123 | NH2    | A_ASP_140 | OD2    | 3.466        |
| 5IHL   | A_LYS_132 | NZ     | A_GLU_144 | OE2    | 3.445        |
| 5IHL   | B_ARG_38  | NH1    | B_GLU_46  | OE2    | 3.444        |
| 5IHL   | B_ARG_38  | NH1    | B_ASP_86  | OD1    | 3.975        |
| 5IHL   | B_ARG_38  | NH2    | B_ASP_86  | OD1    | 3.323        |
| 5IHL   | B_ARG_66  | NH1    | B_ASP_86  | OD1    | 3.298        |
| 5IHL   | B_ARG_66  | NH1    | B_ASP_86  | OD2    | 2.656        |
| 5IHL   | B_ARG_66  | NH2    | B_ASP_86  | OD1    | 3.517        |
| 5IHL   | D_HIS_78  | NE2    | D_ASP_69  | OD1    | 3.189        |
| 5IHL   | D_HIS_78  | NE2    | D_GLU_74  | OE1    | 3.120        |
| 5IHL   | D_HIS_78  | NE2    | D_GLU_74  | OE2    | 3.496        |
| 5IHL   | D_ARG_123 | NH2    | D_ASP_140 | OD2    | 3.433        |
| 5IHL   | D_HIS_162 | NE2    | D_GLU_159 | OE1    | 3.297        |
| 5IHL   | E_ARG_38  | NH1    | E_ASP_86  | OD1    | 3.969        |
| 5IHL   | E_ARG_38  | NH2    | E_ASP_86  | OD1    | 3.308        |
| 5IHL   | E_ARG_66  | NH1    | E_ASP_86  | OD1    | 3.287        |
| 5IHL   | E_ARG_66  | NH1    | E_ASP_86  | OD2    | 2.657        |
| 5IHL   | E_ARG_66  | NH2    | E_ASP_86  | OD1    | 3.504        |
| 5IHL   | F_HIS_78  | ND1    | F_ASP_69  | OD1    | 3.127        |
| 5IHL   | F_HIS_78  | NE2    | F_GLU_74  | OE1    | 3.224        |
| 5IHL   | F_HIS_110 | ND1    | F_ASP_140 | OD1    | 3.789        |
| 5IHL   | F_HIS_110 | ND1    | F_ASP_140 | OD2    | 2.873        |
| 5IHL   | F_ARG_123 | NH1    | F_ASP_140 | OD2    | 3.408        |
| 5IHL   | F_HIS_162 | NE2    | F_GLU_159 | OE1    | 2.954        |
| 5IHL   | G_ARG_38  | NH1    | G_GLU_46  | OE1    | 3.917        |
| 5IHL   | G_ARG_38  | NH1    | G_GLU_46  | OE2    | 3.596        |
| 5IHL   | G_ARG_38  | NH1    | G_ASP_86  | OD1    | 3.962        |
| 5IHL   | G_ARG_38  | NH2    | G_ASP_86  | OD1    | 3.314        |
| 5IHL   | G_ARG_66  | NH1    | G_ASP_86  | OD1    | 3.297        |
| 5IHL   | G_ARG_66  | NH1    | G_ASP_86  | OD2    | 2.675        |
| 5IHL   | G_ARG_66  | NH2    | G_ASP_86  | OD1    | 3.505        |
| 5IHL   | H_LYS_29  | NZ     | H_GLU_28  | OE1    | 3.389        |
| 5IHL   | H_HIS_78  | NE2    | H_ASP_69  | OD1    | 3.188        |
| 5IHL   | H_HIS_78  | NE2    | H_GLU_74  | OE1    | 3.148        |
| 5IHL   | H_HIS_78  | NE2    | H_GLU_74  | OE2    | 3.496        |
| 5IHL   | I_ARG_38  | NH1    | I_GLU_46  | OE1    | 3.944        |
| 5IHL   | I_ARG_38  | NH1    | I_GLU_46  | OE2    | 3.555        |
| 5IHL   | I_ARG_38  | NH1    | I_ASP_86  | OD1    | 3.950        |
| 5IHL   | I_ARG_38  | NH2    | I_ASP_86  | OD1    | 3.321        |
| 5IHL   | I_ARG_66  | NH1    | I_ASP_86  | OD1    | 3.272        |
| 5IHL   | I_ARG_66  | NH1    | I_ASP_86  | OD2    | 2.644        |
| 5IHL   | I_ARG_66  | NH2    | I_ASP_86  | OD1    | 3.520        |

---

Table 676: 5IHL-specific salt bridging networks analysis. In this table, a PDB file is specified with a four-letter PDB ID, except that the names of the PDB files corresponding to the single NMR structural model split from the NMR ensemble is specified with a four-letter PDB ID in addition to a hyphen followed by the single NMR structural model numeric ID, the residue naming scheme is **Chain ID\_residue name\_residue number**,  $\angle ADH$  represents the angle formed by acceptor (A), donor (D) and hydrogen (H) ( $\angle ADH$ ).

| PDB ID | Residue A | Atom A | Residue B | Atom B | Distance (Å) |
|--------|-----------|--------|-----------|--------|--------------|
| 5ITB   | H_ARG_43  | NH1    | H_ASP_98  | OD1    | 2.808        |
| 5ITB   | H_ARG_43  | NH2    | H_GLU_51  | OE1    | 2.922        |
| 5ITB   | H_ARG_43  | NH2    | H_GLU_51  | OE2    | 3.615        |
| 5ITB   | H_ARG_43  | NH2    | H_ASP_98  | OD1    | 3.996        |
| 5ITB   | H_ARG_75  | NH1    | H_ASP_98  | OD1    | 3.710        |
| 5ITB   | H_ARG_75  | NH1    | H_ASP_98  | OD2    | 2.943        |
| 5ITB   | H_ARG_75  | NH2    | H_ASP_98  | OD1    | 3.077        |
| 5ITB   | H_ARG_75  | NH2    | H_ASP_98  | OD2    | 3.700        |
| 5ITB   | H_ARG_107 | NH1    | H_ASP_114 | OD1    | 3.122        |
| 5ITB   | H_ARG_111 | NH1    | L_GLU_68  | OE1    | 3.426        |
| 5ITB   | H_ARG_111 | NH2    | H_ASP_114 | OD2    | 2.687        |
| 5ITB   | H_ARG_111 | NH2    | H_ASP_116 | OD2    | 3.548        |
| 5ITB   | H_ARG_111 | NH2    | L_GLU_68  | OE1    | 2.856        |
| 5ITB   | H_LYS_224 | NZ     | L_GLU_143 | OE1    | 3.323        |
| 5ITB   | H_LYS_224 | NZ     | L_GLU_143 | OE2    | 2.099        |
| 5ITB   | H_ARG_225 | NH2    | H_GLU_227 | OE2    | 3.950        |
| 5ITB   | L_LYS_45  | NZ     | L_ASP_97  | OD1    | 3.221        |
| 5ITB   | L_LYS_45  | NZ     | L_ASP_97  | OD2    | 3.180        |
| 5ITB   | L_ARG_75  | NH2    | L_ASP_98  | OD1    | 2.991        |
| 5ITB   | L_ARG_75  | NH2    | L_ASP_98  | OD2    | 3.652        |
| 5ITB   | L_LYS_203 | NZ     | L_GLU_207 | OE1    | 3.111        |
| 5ITB   | L_LYS_203 | NZ     | L_GLU_207 | OE2    | 2.934        |
| 5ITB   | L_HIS_209 | ND1    | L_ASP_171 | OD2    | 3.207        |
| 5ITB   | L_HIS_209 | NE2    | L_ASP_205 | OD1    | 2.812        |
| 5ITB   | L_HIS_209 | NE2    | L_ASP_205 | OD2    | 3.009        |

Table 677: 5ITB-specific salt bridging networks analysis. In this table, a PDB file is specified with a four-letter PDB ID, except that the names of the PDB files corresponding to the single NMR structural model split from the NMR ensemble is specified with a four-letter PDB ID in addition to a hyphen followed by the single NMR structural model numeric ID, the residue naming scheme is **Chain ID\_residue name\_residue number**,  $\angle ADH$  represents the angle formed by acceptor (A), donor (D) and hydrogen (H) ( $\angle ADH$ ).

| PDB ID | Residue A | Atom A | Residue B | Atom B | Distance (Å) |
|--------|-----------|--------|-----------|--------|--------------|
| 5J3D   | A_ARG_43  | NH1    | A_ASP_98  | OD1    | 2.896        |
| 5J3D   | A_ARG_43  | NH2    | A_GLU_51  | OE1    | 2.997        |
| 5J3D   | A_ARG_43  | NH2    | A_GLU_51  | OE2    | 2.988        |
| 5J3D   | A_ARG_75  | NH1    | A_ASP_98  | OD1    | 3.601        |
| 5J3D   | A_ARG_75  | NH1    | A_ASP_98  | OD2    | 3.013        |
| 5J3D   | A_ARG_75  | NH2    | A_ASP_98  | OD1    | 3.254        |
| 5J3D   | A_ARG_95  | NH2    | A_GLU_97  | OE2    | 3.552        |
| 5J3D   | A_ARG_107 | NH1    | A_ASP_114 | OD1    | 3.567        |
| 5J3D   | A_ARG_111 | NH2    | A_ASP_114 | OD2    | 3.401        |
| 5J3D   | A_ARG_111 | NH2    | B_GLU_68  | OE1    | 3.664        |
| 5J3D   | A_LYS_158 | NZ     | A_ASP_159 | OD1    | 3.439        |
| 5J3D   | A_LYS_158 | NZ     | A_ASP_159 | OD2    | 3.508        |
| 5J3D   | A_LYS_224 | NZ     | B_GLU_143 | OE1    | 3.390        |
| 5J3D   | A_LYS_229 | NZ     | B_ASP_142 | OD1    | 3.902        |
| 5J3D   | A_LYS_229 | NZ     | B_ASP_142 | OD2    | 3.196        |
| 5J3D   | B_LYS_45  | NZ     | B_ASP_97  | OD1    | 3.783        |
| 5J3D   | B_ARG_75  | NH2    | B_ASP_97  | OD2    | 3.805        |
| 5J3D   | B_LYS_123 | NZ     | B_GLU_185 | OE2    | 3.379        |
| 5J3D   | B_LYS_169 | NZ     | B_GLU_215 | OE2    | 3.640        |
| 5J3D   | B_LYS_203 | NZ     | B_GLU_207 | OE2    | 2.374        |
| 5J3D   | B_HIS_209 | ND1    | B_ASP_171 | OD1    | 3.892        |
| 5J3D   | B_HIS_209 | ND1    | B_ASP_171 | OD2    | 2.212        |
| 5J3D   | C_ARG_    | NH1    | C_ASP_    | OD1    | 3.000        |
| 5J3D   | C_ARG_    | NH2    | C_GLU_    | OE1    | 3.686        |
| 5J3D   | C_ARG_    | NH2    | C_ASP_    | OD1    | 3.849        |
| 5J3D   | C_ARG_    | NH1    | C_ASP_    | OD1    | 3.639        |
| 5J3D   | C_ARG_    | NH1    | C_ASP_    | OD2    | 3.007        |
| 5J3D   | C_ARG_    | NH2    | C_ASP_    | OD1    | 3.160        |
| 5J3D   | C_ARG_    | NH2    | C_ASP_    | OD2    | 3.889        |
| 5J3D   | C_ARG_107 | NH1    | C_ASP_114 | OD1    | 2.971        |
| 5J3D   | C_ARG_107 | NH1    | C_ASP_114 | OD2    | 3.218        |
| 5J3D   | C_ARG_111 | NH2    | C_ASP_114 | OD2    | 3.073        |
| 5J3D   | C_ARG_111 | NH2    | D_GLU_68  | OE1    | 3.489        |
| 5J3D   | C_LYS_    | NZ     | C_ASP_    | OD1    | 3.508        |
| 5J3D   | C_LYS_    | NZ     | C_ASP_    | OD2    | 3.782        |
| 5J3D   | C_LYS_    | NZ     | D_GLU_    | OE1    | 3.377        |
| 5J3D   | C_LYS_    | NZ     | D_ASP_    | OD1    | 2.847        |
| 5J3D   | C_LYS_    | NZ     | D_ASP_    | OD2    | 2.791        |
| 5J3D   | D_ARG_75  | NH2    | D_ASP_97  | OD1    | 3.325        |
| 5J3D   | D_LYS_    | NZ     | D_GLU_    | OE1    | 3.275        |
| 5J3D   | D_LYS_    | NZ     | D_GLU_    | OE2    | 2.521        |
| 5J3D   | D_LYS_    | NZ     | D_GLU_    | OE1    | 3.944        |
| 5J3D   | D_LYS_    | NZ     | D_GLU_    | OE2    | 3.225        |
| 5J3D   | D_HIS_    | ND1    | D_ASP_    | OD2    | 2.270        |
| 5J3D   | E_ARG_49  | NH2    | F_ASP_368 | OD1    | 2.801        |
| 5J3D   | E_ARG_49  | NH2    | F_ASP_368 | OD2    | 3.628        |
| 5J3D   | E_LYS_80  | NZ     | E_ASP_84  | OD2    | 2.975        |
| 5J3D   | E_LYS_85  | NZ     | E_GLU_82  | OE1    | 3.904        |
| 5J3D   | E_LYS_85  | NZ     | E_GLU_82  | OE2    | 3.954        |
| 5J3D   | F_LYS_    | NZ     | I_GLU_    | OE2    | 3.850        |
| 5J3D   | F_HIS_    | NE2    | F_GLU_    | OE1    | 3.357        |
| 5J3D   | F_LYS_191 | NZ     | F_ASP_194 | OD2    | 3.179        |
| 5J3D   | F_LYS_196 | NZ     | I_ASP_489 | OD1    | 2.634        |
| 5J3D   | F_LYS_196 | NZ     | I_ASP_489 | OD2    | 3.067        |
| 5J3D   | F_LYS_201 | NZ     | F_ASP_200 | OD2    | 3.113        |
| 5J3D   | F_ARG_229 | NH1    | F_GLU_256 | OE1    | 3.268        |
| 5J3D   | F_ARG_229 | NH1    | F_GLU_256 | OE2    | 2.433        |

|      |           |     |           |     |       |
|------|-----------|-----|-----------|-----|-------|
| 5J3D | F_ARG_229 | NH2 | F_GLU_256 | OE1 | 2.288 |
| 5J3D | F_ARG_229 | NH2 | F_GLU_256 | OE2 | 3.196 |
| 5J3D | F_ARG_235 | NH1 | I_GLU_232 | OE1 | 3.071 |
| 5J3D | F_ARG_235 | NH1 | I_GLU_232 | OE2 | 2.514 |
| 5J3D | F_ARG_235 | NH2 | F_GLU_232 | OE2 | 3.966 |
| 5J3D | F_LYS_272 | NZ  | B_ASP_56  | OD2 | 3.606 |
| 5J3D | F_LYS_293 | NZ  | F_GLU_295 | OE2 | 3.714 |
| 5J3D | F_ARG_336 | NH2 | F_ASP_338 | OD1 | 2.882 |
| 5J3D | F_ARG_336 | NH2 | F_ASP_338 | OD2 | 3.428 |
| 5J3D | F_ARG_364 | NH1 | F_ASP_310 | OD1 | 3.194 |
| 5J3D | F_ARG_364 | NH2 | F_ASP_310 | OD1 | 2.918 |
| 5J3D | F_LYS_399 | NZ  | K_ASP_392 | OD1 | 3.567 |
| 5J3D | F_LYS_470 | NZ  | J_GLU_60  | OE1 | 3.190 |
| 5J3D | F_LYS_470 | NZ  | J_GLU_60  | OE2 | 3.891 |
| 5J3D | G_ARG_49  | NH2 | I_ASP_368 | OD1 | 3.151 |
| 5J3D | G_LYS_80  | NZ  | G_ASP_84  | OD2 | 2.927 |
| 5J3D | G_LYS_85  | NZ  | G_GLU_82  | OE2 | 3.889 |
| 5J3D | H_ARG_43  | NH1 | H_ASP_98  | OD1 | 2.849 |
| 5J3D | H_ARG_43  | NH2 | H_GLU_51  | OE1 | 3.608 |
| 5J3D | H_ARG_43  | NH2 | H_GLU_51  | OE2 | 3.183 |
| 5J3D | H_ARG_43  | NH2 | H_ASP_98  | OD1 | 3.954 |
| 5J3D | H_ARG_75  | NH1 | H_ASP_98  | OD2 | 3.150 |
| 5J3D | H_ARG_75  | NH2 | H_ASP_98  | OD1 | 3.434 |
| 5J3D | H_ARG_75  | NH2 | H_ASP_98  | OD2 | 3.495 |
| 5J3D | H_ARG_107 | NH1 | H_ASP_114 | OD1 | 3.119 |
| 5J3D | H_ARG_107 | NH1 | H_ASP_114 | OD2 | 3.930 |
| 5J3D | H_ARG_111 | NH2 | H_ASP_114 | OD2 | 2.954 |
| 5J3D | H_ARG_111 | NH2 | L_GLU_68  | OE1 | 3.466 |
| 5J3D | H_LYS_158 | NZ  | H_ASP_159 | OD1 | 3.555 |
| 5J3D | H_LYS_158 | NZ  | H_ASP_159 | OD2 | 3.908 |
| 5J3D | H_LYS_224 | NZ  | L_GLU_143 | OE1 | 3.364 |
| 5J3D | H_LYS_    | NZ  | L_ASP_    | OD1 | 3.352 |
| 5J3D | H_LYS_    | NZ  | L_ASP_    | OD2 | 3.692 |
| 5J3D | I_LYS_    | NZ  | K_GLU_    | OE1 | 3.226 |
| 5J3D | I_LYS_    | NZ  | K_GLU_    | OE2 | 3.914 |
| 5J3D | I_LYS_    | NZ  | I_GLU_    | OE1 | 3.318 |
| 5J3D | I_LYS_191 | NZ  | I_ASP_194 | OD2 | 3.257 |
| 5J3D | I_LYS_196 | NZ  | K_ASP_489 | OD1 | 2.833 |
| 5J3D | I_LYS_196 | NZ  | K_ASP_489 | OD2 | 3.027 |
| 5J3D | I_LYS_201 | NZ  | I_ASP_200 | OD2 | 3.213 |
| 5J3D | I_ARG_229 | NH1 | I_GLU_256 | OE1 | 3.887 |
| 5J3D | I_ARG_229 | NH1 | I_GLU_256 | OE2 | 2.592 |
| 5J3D | I_ARG_229 | NH2 | I_GLU_256 | OE1 | 2.607 |
| 5J3D | I_ARG_229 | NH2 | I_GLU_256 | OE2 | 2.843 |
| 5J3D | I_ARG_235 | NH1 | K_GLU_232 | OE1 | 3.110 |
| 5J3D | I_ARG_235 | NH1 | K_GLU_232 | OE2 | 2.664 |
| 5J3D | I_LYS_272 | NZ  | D_ASP_56  | OD2 | 3.795 |
| 5J3D | I_LYS_293 | NZ  | I_GLU_295 | OE2 | 3.743 |
| 5J3D | I_ARG_336 | NH2 | I_ASP_338 | OD1 | 3.080 |
| 5J3D | I_ARG_336 | NH2 | I_ASP_338 | OD2 | 3.543 |
| 5J3D | I_ARG_364 | NH1 | I_ASP_310 | OD1 | 3.192 |
| 5J3D | I_ARG_364 | NH2 | I_ASP_310 | OD1 | 2.780 |
| 5J3D | I_LYS_399 | NZ  | F_ASP_392 | OD1 | 3.746 |
| 5J3D | I_LYS_470 | NZ  | E_GLU_60  | OE1 | 3.634 |
| 5J3D | I_LYS_470 | NZ  | E_GLU_60  | OE2 | 3.872 |
| 5J3D | J_ARG_49  | NH2 | K_ASP_368 | OD1 | 3.049 |
| 5J3D | J_ARG_49  | NH2 | K_ASP_368 | OD2 | 3.898 |
| 5J3D | J_LYS_80  | NZ  | J_ASP_84  | OD2 | 3.423 |



|      |           |     |           |     |       |
|------|-----------|-----|-----------|-----|-------|
| 5J3D | J_LYS_85  | NZ  | J_GLU_82  | OE1 | 3.982 |
| 5J3D | J_LYS_85  | NZ  | J_GLU_82  | OE2 | 3.902 |
| 5J3D | J_LYS_87  | NZ  | K_GLU_294 | OE1 | 3.791 |
| 5J3D | K_LYS_    | NZ  | F_GLU_    | OE1 | 2.905 |
| 5J3D | K_LYS_    | NZ  | K_GLU_    | OE1 | 3.429 |
| 5J3D | K_LYS_191 | NZ  | K_ASP_194 | OD2 | 3.194 |
| 5J3D | K_LYS_196 | NZ  | F_ASP_489 | OD1 | 2.822 |
| 5J3D | K_LYS_196 | NZ  | F_ASP_489 | OD2 | 3.022 |
| 5J3D | K_LYS_201 | NZ  | K_ASP_200 | OD2 | 2.845 |
| 5J3D | K_ARG_229 | NH1 | K_GLU_256 | OE1 | 3.743 |
| 5J3D | K_ARG_229 | NH1 | K_GLU_256 | OE2 | 2.813 |
| 5J3D | K_ARG_229 | NH2 | K_GLU_256 | OE1 | 2.714 |
| 5J3D | K_ARG_229 | NH2 | K_GLU_256 | OE2 | 3.345 |
| 5J3D | K_ARG_235 | NH1 | F_GLU_232 | OE1 | 2.445 |
| 5J3D | K_ARG_235 | NH1 | F_GLU_232 | OE2 | 2.683 |
| 5J3D | K_ARG_235 | NH2 | F_GLU_232 | OE2 | 3.814 |
| 5J3D | K_ARG_235 | NH2 | K_GLU_232 | OE2 | 3.561 |
| 5J3D | K_LYS_293 | NZ  | K_GLU_295 | OE2 | 3.880 |
| 5J3D | K_ARG_336 | NH2 | K_ASP_338 | OD1 | 2.871 |
| 5J3D | K_ARG_336 | NH2 | K_ASP_338 | OD2 | 3.213 |
| 5J3D | K_LYS_359 | NZ  | K_GLU_356 | OE2 | 3.629 |
| 5J3D | K_ARG_364 | NH1 | K_ASP_310 | OD1 | 3.298 |
| 5J3D | K_ARG_364 | NH2 | K_ASP_310 | OD1 | 2.637 |
| 5J3D | K_ARG_364 | NH2 | K_ASP_310 | OD2 | 3.766 |
| 5J3D | K_LYS_399 | NZ  | L_ASP_392 | OD1 | 3.598 |
| 5J3D | K_LYS_470 | NZ  | G_GLU_60  | OE1 | 3.953 |
| 5J3D | L_ARG_75  | NH2 | L_ASP_97  | OD2 | 3.011 |
| 5J3D | L_LYS_123 | NZ  | L_GLU_185 | OE2 | 3.382 |
| 5J3D | L_LYS_169 | NZ  | L_GLU_215 | OE2 | 3.052 |
| 5J3D | L_LYS_203 | NZ  | L_GLU_207 | OE1 | 3.556 |
| 5J3D | L_LYS_203 | NZ  | L_GLU_207 | OE2 | 2.397 |
| 5J3D | L_HIS_209 | ND1 | L_ASP_171 | OD2 | 2.293 |

Table 678: 5J3D-specific salt bridging networks analysis. In this table, a PDB file is specified with a four-letter PDB ID, except that the names of the PDB files corresponding to the single NMR structural model split from the NMR ensemble is specified with a four-letter PDB ID in addition to a hyphen followed by the single NMR structural model numeric ID, the residue naming scheme is **Chain ID\_residue name\_residue number**,  $\angle ADH$  represents the angle formed by acceptor (A), donor (D) and hydrogen (H) ( $\angle ADH$ ).

| PDB ID | Residue A | Atom A | Residue B  | Atom B | Distance (Å) |
|--------|-----------|--------|------------|--------|--------------|
| 5JO5   | H_ARG_38  | NH1    | H_ASP_86   | OD1    | 2.872        |
| 5JO5   | H_ARG_38  | NH2    | H_GLU_46   | OE1    | 3.137        |
| 5JO5   | H_ARG_38  | NH2    | H_ASP_86   | OD1    | 3.899        |
| 5JO5   | H_ARG_50  | NH1    | H_ASP_58   | OD2    | 3.272        |
| 5JO5   | H_ARG_50  | NH1    | H_GLU_100J | OE1    | 3.655        |
| 5JO5   | H_ARG_50  | NH1    | H_GLU_100J | OE2    | 3.015        |
| 5JO5   | H_ARG_50  | NH2    | H_ASP_58   | OD2    | 2.837        |
| 5JO5   | H_ARG_66  | NH1    | H_ASP_86   | OD1    | 3.782        |
| 5JO5   | H_ARG_66  | NH1    | H_ASP_86   | OD2    | 2.781        |
| 5JO5   | H_ARG_66  | NH2    | H_ASP_86   | OD1    | 3.036        |
| 5JO5   | H_ARG_66  | NH2    | H_ASP_86   | OD2    | 3.534        |
| 5JO5   | H_ARG_71  | NH2    | H_ASP_73   | OD1    | 3.590        |
| 5JO5   | H_LYS_75  | NZ     | H_ASP_72   | OD2    | 3.855        |
| 5JO5   | H_ARG_94  | NH1    | H_ASP_102  | OD2    | 2.698        |
| 5JO5   | H_LYS_143 | NZ     | L_GLU_124  | OE2    | 2.459        |
| 5JO5   | H_LYS_206 | NZ     | H_ASP_208  | OD1    | 3.914        |
| 5JO5   | H_LYS_206 | NZ     | H_ASP_208  | OD2    | 3.240        |
| 5JO5   | H_LYS_209 | NZ     | L_GLU_     | OE2    | 2.531        |
| 5JO5   | L_ARG_61  | NH2    | L_GLU_81   | OE2    | 2.979        |
| 5JO5   | L_ARG_61  | NH2    | L_ASP_82   | OD1    | 2.750        |
| 5JO5   | L_ARG_61  | NH2    | L_ASP_82   | OD2    | 3.466        |
| 5JO5   | L_ARG_91  | NH1    | H_GLU_100J | OE2    | 3.301        |
| 5JO5   | L_ARG_91  | NH2    | H_GLU_100J | OE2    | 2.691        |
| 5JO5   | L_ARG_95B | NH2    | H_ASP_58   | OD1    | 3.439        |
| 5JO5   | L_LYS_110 | NZ     | L_GLU_198  | OE1    | 2.940        |
| 5JO5   | L_LYS_149 | NZ     | L_GLU_203  | OE2    | 3.049        |
| 5JO5   | A_ARG_38  | NH1    | A_ASP_86   | OD1    | 2.834        |
| 5JO5   | A_ARG_38  | NH2    | A_GLU_46   | OE1    | 3.010        |
| 5JO5   | A_ARG_38  | NH2    | A_ASP_86   | OD1    | 3.868        |
| 5JO5   | A_ARG_50  | NH1    | A_ASP_58   | OD2    | 3.242        |
| 5JO5   | A_ARG_50  | NH1    | A_GLU_100J | OE1    | 3.684        |
| 5JO5   | A_ARG_50  | NH1    | A_GLU_100J | OE2    | 2.906        |
| 5JO5   | A_ARG_50  | NH2    | A_ASP_58   | OD2    | 2.882        |
| 5JO5   | A_ARG_66  | NH1    | A_ASP_86   | OD1    | 3.892        |
| 5JO5   | A_ARG_66  | NH1    | A_ASP_86   | OD2    | 2.803        |
| 5JO5   | A_ARG_66  | NH2    | A_ASP_86   | OD1    | 3.001        |
| 5JO5   | A_ARG_66  | NH2    | A_ASP_86   | OD2    | 3.402        |
| 5JO5   | A_ARG_71  | NH2    | A_ASP_73   | OD1    | 3.562        |
| 5JO5   | A_ARG_94  | NH1    | A_ASP_102  | OD2    | 2.584        |
| 5JO5   | A_LYS_143 | NZ     | B_GLU_124  | OE2    | 2.618        |
| 5JO5   | A_LYS_209 | NZ     | B_GLU_123  | OE2    | 2.545        |
| 5JO5   | A_ARG_210 | NH1    | A_GLU_212  | OE2    | 3.723        |
| 5JO5   | A_ARG_210 | NH2    | A_GLU_212  | OE2    | 3.222        |
| 5JO5   | B_ARG_61  | NH2    | B_GLU_81   | OE2    | 3.302        |
| 5JO5   | B_ARG_61  | NH2    | B_ASP_82   | OD1    | 2.664        |
| 5JO5   | B_ARG_61  | NH2    | B_ASP_82   | OD2    | 3.454        |
| 5JO5   | B_ARG_91  | NH1    | A_GLU_100J | OE2    | 3.353        |
| 5JO5   | B_ARG_91  | NH2    | A_GLU_100J | OE2    | 3.038        |
| 5JO5   | C_ARG_38  | NH1    | C_ASP_86   | OD1    | 2.847        |
| 5JO5   | C_ARG_38  | NH2    | C_GLU_46   | OE1    | 3.028        |
| 5JO5   | C_ARG_38  | NH2    | C_ASP_86   | OD1    | 3.875        |
| 5JO5   | C_ARG_50  | NH1    | C_ASP_58   | OD2    | 2.775        |
| 5JO5   | C_ARG_50  | NH2    | C_ASP_58   | OD2    | 3.216        |
| 5JO5   | C_ARG_50  | NH2    | C_GLU_100J | OE1    | 3.640        |
| 5JO5   | C_ARG_50  | NH2    | C_GLU_100J | OE2    | 2.862        |
| 5JO5   | C_ARG_66  | NH1    | C_ASP_86   | OD1    | 3.889        |
| 5JO5   | C_ARG_66  | NH1    | C_ASP_86   | OD2    | 2.829        |

|      |           |     |            |     |       |
|------|-----------|-----|------------|-----|-------|
| 5JO5 | C_ARG_66  | NH2 | C_ASP_86   | OD1 | 3.094 |
| 5JO5 | C_ARG_66  | NH2 | C_ASP_86   | OD2 | 3.488 |
| 5JO5 | C_ARG_71  | NH2 | C_ASP_73   | OD1 | 3.622 |
| 5JO5 | C_ARG_94  | NH1 | C_ASP_102  | OD2 | 2.554 |
| 5JO5 | C_LYS_143 | NZ  | D_GLU_124  | OE2 | 2.788 |
| 5JO5 | C_LYS_209 | NZ  | D_GLU_123  | OE2 | 2.583 |
| 5JO5 | C_ARG_    | NH1 | C_GLU_     | OE2 | 2.988 |
| 5JO5 | D_ARG_61  | NH2 | D_ASP_82   | OD1 | 2.885 |
| 5JO5 | D_ARG_61  | NH2 | D_ASP_82   | OD2 | 3.652 |
| 5JO5 | D_ARG_91  | NH1 | C_GLU_100J | OE2 | 3.302 |
| 5JO5 | D_ARG_91  | NH2 | C_GLU_100J | OE2 | 3.077 |
| 5JO5 | D_LYS_93  | NZ  | D_GLU_3    | OE2 | 3.062 |
| 5JO5 | D_ARG_95B | NH2 | C_ASP_58   | OD1 | 3.978 |
| 5JO5 | D_LYS_149 | NZ  | D_GLU_203  | OE2 | 2.721 |
| 5JO5 | D_HIS_188 | ND1 | D_ASP_151  | OD2 | 2.674 |
| 5JO5 | E_ARG_38  | NH1 | E_ASP_86   | OD1 | 2.821 |
| 5JO5 | E_ARG_38  | NH2 | E_GLU_46   | OE1 | 3.015 |
| 5JO5 | E_ARG_38  | NH2 | E_GLU_46   | OE2 | 3.976 |
| 5JO5 | E_ARG_38  | NH2 | E_ASP_86   | OD1 | 3.922 |
| 5JO5 | E_ARG_50  | NH1 | E_ASP_58   | OD2 | 2.782 |
| 5JO5 | E_ARG_50  | NH2 | E_ASP_58   | OD2 | 3.264 |
| 5JO5 | E_ARG_50  | NH2 | E_GLU_100J | OE1 | 3.626 |
| 5JO5 | E_ARG_50  | NH2 | E_GLU_100J | OE2 | 2.982 |
| 5JO5 | E_ARG_66  | NH1 | E_ASP_86   | OD1 | 3.801 |
| 5JO5 | E_ARG_66  | NH1 | E_ASP_86   | OD2 | 2.750 |
| 5JO5 | E_ARG_66  | NH2 | E_ASP_86   | OD1 | 3.037 |
| 5JO5 | E_ARG_66  | NH2 | E_ASP_86   | OD2 | 3.493 |
| 5JO5 | E_ARG_71  | NH2 | E_ASP_73   | OD1 | 3.535 |
| 5JO5 | E_LYS_75  | NZ  | E_ASP_72   | OD2 | 3.717 |
| 5JO5 | E_ARG_94  | NH2 | E_ASP_102  | OD2 | 2.730 |
| 5JO5 | E_LYS_143 | NZ  | F_GLU_124  | OE2 | 2.545 |
| 5JO5 | E_LYS_209 | NZ  | F_GLU_123  | OE2 | 2.567 |
| 5JO5 | E_ARG_210 | NH1 | E_GLU_212  | OE2 | 3.744 |
| 5JO5 | E_ARG_210 | NH2 | E_GLU_212  | OE2 | 3.125 |
| 5JO5 | F_ARG_54  | NH1 | F_ASP_60   | OD1 | 2.423 |
| 5JO5 | F_ARG_61  | NH2 | F_GLU_81   | OE2 | 3.010 |
| 5JO5 | F_ARG_61  | NH2 | F_ASP_82   | OD1 | 2.807 |
| 5JO5 | F_ARG_61  | NH2 | F_ASP_82   | OD2 | 3.560 |
| 5JO5 | F_ARG_91  | NH1 | E_GLU_100J | OE2 | 3.369 |
| 5JO5 | F_ARG_91  | NH2 | E_GLU_100J | OE2 | 2.722 |
| 5JO5 | F_ARG_95B | NH2 | E_ASP_58   | OD1 | 3.518 |
| 5JO5 | F_LYS_110 | NZ  | F_GLU_198  | OE1 | 2.973 |

Table 679: 5JO5-specific salt bridging networks analysis. In this table, a PDB file is specified with a four-letter PDB ID, except that the names of the PDB files corresponding to the single NMR structural model split from the NMR ensemble is specified with a four-letter PDB ID in addition to a hyphen followed by the single NMR structural model numeric ID, the residue naming scheme is **Chain ID\_residue name\_residue number**,  $\angle ADH$  represents the angle formed by acceptor (A), donor (D) and hydrogen (H) ( $\angle ADH$ ).

| PDB ID | Residue A | Atom A | Residue B  | Atom B | Distance (Å) |
|--------|-----------|--------|------------|--------|--------------|
| 5JOF   | H_LYS_12  | NZ     | H_GLU_10   | OE1    | 3.976        |
| 5JOF   | H_ARG_38  | NH1    | H_ASP_86   | OD1    | 2.816        |
| 5JOF   | H_ARG_38  | NH2    | H_GLU_46   | OE1    | 2.389        |
| 5JOF   | H_ARG_38  | NH2    | H_GLU_46   | OE2    | 3.859        |
| 5JOF   | H_LYS_62  | NZ     | H_GLU_46   | OE2    | 2.776        |
| 5JOF   | H_ARG_66  | NH1    | H_ASP_86   | OD2    | 2.820        |
| 5JOF   | H_ARG_66  | NH2    | H_ASP_86   | OD1    | 3.127        |
| 5JOF   | H_ARG_66  | NH2    | H_ASP_86   | OD2    | 3.314        |
| 5JOF   | H_LYS_212 | NZ     | L_GLU_123  | OE2    | 3.883        |
| 5JOF   | H_LYS_213 | NZ     | H_GLU_215  | OE1    | 3.500        |
| 5JOF   | H_LYS_217 | NZ     | L_ASP_122  | OD2    | 3.165        |
| 5JOF   | L_ARG_54  | NH1    | L_ASP_60   | OD1    | 3.764        |
| 5JOF   | L_ARG_61  | NH2    | L_GLU_81   | OE2    | 3.643        |
| 5JOF   | L_ARG_61  | NH2    | L_ASP_82   | OD1    | 3.848        |
| 5JOF   | L_ARG_61  | NH2    | L_ASP_82   | OD2    | 3.642        |
| 5JOF   | L_ARG_142 | NH1    | L_GLU_103  | OE1    | 3.845        |
| 5JOF   | L_ARG_142 | NH1    | L_GLU_105  | OE2    | 3.937        |
| 5JOF   | L_ARG_142 | NH2    | L_GLU_103  | OE1    | 3.654        |
| 5JOF   | L_ARG_142 | NH2    | L_GLU_103  | OE2    | 2.697        |
| 5JOF   | L_ARG_142 | NH2    | L_GLU_105  | OE2    | 3.736        |
| 5JOF   | L_LYS_149 | NZ     | L_GLU_195  | OE1    | 3.071        |
| 5JOF   | A_LYS_12  | NZ     | A_GLU_10   | OE1    | 3.516        |
| 5JOF   | A_HIS_35  | NE2    | A_ASP_100C | OD1    | 2.627        |
| 5JOF   | A_ARG_38  | NH1    | A_GLU_46   | OE1    | 3.912        |
| 5JOF   | A_ARG_38  | NH1    | A_ASP_86   | OD1    | 3.722        |
| 5JOF   | A_ARG_38  | NH2    | A_ASP_86   | OD1    | 2.667        |
| 5JOF   | A_ARG_66  | NH1    | A_ASP_86   | OD1    | 2.903        |
| 5JOF   | A_ARG_66  | NH1    | A_ASP_86   | OD2    | 2.899        |
| 5JOF   | A_ARG_83  | NH2    | A_ASP_85   | OD2    | 3.607        |
| 5JOF   | A_LYS_143 | NZ     | A_ASP_144  | OD1    | 3.485        |
| 5JOF   | A_LYS_209 | NZ     | B_GLU_123  | OE1    | 3.449        |
| 5JOF   | A_LYS_209 | NZ     | B_GLU_123  | OE2    | 3.809        |
| 5JOF   | B_ARG_24  | NH1    | C_ASP_99   | OD1    | 2.692        |
| 5JOF   | B_ARG_24  | NH1    | C_ASP_99   | OD2    | 3.960        |
| 5JOF   | B_ARG_61  | NH2    | B_GLU_81   | OE2    | 3.500        |
| 5JOF   | B_ARG_61  | NH2    | B_ASP_82   | OD1    | 3.535        |
| 5JOF   | B_ARG_61  | NH2    | B_ASP_82   | OD2    | 3.507        |
| 5JOF   | B_ARG_77  | NH1    | B_GLU_79   | OE1    | 3.191        |
| 5JOF   | B_ARG_77  | NH1    | B_GLU_79   | OE2    | 3.717        |
| 5JOF   | B_HIS_189 | ND1    | B_ASP_151  | OD2    | 2.926        |
| 5JOF   | C_LYS_12  | NZ     | C_GLU_10   | OE1    | 3.233        |
| 5JOF   | C_HIS_35  | NE2    | C_ASP_100C | OD1    | 2.684        |
| 5JOF   | C_ARG_38  | NH1    | C_ASP_86   | OD1    | 3.621        |
| 5JOF   | C_ARG_38  | NH2    | C_GLU_46   | OE1    | 3.694        |
| 5JOF   | C_ARG_38  | NH2    | C_ASP_86   | OD1    | 3.344        |
| 5JOF   | C_LYS_62  | NZ     | C_GLU_46   | OE1    | 3.985        |
| 5JOF   | C_LYS_62  | NZ     | C_GLU_46   | OE2    | 3.097        |
| 5JOF   | C_ARG_66  | NH1    | C_ASP_86   | OD1    | 3.730        |
| 5JOF   | C_ARG_66  | NH1    | C_ASP_86   | OD2    | 2.579        |
| 5JOF   | C_ARG_94  | NH1    | B_GLU_1    | OE2    | 2.653        |
| 5JOF   | C_ARG_94  | NH2    | B_GLU_1    | OE2    | 3.195        |
| 5JOF   | C_LYS_210 | NZ     | C_GLU_212  | OE1    | 3.967        |
| 5JOF   | C_LYS_214 | NZ     | D_ASP_122  | OD2    | 3.772        |
| 5JOF   | C_LYS_214 | NZ     | D_GLU_123  | OE1    | 2.987        |
| 5JOF   | C_LYS_214 | NZ     | D_GLU_123  | OE2    | 3.631        |
| 5JOF   | D_ARG_24  | NH2    | D_ASP_70   | OD2    | 3.929        |
| 5JOF   | D_LYS_39  | NZ     | D_GLU_81   | OE2    | 3.210        |

|      |           |     |            |     |       |
|------|-----------|-----|------------|-----|-------|
| 5JOF | D_ARG_54  | NH1 | D_ASP_60   | OD1 | 3.417 |
| 5JOF | D_ARG_54  | NH2 | D_ASP_60   | OD1 | 2.714 |
| 5JOF | D_ARG_61  | NH1 | D_GLU_79   | OE1 | 3.968 |
| 5JOF | D_ARG_61  | NH2 | D_GLU_79   | OE1 | 3.623 |
| 5JOF | D_ARG_61  | NH2 | D_ASP_82   | OD1 | 3.619 |
| 5JOF | D_LYS_149 | NZ  | D_GLU_195  | OE1 | 3.879 |
| 5JOF | D_LYS_183 | NZ  | D_GLU_187  | OE1 | 3.559 |
| 5JOF | D_ARG_211 | NH2 | D_GLU_187  | OE2 | 3.871 |
| 5JOF | E_HIS_35  | NE2 | E_ASP_100C | OD1 | 3.045 |
| 5JOF | E_ARG_38  | NH1 | E_ASP_86   | OD1 | 2.429 |
| 5JOF | E_ARG_38  | NH2 | E_GLU_46   | OE1 | 3.439 |
| 5JOF | E_ARG_38  | NH2 | E_ASP_86   | OD1 | 3.968 |
| 5JOF | E_LYS_62  | NZ  | E_GLU_46   | OE1 | 3.849 |
| 5JOF | E_LYS_62  | NZ  | E_GLU_46   | OE2 | 3.146 |
| 5JOF | E_ARG_66  | NH1 | E_ASP_86   | OD1 | 3.702 |
| 5JOF | E_ARG_66  | NH1 | E_ASP_86   | OD2 | 2.671 |
| 5JOF | E_LYS_209 | NZ  | F_GLU_123  | OE1 | 2.331 |
| 5JOF | E_LYS_209 | NZ  | F_GLU_123  | OE2 | 3.588 |
| 5JOF | E_LYS_214 | NZ  | F_ASP_122  | OD2 | 3.802 |
| 5JOF | F_ARG_54  | NH1 | F_ASP_60   | OD1 | 2.591 |
| 5JOF | F_ARG_61  | NH1 | F_ASP_82   | OD1 | 2.348 |
| 5JOF | F_ARG_61  | NH1 | F_ASP_82   | OD2 | 1.974 |
| 5JOF | F_ARG_61  | NH2 | F_ASP_82   | OD1 | 3.989 |
| 5JOF | F_LYS_149 | NZ  | F_GLU_195  | OE1 | 2.606 |
| 5JOF | F_LYS_183 | NZ  | F_GLU_187  | OE1 | 3.917 |
| 5JOF | F_LYS_183 | NZ  | F_GLU_187  | OE2 | 3.217 |

Table 680: 5JOF-specific salt bridging networks analysis. In this table, a PDB file is specified with a four-letter PDB ID, except that the names of the PDB files corresponding to the single NMR structural model split from the NMR ensemble is specified with a four-letter PDB ID in addition to a hyphen followed by the single NMR structural model numeric ID, the residue naming scheme is **Chain ID\_residue name\_residue number**,  $\angle ADH$  represents the angle formed by acceptor (A), donor (D) and hydrogen (H) ( $\angle ADH$ ).

| PDB ID | Residue A | Atom A | Residue B  | Atom B | Distance (Å) |
|--------|-----------|--------|------------|--------|--------------|
| 5JR1   | H_ARG_38  | NH1    | H_ASP_86   | OD1    | 2.944        |
| 5JR1   | H_ARG_38  | NH2    | H_GLU_46   | OE2    | 2.675        |
| 5JR1   | H_ARG_38  | NH2    | H_ASP_86   | OD1    | 3.952        |
| 5JR1   | H_ARG_50  | NH1    | H_GLU_100J | OE1    | 3.342        |
| 5JR1   | H_ARG_50  | NH1    | H_GLU_100J | OE2    | 3.375        |
| 5JR1   | H_ARG_50  | NH2    | H_GLU_100J | OE1    | 3.986        |
| 5JR1   | H_LYS_52  | NZ     | H_ASP_53   | OD1    | 2.855        |
| 5JR1   | H_ARG_66  | NH1    | H_ASP_86   | OD1    | 3.760        |
| 5JR1   | H_ARG_66  | NH1    | H_ASP_86   | OD2    | 2.716        |
| 5JR1   | H_ARG_66  | NH2    | H_ASP_86   | OD1    | 3.157        |
| 5JR1   | H_ARG_66  | NH2    | H_ASP_86   | OD2    | 3.593        |
| 5JR1   | H_ARG_71  | NH2    | H_ASP_73   | OD1    | 3.546        |
| 5JR1   | H_ARG_94  | NH1    | H_ASP_102  | OD2    | 2.955        |
| 5JR1   | H_LYS_143 | NZ     | H_ASP_144  | OD1    | 3.485        |
| 5JR1   | H_LYS_143 | NZ     | H_ASP_144  | OD2    | 2.637        |
| 5JR1   | H_HIS_164 | NE2    | L_ASP_139  | OD1    | 3.232        |
| 5JR1   | H_HIS_164 | NE2    | L_ASP_139  | OD2    | 3.168        |
| 5JR1   | H_LYS_206 | NZ     | H_ASP_208  | OD1    | 2.690        |
| 5JR1   | L_HIS_31  | ND1    | H_ASP_100  | OD2    | 3.496        |
| 5JR1   | L_HIS_31  | ND1    | H_GLU_100I | OE2    | 3.149        |
| 5JR1   | L_ARG_61  | NH2    | L_GLU_81   | OE2    | 3.044        |
| 5JR1   | L_ARG_61  | NH2    | L_ASP_82   | OD1    | 2.738        |
| 5JR1   | L_ARG_61  | NH2    | L_ASP_82   | OD2    | 3.536        |
| 5JR1   | L_ARG_95B | NH1    | H_ASP_58   | OD1    | 3.367        |
| 5JR1   | L_ARG_95B | NH1    | H_ASP_58   | OD2    | 3.787        |
| 5JR1   | L_ARG_95B | NH2    | H_ASP_58   | OD1    | 3.502        |
| 5JR1   | L_ARG_95B | NH2    | H_ASP_58   | OD2    | 2.474        |
| 5JR1   | L_LYS_110 | NZ     | L_GLU_199  | OE1    | 2.769        |
| 5JR1   | L_HIS_189 | ND1    | L_ASP_152  | OD2    | 3.281        |

Table 681: 5JR1-specific salt bridging networks analysis. In this table, a PDB file is specified with a four-letter PDB ID, except that the names of the PDB files corresponding to the single NMR structural model split from the NMR ensemble is specified with a four-letter PDB ID in addition to a hyphen followed by the single NMR structural model numeric ID, the residue naming scheme is **Chain ID\_residue name\_residue number**,  $\angle ADH$  represents the angle formed by acceptor (A), donor (D) and hydrogen (H) ( $\angle ADH$ ).

| PDB ID | Residue A | Atom A | Residue B | Atom B | Distance (Å) |
|--------|-----------|--------|-----------|--------|--------------|
| 5JUE   | L_ARG_61  | NH1    | L_ASP_82  | OD1    | 2.841        |
| 5JUE   | L_ARG_61  | NH1    | L_ASP_82  | OD2    | 3.261        |
| 5JUE   | L_ARG_61  | NH2    | L_ASP_82  | OD1    | 3.675        |
| 5JUE   | L_ARG_61  | NH2    | L_ASP_82  | OD2    | 2.578        |
| 5JUE   | L_LYS_103 | NZ     | L_ASP_165 | OD1    | 3.155        |
| 5JUE   | L_LYS_147 | NZ     | L_GLU_154 | OE1    | 3.955        |
| 5JUE   | L_LYS_149 | NZ     | L_GLU_195 | OE1    | 3.435        |
| 5JUE   | L_LYS_149 | NZ     | L_GLU_195 | OE2    | 2.940        |
| 5JUE   | L_ARG_155 | NH1    | L_GLU_185 | OE1    | 2.977        |
| 5JUE   | L_ARG_155 | NH1    | L_GLU_185 | OE2    | 3.732        |
| 5JUE   | L_ARG_155 | NH2    | L_GLU_185 | OE1    | 3.822        |
| 5JUE   | L_ARG_155 | NH2    | L_GLU_185 | OE2    | 3.203        |
| 5JUE   | L_ARG_188 | NH2    | L_ASP_184 | OD1    | 3.007        |
| 5JUE   | L_ARG_188 | NH2    | L_ASP_184 | OD2    | 3.926        |
| 5JUE   | L_HIS_189 | ND1    | L_ASP_151 | OD2    | 2.628        |
| 5JUE   | L_LYS_199 | NZ     | L_ASP_110 | OD1    | 3.968        |
| 5JUE   | L_LYS_199 | NZ     | L_ASP_110 | OD2    | 3.647        |
| 5JUE   | H_LYS_66  | NZ     | H_ASP_86  | OD1    | 3.729        |
| 5JUE   | H_LYS_66  | NZ     | H_ASP_86  | OD2    | 2.761        |
| 5JUE   | H_ARG_94  | NH2    | H_ASP_101 | OD1    | 3.685        |
| 5JUE   | H_ARG_94  | NH2    | H_ASP_101 | OD2    | 2.851        |
| 5JUE   | H_LYS_208 | NZ     | L_GLU_123 | OE1    | 2.809        |
| 5JUE   | H_LYS_208 | NZ     | L_GLU_123 | OE2    | 2.812        |
| 5JUE   | H_LYS_209 | NZ     | H_GLU_211 | OE1    | 3.891        |

Table 682: 5JUE-specific salt bridging networks analysis. In this table, a PDB file is specified with a four-letter PDB ID, except that the names of the PDB files corresponding to the single NMR structural model split from the NMR ensemble is specified with a four-letter PDB ID in addition to a hyphen followed by the single NMR structural model numeric ID, the residue naming scheme is **Chain ID\_residue name\_residue number**,  $\angle ADH$  represents the angle formed by acceptor (A), donor (D) and hydrogen (H) ( $\angle ADH$ ).

| PDB ID | Residue A | Atom A | Residue B | Atom B | Distance (Å) |
|--------|-----------|--------|-----------|--------|--------------|
| 5JXA   | H_ARG_38  | NH1    | H_ASP_86  | OD1    | 2.740        |
| 5JXA   | H_ARG_38  | NH2    | H_GLU_46  | OE1    | 2.757        |
| 5JXA   | H_ARG_38  | NH2    | H_ASP_86  | OD1    | 3.580        |
| 5JXA   | H_ARG_66  | NH1    | H_ASP_86  | OD1    | 3.702        |
| 5JXA   | H_ARG_66  | NH1    | H_ASP_86  | OD2    | 3.100        |
| 5JXA   | H_ARG_66  | NH2    | H_ASP_86  | OD1    | 2.964        |
| 5JXA   | H_ARG_66  | NH2    | H_ASP_86  | OD2    | 3.681        |
| 5JXA   | H_ARG_95  | NH1    | H_ASP_99  | OD1    | 3.572        |
| 5JXA   | H_ARG_95  | NH2    | H_ASP_99  | OD1    | 2.948        |
| 5JXA   | H_LYS_143 | NZ     | H_ASP_144 | OD1    | 2.917        |
| 5JXA   | H_LYS_143 | NZ     | H_ASP_144 | OD2    | 3.163        |
| 5JXA   | H_LYS_209 | NZ     | L_GLU_123 | OE1    | 3.277        |
| 5JXA   | H_LYS_210 | NZ     | H_GLU_212 | OE1    | 2.675        |
| 5JXA   | H_LYS_210 | NZ     | H_GLU_212 | OE2    | 3.292        |
| 5JXA   | H_LYS_214 | NZ     | L_ASP_122 | OD1    | 2.755        |
| 5JXA   | H_LYS_214 | NZ     | L_ASP_122 | OD2    | 3.275        |
| 5JXA   | L_LYS_24  | NZ     | L_ASP_70  | OD1    | 2.561        |
| 5JXA   | L_LYS_24  | NZ     | L_ASP_70  | OD2    | 3.785        |
| 5JXA   | L_ARG_39  | NH2    | L_GLU_81  | OE1    | 3.801        |
| 5JXA   | L_ARG_61  | NH2    | L_ASP_82  | OD1    | 2.836        |
| 5JXA   | L_ARG_61  | NH2    | L_ASP_82  | OD2    | 3.523        |
| 5JXA   | L_ARG_142 | NH1    | L_GLU_103 | OE1    | 2.871        |
| 5JXA   | L_ARG_142 | NH1    | L_GLU_103 | OE2    | 3.755        |
| 5JXA   | L_ARG_142 | NH2    | L_GLU_103 | OE1    | 3.345        |
| 5JXA   | L_ARG_142 | NH2    | L_GLU_103 | OE2    | 2.786        |
| 5JXA   | L_ARG_142 | NH2    | L_GLU_105 | OE2    | 3.779        |
| 5JXA   | L_LYS_149 | NZ     | L_GLU_195 | OE2    | 3.064        |
| 5JXA   | L_LYS_188 | NZ     | L_ASP_185 | OD1    | 2.848        |
| 5JXA   | L_HIS_189 | ND1    | L_ASP_151 | OD2    | 3.368        |

Table 683: 5JXA-specific salt bridging networks analysis. In this table, a PDB file is specified with a four-letter PDB ID, except that the names of the PDB files corresponding to the single NMR structural model split from the NMR ensemble is specified with a four-letter PDB ID in addition to a hyphen followed by the single NMR structural model numeric ID, the residue naming scheme is **Chain ID\_residue name\_residue number**,  $\angle ADH$  represents the angle formed by acceptor (A), donor (D) and hydrogen (H) ( $\angle ADH$ ).



| PDB ID | Residue A | Atom A | Residue B | Atom B | Distance (Å) |
|--------|-----------|--------|-----------|--------|--------------|
| 5KZP   | H_HIS_35  | NE2    | H_ASP_99  | OD2    | 2.522        |
| 5KZP   | H_ARG_38  | NH1    | H_ASP_90  | OD1    | 2.873        |
| 5KZP   | H_ARG_38  | NH2    | H_GLU_46  | OE1    | 3.219        |
| 5KZP   | H_ARG_38  | NH2    | H_GLU_46  | OE2    | 3.666        |
| 5KZP   | H_ARG_38  | NH2    | H_ASP_90  | OD1    | 3.689        |
| 5KZP   | H_ARG_65  | NH1    | H_ASP_62  | OD1    | 2.911        |
| 5KZP   | H_ARG_65  | NH2    | H_ASP_62  | OD1    | 2.885        |
| 5KZP   | H_ARG_67  | NH1    | H_ASP_90  | OD1    | 3.700        |
| 5KZP   | H_ARG_67  | NH1    | H_ASP_90  | OD2    | 2.484        |
| 5KZP   | H_ARG_67  | NH2    | H_ASP_90  | OD1    | 2.918        |
| 5KZP   | H_ARG_67  | NH2    | H_ASP_90  | OD2    | 3.301        |
| 5KZP   | H_ARG_98  | NH2    | H_ASP_111 | OD1    | 3.703        |
| 5KZP   | H_ARG_98  | NH2    | H_ASP_111 | OD2    | 2.809        |
| 5KZP   | H_LYS_153 | NZ     | H_ASP_154 | OD1    | 3.314        |
| 5KZP   | H_LYS_153 | NZ     | H_ASP_154 | OD2    | 3.555        |
| 5KZP   | H_LYS_224 | NZ     | L_ASP_122 | OD2    | 3.852        |
| 5KZP   | L_ARG_61  | NH1    | L_GLU_79  | OE1    | 3.104        |
| 5KZP   | L_ARG_61  | NH1    | L_GLU_79  | OE2    | 3.279        |
| 5KZP   | L_ARG_61  | NH2    | L_GLU_79  | OE2    | 3.588        |
| 5KZP   | L_ARG_61  | NH2    | L_GLU_81  | OE1    | 3.551        |
| 5KZP   | L_ARG_61  | NH2    | L_ASP_82  | OD1    | 2.835        |
| 5KZP   | L_ARG_61  | NH2    | L_ASP_82  | OD2    | 3.395        |
| 5KZP   | L_ARG_103 | NH1    | L_GLU_105 | OE1    | 3.734        |
| 5KZP   | L_ARG_103 | NH2    | L_GLU_105 | OE1    | 3.962        |
| 5KZP   | L_LYS_149 | NZ     | L_GLU_195 | OE1    | 3.543        |
| 5KZP   | L_LYS_183 | NZ     | L_GLU_187 | OE2    | 3.769        |
| 5KZP   | E_HIS_35  | NE2    | E_ASP_99  | OD2    | 2.563        |
| 5KZP   | E_ARG_38  | NH1    | E_ASP_90  | OD1    | 3.683        |
| 5KZP   | E_ARG_65  | NH1    | E_ASP_62  | OD1    | 2.341        |
| 5KZP   | E_ARG_65  | NH2    | E_ASP_62  | OD1    | 2.619        |
| 5KZP   | E_ARG_65  | NH2    | K_GLU_1   | OE2    | 3.580        |
| 5KZP   | E_ARG_98  | NH2    | E_ASP_111 | OD1    | 3.416        |
| 5KZP   | E_ARG_98  | NH2    | E_ASP_111 | OD2    | 2.790        |
| 5KZP   | E_LYS_153 | NZ     | E_ASP_154 | OD1    | 2.756        |
| 5KZP   | E_LYS_153 | NZ     | E_ASP_154 | OD2    | 2.951        |
| 5KZP   | E_LYS_219 | NZ     | L_GLU_123 | OE1    | 2.944        |
| 5KZP   | E_LYS_219 | NZ     | L_GLU_123 | OE2    | 2.510        |
| 5KZP   | L_ARG_24  | NH1    | L_ASP_70  | OD1    | 3.891        |
| 5KZP   | L_ARG_24  | NH1    | L_ASP_70  | OD2    | 3.598        |
| 5KZP   | L_ARG_61  | NH2    | L_GLU_81  | OE1    | 3.907        |
| 5KZP   | L_ARG_61  | NH2    | L_ASP_82  | OD1    | 2.991        |
| 5KZP   | L_ARG_61  | NH2    | L_ASP_82  | OD2    | 3.614        |
| 5KZP   | L_HIS_189 | ND1    | L_ASP_185 | OD1    | 3.770        |
| 5KZP   | F_HIS_35  | NE2    | F_ASP_99  | OD2    | 2.631        |
| 5KZP   | F_ARG_38  | NH1    | F_ASP_90  | OD1    | 2.940        |
| 5KZP   | F_ARG_38  | NH2    | F_GLU_46  | OE1    | 2.834        |
| 5KZP   | F_ARG_38  | NH2    | F_GLU_46  | OE2    | 3.617        |
| 5KZP   | F_ARG_65  | NH1    | F_ASP_62  | OD1    | 2.904        |
| 5KZP   | F_ARG_65  | NH2    | F_ASP_62  | OD1    | 2.941        |
| 5KZP   | F_ARG_67  | NH1    | F_ASP_90  | OD1    | 3.792        |
| 5KZP   | F_ARG_67  | NH1    | F_ASP_90  | OD2    | 2.747        |
| 5KZP   | F_ARG_67  | NH2    | F_ASP_90  | OD1    | 3.178        |
| 5KZP   | F_ARG_67  | NH2    | F_ASP_90  | OD2    | 3.633        |
| 5KZP   | F_ARG_98  | NH2    | F_ASP_111 | OD1    | 3.568        |
| 5KZP   | F_ARG_98  | NH2    | F_ASP_111 | OD2    | 2.783        |
| 5KZP   | F_LYS_139 | NZ     | J_GLU_213 | OE2    | 2.615        |
| 5KZP   | F_LYS_153 | NZ     | F_ASP_154 | OD2    | 3.275        |

|      |           |     |           |     |       |
|------|-----------|-----|-----------|-----|-------|
| 5KZP | J_ARG_61  | NH2 | J_GLU_81  | OE1 | 3.789 |
| 5KZP | J_ARG_61  | NH2 | J_ASP_82  | OD1 | 2.791 |
| 5KZP | J_ARG_61  | NH2 | J_ASP_82  | OD2 | 3.369 |
| 5KZP | J_ARG_211 | NH1 | J_GLU_187 | OE1 | 3.757 |
| 5KZP | J_ARG_211 | NH2 | J_GLU_187 | OE1 | 3.382 |
| 5KZP | G_HIS_35  | NE2 | G_ASP_99  | OD2 | 3.393 |
| 5KZP | G_ARG_38  | NH1 | G_ASP_90  | OD1 | 3.839 |
| 5KZP | G_ARG_38  | NH2 | G_GLU_46  | OE1 | 3.198 |
| 5KZP | G_ARG_38  | NH2 | G_GLU_46  | OE2 | 3.193 |
| 5KZP | G_ARG_65  | NH2 | G_ASP_62  | OD1 | 3.015 |
| 5KZP | G_ARG_67  | NH1 | G_ASP_90  | OD2 | 3.513 |
| 5KZP | G_LYS_87  | NZ  | G_GLU_89  | OE1 | 2.242 |
| 5KZP | G_LYS_87  | NZ  | G_GLU_89  | OE2 | 3.284 |
| 5KZP | G_ARG_98  | NH2 | G_ASP_111 | OD1 | 3.923 |
| 5KZP | G_ARG_98  | NH2 | G_ASP_111 | OD2 | 3.052 |
| 5KZP | G_LYS_153 | NZ  | G_ASP_154 | OD1 | 2.784 |
| 5KZP | G_LYS_153 | NZ  | G_ASP_154 | OD2 | 3.265 |
| 5KZP | G_LYS_219 | NZ  | K_GLU_123 | OE2 | 3.381 |
| 5KZP | G_LYS_220 | NZ  | G_GLU_222 | OE1 | 3.746 |
| 5KZP | G_LYS_220 | NZ  | G_GLU_222 | OE2 | 2.332 |
| 5KZP | K_ARG_24  | NH2 | K_ASP_70  | OD1 | 2.089 |
| 5KZP | K_ARG_24  | NH2 | K_ASP_70  | OD2 | 3.470 |
| 5KZP | K_ARG_61  | NH2 | K_GLU_81  | OE1 | 3.540 |
| 5KZP | K_ARG_61  | NH2 | K_ASP_82  | OD1 | 2.863 |
| 5KZP | K_ARG_61  | NH2 | K_ASP_82  | OD2 | 3.407 |
| 5KZP | K_ARG_103 | NH1 | K_GLU_105 | OE2 | 3.064 |
| 5KZP | K_HIS_189 | ND1 | K_ASP_185 | OD1 | 3.899 |
| 5KZP | K_ARG_211 | NH1 | K_GLU_187 | OE2 | 3.000 |
| 5KZP | K_ARG_211 | NH2 | K_GLU_187 | OE2 | 3.195 |

Table 684: 5KZP-specific salt bridging networks analysis. In this table, a PDB file is specified with a four-letter PDB ID, except that the names of the PDB files corresponding to the single NMR structural model split from the NMR ensemble is specified with a four-letter PDB ID in addition to a hyphen followed by the single NMR structural model numeric ID, the residue naming scheme is **Chain ID\_residue name\_residue number**,  $\angle ADH$  represents the angle formed by acceptor (A), donor (D) and hydrogen (H) ( $\angle ADH$ ).

| PDB ID | Residue A | Atom A | Residue B | Atom B | Distance (Å) |
|--------|-----------|--------|-----------|--------|--------------|
| 5LDN   | A_ARG.72  | NH2    | A_ASP.74  | OD1    | 3.403        |
| 5LDN   | A_ARG.72  | NH2    | A_ASP.74  | OD2    | 3.634        |
| 5LDN   | A_LYS.80  | NZ     | A_ASP.71  | OD2    | 3.125        |
| 5LDN   | A_LYS.80  | NZ     | A_GLU.73  | OE1    | 3.933        |
| 5LDN   | A_LYS.80  | NZ     | A_GLU.73  | OE2    | 2.939        |
| 5LDN   | A_LYS.80  | NZ     | A_GLU.581 | OE1    | 2.882        |
| 5LDN   | A_ARG.82  | NH1    | A_ASP.71  | OD2    | 3.811        |
| 5LDN   | A_ARG.82  | NH1    | A_GLU.581 | OE1    | 2.442        |
| 5LDN   | A_ARG.82  | NH2    | A_GLU.581 | OE1    | 3.951        |
| 5LDN   | A_LYS.193 | NZ     | A_GLU.188 | OE2    | 3.913        |
| 5LDN   | A_ARG.221 | NH2    | A_GLU.288 | OE1    | 2.862        |
| 5LDN   | A_ARG.221 | NH2    | A_GLU.288 | OE2    | 3.399        |
| 5LDN   | A_LYS.225 | NZ     | A_ASP.135 | OD1    | 3.401        |
| 5LDN   | A_LYS.225 | NZ     | A_ASP.135 | OD2    | 3.221        |
| 5LDN   | A_LYS.238 | NZ     | A_ASP.291 | OD2    | 3.266        |
| 5LDN   | A_LYS.238 | NZ     | A_GLU.293 | OE2    | 3.311        |
| 5LDN   | A_ARG.311 | NH2    | A_GLU.136 | OE1    | 3.150        |
| 5LDN   | A_ARG.311 | NH2    | A_GLU.136 | OE2    | 3.587        |
| 5LDN   | A_ARG.363 | NH1    | A_ASP.359 | OD1    | 3.274        |
| 5LDN   | A_ARG.363 | NH2    | A_ASP.923 | OD1    | 2.881        |
| 5LDN   | A_ARG.363 | NH2    | A_ASP.923 | OD2    | 3.367        |
| 5LDN   | A_ARG.379 | NH1    | A_ASP.330 | OD1    | 3.918        |
| 5LDN   | A_ARG.379 | NH1    | A_ASP.330 | OD2    | 3.115        |
| 5LDN   | A_ARG.379 | NH2    | A_ASP.330 | OD1    | 2.861        |
| 5LDN   | A_ARG.379 | NH2    | A_ASP.330 | OD2    | 3.485        |
| 5LDN   | A_ARG.398 | NH2    | A_ASP.866 | OD1    | 2.806        |
| 5LDN   | A_ARG.398 | NH2    | A_ASP.866 | OD2    | 3.196        |
| 5LDN   | A_HIS.403 | NE2    | A_GLU.401 | OE1    | 3.143        |
| 5LDN   | A_LYS.440 | NZ     | A_ASP.447 | OD2    | 3.777        |
| 5LDN   | A_LYS.483 | NZ     | A_ASP.910 | OD2    | 3.275        |
| 5LDN   | A_LYS.505 | NZ     | A_ASP.501 | OD1    | 3.131        |
| 5LDN   | A_LYS.505 | NZ     | A_ASP.501 | OD2    | 3.450        |
| 5LDN   | A_ARG.506 | NH2    | A_ASP.482 | OD1    | 3.756        |
| 5LDN   | A_ARG.506 | NH2    | A_ASP.482 | OD2    | 3.168        |
| 5LDN   | A_ARG.522 | NH2    | A_GLU.401 | OE2    | 3.872        |
| 5LDN   | A_ARG.538 | NH1    | A_ASP.394 | OD2    | 3.250        |
| 5LDN   | A_ARG.545 | NH2    | A_ASP.391 | OD1    | 2.660        |
| 5LDN   | A_ARG.545 | NH2    | A_ASP.391 | OD2    | 3.895        |
| 5LDN   | A_ARG.553 | NH1    | A_ASP.107 | OD1    | 3.270        |
| 5LDN   | A_ARG.553 | NH1    | A_ASP.107 | OD2    | 3.176        |
| 5LDN   | A_HIS.558 | NE2    | A_ASP.101 | OD1    | 3.369        |
| 5LDN   | A_HIS.558 | NE2    | A_ASP.101 | OD2    | 2.749        |
| 5LDN   | A_LYS.564 | NZ     | A_GLU.366 | OE1    | 2.705        |
| 5LDN   | A_LYS.586 | NZ     | A_ASP.74  | OD2    | 3.049        |
| 5LDN   | A_ARG.601 | NH1    | A_ASP.587 | OD1    | 3.101        |
| 5LDN   | A_ARG.601 | NH1    | A_ASP.587 | OD2    | 2.666        |
| 5LDN   | A_ARG.634 | NH2    | A_GLU.630 | OE2    | 3.382        |
| 5LDN   | A_ARG.675 | NH1    | A_GLU.920 | OE2    | 3.980        |
| 5LDN   | A_ARG.675 | NH2    | A_GLU.920 | OE2    | 3.771        |
| 5LDN   | A_LYS.683 | NZ     | A_GLU.911 | OE1    | 2.897        |
| 5LDN   | A_LYS.719 | NZ     | A_GLU.741 | OE1    | 3.754        |
| 5LDN   | A_LYS.719 | NZ     | A_GLU.741 | OE2    | 3.492        |
| 5LDN   | A_LYS.745 | NZ     | A_ASP.907 | OD1    | 3.711        |
| 5LDN   | A_LYS.745 | NZ     | A_ASP.907 | OD2    | 2.722        |
| 5LDN   | A_ARG.746 | NH1    | A_GLU.743 | OE1    | 2.687        |
| 5LDN   | A_ARG.746 | NH1    | A_GLU.743 | OE2    | 2.969        |
| 5LDN   | A_ARG.802 | NH1    | A_ASP.526 | OD2    | 3.579        |

|      |           |     |           |     |       |
|------|-----------|-----|-----------|-----|-------|
| 5LDN | A_LYS_862 | NZ  | A_ASP_526 | OD1 | 2.598 |
| 5LDN | A_LYS_862 | NZ  | A_ASP_529 | OD1 | 3.751 |
| 5LDN | A_LYS_862 | NZ  | A_ASP_529 | OD2 | 2.683 |
| 5LDN | A_ARG_871 | NH1 | A_GLU_920 | OE2 | 3.400 |
| 5LDN | A_HIS_898 | ND1 | A_ASP_725 | OD1 | 3.639 |
| 5LDN | A_HIS_898 | ND1 | A_ASP_725 | OD2 | 2.775 |
| 5LDN | A_ARG_926 | NH2 | A_ASP_639 | OD2 | 3.350 |
| 5LDN | A_HIS_928 | ND1 | A_ASP_639 | OD1 | 2.832 |
| 5LDN | A_HIS_928 | ND1 | A_ASP_639 | OD2 | 3.728 |
| 5LDN | A_HIS_928 | NE2 | A_ASP_636 | OD2 | 3.490 |
| 5LDN | A_ARG_932 | NH1 | A_ASP_89  | OD2 | 3.407 |
| 5LDN | A_ARG_932 | NH2 | A_ASP_89  | OD1 | 3.679 |
| 5LDN | A_ARG_932 | NH2 | A_ASP_89  | OD2 | 2.766 |
| 5LDN | A_ARG_932 | NH2 | A_GLU_630 | OE1 | 3.434 |
| 5LDN | A_ARG_932 | NH2 | A_GLU_630 | OE2 | 3.081 |
| 5LDN | A_ARG_941 | NH1 | A_ASP_362 | OD1 | 3.367 |
| 5LDN | A_ARG_941 | NH1 | A_ASP_362 | OD2 | 3.176 |
| 5LDN | A_ARG_941 | NH2 | A_ASP_362 | OD1 | 3.000 |
| 5LDN | A_ARG_941 | NH2 | A_ASP_362 | OD2 | 3.971 |
| 5LDN | L_LYS_44  | NZ  | L_ASP_90  | OD1 | 2.996 |
| 5LDN | L_ARG_81  | NH1 | L_ASP_102 | OD1 | 3.268 |
| 5LDN | L_ARG_81  | NH1 | L_ASP_102 | OD2 | 2.452 |
| 5LDN | L_ARG_81  | NH2 | L_ASP_102 | OD1 | 3.517 |
| 5LDN | L_ARG_    | NH1 | L_GLU_    | OE1 | 3.301 |
| 5LDN | L_ARG_    | NH2 | L_GLU_    | OE1 | 3.915 |
| 5LDN | L_ARG_    | NH1 | L_GLU_    | OE2 | 3.234 |
| 5LDN | L_HIS_    | ND1 | L_ASP_    | OD1 | 3.989 |
| 5LDN | L_HIS_    | ND1 | L_ASP_    | OD2 | 2.838 |
| 5LDN | H_ARG_37  | NH1 | H_ASP_88  | OD1 | 2.969 |
| 5LDN | H_ARG_37  | NH2 | H_GLU_45  | OE2 | 3.151 |
| 5LDN | H_ARG_65  | NH1 | H_ASP_88  | OD1 | 3.733 |
| 5LDN | H_ARG_65  | NH1 | H_ASP_    | OD2 | 3.243 |
| 5LDN | H_ARG_65  | NH2 | H_ASP_88  | OD1 | 2.798 |
| 5LDN | H_ARG_65  | NH2 | H_ASP_    | OD2 | 3.381 |
| 5LDN | H_LYS_70  | NZ  | H_ASP_72  | OD2 | 3.198 |
| 5LDN | H_ARG_    | NH1 | H_ASP_    | OD1 | 3.345 |
| 5LDN | H_ARG_    | NH2 | H_ASP_    | OD1 | 3.435 |
| 5LDN | H_LYS_    | NZ  | L_GLU_    | OE1 | 3.019 |

Table 685: 5LDN-specific salt bridging networks analysis. In this table, a PDB file is specified with a four-letter PDB ID, except that the names of the PDB files corresponding to the single NMR structural model split from the NMR ensemble is specified with a four-letter PDB ID in addition to a hyphen followed by the single NMR structural model numeric ID, the residue naming scheme is **Chain ID\_residue name\_residue number**,  $\angle ADH$  represents the angle formed by acceptor (A), donor (D) and hydrogen (H) ( $\angle ADH$ ).

| PDB ID | Residue A | Atom A | Residue B | Atom B | Distance (Å) |
|--------|-----------|--------|-----------|--------|--------------|
| 5M2C   | A_LYS_124 | NZ     | A_ASP_195 | OD1    | 2.994        |
| 5M2C   | A_LYS_124 | NZ     | A_ASP_195 | OD2    | 3.852        |
| 5M2C   | A_LYS_144 | NZ     | A_ASP_138 | OD1    | 2.840        |
| 5M2C   | A_LYS_171 | NZ     | A_ASP_138 | OD1    | 3.119        |
| 5M2C   | A_LYS_187 | NZ     | A_ASP_155 | OD1    | 3.762        |
| 5M2C   | A_LYS_187 | NZ     | A_ASP_155 | OD2    | 3.179        |
| 5M2C   | A_HIS_191 | NE2    | A_ASP_128 | OD1    | 3.269        |
| 5M2C   | A_HIS_191 | NE2    | A_ASP_128 | OD2    | 2.695        |
| 5M2C   | B_LYS_124 | NZ     | B_ASP_195 | OD1    | 3.117        |
| 5M2C   | B_LYS_124 | NZ     | B_ASP_195 | OD2    | 3.775        |
| 5M2C   | B_LYS_144 | NZ     | B_ASP_138 | OD1    | 2.798        |
| 5M2C   | B_LYS_171 | NZ     | B_ASP_138 | OD1    | 3.131        |
| 5M2C   | B_LYS_187 | NZ     | B_ASP_155 | OD1    | 3.683        |
| 5M2C   | B_LYS_187 | NZ     | B_ASP_155 | OD2    | 3.174        |
| 5M2C   | B_HIS_191 | NE2    | B_ASP_128 | OD1    | 3.220        |
| 5M2C   | B_HIS_191 | NE2    | B_ASP_128 | OD2    | 2.713        |

Table 686: 5M2C-specific salt bridging networks analysis. In this table, a PDB file is specified with a four-letter PDB ID, except that the names of the PDB files corresponding to the single NMR structural model split from the NMR ensemble is specified with a four-letter PDB ID in addition to a hyphen followed by the single NMR structural model numeric ID, the residue naming scheme is **Chain ID\_residue name\_residue number**,  $\angle ADH$  represents the angle formed by acceptor (A), donor (D) and hydrogen (H) ( $\angle ADH$ ).

| PDB ID | Residue A | Atom A | Residue B | Atom B | Distance (Å) |
|--------|-----------|--------|-----------|--------|--------------|
| 5M33   | A_LYS_124 | NZ     | A_ASP_195 | OD1    | 2.806        |
| 5M33   | A_LYS_124 | NZ     | A_ASP_195 | OD2    | 3.061        |
| 5M33   | A_LYS_187 | NZ     | A_ASP_155 | OD1    | 2.820        |
| 5M33   | A_HIS_191 | NE2    | A_ASP_128 | OD1    | 3.390        |
| 5M33   | A_HIS_191 | NE2    | A_ASP_128 | OD2    | 2.760        |
| 5M33   | A_LYS_193 | NZ     | A_GLU_188 | OE1    | 2.934        |
| 5M33   | B_LYS_124 | NZ     | B_ASP_195 | OD1    | 3.243        |
| 5M33   | B_LYS_124 | NZ     | B_ASP_195 | OD2    | 2.646        |
| 5M33   | B_HIS_191 | NE2    | B_ASP_128 | OD1    | 3.361        |
| 5M33   | B_HIS_191 | NE2    | B_ASP_128 | OD2    | 2.690        |

Table 687: 5M33-specific salt bridging networks analysis. In this table, a PDB file is specified with a four-letter PDB ID, except that the names of the PDB files corresponding to the single NMR structural model split from the NMR ensemble is specified with a four-letter PDB ID in addition to a hyphen followed by the single NMR structural model numeric ID, the residue naming scheme is **Chain ID\_residue name\_residue number**,  $\angle ADH$  represents the angle formed by acceptor (A), donor (D) and hydrogen (H) ( $\angle ADH$ ).

| PDB ID | Residue A | Atom A | Residue B | Atom B | Distance (Å) |
|--------|-----------|--------|-----------|--------|--------------|
| 5M3D   | A_LYS_116 | NZ     | A_ASP_117 | OD1    | 3.826        |
| 5M3D   | A_LYS_124 | NZ     | A_ASP_195 | OD1    | 3.095        |
| 5M3D   | A_LYS_124 | NZ     | A_ASP_195 | OD2    | 2.681        |
| 5M3D   | A_LYS_144 | NZ     | A_ASP_138 | OD1    | 3.722        |
| 5M3D   | A_LYS_148 | NZ     | A_GLU_152 | OE2    | 2.745        |
| 5M3D   | A_LYS_187 | NZ     | A_ASP_155 | OD2    | 2.929        |
| 5M3D   | A_HIS_191 | NE2    | A_ASP_128 | OD1    | 3.275        |
| 5M3D   | A_HIS_191 | NE2    | A_ASP_128 | OD2    | 2.681        |
| 5M3D   | A_LYS_201 | NZ     | A_ASP_196 | OD1    | 3.448        |
| 5M3D   | B_LYS_116 | NZ     | B_ASP_117 | OD1    | 3.148        |
| 5M3D   | B_LYS_124 | NZ     | B_ASP_195 | OD1    | 2.979        |
| 5M3D   | B_LYS_124 | NZ     | B_ASP_195 | OD2    | 2.591        |
| 5M3D   | B_LYS_144 | NZ     | B_ASP_138 | OD1    | 3.668        |
| 5M3D   | B_LYS_148 | NZ     | B_GLU_152 | OE2    | 2.496        |
| 5M3D   | B_LYS_187 | NZ     | B_ASP_155 | OD2    | 3.090        |
| 5M3D   | B_HIS_191 | NE2    | B_ASP_128 | OD1    | 3.349        |
| 5M3D   | B_HIS_191 | NE2    | B_ASP_128 | OD2    | 2.596        |
| 5M3D   | C_LYS_124 | NZ     | C_ASP_195 | OD1    | 2.934        |
| 5M3D   | C_LYS_124 | NZ     | C_ASP_195 | OD2    | 3.127        |
| 5M3D   | C_LYS_148 | NZ     | C_GLU_152 | OE2    | 2.588        |
| 5M3D   | C_LYS_171 | NZ     | C_ASP_137 | OD1    | 3.243        |
| 5M3D   | C_LYS_171 | NZ     | C_ASP_137 | OD2    | 3.458        |
| 5M3D   | C_LYS_187 | NZ     | C_ASP_155 | OD2    | 3.290        |
| 5M3D   | C_HIS_191 | NE2    | C_ASP_128 | OD1    | 3.231        |
| 5M3D   | C_HIS_191 | NE2    | C_ASP_128 | OD2    | 2.539        |
| 5M3D   | D_LYS_124 | NZ     | D_ASP_195 | OD1    | 3.141        |
| 5M3D   | D_LYS_124 | NZ     | D_ASP_195 | OD2    | 3.445        |
| 5M3D   | D_LYS_148 | NZ     | D_GLU_152 | OE1    | 3.259        |
| 5M3D   | D_LYS_171 | NZ     | D_ASP_137 | OD1    | 2.423        |
| 5M3D   | D_LYS_171 | NZ     | D_ASP_137 | OD2    | 3.425        |
| 5M3D   | D_LYS_187 | NZ     | D_ASP_155 | OD2    | 3.128        |
| 5M3D   | D_HIS_191 | NE2    | D_ASP_128 | OD1    | 3.228        |
| 5M3D   | D_HIS_191 | NE2    | D_ASP_128 | OD2    | 2.528        |

Table 688: 5M3D-specific salt bridging networks analysis. In this table, a PDB file is specified with a four-letter PDB ID, except that the names of the PDB files corresponding to the single NMR structural model split from the NMR ensemble is specified with a four-letter PDB ID in addition to a hyphen followed by the single NMR structural model numeric ID, the residue naming scheme is **Chain ID\_residue name\_residue number**,  $\angle ADH$  represents the angle formed by acceptor (A), donor (D) and hydrogen (H) ( $\angle ADH$ ).

| PDB ID | Residue A | Atom A | Residue B | Atom B | Distance (Å) |
|--------|-----------|--------|-----------|--------|--------------|
| 5M3T   | A_LYS_124 | NZ     | A_ASP_195 | OD1    | 3.045        |
| 5M3T   | A_LYS_124 | NZ     | A_ASP_195 | OD2    | 3.381        |
| 5M3T   | A_LYS_144 | NZ     | A_ASP_137 | OD1    | 3.126        |
| 5M3T   | A_HIS_191 | NE2    | A_ASP_128 | OD1    | 2.701        |
| 5M3T   | A_HIS_191 | NE2    | A_ASP_128 | OD2    | 3.351        |
| 5M3T   | B_LYS_116 | NZ     | B_ASP_117 | OD1    | 3.281        |
| 5M3T   | B_LYS_124 | NZ     | B_ASP_195 | OD1    | 2.763        |
| 5M3T   | B_LYS_124 | NZ     | B_ASP_195 | OD2    | 2.942        |
| 5M3T   | B_LYS_144 | NZ     | B_ASP_138 | OD1    | 2.688        |
| 5M3T   | B_LYS_144 | NZ     | B_ASP_138 | OD2    | 3.938        |
| 5M3T   | B_LYS_148 | NZ     | B_GLU_152 | OE2    | 3.571        |
| 5M3T   | B_LYS_187 | NZ     | B_ASP_155 | OD1    | 3.212        |
| 5M3T   | B_HIS_191 | NE2    | B_ASP_128 | OD1    | 2.761        |
| 5M3T   | B_HIS_191 | NE2    | B_ASP_128 | OD2    | 3.127        |

Table 689: 5M3T-specific salt bridging networks analysis. In this table, a PDB file is specified with a four-letter PDB ID, except that the names of the PDB files corresponding to the single NMR structural model split from the NMR ensemble is specified with a four-letter PDB ID in addition to a hyphen followed by the single NMR structural model numeric ID, the residue naming scheme is **Chain ID\_residue name\_residue number**,  $\angle ADH$  represents the angle formed by acceptor (A), donor (D) and hydrogen (H) ( $\angle ADH$ ).



| PDB ID | Residue A | Atom A | Residue B | Atom B | Distance (Å) |
|--------|-----------|--------|-----------|--------|--------------|
| 5M4R   | A_LYS_124 | NZ     | A_ASP_195 | OD1    | 3.169        |
| 5M4R   | A_LYS_124 | NZ     | A_ASP_195 | OD2    | 3.633        |
| 5M4R   | A_LYS_171 | NZ     | A_ASP_138 | OD1    | 2.609        |
| 5M4R   | A_LYS_187 | NZ     | A_ASP_155 | OD2    | 3.101        |
| 5M4R   | A_HIS_191 | NE2    | A_ASP_128 | OD1    | 3.374        |
| 5M4R   | A_HIS_191 | NE2    | A_ASP_128 | OD2    | 2.535        |
| 5M4R   | B_LYS_124 | NZ     | B_ASP_195 | OD1    | 3.161        |
| 5M4R   | B_LYS_124 | NZ     | B_ASP_195 | OD2    | 3.629        |
| 5M4R   | B_LYS_144 | NZ     | B_ASP_138 | OD1    | 2.408        |
| 5M4R   | B_LYS_187 | NZ     | B_ASP_155 | OD1    | 3.374        |
| 5M4R   | B_HIS_191 | NE2    | B_ASP_128 | OD1    | 3.385        |
| 5M4R   | B_HIS_191 | NE2    | B_ASP_128 | OD2    | 2.546        |
| 5M4R   | C_LYS_124 | NZ     | C_ASP_195 | OD1    | 3.153        |
| 5M4R   | C_LYS_124 | NZ     | C_ASP_195 | OD2    | 3.571        |
| 5M4R   | C_LYS_171 | NZ     | C_ASP_138 | OD1    | 3.210        |
| 5M4R   | C_LYS_187 | NZ     | C_ASP_155 | OD1    | 3.818        |
| 5M4R   | C_HIS_191 | NE2    | C_ASP_128 | OD1    | 3.374        |
| 5M4R   | C_HIS_191 | NE2    | C_ASP_128 | OD2    | 2.549        |
| 5M4R   | D_LYS_124 | NZ     | D_ASP_195 | OD1    | 3.169        |
| 5M4R   | D_LYS_124 | NZ     | D_ASP_195 | OD2    | 3.626        |
| 5M4R   | D_LYS_187 | NZ     | D_ASP_155 | OD1    | 3.733        |
| 5M4R   | D_LYS_187 | NZ     | D_ASP_155 | OD2    | 3.658        |
| 5M4R   | D_HIS_191 | NE2    | D_ASP_128 | OD1    | 3.367        |
| 5M4R   | D_HIS_191 | NE2    | D_ASP_128 | OD2    | 2.515        |
| 5M4R   | E_LYS_124 | NZ     | E_ASP_195 | OD1    | 3.158        |
| 5M4R   | E_LYS_124 | NZ     | E_ASP_195 | OD2    | 3.599        |
| 5M4R   | E_LYS_144 | NZ     | E_ASP_137 | OD2    | 3.235        |
| 5M4R   | E_LYS_187 | NZ     | E_ASP_155 | OD1    | 3.706        |
| 5M4R   | E_HIS_191 | NE2    | E_ASP_128 | OD1    | 3.375        |
| 5M4R   | E_HIS_191 | NE2    | E_ASP_128 | OD2    | 2.532        |
| 5M4R   | E_LYS_201 | NZ     | E_ASP_196 | OD1    | 3.587        |

Table 690: 5M4R-specific salt bridging networks analysis. In this table, a PDB file is specified with a four-letter PDB ID, except that the names of the PDB files corresponding to the single NMR structural model split from the NMR ensemble is specified with a four-letter PDB ID in addition to a hyphen followed by the single NMR structural model numeric ID, the residue naming scheme is **Chain ID\_residue name\_residue number**,  $\angle ADH$  represents the angle formed by acceptor (A), donor (D) and hydrogen (H) ( $\angle ADH$ ).

| PDB ID | Residue A | Atom A | Residue B | Atom B | Distance (Å) |
|--------|-----------|--------|-----------|--------|--------------|
| 5MO9   | H_HIS_35  | NE2    | H_GLU_33  | OE1    | 3.220        |
| 5MO9   | H_HIS_43  | NE2    | H_GLU_89  | OE1    | 3.753        |
| 5MO9   | H_LYS_63  | NZ     | H_GLU_46  | OE1    | 3.930        |
| 5MO9   | H_LYS_63  | NZ     | H_GLU_46  | OE2    | 3.238        |
| 5MO9   | H_LYS_67  | NZ     | H_ASP_90  | OD1    | 3.821        |
| 5MO9   | H_LYS_67  | NZ     | H_ASP_90  | OD2    | 2.804        |
| 5MO9   | H_ARG_84  | NH1    | H_GLU_82  | OE1    | 3.999        |
| 5MO9   | H_ARG_84  | NH1    | H_GLU_82  | OE2    | 3.132        |
| 5MO9   | H_LYS_146 | NZ     | H_ASP_147 | OD1    | 3.365        |
| 5MO9   | H_LYS_146 | NZ     | H_ASP_147 | OD2    | 3.626        |
| 5MO9   | H_LYS_212 | NZ     | L_GLU_128 | OE2    | 3.509        |
| 5MO9   | H_LYS_213 | NZ     | H_GLU_215 | OE2    | 3.368        |
| 5MO9   | L_LYS_44  | NZ     | L_GLU_86  | OE2    | 3.853        |
| 5MO9   | L_LYS_55  | NZ     | X_GLU_371 | OE2    | 2.811        |
| 5MO9   | L_ARG_59  | NH1    | L_ASP_65  | OD1    | 3.142        |
| 5MO9   | L_ARG_66  | NH1    | L_ASP_87  | OD1    | 3.324        |
| 5MO9   | L_ARG_66  | NH1    | L_ASP_87  | OD2    | 2.775        |
| 5MO9   | L_ARG_66  | NH2    | L_ASP_87  | OD1    | 2.980        |
| 5MO9   | L_ARG_66  | NH2    | L_ASP_87  | OD2    | 3.846        |
| 5MO9   | L_LYS_108 | NZ     | L_GLU_170 | OE2    | 3.379        |
| 5MO9   | L_LYS_154 | NZ     | L_GLU_200 | OE2    | 3.767        |
| 5MO9   | X_HIS_343 | NE2    | X_GLU_341 | OE2    | 3.960        |
| 5MO9   | X_LYS_364 | NZ     | H_GLU_33  | OE2    | 2.799        |
| 5MO9   | X_LYS_364 | NZ     | H_ASP_52  | OD1    | 3.966        |
| 5MO9   | X_LYS_369 | NZ     | X_GLU_371 | OE1    | 3.611        |
| 5MO9   | X_LYS_372 | NZ     | X_ASP_370 | OD1    | 3.437        |

Table 691: 5MO9-specific salt bridging networks analysis. In this table, a PDB file is specified with a four-letter PDB ID, except that the names of the PDB files corresponding to the single NMR structural model split from the NMR ensemble is specified with a four-letter PDB ID in addition to a hyphen followed by the single NMR structural model numeric ID, the residue naming scheme is **Chain ID\_residue name\_residue number**,  $\angle ADH$  represents the angle formed by acceptor (A), donor (D) and hydrogen (H) ( $\angle ADH$ ).

| PDB ID | Residue A | Atom A | Residue B | Atom B | Distance (Å) |
|--------|-----------|--------|-----------|--------|--------------|
| 5N2B   | A_LYS_82  | NZ     | A_ASP_144 | OD1    | 3.469        |

Table 692: 5N2B-specific salt bridging networks analysis. In this table, a PDB file is specified with a four-letter PDB ID, except that the names of the PDB files corresponding to the single NMR structural model split from the NMR ensemble is specified with a four-letter PDB ID in addition to a hyphen followed by the single NMR structural model numeric ID, the residue naming scheme is **Chain ID\_residue name\_residue number**,  $\angle ADH$  represents the angle formed by acceptor (A), donor (D) and hydrogen (H) ( $\angle ADH$ ).

| PDB ID | Residue A | Atom A | Residue B | Atom B | Distance (Å) |
|--------|-----------|--------|-----------|--------|--------------|
| 5N4J   | L_ARG_38  | NH1    | H_ASP_100 | OD1    | 2.794        |
| 5N4J   | L_ARG_38  | NH1    | H_ASP_100 | OD2    | 3.589        |
| 5N4J   | L_ARG_60  | NH2    | L_ASP_66  | OD1    | 3.938        |
| 5N4J   | L_ARG_67  | NH2    | L_GLU_87  | OE2    | 2.853        |
| 5N4J   | L_ARG_67  | NH2    | L_ASP_88  | OD1    | 2.770        |
| 5N4J   | L_ARG_67  | NH2    | L_ASP_88  | OD2    | 3.658        |
| 5N4J   | L_LYS_174 | NZ     | L_GLU_89  | OE2    | 2.818        |
| 5N4J   | H_LYS_11  | NZ     | H_GLU_9   | OE1    | 3.995        |
| 5N4J   | H_ARG_37  | NH1    | H_ASP_89  | OD1    | 2.887        |
| 5N4J   | H_ARG_37  | NH2    | H_GLU_45  | OE1    | 3.779        |
| 5N4J   | H_ARG_37  | NH2    | H_GLU_45  | OE2    | 3.178        |
| 5N4J   | H_ARG_37  | NH2    | H_ASP_89  | OD1    | 3.973        |
| 5N4J   | H_LYS_62  | NZ     | H_GLU_45  | OE1    | 2.843        |
| 5N4J   | H_LYS_62  | NZ     | H_GLU_45  | OE2    | 3.909        |
| 5N4J   | H_ARG_66  | NH1    | H_ASP_89  | OD1    | 3.808        |
| 5N4J   | H_ARG_66  | NH1    | H_ASP_89  | OD2    | 2.928        |
| 5N4J   | H_ARG_66  | NH2    | H_ASP_89  | OD1    | 2.878        |
| 5N4J   | H_ARG_66  | NH2    | H_ASP_89  | OD2    | 3.415        |
| 5N4J   | H_ARG_83  | NH1    | H_GLU_81  | OE1    | 2.921        |
| 5N4J   | H_ARG_86  | NH2    | H_ASP_88  | OD1    | 3.231        |
| 5N4J   | H_ARG_86  | NH2    | H_ASP_88  | OD2    | 2.601        |
| 5N4J   | H_ARG_97  | NH2    | H_ASP_102 | OD1    | 3.488        |
| 5N4J   | H_ARG_97  | NH2    | H_ASP_102 | OD2    | 2.852        |
| 5N4J   | H_LYS_210 | NZ     | L_GLU_131 | OE1    | 2.936        |
| 5N4J   | H_LYS_210 | NZ     | L_GLU_131 | OE2    | 3.282        |
| 5N4J   | H_ARG_211 | NH1    | H_GLU_213 | OE2    | 3.986        |

Table 693: 5N4J-specific salt bridging networks analysis. In this table, a PDB file is specified with a four-letter PDB ID, except that the names of the PDB files corresponding to the single NMR structural model split from the NMR ensemble is specified with a four-letter PDB ID in addition to a hyphen followed by the single NMR structural model numeric ID, the residue naming scheme is **Chain ID\_residue name\_residue number**,  $\angle ADH$  represents the angle formed by acceptor (A), donor (D) and hydrogen (H) ( $\angle ADH$ ).

| PDB ID | Residue A  | Atom A | Residue B  | Atom B | Distance (Å) |
|--------|------------|--------|------------|--------|--------------|
| 5N7B   | H_ARG_38   | NH1    | H_ASP_92   | OD1    | 2.899        |
| 5N7B   | H_ARG_38   | NH2    | H_GLU_46   | OE1    | 3.245        |
| 5N7B   | H_ARG_38   | NH2    | H_GLU_46   | OE2    | 3.600        |
| 5N7B   | H_ARG_38   | NH2    | H_ASP_92   | OD1    | 3.935        |
| 5N7B   | H_LYS_43   | NZ     | H_GLU_46   | OE1    | 3.841        |
| 5N7B   | H_LYS_43   | NZ     | H_GLU_91   | OE1    | 3.761        |
| 5N7B   | H_ARG_52   | NH1    | H_GLU_50   | OE2    | 2.676        |
| 5N7B   | H_ARG_69   | NH1    | H_ASP_92   | OD1    | 3.313        |
| 5N7B   | H_ARG_69   | NH1    | H_ASP_92   | OD2    | 3.638        |
| 5N7B   | H_ARG_69   | NH2    | H_ASP_92   | OD1    | 3.498        |
| 5N7B   | H_ARG_69   | NH2    | H_ASP_92   | OD2    | 2.337        |
| 5N7B   | H_ARG_74   | NH2    | H_ASP_76   | OD1    | 3.523        |
| 5N7B   | H_ARG_89   | NH1    | H_GLU_91   | OE2    | 3.715        |
| 5N7B   | H_HIS_1051 | ND1    | H_GLU_1047 | OE2    | 2.925        |
| 5N7B   | H_HIS_1051 | NE2    | H_ASP_1050 | OD1    | 3.871        |
| 5N7B   | H_ARG_1070 | NH2    | H_GLU_1090 | OE2    | 3.894        |
| 5N7B   | H_ARG_1070 | NH2    | H_ASP_1091 | OD1    | 2.787        |
| 5N7B   | H_ARG_1070 | NH2    | H_ASP_1091 | OD2    | 3.671        |

Table 694: 5N7B-specific salt bridging networks analysis. In this table, a PDB file is specified with a four-letter PDB ID, except that the names of the PDB files corresponding to the single NMR structural model split from the NMR ensemble is specified with a four-letter PDB ID in addition to a hyphen followed by the single NMR structural model numeric ID, the residue naming scheme is **Chain ID\_residue name\_residue number**,  $\angle ADH$  represents the angle formed by acceptor (A), donor (D) and hydrogen (H) ( $\angle ADH$ ).

| PDB ID | Residue A | Atom A | Residue B | Atom B | Distance (Å) |
|--------|-----------|--------|-----------|--------|--------------|
| 5N7W   | A_LYS_12  | NZ     | A_GLU_10  | OE1    | 3.956        |
| 5N7W   | A_ARG_38  | NH1    | A_ASP_90  | OD1    | 2.843        |
| 5N7W   | A_ARG_38  | NH2    | A_GLU_46  | OE1    | 3.305        |
| 5N7W   | A_ARG_38  | NH2    | A_ASP_90  | OD1    | 3.827        |
| 5N7W   | A_LYS_63  | NZ     | A_GLU_46  | OE1    | 3.619        |
| 5N7W   | A_LYS_63  | NZ     | A_GLU_46  | OE2    | 2.845        |
| 5N7W   | A_ARG_67  | NH1    | A_ASP_90  | OD1    | 3.584        |
| 5N7W   | A_ARG_67  | NH1    | A_ASP_90  | OD2    | 2.765        |
| 5N7W   | A_ARG_67  | NH2    | A_ASP_90  | OD1    | 2.880        |
| 5N7W   | A_ARG_67  | NH2    | A_ASP_90  | OD2    | 3.520        |
| 5N7W   | A_ARG_98  | NH2    | A_ASP_107 | OD1    | 3.757        |
| 5N7W   | A_ARG_98  | NH2    | A_ASP_107 | OD2    | 2.848        |
| 5N7W   | A_LYS_149 | NZ     | B_GLU_126 | OE2    | 2.961        |
| 5N7W   | A_LYS_215 | NZ     | B_GLU_125 | OE1    | 2.755        |
| 5N7W   | A_LYS_215 | NZ     | B_GLU_125 | OE2    | 3.335        |
| 5N7W   | B_LYS_39  | NZ     | B_GLU_81  | OE2    | 3.652        |
| 5N7W   | B_ARG_61  | NH2    | B_ASP_82  | OD1    | 2.909        |
| 5N7W   | B_ARG_61  | NH2    | B_ASP_82  | OD2    | 3.717        |
| 5N7W   | B_HIS_190 | ND1    | B_ASP_153 | OD2    | 2.856        |
| 5N7W   | H_LYS_12  | NZ     | H_GLU_10  | OE1    | 3.973        |
| 5N7W   | H_ARG_38  | NH1    | H_ASP_90  | OD1    | 2.822        |
| 5N7W   | H_ARG_38  | NH2    | H_GLU_46  | OE1    | 3.307        |
| 5N7W   | H_ARG_38  | NH2    | H_ASP_90  | OD1    | 3.828        |
| 5N7W   | H_LYS_63  | NZ     | H_GLU_46  | OE1    | 3.613        |
| 5N7W   | H_LYS_63  | NZ     | H_GLU_46  | OE2    | 2.860        |
| 5N7W   | H_ARG_67  | NH1    | H_ASP_90  | OD1    | 3.649        |
| 5N7W   | H_ARG_67  | NH1    | H_ASP_90  | OD2    | 2.788        |
| 5N7W   | H_ARG_67  | NH2    | H_ASP_90  | OD1    | 2.914        |
| 5N7W   | H_ARG_67  | NH2    | H_ASP_90  | OD2    | 3.510        |
| 5N7W   | H_ARG_98  | NH2    | H_ASP_107 | OD1    | 3.723        |
| 5N7W   | H_ARG_98  | NH2    | H_ASP_107 | OD2    | 2.808        |
| 5N7W   | H_LYS_149 | NZ     | L_GLU_126 | OE2    | 2.605        |
| 5N7W   | H_ARG_216 | NH2    | H_GLU_218 | OE2    | 2.838        |
| 5N7W   | L_LYS_39  | NZ     | L_GLU_81  | OE1    | 3.895        |
| 5N7W   | L_ARG_61  | NH1    | L_GLU_81  | OE2    | 3.879        |
| 5N7W   | L_ARG_61  | NH2    | L_GLU_81  | OE2    | 3.018        |
| 5N7W   | L_ARG_61  | NH2    | L_ASP_82  | OD1    | 2.869        |
| 5N7W   | L_ARG_61  | NH2    | L_ASP_82  | OD2    | 3.688        |
| 5N7W   | X_HIS_54  | NE2    | X_GLU_68  | OE1    | 3.783        |
| 5N7W   | X_ARG_55  | NH1    | X_GLU_57  | OE2    | 2.811        |
| 5N7W   | X_ARG_55  | NH2    | X_GLU_57  | OE2    | 2.683        |
| 5N7W   | X_ARG_100 | NH1    | X_ASP_58  | OD1    | 3.676        |
| 5N7W   | X_ARG_100 | NH1    | X_ASP_58  | OD2    | 3.093        |
| 5N7W   | X_ARG_100 | NH2    | X_ASP_58  | OD2    | 2.743        |
| 5N7W   | X_ARG_100 | NH2    | X_GLU_113 | OE2    | 3.977        |
| 5N7W   | X_ARG_101 | NH2    | X_GLU_60  | OE1    | 3.293        |
| 5N7W   | X_ARG_101 | NH2    | X_GLU_60  | OE2    | 3.261        |
| 5N7W   | X_HIS_105 | NE2    | X_GLU_60  | OE1    | 3.956        |
| 5N7W   | X_HIS_105 | NE2    | X_GLU_60  | OE2    | 4.000        |
| 5N7W   | X_ARG_111 | NH2    | X_GLU_102 | OE1    | 3.583        |
| 5N7W   | Y_ARG_46  | NH1    | Y_ASP_42  | OD2    | 2.678        |
| 5N7W   | Y_ARG_55  | NH2    | Y_GLU_57  | OE2    | 2.650        |
| 5N7W   | Y_ARG_100 | NH1    | Y_ASP_58  | OD1    | 3.688        |
| 5N7W   | Y_ARG_100 | NH1    | Y_ASP_58  | OD2    | 3.136        |
| 5N7W   | Y_ARG_100 | NH2    | Y_ASP_58  | OD2    | 2.751        |
| 5N7W   | Y_ARG_100 | NH2    | Y_GLU_113 | OE1    | 3.830        |
| 5N7W   | Y_ARG_101 | NH2    | Y_GLU_60  | OE1    | 3.497        |

|      |           |     |           |     |       |
|------|-----------|-----|-----------|-----|-------|
| 5N7W | Y_ARG_101 | NH2 | Y_GLU_60  | OE2 | 3.078 |
| 5N7W | Y_HIS_105 | NE2 | Y_GLU_60  | OE1 | 3.784 |
| 5N7W | Y_HIS_105 | NE2 | Y_GLU_60  | OE2 | 3.473 |
| 5N7W | Y_ARG_111 | NH2 | Y_GLU_102 | OE1 | 3.366 |

Table 695: 5N7W-specific salt bridging networks analysis. In this table, a PDB file is specified with a four-letter PDB ID, except that the names of the PDB files corresponding to the single NMR structural model split from the NMR ensemble is specified with a four-letter PDB ID in addition to a hyphen followed by the single NMR structural model numeric ID, the residue naming scheme is **Chain ID\_residue name\_residue number**,  $\angle ADH$  represents the angle formed by acceptor (A), donor (D) and hydrogen (H) ( $\angle ADH$ ).

| PDB ID | Residue A | Atom A | Residue B | Atom B | Distance (Å) |
|--------|-----------|--------|-----------|--------|--------------|
| 5N88   | H_ARG_38  | NH1    | H_ASP_90  | OD1    | 2.861        |
| 5N88   | H_ARG_38  | NH2    | H_GLU_46  | OE1    | 2.966        |
| 5N88   | H_ARG_38  | NH2    | H_GLU_46  | OE2    | 3.874        |
| 5N88   | H_ARG_38  | NH2    | H_ASP_90  | OD1    | 3.775        |
| 5N88   | H_ARG_53  | NH2    | H_ASP_105 | OD1    | 3.754        |
| 5N88   | H_ARG_53  | NH2    | H_ASP_105 | OD2    | 2.841        |
| 5N88   | H_LYS_65  | NZ     | H_ASP_62  | OD1    | 2.674        |
| 5N88   | H_ARG_67  | NH1    | H_ASP_90  | OD1    | 3.790        |
| 5N88   | H_ARG_67  | NH1    | H_ASP_90  | OD2    | 2.789        |
| 5N88   | H_ARG_67  | NH2    | H_ASP_90  | OD1    | 3.111        |
| 5N88   | H_ARG_67  | NH2    | H_ASP_90  | OD2    | 3.597        |
| 5N88   | H_ARG_98  | NH2    | H_ASP_115 | OD1    | 3.514        |
| 5N88   | H_ARG_98  | NH2    | H_ASP_115 | OD2    | 2.816        |
| 5N88   | D_ARG_351 | NH2    | D_GLU_379 | OE1    | 2.947        |
| 5N88   | D_ARG_354 | NH1    | D_GLU_379 | OE1    | 3.813        |
| 5N88   | D_ARG_354 | NH2    | D_GLU_358 | OE1    | 3.788        |
| 5N88   | D_ARG_354 | NH2    | D_GLU_358 | OE2    | 3.296        |
| 5N88   | D_ARG_354 | NH2    | D_GLU_379 | OE1    | 3.408        |
| 5N88   | D_ARG_354 | NH2    | D_GLU_379 | OE2    | 2.654        |
| 5N88   | D_ARG_372 | NH1    | D_ASP_369 | OD2    | 3.104        |
| 5N88   | D_LYS_392 | NZ     | D_ASP_349 | OD1    | 3.585        |
| 5N88   | D_LYS_392 | NZ     | D_ASP_349 | OD2    | 3.429        |
| 5N88   | D_HIS_393 | NE2    | D_ASP_349 | OD1    | 2.893        |
| 5N88   | D_LYS_415 | NZ     | D_ASP_378 | OD1    | 2.913        |
| 5N88   | A_ARG_38  | NH1    | A_ASP_90  | OD1    | 2.946        |
| 5N88   | A_ARG_38  | NH2    | A_GLU_46  | OE1    | 2.784        |
| 5N88   | A_ARG_38  | NH2    | A_ASP_90  | OD1    | 3.960        |
| 5N88   | A_LYS_65  | NZ     | A_ASP_62  | OD1    | 2.935        |
| 5N88   | A_ARG_67  | NH1    | A_ASP_90  | OD1    | 3.771        |
| 5N88   | A_ARG_67  | NH1    | A_ASP_90  | OD2    | 2.724        |
| 5N88   | A_ARG_67  | NH2    | A_ASP_90  | OD1    | 3.229        |
| 5N88   | A_ARG_67  | NH2    | A_ASP_90  | OD2    | 3.677        |
| 5N88   | A_LYS_76  | NZ     | A_ASP_73  | OD2    | 3.426        |
| 5N88   | A_ARG_87  | NH1    | A_GLU_89  | OE1    | 3.467        |
| 5N88   | A_ARG_87  | NH2    | A_GLU_89  | OE1    | 3.356        |
| 5N88   | A_ARG_98  | NH2    | A_ASP_115 | OD1    | 3.457        |
| 5N88   | A_ARG_98  | NH2    | A_ASP_115 | OD2    | 3.121        |
| 5N88   | E_ARG_372 | NH2    | E_GLU_358 | OE1    | 2.751        |
| 5N88   | E_ARG_372 | NH2    | E_GLU_358 | OE2    | 3.550        |
| 5N88   | E_LYS_392 | NZ     | E_ASP_349 | OD1    | 2.862        |
| 5N88   | E_LYS_392 | NZ     | E_ASP_349 | OD2    | 3.023        |
| 5N88   | E_HIS_393 | NE2    | E_ASP_349 | OD1    | 3.833        |
| 5N88   | E_LYS_415 | NZ     | E_ASP_378 | OD1    | 2.913        |
| 5N88   | E_LYS_415 | NZ     | E_ASP_378 | OD2    | 3.971        |

Table 696: 5N88-specific salt bridging networks analysis. In this table, a PDB file is specified with a four-letter PDB ID, except that the names of the PDB files corresponding to the single NMR structural model split from the NMR ensemble is specified with a four-letter PDB ID in addition to a hyphen followed by the single NMR structural model numeric ID, the residue naming scheme is **Chain ID\_residue name\_residue number**,  $\angle ADH$  represents the angle formed by acceptor (A), donor (D) and hydrogen (H) ( $\angle ADH$ ).



| PDB ID | Residue A | Atom A | Residue B | Atom B | Distance (Å) |
|--------|-----------|--------|-----------|--------|--------------|
| 5NPH   | H.LYS_63  | NZ     | H.GLU_46  | OE1    | 2.774        |
| 5NPH   | H.LYS_63  | NZ     | H.GLU_46  | OE2    | 3.824        |
| 5NPH   | H.LYS_67  | NZ     | H.ASP_90  | OD1    | 3.768        |
| 5NPH   | H.LYS_67  | NZ     | H.ASP_90  | OD2    | 2.830        |
| 5NPH   | H.ARG_84  | NH2    | H.GLU_82  | OE2    | 2.962        |
| 5NPH   | H.ARG_98  | NH2    | H.ASP_108 | OD1    | 3.726        |
| 5NPH   | H.ARG_98  | NH2    | H.ASP_108 | OD2    | 2.829        |
| 5NPH   | H.LYS_215 | NZ     | L.GLU_123 | OE2    | 2.787        |
| 5NPH   | L.ARG_61  | NH2    | L.GLU_81  | OE1    | 2.810        |
| 5NPH   | L.ARG_61  | NH2    | L.ASP_82  | OD1    | 2.818        |
| 5NPH   | L.ARG_61  | NH2    | L.ASP_82  | OD2    | 3.582        |
| 5NPH   | L.LYS_93  | NZ     | A.GLU_533 | OE1    | 3.679        |
| 5NPH   | L.LYS_149 | NZ     | L.GLU_195 | OE1    | 3.660        |
| 5NPH   | L.HIS_189 | ND1    | L.ASP_151 | OD2    | 3.036        |
| 5NPH   | L.LYS_199 | NZ     | L.ASP_110 | OD2    | 2.799        |

Table 697: 5NPH-specific salt bridging networks analysis. In this table, a PDB file is specified with a four-letter PDB ID, except that the names of the PDB files corresponding to the single NMR structural model split from the NMR ensemble is specified with a four-letter PDB ID in addition to a hyphen followed by the single NMR structural model numeric ID, the residue naming scheme is **Chain ID\_residue name\_residue number**,  $\angle ADH$  represents the angle formed by acceptor (A), donor (D) and hydrogen (H) ( $\angle ADH$ ).

| PDB ID | Residue A | Atom A | Residue B | Atom B | Distance (Å) |
|--------|-----------|--------|-----------|--------|--------------|
| 5NPI   | A_LYS_63  | NZ     | A_GLU_46  | OE1    | 2.778        |
| 5NPI   | A_LYS_63  | NZ     | A_GLU_46  | OE2    | 3.947        |
| 5NPI   | A_LYS_67  | NZ     | A_ASP_90  | OD1    | 3.854        |
| 5NPI   | A_LYS_67  | NZ     | A_ASP_90  | OD2    | 2.867        |
| 5NPI   | A_ARG_98  | NH2    | A_ASP_108 | OD1    | 3.690        |
| 5NPI   | A_ARG_98  | NH2    | A_ASP_108 | OD2    | 2.811        |
| 5NPI   | A_HIS_181 | NE2    | B_GLU_10  | OE1    | 3.570        |
| 5NPI   | A_HIS_181 | NE2    | B_GLU_10  | OE2    | 3.750        |
| 5NPI   | A_ARG_201 | NH2    | A_GLU_221 | OE1    | 2.818        |
| 5NPI   | A_ARG_201 | NH2    | A_ASP_222 | OD1    | 2.795        |
| 5NPI   | A_ARG_201 | NH2    | A_ASP_222 | OD2    | 3.637        |
| 5NPI   | A_LYS_243 | NZ     | A_GLU_245 | OE1    | 3.089        |
| 5NPI   | B_LYS_63  | NZ     | B_GLU_46  | OE1    | 2.773        |
| 5NPI   | B_LYS_63  | NZ     | B_GLU_46  | OE2    | 3.955        |
| 5NPI   | B_LYS_67  | NZ     | B_ASP_90  | OD1    | 3.936        |
| 5NPI   | B_LYS_67  | NZ     | B_ASP_90  | OD2    | 2.892        |
| 5NPI   | B_ARG_98  | NH2    | B_ASP_108 | OD1    | 3.701        |
| 5NPI   | B_ARG_98  | NH2    | B_ASP_108 | OD2    | 2.749        |
| 5NPI   | B_HIS_181 | NE2    | A_GLU_10  | OE1    | 3.757        |
| 5NPI   | B_HIS_181 | NE2    | A_GLU_10  | OE2    | 3.882        |
| 5NPI   | B_ARG_201 | NH2    | B_GLU_221 | OE1    | 2.813        |
| 5NPI   | B_ARG_201 | NH2    | B_ASP_222 | OD1    | 2.796        |
| 5NPI   | B_ARG_201 | NH2    | B_ASP_222 | OD2    | 3.658        |
| 5NPI   | B_LYS_233 | NZ     | E_GLU_533 | OE1    | 3.924        |
| 5NPI   | B_LYS_243 | NZ     | B_GLU_245 | OE1    | 3.090        |

Table 698: 5NPI-specific salt bridging networks analysis. In this table, a PDB file is specified with a four-letter PDB ID, except that the names of the PDB files corresponding to the single NMR structural model split from the NMR ensemble is specified with a four-letter PDB ID in addition to a hyphen followed by the single NMR structural model numeric ID, the residue naming scheme is **Chain ID\_residue name\_residue number**,  $\angle ADH$  represents the angle formed by acceptor (A), donor (D) and hydrogen (H) ( $\angle ADH$ ).

| PDB ID | Residue A | Atom A | Residue B | Atom B | Distance (Å) |
|--------|-----------|--------|-----------|--------|--------------|
| 5NPJ   | A_LYS_63  | NZ     | A_GLU_46  | OE1    | 2.799        |
| 5NPJ   | A_LYS_67  | NZ     | A_ASP_90  | OD1    | 3.867        |
| 5NPJ   | A_LYS_67  | NZ     | A_ASP_90  | OD2    | 2.954        |
| 5NPJ   | A_ARG_98  | NH2    | A_ASP_108 | OD1    | 3.695        |
| 5NPJ   | A_ARG_98  | NH2    | A_ASP_108 | OD2    | 2.771        |
| 5NPJ   | A_HIS_181 | NE2    | B_GLU_10  | OE1    | 3.540        |
| 5NPJ   | A_HIS_181 | NE2    | B_GLU_10  | OE2    | 3.793        |
| 5NPJ   | A_ARG_201 | NH2    | A_GLU_221 | OE1    | 2.812        |
| 5NPJ   | A_ARG_201 | NH2    | A_ASP_222 | OD1    | 2.769        |
| 5NPJ   | A_ARG_201 | NH2    | A_ASP_222 | OD2    | 3.614        |
| 5NPJ   | A_LYS_243 | NZ     | A_GLU_245 | OE1    | 2.814        |
| 5NPJ   | B_LYS_63  | NZ     | B_GLU_46  | OE1    | 2.797        |
| 5NPJ   | B_LYS_67  | NZ     | B_ASP_90  | OD1    | 3.887        |
| 5NPJ   | B_LYS_67  | NZ     | B_ASP_90  | OD2    | 2.961        |
| 5NPJ   | B_ARG_98  | NH2    | B_ASP_108 | OD1    | 3.704        |
| 5NPJ   | B_ARG_98  | NH2    | B_ASP_108 | OD2    | 2.768        |
| 5NPJ   | B_HIS_181 | NE2    | A_GLU_10  | OE1    | 3.734        |
| 5NPJ   | B_HIS_181 | NE2    | A_GLU_10  | OE2    | 3.967        |
| 5NPJ   | B_ARG_201 | NH2    | B_GLU_221 | OE1    | 2.825        |
| 5NPJ   | B_ARG_201 | NH2    | B_ASP_222 | OD1    | 2.760        |
| 5NPJ   | B_ARG_201 | NH2    | B_ASP_222 | OD2    | 3.648        |
| 5NPJ   | B_LYS_243 | NZ     | B_GLU_245 | OE1    | 2.926        |

Table 699: 5NPJ-specific salt bridging networks analysis. In this table, a PDB file is specified with a four-letter PDB ID, except that the names of the PDB files corresponding to the single NMR structural model split from the NMR ensemble is specified with a four-letter PDB ID in addition to a hyphen followed by the single NMR structural model numeric ID, the residue naming scheme is **Chain ID\_residue name\_residue number**,  $\angle ADH$  represents the angle formed by acceptor (A), donor (D) and hydrogen (H) ( $\angle ADH$ ).

| PDB ID | Residue A | Atom A | Residue B | Atom B | Distance (Å) |
|--------|-----------|--------|-----------|--------|--------------|
| 5NST   | A_ARG_39  | NH1    | C_GLU_81  | OE1    | 3.260        |
| 5NST   | A_ARG_39  | NH1    | C_GLU_81  | OE2    | 3.263        |
| 5NST   | A_ARG_39  | NH2    | C_GLU_81  | OE1    | 3.038        |
| 5NST   | A_ARG_61  | NH1    | A_ASP_82  | OD1    | 3.453        |
| 5NST   | A_ARG_61  | NH1    | A_ASP_82  | OD2    | 2.620        |
| 5NST   | A_ARG_61  | NH2    | A_ASP_82  | OD1    | 3.456        |
| 5NST   | A_ARG_61  | NH2    | A_ASP_82  | OD2    | 3.977        |
| 5NST   | A_LYS_147 | NZ     | A_GLU_195 | OE2    | 3.805        |
| 5NST   | A_LYS_149 | NZ     | A_GLU_195 | OE1    | 3.194        |
| 5NST   | A_LYS_149 | NZ     | A_GLU_195 | OE2    | 3.752        |
| 5NST   | A_ARG_155 | NH1    | A_GLU_185 | OE2    | 3.200        |
| 5NST   | A_ARG_155 | NH2    | A_GLU_185 | OE2    | 2.920        |
| 5NST   | A_HIS_189 | ND1    | A_ASP_151 | OD2    | 3.206        |
| 5NST   | A_LYS_199 | NZ     | A_ASP_110 | OD1    | 3.008        |
| 5NST   | A_LYS_199 | NZ     | A_ASP_110 | OD2    | 3.591        |
| 5NST   | B_ARG_33  | NH2    | B_ASP_27  | OD1    | 3.734        |
| 5NST   | B_ARG_33  | NH2    | B_ASP_27  | OD2    | 3.892        |
| 5NST   | B_ARG_39  | NH1    | B_ASP_90  | OD1    | 3.041        |
| 5NST   | B_ARG_39  | NH2    | B_GLU_47  | OE1    | 3.114        |
| 5NST   | B_ARG_39  | NH2    | B_ASP_90  | OD1    | 3.726        |
| 5NST   | B_HIS_53  | NE2    | B_GLU_51  | OE2    | 3.083        |
| 5NST   | B_ARG_67  | NH1    | B_ASP_90  | OD1    | 3.015        |
| 5NST   | B_ARG_67  | NH1    | B_ASP_90  | OD2    | 2.796        |
| 5NST   | B_ARG_67  | NH2    | B_ASP_90  | OD1    | 3.245        |
| 5NST   | B_LYS_76  | NZ     | B_ASP_73  | OD2    | 2.807        |
| 5NST   | B_ARG_98  | NH1    | B_ASP_27  | OD2    | 2.918        |
| 5NST   | B_ARG_98  | NH2    | B_ASP_238 | OD1    | 3.501        |
| 5NST   | B_ARG_98  | NH2    | B_ASP_238 | OD2    | 2.970        |
| 5NST   | B_LYS_103 | NZ     | B_ASP_233 | OD1    | 2.837        |
| 5NST   | B_ARG_112 | NH1    | B_ASP_198 | OD1    | 3.483        |
| 5NST   | B_ARG_112 | NH1    | B_ASP_198 | OD2    | 3.324        |
| 5NST   | B_ARG_112 | NH2    | B_ASP_198 | OD1    | 3.105        |
| 5NST   | B_ARG_134 | NH1    | B_GLU_167 | OE1    | 3.225        |
| 5NST   | B_ARG_143 | NH2    | B_ASP_154 | OD1    | 3.483        |
| 5NST   | B_ARG_143 | NH2    | B_ASP_154 | OD2    | 3.145        |
| 5NST   | B_ARG_169 | NH1    | B_GLU_118 | OE1    | 3.192        |
| 5NST   | B_ARG_169 | NH2    | B_GLU_167 | OE2    | 3.020        |
| 5NST   | B_ARG_171 | NH1    | B_ASP_173 | OD1    | 2.814        |
| 5NST   | B_ARG_171 | NH2    | B_ASP_173 | OD1    | 3.985        |
| 5NST   | B_ARG_184 | NH2    | B_GLU_145 | OE1    | 3.999        |
| 5NST   | B_LYS_345 | NZ     | A_GLU_123 | OE1    | 3.069        |
| 5NST   | C_ARG_24  | NH2    | C_ASP_70  | OD2    | 2.795        |
| 5NST   | C_ARG_39  | NH1    | A_GLU_81  | OE1    | 3.247        |
| 5NST   | C_ARG_39  | NH1    | A_GLU_81  | OE2    | 3.139        |
| 5NST   | C_ARG_39  | NH2    | A_GLU_81  | OE1    | 3.004        |
| 5NST   | C_ARG_61  | NH2    | C_GLU_81  | OE2    | 3.339        |
| 5NST   | C_ARG_61  | NH2    | C_ASP_82  | OD1    | 2.949        |
| 5NST   | C_ARG_61  | NH2    | C_ASP_82  | OD2    | 3.501        |
| 5NST   | C_ARG_103 | NH1    | C_ASP_165 | OD1    | 3.414        |
| 5NST   | C_LYS_147 | NZ     | C_GLU_195 | OE2    | 3.756        |
| 5NST   | C_LYS_149 | NZ     | C_GLU_195 | OE1    | 3.043        |
| 5NST   | C_LYS_149 | NZ     | C_GLU_195 | OE2    | 3.450        |
| 5NST   | C_ARG_188 | NH1    | C_ASP_151 | OD2    | 2.746        |
| 5NST   | C_ARG_188 | NH2    | C_GLU_187 | OE1    | 2.814        |
| 5NST   | C_LYS_199 | NZ     | C_ASP_110 | OD1    | 3.560        |
| 5NST   | C_LYS_199 | NZ     | C_ASP_110 | OD2    | 3.855        |
| 5NST   | D_ARG_33  | NH2    | D_ASP_27  | OD2    | 3.973        |

|      |           |     |           |     |       |
|------|-----------|-----|-----------|-----|-------|
| 5NST | D_ARG_39  | NH1 | D_ASP_90  | OD1 | 3.042 |
| 5NST | D_ARG_39  | NH2 | D_GLU_47  | OE1 | 3.103 |
| 5NST | D_ARG_39  | NH2 | D_ASP_90  | OD1 | 3.721 |
| 5NST | D_HIS_53  | NE2 | D_GLU_51  | OE2 | 2.781 |
| 5NST | D_ARG_67  | NH1 | D_ASP_90  | OD1 | 2.697 |
| 5NST | D_ARG_67  | NH1 | D_ASP_90  | OD2 | 3.158 |
| 5NST | D_LYS_76  | NZ  | D_ASP_73  | OD2 | 2.790 |
| 5NST | D_LYS_82  | NZ  | D_ASP_84  | OD2 | 3.904 |
| 5NST | D_ARG_98  | NH1 | D_ASP_27  | OD2 | 2.885 |
| 5NST | D_ARG_98  | NH2 | D_ASP_238 | OD1 | 3.522 |
| 5NST | D_ARG_98  | NH2 | D_ASP_238 | OD2 | 2.972 |
| 5NST | D_LYS_103 | NZ  | D_ASP_233 | OD1 | 3.094 |
| 5NST | D_LYS_103 | NZ  | D_ASP_233 | OD2 | 3.059 |
| 5NST | D_ARG_112 | NH1 | D_ASP_198 | OD1 | 3.172 |
| 5NST | D_ARG_112 | NH1 | D_ASP_198 | OD2 | 3.063 |
| 5NST | D_ARG_112 | NH2 | D_ASP_198 | OD1 | 2.909 |
| 5NST | D_ARG_134 | NH1 | D_GLU_165 | OE1 | 3.890 |
| 5NST | D_ARG_134 | NH1 | D_GLU_167 | OE1 | 3.201 |
| 5NST | D_ARG_143 | NH2 | D_ASP_154 | OD1 | 3.487 |
| 5NST | D_ARG_143 | NH2 | D_ASP_154 | OD2 | 3.164 |
| 5NST | D_ARG_169 | NH1 | D_GLU_118 | OE1 | 3.163 |
| 5NST | D_ARG_169 | NH2 | D_GLU_167 | OE2 | 3.007 |
| 5NST | D_ARG_171 | NH1 | D_ASP_173 | OD1 | 2.813 |
| 5NST | D_ARG_171 | NH2 | D_ASP_173 | OD1 | 3.989 |
| 5NST | D_LYS_345 | NZ  | C_GLU_123 | OE2 | 3.272 |

Table 700: 5NST-specific salt bridging networks analysis. In this table, a PDB file is specified with a four-letter PDB ID, except that the names of the PDB files corresponding to the single NMR structural model split from the NMR ensemble is specified with a four-letter PDB ID in addition to a hyphen followed by the single NMR structural model numeric ID, the residue naming scheme is **Chain ID\_residue name\_residue number**,  $\angle ADH$  represents the angle formed by acceptor (A), donor (D) and hydrogen (H) ( $\angle ADH$ ).

| PDB ID | Residue A | Atom A | Residue B  | Atom B | Distance (Å) |
|--------|-----------|--------|------------|--------|--------------|
| 5NUZ   | A_LYS_66  | NZ     | A_ASP_86   | OD1    | 3.693        |
| 5NUZ   | A_LYS_66  | NZ     | A_ASP_86   | OD2    | 2.849        |
| 5NUZ   | A_ARG_94  | NH2    | A_ASP_101  | OD1    | 3.574        |
| 5NUZ   | A_ARG_94  | NH2    | A_ASP_101  | OD2    | 2.713        |
| 5NUZ   | A_ARG_95  | NH1    | C_ASP_114  | OD1    | 3.502        |
| 5NUZ   | A_ARG_95  | NH1    | C_ASP_114  | OD2    | 2.701        |
| 5NUZ   | A_ARG_95  | NH2    | A_ASP_100A | OD2    | 3.027        |
| 5NUZ   | A_ARG_95  | NH2    | C_ASP_114  | OD1    | 2.822        |
| 5NUZ   | A_ARG_95  | NH2    | C_ASP_114  | OD2    | 3.585        |
| 5NUZ   | A_LYS_208 | NZ     | B_GLU_123  | OE1    | 3.889        |
| 5NUZ   | A_LYS_208 | NZ     | B_GLU_123  | OE2    | 2.684        |
| 5NUZ   | H_LYS_66  | NZ     | H_ASP_86   | OD1    | 3.692        |
| 5NUZ   | H_LYS_66  | NZ     | H_ASP_86   | OD2    | 2.845        |
| 5NUZ   | H_ARG_94  | NH2    | H_ASP_101  | OD1    | 3.585        |
| 5NUZ   | H_ARG_94  | NH2    | H_ASP_101  | OD2    | 2.715        |
| 5NUZ   | H_ARG_95  | NH1    | D_ASP_114  | OD1    | 3.679        |
| 5NUZ   | H_ARG_95  | NH1    | D_ASP_114  | OD2    | 2.753        |
| 5NUZ   | H_ARG_95  | NH2    | H_ASP_100A | OD2    | 3.002        |
| 5NUZ   | H_ARG_95  | NH2    | D_ASP_114  | OD1    | 2.850        |
| 5NUZ   | H_ARG_95  | NH2    | D_ASP_114  | OD2    | 3.470        |
| 5NUZ   | H_LYS_208 | NZ     | L_GLU_123  | OE2    | 2.982        |
| 5NUZ   | B_ARG_24  | NH1    | B_ASP_70   | OD1    | 3.493        |
| 5NUZ   | B_ARG_24  | NH1    | B_ASP_70   | OD2    | 3.358        |
| 5NUZ   | B_ARG_61  | NH1    | B_ASP_81   | OD1    | 3.247        |
| 5NUZ   | B_ARG_61  | NH1    | B_ASP_82   | OD1    | 2.766        |
| 5NUZ   | B_ARG_61  | NH1    | B_ASP_82   | OD2    | 3.636        |
| 5NUZ   | B_ARG_61  | NH2    | L_GLU_79   | OE1    | 3.072        |
| 5NUZ   | B_ARG_61  | NH2    | L_GLU_79   | OE2    | 3.676        |
| 5NUZ   | B_LYS_92  | NZ     | B_GLU_93   | OE2    | 2.758        |
| 5NUZ   | B_LYS_103 | NZ     | B_GLU_105  | OE2    | 3.588        |
| 5NUZ   | B_LYS_142 | NZ     | B_GLU_105  | OE1    | 3.907        |
| 5NUZ   | B_LYS_142 | NZ     | B_GLU_105  | OE2    | 2.608        |
| 5NUZ   | B_LYS_147 | NZ     | B_GLU_195  | OE1    | 3.572        |
| 5NUZ   | B_LYS_149 | NZ     | B_GLU_195  | OE2    | 3.615        |
| 5NUZ   | B_ARG_155 | NH1    | B_GLU_185  | OE1    | 3.558        |
| 5NUZ   | B_ARG_155 | NH1    | B_GLU_185  | OE2    | 3.557        |
| 5NUZ   | B_ARG_155 | NH2    | B_GLU_185  | OE2    | 2.757        |
| 5NUZ   | B_ARG_188 | NH1    | B_GLU_185  | OE1    | 3.922        |
| 5NUZ   | B_HIS_189 | ND1    | B_ASP_151  | OD2    | 3.016        |
| 5NUZ   | B_LYS_199 | NZ     | B_ASP_110  | OD2    | 3.082        |
| 5NUZ   | C_LYS_181 | NZ     | C_GLU_186  | OE1    | 3.275        |
| 5NUZ   | C_LYS_191 | NZ     | C_ASP_159  | OD1    | 3.275        |
| 5NUZ   | C_LYS_191 | NZ     | C_ASP_159  | OD2    | 2.624        |
| 5NUZ   | C_LYS_193 | NZ     | C_ASP_205  | OD2    | 3.554        |
| 5NUZ   | C_LYS_211 | NZ     | A_ASP_54   | OD1    | 3.758        |
| 5NUZ   | C_LYS_211 | NZ     | A_ASP_54   | OD2    | 3.058        |
| 5NUZ   | C_LYS_211 | NZ     | A_ASP_56   | OD2    | 2.861        |
| 5NUZ   | C_LYS_216 | NZ     | C_ASP_113  | OD1    | 2.638        |
| 5NUZ   | L_ARG_61  | NH1    | L_ASP_82   | OD1    | 2.773        |
| 5NUZ   | L_ARG_61  | NH1    | L_ASP_82   | OD2    | 3.655        |
| 5NUZ   | L_ARG_61  | NH2    | B_GLU_79   | OE1    | 3.765        |
| 5NUZ   | L_ARG_61  | NH2    | B_GLU_79   | OE2    | 2.966        |
| 5NUZ   | L_LYS_92  | NZ     | L_GLU_93   | OE2    | 2.743        |
| 5NUZ   | L_LYS_103 | NZ     | L_GLU_105  | OE2    | 3.583        |
| 5NUZ   | L_LYS_142 | NZ     | L_GLU_105  | OE1    | 3.968        |
| 5NUZ   | L_LYS_142 | NZ     | L_GLU_105  | OE2    | 2.583        |
| 5NUZ   | L_LYS_149 | NZ     | L_GLU_195  | OE2    | 3.652        |

|      |           |     |           |     |       |
|------|-----------|-----|-----------|-----|-------|
| 5NUZ | L_ARG_155 | NH1 | L_GLU_185 | OE1 | 3.502 |
| 5NUZ | L_ARG_155 | NH1 | L_GLU_185 | OE2 | 3.552 |
| 5NUZ | L_ARG_155 | NH2 | L_GLU_185 | OE2 | 2.742 |
| 5NUZ | L_LYS_183 | NZ  | L_GLU_187 | OE2 | 3.902 |
| 5NUZ | L_HIS_189 | ND1 | L_ASP_151 | OD2 | 3.012 |
| 5NUZ | L_LYS_199 | NZ  | L_ASP_110 | OD2 | 3.059 |
| 5NUZ | D_LYS_169 | NZ  | D_GLU_171 | OE1 | 3.996 |
| 5NUZ | D_LYS_181 | NZ  | D_ASP_205 | OD2 | 3.184 |
| 5NUZ | D_LYS_190 | NZ  | D_GLU_186 | OE2 | 3.856 |
| 5NUZ | D_LYS_191 | NZ  | D_ASP_159 | OD1 | 3.278 |
| 5NUZ | D_LYS_191 | NZ  | D_ASP_159 | OD2 | 2.625 |
| 5NUZ | D_LYS_193 | NZ  | D_ASP_205 | OD2 | 3.551 |
| 5NUZ | D_LYS_211 | NZ  | H_ASP_54  | OD1 | 3.910 |
| 5NUZ | D_LYS_211 | NZ  | H_ASP_54  | OD2 | 3.105 |
| 5NUZ | D_LYS_211 | NZ  | H_ASP_56  | OD2 | 2.803 |
| 5NUZ | D_LYS_216 | NZ  | D_ASP_113 | OD1 | 2.650 |

Table 701: 5NUZ-specific salt bridging networks analysis. In this table, a PDB file is specified with a four-letter PDB ID, except that the names of the PDB files corresponding to the single NMR structural model split from the NMR ensemble is specified with a four-letter PDB ID in addition to a hyphen followed by the single NMR structural model numeric ID, the residue naming scheme is **Chain ID\_residue name\_residue number**,  $\angle ADH$  represents the angle formed by acceptor (A), donor (D) and hydrogen (H) ( $\angle ADH$ ).

| PDB ID | Residue A | Atom A | Residue B | Atom B | Distance (Å) |
|--------|-----------|--------|-----------|--------|--------------|
| 5O14   | A_LYS_67  | NZ     | A_ASP_28  | OD1    | 3.407        |
| 5O14   | A_LYS_67  | NZ     | A_ASP_28  | OD2    | 3.007        |
| 5O14   | A_ARG_75  | NH2    | A_GLU_95  | OE2    | 3.608        |
| 5O14   | A_ARG_80  | NH1    | A_GLU_44  | OE1    | 2.660        |
| 5O14   | A_ARG_80  | NH1    | A_GLU_44  | OE2    | 2.889        |
| 5O14   | A_ARG_80  | NH2    | A_GLU_92  | OE2    | 3.706        |
| 5O14   | A_HIS_103 | ND1    | A_GLU_137 | OE1    | 2.640        |
| 5O14   | A_HIS_103 | ND1    | A_GLU_137 | OE2    | 3.720        |
| 5O14   | A_ARG_127 | NH1    | A_GLU_112 | OE1    | 2.708        |
| 5O14   | A_ARG_127 | NH1    | A_GLU_112 | OE2    | 3.026        |
| 5O14   | A_ARG_127 | NH1    | A_ASP_160 | OD1    | 3.772        |
| 5O14   | A_ARG_127 | NH2    | A_ASP_160 | OD1    | 2.801        |
| 5O14   | A_ARG_127 | NH2    | A_ASP_160 | OD2    | 2.429        |
| 5O14   | A_ARG_130 | NH1    | A_GLU_92  | OE1    | 2.377        |
| 5O14   | A_ARG_130 | NH1    | A_GLU_92  | OE2    | 3.180        |
| 5O14   | A_ARG_130 | NH2    | A_GLU_92  | OE2    | 3.816        |
| 5O14   | A_ARG_149 | NH1    | A_ASP_171 | OD2    | 3.921        |
| 5O14   | A_LYS_180 | NZ     | A_GLU_182 | OE1    | 3.683        |
| 5O14   | A_LYS_180 | NZ     | A_GLU_182 | OE2    | 3.327        |
| 5O14   | A_LYS_185 | NZ     | H_ASP_55  | OD1    | 3.249        |
| 5O14   | A_LYS_185 | NZ     | H_ASP_55  | OD2    | 2.764        |
| 5O14   | A_LYS_185 | NZ     | H_ASP_57  | OD2    | 2.802        |
| 5O14   | A_ARG_204 | NH1    | A_ASP_142 | OD1    | 3.025        |
| 5O14   | A_ARG_204 | NH1    | A_ASP_142 | OD2    | 3.586        |
| 5O14   | A_ARG_204 | NH1    | B_GLU_218 | OE1    | 3.625        |
| 5O14   | A_LYS_254 | NZ     | A_ASP_71  | OD1    | 3.427        |
| 5O14   | A_LYS_254 | NZ     | A_ASP_71  | OD2    | 2.831        |
| 5O14   | B_LYS_67  | NZ     | B_ASP_28  | OD1    | 3.290        |
| 5O14   | B_LYS_67  | NZ     | B_ASP_28  | OD2    | 3.377        |
| 5O14   | B_ARG_75  | NH2    | B_GLU_95  | OE2    | 3.639        |
| 5O14   | B_ARG_80  | NH1    | B_GLU_92  | OE1    | 2.081        |
| 5O14   | B_ARG_80  | NH1    | B_GLU_92  | OE2    | 3.936        |
| 5O14   | B_HIS_103 | ND1    | B_GLU_137 | OE1    | 2.779        |
| 5O14   | B_ARG_127 | NH1    | B_GLU_112 | OE1    | 3.567        |
| 5O14   | B_ARG_127 | NH1    | B_GLU_112 | OE2    | 3.007        |
| 5O14   | B_ARG_127 | NH1    | B_ASP_160 | OD1    | 3.642        |
| 5O14   | B_ARG_127 | NH1    | B_ASP_160 | OD2    | 3.977        |
| 5O14   | B_ARG_127 | NH2    | B_ASP_160 | OD1    | 3.089        |
| 5O14   | B_ARG_127 | NH2    | B_ASP_160 | OD2    | 2.271        |
| 5O14   | B_ARG_130 | NH1    | B_GLU_92  | OE1    | 3.575        |
| 5O14   | B_ARG_130 | NH2    | B_GLU_92  | OE1    | 3.187        |
| 5O14   | B_ARG_130 | NH2    | B_GLU_92  | OE2    | 2.572        |
| 5O14   | B_LYS_180 | NZ     | B_GLU_182 | OE1    | 3.557        |
| 5O14   | B_LYS_180 | NZ     | B_GLU_182 | OE2    | 3.069        |
| 5O14   | B_LYS_185 | NZ     | C_ASP_55  | OD1    | 3.234        |
| 5O14   | B_LYS_185 | NZ     | C_ASP_55  | OD2    | 2.720        |
| 5O14   | B_LYS_185 | NZ     | C_ASP_57  | OD2    | 2.736        |
| 5O14   | B_ARG_204 | NH2    | B_ASP_142 | OD1    | 2.625        |
| 5O14   | B_ARG_204 | NH2    | B_ASP_142 | OD2    | 3.290        |
| 5O14   | B_HIS_248 | ND1    | B_GLU_239 | OE2    | 3.868        |
| 5O14   | B_LYS_254 | NZ     | B_ASP_71  | OD1    | 3.441        |
| 5O14   | B_LYS_254 | NZ     | B_ASP_71  | OD2    | 2.876        |
| 5O14   | C_ARG_38  | NH2    | C_GLU_46  | OE1    | 3.250        |
| 5O14   | C_ARG_38  | NH2    | C_GLU_46  | OE2    | 3.275        |
| 5O14   | C_ARG_54  | NH2    | B_ASP_161 | OD1    | 2.870        |
| 5O14   | C_ARG_54  | NH2    | B_ASP_161 | OD2    | 3.505        |
| 5O14   | C_ARG_59  | NH2    | C_ASP_57  | OD1    | 3.868        |



|      |           |     |           |     |       |
|------|-----------|-----|-----------|-----|-------|
| 5O14 | C_ARG_59  | NH2 | C_ASP_57  | OD2 | 2.946 |
| 5O14 | C_ARG_67  | NH1 | C_ASP_90  | OD1 | 3.547 |
| 5O14 | C_ARG_67  | NH1 | C_ASP_90  | OD2 | 2.749 |
| 5O14 | C_ARG_67  | NH2 | C_ASP_90  | OD1 | 2.849 |
| 5O14 | C_ARG_67  | NH2 | C_ASP_90  | OD2 | 3.598 |
| 5O14 | C_LYS_152 | NZ  | C_ASP_153 | OD1 | 3.378 |
| 5O14 | C_LYS_152 | NZ  | C_ASP_153 | OD2 | 3.892 |
| 5O14 | C_LYS_218 | NZ  | D_GLU_124 | OE1 | 3.107 |
| 5O14 | C_LYS_219 | NZ  | C_GLU_221 | OE2 | 3.134 |
| 5O14 | D_ARG_18  | NH1 | A_GLU_218 | OE1 | 3.301 |
| 5O14 | D_ARG_61  | NH2 | D_GLU_81  | OE1 | 3.945 |
| 5O14 | D_ARG_61  | NH2 | D_ASP_82  | OD1 | 2.914 |
| 5O14 | D_ARG_61  | NH2 | D_ASP_82  | OD2 | 3.547 |
| 5O14 | D_LYS_104 | NZ  | D_GLU_166 | OE1 | 3.330 |
| 5O14 | D_HIS_190 | ND1 | D_ASP_152 | OD2 | 2.554 |
| 5O14 | L_ARG_61  | NH2 | L_GLU_81  | OE2 | 3.920 |
| 5O14 | L_ARG_61  | NH2 | L_ASP_82  | OD1 | 2.835 |
| 5O14 | L_ARG_61  | NH2 | L_ASP_82  | OD2 | 3.469 |
| 5O14 | L_HIS_190 | ND1 | L_ASP_152 | OD2 | 2.475 |
| 5O14 | H_ARG_38  | NH2 | H_GLU_46  | OE1 | 3.594 |
| 5O14 | H_ARG_38  | NH2 | H_GLU_46  | OE2 | 3.310 |
| 5O14 | H_ARG_54  | NH1 | A_ASP_161 | OD1 | 2.861 |
| 5O14 | H_ARG_54  | NH1 | A_ASP_161 | OD2 | 3.283 |
| 5O14 | H_ARG_59  | NH1 | L_ASP_94  | OD1 | 3.733 |
| 5O14 | H_ARG_59  | NH1 | L_ASP_94  | OD2 | 3.698 |
| 5O14 | H_ARG_59  | NH2 | H_ASP_57  | OD2 | 3.228 |
| 5O14 | H_ARG_67  | NH1 | H_ASP_90  | OD1 | 2.800 |
| 5O14 | H_ARG_67  | NH1 | H_ASP_90  | OD2 | 3.115 |
| 5O14 | H_ARG_67  | NH2 | H_ASP_90  | OD1 | 3.984 |
| 5O14 | H_ARG_67  | NH2 | H_ASP_90  | OD2 | 2.770 |
| 5O14 | H_LYS_152 | NZ  | H_ASP_153 | OD1 | 3.488 |
| 5O14 | H_LYS_152 | NZ  | H_ASP_153 | OD2 | 3.902 |

Table 702: 5O14-specific salt bridging networks analysis. In this table, a PDB file is specified with a four-letter PDB ID, except that the names of the PDB files corresponding to the single NMR structural model split from the NMR ensemble is specified with a four-letter PDB ID in addition to a hyphen followed by the single NMR structural model numeric ID, the residue naming scheme is **Chain ID\_residue name\_residue number**,  $\angle ADH$  represents the angle formed by acceptor (A), donor (D) and hydrogen (H) ( $\angle ADH$ ).

| PDB ID | Residue A | Atom A | Residue B | Atom B | Distance (Å) |
|--------|-----------|--------|-----------|--------|--------------|
| 5O1R   | A_HIS_325 | NE2    | A_ASP_359 | OD2    | 3.546        |
| 5O1R   | A_ARG_339 | NH1    | H_ASP_100 | OD1    | 3.968        |
| 5O1R   | A_ARG_339 | NH1    | H_ASP_100 | OD2    | 3.203        |
| 5O1R   | A_ARG_339 | NH2    | A_ASP_356 | OD2    | 3.370        |
| 5O1R   | A_HIS_362 | ND1    | A_ASP_359 | OD1    | 3.211        |
| 5O1R   | A_HIS_362 | ND1    | A_ASP_359 | OD2    | 3.253        |
| 5O1R   | B_HIS_325 | NE2    | B_ASP_359 | OD2    | 3.534        |
| 5O1R   | B_HIS_327 | ND1    | B_ASP_359 | OD2    | 3.365        |
| 5O1R   | B_HIS_327 | NE2    | B_GLU_329 | OE1    | 3.540        |
| 5O1R   | B_ARG_339 | NH1    | I_ASP_100 | OD1    | 3.595        |
| 5O1R   | B_ARG_339 | NH1    | I_ASP_100 | OD2    | 2.991        |
| 5O1R   | B_ARG_339 | NH2    | B_ASP_356 | OD2    | 3.328        |
| 5O1R   | B_HIS_362 | ND1    | B_ASP_359 | OD1    | 3.462        |
| 5O1R   | B_HIS_362 | ND1    | B_ASP_359 | OD2    | 3.359        |
| 5O1R   | B_LYS_369 | NZ     | B_ASP_352 | OD1    | 3.251        |
| 5O1R   | B_LYS_369 | NZ     | B_ASP_352 | OD2    | 3.231        |
| 5O1R   | B_LYS_414 | NZ     | B_GLU_329 | OE1    | 2.817        |
| 5O1R   | H_ARG_40  | NH1    | H_ASP_91  | OD1    | 2.787        |
| 5O1R   | H_ARG_40  | NH2    | H_GLU_48  | OE1    | 3.205        |
| 5O1R   | H_ARG_40  | NH2    | H_ASP_91  | OD1    | 3.587        |
| 5O1R   | H_ARG_68  | NH1    | H_ASP_91  | OD1    | 3.869        |
| 5O1R   | H_ARG_68  | NH1    | H_ASP_91  | OD2    | 2.814        |
| 5O1R   | H_ARG_68  | NH2    | H_ASP_91  | OD1    | 2.730        |
| 5O1R   | H_ARG_68  | NH2    | H_ASP_91  | OD2    | 3.072        |
| 5O1R   | H_LYS_77  | NZ     | H_ASP_74  | OD2    | 3.598        |
| 5O1R   | H_ARG_99  | NH1    | H_ASP_111 | OD2    | 2.787        |
| 5O1R   | H_ARG_99  | NH2    | H_ASP_111 | OD2    | 3.771        |
| 5O1R   | H_ARG_101 | NH1    | H_ASP_111 | OD1    | 3.295        |
| 5O1R   | H_LYS_153 | NZ     | H_ASP_154 | OD1    | 3.367        |
| 5O1R   | H_LYS_153 | NZ     | H_ASP_154 | OD2    | 3.373        |
| 5O1R   | H_LYS_216 | NZ     | H_ASP_218 | OD1    | 2.810        |
| 5O1R   | H_LYS_216 | NZ     | H_ASP_218 | OD2    | 3.814        |
| 5O1R   | I_ARG_40  | NH1    | I_ASP_91  | OD1    | 2.950        |
| 5O1R   | I_ARG_40  | NH2    | I_GLU_48  | OE1    | 3.324        |
| 5O1R   | I_ARG_40  | NH2    | I_ASP_91  | OD1    | 3.459        |
| 5O1R   | I_ARG_68  | NH1    | I_ASP_91  | OD1    | 3.823        |
| 5O1R   | I_ARG_68  | NH1    | I_ASP_91  | OD2    | 2.796        |
| 5O1R   | I_ARG_68  | NH2    | I_ASP_91  | OD1    | 2.735        |
| 5O1R   | I_ARG_68  | NH2    | I_ASP_91  | OD2    | 3.137        |
| 5O1R   | I_ARG_99  | NH1    | I_ASP_111 | OD2    | 2.797        |
| 5O1R   | I_ARG_99  | NH2    | I_ASP_111 | OD2    | 3.787        |
| 5O1R   | I_ARG_101 | NH1    | I_ASP_111 | OD1    | 3.285        |
| 5O1R   | I_LYS_153 | NZ     | I_ASP_154 | OD1    | 3.364        |
| 5O1R   | I_LYS_153 | NZ     | I_ASP_154 | OD2    | 3.368        |
| 5O1R   | L_ARG_61  | NH2    | L_ASP_82  | OD1    | 2.771        |
| 5O1R   | L_ARG_61  | NH2    | L_ASP_82  | OD2    | 3.474        |
| 5O1R   | L_ARG_106 | NH2    | L_ASP_17  | OD2    | 3.826        |
| 5O1R   | L_LYS_148 | NZ     | L_GLU_194 | OE1    | 3.986        |
| 5O1R   | L_LYS_148 | NZ     | L_GLU_194 | OE2    | 3.121        |
| 5O1R   | L_LYS_187 | NZ     | L_ASP_184 | OD2    | 2.794        |
| 5O1R   | L_ARG_210 | NH1    | L_GLU_186 | OE1    | 3.088        |
| 5O1R   | M_ARG_61  | NH2    | M_ASP_82  | OD1    | 2.703        |
| 5O1R   | M_ARG_61  | NH2    | M_ASP_82  | OD2    | 3.538        |
| 5O1R   | M_ARG_106 | NH2    | M_ASP_17  | OD2    | 3.805        |
| 5O1R   | M_LYS_148 | NZ     | M_GLU_194 | OE1    | 3.979        |
| 5O1R   | M_LYS_148 | NZ     | M_GLU_194 | OE2    | 3.088        |
| 5O1R   | M_LYS_168 | NZ     | M_ASP_166 | OD2    | 3.194        |

|      |           |     |           |     |       |
|------|-----------|-----|-----------|-----|-------|
| 5O1R | M_LYS_168 | NZ  | M_ASP_169 | OD1 | 3.618 |
| 5O1R | M_LYS_187 | NZ  | M_ASP_184 | OD2 | 2.800 |
| 5O1R | M_HIS_188 | ND1 | M_ASP_150 | OD2 | 3.718 |

Table 703: 5O1R-specific salt bridging networks analysis. In this table, a PDB file is specified with a four-letter PDB ID, except that the names of the PDB files corresponding to the single NMR structural model split from the NMR ensemble is specified with a four-letter PDB ID in addition to a hyphen followed by the single NMR structural model numeric ID, the residue naming scheme is **Chain ID\_residue name\_residue number**,  $\angle ADH$  represents the angle formed by acceptor (A), donor (D) and hydrogen (H) ( $\angle ADH$ ).

| PDB ID | Residue A | Atom A | Residue B | Atom B | Distance (Å) |
|--------|-----------|--------|-----------|--------|--------------|
| 5OLM   | A_HIS_0   | NE2    | B_GLU_97  | OE1    | 2.769        |
| 5OLM   | A_HIS_0   | NE2    | B_GLU_97  | OE2    | 2.598        |
| 5OLM   | A_ARG_6   | NH2    | B_GLU_82  | OE1    | 3.071        |
| 5OLM   | A_ARG_67  | NH1    | A_GLU_25  | OE1    | 3.750        |
| 5OLM   | A_ARG_67  | NH1    | A_GLU_25  | OE2    | 3.549        |
| 5OLM   | A_ARG_118 | NH2    | A_GLU_12  | OE1    | 3.821        |
| 5OLM   | A_ARG_118 | NH2    | A_GLU_12  | OE2    | 2.560        |
| 5OLM   | A_LYS_119 | NZ     | A_ASP_21  | OD1    | 2.937        |
| 5OLM   | A_LYS_119 | NZ     | A_ASP_21  | OD2    | 3.505        |
| 5OLM   | A_HIS_120 | ND1    | A_ASP_106 | OD2    | 2.406        |
| 5OLM   | A_HIS_120 | NE2    | A_ASP_106 | OD2    | 3.755        |
| 5OLM   | A_HIS_123 | ND1    | A_ASP_106 | OD1    | 3.485        |
| 5OLM   | A_HIS_123 | ND1    | A_ASP_106 | OD2    | 3.274        |
| 5OLM   | B_HIS_0   | NE2    | A_GLU_97  | OE1    | 2.741        |
| 5OLM   | B_HIS_0   | NE2    | A_GLU_97  | OE2    | 3.001        |
| 5OLM   | B_ARG_6   | NH2    | A_GLU_82  | OE2    | 2.559        |
| 5OLM   | B_ARG_67  | NH1    | B_GLU_25  | OE1    | 3.574        |
| 5OLM   | B_ARG_118 | NH1    | B_GLU_12  | OE1    | 2.892        |
| 5OLM   | B_ARG_118 | NH1    | B_GLU_12  | OE2    | 3.281        |
| 5OLM   | B_LYS_119 | NZ     | B_ASP_21  | OD1    | 2.647        |
| 5OLM   | B_LYS_119 | NZ     | B_ASP_21  | OD2    | 3.211        |
| 5OLM   | B_HIS_120 | ND1    | B_ASP_106 | OD2    | 2.889        |
| 5OLM   | B_HIS_123 | ND1    | B_ASP_106 | OD2    | 2.910        |

Table 704: 5OLM-specific salt bridging networks analysis. In this table, a PDB file is specified with a four-letter PDB ID, except that the names of the PDB files corresponding to the single NMR structural model split from the NMR ensemble is specified with a four-letter PDB ID in addition to a hyphen followed by the single NMR structural model numeric ID, the residue naming scheme is **Chain ID\_residue name\_residue number**,  $\angle ADH$  represents the angle formed by acceptor (A), donor (D) and hydrogen (H) ( $\angle ADH$ ).

| PDB ID | Residue A | Atom A | Residue B | Atom B | Distance (Å) |
|--------|-----------|--------|-----------|--------|--------------|
| 5OPY   | H_ARG.38  | NH1    | H_ASP.90  | OD1    | 3.516        |
| 5OPY   | H_ARG.38  | NH2    | H_GLU.46  | OE1    | 3.707        |
| 5OPY   | H_ARG.38  | NH2    | H_GLU.46  | OE2    | 3.605        |
| 5OPY   | H_ARG.67  | NH1    | H_ASP.90  | OD1    | 3.928        |
| 5OPY   | H_ARG.67  | NH1    | H_ASP.90  | OD2    | 2.808        |
| 5OPY   | H_ARG.67  | NH2    | H_ASP.90  | OD1    | 3.025        |
| 5OPY   | H_ARG.67  | NH2    | H_ASP.90  | OD2    | 3.394        |
| 5OPY   | H_LYS.212 | NZ     | L_GLU.123 | OE2    | 3.578        |
| 5OPY   | L_ARG.61  | NH1    | L_ASP.82  | OD1    | 3.825        |
| 5OPY   | L_ARG.61  | NH1    | L_ASP.82  | OD2    | 2.771        |
| 5OPY   | L_ARG.61  | NH2    | L_GLU.79  | OE1    | 3.579        |
| 5OPY   | L_ARG.61  | NH2    | L_GLU.79  | OE2    | 3.640        |
| 5OPY   | L_ARG.61  | NH2    | L_ASP.82  | OD1    | 3.036        |
| 5OPY   | L_ARG.61  | NH2    | L_ASP.82  | OD2    | 3.486        |
| 5OPY   | L_LYS.147 | NZ     | L_GLU.154 | OE2    | 3.483        |
| 5OPY   | L_LYS.149 | NZ     | L_GLU.195 | OE1    | 3.661        |
| 5OPY   | L_LYS.149 | NZ     | L_GLU.195 | OE2    | 3.217        |
| 5OPY   | L_ARG.155 | NH2    | L_GLU.185 | OE1    | 3.459        |
| 5OPY   | L_LYS.183 | NZ     | L_GLU.187 | OE1    | 3.576        |
| 5OPY   | L_LYS.183 | NZ     | L_GLU.187 | OE2    | 2.833        |
| 5OPY   | L_HIS.189 | ND1    | L_ASP.151 | OD2    | 3.278        |
| 5OPY   | L_HIS.189 | NE2    | L_GLU.185 | OE1    | 2.982        |
| 5OPY   | L_HIS.189 | NE2    | L_GLU.185 | OE2    | 3.936        |
| 5OPY   | L_LYS.199 | NZ     | L_ASP.143 | OD1    | 3.965        |

Table 705: 5OPY-specific salt bridging networks analysis. In this table, a PDB file is specified with a four-letter PDB ID, except that the names of the PDB files corresponding to the single NMR structural model split from the NMR ensemble is specified with a four-letter PDB ID in addition to a hyphen followed by the single NMR structural model numeric ID, the residue naming scheme is **Chain ID\_residue name\_residue number**,  $\angle ADH$  represents the angle formed by acceptor (A), donor (D) and hydrogen (H) ( $\angle ADH$ ).

| PDB ID | Residue A  | Atom A | Residue B  | Atom B | Distance (Å) |
|--------|------------|--------|------------|--------|--------------|
| 5OWP   | H_ARG_38   | NH1    | H_ASP_92   | OD1    | 2.637        |
| 5OWP   | H_ARG_38   | NH2    | H_GLU_46   | OE1    | 3.304        |
| 5OWP   | H_ARG_38   | NH2    | H_GLU_46   | OE2    | 3.626        |
| 5OWP   | H_ARG_38   | NH2    | H_ASP_92   | OD1    | 3.777        |
| 5OWP   | H_ARG_52   | NH1    | H_GLU_50   | OE1    | 3.856        |
| 5OWP   | H_ARG_52   | NH1    | H_GLU_50   | OE2    | 2.567        |
| 5OWP   | H_HIS_61   | ND1    | H_GLU_50   | OE2    | 2.863        |
| 5OWP   | H_ARG_69   | NH1    | H_ASP_92   | OD1    | 3.470        |
| 5OWP   | H_ARG_69   | NH1    | H_ASP_92   | OD2    | 3.501        |
| 5OWP   | H_ARG_69   | NH2    | H_ASP_92   | OD1    | 3.595        |
| 5OWP   | H_ARG_69   | NH2    | H_ASP_92   | OD2    | 2.233        |
| 5OWP   | H_ARG_74   | NH2    | H_ASP_76   | OD1    | 3.541        |
| 5OWP   | H_ARG_89   | NH1    | H_GLU_91   | OE1    | 3.703        |
| 5OWP   | H_HIS_1051 | ND1    | H_GLU_1047 | OE2    | 3.012        |
| 5OWP   | H_HIS_1051 | NE2    | H_ASP_1050 | OD1    | 3.919        |
| 5OWP   | H_ARG_1070 | NH2    | H_GLU_1090 | OE2    | 3.696        |
| 5OWP   | H_ARG_1070 | NH2    | H_ASP_1091 | OD1    | 2.948        |
| 5OWP   | H_ARG_1070 | NH2    | H_ASP_1091 | OD2    | 3.682        |

Table 706: 5OWP-specific salt bridging networks analysis. In this table, a PDB file is specified with a four-letter PDB ID, except that the names of the PDB files corresponding to the single NMR structural model split from the NMR ensemble is specified with a four-letter PDB ID in addition to a hyphen followed by the single NMR structural model numeric ID, the residue naming scheme is **Chain ID\_residue name\_residue number**,  $\angle ADH$  represents the angle formed by acceptor (A), donor (D) and hydrogen (H) ( $\angle ADH$ ).

| PDB ID | Residue A | Atom A | Residue B | Atom B | Distance (Å) |
|--------|-----------|--------|-----------|--------|--------------|
| 5SV3   | A_ARG_38  | NH1    | A_ASP_90  | OD1    | 2.898        |
| 5SV3   | A_ARG_38  | NH2    | A_GLU_46  | OE1    | 3.409        |
| 5SV3   | A_ARG_38  | NH2    | A_GLU_46  | OE2    | 3.843        |
| 5SV3   | A_ARG_53  | NH2    | A_ASP_31  | OD1    | 3.179        |
| 5SV3   | A_ARG_67  | NH1    | A_ASP_90  | OD1    | 3.708        |
| 5SV3   | A_ARG_67  | NH1    | A_ASP_90  | OD2    | 2.739        |
| 5SV3   | A_ARG_67  | NH2    | A_ASP_90  | OD1    | 3.001        |
| 5SV3   | A_ARG_67  | NH2    | A_ASP_90  | OD2    | 3.495        |
| 5SV3   | A_ARG_108 | NH2    | A_ASP_59  | OD1    | 2.902        |
| 5SV3   | A_ARG_108 | NH2    | A_ASP_59  | OD2    | 3.573        |
| 5SV3   | B_ARG_56  | NH2    | B_GLU_99  | OE2    | 2.640        |
| 5SV3   | B_ARG_85  | NH1    | B_ASP_110 | OD1    | 3.300        |
| 5SV3   | B_ARG_85  | NH2    | B_ASP_110 | OD1    | 3.843        |
| 5SV3   | B_HIS_106 | NE2    | B_GLU_102 | OE1    | 3.940        |
| 5SV3   | B_HIS_106 | NE2    | B_GLU_102 | OE2    | 3.110        |
| 5SV3   | B_ARG_134 | NH2    | B_GLU_127 | OE2    | 3.441        |
| 5SV3   | C_ARG_38  | NH1    | C_ASP_90  | OD1    | 2.882        |
| 5SV3   | C_ARG_38  | NH2    | C_GLU_46  | OE1    | 3.359        |
| 5SV3   | C_ARG_53  | NH2    | C_ASP_31  | OD1    | 3.440        |
| 5SV3   | C_ARG_65  | NH1    | C_ASP_59  | OD1    | 3.685        |
| 5SV3   | C_ARG_67  | NH1    | C_ASP_90  | OD1    | 3.690        |
| 5SV3   | C_ARG_67  | NH1    | C_ASP_90  | OD2    | 2.685        |
| 5SV3   | C_ARG_67  | NH2    | C_ASP_90  | OD1    | 3.040        |
| 5SV3   | C_ARG_67  | NH2    | C_ASP_90  | OD2    | 3.474        |
| 5SV3   | C_ARG_108 | NH2    | C_ASP_59  | OD1    | 2.968        |
| 5SV3   | C_ARG_108 | NH2    | C_ASP_59  | OD2    | 3.652        |
| 5SV3   | D_ARG_56  | NH1    | D_ASP_75  | OD1    | 2.619        |
| 5SV3   | D_ARG_56  | NH1    | D_ASP_75  | OD2    | 3.392        |
| 5SV3   | D_ARG_56  | NH2    | D_ASP_75  | OD1    | 3.670        |
| 5SV3   | D_ARG_56  | NH2    | D_ASP_75  | OD2    | 2.993        |
| 5SV3   | D_ARG_56  | NH2    | D_ASP_100 | OD1    | 3.462        |
| 5SV3   | D_ARG_85  | NH2    | D_GLU_61  | OE2    | 3.968        |
| 5SV3   | D_HIS_106 | NE2    | D_GLU_102 | OE2    | 2.939        |
| 5SV3   | D_ARG_134 | NH2    | D_GLU_127 | OE2    | 3.653        |

Table 707: 5SV3-specific salt bridging networks analysis. In this table, a PDB file is specified with a four-letter PDB ID, except that the names of the PDB files corresponding to the single NMR structural model split from the NMR ensemble is specified with a four-letter PDB ID in addition to a hyphen followed by the single NMR structural model numeric ID, the residue naming scheme is **Chain ID\_residue name\_residue number**,  $\angle ADH$  represents the angle formed by acceptor (A), donor (D) and hydrogen (H) ( $\angle ADH$ ).

| PDB ID | Residue A | Atom A | Residue B | Atom B | Distance (Å) |
|--------|-----------|--------|-----------|--------|--------------|
| 5SV4   | A_ARG_38  | NH1    | A_ASP_90  | OD1    | 2.712        |
| 5SV4   | A_ARG_38  | NH2    | A_ASP_90  | OD1    | 3.862        |
| 5SV4   | A_ARG_53  | NH2    | A_ASP_31  | OD1    | 3.931        |
| 5SV4   | A_ARG_65  | NH1    | A_ASP_62  | OD1    | 3.431        |
| 5SV4   | A_ARG_65  | NH2    | A_ASP_59  | OD1    | 3.543        |
| 5SV4   | A_ARG_67  | NH1    | A_ASP_90  | OD1    | 3.932        |
| 5SV4   | A_ARG_67  | NH1    | A_ASP_90  | OD2    | 2.726        |
| 5SV4   | A_ARG_67  | NH2    | A_ASP_90  | OD1    | 2.988        |
| 5SV4   | A_ARG_67  | NH2    | A_ASP_90  | OD2    | 3.261        |
| 5SV4   | A_LYS_76  | NZ     | A_ASP_73  | OD2    | 3.315        |
| 5SV4   | A_ARG_108 | NH2    | A_ASP_59  | OD1    | 3.667        |
| 5SV4   | A_ARG_108 | NH2    | A_ASP_59  | OD2    | 3.318        |
| 5SV4   | A_HIS_115 | ND1    | A_GLU_1   | OE1    | 3.848        |
| 5SV4   | B_ARG_38  | NH1    | B_ASP_90  | OD1    | 2.707        |
| 5SV4   | B_ARG_38  | NH2    | B_GLU_46  | OE2    | 3.766        |
| 5SV4   | B_ARG_38  | NH2    | B_ASP_90  | OD1    | 3.824        |
| 5SV4   | B_ARG_65  | NH2    | B_ASP_59  | OD1    | 2.826        |
| 5SV4   | B_ARG_67  | NH1    | B_ASP_90  | OD1    | 3.935        |
| 5SV4   | B_ARG_67  | NH1    | B_ASP_90  | OD2    | 2.734        |
| 5SV4   | B_ARG_67  | NH2    | B_ASP_90  | OD1    | 2.973        |
| 5SV4   | B_ARG_67  | NH2    | B_ASP_90  | OD2    | 3.240        |
| 5SV4   | B_LYS_76  | NZ     | B_ASP_73  | OD2    | 2.871        |
| 5SV4   | B_ARG_108 | NH2    | B_ASP_59  | OD2    | 3.154        |
| 5SV4   | B_HIS_115 | NE2    | B_GLU_1   | OE1    | 3.463        |

Table 708: 5SV4-specific salt bridging networks analysis. In this table, a PDB file is specified with a four-letter PDB ID, except that the names of the PDB files corresponding to the single NMR structural model split from the NMR ensemble is specified with a four-letter PDB ID in addition to a hyphen followed by the single NMR structural model numeric ID, the residue naming scheme is **Chain ID\_residue name\_residue number**,  $\angle ADH$  represents the angle formed by acceptor (A), donor (D) and hydrogen (H) ( $\angle ADH$ ).



| PDB ID | Residue A | Atom A | Residue B | Atom B | Distance (Å) |
|--------|-----------|--------|-----------|--------|--------------|
| 5T6P   | A_ARG_24  | NH2    | A_ASP_75  | OD1    | 3.082        |
| 5T6P   | A_ARG_24  | NH2    | A_ASP_75  | OD2    | 3.476        |
| 5T6P   | A_LYS_58  | NZ     | F_ASP_3   | OD2    | 1.997        |
| 5T6P   | A_ARG_66  | NH1    | A_ASP_87  | OD1    | 3.333        |
| 5T6P   | A_ARG_66  | NH1    | A_ASP_87  | OD2    | 2.414        |
| 5T6P   | A_ARG_66  | NH2    | A_GLU_84  | OE1    | 3.740        |
| 5T6P   | A_ARG_66  | NH2    | A_ASP_87  | OD1    | 2.866        |
| 5T6P   | A_ARG_66  | NH2    | A_ASP_87  | OD2    | 3.216        |
| 5T6P   | A_LYS_152 | NZ     | A_GLU_200 | OE2    | 3.883        |
| 5T6P   | A_LYS_154 | NZ     | A_GLU_200 | OE1    | 3.251        |
| 5T6P   | A_LYS_154 | NZ     | A_GLU_200 | OE2    | 3.726        |
| 5T6P   | A_ARG_160 | NH1    | A_GLU_190 | OE2    | 3.359        |
| 5T6P   | A_ARG_160 | NH2    | A_GLU_190 | OE1    | 3.571        |
| 5T6P   | A_ARG_160 | NH2    | A_GLU_190 | OE2    | 3.087        |
| 5T6P   | A_LYS_174 | NZ     | C_GLU_128 | OE2    | 3.605        |
| 5T6P   | A_LYS_188 | NZ     | A_GLU_192 | OE1    | 3.265        |
| 5T6P   | A_LYS_188 | NZ     | A_GLU_192 | OE2    | 2.843        |
| 5T6P   | A_HIS_194 | ND1    | A_ASP_156 | OD2    | 2.597        |
| 5T6P   | A_LYS_204 | NZ     | A_ASP_115 | OD2    | 3.286        |
| 5T6P   | B_ARG_38  | NH1    | B_ASP_90  | OD1    | 3.096        |
| 5T6P   | B_ARG_38  | NH2    | B_GLU_46  | OE1    | 3.132        |
| 5T6P   | B_ARG_38  | NH2    | B_ASP_90  | OD1    | 3.992        |
| 5T6P   | B_ARG_44  | NH1    | B_GLU_42  | OE1    | 3.832        |
| 5T6P   | B_ARG_44  | NH2    | B_GLU_42  | OE1    | 3.154        |
| 5T6P   | B_LYS_65  | NZ     | B_ASP_62  | OD1    | 3.614        |
| 5T6P   | B_ARG_67  | NH2    | B_ASP_90  | OD1    | 3.026        |
| 5T6P   | B_ARG_67  | NH2    | B_ASP_90  | OD2    | 2.391        |
| 5T6P   | C_ARG_24  | NH2    | C_ASP_75  | OD1    | 2.942        |
| 5T6P   | C_ARG_24  | NH2    | C_ASP_75  | OD2    | 3.165        |
| 5T6P   | C_ARG_55  | NH1    | E_ASP_3   | OD2    | 3.191        |
| 5T6P   | C_LYS_58  | NZ     | E_ASP_3   | OD2    | 2.925        |
| 5T6P   | C_ARG_59  | NH2    | C_ASP_65  | OD1    | 3.527        |
| 5T6P   | C_ARG_66  | NH1    | C_ASP_87  | OD1    | 3.426        |
| 5T6P   | C_ARG_66  | NH1    | C_ASP_87  | OD2    | 2.481        |
| 5T6P   | C_ARG_66  | NH2    | C_GLU_84  | OE1    | 3.835        |
| 5T6P   | C_ARG_66  | NH2    | C_GLU_84  | OE2    | 3.800        |
| 5T6P   | C_ARG_66  | NH2    | C_ASP_87  | OD1    | 3.132        |
| 5T6P   | C_ARG_66  | NH2    | C_ASP_87  | OD2    | 3.431        |
| 5T6P   | C_LYS_154 | NZ     | C_GLU_200 | OE1    | 3.347        |
| 5T6P   | C_ARG_160 | NH1    | C_GLU_190 | OE2    | 3.251        |
| 5T6P   | C_ARG_160 | NH2    | C_GLU_190 | OE1    | 3.781        |
| 5T6P   | C_ARG_160 | NH2    | C_GLU_190 | OE2    | 3.563        |
| 5T6P   | C_LYS_188 | NZ     | C_GLU_192 | OE1    | 3.328        |
| 5T6P   | C_LYS_188 | NZ     | C_GLU_192 | OE2    | 3.157        |
| 5T6P   | C_HIS_194 | ND1    | C_ASP_156 | OD2    | 2.748        |
| 5T6P   | C_LYS_204 | NZ     | C_ASP_115 | OD2    | 3.242        |
| 5T6P   | D_ARG_38  | NH1    | D_ASP_90  | OD1    | 2.948        |
| 5T6P   | D_ARG_38  | NH2    | D_GLU_46  | OE1    | 3.287        |
| 5T6P   | D_ARG_44  | NH2    | D_GLU_42  | OE1    | 3.539        |
| 5T6P   | D_LYS_65  | NZ     | D_ASP_62  | OD1    | 3.833        |
| 5T6P   | D_ARG_67  | NH2    | D_ASP_90  | OD1    | 2.581        |
| 5T6P   | D_ARG_67  | NH2    | D_ASP_90  | OD2    | 2.532        |
| 5T6P   | E_ARG_5   | NH2    | C_GLU_39  | OE1    | 3.351        |
| 5T6P   | E_ARG_5   | NH2    | C_GLU_39  | OE2    | 2.626        |
| 5T6P   | F_ARG_5   | NH2    | A_GLU_39  | OE1    | 3.661        |
| 5T6P   | F_ARG_5   | NH2    | A_GLU_39  | OE2    | 2.718        |

---

Table 709: 5T6P-specific salt bridging networks analysis. In this table, a PDB file is specified with a four-letter PDB ID, except that the names of the PDB files corresponding to the single NMR structural model split from the NMR ensemble is specified with a four-letter PDB ID in addition to a hyphen followed by the single NMR structural model numeric ID, the residue naming scheme is **Chain ID\_residue name\_residue number**,  $\angle ADH$  represents the angle formed by acceptor (A), donor (D) and hydrogen (H) ( $\angle ADH$ ).

| PDB ID | Residue A | Atom A | Residue B | Atom B | Distance (Å) |
|--------|-----------|--------|-----------|--------|--------------|
| 5T78   | A_ARG_24  | NH2    | A_ASP_75  | OD1    | 3.292        |
| 5T78   | A_ARG_24  | NH2    | A_ASP_75  | OD2    | 3.506        |
| 5T78   | A_LYS_44  | NZ     | A_GLU_86  | OE2    | 3.456        |
| 5T78   | A_LYS_58  | NZ     | F_ASP_3   | OD1    | 2.579        |
| 5T78   | A_LYS_58  | NZ     | F_ASP_3   | OD2    | 3.334        |
| 5T78   | A_ARG_66  | NH1    | A_ASP_87  | OD1    | 3.316        |
| 5T78   | A_ARG_66  | NH1    | A_ASP_87  | OD2    | 2.549        |
| 5T78   | A_ARG_66  | NH2    | A_GLU_84  | OE1    | 3.229        |
| 5T78   | A_ARG_66  | NH2    | A_GLU_84  | OE2    | 3.938        |
| 5T78   | A_ARG_66  | NH2    | A_ASP_87  | OD1    | 2.866        |
| 5T78   | A_ARG_66  | NH2    | A_ASP_87  | OD2    | 3.475        |
| 5T78   | A_LYS_152 | NZ     | A_GLU_200 | OE2    | 3.993        |
| 5T78   | A_LYS_154 | NZ     | A_GLU_200 | OE1    | 3.160        |
| 5T78   | A_LYS_154 | NZ     | A_GLU_200 | OE2    | 3.631        |
| 5T78   | A_ARG_160 | NH1    | A_GLU_190 | OE2    | 2.874        |
| 5T78   | A_ARG_160 | NH2    | A_GLU_190 | OE1    | 3.635        |
| 5T78   | A_ARG_160 | NH2    | A_GLU_190 | OE2    | 3.190        |
| 5T78   | A_LYS_188 | NZ     | A_GLU_192 | OE1    | 3.158        |
| 5T78   | A_LYS_188 | NZ     | A_GLU_192 | OE2    | 2.974        |
| 5T78   | A_HIS_194 | ND1    | A_ASP_156 | OD2    | 2.728        |
| 5T78   | A_LYS_204 | NZ     | A_ASP_115 | OD1    | 3.976        |
| 5T78   | A_LYS_204 | NZ     | A_ASP_115 | OD2    | 3.220        |
| 5T78   | B_LYS_3   | NZ     | B_GLU_1   | OE2    | 3.096        |
| 5T78   | B_ARG_38  | NH1    | B_ASP_90  | OD1    | 2.890        |
| 5T78   | B_ARG_38  | NH2    | B_GLU_46  | OE1    | 3.379        |
| 5T78   | B_ARG_38  | NH2    | B_ASP_90  | OD1    | 3.918        |
| 5T78   | B_ARG_44  | NH2    | B_GLU_42  | OE1    | 2.944        |
| 5T78   | B_ARG_67  | NH2    | B_ASP_90  | OD1    | 2.740        |
| 5T78   | B_ARG_67  | NH2    | B_ASP_90  | OD2    | 2.732        |
| 5T78   | F_ARG_5   | NH1    | A_GLU_39  | OE1    | 2.678        |
| 5T78   | F_ARG_5   | NH1    | A_GLU_39  | OE2    | 2.480        |
| 5T78   | C_ARG_24  | NH2    | C_ASP_75  | OD1    | 3.347        |
| 5T78   | C_ARG_24  | NH2    | C_ASP_75  | OD2    | 3.277        |
| 5T78   | C_ARG_55  | NH2    | E_ASP_3   | OD1    | 3.685        |
| 5T78   | C_LYS_58  | NZ     | E_ASP_3   | OD1    | 2.753        |
| 5T78   | C_LYS_58  | NZ     | E_ASP_3   | OD2    | 2.872        |
| 5T78   | C_ARG_59  | NH1    | C_ASP_65  | OD1    | 2.623        |
| 5T78   | C_ARG_66  | NH1    | C_ASP_87  | OD1    | 3.605        |
| 5T78   | C_ARG_66  | NH1    | C_ASP_87  | OD2    | 2.346        |
| 5T78   | C_ARG_66  | NH2    | C_GLU_84  | OE1    | 3.346        |
| 5T78   | C_ARG_66  | NH2    | C_GLU_84  | OE2    | 3.846        |
| 5T78   | C_ARG_66  | NH2    | C_GLU_86  | OE2    | 3.475        |
| 5T78   | C_ARG_66  | NH2    | C_ASP_87  | OD1    | 3.004        |
| 5T78   | C_ARG_66  | NH2    | C_ASP_87  | OD2    | 3.187        |
| 5T78   | C_LYS_154 | NZ     | C_GLU_200 | OE1    | 3.236        |
| 5T78   | C_ARG_160 | NH1    | C_GLU_190 | OE1    | 3.681        |
| 5T78   | C_ARG_160 | NH1    | C_GLU_190 | OE2    | 2.945        |
| 5T78   | C_ARG_160 | NH2    | C_GLU_190 | OE1    | 3.366        |
| 5T78   | C_ARG_160 | NH2    | C_GLU_190 | OE2    | 3.933        |
| 5T78   | C_LYS_188 | NZ     | C_GLU_192 | OE1    | 3.411        |
| 5T78   | C_LYS_188 | NZ     | C_GLU_192 | OE2    | 3.168        |
| 5T78   | C_HIS_194 | ND1    | C_ASP_156 | OD2    | 2.579        |
| 5T78   | C_LYS_204 | NZ     | C_ASP_115 | OD2    | 3.148        |
| 5T78   | D_ARG_38  | NH1    | D_ASP_90  | OD1    | 2.853        |
| 5T78   | D_ARG_38  | NH2    | D_GLU_46  | OE1    | 3.156        |
| 5T78   | D_ARG_38  | NH2    | D_ASP_90  | OD1    | 3.962        |
| 5T78   | D_ARG_67  | NH2    | D_ASP_90  | OD1    | 2.642        |

|      |           |     |           |     |       |
|------|-----------|-----|-----------|-----|-------|
| 5T78 | D_ARG_67  | NH2 | D_ASP_90  | OD2 | 2.478 |
| 5T78 | D_LYS_211 | NZ  | C_GLU_128 | OE1 | 3.376 |
| 5T78 | E_ARG_5   | NH1 | C_GLU_39  | OE1 | 2.693 |
| 5T78 | E_ARG_5   | NH1 | C_GLU_39  | OE2 | 2.664 |

Table 710: 5T78-specific salt bridging networks analysis. In this table, a PDB file is specified with a four-letter PDB ID, except that the names of the PDB files corresponding to the single NMR structural model split from the NMR ensemble is specified with a four-letter PDB ID in addition to a hyphen followed by the single NMR structural model numeric ID, the residue naming scheme is **Chain ID\_residue name\_residue number**,  $\angle ADH$  represents the angle formed by acceptor (A), donor (D) and hydrogen (H) ( $\angle ADH$ ).

| PDB ID | Residue A | Atom A | Residue B | Atom B | Distance (Å) |
|--------|-----------|--------|-----------|--------|--------------|
| 5TCX   | A_LYS_124 | NZ     | A_ASP_195 | OD1    | 3.385        |
| 5TCX   | A_LYS_124 | NZ     | A_ASP_195 | OD2    | 2.891        |
| 5TCX   | A_LYS_144 | NZ     | A_ASP_138 | OD1    | 2.296        |
| 5TCX   | A_LYS_171 | NZ     | A_ASP_138 | OD1    | 3.371        |
| 5TCX   | A_LYS_187 | NZ     | A_ASP_155 | OD1    | 3.854        |
| 5TCX   | A_LYS_187 | NZ     | A_ASP_155 | OD2    | 3.942        |
| 5TCX   | A_HIS_191 | NE2    | A_ASP_128 | OD1    | 2.502        |
| 5TCX   | A_HIS_191 | NE2    | A_ASP_128 | OD2    | 3.422        |
| 5TCX   | A_LYS_193 | NZ     | A_GLU_188 | OE2    | 2.937        |
| 5TCX   | A_LYS_201 | NZ     | A_ASP_196 | OD2    | 3.323        |

Table 711: 5TCX-specific salt bridging networks analysis. In this table, a PDB file is specified with a four-letter PDB ID, except that the names of the PDB files corresponding to the single NMR structural model split from the NMR ensemble is specified with a four-letter PDB ID in addition to a hyphen followed by the single NMR structural model numeric ID, the residue naming scheme is **Chain ID\_residue name\_residue number**,  $\angle ADH$  represents the angle formed by acceptor (A), donor (D) and hydrogen (H) ( $\angle ADH$ ).

| PDB ID | Residue A | Atom A | Residue B | Atom B | Distance (Å) |
|--------|-----------|--------|-----------|--------|--------------|
| 5TIH   | A_HIS_3   | ND1    | A_GLU_333 | OE1    | 3.713        |
| 5TIH   | A_LYS_28  | NZ     | A_GLU_83  | OE1    | 3.102        |
| 5TIH   | A_ARG_29  | NH2    | A_ASP_307 | OD2    | 2.694        |
| 5TIH   | A_LYS_40  | NZ     | A_ASP_38  | OD1    | 3.409        |
| 5TIH   | A_LYS_40  | NZ     | A_ASP_38  | OD2    | 3.673        |
| 5TIH   | A_HIS_47  | ND1    | A_ASP_63  | OD2    | 2.822        |
| 5TIH   | A_LYS_52  | NZ     | A_GLU_30  | OE1    | 2.433        |
| 5TIH   | A_LYS_52  | NZ     | A_GLU_30  | OE2    | 3.751        |
| 5TIH   | A_LYS_66  | NZ     | L_ASP_92  | OD1    | 3.482        |
| 5TIH   | A_ARG_73  | NH2    | A_ASP_38  | OD2    | 3.662        |
| 5TIH   | A_HIS_75  | NE2    | A_ASP_92  | OD1    | 3.360        |
| 5TIH   | A_LYS_100 | NZ     | A_ASP_124 | OD1    | 3.619        |
| 5TIH   | A_ARG_106 | NH1    | A_GLU_177 | OE2    | 3.261        |
| 5TIH   | A_LYS_130 | NZ     | A_ASP_165 | OD1    | 3.418        |
| 5TIH   | A_LYS_130 | NZ     | A_ASP_165 | OD2    | 3.868        |
| 5TIH   | A_LYS_157 | NZ     | A_ASP_160 | OD1    | 3.149        |
| 5TIH   | A_LYS_157 | NZ     | A_ASP_166 | OD1    | 2.621        |
| 5TIH   | A_LYS_164 | NZ     | A_GLU_236 | OE1    | 3.487        |
| 5TIH   | A_LYS_164 | NZ     | A_GLU_236 | OE2    | 2.956        |
| 5TIH   | A_LYS_175 | NZ     | A_GLU_84  | OE1    | 2.559        |
| 5TIH   | A_LYS_175 | NZ     | A_GLU_84  | OE2    | 3.472        |
| 5TIH   | A_LYS_186 | NZ     | A_ASP_188 | OD2    | 3.836        |
| 5TIH   | A_LYS_205 | NZ     | A_ASP_259 | OD1    | 3.347        |
| 5TIH   | A_LYS_205 | NZ     | A_GLU_308 | OE1    | 3.703        |
| 5TIH   | A_LYS_205 | NZ     | A_GLU_308 | OE2    | 3.973        |
| 5TIH   | A_HIS_211 | NE2    | A_ASP_253 | OD1    | 3.623        |
| 5TIH   | A_LYS_305 | NZ     | A_GLU_308 | OE1    | 2.934        |
| 5TIH   | A_LYS_305 | NZ     | A_GLU_308 | OE2    | 3.911        |
| 5TIH   | H_HIS_35  | NE2    | A_ASP_69  | OD1    | 2.973        |
| 5TIH   | H_HIS_35  | NE2    | A_ASP_69  | OD2    | 3.535        |
| 5TIH   | H_ARG_67  | NH2    | H_ASP_90  | OD1    | 3.399        |
| 5TIH   | H_ARG_67  | NH2    | H_ASP_90  | OD2    | 3.193        |
| 5TIH   | H_ARG_100 | NH2    | A_ASP_69  | OD1    | 3.080        |
| 5TIH   | H_ARG_101 | NH2    | A_GLU_119 | OE1    | 3.357        |
| 5TIH   | H_ARG_101 | NH2    | A_GLU_119 | OE2    | 3.359        |
| 5TIH   | L_ARG_24  | NH1    | L_ASP_70  | OD1    | 2.418        |
| 5TIH   | L_ARG_24  | NH1    | L_ASP_70  | OD2    | 3.060        |
| 5TIH   | L_ARG_24  | NH2    | L_ASP_70  | OD2    | 3.324        |
| 5TIH   | L_LYS_39  | NZ     | L_GLU_81  | OE2    | 3.732        |
| 5TIH   | L_LYS_45  | NZ     | L_GLU_81  | OE2    | 3.780        |
| 5TIH   | L_ARG_46  | NH2    | L_ASP_55  | OD1    | 3.597        |
| 5TIH   | L_ARG_46  | NH2    | L_ASP_55  | OD2    | 2.892        |
| 5TIH   | L_ARG_61  | NH2    | L_GLU_81  | OE1    | 3.907        |
| 5TIH   | L_ARG_61  | NH2    | L_ASP_82  | OD1    | 3.126        |
| 5TIH   | L_ARG_61  | NH2    | L_ASP_82  | OD2    | 3.816        |
| 5TIH   | L_ARG_66  | NH2    | L_GLU_28  | OE1    | 2.831        |
| 5TIH   | L_ARG_66  | NH2    | L_GLU_28  | OE2    | 3.769        |
| 5TIH   | L_LYS_103 | NZ     | L_ASP_85  | OD2    | 3.969        |
| 5TIH   | L_LYS_142 | NZ     | L_GLU_105 | OE1    | 3.302        |
| 5TIH   | L_LYS_142 | NZ     | L_GLU_105 | OE2    | 3.271        |
| 5TIH   | L_LYS_147 | NZ     | L_GLU_195 | OE2    | 3.679        |
| 5TIH   | L_LYS_149 | NZ     | L_GLU_195 | OE1    | 3.506        |
| 5TIH   | L_LYS_149 | NZ     | L_GLU_195 | OE2    | 3.625        |
| 5TIH   | L_ARG_155 | NH1    | L_GLU_185 | OE1    | 3.848        |
| 5TIH   | L_ARG_155 | NH2    | L_GLU_185 | OE1    | 3.868        |
| 5TIH   | L_HIS_189 | ND1    | L_ASP_151 | OD2    | 3.122        |
| 5TIH   | L_ARG_211 | NH1    | L_GLU_187 | OE2    | 3.061        |

---

Table 712: 5TIH-specific salt bridging networks analysis. In this table, a PDB file is specified with a four-letter PDB ID, except that the names of the PDB files corresponding to the single NMR structural model split from the NMR ensemble is specified with a four-letter PDB ID in addition to a hyphen followed by the single NMR structural model numeric ID, the residue naming scheme is **Chain ID\_residue name\_residue number**,  $\angle ADH$  represents the angle formed by acceptor (A), donor (D) and hydrogen (H) ( $\angle ADH$ ).

| PDB ID | Residue A | Atom A | Residue B | Atom B | Distance (Å) |
|--------|-----------|--------|-----------|--------|--------------|
| 5TIK   | A_HIS_3   | ND1    | D_GLU_9   | OE2    | 3.832        |
| 5TIK   | A_HIS_3   | NE2    | B_GLU_9   | OE2    | 3.597        |
| 5TIK   | A_LYS_28  | NZ     | A_GLU_83  | OE1    | 3.971        |
| 5TIK   | A_HIS_47  | NE2    | A_GLU_45  | OE1    | 3.808        |
| 5TIK   | A_HIS_47  | NE2    | A_GLU_45  | OE2    | 2.915        |
| 5TIK   | A_HIS_47  | NE2    | A_ASP_63  | OD2    | 3.962        |
| 5TIK   | A_LYS_52  | NZ     | A_GLU_30  | OE1    | 3.759        |
| 5TIK   | A_LYS_52  | NZ     | A_GLU_30  | OE2    | 2.781        |
| 5TIK   | A_HIS_75  | NE2    | A_ASP_92  | OD1    | 3.609        |
| 5TIK   | A_HIS_75  | NE2    | A_ASP_92  | OD2    | 3.079        |
| 5TIK   | A_ARG_145 | NH1    | A_ASP_234 | OD2    | 3.502        |
| 5TIK   | A_ARG_145 | NH2    | A_ASP_234 | OD1    | 2.795        |
| 5TIK   | A_ARG_145 | NH2    | A_ASP_234 | OD2    | 3.031        |
| 5TIK   | A_LYS_157 | NZ     | A_ASP_160 | OD1    | 3.965        |
| 5TIK   | A_LYS_157 | NZ     | A_ASP_161 | OD1    | 3.943        |
| 5TIK   | A_LYS_157 | NZ     | A_ASP_166 | OD1    | 3.100        |
| 5TIK   | A_LYS_164 | NZ     | A_ASP_160 | OD1    | 3.523        |
| 5TIK   | A_LYS_175 | NZ     | A_ASP_81  | OD2    | 2.307        |
| 5TIK   | A_LYS_175 | NZ     | A_GLU_84  | OE2    | 2.899        |
| 5TIK   | A_LYS_182 | NZ     | A_ASP_165 | OD2    | 3.588        |
| 5TIK   | A_LYS_205 | NZ     | A_GLU_308 | OE1    | 3.830        |
| 5TIK   | A_LYS_205 | NZ     | A_GLU_308 | OE2    | 3.734        |
| 5TIK   | A_HIS_211 | NE2    | A_ASP_253 | OD1    | 3.988        |
| 5TIK   | A_LYS_287 | NZ     | A_GLU_273 | OE2    | 3.653        |
| 5TIK   | A_LYS_305 | NZ     | A_GLU_308 | OE1    | 3.281        |
| 5TIK   | A_LYS_305 | NZ     | A_GLU_308 | OE2    | 3.263        |
| 5TIK   | B_HIS_3   | NE2    | A_GLU_9   | OE1    | 3.627        |
| 5TIK   | B_HIS_3   | NE2    | A_GLU_9   | OE2    | 3.175        |
| 5TIK   | B_HIS_3   | NE2    | C_GLU_9   | OE1    | 3.296        |
| 5TIK   | B_HIS_3   | NE2    | C_GLU_9   | OE2    | 3.823        |
| 5TIK   | B_LYS_28  | NZ     | B_GLU_83  | OE1    | 3.175        |
| 5TIK   | B_LYS_28  | NZ     | B_GLU_83  | OE2    | 3.839        |
| 5TIK   | B_HIS_47  | ND1    | B_ASP_63  | OD2    | 3.018        |
| 5TIK   | B_LYS_52  | NZ     | B_GLU_30  | OE1    | 3.671        |
| 5TIK   | B_HIS_75  | NE2    | B_ASP_92  | OD2    | 2.903        |
| 5TIK   | B_LYS_100 | NZ     | B_ASP_124 | OD1    | 3.470        |
| 5TIK   | B_LYS_100 | NZ     | B_ASP_124 | OD2    | 2.292        |
| 5TIK   | B_ARG_106 | NH2    | B_GLU_177 | OE2    | 3.673        |
| 5TIK   | B_LYS_157 | NZ     | B_ASP_161 | OD1    | 3.470        |
| 5TIK   | B_LYS_157 | NZ     | B_ASP_166 | OD1    | 2.331        |
| 5TIK   | B_LYS_157 | NZ     | B_ASP_166 | OD2    | 3.739        |
| 5TIK   | B_LYS_175 | NZ     | B_GLU_84  | OE1    | 3.721        |
| 5TIK   | B_LYS_175 | NZ     | B_GLU_84  | OE2    | 3.186        |
| 5TIK   | B_LYS_182 | NZ     | B_ASP_165 | OD1    | 3.333        |
| 5TIK   | B_LYS_186 | NZ     | B_GLU_236 | OE1    | 2.882        |
| 5TIK   | B_LYS_186 | NZ     | B_GLU_236 | OE2    | 3.887        |
| 5TIK   | B_LYS_205 | NZ     | B_ASP_259 | OD2    | 3.092        |
| 5TIK   | B_HIS_211 | NE2    | B_ASP_253 | OD1    | 3.835        |
| 5TIK   | B_ARG_242 | NH2    | B_GLU_228 | OE2    | 3.300        |
| 5TIK   | B_LYS_290 | NZ     | A_GLU_281 | OE1    | 3.703        |
| 5TIK   | B_LYS_305 | NZ     | B_GLU_308 | OE1    | 2.748        |
| 5TIK   | B_ARG_310 | NH2    | B_ASP_307 | OD2    | 3.708        |
| 5TIK   | C_HIS_3   | NE2    | B_GLU_9   | OE1    | 2.908        |
| 5TIK   | C_ARG_29  | NH2    | B_ASP_259 | OD2    | 3.311        |
| 5TIK   | C_HIS_47  | ND1    | C_ASP_63  | OD2    | 3.231        |
| 5TIK   | C_LYS_52  | NZ     | C_GLU_30  | OE1    | 3.235        |
| 5TIK   | C_LYS_52  | NZ     | C_GLU_30  | OE2    | 3.319        |



|      |           |     |           |     |       |
|------|-----------|-----|-----------|-----|-------|
| 5TIK | C_LYS_66  | NZ  | C_ASP_63  | OD2 | 3.918 |
| 5TIK | C_LYS_99  | NZ  | C_GLU_93  | OE2 | 2.385 |
| 5TIK | C_ARG_106 | NH2 | C_GLU_177 | OE2 | 3.784 |
| 5TIK | C_LYS_157 | NZ  | C_ASP_161 | OD1 | 3.341 |
| 5TIK | C_LYS_157 | NZ  | C_ASP_161 | OD2 | 3.707 |
| 5TIK | C_LYS_157 | NZ  | C_ASP_166 | OD1 | 2.361 |
| 5TIK | C_HIS_173 | ND1 | C_ASP_174 | OD2 | 3.723 |
| 5TIK | C_LYS_175 | NZ  | C_GLU_84  | OE1 | 3.431 |
| 5TIK | C_LYS_175 | NZ  | C_GLU_84  | OE2 | 2.598 |
| 5TIK | C_LYS_182 | NZ  | C_ASP_165 | OD2 | 3.481 |
| 5TIK | C_LYS_186 | NZ  | C_GLU_232 | OE1 | 3.373 |
| 5TIK | C_LYS_205 | NZ  | C_ASP_259 | OD1 | 2.434 |
| 5TIK | C_LYS_205 | NZ  | C_ASP_259 | OD2 | 3.747 |
| 5TIK | C_LYS_205 | NZ  | C_GLU_308 | OE1 | 3.839 |
| 5TIK | C_LYS_205 | NZ  | C_GLU_308 | OE2 | 3.684 |
| 5TIK | C_LYS_287 | NZ  | C_GLU_273 | OE1 | 3.786 |
| 5TIK | C_LYS_305 | NZ  | C_GLU_308 | OE1 | 3.517 |
| 5TIK | C_LYS_305 | NZ  | C_GLU_308 | OE2 | 3.437 |
| 5TIK | C_ARG_310 | NH1 | C_ASP_307 | OD2 | 3.297 |
| 5TIK | D_HIS_3   | NE2 | A_GLU_9   | OE1 | 2.950 |
| 5TIK | D_HIS_3   | NE2 | A_GLU_9   | OE2 | 2.918 |
| 5TIK | D_ARG_7   | NH1 | D_GLU_9   | OE1 | 3.447 |
| 5TIK | D_LYS_28  | NZ  | D_GLU_83  | OE1 | 3.595 |
| 5TIK | D_LYS_28  | NZ  | D_GLU_83  | OE2 | 2.506 |
| 5TIK | D_HIS_47  | ND1 | D_ASP_63  | OD2 | 2.503 |
| 5TIK | D_LYS_52  | NZ  | D_GLU_30  | OE1 | 2.944 |
| 5TIK | D_LYS_52  | NZ  | D_GLU_30  | OE2 | 3.601 |
| 5TIK | D_HIS_75  | NE2 | D_ASP_92  | OD1 | 3.926 |
| 5TIK | D_LYS_99  | NZ  | D_GLU_91  | OE1 | 3.765 |
| 5TIK | D_ARG_106 | NH1 | D_GLU_177 | OE1 | 3.872 |
| 5TIK | D_ARG_106 | NH1 | D_GLU_177 | OE2 | 3.044 |
| 5TIK | D_ARG_106 | NH2 | D_GLU_177 | OE2 | 3.983 |
| 5TIK | D_LYS_157 | NZ  | D_ASP_161 | OD1 | 2.995 |
| 5TIK | D_LYS_157 | NZ  | D_ASP_166 | OD1 | 2.612 |
| 5TIK | D_LYS_157 | NZ  | D_ASP_166 | OD2 | 3.577 |
| 5TIK | D_LYS_175 | NZ  | D_GLU_146 | OE1 | 3.788 |
| 5TIK | D_LYS_205 | NZ  | D_GLU_308 | OE2 | 3.635 |
| 5TIK | D_LYS_287 | NZ  | D_GLU_273 | OE1 | 3.724 |
| 5TIK | D_LYS_305 | NZ  | D_GLU_308 | OE1 | 3.354 |
| 5TIK | D_LYS_305 | NZ  | D_GLU_308 | OE2 | 2.963 |

Table 713: 5TIK-specific salt bridging networks analysis. In this table, a PDB file is specified with a four-letter PDB ID, except that the names of the PDB files corresponding to the single NMR structural model split from the NMR ensemble is specified with a four-letter PDB ID in addition to a hyphen followed by the single NMR structural model numeric ID, the residue naming scheme is **Chain ID\_residue name\_residue number**,  $\angle ADH$  represents the angle formed by acceptor (A), donor (D) and hydrogen (H) ( $\angle ADH$ ).

| PDB ID | Residue A | Atom A | Residue B | Atom B | Distance (Å) |
|--------|-----------|--------|-----------|--------|--------------|
| 5TL5   | L.LYS_24  | NZ     | L.ASP_74  | OD1    | 3.254        |
| 5TL5   | L.LYS_24  | NZ     | L.ASP_74  | OD2    | 3.141        |
| 5TL5   | L.ARG_65  | NH1    | L.ASP_86  | OD1    | 3.543        |
| 5TL5   | L.ARG_65  | NH1    | L.ASP_86  | OD2    | 2.755        |
| 5TL5   | L.ARG_65  | NH2    | L.GLU_85  | OE2    | 3.698        |
| 5TL5   | L.ARG_65  | NH2    | L.ASP_86  | OD1    | 2.948        |
| 5TL5   | L.ARG_65  | NH2    | L.ASP_86  | OD2    | 3.662        |
| 5TL5   | L.LYS_153 | NZ     | L.GLU_199 | OE1    | 2.824        |
| 5TL5   | L.HIS_193 | ND1    | L.ASP_189 | OD1    | 3.571        |
| 5TL5   | L.ARG_215 | NH1    | L.GLU_191 | OE1    | 3.322        |
| 5TL5   | H.ARG_40  | NH1    | H.GLU_89  | OE1    | 3.264        |
| 5TL5   | H.ARG_40  | NH2    | H.GLU_89  | OE1    | 3.195        |
| 5TL5   | H.ARG_40  | NH2    | H.GLU_89  | OE2    | 3.409        |
| 5TL5   | H.ARG_50  | NH1    | L.ASP_98  | OD1    | 2.887        |
| 5TL5   | H.ARG_50  | NH1    | L.ASP_98  | OD2    | 3.532        |
| 5TL5   | H.ARG_50  | NH2    | L.ASP_98  | OD1    | 3.785        |
| 5TL5   | H.ARG_50  | NH2    | L.ASP_98  | OD2    | 2.933        |
| 5TL5   | H.LYS_67  | NZ     | H.ASP_90  | OD1    | 3.648        |
| 5TL5   | H.LYS_67  | NZ     | H.ASP_90  | OD2    | 2.769        |
| 5TL5   | H.ARG_98  | NH2    | H.ASP_100 | OD1    | 3.835        |
| 5TL5   | H.LYS_150 | NZ     | H.ASP_151 | OD1    | 3.624        |
| 5TL5   | H.LYS_150 | NZ     | H.ASP_151 | OD2    | 3.145        |
| 5TL5   | H.LYS_216 | NZ     | L.GLU_127 | OE1    | 3.027        |
| 5TL5   | H.LYS_216 | NZ     | L.GLU_127 | OE2    | 3.571        |
| 5TL5   | A.LYS_17  | NZ     | H.ASP_55  | OD1    | 3.610        |
| 5TL5   | A.LYS_17  | NZ     | H.ASP_55  | OD2    | 2.637        |
| 5TL5   | A.LYS_17  | NZ     | H.ASP_57  | OD1    | 2.990        |
| 5TL5   | A.HIS_36  | NE2    | H.ASP_104 | OD1    | 3.017        |
| 5TL5   | A.HIS_36  | NE2    | H.ASP_104 | OD2    | 2.947        |
| 5TL5   | A.ARG_37  | NH2    | H.ASP_104 | OD2    | 2.895        |
| 5TL5   | A.ARG_58  | NH1    | A.ASP_54  | OD1    | 3.167        |
| 5TL5   | A.ARG_58  | NH1    | A.ASP_54  | OD2    | 3.803        |
| 5TL5   | A.ARG_58  | NH1    | A.GLU_62  | OE2    | 3.990        |
| 5TL5   | A.ARG_58  | NH2    | A.ASP_54  | OD1    | 2.943        |
| 5TL5   | A.ARG_58  | NH2    | A.GLU_62  | OE2    | 3.654        |
| 5TL5   | A.ARG_65  | NH1    | A.GLU_96  | OE2    | 3.447        |
| 5TL5   | A.ARG_65  | NH2    | A.GLU_96  | OE2    | 3.907        |
| 5TL5   | A.ARG_74  | NH1    | A.GLU_83  | OE1    | 3.799        |
| 5TL5   | A.ARG_74  | NH2    | A.GLU_83  | OE1    | 3.360        |

Table 714: 5TL5-specific salt bridging networks analysis. In this table, a PDB file is specified with a four-letter PDB ID, except that the names of the PDB files corresponding to the single NMR structural model split from the NMR ensemble is specified with a four-letter PDB ID in addition to a hyphen followed by the single NMR structural model numeric ID, the residue naming scheme is **Chain ID\_residue name\_residue number**,  $\angle ADH$  represents the angle formed by acceptor (A), donor (D) and hydrogen (H) ( $\angle ADH$ ).

| PDB ID | Residue A | Atom A | Residue B | Atom B | Distance (Å) |
|--------|-----------|--------|-----------|--------|--------------|
| 5TLJ   | A_ARG_65  | NH1    | A_GLU_83  | OE2    | 2.851        |
| 5TLJ   | A_ARG_65  | NH1    | A_GLU_85  | OE2    | 3.561        |
| 5TLJ   | A_ARG_65  | NH2    | A_ASP_86  | OD1    | 2.756        |
| 5TLJ   | A_ARG_65  | NH2    | A_ASP_86  | OD2    | 2.866        |
| 5TLJ   | A_LYS_153 | NZ     | A_GLU_199 | OE1    | 3.517        |
| 5TLJ   | A_LYS_153 | NZ     | A_GLU_199 | OE2    | 2.835        |
| 5TLJ   | A_ARG_215 | NH1    | A_GLU_191 | OE1    | 2.713        |
| 5TLJ   | B_LYS_38  | NZ     | B_GLU_46  | OE1    | 3.196        |
| 5TLJ   | B_LYS_38  | NZ     | B_ASP_90  | OD1    | 3.704        |
| 5TLJ   | B_ARG_40  | NH1    | B_GLU_89  | OE2    | 2.861        |
| 5TLJ   | B_ARG_50  | NH1    | A_ASP_98  | OD1    | 2.672        |
| 5TLJ   | B_ARG_50  | NH1    | A_ASP_98  | OD2    | 3.926        |
| 5TLJ   | B_LYS_63  | NZ     | B_GLU_46  | OE1    | 3.698        |
| 5TLJ   | B_LYS_63  | NZ     | B_GLU_89  | OE1    | 3.182        |
| 5TLJ   | B_LYS_63  | NZ     | B_GLU_89  | OE2    | 3.310        |
| 5TLJ   | B_LYS_67  | NZ     | B_ASP_90  | OD2    | 3.121        |
| 5TLJ   | B_LYS_150 | NZ     | B_ASP_151 | OD1    | 3.569        |
| 5TLJ   | B_LYS_150 | NZ     | B_ASP_151 | OD2    | 3.604        |
| 5TLJ   | B_LYS_213 | NZ     | B_ASP_215 | OD2    | 3.942        |
| 5TLJ   | C_ARG_65  | NH1    | C_ASP_86  | OD1    | 2.756        |
| 5TLJ   | C_ARG_65  | NH1    | C_ASP_86  | OD2    | 2.971        |
| 5TLJ   | C_ARG_65  | NH2    | C_GLU_83  | OE1    | 3.613        |
| 5TLJ   | C_ARG_65  | NH2    | C_ASP_86  | OD1    | 3.864        |
| 5TLJ   | C_LYS_153 | NZ     | C_GLU_199 | OE1    | 3.775        |
| 5TLJ   | C_LYS_153 | NZ     | C_GLU_199 | OE2    | 3.308        |
| 5TLJ   | C_HIS_193 | ND1    | C_ASP_189 | OD1    | 3.530        |
| 5TLJ   | C_ARG_215 | NH1    | C_GLU_191 | OE2    | 3.808        |
| 5TLJ   | C_ARG_215 | NH2    | C_GLU_191 | OE2    | 3.846        |
| 5TLJ   | D_ARG_38  | NH1    | D_ASP_90  | OD1    | 3.566        |
| 5TLJ   | D_ARG_38  | NH2    | D_GLU_46  | OE1    | 2.710        |
| 5TLJ   | D_ARG_38  | NH2    | D_GLU_46  | OE2    | 3.743        |
| 5TLJ   | D_ARG_38  | NH2    | D_ASP_90  | OD1    | 3.868        |
| 5TLJ   | D_ARG_67  | NH1    | D_ASP_90  | OD2    | 3.824        |
| 5TLJ   | D_ARG_67  | NH2    | D_ASP_90  | OD1    | 3.650        |
| 5TLJ   | D_ARG_100 | NH1    | X_ASP_43  | OD2    | 3.396        |
| 5TLJ   | D_ARG_100 | NH2    | C_GLU_59  | OE1    | 2.703        |
| 5TLJ   | D_ARG_100 | NH2    | C_GLU_59  | OE2    | 3.403        |
| 5TLJ   | D_ARG_100 | NH2    | X_ASP_43  | OD2    | 3.844        |
| 5TLJ   | D_LYS_147 | NZ     | D_ASP_148 | OD1    | 3.264        |
| 5TLJ   | D_LYS_147 | NZ     | D_ASP_148 | OD2    | 2.806        |
| 5TLJ   | E_LYS_24  | NZ     | E_ASP_74  | OD1    | 3.563        |
| 5TLJ   | E_ARG_65  | NH1    | E_GLU_83  | OE2    | 3.709        |
| 5TLJ   | E_ARG_65  | NH2    | E_GLU_85  | OE1    | 3.881        |
| 5TLJ   | E_ARG_65  | NH2    | E_ASP_86  | OD1    | 2.674        |
| 5TLJ   | E_ARG_65  | NH2    | E_ASP_86  | OD2    | 3.332        |
| 5TLJ   | E_ARG_146 | NH2    | E_GLU_169 | OE1    | 3.285        |
| 5TLJ   | E_ARG_215 | NH1    | E_GLU_191 | OE2    | 3.303        |
| 5TLJ   | F_LYS_38  | NZ     | F_GLU_46  | OE1    | 3.804        |
| 5TLJ   | F_ARG_50  | NH1    | E_ASP_98  | OD1    | 3.689        |
| 5TLJ   | F_ARG_50  | NH1    | E_ASP_98  | OD2    | 2.897        |
| 5TLJ   | F_ARG_50  | NH2    | E_ASP_98  | OD1    | 3.671        |
| 5TLJ   | F_ARG_50  | NH2    | E_ASP_98  | OD2    | 3.575        |
| 5TLJ   | F_LYS_63  | NZ     | F_GLU_89  | OE1    | 3.558        |
| 5TLJ   | F_LYS_67  | NZ     | F_ASP_90  | OD1    | 3.830        |
| 5TLJ   | F_LYS_67  | NZ     | F_ASP_90  | OD2    | 3.115        |
| 5TLJ   | F_ARG_98  | NH1    | F_ASP_100 | OD1    | 3.189        |
| 5TLJ   | F_ARG_98  | NH1    | F_ASP_100 | OD2    | 3.943        |

|      |           |     |           |     |       |
|------|-----------|-----|-----------|-----|-------|
| 5TLJ | F_LYS_150 | NZ  | F_ASP_151 | OD1 | 3.468 |
| 5TLJ | F_HIS_171 | ND1 | E_ASP_171 | OD1 | 3.892 |
| 5TLJ | F_HIS_171 | NE2 | E_ASP_171 | OD2 | 3.411 |
| 5TLJ | F_LYS_217 | NZ  | F_GLU_219 | OE2 | 2.788 |
| 5TLJ | G_ARG_24  | NH2 | G_ASP_74  | OD1 | 3.512 |
| 5TLJ | G_ARG_65  | NH1 | G_GLU_83  | OE1 | 3.877 |
| 5TLJ | G_ARG_65  | NH1 | G_ASP_86  | OD1 | 3.552 |
| 5TLJ | G_ARG_65  | NH1 | G_ASP_86  | OD2 | 2.689 |
| 5TLJ | G_ARG_65  | NH2 | G_GLU_83  | OE1 | 3.030 |
| 5TLJ | G_LYS_187 | NZ  | G_GLU_191 | OE2 | 3.996 |
| 5TLJ | H_ARG_38  | NH1 | H_GLU_46  | OE1 | 3.968 |
| 5TLJ | H_ARG_38  | NH1 | H_ASP_90  | OD1 | 3.590 |
| 5TLJ | H_ARG_38  | NH2 | H_GLU_46  | OE1 | 2.850 |
| 5TLJ | H_ARG_38  | NH2 | H_GLU_46  | OE2 | 3.149 |
| 5TLJ | H_ARG_38  | NH2 | H_ASP_90  | OD1 | 3.501 |
| 5TLJ | H_ARG_67  | NH1 | H_ASP_90  | OD1 | 3.809 |
| 5TLJ | H_ARG_67  | NH1 | H_ASP_90  | OD2 | 2.805 |
| 5TLJ | H_ARG_67  | NH2 | H_ASP_90  | OD1 | 3.038 |
| 5TLJ | H_ARG_67  | NH2 | H_ASP_90  | OD2 | 3.316 |
| 5TLJ | H_ARG_76  | NH2 | H_ASP_73  | OD2 | 3.334 |
| 5TLJ | H_ARG_98  | NH2 | H_ASP_105 | OD2 | 3.277 |
| 5TLJ | H_ARG_100 | NH2 | G_GLU_59  | OE1 | 2.761 |
| 5TLJ | H_LYS_147 | NZ  | H_ASP_148 | OD1 | 3.556 |
| 5TLJ | H_LYS_147 | NZ  | H_ASP_148 | OD2 | 2.892 |
| 5TLJ | X_LYS_17  | NZ  | B_ASP_57  | OD2 | 3.053 |
| 5TLJ | X_HIS_36  | NE2 | B_ASP_104 | OD1 | 3.121 |
| 5TLJ | X_HIS_36  | NE2 | B_ASP_104 | OD2 | 2.886 |
| 5TLJ | X_ARG_58  | NH1 | X_GLU_62  | OE2 | 2.792 |
| 5TLJ | X_ARG_58  | NH2 | X_ASP_54  | OD1 | 3.157 |
| 5TLJ | X_ARG_58  | NH2 | X_GLU_62  | OE2 | 3.987 |
| 5TLJ | X_ARG_65  | NH2 | X_GLU_83  | OE2 | 3.778 |

Table 715: 5TLJ-specific salt bridging networks analysis. In this table, a PDB file is specified with a four-letter PDB ID, except that the names of the PDB files corresponding to the single NMR structural model split from the NMR ensemble is specified with a four-letter PDB ID in addition to a hyphen followed by the single NMR structural model numeric ID, the residue naming scheme is **Chain ID\_residue name\_residue number**,  $\angle ADH$  represents the angle formed by acceptor (A), donor (D) and hydrogen (H) ( $\angle ADH$ ).

| PDB ID | Residue A | Atom A | Residue B | Atom B | Distance (Å) |
|--------|-----------|--------|-----------|--------|--------------|
| 5TLK   | A_LYS_24  | NZ     | A_ASP_74  | OD1    | 3.675        |
| 5TLK   | A_ARG_65  | NH1    | A_ASP_86  | OD1    | 3.826        |
| 5TLK   | A_ARG_65  | NH1    | A_ASP_86  | OD2    | 2.689        |
| 5TLK   | A_ARG_65  | NH2    | A_GLU_83  | OE2    | 3.993        |
| 5TLK   | A_ARG_65  | NH2    | A_ASP_86  | OD1    | 3.142        |
| 5TLK   | A_ARG_65  | NH2    | A_ASP_86  | OD2    | 3.459        |
| 5TLK   | A_LYS_107 | NZ     | A_GLU_169 | OE2    | 3.867        |
| 5TLK   | A_LYS_153 | NZ     | A_GLU_199 | OE1    | 2.764        |
| 5TLK   | B_ARG_50  | NH1    | A_ASP_98  | OD1    | 3.277        |
| 5TLK   | B_ARG_50  | NH1    | A_ASP_98  | OD2    | 2.898        |
| 5TLK   | B_ARG_50  | NH2    | A_ASP_98  | OD1    | 2.923        |
| 5TLK   | B_LYS_63  | NZ     | B_GLU_46  | OE1    | 3.471        |
| 5TLK   | B_LYS_63  | NZ     | B_GLU_46  | OE2    | 3.192        |
| 5TLK   | B_LYS_67  | NZ     | B_ASP_90  | OD1    | 3.881        |
| 5TLK   | B_LYS_67  | NZ     | B_ASP_90  | OD2    | 2.993        |
| 5TLK   | B_LYS_150 | NZ     | B_ASP_151 | OD1    | 3.046        |
| 5TLK   | B_LYS_150 | NZ     | B_ASP_151 | OD2    | 2.798        |
| 5TLK   | B_LYS_216 | NZ     | A_GLU_127 | OE1    | 3.067        |
| 5TLK   | B_LYS_216 | NZ     | A_GLU_127 | OE2    | 3.588        |
| 5TLK   | C_ARG_24  | NH1    | C_ASP_74  | OD1    | 3.109        |
| 5TLK   | C_ARG_24  | NH1    | C_ASP_74  | OD2    | 2.746        |
| 5TLK   | C_LYS_27  | NZ     | C_GLU_97  | OE1    | 3.042        |
| 5TLK   | C_ARG_57  | NH2    | X_ASP_43  | OD1    | 3.384        |
| 5TLK   | C_ARG_65  | NH1    | C_ASP_86  | OD1    | 3.594        |
| 5TLK   | C_ARG_65  | NH1    | C_ASP_86  | OD2    | 2.481        |
| 5TLK   | C_ARG_65  | NH2    | C_ASP_86  | OD1    | 2.770        |
| 5TLK   | C_ARG_65  | NH2    | C_ASP_86  | OD2    | 3.157        |
| 5TLK   | C_LYS_107 | NZ     | C_GLU_169 | OE2    | 2.732        |
| 5TLK   | C_LYS_153 | NZ     | C_GLU_199 | OE1    | 2.786        |
| 5TLK   | C_LYS_153 | NZ     | C_GLU_199 | OE2    | 3.954        |
| 5TLK   | C_LYS_187 | NZ     | C_GLU_191 | OE2    | 3.768        |
| 5TLK   | C_ARG_215 | NH1    | C_GLU_191 | OE1    | 3.277        |
| 5TLK   | D_ARG_38  | NH1    | D_ASP_90  | OD1    | 2.987        |
| 5TLK   | D_ARG_38  | NH2    | D_GLU_46  | OE1    | 2.875        |
| 5TLK   | D_ARG_38  | NH2    | D_GLU_46  | OE2    | 3.558        |
| 5TLK   | D_ARG_38  | NH2    | D_ASP_90  | OD1    | 3.987        |
| 5TLK   | D_LYS_65  | NZ     | D_ASP_62  | OD1    | 2.814        |
| 5TLK   | D_ARG_67  | NH1    | D_ASP_90  | OD2    | 2.614        |
| 5TLK   | D_ARG_67  | NH2    | D_ASP_90  | OD1    | 3.114        |
| 5TLK   | D_ARG_67  | NH2    | D_ASP_90  | OD2    | 3.161        |
| 5TLK   | D_ARG_98  | NH2    | D_ASP_105 | OD1    | 3.927        |
| 5TLK   | D_ARG_98  | NH2    | D_ASP_105 | OD2    | 2.700        |
| 5TLK   | D_ARG_100 | NH1    | X_ASP_43  | OD2    | 2.904        |
| 5TLK   | D_ARG_100 | NH2    | C_GLU_59  | OE1    | 2.708        |
| 5TLK   | D_ARG_100 | NH2    | C_GLU_59  | OE2    | 3.299        |
| 5TLK   | D_ARG_100 | NH2    | X_ASP_43  | OD2    | 3.882        |
| 5TLK   | D_LYS_147 | NZ     | D_ASP_148 | OD1    | 3.173        |
| 5TLK   | D_LYS_147 | NZ     | D_ASP_148 | OD2    | 3.344        |
| 5TLK   | E_ARG_65  | NH1    | E_ASP_86  | OD1    | 3.727        |
| 5TLK   | E_ARG_65  | NH1    | E_ASP_86  | OD2    | 2.581        |
| 5TLK   | E_ARG_65  | NH2    | E_GLU_83  | OE1    | 3.517        |
| 5TLK   | E_ARG_65  | NH2    | E_ASP_86  | OD1    | 2.787        |
| 5TLK   | E_ARG_65  | NH2    | E_ASP_86  | OD2    | 3.198        |
| 5TLK   | E_LYS_153 | NZ     | E_GLU_199 | OE1    | 2.662        |
| 5TLK   | E_LYS_187 | NZ     | E_GLU_191 | OE1    | 3.794        |
| 5TLK   | F_LYS_38  | NZ     | F_ASP_90  | OD1    | 3.722        |
| 5TLK   | F_ARG_40  | NH1    | F_GLU_89  | OE1    | 3.871        |

|      |           |     |           |     |       |
|------|-----------|-----|-----------|-----|-------|
| 5TLK | F_ARG_40  | NH2 | F_GLU_89  | OE1 | 3.823 |
| 5TLK | F_ARG_40  | NH2 | F_GLU_89  | OE2 | 2.772 |
| 5TLK | F_ARG_50  | NH1 | E_ASP_98  | OD1 | 3.086 |
| 5TLK | F_ARG_50  | NH1 | E_ASP_98  | OD2 | 3.224 |
| 5TLK | F_ARG_50  | NH2 | E_ASP_98  | OD1 | 2.767 |
| 5TLK | F_ARG_50  | NH2 | E_ASP_98  | OD2 | 3.943 |
| 5TLK | F_LYS_67  | NZ  | F_ASP_90  | OD2 | 3.364 |
| 5TLK | F_ARG_98  | NH1 | F_ASP_100 | OD1 | 3.582 |
| 5TLK | F_LYS_150 | NZ  | F_ASP_151 | OD1 | 3.689 |
| 5TLK | G_ARG_24  | NH1 | G_ASP_74  | OD2 | 2.978 |
| 5TLK | G_ARG_24  | NH2 | G_ASP_74  | OD1 | 3.856 |
| 5TLK | G_ARG_24  | NH2 | G_ASP_74  | OD2 | 3.656 |
| 5TLK | G_LYS_27  | NZ  | G_GLU_97  | OE1 | 3.620 |
| 5TLK | G_ARG_33  | NH1 | Y_GLU_24  | OE2 | 3.993 |
| 5TLK | G_ARG_33  | NH2 | Y_GLU_24  | OE2 | 3.475 |
| 5TLK | G_ARG_65  | NH1 | G_ASP_86  | OD1 | 3.101 |
| 5TLK | G_ARG_65  | NH1 | G_ASP_86  | OD2 | 2.770 |
| 5TLK | G_ARG_65  | NH2 | G_GLU_85  | OE2 | 3.596 |
| 5TLK | G_LYS_107 | NZ  | G_GLU_169 | OE2 | 3.886 |
| 5TLK | G_LYS_153 | NZ  | G_GLU_199 | OE1 | 2.760 |
| 5TLK | G_LYS_187 | NZ  | G_GLU_191 | OE2 | 2.938 |
| 5TLK | G_HIS_193 | ND1 | G_ASP_189 | OD1 | 3.813 |
| 5TLK | G_ARG_215 | NH1 | G_GLU_191 | OE1 | 3.873 |
| 5TLK | H_ARG_38  | NH1 | H_ASP_90  | OD1 | 2.755 |
| 5TLK | H_ARG_38  | NH2 | H_GLU_46  | OE1 | 3.268 |
| 5TLK | H_ARG_38  | NH2 | H_GLU_46  | OE2 | 3.476 |
| 5TLK | H_ARG_38  | NH2 | H_ASP_90  | OD1 | 3.679 |
| 5TLK | H_LYS_65  | NZ  | H_ASP_62  | OD1 | 3.982 |
| 5TLK | H_ARG_67  | NH1 | H_ASP_90  | OD2 | 2.783 |
| 5TLK | H_ARG_67  | NH2 | H_ASP_90  | OD1 | 2.925 |
| 5TLK | H_ARG_67  | NH2 | H_ASP_90  | OD2 | 2.986 |
| 5TLK | H_ARG_98  | NH2 | H_ASP_105 | OD1 | 3.818 |
| 5TLK | H_ARG_98  | NH2 | H_ASP_105 | OD2 | 2.712 |
| 5TLK | H_ARG_100 | NH1 | G_GLU_59  | OE1 | 3.531 |
| 5TLK | H_ARG_100 | NH1 | Y_ASP_43  | OD2 | 3.423 |
| 5TLK | H_ARG_100 | NH2 | G_GLU_59  | OE1 | 2.787 |
| 5TLK | H_ARG_100 | NH2 | G_GLU_59  | OE2 | 3.306 |
| 5TLK | H_LYS_147 | NZ  | H_ASP_148 | OD1 | 3.296 |
| 5TLK | H_LYS_147 | NZ  | H_ASP_148 | OD2 | 3.127 |
| 5TLK | H_LYS_213 | NZ  | G_GLU_127 | OE1 | 3.569 |
| 5TLK | X_LYS_17  | NZ  | B_ASP_55  | OD1 | 3.914 |
| 5TLK | X_LYS_17  | NZ  | B_ASP_55  | OD2 | 3.018 |
| 5TLK | X_LYS_17  | NZ  | B_ASP_57  | OD2 | 3.114 |
| 5TLK | X_HIS_36  | NE2 | B_ASP_104 | OD1 | 3.010 |
| 5TLK | X_HIS_36  | NE2 | B_ASP_104 | OD2 | 2.891 |
| 5TLK | X_ARG_37  | NH2 | B_ASP_104 | OD1 | 2.703 |
| 5TLK | X_HIS_56  | ND1 | X_ASP_54  | OD1 | 3.625 |
| 5TLK | X_ARG_58  | NH2 | X_ASP_54  | OD1 | 2.720 |
| 5TLK | X_ARG_58  | NH2 | X_ASP_54  | OD2 | 3.583 |
| 5TLK | X_ARG_74  | NH1 | X_GLU_83  | OE2 | 3.772 |
| 5TLK | X_ARG_74  | NH2 | X_GLU_83  | OE2 | 3.777 |
| 5TLK | Y_LYS_17  | NZ  | F_ASP_55  | OD1 | 3.581 |
| 5TLK | Y_LYS_17  | NZ  | F_ASP_55  | OD2 | 3.170 |
| 5TLK | Y_LYS_17  | NZ  | F_ASP_57  | OD2 | 3.380 |
| 5TLK | Y_HIS_36  | NE2 | F_ASP_104 | OD1 | 3.198 |
| 5TLK | Y_HIS_36  | NE2 | F_ASP_104 | OD2 | 2.793 |
| 5TLK | Y_ARG_37  | NH2 | F_ASP_104 | OD1 | 3.616 |
| 5TLK | Y_ARG_58  | NH2 | Y_ASP_54  | OD1 | 3.024 |

|      |          |     |          |     |       |
|------|----------|-----|----------|-----|-------|
| 5TLK | Y_ARG_74 | NH1 | Y_GLU_83 | OE2 | 3.804 |
| 5TLK | Y_ARG_74 | NH2 | Y_GLU_83 | OE2 | 3.441 |

Table 716: 5TLK-specific salt bridging networks analysis. In this table, a PDB file is specified with a four-letter PDB ID, except that the names of the PDB files corresponding to the single NMR structural model split from the NMR ensemble is specified with a four-letter PDB ID in addition to a hyphen followed by the single NMR structural model numeric ID, the residue naming scheme is **Chain ID\_residue name\_residue number**,  $\angle ADH$  represents the angle formed by acceptor (A), donor (D) and hydrogen (H) ( $\angle ADH$ ).

| PDB ID | Residue A | Atom A | Residue B | Atom B | Distance (Å) |
|--------|-----------|--------|-----------|--------|--------------|
| 5TRU   | L_ARG_24  | NH1    | L_ASP_71  | OD2    | 3.954        |
| 5TRU   | L_ARG_55  | NH2    | L_ASP_61  | OD1    | 3.408        |
| 5TRU   | L_ARG_62  | NH2    | L_ASP_83  | OD1    | 2.775        |
| 5TRU   | L_ARG_62  | NH2    | L_ASP_83  | OD2    | 3.715        |
| 5TRU   | L_LYS_150 | NZ     | L_GLU_196 | OE1    | 3.945        |
| 5TRU   | L_HIS_190 | ND1    | L_ASP_152 | OD2    | 3.931        |
| 5TRU   | H_ARG_38  | NH1    | H_ASP_90  | OD1    | 2.859        |
| 5TRU   | H_ARG_38  | NH2    | H_GLU_46  | OE1    | 3.419        |
| 5TRU   | H_ARG_38  | NH2    | H_ASP_90  | OD1    | 3.391        |
| 5TRU   | H_ARG_67  | NH1    | H_ASP_90  | OD1    | 3.755        |
| 5TRU   | H_ARG_67  | NH1    | H_ASP_90  | OD2    | 2.634        |
| 5TRU   | H_ARG_67  | NH2    | H_ASP_90  | OD1    | 2.978        |
| 5TRU   | H_ARG_67  | NH2    | H_ASP_90  | OD2    | 3.388        |
| 5TRU   | H_ARG_98  | NH2    | H_ASP_106 | OD1    | 3.783        |
| 5TRU   | H_ARG_98  | NH2    | H_ASP_106 | OD2    | 2.740        |
| 5TRU   | H_LYS_148 | NZ     | H_ASP_149 | OD1    | 3.967        |
| 5TRU   | H_LYS_148 | NZ     | H_ASP_149 | OD2    | 3.741        |
| 5TRU   | L_ARG_55  | NH2    | L_ASP_61  | OD1    | 2.796        |
| 5TRU   | L_ARG_62  | NH2    | L_ASP_83  | OD1    | 2.608        |
| 5TRU   | L_ARG_62  | NH2    | L_ASP_83  | OD2    | 3.126        |
| 5TRU   | L_ARG_78  | NH1    | L_GLU_80  | OE2    | 2.858        |
| 5TRU   | L_LYS_104 | NZ     | L_GLU_166 | OE2    | 3.131        |
| 5TRU   | L_LYS_127 | NZ     | L_ASP_123 | OD2    | 3.360        |
| 5TRU   | h_ARG_38  | NH1    | h_ASP_90  | OD1    | 2.730        |
| 5TRU   | h_ARG_38  | NH2    | h_GLU_46  | OE1    | 3.334        |
| 5TRU   | h_ARG_38  | NH2    | h_ASP_90  | OD1    | 3.607        |
| 5TRU   | h_ARG_67  | NH1    | h_ASP_90  | OD1    | 3.906        |
| 5TRU   | h_ARG_67  | NH1    | h_ASP_90  | OD2    | 2.771        |
| 5TRU   | h_ARG_67  | NH2    | h_ASP_90  | OD1    | 3.264        |
| 5TRU   | h_ARG_67  | NH2    | h_ASP_90  | OD2    | 3.554        |
| 5TRU   | h_ARG_98  | NH2    | h_ASP_106 | OD2    | 3.484        |
| 5TRU   | h_HIS_169 | NE2    | L_ASP_168 | OD2    | 3.995        |

Table 717: 5TRU-specific salt bridging networks analysis. In this table, a PDB file is specified with a four-letter PDB ID, except that the names of the PDB files corresponding to the single NMR structural model split from the NMR ensemble is specified with a four-letter PDB ID in addition to a hyphen followed by the single NMR structural model numeric ID, the residue naming scheme is **Chain ID\_residue name\_residue number**,  $\angle ADH$  represents the angle formed by acceptor (A), donor (D) and hydrogen (H) ( $\angle ADH$ ).



| PDB ID | Residue A | Atom A | Residue B | Atom B | Distance (Å) |
|--------|-----------|--------|-----------|--------|--------------|
| 5TZ2   | H_LYS_12  | NZ     | H_GLU_16  | OE1    | 3.837        |
| 5TZ2   | H_ARG_38  | NH2    | H_GLU_46  | OE1    | 3.145        |
| 5TZ2   | H_ARG_38  | NH2    | H_GLU_46  | OE2    | 3.092        |
| 5TZ2   | H_ARG_59  | NH2    | H_ASP_57  | OD1    | 3.404        |
| 5TZ2   | H_ARG_59  | NH2    | H_ASP_57  | OD2    | 2.670        |
| 5TZ2   | H_ARG_98  | NH2    | H_ASP_108 | OD1    | 3.872        |
| 5TZ2   | H_ARG_98  | NH2    | H_ASP_108 | OD2    | 2.930        |
| 5TZ2   | H_ARG_101 | NH1    | C_ASP_46  | OD2    | 3.182        |
| 5TZ2   | H_HIS_105 | NE2    | C_ASP_51  | OD1    | 2.798        |
| 5TZ2   | H_HIS_105 | NE2    | C_ASP_51  | OD2    | 2.654        |
| 5TZ2   | H_LYS_150 | NZ     | H_ASP_151 | OD1    | 3.764        |
| 5TZ2   | L_ARG_61  | NH2    | L_ASP_82  | OD1    | 3.176        |
| 5TZ2   | L_ARG_61  | NH2    | L_ASP_82  | OD2    | 3.586        |
| 5TZ2   | C_LYS_41  | NZ     | C_ASP_46  | OD1    | 2.641        |
| 5TZ2   | C_ARG_45  | NH1    | C_ASP_62  | OD2    | 3.329        |
| 5TZ2   | C_ARG_45  | NH2    | C_ASP_62  | OD1    | 3.717        |
| 5TZ2   | C_ARG_45  | NH2    | C_ASP_62  | OD2    | 3.722        |
| 5TZ2   | C_LYS_56  | NZ     | H_ASP_55  | OD1    | 3.222        |
| 5TZ2   | C_LYS_56  | NZ     | H_ASP_55  | OD2    | 2.489        |
| 5TZ2   | C_LYS_56  | NZ     | H_ASP_57  | OD2    | 3.354        |
| 5TZ2   | C_HIS_90  | NE2    | C_ASP_62  | OD2    | 3.559        |
| 5TZ2   | C_ARG_103 | NH2    | C_GLU_29  | OE2    | 3.947        |
| 5TZ2   | C_ARG_103 | NH2    | C_GLU_100 | OE1    | 2.920        |
| 5TZ2   | C_ARG_103 | NH2    | C_GLU_100 | OE2    | 3.895        |

Table 718: 5TZ2-specific salt bridging networks analysis. In this table, a PDB file is specified with a four-letter PDB ID, except that the names of the PDB files corresponding to the single NMR structural model split from the NMR ensemble is specified with a four-letter PDB ID in addition to a hyphen followed by the single NMR structural model numeric ID, the residue naming scheme is **Chain ID\_residue name\_residue number**,  $\angle ADH$  represents the angle formed by acceptor (A), donor (D) and hydrogen (H) ( $\angle ADH$ ).

| PDB ID | Residue A | Atom A | Residue B | Atom B | Distance (Å) |
|--------|-----------|--------|-----------|--------|--------------|
| 5TZT   | B_ARG_82  | NH2    | H_ASP_31  | OD1    | 2.783        |
| 5TZT   | B_ARG_82  | NH2    | H_ASP_31  | OD2    | 3.806        |
| 5TZT   | B_LYS_108 | NZ     | B_GLU_110 | OE2    | 3.764        |
| 5TZT   | B_HIS_194 | ND1    | B_ASP_156 | OD2    | 2.786        |
| 5TZT   | A_LYS_19  | NZ     | A_GLU_82  | OE1    | 3.806        |
| 5TZT   | A_ARG_38  | NH1    | A_ASP_90  | OD2    | 3.536        |
| 5TZT   | A_ARG_38  | NH2    | A_GLU_46  | OE1    | 3.836        |
| 5TZT   | A_ARG_38  | NH2    | A_GLU_46  | OE2    | 2.074        |
| 5TZT   | A_LYS_63  | NZ     | A_GLU_46  | OE1    | 3.429        |
| 5TZT   | A_LYS_63  | NZ     | A_GLU_46  | OE2    | 3.935        |
| 5TZT   | A_ARG_67  | NH1    | A_ASP_90  | OD1    | 3.187        |
| 5TZT   | A_ARG_67  | NH1    | A_ASP_90  | OD2    | 3.312        |
| 5TZT   | A_ARG_67  | NH2    | A_ASP_90  | OD1    | 2.897        |
| 5TZT   | A_ARG_87  | NH1    | A_GLU_89  | OE1    | 3.756        |
| 5TZT   | A_ARG_98  | NH1    | A_ASP_105 | OD1    | 3.423        |
| 5TZT   | A_ARG_98  | NH1    | A_ASP_105 | OD2    | 2.447        |
| 5TZT   | A_HIS_102 | ND1    | D_GLU_104 | OE2    | 3.803        |
| 5TZT   | L_LYS_55  | NZ     | C_GLU_104 | OE1    | 3.704        |
| 5TZT   | L_LYS_55  | NZ     | C_GLU_104 | OE2    | 2.899        |
| 5TZT   | L_ARG_66  | NH1    | L_ASP_87  | OD1    | 3.313        |
| 5TZT   | L_ARG_66  | NH1    | L_ASP_87  | OD2    | 2.679        |
| 5TZT   | L_ARG_66  | NH2    | L_GLU_84  | OE1    | 2.654        |
| 5TZT   | L_ARG_66  | NH2    | L_GLU_84  | OE2    | 3.502        |
| 5TZT   | L_HIS_194 | ND1    | L_ASP_156 | OD2    | 3.224        |
| 5TZT   | H_ARG_38  | NH2    | H_GLU_46  | OE1    | 3.226        |
| 5TZT   | H_LYS_63  | NZ     | H_GLU_46  | OE2    | 3.670        |
| 5TZT   | H_ARG_67  | NH2    | H_ASP_90  | OD2    | 3.363        |
| 5TZT   | H_ARG_98  | NH1    | H_ASP_105 | OD1    | 3.531        |
| 5TZT   | H_ARG_98  | NH1    | H_ASP_105 | OD2    | 2.846        |
| 5TZT   | H_ARG_98  | NH2    | H_ASP_105 | OD1    | 3.738        |
| 5TZT   | H_HIS_102 | ND1    | C_GLU_104 | OE1    | 2.856        |
| 5TZT   | C_ARG_45  | NH1    | C_ASP_62  | OD1    | 2.637        |
| 5TZT   | C_ARG_45  | NH1    | C_ASP_62  | OD2    | 2.581        |
| 5TZT   | C_ARG_45  | NH2    | C_ASP_62  | OD1    | 3.454        |
| 5TZT   | C_HIS_90  | NE2    | C_ASP_62  | OD1    | 3.571        |
| 5TZT   | D_HIS_90  | NE2    | D_ASP_62  | OD1    | 3.274        |
| 5TZT   | D_ARG_103 | NH2    | D_GLU_100 | OE1    | 2.563        |
| 5TZT   | D_ARG_114 | NH1    | D_GLU_11  | OE1    | 3.807        |
| 5TZT   | D_ARG_114 | NH1    | D_GLU_11  | OE2    | 3.964        |

Table 719: 5TZT-specific salt bridging networks analysis. In this table, a PDB file is specified with a four-letter PDB ID, except that the names of the PDB files corresponding to the single NMR structural model split from the NMR ensemble is specified with a four-letter PDB ID in addition to a hyphen followed by the single NMR structural model numeric ID, the residue naming scheme is **Chain ID\_residue name\_residue number**,  $\angle ADH$  represents the angle formed by acceptor (A), donor (D) and hydrogen (H) ( $\angle ADH$ ).

| PDB ID | Residue A | Atom A | Residue B | Atom B | Distance (Å) |
|--------|-----------|--------|-----------|--------|--------------|
| 5TZU   | L.LYS_49  | NZ     | C.ASP_51  | OD1    | 3.523        |
| 5TZU   | L.LYS_49  | NZ     | C.ASP_51  | OD2    | 2.772        |
| 5TZU   | L.ARG_61  | NH1    | L.GLU_79  | OE1    | 3.734        |
| 5TZU   | L.ARG_61  | NH1    | L.GLU_81  | OE2    | 3.054        |
| 5TZU   | L.ARG_61  | NH1    | L.ASP_82  | OD1    | 2.764        |
| 5TZU   | L.ARG_61  | NH1    | L.ASP_82  | OD2    | 3.551        |
| 5TZU   | L.ARG_61  | NH2    | L.GLU_79  | OE1    | 3.680        |
| 5TZU   | L.ARG_96  | NH1    | C.GLU_104 | OE1    | 3.230        |
| 5TZU   | L.ARG_96  | NH1    | C.GLU_104 | OE2    | 3.808        |
| 5TZU   | L.ARG_96  | NH2    | C.GLU_104 | OE1    | 2.901        |
| 5TZU   | L.LYS_103 | NZ     | L.GLU_165 | OE1    | 3.822        |
| 5TZU   | L.LYS_103 | NZ     | L.GLU_165 | OE2    | 3.206        |
| 5TZU   | L.ARG_211 | NH1    | L.GLU_187 | OE1    | 3.562        |
| 5TZU   | H.ARG_38  | NH1    | H.ASP_90  | OD2    | 2.785        |
| 5TZU   | H.ARG_38  | NH2    | H.GLU_46  | OE1    | 2.862        |
| 5TZU   | H.ARG_38  | NH2    | H.GLU_46  | OE2    | 3.976        |
| 5TZU   | H.ARG_38  | NH2    | H.ASP_90  | OD2    | 3.917        |
| 5TZU   | H.ARG_67  | NH1    | H.ASP_90  | OD1    | 2.777        |
| 5TZU   | H.ARG_67  | NH1    | H.ASP_90  | OD2    | 3.488        |
| 5TZU   | H.ARG_67  | NH2    | H.ASP_90  | OD1    | 3.415        |
| 5TZU   | H.ARG_67  | NH2    | H.ASP_90  | OD2    | 3.088        |
| 5TZU   | H.ARG_98  | NH2    | H.ASP_106 | OD1    | 3.900        |
| 5TZU   | H.ARG_98  | NH2    | H.ASP_106 | OD2    | 2.795        |
| 5TZU   | H.LYS_214 | NZ     | L.GLU_123 | OE1    | 2.584        |
| 5TZU   | H.LYS_214 | NZ     | L.GLU_123 | OE2    | 3.416        |
| 5TZU   | C.LYS_39  | NZ     | L.ASP_31  | OD1    | 3.076        |
| 5TZU   | C.LYS_39  | NZ     | L.ASP_31  | OD2    | 2.978        |
| 5TZU   | C.LYS_39  | NZ     | C.ASP_46  | OD1    | 3.593        |
| 5TZU   | C.LYS_39  | NZ     | C.GLU_97  | OE2    | 3.431        |
| 5TZU   | C.LYS_41  | NZ     | C.ASP_46  | OD2    | 2.556        |
| 5TZU   | C.ARG_45  | NH1    | C.ASP_62  | OD2    | 3.407        |
| 5TZU   | C.ARG_45  | NH2    | C.ASP_62  | OD1    | 3.389        |
| 5TZU   | C.ARG_45  | NH2    | C.ASP_62  | OD2    | 3.679        |
| 5TZU   | C.HIS_90  | NE2    | C.ASP_62  | OD2    | 3.453        |
| 5TZU   | C.ARG_103 | NH1    | C.GLU_29  | OE2    | 3.912        |
| 5TZU   | C.ARG_103 | NH2    | C.GLU_29  | OE1    | 3.883        |
| 5TZU   | C.ARG_103 | NH2    | C.GLU_100 | OE1    | 3.920        |
| 5TZU   | C.ARG_103 | NH2    | C.GLU_100 | OE2    | 3.101        |

Table 720: 5TZU-specific salt bridging networks analysis. In this table, a PDB file is specified with a four-letter PDB ID, except that the names of the PDB files corresponding to the single NMR structural model split from the NMR ensemble is specified with a four-letter PDB ID in addition to a hyphen followed by the single NMR structural model numeric ID, the residue naming scheme is **Chain ID\_residue name\_residue number**,  $\angle ADH$  represents the angle formed by acceptor (A), donor (D) and hydrogen (H) ( $\angle ADH$ ).

| PDB ID | Residue A | Atom A | Residue B | Atom B | Distance (Å) |
|--------|-----------|--------|-----------|--------|--------------|
| 5U3J   | H_ARG_38  | NH1    | H_ASP_86  | OD1    | 2.854        |
| 5U3J   | H_ARG_38  | NH2    | H_GLU_46  | OE1    | 3.279        |
| 5U3J   | H_ARG_38  | NH2    | H_GLU_46  | OE2    | 3.381        |
| 5U3J   | H_ARG_50  | NH2    | H_GLU_58  | OE1    | 2.789        |
| 5U3J   | H_ARG_52A | NH1    | H_ASP_53  | OD1    | 3.274        |
| 5U3J   | H_ARG_52A | NH1    | H_ASP_53  | OD2    | 3.547        |
| 5U3J   | H_ARG_52A | NH1    | A_ASP_674 | OD1    | 3.805        |
| 5U3J   | H_ARG_52A | NH1    | A_ASP_674 | OD2    | 3.646        |
| 5U3J   | H_ARG_52A | NH2    | A_ASP_674 | OD2    | 3.216        |
| 5U3J   | H_LYS_52C | NZ     | A_ASP_674 | OD1    | 3.151        |
| 5U3J   | H_LYS_52C | NZ     | A_ASP_674 | OD2    | 3.836        |
| 5U3J   | H_ARG_66  | NH1    | H_ASP_86  | OD1    | 3.711        |
| 5U3J   | H_ARG_66  | NH1    | H_ASP_86  | OD2    | 2.572        |
| 5U3J   | H_ARG_66  | NH2    | H_ASP_86  | OD1    | 2.894        |
| 5U3J   | H_ARG_66  | NH2    | H_ASP_86  | OD2    | 3.336        |
| 5U3J   | H_ARG_71  | NH2    | H_ASP_73  | OD1    | 3.654        |
| 5U3J   | H_LYS_143 | NZ     | H_ASP_144 | OD1    | 3.689        |
| 5U3J   | H_LYS_209 | NZ     | L_GLU_123 | OE1    | 3.171        |
| 5U3J   | H_LYS_209 | NZ     | L_GLU_123 | OE2    | 2.412        |
| 5U3J   | L_ARG_24  | NH1    | L_ASP_70  | OD1    | 3.454        |
| 5U3J   | L_ARG_24  | NH1    | L_ASP_70  | OD2    | 3.616        |
| 5U3J   | L_LYS_39  | NZ     | L_GLU_81  | OE1    | 2.718        |
| 5U3J   | L_ARG_61  | NH2    | L_ASP_82  | OD2    | 3.220        |
| 5U3J   | L_LYS_149 | NZ     | L_GLU_195 | OE1    | 2.981        |
| 5U3J   | L_LYS_188 | NZ     | L_ASP_185 | OD1    | 3.489        |
| 5U3J   | L_ARG_211 | NH1    | L_GLU_187 | OE2    | 3.588        |

Table 721: 5U3J-specific salt bridging networks analysis. In this table, a PDB file is specified with a four-letter PDB ID, except that the names of the PDB files corresponding to the single NMR structural model split from the NMR ensemble is specified with a four-letter PDB ID in addition to a hyphen followed by the single NMR structural model numeric ID, the residue naming scheme is **Chain ID\_residue name\_residue number**,  $\angle ADH$  represents the angle formed by acceptor (A), donor (D) and hydrogen (H) ( $\angle ADH$ ).

| PDB ID | Residue A  | Atom A | Residue B  | Atom B | Distance (Å) |
|--------|------------|--------|------------|--------|--------------|
| 5U3N   | H_ARG_38   | NH1    | H_ASP_86   | OD1    | 3.106        |
| 5U3N   | H_ARG_38   | NH2    | H_GLU_46   | OE1    | 3.388        |
| 5U3N   | H_ARG_38   | NH2    | H_GLU_46   | OE2    | 3.678        |
| 5U3N   | H_ARG_50   | NH2    | H_ASP_58   | OD2    | 3.019        |
| 5U3N   | H_ARG_52A  | NH1    | A_ASP_674  | OD2    | 2.997        |
| 5U3N   | H_ARG_52A  | NH2    | H_ASP_53   | OD1    | 2.927        |
| 5U3N   | H_ARG_52A  | NH2    | H_ASP_53   | OD2    | 3.679        |
| 5U3N   | H_ARG_52A  | NH2    | A_ASP_674  | OD1    | 3.173        |
| 5U3N   | H_ARG_52A  | NH2    | A_ASP_674  | OD2    | 3.047        |
| 5U3N   | H_ARG_66   | NH1    | H_ASP_86   | OD1    | 3.888        |
| 5U3N   | H_ARG_66   | NH1    | H_ASP_86   | OD2    | 2.734        |
| 5U3N   | H_ARG_66   | NH2    | H_ASP_86   | OD1    | 3.118        |
| 5U3N   | H_ARG_66   | NH2    | H_ASP_86   | OD2    | 3.431        |
| 5U3N   | H_ARG_71   | NH2    | H_ASP_73   | OD1    | 3.283        |
| 5U3N   | H_ARG_100B | NH1    | L_ASP_31   | OD1    | 3.593        |
| 5U3N   | H_ARG_100B | NH1    | L_ASP_31   | OD2    | 2.967        |
| 5U3N   | H_ARG_100B | NH2    | H_GLU_100E | OE1    | 3.425        |
| 5U3N   | H_ARG_100B | NH2    | H_GLU_100E | OE2    | 2.907        |
| 5U3N   | H_ARG_100B | NH2    | L_ASP_31   | OD1    | 2.974        |
| 5U3N   | H_ARG_100B | NH2    | L_ASP_31   | OD2    | 3.816        |
| 5U3N   | H_LYS_143  | NZ     | H_ASP_144  | OD1    | 3.337        |
| 5U3N   | H_LYS_209  | NZ     | L_GLU_123  | OE1    | 3.254        |
| 5U3N   | H_ARG_210  | NH1    | H_GLU_212  | OE2    | 3.469        |
| 5U3N   | H_ARG_210  | NH2    | H_GLU_212  | OE2    | 3.206        |
| 5U3N   | L_LYS_30   | NZ     | H_GLU_100E | OE1    | 3.899        |
| 5U3N   | L_ARG_55   | NH2    | H_ASP_101  | OD1    | 3.682        |
| 5U3N   | L_ARG_55   | NH2    | H_ASP_101  | OD2    | 2.901        |
| 5U3N   | L_ARG_61   | NH1    | L_ASP_82   | OD1    | 3.771        |
| 5U3N   | L_ARG_61   | NH1    | L_ASP_82   | OD2    | 2.649        |
| 5U3N   | L_ARG_61   | NH2    | L_ASP_82   | OD1    | 3.486        |
| 5U3N   | L_ARG_61   | NH2    | L_ASP_82   | OD2    | 3.672        |
| 5U3N   | L_LYS_149  | NZ     | L_GLU_195  | OE1    | 2.891        |
| 5U3N   | L_LYS_190  | NZ     | L_GLU_213  | OE1    | 3.468        |
| 5U3N   | L_ARG_211  | NH1    | L_GLU_187  | OE2    | 3.281        |

Table 722: 5U3N-specific salt bridging networks analysis. In this table, a PDB file is specified with a four-letter PDB ID, except that the names of the PDB files corresponding to the single NMR structural model split from the NMR ensemble is specified with a four-letter PDB ID in addition to a hyphen followed by the single NMR structural model numeric ID, the residue naming scheme is **Chain ID\_residue name\_residue number**,  $\angle ADH$  represents the angle formed by acceptor (A), donor (D) and hydrogen (H) ( $\angle ADH$ ).

| PDB ID | Residue A | Atom A | Residue B | Atom B | Distance (Å) |
|--------|-----------|--------|-----------|--------|--------------|
| 5UCB   | H_ARG_38  | NH1    | H_ASP_86  | OD1    | 2.881        |
| 5UCB   | H_ARG_38  | NH2    | H_GLU_46  | OE1    | 3.076        |
| 5UCB   | H_ARG_38  | NH2    | H_GLU_46  | OE2    | 3.531        |
| 5UCB   | H_ARG_38  | NH2    | H_ASP_86  | OD1    | 3.930        |
| 5UCB   | H_ARG_66  | NH1    | H_ASP_86  | OD1    | 3.749        |
| 5UCB   | H_ARG_66  | NH1    | H_ASP_86  | OD2    | 2.753        |
| 5UCB   | H_ARG_66  | NH2    | H_ASP_86  | OD1    | 3.062        |
| 5UCB   | H_ARG_66  | NH2    | H_ASP_86  | OD2    | 3.559        |
| 5UCB   | H_ARG_94  | NH2    | H_ASP_101 | OD2    | 3.041        |
| 5UCB   | H_LYS_143 | NZ     | H_ASP_144 | OD1    | 3.312        |
| 5UCB   | H_LYS_143 | NZ     | H_ASP_144 | OD2    | 3.791        |
| 5UCB   | L_ARG_24  | NH1    | L_ASP_70  | OD1    | 3.024        |
| 5UCB   | L_ARG_24  | NH1    | L_ASP_70  | OD2    | 3.164        |
| 5UCB   | L_ARG_61  | NH2    | L_GLU_81  | OE2    | 3.626        |
| 5UCB   | L_ARG_61  | NH2    | L_ASP_82  | OD1    | 2.851        |
| 5UCB   | L_ARG_61  | NH2    | L_ASP_82  | OD2    | 3.578        |
| 5UCB   | L_ARG_66  | NH2    | B_ASP_51  | OD1    | 2.894        |
| 5UCB   | L_LYS_103 | NZ     | L_GLU_165 | OE1    | 2.767        |
| 5UCB   | L_LYS_103 | NZ     | L_GLU_165 | OE2    | 3.262        |
| 5UCB   | L_LYS_149 | NZ     | L_GLU_195 | OE1    | 3.236        |
| 5UCB   | L_LYS_149 | NZ     | L_GLU_195 | OE2    | 2.876        |
| 5UCB   | L_LYS_188 | NZ     | L_ASP_185 | OD1    | 3.509        |
| 5UCB   | B_LYS_16  | NZ     | B_ASP_132 | OD1    | 2.899        |
| 5UCB   | B_LYS_40  | NZ     | B_GLU_55  | OE1    | 3.387        |
| 5UCB   | B_HIS_52  | NE2    | B_GLU_87  | OE1    | 3.757        |
| 5UCB   | B_ARG_103 | NH1    | B_ASP_101 | OD2    | 2.895        |
| 5UCB   | B_ARG_103 | NH2    | B_ASP_101 | OD2    | 3.593        |
| 5UCB   | B_ARG_107 | NH2    | B_GLU_104 | OE1    | 3.008        |
| 5UCB   | B_ARG_107 | NH2    | B_GLU_104 | OE2    | 3.594        |
| 5UCB   | B_ARG_122 | NH2    | B_GLU_119 | OE1    | 3.126        |
| 5UCB   | B_HIS_133 | ND1    | B_ASP_117 | OD1    | 2.951        |
| 5UCB   | B_HIS_133 | ND1    | B_ASP_117 | OD2    | 3.612        |
| 5UCB   | B_HIS_133 | ND1    | B_GLU_118 | OE2    | 3.928        |
| 5UCB   | B_ARG_144 | NH2    | L_ASP_91  | OD1    | 2.844        |
| 5UCB   | B_ARG_144 | NH2    | L_ASP_91  | OD2    | 3.495        |

Table 723: 5UCB-specific salt bridging networks analysis. In this table, a PDB file is specified with a four-letter PDB ID, except that the names of the PDB files corresponding to the single NMR structural model split from the NMR ensemble is specified with a four-letter PDB ID in addition to a hyphen followed by the single NMR structural model numeric ID, the residue naming scheme is **Chain ID\_residue name\_residue number**,  $\angle ADH$  represents the angle formed by acceptor (A), donor (D) and hydrogen (H) ( $\angle ADH$ ).

| PDB ID | Residue A | Atom A | Residue B | Atom B | Distance (Å) |
|--------|-----------|--------|-----------|--------|--------------|
| 5UEA   | A_ARG_38  | NH1    | A_ASP_86  | OD1    | 2.925        |
| 5UEA   | A_ARG_38  | NH2    | A_GLU_46  | OE1    | 3.053        |
| 5UEA   | A_ARG_38  | NH2    | A_GLU_46  | OE2    | 3.718        |
| 5UEA   | A_ARG_38  | NH2    | A_ASP_86  | OD1    | 3.982        |
| 5UEA   | A_LYS_64  | NZ     | A_ASP_61  | OD1    | 3.564        |
| 5UEA   | A_ARG_66  | NH1    | A_ASP_86  | OD1    | 3.801        |
| 5UEA   | A_ARG_66  | NH1    | A_ASP_86  | OD2    | 2.753        |
| 5UEA   | A_ARG_66  | NH2    | A_ASP_86  | OD1    | 3.014        |
| 5UEA   | A_ARG_66  | NH2    | A_ASP_86  | OD2    | 3.470        |
| 5UEA   | A_LYS_75  | NZ     | A_ASP_72  | OD2    | 2.831        |
| 5UEA   | A_ARG_83  | NH1    | A_GLU_85  | OE2    | 3.478        |
| 5UEA   | A_ARG_94  | NH1    | A_ASP_101 | OD2    | 3.648        |
| 5UEA   | A_LYS_143 | NZ     | A_ASP_144 | OD1    | 3.213        |
| 5UEA   | A_LYS_143 | NZ     | A_ASP_144 | OD2    | 3.068        |
| 5UEA   | A_LYS_210 | NZ     | A_GLU_212 | OE2    | 3.717        |
| 5UEA   | X_LYS_10  | NZ     | X_GLU_25  | OE1    | 2.830        |
| 5UEA   | X_LYS_10  | NZ     | X_GLU_25  | OE2    | 3.963        |
| 5UEA   | X_LYS_10  | NZ     | D_GLU_29  | OE1    | 3.740        |
| 5UEA   | X_LYS_10  | NZ     | D_GLU_29  | OE2    | 2.855        |
| 5UEA   | X_HIS_36  | ND1    | X_ASP_102 | OD1    | 3.747        |
| 5UEA   | X_HIS_53  | ND1    | X_ASP_54  | OD1    | 3.697        |
| 5UEA   | X_HIS_53  | NE2    | X_ASP_54  | OD1    | 3.655        |
| 5UEA   | X_LYS_71  | NZ     | D_GLU_29  | OE2    | 3.320        |
| 5UEA   | X_ARG_104 | NH1    | X_ASP_102 | OD2    | 3.117        |
| 5UEA   | X_ARG_104 | NH2    | X_ASP_102 | OD2    | 3.925        |
| 5UEA   | X_ARG_108 | NH2    | X_GLU_105 | OE1    | 2.916        |
| 5UEA   | X_ARG_108 | NH2    | X_GLU_105 | OE2    | 3.333        |
| 5UEA   | X_ARG_123 | NH2    | X_GLU_120 | OE1    | 3.394        |
| 5UEA   | X_HIS_134 | ND1    | X_ASP_118 | OD2    | 2.696        |
| 5UEA   | X_HIS_134 | ND1    | X_GLU_119 | OE1    | 3.900        |
| 5UEA   | X_HIS_134 | NE2    | X_ASP_133 | OD2    | 3.951        |
| 5UEA   | H_ARG_38  | NH1    | H_ASP_86  | OD1    | 2.893        |
| 5UEA   | H_ARG_38  | NH2    | H_GLU_46  | OE1    | 3.038        |
| 5UEA   | H_ARG_38  | NH2    | H_GLU_46  | OE2    | 3.945        |
| 5UEA   | H_ARG_38  | NH2    | H_ASP_86  | OD1    | 3.946        |
| 5UEA   | H_ARG_66  | NH1    | H_ASP_86  | OD1    | 3.977        |
| 5UEA   | H_ARG_66  | NH1    | H_ASP_86  | OD2    | 2.837        |
| 5UEA   | H_ARG_66  | NH2    | H_ASP_86  | OD1    | 3.030        |
| 5UEA   | H_ARG_66  | NH2    | H_ASP_86  | OD2    | 3.367        |
| 5UEA   | H_LYS_75  | NZ     | H_ASP_72  | OD2    | 3.470        |
| 5UEA   | H_ARG_94  | NH1    | H_ASP_101 | OD2    | 3.608        |
| 5UEA   | H_LYS_143 | NZ     | H_ASP_144 | OD1    | 3.356        |
| 5UEA   | H_LYS_143 | NZ     | H_ASP_144 | OD2    | 3.506        |
| 5UEA   | D_LYS_10  | NZ     | X_GLU_29  | OE1    | 3.485        |
| 5UEA   | D_LYS_10  | NZ     | X_GLU_29  | OE2    | 2.490        |
| 5UEA   | D_LYS_10  | NZ     | D_GLU_25  | OE1    | 2.206        |
| 5UEA   | D_LYS_10  | NZ     | D_GLU_25  | OE2    | 3.753        |
| 5UEA   | D_HIS_36  | NE2    | D_ASP_102 | OD2    | 3.900        |
| 5UEA   | D_LYS_70  | NZ     | X_GLU_29  | OE2    | 3.861        |
| 5UEA   | D_ARG_104 | NH1    | D_ASP_102 | OD2    | 3.466        |
| 5UEA   | D_ARG_108 | NH2    | D_GLU_105 | OE1    | 2.929        |
| 5UEA   | D_ARG_108 | NH2    | D_GLU_105 | OE2    | 3.455        |
| 5UEA   | D_HIS_134 | ND1    | D_ASP_118 | OD2    | 2.708        |
| 5UEA   | L_ARG_24  | NH2    | L_ASP_70  | OD1    | 3.498        |
| 5UEA   | L_ARG_24  | NH2    | L_ASP_70  | OD2    | 2.931        |
| 5UEA   | L_ARG_61  | NH2    | L_GLU_81  | OE2    | 3.429        |
| 5UEA   | L_ARG_61  | NH2    | L_ASP_82  | OD1    | 2.822        |

|      |           |     |           |     |       |
|------|-----------|-----|-----------|-----|-------|
| 5UEA | L_ARG_61  | NH2 | L_ASP_82  | OD2 | 3.535 |
| 5UEA | L_LYS_103 | NZ  | L_GLU_165 | OE1 | 2.845 |
| 5UEA | L_LYS_103 | NZ  | L_GLU_165 | OE2 | 3.041 |
| 5UEA | L_LYS_149 | NZ  | L_GLU_195 | OE1 | 3.248 |
| 5UEA | L_LYS_183 | NZ  | L_GLU_187 | OE1 | 3.535 |
| 5UEA | L_LYS_183 | NZ  | L_GLU_187 | OE2 | 2.491 |
| 5UEA | B_ARG_24  | NH1 | B_ASP_70  | OD1 | 2.938 |
| 5UEA | B_ARG_24  | NH1 | B_ASP_70  | OD2 | 3.769 |
| 5UEA | B_ARG_61  | NH2 | B_GLU_81  | OE2 | 3.252 |
| 5UEA | B_ARG_61  | NH2 | B_ASP_82  | OD1 | 2.947 |
| 5UEA | B_ARG_61  | NH2 | B_ASP_82  | OD2 | 3.541 |
| 5UEA | B_LYS_103 | NZ  | B_GLU_165 | OE1 | 3.082 |
| 5UEA | B_LYS_103 | NZ  | B_GLU_165 | OE2 | 2.513 |
| 5UEA | B_LYS_107 | NZ  | B_ASP_17  | OD2 | 3.363 |
| 5UEA | B_ARG_142 | NH1 | B_GLU_105 | OE1 | 2.937 |
| 5UEA | B_ARG_142 | NH1 | B_GLU_105 | OE2 | 2.716 |
| 5UEA | B_ARG_142 | NH2 | B_GLU_105 | OE1 | 2.783 |
| 5UEA | B_LYS_149 | NZ  | B_GLU_195 | OE1 | 3.063 |
| 5UEA | B_LYS_183 | NZ  | B_GLU_187 | OE2 | 3.815 |
| 5UEA | B_ARG_211 | NH1 | B_GLU_187 | OE1 | 3.735 |

Table 724: 5UEA-specific salt bridging networks analysis. In this table, a PDB file is specified with a four-letter PDB ID, except that the names of the PDB files corresponding to the single NMR structural model split from the NMR ensemble is specified with a four-letter PDB ID in addition to a hyphen followed by the single NMR structural model numeric ID, the residue naming scheme is **Chain ID\_residue name\_residue number**,  $\angle ADH$  represents the angle formed by acceptor (A), donor (D) and hydrogen (H) ( $\angle ADH$ ).



| PDB ID | Residue A | Atom A | Residue B | Atom B | Distance (Å) |
|--------|-----------|--------|-----------|--------|--------------|
| 5UEK   | A_LYS_10  | NZ     | A_GLU_25  | OE1    | 3.987        |
| 5UEK   | A_HIS_36  | ND1    | A_ASP_154 | OD1    | 3.867        |
| 5UEK   | A_HIS_36  | NE2    | A_ASP_102 | OD1    | 3.958        |
| 5UEK   | A_LYS_41  | NZ     | A_GLU_39  | OE1    | 3.964        |
| 5UEK   | A_LYS_41  | NZ     | A_GLU_56  | OE1    | 2.739        |
| 5UEK   | A_ARG_49  | NH1    | A_GLU_88  | OE1    | 3.431        |
| 5UEK   | A_ARG_104 | NH1    | A_ASP_102 | OD2    | 2.895        |
| 5UEK   | A_ARG_104 | NH2    | A_ASP_102 | OD2    | 3.461        |
| 5UEK   | A_ARG_108 | NH2    | A_GLU_105 | OE1    | 2.914        |
| 5UEK   | A_ARG_108 | NH2    | A_GLU_105 | OE2    | 3.466        |
| 5UEK   | A_ARG_123 | NH1    | A_GLU_116 | OE1    | 3.682        |
| 5UEK   | A_HIS_134 | ND1    | A_ASP_133 | OD1    | 2.831        |
| 5UEK   | A_HIS_134 | NE2    | A_GLU_119 | OE1    | 3.693        |
| 5UEK   | A_ARG_145 | NH2    | L_ASP_91  | OD1    | 2.787        |
| 5UEK   | A_ARG_145 | NH2    | L_ASP_91  | OD2    | 3.426        |
| 5UEK   | H_ARG_38  | NH1    | H_ASP_86  | OD2    | 2.930        |
| 5UEK   | H_ARG_38  | NH2    | H_GLU_46  | OE1    | 3.662        |
| 5UEK   | H_ARG_38  | NH2    | H_GLU_46  | OE2    | 3.239        |
| 5UEK   | H_ARG_38  | NH2    | H_GLU_85  | OE1    | 2.889        |
| 5UEK   | H_ARG_38  | NH2    | H_ASP_86  | OD2    | 3.876        |
| 5UEK   | H_ARG_66  | NH1    | H_ASP_86  | OD1    | 2.840        |
| 5UEK   | H_ARG_66  | NH1    | H_ASP_86  | OD2    | 3.752        |
| 5UEK   | H_ARG_66  | NH2    | H_GLU_85  | OE1    | 3.536        |
| 5UEK   | H_ARG_66  | NH2    | H_ASP_86  | OD1    | 3.599        |
| 5UEK   | H_ARG_66  | NH2    | H_ASP_86  | OD2    | 3.048        |
| 5UEK   | H_ARG_83  | NH1    | H_GLU_85  | OE2    | 3.252        |
| 5UEK   | H_ARG_94  | NH2    | H_ASP_101 | OD1    | 3.975        |
| 5UEK   | H_ARG_94  | NH2    | H_ASP_101 | OD2    | 2.845        |
| 5UEK   | H_LYS_143 | NZ     | H_ASP_144 | OD1    | 3.123        |
| 5UEK   | H_LYS_143 | NZ     | H_ASP_144 | OD2    | 3.057        |
| 5UEK   | H_LYS_210 | NZ     | H_GLU_212 | OE1    | 3.851        |
| 5UEK   | H_LYS_210 | NZ     | H_GLU_212 | OE2    | 2.516        |
| 5UEK   | L_ARG_24  | NH1    | L_ASP_70  | OD1    | 3.080        |
| 5UEK   | L_ARG_24  | NH1    | L_ASP_70  | OD2    | 2.941        |
| 5UEK   | L_ARG_61  | NH2    | L_GLU_81  | OE1    | 3.355        |
| 5UEK   | L_ARG_61  | NH2    | L_ASP_82  | OD1    | 2.825        |
| 5UEK   | L_ARG_61  | NH2    | L_ASP_82  | OD2    | 3.599        |
| 5UEK   | L_ARG_66  | NH2    | A_ASP_52  | OD1    | 2.873        |
| 5UEK   | L_LYS_103 | NZ     | L_GLU_105 | OE2    | 2.640        |
| 5UEK   | L_LYS_103 | NZ     | L_GLU_165 | OE1    | 3.290        |
| 5UEK   | L_LYS_149 | NZ     | L_GLU_195 | OE2    | 3.692        |
| 5UEK   | L_LYS_183 | NZ     | L_GLU_187 | OE1    | 2.986        |

Table 725: 5UEK-specific salt bridging networks analysis. In this table, a PDB file is specified with a four-letter PDB ID, except that the names of the PDB files corresponding to the single NMR structural model split from the NMR ensemble is specified with a four-letter PDB ID in addition to a hyphen followed by the single NMR structural model numeric ID, the residue naming scheme is **Chain ID\_residue name\_residue number**,  $\angle ADH$  represents the angle formed by acceptor (A), donor (D) and hydrogen (H) ( $\angle ADH$ ).

| PDB ID | Residue A | Atom A | Residue B | Atom B | Distance (Å) |
|--------|-----------|--------|-----------|--------|--------------|
| 5UG0   | A_LYS_44  | NZ     | A_ASP_276 | OD1    | 3.145        |
| 5UG0   | A_ARG_106 | NH1    | A_GLU_85  | OE1    | 3.304        |
| 5UG0   | A_ARG_106 | NH1    | B_GLU_69  | OE1    | 3.096        |
| 5UG0   | A_ARG_106 | NH1    | B_GLU_69  | OE2    | 3.964        |
| 5UG0   | A_ARG_106 | NH2    | A_GLU_85  | OE1    | 2.806        |
| 5UG0   | A_ARG_106 | NH2    | A_GLU_85  | OE2    | 3.674        |
| 5UG0   | A_ARG_106 | NH2    | B_GLU_69  | OE1    | 3.415        |
| 5UG0   | A_ARG_106 | NH2    | B_GLU_69  | OE2    | 3.059        |
| 5UG0   | A_HIS_141 | ND1    | A_GLU_70  | OE2    | 2.794        |
| 5UG0   | A_LYS_149 | NZ     | A_GLU_72  | OE1    | 3.216        |
| 5UG0   | A_LYS_149 | NZ     | A_GLU_72  | OE2    | 2.794        |
| 5UG0   | A_LYS_172 | NZ     | A_GLU_116 | OE2    | 3.654        |
| 5UG0   | A_ARG_192 | NH1    | A_GLU_198 | OE1    | 3.844        |
| 5UG0   | A_ARG_192 | NH1    | A_GLU_198 | OE2    | 3.866        |
| 5UG0   | A_LYS_222 | NZ     | A_ASP_225 | OD1    | 3.696        |
| 5UG0   | A_LYS_222 | NZ     | A_GLU_227 | OE2    | 3.476        |
| 5UG0   | A_LYS_222 | NZ     | D_ASP_107 | OD2    | 3.472        |
| 5UG0   | A_ARG_255 | NH2    | A_GLU_119 | OE2    | 3.754        |
| 5UG0   | A_ARG_255 | NH2    | A_GLU_124 | OE2    | 3.685        |
| 5UG0   | A_ARG_262 | NH1    | A_GLU_175 | OE1    | 3.614        |
| 5UG0   | A_ARG_262 | NH1    | A_GLU_175 | OE2    | 2.850        |
| 5UG0   | A_ARG_311 | NH1    | B_ASP_90  | OD1    | 2.840        |
| 5UG0   | A_ARG_311 | NH2    | B_ASP_86  | OD1    | 2.770        |
| 5UG0   | A_ARG_311 | NH2    | B_ASP_90  | OD1    | 3.313        |
| 5UG0   | A_ARG_322 | NH2    | A_GLU_25  | OE2    | 3.810        |
| 5UG0   | B_LYS_68  | NZ     | A_GLU_107 | OE2    | 3.009        |
| 5UG0   | B_ARG_75  | NH1    | B_GLU_78  | OE2    | 3.343        |
| 5UG0   | B_LYS_116 | NZ     | B_GLU_120 | OE2    | 3.389        |
| 5UG0   | B_LYS_123 | NZ     | B_GLU_120 | OE1    | 3.342        |
| 5UG0   | B_LYS_123 | NZ     | B_GLU_120 | OE2    | 3.653        |
| 5UG0   | B_LYS_131 | NZ     | B_GLU_139 | OE1    | 3.933        |
| 5UG0   | B_LYS_153 | NZ     | B_GLU_150 | OE1    | 3.568        |
| 5UG0   | B_LYS_153 | NZ     | B_GLU_150 | OE2    | 2.976        |
| 5UG0   | B_LYS_161 | NZ     | B_GLU_165 | OE1    | 3.465        |
| 5UG0   | C_ARG_55  | NH1    | C_ASP_61  | OD1    | 3.504        |
| 5UG0   | C_ARG_62  | NH2    | C_GLU_82  | OE1    | 3.126        |
| 5UG0   | C_ARG_62  | NH2    | C_GLU_82  | OE2    | 3.930        |
| 5UG0   | C_ARG_62  | NH2    | C_ASP_83  | OD1    | 2.816        |
| 5UG0   | C_ARG_62  | NH2    | C_ASP_83  | OD2    | 3.378        |
| 5UG0   | C_LYS_109 | NZ     | C_GLU_107 | OE1    | 3.664        |
| 5UG0   | C_ARG_144 | NH1    | C_GLU_107 | OE1    | 3.309        |
| 5UG0   | C_ARG_144 | NH1    | C_GLU_107 | OE2    | 3.710        |
| 5UG0   | C_ARG_144 | NH1    | C_GLU_167 | OE1    | 3.879        |
| 5UG0   | C_ARG_144 | NH2    | C_GLU_167 | OE1    | 3.902        |
| 5UG0   | C_ARG_144 | NH2    | C_GLU_167 | OE2    | 3.194        |
| 5UG0   | C_LYS_147 | NZ     | C_GLU_145 | OE2    | 2.927        |
| 5UG0   | C_LYS_151 | NZ     | C_GLU_197 | OE1    | 3.587        |
| 5UG0   | C_LYS_151 | NZ     | C_GLU_197 | OE2    | 3.166        |
| 5UG0   | C_HIS_191 | ND1    | C_ASP_153 | OD2    | 3.193        |
| 5UG0   | D_ARG_38  | NH1    | D_ASP_89  | OD1    | 3.285        |
| 5UG0   | D_ARG_38  | NH2    | D_GLU_46  | OE1    | 3.648        |
| 5UG0   | D_ARG_38  | NH2    | D_ASP_89  | OD1    | 3.488        |
| 5UG0   | D_ARG_86  | NH2    | D_ASP_89  | OD1    | 3.223        |
| 5UG0   | D_ARG_100 | NH1    | A_ASP_190 | OD1    | 3.522        |
| 5UG0   | D_ARG_100 | NH1    | A_ASP_190 | OD2    | 3.877        |
| 5UG0   | D_HIS_178 | NE2    | C_ASP_169 | OD2    | 3.490        |
| 5UG0   | D_LYS_223 | NZ     | C_GLU_125 | OE2    | 3.392        |

---

Table 726: 5UG0-specific salt bridging networks analysis. In this table, a PDB file is specified with a four-letter PDB ID, except that the names of the PDB files corresponding to the single NMR structural model split from the NMR ensemble is specified with a four-letter PDB ID in addition to a hyphen followed by the single NMR structural model numeric ID, the residue naming scheme is **Chain ID\_residue name\_residue number**,  $\angle ADH$  represents the angle formed by acceptor (A), donor (D) and hydrogen (H) ( $\angle ADH$ ).

| PDB ID | Residue A | Atom A | Residue B | Atom B | Distance (Å) |
|--------|-----------|--------|-----------|--------|--------------|
| 5UJZ   | A_LYS_86  | NZ     | A_GLU_90  | OE2    | 3.056        |
| 5UJZ   | A_ARG_106 | NH1    | A_GLU_85  | OE1    | 3.777        |
| 5UJZ   | A_ARG_106 | NH1    | A_GLU_85  | OE2    | 2.785        |
| 5UJZ   | A_ARG_106 | NH1    | B_GLU_569 | OE2    | 3.797        |
| 5UJZ   | A_ARG_106 | NH2    | A_GLU_85  | OE1    | 3.157        |
| 5UJZ   | A_ARG_106 | NH2    | A_GLU_85  | OE2    | 3.125        |
| 5UJZ   | A_ARG_106 | NH2    | B_GLU_569 | OE1    | 3.958        |
| 5UJZ   | A_ARG_106 | NH2    | B_GLU_569 | OE2    | 3.070        |
| 5UJZ   | A_HIS_141 | ND1    | A_GLU_70  | OE2    | 3.820        |
| 5UJZ   | A_LYS_174 | NZ     | A_GLU_116 | OE2    | 3.728        |
| 5UJZ   | A_ARG_192 | NH2    | A_GLU_198 | OE2    | 2.656        |
| 5UJZ   | A_HIS_208 | ND1    | A_GLU_238 | OE2    | 3.816        |
| 5UJZ   | A_LYS_219 | NZ     | A_GLU_227 | OE2    | 3.960        |
| 5UJZ   | A_ARG_262 | NH1    | A_GLU_175 | OE1    | 2.805        |
| 5UJZ   | A_ARG_262 | NH1    | A_GLU_175 | OE2    | 3.687        |
| 5UJZ   | A_ARG_311 | NH1    | B_ASP_586 | OD1    | 3.689        |
| 5UJZ   | A_ARG_311 | NH1    | B_ASP_590 | OD1    | 3.217        |
| 5UJZ   | A_ARG_311 | NH1    | B_ASP_590 | OD2    | 3.955        |
| 5UJZ   | A_ARG_311 | NH2    | B_ASP_586 | OD1    | 2.782        |
| 5UJZ   | B_LYS_551 | NZ     | B_GLU_603 | OE1    | 3.842        |
| 5UJZ   | B_LYS_558 | NZ     | F_GLU_597 | OE1    | 3.688        |
| 5UJZ   | B_LYS_558 | NZ     | F_GLU_597 | OE2    | 3.874        |
| 5UJZ   | B_ARG_576 | NH1    | D_GLU_574 | OE1    | 3.986        |
| 5UJZ   | B_ARG_576 | NH1    | D_GLU_574 | OE2    | 3.042        |
| 5UJZ   | B_ARG_576 | NH2    | C_GLU_104 | OE2    | 3.168        |
| 5UJZ   | B_LYS_582 | NZ     | B_ASP_586 | OD2    | 3.643        |
| 5UJZ   | B_LYS_583 | NZ     | D_ASP_585 | OD1    | 3.717        |
| 5UJZ   | B_ARG_606 | NH2    | F_ASP_609 | OD2    | 2.744        |
| 5UJZ   | B_LYS_623 | NZ     | B_GLU_632 | OE2    | 3.820        |
| 5UJZ   | B_LYS_631 | NZ     | B_GLU_639 | OE1    | 3.976        |
| 5UJZ   | B_LYS_643 | NZ     | A_GLU_4   | OE1    | 2.954        |
| 5UJZ   | B_LYS_643 | NZ     | A_ASP_5   | OD1    | 2.763        |
| 5UJZ   | B_LYS_643 | NZ     | A_ASP_5   | OD2    | 3.863        |
| 5UJZ   | B_LYS_643 | NZ     | B_GLU_529 | OE2    | 3.375        |
| 5UJZ   | B_LYS_653 | NZ     | B_GLU_650 | OE1    | 3.647        |
| 5UJZ   | B_LYS_661 | NZ     | B_GLU_647 | OE1    | 3.374        |
| 5UJZ   | B_ARG_670 | NH2    | B_GLU_671 | OE2    | 2.839        |
| 5UJZ   | C_LYS_86  | NZ     | C_GLU_90  | OE2    | 3.056        |
| 5UJZ   | C_ARG_106 | NH1    | C_GLU_85  | OE1    | 3.777        |
| 5UJZ   | C_ARG_106 | NH1    | C_GLU_85  | OE2    | 2.784        |
| 5UJZ   | C_ARG_106 | NH1    | D_GLU_569 | OE2    | 3.872        |
| 5UJZ   | C_ARG_106 | NH2    | C_GLU_85  | OE1    | 3.158        |
| 5UJZ   | C_ARG_106 | NH2    | C_GLU_85  | OE2    | 3.125        |
| 5UJZ   | C_ARG_106 | NH2    | D_GLU_569 | OE2    | 3.260        |
| 5UJZ   | C_HIS_141 | ND1    | C_GLU_70  | OE2    | 3.819        |
| 5UJZ   | C_LYS_174 | NZ     | C_GLU_116 | OE2    | 3.728        |
| 5UJZ   | C_ARG_192 | NH2    | C_GLU_198 | OE2    | 2.657        |
| 5UJZ   | C_HIS_208 | ND1    | C_GLU_238 | OE2    | 3.817        |
| 5UJZ   | C_LYS_219 | NZ     | C_GLU_227 | OE2    | 3.960        |
| 5UJZ   | C_ARG_262 | NH1    | C_GLU_175 | OE1    | 2.805        |
| 5UJZ   | C_ARG_262 | NH1    | C_GLU_175 | OE2    | 3.686        |
| 5UJZ   | C_ARG_311 | NH1    | D_ASP_586 | OD1    | 3.865        |
| 5UJZ   | C_ARG_311 | NH1    | D_ASP_590 | OD1    | 3.148        |
| 5UJZ   | C_ARG_311 | NH1    | D_ASP_590 | OD2    | 3.998        |
| 5UJZ   | C_ARG_311 | NH2    | D_ASP_586 | OD1    | 2.921        |
| 5UJZ   | D_LYS_551 | NZ     | D_GLU_603 | OE1    | 3.842        |
| 5UJZ   | D_LYS_558 | NZ     | B_GLU_597 | OE1    | 3.772        |

|      |           |     |           |     |       |
|------|-----------|-----|-----------|-----|-------|
| 5UJZ | D_LYS_572 | NZ  | E_GLU_238 | OE1 | 3.910 |
| 5UJZ | D_ARG_576 | NH1 | F_GLU_574 | OE1 | 3.863 |
| 5UJZ | D_ARG_576 | NH1 | F_GLU_574 | OE2 | 2.716 |
| 5UJZ | D_ARG_576 | NH2 | E_GLU_104 | OE2 | 3.170 |
| 5UJZ | D_LYS_582 | NZ  | D_ASP_586 | OD2 | 3.642 |
| 5UJZ | D_LYS_583 | NZ  | F_ASP_585 | OD1 | 3.807 |
| 5UJZ | D_ARG_606 | NH2 | B_ASP_609 | OD2 | 2.766 |
| 5UJZ | D_LYS_623 | NZ  | D_GLU_632 | OE2 | 3.820 |
| 5UJZ | D_LYS_631 | NZ  | D_GLU_639 | OE1 | 3.976 |
| 5UJZ | D_LYS_643 | NZ  | C_GLU_4   | OE1 | 3.185 |
| 5UJZ | D_LYS_643 | NZ  | C_ASP_5   | OD1 | 2.519 |
| 5UJZ | D_LYS_643 | NZ  | C_ASP_5   | OD2 | 3.642 |
| 5UJZ | D_LYS_643 | NZ  | D_GLU_529 | OE2 | 3.375 |
| 5UJZ | D_LYS_653 | NZ  | D_GLU_650 | OE1 | 3.648 |
| 5UJZ | D_LYS_661 | NZ  | D_GLU_647 | OE1 | 3.376 |
| 5UJZ | D_ARG_670 | NH2 | D_GLU_671 | OE2 | 2.839 |
| 5UJZ | E_LYS_86  | NZ  | E_GLU_90  | OE2 | 3.056 |
| 5UJZ | E_ARG_106 | NH1 | E_GLU_85  | OE1 | 3.777 |
| 5UJZ | E_ARG_106 | NH1 | E_GLU_85  | OE2 | 2.784 |
| 5UJZ | E_ARG_106 | NH2 | E_GLU_85  | OE1 | 3.158 |
| 5UJZ | E_ARG_106 | NH2 | E_GLU_85  | OE2 | 3.126 |
| 5UJZ | E_ARG_106 | NH2 | F_GLU_569 | OE2 | 3.361 |
| 5UJZ | E_HIS_141 | ND1 | E_GLU_70  | OE2 | 3.819 |
| 5UJZ | E_LYS_174 | NZ  | E_GLU_116 | OE2 | 3.728 |
| 5UJZ | E_ARG_192 | NH2 | E_GLU_198 | OE2 | 2.656 |
| 5UJZ | E_HIS_208 | ND1 | E_GLU_238 | OE2 | 3.816 |
| 5UJZ | E_LYS_219 | NZ  | E_GLU_227 | OE2 | 3.960 |
| 5UJZ | E_ARG_262 | NH1 | E_GLU_175 | OE1 | 2.805 |
| 5UJZ | E_ARG_262 | NH1 | E_GLU_175 | OE2 | 3.687 |
| 5UJZ | E_ARG_311 | NH1 | F_ASP_586 | OD1 | 3.477 |
| 5UJZ | E_ARG_311 | NH1 | F_ASP_590 | OD1 | 3.629 |
| 5UJZ | E_ARG_311 | NH2 | F_ASP_586 | OD1 | 2.793 |
| 5UJZ | F_LYS_551 | NZ  | F_GLU_603 | OE1 | 3.843 |
| 5UJZ | F_ARG_576 | NH1 | B_GLU_574 | OE1 | 3.655 |
| 5UJZ | F_ARG_576 | NH1 | B_GLU_574 | OE2 | 2.847 |
| 5UJZ | F_ARG_576 | NH2 | A_GLU_104 | OE2 | 3.211 |
| 5UJZ | F_LYS_582 | NZ  | F_ASP_586 | OD2 | 3.643 |
| 5UJZ | F_LYS_583 | NZ  | B_ASP_585 | OD1 | 3.548 |
| 5UJZ | F_ARG_606 | NH2 | D_ASP_609 | OD2 | 2.609 |
| 5UJZ | F_LYS_623 | NZ  | F_GLU_632 | OE2 | 3.821 |
| 5UJZ | F_LYS_631 | NZ  | F_GLU_639 | OE1 | 3.976 |
| 5UJZ | F_LYS_643 | NZ  | E_GLU_4   | OE1 | 3.009 |
| 5UJZ | F_LYS_643 | NZ  | E_ASP_5   | OD1 | 2.882 |
| 5UJZ | F_LYS_643 | NZ  | E_ASP_5   | OD2 | 3.935 |
| 5UJZ | F_LYS_643 | NZ  | F_GLU_529 | OE2 | 3.375 |
| 5UJZ | F_LYS_653 | NZ  | F_GLU_650 | OE1 | 3.646 |
| 5UJZ | F_LYS_661 | NZ  | F_GLU_647 | OE1 | 3.375 |
| 5UJZ | F_ARG_670 | NH2 | F_GLU_671 | OE2 | 2.839 |
| 5UJZ | G_HIS_160 | NE2 | G_ASP_158 | OD1 | 3.708 |
| 5UJZ | G_ARG_163 | NH1 | G_ASP_214 | OD1 | 3.087 |
| 5UJZ | G_ARG_163 | NH2 | G_GLU_171 | OE1 | 2.822 |
| 5UJZ | G_ARG_163 | NH2 | G_GLU_171 | OE2 | 3.867 |
| 5UJZ | G_ARG_191 | NH1 | G_ASP_214 | OD2 | 3.584 |
| 5UJZ | G_ARG_225 | NH1 | A_ASP_190 | OD1 | 3.090 |
| 5UJZ | G_ARG_225 | NH1 | A_ASP_190 | OD2 | 3.996 |
| 5UJZ | G_ARG_225 | NH2 | A_ASP_190 | OD1 | 3.715 |
| 5UJZ | G_ARG_225 | NH2 | A_ASP_190 | OD2 | 3.410 |
| 5UJZ | H_HIS_160 | NE2 | H_ASP_158 | OD1 | 3.708 |

|      |           |     |           |     |       |
|------|-----------|-----|-----------|-----|-------|
| 5UJZ | H_ARG_163 | NH1 | H_ASP_214 | OD1 | 3.088 |
| 5UJZ | H_ARG_163 | NH2 | H_GLU_171 | OE1 | 2.821 |
| 5UJZ | H_ARG_163 | NH2 | H_GLU_171 | OE2 | 3.867 |
| 5UJZ | H_ARG_191 | NH1 | H_ASP_214 | OD2 | 3.583 |
| 5UJZ | H_ARG_225 | NH1 | C_ASP_190 | OD1 | 3.041 |
| 5UJZ | H_ARG_225 | NH2 | C_ASP_190 | OD1 | 3.552 |
| 5UJZ | H_ARG_225 | NH2 | C_ASP_190 | OD2 | 3.366 |
| 5UJZ | I_HIS_160 | NE2 | I_ASP_158 | OD1 | 3.708 |
| 5UJZ | I_ARG_163 | NH1 | I_ASP_214 | OD1 | 3.088 |
| 5UJZ | I_ARG_163 | NH2 | I_GLU_171 | OE1 | 2.823 |
| 5UJZ | I_ARG_163 | NH2 | I_GLU_171 | OE2 | 3.868 |
| 5UJZ | I_ARG_191 | NH1 | I_ASP_214 | OD2 | 3.584 |
| 5UJZ | I_ARG_225 | NH1 | E_ASP_190 | OD1 | 3.119 |
| 5UJZ | I_ARG_225 | NH1 | E_ASP_190 | OD2 | 3.970 |
| 5UJZ | I_ARG_225 | NH2 | E_ASP_190 | OD1 | 3.713 |
| 5UJZ | I_ARG_225 | NH2 | E_ASP_190 | OD2 | 3.347 |

Table 727: 5UJZ-specific salt bridging networks analysis. In this table, a PDB file is specified with a four-letter PDB ID, except that the names of the PDB files corresponding to the single NMR structural model split from the NMR ensemble is specified with a four-letter PDB ID in addition to a hyphen followed by the single NMR structural model numeric ID, the residue naming scheme is **Chain ID\_residue name\_residue number**,  $\angle ADH$  represents the angle formed by acceptor (A), donor (D) and hydrogen (H) ( $\angle ADH$ ).

| PDB ID | Residue A | Atom A | Residue B | Atom B | Distance (Å) |
|--------|-----------|--------|-----------|--------|--------------|
| 5UK0   | A_LYS_86  | NZ     | A_GLU_90  | OE2    | 3.309        |
| 5UK0   | A_ARG_106 | NH1    | A_GLU_85  | OE1    | 3.645        |
| 5UK0   | A_ARG_106 | NH1    | A_GLU_85  | OE2    | 3.045        |
| 5UK0   | A_ARG_106 | NH1    | B_GLU_569 | OE2    | 3.967        |
| 5UK0   | A_ARG_106 | NH2    | A_GLU_85  | OE1    | 3.291        |
| 5UK0   | A_ARG_106 | NH2    | A_GLU_85  | OE2    | 3.562        |
| 5UK0   | A_ARG_106 | NH2    | B_GLU_569 | OE2    | 3.244        |
| 5UK0   | A_LYS_174 | NZ     | A_GLU_116 | OE2    | 3.452        |
| 5UK0   | A_ARG_192 | NH2    | A_GLU_198 | OE2    | 2.543        |
| 5UK0   | A_HIS_208 | ND1    | A_GLU_238 | OE2    | 3.818        |
| 5UK0   | A_HIS_208 | NE2    | A_GLU_238 | OE2    | 3.885        |
| 5UK0   | A_ARG_220 | NH2    | C_ASP_241 | OD1    | 3.711        |
| 5UK0   | A_ARG_220 | NH2    | C_ASP_241 | OD2    | 3.819        |
| 5UK0   | A_ARG_262 | NH1    | A_GLU_175 | OE1    | 3.069        |
| 5UK0   | A_ARG_311 | NH1    | B_ASP_590 | OD1    | 3.139        |
| 5UK0   | A_ARG_311 | NH1    | B_ASP_590 | OD2    | 3.961        |
| 5UK0   | A_ARG_311 | NH2    | B_ASP_586 | OD1    | 3.197        |
| 5UK0   | B_LYS_551 | NZ     | B_GLU_603 | OE1    | 3.035        |
| 5UK0   | B_LYS_558 | NZ     | F_GLU_597 | OE1    | 3.717        |
| 5UK0   | B_LYS_568 | NZ     | A_GLU_107 | OE2    | 3.962        |
| 5UK0   | B_ARG_576 | NH1    | D_GLU_574 | OE1    | 2.500        |
| 5UK0   | B_ARG_576 | NH1    | D_GLU_574 | OE2    | 3.431        |
| 5UK0   | B_ARG_576 | NH2    | C_GLU_104 | OE2    | 3.446        |
| 5UK0   | B_ARG_576 | NH2    | D_GLU_574 | OE1    | 3.430        |
| 5UK0   | B_ARG_576 | NH2    | D_GLU_574 | OE2    | 3.016        |
| 5UK0   | B_LYS_582 | NZ     | B_ASP_586 | OD2    | 3.693        |
| 5UK0   | B_ARG_606 | NH2    | F_ASP_609 | OD2    | 2.765        |
| 5UK0   | B_LYS_623 | NZ     | B_GLU_632 | OE2    | 3.579        |
| 5UK0   | B_LYS_643 | NZ     | A_GLU_4   | OE1    | 2.724        |
| 5UK0   | B_LYS_643 | NZ     | A_ASP_5   | OD1    | 2.705        |
| 5UK0   | B_LYS_643 | NZ     | A_ASP_5   | OD2    | 3.831        |
| 5UK0   | B_LYS_643 | NZ     | B_GLU_529 | OE2    | 3.437        |
| 5UK0   | B_LYS_661 | NZ     | B_GLU_647 | OE1    | 3.387        |
| 5UK0   | B_ARG_670 | NH2    | B_GLU_671 | OE2    | 2.699        |
| 5UK0   | C_LYS_86  | NZ     | C_GLU_90  | OE2    | 3.309        |
| 5UK0   | C_ARG_106 | NH1    | C_GLU_85  | OE1    | 3.646        |
| 5UK0   | C_ARG_106 | NH1    | C_GLU_85  | OE2    | 3.045        |
| 5UK0   | C_ARG_106 | NH1    | D_GLU_569 | OE2    | 3.998        |
| 5UK0   | C_ARG_106 | NH2    | C_GLU_85  | OE1    | 3.291        |
| 5UK0   | C_ARG_106 | NH2    | C_GLU_85  | OE2    | 3.562        |
| 5UK0   | C_ARG_106 | NH2    | D_GLU_569 | OE2    | 3.213        |
| 5UK0   | C_LYS_174 | NZ     | C_GLU_116 | OE2    | 3.452        |
| 5UK0   | C_ARG_192 | NH2    | C_GLU_198 | OE2    | 2.542        |
| 5UK0   | C_HIS_208 | ND1    | C_GLU_238 | OE2    | 3.819        |
| 5UK0   | C_HIS_208 | NE2    | C_GLU_238 | OE2    | 3.885        |
| 5UK0   | C_ARG_220 | NH2    | E_ASP_241 | OD1    | 3.755        |
| 5UK0   | C_ARG_220 | NH2    | E_ASP_241 | OD2    | 3.891        |
| 5UK0   | C_ARG_262 | NH1    | C_GLU_175 | OE1    | 3.069        |
| 5UK0   | C_ARG_311 | NH1    | D_ASP_586 | OD1    | 3.901        |
| 5UK0   | C_ARG_311 | NH1    | D_ASP_590 | OD1    | 3.110        |
| 5UK0   | C_ARG_311 | NH1    | D_ASP_590 | OD2    | 3.851        |
| 5UK0   | C_ARG_311 | NH2    | D_ASP_586 | OD1    | 2.981        |
| 5UK0   | D_LYS_551 | NZ     | D_GLU_603 | OE1    | 3.035        |
| 5UK0   | D_LYS_558 | NZ     | B_GLU_597 | OE1    | 3.800        |
| 5UK0   | D_LYS_572 | NZ     | E_GLU_238 | OE1    | 3.723        |
| 5UK0   | D_ARG_576 | NH1    | F_GLU_574 | OE1    | 2.823        |
| 5UK0   | D_ARG_576 | NH1    | F_GLU_574 | OE2    | 3.743        |

|      |           |     |           |     |       |
|------|-----------|-----|-----------|-----|-------|
| 5UK0 | D_ARG_576 | NH2 | E_GLU_104 | OE2 | 3.003 |
| 5UK0 | D_ARG_576 | NH2 | F_GLU_574 | OE1 | 3.596 |
| 5UK0 | D_ARG_576 | NH2 | F_GLU_574 | OE2 | 3.278 |
| 5UK0 | D_LYS_582 | NZ  | D_ASP_586 | OD2 | 3.695 |
| 5UK0 | D_ARG_606 | NH2 | B_ASP_609 | OD2 | 2.683 |
| 5UK0 | D_LYS_623 | NZ  | D_GLU_632 | OE2 | 3.578 |
| 5UK0 | D_LYS_643 | NZ  | C_GLU_4   | OE1 | 2.844 |
| 5UK0 | D_LYS_643 | NZ  | C_ASP_5   | OD1 | 2.693 |
| 5UK0 | D_LYS_643 | NZ  | C_ASP_5   | OD2 | 3.673 |
| 5UK0 | D_LYS_643 | NZ  | D_GLU_529 | OE2 | 3.436 |
| 5UK0 | D_LYS_661 | NZ  | D_GLU_647 | OE1 | 3.387 |
| 5UK0 | D_ARG_670 | NH2 | D_GLU_671 | OE2 | 2.700 |
| 5UK0 | E_LYS_86  | NZ  | E_GLU_90  | OE2 | 3.309 |
| 5UK0 | E_ARG_106 | NH1 | E_GLU_85  | OE1 | 3.645 |
| 5UK0 | E_ARG_106 | NH1 | E_GLU_85  | OE2 | 3.045 |
| 5UK0 | E_ARG_106 | NH1 | F_GLU_569 | OE2 | 3.924 |
| 5UK0 | E_ARG_106 | NH2 | E_GLU_85  | OE1 | 3.291 |
| 5UK0 | E_ARG_106 | NH2 | E_GLU_85  | OE2 | 3.563 |
| 5UK0 | E_ARG_106 | NH2 | F_GLU_569 | OE2 | 3.130 |
| 5UK0 | E_LYS_174 | NZ  | E_GLU_116 | OE2 | 3.453 |
| 5UK0 | E_ARG_192 | NH2 | E_GLU_198 | OE2 | 2.543 |
| 5UK0 | E_HIS_208 | ND1 | E_GLU_238 | OE2 | 3.818 |
| 5UK0 | E_HIS_208 | NE2 | E_GLU_238 | OE2 | 3.885 |
| 5UK0 | E_ARG_220 | NH2 | A_ASP_241 | OD1 | 3.703 |
| 5UK0 | E_ARG_220 | NH2 | A_ASP_241 | OD2 | 3.860 |
| 5UK0 | E_ARG_262 | NH1 | E_GLU_175 | OE1 | 3.069 |
| 5UK0 | E_ARG_311 | NH1 | F_ASP_586 | OD1 | 3.927 |
| 5UK0 | E_ARG_311 | NH1 | F_ASP_590 | OD1 | 3.174 |
| 5UK0 | E_ARG_311 | NH1 | F_ASP_590 | OD2 | 3.882 |
| 5UK0 | E_ARG_311 | NH2 | F_ASP_586 | OD1 | 3.095 |
| 5UK0 | F_LYS_551 | NZ  | F_GLU_603 | OE1 | 3.034 |
| 5UK0 | F_LYS_558 | NZ  | D_GLU_597 | OE1 | 3.758 |
| 5UK0 | F_LYS_568 | NZ  | E_GLU_107 | OE2 | 3.989 |
| 5UK0 | F_LYS_572 | NZ  | A_GLU_238 | OE1 | 3.995 |
| 5UK0 | F_ARG_576 | NH1 | B_GLU_574 | OE1 | 2.515 |
| 5UK0 | F_ARG_576 | NH1 | B_GLU_574 | OE2 | 3.607 |
| 5UK0 | F_ARG_576 | NH2 | A_GLU_104 | OE2 | 3.281 |
| 5UK0 | F_ARG_576 | NH2 | B_GLU_574 | OE1 | 3.248 |
| 5UK0 | F_ARG_576 | NH2 | B_GLU_574 | OE2 | 3.003 |
| 5UK0 | F_LYS_582 | NZ  | F_ASP_586 | OD2 | 3.694 |
| 5UK0 | F_ARG_606 | NH2 | D_ASP_609 | OD2 | 2.740 |
| 5UK0 | F_LYS_623 | NZ  | F_GLU_632 | OE2 | 3.578 |
| 5UK0 | F_LYS_643 | NZ  | E_GLU_4   | OE1 | 2.987 |
| 5UK0 | F_LYS_643 | NZ  | E_ASP_5   | OD1 | 2.694 |
| 5UK0 | F_LYS_643 | NZ  | E_ASP_5   | OD2 | 3.721 |
| 5UK0 | F_LYS_643 | NZ  | F_GLU_529 | OE2 | 3.437 |
| 5UK0 | F_LYS_661 | NZ  | F_GLU_647 | OE1 | 3.387 |
| 5UK0 | F_ARG_670 | NH2 | F_GLU_671 | OE2 | 2.698 |
| 5UK0 | G_ARG_163 | NH1 | G_ASP_214 | OD1 | 2.891 |
| 5UK0 | G_ARG_163 | NH2 | G_GLU_171 | OE1 | 2.986 |
| 5UK0 | G_ARG_163 | NH2 | G_GLU_171 | OE2 | 3.691 |
| 5UK0 | G_ARG_191 | NH1 | G_ASP_214 | OD2 | 3.874 |
| 5UK0 | G_ARG_225 | NH1 | A_ASP_190 | OD1 | 3.056 |
| 5UK0 | G_ARG_225 | NH1 | A_ASP_190 | OD2 | 3.844 |
| 5UK0 | G_ARG_225 | NH1 | G_ASP_233 | OD1 | 3.964 |
| 5UK0 | G_ARG_225 | NH2 | A_ASP_190 | OD1 | 3.909 |
| 5UK0 | G_ARG_225 | NH2 | A_ASP_190 | OD2 | 3.442 |
| 5UK0 | H_ARG_163 | NH1 | H_ASP_214 | OD1 | 2.890 |



|      |           |     |           |     |       |
|------|-----------|-----|-----------|-----|-------|
| 5UK0 | H_ARG_163 | NH2 | H_GLU_171 | OE1 | 2.986 |
| 5UK0 | H_ARG_163 | NH2 | H_GLU_171 | OE2 | 3.690 |
| 5UK0 | H_ARG_191 | NH1 | H_ASP_214 | OD2 | 3.874 |
| 5UK0 | H_ARG_225 | NH1 | C_ASP_190 | OD1 | 3.008 |
| 5UK0 | H_ARG_225 | NH1 | C_ASP_190 | OD2 | 3.873 |
| 5UK0 | H_ARG_225 | NH1 | H_ASP_233 | OD1 | 3.965 |
| 5UK0 | H_ARG_225 | NH2 | C_ASP_190 | OD1 | 3.782 |
| 5UK0 | H_ARG_225 | NH2 | C_ASP_190 | OD2 | 3.377 |
| 5UK0 | I_ARG_163 | NH1 | I_ASP_214 | OD1 | 2.890 |
| 5UK0 | I_ARG_163 | NH2 | I_GLU_171 | OE1 | 2.985 |
| 5UK0 | I_ARG_163 | NH2 | I_GLU_171 | OE2 | 3.690 |
| 5UK0 | I_ARG_191 | NH1 | I_ASP_214 | OD2 | 3.873 |
| 5UK0 | I_ARG_225 | NH1 | E_ASP_190 | OD1 | 3.078 |
| 5UK0 | I_ARG_225 | NH1 | E_ASP_190 | OD2 | 3.875 |
| 5UK0 | I_ARG_225 | NH1 | I_ASP_233 | OD1 | 3.965 |
| 5UK0 | I_ARG_225 | NH2 | E_ASP_190 | OD1 | 3.886 |
| 5UK0 | I_ARG_225 | NH2 | E_ASP_190 | OD2 | 3.433 |

Table 728: 5UK0-specific salt bridging networks analysis. In this table, a PDB file is specified with a four-letter PDB ID, except that the names of the PDB files corresponding to the single NMR structural model split from the NMR ensemble is specified with a four-letter PDB ID in addition to a hyphen followed by the single NMR structural model numeric ID, the residue naming scheme is **Chain ID\_residue name\_residue number**,  $\angle ADH$  represents the angle formed by acceptor (A), donor (D) and hydrogen (H) ( $\angle ADH$ ).

| PDB ID | Residue A | Atom A | Residue B | Atom B | Distance (Å) |
|--------|-----------|--------|-----------|--------|--------------|
| 5UK1   | A_LYS_44  | NZ     | A_ASP_276 | OD2    | 3.906        |
| 5UK1   | A_LYS_86  | NZ     | A_GLU_90  | OE2    | 3.504        |
| 5UK1   | A_ARG_106 | NH1    | A_GLU_85  | OE1    | 3.701        |
| 5UK1   | A_ARG_106 | NH1    | A_GLU_85  | OE2    | 3.090        |
| 5UK1   | A_ARG_106 | NH1    | B_GLU_569 | OE2    | 3.892        |
| 5UK1   | A_ARG_106 | NH2    | A_GLU_85  | OE1    | 3.008        |
| 5UK1   | A_ARG_106 | NH2    | A_GLU_85  | OE2    | 3.228        |
| 5UK1   | A_ARG_106 | NH2    | B_GLU_569 | OE2    | 2.755        |
| 5UK1   | A_LYS_174 | NZ     | A_GLU_116 | OE2    | 3.687        |
| 5UK1   | A_ARG_192 | NH2    | A_GLU_198 | OE2    | 2.985        |
| 5UK1   | A_ARG_262 | NH1    | A_GLU_175 | OE1    | 3.086        |
| 5UK1   | A_ARG_311 | NH1    | B_ASP_590 | OD1    | 2.545        |
| 5UK1   | A_ARG_311 | NH1    | B_ASP_590 | OD2    | 3.367        |
| 5UK1   | A_ARG_311 | NH2    | B_ASP_586 | OD1    | 3.117        |
| 5UK1   | A_ARG_322 | NH2    | A_GLU_25  | OE1    | 3.980        |
| 5UK1   | B_LYS_558 | NZ     | F_GLU_597 | OE1    | 3.470        |
| 5UK1   | B_ARG_576 | NH1    | D_GLU_574 | OE1    | 3.845        |
| 5UK1   | B_ARG_576 | NH1    | D_GLU_574 | OE2    | 3.273        |
| 5UK1   | B_ARG_576 | NH2    | C_GLU_104 | OE2    | 2.839        |
| 5UK1   | B_LYS_582 | NZ     | B_ASP_586 | OD2    | 3.755        |
| 5UK1   | B_ARG_606 | NH2    | F_ASP_609 | OD2    | 3.320        |
| 5UK1   | B_LYS_623 | NZ     | B_GLU_632 | OE2    | 3.460        |
| 5UK1   | B_LYS_631 | NZ     | B_GLU_639 | OE1    | 3.968        |
| 5UK1   | B_LYS_643 | NZ     | A_GLU_4   | OE1    | 2.898        |
| 5UK1   | B_LYS_643 | NZ     | A_ASP_5   | OD1    | 2.632        |
| 5UK1   | B_LYS_643 | NZ     | A_ASP_5   | OD2    | 3.703        |
| 5UK1   | B_LYS_643 | NZ     | B_GLU_529 | OE2    | 3.727        |
| 5UK1   | B_LYS_653 | NZ     | B_GLU_650 | OE1    | 3.697        |
| 5UK1   | B_LYS_661 | NZ     | B_GLU_647 | OE1    | 3.063        |
| 5UK1   | B_ARG_670 | NH2    | B_GLU_671 | OE2    | 2.925        |
| 5UK1   | C_LYS_44  | NZ     | C_ASP_276 | OD2    | 3.906        |
| 5UK1   | C_LYS_86  | NZ     | C_GLU_90  | OE2    | 3.504        |
| 5UK1   | C_ARG_106 | NH1    | C_GLU_85  | OE1    | 3.701        |
| 5UK1   | C_ARG_106 | NH1    | C_GLU_85  | OE2    | 3.090        |
| 5UK1   | C_ARG_106 | NH2    | C_GLU_85  | OE1    | 3.009        |
| 5UK1   | C_ARG_106 | NH2    | C_GLU_85  | OE2    | 3.227        |
| 5UK1   | C_ARG_106 | NH2    | D_GLU_569 | OE2    | 3.108        |
| 5UK1   | C_LYS_174 | NZ     | C_GLU_116 | OE2    | 3.686        |
| 5UK1   | C_ARG_192 | NH2    | C_GLU_198 | OE2    | 2.984        |
| 5UK1   | C_ARG_262 | NH1    | C_GLU_175 | OE1    | 3.087        |
| 5UK1   | C_ARG_311 | NH1    | D_ASP_590 | OD1    | 2.901        |
| 5UK1   | C_ARG_311 | NH1    | D_ASP_590 | OD2    | 3.798        |
| 5UK1   | C_ARG_311 | NH2    | D_ASP_586 | OD1    | 3.261        |
| 5UK1   | C_ARG_322 | NH2    | C_GLU_25  | OE1    | 3.979        |
| 5UK1   | D_LYS_558 | NZ     | B_GLU_597 | OE1    | 3.543        |
| 5UK1   | D_ARG_576 | NH1    | F_GLU_574 | OE1    | 3.490        |
| 5UK1   | D_ARG_576 | NH1    | F_GLU_574 | OE2    | 3.058        |
| 5UK1   | D_ARG_576 | NH2    | E_GLU_104 | OE2    | 3.186        |
| 5UK1   | D_LYS_582 | NZ     | D_ASP_586 | OD2    | 3.755        |
| 5UK1   | D_ARG_606 | NH2    | B_ASP_609 | OD2    | 3.177        |
| 5UK1   | D_LYS_623 | NZ     | D_GLU_632 | OE2    | 3.460        |
| 5UK1   | D_LYS_631 | NZ     | D_GLU_639 | OE1    | 3.968        |
| 5UK1   | D_LYS_643 | NZ     | C_GLU_4   | OE1    | 3.015        |
| 5UK1   | D_LYS_643 | NZ     | C_ASP_5   | OD1    | 2.615        |
| 5UK1   | D_LYS_643 | NZ     | C_ASP_5   | OD2    | 3.806        |
| 5UK1   | D_LYS_643 | NZ     | D_GLU_529 | OE2    | 3.727        |
| 5UK1   | D_LYS_653 | NZ     | D_GLU_650 | OE1    | 3.695        |

|      |           |     |           |     |       |
|------|-----------|-----|-----------|-----|-------|
| 5UK1 | D_LYS_661 | NZ  | D_GLU_647 | OE1 | 3.063 |
| 5UK1 | D_ARG_670 | NH2 | D_GLU_671 | OE2 | 2.927 |
| 5UK1 | E_LYS_44  | NZ  | E_ASP_276 | OD2 | 3.905 |
| 5UK1 | E_LYS_86  | NZ  | E_GLU_90  | OE2 | 3.505 |
| 5UK1 | E_ARG_106 | NH1 | E_GLU_85  | OE1 | 3.700 |
| 5UK1 | E_ARG_106 | NH1 | E_GLU_85  | OE2 | 3.089 |
| 5UK1 | E_ARG_106 | NH2 | E_GLU_85  | OE1 | 3.009 |
| 5UK1 | E_ARG_106 | NH2 | E_GLU_85  | OE2 | 3.227 |
| 5UK1 | E_ARG_106 | NH2 | F_GLU_569 | OE2 | 2.991 |
| 5UK1 | E_LYS_174 | NZ  | E_GLU_116 | OE2 | 3.687 |
| 5UK1 | E_ARG_192 | NH2 | E_GLU_198 | OE2 | 2.984 |
| 5UK1 | E_ARG_262 | NH1 | E_GLU_175 | OE1 | 3.086 |
| 5UK1 | E_ARG_311 | NH1 | F_ASP_590 | OD1 | 2.696 |
| 5UK1 | E_ARG_311 | NH1 | F_ASP_590 | OD2 | 3.637 |
| 5UK1 | E_ARG_311 | NH2 | F_ASP_586 | OD1 | 3.291 |
| 5UK1 | E_ARG_322 | NH2 | E_GLU_25  | OE1 | 3.980 |
| 5UK1 | F_LYS_558 | NZ  | D_GLU_597 | OE1 | 3.566 |
| 5UK1 | F_ARG_576 | NH1 | B_GLU_574 | OE1 | 3.570 |
| 5UK1 | F_ARG_576 | NH1 | B_GLU_574 | OE2 | 3.065 |
| 5UK1 | F_ARG_576 | NH2 | A_GLU_104 | OE2 | 3.295 |
| 5UK1 | F_LYS_582 | NZ  | F_ASP_586 | OD2 | 3.755 |
| 5UK1 | F_ARG_606 | NH2 | D_ASP_609 | OD2 | 3.182 |
| 5UK1 | F_LYS_623 | NZ  | F_GLU_632 | OE2 | 3.459 |
| 5UK1 | F_LYS_631 | NZ  | F_GLU_639 | OE1 | 3.967 |
| 5UK1 | F_LYS_643 | NZ  | E_GLU_4   | OE1 | 3.024 |
| 5UK1 | F_LYS_643 | NZ  | E_ASP_5   | OD1 | 2.503 |
| 5UK1 | F_LYS_643 | NZ  | E_ASP_5   | OD2 | 3.650 |
| 5UK1 | F_LYS_643 | NZ  | F_GLU_529 | OE2 | 3.727 |
| 5UK1 | F_LYS_653 | NZ  | F_GLU_650 | OE1 | 3.696 |
| 5UK1 | F_LYS_661 | NZ  | F_GLU_647 | OE1 | 3.063 |
| 5UK1 | F_ARG_670 | NH2 | F_GLU_671 | OE2 | 2.926 |
| 5UK1 | G_HIS_160 | NE2 | G_ASP_158 | OD1 | 3.432 |
| 5UK1 | G_ARG_163 | NH1 | G_ASP_214 | OD1 | 2.991 |
| 5UK1 | G_ARG_163 | NH2 | G_GLU_171 | OE1 | 2.756 |
| 5UK1 | G_ARG_163 | NH2 | G_GLU_171 | OE2 | 3.832 |
| 5UK1 | G_ARG_225 | NH1 | A_ASP_190 | OD1 | 2.887 |
| 5UK1 | G_ARG_225 | NH1 | A_ASP_190 | OD2 | 3.709 |
| 5UK1 | G_ARG_225 | NH2 | A_ASP_190 | OD1 | 3.956 |
| 5UK1 | G_ARG_225 | NH2 | A_ASP_190 | OD2 | 3.555 |
| 5UK1 | H_HIS_160 | NE2 | H_ASP_158 | OD1 | 3.431 |
| 5UK1 | H_ARG_163 | NH1 | H_ASP_214 | OD1 | 2.991 |
| 5UK1 | H_ARG_163 | NH2 | H_GLU_171 | OE1 | 2.756 |
| 5UK1 | H_ARG_163 | NH2 | H_GLU_171 | OE2 | 3.832 |
| 5UK1 | H_ARG_225 | NH1 | C_ASP_190 | OD1 | 2.683 |
| 5UK1 | H_ARG_225 | NH1 | C_ASP_190 | OD2 | 3.511 |
| 5UK1 | H_ARG_225 | NH2 | C_ASP_190 | OD1 | 3.809 |
| 5UK1 | H_ARG_225 | NH2 | C_ASP_190 | OD2 | 3.346 |
| 5UK1 | I_HIS_160 | NE2 | I_ASP_158 | OD1 | 3.432 |
| 5UK1 | I_ARG_163 | NH1 | I_ASP_214 | OD1 | 2.991 |
| 5UK1 | I_ARG_163 | NH2 | I_GLU_171 | OE1 | 2.756 |
| 5UK1 | I_ARG_163 | NH2 | I_GLU_171 | OE2 | 3.832 |
| 5UK1 | I_ARG_225 | NH1 | E_ASP_190 | OD1 | 2.885 |
| 5UK1 | I_ARG_225 | NH1 | E_ASP_190 | OD2 | 3.789 |
| 5UK1 | I_ARG_225 | NH2 | E_ASP_190 | OD1 | 3.888 |
| 5UK1 | I_ARG_225 | NH2 | E_ASP_190 | OD2 | 3.567 |

---

Table 729: 5UK1-specific salt bridging networks analysis. In this table, a PDB file is specified with a four-letter PDB ID, except that the names of the PDB files corresponding to the single NMR structural model split from the NMR ensemble is specified with a four-letter PDB ID in addition to a hyphen followed by the single NMR structural model numeric ID, the residue naming scheme is **Chain ID\_residue name\_residue number**,  $\angle ADH$  represents the angle formed by acceptor (A), donor (D) and hydrogen (H) ( $\angle ADH$ ).

| PDB ID | Residue A | Atom A | Residue B | Atom B | Distance (Å) |
|--------|-----------|--------|-----------|--------|--------------|
| 5UK2   | A_LYS_86  | NZ     | A_GLU_90  | OE2    | 3.657        |
| 5UK2   | A_ARG_106 | NH1    | A_GLU_85  | OE2    | 2.898        |
| 5UK2   | A_ARG_106 | NH1    | B_GLU_569 | OE2    | 3.935        |
| 5UK2   | A_ARG_106 | NH2    | A_GLU_85  | OE1    | 3.401        |
| 5UK2   | A_ARG_106 | NH2    | A_GLU_85  | OE2    | 3.141        |
| 5UK2   | A_ARG_106 | NH2    | B_GLU_569 | OE2    | 2.216        |
| 5UK2   | A_HIS_141 | ND1    | A_GLU_70  | OE2    | 3.497        |
| 5UK2   | A_LYS_174 | NZ     | A_GLU_116 | OE2    | 3.324        |
| 5UK2   | A_ARG_192 | NH2    | A_GLU_198 | OE2    | 3.178        |
| 5UK2   | A_HIS_208 | ND1    | A_GLU_238 | OE2    | 3.989        |
| 5UK2   | A_LYS_219 | NZ     | A_GLU_227 | OE2    | 3.929        |
| 5UK2   | A_ARG_262 | NH1    | A_GLU_175 | OE1    | 3.101        |
| 5UK2   | A_ARG_311 | NH1    | B_ASP_586 | OD1    | 3.877        |
| 5UK2   | A_ARG_311 | NH1    | B_ASP_590 | OD1    | 2.946        |
| 5UK2   | A_ARG_311 | NH1    | B_ASP_590 | OD2    | 3.729        |
| 5UK2   | A_ARG_311 | NH2    | B_ASP_586 | OD1    | 3.044        |
| 5UK2   | B_LYS_551 | NZ     | B_GLU_603 | OE1    | 3.663        |
| 5UK2   | B_LYS_558 | NZ     | F_GLU_597 | OE1    | 3.672        |
| 5UK2   | B_LYS_568 | NZ     | A_GLU_107 | OE1    | 3.896        |
| 5UK2   | B_ARG_576 | NH1    | D_GLU_574 | OE1    | 3.949        |
| 5UK2   | B_ARG_576 | NH1    | D_GLU_574 | OE2    | 2.806        |
| 5UK2   | B_ARG_576 | NH2    | C_GLU_104 | OE2    | 3.501        |
| 5UK2   | B_LYS_582 | NZ     | B_ASP_586 | OD2    | 3.917        |
| 5UK2   | B_LYS_583 | NZ     | D_ASP_585 | OD1    | 3.241        |
| 5UK2   | B_LYS_583 | NZ     | D_ASP_585 | OD2    | 3.954        |
| 5UK2   | B_ARG_606 | NH2    | F_ASP_609 | OD2    | 2.779        |
| 5UK2   | B_LYS_623 | NZ     | B_GLU_632 | OE2    | 3.089        |
| 5UK2   | B_LYS_643 | NZ     | A_GLU_4   | OE1    | 3.076        |
| 5UK2   | B_LYS_643 | NZ     | A_ASP_5   | OD1    | 2.565        |
| 5UK2   | B_LYS_643 | NZ     | A_ASP_5   | OD2    | 3.717        |
| 5UK2   | B_LYS_643 | NZ     | B_GLU_529 | OE2    | 3.623        |
| 5UK2   | B_LYS_661 | NZ     | B_GLU_647 | OE1    | 3.251        |
| 5UK2   | B_ARG_670 | NH2    | B_GLU_671 | OE2    | 2.809        |
| 5UK2   | C_LYS_86  | NZ     | C_GLU_90  | OE2    | 3.657        |
| 5UK2   | C_ARG_106 | NH1    | C_GLU_85  | OE2    | 2.898        |
| 5UK2   | C_ARG_106 | NH1    | D_GLU_569 | OE2    | 3.977        |
| 5UK2   | C_ARG_106 | NH2    | C_GLU_85  | OE1    | 3.401        |
| 5UK2   | C_ARG_106 | NH2    | C_GLU_85  | OE2    | 3.141        |
| 5UK2   | C_ARG_106 | NH2    | D_GLU_569 | OE2    | 2.287        |
| 5UK2   | C_HIS_141 | ND1    | C_GLU_70  | OE2    | 3.498        |
| 5UK2   | C_LYS_174 | NZ     | C_GLU_116 | OE2    | 3.326        |
| 5UK2   | C_ARG_192 | NH2    | C_GLU_198 | OE2    | 3.177        |
| 5UK2   | C_HIS_208 | ND1    | C_GLU_238 | OE2    | 3.990        |
| 5UK2   | C_LYS_219 | NZ     | C_GLU_227 | OE2    | 3.929        |
| 5UK2   | C_ARG_262 | NH1    | C_GLU_175 | OE1    | 3.100        |
| 5UK2   | C_ARG_311 | NH1    | D_ASP_586 | OD1    | 3.894        |
| 5UK2   | C_ARG_311 | NH1    | D_ASP_590 | OD1    | 2.932        |
| 5UK2   | C_ARG_311 | NH1    | D_ASP_590 | OD2    | 3.727        |
| 5UK2   | C_ARG_311 | NH2    | D_ASP_586 | OD1    | 3.043        |
| 5UK2   | D_LYS_551 | NZ     | D_GLU_603 | OE1    | 3.662        |
| 5UK2   | D_LYS_558 | NZ     | B_GLU_597 | OE1    | 3.518        |
| 5UK2   | D_LYS_558 | NZ     | B_GLU_597 | OE2    | 3.929        |
| 5UK2   | D_LYS_568 | NZ     | C_GLU_107 | OE1    | 3.830        |
| 5UK2   | D_ARG_576 | NH1    | F_GLU_574 | OE1    | 3.823        |
| 5UK2   | D_ARG_576 | NH1    | F_GLU_574 | OE2    | 2.724        |
| 5UK2   | D_ARG_576 | NH2    | E_GLU_104 | OE2    | 3.539        |
| 5UK2   | D_LYS_582 | NZ     | D_ASP_586 | OD2    | 3.917        |

|      |           |     |           |     |       |
|------|-----------|-----|-----------|-----|-------|
| 5UK2 | D_LYS_583 | NZ  | F_ASP_585 | OD1 | 3.067 |
| 5UK2 | D_LYS_583 | NZ  | F_ASP_585 | OD2 | 3.783 |
| 5UK2 | D_ARG_606 | NH2 | B_ASP_609 | OD2 | 2.604 |
| 5UK2 | D_LYS_623 | NZ  | D_GLU_632 | OE2 | 3.089 |
| 5UK2 | D_LYS_643 | NZ  | C_GLU_4   | OE1 | 3.112 |
| 5UK2 | D_LYS_643 | NZ  | C_ASP_5   | OD1 | 2.525 |
| 5UK2 | D_LYS_643 | NZ  | C_ASP_5   | OD2 | 3.631 |
| 5UK2 | D_LYS_643 | NZ  | D_GLU_529 | OE2 | 3.624 |
| 5UK2 | D_LYS_661 | NZ  | D_GLU_647 | OE1 | 3.251 |
| 5UK2 | D_ARG_670 | NH2 | D_GLU_671 | OE2 | 2.809 |
| 5UK2 | E_LYS_86  | NZ  | E_GLU_90  | OE2 | 3.657 |
| 5UK2 | E_ARG_106 | NH1 | E_GLU_85  | OE2 | 2.898 |
| 5UK2 | E_ARG_106 | NH1 | F_GLU_569 | OE2 | 3.948 |
| 5UK2 | E_ARG_106 | NH2 | E_GLU_85  | OE1 | 3.401 |
| 5UK2 | E_ARG_106 | NH2 | E_GLU_85  | OE2 | 3.140 |
| 5UK2 | E_ARG_106 | NH2 | F_GLU_569 | OE2 | 2.300 |
| 5UK2 | E_HIS_141 | ND1 | E_GLU_70  | OE2 | 3.497 |
| 5UK2 | E_LYS_174 | NZ  | E_GLU_116 | OE2 | 3.326 |
| 5UK2 | E_ARG_192 | NH2 | E_GLU_198 | OE2 | 3.179 |
| 5UK2 | E_HIS_208 | ND1 | E_GLU_238 | OE2 | 3.988 |
| 5UK2 | E_LYS_219 | NZ  | E_GLU_227 | OE2 | 3.928 |
| 5UK2 | E_ARG_262 | NH1 | E_GLU_175 | OE1 | 3.100 |
| 5UK2 | E_ARG_311 | NH1 | F_ASP_586 | OD1 | 3.963 |
| 5UK2 | E_ARG_311 | NH1 | F_ASP_590 | OD1 | 2.962 |
| 5UK2 | E_ARG_311 | NH1 | F_ASP_590 | OD2 | 3.800 |
| 5UK2 | E_ARG_311 | NH2 | F_ASP_586 | OD1 | 3.154 |
| 5UK2 | F_LYS_551 | NZ  | F_GLU_603 | OE1 | 3.663 |
| 5UK2 | F_LYS_558 | NZ  | D_GLU_597 | OE1 | 3.583 |
| 5UK2 | F_LYS_558 | NZ  | D_GLU_597 | OE2 | 3.900 |
| 5UK2 | F_LYS_568 | NZ  | E_GLU_107 | OE1 | 3.789 |
| 5UK2 | F_ARG_576 | NH1 | B_GLU_574 | OE1 | 3.881 |
| 5UK2 | F_ARG_576 | NH1 | B_GLU_574 | OE2 | 2.699 |
| 5UK2 | F_ARG_576 | NH2 | A_GLU_104 | OE2 | 3.688 |
| 5UK2 | F_LYS_582 | NZ  | F_ASP_586 | OD2 | 3.917 |
| 5UK2 | F_LYS_583 | NZ  | B_ASP_585 | OD1 | 3.058 |
| 5UK2 | F_LYS_583 | NZ  | B_ASP_585 | OD2 | 3.745 |
| 5UK2 | F_ARG_606 | NH2 | D_ASP_609 | OD2 | 2.605 |
| 5UK2 | F_LYS_623 | NZ  | F_GLU_632 | OE2 | 3.089 |
| 5UK2 | F_LYS_643 | NZ  | E_GLU_4   | OE1 | 3.293 |
| 5UK2 | F_LYS_643 | NZ  | E_ASP_5   | OD1 | 2.450 |
| 5UK2 | F_LYS_643 | NZ  | E_ASP_5   | OD2 | 3.677 |
| 5UK2 | F_LYS_643 | NZ  | F_GLU_529 | OE2 | 3.624 |
| 5UK2 | F_LYS_661 | NZ  | F_GLU_647 | OE1 | 3.251 |
| 5UK2 | F_ARG_670 | NH2 | F_GLU_671 | OE2 | 2.809 |
| 5UK2 | G_HIS_160 | NE2 | G_ASP_158 | OD1 | 3.898 |
| 5UK2 | G_ARG_163 | NH1 | G_ASP_214 | OD1 | 2.808 |
| 5UK2 | G_ARG_163 | NH2 | G_GLU_171 | OE1 | 3.032 |
| 5UK2 | G_ARG_163 | NH2 | G_GLU_171 | OE2 | 3.708 |
| 5UK2 | G_ARG_225 | NH1 | A_ASP_190 | OD1 | 2.979 |
| 5UK2 | G_ARG_225 | NH1 | A_ASP_190 | OD2 | 3.894 |
| 5UK2 | G_ARG_225 | NH2 | A_ASP_190 | OD1 | 3.206 |
| 5UK2 | G_ARG_225 | NH2 | A_ASP_190 | OD2 | 2.785 |
| 5UK2 | H_HIS_160 | NE2 | H_ASP_158 | OD1 | 3.898 |
| 5UK2 | H_ARG_163 | NH1 | H_ASP_214 | OD1 | 2.808 |
| 5UK2 | H_ARG_163 | NH2 | H_GLU_171 | OE1 | 3.032 |
| 5UK2 | H_ARG_163 | NH2 | H_GLU_171 | OE2 | 3.708 |
| 5UK2 | H_ARG_225 | NH1 | C_ASP_190 | OD1 | 3.085 |
| 5UK2 | H_ARG_225 | NH2 | C_ASP_190 | OD1 | 3.195 |

|      |           |     |           |     |       |
|------|-----------|-----|-----------|-----|-------|
| 5UK2 | H_ARG_225 | NH2 | C_ASP_190 | OD2 | 2.865 |
| 5UK2 | I_HIS_160 | NE2 | I_ASP_158 | OD1 | 3.898 |
| 5UK2 | I_ARG_163 | NH1 | I_ASP_214 | OD1 | 2.807 |
| 5UK2 | I_ARG_163 | NH2 | I_GLU_171 | OE1 | 3.032 |
| 5UK2 | I_ARG_163 | NH2 | I_GLU_171 | OE2 | 3.708 |
| 5UK2 | I_ARG_225 | NH1 | E_ASP_190 | OD1 | 2.888 |
| 5UK2 | I_ARG_225 | NH1 | E_ASP_190 | OD2 | 3.869 |
| 5UK2 | I_ARG_225 | NH2 | E_ASP_190 | OD1 | 3.014 |
| 5UK2 | I_ARG_225 | NH2 | E_ASP_190 | OD2 | 2.625 |

Table 730: 5UK2-specific salt bridging networks analysis. In this table, a PDB file is specified with a four-letter PDB ID, except that the names of the PDB files corresponding to the single NMR structural model split from the NMR ensemble is specified with a four-letter PDB ID in addition to a hyphen followed by the single NMR structural model numeric ID, the residue naming scheme is **Chain ID\_residue name\_residue number**,  $\angle ADH$  represents the angle formed by acceptor (A), donor (D) and hydrogen (H) ( $\angle ADH$ ).

| PDB ID | Residue A | Atom A | Residue B | Atom B | Distance (Å) |
|--------|-----------|--------|-----------|--------|--------------|
| 5UR8   | A_ARG_38  | NH2    | A_GLU_46  | OE1    | 3.406        |
| 5UR8   | A_ARG_38  | NH2    | A_GLU_46  | OE2    | 2.842        |
| 5UR8   | A_ARG_59  | NH1    | B_ASP_95  | OD1    | 3.084        |
| 5UR8   | A_ARG_59  | NH1    | B_ASP_95  | OD2    | 3.357        |
| 5UR8   | A_ARG_59  | NH2    | A_ASP_57  | OD1    | 2.972        |
| 5UR8   | A_ARG_59  | NH2    | A_ASP_57  | OD2    | 3.995        |
| 5UR8   | A_ARG_67  | NH1    | A_ASP_90  | OD1    | 2.756        |
| 5UR8   | A_ARG_67  | NH1    | A_ASP_90  | OD2    | 3.331        |
| 5UR8   | A_ARG_67  | NH2    | A_ASP_90  | OD1    | 3.669        |
| 5UR8   | A_ARG_67  | NH2    | A_ASP_90  | OD2    | 2.616        |
| 5UR8   | A_LYS_138 | NZ     | B_GLU_215 | OE2    | 2.961        |
| 5UR8   | A_LYS_152 | NZ     | A_ASP_153 | OD1    | 3.501        |
| 5UR8   | A_LYS_152 | NZ     | A_ASP_153 | OD2    | 3.066        |
| 5UR8   | B_ARG_62  | NH2    | B_GLU_82  | OE2    | 3.548        |
| 5UR8   | B_ARG_62  | NH2    | B_ASP_83  | OD1    | 2.828        |
| 5UR8   | B_ARG_62  | NH2    | B_ASP_83  | OD2    | 3.632        |
| 5UR8   | B_LYS_105 | NZ     | B_GLU_167 | OE1    | 2.973        |
| 5UR8   | B_LYS_105 | NZ     | B_GLU_167 | OE2    | 3.906        |
| 5UR8   | B_LYS_151 | NZ     | B_GLU_197 | OE1    | 2.809        |
| 5UR8   | B_LYS_151 | NZ     | B_GLU_197 | OE2    | 3.414        |
| 5UR8   | B_LYS_190 | NZ     | B_ASP_187 | OD1    | 3.286        |
| 5UR8   | B_HIS_191 | ND1    | B_ASP_153 | OD1    | 3.243        |

Table 731: 5UR8-specific salt bridging networks analysis. In this table, a PDB file is specified with a four-letter PDB ID, except that the names of the PDB files corresponding to the single NMR structural model split from the NMR ensemble is specified with a four-letter PDB ID in addition to a hyphen followed by the single NMR structural model numeric ID, the residue naming scheme is **Chain ID\_residue name\_residue number**,  $\angle ADH$  represents the angle formed by acceptor (A), donor (D) and hydrogen (H) ( $\angle ADH$ ).



| PDB ID | Residue A | Atom A | Residue B | Atom B | Distance (Å) |
|--------|-----------|--------|-----------|--------|--------------|
| 5VF2   | A.LYS_64  | NZ     | A.GLU_47  | OE2    | 2.716        |
| 5VF2   | A.LYS_68  | NZ     | A.ASP_91  | OD1    | 3.611        |
| 5VF2   | A.LYS_68  | NZ     | A.ASP_91  | OD2    | 2.737        |
| 5VF2   | A.ARG_99  | NH2    | A.ASP_108 | OD1    | 3.519        |
| 5VF2   | A.ARG_99  | NH2    | A.ASP_108 | OD2    | 2.783        |

Table 732: 5VF2-specific salt bridging networks analysis. In this table, a PDB file is specified with a four-letter PDB ID, except that the names of the PDB files corresponding to the single NMR structural model split from the NMR ensemble is specified with a four-letter PDB ID in addition to a hyphen followed by the single NMR structural model numeric ID, the residue naming scheme is **Chain ID\_residue name\_residue number**,  $\angle ADH$  represents the angle formed by acceptor (A), donor (D) and hydrogen (H) ( $\angle ADH$ ).

| PDB ID | Residue A | Atom A | Residue B | Atom B | Distance (Å) |
|--------|-----------|--------|-----------|--------|--------------|
| 5VL3   | Q_HIS_28  | NE2    | Q_GLU_130 | OE2    | 3.358        |
| 5VL3   | Q_ARG_75  | NH1    | Q_GLU_78  | OE2    | 3.350        |
| 5VL3   | Q_ARG_91  | NH1    | Q_ASP_113 | OD1    | 3.515        |
| 5VL3   | Q_ARG_91  | NH1    | Q_ASP_113 | OD2    | 2.674        |
| 5VL3   | Q_ARG_91  | NH2    | Q_ASP_113 | OD1    | 3.050        |
| 5VL3   | Q_ARG_91  | NH2    | Q_ASP_113 | OD2    | 3.746        |
| 5VL3   | Q_HIS_110 | ND1    | Q_GLU_36  | OE1    | 3.316        |
| 5VL3   | Q_HIS_110 | ND1    | Q_GLU_36  | OE2    | 2.335        |
| 5VL3   | Q_HIS_213 | NE2    | H_GLU_58  | OE2    | 3.352        |
| 5VL3   | Q_LYS_239 | NZ     | Q_GLU_150 | OE1    | 3.878        |
| 5VL3   | Q_LYS_239 | NZ     | Q_GLU_150 | OE2    | 3.128        |
| 5VL3   | Q_LYS_243 | NZ     | Q_GLU_153 | OE1    | 2.660        |
| 5VL3   | Q_LYS_243 | NZ     | Q_GLU_153 | OE2    | 2.886        |
| 5VL3   | Q_LYS_281 | NZ     | Q_ASP_282 | OD2    | 3.077        |
| 5VL3   | Q_LYS_306 | NZ     | Q_GLU_322 | OE1    | 3.813        |
| 5VL3   | R_HIS_28  | NE2    | R_GLU_130 | OE2    | 3.389        |
| 5VL3   | R_LYS_70  | NZ     | R_ASP_72  | OD1    | 3.096        |
| 5VL3   | R_ARG_91  | NH1    | R_ASP_113 | OD1    | 3.738        |
| 5VL3   | R_ARG_91  | NH1    | R_ASP_113 | OD2    | 2.609        |
| 5VL3   | R_ARG_91  | NH2    | R_ASP_113 | OD1    | 2.934        |
| 5VL3   | R_ARG_91  | NH2    | R_ASP_113 | OD2    | 3.371        |
| 5VL3   | R_HIS_110 | ND1    | R_GLU_36  | OE1    | 3.943        |
| 5VL3   | R_HIS_110 | ND1    | R_GLU_36  | OE2    | 2.329        |
| 5VL3   | R_ARG_120 | NH2    | T_GLU_54  | OE2    | 3.782        |
| 5VL3   | R_LYS_127 | NZ     | R_GLU_122 | OE2    | 3.799        |
| 5VL3   | R_LYS_127 | NZ     | T_GLU_54  | OE1    | 2.927        |
| 5VL3   | R_LYS_127 | NZ     | T_GLU_122 | OE1    | 2.999        |
| 5VL3   | R_HIS_213 | NE2    | A_GLU_58  | OE2    | 3.157        |
| 5VL3   | R_LYS_239 | NZ     | R_GLU_150 | OE1    | 3.277        |
| 5VL3   | R_LYS_247 | NZ     | R_GLU_266 | OE2    | 3.438        |
| 5VL3   | R_LYS_281 | NZ     | R_ASP_282 | OD2    | 3.188        |
| 5VL3   | R_LYS_306 | NZ     | R_GLU_322 | OE1    | 3.817        |
| 5VL3   | R_ARG_319 | NH2    | R_GLU_322 | OE2    | 3.267        |
| 5VL3   | S_LYS_23  | NZ     | S_ASP_50  | OD2    | 3.917        |
| 5VL3   | S_HIS_28  | NE2    | S_GLU_130 | OE2    | 3.287        |
| 5VL3   | S_ARG_75  | NH1    | S_GLU_78  | OE2    | 2.970        |
| 5VL3   | S_LYS_100 | NZ     | S_ASP_97  | OD2    | 2.933        |
| 5VL3   | S_LYS_205 | NZ     | S_GLU_156 | OE2    | 3.382        |
| 5VL3   | S_HIS_213 | NE2    | C_GLU_58  | OE2    | 3.140        |
| 5VL3   | S_LYS_227 | NZ     | S_ASP_225 | OD1    | 3.967        |
| 5VL3   | S_LYS_239 | NZ     | S_GLU_150 | OE2    | 3.417        |
| 5VL3   | S_LYS_243 | NZ     | S_GLU_153 | OE1    | 2.988        |
| 5VL3   | S_LYS_243 | NZ     | S_GLU_153 | OE2    | 2.544        |
| 5VL3   | S_LYS_281 | NZ     | S_ASP_282 | OD2    | 3.330        |
| 5VL3   | S_LYS_306 | NZ     | S_GLU_322 | OE1    | 3.934        |
| 5VL3   | T_HIS_28  | NE2    | T_GLU_130 | OE2    | 3.482        |
| 5VL3   | T_ARG_75  | NH1    | T_GLU_78  | OE2    | 2.965        |
| 5VL3   | T_ARG_91  | NH2    | T_ASP_113 | OD1    | 2.973        |
| 5VL3   | T_ARG_91  | NH2    | T_ASP_113 | OD2    | 2.700        |
| 5VL3   | T_LYS_98  | NZ     | T_ASP_52  | OD2    | 3.823        |
| 5VL3   | T_HIS_110 | ND1    | T_GLU_36  | OE1    | 3.602        |
| 5VL3   | T_HIS_110 | ND1    | T_GLU_36  | OE2    | 2.613        |
| 5VL3   | T_LYS_127 | NZ     | R_GLU_54  | OE1    | 3.658        |
| 5VL3   | T_LYS_127 | NZ     | R_GLU_122 | OE1    | 3.863        |
| 5VL3   | T_LYS_205 | NZ     | T_GLU_156 | OE1    | 3.981        |
| 5VL3   | T_HIS_213 | NE2    | E_GLU_58  | OE2    | 3.636        |
| 5VL3   | T_LYS_239 | NZ     | T_GLU_150 | OE2    | 3.518        |

|      |           |     |           |     |       |
|------|-----------|-----|-----------|-----|-------|
| 5VL3 | T_LYS_243 | NZ  | T_GLU_153 | OE1 | 3.300 |
| 5VL3 | T_LYS_243 | NZ  | T_GLU_153 | OE2 | 2.403 |
| 5VL3 | T_LYS_247 | NZ  | T_GLU_266 | OE2 | 3.696 |
| 5VL3 | T_LYS_281 | NZ  | T_ASP_282 | OD2 | 3.114 |
| 5VL3 | T_ARG_319 | NH2 | T_GLU_322 | OE2 | 3.136 |
| 5VL3 | A_ARG_38  | NH1 | A_GLU_46  | OE2 | 3.328 |
| 5VL3 | A_ARG_53  | NH2 | R_ASP_232 | OD1 | 3.883 |
| 5VL3 | A_ARG_53  | NH2 | R_ASP_232 | OD2 | 3.340 |
| 5VL3 | A_LYS_66  | NZ  | A_ASP_86  | OD1 | 3.151 |
| 5VL3 | A_LYS_66  | NZ  | A_ASP_86  | OD2 | 3.194 |
| 5VL3 | A_ARG_83  | NH2 | A_GLU_85  | OE1 | 2.855 |
| 5VL3 | A_ARG_83  | NH2 | A_GLU_85  | OE2 | 3.048 |
| 5VL3 | A_ARG_95  | NH1 | R_GLU_179 | OE1 | 3.121 |
| 5VL3 | A_ARG_95  | NH1 | R_GLU_179 | OE2 | 3.607 |
| 5VL3 | A_ARG_95  | NH2 | R_GLU_179 | OE2 | 3.046 |
| 5VL3 | A_LYS_210 | NZ  | B_GLU_124 | OE2 | 3.976 |
| 5VL3 | A_LYS_215 | NZ  | A_GLU_213 | OE1 | 2.311 |
| 5VL3 | C_ARG_38  | NH1 | C_GLU_46  | OE2 | 3.106 |
| 5VL3 | C_ARG_53  | NH2 | S_ASP_232 | OD2 | 3.370 |
| 5VL3 | C_ARG_94  | NH1 | C_ASP_96  | OD1 | 3.364 |
| 5VL3 | C_ARG_94  | NH2 | C_ASP_96  | OD1 | 3.938 |
| 5VL3 | C_ARG_95  | NH1 | S_GLU_179 | OE1 | 3.505 |
| 5VL3 | C_ARG_95  | NH1 | S_GLU_179 | OE2 | 3.184 |
| 5VL3 | C_ARG_95  | NH2 | S_GLU_179 | OE2 | 3.815 |
| 5VL3 | C_LYS_144 | NZ  | C_ASP_145 | OD1 | 3.207 |
| 5VL3 | C_LYS_144 | NZ  | C_ASP_145 | OD2 | 2.725 |
| 5VL3 | E_ARG_38  | NH1 | E_GLU_46  | OE2 | 3.258 |
| 5VL3 | E_ARG_53  | NH2 | T_ASP_232 | OD1 | 3.852 |
| 5VL3 | E_ARG_53  | NH2 | T_ASP_232 | OD2 | 3.470 |
| 5VL3 | E_ARG_83  | NH1 | E_ASP_86  | OD1 | 3.861 |
| 5VL3 | E_ARG_94  | NH1 | E_ASP_96  | OD1 | 2.513 |
| 5VL3 | E_ARG_95  | NH1 | T_GLU_179 | OE1 | 2.688 |
| 5VL3 | E_ARG_95  | NH1 | T_GLU_179 | OE2 | 2.993 |
| 5VL3 | E_ARG_95  | NH2 | T_GLU_179 | OE2 | 3.079 |
| 5VL3 | E_LYS_144 | NZ  | E_ASP_145 | OD1 | 2.943 |
| 5VL3 | E_LYS_144 | NZ  | E_ASP_145 | OD2 | 2.901 |
| 5VL3 | E_LYS_210 | NZ  | F_GLU_    | OE2 | 3.778 |
| 5VL3 | E_LYS_    | NZ  | F_ASP_    | OD2 | 3.984 |
| 5VL3 | H_ARG_38  | NH1 | H_GLU_46  | OE2 | 2.851 |
| 5VL3 | H_ARG_53  | NH2 | Q_ASP_232 | OD1 | 3.950 |
| 5VL3 | H_ARG_53  | NH2 | Q_ASP_232 | OD2 | 3.411 |
| 5VL3 | H_LYS_66  | NZ  | H_ASP_86  | OD1 | 3.327 |
| 5VL3 | H_LYS_66  | NZ  | H_ASP_86  | OD2 | 2.190 |
| 5VL3 | H_ARG_83  | NH2 | H_GLU_85  | OE1 | 3.339 |
| 5VL3 | H_ARG_83  | NH2 | H_GLU_85  | OE2 | 3.382 |
| 5VL3 | H_ARG_94  | NH1 | H_ASP_96  | OD1 | 3.684 |
| 5VL3 | H_ARG_95  | NH1 | Q_GLU_179 | OE1 | 3.431 |
| 5VL3 | H_ARG_95  | NH1 | Q_GLU_179 | OE2 | 3.819 |
| 5VL3 | H_ARG_95  | NH2 | Q_GLU_179 | OE2 | 3.149 |
| 5VL3 | H_LYS_144 | NZ  | H_ASP_145 | OD1 | 2.853 |
| 5VL3 | H_LYS_144 | NZ  | H_ASP_145 | OD2 | 2.951 |
| 5VL3 | B_ARG_61  | NH2 | B_GLU_81  | OE1 | 3.497 |
| 5VL3 | B_ARG_61  | NH2 | B_ASP_82  | OD1 | 2.798 |
| 5VL3 | B_ARG_61  | NH2 | B_ASP_82  | OD2 | 3.720 |
| 5VL3 | D_ARG_61  | NH2 | D_GLU_81  | OE1 | 3.609 |
| 5VL3 | D_ARG_61  | NH2 | D_ASP_82  | OD1 | 3.084 |
| 5VL3 | D_ARG_61  | NH2 | D_ASP_82  | OD2 | 3.921 |
| 5VL3 | D_LYS_150 | NZ  | D_GLU_196 | OE1 | 3.872 |

|      |           |     |           |     |       |
|------|-----------|-----|-----------|-----|-------|
| 5VL3 | D_LYS_150 | NZ  | D_GLU_196 | OE2 | 3.186 |
| 5VL3 | D_LYS_189 | NZ  | D_ASP_186 | OD1 | 3.734 |
| 5VL3 | F_ARG_61  | NH1 | F_GLU_81  | OE2 | 3.708 |
| 5VL3 | F_ARG_61  | NH2 | F_GLU_81  | OE2 | 2.960 |
| 5VL3 | F_ARG_61  | NH2 | F_ASP_82  | OD1 | 2.834 |
| 5VL3 | F_ARG_61  | NH2 | F_ASP_82  | OD2 | 3.453 |
| 5VL3 | F_LYS_150 | NZ  | F_GLU_196 | OE1 | 3.617 |
| 5VL3 | F_LYS_150 | NZ  | F_GLU_196 | OE2 | 3.530 |
| 5VL3 | L_ARG_18  | NH2 | R_GLU_36  | OE2 | 3.892 |
| 5VL3 | L_ARG_61  | NH2 | L_GLU_81  | OE1 | 3.403 |
| 5VL3 | L_ARG_61  | NH2 | L_ASP_82  | OD1 | 2.637 |
| 5VL3 | L_ARG_61  | NH2 | L_ASP_82  | OD2 | 3.407 |
| 5VL3 | L_LYS_150 | NZ  | L_GLU_196 | OE1 | 3.651 |
| 5VL3 | L_LYS_150 | NZ  | L_GLU_196 | OE2 | 3.240 |

Table 733: 5VL3-specific salt bridging networks analysis. In this table, a PDB file is specified with a four-letter PDB ID, except that the names of the PDB files corresponding to the single NMR structural model split from the NMR ensemble is specified with a four-letter PDB ID in addition to a hyphen followed by the single NMR structural model numeric ID, the residue naming scheme is **Chain ID\_residue name\_residue number**,  $\angle ADH$  represents the angle formed by acceptor (A), donor (D) and hydrogen (H) ( $\angle ADH$ ).

| PDB ID | Residue A | Atom A | Residue B | Atom B | Distance (Å) |
|--------|-----------|--------|-----------|--------|--------------|
| 5VN8   | G_LYS_34  | NZ     | A_ASP_612 | OD1    | 3.263        |
| 5VN8   | G_LYS_46  | NZ     | A_GLU_632 | OE1    | 3.416        |
| 5VN8   | G_LYS_46  | NZ     | A_GLU_632 | OE2    | 2.866        |
| 5VN8   | G_LYS_282 | NZ     | G_GLU_275 | OE1    | 3.041        |
| 5VN8   | G_ARG_337 | NH1    | G_GLU_290 | OE1    | 3.439        |
| 5VN8   | G_ARG_337 | NH1    | G_GLU_290 | OE2    | 3.645        |
| 5VN8   | G_ARG_337 | NH1    | G_GLU_340 | OE1    | 3.059        |
| 5VN8   | G_LYS_348 | NZ     | G_GLU_269 | OE2    | 2.496        |
| 5VN8   | G_LYS_348 | NZ     | G_GLU_351 | OE1    | 3.775        |
| 5VN8   | G_LYS_356 | NZ     | G_GLU_466 | OE2    | 2.685        |
| 5VN8   | G_ARG_456 | NH1    | G_GLU_466 | OE2    | 3.971        |
| 5VN8   | G_ARG_469 | NH2    | G_ASP_457 | OD2    | 3.488        |
| 5VN8   | G_ARG_476 | NH2    | G_GLU_102 | OE1    | 2.991        |
| 5VN8   | G_ARG_476 | NH2    | G_GLU_102 | OE2    | 3.449        |
| 5VN8   | G_LYS_487 | NZ     | G_GLU_47  | OE1    | 3.496        |
| 5VN8   | G_LYS_487 | NZ     | G_GLU_91  | OE2    | 3.186        |
| 5VN8   | A_ARG_542 | NH2    | C_GLU_647 | OE2    | 2.749        |
| 5VN8   | A_ARG_579 | NH1    | C_GLU_584 | OE1    | 3.931        |
| 5VN8   | H_LYS_12  | NZ     | H_GLU_10  | OE2    | 2.532        |
| 5VN8   | H_ARG_28  | NH1    | G_ASP_457 | OD1    | 2.893        |
| 5VN8   | H_ARG_38  | NH1    | H_ASP_86  | OD1    | 2.826        |
| 5VN8   | H_ARG_38  | NH2    | H_GLU_46  | OE1    | 3.729        |
| 5VN8   | H_ARG_38  | NH2    | H_GLU_46  | OE2    | 2.857        |
| 5VN8   | H_LYS_62  | NZ     | H_GLU_46  | OE1    | 3.455        |
| 5VN8   | H_ARG_66  | NH2    | H_ASP_86  | OD1    | 3.206        |
| 5VN8   | H_ARG_66  | NH2    | H_ASP_86  | OD2    | 2.433        |
| 5VN8   | H_ARG_82A | NH1    | H_ASP_65  | OD1    | 3.493        |
| 5VN8   | H_ARG_94  | NH2    | H_ASP_101 | OD2    | 3.929        |
| 5VN8   | L_HIS_27  | NE2    | L_GLU_1   | OE2    | 2.752        |
| 5VN8   | L_HIS_49  | ND1    | H_ASP_101 | OD1    | 3.097        |
| 5VN8   | L_ARG_61  | NH1    | L_ASP_82  | OD2    | 2.660        |
| 5VN8   | L_ARG_61  | NH2    | L_GLU_81  | OE2    | 3.818        |
| 5VN8   | L_ARG_61  | NH2    | L_ASP_82  | OD1    | 3.890        |
| 5VN8   | L_ARG_61  | NH2    | L_ASP_82  | OD2    | 2.783        |
| 5VN8   | L_LYS_103 | NZ     | L_GLU_105 | OE1    | 3.506        |
| 5VN8   | D_LYS_34  | NZ     | B_ASP_612 | OD1    | 3.397        |
| 5VN8   | D_LYS_46  | NZ     | B_GLU_632 | OE1    | 3.407        |
| 5VN8   | D_LYS_46  | NZ     | B_GLU_632 | OE2    | 2.853        |
| 5VN8   | D_LYS_282 | NZ     | D_GLU_275 | OE1    | 3.041        |
| 5VN8   | D_ARG_337 | NH1    | D_GLU_290 | OE1    | 3.439        |
| 5VN8   | D_ARG_337 | NH1    | D_GLU_290 | OE2    | 3.644        |
| 5VN8   | D_ARG_337 | NH1    | D_GLU_340 | OE1    | 3.058        |
| 5VN8   | D_LYS_348 | NZ     | D_GLU_269 | OE2    | 2.495        |
| 5VN8   | D_LYS_348 | NZ     | D_GLU_351 | OE1    | 3.775        |
| 5VN8   | D_LYS_356 | NZ     | D_GLU_466 | OE2    | 2.685        |
| 5VN8   | D_ARG_456 | NH1    | D_GLU_466 | OE2    | 3.971        |
| 5VN8   | D_ARG_469 | NH2    | D_ASP_457 | OD2    | 3.488        |
| 5VN8   | D_ARG_476 | NH2    | D_GLU_102 | OE1    | 2.992        |
| 5VN8   | D_ARG_476 | NH2    | D_GLU_102 | OE2    | 3.449        |
| 5VN8   | D_LYS_487 | NZ     | D_GLU_47  | OE1    | 3.496        |
| 5VN8   | D_LYS_487 | NZ     | D_GLU_91  | OE2    | 3.186        |
| 5VN8   | B_ARG_542 | NH2    | A_GLU_647 | OE1    | 3.985        |
| 5VN8   | B_ARG_542 | NH2    | A_GLU_647 | OE2    | 2.712        |
| 5VN8   | B_ARG_579 | NH1    | A_GLU_584 | OE1    | 3.986        |
| 5VN8   | F_LYS_12  | NZ     | F_GLU_10  | OE2    | 2.532        |
| 5VN8   | F_ARG_28  | NH1    | D_ASP_457 | OD1    | 2.808        |
| 5VN8   | F_ARG_38  | NH1    | F_ASP_86  | OD1    | 2.826        |

|      |           |     |           |     |       |
|------|-----------|-----|-----------|-----|-------|
| 5VN8 | F_ARG_38  | NH2 | F_GLU_46  | OE1 | 3.728 |
| 5VN8 | F_ARG_38  | NH2 | F_GLU_46  | OE2 | 2.856 |
| 5VN8 | F_LYS_62  | NZ  | F_GLU_46  | OE1 | 3.454 |
| 5VN8 | F_ARG_66  | NH2 | F_ASP_86  | OD1 | 3.206 |
| 5VN8 | F_ARG_66  | NH2 | F_ASP_86  | OD2 | 2.433 |
| 5VN8 | F_ARG_82A | NH1 | F_ASP_65  | OD1 | 3.494 |
| 5VN8 | F_ARG_94  | NH2 | F_ASP_101 | OD2 | 3.929 |
| 5VN8 | J_HIS_27  | NE2 | J_GLU_1   | OE2 | 2.753 |
| 5VN8 | J_HIS_49  | ND1 | F_ASP_101 | OD1 | 3.213 |
| 5VN8 | J_ARG_61  | NH1 | J_ASP_82  | OD2 | 2.661 |
| 5VN8 | J_ARG_61  | NH2 | J_GLU_81  | OE2 | 3.818 |
| 5VN8 | J_ARG_61  | NH2 | J_ASP_82  | OD1 | 3.889 |
| 5VN8 | J_ARG_61  | NH2 | J_ASP_82  | OD2 | 2.783 |
| 5VN8 | J_LYS_103 | NZ  | J_GLU_105 | OE1 | 3.505 |
| 5VN8 | E_LYS_34  | NZ  | C_ASP_612 | OD1 | 3.266 |
| 5VN8 | E_LYS_46  | NZ  | C_GLU_632 | OE1 | 3.380 |
| 5VN8 | E_LYS_46  | NZ  | C_GLU_632 | OE2 | 2.776 |
| 5VN8 | E_LYS_282 | NZ  | E_GLU_275 | OE1 | 3.041 |
| 5VN8 | E_ARG_337 | NH1 | E_GLU_290 | OE1 | 3.439 |
| 5VN8 | E_ARG_337 | NH1 | E_GLU_290 | OE2 | 3.643 |
| 5VN8 | E_ARG_337 | NH1 | E_GLU_340 | OE1 | 3.057 |
| 5VN8 | E_LYS_348 | NZ  | E_GLU_269 | OE2 | 2.495 |
| 5VN8 | E_LYS_348 | NZ  | E_GLU_351 | OE1 | 3.775 |
| 5VN8 | E_LYS_356 | NZ  | E_GLU_466 | OE2 | 2.685 |
| 5VN8 | E_ARG_456 | NH1 | E_GLU_466 | OE2 | 3.971 |
| 5VN8 | E_ARG_469 | NH2 | E_ASP_457 | OD2 | 3.488 |
| 5VN8 | E_ARG_476 | NH2 | E_GLU_102 | OE1 | 2.991 |
| 5VN8 | E_ARG_476 | NH2 | E_GLU_102 | OE2 | 3.449 |
| 5VN8 | E_LYS_487 | NZ  | E_GLU_47  | OE1 | 3.496 |
| 5VN8 | E_LYS_487 | NZ  | E_GLU_91  | OE2 | 3.186 |
| 5VN8 | C_ARG_542 | NH2 | B_GLU_647 | OE2 | 2.738 |
| 5VN8 | C_ARG_579 | NH1 | B_GLU_584 | OE1 | 3.772 |
| 5VN8 | I_LYS_12  | NZ  | I_GLU_10  | OE2 | 2.532 |
| 5VN8 | I_ARG_28  | NH1 | E_ASP_457 | OD1 | 3.234 |
| 5VN8 | I_ARG_38  | NH1 | I_ASP_86  | OD1 | 2.826 |
| 5VN8 | I_ARG_38  | NH2 | I_GLU_46  | OE1 | 3.728 |
| 5VN8 | I_ARG_38  | NH2 | I_GLU_46  | OE2 | 2.857 |
| 5VN8 | I_LYS_62  | NZ  | I_GLU_46  | OE1 | 3.455 |
| 5VN8 | I_ARG_66  | NH2 | I_ASP_86  | OD1 | 3.206 |
| 5VN8 | I_ARG_66  | NH2 | I_ASP_86  | OD2 | 2.435 |
| 5VN8 | I_ARG_82A | NH1 | I_ASP_65  | OD1 | 3.494 |
| 5VN8 | I_ARG_94  | NH2 | I_ASP_101 | OD2 | 3.929 |
| 5VN8 | K_HIS_27  | NE2 | K_GLU_1   | OE2 | 2.754 |
| 5VN8 | K_HIS_49  | ND1 | I_ASP_101 | OD1 | 3.072 |
| 5VN8 | K_HIS_49  | NE2 | I_ASP_101 | OD1 | 3.981 |
| 5VN8 | K_ARG_61  | NH1 | K_ASP_82  | OD2 | 2.660 |
| 5VN8 | K_ARG_61  | NH2 | K_GLU_81  | OE2 | 3.818 |
| 5VN8 | K_ARG_61  | NH2 | K_ASP_82  | OD1 | 3.890 |
| 5VN8 | K_ARG_61  | NH2 | K_ASP_82  | OD2 | 2.783 |
| 5VN8 | K_LYS_103 | NZ  | K_GLU_105 | OE1 | 3.505 |

---

Table 734: 5VN8-specific salt bridging networks analysis. In this table, a PDB file is specified with a four-letter PDB ID, except that the names of the PDB files corresponding to the single NMR structural model split from the NMR ensemble is specified with a four-letter PDB ID in addition to a hyphen followed by the single NMR structural model numeric ID, the residue naming scheme is **Chain ID\_residue name\_residue number**,  $\angle ADH$  represents the angle formed by acceptor (A), donor (D) and hydrogen (H) ( $\angle ADH$ ).

| PDB ID | Residue A | Atom A | Residue B | Atom B | Distance (Å) |
|--------|-----------|--------|-----------|--------|--------------|
| 5VXJ   | A_ARG_55  | NH2    | A_ASP_309 | OD2    | 2.897        |
| 5VXJ   | A_LYS_63  | NZ     | A_GLU_64  | OE1    | 2.911        |
| 5VXJ   | A_ARG_101 | NH2    | A_ASP_97  | OD2    | 3.249        |
| 5VXJ   | A_LYS_151 | NZ     | A_GLU_147 | OE1    | 3.093        |
| 5VXJ   | A_LYS_151 | NZ     | A_GLU_147 | OE2    | 3.176        |
| 5VXJ   | A_LYS_196 | NZ     | A_ASP_261 | OD1    | 2.840        |
| 5VXJ   | A_LYS_197 | NZ     | A_GLU_201 | OE1    | 3.559        |
| 5VXJ   | A_LYS_197 | NZ     | A_GLU_201 | OE2    | 2.683        |
| 5VXJ   | A_LYS_203 | NZ     | A_ASP_254 | OD1    | 2.485        |
| 5VXJ   | A_LYS_203 | NZ     | A_ASP_254 | OD2    | 3.995        |
| 5VXJ   | A_LYS_205 | NZ     | A_ASP_166 | OD2    | 2.597        |
| 5VXJ   | A_LYS_207 | NZ     | A_GLU_204 | OE2    | 3.657        |
| 5VXJ   | A_LYS_207 | NZ     | A_ASP_208 | OD2    | 3.848        |
| 5VXJ   | A_LYS_291 | NZ     | A_ASP_287 | OD2    | 2.858        |
| 5VXJ   | A_LYS_300 | NZ     | A_GLU_229 | OE2    | 3.809        |
| 5VXJ   | B_ARG_19  | NH2    | A_ASP_97  | OD1    | 2.652        |
| 5VXJ   | B_ARG_38  | NH1    | B_ASP_90  | OD1    | 2.762        |
| 5VXJ   | B_ARG_38  | NH2    | B_GLU_46  | OE2    | 3.072        |
| 5VXJ   | B_ARG_38  | NH2    | B_ASP_90  | OD1    | 3.724        |
| 5VXJ   | B_ARG_50  | NH1    | L_GLU_200 | OE1    | 2.921        |
| 5VXJ   | B_ARG_50  | NH2    | L_GLU_200 | OE1    | 3.757        |
| 5VXJ   | B_ARG_67  | NH1    | B_ASP_90  | OD2    | 2.822        |
| 5VXJ   | B_ARG_67  | NH2    | B_ASP_90  | OD1    | 2.956        |
| 5VXJ   | B_ARG_67  | NH2    | B_ASP_90  | OD2    | 3.171        |
| 5VXJ   | B_LYS_76  | NZ     | A_GLU_122 | OE1    | 2.874        |
| 5VXJ   | B_HIS_80  | NE2    | A_ASP_144 | OD1    | 3.165        |
| 5VXJ   | B_HIS_80  | NE2    | A_ASP_144 | OD2    | 3.364        |
| 5VXJ   | C_ARG_55  | NH2    | C_ASP_309 | OD1    | 3.860        |
| 5VXJ   | C_ARG_55  | NH2    | C_ASP_309 | OD2    | 2.973        |
| 5VXJ   | C_LYS_72  | NZ     | C_GLU_76  | OE2    | 3.986        |
| 5VXJ   | C_HIS_81  | NE2    | C_GLU_77  | OE1    | 3.864        |
| 5VXJ   | C_ARG_101 | NH2    | C_ASP_97  | OD2    | 3.028        |
| 5VXJ   | C_ARG_111 | NH1    | C_ASP_126 | OD1    | 3.446        |
| 5VXJ   | C_LYS_137 | NZ     | C_ASP_124 | OD1    | 3.580        |
| 5VXJ   | C_LYS_137 | NZ     | C_ASP_124 | OD2    | 3.859        |
| 5VXJ   | C_LYS_151 | NZ     | C_GLU_147 | OE1    | 3.347        |
| 5VXJ   | C_LYS_151 | NZ     | C_GLU_147 | OE2    | 3.417        |
| 5VXJ   | C_LYS_189 | NZ     | C_GLU_268 | OE1    | 3.664        |
| 5VXJ   | C_LYS_196 | NZ     | C_ASP_261 | OD1    | 2.639        |
| 5VXJ   | C_LYS_196 | NZ     | C_ASP_261 | OD2    | 3.513        |
| 5VXJ   | C_LYS_197 | NZ     | C_GLU_201 | OE1    | 2.594        |
| 5VXJ   | C_LYS_197 | NZ     | C_GLU_201 | OE2    | 3.519        |
| 5VXJ   | C_LYS_203 | NZ     | C_ASP_254 | OD1    | 2.687        |
| 5VXJ   | C_LYS_205 | NZ     | C_ASP_166 | OD2    | 2.854        |
| 5VXJ   | C_LYS_207 | NZ     | C_GLU_204 | OE1    | 3.423        |
| 5VXJ   | C_LYS_207 | NZ     | C_GLU_204 | OE2    | 2.767        |
| 5VXJ   | C_LYS_275 | NZ     | C_ASP_272 | OD2    | 3.447        |
| 5VXJ   | D_ARG_19  | NH1    | C_ASP_97  | OD1    | 3.252        |
| 5VXJ   | D_ARG_31  | NH1    | D_ASP_102 | OD1    | 3.380        |
| 5VXJ   | D_ARG_38  | NH1    | D_ASP_90  | OD1    | 2.860        |
| 5VXJ   | D_ARG_38  | NH2    | D_GLU_46  | OE2    | 2.886        |
| 5VXJ   | D_ARG_50  | NH1    | E_GLU_200 | OE1    | 3.721        |
| 5VXJ   | D_ARG_50  | NH2    | E_GLU_200 | OE1    | 3.781        |
| 5VXJ   | D_ARG_67  | NH1    | D_ASP_90  | OD1    | 3.893        |
| 5VXJ   | D_ARG_67  | NH1    | D_ASP_90  | OD2    | 2.756        |
| 5VXJ   | D_ARG_67  | NH2    | D_ASP_90  | OD1    | 2.919        |
| 5VXJ   | D_ARG_67  | NH2    | D_ASP_90  | OD2    | 3.254        |



|      |           |     |           |     |       |
|------|-----------|-----|-----------|-----|-------|
| 5VXJ | D_LYS_76  | NZ  | C_GLU_122 | OE1 | 3.854 |
| 5VXJ | D_HIS_80  | NE2 | C_ASP_144 | OD1 | 3.067 |
| 5VXJ | D_HIS_80  | NE2 | C_ASP_144 | OD2 | 3.196 |
| 5VXJ | E_ARG_55  | NH2 | E_ASP_309 | OD1 | 3.935 |
| 5VXJ | E_ARG_55  | NH2 | E_ASP_309 | OD2 | 2.817 |
| 5VXJ | E_ARG_101 | NH1 | E_ASP_97  | OD2 | 2.865 |
| 5VXJ | E_LYS_119 | NZ  | E_GLU_120 | OE2 | 3.261 |
| 5VXJ | E_LYS_137 | NZ  | F_ASP_73  | OD1 | 3.543 |
| 5VXJ | E_LYS_137 | NZ  | F_ASP_73  | OD2 | 2.771 |
| 5VXJ | E_LYS_151 | NZ  | E_GLU_154 | OE1 | 3.893 |
| 5VXJ | E_LYS_196 | NZ  | E_ASP_261 | OD1 | 3.147 |
| 5VXJ | E_LYS_196 | NZ  | E_ASP_261 | OD2 | 3.896 |
| 5VXJ | E_LYS_197 | NZ  | E_GLU_201 | OE1 | 3.410 |
| 5VXJ | E_LYS_197 | NZ  | E_GLU_201 | OE2 | 2.471 |
| 5VXJ | E_LYS_203 | NZ  | E_ASP_254 | OD1 | 2.551 |
| 5VXJ | E_LYS_203 | NZ  | E_ASP_254 | OD2 | 3.950 |
| 5VXJ | E_LYS_205 | NZ  | E_ASP_166 | OD2 | 2.795 |
| 5VXJ | E_LYS_207 | NZ  | E_GLU_204 | OE2 | 3.844 |
| 5VXJ | E_LYS_207 | NZ  | E_ASP_208 | OD1 | 3.647 |
| 5VXJ | E_LYS_207 | NZ  | E_ASP_208 | OD2 | 3.353 |
| 5VXJ | E_LYS_275 | NZ  | E_ASP_272 | OD1 | 3.514 |
| 5VXJ | E_LYS_275 | NZ  | E_ASP_272 | OD2 | 3.831 |
| 5VXJ | E_LYS_291 | NZ  | E_ASP_287 | OD2 | 3.845 |
| 5VXJ | E_LYS_291 | NZ  | E_GLU_288 | OE2 | 3.598 |
| 5VXJ | F_ARG_19  | NH2 | E_ASP_97  | OD1 | 2.921 |
| 5VXJ | F_ARG_38  | NH1 | F_ASP_90  | OD1 | 2.919 |
| 5VXJ | F_ARG_38  | NH2 | F_GLU_46  | OE2 | 2.728 |
| 5VXJ | F_ARG_50  | NH1 | G_GLU_200 | OE1 | 3.576 |
| 5VXJ | F_ARG_50  | NH2 | G_GLU_200 | OE1 | 2.702 |
| 5VXJ | F_ARG_67  | NH1 | F_ASP_90  | OD1 | 3.836 |
| 5VXJ | F_ARG_67  | NH1 | F_ASP_90  | OD2 | 2.827 |
| 5VXJ | F_ARG_67  | NH2 | F_ASP_90  | OD1 | 3.120 |
| 5VXJ | F_ARG_67  | NH2 | F_ASP_90  | OD2 | 3.574 |
| 5VXJ | F_LYS_76  | NZ  | E_GLU_122 | OE1 | 3.693 |
| 5VXJ | F_HIS_80  | NE2 | E_ASP_144 | OD1 | 3.009 |
| 5VXJ | F_HIS_80  | NE2 | E_ASP_144 | OD2 | 3.134 |
| 5VXJ | F_ARG_106 | NH2 | F_ASP_102 | OD1 | 3.541 |
| 5VXJ | G_ARG_55  | NH2 | G_ASP_309 | OD1 | 3.852 |
| 5VXJ | G_ARG_55  | NH2 | G_ASP_309 | OD2 | 3.242 |
| 5VXJ | G_ARG_101 | NH2 | G_ASP_97  | OD2 | 3.466 |
| 5VXJ | G_HIS_115 | ND1 | G_GLU_112 | OE1 | 3.174 |
| 5VXJ | G_LYS_119 | NZ  | G_GLU_120 | OE2 | 3.684 |
| 5VXJ | G_LYS_137 | NZ  | G_ASP_124 | OD2 | 3.625 |
| 5VXJ | G_LYS_137 | NZ  | H_ASP_73  | OD1 | 3.131 |
| 5VXJ | G_LYS_137 | NZ  | H_ASP_73  | OD2 | 2.336 |
| 5VXJ | G_LYS_151 | NZ  | G_GLU_147 | OE1 | 3.540 |
| 5VXJ | G_LYS_151 | NZ  | G_GLU_147 | OE2 | 3.043 |
| 5VXJ | G_LYS_196 | NZ  | G_ASP_261 | OD1 | 2.809 |
| 5VXJ | G_LYS_197 | NZ  | G_GLU_201 | OE1 | 3.460 |
| 5VXJ | G_LYS_197 | NZ  | G_GLU_201 | OE2 | 2.587 |
| 5VXJ | G_LYS_203 | NZ  | G_ASP_254 | OD1 | 2.489 |
| 5VXJ | G_LYS_203 | NZ  | G_ASP_254 | OD2 | 3.948 |
| 5VXJ | G_LYS_205 | NZ  | G_ASP_166 | OD2 | 2.817 |
| 5VXJ | G_LYS_207 | NZ  | G_GLU_204 | OE2 | 3.639 |
| 5VXJ | G_LYS_207 | NZ  | G_ASP_208 | OD1 | 3.592 |
| 5VXJ | G_LYS_207 | NZ  | G_ASP_208 | OD2 | 3.456 |
| 5VXJ | G_LYS_291 | NZ  | G_GLU_288 | OE1 | 3.119 |
| 5VXJ | H_ARG_19  | NH2 | G_ASP_97  | OD1 | 2.467 |

|      |           |     |           |     |       |
|------|-----------|-----|-----------|-----|-------|
| 5VXJ | H_ARG_31  | NH1 | H_ASP_102 | OD1 | 3.947 |
| 5VXJ | H_ARG_31  | NH2 | H_ASP_102 | OD1 | 3.898 |
| 5VXJ | H_ARG_38  | NH1 | H_ASP_90  | OD1 | 2.996 |
| 5VXJ | H_ARG_38  | NH2 | H_GLU_46  | OE1 | 3.400 |
| 5VXJ | H_LYS_65  | NZ  | H_ASP_62  | OD1 | 3.343 |
| 5VXJ | H_ARG_67  | NH1 | H_ASP_90  | OD1 | 3.939 |
| 5VXJ | H_ARG_67  | NH1 | H_ASP_90  | OD2 | 2.890 |
| 5VXJ | H_ARG_67  | NH2 | H_ASP_90  | OD1 | 3.245 |
| 5VXJ | H_ARG_67  | NH2 | H_ASP_90  | OD2 | 3.633 |
| 5VXJ | H_LYS_76  | NZ  | G_ASP_124 | OD2 | 3.951 |
| 5VXJ | H_HIS_80  | NE2 | G_ASP_144 | OD1 | 3.186 |
| 5VXJ | H_HIS_80  | NE2 | G_ASP_144 | OD2 | 3.321 |
| 5VXJ | H_ARG_106 | NH2 | H_ASP_102 | OD2 | 2.976 |
| 5VXJ | I_ARG_55  | NH2 | I_ASP_309 | OD2 | 3.083 |
| 5VXJ | I_HIS_81  | NE2 | I_GLU_77  | OE1 | 3.831 |
| 5VXJ | I_ARG_101 | NH2 | I_ASP_97  | OD2 | 3.365 |
| 5VXJ | I_LYS_137 | NZ  | J_ASP_73  | OD1 | 3.804 |
| 5VXJ | I_LYS_137 | NZ  | J_ASP_73  | OD2 | 2.902 |
| 5VXJ | I_LYS_151 | NZ  | I_GLU_147 | OE1 | 3.728 |
| 5VXJ | I_LYS_151 | NZ  | I_GLU_147 | OE2 | 3.585 |
| 5VXJ | I_LYS_196 | NZ  | I_ASP_261 | OD1 | 2.688 |
| 5VXJ | I_LYS_196 | NZ  | I_ASP_261 | OD2 | 3.785 |
| 5VXJ | I_LYS_197 | NZ  | I_GLU_201 | OE1 | 3.642 |
| 5VXJ | I_LYS_197 | NZ  | I_GLU_201 | OE2 | 2.731 |
| 5VXJ | I_LYS_203 | NZ  | I_ASP_254 | OD1 | 2.602 |
| 5VXJ | I_LYS_205 | NZ  | I_ASP_166 | OD2 | 2.773 |
| 5VXJ | I_LYS_207 | NZ  | I_GLU_204 | OE1 | 3.025 |
| 5VXJ | I_LYS_207 | NZ  | I_GLU_204 | OE2 | 3.929 |
| 5VXJ | I_LYS_275 | NZ  | I_ASP_272 | OD1 | 3.295 |
| 5VXJ | I_LYS_275 | NZ  | I_ASP_272 | OD2 | 2.777 |
| 5VXJ | I_LYS_300 | NZ  | I_GLU_229 | OE1 | 3.150 |
| 5VXJ | J_ARG_19  | NH2 | I_ASP_97  | OD1 | 2.772 |
| 5VXJ | J_ARG_31  | NH1 | J_ASP_102 | OD1 | 3.834 |
| 5VXJ | J_ARG_38  | NH1 | J_ASP_90  | OD1 | 2.886 |
| 5VXJ | J_ARG_38  | NH2 | J_GLU_46  | OE2 | 2.770 |
| 5VXJ | J_LYS_65  | NZ  | J_ASP_62  | OD1 | 2.928 |
| 5VXJ | J_ARG_67  | NH1 | J_ASP_90  | OD1 | 3.756 |
| 5VXJ | J_ARG_67  | NH1 | J_ASP_90  | OD2 | 2.548 |
| 5VXJ | J_ARG_67  | NH2 | J_ASP_90  | OD1 | 2.840 |
| 5VXJ | J_ARG_67  | NH2 | J_ASP_90  | OD2 | 3.177 |
| 5VXJ | J_LYS_76  | NZ  | I_GLU_122 | OE2 | 2.338 |
| 5VXJ | J_HIS_80  | NE2 | I_ASP_144 | OD1 | 3.036 |
| 5VXJ | J_HIS_80  | NE2 | I_ASP_144 | OD2 | 3.151 |

Table 735: 5VXJ-specific salt bridging networks analysis. In this table, a PDB file is specified with a four-letter PDB ID, except that the names of the PDB files corresponding to the single NMR structural model split from the NMR ensemble is specified with a four-letter PDB ID in addition to a hyphen followed by the single NMR structural model numeric ID, the residue naming scheme is **Chain ID\_residue name\_residue number**,  $\angle ADH$  represents the angle formed by acceptor (A), donor (D) and hydrogen (H) ( $\angle ADH$ ).

| PDB ID | Residue A | Atom A | Residue B | Atom B | Distance (Å) |
|--------|-----------|--------|-----------|--------|--------------|
| 5VXK   | B_ARG_38  | NH1    | B_ASP_90  | OD1    | 3.007        |
| 5VXK   | B_ARG_38  | NH2    | B_GLU_46  | OE1    | 3.833        |
| 5VXK   | B_ARG_38  | NH2    | B_GLU_89  | OE2    | 3.179        |
| 5VXK   | B_ARG_67  | NH1    | B_ASP_90  | OD1    | 3.692        |
| 5VXK   | B_ARG_67  | NH1    | B_ASP_90  | OD2    | 3.910        |
| 5VXK   | B_ARG_67  | NH2    | B_ASP_90  | OD1    | 3.395        |
| 5VXK   | B_ARG_67  | NH2    | B_ASP_90  | OD2    | 2.274        |
| 5VXK   | B_HIS_80  | NE2    | B_ASP_73  | OD2    | 3.665        |
| 5VXK   | B_ARG_100 | NH2    | B_ASP_31  | OD2    | 3.630        |
| 5VXK   | A_LYS_151 | NZ     | A_GLU_147 | OE1    | 2.685        |
| 5VXK   | A_LYS_151 | NZ     | A_GLU_147 | OE2    | 3.996        |
| 5VXK   | A_LYS_196 | NZ     | A_ASP_261 | OD2    | 2.739        |
| 5VXK   | A_LYS_203 | NZ     | A_ASP_254 | OD1    | 2.600        |
| 5VXK   | A_LYS_203 | NZ     | A_ASP_254 | OD2    | 3.429        |
| 5VXK   | A_LYS_205 | NZ     | A_ASP_166 | OD1    | 3.632        |
| 5VXK   | A_LYS_225 | NZ     | A_GLU_229 | OE1    | 3.736        |
| 5VXK   | A_LYS_291 | NZ     | A_ASP_287 | OD1    | 3.331        |
| 5VXK   | A_LYS_291 | NZ     | A_GLU_288 | OE1    | 3.331        |
| 5VXK   | A_LYS_291 | NZ     | A_GLU_288 | OE2    | 2.840        |
| 5VXK   | A_LYS_313 | NZ     | A_ASP_309 | OD2    | 3.376        |

Table 736: 5VXK-specific salt bridging networks analysis. In this table, a PDB file is specified with a four-letter PDB ID, except that the names of the PDB files corresponding to the single NMR structural model split from the NMR ensemble is specified with a four-letter PDB ID in addition to a hyphen followed by the single NMR structural model numeric ID, the residue naming scheme is **Chain ID\_residue name\_residue number**,  $\angle ADH$  represents the angle formed by acceptor (A), donor (D) and hydrogen (H) ( $\angle ADH$ ).

| PDB ID | Residue A | Atom A | Residue B | Atom B | Distance (Å) |
|--------|-----------|--------|-----------|--------|--------------|
| 5VXL   | A_ARG_55  | NH1    | A_ASP_309 | OD1    | 3.335        |
| 5VXL   | A_ARG_55  | NH1    | A_ASP_309 | OD2    | 2.392        |
| 5VXL   | A_ARG_101 | NH1    | A_ASP_97  | OD1    | 3.775        |
| 5VXL   | A_ARG_101 | NH1    | A_ASP_97  | OD2    | 3.730        |
| 5VXL   | A_ARG_101 | NH2    | A_ASP_97  | OD1    | 3.151        |
| 5VXL   | A_ARG_101 | NH2    | A_ASP_97  | OD2    | 2.610        |
| 5VXL   | A_LYS_151 | NZ     | A_GLU_147 | OE1    | 2.946        |
| 5VXL   | A_LYS_151 | NZ     | A_GLU_147 | OE2    | 3.503        |
| 5VXL   | A_LYS_189 | NZ     | A_GLU_268 | OE1    | 3.767        |
| 5VXL   | A_LYS_196 | NZ     | A_ASP_261 | OD1    | 2.987        |
| 5VXL   | A_LYS_197 | NZ     | A_GLU_201 | OE2    | 2.961        |
| 5VXL   | A_LYS_203 | NZ     | A_ASP_254 | OD1    | 2.551        |
| 5VXL   | A_LYS_203 | NZ     | A_ASP_254 | OD2    | 3.633        |
| 5VXL   | A_LYS_205 | NZ     | A_ASP_166 | OD1    | 3.841        |
| 5VXL   | A_LYS_205 | NZ     | A_ASP_166 | OD2    | 2.867        |
| 5VXL   | A_LYS_205 | NZ     | B_ASP_52  | OD2    | 2.998        |
| 5VXL   | A_LYS_291 | NZ     | A_ASP_287 | OD2    | 3.686        |
| 5VXL   | B_ARG_19  | NH2    | B_GLU_83  | OE1    | 3.609        |
| 5VXL   | B_ARG_38  | NH1    | B_ASP_91  | OD1    | 2.974        |
| 5VXL   | B_ARG_38  | NH2    | B_GLU_46  | OE1    | 3.298        |
| 5VXL   | B_ARG_38  | NH2    | B_GLU_46  | OE2    | 3.686        |
| 5VXL   | B_LYS_66  | NZ     | B_ASP_63  | OD1    | 2.473        |
| 5VXL   | B_ARG_68  | NH1    | B_ASP_91  | OD2    | 2.829        |
| 5VXL   | B_ARG_68  | NH2    | B_ASP_91  | OD1    | 3.190        |
| 5VXL   | B_ARG_68  | NH2    | B_ASP_91  | OD2    | 3.203        |
| 5VXL   | B_ARG_79  | NH1    | B_GLU_77  | OE1    | 3.438        |
| 5VXL   | B_ARG_102 | NH1    | A_GLU_201 | OE1    | 3.097        |
| 5VXL   | B_ARG_102 | NH2    | A_GLU_201 | OE1    | 3.202        |
| 5VXL   | B_ARG_102 | NH2    | A_GLU_201 | OE2    | 2.871        |

Table 737: 5VXL-specific salt bridging networks analysis. In this table, a PDB file is specified with a four-letter PDB ID, except that the names of the PDB files corresponding to the single NMR structural model split from the NMR ensemble is specified with a four-letter PDB ID in addition to a hyphen followed by the single NMR structural model numeric ID, the residue naming scheme is **Chain ID\_residue name\_residue number**,  $\angle ADH$  represents the angle formed by acceptor (A), donor (D) and hydrogen (H) ( $\angle ADH$ ).

| PDB ID | Residue A | Atom A | Residue B | Atom B | Distance (Å) |
|--------|-----------|--------|-----------|--------|--------------|
| 5VXM   | A_ARG_55  | NH2    | A_ASP_309 | OD2    | 2.709        |
| 5VXM   | A_HIS_81  | ND1    | A_GLU_64  | OE1    | 2.699        |
| 5VXM   | A_HIS_81  | ND1    | A_GLU_64  | OE2    | 3.443        |
| 5VXM   | A_LYS_203 | NZ     | A_ASP_254 | OD1    | 3.048        |
| 5VXM   | A_LYS_205 | NZ     | A_ASP_166 | OD2    | 2.794        |
| 5VXM   | A_LYS_205 | NZ     | B_ASP_53  | OD1    | 3.221        |
| 5VXM   | A_LYS_205 | NZ     | B_ASP_53  | OD2    | 3.090        |
| 5VXM   | A_LYS_240 | NZ     | A_ASP_208 | OD2    | 3.009        |
| 5VXM   | A_LYS_291 | NZ     | A_ASP_287 | OD1    | 3.603        |
| 5VXM   | A_LYS_291 | NZ     | A_ASP_287 | OD2    | 3.020        |
| 5VXM   | A_LYS_291 | NZ     | A_GLU_288 | OE2    | 2.698        |
| 5VXM   | B_ARG_38  | NH1    | B_ASP_90  | OD1    | 2.771        |
| 5VXM   | B_ARG_38  | NH2    | B_GLU_46  | OE1    | 3.784        |
| 5VXM   | B_ARG_38  | NH2    | B_GLU_46  | OE2    | 3.779        |
| 5VXM   | B_ARG_38  | NH2    | B_ASP_90  | OD1    | 3.793        |
| 5VXM   | B_ARG_59  | NH2    | A_GLU_201 | OE1    | 3.364        |
| 5VXM   | B_LYS_65  | NZ     | B_ASP_62  | OD1    | 2.888        |
| 5VXM   | B_ARG_67  | NH1    | B_ASP_90  | OD1    | 3.808        |
| 5VXM   | B_ARG_67  | NH1    | B_ASP_90  | OD2    | 2.755        |
| 5VXM   | B_ARG_67  | NH2    | B_ASP_90  | OD1    | 3.073        |
| 5VXM   | B_ARG_67  | NH2    | B_ASP_90  | OD2    | 3.515        |

Table 738: 5VXM-specific salt bridging networks analysis. In this table, a PDB file is specified with a four-letter PDB ID, except that the names of the PDB files corresponding to the single NMR structural model split from the NMR ensemble is specified with a four-letter PDB ID in addition to a hyphen followed by the single NMR structural model numeric ID, the residue naming scheme is **Chain ID\_residue name\_residue number**,  $\angle ADH$  represents the angle formed by acceptor (A), donor (D) and hydrogen (H) ( $\angle ADH$ ).

| PDB ID | Residue A | Atom A | Residue B | Atom B | Distance (Å) |
|--------|-----------|--------|-----------|--------|--------------|
| 5VXR   | H_ARG_38  | NH1    | H_ASP_89  | OD1    | 2.812        |
| 5VXR   | H_ARG_38  | NH2    | H_GLU_46  | OE1    | 2.830        |
| 5VXR   | H_ARG_38  | NH2    | H_ASP_89  | OD1    | 3.607        |
| 5VXR   | H_ARG_66  | NH1    | H_ASP_89  | OD1    | 3.628        |
| 5VXR   | H_ARG_66  | NH1    | H_ASP_89  | OD2    | 3.027        |
| 5VXR   | H_ARG_66  | NH2    | H_ASP_89  | OD1    | 2.986        |
| 5VXR   | H_ARG_66  | NH2    | H_ASP_89  | OD2    | 3.606        |
| 5VXR   | H_ARG_97  | NH2    | H_ASP_27  | OD2    | 3.982        |
| 5VXR   | H_LYS_214 | NZ     | L_GLU_123 | OE2    | 2.932        |
| 5VXR   | H_LYS_215 | NZ     | H_GLU_217 | OE1    | 3.858        |
| 5VXR   | L_ARG_24  | NH1    | L_ASP_70  | OD1    | 3.927        |
| 5VXR   | L_LYS_39  | NZ     | L_ASP_81  | OD1    | 2.793        |
| 5VXR   | L_LYS_39  | NZ     | L_ASP_81  | OD2    | 3.461        |
| 5VXR   | L_ARG_61  | NH1    | L_ASP_82  | OD1    | 3.414        |
| 5VXR   | L_ARG_61  | NH1    | L_ASP_82  | OD2    | 2.748        |
| 5VXR   | L_ARG_61  | NH2    | L_GLU_79  | OE1    | 3.909        |
| 5VXR   | L_ARG_61  | NH2    | L_ASP_82  | OD1    | 2.825        |
| 5VXR   | L_ARG_61  | NH2    | L_ASP_82  | OD2    | 3.695        |
| 5VXR   | L_LYS_147 | NZ     | L_GLU_154 | OE2    | 3.969        |
| 5VXR   | L_LYS_149 | NZ     | L_GLU_195 | OE1    | 3.427        |
| 5VXR   | L_LYS_149 | NZ     | L_GLU_195 | OE2    | 3.261        |
| 5VXR   | L_ARG_155 | NH2    | L_GLU_185 | OE1    | 3.900        |
| 5VXR   | L_HIS_189 | ND1    | L_ASP_151 | OD2    | 2.731        |
| 5VXR   | L_LYS_199 | NZ     | L_ASP_110 | OD2    | 3.874        |

Table 739: 5VXR-specific salt bridging networks analysis. In this table, a PDB file is specified with a four-letter PDB ID, except that the names of the PDB files corresponding to the single NMR structural model split from the NMR ensemble is specified with a four-letter PDB ID in addition to a hyphen followed by the single NMR structural model numeric ID, the residue naming scheme is **Chain ID\_residue name\_residue number**,  $\angle ADH$  represents the angle formed by acceptor (A), donor (D) and hydrogen (H) ( $\angle ADH$ ).

| PDB ID | Residue A | Atom A | Residue B  | Atom B | Distance (Å) |
|--------|-----------|--------|------------|--------|--------------|
| 5VZR   | H_HIS_35  | NE2    | H_ASP_100C | OD1    | 2.839        |
| 5VZR   | H_HIS_35  | NE2    | H_ASP_100C | OD2    | 3.345        |
| 5VZR   | H_ARG_66  | NH1    | H_ASP_86   | OD1    | 3.315        |
| 5VZR   | H_ARG_66  | NH1    | H_ASP_86   | OD2    | 2.889        |
| 5VZR   | H_ARG_66  | NH2    | H_ASP_86   | OD1    | 2.686        |
| 5VZR   | H_ARG_66  | NH2    | H_ASP_86   | OD2    | 3.653        |
| 5VZR   | H_ARG_94  | NH2    | H_ASP_101  | OD1    | 3.645        |
| 5VZR   | H_ARG_94  | NH2    | H_ASP_101  | OD2    | 2.665        |
| 5VZR   | H_LYS_219 | NZ     | L_GLU_123  | OE2    | 3.208        |
| 5VZR   | L_LYS_39  | NZ     | L_ASP_81   | OD1    | 3.338        |
| 5VZR   | L_LYS_39  | NZ     | L_ASP_81   | OD2    | 2.831        |
| 5VZR   | L_ARG_61  | NH1    | L_ASP_82   | OD1    | 3.560        |
| 5VZR   | L_ARG_61  | NH1    | L_ASP_82   | OD2    | 2.794        |
| 5VZR   | L_ARG_61  | NH2    | L_GLU_79   | OE2    | 3.432        |
| 5VZR   | L_ARG_61  | NH2    | L_ASP_82   | OD1    | 2.758        |
| 5VZR   | L_ARG_61  | NH2    | L_ASP_82   | OD2    | 3.575        |
| 5VZR   | L_ARG_96  | NH2    | H_ASP_100C | OD2    | 3.042        |
| 5VZR   | L_LYS_147 | NZ     | L_GLU_195  | OE2    | 3.957        |
| 5VZR   | L_LYS_149 | NZ     | L_GLU_195  | OE1    | 3.473        |
| 5VZR   | L_LYS_149 | NZ     | L_GLU_195  | OE2    | 3.623        |
| 5VZR   | L_ARG_155 | NH1    | L_GLU_185  | OE1    | 3.298        |
| 5VZR   | L_ARG_155 | NH2    | L_GLU_185  | OE1    | 3.461        |
| 5VZR   | L_LYS_183 | NZ     | L_GLU_187  | OE1    | 3.869        |
| 5VZR   | L_HIS_189 | ND1    | L_ASP_151  | OD2    | 2.938        |
| 5VZR   | L_LYS_199 | NZ     | L_ASP_110  | OD1    | 3.115        |
| 5VZR   | L_LYS_199 | NZ     | L_ASP_110  | OD2    | 3.180        |
| 5VZR   | A_HIS_35  | NE2    | A_ASP_100C | OD1    | 2.841        |
| 5VZR   | A_HIS_35  | NE2    | A_ASP_100C | OD2    | 3.362        |
| 5VZR   | A_ARG_66  | NH1    | A_ASP_86   | OD1    | 3.497        |
| 5VZR   | A_ARG_66  | NH1    | A_ASP_86   | OD2    | 2.943        |
| 5VZR   | A_ARG_66  | NH2    | A_ASP_86   | OD1    | 2.855        |
| 5VZR   | A_ARG_66  | NH2    | A_ASP_86   | OD2    | 3.669        |
| 5VZR   | A_ARG_94  | NH2    | A_ASP_101  | OD1    | 3.759        |
| 5VZR   | A_ARG_94  | NH2    | A_ASP_101  | OD2    | 2.688        |
| 5VZR   | A_LYS_219 | NZ     | B_GLU_123  | OE1    | 3.381        |
| 5VZR   | B_ARG_24  | NH1    | B_ASP_70   | OD1    | 3.001        |
| 5VZR   | B_ARG_24  | NH1    | B_ASP_70   | OD2    | 3.957        |
| 5VZR   | B_LYS_39  | NZ     | B_ASP_81   | OD1    | 3.456        |
| 5VZR   | B_LYS_39  | NZ     | B_ASP_81   | OD2    | 2.971        |
| 5VZR   | B_ARG_61  | NH1    | B_ASP_82   | OD1    | 3.543        |
| 5VZR   | B_ARG_61  | NH1    | B_ASP_82   | OD2    | 2.682        |
| 5VZR   | B_ARG_61  | NH2    | B_GLU_79   | OE2    | 3.666        |
| 5VZR   | B_ARG_61  | NH2    | B_ASP_82   | OD1    | 2.894        |
| 5VZR   | B_ARG_61  | NH2    | B_ASP_82   | OD2    | 3.609        |
| 5VZR   | B_ARG_96  | NH2    | A_ASP_100C | OD2    | 2.983        |
| 5VZR   | B_LYS_147 | NZ     | B_GLU_154  | OE1    | 3.313        |
| 5VZR   | B_LYS_147 | NZ     | B_GLU_154  | OE2    | 3.668        |
| 5VZR   | B_LYS_149 | NZ     | B_GLU_195  | OE1    | 2.858        |
| 5VZR   | B_LYS_149 | NZ     | B_GLU_195  | OE2    | 3.431        |
| 5VZR   | B_ARG_155 | NH2    | B_GLU_185  | OE2    | 3.691        |
| 5VZR   | B_LYS_183 | NZ     | B_GLU_187  | OE1    | 3.084        |
| 5VZR   | B_LYS_183 | NZ     | B_GLU_187  | OE2    | 3.264        |
| 5VZR   | B_ARG_188 | NH2    | B_GLU_185  | OE1    | 2.762        |
| 5VZR   | B_HIS_189 | ND1    | B_ASP_151  | OD2    | 3.256        |
| 5VZR   | B_HIS_189 | NE2    | B_GLU_185  | OE2    | 2.898        |

---

Table 740: 5VZR-specific salt bridging networks analysis. In this table, a PDB file is specified with a four-letter PDB ID, except that the names of the PDB files corresponding to the single NMR structural model split from the NMR ensemble is specified with a four-letter PDB ID in addition to a hyphen followed by the single NMR structural model numeric ID, the residue naming scheme is **Chain ID\_residue name\_residue number**,  $\angle ADH$  represents the angle formed by acceptor (A), donor (D) and hydrogen (H) ( $\angle ADH$ ).



| PDB ID | Residue A | Atom A | Residue B | Atom B | Distance (Å) |
|--------|-----------|--------|-----------|--------|--------------|
| 5W2B   | H_ARG_41  | NH1    | H_ASP_93  | OD1    | 2.811        |
| 5W2B   | H_ARG_41  | NH2    | H_GLU_49  | OE1    | 3.026        |
| 5W2B   | H_ARG_41  | NH2    | H_GLU_49  | OE2    | 3.821        |
| 5W2B   | H_ARG_41  | NH2    | H_ASP_93  | OD1    | 3.696        |
| 5W2B   | H_LYS_68  | NZ     | H_ASP_65  | OD1    | 3.641        |
| 5W2B   | H_ARG_70  | NH1    | H_ASP_93  | OD2    | 3.880        |
| 5W2B   | H_ARG_70  | NH2    | H_ASP_93  | OD1    | 3.178        |
| 5W2B   | H_ARG_70  | NH2    | H_ASP_93  | OD2    | 3.275        |
| 5W2B   | H_ARG_90  | NH1    | H_GLU_92  | OE2    | 3.439        |
| 5W2B   | H_ARG_101 | NH2    | H_ASP_116 | OD1    | 3.885        |
| 5W2B   | H_ARG_101 | NH2    | H_ASP_116 | OD2    | 2.522        |
| 5W2B   | H_LYS_158 | NZ     | H_ASP_159 | OD1    | 3.610        |
| 5W2B   | H_LYS_158 | NZ     | H_ASP_159 | OD2    | 3.126        |
| 5W2B   | H_LYS_225 | NZ     | H_GLU_227 | OE2    | 3.518        |
| 5W2B   | L_ARG_25  | NH1    | L_ASP_71  | OD2    | 3.833        |
| 5W2B   | L_ARG_25  | NH2    | L_ASP_71  | OD2    | 3.096        |
| 5W2B   | L_ARG_62  | NH1    | L_GLU_82  | OE2    | 3.995        |
| 5W2B   | L_ARG_62  | NH2    | L_GLU_82  | OE2    | 2.777        |
| 5W2B   | L_ARG_62  | NH2    | L_ASP_83  | OD1    | 2.811        |
| 5W2B   | L_ARG_62  | NH2    | L_ASP_83  | OD2    | 3.485        |
| 5W2B   | L_LYS_104 | NZ     | L_GLU_166 | OE1    | 2.996        |
| 5W2B   | L_LYS_104 | NZ     | L_GLU_166 | OE2    | 3.194        |
| 5W2B   | L_LYS_127 | NZ     | L_ASP_123 | OD1    | 2.992        |
| 5W2B   | L_LYS_127 | NZ     | L_ASP_123 | OD2    | 3.947        |
| 5W2B   | L_ARG_143 | NH1    | L_GLU_106 | OE1    | 3.368        |
| 5W2B   | L_ARG_143 | NH1    | L_GLU_106 | OE2    | 3.850        |
| 5W2B   | L_ARG_143 | NH2    | L_GLU_106 | OE1    | 3.513        |
| 5W2B   | L_ARG_143 | NH2    | L_GLU_106 | OE2    | 2.678        |
| 5W2B   | L_LYS_150 | NZ     | L_GLU_196 | OE1    | 3.463        |
| 5W2B   | L_HIS_190 | ND1    | L_ASP_152 | OD2    | 3.239        |
| 5W2B   | A_HIS_653 | NE2    | A_GLU_649 | OE1    | 3.647        |
| 5W2B   | A_LYS_672 | NZ     | A_GLU_674 | OE2    | 3.333        |
| 5W2B   | A_ARG_728 | NH1    | A_ASP_729 | OD1    | 3.255        |
| 5W2B   | A_HIS_738 | ND1    | A_ASP_682 | OD1    | 3.266        |
| 5W2B   | A_HIS_738 | ND1    | A_ASP_682 | OD2    | 2.866        |

Table 741: 5W2B-specific salt bridging networks analysis. In this table, a PDB file is specified with a four-letter PDB ID, except that the names of the PDB files corresponding to the single NMR structural model split from the NMR ensemble is specified with a four-letter PDB ID in addition to a hyphen followed by the single NMR structural model numeric ID, the residue naming scheme is **Chain ID\_residue name\_residue number**,  $\angle ADH$  represents the angle formed by acceptor (A), donor (D) and hydrogen (H) ( $\angle ADH$ ).

| PDB ID | Residue A  | Atom A | Residue B  | Atom B | Distance (Å) |
|--------|------------|--------|------------|--------|--------------|
| 5W9H   | A_ARG.758  | NH1    | p_ASP.740  | OD1    | 3.106        |
| 5W9H   | A_LYS.779  | NZ     | A_GLU.1148 | OE1    | 2.900        |
| 5W9H   | A_LYS.801  | NZ     | A_ASP.843  | OD1    | 2.837        |
| 5W9H   | A_LYS.801  | NZ     | A_ASP.843  | OD2    | 3.404        |
| 5W9H   | A_LYS.807  | NZ     | A_GLU.818  | OE2    | 3.090        |
| 5W9H   | A_ARG.841  | NH2    | A_ASP.844  | OD2    | 2.768        |
| 5W9H   | A_ARG.847  | NH2    | A_ASP.844  | OD1    | 2.690        |
| 5W9H   | A_ARG.887  | NH2    | A_ASP.892  | OD1    | 2.869        |
| 5W9H   | A_ARG.887  | NH2    | A_ASP.892  | OD2    | 3.887        |
| 5W9H   | A_HIS.1020 | NE2    | A_ASP.1024 | OD2    | 2.968        |
| 5W9H   | A_ARG.1057 | NH1    | A_ASP.1053 | OD2    | 3.477        |
| 5W9H   | A_ARG.1057 | NH2    | A_ASP.1053 | OD1    | 3.268        |
| 5W9H   | A_ARG.1057 | NH2    | A_ASP.1053 | OD2    | 3.305        |
| 5W9H   | A_LYS.1102 | NZ     | A_GLU.793  | OE1    | 2.898        |
| 5W9H   | A_LYS.1102 | NZ     | A_GLU.793  | OE2    | 3.271        |
| 5W9H   | A_ARG.1113 | NH1    | A_GLU.1105 | OE1    | 3.282        |
| 5W9H   | A_ARG.1113 | NH1    | A_GLU.1105 | OE2    | 3.829        |
| 5W9H   | A_ARG.1113 | NH2    | D_GLU.1105 | OE1    | 3.583        |
| 5W9H   | A_HIS.1138 | NE2    | A_GLU.793  | OE1    | 3.148        |
| 5W9H   | A_LYS.1174 | NZ     | A_GLU.1183 | OE1    | 2.609        |
| 5W9H   | A_ARG.1179 | NH2    | B_ASP.31   | OD1    | 2.752        |
| 5W9H   | B_LYS.19   | NZ     | B_GLU.81   | OE1    | 3.976        |
| 5W9H   | B_LYS.38   | NZ     | B_ASP.86   | OD1    | 3.271        |
| 5W9H   | B_LYS.62   | NZ     | B_GLU.46   | OE1    | 2.834        |
| 5W9H   | B_LYS.62   | NZ     | B_GLU.46   | OE2    | 3.973        |
| 5W9H   | B_ARG.66   | NH2    | B_ASP.86   | OD1    | 2.870        |
| 5W9H   | B_ARG.66   | NH2    | B_ASP.86   | OD2    | 3.022        |
| 5W9H   | B_ARG.94   | NH2    | B_ASP.101  | OD2    | 2.758        |
| 5W9H   | B_LYS.95   | NZ     | B_ASP.100C | OD2    | 3.768        |
| 5W9H   | C_ARG.24   | NH1    | C_ASP.70   | OD1    | 2.971        |
| 5W9H   | C_ARG.24   | NH1    | C_ASP.70   | OD2    | 3.712        |
| 5W9H   | C_ARG.61   | NH1    | C_ASP.82   | OD1    | 3.151        |
| 5W9H   | C_ARG.61   | NH1    | C_ASP.82   | OD2    | 3.358        |
| 5W9H   | C_LYS.92   | NZ     | C_GLU.93   | OE1    | 3.334        |
| 5W9H   | C_ARG.96   | NH1    | B_ASP.100C | OD2    | 2.859        |
| 5W9H   | C_ARG.96   | NH2    | A_GLU.1183 | OE1    | 3.871        |
| 5W9H   | C_ARG.96   | NH2    | A_GLU.1183 | OE2    | 2.827        |
| 5W9H   | C_ARG.96   | NH2    | B_ASP.100C | OD2    | 2.885        |
| 5W9H   | C_LYS.103  | NZ     | C_GLU.105  | OE1    | 3.465        |
| 5W9H   | D_LYS.779  | NZ     | D_ASP.771  | OD2    | 3.242        |
| 5W9H   | D_LYS.779  | NZ     | D_GLU.1148 | OE1    | 3.666        |
| 5W9H   | D_LYS.801  | NZ     | D_ASP.843  | OD1    | 2.844        |
| 5W9H   | D_LYS.801  | NZ     | D_ASP.843  | OD2    | 3.387        |
| 5W9H   | D_LYS.816  | NZ     | D_ASP.1064 | OD1    | 3.505        |
| 5W9H   | D_LYS.816  | NZ     | D_ASP.1064 | OD2    | 2.929        |
| 5W9H   | D_ARG.841  | NH1    | D_GLU.1090 | OE1    | 2.843        |
| 5W9H   | D_ARG.841  | NH2    | D_GLU.1090 | OE1    | 2.754        |
| 5W9H   | D_ARG.847  | NH2    | D_ASP.844  | OD1    | 2.671        |
| 5W9H   | D_ARG.887  | NH2    | D_ASP.892  | OD1    | 2.891        |
| 5W9H   | D_ARG.887  | NH2    | D_ASP.892  | OD2    | 3.987        |
| 5W9H   | D_HIS.1020 | NE2    | D_ASP.1024 | OD1    | 3.700        |
| 5W9H   | D_HIS.1020 | NE2    | D_ASP.1024 | OD2    | 3.194        |
| 5W9H   | D_ARG.1057 | NH1    | D_ASP.1053 | OD1    | 3.487        |
| 5W9H   | D_LYS.1102 | NZ     | D_GLU.793  | OE1    | 2.907        |
| 5W9H   | D_LYS.1102 | NZ     | D_GLU.793  | OE2    | 3.062        |
| 5W9H   | D_ARG.1113 | NH1    | G_GLU.1105 | OE1    | 3.247        |
| 5W9H   | D_ARG.1113 | NH2    | D_GLU.1105 | OE1    | 3.897        |

|      |            |     |            |     |       |
|------|------------|-----|------------|-----|-------|
| 5W9H | D_ARG.1113 | NH2 | D_GLU.1105 | OE2 | 3.876 |
| 5W9H | D_HIS.1138 | NE2 | D_GLU.793  | OE1 | 2.876 |
| 5W9H | D_LYS.1174 | NZ  | D_GLU.1183 | OE2 | 2.738 |
| 5W9H | E_LYS.38   | NZ  | E_ASP.86   | OD1 | 3.906 |
| 5W9H | E_LYS.62   | NZ  | E_GLU.46   | OE1 | 2.861 |
| 5W9H | E_LYS.62   | NZ  | E_GLU.46   | OE2 | 3.757 |
| 5W9H | E_ARG.66   | NH1 | E_ASP.86   | OD1 | 2.947 |
| 5W9H | E_ARG.66   | NH1 | E_ASP.86   | OD2 | 3.381 |
| 5W9H | E_ARG.94   | NH2 | E_ASP.101  | OD2 | 3.822 |
| 5W9H | E_LYS.95   | NZ  | E_ASP.100C | OD1 | 3.733 |
| 5W9H | F_ARG.61   | NH1 | F_ASP.82   | OD1 | 3.217 |
| 5W9H | F_ARG.61   | NH1 | F_ASP.82   | OD2 | 3.689 |
| 5W9H | F_ARG.61   | NH2 | F_ASP.82   | OD1 | 3.660 |
| 5W9H | F_ARG.61   | NH2 | F_ASP.82   | OD2 | 2.716 |
| 5W9H | F_ARG.96   | NH1 | E_ASP.100C | OD2 | 2.830 |
| 5W9H | F_ARG.96   | NH2 | E_ASP.100C | OD2 | 2.948 |
| 5W9H | G_ARG.758  | NH1 | r_ASP.740  | OD1 | 2.922 |
| 5W9H | G_LYS.779  | NZ  | G_ASP.771  | OD2 | 2.887 |
| 5W9H | G_LYS.779  | NZ  | G_GLU.1148 | OE1 | 3.575 |
| 5W9H | G_LYS.801  | NZ  | G_ASP.843  | OD1 | 2.852 |
| 5W9H | G_LYS.801  | NZ  | G_ASP.843  | OD2 | 3.379 |
| 5W9H | G_LYS.807  | NZ  | G_GLU.818  | OE1 | 2.858 |
| 5W9H | G_LYS.807  | NZ  | G_GLU.818  | OE2 | 3.782 |
| 5W9H | G_LYS.816  | NZ  | G_ASP.1064 | OD1 | 3.397 |
| 5W9H | G_LYS.816  | NZ  | G_ASP.1064 | OD2 | 2.986 |
| 5W9H | G_ARG.841  | NH2 | G_ASP.844  | OD2 | 2.751 |
| 5W9H | G_ARG.847  | NH2 | G_ASP.844  | OD1 | 2.677 |
| 5W9H | G_ARG.887  | NH2 | G_ASP.892  | OD1 | 2.871 |
| 5W9H | G_ARG.887  | NH2 | G_ASP.892  | OD2 | 3.986 |
| 5W9H | G_HIS.1020 | NE2 | G_ASP.1024 | OD2 | 2.969 |
| 5W9H | G_LYS.1102 | NZ  | G_GLU.793  | OE1 | 3.868 |
| 5W9H | G_LYS.1102 | NZ  | G_GLU.793  | OE2 | 3.570 |
| 5W9H | G_ARG.1113 | NH2 | A_GLU.1105 | OE1 | 3.110 |
| 5W9H | G_HIS.1138 | NE2 | G_GLU.793  | OE2 | 2.825 |
| 5W9H | G_LYS.1174 | NZ  | G_GLU.1183 | OE1 | 2.701 |
| 5W9H | G_ARG.1179 | NH2 | H_ASP.31   | OD1 | 2.809 |
| 5W9H | H_LYS.38   | NZ  | H_ASP.86   | OD1 | 3.793 |
| 5W9H | H_LYS.62   | NZ  | H_GLU.46   | OE1 | 3.235 |
| 5W9H | H_LYS.62   | NZ  | H_GLU.46   | OE2 | 2.887 |
| 5W9H | H_ARG.66   | NH1 | H_ASP.86   | OD1 | 3.910 |
| 5W9H | H_ARG.66   | NH1 | H_ASP.86   | OD2 | 3.798 |
| 5W9H | H_ARG.66   | NH2 | H_ASP.86   | OD1 | 3.900 |
| 5W9H | H_ARG.66   | NH2 | H_ASP.86   | OD2 | 2.887 |
| 5W9H | H_ARG.94   | NH2 | H_ASP.101  | OD2 | 2.744 |
| 5W9H | H_LYS.95   | NZ  | H_ASP.100C | OD1 | 3.649 |
| 5W9H | I_ARG.24   | NH1 | I_ASP.70   | OD1 | 2.956 |
| 5W9H | I_ARG.24   | NH1 | I_ASP.70   | OD2 | 3.606 |
| 5W9H | I_ARG.24   | NH2 | I_ASP.70   | OD1 | 3.918 |
| 5W9H | I_ARG.61   | NH1 | I_GLU.79   | OE2 | 2.865 |
| 5W9H | I_ARG.61   | NH1 | I_ASP.82   | OD1 | 3.820 |
| 5W9H | I_ARG.61   | NH1 | I_ASP.82   | OD2 | 3.014 |
| 5W9H | I_ARG.61   | NH2 | I_GLU.79   | OE2 | 2.954 |
| 5W9H | I_ARG.96   | NH1 | H_ASP.100C | OD2 | 2.791 |
| 5W9H | I_ARG.96   | NH2 | G_GLU.1183 | OE2 | 2.911 |
| 5W9H | I_ARG.96   | NH2 | H_ASP.100C | OD2 | 2.950 |
| 5W9H | p_HIS.81   | ND1 | p_ASP.80   | OD1 | 3.485 |
| 5W9H | p_LYS.99   | NZ  | p_GLU.32   | OE1 | 2.779 |
| 5W9H | p_LYS.110  | NZ  | p_ASP.83   | OD2 | 2.727 |

|      |           |     |           |     |       |
|------|-----------|-----|-----------|-----|-------|
| 5W9H | p_ARG_119 | NH2 | p_ASP_54  | OD2 | 3.407 |
| 5W9H | p_LYS_142 | NZ  | p_GLU_252 | OE1 | 3.739 |
| 5W9H | p_LYS_142 | NZ  | p_GLU_252 | OE2 | 3.528 |
| 5W9H | p_ARG_190 | NH1 | p_ASP_24  | OD2 | 3.182 |
| 5W9H | p_ARG_190 | NH2 | p_ASP_24  | OD2 | 3.492 |
| 5W9H | p_HIS_194 | NE2 | p_GLU_32  | OE1 | 3.741 |
| 5W9H | p_ARG_235 | NH2 | p_GLU_188 | OE1 | 2.810 |
| 5W9H | p_ARG_235 | NH2 | p_GLU_188 | OE2 | 3.752 |
| 5W9H | p_ARG_269 | NH1 | p_GLU_252 | OE1 | 3.003 |
| 5W9H | p_ARG_334 | NH2 | p_ASP_330 | OD1 | 3.952 |
| 5W9H | p_ARG_334 | NH2 | p_ASP_330 | OD2 | 3.020 |
| 5W9H | p_ARG_335 | NH2 | p_ASP_326 | OD2 | 2.866 |
| 5W9H | p_ARG_401 | NH2 | p_ASP_444 | OD1 | 3.583 |
| 5W9H | p_ARG_401 | NH2 | p_ASP_444 | OD2 | 2.889 |
| 5W9H | p_LYS_496 | NZ  | p_GLU_536 | OE1 | 3.232 |
| 5W9H | p_LYS_496 | NZ  | p_GLU_536 | OE2 | 3.655 |
| 5W9H | p_LYS_502 | NZ  | p_GLU_513 | OE2 | 2.865 |
| 5W9H | p_ARG_614 | NH2 | p_GLU_605 | OE2 | 2.933 |
| 5W9H | p_ARG_629 | NH1 | p_GLU_376 | OE1 | 3.493 |
| 5W9H | p_ARG_629 | NH1 | p_ASP_644 | OD1 | 2.871 |
| 5W9H | p_ARG_629 | NH1 | p_ASP_644 | OD2 | 3.990 |
| 5W9H | p_ARG_629 | NH2 | p_ASP_644 | OD1 | 2.880 |
| 5W9H | p_ARG_629 | NH2 | p_ASP_644 | OD2 | 3.886 |
| 5W9H | p_LYS_665 | NZ  | p_ASP_355 | OD2 | 3.928 |
| 5W9H | p_HIS_681 | NE2 | D_ASP_910 | OD1 | 2.819 |
| 5W9H | p_HIS_681 | NE2 | D_ASP_910 | OD2 | 3.760 |
| 5W9H | p_ARG_694 | NH1 | p_ASP_343 | OD1 | 3.986 |
| 5W9H | p_ARG_694 | NH1 | p_ASP_343 | OD2 | 2.926 |
| 5W9H | p_ARG_694 | NH2 | p_ASP_343 | OD1 | 3.403 |
| 5W9H | p_ARG_694 | NH2 | p_ASP_343 | OD2 | 3.427 |
| 5W9H | p_LYS_728 | NZ  | p_ASP_726 | OD2 | 2.881 |
| 5W9H | q_LYS_99  | NZ  | q_GLU_32  | OE1 | 2.764 |
| 5W9H | q_LYS_110 | NZ  | q_ASP_83  | OD2 | 2.762 |
| 5W9H | q_LYS_110 | NZ  | q_ASP_108 | OD2 | 3.795 |
| 5W9H | q_ARG_119 | NH2 | q_ASP_54  | OD2 | 3.096 |
| 5W9H | q_LYS_142 | NZ  | q_GLU_252 | OE1 | 2.907 |
| 5W9H | q_LYS_142 | NZ  | q_GLU_252 | OE2 | 3.991 |
| 5W9H | q_ARG_181 | NH1 | q_ASP_174 | OD2 | 3.114 |
| 5W9H | q_HIS_194 | NE2 | q_GLU_32  | OE1 | 3.504 |
| 5W9H | q_HIS_208 | ND1 | q_ASP_213 | OD2 | 3.767 |
| 5W9H | q_ARG_235 | NH1 | q_ASP_24  | OD1 | 3.943 |
| 5W9H | q_ARG_235 | NH1 | q_ASP_24  | OD2 | 3.081 |
| 5W9H | q_ARG_235 | NH2 | q_ASP_24  | OD2 | 2.878 |
| 5W9H | q_ARG_235 | NH2 | q_GLU_188 | OE1 | 2.783 |
| 5W9H | q_ARG_235 | NH2 | q_GLU_188 | OE2 | 3.707 |
| 5W9H | q_ARG_269 | NH1 | q_GLU_252 | OE2 | 3.153 |
| 5W9H | q_ARG_335 | NH2 | q_ASP_326 | OD2 | 2.856 |
| 5W9H | q_ARG_401 | NH2 | q_ASP_444 | OD1 | 3.945 |
| 5W9H | q_ARG_401 | NH2 | q_ASP_444 | OD2 | 3.807 |
| 5W9H | q_LYS_502 | NZ  | q_GLU_513 | OE2 | 2.769 |
| 5W9H | q_LYS_543 | NZ  | q_GLU_549 | OE1 | 3.143 |
| 5W9H | q_LYS_543 | NZ  | q_GLU_549 | OE2 | 2.917 |
| 5W9H | q_LYS_587 | NZ  | q_GLU_382 | OE2 | 2.893 |
| 5W9H | q_ARG_614 | NH1 | q_GLU_605 | OE2 | 3.381 |
| 5W9H | q_ARG_629 | NH1 | q_ASP_644 | OD1 | 3.524 |
| 5W9H | q_ARG_629 | NH1 | q_ASP_644 | OD2 | 3.882 |
| 5W9H | q_LYS_668 | NZ  | q_ASP_355 | OD1 | 3.851 |
| 5W9H | q_HIS_681 | ND1 | q_GLU_680 | OE2 | 3.860 |

|      |           |     |           |     |       |
|------|-----------|-----|-----------|-----|-------|
| 5W9H | q_LYS_728 | NZ  | q_ASP_726 | OD2 | 2.831 |
| 5W9H | r_LYS_27  | NZ  | r_GLU_230 | OE2 | 2.686 |
| 5W9H | r_LYS_52  | NZ  | r_ASP_49  | OD2 | 3.239 |
| 5W9H | r_LYS_99  | NZ  | r_GLU_32  | OE1 | 2.778 |
| 5W9H | r_LYS_110 | NZ  | r_ASP_83  | OD2 | 3.861 |
| 5W9H | r_LYS_110 | NZ  | r_ASP_108 | OD1 | 3.126 |
| 5W9H | r_LYS_110 | NZ  | r_ASP_108 | OD2 | 3.630 |
| 5W9H | r_ARG_119 | NH2 | r_ASP_54  | OD2 | 3.338 |
| 5W9H | r_LYS_142 | NZ  | r_GLU_252 | OE2 | 3.806 |
| 5W9H | r_ARG_181 | NH1 | r_ASP_174 | OD2 | 3.239 |
| 5W9H | r_ARG_190 | NH1 | r_ASP_24  | OD1 | 3.106 |
| 5W9H | r_ARG_190 | NH1 | r_ASP_24  | OD2 | 3.916 |
| 5W9H | r_ARG_190 | NH2 | r_ASP_24  | OD1 | 2.743 |
| 5W9H | r_HIS_194 | NE2 | r_GLU_32  | OE1 | 3.751 |
| 5W9H | r_ARG_235 | NH2 | r_GLU_188 | OE1 | 3.176 |
| 5W9H | r_ARG_269 | NH1 | r_GLU_252 | OE1 | 3.002 |
| 5W9H | r_ARG_335 | NH2 | r_ASP_326 | OD2 | 2.830 |
| 5W9H | r_ARG_401 | NH2 | r_ASP_444 | OD1 | 3.679 |
| 5W9H | r_ARG_401 | NH2 | r_ASP_444 | OD2 | 3.146 |
| 5W9H | r_LYS_413 | NZ  | r_GLU_382 | OE1 | 3.858 |
| 5W9H | r_LYS_413 | NZ  | r_GLU_382 | OE2 | 2.731 |
| 5W9H | r_LYS_502 | NZ  | r_GLU_513 | OE1 | 3.965 |
| 5W9H | r_LYS_502 | NZ  | r_GLU_513 | OE2 | 2.807 |
| 5W9H | r_ARG_511 | NH2 | r_ASP_509 | OD2 | 3.938 |
| 5W9H | r_ARG_614 | NH1 | r_GLU_605 | OE2 | 3.430 |
| 5W9H | r_ARG_629 | NH2 | r_ASP_644 | OD1 | 3.737 |
| 5W9H | r_LYS_665 | NZ  | r_GLU_666 | OE2 | 2.722 |
| 5W9H | r_HIS_681 | NE2 | A_ASP_910 | OD1 | 2.850 |
| 5W9H | r_HIS_681 | NE2 | A_ASP_910 | OD2 | 3.840 |
| 5W9H | r_LYS_728 | NZ  | r_ASP_726 | OD2 | 2.800 |

Table 742: 5W9H-specific salt bridging networks analysis. In this table, a PDB file is specified with a four-letter PDB ID, except that the names of the PDB files corresponding to the single NMR structural model split from the NMR ensemble is specified with a four-letter PDB ID in addition to a hyphen followed by the single NMR structural model numeric ID, the residue naming scheme is **Chain ID\_residue name\_residue number**,  $\angle ADH$  represents the angle formed by acceptor (A), donor (D) and hydrogen (H) ( $\angle ADH$ ).

| PDB ID | Residue A  | Atom A | Residue B  | Atom B | Distance (Å) |
|--------|------------|--------|------------|--------|--------------|
| 5W9I   | A_ARG.758  | NH1    | B_ASP.740  | OD1    | 2.830        |
| 5W9I   | A_LYS.779  | NZ     | A_ASP.771  | OD2    | 2.920        |
| 5W9I   | A_LYS.779  | NZ     | A_GLU.1148 | OE1    | 3.679        |
| 5W9I   | A_LYS.801  | NZ     | A_ASP.843  | OD1    | 2.853        |
| 5W9I   | A_LYS.801  | NZ     | A_ASP.843  | OD2    | 3.508        |
| 5W9I   | A_LYS.807  | NZ     | A_GLU.818  | OE1    | 3.679        |
| 5W9I   | A_LYS.807  | NZ     | A_GLU.818  | OE2    | 2.901        |
| 5W9I   | A_LYS.816  | NZ     | A_ASP.1064 | OD1    | 3.819        |
| 5W9I   | A_LYS.816  | NZ     | A_ASP.1064 | OD2    | 3.674        |
| 5W9I   | A_ARG.841  | NH1    | A_GLU.1090 | OE1    | 2.870        |
| 5W9I   | A_ARG.841  | NH2    | A_GLU.1090 | OE1    | 2.843        |
| 5W9I   | A_ARG.847  | NH1    | F_ASP.726  | OD1    | 3.733        |
| 5W9I   | A_ARG.847  | NH1    | F_ASP.726  | OD2    | 2.884        |
| 5W9I   | A_ARG.847  | NH2    | A_ASP.844  | OD1    | 2.784        |
| 5W9I   | A_ARG.887  | NH2    | A_ASP.892  | OD1    | 2.922        |
| 5W9I   | A_HIS.1020 | NE2    | A_ASP.1024 | OD2    | 3.009        |
| 5W9I   | A_LYS.1021 | NZ     | A_GLU.1017 | OE2    | 3.419        |
| 5W9I   | A_LYS.1102 | NZ     | A_GLU.793  | OE1    | 2.923        |
| 5W9I   | A_LYS.1102 | NZ     | A_GLU.793  | OE2    | 2.903        |
| 5W9I   | A_ARG.1113 | NH1    | A_GLU.1105 | OE1    | 2.902        |
| 5W9I   | A_ARG.1113 | NH1    | A_GLU.1105 | OE2    | 3.646        |
| 5W9I   | A_ARG.1113 | NH2    | L_GLU.1105 | OE2    | 2.773        |
| 5W9I   | A_HIS.1138 | NE2    | A_GLU.793  | OE2    | 2.945        |
| 5W9I   | A_LYS.1174 | NZ     | A_GLU.1183 | OE1    | 2.820        |
| 5W9I   | A_ARG.1179 | NH2    | C_ASP.31   | OD1    | 2.834        |
| 5W9I   | B_LYS.99   | NZ     | B_GLU.32   | OE1    | 2.800        |
| 5W9I   | B_LYS.110  | NZ     | B_ASP.83   | OD2    | 2.763        |
| 5W9I   | B_ARG.119  | NH2    | B_ASP.54   | OD2    | 3.186        |
| 5W9I   | B_LYS.142  | NZ     | B_GLU.252  | OE1    | 2.883        |
| 5W9I   | B_HIS.194  | NE2    | B_GLU.32   | OE1    | 3.646        |
| 5W9I   | B_ARG.235  | NH1    | B_ASP.24   | OD1    | 3.781        |
| 5W9I   | B_ARG.235  | NH1    | B_ASP.24   | OD2    | 3.330        |
| 5W9I   | B_ARG.235  | NH2    | B_ASP.24   | OD2    | 2.925        |
| 5W9I   | B_ARG.235  | NH2    | B_GLU.188  | OE1    | 2.886        |
| 5W9I   | B_ARG.235  | NH2    | B_GLU.188  | OE2    | 3.821        |
| 5W9I   | B_ARG.335  | NH2    | B_ASP.326  | OD2    | 2.866        |
| 5W9I   | B_ARG.614  | NH1    | B_GLU.367  | OE2    | 2.904        |
| 5W9I   | B_ARG.614  | NH2    | B_GLU.367  | OE2    | 2.914        |
| 5W9I   | B_ARG.629  | NH1    | B_GLU.376  | OE1    | 3.454        |
| 5W9I   | B_ARG.629  | NH1    | B_ASP.644  | OD1    | 2.966        |
| 5W9I   | B_ARG.629  | NH1    | B_ASP.644  | OD2    | 3.812        |
| 5W9I   | B_ARG.629  | NH2    | B_ASP.644  | OD1    | 2.995        |
| 5W9I   | B_LYS.665  | NZ     | B_GLU.357  | OE1    | 2.866        |
| 5W9I   | B_LYS.665  | NZ     | B_GLU.357  | OE2    | 3.798        |
| 5W9I   | B_LYS.668  | NZ     | B_ASP.355  | OD1    | 2.986        |
| 5W9I   | B_HIS.681  | NE2    | L_ASP.910  | OD1    | 2.801        |
| 5W9I   | B_HIS.681  | NE2    | L_ASP.910  | OD2    | 3.893        |
| 5W9I   | B_LYS.728  | NZ     | B_ASP.726  | OD2    | 2.881        |
| 5W9I   | C_LYS.38   | NZ     | C_ASP.86   | OD1    | 3.889        |
| 5W9I   | C_LYS.62   | NZ     | C_GLU.46   | OE1    | 3.450        |
| 5W9I   | C_LYS.62   | NZ     | C_GLU.46   | OE2    | 2.930        |
| 5W9I   | C_ARG.66   | NH1    | C_ASP.86   | OD1    | 3.145        |
| 5W9I   | C_ARG.66   | NH1    | C_ASP.86   | OD2    | 3.495        |
| 5W9I   | C_ARG.66   | NH2    | C_ASP.86   | OD1    | 3.789        |
| 5W9I   | C_ARG.66   | NH2    | C_ASP.86   | OD2    | 2.783        |
| 5W9I   | C_ARG.94   | NH2    | C_ASP.101  | OD1    | 2.867        |
| 5W9I   | C_ARG.94   | NH2    | C_ASP.101  | OD2    | 3.643        |

|      |            |     |            |     |       |
|------|------------|-----|------------|-----|-------|
| 5W9I | C_LYS_95   | NZ  | C_ASP_100C | OD1 | 3.543 |
| 5W9I | C_LYS_95   | NZ  | C_ASP_100C | OD2 | 3.727 |
| 5W9I | D_ARG_24   | NH2 | D_ASP_70   | OD1 | 2.945 |
| 5W9I | D_ARG_24   | NH2 | D_ASP_70   | OD2 | 3.831 |
| 5W9I | D_ARG_61   | NH1 | D_ASP_82   | OD1 | 3.202 |
| 5W9I | D_ARG_61   | NH1 | D_ASP_82   | OD2 | 3.681 |
| 5W9I | D_ARG_61   | NH2 | D_ASP_82   | OD1 | 3.712 |
| 5W9I | D_ARG_61   | NH2 | D_ASP_82   | OD2 | 2.777 |
| 5W9I | D_ARG_96   | NH1 | C_ASP_100C | OD2 | 2.837 |
| 5W9I | D_ARG_96   | NH2 | A_GLU_1183 | OE2 | 2.862 |
| 5W9I | D_ARG_96   | NH2 | C_ASP_100C | OD2 | 2.920 |
| 5W9I | D_LYS_103  | NZ  | D_GLU_105  | OE2 | 3.345 |
| 5W9I | E_ARG_758  | NH1 | F_ASP_740  | OD1 | 2.820 |
| 5W9I | E_LYS_779  | NZ  | E_ASP_771  | OD2 | 2.924 |
| 5W9I | E_LYS_779  | NZ  | E_GLU_1148 | OE1 | 3.718 |
| 5W9I | E_LYS_801  | NZ  | E_ASP_843  | OD1 | 2.850 |
| 5W9I | E_LYS_801  | NZ  | E_ASP_843  | OD2 | 3.507 |
| 5W9I | E_LYS_807  | NZ  | E_GLU_818  | OE1 | 3.745 |
| 5W9I | E_LYS_807  | NZ  | E_GLU_818  | OE2 | 3.005 |
| 5W9I | E_LYS_816  | NZ  | E_ASP_1064 | OD1 | 3.825 |
| 5W9I | E_LYS_816  | NZ  | E_ASP_1064 | OD2 | 3.707 |
| 5W9I | E_ARG_841  | NH1 | E_GLU_1090 | OE1 | 2.868 |
| 5W9I | E_ARG_841  | NH2 | E_GLU_1090 | OE1 | 2.843 |
| 5W9I | E_ARG_847  | NH1 | J_ASP_726  | OD1 | 3.709 |
| 5W9I | E_ARG_847  | NH1 | J_ASP_726  | OD2 | 2.881 |
| 5W9I | E_ARG_847  | NH2 | E_ASP_844  | OD1 | 2.801 |
| 5W9I | E_ARG_887  | NH2 | E_ASP_892  | OD1 | 2.928 |
| 5W9I | E_HIS_1020 | NE2 | E_ASP_1024 | OD2 | 2.999 |
| 5W9I | E_LYS_1021 | NZ  | E_GLU_1017 | OE2 | 3.409 |
| 5W9I | E_LYS_1102 | NZ  | E_GLU_793  | OE1 | 2.968 |
| 5W9I | E_LYS_1102 | NZ  | E_GLU_793  | OE2 | 2.898 |
| 5W9I | E_ARG_1113 | NH1 | E_GLU_1105 | OE1 | 2.970 |
| 5W9I | E_ARG_1113 | NH2 | E_GLU_1105 | OE1 | 3.046 |
| 5W9I | E_ARG_1113 | NH2 | E_GLU_1105 | OE2 | 3.856 |
| 5W9I | E_HIS_1138 | NE2 | E_GLU_793  | OE2 | 2.952 |
| 5W9I | E_LYS_1174 | NZ  | E_GLU_1183 | OE1 | 2.800 |
| 5W9I | E_ARG_1179 | NH2 | G_ASP_31   | OD1 | 2.831 |
| 5W9I | F_LYS_99   | NZ  | F_GLU_32   | OE1 | 2.800 |
| 5W9I | F_LYS_110  | NZ  | F_ASP_83   | OD2 | 2.755 |
| 5W9I | F_ARG_119  | NH2 | F_ASP_54   | OD2 | 3.152 |
| 5W9I | F_LYS_142  | NZ  | F_GLU_252  | OE1 | 2.880 |
| 5W9I | F_HIS_194  | NE2 | F_GLU_32   | OE1 | 3.655 |
| 5W9I | F_ARG_235  | NH1 | F_ASP_24   | OD1 | 3.849 |
| 5W9I | F_ARG_235  | NH1 | F_ASP_24   | OD2 | 3.358 |
| 5W9I | F_ARG_235  | NH2 | F_ASP_24   | OD2 | 2.934 |
| 5W9I | F_ARG_235  | NH2 | F_GLU_188  | OE1 | 2.870 |
| 5W9I | F_ARG_235  | NH2 | F_GLU_188  | OE2 | 3.760 |
| 5W9I | F_ARG_335  | NH2 | F_ASP_326  | OD2 | 2.868 |
| 5W9I | F_ARG_614  | NH1 | F_GLU_367  | OE2 | 3.306 |
| 5W9I | F_ARG_614  | NH2 | F_GLU_367  | OE2 | 3.411 |
| 5W9I | F_ARG_629  | NH1 | F_GLU_376  | OE1 | 3.445 |
| 5W9I | F_ARG_629  | NH1 | F_ASP_644  | OD1 | 2.966 |
| 5W9I | F_ARG_629  | NH1 | F_ASP_644  | OD2 | 3.809 |
| 5W9I | F_ARG_629  | NH2 | F_ASP_644  | OD1 | 2.990 |
| 5W9I | F_LYS_665  | NZ  | F_GLU_357  | OE1 | 2.866 |
| 5W9I | F_LYS_665  | NZ  | F_GLU_357  | OE2 | 3.810 |
| 5W9I | F_HIS_681  | NE2 | A_ASP_910  | OD1 | 2.878 |
| 5W9I | F_HIS_681  | NE2 | A_ASP_910  | OD2 | 3.982 |

|      |            |     |            |     |       |
|------|------------|-----|------------|-----|-------|
| 5W9I | F_HIS.681  | NE2 | F_GLU.680  | OE2 | 3.229 |
| 5W9I | F_LYS.728  | NZ  | F_ASP.726  | OD2 | 2.885 |
| 5W9I | G_LYS.38   | NZ  | G_ASP.86   | OD1 | 3.902 |
| 5W9I | G_LYS.62   | NZ  | G_GLU.46   | OE1 | 3.433 |
| 5W9I | G_LYS.62   | NZ  | G_GLU.46   | OE2 | 2.934 |
| 5W9I | G_ARG.66   | NH1 | G_ASP.86   | OD1 | 3.147 |
| 5W9I | G_ARG.66   | NH1 | G_ASP.86   | OD2 | 3.501 |
| 5W9I | G_ARG.66   | NH2 | G_ASP.86   | OD1 | 3.792 |
| 5W9I | G_ARG.66   | NH2 | G_ASP.86   | OD2 | 2.779 |
| 5W9I | G_ARG.94   | NH2 | G_ASP.101  | OD1 | 3.649 |
| 5W9I | G_ARG.94   | NH2 | G_ASP.101  | OD2 | 2.843 |
| 5W9I | G_LYS.95   | NZ  | G_ASP.100C | OD1 | 3.513 |
| 5W9I | G_LYS.95   | NZ  | G_ASP.100C | OD2 | 3.725 |
| 5W9I | H_ARG.24   | NH2 | H_ASP.70   | OD1 | 2.942 |
| 5W9I | H_ARG.24   | NH2 | H_ASP.70   | OD2 | 3.817 |
| 5W9I | H_ARG.61   | NH1 | H_ASP.82   | OD1 | 3.183 |
| 5W9I | H_ARG.61   | NH1 | H_ASP.82   | OD2 | 3.671 |
| 5W9I | H_ARG.61   | NH2 | H_ASP.82   | OD1 | 3.703 |
| 5W9I | H_ARG.61   | NH2 | H_ASP.82   | OD2 | 2.773 |
| 5W9I | H_LYS.92   | NZ  | H_GLU.93   | OE1 | 3.454 |
| 5W9I | H_ARG.96   | NH1 | G_ASP.100C | OD2 | 2.856 |
| 5W9I | H_ARG.96   | NH2 | E_GLU.1183 | OE2 | 2.871 |
| 5W9I | H_ARG.96   | NH2 | G_ASP.100C | OD2 | 2.925 |
| 5W9I | H_LYS.103  | NZ  | H_GLU.105  | OE2 | 3.616 |
| 5W9I | I_ARG.758  | NH1 | J_ASP.740  | OD1 | 2.804 |
| 5W9I | I_LYS.779  | NZ  | I_ASP.771  | OD2 | 2.925 |
| 5W9I | I_LYS.779  | NZ  | I_GLU.1148 | OE1 | 3.696 |
| 5W9I | I_LYS.801  | NZ  | I_ASP.843  | OD1 | 2.847 |
| 5W9I | I_LYS.801  | NZ  | I_ASP.843  | OD2 | 3.503 |
| 5W9I | I_LYS.807  | NZ  | I_GLU.818  | OE1 | 3.621 |
| 5W9I | I_LYS.807  | NZ  | I_GLU.818  | OE2 | 2.894 |
| 5W9I | I_LYS.816  | NZ  | I_ASP.1064 | OD1 | 3.871 |
| 5W9I | I_LYS.816  | NZ  | I_ASP.1064 | OD2 | 3.720 |
| 5W9I | I_ARG.841  | NH1 | I_GLU.1090 | OE1 | 2.860 |
| 5W9I | I_ARG.841  | NH2 | I_GLU.1090 | OE1 | 2.839 |
| 5W9I | I_ARG.847  | NH1 | B_ASP.726  | OD1 | 3.716 |
| 5W9I | I_ARG.847  | NH1 | B_ASP.726  | OD2 | 2.881 |
| 5W9I | I_ARG.847  | NH2 | I_ASP.844  | OD1 | 2.793 |
| 5W9I | I_ARG.887  | NH2 | I_ASP.892  | OD1 | 2.930 |
| 5W9I | I_HIS.1020 | NE2 | I_ASP.1024 | OD2 | 3.008 |
| 5W9I | I_LYS.1021 | NZ  | I_GLU.1017 | OE2 | 3.414 |
| 5W9I | I_LYS.1102 | NZ  | I_GLU.793  | OE1 | 2.931 |
| 5W9I | I_LYS.1102 | NZ  | I_GLU.793  | OE2 | 2.910 |
| 5W9I | I_ARG.1113 | NH1 | I_GLU.1105 | OE1 | 2.967 |
| 5W9I | I_ARG.1113 | NH1 | I_GLU.1105 | OE2 | 3.647 |
| 5W9I | I_ARG.1113 | NH2 | E_GLU.1105 | OE2 | 2.821 |
| 5W9I | I_HIS.1138 | NE2 | I_GLU.793  | OE2 | 2.948 |
| 5W9I | I_LYS.1174 | NZ  | I_GLU.1183 | OE1 | 2.809 |
| 5W9I | I_ARG.1179 | NH2 | K_ASP.31   | OD1 | 2.785 |
| 5W9I | J_LYS.99   | NZ  | J_GLU.32   | OE1 | 2.800 |
| 5W9I | J_LYS.110  | NZ  | J_ASP.83   | OD2 | 2.766 |
| 5W9I | J_ARG.119  | NH2 | J_ASP.54   | OD2 | 3.206 |
| 5W9I | J_LYS.142  | NZ  | J_GLU.252  | OE1 | 2.986 |
| 5W9I | J_HIS.194  | NE2 | J_GLU.32   | OE1 | 3.656 |
| 5W9I | J_ARG.235  | NH1 | J_ASP.24   | OD1 | 3.840 |
| 5W9I | J_ARG.235  | NH1 | J_ASP.24   | OD2 | 3.366 |
| 5W9I | J_ARG.235  | NH2 | J_ASP.24   | OD2 | 2.931 |
| 5W9I | J_ARG.235  | NH2 | J_GLU.188  | OE1 | 2.868 |



|      |           |     |            |     |       |
|------|-----------|-----|------------|-----|-------|
| 5W9I | J_ARG_235 | NH2 | J_GLU_188  | OE2 | 3.758 |
| 5W9I | J_ARG_335 | NH2 | J_ASP_326  | OD2 | 2.865 |
| 5W9I | J_ARG_614 | NH1 | J_GLU_367  | OE2 | 3.042 |
| 5W9I | J_ARG_614 | NH2 | J_GLU_367  | OE2 | 3.261 |
| 5W9I | J_ARG_629 | NH1 | J_ASP_644  | OD1 | 2.970 |
| 5W9I | J_ARG_629 | NH1 | J_ASP_644  | OD2 | 3.960 |
| 5W9I | J_ARG_629 | NH2 | J_ASP_644  | OD1 | 3.193 |
| 5W9I | J_LYS_665 | NZ  | J_GLU_357  | OE1 | 2.867 |
| 5W9I | J_LYS_665 | NZ  | J_GLU_357  | OE2 | 3.780 |
| 5W9I | J_LYS_668 | NZ  | J_ASP_355  | OD1 | 3.043 |
| 5W9I | J_HIS_681 | NE2 | E_ASP_910  | OD1 | 2.832 |
| 5W9I | J_HIS_681 | NE2 | J_GLU_680  | OE2 | 3.209 |
| 5W9I | J_LYS_728 | NZ  | J_ASP_726  | OD2 | 2.883 |
| 5W9I | K_LYS_38  | NZ  | K_ASP_86   | OD1 | 3.899 |
| 5W9I | K_LYS_62  | NZ  | K_GLU_46   | OE1 | 3.395 |
| 5W9I | K_LYS_62  | NZ  | K_GLU_46   | OE2 | 2.930 |
| 5W9I | K_ARG_66  | NH1 | K_ASP_86   | OD1 | 3.149 |
| 5W9I | K_ARG_66  | NH1 | K_ASP_86   | OD2 | 3.507 |
| 5W9I | K_ARG_66  | NH2 | K_ASP_86   | OD1 | 3.795 |
| 5W9I | K_ARG_66  | NH2 | K_ASP_86   | OD2 | 2.786 |
| 5W9I | K_ARG_94  | NH2 | K_ASP_101  | OD1 | 2.859 |
| 5W9I | K_ARG_94  | NH2 | K_ASP_101  | OD2 | 3.615 |
| 5W9I | K_LYS_95  | NZ  | K_ASP_100C | OD1 | 3.504 |
| 5W9I | K_LYS_95  | NZ  | K_ASP_100C | OD2 | 3.759 |
| 5W9I | L_ARG_24  | NH1 | L_ASP_70   | OD1 | 2.947 |
| 5W9I | L_ARG_24  | NH1 | L_ASP_70   | OD2 | 3.851 |
| 5W9I | L_ARG_61  | NH1 | L_ASP_82   | OD1 | 3.190 |
| 5W9I | L_ARG_61  | NH1 | L_ASP_82   | OD2 | 3.680 |
| 5W9I | L_ARG_61  | NH2 | L_ASP_82   | OD1 | 3.703 |
| 5W9I | L_ARG_61  | NH2 | L_ASP_82   | OD2 | 2.775 |
| 5W9I | L_LYS_92  | NZ  | L_GLU_93   | OE1 | 3.397 |
| 5W9I | L_ARG_96  | NH1 | K_ASP_100C | OD2 | 2.856 |
| 5W9I | L_ARG_96  | NH2 | L_GLU_1183 | OE2 | 2.872 |
| 5W9I | L_ARG_96  | NH2 | K_ASP_100C | OD2 | 2.922 |
| 5W9I | L_LYS_103 | NZ  | L_GLU_105  | OE2 | 3.808 |

Table 743: 5W9I-specific salt bridging networks analysis. In this table, a PDB file is specified with a four-letter PDB ID, except that the names of the PDB files corresponding to the single NMR structural model split from the NMR ensemble is specified with a four-letter PDB ID in addition to a hyphen followed by the single NMR structural model numeric ID, the residue naming scheme is **Chain ID\_residue name\_residue number**,  $\angle ADH$  represents the angle formed by acceptor (A), donor (D) and hydrogen (H) ( $\angle ADH$ ).

| PDB ID | Residue A  | Atom A | Residue B  | Atom B | Distance (Å) |
|--------|------------|--------|------------|--------|--------------|
| 5W9J   | D_LYS_779  | NZ     | D_GLU_1148 | OE1    | 2.939        |
| 5W9J   | D_LYS_801  | NZ     | D_ASP_843  | OD1    | 3.375        |
| 5W9J   | D_LYS_807  | NZ     | D_GLU_818  | OE1    | 2.817        |
| 5W9J   | D_LYS_807  | NZ     | D_GLU_818  | OE2    | 3.422        |
| 5W9J   | D_LYS_816  | NZ     | D_ASP_1064 | OD1    | 3.520        |
| 5W9J   | D_LYS_816  | NZ     | D_ASP_1064 | OD2    | 3.973        |
| 5W9J   | D_ARG_841  | NH2    | D_ASP_844  | OD2    | 2.773        |
| 5W9J   | D_ARG_847  | NH2    | D_ASP_844  | OD1    | 2.691        |
| 5W9J   | D_ARG_887  | NH1    | D_ASP_892  | OD1    | 2.879        |
| 5W9J   | D_HIS_1020 | NE2    | D_ASP_1024 | OD1    | 3.785        |
| 5W9J   | D_HIS_1020 | NE2    | D_ASP_1024 | OD2    | 2.892        |
| 5W9J   | D_ARG_1057 | NH2    | D_ASP_1053 | OD1    | 3.921        |
| 5W9J   | D_LYS_1102 | NZ     | D_GLU_793  | OE1    | 2.814        |
| 5W9J   | D_LYS_1102 | NZ     | D_GLU_793  | OE2    | 3.963        |
| 5W9J   | D_ARG_1113 | NH1    | D_GLU_1105 | OE1    | 3.016        |
| 5W9J   | D_ARG_1113 | NH2    | G_GLU_1105 | OE1    | 3.627        |
| 5W9J   | D_ARG_1113 | NH2    | G_GLU_1105 | OE2    | 2.779        |
| 5W9J   | D_HIS_1138 | NE2    | D_GLU_793  | OE2    | 2.844        |
| 5W9J   | E_HIS_35   | NE2    | E_ASP_100C | OD2    | 3.981        |
| 5W9J   | E_LYS_38   | NZ     | E_GLU_46   | OE1    | 3.833        |
| 5W9J   | E_LYS_38   | NZ     | E_ASP_86   | OD1    | 2.905        |
| 5W9J   | E_LYS_62   | NZ     | E_GLU_46   | OE2    | 2.796        |
| 5W9J   | E_ARG_94   | NH1    | E_ASP_101  | OD2    | 3.268        |
| 5W9J   | E_LYS_95   | NZ     | E_ASP_100C | OD2    | 2.845        |
| 5W9J   | F_ARG_61   | NH1    | F_ASP_82   | OD1    | 3.198        |
| 5W9J   | F_ARG_61   | NH1    | F_ASP_82   | OD2    | 3.745        |
| 5W9J   | F_ARG_61   | NH2    | F_GLU_79   | OE1    | 3.635        |
| 5W9J   | F_ARG_61   | NH2    | F_ASP_82   | OD1    | 3.645        |
| 5W9J   | F_ARG_61   | NH2    | F_ASP_82   | OD2    | 2.778        |
| 5W9J   | F_ARG_96   | NH1    | E_ASP_100C | OD1    | 3.873        |
| 5W9J   | F_ARG_96   | NH1    | E_ASP_100C | OD2    | 3.469        |
| 5W9J   | A_LYS_779  | NZ     | A_GLU_1148 | OE1    | 2.940        |
| 5W9J   | A_LYS_801  | NZ     | A_ASP_843  | OD1    | 3.375        |
| 5W9J   | A_LYS_807  | NZ     | A_GLU_818  | OE1    | 2.817        |
| 5W9J   | A_LYS_807  | NZ     | A_GLU_818  | OE2    | 3.422        |
| 5W9J   | A_LYS_816  | NZ     | A_ASP_1064 | OD1    | 3.520        |
| 5W9J   | A_LYS_816  | NZ     | A_ASP_1064 | OD2    | 3.973        |
| 5W9J   | A_ARG_841  | NH2    | A_ASP_844  | OD2    | 2.773        |
| 5W9J   | A_ARG_847  | NH2    | A_ASP_844  | OD1    | 2.691        |
| 5W9J   | A_ARG_887  | NH1    | A_ASP_892  | OD1    | 2.879        |
| 5W9J   | A_HIS_1020 | NE2    | A_ASP_1024 | OD1    | 3.785        |
| 5W9J   | A_HIS_1020 | NE2    | A_ASP_1024 | OD2    | 2.892        |
| 5W9J   | A_ARG_1057 | NH2    | A_ASP_1053 | OD1    | 3.921        |
| 5W9J   | A_LYS_1102 | NZ     | A_GLU_793  | OE1    | 2.814        |
| 5W9J   | A_LYS_1102 | NZ     | A_GLU_793  | OE2    | 3.964        |
| 5W9J   | A_ARG_1113 | NH1    | A_GLU_1105 | OE1    | 3.016        |
| 5W9J   | A_ARG_1113 | NH2    | D_GLU_1105 | OE1    | 3.626        |
| 5W9J   | A_ARG_1113 | NH2    | D_GLU_1105 | OE2    | 2.778        |
| 5W9J   | A_HIS_1138 | NE2    | A_GLU_793  | OE2    | 2.844        |
| 5W9J   | B_HIS_35   | NE2    | B_ASP_100C | OD2    | 3.981        |
| 5W9J   | B_LYS_38   | NZ     | B_GLU_46   | OE1    | 3.833        |
| 5W9J   | B_LYS_38   | NZ     | B_ASP_86   | OD1    | 2.905        |
| 5W9J   | B_LYS_62   | NZ     | B_GLU_46   | OE2    | 2.796        |
| 5W9J   | B_ARG_94   | NH1    | B_ASP_101  | OD2    | 3.270        |
| 5W9J   | B_LYS_95   | NZ     | B_ASP_100C | OD2    | 2.844        |
| 5W9J   | C_ARG_61   | NH1    | C_ASP_82   | OD1    | 3.196        |
| 5W9J   | C_ARG_61   | NH1    | C_ASP_82   | OD2    | 3.745        |

|      |            |     |            |     |       |
|------|------------|-----|------------|-----|-------|
| 5W9J | C_ARG_61   | NH2 | C_GLU_79   | OE1 | 3.636 |
| 5W9J | C_ARG_61   | NH2 | C_ASP_82   | OD1 | 3.644 |
| 5W9J | C_ARG_61   | NH2 | C_ASP_82   | OD2 | 2.779 |
| 5W9J | C_ARG_96   | NH1 | B_ASP_100C | OD1 | 3.873 |
| 5W9J | C_ARG_96   | NH1 | B_ASP_100C | OD2 | 3.470 |
| 5W9J | G_LYS_779  | NZ  | G_GLU_1148 | OE1 | 2.940 |
| 5W9J | G_LYS_801  | NZ  | G_ASP_843  | OD1 | 3.374 |
| 5W9J | G_LYS_807  | NZ  | G_GLU_818  | OE1 | 2.817 |
| 5W9J | G_LYS_807  | NZ  | G_GLU_818  | OE2 | 3.421 |
| 5W9J | G_LYS_816  | NZ  | G_ASP_1064 | OD1 | 3.521 |
| 5W9J | G_LYS_816  | NZ  | G_ASP_1064 | OD2 | 3.973 |
| 5W9J | G_ARG_841  | NH2 | G_ASP_844  | OD2 | 2.773 |
| 5W9J | G_ARG_847  | NH2 | G_ASP_844  | OD1 | 2.691 |
| 5W9J | G_ARG_887  | NH1 | G_ASP_892  | OD1 | 2.880 |
| 5W9J | G_HIS_1020 | NE2 | G_ASP_1024 | OD1 | 3.785 |
| 5W9J | G_HIS_1020 | NE2 | G_ASP_1024 | OD2 | 2.892 |
| 5W9J | G_ARG_1057 | NH2 | G_ASP_1053 | OD1 | 3.921 |
| 5W9J | G_LYS_1102 | NZ  | G_GLU_793  | OE1 | 2.813 |
| 5W9J | G_LYS_1102 | NZ  | G_GLU_793  | OE2 | 3.963 |
| 5W9J | G_ARG_1113 | NH1 | G_GLU_1105 | OE1 | 3.016 |
| 5W9J | G_ARG_1113 | NH2 | A_GLU_1105 | OE1 | 3.626 |
| 5W9J | G_ARG_1113 | NH2 | A_GLU_1105 | OE2 | 2.777 |
| 5W9J | G_HIS_1138 | NE2 | G_GLU_793  | OE2 | 2.844 |
| 5W9J | H_HIS_35   | NE2 | H_ASP_100C | OD2 | 3.981 |
| 5W9J | H_LYS_38   | NZ  | H_GLU_46   | OE1 | 3.832 |
| 5W9J | H_LYS_38   | NZ  | H_ASP_86   | OD1 | 2.905 |
| 5W9J | H_LYS_62   | NZ  | H_GLU_46   | OE2 | 2.795 |
| 5W9J | H_ARG_94   | NH1 | H_ASP_101  | OD2 | 3.269 |
| 5W9J | H_LYS_95   | NZ  | H_ASP_100C | OD2 | 2.844 |
| 5W9J | I_ARG_61   | NH1 | I_ASP_82   | OD1 | 3.197 |
| 5W9J | I_ARG_61   | NH1 | I_ASP_82   | OD2 | 3.745 |
| 5W9J | I_ARG_61   | NH2 | I_GLU_79   | OE1 | 3.636 |
| 5W9J | I_ARG_61   | NH2 | I_ASP_82   | OD1 | 3.644 |
| 5W9J | I_ARG_61   | NH2 | I_ASP_82   | OD2 | 2.779 |
| 5W9J | I_ARG_96   | NH1 | H_ASP_100C | OD1 | 3.873 |
| 5W9J | I_ARG_96   | NH1 | H_ASP_100C | OD2 | 3.470 |
| 5W9J | J_LYS_52   | NZ  | J_ASP_49   | OD2 | 2.757 |
| 5W9J | J_HIS_81   | ND1 | J_ASP_80   | OD1 | 3.851 |
| 5W9J | J_LYS_99   | NZ  | J_ASP_34   | OD2 | 2.722 |
| 5W9J | J_LYS_110  | NZ  | J_ASP_108  | OD1 | 3.409 |
| 5W9J | J_LYS_110  | NZ  | J_ASP_108  | OD2 | 3.230 |
| 5W9J | J_ARG_119  | NH1 | J_ASP_54   | OD2 | 3.696 |
| 5W9J | J_ARG_119  | NH2 | J_ASP_54   | OD2 | 3.009 |
| 5W9J | J_ARG_181  | NH1 | J_ASP_174  | OD2 | 3.331 |
| 5W9J | J_ARG_190  | NH1 | J_ASP_24   | OD1 | 3.612 |
| 5W9J | J_ARG_190  | NH1 | J_ASP_24   | OD2 | 3.889 |
| 5W9J | J_ARG_190  | NH2 | J_ASP_24   | OD1 | 2.692 |
| 5W9J | J_ARG_235  | NH2 | J_GLU_188  | OE1 | 2.796 |
| 5W9J | J_ARG_334  | NH2 | J_ASP_330  | OD2 | 3.710 |
| 5W9J | J_ARG_335  | NH2 | J_ASP_326  | OD2 | 3.031 |
| 5W9J | J_ARG_401  | NH2 | J_ASP_444  | OD1 | 3.639 |
| 5W9J | J_ARG_401  | NH2 | J_ASP_444  | OD2 | 3.140 |
| 5W9J | J_LYS_502  | NZ  | J_GLU_513  | OE2 | 2.796 |
| 5W9J | J_LYS_543  | NZ  | J_GLU_549  | OE2 | 3.291 |
| 5W9J | J_LYS_587  | NZ  | J_GLU_382  | OE2 | 2.820 |
| 5W9J | J_ARG_614  | NH2 | J_GLU_605  | OE2 | 2.932 |
| 5W9J | J_LYS_665  | NZ  | J_GLU_666  | OE2 | 2.774 |
| 5W9J | J_LYS_728  | NZ  | J_ASP_726  | OD2 | 2.840 |

|      |           |     |           |     |       |
|------|-----------|-----|-----------|-----|-------|
| 5W9J | K_LYS_52  | NZ  | K_ASP_49  | OD2 | 2.756 |
| 5W9J | K_HIS_81  | ND1 | K_ASP_80  | OD1 | 3.851 |
| 5W9J | K_LYS_99  | NZ  | K_ASP_34  | OD2 | 2.723 |
| 5W9J | K_LYS_110 | NZ  | K_ASP_108 | OD1 | 3.410 |
| 5W9J | K_LYS_110 | NZ  | K_ASP_108 | OD2 | 3.231 |
| 5W9J | K_ARG_119 | NH1 | K_ASP_54  | OD2 | 3.694 |
| 5W9J | K_ARG_119 | NH2 | K_ASP_54  | OD2 | 3.008 |
| 5W9J | K_ARG_181 | NH1 | K_ASP_174 | OD2 | 3.331 |
| 5W9J | K_ARG_190 | NH1 | K_ASP_24  | OD1 | 3.611 |
| 5W9J | K_ARG_190 | NH1 | K_ASP_24  | OD2 | 3.890 |
| 5W9J | K_ARG_190 | NH2 | K_ASP_24  | OD1 | 2.691 |
| 5W9J | K_ARG_235 | NH2 | K_GLU_188 | OE1 | 2.796 |
| 5W9J | K_ARG_334 | NH2 | K_ASP_330 | OD2 | 3.710 |
| 5W9J | K_ARG_335 | NH2 | K_ASP_326 | OD2 | 3.030 |
| 5W9J | K_ARG_401 | NH2 | K_ASP_444 | OD1 | 3.638 |
| 5W9J | K_ARG_401 | NH2 | K_ASP_444 | OD2 | 3.140 |
| 5W9J | K_LYS_502 | NZ  | K_GLU_513 | OE2 | 2.796 |
| 5W9J | K_LYS_543 | NZ  | K_GLU_549 | OE2 | 3.291 |
| 5W9J | K_LYS_587 | NZ  | K_GLU_382 | OE2 | 2.819 |
| 5W9J | K_ARG_614 | NH2 | K_GLU_605 | OE2 | 2.931 |
| 5W9J | K_LYS_665 | NZ  | K_GLU_666 | OE2 | 2.774 |
| 5W9J | K_LYS_728 | NZ  | K_ASP_726 | OD2 | 2.839 |
| 5W9J | L_LYS_52  | NZ  | L_ASP_49  | OD2 | 2.756 |
| 5W9J | L_HIS_81  | ND1 | L_ASP_80  | OD1 | 3.851 |
| 5W9J | L_LYS_99  | NZ  | L_ASP_34  | OD2 | 2.724 |
| 5W9J | L_LYS_110 | NZ  | L_ASP_108 | OD1 | 3.409 |
| 5W9J | L_LYS_110 | NZ  | L_ASP_108 | OD2 | 3.231 |
| 5W9J | L_ARG_119 | NH1 | L_ASP_54  | OD2 | 3.695 |
| 5W9J | L_ARG_119 | NH2 | L_ASP_54  | OD2 | 3.009 |
| 5W9J | L_ARG_181 | NH1 | L_ASP_174 | OD2 | 3.331 |
| 5W9J | L_ARG_190 | NH1 | L_ASP_24  | OD1 | 3.612 |
| 5W9J | L_ARG_190 | NH1 | L_ASP_24  | OD2 | 3.889 |
| 5W9J | L_ARG_190 | NH2 | L_ASP_24  | OD1 | 2.692 |
| 5W9J | L_ARG_235 | NH2 | L_GLU_188 | OE1 | 2.796 |
| 5W9J | L_ARG_334 | NH2 | L_ASP_330 | OD2 | 3.710 |
| 5W9J | L_ARG_335 | NH2 | L_ASP_326 | OD2 | 3.031 |
| 5W9J | L_ARG_401 | NH2 | L_ASP_444 | OD1 | 3.638 |
| 5W9J | L_ARG_401 | NH2 | L_ASP_444 | OD2 | 3.140 |
| 5W9J | L_LYS_502 | NZ  | L_GLU_513 | OE2 | 2.796 |
| 5W9J | L_LYS_543 | NZ  | L_GLU_549 | OE2 | 3.291 |
| 5W9J | L_LYS_587 | NZ  | L_GLU_382 | OE2 | 2.820 |
| 5W9J | L_ARG_614 | NH2 | L_GLU_605 | OE2 | 2.931 |
| 5W9J | L_LYS_665 | NZ  | L_GLU_666 | OE2 | 2.773 |
| 5W9J | L_LYS_728 | NZ  | L_ASP_726 | OD2 | 2.839 |

Table 744: 5W9J-specific salt bridging networks analysis. In this table, a PDB file is specified with a four-letter PDB ID, except that the names of the PDB files corresponding to the single NMR structural model split from the NMR ensemble is specified with a four-letter PDB ID in addition to a hyphen followed by the single NMR structural model numeric ID, the residue naming scheme is **Chain ID\_residue name\_residue number**,  $\angle ADH$  represents the angle formed by acceptor (A), donor (D) and hydrogen (H) ( $\angle ADH$ ).

| PDB ID | Residue A  | Atom A | Residue B  | Atom B | Distance (Å) |
|--------|------------|--------|------------|--------|--------------|
| 5W9K   | A_ARG.758  | NH1    | J_ASP.740  | OD1    | 3.054        |
| 5W9K   | A_LYS.801  | NZ     | A_ASP.843  | OD1    | 2.794        |
| 5W9K   | A_LYS.801  | NZ     | A_ASP.843  | OD2    | 3.729        |
| 5W9K   | A_LYS.807  | NZ     | A_GLU.818  | OE2    | 3.490        |
| 5W9K   | A_ARG.841  | NH2    | A_ASP.844  | OD2    | 2.781        |
| 5W9K   | A_ARG.847  | NH2    | A_ASP.844  | OD1    | 2.722        |
| 5W9K   | A_ARG.887  | NH2    | A_ASP.892  | OD1    | 2.945        |
| 5W9K   | A_LYS.995  | NZ     | A_ASP.868  | OD1    | 3.265        |
| 5W9K   | A_LYS.995  | NZ     | A_ASP.868  | OD2    | 1.942        |
| 5W9K   | A_HIS.1020 | NE2    | A_ASP.1024 | OD2    | 2.878        |
| 5W9K   | A_LYS.1102 | NZ     | A_GLU.793  | OE1    | 2.948        |
| 5W9K   | A_LYS.1102 | NZ     | A_GLU.793  | OE2    | 3.271        |
| 5W9K   | A_ARG.1113 | NH1    | A_GLU.1105 | OE1    | 3.481        |
| 5W9K   | A_ARG.1113 | NH1    | A_GLU.1105 | OE2    | 2.966        |
| 5W9K   | A_ARG.1113 | NH2    | D_GLU.1105 | OE1    | 3.698        |
| 5W9K   | A_HIS.1138 | NE2    | A_GLU.793  | OE1    | 2.957        |
| 5W9K   | A_LYS.1174 | NZ     | A_GLU.1183 | OE2    | 3.009        |
| 5W9K   | B_LYS.62   | NZ     | B_GLU.46   | OE1    | 2.956        |
| 5W9K   | B_LYS.62   | NZ     | B_GLU.46   | OE2    | 3.368        |
| 5W9K   | B_ARG.66   | NH2    | B_ASP.86   | OD2    | 3.716        |
| 5W9K   | B_ARG.94   | NH2    | B_ASP.101  | OD2    | 2.759        |
| 5W9K   | B_LYS.95   | NZ     | B_ASP.100C | OD2    | 3.608        |
| 5W9K   | C_ARG.61   | NH1    | C_GLU.79   | OE1    | 3.492        |
| 5W9K   | C_LYS.92   | NZ     | C_GLU.93   | OE1    | 2.823        |
| 5W9K   | C_ARG.96   | NH1    | B_ASP.100C | OD2    | 2.822        |
| 5W9K   | C_ARG.96   | NH2    | A_GLU.1183 | OE1    | 3.683        |
| 5W9K   | C_ARG.96   | NH2    | B_ASP.100C | OD2    | 3.420        |
| 5W9K   | C_LYS.103  | NZ     | C_GLU.105  | OE1    | 3.546        |
| 5W9K   | D_LYS.779  | NZ     | D_ASP.771  | OD2    | 2.911        |
| 5W9K   | D_LYS.779  | NZ     | D_GLU.1148 | OE1    | 3.847        |
| 5W9K   | D_LYS.801  | NZ     | D_ASP.843  | OD1    | 3.006        |
| 5W9K   | D_LYS.807  | NZ     | D_GLU.818  | OE1    | 2.844        |
| 5W9K   | D_LYS.807  | NZ     | D_GLU.818  | OE2    | 3.659        |
| 5W9K   | D_ARG.841  | NH2    | D_GLU.1090 | OE1    | 3.013        |
| 5W9K   | D_ARG.841  | NH2    | D_GLU.1090 | OE2    | 3.315        |
| 5W9K   | D_ARG.847  | NH1    | D_ASP.844  | OD1    | 2.982        |
| 5W9K   | D_ARG.847  | NH2    | A_GLU.1017 | OE2    | 3.108        |
| 5W9K   | D_ARG.847  | NH2    | D_ASP.844  | OD1    | 2.962        |
| 5W9K   | D_ARG.887  | NH2    | D_ASP.892  | OD1    | 2.947        |
| 5W9K   | D_HIS.1020 | NE2    | D_ASP.1024 | OD1    | 3.582        |
| 5W9K   | D_HIS.1020 | NE2    | D_ASP.1024 | OD2    | 3.188        |
| 5W9K   | D_ARG.1057 | NH1    | D_ASP.1053 | OD1    | 3.444        |
| 5W9K   | D_LYS.1102 | NZ     | D_GLU.793  | OE1    | 2.980        |
| 5W9K   | D_LYS.1102 | NZ     | D_GLU.793  | OE2    | 3.212        |
| 5W9K   | D_ARG.1113 | NH1    | G_GLU.1105 | OE2    | 3.336        |
| 5W9K   | D_ARG.1113 | NH2    | D_GLU.1105 | OE1    | 3.680        |
| 5W9K   | D_ARG.1113 | NH2    | D_GLU.1105 | OE2    | 3.676        |
| 5W9K   | D_HIS.1138 | NE2    | D_GLU.793  | OE1    | 3.055        |
| 5W9K   | E_LYS.62   | NZ     | E_GLU.46   | OE1    | 2.864        |
| 5W9K   | E_LYS.62   | NZ     | E_GLU.46   | OE2    | 3.729        |
| 5W9K   | E_ARG.66   | NH1    | E_ASP.86   | OD1    | 2.957        |
| 5W9K   | E_ARG.66   | NH1    | E_ASP.86   | OD2    | 3.366        |
| 5W9K   | E_ARG.94   | NH1    | E_ASP.101  | OD2    | 3.378        |
| 5W9K   | E_ARG.94   | NH2    | E_ASP.101  | OD2    | 2.893        |
| 5W9K   | E_LYS.95   | NZ     | E_ASP.100C | OD1    | 3.994        |
| 5W9K   | F_ARG.24   | NH1    | F_ASP.70   | OD1    | 2.969        |
| 5W9K   | F_ARG.24   | NH1    | F_ASP.70   | OD2    | 3.751        |

|      |            |     |            |     |       |
|------|------------|-----|------------|-----|-------|
| 5W9K | F_ARG_61   | NH1 | F_GLU_79   | OE1 | 3.263 |
| 5W9K | F_ARG_61   | NH1 | F_GLU_79   | OE2 | 3.365 |
| 5W9K | F_ARG_61   | NH2 | F_GLU_79   | OE2 | 3.136 |
| 5W9K | F_ARG_96   | NH1 | E_ASP_100C | OD2 | 2.856 |
| 5W9K | F_ARG_96   | NH2 | D_GLU_1183 | OE2 | 3.059 |
| 5W9K | F_ARG_96   | NH2 | E_ASP_100C | OD2 | 3.317 |
| 5W9K | G_ARG_758  | NH1 | L_ASP_740  | OD1 | 3.028 |
| 5W9K | G_ARG_758  | NH2 | L_ASP_740  | OD1 | 3.483 |
| 5W9K | G_LYS_801  | NZ  | G_ASP_843  | OD1 | 2.854 |
| 5W9K | G_LYS_801  | NZ  | G_ASP_843  | OD2 | 3.469 |
| 5W9K | G_LYS_816  | NZ  | G_ASP_1064 | OD2 | 3.838 |
| 5W9K | G_ARG_847  | NH1 | K_ASP_726  | OD2 | 3.336 |
| 5W9K | G_ARG_847  | NH2 | G_ASP_844  | OD1 | 2.739 |
| 5W9K | G_ARG_887  | NH2 | G_ASP_892  | OD1 | 2.989 |
| 5W9K | G_ARG_887  | NH2 | G_ASP_892  | OD2 | 3.967 |
| 5W9K | G_HIS_1020 | NE2 | G_ASP_1024 | OD2 | 2.997 |
| 5W9K | G_LYS_1035 | NZ  | G_GLU_1039 | OE2 | 2.927 |
| 5W9K | G_ARG_1057 | NH1 | G_ASP_1053 | OD2 | 3.710 |
| 5W9K | G_ARG_1057 | NH2 | G_ASP_1053 | OD1 | 3.602 |
| 5W9K | G_ARG_1057 | NH2 | G_ASP_1053 | OD2 | 3.839 |
| 5W9K | G_LYS_1102 | NZ  | G_GLU_793  | OE1 | 2.948 |
| 5W9K | G_LYS_1102 | NZ  | G_GLU_793  | OE2 | 3.330 |
| 5W9K | G_ARG_1113 | NH1 | G_GLU_1105 | OE1 | 3.508 |
| 5W9K | G_ARG_1113 | NH1 | G_GLU_1105 | OE2 | 2.905 |
| 5W9K | G_ARG_1113 | NH2 | A_GLU_1105 | OE2 | 3.565 |
| 5W9K | G_HIS_1138 | NE2 | G_GLU_793  | OE1 | 3.027 |
| 5W9K | G_LYS_1174 | NZ  | G_GLU_1183 | OE1 | 3.901 |
| 5W9K | H_LYS_62   | NZ  | H_GLU_46   | OE1 | 3.402 |
| 5W9K | H_LYS_62   | NZ  | H_GLU_46   | OE2 | 2.946 |
| 5W9K | H_ARG_66   | NH2 | H_ASP_86   | OD2 | 2.876 |
| 5W9K | H_ARG_94   | NH2 | H_ASP_101  | OD2 | 2.768 |
| 5W9K | H_LYS_95   | NZ  | H_ASP_100C | OD2 | 3.668 |
| 5W9K | I_ARG_24   | NH1 | I_ASP_70   | OD1 | 3.017 |
| 5W9K | I_ARG_24   | NH2 | I_ASP_70   | OD1 | 3.829 |
| 5W9K | I_LYS_92   | NZ  | I_GLU_93   | OE1 | 2.854 |
| 5W9K | I_ARG_96   | NH1 | H_ASP_100C | OD2 | 2.828 |
| 5W9K | I_ARG_96   | NH2 | G_GLU_1183 | OE2 | 3.651 |
| 5W9K | I_ARG_96   | NH2 | H_ASP_100C | OD2 | 3.553 |
| 5W9K | I_LYS_103  | NZ  | I_GLU_105  | OE1 | 3.522 |
| 5W9K | J_HIS_81   | ND1 | J_ASP_80   | OD1 | 3.968 |
| 5W9K | J_LYS_99   | NZ  | J_GLU_32   | OE1 | 2.810 |
| 5W9K | J_LYS_110  | NZ  | J_ASP_83   | OD2 | 2.940 |
| 5W9K | J_LYS_142  | NZ  | J_GLU_247  | OE1 | 3.288 |
| 5W9K | J_LYS_142  | NZ  | J_GLU_249  | OE2 | 2.849 |
| 5W9K | J_ARG_190  | NH1 | J_ASP_24   | OD1 | 3.560 |
| 5W9K | J_ARG_190  | NH1 | J_ASP_24   | OD2 | 3.246 |
| 5W9K | J_ARG_190  | NH2 | J_ASP_24   | OD1 | 2.727 |
| 5W9K | J_ARG_190  | NH2 | J_ASP_24   | OD2 | 3.757 |
| 5W9K | J_HIS_194  | NE2 | J_GLU_32   | OE1 | 3.514 |
| 5W9K | J_ARG_235  | NH1 | J_GLU_188  | OE1 | 2.902 |
| 5W9K | J_ARG_235  | NH1 | J_GLU_188  | OE2 | 3.519 |
| 5W9K | J_ARG_334  | NH2 | J_ASP_330  | OD1 | 3.961 |
| 5W9K | J_ARG_334  | NH2 | J_ASP_330  | OD2 | 3.087 |
| 5W9K | J_ARG_335  | NH2 | J_ASP_326  | OD2 | 2.876 |
| 5W9K | J_ARG_401  | NH2 | J_ASP_444  | OD1 | 3.806 |
| 5W9K | J_ARG_401  | NH2 | J_ASP_444  | OD2 | 3.280 |
| 5W9K | J_LYS_502  | NZ  | J_GLU_513  | OE2 | 3.504 |
| 5W9K | J_ARG_505  | NH1 | J_GLU_549  | OE1 | 3.692 |

|      |           |     |           |     |       |
|------|-----------|-----|-----------|-----|-------|
| 5W9K | J_ARG.629 | NH1 | J_GLU.376 | OE2 | 3.955 |
| 5W9K | J_LYS.665 | NZ  | J_ASP.355 | OD2 | 3.949 |
| 5W9K | J_HIS.681 | NE2 | D_ASP.910 | OD1 | 2.963 |
| 5W9K | J_ARG.694 | NH1 | J_ASP.343 | OD2 | 3.085 |
| 5W9K | J_ARG.694 | NH2 | J_ASP.343 | OD2 | 2.916 |
| 5W9K | J_ARG.700 | NH2 | A_GLU.756 | OE2 | 2.841 |
| 5W9K | J_LYS.728 | NZ  | J_GLU.666 | OE1 | 3.931 |
| 5W9K | J_LYS.728 | NZ  | J_GLU.666 | OE2 | 3.368 |
| 5W9K | K_HIS.81  | ND1 | K_ASP.80  | OD1 | 3.713 |
| 5W9K | K_LYS.99  | NZ  | K_GLU.32  | OE1 | 2.842 |
| 5W9K | K_LYS.142 | NZ  | K_GLU.252 | OE2 | 3.341 |
| 5W9K | K_ARG.190 | NH1 | K_GLU.188 | OE1 | 2.901 |
| 5W9K | K_HIS.194 | NE2 | K_GLU.32  | OE1 | 3.703 |
| 5W9K | K_ARG.235 | NH1 | K_GLU.188 | OE2 | 3.498 |
| 5W9K | K_ARG.335 | NH2 | K_ASP.326 | OD2 | 2.914 |
| 5W9K | K_ARG.401 | NH2 | K_ASP.444 | OD1 | 3.980 |
| 5W9K | K_ARG.401 | NH2 | K_ASP.444 | OD2 | 3.862 |
| 5W9K | K_LYS.502 | NZ  | K_GLU.513 | OE1 | 2.884 |
| 5W9K | K_LYS.502 | NZ  | K_GLU.513 | OE2 | 3.989 |
| 5W9K | K_LYS.543 | NZ  | K_GLU.549 | OE1 | 3.288 |
| 5W9K | K_LYS.543 | NZ  | K_GLU.549 | OE2 | 3.352 |
| 5W9K | K_LYS.587 | NZ  | K_GLU.382 | OE2 | 2.948 |
| 5W9K | K_LYS.665 | NZ  | K_GLU.666 | OE2 | 2.821 |
| 5W9K | K_LYS.668 | NZ  | K_ASP.355 | OD1 | 3.287 |
| 5W9K | K_LYS.668 | NZ  | K_ASP.355 | OD2 | 3.232 |
| 5W9K | K_LYS.728 | NZ  | K_ASP.726 | OD2 | 2.912 |
| 5W9K | L_LYS.27  | NZ  | L_GLU.230 | OE2 | 3.262 |
| 5W9K | L_HIS.81  | ND1 | L_ASP.80  | OD1 | 3.835 |
| 5W9K | L_LYS.99  | NZ  | L_GLU.32  | OE2 | 3.537 |
| 5W9K | L_LYS.99  | NZ  | L_ASP.34  | OD2 | 3.570 |
| 5W9K | L_LYS.110 | NZ  | L_ASP.83  | OD2 | 2.905 |
| 5W9K | L_ARG.119 | NH1 | L_ASP.54  | OD2 | 3.602 |
| 5W9K | L_LYS.142 | NZ  | L_GLU.252 | OE2 | 3.115 |
| 5W9K | L_ARG.190 | NH1 | L_ASP.24  | OD2 | 3.340 |
| 5W9K | L_ARG.190 | NH2 | L_GLU.188 | OE2 | 3.335 |
| 5W9K | L_HIS.194 | NE2 | L_GLU.32  | OE1 | 3.901 |
| 5W9K | L_ARG.235 | NH1 | L_GLU.188 | OE1 | 2.872 |
| 5W9K | L_ARG.269 | NH1 | L_GLU.252 | OE1 | 2.853 |
| 5W9K | L_ARG.334 | NH2 | L_ASP.330 | OD1 | 3.920 |
| 5W9K | L_ARG.334 | NH2 | L_ASP.330 | OD2 | 3.026 |
| 5W9K | L_ARG.335 | NH2 | L_ASP.326 | OD2 | 2.940 |
| 5W9K | L_ARG.401 | NH2 | L_ASP.444 | OD1 | 3.708 |
| 5W9K | L_ARG.401 | NH2 | L_ASP.444 | OD2 | 3.216 |
| 5W9K | L_LYS.496 | NZ  | L_GLU.536 | OE1 | 2.998 |
| 5W9K | L_LYS.496 | NZ  | L_GLU.536 | OE2 | 3.594 |
| 5W9K | L_LYS.502 | NZ  | L_GLU.513 | OE2 | 3.474 |
| 5W9K | L_ARG.505 | NH1 | L_GLU.549 | OE1 | 2.874 |
| 5W9K | L_ARG.629 | NH1 | L_GLU.376 | OE2 | 3.648 |
| 5W9K | L_ARG.629 | NH1 | L_ASP.644 | OD1 | 2.887 |
| 5W9K | L_ARG.629 | NH1 | L_ASP.644 | OD2 | 3.878 |
| 5W9K | L_ARG.629 | NH2 | L_ASP.644 | OD1 | 2.829 |
| 5W9K | L_ARG.629 | NH2 | L_ASP.644 | OD2 | 3.918 |
| 5W9K | L_HIS.681 | NE2 | A_ASP.910 | OD1 | 3.027 |
| 5W9K | L_HIS.681 | NE2 | A_ASP.910 | OD2 | 3.875 |
| 5W9K | L_ARG.691 | NH2 | L_ASP.343 | OD1 | 3.689 |
| 5W9K | L_ARG.694 | NH1 | L_ASP.343 | OD2 | 3.049 |
| 5W9K | L_ARG.694 | NH2 | L_ASP.343 | OD2 | 2.912 |
| 5W9K | L_ARG.700 | NH2 | G_GLU.756 | OE2 | 2.893 |

|      |           |    |           |     |       |
|------|-----------|----|-----------|-----|-------|
| 5W9K | L.LYS.728 | NZ | L.ASP.726 | OD2 | 2.874 |
|------|-----------|----|-----------|-----|-------|

Table 745: 5W9K-specific salt bridging networks analysis. In this table, a PDB file is specified with a four-letter PDB ID, except that the names of the PDB files corresponding to the single NMR structural model split from the NMR ensemble is specified with a four-letter PDB ID in addition to a hyphen followed by the single NMR structural model numeric ID, the residue naming scheme is **Chain ID\_residue name\_residue number**,  $\angle ADH$  represents the angle formed by acceptor (A), donor (D) and hydrogen (H) ( $\angle ADH$ ).



| PDB ID | Residue A  | Atom A | Residue B  | Atom B | Distance (Å) |
|--------|------------|--------|------------|--------|--------------|
| 5W9L   | A_ARG.758  | NH1    | B_ASP.740  | OD1    | 2.964        |
| 5W9L   | A_ARG.758  | NH2    | B_ASP.740  | OD1    | 3.858        |
| 5W9L   | A_LYS.801  | NZ     | A_ASP.843  | OD1    | 2.802        |
| 5W9L   | A_LYS.801  | NZ     | A_ASP.843  | OD2    | 3.510        |
| 5W9L   | A_LYS.807  | NZ     | A_GLU.818  | OE1    | 2.932        |
| 5W9L   | A_LYS.807  | NZ     | A_GLU.818  | OE2    | 3.202        |
| 5W9L   | A_ARG.841  | NH1    | A_ASP.844  | OD2    | 3.517        |
| 5W9L   | A_ARG.847  | NH2    | A_ASP.844  | OD1    | 2.713        |
| 5W9L   | A_ARG.887  | NH2    | A_ASP.892  | OD1    | 2.862        |
| 5W9L   | A_ARG.887  | NH2    | A_ASP.892  | OD2    | 3.937        |
| 5W9L   | A_HIS.1020 | NE2    | A_ASP.1024 | OD2    | 2.890        |
| 5W9L   | A_LYS.1021 | NZ     | A_GLU.793  | OE1    | 3.715        |
| 5W9L   | A_LYS.1021 | NZ     | A_GLU.793  | OE2    | 2.898        |
| 5W9L   | A_ARG.1057 | NH2    | A_ASP.1053 | OD1    | 3.565        |
| 5W9L   | A_ARG.1057 | NH2    | A_ASP.1053 | OD2    | 2.794        |
| 5W9L   | A_ARG.1113 | NH1    | A_GLU.1105 | OE1    | 3.356        |
| 5W9L   | A_ARG.1113 | NH1    | A_GLU.1105 | OE2    | 2.777        |
| 5W9L   | A_ARG.1113 | NH2    | D_GLU.1105 | OE1    | 3.448        |
| 5W9L   | A_ARG.1113 | NH2    | D_GLU.1105 | OE2    | 2.879        |
| 5W9L   | D_LYS.779  | NZ     | D_ASP.771  | OD2    | 2.899        |
| 5W9L   | D_LYS.801  | NZ     | D_ASP.843  | OD1    | 2.808        |
| 5W9L   | D_LYS.801  | NZ     | D_ASP.843  | OD2    | 3.150        |
| 5W9L   | D_LYS.807  | NZ     | D_GLU.818  | OE1    | 3.544        |
| 5W9L   | D_LYS.807  | NZ     | D_GLU.818  | OE2    | 2.846        |
| 5W9L   | D_ARG.841  | NH1    | D_GLU.1090 | OE1    | 2.693        |
| 5W9L   | D_ARG.841  | NH1    | D_GLU.1090 | OE2    | 3.687        |
| 5W9L   | D_ARG.841  | NH2    | D_GLU.1090 | OE1    | 3.508        |
| 5W9L   | D_ARG.841  | NH2    | D_GLU.1090 | OE2    | 3.018        |
| 5W9L   | D_ARG.847  | NH1    | D_ASP.844  | OD1    | 3.540        |
| 5W9L   | D_ARG.847  | NH2    | D_ASP.844  | OD1    | 2.650        |
| 5W9L   | D_ARG.887  | NH2    | D_ASP.892  | OD1    | 2.968        |
| 5W9L   | D_HIS.1020 | NE2    | D_ASP.1024 | OD1    | 3.581        |
| 5W9L   | D_HIS.1020 | NE2    | D_ASP.1024 | OD2    | 2.693        |
| 5W9L   | D_LYS.1102 | NZ     | D_GLU.793  | OE1    | 2.889        |
| 5W9L   | D_LYS.1102 | NZ     | D_GLU.793  | OE2    | 3.224        |
| 5W9L   | D_LYS.1174 | NZ     | D_GLU.1183 | OE1    | 2.743        |
| 5W9L   | E_LYS.62   | NZ     | E_GLU.46   | OE2    | 2.839        |
| 5W9L   | E_ARG.66   | NH1    | E_ASP.86   | OD1    | 2.896        |
| 5W9L   | E_ARG.66   | NH1    | E_ASP.86   | OD2    | 3.239        |
| 5W9L   | E_ARG.66   | NH2    | E_ASP.86   | OD1    | 3.963        |
| 5W9L   | E_ARG.94   | NH1    | E_ASP.101  | OD2    | 2.725        |
| 5W9L   | E_LYS.95   | NZ     | E_ASP.100C | OD1    | 3.912        |
| 5W9L   | F_ARG.61   | NH1    | F_ASP.82   | OD1    | 3.203        |
| 5W9L   | F_ARG.61   | NH1    | F_ASP.82   | OD2    | 3.638        |
| 5W9L   | F_ARG.61   | NH2    | F_GLU.79   | OE2    | 3.934        |
| 5W9L   | F_ARG.61   | NH2    | F_ASP.82   | OD1    | 3.694        |
| 5W9L   | F_ARG.61   | NH2    | F_ASP.82   | OD2    | 2.714        |
| 5W9L   | F_LYS.92   | NZ     | F_GLU.93   | OE1    | 2.893        |
| 5W9L   | F_ARG.96   | NH1    | E_ASP.100C | OD2    | 3.246        |
| 5W9L   | F_ARG.96   | NH2    | D_GLU.1183 | OE2    | 2.643        |
| 5W9L   | F_ARG.96   | NH2    | E_ASP.100C | OD2    | 3.370        |
| 5W9L   | G_ARG.758  | NH1    | J_ASP.740  | OD1    | 2.859        |
| 5W9L   | G_ARG.758  | NH2    | J_ASP.740  | OD1    | 3.792        |
| 5W9L   | G_LYS.801  | NZ     | G_ASP.843  | OD1    | 2.779        |
| 5W9L   | G_LYS.801  | NZ     | G_ASP.843  | OD2    | 2.846        |
| 5W9L   | G_LYS.807  | NZ     | G_GLU.818  | OE1    | 2.853        |
| 5W9L   | G_LYS.807  | NZ     | G_GLU.818  | OE2    | 3.467        |

|      |            |     |            |     |       |
|------|------------|-----|------------|-----|-------|
| 5W9L | G_ARG.841  | NH1 | G_GLU.1090 | OE1 | 3.667 |
| 5W9L | G_ARG.841  | NH1 | G_GLU.1090 | OE2 | 2.809 |
| 5W9L | G_ARG.841  | NH2 | G_GLU.1090 | OE1 | 2.982 |
| 5W9L | G_ARG.841  | NH2 | G_GLU.1090 | OE2 | 3.598 |
| 5W9L | G_ARG.847  | NH1 | G_ASP.844  | OD1 | 3.281 |
| 5W9L | G_ARG.847  | NH2 | G_ASP.844  | OD1 | 2.692 |
| 5W9L | G_ARG.887  | NH2 | G_ASP.892  | OD1 | 2.920 |
| 5W9L | G_HIS.1020 | NE2 | G_ASP.1024 | OD1 | 3.996 |
| 5W9L | G_HIS.1020 | NE2 | G_ASP.1024 | OD2 | 2.966 |
| 5W9L | G_LYS.1021 | NZ  | G_GLU.793  | OE1 | 3.707 |
| 5W9L | G_LYS.1021 | NZ  | G_GLU.793  | OE2 | 2.887 |
| 5W9L | G_LYS.1035 | NZ  | G_GLU.1039 | OE2 | 2.763 |
| 5W9L | G_LYS.1174 | NZ  | G_GLU.1183 | OE2 | 2.797 |
| 5W9L | G_ARG.1179 | NH2 | H_ASP.31   | OD1 | 2.753 |
| 5W9L | H_LYS.19   | NZ  | H_GLU.81   | OE1 | 3.889 |
| 5W9L | H_LYS.38   | NZ  | H_GLU.46   | OE1 | 2.832 |
| 5W9L | H_LYS.62   | NZ  | H_GLU.46   | OE2 | 3.395 |
| 5W9L | H_ARG.66   | NH1 | H_ASP.86   | OD1 | 3.754 |
| 5W9L | H_ARG.66   | NH1 | H_ASP.86   | OD2 | 3.742 |
| 5W9L | H_ARG.66   | NH2 | H_ASP.86   | OD1 | 3.914 |
| 5W9L | H_ARG.66   | NH2 | H_ASP.86   | OD2 | 2.831 |
| 5W9L | H_ARG.94   | NH2 | H_ASP.101  | OD2 | 2.725 |
| 5W9L | H_LYS.95   | NZ  | H_ASP.100C | OD1 | 3.863 |
| 5W9L | I_ARG.24   | NH1 | I_ASP.70   | OD1 | 2.847 |
| 5W9L | I_ARG.24   | NH1 | I_ASP.70   | OD2 | 3.591 |
| 5W9L | I_ARG.61   | NH1 | I_GLU.79   | OE2 | 2.866 |
| 5W9L | I_ARG.61   | NH1 | I_ASP.82   | OD1 | 3.906 |
| 5W9L | I_ARG.61   | NH1 | I_ASP.82   | OD2 | 2.956 |
| 5W9L | I_ARG.61   | NH2 | I_GLU.79   | OE2 | 2.901 |
| 5W9L | I_LYS.92   | NZ  | I_GLU.93   | OE1 | 2.785 |
| 5W9L | I_ARG.96   | NH1 | H_ASP.100C | OD2 | 2.945 |
| 5W9L | I_ARG.96   | NH2 | H_ASP.100C | OD2 | 2.982 |
| 5W9L | B_LYS.27   | NZ  | B_GLU.230  | OE2 | 3.782 |
| 5W9L | B_LYS.99   | NZ  | B_GLU.32   | OE1 | 2.878 |
| 5W9L | B_LYS.110  | NZ  | B_ASP.83   | OD2 | 2.826 |
| 5W9L | B_ARG.119  | NH2 | B_ASP.54   | OD2 | 3.988 |
| 5W9L | B_LYS.142  | NZ  | B_GLU.252  | OE1 | 2.955 |
| 5W9L | B_HIS.194  | NE2 | B_GLU.32   | OE1 | 3.596 |
| 5W9L | B_ARG.235  | NH1 | B_ASP.24   | OD1 | 3.631 |
| 5W9L | B_ARG.235  | NH1 | B_ASP.24   | OD2 | 2.911 |
| 5W9L | B_ARG.235  | NH2 | B_ASP.24   | OD2 | 3.191 |
| 5W9L | B_ARG.235  | NH2 | B_GLU.188  | OE1 | 3.770 |
| 5W9L | B_ARG.235  | NH2 | B_GLU.188  | OE2 | 2.915 |
| 5W9L | B_ARG.335  | NH2 | B_ASP.326  | OD2 | 2.950 |
| 5W9L | B_ARG.401  | NH2 | B_ASP.444  | OD1 | 3.583 |
| 5W9L | B_ARG.401  | NH2 | B_ASP.444  | OD2 | 2.888 |
| 5W9L | B_LYS.496  | NZ  | B_GLU.536  | OE1 | 3.232 |
| 5W9L | B_LYS.496  | NZ  | B_GLU.536  | OE2 | 3.655 |
| 5W9L | B_LYS.502  | NZ  | B_GLU.513  | OE2 | 2.865 |
| 5W9L | B_ARG.614  | NH2 | B_GLU.605  | OE2 | 2.923 |
| 5W9L | B_ARG.629  | NH1 | B_GLU.376  | OE1 | 3.464 |
| 5W9L | B_ARG.629  | NH1 | B_ASP.644  | OD1 | 2.816 |
| 5W9L | B_ARG.629  | NH2 | B_ASP.644  | OD1 | 2.786 |
| 5W9L | B_HIS.681  | NE2 | D_ASP.910  | OD1 | 2.803 |
| 5W9L | B_HIS.681  | NE2 | D_ASP.910  | OD2 | 3.795 |
| 5W9L | B_ARG.691  | NH1 | B_ASP.343  | OD2 | 3.571 |
| 5W9L | B_ARG.700  | NH1 | A_GLU.756  | OE2 | 2.893 |
| 5W9L | B_LYS.728  | NZ  | B_ASP.726  | OD2 | 2.978 |

|      |           |     |           |     |       |
|------|-----------|-----|-----------|-----|-------|
| 5W9L | C_HIS_81  | ND1 | C_ASP_80  | OD1 | 3.849 |
| 5W9L | C_LYS_99  | NZ  | C_GLU_32  | OE1 | 2.902 |
| 5W9L | C_LYS_99  | NZ  | C_GLU_32  | OE2 | 3.891 |
| 5W9L | C_LYS_110 | NZ  | C_ASP_83  | OD2 | 2.851 |
| 5W9L | C_LYS_142 | NZ  | C_GLU_252 | OE1 | 2.960 |
| 5W9L | C_ARG_181 | NH1 | C_ASP_174 | OD2 | 3.375 |
| 5W9L | C_HIS_208 | ND1 | C_ASP_213 | OD2 | 3.867 |
| 5W9L | C_ARG_235 | NH1 | C_ASP_24  | OD1 | 3.815 |
| 5W9L | C_ARG_235 | NH1 | C_ASP_24  | OD2 | 3.367 |
| 5W9L | C_ARG_235 | NH2 | C_ASP_24  | OD2 | 2.948 |
| 5W9L | C_ARG_235 | NH2 | C_GLU_188 | OE1 | 3.081 |
| 5W9L | C_ARG_235 | NH2 | C_GLU_188 | OE2 | 3.858 |
| 5W9L | C_ARG_269 | NH1 | C_GLU_252 | OE2 | 3.121 |
| 5W9L | C_ARG_334 | NH2 | C_ASP_330 | OD2 | 3.055 |
| 5W9L | C_ARG_335 | NH2 | C_ASP_326 | OD2 | 2.939 |
| 5W9L | C_ARG_401 | NH2 | C_ASP_444 | OD1 | 3.945 |
| 5W9L | C_ARG_401 | NH2 | C_ASP_444 | OD2 | 3.806 |
| 5W9L | C_LYS_502 | NZ  | C_GLU_513 | OE2 | 2.769 |
| 5W9L | C_LYS_543 | NZ  | C_GLU_549 | OE1 | 3.142 |
| 5W9L | C_LYS_543 | NZ  | C_GLU_549 | OE2 | 2.917 |
| 5W9L | C_LYS_587 | NZ  | C_GLU_382 | OE2 | 2.765 |
| 5W9L | C_ARG_614 | NH2 | C_GLU_605 | OE2 | 2.923 |
| 5W9L | C_ARG_691 | NH2 | C_ASP_343 | OD1 | 3.440 |
| 5W9L | C_LYS_728 | NZ  | C_ASP_726 | OD2 | 2.825 |
| 5W9L | J_LYS_99  | NZ  | J_GLU_32  | OE1 | 2.885 |
| 5W9L | J_LYS_110 | NZ  | J_ASP_83  | OD2 | 2.834 |
| 5W9L | J_LYS_110 | NZ  | J_ASP_108 | OD2 | 3.969 |
| 5W9L | J_ARG_119 | NH2 | J_ASP_54  | OD2 | 3.754 |
| 5W9L | J_LYS_142 | NZ  | J_GLU_252 | OE1 | 3.881 |
| 5W9L | J_ARG_181 | NH1 | J_ASP_174 | OD2 | 3.154 |
| 5W9L | J_ARG_190 | NH1 | J_ASP_24  | OD1 | 3.142 |
| 5W9L | J_ARG_190 | NH2 | J_ASP_24  | OD1 | 2.772 |
| 5W9L | J_HIS_194 | NE2 | J_GLU_32  | OE1 | 3.916 |
| 5W9L | J_ARG_235 | NH2 | J_GLU_188 | OE1 | 3.860 |
| 5W9L | J_ARG_235 | NH2 | J_GLU_188 | OE2 | 2.919 |
| 5W9L | J_ARG_334 | NH2 | J_ASP_330 | OD2 | 3.039 |
| 5W9L | J_ARG_335 | NH2 | J_ASP_326 | OD2 | 2.959 |
| 5W9L | J_ARG_401 | NH2 | J_ASP_444 | OD1 | 3.680 |
| 5W9L | J_ARG_401 | NH2 | J_ASP_444 | OD2 | 3.147 |
| 5W9L | J_LYS_413 | NZ  | J_GLU_382 | OE1 | 3.990 |
| 5W9L | J_LYS_413 | NZ  | J_GLU_382 | OE2 | 2.824 |
| 5W9L | J_LYS_502 | NZ  | J_GLU_513 | OE1 | 3.965 |
| 5W9L | J_LYS_502 | NZ  | J_GLU_513 | OE2 | 2.807 |
| 5W9L | J_ARG_511 | NH2 | J_ASP_509 | OD2 | 3.938 |
| 5W9L | J_ARG_614 | NH2 | J_GLU_605 | OE1 | 2.958 |
| 5W9L | J_ARG_614 | NH2 | J_GLU_605 | OE2 | 3.605 |
| 5W9L | J_ARG_629 | NH1 | J_GLU_376 | OE1 | 3.967 |
| 5W9L | J_ARG_629 | NH1 | J_ASP_644 | OD1 | 2.719 |
| 5W9L | J_ARG_629 | NH2 | J_ASP_644 | OD1 | 2.638 |
| 5W9L | J_ARG_629 | NH2 | J_ASP_644 | OD2 | 3.881 |
| 5W9L | J_LYS_665 | NZ  | J_GLU_666 | OE2 | 2.675 |
| 5W9L | J_HIS_681 | NE2 | A_ASP_910 | OD1 | 2.810 |
| 5W9L | J_HIS_681 | NE2 | A_ASP_910 | OD2 | 3.815 |
| 5W9L | J_LYS_728 | NZ  | J_ASP_726 | OD2 | 2.753 |

---

Table 746: 5W9L-specific salt bridging networks analysis. In this table, a PDB file is specified with a four-letter PDB ID, except that the names of the PDB files corresponding to the single NMR structural model split from the NMR ensemble is specified with a four-letter PDB ID in addition to a hyphen followed by the single NMR structural model numeric ID, the residue naming scheme is **Chain ID\_residue name\_residue number**,  $\angle ADH$  represents the angle formed by acceptor (A), donor (D) and hydrogen (H) ( $\angle ADH$ ).

| PDB ID | Residue A  | Atom A | Residue B  | Atom B | Distance (Å) |
|--------|------------|--------|------------|--------|--------------|
| 5W9M   | A_ARG.758  | NH1    | E_ASP.740  | OD1    | 2.862        |
| 5W9M   | A_ARG.758  | NH2    | E_ASP.740  | OD1    | 2.970        |
| 5W9M   | A_LYS.801  | NZ     | A_ASP.843  | OD1    | 2.883        |
| 5W9M   | A_LYS.801  | NZ     | A_ASP.843  | OD2    | 3.678        |
| 5W9M   | A_ARG.841  | NH1    | A_GLU.1090 | OE1    | 3.685        |
| 5W9M   | A_ARG.841  | NH1    | A_GLU.1090 | OE2    | 2.836        |
| 5W9M   | A_ARG.841  | NH2    | A_GLU.1090 | OE1    | 2.984        |
| 5W9M   | A_ARG.841  | NH2    | A_GLU.1090 | OE2    | 3.616        |
| 5W9M   | A_ARG.847  | NH1    | J_ASP.726  | OD2    | 3.850        |
| 5W9M   | A_ARG.847  | NH2    | A_ASP.844  | OD1    | 2.786        |
| 5W9M   | A_ARG.887  | NH2    | A_ASP.892  | OD1    | 2.933        |
| 5W9M   | A_HIS.1020 | NE2    | A_ASP.1024 | OD2    | 3.018        |
| 5W9M   | A_LYS.1035 | NZ     | A_GLU.1039 | OE2    | 2.904        |
| 5W9M   | A_ARG.1057 | NH2    | A_ASP.1053 | OD1    | 2.900        |
| 5W9M   | A_ARG.1057 | NH2    | A_ASP.1053 | OD2    | 3.314        |
| 5W9M   | A_LYS.1102 | NZ     | A_GLU.793  | OE1    | 2.817        |
| 5W9M   | A_LYS.1102 | NZ     | A_GLU.793  | OE2    | 3.330        |
| 5W9M   | A_ARG.1113 | NH1    | A_GLU.1105 | OE1    | 2.883        |
| 5W9M   | A_ARG.1113 | NH1    | A_GLU.1105 | OE2    | 3.760        |
| 5W9M   | A_ARG.1113 | NH2    | A_GLU.1105 | OE1    | 2.893        |
| 5W9M   | A_HIS.1138 | NE2    | A_GLU.793  | OE2    | 2.874        |
| 5W9M   | A_LYS.1174 | NZ     | A_GLU.1183 | OE1    | 2.780        |
| 5W9M   | B_LYS.38   | NZ     | B_GLU.46   | OE2    | 3.812        |
| 5W9M   | B_LYS.62   | NZ     | B_GLU.46   | OE1    | 2.808        |
| 5W9M   | B_LYS.62   | NZ     | B_GLU.46   | OE2    | 3.864        |
| 5W9M   | B_ARG.66   | NH2    | B_ASP.86   | OD1    | 2.831        |
| 5W9M   | B_ARG.66   | NH2    | B_ASP.86   | OD2    | 3.198        |
| 5W9M   | C_ARG.61   | NH1    | C_GLU.79   | OE1    | 2.869        |
| 5W9M   | C_ARG.96   | NH1    | B_ASP.100C | OD2    | 2.894        |
| 5W9M   | C_ARG.96   | NH2    | A_GLU.1183 | OE2    | 2.938        |
| 5W9M   | C_ARG.96   | NH2    | B_ASP.100C | OD2    | 2.940        |
| 5W9M   | C_LYS.103  | NZ     | C_GLU.105  | OE1    | 3.072        |
| 5W9M   | D_LYS.779  | NZ     | D_GLU.1148 | OE1    | 2.693        |
| 5W9M   | D_LYS.801  | NZ     | D_ASP.843  | OD1    | 2.885        |
| 5W9M   | D_LYS.801  | NZ     | D_ASP.843  | OD2    | 3.585        |
| 5W9M   | D_LYS.816  | NZ     | D_ASP.1064 | OD1    | 3.628        |
| 5W9M   | D_LYS.816  | NZ     | D_ASP.1064 | OD2    | 3.861        |
| 5W9M   | D_ARG.841  | NH2    | D_GLU.1090 | OE1    | 3.446        |
| 5W9M   | D_ARG.841  | NH2    | D_GLU.1090 | OE2    | 2.981        |
| 5W9M   | D_ARG.847  | NH1    | A_GLU.1017 | OE2    | 3.300        |
| 5W9M   | D_ARG.847  | NH2    | A_GLU.1017 | OE2    | 3.532        |
| 5W9M   | D_ARG.847  | NH2    | D_ASP.844  | OD1    | 2.832        |
| 5W9M   | D_ARG.887  | NH2    | D_ASP.892  | OD1    | 2.922        |
| 5W9M   | D_LYS.995  | NZ     | D_ASP.868  | OD1    | 3.932        |
| 5W9M   | D_LYS.995  | NZ     | D_ASP.868  | OD2    | 2.628        |
| 5W9M   | D_HIS.1020 | NE2    | D_ASP.1024 | OD1    | 3.644        |
| 5W9M   | D_HIS.1020 | NE2    | D_ASP.1024 | OD2    | 3.049        |
| 5W9M   | D_LYS.1102 | NZ     | D_GLU.793  | OE1    | 3.825        |
| 5W9M   | D_ARG.1113 | NH1    | D_GLU.1105 | OE1    | 2.819        |
| 5W9M   | D_ARG.1113 | NH1    | D_GLU.1105 | OE2    | 3.747        |
| 5W9M   | D_ARG.1113 | NH2    | D_GLU.1105 | OE1    | 3.533        |
| 5W9M   | D_ARG.1113 | NH2    | D_GLU.1105 | OE2    | 2.987        |
| 5W9M   | D_HIS.1138 | NE2    | D_GLU.793  | OE2    | 2.837        |
| 5W9M   | D_LYS.1174 | NZ     | D_GLU.1183 | OE2    | 2.795        |
| 5W9M   | G_ARG.758  | NH1    | J_ASP.740  | OD1    | 2.816        |
| 5W9M   | G_ARG.758  | NH2    | J_ASP.740  | OD1    | 3.407        |
| 5W9M   | G_LYS.779  | NZ     | G_ASP.771  | OD2    | 2.927        |

|      |            |     |            |     |       |
|------|------------|-----|------------|-----|-------|
| 5W9M | G_LYS_779  | NZ  | G_GLU_1148 | OE1 | 3.707 |
| 5W9M | G_LYS_801  | NZ  | G_ASP_843  | OD1 | 2.888 |
| 5W9M | G_LYS_801  | NZ  | G_ASP_843  | OD2 | 3.840 |
| 5W9M | G_LYS_807  | NZ  | G_GLU_818  | OE2 | 3.982 |
| 5W9M | G_ARG_841  | NH1 | G_GLU_1090 | OE1 | 3.659 |
| 5W9M | G_ARG_841  | NH1 | G_GLU_1090 | OE2 | 2.832 |
| 5W9M | G_ARG_841  | NH2 | G_GLU_1090 | OE1 | 2.944 |
| 5W9M | G_ARG_841  | NH2 | G_GLU_1090 | OE2 | 3.615 |
| 5W9M | G_ARG_847  | NH2 | G_ASP_844  | OD1 | 2.704 |
| 5W9M | G_ARG_887  | NH2 | G_ASP_892  | OD1 | 2.967 |
| 5W9M | G_HIS_1020 | NE2 | G_ASP_1024 | OD1 | 3.635 |
| 5W9M | G_HIS_1020 | NE2 | G_ASP_1024 | OD2 | 3.025 |
| 5W9M | G_LYS_1100 | NZ  | G_ASP_1101 | OD1 | 2.964 |
| 5W9M | G_LYS_1102 | NZ  | G_GLU_793  | OE2 | 3.845 |
| 5W9M | G_ARG_1113 | NH1 | G_GLU_1105 | OE1 | 2.863 |
| 5W9M | G_ARG_1113 | NH1 | G_GLU_1105 | OE2 | 3.297 |
| 5W9M | G_ARG_1113 | NH2 | A_GLU_1105 | OE1 | 3.823 |
| 5W9M | G_ARG_1113 | NH2 | A_GLU_1105 | OE2 | 2.800 |
| 5W9M | G_HIS_1138 | NE2 | G_GLU_793  | OE2 | 2.857 |
| 5W9M | G_LYS_1174 | NZ  | G_GLU_1183 | OE1 | 2.907 |
| 5W9M | G_ARG_1179 | NH1 | H_ASP_31   | OD1 | 3.713 |
| 5W9M | H_LYS_62   | NZ  | H_GLU_46   | OE1 | 3.377 |
| 5W9M | H_LYS_62   | NZ  | H_GLU_46   | OE2 | 2.872 |
| 5W9M | H_ARG_66   | NH1 | H_ASP_86   | OD1 | 3.768 |
| 5W9M | H_ARG_66   | NH1 | H_ASP_86   | OD2 | 3.866 |
| 5W9M | H_ARG_66   | NH2 | H_ASP_86   | OD1 | 3.905 |
| 5W9M | H_ARG_66   | NH2 | H_ASP_86   | OD2 | 2.981 |
| 5W9M | H_ARG_94   | NH1 | H_ASP_101  | OD2 | 3.814 |
| 5W9M | H_ARG_94   | NH2 | H_ASP_101  | OD2 | 2.908 |
| 5W9M | H_LYS_95   | NZ  | H_ASP_100C | OD1 | 3.555 |
| 5W9M | H_LYS_95   | NZ  | H_ASP_100C | OD2 | 2.929 |
| 5W9M | I_ARG_61   | NH1 | I_GLU_79   | OE1 | 2.897 |
| 5W9M | I_ARG_61   | NH1 | I_ASP_82   | OD1 | 3.868 |
| 5W9M | I_ARG_61   | NH1 | I_ASP_82   | OD2 | 2.952 |
| 5W9M | I_ARG_61   | NH2 | I_GLU_79   | OE1 | 2.900 |
| 5W9M | I_ARG_96   | NH1 | H_ASP_100C | OD2 | 2.840 |
| 5W9M | I_ARG_96   | NH2 | G_GLU_1183 | OE2 | 2.957 |
| 5W9M | I_ARG_96   | NH2 | H_ASP_100C | OD2 | 3.363 |
| 5W9M | I_LYS_103  | NZ  | I_GLU_105  | OE2 | 3.254 |
| 5W9M | E_LYS_27   | NZ  | E_GLU_230  | OE2 | 3.877 |
| 5W9M | E_LYS_52   | NZ  | E_ASP_49   | OD2 | 3.990 |
| 5W9M | E_HIS_81   | ND1 | E_ASP_80   | OD1 | 3.823 |
| 5W9M | E_LYS_99   | NZ  | E_GLU_32   | OE1 | 2.847 |
| 5W9M | E_LYS_110  | NZ  | E_ASP_83   | OD2 | 2.742 |
| 5W9M | E_LYS_142  | NZ  | E_GLU_252  | OE1 | 3.416 |
| 5W9M | E_LYS_142  | NZ  | E_GLU_252  | OE2 | 3.425 |
| 5W9M | E_ARG_181  | NH1 | E_ASP_174  | OD2 | 3.814 |
| 5W9M | E_HIS_194  | NE2 | E_GLU_32   | OE1 | 3.141 |
| 5W9M | E_ARG_235  | NH1 | E_GLU_188  | OE1 | 3.017 |
| 5W9M | E_ARG_335  | NH2 | E_ASP_326  | OD2 | 2.919 |
| 5W9M | E_ARG_401  | NH2 | E_ASP_444  | OD1 | 3.595 |
| 5W9M | E_ARG_401  | NH2 | E_ASP_444  | OD2 | 2.975 |
| 5W9M | E_LYS_496  | NZ  | E_GLU_536  | OE1 | 2.925 |
| 5W9M | E_LYS_496  | NZ  | E_GLU_536  | OE2 | 3.563 |
| 5W9M | E_LYS_502  | NZ  | E_GLU_513  | OE2 | 2.857 |
| 5W9M | E_ARG_505  | NH1 | E_GLU_549  | OE1 | 2.887 |
| 5W9M | E_ARG_505  | NH2 | E_GLU_549  | OE1 | 3.647 |
| 5W9M | E_ARG_629  | NH1 | E_GLU_376  | OE2 | 3.561 |

|      |           |     |           |     |       |
|------|-----------|-----|-----------|-----|-------|
| 5W9M | E_ARG.629 | NH1 | E_ASP.644 | OD1 | 2.850 |
| 5W9M | E_ARG.629 | NH2 | E_ASP.644 | OD1 | 2.751 |
| 5W9M | E_ARG.629 | NH2 | E_ASP.644 | OD2 | 3.949 |
| 5W9M | E_LYS.665 | NZ  | E_GLU.666 | OE2 | 2.766 |
| 5W9M | E_HIS.681 | NE2 | D_ASP.910 | OD1 | 2.869 |
| 5W9M | E_HIS.681 | NE2 | D_ASP.910 | OD2 | 3.974 |
| 5W9M | E_ARG.691 | NH2 | E_ASP.343 | OD1 | 3.021 |
| 5W9M | E_ARG.700 | NH2 | A_GLU.756 | OE1 | 3.024 |
| 5W9M | E_ARG.700 | NH2 | A_GLU.756 | OE2 | 3.469 |
| 5W9M | E_LYS.728 | NZ  | E_ASP.726 | OD2 | 2.871 |
| 5W9M | F_HIS.81  | ND1 | F_ASP.80  | OD1 | 3.780 |
| 5W9M | F_LYS.99  | NZ  | F_GLU.32  | OE1 | 3.190 |
| 5W9M | F_LYS.99  | NZ  | F_GLU.32  | OE2 | 3.555 |
| 5W9M | F_LYS.110 | NZ  | F_ASP.83  | OD2 | 3.405 |
| 5W9M | F_LYS.110 | NZ  | F_ASP.108 | OD1 | 3.183 |
| 5W9M | F_LYS.110 | NZ  | F_ASP.108 | OD2 | 3.399 |
| 5W9M | F_ARG.119 | NH1 | F_ASP.54  | OD2 | 3.785 |
| 5W9M | F_ARG.119 | NH2 | F_ASP.54  | OD2 | 3.047 |
| 5W9M | F_LYS.142 | NZ  | F_GLU.252 | OE1 | 2.921 |
| 5W9M | F_HIS.194 | NE2 | F_GLU.32  | OE1 | 3.759 |
| 5W9M | F_ARG.235 | NH1 | F_GLU.188 | OE2 | 3.596 |
| 5W9M | F_ARG.334 | NH2 | F_ASP.330 | OD1 | 3.977 |
| 5W9M | F_ARG.334 | NH2 | F_ASP.330 | OD2 | 3.003 |
| 5W9M | F_ARG.335 | NH2 | F_ASP.326 | OD2 | 2.919 |
| 5W9M | F_ARG.401 | NH2 | F_ASP.444 | OD1 | 3.837 |
| 5W9M | F_ARG.401 | NH2 | F_ASP.444 | OD2 | 3.316 |
| 5W9M | F_LYS.502 | NZ  | F_GLU.513 | OE1 | 2.889 |
| 5W9M | F_LYS.543 | NZ  | F_GLU.549 | OE2 | 3.751 |
| 5W9M | F_LYS.587 | NZ  | F_GLU.382 | OE2 | 2.825 |
| 5W9M | F_ARG.614 | NH2 | F_GLU.605 | OE1 | 2.961 |
| 5W9M | F_HIS.681 | NE2 | G_ASP.910 | OD1 | 2.934 |
| 5W9M | F_HIS.681 | NE2 | G_ASP.910 | OD2 | 3.892 |
| 5W9M | F_ARG.691 | NH2 | F_ASP.343 | OD1 | 2.990 |
| 5W9M | F_LYS.728 | NZ  | F_ASP.726 | OD1 | 3.991 |
| 5W9M | F_LYS.728 | NZ  | F_ASP.726 | OD2 | 2.816 |
| 5W9M | J_HIS.81  | ND1 | J_ASP.80  | OD1 | 3.900 |
| 5W9M | J_LYS.99  | NZ  | J_ASP.34  | OD2 | 2.828 |
| 5W9M | J_ARG.119 | NH2 | J_ASP.54  | OD2 | 3.814 |
| 5W9M | J_LYS.142 | NZ  | J_GLU.252 | OE1 | 3.757 |
| 5W9M | J_LYS.142 | NZ  | J_GLU.252 | OE2 | 3.691 |
| 5W9M | J_HIS.194 | NE2 | J_GLU.32  | OE1 | 3.474 |
| 5W9M | J_ARG.235 | NH2 | J_GLU.188 | OE1 | 3.932 |
| 5W9M | J_ARG.235 | NH2 | J_GLU.188 | OE2 | 2.863 |
| 5W9M | J_ARG.334 | NH2 | J_ASP.330 | OD1 | 3.986 |
| 5W9M | J_ARG.334 | NH2 | J_ASP.330 | OD2 | 2.914 |
| 5W9M | J_ARG.335 | NH2 | J_ASP.326 | OD2 | 2.924 |
| 5W9M | J_ARG.401 | NH2 | J_ASP.444 | OD1 | 3.669 |
| 5W9M | J_ARG.401 | NH2 | J_ASP.444 | OD2 | 3.110 |
| 5W9M | J_LYS.413 | NZ  | J_GLU.382 | OE1 | 3.999 |
| 5W9M | J_LYS.413 | NZ  | J_GLU.382 | OE2 | 2.963 |
| 5W9M | J_HIS.486 | NE2 | J_GLU.565 | OE2 | 3.789 |
| 5W9M | J_LYS.496 | NZ  | J_GLU.536 | OE2 | 3.687 |
| 5W9M | J_LYS.502 | NZ  | J_GLU.513 | OE1 | 2.953 |
| 5W9M | J_LYS.502 | NZ  | J_GLU.513 | OE2 | 3.624 |
| 5W9M | J_ARG.511 | NH2 | J_ASP.509 | OD2 | 3.887 |
| 5W9M | J_ARG.629 | NH1 | J_ASP.644 | OD1 | 2.859 |
| 5W9M | J_ARG.629 | NH2 | J_ASP.644 | OD1 | 2.744 |
| 5W9M | J_ARG.629 | NH2 | J_ASP.644 | OD2 | 3.852 |

|      |           |     |           |     |       |
|------|-----------|-----|-----------|-----|-------|
| 5W9M | J_HIS_681 | NE2 | A_ASP_910 | OD1 | 3.021 |
| 5W9M | J_LYS_728 | NZ  | J_ASP_726 | OD2 | 2.879 |

Table 747: 5W9M-specific salt bridging networks analysis. In this table, a PDB file is specified with a four-letter PDB ID, except that the names of the PDB files corresponding to the single NMR structural model split from the NMR ensemble is specified with a four-letter PDB ID in addition to a hyphen followed by the single NMR structural model numeric ID, the residue naming scheme is **Chain ID\_residue name\_residue number**,  $\angle ADH$  represents the angle formed by acceptor (A), donor (D) and hydrogen (H) ( $\angle ADH$ ).



| PDB ID | Residue A  | Atom A | Residue B  | Atom B | Distance (Å) |
|--------|------------|--------|------------|--------|--------------|
| 5W9N   | A_ARG.758  | NH1    | H_ASP.740  | OD1    | 3.061        |
| 5W9N   | A_ARG.758  | NH2    | H_ASP.740  | OD1    | 3.534        |
| 5W9N   | A_LYS.801  | NZ     | A_ASP.843  | OD1    | 2.885        |
| 5W9N   | A_LYS.801  | NZ     | A_ASP.843  | OD2    | 3.553        |
| 5W9N   | A_LYS.816  | NZ     | A_ASP.1064 | OD2    | 3.955        |
| 5W9N   | A_ARG.841  | NH2    | A_ASP.844  | OD2    | 2.840        |
| 5W9N   | A_ARG.847  | NH2    | A_ASP.844  | OD1    | 2.793        |
| 5W9N   | A_ARG.887  | NH2    | A_ASP.892  | OD1    | 2.922        |
| 5W9N   | A_ARG.887  | NH2    | A_ASP.892  | OD2    | 3.858        |
| 5W9N   | A_HIS.1020 | NE2    | A_ASP.1024 | OD2    | 2.929        |
| 5W9N   | A_ARG.1057 | NH1    | A_ASP.1053 | OD1    | 3.524        |
| 5W9N   | A_LYS.1102 | NZ     | A_GLU.793  | OE1    | 2.942        |
| 5W9N   | A_LYS.1102 | NZ     | A_GLU.793  | OE2    | 3.253        |
| 5W9N   | A_HIS.1138 | NE2    | A_GLU.793  | OE1    | 2.975        |
| 5W9N   | B_LYS.62   | NZ     | B_GLU.46   | OE1    | 3.336        |
| 5W9N   | B_LYS.62   | NZ     | B_GLU.46   | OE2    | 2.950        |
| 5W9N   | B_ARG.66   | NH2    | B_ASP.86   | OD1    | 2.875        |
| 5W9N   | B_ARG.66   | NH2    | B_ASP.86   | OD2    | 3.096        |
| 5W9N   | B_ARG.94   | NH2    | B_ASP.101  | OD2    | 2.805        |
| 5W9N   | B_LYS.95   | NZ     | B_ASP.100C | OD2    | 3.671        |
| 5W9N   | C_ARG.24   | NH1    | C_ASP.70   | OD1    | 2.929        |
| 5W9N   | C_ARG.24   | NH1    | C_ASP.70   | OD2    | 3.584        |
| 5W9N   | C_ARG.24   | NH2    | C_ASP.70   | OD1    | 3.992        |
| 5W9N   | C_LYS.92   | NZ     | C_GLU.93   | OE1    | 2.776        |
| 5W9N   | C_ARG.96   | NH1    | B_ASP.100C | OD2    | 2.860        |
| 5W9N   | C_ARG.96   | NH2    | A_GLU.1183 | OE2    | 2.942        |
| 5W9N   | C_ARG.96   | NH2    | B_ASP.100C | OD2    | 3.629        |
| 5W9N   | C_LYS.103  | NZ     | C_GLU.105  | OE1    | 3.535        |
| 5W9N   | D_LYS.779  | NZ     | D_ASP.771  | OD2    | 2.906        |
| 5W9N   | D_LYS.779  | NZ     | D_GLU.1148 | OE1    | 3.841        |
| 5W9N   | D_LYS.801  | NZ     | D_ASP.843  | OD1    | 2.866        |
| 5W9N   | D_LYS.801  | NZ     | D_ASP.843  | OD2    | 3.784        |
| 5W9N   | D_LYS.807  | NZ     | D_GLU.818  | OE1    | 2.846        |
| 5W9N   | D_LYS.807  | NZ     | D_GLU.818  | OE2    | 3.746        |
| 5W9N   | D_LYS.816  | NZ     | D_ASP.1064 | OD1    | 3.551        |
| 5W9N   | D_LYS.816  | NZ     | D_ASP.1064 | OD2    | 2.989        |
| 5W9N   | D_ARG.841  | NH2    | D_ASP.844  | OD2    | 2.860        |
| 5W9N   | D_ARG.847  | NH2    | D_ASP.844  | OD1    | 2.752        |
| 5W9N   | D_ARG.887  | NH2    | D_ASP.892  | OD1    | 2.921        |
| 5W9N   | D_HIS.1020 | NE2    | D_ASP.1024 | OD1    | 3.511        |
| 5W9N   | D_HIS.1020 | NE2    | D_ASP.1024 | OD2    | 3.177        |
| 5W9N   | D_LYS.1102 | NZ     | D_GLU.793  | OE1    | 2.862        |
| 5W9N   | D_LYS.1102 | NZ     | D_GLU.793  | OE2    | 3.547        |
| 5W9N   | D_ARG.1113 | NH1    | D_GLU.1105 | OE1    | 2.833        |
| 5W9N   | D_ARG.1113 | NH1    | D_GLU.1105 | OE2    | 3.606        |
| 5W9N   | D_ARG.1113 | NH2    | D_GLU.1105 | OE1    | 3.657        |
| 5W9N   | D_ARG.1113 | NH2    | D_GLU.1105 | OE2    | 2.979        |
| 5W9N   | D_HIS.1138 | NE2    | D_GLU.793  | OE1    | 3.682        |
| 5W9N   | E_LYS.62   | NZ     | E_GLU.46   | OE1    | 2.853        |
| 5W9N   | E_LYS.62   | NZ     | E_GLU.46   | OE2    | 3.766        |
| 5W9N   | E_ARG.94   | NH1    | E_ASP.101  | OD2    | 3.322        |
| 5W9N   | E_ARG.94   | NH2    | E_ASP.101  | OD2    | 2.876        |
| 5W9N   | F_ARG.61   | NH1    | F_GLU.79   | OE1    | 3.387        |
| 5W9N   | F_ARG.61   | NH1    | F_GLU.79   | OE2    | 3.250        |
| 5W9N   | F_ARG.61   | NH2    | F_GLU.79   | OE2    | 3.109        |
| 5W9N   | F_ARG.96   | NH1    | E_ASP.100C | OD2    | 2.898        |
| 5W9N   | F_ARG.96   | NH2    | D_GLU.1183 | OE2    | 3.465        |

|      |            |     |            |     |       |
|------|------------|-----|------------|-----|-------|
| 5W9N | F_ARG_96   | NH2 | E_ASP_100C | OD2 | 3.359 |
| 5W9N | F_LYS_103  | NZ  | F_GLU_105  | OE2 | 3.523 |
| 5W9N | G_ARG_758  | NH1 | J_ASP_740  | OD1 | 2.883 |
| 5W9N | G_ARG_758  | NH2 | J_ASP_740  | OD1 | 3.992 |
| 5W9N | G_LYS_779  | NZ  | G_GLU_1148 | OE1 | 3.821 |
| 5W9N | G_LYS_801  | NZ  | G_ASP_843  | OD1 | 3.095 |
| 5W9N | G_LYS_807  | NZ  | G_GLU_818  | OE1 | 2.848 |
| 5W9N | G_LYS_807  | NZ  | G_GLU_818  | OE2 | 3.640 |
| 5W9N | G_ARG_841  | NH2 | G_ASP_844  | OD2 | 2.821 |
| 5W9N | G_ARG_847  | NH2 | G_ASP_844  | OD1 | 2.784 |
| 5W9N | G_ARG_887  | NH2 | G_ASP_892  | OD1 | 2.977 |
| 5W9N | G_ARG_887  | NH2 | G_ASP_892  | OD2 | 3.996 |
| 5W9N | G_HIS_1020 | NE2 | G_ASP_1024 | OD1 | 3.933 |
| 5W9N | G_HIS_1020 | NE2 | G_ASP_1024 | OD2 | 2.877 |
| 5W9N | G_ARG_1057 | NH2 | G_ASP_1053 | OD1 | 2.973 |
| 5W9N | G_ARG_1057 | NH2 | G_ASP_1053 | OD2 | 3.603 |
| 5W9N | G_LYS_1102 | NZ  | G_GLU_793  | OE1 | 3.542 |
| 5W9N | G_LYS_1102 | NZ  | G_GLU_793  | OE2 | 3.374 |
| 5W9N | G_ARG_1113 | NH1 | G_GLU_1105 | OE1 | 3.319 |
| 5W9N | G_ARG_1113 | NH2 | A_GLU_1105 | OE1 | 3.089 |
| 5W9N | G_HIS_1138 | NE2 | G_GLU_793  | OE2 | 2.888 |
| 5W9N | H_LYS_99   | NZ  | H_GLU_32   | OE1 | 2.795 |
| 5W9N | H_LYS_110  | NZ  | H_ASP_83   | OD2 | 2.820 |
| 5W9N | H_ARG_119  | NH2 | H_ASP_54   | OD2 | 3.318 |
| 5W9N | H_LYS_142  | NZ  | H_GLU_252  | OE1 | 3.837 |
| 5W9N | H_LYS_142  | NZ  | H_GLU_252  | OE2 | 3.110 |
| 5W9N | H_ARG_181  | NH1 | H_ASP_174  | OD2 | 2.922 |
| 5W9N | H_HIS_194  | NE2 | H_GLU_32   | OE1 | 3.891 |
| 5W9N | H_ARG_334  | NH2 | H_ASP_330  | OD1 | 3.972 |
| 5W9N | H_ARG_334  | NH2 | H_ASP_330  | OD2 | 3.030 |
| 5W9N | H_ARG_335  | NH2 | H_ASP_326  | OD2 | 2.979 |
| 5W9N | H_ARG_401  | NH2 | H_ASP_444  | OD1 | 3.754 |
| 5W9N | H_ARG_401  | NH2 | H_ASP_444  | OD2 | 3.247 |
| 5W9N | H_LYS_496  | NZ  | H_GLU_536  | OE1 | 3.049 |
| 5W9N | H_LYS_496  | NZ  | H_GLU_536  | OE2 | 3.699 |
| 5W9N | H_LYS_502  | NZ  | H_GLU_513  | OE2 | 3.408 |
| 5W9N | H_ARG_505  | NH1 | H_GLU_549  | OE1 | 2.896 |
| 5W9N | H_ARG_505  | NH2 | H_GLU_549  | OE1 | 3.946 |
| 5W9N | H_ARG_629  | NH1 | H_GLU_376  | OE2 | 3.417 |
| 5W9N | H_ARG_629  | NH1 | H_ASP_644  | OD1 | 2.873 |
| 5W9N | H_ARG_629  | NH1 | H_ASP_644  | OD2 | 3.992 |
| 5W9N | H_ARG_629  | NH2 | H_ASP_644  | OD1 | 2.928 |
| 5W9N | H_ARG_629  | NH2 | H_ASP_644  | OD2 | 3.862 |
| 5W9N | H_HIS_681  | NE2 | D_ASP_910  | OD1 | 2.909 |
| 5W9N | H_HIS_681  | NE2 | D_ASP_910  | OD2 | 3.885 |
| 5W9N | H_ARG_691  | NH2 | H_ASP_343  | OD1 | 3.539 |
| 5W9N | H_ARG_694  | NH1 | H_ASP_343  | OD2 | 3.042 |
| 5W9N | H_ARG_694  | NH2 | H_ASP_343  | OD2 | 2.913 |
| 5W9N | H_LYS_728  | NZ  | H_ASP_726  | OD2 | 2.885 |
| 5W9N | I_LYS_99   | NZ  | I_GLU_32   | OE1 | 2.834 |
| 5W9N | I_LYS_110  | NZ  | I_ASP_108  | OD1 | 3.843 |
| 5W9N | I_LYS_110  | NZ  | I_ASP_108  | OD2 | 3.078 |
| 5W9N | I_ARG_119  | NH1 | I_ASP_54   | OD2 | 3.752 |
| 5W9N | I_ARG_119  | NH2 | I_ASP_54   | OD2 | 3.062 |
| 5W9N | I_LYS_142  | NZ  | I_GLU_247  | OE1 | 2.823 |
| 5W9N | I_LYS_142  | NZ  | I_GLU_249  | OE2 | 2.931 |
| 5W9N | I_ARG_181  | NH1 | I_ASP_174  | OD2 | 3.305 |
| 5W9N | I_ARG_190  | NH1 | I_GLU_188  | OE2 | 2.866 |

|      |           |     |           |     |       |
|------|-----------|-----|-----------|-----|-------|
| 5W9N | I_ARG_334 | NH2 | I_ASP_330 | OD1 | 3.946 |
| 5W9N | I_ARG_334 | NH2 | I_ASP_330 | OD2 | 3.014 |
| 5W9N | I_ARG_335 | NH2 | I_ASP_326 | OD2 | 2.875 |
| 5W9N | I_ARG_401 | NH2 | I_ASP_444 | OD1 | 3.778 |
| 5W9N | I_ARG_401 | NH2 | I_ASP_444 | OD2 | 3.214 |
| 5W9N | I_LYS_502 | NZ  | I_GLU_513 | OE2 | 2.781 |
| 5W9N | I_LYS_587 | NZ  | I_GLU_382 | OE2 | 2.936 |
| 5W9N | I_ARG_614 | NH1 | I_GLU_605 | OE2 | 3.987 |
| 5W9N | I_LYS_668 | NZ  | I_ASP_355 | OD1 | 3.243 |
| 5W9N | I_LYS_668 | NZ  | I_ASP_355 | OD2 | 3.427 |
| 5W9N | I_HIS_681 | ND1 | I_GLU_680 | OE2 | 3.948 |
| 5W9N | I_LYS_728 | NZ  | I_ASP_726 | OD2 | 2.845 |
| 5W9N | J_LYS_52  | NZ  | J_ASP_49  | OD2 | 3.577 |
| 5W9N | J_HIS_81  | ND1 | J_ASP_80  | OD1 | 3.829 |
| 5W9N | J_LYS_99  | NZ  | J_GLU_32  | OE1 | 2.844 |
| 5W9N | J_ARG_119 | NH1 | J_ASP_54  | OD2 | 3.500 |
| 5W9N | J_LYS_142 | NZ  | J_GLU_252 | OE1 | 3.608 |
| 5W9N | J_LYS_142 | NZ  | J_GLU_252 | OE2 | 3.253 |
| 5W9N | J_ARG_190 | NH1 | J_ASP_24  | OD1 | 3.620 |
| 5W9N | J_ARG_190 | NH1 | J_ASP_24  | OD2 | 3.407 |
| 5W9N | J_ARG_190 | NH2 | J_ASP_24  | OD1 | 2.694 |
| 5W9N | J_ARG_190 | NH2 | J_ASP_24  | OD2 | 3.854 |
| 5W9N | J_ARG_235 | NH2 | J_GLU_188 | OE1 | 2.960 |
| 5W9N | J_ARG_235 | NH2 | J_GLU_188 | OE2 | 3.595 |
| 5W9N | J_ARG_334 | NH2 | J_ASP_330 | OD1 | 3.929 |
| 5W9N | J_ARG_334 | NH2 | J_ASP_330 | OD2 | 2.885 |
| 5W9N | J_ARG_335 | NH2 | J_ASP_326 | OD2 | 2.940 |
| 5W9N | J_ARG_401 | NH2 | J_ASP_444 | OD1 | 3.745 |
| 5W9N | J_ARG_401 | NH2 | J_ASP_444 | OD2 | 3.113 |
| 5W9N | J_LYS_413 | NZ  | J_GLU_382 | OE1 | 3.770 |
| 5W9N | J_LYS_413 | NZ  | J_GLU_382 | OE2 | 2.885 |
| 5W9N | J_LYS_502 | NZ  | J_GLU_513 | OE1 | 3.403 |
| 5W9N | J_LYS_502 | NZ  | J_GLU_513 | OE2 | 3.488 |
| 5W9N | J_ARG_511 | NH2 | J_ASP_509 | OD2 | 3.316 |
| 5W9N | J_ARG_614 | NH1 | J_GLU_605 | OE2 | 3.946 |
| 5W9N | J_ARG_629 | NH1 | J_ASP_644 | OD1 | 2.925 |
| 5W9N | J_ARG_629 | NH2 | J_ASP_644 | OD1 | 2.748 |
| 5W9N | J_ARG_629 | NH2 | J_ASP_644 | OD2 | 3.827 |
| 5W9N | J_LYS_665 | NZ  | J_GLU_666 | OE2 | 2.737 |
| 5W9N | J_HIS_681 | NE2 | A_ASP_910 | OD1 | 2.923 |
| 5W9N | J_HIS_681 | NE2 | A_ASP_910 | OD2 | 3.770 |
| 5W9N | J_LYS_728 | NZ  | J_ASP_726 | OD1 | 3.992 |
| 5W9N | J_LYS_728 | NZ  | J_ASP_726 | OD2 | 2.808 |

Table 748: 5W9N-specific salt bridging networks analysis. In this table, a PDB file is specified with a four-letter PDB ID, except that the names of the PDB files corresponding to the single NMR structural model split from the NMR ensemble is specified with a four-letter PDB ID in addition to a hyphen followed by the single NMR structural model numeric ID, the residue naming scheme is **Chain ID\_residue name\_residue number**,  $\angle ADH$  represents the angle formed by acceptor (A), donor (D) and hydrogen (H) ( $\angle ADH$ ).

| PDB ID | Residue A  | Atom A | Residue B  | Atom B | Distance (Å) |
|--------|------------|--------|------------|--------|--------------|
| 5W9O   | A_ARG.758  | NH1    | J_ASP.740  | OD1    | 2.989        |
| 5W9O   | A_LYS.779  | NZ     | A_ASP.771  | OD2    | 3.308        |
| 5W9O   | A_LYS.779  | NZ     | A_GLU.1148 | OE1    | 3.756        |
| 5W9O   | A_LYS.801  | NZ     | A_ASP.843  | OD1    | 2.906        |
| 5W9O   | A_LYS.801  | NZ     | A_ASP.843  | OD2    | 3.361        |
| 5W9O   | A_LYS.807  | NZ     | A_GLU.818  | OE1    | 3.592        |
| 5W9O   | A_LYS.807  | NZ     | A_GLU.818  | OE2    | 2.924        |
| 5W9O   | A_ARG.841  | NH2    | A_ASP.844  | OD2    | 2.838        |
| 5W9O   | A_ARG.847  | NH1    | A_ASP.844  | OD1    | 3.667        |
| 5W9O   | A_ARG.847  | NH2    | A_ASP.844  | OD1    | 2.759        |
| 5W9O   | A_ARG.887  | NH2    | A_ASP.892  | OD1    | 3.046        |
| 5W9O   | A_ARG.887  | NH2    | A_ASP.892  | OD2    | 3.709        |
| 5W9O   | A_HIS.1020 | NE2    | A_ASP.1024 | OD2    | 2.966        |
| 5W9O   | A_LYS.1021 | NZ     | A_GLU.793  | OE1    | 3.937        |
| 5W9O   | A_LYS.1021 | NZ     | A_GLU.793  | OE2    | 2.905        |
| 5W9O   | A_ARG.1057 | NH1    | A_ASP.1053 | OD1    | 2.779        |
| 5W9O   | A_ARG.1113 | NH1    | A_GLU.1105 | OE1    | 3.499        |
| 5W9O   | A_ARG.1113 | NH1    | A_GLU.1105 | OE2    | 2.983        |
| 5W9O   | A_ARG.1113 | NH2    | D_GLU.1105 | OE1    | 3.178        |
| 5W9O   | A_ARG.1179 | NH2    | B_ASP.31   | OD1    | 2.796        |
| 5W9O   | B_LYS.38   | NZ     | B_GLU.46   | OE1    | 2.988        |
| 5W9O   | B_LYS.62   | NZ     | B_GLU.46   | OE1    | 3.057        |
| 5W9O   | B_LYS.62   | NZ     | B_GLU.46   | OE2    | 3.242        |
| 5W9O   | B_ARG.94   | NH2    | B_ASP.101  | OD2    | 2.810        |
| 5W9O   | B_LYS.95   | NZ     | B_ASP.100C | OD1    | 3.658        |
| 5W9O   | C_ARG.24   | NH2    | C_ASP.70   | OD1    | 3.533        |
| 5W9O   | C_ARG.24   | NH2    | C_ASP.70   | OD2    | 2.999        |
| 5W9O   | C_ARG.61   | NH1    | C_GLU.79   | OE2    | 2.984        |
| 5W9O   | C_ARG.61   | NH2    | C_GLU.79   | OE2    | 3.885        |
| 5W9O   | C_LYS.92   | NZ     | C_GLU.93   | OE1    | 2.863        |
| 5W9O   | C_ARG.96   | NH1    | B_ASP.100C | OD2    | 3.180        |
| 5W9O   | C_ARG.96   | NH2    | B_ASP.100C | OD2    | 2.879        |
| 5W9O   | C_LYS.103  | NZ     | C_GLU.105  | OE1    | 3.349        |
| 5W9O   | D_LYS.779  | NZ     | D_ASP.771  | OD2    | 2.942        |
| 5W9O   | D_LYS.779  | NZ     | D_GLU.1148 | OE1    | 3.819        |
| 5W9O   | D_LYS.801  | NZ     | D_ASP.843  | OD1    | 2.899        |
| 5W9O   | D_LYS.801  | NZ     | D_ASP.843  | OD2    | 3.628        |
| 5W9O   | D_LYS.807  | NZ     | D_GLU.818  | OE1    | 2.864        |
| 5W9O   | D_LYS.807  | NZ     | D_GLU.818  | OE2    | 3.460        |
| 5W9O   | D_LYS.816  | NZ     | D_ASP.1064 | OD1    | 3.778        |
| 5W9O   | D_LYS.816  | NZ     | D_ASP.1064 | OD2    | 2.905        |
| 5W9O   | D_ARG.841  | NH2    | D_ASP.844  | OD2    | 2.807        |
| 5W9O   | D_ARG.847  | NH1    | J_ASP.726  | OD2    | 2.979        |
| 5W9O   | D_ARG.847  | NH2    | D_ASP.844  | OD1    | 2.817        |
| 5W9O   | D_ARG.887  | NH2    | D_ASP.892  | OD1    | 3.050        |
| 5W9O   | D_ARG.887  | NH2    | D_ASP.892  | OD2    | 3.816        |
| 5W9O   | D_HIS.1020 | NE2    | D_ASP.1024 | OD1    | 3.793        |
| 5W9O   | D_HIS.1020 | NE2    | D_ASP.1024 | OD2    | 3.047        |
| 5W9O   | D_ARG.1057 | NH1    | D_ASP.1053 | OD1    | 3.689        |
| 5W9O   | D_LYS.1102 | NZ     | D_GLU.793  | OE1    | 2.930        |
| 5W9O   | D_LYS.1102 | NZ     | D_GLU.793  | OE2    | 3.237        |
| 5W9O   | D_ARG.1113 | NH1    | G_GLU.1105 | OE1    | 3.664        |
| 5W9O   | D_ARG.1113 | NH2    | D_GLU.1105 | OE1    | 3.068        |
| 5W9O   | D_ARG.1113 | NH2    | D_GLU.1105 | OE2    | 3.628        |
| 5W9O   | D_HIS.1138 | NE2    | D_GLU.793  | OE1    | 2.926        |
| 5W9O   | E_LYS.38   | NZ     | E_ASP.86   | OD1    | 3.864        |
| 5W9O   | E_LYS.62   | NZ     | E_GLU.46   | OE1    | 2.853        |

|      |            |     |            |     |       |
|------|------------|-----|------------|-----|-------|
| 5W9O | E_LYS_62   | NZ  | E_GLU_46   | OE2 | 3.614 |
| 5W9O | E_LYS_95   | NZ  | E_ASP_100C | OD1 | 3.641 |
| 5W9O | E_LYS_95   | NZ  | E_ASP_100C | OD2 | 3.940 |
| 5W9O | F_ARG_61   | NH1 | F_GLU_79   | OE1 | 3.425 |
| 5W9O | F_ARG_61   | NH1 | F_GLU_79   | OE2 | 3.162 |
| 5W9O | F_ARG_61   | NH2 | F_GLU_79   | OE2 | 3.303 |
| 5W9O | F_ARG_96   | NH1 | E_ASP_100C | OD2 | 2.799 |
| 5W9O | F_ARG_96   | NH2 | D_GLU_1183 | OE2 | 3.799 |
| 5W9O | F_ARG_96   | NH2 | E_ASP_100C | OD2 | 3.255 |
| 5W9O | G_ARG_758  | NH1 | L_ASP_740  | OD1 | 2.934 |
| 5W9O | G_LYS_779  | NZ  | G_ASP_771  | OD2 | 2.924 |
| 5W9O | G_LYS_779  | NZ  | G_GLU_1148 | OE1 | 3.649 |
| 5W9O | G_LYS_801  | NZ  | G_ASP_843  | OD1 | 2.865 |
| 5W9O | G_LYS_801  | NZ  | G_ASP_843  | OD2 | 3.439 |
| 5W9O | G_LYS_807  | NZ  | G_GLU_818  | OE1 | 2.891 |
| 5W9O | G_LYS_807  | NZ  | G_GLU_818  | OE2 | 3.530 |
| 5W9O | G_LYS_816  | NZ  | G_ASP_1064 | OD1 | 3.715 |
| 5W9O | G_LYS_816  | NZ  | G_ASP_1064 | OD2 | 3.538 |
| 5W9O | G_ARG_841  | NH1 | G_GLU_1090 | OE2 | 3.058 |
| 5W9O | G_ARG_847  | NH1 | K_ASP_726  | OD2 | 3.097 |
| 5W9O | G_ARG_847  | NH2 | G_ASP_844  | OD1 | 2.809 |
| 5W9O | G_ARG_887  | NH2 | G_ASP_892  | OD1 | 2.982 |
| 5W9O | G_HIS_1020 | NE2 | G_ASP_1024 | OD2 | 3.021 |
| 5W9O | G_LYS_1102 | NZ  | G_GLU_793  | OE1 | 3.370 |
| 5W9O | G_LYS_1102 | NZ  | G_GLU_793  | OE2 | 2.830 |
| 5W9O | G_ARG_1113 | NH1 | G_GLU_1105 | OE1 | 3.501 |
| 5W9O | G_ARG_1113 | NH1 | G_GLU_1105 | OE2 | 2.926 |
| 5W9O | G_HIS_1138 | NE2 | G_GLU_793  | OE1 | 3.125 |
| 5W9O | G_LYS_1174 | NZ  | G_GLU_1183 | OE1 | 2.745 |
| 5W9O | G_ARG_1179 | NH2 | H_ASP_31   | OD1 | 2.843 |
| 5W9O | H_HIS_35   | NE2 | H_ASP_100C | OD1 | 3.649 |
| 5W9O | H_HIS_35   | NE2 | H_ASP_100C | OD2 | 3.605 |
| 5W9O | H_LYS_38   | NZ  | H_ASP_86   | OD1 | 3.619 |
| 5W9O | H_LYS_62   | NZ  | H_GLU_46   | OE1 | 2.840 |
| 5W9O | H_LYS_62   | NZ  | H_GLU_46   | OE2 | 3.755 |
| 5W9O | H_ARG_66   | NH2 | H_ASP_86   | OD2 | 3.025 |
| 5W9O | H_ARG_94   | NH2 | H_ASP_101  | OD1 | 3.987 |
| 5W9O | H_ARG_94   | NH2 | H_ASP_101  | OD2 | 2.829 |
| 5W9O | I_ARG_61   | NH1 | I_GLU_79   | OE2 | 2.913 |
| 5W9O | I_ARG_61   | NH1 | I_ASP_82   | OD1 | 3.774 |
| 5W9O | I_ARG_61   | NH1 | I_ASP_82   | OD2 | 2.961 |
| 5W9O | I_ARG_61   | NH2 | I_GLU_79   | OE2 | 3.003 |
| 5W9O | I_LYS_92   | NZ  | I_GLU_93   | OE1 | 3.065 |
| 5W9O | I_ARG_96   | NH1 | H_ASP_100C | OD2 | 3.979 |
| 5W9O | I_ARG_96   | NH2 | G_GLU_1183 | OE2 | 2.715 |
| 5W9O | I_ARG_96   | NH2 | H_ASP_100C | OD2 | 3.993 |
| 5W9O | J_LYS_27   | NZ  | J_GLU_230  | OE2 | 3.475 |
| 5W9O | J_LYS_52   | NZ  | J_ASP_49   | OD2 | 3.987 |
| 5W9O | J_LYS_99   | NZ  | J_GLU_32   | OE1 | 3.930 |
| 5W9O | J_LYS_99   | NZ  | J_GLU_32   | OE2 | 3.469 |
| 5W9O | J_LYS_99   | NZ  | J_ASP_34   | OD2 | 3.652 |
| 5W9O | J_LYS_110  | NZ  | J_ASP_83   | OD2 | 3.502 |
| 5W9O | J_LYS_110  | NZ  | J_ASP_108  | OD1 | 3.336 |
| 5W9O | J_LYS_110  | NZ  | J_ASP_108  | OD2 | 3.601 |
| 5W9O | J_ARG_119  | NH2 | J_ASP_54   | OD2 | 3.505 |
| 5W9O | J_LYS_142  | NZ  | J_GLU_252  | OE2 | 3.340 |
| 5W9O | J_HIS_194  | NE2 | J_GLU_32   | OE1 | 2.883 |
| 5W9O | J_HIS_208  | ND1 | J_ASP_213  | OD2 | 3.923 |

|      |           |     |           |     |       |
|------|-----------|-----|-----------|-----|-------|
| 5W9O | J_HIS_208 | NE2 | J_ASP_213 | OD2 | 3.787 |
| 5W9O | J_ARG_335 | NH2 | J_ASP_326 | OD2 | 2.668 |
| 5W9O | J_ARG_401 | NH2 | J_ASP_444 | OD2 | 3.561 |
| 5W9O | J_LYS_496 | NZ  | J_GLU_536 | OE1 | 3.601 |
| 5W9O | J_LYS_502 | NZ  | J_GLU_513 | OE2 | 2.998 |
| 5W9O | J_ARG_505 | NH1 | J_GLU_549 | OE1 | 3.551 |
| 5W9O | J_ARG_614 | NH2 | J_GLU_605 | OE2 | 3.078 |
| 5W9O | J_LYS_665 | NZ  | J_GLU_357 | OE1 | 3.881 |
| 5W9O | J_LYS_665 | NZ  | J_GLU_357 | OE2 | 2.936 |
| 5W9O | J_LYS_665 | NZ  | J_GLU_666 | OE2 | 3.739 |
| 5W9O | J_HIS_681 | NE2 | D_ASP_910 | OD1 | 2.932 |
| 5W9O | J_ARG_694 | NH1 | J_ASP_343 | OD2 | 3.143 |
| 5W9O | J_ARG_694 | NH2 | J_ASP_343 | OD2 | 2.962 |
| 5W9O | J_ARG_700 | NH2 | A_GLU_756 | OE1 | 3.931 |
| 5W9O | J_ARG_700 | NH2 | A_GLU_756 | OE2 | 2.914 |
| 5W9O | K_LYS_52  | NZ  | K_ASP_49  | OD2 | 2.630 |
| 5W9O | K_LYS_99  | NZ  | K_GLU_32  | OE1 | 2.833 |
| 5W9O | K_LYS_99  | NZ  | K_GLU_32  | OE2 | 3.941 |
| 5W9O | K_LYS_110 | NZ  | K_ASP_83  | OD2 | 3.249 |
| 5W9O | K_LYS_110 | NZ  | K_ASP_108 | OD1 | 3.411 |
| 5W9O | K_LYS_110 | NZ  | K_ASP_108 | OD2 | 3.722 |
| 5W9O | K_ARG_119 | NH1 | K_ASP_54  | OD1 | 3.012 |
| 5W9O | K_ARG_119 | NH1 | K_ASP_54  | OD2 | 3.524 |
| 5W9O | K_LYS_142 | NZ  | K_GLU_247 | OE1 | 3.485 |
| 5W9O | K_LYS_142 | NZ  | K_GLU_249 | OE2 | 2.994 |
| 5W9O | K_ARG_190 | NH1 | K_GLU_188 | OE1 | 3.568 |
| 5W9O | K_HIS_194 | NE2 | K_GLU_32  | OE1 | 3.387 |
| 5W9O | K_HIS_194 | NE2 | K_GLU_32  | OE2 | 3.889 |
| 5W9O | K_HIS_208 | NE2 | K_ASP_213 | OD2 | 3.790 |
| 5W9O | K_ARG_335 | NH2 | K_ASP_326 | OD2 | 2.949 |
| 5W9O | K_ARG_401 | NH2 | K_ASP_444 | OD1 | 3.796 |
| 5W9O | K_ARG_401 | NH2 | K_ASP_444 | OD2 | 3.928 |
| 5W9O | K_LYS_502 | NZ  | K_GLU_513 | OE2 | 2.673 |
| 5W9O | K_LYS_587 | NZ  | K_GLU_382 | OE2 | 2.796 |
| 5W9O | K_ARG_629 | NH1 | K_ASP_644 | OD1 | 2.889 |
| 5W9O | K_ARG_629 | NH1 | K_ASP_644 | OD2 | 3.817 |
| 5W9O | K_LYS_665 | NZ  | K_ASP_355 | OD1 | 3.037 |
| 5W9O | K_LYS_665 | NZ  | K_ASP_355 | OD2 | 3.492 |
| 5W9O | K_ARG_694 | NH1 | K_ASP_343 | OD2 | 3.613 |
| 5W9O | K_ARG_694 | NH2 | K_ASP_343 | OD2 | 3.571 |
| 5W9O | L_LYS_27  | NZ  | L_GLU_230 | OE2 | 3.874 |
| 5W9O | L_LYS_99  | NZ  | L_ASP_34  | OD2 | 3.209 |
| 5W9O | L_ARG_119 | NH2 | L_ASP_54  | OD2 | 3.705 |
| 5W9O | L_LYS_142 | NZ  | L_GLU_252 | OE2 | 2.676 |
| 5W9O | L_HIS_194 | NE2 | L_GLU_32  | OE1 | 3.367 |
| 5W9O | L_HIS_194 | NE2 | L_GLU_32  | OE2 | 3.603 |
| 5W9O | L_HIS_208 | NE2 | L_ASP_213 | OD2 | 3.918 |
| 5W9O | L_ARG_235 | NH2 | L_GLU_188 | OE1 | 2.895 |
| 5W9O | L_ARG_235 | NH2 | L_GLU_188 | OE2 | 3.955 |
| 5W9O | L_ARG_335 | NH2 | L_ASP_326 | OD2 | 2.658 |
| 5W9O | L_ARG_401 | NH2 | L_ASP_444 | OD1 | 3.946 |
| 5W9O | L_LYS_413 | NZ  | L_GLU_382 | OE2 | 2.929 |
| 5W9O | L_LYS_502 | NZ  | L_GLU_513 | OE1 | 3.607 |
| 5W9O | L_LYS_502 | NZ  | L_GLU_513 | OE2 | 3.762 |
| 5W9O | L_ARG_614 | NH2 | L_GLU_605 | OE1 | 3.049 |
| 5W9O | L_ARG_614 | NH2 | L_GLU_605 | OE2 | 3.623 |
| 5W9O | L_ARG_629 | NH1 | L_ASP_644 | OD1 | 2.908 |
| 5W9O | L_ARG_629 | NH2 | L_ASP_644 | OD1 | 2.789 |

|      |           |     |           |     |       |
|------|-----------|-----|-----------|-----|-------|
| 5W9O | L_ARG_629 | NH2 | L_ASP_644 | OD2 | 3.634 |
| 5W9O | L_LYS_665 | NZ  | L_GLU_666 | OE2 | 2.768 |
| 5W9O | L_HIS_681 | NE2 | A_ASP_910 | OD1 | 3.028 |
| 5W9O | L_HIS_681 | NE2 | A_ASP_910 | OD2 | 3.886 |
| 5W9O | L_HIS_681 | NE2 | L_GLU_680 | OE2 | 3.236 |
| 5W9O | L_ARG_694 | NH1 | L_ASP_343 | OD2 | 2.925 |
| 5W9O | L_ARG_694 | NH2 | L_ASP_343 | OD2 | 3.698 |

Table 749: 5W9O-specific salt bridging networks analysis. In this table, a PDB file is specified with a four-letter PDB ID, except that the names of the PDB files corresponding to the single NMR structural model split from the NMR ensemble is specified with a four-letter PDB ID in addition to a hyphen followed by the single NMR structural model numeric ID, the residue naming scheme is **Chain ID\_residue name\_residue number**,  $\angle ADH$  represents the angle formed by acceptor (A), donor (D) and hydrogen (H) ( $\angle ADH$ ).

| PDB ID | Residue A  | Atom A | Residue B  | Atom B | Distance (Å) |
|--------|------------|--------|------------|--------|--------------|
| 5W9P   | J_ARG_758  | NH2    | A_ASP_740  | OD1    | 2.970        |
| 5W9P   | J_LYS_779  | NZ     | J_ASP_771  | OD2    | 2.978        |
| 5W9P   | J_LYS_779  | NZ     | J_GLU_1148 | OE1    | 2.979        |
| 5W9P   | J_LYS_779  | NZ     | J_GLU_1148 | OE2    | 3.840        |
| 5W9P   | J_LYS_801  | NZ     | J_ASP_843  | OD1    | 2.959        |
| 5W9P   | J_LYS_801  | NZ     | J_ASP_843  | OD2    | 3.857        |
| 5W9P   | J_LYS_807  | NZ     | J_GLU_818  | OE1    | 3.681        |
| 5W9P   | J_LYS_807  | NZ     | J_GLU_818  | OE2    | 2.920        |
| 5W9P   | J_LYS_816  | NZ     | J_ASP_1064 | OD1    | 3.615        |
| 5W9P   | J_LYS_816  | NZ     | J_ASP_1064 | OD2    | 2.986        |
| 5W9P   | J_ARG_841  | NH2    | J_GLU_1090 | OE1    | 2.927        |
| 5W9P   | J_ARG_841  | NH2    | J_GLU_1090 | OE2    | 3.745        |
| 5W9P   | J_ARG_847  | NH1    | C_ASP_726  | OD1    | 3.573        |
| 5W9P   | J_ARG_847  | NH1    | C_ASP_726  | OD2    | 2.973        |
| 5W9P   | J_ARG_847  | NH2    | J_ASP_844  | OD1    | 2.813        |
| 5W9P   | J_ARG_887  | NH2    | J_ASP_892  | OD1    | 2.929        |
| 5W9P   | J_HIS_1020 | NE2    | J_ASP_1024 | OD2    | 3.009        |
| 5W9P   | J_LYS_1021 | NZ     | J_GLU_793  | OE1    | 2.955        |
| 5W9P   | J_LYS_1021 | NZ     | J_GLU_793  | OE2    | 3.659        |
| 5W9P   | J_ARG_1113 | NH1    | J_GLU_1105 | OE1    | 3.033        |
| 5W9P   | J_ARG_1113 | NH2    | H_GLU_1105 | OE1    | 3.990        |
| 5W9P   | J_ARG_1113 | NH2    | H_GLU_1105 | OE2    | 2.796        |
| 5W9P   | J_LYS_1174 | NZ     | J_GLU_1183 | OE1    | 2.861        |
| 5W9P   | J_ARG_1179 | NH2    | F_ASP_31   | OD1    | 2.888        |
| 5W9P   | A_LYS_52   | NZ     | A_ASP_49   | OD2    | 2.805        |
| 5W9P   | A_LYS_99   | NZ     | A_GLU_32   | OE1    | 2.801        |
| 5W9P   | A_LYS_110  | NZ     | A_ASP_83   | OD2    | 2.816        |
| 5W9P   | A_ARG_119  | NH2    | A_ASP_54   | OD1    | 3.835        |
| 5W9P   | A_ARG_119  | NH2    | A_ASP_54   | OD2    | 3.031        |
| 5W9P   | A_LYS_142  | NZ     | A_GLU_252  | OE1    | 2.862        |
| 5W9P   | A_HIS_194  | NE2    | A_GLU_32   | OE1    | 3.536        |
| 5W9P   | A_ARG_235  | NH1    | A_GLU_188  | OE1    | 2.967        |
| 5W9P   | A_ARG_235  | NH1    | A_GLU_188  | OE2    | 3.856        |
| 5W9P   | A_ARG_269  | NH1    | A_GLU_252  | OE1    | 3.898        |
| 5W9P   | A_ARG_269  | NH1    | A_GLU_252  | OE2    | 2.880        |
| 5W9P   | A_ARG_335  | NH2    | A_ASP_326  | OD2    | 2.878        |
| 5W9P   | A_ARG_614  | NH1    | A_GLU_367  | OE2    | 2.943        |
| 5W9P   | A_ARG_614  | NH2    | A_GLU_367  | OE2    | 2.985        |
| 5W9P   | A_ARG_629  | NH1    | A_GLU_376  | OE1    | 3.647        |
| 5W9P   | A_ARG_629  | NH1    | A_ASP_644  | OD1    | 2.978        |
| 5W9P   | A_ARG_629  | NH2    | A_ASP_644  | OD1    | 2.931        |
| 5W9P   | A_LYS_665  | NZ     | A_GLU_357  | OE1    | 3.670        |
| 5W9P   | A_LYS_665  | NZ     | A_GLU_357  | OE2    | 2.942        |
| 5W9P   | A_HIS_681  | NE2    | H_ASP_910  | OD1    | 3.149        |
| 5W9P   | A_HIS_681  | NE2    | H_ASP_910  | OD2    | 3.352        |
| 5W9P   | A_ARG_691  | NH2    | H_GLU_818  | OE2    | 2.969        |
| 5W9P   | A_ARG_694  | NH2    | A_ASP_343  | OD1    | 2.962        |
| 5W9P   | A_ARG_694  | NH2    | A_ASP_343  | OD2    | 3.657        |
| 5W9P   | A_ARG_700  | NH2    | J_GLU_756  | OE2    | 2.978        |
| 5W9P   | A_LYS_728  | NZ     | A_ASP_726  | OD2    | 2.889        |
| 5W9P   | F_LYS_62   | NZ     | F_GLU_46   | OE1    | 2.994        |
| 5W9P   | F_LYS_62   | NZ     | F_GLU_46   | OE2    | 3.429        |
| 5W9P   | F_ARG_66   | NH1    | F_ASP_86   | OD1    | 3.067        |
| 5W9P   | F_ARG_66   | NH1    | F_ASP_86   | OD2    | 3.588        |
| 5W9P   | F_ARG_66   | NH2    | F_ASP_86   | OD1    | 3.743        |
| 5W9P   | F_ARG_66   | NH2    | F_ASP_86   | OD2    | 2.861        |
| 5W9P   | F_ARG_94   | NH2    | F_ASP_101  | OD1    | 3.927        |



|      |            |     |            |     |       |
|------|------------|-----|------------|-----|-------|
| 5W9P | F_ARG_94   | NH2 | F_ASP_101  | OD2 | 2.913 |
| 5W9P | F_LYS_95   | NZ  | F_ASP_100C | OD1 | 2.870 |
| 5W9P | F_LYS_95   | NZ  | F_ASP_100C | OD2 | 3.708 |
| 5W9P | G_ARG_1177 | NH1 | G_ASP_1198 | OD1 | 3.165 |
| 5W9P | G_ARG_1177 | NH1 | G_ASP_1198 | OD2 | 3.744 |
| 5W9P | G_ARG_1177 | NH2 | G_ASP_1198 | OD1 | 3.713 |
| 5W9P | G_ARG_1177 | NH2 | G_ASP_1198 | OD2 | 2.872 |
| 5W9P | G_ARG_1212 | NH1 | J_GLU_1183 | OE2 | 3.421 |
| 5W9P | G_ARG_1212 | NH2 | J_GLU_1183 | OE2 | 2.921 |
| 5W9P | G_ARG_1212 | NH2 | F_ASP_100C | OD2 | 2.848 |
| 5W9P | G_LYS_1219 | NZ  | G_GLU_1221 | OE2 | 2.894 |
| 5W9P | B_ARG_758  | NH2 | C_ASP_740  | OD1 | 2.971 |
| 5W9P | B_LYS_779  | NZ  | B_ASP_771  | OD2 | 2.978 |
| 5W9P | B_LYS_779  | NZ  | B_GLU_1148 | OE1 | 2.979 |
| 5W9P | B_LYS_779  | NZ  | B_GLU_1148 | OE2 | 3.841 |
| 5W9P | B_LYS_801  | NZ  | B_ASP_843  | OD1 | 2.958 |
| 5W9P | B_LYS_801  | NZ  | B_ASP_843  | OD2 | 3.857 |
| 5W9P | B_LYS_807  | NZ  | B_GLU_818  | OE1 | 3.681 |
| 5W9P | B_LYS_807  | NZ  | B_GLU_818  | OE2 | 2.920 |
| 5W9P | B_LYS_816  | NZ  | B_ASP_1064 | OD1 | 3.616 |
| 5W9P | B_LYS_816  | NZ  | B_ASP_1064 | OD2 | 2.986 |
| 5W9P | B_ARG_841  | NH2 | B_GLU_1090 | OE1 | 2.927 |
| 5W9P | B_ARG_841  | NH2 | B_GLU_1090 | OE2 | 3.745 |
| 5W9P | B_ARG_847  | NH1 | I_ASP_726  | OD1 | 3.572 |
| 5W9P | B_ARG_847  | NH1 | I_ASP_726  | OD2 | 2.973 |
| 5W9P | B_ARG_847  | NH2 | B_ASP_844  | OD1 | 2.813 |
| 5W9P | B_ARG_887  | NH2 | B_ASP_892  | OD1 | 2.929 |
| 5W9P | B_HIS_1020 | NE2 | B_ASP_1024 | OD2 | 3.009 |
| 5W9P | B_LYS_1021 | NZ  | B_GLU_793  | OE1 | 2.955 |
| 5W9P | B_LYS_1021 | NZ  | B_GLU_793  | OE2 | 3.659 |
| 5W9P | B_ARG_1113 | NH1 | B_GLU_1105 | OE1 | 3.033 |
| 5W9P | B_ARG_1113 | NH2 | J_GLU_1105 | OE1 | 3.989 |
| 5W9P | B_ARG_1113 | NH2 | J_GLU_1105 | OE2 | 2.795 |
| 5W9P | B_LYS_1174 | NZ  | B_GLU_1183 | OE1 | 2.862 |
| 5W9P | B_ARG_1179 | NH2 | D_ASP_31   | OD1 | 2.887 |
| 5W9P | C_LYS_52   | NZ  | C_ASP_49   | OD2 | 2.805 |
| 5W9P | C_LYS_99   | NZ  | C_GLU_32   | OE1 | 2.802 |
| 5W9P | C_LYS_110  | NZ  | C_ASP_83   | OD2 | 2.816 |
| 5W9P | C_ARG_119  | NH2 | C_ASP_54   | OD1 | 3.834 |
| 5W9P | C_ARG_119  | NH2 | C_ASP_54   | OD2 | 3.030 |
| 5W9P | C_LYS_142  | NZ  | C_GLU_252  | OE1 | 2.862 |
| 5W9P | C_HIS_194  | NE2 | C_GLU_32   | OE1 | 3.534 |
| 5W9P | C_ARG_235  | NH1 | C_GLU_188  | OE1 | 2.966 |
| 5W9P | C_ARG_235  | NH1 | C_GLU_188  | OE2 | 3.856 |
| 5W9P | C_ARG_269  | NH1 | C_GLU_252  | OE1 | 3.899 |
| 5W9P | C_ARG_269  | NH1 | C_GLU_252  | OE2 | 2.881 |
| 5W9P | C_ARG_335  | NH2 | C_ASP_326  | OD2 | 2.876 |
| 5W9P | C_ARG_614  | NH1 | C_GLU_367  | OE2 | 2.943 |
| 5W9P | C_ARG_614  | NH2 | C_GLU_367  | OE2 | 2.984 |
| 5W9P | C_ARG_629  | NH1 | C_GLU_376  | OE1 | 3.647 |
| 5W9P | C_ARG_629  | NH1 | C_ASP_644  | OD1 | 2.978 |
| 5W9P | C_ARG_629  | NH1 | C_ASP_644  | OD2 | 4.000 |
| 5W9P | C_ARG_629  | NH2 | C_ASP_644  | OD1 | 2.931 |
| 5W9P | C_LYS_665  | NZ  | C_GLU_357  | OE1 | 3.671 |
| 5W9P | C_LYS_665  | NZ  | C_GLU_357  | OE2 | 2.942 |
| 5W9P | C_HIS_681  | NE2 | J_ASP_910  | OD1 | 3.149 |
| 5W9P | C_HIS_681  | NE2 | J_ASP_910  | OD2 | 3.352 |
| 5W9P | C_ARG_691  | NH2 | J_GLU_818  | OE2 | 2.970 |

|      |            |     |            |     |       |
|------|------------|-----|------------|-----|-------|
| 5W9P | C_ARG.694  | NH2 | C_ASP.343  | OD1 | 2.962 |
| 5W9P | C_ARG.694  | NH2 | C_ASP.343  | OD2 | 3.658 |
| 5W9P | C_ARG.700  | NH2 | B_GLU.756  | OE2 | 2.978 |
| 5W9P | C_LYS.728  | NZ  | C_ASP.726  | OD2 | 2.889 |
| 5W9P | D_LYS.62   | NZ  | D_GLU.46   | OE1 | 2.993 |
| 5W9P | D_LYS.62   | NZ  | D_GLU.46   | OE2 | 3.428 |
| 5W9P | D_ARG.66   | NH1 | D_ASP.86   | OD1 | 3.067 |
| 5W9P | D_ARG.66   | NH1 | D_ASP.86   | OD2 | 3.588 |
| 5W9P | D_ARG.66   | NH2 | D_ASP.86   | OD1 | 3.743 |
| 5W9P | D_ARG.66   | NH2 | D_ASP.86   | OD2 | 2.862 |
| 5W9P | D_ARG.94   | NH2 | D_ASP.101  | OD1 | 3.928 |
| 5W9P | D_ARG.94   | NH2 | D_ASP.101  | OD2 | 2.914 |
| 5W9P | D_LYS.95   | NZ  | D_ASP.100C | OD1 | 2.871 |
| 5W9P | D_LYS.95   | NZ  | D_ASP.100C | OD2 | 3.708 |
| 5W9P | E_ARG.1177 | NH1 | E_ASP.1198 | OD1 | 3.165 |
| 5W9P | E_ARG.1177 | NH1 | E_ASP.1198 | OD2 | 3.743 |
| 5W9P | E_ARG.1177 | NH2 | E_ASP.1198 | OD1 | 3.713 |
| 5W9P | E_ARG.1177 | NH2 | E_ASP.1198 | OD2 | 2.872 |
| 5W9P | E_ARG.1212 | NH1 | B_GLU.1183 | OE2 | 3.420 |
| 5W9P | E_ARG.1212 | NH2 | B_GLU.1183 | OE2 | 2.920 |
| 5W9P | E_ARG.1212 | NH2 | D_ASP.100C | OD2 | 2.848 |
| 5W9P | E_LYS.1219 | NZ  | E_GLU.1221 | OE2 | 2.894 |
| 5W9P | H_ARG.758  | NH2 | I_ASP.740  | OD1 | 2.969 |
| 5W9P | H_LYS.779  | NZ  | H_ASP.771  | OD2 | 2.978 |
| 5W9P | H_LYS.779  | NZ  | H_GLU.1148 | OE1 | 2.978 |
| 5W9P | H_LYS.779  | NZ  | H_GLU.1148 | OE2 | 3.840 |
| 5W9P | H_LYS.801  | NZ  | H_ASP.843  | OD1 | 2.959 |
| 5W9P | H_LYS.801  | NZ  | H_ASP.843  | OD2 | 3.857 |
| 5W9P | H_LYS.807  | NZ  | H_GLU.818  | OE1 | 3.681 |
| 5W9P | H_LYS.807  | NZ  | H_GLU.818  | OE2 | 2.919 |
| 5W9P | H_LYS.816  | NZ  | H_ASP.1064 | OD1 | 3.616 |
| 5W9P | H_LYS.816  | NZ  | H_ASP.1064 | OD2 | 2.986 |
| 5W9P | H_ARG.841  | NH2 | H_GLU.1090 | OE1 | 2.927 |
| 5W9P | H_ARG.841  | NH2 | H_GLU.1090 | OE2 | 3.745 |
| 5W9P | H_ARG.847  | NH1 | A_ASP.726  | OD1 | 3.572 |
| 5W9P | H_ARG.847  | NH1 | A_ASP.726  | OD2 | 2.973 |
| 5W9P | H_ARG.847  | NH2 | H_ASP.844  | OD1 | 2.813 |
| 5W9P | H_ARG.887  | NH2 | H_ASP.892  | OD1 | 2.929 |
| 5W9P | H_HIS.1020 | NE2 | H_ASP.1024 | OD2 | 3.010 |
| 5W9P | H_LYS.1021 | NZ  | H_GLU.793  | OE1 | 2.954 |
| 5W9P | H_LYS.1021 | NZ  | H_GLU.793  | OE2 | 3.659 |
| 5W9P | H_ARG.1113 | NH1 | H_GLU.1105 | OE1 | 3.032 |
| 5W9P | H_ARG.1113 | NH2 | B_GLU.1105 | OE1 | 3.989 |
| 5W9P | H_ARG.1113 | NH2 | B_GLU.1105 | OE2 | 2.795 |
| 5W9P | H_LYS.1174 | NZ  | H_GLU.1183 | OE1 | 2.861 |
| 5W9P | H_ARG.1179 | NH2 | K_ASP.31   | OD1 | 2.888 |
| 5W9P | I_LYS.52   | NZ  | I_ASP.49   | OD2 | 2.805 |
| 5W9P | I_LYS.99   | NZ  | I_GLU.32   | OE1 | 2.802 |
| 5W9P | I_LYS.110  | NZ  | I_ASP.83   | OD2 | 2.816 |
| 5W9P | I_ARG.119  | NH2 | I_ASP.54   | OD1 | 3.835 |
| 5W9P | I_ARG.119  | NH2 | I_ASP.54   | OD2 | 3.031 |
| 5W9P | I_LYS.142  | NZ  | I_GLU.252  | OE1 | 2.862 |
| 5W9P | I_HIS.194  | NE2 | I_GLU.32   | OE1 | 3.534 |
| 5W9P | I_ARG.235  | NH1 | I_GLU.188  | OE1 | 2.967 |
| 5W9P | I_ARG.235  | NH1 | I_GLU.188  | OE2 | 3.856 |
| 5W9P | I_ARG.269  | NH1 | I_GLU.252  | OE1 | 3.899 |
| 5W9P | I_ARG.269  | NH1 | I_GLU.252  | OE2 | 2.881 |
| 5W9P | I_ARG.335  | NH2 | I_ASP.326  | OD2 | 2.877 |

|      |            |     |            |     |       |
|------|------------|-----|------------|-----|-------|
| 5W9P | L_ARG.614  | NH1 | L_GLU_367  | OE2 | 2.944 |
| 5W9P | L_ARG.614  | NH2 | L_GLU_367  | OE2 | 2.985 |
| 5W9P | L_ARG.629  | NH1 | L_GLU_376  | OE1 | 3.647 |
| 5W9P | L_ARG.629  | NH1 | L_ASP_644  | OD1 | 2.978 |
| 5W9P | L_ARG.629  | NH1 | L_ASP_644  | OD2 | 4.000 |
| 5W9P | L_ARG.629  | NH2 | L_ASP_644  | OD1 | 2.931 |
| 5W9P | L_LYS.665  | NZ  | L_GLU_357  | OE1 | 3.671 |
| 5W9P | L_LYS.665  | NZ  | L_GLU_357  | OE2 | 2.942 |
| 5W9P | L_HIS.681  | NE2 | B_ASP_910  | OD1 | 3.149 |
| 5W9P | L_HIS.681  | NE2 | B_ASP_910  | OD2 | 3.352 |
| 5W9P | L_ARG.691  | NH2 | B_GLU_818  | OE2 | 2.970 |
| 5W9P | L_ARG.694  | NH2 | L_ASP_343  | OD1 | 2.962 |
| 5W9P | L_ARG.694  | NH2 | L_ASP_343  | OD2 | 3.657 |
| 5W9P | L_ARG.700  | NH2 | H_GLU_756  | OE2 | 2.977 |
| 5W9P | L_LYS.728  | NZ  | L_ASP_726  | OD2 | 2.890 |
| 5W9P | K_LYS.62   | NZ  | K_GLU_46   | OE1 | 2.994 |
| 5W9P | K_LYS.62   | NZ  | K_GLU_46   | OE2 | 3.429 |
| 5W9P | K_ARG.66   | NH1 | K_ASP_86   | OD1 | 3.067 |
| 5W9P | K_ARG.66   | NH1 | K_ASP_86   | OD2 | 3.588 |
| 5W9P | K_ARG.66   | NH2 | K_ASP_86   | OD1 | 3.743 |
| 5W9P | K_ARG.66   | NH2 | K_ASP_86   | OD2 | 2.862 |
| 5W9P | K_ARG.94   | NH2 | K_ASP_101  | OD1 | 3.928 |
| 5W9P | K_ARG.94   | NH2 | K_ASP_101  | OD2 | 2.914 |
| 5W9P | K_LYS.95   | NZ  | K_ASP_100C | OD1 | 2.870 |
| 5W9P | K_LYS.95   | NZ  | K_ASP_100C | OD2 | 3.709 |
| 5W9P | L_ARG.1177 | NH1 | L_ASP_1198 | OD1 | 3.165 |
| 5W9P | L_ARG.1177 | NH1 | L_ASP_1198 | OD2 | 3.743 |
| 5W9P | L_ARG.1177 | NH2 | L_ASP_1198 | OD1 | 3.713 |
| 5W9P | L_ARG.1177 | NH2 | L_ASP_1198 | OD2 | 2.871 |
| 5W9P | L_ARG.1212 | NH1 | H_GLU_1183 | OE2 | 3.420 |
| 5W9P | L_ARG.1212 | NH2 | H_GLU_1183 | OE2 | 2.921 |
| 5W9P | L_ARG.1212 | NH2 | K_ASP_100C | OD2 | 2.848 |
| 5W9P | L_LYS.1219 | NZ  | L_GLU_1221 | OE2 | 2.893 |

Table 750: 5W9P-specific salt bridging networks analysis. In this table, a PDB file is specified with a four-letter PDB ID, except that the names of the PDB files corresponding to the single NMR structural model split from the NMR ensemble is specified with a four-letter PDB ID in addition to a hyphen followed by the single NMR structural model numeric ID, the residue naming scheme is **Chain ID\_residue name\_residue number**,  $\angle ADH$  represents the angle formed by acceptor (A), donor (D) and hydrogen (H) ( $\angle ADH$ ).

| PDB ID | Residue A | Atom A | Residue B | Atom B | Distance (Å) |
|--------|-----------|--------|-----------|--------|--------------|
| 5WK4   | D_ARG_29  | NH2    | E_ASP_36  | OD1    | 3.168        |
| 5WK4   | D_ARG_29  | NH2    | E_ASP_36  | OD2    | 3.056        |
| 5WK4   | D_ARG_38  | NH1    | D_ASP_36  | OD1    | 3.446        |
| 5WK4   | D_ARG_51  | NH1    | D_ASP_50  | OD1    | 3.642        |
| 5WK4   | D_ARG_51  | NH1    | D_ASP_50  | OD2    | 3.657        |
| 5WK4   | D_ARG_101 | NH2    | E_ASP_50  | OD2    | 3.021        |
| 5WK4   | D_ARG_199 | NH1    | D_ASP_187 | OD1    | 3.481        |
| 5WK4   | A_ARG_38  | NH1    | A_ASP_36  | OD1    | 3.370        |
| 5WK4   | A_ARG_51  | NH2    | A_ASP_50  | OD1    | 3.057        |
| 5WK4   | A_ARG_51  | NH2    | A_ASP_50  | OD2    | 3.306        |
| 5WK4   | A_HIS_174 | NE2    | D_GLU_65  | OE2    | 2.738        |
| 5WK4   | A_ARG_199 | NH1    | A_ASP_187 | OD1    | 3.560        |
| 5WK4   | B_ARG_29  | NH2    | C_ASP_36  | OD1    | 3.257        |
| 5WK4   | B_ARG_29  | NH2    | C_ASP_36  | OD2    | 2.944        |
| 5WK4   | B_ARG_38  | NH1    | B_ASP_36  | OD1    | 3.452        |
| 5WK4   | B_ARG_101 | NH1    | C_ASP_50  | OD2    | 3.997        |
| 5WK4   | B_ARG_101 | NH2    | C_ASP_50  | OD2    | 2.811        |
| 5WK4   | B_ARG_199 | NH1    | B_ASP_187 | OD1    | 3.746        |
| 5WK4   | B_ARG_199 | NH1    | B_ASP_187 | OD2    | 3.724        |
| 5WK4   | C_ARG_29  | NH2    | B_ASP_36  | OD1    | 3.196        |
| 5WK4   | C_ARG_29  | NH2    | B_ASP_36  | OD2    | 3.146        |
| 5WK4   | C_ARG_38  | NH1    | C_ASP_36  | OD1    | 3.439        |
| 5WK4   | C_ARG_51  | NH2    | C_ASP_50  | OD1    | 3.405        |
| 5WK4   | C_ARG_51  | NH2    | C_ASP_50  | OD2    | 3.912        |
| 5WK4   | C_ARG_101 | NH1    | B_ASP_50  | OD2    | 3.840        |
| 5WK4   | C_ARG_101 | NH2    | B_ASP_50  | OD2    | 2.874        |
| 5WK4   | C_ARG_199 | NH1    | C_ASP_187 | OD1    | 3.232        |
| 5WK4   | C_ARG_199 | NH1    | C_ASP_187 | OD2    | 3.963        |
| 5WK4   | C_LYS_210 | NZ     | C_GLU_160 | OE1    | 3.001        |
| 5WK4   | E_ARG_29  | NH2    | D_ASP_36  | OD1    | 3.889        |
| 5WK4   | E_ARG_38  | NH1    | E_ASP_36  | OD1    | 3.587        |
| 5WK4   | E_ARG_101 | NH2    | D_ASP_50  | OD2    | 2.922        |
| 5WK4   | E_ARG_199 | NH1    | E_ASP_187 | OD1    | 3.573        |
| 5WK4   | E_ARG_199 | NH1    | E_ASP_187 | OD2    | 3.380        |
| 5WK4   | E_LYS_210 | NZ     | E_GLU_160 | OE1    | 3.540        |
| 5WK4   | F_ARG_38  | NH1    | F_ASP_36  | OD1    | 3.514        |
| 5WK4   | F_ARG_51  | NH1    | F_ASP_50  | OD1    | 3.360        |
| 5WK4   | F_ARG_51  | NH1    | F_ASP_50  | OD2    | 3.476        |

Table 751: 5WK4-specific salt bridging networks analysis. In this table, a PDB file is specified with a four-letter PDB ID, except that the names of the PDB files corresponding to the single NMR structural model split from the NMR ensemble is specified with a four-letter PDB ID in addition to a hyphen followed by the single NMR structural model numeric ID, the residue naming scheme is **Chain ID\_residue name\_residue number**,  $\angle ADH$  represents the angle formed by acceptor (A), donor (D) and hydrogen (H) ( $\angle ADH$ ).

| PDB ID | Residue A | Atom A | Residue B | Atom B | Distance (Å) |
|--------|-----------|--------|-----------|--------|--------------|
| 5WKQ   | A_LYS_122 | NZ     | A_GLU_220 | OE1    | 3.888        |
| 5WKQ   | A_ARG_135 | NH1    | B_ASP_212 | OD1    | 3.924        |
| 5WKQ   | A_ARG_135 | NH2    | B_ASP_212 | OD1    | 3.057        |
| 5WKQ   | A_LYS_157 | NZ     | A_ASP_153 | OD1    | 3.684        |
| 5WKQ   | A_LYS_157 | NZ     | A_ASP_153 | OD2    | 2.658        |
| 5WKQ   | A_ARG_164 | NH2    | A_GLU_174 | OE2    | 3.301        |
| 5WKQ   | A_LYS_189 | NZ     | A_ASP_190 | OD1    | 3.185        |
| 5WKQ   | B_LYS_115 | NZ     | B_GLU_220 | OE2    | 3.947        |
| 5WKQ   | B_LYS_157 | NZ     | B_ASP_153 | OD1    | 3.490        |
| 5WKQ   | B_LYS_157 | NZ     | B_ASP_153 | OD2    | 3.167        |
| 5WKQ   | B_LYS_189 | NZ     | B_GLU_155 | OE2    | 3.558        |
| 5WKQ   | B_ARG_196 | NH1    | B_ASP_148 | OD1    | 2.868        |
| 5WKQ   | B_HIS_207 | ND1    | A_GLU_131 | OE1    | 3.383        |
| 5WKQ   | B_HIS_207 | ND1    | A_GLU_131 | OE2    | 2.652        |
| 5WKQ   | B_LYS_213 | NZ     | B_GLU_129 | OE1    | 3.323        |

Table 752: 5WKQ-specific salt bridging networks analysis. In this table, a PDB file is specified with a four-letter PDB ID, except that the names of the PDB files corresponding to the single NMR structural model split from the NMR ensemble is specified with a four-letter PDB ID in addition to a hyphen followed by the single NMR structural model numeric ID, the residue naming scheme is **Chain ID\_residue name\_residue number**,  $\angle ADH$  represents the angle formed by acceptor (A), donor (D) and hydrogen (H) ( $\angle ADH$ ).

| PDB ID | Residue A | Atom A | Residue B | Atom B | Distance (Å) |
|--------|-----------|--------|-----------|--------|--------------|
| 5WN9   | H_ARG_38  | NH1    | H_GLU_46  | OE1    | 3.227        |
| 5WN9   | H_ARG_38  | NH1    | H_GLU_46  | OE2    | 3.503        |
| 5WN9   | H_ARG_38  | NH1    | H_ASP_90  | OD1    | 3.902        |
| 5WN9   | H_ARG_38  | NH2    | H_ASP_90  | OD1    | 2.913        |
| 5WN9   | H_LYS_63  | NZ     | H_GLU_46  | OE1    | 3.637        |
| 5WN9   | H_LYS_63  | NZ     | H_GLU_46  | OE2    | 3.106        |
| 5WN9   | H_ARG_67  | NH1    | H_ASP_90  | OD1    | 3.282        |
| 5WN9   | H_ARG_67  | NH1    | H_ASP_90  | OD2    | 2.270        |
| 5WN9   | H_ARG_67  | NH2    | H_ASP_90  | OD1    | 3.376        |
| 5WN9   | H_ARG_67  | NH2    | H_ASP_90  | OD2    | 3.700        |
| 5WN9   | H_ARG_84  | NH1    | H_GLU_82  | OE1    | 3.057        |
| 5WN9   | H_ARG_98  | NH1    | H_ASP_112 | OD1    | 3.399        |
| 5WN9   | H_ARG_98  | NH1    | H_ASP_112 | OD2    | 2.841        |
| 5WN9   | H_ARG_168 | NH2    | H_ASP_214 | OD1    | 2.927        |
| 5WN9   | H_ARG_168 | NH2    | H_ASP_214 | OD2    | 3.594        |
| 5WN9   | H_ARG_205 | NH1    | H_GLU_225 | OE2    | 3.482        |
| 5WN9   | H_ARG_205 | NH1    | H_ASP_226 | OD1    | 2.888        |
| 5WN9   | H_ARG_205 | NH1    | H_ASP_226 | OD2    | 3.550        |

Table 753: 5WN9-specific salt bridging networks analysis. In this table, a PDB file is specified with a four-letter PDB ID, except that the names of the PDB files corresponding to the single NMR structural model split from the NMR ensemble is specified with a four-letter PDB ID in addition to a hyphen followed by the single NMR structural model numeric ID, the residue naming scheme is **Chain ID\_residue name\_residue number**,  $\angle ADH$  represents the angle formed by acceptor (A), donor (D) and hydrogen (H) ( $\angle ADH$ ).

| PDB ID | Residue A | Atom A | Residue B | Atom B | Distance (Å) |
|--------|-----------|--------|-----------|--------|--------------|
| 5WNA   | H_ARG_28  | NH2    | H_GLU_31  | OE2    | 3.703        |
| 5WNA   | H_ARG_38  | NH1    | H_ASP_90  | OD2    | 2.959        |
| 5WNA   | H_ARG_38  | NH2    | H_GLU_46  | OE1    | 3.180        |
| 5WNA   | H_LYS_65  | NZ     | H_ASP_62  | OD1    | 2.520        |
| 5WNA   | H_ARG_67  | NH1    | H_ASP_90  | OD1    | 3.443        |
| 5WNA   | H_ARG_67  | NH1    | H_ASP_90  | OD2    | 3.943        |
| 5WNA   | H_ARG_67  | NH2    | H_ASP_90  | OD1    | 3.917        |
| 5WNA   | H_ARG_67  | NH2    | H_ASP_90  | OD2    | 3.253        |
| 5WNA   | H_LYS_111 | NZ     | H_GLU_2   | OE1    | 2.349        |
| 5WNA   | H_LYS_111 | NZ     | H_GLU_2   | OE2    | 2.999        |
| 5WNA   | H_LYS_154 | NZ     | H_ASP_155 | OD2    | 3.921        |
| 5WNA   | H_LYS_220 | NZ     | L_GLU_122 | OE2    | 3.667        |
| 5WNA   | H_LYS_221 | NZ     | H_GLU_223 | OE2    | 2.498        |
| 5WNA   | H_LYS_225 | NZ     | L_ASP_121 | OD1    | 3.706        |
| 5WNA   | L_HIS_32  | ND1    | L_GLU_50  | OE1    | 2.885        |
| 5WNA   | L_HIS_32  | ND1    | L_GLU_50  | OE2    | 3.439        |
| 5WNA   | L_LYS_39  | NZ     | D_GLU_81  | OE1    | 2.898        |
| 5WNA   | L_LYS_39  | NZ     | D_GLU_81  | OE2    | 2.887        |
| 5WNA   | L_ARG_61  | NH2    | L_GLU_81  | OE2    | 2.586        |
| 5WNA   | L_ARG_61  | NH2    | L_ASP_82  | OD1    | 3.471        |
| 5WNA   | L_ARG_61  | NH2    | L_ASP_82  | OD2    | 2.813        |
| 5WNA   | L_LYS_148 | NZ     | L_GLU_194 | OE1    | 2.468        |
| 5WNA   | L_LYS_148 | NZ     | L_GLU_194 | OE2    | 3.864        |
| 5WNA   | L_LYS_182 | NZ     | L_GLU_186 | OE1    | 3.903        |
| 5WNA   | L_LYS_182 | NZ     | L_GLU_186 | OE2    | 3.646        |
| 5WNA   | C_ARG_28  | NH2    | C_GLU_31  | OE1    | 3.185        |
| 5WNA   | C_ARG_38  | NH1    | C_ASP_90  | OD1    | 2.822        |
| 5WNA   | C_ARG_38  | NH2    | C_GLU_46  | OE1    | 3.169        |
| 5WNA   | C_ARG_38  | NH2    | C_GLU_46  | OE2    | 3.973        |
| 5WNA   | C_ARG_38  | NH2    | C_ASP_90  | OD1    | 3.613        |
| 5WNA   | C_LYS_65  | NZ     | C_ASP_62  | OD2    | 2.607        |
| 5WNA   | C_ARG_67  | NH1    | C_ASP_90  | OD1    | 3.948        |
| 5WNA   | C_ARG_67  | NH1    | C_ASP_90  | OD2    | 3.192        |
| 5WNA   | C_ARG_67  | NH2    | C_ASP_90  | OD1    | 3.187        |
| 5WNA   | C_ARG_67  | NH2    | C_ASP_90  | OD2    | 3.777        |
| 5WNA   | C_LYS_76  | NZ     | C_ASP_73  | OD2    | 3.522        |
| 5WNA   | C_LYS_111 | NZ     | C_GLU_2   | OE1    | 3.732        |
| 5WNA   | C_LYS_111 | NZ     | C_GLU_2   | OE2    | 2.480        |
| 5WNA   | C_LYS_154 | NZ     | C_ASP_155 | OD1    | 3.662        |
| 5WNA   | C_LYS_220 | NZ     | D_GLU_122 | OE2    | 3.567        |
| 5WNA   | C_LYS_221 | NZ     | C_GLU_223 | OE1    | 3.081        |
| 5WNA   | D_ARG_24  | NH1    | D_ASP_70  | OD1    | 2.370        |
| 5WNA   | D_ARG_24  | NH1    | D_ASP_70  | OD2    | 2.529        |
| 5WNA   | D_ARG_24  | NH2    | D_ASP_70  | OD1    | 3.649        |
| 5WNA   | D_HIS_32  | ND1    | D_GLU_50  | OE1    | 3.272        |
| 5WNA   | D_HIS_32  | ND1    | D_GLU_50  | OE2    | 2.966        |
| 5WNA   | D_LYS_39  | NZ     | L_GLU_81  | OE1    | 3.744        |
| 5WNA   | D_ARG_61  | NH2    | D_GLU_81  | OE1    | 3.776        |
| 5WNA   | D_ARG_61  | NH2    | D_ASP_82  | OD1    | 3.311        |
| 5WNA   | D_ARG_61  | NH2    | D_ASP_82  | OD2    | 2.738        |
| 5WNA   | D_LYS_148 | NZ     | D_GLU_194 | OE2    | 3.083        |
| 5WNA   | D_LYS_182 | NZ     | D_GLU_186 | OE1    | 3.810        |
| 5WNA   | D_LYS_182 | NZ     | D_GLU_186 | OE2    | 3.086        |
| 5WNA   | D_LYS_187 | NZ     | D_ASP_184 | OD1    | 3.142        |

---

Table 754: 5WNA-specific salt bridging networks analysis. In this table, a PDB file is specified with a four-letter PDB ID, except that the names of the PDB files corresponding to the single NMR structural model split from the NMR ensemble is specified with a four-letter PDB ID in addition to a hyphen followed by the single NMR structural model numeric ID, the residue naming scheme is **Chain ID\_residue name\_residue number**,  $\angle ADH$  represents the angle formed by acceptor (A), donor (D) and hydrogen (H) ( $\angle ADH$ ).



| PDB ID | Residue A | Atom A | Residue B | Atom B | Distance (Å) |
|--------|-----------|--------|-----------|--------|--------------|
| 5WNB   | H_ARG_19  | NH1    | H_GLU_82  | OE1    | 2.506        |
| 5WNB   | H_ARG_38  | NH1    | H_ASP_90  | OD1    | 3.116        |
| 5WNB   | H_ARG_38  | NH2    | H_GLU_46  | OE1    | 3.477        |
| 5WNB   | H_ARG_38  | NH2    | H_GLU_46  | OE2    | 2.945        |
| 5WNB   | H_ARG_38  | NH2    | H_ASP_90  | OD1    | 3.843        |
| 5WNB   | H_LYS_65  | NZ     | H_ASP_62  | OD1    | 3.127        |
| 5WNB   | H_ARG_67  | NH1    | H_ASP_90  | OD2    | 3.008        |
| 5WNB   | H_ARG_67  | NH2    | H_ASP_90  | OD1    | 3.462        |
| 5WNB   | H_ARG_67  | NH2    | H_ASP_90  | OD2    | 3.519        |
| 5WNB   | H_ARG_72  | NH2    | H_ASP_77  | OD2    | 3.365        |
| 5WNB   | H_LYS_76  | NZ     | H_ASP_73  | OD2    | 3.433        |
| 5WNB   | H_HIS_108 | ND1    | H_ASP_106 | OD2    | 3.787        |
| 5WNB   | H_HIS_108 | NE2    | H_ASP_106 | OD2    | 2.649        |
| 5WNB   | H_LYS_140 | NZ     | L_GLU_212 | OE1    | 3.467        |
| 5WNB   | H_LYS_140 | NZ     | L_GLU_212 | OE2    | 3.708        |
| 5WNB   | H_LYS_154 | NZ     | H_ASP_155 | OD1    | 3.075        |
| 5WNB   | H_LYS_154 | NZ     | H_ASP_155 | OD2    | 2.337        |
| 5WNB   | L_HIS_32  | ND1    | L_GLU_50  | OE1    | 3.927        |
| 5WNB   | L_HIS_32  | ND1    | L_GLU_50  | OE2    | 3.082        |
| 5WNB   | L_ARG_61  | NH1    | M_GLU_79  | OE2    | 3.612        |
| 5WNB   | L_ARG_61  | NH2    | L_GLU_81  | OE1    | 3.333        |
| 5WNB   | L_ARG_61  | NH2    | L_ASP_82  | OD1    | 3.537        |
| 5WNB   | L_ARG_61  | NH2    | L_ASP_82  | OD2    | 2.770        |
| 5WNB   | L_LYS_148 | NZ     | L_GLU_194 | OE1    | 2.500        |
| 5WNB   | L_LYS_187 | NZ     | L_ASP_184 | OD2    | 3.098        |
| 5WNB   | L_HIS_188 | ND1    | L_ASP_150 | OD1    | 3.403        |
| 5WNB   | L_ARG_38  | NH1    | L_ASP_90  | OD2    | 3.224        |
| 5WNB   | L_ARG_38  | NH2    | L_GLU_46  | OE1    | 2.966        |
| 5WNB   | L_ARG_38  | NH2    | L_GLU_46  | OE2    | 3.754        |
| 5WNB   | L_ARG_67  | NH2    | L_ASP_90  | OD1    | 2.682        |
| 5WNB   | L_ARG_67  | NH2    | L_ASP_90  | OD2    | 3.569        |
| 5WNB   | L_HIS_108 | NE2    | L_ASP_106 | OD2    | 3.548        |
| 5WNB   | L_LYS_154 | NZ     | L_ASP_155 | OD1    | 2.470        |
| 5WNB   | L_LYS_154 | NZ     | L_ASP_155 | OD2    | 2.919        |
| 5WNB   | M_HIS_32  | ND1    | M_GLU_50  | OE1    | 2.976        |
| 5WNB   | M_HIS_32  | ND1    | M_GLU_50  | OE2    | 3.054        |
| 5WNB   | M_ARG_61  | NH2    | M_GLU_81  | OE1    | 3.769        |
| 5WNB   | M_ARG_61  | NH2    | M_ASP_82  | OD1    | 2.298        |
| 5WNB   | M_ARG_61  | NH2    | M_ASP_82  | OD2    | 3.245        |
| 5WNB   | M_LYS_168 | NZ     | M_ASP_166 | OD1    | 3.331        |
| 5WNB   | M_LYS_168 | NZ     | M_ASP_166 | OD2    | 3.217        |
| 5WNB   | A_HIS_164 | ND1    | A_GLU_166 | OE1    | 3.440        |
| 5WNB   | A_HIS_164 | NE2    | A_ASP_162 | OD1    | 3.262        |
| 5WNB   | A_HIS_164 | NE2    | A_ASP_162 | OD2    | 3.502        |
| 5WNB   | B_HIS_164 | ND1    | B_GLU_166 | OE1    | 3.999        |
| 5WNB   | B_HIS_164 | ND1    | B_GLU_166 | OE2    | 3.280        |
| 5WNB   | B_HIS_164 | NE2    | B_ASP_162 | OD1    | 3.381        |

---

Table 755: 5WNB-specific salt bridging networks analysis. In this table, a PDB file is specified with a four-letter PDB ID, except that the names of the PDB files corresponding to the single NMR structural model split from the NMR ensemble is specified with a four-letter PDB ID in addition to a hyphen followed by the single NMR structural model numeric ID, the residue naming scheme is **Chain ID\_residue name\_residue number**,  $\angle ADH$  represents the angle formed by acceptor (A), donor (D) and hydrogen (H) ( $\angle ADH$ ).

| PDB ID | Residue A | Atom A | Residue B | Atom B | Distance (Å) |
|--------|-----------|--------|-----------|--------|--------------|
| 5XBM   | A_ARG_59  | NH2    | A_GLU_79  | OE1    | 3.378        |
| 5XBM   | A_ARG_59  | NH2    | A_ASP_80  | OD2    | 3.511        |
| 5XBM   | A_LYS_140 | NZ     | A_GLU_103 | OE2    | 3.814        |
| 5XBM   | A_LYS_145 | NZ     | A_GLU_193 | OE1    | 3.556        |
| 5XBM   | A_LYS_145 | NZ     | A_GLU_193 | OE2    | 2.956        |
| 5XBM   | A_ARG_153 | NH1    | A_GLU_183 | OE1    | 2.925        |
| 5XBM   | A_ARG_153 | NH2    | A_GLU_183 | OE1    | 3.437        |
| 5XBM   | A_LYS_181 | NZ     | A_GLU_185 | OE2    | 3.524        |
| 5XBM   | A_LYS_205 | NZ     | B_ASP_139 | OD1    | 3.654        |
| 5XBM   | B_LYS_67  | NZ     | B_ASP_90  | OD1    | 3.066        |
| 5XBM   | B_LYS_67  | NZ     | B_ASP_90  | OD2    | 2.464        |
| 5XBM   | B_ARG_98  | NH2    | B_ASP_110 | OD2    | 3.054        |
| 5XBM   | B_LYS_217 | NZ     | A_GLU_121 | OE1    | 2.614        |
| 5XBM   | B_LYS_217 | NZ     | A_GLU_121 | OE2    | 3.625        |
| 5XBM   | C_ARG_77  | NH1    | C_GLU_79  | OE1    | 3.381        |
| 5XBM   | C_ARG_77  | NH2    | C_GLU_79  | OE1    | 2.852        |
| 5XBM   | C_ARG_95  | NH1    | C_ASP_254 | OD2    | 2.603        |
| 5XBM   | C_ARG_95  | NH2    | C_GLU_93  | OE2    | 3.851        |
| 5XBM   | C_ARG_95  | NH2    | C_GLU_413 | OE1    | 3.677        |
| 5XBM   | C_ARG_95  | NH2    | C_GLU_413 | OE2    | 3.452        |
| 5XBM   | C_LYS_97  | NZ     | C_ASP_252 | OD2    | 3.959        |
| 5XBM   | C_HIS_171 | ND1    | C_GLU_175 | OE2    | 3.888        |
| 5XBM   | C_ARG_192 | NH2    | C_ASP_194 | OD2    | 3.106        |
| 5XBM   | C_HIS_257 | NE2    | C_GLU_264 | OE2    | 3.860        |
| 5XBM   | C_ARG_294 | NH1    | C_GLU_361 | OE2    | 3.640        |
| 5XBM   | C_ARG_294 | NH2    | C_ASP_368 | OD2    | 3.362        |
| 5XBM   | C_LYS_296 | NZ     | C_GLU_364 | OE1    | 3.065        |
| 5XBM   | C_LYS_296 | NZ     | C_GLU_364 | OE2    | 3.891        |
| 5XBM   | C_HIS_341 | NE2    | C_GLU_85  | OE2    | 2.443        |
| 5XBM   | C_LYS_381 | NZ     | C_ASP_254 | OD1    | 2.330        |
| 5XBM   | C_LYS_391 | NZ     | C_ASP_393 | OD2    | 3.425        |
| 5XBM   | C_LYS_419 | NZ     | C_GLU_420 | OE2    | 2.764        |
| 5XBM   | D_ARG_59  | NH1    | D_ASP_80  | OD2    | 3.136        |
| 5XBM   | D_LYS_145 | NZ     | D_GLU_152 | OE2    | 2.597        |
| 5XBM   | D_ARG_153 | NH2    | D_GLU_183 | OE2    | 3.712        |
| 5XBM   | D_LYS_181 | NZ     | D_GLU_185 | OE2    | 2.414        |
| 5XBM   | D_ARG_209 | NH1    | D_GLU_185 | OE1    | 3.438        |
| 5XBM   | E_LYS_67  | NZ     | E_ASP_90  | OD2    | 3.658        |
| 5XBM   | E_ARG_98  | NH1    | E_ASP_110 | OD1    | 3.749        |
| 5XBM   | E_ARG_98  | NH2    | E_ASP_110 | OD1    | 3.811        |
| 5XBM   | E_LYS_217 | NZ     | D_GLU_121 | OE2    | 3.463        |
| 5XBM   | F_ARG_77  | NH1    | D_ASP_31  | OD1    | 3.188        |
| 5XBM   | F_ARG_77  | NH1    | F_GLU_79  | OE1    | 3.586        |
| 5XBM   | F_ARG_77  | NH1    | F_GLU_79  | OE2    | 3.933        |
| 5XBM   | F_ARG_77  | NH2    | D_ASP_31  | OD1    | 3.156        |
| 5XBM   | F_ARG_77  | NH2    | D_ASP_31  | OD2    | 3.938        |
| 5XBM   | F_ARG_77  | NH2    | F_GLU_73  | OE1    | 3.951        |
| 5XBM   | F_ARG_82  | NH1    | F_GLU_354 | OE2    | 3.586        |
| 5XBM   | F_ARG_95  | NH2    | F_GLU_93  | OE1    | 3.848        |
| 5XBM   | F_ARG_95  | NH2    | F_GLU_413 | OE2    | 2.568        |
| 5XBM   | F_LYS_129 | NZ     | F_ASP_127 | OD1    | 3.700        |
| 5XBM   | F_LYS_161 | NZ     | C_GLU_154 | OE2    | 3.149        |
| 5XBM   | F_HIS_171 | ND1    | F_GLU_175 | OE1    | 3.652        |
| 5XBM   | F_HIS_257 | NE2    | F_GLU_264 | OE1    | 3.279        |
| 5XBM   | F_HIS_257 | NE2    | F_GLU_264 | OE2    | 3.085        |
| 5XBM   | F_ARG_294 | NH1    | F_GLU_285 | OE1    | 3.934        |
| 5XBM   | F_ARG_294 | NH2    | F_GLU_285 | OE1    | 2.990        |

|      |           |     |           |     |       |
|------|-----------|-----|-----------|-----|-------|
| 5XBM | F_ARG_294 | NH2 | F_GLU_285 | OE2 | 3.166 |
| 5XBM | F_ARG_294 | NH2 | F_ASP_368 | OD1 | 3.670 |
| 5XBM | F_LYS_296 | NZ  | F_GLU_364 | OE1 | 3.766 |
| 5XBM | F_LYS_296 | NZ  | F_GLU_364 | OE2 | 3.585 |
| 5XBM | F_HIS_341 | NE2 | F_GLU_85  | OE2 | 2.413 |
| 5XBM | F_LYS_391 | NZ  | F_ASP_393 | OD2 | 3.195 |

Table 756: 5XBM-specific salt bridging networks analysis. In this table, a PDB file is specified with a four-letter PDB ID, except that the names of the PDB files corresponding to the single NMR structural model split from the NMR ensemble is specified with a four-letter PDB ID in addition to a hyphen followed by the single NMR structural model numeric ID, the residue naming scheme is **Chain ID\_residue name\_residue number**,  $\angle ADH$  represents the angle formed by acceptor (A), donor (D) and hydrogen (H) ( $\angle ADH$ ).

| PDB ID | Residue A | Atom A | Residue B | Atom B | Distance (Å) |
|--------|-----------|--------|-----------|--------|--------------|
| 5XCQ   | A_LYS_13  | NZ     | B_ASP_154 | OD1    | 3.910        |
| 5XCQ   | A_ARG_66  | NH1    | A_ASP_86  | OD1    | 3.789        |
| 5XCQ   | A_ARG_66  | NH1    | A_ASP_86  | OD2    | 2.772        |
| 5XCQ   | A_ARG_66  | NH2    | A_ASP_86  | OD1    | 2.957        |
| 5XCQ   | A_ARG_66  | NH2    | A_ASP_86  | OD2    | 3.362        |
| 5XCQ   | A_LYS_121 | NZ     | A_GLU_118 | OE2    | 2.790        |
| 5XCQ   | B_HIS_42  | NE2    | B_ASP_41  | OD1    | 3.768        |
| 5XCQ   | B_HIS_42  | NE2    | B_ASP_41  | OD2    | 3.647        |
| 5XCQ   | B_HIS_42  | NE2    | B_GLU_140 | OE1    | 3.727        |
| 5XCQ   | B_HIS_42  | NE2    | B_GLU_140 | OE2    | 2.593        |
| 5XCQ   | B_ARG_61  | NH2    | B_ASP_82  | OD1    | 2.863        |
| 5XCQ   | B_ARG_61  | NH2    | B_ASP_82  | OD2    | 3.535        |
| 5XCQ   | B_LYS_116 | NZ     | B_GLU_113 | OE1    | 3.934        |
| 5XCQ   | B_LYS_116 | NZ     | B_GLU_113 | OE2    | 2.845        |
| 5XCQ   | B_LYS_144 | NZ     | A_GLU_142 | OE1    | 3.005        |
| 5XCQ   | B_LYS_144 | NZ     | A_GLU_142 | OE2    | 2.931        |

Table 757: 5XCQ-specific salt bridging networks analysis. In this table, a PDB file is specified with a four-letter PDB ID, except that the names of the PDB files corresponding to the single NMR structural model split from the NMR ensemble is specified with a four-letter PDB ID in addition to a hyphen followed by the single NMR structural model numeric ID, the residue naming scheme is **Chain ID\_residue name\_residue number**,  $\angle ADH$  represents the angle formed by acceptor (A), donor (D) and hydrogen (H) ( $\angle ADH$ ).

| PDB ID | Residue A | Atom A | Residue B | Atom B | Distance (Å) |
|--------|-----------|--------|-----------|--------|--------------|
| 5XCR   | A_LYS_13  | NZ     | B_ASP_154 | OD1    | 3.316        |
| 5XCR   | A_LYS_13  | NZ     | B_ASP_154 | OD2    | 2.938        |
| 5XCR   | A_ARG_66  | NH1    | A_ASP_86  | OD1    | 3.686        |
| 5XCR   | A_ARG_66  | NH1    | A_ASP_86  | OD2    | 2.734        |
| 5XCR   | A_ARG_66  | NH2    | A_ASP_86  | OD1    | 2.875        |
| 5XCR   | A_ARG_66  | NH2    | A_ASP_86  | OD2    | 3.410        |
| 5XCR   | A_LYS_121 | NZ     | A_GLU_118 | OE2    | 2.719        |
| 5XCR   | A_ARG_147 | NH2    | B_GLU_135 | OE2    | 3.104        |
| 5XCR   | A_LYS_149 | NZ     | B_ASP_41  | OD1    | 2.692        |
| 5XCR   | A_LYS_149 | NZ     | B_ASP_41  | OD2    | 3.682        |
| 5XCR   | A_LYS_153 | NZ     | B_ASP_41  | OD1    | 3.567        |
| 5XCR   | A_LYS_153 | NZ     | B_ASP_41  | OD2    | 3.385        |
| 5XCR   | B_ARG_61  | NH2    | B_GLU_81  | OE2    | 3.905        |
| 5XCR   | B_ARG_61  | NH2    | B_ASP_82  | OD1    | 2.794        |
| 5XCR   | B_ARG_61  | NH2    | B_ASP_82  | OD2    | 3.586        |
| 5XCR   | B_ARG_142 | NH1    | B_GLU_139 | OE1    | 3.167        |
| 5XCR   | B_LYS_144 | NZ     | A_GLU_142 | OE1    | 2.665        |
| 5XCR   | B_LYS_144 | NZ     | A_GLU_142 | OE2    | 3.686        |
| 5XCR   | D_LYS_13  | NZ     | D_GLU_16  | OE2    | 3.937        |
| 5XCR   | D_LYS_64  | NZ     | D_GLU_61  | OE2    | 3.102        |
| 5XCR   | D_ARG_66  | NH1    | D_ASP_86  | OD1    | 3.572        |
| 5XCR   | D_ARG_66  | NH1    | D_ASP_86  | OD2    | 2.754        |
| 5XCR   | D_ARG_66  | NH2    | D_ASP_86  | OD1    | 2.764        |
| 5XCR   | D_ARG_66  | NH2    | D_ASP_86  | OD2    | 3.427        |
| 5XCR   | D_LYS_149 | NZ     | E_ASP_41  | OD1    | 2.596        |
| 5XCR   | D_LYS_149 | NZ     | E_ASP_41  | OD2    | 3.537        |
| 5XCR   | D_LYS_149 | NZ     | E_GLU_137 | OE1    | 2.552        |
| 5XCR   | D_LYS_149 | NZ     | E_GLU_137 | OE2    | 3.483        |
| 5XCR   | D_ARG_154 | NH2    | E_ASP_131 | OD1    | 2.972        |
| 5XCR   | E_LYS_39  | NZ     | E_GLU_81  | OE2    | 3.722        |
| 5XCR   | E_ARG_61  | NH2    | E_GLU_81  | OE1    | 3.056        |
| 5XCR   | E_ARG_61  | NH2    | E_ASP_82  | OD1    | 2.787        |
| 5XCR   | E_ARG_61  | NH2    | E_ASP_82  | OD2    | 3.509        |
| 5XCR   | E_LYS_116 | NZ     | E_GLU_113 | OE1    | 3.303        |
| 5XCR   | E_LYS_116 | NZ     | E_GLU_113 | OE2    | 3.987        |
| 5XCR   | E_ARG_126 | NH1    | E_GLU_81  | OE2    | 3.465        |
| 5XCR   | E_LYS_144 | NZ     | D_GLU_142 | OE1    | 2.644        |
| 5XCR   | E_LYS_144 | NZ     | D_GLU_142 | OE2    | 3.385        |

Table 758: 5XCR-specific salt bridging networks analysis. In this table, a PDB file is specified with a four-letter PDB ID, except that the names of the PDB files corresponding to the single NMR structural model split from the NMR ensemble is specified with a four-letter PDB ID in addition to a hyphen followed by the single NMR structural model numeric ID, the residue naming scheme is **Chain ID\_residue name\_residue number**,  $\angle ADH$  represents the angle formed by acceptor (A), donor (D) and hydrogen (H) ( $\angle ADH$ ).

| PDB ID | Residue A  | Atom A | Residue B | Atom B | Distance (Å) |
|--------|------------|--------|-----------|--------|--------------|
| 5XCS   | A_ARG_38   | NH1    | A_ASP_86  | OD1    | 2.824        |
| 5XCS   | A_ARG_38   | NH2    | A_GLU_46  | OE1    | 3.945        |
| 5XCS   | A_ARG_38   | NH2    | A_GLU_46  | OE2    | 3.011        |
| 5XCS   | A_ARG_38   | NH2    | A_ASP_86  | OD1    | 3.632        |
| 5XCS   | A_LYS_43   | NZ     | B_GLU_140 | OE2    | 2.517        |
| 5XCS   | A_ARG_66   | NH1    | A_ASP_86  | OD1    | 3.282        |
| 5XCS   | A_ARG_66   | NH1    | A_ASP_86  | OD2    | 2.652        |
| 5XCS   | A_ARG_66   | NH2    | A_ASP_86  | OD1    | 3.265        |
| 5XCS   | A_ARG_66   | NH2    | A_ASP_86  | OD2    | 3.877        |
| 5XCS   | A_LYS_75   | NZ     | A_ASP_72  | OD2    | 3.471        |
| 5XCS   | A_ARG_94   | NH2    | A_GLU_96  | OE1    | 2.939        |
| 5XCS   | A_ARG_94   | NH2    | A_GLU_96  | OE2    | 3.439        |
| 5XCS   | A_ARG_95   | NH1    | B_ASP_91  | OD1    | 2.738        |
| 5XCS   | A_ARG_95   | NH1    | B_ASP_91  | OD2    | 3.741        |
| 5XCS   | A_ARG_95   | NH2    | B_ASP_91  | OD1    | 3.421        |
| 5XCS   | A_ARG_95   | NH2    | C_ASP_7   | OD1    | 3.700        |
| 5XCS   | A_ARG_95   | NH2    | C_ASP_7   | OD2    | 2.872        |
| 5XCS   | A_LYS_100A | NZ     | B_GLU_55  | OE1    | 2.609        |
| 5XCS   | A_LYS_100A | NZ     | B_GLU_55  | OE2    | 3.239        |
| 5XCS   | A_ARG_147  | NH1    | A_GLU_144 | OE1    | 3.227        |
| 5XCS   | A_LYS_149  | NZ     | B_GLU_137 | OE1    | 3.069        |
| 5XCS   | A_LYS_149  | NZ     | B_GLU_137 | OE2    | 3.874        |
| 5XCS   | B_ARG_61   | NH2    | B_GLU_81  | OE2    | 3.146        |
| 5XCS   | B_ARG_61   | NH2    | B_ASP_82  | OD1    | 2.765        |
| 5XCS   | B_ARG_61   | NH2    | B_ASP_82  | OD2    | 3.342        |
| 5XCS   | B_HIS_94   | NE2    | C_ASP_7   | OD2    | 3.772        |
| 5XCS   | B_LYS_103  | NZ     | B_GLU_105 | OE2    | 3.336        |
| 5XCS   | B_LYS_125  | NZ     | B_GLU_121 | OE2    | 3.175        |
| 5XCS   | B_ARG_142  | NH2    | B_GLU_139 | OE1    | 3.838        |
| 5XCS   | B_LYS_144  | NZ     | A_GLU_142 | OE1    | 3.111        |
| 5XCS   | B_LYS_144  | NZ     | A_GLU_142 | OE2    | 3.511        |
| 5XCS   | B_ARG_149  | NH1    | A_ASP_136 | OD1    | 2.816        |

Table 759: 5XCS-specific salt bridging networks analysis. In this table, a PDB file is specified with a four-letter PDB ID, except that the names of the PDB files corresponding to the single NMR structural model split from the NMR ensemble is specified with a four-letter PDB ID in addition to a hyphen followed by the single NMR structural model numeric ID, the residue naming scheme is **Chain ID\_residue name\_residue number**,  $\angle ADH$  represents the angle formed by acceptor (A), donor (D) and hydrogen (H) ( $\angle ADH$ ).

| PDB ID | Residue A | Atom A | Residue B | Atom B | Distance (Å) |
|--------|-----------|--------|-----------|--------|--------------|
| 5XCT   | A_ARG.66  | NH1    | A_ASP.86  | OD1    | 3.743        |
| 5XCT   | A_ARG.66  | NH1    | A_ASP.86  | OD2    | 2.753        |
| 5XCT   | A_ARG.66  | NH2    | A_ASP.86  | OD1    | 2.868        |
| 5XCT   | A_ARG.66  | NH2    | A_ASP.86  | OD2    | 3.322        |
| 5XCT   | A_ARG.131 | NH2    | A_ASP.116 | OD2    | 3.928        |
| 5XCT   | B_HIS.42  | NE2    | B_ASP.41  | OD2    | 3.182        |
| 5XCT   | B_HIS.42  | NE2    | B_GLU.140 | OE1    | 3.857        |
| 5XCT   | B_HIS.42  | NE2    | B_GLU.140 | OE2    | 3.342        |
| 5XCT   | B_ARG.61  | NH2    | B_ASP.82  | OD1    | 2.811        |
| 5XCT   | B_ARG.61  | NH2    | B_ASP.82  | OD2    | 3.636        |
| 5XCT   | B_LYS.144 | NZ     | A_GLU.142 | OE1    | 2.822        |
| 5XCT   | B_LYS.144 | NZ     | A_GLU.142 | OE2    | 3.117        |

Table 760: 5XCT-specific salt bridging networks analysis. In this table, a PDB file is specified with a four-letter PDB ID, except that the names of the PDB files corresponding to the single NMR structural model split from the NMR ensemble is specified with a four-letter PDB ID in addition to a hyphen followed by the single NMR structural model numeric ID, the residue naming scheme is **Chain ID** **residue name** **residue number**,  $\angle ADH$  represents the angle formed by acceptor (A), donor (D) and hydrogen (H) ( $\angle ADH$ ).



| PDB ID | Residue A  | Atom A | Residue B | Atom B | Distance (Å) |
|--------|------------|--------|-----------|--------|--------------|
| 5XCU   | A_LYS_13   | NZ     | B_ASP_154 | OD2    | 3.098        |
| 5XCU   | A_ARG_38   | NH1    | A_GLU_46  | OE1    | 2.812        |
| 5XCU   | A_ARG_38   | NH1    | A_GLU_46  | OE2    | 3.498        |
| 5XCU   | A_ARG_38   | NH1    | A_ASP_86  | OD1    | 3.796        |
| 5XCU   | A_ARG_38   | NH2    | A_ASP_86  | OD1    | 2.904        |
| 5XCU   | A_ARG_66   | NH1    | A_ASP_86  | OD1    | 2.877        |
| 5XCU   | A_ARG_66   | NH1    | A_ASP_86  | OD2    | 3.351        |
| 5XCU   | A_ARG_66   | NH2    | A_ASP_86  | OD1    | 3.756        |
| 5XCU   | A_ARG_66   | NH2    | A_ASP_86  | OD2    | 2.690        |
| 5XCU   | A_ARG_94   | NH2    | A_GLU_96  | OE1    | 3.021        |
| 5XCU   | A_ARG_94   | NH2    | A_GLU_96  | OE2    | 3.420        |
| 5XCU   | A_ARG_95   | NH1    | B_ASP_91  | OD1    | 2.822        |
| 5XCU   | A_ARG_95   | NH1    | B_ASP_91  | OD2    | 3.880        |
| 5XCU   | A_ARG_95   | NH2    | B_ASP_91  | OD1    | 3.668        |
| 5XCU   | A_ARG_95   | NH2    | C_ASP_7   | OD1    | 3.592        |
| 5XCU   | A_ARG_95   | NH2    | C_ASP_7   | OD2    | 2.664        |
| 5XCU   | A_LYS_100A | NZ     | A_ASP_99  | OD2    | 3.553        |
| 5XCU   | A_LYS_100A | NZ     | B_GLU_55  | OE1    | 3.292        |
| 5XCU   | A_LYS_100A | NZ     | B_GLU_55  | OE2    | 3.457        |
| 5XCU   | A_LYS_121  | NZ     | A_GLU_118 | OE1    | 2.230        |
| 5XCU   | A_LYS_149  | NZ     | B_GLU_137 | OE1    | 3.142        |
| 5XCU   | A_LYS_149  | NZ     | B_GLU_137 | OE2    | 3.674        |
| 5XCU   | B_LYS_24   | NZ     | B_ASP_70  | OD1    | 2.759        |
| 5XCU   | B_LYS_24   | NZ     | B_ASP_70  | OD2    | 2.992        |
| 5XCU   | B_ARG_61   | NH2    | B_GLU_81  | OE2    | 3.746        |
| 5XCU   | B_ARG_61   | NH2    | B_ASP_82  | OD1    | 2.826        |
| 5XCU   | B_ARG_61   | NH2    | B_ASP_82  | OD2    | 3.416        |
| 5XCU   | B_HIS_94   | NE2    | C_ASP_7   | OD2    | 3.530        |
| 5XCU   | B_LYS_103  | NZ     | B_GLU_105 | OE1    | 2.119        |
| 5XCU   | B_LYS_116  | NZ     | B_GLU_113 | OE2    | 2.757        |
| 5XCU   | B_ARG_142  | NH1    | B_GLU_139 | OE1    | 3.141        |
| 5XCU   | B_ARG_142  | NH2    | D_GLU_100 | OE1    | 3.626        |
| 5XCU   | B_ARG_142  | NH2    | D_GLU_100 | OE2    | 3.496        |
| 5XCU   | B_LYS_144  | NZ     | A_GLU_142 | OE1    | 2.843        |
| 5XCU   | B_LYS_144  | NZ     | A_GLU_142 | OE2    | 2.719        |
| 5XCU   | B_ARG_149  | NH2    | A_ASP_136 | OD1    | 3.520        |
| 5XCU   | D_LYS_13   | NZ     | E_ASP_154 | OD2    | 2.965        |
| 5XCU   | D_ARG_38   | NH1    | D_ASP_86  | OD1    | 2.931        |
| 5XCU   | D_ARG_38   | NH2    | D_GLU_46  | OE1    | 2.982        |
| 5XCU   | D_ARG_52A  | NH1    | A_GLU_144 | OE1    | 3.014        |
| 5XCU   | D_ARG_52A  | NH1    | A_GLU_144 | OE2    | 3.323        |
| 5XCU   | D_ARG_52A  | NH2    | A_GLU_144 | OE2    | 3.086        |
| 5XCU   | D_ARG_66   | NH1    | D_ASP_86  | OD1    | 3.903        |
| 5XCU   | D_ARG_66   | NH1    | D_ASP_86  | OD2    | 2.901        |
| 5XCU   | D_ARG_66   | NH2    | D_ASP_86  | OD1    | 3.158        |
| 5XCU   | D_ARG_66   | NH2    | D_ASP_86  | OD2    | 3.501        |
| 5XCU   | D_ARG_94   | NH2    | D_GLU_96  | OE1    | 3.413        |
| 5XCU   | D_ARG_94   | NH2    | D_GLU_96  | OE2    | 3.168        |
| 5XCU   | D_ARG_95   | NH1    | E_ASP_91  | OD1    | 2.736        |
| 5XCU   | D_ARG_95   | NH1    | E_ASP_91  | OD2    | 3.660        |
| 5XCU   | D_ARG_95   | NH2    | E_ASP_91  | OD1    | 3.272        |
| 5XCU   | D_ARG_95   | NH2    | F_ASP_7   | OD1    | 3.878        |
| 5XCU   | D_ARG_95   | NH2    | F_ASP_7   | OD2    | 3.169        |
| 5XCU   | D_LYS_100A | NZ     | D_ASP_99  | OD2    | 3.711        |
| 5XCU   | D_LYS_100A | NZ     | E_GLU_55  | OE1    | 3.852        |
| 5XCU   | D_LYS_100A | NZ     | E_GLU_55  | OE2    | 2.994        |
| 5XCU   | D_ARG_147  | NH2    | D_GLU_144 | OE1    | 3.695        |

|      |           |     |           |     |       |
|------|-----------|-----|-----------|-----|-------|
| 5XCU | D_LYS_149 | NZ  | E_GLU_137 | OE1 | 2.785 |
| 5XCU | D_LYS_149 | NZ  | E_GLU_137 | OE2 | 3.293 |
| 5XCU | E_LYS_24  | NZ  | E_ASP_70  | OD1 | 3.892 |
| 5XCU | E_LYS_30F | NZ  | B_GLU_139 | OE1 | 2.662 |
| 5XCU | E_LYS_30F | NZ  | B_GLU_139 | OE2 | 3.287 |
| 5XCU | E_ARG_61  | NH1 | E_GLU_81  | OE1 | 3.712 |
| 5XCU | E_ARG_61  | NH1 | E_ASP_82  | OD1 | 3.146 |
| 5XCU | E_ARG_61  | NH1 | E_ASP_82  | OD2 | 3.543 |
| 5XCU | E_HIS_94  | NE2 | F_ASP_7   | OD2 | 3.551 |
| 5XCU | E_LYS_103 | NZ  | E_GLU_105 | OE2 | 3.303 |
| 5XCU | E_ARG_142 | NH1 | E_GLU_139 | OE2 | 3.171 |
| 5XCU | E_ARG_142 | NH2 | D_GLU_140 | OE2 | 3.967 |
| 5XCU | E_LYS_144 | NZ  | D_GLU_142 | OE1 | 3.438 |
| 5XCU | E_LYS_144 | NZ  | D_GLU_142 | OE2 | 2.648 |

Table 761: 5XCU-specific salt bridging networks analysis. In this table, a PDB file is specified with a four-letter PDB ID, except that the names of the PDB files corresponding to the single NMR structural model split from the NMR ensemble is specified with a four-letter PDB ID in addition to a hyphen followed by the single NMR structural model numeric ID, the residue naming scheme is **Chain ID\_residue name\_residue number**,  $\angle ADH$  represents the angle formed by acceptor (A), donor (D) and hydrogen (H) ( $\angle ADH$ ).

| PDB ID | Residue A | Atom A | Residue B | Atom B | Distance (Å) |
|--------|-----------|--------|-----------|--------|--------------|
| 5XCV   | A_ARG_38  | NH1    | A_GLU_46  | OE1    | 3.020        |
| 5XCV   | A_ARG_38  | NH1    | A_ASP_86  | OD1    | 3.966        |
| 5XCV   | A_ARG_38  | NH2    | A_ASP_86  | OD1    | 2.867        |
| 5XCV   | A_LYS_56  | NZ     | C_GLU_10  | OE2    | 3.165        |
| 5XCV   | A_LYS_56  | NZ     | C_ASP_11  | OD1    | 3.842        |
| 5XCV   | A_LYS_56  | NZ     | C_ASP_11  | OD2    | 2.877        |
| 5XCV   | A_ARG_66  | NH1    | A_ASP_86  | OD1    | 3.207        |
| 5XCV   | A_ARG_66  | NH1    | A_ASP_86  | OD2    | 3.568        |
| 5XCV   | A_ARG_66  | NH2    | A_ASP_86  | OD1    | 3.873        |
| 5XCV   | A_ARG_66  | NH2    | A_ASP_86  | OD2    | 2.785        |
| 5XCV   | A_LYS_75  | NZ     | A_ASP_72  | OD2    | 3.989        |
| 5XCV   | A_ARG_83  | NH2    | A_GLU_85  | OE2    | 3.625        |
| 5XCV   | A_LYS_94  | NZ     | A_ASP_101 | OD2    | 3.427        |
| 5XCV   | A_LYS_121 | NZ     | A_GLU_118 | OE1    | 2.490        |
| 5XCV   | A_LYS_121 | NZ     | A_GLU_118 | OE2    | 3.921        |
| 5XCV   | A_ARG_131 | NH1    | D_GLU_142 | OE2    | 2.857        |
| 5XCV   | A_ARG_131 | NH2    | D_GLU_142 | OE2    | 3.651        |
| 5XCV   | A_LYS_149 | NZ     | B_GLU_137 | OE1    | 3.135        |
| 5XCV   | A_LYS_149 | NZ     | B_GLU_137 | OE2    | 2.706        |
| 5XCV   | A_ARG_154 | NH2    | B_ASP_131 | OD1    | 2.532        |
| 5XCV   | B_LYS_53  | NZ     | B_ASP_52  | OD1    | 2.531        |
| 5XCV   | B_LYS_53  | NZ     | B_ASP_52  | OD2    | 3.942        |
| 5XCV   | B_ARG_61  | NH1    | B_GLU_81  | OE2    | 2.626        |
| 5XCV   | B_ARG_61  | NH1    | B_ASP_82  | OD1    | 3.375        |
| 5XCV   | B_ARG_61  | NH1    | B_ASP_82  | OD2    | 3.966        |
| 5XCV   | B_ARG_61  | NH2    | B_ASP_82  | OD1    | 2.920        |
| 5XCV   | B_ARG_61  | NH2    | B_ASP_82  | OD2    | 2.592        |
| 5XCV   | B_ARG_142 | NH1    | B_GLU_135 | OE2    | 3.241        |
| 5XCV   | B_ARG_142 | NH1    | B_GLU_139 | OE1    | 2.828        |
| 5XCV   | B_ARG_142 | NH2    | B_GLU_135 | OE1    | 3.178        |
| 5XCV   | B_ARG_142 | NH2    | B_GLU_135 | OE2    | 3.502        |
| 5XCV   | B_LYS_144 | NZ     | A_GLU_142 | OE1    | 2.798        |
| 5XCV   | B_LYS_144 | NZ     | A_GLU_142 | OE2    | 3.295        |
| 5XCV   | B_ARG_149 | NH2    | A_ASP_136 | OD1    | 3.863        |
| 5XCV   | B_ARG_149 | NH2    | A_ASP_136 | OD2    | 3.941        |
| 5XCV   | D_ARG_38  | NH1    | D_GLU_46  | OE1    | 3.023        |
| 5XCV   | D_ARG_38  | NH1    | D_ASP_86  | OD1    | 3.942        |
| 5XCV   | D_ARG_38  | NH2    | D_ASP_86  | OD1    | 2.784        |
| 5XCV   | D_ARG_66  | NH1    | D_ASP_86  | OD1    | 3.694        |
| 5XCV   | D_ARG_66  | NH1    | D_ASP_86  | OD2    | 2.840        |
| 5XCV   | D_ARG_66  | NH2    | D_ASP_86  | OD1    | 3.151        |
| 5XCV   | D_ARG_66  | NH2    | D_ASP_86  | OD2    | 3.768        |
| 5XCV   | D_LYS_94  | NZ     | D_ASP_101 | OD2    | 3.401        |
| 5XCV   | D_LYS_121 | NZ     | D_GLU_118 | OE1    | 3.518        |
| 5XCV   | D_LYS_121 | NZ     | D_GLU_118 | OE2    | 3.547        |
| 5XCV   | D_ARG_131 | NH1    | A_GLU_142 | OE2    | 2.791        |
| 5XCV   | D_ARG_131 | NH2    | A_GLU_142 | OE2    | 3.693        |
| 5XCV   | D_LYS_149 | NZ     | E_GLU_137 | OE1    | 2.622        |
| 5XCV   | D_LYS_149 | NZ     | E_GLU_137 | OE2    | 3.565        |
| 5XCV   | D_LYS_153 | NZ     | E_GLU_40  | OE2    | 3.944        |
| 5XCV   | E_LYS_53  | NZ     | E_ASP_52  | OD1    | 2.875        |
| 5XCV   | E_ARG_61  | NH2    | E_ASP_82  | OD1    | 3.461        |
| 5XCV   | E_ARG_61  | NH2    | E_ASP_82  | OD2    | 3.413        |
| 5XCV   | E_LYS_116 | NZ     | E_GLU_113 | OE2    | 3.173        |
| 5XCV   | E_LYS_144 | NZ     | D_GLU_142 | OE1    | 2.798        |
| 5XCV   | E_LYS_144 | NZ     | D_GLU_142 | OE2    | 3.738        |

---

Table 762: 5XCV-specific salt bridging networks analysis. In this table, a PDB file is specified with a four-letter PDB ID, except that the names of the PDB files corresponding to the single NMR structural model split from the NMR ensemble is specified with a four-letter PDB ID in addition to a hyphen followed by the single NMR structural model numeric ID, the residue naming scheme is **Chain ID\_residue name\_residue number**,  $\angle ADH$  represents the angle formed by acceptor (A), donor (D) and hydrogen (H) ( $\angle ADH$ ).

| PDB ID | Residue A | Atom A | Residue B | Atom B | Distance (Å) |
|--------|-----------|--------|-----------|--------|--------------|
| 5XJ3   | A_ARG_38  | NH1    | A_ASP_90  | OD1    | 3.056        |
| 5XJ3   | A_ARG_38  | NH2    | A_GLU_46  | OE1    | 3.585        |
| 5XJ3   | A_ARG_38  | NH2    | A_GLU_46  | OE2    | 3.163        |
| 5XJ3   | A_ARG_38  | NH2    | A_GLU_89  | OE1    | 3.576        |
| 5XJ3   | A_ARG_67  | NH1    | A_GLU_89  | OE2    | 3.733        |
| 5XJ3   | A_ARG_67  | NH2    | A_ASP_90  | OD1    | 2.978        |
| 5XJ3   | A_ARG_67  | NH2    | A_ASP_90  | OD2    | 2.554        |
| 5XJ3   | A_ARG_87  | NH1    | A_GLU_89  | OE2    | 3.859        |
| 5XJ3   | A_ARG_98  | NH1    | A_ASP_106 | OD2    | 3.164        |
| 5XJ3   | B_ARG_55  | NH1    | B_ASP_61  | OD1    | 2.406        |
| 5XJ3   | B_ARG_62  | NH2    | B_GLU_82  | OE2    | 2.865        |
| 5XJ3   | B_ARG_62  | NH2    | B_ASP_83  | OD1    | 3.259        |
| 5XJ3   | B_LYS_104 | NZ     | B_GLU_106 | OE1    | 3.023        |
| 5XJ3   | C_ARG_75  | NH1    | C_ASP_123 | OD1    | 3.835        |
| 5XJ3   | C_LYS_130 | NZ     | C_GLU_132 | OE1    | 3.977        |
| 5XJ3   | D_ARG_38  | NH1    | D_ASP_90  | OD1    | 3.121        |
| 5XJ3   | D_ARG_38  | NH2    | D_GLU_46  | OE2    | 3.650        |
| 5XJ3   | D_ARG_38  | NH2    | D_GLU_89  | OE1    | 3.831        |
| 5XJ3   | D_ARG_38  | NH2    | D_ASP_90  | OD1    | 4.000        |
| 5XJ3   | D_ARG_67  | NH1    | D_GLU_89  | OE2    | 3.568        |
| 5XJ3   | D_ARG_67  | NH2    | D_ASP_90  | OD1    | 2.936        |
| 5XJ3   | D_ARG_67  | NH2    | D_ASP_90  | OD2    | 2.379        |
| 5XJ3   | D_ARG_87  | NH1    | D_GLU_89  | OE2    | 3.625        |
| 5XJ3   | D_ARG_98  | NH1    | D_ASP_106 | OD2    | 3.382        |
| 5XJ3   | E_ARG_55  | NH1    | E_ASP_61  | OD1    | 2.462        |
| 5XJ3   | E_ARG_62  | NH2    | E_GLU_82  | OE2    | 2.848        |
| 5XJ3   | E_ARG_62  | NH2    | E_ASP_83  | OD1    | 3.444        |
| 5XJ3   | E_LYS_104 | NZ     | E_GLU_106 | OE1    | 2.817        |
| 5XJ3   | G_ARG_38  | NH1    | G_ASP_90  | OD1    | 3.040        |
| 5XJ3   | G_ARG_38  | NH2    | G_GLU_46  | OE1    | 3.607        |
| 5XJ3   | G_ARG_38  | NH2    | G_GLU_46  | OE2    | 3.241        |
| 5XJ3   | G_ARG_38  | NH2    | G_GLU_89  | OE1    | 3.847        |
| 5XJ3   | G_ARG_67  | NH1    | G_GLU_89  | OE2    | 3.528        |
| 5XJ3   | G_ARG_67  | NH2    | G_ASP_90  | OD1    | 2.953        |
| 5XJ3   | G_ARG_67  | NH2    | G_ASP_90  | OD2    | 2.607        |
| 5XJ3   | G_ARG_87  | NH1    | G_GLU_89  | OE2    | 3.758        |
| 5XJ3   | G_ARG_98  | NH1    | G_ASP_106 | OD2    | 3.240        |
| 5XJ3   | H_ARG_55  | NH1    | H_ASP_61  | OD1    | 2.456        |
| 5XJ3   | H_ARG_62  | NH2    | H_GLU_82  | OE2    | 3.013        |
| 5XJ3   | H_ARG_62  | NH2    | H_ASP_83  | OD1    | 3.165        |
| 5XJ3   | H_LYS_104 | NZ     | H_GLU_106 | OE1    | 3.016        |
| 5XJ3   | I_LYS_130 | NZ     | I_GLU_132 | OE1    | 3.959        |
| 5XJ3   | J_ARG_38  | NH1    | J_ASP_90  | OD1    | 3.001        |
| 5XJ3   | J_ARG_38  | NH2    | J_GLU_46  | OE1    | 3.663        |
| 5XJ3   | J_ARG_38  | NH2    | J_GLU_46  | OE2    | 3.259        |
| 5XJ3   | J_ARG_38  | NH2    | J_GLU_89  | OE1    | 3.925        |
| 5XJ3   | J_ARG_67  | NH1    | J_GLU_89  | OE2    | 3.761        |
| 5XJ3   | J_ARG_67  | NH2    | J_ASP_90  | OD1    | 3.129        |
| 5XJ3   | J_ARG_67  | NH2    | J_ASP_90  | OD2    | 2.474        |
| 5XJ3   | J_ARG_87  | NH1    | J_GLU_89  | OE2    | 3.928        |
| 5XJ3   | J_ARG_98  | NH1    | J_ASP_106 | OD2    | 3.259        |
| 5XJ3   | K_ARG_55  | NH1    | K_ASP_61  | OD1    | 2.399        |
| 5XJ3   | K_ARG_55  | NH2    | K_ASP_61  | OD1    | 3.996        |
| 5XJ3   | K_ARG_62  | NH2    | K_GLU_82  | OE2    | 2.984        |
| 5XJ3   | K_ARG_62  | NH2    | K_ASP_83  | OD1    | 3.334        |
| 5XJ3   | K_LYS_104 | NZ     | K_GLU_106 | OE1    | 2.971        |
| 5XJ3   | L_LYS_130 | NZ     | L_GLU_132 | OE1    | 3.881        |

---

Table 763: 5XJ3-specific salt bridging networks analysis. In this table, a PDB file is specified with a four-letter PDB ID, except that the names of the PDB files corresponding to the single NMR structural model split from the NMR ensemble is specified with a four-letter PDB ID in addition to a hyphen followed by the single NMR structural model numeric ID, the residue naming scheme is **Chain ID\_residue name\_residue number**,  $\angle ADH$  represents the angle formed by acceptor (A), donor (D) and hydrogen (H) ( $\angle ADH$ ).

| PDB ID | Residue A | Atom A | Residue B | Atom B | Distance (Å) |
|--------|-----------|--------|-----------|--------|--------------|
| 5XRT   | A_LYS_27  | NZ     | B_GLU_97  | OE2    | 3.178        |
| 5XRT   | A_ARG_50  | NH1    | A_ASP_275 | OD1    | 3.489        |
| 5XRT   | A_HIS_75  | ND1    | A_ASP_73  | OD1    | 2.934        |
| 5XRT   | A_HIS_75  | ND1    | A_ASP_73  | OD2    | 3.817        |
| 5XRT   | A_ARG_90  | NH2    | A_ASP_60  | OD1    | 3.541        |
| 5XRT   | A_ARG_90  | NH2    | A_ASP_60  | OD2    | 3.101        |
| 5XRT   | A_ARG_109 | NH1    | B_GLU_67  | OE2    | 3.059        |
| 5XRT   | A_ARG_109 | NH2    | A_GLU_89  | OE1    | 3.449        |
| 5XRT   | A_ARG_109 | NH2    | B_GLU_67  | OE2    | 3.511        |
| 5XRT   | A_ARG_141 | NH1    | A_ASP_77  | OD1    | 3.404        |
| 5XRT   | A_ARG_141 | NH1    | A_ASP_77  | OD2    | 2.369        |
| 5XRT   | A_LYS_176 | NZ     | A_GLU_123 | OE1    | 3.717        |
| 5XRT   | A_LYS_176 | NZ     | A_GLU_123 | OE2    | 2.851        |
| 5XRT   | A_LYS_238 | NZ     | F_GLU_72  | OE1    | 3.452        |
| 5XRT   | A_LYS_238 | NZ     | F_GLU_72  | OE2    | 2.683        |
| 5XRT   | A_ARG_255 | NH1    | A_ASP_133 | OD2    | 3.443        |
| 5XRT   | A_ARG_255 | NH2    | A_ASP_133 | OD2    | 3.614        |
| 5XRT   | A_ARG_269 | NH1    | B_GLU_67  | OE1    | 3.465        |
| 5XRT   | A_LYS_292 | NZ     | A_ASP_291 | OD2    | 3.086        |
| 5XRT   | A_ARG_307 | NH1    | F_ASP_90  | OD2    | 3.867        |
| 5XRT   | A_ARG_307 | NH2    | F_ASP_90  | OD2    | 3.590        |
| 5XRT   | A_LYS_310 | NZ     | B_ASP_90  | OD1    | 2.844        |
| 5XRT   | A_LYS_315 | NZ     | A_GLU_41  | OE1    | 3.734        |
| 5XRT   | A_LYS_326 | NZ     | B_GLU_11  | OE1    | 2.808        |
| 5XRT   | A_LYS_326 | NZ     | B_GLU_11  | OE2    | 2.925        |
| 5XRT   | B_LYS_51  | NZ     | B_GLU_103 | OE1    | 3.416        |
| 5XRT   | B_ARG_54  | NH1    | F_GLU_97  | OE2    | 3.836        |
| 5XRT   | B_ARG_54  | NH2    | F_GLU_97  | OE2    | 2.767        |
| 5XRT   | B_LYS_62  | NZ     | F_ASP_86  | OD1    | 3.336        |
| 5XRT   | B_LYS_62  | NZ     | F_ASP_86  | OD2    | 2.617        |
| 5XRT   | B_LYS_62  | NZ     | F_ASP_90  | OD1    | 3.654        |
| 5XRT   | B_LYS_62  | NZ     | F_ASP_90  | OD2    | 2.589        |
| 5XRT   | B_HIS_64  | NE2    | F_ASP_79  | OD2    | 3.582        |
| 5XRT   | B_LYS_68  | NZ     | B_GLU_85  | OE1    | 3.082        |
| 5XRT   | B_LYS_68  | NZ     | B_GLU_85  | OE2    | 2.799        |
| 5XRT   | B_ARG_76  | NH1    | D_GLU_74  | OE1    | 3.704        |
| 5XRT   | B_ARG_76  | NH1    | D_GLU_74  | OE2    | 3.032        |
| 5XRT   | B_ARG_76  | NH2    | D_GLU_74  | OE1    | 2.984        |
| 5XRT   | B_ARG_76  | NH2    | D_GLU_74  | OE2    | 3.801        |
| 5XRT   | B_ARG_76  | NH2    | D_GLU_81  | OE1    | 2.864        |
| 5XRT   | B_ARG_76  | NH2    | D_GLU_81  | OE2    | 3.722        |
| 5XRT   | B_LYS_117 | NZ     | B_GLU_114 | OE2    | 3.280        |
| 5XRT   | B_ARG_121 | NH2    | B_ASP_37  | OD2    | 3.079        |
| 5XRT   | B_ARG_123 | NH1    | B_GLU_120 | OE1    | 2.622        |
| 5XRT   | B_ARG_123 | NH1    | B_GLU_120 | OE2    | 3.886        |
| 5XRT   | B_ARG_123 | NH2    | B_GLU_120 | OE1    | 3.456        |
| 5XRT   | B_ARG_123 | NH2    | F_ASP_132 | OD2    | 3.663        |
| 5XRT   | B_ARG_124 | NH1    | F_ASP_132 | OD2    | 2.812        |
| 5XRT   | B_ARG_127 | NH2    | F_GLU_131 | OE1    | 3.103        |
| 5XRT   | B_ARG_163 | NH1    | F_GLU_131 | OE1    | 3.194        |
| 5XRT   | B_ARG_163 | NH1    | F_GLU_131 | OE2    | 3.563        |
| 5XRT   | B_ARG_163 | NH2    | F_GLU_131 | OE1    | 3.596        |
| 5XRT   | B_ARG_163 | NH2    | F_GLU_131 | OE2    | 2.598        |
| 5XRT   | B_ARG_170 | NH1    | B_GLU_128 | OE2    | 3.435        |
| 5XRT   | B_ARG_170 | NH2    | B_GLU_131 | OE2    | 3.245        |
| 5XRT   | B_ARG_170 | NH2    | D_GLU_128 | OE1    | 3.449        |
| 5XRT   | B_ARG_170 | NH2    | D_GLU_128 | OE2    | 3.578        |

|      |           |     |           |     |       |
|------|-----------|-----|-----------|-----|-------|
| 5XRT | C_LYS_27  | NZ  | D_GLU_97  | OE1 | 3.926 |
| 5XRT | C_LYS_27  | NZ  | D_GLU_97  | OE2 | 3.340 |
| 5XRT | C_HIS_56  | NE2 | C_GLU_280 | OE1 | 3.939 |
| 5XRT | C_HIS_75  | ND1 | C_ASP_73  | OD1 | 2.939 |
| 5XRT | C_HIS_75  | ND1 | C_ASP_73  | OD2 | 3.672 |
| 5XRT | C_ARG_90  | NH2 | C_ASP_60  | OD1 | 3.078 |
| 5XRT | C_ARG_90  | NH2 | C_ASP_60  | OD2 | 2.971 |
| 5XRT | C_ARG_109 | NH1 | D_GLU_67  | OE2 | 2.932 |
| 5XRT | C_ARG_109 | NH2 | C_GLU_89  | OE1 | 3.101 |
| 5XRT | C_ARG_141 | NH2 | C_ASP_77  | OD1 | 3.277 |
| 5XRT | C_ARG_141 | NH2 | C_ASP_77  | OD2 | 3.129 |
| 5XRT | C_LYS_176 | NZ  | C_GLU_123 | OE2 | 3.009 |
| 5XRT | C_LYS_238 | NZ  | B_GLU_72  | OE2 | 3.031 |
| 5XRT | C_ARG_255 | NH1 | C_ASP_133 | OD1 | 3.530 |
| 5XRT | C_ARG_255 | NH2 | C_ASP_133 | OD1 | 3.274 |
| 5XRT | C_ARG_269 | NH1 | D_GLU_67  | OE1 | 3.251 |
| 5XRT | C_LYS_292 | NZ  | C_ASP_291 | OD1 | 3.150 |
| 5XRT | C_ARG_307 | NH2 | B_ASP_90  | OD2 | 3.134 |
| 5XRT | C_LYS_310 | NZ  | D_ASP_90  | OD1 | 3.206 |
| 5XRT | C_LYS_310 | NZ  | D_ASP_90  | OD2 | 3.892 |
| 5XRT | D_LYS_51  | NZ  | D_GLU_103 | OE1 | 3.086 |
| 5XRT | D_ARG_54  | NH2 | B_GLU_97  | OE2 | 3.066 |
| 5XRT | D_LYS_62  | NZ  | B_ASP_86  | OD1 | 3.579 |
| 5XRT | D_LYS_62  | NZ  | B_ASP_86  | OD2 | 3.058 |
| 5XRT | D_LYS_62  | NZ  | B_ASP_90  | OD1 | 3.574 |
| 5XRT | D_LYS_62  | NZ  | B_ASP_90  | OD2 | 2.797 |
| 5XRT | D_HIS_64  | NE2 | B_ASP_79  | OD2 | 3.856 |
| 5XRT | D_LYS_68  | NZ  | D_GLU_85  | OE1 | 3.229 |
| 5XRT | D_LYS_68  | NZ  | D_GLU_85  | OE2 | 3.297 |
| 5XRT | D_ARG_76  | NH1 | F_GLU_74  | OE1 | 3.338 |
| 5XRT | D_ARG_76  | NH1 | F_GLU_74  | OE2 | 2.885 |
| 5XRT | D_ARG_76  | NH2 | F_GLU_74  | OE1 | 2.652 |
| 5XRT | D_ARG_76  | NH2 | F_GLU_74  | OE2 | 3.749 |
| 5XRT | D_ARG_76  | NH2 | F_GLU_81  | OE1 | 2.506 |
| 5XRT | D_ARG_76  | NH2 | F_GLU_81  | OE2 | 3.677 |
| 5XRT | D_LYS_117 | NZ  | D_GLU_114 | OE2 | 2.877 |
| 5XRT | D_ARG_121 | NH1 | D_ASP_37  | OD2 | 3.944 |
| 5XRT | D_ARG_121 | NH2 | D_ASP_37  | OD1 | 3.995 |
| 5XRT | D_ARG_121 | NH2 | D_ASP_37  | OD2 | 3.020 |
| 5XRT | D_ARG_123 | NH1 | D_GLU_120 | OE1 | 2.708 |
| 5XRT | D_ARG_123 | NH1 | D_GLU_120 | OE2 | 3.830 |
| 5XRT | D_ARG_123 | NH2 | B_ASP_132 | OD2 | 3.975 |
| 5XRT | D_ARG_123 | NH2 | D_GLU_120 | OE1 | 3.166 |
| 5XRT | D_ARG_124 | NH1 | B_ASP_132 | OD1 | 3.986 |
| 5XRT | D_ARG_124 | NH1 | B_ASP_132 | OD2 | 2.717 |
| 5XRT | D_ARG_127 | NH2 | B_GLU_131 | OE1 | 2.649 |
| 5XRT | D_HIS_159 | NE2 | D_ASP_160 | OD1 | 3.798 |
| 5XRT | D_HIS_159 | NE2 | D_ASP_160 | OD2 | 3.813 |
| 5XRT | D_ARG_163 | NH1 | B_GLU_131 | OE1 | 3.152 |
| 5XRT | D_ARG_163 | NH1 | B_GLU_131 | OE2 | 3.070 |
| 5XRT | D_ARG_163 | NH2 | B_GLU_131 | OE1 | 3.267 |
| 5XRT | D_ARG_163 | NH2 | B_GLU_131 | OE2 | 2.951 |
| 5XRT | D_ARG_170 | NH1 | D_GLU_128 | OE2 | 3.582 |
| 5XRT | D_ARG_170 | NH2 | D_GLU_131 | OE2 | 3.591 |
| 5XRT | D_ARG_170 | NH2 | F_GLU_128 | OE1 | 2.950 |
| 5XRT | D_ARG_170 | NH2 | F_GLU_128 | OE2 | 3.791 |
| 5XRT | E_LYS_27  | NZ  | F_GLU_97  | OE1 | 3.896 |
| 5XRT | E_LYS_27  | NZ  | F_GLU_97  | OE2 | 3.675 |



|      |           |     |           |     |       |
|------|-----------|-----|-----------|-----|-------|
| 5XRT | E_ARG_50  | NH1 | E_ASP_275 | OD1 | 3.578 |
| 5XRT | E_HIS_56  | NE2 | E_GLU_280 | OE1 | 3.346 |
| 5XRT | E_HIS_75  | ND1 | E_ASP_73  | OD1 | 2.764 |
| 5XRT | E_ARG_90  | NH2 | E_ASP_60  | OD1 | 3.458 |
| 5XRT | E_ARG_90  | NH2 | E_ASP_60  | OD2 | 2.922 |
| 5XRT | E_ARG_109 | NH1 | F_GLU_67  | OE2 | 2.719 |
| 5XRT | E_ARG_109 | NH2 | E_GLU_89  | OE1 | 3.357 |
| 5XRT | E_ARG_109 | NH2 | F_GLU_67  | OE2 | 3.732 |
| 5XRT | E_ARG_141 | NH2 | E_ASP_77  | OD1 | 3.300 |
| 5XRT | E_ARG_141 | NH2 | E_ASP_77  | OD2 | 3.765 |
| 5XRT | E_LYS_176 | NZ  | E_GLU_123 | OE2 | 3.077 |
| 5XRT | E_LYS_238 | NZ  | D_GLU_72  | OE2 | 3.742 |
| 5XRT | E_LYS_238 | NZ  | E_ASP_175 | OD2 | 3.711 |
| 5XRT | E_ARG_255 | NH1 | E_ASP_133 | OD1 | 2.710 |
| 5XRT | E_ARG_269 | NH1 | F_GLU_67  | OE1 | 2.954 |
| 5XRT | E_ARG_269 | NH1 | F_GLU_67  | OE2 | 3.996 |
| 5XRT | E_LYS_292 | NZ  | E_ASP_291 | OD1 | 3.378 |
| 5XRT | E_ARG_307 | NH1 | D_ASP_90  | OD2 | 3.580 |
| 5XRT | E_ARG_307 | NH2 | D_ASP_90  | OD2 | 3.837 |
| 5XRT | E_LYS_310 | NZ  | F_ASP_90  | OD1 | 3.115 |
| 5XRT | E_LYS_326 | NZ  | F_GLU_11  | OE1 | 3.300 |
| 5XRT | F_LYS_51  | NZ  | F_GLU_103 | OE1 | 3.279 |
| 5XRT | F_ARG_54  | NH2 | D_GLU_97  | OE2 | 3.005 |
| 5XRT | F_LYS_62  | NZ  | D_ASP_86  | OD1 | 3.549 |
| 5XRT | F_LYS_62  | NZ  | D_ASP_86  | OD2 | 2.499 |
| 5XRT | F_LYS_62  | NZ  | D_ASP_90  | OD1 | 3.666 |
| 5XRT | F_LYS_62  | NZ  | D_ASP_90  | OD2 | 2.972 |
| 5XRT | F_HIS_64  | NE2 | D_ASP_79  | OD2 | 3.194 |
| 5XRT | F_LYS_68  | NZ  | F_GLU_85  | OE1 | 3.860 |
| 5XRT | F_LYS_68  | NZ  | F_GLU_85  | OE2 | 3.605 |
| 5XRT | F_ARG_76  | NH1 | B_GLU_74  | OE1 | 3.311 |
| 5XRT | F_ARG_76  | NH1 | B_GLU_74  | OE2 | 3.105 |
| 5XRT | F_ARG_76  | NH2 | B_GLU_74  | OE1 | 2.768 |
| 5XRT | F_ARG_76  | NH2 | B_GLU_74  | OE2 | 3.989 |
| 5XRT | F_ARG_76  | NH2 | B_GLU_81  | OE1 | 2.869 |
| 5XRT | F_ARG_76  | NH2 | B_GLU_81  | OE2 | 3.812 |
| 5XRT | F_LYS_117 | NZ  | F_GLU_114 | OE2 | 3.321 |
| 5XRT | F_ARG_121 | NH2 | F_ASP_37  | OD2 | 3.444 |
| 5XRT | F_ARG_123 | NH1 | F_GLU_120 | OE1 | 2.902 |
| 5XRT | F_ARG_123 | NH1 | F_GLU_120 | OE2 | 2.669 |
| 5XRT | F_ARG_123 | NH2 | F_GLU_120 | OE1 | 2.949 |
| 5XRT | F_ARG_124 | NH1 | D_ASP_132 | OD2 | 3.024 |
| 5XRT | F_ARG_127 | NH2 | D_GLU_131 | OE1 | 2.415 |
| 5XRT | F_HIS_159 | ND1 | F_ASP_160 | OD1 | 3.993 |
| 5XRT | F_HIS_159 | NE2 | F_ASP_160 | OD1 | 2.911 |
| 5XRT | F_ARG_163 | NH1 | D_GLU_131 | OE1 | 3.516 |
| 5XRT | F_ARG_163 | NH2 | D_GLU_131 | OE1 | 3.296 |
| 5XRT | F_ARG_163 | NH2 | D_GLU_131 | OE2 | 2.611 |
| 5XRT | F_ARG_170 | NH1 | F_GLU_128 | OE2 | 3.390 |
| 5XRT | F_ARG_170 | NH2 | B_GLU_128 | OE1 | 3.475 |
| 5XRT | F_ARG_170 | NH2 | B_GLU_128 | OE2 | 3.657 |
| 5XRT | F_ARG_170 | NH2 | F_GLU_128 | OE2 | 3.860 |
| 5XRT | F_ARG_170 | NH2 | F_GLU_131 | OE2 | 3.345 |
| 5XRT | F_LYS_174 | NZ  | B_ASP_160 | OD1 | 3.902 |
| 5XRT | G_LYS_27  | NZ  | H_GLU_97  | OE2 | 3.228 |
| 5XRT | G_ARG_50  | NH1 | G_ASP_275 | OD1 | 3.487 |
| 5XRT | G_HIS_56  | NE2 | G_GLU_280 | OE1 | 3.893 |
| 5XRT | G_HIS_75  | ND1 | G_ASP_73  | OD1 | 2.567 |

|      |           |     |           |     |       |
|------|-----------|-----|-----------|-----|-------|
| 5XRT | G_HIS_75  | ND1 | G_ASP_73  | OD2 | 3.814 |
| 5XRT | G_LYS_82  | NZ  | E_GLU_119 | OE1 | 3.805 |
| 5XRT | G_ARG_90  | NH2 | G_ASP_60  | OD1 | 3.337 |
| 5XRT | G_ARG_90  | NH2 | G_ASP_60  | OD2 | 3.035 |
| 5XRT | G_ARG_109 | NH1 | H_GLU_67  | OE1 | 3.826 |
| 5XRT | G_ARG_109 | NH1 | H_GLU_67  | OE2 | 2.804 |
| 5XRT | G_ARG_109 | NH2 | G_GLU_89  | OE1 | 2.924 |
| 5XRT | G_ARG_141 | NH2 | G_ASP_77  | OD1 | 3.443 |
| 5XRT | G_ARG_141 | NH2 | G_ASP_77  | OD2 | 3.249 |
| 5XRT | G_LYS_176 | NZ  | G_GLU_123 | OE2 | 3.413 |
| 5XRT | G_LYS_176 | NZ  | G_ASP_172 | OD2 | 3.797 |
| 5XRT | G_LYS_238 | NZ  | G_ASP_175 | OD1 | 3.036 |
| 5XRT | G_LYS_238 | NZ  | G_ASP_175 | OD2 | 3.186 |
| 5XRT | G_ARG_255 | NH1 | G_ASP_133 | OD2 | 3.599 |
| 5XRT | G_ARG_255 | NH2 | G_ASP_133 | OD2 | 3.335 |
| 5XRT | G_ARG_269 | NH1 | H_GLU_67  | OE1 | 3.306 |
| 5XRT | G_LYS_292 | NZ  | G_ASP_291 | OD1 | 3.807 |
| 5XRT | G_LYS_292 | NZ  | G_ASP_291 | OD2 | 3.964 |
| 5XRT | G_LYS_299 | NZ  | H_GLU_69  | OE2 | 3.918 |
| 5XRT | G_LYS_310 | NZ  | H_ASP_90  | OD1 | 2.955 |
| 5XRT | H_LYS_51  | NZ  | H_GLU_103 | OE1 | 3.120 |
| 5XRT | H_LYS_68  | NZ  | H_GLU_85  | OE1 | 3.706 |
| 5XRT | H_LYS_68  | NZ  | H_GLU_85  | OE2 | 3.564 |
| 5XRT | H_LYS_117 | NZ  | H_GLU_114 | OE2 | 3.149 |
| 5XRT | H_ARG_121 | NH2 | H_ASP_37  | OD2 | 3.626 |
| 5XRT | H_ARG_123 | NH1 | H_GLU_120 | OE1 | 3.412 |
| 5XRT | H_ARG_170 | NH2 | H_GLU_131 | OE2 | 3.622 |

Table 764: 5XRT-specific salt bridging networks analysis. In this table, a PDB file is specified with a four-letter PDB ID, except that the names of the PDB files corresponding to the single NMR structural model split from the NMR ensemble is specified with a four-letter PDB ID in addition to a hyphen followed by the single NMR structural model numeric ID, the residue naming scheme is **Chain ID\_residue name\_residue number**,  $\angle ADH$  represents the angle formed by acceptor (A), donor (D) and hydrogen (H) ( $\angle ADH$ ).

| PDB ID | Residue A | Atom A | Residue B | Atom B | Distance (Å) |
|--------|-----------|--------|-----------|--------|--------------|
| 5XWD   | A_ARG_48  | NH1    | A_GLU_73  | OE2    | 3.630        |
| 5XWD   | A_ARG_74  | NH1    | A_GLU_110 | OE1    | 2.554        |
| 5XWD   | A_ARG_74  | NH1    | A_GLU_110 | OE2    | 3.566        |
| 5XWD   | A_ARG_74  | NH2    | A_GLU_78  | OE2    | 2.523        |
| 5XWD   | A_ARG_84  | NH2    | A_GLU_60  | OE1    | 3.684        |
| 5XWD   | A_ARG_84  | NH2    | A_GLU_60  | OE2    | 3.617        |
| 5XWD   | A_ARG_114 | NH1    | A_GLU_78  | OE1    | 3.452        |
| 5XWD   | A_ARG_114 | NH2    | A_GLU_78  | OE1    | 2.694        |
| 5XWD   | A_ARG_198 | NH1    | A_ASP_142 | OD2    | 3.491        |
| 5XWD   | A_ARG_198 | NH2    | A_GLU_118 | OE2    | 3.197        |
| 5XWD   | A_ARG_220 | NH1    | A_GLU_221 | OE1    | 3.463        |
| 5XWD   | A_ARG_220 | NH1    | A_GLU_221 | OE2    | 2.447        |
| 5XWD   | A_ARG_220 | NH2    | A_GLU_221 | OE2    | 3.674        |
| 5XWD   | A_ARG_228 | NH1    | A_GLU_118 | OE2    | 3.743        |
| 5XWD   | A_ARG_228 | NH2    | A_GLU_118 | OE2    | 3.666        |
| 5XWD   | A_LYS_237 | NZ     | A_ASP_232 | OD2    | 2.616        |
| 5XWD   | A_LYS_260 | NZ     | A_ASP_232 | OD1    | 2.521        |
| 5XWD   | A_LYS_260 | NZ     | A_ASP_232 | OD2    | 3.550        |
| 5XWD   | A_LYS_260 | NZ     | A_GLU_233 | OE2    | 3.396        |
| 5XWD   | A_LYS_301 | NZ     | A_GLU_296 | OE1    | 3.844        |
| 5XWD   | A_LYS_303 | NZ     | A_GLU_296 | OE2    | 3.546        |
| 5XWD   | A_LYS_333 | NZ     | A_GLU_367 | OE2    | 3.373        |
| 5XWD   | A_ARG_353 | NH2    | D_ASP_96  | OD2    | 3.335        |
| 5XWD   | A_LYS_372 | NZ     | A_GLU_397 | OE2    | 3.502        |
| 5XWD   | A_ARG_390 | NH1    | A_ASP_369 | OD1    | 3.207        |
| 5XWD   | A_HIS_394 | ND1    | A_ASP_369 | OD1    | 3.398        |
| 5XWD   | A_HIS_394 | NE2    | A_GLU_397 | OE2    | 3.209        |
| 5XWD   | A_ARG_403 | NH2    | A_GLU_376 | OE2    | 3.449        |
| 5XWD   | A_LYS_407 | NZ     | A_ASP_434 | OD2    | 3.832        |
| 5XWD   | A_HIS_409 | NE2    | H_ASP_108 | OD2    | 2.707        |
| 5XWD   | A_ARG_427 | NH1    | A_ASP_498 | OD1    | 2.268        |
| 5XWD   | A_ARG_427 | NH1    | A_ASP_498 | OD2    | 3.446        |
| 5XWD   | A_ARG_427 | NH2    | A_ASP_392 | OD2    | 3.547        |
| 5XWD   | A_LYS_443 | NZ     | D_ASP_51  | OD2    | 2.907        |
| 5XWD   | A_LYS_455 | NZ     | A_GLU_489 | OE1    | 2.906        |
| 5XWD   | A_LYS_463 | NZ     | A_ASP_436 | OD2    | 2.868        |
| 5XWD   | A_LYS_465 | NZ     | D_ASP_53  | OD2    | 3.314        |
| 5XWD   | A_ARG_497 | NH2    | A_GLU_510 | OE1    | 3.595        |
| 5XWD   | A_ARG_507 | NH1    | A_GLU_524 | OE1    | 3.565        |
| 5XWD   | A_ARG_507 | NH1    | A_GLU_524 | OE2    | 2.365        |
| 5XWD   | A_ARG_550 | NH2    | A_GLU_527 | OE2    | 2.299        |
| 5XWD   | A_HIS_560 | ND1    | A_GLU_537 | OE1    | 2.920        |
| 5XWD   | A_HIS_560 | ND1    | A_GLU_537 | OE2    | 3.490        |
| 5XWD   | A_HIS_566 | NE2    | A_ASP_553 | OD1    | 3.274        |
| 5XWD   | A_HIS_566 | NE2    | A_ASP_553 | OD2    | 3.788        |
| 5XWD   | A_LYS_585 | NZ     | A_ASP_563 | OD1    | 2.730        |
| 5XWD   | A_LYS_585 | NZ     | A_ASP_563 | OD2    | 3.880        |
| 5XWD   | H_ARG_40  | NH1    | H_ASP_91  | OD1    | 2.811        |
| 5XWD   | H_ARG_40  | NH2    | H_GLU_48  | OE1    | 3.427        |
| 5XWD   | H_ARG_40  | NH2    | H_GLU_48  | OE2    | 3.173        |
| 5XWD   | H_ARG_40  | NH2    | H_ASP_91  | OD1    | 3.631        |
| 5XWD   | H_ARG_68  | NH1    | H_ASP_91  | OD1    | 3.454        |
| 5XWD   | H_ARG_68  | NH1    | H_ASP_91  | OD2    | 3.334        |
| 5XWD   | H_ARG_68  | NH2    | H_ASP_91  | OD2    | 3.355        |
| 5XWD   | H_ARG_99  | NH1    | H_ASP_108 | OD2    | 3.765        |
| 5XWD   | D_ARG_54  | NH2    | D_GLU_60  | OE2    | 3.951        |
| 5XWD   | D_ARG_61  | NH1    | D_GLU_79  | OE2    | 3.685        |

|      |          |     |          |     |       |
|------|----------|-----|----------|-----|-------|
| 5XWD | D_ARG_61 | NH2 | D_ASP_82 | OD1 | 3.092 |
| 5XWD | D_ARG_61 | NH2 | D_ASP_82 | OD2 | 2.961 |

Table 765: 5XWD-specific salt bridging networks analysis. In this table, a PDB file is specified with a four-letter PDB ID, except that the names of the PDB files corresponding to the single NMR structural model split from the NMR ensemble is specified with a four-letter PDB ID in addition to a hyphen followed by the single NMR structural model numeric ID, the residue naming scheme is **Chain ID\_residue name\_residue number**,  $\angle ADH$  represents the angle formed by acceptor (A), donor (D) and hydrogen (H) ( $\angle ADH$ ).

| PDB ID | Residue A | Atom A | Residue B | Atom B | Distance (Å) |
|--------|-----------|--------|-----------|--------|--------------|
| 5YC5   | A_LYS_248 | NZ     | A_GLU_380 | OE1    | 3.797        |
| 5YC5   | A_LYS_248 | NZ     | A_GLU_380 | OE2    | 2.893        |
| 5YC5   | A_ARG_255 | NH2    | A_ASP_249 | OD2    | 2.780        |
| 5YC5   | A_HIS_268 | NE2    | A_GLU_294 | OE1    | 3.378        |
| 5YC5   | A_LYS_317 | NZ     | A_ASP_312 | OD1    | 3.804        |
| 5YC5   | A_LYS_320 | NZ     | A_GLU_333 | OE1    | 3.131        |
| 5YC5   | A_LYS_320 | NZ     | A_GLU_333 | OE2    | 3.746        |
| 5YC5   | A_LYS_322 | NZ     | A_GLU_333 | OE2    | 3.405        |
| 5YC5   | A_LYS_338 | NZ     | A_GLU_430 | OE1    | 3.617        |
| 5YC5   | A_LYS_338 | NZ     | A_GLU_430 | OE2    | 3.041        |
| 5YC5   | A_LYS_340 | NZ     | A_GLU_318 | OE2    | 3.537        |
| 5YC5   | A_ARG_344 | NH2    | A_ASP_401 | OD1    | 3.750        |
| 5YC5   | A_ARG_344 | NH2    | A_ASP_401 | OD2    | 3.122        |
| 5YC5   | A_LYS_409 | NZ     | B_ASP_399 | OD1    | 3.635        |
| 5YC5   | A_LYS_409 | NZ     | B_ASP_399 | OD2    | 2.875        |
| 5YC5   | A_ARG_416 | NH1    | A_GLU_388 | OE1    | 3.188        |
| 5YC5   | A_ARG_416 | NH1    | A_GLU_388 | OE2    | 3.570        |
| 5YC5   | A_ARG_416 | NH2    | A_GLU_388 | OE2    | 2.991        |
| 5YC5   | A_LYS_439 | NZ     | B_ASP_356 | OD1    | 3.309        |
| 5YC5   | B_LYS_248 | NZ     | B_GLU_380 | OE1    | 3.889        |
| 5YC5   | B_LYS_248 | NZ     | B_GLU_380 | OE2    | 2.644        |
| 5YC5   | B_ARG_255 | NH2    | B_ASP_249 | OD1    | 3.838        |
| 5YC5   | B_HIS_268 | NE2    | B_GLU_294 | OE1    | 2.811        |
| 5YC5   | B_HIS_268 | NE2    | B_GLU_294 | OE2    | 3.075        |
| 5YC5   | B_HIS_285 | ND1    | B_GLU_283 | OE2    | 3.786        |
| 5YC5   | B_LYS_317 | NZ     | B_ASP_312 | OD1    | 3.231        |
| 5YC5   | B_LYS_320 | NZ     | B_GLU_333 | OE1    | 3.707        |
| 5YC5   | B_LYS_338 | NZ     | B_GLU_430 | OE1    | 3.390        |
| 5YC5   | B_LYS_338 | NZ     | B_GLU_430 | OE2    | 3.171        |
| 5YC5   | B_LYS_340 | NZ     | B_GLU_318 | OE2    | 3.467        |
| 5YC5   | B_ARG_344 | NH2    | B_ASP_401 | OD1    | 3.756        |
| 5YC5   | B_ARG_344 | NH2    | B_ASP_401 | OD2    | 2.965        |
| 5YC5   | B_LYS_409 | NZ     | A_ASP_399 | OD1    | 3.731        |
| 5YC5   | B_LYS_409 | NZ     | A_ASP_399 | OD2    | 2.920        |
| 5YC5   | B_ARG_416 | NH1    | B_GLU_388 | OE1    | 2.764        |
| 5YC5   | B_ARG_416 | NH1    | B_GLU_388 | OE2    | 3.921        |
| 5YC5   | B_ARG_416 | NH2    | B_GLU_388 | OE1    | 3.687        |
| 5YC5   | C_LYS_7   | NZ     | C_ASP_80  | OD1    | 3.624        |
| 5YC5   | C_LYS_7   | NZ     | C_ASP_80  | OD2    | 3.128        |
| 5YC5   | C_ARG_18  | NH1    | C_GLU_85  | OE1    | 3.674        |
| 5YC5   | C_HIS_87  | ND1    | C_GLU_166 | OE1    | 3.687        |
| 5YC5   | C_HIS_87  | ND1    | C_GLU_166 | OE2    | 2.703        |
| 5YC5   | C_HIS_87  | NE2    | C_GLU_85  | OE1    | 3.071        |
| 5YC5   | C_ARG_97  | NH2    | C_ASP_104 | OD2    | 3.100        |
| 5YC5   | C_HIS_107 | NE2    | C_ASP_138 | OD2    | 2.605        |
| 5YC5   | C_HIS_111 | NE2    | C_ASP_23  | OD1    | 2.779        |
| 5YC5   | C_HIS_111 | NE2    | C_ASP_23  | OD2    | 2.823        |
| 5YC5   | C_LYS_120 | NZ     | A_ASP_265 | OD2    | 2.563        |
| 5YC5   | C_ARG_130 | NH1    | C_ASP_148 | OD1    | 3.773        |
| 5YC5   | C_ARG_130 | NH2    | C_ASP_148 | OD1    | 3.062        |
| 5YC5   | C_LYS_131 | NZ     | A_GLU_269 | OE1    | 3.549        |
| 5YC5   | C_LYS_131 | NZ     | A_GLU_269 | OE2    | 2.940        |

---

Table 766: 5YC5-specific salt bridging networks analysis. In this table, a PDB file is specified with a four-letter PDB ID, except that the names of the PDB files corresponding to the single NMR structural model split from the NMR ensemble is specified with a four-letter PDB ID in addition to a hyphen followed by the single NMR structural model numeric ID, the residue naming scheme is **Chain ID\_residue name\_residue number**,  $\angle ADH$  represents the angle formed by acceptor (A), donor (D) and hydrogen (H) ( $\angle ADH$ ).

| PDB ID | Residue A | Atom A | Residue B | Atom B | Distance (Å) |
|--------|-----------|--------|-----------|--------|--------------|
| 5ZV3   | A.LYS_67  | NZ     | H.ASP_54  | OD1    | 3.656        |
| 5ZV3   | A.LYS_67  | NZ     | H.ASP_54  | OD2    | 2.636        |
| 5ZV3   | A.LYS_67  | NZ     | H.ASP_56  | OD2    | 3.213        |
| 5ZV3   | H.LYS_12  | NZ     | H.GLU_16  | OE1    | 3.523        |
| 5ZV3   | H.ARG_38  | NH2    | H.GLU_46  | OE1    | 3.368        |
| 5ZV3   | H.ARG_38  | NH2    | H.GLU_46  | OE2    | 2.729        |
| 5ZV3   | H.ARG_58  | NH1    | H.ASP_56  | OD1    | 3.153        |
| 5ZV3   | H.ARG_58  | NH1    | H.ASP_56  | OD2    | 2.840        |
| 5ZV3   | H.ARG_58  | NH2    | A.ASP_65  | OD1    | 3.187        |
| 5ZV3   | H.ARG_58  | NH2    | H.ASP_56  | OD2    | 3.078        |
| 5ZV3   | H.ARG_97  | NH1    | A.GLU_62  | OE2    | 3.412        |
| 5ZV3   | H.ARG_97  | NH2    | A.GLU_62  | OE1    | 3.676        |
| 5ZV3   | H.ARG_97  | NH2    | A.GLU_62  | OE2    | 3.134        |
| 5ZV3   | H.LYS_100 | NZ     | A.GLU_62  | OE1    | 2.715        |
| 5ZV3   | H.LYS_143 | NZ     | H.ASP_144 | OD1    | 3.086        |
| 5ZV3   | H.LYS_143 | NZ     | H.ASP_144 | OD2    | 2.913        |
| 5ZV3   | H.LYS_206 | NZ     | H.ASP_208 | OD1    | 2.838        |
| 5ZV3   | H.LYS_206 | NZ     | H.ASP_208 | OD2    | 3.804        |
| 5ZV3   | H.LYS_209 | NZ     | L.GLU_123 | OE1    | 3.860        |
| 5ZV3   | L.ARG_61  | NH2    | L.GLU_81  | OE1    | 3.640        |
| 5ZV3   | L.ARG_61  | NH2    | L.GLU_81  | OE2    | 2.887        |
| 5ZV3   | L.ARG_61  | NH2    | L.ASP_82  | OD1    | 2.840        |
| 5ZV3   | L.ARG_61  | NH2    | L.ASP_82  | OD2    | 3.594        |
| 5ZV3   | L.LYS_149 | NZ     | L.GLU_195 | OE1    | 3.451        |
| 5ZV3   | L.LYS_149 | NZ     | L.GLU_195 | OE2    | 3.726        |
| 5ZV3   | L.LYS_169 | NZ     | L.ASP_167 | OD1    | 3.271        |
| 5ZV3   | L.LYS_169 | NZ     | L.ASP_167 | OD2    | 2.906        |
| 5ZV3   | L.LYS_169 | NZ     | L.ASP_170 | OD2    | 3.903        |
| 5ZV3   | L.LYS_183 | NZ     | L.GLU_187 | OE1    | 3.966        |
| 5ZV3   | L.LYS_183 | NZ     | L.GLU_187 | OE2    | 3.971        |
| 5ZV3   | L.LYS_188 | NZ     | L.ASP_185 | OD1    | 3.915        |

Table 767: 5ZV3-specific salt bridging networks analysis. In this table, a PDB file is specified with a four-letter PDB ID, except that the names of the PDB files corresponding to the single NMR structural model split from the NMR ensemble is specified with a four-letter PDB ID in addition to a hyphen followed by the single NMR structural model numeric ID, the residue naming scheme is **Chain ID\_residue name\_residue number**,  $\angle ADH$  represents the angle formed by acceptor (A), donor (D) and hydrogen (H) ( $\angle ADH$ ).

| PDB ID | Residue A | Atom A | Residue B | Atom B | Distance (Å) |
|--------|-----------|--------|-----------|--------|--------------|
| 6A3V   | A_ARG_211 | NH1    | A_GLU_132 | OE1    | 3.731        |
| 6A3V   | A_HIS_217 | ND1    | A_ASP_104 | OD2    | 2.707        |
| 6A3V   | A_HIS_217 | NE2    | A_GLU_219 | OE2    | 3.407        |
| 6A3V   | A_ARG_223 | NH1    | A_ASP_104 | OD1    | 3.394        |
| 6A3V   | B_ARG_41  | NH2    | B_ASP_38  | OD2    | 2.943        |
| 6A3V   | B_ARG_75  | NH2    | B_ASP_87  | OD2    | 2.598        |
| 6A3V   | B_HIS_93  | ND1    | B_ASP_105 | OD1    | 3.013        |
| 6A3V   | B_HIS_93  | NE2    | B_GLU_103 | OE1    | 3.252        |
| 6A3V   | B_ARG_130 | NH1    | B_ASP_105 | OD2    | 2.750        |
| 6A3V   | B_ARG_130 | NH2    | B_ASP_105 | OD2    | 3.837        |
| 6A3V   | C_ARG_223 | NH1    | C_ASP_104 | OD2    | 3.845        |
| 6A3V   | C_ARG_223 | NH2    | C_ASP_104 | OD2    | 3.259        |
| 6A3V   | C_HIS_224 | NE2    | C_GLU_156 | OE1    | 3.858        |
| 6A3V   | D_ARG_41  | NH2    | D_ASP_38  | OD2    | 3.204        |
| 6A3V   | D_ARG_73  | NH1    | D_ASP_87  | OD1    | 3.159        |
| 6A3V   | D_ARG_73  | NH2    | D_ASP_87  | OD1    | 3.076        |
| 6A3V   | D_LYS_76  | NZ     | D_GLU_85  | OE2    | 3.594        |
| 6A3V   | D_HIS_93  | NE2    | D_GLU_103 | OE1    | 3.727        |
| 6A3V   | D_LYS_129 | NZ     | D_ASP_105 | OD2    | 3.162        |
| 6A3V   | D_ARG_130 | NH1    | D_ASP_105 | OD2    | 3.228        |
| 6A3V   | D_LYS_152 | NZ     | D_ASP_119 | OD2    | 3.272        |
| 6A3V   | E_ARG_193 | NH1    | C_ASP_184 | OD1    | 3.333        |
| 6A3V   | E_ARG_211 | NH1    | E_GLU_132 | OE1    | 3.556        |
| 6A3V   | E_HIS_217 | ND1    | E_ASP_104 | OD2    | 3.184        |
| 6A3V   | E_HIS_217 | NE2    | E_GLU_219 | OE2    | 3.906        |
| 6A3V   | E_HIS_224 | NE2    | E_GLU_156 | OE1    | 3.569        |
| 6A3V   | F_ARG_75  | NH2    | F_ASP_87  | OD2    | 2.816        |
| 6A3V   | F_HIS_93  | NE2    | F_GLU_103 | OE1    | 3.902        |
| 6A3V   | F_LYS_118 | NZ     | F_GLU_111 | OE2    | 3.173        |
| 6A3V   | F_ARG_130 | NH1    | F_ASP_105 | OD2    | 3.184        |
| 6A3V   | F_ARG_130 | NH2    | F_ASP_105 | OD2    | 3.490        |
| 6A3V   | F_LYS_152 | NZ     | F_ASP_119 | OD2    | 3.307        |
| 6A3V   | G_ARG_211 | NH1    | G_GLU_132 | OE1    | 3.434        |
| 6A3V   | G_HIS_217 | ND1    | G_ASP_104 | OD2    | 2.526        |
| 6A3V   | G_ARG_223 | NH1    | G_ASP_104 | OD1    | 3.210        |
| 6A3V   | G_ARG_223 | NH2    | G_ASP_104 | OD1    | 3.429        |
| 6A3V   | G_ARG_239 | NH2    | G_GLU_243 | OE1    | 3.944        |
| 6A3V   | H_ARG_75  | NH2    | H_ASP_87  | OD1    | 3.886        |
| 6A3V   | H_ARG_75  | NH2    | H_ASP_87  | OD2    | 3.340        |
| 6A3V   | H_HIS_93  | NE2    | H_ASP_105 | OD1    | 4.000        |
| 6A3V   | I_ARG_193 | NH1    | K_ASP_184 | OD1    | 3.791        |
| 6A3V   | I_ARG_211 | NH1    | I_GLU_132 | OE1    | 3.418        |
| 6A3V   | I_ARG_211 | NH2    | I_GLU_132 | OE1    | 3.588        |
| 6A3V   | I_HIS_217 | ND1    | I_ASP_104 | OD2    | 3.427        |
| 6A3V   | I_ARG_223 | NH1    | I_ASP_104 | OD1    | 3.086        |
| 6A3V   | I_ARG_223 | NH2    | I_ASP_104 | OD1    | 3.348        |
| 6A3V   | I_ARG_223 | NH2    | I_ASP_104 | OD2    | 3.799        |
| 6A3V   | I_HIS_224 | ND1    | I_GLU_156 | OE1    | 3.995        |
| 6A3V   | J_ARG_73  | NH1    | J_ASP_87  | OD2    | 3.305        |
| 6A3V   | J_ARG_75  | NH1    | J_GLU_85  | OE1    | 2.939        |
| 6A3V   | J_ARG_75  | NH1    | J_GLU_85  | OE2    | 3.776        |
| 6A3V   | J_HIS_93  | NE2    | J_GLU_103 | OE1    | 3.602        |
| 6A3V   | J_LYS_129 | NZ     | J_ASP_105 | OD2    | 3.649        |
| 6A3V   | J_LYS_152 | NZ     | J_ASP_119 | OD2    | 3.759        |
| 6A3V   | K_ARG_211 | NH1    | K_GLU_132 | OE1    | 3.841        |
| 6A3V   | K_ARG_211 | NH2    | K_GLU_132 | OE1    | 3.828        |
| 6A3V   | K_HIS_217 | ND1    | K_ASP_104 | OD2    | 3.054        |



|      |           |     |           |     |       |
|------|-----------|-----|-----------|-----|-------|
| 6A3V | K_HIS_217 | NE2 | K_GLU_219 | OE2 | 3.795 |
| 6A3V | K_ARG_223 | NH1 | K_ASP_104 | OD1 | 3.294 |
| 6A3V | K_ARG_223 | NH2 | K_ASP_104 | OD1 | 2.971 |
| 6A3V | K_ARG_223 | NH2 | K_ASP_104 | OD2 | 3.952 |
| 6A3V | K_HIS_224 | NE2 | K_GLU_156 | OE1 | 2.347 |
| 6A3V | K_ARG_239 | NH1 | K_GLU_243 | OE1 | 3.687 |
| 6A3V | K_ARG_239 | NH2 | K_GLU_243 | OE1 | 3.100 |
| 6A3V | L_ARG_41  | NH2 | L_ASP_38  | OD2 | 2.939 |
| 6A3V | L_ARG_75  | NH2 | L_ASP_87  | OD1 | 3.204 |
| 6A3V | L_ARG_75  | NH2 | L_ASP_87  | OD2 | 2.988 |
| 6A3V | L_HIS_93  | ND1 | L_ASP_105 | OD1 | 3.521 |
| 6A3V | L_LYS_118 | NZ  | L_GLU_111 | OE1 | 3.470 |
| 6A3V | L_ARG_130 | NH1 | L_ASP_105 | OD2 | 2.982 |
| 6A3V | M_ARG_211 | NH1 | M_GLU_132 | OE1 | 3.246 |
| 6A3V | M_ARG_211 | NH2 | M_GLU_132 | OE1 | 3.377 |
| 6A3V | M_HIS_217 | ND1 | M_ASP_104 | OD2 | 3.857 |
| 6A3V | M_HIS_217 | NE2 | M_GLU_219 | OE2 | 3.798 |
| 6A3V | M_ARG_223 | NH2 | M_ASP_104 | OD1 | 3.607 |
| 6A3V | M_HIS_224 | NE2 | M_GLU_156 | OE1 | 2.966 |
| 6A3V | N_ARG_41  | NH1 | N_ASP_38  | OD2 | 3.719 |
| 6A3V | N_ARG_41  | NH2 | N_ASP_38  | OD2 | 3.742 |
| 6A3V | N_ARG_73  | NH1 | N_ASP_87  | OD2 | 3.095 |
| 6A3V | N_ARG_73  | NH2 | N_ASP_87  | OD2 | 3.858 |
| 6A3V | N_HIS_93  | NE2 | N_GLU_103 | OE1 | 3.849 |
| 6A3V | N_ARG_130 | NH1 | N_ASP_105 | OD2 | 3.648 |
| 6A3V | N_LYS_144 | NZ  | N_ASP_142 | OD2 | 3.634 |
| 6A3V | O_ARG_211 | NH1 | O_GLU_132 | OE1 | 3.603 |
| 6A3V | O_HIS_217 | NE2 | O_ASP_104 | OD2 | 3.976 |
| 6A3V | O_ARG_223 | NH2 | O_ASP_104 | OD1 | 3.679 |
| 6A3V | P_ARG_41  | NH1 | P_ASP_38  | OD2 | 3.282 |
| 6A3V | P_ARG_75  | NH2 | P_ASP_87  | OD2 | 3.792 |
| 6A3V | P_LYS_118 | NZ  | P_GLU_111 | OE1 | 3.659 |
| 6A3V | Q_ARG_211 | NH1 | Q_GLU_132 | OE1 | 3.475 |
| 6A3V | Q_HIS_217 | ND1 | Q_ASP_104 | OD2 | 2.963 |
| 6A3V | Q_ARG_223 | NH1 | Q_ASP_104 | OD1 | 2.976 |
| 6A3V | Q_HIS_224 | NE2 | Q_GLU_156 | OE1 | 3.942 |
| 6A3V | R_HIS_93  | NE2 | R_GLU_103 | OE1 | 3.672 |
| 6A3V | R_LYS_118 | NZ  | R_GLU_111 | OE1 | 3.192 |
| 6A3V | R_ARG_130 | NH1 | R_ASP_105 | OD2 | 3.502 |
| 6A3V | S_ARG_211 | NH2 | S_GLU_132 | OE1 | 3.631 |
| 6A3V | S_HIS_217 | ND1 | S_ASP_104 | OD2 | 2.703 |
| 6A3V | S_HIS_217 | NE2 | S_GLU_219 | OE2 | 3.257 |
| 6A3V | S_ARG_223 | NH1 | S_ASP_104 | OD1 | 3.253 |
| 6A3V | S_HIS_224 | NE2 | S_GLU_156 | OE1 | 3.213 |
| 6A3V | T_ARG_73  | NH1 | T_ASP_87  | OD2 | 2.770 |
| 6A3V | T_ARG_73  | NH2 | T_ASP_87  | OD2 | 3.434 |
| 6A3V | T_ARG_75  | NH2 | T_ASP_87  | OD2 | 3.502 |
| 6A3V | T_ARG_130 | NH1 | T_ASP_105 | OD2 | 3.621 |
| 6A3V | T_LYS_152 | NZ  | T_ASP_119 | OD2 | 3.864 |
| 6A3V | U_ARG_193 | NH1 | W_ASP_184 | OD1 | 2.218 |
| 6A3V | U_ARG_193 | NH1 | W_ASP_184 | OD2 | 3.282 |
| 6A3V | U_ARG_193 | NH2 | W_ASP_184 | OD1 | 3.966 |
| 6A3V | U_ARG_193 | NH2 | W_ASP_184 | OD2 | 3.892 |
| 6A3V | U_HIS_217 | ND1 | U_ASP_104 | OD2 | 2.618 |
| 6A3V | U_HIS_217 | NE2 | U_GLU_219 | OE2 | 3.783 |
| 6A3V | U_ARG_223 | NH1 | U_ASP_104 | OD1 | 2.826 |
| 6A3V | U_ARG_223 | NH2 | U_ASP_104 | OD1 | 3.610 |
| 6A3V | U_ARG_223 | NH2 | U_ASP_104 | OD2 | 3.971 |

|      |           |     |           |     |       |
|------|-----------|-----|-----------|-----|-------|
| 6A3V | U_ARG_239 | NH2 | U_GLU_243 | OE1 | 3.949 |
| 6A3V | V_ARG_41  | NH1 | V_ASP_38  | OD2 | 3.081 |
| 6A3V | V_ARG_41  | NH2 | V_ASP_38  | OD2 | 3.046 |
| 6A3V | V_ARG_73  | NH2 | V_ASP_87  | OD2 | 3.990 |
| 6A3V | V_ARG_75  | NH1 | V_GLU_85  | OE1 | 3.013 |
| 6A3V | V_LYS_152 | NZ  | V_ASP_119 | OD2 | 3.972 |
| 6A3V | W_ARG_211 | NH1 | W_GLU_132 | OE1 | 3.268 |
| 6A3V | W_ARG_211 | NH2 | W_GLU_132 | OE1 | 3.360 |
| 6A3V | W_HIS_217 | ND1 | W_ASP_104 | OD2 | 3.170 |
| 6A3V | W_ARG_223 | NH1 | W_ASP_104 | OD1 | 2.419 |
| 6A3V | W_ARG_223 | NH2 | W_ASP_104 | OD1 | 3.222 |
| 6A3V | W_ARG_223 | NH2 | W_ASP_104 | OD2 | 3.772 |
| 6A3V | W_HIS_224 | NE2 | W_GLU_156 | OE1 | 3.235 |
| 6A3V | W_ARG_239 | NH1 | W_GLU_243 | OE1 | 3.294 |
| 6A3V | W_ARG_239 | NH2 | W_GLU_243 | OE1 | 3.255 |
| 6A3V | X_ARG_41  | NH1 | X_ASP_38  | OD2 | 3.260 |
| 6A3V | X_ARG_75  | NH2 | X_ASP_87  | OD1 | 3.736 |
| 6A3V | X_ARG_75  | NH2 | X_ASP_87  | OD2 | 2.379 |
| 6A3V | X_HIS_93  | NE2 | X_GLU_103 | OE2 | 3.466 |
| 6A3V | X_LYS_152 | NZ  | X_ASP_119 | OD2 | 3.649 |

Table 768: 6A3V-specific salt bridging networks analysis. In this table, a PDB file is specified with a four-letter PDB ID, except that the names of the PDB files corresponding to the single NMR structural model split from the NMR ensemble is specified with a four-letter PDB ID in addition to a hyphen followed by the single NMR structural model numeric ID, the residue naming scheme is **Chain ID\_residue name\_residue number**,  $\angle ADH$  represents the angle formed by acceptor (A), donor (D) and hydrogen (H) ( $\angle ADH$ ).

| PDB ID | Residue A | Atom A | Residue B | Atom B | Distance (Å) |
|--------|-----------|--------|-----------|--------|--------------|
| 6A3W   | A_LYS_12  | NZ     | A_GLU_16  | OE1    | 3.967        |
| 6A3W   | A_ARG_38  | NH2    | A_GLU_46  | OE1    | 3.186        |
| 6A3W   | A_ARG_38  | NH2    | A_GLU_46  | OE2    | 3.290        |
| 6A3W   | A_ARG_98  | NH1    | A_ASP_104 | OD1    | 3.876        |
| 6A3W   | A_ARG_98  | NH1    | A_ASP_104 | OD2    | 2.660        |
| 6A3W   | B_ARG_61  | NH1    | B_ASP_82  | OD1    | 2.815        |
| 6A3W   | B_ARG_61  | NH1    | B_ASP_82  | OD2    | 3.460        |
| 6A3W   | C_ARG_73  | NH1    | C_ASP_87  | OD1    | 3.716        |
| 6A3W   | C_ARG_73  | NH1    | C_ASP_87  | OD2    | 2.737        |
| 6A3W   | C_ARG_75  | NH1    | C_ASP_87  | OD2    | 3.237        |
| 6A3W   | C_LYS_76  | NZ     | C_GLU_85  | OE2    | 3.299        |
| 6A3W   | C_HIS_93  | ND1    | C_ASP_105 | OD1    | 2.579        |
| 6A3W   | C_HIS_93  | NE2    | C_GLU_103 | OE1    | 2.951        |
| 6A3W   | C_LYS_107 | NZ     | E_ASP_30  | OD2    | 3.465        |
| 6A3W   | C_LYS_114 | NZ     | B_ASP_51  | OD2    | 2.835        |
| 6A3W   | C_ARG_134 | NH1    | C_ASP_127 | OD1    | 3.596        |
| 6A3W   | C_ARG_134 | NH2    | A_ASP_55  | OD2    | 3.122        |
| 6A3W   | C_ARG_134 | NH2    | C_ASP_127 | OD2    | 3.828        |
| 6A3W   | C_LYS_152 | NZ     | C_ASP_119 | OD2    | 3.915        |
| 6A3W   | D_ARG_38  | NH2    | D_GLU_46  | OE1    | 3.287        |
| 6A3W   | D_ARG_38  | NH2    | D_GLU_46  | OE2    | 3.072        |
| 6A3W   | D_LYS_43  | NZ     | K_ASP_26  | OD1    | 2.407        |
| 6A3W   | D_LYS_43  | NZ     | K_ASP_26  | OD2    | 3.696        |
| 6A3W   | D_ARG_98  | NH1    | D_ASP_104 | OD1    | 3.875        |
| 6A3W   | D_ARG_98  | NH1    | D_ASP_104 | OD2    | 2.630        |
| 6A3W   | E_ARG_61  | NH1    | E_ASP_82  | OD1    | 2.951        |
| 6A3W   | E_ARG_61  | NH1    | E_ASP_82  | OD2    | 3.557        |
| 6A3W   | F_ARG_73  | NH1    | F_ASP_87  | OD1    | 3.885        |
| 6A3W   | F_ARG_75  | NH1    | F_GLU_85  | OE2    | 2.970        |
| 6A3W   | F_ARG_75  | NH2    | F_GLU_85  | OE1    | 3.905        |
| 6A3W   | F_ARG_75  | NH2    | F_GLU_85  | OE2    | 2.751        |
| 6A3W   | F_LYS_76  | NZ     | F_GLU_85  | OE2    | 3.766        |
| 6A3W   | F_HIS_93  | ND1    | F_ASP_105 | OD1    | 2.524        |
| 6A3W   | F_HIS_93  | NE2    | F_GLU_103 | OE1    | 2.635        |
| 6A3W   | F_LYS_114 | NZ     | E_ASP_51  | OD2    | 2.834        |
| 6A3W   | F_ARG_134 | NH1    | F_ASP_127 | OD1    | 3.399        |
| 6A3W   | F_ARG_134 | NH1    | F_ASP_127 | OD2    | 3.721        |
| 6A3W   | F_ARG_134 | NH2    | D_ASP_55  | OD1    | 3.962        |
| 6A3W   | F_ARG_134 | NH2    | D_ASP_55  | OD2    | 2.895        |
| 6A3W   | F_LYS_152 | NZ     | F_ASP_119 | OD2    | 3.783        |
| 6A3W   | G_ARG_38  | NH2    | G_GLU_46  | OE1    | 3.389        |
| 6A3W   | G_ARG_38  | NH2    | G_GLU_46  | OE2    | 3.208        |
| 6A3W   | G_ARG_98  | NH1    | G_ASP_104 | OD1    | 3.869        |
| 6A3W   | G_ARG_98  | NH1    | G_ASP_104 | OD2    | 2.668        |
| 6A3W   | H_ARG_61  | NH1    | H_ASP_82  | OD1    | 2.906        |
| 6A3W   | H_ARG_61  | NH1    | H_ASP_82  | OD2    | 3.552        |
| 6A3W   | I_ARG_73  | NH1    | I_ASP_87  | OD1    | 2.942        |
| 6A3W   | I_ARG_73  | NH1    | I_ASP_87  | OD2    | 3.979        |
| 6A3W   | I_ARG_75  | NH1    | I_GLU_85  | OE1    | 2.824        |
| 6A3W   | I_ARG_75  | NH2    | I_GLU_85  | OE1    | 2.900        |
| 6A3W   | I_HIS_93  | ND1    | I_ASP_105 | OD1    | 2.434        |
| 6A3W   | I_HIS_93  | NE2    | I_GLU_103 | OE1    | 3.040        |
| 6A3W   | I_LYS_114 | NZ     | H_ASP_51  | OD2    | 2.757        |
| 6A3W   | I_LYS_115 | NZ     | L_ASP_119 | OD1    | 3.708        |
| 6A3W   | I_LYS_115 | NZ     | L_ASP_119 | OD2    | 3.946        |
| 6A3W   | I_ARG_134 | NH1    | I_ASP_127 | OD1    | 2.960        |
| 6A3W   | I_ARG_134 | NH1    | I_ASP_127 | OD2    | 3.787        |

|      |           |     |           |     |       |
|------|-----------|-----|-----------|-----|-------|
| 6A3W | I_ARG_134 | NH2 | G_ASP_55  | OD1 | 3.740 |
| 6A3W | I_ARG_134 | NH2 | G_ASP_55  | OD2 | 2.630 |
| 6A3W | I_ARG_154 | NH1 | E_ASP_26  | OD1 | 2.965 |
| 6A3W | I_ARG_154 | NH2 | E_ASP_26  | OD1 | 3.042 |
| 6A3W | J_ARG_38  | NH2 | J_GLU_46  | OE1 | 3.258 |
| 6A3W | J_ARG_38  | NH2 | J_GLU_46  | OE2 | 2.995 |
| 6A3W | J_ARG_98  | NH1 | J_ASP_104 | OD1 | 3.897 |
| 6A3W | J_ARG_98  | NH1 | J_ASP_104 | OD2 | 2.584 |
| 6A3W | K_ARG_61  | NH1 | K_ASP_82  | OD1 | 2.841 |
| 6A3W | K_ARG_61  | NH1 | K_ASP_82  | OD2 | 3.357 |
| 6A3W | K_LYS_105 | NZ  | K_GLU_83  | OE2 | 3.649 |
| 6A3W | L_ARG_73  | NH1 | L_ASP_87  | OD1 | 2.207 |
| 6A3W | L_ARG_73  | NH1 | L_ASP_87  | OD2 | 3.450 |
| 6A3W | L_ARG_75  | NH1 | L_GLU_85  | OE1 | 2.429 |
| 6A3W | L_ARG_75  | NH2 | L_GLU_85  | OE1 | 3.919 |
| 6A3W | L_HIS_93  | ND1 | L_ASP_105 | OD1 | 2.405 |
| 6A3W | L_HIS_93  | NE2 | L_GLU_103 | OE1 | 2.765 |
| 6A3W | L_LYS_107 | NZ  | H_ASP_30  | OD1 | 3.282 |
| 6A3W | L_LYS_107 | NZ  | H_ASP_30  | OD2 | 2.525 |
| 6A3W | L_LYS_114 | NZ  | K_ASP_51  | OD2 | 2.893 |
| 6A3W | L_ARG_134 | NH1 | L_ASP_127 | OD1 | 3.199 |
| 6A3W | L_ARG_134 | NH1 | L_ASP_127 | OD2 | 3.994 |
| 6A3W | L_ARG_134 | NH2 | J_ASP_55  | OD1 | 3.749 |
| 6A3W | L_ARG_134 | NH2 | J_ASP_55  | OD2 | 2.496 |
| 6A3W | L_LYS_152 | NZ  | L_GLU_153 | OE1 | 2.608 |

Table 769: 6A3W-specific salt bridging networks analysis. In this table, a PDB file is specified with a four-letter PDB ID, except that the names of the PDB files corresponding to the single NMR structural model split from the NMR ensemble is specified with a four-letter PDB ID in addition to a hyphen followed by the single NMR structural model numeric ID, the residue naming scheme is **Chain ID\_residue name\_residue number**,  $\angle ADH$  represents the angle formed by acceptor (A), donor (D) and hydrogen (H) ( $\angle ADH$ ).

| PDB ID | Residue A | Atom A | Residue B | Atom B | Distance (Å) |
|--------|-----------|--------|-----------|--------|--------------|
| 6A76   | L_ARG_61  | NH1    | L_ASP_82  | OD1    | 3.683        |
| 6A76   | L_ARG_61  | NH1    | L_ASP_82  | OD2    | 2.680        |
| 6A76   | L_ARG_61  | NH2    | L_ASP_82  | OD1    | 3.015        |
| 6A76   | L_ARG_61  | NH2    | L_ASP_82  | OD2    | 3.572        |
| 6A76   | L_LYS_103 | NZ     | L_ASP_165 | OD1    | 3.109        |
| 6A76   | L_LYS_142 | NZ     | L_GLU_105 | OE2    | 3.334        |
| 6A76   | L_LYS_149 | NZ     | L_GLU_195 | OE1    | 3.105        |
| 6A76   | L_LYS_149 | NZ     | L_GLU_195 | OE2    | 3.126        |
| 6A76   | L_ARG_155 | NH1    | L_GLU_185 | OE1    | 3.296        |
| 6A76   | L_ARG_155 | NH1    | L_GLU_185 | OE2    | 3.384        |
| 6A76   | L_LYS_183 | NZ     | L_GLU_187 | OE1    | 3.631        |
| 6A76   | L_LYS_183 | NZ     | L_GLU_187 | OE2    | 3.456        |
| 6A76   | L_ARG_188 | NH1    | L_ASP_184 | OD1    | 3.485        |
| 6A76   | L_HIS_189 | ND1    | L_ASP_151 | OD2    | 3.115        |
| 6A76   | L_HIS_189 | NE2    | L_GLU_185 | OE2    | 3.849        |
| 6A76   | L_LYS_199 | NZ     | L_ASP_110 | OD1    | 3.384        |
| 6A76   | H_ARG_36  | NH1    | H_GLU_44  | OE1    | 2.863        |
| 6A76   | H_ARG_36  | NH1    | H_ASP_88  | OD2    | 3.886        |
| 6A76   | H_ARG_36  | NH2    | H_ASP_88  | OD2    | 2.856        |
| 6A76   | H_ARG_42  | NH1    | H_ASP_40  | OD1    | 3.023        |
| 6A76   | H_ARG_65  | NH1    | H_ASP_88  | OD1    | 2.744        |
| 6A76   | H_ARG_65  | NH1    | H_ASP_88  | OD2    | 3.775        |
| 6A76   | H_ARG_65  | NH2    | H_ASP_88  | OD1    | 3.457        |
| 6A76   | H_ARG_65  | NH2    | H_ASP_88  | OD2    | 2.986        |
| 6A76   | H_LYS_74  | NZ     | H_ASP_71  | OD2    | 3.113        |
| 6A76   | H_ARG_96  | NH1    | H_ASP_108 | OD1    | 3.592        |
| 6A76   | H_ARG_96  | NH1    | H_ASP_108 | OD2    | 2.860        |
| 6A76   | H_LYS_213 | NZ     | L_GLU_123 | OE1    | 3.460        |

Table 770: 6A76-specific salt bridging networks analysis. In this table, a PDB file is specified with a four-letter PDB ID, except that the names of the PDB files corresponding to the single NMR structural model split from the NMR ensemble is specified with a four-letter PDB ID in addition to a hyphen followed by the single NMR structural model numeric ID, the residue naming scheme is **Chain ID\_residue name\_residue number**,  $\angle ADH$  represents the angle formed by acceptor (A), donor (D) and hydrogen (H) ( $\angle ADH$ ).

| PDB ID | Residue A | Atom A | Residue B | Atom B | Distance (Å) |
|--------|-----------|--------|-----------|--------|--------------|
| 6A77   | A_LYS_44  | NZ     | A_ASP_45  | OD2    | 3.622        |
| 6A77   | A_ARG_55  | NH1    | A_ASP_73  | OD1    | 3.618        |
| 6A77   | A_ARG_55  | NH1    | A_ASP_73  | OD2    | 2.774        |
| 6A77   | A_ARG_55  | NH2    | A_ASP_53  | OD2    | 3.164        |
| 6A77   | A_ARG_55  | NH2    | A_ASP_73  | OD1    | 2.879        |
| 6A77   | A_ARG_55  | NH2    | A_ASP_73  | OD2    | 3.609        |
| 6A77   | A_ARG_67  | NH1    | H_GLU_97  | OE1    | 2.680        |
| 6A77   | A_ARG_67  | NH2    | H_GLU_97  | OE1    | 3.115        |
| 6A77   | A_ARG_67  | NH2    | H_GLU_97  | OE2    | 3.032        |
| 6A77   | L_LYS_39  | NZ     | L_ASP_81  | OD1    | 2.939        |
| 6A77   | L_LYS_39  | NZ     | L_ASP_81  | OD2    | 3.685        |
| 6A77   | L_LYS_58  | NZ     | L_ASP_57  | OD2    | 3.665        |
| 6A77   | L_ARG_61  | NH1    | L_ASP_82  | OD1    | 3.988        |
| 6A77   | L_ARG_61  | NH1    | L_ASP_82  | OD2    | 2.871        |
| 6A77   | L_ARG_61  | NH2    | L_ASP_82  | OD1    | 3.242        |
| 6A77   | L_ARG_61  | NH2    | L_ASP_82  | OD2    | 3.518        |
| 6A77   | L_LYS_103 | NZ     | L_ASP_165 | OD1    | 2.895        |
| 6A77   | L_LYS_149 | NZ     | L_GLU_195 | OE2    | 3.578        |
| 6A77   | L_ARG_155 | NH1    | L_GLU_185 | OE1    | 3.397        |
| 6A77   | L_ARG_155 | NH1    | L_GLU_185 | OE2    | 3.437        |
| 6A77   | L_HIS_189 | ND1    | L_ASP_151 | OD2    | 2.718        |
| 6A77   | L_LYS_199 | NZ     | L_ASP_110 | OD1    | 3.833        |
| 6A77   | H_ARG_36  | NH1    | H_GLU_44  | OE1    | 2.723        |
| 6A77   | H_ARG_36  | NH1    | H_ASP_88  | OD2    | 3.780        |
| 6A77   | H_ARG_36  | NH2    | H_ASP_88  | OD2    | 2.740        |
| 6A77   | H_ARG_42  | NH1    | H_ASP_40  | OD1    | 3.854        |
| 6A77   | H_ARG_65  | NH1    | H_ASP_88  | OD1    | 2.999        |
| 6A77   | H_ARG_65  | NH1    | H_ASP_88  | OD2    | 3.898        |
| 6A77   | H_ARG_65  | NH2    | H_ASP_88  | OD1    | 3.615        |
| 6A77   | H_ARG_65  | NH2    | H_ASP_88  | OD2    | 3.124        |
| 6A77   | H_LYS_74  | NZ     | H_ASP_71  | OD2    | 3.837        |
| 6A77   | H_ARG_96  | NH1    | H_ASP_108 | OD1    | 3.281        |
| 6A77   | H_ARG_96  | NH1    | H_ASP_108 | OD2    | 2.697        |

Table 771: 6A77-specific salt bridging networks analysis. In this table, a PDB file is specified with a four-letter PDB ID, except that the names of the PDB files corresponding to the single NMR structural model split from the NMR ensemble is specified with a four-letter PDB ID in addition to a hyphen followed by the single NMR structural model numeric ID, the residue naming scheme is **Chain ID\_residue name\_residue number**,  $\angle ADH$  represents the angle formed by acceptor (A), donor (D) and hydrogen (H) ( $\angle ADH$ ).

| PDB ID | Residue A | Atom A | Residue B | Atom B | Distance (Å) |
|--------|-----------|--------|-----------|--------|--------------|
| 6A78   | A_LYS_44  | NZ     | A_ASP_45  | OD2    | 2.854        |
| 6A78   | A_ARG_55  | NH1    | A_ASP_73  | OD1    | 3.832        |
| 6A78   | A_ARG_55  | NH1    | A_ASP_73  | OD2    | 2.833        |
| 6A78   | A_ARG_55  | NH2    | A_ASP_73  | OD1    | 2.906        |
| 6A78   | A_ARG_55  | NH2    | A_ASP_73  | OD2    | 3.320        |
| 6A78   | A_LYS_57  | NZ     | H_GLU_97  | OE1    | 3.795        |
| 6A78   | L_ARG_61  | NH1    | L_ASP_82  | OD1    | 3.686        |
| 6A78   | L_ARG_61  | NH1    | L_ASP_82  | OD2    | 2.718        |
| 6A78   | L_ARG_61  | NH2    | L_ASP_82  | OD1    | 2.728        |
| 6A78   | L_ARG_61  | NH2    | L_ASP_82  | OD2    | 3.282        |
| 6A78   | L_HIS_79  | NE2    | L_ASP_81  | OD1    | 3.422        |
| 6A78   | L_HIS_79  | NE2    | L_ASP_81  | OD2    | 3.962        |
| 6A78   | L_LYS_103 | NZ     | L_GLU_105 | OE1    | 3.231        |
| 6A78   | H_ARG_36  | NH1    | H_GLU_44  | OE1    | 2.888        |
| 6A78   | H_ARG_36  | NH1    | H_ASP_88  | OD2    | 3.771        |
| 6A78   | H_ARG_36  | NH2    | H_ASP_88  | OD2    | 2.790        |
| 6A78   | H_ARG_42  | NH1    | H_ASP_40  | OD1    | 2.849        |
| 6A78   | H_ARG_42  | NH2    | H_ASP_40  | OD1    | 3.906        |
| 6A78   | H_ARG_65  | NH1    | H_ASP_88  | OD1    | 2.758        |
| 6A78   | H_ARG_65  | NH1    | H_ASP_88  | OD2    | 3.837        |
| 6A78   | H_ARG_65  | NH2    | H_ASP_88  | OD1    | 3.387        |
| 6A78   | H_ARG_65  | NH2    | H_ASP_88  | OD2    | 2.998        |
| 6A78   | H_LYS_85  | NZ     | H_GLU_87  | OE1    | 2.690        |
| 6A78   | H_LYS_85  | NZ     | H_GLU_87  | OE2    | 2.968        |
| 6A78   | H_ARG_96  | NH1    | H_ASP_108 | OD1    | 3.531        |
| 6A78   | H_ARG_96  | NH1    | H_ASP_108 | OD2    | 2.835        |
| 6A78   | B_LYS_44  | NZ     | B_ASP_45  | OD2    | 2.857        |
| 6A78   | B_ARG_55  | NH1    | B_ASP_73  | OD1    | 3.872        |
| 6A78   | B_ARG_55  | NH1    | B_ASP_73  | OD2    | 2.818        |
| 6A78   | B_ARG_55  | NH2    | B_ASP_73  | OD1    | 2.889        |
| 6A78   | B_ARG_55  | NH2    | B_ASP_73  | OD2    | 3.230        |
| 6A78   | M_ARG_61  | NH1    | M_ASP_82  | OD1    | 3.726        |
| 6A78   | M_ARG_61  | NH1    | M_ASP_82  | OD2    | 2.765        |
| 6A78   | M_ARG_61  | NH2    | M_ASP_82  | OD1    | 2.709        |
| 6A78   | M_ARG_61  | NH2    | M_ASP_82  | OD2    | 3.204        |
| 6A78   | M_HIS_79  | NE2    | M_ASP_81  | OD1    | 3.457        |
| 6A78   | M_LYS_103 | NZ     | M_GLU_105 | OE1    | 2.516        |
| 6A78   | I_ARG_36  | NH1    | I_GLU_44  | OE1    | 2.879        |
| 6A78   | I_ARG_36  | NH1    | I_ASP_88  | OD2    | 3.824        |
| 6A78   | I_ARG_36  | NH2    | I_ASP_88  | OD2    | 2.775        |
| 6A78   | I_ARG_42  | NH1    | I_ASP_40  | OD1    | 3.724        |
| 6A78   | I_LYS_63  | NZ     | B_ASP_23  | OD1    | 3.699        |
| 6A78   | I_ARG_65  | NH1    | I_ASP_88  | OD1    | 2.785        |
| 6A78   | I_ARG_65  | NH1    | I_ASP_88  | OD2    | 3.893        |
| 6A78   | I_ARG_65  | NH2    | I_ASP_88  | OD1    | 3.383        |
| 6A78   | I_ARG_65  | NH2    | I_ASP_88  | OD2    | 3.054        |
| 6A78   | I_LYS_85  | NZ     | I_GLU_87  | OE1    | 3.246        |
| 6A78   | I_LYS_85  | NZ     | I_GLU_87  | OE2    | 3.483        |
| 6A78   | I_ARG_96  | NH1    | I_ASP_108 | OD1    | 3.557        |
| 6A78   | I_ARG_96  | NH1    | I_ASP_108 | OD2    | 2.895        |

---

Table 772: 6A78-specific salt bridging networks analysis. In this table, a PDB file is specified with a four-letter PDB ID, except that the names of the PDB files corresponding to the single NMR structural model split from the NMR ensemble is specified with a four-letter PDB ID in addition to a hyphen followed by the single NMR structural model numeric ID, the residue naming scheme is **Chain ID\_residue name\_residue number**,  $\angle ADH$  represents the angle formed by acceptor (A), donor (D) and hydrogen (H) ( $\angle ADH$ ).



| PDB ID | Residue A | Atom A | Residue B | Atom B | Distance (Å) |
|--------|-----------|--------|-----------|--------|--------------|
| 6A79   | A_LYS_44  | NZ     | A_ASP_45  | OD2    | 2.831        |
| 6A79   | A_ARG_55  | NH1    | A_ASP_73  | OD1    | 3.891        |
| 6A79   | A_ARG_55  | NH1    | A_ASP_73  | OD2    | 2.680        |
| 6A79   | A_ARG_55  | NH2    | A_ASP_73  | OD1    | 3.082        |
| 6A79   | A_ARG_55  | NH2    | A_ASP_73  | OD2    | 3.256        |
| 6A79   | L_ARG_61  | NH1    | L_ASP_82  | OD1    | 3.024        |
| 6A79   | L_ARG_61  | NH1    | L_ASP_82  | OD2    | 2.736        |
| 6A79   | L_ARG_61  | NH2    | L_ASP_82  | OD1    | 2.726        |
| 6A79   | L_ARG_61  | NH2    | L_ASP_82  | OD2    | 3.768        |
| 6A79   | L_HIS_79  | NE2    | L_ASP_81  | OD1    | 3.224        |
| 6A79   | L_HIS_79  | NE2    | L_ASP_81  | OD2    | 3.424        |
| 6A79   | L_LYS_103 | NZ     | L_GLU_105 | OE1    | 2.597        |
| 6A79   | H_ARG_36  | NH1    | H_GLU_44  | OE1    | 3.267        |
| 6A79   | H_ARG_36  | NH1    | H_GLU_44  | OE2    | 3.458        |
| 6A79   | H_ARG_36  | NH1    | H_ASP_88  | OD1    | 3.347        |
| 6A79   | H_ARG_36  | NH2    | H_ASP_88  | OD1    | 2.770        |
| 6A79   | H_ARG_42  | NH1    | H_ASP_40  | OD2    | 3.039        |
| 6A79   | H_ARG_42  | NH2    | H_ASP_40  | OD2    | 3.868        |
| 6A79   | H_ARG_65  | NH1    | H_ASP_88  | OD2    | 3.054        |
| 6A79   | H_ARG_65  | NH2    | H_ASP_88  | OD1    | 3.293        |
| 6A79   | H_ARG_65  | NH2    | H_ASP_88  | OD2    | 3.419        |
| 6A79   | H_LYS_85  | NZ     | H_GLU_87  | OE1    | 3.696        |
| 6A79   | H_LYS_85  | NZ     | H_GLU_87  | OE2    | 2.564        |
| 6A79   | H_ARG_96  | NH1    | H_ASP_108 | OD1    | 3.338        |
| 6A79   | H_ARG_96  | NH1    | H_ASP_108 | OD2    | 2.871        |
| 6A79   | B_LYS_44  | NZ     | B_ASP_45  | OD2    | 2.762        |
| 6A79   | B_ARG_55  | NH1    | B_ASP_73  | OD1    | 3.944        |
| 6A79   | B_ARG_55  | NH1    | B_ASP_73  | OD2    | 2.685        |
| 6A79   | B_ARG_55  | NH2    | B_ASP_73  | OD1    | 3.213        |
| 6A79   | B_ARG_55  | NH2    | B_ASP_73  | OD2    | 3.130        |
| 6A79   | B_ARG_67  | NH1    | L_GLU_97  | OE2    | 3.582        |
| 6A79   | M_ARG_61  | NH1    | M_ASP_82  | OD1    | 3.110        |
| 6A79   | M_ARG_61  | NH1    | M_ASP_82  | OD2    | 2.870        |
| 6A79   | M_ARG_61  | NH2    | M_ASP_82  | OD1    | 2.772        |
| 6A79   | M_ARG_61  | NH2    | M_ASP_82  | OD2    | 3.856        |
| 6A79   | M_HIS_79  | NE2    | M_ASP_81  | OD1    | 3.808        |
| 6A79   | M_HIS_79  | NE2    | M_ASP_81  | OD2    | 3.655        |
| 6A79   | M_LYS_103 | NZ     | M_GLU_105 | OE1    | 2.465        |
| 6A79   | I_ARG_36  | NH1    | I_GLU_44  | OE1    | 3.040        |
| 6A79   | I_ARG_36  | NH1    | I_GLU_44  | OE2    | 3.647        |
| 6A79   | I_ARG_36  | NH1    | I_ASP_88  | OD1    | 3.777        |
| 6A79   | I_ARG_36  | NH2    | I_ASP_88  | OD1    | 2.864        |
| 6A79   | I_ARG_42  | NH1    | I_ASP_40  | OD2    | 3.303        |
| 6A79   | I_ARG_42  | NH2    | I_ASP_40  | OD2    | 3.939        |
| 6A79   | I_ARG_65  | NH1    | I_ASP_88  | OD2    | 2.883        |
| 6A79   | I_ARG_65  | NH2    | I_ASP_88  | OD1    | 3.193        |
| 6A79   | I_ARG_65  | NH2    | I_ASP_88  | OD2    | 3.477        |
| 6A79   | I_LYS_85  | NZ     | I_GLU_87  | OE1    | 3.709        |
| 6A79   | I_LYS_85  | NZ     | I_GLU_87  | OE2    | 2.725        |
| 6A79   | I_ARG_96  | NH1    | I_ASP_108 | OD1    | 3.351        |
| 6A79   | I_ARG_96  | NH1    | I_ASP_108 | OD2    | 2.910        |

---

Table 773: 6A79-specific salt bridging networks analysis. In this table, a PDB file is specified with a four-letter PDB ID, except that the names of the PDB files corresponding to the single NMR structural model split from the NMR ensemble is specified with a four-letter PDB ID in addition to a hyphen followed by the single NMR structural model numeric ID, the residue naming scheme is **Chain ID\_residue name\_residue number**,  $\angle ADH$  represents the angle formed by acceptor (A), donor (D) and hydrogen (H) ( $\angle ADH$ ).

| PDB ID | Residue A | Atom A | Residue B | Atom B | Distance (Å) |
|--------|-----------|--------|-----------|--------|--------------|
| 6AL5   | A_LYS_155 | NZ     | H_GLU_74  | OE1    | 3.542        |
| 6AL5   | A_ARG_163 | NH1    | A_ASP_162 | OD1    | 3.779        |
| 6AL5   | A_ARG_163 | NH1    | A_ASP_162 | OD2    | 2.756        |
| 6AL5   | A_ARG_163 | NH2    | A_ASP_162 | OD2    | 3.912        |
| 6AL5   | A_HIS_218 | NE2    | A_GLU_120 | OE1    | 3.847        |
| 6AL5   | A_HIS_218 | NE2    | A_GLU_120 | OE2    | 3.910        |
| 6AL5   | A_LYS_220 | NZ     | H_ASP_55  | OD1    | 3.389        |
| 6AL5   | A_LYS_220 | NZ     | H_ASP_55  | OD2    | 2.832        |
| 6AL5   | A_LYS_220 | NZ     | H_ASP_57  | OD2    | 3.301        |
| 6AL5   | A_ARG_237 | NH1    | A_ASP_255 | OD1    | 3.153        |
| 6AL5   | A_ARG_237 | NH1    | A_ASP_255 | OD2    | 2.798        |
| 6AL5   | A_ARG_277 | NH2    | A_ASP_32  | OD1    | 2.744        |
| 6AL5   | L_ARG_65  | NH2    | L_ASP_86  | OD1    | 3.023        |
| 6AL5   | L_ARG_65  | NH2    | L_ASP_86  | OD2    | 3.003        |
| 6AL5   | L_LYS_107 | NZ     | L_GLU_109 | OE1    | 3.519        |
| 6AL5   | L_LYS_107 | NZ     | L_GLU_169 | OE1    | 3.283        |
| 6AL5   | L_LYS_107 | NZ     | L_GLU_169 | OE2    | 3.574        |
| 6AL5   | L_ARG_146 | NH1    | L_GLU_109 | OE1    | 2.818        |
| 6AL5   | L_LYS_153 | NZ     | L_GLU_199 | OE2    | 3.184        |
| 6AL5   | L_LYS_187 | NZ     | L_GLU_191 | OE2    | 3.556        |
| 6AL5   | L_HIS_193 | ND1    | L_ASP_189 | OD1    | 3.737        |
| 6AL5   | H_ARG_38  | NH1    | H_ASP_90  | OD1    | 3.791        |
| 6AL5   | H_ARG_38  | NH2    | H_GLU_46  | OE1    | 3.814        |
| 6AL5   | H_ARG_67  | NH1    | H_ASP_90  | OD1    | 3.408        |
| 6AL5   | H_ARG_67  | NH1    | H_ASP_90  | OD2    | 3.019        |
| 6AL5   | H_ARG_67  | NH2    | H_ASP_90  | OD1    | 3.382        |
| 6AL5   | H_ARG_98  | NH2    | H_ASP_112 | OD1    | 3.627        |
| 6AL5   | H_ARG_98  | NH2    | H_ASP_112 | OD2    | 2.814        |
| 6AL5   | H_ARG_106 | NH1    | H_GLU_100 | OE1    | 3.206        |
| 6AL5   | H_ARG_106 | NH1    | H_GLU_100 | OE2    | 2.772        |
| 6AL5   | H_ARG_106 | NH2    | L_ASP_54  | OD1    | 3.142        |
| 6AL5   | H_ARG_106 | NH2    | L_ASP_54  | OD2    | 3.298        |
| 6AL5   | H_ARG_106 | NH2    | H_GLU_100 | OE2    | 3.102        |
| 6AL5   | H_LYS_154 | NZ     | H_ASP_155 | OD1    | 3.510        |
| 6AL5   | H_LYS_154 | NZ     | H_ASP_155 | OD2    | 3.733        |
| 6AL5   | H_LYS_220 | NZ     | L_GLU_127 | OE1    | 3.220        |
| 6AL5   | H_LYS_221 | NZ     | H_GLU_223 | OE2    | 3.651        |

Table 774: 6AL5-specific salt bridging networks analysis. In this table, a PDB file is specified with a four-letter PDB ID, except that the names of the PDB files corresponding to the single NMR structural model split from the NMR ensemble is specified with a four-letter PDB ID in addition to a hyphen followed by the single NMR structural model numeric ID, the residue naming scheme is **Chain ID\_residue name\_residue number**,  $\angle ADH$  represents the angle formed by acceptor (A), donor (D) and hydrogen (H) ( $\angle ADH$ ).

| PDB ID | Residue A | Atom A | Residue B | Atom B | Distance (Å) |
|--------|-----------|--------|-----------|--------|--------------|
| 6ANA   | H_LYS_64  | NZ     | H_ASP_65  | OD1    | 3.910        |
| 6ANA   | H_LYS_64  | NZ     | H_ASP_65  | OD2    | 2.779        |
| 6ANA   | H_LYS_66  | NZ     | H_ASP_86  | OD1    | 3.581        |
| 6ANA   | H_LYS_66  | NZ     | H_ASP_86  | OD2    | 2.714        |
| 6ANA   | H_ARG_94  | NH2    | H_ASP_96  | OD1    | 3.718        |
| 6ANA   | H_ARG_94  | NH2    | H_ASP_96  | OD2    | 3.967        |
| 6ANA   | H_LYS_142 | NZ     | H_ASP_143 | OD1    | 3.131        |
| 6ANA   | H_LYS_142 | NZ     | H_ASP_143 | OD2    | 2.790        |
| 6ANA   | H_ARG_209 | NH1    | H_GLU_211 | OE1    | 3.669        |
| 6ANA   | L_ARG_61  | NH2    | L_ASP_82  | OD1    | 2.820        |
| 6ANA   | L_ARG_61  | NH2    | L_ASP_82  | OD2    | 3.661        |
| 6ANA   | L_LYS_102 | NZ     | L_GLU_104 | OE2    | 2.841        |
| 6ANA   | L_LYS_148 | NZ     | L_GLU_194 | OE2    | 2.623        |
| 6ANA   | L_LYS_182 | NZ     | L_GLU_186 | OE1    | 2.943        |
| 6ANA   | L_LYS_182 | NZ     | L_GLU_186 | OE2    | 3.303        |
| 6ANA   | L_LYS_187 | NZ     | L_ASP_184 | OD1    | 2.815        |
| 6ANA   | L_LYS_189 | NZ     | L_GLU_212 | OE2    | 2.496        |

Table 775: 6ANA-specific salt bridging networks analysis. In this table, a PDB file is specified with a four-letter PDB ID, except that the names of the PDB files corresponding to the single NMR structural model split from the NMR ensemble is specified with a four-letter PDB ID in addition to a hyphen followed by the single NMR structural model numeric ID, the residue naming scheme is **Chain ID\_residue name\_residue number**,  $\angle ADH$  represents the angle formed by acceptor (A), donor (D) and hydrogen (H) ( $\angle ADH$ ).

| PDB ID | Residue A | Atom A | Residue B | Atom B | Distance (Å) |
|--------|-----------|--------|-----------|--------|--------------|
| 6AND   | H_ARG_38  | NH1    | H_GLU_46  | OE2    | 2.978        |
| 6AND   | H_ARG_38  | NH1    | H_ASP_86  | OD1    | 3.864        |
| 6AND   | H_ARG_38  | NH2    | H_ASP_86  | OD1    | 2.906        |
| 6AND   | H_ARG_50  | NH2    | H_ASP_95  | OD1    | 3.873        |
| 6AND   | H_ARG_50  | NH2    | H_ASP_95  | OD2    | 3.421        |
| 6AND   | H_LYS_62  | NZ     | H_GLU_46  | OE1    | 2.841        |
| 6AND   | H_LYS_62  | NZ     | H_GLU_46  | OE2    | 3.776        |
| 6AND   | H_ARG_66  | NH1    | H_ASP_86  | OD1    | 3.755        |
| 6AND   | H_ARG_66  | NH1    | H_ASP_86  | OD2    | 2.814        |
| 6AND   | H_ARG_66  | NH2    | H_ASP_86  | OD1    | 2.852        |
| 6AND   | H_ARG_66  | NH2    | H_ASP_86  | OD2    | 3.248        |
| 6AND   | H_ARG_94  | NH2    | H_ASP_101 | OD1    | 3.615        |
| 6AND   | H_ARG_94  | NH2    | H_ASP_101 | OD2    | 2.990        |
| 6AND   | H_LYS_143 | NZ     | H_ASP_144 | OD1    | 3.840        |
| 6AND   | H_LYS_209 | NZ     | L_GLU_123 | OE1    | 2.684        |
| 6AND   | H_LYS_209 | NZ     | L_GLU_123 | OE2    | 3.876        |
| 6AND   | L_LYS_50  | NZ     | H_ASP_100 | OD1    | 3.188        |
| 6AND   | L_ARG_61  | NH2    | L_GLU_81  | OE2    | 3.449        |
| 6AND   | L_ARG_61  | NH2    | L_ASP_82  | OD1    | 2.730        |
| 6AND   | L_ARG_61  | NH2    | L_ASP_82  | OD2    | 3.513        |
| 6AND   | L_LYS_103 | NZ     | L_GLU_165 | OE1    | 3.616        |
| 6AND   | L_LYS_103 | NZ     | L_GLU_165 | OE2    | 3.146        |
| 6AND   | L_LYS_149 | NZ     | L_GLU_195 | OE2    | 2.858        |
| 6AND   | L_LYS_188 | NZ     | L_ASP_185 | OD1    | 3.465        |
| 6AND   | L_HIS_189 | ND1    | L_ASP_151 | OD2    | 3.034        |

Table 776: 6AND-specific salt bridging networks analysis. In this table, a PDB file is specified with a four-letter PDB ID, except that the names of the PDB files corresponding to the single NMR structural model split from the NMR ensemble is specified with a four-letter PDB ID in addition to a hyphen followed by the single NMR structural model numeric ID, the residue naming scheme is **Chain ID\_residue name\_residue number**,  $\angle ADH$  represents the angle formed by acceptor (A), donor (D) and hydrogen (H) ( $\angle ADH$ ).

| PDB ID | Residue A | Atom A | Residue B | Atom B | Distance (Å) |
|--------|-----------|--------|-----------|--------|--------------|
| 6ANI   | H.HIS_35  | ND1    | H.GLU_50  | OE1    | 3.692        |
| 6ANI   | H.HIS_35  | NE2    | H.GLU_50  | OE1    | 3.990        |
| 6ANI   | H.LYS_66  | NZ     | H.ASP_86  | OD1    | 3.842        |
| 6ANI   | H.LYS_66  | NZ     | H.ASP_86  | OD2    | 3.014        |
| 6ANI   | H.ARG_83  | NH2    | H.ASP_85  | OD2    | 3.086        |
| 6ANI   | H.ARG_94  | NH2    | H.ASP_101 | OD1    | 3.640        |
| 6ANI   | H.ARG_94  | NH2    | H.ASP_101 | OD2    | 2.660        |
| 6ANI   | H.LYS_143 | NZ     | H.ASP_144 | OD1    | 3.153        |
| 6ANI   | H.LYS_143 | NZ     | H.ASP_144 | OD2    | 2.622        |
| 6ANI   | H.LYS_209 | NZ     | L.GLU_123 | OE1    | 2.397        |
| 6ANI   | H.LYS_210 | NZ     | H.GLU_212 | OE1    | 2.867        |
| 6ANI   | L.LYS_53  | NZ     | L.ASP_50  | OD2    | 2.769        |
| 6ANI   | L.ARG_61  | NH1    | L.GLU_81  | OE2    | 3.915        |
| 6ANI   | L.ARG_61  | NH2    | L.GLU_81  | OE2    | 3.089        |
| 6ANI   | L.ARG_61  | NH2    | L.ASP_82  | OD1    | 2.623        |
| 6ANI   | L.ARG_61  | NH2    | L.ASP_82  | OD2    | 3.423        |
| 6ANI   | L.LYS_149 | NZ     | L.GLU_195 | OE1    | 3.748        |
| 6ANI   | L.LYS_188 | NZ     | L.ASP_185 | OD1    | 3.446        |
| 6ANI   | I.HIS_35  | ND1    | I.GLU_50  | OE1    | 3.825        |
| 6ANI   | I.HIS_35  | NE2    | I.GLU_50  | OE1    | 3.743        |
| 6ANI   | I.LYS_66  | NZ     | I.ASP_86  | OD1    | 3.950        |
| 6ANI   | I.LYS_66  | NZ     | I.ASP_86  | OD2    | 2.953        |
| 6ANI   | I.ARG_83  | NH2    | I.ASP_85  | OD2    | 2.907        |
| 6ANI   | I.ARG_94  | NH2    | I.ASP_101 | OD1    | 3.760        |
| 6ANI   | I.ARG_94  | NH2    | I.ASP_101 | OD2    | 2.654        |
| 6ANI   | I.LYS_143 | NZ     | I.ASP_144 | OD1    | 3.006        |
| 6ANI   | I.LYS_143 | NZ     | I.ASP_144 | OD2    | 2.878        |
| 6ANI   | I.LYS_209 | NZ     | M.GLU_123 | OE2    | 3.950        |
| 6ANI   | I.LYS_210 | NZ     | I.GLU_212 | OE2    | 3.076        |
| 6ANI   | M.LYS_53  | NZ     | M.ASP_50  | OD2    | 2.878        |
| 6ANI   | M.ARG_61  | NH2    | M.ASP_82  | OD1    | 2.930        |
| 6ANI   | M.ARG_61  | NH2    | M.ASP_82  | OD2    | 3.730        |
| 6ANI   | M.HIS_189 | ND1    | M.ASP_151 | OD2    | 3.008        |

Table 777: 6ANI-specific salt bridging networks analysis. In this table, a PDB file is specified with a four-letter PDB ID, except that the names of the PDB files corresponding to the single NMR structural model split from the NMR ensemble is specified with a four-letter PDB ID in addition to a hyphen followed by the single NMR structural model numeric ID, the residue naming scheme is **Chain ID\_residue name\_residue number**,  $\angle ADH$  represents the angle formed by acceptor (A), donor (D) and hydrogen (H) ( $\angle ADH$ ).

| PDB ID | Residue A | Atom A | Residue B | Atom B | Distance (Å) |
|--------|-----------|--------|-----------|--------|--------------|
| 6AQ7   | A_ARG_155 | NH1    | A_GLU_195 | OE1    | 2.727        |
| 6AQ7   | A_ARG_155 | NH1    | A_GLU_195 | OE2    | 3.462        |
| 6AQ7   | A_ARG_155 | NH2    | A_ASP_201 | OD1    | 3.324        |
| 6AQ7   | A_ARG_155 | NH2    | A_ASP_201 | OD2    | 3.430        |
| 6AQ7   | A_ARG_163 | NH2    | A_ASP_177 | OD2    | 2.708        |
| 6AQ7   | A_LYS_203 | NZ     | A_GLU_206 | OE1    | 2.779        |
| 6AQ7   | A_LYS_203 | NZ     | A_GLU_206 | OE2    | 3.528        |
| 6AQ7   | H_HIS_34  | NE2    | A_GLU_199 | OE1    | 3.934        |
| 6AQ7   | H_HIS_34  | NE2    | A_GLU_199 | OE2    | 2.717        |
| 6AQ7   | H_ARG_37  | NH1    | H_ASP_89  | OD1    | 2.941        |
| 6AQ7   | H_ARG_37  | NH2    | H_GLU_45  | OE1    | 2.823        |
| 6AQ7   | H_ARG_37  | NH2    | H_ASP_89  | OD1    | 3.962        |
| 6AQ7   | H_ARG_49  | NH1    | A_GLU_199 | OE2    | 2.744        |
| 6AQ7   | H_LYS_66  | NZ     | H_ASP_89  | OD1    | 3.144        |
| 6AQ7   | H_LYS_66  | NZ     | H_ASP_89  | OD2    | 2.568        |
| 6AQ7   | H_ARG_97  | NH2    | H_ASP_103 | OD1    | 3.527        |
| 6AQ7   | H_ARG_97  | NH2    | H_ASP_103 | OD2    | 2.817        |
| 6AQ7   | H_LYS_209 | NZ     | L_GLU_127 | OE2    | 2.651        |
| 6AQ7   | L_LYS_24  | NZ     | L_ASP_74  | OD1    | 3.475        |
| 6AQ7   | L_LYS_24  | NZ     | L_ASP_74  | OD2    | 3.224        |
| 6AQ7   | L_LYS_53  | NZ     | L_GLU_59  | OE1    | 3.832        |
| 6AQ7   | L_ARG_65  | NH2    | L_GLU_85  | OE2    | 3.459        |
| 6AQ7   | L_ARG_65  | NH2    | L_ASP_86  | OD1    | 2.720        |
| 6AQ7   | L_ARG_65  | NH2    | L_ASP_86  | OD2    | 3.600        |
| 6AQ7   | L_LYS_146 | NZ     | L_GLU_109 | OE1    | 3.899        |
| 6AQ7   | L_LYS_151 | NZ     | L_GLU_158 | OE2    | 3.172        |
| 6AQ7   | L_LYS_153 | NZ     | L_GLU_199 | OE1    | 3.387        |
| 6AQ7   | L_LYS_153 | NZ     | L_GLU_199 | OE2    | 2.997        |
| 6AQ7   | L_ARG_159 | NH1    | L_GLU_189 | OE2    | 3.035        |
| 6AQ7   | L_ARG_159 | NH2    | L_GLU_189 | OE2    | 3.333        |
| 6AQ7   | L_HIS_193 | ND1    | L_ASP_155 | OD2    | 2.747        |
| 6AQ7   | L_LYS_203 | NZ     | L_ASP_114 | OD1    | 3.000        |
| 6AQ7   | L_LYS_203 | NZ     | L_ASP_114 | OD2    | 2.913        |

Table 778: 6AQ7-specific salt bridging networks analysis. In this table, a PDB file is specified with a four-letter PDB ID, except that the names of the PDB files corresponding to the single NMR structural model split from the NMR ensemble is specified with a four-letter PDB ID in addition to a hyphen followed by the single NMR structural model numeric ID, the residue naming scheme is **Chain ID\_residue name\_residue number**,  $\angle ADH$  represents the angle formed by acceptor (A), donor (D) and hydrogen (H) ( $\angle ADH$ ).

| PDB ID | Residue A | Atom A | Residue B | Atom B | Distance (Å) |
|--------|-----------|--------|-----------|--------|--------------|
| 6ATT   | A_ARG_25  | NH2    | A_ASP_22  | OD1    | 3.000        |
| 6ATT   | A_HIS_26  | NE2    | A_ASP_22  | OD1    | 3.343        |
| 6ATT   | A_ARG_76  | NH1    | A_ASP_54  | OD1    | 2.778        |
| 6ATT   | A_ARG_81  | NH2    | A_GLU_57  | OE1    | 3.490        |
| 6ATT   | A_ARG_81  | NH2    | A_GLU_57  | OE2    | 3.603        |
| 6ATT   | A_ARG_121 | NH1    | A_GLU_188 | OE1    | 3.331        |
| 6ATT   | A_ARG_121 | NH1    | A_ASP_189 | OD1    | 3.785        |
| 6ATT   | A_ARG_121 | NH2    | A_ASP_189 | OD1    | 3.820        |
| 6ATT   | A_ARG_135 | NH1    | A_ASP_96  | OD1    | 3.753        |
| 6ATT   | A_ARG_135 | NH1    | A_ASP_96  | OD2    | 3.334        |
| 6ATT   | A_ARG_135 | NH2    | A_ASP_96  | OD2    | 3.651        |
| 6ATT   | A_HIS_152 | ND1    | A_GLU_125 | OE2    | 3.074        |
| 6ATT   | A_ARG_166 | NH1    | A_ASP_143 | OD2    | 3.858        |
| 6ATT   | A_HIS_171 | ND1    | A_GLU_185 | OE1    | 3.239        |
| 6ATT   | A_ARG_204 | NH1    | A_GLU_125 | OE1    | 3.451        |
| 6ATT   | A_ARG_204 | NH2    | A_GLU_125 | OE1    | 3.326        |
| 6ATT   | A_ARG_204 | NH2    | A_GLU_125 | OE2    | 3.886        |
| 6ATT   | A_HIS_238 | ND1    | A_GLU_243 | OE1    | 3.002        |
| 6ATT   | A_HIS_238 | ND1    | A_GLU_243 | OE2    | 3.743        |
| 6ATT   | A_ARG_266 | NH2    | A_GLU_264 | OE1    | 3.983        |
| 6ATT   | A_ARG_308 | NH1    | A_ASP_304 | OD2    | 3.570        |
| 6ATT   | A_ARG_308 | NH2    | A_ASP_304 | OD2    | 2.743        |
| 6ATT   | A_HIS_    | NE2    | A_GLU_    | OE1    | 2.757        |
| 6ATT   | A_HIS_    | NE2    | A_GLU_    | OE2    | 3.385        |
| 6ATT   | A_ARG_329 | NH1    | A_GLU_330 | OE1    | 3.614        |
| 6ATT   | A_ARG_329 | NH2    | A_GLU_330 | OE2    | 3.989        |
| 6ATT   | A_ARG_    | NH1    | A_GLU_    | OE1    | 2.988        |
| 6ATT   | A_ARG_    | NH1    | A_GLU_357 | OE2    | 3.696        |
| 6ATT   | A_ARG_332 | NH2    | A_GLU_357 | OE2    | 3.986        |
| 6ATT   | A_LYS_    | NZ     | A_GLU_    | OE1    | 3.919        |
| 6ATT   | A_LYS_347 | NZ     | A_GLU_299 | OE2    | 3.462        |
| 6ATT   | A_LYS_347 | NZ     | A_GLU_383 | OE2    | 3.837        |
| 6ATT   | A_ARG_410 | NH1    | A_GLU_438 | OE2    | 3.785        |
| 6ATT   | A_ARG_410 | NH2    | A_GLU_383 | OE1    | 3.874        |
| 6ATT   | A_ARG_410 | NH2    | A_GLU_383 | OE2    | 3.055        |
| 6ATT   | A_ARG_412 | NH1    | A_GLU_299 | OE1    | 3.365        |
| 6ATT   | A_ARG_412 | NH1    | A_GLU_299 | OE2    | 3.033        |
| 6ATT   | A_ARG_412 | NH2    | A_GLU_299 | OE2    | 3.491        |
| 6ATT   | A_ARG_465 | NH1    | A_GLU_438 | OE1    | 3.352        |
| 6ATT   | A_ARG_477 | NH1    | A_GLU_485 | OE1    | 3.071        |
| 6ATT   | A_ARG_477 | NH2    | A_GLU_481 | OE2    | 3.926        |
| 6ATT   | A_ARG_477 | NH2    | A_GLU_485 | OE1    | 3.540        |
| 6ATT   | A_ARG_    | NH1    | A_GLU_    | OE1    | 2.803        |
| 6ATT   | A_ARG_    | NH1    | A_GLU_    | OE2    | 3.745        |
| 6ATT   | A_ARG_    | NH1    | A_GLU_    | OE1    | 3.574        |
| 6ATT   | A_ARG_    | NH1    | A_GLU_    | OE2    | 2.811        |
| 6ATT   | A_HIS_    | ND1    | A_GLU_    | OE1    | 3.143        |
| 6ATT   | A_HIS_    | ND1    | A_GLU_    | OE2    | 3.018        |
| 6ATT   | H_ARG_38  | NH1    | H_ASP_90  | OD1    | 2.909        |
| 6ATT   | H_ARG_38  | NH2    | H_GLU_46  | OE1    | 3.113        |
| 6ATT   | H_ARG_38  | NH2    | H_ASP_90  | OD1    | 3.490        |
| 6ATT   | H_ARG_67  | NH1    | H_ASP_90  | OD1    | 3.630        |
| 6ATT   | H_ARG_67  | NH1    | H_ASP_90  | OD2    | 2.692        |
| 6ATT   | H_ARG_67  | NH2    | H_ASP_90  | OD1    | 3.064        |
| 6ATT   | H_ARG_67  | NH2    | H_ASP_90  | OD2    | 3.552        |
| 6ATT   | H_ARG_98  | NH2    | H_ASP_109 | OD2    | 3.700        |
| 6ATT   | H_LYS_151 | NZ     | H_ASP_152 | OD1    | 3.592        |



|      |           |     |           |     |       |
|------|-----------|-----|-----------|-----|-------|
| 6ATT | H_LYS_151 | NZ  | H_ASP_152 | OD2 | 3.811 |
| 6ATT | H_LYS_217 | NZ  | L_GLU_129 | OE1 | 3.069 |
| 6ATT | H_ARG_218 | NH1 | H_GLU_220 | OE2 | 2.838 |
| 6ATT | H_LYS_222 | NZ  | L_ASP_128 | OD1 | 2.688 |
| 6ATT | L_ARG_32  | NH1 | A_GLU_216 | OE1 | 2.742 |
| 6ATT | L_LYS_45  | NZ  | L_GLU_87  | OE1 | 2.487 |
| 6ATT | L_ARG_67  | NH1 | L_GLU_85  | OE1 | 3.360 |
| 6ATT | L_ARG_67  | NH1 | L_GLU_85  | OE2 | 3.299 |
| 6ATT | L_ARG_67  | NH2 | L_ASP_88  | OD1 | 2.767 |
| 6ATT | L_LYS_155 | NZ  | L_GLU_201 | OE1 | 3.534 |
| 6ATT | L_LYS_155 | NZ  | L_GLU_201 | OE2 | 3.250 |
| 6ATT | L_LYS_189 | NZ  | L_GLU_193 | OE1 | 3.627 |
| 6ATT | L_LYS_189 | NZ  | L_GLU_193 | OE2 | 3.286 |
| 6ATT | L_HIS_195 | ND1 | L_ASP_157 | OD2 | 2.711 |

Table 779: 6ATT-specific salt bridging networks analysis. In this table, a PDB file is specified with a four-letter PDB ID, except that the names of the PDB files corresponding to the single NMR structural model split from the NMR ensemble is specified with a four-letter PDB ID in addition to a hyphen followed by the single NMR structural model numeric ID, the residue naming scheme is **Chain ID\_residue name\_residue number**,  $\angle ADH$  represents the angle formed by acceptor (A), donor (D) and hydrogen (H) ( $\angle ADH$ ).

| PDB ID | Residue A | Atom A | Residue B | Atom B | Distance (Å) |
|--------|-----------|--------|-----------|--------|--------------|
| 6AZZ   | F_HIS_35  | NE2    | F_ASP_95  | OD1    | 2.684        |
| 6AZZ   | F_HIS_35  | NE2    | F_ASP_95  | OD2    | 3.272        |
| 6AZZ   | F_LYS_62  | NZ     | F_GLU_46  | OE1    | 3.990        |
| 6AZZ   | F_LYS_62  | NZ     | F_GLU_46  | OE2    | 2.597        |
| 6AZZ   | F_ARG_94  | NH2    | F_ASP_101 | OD1    | 3.814        |
| 6AZZ   | F_ARG_94  | NH2    | F_ASP_101 | OD2    | 2.728        |
| 6AZZ   | F_LYS_209 | NZ     | E_GLU_124 | OE2    | 3.461        |
| 6AZZ   | F_LYS_210 | NZ     | F_GLU_212 | OE1    | 2.660        |
| 6AZZ   | E_ARG_61  | NH1    | E_ASP_82  | OD1    | 3.472        |
| 6AZZ   | E_ARG_61  | NH1    | E_ASP_82  | OD2    | 2.388        |
| 6AZZ   | E_ARG_61  | NH2    | E_GLU_79  | OE1    | 3.246        |
| 6AZZ   | E_ARG_61  | NH2    | E_GLU_79  | OE2    | 3.544        |
| 6AZZ   | E_ARG_61  | NH2    | E_ASP_82  | OD1    | 2.711        |
| 6AZZ   | E_ARG_61  | NH2    | E_ASP_82  | OD2    | 2.961        |
| 6AZZ   | E_ARG_77  | NH1    | B_GLU_79  | OE2    | 3.685        |
| 6AZZ   | E_ARG_77  | NH2    | B_GLU_79  | OE1    | 3.407        |
| 6AZZ   | E_ARG_77  | NH2    | B_GLU_79  | OE2    | 3.489        |
| 6AZZ   | E_LYS_111 | NZ     | E_GLU_199 | OE1    | 3.404        |
| 6AZZ   | E_LYS_130 | NZ     | F_ASP_144 | OD2    | 3.330        |
| 6AZZ   | C_HIS_35  | NE2    | C_ASP_95  | OD1    | 2.700        |
| 6AZZ   | C_HIS_35  | NE2    | C_ASP_95  | OD2    | 3.324        |
| 6AZZ   | C_LYS_62  | NZ     | C_GLU_46  | OE1    | 3.744        |
| 6AZZ   | C_LYS_62  | NZ     | C_GLU_46  | OE2    | 2.907        |
| 6AZZ   | C_ARG_94  | NH2    | C_ASP_101 | OD1    | 3.926        |
| 6AZZ   | C_ARG_94  | NH2    | C_ASP_101 | OD2    | 2.919        |
| 6AZZ   | C_LYS_209 | NZ     | B_GLU_124 | OE1    | 3.784        |
| 6AZZ   | C_LYS_209 | NZ     | B_GLU_124 | OE2    | 2.655        |
| 6AZZ   | C_LYS_210 | NZ     | C_GLU_212 | OE1    | 2.801        |
| 6AZZ   | B_LYS_31  | NZ     | B_ASP_92  | OD1    | 3.992        |
| 6AZZ   | B_ARG_61  | NH1    | B_GLU_79  | OE2    | 3.665        |
| 6AZZ   | B_ARG_61  | NH2    | B_GLU_79  | OE1    | 3.459        |
| 6AZZ   | B_ARG_61  | NH2    | B_GLU_79  | OE2    | 3.381        |
| 6AZZ   | B_ARG_61  | NH2    | B_ASP_82  | OD1    | 2.944        |
| 6AZZ   | B_ARG_61  | NH2    | B_ASP_82  | OD2    | 3.568        |
| 6AZZ   | B_LYS_111 | NZ     | B_GLU_199 | OE1    | 3.484        |
| 6AZZ   | B_LYS_130 | NZ     | C_ASP_144 | OD2    | 3.121        |
| 6AZZ   | A_HIS_20  | NE2    | A_GLU_22  | OE1    | 2.799        |
| 6AZZ   | A_LYS_90  | NZ     | B_ASP_51  | OD1    | 3.552        |
| 6AZZ   | A_LYS_90  | NZ     | B_ASP_51  | OD2    | 2.501        |
| 6AZZ   | A_LYS_98  | NZ     | A_GLU_22  | OE1    | 2.677        |
| 6AZZ   | A_LYS_98  | NZ     | A_GLU_22  | OE2    | 3.134        |
| 6AZZ   | A_LYS_108 | NZ     | B_ASP_53  | OD2    | 3.868        |
| 6AZZ   | A_LYS_108 | NZ     | A_GLU_88  | OE2    | 3.991        |
| 6AZZ   | A_LYS_118 | NZ     | A_ASP_131 | OD1    | 2.501        |
| 6AZZ   | A_LYS_139 | NZ     | A_ASP_6   | OD1    | 2.975        |
| 6AZZ   | D_LYS_10  | NZ     | D_GLU_35  | OE2    | 3.455        |
| 6AZZ   | D_ARG_11  | NH1    | D_GLU_26  | OE1    | 3.991        |
| 6AZZ   | D_HIS_20  | NE2    | D_GLU_22  | OE1    | 2.833        |
| 6AZZ   | D_LYS_90  | NZ     | E_ASP_51  | OD1    | 3.639        |
| 6AZZ   | D_LYS_90  | NZ     | E_ASP_51  | OD2    | 2.901        |
| 6AZZ   | D_LYS_98  | NZ     | D_GLU_22  | OE1    | 2.924        |
| 6AZZ   | D_LYS_98  | NZ     | D_GLU_22  | OE2    | 3.312        |
| 6AZZ   | D_LYS_118 | NZ     | D_ASP_131 | OD1    | 2.526        |
| 6AZZ   | D_LYS_139 | NZ     | D_ASP_6   | OD1    | 3.014        |
| 6AZZ   | D_LYS_139 | NZ     | D_ASP_6   | OD2    | 3.993        |

---

Table 780: 6AZZ-specific salt bridging networks analysis. In this table, a PDB file is specified with a four-letter PDB ID, except that the names of the PDB files corresponding to the single NMR structural model split from the NMR ensemble is specified with a four-letter PDB ID in addition to a hyphen followed by the single NMR structural model numeric ID, the residue naming scheme is **Chain ID\_residue name\_residue number**,  $\angle ADH$  represents the angle formed by acceptor (A), donor (D) and hydrogen (H) ( $\angle ADH$ ).

| PDB ID | Residue A | Atom A | Residue B | Atom B | Distance (Å) |
|--------|-----------|--------|-----------|--------|--------------|
| 6B08   | C_HIS_35  | NE2    | C_ASP_95  | OD1    | 2.543        |
| 6B08   | C_HIS_35  | NE2    | C_ASP_95  | OD2    | 3.235        |
| 6B08   | C_ARG_38  | NH2    | C_GLU_46  | OE1    | 3.451        |
| 6B08   | C_ARG_94  | NH2    | C_ASP_101 | OD1    | 3.885        |
| 6B08   | C_ARG_94  | NH2    | C_ASP_101 | OD2    | 2.821        |
| 6B08   | C_LYS_143 | NZ     | B_GLU_125 | OE2    | 2.599        |
| 6B08   | B_LYS_31  | NZ     | B_ASP_92  | OD2    | 3.730        |
| 6B08   | B_ARG_61  | NH1    | B_GLU_79  | OE2    | 3.112        |
| 6B08   | B_ARG_61  | NH2    | B_ASP_82  | OD1    | 2.963        |
| 6B08   | B_ARG_61  | NH2    | B_ASP_82  | OD2    | 2.912        |
| 6B08   | B_LYS_167 | NZ     | B_GLU_83  | OE2    | 3.572        |
| 6B08   | A_LYS_10  | NZ     | A_GLU_35  | OE2    | 3.550        |
| 6B08   | A_HIS_20  | NE2    | A_GLU_22  | OE2    | 2.721        |
| 6B08   | A_LYS_90  | NZ     | B_ASP_51  | OD1    | 2.529        |
| 6B08   | A_LYS_90  | NZ     | B_ASP_51  | OD2    | 3.708        |
| 6B08   | A_LYS_98  | NZ     | A_GLU_22  | OE1    | 3.424        |
| 6B08   | A_LYS_98  | NZ     | A_GLU_22  | OE2    | 2.846        |
| 6B08   | A_LYS_118 | NZ     | A_ASP_131 | OD1    | 3.348        |
| 6B08   | A_LYS_142 | NZ     | A_GLU_145 | OE1    | 2.917        |
| 6B08   | A_LYS_142 | NZ     | A_GLU_145 | OE2    | 3.424        |

Table 781: 6B08-specific salt bridging networks analysis. In this table, a PDB file is specified with a four-letter PDB ID, except that the names of the PDB files corresponding to the single NMR structural model split from the NMR ensemble is specified with a four-letter PDB ID in addition to a hyphen followed by the single NMR structural model numeric ID, the residue naming scheme is **Chain ID\_residue name\_residue number**,  $\angle ADH$  represents the angle formed by acceptor (A), donor (D) and hydrogen (H) ( $\angle ADH$ ).

| PDB ID | Residue A | Atom A | Residue B | Atom B | Distance (Å) |
|--------|-----------|--------|-----------|--------|--------------|
| 6B0A   | H_ARG_38  | NH1    | H_ASP_90  | OD1    | 3.014        |
| 6B0A   | H_ARG_38  | NH2    | H_GLU_46  | OE2    | 3.036        |
| 6B0A   | H_ARG_38  | NH2    | H_ASP_90  | OD1    | 3.967        |
| 6B0A   | H_LYS_65  | NZ     | H_ASP_62  | OD1    | 3.558        |
| 6B0A   | H_ARG_67  | NH1    | H_ASP_90  | OD1    | 3.030        |
| 6B0A   | H_ARG_67  | NH1    | H_ASP_90  | OD2    | 2.551        |
| 6B0A   | H_ARG_67  | NH2    | H_ASP_90  | OD1    | 3.040        |
| 6B0A   | H_ARG_67  | NH2    | H_ASP_90  | OD2    | 3.966        |
| 6B0A   | H_LYS_98  | NZ     | H_ASP_100 | OD1    | 3.067        |
| 6B0A   | H_LYS_98  | NZ     | H_ASP_113 | OD1    | 3.416        |
| 6B0A   | H_LYS_98  | NZ     | H_ASP_113 | OD2    | 3.062        |
| 6B0A   | H_LYS_218 | NZ     | H_ASP_220 | OD1    | 3.753        |
| 6B0A   | L_ARG_62  | NH1    | L_GLU_80  | OE1    | 3.743        |
| 6B0A   | L_ARG_62  | NH1    | L_GLU_80  | OE2    | 3.406        |
| 6B0A   | L_ARG_62  | NH2    | L_GLU_80  | OE2    | 3.228        |
| 6B0A   | L_ARG_62  | NH2    | L_GLU_82  | OE1    | 3.824        |
| 6B0A   | L_ARG_62  | NH2    | L_ASP_83  | OD1    | 2.621        |
| 6B0A   | L_ARG_62  | NH2    | L_ASP_83  | OD2    | 3.165        |
| 6B0A   | L_ARG_101 | NH1    | L_GLU_103 | OE1    | 3.058        |
| 6B0A   | L_HIS_187 | ND1    | L_ASP_149 | OD2    | 2.488        |
| 6B0A   | A_HIS_20  | NE2    | A_GLU_22  | OE1    | 3.003        |
| 6B0A   | A_LYS_90  | NZ     | A_ASP_78  | OD2    | 3.536        |
| 6B0A   | A_LYS_98  | NZ     | A_GLU_22  | OE1    | 3.288        |
| 6B0A   | A_LYS_98  | NZ     | A_GLU_22  | OE2    | 2.898        |
| 6B0A   | A_LYS_118 | NZ     | A_ASP_131 | OD1    | 2.522        |

Table 782: 6B0A-specific salt bridging networks analysis. In this table, a PDB file is specified with a four-letter PDB ID, except that the names of the PDB files corresponding to the single NMR structural model split from the NMR ensemble is specified with a four-letter PDB ID in addition to a hyphen followed by the single NMR structural model numeric ID, the residue naming scheme is **Chain ID\_residue name\_residue number**,  $\angle ADH$  represents the angle formed by acceptor (A), donor (D) and hydrogen (H) ( $\angle ADH$ ).

| PDB ID | Residue A | Atom A | Residue B | Atom B | Distance (Å) |
|--------|-----------|--------|-----------|--------|--------------|
| 6B0E   | A_ARG_46  | NH2    | A_ASP_55  | OD1    | 3.681        |
| 6B0E   | A_ARG_46  | NH2    | A_ASP_55  | OD2    | 2.616        |
| 6B0E   | A_ARG_54  | NH2    | A_ASP_60  | OD1    | 3.407        |
| 6B0E   | A_ARG_61  | NH1    | A_GLU_81  | OE2    | 2.864        |
| 6B0E   | A_ARG_61  | NH1    | A_ASP_82  | OD1    | 2.718        |
| 6B0E   | A_ARG_61  | NH1    | A_ASP_82  | OD2    | 3.652        |
| 6B0E   | A_ARG_61  | NH2    | A_GLU_79  | OE1    | 3.681        |
| 6B0E   | A_ARG_61  | NH2    | A_GLU_79  | OE2    | 3.517        |
| 6B0E   | A_ARG_61  | NH2    | A_GLU_81  | OE2    | 3.930        |
| 6B0E   | A_HIS_189 | ND1    | A_ASP_151 | OD2    | 2.935        |
| 6B0E   | B_ARG_38  | NH1    | B_ASP_86  | OD1    | 3.019        |
| 6B0E   | B_ARG_38  | NH2    | B_GLU_46  | OE2    | 3.029        |
| 6B0E   | B_ARG_38  | NH2    | B_ASP_86  | OD1    | 3.941        |
| 6B0E   | B_ARG_94  | NH2    | B_ASP_101 | OD1    | 3.699        |
| 6B0E   | B_ARG_94  | NH2    | B_ASP_101 | OD2    | 2.508        |
| 6B0E   | B_LYS_143 | NZ     | B_ASP_144 | OD1    | 2.734        |
| 6B0E   | B_LYS_143 | NZ     | B_ASP_144 | OD2    | 3.061        |
| 6B0E   | B_HIS_164 | ND1    | A_ASP_167 | OD2    | 3.677        |
| 6B0E   | E_HIS_20  | NE2    | E_GLU_22  | OE1    | 2.862        |
| 6B0E   | E_LYS_118 | NZ     | E_ASP_131 | OD1    | 2.359        |
| 6B0E   | E_LYS_142 | NZ     | E_GLU_145 | OE1    | 3.928        |
| 6B0E   | E_LYS_155 | NZ     | B_ASP_98  | OD2    | 3.864        |

Table 783: 6B0E-specific salt bridging networks analysis. In this table, a PDB file is specified with a four-letter PDB ID, except that the names of the PDB files corresponding to the single NMR structural model split from the NMR ensemble is specified with a four-letter PDB ID in addition to a hyphen followed by the single NMR structural model numeric ID, the residue naming scheme is **Chain ID\_residue name\_residue number**,  $\angle ADH$  represents the angle formed by acceptor (A), donor (D) and hydrogen (H) ( $\angle ADH$ ).

| PDB ID | Residue A  | Atom A | Residue B | Atom B | Distance (Å) |
|--------|------------|--------|-----------|--------|--------------|
| 6B0G   | C_ARG_24   | NH1    | C_ASP_70  | OD1    | 3.644        |
| 6B0G   | C_ARG_24   | NH2    | C_ASP_70  | OD1    | 3.217        |
| 6B0G   | C_ARG_46   | NH2    | C_ASP_55  | OD1    | 3.667        |
| 6B0G   | C_ARG_46   | NH2    | C_ASP_55  | OD2    | 2.584        |
| 6B0G   | C_ARG_54   | NH2    | C_ASP_60  | OD1    | 2.717        |
| 6B0G   | C_ARG_61   | NH1    | C_GLU_79  | OE1    | 3.756        |
| 6B0G   | C_ARG_61   | NH1    | C_GLU_79  | OE2    | 3.832        |
| 6B0G   | C_ARG_61   | NH2    | C_GLU_79  | OE1    | 3.846        |
| 6B0G   | C_ARG_61   | NH2    | C_ASP_82  | OD1    | 2.542        |
| 6B0G   | C_ARG_61   | NH2    | C_ASP_82  | OD2    | 3.446        |
| 6B0G   | C_LYS_103  | NZ     | C_GLU_165 | OE1    | 3.504        |
| 6B0G   | C_LYS_103  | NZ     | C_GLU_165 | OE2    | 3.698        |
| 6B0G   | C_LYS_149  | NZ     | C_GLU_195 | OE1    | 3.121        |
| 6B0G   | C_LYS_188  | NZ     | C_ASP_185 | OD1    | 2.887        |
| 6B0G   | C_HIS_189  | ND1    | C_ASP_151 | OD2    | 3.287        |
| 6B0G   | C_ARG_211  | NH1    | C_GLU_187 | OE1    | 3.151        |
| 6B0G   | D_ARG_38   | NH1    | D_ASP_86  | OD1    | 2.889        |
| 6B0G   | D_ARG_38   | NH2    | D_ASP_86  | OD1    | 3.880        |
| 6B0G   | D_LYS_62   | NZ     | D_GLU_46  | OE1    | 3.387        |
| 6B0G   | D_LYS_62   | NZ     | D_GLU_46  | OE2    | 3.344        |
| 6B0G   | D_ARG_66   | NH1    | D_ASP_86  | OD1    | 3.686        |
| 6B0G   | D_ARG_66   | NH1    | D_ASP_86  | OD2    | 2.815        |
| 6B0G   | D_ARG_66   | NH2    | D_ASP_86  | OD1    | 2.895        |
| 6B0G   | D_ARG_66   | NH2    | D_ASP_86  | OD2    | 3.345        |
| 6B0G   | D_ARG_82A  | NH2    | D_GLU_81  | OE1    | 3.967        |
| 6B0G   | D_LYS_94   | NZ     | D_ASP_101 | OD1    | 3.857        |
| 6B0G   | D_LYS_94   | NZ     | D_ASP_101 | OD2    | 2.849        |
| 6B0G   | D_ARG_100B | NH1    | C_ASP_91  | OD2    | 3.003        |
| 6B0G   | D_ARG_100B | NH2    | C_ASP_91  | OD2    | 3.130        |
| 6B0G   | D_LYS_148  | NZ     | D_ASP_149 | OD1    | 3.128        |
| 6B0G   | D_LYS_148  | NZ     | D_ASP_149 | OD2    | 3.390        |
| 6B0G   | D_LYS_214  | NZ     | C_GLU_123 | OE2    | 3.176        |
| 6B0G   | D_LYS_215  | NZ     | D_GLU_217 | OE2    | 3.125        |
| 6B0G   | E_ARG_11   | NH1    | E_GLU_39  | OE2    | 3.696        |
| 6B0G   | E_HIS_20   | NE2    | E_GLU_22  | OE1    | 2.725        |
| 6B0G   | E_LYS_90   | NZ     | E_ASP_78  | OD2    | 3.931        |
| 6B0G   | E_LYS_98   | NZ     | E_GLU_22  | OE1    | 2.876        |
| 6B0G   | E_LYS_98   | NZ     | E_GLU_22  | OE2    | 3.660        |
| 6B0G   | E_LYS_118  | NZ     | E_ASP_131 | OD1    | 2.414        |
| 6B0G   | E_LYS_139  | NZ     | E_ASP_6   | OD1    | 2.804        |
| 6B0G   | E_LYS_139  | NZ     | E_ASP_6   | OD2    | 3.888        |
| 6B0G   | E_LYS_155  | NZ     | D_ASP_98  | OD2    | 2.837        |
| 6B0G   | E_LYS_155  | NZ     | E_ASP_157 | OD2    | 3.894        |

Table 784: 6B0G-specific salt bridging networks analysis. In this table, a PDB file is specified with a four-letter PDB ID, except that the names of the PDB files corresponding to the single NMR structural model split from the NMR ensemble is specified with a four-letter PDB ID in addition to a hyphen followed by the single NMR structural model numeric ID, the residue naming scheme is **Chain ID\_residue name\_residue number**,  $\angle ADH$  represents the angle formed by acceptor (A), donor (D) and hydrogen (H) ( $\angle ADH$ ).

| PDB ID | Residue A | Atom A | Residue B | Atom B | Distance (Å) |
|--------|-----------|--------|-----------|--------|--------------|
| 6B0H   | I_ARG_11  | NH1    | I_GLU_39  | OE1    | 2.905        |
| 6B0H   | I_ARG_11  | NH1    | I_GLU_39  | OE2    | 3.603        |
| 6B0H   | I_ARG_11  | NH2    | I_GLU_39  | OE1    | 3.421        |
| 6B0H   | I_ARG_11  | NH2    | I_GLU_39  | OE2    | 2.810        |
| 6B0H   | I_HIS_20  | NE2    | I_GLU_22  | OE1    | 2.759        |
| 6B0H   | I_LYS_24  | NZ     | I_GLU_22  | OE2    | 3.743        |
| 6B0H   | I_LYS_90  | NZ     | I_ASP_78  | OD2    | 2.698        |
| 6B0H   | I_LYS_118 | NZ     | I_ASP_131 | OD1    | 2.468        |
| 6B0H   | I_LYS_127 | NZ     | I_ASP_124 | OD2    | 3.708        |
| 6B0H   | I_LYS_139 | NZ     | I_ASP_6   | OD1    | 2.845        |
| 6B0H   | I_LYS_139 | NZ     | I_ASP_6   | OD2    | 3.883        |
| 6B0H   | I_LYS_142 | NZ     | I_GLU_145 | OE2    | 3.701        |
| 6B0H   | I_LYS_155 | NZ     | I_ASP_157 | OD2    | 3.811        |
| 6B0H   | J_ARG_11  | NH1    | J_GLU_39  | OE1    | 3.153        |
| 6B0H   | J_ARG_11  | NH1    | J_GLU_39  | OE2    | 3.697        |
| 6B0H   | J_ARG_11  | NH2    | J_GLU_39  | OE1    | 3.428        |
| 6B0H   | J_ARG_11  | NH2    | J_GLU_39  | OE2    | 2.670        |
| 6B0H   | J_HIS_20  | NE2    | J_GLU_22  | OE1    | 2.670        |
| 6B0H   | J_LYS_24  | NZ     | J_GLU_22  | OE2    | 3.866        |
| 6B0H   | J_LYS_90  | NZ     | J_ASP_78  | OD2    | 3.917        |
| 6B0H   | J_LYS_98  | NZ     | J_GLU_22  | OE2    | 3.958        |
| 6B0H   | J_LYS_118 | NZ     | J_ASP_131 | OD1    | 2.439        |
| 6B0H   | J_LYS_127 | NZ     | J_ASP_124 | OD1    | 3.354        |
| 6B0H   | J_LYS_127 | NZ     | J_ASP_124 | OD2    | 3.839        |
| 6B0H   | J_LYS_139 | NZ     | J_ASP_6   | OD1    | 3.036        |
| 6B0H   | B_ARG_38  | NH1    | B_ASP_86  | OD1    | 2.831        |
| 6B0H   | B_ARG_38  | NH2    | B_GLU_46  | OE1    | 3.367        |
| 6B0H   | B_ARG_38  | NH2    | B_ASP_86  | OD1    | 3.809        |
| 6B0H   | B_LYS_43  | NZ     | B_GLU_46  | OE2    | 3.945        |
| 6B0H   | B_HIS_58  | ND1    | B_GLU_50  | OE2    | 3.817        |
| 6B0H   | B_ARG_66  | NH1    | B_ASP_86  | OD1    | 3.737        |
| 6B0H   | B_ARG_66  | NH2    | B_ASP_86  | OD1    | 3.093        |
| 6B0H   | B_ARG_66  | NH2    | B_ASP_86  | OD2    | 2.466        |
| 6B0H   | B_ARG_94  | NH2    | B_ASP_101 | OD1    | 3.827        |
| 6B0H   | B_ARG_94  | NH2    | B_ASP_101 | OD2    | 2.750        |
| 6B0H   | B_ARG_97  | NH2    | B_GLU_50  | OE1    | 2.771        |
| 6B0H   | B_ARG_97  | NH2    | B_GLU_50  | OE2    | 3.459        |
| 6B0H   | B_ARG_97  | NH2    | B_GLU_95  | OE2    | 2.917        |
| 6B0H   | B_LYS_144 | NZ     | B_ASP_145 | OD1    | 3.326        |
| 6B0H   | B_LYS_144 | NZ     | B_ASP_145 | OD2    | 3.603        |
| 6B0H   | D_ARG_38  | NH1    | D_ASP_86  | OD1    | 2.588        |
| 6B0H   | D_ARG_38  | NH2    | D_GLU_46  | OE1    | 3.399        |
| 6B0H   | D_ARG_38  | NH2    | D_ASP_86  | OD1    | 3.688        |
| 6B0H   | D_LYS_43  | NZ     | D_GLU_46  | OE2    | 3.764        |
| 6B0H   | D_HIS_58  | ND1    | D_GLU_50  | OE1    | 3.722        |
| 6B0H   | D_ARG_66  | NH1    | D_ASP_86  | OD1    | 3.850        |
| 6B0H   | D_ARG_66  | NH1    | D_ASP_86  | OD2    | 3.946        |
| 6B0H   | D_ARG_66  | NH2    | D_ASP_86  | OD1    | 3.173        |
| 6B0H   | D_ARG_66  | NH2    | D_ASP_86  | OD2    | 2.383        |
| 6B0H   | D_ARG_94  | NH2    | D_ASP_101 | OD1    | 3.853        |
| 6B0H   | D_ARG_94  | NH2    | D_ASP_101 | OD2    | 2.885        |
| 6B0H   | D_ARG_97  | NH2    | D_GLU_50  | OE1    | 3.508        |
| 6B0H   | D_ARG_97  | NH2    | D_GLU_50  | OE2    | 2.823        |
| 6B0H   | D_ARG_97  | NH2    | D_GLU_95  | OE2    | 2.857        |
| 6B0H   | D_LYS_144 | NZ     | D_ASP_145 | OD1    | 3.294        |
| 6B0H   | D_LYS_144 | NZ     | D_ASP_145 | OD2    | 3.795        |
| 6B0H   | D_LYS_207 | NZ     | D_ASP_209 | OD1    | 3.527        |



|      |           |     |           |     |       |
|------|-----------|-----|-----------|-----|-------|
| 6B0H | D_LYS_207 | NZ  | D_ASP_209 | OD2 | 2.851 |
| 6B0H | A_ARG_61  | NH1 | A_GLU_81  | OE2 | 3.989 |
| 6B0H | A_ARG_61  | NH2 | A_GLU_81  | OE2 | 2.801 |
| 6B0H | A_ARG_61  | NH2 | A_ASP_82  | OD1 | 2.591 |
| 6B0H | A_ARG_61  | NH2 | A_ASP_82  | OD2 | 3.548 |
| 6B0H | A_LYS_149 | NZ  | A_GLU_195 | OE1 | 2.772 |
| 6B0H | A_LYS_183 | NZ  | A_GLU_187 | OE1 | 2.500 |
| 6B0H | A_LYS_183 | NZ  | A_GLU_187 | OE2 | 3.165 |
| 6B0H | C_ARG_61  | NH2 | C_GLU_81  | OE2 | 3.031 |
| 6B0H | C_ARG_61  | NH2 | C_ASP_82  | OD1 | 2.583 |
| 6B0H | C_ARG_61  | NH2 | C_ASP_82  | OD2 | 3.415 |
| 6B0H | C_LYS_149 | NZ  | C_GLU_195 | OE1 | 2.730 |

Table 785: 6B0H-specific salt bridging networks analysis. In this table, a PDB file is specified with a four-letter PDB ID, except that the names of the PDB files corresponding to the single NMR structural model split from the NMR ensemble is specified with a four-letter PDB ID in addition to a hyphen followed by the single NMR structural model numeric ID, the residue naming scheme is **Chain ID\_residue name\_residue number**,  $\angle ADH$  represents the angle formed by acceptor (A), donor (D) and hydrogen (H) ( $\angle ADH$ ).

| PDB ID | Residue A | Atom A | Residue B | Atom B | Distance (Å) |
|--------|-----------|--------|-----------|--------|--------------|
| 6BE2   | H_ARG_38  | NH1    | H_ASP_89  | OD1    | 2.773        |
| 6BE2   | H_ARG_38  | NH2    | H_GLU_46  | OE1    | 3.073        |
| 6BE2   | H_ARG_38  | NH2    | H_ASP_89  | OD1    | 3.711        |
| 6BE2   | H_ARG_66  | NH1    | H_ASP_89  | OD1    | 3.581        |
| 6BE2   | H_ARG_66  | NH1    | H_ASP_89  | OD2    | 2.936        |
| 6BE2   | H_ARG_66  | NH2    | H_ASP_89  | OD1    | 2.937        |
| 6BE2   | H_ARG_66  | NH2    | H_ASP_89  | OD2    | 3.585        |
| 6BE2   | H_ARG_97  | NH2    | H_ASP_112 | OD1    | 3.701        |
| 6BE2   | H_ARG_97  | NH2    | H_ASP_112 | OD2    | 2.907        |
| 6BE2   | H_LYS_154 | NZ     | L_GLU_129 | OE2    | 2.747        |
| 6BE2   | L_LYS_49  | NZ     | H_GLU_108 | OE2    | 2.828        |
| 6BE2   | L_ARG_65  | NH1    | L_ASP_86  | OD1    | 3.600        |
| 6BE2   | L_ARG_65  | NH1    | L_ASP_86  | OD2    | 2.741        |
| 6BE2   | L_ARG_65  | NH2    | L_ASP_86  | OD1    | 2.925        |
| 6BE2   | L_ARG_65  | NH2    | L_ASP_86  | OD2    | 3.429        |
| 6BE2   | L_ARG_100 | NH2    | H_ASP_98  | OD1    | 2.914        |
| 6BE2   | L_LYS_107 | NZ     | L_ASP_89  | OD1    | 2.799        |
| 6BE2   | L_LYS_107 | NZ     | L_ASP_89  | OD2    | 3.237        |
| 6BE2   | L_LYS_171 | NZ     | L_GLU_87  | OE1    | 2.671        |

Table 786: 6BE2-specific salt bridging networks analysis. In this table, a PDB file is specified with a four-letter PDB ID, except that the names of the PDB files corresponding to the single NMR structural model split from the NMR ensemble is specified with a four-letter PDB ID in addition to a hyphen followed by the single NMR structural model numeric ID, the residue naming scheme is **Chain ID** **residue name** **residue number**,  $\angle ADH$  represents the angle formed by acceptor (A), donor (D) and hydrogen (H) ( $\angle ADH$ ).

| PDB ID | Residue A | Atom A | Residue B | Atom B | Distance (Å) |
|--------|-----------|--------|-----------|--------|--------------|
| 6BE3   | H_ARG_38  | NH1    | H_ASP_89  | OD1    | 2.759        |
| 6BE3   | H_ARG_38  | NH2    | H_GLU_46  | OE1    | 3.050        |
| 6BE3   | H_ARG_38  | NH2    | H_ASP_89  | OD1    | 3.706        |
| 6BE3   | H_ARG_66  | NH1    | H_ASP_89  | OD1    | 3.702        |
| 6BE3   | H_ARG_66  | NH1    | H_ASP_89  | OD2    | 3.027        |
| 6BE3   | H_ARG_66  | NH2    | H_ASP_89  | OD1    | 2.994        |
| 6BE3   | H_ARG_66  | NH2    | H_ASP_89  | OD2    | 3.609        |
| 6BE3   | H_ARG_97  | NH2    | H_ASP_112 | OD1    | 3.602        |
| 6BE3   | H_ARG_97  | NH2    | H_ASP_112 | OD2    | 2.963        |
| 6BE3   | H_LYS_154 | NZ     | L_GLU_129 | OE2    | 2.742        |
| 6BE3   | H_LYS_220 | NZ     | L_GLU_128 | OE1    | 3.265        |
| 6BE3   | H_LYS_220 | NZ     | L_GLU_128 | OE2    | 2.896        |
| 6BE3   | L_LYS_49  | NZ     | H_GLU_108 | OE2    | 2.860        |
| 6BE3   | L_ARG_65  | NH1    | L_ASP_86  | OD1    | 3.594        |
| 6BE3   | L_ARG_65  | NH1    | L_ASP_86  | OD2    | 2.669        |
| 6BE3   | L_ARG_65  | NH2    | L_ASP_86  | OD1    | 2.920        |
| 6BE3   | L_ARG_65  | NH2    | L_ASP_86  | OD2    | 3.411        |
| 6BE3   | L_ARG_100 | NH2    | H_ASP_98  | OD1    | 3.147        |
| 6BE3   | L_ARG_100 | NH2    | H_ASP_109 | OD1    | 3.865        |
| 6BE3   | L_LYS_171 | NZ     | L_GLU_87  | OE2    | 2.868        |

Table 787: 6BE3-specific salt bridging networks analysis. In this table, a PDB file is specified with a four-letter PDB ID, except that the names of the PDB files corresponding to the single NMR structural model split from the NMR ensemble is specified with a four-letter PDB ID in addition to a hyphen followed by the single NMR structural model numeric ID, the residue naming scheme is **Chain ID\_residue name\_residue number**,  $\angle ADH$  represents the angle formed by acceptor (A), donor (D) and hydrogen (H) ( $\angle ADH$ ).

| PDB ID | Residue A | Atom A | Residue B | Atom B | Distance (Å) |
|--------|-----------|--------|-----------|--------|--------------|
| 6BE4   | H_ARG_38  | NH1    | H_ASP_89  | OD2    | 2.649        |
| 6BE4   | H_ARG_38  | NH2    | H_GLU_46  | OE1    | 3.034        |
| 6BE4   | H_ARG_38  | NH2    | H_ASP_89  | OD2    | 3.562        |
| 6BE4   | H_ARG_66  | NH1    | H_ASP_89  | OD1    | 2.856        |
| 6BE4   | H_ARG_66  | NH1    | H_ASP_89  | OD2    | 3.787        |
| 6BE4   | H_ARG_66  | NH2    | H_ASP_89  | OD1    | 3.571        |
| 6BE4   | H_ARG_66  | NH2    | H_ASP_89  | OD2    | 3.108        |
| 6BE4   | H_ARG_97  | NH2    | H_ASP_112 | OD1    | 3.623        |
| 6BE4   | H_ARG_97  | NH2    | H_ASP_112 | OD2    | 3.151        |
| 6BE4   | H_LYS_154 | NZ     | L_GLU_129 | OE1    | 2.824        |
| 6BE4   | H_LYS_221 | NZ     | H_GLU_223 | OE2    | 2.728        |
| 6BE4   | L_ARG_65  | NH1    | L_ASP_86  | OD1    | 3.135        |
| 6BE4   | L_ARG_65  | NH2    | L_ASP_86  | OD1    | 3.000        |
| 6BE4   | L_ARG_65  | NH2    | L_ASP_86  | OD2    | 2.628        |
| 6BE4   | L_ARG_100 | NH2    | H_ASP_98  | OD1    | 3.253        |
| 6BE4   | L_ARG_100 | NH2    | H_ASP_109 | OD1    | 3.926        |
| 6BE4   | L_LYS_171 | NZ     | L_GLU_87  | OE1    | 3.243        |
| 6BE4   | L_ARG_194 | NH1    | L_ASP_156 | OD2    | 3.672        |
| 6BE4   | L_ARG_194 | NH2    | L_ASP_156 | OD1    | 3.622        |
| 6BE4   | L_ARG_194 | NH2    | L_ASP_156 | OD2    | 3.634        |

Table 788: 6BE4-specific salt bridging networks analysis. In this table, a PDB file is specified with a four-letter PDB ID, except that the names of the PDB files corresponding to the single NMR structural model split from the NMR ensemble is specified with a four-letter PDB ID in addition to a hyphen followed by the single NMR structural model numeric ID, the residue naming scheme is **Chain ID\_residue name\_residue number**,  $\angle ADH$  represents the angle formed by acceptor (A), donor (D) and hydrogen (H) ( $\angle ADH$ ).

| PDB ID | Residue A | Atom A | Residue B | Atom B | Distance (Å) |
|--------|-----------|--------|-----------|--------|--------------|
| 6BIT   | I.HIS_35  | NE2    | H.GLU_54  | OE1    | 3.340        |
| 6BIT   | I.ARG_40  | NH2    | I.GLU_46  | OE1    | 2.891        |
| 6BIT   | I.ARG_50  | NH1    | I.GLU_57  | OE1    | 3.032        |
| 6BIT   | I.ARG_50  | NH2    | I.GLU_57  | OE1    | 3.316        |
| 6BIT   | I.ARG_50  | NH2    | H.ASP_100 | OD1    | 3.331        |
| 6BIT   | I.ARG_50  | NH2    | H.ASP_101 | OD1    | 3.135        |
| 6BIT   | I.ARG_50  | NH2    | H.ASP_101 | OD2    | 3.871        |
| 6BIT   | I.LYS_59  | NZ     | I.GLU_57  | OE2    | 3.249        |
| 6BIT   | I.LYS_59  | NZ     | H.ASP_100 | OD1    | 3.680        |
| 6BIT   | I.LYS_63  | NZ     | I.GLU_46  | OE1    | 3.651        |
| 6BIT   | I.LYS_63  | NZ     | I.GLU_46  | OE2    | 2.777        |
| 6BIT   | I.LYS_67  | NZ     | I.ASP_90  | OD1    | 3.668        |
| 6BIT   | I.LYS_67  | NZ     | I.ASP_90  | OD2    | 3.222        |
| 6BIT   | I.LYS_208 | NZ     | K.GLU_123 | OE2    | 3.567        |
| 6BIT   | I.ARG_213 | NH1    | L.ASP_143 | OD1    | 3.423        |
| 6BIT   | K.ARG_61  | NH1    | K.GLU_81  | OE2    | 3.581        |
| 6BIT   | K.ARG_61  | NH1    | K.ASP_82  | OD1    | 2.603        |
| 6BIT   | K.ARG_61  | NH1    | K.ASP_82  | OD2    | 3.046        |
| 6BIT   | K.ARG_61  | NH2    | K.GLU_81  | OE2    | 3.311        |
| 6BIT   | K.ARG_96  | NH1    | H.GLU_54  | OE1    | 3.223        |
| 6BIT   | K.ARG_96  | NH2    | H.GLU_54  | OE1    | 2.904        |
| 6BIT   | K.ARG_96  | NH2    | H.GLU_54  | OE2    | 3.687        |
| 6BIT   | K.LYS_103 | NZ     | K.ASP_165 | OD1    | 3.785        |
| 6BIT   | K.LYS_149 | NZ     | K.GLU_195 | OE1    | 3.128        |
| 6BIT   | K.LYS_149 | NZ     | K.GLU_195 | OE2    | 3.026        |
| 6BIT   | K.LYS_183 | NZ     | K.GLU_187 | OE2    | 3.925        |
| 6BIT   | K.LYS_199 | NZ     | K.ASP_110 | OD1    | 3.991        |
| 6BIT   | K.LYS_199 | NZ     | K.ASP_110 | OD2    | 3.333        |
| 6BIT   | H.ARG_24  | NH1    | H.ASP_10  | OD1    | 2.961        |
| 6BIT   | H.ARG_24  | NH1    | H.ASP_10  | OD2    | 3.571        |
| 6BIT   | H.ARG_40  | NH2    | H.GLU_47  | OE1    | 2.715        |
| 6BIT   | H.ARG_40  | NH2    | H.GLU_47  | OE2    | 3.722        |
| 6BIT   | H.ARG_46  | NH1    | H.GLU_103 | OE1    | 2.965        |
| 6BIT   | H.ARG_46  | NH2    | H.GLU_103 | OE1    | 2.785        |
| 6BIT   | H.LYS_53  | NZ     | I.ASP_52  | OD1    | 3.518        |
| 6BIT   | H.LYS_53  | NZ     | I.GLU_54  | OE1    | 2.817        |
| 6BIT   | H.ARG_59  | NH1    | H.ASP_85  | OD1    | 2.707        |
| 6BIT   | H.ARG_59  | NH1    | H.ASP_85  | OD2    | 3.494        |
| 6BIT   | H.ARG_59  | NH2    | H.ASP_85  | OD1    | 3.485        |
| 6BIT   | H.ARG_59  | NH2    | H.ASP_85  | OD2    | 2.872        |
| 6BIT   | H.LYS_96  | NZ     | I.ASP_52  | OD2    | 2.786        |
| 6BIT   | H.LYS_96  | NZ     | I.ASP_55  | OD1    | 3.426        |
| 6BIT   | H.LYS_96  | NZ     | I.ASP_55  | OD2    | 2.655        |
| 6BIT   | H.LYS_96  | NZ     | I.GLU_57  | OE1    | 2.771        |
| 6BIT   | H.LYS_105 | NZ     | H.GLU_3   | OE2    | 2.864        |
| 6BIT   | J.HIS_35  | NE2    | G.GLU_54  | OE1    | 3.221        |
| 6BIT   | J.ARG_40  | NH1    | J.GLU_89  | OE1    | 3.452        |
| 6BIT   | J.ARG_50  | NH1    | J.GLU_57  | OE2    | 2.730        |
| 6BIT   | J.ARG_50  | NH2    | J.GLU_57  | OE2    | 3.003        |
| 6BIT   | J.ARG_50  | NH2    | G.ASP_100 | OD1    | 3.724        |
| 6BIT   | J.ARG_50  | NH2    | G.ASP_101 | OD1    | 3.330        |
| 6BIT   | J.LYS_59  | NZ     | J.GLU_57  | OE1    | 3.468        |
| 6BIT   | J.LYS_67  | NZ     | J.ASP_90  | OD1    | 3.323        |
| 6BIT   | J.LYS_208 | NZ     | L.GLU_123 | OE2    | 3.539        |
| 6BIT   | L.ARG_61  | NH1    | L.GLU_81  | OE2    | 3.351        |
| 6BIT   | L.ARG_61  | NH1    | L.ASP_82  | OD1    | 2.686        |
| 6BIT   | L.ARG_61  | NH1    | L.ASP_82  | OD2    | 3.128        |

|      |           |     |           |     |       |
|------|-----------|-----|-----------|-----|-------|
| 6BIT | L_ARG_61  | NH2 | L_GLU_81  | OE2 | 3.264 |
| 6BIT | L_ARG_96  | NH1 | G_GLU_54  | OE1 | 3.007 |
| 6BIT | L_ARG_96  | NH2 | G_GLU_54  | OE1 | 2.768 |
| 6BIT | L_ARG_96  | NH2 | G_GLU_54  | OE2 | 3.419 |
| 6BIT | L_LYS_103 | NZ  | L_ASP_165 | OD1 | 3.780 |
| 6BIT | L_LYS_169 | NZ  | L_ASP_167 | OD1 | 3.582 |
| 6BIT | L_LYS_169 | NZ  | L_ASP_167 | OD2 | 3.848 |
| 6BIT | L_LYS_183 | NZ  | L_GLU_187 | OE2 | 3.386 |
| 6BIT | L_HIS_189 | ND1 | L_ASP_151 | OD2 | 2.866 |
| 6BIT | G_ARG_24  | NH2 | G_ASP_10  | OD1 | 2.805 |
| 6BIT | G_ARG_24  | NH2 | G_ASP_10  | OD2 | 3.462 |
| 6BIT | G_ARG_40  | NH2 | G_GLU_47  | OE1 | 2.503 |
| 6BIT | G_ARG_40  | NH2 | G_GLU_47  | OE2 | 3.922 |
| 6BIT | G_ARG_46  | NH1 | G_GLU_103 | OE1 | 3.088 |
| 6BIT | G_ARG_46  | NH1 | G_GLU_103 | OE2 | 3.993 |
| 6BIT | G_ARG_46  | NH2 | G_GLU_103 | OE1 | 2.832 |
| 6BIT | G_LYS_53  | NZ  | J_ASP_52  | OD1 | 2.843 |
| 6BIT | G_LYS_53  | NZ  | J_ASP_52  | OD2 | 3.656 |
| 6BIT | G_LYS_53  | NZ  | J_GLU_54  | OE1 | 2.681 |
| 6BIT | G_ARG_59  | NH1 | G_ASP_85  | OD1 | 3.056 |
| 6BIT | G_ARG_59  | NH1 | G_ASP_85  | OD2 | 3.619 |
| 6BIT | G_ARG_59  | NH2 | G_ASP_85  | OD1 | 3.597 |
| 6BIT | G_ARG_59  | NH2 | G_ASP_85  | OD2 | 2.677 |
| 6BIT | G_LYS_96  | NZ  | J_ASP_52  | OD2 | 2.719 |
| 6BIT | G_LYS_96  | NZ  | J_ASP_55  | OD1 | 3.165 |
| 6BIT | G_LYS_96  | NZ  | J_ASP_55  | OD2 | 2.701 |
| 6BIT | G_LYS_96  | NZ  | J_GLU_57  | OE2 | 2.943 |
| 6BIT | G_LYS_105 | NZ  | G_GLU_3   | OE1 | 3.650 |

Table 789: 6BIT-specific salt bridging networks analysis. In this table, a PDB file is specified with a four-letter PDB ID, except that the names of the PDB files corresponding to the single NMR structural model split from the NMR ensemble is specified with a four-letter PDB ID in addition to a hyphen followed by the single NMR structural model numeric ID, the residue naming scheme is **Chain ID\_residue name\_residue number**,  $\angle ADH$  represents the angle formed by acceptor (A), donor (D) and hydrogen (H) ( $\angle ADH$ ).

| PDB ID | Residue A | Atom A | Residue B | Atom B | Distance (Å) |
|--------|-----------|--------|-----------|--------|--------------|
| 6BRB   | D_LYS_5   | NZ     | D_GLU_3   | OE1    | 2.959        |
| 6BRB   | D_LYS_5   | NZ     | D_GLU_3   | OE2    | 3.636        |
| 6BRB   | D_LYS_33  | NZ     | D_GLU_63  | OE1    | 3.743        |
| 6BRB   | D_ARG_69  | NH2    | D_GLU_27  | OE1    | 3.803        |
| 6BRB   | D_ARG_69  | NH2    | D_GLU_27  | OE2    | 3.492        |

Table 790: 6BRB-specific salt bridging networks analysis. In this table, a PDB file is specified with a four-letter PDB ID, except that the names of the PDB files corresponding to the single NMR structural model split from the NMR ensemble is specified with a four-letter PDB ID in addition to a hyphen followed by the single NMR structural model numeric ID, the residue naming scheme is **Chain ID\_residue name\_residue number**,  $\angle ADH$  represents the angle formed by acceptor (A), donor (D) and hydrogen (H) ( $\angle ADH$ ).

| PDB ID | Residue A | Atom A | Residue B | Atom B | Distance (Å) |
|--------|-----------|--------|-----------|--------|--------------|
| 6BXA   | A_ARG_37  | NH1    | C_GLU_101 | OE1    | 3.957        |
| 6BXA   | A_ARG_37  | NH1    | C_GLU_101 | OE2    | 3.920        |
| 6BXA   | A_ARG_37  | NH2    | C_GLU_101 | OE1    | 3.689        |
| 6BXA   | A_ARG_37  | NH2    | C_GLU_101 | OE2    | 2.525        |
| 6BXA   | A_LYS_77  | NZ     | A_ASP_53  | OD2    | 3.745        |
| 6BXA   | A_LYS_77  | NZ     | A_GLU_79  | OE2    | 3.822        |
| 6BXA   | A_LYS_77  | NZ     | C_ASP_34  | OD2    | 2.860        |
| 6BXA   | A_ARG_88  | NH1    | A_GLU_112 | OE2    | 2.776        |
| 6BXA   | A_ARG_88  | NH2    | A_GLU_61  | OE1    | 3.314        |
| 6BXA   | A_LYS_102 | NZ     | C_ASP_34  | OD1    | 2.955        |
| 6BXA   | A_ARG_154 | NH1    | A_ASP_177 | OD1    | 3.604        |
| 6BXA   | A_ARG_154 | NH1    | A_ASP_177 | OD2    | 2.924        |
| 6BXA   | A_ARG_172 | NH2    | A_GLU_149 | OE2    | 3.243        |
| 6BXA   | A_LYS_184 | NZ     | A_ASP_211 | OD2    | 2.992        |
| 6BXA   | A_LYS_184 | NZ     | B_ASP_133 | OD2    | 2.709        |
| 6BXA   | A_ARG_203 | NH1    | A_ASP_177 | OD2    | 3.223        |
| 6BXA   | A_LYS_221 | NZ     | A_GLU_189 | OE1    | 2.737        |
| 6BXA   | A_LYS_221 | NZ     | A_GLU_189 | OE2    | 3.962        |
| 6BXA   | A_LYS_227 | NZ     | A_GLU_188 | OE2    | 3.721        |
| 6BXA   | A_LYS_242 | NZ     | A_GLU_214 | OE1    | 2.824        |
| 6BXA   | A_LYS_247 | NZ     | A_ASP_251 | OD2    | 3.024        |
| 6BXA   | A_LYS_287 | NZ     | A_GLU_290 | OE1    | 3.206        |
| 6BXA   | A_LYS_287 | NZ     | A_GLU_290 | OE2    | 3.365        |
| 6BXA   | A_LYS_365 | NZ     | A_ASP_364 | OD2    | 2.586        |
| 6BXA   | A_ARG_430 | NH1    | A_ASP_425 | OD2    | 2.739        |
| 6BXA   | A_ARG_436 | NH1    | A_ASP_432 | OD1    | 3.991        |
| 6BXA   | A_ARG_436 | NH1    | A_ASP_432 | OD2    | 3.281        |
| 6BXA   | A_ARG_436 | NH2    | A_ASP_432 | OD1    | 3.255        |
| 6BXA   | A_ARG_436 | NH2    | A_ASP_432 | OD2    | 3.091        |
| 6BXA   | A_ARG_459 | NH2    | A_GLU_445 | OE1    | 3.182        |
| 6BXA   | B_ARG_37  | NH2    | D_GLU_101 | OE1    | 3.840        |
| 6BXA   | B_ARG_37  | NH2    | D_GLU_101 | OE2    | 2.839        |
| 6BXA   | B_LYS_77  | NZ     | B_ASP_53  | OD2    | 3.863        |
| 6BXA   | B_LYS_77  | NZ     | B_GLU_79  | OE1    | 3.945        |
| 6BXA   | B_LYS_77  | NZ     | B_GLU_79  | OE2    | 3.546        |
| 6BXA   | B_LYS_77  | NZ     | D_ASP_34  | OD1    | 2.907        |
| 6BXA   | B_ARG_88  | NH1    | B_GLU_112 | OE2    | 2.748        |
| 6BXA   | B_ARG_88  | NH2    | B_GLU_61  | OE1    | 3.185        |
| 6BXA   | B_ARG_93  | NH2    | B_GLU_64  | OE1    | 2.917        |
| 6BXA   | B_ARG_93  | NH2    | B_GLU_64  | OE2    | 2.657        |
| 6BXA   | B_LYS_102 | NZ     | D_ASP_34  | OD2    | 3.845        |
| 6BXA   | B_ARG_154 | NH2    | B_ASP_177 | OD2    | 4.000        |
| 6BXA   | B_LYS_184 | NZ     | A_ASP_133 | OD2    | 2.771        |
| 6BXA   | B_LYS_184 | NZ     | B_ASP_211 | OD2    | 2.792        |
| 6BXA   | B_ARG_203 | NH1    | B_ASP_177 | OD2    | 3.054        |
| 6BXA   | B_LYS_242 | NZ     | B_GLU_214 | OE2    | 3.352        |
| 6BXA   | B_LYS_247 | NZ     | B_ASP_251 | OD2    | 2.934        |
| 6BXA   | C_ARG_125 | NH1    | C_GLU_127 | OE1    | 2.840        |
| 6BXA   | C_ARG_199 | NH2    | C_ASP_187 | OD1    | 3.576        |
| 6BXA   | C_ARG_199 | NH2    | C_ASP_187 | OD2    | 3.048        |
| 6BXA   | C_LYS_210 | NZ     | C_GLU_160 | OE1    | 3.673        |
| 6BXA   | D_ARG_125 | NH1    | D_GLU_127 | OE1    | 2.909        |
| 6BXA   | D_ARG_199 | NH2    | D_ASP_187 | OD1    | 2.818        |
| 6BXA   | D_ARG_199 | NH2    | D_ASP_187 | OD2    | 3.045        |



---

Table 791: 6BXA-specific salt bridging networks analysis. In this table, a PDB file is specified with a four-letter PDB ID, except that the names of the PDB files corresponding to the single NMR structural model split from the NMR ensemble is specified with a four-letter PDB ID in addition to a hyphen followed by the single NMR structural model numeric ID, the residue naming scheme is **Chain ID\_residue name\_residue number**,  $\angle ADH$  represents the angle formed by acceptor (A), donor (D) and hydrogen (H) ( $\angle ADH$ ).

| PDB ID | Residue A | Atom A | Residue B | Atom B | Distance (Å) |
|--------|-----------|--------|-----------|--------|--------------|
| 6BXC   | A_ARG_88  | NH1    | A_GLU_112 | OE2    | 3.484        |
| 6BXC   | A_LYS_102 | NZ     | A_GLU_79  | OE2    | 2.891        |
| 6BXC   | A_LYS_102 | NZ     | A_ASP_104 | OD2    | 2.667        |
| 6BXC   | A_ARG_154 | NH1    | A_ASP_177 | OD1    | 3.409        |
| 6BXC   | A_ARG_154 | NH1    | A_ASP_177 | OD2    | 2.660        |
| 6BXC   | A_ARG_172 | NH2    | A_GLU_149 | OE2    | 2.307        |
| 6BXC   | A_LYS_184 | NZ     | C_ASP_34  | OD2    | 3.851        |
| 6BXC   | A_HIS_198 | NE2    | D_GLU_65  | OE2    | 3.317        |
| 6BXC   | A_ARG_203 | NH2    | A_ASP_235 | OD2    | 3.882        |
| 6BXC   | A_LYS_247 | NZ     | A_ASP_251 | OD2    | 3.104        |
| 6BXC   | A_HIS_314 | ND1    | A_GLU_290 | OE2    | 3.791        |
| 6BXC   | A_ARG_358 | NH2    | A_ASP_333 | OD1    | 3.683        |
| 6BXC   | A_ARG_358 | NH2    | A_ASP_333 | OD2    | 2.263        |
| 6BXC   | B_LYS_77  | NZ     | B_ASP_53  | OD2    | 3.559        |
| 6BXC   | B_LYS_77  | NZ     | B_GLU_79  | OE1    | 3.681        |
| 6BXC   | B_LYS_77  | NZ     | B_GLU_79  | OE2    | 3.867        |
| 6BXC   | B_ARG_88  | NH1    | B_GLU_112 | OE2    | 2.734        |
| 6BXC   | B_ARG_88  | NH2    | B_GLU_61  | OE1    | 3.021        |
| 6BXC   | B_ARG_154 | NH1    | B_ASP_177 | OD1    | 3.602        |
| 6BXC   | B_ARG_154 | NH1    | B_ASP_177 | OD2    | 2.827        |
| 6BXC   | B_LYS_159 | NZ     | D_ASP_34  | OD2    | 3.891        |
| 6BXC   | B_ARG_172 | NH1    | B_GLU_123 | OE2    | 3.880        |
| 6BXC   | B_ARG_172 | NH2    | B_GLU_123 | OE1    | 3.923        |
| 6BXC   | B_ARG_172 | NH2    | B_GLU_123 | OE2    | 3.236        |
| 6BXC   | B_ARG_172 | NH2    | B_GLU_149 | OE2    | 2.392        |
| 6BXC   | B_LYS_182 | NZ     | D_GLU_81  | OE2    | 3.361        |
| 6BXC   | B_LYS_184 | NZ     | D_ASP_34  | OD2    | 3.547        |
| 6BXC   | B_ARG_203 | NH1    | B_ASP_177 | OD2    | 3.785        |
| 6BXC   | B_LYS_221 | NZ     | B_GLU_189 | OE1    | 2.699        |
| 6BXC   | B_LYS_227 | NZ     | B_GLU_188 | OE1    | 3.703        |
| 6BXC   | B_LYS_227 | NZ     | B_GLU_188 | OE2    | 2.986        |
| 6BXC   | B_LYS_247 | NZ     | B_ASP_251 | OD2    | 2.562        |
| 6BXC   | B_LYS_287 | NZ     | B_GLU_290 | OE1    | 3.663        |
| 6BXC   | B_HIS_314 | ND1    | B_GLU_290 | OE2    | 3.748        |
| 6BXC   | B_ARG_358 | NH1    | B_ASP_333 | OD2    | 2.973        |
| 6BXC   | B_ARG_358 | NH2    | B_ASP_333 | OD2    | 3.373        |
| 6BXC   | B_HIS_420 | NE2    | B_ASP_396 | OD2    | 3.947        |

Table 792: 6BXC-specific salt bridging networks analysis. In this table, a PDB file is specified with a four-letter PDB ID, except that the names of the PDB files corresponding to the single NMR structural model split from the NMR ensemble is specified with a four-letter PDB ID in addition to a hyphen followed by the single NMR structural model numeric ID, the residue naming scheme is **Chain ID\_residue name\_residue number**,  $\angle ADH$  represents the angle formed by acceptor (A), donor (D) and hydrogen (H) ( $\angle ADH$ ).

| PDB ID | Residue A | Atom A | Residue B | Atom B | Distance (Å) |
|--------|-----------|--------|-----------|--------|--------------|
| 6BXD   | A_ARG_125 | NH1    | A_GLU_101 | OE2    | 3.973        |
| 6BXD   | A_ARG_199 | NH2    | A_ASP_187 | OD1    | 3.406        |
| 6BXD   | A_LYS_210 | NZ     | A_GLU_160 | OE1    | 3.837        |

Table 793: 6BXD-specific salt bridging networks analysis. In this table, a PDB file is specified with a four-letter PDB ID, except that the names of the PDB files corresponding to the single NMR structural model split from the NMR ensemble is specified with a four-letter PDB ID in addition to a hyphen followed by the single NMR structural model numeric ID, the residue naming scheme is **Chain ID\_residue name\_residue number**,  $\angle ADH$  represents the angle formed by acceptor (A), donor (D) and hydrogen (H) ( $\angle ADH$ ).

| PDB ID | Residue A | Atom A | Residue B | Atom B | Distance (Å) |
|--------|-----------|--------|-----------|--------|--------------|
| 6BXE   | A_LYS_63  | NZ     | A_GLU_65  | OE2    | 3.493        |
| 6BXE   | A_HIS_125 | NE2    | B_GLU_81  | OE2    | 2.552        |
| 6BXE   | B_LYS_63  | NZ     | B_GLU_65  | OE2    | 3.400        |
| 6BXE   | B_HIS_125 | NE2    | A_GLU_81  | OE2    | 3.833        |
| 6BXE   | B_ARG_168 | NH1    | B_GLU_154 | OE1    | 2.963        |

Table 794: 6BXE-specific salt bridging networks analysis. In this table, a PDB file is specified with a four-letter PDB ID, except that the names of the PDB files corresponding to the single NMR structural model split from the NMR ensemble is specified with a four-letter PDB ID in addition to a hyphen followed by the single NMR structural model numeric ID, the residue naming scheme is **Chain ID\_residue name\_residue number**,  $\angle ADH$  represents the angle formed by acceptor (A), donor (D) and hydrogen (H) ( $\angle ADH$ ).

| PDB ID | Residue A | Atom A | Residue B | Atom B | Distance (Å) |
|--------|-----------|--------|-----------|--------|--------------|
| 6BZU   | A_ARG_38  | NH1    | A_ASP_86  | OD1    | 2.830        |
| 6BZU   | A_ARG_38  | NH2    | A_GLU_46  | OE1    | 2.706        |
| 6BZU   | A_ARG_38  | NH2    | A_GLU_46  | OE2    | 3.949        |
| 6BZU   | A_ARG_38  | NH2    | A_ASP_86  | OD1    | 3.655        |
| 6BZU   | A_ARG_64  | NH2    | B_ASP_94  | OD1    | 3.703        |
| 6BZU   | A_ARG_66  | NH1    | A_ASP_86  | OD1    | 3.455        |
| 6BZU   | A_ARG_66  | NH1    | A_ASP_86  | OD2    | 2.992        |
| 6BZU   | A_ARG_66  | NH2    | A_ASP_86  | OD1    | 2.772        |
| 6BZU   | A_ARG_66  | NH2    | A_ASP_86  | OD2    | 3.274        |
| 6BZU   | A_ARG_94  | NH1    | A_ASP_27  | OD1    | 3.748        |
| 6BZU   | A_ARG_94  | NH1    | A_ASP_27  | OD2    | 3.345        |
| 6BZU   | A_ARG_94  | NH2    | A_ASP_101 | OD1    | 3.362        |
| 6BZU   | A_ARG_94  | NH2    | A_ASP_101 | OD2    | 2.575        |
| 6BZU   | A_LYS_143 | NZ     | A_ASP_144 | OD1    | 3.544        |
| 6BZU   | A_LYS_206 | NZ     | A_ASP_208 | OD1    | 3.589        |
| 6BZU   | A_LYS_206 | NZ     | A_ASP_208 | OD2    | 3.931        |
| 6BZU   | A_LYS_209 | NZ     | B_GLU_123 | OE2    | 3.980        |
| 6BZU   | B_ARG_18  | NH1    | B_ASP_76  | OD2    | 3.621        |
| 6BZU   | B_ARG_18  | NH2    | B_ASP_76  | OD2    | 3.174        |
| 6BZU   | B_ARG_18  | NH2    | F_ASP_70  | OD2    | 2.642        |
| 6BZU   | B_ARG_24  | NH1    | B_ASP_70  | OD1    | 3.347        |
| 6BZU   | B_ARG_24  | NH1    | F_ASP_76  | OD1    | 3.597        |
| 6BZU   | B_ARG_24  | NH1    | F_ASP_76  | OD2    | 2.861        |
| 6BZU   | B_LYS_39  | NZ     | B_ASP_81  | OD1    | 2.891        |
| 6BZU   | B_LYS_39  | NZ     | B_ASP_81  | OD2    | 2.853        |
| 6BZU   | B_ARG_61  | NH1    | B_ASP_82  | OD1    | 3.370        |
| 6BZU   | B_ARG_61  | NH1    | B_ASP_82  | OD2    | 2.618        |
| 6BZU   | B_ARG_61  | NH2    | B_ASP_82  | OD1    | 3.228        |
| 6BZU   | B_ARG_61  | NH2    | B_ASP_82  | OD2    | 3.877        |
| 6BZU   | B_LYS_149 | NZ     | B_GLU_195 | OE2    | 3.153        |
| 6BZU   | B_LYS_183 | NZ     | B_GLU_187 | OE1    | 3.079        |
| 6BZU   | B_LYS_183 | NZ     | B_GLU_187 | OE2    | 2.953        |
| 6BZU   | B_HIS_189 | ND1    | B_ASP_151 | OD1    | 3.911        |
| 6BZU   | B_HIS_189 | ND1    | B_ASP_151 | OD2    | 2.360        |
| 6BZU   | C_ARG_38  | NH1    | C_ASP_86  | OD1    | 2.726        |
| 6BZU   | C_ARG_38  | NH2    | C_GLU_46  | OE1    | 2.726        |
| 6BZU   | C_ARG_38  | NH2    | C_GLU_46  | OE2    | 3.930        |
| 6BZU   | C_ARG_38  | NH2    | C_ASP_86  | OD1    | 3.517        |
| 6BZU   | C_ARG_64  | NH2    | D_ASP_94  | OD1    | 3.618        |
| 6BZU   | C_ARG_66  | NH1    | C_ASP_86  | OD1    | 3.539        |
| 6BZU   | C_ARG_66  | NH1    | C_ASP_86  | OD2    | 2.951        |
| 6BZU   | C_ARG_66  | NH2    | C_ASP_86  | OD1    | 2.783        |
| 6BZU   | C_ARG_66  | NH2    | C_ASP_86  | OD2    | 3.152        |
| 6BZU   | C_ARG_94  | NH1    | C_ASP_27  | OD2    | 3.167        |
| 6BZU   | C_ARG_94  | NH2    | C_ASP_101 | OD1    | 3.308        |
| 6BZU   | C_ARG_94  | NH2    | C_ASP_101 | OD2    | 2.595        |
| 6BZU   | C_LYS_143 | NZ     | C_ASP_144 | OD1    | 3.728        |
| 6BZU   | C_LYS_206 | NZ     | C_ASP_208 | OD1    | 3.579        |
| 6BZU   | C_LYS_206 | NZ     | C_ASP_208 | OD2    | 3.842        |
| 6BZU   | C_LYS_210 | NZ     | C_GLU_212 | OE2    | 3.412        |
| 6BZU   | D_ARG_18  | NH1    | D_ASP_76  | OD2    | 3.756        |
| 6BZU   | D_ARG_18  | NH2    | D_ASP_76  | OD2    | 3.639        |
| 6BZU   | D_ARG_24  | NH2    | D_ASP_70  | OD1    | 2.824        |
| 6BZU   | D_ARG_24  | NH2    | D_ASP_70  | OD2    | 3.740        |
| 6BZU   | D_LYS_39  | NZ     | D_ASP_81  | OD1    | 2.752        |
| 6BZU   | D_LYS_39  | NZ     | D_ASP_81  | OD2    | 2.990        |
| 6BZU   | D_ARG_61  | NH1    | D_ASP_82  | OD1    | 3.166        |

|      |           |     |           |     |       |
|------|-----------|-----|-----------|-----|-------|
| 6BZU | D_ARG_61  | NH1 | D_ASP_82  | OD2 | 2.739 |
| 6BZU | D_ARG_61  | NH2 | D_ASP_82  | OD1 | 3.480 |
| 6BZU | D_LYS_183 | NZ  | D_GLU_187 | OE1 | 2.974 |
| 6BZU | D_LYS_183 | NZ  | D_GLU_187 | OE2 | 3.283 |
| 6BZU | D_HIS_189 | ND1 | D_ASP_151 | OD2 | 3.151 |
| 6BZU | E_ARG_38  | NH1 | E_ASP_86  | OD1 | 2.631 |
| 6BZU | E_ARG_38  | NH2 | E_GLU_46  | OE1 | 2.648 |
| 6BZU | E_ARG_38  | NH2 | E_GLU_46  | OE2 | 3.839 |
| 6BZU | E_ARG_38  | NH2 | E_ASP_86  | OD1 | 3.682 |
| 6BZU | E_ARG_64  | NH2 | F_ASP_94  | OD1 | 3.701 |
| 6BZU | E_ARG_66  | NH1 | E_ASP_86  | OD1 | 3.600 |
| 6BZU | E_ARG_66  | NH1 | E_ASP_86  | OD2 | 3.079 |
| 6BZU | E_ARG_66  | NH2 | E_ASP_86  | OD1 | 3.151 |
| 6BZU | E_ARG_66  | NH2 | E_ASP_86  | OD2 | 3.506 |
| 6BZU | E_ARG_94  | NH1 | E_ASP_27  | OD1 | 3.760 |
| 6BZU | E_ARG_94  | NH1 | E_ASP_27  | OD2 | 3.069 |
| 6BZU | E_ARG_94  | NH2 | E_ASP_101 | OD1 | 3.575 |
| 6BZU | E_ARG_94  | NH2 | E_ASP_101 | OD2 | 3.123 |
| 6BZU | E_LYS_143 | NZ  | E_ASP_144 | OD1 | 3.596 |
| 6BZU | E_LYS_206 | NZ  | E_ASP_208 | OD1 | 3.535 |
| 6BZU | E_LYS_206 | NZ  | E_ASP_208 | OD2 | 3.797 |
| 6BZU | F_ARG_18  | NH1 | F_ASP_76  | OD2 | 3.679 |
| 6BZU | F_ARG_18  | NH2 | F_ASP_76  | OD2 | 3.069 |
| 6BZU | F_ARG_24  | NH1 | B_ASP_76  | OD1 | 3.333 |
| 6BZU | F_ARG_24  | NH1 | B_ASP_76  | OD2 | 3.080 |
| 6BZU | F_LYS_39  | NZ  | F_ASP_81  | OD1 | 2.757 |
| 6BZU | F_LYS_39  | NZ  | F_ASP_81  | OD2 | 3.575 |
| 6BZU | F_ARG_61  | NH1 | F_ASP_82  | OD1 | 3.022 |
| 6BZU | F_ARG_61  | NH1 | F_ASP_82  | OD2 | 2.655 |
| 6BZU | F_ARG_61  | NH2 | F_ASP_82  | OD1 | 3.315 |
| 6BZU | F_LYS_149 | NZ  | F_GLU_195 | OE2 | 3.477 |
| 6BZU | F_LYS_183 | NZ  | F_GLU_187 | OE1 | 3.247 |
| 6BZU | F_LYS_183 | NZ  | F_GLU_187 | OE2 | 3.817 |
| 6BZU | F_HIS_189 | ND1 | F_ASP_151 | OD2 | 2.440 |
| 6BZU | G_ARG_38  | NH1 | G_ASP_86  | OD1 | 2.471 |
| 6BZU | G_ARG_38  | NH2 | G_GLU_46  | OE1 | 2.713 |
| 6BZU | G_ARG_38  | NH2 | G_GLU_46  | OE2 | 3.875 |
| 6BZU | G_ARG_38  | NH2 | G_ASP_86  | OD1 | 3.468 |
| 6BZU | G_ARG_64  | NH2 | H_ASP_94  | OD1 | 3.197 |
| 6BZU | G_ARG_64  | NH2 | H_ASP_94  | OD2 | 3.837 |
| 6BZU | G_ARG_66  | NH1 | G_ASP_86  | OD1 | 3.947 |
| 6BZU | G_ARG_66  | NH1 | G_ASP_86  | OD2 | 3.042 |
| 6BZU | G_ARG_66  | NH2 | G_ASP_86  | OD1 | 2.869 |
| 6BZU | G_ARG_66  | NH2 | G_ASP_86  | OD2 | 2.950 |
| 6BZU | G_ARG_94  | NH1 | G_ASP_27  | OD2 | 3.484 |
| 6BZU | G_ARG_94  | NH2 | G_ASP_101 | OD1 | 3.468 |
| 6BZU | G_ARG_94  | NH2 | G_ASP_101 | OD2 | 2.612 |
| 6BZU | G_LYS_143 | NZ  | G_ASP_144 | OD1 | 3.677 |
| 6BZU | G_LYS_206 | NZ  | G_ASP_208 | OD1 | 3.523 |
| 6BZU | G_LYS_206 | NZ  | G_ASP_208 | OD2 | 3.779 |
| 6BZU | G_LYS_209 | NZ  | H_GLU_123 | OE1 | 2.734 |
| 6BZU | G_LYS_209 | NZ  | H_GLU_123 | OE2 | 3.547 |
| 6BZU | G_LYS_210 | NZ  | G_GLU_212 | OE2 | 3.397 |
| 6BZU | H_ARG_18  | NH1 | H_ASP_76  | OD2 | 3.879 |
| 6BZU | H_ARG_18  | NH2 | H_ASP_76  | OD2 | 3.299 |
| 6BZU | H_LYS_39  | NZ  | H_ASP_81  | OD1 | 2.621 |
| 6BZU | H_LYS_39  | NZ  | H_ASP_81  | OD2 | 3.478 |
| 6BZU | H_ARG_61  | NH1 | H_ASP_82  | OD1 | 3.357 |

|      |           |     |           |     |       |
|------|-----------|-----|-----------|-----|-------|
| 6BZU | H_ARG_61  | NH1 | H_ASP_82  | OD2 | 2.854 |
| 6BZU | H_ARG_61  | NH2 | H_ASP_82  | OD1 | 3.381 |
| 6BZU | H_LYS_149 | NZ  | H_GLU_195 | OE2 | 3.735 |
| 6BZU | H_LYS_183 | NZ  | H_GLU_187 | OE1 | 3.364 |
| 6BZU | H_LYS_183 | NZ  | H_GLU_187 | OE2 | 3.961 |
| 6BZU | H_LYS_188 | NZ  | H_ASP_185 | OD1 | 3.876 |

Table 795: 6BZU-specific salt bridging networks analysis. In this table, a PDB file is specified with a four-letter PDB ID, except that the names of the PDB files corresponding to the single NMR structural model split from the NMR ensemble is specified with a four-letter PDB ID in addition to a hyphen followed by the single NMR structural model numeric ID, the residue naming scheme is **Chain ID\_residue name\_residue number**,  $\angle ADH$  represents the angle formed by acceptor (A), donor (D) and hydrogen (H) ( $\angle ADH$ ).

| PDB ID | Residue A | Atom A | Residue B | Atom B | Distance (Å) |
|--------|-----------|--------|-----------|--------|--------------|
| 6BZV   | E_ARG_38  | NH1    | E_ASP_86  | OD1    | 2.844        |
| 6BZV   | E_ARG_38  | NH2    | E_GLU_46  | OE1    | 2.762        |
| 6BZV   | E_ARG_38  | NH2    | E_ASP_86  | OD1    | 3.884        |
| 6BZV   | E_ARG_66  | NH1    | E_ASP_86  | OD2    | 3.252        |
| 6BZV   | E_ARG_66  | NH1    | C_GLU_85  | OE2    | 3.540        |
| 6BZV   | E_ARG_66  | NH2    | E_ASP_86  | OD1    | 3.097        |
| 6BZV   | E_ARG_66  | NH2    | E_ASP_86  | OD2    | 3.221        |
| 6BZV   | E_ARG_66  | NH2    | C_GLU_85  | OE2    | 3.482        |
| 6BZV   | E_ARG_94  | NH1    | E_ASP_27  | OD2    | 2.862        |
| 6BZV   | E_ARG_94  | NH2    | E_ASP_101 | OD1    | 3.797        |
| 6BZV   | E_ARG_94  | NH2    | E_ASP_101 | OD2    | 2.904        |
| 6BZV   | E_LYS_143 | NZ     | E_ASP_144 | OD1    | 3.856        |
| 6BZV   | E_LYS_206 | NZ     | G_ASP_208 | OD2    | 3.271        |
| 6BZV   | E_LYS_209 | NZ     | F_GLU_123 | OE1    | 3.953        |
| 6BZV   | E_LYS_209 | NZ     | F_GLU_123 | OE2    | 2.713        |
| 6BZV   | E_LYS_210 | NZ     | E_GLU_212 | OE2    | 2.831        |
| 6BZV   | F_ARG_18  | NH2    | F_ASP_76  | OD2    | 3.890        |
| 6BZV   | F_LYS_39  | NZ     | F_ASP_81  | OD1    | 3.137        |
| 6BZV   | F_LYS_39  | NZ     | F_ASP_81  | OD2    | 3.795        |
| 6BZV   | F_ARG_61  | NH1    | F_ASP_82  | OD1    | 3.530        |
| 6BZV   | F_ARG_61  | NH1    | F_ASP_82  | OD2    | 2.932        |
| 6BZV   | F_ARG_61  | NH2    | F_ASP_82  | OD1    | 3.252        |
| 6BZV   | F_LYS_188 | NZ     | F_ASP_185 | OD1    | 3.910        |
| 6BZV   | A_ARG_38  | NH1    | A_ASP_86  | OD1    | 2.647        |
| 6BZV   | A_ARG_38  | NH2    | A_GLU_46  | OE1    | 3.008        |
| 6BZV   | A_ARG_38  | NH2    | A_ASP_86  | OD1    | 3.189        |
| 6BZV   | A_ARG_66  | NH1    | A_ASP_86  | OD2    | 3.345        |
| 6BZV   | A_ARG_66  | NH2    | A_ASP_86  | OD1    | 3.206        |
| 6BZV   | A_ARG_66  | NH2    | A_ASP_86  | OD2    | 3.333        |
| 6BZV   | A_ARG_94  | NH1    | A_ASP_27  | OD2    | 2.749        |
| 6BZV   | A_ARG_94  | NH2    | A_ASP_101 | OD1    | 3.799        |
| 6BZV   | A_ARG_94  | NH2    | A_ASP_101 | OD2    | 2.974        |
| 6BZV   | A_LYS_143 | NZ     | A_ASP_144 | OD1    | 3.960        |
| 6BZV   | A_LYS_206 | NZ     | A_ASP_208 | OD1    | 3.297        |
| 6BZV   | A_LYS_206 | NZ     | A_ASP_208 | OD2    | 3.789        |
| 6BZV   | A_LYS_209 | NZ     | B_GLU_123 | OE1    | 2.709        |
| 6BZV   | A_LYS_209 | NZ     | B_GLU_123 | OE2    | 3.439        |
| 6BZV   | A_LYS_210 | NZ     | A_GLU_212 | OE2    | 2.656        |
| 6BZV   | B_ARG_18  | NH2    | B_ASP_76  | OD2    | 3.495        |
| 6BZV   | B_ARG_24  | NH2    | B_ASP_70  | OD1    | 3.551        |
| 6BZV   | B_ARG_24  | NH2    | B_ASP_70  | OD2    | 3.558        |
| 6BZV   | B_LYS_39  | NZ     | B_ASP_81  | OD1    | 2.943        |
| 6BZV   | B_LYS_39  | NZ     | B_ASP_81  | OD2    | 3.840        |
| 6BZV   | B_ARG_61  | NH1    | B_ASP_82  | OD1    | 2.943        |
| 6BZV   | B_ARG_61  | NH1    | B_ASP_82  | OD2    | 2.669        |
| 6BZV   | B_ARG_61  | NH2    | B_ASP_82  | OD1    | 3.350        |
| 6BZV   | B_LYS_149 | NZ     | B_GLU_195 | OE2    | 3.685        |
| 6BZV   | B_LYS_183 | NZ     | B_GLU_187 | OE1    | 3.842        |
| 6BZV   | C_ARG_38  | NH1    | C_ASP_86  | OD1    | 2.657        |
| 6BZV   | C_ARG_38  | NH2    | C_GLU_46  | OE1    | 3.551        |
| 6BZV   | C_ARG_38  | NH2    | C_ASP_86  | OD1    | 3.055        |
| 6BZV   | C_ARG_66  | NH1    | C_ASP_86  | OD2    | 3.524        |
| 6BZV   | C_ARG_66  | NH2    | C_ASP_86  | OD1    | 3.405        |
| 6BZV   | C_ARG_66  | NH2    | C_ASP_86  | OD2    | 3.206        |
| 6BZV   | C_ARG_94  | NH1    | C_ASP_27  | OD2    | 2.994        |
| 6BZV   | C_ARG_94  | NH2    | C_ASP_101 | OD1    | 3.607        |
| 6BZV   | C_ARG_94  | NH2    | C_ASP_101 | OD2    | 3.021        |



|      |           |     |           |     |       |
|------|-----------|-----|-----------|-----|-------|
| 6BZV | C_LYS_143 | NZ  | C_ASP_144 | OD1 | 3.671 |
| 6BZV | C_LYS_206 | NZ  | C_ASP_208 | OD1 | 2.715 |
| 6BZV | C_LYS_206 | NZ  | C_ASP_208 | OD2 | 3.362 |
| 6BZV | C_LYS_209 | NZ  | D_GLU_123 | OE1 | 2.619 |
| 6BZV | C_LYS_209 | NZ  | D_GLU_123 | OE2 | 2.945 |
| 6BZV | C_LYS_210 | NZ  | C_GLU_212 | OE2 | 2.891 |
| 6BZV | D_ARG_18  | NH2 | D_ASP_76  | OD2 | 3.172 |
| 6BZV | D_ARG_24  | NH2 | D_ASP_70  | OD1 | 2.988 |
| 6BZV | D_ARG_24  | NH2 | D_ASP_70  | OD2 | 3.384 |
| 6BZV | D_LYS_39  | NZ  | D_ASP_81  | OD1 | 2.720 |
| 6BZV | D_LYS_39  | NZ  | D_ASP_81  | OD2 | 3.480 |
| 6BZV | D_ARG_61  | NH1 | D_ASP_82  | OD1 | 2.908 |
| 6BZV | D_ARG_61  | NH1 | D_ASP_82  | OD2 | 2.744 |
| 6BZV | D_ARG_61  | NH2 | D_GLU_79  | OE1 | 3.805 |
| 6BZV | D_ARG_61  | NH2 | D_ASP_82  | OD1 | 3.651 |
| 6BZV | D_LYS_183 | NZ  | D_GLU_187 | OE1 | 3.827 |
| 6BZV | D_LYS_183 | NZ  | D_GLU_187 | OE2 | 3.971 |
| 6BZV | G_ARG_38  | NH1 | G_ASP_86  | OD1 | 2.748 |
| 6BZV | G_ARG_38  | NH2 | G_GLU_46  | OE1 | 3.230 |
| 6BZV | G_ARG_38  | NH2 | G_ASP_86  | OD1 | 3.248 |
| 6BZV | G_ARG_66  | NH1 | G_ASP_86  | OD2 | 3.499 |
| 6BZV | G_ARG_66  | NH2 | G_ASP_86  | OD1 | 3.475 |
| 6BZV | G_ARG_66  | NH2 | G_ASP_86  | OD2 | 3.645 |
| 6BZV | G_ARG_94  | NH1 | G_ASP_27  | OD1 | 2.468 |
| 6BZV | G_ARG_94  | NH2 | G_ASP_101 | OD1 | 3.530 |
| 6BZV | G_ARG_94  | NH2 | G_ASP_101 | OD2 | 3.139 |
| 6BZV | G_LYS_143 | NZ  | G_ASP_144 | OD1 | 3.706 |
| 6BZV | G_HIS_164 | NE2 | H_ASP_167 | OD1 | 3.817 |
| 6BZV | G_LYS_209 | NZ  | H_GLU_123 | OE1 | 3.054 |
| 6BZV | G_LYS_209 | NZ  | H_GLU_123 | OE2 | 3.192 |
| 6BZV | G_LYS_210 | NZ  | G_GLU_212 | OE2 | 2.995 |
| 6BZV | H_ARG_18  | NH2 | H_ASP_76  | OD2 | 3.078 |
| 6BZV | H_LYS_39  | NZ  | H_ASP_81  | OD1 | 2.837 |
| 6BZV | H_LYS_39  | NZ  | H_ASP_81  | OD2 | 3.626 |
| 6BZV | H_ARG_61  | NH1 | H_ASP_82  | OD1 | 3.084 |
| 6BZV | H_ARG_61  | NH1 | H_ASP_82  | OD2 | 2.483 |
| 6BZV | H_ARG_61  | NH2 | H_ASP_82  | OD1 | 2.797 |
| 6BZV | H_ARG_61  | NH2 | H_ASP_82  | OD2 | 3.746 |
| 6BZV | H_LYS_103 | NZ  | H_GLU_165 | OE1 | 3.239 |
| 6BZV | H_LYS_103 | NZ  | H_GLU_165 | OE2 | 2.963 |
| 6BZV | H_LYS_149 | NZ  | H_GLU_195 | OE2 | 3.595 |
| 6BZV | H_LYS_183 | NZ  | H_GLU_187 | OE1 | 3.837 |
| 6BZV | H_LYS_183 | NZ  | H_GLU_187 | OE2 | 3.903 |

Table 796: 6BZV-specific salt bridging networks analysis. In this table, a PDB file is specified with a four-letter PDB ID, except that the names of the PDB files corresponding to the single NMR structural model split from the NMR ensemble is specified with a four-letter PDB ID in addition to a hyphen followed by the single NMR structural model numeric ID, the residue naming scheme is **Chain ID\_residue name\_residue number**,  $\angle ADH$  represents the angle formed by acceptor (A), donor (D) and hydrogen (H) ( $\angle ADH$ ).

| PDB ID | Residue A | Atom A | Residue B | Atom B | Distance (Å) |
|--------|-----------|--------|-----------|--------|--------------|
| 6BZW   | C_ARG_38  | NH1    | C_ASP_86  | OD1    | 2.855        |
| 6BZW   | C_ARG_38  | NH2    | C_GLU_46  | OE1    | 2.761        |
| 6BZW   | C_ARG_38  | NH2    | C_GLU_46  | OE2    | 3.900        |
| 6BZW   | C_ARG_38  | NH2    | C_ASP_86  | OD1    | 3.525        |
| 6BZW   | C_ARG_66  | NH1    | C_ASP_86  | OD1    | 3.684        |
| 6BZW   | C_ARG_66  | NH1    | C_ASP_86  | OD2    | 2.944        |
| 6BZW   | C_ARG_66  | NH2    | C_ASP_86  | OD1    | 2.982        |
| 6BZW   | C_ARG_66  | NH2    | C_ASP_86  | OD2    | 3.451        |
| 6BZW   | C_ARG_94  | NH1    | C_ASP_27  | OD2    | 3.411        |
| 6BZW   | C_ARG_94  | NH2    | C_ASP_101 | OD1    | 3.817        |
| 6BZW   | C_ARG_94  | NH2    | C_ASP_101 | OD2    | 2.574        |
| 6BZW   | C_LYS_143 | NZ     | C_ASP_144 | OD1    | 3.327        |
| 6BZW   | C_LYS_143 | NZ     | C_ASP_144 | OD2    | 2.941        |
| 6BZW   | C_LYS_209 | NZ     | D_GLU_123 | OE1    | 2.857        |
| 6BZW   | C_LYS_209 | NZ     | D_GLU_123 | OE2    | 3.990        |
| 6BZW   | C_LYS_210 | NZ     | C_GLU_212 | OE2    | 3.580        |
| 6BZW   | D_ARG_18  | NH2    | H_GLU_93  | OE1    | 3.070        |
| 6BZW   | D_LYS_39  | NZ     | D_ASP_81  | OD1    | 2.338        |
| 6BZW   | D_LYS_39  | NZ     | D_ASP_81  | OD2    | 3.833        |
| 6BZW   | D_ARG_61  | NH1    | D_ASP_82  | OD1    | 3.630        |
| 6BZW   | D_ARG_61  | NH1    | D_ASP_82  | OD2    | 2.695        |
| 6BZW   | D_ARG_61  | NH2    | D_ASP_82  | OD1    | 3.497        |
| 6BZW   | D_ARG_61  | NH2    | D_ASP_82  | OD2    | 3.898        |
| 6BZW   | D_LYS_149 | NZ     | D_GLU_195 | OE1    | 3.578        |
| 6BZW   | D_LYS_188 | NZ     | D_ASP_185 | OD1    | 3.347        |
| 6BZW   | D_HIS_189 | ND1    | D_ASP_151 | OD2    | 2.863        |
| 6BZW   | D_ARG_211 | NH2    | D_GLU_187 | OE1    | 2.961        |
| 6BZW   | A_ARG_38  | NH1    | A_ASP_86  | OD1    | 2.806        |
| 6BZW   | A_ARG_38  | NH2    | A_GLU_46  | OE1    | 2.810        |
| 6BZW   | A_ARG_38  | NH2    | A_ASP_86  | OD1    | 3.534        |
| 6BZW   | A_ARG_66  | NH1    | A_ASP_86  | OD1    | 3.766        |
| 6BZW   | A_ARG_66  | NH1    | A_ASP_86  | OD2    | 3.088        |
| 6BZW   | A_ARG_66  | NH2    | A_ASP_86  | OD1    | 2.975        |
| 6BZW   | A_ARG_66  | NH2    | A_ASP_86  | OD2    | 3.224        |
| 6BZW   | A_ARG_94  | NH1    | A_ASP_27  | OD2    | 3.062        |
| 6BZW   | A_ARG_94  | NH2    | A_ASP_101 | OD1    | 3.805        |
| 6BZW   | A_ARG_94  | NH2    | A_ASP_101 | OD2    | 2.322        |
| 6BZW   | A_LYS_143 | NZ     | A_ASP_144 | OD1    | 3.396        |
| 6BZW   | A_LYS_143 | NZ     | A_ASP_144 | OD2    | 2.710        |
| 6BZW   | A_LYS_209 | NZ     | B_GLU_123 | OE1    | 2.988        |
| 6BZW   | A_LYS_210 | NZ     | A_GLU_212 | OE2    | 3.336        |
| 6BZW   | B_ARG_18  | NH2    | B_ASP_76  | OD2    | 3.990        |
| 6BZW   | B_LYS_39  | NZ     | B_ASP_81  | OD1    | 2.457        |
| 6BZW   | B_LYS_39  | NZ     | B_ASP_81  | OD2    | 3.775        |
| 6BZW   | B_ARG_61  | NH1    | B_ASP_82  | OD1    | 3.435        |
| 6BZW   | B_ARG_61  | NH1    | B_ASP_82  | OD2    | 2.481        |
| 6BZW   | B_ARG_61  | NH2    | B_ASP_82  | OD1    | 2.977        |
| 6BZW   | B_ARG_61  | NH2    | B_ASP_82  | OD2    | 3.551        |
| 6BZW   | B_ARG_68  | NH1    | B_ASP_27C | OD2    | 3.000        |
| 6BZW   | B_LYS_149 | NZ     | B_GLU_195 | OE1    | 3.533        |
| 6BZW   | B_LYS_188 | NZ     | B_ASP_185 | OD1    | 3.312        |
| 6BZW   | B_HIS_189 | ND1    | B_ASP_151 | OD2    | 2.735        |
| 6BZW   | B_LYS_190 | NZ     | B_GLU_213 | OE2    | 3.979        |
| 6BZW   | B_ARG_211 | NH2    | B_GLU_187 | OE1    | 3.195        |
| 6BZW   | E_ARG_38  | NH1    | E_ASP_86  | OD1    | 2.836        |
| 6BZW   | E_ARG_38  | NH2    | E_GLU_46  | OE1    | 2.758        |
| 6BZW   | E_ARG_38  | NH2    | E_GLU_46  | OE2    | 3.957        |

|      |           |     |           |     |       |
|------|-----------|-----|-----------|-----|-------|
| 6BZW | E_ARG_38  | NH2 | E_ASP_86  | OD1 | 3.594 |
| 6BZW | E_ARG_66  | NH1 | E_ASP_86  | OD1 | 3.616 |
| 6BZW | E_ARG_66  | NH1 | E_ASP_86  | OD2 | 2.872 |
| 6BZW | E_ARG_66  | NH2 | E_ASP_86  | OD1 | 2.980 |
| 6BZW | E_ARG_66  | NH2 | E_ASP_86  | OD2 | 3.348 |
| 6BZW | E_ARG_94  | NH1 | E_ASP_27  | OD2 | 3.258 |
| 6BZW | E_ARG_94  | NH2 | E_ASP_101 | OD1 | 3.737 |
| 6BZW | E_ARG_94  | NH2 | E_ASP_101 | OD2 | 2.526 |
| 6BZW | E_LYS_143 | NZ  | E_ASP_144 | OD1 | 2.783 |
| 6BZW | E_LYS_143 | NZ  | E_ASP_144 | OD2 | 3.427 |
| 6BZW | E_LYS_209 | NZ  | F_GLU_123 | OE1 | 2.583 |
| 6BZW | E_LYS_209 | NZ  | F_GLU_123 | OE2 | 3.254 |
| 6BZW | E_LYS_210 | NZ  | E_GLU_212 | OE2 | 3.361 |
| 6BZW | F_ARG_18  | NH2 | F_ASP_76  | OD2 | 3.915 |
| 6BZW | F_LYS_39  | NZ  | F_ASP_81  | OD1 | 2.665 |
| 6BZW | F_ARG_61  | NH2 | F_ASP_82  | OD1 | 2.596 |
| 6BZW | F_ARG_61  | NH2 | F_ASP_82  | OD2 | 3.915 |
| 6BZW | F_LYS_149 | NZ  | F_GLU_195 | OE1 | 3.703 |
| 6BZW | F_LYS_188 | NZ  | F_ASP_185 | OD1 | 3.561 |
| 6BZW | F_ARG_211 | NH2 | F_GLU_187 | OE1 | 3.709 |
| 6BZW | G_ARG_38  | NH1 | G_ASP_86  | OD1 | 2.636 |
| 6BZW | G_ARG_38  | NH2 | G_GLU_46  | OE1 | 3.016 |
| 6BZW | G_ARG_38  | NH2 | G_ASP_86  | OD1 | 3.345 |
| 6BZW | G_ARG_66  | NH1 | G_ASP_86  | OD1 | 3.851 |
| 6BZW | G_ARG_66  | NH1 | G_ASP_86  | OD2 | 3.048 |
| 6BZW | G_ARG_66  | NH2 | G_ASP_86  | OD1 | 2.949 |
| 6BZW | G_ARG_66  | NH2 | G_ASP_86  | OD2 | 3.330 |
| 6BZW | G_ARG_94  | NH1 | G_ASP_27  | OD2 | 3.098 |
| 6BZW | G_ARG_94  | NH2 | G_ASP_101 | OD1 | 3.595 |
| 6BZW | G_ARG_94  | NH2 | G_ASP_101 | OD2 | 2.509 |
| 6BZW | G_LYS_143 | NZ  | G_ASP_144 | OD1 | 2.922 |
| 6BZW | G_LYS_143 | NZ  | G_ASP_144 | OD2 | 2.656 |
| 6BZW | G_LYS_209 | NZ  | H_GLU_123 | OE1 | 2.709 |
| 6BZW | G_LYS_209 | NZ  | H_GLU_123 | OE2 | 2.569 |
| 6BZW | H_LYS_39  | NZ  | H_ASP_81  | OD1 | 2.836 |
| 6BZW | H_ARG_61  | NH1 | H_GLU_79  | OE1 | 3.176 |
| 6BZW | H_ARG_61  | NH2 | H_GLU_79  | OE1 | 3.932 |
| 6BZW | H_ARG_61  | NH2 | H_ASP_82  | OD1 | 2.618 |
| 6BZW | H_ARG_61  | NH2 | H_ASP_82  | OD2 | 3.730 |
| 6BZW | H_LYS_149 | NZ  | H_GLU_195 | OE1 | 3.312 |
| 6BZW | H_LYS_188 | NZ  | H_ASP_185 | OD1 | 3.591 |
| 6BZW | H_LYS_190 | NZ  | H_GLU_213 | OE2 | 3.965 |
| 6BZW | H_ARG_211 | NH2 | H_GLU_187 | OE1 | 2.787 |

Table 797: 6BZW-specific salt bridging networks analysis. In this table, a PDB file is specified with a four-letter PDB ID, except that the names of the PDB files corresponding to the single NMR structural model split from the NMR ensemble is specified with a four-letter PDB ID in addition to a hyphen followed by the single NMR structural model numeric ID, the residue naming scheme is **Chain ID\_residue name\_residue number**,  $\angle ADH$  represents the angle formed by acceptor (A), donor (D) and hydrogen (H) ( $\angle ADH$ ).

| PDB ID | Residue A | Atom A | Residue B | Atom B | Distance (Å) |
|--------|-----------|--------|-----------|--------|--------------|
| 6BZY   | H_ARG_38  | NH1    | H_ASP_86  | OD1    | 2.808        |
| 6BZY   | H_ARG_38  | NH2    | H_GLU_46  | OE1    | 3.237        |
| 6BZY   | H_ARG_38  | NH2    | H_ASP_86  | OD1    | 3.627        |
| 6BZY   | H_ARG_66  | NH1    | H_ASP_86  | OD1    | 3.726        |
| 6BZY   | H_ARG_66  | NH1    | H_ASP_86  | OD2    | 3.046        |
| 6BZY   | H_ARG_66  | NH2    | H_ASP_86  | OD1    | 3.005        |
| 6BZY   | H_ARG_66  | NH2    | H_ASP_86  | OD2    | 3.522        |
| 6BZY   | L_LYS_39  | NZ     | L_ASP_81  | OD1    | 3.422        |
| 6BZY   | L_LYS_39  | NZ     | L_ASP_81  | OD2    | 3.246        |
| 6BZY   | L_ARG_61  | NH1    | L_GLU_79  | OE1    | 3.883        |
| 6BZY   | L_ARG_61  | NH1    | L_GLU_79  | OE2    | 3.484        |
| 6BZY   | L_ARG_61  | NH2    | L_GLU_79  | OE2    | 3.709        |
| 6BZY   | L_ARG_61  | NH2    | L_ASP_82  | OD1    | 2.811        |
| 6BZY   | L_ARG_61  | NH2    | L_ASP_82  | OD2    | 3.630        |
| 6BZY   | L_LYS_92  | NZ     | L_GLU_93  | OE1    | 2.944        |
| 6BZY   | L_LYS_149 | NZ     | L_GLU_195 | OE1    | 3.863        |
| 6BZY   | L_LYS_149 | NZ     | L_GLU_195 | OE2    | 3.027        |
| 6BZY   | L_ARG_155 | NH1    | L_GLU_185 | OE2    | 3.136        |
| 6BZY   | L_ARG_155 | NH2    | L_GLU_185 | OE1    | 2.999        |
| 6BZY   | L_ARG_155 | NH2    | L_GLU_185 | OE2    | 3.270        |
| 6BZY   | L_LYS_183 | NZ     | L_GLU_187 | OE1    | 3.043        |
| 6BZY   | L_LYS_183 | NZ     | L_GLU_187 | OE2    | 3.003        |
| 6BZY   | L_HIS_189 | ND1    | L_ASP_151 | OD2    | 2.978        |
| 6BZY   | L_LYS_199 | NZ     | L_ASP_110 | OD1    | 3.404        |
| 6BZY   | L_LYS_199 | NZ     | L_ASP_110 | OD2    | 3.217        |

Table 798: 6BZY-specific salt bridging networks analysis. In this table, a PDB file is specified with a four-letter PDB ID, except that the names of the PDB files corresponding to the single NMR structural model split from the NMR ensemble is specified with a four-letter PDB ID in addition to a hyphen followed by the single NMR structural model numeric ID, the residue naming scheme is **Chain ID\_residue name\_residue number**,  $\angle ADH$  represents the angle formed by acceptor (A), donor (D) and hydrogen (H) ( $\angle ADH$ ).

| PDB ID | Residue A | Atom A | Residue B | Atom B | Distance (Å) |
|--------|-----------|--------|-----------|--------|--------------|
| 6C5H   | H_ARG_38  | NH1    | H_ASP_86  | OD1    | 2.721        |
| 6C5H   | H_ARG_38  | NH2    | H_GLU_46  | OE1    | 2.994        |
| 6C5H   | H_ARG_38  | NH2    | H_ASP_86  | OD1    | 3.747        |
| 6C5H   | H_ARG_66  | NH1    | H_ASP_86  | OD1    | 3.644        |
| 6C5H   | H_ARG_66  | NH1    | H_ASP_86  | OD2    | 2.991        |
| 6C5H   | H_ARG_66  | NH2    | H_ASP_86  | OD1    | 2.973        |
| 6C5H   | H_ARG_66  | NH2    | H_ASP_86  | OD2    | 3.516        |
| 6C5H   | H_LYS_75  | NZ     | H_ASP_72  | OD2    | 3.835        |
| 6C5H   | H_ARG_94  | NH2    | H_ASP_100 | OD1    | 2.833        |
| 6C5H   | H_ARG_94  | NH2    | H_ASP_100 | OD2    | 3.662        |
| 6C5H   | H_LYS_208 | NZ     | L_GLU_123 | OE1    | 3.569        |
| 6C5H   | L_ARG_61  | NH1    | L_GLU_79  | OE1    | 3.434        |
| 6C5H   | L_ARG_61  | NH1    | L_GLU_79  | OE2    | 3.291        |
| 6C5H   | L_ARG_61  | NH2    | L_GLU_79  | OE1    | 3.399        |
| 6C5H   | L_ARG_61  | NH2    | L_GLU_81  | OE1    | 2.979        |
| 6C5H   | L_ARG_61  | NH2    | L_GLU_81  | OE2    | 3.883        |
| 6C5H   | L_ARG_61  | NH2    | L_ASP_82  | OD1    | 2.822        |
| 6C5H   | L_ARG_61  | NH2    | L_ASP_82  | OD2    | 3.827        |
| 6C5H   | L_LYS_142 | NZ     | L_GLU_105 | OE1    | 3.070        |
| 6C5H   | L_ARG_155 | NH1    | L_GLU_185 | OE1    | 2.690        |
| 6C5H   | L_ARG_155 | NH1    | L_GLU_185 | OE2    | 3.698        |
| 6C5H   | L_ARG_155 | NH2    | L_GLU_185 | OE1    | 3.395        |
| 6C5H   | L_ARG_155 | NH2    | L_GLU_185 | OE2    | 2.806        |
| 6C5H   | L_HIS_189 | ND1    | L_ASP_151 | OD2    | 2.883        |
| 6C5H   | L_LYS_199 | NZ     | L_ASP_110 | OD1    | 3.394        |
| 6C5H   | L_LYS_199 | NZ     | L_ASP_110 | OD2    | 3.049        |
| 6C5H   | L_ARG_211 | NH1    | L_GLU_187 | OE2    | 3.775        |

Table 799: 6C5H-specific salt bridging networks analysis. In this table, a PDB file is specified with a four-letter PDB ID, except that the names of the PDB files corresponding to the single NMR structural model split from the NMR ensemble is specified with a four-letter PDB ID in addition to a hyphen followed by the single NMR structural model numeric ID, the residue naming scheme is **Chain ID\_residue name\_residue number**,  $\angle ADH$  represents the angle formed by acceptor (A), donor (D) and hydrogen (H) ( $\angle ADH$ ).

| PDB ID | Residue A | Atom A | Residue B | Atom B | Distance (Å) |
|--------|-----------|--------|-----------|--------|--------------|
| 6C5I   | H_ARG_38  | NH1    | H_ASP_86  | OD1    | 2.831        |
| 6C5I   | H_ARG_38  | NH2    | H_ASP_86  | OD1    | 3.788        |
| 6C5I   | H_ARG_66  | NH1    | H_ASP_86  | OD1    | 3.709        |
| 6C5I   | H_ARG_66  | NH1    | H_ASP_86  | OD2    | 3.027        |
| 6C5I   | H_ARG_66  | NH2    | H_ASP_86  | OD1    | 2.746        |
| 6C5I   | H_ARG_66  | NH2    | H_ASP_86  | OD2    | 3.384        |
| 6C5I   | H_ARG_94  | NH2    | H_ASP_100 | OD1    | 3.126        |
| 6C5I   | H_ARG_94  | NH2    | H_ASP_100 | OD2    | 3.618        |
| 6C5I   | H_HIS_164 | NE2    | L_ASP_167 | OD2    | 3.802        |
| 6C5I   | H_LYS_208 | NZ     | L_GLU_123 | OE1    | 3.192        |
| 6C5I   | L_ARG_24  | NH2    | L_ASP_70  | OD2    | 3.159        |
| 6C5I   | L_ARG_61  | NH1    | L_GLU_79  | OE2    | 3.233        |
| 6C5I   | L_ARG_61  | NH2    | L_GLU_79  | OE1    | 3.749        |
| 6C5I   | L_ARG_61  | NH2    | L_GLU_79  | OE2    | 3.995        |
| 6C5I   | L_ARG_61  | NH2    | L_GLU_81  | OE1    | 2.811        |
| 6C5I   | L_ARG_61  | NH2    | L_ASP_82  | OD1    | 2.855        |
| 6C5I   | L_ARG_61  | NH2    | L_ASP_82  | OD2    | 3.717        |
| 6C5I   | L_LYS_147 | NZ     | L_GLU_154 | OE1    | 2.837        |
| 6C5I   | L_LYS_147 | NZ     | L_GLU_154 | OE2    | 3.916        |
| 6C5I   | L_LYS_149 | NZ     | L_GLU_195 | OE2    | 3.136        |
| 6C5I   | L_LYS_199 | NZ     | L_ASP_110 | OD1    | 3.935        |
| 6C5I   | L_LYS_199 | NZ     | L_ASP_110 | OD2    | 3.250        |

Table 800: 6C5I-specific salt bridging networks analysis. In this table, a PDB file is specified with a four-letter PDB ID, except that the names of the PDB files corresponding to the single NMR structural model split from the NMR ensemble is specified with a four-letter PDB ID in addition to a hyphen followed by the single NMR structural model numeric ID, the residue naming scheme is **Chain ID\_residue name\_residue number**,  $\angle ADH$  represents the angle formed by acceptor (A), donor (D) and hydrogen (H) ( $\angle ADH$ ).

| PDB ID | Residue A | Atom A | Residue B | Atom B | Distance (Å) |
|--------|-----------|--------|-----------|--------|--------------|
| 6C5J   | H_ARG_38  | NH1    | H_ASP_86  | OD1    | 2.836        |
| 6C5J   | H_ARG_38  | NH2    | H_GLU_46  | OE1    | 3.113        |
| 6C5J   | H_ARG_38  | NH2    | H_ASP_86  | OD1    | 3.867        |
| 6C5J   | H_ARG_66  | NH1    | H_ASP_86  | OD1    | 3.634        |
| 6C5J   | H_ARG_66  | NH1    | H_ASP_86  | OD2    | 2.729        |
| 6C5J   | H_ARG_66  | NH2    | H_ASP_86  | OD1    | 2.996        |
| 6C5J   | H_ARG_66  | NH2    | H_ASP_86  | OD2    | 3.388        |
| 6C5J   | H_ARG_94  | NH2    | H_ASP_100 | OD1    | 2.849        |
| 6C5J   | H_ARG_94  | NH2    | H_ASP_100 | OD2    | 3.422        |
| 6C5J   | H_HIS_164 | ND1    | L_ASP_167 | OD1    | 3.598        |
| 6C5J   | L_ARG_24  | NH1    | L_ASP_70  | OD1    | 3.086        |
| 6C5J   | L_ARG_24  | NH2    | L_ASP_70  | OD1    | 3.332        |
| 6C5J   | L_ARG_54  | NH1    | L_ASP_60  | OD1    | 3.010        |
| 6C5J   | L_ARG_54  | NH2    | L_ASP_60  | OD1    | 3.261        |
| 6C5J   | L_ARG_61  | NH1    | L_GLU_79  | OE2    | 3.828        |
| 6C5J   | L_ARG_61  | NH1    | L_ASP_82  | OD1    | 3.025        |
| 6C5J   | L_ARG_61  | NH1    | L_ASP_82  | OD2    | 3.858        |
| 6C5J   | L_ARG_61  | NH2    | L_ASP_82  | OD1    | 3.240        |
| 6C5J   | L_ARG_61  | NH2    | L_ASP_82  | OD2    | 2.681        |
| 6C5J   | L_LYS_103 | NZ     | L_ASP_165 | OD1    | 2.761        |
| 6C5J   | L_LYS_103 | NZ     | L_ASP_165 | OD2    | 3.775        |
| 6C5J   | L_LYS_147 | NZ     | L_GLU_195 | OE1    | 4.000        |
| 6C5J   | L_LYS_149 | NZ     | L_GLU_195 | OE1    | 3.633        |
| 6C5J   | L_LYS_149 | NZ     | L_GLU_195 | OE2    | 3.074        |
| 6C5J   | L_ARG_155 | NH1    | L_GLU_185 | OE1    | 3.663        |
| 6C5J   | L_ARG_155 | NH2    | L_GLU_185 | OE1    | 3.950        |
| 6C5J   | L_HIS_189 | ND1    | L_ASP_151 | OD2    | 3.348        |
| 6C5J   | L_HIS_189 | NE2    | L_GLU_185 | OE2    | 3.487        |

Table 801: 6C5J-specific salt bridging networks analysis. In this table, a PDB file is specified with a four-letter PDB ID, except that the names of the PDB files corresponding to the single NMR structural model split from the NMR ensemble is specified with a four-letter PDB ID in addition to a hyphen followed by the single NMR structural model numeric ID, the residue naming scheme is **Chain ID\_residue name\_residue number**,  $\angle ADH$  represents the angle formed by acceptor (A), donor (D) and hydrogen (H) ( $\angle ADH$ ).

| PDB ID | Residue A | Atom A | Residue B | Atom B | Distance (Å) |
|--------|-----------|--------|-----------|--------|--------------|
| 6C5K   | H_ARG_38  | NH1    | H_ASP_86  | OD1    | 2.795        |
| 6C5K   | H_ARG_38  | NH2    | H_GLU_46  | OE1    | 3.031        |
| 6C5K   | H_ARG_38  | NH2    | H_ASP_86  | OD1    | 3.813        |
| 6C5K   | H_ARG_66  | NH1    | H_ASP_86  | OD1    | 3.655        |
| 6C5K   | H_ARG_66  | NH1    | H_ASP_86  | OD2    | 2.836        |
| 6C5K   | H_ARG_66  | NH2    | H_ASP_86  | OD1    | 2.955        |
| 6C5K   | H_ARG_66  | NH2    | H_ASP_86  | OD2    | 3.481        |
| 6C5K   | H_LYS_75  | NZ     | H_ASP_72  | OD2    | 2.938        |
| 6C5K   | H_ARG_94  | NH2    | H_ASP_100 | OD1    | 2.779        |
| 6C5K   | H_ARG_94  | NH2    | H_ASP_100 | OD2    | 3.677        |
| 6C5K   | A_ARG_38  | NH1    | A_ASP_86  | OD1    | 2.763        |
| 6C5K   | A_ARG_38  | NH2    | A_GLU_46  | OE1    | 3.011        |
| 6C5K   | A_ARG_38  | NH2    | A_ASP_86  | OD1    | 3.834        |
| 6C5K   | A_LYS_43  | NZ     | A_GLU_46  | OE2    | 3.601        |
| 6C5K   | A_ARG_66  | NH1    | A_ASP_86  | OD1    | 3.702        |
| 6C5K   | A_ARG_66  | NH1    | A_ASP_86  | OD2    | 2.833        |
| 6C5K   | A_ARG_66  | NH2    | A_ASP_86  | OD1    | 2.960        |
| 6C5K   | A_ARG_66  | NH2    | A_ASP_86  | OD2    | 3.480        |
| 6C5K   | A_LYS_75  | NZ     | A_ASP_72  | OD2    | 3.839        |
| 6C5K   | A_ARG_94  | NH2    | A_ASP_100 | OD1    | 2.772        |
| 6C5K   | A_ARG_94  | NH2    | A_ASP_100 | OD2    | 3.672        |
| 6C5K   | L_ARG_61  | NH1    | L_GLU_79  | OE2    | 3.364        |
| 6C5K   | L_ARG_61  | NH2    | L_GLU_79  | OE1    | 3.895        |
| 6C5K   | L_ARG_61  | NH2    | L_ASP_82  | OD1    | 2.830        |
| 6C5K   | L_ARG_61  | NH2    | L_ASP_82  | OD2    | 3.538        |
| 6C5K   | L_LYS_142 | NZ     | L_GLU_105 | OE1    | 3.073        |
| 6C5K   | L_LYS_142 | NZ     | L_GLU_105 | OE2    | 3.102        |
| 6C5K   | L_ARG_155 | NH1    | L_GLU_185 | OE2    | 3.793        |
| 6C5K   | L_ARG_155 | NH2    | L_GLU_185 | OE2    | 3.452        |
| 6C5K   | L_HIS_189 | ND1    | L_ASP_151 | OD2    | 3.191        |
| 6C5K   | L_LYS_199 | NZ     | L_ASP_110 | OD2    | 3.559        |
| 6C5K   | B_ARG_61  | NH1    | B_ASP_82  | OD1    | 3.628        |
| 6C5K   | B_ARG_61  | NH1    | B_ASP_82  | OD2    | 2.598        |
| 6C5K   | B_ARG_61  | NH2    | B_GLU_79  | OE1    | 3.919        |
| 6C5K   | B_ARG_61  | NH2    | B_ASP_82  | OD1    | 2.914        |
| 6C5K   | B_ARG_61  | NH2    | B_ASP_82  | OD2    | 3.428        |
| 6C5K   | B_ARG_77  | NH1    | B_ASP_60  | OD1    | 3.873        |
| 6C5K   | B_ARG_77  | NH2    | B_ASP_60  | OD1    | 3.181        |
| 6C5K   | B_ARG_77  | NH2    | B_ASP_60  | OD2    | 3.837        |
| 6C5K   | B_LYS_142 | NZ     | B_GLU_105 | OE1    | 2.957        |
| 6C5K   | B_LYS_142 | NZ     | B_GLU_105 | OE2    | 3.105        |
| 6C5K   | B_LYS_147 | NZ     | B_GLU_154 | OE1    | 3.468        |
| 6C5K   | B_LYS_149 | NZ     | B_GLU_195 | OE1    | 3.461        |
| 6C5K   | B_LYS_149 | NZ     | B_GLU_195 | OE2    | 3.022        |
| 6C5K   | B_LYS_183 | NZ     | B_GLU_187 | OE1    | 3.352        |
| 6C5K   | B_LYS_183 | NZ     | B_GLU_187 | OE2    | 3.700        |
| 6C5K   | B_HIS_189 | ND1    | B_ASP_151 | OD2    | 3.184        |
| 6C5K   | B_LYS_199 | NZ     | B_ASP_110 | OD2    | 3.547        |



---

Table 802: 6C5K-specific salt bridging networks analysis. In this table, a PDB file is specified with a four-letter PDB ID, except that the names of the PDB files corresponding to the single NMR structural model split from the NMR ensemble is specified with a four-letter PDB ID in addition to a hyphen followed by the single NMR structural model numeric ID, the residue naming scheme is **Chain ID\_residue name\_residue number**,  $\angle ADH$  represents the angle formed by acceptor (A), donor (D) and hydrogen (H) ( $\angle ADH$ ).

| PDB ID | Residue A | Atom A | Residue B | Atom B | Distance (Å) |
|--------|-----------|--------|-----------|--------|--------------|
| 6C6X   | A_ARG_38  | NH1    | A_ASP_86  | OD1    | 2.916        |
| 6C6X   | A_ARG_38  | NH2    | A_GLU_46  | OE1    | 3.235        |
| 6C6X   | A_ARG_38  | NH2    | A_ASP_86  | OD1    | 3.654        |
| 6C6X   | A_ARG_66  | NH1    | A_ASP_86  | OD1    | 3.723        |
| 6C6X   | A_ARG_66  | NH1    | A_ASP_86  | OD2    | 3.099        |
| 6C6X   | A_ARG_66  | NH2    | A_ASP_86  | OD1    | 2.823        |
| 6C6X   | A_ARG_66  | NH2    | A_ASP_86  | OD2    | 3.594        |
| 6C6X   | A_LYS_75  | NZ     | A_ASP_72  | OD2    | 3.085        |
| 6C6X   | A_LYS_94  | NZ     | A_ASP_27  | OD1    | 3.369        |
| 6C6X   | A_LYS_94  | NZ     | A_ASP_27  | OD2    | 3.236        |
| 6C6X   | A_LYS_143 | NZ     | A_ASP_144 | OD1    | 3.316        |
| 6C6X   | A_LYS_143 | NZ     | A_ASP_144 | OD2    | 3.281        |
| 6C6X   | B_ARG_24  | NH2    | B_ASP_70  | OD2    | 3.520        |
| 6C6X   | B_ARG_61  | NH1    | B_GLU_81  | OE2    | 3.777        |
| 6C6X   | B_ARG_61  | NH2    | B_GLU_81  | OE2    | 2.736        |
| 6C6X   | B_ARG_61  | NH2    | B_ASP_82  | OD1    | 2.804        |
| 6C6X   | B_ARG_61  | NH2    | B_ASP_82  | OD2    | 3.688        |
| 6C6X   | B_ARG_66  | NH1    | B_ASP_28  | OD1    | 3.798        |
| 6C6X   | B_LYS_103 | NZ     | B_GLU_105 | OE1    | 3.590        |
| 6C6X   | B_LYS_103 | NZ     | B_GLU_165 | OE2    | 3.918        |
| 6C6X   | B_LYS_147 | NZ     | B_GLU_195 | OE2    | 3.987        |
| 6C6X   | B_LYS_155 | NZ     | B_GLU_185 | OE2    | 2.799        |
| 6C6X   | B_HIS_189 | ND1    | B_ASP_151 | OD2    | 3.308        |
| 6C6X   | B_LYS_207 | NZ     | A_GLU_133 | OE1    | 3.861        |
| 6C6X   | C_ARG_38  | NH1    | C_ASP_86  | OD1    | 2.686        |
| 6C6X   | C_ARG_38  | NH2    | C_GLU_46  | OE1    | 3.038        |
| 6C6X   | C_ARG_38  | NH2    | C_ASP_86  | OD1    | 3.600        |
| 6C6X   | C_ARG_66  | NH1    | C_ASP_86  | OD1    | 3.306        |
| 6C6X   | C_ARG_66  | NH1    | C_ASP_86  | OD2    | 3.758        |
| 6C6X   | C_ARG_66  | NH2    | C_ASP_86  | OD1    | 3.273        |
| 6C6X   | C_ARG_66  | NH2    | C_ASP_86  | OD2    | 2.552        |
| 6C6X   | C_LYS_75  | NZ     | C_ASP_72  | OD2    | 3.346        |
| 6C6X   | C_LYS_94  | NZ     | C_ASP_27  | OD1    | 3.722        |
| 6C6X   | C_LYS_94  | NZ     | C_ASP_27  | OD2    | 2.313        |
| 6C6X   | C_LYS_143 | NZ     | C_ASP_144 | OD1    | 3.560        |
| 6C6X   | C_LYS_143 | NZ     | C_ASP_144 | OD2    | 3.637        |
| 6C6X   | D_ARG_61  | NH2    | D_GLU_81  | OE2    | 3.760        |
| 6C6X   | D_ARG_61  | NH2    | D_ASP_82  | OD1    | 2.628        |
| 6C6X   | D_ARG_61  | NH2    | D_ASP_82  | OD2    | 3.448        |
| 6C6X   | D_ARG_66  | NH1    | D_ASP_28  | OD1    | 3.243        |
| 6C6X   | D_ARG_66  | NH1    | D_ASP_28  | OD2    | 3.729        |
| 6C6X   | D_LYS_149 | NZ     | D_GLU_195 | OE1    | 2.932        |
| 6C6X   | D_LYS_155 | NZ     | D_GLU_185 | OE2    | 3.201        |
| 6C6X   | D_HIS_189 | ND1    | D_GLU_185 | OE1    | 3.992        |
| 6C6X   | E_ARG_38  | NH1    | E_ASP_86  | OD1    | 2.787        |
| 6C6X   | E_ARG_38  | NH2    | E_GLU_46  | OE2    | 3.116        |
| 6C6X   | E_ARG_38  | NH2    | E_ASP_86  | OD1    | 3.697        |
| 6C6X   | E_ARG_66  | NH1    | E_ASP_86  | OD1    | 3.910        |
| 6C6X   | E_ARG_66  | NH1    | E_ASP_86  | OD2    | 3.139        |
| 6C6X   | E_ARG_66  | NH2    | E_ASP_86  | OD1    | 2.977        |
| 6C6X   | E_ARG_66  | NH2    | E_ASP_86  | OD2    | 3.550        |
| 6C6X   | E_LYS_75  | NZ     | E_ASP_72  | OD2    | 3.750        |
| 6C6X   | E_LYS_94  | NZ     | E_ASP_27  | OD1    | 3.779        |
| 6C6X   | E_LYS_94  | NZ     | E_ASP_27  | OD2    | 2.090        |
| 6C6X   | E_LYS_143 | NZ     | E_ASP_144 | OD1    | 3.540        |
| 6C6X   | E_LYS_143 | NZ     | E_ASP_144 | OD2    | 3.461        |
| 6C6X   | F_ARG_24  | NH1    | F_ASP_70  | OD1    | 3.452        |

|      |           |     |           |     |       |
|------|-----------|-----|-----------|-----|-------|
| 6C6X | F_ARG_24  | NH1 | F_ASP_70  | OD2 | 3.656 |
| 6C6X | F_ARG_24  | NH2 | F_ASP_70  | OD2 | 3.468 |
| 6C6X | F_ARG_61  | NH2 | F_GLU_81  | OE1 | 3.978 |
| 6C6X | F_ARG_61  | NH2 | F_ASP_82  | OD1 | 2.486 |
| 6C6X | F_ARG_61  | NH2 | F_ASP_82  | OD2 | 3.255 |
| 6C6X | F_ARG_66  | NH1 | F_ASP_28  | OD1 | 3.527 |
| 6C6X | F_LYS_149 | NZ  | F_GLU_195 | OE2 | 3.170 |
| 6C6X | F_LYS_169 | NZ  | F_ASP_167 | OD1 | 3.680 |
| 6C6X | F_LYS_169 | NZ  | F_ASP_167 | OD2 | 3.672 |
| 6C6X | F_LYS_169 | NZ  | F_ASP_170 | OD2 | 2.920 |
| 6C6X | F_HIS_189 | ND1 | F_ASP_151 | OD2 | 3.007 |
| 6C6X | H_ARG_38  | NH1 | H_ASP_86  | OD1 | 2.791 |
| 6C6X | H_ARG_38  | NH2 | H_GLU_46  | OE1 | 3.334 |
| 6C6X | H_ARG_38  | NH2 | H_ASP_86  | OD1 | 3.541 |
| 6C6X | H_ARG_50  | NH2 | H_ASP_58  | OD2 | 3.546 |
| 6C6X | H_LYS_64  | NZ  | H_ASP_58  | OD1 | 3.715 |
| 6C6X | H_ARG_66  | NH1 | H_ASP_86  | OD1 | 3.732 |
| 6C6X | H_ARG_66  | NH1 | H_ASP_86  | OD2 | 3.107 |
| 6C6X | H_ARG_66  | NH2 | H_ASP_86  | OD1 | 2.991 |
| 6C6X | H_ARG_66  | NH2 | H_ASP_86  | OD2 | 3.632 |
| 6C6X | H_LYS_75  | NZ  | H_ASP_72  | OD2 | 2.419 |
| 6C6X | H_LYS_143 | NZ  | H_ASP_144 | OD1 | 3.420 |
| 6C6X | H_LYS_143 | NZ  | H_ASP_144 | OD2 | 3.402 |
| 6C6X | H_ARG_210 | NH1 | H_GLU_212 | OE2 | 2.704 |
| 6C6X | H_ARG_210 | NH2 | H_GLU_212 | OE2 | 3.451 |
| 6C6X | L_ARG_24  | NH2 | L_ASP_70  | OD1 | 3.667 |
| 6C6X | L_ARG_24  | NH2 | L_ASP_70  | OD2 | 3.530 |
| 6C6X | L_ARG_61  | NH2 | L_GLU_81  | OE1 | 3.682 |
| 6C6X | L_ARG_61  | NH2 | L_ASP_82  | OD1 | 2.742 |
| 6C6X | L_ARG_61  | NH2 | L_ASP_82  | OD2 | 3.507 |
| 6C6X | L_ARG_66  | NH2 | L_ASP_28  | OD1 | 3.147 |
| 6C6X | L_ARG_66  | NH2 | L_ASP_28  | OD2 | 3.848 |
| 6C6X | L_LYS_103 | NZ  | L_GLU_165 | OE1 | 2.822 |
| 6C6X | L_LYS_103 | NZ  | L_GLU_165 | OE2 | 3.323 |
| 6C6X | L_ARG_142 | NH1 | L_GLU_105 | OE1 | 3.994 |
| 6C6X | L_LYS_149 | NZ  | L_GLU_195 | OE1 | 3.966 |
| 6C6X | L_LYS_149 | NZ  | L_GLU_195 | OE2 | 2.484 |
| 6C6X | L_HIS_189 | ND1 | L_ASP_151 | OD2 | 3.012 |

Table 803: 6C6X-specific salt bridging networks analysis. In this table, a PDB file is specified with a four-letter PDB ID, except that the names of the PDB files corresponding to the single NMR structural model split from the NMR ensemble is specified with a four-letter PDB ID in addition to a hyphen followed by the single NMR structural model numeric ID, the residue naming scheme is **Chain ID\_residue name\_residue number**,  $\angle ADH$  represents the angle formed by acceptor (A), donor (D) and hydrogen (H) ( $\angle ADH$ ).

| PDB ID | Residue A | Atom A | Residue B | Atom B | Distance (Å) |
|--------|-----------|--------|-----------|--------|--------------|
| 6C6Y   | A_ARG_38  | NH1    | A_ASP_86  | OD1    | 3.064        |
| 6C6Y   | A_ARG_38  | NH2    | A_GLU_46  | OE2    | 3.198        |
| 6C6Y   | A_ARG_66  | NH1    | A_ASP_86  | OD2    | 3.498        |
| 6C6Y   | A_ARG_66  | NH2    | A_ASP_86  | OD1    | 3.146        |
| 6C6Y   | A_ARG_66  | NH2    | A_ASP_86  | OD2    | 3.520        |
| 6C6Y   | A_LYS_94  | NZ     | A_ASP_27  | OD2    | 3.819        |
| 6C6Y   | A_LYS_143 | NZ     | A_ASP_144 | OD1    | 3.805        |
| 6C6Y   | B_ARG_24  | NH1    | B_ASP_70  | OD1    | 3.301        |
| 6C6Y   | B_ARG_24  | NH2    | B_ASP_70  | OD1    | 3.031        |
| 6C6Y   | B_ARG_24  | NH2    | B_ASP_70  | OD2    | 3.357        |
| 6C6Y   | B_ARG_61  | NH1    | B_GLU_81  | OE1    | 3.827        |
| 6C6Y   | B_ARG_61  | NH2    | B_GLU_81  | OE1    | 3.995        |
| 6C6Y   | B_ARG_61  | NH2    | B_ASP_82  | OD1    | 2.452        |
| 6C6Y   | B_ARG_61  | NH2    | B_ASP_82  | OD2    | 3.063        |
| 6C6Y   | B_ARG_66  | NH1    | B_ASP_28  | OD1    | 2.856        |
| 6C6Y   | B_LYS_103 | NZ     | B_GLU_165 | OE1    | 2.786        |
| 6C6Y   | B_LYS_103 | NZ     | B_GLU_165 | OE2    | 3.365        |
| 6C6Y   | B_ARG_142 | NH1    | B_GLU_165 | OE2    | 3.444        |
| 6C6Y   | B_LYS_149 | NZ     | B_GLU_195 | OE1    | 3.173        |
| 6C6Y   | B_LYS_149 | NZ     | B_GLU_195 | OE2    | 3.288        |
| 6C6Y   | B_LYS_155 | NZ     | B_GLU_185 | OE1    | 3.980        |
| 6C6Y   | B_LYS_155 | NZ     | B_GLU_185 | OE2    | 2.781        |
| 6C6Y   | H_ARG_38  | NH1    | H_ASP_86  | OD1    | 3.029        |
| 6C6Y   | H_ARG_38  | NH2    | H_GLU_46  | OE2    | 2.521        |
| 6C6Y   | H_ARG_38  | NH2    | H_ASP_86  | OD1    | 3.913        |
| 6C6Y   | H_ARG_50  | NH2    | H_ASP_58  | OD2    | 3.613        |
| 6C6Y   | H_ARG_66  | NH1    | H_ASP_86  | OD1    | 3.184        |
| 6C6Y   | H_ARG_66  | NH1    | H_ASP_86  | OD2    | 2.116        |
| 6C6Y   | H_ARG_66  | NH2    | H_ASP_86  | OD1    | 3.133        |
| 6C6Y   | H_ARG_66  | NH2    | H_ASP_86  | OD2    | 3.619        |
| 6C6Y   | L_ARG_24  | NH1    | L_ASP_70  | OD1    | 3.969        |
| 6C6Y   | L_ARG_24  | NH1    | L_ASP_70  | OD2    | 3.418        |
| 6C6Y   | L_ARG_24  | NH2    | L_ASP_70  | OD1    | 3.004        |
| 6C6Y   | L_ARG_24  | NH2    | L_ASP_70  | OD2    | 2.849        |
| 6C6Y   | L_ARG_61  | NH2    | L_ASP_82  | OD1    | 2.482        |
| 6C6Y   | L_ARG_61  | NH2    | L_ASP_82  | OD2    | 3.036        |
| 6C6Y   | L_ARG_66  | NH1    | L_ASP_28  | OD1    | 3.067        |
| 6C6Y   | L_LYS_103 | NZ     | L_GLU_165 | OE1    | 2.476        |
| 6C6Y   | L_ARG_142 | NH2    | L_GLU_165 | OE2    | 3.885        |
| 6C6Y   | L_LYS_147 | NZ     | L_GLU_195 | OE1    | 3.059        |
| 6C6Y   | L_LYS_147 | NZ     | L_GLU_195 | OE2    | 3.820        |
| 6C6Y   | L_LYS_155 | NZ     | L_GLU_185 | OE2    | 3.070        |
| 6C6Y   | R_LYS_400 | NZ     | L_ASP_28  | OD2    | 3.363        |
| 6C6Y   | R_ARG_401 | NH2    | R_ASP_444 | OD2    | 3.769        |
| 6C6Y   | R_LYS_413 | NZ     | R_GLU_382 | OE2    | 3.002        |
| 6C6Y   | R_LYS_453 | NZ     | R_ASP_422 | OD2    | 3.217        |
| 6C6Y   | R_LYS_502 | NZ     | R_GLU_513 | OE1    | 3.001        |
| 6C6Y   | R_LYS_543 | NZ     | L_GLU_55  | OE2    | 2.973        |
| 6C6Y   | R_LYS_587 | NZ     | R_GLU_382 | OE1    | 3.401        |
| 6C6Y   | R_LYS_587 | NZ     | R_GLU_382 | OE2    | 2.619        |
| 6C6Y   | S_LYS_400 | NZ     | B_ASP_28  | OD1    | 3.764        |
| 6C6Y   | S_LYS_400 | NZ     | B_ASP_28  | OD2    | 2.712        |
| 6C6Y   | S_ARG_401 | NH2    | S_ASP_444 | OD2    | 2.856        |
| 6C6Y   | S_LYS_413 | NZ     | S_GLU_382 | OE2    | 3.998        |
| 6C6Y   | S_LYS_453 | NZ     | S_ASP_422 | OD2    | 2.144        |
| 6C6Y   | S_LYS_502 | NZ     | S_GLU_513 | OE1    | 3.472        |
| 6C6Y   | S_LYS_543 | NZ     | B_GLU_55  | OE2    | 3.134        |

|      |           |    |           |     |       |
|------|-----------|----|-----------|-----|-------|
| 6C6Y | S_LYS_587 | NZ | S_GLU_382 | OE1 | 3.941 |
| 6C6Y | S_LYS_587 | NZ | S_GLU_382 | OE2 | 2.874 |

Table 804: 6C6Y-specific salt bridging networks analysis. In this table, a PDB file is specified with a four-letter PDB ID, except that the names of the PDB files corresponding to the single NMR structural model split from the NMR ensemble is specified with a four-letter PDB ID in addition to a hyphen followed by the single NMR structural model numeric ID, the residue naming scheme is **Chain ID\_residue name\_residue number**,  $\angle ADH$  represents the angle formed by acceptor (A), donor (D) and hydrogen (H) ( $\angle ADH$ ).

| PDB ID | Residue A | Atom A | Residue B | Atom B | Distance (Å) |
|--------|-----------|--------|-----------|--------|--------------|
| 6C6Z   | A_ARG_401 | NH2    | A_ASP_444 | OD1    | 3.459        |
| 6C6Z   | A_ARG_401 | NH2    | A_ASP_444 | OD2    | 2.937        |
| 6C6Z   | A_LYS_453 | NZ     | A_ASP_422 | OD1    | 3.282        |
| 6C6Z   | A_LYS_453 | NZ     | A_ASP_422 | OD2    | 3.866        |
| 6C6Z   | A_ARG_542 | NH1    | C_GLU_95  | OE1    | 3.387        |
| 6C6Z   | A_ARG_542 | NH1    | C_GLU_95  | OE2    | 2.704        |
| 6C6Z   | A_ARG_542 | NH2    | C_GLU_95  | OE1    | 2.635        |
| 6C6Z   | A_ARG_542 | NH2    | C_GLU_95  | OE2    | 3.577        |
| 6C6Z   | B_ARG_401 | NH2    | B_ASP_444 | OD1    | 3.464        |
| 6C6Z   | B_ARG_401 | NH2    | B_ASP_444 | OD2    | 3.103        |
| 6C6Z   | B_LYS_453 | NZ     | B_ASP_422 | OD2    | 2.962        |
| 6C6Z   | B_LYS_502 | NZ     | B_GLU_513 | OE2    | 2.909        |
| 6C6Z   | B_ARG_542 | NH1    | H_GLU_95  | OE1    | 3.238        |
| 6C6Z   | B_ARG_542 | NH1    | H_GLU_95  | OE2    | 2.770        |
| 6C6Z   | B_ARG_542 | NH2    | H_GLU_95  | OE1    | 2.578        |
| 6C6Z   | B_ARG_542 | NH2    | H_GLU_95  | OE2    | 3.689        |
| 6C6Z   | B_LYS_543 | NZ     | B_GLU_549 | OE2    | 3.799        |
| 6C6Z   | C_LYS_12  | NZ     | C_GLU_10  | OE1    | 3.923        |
| 6C6Z   | C_ARG_38  | NH1    | C_ASP_86  | OD1    | 2.775        |
| 6C6Z   | C_ARG_38  | NH2    | C_GLU_46  | OE1    | 3.971        |
| 6C6Z   | C_ARG_38  | NH2    | C_ASP_86  | OD1    | 3.678        |
| 6C6Z   | C_LYS_62  | NZ     | C_GLU_46  | OE1    | 3.517        |
| 6C6Z   | C_LYS_62  | NZ     | C_GLU_46  | OE2    | 2.404        |
| 6C6Z   | C_ARG_66  | NH1    | C_ASP_86  | OD1    | 3.649        |
| 6C6Z   | C_ARG_66  | NH1    | C_ASP_86  | OD2    | 2.887        |
| 6C6Z   | C_ARG_66  | NH2    | C_ASP_86  | OD1    | 2.965        |
| 6C6Z   | C_ARG_66  | NH2    | C_ASP_86  | OD2    | 3.656        |
| 6C6Z   | C_LYS_143 | NZ     | C_ASP_144 | OD1    | 3.698        |
| 6C6Z   | C_LYS_209 | NZ     | D_GLU_123 | OE1    | 2.970        |
| 6C6Z   | C_LYS_209 | NZ     | D_GLU_123 | OE2    | 3.150        |
| 6C6Z   | C_LYS_214 | NZ     | D_ASP_122 | OD2    | 2.844        |
| 6C6Z   | D_ARG_24  | NH2    | D_ASP_70  | OD1    | 3.771        |
| 6C6Z   | D_ARG_24  | NH2    | D_ASP_70  | OD2    | 3.462        |
| 6C6Z   | D_HIS_27D | NE2    | A_GLU_536 | OE1    | 2.616        |
| 6C6Z   | D_LYS_39  | NZ     | D_GLU_81  | OE1    | 3.045        |
| 6C6Z   | D_ARG_61  | NH1    | D_ASP_82  | OD1    | 3.547        |
| 6C6Z   | D_ARG_61  | NH1    | D_ASP_82  | OD2    | 2.767        |
| 6C6Z   | D_ARG_61  | NH2    | D_GLU_79  | OE2    | 3.892        |
| 6C6Z   | D_ARG_61  | NH2    | D_ASP_82  | OD1    | 2.888        |
| 6C6Z   | D_ARG_61  | NH2    | D_ASP_82  | OD2    | 3.519        |
| 6C6Z   | D_LYS_103 | NZ     | D_GLU_105 | OE1    | 3.035        |
| 6C6Z   | D_LYS_149 | NZ     | D_GLU_195 | OE2    | 3.680        |
| 6C6Z   | D_LYS_183 | NZ     | D_GLU_187 | OE1    | 3.446        |
| 6C6Z   | D_LYS_183 | NZ     | D_GLU_187 | OE2    | 2.362        |
| 6C6Z   | H_LYS_12  | NZ     | H_GLU_10  | OE1    | 3.627        |
| 6C6Z   | H_ARG_38  | NH1    | H_ASP_86  | OD1    | 2.800        |
| 6C6Z   | H_ARG_38  | NH2    | H_GLU_46  | OE1    | 3.855        |
| 6C6Z   | H_ARG_38  | NH2    | H_ASP_86  | OD1    | 3.819        |
| 6C6Z   | H_LYS_62  | NZ     | H_GLU_46  | OE1    | 3.413        |
| 6C6Z   | H_LYS_62  | NZ     | H_GLU_46  | OE2    | 2.893        |
| 6C6Z   | H_ARG_66  | NH1    | H_ASP_86  | OD1    | 3.573        |
| 6C6Z   | H_ARG_66  | NH1    | H_ASP_86  | OD2    | 2.784        |
| 6C6Z   | H_ARG_66  | NH2    | H_ASP_86  | OD1    | 2.918        |
| 6C6Z   | H_ARG_66  | NH2    | H_ASP_86  | OD2    | 3.610        |
| 6C6Z   | H_LYS_143 | NZ     | H_ASP_144 | OD1    | 3.196        |
| 6C6Z   | H_LYS_143 | NZ     | H_ASP_144 | OD2    | 3.107        |
| 6C6Z   | H_LYS_206 | NZ     | H_ASP_208 | OD1    | 2.733        |

|      |           |     |           |     |       |
|------|-----------|-----|-----------|-----|-------|
| 6C6Z | H_LYS_209 | NZ  | L_GLU_123 | OE1 | 3.044 |
| 6C6Z | H_LYS_209 | NZ  | L_GLU_123 | OE2 | 3.156 |
| 6C6Z | L_HIS_27D | NE2 | B_GLU_536 | OE1 | 2.931 |
| 6C6Z | L_LYS_39  | NZ  | L_GLU_81  | OE1 | 3.674 |
| 6C6Z | L_ARG_61  | NH1 | L_ASP_82  | OD1 | 3.616 |
| 6C6Z | L_ARG_61  | NH1 | L_ASP_82  | OD2 | 2.658 |
| 6C6Z | L_ARG_61  | NH2 | L_ASP_82  | OD1 | 2.969 |
| 6C6Z | L_ARG_61  | NH2 | L_ASP_82  | OD2 | 3.526 |
| 6C6Z | L_LYS_169 | NZ  | L_ASP_170 | OD2 | 3.960 |
| 6C6Z | L_LYS_183 | NZ  | L_GLU_187 | OE1 | 2.903 |
| 6C6Z | L_LYS_183 | NZ  | L_GLU_187 | OE2 | 3.197 |
| 6C6Z | L_LYS_188 | NZ  | L_ASP_185 | OD1 | 3.953 |

Table 805: 6C6Z-specific salt bridging networks analysis. In this table, a PDB file is specified with a four-letter PDB ID, except that the names of the PDB files corresponding to the single NMR structural model split from the NMR ensemble is specified with a four-letter PDB ID in addition to a hyphen followed by the single NMR structural model numeric ID, the residue naming scheme is **Chain ID\_residue name\_residue number**,  $\angle ADH$  represents the angle formed by acceptor (A), donor (D) and hydrogen (H) ( $\angle ADH$ ).

| PDB ID | Residue A | Atom A | Residue B | Atom B | Distance (Å) |
|--------|-----------|--------|-----------|--------|--------------|
| 6CUJ   | A_HIS_325 | NE2    | A_ASP_359 | OD2    | 3.301        |
| 6CUJ   | A_ARG_337 | NH1    | A_GLU_322 | OE1    | 3.884        |
| 6CUJ   | A_LYS_378 | NZ     | A_ASP_388 | OD2    | 3.300        |
| 6CUJ   | B_HIS_327 | ND1    | B_ASP_359 | OD2    | 3.102        |
| 6CUJ   | B_HIS_327 | NE2    | B_GLU_329 | OE2    | 2.543        |
| 6CUJ   | B_HIS_327 | NE2    | B_ASP_359 | OD2    | 3.671        |
| 6CUJ   | B_ARG_337 | NH1    | B_GLU_322 | OE1    | 3.772        |
| 6CUJ   | B_HIS_362 | ND1    | B_ASP_359 | OD1    | 3.012        |
| 6CUJ   | B_HIS_362 | ND1    | B_ASP_359 | OD2    | 2.820        |
| 6CUJ   | B_LYS_404 | NZ     | A_GLU_292 | OE1    | 3.957        |

Table 806: 6CUJ-specific salt bridging networks analysis. In this table, a PDB file is specified with a four-letter PDB ID, except that the names of the PDB files corresponding to the single NMR structural model split from the NMR ensemble is specified with a four-letter PDB ID in addition to a hyphen followed by the single NMR structural model numeric ID, the residue naming scheme is **Chain ID\_residue name\_residue number**,  $\angle ADH$  represents the angle formed by acceptor (A), donor (D) and hydrogen (H) ( $\angle ADH$ ).



| PDB ID | Residue A | Atom A | Residue B | Atom B | Distance (Å) |
|--------|-----------|--------|-----------|--------|--------------|
| 6DC3   | H_ARG_38  | NH1    | H_ASP_86  | OD1    | 2.959        |
| 6DC3   | H_ARG_38  | NH2    | H_GLU_46  | OE1    | 3.231        |
| 6DC3   | H_ARG_38  | NH2    | H_GLU_46  | OE2    | 3.389        |
| 6DC3   | H_ARG_66  | NH2    | H_ASP_86  | OD1    | 3.488        |
| 6DC3   | H_ARG_66  | NH2    | H_ASP_86  | OD2    | 2.922        |
| 6DC3   | H_ARG_94  | NH2    | H_ASP_101 | OD1    | 3.653        |
| 6DC3   | H_ARG_94  | NH2    | H_ASP_101 | OD2    | 2.581        |
| 6DC3   | H_LYS_143 | NZ     | L_GLU_125 | OE2    | 3.101        |
| 6DC3   | H_LYS_209 | NZ     | L_GLU_124 | OE1    | 3.719        |
| 6DC3   | H_ARG_210 | NH1    | H_GLU_212 | OE2    | 3.787        |
| 6DC3   | H_ARG_210 | NH2    | H_GLU_212 | OE2    | 3.635        |
| 6DC3   | L_ARG_61  | NH1    | L_ASP_82  | OD2    | 2.982        |
| 6DC3   | L_ARG_61  | NH2    | L_ASP_82  | OD1    | 2.867        |
| 6DC3   | L_ARG_61  | NH2    | L_ASP_82  | OD2    | 2.906        |
| 6DC3   | F_ARG_49  | NH1    | F_ASP_368 | OD1    | 2.816        |
| 6DC3   | F_ARG_49  | NH1    | F_ASP_368 | OD2    | 3.848        |
| 6DC3   | F_LYS_166 | NZ     | F_GLU_163 | OE1    | 2.612        |
| 6DC3   | F_LYS_168 | NZ     | H_ASP_53  | OD2    | 2.485        |
| 6DC3   | F_LYS_176 | NZ     | F_ASP_263 | OD1    | 3.442        |
| 6DC3   | F_LYS_176 | NZ     | F_ASP_263 | OD2    | 3.080        |
| 6DC3   | F_LYS_191 | NZ     | F_GLU_60  | OE1    | 2.907        |
| 6DC3   | F_LYS_191 | NZ     | F_GLU_60  | OE2    | 3.428        |
| 6DC3   | F_LYS_196 | NZ     | F_GLU_295 | OE1    | 2.816        |
| 6DC3   | F_ARG_229 | NH1    | F_GLU_256 | OE1    | 3.821        |
| 6DC3   | F_ARG_229 | NH1    | F_GLU_256 | OE2    | 2.936        |
| 6DC3   | F_ARG_229 | NH2    | F_GLU_256 | OE1    | 2.824        |
| 6DC3   | F_ARG_229 | NH2    | F_GLU_256 | OE2    | 3.412        |
| 6DC3   | F_ARG_235 | NH2    | F_GLU_232 | OE1    | 3.589        |
| 6DC3   | F_ARG_235 | NH2    | F_GLU_232 | OE2    | 3.188        |
| 6DC3   | F_ARG_336 | NH2    | F_ASP_338 | OD1    | 3.536        |
| 6DC3   | F_ARG_336 | NH2    | F_ASP_338 | OD2    | 3.006        |
| 6DC3   | F_ARG_364 | NH1    | F_ASP_310 | OD1    | 3.283        |
| 6DC3   | F_ARG_364 | NH2    | F_ASP_310 | OD1    | 2.353        |
| 6DC3   | F_LYS_394 | NZ     | F_ASP_489 | OD1    | 2.937        |
| 6DC3   | F_LYS_433 | NZ     | F_ASP_440 | OD1    | 3.790        |
| 6DC3   | F_LYS_433 | NZ     | F_ASP_440 | OD2    | 2.911        |
| 6DC3   | F_LYS_461 | NZ     | F_ASP_448 | OD1    | 3.211        |
| 6DC3   | F_LYS_498 | NZ     | F_GLU_487 | OE2    | 3.896        |

Table 807: 6DC3-specific salt bridging networks analysis. In this table, a PDB file is specified with a four-letter PDB ID, except that the names of the PDB files corresponding to the single NMR structural model split from the NMR ensemble is specified with a four-letter PDB ID in addition to a hyphen followed by the single NMR structural model numeric ID, the residue naming scheme is **Chain ID\_residue name\_residue number**,  $\angle ADH$  represents the angle formed by acceptor (A), donor (D) and hydrogen (H) ( $\angle ADH$ ).

| PDB ID | Residue A | Atom A | Residue B | Atom B | Distance (Å) |
|--------|-----------|--------|-----------|--------|--------------|
| 6DC4   | H_HIS_35  | NE2    | H_GLU_52  | OE2    | 2.774        |
| 6DC4   | H_ARG_38  | NH1    | H_ASP_86  | OD1    | 2.825        |
| 6DC4   | H_ARG_38  | NH2    | H_GLU_46  | OE1    | 3.316        |
| 6DC4   | H_ARG_38  | NH2    | H_ASP_86  | OD1    | 3.824        |
| 6DC4   | H_LYS_62  | NZ     | H_GLU_46  | OE1    | 3.857        |
| 6DC4   | H_LYS_62  | NZ     | H_GLU_46  | OE2    | 2.772        |
| 6DC4   | H_ARG_66  | NH1    | H_ASP_86  | OD1    | 3.550        |
| 6DC4   | H_ARG_66  | NH1    | H_ASP_86  | OD2    | 2.921        |
| 6DC4   | H_ARG_66  | NH2    | H_ASP_86  | OD1    | 2.875        |
| 6DC4   | H_ARG_66  | NH2    | H_ASP_86  | OD2    | 3.553        |
| 6DC4   | H_LYS_143 | NZ     | H_ASP_144 | OD1    | 2.940        |
| 6DC4   | H_LYS_143 | NZ     | H_ASP_144 | OD2    | 2.949        |
| 6DC4   | H_LYS_209 | NZ     | L_GLU_123 | OE1    | 3.056        |
| 6DC4   | H_LYS_210 | NZ     | H_GLU_212 | OE2    | 2.245        |
| 6DC4   | L_ARG_24  | NH2    | L_ASP_70  | OD1    | 2.900        |
| 6DC4   | L_ARG_24  | NH2    | L_ASP_70  | OD2    | 3.578        |
| 6DC4   | L_ARG_61  | NH2    | L_GLU_81  | OE2    | 3.633        |
| 6DC4   | L_ARG_61  | NH2    | L_ASP_82  | OD1    | 2.855        |
| 6DC4   | L_ARG_61  | NH2    | L_ASP_82  | OD2    | 3.416        |

Table 808: 6DC4-specific salt bridging networks analysis. In this table, a PDB file is specified with a four-letter PDB ID, except that the names of the PDB files corresponding to the single NMR structural model split from the NMR ensemble is specified with a four-letter PDB ID in addition to a hyphen followed by the single NMR structural model numeric ID, the residue naming scheme is **Chain ID** **residue name** **residue number**,  $\angle ADH$  represents the angle formed by acceptor (A), donor (D) and hydrogen (H) ( $\angle ADH$ ).

| PDB ID | Residue A | Atom A | Residue B  | Atom B | Distance (Å) |
|--------|-----------|--------|------------|--------|--------------|
| 6DC5   | A_ARG_49  | NH2    | A_ASP_368  | OD1    | 3.110        |
| 6DC5   | A_LYS_85  | NZ     | A_GLU_82   | OE1    | 3.470        |
| 6DC5   | A_LYS_87  | NZ     | A_ASP_84   | OD1    | 3.601        |
| 6DC5   | A_LYS_156 | NZ     | D_GLU_463  | OE1    | 3.876        |
| 6DC5   | A_LYS_166 | NZ     | A_GLU_163  | OE1    | 3.173        |
| 6DC5   | A_LYS_166 | NZ     | A_GLU_163  | OE2    | 3.169        |
| 6DC5   | A_LYS_168 | NZ     | A_GLU_294  | OE1    | 3.265        |
| 6DC5   | A_LYS_176 | NZ     | A_ASP_263  | OD2    | 2.052        |
| 6DC5   | A_LYS_191 | NZ     | A_GLU_60   | OE1    | 3.950        |
| 6DC5   | A_LYS_196 | NZ     | A_ASP_200  | OD2    | 2.872        |
| 6DC5   | A_LYS_196 | NZ     | A_GLU_295  | OE1    | 2.434        |
| 6DC5   | A_LYS_196 | NZ     | A_GLU_295  | OE2    | 3.186        |
| 6DC5   | A_LYS_226 | NZ     | A_GLU_222  | OE2    | 3.817        |
| 6DC5   | A_ARG_229 | NH1    | A_GLU_256  | OE1    | 3.604        |
| 6DC5   | A_ARG_229 | NH1    | A_GLU_256  | OE2    | 2.958        |
| 6DC5   | A_ARG_229 | NH2    | A_GLU_256  | OE1    | 2.962        |
| 6DC5   | A_ARG_229 | NH2    | A_GLU_256  | OE2    | 3.782        |
| 6DC5   | A_ARG_235 | NH1    | A_GLU_232  | OE1    | 2.605        |
| 6DC5   | A_ARG_235 | NH1    | A_GLU_232  | OE2    | 2.938        |
| 6DC5   | A_ARG_336 | NH2    | A_ASP_338  | OD1    | 3.564        |
| 6DC5   | A_ARG_336 | NH2    | A_ASP_338  | OD2    | 2.679        |
| 6DC5   | A_ARG_364 | NH1    | A_ASP_310  | OD1    | 2.528        |
| 6DC5   | A_ARG_364 | NH2    | A_ASP_310  | OD1    | 3.947        |
| 6DC5   | A_LYS_394 | NZ     | A_ASP_489  | OD1    | 2.355        |
| 6DC5   | A_LYS_394 | NZ     | A_ASP_489  | OD2    | 3.843        |
| 6DC5   | A_LYS_399 | NZ     | G_GLU_497  | OE2    | 2.871        |
| 6DC5   | A_LYS_427 | NZ     | A_ASP_448  | OD1    | 3.250        |
| 6DC5   | A_LYS_427 | NZ     | A_ASP_448  | OD2    | 2.579        |
| 6DC5   | A_LYS_461 | NZ     | A_ASP_448  | OD1    | 2.319        |
| 6DC5   | A_LYS_498 | NZ     | A_GLU_487  | OE1    | 3.625        |
| 6DC5   | A_LYS_498 | NZ     | A_GLU_487  | OE2    | 2.810        |
| 6DC5   | D_LYS_42  | NZ     | D_GLU_31   | OE2    | 3.526        |
| 6DC5   | D_ARG_49  | NH2    | D_ASP_368  | OD1    | 2.868        |
| 6DC5   | D_LYS_75  | NZ     | G_GLU_218  | OE2    | 2.912        |
| 6DC5   | D_LYS_85  | NZ     | D_GLU_82   | OE1    | 3.435        |
| 6DC5   | D_LYS_166 | NZ     | D_GLU_163  | OE1    | 3.454        |
| 6DC5   | D_LYS_166 | NZ     | D_GLU_163  | OE2    | 3.601        |
| 6DC5   | D_LYS_168 | NZ     | D_GLU_294  | OE1    | 3.339        |
| 6DC5   | D_LYS_168 | NZ     | D_GLU_294  | OE2    | 3.380        |
| 6DC5   | D_LYS_176 | NZ     | D_ASP_263  | OD1    | 3.729        |
| 6DC5   | D_LYS_176 | NZ     | D_ASP_263  | OD2    | 2.442        |
| 6DC5   | D_LYS_196 | NZ     | D_ASP_200  | OD2    | 2.508        |
| 6DC5   | D_LYS_196 | NZ     | D_GLU_295  | OE1    | 2.680        |
| 6DC5   | D_LYS_196 | NZ     | D_GLU_295  | OE2    | 3.385        |
| 6DC5   | D_LYS_209 | NZ     | E_GLU_53   | OE2    | 3.142        |
| 6DC5   | D_LYS_209 | NZ     | E_ASP_100G | OD2    | 3.755        |
| 6DC5   | D_LYS_226 | NZ     | D_GLU_222  | OE2    | 3.264        |
| 6DC5   | D_ARG_229 | NH1    | D_GLU_256  | OE1    | 3.363        |
| 6DC5   | D_ARG_229 | NH1    | D_GLU_256  | OE2    | 3.131        |
| 6DC5   | D_ARG_229 | NH2    | D_GLU_256  | OE1    | 3.395        |
| 6DC5   | D_ARG_235 | NH1    | D_GLU_232  | OE1    | 3.378        |
| 6DC5   | D_ARG_235 | NH1    | D_GLU_232  | OE2    | 2.564        |
| 6DC5   | D_ARG_336 | NH2    | D_ASP_338  | OD1    | 3.496        |
| 6DC5   | D_ARG_336 | NH2    | D_ASP_338  | OD2    | 2.373        |
| 6DC5   | D_ARG_364 | NH1    | D_ASP_310  | OD1    | 2.428        |
| 6DC5   | D_ARG_364 | NH2    | D_ASP_310  | OD1    | 3.463        |
| 6DC5   | D_LYS_394 | NZ     | D_ASP_489  | OD1    | 2.520        |

|      |           |     |            |     |       |
|------|-----------|-----|------------|-----|-------|
| 6DC5 | D_LYS_427 | NZ  | D_ASP_448  | OD1 | 3.113 |
| 6DC5 | D_LYS_427 | NZ  | D_ASP_448  | OD2 | 2.130 |
| 6DC5 | D_LYS_433 | NZ  | D_ASP_440  | OD2 | 3.766 |
| 6DC5 | G_ARG_49  | NH2 | G_ASP_368  | OD1 | 3.771 |
| 6DC5 | G_LYS_68  | NZ  | G_GLU_66   | OE2 | 3.905 |
| 6DC5 | G_LYS_77  | NZ  | A_GLU_222  | OE2 | 3.675 |
| 6DC5 | G_LYS_85  | NZ  | G_GLU_82   | OE1 | 2.899 |
| 6DC5 | G_LYS_87  | NZ  | G_ASP_84   | OD1 | 3.393 |
| 6DC5 | G_LYS_166 | NZ  | G_GLU_163  | OE1 | 3.829 |
| 6DC5 | G_LYS_166 | NZ  | G_GLU_163  | OE2 | 3.728 |
| 6DC5 | G_LYS_168 | NZ  | G_GLU_294  | OE1 | 3.141 |
| 6DC5 | G_LYS_176 | NZ  | G_ASP_263  | OD1 | 3.769 |
| 6DC5 | G_LYS_176 | NZ  | G_ASP_263  | OD2 | 2.528 |
| 6DC5 | G_LYS_191 | NZ  | G_GLU_60   | OE1 | 3.637 |
| 6DC5 | G_LYS_191 | NZ  | G_GLU_60   | OE2 | 2.059 |
| 6DC5 | G_LYS_196 | NZ  | G_GLU_295  | OE1 | 3.725 |
| 6DC5 | G_LYS_196 | NZ  | G_GLU_295  | OE2 | 2.152 |
| 6DC5 | G_LYS_209 | NZ  | H_GLU_53   | OE2 | 3.533 |
| 6DC5 | G_LYS_209 | NZ  | H_ASP_100G | OD2 | 3.715 |
| 6DC5 | G_ARG_229 | NH1 | G_GLU_256  | OE1 | 3.620 |
| 6DC5 | G_ARG_229 | NH1 | G_GLU_256  | OE2 | 2.755 |
| 6DC5 | G_ARG_229 | NH2 | G_GLU_256  | OE1 | 2.678 |
| 6DC5 | G_ARG_229 | NH2 | G_GLU_256  | OE2 | 3.180 |
| 6DC5 | G_ARG_235 | NH1 | G_GLU_232  | OE1 | 3.701 |
| 6DC5 | G_ARG_235 | NH1 | G_GLU_232  | OE2 | 2.639 |
| 6DC5 | G_ARG_336 | NH2 | G_ASP_338  | OD1 | 3.302 |
| 6DC5 | G_ARG_364 | NH1 | G_ASP_310  | OD1 | 2.671 |
| 6DC5 | G_ARG_364 | NH2 | G_ASP_310  | OD1 | 2.918 |
| 6DC5 | G_LYS_399 | NZ  | D_GLU_497  | OE1 | 3.390 |
| 6DC5 | G_LYS_399 | NZ  | D_GLU_497  | OE2 | 2.804 |
| 6DC5 | G_LYS_461 | NZ  | G_ASP_448  | OD1 | 3.243 |
| 6DC5 | B_LYS_12  | NZ  | B_GLU_10   | OE1 | 3.494 |
| 6DC5 | B_HIS_35  | NE2 | B_GLU_52   | OE2 | 2.642 |
| 6DC5 | B_ARG_38  | NH1 | B_ASP_86   | OD1 | 3.077 |
| 6DC5 | B_ARG_38  | NH2 | B_GLU_46   | OE1 | 3.245 |
| 6DC5 | B_LYS_62  | NZ  | B_GLU_46   | OE2 | 3.113 |
| 6DC5 | B_ARG_66  | NH1 | B_ASP_86   | OD1 | 3.647 |
| 6DC5 | B_ARG_66  | NH1 | B_ASP_86   | OD2 | 3.361 |
| 6DC5 | B_ARG_66  | NH2 | B_ASP_86   | OD1 | 2.784 |
| 6DC5 | B_ARG_66  | NH2 | B_ASP_86   | OD2 | 3.528 |
| 6DC5 | B_LYS_143 | NZ  | B_ASP_144  | OD1 | 3.448 |
| 6DC5 | B_LYS_143 | NZ  | B_ASP_144  | OD2 | 3.641 |
| 6DC5 | B_LYS_209 | NZ  | C_GLU_123  | OE1 | 2.374 |
| 6DC5 | B_LYS_209 | NZ  | C_GLU_123  | OE2 | 3.312 |
| 6DC5 | B_LYS_210 | NZ  | B_GLU_212  | OE2 | 2.833 |
| 6DC5 | C_ARG_61  | NH2 | C_GLU_81   | OE2 | 3.401 |
| 6DC5 | C_ARG_61  | NH2 | C_ASP_82   | OD1 | 3.387 |
| 6DC5 | C_ARG_61  | NH2 | C_ASP_82   | OD2 | 3.483 |
| 6DC5 | E_LYS_12  | NZ  | E_GLU_10   | OE1 | 3.386 |
| 6DC5 | E_HIS_35  | NE2 | E_GLU_52   | OE2 | 3.002 |
| 6DC5 | E_ARG_38  | NH1 | E_ASP_86   | OD1 | 3.042 |
| 6DC5 | E_ARG_38  | NH2 | E_GLU_46   | OE1 | 3.298 |
| 6DC5 | E_LYS_62  | NZ  | E_GLU_46   | OE1 | 3.343 |
| 6DC5 | E_LYS_62  | NZ  | E_GLU_46   | OE2 | 2.685 |
| 6DC5 | E_ARG_66  | NH1 | E_ASP_86   | OD1 | 3.530 |
| 6DC5 | E_ARG_66  | NH1 | E_ASP_86   | OD2 | 3.256 |
| 6DC5 | E_ARG_66  | NH2 | E_ASP_86   | OD1 | 2.815 |
| 6DC5 | E_ARG_66  | NH2 | E_ASP_86   | OD2 | 3.601 |

|      |           |     |           |     |       |
|------|-----------|-----|-----------|-----|-------|
| 6DC5 | E.LYS_143 | NZ  | E.ASP_144 | OD1 | 3.756 |
| 6DC5 | E.LYS_143 | NZ  | E.ASP_144 | OD2 | 3.843 |
| 6DC5 | E.LYS_209 | NZ  | F.GLU_123 | OE1 | 3.793 |
| 6DC5 | E.LYS_210 | NZ  | E.GLU_212 | OE2 | 3.622 |
| 6DC5 | F_ARG_24  | NH1 | F.ASP_70  | OD1 | 3.764 |
| 6DC5 | F_ARG_24  | NH2 | F.ASP_70  | OD1 | 2.904 |
| 6DC5 | F_ARG_24  | NH2 | F.ASP_70  | OD2 | 2.994 |
| 6DC5 | F_ARG_61  | NH2 | F.GLU_81  | OE2 | 3.917 |
| 6DC5 | F_ARG_61  | NH2 | F.ASP_82  | OD1 | 2.920 |
| 6DC5 | F_ARG_61  | NH2 | F.ASP_82  | OD2 | 3.281 |
| 6DC5 | F.LYS_103 | NZ  | F.ASP_105 | OD1 | 3.853 |
| 6DC5 | F.LYS_107 | NZ  | F.GLU_17  | OE1 | 3.389 |
| 6DC5 | F.LYS_107 | NZ  | F.GLU_17  | OE2 | 3.533 |
| 6DC5 | H.HIS_35  | NE2 | H.GLU_52  | OE2 | 2.720 |
| 6DC5 | H_ARG_38  | NH1 | H.ASP_86  | OD1 | 3.016 |
| 6DC5 | H_ARG_38  | NH2 | H.GLU_46  | OE1 | 3.352 |
| 6DC5 | H_ARG_38  | NH2 | H.ASP_86  | OD1 | 3.965 |
| 6DC5 | H.LYS_62  | NZ  | H.GLU_46  | OE1 | 3.843 |
| 6DC5 | H.LYS_62  | NZ  | H.GLU_46  | OE2 | 2.697 |
| 6DC5 | H_ARG_66  | NH1 | H.ASP_86  | OD1 | 3.199 |
| 6DC5 | H_ARG_66  | NH1 | H.ASP_86  | OD2 | 2.905 |
| 6DC5 | H_ARG_66  | NH2 | H.ASP_86  | OD1 | 3.432 |
| 6DC5 | H.LYS_143 | NZ  | H.ASP_144 | OD1 | 3.438 |
| 6DC5 | H.LYS_143 | NZ  | H.ASP_    | OD2 | 3.755 |
| 6DC5 | H.LYS_    | NZ  | I.GLU_    | OE1 | 2.846 |
| 6DC5 | H.LYS_    | NZ  | I.ASP_    | OD1 | 3.400 |
| 6DC5 | H.LYS_    | NZ  | I.ASP_    | OD2 | 3.825 |
| 6DC5 | I_ARG_24  | NH1 | I.ASP_70  | OD2 | 3.681 |
| 6DC5 | I_ARG_61  | NH2 | I.ASP_82  | OD1 | 2.828 |
| 6DC5 | I_ARG_61  | NH2 | I.ASP_82  | OD2 | 3.083 |
| 6DC5 | I.LYS_107 | NZ  | I.GLU_17  | OE1 | 3.661 |
| 6DC5 | I.LYS_107 | NZ  | I.GLU_17  | OE2 | 3.133 |
| 6DC5 | I.LYS_149 | NZ  | I.GLU_195 | OE1 | 3.809 |

Table 809: 6DC5-specific salt bridging networks analysis. In this table, a PDB file is specified with a four-letter PDB ID, except that the names of the PDB files corresponding to the single NMR structural model split from the NMR ensemble is specified with a four-letter PDB ID in addition to a hyphen followed by the single NMR structural model numeric ID, the residue naming scheme is **Chain ID\_residue name\_residue number**,  $\angle ADH$  represents the angle formed by acceptor (A), donor (D) and hydrogen (H) ( $\angle ADH$ ).

| PDB ID | Residue A | Atom A | Residue B | Atom B | Distance (Å) |
|--------|-----------|--------|-----------|--------|--------------|
| 6DCV   | L_ARG_18  | NH2    | L_ASP_76  | OD1    | 3.175        |
| 6DCV   | L_ARG_61  | NH1    | L_ASP_82  | OD1    | 3.860        |
| 6DCV   | L_ARG_61  | NH1    | L_ASP_82  | OD2    | 2.769        |
| 6DCV   | L_ARG_61  | NH2    | L_ASP_82  | OD1    | 2.985        |
| 6DCV   | L_ARG_61  | NH2    | L_ASP_82  | OD2    | 3.307        |
| 6DCV   | L_LYS_149 | NZ     | L_GLU_195 | OE1    | 2.823        |
| 6DCV   | L_LYS_149 | NZ     | L_GLU_195 | OE2    | 3.954        |
| 6DCV   | L_LYS_183 | NZ     | L_GLU_187 | OE2    | 2.410        |
| 6DCV   | L_LYS_188 | NZ     | L_ASP_185 | OD1    | 3.076        |
| 6DCV   | L_HIS_189 | ND1    | L_ASP_151 | OD2    | 3.050        |
| 6DCV   | H_ARG_12  | NH1    | H_GLU_10  | OE1    | 3.321        |
| 6DCV   | H_ARG_12  | NH2    | H_GLU_10  | OE1    | 3.424        |
| 6DCV   | H_LYS_43  | NZ     | L_ASP_9   | OD1    | 3.193        |
| 6DCV   | H_ARG_58  | NH1    | H_ASP_56  | OD1    | 3.128        |
| 6DCV   | H_ARG_58  | NH1    | H_ASP_56  | OD2    | 3.930        |
| 6DCV   | H_HIS_66  | ND1    | H_ASP_86  | OD1    | 3.802        |
| 6DCV   | H_HIS_66  | NE2    | H_ASP_86  | OD2    | 3.695        |
| 6DCV   | H_ARG_94  | NH2    | H_ASP_101 | OD1    | 3.792        |
| 6DCV   | H_ARG_94  | NH2    | H_ASP_101 | OD2    | 3.895        |
| 6DCV   | H_ARG_98  | NH1    | H_ASP_96  | OD2    | 3.931        |
| 6DCV   | H_ARG_98  | NH2    | H_ASP_31  | OD2    | 3.613        |
| 6DCV   | H_LYS_145 | NZ     | H_ASP_146 | OD1    | 3.176        |
| 6DCV   | H_LYS_145 | NZ     | H_ASP_146 | OD2    | 2.821        |
| 6DCV   | H_LYS_221 | NZ     | L_GLU_123 | OE1    | 3.166        |
| 6DCV   | H_ARG_222 | NH1    | H_GLU_226 | OE2    | 3.915        |
| 6DCV   | A_ARG_18  | NH2    | A_ASP_76  | OD1    | 2.925        |
| 6DCV   | A_ARG_61  | NH1    | A_ASP_82  | OD1    | 3.927        |
| 6DCV   | A_ARG_61  | NH1    | A_ASP_82  | OD2    | 2.798        |
| 6DCV   | A_ARG_61  | NH2    | A_ASP_82  | OD1    | 2.940        |
| 6DCV   | A_ARG_61  | NH2    | A_ASP_82  | OD2    | 3.262        |
| 6DCV   | A_LYS_149 | NZ     | A_GLU_195 | OE1    | 2.726        |
| 6DCV   | A_HIS_189 | ND1    | A_ASP_151 | OD2    | 3.062        |
| 6DCV   | B_ARG_12  | NH1    | B_GLU_10  | OE1    | 3.306        |
| 6DCV   | B_ARG_12  | NH2    | B_GLU_10  | OE1    | 3.831        |
| 6DCV   | B_LYS_13  | NZ     | B_GLU_16  | OE2    | 3.930        |
| 6DCV   | B_LYS_43  | NZ     | A_ASP_9   | OD1    | 3.127        |
| 6DCV   | B_ARG_58  | NH1    | B_ASP_56  | OD1    | 3.719        |
| 6DCV   | B_ARG_58  | NH1    | B_ASP_56  | OD2    | 3.964        |
| 6DCV   | B_ARG_58  | NH2    | B_ASP_56  | OD2    | 3.300        |
| 6DCV   | B_HIS_66  | NE2    | B_ASP_86  | OD1    | 2.995        |
| 6DCV   | B_HIS_66  | NE2    | B_ASP_86  | OD2    | 3.037        |
| 6DCV   | B_ARG_94  | NH2    | B_ASP_101 | OD1    | 3.995        |
| 6DCV   | B_ARG_94  | NH2    | B_ASP_101 | OD2    | 3.590        |
| 6DCV   | B_ARG_98  | NH2    | B_ASP_31  | OD2    | 3.052        |
| 6DCV   | B_LYS_145 | NZ     | B_ASP_146 | OD1    | 3.023        |
| 6DCV   | B_LYS_145 | NZ     | B_ASP_146 | OD2    | 2.799        |
| 6DCV   | B_LYS_221 | NZ     | A_GLU_123 | OE1    | 3.096        |

---

Table 810: 6DCV-specific salt bridging networks analysis. In this table, a PDB file is specified with a four-letter PDB ID, except that the names of the PDB files corresponding to the single NMR structural model split from the NMR ensemble is specified with a four-letter PDB ID in addition to a hyphen followed by the single NMR structural model numeric ID, the residue naming scheme is **Chain ID\_residue name\_residue number**,  $\angle ADH$  represents the angle formed by acceptor (A), donor (D) and hydrogen (H) ( $\angle ADH$ ).

| PDB ID | Residue A | Atom A | Residue B | Atom B | Distance (Å) |
|--------|-----------|--------|-----------|--------|--------------|
| 6DCW   | L_ARG_18  | NH1    | L_ASP_76  | OD1    | 3.895        |
| 6DCW   | L_ARG_54  | NH2    | L_ASP_60  | OD1    | 3.555        |
| 6DCW   | L_ARG_61  | NH1    | L_ASP_82  | OD1    | 3.666        |
| 6DCW   | L_ARG_61  | NH1    | L_ASP_82  | OD2    | 2.742        |
| 6DCW   | L_ARG_61  | NH2    | L_ASP_82  | OD1    | 2.952        |
| 6DCW   | L_ARG_61  | NH2    | L_ASP_82  | OD2    | 3.481        |
| 6DCW   | L_LYS_188 | NZ     | L_ASP_185 | OD1    | 2.731        |
| 6DCW   | L_HIS_189 | ND1    | L_ASP_151 | OD2    | 3.503        |
| 6DCW   | H_ARG_12  | NH1    | H_GLU_10  | OE1    | 3.120        |
| 6DCW   | H_ARG_12  | NH2    | H_GLU_10  | OE1    | 3.789        |
| 6DCW   | H_LYS_43  | NZ     | L_ASP_9   | OD1    | 3.018        |
| 6DCW   | H_ARG_58  | NH2    | H_ASP_56  | OD1    | 3.918        |
| 6DCW   | H_ARG_58  | NH2    | H_ASP_56  | OD2    | 2.896        |
| 6DCW   | H_HIS_66  | NE2    | H_ASP_86  | OD1    | 3.111        |
| 6DCW   | H_HIS_66  | NE2    | H_ASP_86  | OD2    | 2.753        |
| 6DCW   | H_ARG_94  | NH2    | H_ASP_101 | OD1    | 3.488        |
| 6DCW   | H_ARG_98  | NH1    | H_ASP_31  | OD2    | 3.894        |
| 6DCW   | H_ARG_98  | NH2    | H_ASP_96  | OD1    | 3.809        |
| 6DCW   | H_ARG_98  | NH2    | H_ASP_96  | OD2    | 3.209        |
| 6DCW   | H_LYS_145 | NZ     | H_ASP_146 | OD1    | 3.440        |
| 6DCW   | H_LYS_145 | NZ     | H_ASP_146 | OD2    | 3.529        |
| 6DCW   | T_LYS_317 | NZ     | H_ASP_54  | OD1    | 3.849        |
| 6DCW   | T_LYS_317 | NZ     | H_ASP_54  | OD2    | 2.833        |
| 6DCW   | T_LYS_317 | NZ     | H_ASP_56  | OD2    | 2.597        |

Table 811: 6DCW-specific salt bridging networks analysis. In this table, a PDB file is specified with a four-letter PDB ID, except that the names of the PDB files corresponding to the single NMR structural model split from the NMR ensemble is specified with a four-letter PDB ID in addition to a hyphen followed by the single NMR structural model numeric ID, the residue naming scheme is **Chain ID\_residue name\_residue number**,  $\angle ADH$  represents the angle formed by acceptor (A), donor (D) and hydrogen (H) ( $\angle ADH$ ).



| PDB ID | Residue A | Atom A | Residue B | Atom B | Distance (Å) |
|--------|-----------|--------|-----------|--------|--------------|
| 6DDM   | A_ARG_61  | NH2    | A_GLU_81  | OE2    | 2.977        |
| 6DDM   | A_ARG_61  | NH2    | A_ASP_82  | OD1    | 2.747        |
| 6DDM   | A_ARG_61  | NH2    | A_ASP_82  | OD2    | 3.496        |
| 6DDM   | A_LYS_103 | NZ     | A_GLU_165 | OE1    | 2.802        |
| 6DDM   | A_LYS_103 | NZ     | A_GLU_165 | OE2    | 3.912        |
| 6DDM   | A_LYS_149 | NZ     | A_GLU_195 | OE1    | 2.933        |
| 6DDM   | A_ARG_211 | NH1    | A_GLU_187 | OE1    | 3.736        |
| 6DDM   | C_ARG_213 | NH2    | C_GLU_277 | OE2    | 3.529        |
| 6DDM   | C_ARG_279 | NH1    | C_GLU_276 | OE1    | 2.719        |
| 6DDM   | C_ARG_279 | NH2    | C_ASP_242 | OD2    | 2.805        |
| 6DDM   | B_LYS_62  | NZ     | A_GLU_1   | OE1    | 3.434        |
| 6DDM   | B_LYS_62  | NZ     | A_GLU_1   | OE2    | 2.992        |
| 6DDM   | B_LYS_66  | NZ     | B_ASP_86  | OD1    | 3.688        |
| 6DDM   | B_LYS_66  | NZ     | B_ASP_86  | OD2    | 2.870        |
| 6DDM   | B_LYS_143 | NZ     | B_ASP_144 | OD1    | 3.301        |
| 6DDM   | B_LYS_143 | NZ     | B_ASP_144 | OD2    | 3.964        |
| 6DDM   | B_LYS_210 | NZ     | B_GLU_212 | OE2    | 3.002        |

Table 812: 6DDM-specific salt bridging networks analysis. In this table, a PDB file is specified with a four-letter PDB ID, except that the names of the PDB files corresponding to the single NMR structural model split from the NMR ensemble is specified with a four-letter PDB ID in addition to a hyphen followed by the single NMR structural model numeric ID, the residue naming scheme is **Chain ID\_residue name\_residue number**,  $\angle ADH$  represents the angle formed by acceptor (A), donor (D) and hydrogen (H) ( $\angle ADH$ ).

| PDB ID | Residue A | Atom A | Residue B | Atom B | Distance (Å) |
|--------|-----------|--------|-----------|--------|--------------|
| 6DDR   | A_ARG_61  | NH2    | A_GLU_81  | OE2    | 3.323        |
| 6DDR   | A_ARG_61  | NH2    | A_ASP_82  | OD1    | 2.814        |
| 6DDR   | A_ARG_61  | NH2    | A_ASP_82  | OD2    | 3.435        |
| 6DDR   | A_LYS_103 | NZ     | A_GLU_165 | OE1    | 2.937        |
| 6DDR   | A_LYS_103 | NZ     | A_GLU_165 | OE2    | 3.642        |
| 6DDR   | A_LYS_149 | NZ     | A_GLU_195 | OE1    | 3.062        |
| 6DDR   | A_LYS_149 | NZ     | A_GLU_195 | OE2    | 3.956        |
| 6DDR   | A_HIS_189 | ND1    | A_ASP_151 | OD2    | 2.733        |
| 6DDR   | A_HIS_189 | NE2    | A_ASP_185 | OD1    | 3.597        |
| 6DDR   | B_LYS_38  | NZ     | B_ASP_85  | OD2    | 3.921        |
| 6DDR   | B_ARG_40  | NH1    | B_ASP_85  | OD1    | 2.696        |
| 6DDR   | B_ARG_40  | NH2    | B_GLU_46  | OE1    | 2.989        |
| 6DDR   | B_ARG_40  | NH2    | B_ASP_85  | OD1    | 3.981        |
| 6DDR   | B_LYS_66  | NZ     | B_ASP_86  | OD1    | 3.678        |
| 6DDR   | B_LYS_66  | NZ     | B_ASP_86  | OD2    | 2.732        |
| 6DDR   | B_LYS_143 | NZ     | B_ASP_144 | OD1    | 3.277        |
| 6DDR   | B_LYS_143 | NZ     | B_ASP_144 | OD2    | 2.811        |
| 6DDR   | B_LYS_209 | NZ     | A_GLU_123 | OE1    | 3.270        |
| 6DDR   | B_LYS_210 | NZ     | B_GLU_212 | OE1    | 3.192        |
| 6DDR   | C_ARG_213 | NH1    | C_GLU_277 | OE2    | 3.507        |
| 6DDR   | C_ARG_213 | NH2    | C_GLU_277 | OE2    | 2.893        |
| 6DDR   | C_HIS_248 | NE2    | C_ASP_249 | OD1    | 3.810        |
| 6DDR   | C_ARG_279 | NH2    | C_ASP_242 | OD1    | 3.644        |
| 6DDR   | C_ARG_279 | NH2    | C_ASP_242 | OD2    | 2.939        |

Table 813: 6DDR-specific salt bridging networks analysis. In this table, a PDB file is specified with a four-letter PDB ID, except that the names of the PDB files corresponding to the single NMR structural model split from the NMR ensemble is specified with a four-letter PDB ID in addition to a hyphen followed by the single NMR structural model numeric ID, the residue naming scheme is **Chain ID\_residue name\_residue number**,  $\angle ADH$  represents the angle formed by acceptor (A), donor (D) and hydrogen (H) ( $\angle ADH$ ).

| PDB ID | Residue A | Atom A | Residue B | Atom B | Distance (Å) |
|--------|-----------|--------|-----------|--------|--------------|
| 6DDV   | B.LYS_40  | NZ     | B.GLU_85  | OE1    | 3.350        |
| 6DDV   | B.LYS_62  | NZ     | B.GLU_46  | OE1    | 2.630        |
| 6DDV   | B.LYS_62  | NZ     | B.GLU_46  | OE2    | 3.425        |
| 6DDV   | B.ARG_64  | NH1    | B.ASP_65  | OD2    | 3.653        |
| 6DDV   | B.LYS_66  | NZ     | B.ASP_86  | OD1    | 3.869        |
| 6DDV   | B.LYS_66  | NZ     | B.ASP_86  | OD2    | 2.750        |
| 6DDV   | B.LYS_143 | NZ     | B.ASP_144 | OD1    | 3.440        |
| 6DDV   | B.LYS_143 | NZ     | B.ASP_144 | OD2    | 3.403        |
| 6DDV   | B.LYS_209 | NZ     | A.GLU_123 | OE1    | 3.050        |
| 6DDV   | B.LYS_209 | NZ     | A.GLU_123 | OE2    | 3.197        |
| 6DDV   | B.LYS_210 | NZ     | B.GLU_212 | OE1    | 3.943        |
| 6DDV   | B.LYS_210 | NZ     | B.GLU_212 | OE2    | 3.102        |
| 6DDV   | C.ARG_226 | NH1    | B.ASP_31  | OD1    | 3.652        |
| 6DDV   | C.ARG_226 | NH1    | B.ASP_31  | OD2    | 2.831        |
| 6DDV   | C.ARG_226 | NH2    | B.ASP_31  | OD1    | 3.123        |
| 6DDV   | C.ARG_226 | NH2    | B.ASP_31  | OD2    | 3.778        |
| 6DDV   | C.ARG_279 | NH1    | C.GLU_276 | OE1    | 3.430        |
| 6DDV   | C.ARG_279 | NH1    | C.GLU_276 | OE2    | 2.920        |
| 6DDV   | C.ARG_279 | NH2    | C.ASP_242 | OD2    | 3.431        |
| 6DDV   | A.LYS_50  | NZ     | C.ASP_255 | OD1    | 3.063        |
| 6DDV   | A.LYS_50  | NZ     | C.ASP_255 | OD2    | 3.312        |
| 6DDV   | A.ARG_61  | NH2    | A.ASP_82  | OD1    | 2.731        |
| 6DDV   | A.ARG_61  | NH2    | A.ASP_82  | OD2    | 3.820        |
| 6DDV   | A.LYS_103 | NZ     | A.GLU_165 | OE1    | 2.682        |
| 6DDV   | A.LYS_149 | NZ     | A.GLU_195 | OE1    | 2.706        |

Table 814: 6DDV-specific salt bridging networks analysis. In this table, a PDB file is specified with a four-letter PDB ID, except that the names of the PDB files corresponding to the single NMR structural model split from the NMR ensemble is specified with a four-letter PDB ID in addition to a hyphen followed by the single NMR structural model numeric ID, the residue naming scheme is **Chain ID\_residue name\_residue number**,  $\angle ADH$  represents the angle formed by acceptor (A), donor (D) and hydrogen (H) ( $\angle ADH$ ).

| PDB ID | Residue A | Atom A | Residue B | Atom B | Distance (Å) |
|--------|-----------|--------|-----------|--------|--------------|
| 6DFG   | A_LYS_168 | NZ     | A_ASP_167 | OD1    | 3.182        |
| 6DFG   | A_LYS_168 | NZ     | A_ASP_167 | OD2    | 2.721        |
| 6DFG   | A_LYS_229 | NZ     | A_GLU_83  | OE1    | 3.608        |
| 6DFG   | A_LYS_232 | NZ     | A_GLU_267 | OE1    | 3.152        |
| 6DFG   | A_LYS_232 | NZ     | A_GLU_268 | OE1    | 3.241        |
| 6DFG   | A_LYS_232 | NZ     | A_GLU_268 | OE2    | 3.886        |
| 6DFG   | A_LYS_282 | NZ     | A_GLU_275 | OE1    | 2.361        |
| 6DFG   | A_ARG_298 | NH1    | A_GLU_381 | OE1    | 3.634        |
| 6DFG   | A_ARG_298 | NH1    | A_GLU_381 | OE2    | 3.774        |
| 6DFG   | A_ARG_327 | NH2    | A_ASP_325 | OD2    | 3.456        |
| 6DFG   | A_ARG_476 | NH1    | A_ASP_474 | OD1    | 3.432        |
| 6DFG   | A_ARG_476 | NH1    | A_ASP_474 | OD2    | 3.733        |
| 6DFG   | A_ARG_480 | NH1    | A_ASP_477 | OD1    | 2.382        |
| 6DFG   | A_LYS_487 | NZ     | A_GLU_91  | OE2    | 2.524        |
| 6DFG   | A_LYS_490 | NZ     | A_GLU_492 | OE2    | 2.373        |
| 6DFG   | B_HIS_585 | ND1    | B_GLU_584 | OE1    | 3.794        |
| 6DFG   | B_HIS_585 | NE2    | A_GLU_492 | OE2    | 3.210        |
| 6DFG   | B_ARG_588 | NH2    | A_GLU_492 | OE1    | 2.981        |
| 6DFG   | B_ARG_588 | NH2    | A_GLU_492 | OE2    | 3.149        |
| 6DFG   | B_ARG_617 | NH1    | B_GLU_634 | OE1    | 3.067        |
| 6DFG   | B_ARG_617 | NH1    | B_GLU_634 | OE2    | 2.965        |
| 6DFG   | H_HIS_33  | NE2    | H_ASP_27  | OD1    | 3.974        |
| 6DFG   | H_ARG_38  | NH1    | H_ASP_86  | OD1    | 3.005        |
| 6DFG   | H_ARG_38  | NH1    | H_ASP_86  | OD2    | 3.826        |
| 6DFG   | H_ARG_38  | NH2    | H_GLU_46  | OE1    | 3.689        |
| 6DFG   | H_ARG_38  | NH2    | H_GLU_46  | OE2    | 3.014        |
| 6DFG   | H_ARG_38  | NH2    | H_ASP_86  | OD1    | 2.880        |
| 6DFG   | H_ARG_66  | NH1    | H_ASP_86  | OD2    | 3.544        |
| 6DFG   | H_ARG_94  | NH1    | H_ASP_27  | OD1    | 3.807        |
| 6DFG   | H_ARG_94  | NH1    | H_ASP_27  | OD2    | 3.737        |
| 6DFG   | H_ARG_94  | NH2    | H_ASP_101 | OD1    | 3.688        |
| 6DFG   | H_ARG_94  | NH2    | H_ASP_101 | OD2    | 2.491        |
| 6DFG   | L_ARG_31  | NH1    | A_ASP_140 | OD2    | 3.569        |
| 6DFG   | L_ARG_31  | NH2    | L_ASP_95  | OD1    | 3.542        |
| 6DFG   | L_ARG_37  | NH1    | L_ASP_82  | OD1    | 3.979        |
| 6DFG   | L_ARG_54  | NH2    | A_ASP_322 | OD2    | 3.922        |
| 6DFG   | L_ARG_61  | NH1    | L_ASP_82  | OD2    | 3.243        |
| 6DFG   | L_ARG_61  | NH2    | L_ASP_82  | OD2    | 3.425        |
| 6DFG   | L_LYS_96  | NZ     | H_ASP_50  | OD2    | 3.294        |
| 6DFG   | C_LYS_168 | NZ     | C_ASP_167 | OD1    | 3.183        |
| 6DFG   | C_LYS_168 | NZ     | C_ASP_167 | OD2    | 2.721        |
| 6DFG   | C_LYS_229 | NZ     | C_GLU_83  | OE1    | 3.608        |
| 6DFG   | C_LYS_232 | NZ     | C_GLU_267 | OE1    | 3.151        |
| 6DFG   | C_LYS_232 | NZ     | C_GLU_268 | OE1    | 3.240        |
| 6DFG   | C_LYS_232 | NZ     | C_GLU_268 | OE2    | 3.886        |
| 6DFG   | C_LYS_282 | NZ     | C_GLU_275 | OE1    | 2.361        |
| 6DFG   | C_ARG_298 | NH1    | C_GLU_381 | OE1    | 3.635        |
| 6DFG   | C_ARG_298 | NH1    | C_GLU_381 | OE2    | 3.774        |
| 6DFG   | C_ARG_327 | NH2    | C_ASP_325 | OD2    | 3.457        |
| 6DFG   | C_ARG_476 | NH1    | C_ASP_474 | OD1    | 3.431        |
| 6DFG   | C_ARG_476 | NH1    | C_ASP_474 | OD2    | 3.733        |
| 6DFG   | C_ARG_480 | NH1    | C_ASP_477 | OD1    | 2.383        |
| 6DFG   | C_LYS_487 | NZ     | C_GLU_91  | OE2    | 2.525        |
| 6DFG   | C_LYS_490 | NZ     | C_GLU_492 | OE2    | 2.372        |
| 6DFG   | E_HIS_585 | ND1    | E_GLU_584 | OE1    | 3.793        |
| 6DFG   | E_HIS_585 | NE2    | C_GLU_492 | OE2    | 3.225        |
| 6DFG   | E_ARG_588 | NH2    | C_GLU_492 | OE1    | 2.984        |

|      |           |     |           |     |       |
|------|-----------|-----|-----------|-----|-------|
| 6DFG | E_ARG_588 | NH2 | C_GLU_492 | OE2 | 3.072 |
| 6DFG | E_ARG_617 | NH1 | E_GLU_634 | OE1 | 3.067 |
| 6DFG | E_ARG_617 | NH1 | E_GLU_634 | OE2 | 2.965 |
| 6DFG | G_HIS_33  | NE2 | G_ASP_27  | OD1 | 3.974 |
| 6DFG | G_ARG_38  | NH1 | G_ASP_86  | OD1 | 3.004 |
| 6DFG | G_ARG_38  | NH1 | G_ASP_86  | OD2 | 3.826 |
| 6DFG | G_ARG_38  | NH2 | G_GLU_46  | OE1 | 3.689 |
| 6DFG | G_ARG_38  | NH2 | G_GLU_46  | OE2 | 3.013 |
| 6DFG | G_ARG_38  | NH2 | G_ASP_86  | OD1 | 2.880 |
| 6DFG | G_ARG_66  | NH1 | G_ASP_86  | OD2 | 3.543 |
| 6DFG | G_ARG_94  | NH1 | G_ASP_27  | OD1 | 3.807 |
| 6DFG | G_ARG_94  | NH1 | G_ASP_27  | OD2 | 3.738 |
| 6DFG | G_ARG_94  | NH2 | G_ASP_101 | OD1 | 3.688 |
| 6DFG | G_ARG_94  | NH2 | G_ASP_101 | OD2 | 2.492 |
| 6DFG | J_ARG_31  | NH1 | C_ASP_140 | OD2 | 3.924 |
| 6DFG | J_ARG_31  | NH2 | J_ASP_95  | OD1 | 3.542 |
| 6DFG | J_ARG_37  | NH1 | J_ASP_82  | OD1 | 3.978 |
| 6DFG | J_ARG_61  | NH1 | J_ASP_82  | OD2 | 3.243 |
| 6DFG | J_ARG_61  | NH2 | J_ASP_82  | OD2 | 3.425 |
| 6DFG | J_LYS_96  | NZ  | G_ASP_50  | OD2 | 3.096 |
| 6DFG | D_LYS_168 | NZ  | D_ASP_167 | OD1 | 3.183 |
| 6DFG | D_LYS_168 | NZ  | D_ASP_167 | OD2 | 2.721 |
| 6DFG | D_LYS_229 | NZ  | D_GLU_83  | OE1 | 3.608 |
| 6DFG | D_LYS_232 | NZ  | D_GLU_267 | OE1 | 3.152 |
| 6DFG | D_LYS_232 | NZ  | D_GLU_268 | OE1 | 3.241 |
| 6DFG | D_LYS_232 | NZ  | D_GLU_268 | OE2 | 3.886 |
| 6DFG | D_LYS_282 | NZ  | D_GLU_275 | OE1 | 2.361 |
| 6DFG | D_ARG_298 | NH1 | D_GLU_381 | OE1 | 3.634 |
| 6DFG | D_ARG_298 | NH1 | D_GLU_381 | OE2 | 3.773 |
| 6DFG | D_ARG_327 | NH2 | D_ASP_325 | OD2 | 3.457 |
| 6DFG | D_ARG_476 | NH1 | D_ASP_474 | OD1 | 3.432 |
| 6DFG | D_ARG_476 | NH1 | D_ASP_474 | OD2 | 3.733 |
| 6DFG | D_ARG_480 | NH1 | D_ASP_477 | OD1 | 2.383 |
| 6DFG | D_LYS_487 | NZ  | D_GLU_91  | OE2 | 2.524 |
| 6DFG | D_LYS_490 | NZ  | D_GLU_492 | OE2 | 2.374 |
| 6DFG | F_HIS_585 | ND1 | F_GLU_584 | OE1 | 3.793 |
| 6DFG | F_HIS_585 | NE2 | D_GLU_492 | OE2 | 3.337 |
| 6DFG | F_ARG_588 | NH2 | D_GLU_492 | OE1 | 2.974 |
| 6DFG | F_ARG_588 | NH2 | D_GLU_492 | OE2 | 3.036 |
| 6DFG | F_ARG_617 | NH1 | F_GLU_634 | OE1 | 3.067 |
| 6DFG | F_ARG_617 | NH1 | F_GLU_634 | OE2 | 2.965 |
| 6DFG | I_HIS_33  | NE2 | I_ASP_27  | OD1 | 3.975 |
| 6DFG | I_ARG_38  | NH1 | I_ASP_86  | OD1 | 3.005 |
| 6DFG | I_ARG_38  | NH1 | I_ASP_86  | OD2 | 3.826 |
| 6DFG | I_ARG_38  | NH2 | I_GLU_46  | OE1 | 3.689 |
| 6DFG | I_ARG_38  | NH2 | I_GLU_46  | OE2 | 3.014 |
| 6DFG | I_ARG_38  | NH2 | I_ASP_86  | OD1 | 2.879 |
| 6DFG | I_ARG_66  | NH1 | I_ASP_86  | OD2 | 3.544 |
| 6DFG | I_ARG_94  | NH1 | I_ASP_27  | OD1 | 3.807 |
| 6DFG | I_ARG_94  | NH1 | I_ASP_27  | OD2 | 3.738 |
| 6DFG | I_ARG_94  | NH2 | I_ASP_101 | OD1 | 3.687 |
| 6DFG | I_ARG_94  | NH2 | I_ASP_101 | OD2 | 2.491 |
| 6DFG | K_ARG_31  | NH1 | D_ASP_140 | OD2 | 3.732 |
| 6DFG | K_ARG_31  | NH2 | K_ASP_95  | OD1 | 3.542 |
| 6DFG | K_ARG_37  | NH1 | K_ASP_82  | OD1 | 3.979 |
| 6DFG | K_ARG_61  | NH1 | K_ASP_82  | OD2 | 3.243 |
| 6DFG | K_ARG_61  | NH2 | K_ASP_82  | OD2 | 3.426 |
| 6DFG | K_LYS_96  | NZ  | I_ASP_50  | OD2 | 3.268 |

---

Table 815: 6DFG-specific salt bridging networks analysis. In this table, a PDB file is specified with a four-letter PDB ID, except that the names of the PDB files corresponding to the single NMR structural model split from the NMR ensemble is specified with a four-letter PDB ID in addition to a hyphen followed by the single NMR structural model numeric ID, the residue naming scheme is **Chain ID\_residue name\_residue number**,  $\angle ADH$  represents the angle formed by acceptor (A), donor (D) and hydrogen (H) ( $\angle ADH$ ).

| PDB ID | Residue A | Atom A | Residue B | Atom B | Distance (Å) |
|--------|-----------|--------|-----------|--------|--------------|
| 6DFH   | A_LYS_46  | NZ     | A_GLU_492 | OE1    | 3.414        |
| 6DFH   | A_HIS_85  | NE2    | A_GLU_87  | OE2    | 3.841        |
| 6DFH   | A_LYS_137 | NZ     | L_ASP_51  | OD2    | 2.491        |
| 6DFH   | A_ARG_192 | NH1    | D_GLU_164 | OE2    | 3.939        |
| 6DFH   | A_HIS_216 | NE2    | A_ASP_57  | OD1    | 3.108        |
| 6DFH   | A_HIS_216 | NE2    | A_ASP_57  | OD2    | 2.891        |
| 6DFH   | A_LYS_227 | NZ     | A_GLU_83  | OE1    | 3.845        |
| 6DFH   | A_LYS_227 | NZ     | A_GLU_83  | OE2    | 2.457        |
| 6DFH   | A_LYS_232 | NZ     | A_GLU_268 | OE2    | 3.725        |
| 6DFH   | A_HIS_249 | NE2    | A_GLU_482 | OE1    | 3.926        |
| 6DFH   | A_LYS_282 | NZ     | A_GLU_275 | OE1    | 3.019        |
| 6DFH   | A_LYS_282 | NZ     | A_GLU_275 | OE2    | 3.829        |
| 6DFH   | A_LYS_351 | NZ     | A_GLU_269 | OE1    | 3.844        |
| 6DFH   | A_LYS_351 | NZ     | A_GLU_269 | OE2    | 3.223        |
| 6DFH   | A_ARG_419 | NH1    | A_GLU_153 | OE1    | 2.923        |
| 6DFH   | A_ARG_419 | NH1    | A_GLU_153 | OE2    | 3.091        |
| 6DFH   | A_ARG_429 | NH2    | A_ASP_113 | OD2    | 3.911        |
| 6DFH   | A_ARG_476 | NH1    | A_GLU_102 | OE1    | 3.544        |
| 6DFH   | A_ARG_476 | NH1    | A_GLU_102 | OE2    | 2.438        |
| 6DFH   | A_ARG_476 | NH2    | A_ASP_474 | OD2    | 3.340        |
| 6DFH   | A_ARG_480 | NH1    | A_ASP_477 | OD1    | 2.443        |
| 6DFH   | A_LYS_487 | NZ     | A_ASP_47  | OD1    | 3.477        |
| 6DFH   | A_LYS_487 | NZ     | A_ASP_47  | OD2    | 2.691        |
| 6DFH   | A_LYS_487 | NZ     | A_GLU_91  | OE2    | 3.894        |
| 6DFH   | B_ARG_542 | NH1    | E_GLU_647 | OE2    | 2.777        |
| 6DFH   | B_LYS_574 | NZ     | A_ASP_107 | OD1    | 3.419        |
| 6DFH   | B_LYS_574 | NZ     | A_ASP_107 | OD2    | 3.383        |
| 6DFH   | B_ARG_588 | NH2    | A_GLU_492 | OE1    | 3.118        |
| 6DFH   | B_ARG_588 | NH2    | A_GLU_492 | OE2    | 3.874        |
| 6DFH   | H_ARG_38  | NH1    | H_ASP_86  | OD1    | 3.690        |
| 6DFH   | H_ARG_38  | NH1    | H_ASP_86  | OD2    | 3.393        |
| 6DFH   | H_ARG_38  | NH2    | H_GLU_46  | OE1    | 3.255        |
| 6DFH   | H_ARG_38  | NH2    | H_ASP_86  | OD1    | 3.023        |
| 6DFH   | H_ARG_38  | NH2    | H_ASP_86  | OD2    | 3.384        |
| 6DFH   | H_ARG_66  | NH2    | H_ASP_86  | OD2    | 3.900        |
| 6DFH   | H_ARG_94  | NH1    | H_ASP_101 | OD2    | 3.387        |
| 6DFH   | L_LYS_103 | NZ     | L_ASP_85  | OD1    | 3.975        |
| 6DFH   | C_LYS_46  | NZ     | C_GLU_492 | OE1    | 3.413        |
| 6DFH   | C_HIS_85  | NE2    | C_GLU_87  | OE2    | 3.840        |
| 6DFH   | C_LYS_137 | NZ     | J_ASP_51  | OD2    | 2.536        |
| 6DFH   | C_ARG_192 | NH1    | A_GLU_164 | OE2    | 3.905        |
| 6DFH   | C_HIS_216 | NE2    | C_ASP_57  | OD1    | 3.108        |
| 6DFH   | C_HIS_216 | NE2    | C_ASP_57  | OD2    | 2.892        |
| 6DFH   | C_LYS_227 | NZ     | C_GLU_83  | OE1    | 3.845        |
| 6DFH   | C_LYS_227 | NZ     | C_GLU_83  | OE2    | 2.456        |
| 6DFH   | C_LYS_232 | NZ     | C_GLU_268 | OE2    | 3.726        |
| 6DFH   | C_HIS_249 | NE2    | C_GLU_482 | OE1    | 3.927        |
| 6DFH   | C_LYS_282 | NZ     | C_GLU_275 | OE1    | 3.018        |
| 6DFH   | C_LYS_282 | NZ     | C_GLU_275 | OE2    | 3.829        |
| 6DFH   | C_LYS_351 | NZ     | C_GLU_269 | OE1    | 3.844        |
| 6DFH   | C_LYS_351 | NZ     | C_GLU_269 | OE2    | 3.223        |
| 6DFH   | C_ARG_419 | NH1    | C_GLU_153 | OE1    | 2.923        |
| 6DFH   | C_ARG_419 | NH1    | C_GLU_153 | OE2    | 3.092        |
| 6DFH   | C_ARG_429 | NH2    | C_ASP_113 | OD2    | 3.910        |
| 6DFH   | C_ARG_476 | NH1    | C_GLU_102 | OE1    | 3.543        |
| 6DFH   | C_ARG_476 | NH1    | C_GLU_102 | OE2    | 2.438        |
| 6DFH   | C_ARG_476 | NH2    | C_ASP_474 | OD2    | 3.339        |

|      |           |     |           |     |       |
|------|-----------|-----|-----------|-----|-------|
| 6DFH | C_ARG_480 | NH1 | C_ASP_477 | OD1 | 2.443 |
| 6DFH | C_LYS_487 | NZ  | C_ASP_47  | OD1 | 3.476 |
| 6DFH | C_LYS_487 | NZ  | C_ASP_47  | OD2 | 2.691 |
| 6DFH | C_LYS_487 | NZ  | C_GLU_91  | OE2 | 3.893 |
| 6DFH | E_ARG_542 | NH1 | F_GLU_647 | OE2 | 2.777 |
| 6DFH | E_LYS_574 | NZ  | C_ASP_107 | OD1 | 3.423 |
| 6DFH | E_LYS_574 | NZ  | C_ASP_107 | OD2 | 3.381 |
| 6DFH | E_ARG_588 | NH2 | C_GLU_492 | OE1 | 3.158 |
| 6DFH | E_ARG_588 | NH2 | C_GLU_492 | OE2 | 3.904 |
| 6DFH | G_ARG_38  | NH1 | G_ASP_86  | OD1 | 3.690 |
| 6DFH | G_ARG_38  | NH1 | G_ASP_86  | OD2 | 3.393 |
| 6DFH | G_ARG_38  | NH2 | G_GLU_46  | OE1 | 3.255 |
| 6DFH | G_ARG_38  | NH2 | G_ASP_86  | OD1 | 3.022 |
| 6DFH | G_ARG_38  | NH2 | G_ASP_86  | OD2 | 3.383 |
| 6DFH | G_ARG_66  | NH2 | G_ASP_86  | OD2 | 3.900 |
| 6DFH | G_ARG_94  | NH1 | G_ASP_101 | OD2 | 3.387 |
| 6DFH | J_LYS_103 | NZ  | J_ASP_85  | OD1 | 3.976 |
| 6DFH | D_LYS_46  | NZ  | D_GLU_492 | OE1 | 3.413 |
| 6DFH | D_HIS_85  | NE2 | D_GLU_87  | OE2 | 3.840 |
| 6DFH | D_LYS_137 | NZ  | K_ASP_51  | OD2 | 2.448 |
| 6DFH | D_ARG_192 | NH1 | C_GLU_164 | OE2 | 3.902 |
| 6DFH | D_HIS_216 | NE2 | D_ASP_57  | OD1 | 3.108 |
| 6DFH | D_HIS_216 | NE2 | D_ASP_57  | OD2 | 2.891 |
| 6DFH | D_LYS_227 | NZ  | D_GLU_83  | OE1 | 3.845 |
| 6DFH | D_LYS_227 | NZ  | D_GLU_83  | OE2 | 2.456 |
| 6DFH | D_LYS_232 | NZ  | D_GLU_268 | OE2 | 3.726 |
| 6DFH | D_HIS_249 | NE2 | D_GLU_482 | OE1 | 3.926 |
| 6DFH | D_LYS_282 | NZ  | D_GLU_275 | OE1 | 3.019 |
| 6DFH | D_LYS_282 | NZ  | D_GLU_275 | OE2 | 3.830 |
| 6DFH | D_LYS_351 | NZ  | D_GLU_269 | OE1 | 3.845 |
| 6DFH | D_LYS_351 | NZ  | D_GLU_269 | OE2 | 3.223 |
| 6DFH | D_ARG_419 | NH1 | D_GLU_153 | OE1 | 2.923 |
| 6DFH | D_ARG_419 | NH1 | D_GLU_153 | OE2 | 3.092 |
| 6DFH | D_ARG_429 | NH2 | D_ASP_113 | OD2 | 3.910 |
| 6DFH | D_ARG_476 | NH1 | D_GLU_102 | OE1 | 3.543 |
| 6DFH | D_ARG_476 | NH1 | D_GLU_102 | OE2 | 2.438 |
| 6DFH | D_ARG_476 | NH2 | D_ASP_474 | OD2 | 3.339 |
| 6DFH | D_ARG_480 | NH1 | D_ASP_477 | OD1 | 2.443 |
| 6DFH | D_LYS_487 | NZ  | D_ASP_47  | OD1 | 3.476 |
| 6DFH | D_LYS_487 | NZ  | D_ASP_47  | OD2 | 2.691 |
| 6DFH | D_LYS_487 | NZ  | D_GLU_91  | OE2 | 3.894 |
| 6DFH | F_ARG_542 | NH1 | B_GLU_647 | OE2 | 2.778 |
| 6DFH | F_LYS_574 | NZ  | D_ASP_107 | OD1 | 3.408 |
| 6DFH | F_LYS_574 | NZ  | D_ASP_107 | OD2 | 3.378 |
| 6DFH | F_ARG_588 | NH2 | D_GLU_492 | OE1 | 3.059 |
| 6DFH | F_ARG_588 | NH2 | D_GLU_492 | OE2 | 3.839 |
| 6DFH | I_ARG_38  | NH1 | I_ASP_86  | OD1 | 3.691 |
| 6DFH | I_ARG_38  | NH1 | I_ASP_86  | OD2 | 3.393 |
| 6DFH | I_ARG_38  | NH2 | I_GLU_46  | OE1 | 3.255 |
| 6DFH | I_ARG_38  | NH2 | I_ASP_86  | OD1 | 3.023 |
| 6DFH | I_ARG_38  | NH2 | I_ASP_86  | OD2 | 3.383 |
| 6DFH | I_ARG_66  | NH2 | I_ASP_86  | OD2 | 3.901 |
| 6DFH | I_ARG_94  | NH1 | I_ASP_101 | OD2 | 3.386 |
| 6DFH | K_LYS_103 | NZ  | K_ASP_85  | OD1 | 3.976 |



---

Table 816: 6DFH-specific salt bridging networks analysis. In this table, a PDB file is specified with a four-letter PDB ID, except that the names of the PDB files corresponding to the single NMR structural model split from the NMR ensemble is specified with a four-letter PDB ID in addition to a hyphen followed by the single NMR structural model numeric ID, the residue naming scheme is **Chain ID\_residue name\_residue number**,  $\angle ADH$  represents the angle formed by acceptor (A), donor (D) and hydrogen (H) ( $\angle ADH$ ).

| PDB ID | Residue A | Atom A | Residue B | Atom B | Distance (Å) |
|--------|-----------|--------|-----------|--------|--------------|
| 6DG2   | A_HIS_35  | NE2    | A_GLU_50  | OE1    | 2.810        |
| 6DG2   | A_ARG_40  | NH1    | A_GLU_89  | OE2    | 3.382        |
| 6DG2   | A_ARG_40  | NH2    | A_GLU_89  | OE2    | 3.578        |
| 6DG2   | A_ARG_57  | NH1    | C_GLU_50  | OE1    | 2.686        |
| 6DG2   | A_ARG_57  | NH1    | C_GLU_50  | OE2    | 3.712        |
| 6DG2   | A_ARG_57  | NH1    | C_ASP_59  | OD1    | 3.923        |
| 6DG2   | A_ARG_57  | NH2    | C_GLU_50  | OE1    | 3.412        |
| 6DG2   | A_ARG_57  | NH2    | C_GLU_50  | OE2    | 2.876        |
| 6DG2   | A_LYS_65  | NZ     | A_GLU_62  | OE1    | 2.446        |
| 6DG2   | A_LYS_65  | NZ     | A_GLU_62  | OE2    | 3.885        |
| 6DG2   | A_LYS_67  | NZ     | A_ASP_90  | OD1    | 3.375        |
| 6DG2   | A_LYS_67  | NZ     | A_ASP_90  | OD2    | 3.355        |
| 6DG2   | A_ARG_98  | NH2    | A_ASP_106 | OD1    | 3.809        |
| 6DG2   | A_ARG_98  | NH2    | A_ASP_106 | OD2    | 2.951        |
| 6DG2   | A_LYS_148 | NZ     | A_ASP_149 | OD1    | 3.488        |
| 6DG2   | A_LYS_148 | NZ     | A_ASP_149 | OD2    | 3.887        |
| 6DG2   | A_LYS_211 | NZ     | A_ASP_213 | OD1    | 2.323        |
| 6DG2   | A_LYS_211 | NZ     | A_ASP_213 | OD2    | 3.618        |
| 6DG2   | A_LYS_215 | NZ     | A_GLU_217 | OE2    | 3.590        |
| 6DG2   | A_LYS_219 | NZ     | B_ASP_123 | OD1    | 3.620        |
| 6DG2   | A_LYS_219 | NZ     | B_ASP_123 | OD2    | 3.832        |
| 6DG2   | B_ARG_61  | NH1    | B_ASP_82  | OD1    | 3.334        |
| 6DG2   | B_ARG_61  | NH1    | B_ASP_82  | OD2    | 3.815        |
| 6DG2   | B_ARG_61  | NH2    | B_GLU_81  | OE1    | 3.510        |
| 6DG2   | B_ARG_61  | NH2    | B_ASP_82  | OD1    | 3.338        |
| 6DG2   | B_ARG_61  | NH2    | B_ASP_82  | OD2    | 3.953        |
| 6DG2   | B_LYS_104 | NZ     | B_GLU_166 | OE1    | 3.797        |
| 6DG2   | B_LYS_150 | NZ     | B_GLU_196 | OE1    | 3.711        |
| 6DG2   | B_LYS_150 | NZ     | B_GLU_196 | OE2    | 2.891        |
| 6DG2   | B_LYS_184 | NZ     | B_GLU_188 | OE1    | 3.697        |
| 6DG2   | B_LYS_184 | NZ     | B_GLU_188 | OE2    | 2.997        |
| 6DG2   | B_LYS_189 | NZ     | B_ASP_186 | OD1    | 2.377        |
| 6DG2   | C_HIS_35  | NE2    | C_GLU_50  | OE2    | 2.691        |
| 6DG2   | C_LYS_38  | NZ     | C_ASP_90  | OD2    | 3.933        |
| 6DG2   | C_ARG_40  | NH1    | C_GLU_89  | OE1    | 3.263        |
| 6DG2   | C_ARG_57  | NH1    | A_GLU_50  | OE1    | 3.739        |
| 6DG2   | C_ARG_57  | NH1    | A_GLU_50  | OE2    | 2.758        |
| 6DG2   | C_ARG_57  | NH1    | A_ASP_59  | OD1    | 3.719        |
| 6DG2   | C_ARG_57  | NH2    | A_GLU_50  | OE1    | 2.935        |
| 6DG2   | C_ARG_57  | NH2    | A_GLU_50  | OE2    | 3.488        |
| 6DG2   | C_LYS_63  | NZ     | C_GLU_46  | OE2    | 3.257        |
| 6DG2   | C_LYS_65  | NZ     | C_GLU_62  | OE1    | 3.990        |
| 6DG2   | C_LYS_67  | NZ     | C_ASP_90  | OD1    | 2.743        |
| 6DG2   | C_LYS_67  | NZ     | C_ASP_90  | OD2    | 3.331        |
| 6DG2   | C_ARG_98  | NH2    | C_ASP_106 | OD1    | 3.590        |
| 6DG2   | C_ARG_98  | NH2    | C_ASP_106 | OD2    | 2.787        |
| 6DG2   | C_LYS_148 | NZ     | C_ASP_149 | OD1    | 3.517        |
| 6DG2   | C_LYS_148 | NZ     | C_ASP_149 | OD2    | 3.956        |
| 6DG2   | C_LYS_215 | NZ     | C_GLU_217 | OE1    | 3.786        |
| 6DG2   | D_LYS_24  | NZ     | D_ASP_70  | OD1    | 3.383        |
| 6DG2   | D_LYS_39  | NZ     | D_GLU_81  | OE2    | 2.693        |
| 6DG2   | D_ARG_54  | NH1    | D_ASP_60  | OD1    | 3.820        |
| 6DG2   | D_ARG_54  | NH2    | D_ASP_60  | OD1    | 3.271        |
| 6DG2   | D_ARG_61  | NH2    | D_GLU_81  | OE1    | 3.822        |
| 6DG2   | D_ARG_61  | NH2    | D_ASP_82  | OD1    | 3.113        |
| 6DG2   | D_LYS_104 | NZ     | D_GLU_166 | OE1    | 2.780        |
| 6DG2   | D_LYS_150 | NZ     | D_GLU_196 | OE1    | 3.724        |

|      |           |    |           |     |       |
|------|-----------|----|-----------|-----|-------|
| 6DG2 | D_LYS_150 | NZ | D_GLU_196 | OE2 | 2.441 |
|------|-----------|----|-----------|-----|-------|

Table 817: 6DG2-specific salt bridging networks analysis. In this table, a PDB file is specified with a four-letter PDB ID, except that the names of the PDB files corresponding to the single NMR structural model split from the NMR ensemble is specified with a four-letter PDB ID in addition to a hyphen followed by the single NMR structural model numeric ID, the residue naming scheme is **Chain ID\_residue name\_residue number**,  $\angle ADH$  represents the angle formed by acceptor (A), donor (D) and hydrogen (H) ( $\angle ADH$ ).

| PDB ID | Residue A | Atom A | Residue B | Atom B | Distance (Å) |
|--------|-----------|--------|-----------|--------|--------------|
| 6E62   | P_LYS_307 | NZ     | P_ASP_386 | OD2    | 3.669        |
| 6E62   | P_HIS_308 | NE2    | P_ASP_386 | OD2    | 2.759        |
| 6E62   | P_HIS_324 | NE2    | P_GLU_362 | OE1    | 3.607        |
| 6E62   | P_HIS_324 | NE2    | P_GLU_362 | OE2    | 3.765        |
| 6E62   | P_HIS_330 | NE2    | P_ASP_426 | OD1    | 2.903        |
| 6E62   | P_HIS_330 | NE2    | P_ASP_426 | OD2    | 3.266        |
| 6E62   | P_LYS_394 | NZ     | P_GLU_385 | OE2    | 3.213        |
| 6E62   | P_LYS_413 | NZ     | H_ASP_100 | OD1    | 3.190        |
| 6E62   | P_LYS_413 | NZ     | H_ASP_100 | OD2    | 2.736        |
| 6E62   | P_LYS_416 | NZ     | L_ASP_51  | OD2    | 2.614        |
| 6E62   | P_LYS_417 | NZ     | P_ASP_321 | OD1    | 2.847        |
| 6E62   | H_ARG_38  | NH1    | H_GLU_46  | OE1    | 2.901        |
| 6E62   | H_ARG_38  | NH1    | H_GLU_46  | OE2    | 3.315        |
| 6E62   | H_ARG_38  | NH2    | H_ASP_86  | OD2    | 3.041        |
| 6E62   | H_LYS_64  | NZ     | H_ASP_61  | OD1    | 3.685        |
| 6E62   | H_ARG_66  | NH1    | H_ASP_86  | OD1    | 3.196        |
| 6E62   | H_ARG_66  | NH2    | H_ASP_86  | OD1    | 2.873        |
| 6E62   | H_ARG_66  | NH2    | H_ASP_86  | OD2    | 2.687        |
| 6E62   | H_ARG_94  | NH2    | H_ASP_101 | OD2    | 2.512        |
| 6E62   | H_ARG_97  | NH1    | P_ASP_347 | OD2    | 3.575        |
| 6E62   | H_ARG_97  | NH1    | H_ASP_100 | OD1    | 2.302        |
| 6E62   | H_ARG_97  | NH2    | H_ASP_100 | OD1    | 3.098        |
| 6E62   | H_LYS_143 | NZ     | L_GLU_124 | OE2    | 2.458        |
| 6E62   | H_LYS_209 | NZ     | L_GLU_123 | OE1    | 3.996        |
| 6E62   | H_LYS_209 | NZ     | L_GLU_123 | OE2    | 3.607        |
| 6E62   | H_LYS_210 | NZ     | H_GLU_212 | OE1    | 3.306        |
| 6E62   | H_LYS_210 | NZ     | H_GLU_212 | OE2    | 3.355        |
| 6E62   | L_ARG_61  | NH1    | L_ASP_82  | OD1    | 2.647        |
| 6E62   | L_ARG_61  | NH1    | L_ASP_82  | OD2    | 2.836        |
| 6E62   | L_ARG_61  | NH2    | L_ASP_82  | OD1    | 3.964        |
| 6E62   | L_LYS_110 | NZ     | L_GLU_198 | OE1    | 3.168        |
| 6E62   | L_LYS_110 | NZ     | L_GLU_198 | OE2    | 3.580        |
| 6E62   | L_HIS_188 | NE2    | L_ASP_151 | OD2    | 3.831        |
| 6E62   | A_HIS_308 | NE2    | A_ASP_386 | OD2    | 3.782        |
| 6E62   | A_HIS_324 | NE2    | A_GLU_362 | OE2    | 3.283        |
| 6E62   | A_HIS_330 | NE2    | A_ASP_426 | OD1    | 2.479        |
| 6E62   | A_HIS_330 | NE2    | A_ASP_426 | OD2    | 3.398        |
| 6E62   | A_HIS_338 | NE2    | A_GLU_333 | OE2    | 3.680        |
| 6E62   | A_LYS_394 | NZ     | A_GLU_385 | OE2    | 2.787        |
| 6E62   | A_LYS_413 | NZ     | B_ASP_100 | OD1    | 3.041        |
| 6E62   | A_LYS_413 | NZ     | B_ASP_100 | OD2    | 2.916        |
| 6E62   | A_LYS_416 | NZ     | C_ASP_51  | OD2    | 2.944        |
| 6E62   | A_LYS_417 | NZ     | A_ASP_321 | OD1    | 2.603        |
| 6E62   | B_ARG_38  | NH1    | B_GLU_46  | OE1    | 3.293        |
| 6E62   | B_ARG_38  | NH1    | B_GLU_46  | OE2    | 3.910        |
| 6E62   | B_ARG_38  | NH1    | B_ASP_86  | OD2    | 3.877        |
| 6E62   | B_ARG_38  | NH2    | B_ASP_86  | OD2    | 2.880        |
| 6E62   | B_ARG_66  | NH1    | B_ASP_86  | OD1    | 2.876        |
| 6E62   | B_ARG_66  | NH1    | B_ASP_86  | OD2    | 3.625        |
| 6E62   | B_ARG_66  | NH2    | B_ASP_86  | OD1    | 3.290        |
| 6E62   | B_ARG_66  | NH2    | B_ASP_86  | OD2    | 2.657        |
| 6E62   | B_ARG_83  | NH1    | H_GLU_1   | OE1    | 3.696        |
| 6E62   | B_ARG_83  | NH1    | H_GLU_1   | OE2    | 3.867        |
| 6E62   | B_ARG_83  | NH2    | H_GLU_1   | OE1    | 3.783        |
| 6E62   | B_ARG_83  | NH2    | H_GLU_1   | OE2    | 3.983        |
| 6E62   | B_ARG_94  | NH2    | B_ASP_101 | OD2    | 2.599        |
| 6E62   | B_ARG_97  | NH1    | B_ASP_100 | OD1    | 2.912        |

|      |           |     |           |     |       |
|------|-----------|-----|-----------|-----|-------|
| 6E62 | B_LYS_143 | NZ  | C_GLU_124 | OE2 | 2.797 |
| 6E62 | B_LYS_210 | NZ  | B_GLU_212 | OE1 | 3.652 |
| 6E62 | B_LYS_210 | NZ  | B_GLU_212 | OE2 | 2.960 |
| 6E62 | C_ARG_54  | NH1 | C_ASP_60  | OD2 | 3.657 |
| 6E62 | C_ARG_61  | NH1 | C_ASP_82  | OD2 | 3.397 |
| 6E62 | C_ARG_61  | NH2 | C_ASP_82  | OD1 | 3.278 |
| 6E62 | C_ARG_61  | NH2 | C_ASP_82  | OD2 | 2.476 |
| 6E62 | C_LYS_103 | NZ  | C_GLU_83  | OE2 | 3.303 |
| 6E62 | C_LYS_110 | NZ  | C_GLU_198 | OE1 | 2.849 |
| 6E62 | C_LYS_110 | NZ  | C_GLU_198 | OE2 | 3.942 |
| 6E62 | C_LYS_149 | NZ  | C_GLU_203 | OE1 | 2.875 |
| 6E62 | C_LYS_149 | NZ  | C_GLU_203 | OE2 | 3.215 |
| 6E62 | C_LYS_156 | NZ  | L_GLU_81  | OE2 | 3.985 |
| 6E62 | C_HIS_188 | NE2 | C_ASP_151 | OD2 | 3.860 |

Table 818: 6E62-specific salt bridging networks analysis. In this table, a PDB file is specified with a four-letter PDB ID, except that the names of the PDB files corresponding to the single NMR structural model split from the NMR ensemble is specified with a four-letter PDB ID in addition to a hyphen followed by the single NMR structural model numeric ID, the residue naming scheme is **Chain ID\_residue name\_residue number**,  $\angle ADH$  represents the angle formed by acceptor (A), donor (D) and hydrogen (H) ( $\angle ADH$ ).

| PDB ID | Residue A | Atom A | Residue B | Atom B | Distance (Å) |
|--------|-----------|--------|-----------|--------|--------------|
| 6E63   | P_LYS_307 | NZ     | P_ASP_386 | OD1    | 3.127        |
| 6E63   | P_LYS_307 | NZ     | P_ASP_386 | OD2    | 2.866        |
| 6E63   | P_HIS_308 | NE2    | P_ASP_386 | OD2    | 2.480        |
| 6E63   | P_HIS_330 | NE2    | P_ASP_426 | OD1    | 2.711        |
| 6E63   | P_LYS_394 | NZ     | P_GLU_385 | OE2    | 3.080        |
| 6E63   | P_LYS_413 | NZ     | H_ASP_100 | OD1    | 3.187        |
| 6E63   | P_LYS_413 | NZ     | H_ASP_100 | OD2    | 2.904        |
| 6E63   | P_LYS_416 | NZ     | L_ASP_51  | OD1    | 3.564        |
| 6E63   | P_LYS_416 | NZ     | L_ASP_51  | OD2    | 2.955        |
| 6E63   | H_ARG_38  | NH1    | H_GLU_46  | OE1    | 3.318        |
| 6E63   | H_ARG_38  | NH1    | H_GLU_46  | OE2    | 3.594        |
| 6E63   | H_ARG_38  | NH2    | H_ASP_86  | OD1    | 2.939        |
| 6E63   | H_LYS_64  | NZ     | H_ASP_61  | OD1    | 2.864        |
| 6E63   | H_ARG_66  | NH1    | H_ASP_86  | OD1    | 3.558        |
| 6E63   | H_ARG_66  | NH1    | H_ASP_86  | OD2    | 2.622        |
| 6E63   | H_ARG_66  | NH2    | H_ASP_86  | OD1    | 3.266        |
| 6E63   | H_ARG_66  | NH2    | H_ASP_86  | OD2    | 3.816        |
| 6E63   | H_ARG_94  | NH2    | H_ASP_101 | OD2    | 2.922        |
| 6E63   | H_ARG_97  | NH1    | P_ASP_347 | OD2    | 3.407        |
| 6E63   | H_ARG_97  | NH2    | H_ASP_100 | OD1    | 2.600        |
| 6E63   | H_LYS_143 | NZ     | L_GLU_124 | OE2    | 2.665        |
| 6E63   | H_LYS_209 | NZ     | L_GLU_123 | OE1    | 2.498        |
| 6E63   | L_LYS_17  | NZ     | B_GLU_85  | OE1    | 3.318        |
| 6E63   | L_LYS_17  | NZ     | B_GLU_85  | OE2    | 3.250        |
| 6E63   | L_ARG_61  | NH1    | L_ASP_82  | OD1    | 3.684        |
| 6E63   | L_ARG_61  | NH1    | L_ASP_82  | OD2    | 2.729        |
| 6E63   | L_ARG_61  | NH2    | L_ASP_82  | OD1    | 2.979        |
| 6E63   | L_ARG_61  | NH2    | L_ASP_82  | OD2    | 3.405        |
| 6E63   | A_LYS_307 | NZ     | A_ASP_386 | OD2    | 3.648        |
| 6E63   | A_HIS_308 | NE2    | A_ASP_386 | OD2    | 2.820        |
| 6E63   | A_HIS_330 | NE2    | A_ASP_426 | OD1    | 2.686        |
| 6E63   | A_HIS_330 | NE2    | A_ASP_426 | OD2    | 3.540        |
| 6E63   | A_LYS_394 | NZ     | A_GLU_385 | OE2    | 2.976        |
| 6E63   | A_LYS_413 | NZ     | B_ASP_100 | OD1    | 2.369        |
| 6E63   | A_LYS_413 | NZ     | B_ASP_100 | OD2    | 3.029        |
| 6E63   | A_LYS_416 | NZ     | C_ASP_51  | OD2    | 3.236        |
| 6E63   | A_LYS_417 | NZ     | A_ASP_415 | OD2    | 3.741        |
| 6E63   | B_ARG_38  | NH1    | B_GLU_46  | OE1    | 3.240        |
| 6E63   | B_ARG_38  | NH1    | B_GLU_46  | OE2    | 3.499        |
| 6E63   | B_ARG_38  | NH1    | B_ASP_86  | OD1    | 3.761        |
| 6E63   | B_ARG_38  | NH2    | B_ASP_86  | OD1    | 2.835        |
| 6E63   | B_ARG_66  | NH1    | B_ASP_86  | OD1    | 3.865        |
| 6E63   | B_ARG_66  | NH1    | B_ASP_86  | OD2    | 2.829        |
| 6E63   | B_ARG_66  | NH2    | B_ASP_86  | OD1    | 3.527        |
| 6E63   | B_ARG_66  | NH2    | B_ASP_86  | OD2    | 3.871        |
| 6E63   | B_LYS_75  | NZ     | B_ASP_72  | OD2    | 3.854        |
| 6E63   | B_ARG_83  | NH1    | L_GLU_13  | OE1    | 3.486        |
| 6E63   | B_ARG_83  | NH1    | L_GLU_13  | OE2    | 2.814        |
| 6E63   | B_ARG_94  | NH2    | B_ASP_101 | OD2    | 2.586        |
| 6E63   | B_ARG_97  | NH1    | A_ASP_347 | OD1    | 3.859        |
| 6E63   | B_ARG_97  | NH2    | B_ASP_100 | OD2    | 2.691        |
| 6E63   | B_LYS_143 | NZ     | B_ASP_144 | OD2    | 2.985        |
| 6E63   | C_ARG_61  | NH1    | C_ASP_82  | OD1    | 3.450        |
| 6E63   | C_ARG_61  | NH1    | C_ASP_82  | OD2    | 2.361        |
| 6E63   | C_ARG_61  | NH2    | C_ASP_82  | OD1    | 3.192        |
| 6E63   | C_ARG_61  | NH2    | C_ASP_82  | OD2    | 3.567        |
| 6E63   | C_LYS_103 | NZ     | C_ASP_85  | OD1    | 3.606        |

|      |           |     |           |     |       |
|------|-----------|-----|-----------|-----|-------|
| 6E63 | C_LYS_110 | NZ  | C_GLU_198 | OE2 | 2.744 |
| 6E63 | C_HIS_188 | ND1 | C_ASP_151 | OD1 | 2.608 |

Table 819: 6E63-specific salt bridging networks analysis. In this table, a PDB file is specified with a four-letter PDB ID, except that the names of the PDB files corresponding to the single NMR structural model split from the NMR ensemble is specified with a four-letter PDB ID in addition to a hyphen followed by the single NMR structural model numeric ID, the residue naming scheme is **Chain ID\_residue name\_residue number**,  $\angle ADH$  represents the angle formed by acceptor (A), donor (D) and hydrogen (H) ( $\angle ADH$ ).

| PDB ID | Residue A | Atom A | Residue B | Atom B | Distance (Å) |
|--------|-----------|--------|-----------|--------|--------------|
| 6E64   | H_ARG_38  | NH1    | H_GLU_46  | OE1    | 3.189        |
| 6E64   | H_ARG_38  | NH1    | H_GLU_46  | OE2    | 3.661        |
| 6E64   | H_ARG_38  | NH1    | H_ASP_86  | OD2    | 3.741        |
| 6E64   | H_ARG_38  | NH2    | H_ASP_86  | OD2    | 2.909        |
| 6E64   | H_ARG_66  | NH1    | H_ASP_86  | OD1    | 2.379        |
| 6E64   | H_ARG_66  | NH1    | H_ASP_86  | OD2    | 3.616        |
| 6E64   | H_ARG_66  | NH2    | H_ASP_86  | OD1    | 3.004        |
| 6E64   | H_ARG_66  | NH2    | H_ASP_86  | OD2    | 2.769        |
| 6E64   | H_ARG_83  | NH2    | H_GLU_85  | OE1    | 3.958        |
| 6E64   | H_ARG_94  | NH2    | H_ASP_101 | OD2    | 2.952        |
| 6E64   | H_ARG_97  | NH1    | H_ASP_100 | OD1    | 3.380        |
| 6E64   | H_ARG_97  | NH2    | H_ASP_100 | OD1    | 3.101        |
| 6E64   | H_LYS_143 | NZ     | L_GLU_124 | OE2    | 2.942        |
| 6E64   | H_LYS_209 | NZ     | L_GLU_123 | OE2    | 2.774        |
| 6E64   | H_LYS_210 | NZ     | H_GLU_212 | OE1    | 3.202        |
| 6E64   | H_LYS_210 | NZ     | H_GLU_212 | OE2    | 3.230        |
| 6E64   | L_ARG_54  | NH1    | L_ASP_60  | OD2    | 3.879        |
| 6E64   | L_ARG_61  | NH1    | L_ASP_82  | OD1    | 3.199        |
| 6E64   | L_ARG_61  | NH1    | L_ASP_82  | OD2    | 2.244        |
| 6E64   | L_ARG_61  | NH2    | L_GLU_81  | OE2    | 2.926        |
| 6E64   | L_ARG_61  | NH2    | L_ASP_82  | OD1    | 3.741        |
| 6E64   | L_LYS_110 | NZ     | L_GLU_198 | OE1    | 3.205        |
| 6E64   | L_LYS_110 | NZ     | L_GLU_198 | OE2    | 3.935        |
| 6E64   | L_LYS_149 | NZ     | L_GLU_203 | OE2    | 3.889        |
| 6E64   | A_ARG_38  | NH1    | A_GLU_46  | OE1    | 3.590        |
| 6E64   | A_ARG_38  | NH1    | A_GLU_46  | OE2    | 3.959        |
| 6E64   | A_ARG_38  | NH1    | A_ASP_86  | OD2    | 3.714        |
| 6E64   | A_ARG_38  | NH2    | A_ASP_86  | OD2    | 2.885        |
| 6E64   | A_ARG_66  | NH1    | A_ASP_86  | OD1    | 2.673        |
| 6E64   | A_ARG_66  | NH1    | A_ASP_86  | OD2    | 3.501        |
| 6E64   | A_ARG_66  | NH2    | A_ASP_86  | OD2    | 3.885        |
| 6E64   | A_ARG_94  | NH2    | A_ASP_101 | OD2    | 2.800        |
| 6E64   | A_ARG_97  | NH1    | A_ASP_100 | OD1    | 2.610        |
| 6E64   | A_LYS_209 | NZ     | B_GLU_123 | OE1    | 3.569        |
| 6E64   | A_LYS_209 | NZ     | B_GLU_123 | OE2    | 2.777        |
| 6E64   | A_LYS_210 | NZ     | A_GLU_212 | OE1    | 2.858        |
| 6E64   | B_ARG_54  | NH1    | B_ASP_60  | OD2    | 3.850        |
| 6E64   | B_ARG_61  | NH1    | B_ASP_82  | OD1    | 3.141        |
| 6E64   | B_ARG_61  | NH1    | B_ASP_82  | OD2    | 2.224        |
| 6E64   | B_ARG_61  | NH2    | B_GLU_81  | OE2    | 3.154        |
| 6E64   | B_LYS_110 | NZ     | B_GLU_198 | OE1    | 3.325        |

Table 820: 6E64-specific salt bridging networks analysis. In this table, a PDB file is specified with a four-letter PDB ID, except that the names of the PDB files corresponding to the single NMR structural model split from the NMR ensemble is specified with a four-letter PDB ID in addition to a hyphen followed by the single NMR structural model numeric ID, the residue naming scheme is **Chain ID\_residue name\_residue number**,  $\angle ADH$  represents the angle formed by acceptor (A), donor (D) and hydrogen (H) ( $\angle ADH$ ).



| PDB ID | Residue A | Atom A | Residue B | Atom B | Distance (Å) |
|--------|-----------|--------|-----------|--------|--------------|
| 6E65   | L_ARG_61  | NH1    | L_ASP_82  | OD1    | 3.558        |
| 6E65   | L_ARG_61  | NH1    | L_ASP_82  | OD2    | 2.687        |
| 6E65   | L_ARG_61  | NH2    | L_ASP_82  | OD1    | 2.921        |
| 6E65   | L_ARG_61  | NH2    | L_ASP_82  | OD2    | 3.517        |
| 6E65   | L_LYS_110 | NZ     | L_GLU_198 | OE1    | 3.254        |
| 6E65   | L_LYS_149 | NZ     | L_GLU_203 | OE2    | 3.192        |
| 6E65   | H_ARG_38  | NH1    | H_GLU_46  | OE1    | 3.010        |
| 6E65   | H_ARG_38  | NH1    | H_GLU_46  | OE2    | 3.789        |
| 6E65   | H_ARG_38  | NH1    | H_ASP_86  | OD2    | 3.921        |
| 6E65   | H_ARG_38  | NH2    | H_ASP_86  | OD2    | 2.906        |
| 6E65   | H_LYS_64  | NZ     | H_ASP_61  | OD1    | 2.812        |
| 6E65   | H_ARG_66  | NH1    | H_ASP_86  | OD1    | 2.716        |
| 6E65   | H_ARG_66  | NH1    | H_ASP_86  | OD2    | 3.744        |
| 6E65   | H_ARG_66  | NH2    | H_ASP_86  | OD1    | 3.520        |
| 6E65   | H_ARG_66  | NH2    | H_ASP_86  | OD2    | 3.030        |
| 6E65   | H_ARG_94  | NH2    | H_ASP_101 | OD1    | 3.830        |
| 6E65   | H_ARG_94  | NH2    | H_ASP_101 | OD2    | 2.624        |
| 6E65   | H_ARG_97  | NH1    | H_ASP_100 | OD1    | 3.182        |
| 6E65   | H_ARG_97  | NH2    | H_ASP_100 | OD1    | 2.837        |
| 6E65   | H_LYS_209 | NZ     | L_GLU_123 | OE1    | 2.900        |
| 6E65   | H_LYS_209 | NZ     | L_GLU_123 | OE2    | 3.402        |
| 6E65   | H_LYS_210 | NZ     | H_GLU_212 | OE2    | 3.313        |

Table 821: 6E65-specific salt bridging networks analysis. In this table, a PDB file is specified with a four-letter PDB ID, except that the names of the PDB files corresponding to the single NMR structural model split from the NMR ensemble is specified with a four-letter PDB ID in addition to a hyphen followed by the single NMR structural model numeric ID, the residue naming scheme is **Chain ID\_residue name\_residue number**,  $\angle ADH$  represents the angle formed by acceptor (A), donor (D) and hydrogen (H) ( $\angle ADH$ ).

| PDB ID | Residue A | Atom A | Residue B | Atom B | Distance (Å) |
|--------|-----------|--------|-----------|--------|--------------|
| 6E8V   | A_LYS_58  | NZ     | A_ASP_183 | OD2    | 3.383        |
| 6E8V   | A_ARG_64  | NH1    | A_ASP_115 | OD1    | 3.736        |
| 6E8V   | A_ARG_64  | NH1    | A_ASP_115 | OD2    | 3.862        |
| 6E8V   | A_ARG_64  | NH2    | A_GLU_72  | OE1    | 2.461        |
| 6E8V   | A_LYS_69  | NZ     | H_GLU_114 | OE1    | 3.919        |
| 6E8V   | A_LYS_69  | NZ     | H_GLU_114 | OE2    | 3.267        |
| 6E8V   | A_ARG_92  | NH1    | A_ASP_115 | OD1    | 3.628        |
| 6E8V   | A_ARG_92  | NH1    | A_ASP_115 | OD2    | 2.200        |
| 6E8V   | A_ARG_92  | NH2    | A_ASP_115 | OD2    | 3.895        |
| 6E8V   | A_HIS_129 | NE2    | A_GLU_179 | OE1    | 3.896        |
| 6E8V   | A_LYS_290 | NZ     | B_GLU_128 | OE1    | 3.297        |
| 6E8V   | A_LYS_290 | NZ     | B_GLU_128 | OE2    | 3.454        |
| 6E8V   | B_ARG_62  | NH2    | B_ASP_83  | OD1    | 3.866        |
| 6E8V   | B_ARG_62  | NH2    | B_ASP_83  | OD2    | 3.065        |
| 6E8V   | B_LYS_154 | NZ     | E_ASP_98  | OD2    | 3.855        |
| 6E8V   | B_LYS_212 | NZ     | B_GLU_215 | OE2    | 3.054        |
| 6E8V   | E_LYS_58  | NZ     | E_ASP_183 | OD2    | 3.769        |
| 6E8V   | E_ARG_64  | NH1    | E_ASP_115 | OD1    | 3.111        |
| 6E8V   | E_ARG_64  | NH2    | E_GLU_72  | OE1    | 2.694        |
| 6E8V   | E_ARG_64  | NH2    | E_GLU_72  | OE2    | 3.880        |
| 6E8V   | E_ARG_64  | NH2    | E_ASP_115 | OD1    | 3.985        |
| 6E8V   | E_ARG_92  | NH1    | E_ASP_115 | OD1    | 2.769        |
| 6E8V   | E_ARG_92  | NH1    | E_ASP_115 | OD2    | 3.085        |
| 6E8V   | E_HIS_129 | NE2    | E_GLU_179 | OE2    | 3.144        |
| 6E8V   | E_LYS_290 | NZ     | F_GLU_128 | OE1    | 2.548        |
| 6E8V   | E_LYS_290 | NZ     | F_GLU_128 | OE2    | 3.232        |
| 6E8V   | F_ARG_63  | NH1    | F_GLU_83  | OE2    | 3.510        |
| 6E8V   | F_ARG_63  | NH1    | F_ASP_84  | OD1    | 3.568        |
| 6E8V   | F_ARG_63  | NH2    | F_ASP_84  | OD1    | 3.073        |
| 6E8V   | F_ARG_63  | NH2    | F_ASP_84  | OD2    | 2.536        |
| 6E8V   | F_ARG_68  | NH2    | F_ASP_53  | OD2    | 3.856        |
| 6E8V   | H_LYS_58  | NZ     | H_ASP_183 | OD2    | 3.692        |
| 6E8V   | H_ARG_64  | NH1    | H_ASP_115 | OD2    | 3.761        |
| 6E8V   | H_ARG_64  | NH2    | H_GLU_72  | OE1    | 3.369        |
| 6E8V   | H_ARG_64  | NH2    | H_GLU_72  | OE2    | 2.811        |
| 6E8V   | H_LYS_69  | NZ     | H_GLU_72  | OE2    | 3.846        |
| 6E8V   | H_LYS_69  | NZ     | H_GLU_114 | OE2    | 2.887        |
| 6E8V   | H_ARG_92  | NH1    | H_ASP_115 | OD1    | 3.257        |
| 6E8V   | H_ARG_92  | NH1    | H_ASP_115 | OD2    | 2.227        |
| 6E8V   | H_ARG_92  | NH2    | H_ASP_115 | OD2    | 3.949        |
| 6E8V   | H_HIS_125 | NE2    | H_ASP_183 | OD2    | 3.568        |
| 6E8V   | H_HIS_129 | NE2    | H_GLU_179 | OE2    | 2.966        |
| 6E8V   | H_LYS_290 | NZ     | L_GLU_127 | OE1    | 2.706        |
| 6E8V   | H_LYS_290 | NZ     | L_GLU_127 | OE2    | 2.554        |
| 6E8V   | J_LYS_58  | NZ     | J_ASP_183 | OD2    | 3.273        |
| 6E8V   | J_ARG_64  | NH1    | J_ASP_115 | OD2    | 3.190        |
| 6E8V   | J_ARG_64  | NH2    | J_GLU_72  | OE1    | 3.098        |
| 6E8V   | J_ARG_92  | NH1    | J_ASP_115 | OD1    | 2.752        |
| 6E8V   | J_ARG_92  | NH1    | J_ASP_115 | OD2    | 2.685        |
| 6E8V   | J_HIS_129 | NE2    | J_GLU_179 | OE2    | 3.681        |
| 6E8V   | J_LYS_290 | NZ     | K_GLU_128 | OE1    | 3.173        |
| 6E8V   | J_LYS_290 | NZ     | K_GLU_128 | OE2    | 2.611        |
| 6E8V   | K_ARG_63  | NH1    | K_ASP_84  | OD2    | 3.865        |
| 6E8V   | K_ARG_63  | NH2    | K_ASP_84  | OD1    | 2.385        |
| 6E8V   | K_ARG_63  | NH2    | K_ASP_84  | OD2    | 3.106        |
| 6E8V   | K_LYS_212 | NZ     | H_GLU_101 | OE1    | 3.767        |
| 6E8V   | K_LYS_212 | NZ     | H_GLU_101 | OE2    | 3.490        |

|      |           |     |           |     |       |
|------|-----------|-----|-----------|-----|-------|
| 6E8V | K_LYS_212 | NZ  | K_GLU_215 | OE1 | 3.501 |
| 6E8V | L_LYS_211 | NZ  | L_GLU_214 | OE1 | 3.855 |
| 6E8V | L_LYS_211 | NZ  | L_GLU_214 | OE2 | 3.483 |
| 6E8V | O_LYS_58  | NZ  | O_ASP_183 | OD2 | 2.755 |
| 6E8V | O_ARG_64  | NH1 | O_ASP_115 | OD1 | 2.759 |
| 6E8V | O_ARG_64  | NH2 | O_GLU_72  | OE1 | 3.262 |
| 6E8V | O_ARG_64  | NH2 | O_GLU_72  | OE2 | 2.920 |
| 6E8V | O_ARG_64  | NH2 | O_ASP_115 | OD1 | 3.656 |
| 6E8V | O_ARG_92  | NH1 | O_ASP_115 | OD1 | 3.104 |
| 6E8V | O_ARG_92  | NH1 | O_ASP_115 | OD2 | 2.418 |
| 6E8V | O_ARG_92  | NH2 | O_ASP_115 | OD1 | 3.944 |
| 6E8V | O_HIS_129 | NE2 | L_ASP_61  | OD1 | 3.511 |
| 6E8V | O_HIS_129 | NE2 | O_GLU_179 | OE1 | 3.633 |
| 6E8V | O_LYS_290 | NZ  | P_GLU_128 | OE1 | 3.591 |
| 6E8V | P_ARG_56  | NH2 | P_ASP_62  | OD1 | 3.947 |
| 6E8V | P_ARG_63  | NH2 | P_ASP_84  | OD1 | 2.443 |
| 6E8V | P_ARG_63  | NH2 | P_ASP_84  | OD2 | 3.024 |
| 6E8V | P_ARG_68  | NH2 | P_ASP_53  | OD2 | 3.638 |
| 6E8V | P_LYS_171 | NZ  | P_GLU_85  | OE1 | 3.474 |
| 6E8V | P_LYS_212 | NZ  | P_GLU_215 | OE2 | 3.770 |
| 6E8V | U_ARG_64  | NH1 | U_ASP_115 | OD1 | 2.978 |
| 6E8V | U_ARG_64  | NH2 | U_GLU_72  | OE1 | 3.075 |
| 6E8V | U_ARG_64  | NH2 | U_GLU_72  | OE2 | 3.322 |
| 6E8V | U_LYS_69  | NZ  | U_GLU_72  | OE1 | 2.536 |
| 6E8V | U_ARG_92  | NH1 | U_ASP_115 | OD1 | 3.227 |
| 6E8V | U_ARG_92  | NH1 | U_ASP_115 | OD2 | 2.688 |
| 6E8V | U_LYS_290 | NZ  | V_GLU_128 | OE1 | 2.346 |
| 6E8V | U_LYS_290 | NZ  | V_GLU_128 | OE2 | 3.693 |
| 6E8V | V_ARG_63  | NH1 | V_GLU_83  | OE2 | 3.928 |
| 6E8V | V_ARG_63  | NH2 | V_ASP_84  | OD1 | 2.920 |
| 6E8V | V_ARG_63  | NH2 | V_ASP_84  | OD2 | 2.400 |
| 6E8V | V_LYS_154 | NZ  | V_GLU_199 | OE2 | 3.787 |
| 6E8V | V_LYS_212 | NZ  | V_GLU_215 | OE1 | 3.212 |
| 6E8V | Y_ARG_64  | NH1 | Y_ASP_115 | OD1 | 3.849 |
| 6E8V | Y_ARG_64  | NH1 | Y_ASP_115 | OD2 | 3.924 |
| 6E8V | Y_ARG_64  | NH2 | Y_GLU_72  | OE1 | 3.305 |
| 6E8V | Y_ARG_64  | NH2 | Y_GLU_72  | OE2 | 3.450 |
| 6E8V | Y_ARG_64  | NH2 | Y_ASP_115 | OD1 | 3.987 |
| 6E8V | Y_ARG_92  | NH1 | Y_ASP_115 | OD1 | 3.320 |
| 6E8V | Y_ARG_92  | NH1 | Y_ASP_115 | OD2 | 2.179 |
| 6E8V | Y_HIS_129 | NE2 | Y_GLU_179 | OE1 | 2.918 |
| 6E8V | Y_LYS_290 | NZ  | Z_GLU_128 | OE1 | 3.390 |
| 6E8V | Z_ARG_63  | NH1 | Z_ASP_84  | OD1 | 3.893 |
| 6E8V | Z_ARG_63  | NH2 | Z_ASP_84  | OD1 | 3.228 |
| 6E8V | Z_ARG_63  | NH2 | Z_ASP_84  | OD2 | 2.268 |
| 6E8V | Z_LYS_171 | NZ  | Z_GLU_85  | OE1 | 2.482 |
| 6E8V | Z_HIS_202 | NE2 | Z_GLU_203 | OE1 | 3.581 |
| 6E8V | Z_LYS_212 | NZ  | Z_GLU_215 | OE2 | 3.769 |
| 6E8V | c_LYS_58  | NZ  | c_ASP_183 | OD2 | 3.320 |
| 6E8V | c_ARG_64  | NH1 | c_ASP_115 | OD1 | 3.153 |
| 6E8V | c_ARG_64  | NH2 | c_GLU_72  | OE1 | 2.815 |
| 6E8V | c_ARG_64  | NH2 | c_GLU_72  | OE2 | 3.967 |
| 6E8V | c_ARG_92  | NH1 | c_ASP_115 | OD1 | 2.545 |
| 6E8V | c_ARG_92  | NH1 | c_ASP_115 | OD2 | 2.955 |
| 6E8V | c_HIS_125 | ND1 | K_ASP_62  | OD1 | 3.174 |
| 6E8V | c_HIS_125 | ND1 | K_ASP_62  | OD2 | 3.139 |
| 6E8V | c_HIS_125 | NE2 | c_ASP_183 | OD2 | 2.451 |
| 6E8V | c_HIS_129 | NE2 | c_GLU_179 | OE1 | 3.728 |

|      |           |     |           |     |       |
|------|-----------|-----|-----------|-----|-------|
| 6E8V | c_LYS_290 | NZ  | d_GLU_128 | OE1 | 2.357 |
| 6E8V | c_LYS_290 | NZ  | d_GLU_128 | OE2 | 3.486 |
| 6E8V | d_ARG_63  | NH2 | d_ASP_84  | OD1 | 3.212 |
| 6E8V | d_ARG_63  | NH2 | d_ASP_84  | OD2 | 2.255 |
| 6E8V | d_LYS_154 | NZ  | d_GLU_199 | OE1 | 2.319 |
| 6E8V | d_LYS_154 | NZ  | d_GLU_199 | OE2 | 3.282 |

Table 822: 6E8V-specific salt bridging networks analysis. In this table, a PDB file is specified with a four-letter PDB ID, except that the names of the PDB files corresponding to the single NMR structural model split from the NMR ensemble is specified with a four-letter PDB ID in addition to a hyphen followed by the single NMR structural model numeric ID, the residue naming scheme is **Chain ID\_residue name\_residue number**,  $\angle ADH$  represents the angle formed by acceptor (A), donor (D) and hydrogen (H) ( $\angle ADH$ ).

| PDB ID | Residue A | Atom A | Residue B | Atom B | Distance (Å) |
|--------|-----------|--------|-----------|--------|--------------|
| 6E9G   | A_ARG_38  | NH1    | A_GLU_46  | OE1    | 3.009        |
| 6E9G   | A_ARG_38  | NH1    | A_GLU_46  | OE2    | 3.865        |
| 6E9G   | A_ARG_38  | NH1    | A_ASP_89  | OD1    | 3.731        |
| 6E9G   | A_ARG_38  | NH2    | A_ASP_89  | OD1    | 2.942        |
| 6E9G   | A_ARG_124 | NH1    | A_ASP_126 | OD1    | 3.428        |
| 6E9G   | A_ARG_124 | NH1    | A_ASP_126 | OD2    | 3.623        |
| 6E9G   | A_LYS_259 | NZ     | A_ASP_261 | OD1    | 3.382        |
| 6E9G   | A_LYS_262 | NZ     | B_GLU_127 | OE1    | 3.021        |
| 6E9G   | A_LYS_262 | NZ     | B_GLU_127 | OE2    | 3.870        |
| 6E9G   | B_ARG_55  | NH1    | B_ASP_61  | OD2    | 3.166        |
| 6E9G   | B_ARG_55  | NH2    | B_ASP_61  | OD1    | 3.953        |
| 6E9G   | B_ARG_55  | NH2    | B_ASP_61  | OD2    | 3.935        |
| 6E9G   | B_ARG_62  | NH1    | B_ASP_83  | OD1    | 3.754        |
| 6E9G   | B_ARG_62  | NH2    | B_ASP_83  | OD1    | 2.216        |
| 6E9G   | B_ARG_62  | NH2    | B_ASP_83  | OD2    | 3.767        |
| 6E9G   | B_LYS_114 | NZ     | B_GLU_202 | OE1    | 3.419        |

Table 823: 6E9G-specific salt bridging networks analysis. In this table, a PDB file is specified with a four-letter PDB ID, except that the names of the PDB files corresponding to the single NMR structural model split from the NMR ensemble is specified with a four-letter PDB ID in addition to a hyphen followed by the single NMR structural model numeric ID, the residue naming scheme is **Chain ID\_residue name\_residue number**,  $\angle ADH$  represents the angle formed by acceptor (A), donor (D) and hydrogen (H) ( $\angle ADH$ ).

| PDB ID | Residue A | Atom A | Residue B | Atom B | Distance (Å) |
|--------|-----------|--------|-----------|--------|--------------|
| 6E9H   | A_LYS_58  | NZ     | A_ASP_57  | OD2    | 3.854        |
| 6E9H   | A_ARG_64  | NH1    | A_ASP_115 | OD1    | 2.780        |
| 6E9H   | A_ARG_64  | NH2    | A_GLU_72  | OE1    | 3.005        |
| 6E9H   | A_ARG_64  | NH2    | A_ASP_115 | OD1    | 3.589        |
| 6E9H   | A_ARG_92  | NH1    | A_ASP_115 | OD1    | 3.583        |
| 6E9H   | A_ARG_92  | NH1    | A_ASP_115 | OD2    | 2.997        |
| 6E9H   | A_ARG_92  | NH2    | A_ASP_115 | OD1    | 3.156        |
| 6E9H   | A_ARG_92  | NH2    | A_ASP_115 | OD2    | 3.683        |
| 6E9H   | A_HIS_125 | NE2    | A_GLU_181 | OE2    | 3.054        |
| 6E9H   | A_ARG_147 | NH2    | A_ASP_160 | OD1    | 3.058        |
| 6E9H   | A_ARG_147 | NH2    | A_ASP_160 | OD2    | 3.404        |
| 6E9H   | A_LYS_292 | NZ     | B_GLU_128 | OE1    | 2.895        |
| 6E9H   | A_LYS_292 | NZ     | B_GLU_128 | OE2    | 3.744        |
| 6E9H   | B_ARG_56  | NH1    | B_ASP_62  | OD2    | 3.861        |
| 6E9H   | B_ARG_56  | NH2    | B_ASP_62  | OD2    | 3.548        |
| 6E9H   | B_ARG_63  | NH1    | B_ASP_84  | OD1    | 2.804        |
| 6E9H   | B_ARG_63  | NH1    | B_ASP_84  | OD2    | 3.553        |
| 6E9H   | B_ARG_63  | NH2    | B_ASP_84  | OD1    | 3.448        |
| 6E9H   | B_ARG_63  | NH2    | B_ASP_84  | OD2    | 2.780        |
| 6E9H   | B_ARG_68  | NH2    | B_ASP_53  | OD2    | 3.674        |
| 6E9H   | B_LYS_154 | NZ     | B_GLU_199 | OE1    | 3.479        |
| 6E9H   | B_LYS_154 | NZ     | B_GLU_199 | OE2    | 3.530        |
| 6E9H   | B_LYS_171 | NZ     | B_GLU_85  | OE1    | 2.299        |
| 6E9H   | B_LYS_171 | NZ     | B_GLU_85  | OE2    | 3.752        |

Table 824: 6E9H-specific salt bridging networks analysis. In this table, a PDB file is specified with a four-letter PDB ID, except that the names of the PDB files corresponding to the single NMR structural model split from the NMR ensemble is specified with a four-letter PDB ID in addition to a hyphen followed by the single NMR structural model numeric ID, the residue naming scheme is **Chain ID\_residue name\_residue number**,  $\angle ADH$  represents the angle formed by acceptor (A), donor (D) and hydrogen (H) ( $\angle ADH$ ).

| PDB ID | Residue A | Atom A | Residue B | Atom B | Distance (Å) |
|--------|-----------|--------|-----------|--------|--------------|
| 6E9I   | A_LYS_58  | NZ     | A_ASP_182 | OD2    | 3.602        |
| 6E9I   | A_ARG_64  | NH1    | A_ASP_115 | OD2    | 2.633        |
| 6E9I   | A_ARG_64  | NH2    | A_GLU_72  | OE2    | 3.049        |
| 6E9I   | A_ARG_64  | NH2    | A_ASP_115 | OD2    | 3.483        |
| 6E9I   | A_ARG_92  | NH1    | A_ASP_115 | OD1    | 3.516        |
| 6E9I   | A_ARG_92  | NH1    | A_ASP_115 | OD2    | 2.842        |
| 6E9I   | A_ARG_92  | NH2    | A_ASP_115 | OD1    | 3.099        |
| 6E9I   | A_ARG_92  | NH2    | A_ASP_115 | OD2    | 3.725        |
| 6E9I   | A_ARG_109 | NH2    | D_ASP_95  | OD1    | 3.782        |
| 6E9I   | A_ARG_109 | NH2    | D_ASP_95  | OD2    | 3.931        |
| 6E9I   | A_HIS_125 | NE2    | A_GLU_178 | OE2    | 3.001        |
| 6E9I   | A_LYS_289 | NZ     | B_GLU_128 | OE1    | 3.746        |
| 6E9I   | A_LYS_289 | NZ     | B_GLU_128 | OE2    | 2.925        |
| 6E9I   | B_ARG_63  | NH1    | B_ASP_84  | OD1    | 2.801        |
| 6E9I   | B_ARG_63  | NH1    | B_ASP_84  | OD2    | 2.588        |
| 6E9I   | B_ARG_68  | NH1    | B_ASP_53  | OD2    | 3.498        |
| 6E9I   | B_LYS_171 | NZ     | B_GLU_85  | OE1    | 2.942        |
| 6E9I   | C_ARG_64  | NH1    | C_ASP_115 | OD2    | 2.558        |
| 6E9I   | C_ARG_64  | NH2    | C_GLU_72  | OE2    | 2.949        |
| 6E9I   | C_ARG_64  | NH2    | C_ASP_115 | OD2    | 3.425        |
| 6E9I   | C_ARG_92  | NH1    | C_ASP_115 | OD1    | 3.394        |
| 6E9I   | C_ARG_92  | NH1    | C_ASP_115 | OD2    | 2.831        |
| 6E9I   | C_ARG_92  | NH2    | C_ASP_115 | OD1    | 3.153        |
| 6E9I   | C_ARG_92  | NH2    | C_ASP_115 | OD2    | 3.762        |
| 6E9I   | C_HIS_125 | NE2    | C_GLU_178 | OE1    | 3.090        |
| 6E9I   | C_LYS_289 | NZ     | D_GLU_128 | OE1    | 2.528        |
| 6E9I   | C_LYS_289 | NZ     | D_GLU_128 | OE2    | 3.968        |
| 6E9I   | D_ARG_63  | NH2    | D_ASP_84  | OD1    | 2.787        |
| 6E9I   | D_ARG_63  | NH2    | D_ASP_84  | OD2    | 2.635        |
| 6E9I   | D_ARG_68  | NH2    | D_ASP_53  | OD2    | 3.085        |
| 6E9I   | D_LYS_115 | NZ     | D_GLU_203 | OE2    | 3.399        |
| 6E9I   | D_LYS_171 | NZ     | D_GLU_85  | OE2    | 3.210        |
| 6E9I   | H_LYS_58  | NZ     | H_ASP_57  | OD1    | 3.428        |
| 6E9I   | H_ARG_64  | NH1    | H_ASP_115 | OD1    | 2.649        |
| 6E9I   | H_ARG_64  | NH2    | H_GLU_72  | OE1    | 2.999        |
| 6E9I   | H_ARG_64  | NH2    | H_ASP_115 | OD1    | 3.536        |
| 6E9I   | H_LYS_69  | NZ     | H_GLU_114 | OE2    | 3.957        |
| 6E9I   | H_ARG_92  | NH1    | H_ASP_115 | OD1    | 2.822        |
| 6E9I   | H_ARG_92  | NH1    | H_ASP_115 | OD2    | 3.288        |
| 6E9I   | H_ARG_92  | NH2    | H_ASP_115 | OD1    | 3.754        |
| 6E9I   | H_ARG_92  | NH2    | H_ASP_115 | OD2    | 3.182        |
| 6E9I   | H_HIS_125 | NE2    | H_GLU_178 | OE1    | 3.044        |
| 6E9I   | H_LYS_289 | NZ     | L_GLU_128 | OE1    | 3.811        |
| 6E9I   | H_LYS_289 | NZ     | L_GLU_128 | OE2    | 2.547        |
| 6E9I   | L_ARG_56  | NH1    | L_ASP_62  | OD2    | 3.686        |
| 6E9I   | L_ARG_56  | NH2    | L_ASP_62  | OD2    | 3.053        |
| 6E9I   | L_ARG_63  | NH1    | L_ASP_84  | OD1    | 3.024        |
| 6E9I   | L_ARG_63  | NH1    | L_ASP_84  | OD2    | 2.419        |
| 6E9I   | L_ARG_63  | NH2    | L_GLU_83  | OE1    | 3.490        |
| 6E9I   | L_ARG_63  | NH2    | L_ASP_84  | OD1    | 3.404        |
| 6E9I   | L_ARG_68  | NH1    | L_ASP_53  | OD2    | 3.356        |
| 6E9I   | L_LYS_171 | NZ     | L_GLU_85  | OE1    | 2.446        |

---

Table 825: 6E9I-specific salt bridging networks analysis. In this table, a PDB file is specified with a four-letter PDB ID, except that the names of the PDB files corresponding to the single NMR structural model split from the NMR ensemble is specified with a four-letter PDB ID in addition to a hyphen followed by the single NMR structural model numeric ID, the residue naming scheme is **Chain ID\_residue name\_residue number**,  $\angle ADH$  represents the angle formed by acceptor (A), donor (D) and hydrogen (H) ( $\angle ADH$ ).



| PDB ID | Residue A | Atom A | Residue B | Atom B | Distance (Å) |
|--------|-----------|--------|-----------|--------|--------------|
| 6E9K   | A_LYS_32  | NZ     | A_ASP_31  | OD1    | 2.993        |
| 6E9K   | A_LYS_32  | NZ     | A_ASP_31  | OD2    | 3.547        |
| 6E9K   | A_ARG_38  | NH1    | A_ASP_89  | OD1    | 2.700        |
| 6E9K   | A_ARG_38  | NH2    | A_GLU_46  | OE1    | 3.033        |
| 6E9K   | A_ARG_38  | NH2    | A_ASP_89  | OD1    | 3.664        |
| 6E9K   | A_ARG_66  | NH1    | A_ASP_89  | OD1    | 3.360        |
| 6E9K   | A_ARG_66  | NH1    | A_ASP_89  | OD2    | 2.516        |
| 6E9K   | A_ARG_66  | NH2    | A_ASP_89  | OD1    | 3.299        |
| 6E9K   | A_ARG_66  | NH2    | A_ASP_89  | OD2    | 3.549        |
| 6E9K   | A_HIS_99  | NE2    | A_GLU_146 | OE2    | 3.060        |
| 6E9K   | A_ARG_103 | NH1    | A_GLU_146 | OE1    | 3.769        |
| 6E9K   | A_LYS_104 | NZ     | A_ASP_143 | OD1    | 2.823        |
| 6E9K   | A_LYS_104 | NZ     | A_ASP_143 | OD2    | 3.004        |
| 6E9K   | A_LYS_257 | NZ     | B_GLU_128 | OE1    | 3.997        |
| 6E9K   | A_LYS_257 | NZ     | B_GLU_128 | OE2    | 3.056        |
| 6E9K   | B_ARG_63  | NH1    | B_ASP_84  | OD1    | 3.165        |
| 6E9K   | B_ARG_63  | NH1    | B_ASP_84  | OD2    | 2.396        |
| 6E9K   | B_ARG_63  | NH2    | B_ASP_84  | OD1    | 2.989        |
| 6E9K   | B_ARG_63  | NH2    | B_ASP_84  | OD2    | 3.593        |
| 6E9K   | B_LYS_115 | NZ     | B_GLU_203 | OE1    | 3.094        |
| 6E9K   | B_LYS_154 | NZ     | B_GLU_199 | OE2    | 3.249        |
| 6E9K   | B_LYS_171 | NZ     | B_GLU_85  | OE1    | 2.917        |

Table 826: 6E9K-specific salt bridging networks analysis. In this table, a PDB file is specified with a four-letter PDB ID, except that the names of the PDB files corresponding to the single NMR structural model split from the NMR ensemble is specified with a four-letter PDB ID in addition to a hyphen followed by the single NMR structural model numeric ID, the residue naming scheme is **Chain ID\_residue name\_residue number**,  $\angle ADH$  represents the angle formed by acceptor (A), donor (D) and hydrogen (H) ( $\angle ADH$ ).

| PDB ID | Residue A | Atom A | Residue B | Atom B | Distance (Å) |
|--------|-----------|--------|-----------|--------|--------------|
| 6E9Q   | A_ARG_38  | NH1    | A_ASP_89  | OD2    | 3.963        |
| 6E9Q   | A_ARG_66  | NH1    | A_ASP_89  | OD1    | 2.868        |
| 6E9Q   | A_ARG_66  | NH1    | A_ASP_89  | OD2    | 2.514        |
| 6E9Q   | A_HIS_99  | NE2    | A_GLU_142 | OE1    | 3.452        |
| 6E9Q   | A_LYS_101 | NZ     | A_GLU_142 | OE2    | 3.652        |
| 6E9Q   | A_LYS_253 | NZ     | B_GLU_128 | OE1    | 3.048        |
| 6E9Q   | A_LYS_253 | NZ     | B_GLU_128 | OE2    | 2.978        |
| 6E9Q   | B_ARG_63  | NH2    | B_ASP_84  | OD1    | 2.631        |
| 6E9Q   | B_ARG_63  | NH2    | B_ASP_84  | OD2    | 2.815        |
| 6E9Q   | B_ARG_68  | NH2    | B_ASP_53  | OD2    | 3.543        |
| 6E9Q   | B_LYS_154 | NZ     | B_GLU_199 | OE1    | 2.492        |
| 6E9Q   | B_LYS_171 | NZ     | B_GLU_85  | OE1    | 2.682        |
| 6E9Q   | B_LYS_171 | NZ     | B_GLU_85  | OE2    | 3.666        |
| 6E9Q   | C_ARG_38  | NH1    | C_ASP_89  | OD1    | 2.493        |
| 6E9Q   | C_ARG_38  | NH2    | C_GLU_46  | OE1    | 2.768        |
| 6E9Q   | C_ARG_38  | NH2    | C_GLU_46  | OE2    | 3.894        |
| 6E9Q   | C_ARG_38  | NH2    | C_ASP_89  | OD1    | 3.476        |
| 6E9Q   | C_ARG_66  | NH1    | C_ASP_89  | OD1    | 3.542        |
| 6E9Q   | C_ARG_66  | NH1    | C_ASP_89  | OD2    | 2.437        |
| 6E9Q   | C_ARG_66  | NH2    | C_ASP_89  | OD1    | 3.979        |
| 6E9Q   | C_ARG_66  | NH2    | C_ASP_89  | OD2    | 3.919        |
| 6E9Q   | C_HIS_99  | NE2    | C_GLU_142 | OE1    | 3.707        |
| 6E9Q   | C_LYS_101 | NZ     | C_GLU_142 | OE1    | 3.900        |
| 6E9Q   | D_ARG_56  | NH1    | D_ASP_62  | OD2    | 3.862        |
| 6E9Q   | D_ARG_63  | NH2    | D_ASP_84  | OD1    | 3.419        |
| 6E9Q   | D_ARG_63  | NH2    | D_ASP_84  | OD2    | 3.605        |
| 6E9Q   | D_LYS_154 | NZ     | D_GLU_199 | OE1    | 3.115        |
| 6E9Q   | D_LYS_176 | NZ     | D_ASP_143 | OD1    | 3.925        |
| 6E9Q   | D_LYS_193 | NZ     | D_ASP_189 | OD1    | 3.400        |
| 6E9Q   | E_ARG_38  | NH1    | E_ASP_89  | OD1    | 3.733        |
| 6E9Q   | E_ARG_38  | NH2    | E_GLU_46  | OE1    | 3.706        |
| 6E9Q   | E_ARG_38  | NH2    | E_ASP_89  | OD1    | 2.896        |
| 6E9Q   | E_ARG_66  | NH1    | E_ASP_89  | OD1    | 3.922        |
| 6E9Q   | E_ARG_66  | NH1    | E_ASP_89  | OD2    | 2.529        |
| 6E9Q   | E_ARG_66  | NH2    | E_ASP_89  | OD2    | 3.750        |
| 6E9Q   | E_HIS_99  | NE2    | E_GLU_142 | OE2    | 3.775        |
| 6E9Q   | E_LYS_253 | NZ     | F_GLU_128 | OE1    | 2.966        |
| 6E9Q   | E_LYS_253 | NZ     | F_GLU_128 | OE2    | 2.802        |
| 6E9Q   | F_ARG_63  | NH2    | F_ASP_84  | OD1    | 2.560        |
| 6E9Q   | F_ARG_63  | NH2    | F_ASP_84  | OD2    | 3.515        |
| 6E9Q   | F_ARG_68  | NH2    | F_ASP_53  | OD2    | 3.049        |
| 6E9Q   | F_LYS_171 | NZ     | F_GLU_85  | OE1    | 3.068        |
| 6E9Q   | G_ARG_38  | NH1    | G_ASP_89  | OD1    | 3.204        |
| 6E9Q   | G_ARG_38  | NH2    | G_GLU_46  | OE1    | 2.728        |
| 6E9Q   | G_ARG_38  | NH2    | G_GLU_46  | OE2    | 3.967        |
| 6E9Q   | G_ARG_66  | NH1    | G_ASP_89  | OD1    | 3.146        |
| 6E9Q   | G_ARG_66  | NH1    | G_ASP_89  | OD2    | 2.916        |
| 6E9Q   | G_ARG_66  | NH2    | G_ASP_89  | OD1    | 3.930        |
| 6E9Q   | G_HIS_99  | NE2    | G_GLU_142 | OE2    | 3.698        |

---

Table 827: 6E9Q-specific salt bridging networks analysis. In this table, a PDB file is specified with a four-letter PDB ID, except that the names of the PDB files corresponding to the single NMR structural model split from the NMR ensemble is specified with a four-letter PDB ID in addition to a hyphen followed by the single NMR structural model numeric ID, the residue naming scheme is **Chain ID\_residue name\_residue number**,  $\angle ADH$  represents the angle formed by acceptor (A), donor (D) and hydrogen (H) ( $\angle ADH$ ).

| PDB ID | Residue A | Atom A | Residue B | Atom B | Distance (Å) |
|--------|-----------|--------|-----------|--------|--------------|
| 6E9U   | A_LYS_32  | NZ     | A_ASP_159 | OD2    | 3.058        |
| 6E9U   | A_ARG_38  | NH1    | A_ASP_89  | OD1    | 2.696        |
| 6E9U   | A_ARG_38  | NH2    | A_GLU_46  | OE1    | 3.019        |
| 6E9U   | A_ARG_38  | NH2    | A_ASP_89  | OD1    | 3.469        |
| 6E9U   | A_ARG_66  | NH1    | A_ASP_89  | OD1    | 3.553        |
| 6E9U   | A_ARG_66  | NH1    | A_ASP_89  | OD2    | 2.571        |
| 6E9U   | A_ARG_66  | NH2    | A_ASP_89  | OD1    | 3.370        |
| 6E9U   | A_ARG_66  | NH2    | A_ASP_89  | OD2    | 3.619        |
| 6E9U   | A_HIS_99  | NE2    | A_GLU_155 | OE2    | 3.178        |
| 6E9U   | A_LYS_104 | NZ     | A_ASP_133 | OD2    | 2.359        |
| 6E9U   | A_ARG_117 | NH2    | A_ASP_116 | OD1    | 3.439        |
| 6E9U   | A_ARG_117 | NH2    | A_ASP_116 | OD2    | 3.943        |
| 6E9U   | A_LYS_266 | NZ     | B_GLU_128 | OE1    | 2.942        |
| 6E9U   | A_LYS_266 | NZ     | B_GLU_128 | OE2    | 2.747        |
| 6E9U   | B_ARG_56  | NH2    | B_ASP_62  | OD2    | 3.549        |
| 6E9U   | B_ARG_63  | NH2    | B_ASP_84  | OD1    | 2.519        |
| 6E9U   | B_ARG_63  | NH2    | B_ASP_84  | OD2    | 3.472        |
| 6E9U   | B_ARG_168 | NH2    | B_ASP_87  | OD1    | 3.330        |
| 6E9U   | B_ARG_168 | NH2    | B_ASP_87  | OD2    | 3.181        |

Table 828: 6E9U-specific salt bridging networks analysis. In this table, a PDB file is specified with a four-letter PDB ID, except that the names of the PDB files corresponding to the single NMR structural model split from the NMR ensemble is specified with a four-letter PDB ID in addition to a hyphen followed by the single NMR structural model numeric ID, the residue naming scheme is **Chain ID residue name residue number**,  $\angle ADH$  represents the angle formed by acceptor (A), donor (D) and hydrogen (H) ( $\angle ADH$ ).

| PDB ID | Residue A | Atom A | Residue B | Atom B | Distance (Å) |
|--------|-----------|--------|-----------|--------|--------------|
| 6EDU   | D_LYS_348 | NZ     | D_GLU_269 | OE1    | 2.947        |
| 6EDU   | D_LYS_348 | NZ     | D_GLU_269 | OE2    | 3.576        |
| 6EDU   | D_LYS_421 | NZ     | L_GLU_54  | OE2    | 2.920        |
| 6EDU   | D_LYS_432 | NZ     | L_GLU_55  | OE1    | 3.655        |
| 6EDU   | D_LYS_432 | NZ     | L_GLU_55  | OE2    | 3.439        |
| 6EDU   | D_ARG_476 | NH1    | D_GLU_102 | OE1    | 3.942        |
| 6EDU   | D_ARG_476 | NH1    | D_GLU_102 | OE2    | 2.435        |
| 6EDU   | D_ARG_480 | NH1    | D_ASP_477 | OD1    | 2.572        |
| 6EDU   | D_LYS_487 | NZ     | D_GLU_47  | OE2    | 2.857        |
| 6EDU   | D_LYS_487 | NZ     | D_GLU_91  | OE2    | 3.215        |
| 6EDU   | E_LYS_348 | NZ     | E_GLU_269 | OE1    | 2.948        |
| 6EDU   | E_LYS_348 | NZ     | E_GLU_269 | OE2    | 3.576        |
| 6EDU   | E_LYS_421 | NZ     | N_GLU_54  | OE2    | 3.004        |
| 6EDU   | E_LYS_432 | NZ     | N_GLU_55  | OE1    | 3.579        |
| 6EDU   | E_LYS_432 | NZ     | N_GLU_55  | OE2    | 3.398        |
| 6EDU   | E_ARG_476 | NH1    | E_GLU_102 | OE1    | 3.943        |
| 6EDU   | E_ARG_476 | NH1    | E_GLU_102 | OE2    | 2.436        |
| 6EDU   | E_ARG_480 | NH1    | E_ASP_477 | OD1    | 2.573        |
| 6EDU   | E_LYS_487 | NZ     | E_GLU_47  | OE2    | 2.857        |
| 6EDU   | E_LYS_487 | NZ     | E_GLU_91  | OE2    | 3.215        |
| 6EDU   | F_LYS_348 | NZ     | F_GLU_269 | OE1    | 2.947        |
| 6EDU   | F_LYS_348 | NZ     | F_GLU_269 | OE2    | 3.576        |
| 6EDU   | F_LYS_421 | NZ     | J_GLU_54  | OE2    | 3.064        |
| 6EDU   | F_LYS_432 | NZ     | J_GLU_55  | OE1    | 3.805        |
| 6EDU   | F_LYS_432 | NZ     | J_GLU_55  | OE2    | 3.577        |
| 6EDU   | F_ARG_476 | NH1    | F_GLU_102 | OE1    | 3.943        |
| 6EDU   | F_ARG_476 | NH1    | F_GLU_102 | OE2    | 2.437        |
| 6EDU   | F_ARG_480 | NH1    | F_ASP_477 | OD1    | 2.573        |
| 6EDU   | F_LYS_487 | NZ     | F_GLU_47  | OE2    | 2.856        |
| 6EDU   | F_LYS_487 | NZ     | F_GLU_91  | OE2    | 3.215        |
| 6EDU   | G_LYS_22  | NZ     | F_GLU_102 | OE1    | 3.040        |
| 6EDU   | G_ARG_59  | NH2    | F_ASP_368 | OD1    | 3.059        |
| 6EDU   | G_LYS_72  | NZ     | G_ASP_56  | OD2    | 3.829        |
| 6EDU   | H_LYS_22  | NZ     | E_GLU_102 | OE1    | 3.174        |
| 6EDU   | H_ARG_59  | NH2    | E_ASP_368 | OD1    | 3.166        |
| 6EDU   | H_LYS_72  | NZ     | H_ASP_56  | OD2    | 3.828        |
| 6EDU   | I_LYS_22  | NZ     | D_GLU_102 | OE1    | 3.053        |
| 6EDU   | I_ARG_59  | NH2    | D_ASP_368 | OD1    | 3.238        |
| 6EDU   | I_LYS_72  | NZ     | I_ASP_56  | OD2    | 3.828        |
| 6EDU   | J_ARG_12  | NH2    | J_GLU_10  | OE2    | 2.569        |
| 6EDU   | J_LYS_19  | NZ     | J_GLU_82  | OE2    | 3.419        |
| 6EDU   | J_ARG_38  | NH2    | J_GLU_46  | OE1    | 2.774        |
| 6EDU   | J_ARG_38  | NH2    | J_GLU_46  | OE2    | 3.579        |
| 6EDU   | J_LYS_63  | NZ     | J_GLU_46  | OE1    | 3.894        |
| 6EDU   | J_LYS_63  | NZ     | J_GLU_46  | OE2    | 3.217        |
| 6EDU   | J_ARG_67  | NH1    | J_ASP_90  | OD2    | 3.399        |
| 6EDU   | J_ARG_67  | NH2    | J_ASP_90  | OD1    | 3.817        |
| 6EDU   | K_ARG_63  | NH1    | K_ASP_84  | OD1    | 3.667        |
| 6EDU   | K_ARG_63  | NH1    | K_ASP_84  | OD2    | 3.012        |
| 6EDU   | K_ARG_63  | NH2    | K_ASP_84  | OD2    | 3.643        |
| 6EDU   | L_ARG_12  | NH2    | L_GLU_10  | OE2    | 2.570        |
| 6EDU   | L_LYS_19  | NZ     | L_GLU_82  | OE2    | 3.420        |
| 6EDU   | L_ARG_38  | NH2    | L_GLU_46  | OE1    | 2.773        |
| 6EDU   | L_ARG_38  | NH2    | L_GLU_46  | OE2    | 3.579        |
| 6EDU   | L_LYS_63  | NZ     | L_GLU_46  | OE1    | 3.894        |
| 6EDU   | L_LYS_63  | NZ     | L_GLU_46  | OE2    | 3.217        |
| 6EDU   | L_ARG_67  | NH1    | L_ASP_90  | OD2    | 3.399        |

|      |           |     |          |     |       |
|------|-----------|-----|----------|-----|-------|
| 6EDU | L_ARG_67  | NH2 | L_ASP_90 | OD1 | 3.816 |
| 6EDU | M_ARG_63  | NH1 | M_ASP_84 | OD1 | 3.667 |
| 6EDU | M_ARG_63  | NH1 | M_ASP_84 | OD2 | 3.013 |
| 6EDU | M_ARG_63  | NH2 | M_ASP_84 | OD2 | 3.645 |
| 6EDU | N_ARG_12  | NH2 | N_GLU_10 | OE2 | 2.569 |
| 6EDU | N_LYS_19  | NZ  | N_GLU_82 | OE2 | 3.419 |
| 6EDU | N_ARG_38  | NH2 | N_GLU_46 | OE1 | 2.773 |
| 6EDU | N_ARG_38  | NH2 | N_GLU_46 | OE2 | 3.579 |
| 6EDU | N_LYS_63  | NZ  | N_GLU_46 | OE1 | 3.894 |
| 6EDU | N_LYS_63  | NZ  | N_GLU_46 | OE2 | 3.217 |
| 6EDU | N_ARG_67  | NH1 | N_ASP_90 | OD2 | 3.398 |
| 6EDU | N_ARG_67  | NH2 | N_ASP_90 | OD1 | 3.817 |
| 6EDU | O_ARG_63  | NH1 | O_ASP_84 | OD1 | 3.667 |
| 6EDU | O_ARG_63  | NH1 | O_ASP_84 | OD2 | 3.013 |
| 6EDU | O_ARG_63  | NH2 | O_ASP_84 | OD2 | 3.644 |
| 6EDU | P_ARG_39  | NH1 | P_ASP_93 | OD1 | 3.407 |
| 6EDU | P_ARG_39  | NH2 | P_GLU_47 | OE1 | 3.894 |
| 6EDU | P_ARG_39  | NH2 | P_GLU_47 | OE2 | 3.043 |
| 6EDU | P_ARG_66  | NH1 | P_ASP_93 | OD2 | 3.616 |
| 6EDU | P_ARG_66  | NH2 | P_ASP_93 | OD2 | 2.801 |
| 6EDU | P_LYS_87  | NZ  | P_GLU_85 | OE2 | 3.427 |
| 6EDU | P_LYS_107 | NZ  | F_GLU_91 | OE1 | 3.324 |
| 6EDU | Q_ARG_24  | NH1 | Q_ASP_71 | OD1 | 3.743 |
| 6EDU | Q_ARG_62  | NH2 | Q_GLU_82 | OE2 | 3.021 |
| 6EDU | Q_ARG_62  | NH2 | Q_ASP_83 | OD2 | 3.975 |
| 6EDU | R_ARG_39  | NH1 | R_ASP_93 | OD1 | 3.408 |
| 6EDU | R_ARG_39  | NH2 | R_GLU_47 | OE1 | 3.894 |
| 6EDU | R_ARG_39  | NH2 | R_GLU_47 | OE2 | 3.044 |
| 6EDU | R_ARG_66  | NH1 | R_ASP_93 | OD2 | 3.616 |
| 6EDU | R_ARG_66  | NH2 | R_ASP_93 | OD2 | 2.800 |
| 6EDU | R_LYS_87  | NZ  | R_GLU_85 | OE2 | 3.427 |
| 6EDU | R_LYS_107 | NZ  | D_GLU_91 | OE1 | 3.704 |
| 6EDU | S_ARG_24  | NH1 | S_ASP_71 | OD1 | 3.743 |
| 6EDU | S_ARG_62  | NH2 | S_GLU_82 | OE2 | 3.020 |
| 6EDU | S_ARG_62  | NH2 | S_ASP_83 | OD2 | 3.975 |
| 6EDU | T_ARG_39  | NH1 | T_ASP_93 | OD1 | 3.408 |
| 6EDU | T_ARG_39  | NH2 | T_GLU_47 | OE1 | 3.894 |
| 6EDU | T_ARG_39  | NH2 | T_GLU_47 | OE2 | 3.043 |
| 6EDU | T_ARG_66  | NH1 | T_ASP_93 | OD2 | 3.616 |
| 6EDU | T_ARG_66  | NH2 | T_ASP_93 | OD2 | 2.801 |
| 6EDU | T_LYS_87  | NZ  | T_GLU_85 | OE2 | 3.426 |
| 6EDU | T_LYS_107 | NZ  | E_GLU_91 | OE1 | 3.475 |
| 6EDU | U_ARG_24  | NH1 | U_ASP_71 | OD1 | 3.744 |
| 6EDU | U_ARG_62  | NH2 | U_GLU_82 | OE2 | 3.020 |
| 6EDU | U_ARG_62  | NH2 | U_ASP_83 | OD2 | 3.976 |

Table 829: 6EDU-specific salt bridging networks analysis. In this table, a PDB file is specified with a four-letter PDB ID, except that the names of the PDB files corresponding to the single NMR structural model split from the NMR ensemble is specified with a four-letter PDB ID in addition to a hyphen followed by the single NMR structural model numeric ID, the residue naming scheme is **Chain ID\_residue name\_residue number**,  $\angle ADH$  represents the angle formed by acceptor (A), donor (D) and hydrogen (H) ( $\angle ADH$ ).

| PDB ID | Residue A | Atom A | Residue B | Atom B | Distance (Å) |
|--------|-----------|--------|-----------|--------|--------------|
| 6EJG   | A_LYS_116 | NZ     | A_ASP_117 | OD2    | 3.986        |
| 6EJG   | A_LYS_124 | NZ     | A_ASP_195 | OD1    | 3.544        |
| 6EJG   | A_LYS_124 | NZ     | A_ASP_195 | OD2    | 2.697        |
| 6EJG   | A_LYS_171 | NZ     | C_ASP_224 | OD2    | 3.396        |
| 6EJG   | A_LYS_171 | NZ     | C_ASP_226 | OD2    | 2.901        |
| 6EJG   | A_HIS_191 | NE2    | A_ASP_128 | OD1    | 3.062        |
| 6EJG   | A_HIS_191 | NE2    | A_ASP_128 | OD2    | 2.636        |
| 6EJG   | A_LYS_193 | NZ     | A_ASP_155 | OD1    | 3.682        |
| 6EJG   | B_LYS_124 | NZ     | B_ASP_195 | OD1    | 2.725        |
| 6EJG   | B_LYS_124 | NZ     | B_ASP_195 | OD2    | 3.034        |
| 6EJG   | B_LYS_    | NZ     | B_ASP_    | OD2    | 3.458        |
| 6EJG   | B_LYS_    | NZ     | D_ASP_    | OD1    | 3.521        |
| 6EJG   | B_LYS_    | NZ     | D_ASP_    | OD2    | 2.547        |
| 6EJG   | B_LYS_    | NZ     | D_ASP_    | OD2    | 2.932        |
| 6EJG   | B_HIS_191 | NE2    | B_ASP_    | OD1    | 2.701        |
| 6EJG   | B_HIS_191 | NE2    | B_ASP_    | OD2    | 3.241        |
| 6EJG   | C_ARG_62  | NH1    | C_ASP_112 | OD1    | 3.837        |
| 6EJG   | C_ARG_62  | NH2    | C_ASP_112 | OD1    | 3.201        |
| 6EJG   | C_ARG_62  | NH2    | C_ASP_112 | OD2    | 3.690        |
| 6EJG   | C_LYS_65  | NZ     | C_GLU_135 | OE1    | 3.179        |
| 6EJG   | C_LYS_91  | NZ     | C_GLU_97  | OE1    | 3.567        |
| 6EJG   | C_ARG_103 | NH1    | C_GLU_123 | OE2    | 3.023        |
| 6EJG   | C_ARG_103 | NH1    | C_ASP_124 | OD2    | 3.428        |
| 6EJG   | C_ARG_103 | NH2    | C_GLU_121 | OE2    | 3.520        |
| 6EJG   | C_ARG_209 | NH1    | C_GLU_258 | OE1    | 3.385        |
| 6EJG   | C_ARG_209 | NH1    | C_GLU_258 | OE2    | 3.605        |
| 6EJG   | C_ARG_219 | NH2    | C_GLU_268 | OE1    | 2.753        |
| 6EJG   | C_ARG_219 | NH2    | C_GLU_268 | OE2    | 3.078        |
| 6EJG   | C_LYS_236 | NZ     | C_ASP_259 | OD1    | 3.275        |
| 6EJG   | C_LYS_236 | NZ     | C_ASP_259 | OD2    | 2.696        |
| 6EJG   | C_ARG_277 | NH1    | C_ASP_273 | OD1    | 3.404        |
| 6EJG   | C_ARG_277 | NH1    | C_ASP_273 | OD2    | 3.492        |
| 6EJG   | C_ARG_277 | NH2    | C_GLU_97  | OE1    | 3.001        |
| 6EJG   | D_ARG_    | NH1    | D_ASP_    | OD1    | 2.944        |
| 6EJG   | D_ARG_    | NH1    | D_ASP_    | OD2    | 3.871        |
| 6EJG   | D_ARG_    | NH2    | D_ASP_    | OD1    | 3.096        |
| 6EJG   | D_ARG_    | NH2    | D_ASP_    | OD2    | 3.874        |
| 6EJG   | D_LYS_    | NZ     | D_GLU_    | OE1    | 2.983        |
| 6EJG   | D_LYS_    | NZ     | D_GLU_    | OE2    | 3.137        |
| 6EJG   | D_ARG_    | NH1    | D_GLU_    | OE2    | 3.108        |
| 6EJG   | D_ARG_    | NH1    | D_ASP_    | OD2    | 3.449        |
| 6EJG   | D_ARG_    | NH2    | D_ASP_    | OD1    | 2.957        |
| 6EJG   | D_ARG_    | NH2    | D_ASP_    | OD2    | 3.232        |
| 6EJG   | D_LYS_    | NZ     | D_ASP_    | OD1    | 3.981        |
| 6EJG   | D_ARG_    | NH2    | D_GLU_    | OE1    | 2.937        |
| 6EJG   | D_ARG_    | NH2    | D_GLU_    | OE2    | 3.024        |
| 6EJG   | D_LYS_    | NZ     | D_ASP_    | OD1    | 3.260        |
| 6EJG   | D_LYS_    | NZ     | D_ASP_    | OD2    | 2.656        |
| 6EJG   | D_ARG_    | NH1    | D_ASP_    | OD1    | 3.140        |
| 6EJG   | D_ARG_    | NH1    | D_ASP_    | OD2    | 3.900        |
| 6EJG   | D_ARG_    | NH2    | D_GLU_    | OE1    | 3.261        |
| 6EJG   | D_ARG_    | NH2    | D_GLU_    | OE2    | 3.642        |

---

Table 830: 6EJG-specific salt bridging networks analysis. In this table, a PDB file is specified with a four-letter PDB ID, except that the names of the PDB files corresponding to the single NMR structural model split from the NMR ensemble is specified with a four-letter PDB ID in addition to a hyphen followed by the single NMR structural model numeric ID, the residue naming scheme is **Chain ID\_residue name\_residue number**,  $\angle ADH$  represents the angle formed by acceptor (A), donor (D) and hydrogen (H) ( $\angle ADH$ ).



| PDB ID | Residue A | Atom A | Residue B | Atom B | Distance (Å) |
|--------|-----------|--------|-----------|--------|--------------|
| 6EJM   | A_LYS_124 | NZ     | A_ASP_195 | OD1    | 3.195        |
| 6EJM   | A_LYS_124 | NZ     | A_ASP_195 | OD2    | 2.580        |
| 6EJM   | A_HIS_191 | NE2    | A_ASP_128 | OD1    | 3.203        |
| 6EJM   | A_HIS_191 | NE2    | A_ASP_128 | OD2    | 2.407        |
| 6EJM   | A_HIS_204 | ND1    | B_GLU_152 | OE2    | 3.786        |
| 6EJM   | B_LYS_124 | NZ     | B_ASP_195 | OD1    | 2.563        |
| 6EJM   | B_LYS_124 | NZ     | B_ASP_195 | OD2    | 3.251        |
| 6EJM   | B_HIS_191 | NE2    | B_ASP_128 | OD1    | 2.629        |
| 6EJM   | B_HIS_191 | NE2    | B_ASP_128 | OD2    | 3.201        |
| 6EJM   | B_LYS_193 | NZ     | B_GLU_188 | OE2    | 3.576        |
| 6EJM   | H_ARG_76  | NH1    | H_GLU_84  | OE1    | 2.904        |
| 6EJM   | H_ARG_76  | NH1    | H_ASP_128 | OD1    | 3.983        |
| 6EJM   | H_ARG_76  | NH2    | H_ASP_128 | OD1    | 2.619        |
| 6EJM   | H_ARG_105 | NH1    | H_ASP_128 | OD1    | 3.929        |
| 6EJM   | H_ARG_105 | NH1    | H_ASP_128 | OD2    | 2.801        |
| 6EJM   | H_ARG_105 | NH2    | H_ASP_128 | OD1    | 3.282        |
| 6EJM   | H_ARG_105 | NH2    | H_ASP_128 | OD2    | 3.596        |
| 6EJM   | H_LYS_114 | NZ     | H_ASP_111 | OD1    | 3.878        |
| 6EJM   | H_LYS_198 | NZ     | H_ASP_249 | OD2    | 3.812        |
| 6EJM   | H_ARG_225 | NH2    | H_ASP_142 | OD2    | 3.513        |
| 6EJM   | H_ARG_240 | NH1    | H_GLU_258 | OE1    | 3.177        |
| 6EJM   | H_ARG_240 | NH1    | H_GLU_258 | OE2    | 3.066        |
| 6EJM   | H_ARG_240 | NH1    | H_GLU_260 | OE2    | 3.276        |
| 6EJM   | H_ARG_240 | NH1    | H_ASP_261 | OD2    | 3.562        |
| 6EJM   | H_ARG_240 | NH2    | H_ASP_261 | OD1    | 2.537        |
| 6EJM   | H_ARG_240 | NH2    | H_ASP_261 | OD2    | 2.801        |
| 6EJM   | I_ARG_76  | NH1    | I_GLU_84  | OE1    | 2.878        |
| 6EJM   | I_ARG_76  | NH2    | I_ASP_128 | OD1    | 2.699        |
| 6EJM   | I_ARG_82  | NH2    | I_GLU_84  | OE2    | 3.006        |
| 6EJM   | I_ARG_105 | NH1    | I_ASP_128 | OD1    | 3.783        |
| 6EJM   | I_ARG_105 | NH1    | I_ASP_128 | OD2    | 2.828        |
| 6EJM   | I_ARG_105 | NH2    | I_ASP_128 | OD1    | 3.082        |
| 6EJM   | I_ARG_105 | NH2    | I_ASP_128 | OD2    | 3.617        |
| 6EJM   | I_ARG_225 | NH2    | I_ASP_142 | OD2    | 3.785        |
| 6EJM   | I_ARG_240 | NH2    | I_ASP_261 | OD1    | 3.449        |
| 6EJM   | I_ARG_240 | NH2    | I_ASP_261 | OD2    | 2.659        |

Table 831: 6EJM-specific salt bridging networks analysis. In this table, a PDB file is specified with a four-letter PDB ID, except that the names of the PDB files corresponding to the single NMR structural model split from the NMR ensemble is specified with a four-letter PDB ID in addition to a hyphen followed by the single NMR structural model numeric ID, the residue naming scheme is **Chain ID\_residue name\_residue number**,  $\angle ADH$  represents the angle formed by acceptor (A), donor (D) and hydrogen (H) ( $\angle ADH$ ).

| PDB ID | Residue A | Atom A | Residue B | Atom B | Distance (Å) |
|--------|-----------|--------|-----------|--------|--------------|
| 6EK2   | A_LYS_124 | NZ     | A_ASP_195 | OD1    | 3.535        |
| 6EK2   | A_LYS_124 | NZ     | A_ASP_195 | OD2    | 2.854        |
| 6EK2   | A_LYS_187 | NZ     | A_ASP_189 | OD1    | 3.611        |
| 6EK2   | A_HIS_191 | NE2    | A_ASP_128 | OD1    | 3.936        |
| 6EK2   | A_HIS_191 | NE2    | A_ASP_128 | OD2    | 2.649        |
| 6EK2   | B_LYS_124 | NZ     | B_ASP_195 | OD1    | 2.644        |
| 6EK2   | B_LYS_124 | NZ     | B_ASP_195 | OD2    | 3.630        |
| 6EK2   | B_LYS_144 | NZ     | B_ASP_137 | OD1    | 3.085        |
| 6EK2   | B_HIS_191 | NE2    | B_ASP_128 | OD1    | 2.602        |
| 6EK2   | B_HIS_191 | NE2    | B_ASP_128 | OD2    | 3.758        |
| 6EK2   | B_LYS_193 | NZ     | B_ASP_189 | OD1    | 3.150        |
| 6EK2   | H_LYS_188 | NZ     | H_ASP_249 | OD1    | 2.862        |
| 6EK2   | H_HIS_204 | NE2    | H_ASP_268 | OD1    | 2.734        |
| 6EK2   | H_ARG_207 | NH1    | H_GLU_215 | OE1    | 3.268        |
| 6EK2   | H_ARG_207 | NH1    | H_GLU_215 | OE2    | 3.622        |
| 6EK2   | H_ARG_207 | NH1    | H_GLU_258 | OE2    | 3.557        |
| 6EK2   | H_ARG_207 | NH2    | H_ASP_259 | OD1    | 2.945        |
| 6EK2   | H_ARG_213 | NH1    | H_GLU_215 | OE1    | 3.256        |
| 6EK2   | H_ARG_213 | NH1    | H_GLU_215 | OE2    | 3.614        |
| 6EK2   | H_ARG_236 | NH1    | H_ASP_259 | OD1    | 3.179        |
| 6EK2   | H_ARG_236 | NH1    | H_ASP_259 | OD2    | 2.190        |
| 6EK2   | H_ARG_236 | NH2    | H_GLU_258 | OE2    | 3.829        |
| 6EK2   | H_ARG_236 | NH2    | H_ASP_259 | OD1    | 3.282        |
| 6EK2   | H_ARG_236 | NH2    | H_ASP_259 | OD2    | 3.781        |
| 6EK2   | H_LYS_247 | NZ     | H_ASP_249 | OD1    | 3.816        |
| 6EK2   | H_LYS_271 | NZ     | H_ASP_222 | OD2    | 3.418        |
| 6EK2   | H_LYS_362 | NZ     | H_ASP_408 | OD2    | 3.909        |
| 6EK2   | H_ARG_370 | NH1    | A_GLU_188 | OE2    | 3.014        |
| 6EK2   | H_ARG_370 | NH2    | A_GLU_188 | OE1    | 3.920        |
| 6EK2   | H_ARG_370 | NH2    | A_GLU_188 | OE2    | 3.261        |
| 6EK2   | H_ARG_399 | NH1    | H_ASP_420 | OD1    | 3.412        |
| 6EK2   | H_ARG_399 | NH1    | H_ASP_420 | OD2    | 2.682        |
| 6EK2   | H_LYS_441 | NZ     | H_GLU_443 | OE2    | 3.288        |
| 6EK2   | I_LYS_188 | NZ     | I_ASP_249 | OD1    | 2.854        |
| 6EK2   | I_HIS_204 | NE2    | I_ASP_268 | OD2    | 2.800        |
| 6EK2   | I_ARG_207 | NH1    | I_GLU_215 | OE1    | 3.248        |
| 6EK2   | I_ARG_207 | NH1    | I_GLU_215 | OE2    | 3.625        |
| 6EK2   | I_ARG_207 | NH1    | I_GLU_258 | OE2    | 3.570        |
| 6EK2   | I_ARG_207 | NH2    | I_ASP_259 | OD1    | 2.867        |
| 6EK2   | I_ARG_236 | NH1    | I_ASP_259 | OD1    | 2.843        |
| 6EK2   | I_ARG_236 | NH1    | I_ASP_259 | OD2    | 2.628        |
| 6EK2   | I_LYS_247 | NZ     | I_ASP_249 | OD1    | 3.833        |
| 6EK2   | I_LYS_271 | NZ     | I_ASP_222 | OD2    | 3.427        |
| 6EK2   | I_LYS_362 | NZ     | I_ASP_408 | OD2    | 3.921        |
| 6EK2   | I_ARG_370 | NH1    | B_GLU_188 | OE1    | 2.817        |
| 6EK2   | I_ARG_370 | NH1    | B_GLU_188 | OE2    | 3.286        |
| 6EK2   | I_ARG_370 | NH2    | B_GLU_188 | OE1    | 3.837        |
| 6EK2   | I_ARG_370 | NH2    | B_GLU_188 | OE2    | 3.095        |
| 6EK2   | I_ARG_399 | NH1    | I_ASP_420 | OD1    | 3.393        |
| 6EK2   | I_ARG_399 | NH1    | I_ASP_420 | OD2    | 2.676        |
| 6EK2   | I_LYS_441 | NZ     | I_GLU_443 | OE2    | 3.785        |

---

Table 832: 6EK2-specific salt bridging networks analysis. In this table, a PDB file is specified with a four-letter PDB ID, except that the names of the PDB files corresponding to the single NMR structural model split from the NMR ensemble is specified with a four-letter PDB ID in addition to a hyphen followed by the single NMR structural model numeric ID, the residue naming scheme is **Chain ID\_residue name\_residue number**,  $\angle ADH$  represents the angle formed by acceptor (A), donor (D) and hydrogen (H) ( $\angle ADH$ ).

| PDB ID | Residue A | Atom A | Residue B | Atom B | Distance (Å) |
|--------|-----------|--------|-----------|--------|--------------|
| 6EUN   | A_LYS_82  | NZ     | A_GLU_77  | OE2    | 2.937        |
| 6EUN   | A_LYS_87  | NZ     | B_GLU_47  | OE1    | 3.058        |
| 6EUN   | A_LYS_101 | NZ     | A_ASP_105 | OD2    | 3.752        |
| 6EUN   | A_LYS_107 | NZ     | C_ASP_105 | OD1    | 3.488        |
| 6EUN   | A_LYS_145 | NZ     | A_GLU_148 | OE2    | 3.702        |
| 6EUN   | A_LYS_167 | NZ     | C_ASP_165 | OD1    | 3.883        |
| 6EUN   | B_LYS_69  | NZ     | B_ASP_59  | OD2    | 2.842        |
| 6EUN   | B_LYS_82  | NZ     | B_GLU_77  | OE2    | 2.936        |
| 6EUN   | B_LYS_87  | NZ     | C_GLU_47  | OE1    | 3.021        |
| 6EUN   | B_LYS_101 | NZ     | B_ASP_105 | OD2    | 3.762        |
| 6EUN   | B_LYS_107 | NZ     | A_ASP_105 | OD1    | 3.579        |
| 6EUN   | B_LYS_145 | NZ     | B_GLU_148 | OE2    | 3.617        |
| 6EUN   | C_LYS_69  | NZ     | C_ASP_59  | OD2    | 2.843        |
| 6EUN   | C_LYS_82  | NZ     | C_GLU_77  | OE2    | 2.928        |
| 6EUN   | C_LYS_87  | NZ     | A_GLU_47  | OE1    | 3.007        |
| 6EUN   | C_LYS_101 | NZ     | C_ASP_105 | OD2    | 3.754        |
| 6EUN   | C_LYS_107 | NZ     | B_ASP_105 | OD1    | 3.525        |
| 6EUN   | C_LYS_145 | NZ     | C_GLU_148 | OE2    | 3.782        |

Table 833: 6EUN-specific salt bridging networks analysis. In this table, a PDB file is specified with a four-letter PDB ID, except that the names of the PDB files corresponding to the single NMR structural model split from the NMR ensemble is specified with a four-letter PDB ID in addition to a hyphen followed by the single NMR structural model numeric ID, the residue naming scheme is **Chain ID\_residue name\_residue number**,  $\angle ADH$  represents the angle formed by acceptor (A), donor (D) and hydrogen (H) ( $\angle ADH$ ).

| PDB ID | Residue A | Atom A | Residue B | Atom B | Distance (Å) |
|--------|-----------|--------|-----------|--------|--------------|
| 6EUP   | A.LYS_69  | NZ     | A.ASP_59  | OD2    | 3.593        |
| 6EUP   | A.LYS_87  | NZ     | B.GLU_47  | OE1    | 2.842        |
| 6EUP   | A.LYS_87  | NZ     | B.ASP_79  | OD1    | 3.786        |
| 6EUP   | A.LYS_107 | NZ     | C.ASP_105 | OD1    | 3.538        |
| 6EUP   | A.LYS_145 | NZ     | A.GLU_148 | OE2    | 3.961        |
| 6EUP   | B.LYS_69  | NZ     | B.ASP_75  | OD1    | 3.179        |
| 6EUP   | B.LYS_69  | NZ     | B.ASP_75  | OD2    | 2.780        |
| 6EUP   | B.LYS_87  | NZ     | C.GLU_47  | OE1    | 2.811        |
| 6EUP   | B.LYS_87  | NZ     | C.ASP_79  | OD1    | 3.799        |
| 6EUP   | B.LYS_107 | NZ     | A.ASP_105 | OD1    | 3.723        |
| 6EUP   | C.LYS_69  | NZ     | C.ASP_59  | OD2    | 3.592        |
| 6EUP   | C.LYS_87  | NZ     | A.GLU_47  | OE1    | 2.814        |
| 6EUP   | C.LYS_87  | NZ     | A.ASP_79  | OD1    | 3.752        |
| 6EUP   | C.LYS_107 | NZ     | B.ASP_105 | OD1    | 3.560        |
| 6EUP   | C.LYS_145 | NZ     | C.GLU_148 | OE2    | 3.928        |

Table 834: 6EUP-specific salt bridging networks analysis. In this table, a PDB file is specified with a four-letter PDB ID, except that the names of the PDB files corresponding to the single NMR structural model split from the NMR ensemble is specified with a four-letter PDB ID in addition to a hyphen followed by the single NMR structural model numeric ID, the residue naming scheme is **Chain ID\_residue name\_residue number**,  $\angle ADH$  represents the angle formed by acceptor (A), donor (D) and hydrogen (H) ( $\angle ADH$ ).

| PDB ID | Residue A | Atom A | Residue B | Atom B | Distance (Å) |
|--------|-----------|--------|-----------|--------|--------------|
| 6EV1   | A_ARG_40  | NH1    | A_GLU_46  | OE1    | 3.790        |
| 6EV1   | A_ARG_40  | NH1    | A_GLU_46  | OE2    | 2.696        |
| 6EV1   | A_ARG_40  | NH2    | A_GLU_46  | OE2    | 2.910        |
| 6EV1   | A_LYS_63  | NZ     | A_GLU_46  | OE1    | 3.383        |
| 6EV1   | A_LYS_67  | NZ     | A_ASP_90  | OD1    | 3.842        |
| 6EV1   | A_LYS_67  | NZ     | A_ASP_90  | OD2    | 2.754        |
| 6EV1   | A_LYS_147 | NZ     | A_ASP_148 | OD1    | 3.932        |
| 6EV1   | A_LYS_213 | NZ     | B_GLU_122 | OE1    | 3.565        |
| 6EV1   | B_HIS_33  | NE2    | B_ASP_49  | OD1    | 3.832        |
| 6EV1   | B_ARG_45  | NH1    | A_ASP_105 | OD1    | 3.400        |
| 6EV1   | B_LYS_52  | NZ     | B_ASP_49  | OD2    | 3.765        |
| 6EV1   | B_ARG_60  | NH1    | B_GLU_78  | OE1    | 3.819        |
| 6EV1   | B_ARG_60  | NH1    | B_GLU_78  | OE2    | 3.655        |
| 6EV1   | B_ARG_60  | NH2    | B_GLU_78  | OE2    | 3.561        |
| 6EV1   | B_ARG_60  | NH2    | B_GLU_80  | OE2    | 2.733        |
| 6EV1   | B_ARG_60  | NH2    | B_ASP_81  | OD1    | 3.048        |
| 6EV1   | B_ARG_60  | NH2    | B_ASP_81  | OD2    | 3.747        |
| 6EV1   | B_LYS_102 | NZ     | B_GLU_104 | OE2    | 3.444        |
| 6EV1   | B_LYS_102 | NZ     | B_GLU_164 | OE2    | 3.563        |
| 6EV1   | B_ARG_141 | NH1    | B_GLU_104 | OE1    | 3.542        |
| 6EV1   | B_ARG_141 | NH1    | B_GLU_104 | OE2    | 2.887        |
| 6EV1   | B_ARG_141 | NH2    | B_GLU_104 | OE1    | 3.560        |
| 6EV1   | B_ARG_141 | NH2    | B_GLU_104 | OE2    | 2.857        |
| 6EV1   | B_LYS_144 | NZ     | B_GLU_194 | OE2    | 3.954        |
| 6EV1   | B_LYS_148 | NZ     | B_GLU_194 | OE1    | 2.745        |
| 6EV1   | B_LYS_187 | NZ     | B_ASP_184 | OD1    | 3.196        |
| 6EV1   | C_LYS_38  | NZ     | C_GLU_89  | OE2    | 2.747        |
| 6EV1   | C_LYS_63  | NZ     | C_GLU_46  | OE1    | 3.586        |
| 6EV1   | C_LYS_63  | NZ     | C_GLU_46  | OE2    | 3.868        |
| 6EV1   | C_LYS_63  | NZ     | C_GLU_89  | OE2    | 3.610        |
| 6EV1   | C_LYS_67  | NZ     | C_ASP_90  | OD1    | 3.419        |
| 6EV1   | C_LYS_67  | NZ     | C_ASP_90  | OD2    | 2.576        |
| 6EV1   | C_LYS_147 | NZ     | C_ASP_148 | OD1    | 3.591        |
| 6EV1   | D_LYS_52  | NZ     | D_ASP_49  | OD2    | 3.936        |
| 6EV1   | D_ARG_60  | NH1    | D_GLU_78  | OE1    | 3.982        |
| 6EV1   | D_ARG_60  | NH1    | D_ASP_81  | OD1    | 2.686        |
| 6EV1   | D_ARG_60  | NH1    | D_ASP_81  | OD2    | 2.341        |
| 6EV1   | D_ARG_60  | NH2    | D_GLU_78  | OE2    | 3.908        |
| 6EV1   | D_ARG_60  | NH2    | D_GLU_80  | OE2    | 2.672        |
| 6EV1   | D_ARG_60  | NH2    | D_ASP_81  | OD1    | 3.533        |
| 6EV1   | D_LYS_102 | NZ     | D_GLU_104 | OE2    | 2.957        |
| 6EV1   | D_LYS_102 | NZ     | D_GLU_164 | OE1    | 3.066        |
| 6EV1   | D_ARG_141 | NH1    | D_GLU_104 | OE1    | 3.100        |
| 6EV1   | D_ARG_141 | NH1    | D_GLU_104 | OE2    | 2.729        |
| 6EV1   | D_ARG_141 | NH2    | D_GLU_104 | OE1    | 3.502        |
| 6EV1   | D_LYS_148 | NZ     | D_GLU_194 | OE2    | 2.419        |
| 6EV1   | D_LYS_187 | NZ     | D_ASP_184 | OD1    | 2.568        |
| 6EV1   | D_LYS_187 | NZ     | D_ASP_184 | OD2    | 3.848        |
| 6EV1   | E_ARG_40  | NH1    | E_GLU_46  | OE1    | 3.238        |
| 6EV1   | E_LYS_67  | NZ     | E_ASP_90  | OD1    | 3.136        |
| 6EV1   | E_LYS_67  | NZ     | E_ASP_90  | OD2    | 3.150        |
| 6EV1   | E_LYS_147 | NZ     | E_ASP_148 | OD1    | 3.641        |
| 6EV1   | E_LYS_147 | NZ     | E_ASP_148 | OD2    | 3.538        |
| 6EV1   | E_LYS_213 | NZ     | F_GLU_122 | OE2    | 3.696        |
| 6EV1   | E_LYS_214 | NZ     | E_GLU_216 | OE2    | 3.745        |
| 6EV1   | F_ARG_45  | NH1    | E_ASP_105 | OD1    | 3.598        |
| 6EV1   | F_LYS_52  | NZ     | F_ASP_49  | OD2    | 3.409        |

|      |           |     |           |     |       |
|------|-----------|-----|-----------|-----|-------|
| 6EV1 | F_ARG_60  | NH1 | F_GLU_78  | OE1 | 3.963 |
| 6EV1 | F_ARG_60  | NH2 | F_GLU_80  | OE2 | 2.462 |
| 6EV1 | F_ARG_60  | NH2 | F_ASP_81  | OD1 | 2.838 |
| 6EV1 | F_ARG_60  | NH2 | F_ASP_81  | OD2 | 3.378 |
| 6EV1 | F_LYS_102 | NZ  | F_GLU_104 | OE2 | 3.200 |
| 6EV1 | F_LYS_102 | NZ  | F_GLU_164 | OE1 | 3.253 |
| 6EV1 | F_LYS_102 | NZ  | F_GLU_164 | OE2 | 3.819 |
| 6EV1 | F_ARG_141 | NH1 | F_GLU_142 | OE2 | 3.956 |
| 6EV1 | F_ARG_141 | NH2 | F_GLU_104 | OE1 | 2.879 |
| 6EV1 | F_ARG_141 | NH2 | F_GLU_104 | OE2 | 2.315 |
| 6EV1 | F_LYS_148 | NZ  | F_GLU_194 | OE1 | 2.676 |
| 6EV1 | F_LYS_187 | NZ  | F_ASP_184 | OD1 | 3.320 |
| 6EV1 | F_LYS_189 | NZ  | F_GLU_212 | OE1 | 3.396 |
| 6EV1 | G_ARG_40  | NH1 | G_GLU_46  | OE1 | 3.181 |
| 6EV1 | G_LYS_63  | NZ  | G_GLU_46  | OE1 | 3.941 |
| 6EV1 | G_LYS_63  | NZ  | G_GLU_46  | OE2 | 3.486 |
| 6EV1 | G_LYS_67  | NZ  | G_ASP_90  | OD1 | 3.844 |
| 6EV1 | G_LYS_67  | NZ  | G_ASP_90  | OD2 | 3.076 |
| 6EV1 | G_LYS_213 | NZ  | H_GLU_122 | OE2 | 3.127 |
| 6EV1 | H_HIS_33  | NE2 | H_ASP_49  | OD1 | 3.831 |
| 6EV1 | H_ARG_60  | NH2 | H_GLU_80  | OE2 | 2.685 |
| 6EV1 | H_ARG_60  | NH2 | H_ASP_81  | OD1 | 3.172 |
| 6EV1 | H_ARG_60  | NH2 | H_ASP_81  | OD2 | 3.902 |
| 6EV1 | H_LYS_102 | NZ  | H_GLU_104 | OE2 | 2.463 |
| 6EV1 | H_LYS_102 | NZ  | H_GLU_164 | OE1 | 3.887 |
| 6EV1 | H_LYS_102 | NZ  | H_GLU_164 | OE2 | 3.148 |
| 6EV1 | H_ARG_141 | NH1 | H_GLU_104 | OE1 | 3.993 |
| 6EV1 | H_ARG_141 | NH2 | H_GLU_104 | OE1 | 2.709 |
| 6EV1 | H_ARG_141 | NH2 | H_GLU_104 | OE2 | 3.012 |
| 6EV1 | H_HIS_188 | ND1 | H_ASP_150 | OD2 | 3.547 |
| 6EV1 | I_ARG_40  | NH1 | I_GLU_46  | OE1 | 3.727 |
| 6EV1 | I_ARG_40  | NH1 | I_GLU_46  | OE2 | 2.502 |
| 6EV1 | I_ARG_40  | NH2 | I_GLU_46  | OE2 | 3.081 |
| 6EV1 | I_LYS_67  | NZ  | I_ASP_90  | OD1 | 3.185 |
| 6EV1 | I_LYS_67  | NZ  | I_ASP_90  | OD2 | 2.453 |
| 6EV1 | I_LYS_147 | NZ  | I_ASP_148 | OD1 | 3.802 |
| 6EV1 | I_LYS_213 | NZ  | J_GLU_122 | OE1 | 2.884 |
| 6EV1 | I_LYS_213 | NZ  | J_GLU_122 | OE2 | 3.812 |
| 6EV1 | J_ARG_45  | NH2 | I_ASP_105 | OD1 | 3.213 |
| 6EV1 | J_ARG_45  | NH2 | I_ASP_105 | OD2 | 3.457 |
| 6EV1 | J_ARG_60  | NH1 | J_GLU_78  | OE1 | 2.996 |
| 6EV1 | J_ARG_60  | NH2 | J_GLU_78  | OE1 | 2.740 |
| 6EV1 | J_ARG_60  | NH2 | J_GLU_78  | OE2 | 3.438 |
| 6EV1 | J_ARG_60  | NH2 | J_GLU_80  | OE1 | 3.708 |
| 6EV1 | J_ARG_60  | NH2 | J_ASP_81  | OD1 | 3.548 |
| 6EV1 | J_LYS_102 | NZ  | J_GLU_164 | OE1 | 3.206 |
| 6EV1 | J_LYS_102 | NZ  | J_GLU_164 | OE2 | 3.357 |
| 6EV1 | J_ARG_141 | NH1 | J_GLU_104 | OE1 | 3.574 |
| 6EV1 | J_ARG_141 | NH1 | J_GLU_104 | OE2 | 3.837 |
| 6EV1 | J_ARG_141 | NH2 | J_GLU_104 | OE1 | 3.635 |
| 6EV1 | J_ARG_141 | NH2 | J_GLU_104 | OE2 | 3.025 |
| 6EV1 | J_LYS_148 | NZ  | J_GLU_194 | OE1 | 2.568 |
| 6EV1 | J_LYS_187 | NZ  | J_ASP_184 | OD1 | 2.786 |
| 6EV1 | J_HIS_188 | ND1 | J_ASP_150 | OD2 | 3.581 |
| 6EV1 | K_LYS_67  | NZ  | K_ASP_90  | OD1 | 3.821 |
| 6EV1 | K_LYS_67  | NZ  | K_ASP_90  | OD2 | 3.131 |
| 6EV1 | K_LYS_147 | NZ  | K_ASP_148 | OD1 | 3.891 |
| 6EV1 | K_LYS_147 | NZ  | K_ASP_148 | OD2 | 3.991 |

|      |           |     |           |     |       |
|------|-----------|-----|-----------|-----|-------|
| 6EV1 | K_HIS_168 | NE2 | L_ASP_166 | OD2 | 3.740 |
| 6EV1 | K_LYS_213 | NZ  | L_GLU_122 | OE1 | 3.450 |
| 6EV1 | L_ARG_45  | NH2 | K_ASP_105 | OD1 | 3.857 |
| 6EV1 | L_LYS_52  | NZ  | L_ASP_49  | OD2 | 3.305 |
| 6EV1 | L_ARG_60  | NH1 | L_GLU_78  | OE2 | 3.656 |
| 6EV1 | L_ARG_60  | NH2 | L_GLU_80  | OE2 | 2.289 |
| 6EV1 | L_ARG_60  | NH2 | L_ASP_81  | OD1 | 3.740 |
| 6EV1 | L_LYS_102 | NZ  | L_GLU_104 | OE1 | 3.803 |
| 6EV1 | L_LYS_102 | NZ  | L_GLU_104 | OE2 | 3.397 |
| 6EV1 | L_LYS_102 | NZ  | L_GLU_164 | OE1 | 3.211 |
| 6EV1 | L_ARG_141 | NH1 | L_GLU_104 | OE1 | 3.719 |
| 6EV1 | L_LYS_148 | NZ  | L_GLU_194 | OE1 | 2.763 |
| 6EV1 | L_LYS_187 | NZ  | L_ASP_184 | OD1 | 2.439 |
| 6EV1 | L_LYS_187 | NZ  | L_ASP_184 | OD2 | 3.983 |

Table 835: 6EV1-specific salt bridging networks analysis. In this table, a PDB file is specified with a four-letter PDB ID, except that the names of the PDB files corresponding to the single NMR structural model split from the NMR ensemble is specified with a four-letter PDB ID in addition to a hyphen followed by the single NMR structural model numeric ID, the residue naming scheme is **Chain ID\_residue name\_residue number**,  $\angle ADH$  represents the angle formed by acceptor (A), donor (D) and hydrogen (H) ( $\angle ADH$ ).



| PDB ID | Residue A | Atom A | Residue B | Atom B | Distance (Å) |
|--------|-----------|--------|-----------|--------|--------------|
| 6EV2   | A.LYS_63  | NZ     | A.GLU_46  | OE2    | 3.111        |
| 6EV2   | A.LYS_65  | NZ     | A.ASP_66  | OD1    | 3.842        |
| 6EV2   | A.LYS_65  | NZ     | A.ASP_66  | OD2    | 2.879        |
| 6EV2   | A.LYS_67  | NZ     | A.ASP_90  | OD1    | 3.783        |
| 6EV2   | A.LYS_67  | NZ     | A.ASP_90  | OD2    | 2.679        |
| 6EV2   | A.LYS_147 | NZ     | A.ASP_148 | OD1    | 3.638        |
| 6EV2   | A.LYS_213 | NZ     | B.GLU_122 | OE1    | 3.442        |
| 6EV2   | B.ARG_45  | NH1    | A.ASP_105 | OD1    | 3.088        |
| 6EV2   | B.LYS_52  | NZ     | B.ASP_49  | OD2    | 3.559        |
| 6EV2   | B.ARG_60  | NH1    | B.GLU_78  | OE1    | 3.644        |
| 6EV2   | B.ARG_60  | NH1    | B.GLU_78  | OE2    | 3.977        |
| 6EV2   | B.ARG_60  | NH2    | B.GLU_80  | OE2    | 3.107        |
| 6EV2   | B.ARG_60  | NH2    | B.ASP_81  | OD1    | 2.872        |
| 6EV2   | B.ARG_60  | NH2    | B.ASP_81  | OD2    | 3.612        |
| 6EV2   | B.LYS_102 | NZ     | B.GLU_104 | OE1    | 3.573        |
| 6EV2   | B.LYS_102 | NZ     | B.GLU_164 | OE1    | 3.299        |
| 6EV2   | B.LYS_102 | NZ     | B.GLU_164 | OE2    | 3.878        |
| 6EV2   | B.ARG_141 | NH2    | B.GLU_104 | OE1    | 3.798        |
| 6EV2   | B.ARG_141 | NH2    | B.GLU_104 | OE2    | 3.715        |
| 6EV2   | B.LYS_168 | NZ     | F.GLU_78  | OE2    | 2.948        |
| 6EV2   | B.LYS_182 | NZ     | B.GLU_186 | OE2    | 3.804        |
| 6EV2   | B.HIS_188 | ND1    | B.ASP_150 | OD2    | 3.294        |
| 6EV2   | B.HIS_217 | NE2    | B.GLU_186 | OE2    | 3.191        |
| 6EV2   | C.LYS_38  | NZ     | C.GLU_46  | OE1    | 3.925        |
| 6EV2   | C.ARG_40  | NH1    | C.GLU_89  | OE1    | 2.530        |
| 6EV2   | C.ARG_40  | NH1    | C.GLU_89  | OE2    | 3.940        |
| 6EV2   | C.ARG_40  | NH2    | C.GLU_89  | OE1    | 2.841        |
| 6EV2   | C.LYS_63  | NZ     | C.GLU_46  | OE2    | 2.910        |
| 6EV2   | C.LYS_67  | NZ     | C.ASP_90  | OD1    | 3.799        |
| 6EV2   | C.LYS_67  | NZ     | C.ASP_90  | OD2    | 2.689        |
| 6EV2   | C.LYS_147 | NZ     | C.ASP_148 | OD1    | 3.909        |
| 6EV2   | C.LYS_214 | NZ     | C.GLU_216 | OE1    | 3.019        |
| 6EV2   | C.LYS_214 | NZ     | C.GLU_216 | OE2    | 3.275        |
| 6EV2   | D.LYS_44  | NZ     | C.ASP_105 | OD2    | 3.822        |
| 6EV2   | D.ARG_45  | NH1    | C.ASP_105 | OD1    | 3.142        |
| 6EV2   | D.LYS_52  | NZ     | D.ASP_49  | OD2    | 3.541        |
| 6EV2   | D.ARG_60  | NH1    | D.GLU_78  | OE1    | 3.997        |
| 6EV2   | D.ARG_60  | NH1    | D.GLU_78  | OE2    | 3.666        |
| 6EV2   | D.ARG_60  | NH2    | D.GLU_80  | OE2    | 2.969        |
| 6EV2   | D.ARG_60  | NH2    | D.ASP_81  | OD1    | 2.871        |
| 6EV2   | D.ARG_60  | NH2    | D.ASP_81  | OD2    | 3.679        |
| 6EV2   | D.LYS_102 | NZ     | D.GLU_164 | OE1    | 3.482        |
| 6EV2   | D.ARG_141 | NH2    | D.GLU_104 | OE1    | 3.236        |
| 6EV2   | D.ARG_141 | NH2    | D.GLU_104 | OE2    | 3.266        |
| 6EV2   | D.LYS_148 | NZ     | D.GLU_194 | OE1    | 3.886        |
| 6EV2   | D.LYS_148 | NZ     | D.GLU_194 | OE2    | 2.872        |
| 6EV2   | D.LYS_168 | NZ     | H.GLU_78  | OE2    | 3.198        |
| 6EV2   | D.HIS_188 | ND1    | D.ASP_150 | OD2    | 3.510        |
| 6EV2   | E.ARG_40  | NH1    | E.GLU_89  | OE1    | 3.472        |
| 6EV2   | E.ARG_40  | NH1    | E.GLU_89  | OE2    | 2.763        |
| 6EV2   | E.ARG_40  | NH2    | E.GLU_89  | OE2    | 2.889        |
| 6EV2   | E.LYS_63  | NZ     | E.GLU_46  | OE1    | 3.154        |
| 6EV2   | E.LYS_63  | NZ     | E.GLU_46  | OE2    | 2.770        |
| 6EV2   | E.LYS_67  | NZ     | E.ASP_90  | OD1    | 3.680        |
| 6EV2   | E.LYS_67  | NZ     | E.ASP_90  | OD2    | 2.852        |
| 6EV2   | E.LYS_147 | NZ     | E.ASP_148 | OD1    | 2.804        |
| 6EV2   | E.LYS_147 | NZ     | E.ASP_148 | OD2    | 3.429        |

|      |           |     |           |     |       |
|------|-----------|-----|-----------|-----|-------|
| 6EV2 | E_LYS_210 | NZ  | E_ASP_212 | OD1 | 3.724 |
| 6EV2 | E_LYS_210 | NZ  | E_ASP_212 | OD2 | 3.578 |
| 6EV2 | E_LYS_213 | NZ  | F_GLU_122 | OE1 | 3.493 |
| 6EV2 | E_LYS_214 | NZ  | E_GLU_216 | OE2 | 2.823 |
| 6EV2 | E_LYS_218 | NZ  | F_ASP_121 | OD2 | 3.835 |
| 6EV2 | F_ARG_45  | NH1 | E_ASP_105 | OD1 | 2.818 |
| 6EV2 | F_LYS_52  | NZ  | F_ASP_49  | OD2 | 3.921 |
| 6EV2 | F_ARG_60  | NH1 | F_GLU_78  | OE2 | 3.617 |
| 6EV2 | F_ARG_60  | NH2 | F_GLU_80  | OE2 | 3.106 |
| 6EV2 | F_ARG_60  | NH2 | F_ASP_81  | OD1 | 2.910 |
| 6EV2 | F_ARG_60  | NH2 | F_ASP_81  | OD2 | 3.493 |
| 6EV2 | F_LYS_102 | NZ  | F_GLU_104 | OE2 | 3.866 |
| 6EV2 | F_LYS_102 | NZ  | F_GLU_164 | OE1 | 2.823 |
| 6EV2 | F_LYS_102 | NZ  | F_GLU_164 | OE2 | 3.600 |
| 6EV2 | F_LYS_148 | NZ  | F_GLU_194 | OE1 | 2.349 |
| 6EV2 | F_LYS_168 | NZ  | B_GLU_78  | OE1 | 3.747 |
| 6EV2 | F_LYS_189 | NZ  | F_GLU_212 | OE1 | 2.964 |
| 6EV2 | F_LYS_189 | NZ  | F_GLU_212 | OE2 | 3.194 |
| 6EV2 | G_LYS_63  | NZ  | G_GLU_46  | OE2 | 2.652 |
| 6EV2 | G_LYS_67  | NZ  | G_ASP_90  | OD1 | 3.758 |
| 6EV2 | G_LYS_67  | NZ  | G_ASP_90  | OD2 | 2.774 |
| 6EV2 | G_LYS_147 | NZ  | G_ASP_148 | OD1 | 3.806 |
| 6EV2 | G_LYS_210 | NZ  | A_ASP_73  | OD1 | 3.883 |
| 6EV2 | G_LYS_210 | NZ  | A_ASP_73  | OD2 | 2.404 |
| 6EV2 | G_LYS_213 | NZ  | H_GLU_122 | OE1 | 3.330 |
| 6EV2 | G_LYS_213 | NZ  | H_GLU_122 | OE2 | 3.779 |
| 6EV2 | G_LYS_214 | NZ  | G_GLU_216 | OE2 | 2.730 |
| 6EV2 | H_ARG_45  | NH1 | G_ASP_105 | OD1 | 3.108 |
| 6EV2 | H_ARG_60  | NH1 | H_GLU_78  | OE2 | 3.921 |
| 6EV2 | H_ARG_60  | NH2 | H_GLU_80  | OE2 | 2.991 |
| 6EV2 | H_ARG_60  | NH2 | H_ASP_81  | OD1 | 3.423 |
| 6EV2 | H_ARG_60  | NH2 | H_ASP_81  | OD2 | 2.856 |
| 6EV2 | H_LYS_102 | NZ  | H_GLU_164 | OE1 | 3.383 |
| 6EV2 | H_ARG_141 | NH2 | H_GLU_104 | OE1 | 3.404 |
| 6EV2 | H_ARG_141 | NH2 | H_GLU_104 | OE2 | 2.455 |
| 6EV2 | H_LYS_148 | NZ  | H_GLU_194 | OE1 | 2.710 |
| 6EV2 | H_LYS_148 | NZ  | H_GLU_194 | OE2 | 3.785 |
| 6EV2 | H_LYS_168 | NZ  | D_GLU_78  | OE2 | 3.686 |

Table 836: 6EV2-specific salt bridging networks analysis. In this table, a PDB file is specified with a four-letter PDB ID, except that the names of the PDB files corresponding to the single NMR structural model split from the NMR ensemble is specified with a four-letter PDB ID in addition to a hyphen followed by the single NMR structural model numeric ID, the residue naming scheme is **Chain ID\_residue name\_residue number**,  $\angle ADH$  represents the angle formed by acceptor (A), donor (D) and hydrogen (H) ( $\angle ADH$ ).

| PDB ID | Residue A | Atom A | Residue B | Atom B | Distance (Å) |
|--------|-----------|--------|-----------|--------|--------------|
| 6EWB   | A_ARG_241 | NH2    | A_ASP_325 | OD1    | 2.936        |
| 6EWB   | A_ARG_241 | NH2    | A_ASP_325 | OD2    | 3.696        |
| 6EWB   | A_LYS_248 | NZ     | A_GLU_247 | OE1    | 3.886        |
| 6EWB   | A_ARG_345 | NH1    | A_GLU_376 | OE2    | 3.889        |
| 6EWB   | A_HIS_347 | NE2    | A_ASP_374 | OD2    | 2.911        |
| 6EWB   | A_HIS_396 | ND1    | A_ASP_391 | OD2    | 3.943        |
| 6EWB   | A_ARG_435 | NH1    | A_ASP_448 | OD2    | 3.551        |
| 6EWB   | A_ARG_435 | NH2    | A_ASP_450 | OD1    | 3.333        |
| 6EWB   | A_ARG_435 | NH2    | A_ASP_450 | OD2    | 2.720        |
| 6EWB   | A_ARG_476 | NH1    | A_ASP_518 | OD2    | 2.712        |
| 6EWB   | A_ARG_476 | NH2    | A_GLU_488 | OE1    | 3.271        |
| 6EWB   | A_LYS_490 | NZ     | A_GLU_429 | OE2    | 3.221        |
| 6EWB   | A_ARG_516 | NH2    | A_ASP_518 | OD1    | 3.815        |
| 6EWB   | A_ARG_516 | NH2    | A_ASP_518 | OD2    | 3.445        |
| 6EWB   | B_ARG_241 | NH2    | B_ASP_325 | OD1    | 3.075        |
| 6EWB   | B_ARG_241 | NH2    | B_ASP_325 | OD2    | 3.936        |
| 6EWB   | B_LYS_248 | NZ     | B_GLU_247 | OE1    | 3.679        |
| 6EWB   | B_ARG_345 | NH1    | B_GLU_376 | OE2    | 3.796        |
| 6EWB   | B_ARG_345 | NH2    | B_GLU_376 | OE2    | 3.815        |
| 6EWB   | B_HIS_347 | ND1    | B_ASP_370 | OD1    | 3.328        |
| 6EWB   | B_HIS_347 | NE2    | B_ASP_374 | OD2    | 2.654        |
| 6EWB   | B_ARG_373 | NH1    | B_ASP_372 | OD2    | 3.813        |
| 6EWB   | B_ARG_373 | NH2    | B_ASP_372 | OD2    | 3.329        |
| 6EWB   | B_ARG_435 | NH1    | B_ASP_448 | OD2    | 3.850        |
| 6EWB   | B_ARG_435 | NH1    | B_ASP_506 | OD1    | 3.944        |
| 6EWB   | B_ARG_435 | NH2    | B_ASP_450 | OD1    | 3.359        |
| 6EWB   | B_ARG_435 | NH2    | B_ASP_450 | OD2    | 2.788        |
| 6EWB   | B_ARG_476 | NH1    | B_ASP_518 | OD2    | 2.823        |
| 6EWB   | B_ARG_476 | NH2    | B_GLU_488 | OE1    | 3.165        |
| 6EWB   | B_LYS_490 | NZ     | B_GLU_429 | OE2    | 3.030        |
| 6EWB   | B_ARG_516 | NH2    | B_ASP_518 | OD1    | 3.365        |
| 6EWB   | B_ARG_516 | NH2    | B_ASP_518 | OD2    | 2.936        |
| 6EWB   | C_ARG_241 | NH2    | C_ASP_325 | OD1    | 2.915        |
| 6EWB   | C_ARG_241 | NH2    | C_ASP_325 | OD2    | 3.721        |
| 6EWB   | C_LYS_248 | NZ     | C_GLU_247 | OE1    | 3.894        |
| 6EWB   | C_ARG_345 | NH1    | C_GLU_376 | OE2    | 3.422        |
| 6EWB   | C_ARG_345 | NH2    | C_GLU_376 | OE2    | 3.471        |
| 6EWB   | C_HIS_347 | ND1    | C_ASP_370 | OD1    | 3.346        |
| 6EWB   | C_HIS_347 | NE2    | C_ASP_374 | OD2    | 2.797        |
| 6EWB   | C_HIS_396 | ND1    | C_ASP_391 | OD2    | 3.992        |
| 6EWB   | C_ARG_435 | NH1    | C_ASP_448 | OD2    | 3.511        |
| 6EWB   | C_ARG_435 | NH2    | C_ASP_450 | OD1    | 3.163        |
| 6EWB   | C_ARG_435 | NH2    | C_ASP_450 | OD2    | 2.800        |
| 6EWB   | C_ARG_476 | NH1    | C_GLU_488 | OE1    | 2.525        |
| 6EWB   | C_ARG_476 | NH2    | C_ASP_518 | OD2    | 3.985        |
| 6EWB   | C_LYS_490 | NZ     | C_GLU_429 | OE1    | 3.972        |
| 6EWB   | C_LYS_490 | NZ     | C_GLU_429 | OE2    | 3.084        |
| 6EWB   | C_ARG_516 | NH2    | C_ASP_518 | OD1    | 3.755        |
| 6EWB   | C_ARG_516 | NH2    | C_ASP_518 | OD2    | 3.482        |
| 6EWB   | D_ARG_241 | NH2    | D_ASP_325 | OD1    | 3.023        |
| 6EWB   | D_ARG_241 | NH2    | D_ASP_325 | OD2    | 3.955        |
| 6EWB   | D_LYS_248 | NZ     | D_GLU_247 | OE1    | 3.969        |
| 6EWB   | D_ARG_345 | NH1    | D_GLU_376 | OE2    | 3.830        |
| 6EWB   | D_HIS_347 | ND1    | D_ASP_370 | OD1    | 3.312        |
| 6EWB   | D_HIS_347 | NE2    | D_ASP_374 | OD2    | 2.724        |
| 6EWB   | D_HIS_417 | NE2    | L_GLU_80  | OE2    | 3.932        |
| 6EWB   | D_ARG_435 | NH1    | D_ASP_448 | OD2    | 3.638        |

|      |           |     |           |     |       |
|------|-----------|-----|-----------|-----|-------|
| 6EWB | D_ARG_435 | NH2 | D_ASP_450 | OD1 | 3.210 |
| 6EWB | D_ARG_435 | NH2 | D_ASP_450 | OD2 | 2.891 |
| 6EWB | D_ARG_476 | NH1 | D_ASP_518 | OD2 | 2.514 |
| 6EWB | D_ARG_476 | NH2 | D_GLU_488 | OE1 | 3.217 |
| 6EWB | D_LYS_490 | NZ  | D_GLU_429 | OE2 | 2.925 |
| 6EWB | D_ARG_516 | NH2 | D_ASP_518 | OD1 | 3.559 |
| 6EWB | D_ARG_516 | NH2 | D_ASP_518 | OD2 | 3.083 |
| 6EWB | E_LYS_    | NZ  | E_ASP_    | OD1 | 3.980 |
| 6EWB | E_ARG_98  | NH1 | B_ASP_341 | OD1 | 3.977 |
| 6EWB | E_ARG_98  | NH2 | B_ASP_341 | OD1 | 3.813 |
| 6EWB | E_ARG_101 | NH1 | F_ASP_49  | OD1 | 2.895 |
| 6EWB | E_ARG_101 | NH1 | F_ASP_49  | OD2 | 3.620 |
| 6EWB | F_ARG_    | NH1 | E_ASP_    | OD1 | 3.803 |
| 6EWB | F_ARG_    | NH1 | E_ASP_    | OD2 | 3.536 |
| 6EWB | F_LYS_52  | NZ  | A_ASP_448 | OD1 | 3.722 |
| 6EWB | F_LYS_52  | NZ  | A_ASP_448 | OD2 | 2.304 |
| 6EWB | F_LYS_52  | NZ  | F_ASP_49  | OD2 | 3.153 |
| 6EWB | F_ARG_    | NH1 | F_GLU_    | OE2 | 3.882 |
| 6EWB | F_ARG_    | NH2 | F_GLU_    | OE2 | 2.849 |
| 6EWB | F_ARG_    | NH2 | F_ASP_    | OD1 | 2.744 |
| 6EWB | F_ARG_    | NH2 | F_ASP_    | OD2 | 3.294 |
| 6EWB | G_ARG_40  | NH1 | G_GLU_89  | OE1 | 3.993 |
| 6EWB | G_ARG_40  | NH2 | G_GLU_89  | OE2 | 3.112 |
| 6EWB | G_LYS_63  | NZ  | G_GLU_46  | OE1 | 3.095 |
| 6EWB | G_LYS_63  | NZ  | G_GLU_46  | OE2 | 3.462 |
| 6EWB | G_LYS_67  | NZ  | G_ASP_90  | OD2 | 3.352 |
| 6EWB | G_ARG_98  | NH1 | D_ASP_341 | OD1 | 3.850 |
| 6EWB | G_ARG_98  | NH2 | D_ASP_341 | OD1 | 3.731 |
| 6EWB | G_ARG_101 | NH1 | I_ASP_49  | OD1 | 2.830 |
| 6EWB | G_ARG_101 | NH1 | I_ASP_49  | OD2 | 3.797 |
| 6EWB | H_ARG_40  | NH1 | H_GLU_89  | OE1 | 3.969 |
| 6EWB | H_LYS_67  | NZ  | H_ASP_90  | OD2 | 3.353 |
| 6EWB | H_ARG_98  | NH1 | A_ASP_341 | OD2 | 3.948 |
| 6EWB | H_ARG_98  | NH2 | A_ASP_341 | OD2 | 3.896 |
| 6EWB | H_ARG_101 | NH1 | L_ASP_49  | OD1 | 2.509 |
| 6EWB | H_ARG_101 | NH1 | L_ASP_49  | OD2 | 3.441 |
| 6EWB | H_LYS_208 | NZ  | H_ASP_210 | OD1 | 3.387 |
| 6EWB | H_LYS_208 | NZ  | H_ASP_210 | OD2 | 3.606 |
| 6EWB | I_ARG_45  | NH1 | G_ASP_104 | OD1 | 3.731 |
| 6EWB | I_ARG_45  | NH1 | G_ASP_104 | OD2 | 3.636 |
| 6EWB | I_LYS_52  | NZ  | C_ASP_448 | OD1 | 3.564 |
| 6EWB | I_LYS_52  | NZ  | C_ASP_448 | OD2 | 2.694 |
| 6EWB | I_LYS_52  | NZ  | I_ASP_49  | OD2 | 3.594 |
| 6EWB | I_ARG_60  | NH1 | I_GLU_80  | OE2 | 3.662 |
| 6EWB | I_ARG_60  | NH2 | I_GLU_80  | OE2 | 2.362 |
| 6EWB | I_ARG_60  | NH2 | I_ASP_81  | OD1 | 3.161 |
| 6EWB | I_ARG_60  | NH2 | I_ASP_81  | OD2 | 3.779 |
| 6EWB | I_LYS_148 | NZ  | I_GLU_194 | OE1 | 2.906 |
| 6EWB | I_LYS_148 | NZ  | I_GLU_194 | OE2 | 3.891 |
| 6EWB | I_HIS_188 | ND1 | I_ASP_150 | OD2 | 2.838 |
| 6EWB | J_LYS_38  | NZ  | J_ASP_90  | OD1 | 3.994 |
| 6EWB | J_ARG_98  | NH1 | C_ASP_341 | OD2 | 3.957 |
| 6EWB | J_ARG_98  | NH2 | C_ASP_341 | OD2 | 3.467 |
| 6EWB | J_ARG_101 | NH1 | K_ASP_49  | OD1 | 2.726 |
| 6EWB | J_ARG_101 | NH1 | K_ASP_49  | OD2 | 3.581 |
| 6EWB | J_LYS_211 | NZ  | K_GLU_122 | OE2 | 2.945 |
| 6EWB | K_ARG_45  | NH1 | J_ASP_104 | OD2 | 3.826 |
| 6EWB | K_LYS_52  | NZ  | D_ASP_448 | OD1 | 3.845 |

|      |           |     |           |     |       |
|------|-----------|-----|-----------|-----|-------|
| 6EWB | K_LYS_52  | NZ  | D_ASP_448 | OD2 | 2.608 |
| 6EWB | K_LYS_52  | NZ  | K_ASP_49  | OD2 | 3.118 |
| 6EWB | K_ARG_60  | NH2 | K_GLU_80  | OE1 | 3.852 |
| 6EWB | K_ARG_60  | NH2 | K_ASP_81  | OD1 | 2.735 |
| 6EWB | K_ARG_60  | NH2 | K_ASP_81  | OD2 | 3.577 |
| 6EWB | K_LYS_141 | NZ  | K_GLU_104 | OE1 | 3.738 |
| 6EWB | K_LYS_141 | NZ  | K_GLU_104 | OE2 | 2.397 |
| 6EWB | K_LYS_198 | NZ  | K_ASP_109 | OD2 | 3.688 |
| 6EWB | L_ARG_45  | NH1 | H_ASP_104 | OD1 | 3.721 |
| 6EWB | L_ARG_45  | NH1 | H_ASP_104 | OD2 | 3.560 |
| 6EWB | L_LYS_52  | NZ  | B_ASP_448 | OD1 | 3.690 |
| 6EWB | L_LYS_52  | NZ  | B_ASP_448 | OD2 | 2.585 |
| 6EWB | L_LYS_52  | NZ  | L_ASP_49  | OD2 | 3.133 |
| 6EWB | L_ARG_60  | NH1 | D_GLU_316 | OE1 | 3.251 |
| 6EWB | L_ARG_60  | NH1 | D_GLU_316 | OE2 | 3.266 |
| 6EWB | L_ARG_60  | NH2 | L_GLU_80  | OE1 | 3.300 |
| 6EWB | L_ARG_60  | NH2 | L_ASP_81  | OD1 | 2.716 |
| 6EWB | L_ARG_60  | NH2 | L_ASP_81  | OD2 | 3.315 |
| 6EWB | L_LYS_102 | NZ  | L_ASP_164 | OD2 | 3.771 |
| 6EWB | L_LYS_141 | NZ  | L_GLU_104 | OE2 | 3.049 |
| 6EWB | L_HIS_188 | ND1 | L_ASP_150 | OD1 | 3.713 |

Table 837: 6EWB-specific salt bridging networks analysis. In this table, a PDB file is specified with a four-letter PDB ID, except that the names of the PDB files corresponding to the single NMR structural model split from the NMR ensemble is specified with a four-letter PDB ID in addition to a hyphen followed by the single NMR structural model numeric ID, the residue naming scheme is **Chain ID\_residue name\_residue number**,  $\angle ADH$  represents the angle formed by acceptor (A), donor (D) and hydrogen (H) ( $\angle ADH$ ).

| PDB ID | Residue A | Atom A | Residue B | Atom B | Distance (Å) |
|--------|-----------|--------|-----------|--------|--------------|
| 6FAB   | L_ARG_24  | NH1    | L_ASP_70  | OD1    | 2.789        |
| 6FAB   | L_ARG_61  | NH1    | L_GLU_81  | OE2    | 3.576        |
| 6FAB   | L_ARG_61  | NH2    | L_GLU_81  | OE1    | 2.864        |
| 6FAB   | L_ARG_61  | NH2    | L_GLU_81  | OE2    | 2.823        |
| 6FAB   | L_ARG_61  | NH2    | L_ASP_82  | OD1    | 2.715        |
| 6FAB   | L_ARG_61  | NH2    | L_ASP_82  | OD2    | 3.543        |
| 6FAB   | L_LYS_107 | NZ     | L_ASP_110 | OD1    | 3.024        |
| 6FAB   | L_LYS_147 | NZ     | L_GLU_195 | OE2    | 3.857        |
| 6FAB   | L_LYS_149 | NZ     | L_GLU_195 | OE1    | 2.545        |
| 6FAB   | L_LYS_149 | NZ     | L_GLU_195 | OE2    | 2.801        |
| 6FAB   | L_LYS_169 | NZ     | L_ASP_167 | OD1    | 2.717        |
| 6FAB   | L_LYS_169 | NZ     | L_ASP_167 | OD2    | 2.572        |
| 6FAB   | L_LYS_183 | NZ     | L_GLU_187 | OE1    | 2.518        |
| 6FAB   | L_LYS_183 | NZ     | L_GLU_187 | OE2    | 2.757        |
| 6FAB   | L_ARG_188 | NH1    | L_ASP_184 | OD1    | 2.649        |
| 6FAB   | L_ARG_188 | NH1    | L_ASP_184 | OD2    | 3.158        |
| 6FAB   | L_ARG_188 | NH2    | L_ASP_184 | OD1    | 3.720        |
| 6FAB   | L_ARG_188 | NH2    | L_ASP_184 | OD2    | 2.655        |
| 6FAB   | L_ARG_188 | NH2    | L_GLU_185 | OE1    | 2.879        |
| 6FAB   | L_LYS_199 | NZ     | L_ASP_143 | OD1    | 2.609        |
| 6FAB   | L_LYS_199 | NZ     | L_ASP_143 | OD2    | 2.563        |
| 6FAB   | H_LYS_63  | NZ     | H_GLU_46  | OE1    | 2.502        |
| 6FAB   | H_LYS_63  | NZ     | H_GLU_46  | OE2    | 3.193        |
| 6FAB   | H_LYS_65  | NZ     | H_GLU_62  | OE1    | 2.682        |
| 6FAB   | H_LYS_65  | NZ     | H_GLU_62  | OE2    | 2.720        |
| 6FAB   | H_LYS_67  | NZ     | H_ASP_90  | OD1    | 3.504        |
| 6FAB   | H_LYS_67  | NZ     | H_ASP_90  | OD2    | 2.658        |
| 6FAB   | H_ARG_98  | NH2    | H_ASP_109 | OD1    | 3.478        |
| 6FAB   | H_ARG_98  | NH2    | H_ASP_109 | OD2    | 2.734        |
| 6FAB   | H_LYS_107 | NZ     | H_GLU_100 | OE2    | 3.655        |
| 6FAB   | H_LYS_107 | NZ     | H_ASP_109 | OD2    | 2.865        |
| 6FAB   | H_LYS_213 | NZ     | H_ASP_215 | OD1    | 3.756        |
| 6FAB   | H_LYS_213 | NZ     | H_ASP_215 | OD2    | 2.836        |
| 6FAB   | H_LYS_216 | NZ     | L_GLU_123 | OE1    | 2.624        |
| 6FAB   | H_LYS_216 | NZ     | L_GLU_123 | OE2    | 2.770        |
| 6FAB   | H_ARG_221 | NH2    | H_ASP_222 | OD1    | 2.832        |
| 6FAB   | H_ARG_221 | NH2    | H_ASP_222 | OD2    | 3.565        |

Table 838: 6FAB-specific salt bridging networks analysis. In this table, a PDB file is specified with a four-letter PDB ID, except that the names of the PDB files corresponding to the single NMR structural model split from the NMR ensemble is specified with a four-letter PDB ID in addition to a hyphen followed by the single NMR structural model numeric ID, the residue naming scheme is **Chain ID\_residue name\_residue number**,  $\angle ADH$  represents the angle formed by acceptor (A), donor (D) and hydrogen (H) ( $\angle ADH$ ).

| PDB ID | Residue A | Atom A | Residue B | Atom B | Distance (Å) |
|--------|-----------|--------|-----------|--------|--------------|
| 6FAX   | L_ARG_61  | NH2    | L_ASP_82  | OD1    | 2.582        |
| 6FAX   | L_ARG_61  | NH2    | L_ASP_82  | OD2    | 3.227        |
| 6FAX   | L_LYS_103 | NZ     | L_GLU_165 | OE1    | 3.961        |
| 6FAX   | L_LYS_149 | NZ     | L_GLU_195 | OE1    | 3.174        |
| 6FAX   | L_LYS_149 | NZ     | L_GLU_195 | OE2    | 3.580        |
| 6FAX   | L_HIS_189 | ND1    | L_ASP_151 | OD2    | 3.031        |
| 6FAX   | H_LYS_19  | NZ     | H_GLU_82  | OE1    | 3.254        |
| 6FAX   | H_LYS_38  | NZ     | H_ASP_90  | OD1    | 3.375        |
| 6FAX   | H_LYS_63  | NZ     | H_GLU_46  | OE1    | 3.943        |
| 6FAX   | H_LYS_63  | NZ     | H_GLU_46  | OE2    | 3.507        |
| 6FAX   | H_LYS_67  | NZ     | H_ASP_90  | OD2    | 3.573        |
| 6FAX   | H_ARG_98  | NH2    | H_ASP_110 | OD1    | 3.912        |
| 6FAX   | H_ARG_98  | NH2    | H_ASP_110 | OD2    | 3.034        |
| 6FAX   | H_ARG_104 | NH1    | H_GLU_100 | OE2    | 2.851        |
| 6FAX   | H_ARG_104 | NH2    | R_GLU_21  | OE1    | 3.986        |
| 6FAX   | H_LYS_152 | NZ     | H_ASP_153 | OD1    | 3.279        |
| 6FAX   | H_LYS_152 | NZ     | H_ASP_153 | OD2    | 3.260        |
| 6FAX   | H_HIS_173 | NE2    | L_ASP_167 | OD1    | 3.928        |
| 6FAX   | H_LYS_218 | NZ     | L_GLU_123 | OE1    | 3.125        |
| 6FAX   | H_LYS_218 | NZ     | L_GLU_123 | OE2    | 3.415        |
| 6FAX   | R_HIS_78  | NE2    | R_GLU_74  | OE1    | 3.706        |
| 6FAX   | R_HIS_78  | NE2    | R_GLU_74  | OE2    | 3.685        |

Table 839: 6FAX-specific salt bridging networks analysis. In this table, a PDB file is specified with a four-letter PDB ID, except that the names of the PDB files corresponding to the single NMR structural model split from the NMR ensemble is specified with a four-letter PDB ID in addition to a hyphen followed by the single NMR structural model numeric ID, the residue naming scheme is **Chain ID\_residue name\_residue number**,  $\angle ADH$  represents the angle formed by acceptor (A), donor (D) and hydrogen (H) ( $\angle ADH$ ).

| PDB ID | Residue A  | Atom A | Residue B  | Atom B | Distance (Å) |
|--------|------------|--------|------------|--------|--------------|
| 6FN1   | A_ARG_40   | NH1    | A_ASP_369  | OD1    | 2.632        |
| 6FN1   | A_ARG_40   | NH1    | A_ASP_369  | OD2    | 3.669        |
| 6FN1   | A_ARG_40   | NH2    | A_ASP_369  | OD1    | 3.084        |
| 6FN1   | A_HIS_152  | NE2    | A_GLU_916  | OE2    | 3.957        |
| 6FN1   | A_ARG_173  | NH2    | A_GLU_169  | OE1    | 2.871        |
| 6FN1   | A_LYS_180  | NZ     | A_ASP_176  | OD1    | 3.377        |
| 6FN1   | A_LYS_180  | NZ     | A_ASP_176  | OD2    | 3.959        |
| 6FN1   | A_LYS_212  | NZ     | A_GLU_324  | OE1    | 3.963        |
| 6FN1   | A_LYS_212  | NZ     | A_GLU_324  | OE2    | 2.762        |
| 6FN1   | A_ARG_261  | NH2    | A_ASP_804  | OD1    | 2.402        |
| 6FN1   | A_ARG_261  | NH2    | A_ASP_804  | OD2    | 3.659        |
| 6FN1   | A_ARG_275  | NH1    | A_GLU_255  | OE2    | 3.657        |
| 6FN1   | A_ARG_275  | NH1    | A_GLU_272  | OE1    | 3.157        |
| 6FN1   | A_ARG_275  | NH2    | A_GLU_255  | OE2    | 3.869        |
| 6FN1   | A_ARG_285  | NH2    | A_GLU_282  | OE2    | 2.865        |
| 6FN1   | A_HIS_517  | ND1    | A_ASP_520  | OD1    | 3.421        |
| 6FN1   | A_HIS_517  | ND1    | A_ASP_520  | OD2    | 3.421        |
| 6FN1   | A_ARG_526  | NH1    | A_GLU_525  | OE1    | 3.961        |
| 6FN1   | A_ARG_526  | NH1    | A_GLU_525  | OE2    | 2.166        |
| 6FN1   | A_ARG_546  | NH2    | A_GLU_467  | OE2    | 3.847        |
| 6FN1   | A_ARG_576  | NH2    | A_ASP_573  | OD1    | 2.465        |
| 6FN1   | A_HIS_586  | ND1    | A_GLU_555  | OE1    | 3.845        |
| 6FN1   | A_HIS_586  | NE2    | A_GLU_555  | OE2    | 3.514        |
| 6FN1   | A_ARG_587  | NH1    | A_GLU_565  | OE1    | 3.907        |
| 6FN1   | A_ARG_587  | NH2    | A_GLU_565  | OE1    | 3.568        |
| 6FN1   | A_ARG_587  | NH2    | A_GLU_565  | OE2    | 3.656        |
| 6FN1   | A_HIS_611  | ND1    | A_ASP_612  | OD1    | 3.740        |
| 6FN1   | A_ARG_740  | NH1    | A_ASP_742  | OD1    | 3.566        |
| 6FN1   | A_ARG_740  | NH1    | A_ASP_742  | OD2    | 2.936        |
| 6FN1   | A_ARG_786  | NH2    | A_GLU_706  | OE2    | 3.988        |
| 6FN1   | A_ARG_797  | NH1    | A_ASP_1018 | OD1    | 3.806        |
| 6FN1   | A_ARG_797  | NH1    | A_ASP_1018 | OD2    | 3.974        |
| 6FN1   | A_LYS_807  | NZ     | A_ASP_805  | OD1    | 3.714        |
| 6FN1   | A_ARG_816  | NH1    | A_ASP_820  | OD2    | 3.588        |
| 6FN1   | A_LYS_825  | NZ     | A_GLU_781  | OE2    | 3.696        |
| 6FN1   | A_ARG_911  | NH1    | A_GLU_492  | OE1    | 3.944        |
| 6FN1   | A_LYS_914  | NZ     | A_GLU_485  | OE2    | 3.976        |
| 6FN1   | A_LYS_966  | NZ     | A_GLU_85   | OE1    | 3.505        |
| 6FN1   | A_LYS_966  | NZ     | A_GLU_85   | OE2    | 2.563        |
| 6FN1   | A_ARG_1084 | NH2    | A_ASP_1087 | OD2    | 3.806        |
| 6FN1   | A_ARG_1137 | NH2    | A_GLU_1143 | OE1    | 3.300        |
| 6FN1   | A_ARG_1137 | NH2    | A_GLU_1143 | OE2    | 2.684        |
| 6FN1   | A_ARG_1146 | NH1    | A_GLU_1142 | OE2    | 3.522        |
| 6FN1   | A_ARG_1146 | NH2    | A_GLU_1142 | OE2    | 3.079        |
| 6FN1   | A_HIS_1154 | NE2    | A_ASP_1158 | OD1    | 3.475        |
| 6FN1   | A_HIS_1154 | NE2    | A_ASP_1158 | OD2    | 3.129        |
| 6FN1   | A_ARG_1167 | NH2    | A_ASP_1123 | OD1    | 2.431        |
| 6FN1   | A_ARG_1167 | NH2    | A_ASP_1123 | OD2    | 3.170        |
| 6FN1   | A_ARG_1221 | NH1    | A_ASP_1218 | OD1    | 3.994        |
| 6FN1   | A_ARG_1221 | NH2    | A_ASP_1218 | OD1    | 2.327        |
| 6FN1   | B_ARG_24   | NH1    | B_ASP_75   | OD1    | 3.067        |
| 6FN1   | B_ARG_24   | NH2    | B_ASP_75   | OD1    | 3.279        |
| 6FN1   | B_ARG_59   | NH1    | B_ASP_65   | OD1    | 2.228        |
| 6FN1   | B_ARG_59   | NH2    | B_ASP_65   | OD1    | 3.826        |
| 6FN1   | B_ARG_66   | NH1    | B_GLU_84   | OE1    | 3.321        |
| 6FN1   | B_ARG_66   | NH1    | B_GLU_84   | OE2    | 3.915        |
| 6FN1   | B_ARG_66   | NH1    | B_ASP_87   | OD2    | 2.881        |



|      |           |     |           |     |       |
|------|-----------|-----|-----------|-----|-------|
| 6FN1 | B_ARG_66  | NH2 | B_ASP_87  | OD2 | 3.217 |
| 6FN1 | B_LYS_153 | NZ  | B_GLU_160 | OE1 | 2.476 |
| 6FN1 | B_LYS_153 | NZ  | B_GLU_160 | OE2 | 3.139 |
| 6FN1 | B_LYS_189 | NZ  | B_GLU_193 | OE1 | 3.697 |
| 6FN1 | B_LYS_189 | NZ  | B_GLU_193 | OE2 | 2.359 |
| 6FN1 | B_ARG_194 | NH1 | B_GLU_191 | OE1 | 3.707 |
| 6FN1 | B_HIS_195 | ND1 | B_ASP_157 | OD2 | 2.402 |
| 6FN1 | B_HIS_195 | NE2 | B_GLU_191 | OE2 | 2.859 |
| 6FN1 | C_LYS_38  | NZ  | C_ASP_90  | OD1 | 3.638 |
| 6FN1 | C_ARG_98  | NH1 | C_ASP_110 | OD1 | 3.210 |
| 6FN1 | C_ARG_98  | NH1 | C_ASP_110 | OD2 | 2.556 |
| 6FN1 | C_ARG_98  | NH2 | C_ASP_110 | OD2 | 3.769 |
| 6FN1 | C_LYS_217 | NZ  | B_GLU_129 | OE1 | 3.462 |
| 6FN1 | C_LYS_217 | NZ  | B_GLU_129 | OE2 | 2.375 |

Table 840: 6FN1-specific salt bridging networks analysis. In this table, a PDB file is specified with a four-letter PDB ID, except that the names of the PDB files corresponding to the single NMR structural model split from the NMR ensemble is specified with a four-letter PDB ID in addition to a hyphen followed by the single NMR structural model numeric ID, the residue naming scheme is **Chain ID\_residue name\_residue number**,  $\angle ADH$  represents the angle formed by acceptor (A), donor (D) and hydrogen (H) ( $\angle ADH$ ).

| PDB ID | Residue A  | Atom A | Residue B  | Atom B | Distance (Å) |
|--------|------------|--------|------------|--------|--------------|
| 6FN4   | A_ARG_40   | NH1    | A_ASP_369  | OD1    | 3.044        |
| 6FN4   | A_ARG_40   | NH1    | A_ASP_369  | OD2    | 2.673        |
| 6FN4   | A_ARG_40   | NH2    | A_ASP_369  | OD1    | 2.550        |
| 6FN4   | A_ARG_40   | NH2    | A_ASP_369  | OD2    | 3.247        |
| 6FN4   | A_HIS_152  | NE2    | A_GLU_916  | OE2    | 3.942        |
| 6FN4   | A_ARG_173  | NH1    | A_GLU_363  | OE1    | 3.817        |
| 6FN4   | A_ARG_209  | NH1    | A_GLU_73   | OE2    | 3.499        |
| 6FN4   | A_ARG_209  | NH2    | A_GLU_73   | OE2    | 2.413        |
| 6FN4   | A_LYS_212  | NZ     | A_GLU_324  | OE2    | 3.760        |
| 6FN4   | A_ARG_261  | NH2    | A_ASP_804  | OD1    | 3.439        |
| 6FN4   | A_ARG_275  | NH1    | A_GLU_272  | OE2    | 3.706        |
| 6FN4   | A_ARG_275  | NH2    | A_GLU_255  | OE2    | 3.146        |
| 6FN4   | A_ARG_275  | NH2    | A_GLU_272  | OE1    | 2.485        |
| 6FN4   | A_ARG_275  | NH2    | A_GLU_272  | OE2    | 3.067        |
| 6FN4   | A_LYS_394  | NZ     | A_GLU_392  | OE2    | 3.872        |
| 6FN4   | A_ARG_441  | NH2    | A_ASP_444  | OD1    | 3.730        |
| 6FN4   | A_ARG_441  | NH2    | A_ASP_444  | OD2    | 3.767        |
| 6FN4   | A_ARG_458  | NH1    | A_ASP_456  | OD2    | 3.726        |
| 6FN4   | A_ARG_458  | NH2    | A_ASP_456  | OD2    | 3.316        |
| 6FN4   | A_ARG_488  | NH1    | A_GLU_485  | OE2    | 3.913        |
| 6FN4   | A_ARG_491  | NH2    | A_GLU_498  | OE1    | 3.157        |
| 6FN4   | A_ARG_576  | NH2    | A_ASP_573  | OD1    | 2.521        |
| 6FN4   | A_HIS_586  | NE2    | A_GLU_555  | OE2    | 3.330        |
| 6FN4   | A_HIS_611  | ND1    | A_ASP_612  | OD1    | 3.332        |
| 6FN4   | A_LYS_747  | NZ     | A_ASP_742  | OD1    | 2.172        |
| 6FN4   | A_LYS_747  | NZ     | A_ASP_742  | OD2    | 3.656        |
| 6FN4   | A_LYS_807  | NZ     | A_ASP_805  | OD1    | 2.940        |
| 6FN4   | A_LYS_807  | NZ     | A_ASP_805  | OD2    | 3.024        |
| 6FN4   | A_ARG_904  | NH2    | A_ASP_163  | OD2    | 3.996        |
| 6FN4   | A_ARG_911  | NH1    | A_GLU_492  | OE2    | 3.311        |
| 6FN4   | A_LYS_914  | NZ     | A_GLU_485  | OE1    | 2.840        |
| 6FN4   | A_ARG_957  | NH2    | A_GLU_107  | OE2    | 3.364        |
| 6FN4   | A_LYS_966  | NZ     | A_GLU_85   | OE2    | 2.855        |
| 6FN4   | A_HIS_1006 | ND1    | A_ASP_820  | OD2    | 3.743        |
| 6FN4   | A_ARG_1084 | NH2    | A_ASP_1087 | OD2    | 3.893        |
| 6FN4   | A_ARG_1137 | NH2    | A_GLU_1143 | OE1    | 3.629        |
| 6FN4   | A_ARG_1137 | NH2    | A_GLU_1143 | OE2    | 3.357        |
| 6FN4   | A_HIS_1154 | ND1    | A_ASP_1158 | OD2    | 3.508        |
| 6FN4   | A_HIS_1154 | NE2    | A_ASP_1158 | OD2    | 2.806        |
| 6FN4   | A_LYS_1163 | NZ     | A_ASP_1158 | OD1    | 3.925        |
| 6FN4   | A_ARG_1221 | NH1    | A_ASP_1218 | OD1    | 3.565        |
| 6FN4   | A_ARG_1221 | NH2    | A_ASP_1218 | OD1    | 2.235        |
| 6FN4   | A_ARG_1232 | NH1    | A_GLU_1210 | OE2    | 2.338        |
| 6FN4   | B_LYS_55   | NZ     | A_ASP_743  | OD1    | 2.728        |
| 6FN4   | B_LYS_55   | NZ     | A_ASP_743  | OD2    | 3.540        |
| 6FN4   | B_ARG_59   | NH1    | B_ASP_65   | OD1    | 2.795        |
| 6FN4   | B_ARG_59   | NH2    | B_ASP_65   | OD1    | 2.360        |
| 6FN4   | B_ARG_66   | NH1    | B_GLU_84   | OE1    | 3.279        |
| 6FN4   | B_ARG_66   | NH1    | B_GLU_84   | OE2    | 3.707        |
| 6FN4   | B_ARG_66   | NH1    | B_ASP_87   | OD1    | 3.527        |
| 6FN4   | B_ARG_66   | NH1    | B_ASP_87   | OD2    | 2.589        |
| 6FN4   | B_ARG_66   | NH2    | B_ASP_87   | OD2    | 2.765        |
| 6FN4   | B_LYS_155  | NZ     | B_GLU_201  | OE2    | 2.874        |
| 6FN4   | B_HIS_195  | ND1    | B_ASP_157  | OD2    | 2.468        |
| 6FN4   | B_LYS_205  | NZ     | B_ASP_149  | OD2    | 3.164        |
| 6FN4   | C_LYS_38   | NZ     | C_ASP_90   | OD1    | 3.032        |
| 6FN4   | C_ARG_98   | NH2    | C_ASP_110  | OD2    | 2.746        |

|      |           |    |           |     |       |
|------|-----------|----|-----------|-----|-------|
| 6FN4 | C.LYS_217 | NZ | B.GLU_129 | OE2 | 3.828 |
|------|-----------|----|-----------|-----|-------|

Table 841: 6FN4-specific salt bridging networks analysis. In this table, a PDB file is specified with a four-letter PDB ID, except that the names of the PDB files corresponding to the single NMR structural model split from the NMR ensemble is specified with a four-letter PDB ID in addition to a hyphen followed by the single NMR structural model numeric ID, the residue naming scheme is **Chain ID\_residue name\_residue number**,  $\angle ADH$  represents the angle formed by acceptor (A), donor (D) and hydrogen (H) ( $\angle ADH$ ).

| PDB ID | Residue A  | Atom A | Residue B  | Atom B | Distance (Å) |
|--------|------------|--------|------------|--------|--------------|
| 6FRJ   | H_ARG_38   | NH1    | H_ASP_92   | OD1    | 2.898        |
| 6FRJ   | H_ARG_38   | NH2    | H_GLU_46   | OE1    | 3.142        |
| 6FRJ   | H_ARG_38   | NH2    | H_GLU_46   | OE2    | 3.614        |
| 6FRJ   | H_ARG_38   | NH2    | H_ASP_92   | OD1    | 3.948        |
| 6FRJ   | H_ARG_52   | NH1    | H_GLU_50   | OE2    | 2.771        |
| 6FRJ   | H_HIS_61   | ND1    | H_GLU_50   | OE2    | 2.713        |
| 6FRJ   | H_ARG_69   | NH1    | H_ASP_92   | OD1    | 3.677        |
| 6FRJ   | H_ARG_69   | NH1    | H_ASP_92   | OD2    | 3.927        |
| 6FRJ   | H_ARG_69   | NH2    | H_ASP_92   | OD1    | 3.557        |
| 6FRJ   | H_ARG_69   | NH2    | H_ASP_92   | OD2    | 2.452        |
| 6FRJ   | H_ARG_74   | NH2    | H_ASP_76   | OD1    | 3.295        |
| 6FRJ   | H_ARG_89   | NH1    | H_GLU_91   | OE2    | 3.985        |
| 6FRJ   | H_HIS_1051 | ND1    | H_GLU_1047 | OE2    | 3.559        |
| 6FRJ   | H_ARG_1070 | NH2    | H_GLU_1090 | OE2    | 3.987        |
| 6FRJ   | H_ARG_1070 | NH2    | H_ASP_1091 | OD1    | 2.809        |
| 6FRJ   | H_ARG_1070 | NH2    | H_ASP_1091 | OD2    | 3.687        |

Table 842: 6FRJ-specific salt bridging networks analysis. In this table, a PDB file is specified with a four-letter PDB ID, except that the names of the PDB files corresponding to the single NMR structural model split from the NMR ensemble is specified with a four-letter PDB ID in addition to a hyphen followed by the single NMR structural model numeric ID, the residue naming scheme is **Chain ID\_residue name\_residue number**,  $\angle ADH$  represents the angle formed by acceptor (A), donor (D) and hydrogen (H) ( $\angle ADH$ ).

| PDB ID | Residue A | Atom A | Residue B | Atom B | Distance (Å) |
|--------|-----------|--------|-----------|--------|--------------|
| 6GK7   | L_ARG_67  | NH1    | L_ASP_88  | OD1    | 3.869        |
| 6GK7   | L_ARG_67  | NH1    | L_ASP_88  | OD2    | 2.730        |
| 6GK7   | L_ARG_67  | NH2    | L_ASP_88  | OD1    | 3.654        |
| 6GK7   | L_ARG_67  | NH2    | L_ASP_88  | OD2    | 3.733        |
| 6GK7   | L_LYS_155 | NZ     | L_GLU_201 | OE1    | 2.758        |
| 6GK7   | L_LYS_194 | NZ     | L_ASP_191 | OD1    | 3.901        |
| 6GK7   | L_HIS_195 | ND1    | L_ASP_157 | OD2    | 3.421        |
| 6GK7   | H_ARG_12  | NH1    | H_GLU_10  | OE1    | 3.806        |
| 6GK7   | H_LYS_43  | NZ     | L_ASP_9   | OD1    | 3.203        |
| 6GK7   | H_ARG_59  | NH2    | H_ASP_57  | OD2    | 3.671        |
| 6GK7   | H_HIS_67  | NE2    | H_ASP_90  | OD1    | 2.917        |
| 6GK7   | H_HIS_67  | NE2    | H_ASP_90  | OD2    | 3.437        |
| 6GK7   | H_ARG_98  | NH2    | H_ASP_110 | OD1    | 3.856        |
| 6GK7   | H_ARG_98  | NH2    | H_ASP_110 | OD2    | 2.851        |
| 6GK7   | H_ARG_102 | NH2    | H_ASP_100 | OD1    | 3.141        |
| 6GK7   | H_LYS_152 | NZ     | H_ASP_153 | OD1    | 3.227        |
| 6GK7   | H_LYS_152 | NZ     | H_ASP_153 | OD2    | 3.445        |
| 6GK7   | H_LYS_218 | NZ     | L_GLU_129 | OE1    | 3.512        |
| 6GK7   | H_LYS_218 | NZ     | L_GLU_129 | OE2    | 3.016        |
| 6GK7   | H_LYS_223 | NZ     | L_ASP_128 | OD2    | 3.231        |
| 6GK7   | A_LYS_317 | NZ     | H_ASP_55  | OD2    | 2.761        |
| 6GK7   | A_LYS_317 | NZ     | H_ASP_57  | OD2    | 2.983        |

Table 843: 6GK7-specific salt bridging networks analysis. In this table, a PDB file is specified with a four-letter PDB ID, except that the names of the PDB files corresponding to the single NMR structural model split from the NMR ensemble is specified with a four-letter PDB ID in addition to a hyphen followed by the single NMR structural model numeric ID, the residue naming scheme is **Chain ID\_residue name\_residue number**,  $\angle ADH$  represents the angle formed by acceptor (A), donor (D) and hydrogen (H) ( $\angle ADH$ ).

| PDB ID | Residue A | Atom A | Residue B | Atom B | Distance (Å) |
|--------|-----------|--------|-----------|--------|--------------|
| 6GK8   | H_ARG_38  | NH1    | H_ASP_90  | OD1    | 3.902        |
| 6GK8   | H_ARG_38  | NH2    | H_GLU_46  | OE1    | 3.059        |
| 6GK8   | H_ARG_38  | NH2    | H_GLU_46  | OE2    | 3.561        |
| 6GK8   | H_ARG_59  | NH1    | H_ASP_57  | OD1    | 3.512        |
| 6GK8   | H_ARG_59  | NH1    | H_ASP_57  | OD2    | 2.923        |
| 6GK8   | H_ARG_59  | NH2    | H_ASP_57  | OD2    | 3.871        |
| 6GK8   | H_ARG_59  | NH2    | L_ASP_65  | OD1    | 3.295        |
| 6GK8   | H_ARG_101 | NH1    | L_GLU_62  | OE2    | 2.742        |
| 6GK8   | H_ARG_101 | NH2    | L_GLU_62  | OE2    | 3.142        |
| 6GK8   | H_LYS_104 | NZ     | L_GLU_62  | OE1    | 2.762        |
| 6GK8   | H_LYS_104 | NZ     | L_GLU_62  | OE2    | 3.928        |
| 6GK8   | H_LYS_151 | NZ     | H_ASP_152 | OD1    | 3.401        |
| 6GK8   | H_LYS_151 | NZ     | H_ASP_152 | OD2    | 3.307        |
| 6GK8   | H_LYS_222 | NZ     | L_ASP_128 | OD2    | 2.761        |
| 6GK8   | L_ARG_32  | NH1    | L_GLU_57  | OE2    | 3.709        |
| 6GK8   | L_ARG_67  | NH2    | L_GLU_87  | OE1    | 3.972        |
| 6GK8   | L_ARG_67  | NH2    | L_GLU_87  | OE2    | 2.995        |
| 6GK8   | L_ARG_67  | NH2    | L_ASP_88  | OD1    | 3.077        |
| 6GK8   | L_ARG_67  | NH2    | L_ASP_88  | OD2    | 3.854        |
| 6GK8   | L_ARG_109 | NH2    | L_GLU_111 | OE1    | 3.804        |
| 6GK8   | L_ARG_148 | NH2    | L_GLU_171 | OE2    | 3.424        |
| 6GK8   | L_LYS_155 | NZ     | L_GLU_201 | OE1    | 3.754        |
| 6GK8   | L_LYS_194 | NZ     | L_ASP_191 | OD1    | 3.678        |
| 6GK8   | L_HIS_195 | ND1    | L_ASP_157 | OD2    | 2.898        |
| 6GK8   | L_LYS_67  | NZ     | H_ASP_55  | OD1    | 3.586        |
| 6GK8   | L_LYS_67  | NZ     | H_ASP_55  | OD2    | 3.183        |
| 6GK8   | L_LYS_67  | NZ     | H_ASP_57  | OD2    | 3.085        |

Table 844: 6GK8-specific salt bridging networks analysis. In this table, a PDB file is specified with a four-letter PDB ID, except that the names of the PDB files corresponding to the single NMR structural model split from the NMR ensemble is specified with a four-letter PDB ID in addition to a hyphen followed by the single NMR structural model numeric ID, the residue naming scheme is **Chain ID\_residue name\_residue number**,  $\angle ADH$  represents the angle formed by acceptor (A), donor (D) and hydrogen (H) ( $\angle ADH$ ).

| PDB ID | Residue A | Atom A | Residue B | Atom B | Distance (Å) |
|--------|-----------|--------|-----------|--------|--------------|
| 6H2Y   | D_HIS_30  | ND1    | D_ASP_29  | OD2    | 2.968        |
| 6H2Y   | D_LYS_74  | NZ     | D_ASP_32  | OD1    | 3.080        |
| 6H2Y   | D_LYS_74  | NZ     | D_ASP_32  | OD2    | 3.146        |
| 6H2Y   | D_LYS_79  | NZ     | L_ASP_52  | OD1    | 3.126        |
| 6H2Y   | D_ARG_82  | NH1    | D_GLU_102 | OE1    | 3.225        |
| 6H2Y   | D_HIS_110 | ND1    | D_GLU_144 | OE1    | 3.692        |
| 6H2Y   | D_LYS_120 | NZ     | L_ASP_95  | OD2    | 2.910        |
| 6H2Y   | D_HIS_173 | ND1    | D_GLU_188 | OE2    | 3.534        |
| 6H2Y   | D_HIS_173 | NE2    | D_GLU_188 | OE2    | 3.951        |
| 6H2Y   | D_ARG_186 | NH1    | D_GLU_188 | OE2    | 2.556        |
| 6H2Y   | D_ARG_186 | NH2    | D_GLU_194 | OE1    | 3.470        |
| 6H2Y   | D_HIS_189 | NE2    | D_GLU_188 | OE1    | 3.353        |
| 6H2Y   | D_LYS_191 | NZ     | L_ASP_50  | OD2    | 2.715        |
| 6H2Y   | D_ARG_236 | NH1    | D_ASP_235 | OD2    | 3.896        |
| 6H2Y   | D_LYS_260 | NZ     | D_ASP_78  | OD1    | 3.223        |
| 6H2Y   | D_LYS_260 | NZ     | D_ASP_78  | OD2    | 3.636        |
| 6H2Y   | D_LYS_260 | NZ     | D_GLU_239 | OE2    | 3.969        |
| 6H2Y   | H_ARG_38  | NH1    | H_ASP_90  | OD2    | 2.735        |
| 6H2Y   | H_ARG_38  | NH2    | H_GLU_46  | OE1    | 3.600        |
| 6H2Y   | H_ARG_38  | NH2    | H_ASP_90  | OD2    | 3.880        |
| 6H2Y   | H_ARG_56  | NH2    | D_GLU_58  | OE1    | 3.564        |
| 6H2Y   | H_ARG_56  | NH2    | D_GLU_58  | OE2    | 3.905        |
| 6H2Y   | H_LYS_63  | NZ     | H_GLU_46  | OE1    | 3.969        |
| 6H2Y   | H_LYS_63  | NZ     | H_GLU_46  | OE2    | 2.764        |
| 6H2Y   | H_ARG_67  | NH1    | H_ASP_90  | OD1    | 2.793        |
| 6H2Y   | H_ARG_67  | NH1    | H_ASP_90  | OD2    | 3.306        |
| 6H2Y   | H_ARG_67  | NH2    | H_ASP_90  | OD1    | 3.797        |
| 6H2Y   | H_ARG_67  | NH2    | H_ASP_90  | OD2    | 3.132        |
| 6H2Y   | H_LYS_215 | NZ     | L_GLU_125 | OE1    | 3.261        |
| 6H2Y   | H_LYS_215 | NZ     | L_GLU_125 | OE2    | 2.865        |
| 6H2Y   | L_ARG_60  | NH1    | L_ASP_81  | OD1    | 3.946        |
| 6H2Y   | L_ARG_60  | NH1    | L_ASP_81  | OD2    | 2.714        |
| 6H2Y   | L_ARG_60  | NH2    | L_ASP_81  | OD1    | 2.835        |
| 6H2Y   | L_ARG_60  | NH2    | L_ASP_81  | OD2    | 3.155        |
| 6H2Y   | L_ARG_92  | NH1    | D_ASP_166 | OD2    | 3.217        |
| 6H2Y   | L_ARG_92  | NH2    | D_GLU_119 | OE1    | 3.274        |
| 6H2Y   | L_ARG_92  | NH2    | D_GLU_119 | OE2    | 3.244        |
| 6H2Y   | L_ARG_92  | NH2    | D_ASP_166 | OD1    | 3.891        |
| 6H2Y   | L_ARG_92  | NH2    | D_ASP_166 | OD2    | 2.328        |
| 6H2Y   | L_LYS_104 | NZ     | L_ASP_84  | OD1    | 2.864        |
| 6H2Y   | L_LYS_104 | NZ     | L_ASP_84  | OD2    | 2.840        |
| 6H2Y   | L_LYS_168 | NZ     | L_GLU_82  | OE1    | 2.735        |
| 6H2Y   | L_LYS_168 | NZ     | L_GLU_82  | OE2    | 3.700        |
| 6H2Y   | L_HIS_190 | ND1    | L_ASP_153 | OD2    | 3.040        |

Table 845: 6H2Y-specific salt bridging networks analysis. In this table, a PDB file is specified with a four-letter PDB ID, except that the names of the PDB files corresponding to the single NMR structural model split from the NMR ensemble is specified with a four-letter PDB ID in addition to a hyphen followed by the single NMR structural model numeric ID, the residue naming scheme is **Chain ID\_residue name\_residue number**,  $\angle ADH$  represents the angle formed by acceptor (A), donor (D) and hydrogen (H) ( $\angle ADH$ ).

| PDB ID | Residue A | Atom A | Residue B | Atom B | Distance (Å) |
|--------|-----------|--------|-----------|--------|--------------|
| 6I3Z   | A_HIS_73  | ND1    | A_ASP_74  | OD1    | 3.992        |
| 6I3Z   | A_LYS_201 | NZ     | L_ASP_92  | OD1    | 3.556        |
| 6I3Z   | A_LYS_217 | NZ     | A_ASP_207 | OD1    | 2.912        |
| 6I3Z   | A_LYS_222 | NZ     | A_GLU_204 | OE1    | 2.374        |
| 6I3Z   | A_LYS_222 | NZ     | A_GLU_206 | OE2    | 3.231        |
| 6I3Z   | A_LYS_290 | NZ     | A_GLU_342 | OE1    | 3.811        |
| 6I3Z   | A_LYS_290 | NZ     | H_ASP_33  | OD1    | 3.699        |
| 6I3Z   | H_ARG_38  | NH1    | H_GLU_46  | OE2    | 3.015        |
| 6I3Z   | H_ARG_38  | NH2    | H_ASP_86  | OD1    | 2.939        |
| 6I3Z   | H_ARG_66  | NH1    | H_ASP_86  | OD1    | 3.907        |
| 6I3Z   | H_ARG_66  | NH1    | H_ASP_86  | OD2    | 3.045        |
| 6I3Z   | H_ARG_66  | NH2    | H_ASP_86  | OD1    | 3.844        |
| 6I3Z   | L_ARG_53  | NH1    | A_GLU_204 | OE1    | 2.383        |
| 6I3Z   | L_ARG_53  | NH1    | A_GLU_204 | OE2    | 3.516        |
| 6I3Z   | L_ARG_61  | NH1    | L_GLU_81  | OE2    | 3.392        |
| 6I3Z   | L_ARG_61  | NH1    | L_ASP_82  | OD1    | 3.108        |
| 6I3Z   | L_ARG_61  | NH1    | L_ASP_82  | OD2    | 3.395        |
| 6I3Z   | L_ARG_61  | NH2    | L_GLU_81  | OE2    | 3.127        |
| 6I3Z   | L_ARG_61  | NH2    | L_ASP_82  | OD1    | 3.903        |
| 6I3Z   | L_ARG_61  | NH2    | L_ASP_82  | OD2    | 3.066        |

Table 846: 6I3Z-specific salt bridging networks analysis. In this table, a PDB file is specified with a four-letter PDB ID, except that the names of the PDB files corresponding to the single NMR structural model split from the NMR ensemble is specified with a four-letter PDB ID in addition to a hyphen followed by the single NMR structural model numeric ID, the residue naming scheme is **Chain ID\_residue name\_residue number**,  $\angle ADH$  represents the angle formed by acceptor (A), donor (D) and hydrogen (H) ( $\angle ADH$ ).



| PDB ID | Residue A | Atom A | Residue B | Atom B | Distance (Å) |
|--------|-----------|--------|-----------|--------|--------------|
| 6I9J   | A_ARG_328 | NH1    | A_ASP_325 | OD2    | 3.806        |
| 6I9J   | A_ARG_328 | NH2    | A_ASP_329 | OD1    | 3.559        |
| 6I9J   | A_ARG_328 | NH2    | A_ASP_329 | OD2    | 3.170        |

Table 847: 6I9J-specific salt bridging networks analysis. In this table, a PDB file is specified with a four-letter PDB ID, except that the names of the PDB files corresponding to the single NMR structural model split from the NMR ensemble is specified with a four-letter PDB ID in addition to a hyphen followed by the single NMR structural model numeric ID, the residue naming scheme is **Chain ID\_residue name\_residue number**,  $\angle ADH$  represents the angle formed by acceptor (A), donor (D) and hydrogen (H) ( $\angle ADH$ ).

| PDB ID | Residue A | Atom A | Residue B | Atom B | Distance (Å) |
|--------|-----------|--------|-----------|--------|--------------|
| 6IAP   | A_LYS_4   | NZ     | A_GLU_84  | OE1    | 3.796        |
| 6IAP   | A_ARG_47  | NH1    | A_GLU_33  | OE1    | 3.554        |
| 6IAP   | A_ARG_47  | NH1    | A_GLU_33  | OE2    | 2.707        |
| 6IAP   | A_ARG_77  | NH1    | A_GLU_33  | OE1    | 3.589        |
| 6IAP   | A_ARG_77  | NH1    | A_GLU_33  | OE2    | 2.806        |
| 6IAP   | A_ARG_77  | NH2    | A_GLU_33  | OE2    | 3.449        |
| 6IAP   | A_ARG_165 | NH1    | A_GLU_134 | OE1    | 2.832        |
| 6IAP   | A_ARG_165 | NH1    | A_GLU_134 | OE2    | 2.932        |
| 6IAP   | D_ARG_61  | NH2    | D_ASP_82  | OD1    | 2.957        |
| 6IAP   | D_ARG_61  | NH2    | D_ASP_82  | OD2    | 3.990        |
| 6IAP   | D_ARG_96  | NH2    | A_GLU_80  | OE1    | 3.466        |
| 6IAP   | D_LYS_103 | NZ     | D_GLU_105 | OE1    | 2.801        |
| 6IAP   | D_LYS_103 | NZ     | D_GLU_165 | OE1    | 3.070        |
| 6IAP   | D_ARG_142 | NH1    | D_GLU_105 | OE1    | 3.560        |
| 6IAP   | D_LYS_149 | NZ     | D_GLU_195 | OE2    | 3.829        |
| 6IAP   | D_LYS_183 | NZ     | D_GLU_187 | OE1    | 3.913        |
| 6IAP   | D_HIS_189 | ND1    | D_ASP_151 | OD2    | 3.610        |
| 6IAP   | E_HIS_35  | NE2    | A_GLU_80  | OE1    | 3.445        |
| 6IAP   | E_ARG_38  | NH1    | E_GLU_46  | OE1    | 3.245        |
| 6IAP   | E_ARG_38  | NH1    | E_ASP_90  | OD1    | 3.826        |
| 6IAP   | E_ARG_38  | NH2    | E_ASP_90  | OD1    | 2.938        |
| 6IAP   | E_LYS_63  | NZ     | E_GLU_46  | OE2    | 2.856        |
| 6IAP   | E_ARG_67  | NH1    | E_ASP_90  | OD1    | 3.217        |
| 6IAP   | E_ARG_67  | NH1    | E_ASP_90  | OD2    | 2.832        |
| 6IAP   | E_ARG_98  | NH1    | E_ASP_105 | OD2    | 2.742        |
| 6IAP   | E_LYS_147 | NZ     | E_ASP_148 | OD1    | 3.224        |
| 6IAP   | E_LYS_147 | NZ     | E_ASP_148 | OD2    | 2.946        |
| 6IAP   | H_ARG_38  | NH2    | H_GLU_46  | OE1    | 3.468        |
| 6IAP   | H_LYS_65  | NZ     | H_GLU_62  | OE1    | 2.882        |
| 6IAP   | H_LYS_65  | NZ     | H_GLU_62  | OE2    | 3.834        |
| 6IAP   | H_ARG_87  | NH1    | H_GLU_89  | OE1    | 2.796        |
| 6IAP   | H_ARG_98  | NH1    | H_ASP_108 | OD2    | 3.622        |
| 6IAP   | H_ARG_99  | NH1    | H_GLU_50  | OE1    | 2.819        |
| 6IAP   | H_ARG_99  | NH1    | H_GLU_50  | OE2    | 2.819        |
| 6IAP   | H_ARG_99  | NH2    | A_ASP_98  | OD1    | 2.689        |
| 6IAP   | H_LYS_150 | NZ     | H_ASP_151 | OD1    | 3.562        |
| 6IAP   | H_LYS_150 | NZ     | H_ASP_151 | OD2    | 3.534        |
| 6IAP   | H_ARG_217 | NH1    | H_GLU_219 | OE2    | 3.357        |
| 6IAP   | L_ARG_24  | NH1    | L_ASP_70  | OD1    | 3.449        |
| 6IAP   | L_ARG_94  | NH1    | H_GLU_50  | OE2    | 2.973        |
| 6IAP   | L_ARG_94  | NH2    | A_ASP_123 | OD2    | 3.888        |
| 6IAP   | L_LYS_103 | NZ     | L_GLU_105 | OE1    | 2.667        |
| 6IAP   | L_LYS_126 | NZ     | L_GLU_123 | OE1    | 3.630        |
| 6IAP   | L_ARG_142 | NH2    | L_GLU_143 | OE2    | 2.909        |
| 6IAP   | L_LYS_149 | NZ     | L_GLU_195 | OE2    | 3.247        |
| 6IAP   | L_LYS_183 | NZ     | L_GLU_187 | OE1    | 3.970        |
| 6IAP   | L_HIS_189 | ND1    | L_ASP_151 | OD2    | 3.405        |

---

Table 848: 6IAP-specific salt bridging networks analysis. In this table, a PDB file is specified with a four-letter PDB ID, except that the names of the PDB files corresponding to the single NMR structural model split from the NMR ensemble is specified with a four-letter PDB ID in addition to a hyphen followed by the single NMR structural model numeric ID, the residue naming scheme is **Chain ID\_residue name\_residue number**,  $\angle ADH$  represents the angle formed by acceptor (A), donor (D) and hydrogen (H) ( $\angle ADH$ ).

| PDB ID | Residue A | Atom A | Residue B | Atom B | Distance (Å) |
|--------|-----------|--------|-----------|--------|--------------|
| 6JMQ   | A_LYS_112 | NZ     | A_GLU_265 | OE2    | 3.737        |
| 6JMQ   | A_ARG_419 | NH1    | A_GLU_426 | OE1    | 3.417        |
| 6JMQ   | A_ARG_419 | NH1    | A_GLU_426 | OE2    | 2.358        |
| 6JMQ   | A_ARG_419 | NH2    | A_GLU_426 | OE1    | 2.551        |
| 6JMQ   | A_ARG_419 | NH2    | A_GLU_426 | OE2    | 3.223        |
| 6JMQ   | B_ARG_211 | NH2    | B_ASP_540 | OD1    | 3.901        |
| 6JMQ   | B_ARG_211 | NH2    | B_ASP_540 | OD2    | 3.653        |
| 6JMQ   | B_LYS_298 | NZ     | B_ASP_343 | OD1    | 3.798        |
| 6JMQ   | B_LYS_298 | NZ     | B_ASP_343 | OD2    | 2.773        |
| 6JMQ   | B_LYS_300 | NZ     | B_ASP_249 | OD1    | 2.988        |
| 6JMQ   | B_LYS_300 | NZ     | B_ASP_249 | OD2    | 3.168        |
| 6JMQ   | B_ARG_313 | NH2    | B_ASP_281 | OD2    | 2.986        |
| 6JMQ   | B_ARG_348 | NH1    | B_ASP_349 | OD2    | 3.884        |
| 6JMQ   | B_LYS_354 | NZ     | B_ASP_355 | OD1    | 3.767        |
| 6JMQ   | B_LYS_354 | NZ     | B_ASP_355 | OD2    | 3.182        |
| 6JMQ   | B_ARG_374 | NH1    | B_ASP_343 | OD1    | 3.786        |
| 6JMQ   | B_HIS_414 | ND1    | B_GLU_413 | OE1    | 3.881        |
| 6JMQ   | B_HIS_414 | NE2    | B_GLU_413 | OE1    | 3.761        |
| 6JMQ   | B_HIS_414 | NE2    | B_GLU_413 | OE2    | 3.827        |
| 6JMQ   | B_LYS_510 | NZ     | B_GLU_493 | OE2    | 3.727        |
| 6JMQ   | B_ARG_525 | NH1    | B_GLU_605 | OE1    | 3.564        |
| 6JMQ   | B_ARG_525 | NH1    | B_GLU_605 | OE2    | 3.265        |
| 6JMQ   | B_ARG_525 | NH2    | B_GLU_605 | OE1    | 2.626        |
| 6JMQ   | B_ARG_525 | NH2    | B_GLU_605 | OE2    | 3.608        |
| 6JMQ   | B_HIS_556 | NE2    | B_ASP_540 | OD2    | 3.806        |
| 6JMQ   | B_LYS_592 | NZ     | B_GLU_610 | OE1    | 3.993        |
| 6JMQ   | B_ARG_603 | NH1    | B_GLU_620 | OE1    | 2.595        |
| 6JMQ   | B_ARG_603 | NH1    | B_GLU_620 | OE2    | 3.221        |
| 6JMQ   | B_ARG_613 | NH1    | B_GLU_610 | OE2    | 3.252        |
| 6JMQ   | B_HIS_619 | ND1    | B_ASP_571 | OD1    | 3.990        |
| 6JMQ   | B_ARG_625 | NH2    | B_GLU_533 | OE2    | 3.458        |
| 6JMQ   | B_ARG_625 | NH2    | B_GLU_561 | OE1    | 3.849        |
| 6JMQ   | C_ARG_38  | NH1    | C_ASP_89  | OD1    | 3.785        |
| 6JMQ   | C_ARG_38  | NH2    | C_GLU_46  | OE1    | 2.796        |
| 6JMQ   | C_ARG_38  | NH2    | C_GLU_46  | OE2    | 3.808        |
| 6JMQ   | C_ARG_66  | NH1    | C_ASP_89  | OD1    | 3.398        |
| 6JMQ   | C_ARG_66  | NH1    | C_ASP_89  | OD2    | 2.424        |
| 6JMQ   | C_ARG_66  | NH2    | C_ASP_89  | OD1    | 3.049        |
| 6JMQ   | C_ARG_66  | NH2    | C_ASP_89  | OD2    | 3.597        |
| 6JMQ   | C_HIS_169 | NE2    | D_ASP_173 | OD2    | 3.860        |
| 6JMQ   | C_LYS_213 | NZ     | D_GLU_129 | OE1    | 3.825        |
| 6JMQ   | D_ARG_67  | NH2    | D_ASP_88  | OD1    | 2.846        |
| 6JMQ   | D_ARG_67  | NH2    | D_ASP_88  | OD2    | 3.134        |
| 6JMQ   | D_LYS_109 | NZ     | D_GLU_111 | OE2    | 3.564        |
| 6JMQ   | D_LYS_155 | NZ     | D_GLU_160 | OE1    | 3.318        |
| 6JMQ   | D_LYS_155 | NZ     | D_GLU_201 | OE1    | 2.847        |
| 6JMQ   | D_LYS_155 | NZ     | D_GLU_201 | OE2    | 3.538        |
| 6JMQ   | D_ARG_194 | NH2    | D_GLU_191 | OE1    | 2.521        |
| 6JMQ   | D_ARG_194 | NH2    | D_GLU_191 | OE2    | 3.913        |
| 6JMQ   | D_HIS_195 | ND1    | D_ASP_157 | OD1    | 3.523        |
| 6JMQ   | D_HIS_195 | ND1    | D_ASP_157 | OD2    | 3.075        |

---

Table 849: 6JMQ-specific salt bridging networks analysis. In this table, a PDB file is specified with a four-letter PDB ID, except that the names of the PDB files corresponding to the single NMR structural model split from the NMR ensemble is specified with a four-letter PDB ID in addition to a hyphen followed by the single NMR structural model numeric ID, the residue naming scheme is **Chain ID\_residue name\_residue number**,  $\angle ADH$  represents the angle formed by acceptor (A), donor (D) and hydrogen (H) ( $\angle ADH$ ).

| PDB ID | Residue A | Atom A | Residue B | Atom B | Distance (Å) |
|--------|-----------|--------|-----------|--------|--------------|
| 6JMR   | E_ARG_38  | NH2    | E_GLU_46  | OE1    | 2.993        |
| 6JMR   | E_ARG_66  | NH1    | E_ASP_89  | OD2    | 3.421        |
| 6JMR   | E_ARG_66  | NH2    | E_ASP_89  | OD2    | 3.938        |
| 6JMR   | F_LYS_152 | NZ     | F_GLU_159 | OE2    | 3.268        |
| 6JMR   | F_LYS_154 | NZ     | F_GLU_200 | OE1    | 3.337        |
| 6JMR   | F_LYS_154 | NZ     | F_GLU_200 | OE2    | 3.361        |
| 6JMR   | F_ARG_193 | NH1    | F_ASP_189 | OD1    | 3.350        |
| 6JMR   | F_ARG_193 | NH2    | F_GLU_190 | OE1    | 2.696        |
| 6JMR   | F_HIS_194 | ND1    | F_ASP_156 | OD1    | 3.981        |
| 6JMR   | F_HIS_194 | ND1    | F_ASP_156 | OD2    | 2.412        |
| 6JMR   | F_HIS_194 | NE2    | F_GLU_190 | OE2    | 2.764        |
| 6JMR   | B_ARG_211 | NH1    | B_ASP_558 | OD1    | 3.360        |
| 6JMR   | B_ARG_211 | NH1    | B_ASP_558 | OD2    | 3.537        |
| 6JMR   | B_ARG_211 | NH2    | B_ASP_558 | OD1    | 3.693        |
| 6JMR   | B_ARG_211 | NH2    | B_ASP_558 | OD2    | 3.265        |
| 6JMR   | B_LYS_255 | NZ     | B_ASP_528 | OD1    | 2.933        |
| 6JMR   | B_LYS_287 | NZ     | B_ASP_291 | OD1    | 3.700        |
| 6JMR   | B_LYS_287 | NZ     | B_ASP_291 | OD2    | 2.415        |
| 6JMR   | B_LYS_298 | NZ     | B_ASP_343 | OD2    | 3.993        |
| 6JMR   | B_LYS_300 | NZ     | B_ASP_249 | OD1    | 3.273        |
| 6JMR   | B_LYS_300 | NZ     | B_ASP_249 | OD2    | 3.592        |
| 6JMR   | B_ARG_303 | NH2    | B_ASP_373 | OD2    | 3.818        |
| 6JMR   | B_ARG_313 | NH1    | B_ASP_281 | OD2    | 3.856        |
| 6JMR   | B_ARG_313 | NH2    | B_ASP_281 | OD2    | 2.988        |
| 6JMR   | B_ARG_348 | NH2    | B_ASP_307 | OD2    | 2.462        |
| 6JMR   | B_LYS_354 | NZ     | B_ASP_355 | OD2    | 2.401        |
| 6JMR   | B_ARG_525 | NH2    | B_GLU_605 | OE1    | 2.922        |
| 6JMR   | B_ARG_603 | NH1    | B_GLU_620 | OE1    | 3.059        |
| 6JMR   | B_ARG_603 | NH2    | B_GLU_620 | OE1    | 3.650        |
| 6JMR   | B_HIS_619 | ND1    | B_ASP_571 | OD1    | 3.672        |
| 6JMR   | C_ARG_38  | NH1    | C_ASP_89  | OD1    | 3.534        |
| 6JMR   | C_ARG_38  | NH2    | C_ASP_89  | OD1    | 3.797        |
| 6JMR   | C_HIS_169 | NE2    | D_ASP_173 | OD1    | 3.922        |
| 6JMR   | D_ARG_67  | NH2    | D_ASP_88  | OD1    | 2.789        |
| 6JMR   | D_ARG_67  | NH2    | D_ASP_88  | OD2    | 2.868        |
| 6JMR   | D_LYS_113 | NZ     | D_GLU_17  | OE1    | 3.374        |
| 6JMR   | D_LYS_113 | NZ     | D_GLU_17  | OE2    | 3.100        |
| 6JMR   | D_LYS_155 | NZ     | D_GLU_201 | OE1    | 3.651        |
| 6JMR   | D_LYS_155 | NZ     | D_GLU_201 | OE2    | 2.757        |
| 6JMR   | D_LYS_175 | NZ     | D_GLU_87  | OE1    | 3.592        |
| 6JMR   | D_ARG_194 | NH1    | D_GLU_191 | OE1    | 3.814        |
| 6JMR   | D_ARG_194 | NH2    | D_GLU_191 | OE1    | 2.418        |
| 6JMR   | D_ARG_194 | NH2    | D_GLU_191 | OE2    | 3.613        |
| 6JMR   | D_HIS_195 | ND1    | D_ASP_157 | OD2    | 3.249        |
| 6JMR   | D_HIS_195 | NE2    | D_GLU_191 | OE2    | 3.086        |

Table 850: 6JMR-specific salt bridging networks analysis. In this table, a PDB file is specified with a four-letter PDB ID, except that the names of the PDB files corresponding to the single NMR structural model split from the NMR ensemble is specified with a four-letter PDB ID in addition to a hyphen followed by the single NMR structural model numeric ID, the residue naming scheme is **Chain ID\_residue name\_residue number**,  $\angle ADH$  represents the angle formed by acceptor (A), donor (D) and hydrogen (H) ( $\angle ADH$ ).

| PDB ID | Residue A  | Atom A | Residue B  | Atom B | Distance (Å) |
|--------|------------|--------|------------|--------|--------------|
| 6K4Z   | A_HIS_42   | ND1    | A_GLU_38   | OE2    | 3.995        |
| 6K4Z   | A_ARG_61   | NH2    | A_GLU_81   | OE2    | 3.887        |
| 6K4Z   | A_ARG_61   | NH2    | A_ASP_82   | OD1    | 2.751        |
| 6K4Z   | A_ARG_61   | NH2    | A_ASP_82   | OD2    | 3.412        |
| 6K4Z   | A_LYS_1064 | NZ     | A_GLU_1061 | OE2    | 2.583        |
| 6K4Z   | A_LYS_1066 | NZ     | A_ASP_1086 | OD1    | 3.628        |
| 6K4Z   | A_LYS_1066 | NZ     | A_ASP_1086 | OD2    | 2.944        |
| 6K4Z   | A_ARG_1094 | NH1    | A_ASP_1101 | OD1    | 3.902        |
| 6K4Z   | A_ARG_1094 | NH1    | A_ASP_1101 | OD2    | 2.777        |
| 6K4Z   | B_HIS_42   | ND1    | B_GLU_38   | OE2    | 3.400        |
| 6K4Z   | B_ARG_61   | NH2    | B_GLU_81   | OE1    | 3.807        |
| 6K4Z   | B_ARG_61   | NH2    | B_ASP_82   | OD1    | 2.835        |
| 6K4Z   | B_ARG_61   | NH2    | B_ASP_82   | OD2    | 3.444        |
| 6K4Z   | B_LYS_1064 | NZ     | B_GLU_1061 | OE1    | 3.293        |
| 6K4Z   | B_LYS_1064 | NZ     | B_GLU_1061 | OE2    | 3.306        |
| 6K4Z   | B_LYS_1066 | NZ     | B_ASP_1086 | OD1    | 2.977        |
| 6K4Z   | B_LYS_1066 | NZ     | B_ASP_1086 | OD2    | 3.306        |
| 6K4Z   | B_ARG_1094 | NH2    | B_ASP_1101 | OD1    | 3.758        |
| 6K4Z   | B_ARG_1094 | NH2    | B_ASP_1101 | OD2    | 2.738        |

Table 851: 6K4Z-specific salt bridging networks analysis. In this table, a PDB file is specified with a four-letter PDB ID, except that the names of the PDB files corresponding to the single NMR structural model split from the NMR ensemble is specified with a four-letter PDB ID in addition to a hyphen followed by the single NMR structural model numeric ID, the residue naming scheme is **Chain ID residue name residue number**,  $\angle ADH$  represents the angle formed by acceptor (A), donor (D) and hydrogen (H) ( $\angle ADH$ ).

| PDB ID | Residue A | Atom A | Residue B | Atom B | Distance (Å) |
|--------|-----------|--------|-----------|--------|--------------|
| 6K7O   | A_LYS_5   | NZ     | A_ASP_88  | OD1    | 2.318        |
| 6K7O   | A_LYS_5   | NZ     | A_ASP_88  | OD2    | 3.371        |
| 6K7O   | A_ARG_36  | NH2    | A_ASP_38  | OD2    | 3.575        |
| 6K7O   | A_LYS_55  | NZ     | A_GLU_53  | OE2    | 3.732        |
| 6K7O   | A_LYS_55  | NZ     | H_ASP_106 | OD1    | 3.027        |
| 6K7O   | A_ARG_72  | NH1    | A_GLU_40  | OE1    | 3.011        |
| 6K7O   | A_ARG_72  | NH1    | A_GLU_40  | OE2    | 2.176        |
| 6K7O   | A_ARG_74  | NH2    | A_GLU_40  | OE2    | 2.314        |
| 6K7O   | A_ARG_78  | NH1    | L_ASP_94  | OD1    | 3.792        |
| 6K7O   | A_ARG_78  | NH2    | L_ASP_94  | OD1    | 2.709        |
| 6K7O   | B_ARG_39  | NH1    | B_ASP_92  | OD1    | 2.639        |
| 6K7O   | B_ARG_39  | NH2    | B_GLU_47  | OE1    | 3.803        |
| 6K7O   | B_ARG_39  | NH2    | B_ASP_92  | OD1    | 3.143        |
| 6K7O   | B_LYS_67  | NZ     | B_ASP_64  | OD1    | 3.307        |
| 6K7O   | B_ARG_69  | NH1    | B_ASP_92  | OD1    | 3.750        |
| 6K7O   | B_ARG_69  | NH1    | B_ASP_92  | OD2    | 2.232        |
| 6K7O   | B_ARG_69  | NH2    | B_ASP_92  | OD1    | 2.738        |
| 6K7O   | B_ARG_69  | NH2    | B_ASP_92  | OD2    | 2.835        |
| 6K7O   | B_ARG_100 | NH2    | B_ASP_110 | OD1    | 3.271        |
| 6K7O   | B_ARG_100 | NH2    | B_ASP_110 | OD2    | 3.077        |
| 6K7O   | B_LYS_152 | NZ     | B_ASP_153 | OD1    | 2.261        |
| 6K7O   | B_LYS_152 | NZ     | B_ASP_153 | OD2    | 3.089        |
| 6K7O   | B_LYS_218 | NZ     | C_GLU_127 | OE1    | 3.816        |
| 6K7O   | B_LYS_218 | NZ     | C_GLU_127 | OE2    | 2.813        |
| 6K7O   | B_LYS_219 | NZ     | B_GLU_221 | OE2    | 3.997        |
| 6K7O   | B_LYS_223 | NZ     | C_ASP_126 | OD1    | 2.273        |
| 6K7O   | B_LYS_223 | NZ     | C_ASP_126 | OD2    | 2.907        |
| 6K7O   | C_ARG_62  | NH1    | C_GLU_82  | OE1    | 3.128        |
| 6K7O   | C_ARG_62  | NH2    | C_ASP_83  | OD1    | 2.283        |
| 6K7O   | C_ARG_62  | NH2    | C_ASP_83  | OD2    | 3.026        |
| 6K7O   | C_LYS_107 | NZ     | C_GLU_169 | OE1    | 3.884        |
| 6K7O   | C_LYS_153 | NZ     | C_GLU_199 | OE1    | 2.343        |
| 6K7O   | C_LYS_153 | NZ     | C_GLU_199 | OE2    | 3.740        |
| 6K7O   | C_ARG_215 | NH1    | C_GLU_191 | OE1    | 3.258        |
| 6K7O   | D_ARG_39  | NH1    | D_ASP_92  | OD1    | 3.691        |
| 6K7O   | D_ARG_39  | NH2    | D_GLU_47  | OE1    | 3.378        |
| 6K7O   | D_ARG_69  | NH1    | D_ASP_92  | OD1    | 3.540        |
| 6K7O   | D_ARG_69  | NH1    | D_ASP_92  | OD2    | 3.004        |
| 6K7O   | D_ARG_100 | NH1    | D_ASP_28  | OD1    | 3.508        |
| 6K7O   | D_ARG_100 | NH2    | D_ASP_110 | OD1    | 3.621        |
| 6K7O   | D_ARG_100 | NH2    | D_ASP_110 | OD2    | 2.219        |
| 6K7O   | D_LYS_152 | NZ     | D_ASP_153 | OD1    | 2.709        |
| 6K7O   | D_LYS_152 | NZ     | D_ASP_153 | OD2    | 2.488        |
| 6K7O   | D_LYS_215 | NZ     | G_ASP_189 | OD2    | 2.832        |
| 6K7O   | D_LYS_218 | NZ     | E_GLU_127 | OE1    | 2.290        |
| 6K7O   | D_LYS_218 | NZ     | E_GLU_127 | OE2    | 3.074        |
| 6K7O   | D_LYS_219 | NZ     | D_GLU_221 | OE2    | 3.309        |
| 6K7O   | D_LYS_223 | NZ     | E_ASP_126 | OD1    | 3.765        |
| 6K7O   | D_LYS_223 | NZ     | E_ASP_126 | OD2    | 3.552        |
| 6K7O   | E_ARG_62  | NH1    | E_GLU_82  | OE1    | 3.785        |
| 6K7O   | E_ARG_62  | NH2    | E_ASP_83  | OD1    | 2.379        |
| 6K7O   | E_ARG_62  | NH2    | E_ASP_83  | OD2    | 2.884        |
| 6K7O   | E_LYS_107 | NZ     | E_GLU_169 | OE1    | 3.682        |
| 6K7O   | E_LYS_107 | NZ     | E_GLU_169 | OE2    | 3.861        |
| 6K7O   | E_LYS_153 | NZ     | E_GLU_199 | OE1    | 3.571        |
| 6K7O   | E_LYS_187 | NZ     | E_GLU_191 | OE1    | 3.589        |
| 6K7O   | E_HIS_193 | ND1    | E_ASP_155 | OD2    | 2.222        |



|      |           |     |           |     |       |
|------|-----------|-----|-----------|-----|-------|
| 6K7O | E_ARG_215 | NH1 | E_GLU_191 | OE1 | 3.183 |
| 6K7O | E_ARG_215 | NH1 | E_GLU_191 | OE2 | 3.052 |
| 6K7O | F_ARG_39  | NH1 | F_ASP_92  | OD1 | 3.160 |
| 6K7O | F_ARG_39  | NH2 | F_GLU_47  | OE1 | 3.541 |
| 6K7O | F_ARG_39  | NH2 | F_ASP_92  | OD1 | 3.852 |
| 6K7O | F_ARG_69  | NH2 | F_ASP_92  | OD1 | 3.334 |
| 6K7O | F_ARG_69  | NH2 | F_ASP_92  | OD2 | 2.262 |
| 6K7O | F_ARG_100 | NH2 | F_ASP_110 | OD1 | 3.367 |
| 6K7O | F_ARG_100 | NH2 | F_ASP_110 | OD2 | 2.302 |
| 6K7O | F_LYS_152 | NZ  | F_ASP_153 | OD1 | 2.970 |
| 6K7O | F_LYS_152 | NZ  | F_ASP_153 | OD2 | 3.514 |
| 6K7O | F_HIS_173 | NE2 | G_ASP_171 | OD2 | 3.941 |
| 6K7O | G_ARG_51  | NH2 | F_ASP_106 | OD2 | 3.980 |
| 6K7O | G_ARG_62  | NH2 | G_ASP_83  | OD1 | 2.886 |
| 6K7O | G_ARG_62  | NH2 | G_ASP_83  | OD2 | 2.569 |
| 6K7O | G_LYS_107 | NZ  | G_GLU_169 | OE1 | 3.132 |
| 6K7O | G_LYS_107 | NZ  | G_GLU_169 | OE2 | 2.495 |
| 6K7O | G_LYS_153 | NZ  | G_GLU_199 | OE1 | 3.412 |
| 6K7O | G_ARG_215 | NH1 | G_GLU_191 | OE1 | 2.817 |
| 6K7O | H_ARG_39  | NH1 | H_ASP_92  | OD1 | 3.037 |
| 6K7O | H_ARG_39  | NH2 | H_GLU_47  | OE2 | 3.357 |
| 6K7O | H_ARG_39  | NH2 | H_ASP_92  | OD1 | 3.458 |
| 6K7O | H_ARG_69  | NH1 | H_ASP_92  | OD1 | 3.457 |
| 6K7O | H_ARG_69  | NH1 | H_ASP_92  | OD2 | 2.161 |
| 6K7O | H_ARG_69  | NH2 | H_ASP_92  | OD1 | 3.051 |
| 6K7O | H_ARG_69  | NH2 | H_ASP_92  | OD2 | 3.302 |
| 6K7O | H_ARG_100 | NH1 | H_ASP_28  | OD1 | 3.046 |
| 6K7O | H_ARG_100 | NH1 | H_ASP_28  | OD2 | 3.800 |
| 6K7O | H_ARG_100 | NH2 | H_ASP_110 | OD1 | 3.159 |
| 6K7O | H_ARG_100 | NH2 | H_ASP_110 | OD2 | 2.559 |
| 6K7O | H_LYS_152 | NZ  | H_ASP_153 | OD1 | 3.285 |
| 6K7O | H_LYS_152 | NZ  | H_ASP_153 | OD2 | 3.072 |
| 6K7O | H_HIS_173 | NE2 | L_ASP_171 | OD2 | 3.862 |
| 6K7O | H_LYS_218 | NZ  | L_GLU_127 | OE1 | 3.981 |
| 6K7O | H_LYS_219 | NZ  | H_GLU_221 | OE1 | 3.644 |
| 6K7O | H_LYS_223 | NZ  | L_ASP_126 | OD1 | 3.964 |
| 6K7O | L_ARG_62  | NH1 | L_GLU_82  | OE1 | 3.867 |
| 6K7O | L_ARG_62  | NH2 | L_ASP_83  | OD1 | 2.401 |
| 6K7O | L_ARG_62  | NH2 | L_ASP_83  | OD2 | 2.682 |
| 6K7O | L_ARG_215 | NH1 | L_GLU_191 | OE1 | 2.693 |
| 6K7O | P_LYS_5   | NZ  | P_ASP_88  | OD1 | 3.227 |
| 6K7O | P_ARG_36  | NH2 | P_ASP_38  | OD2 | 3.978 |
| 6K7O | P_LYS_55  | NZ  | B_ASP_106 | OD1 | 3.340 |
| 6K7O | P_LYS_55  | NZ  | P_GLU_53  | OE2 | 3.383 |
| 6K7O | P_ARG_72  | NH1 | P_GLU_40  | OE2 | 3.046 |
| 6K7O | P_ARG_74  | NH2 | P_GLU_40  | OE2 | 2.240 |
| 6K7O | P_ARG_78  | NH1 | C_ASP_94  | OD1 | 2.583 |
| 6K7O | P_ARG_78  | NH2 | C_ASP_94  | OD1 | 2.609 |
| 6K7O | R_LYS_5   | NZ  | R_ASP_88  | OD1 | 2.725 |
| 6K7O | R_LYS_5   | NZ  | R_ASP_88  | OD2 | 3.900 |
| 6K7O | R_LYS_55  | NZ  | F_ASP_106 | OD1 | 2.834 |
| 6K7O | R_LYS_55  | NZ  | R_GLU_53  | OE2 | 3.817 |
| 6K7O | R_ARG_72  | NH1 | R_GLU_40  | OE1 | 3.051 |
| 6K7O | R_ARG_72  | NH1 | R_GLU_40  | OE2 | 2.785 |
| 6K7O | R_ARG_74  | NH2 | R_GLU_40  | OE2 | 2.444 |
| 6K7O | Q_LYS_5   | NZ  | Q_ASP_88  | OD1 | 3.267 |
| 6K7O | Q_ARG_36  | NH2 | Q_ASP_38  | OD2 | 3.639 |
| 6K7O | Q_LYS_55  | NZ  | D_ASP_106 | OD1 | 3.172 |

|      |          |     |           |     |       |
|------|----------|-----|-----------|-----|-------|
| 6K7O | Q_ARG_59 | NH1 | H_GLU_221 | OE1 | 3.018 |
| 6K7O | Q_ARG_59 | NH1 | H_GLU_221 | OE2 | 3.413 |
| 6K7O | Q_ARG_59 | NH2 | H_GLU_221 | OE1 | 3.299 |
| 6K7O | Q_ARG_59 | NH2 | H_GLU_221 | OE2 | 2.855 |
| 6K7O | Q_ARG_72 | NH1 | Q_GLU_40  | OE1 | 2.910 |
| 6K7O | Q_ARG_72 | NH1 | Q_GLU_40  | OE2 | 2.362 |
| 6K7O | Q_ARG_74 | NH2 | Q_GLU_40  | OE2 | 3.223 |
| 6K7O | Q_ARG_78 | NH1 | E_ASP_94  | OD1 | 3.546 |
| 6K7O | Q_ARG_78 | NH2 | E_ASP_94  | OD1 | 2.499 |

Table 852: 6K7O-specific salt bridging networks analysis. In this table, a PDB file is specified with a four-letter PDB ID, except that the names of the PDB files corresponding to the single NMR structural model split from the NMR ensemble is specified with a four-letter PDB ID in addition to a hyphen followed by the single NMR structural model numeric ID, the residue naming scheme is **Chain ID\_residue name\_residue number**,  $\angle ADH$  represents the angle formed by acceptor (A), donor (D) and hydrogen (H) ( $\angle ADH$ ).

| PDB ID | Residue A | Atom A | Residue B | Atom B | Distance (Å) |
|--------|-----------|--------|-----------|--------|--------------|
| 6KN9   | A_HIS_112 | ND1    | A_GLU_41  | OE1    | 3.585        |
| 6KN9   | A_ARG_235 | NH2    | A_ASP_222 | OD1    | 3.857        |
| 6KN9   | A_ARG_235 | NH2    | A_ASP_222 | OD2    | 2.742        |
| 6KN9   | A_ARG_241 | NH2    | A_ASP_164 | OD1    | 3.542        |
| 6KN9   | A_ARG_241 | NH2    | A_ASP_164 | OD2    | 3.212        |
| 6KN9   | A_LYS_267 | NZ     | A_GLU_264 | OE1    | 2.822        |
| 6KN9   | A_LYS_267 | NZ     | A_GLU_264 | OE2    | 3.577        |
| 6KN9   | A_LYS_274 | NZ     | A_ASP_255 | OD2    | 3.178        |
| 6KN9   | A_LYS_274 | NZ     | A_GLU_318 | OE2    | 3.699        |
| 6KN9   | A_ARG_276 | NH2    | A_ASP_314 | OD1    | 1.972        |
| 6KN9   | A_ARG_281 | NH1    | D_ASP_111 | OD1    | 2.228        |
| 6KN9   | A_ARG_281 | NH1    | D_ASP_111 | OD2    | 3.976        |
| 6KN9   | A_LYS_288 | NZ     | A_GLU_299 | OE1    | 3.349        |
| 6KN9   | A_LYS_292 | NZ     | A_GLU_297 | OE1    | 3.199        |
| 6KN9   | A_LYS_292 | NZ     | A_GLU_297 | OE2    | 3.595        |
| 6KN9   | A_LYS_306 | NZ     | A_GLU_318 | OE1    | 3.465        |
| 6KN9   | A_LYS_309 | NZ     | A_ASP_314 | OD2    | 2.944        |
| 6KN9   | A_ARG_319 | NH2    | A_GLU_299 | OE2    | 3.969        |
| 6KN9   | A_ARG_333 | NH1    | A_ASP_330 | OD1    | 3.681        |
| 6KN9   | A_ARG_333 | NH2    | A_ASP_293 | OD2    | 3.015        |
| 6KN9   | B_ARG_241 | NH2    | B_ASP_164 | OD2    | 3.877        |
| 6KN9   | B_LYS_267 | NZ     | B_GLU_264 | OE1    | 3.093        |
| 6KN9   | B_LYS_267 | NZ     | B_GLU_264 | OE2    | 3.256        |
| 6KN9   | B_LYS_274 | NZ     | B_ASP_255 | OD2    | 2.896        |
| 6KN9   | B_LYS_274 | NZ     | B_GLU_318 | OE1    | 3.770        |
| 6KN9   | B_ARG_276 | NH2    | B_ASP_314 | OD1    | 3.835        |
| 6KN9   | B_ARG_281 | NH2    | E_ASP_111 | OD1    | 2.487        |
| 6KN9   | B_ARG_281 | NH2    | E_ASP_111 | OD2    | 3.660        |
| 6KN9   | B_LYS_288 | NZ     | B_GLU_299 | OE1    | 3.279        |
| 6KN9   | B_LYS_306 | NZ     | B_GLU_318 | OE2    | 3.342        |
| 6KN9   | B_LYS_309 | NZ     | B_ASP_314 | OD2    | 2.507        |
| 6KN9   | B_LYS_313 | NZ     | B_ASP_314 | OD2    | 3.641        |
| 6KN9   | B_ARG_319 | NH1    | B_GLU_304 | OE1    | 3.890        |
| 6KN9   | B_ARG_319 | NH2    | B_GLU_304 | OE1    | 3.759        |
| 6KN9   | B_ARG_319 | NH2    | B_GLU_304 | OE2    | 3.666        |
| 6KN9   | B_ARG_333 | NH2    | B_ASP_293 | OD2    | 3.063        |
| 6KN9   | C_HIS_112 | ND1    | C_GLU_41  | OE1    | 2.327        |
| 6KN9   | C_HIS_112 | NE2    | C_ASP_107 | OD2    | 3.295        |
| 6KN9   | C_ARG_235 | NH2    | C_ASP_222 | OD1    | 3.959        |
| 6KN9   | C_ARG_235 | NH2    | C_ASP_222 | OD2    | 2.800        |
| 6KN9   | C_ARG_241 | NH2    | C_ASP_164 | OD1    | 3.385        |
| 6KN9   | C_ARG_241 | NH2    | C_ASP_164 | OD2    | 2.874        |
| 6KN9   | C_LYS_274 | NZ     | C_ASP_255 | OD2    | 3.106        |
| 6KN9   | C_LYS_274 | NZ     | C_GLU_318 | OE1    | 3.930        |
| 6KN9   | C_ARG_276 | NH2    | C_ASP_314 | OD1    | 3.434        |
| 6KN9   | C_ARG_281 | NH2    | F_ASP_111 | OD2    | 3.907        |
| 6KN9   | C_LYS_288 | NZ     | C_GLU_299 | OE1    | 3.086        |
| 6KN9   | C_LYS_288 | NZ     | C_GLU_299 | OE2    | 3.808        |
| 6KN9   | C_LYS_306 | NZ     | C_GLU_318 | OE2    | 3.670        |
| 6KN9   | C_LYS_309 | NZ     | C_ASP_314 | OD2    | 2.610        |
| 6KN9   | C_ARG_319 | NH1    | C_GLU_299 | OE2    | 3.995        |
| 6KN9   | C_ARG_333 | NH1    | C_ASP_330 | OD1    | 3.656        |
| 6KN9   | C_ARG_333 | NH2    | C_ASP_293 | OD2    | 2.842        |
| 6KN9   | D_ARG_38  | NH1    | D_ASP_90  | OD1    | 3.545        |
| 6KN9   | D_ARG_38  | NH2    | D_GLU_46  | OE1    | 2.628        |
| 6KN9   | D_ARG_38  | NH2    | D_GLU_46  | OE2    | 3.501        |
| 6KN9   | D_LYS_43  | NZ     | D_GLU_89  | OE1    | 3.952        |

|      |           |     |           |     |       |
|------|-----------|-----|-----------|-----|-------|
| 6KN9 | D_LYS_43  | NZ  | D_GLU_89  | OE2 | 3.337 |
| 6KN9 | D_ARG_67  | NH1 | D_ASP_90  | OD1 | 3.041 |
| 6KN9 | D_ARG_67  | NH1 | D_ASP_90  | OD2 | 3.151 |
| 6KN9 | D_ARG_67  | NH2 | D_ASP_90  | OD1 | 3.897 |
| 6KN9 | D_ARG_98  | NH1 | D_ASP_111 | OD2 | 2.640 |
| 6KN9 | D_ARG_201 | NH2 | D_ASP_222 | OD1 | 2.871 |
| 6KN9 | D_ARG_201 | NH2 | D_ASP_222 | OD2 | 3.172 |
| 6KN9 | F_ARG_38  | NH1 | F_ASP_90  | OD1 | 3.168 |
| 6KN9 | F_ARG_38  | NH2 | F_GLU_46  | OE1 | 2.799 |
| 6KN9 | F_ARG_38  | NH2 | F_GLU_46  | OE2 | 3.293 |
| 6KN9 | F_ARG_98  | NH1 | F_ASP_111 | OD1 | 3.108 |
| 6KN9 | F_ARG_98  | NH1 | F_ASP_111 | OD2 | 2.892 |
| 6KN9 | F_ARG_201 | NH2 | F_ASP_222 | OD1 | 2.968 |
| 6KN9 | F_ARG_201 | NH2 | F_ASP_222 | OD2 | 3.406 |

Table 853: 6KN9-specific salt bridging networks analysis. In this table, a PDB file is specified with a four-letter PDB ID, except that the names of the PDB files corresponding to the single NMR structural model split from the NMR ensemble is specified with a four-letter PDB ID in addition to a hyphen followed by the single NMR structural model numeric ID, the residue naming scheme is **Chain ID\_residue name\_residue number**,  $\angle ADH$  represents the angle formed by acceptor (A), donor (D) and hydrogen (H) ( $\angle ADH$ ).

| PDB ID | Residue A | Atom A | Residue B | Atom B | Distance (Å) |
|--------|-----------|--------|-----------|--------|--------------|
| 6MH2   | A_LYS_149 | NZ     | A_GLU_195 | OE1    | 3.787        |
| 6MH2   | A_LYS_149 | NZ     | A_GLU_195 | OE2    | 3.621        |
| 6MH2   | B_ARG_38  | NH1    | B_ASP_90  | OD1    | 2.761        |
| 6MH2   | B_ARG_38  | NH2    | B_GLU_46  | OE1    | 3.270        |
| 6MH2   | B_ARG_38  | NH2    | B_GLU_46  | OE2    | 3.852        |
| 6MH2   | B_ARG_38  | NH2    | B_ASP_90  | OD1    | 3.946        |
| 6MH2   | B_ARG_67  | NH1    | B_ASP_90  | OD1    | 3.761        |
| 6MH2   | B_ARG_67  | NH1    | B_ASP_90  | OD2    | 2.763        |
| 6MH2   | B_ARG_67  | NH2    | B_ASP_90  | OD1    | 3.235        |
| 6MH2   | B_ARG_67  | NH2    | B_ASP_90  | OD2    | 3.604        |
| 6MH2   | B_LYS_76  | NZ     | B_ASP_73  | OD2    | 3.341        |
| 6MH2   | B_ARG_98  | NH2    | B_ASP_108 | OD1    | 3.946        |
| 6MH2   | B_ARG_98  | NH2    | B_ASP_108 | OD2    | 3.214        |
| 6MH2   | B_LYS_150 | NZ     | B_ASP_151 | OD1    | 3.564        |
| 6MH2   | B_LYS_150 | NZ     | B_ASP_151 | OD2    | 3.741        |
| 6MH2   | C_ARG_61  | NH2    | C_ASP_82  | OD1    | 3.009        |
| 6MH2   | C_ARG_61  | NH2    | C_ASP_82  | OD2    | 3.516        |
| 6MH2   | C_ARG_66  | NH1    | C_ASP_28  | OD1    | 3.766        |
| 6MH2   | D_ARG_38  | NH1    | D_ASP_90  | OD1    | 2.776        |
| 6MH2   | D_ARG_38  | NH2    | D_GLU_46  | OE1    | 2.980        |
| 6MH2   | D_ARG_38  | NH2    | D_GLU_46  | OE2    | 3.596        |
| 6MH2   | D_ARG_38  | NH2    | D_ASP_90  | OD1    | 3.851        |
| 6MH2   | D_ARG_67  | NH1    | D_ASP_90  | OD1    | 3.812        |
| 6MH2   | D_ARG_67  | NH1    | D_ASP_90  | OD2    | 2.537        |
| 6MH2   | D_ARG_67  | NH2    | D_ASP_90  | OD1    | 3.255        |
| 6MH2   | D_ARG_67  | NH2    | D_ASP_90  | OD2    | 3.479        |
| 6MH2   | D_LYS_76  | NZ     | D_ASP_73  | OD2    | 3.284        |
| 6MH2   | D_ARG_98  | NH2    | D_ASP_108 | OD2    | 2.820        |

Table 854: 6MH2-specific salt bridging networks analysis. In this table, a PDB file is specified with a four-letter PDB ID, except that the names of the PDB files corresponding to the single NMR structural model split from the NMR ensemble is specified with a four-letter PDB ID in addition to a hyphen followed by the single NMR structural model numeric ID, the residue naming scheme is **Chain ID\_residue name\_residue number**,  $\angle ADH$  represents the angle formed by acceptor (A), donor (D) and hydrogen (H) ( $\angle ADH$ ).

| PDB ID | Residue A | Atom A | Residue B | Atom B | Distance (Å) |
|--------|-----------|--------|-----------|--------|--------------|
| 6MHR   | D_ARG_38  | NH1    | D_ASP_89  | OD1    | 2.826        |
| 6MHR   | D_ARG_38  | NH2    | D_GLU_46  | OE1    | 3.169        |
| 6MHR   | D_ARG_38  | NH2    | D_GLU_46  | OE2    | 3.753        |
| 6MHR   | D_ARG_38  | NH2    | D_ASP_89  | OD1    | 3.916        |
| 6MHR   | D_ARG_66  | NH1    | D_ASP_89  | OD1    | 3.572        |
| 6MHR   | D_ARG_66  | NH1    | D_ASP_89  | OD2    | 2.987        |
| 6MHR   | D_ARG_66  | NH2    | D_ASP_89  | OD1    | 2.810        |
| 6MHR   | D_ARG_66  | NH2    | D_ASP_89  | OD2    | 3.631        |
| 6MHR   | D_ARG_97  | NH2    | D_ASP_109 | OD1    | 2.845        |
| 6MHR   | D_ARG_97  | NH2    | D_ASP_109 | OD2    | 3.931        |
| 6MHR   | D_LYS_151 | NZ     | D_ASP_152 | OD1    | 3.753        |
| 6MHR   | D_LYS_151 | NZ     | D_ASP_152 | OD2    | 3.790        |
| 6MHR   | E_ARG_61  | NH2    | E_ASP_82  | OD1    | 3.057        |
| 6MHR   | E_ARG_61  | NH2    | E_ASP_82  | OD2    | 3.583        |
| 6MHR   | E_ARG_91  | NH1    | D_GLU_50  | OE1    | 3.108        |
| 6MHR   | E_ARG_91  | NH1    | D_ASP_98  | OD2    | 3.892        |
| 6MHR   | E_ARG_91  | NH2    | D_GLU_50  | OE1    | 3.238        |
| 6MHR   | E_ARG_91  | NH2    | D_GLU_50  | OE2    | 3.082        |
| 6MHR   | E_LYS_151 | NZ     | E_GLU_197 | OE1    | 3.306        |
| 6MHR   | E_LYS_151 | NZ     | E_GLU_197 | OE2    | 2.656        |
| 6MHR   | A_ARG_38  | NH1    | A_ASP_89  | OD1    | 2.922        |
| 6MHR   | A_ARG_38  | NH2    | A_GLU_46  | OE1    | 3.494        |
| 6MHR   | A_ARG_38  | NH2    | A_ASP_89  | OD1    | 3.894        |
| 6MHR   | A_ARG_66  | NH1    | A_ASP_89  | OD1    | 3.791        |
| 6MHR   | A_ARG_66  | NH2    | A_ASP_89  | OD1    | 2.938        |
| 6MHR   | A_ARG_66  | NH2    | A_ASP_89  | OD2    | 2.504        |
| 6MHR   | A_ARG_97  | NH2    | A_ASP_109 | OD1    | 3.855        |
| 6MHR   | A_ARG_97  | NH2    | A_ASP_109 | OD2    | 2.834        |
| 6MHR   | A_LYS_151 | NZ     | A_ASP_152 | OD2    | 3.659        |
| 6MHR   | A_LYS_217 | NZ     | B_GLU_125 | OE2    | 2.775        |
| 6MHR   | B_ARG_61  | NH1    | B_ASP_82  | OD1    | 2.499        |
| 6MHR   | B_ARG_61  | NH1    | B_ASP_82  | OD2    | 2.707        |
| 6MHR   | B_ARG_61  | NH2    | B_GLU_81  | OE2    | 3.693        |
| 6MHR   | B_ARG_91  | NH1    | A_GLU_50  | OE1    | 3.086        |
| 6MHR   | B_ARG_91  | NH1    | A_GLU_50  | OE2    | 3.775        |
| 6MHR   | B_ARG_91  | NH1    | A_ASP_98  | OD2    | 3.351        |
| 6MHR   | B_ARG_91  | NH2    | A_GLU_50  | OE1    | 3.608        |
| 6MHR   | B_ARG_91  | NH2    | A_GLU_50  | OE2    | 2.934        |
| 6MHR   | F_ARG_73  | NH2    | F_ASP_87  | OD2    | 3.617        |
| 6MHR   | F_ARG_75  | NH1    | F_ASP_87  | OD1    | 3.232        |
| 6MHR   | F_HIS_93  | ND1    | F_ASP_105 | OD1    | 2.539        |
| 6MHR   | F_HIS_93  | NE2    | F_GLU_103 | OE1    | 2.711        |
| 6MHR   | C_ARG_75  | NH2    | C_GLU_85  | OE2    | 2.934        |
| 6MHR   | C_HIS_    | ND1    | C_ASP_    | OD1    | 2.729        |
| 6MHR   | C_HIS_93  | NE2    | C_GLU_103 | OE1    | 2.688        |
| 6MHR   | C_ARG_    | NH1    | C_ASP_    | OD1    | 3.364        |
| 6MHR   | C_ARG_    | NH2    | C_ASP_    | OD1    | 3.177        |

---

Table 855: 6MHR-specific salt bridging networks analysis. In this table, a PDB file is specified with a four-letter PDB ID, except that the names of the PDB files corresponding to the single NMR structural model split from the NMR ensemble is specified with a four-letter PDB ID in addition to a hyphen followed by the single NMR structural model numeric ID, the residue naming scheme is **Chain ID\_residue name\_residue number**,  $\angle ADH$  represents the angle formed by acceptor (A), donor (D) and hydrogen (H) ( $\angle ADH$ ).

| PDB ID | Residue A | Atom A | Residue B | Atom B | Distance (Å) |
|--------|-----------|--------|-----------|--------|--------------|
| 6MI2   | A_LYS_12  | NZ     | A_GLU_16  | OE2    | 3.989        |
| 6MI2   | A_ARG_38  | NH2    | A_GLU_46  | OE1    | 2.859        |
| 6MI2   | A_ARG_38  | NH2    | A_GLU_46  | OE2    | 3.408        |
| 6MI2   | A_ARG_98  | NH2    | A_ASP_104 | OD2    | 3.122        |
| 6MI2   | B_ARG_60  | NH2    | B_ASP_81  | OD1    | 3.443        |
| 6MI2   | D_ARG_38  | NH2    | D_GLU_46  | OE1    | 2.927        |
| 6MI2   | D_ARG_38  | NH2    | D_GLU_46  | OE2    | 2.802        |
| 6MI2   | D_ARG_98  | NH2    | D_ASP_104 | OD1    | 3.789        |
| 6MI2   | D_ARG_98  | NH2    | D_ASP_104 | OD2    | 2.702        |
| 6MI2   | E_ARG_60  | NH2    | E_ASP_81  | OD1    | 2.603        |
| 6MI2   | E_ARG_60  | NH2    | E_ASP_81  | OD2    | 2.973        |
| 6MI2   | F_ARG_73  | NH2    | F_ASP_87  | OD2    | 3.773        |
| 6MI2   | F_HIS_93  | ND1    | F_ASP_105 | OD1    | 2.788        |
| 6MI2   | F_HIS_93  | ND1    | F_ASP_105 | OD2    | 3.836        |
| 6MI2   | F_HIS_93  | NE2    | F_GLU_103 | OE2    | 3.226        |
| 6MI2   | F_LYS_114 | NZ     | E_ASP_50  | OD1    | 2.776        |
| 6MI2   | F_LYS_114 | NZ     | E_ASP_50  | OD2    | 3.977        |
| 6MI2   | F_ARG_134 | NH2    | D_ASP_55  | OD2    | 3.507        |
| 6MI2   | F_ARG_134 | NH2    | F_ASP_127 | OD1    | 3.458        |
| 6MI2   | F_ARG_134 | NH2    | F_ASP_127 | OD2    | 3.809        |
| 6MI2   | C_ARG_73  | NH2    | C_ASP_87  | OD1    | 3.648        |
| 6MI2   | C_ARG_73  | NH2    | C_ASP_87  | OD2    | 2.300        |
| 6MI2   | C_HIS_93  | ND1    | C_ASP_105 | OD1    | 2.396        |
| 6MI2   | C_HIS_93  | NE2    | C_GLU_103 | OE2    | 2.977        |
| 6MI2   | C_LYS_114 | NZ     | B_ASP_50  | OD1    | 3.683        |
| 6MI2   | C_LYS_114 | NZ     | B_ASP_50  | OD2    | 2.434        |
| 6MI2   | C_ARG_134 | NH1    | C_ASP_127 | OD2    | 3.259        |
| 6MI2   | C_ARG_134 | NH2    | C_ASP_127 | OD1    | 3.569        |
| 6MI2   | C_ARG_134 | NH2    | C_ASP_127 | OD2    | 3.076        |

Table 856: 6MI2-specific salt bridging networks analysis. In this table, a PDB file is specified with a four-letter PDB ID, except that the names of the PDB files corresponding to the single NMR structural model split from the NMR ensemble is specified with a four-letter PDB ID in addition to a hyphen followed by the single NMR structural model numeric ID, the residue naming scheme is **Chain ID\_residue name\_residue number**,  $\angle ADH$  represents the angle formed by acceptor (A), donor (D) and hydrogen (H) ( $\angle ADH$ ).



| PDB ID | Residue A | Atom A | Residue B | Atom B | Distance (Å) |
|--------|-----------|--------|-----------|--------|--------------|
| 6MN7   | A_LYS_46  | NZ     | A_GLU_492 | OE1    | 3.387        |
| 6MN7   | A_LYS_46  | NZ     | A_GLU_492 | OE2    | 2.895        |
| 6MN7   | A_LYS_229 | NZ     | A_GLU_83  | OE1    | 2.957        |
| 6MN7   | A_LYS_232 | NZ     | A_GLU_268 | OE1    | 3.584        |
| 6MN7   | A_LYS_232 | NZ     | A_GLU_268 | OE2    | 2.841        |
| 6MN7   | A_LYS_282 | NZ     | A_GLU_275 | OE1    | 2.868        |
| 6MN7   | A_LYS_282 | NZ     | A_GLU_275 | OE2    | 3.561        |
| 6MN7   | A_ARG_308 | NH2    | A_GLU_164 | OE1    | 3.817        |
| 6MN7   | A_ARG_308 | NH2    | A_GLU_164 | OE2    | 3.051        |
| 6MN7   | A_LYS_351 | NZ     | A_GLU_269 | OE1    | 2.814        |
| 6MN7   | A_LYS_351 | NZ     | A_GLU_269 | OE2    | 3.423        |
| 6MN7   | A_ARG_429 | NH1    | A_ASP_113 | OD1    | 3.456        |
| 6MN7   | A_ARG_429 | NH1    | A_ASP_113 | OD2    | 2.823        |
| 6MN7   | A_ARG_429 | NH2    | A_ASP_113 | OD2    | 3.973        |
| 6MN7   | A_ARG_456 | NH2    | A_GLU_466 | OE1    | 3.736        |
| 6MN7   | A_ARG_456 | NH2    | A_GLU_466 | OE2    | 2.975        |
| 6MN7   | A_ARG_469 | NH1    | A_ASP_457 | OD1    | 2.938        |
| 6MN7   | A_ARG_469 | NH2    | A_ASP_457 | OD1    | 3.933        |
| 6MN7   | A_ARG_476 | NH1    | A_GLU_102 | OE1    | 3.017        |
| 6MN7   | A_ARG_476 | NH1    | A_GLU_102 | OE2    | 3.686        |
| 6MN7   | A_ARG_476 | NH2    | A_ASP_474 | OD2    | 2.794        |
| 6MN7   | A_ARG_480 | NH1    | A_ASP_477 | OD1    | 3.065        |
| 6MN7   | A_ARG_480 | NH2    | A_ASP_477 | OD1    | 2.733        |
| 6MN7   | A_LYS_487 | NZ     | A_ASP_47  | OD1    | 3.272        |
| 6MN7   | A_LYS_487 | NZ     | A_ASP_47  | OD2    | 2.968        |
| 6MN7   | A_LYS_487 | NZ     | A_GLU_91  | OE2    | 2.917        |
| 6MN7   | B_ARG_542 | NH1    | F_GLU_647 | OE2    | 3.229        |
| 6MN7   | B_LYS_574 | NZ     | A_ASP_107 | OD1    | 3.285        |
| 6MN7   | B_LYS_574 | NZ     | A_ASP_107 | OD2    | 3.696        |
| 6MN7   | B_ARG_579 | NH2    | F_GLU_584 | OE1    | 2.844        |
| 6MN7   | B_ARG_579 | NH2    | F_GLU_584 | OE2    | 3.533        |
| 6MN7   | B_ARG_585 | NH1    | B_ASP_589 | OD1    | 3.926        |
| 6MN7   | B_ARG_585 | NH1    | B_ASP_589 | OD2    | 2.732        |
| 6MN7   | B_ARG_585 | NH2    | B_ASP_589 | OD2    | 3.591        |
| 6MN7   | B_ARG_588 | NH2    | B_GLU_584 | OE2    | 2.813        |
| 6MN7   | B_ARG_617 | NH1    | B_GLU_621 | OE2    | 2.445        |
| 6MN7   | B_ARG_617 | NH2    | B_GLU_634 | OE1    | 3.873        |
| 6MN7   | B_ARG_617 | NH2    | B_GLU_634 | OE2    | 2.744        |
| 6MN7   | C_LYS_46  | NZ     | C_GLU_492 | OE1    | 3.386        |
| 6MN7   | C_LYS_46  | NZ     | C_GLU_492 | OE2    | 2.894        |
| 6MN7   | C_LYS_229 | NZ     | C_GLU_83  | OE1    | 2.956        |
| 6MN7   | C_LYS_232 | NZ     | C_GLU_268 | OE1    | 3.583        |
| 6MN7   | C_LYS_232 | NZ     | C_GLU_268 | OE2    | 2.842        |
| 6MN7   | C_LYS_282 | NZ     | C_GLU_275 | OE1    | 2.869        |
| 6MN7   | C_LYS_282 | NZ     | C_GLU_275 | OE2    | 3.561        |
| 6MN7   | C_ARG_308 | NH2    | C_GLU_164 | OE1    | 3.817        |
| 6MN7   | C_ARG_308 | NH2    | C_GLU_164 | OE2    | 3.051        |
| 6MN7   | C_LYS_351 | NZ     | C_GLU_269 | OE1    | 2.813        |
| 6MN7   | C_LYS_351 | NZ     | C_GLU_269 | OE2    | 3.422        |
| 6MN7   | C_ARG_429 | NH1    | C_ASP_113 | OD1    | 3.457        |
| 6MN7   | C_ARG_429 | NH1    | C_ASP_113 | OD2    | 2.824        |
| 6MN7   | C_ARG_429 | NH2    | C_ASP_113 | OD2    | 3.973        |
| 6MN7   | C_ARG_456 | NH2    | C_GLU_466 | OE1    | 3.737        |
| 6MN7   | C_ARG_456 | NH2    | C_GLU_466 | OE2    | 2.976        |
| 6MN7   | C_ARG_469 | NH1    | C_ASP_457 | OD1    | 2.939        |
| 6MN7   | C_ARG_469 | NH2    | C_ASP_457 | OD1    | 3.933        |
| 6MN7   | C_ARG_476 | NH1    | C_GLU_102 | OE1    | 3.016        |

|      |           |     |           |     |       |
|------|-----------|-----|-----------|-----|-------|
| 6MN7 | C_ARG_476 | NH1 | C_GLU_102 | OE2 | 3.686 |
| 6MN7 | C_ARG_476 | NH2 | C_ASP_474 | OD2 | 2.793 |
| 6MN7 | C_ARG_480 | NH1 | C_ASP_477 | OD1 | 3.066 |
| 6MN7 | C_ARG_480 | NH2 | C_ASP_477 | OD1 | 2.733 |
| 6MN7 | C_LYS_487 | NZ  | C_ASP_47  | OD1 | 3.273 |
| 6MN7 | C_LYS_487 | NZ  | C_ASP_47  | OD2 | 2.968 |
| 6MN7 | C_LYS_487 | NZ  | C_GLU_91  | OE2 | 2.918 |
| 6MN7 | D_LYS_46  | NZ  | D_GLU_492 | OE1 | 3.385 |
| 6MN7 | D_LYS_46  | NZ  | D_GLU_492 | OE2 | 2.893 |
| 6MN7 | D_LYS_229 | NZ  | D_GLU_83  | OE1 | 2.958 |
| 6MN7 | D_LYS_232 | NZ  | D_GLU_268 | OE1 | 3.583 |
| 6MN7 | D_LYS_232 | NZ  | D_GLU_268 | OE2 | 2.840 |
| 6MN7 | D_LYS_282 | NZ  | D_GLU_275 | OE1 | 2.869 |
| 6MN7 | D_LYS_282 | NZ  | D_GLU_275 | OE2 | 3.560 |
| 6MN7 | D_ARG_308 | NH2 | D_GLU_164 | OE1 | 3.817 |
| 6MN7 | D_ARG_308 | NH2 | D_GLU_164 | OE2 | 3.051 |
| 6MN7 | D_LYS_351 | NZ  | D_GLU_269 | OE1 | 2.813 |
| 6MN7 | D_LYS_351 | NZ  | D_GLU_269 | OE2 | 3.422 |
| 6MN7 | D_ARG_429 | NH1 | D_ASP_113 | OD1 | 3.456 |
| 6MN7 | D_ARG_429 | NH1 | D_ASP_113 | OD2 | 2.823 |
| 6MN7 | D_ARG_429 | NH2 | D_ASP_113 | OD2 | 3.972 |
| 6MN7 | D_ARG_456 | NH2 | D_GLU_466 | OE1 | 3.737 |
| 6MN7 | D_ARG_456 | NH2 | D_GLU_466 | OE2 | 2.975 |
| 6MN7 | D_ARG_469 | NH1 | D_ASP_457 | OD1 | 2.938 |
| 6MN7 | D_ARG_469 | NH2 | D_ASP_457 | OD1 | 3.933 |
| 6MN7 | D_ARG_476 | NH1 | D_GLU_102 | OE1 | 3.018 |
| 6MN7 | D_ARG_476 | NH1 | D_GLU_102 | OE2 | 3.687 |
| 6MN7 | D_ARG_476 | NH2 | D_ASP_474 | OD2 | 2.795 |
| 6MN7 | D_ARG_480 | NH1 | D_ASP_477 | OD1 | 3.065 |
| 6MN7 | D_ARG_480 | NH2 | D_ASP_477 | OD1 | 2.732 |
| 6MN7 | D_LYS_487 | NZ  | D_ASP_47  | OD1 | 3.273 |
| 6MN7 | D_LYS_487 | NZ  | D_ASP_47  | OD2 | 2.968 |
| 6MN7 | D_LYS_487 | NZ  | D_GLU_91  | OE2 | 2.917 |
| 6MN7 | E_ARG_542 | NH1 | B_GLU_647 | OE2 | 3.076 |
| 6MN7 | E_LYS_574 | NZ  | C_ASP_107 | OD1 | 3.286 |
| 6MN7 | E_LYS_574 | NZ  | C_ASP_107 | OD2 | 3.697 |
| 6MN7 | E_ARG_579 | NH2 | B_GLU_584 | OE1 | 2.796 |
| 6MN7 | E_ARG_579 | NH2 | B_GLU_584 | OE2 | 3.568 |
| 6MN7 | E_ARG_585 | NH1 | E_ASP_589 | OD1 | 3.925 |
| 6MN7 | E_ARG_585 | NH1 | E_ASP_589 | OD2 | 2.731 |
| 6MN7 | E_ARG_585 | NH2 | E_ASP_589 | OD2 | 3.591 |
| 6MN7 | E_ARG_588 | NH2 | E_GLU_584 | OE2 | 2.814 |
| 6MN7 | E_ARG_617 | NH1 | E_GLU_621 | OE2 | 2.446 |
| 6MN7 | E_ARG_617 | NH2 | E_GLU_634 | OE1 | 3.873 |
| 6MN7 | E_ARG_617 | NH2 | E_GLU_634 | OE2 | 2.744 |
| 6MN7 | F_ARG_542 | NH1 | E_GLU_647 | OE2 | 3.126 |
| 6MN7 | F_LYS_574 | NZ  | D_ASP_107 | OD1 | 3.285 |
| 6MN7 | F_LYS_574 | NZ  | D_ASP_107 | OD2 | 3.696 |
| 6MN7 | F_ARG_579 | NH2 | E_GLU_584 | OE1 | 2.859 |
| 6MN7 | F_ARG_579 | NH2 | E_GLU_584 | OE2 | 3.579 |
| 6MN7 | F_ARG_585 | NH1 | F_ASP_589 | OD1 | 3.927 |
| 6MN7 | F_ARG_585 | NH1 | F_ASP_589 | OD2 | 2.734 |
| 6MN7 | F_ARG_585 | NH2 | F_ASP_589 | OD2 | 3.592 |
| 6MN7 | F_ARG_588 | NH2 | F_GLU_584 | OE2 | 2.813 |
| 6MN7 | F_ARG_617 | NH1 | F_GLU_621 | OE2 | 2.447 |
| 6MN7 | F_ARG_617 | NH2 | F_GLU_634 | OE1 | 3.873 |
| 6MN7 | F_ARG_617 | NH2 | F_GLU_634 | OE2 | 2.744 |
| 6MN7 | G_LYS_12  | NZ  | G_GLU_10  | OE1 | 3.426 |

|      |           |     |           |     |       |
|------|-----------|-----|-----------|-----|-------|
| 6MN7 | G_ARG_38  | NH1 | G_GLU_46  | OE1 | 3.285 |
| 6MN7 | G_ARG_38  | NH1 | G_GLU_46  | OE2 | 3.559 |
| 6MN7 | G_ARG_38  | NH1 | G_ASP_89  | OD1 | 3.445 |
| 6MN7 | G_ARG_38  | NH1 | G_ASP_89  | OD2 | 3.578 |
| 6MN7 | G_ARG_38  | NH2 | G_ASP_90  | OD1 | 2.915 |
| 6MN7 | G_ARG_63  | NH1 | G_GLU_46  | OE2 | 3.497 |
| 6MN7 | G_ARG_67  | NH1 | G_ASP_90  | OD1 | 2.860 |
| 6MN7 | G_ARG_67  | NH1 | G_ASP_90  | OD2 | 2.650 |
| 6MN7 | G_ARG_67  | NH2 | G_ASP_90  | OD1 | 2.942 |
| 6MN7 | G_ARG_98  | NH1 | G_ASP_115 | OD2 | 3.898 |
| 6MN7 | G_ARG_188 | NH1 | G_GLU_208 | OE2 | 3.991 |
| 6MN7 | G_ARG_188 | NH1 | G_ASP_209 | OD1 | 2.679 |
| 6MN7 | G_ARG_188 | NH1 | G_ASP_209 | OD2 | 2.661 |
| 6MN7 | G_ARG_188 | NH2 | G_GLU_208 | OE2 | 3.728 |
| 6MN7 | G_ARG_188 | NH2 | G_ASP_209 | OD1 | 3.908 |
| 6MN7 | H_LYS_12  | NZ  | H_GLU_10  | OE1 | 3.427 |
| 6MN7 | H_ARG_38  | NH1 | H_GLU_46  | OE1 | 3.285 |
| 6MN7 | H_ARG_38  | NH1 | H_GLU_46  | OE2 | 3.557 |
| 6MN7 | H_ARG_38  | NH1 | H_ASP_89  | OD1 | 3.443 |
| 6MN7 | H_ARG_38  | NH1 | H_ASP_89  | OD2 | 3.578 |
| 6MN7 | H_ARG_38  | NH2 | H_ASP_90  | OD1 | 2.915 |
| 6MN7 | H_ARG_63  | NH1 | H_GLU_46  | OE2 | 3.498 |
| 6MN7 | H_ARG_67  | NH1 | H_ASP_90  | OD1 | 2.859 |
| 6MN7 | H_ARG_67  | NH1 | H_ASP_90  | OD2 | 2.650 |
| 6MN7 | H_ARG_67  | NH2 | H_ASP_90  | OD1 | 2.942 |
| 6MN7 | H_ARG_98  | NH1 | H_ASP_115 | OD2 | 3.897 |
| 6MN7 | H_ARG_188 | NH1 | H_GLU_208 | OE2 | 3.991 |
| 6MN7 | H_ARG_188 | NH1 | H_ASP_209 | OD1 | 2.679 |
| 6MN7 | H_ARG_188 | NH1 | H_ASP_209 | OD2 | 2.663 |
| 6MN7 | H_ARG_188 | NH2 | H_GLU_208 | OE2 | 3.729 |
| 6MN7 | H_ARG_188 | NH2 | H_ASP_209 | OD1 | 3.908 |
| 6MN7 | I_LYS_12  | NZ  | I_GLU_10  | OE1 | 3.427 |
| 6MN7 | I_ARG_38  | NH1 | I_GLU_46  | OE1 | 3.285 |
| 6MN7 | I_ARG_38  | NH1 | I_GLU_46  | OE2 | 3.556 |
| 6MN7 | I_ARG_38  | NH1 | I_ASP_89  | OD1 | 3.444 |
| 6MN7 | I_ARG_38  | NH1 | I_ASP_89  | OD2 | 3.578 |
| 6MN7 | I_ARG_38  | NH2 | I_ASP_90  | OD1 | 2.915 |
| 6MN7 | I_ARG_63  | NH1 | I_GLU_46  | OE2 | 3.498 |
| 6MN7 | I_ARG_67  | NH1 | I_ASP_90  | OD1 | 2.860 |
| 6MN7 | I_ARG_67  | NH1 | I_ASP_90  | OD2 | 2.649 |
| 6MN7 | I_ARG_67  | NH2 | I_ASP_90  | OD1 | 2.942 |
| 6MN7 | I_ARG_98  | NH1 | I_ASP_115 | OD2 | 3.897 |
| 6MN7 | I_ARG_188 | NH1 | I_GLU_208 | OE2 | 3.991 |
| 6MN7 | I_ARG_188 | NH1 | I_ASP_209 | OD1 | 2.681 |
| 6MN7 | I_ARG_188 | NH1 | I_ASP_209 | OD2 | 2.663 |
| 6MN7 | I_ARG_188 | NH2 | I_GLU_208 | OE2 | 3.728 |
| 6MN7 | I_ARG_188 | NH2 | I_ASP_209 | OD1 | 3.910 |

---

Table 857: 6MN7-specific salt bridging networks analysis. In this table, a PDB file is specified with a four-letter PDB ID, except that the names of the PDB files corresponding to the single NMR structural model split from the NMR ensemble is specified with a four-letter PDB ID in addition to a hyphen followed by the single NMR structural model numeric ID, the residue naming scheme is **Chain ID\_residue name\_residue number**,  $\angle ADH$  represents the angle formed by acceptor (A), donor (D) and hydrogen (H) ( $\angle ADH$ ).

| PDB ID | Residue A | Atom A | Residue B  | Atom B | Distance (Å) |
|--------|-----------|--------|------------|--------|--------------|
| 6MPG   | B_ARG_67  | NH1    | B_GLU_87   | OE2    | 2.287        |
| 6MPG   | B_ARG_67  | NH1    | B_ASP_88   | OD1    | 3.091        |
| 6MPG   | B_ARG_67  | NH1    | B_ASP_88   | OD2    | 3.303        |
| 6MPG   | B_ARG_67  | NH2    | B_GLU_87   | OE2    | 3.585        |
| 6MPG   | U_ARG_542 | NH2    | D_GLU_647  | OE1    | 3.141        |
| 6MPG   | U_ARG_542 | NH2    | D_GLU_647  | OE2    | 2.524        |
| 6MPG   | U_ARG_579 | NH2    | D_GLU_584  | OE1    | 2.488        |
| 6MPG   | U_ARG_588 | NH2    | U_GLU_584  | OE2    | 2.498        |
| 6MPG   | U_ARG_617 | NH1    | U_GLU_634  | OE1    | 3.224        |
| 6MPG   | U_ARG_617 | NH1    | U_GLU_634  | OE2    | 3.055        |
| 6MPG   | V_LYS_46  | NZ     | V_GLU_492  | OE2    | 3.793        |
| 6MPG   | V_LYS_65  | NZ     | V_GLU_64   | OE2    | 2.921        |
| 6MPG   | V_HIS_85  | NE2    | V_GLU_87   | OE1    | 3.725        |
| 6MPG   | V_HIS_105 | NE2    | V_ASP_474  | OD1    | 3.796        |
| 6MPG   | V_HIS_216 | NE2    | V_ASP_57   | OD1    | 2.756        |
| 6MPG   | V_HIS_216 | NE2    | V_ASP_57   | OD2    | 3.780        |
| 6MPG   | V_LYS_227 | NZ     | V_GLU_83   | OE1    | 2.744        |
| 6MPG   | V_LYS_227 | NZ     | V_GLU_83   | OE2    | 3.617        |
| 6MPG   | V_LYS_229 | NZ     | B_ASP_1    | OD1    | 2.776        |
| 6MPG   | V_LYS_231 | NZ     | V_GLU_268  | OE1    | 2.210        |
| 6MPG   | V_LYS_231 | NZ     | V_GLU_268  | OE2    | 3.773        |
| 6MPG   | V_LYS_231 | NZ     | V_GLU_269  | OE1    | 3.900        |
| 6MPG   | V_LYS_282 | NZ     | V_GLU_275  | OE1    | 2.926        |
| 6MPG   | V_ARG_298 | NH1    | V_GLU_381  | OE1    | 3.522        |
| 6MPG   | V_ARG_298 | NH1    | V_GLU_381  | OE2    | 2.978        |
| 6MPG   | V_ARG_298 | NH2    | V_GLU_381  | OE1    | 3.713        |
| 6MPG   | V_ARG_308 | NH1    | V_GLU_164  | OE1    | 3.822        |
| 6MPG   | V_LYS_421 | NZ     | V_ASP_180  | OD1    | 3.836        |
| 6MPG   | V_ARG_429 | NH1    | V_ASP_113  | OD2    | 3.831        |
| 6MPG   | V_ARG_429 | NH2    | V_ASP_113  | OD1    | 3.803        |
| 6MPG   | V_ARG_429 | NH2    | V_ASP_113  | OD2    | 2.191        |
| 6MPG   | V_ARG_469 | NH2    | V_ASP_457  | OD2    | 3.540        |
| 6MPG   | V_ARG_476 | NH1    | V_GLU_102  | OE1    | 2.983        |
| 6MPG   | V_ARG_476 | NH1    | V_GLU_102  | OE2    | 2.663        |
| 6MPG   | V_ARG_476 | NH2    | V_GLU_102  | OE1    | 3.160        |
| 6MPG   | V_ARG_480 | NH1    | V_ASP_477  | OD1    | 2.648        |
| 6MPG   | V_LYS_487 | NZ     | V_ASP_47   | OD1    | 2.603        |
| 6MPG   | V_LYS_487 | NZ     | V_ASP_47   | OD2    | 3.288        |
| 6MPG   | W_ARG_38  | NH1    | W_GLU_46   | OE2    | 3.453        |
| 6MPG   | W_ARG_38  | NH1    | W_ASP_89   | OD1    | 3.905        |
| 6MPG   | W_ARG_38  | NH2    | W_ASP_89   | OD1    | 2.942        |
| 6MPG   | W_ARG_66  | NH2    | W_ASP_89   | OD2    | 3.660        |
| 6MPG   | W_HIS_105 | NE2    | B_GLU_61   | OE2    | 3.652        |
| 6MPG   | m_ARG_38  | NH1    | m_ASP_86   | OD1    | 2.924        |
| 6MPG   | m_ARG_38  | NH2    | m_GLU_46   | OE1    | 3.523        |
| 6MPG   | m_ARG_38  | NH2    | m_GLU_46   | OE2    | 3.688        |
| 6MPG   | m_ARG_38  | NH2    | m_ASP_86   | OD1    | 3.975        |
| 6MPG   | m_LYS_73  | NZ     | m_ASP_53   | OD1    | 3.849        |
| 6MPG   | m_LYS_73  | NZ     | m_ASP_53   | OD2    | 2.556        |
| 6MPG   | n_ARG_61  | NH1    | n_ASP_60   | OD1    | 3.630        |
| 6MPG   | n_ARG_61  | NH1    | n_ASP_60   | OD2    | 3.902        |
| 6MPG   | n_ARG_94  | NH1    | V_ASP_321A | OD1    | 3.878        |
| 6MPG   | n_ARG_95  | NH2    | n_GLU_25   | OE2    | 3.812        |
| 6MPG   | q_ARG_38  | NH1    | q_ASP_86   | OD1    | 3.717        |
| 6MPG   | q_ARG_38  | NH2    | q_ASP_86   | OD1    | 3.650        |
| 6MPG   | q_ARG_66  | NH1    | q_ASP_86   | OD2    | 3.786        |
| 6MPG   | q_ARG_66  | NH2    | q_ASP_86   | OD1    | 3.709        |

|      |           |     |            |     |       |
|------|-----------|-----|------------|-----|-------|
| 6MPG | q_ARG_66  | NH2 | q_ASP_86   | OD2 | 2.196 |
| 6MPG | r_ARG_60  | NH1 | r_ASP_81   | OD2 | 3.768 |
| 6MPG | r_ARG_60  | NH2 | r_ASP_81   | OD1 | 3.488 |
| 6MPG | r_ARG_60  | NH2 | r_ASP_81   | OD2 | 2.219 |
| 6MPG | 2_LYS_46  | NZ  | 2_GLU_492  | OE2 | 3.792 |
| 6MPG | 2_LYS_65  | NZ  | 2_GLU_64   | OE2 | 2.922 |
| 6MPG | 2_HIS_85  | NE2 | 2_GLU_87   | OE1 | 3.726 |
| 6MPG | 2_HIS_105 | NE2 | 2_ASP_474  | OD1 | 3.795 |
| 6MPG | 2_HIS_216 | NE2 | 2_ASP_57   | OD1 | 2.756 |
| 6MPG | 2_HIS_216 | NE2 | 2_ASP_57   | OD2 | 3.779 |
| 6MPG | 2_LYS_227 | NZ  | 2_GLU_83   | OE1 | 2.745 |
| 6MPG | 2_LYS_227 | NZ  | 2_GLU_83   | OE2 | 3.617 |
| 6MPG | 2_LYS_229 | NZ  | 4_ASP_1    | OD1 | 2.776 |
| 6MPG | 2_LYS_231 | NZ  | 2_GLU_268  | OE1 | 2.210 |
| 6MPG | 2_LYS_231 | NZ  | 2_GLU_268  | OE2 | 3.772 |
| 6MPG | 2_LYS_231 | NZ  | 2_GLU_269  | OE1 | 3.900 |
| 6MPG | 2_LYS_282 | NZ  | 2_GLU_275  | OE1 | 2.926 |
| 6MPG | 2_ARG_298 | NH1 | 2_GLU_381  | OE1 | 3.521 |
| 6MPG | 2_ARG_298 | NH1 | 2_GLU_381  | OE2 | 2.977 |
| 6MPG | 2_ARG_298 | NH2 | 2_GLU_381  | OE1 | 3.713 |
| 6MPG | 2_ARG_308 | NH1 | 2_GLU_164  | OE1 | 3.822 |
| 6MPG | 2_LYS_421 | NZ  | 2_ASP_180  | OD1 | 3.837 |
| 6MPG | 2_ARG_429 | NH1 | 2_ASP_113  | OD2 | 3.831 |
| 6MPG | 2_ARG_429 | NH2 | 2_ASP_113  | OD1 | 3.804 |
| 6MPG | 2_ARG_429 | NH2 | 2_ASP_113  | OD2 | 2.191 |
| 6MPG | 2_ARG_469 | NH2 | 2_ASP_457  | OD2 | 3.540 |
| 6MPG | 2_ARG_476 | NH1 | 2_GLU_102  | OE1 | 2.983 |
| 6MPG | 2_ARG_476 | NH1 | 2_GLU_102  | OE2 | 2.663 |
| 6MPG | 2_ARG_476 | NH2 | 2_GLU_102  | OE1 | 3.160 |
| 6MPG | 2_ARG_480 | NH1 | 2_ASP_477  | OD1 | 2.648 |
| 6MPG | 2_LYS_487 | NZ  | 2_ASP_47   | OD1 | 2.604 |
| 6MPG | 2_LYS_487 | NZ  | 2_ASP_47   | OD2 | 3.288 |
| 6MPG | 3_ARG_38  | NH1 | 3_GLU_46   | OE2 | 3.453 |
| 6MPG | 3_ARG_38  | NH1 | 3_ASP_89   | OD1 | 3.905 |
| 6MPG | 3_ARG_38  | NH2 | 3_ASP_89   | OD1 | 2.943 |
| 6MPG | 3_ARG_66  | NH2 | 3_ASP_89   | OD2 | 3.660 |
| 6MPG | 3_HIS_105 | NE2 | 4_GLU_61   | OE2 | 3.651 |
| 6MPG | 4_ARG_67  | NH1 | 4_GLU_87   | OE2 | 2.288 |
| 6MPG | 4_ARG_67  | NH1 | 4_ASP_88   | OD1 | 3.090 |
| 6MPG | 4_ARG_67  | NH1 | 4_ASP_88   | OD2 | 3.302 |
| 6MPG | 4_ARG_67  | NH2 | 4_GLU_87   | OE2 | 3.586 |
| 6MPG | 5_ARG_38  | NH1 | 5_ASP_86   | OD1 | 2.924 |
| 6MPG | 5_ARG_38  | NH2 | 5_GLU_46   | OE1 | 3.523 |
| 6MPG | 5_ARG_38  | NH2 | 5_GLU_46   | OE2 | 3.688 |
| 6MPG | 5_ARG_38  | NH2 | 5_ASP_86   | OD1 | 3.975 |
| 6MPG | 5_LYS_73  | NZ  | 5_ASP_53   | OD1 | 3.850 |
| 6MPG | 5_LYS_73  | NZ  | 5_ASP_53   | OD2 | 2.557 |
| 6MPG | 6_ARG_61  | NH1 | 6_ASP_60   | OD1 | 3.630 |
| 6MPG | 6_ARG_61  | NH1 | 6_ASP_60   | OD2 | 3.902 |
| 6MPG | 6_ARG_94  | NH1 | 2_ASP_321A | OD1 | 3.878 |
| 6MPG | 6_ARG_95  | NH2 | 6_GLU_25   | OE2 | 3.812 |
| 6MPG | 7_ARG_60  | NH1 | 7_ASP_81   | OD2 | 3.768 |
| 6MPG | 7_ARG_60  | NH2 | 7_ASP_81   | OD1 | 3.488 |
| 6MPG | 7_ARG_60  | NH2 | 7_ASP_81   | OD2 | 2.218 |
| 6MPG | 8_ARG_38  | NH1 | 8_ASP_86   | OD1 | 3.717 |
| 6MPG | 8_ARG_38  | NH2 | 8_ASP_86   | OD1 | 3.651 |
| 6MPG | 8_ARG_66  | NH1 | 8_ASP_86   | OD2 | 3.787 |
| 6MPG | 8_ARG_66  | NH2 | 8_ASP_86   | OD1 | 3.708 |

|      |           |     |            |     |       |
|------|-----------|-----|------------|-----|-------|
| 6MPG | 8_ARG_66  | NH2 | 8_ASP_86   | OD2 | 2.195 |
| 6MPG | A_ARG_542 | NH2 | U_GLU_647  | OE1 | 3.132 |
| 6MPG | A_ARG_542 | NH2 | U_GLU_647  | OE2 | 2.525 |
| 6MPG | A_ARG_579 | NH2 | U_GLU_584  | OE1 | 2.474 |
| 6MPG | A_ARG_588 | NH2 | A_GLU_584  | OE2 | 2.498 |
| 6MPG | A_ARG_617 | NH1 | A_GLU_634  | OE1 | 3.224 |
| 6MPG | A_ARG_617 | NH1 | A_GLU_634  | OE2 | 3.054 |
| 6MPG | C_LYS_46  | NZ  | C_GLU_492  | OE2 | 3.793 |
| 6MPG | C_LYS_65  | NZ  | C_GLU_64   | OE2 | 2.921 |
| 6MPG | C_HIS_85  | NE2 | C_GLU_87   | OE1 | 3.726 |
| 6MPG | C_HIS_105 | NE2 | C_ASP_474  | OD1 | 3.796 |
| 6MPG | C_HIS_216 | NE2 | C_ASP_57   | OD1 | 2.756 |
| 6MPG | C_HIS_216 | NE2 | C_ASP_57   | OD2 | 3.780 |
| 6MPG | C_LYS_227 | NZ  | C_GLU_83   | OE1 | 2.745 |
| 6MPG | C_LYS_227 | NZ  | C_GLU_83   | OE2 | 3.617 |
| 6MPG | C_LYS_229 | NZ  | Y_ASP_1    | OD1 | 2.776 |
| 6MPG | C_LYS_231 | NZ  | C_GLU_268  | OE1 | 2.210 |
| 6MPG | C_LYS_231 | NZ  | C_GLU_268  | OE2 | 3.773 |
| 6MPG | C_LYS_231 | NZ  | C_GLU_269  | OE1 | 3.900 |
| 6MPG | C_LYS_282 | NZ  | C_GLU_275  | OE1 | 2.926 |
| 6MPG | C_ARG_298 | NH1 | C_GLU_381  | OE1 | 3.521 |
| 6MPG | C_ARG_298 | NH1 | C_GLU_381  | OE2 | 2.977 |
| 6MPG | C_ARG_298 | NH2 | C_GLU_381  | OE1 | 3.713 |
| 6MPG | C_ARG_308 | NH1 | C_GLU_164  | OE1 | 3.822 |
| 6MPG | C_LYS_421 | NZ  | C_ASP_180  | OD1 | 3.836 |
| 6MPG | C_ARG_429 | NH1 | C_ASP_113  | OD2 | 3.831 |
| 6MPG | C_ARG_429 | NH2 | C_ASP_113  | OD1 | 3.803 |
| 6MPG | C_ARG_429 | NH2 | C_ASP_113  | OD2 | 2.191 |
| 6MPG | C_ARG_469 | NH2 | C_ASP_457  | OD2 | 3.540 |
| 6MPG | C_ARG_476 | NH1 | C_GLU_102  | OE1 | 2.983 |
| 6MPG | C_ARG_476 | NH1 | C_GLU_102  | OE2 | 2.663 |
| 6MPG | C_ARG_476 | NH2 | C_GLU_102  | OE1 | 3.160 |
| 6MPG | C_ARG_480 | NH1 | C_ASP_477  | OD1 | 2.648 |
| 6MPG | C_LYS_487 | NZ  | C_ASP_47   | OD1 | 2.604 |
| 6MPG | C_LYS_487 | NZ  | C_ASP_47   | OD2 | 3.288 |
| 6MPG | D_ARG_542 | NH2 | A_GLU_647  | OE1 | 3.137 |
| 6MPG | D_ARG_542 | NH2 | A_GLU_647  | OE2 | 2.533 |
| 6MPG | D_ARG_579 | NH2 | A_GLU_584  | OE1 | 2.479 |
| 6MPG | D_ARG_588 | NH2 | D_GLU_584  | OE2 | 2.498 |
| 6MPG | D_ARG_617 | NH1 | D_GLU_634  | OE1 | 3.224 |
| 6MPG | D_ARG_617 | NH1 | D_GLU_634  | OE2 | 3.054 |
| 6MPG | M_ARG_38  | NH1 | M_ASP_86   | OD1 | 2.924 |
| 6MPG | M_ARG_38  | NH2 | M_GLU_46   | OE1 | 3.523 |
| 6MPG | M_ARG_38  | NH2 | M_GLU_46   | OE2 | 3.688 |
| 6MPG | M_ARG_38  | NH2 | M_ASP_86   | OD1 | 3.975 |
| 6MPG | M_LYS_73  | NZ  | M_ASP_53   | OD1 | 3.849 |
| 6MPG | M_LYS_73  | NZ  | M_ASP_53   | OD2 | 2.557 |
| 6MPG | N_ARG_61  | NH1 | N_ASP_60   | OD1 | 3.630 |
| 6MPG | N_ARG_61  | NH1 | N_ASP_60   | OD2 | 3.902 |
| 6MPG | N_ARG_94  | NH1 | C_ASP_321A | OD1 | 3.878 |
| 6MPG | N_ARG_95  | NH2 | N_GLU_25   | OE2 | 3.813 |
| 6MPG | Q_ARG_38  | NH1 | Q_ASP_86   | OD1 | 3.717 |
| 6MPG | Q_ARG_38  | NH2 | Q_ASP_86   | OD1 | 3.651 |
| 6MPG | Q_ARG_66  | NH1 | Q_ASP_86   | OD2 | 3.787 |
| 6MPG | Q_ARG_66  | NH2 | Q_ASP_86   | OD1 | 3.708 |
| 6MPG | Q_ARG_66  | NH2 | Q_ASP_86   | OD2 | 2.196 |
| 6MPG | R_ARG_60  | NH1 | R_ASP_81   | OD2 | 3.768 |
| 6MPG | R_ARG_60  | NH2 | R_ASP_81   | OD1 | 3.488 |

|      |           |     |          |     |       |
|------|-----------|-----|----------|-----|-------|
| 6MPG | R_ARG_60  | NH2 | R_ASP_81 | OD2 | 2.219 |
| 6MPG | X_ARG_38  | NH1 | X_GLU_46 | OE2 | 3.453 |
| 6MPG | X_ARG_38  | NH1 | X_ASP_89 | OD1 | 3.905 |
| 6MPG | X_ARG_38  | NH2 | X_ASP_89 | OD1 | 2.942 |
| 6MPG | X_ARG_66  | NH2 | X_ASP_89 | OD2 | 3.661 |
| 6MPG | X_HIS_105 | NE2 | Y_GLU_61 | OE2 | 3.651 |
| 6MPG | Y_ARG_67  | NH1 | Y_GLU_87 | OE2 | 2.288 |
| 6MPG | Y_ARG_67  | NH1 | Y_ASP_88 | OD1 | 3.090 |
| 6MPG | Y_ARG_67  | NH1 | Y_ASP_88 | OD2 | 3.302 |
| 6MPG | Y_ARG_67  | NH2 | Y_GLU_87 | OE2 | 3.586 |

Table 858: 6MPG-specific salt bridging networks analysis. In this table, a PDB file is specified with a four-letter PDB ID, except that the names of the PDB files corresponding to the single NMR structural model split from the NMR ensemble is specified with a four-letter PDB ID in addition to a hyphen followed by the single NMR structural model numeric ID, the residue naming scheme is **Chain ID\_residue name\_residue number**,  $\angle ADH$  represents the angle formed by acceptor (A), donor (D) and hydrogen (H) ( $\angle ADH$ ).



| PDB ID | Residue A | Atom A | Residue B  | Atom B | Distance (Å) |
|--------|-----------|--------|------------|--------|--------------|
| 6MPH   | 1.LYS_31A | NZ     | A_GLU_87   | OE1    | 2.457        |
| 6MPH   | 1.LYS_31A | NZ     | A_GLU_87   | OE2    | 3.919        |
| 6MPH   | 1.ARG_38  | NH1    | 1.GLU_46   | OE1    | 3.740        |
| 6MPH   | 1.ARG_38  | NH1    | 1.GLU_46   | OE2    | 2.866        |
| 6MPH   | 2.ARG_61  | NH1    | 2.ASP_82   | OD1    | 3.657        |
| 6MPH   | 2.ARG_96  | NH1    | 1.GLU_95   | OE1    | 3.340        |
| 6MPH   | 2.ARG_96  | NH1    | 1.GLU_95   | OE2    | 2.522        |
| 6MPH   | 3.LYS_31A | NZ     | B_GLU_87   | OE1    | 2.448        |
| 6MPH   | 3.LYS_31A | NZ     | B_GLU_87   | OE2    | 3.973        |
| 6MPH   | 3.ARG_38  | NH1    | 3.GLU_46   | OE1    | 3.744        |
| 6MPH   | 3.ARG_38  | NH1    | 3.GLU_46   | OE2    | 2.935        |
| 6MPH   | 4.ARG_61  | NH1    | 4.ASP_82   | OD1    | 3.637        |
| 6MPH   | 4.ARG_96  | NH1    | 3.GLU_95   | OE1    | 3.339        |
| 6MPH   | 4.ARG_96  | NH1    | 3.GLU_95   | OE2    | 2.507        |
| 6MPH   | 6.ARG_542 | NH1    | E_GLU_647  | OE2    | 3.863        |
| 6MPH   | 6.ARG_542 | NH2    | E_GLU_647  | OE1    | 3.449        |
| 6MPH   | 6.ARG_542 | NH2    | E_GLU_647  | OE2    | 2.484        |
| 6MPH   | 6.ARG_579 | NH2    | E_GLU_584  | OE1    | 2.833        |
| 6MPH   | 6.ARG_588 | NH2    | 6_GLU_584  | OE2    | 2.677        |
| 6MPH   | 6.ARG_617 | NH1    | 6_GLU_634  | OE2    | 2.791        |
| 6MPH   | 6.ARG_617 | NH2    | 6_GLU_621  | OE2    | 3.365        |
| 6MPH   | A_LYS_46  | NZ     | A_GLU_492  | OE2    | 3.500        |
| 6MPH   | A_HIS_216 | NE2    | A_ASP_57   | OD1    | 2.758        |
| 6MPH   | A_HIS_216 | NE2    | A_ASP_57   | OD2    | 3.293        |
| 6MPH   | A_LYS_231 | NZ     | A_GLU_268  | OE1    | 2.566        |
| 6MPH   | A_LYS_231 | NZ     | A_GLU_268  | OE2    | 3.911        |
| 6MPH   | A_LYS_282 | NZ     | A_GLU_275  | OE1    | 3.999        |
| 6MPH   | A_LYS_282 | NZ     | f_ASP_114  | OD1    | 3.470        |
| 6MPH   | A_LYS_282 | NZ     | f_ASP_114  | OD2    | 3.288        |
| 6MPH   | A_ARG_298 | NH1    | A_GLU_381  | OE1    | 2.662        |
| 6MPH   | A_ARG_298 | NH1    | A_GLU_381  | OE2    | 3.145        |
| 6MPH   | A_ARG_298 | NH2    | A_GLU_381  | OE1    | 3.543        |
| 6MPH   | A_ARG_308 | NH1    | A_GLU_164  | OE2    | 3.005        |
| 6MPH   | A_ARG_327 | NH2    | X_GLU_100I | OE1    | 3.876        |
| 6MPH   | A_LYS_351 | NZ     | A_GLU_269  | OE1    | 3.880        |
| 6MPH   | A_LYS_421 | NZ     | A_ASP_180  | OD1    | 3.919        |
| 6MPH   | A_ARG_429 | NH1    | A_ASP_113  | OD1    | 3.710        |
| 6MPH   | A_ARG_429 | NH1    | A_ASP_113  | OD2    | 3.111        |
| 6MPH   | A_ARG_429 | NH2    | A_ASP_113  | OD1    | 3.007        |
| 6MPH   | A_ARG_429 | NH2    | A_ASP_113  | OD2    | 2.937        |
| 6MPH   | A_ARG_469 | NH2    | A_ASP_457  | OD2    | 3.457        |
| 6MPH   | A_ARG_476 | NH1    | A_GLU_102  | OE1    | 3.188        |
| 6MPH   | A_ARG_476 | NH1    | A_GLU_102  | OE2    | 2.587        |
| 6MPH   | A_ARG_476 | NH2    | A_GLU_102  | OE1    | 3.380        |
| 6MPH   | A_ARG_480 | NH1    | A_ASP_477  | OD1    | 2.475        |
| 6MPH   | A_LYS_487 | NZ     | A_ASP_47   | OD1    | 2.599        |
| 6MPH   | A_LYS_487 | NZ     | A_ASP_47   | OD2    | 3.570        |
| 6MPH   | A_LYS_487 | NZ     | A_GLU_91   | OE1    | 3.931        |
| 6MPH   | B_LYS_46  | NZ     | B_GLU_492  | OE2    | 3.523        |
| 6MPH   | B_HIS_216 | NE2    | B_ASP_57   | OD1    | 2.681        |
| 6MPH   | B_HIS_216 | NE2    | B_ASP_57   | OD2    | 3.250        |
| 6MPH   | B_LYS_231 | NZ     | B_GLU_268  | OE1    | 2.562        |
| 6MPH   | B_LYS_231 | NZ     | B_GLU_268  | OE2    | 3.926        |
| 6MPH   | B_LYS_282 | NZ     | B_GLU_275  | OE1    | 3.947        |
| 6MPH   | B_LYS_282 | NZ     | g_ASP_114  | OD1    | 3.432        |
| 6MPH   | B_LYS_282 | NZ     | g_ASP_114  | OD2    | 3.289        |
| 6MPH   | B_ARG_298 | NH1    | B_GLU_381  | OE1    | 2.635        |

|      |           |     |            |     |       |
|------|-----------|-----|------------|-----|-------|
| 6MPH | B_ARG_298 | NH1 | B_GLU_381  | OE2 | 3.103 |
| 6MPH | B_ARG_298 | NH2 | B_GLU_381  | OE1 | 3.494 |
| 6MPH | B_ARG_308 | NH1 | B_GLU_164  | OE2 | 3.028 |
| 6MPH | B_ARG_327 | NH2 | Y_GLU_100I | OE1 | 3.899 |
| 6MPH | B_LYS_351 | NZ  | B_GLU_269  | OE1 | 3.859 |
| 6MPH | B_LYS_421 | NZ  | B_ASP_180  | OD1 | 3.823 |
| 6MPH | B_ARG_429 | NH1 | B_ASP_113  | OD1 | 3.775 |
| 6MPH | B_ARG_429 | NH1 | B_ASP_113  | OD2 | 3.138 |
| 6MPH | B_ARG_429 | NH2 | B_ASP_113  | OD1 | 3.034 |
| 6MPH | B_ARG_429 | NH2 | B_ASP_113  | OD2 | 2.894 |
| 6MPH | B_ARG_469 | NH2 | B_ASP_457  | OD2 | 3.505 |
| 6MPH | B_ARG_476 | NH1 | B_GLU_102  | OE1 | 3.172 |
| 6MPH | B_ARG_476 | NH1 | B_GLU_102  | OE2 | 2.620 |
| 6MPH | B_ARG_476 | NH2 | B_GLU_102  | OE1 | 3.414 |
| 6MPH | B_ARG_480 | NH1 | B_ASP_477  | OD1 | 2.510 |
| 6MPH | B_LYS_487 | NZ  | B_ASP_47   | OD1 | 2.597 |
| 6MPH | B_LYS_487 | NZ  | B_ASP_47   | OD2 | 3.582 |
| 6MPH | B_LYS_487 | NZ  | B_GLU_91   | OE1 | 3.935 |
| 6MPH | C_LYS_46  | NZ  | C_GLU_492  | OE2 | 3.581 |
| 6MPH | C_HIS_216 | NE2 | C_ASP_57   | OD1 | 2.733 |
| 6MPH | C_HIS_216 | NE2 | C_ASP_57   | OD2 | 3.258 |
| 6MPH | C_LYS_231 | NZ  | C_GLU_268  | OE1 | 2.574 |
| 6MPH | C_LYS_231 | NZ  | C_GLU_268  | OE2 | 3.908 |
| 6MPH | C_LYS_282 | NZ  | C_GLU_275  | OE1 | 3.963 |
| 6MPH | C_LYS_282 | NZ  | Q_ASP_114  | OD1 | 3.383 |
| 6MPH | C_LYS_282 | NZ  | Q_ASP_114  | OD2 | 3.272 |
| 6MPH | C_ARG_298 | NH1 | C_GLU_381  | OE1 | 2.658 |
| 6MPH | C_ARG_298 | NH1 | C_GLU_381  | OE2 | 3.166 |
| 6MPH | C_ARG_298 | NH2 | C_GLU_381  | OE1 | 3.611 |
| 6MPH | C_ARG_308 | NH1 | C_GLU_164  | OE2 | 2.979 |
| 6MPH | C_ARG_327 | NH2 | M_GLU_100I | OE1 | 3.872 |
| 6MPH | C_LYS_351 | NZ  | C_GLU_269  | OE1 | 3.861 |
| 6MPH | C_LYS_421 | NZ  | C_ASP_180  | OD1 | 3.916 |
| 6MPH | C_ARG_429 | NH1 | C_ASP_113  | OD1 | 3.764 |
| 6MPH | C_ARG_429 | NH1 | C_ASP_113  | OD2 | 3.172 |
| 6MPH | C_ARG_429 | NH2 | C_ASP_113  | OD1 | 2.996 |
| 6MPH | C_ARG_429 | NH2 | C_ASP_113  | OD2 | 2.906 |
| 6MPH | C_ARG_469 | NH2 | C_ASP_457  | OD2 | 3.484 |
| 6MPH | C_ARG_476 | NH1 | C_GLU_102  | OE1 | 3.185 |
| 6MPH | C_ARG_476 | NH1 | C_GLU_102  | OE2 | 2.606 |
| 6MPH | C_ARG_476 | NH2 | C_GLU_102  | OE1 | 3.401 |
| 6MPH | C_ARG_480 | NH1 | C_ASP_477  | OD1 | 2.485 |
| 6MPH | C_LYS_487 | NZ  | C_ASP_47   | OD1 | 2.672 |
| 6MPH | C_LYS_487 | NZ  | C_ASP_47   | OD2 | 3.601 |
| 6MPH | C_LYS_487 | NZ  | C_GLU_91   | OE1 | 3.831 |
| 6MPH | D_ARG_542 | NH1 | 6_GLU_647  | OE2 | 3.853 |
| 6MPH | D_ARG_542 | NH2 | 6_GLU_647  | OE1 | 3.460 |
| 6MPH | D_ARG_542 | NH2 | 6_GLU_647  | OE2 | 2.476 |
| 6MPH | D_ARG_579 | NH2 | 6_GLU_584  | OE1 | 2.760 |
| 6MPH | D_ARG_588 | NH2 | D_GLU_584  | OE2 | 2.573 |
| 6MPH | D_ARG_617 | NH1 | D_GLU_634  | OE2 | 2.801 |
| 6MPH | D_ARG_617 | NH2 | D_GLU_621  | OE2 | 3.420 |
| 6MPH | E_ARG_542 | NH1 | D_GLU_647  | OE2 | 3.888 |
| 6MPH | E_ARG_542 | NH2 | D_GLU_647  | OE1 | 3.465 |
| 6MPH | E_ARG_542 | NH2 | D_GLU_647  | OE2 | 2.463 |
| 6MPH | E_ARG_579 | NH2 | D_GLU_584  | OE1 | 2.789 |
| 6MPH | E_ARG_588 | NH2 | E_GLU_584  | OE2 | 2.573 |
| 6MPH | E_ARG_617 | NH1 | E_GLU_634  | OE2 | 2.776 |

|      |           |     |            |     |       |
|------|-----------|-----|------------|-----|-------|
| 6MPH | E_ARG_617 | NH2 | E_GLU_621  | OE2 | 3.431 |
| 6MPH | H_LYS_31A | NZ  | C_GLU_87   | OE1 | 2.458 |
| 6MPH | H_LYS_31A | NZ  | C_GLU_87   | OE2 | 3.969 |
| 6MPH | H_ARG_38  | NH1 | H_GLU_46   | OE1 | 3.668 |
| 6MPH | H_ARG_38  | NH1 | H_GLU_46   | OE2 | 2.976 |
| 6MPH | L_ARG_61  | NH1 | L ASP_82   | OD1 | 3.612 |
| 6MPH | L_ARG_96  | NH1 | H_GLU_95   | OE1 | 3.309 |
| 6MPH | L_ARG_96  | NH1 | H_GLU_95   | OE2 | 2.530 |
| 6MPH | M_ARG_38  | NH1 | M ASP_86   | OD1 | 3.017 |
| 6MPH | M_ARG_38  | NH2 | M_GLU_46   | OE1 | 3.135 |
| 6MPH | M_ARG_38  | NH2 | M_GLU_46   | OE2 | 3.398 |
| 6MPH | M_ARG_66  | NH2 | M ASP_86   | OD1 | 3.623 |
| 6MPH | M_LYS_73  | NZ  | M ASP_53   | OD1 | 3.608 |
| 6MPH | M_LYS_73  | NZ  | M ASP_53   | OD2 | 2.901 |
| 6MPH | M_LYS_96  | NZ  | M ASP_100Q | OD2 | 3.995 |
| 6MPH | N_ARG_61  | NH1 | N ASP_60   | OD1 | 3.566 |
| 6MPH | N_ARG_94  | NH1 | C ASP_321A | OD1 | 3.859 |
| 6MPH | Q_ARG_38  | NH1 | Q_GLU_46   | OE1 | 3.730 |
| 6MPH | Q_ARG_38  | NH2 | Q ASP_97   | OD1 | 3.305 |
| 6MPH | Q_ARG_67  | NH2 | Q ASP_97   | OD1 | 3.545 |
| 6MPH | Q_ARG_67  | NH2 | Q ASP_97   | OD2 | 3.021 |
| 6MPH | Q_ARG_72  | NH2 | C ASP_368  | OD2 | 3.534 |
| 6MPH | R_ARG_40  | NH2 | R_GLU_103  | OE2 | 3.768 |
| 6MPH | R_ARG_61  | NH2 | R ASP_82   | OD1 | 3.293 |
| 6MPH | R_ARG_61  | NH2 | R ASP_82   | OD2 | 2.978 |
| 6MPH | X_ARG_38  | NH1 | X ASP_86   | OD1 | 3.079 |
| 6MPH | X_ARG_38  | NH2 | X_GLU_46   | OE1 | 3.140 |
| 6MPH | X_ARG_38  | NH2 | X_GLU_46   | OE2 | 3.408 |
| 6MPH | X_ARG_66  | NH2 | X ASP_86   | OD1 | 3.580 |
| 6MPH | X_LYS_73  | NZ  | X ASP_53   | OD1 | 3.586 |
| 6MPH | X_LYS_73  | NZ  | X ASP_53   | OD2 | 2.898 |
| 6MPH | Y_ARG_38  | NH1 | Y ASP_86   | OD1 | 3.102 |
| 6MPH | Y_ARG_38  | NH2 | Y_GLU_46   | OE1 | 3.155 |
| 6MPH | Y_ARG_38  | NH2 | Y_GLU_46   | OE2 | 3.384 |
| 6MPH | Y_ARG_66  | NH2 | Y ASP_86   | OD1 | 3.575 |
| 6MPH | Y_LYS_73  | NZ  | Y ASP_53   | OD1 | 3.614 |
| 6MPH | Y_LYS_73  | NZ  | Y ASP_53   | OD2 | 2.911 |
| 6MPH | Z_ARG_61  | NH1 | Z ASP_60   | OD1 | 3.627 |
| 6MPH | Z_ARG_94  | NH1 | A ASP_321A | OD1 | 3.890 |
| 6MPH | a_ARG_61  | NH1 | a ASP_60   | OD1 | 3.574 |
| 6MPH | a_ARG_94  | NH1 | B ASP_321A | OD1 | 3.861 |
| 6MPH | f_ARG_38  | NH1 | f_GLU_46   | OE1 | 3.663 |
| 6MPH | f_ARG_38  | NH2 | f ASP_97   | OD1 | 3.333 |
| 6MPH | f_ARG_67  | NH2 | f ASP_97   | OD1 | 3.553 |
| 6MPH | f_ARG_67  | NH2 | f ASP_97   | OD2 | 3.049 |
| 6MPH | f_ARG_72  | NH2 | A ASP_368  | OD2 | 3.577 |
| 6MPH | g_ARG_38  | NH1 | g_GLU_46   | OE1 | 3.701 |
| 6MPH | g_ARG_38  | NH2 | g ASP_97   | OD1 | 3.335 |
| 6MPH | g_ARG_67  | NH2 | g ASP_97   | OD1 | 3.559 |
| 6MPH | g_ARG_67  | NH2 | g ASP_97   | OD2 | 3.040 |
| 6MPH | g_ARG_72  | NH2 | B ASP_368  | OD2 | 3.570 |
| 6MPH | h_ARG_40  | NH2 | h_GLU_103  | OE2 | 3.735 |
| 6MPH | h_ARG_61  | NH2 | h ASP_82   | OD1 | 3.222 |
| 6MPH | h_ARG_61  | NH2 | h ASP_82   | OD2 | 2.932 |
| 6MPH | i_ARG_40  | NH2 | i_GLU_103  | OE2 | 3.762 |
| 6MPH | i_ARG_61  | NH2 | i ASP_82   | OD1 | 3.332 |
| 6MPH | i_ARG_61  | NH2 | i ASP_82   | OD2 | 3.017 |

---

Table 859: 6MPH-specific salt bridging networks analysis. In this table, a PDB file is specified with a four-letter PDB ID, except that the names of the PDB files corresponding to the single NMR structural model split from the NMR ensemble is specified with a four-letter PDB ID in addition to a hyphen followed by the single NMR structural model numeric ID, the residue naming scheme is **Chain ID\_residue name\_residue number**,  $\angle ADH$  represents the angle formed by acceptor (A), donor (D) and hydrogen (H) ( $\angle ADH$ ).

| PDB ID | Residue A | Atom A | Residue B | Atom B | Distance (Å) |
|--------|-----------|--------|-----------|--------|--------------|
| 6MQC   | A_ARG_    | NH1    | A_GLU_    | OE1    | 3.064        |
| 6MQC   | A_ARG_    | NH1    | A_ASP_    | OD1    | 3.838        |
| 6MQC   | A_ARG_    | NH2    | A_ASP_    | OD1    | 3.330        |
| 6MQC   | A_ARG_    | NH2    | A_ASP_    | OD2    | 3.244        |
| 6MQC   | A_ARG_    | NH1    | A_ASP_    | OD1    | 3.212        |
| 6MQC   | A_ARG_    | NH1    | A_ASP_    | OD2    | 2.946        |
| 6MQC   | A_ARG_    | NH1    | A_ASP_    | OD1    | 2.770        |
| 6MQC   | A_ARG_    | NH1    | B_ASP_    | OD1    | 2.994        |
| 6MQC   | A_ARG_    | NH2    | B_ASP_    | OD1    | 2.820        |
| 6MQC   | A_ARG_    | NH2    | A_ASP_    | OD1    | 3.694        |
| 6MQC   | A_ARG_    | NH2    | A_ASP_    | OD2    | 2.674        |
| 6MQC   | A_ARG_    | NH1    | B_ASP_    | OD1    | 3.399        |
| 6MQC   | A_ARG_    | NH1    | B_ASP_    | OD2    | 3.078        |
| 6MQC   | A_ARG_    | NH1    | B_ASP_    | OD1    | 2.829        |
| 6MQC   | A_ARG_    | NH2    | B_ASP_    | OD1    | 2.822        |
| 6MQC   | A_ARG_    | NH2    | B_ASP_    | OD2    | 3.673        |
| 6MQC   | A_ARG_    | NH2    | A_GLU_    | OE2    | 3.410        |
| 6MQC   | B_ARG_    | NH1    | B_ASP_    | OD2    | 3.586        |
| 6MQC   | B_LYS_    | NZ     | B_GLU_    | OE1    | 3.361        |
| 6MQC   | B_ARG_    | NH1    | B_ASP_    | OD1    | 2.810        |
| 6MQC   | B_ARG_    | NH1    | B_ASP_    | OD2    | 3.319        |
| 6MQC   | B_ARG_    | NH2    | B_ASP_    | OD1    | 3.618        |
| 6MQC   | B_ARG_    | NH2    | B_ASP_    | OD2    | 2.613        |
| 6MQC   | B_LYS_    | NZ     | B_GLU_    | OE1    | 3.307        |
| 6MQC   | B_HIS_    | ND1    | B_ASP_    | OD1    | 2.832        |
| 6MQC   | H_ARG_    | NH1    | H_GLU_    | OE1    | 3.098        |
| 6MQC   | H_ARG_    | NH1    | H_ASP_    | OD1    | 3.684        |
| 6MQC   | H_ARG_    | NH2    | H_ASP_    | OD1    | 2.690        |
| 6MQC   | H_ARG_    | NH1    | H_ASP_    | OD1    | 3.063        |
| 6MQC   | H_ARG_    | NH1    | H_ASP_    | OD2    | 3.805        |
| 6MQC   | H_ARG_    | NH2    | H_ASP_    | OD1    | 3.624        |
| 6MQC   | H_ARG_    | NH2    | H_ASP_    | OD2    | 3.006        |
| 6MQC   | H_ARG_    | NH1    | H_ASP_    | OD1    | 2.952        |
| 6MQC   | H_ARG_    | NH1    | L_ASP_    | OD1    | 2.906        |
| 6MQC   | H_ARG_    | NH2    | L_ASP_    | OD1    | 2.999        |
| 6MQC   | H_ARG_    | NH2    | H_ASP_    | OD1    | 3.031        |
| 6MQC   | H_ARG_    | NH2    | H_ASP_    | OD2    | 3.958        |
| 6MQC   | H_ARG_    | NH1    | L_ASP_    | OD1    | 2.856        |
| 6MQC   | H_ARG_    | NH1    | L_ASP_    | OD2    | 3.748        |
| 6MQC   | H_ARG_    | NH2    | L_ASP_    | OD1    | 3.439        |
| 6MQC   | H_ARG_    | NH2    | L_ASP_    | OD2    | 3.140        |
| 6MQC   | H_ARG_    | NH2    | L_ASP_    | OD1    | 2.780        |
| 6MQC   | H_ARG_    | NH2    | L_ASP_    | OD2    | 3.923        |
| 6MQC   | H_LYS_    | NZ     | H_ASP_    | OD1    | 3.326        |
| 6MQC   | L_ARG_    | NH1    | L_ASP_    | OD2    | 3.327        |
| 6MQC   | L_ARG_    | NH1    | L_ASP_    | OD1    | 2.916        |
| 6MQC   | L_ARG_    | NH1    | L_ASP_    | OD2    | 3.414        |
| 6MQC   | L_ARG_    | NH2    | L_ASP_    | OD1    | 3.578        |
| 6MQC   | L_ARG_    | NH2    | L_ASP_    | OD2    | 2.554        |
| 6MQC   | L_LYS_    | NZ     | L_GLU_    | OE2    | 3.839        |
| 6MQC   | L_LYS_    | NZ     | L_GLU_    | OE1    | 3.867        |
| 6MQC   | L_LYS_    | NZ     | L_GLU_    | OE2    | 3.648        |
| 6MQC   | L_HIS_    | ND1    | L_ASP_    | OD1    | 2.866        |
| 6MQC   | L_HIS_    | NE2    | L_GLU_    | OE2    | 3.758        |

---

Table 860: 6MQC-specific salt bridging networks analysis. In this table, a PDB file is specified with a four-letter PDB ID, except that the names of the PDB files corresponding to the single NMR structural model split from the NMR ensemble is specified with a four-letter PDB ID in addition to a hyphen followed by the single NMR structural model numeric ID, the residue naming scheme is **Chain ID\_residue name\_residue number**,  $\angle ADH$  represents the angle formed by acceptor (A), donor (D) and hydrogen (H) ( $\angle ADH$ ).

| PDB ID | Residue A  | Atom A | Residue B | Atom B | Distance (Å) |
|--------|------------|--------|-----------|--------|--------------|
| 6MQE   | B_ARG.61   | NH1    | B_GLU.81  | OE2    | 2.972        |
| 6MQE   | B_ARG.61   | NH1    | B_ASP.82  | OD1    | 3.540        |
| 6MQE   | B_ARG.61   | NH1    | B_ASP.82  | OD2    | 3.139        |
| 6MQE   | B_ARG.61   | NH2    | B_ASP.82  | OD1    | 2.652        |
| 6MQE   | B_ARG.61   | NH2    | B_ASP.82  | OD2    | 3.672        |
| 6MQE   | B_LYS.103  | NZ     | B_GLU.165 | OE1    | 3.601        |
| 6MQE   | B_LYS.126  | NZ     | B_GLU.122 | OE1    | 2.295        |
| 6MQE   | B_LYS.147  | NZ     | B_GLU.195 | OE1    | 2.709        |
| 6MQE   | B_LYS.149  | NZ     | B_GLU.195 | OE2    | 3.823        |
| 6MQE   | B_LYS.155  | NZ     | B_GLU.185 | OE1    | 3.813        |
| 6MQE   | B_LYS.155  | NZ     | B_GLU.185 | OE2    | 2.543        |
| 6MQE   | B_HIS.189  | ND1    | B_ASP.151 | OD1    | 3.273        |
| 6MQE   | B_HIS.189  | NE2    | B_GLU.185 | OE1    | 2.265        |
| 6MQE   | B_HIS.189  | NE2    | B_GLU.185 | OE2    | 2.201        |
| 6MQE   | A_ARG.38   | NH1    | A_GLU.46  | OE2    | 3.135        |
| 6MQE   | A_ARG.38   | NH1    | A_ASP.86  | OD1    | 3.589        |
| 6MQE   | A_ARG.38   | NH2    | A_ASP.86  | OD1    | 2.950        |
| 6MQE   | A_ARG.66   | NH1    | A_ASP.86  | OD1    | 3.044        |
| 6MQE   | A_ARG.66   | NH1    | A_ASP.86  | OD2    | 2.613        |
| 6MQE   | A_ARG.66   | NH2    | A_ASP.86  | OD1    | 3.697        |
| 6MQE   | A_LYS.75   | NZ     | A_ASP.72  | OD2    | 2.759        |
| 6MQE   | A_LYS.75   | NZ     | A_GLU.77  | OE1    | 3.673        |
| 6MQE   | A_ARG.95   | NH1    | A_ASP.101 | OD1    | 3.112        |
| 6MQE   | A_ARG.95   | NH2    | B_ASP.91  | OD2    | 3.864        |
| 6MQE   | A_ARG.100H | NH2    | B_ASP.91  | OD2    | 3.610        |
| 6MQE   | H_ARG.38   | NH1    | H_GLU.46  | OE1    | 2.700        |
| 6MQE   | H_ARG.38   | NH1    | H_GLU.46  | OE2    | 3.912        |
| 6MQE   | H_ARG.38   | NH1    | H_ASP.86  | OD2    | 3.737        |
| 6MQE   | H_ARG.38   | NH2    | H_ASP.86  | OD2    | 2.834        |
| 6MQE   | H_ARG.66   | NH1    | H_ASP.86  | OD1    | 2.676        |
| 6MQE   | H_ARG.66   | NH1    | H_ASP.86  | OD2    | 3.146        |
| 6MQE   | H_ARG.66   | NH2    | H_ASP.86  | OD2    | 3.716        |
| 6MQE   | H_LYS.71   | NZ     | H_GLU.55  | OE1    | 3.815        |
| 6MQE   | H_LYS.71   | NZ     | H_GLU.55  | OE2    | 3.654        |
| 6MQE   | H_ARG.95   | NH1    | H_ASP.101 | OD1    | 3.185        |
| 6MQE   | H_ARG.95   | NH1    | L_ASP.91  | OD1    | 3.360        |
| 6MQE   | H_ARG.95   | NH2    | L_ASP.91  | OD1    | 2.956        |
| 6MQE   | H_ARG.100H | NH1    | L_ASP.91  | OD1    | 2.604        |
| 6MQE   | H_ARG.100H | NH1    | L_ASP.91  | OD2    | 3.888        |
| 6MQE   | H_ARG.210  | NH1    | H_GLU.212 | OE1    | 2.890        |
| 6MQE   | H_ARG.210  | NH2    | H_GLU.212 | OE1    | 3.265        |
| 6MQE   | L_ARG.61   | NH1    | L_ASP.82  | OD1    | 2.728        |
| 6MQE   | L_ARG.61   | NH1    | L_ASP.82  | OD2    | 3.171        |
| 6MQE   | L_ARG.61   | NH2    | L_ASP.82  | OD1    | 3.670        |
| 6MQE   | L_ARG.61   | NH2    | L_ASP.82  | OD2    | 2.544        |
| 6MQE   | L_LYS.103  | NZ     | L_GLU.165 | OE1    | 2.963        |
| 6MQE   | L_LYS.103  | NZ     | L_GLU.165 | OE2    | 3.584        |
| 6MQE   | L_LYS.126  | NZ     | L_ASP.123 | OD1    | 3.637        |
| 6MQE   | L_LYS.155  | NZ     | A_GLU.56  | OE1    | 2.786        |
| 6MQE   | L_LYS.155  | NZ     | L_GLU.185 | OE2    | 3.322        |
| 6MQE   | L_HIS.189  | ND1    | L_GLU.185 | OE2    | 3.793        |
| 6MQE   | L_HIS.189  | NE2    | A_GLU.56  | OE1    | 3.428        |
| 6MQE   | L_HIS.189  | NE2    | A_GLU.56  | OE2    | 2.569        |
| 6MQE   | L_HIS.189  | NE2    | L_GLU.185 | OE2    | 3.601        |

---

Table 861: 6MQE-specific salt bridging networks analysis. In this table, a PDB file is specified with a four-letter PDB ID, except that the names of the PDB files corresponding to the single NMR structural model split from the NMR ensemble is specified with a four-letter PDB ID in addition to a hyphen followed by the single NMR structural model numeric ID, the residue naming scheme is **Chain ID\_residue name\_residue number**,  $\angle ADH$  represents the angle formed by acceptor (A), donor (D) and hydrogen (H) ( $\angle ADH$ ).



| PDB ID | Residue A | Atom A | Residue B | Atom B | Distance (Å) |
|--------|-----------|--------|-----------|--------|--------------|
| 6MQM   | A_ARG_38  | NH1    | A_GLU_46  | OE1    | 3.765        |
| 6MQM   | A_ARG_38  | NH1    | A_GLU_46  | OE2    | 2.771        |
| 6MQM   | A_ARG_38  | NH1    | A_ASP_86  | OD1    | 3.479        |
| 6MQM   | A_ARG_38  | NH2    | A_ASP_86  | OD1    | 2.674        |
| 6MQM   | A_ARG_66  | NH1    | A_ASP_86  | OD1    | 3.175        |
| 6MQM   | A_ARG_66  | NH1    | A_ASP_86  | OD2    | 3.748        |
| 6MQM   | A_ARG_66  | NH2    | A_ASP_86  | OD1    | 3.755        |
| 6MQM   | A_ARG_66  | NH2    | A_ASP_86  | OD2    | 2.918        |
| 6MQM   | A_ARG_94  | NH1    | A_ASP_101 | OD1    | 3.858        |
| 6MQM   | A_ARG_94  | NH1    | A_ASP_101 | OD2    | 3.426        |
| 6MQM   | A_ARG_94  | NH2    | A_ASP_101 | OD2    | 3.302        |
| 6MQM   | A_LYS_206 | NZ     | A_ASP_208 | OD1    | 3.694        |
| 6MQM   | A_LYS_206 | NZ     | A_ASP_208 | OD2    | 3.645        |
| 6MQM   | A_LYS_210 | NZ     | A_GLU_212 | OE1    | 3.835        |
| 6MQM   | A_LYS_210 | NZ     | A_GLU_212 | OE2    | 2.455        |
| 6MQM   | B_ARG_61  | NH1    | B_ASP_82  | OD1    | 3.379        |
| 6MQM   | B_ARG_61  | NH1    | B_ASP_82  | OD2    | 3.603        |
| 6MQM   | B_ARG_96  | NH1    | A_GLU_95  | OE1    | 3.968        |
| 6MQM   | B_ARG_96  | NH1    | A_GLU_95  | OE2    | 2.460        |
| 6MQM   | B_LYS_103 | NZ     | B_GLU_165 | OE1    | 3.460        |
| 6MQM   | B_LYS_103 | NZ     | B_GLU_165 | OE2    | 2.483        |
| 6MQM   | B_LYS_126 | NZ     | B_GLU_122 | OE2    | 3.847        |
| 6MQM   | B_LYS_149 | NZ     | B_GLU_195 | OE1    | 3.490        |
| 6MQM   | D_ARG_38  | NH1    | D_GLU_46  | OE2    | 3.038        |
| 6MQM   | D_ARG_38  | NH1    | D_ASP_86  | OD1    | 3.431        |
| 6MQM   | D_ARG_38  | NH2    | D_ASP_86  | OD1    | 2.590        |
| 6MQM   | D_ARG_66  | NH1    | D_ASP_86  | OD1    | 2.939        |
| 6MQM   | D_ARG_66  | NH1    | D_ASP_86  | OD2    | 2.983        |
| 6MQM   | D_ARG_66  | NH2    | D_ASP_86  | OD2    | 3.281        |
| 6MQM   | D_LYS_206 | NZ     | D_ASP_208 | OD1    | 3.752        |
| 6MQM   | D_LYS_210 | NZ     | D_GLU_212 | OE2    | 3.469        |
| 6MQM   | E_ARG_61  | NH1    | E_ASP_82  | OD1    | 3.174        |
| 6MQM   | E_ARG_61  | NH1    | E_ASP_82  | OD2    | 3.771        |
| 6MQM   | E_ARG_96  | NH1    | D_GLU_95  | OE2    | 2.376        |
| 6MQM   | E_LYS_103 | NZ     | E_GLU_165 | OE1    | 3.185        |
| 6MQM   | E_LYS_103 | NZ     | E_GLU_165 | OE2    | 2.355        |
| 6MQM   | E_LYS_149 | NZ     | E_GLU_195 | OE1    | 2.638        |
| 6MQM   | E_HIS_189 | NE2    | E_ASP_185 | OD1    | 3.808        |
| 6MQM   | G_ARG_38  | NH1    | G_GLU_46  | OE2    | 3.081        |
| 6MQM   | G_ARG_38  | NH1    | G_ASP_86  | OD1    | 3.241        |
| 6MQM   | G_ARG_38  | NH2    | G_ASP_86  | OD1    | 2.432        |
| 6MQM   | G_ARG_66  | NH1    | G_ASP_86  | OD1    | 3.284        |
| 6MQM   | G_ARG_66  | NH1    | G_ASP_86  | OD2    | 3.321        |
| 6MQM   | G_ARG_66  | NH2    | G_ASP_86  | OD2    | 2.999        |
| 6MQM   | G_ARG_94  | NH2    | G_ASP_101 | OD1    | 3.791        |
| 6MQM   | G_ARG_94  | NH2    | G_ASP_101 | OD2    | 2.962        |
| 6MQM   | G_LYS_206 | NZ     | G_ASP_208 | OD1    | 3.377        |
| 6MQM   | G_LYS_206 | NZ     | G_ASP_208 | OD2    | 3.969        |
| 6MQM   | G_LYS_210 | NZ     | G_GLU_212 | OE2    | 3.739        |
| 6MQM   | H_ARG_61  | NH1    | H_ASP_82  | OD1    | 3.357        |
| 6MQM   | H_ARG_61  | NH1    | H_ASP_82  | OD2    | 3.698        |
| 6MQM   | H_ARG_61  | NH2    | H_GLU_79  | OE2    | 3.084        |
| 6MQM   | H_ARG_96  | NH1    | G_GLU_95  | OE2    | 2.480        |
| 6MQM   | H_LYS_103 | NZ     | H_GLU_165 | OE1    | 2.991        |
| 6MQM   | H_LYS_103 | NZ     | H_GLU_165 | OE2    | 2.468        |
| 6MQM   | H_LYS_126 | NZ     | H_GLU_122 | OE2    | 3.719        |
| 6MQM   | H_LYS_149 | NZ     | H_GLU_195 | OE1    | 2.676        |

|      |           |     |           |     |       |
|------|-----------|-----|-----------|-----|-------|
| 6MQM | H_HIS_189 | ND1 | H_ASP_151 | OD1 | 3.088 |
| 6MQM | H_HIS_189 | NE2 | H_ASP_185 | OD1 | 3.777 |
| 6MQM | J_ARG_38  | NH1 | J_GLU_46  | OE2 | 3.367 |
| 6MQM | J_ARG_38  | NH1 | J_ASP_86  | OD1 | 3.218 |
| 6MQM | J_ARG_38  | NH2 | J_ASP_86  | OD1 | 2.641 |
| 6MQM | J_ARG_66  | NH1 | J_ASP_86  | OD1 | 2.986 |
| 6MQM | J_ARG_66  | NH1 | J_ASP_86  | OD2 | 3.538 |
| 6MQM | J_ARG_66  | NH2 | J_ASP_86  | OD1 | 3.738 |
| 6MQM | J_ARG_66  | NH2 | J_ASP_86  | OD2 | 2.783 |
| 6MQM | J_ARG_94  | NH1 | J_ASP_101 | OD2 | 3.348 |
| 6MQM | J_ARG_94  | NH2 | J_ASP_101 | OD2 | 2.919 |
| 6MQM | J_LYS_206 | NZ  | J_ASP_208 | OD1 | 3.651 |
| 6MQM | J_LYS_206 | NZ  | J_ASP_208 | OD2 | 3.476 |
| 6MQM | J_LYS_    | NZ  | J_GLU_    | OE2 | 3.487 |
| 6MQM | K_ARG_61  | NH1 | K_ASP_82  | OD1 | 2.973 |
| 6MQM | K_ARG_61  | NH1 | K_ASP_82  | OD2 | 3.285 |
| 6MQM | K_ARG_96  | NH1 | J_GLU_95  | OE1 | 3.782 |
| 6MQM | K_ARG_96  | NH1 | J_GLU_95  | OE2 | 2.262 |
| 6MQM | K_LYS_103 | NZ  | K_GLU_165 | OE2 | 2.763 |
| 6MQM | K_LYS_    | NZ  | K_GLU_    | OE1 | 2.452 |
| 6MQM | K_HIS_    | ND1 | K_ASP_    | OD1 | 3.413 |
| 6MQM | K_HIS_    | NE2 | K_ASP_    | OD1 | 3.837 |

Table 862: 6MQM-specific salt bridging networks analysis. In this table, a PDB file is specified with a four-letter PDB ID, except that the names of the PDB files corresponding to the single NMR structural model split from the NMR ensemble is specified with a four-letter PDB ID in addition to a hyphen followed by the single NMR structural model numeric ID, the residue naming scheme is **Chain ID\_residue name\_residue number**,  $\angle ADH$  represents the angle formed by acceptor (A), donor (D) and hydrogen (H) ( $\angle ADH$ ).

| PDB ID | Residue A | Atom A | Residue B | Atom B | Distance (Å) |
|--------|-----------|--------|-----------|--------|--------------|
| 6MQR   | H_ARG_38  | NH1    | H_GLU_46  | OE1    | 3.085        |
| 6MQR   | H_ARG_38  | NH1    | H_ASP_86  | OD1    | 3.945        |
| 6MQR   | H_ARG_38  | NH2    | H_ASP_86  | OD1    | 2.835        |
| 6MQR   | H_ARG_41  | NH2    | H_GLU_148 | OE1    | 3.805        |
| 6MQR   | H_ARG_66  | NH1    | H_ASP_86  | OD1    | 3.097        |
| 6MQR   | H_ARG_66  | NH1    | H_ASP_86  | OD2    | 3.599        |
| 6MQR   | H_ARG_66  | NH2    | H_ASP_86  | OD1    | 3.722        |
| 6MQR   | H_ARG_66  | NH2    | H_ASP_86  | OD2    | 3.135        |
| 6MQR   | H_ARG_94  | NH2    | H_ASP_27  | OD2    | 3.095        |
| 6MQR   | H_ARG_96  | NH1    | H_ASP_101 | OD2    | 3.599        |
| 6MQR   | H_ARG_96  | NH1    | L_GLU_55  | OE1    | 2.553        |
| 6MQR   | H_LYS_143 | NZ     | H_ASP_144 | OD1    | 3.883        |
| 6MQR   | H_LYS_143 | NZ     | H_ASP_144 | OD2    | 3.358        |
| 6MQR   | L_LYS_30  | NZ     | L_ASP_28  | OD2    | 3.556        |
| 6MQR   | L_ARG_46  | NH1    | H_ASP_101 | OD2    | 2.970        |
| 6MQR   | L_ARG_46  | NH1    | L_GLU_55  | OE1    | 3.253        |
| 6MQR   | L_ARG_46  | NH1    | L_GLU_55  | OE2    | 3.148        |
| 6MQR   | L_ARG_46  | NH2    | H_GLU_95  | OE2    | 3.587        |
| 6MQR   | L_ARG_46  | NH2    | H_ASP_101 | OD2    | 3.723        |
| 6MQR   | L_HIS_49  | ND1    | L_GLU_55  | OE1    | 3.996        |
| 6MQR   | L_HIS_49  | ND1    | L_GLU_55  | OE2    | 2.804        |
| 6MQR   | L_ARG_61  | NH1    | L_GLU_81  | OE1    | 3.715        |
| 6MQR   | L_ARG_61  | NH1    | L_ASP_82  | OD1    | 3.745        |
| 6MQR   | L_ARG_61  | NH1    | L_ASP_82  | OD2    | 2.987        |
| 6MQR   | L_LYS_126 | NZ     | L_GLU_122 | OE1    | 3.993        |
| 6MQR   | L_ARG_142 | NH2    | L_GLU_161 | OE2    | 3.937        |
| 6MQR   | L_LYS_149 | NZ     | L_GLU_195 | OE1    | 3.817        |
| 6MQR   | L_LYS_149 | NZ     | L_GLU_195 | OE2    | 2.808        |
| 6MQR   | L_LYS_155 | NZ     | L_GLU_185 | OE1    | 3.064        |
| 6MQR   | L_LYS_169 | NZ     | L_ASP_167 | OD2    | 3.796        |
| 6MQR   | L_HIS_189 | ND1    | L_ASP_151 | OD1    | 2.846        |
| 6MQR   | L_HIS_189 | NE2    | L_GLU_185 | OE1    | 2.682        |
| 6MQR   | L_HIS_189 | NE2    | L_GLU_185 | OE2    | 3.307        |

Table 863: 6MQR-specific salt bridging networks analysis. In this table, a PDB file is specified with a four-letter PDB ID, except that the names of the PDB files corresponding to the single NMR structural model split from the NMR ensemble is specified with a four-letter PDB ID in addition to a hyphen followed by the single NMR structural model numeric ID, the residue naming scheme is **Chain ID\_residue name\_residue number**,  $\angle ADH$  represents the angle formed by acceptor (A), donor (D) and hydrogen (H) ( $\angle ADH$ ).

| PDB ID | Residue A | Atom A | Residue B | Atom B | Distance (Å) |
|--------|-----------|--------|-----------|--------|--------------|
| 6MQS   | A_ARG_39  | NH1    | A_ASP_91  | OD1    | 3.081        |
| 6MQS   | A_ARG_39  | NH2    | A_GLU_47  | OE1    | 3.112        |
| 6MQS   | A_ARG_39  | NH2    | A_ASP_91  | OD1    | 3.076        |
| 6MQS   | A_LYS_44  | NZ     | B_ASP_86  | OD1    | 3.511        |
| 6MQS   | A_ARG_45  | NH1    | A_GLU_47  | OE2    | 3.645        |
| 6MQS   | A_ARG_45  | NH2    | A_GLU_47  | OE1    | 3.366        |
| 6MQS   | A_ARG_68  | NH2    | A_ASP_91  | OD1    | 3.145        |
| 6MQS   | A_ARG_68  | NH2    | A_ASP_91  | OD2    | 3.136        |
| 6MQS   | A_ARG_138 | NH1    | B_GLU_214 | OE1    | 3.046        |
| 6MQS   | A_ARG_138 | NH1    | B_GLU_214 | OE2    | 2.728        |
| 6MQS   | A_LYS_152 | NZ     | A_ASP_153 | OD1    | 3.592        |
| 6MQS   | A_LYS_218 | NZ     | B_GLU_127 | OE1    | 2.743        |
| 6MQS   | A_LYS_218 | NZ     | B_GLU_127 | OE2    | 3.002        |
| 6MQS   | B_LYS_54  | NZ     | B_GLU_51  | OE2    | 3.430        |
| 6MQS   | B_ARG_62  | NH1    | B_ASP_83  | OD1    | 2.524        |
| 6MQS   | B_ARG_62  | NH1    | B_ASP_83  | OD2    | 2.782        |
| 6MQS   | B_LYS_114 | NZ     | B_GLU_202 | OE1    | 3.365        |
| 6MQS   | B_LYS_114 | NZ     | B_GLU_202 | OE2    | 2.522        |
| 6MQS   | B_LYS_153 | NZ     | B_GLU_207 | OE1    | 2.539        |
| 6MQS   | B_LYS_153 | NZ     | B_GLU_207 | OE2    | 3.433        |
| 6MQS   | B_LYS_170 | NZ     | B_GLU_106 | OE1    | 3.760        |
| 6MQS   | B_LYS_175 | NZ     | B_ASP_142 | OD2    | 2.550        |
| 6MQS   | B_HIS_192 | ND1    | B_ASP_155 | OD1    | 3.151        |
| 6MQS   | C_ARG_39  | NH1    | C_ASP_91  | OD2    | 3.128        |
| 6MQS   | C_ARG_39  | NH2    | C_GLU_47  | OE2    | 3.179        |
| 6MQS   | C_ARG_39  | NH2    | C_ASP_91  | OD2    | 3.775        |
| 6MQS   | C_LYS_44  | NZ     | D_ASP_86  | OD1    | 2.946        |
| 6MQS   | C_ARG_68  | NH1    | C_ASP_91  | OD1    | 3.157        |
| 6MQS   | C_ARG_68  | NH1    | C_ASP_91  | OD2    | 3.255        |
| 6MQS   | C_ARG_138 | NH2    | D_GLU_214 | OE1    | 2.736        |
| 6MQS   | C_ARG_138 | NH2    | D_GLU_214 | OE2    | 3.220        |
| 6MQS   | C_LYS_152 | NZ     | D_GLU_128 | OE1    | 3.230        |
| 6MQS   | C_LYS_215 | NZ     | C_ASP_217 | OD1    | 3.836        |
| 6MQS   | C_LYS_215 | NZ     | C_ASP_217 | OD2    | 3.808        |
| 6MQS   | C_LYS_218 | NZ     | D_GLU_127 | OE1    | 2.641        |
| 6MQS   | C_LYS_218 | NZ     | D_GLU_127 | OE2    | 3.160        |
| 6MQS   | D_LYS_54  | NZ     | D_GLU_51  | OE2    | 2.149        |
| 6MQS   | D_ARG_55  | NH1    | D_ASP_61  | OD1    | 2.947        |
| 6MQS   | D_ARG_55  | NH2    | D_ASP_61  | OD1    | 3.758        |
| 6MQS   | D_ARG_62  | NH1    | D_ASP_83  | OD1    | 2.603        |
| 6MQS   | D_ARG_62  | NH1    | D_ASP_83  | OD2    | 3.278        |
| 6MQS   | D_ARG_62  | NH2    | D_ASP_83  | OD1    | 3.570        |
| 6MQS   | D_ARG_62  | NH2    | D_ASP_83  | OD2    | 2.546        |
| 6MQS   | D_LYS_153 | NZ     | D_GLU_207 | OE1    | 2.843        |
| 6MQS   | D_LYS_153 | NZ     | D_GLU_207 | OE2    | 3.321        |
| 6MQS   | D_LYS_170 | NZ     | D_GLU_106 | OE1    | 3.583        |
| 6MQS   | D_HIS_192 | ND1    | D_ASP_155 | OD1    | 2.450        |

---

Table 864: 6MQS-specific salt bridging networks analysis. In this table, a PDB file is specified with a four-letter PDB ID, except that the names of the PDB files corresponding to the single NMR structural model split from the NMR ensemble is specified with a four-letter PDB ID in addition to a hyphen followed by the single NMR structural model numeric ID, the residue naming scheme is **Chain ID\_residue name\_residue number**,  $\angle ADH$  represents the angle formed by acceptor (A), donor (D) and hydrogen (H) ( $\angle ADH$ ).

| PDB ID | Residue A | Atom A | Residue B | Atom B | Distance (Å) |
|--------|-----------|--------|-----------|--------|--------------|
| 6N16   | A_ARG_38  | NH1    | A_GLU_46  | OE1    | 3.309        |
| 6N16   | A_ARG_38  | NH1    | A_ASP_86  | OD1    | 3.572        |
| 6N16   | A_ARG_38  | NH2    | A_ASP_86  | OD1    | 2.610        |
| 6N16   | A_ARG_66  | NH1    | A_ASP_86  | OD1    | 3.129        |
| 6N16   | A_ARG_66  | NH1    | A_ASP_86  | OD2    | 3.512        |
| 6N16   | A_ARG_66  | NH2    | A_ASP_86  | OD1    | 3.997        |
| 6N16   | A_ARG_66  | NH2    | A_ASP_86  | OD2    | 3.156        |
| 6N16   | A_LYS_71  | NZ     | A_GLU_55  | OE2    | 3.830        |
| 6N16   | A_ARG_105 | NH1    | C_GLU_64  | OE1    | 3.566        |
| 6N16   | A_ARG_105 | NH2    | C_GLU_64  | OE1    | 3.522        |
| 6N16   | A_ARG_105 | NH2    | C_GLU_64  | OE2    | 3.717        |
| 6N16   | A_HIS_164 | NE2    | B_ASP_167 | OD2    | 3.486        |
| 6N16   | A_ARG_210 | NH2    | A_GLU_212 | OE2    | 3.118        |
| 6N16   | B_ARG_24  | NH1    | B_ASP_70  | OD1    | 3.099        |
| 6N16   | B_ARG_24  | NH2    | B_ASP_70  | OD1    | 2.017        |
| 6N16   | B_ARG_24  | NH2    | B_ASP_70  | OD2    | 3.393        |
| 6N16   | B_HIS_30E | ND1    | B_GLU_50  | OE2    | 3.843        |
| 6N16   | B_ARG_54  | NH1    | B_ASP_60  | OD1    | 2.491        |
| 6N16   | B_ARG_61  | NH1    | B_GLU_81  | OE1    | 2.899        |
| 6N16   | B_ARG_61  | NH1    | B_GLU_81  | OE2    | 3.698        |
| 6N16   | B_ARG_61  | NH1    | B_ASP_82  | OD2    | 3.838        |
| 6N16   | B_ARG_61  | NH2    | B_GLU_79  | OE1    | 3.749        |
| 6N16   | B_ARG_61  | NH2    | B_GLU_79  | OE2    | 2.925        |
| 6N16   | B_ARG_61  | NH2    | B_ASP_82  | OD1    | 2.769        |
| 6N16   | B_ARG_61  | NH2    | B_ASP_82  | OD2    | 3.263        |
| 6N16   | B_ARG_77  | NH1    | B_GLU_79  | OE1    | 3.315        |
| 6N16   | B_LYS_169 | NZ     | B_ASP_167 | OD2    | 3.870        |
| 6N16   | B_HIS_189 | ND1    | B_ASP_151 | OD1    | 3.412        |
| 6N16   | H_ARG_38  | NH1    | H_GLU_46  | OE2    | 3.288        |
| 6N16   | H_ARG_38  | NH1    | H_ASP_86  | OD1    | 3.675        |
| 6N16   | H_ARG_38  | NH2    | H_ASP_86  | OD1    | 2.691        |
| 6N16   | H_ARG_66  | NH1    | H_ASP_86  | OD1    | 3.216        |
| 6N16   | H_ARG_66  | NH1    | H_ASP_86  | OD2    | 3.793        |
| 6N16   | H_ARG_66  | NH2    | H_ASP_86  | OD1    | 3.587        |
| 6N16   | H_ARG_66  | NH2    | H_ASP_86  | OD2    | 3.090        |
| 6N16   | H_LYS_143 | NZ     | H_ASP_144 | OD1    | 3.308        |
| 6N16   | H_LYS_143 | NZ     | H_ASP_144 | OD2    | 3.890        |
| 6N16   | H_HIS_164 | NE2    | L_ASP_167 | OD1    | 3.075        |
| 6N16   | H_ARG_210 | NH1    | H_GLU_212 | OE1    | 3.730        |
| 6N16   | H_ARG_210 | NH1    | H_GLU_212 | OE2    | 3.198        |
| 6N16   | H_ARG_210 | NH2    | H_GLU_212 | OE1    | 3.203        |
| 6N16   | J_ARG_24  | NH1    | J_ASP_70  | OD1    | 2.082        |
| 6N16   | J_ARG_24  | NH1    | J_ASP_70  | OD2    | 2.995        |
| 6N16   | J_ARG_24  | NH2    | J_ASP_70  | OD1    | 2.960        |
| 6N16   | J_ARG_24  | NH2    | J_ASP_70  | OD2    | 3.355        |
| 6N16   | J_ARG_54  | NH1    | J_ASP_60  | OD1    | 2.428        |
| 6N16   | J_ARG_54  | NH2    | J_ASP_60  | OD1    | 2.646        |
| 6N16   | J_ARG_61  | NH1    | J_GLU_81  | OE2    | 3.475        |
| 6N16   | J_ARG_61  | NH1    | J_ASP_82  | OD1    | 3.146        |
| 6N16   | J_ARG_61  | NH1    | J_ASP_82  | OD2    | 3.392        |
| 6N16   | J_ARG_61  | NH2    | J_GLU_79  | OE1    | 3.524        |
| 6N16   | J_ARG_77  | NH1    | J_GLU_79  | OE1    | 2.977        |
| 6N16   | J_ARG_77  | NH1    | J_GLU_79  | OE2    | 2.495        |
| 6N16   | J_HIS_189 | ND1    | J_ASP_151 | OD1    | 2.409        |
| 6N16   | J_LYS_190 | NZ     | J_ASP_151 | OD1    | 3.722        |
| 6N16   | J_LYS_190 | NZ     | J_ASP_151 | OD2    | 3.788        |
| 6N16   | K_ARG_38  | NH1    | K_GLU_46  | OE1    | 3.313        |

|      |           |     |           |     |       |
|------|-----------|-----|-----------|-----|-------|
| 6N16 | K_ARG_38  | NH1 | K_ASP_86  | OD1 | 3.587 |
| 6N16 | K_ARG_38  | NH2 | K_ASP_86  | OD1 | 2.713 |
| 6N16 | K_ARG_66  | NH1 | K_ASP_86  | OD1 | 2.932 |
| 6N16 | K_ARG_66  | NH1 | K_ASP_86  | OD2 | 3.658 |
| 6N16 | K_ARG_66  | NH2 | K_ASP_86  | OD1 | 3.552 |
| 6N16 | K_ARG_66  | NH2 | K_ASP_86  | OD2 | 2.933 |
| 6N16 | K_LYS_71  | NZ  | K_GLU_55  | OE1 | 3.671 |
| 6N16 | K_LYS_71  | NZ  | K_GLU_55  | OE2 | 3.555 |
| 6N16 | K_ARG_105 | NH2 | H_GLU_64  | OE1 | 2.463 |
| 6N16 | K_ARG_105 | NH2 | H_GLU_64  | OE2 | 3.174 |
| 6N16 | K_ARG_210 | NH1 | K_GLU_212 | OE1 | 2.599 |
| 6N16 | K_ARG_210 | NH1 | K_GLU_212 | OE2 | 3.558 |
| 6N16 | L_ARG_54  | NH1 | L_ASP_60  | OD2 | 3.141 |
| 6N16 | L_ARG_61  | NH1 | L_ASP_82  | OD1 | 2.699 |
| 6N16 | L_ARG_61  | NH1 | L_ASP_82  | OD2 | 3.825 |
| 6N16 | L_ARG_61  | NH2 | L_GLU_79  | OE1 | 2.631 |
| 6N16 | L_ARG_61  | NH2 | L_GLU_79  | OE2 | 3.838 |
| 6N16 | L_ARG_61  | NH2 | L_GLU_81  | OE2 | 3.819 |
| 6N16 | L_ARG_61  | NH2 | L_ASP_82  | OD1 | 3.883 |
| 6N16 | L_ARG_61  | NH2 | L_ASP_82  | OD2 | 3.728 |
| 6N16 | L_ARG_77  | NH1 | L_GLU_79  | OE2 | 2.621 |
| 6N16 | L_ARG_77  | NH2 | L_GLU_79  | OE2 | 3.210 |
| 6N16 | L_LYS_103 | NZ  | L_GLU_165 | OE2 | 3.676 |
| 6N16 | L_LYS_149 | NZ  | L_GLU_195 | OE2 | 2.385 |
| 6N16 | L_LYS_155 | NZ  | L_GLU_185 | OE2 | 3.497 |
| 6N16 | L_HIS_189 | ND1 | L_ASP_151 | OD2 | 2.964 |
| 6N16 | C_ARG_38  | NH1 | C_ASP_86  | OD1 | 2.762 |
| 6N16 | C_ARG_38  | NH2 | C_GLU_46  | OE2 | 2.909 |
| 6N16 | C_ARG_38  | NH2 | C_ASP_86  | OD1 | 3.930 |
| 6N16 | C_ARG_66  | NH1 | C_ASP_86  | OD1 | 2.966 |
| 6N16 | C_ARG_66  | NH1 | C_ASP_86  | OD2 | 3.602 |
| 6N16 | C_ARG_66  | NH2 | C_ASP_86  | OD1 | 3.584 |
| 6N16 | C_ARG_66  | NH2 | C_ASP_86  | OD2 | 2.985 |
| 6N16 | C_LYS_209 | NZ  | D_ASP_123 | OD2 | 3.251 |
| 6N16 | C_ARG_210 | NH1 | C_GLU_212 | OE1 | 2.646 |
| 6N16 | C_ARG_210 | NH2 | C_GLU_212 | OE1 | 2.972 |
| 6N16 | D_ARG_24  | NH2 | D_ASP_70  | OD1 | 3.142 |
| 6N16 | D_ARG_24  | NH2 | D_ASP_70  | OD2 | 3.869 |
| 6N16 | D_ARG_54  | NH1 | D_ASP_60  | OD1 | 3.199 |
| 6N16 | D_ARG_54  | NH1 | D_ASP_60  | OD2 | 3.672 |
| 6N16 | D_ARG_54  | NH2 | D_ASP_60  | OD1 | 3.573 |
| 6N16 | D_ARG_54  | NH2 | D_ASP_60  | OD2 | 3.601 |
| 6N16 | D_ARG_61  | NH1 | D_GLU_79  | OE2 | 2.680 |
| 6N16 | D_ARG_61  | NH2 | D_GLU_79  | OE2 | 3.457 |
| 6N16 | D_ARG_77  | NH2 | D_GLU_79  | OE1 | 2.307 |
| 6N16 | D_ARG_77  | NH2 | D_GLU_79  | OE2 | 3.456 |
| 6N16 | D_LYS_103 | NZ  | D_GLU_165 | OE1 | 3.221 |
| 6N16 | D_LYS_103 | NZ  | D_GLU_165 | OE2 | 3.677 |
| 6N16 | D_LYS_126 | NZ  | D_GLU_122 | OE1 | 3.518 |
| 6N16 | D_LYS_149 | NZ  | D_GLU_195 | OE1 | 3.379 |

---

Table 865: 6N16-specific salt bridging networks analysis. In this table, a PDB file is specified with a four-letter PDB ID, except that the names of the PDB files corresponding to the single NMR structural model split from the NMR ensemble is specified with a four-letter PDB ID in addition to a hyphen followed by the single NMR structural model numeric ID, the residue naming scheme is **Chain ID\_residue name\_residue number**,  $\angle ADH$  represents the angle formed by acceptor (A), donor (D) and hydrogen (H) ( $\angle ADH$ ).



| PDB ID | Residue A | Atom A | Residue B | Atom B | Distance (Å) |
|--------|-----------|--------|-----------|--------|--------------|
| 6N1V   | 3_ARG_39  | NH1    | 3_ASP_91  | OD1    | 3.220        |
| 6N1V   | 3_ARG_39  | NH2    | 3_GLU_47  | OE1    | 2.848        |
| 6N1V   | 3_ARG_39  | NH2    | 3_GLU_47  | OE2    | 2.999        |
| 6N1V   | 3_LYS_44  | NZ     | 4_ASP_86  | OD1    | 3.675        |
| 6N1V   | 3_LYS_44  | NZ     | 4_ASP_86  | OD2    | 2.472        |
| 6N1V   | 3_LYS_44  | NZ     | 4_GLU_106 | OE1    | 3.723        |
| 6N1V   | 3_ARG_45  | NH2    | 3_GLU_47  | OE1    | 3.739        |
| 6N1V   | 3_ARG_138 | NH1    | 4_GLU_214 | OE1    | 2.573        |
| 6N1V   | 3_ARG_138 | NH1    | 4_GLU_214 | OE2    | 3.070        |
| 6N1V   | 3_ARG_138 | NH2    | 4_GLU_214 | OE2    | 3.291        |
| 6N1V   | 3_LYS_152 | NZ     | 3_ASP_153 | OD2    | 3.384        |
| 6N1V   | 3_LYS_218 | NZ     | 4_GLU_127 | OE1    | 3.611        |
| 6N1V   | 3_ARG_219 | NH1    | 3_GLU_221 | OE1    | 3.404        |
| 6N1V   | 4_LYS_54  | NZ     | 4_GLU_51  | OE1    | 3.248        |
| 6N1V   | 4_ARG_62  | NH1    | 4_ASP_83  | OD1    | 3.753        |
| 6N1V   | 4_ARG_62  | NH1    | 4_ASP_83  | OD2    | 3.947        |
| 6N1V   | 4_LYS_114 | NZ     | 4_GLU_202 | OE1    | 3.543        |
| 6N1V   | 4_LYS_114 | NZ     | 4_GLU_202 | OE2    | 2.746        |
| 6N1V   | 4_LYS_153 | NZ     | 4_GLU_207 | OE1    | 3.065        |
| 6N1V   | 4_LYS_153 | NZ     | 4_GLU_207 | OE2    | 3.086        |
| 6N1V   | 4_LYS_170 | NZ     | 4_GLU_84  | OE1    | 2.379        |
| 6N1V   | 4_LYS_175 | NZ     | 4_ASP_142 | OD1    | 3.116        |
| 6N1V   | 4_LYS_175 | NZ     | 4_ASP_142 | OD2    | 2.712        |
| 6N1V   | 4_HIS_192 | ND1    | 4_ASP_155 | OD1    | 3.682        |
| 6N1V   | 4_HIS_192 | ND1    | 4_ASP_155 | OD2    | 2.769        |
| 6N1V   | B_LYS_46  | NZ     | B_GLU_492 | OE2    | 2.855        |
| 6N1V   | B_LYS_231 | NZ     | B_GLU_268 | OE1    | 3.616        |
| 6N1V   | B_LYS_231 | NZ     | B_GLU_268 | OE2    | 2.737        |
| 6N1V   | B_LYS_282 | NZ     | g_ASP_114 | OD2    | 3.730        |
| 6N1V   | B_ARG_298 | NH1    | B_GLU_381 | OE1    | 3.416        |
| 6N1V   | B_ARG_298 | NH1    | B_GLU_381 | OE2    | 3.774        |
| 6N1V   | B_ARG_298 | NH2    | B_GLU_381 | OE1    | 3.507        |
| 6N1V   | B_ARG_308 | NH1    | B_GLU_164 | OE1    | 3.519        |
| 6N1V   | B_ARG_308 | NH1    | B_GLU_164 | OE2    | 2.477        |
| 6N1V   | B_ARG_429 | NH1    | B_ASP_113 | OD2    | 3.774        |
| 6N1V   | B_ARG_429 | NH2    | B_ASP_113 | OD1    | 3.650        |
| 6N1V   | B_ARG_429 | NH2    | B_ASP_113 | OD2    | 2.335        |
| 6N1V   | B_ARG_469 | NH1    | B_ASP_457 | OD1    | 3.545        |
| 6N1V   | B_ARG_469 | NH1    | B_ASP_457 | OD2    | 2.329        |
| 6N1V   | B_ARG_476 | NH1    | B_GLU_102 | OE2    | 3.982        |
| 6N1V   | B_ARG_476 | NH1    | B_ASP_474 | OD2    | 3.112        |
| 6N1V   | B_ARG_476 | NH2    | B_GLU_102 | OE1    | 3.903        |
| 6N1V   | B_ARG_476 | NH2    | B_GLU_102 | OE2    | 3.744        |
| 6N1V   | B_ARG_480 | NH1    | B_ASP_477 | OD1    | 2.992        |
| 6N1V   | B_LYS_487 | NZ     | B_ASP_47  | OD2    | 2.431        |
| 6N1V   | B_ARG_504 | NH2    | D_GLU_657 | OE2    | 3.905        |
| 6N1V   | F_ARG_542 | NH2    | D_GLU_647 | OE1    | 3.326        |
| 6N1V   | F_ARG_542 | NH2    | D_GLU_647 | OE2    | 2.831        |
| 6N1V   | F_ARG_579 | NH2    | D_GLU_584 | OE1    | 3.581        |
| 6N1V   | F_ARG_588 | NH2    | F_GLU_584 | OE2    | 2.394        |
| 6N1V   | F_ARG_617 | NH1    | F_GLU_634 | OE1    | 2.879        |
| 6N1V   | F_ARG_617 | NH1    | F_GLU_634 | OE2    | 2.871        |
| 6N1V   | F_ARG_617 | NH2    | F_GLU_621 | OE1    | 3.225        |
| 6N1V   | Y_ARG_38  | NH1    | Y_ASP_86  | OD1    | 2.536        |
| 6N1V   | Y_ARG_38  | NH2    | Y_GLU_46  | OE1    | 3.284        |
| 6N1V   | Y_ARG_66  | NH1    | Y_ASP_86  | OD2    | 3.359        |
| 6N1V   | Y_ARG_66  | NH2    | Y_ASP_86  | OD1    | 3.775        |

|      |           |     |           |     |       |
|------|-----------|-----|-----------|-----|-------|
| 6N1V | Y_ARG_66  | NH2 | Y_ASP_86  | OD2 | 3.105 |
| 6N1V | Y_LYS_73  | NZ  | Y_ASP_53  | OD1 | 3.985 |
| 6N1V | Y_LYS_73  | NZ  | Y_ASP_53  | OD2 | 2.420 |
| 6N1V | a_ARG_61  | NH1 | a_ASP_60  | OD1 | 2.807 |
| 6N1V | g_LYS_19  | NZ  | g_GLU_89  | OE1 | 3.749 |
| 6N1V | g_ARG_38  | NH1 | g_GLU_46  | OE1 | 3.909 |
| 6N1V | g_ARG_38  | NH1 | g_GLU_46  | OE2 | 3.659 |
| 6N1V | g_ARG_38  | NH2 | g_ASP_97  | OD1 | 3.891 |
| 6N1V | g_ARG_72  | NH1 | B_ASP_368 | OD2 | 3.927 |
| 6N1V | g_ARG_72  | NH2 | B_ASP_368 | OD2 | 3.974 |
| 6N1V | i_ARG_61  | NH2 | i_ASP_82  | OD1 | 3.042 |
| 6N1V | i_ARG_61  | NH2 | i_ASP_82  | OD2 | 3.088 |
| 6N1V | l_ARG_39  | NH1 | l_ASP_91  | OD1 | 3.219 |
| 6N1V | l_ARG_39  | NH2 | l_GLU_47  | OE1 | 2.847 |
| 6N1V | l_ARG_39  | NH2 | l_GLU_47  | OE2 | 3.000 |
| 6N1V | l_LYS_44  | NZ  | 2_ASP_86  | OD1 | 3.676 |
| 6N1V | l_LYS_44  | NZ  | 2_ASP_86  | OD2 | 2.473 |
| 6N1V | l_LYS_44  | NZ  | 2_GLU_106 | OE1 | 3.723 |
| 6N1V | l_ARG_45  | NH2 | l_GLU_47  | OE1 | 3.739 |
| 6N1V | l_ARG_138 | NH1 | 2_GLU_214 | OE1 | 2.573 |
| 6N1V | l_ARG_138 | NH1 | 2_GLU_214 | OE2 | 3.069 |
| 6N1V | l_ARG_138 | NH2 | 2_GLU_214 | OE2 | 3.291 |
| 6N1V | l_LYS_152 | NZ  | l_ASP_153 | OD2 | 3.384 |
| 6N1V | l_LYS_218 | NZ  | 2_GLU_127 | OE1 | 3.611 |
| 6N1V | l_ARG_219 | NH1 | l_GLU_221 | OE1 | 3.404 |
| 6N1V | 2_LYS_54  | NZ  | 2_GLU_51  | OE1 | 3.247 |
| 6N1V | 2_ARG_62  | NH1 | 2_ASP_83  | OD1 | 3.752 |
| 6N1V | 2_ARG_62  | NH1 | 2_ASP_83  | OD2 | 3.947 |
| 6N1V | 2_LYS_114 | NZ  | 2_GLU_202 | OE1 | 3.543 |
| 6N1V | 2_LYS_114 | NZ  | 2_GLU_202 | OE2 | 2.746 |
| 6N1V | 2_LYS_153 | NZ  | 2_GLU_207 | OE1 | 3.064 |
| 6N1V | 2_LYS_153 | NZ  | 2_GLU_207 | OE2 | 3.086 |
| 6N1V | 2_LYS_170 | NZ  | 2_GLU_84  | OE1 | 2.379 |
| 6N1V | 2_LYS_175 | NZ  | 2_ASP_142 | OD1 | 3.116 |
| 6N1V | 2_LYS_175 | NZ  | 2_ASP_142 | OD2 | 2.712 |
| 6N1V | 2_HIS_192 | ND1 | 2_ASP_155 | OD1 | 3.682 |
| 6N1V | 2_HIS_192 | ND1 | 2_ASP_155 | OD2 | 2.769 |
| 6N1V | A_LYS_46  | NZ  | A_GLU_492 | OE2 | 2.855 |
| 6N1V | A_LYS_231 | NZ  | A_GLU_268 | OE1 | 3.617 |
| 6N1V | A_LYS_231 | NZ  | A_GLU_268 | OE2 | 2.737 |
| 6N1V | A_LYS_282 | NZ  | f_ASP_114 | OD2 | 3.729 |
| 6N1V | A_ARG_298 | NH1 | A_GLU_381 | OE1 | 3.416 |
| 6N1V | A_ARG_298 | NH1 | A_GLU_381 | OE2 | 3.774 |
| 6N1V | A_ARG_298 | NH2 | A_GLU_381 | OE1 | 3.507 |
| 6N1V | A_ARG_308 | NH1 | A_GLU_164 | OE1 | 3.518 |
| 6N1V | A_ARG_308 | NH1 | A_GLU_164 | OE2 | 2.477 |
| 6N1V | A_ARG_429 | NH1 | A_ASP_113 | OD2 | 3.775 |
| 6N1V | A_ARG_429 | NH2 | A_ASP_113 | OD1 | 3.650 |
| 6N1V | A_ARG_429 | NH2 | A_ASP_113 | OD2 | 2.336 |
| 6N1V | A_ARG_469 | NH1 | A_ASP_457 | OD1 | 3.546 |
| 6N1V | A_ARG_469 | NH1 | A_ASP_457 | OD2 | 2.329 |
| 6N1V | A_ARG_476 | NH1 | A_GLU_102 | OE2 | 3.981 |
| 6N1V | A_ARG_476 | NH1 | A_ASP_474 | OD2 | 3.112 |
| 6N1V | A_ARG_476 | NH2 | A_GLU_102 | OE1 | 3.904 |
| 6N1V | A_ARG_476 | NH2 | A_GLU_102 | OE2 | 3.744 |
| 6N1V | A_ARG_480 | NH1 | A_ASP_477 | OD1 | 2.992 |
| 6N1V | A_LYS_487 | NZ  | A_ASP_47  | OD2 | 2.431 |
| 6N1V | A_ARG_504 | NH2 | F_GLU_657 | OE2 | 3.909 |

|      |           |     |           |     |       |
|------|-----------|-----|-----------|-----|-------|
| 6N1V | E_ARG_542 | NH2 | F_GLU_647 | OE1 | 3.328 |
| 6N1V | E_ARG_542 | NH2 | F_GLU_647 | OE2 | 2.831 |
| 6N1V | E_ARG_579 | NH2 | F_GLU_584 | OE1 | 3.583 |
| 6N1V | E_ARG_588 | NH2 | E_GLU_584 | OE2 | 2.393 |
| 6N1V | E_ARG_617 | NH1 | E_GLU_634 | OE1 | 2.879 |
| 6N1V | E_ARG_617 | NH1 | E_GLU_634 | OE2 | 2.871 |
| 6N1V | E_ARG_617 | NH2 | E_GLU_621 | OE1 | 3.225 |
| 6N1V | X_ARG_38  | NH1 | X_ASP_86  | OD1 | 2.536 |
| 6N1V | X_ARG_38  | NH2 | X_GLU_46  | OE1 | 3.284 |
| 6N1V | X_ARG_66  | NH1 | X_ASP_86  | OD2 | 3.359 |
| 6N1V | X_ARG_66  | NH2 | X_ASP_86  | OD1 | 3.775 |
| 6N1V | X_ARG_66  | NH2 | X_ASP_86  | OD2 | 3.105 |
| 6N1V | X_LYS_73  | NZ  | X_ASP_53  | OD1 | 3.985 |
| 6N1V | X_LYS_73  | NZ  | X_ASP_53  | OD2 | 2.420 |
| 6N1V | Z_ARG_61  | NH1 | Z_ASP_60  | OD1 | 2.807 |
| 6N1V | f_LYS_19  | NZ  | f_GLU_89  | OE1 | 3.748 |
| 6N1V | f_ARG_38  | NH1 | f_GLU_46  | OE1 | 3.909 |
| 6N1V | f_ARG_38  | NH1 | f_GLU_46  | OE2 | 3.659 |
| 6N1V | f_ARG_38  | NH2 | f_ASP_97  | OD1 | 3.891 |
| 6N1V | f_ARG_72  | NH1 | A_ASP_368 | OD2 | 3.927 |
| 6N1V | f_ARG_72  | NH2 | A_ASP_368 | OD2 | 3.974 |
| 6N1V | h_ARG_61  | NH2 | h_ASP_82  | OD1 | 3.042 |
| 6N1V | h_ARG_61  | NH2 | h_ASP_82  | OD2 | 3.088 |
| 6N1V | C_LYS_46  | NZ  | C_GLU_492 | OE2 | 2.855 |
| 6N1V | C_LYS_231 | NZ  | C_GLU_268 | OE1 | 3.617 |
| 6N1V | C_LYS_231 | NZ  | C_GLU_268 | OE2 | 2.737 |
| 6N1V | C_LYS_282 | NZ  | Q_ASP_114 | OD2 | 3.730 |
| 6N1V | C_ARG_298 | NH1 | C_GLU_381 | OE1 | 3.416 |
| 6N1V | C_ARG_298 | NH1 | C_GLU_381 | OE2 | 3.775 |
| 6N1V | C_ARG_298 | NH2 | C_GLU_381 | OE1 | 3.507 |
| 6N1V | C_ARG_308 | NH1 | C_GLU_164 | OE1 | 3.518 |
| 6N1V | C_ARG_308 | NH1 | C_GLU_164 | OE2 | 2.477 |
| 6N1V | C_ARG_429 | NH1 | C_ASP_113 | OD2 | 3.775 |
| 6N1V | C_ARG_429 | NH2 | C_ASP_113 | OD1 | 3.651 |
| 6N1V | C_ARG_429 | NH2 | C_ASP_113 | OD2 | 2.336 |
| 6N1V | C_ARG_469 | NH1 | C_ASP_457 | OD1 | 3.545 |
| 6N1V | C_ARG_469 | NH1 | C_ASP_457 | OD2 | 2.329 |
| 6N1V | C_ARG_476 | NH1 | C_GLU_102 | OE2 | 3.982 |
| 6N1V | C_ARG_476 | NH1 | C_ASP_474 | OD2 | 3.112 |
| 6N1V | C_ARG_476 | NH2 | C_GLU_102 | OE1 | 3.904 |
| 6N1V | C_ARG_476 | NH2 | C_GLU_102 | OE2 | 3.744 |
| 6N1V | C_ARG_480 | NH1 | C_ASP_477 | OD1 | 2.992 |
| 6N1V | C_LYS_487 | NZ  | C_ASP_47  | OD2 | 2.431 |
| 6N1V | C_ARG_504 | NH2 | E_GLU_657 | OE2 | 3.907 |
| 6N1V | D_ARG_542 | NH2 | E_GLU_647 | OE1 | 3.330 |
| 6N1V | D_ARG_542 | NH2 | E_GLU_647 | OE2 | 2.832 |
| 6N1V | D_ARG_579 | NH2 | E_GLU_584 | OE1 | 3.585 |
| 6N1V | D_ARG_588 | NH2 | D_GLU_584 | OE2 | 2.394 |
| 6N1V | D_ARG_617 | NH1 | D_GLU_634 | OE1 | 2.880 |
| 6N1V | D_ARG_617 | NH1 | D_GLU_634 | OE2 | 2.871 |
| 6N1V | D_ARG_617 | NH2 | D_GLU_621 | OE1 | 3.225 |
| 6N1V | H_ARG_39  | NH1 | H_ASP_91  | OD1 | 3.220 |
| 6N1V | H_ARG_39  | NH2 | H_GLU_47  | OE1 | 2.848 |
| 6N1V | H_ARG_39  | NH2 | H_GLU_47  | OE2 | 3.000 |
| 6N1V | H_LYS_44  | NZ  | L_ASP_86  | OD1 | 3.676 |
| 6N1V | H_LYS_44  | NZ  | L_ASP_86  | OD2 | 2.472 |
| 6N1V | H_LYS_44  | NZ  | L_GLU_106 | OE1 | 3.722 |
| 6N1V | H_ARG_45  | NH2 | H_GLU_47  | OE1 | 3.739 |

|      |           |     |           |     |       |
|------|-----------|-----|-----------|-----|-------|
| 6N1V | H_ARG_138 | NH1 | L_GLU_214 | OE1 | 2.573 |
| 6N1V | H_ARG_138 | NH1 | L_GLU_214 | OE2 | 3.069 |
| 6N1V | H_ARG_138 | NH2 | L_GLU_214 | OE2 | 3.291 |
| 6N1V | H_LYS_152 | NZ  | H_ASP_153 | OD2 | 3.384 |
| 6N1V | H_LYS_218 | NZ  | L_GLU_127 | OE1 | 3.611 |
| 6N1V | H_ARG_219 | NH1 | H_GLU_221 | OE1 | 3.404 |
| 6N1V | L_LYS_54  | NZ  | L_GLU_51  | OE1 | 3.248 |
| 6N1V | L_ARG_62  | NH1 | L_ASP_83  | OD1 | 3.753 |
| 6N1V | L_ARG_62  | NH1 | L_ASP_83  | OD2 | 3.947 |
| 6N1V | L_LYS_114 | NZ  | L_GLU_202 | OE1 | 3.542 |
| 6N1V | L_LYS_114 | NZ  | L_GLU_202 | OE2 | 2.746 |
| 6N1V | L_LYS_153 | NZ  | L_GLU_207 | OE1 | 3.065 |
| 6N1V | L_LYS_153 | NZ  | L_GLU_207 | OE2 | 3.087 |
| 6N1V | L_LYS_170 | NZ  | L_GLU_84  | OE1 | 2.379 |
| 6N1V | L_LYS_175 | NZ  | L_ASP_142 | OD1 | 3.116 |
| 6N1V | L_LYS_175 | NZ  | L_ASP_142 | OD2 | 2.712 |
| 6N1V | L_HIS_192 | ND1 | L_ASP_155 | OD1 | 3.682 |
| 6N1V | L_HIS_192 | ND1 | L_ASP_155 | OD2 | 2.769 |
| 6N1V | M_ARG_38  | NH1 | M_ASP_86  | OD1 | 2.536 |
| 6N1V | M_ARG_38  | NH2 | M_GLU_46  | OE1 | 3.284 |
| 6N1V | M_ARG_66  | NH1 | M_ASP_86  | OD2 | 3.359 |
| 6N1V | M_ARG_66  | NH2 | M_ASP_86  | OD1 | 3.775 |
| 6N1V | M_ARG_66  | NH2 | M_ASP_86  | OD2 | 3.105 |
| 6N1V | M_LYS_73  | NZ  | M_ASP_53  | OD1 | 3.985 |
| 6N1V | M_LYS_73  | NZ  | M_ASP_53  | OD2 | 2.420 |
| 6N1V | N_ARG_61  | NH1 | N_ASP_60  | OD1 | 2.808 |
| 6N1V | Q_LYS_19  | NZ  | Q_GLU_89  | OE1 | 3.749 |
| 6N1V | Q_ARG_38  | NH1 | Q_GLU_46  | OE1 | 3.909 |
| 6N1V | Q_ARG_38  | NH1 | Q_GLU_46  | OE2 | 3.659 |
| 6N1V | Q_ARG_38  | NH2 | Q_ASP_97  | OD1 | 3.891 |
| 6N1V | Q_ARG_72  | NH1 | C_ASP_368 | OD2 | 3.927 |
| 6N1V | Q_ARG_72  | NH2 | C_ASP_368 | OD2 | 3.975 |
| 6N1V | R_ARG_61  | NH2 | R_ASP_82  | OD1 | 3.042 |
| 6N1V | R_ARG_61  | NH2 | R_ASP_82  | OD2 | 3.088 |

Table 866: 6N1V-specific salt bridging networks analysis. In this table, a PDB file is specified with a four-letter PDB ID, except that the names of the PDB files corresponding to the single NMR structural model split from the NMR ensemble is specified with a four-letter PDB ID in addition to a hyphen followed by the single NMR structural model numeric ID, the residue naming scheme is **Chain ID\_residue name\_residue number**,  $\angle ADH$  represents the angle formed by acceptor (A), donor (D) and hydrogen (H) ( $\angle ADH$ ).

| PDB ID | Residue A  | Atom A | Residue B  | Atom B | Distance (Å) |
|--------|------------|--------|------------|--------|--------------|
| 6N1W   | 2_LYS_46   | NZ     | 2_GLU_492  | OE2    | 3.928        |
| 6N1W   | 2_LYS_227  | NZ     | 2_GLU_83   | OE1    | 2.543        |
| 6N1W   | 2_LYS_231  | NZ     | 2_GLU_268  | OE1    | 2.454        |
| 6N1W   | 2_LYS_231  | NZ     | 2_GLU_268  | OE2    | 3.957        |
| 6N1W   | 2_LYS_231  | NZ     | 2_GLU_269  | OE1    | 3.998        |
| 6N1W   | 2_HIS_249  | NE2    | 2_GLU_83   | OE1    | 3.939        |
| 6N1W   | 2_LYS_282  | NZ     | 2_GLU_275  | OE1    | 3.006        |
| 6N1W   | 2_ARG_298  | NH1    | 2_GLU_381  | OE1    | 3.635        |
| 6N1W   | 2_ARG_298  | NH1    | 2_GLU_381  | OE2    | 2.558        |
| 6N1W   | 2_ARG_298  | NH2    | 2_GLU_381  | OE1    | 3.709        |
| 6N1W   | 2_ARG_298  | NH2    | 2_GLU_381  | OE2    | 3.969        |
| 6N1W   | 2_ARG_308  | NH1    | 2_GLU_164  | OE1    | 3.421        |
| 6N1W   | 2_ARG_308  | NH1    | 2_GLU_164  | OE2    | 3.903        |
| 6N1W   | 2_ARG_327  | NH2    | m_GLU_100I | OE1    | 3.996        |
| 6N1W   | 2_LYS_421  | NZ     | 2_ASP_180  | OD1    | 3.450        |
| 6N1W   | 2_ARG_429  | NH1    | 2_ASP_113  | OD2    | 3.966        |
| 6N1W   | 2_ARG_429  | NH2    | 2_ASP_113  | OD1    | 3.893        |
| 6N1W   | 2_ARG_429  | NH2    | 2_ASP_113  | OD2    | 2.506        |
| 6N1W   | 2_ARG_469  | NH2    | 2_ASP_457  | OD2    | 2.809        |
| 6N1W   | 2_ARG_476  | NH1    | 2_GLU_102  | OE1    | 2.957        |
| 6N1W   | 2_ARG_476  | NH1    | 2_GLU_102  | OE2    | 3.101        |
| 6N1W   | 2_ARG_476  | NH2    | 2_GLU_102  | OE1    | 3.474        |
| 6N1W   | 2_ARG_480  | NH1    | 2_ASP_477  | OD1    | 2.941        |
| 6N1W   | 2_LYS_487  | NZ     | 2_ASP_47   | OD1    | 2.806        |
| 6N1W   | 2_LYS_487  | NZ     | 2_ASP_47   | OD2    | 3.509        |
| 6N1W   | 2_ARG_504  | NH2    | d_GLU_657  | OE2    | 3.118        |
| 6N1W   | 3_ARG_38   | NH1    | 3_GLU_46   | OE1    | 2.665        |
| 6N1W   | 3_ARG_38   | NH1    | 3_GLU_46   | OE2    | 3.250        |
| 6N1W   | 3_ARG_38   | NH2    | 3_ASP_86   | OD1    | 2.625        |
| 6N1W   | 3_ARG_66   | NH1    | 3_ASP_86   | OD2    | 3.781        |
| 6N1W   | 3_LYS_71   | NZ     | 3_GLU_55   | OE2    | 3.265        |
| 6N1W   | 3_ARG_100H | NH1    | 3_ASP_101  | OD2    | 3.227        |
| 6N1W   | 3_ARG_100H | NH2    | 4_ASP_91   | OD2    | 3.241        |
| 6N1W   | 4_ARG_61   | NH1    | 4_GLU_81   | OE2    | 3.361        |
| 6N1W   | 4_ARG_61   | NH1    | 4_ASP_82   | OD1    | 3.254        |
| 6N1W   | 4_ARG_61   | NH2    | 4_ASP_82   | OD1    | 3.059        |
| 6N1W   | 4_ARG_61   | NH2    | 4_ASP_82   | OD2    | 2.679        |
| 6N1W   | 5_ARG_38   | NH1    | 5_ASP_86   | OD1    | 2.691        |
| 6N1W   | 5_ARG_38   | NH2    | 5_GLU_46   | OE1    | 3.484        |
| 6N1W   | 5_ARG_38   | NH2    | 5_GLU_46   | OE2    | 3.816        |
| 6N1W   | 5_ARG_38   | NH2    | 5_ASP_86   | OD1    | 3.929        |
| 6N1W   | 5_ARG_66   | NH1    | 5_ASP_86   | OD2    | 3.620        |
| 6N1W   | 5_ARG_66   | NH2    | 5_ASP_86   | OD1    | 3.504        |
| 6N1W   | 5_LYS_73   | NZ     | 5_ASP_53   | OD1    | 3.480        |
| 6N1W   | 5_LYS_73   | NZ     | 5_ASP_53   | OD2    | 2.933        |
| 6N1W   | 7_ARG_60   | NH2    | 7_ASP_81   | OD1    | 2.923        |
| 6N1W   | 7_ARG_60   | NH2    | 7_ASP_81   | OD2    | 2.939        |
| 6N1W   | 8_ARG_38   | NH1    | 8_GLU_46   | OE1    | 3.713        |
| 6N1W   | 8_ARG_38   | NH1    | 8_ASP_86   | OD1    | 3.761        |
| 6N1W   | 8_ARG_38   | NH2    | 8_ASP_86   | OD1    | 3.294        |
| 6N1W   | 8_ARG_66   | NH1    | 8_ASP_86   | OD2    | 3.879        |
| 6N1W   | 8_ARG_66   | NH2    | 8_ASP_86   | OD2    | 2.655        |
| 6N1W   | A_ARG_542  | NH1    | d_GLU_647  | OE1    | 3.516        |
| 6N1W   | A_ARG_542  | NH1    | d_GLU_647  | OE2    | 3.474        |
| 6N1W   | A_ARG_542  | NH2    | d_GLU_647  | OE1    | 2.848        |
| 6N1W   | A_ARG_579  | NH2    | d_GLU_584  | OE2    | 3.464        |
| 6N1W   | A_LYS_601  | NZ     | d_GLU_654  | OE1    | 3.802        |

|      |            |     |           |     |       |
|------|------------|-----|-----------|-----|-------|
| 6N1W | A_LYS_601  | NZ  | d_GLU_654 | OE2 | 3.060 |
| 6N1W | A_ARG_617  | NH1 | A_GLU_634 | OE2 | 3.959 |
| 6N1W | A_ARG_617  | NH2 | A_GLU_621 | OE1 | 3.529 |
| 6N1W | C_LYS_46   | NZ  | C_GLU_492 | OE2 | 3.859 |
| 6N1W | C_LYS_97   | NZ  | C_GLU_275 | OE2 | 3.973 |
| 6N1W | C_LYS_227  | NZ  | C_GLU_83  | OE1 | 2.695 |
| 6N1W | C_LYS_231  | NZ  | C_GLU_268 | OE1 | 2.473 |
| 6N1W | C_LYS_231  | NZ  | C_GLU_268 | OE2 | 3.970 |
| 6N1W | C_LYS_231  | NZ  | C_GLU_269 | OE1 | 3.984 |
| 6N1W | C_HIS_249  | NE2 | C_GLU_83  | OE1 | 3.866 |
| 6N1W | C_LYS_282  | NZ  | C_GLU_275 | OE1 | 3.039 |
| 6N1W | C_ARG_298  | NH1 | C_GLU_381 | OE1 | 3.780 |
| 6N1W | C_ARG_298  | NH1 | C_GLU_381 | OE2 | 2.649 |
| 6N1W | C_ARG_298  | NH2 | C_GLU_381 | OE1 | 3.748 |
| 6N1W | C_ARG_298  | NH2 | C_GLU_381 | OE2 | 3.927 |
| 6N1W | C_ARG_308  | NH1 | C_GLU_164 | OE1 | 3.469 |
| 6N1W | C_ARG_308  | NH1 | C_GLU_164 | OE2 | 3.901 |
| 6N1W | C_LYS_421  | NZ  | C_ASP_180 | OD1 | 3.498 |
| 6N1W | C_ARG_429  | NH1 | C_ASP_113 | OD2 | 3.958 |
| 6N1W | C_ARG_429  | NH2 | C_ASP_113 | OD1 | 3.756 |
| 6N1W | C_ARG_429  | NH2 | C_ASP_113 | OD2 | 2.445 |
| 6N1W | C_ARG_469  | NH2 | C_ASP_457 | OD2 | 2.859 |
| 6N1W | C_ARG_476  | NH1 | C_GLU_102 | OE1 | 3.094 |
| 6N1W | C_ARG_476  | NH1 | C_GLU_102 | OE2 | 3.309 |
| 6N1W | C_ARG_476  | NH2 | C_GLU_102 | OE1 | 3.512 |
| 6N1W | C_ARG_480  | NH1 | C_ASP_477 | OD1 | 2.924 |
| 6N1W | C_LYS_487  | NZ  | C_ASP_47  | OD1 | 2.763 |
| 6N1W | C_LYS_487  | NZ  | C_ASP_47  | OD2 | 3.509 |
| 6N1W | C_ARG_504  | NH2 | A_GLU_657 | OE2 | 3.221 |
| 6N1W | D_ARG_542  | NH1 | A_GLU_647 | OE1 | 3.273 |
| 6N1W | D_ARG_542  | NH1 | A_GLU_647 | OE2 | 3.289 |
| 6N1W | D_ARG_542  | NH2 | A_GLU_647 | OE1 | 2.942 |
| 6N1W | D_ARG_579  | NH1 | A_GLU_584 | OE1 | 3.854 |
| 6N1W | D_ARG_579  | NH2 | A_GLU_584 | OE2 | 3.567 |
| 6N1W | D_LYS_601  | NZ  | A_GLU_654 | OE1 | 3.837 |
| 6N1W | D_LYS_601  | NZ  | A_GLU_654 | OE2 | 3.044 |
| 6N1W | D_ARG_617  | NH1 | D_GLU_634 | OE2 | 3.956 |
| 6N1W | D_ARG_617  | NH2 | D_GLU_621 | OE1 | 3.541 |
| 6N1W | H_ARG_38   | NH1 | H_GLU_46  | OE1 | 2.685 |
| 6N1W | H_ARG_38   | NH1 | H_GLU_46  | OE2 | 3.187 |
| 6N1W | H_ARG_38   | NH2 | H_ASP_86  | OD1 | 2.618 |
| 6N1W | H_ARG_66   | NH1 | H_ASP_86  | OD2 | 3.806 |
| 6N1W | H_LYS_71   | NZ  | H_GLU_55  | OE2 | 3.251 |
| 6N1W | H_ARG_100H | NH1 | H_ASP_101 | OD2 | 3.211 |
| 6N1W | H_ARG_100H | NH2 | L_ASP_91  | OD2 | 3.150 |
| 6N1W | L_ARG_61   | NH1 | L_GLU_81  | OE2 | 3.442 |
| 6N1W | L_ARG_61   | NH1 | L_ASP_82  | OD1 | 3.265 |
| 6N1W | L_ARG_61   | NH2 | L_ASP_82  | OD1 | 3.076 |
| 6N1W | L_ARG_61   | NH2 | L_ASP_82  | OD2 | 2.697 |
| 6N1W | M_ARG_38   | NH1 | M_ASP_86  | OD1 | 2.569 |
| 6N1W | M_ARG_38   | NH2 | M_GLU_46  | OE1 | 3.511 |
| 6N1W | M_ARG_38   | NH2 | M_GLU_46  | OE2 | 3.792 |
| 6N1W | M_ARG_38   | NH2 | M_ASP_86  | OD1 | 3.908 |
| 6N1W | M_ARG_66   | NH1 | M_ASP_86  | OD2 | 3.739 |
| 6N1W | M_ARG_66   | NH2 | M_ASP_86  | OD1 | 3.607 |
| 6N1W | M_LYS_73   | NZ  | M_ASP_53  | OD1 | 3.504 |
| 6N1W | M_LYS_73   | NZ  | M_ASP_53  | OD2 | 2.877 |
| 6N1W | Q_ARG_38   | NH1 | Q_GLU_46  | OE1 | 3.699 |

|      |            |     |           |     |       |
|------|------------|-----|-----------|-----|-------|
| 6N1W | Q_ARG_38   | NH1 | Q_ASP_86  | OD1 | 3.715 |
| 6N1W | Q_ARG_38   | NH2 | Q_ASP_86  | OD1 | 3.040 |
| 6N1W | Q_ARG_66   | NH1 | Q_ASP_86  | OD2 | 3.762 |
| 6N1W | Q_ARG_66   | NH2 | Q_ASP_86  | OD2 | 2.524 |
| 6N1W | R_ARG_60   | NH2 | R_ASP_81  | OD1 | 2.849 |
| 6N1W | R_ARG_60   | NH2 | R_ASP_81  | OD2 | 2.945 |
| 6N1W | c_LYS_46   | NZ  | c_GLU_492 | OE2 | 3.862 |
| 6N1W | c_LYS_227  | NZ  | c_GLU_83  | OE1 | 2.652 |
| 6N1W | c_LYS_231  | NZ  | c_GLU_268 | OE1 | 2.434 |
| 6N1W | c_LYS_231  | NZ  | c_GLU_268 | OE2 | 3.951 |
| 6N1W | c_LYS_231  | NZ  | c_GLU_269 | OE1 | 3.890 |
| 6N1W | c_HIS_249  | NE2 | c_GLU_83  | OE1 | 3.931 |
| 6N1W | c_LYS_282  | NZ  | c_GLU_275 | OE1 | 3.038 |
| 6N1W | c_ARG_298  | NH1 | c_GLU_381 | OE1 | 3.531 |
| 6N1W | c_ARG_298  | NH1 | c_GLU_381 | OE2 | 2.444 |
| 6N1W | c_ARG_298  | NH2 | c_GLU_381 | OE1 | 3.806 |
| 6N1W | c_ARG_308  | NH1 | c_GLU_164 | OE1 | 3.441 |
| 6N1W | c_ARG_308  | NH1 | c_GLU_164 | OE2 | 3.830 |
| 6N1W | c_LYS_421  | NZ  | c_ASP_180 | OD1 | 3.813 |
| 6N1W | c_ARG_429  | NH1 | c_ASP_113 | OD2 | 3.970 |
| 6N1W | c_ARG_429  | NH2 | c_ASP_113 | OD1 | 3.958 |
| 6N1W | c_ARG_429  | NH2 | c_ASP_113 | OD2 | 2.540 |
| 6N1W | c_ARG_469  | NH2 | c_ASP_457 | OD2 | 2.886 |
| 6N1W | c_ARG_476  | NH1 | c_GLU_102 | OE1 | 2.901 |
| 6N1W | c_ARG_476  | NH1 | c_GLU_102 | OE2 | 3.038 |
| 6N1W | c_ARG_476  | NH2 | c_GLU_102 | OE1 | 3.473 |
| 6N1W | c_ARG_480  | NH1 | c_ASP_477 | OD1 | 2.867 |
| 6N1W | c_LYS_487  | NZ  | c_ASP_47  | OD1 | 2.950 |
| 6N1W | c_LYS_487  | NZ  | c_ASP_47  | OD2 | 3.392 |
| 6N1W | c_LYS_487  | NZ  | c_GLU_91  | OE1 | 3.967 |
| 6N1W | c_ARG_504  | NH2 | D_GLU_657 | OE2 | 3.061 |
| 6N1W | d_ARG_542  | NH1 | D_GLU_647 | OE1 | 3.482 |
| 6N1W | d_ARG_542  | NH1 | D_GLU_647 | OE2 | 3.280 |
| 6N1W | d_ARG_542  | NH2 | D_GLU_647 | OE1 | 2.854 |
| 6N1W | d_ARG_579  | NH1 | D_GLU_584 | OE1 | 3.913 |
| 6N1W | d_ARG_579  | NH2 | D_GLU_584 | OE2 | 3.653 |
| 6N1W | d_LYS_601  | NZ  | D_GLU_654 | OE1 | 3.862 |
| 6N1W | d_LYS_601  | NZ  | D_GLU_654 | OE2 | 3.082 |
| 6N1W | d_ARG_617  | NH1 | d_GLU_634 | OE2 | 3.896 |
| 6N1W | d_ARG_617  | NH2 | d_GLU_621 | OE1 | 3.678 |
| 6N1W | h_ARG_38   | NH1 | h_GLU_46  | OE1 | 2.684 |
| 6N1W | h_ARG_38   | NH1 | h_GLU_46  | OE2 | 3.228 |
| 6N1W | h_ARG_38   | NH2 | h_ASP_86  | OD1 | 2.566 |
| 6N1W | h_ARG_66   | NH1 | h_ASP_86  | OD2 | 3.765 |
| 6N1W | h_LYS_71   | NZ  | h_GLU_55  | OE2 | 3.379 |
| 6N1W | h_ARG_100H | NH1 | h_ASP_101 | OD2 | 3.191 |
| 6N1W | h_ARG_100H | NH2 | l_ASP_91  | OD2 | 3.226 |
| 6N1W | l_ARG_61   | NH1 | l_GLU_81  | OE2 | 3.471 |
| 6N1W | l_ARG_61   | NH1 | l_ASP_82  | OD1 | 3.278 |
| 6N1W | l_ARG_61   | NH2 | l_ASP_82  | OD1 | 3.046 |
| 6N1W | l_ARG_61   | NH2 | l_ASP_82  | OD2 | 2.734 |
| 6N1W | m_ARG_38   | NH1 | m_ASP_86  | OD1 | 2.662 |
| 6N1W | m_ARG_38   | NH2 | m_GLU_46  | OE1 | 3.392 |
| 6N1W | m_ARG_38   | NH2 | m_GLU_46  | OE2 | 3.730 |
| 6N1W | m_ARG_38   | NH2 | m_ASP_86  | OD1 | 3.976 |
| 6N1W | m_ARG_66   | NH1 | m_ASP_86  | OD2 | 3.631 |
| 6N1W | m_ARG_66   | NH2 | m_ASP_86  | OD1 | 3.510 |
| 6N1W | m_LYS_73   | NZ  | m_ASP_53  | OD1 | 3.489 |

|      |          |     |          |     |       |
|------|----------|-----|----------|-----|-------|
| 6N1W | m_LYS_73 | NZ  | m_ASP_53 | OD2 | 2.916 |
| 6N1W | q_ARG_38 | NH1 | q_GLU_46 | OE1 | 3.649 |
| 6N1W | q_ARG_38 | NH1 | q_ASP_86 | OD1 | 3.800 |
| 6N1W | q_ARG_38 | NH2 | q_ASP_86 | OD1 | 3.194 |
| 6N1W | q_ARG_66 | NH1 | q_ASP_86 | OD2 | 3.833 |
| 6N1W | q_ARG_66 | NH2 | q_ASP_86 | OD2 | 2.511 |
| 6N1W | r_ARG_60 | NH2 | r_ASP_81 | OD1 | 2.963 |
| 6N1W | r_ARG_60 | NH2 | r_ASP_81 | OD2 | 3.033 |

Table 867: 6N1W-specific salt bridging networks analysis. In this table, a PDB file is specified with a four-letter PDB ID, except that the names of the PDB files corresponding to the single NMR structural model split from the NMR ensemble is specified with a four-letter PDB ID in addition to a hyphen followed by the single NMR structural model numeric ID, the residue naming scheme is **Chain ID\_residue name\_residue number**,  $\angle ADH$  represents the angle formed by acceptor (A), donor (D) and hydrogen (H) ( $\angle ADH$ ).



| PDB ID | Residue A | Atom A | Residue B | Atom B | Distance (Å) |
|--------|-----------|--------|-----------|--------|--------------|
| 6N5B   | H_ARG_38  | NH1    | H_GLU_46  | OE1    | 3.194        |
| 6N5B   | H_ARG_38  | NH1    | H_GLU_46  | OE2    | 3.841        |
| 6N5B   | H_ARG_38  | NH2    | H_ASP_86  | OD1    | 3.183        |
| 6N5B   | H_LYS_64  | NZ     | H_ASP_61  | OD1    | 3.760        |
| 6N5B   | H_ARG_66  | NH1    | H_ASP_86  | OD1    | 3.517        |
| 6N5B   | H_ARG_66  | NH1    | H_ASP_86  | OD2    | 3.589        |
| 6N5B   | H_ARG_66  | NH2    | H_ASP_86  | OD2    | 3.024        |
| 6N5B   | H_LYS_149 | NZ     | L_GLU_128 | OE2    | 3.031        |
| 6N5B   | H_LYS_214 | NZ     | L_GLU_127 | OE2    | 3.139        |
| 6N5B   | L_ARG_63  | NH2    | L_ASP_84  | OD1    | 2.528        |
| 6N5B   | L_ARG_63  | NH2    | L_ASP_84  | OD2    | 3.785        |
| 6N5B   | L_LYS_170 | NZ     | L_GLU_85  | OE2    | 2.862        |
| 6N5B   | L_HIS_192 | ND1    | L_ASP_155 | OD2    | 3.335        |
| 6N5B   | B_ARG_53  | NH1    | B_GLU_79  | OE1    | 3.394        |
| 6N5B   | B_ARG_53  | NH2    | B_ASP_81  | OD1    | 3.952        |
| 6N5B   | B_ARG_86  | NH2    | B_ASP_56  | OD1    | 3.915        |
| 6N5B   | B_ARG_86  | NH2    | B_ASP_56  | OD2    | 2.646        |
| 6N5B   | B_ARG_105 | NH2    | B_GLU_85  | OE1    | 3.089        |
| 6N5B   | B_LYS_113 | NZ     | B_GLU_115 | OE1    | 3.775        |
| 6N5B   | B_ARG_137 | NH1    | B_ASP_73  | OD1    | 2.745        |
| 6N5B   | B_ARG_137 | NH1    | B_ASP_73  | OD2    | 3.436        |
| 6N5B   | B_ARG_137 | NH2    | B_ASP_142 | OD2    | 3.308        |
| 6N5B   | B_ARG_172 | NH1    | B_GLU_119 | OE2    | 3.863        |
| 6N5B   | B_HIS_253 | ND1    | B_GLU_119 | OE1    | 2.944        |
| 6N5B   | B_LYS_255 | NZ     | B_GLU_115 | OE2    | 3.788        |

Table 868: 6N5B-specific salt bridging networks analysis. In this table, a PDB file is specified with a four-letter PDB ID, except that the names of the PDB files corresponding to the single NMR structural model split from the NMR ensemble is specified with a four-letter PDB ID in addition to a hyphen followed by the single NMR structural model numeric ID, the residue naming scheme is **Chain ID\_residue name\_residue number**,  $\angle ADH$  represents the angle formed by acceptor (A), donor (D) and hydrogen (H) ( $\angle ADH$ ).

| PDB ID | Residue A | Atom A | Residue B | Atom B | Distance (Å) |
|--------|-----------|--------|-----------|--------|--------------|
| 6N5D   | A_HIS_56  | ND1    | A_ASP_85  | OD2    | 3.953        |
| 6N5D   | A_ARG_57  | NH2    | A_GLU_82  | OE1    | 2.603        |
| 6N5D   | A_HIS_75  | ND1    | A_ASP_73  | OD1    | 2.834        |
| 6N5D   | A_HIS_75  | ND1    | A_ASP_73  | OD2    | 3.931        |
| 6N5D   | A_ARG_90  | NH2    | A_ASP_60  | OD1    | 3.337        |
| 6N5D   | A_ARG_90  | NH2    | A_ASP_60  | OD2    | 2.505        |
| 6N5D   | A_LYS_92  | NZ     | A_ASP_271 | OD2    | 3.373        |
| 6N5D   | A_ARG_109 | NH1    | A_GLU_89  | OE1    | 2.808        |
| 6N5D   | A_ARG_109 | NH1    | A_GLU_89  | OE2    | 3.783        |
| 6N5D   | A_LYS_176 | NZ     | A_GLU_123 | OE2    | 3.918        |
| 6N5D   | A_LYS_238 | NZ     | A_ASP_175 | OD1    | 3.849        |
| 6N5D   | A_LYS_238 | NZ     | A_ASP_175 | OD2    | 3.598        |
| 6N5D   | A_LYS_259 | NZ     | A_GLU_119 | OE2    | 3.730        |
| 6N5D   | C_ARG_38  | NH2    | C_ASP_90  | OD1    | 3.385        |
| 6N5D   | C_ARG_67  | NH1    | C_ASP_90  | OD1    | 3.989        |
| 6N5D   | C_ARG_67  | NH1    | C_ASP_90  | OD2    | 3.731        |
| 6N5D   | C_ARG_67  | NH2    | C_ASP_90  | OD1    | 3.488        |
| 6N5D   | C_ARG_67  | NH2    | C_ASP_90  | OD2    | 2.158        |
| 6N5D   | C_LYS_149 | NZ     | D_GLU_127 | OE2    | 2.211        |
| 6N5D   | C_LYS_212 | NZ     | C_ASP_214 | OD1    | 3.695        |
| 6N5D   | C_LYS_215 | NZ     | D_GLU_126 | OE1    | 3.361        |
| 6N5D   | C_LYS_215 | NZ     | D_GLU_126 | OE2    | 3.815        |
| 6N5D   | C_ARG_216 | NH1    | C_GLU_218 | OE1    | 2.311        |
| 6N5D   | C_ARG_216 | NH1    | C_GLU_218 | OE2    | 3.798        |
| 6N5D   | C_ARG_216 | NH2    | C_GLU_218 | OE1    | 3.283        |
| 6N5D   | C_ARG_216 | NH2    | C_GLU_218 | OE2    | 3.709        |
| 6N5D   | B_ARG_57  | NH2    | B_GLU_82  | OE1    | 2.558        |
| 6N5D   | B_ARG_57  | NH2    | B_GLU_82  | OE2    | 3.860        |
| 6N5D   | B_HIS_75  | ND1    | B_ASP_73  | OD1    | 2.685        |
| 6N5D   | B_HIS_75  | ND1    | B_ASP_73  | OD2    | 3.543        |
| 6N5D   | B_ARG_90  | NH2    | B_ASP_60  | OD1    | 3.667        |
| 6N5D   | B_ARG_90  | NH2    | B_ASP_60  | OD2    | 2.318        |
| 6N5D   | B_LYS_92  | NZ     | B_ASP_271 | OD2    | 2.554        |
| 6N5D   | B_ARG_109 | NH1    | B_GLU_89  | OE1    | 3.519        |
| 6N5D   | B_ARG_141 | NH1    | B_ASP_77  | OD2    | 2.444        |
| 6N5D   | B_LYS_176 | NZ     | B_GLU_123 | OE1    | 3.115        |
| 6N5D   | B_ARG_261 | NH2    | B_GLU_119 | OE1    | 3.598        |
| 6N5D   | B_ARG_269 | NH2    | B_GLU_89  | OE1    | 3.840        |
| 6N5D   | B_LYS_315 | NZ     | B_GLU_41  | OE1    | 3.513        |
| 6N5D   | E_ARG_38  | NH1    | E_ASP_90  | OD1    | 3.664        |
| 6N5D   | E_ARG_38  | NH2    | E_GLU_46  | OE1    | 3.505        |
| 6N5D   | E_ARG_38  | NH2    | E_ASP_90  | OD1    | 3.051        |
| 6N5D   | E_LYS_65  | NZ     | E_ASP_62  | OD1    | 3.737        |
| 6N5D   | E_ARG_67  | NH1    | E_ASP_90  | OD2    | 3.314        |
| 6N5D   | E_ARG_67  | NH2    | E_ASP_90  | OD1    | 3.968        |
| 6N5D   | E_ARG_67  | NH2    | E_ASP_90  | OD2    | 2.162        |
| 6N5D   | E_LYS_149 | NZ     | F_GLU_127 | OE2    | 3.376        |
| 6N5D   | E_LYS_212 | NZ     | E_ASP_214 | OD1    | 3.161        |
| 6N5D   | E_ARG_216 | NH2    | E_GLU_218 | OE2    | 2.928        |
| 6N5D   | K_HIS_56  | ND1    | K_ASP_85  | OD2    | 3.271        |
| 6N5D   | K_ARG_57  | NH2    | K_GLU_82  | OE1    | 2.301        |
| 6N5D   | K_HIS_75  | ND1    | K_ASP_73  | OD1    | 2.835        |
| 6N5D   | K_HIS_75  | ND1    | K_ASP_73  | OD2    | 3.740        |
| 6N5D   | K_ARG_90  | NH2    | K_ASP_60  | OD1    | 3.759        |
| 6N5D   | K_ARG_90  | NH2    | K_ASP_60  | OD2    | 3.274        |
| 6N5D   | K_ARG_109 | NH1    | K_GLU_89  | OE1    | 3.561        |
| 6N5D   | K_ARG_141 | NH1    | K_ASP_77  | OD2    | 3.970        |

|      |           |     |           |     |       |
|------|-----------|-----|-----------|-----|-------|
| 6N5D | K_LYS_176 | NZ  | K_GLU_123 | OE2 | 2.488 |
| 6N5D | K_LYS_238 | NZ  | K_ASP_175 | OD1 | 2.613 |
| 6N5D | K_LYS_238 | NZ  | K_ASP_175 | OD2 | 3.291 |
| 6N5D | K_LYS_315 | NZ  | K_GLU_41  | OE1 | 2.260 |
| 6N5D | L_ARG_38  | NH1 | L_ASP_90  | OD1 | 3.927 |
| 6N5D | L_ARG_38  | NH2 | L_ASP_90  | OD1 | 3.768 |
| 6N5D | L_LYS_65  | NZ  | L_ASP_62  | OD2 | 3.222 |
| 6N5D | L_ARG_67  | NH1 | L_ASP_90  | OD1 | 3.866 |
| 6N5D | L_ARG_67  | NH1 | L_ASP_90  | OD2 | 3.353 |
| 6N5D | L_ARG_67  | NH2 | L_ASP_90  | OD1 | 3.826 |
| 6N5D | L_ARG_67  | NH2 | L_ASP_90  | OD2 | 2.288 |
| 6N5D | L_LYS_149 | NZ  | N_GLU_127 | OE2 | 2.091 |
| 6N5D | L_HIS_170 | NE2 | N_ASP_141 | OD2 | 3.244 |
| 6N5D | L_LYS_212 | NZ  | L_ASP_214 | OD1 | 2.499 |
| 6N5D | L_LYS_212 | NZ  | L_ASP_214 | OD2 | 3.450 |
| 6N5D | F_ARG_63  | NH2 | F_ASP_84  | OD1 | 3.578 |
| 6N5D | D_ARG_63  | NH2 | D_ASP_84  | OD1 | 3.736 |
| 6N5D | D_HIS_191 | ND1 | D_ASP_154 | OD1 | 3.992 |
| 6N5D | D_HIS_191 | ND1 | D_ASP_154 | OD2 | 3.059 |

Table 869: 6N5D-specific salt bridging networks analysis. In this table, a PDB file is specified with a four-letter PDB ID, except that the names of the PDB files corresponding to the single NMR structural model split from the NMR ensemble is specified with a four-letter PDB ID in addition to a hyphen followed by the single NMR structural model numeric ID, the residue naming scheme is **Chain ID\_residue name\_residue number**,  $\angle ADH$  represents the angle formed by acceptor (A), donor (D) and hydrogen (H) ( $\angle ADH$ ).

| PDB ID | Residue A | Atom A | Residue B | Atom B | Distance (Å) |
|--------|-----------|--------|-----------|--------|--------------|
| 6N5E   | A_HIS_56  | NE2    | A_GLU_280 | OE2    | 3.185        |
| 6N5E   | A_ARG_57  | NH2    | A_GLU_82  | OE1    | 2.937        |
| 6N5E   | A_HIS_75  | ND1    | A_ASP_73  | OD1    | 2.982        |
| 6N5E   | A_ARG_90  | NH2    | A_ASP_60  | OD2    | 2.862        |
| 6N5E   | A_LYS_92  | NZ     | A_ASP_63  | OD1    | 3.254        |
| 6N5E   | A_ARG_109 | NH2    | A_GLU_89  | OE1    | 3.038        |
| 6N5E   | A_ARG_109 | NH2    | A_GLU_89  | OE2    | 3.184        |
| 6N5E   | A_ARG_141 | NH1    | A_ASP_77  | OD2    | 2.455        |
| 6N5E   | A_ARG_141 | NH2    | A_ASP_77  | OD2    | 3.946        |
| 6N5E   | A_LYS_176 | NZ     | A_GLU_123 | OE1    | 3.715        |
| 6N5E   | A_LYS_176 | NZ     | A_GLU_123 | OE2    | 2.160        |
| 6N5E   | A_LYS_259 | NZ     | A_GLU_119 | OE2    | 3.507        |
| 6N5E   | A_ARG_261 | NH2    | A_GLU_119 | OE1    | 3.324        |
| 6N5E   | A_LYS_292 | NZ     | A_GLU_41  | OE1    | 3.523        |
| 6N5E   | B_LYS_50  | NZ     | B_ASP_275 | OD2    | 3.461        |
| 6N5E   | B_HIS_56  | NE2    | B_GLU_280 | OE1    | 3.340        |
| 6N5E   | B_ARG_57  | NH2    | B_GLU_82  | OE1    | 3.063        |
| 6N5E   | B_HIS_75  | ND1    | B_ASP_73  | OD1    | 2.687        |
| 6N5E   | B_HIS_75  | ND1    | B_ASP_73  | OD2    | 3.481        |
| 6N5E   | B_ARG_90  | NH2    | B_ASP_60  | OD1    | 3.444        |
| 6N5E   | B_ARG_90  | NH2    | B_ASP_60  | OD2    | 2.891        |
| 6N5E   | B_ARG_141 | NH1    | B_ASP_77  | OD2    | 2.583        |
| 6N5E   | B_ARG_141 | NH2    | B_ASP_77  | OD2    | 3.726        |
| 6N5E   | B_LYS_176 | NZ     | B_GLU_123 | OE1    | 3.977        |
| 6N5E   | B_LYS_176 | NZ     | B_GLU_123 | OE2    | 2.397        |
| 6N5E   | B_LYS_176 | NZ     | B_ASP_172 | OD1    | 2.910        |
| 6N5E   | B_ARG_261 | NH2    | B_GLU_119 | OE1    | 3.905        |
| 6N5E   | C_HIS_56  | NE2    | C_GLU_280 | OE1    | 3.055        |
| 6N5E   | C_ARG_57  | NH2    | C_GLU_82  | OE1    | 3.487        |
| 6N5E   | C_HIS_75  | ND1    | C_ASP_73  | OD1    | 2.463        |
| 6N5E   | C_HIS_75  | ND1    | C_ASP_73  | OD2    | 3.598        |
| 6N5E   | C_ARG_90  | NH2    | C_ASP_60  | OD1    | 3.875        |
| 6N5E   | C_ARG_90  | NH2    | C_ASP_60  | OD2    | 3.604        |
| 6N5E   | C_ARG_141 | NH1    | C_ASP_77  | OD1    | 3.061        |
| 6N5E   | C_ARG_141 | NH1    | C_ASP_77  | OD2    | 2.463        |
| 6N5E   | C_ARG_141 | NH2    | C_ASP_77  | OD1    | 3.964        |
| 6N5E   | C_LYS_176 | NZ     | C_GLU_123 | OE2    | 2.465        |
| 6N5E   | C_LYS_176 | NZ     | C_ASP_172 | OD2    | 3.772        |
| 6N5E   | C_ARG_207 | NH1    | C_ASP_241 | OD1    | 3.296        |
| 6N5E   | C_ARG_207 | NH2    | C_ASP_241 | OD1    | 3.641        |
| 6N5E   | C_LYS_259 | NZ     | C_GLU_119 | OE1    | 3.550        |
| 6N5E   | C_LYS_259 | NZ     | C_GLU_119 | OE2    | 3.071        |
| 6N5E   | C_ARG_261 | NH2    | C_GLU_119 | OE1    | 3.746        |
| 6N5E   | H_ARG_38  | NH2    | H_ASP_89  | OD1    | 2.940        |
| 6N5E   | H_ARG_44  | NH2    | H_GLU_42  | OE1    | 3.999        |
| 6N5E   | H_LYS_64  | NZ     | H_ASP_61  | OD1    | 3.701        |
| 6N5E   | H_ARG_66  | NH1    | H_ASP_89  | OD2    | 3.385        |
| 6N5E   | H_ARG_66  | NH2    | H_ASP_89  | OD2    | 2.231        |
| 6N5E   | H_LYS_214 | NZ     | H_ASP_216 | OD1    | 2.519        |
| 6N5E   | H_LYS_214 | NZ     | H_ASP_216 | OD2    | 3.480        |
| 6N5E   | H_LYS_217 | NZ     | I_GLU_126 | OE2    | 2.748        |
| 6N5E   | H_ARG_218 | NH1    | H_GLU_220 | OE2    | 3.887        |
| 6N5E   | H_ARG_218 | NH2    | H_GLU_220 | OE2    | 2.803        |
| 6N5E   | E_ARG_38  | NH1    | E_ASP_89  | OD1    | 2.478        |
| 6N5E   | E_ARG_38  | NH2    | E_GLU_46  | OE1    | 3.997        |
| 6N5E   | E_ARG_38  | NH2    | E_ASP_89  | OD1    | 2.988        |
| 6N5E   | E_LYS_64  | NZ     | E_ASP_61  | OD1    | 2.968        |

|      |           |     |           |     |       |
|------|-----------|-----|-----------|-----|-------|
| 6N5E | E_ARG_66  | NH1 | E_ASP_89  | OD1 | 3.712 |
| 6N5E | E_ARG_66  | NH1 | E_ASP_89  | OD2 | 2.993 |
| 6N5E | E_ARG_66  | NH2 | E_ASP_89  | OD2 | 2.243 |
| 6N5E | E_ARG_75  | NH1 | E_ASP_72  | OD2 | 3.012 |
| 6N5E | E_LYS_214 | NZ  | E_ASP_216 | OD1 | 2.448 |
| 6N5E | E_LYS_214 | NZ  | E_ASP_216 | OD2 | 3.601 |
| 6N5E | E_LYS_217 | NZ  | D_GLU_126 | OE1 | 2.995 |
| 6N5E | E_LYS_217 | NZ  | D_GLU_126 | OE2 | 2.272 |
| 6N5E | E_ARG_218 | NH1 | E_GLU_220 | OE1 | 3.911 |
| 6N5E | E_ARG_218 | NH1 | E_GLU_220 | OE2 | 2.563 |
| 6N5E | E_ARG_218 | NH2 | E_GLU_220 | OE2 | 2.863 |
| 6N5E | E_LYS_222 | NZ  | D_GLU_126 | OE1 | 3.688 |
| 6N5E | G_ARG_38  | NH1 | G_GLU_46  | OE2 | 2.572 |
| 6N5E | G_ARG_38  | NH2 | G_ASP_89  | OD1 | 3.217 |
| 6N5E | G_LYS_64  | NZ  | G_ASP_61  | OD1 | 3.314 |
| 6N5E | G_LYS_64  | NZ  | G_ASP_61  | OD2 | 3.572 |
| 6N5E | G_ARG_66  | NH2 | G_ASP_89  | OD1 | 3.438 |
| 6N5E | G_ARG_66  | NH2 | G_ASP_89  | OD2 | 3.428 |
| 6N5E | G_LYS_214 | NZ  | G_ASP_216 | OD1 | 2.167 |
| 6N5E | G_LYS_217 | NZ  | F_GLU_126 | OE2 | 3.351 |
| 6N5E | I_ARG_63  | NH2 | I_GLU_83  | OE1 | 3.435 |
| 6N5E | I_ARG_63  | NH2 | I_ASP_84  | OD1 | 2.372 |
| 6N5E | I_ARG_63  | NH2 | I_ASP_84  | OD2 | 3.580 |
| 6N5E | I_LYS_189 | NZ  | I_GLU_186 | OE1 | 2.386 |
| 6N5E | F_ARG_63  | NH2 | F_GLU_83  | OE2 | 3.657 |
| 6N5E | F_ARG_63  | NH2 | F_ASP_84  | OD1 | 2.359 |
| 6N5E | F_ARG_63  | NH2 | F_ASP_84  | OD2 | 3.434 |
| 6N5E | D_ARG_63  | NH2 | D_ASP_84  | OD1 | 2.410 |
| 6N5E | D_ARG_63  | NH2 | D_ASP_84  | OD2 | 3.669 |

Table 870: 6N5E-specific salt bridging networks analysis. In this table, a PDB file is specified with a four-letter PDB ID, except that the names of the PDB files corresponding to the single NMR structural model split from the NMR ensemble is specified with a four-letter PDB ID in addition to a hyphen followed by the single NMR structural model numeric ID, the residue naming scheme is **Chain ID\_residue name\_residue number**,  $\angle ADH$  represents the angle formed by acceptor (A), donor (D) and hydrogen (H) ( $\angle ADH$ ).

| PDB ID | Residue A | Atom A | Residue B | Atom B | Distance (Å) |
|--------|-----------|--------|-----------|--------|--------------|
| 6N6B   | A_ARG_118 | NH1    | A_GLU_119 | OE2    | 3.576        |
| 6N6B   | A_ARG_118 | NH2    | A_GLU_119 | OE2    | 3.958        |
| 6N6B   | A_ARG_118 | NH2    | A_GLU_425 | OE1    | 2.971        |
| 6N6B   | A_ARG_118 | NH2    | A_GLU_425 | OE2    | 3.457        |
| 6N6B   | A_LYS_128 | NZ     | A_GLU_162 | OE1    | 3.900        |
| 6N6B   | A_LYS_128 | NZ     | A_GLU_162 | OE2    | 2.839        |
| 6N6B   | A_ARG_152 | NH2    | A_ASP_198 | OD1    | 3.511        |
| 6N6B   | A_ARG_152 | NH2    | A_ASP_198 | OD2    | 3.079        |
| 6N6B   | A_ARG_156 | NH1    | A_GLU_119 | OE1    | 3.104        |
| 6N6B   | A_ARG_156 | NH1    | A_GLU_119 | OE2    | 3.984        |
| 6N6B   | A_ARG_156 | NH2    | A_GLU_119 | OE1    | 2.722        |
| 6N6B   | A_ARG_224 | NH2    | A_GLU_276 | OE2    | 2.776        |
| 6N6B   | A_ARG_283 | NH2    | A_ASP_355 | OD2    | 3.221        |
| 6N6B   | A_ARG_288 | NH1    | A_ASP_355 | OD1    | 3.223        |
| 6N6B   | A_ARG_288 | NH1    | A_ASP_355 | OD2    | 3.540        |
| 6N6B   | A_ARG_288 | NH2    | A_ASP_304 | OD1    | 3.429        |
| 6N6B   | A_ARG_288 | NH2    | A_ASP_304 | OD2    | 3.339        |
| 6N6B   | A_ARG_292 | NH1    | A_GLU_277 | OE1    | 2.791        |
| 6N6B   | A_ARG_292 | NH1    | A_GLU_277 | OE2    | 3.678        |
| 6N6B   | A_LYS_296 | NZ     | L_ASP_28  | OD1    | 3.122        |
| 6N6B   | A_LYS_296 | NZ     | L_ASP_28  | OD2    | 3.000        |
| 6N6B   | A_LYS_296 | NZ     | L_GLU_68  | OE2    | 2.842        |
| 6N6B   | A_ARG_300 | NH1    | A_ASP_324 | OD1    | 3.902        |
| 6N6B   | A_ARG_300 | NH2    | A_ASP_324 | OD1    | 3.653        |
| 6N6B   | A_LYS_344 | NZ     | A_GLU_369 | OE1    | 2.725        |
| 6N6B   | A_LYS_344 | NZ     | A_GLU_369 | OE2    | 3.576        |
| 6N6B   | A_ARG_364 | NH1    | A_ASP_330 | OD1    | 3.580        |
| 6N6B   | A_ARG_364 | NH2    | A_ASP_330 | OD1    | 3.008        |
| 6N6B   | A_ARG_364 | NH2    | A_ASP_330 | OD2    | 3.328        |
| 6N6B   | A_ARG_364 | NH2    | A_GLU_375 | OE2    | 3.344        |
| 6N6B   | A_ARG_394 | NH2    | A_GLU_375 | OE1    | 2.841        |
| 6N6B   | A_ARG_403 | NH1    | A_GLU_433 | OE1    | 3.202        |
| 6N6B   | A_ARG_403 | NH2    | A_GLU_432 | OE1    | 3.164        |
| 6N6B   | A_ARG_428 | NH1    | A_ASP_460 | OD2    | 3.015        |
| 6N6B   | A_ARG_428 | NH2    | A_GLU_433 | OE1    | 3.667        |
| 6N6B   | A_ARG_428 | NH2    | A_GLU_433 | OE2    | 2.721        |
| 6N6B   | A_LYS_431 | NZ     | K_ASP_101 | OD1    | 3.959        |
| 6N6B   | A_LYS_431 | NZ     | K_ASP_101 | OD2    | 3.832        |
| 6N6B   | K_ARG_39  | NH1    | K_ASP_90  | OD1    | 2.897        |
| 6N6B   | K_ARG_39  | NH2    | K_GLU_47  | OE2    | 2.900        |
| 6N6B   | K_ARG_39  | NH2    | K_ASP_90  | OD1    | 3.537        |
| 6N6B   | K_ARG_67  | NH1    | K_ASP_90  | OD1    | 3.734        |
| 6N6B   | K_ARG_67  | NH1    | K_ASP_90  | OD2    | 2.854        |
| 6N6B   | K_ARG_67  | NH2    | K_ASP_90  | OD1    | 3.053        |
| 6N6B   | K_ARG_67  | NH2    | K_ASP_90  | OD2    | 3.660        |
| 6N6B   | K_LYS_76  | NZ     | K_ASP_73  | OD2    | 3.758        |
| 6N6B   | K_ARG_98  | NH2    | K_ASP_106 | OD1    | 3.697        |
| 6N6B   | K_ARG_98  | NH2    | K_ASP_106 | OD2    | 3.098        |
| 6N6B   | K_HIS_169 | NE2    | L_ASP_167 | OD1    | 3.738        |
| 6N6B   | K_LYS_213 | NZ     | L_GLU_123 | OE1    | 2.814        |
| 6N6B   | K_LYS_213 | NZ     | L_GLU_123 | OE2    | 3.044        |
| 6N6B   | L_ARG_24  | NH2    | L_ASP_70  | OD1    | 3.008        |
| 6N6B   | L_ARG_24  | NH2    | L_ASP_70  | OD2    | 3.990        |
| 6N6B   | L_ARG_61  | NH1    | L_ASP_82  | OD1    | 3.460        |
| 6N6B   | L_ARG_61  | NH1    | L_ASP_82  | OD2    | 2.694        |
| 6N6B   | L_ARG_61  | NH2    | L_GLU_81  | OE1    | 3.382        |
| 6N6B   | L_ARG_61  | NH2    | L_ASP_82  | OD1    | 3.002        |

|      |           |     |           |     |       |
|------|-----------|-----|-----------|-----|-------|
| 6N6B | L_ARG_61  | NH2 | L_ASP_82  | OD2 | 3.567 |
| 6N6B | L_LYS_103 | NZ  | L_ASP_165 | OD2 | 3.902 |
| 6N6B | L_LYS_149 | NZ  | L_GLU_195 | OE2 | 2.717 |
| 6N6B | L_ARG_155 | NH1 | L_GLU_185 | OE2 | 3.590 |
| 6N6B | L_ARG_155 | NH2 | L_GLU_185 | OE1 | 3.631 |
| 6N6B | L_ARG_155 | NH2 | L_GLU_185 | OE2 | 2.832 |
| 6N6B | L_HIS_189 | ND1 | L_ASP_151 | OD2 | 3.291 |
| 6N6B | L_ARG_211 | NH1 | L_GLU_187 | OE1 | 3.717 |

Table 871: 6N6B-specific salt bridging networks analysis. In this table, a PDB file is specified with a four-letter PDB ID, except that the names of the PDB files corresponding to the single NMR structural model split from the NMR ensemble is specified with a four-letter PDB ID in addition to a hyphen followed by the single NMR structural model numeric ID, the residue naming scheme is **Chain ID\_residue name\_residue number**,  $\angle ADH$  represents the angle formed by acceptor (A), donor (D) and hydrogen (H) ( $\angle ADH$ ).

| PDB ID | Residue A | Atom A | Residue B | Atom B | Distance (Å) |
|--------|-----------|--------|-----------|--------|--------------|
| 6NB5   | H_ARG_38  | NH1    | H_ASP_92  | OD2    | 3.491        |
| 6NB5   | H_ARG_38  | NH2    | H_GLU_46  | OE1    | 2.486        |
| 6NB5   | H_ARG_50  | NH2    | H_ASP_61  | OD2    | 3.474        |
| 6NB5   | H_LYS_52  | NZ     | H_GLU_56  | OE2    | 3.363        |
| 6NB5   | H_LYS_54  | NZ     | H_ASP_76  | OD2    | 3.985        |
| 6NB5   | H_ARG_69  | NH1    | H_ASP_92  | OD1    | 2.701        |
| 6NB5   | H_ARG_69  | NH1    | H_ASP_92  | OD2    | 3.806        |
| 6NB5   | H_ARG_69  | NH2    | H_ASP_92  | OD1    | 3.650        |
| 6NB5   | H_ARG_69  | NH2    | H_ASP_92  | OD2    | 3.432        |
| 6NB5   | H_LYS_78  | NZ     | H_ASP_75  | OD2    | 3.471        |
| 6NB5   | H_LYS_157 | NZ     | H_ASP_158 | OD1    | 2.929        |
| 6NB5   | H_LYS_157 | NZ     | H_ASP_158 | OD2    | 3.584        |
| 6NB5   | H_LYS_220 | NZ     | H_ASP_222 | OD1    | 3.861        |
| 6NB5   | H_LYS_223 | NZ     | L_GLU_126 | OE1    | 3.229        |
| 6NB5   | H_LYS_223 | NZ     | L_GLU_126 | OE2    | 2.760        |
| 6NB5   | H_ARG_224 | NH2    | H_GLU_226 | OE2    | 3.546        |
| 6NB5   | L_ARG_63  | NH2    | L_ASP_84  | OD1    | 3.374        |
| 6NB5   | L_ARG_63  | NH2    | L_ASP_84  | OD2    | 3.503        |
| 6NB5   | L_LYS_68  | NZ     | L_ASP_33  | OD2    | 2.578        |
| 6NB5   | L_LYS_113 | NZ     | L_GLU_201 | OE1    | 2.506        |
| 6NB5   | L_ARG_38  | NH1    | L_ASP_92  | OD1    | 3.159        |
| 6NB5   | L_ARG_38  | NH2    | L_GLU_46  | OE1    | 2.869        |
| 6NB5   | L_ARG_38  | NH2    | L_ASP_92  | OD1    | 3.985        |
| 6NB5   | L_ARG_50  | NH1    | L_ASP_61  | OD2    | 3.493        |
| 6NB5   | L_ARG_50  | NH2    | L_ASP_61  | OD1    | 3.774        |
| 6NB5   | L_ARG_69  | NH1    | L_ASP_92  | OD1    | 2.838        |
| 6NB5   | L_ARG_69  | NH1    | L_ASP_92  | OD2    | 2.846        |
| 6NB5   | L_ARG_69  | NH2    | L_ASP_92  | OD1    | 3.249        |
| 6NB5   | L_LYS_157 | NZ     | L_ASP_158 | OD1    | 3.106        |
| 6NB5   | L_LYS_157 | NZ     | M_GLU_127 | OE2    | 3.828        |
| 6NB5   | L_LYS_223 | NZ     | M_GLU_126 | OE2    | 3.316        |
| 6NB5   | M_ARG_63  | NH1    | M_ASP_84  | OD1    | 2.715        |
| 6NB5   | M_ARG_63  | NH1    | M_ASP_84  | OD2    | 3.713        |
| 6NB5   | M_ARG_63  | NH2    | M_ASP_84  | OD1    | 3.329        |
| 6NB5   | M_ARG_63  | NH2    | M_ASP_84  | OD2    | 2.729        |
| 6NB5   | M_LYS_107 | NZ     | M_GLU_85  | OE1    | 3.669        |
| 6NB5   | M_LYS_152 | NZ     | M_GLU_206 | OE1    | 3.241        |
| 6NB5   | M_LYS_152 | NZ     | M_GLU_206 | OE2    | 3.589        |
| 6NB5   | M_ARG_192 | NH1    | M_ASP_154 | OD2    | 3.102        |

Table 872: 6NB5-specific salt bridging networks analysis. In this table, a PDB file is specified with a four-letter PDB ID, except that the names of the PDB files corresponding to the single NMR structural model split from the NMR ensemble is specified with a four-letter PDB ID in addition to a hyphen followed by the single NMR structural model numeric ID, the residue naming scheme is **Chain ID\_residue name\_residue number**,  $\angle ADH$  represents the angle formed by acceptor (A), donor (D) and hydrogen (H) ( $\angle ADH$ ).



| PDB ID | Residue A | Atom A | Residue B | Atom B | Distance (Å) |
|--------|-----------|--------|-----------|--------|--------------|
| 6NB8   | H_ARG_38  | NH1    | H_ASP_90  | OD1    | 2.818        |
| 6NB8   | H_ARG_38  | NH2    | H_ASP_90  | OD1    | 3.793        |
| 6NB8   | H_ARG_67  | NH1    | H_ASP_90  | OD1    | 3.807        |
| 6NB8   | H_ARG_67  | NH1    | H_ASP_90  | OD2    | 2.824        |
| 6NB8   | H_ARG_67  | NH2    | H_ASP_90  | OD1    | 3.012        |
| 6NB8   | H_ARG_67  | NH2    | H_ASP_90  | OD2    | 3.450        |
| 6NB8   | H_ARG_72  | NH2    | H_ASP_74  | OD1    | 3.534        |
| 6NB8   | H_LYS_157 | NZ     | H_ASP_158 | OD1    | 3.474        |
| 6NB8   | H_LYS_223 | NZ     | L_GLU_128 | OE1    | 2.783        |
| 6NB8   | H_LYS_223 | NZ     | L_GLU_128 | OE2    | 3.341        |
| 6NB8   | L_ARG_51  | NH1    | H_ASP_113 | OD1    | 2.821        |
| 6NB8   | L_ARG_51  | NH2    | H_ASP_113 | OD1    | 3.921        |
| 6NB8   | L_ARG_51  | NH2    | H_ASP_115 | OD1    | 3.423        |
| 6NB8   | L_ARG_51  | NH2    | L_ASP_60  | OD1    | 2.805        |
| 6NB8   | L_ARG_51  | NH2    | L_ASP_60  | OD2    | 3.641        |
| 6NB8   | L_ARG_66  | NH2    | L_ASP_87  | OD1    | 2.740        |
| 6NB8   | L_ARG_66  | NH2    | L_ASP_87  | OD2    | 3.561        |
| 6NB8   | L_LYS_108 | NZ     | L_GLU_170 | OE1    | 2.684        |
| 6NB8   | L_LYS_108 | NZ     | L_GLU_170 | OE2    | 3.357        |
| 6NB8   | L_LYS_154 | NZ     | L_GLU_200 | OE1    | 3.899        |
| 6NB8   | L_LYS_154 | NZ     | L_GLU_200 | OE2    | 2.642        |
| 6NB8   | L_LYS_188 | NZ     | L_GLU_192 | OE1    | 3.516        |
| 6NB8   | L_LYS_188 | NZ     | L_GLU_192 | OE2    | 2.963        |
| 6NB8   | L_LYS_193 | NZ     | L_ASP_190 | OD1    | 3.067        |
| 6NB8   | L_HIS_194 | ND1    | L_ASP_156 | OD2    | 3.106        |

Table 873: 6NB8-specific salt bridging networks analysis. In this table, a PDB file is specified with a four-letter PDB ID, except that the names of the PDB files corresponding to the single NMR structural model split from the NMR ensemble is specified with a four-letter PDB ID in addition to a hyphen followed by the single NMR structural model numeric ID, the residue naming scheme is **Chain ID\_residue name\_residue number**,  $\angle ADH$  represents the angle formed by acceptor (A), donor (D) and hydrogen (H) ( $\angle ADH$ ).

| PDB ID | Residue A | Atom A | Residue B | Atom B | Distance (Å) |
|--------|-----------|--------|-----------|--------|--------------|
| 6NC2   | A_LYS_46  | NZ     | B_ASP_636 | OD1    | 3.909        |
| 6NC2   | A_ARG_59  | NH1    | A_ASP_57  | OD1    | 2.814        |
| 6NC2   | A_ARG_59  | NH1    | A_ASP_57  | OD2    | 3.348        |
| 6NC2   | A_ARG_59  | NH2    | A_ASP_57  | OD1    | 3.635        |
| 6NC2   | A_ARG_59  | NH2    | A_ASP_57  | OD2    | 2.766        |
| 6NC2   | A_LYS_155 | NZ     | A_ASP_133 | OD1    | 2.379        |
| 6NC2   | A_LYS_231 | NZ     | A_GLU_268 | OE2    | 2.886        |
| 6NC2   | A_LYS_232 | NZ     | A_GLU_269 | OE1    | 3.666        |
| 6NC2   | A_LYS_232 | NZ     | A_GLU_269 | OE2    | 2.418        |
| 6NC2   | A_LYS_282 | NZ     | A_ASP_279 | OD2    | 2.788        |
| 6NC2   | A_ARG_298 | NH1    | A_GLU_381 | OE1    | 2.865        |
| 6NC2   | A_ARG_298 | NH1    | A_GLU_381 | OE2    | 2.959        |
| 6NC2   | A_LYS_305 | NZ     | A_GLU_172 | OE1    | 2.574        |
| 6NC2   | A_LYS_305 | NZ     | A_GLU_172 | OE2    | 3.869        |
| 6NC2   | A_ARG_327 | NH2    | A_ASP_325 | OD2    | 3.126        |
| 6NC2   | A_LYS_337 | NZ     | A_GLU_293 | OE1    | 2.932        |
| 6NC2   | A_LYS_343 | NZ     | A_ASP_340 | OD1    | 3.486        |
| 6NC2   | A_LYS_348 | NZ     | A_GLU_269 | OE1    | 2.894        |
| 6NC2   | A_LYS_348 | NZ     | A_GLU_269 | OE2    | 3.758        |
| 6NC2   | A_LYS_348 | NZ     | A_GLU_351 | OE2    | 3.738        |
| 6NC2   | A_ARG_419 | NH2    | A_GLU_153 | OE2    | 3.652        |
| 6NC2   | A_LYS_421 | NZ     | A_GLU_370 | OE2    | 2.787        |
| 6NC2   | A_ARG_456 | NH2    | A_GLU_466 | OE1    | 2.887        |
| 6NC2   | A_ARG_456 | NH2    | A_GLU_466 | OE2    | 3.857        |
| 6NC2   | A_LYS_460 | NZ     | A_GLU_466 | OE1    | 3.544        |
| 6NC2   | A_ARG_476 | NH1    | A_GLU_102 | OE1    | 3.959        |
| 6NC2   | A_ARG_476 | NH1    | A_GLU_102 | OE2    | 2.882        |
| 6NC2   | A_ARG_476 | NH2    | A_ASP_474 | OD1    | 3.950        |
| 6NC2   | A_ARG_476 | NH2    | A_ASP_474 | OD2    | 2.809        |
| 6NC2   | A_ARG_480 | NH2    | A_ASP_477 | OD1    | 3.009        |
| 6NC2   | A_ARG_480 | NH2    | A_ASP_477 | OD2    | 3.559        |
| 6NC2   | A_LYS_487 | NZ     | A_GLU_47  | OE1    | 3.379        |
| 6NC2   | A_LYS_487 | NZ     | A_GLU_91  | OE1    | 3.334        |
| 6NC2   | A_LYS_490 | NZ     | A_GLU_492 | OE1    | 3.377        |
| 6NC2   | A_LYS_490 | NZ     | A_GLU_492 | OE2    | 2.629        |
| 6NC2   | A_LYS_500 | NZ     | I_ASP_664 | OD1    | 2.780        |
| 6NC2   | A_LYS_500 | NZ     | I_ASP_664 | OD2    | 3.992        |
| 6NC2   | A_ARG_503 | NH1    | B_GLU_654 | OE1    | 3.759        |
| 6NC2   | A_ARG_503 | NH1    | B_GLU_654 | OE2    | 3.172        |
| 6NC2   | B_ARG_542 | NH1    | I_GLU_647 | OE1    | 2.800        |
| 6NC2   | B_ARG_542 | NH1    | I_ASP_648 | OD1    | 3.191        |
| 6NC2   | B_ARG_542 | NH2    | I_ASP_648 | OD1    | 3.498        |
| 6NC2   | B_LYS_574 | NZ     | A_ASP_107 | OD1    | 2.510        |
| 6NC2   | B_LYS_574 | NZ     | A_ASP_107 | OD2    | 3.688        |
| 6NC2   | B_LYS_588 | NZ     | B_ASP_589 | OD1    | 2.875        |
| 6NC2   | B_LYS_617 | NZ     | B_GLU_634 | OE2    | 2.908        |
| 6NC2   | H_LYS_30  | NZ     | H_ASP_31  | OD1    | 3.266        |
| 6NC2   | H_LYS_30  | NZ     | H_ASP_31  | OD2    | 2.768        |
| 6NC2   | H_HIS_35  | NE2    | H_ASP_95  | OD1    | 2.705        |
| 6NC2   | H_ARG_38  | NH1    | H_ASP_86  | OD1    | 2.970        |
| 6NC2   | H_ARG_38  | NH2    | H_GLU_46  | OE1    | 3.107        |
| 6NC2   | H_ARG_38  | NH2    | H_GLU_46  | OE2    | 3.826        |
| 6NC2   | H_ARG_66  | NH2    | H_ASP_86  | OD1    | 3.009        |
| 6NC2   | H_ARG_66  | NH2    | H_ASP_86  | OD2    | 3.729        |
| 6NC2   | H_LYS_75  | NZ     | H_ASP_72  | OD2    | 3.903        |
| 6NC2   | H_ARG_82B | NH1    | H_ASP_82A | OD2    | 2.740        |
| 6NC2   | H_ARG_83  | NH2    | H_GLU_85  | OE1    | 3.718        |

|      |           |     |           |     |       |
|------|-----------|-----|-----------|-----|-------|
| 6NC2 | H_ARG_83  | NH2 | H_GLU_85  | OE2 | 3.237 |
| 6NC2 | H_LYS_94  | NZ  | H_ASP_101 | OD1 | 3.921 |
| 6NC2 | H_ARG_96  | NH1 | L_ASP_50  | OD1 | 3.082 |
| 6NC2 | H_ARG_96  | NH1 | L_ASP_50  | OD2 | 3.706 |
| 6NC2 | H_ARG_96  | NH2 | L_ASP_50  | OD1 | 3.892 |
| 6NC2 | H_ARG_96  | NH2 | L_ASP_50  | OD2 | 3.158 |
| 6NC2 | H_ARG_99  | NH2 | H_ASP_31  | OD1 | 3.800 |
| 6NC2 | L_LYS_30  | NZ  | L_ASP_28  | OD2 | 2.906 |
| 6NC2 | L_ARG_37  | NH1 | L_ASP_82  | OD1 | 3.215 |
| 6NC2 | L_ARG_37  | NH2 | L_GLU_45  | OE1 | 2.891 |
| 6NC2 | L_ARG_37  | NH2 | L_GLU_45  | OE2 | 3.981 |
| 6NC2 | L_LYS_42  | NZ  | L_GLU_45  | OE1 | 3.768 |
| 6NC2 | L_LYS_103 | NZ  | L_GLU_105 | OE1 | 3.671 |
| 6NC2 | C_LYS_46  | NZ  | L_ASP_636 | OD1 | 3.909 |
| 6NC2 | C_ARG_59  | NH1 | C_ASP_57  | OD1 | 2.814 |
| 6NC2 | C_ARG_59  | NH1 | C_ASP_57  | OD2 | 3.348 |
| 6NC2 | C_ARG_59  | NH2 | C_ASP_57  | OD1 | 3.635 |
| 6NC2 | C_ARG_59  | NH2 | C_ASP_57  | OD2 | 2.765 |
| 6NC2 | C_LYS_155 | NZ  | C_ASP_133 | OD1 | 2.379 |
| 6NC2 | C_LYS_231 | NZ  | C_GLU_268 | OE2 | 2.886 |
| 6NC2 | C_LYS_232 | NZ  | C_GLU_269 | OE1 | 3.666 |
| 6NC2 | C_LYS_232 | NZ  | C_GLU_269 | OE2 | 2.418 |
| 6NC2 | C_LYS_282 | NZ  | C_ASP_279 | OD2 | 2.788 |
| 6NC2 | C_ARG_298 | NH1 | C_GLU_381 | OE1 | 2.865 |
| 6NC2 | C_ARG_298 | NH1 | C_GLU_381 | OE2 | 2.960 |
| 6NC2 | C_LYS_305 | NZ  | C_GLU_172 | OE1 | 2.574 |
| 6NC2 | C_LYS_305 | NZ  | C_GLU_172 | OE2 | 3.869 |
| 6NC2 | C_ARG_327 | NH2 | C_ASP_325 | OD2 | 3.126 |
| 6NC2 | C_LYS_337 | NZ  | C_GLU_293 | OE1 | 2.932 |
| 6NC2 | C_LYS_343 | NZ  | C_ASP_340 | OD1 | 3.486 |
| 6NC2 | C_LYS_348 | NZ  | C_GLU_269 | OE1 | 2.894 |
| 6NC2 | C_LYS_348 | NZ  | C_GLU_269 | OE2 | 3.757 |
| 6NC2 | C_LYS_348 | NZ  | C_GLU_351 | OE2 | 3.738 |
| 6NC2 | C_ARG_419 | NH2 | C_GLU_153 | OE2 | 3.652 |
| 6NC2 | C_LYS_421 | NZ  | C_GLU_370 | OE2 | 2.787 |
| 6NC2 | C_ARG_456 | NH2 | C_GLU_466 | OE1 | 2.887 |
| 6NC2 | C_ARG_456 | NH2 | C_GLU_466 | OE2 | 3.857 |
| 6NC2 | C_LYS_460 | NZ  | C_GLU_466 | OE1 | 3.544 |
| 6NC2 | C_ARG_476 | NH1 | C_GLU_102 | OE1 | 3.959 |
| 6NC2 | C_ARG_476 | NH1 | C_GLU_102 | OE2 | 2.882 |
| 6NC2 | C_ARG_476 | NH2 | C_ASP_474 | OD1 | 3.950 |
| 6NC2 | C_ARG_476 | NH2 | C_ASP_474 | OD2 | 2.809 |
| 6NC2 | C_ARG_480 | NH2 | C_ASP_477 | OD1 | 3.009 |
| 6NC2 | C_ARG_480 | NH2 | C_ASP_477 | OD2 | 3.559 |
| 6NC2 | C_LYS_487 | NZ  | C_GLU_47  | OE1 | 3.379 |
| 6NC2 | C_LYS_487 | NZ  | C_GLU_91  | OE1 | 3.334 |
| 6NC2 | C_LYS_490 | NZ  | C_GLU_492 | OE1 | 3.377 |
| 6NC2 | C_LYS_490 | NZ  | C_GLU_492 | OE2 | 2.629 |
| 6NC2 | C_LYS_500 | NZ  | J_ASP_664 | OD1 | 2.780 |
| 6NC2 | C_LYS_500 | NZ  | J_ASP_664 | OD2 | 3.991 |
| 6NC2 | C_ARG_503 | NH1 | L_GLU_654 | OE1 | 3.760 |
| 6NC2 | C_ARG_503 | NH1 | L_GLU_654 | OE2 | 3.173 |
| 6NC2 | L_ARG_542 | NH1 | J_GLU_647 | OE1 | 2.801 |
| 6NC2 | L_ARG_542 | NH1 | J_ASP_648 | OD1 | 3.190 |
| 6NC2 | L_ARG_542 | NH2 | J_ASP_648 | OD1 | 3.498 |
| 6NC2 | L_LYS_574 | NZ  | C_ASP_107 | OD1 | 2.510 |
| 6NC2 | L_LYS_574 | NZ  | C_ASP_107 | OD2 | 3.688 |
| 6NC2 | L_LYS_588 | NZ  | L_ASP_589 | OD1 | 2.875 |

|      |           |     |           |     |       |
|------|-----------|-----|-----------|-----|-------|
| 6NC2 | I_LYS_617 | NZ  | I_GLU_634 | OE2 | 2.908 |
| 6NC2 | O_LYS_30  | NZ  | O_ASP_31  | OD1 | 3.267 |
| 6NC2 | O_LYS_30  | NZ  | O_ASP_31  | OD2 | 2.768 |
| 6NC2 | O_HIS_35  | NE2 | O_ASP_95  | OD1 | 2.705 |
| 6NC2 | O_ARG_38  | NH1 | O_ASP_86  | OD1 | 2.971 |
| 6NC2 | O_ARG_38  | NH2 | O_GLU_46  | OE1 | 3.107 |
| 6NC2 | O_ARG_38  | NH2 | O_GLU_46  | OE2 | 3.826 |
| 6NC2 | O_ARG_66  | NH2 | O_ASP_86  | OD1 | 3.008 |
| 6NC2 | O_ARG_66  | NH2 | O_ASP_86  | OD2 | 3.729 |
| 6NC2 | O_LYS_75  | NZ  | O_ASP_72  | OD2 | 3.903 |
| 6NC2 | O_ARG_82B | NH1 | O_ASP_82A | OD2 | 2.740 |
| 6NC2 | O_ARG_83  | NH2 | O_GLU_85  | OE1 | 3.718 |
| 6NC2 | O_ARG_83  | NH2 | O_GLU_85  | OE2 | 3.238 |
| 6NC2 | O_LYS_94  | NZ  | O_ASP_101 | OD1 | 3.921 |
| 6NC2 | O_ARG_96  | NH1 | T_ASP_50  | OD1 | 3.082 |
| 6NC2 | O_ARG_96  | NH1 | T_ASP_50  | OD2 | 3.706 |
| 6NC2 | O_ARG_96  | NH2 | T_ASP_50  | OD1 | 3.892 |
| 6NC2 | O_ARG_96  | NH2 | T_ASP_50  | OD2 | 3.158 |
| 6NC2 | O_ARG_99  | NH2 | O_ASP_31  | OD1 | 3.799 |
| 6NC2 | T_LYS_30  | NZ  | T_ASP_28  | OD2 | 2.905 |
| 6NC2 | T_ARG_37  | NH1 | T_ASP_82  | OD1 | 3.216 |
| 6NC2 | T_ARG_37  | NH2 | T_GLU_45  | OE1 | 2.891 |
| 6NC2 | T_ARG_37  | NH2 | T_GLU_45  | OE2 | 3.981 |
| 6NC2 | T_LYS_42  | NZ  | T_GLU_45  | OE1 | 3.769 |
| 6NC2 | T_LYS_103 | NZ  | T_GLU_105 | OE1 | 3.670 |
| 6NC2 | D_LYS_46  | NZ  | J_ASP_636 | OD1 | 3.909 |
| 6NC2 | D_ARG_59  | NH1 | D_ASP_57  | OD1 | 2.814 |
| 6NC2 | D_ARG_59  | NH1 | D_ASP_57  | OD2 | 3.348 |
| 6NC2 | D_ARG_59  | NH2 | D_ASP_57  | OD1 | 3.635 |
| 6NC2 | D_ARG_59  | NH2 | D_ASP_57  | OD2 | 2.766 |
| 6NC2 | D_LYS_155 | NZ  | D_ASP_133 | OD1 | 2.379 |
| 6NC2 | D_LYS_231 | NZ  | D_GLU_268 | OE2 | 2.885 |
| 6NC2 | D_LYS_232 | NZ  | D_GLU_269 | OE1 | 3.666 |
| 6NC2 | D_LYS_232 | NZ  | D_GLU_269 | OE2 | 2.418 |
| 6NC2 | D_LYS_282 | NZ  | D_ASP_279 | OD2 | 2.787 |
| 6NC2 | D_ARG_298 | NH1 | D_GLU_381 | OE1 | 2.864 |
| 6NC2 | D_ARG_298 | NH1 | D_GLU_381 | OE2 | 2.959 |
| 6NC2 | D_LYS_305 | NZ  | D_GLU_172 | OE1 | 2.575 |
| 6NC2 | D_LYS_305 | NZ  | D_GLU_172 | OE2 | 3.868 |
| 6NC2 | D_ARG_327 | NH2 | D_ASP_325 | OD2 | 3.127 |
| 6NC2 | D_LYS_337 | NZ  | D_GLU_293 | OE1 | 2.931 |
| 6NC2 | D_LYS_343 | NZ  | D_ASP_340 | OD1 | 3.486 |
| 6NC2 | D_LYS_348 | NZ  | D_GLU_269 | OE1 | 2.894 |
| 6NC2 | D_LYS_348 | NZ  | D_GLU_269 | OE2 | 3.758 |
| 6NC2 | D_LYS_348 | NZ  | D_GLU_351 | OE2 | 3.738 |
| 6NC2 | D_ARG_419 | NH2 | D_GLU_153 | OE2 | 3.652 |
| 6NC2 | D_LYS_421 | NZ  | D_GLU_370 | OE2 | 2.786 |
| 6NC2 | D_ARG_456 | NH2 | D_GLU_466 | OE1 | 2.886 |
| 6NC2 | D_ARG_456 | NH2 | D_GLU_466 | OE2 | 3.857 |
| 6NC2 | D_LYS_460 | NZ  | D_GLU_466 | OE1 | 3.544 |
| 6NC2 | D_ARG_476 | NH1 | D_GLU_102 | OE1 | 3.959 |
| 6NC2 | D_ARG_476 | NH1 | D_GLU_102 | OE2 | 2.881 |
| 6NC2 | D_ARG_476 | NH2 | D_ASP_474 | OD1 | 3.950 |
| 6NC2 | D_ARG_476 | NH2 | D_ASP_474 | OD2 | 2.809 |
| 6NC2 | D_ARG_480 | NH2 | D_ASP_477 | OD1 | 3.009 |
| 6NC2 | D_ARG_480 | NH2 | D_ASP_477 | OD2 | 3.559 |
| 6NC2 | D_LYS_487 | NZ  | D_GLU_47  | OE1 | 3.379 |
| 6NC2 | D_LYS_487 | NZ  | D_GLU_91  | OE1 | 3.334 |

|      |           |     |           |     |       |
|------|-----------|-----|-----------|-----|-------|
| 6NC2 | D_LYS_490 | NZ  | D_GLU_492 | OE1 | 3.377 |
| 6NC2 | D_LYS_490 | NZ  | D_GLU_492 | OE2 | 2.630 |
| 6NC2 | D_LYS_500 | NZ  | B_ASP_664 | OD1 | 2.780 |
| 6NC2 | D_LYS_500 | NZ  | B_ASP_664 | OD2 | 3.992 |
| 6NC2 | D_ARG_503 | NH1 | J_GLU_654 | OE1 | 3.759 |
| 6NC2 | D_ARG_503 | NH1 | J_GLU_654 | OE2 | 3.173 |
| 6NC2 | J_ARG_542 | NH1 | B_GLU_647 | OE1 | 2.800 |
| 6NC2 | J_ARG_542 | NH1 | B_ASP_648 | OD1 | 3.191 |
| 6NC2 | J_ARG_542 | NH2 | B_ASP_648 | OD1 | 3.498 |
| 6NC2 | J_LYS_574 | NZ  | D_ASP_107 | OD1 | 2.510 |
| 6NC2 | J_LYS_574 | NZ  | D_ASP_107 | OD2 | 3.688 |
| 6NC2 | J_LYS_588 | NZ  | J_ASP_589 | OD1 | 2.875 |
| 6NC2 | J_LYS_617 | NZ  | J_GLU_634 | OE2 | 2.908 |
| 6NC2 | P_LYS_30  | NZ  | P_ASP_31  | OD1 | 3.267 |
| 6NC2 | P_LYS_30  | NZ  | P_ASP_31  | OD2 | 2.768 |
| 6NC2 | P_HIS_35  | NE2 | P_ASP_95  | OD1 | 2.704 |
| 6NC2 | P_ARG_38  | NH1 | P_ASP_86  | OD1 | 2.970 |
| 6NC2 | P_ARG_38  | NH2 | P_GLU_46  | OE1 | 3.107 |
| 6NC2 | P_ARG_38  | NH2 | P_GLU_46  | OE2 | 3.826 |
| 6NC2 | P_ARG_66  | NH2 | P_ASP_86  | OD1 | 3.009 |
| 6NC2 | P_ARG_66  | NH2 | P_ASP_86  | OD2 | 3.730 |
| 6NC2 | P_LYS_75  | NZ  | P_ASP_72  | OD2 | 3.903 |
| 6NC2 | P_ARG_82B | NH1 | P_ASP_82A | OD2 | 2.740 |
| 6NC2 | P_ARG_83  | NH2 | P_GLU_85  | OE1 | 3.718 |
| 6NC2 | P_ARG_83  | NH2 | P_GLU_85  | OE2 | 3.237 |
| 6NC2 | P_LYS_94  | NZ  | P_ASP_101 | OD1 | 3.921 |
| 6NC2 | P_ARG_96  | NH1 | U_ASP_50  | OD1 | 3.083 |
| 6NC2 | P_ARG_96  | NH1 | U_ASP_50  | OD2 | 3.706 |
| 6NC2 | P_ARG_96  | NH2 | U_ASP_50  | OD1 | 3.893 |
| 6NC2 | P_ARG_96  | NH2 | U_ASP_50  | OD2 | 3.158 |
| 6NC2 | P_ARG_99  | NH2 | P_ASP_31  | OD1 | 3.800 |
| 6NC2 | U_LYS_30  | NZ  | U_ASP_28  | OD2 | 2.905 |
| 6NC2 | U_ARG_37  | NH1 | U_ASP_82  | OD1 | 3.215 |
| 6NC2 | U_ARG_37  | NH2 | U_GLU_45  | OE1 | 2.891 |
| 6NC2 | U_ARG_37  | NH2 | U_GLU_45  | OE2 | 3.981 |
| 6NC2 | U_LYS_42  | NZ  | U_GLU_45  | OE1 | 3.768 |
| 6NC2 | U_LYS_103 | NZ  | U_GLU_105 | OE1 | 3.671 |
| 6NC2 | E_LYS_46  | NZ  | K_ASP_636 | OD1 | 3.909 |
| 6NC2 | E_ARG_59  | NH1 | E_ASP_57  | OD1 | 2.814 |
| 6NC2 | E_ARG_59  | NH1 | E_ASP_57  | OD2 | 3.348 |
| 6NC2 | E_ARG_59  | NH2 | E_ASP_57  | OD1 | 3.635 |
| 6NC2 | E_ARG_59  | NH2 | E_ASP_57  | OD2 | 2.766 |
| 6NC2 | E_LYS_155 | NZ  | E_ASP_133 | OD1 | 2.379 |
| 6NC2 | E_LYS_231 | NZ  | E_GLU_268 | OE2 | 2.886 |
| 6NC2 | E_LYS_232 | NZ  | E_GLU_269 | OE1 | 3.666 |
| 6NC2 | E_LYS_232 | NZ  | E_GLU_269 | OE2 | 2.418 |
| 6NC2 | E_LYS_282 | NZ  | E_ASP_279 | OD2 | 2.788 |
| 6NC2 | E_ARG_298 | NH1 | E_GLU_381 | OE1 | 2.865 |
| 6NC2 | E_ARG_298 | NH1 | E_GLU_381 | OE2 | 2.959 |
| 6NC2 | E_LYS_305 | NZ  | E_GLU_172 | OE1 | 2.574 |
| 6NC2 | E_LYS_305 | NZ  | E_GLU_172 | OE2 | 3.869 |
| 6NC2 | E_ARG_327 | NH2 | E_ASP_325 | OD2 | 3.126 |
| 6NC2 | E_LYS_337 | NZ  | E_GLU_293 | OE1 | 2.932 |
| 6NC2 | E_LYS_343 | NZ  | E_ASP_340 | OD1 | 3.486 |
| 6NC2 | E_LYS_348 | NZ  | E_GLU_269 | OE1 | 2.894 |
| 6NC2 | E_LYS_348 | NZ  | E_GLU_269 | OE2 | 3.758 |
| 6NC2 | E_LYS_348 | NZ  | E_GLU_351 | OE2 | 3.738 |
| 6NC2 | E_ARG_419 | NH2 | E_GLU_153 | OE2 | 3.652 |

|      |           |     |           |     |       |
|------|-----------|-----|-----------|-----|-------|
| 6NC2 | E_LYS_421 | NZ  | E_GLU_370 | OE2 | 2.787 |
| 6NC2 | E_ARG_456 | NH2 | E_GLU_466 | OE1 | 2.887 |
| 6NC2 | E_ARG_456 | NH2 | E_GLU_466 | OE2 | 3.857 |
| 6NC2 | E_LYS_460 | NZ  | E_GLU_466 | OE1 | 3.544 |
| 6NC2 | E_ARG_476 | NH1 | E_GLU_102 | OE1 | 3.959 |
| 6NC2 | E_ARG_476 | NH1 | E_GLU_102 | OE2 | 2.882 |
| 6NC2 | E_ARG_476 | NH2 | E_ASP_474 | OD1 | 3.950 |
| 6NC2 | E_ARG_476 | NH2 | E_ASP_474 | OD2 | 2.809 |
| 6NC2 | E_ARG_480 | NH2 | E_ASP_477 | OD1 | 3.009 |
| 6NC2 | E_ARG_480 | NH2 | E_ASP_477 | OD2 | 3.559 |
| 6NC2 | E_LYS_487 | NZ  | E_GLU_47  | OE1 | 3.379 |
| 6NC2 | E_LYS_487 | NZ  | E_GLU_91  | OE1 | 3.334 |
| 6NC2 | E_LYS_490 | NZ  | E_GLU_492 | OE1 | 3.377 |
| 6NC2 | E_LYS_490 | NZ  | E_GLU_492 | OE2 | 2.629 |
| 6NC2 | E_LYS_500 | NZ  | M_ASP_664 | OD1 | 2.780 |
| 6NC2 | E_LYS_500 | NZ  | M_ASP_664 | OD2 | 3.992 |
| 6NC2 | E_ARG_503 | NH1 | K_GLU_654 | OE1 | 3.759 |
| 6NC2 | E_ARG_503 | NH1 | K_GLU_654 | OE2 | 3.172 |
| 6NC2 | K_ARG_542 | NH1 | M_GLU_647 | OE1 | 2.800 |
| 6NC2 | K_ARG_542 | NH1 | M_ASP_648 | OD1 | 3.191 |
| 6NC2 | K_ARG_542 | NH2 | M_ASP_648 | OD1 | 3.498 |
| 6NC2 | K_LYS_574 | NZ  | E_ASP_107 | OD1 | 2.510 |
| 6NC2 | K_LYS_574 | NZ  | E_ASP_107 | OD2 | 3.688 |
| 6NC2 | K_LYS_588 | NZ  | K_ASP_589 | OD1 | 2.875 |
| 6NC2 | K_LYS_617 | NZ  | K_GLU_634 | OE2 | 2.908 |
| 6NC2 | Q_LYS_30  | NZ  | Q_ASP_31  | OD1 | 3.266 |
| 6NC2 | Q_LYS_30  | NZ  | Q_ASP_31  | OD2 | 2.768 |
| 6NC2 | Q_HIS_35  | NE2 | Q_ASP_95  | OD1 | 2.705 |
| 6NC2 | Q_ARG_38  | NH1 | Q_ASP_86  | OD1 | 2.970 |
| 6NC2 | Q_ARG_38  | NH2 | Q_GLU_46  | OE1 | 3.107 |
| 6NC2 | Q_ARG_38  | NH2 | Q_GLU_46  | OE2 | 3.826 |
| 6NC2 | Q_ARG_66  | NH2 | Q_ASP_86  | OD1 | 3.009 |
| 6NC2 | Q_ARG_66  | NH2 | Q_ASP_86  | OD2 | 3.729 |
| 6NC2 | Q_LYS_75  | NZ  | Q_ASP_72  | OD2 | 3.903 |
| 6NC2 | Q_ARG_82B | NH1 | Q_ASP_82A | OD2 | 2.740 |
| 6NC2 | Q_ARG_83  | NH2 | Q_GLU_85  | OE1 | 3.718 |
| 6NC2 | Q_ARG_83  | NH2 | Q_GLU_85  | OE2 | 3.237 |
| 6NC2 | Q_LYS_94  | NZ  | Q_ASP_101 | OD1 | 3.921 |
| 6NC2 | Q_ARG_96  | NH1 | V_ASP_50  | OD1 | 3.082 |
| 6NC2 | Q_ARG_96  | NH1 | V_ASP_50  | OD2 | 3.706 |
| 6NC2 | Q_ARG_96  | NH2 | V_ASP_50  | OD1 | 3.892 |
| 6NC2 | Q_ARG_96  | NH2 | V_ASP_50  | OD2 | 3.158 |
| 6NC2 | Q_ARG_99  | NH2 | Q_ASP_31  | OD1 | 3.800 |
| 6NC2 | V_LYS_30  | NZ  | V_ASP_28  | OD2 | 2.906 |
| 6NC2 | V_ARG_37  | NH1 | V_ASP_82  | OD1 | 3.215 |
| 6NC2 | V_ARG_37  | NH2 | V_GLU_45  | OE1 | 2.891 |
| 6NC2 | V_ARG_37  | NH2 | V_GLU_45  | OE2 | 3.981 |
| 6NC2 | V_LYS_42  | NZ  | V_GLU_45  | OE1 | 3.768 |
| 6NC2 | V_LYS_103 | NZ  | V_GLU_105 | OE1 | 3.671 |
| 6NC2 | F_LYS_46  | NZ  | M_ASP_636 | OD1 | 3.909 |
| 6NC2 | F_ARG_59  | NH1 | F_ASP_57  | OD1 | 2.814 |
| 6NC2 | F_ARG_59  | NH1 | F_ASP_57  | OD2 | 3.348 |
| 6NC2 | F_ARG_59  | NH2 | F_ASP_57  | OD1 | 3.635 |
| 6NC2 | F_ARG_59  | NH2 | F_ASP_57  | OD2 | 2.765 |
| 6NC2 | F_LYS_155 | NZ  | F_ASP_133 | OD1 | 2.379 |
| 6NC2 | F_LYS_231 | NZ  | F_GLU_268 | OE2 | 2.886 |
| 6NC2 | F_LYS_232 | NZ  | F_GLU_269 | OE1 | 3.666 |
| 6NC2 | F_LYS_232 | NZ  | F_GLU_269 | OE2 | 2.418 |

|      |           |     |           |     |       |
|------|-----------|-----|-----------|-----|-------|
| 6NC2 | F_LYS_282 | NZ  | F_ASP_279 | OD2 | 2.788 |
| 6NC2 | F_ARG_298 | NH1 | F_GLU_381 | OE1 | 2.865 |
| 6NC2 | F_ARG_298 | NH1 | F_GLU_381 | OE2 | 2.960 |
| 6NC2 | F_LYS_305 | NZ  | F_GLU_172 | OE1 | 2.574 |
| 6NC2 | F_LYS_305 | NZ  | F_GLU_172 | OE2 | 3.869 |
| 6NC2 | F_ARG_327 | NH2 | F_ASP_325 | OD2 | 3.127 |
| 6NC2 | F_LYS_337 | NZ  | F_GLU_293 | OE1 | 2.932 |
| 6NC2 | F_LYS_343 | NZ  | F_ASP_340 | OD1 | 3.486 |
| 6NC2 | F_LYS_348 | NZ  | F_GLU_269 | OE1 | 2.894 |
| 6NC2 | F_LYS_348 | NZ  | F_GLU_269 | OE2 | 3.757 |
| 6NC2 | F_LYS_348 | NZ  | F_GLU_351 | OE2 | 3.738 |
| 6NC2 | F_ARG_419 | NH2 | F_GLU_153 | OE2 | 3.653 |
| 6NC2 | F_LYS_421 | NZ  | F_GLU_370 | OE2 | 2.787 |
| 6NC2 | F_ARG_456 | NH2 | F_GLU_466 | OE1 | 2.887 |
| 6NC2 | F_ARG_456 | NH2 | F_GLU_466 | OE2 | 3.857 |
| 6NC2 | F_LYS_460 | NZ  | F_GLU_466 | OE1 | 3.544 |
| 6NC2 | F_ARG_476 | NH1 | F_GLU_102 | OE1 | 3.959 |
| 6NC2 | F_ARG_476 | NH1 | F_GLU_102 | OE2 | 2.882 |
| 6NC2 | F_ARG_476 | NH2 | F_ASP_474 | OD1 | 3.950 |
| 6NC2 | F_ARG_476 | NH2 | F_ASP_474 | OD2 | 2.809 |
| 6NC2 | F_ARG_480 | NH2 | F_ASP_477 | OD1 | 3.009 |
| 6NC2 | F_ARG_480 | NH2 | F_ASP_477 | OD2 | 3.559 |
| 6NC2 | F_LYS_487 | NZ  | F_GLU_47  | OE1 | 3.379 |
| 6NC2 | F_LYS_487 | NZ  | F_GLU_91  | OE1 | 3.334 |
| 6NC2 | F_LYS_490 | NZ  | F_GLU_492 | OE1 | 3.377 |
| 6NC2 | F_LYS_490 | NZ  | F_GLU_492 | OE2 | 2.629 |
| 6NC2 | F_LYS_500 | NZ  | N_ASP_664 | OD1 | 2.780 |
| 6NC2 | F_LYS_500 | NZ  | N_ASP_664 | OD2 | 3.991 |
| 6NC2 | F_ARG_503 | NH1 | M_GLU_654 | OE1 | 3.759 |
| 6NC2 | F_ARG_503 | NH1 | M_GLU_654 | OE2 | 3.173 |
| 6NC2 | M_ARG_542 | NH1 | N_GLU_647 | OE1 | 2.801 |
| 6NC2 | M_ARG_542 | NH1 | N_ASP_648 | OD1 | 3.191 |
| 6NC2 | M_ARG_542 | NH2 | N_ASP_648 | OD1 | 3.498 |
| 6NC2 | M_LYS_574 | NZ  | F_ASP_107 | OD1 | 2.510 |
| 6NC2 | M_LYS_574 | NZ  | F_ASP_107 | OD2 | 3.688 |
| 6NC2 | M_LYS_588 | NZ  | M_ASP_589 | OD1 | 2.875 |
| 6NC2 | M_LYS_617 | NZ  | M_GLU_634 | OE2 | 2.907 |
| 6NC2 | R_LYS_30  | NZ  | R_ASP_31  | OD1 | 3.267 |
| 6NC2 | R_LYS_30  | NZ  | R_ASP_31  | OD2 | 2.768 |
| 6NC2 | R_HIS_35  | NE2 | R_ASP_95  | OD1 | 2.705 |
| 6NC2 | R_ARG_38  | NH1 | R_ASP_86  | OD1 | 2.970 |
| 6NC2 | R_ARG_38  | NH2 | R_GLU_46  | OE1 | 3.107 |
| 6NC2 | R_ARG_38  | NH2 | R_GLU_46  | OE2 | 3.826 |
| 6NC2 | R_ARG_66  | NH2 | R_ASP_86  | OD1 | 3.009 |
| 6NC2 | R_ARG_66  | NH2 | R_ASP_86  | OD2 | 3.729 |
| 6NC2 | R_LYS_75  | NZ  | R_ASP_72  | OD2 | 3.903 |
| 6NC2 | R_ARG_82B | NH1 | R_ASP_82A | OD2 | 2.739 |
| 6NC2 | R_ARG_83  | NH2 | R_GLU_85  | OE1 | 3.718 |
| 6NC2 | R_ARG_83  | NH2 | R_GLU_85  | OE2 | 3.238 |
| 6NC2 | R_LYS_94  | NZ  | R_ASP_101 | OD1 | 3.921 |
| 6NC2 | R_ARG_96  | NH1 | W_ASP_50  | OD1 | 3.082 |
| 6NC2 | R_ARG_96  | NH1 | W_ASP_50  | OD2 | 3.706 |
| 6NC2 | R_ARG_96  | NH2 | W_ASP_50  | OD1 | 3.892 |
| 6NC2 | R_ARG_96  | NH2 | W_ASP_50  | OD2 | 3.157 |
| 6NC2 | R_ARG_99  | NH2 | R_ASP_31  | OD1 | 3.799 |
| 6NC2 | W_LYS_30  | NZ  | W_ASP_28  | OD2 | 2.905 |
| 6NC2 | W_ARG_37  | NH1 | W_ASP_82  | OD1 | 3.215 |
| 6NC2 | W_ARG_37  | NH2 | W_GLU_45  | OE1 | 2.891 |

|      |           |     |           |     |       |
|------|-----------|-----|-----------|-----|-------|
| 6NC2 | W_ARG_37  | NH2 | W_GLU_45  | OE2 | 3.981 |
| 6NC2 | W_LYS_42  | NZ  | W_GLU_45  | OE1 | 3.769 |
| 6NC2 | W_LYS_103 | NZ  | W_GLU_105 | OE1 | 3.671 |
| 6NC2 | G_LYS_46  | NZ  | N_ASP_636 | OD1 | 3.909 |
| 6NC2 | G_ARG_59  | NH1 | G_ASP_57  | OD1 | 2.814 |
| 6NC2 | G_ARG_59  | NH1 | G_ASP_57  | OD2 | 3.348 |
| 6NC2 | G_ARG_59  | NH2 | G_ASP_57  | OD1 | 3.635 |
| 6NC2 | G_ARG_59  | NH2 | G_ASP_57  | OD2 | 2.766 |
| 6NC2 | G_LYS_155 | NZ  | G_ASP_133 | OD1 | 2.379 |
| 6NC2 | G_LYS_231 | NZ  | G_GLU_268 | OE2 | 2.886 |
| 6NC2 | G_LYS_232 | NZ  | G_GLU_269 | OE1 | 3.666 |
| 6NC2 | G_LYS_232 | NZ  | G_GLU_269 | OE2 | 2.418 |
| 6NC2 | G_LYS_282 | NZ  | G_ASP_279 | OD2 | 2.787 |
| 6NC2 | G_ARG_298 | NH1 | G_GLU_381 | OE1 | 2.864 |
| 6NC2 | G_ARG_298 | NH1 | G_GLU_381 | OE2 | 2.959 |
| 6NC2 | G_LYS_305 | NZ  | G_GLU_172 | OE1 | 2.575 |
| 6NC2 | G_LYS_305 | NZ  | G_GLU_172 | OE2 | 3.868 |
| 6NC2 | G_ARG_327 | NH2 | G_ASP_325 | OD2 | 3.127 |
| 6NC2 | G_LYS_337 | NZ  | G_GLU_293 | OE1 | 2.931 |
| 6NC2 | G_LYS_343 | NZ  | G_ASP_340 | OD1 | 3.486 |
| 6NC2 | G_LYS_348 | NZ  | G_GLU_269 | OE1 | 2.894 |
| 6NC2 | G_LYS_348 | NZ  | G_GLU_269 | OE2 | 3.758 |
| 6NC2 | G_LYS_348 | NZ  | G_GLU_351 | OE2 | 3.738 |
| 6NC2 | G_ARG_419 | NH2 | G_GLU_153 | OE2 | 3.652 |
| 6NC2 | G_LYS_421 | NZ  | G_GLU_370 | OE2 | 2.786 |
| 6NC2 | G_ARG_456 | NH2 | G_GLU_466 | OE1 | 2.887 |
| 6NC2 | G_ARG_456 | NH2 | G_GLU_466 | OE2 | 3.857 |
| 6NC2 | G_LYS_460 | NZ  | G_GLU_466 | OE1 | 3.544 |
| 6NC2 | G_ARG_476 | NH1 | G_GLU_102 | OE1 | 3.959 |
| 6NC2 | G_ARG_476 | NH1 | G_GLU_102 | OE2 | 2.881 |
| 6NC2 | G_ARG_476 | NH2 | G_ASP_474 | OD1 | 3.950 |
| 6NC2 | G_ARG_476 | NH2 | G_ASP_474 | OD2 | 2.809 |
| 6NC2 | G_ARG_480 | NH2 | G_ASP_477 | OD1 | 3.009 |
| 6NC2 | G_ARG_480 | NH2 | G_ASP_477 | OD2 | 3.559 |
| 6NC2 | G_LYS_487 | NZ  | G_GLU_47  | OE1 | 3.379 |
| 6NC2 | G_LYS_487 | NZ  | G_GLU_91  | OE1 | 3.334 |
| 6NC2 | G_LYS_490 | NZ  | G_GLU_492 | OE1 | 3.377 |
| 6NC2 | G_LYS_490 | NZ  | G_GLU_492 | OE2 | 2.630 |
| 6NC2 | G_LYS_500 | NZ  | K_ASP_664 | OD1 | 2.780 |
| 6NC2 | G_LYS_500 | NZ  | K_ASP_664 | OD2 | 3.992 |
| 6NC2 | G_ARG_503 | NH1 | N_GLU_654 | OE1 | 3.759 |
| 6NC2 | G_ARG_503 | NH1 | N_GLU_654 | OE2 | 3.173 |
| 6NC2 | N_ARG_542 | NH1 | K_GLU_647 | OE1 | 2.800 |
| 6NC2 | N_ARG_542 | NH1 | K_ASP_648 | OD1 | 3.191 |
| 6NC2 | N_ARG_542 | NH2 | K_ASP_648 | OD1 | 3.498 |
| 6NC2 | N_LYS_574 | NZ  | G_ASP_107 | OD1 | 2.510 |
| 6NC2 | N_LYS_574 | NZ  | G_ASP_107 | OD2 | 3.688 |
| 6NC2 | N_LYS_588 | NZ  | N_ASP_589 | OD1 | 2.875 |
| 6NC2 | N_LYS_617 | NZ  | N_GLU_634 | OE2 | 2.908 |
| 6NC2 | S_LYS_30  | NZ  | S_ASP_31  | OD1 | 3.267 |
| 6NC2 | S_LYS_30  | NZ  | S_ASP_31  | OD2 | 2.768 |
| 6NC2 | S_HIS_35  | NE2 | S_ASP_95  | OD1 | 2.704 |
| 6NC2 | S_ARG_38  | NH1 | S_ASP_86  | OD1 | 2.970 |
| 6NC2 | S_ARG_38  | NH2 | S_GLU_46  | OE1 | 3.107 |
| 6NC2 | S_ARG_38  | NH2 | S_GLU_46  | OE2 | 3.826 |
| 6NC2 | S_ARG_66  | NH2 | S_ASP_86  | OD1 | 3.009 |
| 6NC2 | S_ARG_66  | NH2 | S_ASP_86  | OD2 | 3.730 |
| 6NC2 | S_LYS_75  | NZ  | S_ASP_72  | OD2 | 3.903 |



|      |           |     |           |     |       |
|------|-----------|-----|-----------|-----|-------|
| 6NC2 | S_ARG_82B | NH1 | S_ASP_82A | OD2 | 2.740 |
| 6NC2 | S_ARG_83  | NH2 | S_GLU_85  | OE1 | 3.718 |
| 6NC2 | S_ARG_83  | NH2 | S_GLU_85  | OE2 | 3.237 |
| 6NC2 | S_LYS_94  | NZ  | S_ASP_101 | OD1 | 3.921 |
| 6NC2 | S_ARG_96  | NH1 | X_ASP_50  | OD1 | 3.082 |
| 6NC2 | S_ARG_96  | NH1 | X_ASP_50  | OD2 | 3.706 |
| 6NC2 | S_ARG_96  | NH2 | X_ASP_50  | OD1 | 3.892 |
| 6NC2 | S_ARG_96  | NH2 | X_ASP_50  | OD2 | 3.158 |
| 6NC2 | S_ARG_99  | NH2 | S_ASP_31  | OD1 | 3.800 |
| 6NC2 | X_LYS_30  | NZ  | X_ASP_28  | OD2 | 2.906 |
| 6NC2 | X_ARG_37  | NH1 | X_ASP_82  | OD1 | 3.215 |
| 6NC2 | X_ARG_37  | NH2 | X_GLU_45  | OE1 | 2.891 |
| 6NC2 | X_ARG_37  | NH2 | X_GLU_45  | OE2 | 3.981 |
| 6NC2 | X_LYS_42  | NZ  | X_GLU_45  | OE1 | 3.768 |
| 6NC2 | X_LYS_103 | NZ  | X_GLU_105 | OE1 | 3.671 |

Table 874: 6NC2-specific salt bridging networks analysis. In this table, a PDB file is specified with a four-letter PDB ID, except that the names of the PDB files corresponding to the single NMR structural model split from the NMR ensemble is specified with a four-letter PDB ID in addition to a hyphen followed by the single NMR structural model numeric ID, the residue naming scheme is **Chain ID\_residue name\_residue number**,  $\angle ADH$  represents the angle formed by acceptor (A), donor (D) and hydrogen (H) ( $\angle ADH$ ).

| PDB ID | Residue A | Atom A | Residue B | Atom B | Distance (Å) |
|--------|-----------|--------|-----------|--------|--------------|
| 6NC3   | A_LYS_46  | NZ     | B_ASP_636 | OD1    | 2.912        |
| 6NC3   | A_LYS_46  | NZ     | B_ASP_636 | OD2    | 3.719        |
| 6NC3   | A_HIS_72  | ND1    | A_GLU_64  | OE1    | 3.735        |
| 6NC3   | A_LYS_117 | NZ     | A_ASP_113 | OD1    | 3.847        |
| 6NC3   | A_LYS_117 | NZ     | A_ASP_113 | OD2    | 2.492        |
| 6NC3   | A_LYS_155 | NZ     | A_ASP_133 | OD1    | 2.486        |
| 6NC3   | A_LYS_168 | NZ     | A_ASP_167 | OD1    | 2.679        |
| 6NC3   | A_LYS_168 | NZ     | A_ASP_167 | OD2    | 3.249        |
| 6NC3   | A_ARG_192 | NH2    | C_ASP_167 | OD1    | 3.709        |
| 6NC3   | A_ARG_192 | NH2    | C_ASP_167 | OD2    | 3.548        |
| 6NC3   | A_LYS_231 | NZ     | A_GLU_267 | OE1    | 2.789        |
| 6NC3   | A_LYS_231 | NZ     | A_GLU_267 | OE2    | 3.511        |
| 6NC3   | A_LYS_232 | NZ     | A_GLU_269 | OE1    | 3.765        |
| 6NC3   | A_LYS_232 | NZ     | A_GLU_269 | OE2    | 2.544        |
| 6NC3   | A_HIS_249 | NE2    | A_GLU_482 | OE2    | 2.721        |
| 6NC3   | A_LYS_290 | NZ     | A_GLU_268 | OE1    | 3.516        |
| 6NC3   | A_ARG_298 | NH1    | A_GLU_381 | OE2    | 2.878        |
| 6NC3   | A_LYS_305 | NZ     | A_GLU_172 | OE1    | 2.502        |
| 6NC3   | A_LYS_305 | NZ     | A_GLU_172 | OE2    | 3.928        |
| 6NC3   | A_LYS_337 | NZ     | A_GLU_293 | OE2    | 2.661        |
| 6NC3   | A_LYS_348 | NZ     | A_GLU_351 | OE1    | 2.941        |
| 6NC3   | A_LYS_348 | NZ     | A_GLU_351 | OE2    | 3.643        |
| 6NC3   | A_LYS_421 | NZ     | A_GLU_370 | OE2    | 2.811        |
| 6NC3   | A_LYS_432 | NZ     | A_ASP_113 | OD1    | 2.553        |
| 6NC3   | A_LYS_432 | NZ     | A_ASP_113 | OD2    | 3.774        |
| 6NC3   | A_LYS_432 | NZ     | A_GLU_429 | OE1    | 3.926        |
| 6NC3   | A_ARG_456 | NH2    | A_GLU_466 | OE1    | 3.636        |
| 6NC3   | A_ARG_456 | NH2    | A_GLU_466 | OE2    | 2.864        |
| 6NC3   | A_ARG_476 | NH1    | A_GLU_102 | OE1    | 3.922        |
| 6NC3   | A_ARG_476 | NH1    | A_GLU_102 | OE2    | 3.112        |
| 6NC3   | A_ARG_476 | NH2    | A_ASP_474 | OD1    | 3.856        |
| 6NC3   | A_ARG_476 | NH2    | A_ASP_474 | OD2    | 3.033        |
| 6NC3   | A_ARG_480 | NH1    | A_ASP_477 | OD1    | 2.738        |
| 6NC3   | A_ARG_480 | NH2    | A_ASP_477 | OD1    | 3.897        |
| 6NC3   | A_LYS_487 | NZ     | A_GLU_47  | OE1    | 2.894        |
| 6NC3   | A_LYS_487 | NZ     | A_GLU_47  | OE2    | 3.821        |
| 6NC3   | A_LYS_487 | NZ     | A_GLU_91  | OE1    | 3.879        |
| 6NC3   | A_ARG_503 | NH2    | B_GLU_654 | OE1    | 3.773        |
| 6NC3   | A_ARG_503 | NH2    | B_GLU_654 | OE2    | 3.161        |
| 6NC3   | B_ARG_542 | NH2    | J_GLU_647 | OE1    | 2.826        |
| 6NC3   | B_ARG_542 | NH2    | J_ASP_648 | OD1    | 2.949        |
| 6NC3   | B_ARG_542 | NH2    | J_ASP_648 | OD2    | 3.670        |
| 6NC3   | B_LYS_574 | NZ     | A_ASP_107 | OD1    | 2.582        |
| 6NC3   | B_LYS_574 | NZ     | A_ASP_107 | OD2    | 2.711        |
| 6NC3   | B_ARG_579 | NH1    | J_GLU_584 | OE2    | 3.194        |
| 6NC3   | B_ARG_585 | NH2    | A_GLU_492 | OE1    | 2.939        |
| 6NC3   | B_ARG_585 | NH2    | A_GLU_492 | OE2    | 3.498        |
| 6NC3   | B_LYS_617 | NZ     | B_GLU_634 | OE1    | 2.815        |
| 6NC3   | B_LYS_617 | NZ     | B_GLU_634 | OE2    | 3.445        |
| 6NC3   | H_LYS_12  | NZ     | H_GLU_10  | OE1    | 3.786        |
| 6NC3   | H_HIS_35  | NE2    | H_ASP_95  | OD2    | 3.813        |
| 6NC3   | H_ARG_38  | NH1    | H_ASP_86  | OD1    | 2.638        |
| 6NC3   | H_ARG_38  | NH2    | H_GLU_46  | OE1    | 2.857        |
| 6NC3   | H_ARG_38  | NH2    | H_GLU_46  | OE2    | 3.919        |
| 6NC3   | H_ARG_38  | NH2    | H_ASP_86  | OD1    | 3.489        |
| 6NC3   | H_LYS_62  | NZ     | H_GLU_46  | OE2    | 2.819        |
| 6NC3   | H_ARG_66  | NH2    | H_ASP_86  | OD1    | 3.294        |

|      |           |     |           |     |       |
|------|-----------|-----|-----------|-----|-------|
| 6NC3 | H_ARG_66  | NH2 | H_ASP_86  | OD2 | 3.014 |
| 6NC3 | H_ARG_94  | NH1 | H_GLU_2   | OE1 | 2.960 |
| 6NC3 | H_ARG_94  | NH2 | H_GLU_2   | OE1 | 3.018 |
| 6NC3 | H_LYS_96  | NZ  | H_ASP_101 | OD1 | 3.648 |
| 6NC3 | H_LYS_96  | NZ  | H_ASP_101 | OD2 | 2.449 |
| 6NC3 | L_ARG_30  | NH2 | L_GLU_32  | OE2 | 3.023 |
| 6NC3 | L_ARG_61  | NH1 | L_GLU_81  | OE2 | 3.991 |
| 6NC3 | L_ARG_61  | NH2 | L_GLU_81  | OE2 | 3.260 |
| 6NC3 | L_ARG_61  | NH2 | L_ASP_82  | OD1 | 2.918 |
| 6NC3 | L_ARG_61  | NH2 | L_ASP_82  | OD2 | 3.280 |
| 6NC3 | L_LYS_103 | NZ  | L_GLU_105 | OE2 | 3.920 |
| 6NC3 | L_LYS_107 | NZ  | L_ASP_17  | OD2 | 2.904 |
| 6NC3 | C_LYS_46  | NZ  | L_ASP_636 | OD1 | 2.913 |
| 6NC3 | C_LYS_46  | NZ  | L_ASP_636 | OD2 | 3.719 |
| 6NC3 | C_HIS_72  | ND1 | C_GLU_64  | OE1 | 3.735 |
| 6NC3 | C_LYS_117 | NZ  | C_ASP_113 | OD1 | 3.848 |
| 6NC3 | C_LYS_117 | NZ  | C_ASP_113 | OD2 | 2.492 |
| 6NC3 | C_LYS_155 | NZ  | C_ASP_133 | OD1 | 2.487 |
| 6NC3 | C_LYS_168 | NZ  | C_ASP_167 | OD1 | 2.679 |
| 6NC3 | C_LYS_168 | NZ  | C_ASP_167 | OD2 | 3.249 |
| 6NC3 | C_ARG_192 | NH2 | D_ASP_167 | OD1 | 3.709 |
| 6NC3 | C_ARG_192 | NH2 | D_ASP_167 | OD2 | 3.548 |
| 6NC3 | C_LYS_231 | NZ  | C_GLU_267 | OE1 | 2.789 |
| 6NC3 | C_LYS_231 | NZ  | C_GLU_267 | OE2 | 3.511 |
| 6NC3 | C_LYS_232 | NZ  | C_GLU_269 | OE1 | 3.765 |
| 6NC3 | C_LYS_232 | NZ  | C_GLU_269 | OE2 | 2.544 |
| 6NC3 | C_HIS_249 | NE2 | C_GLU_482 | OE2 | 2.721 |
| 6NC3 | C_LYS_290 | NZ  | C_GLU_268 | OE1 | 3.516 |
| 6NC3 | C_ARG_298 | NH1 | C_GLU_381 | OE2 | 2.878 |
| 6NC3 | C_LYS_305 | NZ  | C_GLU_172 | OE1 | 2.502 |
| 6NC3 | C_LYS_305 | NZ  | C_GLU_172 | OE2 | 3.929 |
| 6NC3 | C_LYS_337 | NZ  | C_GLU_293 | OE2 | 2.662 |
| 6NC3 | C_LYS_348 | NZ  | C_GLU_351 | OE1 | 2.941 |
| 6NC3 | C_LYS_348 | NZ  | C_GLU_351 | OE2 | 3.643 |
| 6NC3 | C_LYS_421 | NZ  | C_GLU_370 | OE2 | 2.811 |
| 6NC3 | C_LYS_432 | NZ  | C_ASP_113 | OD1 | 2.553 |
| 6NC3 | C_LYS_432 | NZ  | C_ASP_113 | OD2 | 3.774 |
| 6NC3 | C_LYS_432 | NZ  | C_GLU_429 | OE1 | 3.927 |
| 6NC3 | C_ARG_456 | NH2 | C_GLU_466 | OE1 | 3.636 |
| 6NC3 | C_ARG_456 | NH2 | C_GLU_466 | OE2 | 2.864 |
| 6NC3 | C_ARG_476 | NH1 | C_GLU_102 | OE1 | 3.922 |
| 6NC3 | C_ARG_476 | NH1 | C_GLU_102 | OE2 | 3.112 |
| 6NC3 | C_ARG_476 | NH2 | C_ASP_474 | OD1 | 3.856 |
| 6NC3 | C_ARG_476 | NH2 | C_ASP_474 | OD2 | 3.032 |
| 6NC3 | C_ARG_480 | NH1 | C_ASP_477 | OD1 | 2.738 |
| 6NC3 | C_ARG_480 | NH2 | C_ASP_477 | OD1 | 3.897 |
| 6NC3 | C_LYS_487 | NZ  | C_GLU_47  | OE1 | 2.894 |
| 6NC3 | C_LYS_487 | NZ  | C_GLU_47  | OE2 | 3.821 |
| 6NC3 | C_LYS_487 | NZ  | C_GLU_91  | OE1 | 3.878 |
| 6NC3 | C_ARG_503 | NH2 | L_GLU_654 | OE1 | 3.773 |
| 6NC3 | C_ARG_503 | NH2 | L_GLU_654 | OE2 | 3.161 |
| 6NC3 | L_ARG_542 | NH2 | B_GLU_647 | OE1 | 2.826 |
| 6NC3 | L_ARG_542 | NH2 | B_ASP_648 | OD1 | 2.949 |
| 6NC3 | L_ARG_542 | NH2 | B_ASP_648 | OD2 | 3.670 |
| 6NC3 | L_LYS_574 | NZ  | C_ASP_107 | OD1 | 2.581 |
| 6NC3 | L_LYS_574 | NZ  | C_ASP_107 | OD2 | 2.711 |
| 6NC3 | L_ARG_579 | NH1 | B_GLU_584 | OE2 | 3.194 |
| 6NC3 | L_ARG_585 | NH2 | C_GLU_492 | OE1 | 2.939 |

|      |           |     |           |     |       |
|------|-----------|-----|-----------|-----|-------|
| 6NC3 | I_ARG_585 | NH2 | C_GLU_492 | OE2 | 3.498 |
| 6NC3 | I_LYS_617 | NZ  | I_GLU_634 | OE1 | 2.815 |
| 6NC3 | I_LYS_617 | NZ  | I_GLU_634 | OE2 | 3.445 |
| 6NC3 | O_LYS_12  | NZ  | O_GLU_10  | OE1 | 3.786 |
| 6NC3 | O_HIS_35  | NE2 | O_ASP_95  | OD2 | 3.813 |
| 6NC3 | O_ARG_38  | NH1 | O_ASP_86  | OD1 | 2.638 |
| 6NC3 | O_ARG_38  | NH2 | O_GLU_46  | OE1 | 2.857 |
| 6NC3 | O_ARG_38  | NH2 | O_GLU_46  | OE2 | 3.919 |
| 6NC3 | O_ARG_38  | NH2 | O_ASP_86  | OD1 | 3.489 |
| 6NC3 | O_LYS_62  | NZ  | O_GLU_46  | OE2 | 2.819 |
| 6NC3 | O_ARG_66  | NH2 | O_ASP_86  | OD1 | 3.294 |
| 6NC3 | O_ARG_66  | NH2 | O_ASP_86  | OD2 | 3.013 |
| 6NC3 | O_ARG_94  | NH1 | O_GLU_2   | OE1 | 2.959 |
| 6NC3 | O_ARG_94  | NH2 | O_GLU_2   | OE1 | 3.018 |
| 6NC3 | O_LYS_96  | NZ  | O_ASP_101 | OD1 | 3.647 |
| 6NC3 | O_LYS_96  | NZ  | O_ASP_101 | OD2 | 2.449 |
| 6NC3 | T_ARG_30  | NH2 | T_GLU_32  | OE2 | 3.022 |
| 6NC3 | T_ARG_61  | NH1 | T_GLU_81  | OE2 | 3.990 |
| 6NC3 | T_ARG_61  | NH2 | T_GLU_81  | OE2 | 3.260 |
| 6NC3 | T_ARG_61  | NH2 | T_ASP_82  | OD1 | 2.918 |
| 6NC3 | T_ARG_61  | NH2 | T_ASP_82  | OD2 | 3.280 |
| 6NC3 | T_LYS_103 | NZ  | T_GLU_105 | OE2 | 3.920 |
| 6NC3 | T_LYS_107 | NZ  | T_ASP_17  | OD2 | 2.904 |
| 6NC3 | D_LYS_46  | NZ  | J_ASP_636 | OD1 | 2.913 |
| 6NC3 | D_LYS_46  | NZ  | J_ASP_636 | OD2 | 3.719 |
| 6NC3 | D_HIS_72  | ND1 | D_GLU_64  | OE1 | 3.734 |
| 6NC3 | D_LYS_117 | NZ  | D_ASP_113 | OD1 | 3.848 |
| 6NC3 | D_LYS_117 | NZ  | D_ASP_113 | OD2 | 2.492 |
| 6NC3 | D_LYS_155 | NZ  | D_ASP_133 | OD1 | 2.487 |
| 6NC3 | D_LYS_168 | NZ  | D_ASP_167 | OD1 | 2.679 |
| 6NC3 | D_LYS_168 | NZ  | D_ASP_167 | OD2 | 3.249 |
| 6NC3 | D_ARG_192 | NH2 | A_ASP_167 | OD1 | 3.708 |
| 6NC3 | D_ARG_192 | NH2 | A_ASP_167 | OD2 | 3.548 |
| 6NC3 | D_LYS_231 | NZ  | D_GLU_267 | OE1 | 2.789 |
| 6NC3 | D_LYS_231 | NZ  | D_GLU_267 | OE2 | 3.510 |
| 6NC3 | D_LYS_232 | NZ  | D_GLU_269 | OE1 | 3.765 |
| 6NC3 | D_LYS_232 | NZ  | D_GLU_269 | OE2 | 2.544 |
| 6NC3 | D_HIS_249 | NE2 | D_GLU_482 | OE2 | 2.721 |
| 6NC3 | D_LYS_290 | NZ  | D_GLU_268 | OE1 | 3.516 |
| 6NC3 | D_ARG_298 | NH1 | D_GLU_381 | OE2 | 2.878 |
| 6NC3 | D_LYS_305 | NZ  | D_GLU_172 | OE1 | 2.502 |
| 6NC3 | D_LYS_305 | NZ  | D_GLU_172 | OE2 | 3.929 |
| 6NC3 | D_LYS_337 | NZ  | D_GLU_293 | OE2 | 2.661 |
| 6NC3 | D_LYS_348 | NZ  | D_GLU_351 | OE1 | 2.941 |
| 6NC3 | D_LYS_348 | NZ  | D_GLU_351 | OE2 | 3.643 |
| 6NC3 | D_LYS_421 | NZ  | D_GLU_370 | OE2 | 2.811 |
| 6NC3 | D_LYS_432 | NZ  | D_ASP_113 | OD1 | 2.553 |
| 6NC3 | D_LYS_432 | NZ  | D_ASP_113 | OD2 | 3.775 |
| 6NC3 | D_LYS_432 | NZ  | D_GLU_429 | OE1 | 3.926 |
| 6NC3 | D_ARG_456 | NH2 | D_GLU_466 | OE1 | 3.636 |
| 6NC3 | D_ARG_456 | NH2 | D_GLU_466 | OE2 | 2.864 |
| 6NC3 | D_ARG_476 | NH1 | D_GLU_102 | OE1 | 3.922 |
| 6NC3 | D_ARG_476 | NH1 | D_GLU_102 | OE2 | 3.112 |
| 6NC3 | D_ARG_476 | NH2 | D_ASP_474 | OD1 | 3.856 |
| 6NC3 | D_ARG_476 | NH2 | D_ASP_474 | OD2 | 3.032 |
| 6NC3 | D_ARG_480 | NH1 | D_ASP_477 | OD1 | 2.738 |
| 6NC3 | D_ARG_480 | NH2 | D_ASP_477 | OD1 | 3.897 |
| 6NC3 | D_LYS_487 | NZ  | D_GLU_47  | OE1 | 2.894 |

|      |           |     |           |     |       |
|------|-----------|-----|-----------|-----|-------|
| 6NC3 | D_LYS_487 | NZ  | D_GLU_47  | OE2 | 3.821 |
| 6NC3 | D_LYS_487 | NZ  | D_GLU_91  | OE1 | 3.878 |
| 6NC3 | D_ARG_503 | NH2 | J_GLU_654 | OE1 | 3.773 |
| 6NC3 | D_ARG_503 | NH2 | J_GLU_654 | OE2 | 3.160 |
| 6NC3 | J_ARG_542 | NH2 | I_GLU_647 | OE1 | 2.825 |
| 6NC3 | J_ARG_542 | NH2 | I_ASP_648 | OD1 | 2.949 |
| 6NC3 | J_ARG_542 | NH2 | I_ASP_648 | OD2 | 3.670 |
| 6NC3 | J_LYS_574 | NZ  | D_ASP_107 | OD1 | 2.581 |
| 6NC3 | J_LYS_574 | NZ  | D_ASP_107 | OD2 | 2.710 |
| 6NC3 | J_ARG_579 | NH1 | I_GLU_584 | OE2 | 3.194 |
| 6NC3 | J_ARG_585 | NH2 | D_GLU_492 | OE1 | 2.939 |
| 6NC3 | J_ARG_585 | NH2 | D_GLU_492 | OE2 | 3.498 |
| 6NC3 | J_LYS_617 | NZ  | J_GLU_634 | OE1 | 2.815 |
| 6NC3 | J_LYS_617 | NZ  | J_GLU_634 | OE2 | 3.445 |
| 6NC3 | P_LYS_12  | NZ  | P_GLU_10  | OE1 | 3.785 |
| 6NC3 | P_HIS_35  | NE2 | P_ASP_95  | OD2 | 3.813 |
| 6NC3 | P_ARG_38  | NH1 | P_ASP_86  | OD1 | 2.638 |
| 6NC3 | P_ARG_38  | NH2 | P_GLU_46  | OE1 | 2.856 |
| 6NC3 | P_ARG_38  | NH2 | P_GLU_46  | OE2 | 3.919 |
| 6NC3 | P_ARG_38  | NH2 | P_ASP_86  | OD1 | 3.489 |
| 6NC3 | P_LYS_62  | NZ  | P_GLU_46  | OE2 | 2.819 |
| 6NC3 | P_ARG_66  | NH2 | P_ASP_86  | OD1 | 3.294 |
| 6NC3 | P_ARG_66  | NH2 | P_ASP_86  | OD2 | 3.014 |
| 6NC3 | P_ARG_94  | NH1 | P_GLU_2   | OE1 | 2.959 |
| 6NC3 | P_ARG_94  | NH2 | P_GLU_2   | OE1 | 3.018 |
| 6NC3 | P_LYS_96  | NZ  | P_ASP_101 | OD1 | 3.648 |
| 6NC3 | P_LYS_96  | NZ  | P_ASP_101 | OD2 | 2.449 |
| 6NC3 | U_ARG_30  | NH2 | U_GLU_32  | OE2 | 3.022 |
| 6NC3 | U_ARG_61  | NH1 | U_GLU_81  | OE2 | 3.991 |
| 6NC3 | U_ARG_61  | NH2 | U_GLU_81  | OE2 | 3.260 |
| 6NC3 | U_ARG_61  | NH2 | U_ASP_82  | OD1 | 2.918 |
| 6NC3 | U_ARG_61  | NH2 | U_ASP_82  | OD2 | 3.280 |
| 6NC3 | U_LYS_103 | NZ  | U_GLU_105 | OE2 | 3.920 |
| 6NC3 | U_LYS_107 | NZ  | U_ASP_17  | OD2 | 2.904 |
| 6NC3 | E_LYS_46  | NZ  | K_ASP_636 | OD1 | 2.912 |
| 6NC3 | E_LYS_46  | NZ  | K_ASP_636 | OD2 | 3.719 |
| 6NC3 | E_HIS_72  | ND1 | E_GLU_64  | OE1 | 3.735 |
| 6NC3 | E_LYS_117 | NZ  | E_ASP_113 | OD1 | 3.847 |
| 6NC3 | E_LYS_117 | NZ  | E_ASP_113 | OD2 | 2.492 |
| 6NC3 | E_LYS_155 | NZ  | E_ASP_133 | OD1 | 2.486 |
| 6NC3 | E_LYS_168 | NZ  | E_ASP_167 | OD1 | 2.679 |
| 6NC3 | E_LYS_168 | NZ  | E_ASP_167 | OD2 | 3.249 |
| 6NC3 | E_ARG_192 | NH2 | F_ASP_167 | OD1 | 3.709 |
| 6NC3 | E_ARG_192 | NH2 | F_ASP_167 | OD2 | 3.548 |
| 6NC3 | E_LYS_231 | NZ  | E_GLU_267 | OE1 | 2.789 |
| 6NC3 | E_LYS_231 | NZ  | E_GLU_267 | OE2 | 3.511 |
| 6NC3 | E_LYS_232 | NZ  | E_GLU_269 | OE1 | 3.765 |
| 6NC3 | E_LYS_232 | NZ  | E_GLU_269 | OE2 | 2.544 |
| 6NC3 | E_HIS_249 | NE2 | E_GLU_482 | OE2 | 2.721 |
| 6NC3 | E_LYS_290 | NZ  | E_GLU_268 | OE1 | 3.516 |
| 6NC3 | E_ARG_298 | NH1 | E_GLU_381 | OE2 | 2.878 |
| 6NC3 | E_LYS_305 | NZ  | E_GLU_172 | OE1 | 2.502 |
| 6NC3 | E_LYS_305 | NZ  | E_GLU_172 | OE2 | 3.928 |
| 6NC3 | E_LYS_337 | NZ  | E_GLU_293 | OE2 | 2.661 |
| 6NC3 | E_LYS_348 | NZ  | E_GLU_351 | OE1 | 2.941 |
| 6NC3 | E_LYS_348 | NZ  | E_GLU_351 | OE2 | 3.643 |
| 6NC3 | E_LYS_421 | NZ  | E_GLU_370 | OE2 | 2.811 |
| 6NC3 | E_LYS_432 | NZ  | E_ASP_113 | OD1 | 2.553 |

|      |           |     |           |     |       |
|------|-----------|-----|-----------|-----|-------|
| 6NC3 | E_LYS_432 | NZ  | E_ASP_113 | OD2 | 3.774 |
| 6NC3 | E_LYS_432 | NZ  | E_GLU_429 | OE1 | 3.926 |
| 6NC3 | E_ARG_456 | NH2 | E_GLU_466 | OE1 | 3.636 |
| 6NC3 | E_ARG_456 | NH2 | E_GLU_466 | OE2 | 2.864 |
| 6NC3 | E_ARG_476 | NH1 | E_GLU_102 | OE1 | 3.922 |
| 6NC3 | E_ARG_476 | NH1 | E_GLU_102 | OE2 | 3.112 |
| 6NC3 | E_ARG_476 | NH2 | E_ASP_474 | OD1 | 3.856 |
| 6NC3 | E_ARG_476 | NH2 | E_ASP_474 | OD2 | 3.033 |
| 6NC3 | E_ARG_480 | NH1 | E_ASP_477 | OD1 | 2.738 |
| 6NC3 | E_ARG_480 | NH2 | E_ASP_477 | OD1 | 3.897 |
| 6NC3 | E_LYS_487 | NZ  | E_GLU_47  | OE1 | 2.894 |
| 6NC3 | E_LYS_487 | NZ  | E_GLU_47  | OE2 | 3.821 |
| 6NC3 | E_LYS_487 | NZ  | E_GLU_91  | OE1 | 3.879 |
| 6NC3 | E_ARG_503 | NH2 | K_GLU_654 | OE1 | 3.773 |
| 6NC3 | E_ARG_503 | NH2 | K_GLU_654 | OE2 | 3.161 |
| 6NC3 | K_ARG_542 | NH2 | N_GLU_647 | OE1 | 2.826 |
| 6NC3 | K_ARG_542 | NH2 | N_ASP_648 | OD1 | 2.949 |
| 6NC3 | K_ARG_542 | NH2 | N_ASP_648 | OD2 | 3.670 |
| 6NC3 | K_LYS_574 | NZ  | E_ASP_107 | OD1 | 2.582 |
| 6NC3 | K_LYS_574 | NZ  | E_ASP_107 | OD2 | 2.711 |
| 6NC3 | K_ARG_579 | NH1 | N_GLU_584 | OE2 | 3.194 |
| 6NC3 | K_ARG_585 | NH2 | E_GLU_492 | OE1 | 2.939 |
| 6NC3 | K_ARG_585 | NH2 | E_GLU_492 | OE2 | 3.498 |
| 6NC3 | K_LYS_617 | NZ  | K_GLU_634 | OE1 | 2.815 |
| 6NC3 | K_LYS_617 | NZ  | K_GLU_634 | OE2 | 3.445 |
| 6NC3 | Q_LYS_12  | NZ  | Q_GLU_10  | OE1 | 3.786 |
| 6NC3 | Q_HIS_35  | NE2 | Q_ASP_95  | OD2 | 3.813 |
| 6NC3 | Q_ARG_38  | NH1 | Q_ASP_86  | OD1 | 2.638 |
| 6NC3 | Q_ARG_38  | NH2 | Q_GLU_46  | OE1 | 2.857 |
| 6NC3 | Q_ARG_38  | NH2 | Q_GLU_46  | OE2 | 3.919 |
| 6NC3 | Q_ARG_38  | NH2 | Q_ASP_86  | OD1 | 3.489 |
| 6NC3 | Q_LYS_62  | NZ  | Q_GLU_46  | OE2 | 2.819 |
| 6NC3 | Q_ARG_66  | NH2 | Q_ASP_86  | OD1 | 3.294 |
| 6NC3 | Q_ARG_66  | NH2 | Q_ASP_86  | OD2 | 3.014 |
| 6NC3 | Q_ARG_94  | NH1 | Q_GLU_2   | OE1 | 2.960 |
| 6NC3 | Q_ARG_94  | NH2 | Q_GLU_2   | OE1 | 3.018 |
| 6NC3 | Q_LYS_96  | NZ  | Q_ASP_101 | OD1 | 3.648 |
| 6NC3 | Q_LYS_96  | NZ  | Q_ASP_101 | OD2 | 2.449 |
| 6NC3 | V_ARG_30  | NH2 | V_GLU_32  | OE2 | 3.023 |
| 6NC3 | V_ARG_61  | NH1 | V_GLU_81  | OE2 | 3.991 |
| 6NC3 | V_ARG_61  | NH2 | V_GLU_81  | OE2 | 3.260 |
| 6NC3 | V_ARG_61  | NH2 | V_ASP_82  | OD1 | 2.918 |
| 6NC3 | V_ARG_61  | NH2 | V_ASP_82  | OD2 | 3.280 |
| 6NC3 | V_LYS_103 | NZ  | V_GLU_105 | OE2 | 3.920 |
| 6NC3 | V_LYS_107 | NZ  | V_ASP_17  | OD2 | 2.904 |
| 6NC3 | F_LYS_46  | NZ  | M_ASP_636 | OD1 | 2.913 |
| 6NC3 | F_LYS_46  | NZ  | M_ASP_636 | OD2 | 3.719 |
| 6NC3 | F_HIS_72  | ND1 | F_GLU_64  | OE1 | 3.734 |
| 6NC3 | F_LYS_117 | NZ  | F_ASP_113 | OD1 | 3.848 |
| 6NC3 | F_LYS_117 | NZ  | F_ASP_113 | OD2 | 2.492 |
| 6NC3 | F_LYS_155 | NZ  | F_ASP_133 | OD1 | 2.487 |
| 6NC3 | F_LYS_168 | NZ  | F_ASP_167 | OD1 | 2.679 |
| 6NC3 | F_LYS_168 | NZ  | F_ASP_167 | OD2 | 3.249 |
| 6NC3 | F_ARG_192 | NH2 | G_ASP_167 | OD1 | 3.709 |
| 6NC3 | F_ARG_192 | NH2 | G_ASP_167 | OD2 | 3.548 |
| 6NC3 | F_LYS_231 | NZ  | F_GLU_267 | OE1 | 2.789 |
| 6NC3 | F_LYS_231 | NZ  | F_GLU_267 | OE2 | 3.511 |
| 6NC3 | F_LYS_232 | NZ  | F_GLU_269 | OE1 | 3.765 |

|      |           |     |           |     |       |
|------|-----------|-----|-----------|-----|-------|
| 6NC3 | F_LYS_232 | NZ  | F_GLU_269 | OE2 | 2.544 |
| 6NC3 | F_HIS_249 | NE2 | F_GLU_482 | OE2 | 2.721 |
| 6NC3 | F_LYS_290 | NZ  | F_GLU_268 | OE1 | 3.516 |
| 6NC3 | F_ARG_298 | NH1 | F_GLU_381 | OE2 | 2.878 |
| 6NC3 | F_LYS_305 | NZ  | F_GLU_172 | OE1 | 2.502 |
| 6NC3 | F_LYS_305 | NZ  | F_GLU_172 | OE2 | 3.929 |
| 6NC3 | F_LYS_337 | NZ  | F_GLU_293 | OE2 | 2.662 |
| 6NC3 | F_LYS_348 | NZ  | F_GLU_351 | OE1 | 2.941 |
| 6NC3 | F_LYS_348 | NZ  | F_GLU_351 | OE2 | 3.643 |
| 6NC3 | F_LYS_421 | NZ  | F_GLU_370 | OE2 | 2.811 |
| 6NC3 | F_LYS_432 | NZ  | F_ASP_113 | OD1 | 2.553 |
| 6NC3 | F_LYS_432 | NZ  | F_ASP_113 | OD2 | 3.774 |
| 6NC3 | F_LYS_432 | NZ  | F_GLU_429 | OE1 | 3.927 |
| 6NC3 | F_ARG_456 | NH2 | F_GLU_466 | OE1 | 3.636 |
| 6NC3 | F_ARG_456 | NH2 | F_GLU_466 | OE2 | 2.864 |
| 6NC3 | F_ARG_476 | NH1 | F_GLU_102 | OE1 | 3.922 |
| 6NC3 | F_ARG_476 | NH1 | F_GLU_102 | OE2 | 3.112 |
| 6NC3 | F_ARG_476 | NH2 | F_ASP_474 | OD1 | 3.856 |
| 6NC3 | F_ARG_476 | NH2 | F_ASP_474 | OD2 | 3.032 |
| 6NC3 | F_ARG_480 | NH1 | F_ASP_477 | OD1 | 2.738 |
| 6NC3 | F_ARG_480 | NH2 | F_ASP_477 | OD1 | 3.897 |
| 6NC3 | F_LYS_487 | NZ  | F_GLU_47  | OE1 | 2.894 |
| 6NC3 | F_LYS_487 | NZ  | F_GLU_47  | OE2 | 3.821 |
| 6NC3 | F_LYS_487 | NZ  | F_GLU_91  | OE1 | 3.878 |
| 6NC3 | F_ARG_503 | NH2 | M_GLU_654 | OE1 | 3.773 |
| 6NC3 | F_ARG_503 | NH2 | M_GLU_654 | OE2 | 3.161 |
| 6NC3 | M_ARG_542 | NH2 | K_GLU_647 | OE1 | 2.826 |
| 6NC3 | M_ARG_542 | NH2 | K_ASP_648 | OD1 | 2.949 |
| 6NC3 | M_ARG_542 | NH2 | K_ASP_648 | OD2 | 3.670 |
| 6NC3 | M_LYS_574 | NZ  | F_ASP_107 | OD1 | 2.581 |
| 6NC3 | M_LYS_574 | NZ  | F_ASP_107 | OD2 | 2.711 |
| 6NC3 | M_ARG_579 | NH1 | K_GLU_584 | OE2 | 3.194 |
| 6NC3 | M_ARG_585 | NH2 | F_GLU_492 | OE1 | 2.939 |
| 6NC3 | M_ARG_585 | NH2 | F_GLU_492 | OE2 | 3.498 |
| 6NC3 | M_LYS_617 | NZ  | M_GLU_634 | OE1 | 2.815 |
| 6NC3 | M_LYS_617 | NZ  | M_GLU_634 | OE2 | 3.445 |
| 6NC3 | R_LYS_12  | NZ  | R_GLU_10  | OE1 | 3.786 |
| 6NC3 | R_HIS_35  | NE2 | R_ASP_95  | OD2 | 3.813 |
| 6NC3 | R_ARG_38  | NH1 | R_ASP_86  | OD1 | 2.638 |
| 6NC3 | R_ARG_38  | NH2 | R_GLU_46  | OE1 | 2.857 |
| 6NC3 | R_ARG_38  | NH2 | R_GLU_46  | OE2 | 3.919 |
| 6NC3 | R_ARG_38  | NH2 | R_ASP_86  | OD1 | 3.489 |
| 6NC3 | R_LYS_62  | NZ  | R_GLU_46  | OE2 | 2.819 |
| 6NC3 | R_ARG_66  | NH2 | R_ASP_86  | OD1 | 3.294 |
| 6NC3 | R_ARG_66  | NH2 | R_ASP_86  | OD2 | 3.013 |
| 6NC3 | R_ARG_94  | NH1 | R_GLU_2   | OE1 | 2.959 |
| 6NC3 | R_ARG_94  | NH2 | R_GLU_2   | OE1 | 3.018 |
| 6NC3 | R_LYS_96  | NZ  | R_ASP_101 | OD1 | 3.647 |
| 6NC3 | R_LYS_96  | NZ  | R_ASP_101 | OD2 | 2.449 |
| 6NC3 | W_ARG_30  | NH2 | W_GLU_32  | OE2 | 3.022 |
| 6NC3 | W_ARG_61  | NH1 | W_GLU_81  | OE2 | 3.990 |
| 6NC3 | W_ARG_61  | NH2 | W_GLU_81  | OE2 | 3.260 |
| 6NC3 | W_ARG_61  | NH2 | W_ASP_82  | OD1 | 2.918 |
| 6NC3 | W_ARG_61  | NH2 | W_ASP_82  | OD2 | 3.280 |
| 6NC3 | W_LYS_103 | NZ  | W_GLU_105 | OE2 | 3.920 |
| 6NC3 | W_LYS_107 | NZ  | W_ASP_17  | OD2 | 2.904 |
| 6NC3 | G_LYS_46  | NZ  | N_ASP_636 | OD1 | 2.913 |
| 6NC3 | G_LYS_46  | NZ  | N_ASP_636 | OD2 | 3.719 |

|      |           |     |           |     |       |
|------|-----------|-----|-----------|-----|-------|
| 6NC3 | G_HIS_72  | ND1 | G_GLU_64  | OE1 | 3.735 |
| 6NC3 | G_LYS_117 | NZ  | G_ASP_113 | OD1 | 3.847 |
| 6NC3 | G_LYS_117 | NZ  | G_ASP_113 | OD2 | 2.492 |
| 6NC3 | G_LYS_155 | NZ  | G_ASP_133 | OD1 | 2.487 |
| 6NC3 | G_LYS_168 | NZ  | G_ASP_167 | OD1 | 2.679 |
| 6NC3 | G_LYS_168 | NZ  | G_ASP_167 | OD2 | 3.249 |
| 6NC3 | G_ARG_192 | NH2 | E_ASP_167 | OD1 | 3.708 |
| 6NC3 | G_ARG_192 | NH2 | E_ASP_167 | OD2 | 3.548 |
| 6NC3 | G_LYS_231 | NZ  | G_GLU_267 | OE1 | 2.789 |
| 6NC3 | G_LYS_231 | NZ  | G_GLU_267 | OE2 | 3.510 |
| 6NC3 | G_LYS_232 | NZ  | G_GLU_269 | OE1 | 3.765 |
| 6NC3 | G_LYS_232 | NZ  | G_GLU_269 | OE2 | 2.544 |
| 6NC3 | G_HIS_249 | NE2 | G_GLU_482 | OE2 | 2.721 |
| 6NC3 | G_LYS_290 | NZ  | G_GLU_268 | OE1 | 3.516 |
| 6NC3 | G_ARG_298 | NH1 | G_GLU_381 | OE2 | 2.878 |
| 6NC3 | G_LYS_305 | NZ  | G_GLU_172 | OE1 | 2.502 |
| 6NC3 | G_LYS_305 | NZ  | G_GLU_172 | OE2 | 3.929 |
| 6NC3 | G_LYS_337 | NZ  | G_GLU_293 | OE2 | 2.661 |
| 6NC3 | G_LYS_348 | NZ  | G_GLU_351 | OE1 | 2.941 |
| 6NC3 | G_LYS_348 | NZ  | G_GLU_351 | OE2 | 3.643 |
| 6NC3 | G_LYS_421 | NZ  | G_GLU_370 | OE2 | 2.811 |
| 6NC3 | G_LYS_432 | NZ  | G_ASP_113 | OD1 | 2.553 |
| 6NC3 | G_LYS_432 | NZ  | G_ASP_113 | OD2 | 3.775 |
| 6NC3 | G_LYS_432 | NZ  | G_GLU_429 | OE1 | 3.926 |
| 6NC3 | G_ARG_456 | NH2 | G_GLU_466 | OE1 | 3.636 |
| 6NC3 | G_ARG_456 | NH2 | G_GLU_466 | OE2 | 2.864 |
| 6NC3 | G_ARG_476 | NH1 | G_GLU_102 | OE1 | 3.922 |
| 6NC3 | G_ARG_476 | NH1 | G_GLU_102 | OE2 | 3.112 |
| 6NC3 | G_ARG_476 | NH2 | G_ASP_474 | OD1 | 3.856 |
| 6NC3 | G_ARG_476 | NH2 | G_ASP_474 | OD2 | 3.032 |
| 6NC3 | G_ARG_480 | NH1 | G_ASP_477 | OD1 | 2.738 |
| 6NC3 | G_ARG_480 | NH2 | G_ASP_477 | OD1 | 3.897 |
| 6NC3 | G_LYS_487 | NZ  | G_GLU_47  | OE1 | 2.894 |
| 6NC3 | G_LYS_487 | NZ  | G_GLU_47  | OE2 | 3.821 |
| 6NC3 | G_LYS_487 | NZ  | G_GLU_91  | OE1 | 3.878 |
| 6NC3 | G_ARG_503 | NH2 | N_GLU_654 | OE1 | 3.773 |
| 6NC3 | G_ARG_503 | NH2 | N_GLU_654 | OE2 | 3.160 |
| 6NC3 | N_ARG_542 | NH2 | M_GLU_647 | OE1 | 2.825 |
| 6NC3 | N_ARG_542 | NH2 | M_ASP_648 | OD1 | 2.949 |
| 6NC3 | N_ARG_542 | NH2 | M_ASP_648 | OD2 | 3.670 |
| 6NC3 | N_LYS_574 | NZ  | G_ASP_107 | OD1 | 2.581 |
| 6NC3 | N_LYS_574 | NZ  | G_ASP_107 | OD2 | 2.710 |
| 6NC3 | N_ARG_579 | NH1 | M_GLU_584 | OE2 | 3.194 |
| 6NC3 | N_ARG_585 | NH2 | G_GLU_492 | OE1 | 2.939 |
| 6NC3 | N_ARG_585 | NH2 | G_GLU_492 | OE2 | 3.498 |
| 6NC3 | N_LYS_617 | NZ  | N_GLU_634 | OE1 | 2.815 |
| 6NC3 | N_LYS_617 | NZ  | N_GLU_634 | OE2 | 3.445 |
| 6NC3 | S_LYS_12  | NZ  | S_GLU_10  | OE1 | 3.785 |
| 6NC3 | S_HIS_35  | NE2 | S_ASP_95  | OD2 | 3.813 |
| 6NC3 | S_ARG_38  | NH1 | S_ASP_86  | OD1 | 2.638 |
| 6NC3 | S_ARG_38  | NH2 | S_GLU_46  | OE1 | 2.856 |
| 6NC3 | S_ARG_38  | NH2 | S_GLU_46  | OE2 | 3.919 |
| 6NC3 | S_ARG_38  | NH2 | S_ASP_86  | OD1 | 3.489 |
| 6NC3 | S_LYS_62  | NZ  | S_GLU_46  | OE2 | 2.819 |
| 6NC3 | S_ARG_66  | NH2 | S_ASP_86  | OD1 | 3.294 |
| 6NC3 | S_ARG_66  | NH2 | S_ASP_86  | OD2 | 3.014 |
| 6NC3 | S_ARG_94  | NH1 | S_GLU_2   | OE1 | 2.959 |
| 6NC3 | S_ARG_94  | NH2 | S_GLU_2   | OE1 | 3.018 |



|      |           |     |           |     |       |
|------|-----------|-----|-----------|-----|-------|
| 6NC3 | S_LYS_96  | NZ  | S_ASP_101 | OD1 | 3.648 |
| 6NC3 | S_LYS_96  | NZ  | S_ASP_101 | OD2 | 2.449 |
| 6NC3 | X_ARG_30  | NH2 | X_GLU_32  | OE2 | 3.022 |
| 6NC3 | X_ARG_61  | NH1 | X_GLU_81  | OE2 | 3.991 |
| 6NC3 | X_ARG_61  | NH2 | X_GLU_81  | OE2 | 3.260 |
| 6NC3 | X_ARG_61  | NH2 | X_ASP_82  | OD1 | 2.918 |
| 6NC3 | X_ARG_61  | NH2 | X_ASP_82  | OD2 | 3.280 |
| 6NC3 | X_LYS_103 | NZ  | X_GLU_105 | OE2 | 3.920 |
| 6NC3 | X_LYS_107 | NZ  | X_ASP_17  | OD2 | 2.904 |

Table 875: 6NC3-specific salt bridging networks analysis. In this table, a PDB file is specified with a four-letter PDB ID, except that the names of the PDB files corresponding to the single NMR structural model split from the NMR ensemble is specified with a four-letter PDB ID in addition to a hyphen followed by the single NMR structural model numeric ID, the residue naming scheme is **Chain ID\_residue name\_residue number**,  $\angle ADH$  represents the angle formed by acceptor (A), donor (D) and hydrogen (H) ( $\angle ADH$ ).

| PDB ID | Residue A | Atom A | Residue B | Atom B | Distance (Å) |
|--------|-----------|--------|-----------|--------|--------------|
| 6NEX   | L_ARG_    | NH2    | L_GLU_    | OE2    | 2.737        |
| 6NEX   | L_ARG_    | NH2    | L_ASP_    | OD1    | 2.840        |
| 6NEX   | L_ARG_    | NH2    | L_ASP_    | OD2    | 3.473        |
| 6NEX   | L_LYS_    | NZ     | L_GLU_    | OE2    | 3.642        |
| 6NEX   | H_ARG_    | NH1    | H_ASP_    | OD1    | 2.811        |
| 6NEX   | H_ARG_    | NH2    | H_GLU_    | OE1    | 2.941        |
| 6NEX   | H_ARG_    | NH2    | H_GLU_    | OE2    | 3.733        |
| 6NEX   | H_ARG_    | NH1    | H_ASP_    | OD1    | 3.160        |
| 6NEX   | H_ARG_    | NH1    | H_ASP_    | OD2    | 3.548        |
| 6NEX   | H_ARG_    | NH2    | H_ASP_    | OD1    | 3.762        |
| 6NEX   | H_ARG_    | NH2    | H_ASP_    | OD2    | 2.737        |
| 6NEX   | H_LYS_    | NZ     | H_ASP_    | OD1    | 3.770        |
| 6NEX   | H_ARG_210 | NH1    | H_GLU_212 | OE2    | 3.708        |
| 6NEX   | H_ARG_210 | NH2    | H_GLU_212 | OE1    | 3.957        |
| 6NEX   | H_ARG_210 | NH2    | H_GLU_212 | OE2    | 2.338        |
| 6NEX   | A_ARG_    | NH2    | A_GLU_    | OE2    | 2.672        |
| 6NEX   | A_ARG_    | NH2    | A_ASP_    | OD1    | 2.826        |
| 6NEX   | A_ARG_    | NH2    | A_ASP_    | OD2    | 3.589        |
| 6NEX   | A_LYS_    | NZ     | A_GLU_    | OE1    | 3.636        |
| 6NEX   | A_LYS_    | NZ     | A_GLU_    | OE2    | 3.384        |
| 6NEX   | B_ARG_    | NH1    | B_ASP_    | OD1    | 2.934        |
| 6NEX   | B_ARG_    | NH2    | B_GLU_    | OE2    | 2.957        |
| 6NEX   | B_ARG_    | NH2    | B_ASP_    | OD1    | 3.823        |
| 6NEX   | B_LYS_    | NZ     | B_ASP_    | OD1    | 3.270        |
| 6NEX   | B_ARG_    | NH1    | B_ASP_    | OD1    | 3.264        |
| 6NEX   | B_ARG_    | NH1    | B_ASP_    | OD2    | 3.612        |
| 6NEX   | B_ARG_    | NH2    | B_ASP_    | OD2    | 3.065        |
| 6NEX   | B_ARG_    | NH1    | B_GLU_    | OE2    | 2.598        |
| 6NEX   | B_LYS_    | NZ     | B_ASP_    | OD1    | 3.942        |
| 6NEX   | B_LYS_209 | NZ     | A_GLU_126 | OE2    | 3.298        |

Table 876: 6NEX-specific salt bridging networks analysis. In this table, a PDB file is specified with a four-letter PDB ID, except that the names of the PDB files corresponding to the single NMR structural model split from the NMR ensemble is specified with a four-letter PDB ID in addition to a hyphen followed by the single NMR structural model numeric ID, the residue naming scheme is **Chain ID\_residue name\_residue number**,  $\angle ADH$  represents the angle formed by acceptor (A), donor (D) and hydrogen (H) ( $\angle ADH$ ).

| PDB ID | Residue A | Atom A | Residue B | Atom B | Distance (Å) |
|--------|-----------|--------|-----------|--------|--------------|
| 6NF2   | A.LYS_46  | NZ     | A.GLU_492 | OE2    | 2.493        |
| 6NF2   | A.LYS_46  | NZ     | I.ASP_632 | OD2    | 2.876        |
| 6NF2   | A.HIS_216 | NE2    | A.ASP_57  | OD1    | 2.861        |
| 6NF2   | A.HIS_216 | NE2    | A.ASP_57  | OD2    | 2.990        |
| 6NF2   | A.LYS_227 | NZ     | A.GLU_83  | OE1    | 2.516        |
| 6NF2   | A.LYS_227 | NZ     | A.GLU_83  | OE2    | 3.523        |
| 6NF2   | A.LYS_282 | NZ     | A.GLU_275 | OE1    | 3.484        |
| 6NF2   | A.LYS_282 | NZ     | A.GLU_275 | OE2    | 3.921        |
| 6NF2   | A.ARG_419 | NH1    | A.GLU_153 | OE1    | 3.359        |
| 6NF2   | A.ARG_419 | NH2    | A.GLU_153 | OE1    | 3.820        |
| 6NF2   | A.LYS_421 | NZ     | A.GLU_370 | OE2    | 3.954        |
| 6NF2   | A.ARG_429 | NH1    | A.ASP_113 | OD1    | 2.605        |
| 6NF2   | A.ARG_429 | NH1    | A.ASP_113 | OD2    | 3.059        |
| 6NF2   | A.ARG_429 | NH2    | A.ASP_113 | OD1    | 3.615        |
| 6NF2   | A.ARG_456 | NH1    | A.GLU_466 | OE1    | 3.082        |
| 6NF2   | A.ARG_456 | NH1    | A.GLU_466 | OE2    | 3.859        |
| 6NF2   | A.ARG_476 | NH2    | A.ASP_474 | OD1    | 3.180        |
| 6NF2   | A.LYS_487 | NZ     | A.ASP_47  | OD1    | 2.705        |
| 6NF2   | A.LYS_487 | NZ     | A.ASP_47  | OD2    | 3.456        |
| 6NF2   | A.LYS_487 | NZ     | A.GLU_91  | OE1    | 3.205        |
| 6NF2   | A.LYS_490 | NZ     | A.GLU_492 | OE1    | 3.081        |
| 6NF2   | A.ARG_504 | NH2    | R.GLU_657 | OE2    | 3.927        |
| 6NF2   | B.ARG_579 | NH1    | I.GLU_584 | OE2    | 3.681        |
| 6NF2   | B.LYS_601 | NZ     | I.GLU_654 | OE1    | 2.983        |
| 6NF2   | B.LYS_601 | NZ     | I.GLU_654 | OE2    | 3.256        |
| 6NF2   | B.ARG_617 | NH1    | B.GLU_634 | OE1    | 3.898        |
| 6NF2   | B.ARG_617 | NH1    | B.GLU_634 | OE2    | 3.558        |
| 6NF2   | B.ARG_617 | NH2    | B.GLU_634 | OE1    | 2.451        |
| 6NF2   | B.ARG_617 | NH2    | B.GLU_634 | OE2    | 3.092        |
| 6NF2   | C.LYS_19  | NZ     | C.GLU_81  | OE2    | 3.460        |
| 6NF2   | C.ARG_38  | NH1    | C.GLU_46  | OE1    | 2.376        |
| 6NF2   | C.ARG_38  | NH2    | C.ASP_86  | OD1    | 2.835        |
| 6NF2   | C.ARG_38  | NH2    | C.ASP_86  | OD2    | 3.913        |
| 6NF2   | C.ARG_61  | NH1    | G.GLU_466 | OE1    | 3.610        |
| 6NF2   | C.ARG_61  | NH2    | G.GLU_466 | OE2    | 3.748        |
| 6NF2   | C.ARG_66  | NH2    | C.ASP_86  | OD2    | 2.541        |
| 6NF2   | C.ARG_71  | NH2    | G.ASP_368 | OD1    | 3.504        |
| 6NF2   | D.ARG_38  | NH1    | D.ASP_81  | OD2    | 3.918        |
| 6NF2   | D.ARG_52  | NH1    | D.ASP_49  | OD2    | 2.507        |
| 6NF2   | D.ARG_60  | NH1    | D.ASP_78  | OD1    | 3.451        |
| 6NF2   | D.ARG_60  | NH1    | D.ASP_78  | OD2    | 2.551        |
| 6NF2   | D.ARG_60  | NH1    | D.ASP_81  | OD1    | 3.827        |
| 6NF2   | D.ARG_60  | NH2    | D.ASP_78  | OD2    | 3.741        |
| 6NF2   | D.ARG_60  | NH2    | D.ASP_81  | OD1    | 2.673        |
| 6NF2   | E.ARG_30  | NH1    | E.ASP_53  | OD1    | 3.557        |
| 6NF2   | E.ARG_30  | NH1    | E.ASP_53  | OD2    | 3.208        |
| 6NF2   | E.ARG_30  | NH2    | E.ASP_53  | OD2    | 3.963        |
| 6NF2   | E.ARG_38  | NH2    | E.GLU_46  | OE1    | 2.920        |
| 6NF2   | F.ARG_31  | NH2    | F.ASP_92  | OD2    | 3.578        |
| 6NF2   | F.ARG_61  | NH2    | F.GLU_79  | OE1    | 2.683        |
| 6NF2   | F.ARG_61  | NH2    | F.GLU_79  | OE2    | 3.530        |
| 6NF2   | F.ARG_61  | NH2    | F.ASP_82  | OD1    | 3.710        |
| 6NF2   | F.ARG_95  | NH1    | F.GLU_25  | OE1    | 2.962        |
| 6NF2   | F.ARG_95  | NH1    | F.ASP_92  | OD2    | 3.472        |
| 6NF2   | G.LYS_46  | NZ     | B.ASP_632 | OD2    | 2.943        |
| 6NF2   | G.LYS_46  | NZ     | G.GLU_492 | OE2    | 2.493        |
| 6NF2   | G.HIS_216 | NE2    | G.ASP_57  | OD1    | 2.861        |

|      |            |     |           |     |       |
|------|------------|-----|-----------|-----|-------|
| 6NF2 | G_HIS_216  | NE2 | G_ASP_57  | OD2 | 2.990 |
| 6NF2 | G_LYS_227  | NZ  | G_GLU_83  | OE1 | 2.516 |
| 6NF2 | G_LYS_227  | NZ  | G_GLU_83  | OE2 | 3.523 |
| 6NF2 | G_LYS_282  | NZ  | G_GLU_275 | OE1 | 3.483 |
| 6NF2 | G_LYS_282  | NZ  | G_GLU_275 | OE2 | 3.920 |
| 6NF2 | G_ARG_419  | NH1 | G_GLU_153 | OE1 | 3.359 |
| 6NF2 | G_ARG_419  | NH2 | G_GLU_153 | OE1 | 3.821 |
| 6NF2 | G_LYS_421  | NZ  | G_GLU_370 | OE2 | 3.954 |
| 6NF2 | G_ARG_429  | NH1 | G_ASP_113 | OD1 | 2.606 |
| 6NF2 | G_ARG_429  | NH1 | G_ASP_113 | OD2 | 3.059 |
| 6NF2 | G_ARG_429  | NH2 | G_ASP_113 | OD1 | 3.615 |
| 6NF2 | G_ARG_456  | NH1 | G_GLU_466 | OE1 | 3.082 |
| 6NF2 | G_ARG_456  | NH1 | G_GLU_466 | OE2 | 3.857 |
| 6NF2 | G_ARG_476  | NH2 | G_ASP_474 | OD1 | 3.180 |
| 6NF2 | G_LYS_487  | NZ  | G_ASP_47  | OD1 | 2.706 |
| 6NF2 | G_LYS_487  | NZ  | G_ASP_47  | OD2 | 3.456 |
| 6NF2 | G_LYS_487  | NZ  | G_GLU_91  | OE1 | 3.206 |
| 6NF2 | G_LYS_490  | NZ  | G_GLU_492 | OE1 | 3.082 |
| 6NF2 | G_ARG_504  | NH2 | L_GLU_657 | OE2 | 3.805 |
| 6NF2 | H_LYS_13   | NZ  | H_GLU_16  | OE1 | 3.322 |
| 6NF2 | H_ARG_66   | NH1 | H_ASP_86  | OD1 | 2.849 |
| 6NF2 | H_ARG_66   | NH1 | H_ASP_86  | OD2 | 2.841 |
| 6NF2 | H_ARG_100F | NH1 | L_ASP_50  | OD2 | 2.403 |
| 6NF2 | H_ARG_100F | NH2 | L_ASP_50  | OD2 | 3.926 |
| 6NF2 | I_ARG_579  | NH1 | R_GLU_584 | OE2 | 3.624 |
| 6NF2 | I_LYS_601  | NZ  | R_GLU_654 | OE1 | 3.068 |
| 6NF2 | I_LYS_601  | NZ  | R_GLU_654 | OE2 | 3.333 |
| 6NF2 | I_ARG_617  | NH1 | L_GLU_634 | OE1 | 3.897 |
| 6NF2 | I_ARG_617  | NH1 | L_GLU_634 | OE2 | 3.558 |
| 6NF2 | I_ARG_617  | NH2 | L_GLU_634 | OE1 | 2.451 |
| 6NF2 | I_ARG_617  | NH2 | L_GLU_634 | OE2 | 3.093 |
| 6NF2 | J_ARG_30   | NH1 | J_ASP_53  | OD1 | 3.558 |
| 6NF2 | J_ARG_30   | NH1 | J_ASP_53  | OD2 | 3.207 |
| 6NF2 | J_ARG_30   | NH2 | J_ASP_53  | OD2 | 3.963 |
| 6NF2 | J_ARG_38   | NH2 | J_GLU_46  | OE1 | 2.921 |
| 6NF2 | K_ARG_31   | NH2 | K_ASP_92  | OD2 | 3.577 |
| 6NF2 | K_ARG_61   | NH2 | K_GLU_79  | OE1 | 2.684 |
| 6NF2 | K_ARG_61   | NH2 | K_GLU_79  | OE2 | 3.531 |
| 6NF2 | K_ARG_61   | NH2 | K_ASP_82  | OD1 | 3.710 |
| 6NF2 | K_ARG_95   | NH1 | K_GLU_25  | OE1 | 2.961 |
| 6NF2 | K_ARG_95   | NH1 | K_ASP_92  | OD2 | 3.471 |
| 6NF2 | L_ARG_24   | NH1 | L_ASP_70  | OD2 | 2.515 |
| 6NF2 | L_ARG_54   | NH1 | L_ASP_60  | OD1 | 3.948 |
| 6NF2 | L_ARG_54   | NH2 | L_ASP_60  | OD1 | 2.933 |
| 6NF2 | L_ARG_61   | NH1 | L_GLU_79  | OE1 | 3.691 |
| 6NF2 | L_ARG_61   | NH1 | L_GLU_79  | OE2 | 3.057 |
| 6NF2 | L_ARG_61   | NH2 | L_GLU_79  | OE1 | 3.745 |
| 6NF2 | M_ARG_38   | NH1 | M_ASP_81  | OD2 | 3.919 |
| 6NF2 | M_ARG_52   | NH1 | M_ASP_49  | OD2 | 2.507 |
| 6NF2 | M_ARG_60   | NH1 | M_ASP_78  | OD1 | 3.451 |
| 6NF2 | M_ARG_60   | NH1 | M_ASP_78  | OD2 | 2.551 |
| 6NF2 | M_ARG_60   | NH1 | M_ASP_81  | OD1 | 3.826 |
| 6NF2 | M_ARG_60   | NH2 | M_ASP_78  | OD2 | 3.741 |
| 6NF2 | M_ARG_60   | NH2 | M_ASP_81  | OD1 | 2.674 |
| 6NF2 | N_LYS_19   | NZ  | N_GLU_81  | OE2 | 3.461 |
| 6NF2 | N_ARG_38   | NH1 | N_GLU_46  | OE1 | 2.376 |
| 6NF2 | N_ARG_38   | NH2 | N_ASP_86  | OD1 | 2.835 |
| 6NF2 | N_ARG_38   | NH2 | N_ASP_86  | OD2 | 3.913 |

|      |            |     |           |     |       |
|------|------------|-----|-----------|-----|-------|
| 6NF2 | N_ARG.61   | NH1 | A_GLU_466 | OE1 | 3.592 |
| 6NF2 | N_ARG.61   | NH2 | A_GLU_466 | OE2 | 3.737 |
| 6NF2 | N_ARG.66   | NH2 | N_ASP_86  | OD2 | 2.541 |
| 6NF2 | N_ARG.71   | NH2 | A_ASP_368 | OD1 | 3.532 |
| 6NF2 | O_LYS_13   | NZ  | O_GLU_16  | OE1 | 3.322 |
| 6NF2 | O_ARG.66   | NH1 | O_ASP_86  | OD1 | 2.849 |
| 6NF2 | O_ARG.66   | NH1 | O_ASP_86  | OD2 | 2.841 |
| 6NF2 | O_ARG.100F | NH1 | P_ASP_50  | OD2 | 2.825 |
| 6NF2 | P_ARG.24   | NH1 | P_ASP_70  | OD2 | 2.514 |
| 6NF2 | P_ARG.54   | NH1 | P_ASP_60  | OD1 | 3.948 |
| 6NF2 | P_ARG.54   | NH2 | P_ASP_60  | OD1 | 2.932 |
| 6NF2 | P_ARG.61   | NH1 | P_GLU_79  | OE1 | 3.692 |
| 6NF2 | P_ARG.61   | NH1 | P_GLU_79  | OE2 | 3.058 |
| 6NF2 | P_ARG.61   | NH2 | P_GLU_79  | OE1 | 3.745 |
| 6NF2 | Q_LYS_46   | NZ  | Q_GLU_492 | OE2 | 2.491 |
| 6NF2 | Q_LYS_46   | NZ  | R_ASP_632 | OD2 | 2.912 |
| 6NF2 | Q_HIS_216  | NE2 | Q_ASP_57  | OD1 | 2.861 |
| 6NF2 | Q_HIS_216  | NE2 | Q_ASP_57  | OD2 | 2.990 |
| 6NF2 | Q_LYS_227  | NZ  | Q_GLU_83  | OE1 | 2.514 |
| 6NF2 | Q_LYS_227  | NZ  | Q_GLU_83  | OE2 | 3.524 |
| 6NF2 | Q_LYS_282  | NZ  | Q_GLU_275 | OE1 | 3.483 |
| 6NF2 | Q_LYS_282  | NZ  | Q_GLU_275 | OE2 | 3.921 |
| 6NF2 | Q_ARG.419  | NH1 | Q_GLU_153 | OE1 | 3.360 |
| 6NF2 | Q_ARG.419  | NH2 | Q_GLU_153 | OE1 | 3.820 |
| 6NF2 | Q_LYS_421  | NZ  | Q_GLU_370 | OE2 | 3.955 |
| 6NF2 | Q_ARG.429  | NH1 | Q_ASP_113 | OD1 | 2.604 |
| 6NF2 | Q_ARG.429  | NH1 | Q_ASP_113 | OD2 | 3.059 |
| 6NF2 | Q_ARG.429  | NH2 | Q_ASP_113 | OD1 | 3.616 |
| 6NF2 | Q_ARG.456  | NH1 | Q_GLU_466 | OE1 | 3.084 |
| 6NF2 | Q_ARG.456  | NH1 | Q_GLU_466 | OE2 | 3.860 |
| 6NF2 | Q_ARG.476  | NH2 | Q_ASP_474 | OD1 | 3.179 |
| 6NF2 | Q_LYS_487  | NZ  | Q_ASP_47  | OD1 | 2.706 |
| 6NF2 | Q_LYS_487  | NZ  | Q_ASP_47  | OD2 | 3.457 |
| 6NF2 | Q_LYS_487  | NZ  | Q_GLU_91  | OE1 | 3.205 |
| 6NF2 | Q_LYS_490  | NZ  | Q_GLU_492 | OE1 | 3.080 |
| 6NF2 | Q_ARG.504  | NH2 | B_GLU_657 | OE2 | 3.920 |
| 6NF2 | R_ARG.579  | NH1 | B_GLU_584 | OE2 | 3.657 |
| 6NF2 | R_LYS_601  | NZ  | B_GLU_654 | OE1 | 3.130 |
| 6NF2 | R_LYS_601  | NZ  | B_GLU_654 | OE2 | 3.363 |
| 6NF2 | R_ARG.617  | NH1 | R_GLU_634 | OE1 | 3.896 |
| 6NF2 | R_ARG.617  | NH1 | R_GLU_634 | OE2 | 3.558 |
| 6NF2 | R_ARG.617  | NH2 | R_GLU_634 | OE1 | 2.450 |
| 6NF2 | R_ARG.617  | NH2 | R_GLU_634 | OE2 | 3.092 |
| 6NF2 | S_ARG.30   | NH1 | S_ASP_53  | OD1 | 3.557 |
| 6NF2 | S_ARG.30   | NH1 | S_ASP_53  | OD2 | 3.207 |
| 6NF2 | S_ARG.30   | NH2 | S_ASP_53  | OD2 | 3.964 |
| 6NF2 | S_ARG.38   | NH2 | S_GLU_46  | OE1 | 2.919 |
| 6NF2 | T_ARG.31   | NH2 | T_ASP_92  | OD2 | 3.577 |
| 6NF2 | T_ARG.61   | NH2 | T_GLU_79  | OE1 | 2.683 |
| 6NF2 | T_ARG.61   | NH2 | T_GLU_79  | OE2 | 3.530 |
| 6NF2 | T_ARG.61   | NH2 | T_ASP_82  | OD1 | 3.710 |
| 6NF2 | T_ARG.95   | NH1 | T_GLU_25  | OE1 | 2.962 |
| 6NF2 | T_ARG.95   | NH1 | T_ASP_92  | OD2 | 3.472 |
| 6NF2 | U_ARG.38   | NH1 | U_ASP_81  | OD2 | 3.919 |
| 6NF2 | U_ARG.52   | NH1 | U_ASP_49  | OD2 | 2.509 |
| 6NF2 | U_ARG.60   | NH1 | U_ASP_78  | OD1 | 3.451 |
| 6NF2 | U_ARG.60   | NH1 | U_ASP_78  | OD2 | 2.550 |
| 6NF2 | U_ARG.60   | NH1 | U_ASP_81  | OD1 | 3.827 |

|      |            |     |           |     |       |
|------|------------|-----|-----------|-----|-------|
| 6NF2 | U_ARG_60   | NH2 | U_ASP_78  | OD2 | 3.741 |
| 6NF2 | U_ARG_60   | NH2 | U_ASP_81  | OD1 | 2.673 |
| 6NF2 | V_LYS_19   | NZ  | V_GLU_81  | OE2 | 3.461 |
| 6NF2 | V_ARG_38   | NH1 | V_GLU_46  | OE1 | 2.376 |
| 6NF2 | V_ARG_38   | NH2 | V_ASP_86  | OD1 | 2.836 |
| 6NF2 | V_ARG_38   | NH2 | V_ASP_86  | OD2 | 3.912 |
| 6NF2 | V_ARG_61   | NH1 | Q_GLU_466 | OE1 | 3.626 |
| 6NF2 | V_ARG_61   | NH2 | Q_GLU_466 | OE2 | 3.762 |
| 6NF2 | V_ARG_66   | NH2 | V_ASP_86  | OD2 | 2.542 |
| 6NF2 | V_ARG_71   | NH2 | Q_ASP_368 | OD1 | 3.511 |
| 6NF2 | W_LYS_13   | NZ  | W_GLU_16  | OE1 | 3.322 |
| 6NF2 | W_ARG_66   | NH1 | W_ASP_86  | OD1 | 2.849 |
| 6NF2 | W_ARG_66   | NH1 | W_ASP_86  | OD2 | 2.842 |
| 6NF2 | W_ARG_100F | NH1 | X_ASP_50  | OD2 | 2.242 |
| 6NF2 | W_ARG_100F | NH2 | X_ASP_50  | OD2 | 3.856 |
| 6NF2 | X_ARG_24   | NH1 | X_ASP_70  | OD2 | 2.514 |
| 6NF2 | X_ARG_54   | NH1 | X_ASP_60  | OD1 | 3.949 |
| 6NF2 | X_ARG_54   | NH2 | X_ASP_60  | OD1 | 2.932 |
| 6NF2 | X_ARG_61   | NH1 | X_GLU_79  | OE1 | 3.693 |
| 6NF2 | X_ARG_61   | NH1 | X_GLU_79  | OE2 | 3.059 |
| 6NF2 | X_ARG_61   | NH2 | X_GLU_79  | OE1 | 3.746 |

Table 877: 6NF2-specific salt bridging networks analysis. In this table, a PDB file is specified with a four-letter PDB ID, except that the names of the PDB files corresponding to the single NMR structural model split from the NMR ensemble is specified with a four-letter PDB ID in addition to a hyphen followed by the single NMR structural model numeric ID, the residue naming scheme is **Chain ID\_residue name\_residue number**,  $\angle ADH$  represents the angle formed by acceptor (A), donor (D) and hydrogen (H) ( $\angle ADH$ ).

| PDB ID | Residue A | Atom A | Residue B | Atom B | Distance (Å) |
|--------|-----------|--------|-----------|--------|--------------|
| 6NF5   | A_LYS_46  | NZ     | B_ASP_632 | OD2    | 2.410        |
| 6NF5   | A_LYS_97  | NZ     | A_GLU_275 | OE2    | 3.695        |
| 6NF5   | A_LYS_137 | NZ     | L_ASP_51  | OD2    | 2.736        |
| 6NF5   | A_LYS_168 | NZ     | A_ASP_167 | OD2    | 2.451        |
| 6NF5   | A_ARG_178 | NH2    | A_GLU_153 | OE1    | 3.939        |
| 6NF5   | A_ARG_192 | NH1    | J_GLU_164 | OE2    | 3.009        |
| 6NF5   | A_ARG_192 | NH2    | J_GLU_164 | OE2    | 3.825        |
| 6NF5   | A_LYS_229 | NZ     | A_GLU_83  | OE2    | 2.843        |
| 6NF5   | A_LYS_232 | NZ     | A_GLU_268 | OE1    | 2.483        |
| 6NF5   | A_HIS_249 | NE2    | A_GLU_482 | OE1    | 3.152        |
| 6NF5   | A_LYS_282 | NZ     | A_GLU_275 | OE1    | 3.676        |
| 6NF5   | A_LYS_421 | NZ     | A_GLU_370 | OE2    | 2.968        |
| 6NF5   | A_ARG_456 | NH1    | A_GLU_466 | OE1    | 2.887        |
| 6NF5   | A_ARG_469 | NH1    | A_ASP_457 | OD1    | 2.731        |
| 6NF5   | A_ARG_469 | NH1    | A_ASP_457 | OD2    | 2.912        |
| 6NF5   | A_ARG_476 | NH1    | A_GLU_102 | OE1    | 3.769        |
| 6NF5   | A_ARG_476 | NH1    | A_GLU_102 | OE2    | 2.949        |
| 6NF5   | A_ARG_476 | NH2    | A_ASP_474 | OD1    | 3.812        |
| 6NF5   | A_ARG_476 | NH2    | A_ASP_474 | OD2    | 2.863        |
| 6NF5   | A_ARG_480 | NH1    | A_ASP_477 | OD1    | 2.619        |
| 6NF5   | A_LYS_485 | NZ     | A_GLU_267 | OE2    | 3.474        |
| 6NF5   | A_LYS_487 | NZ     | A_ASP_47  | OD1    | 2.966        |
| 6NF5   | A_LYS_487 | NZ     | A_ASP_47  | OD2    | 2.855        |
| 6NF5   | A_LYS_487 | NZ     | A_GLU_91  | OE1    | 3.852        |
| 6NF5   | A_LYS_490 | NZ     | A_GLU_492 | OE2    | 3.881        |
| 6NF5   | B_ARG_542 | NH1    | D_GLU_647 | OE1    | 3.182        |
| 6NF5   | B_ARG_542 | NH1    | D_GLU_647 | OE2    | 3.535        |
| 6NF5   | B_ARG_542 | NH2    | D_GLU_647 | OE1    | 3.979        |
| 6NF5   | B_LYS_574 | NZ     | A_ASP_107 | OD1    | 2.887        |
| 6NF5   | B_HIS_585 | NE2    | A_GLU_492 | OE1    | 3.726        |
| 6NF5   | B_HIS_585 | NE2    | B_ASP_589 | OD1    | 3.861        |
| 6NF5   | B_HIS_585 | NE2    | B_ASP_589 | OD2    | 3.640        |
| 6NF5   | B_LYS_601 | NZ     | D_GLU_657 | OE1    | 3.026        |
| 6NF5   | B_ARG_617 | NH1    | B_GLU_634 | OE1    | 2.939        |
| 6NF5   | B_ARG_617 | NH1    | B_GLU_634 | OE2    | 3.518        |
| 6NF5   | B_ARG_617 | NH2    | B_GLU_621 | OE2    | 3.903        |
| 6NF5   | H_ARG_38  | NH1    | H_ASP_86  | OD1    | 2.711        |
| 6NF5   | H_ARG_38  | NH2    | H_GLU_46  | OE1    | 2.805        |
| 6NF5   | H_ARG_38  | NH2    | H_GLU_46  | OE2    | 3.660        |
| 6NF5   | H_ARG_38  | NH2    | H_ASP_86  | OD1    | 3.921        |
| 6NF5   | H_ARG_50  | NH1    | H_GLU_95  | OE1    | 3.017        |
| 6NF5   | H_ARG_66  | NH1    | H_ASP_86  | OD1    | 3.025        |
| 6NF5   | H_ARG_66  | NH1    | H_ASP_86  | OD2    | 3.679        |
| 6NF5   | H_ARG_66  | NH2    | H_ASP_86  | OD1    | 3.529        |
| 6NF5   | H_ARG_66  | NH2    | H_ASP_86  | OD2    | 2.747        |
| 6NF5   | L_ARG_61  | NH2    | L_ASP_82  | OD1    | 3.053        |
| 6NF5   | L_ARG_61  | NH2    | L_ASP_82  | OD2    | 3.487        |
| 6NF5   | L_LYS_103 | NZ     | L_ASP_85  | OD1    | 2.813        |
| 6NF5   | L_LYS_103 | NZ     | L_ASP_85  | OD2    | 3.823        |
| 6NF5   | K_ARG_38  | NH1    | K_ASP_86  | OD1    | 3.164        |
| 6NF5   | K_ARG_38  | NH2    | K_ASP_86  | OD1    | 2.934        |
| 6NF5   | K_ARG_53  | NH1    | B_ASP_659 | OD1    | 3.261        |
| 6NF5   | K_ARG_53  | NH1    | B_ASP_659 | OD2    | 3.240        |
| 6NF5   | K_ARG_53  | NH2    | B_ASP_659 | OD1    | 3.591        |
| 6NF5   | K_ARG_53  | NH2    | B_ASP_659 | OD2    | 2.651        |
| 6NF5   | K_ARG_66  | NH1    | K_ASP_86  | OD1    | 3.713        |
| 6NF5   | K_ARG_66  | NH1    | K_ASP_86  | OD2    | 2.791        |

|      |            |     |           |     |       |
|------|------------|-----|-----------|-----|-------|
| 6NF5 | K_ARG_66   | NH2 | K_ASP_86  | OD1 | 3.225 |
| 6NF5 | K_ARG_66   | NH2 | K_ASP_86  | OD2 | 3.737 |
| 6NF5 | K_LYS_75   | NZ  | K_ASP_72  | OD2 | 3.956 |
| 6NF5 | K_LYS_100E | NZ  | K_ASP_101 | OD1 | 3.994 |
| 6NF5 | K_LYS_100E | NZ  | K_ASP_101 | OD2 | 2.688 |
| 6NF5 | N_ARG_54   | NH2 | N_ASP_60  | OD1 | 2.562 |
| 6NF5 | N_ARG_61   | NH2 | N_ASP_82  | OD1 | 3.061 |
| 6NF5 | N_ARG_61   | NH2 | N_ASP_82  | OD2 | 3.668 |
| 6NF5 | N_ARG_103  | NH1 | N_ASP_85  | OD1 | 3.116 |
| 6NF5 | C_LYS_46   | NZ  | D_ASP_632 | OD2 | 2.410 |
| 6NF5 | C_LYS_97   | NZ  | C_GLU_275 | OE2 | 3.696 |
| 6NF5 | C_LYS_137  | NZ  | F_ASP_51  | OD2 | 2.736 |
| 6NF5 | C_LYS_168  | NZ  | C_ASP_167 | OD2 | 2.451 |
| 6NF5 | C_ARG_178  | NH2 | C_GLU_153 | OE1 | 3.938 |
| 6NF5 | C_ARG_192  | NH1 | A_GLU_164 | OE2 | 3.009 |
| 6NF5 | C_ARG_192  | NH2 | A_GLU_164 | OE2 | 3.825 |
| 6NF5 | C_LYS_229  | NZ  | C_GLU_83  | OE2 | 2.843 |
| 6NF5 | C_LYS_232  | NZ  | C_GLU_268 | OE1 | 2.483 |
| 6NF5 | C_HIS_249  | NE2 | C_GLU_482 | OE1 | 3.152 |
| 6NF5 | C_LYS_282  | NZ  | C_GLU_275 | OE1 | 3.676 |
| 6NF5 | C_LYS_421  | NZ  | C_GLU_370 | OE2 | 2.968 |
| 6NF5 | C_ARG_456  | NH1 | C_GLU_466 | OE1 | 2.887 |
| 6NF5 | C_ARG_469  | NH1 | C_ASP_457 | OD1 | 2.731 |
| 6NF5 | C_ARG_469  | NH1 | C_ASP_457 | OD2 | 2.913 |
| 6NF5 | C_ARG_476  | NH1 | C_GLU_102 | OE1 | 3.769 |
| 6NF5 | C_ARG_476  | NH1 | C_GLU_102 | OE2 | 2.949 |
| 6NF5 | C_ARG_476  | NH2 | C_ASP_474 | OD1 | 3.813 |
| 6NF5 | C_ARG_476  | NH2 | C_ASP_474 | OD2 | 2.863 |
| 6NF5 | C_ARG_480  | NH1 | C_ASP_477 | OD1 | 2.619 |
| 6NF5 | C_LYS_485  | NZ  | C_GLU_267 | OE2 | 3.473 |
| 6NF5 | C_LYS_487  | NZ  | C_ASP_47  | OD1 | 2.966 |
| 6NF5 | C_LYS_487  | NZ  | C_ASP_47  | OD2 | 2.856 |
| 6NF5 | C_LYS_487  | NZ  | C_GLU_91  | OE1 | 3.852 |
| 6NF5 | C_LYS_490  | NZ  | C_GLU_492 | OE2 | 3.881 |
| 6NF5 | D_ARG_542  | NH1 | M_GLU_647 | OE1 | 3.182 |
| 6NF5 | D_ARG_542  | NH1 | M_GLU_647 | OE2 | 3.535 |
| 6NF5 | D_ARG_542  | NH2 | M_GLU_647 | OE1 | 3.978 |
| 6NF5 | D_LYS_574  | NZ  | C_ASP_107 | OD1 | 2.887 |
| 6NF5 | D_HIS_585  | NE2 | C_GLU_492 | OE1 | 3.725 |
| 6NF5 | D_HIS_585  | NE2 | D_ASP_589 | OD1 | 3.861 |
| 6NF5 | D_HIS_585  | NE2 | D_ASP_589 | OD2 | 3.640 |
| 6NF5 | D_LYS_601  | NZ  | M_GLU_657 | OE1 | 3.026 |
| 6NF5 | D_ARG_617  | NH1 | D_GLU_634 | OE1 | 2.940 |
| 6NF5 | D_ARG_617  | NH1 | D_GLU_634 | OE2 | 3.518 |
| 6NF5 | D_ARG_617  | NH2 | D_GLU_621 | OE2 | 3.903 |
| 6NF5 | E_ARG_38   | NH1 | E_ASP_86  | OD1 | 2.712 |
| 6NF5 | E_ARG_38   | NH2 | E_GLU_46  | OE1 | 2.805 |
| 6NF5 | E_ARG_38   | NH2 | E_GLU_46  | OE2 | 3.659 |
| 6NF5 | E_ARG_38   | NH2 | E_ASP_86  | OD1 | 3.922 |
| 6NF5 | E_ARG_50   | NH1 | E_GLU_95  | OE1 | 3.018 |
| 6NF5 | E_ARG_66   | NH1 | E_ASP_86  | OD1 | 3.025 |
| 6NF5 | E_ARG_66   | NH1 | E_ASP_86  | OD2 | 3.680 |
| 6NF5 | E_ARG_66   | NH2 | E_ASP_86  | OD1 | 3.528 |
| 6NF5 | E_ARG_66   | NH2 | E_ASP_86  | OD2 | 2.747 |
| 6NF5 | F_ARG_61   | NH2 | F_ASP_82  | OD1 | 3.053 |
| 6NF5 | F_ARG_61   | NH2 | F_ASP_82  | OD2 | 3.487 |
| 6NF5 | F_LYS_103  | NZ  | F_ASP_85  | OD1 | 2.813 |
| 6NF5 | F_LYS_103  | NZ  | F_ASP_85  | OD2 | 3.823 |



|      |            |     |           |     |       |
|------|------------|-----|-----------|-----|-------|
| 6NF5 | G_ARG_38   | NH1 | G_ASP_86  | OD1 | 3.165 |
| 6NF5 | G_ARG_38   | NH2 | G_ASP_86  | OD1 | 2.935 |
| 6NF5 | G_ARG_53   | NH1 | D_ASP_659 | OD1 | 3.261 |
| 6NF5 | G_ARG_53   | NH1 | D_ASP_659 | OD2 | 3.240 |
| 6NF5 | G_ARG_53   | NH2 | D_ASP_659 | OD1 | 3.591 |
| 6NF5 | G_ARG_53   | NH2 | D_ASP_659 | OD2 | 2.651 |
| 6NF5 | G_ARG_66   | NH1 | G_ASP_86  | OD1 | 3.712 |
| 6NF5 | G_ARG_66   | NH1 | G_ASP_86  | OD2 | 2.791 |
| 6NF5 | G_ARG_66   | NH2 | G_ASP_86  | OD1 | 3.225 |
| 6NF5 | G_ARG_66   | NH2 | G_ASP_86  | OD2 | 3.738 |
| 6NF5 | G_LYS_75   | NZ  | G_ASP_72  | OD2 | 3.956 |
| 6NF5 | G_LYS_100E | NZ  | G_ASP_101 | OD1 | 3.994 |
| 6NF5 | G_LYS_100E | NZ  | G_ASP_101 | OD2 | 2.688 |
| 6NF5 | I_ARG_54   | NH2 | I_ASP_60  | OD1 | 2.564 |
| 6NF5 | I_ARG_61   | NH2 | I_ASP_82  | OD1 | 3.061 |
| 6NF5 | I_ARG_61   | NH2 | I_ASP_82  | OD2 | 3.668 |
| 6NF5 | I_ARG_103  | NH1 | I_ASP_85  | OD1 | 3.116 |
| 6NF5 | J_LYS_46   | NZ  | M_ASP_632 | OD2 | 2.410 |
| 6NF5 | J_LYS_97   | NZ  | J_GLU_275 | OE2 | 3.696 |
| 6NF5 | J_LYS_137  | NZ  | P_ASP_51  | OD2 | 2.735 |
| 6NF5 | J_LYS_168  | NZ  | J_ASP_167 | OD2 | 2.451 |
| 6NF5 | J_ARG_178  | NH2 | J_GLU_153 | OE1 | 3.938 |
| 6NF5 | J_ARG_192  | NH1 | C_GLU_164 | OE2 | 3.010 |
| 6NF5 | J_ARG_192  | NH2 | C_GLU_164 | OE2 | 3.825 |
| 6NF5 | J_LYS_229  | NZ  | J_GLU_83  | OE2 | 2.843 |
| 6NF5 | J_LYS_232  | NZ  | J_GLU_268 | OE1 | 2.482 |
| 6NF5 | J_HIS_249  | NE2 | J_GLU_482 | OE1 | 3.151 |
| 6NF5 | J_LYS_282  | NZ  | J_GLU_275 | OE1 | 3.676 |
| 6NF5 | J_LYS_421  | NZ  | J_GLU_370 | OE2 | 2.968 |
| 6NF5 | J_ARG_456  | NH1 | J_GLU_466 | OE1 | 2.887 |
| 6NF5 | J_ARG_469  | NH1 | J_ASP_457 | OD1 | 2.730 |
| 6NF5 | J_ARG_469  | NH1 | J_ASP_457 | OD2 | 2.913 |
| 6NF5 | J_ARG_476  | NH1 | J_GLU_102 | OE1 | 3.770 |
| 6NF5 | J_ARG_476  | NH1 | J_GLU_102 | OE2 | 2.949 |
| 6NF5 | J_ARG_476  | NH2 | J_ASP_474 | OD1 | 3.812 |
| 6NF5 | J_ARG_476  | NH2 | J_ASP_474 | OD2 | 2.862 |
| 6NF5 | J_ARG_480  | NH1 | J_ASP_477 | OD1 | 2.619 |
| 6NF5 | J_LYS_485  | NZ  | J_GLU_267 | OE2 | 3.474 |
| 6NF5 | J_LYS_487  | NZ  | J_ASP_47  | OD1 | 2.966 |
| 6NF5 | J_LYS_487  | NZ  | J_ASP_47  | OD2 | 2.856 |
| 6NF5 | J_LYS_487  | NZ  | J_GLU_91  | OE1 | 3.851 |
| 6NF5 | J_LYS_490  | NZ  | J_GLU_492 | OE2 | 3.881 |
| 6NF5 | M_ARG_542  | NH1 | B_GLU_647 | OE1 | 3.182 |
| 6NF5 | M_ARG_542  | NH1 | B_GLU_647 | OE2 | 3.534 |
| 6NF5 | M_ARG_542  | NH2 | B_GLU_647 | OE1 | 3.979 |
| 6NF5 | M_LYS_574  | NZ  | J_ASP_107 | OD1 | 2.887 |
| 6NF5 | M_HIS_585  | NE2 | J_GLU_492 | OE1 | 3.726 |
| 6NF5 | M_HIS_585  | NE2 | M_ASP_589 | OD1 | 3.860 |
| 6NF5 | M_HIS_585  | NE2 | M_ASP_589 | OD2 | 3.640 |
| 6NF5 | M_LYS_601  | NZ  | B_GLU_657 | OE1 | 3.027 |
| 6NF5 | M_ARG_617  | NH1 | M_GLU_634 | OE1 | 2.940 |
| 6NF5 | M_ARG_617  | NH1 | M_GLU_634 | OE2 | 3.518 |
| 6NF5 | M_ARG_617  | NH2 | M_GLU_621 | OE2 | 3.902 |
| 6NF5 | O_ARG_38   | NH1 | O_ASP_86  | OD1 | 2.712 |
| 6NF5 | O_ARG_38   | NH2 | O_GLU_46  | OE1 | 2.805 |
| 6NF5 | O_ARG_38   | NH2 | O_GLU_46  | OE2 | 3.659 |
| 6NF5 | O_ARG_38   | NH2 | O_ASP_86  | OD1 | 3.922 |
| 6NF5 | O_ARG_50   | NH1 | O_GLU_95  | OE1 | 3.017 |

|      |            |     |           |     |       |
|------|------------|-----|-----------|-----|-------|
| 6NF5 | O_ARG_66   | NH1 | O_ASP_86  | OD1 | 3.025 |
| 6NF5 | O_ARG_66   | NH1 | O_ASP_86  | OD2 | 3.680 |
| 6NF5 | O_ARG_66   | NH2 | O_ASP_86  | OD1 | 3.529 |
| 6NF5 | O_ARG_66   | NH2 | O_ASP_86  | OD2 | 2.748 |
| 6NF5 | P_ARG_61   | NH2 | P_ASP_82  | OD1 | 3.053 |
| 6NF5 | P_ARG_61   | NH2 | P_ASP_82  | OD2 | 3.487 |
| 6NF5 | P_LYS_103  | NZ  | P_ASP_85  | OD1 | 2.813 |
| 6NF5 | P_LYS_103  | NZ  | P_ASP_85  | OD2 | 3.823 |
| 6NF5 | Q_ARG_38   | NH1 | Q_ASP_86  | OD1 | 3.164 |
| 6NF5 | Q_ARG_38   | NH2 | Q_ASP_86  | OD1 | 2.933 |
| 6NF5 | Q_ARG_53   | NH1 | M_ASP_659 | OD1 | 3.262 |
| 6NF5 | Q_ARG_53   | NH1 | M_ASP_659 | OD2 | 3.240 |
| 6NF5 | Q_ARG_53   | NH2 | M_ASP_659 | OD1 | 3.591 |
| 6NF5 | Q_ARG_53   | NH2 | M_ASP_659 | OD2 | 2.650 |
| 6NF5 | Q_ARG_66   | NH1 | Q_ASP_86  | OD1 | 3.713 |
| 6NF5 | Q_ARG_66   | NH1 | Q_ASP_86  | OD2 | 2.791 |
| 6NF5 | Q_ARG_66   | NH2 | Q_ASP_86  | OD1 | 3.225 |
| 6NF5 | Q_ARG_66   | NH2 | Q_ASP_86  | OD2 | 3.737 |
| 6NF5 | Q_LYS_75   | NZ  | Q_ASP_72  | OD2 | 3.956 |
| 6NF5 | Q_LYS_100E | NZ  | Q_ASP_101 | OD1 | 3.994 |
| 6NF5 | Q_LYS_100E | NZ  | Q_ASP_101 | OD2 | 2.688 |
| 6NF5 | R_ARG_54   | NH2 | R_ASP_60  | OD1 | 2.562 |
| 6NF5 | R_ARG_61   | NH2 | R_ASP_82  | OD1 | 3.061 |
| 6NF5 | R_ARG_61   | NH2 | R_ASP_82  | OD2 | 3.667 |
| 6NF5 | R_ARG_103  | NH1 | R_ASP_85  | OD1 | 3.116 |

Table 878: 6NF5-specific salt bridging networks analysis. In this table, a PDB file is specified with a four-letter PDB ID, except that the names of the PDB files corresponding to the single NMR structural model split from the NMR ensemble is specified with a four-letter PDB ID in addition to a hyphen followed by the single NMR structural model numeric ID, the residue naming scheme is **Chain ID\_residue name\_residue number**,  $\angle ADH$  represents the angle formed by acceptor (A), donor (D) and hydrogen (H) ( $\angle ADH$ ).

| PDB ID | Residue A  | Atom A | Residue B | Atom B | Distance (Å) |
|--------|------------|--------|-----------|--------|--------------|
| 6NFC   | C_ARG_38   | NH1    | C_ASP_86  | OD1    | 3.197        |
| 6NFC   | C_ARG_38   | NH2    | C_ASP_86  | OD1    | 2.953        |
| 6NFC   | C_LYS_43   | NZ     | C_GLU_46  | OE1    | 2.792        |
| 6NFC   | C_LYS_43   | NZ     | C_GLU_46  | OE2    | 3.534        |
| 6NFC   | C_ARG_53   | NH1    | L_ASP_659 | OD1    | 3.890        |
| 6NFC   | C_ARG_53   | NH1    | L_ASP_659 | OD2    | 2.842        |
| 6NFC   | C_ARG_53   | NH2    | L_ASP_659 | OD2    | 2.675        |
| 6NFC   | C_LYS_64   | NZ     | C_ASP_61  | OD1    | 2.498        |
| 6NFC   | C_ARG_66   | NH1    | C_ASP_86  | OD1    | 3.737        |
| 6NFC   | C_ARG_66   | NH1    | C_ASP_86  | OD2    | 2.795        |
| 6NFC   | C_ARG_66   | NH2    | C_ASP_86  | OD1    | 3.194        |
| 6NFC   | C_ARG_66   | NH2    | C_ASP_86  | OD2    | 3.686        |
| 6NFC   | C_LYS_100E | NZ     | C_ASP_101 | OD2    | 2.741        |
| 6NFC   | D_ARG_54   | NH1    | D_ASP_60  | OD1    | 3.484        |
| 6NFC   | D_ARG_61   | NH1    | D_ASP_82  | OD1    | 3.021        |
| 6NFC   | D_ARG_61   | NH1    | D_ASP_82  | OD2    | 3.736        |
| 6NFC   | D_ARG_103  | NH2    | D_ASP_85  | OD1    | 3.716        |
| 6NFC   | D_ARG_103  | NH2    | D_ASP_85  | OD2    | 3.091        |
| 6NFC   | A_LYS_46   | NZ     | B_ASP_632 | OD1    | 3.913        |
| 6NFC   | A_LYS_46   | NZ     | B_ASP_632 | OD2    | 2.455        |
| 6NFC   | A_LYS_97   | NZ     | A_GLU_275 | OE2    | 3.627        |
| 6NFC   | A_LYS_137  | NZ     | L_ASP_51  | OD2    | 2.690        |
| 6NFC   | A_ARG_178  | NH2    | A_GLU_153 | OE1    | 3.848        |
| 6NFC   | A_ARG_178  | NH2    | A_GLU_153 | OE2    | 3.063        |
| 6NFC   | A_LYS_227  | NZ     | A_GLU_83  | OE1    | 2.893        |
| 6NFC   | A_LYS_229  | NZ     | A_GLU_83  | OE2    | 2.829        |
| 6NFC   | A_LYS_231  | NZ     | A_GLU_268 | OE2    | 3.327        |
| 6NFC   | A_LYS_232  | NZ     | A_GLU_268 | OE1    | 3.542        |
| 6NFC   | A_LYS_232  | NZ     | A_GLU_269 | OE2    | 3.983        |
| 6NFC   | A_LYS_282  | NZ     | A_GLU_275 | OE1    | 3.354        |
| 6NFC   | A_ARG_298  | NH2    | A_GLU_381 | OE1    | 3.053        |
| 6NFC   | A_ARG_308  | NH1    | A_GLU_164 | OE2    | 2.885        |
| 6NFC   | A_LYS_335  | NZ     | A_ASP_412 | OD2    | 2.571        |
| 6NFC   | A_LYS_351  | NZ     | A_GLU_269 | OE1    | 3.918        |
| 6NFC   | A_LYS_351  | NZ     | A_GLU_269 | OE2    | 3.924        |
| 6NFC   | A_ARG_429  | NH2    | A_ASP_113 | OD2    | 3.338        |
| 6NFC   | A_ARG_456  | NH2    | A_GLU_466 | OE1    | 2.989        |
| 6NFC   | A_ARG_456  | NH2    | A_GLU_466 | OE2    | 3.574        |
| 6NFC   | A_ARG_469  | NH2    | A_ASP_457 | OD1    | 3.689        |
| 6NFC   | A_ARG_469  | NH2    | A_ASP_457 | OD2    | 3.083        |
| 6NFC   | A_ARG_476  | NH1    | A_ASP_474 | OD1    | 3.258        |
| 6NFC   | A_ARG_476  | NH1    | A_ASP_474 | OD2    | 3.799        |
| 6NFC   | A_ARG_476  | NH2    | A_GLU_102 | OE1    | 3.757        |
| 6NFC   | A_ARG_476  | NH2    | A_GLU_102 | OE2    | 3.100        |
| 6NFC   | A_ARG_480  | NH1    | A_ASP_477 | OD1    | 2.962        |
| 6NFC   | A_LYS_487  | NZ     | A_ASP_47  | OD1    | 2.724        |
| 6NFC   | A_LYS_487  | NZ     | A_ASP_47  | OD2    | 3.863        |
| 6NFC   | A_LYS_487  | NZ     | A_GLU_91  | OE1    | 3.844        |
| 6NFC   | B_ARG_542  | NH1    | G_GLU_647 | OE1    | 3.297        |
| 6NFC   | B_ARG_542  | NH1    | G_GLU_647 | OE2    | 3.640        |
| 6NFC   | B_LYS_574  | NZ     | A_GLU_106 | OE1    | 3.608        |
| 6NFC   | B_LYS_574  | NZ     | A_GLU_106 | OE2    | 2.473        |
| 6NFC   | B_ARG_579  | NH2    | G_GLU_584 | OE1    | 3.071        |
| 6NFC   | B_ARG_579  | NH2    | G_GLU_584 | OE2    | 3.850        |
| 6NFC   | B_HIS_585  | NE2    | B_ASP_589 | OD2    | 3.555        |
| 6NFC   | B_ARG_617  | NH1    | B_GLU_634 | OE1    | 2.878        |
| 6NFC   | B_ARG_617  | NH1    | B_GLU_634 | OE2    | 3.440        |

|      |            |     |           |     |       |
|------|------------|-----|-----------|-----|-------|
| 6NFC | B_ARG_617  | NH2 | B_GLU_621 | OE2 | 2.967 |
| 6NFC | H_LYS_19   | NZ  | H_GLU_81  | OE1 | 3.943 |
| 6NFC | H_HIS_35   | NE2 | H_ASP_95  | OD2 | 2.826 |
| 6NFC | H_ARG_38   | NH1 | H_ASP_86  | OD1 | 2.925 |
| 6NFC | H_ARG_38   | NH2 | H_GLU_46  | OE1 | 2.914 |
| 6NFC | H_ARG_38   | NH2 | H_GLU_46  | OE2 | 3.729 |
| 6NFC | H_LYS_62   | NZ  | H_GLU_46  | OE2 | 3.377 |
| 6NFC | H_ARG_66   | NH2 | H_ASP_86  | OD1 | 2.882 |
| 6NFC | H_ARG_66   | NH2 | H_ASP_86  | OD2 | 3.067 |
| 6NFC | H_ARG_98   | NH2 | H_ASP_95  | OD1 | 3.740 |
| 6NFC | L_LYS_50   | NZ  | H_GLU_99  | OE1 | 3.024 |
| 6NFC | L_ARG_61   | NH1 | L_GLU_81  | OE2 | 3.132 |
| 6NFC | L_ARG_61   | NH1 | L_ASP_82  | OD1 | 3.859 |
| 6NFC | L_ARG_61   | NH1 | L_ASP_82  | OD2 | 2.905 |
| 6NFC | L_LYS_103  | NZ  | L_ASP_85  | OD1 | 2.838 |
| 6NFC | L_LYS_103  | NZ  | L_ASP_85  | OD2 | 3.467 |
| 6NFC | J_ARG_38   | NH1 | J_ASP_86  | OD1 | 3.229 |
| 6NFC | J_ARG_38   | NH2 | J_ASP_86  | OD1 | 2.989 |
| 6NFC | J_LYS_43   | NZ  | J_GLU_46  | OE1 | 2.802 |
| 6NFC | J_LYS_43   | NZ  | J_GLU_46  | OE2 | 3.573 |
| 6NFC | J_ARG_53   | NH1 | J_ASP_52A | OD1 | 3.966 |
| 6NFC | J_ARG_53   | NH1 | G_ASP_659 | OD1 | 3.783 |
| 6NFC | J_ARG_53   | NH1 | G_ASP_659 | OD2 | 2.774 |
| 6NFC | J_ARG_53   | NH2 | G_ASP_659 | OD2 | 2.735 |
| 6NFC | J_LYS_64   | NZ  | J_ASP_61  | OD1 | 2.518 |
| 6NFC | J_ARG_66   | NH1 | J_ASP_86  | OD1 | 3.718 |
| 6NFC | J_ARG_66   | NH1 | J_ASP_86  | OD2 | 2.782 |
| 6NFC | J_ARG_66   | NH2 | J_ASP_86  | OD1 | 3.192 |
| 6NFC | J_ARG_66   | NH2 | J_ASP_86  | OD2 | 3.698 |
| 6NFC | J_LYS_75   | NZ  | J_ASP_72  | OD2 | 2.500 |
| 6NFC | J_LYS_100E | NZ  | J_ASP_101 | OD2 | 2.686 |
| 6NFC | M_ARG_103  | NH2 | M_ASP_85  | OD1 | 3.649 |
| 6NFC | M_ARG_103  | NH2 | M_ASP_85  | OD2 | 3.061 |
| 6NFC | E_LYS_46   | NZ  | E_GLU_492 | OE1 | 2.958 |
| 6NFC | E_LYS_46   | NZ  | G_ASP_632 | OD1 | 3.927 |
| 6NFC | E_LYS_46   | NZ  | G_ASP_632 | OD2 | 2.442 |
| 6NFC | E_HIS_85   | NE2 | E_GLU_87  | OE1 | 3.993 |
| 6NFC | E_ARG_178  | NH2 | E_GLU_153 | OE1 | 3.884 |
| 6NFC | E_ARG_178  | NH2 | E_GLU_153 | OE2 | 3.098 |
| 6NFC | E_LYS_227  | NZ  | E_GLU_83  | OE1 | 2.898 |
| 6NFC | E_LYS_229  | NZ  | E_GLU_83  | OE2 | 2.894 |
| 6NFC | E_LYS_232  | NZ  | E_GLU_269 | OE2 | 3.820 |
| 6NFC | E_HIS_249  | NE2 | E_GLU_482 | OE1 | 3.961 |
| 6NFC | E_LYS_282  | NZ  | E_GLU_275 | OE1 | 2.898 |
| 6NFC | E_LYS_282  | NZ  | E_GLU_275 | OE2 | 3.574 |
| 6NFC | E_ARG_298  | NH1 | E_GLU_381 | OE2 | 3.008 |
| 6NFC | E_ARG_308  | NH1 | E_GLU_164 | OE2 | 2.931 |
| 6NFC | E_LYS_335  | NZ  | E_ASP_412 | OD1 | 3.769 |
| 6NFC | E_LYS_335  | NZ  | E_ASP_412 | OD2 | 2.805 |
| 6NFC | E_LYS_351  | NZ  | E_GLU_269 | OE2 | 3.378 |
| 6NFC | E_ARG_429  | NH2 | E_ASP_113 | OD2 | 3.262 |
| 6NFC | E_ARG_456  | NH2 | E_GLU_466 | OE1 | 2.769 |
| 6NFC | E_ARG_456  | NH2 | E_GLU_466 | OE2 | 3.322 |
| 6NFC | E_ARG_469  | NH2 | E_ASP_457 | OD1 | 3.712 |
| 6NFC | E_ARG_469  | NH2 | E_ASP_457 | OD2 | 3.034 |
| 6NFC | E_ARG_476  | NH1 | E_ASP_474 | OD1 | 3.318 |
| 6NFC | E_ARG_476  | NH1 | E_ASP_474 | OD2 | 3.890 |
| 6NFC | E_ARG_476  | NH2 | E_GLU_102 | OE1 | 3.764 |

|      |           |     |           |     |       |
|------|-----------|-----|-----------|-----|-------|
| 6NFC | E_ARG_476 | NH2 | E_GLU_102 | OE2 | 3.083 |
| 6NFC | E_ARG_480 | NH1 | E_ASP_477 | OD1 | 2.952 |
| 6NFC | E_LYS_487 | NZ  | E_ASP_47  | OD1 | 2.725 |
| 6NFC | E_LYS_487 | NZ  | E_ASP_47  | OD2 | 3.874 |
| 6NFC | E_LYS_487 | NZ  | E_GLU_91  | OE1 | 3.818 |
| 6NFC | E_ARG_500 | NH2 | I_ASP_664 | OD1 | 2.950 |
| 6NFC | E_ARG_500 | NH2 | I_ASP_664 | OD2 | 3.747 |
| 6NFC | G_ARG_542 | NH1 | I_GLU_647 | OE1 | 3.321 |
| 6NFC | G_ARG_542 | NH1 | I_GLU_647 | OE2 | 3.884 |
| 6NFC | G_LYS_574 | NZ  | E_GLU_106 | OE1 | 3.312 |
| 6NFC | G_LYS_574 | NZ  | E_GLU_106 | OE2 | 2.741 |
| 6NFC | G_ARG_579 | NH2 | I_GLU_584 | OE1 | 3.032 |
| 6NFC | G_ARG_579 | NH2 | I_GLU_584 | OE2 | 3.885 |
| 6NFC | G_HIS_585 | NE2 | G_ASP_589 | OD2 | 3.475 |
| 6NFC | G_LYS_601 | NZ  | I_GLU_657 | OE1 | 2.933 |
| 6NFC | G_LYS_601 | NZ  | I_GLU_657 | OE2 | 3.730 |
| 6NFC | G_ARG_617 | NH1 | G_GLU_634 | OE1 | 3.252 |
| 6NFC | G_ARG_617 | NH1 | G_GLU_634 | OE2 | 3.637 |
| 6NFC | G_ARG_617 | NH2 | G_GLU_621 | OE2 | 3.149 |
| 6NFC | F_LYS_46  | NZ  | F_GLU_492 | OE1 | 3.791 |
| 6NFC | F_LYS_46  | NZ  | I_ASP_632 | OD1 | 3.960 |
| 6NFC | F_LYS_46  | NZ  | I_ASP_632 | OD2 | 2.474 |
| 6NFC | F_LYS_117 | NZ  | F_ASP_113 | OD1 | 3.918 |
| 6NFC | F_LYS_117 | NZ  | F_ASP_113 | OD2 | 2.461 |
| 6NFC | F_ARG_178 | NH2 | F_GLU_153 | OE1 | 3.758 |
| 6NFC | F_LYS_227 | NZ  | F_GLU_83  | OE1 | 2.903 |
| 6NFC | F_LYS_229 | NZ  | F_GLU_83  | OE2 | 2.947 |
| 6NFC | F_LYS_232 | NZ  | F_GLU_268 | OE1 | 3.618 |
| 6NFC | F_LYS_232 | NZ  | F_GLU_269 | OE2 | 3.891 |
| 6NFC | F_HIS_249 | NE2 | F_GLU_482 | OE1 | 3.968 |
| 6NFC | F_LYS_282 | NZ  | F_GLU_275 | OE1 | 2.886 |
| 6NFC | F_LYS_282 | NZ  | F_GLU_275 | OE2 | 3.568 |
| 6NFC | F_ARG_298 | NH2 | F_GLU_381 | OE1 | 3.051 |
| 6NFC | F_ARG_308 | NH1 | F_GLU_164 | OE2 | 2.946 |
| 6NFC | F_LYS_335 | NZ  | F_ASP_412 | OD2 | 2.846 |
| 6NFC | F_LYS_351 | NZ  | F_GLU_269 | OE1 | 3.913 |
| 6NFC | F_LYS_351 | NZ  | F_GLU_269 | OE2 | 3.773 |
| 6NFC | F_ARG_429 | NH1 | F_ASP_113 | OD1 | 3.014 |
| 6NFC | F_ARG_429 | NH2 | F_ASP_113 | OD1 | 2.930 |
| 6NFC | F_ARG_456 | NH2 | F_GLU_466 | OE1 | 2.974 |
| 6NFC | F_ARG_456 | NH2 | F_GLU_466 | OE2 | 3.635 |
| 6NFC | F_ARG_469 | NH2 | F_ASP_457 | OD1 | 3.660 |
| 6NFC | F_ARG_469 | NH2 | F_ASP_457 | OD2 | 3.070 |
| 6NFC | F_ARG_476 | NH1 | F_ASP_474 | OD1 | 3.311 |
| 6NFC | F_ARG_476 | NH1 | F_ASP_474 | OD2 | 3.824 |
| 6NFC | F_ARG_476 | NH2 | F_GLU_102 | OE1 | 3.903 |
| 6NFC | F_ARG_480 | NH1 | F_ASP_477 | OD1 | 2.871 |
| 6NFC | F_LYS_487 | NZ  | F_ASP_47  | OD1 | 2.719 |
| 6NFC | F_LYS_487 | NZ  | F_ASP_47  | OD2 | 3.910 |
| 6NFC | F_LYS_502 | NZ  | B_ASP_664 | OD1 | 3.023 |
| 6NFC | I_ARG_542 | NH1 | B_GLU_647 | OE1 | 3.339 |
| 6NFC | I_ARG_542 | NH1 | B_GLU_647 | OE2 | 3.856 |
| 6NFC | I_LYS_574 | NZ  | F_ASP_107 | OD1 | 2.742 |
| 6NFC | I_ARG_579 | NH2 | B_GLU_584 | OE1 | 3.222 |
| 6NFC | I_ARG_579 | NH2 | B_GLU_584 | OE2 | 3.762 |
| 6NFC | I_HIS_585 | NE2 | I_ASP_589 | OD2 | 3.720 |
| 6NFC | I_LYS_601 | NZ  | B_GLU_657 | OE1 | 3.945 |
| 6NFC | I_ARG_617 | NH1 | I_GLU_634 | OE1 | 3.726 |

|      |            |     |           |     |       |
|------|------------|-----|-----------|-----|-------|
| 6NFC | K_ARG_38   | NH1 | K_ASP_86  | OD1 | 3.022 |
| 6NFC | K_ARG_38   | NH2 | K_GLU_46  | OE1 | 2.916 |
| 6NFC | K_ARG_38   | NH2 | K_GLU_46  | OE2 | 3.525 |
| 6NFC | K_ARG_53   | NH1 | B_ASP_659 | OD1 | 3.915 |
| 6NFC | K_ARG_53   | NH1 | B_ASP_659 | OD2 | 2.784 |
| 6NFC | K_ARG_53   | NH2 | B_ASP_659 | OD2 | 2.738 |
| 6NFC | K_LYS_64   | NZ  | K_ASP_61  | OD1 | 3.796 |
| 6NFC | K_ARG_66   | NH1 | K_ASP_86  | OD1 | 3.739 |
| 6NFC | K_ARG_66   | NH1 | K_ASP_86  | OD2 | 2.801 |
| 6NFC | K_ARG_66   | NH2 | K_ASP_86  | OD1 | 3.263 |
| 6NFC | K_ARG_66   | NH2 | K_ASP_86  | OD2 | 3.749 |
| 6NFC | K_LYS_75   | NZ  | K_ASP_72  | OD2 | 3.979 |
| 6NFC | K_LYS_100E | NZ  | K_ASP_101 | OD2 | 2.756 |
| 6NFC | N_ARG_54   | NH1 | N_ASP_60  | OD1 | 3.576 |
| 6NFC | N_ARG_61   | NH1 | N_ASP_82  | OD1 | 2.937 |
| 6NFC | N_ARG_61   | NH1 | N_ASP_82  | OD2 | 3.695 |
| 6NFC | N_ARG_103  | NH2 | N_ASP_85  | OD1 | 3.716 |
| 6NFC | N_ARG_103  | NH2 | N_ASP_85  | OD2 | 3.096 |

Table 879: 6NFC-specific salt bridging networks analysis. In this table, a PDB file is specified with a four-letter PDB ID, except that the names of the PDB files corresponding to the single NMR structural model split from the NMR ensemble is specified with a four-letter PDB ID in addition to a hyphen followed by the single NMR structural model numeric ID, the residue naming scheme is **Chain ID\_residue name\_residue number**,  $\angle ADH$  represents the angle formed by acceptor (A), donor (D) and hydrogen (H) ( $\angle ADH$ ).

| PDB ID | Residue A | Atom A | Residue B | Atom B | Distance (Å) |
|--------|-----------|--------|-----------|--------|--------------|
| 6NMR   | L_ARG_24  | NH1    | L_GLU_70  | OE2    | 3.158        |
| 6NMR   | L_ARG_39  | NH2    | L_GLU_81  | OE1    | 3.616        |
| 6NMR   | L_ARG_61  | NH1    | L_GLU_81  | OE2    | 3.707        |
| 6NMR   | L_ARG_61  | NH1    | L_ASP_82  | OD1    | 2.354        |
| 6NMR   | L_ARG_61  | NH1    | L_ASP_82  | OD2    | 2.889        |
| 6NMR   | L_ARG_61  | NH2    | L_GLU_81  | OE2    | 2.699        |
| 6NMR   | L_ARG_61  | NH2    | L_ASP_82  | OD1    | 3.976        |
| 6NMR   | L_LYS_150 | NZ     | L_GLU_196 | OE1    | 3.160        |
| 6NMR   | L_HIS_190 | ND1    | L_ASP_152 | OD2    | 3.477        |
| 6NMR   | L_ARG_212 | NH1    | L_GLU_188 | OE1    | 3.201        |
| 6NMR   | H_ARG_38  | NH1    | H_GLU_46  | OE2    | 3.009        |
| 6NMR   | H_ARG_38  | NH1    | H_ASP_88  | OD1    | 3.678        |
| 6NMR   | H_ARG_38  | NH2    | H_ASP_88  | OD1    | 2.935        |
| 6NMR   | H_ARG_65  | NH1    | H_ASP_88  | OD1    | 3.496        |
| 6NMR   | H_ARG_65  | NH1    | H_ASP_88  | OD2    | 2.506        |
| 6NMR   | H_ARG_65  | NH2    | H_ASP_88  | OD1    | 3.005        |
| 6NMR   | H_ARG_65  | NH2    | H_ASP_88  | OD2    | 3.455        |
| 6NMR   | H_LYS_96  | NZ     | H_ASP_108 | OD1    | 3.882        |
| 6NMR   | H_LYS_96  | NZ     | H_ASP_108 | OD2    | 2.332        |
| 6NMR   | H_LYS_150 | NZ     | H_ASP_151 | OD1    | 3.197        |
| 6NMR   | H_LYS_150 | NZ     | H_ASP_151 | OD2    | 3.273        |
| 6NMR   | H_LYS_216 | NZ     | L_GLU_124 | OE1    | 3.273        |
| 6NMR   | H_LYS_216 | NZ     | L_GLU_124 | OE2    | 3.010        |
| 6NMR   | H_LYS_217 | NZ     | H_GLU_219 | OE1    | 3.365        |
| 6NMR   | H_LYS_217 | NZ     | H_GLU_219 | OE2    | 3.978        |
| 6NMR   | S_ARG_24  | NH1    | S_ASP_10  | OD2    | 3.980        |
| 6NMR   | S_ARG_24  | NH2    | S_ASP_10  | OD1    | 3.502        |
| 6NMR   | S_ARG_40  | NH2    | S_GLU_47  | OE2    | 2.570        |
| 6NMR   | S_ARG_46  | NH1    | S_GLU_103 | OE1    | 3.842        |
| 6NMR   | S_ARG_46  | NH1    | S_GLU_103 | OE2    | 3.579        |
| 6NMR   | S_ARG_46  | NH2    | S_GLU_103 | OE2    | 2.903        |
| 6NMR   | S_ARG_59  | NH1    | S_ASP_85  | OD1    | 3.806        |
| 6NMR   | S_ARG_59  | NH1    | S_ASP_85  | OD2    | 3.028        |
| 6NMR   | S_ARG_59  | NH2    | S_ASP_85  | OD2    | 2.222        |
| 6NMR   | S_ARG_69  | NH1    | L_GLU_55  | OE1    | 3.247        |
| 6NMR   | S_ARG_69  | NH1    | L_GLU_55  | OE2    | 3.038        |
| 6NMR   | S_ARG_69  | NH2    | L_GLU_55  | OE2    | 3.173        |
| 6NMR   | B_ARG_39  | NH2    | B_GLU_81  | OE2    | 3.427        |
| 6NMR   | B_ARG_61  | NH1    | B_ASP_82  | OD1    | 2.926        |
| 6NMR   | B_ARG_61  | NH1    | B_ASP_82  | OD2    | 2.375        |
| 6NMR   | B_ARG_61  | NH2    | B_GLU_81  | OE2    | 3.579        |
| 6NMR   | B_ARG_61  | NH2    | B_ASP_82  | OD1    | 3.952        |
| 6NMR   | B_LYS_189 | NZ     | B_ASP_186 | OD1    | 3.729        |
| 6NMR   | B_ARG_212 | NH1    | B_GLU_188 | OE1    | 3.038        |
| 6NMR   | A_ARG_38  | NH1    | A_GLU_46  | OE1    | 2.680        |
| 6NMR   | A_ARG_38  | NH1    | A_GLU_87  | OE2    | 3.236        |
| 6NMR   | A_ARG_38  | NH2    | A_GLU_87  | OE2    | 3.845        |
| 6NMR   | A_ARG_65  | NH1    | A_ASP_88  | OD1    | 3.503        |
| 6NMR   | A_ARG_65  | NH1    | A_ASP_88  | OD2    | 2.589        |
| 6NMR   | A_ARG_65  | NH2    | A_ASP_88  | OD1    | 2.928        |
| 6NMR   | A_ARG_65  | NH2    | A_ASP_88  | OD2    | 3.469        |
| 6NMR   | A_LYS_74  | NZ     | A_ASP_71  | OD2    | 3.116        |
| 6NMR   | A_LYS_150 | NZ     | A_ASP_151 | OD1    | 3.635        |
| 6NMR   | A_LYS_150 | NZ     | A_ASP_151 | OD2    | 3.589        |
| 6NMR   | E_ARG_40  | NH1    | E_GLU_47  | OE1    | 3.843        |
| 6NMR   | E_ARG_40  | NH1    | E_GLU_47  | OE2    | 3.651        |
| 6NMR   | E_ARG_59  | NH1    | E_ASP_85  | OD2    | 3.106        |

|      |           |     |           |     |       |
|------|-----------|-----|-----------|-----|-------|
| 6NMR | E_ARG_69  | NH1 | B_GLU_55  | OE1 | 2.733 |
| 6NMR | E_ARG_69  | NH1 | B_GLU_55  | OE2 | 2.469 |
| 6NMR | E_ARG_69  | NH2 | B_GLU_55  | OE1 | 2.510 |
| 6NMR | E_ARG_69  | NH2 | B_GLU_55  | OE2 | 3.637 |
| 6NMR | G_ARG_24  | NH1 | G_GLU_70  | OE2 | 3.551 |
| 6NMR | G_ARG_61  | NH1 | G_GLU_81  | OE1 | 3.642 |
| 6NMR | G_ARG_61  | NH2 | G_GLU_81  | OE1 | 3.695 |
| 6NMR | G_ARG_61  | NH2 | G_ASP_82  | OD1 | 3.089 |
| 6NMR | G_ARG_61  | NH2 | G_ASP_82  | OD2 | 3.380 |
| 6NMR | G_LYS_150 | NZ  | G_GLU_196 | OE1 | 2.752 |
| 6NMR | G_HIS_190 | ND1 | G_ASP_152 | OD2 | 3.424 |
| 6NMR | G_HIS_190 | NE2 | G_ASP_186 | OD1 | 3.299 |
| 6NMR | G_ARG_212 | NH1 | G_GLU_188 | OE1 | 3.625 |
| 6NMR | F_ARG_38  | NH1 | F_GLU_46  | OE1 | 2.763 |
| 6NMR | F_ARG_38  | NH2 | F_ASP_88  | OD1 | 3.207 |
| 6NMR | F_LYS_63  | NZ  | F_ASP_60  | OD1 | 3.920 |
| 6NMR | F_ARG_65  | NH1 | F_ASP_88  | OD2 | 3.068 |
| 6NMR | F_ARG_65  | NH2 | F_ASP_88  | OD1 | 3.379 |
| 6NMR | F_ARG_65  | NH2 | F_ASP_88  | OD2 | 3.500 |
| 6NMR | F_LYS_96  | NZ  | F_ASP_108 | OD1 | 3.703 |
| 6NMR | F_LYS_96  | NZ  | F_ASP_108 | OD2 | 2.983 |
| 6NMR | F_LYS_150 | NZ  | F_ASP_151 | OD2 | 3.277 |
| 6NMR | F_LYS_217 | NZ  | F_GLU_219 | OE1 | 3.922 |
| 6NMR | I_ARG_46  | NH1 | I_GLU_103 | OE2 | 3.225 |
| 6NMR | I_ARG_46  | NH2 | I_GLU_103 | OE2 | 3.674 |
| 6NMR | I_ARG_69  | NH1 | G_GLU_55  | OE1 | 3.183 |
| 6NMR | I_ARG_69  | NH1 | G_GLU_55  | OE2 | 2.119 |
| 6NMR | I_ARG_69  | NH1 | F_ASP_108 | OD2 | 3.629 |
| 6NMR | I_ARG_69  | NH2 | G_GLU_55  | OE1 | 2.639 |
| 6NMR | I_ARG_69  | NH2 | G_GLU_55  | OE2 | 3.327 |
| 6NMR | K_ARG_54  | NH2 | K_GLU_60  | OE2 | 3.656 |
| 6NMR | K_ARG_61  | NH1 | K_GLU_81  | OE1 | 3.042 |
| 6NMR | K_ARG_61  | NH2 | K_GLU_81  | OE1 | 3.659 |
| 6NMR | K_ARG_61  | NH2 | K_ASP_82  | OD1 | 2.679 |
| 6NMR | K_ARG_61  | NH2 | K_ASP_82  | OD2 | 3.306 |
| 6NMR | K_LYS_104 | NZ  | K_GLU_106 | OE2 | 3.287 |
| 6NMR | K_LYS_150 | NZ  | K_GLU_196 | OE1 | 3.084 |
| 6NMR | K_HIS_190 | ND1 | K_ASP_186 | OD1 | 3.859 |
| 6NMR | K_ARG_212 | NH1 | K_GLU_188 | OE2 | 3.131 |
| 6NMR | J_ARG_38  | NH1 | J_GLU_46  | OE1 | 3.889 |
| 6NMR | J_ARG_38  | NH1 | J_GLU_46  | OE2 | 3.293 |
| 6NMR | J_ARG_38  | NH1 | J_ASP_88  | OD1 | 3.807 |
| 6NMR | J_ARG_38  | NH2 | J_ASP_88  | OD1 | 2.826 |
| 6NMR | J_ARG_65  | NH1 | J_ASP_88  | OD1 | 3.631 |
| 6NMR | J_ARG_65  | NH1 | J_ASP_88  | OD2 | 2.729 |
| 6NMR | J_ARG_65  | NH2 | J_ASP_88  | OD1 | 3.014 |
| 6NMR | J_ARG_65  | NH2 | J_ASP_88  | OD2 | 3.359 |
| 6NMR | M_ARG_24  | NH1 | M_ASP_10  | OD1 | 3.002 |
| 6NMR | M_ARG_24  | NH1 | M_ASP_10  | OD2 | 3.370 |
| 6NMR | M_ARG_59  | NH1 | M_ASP_85  | OD1 | 3.222 |
| 6NMR | M_ARG_59  | NH1 | M_ASP_85  | OD2 | 2.493 |
| 6NMR | M_ARG_59  | NH2 | M_ASP_85  | OD1 | 2.536 |
| 6NMR | M_ARG_59  | NH2 | M_ASP_85  | OD2 | 3.074 |
| 6NMR | M_ARG_69  | NH1 | J_ASP_108 | OD1 | 3.945 |
| 6NMR | M_ARG_69  | NH1 | J_ASP_108 | OD2 | 3.140 |
| 6NMR | M_ARG_69  | NH2 | K_GLU_55  | OE1 | 3.608 |
| 6NMR | M_ARG_69  | NH2 | J_ASP_108 | OD1 | 1.901 |
| 6NMR | M_ARG_69  | NH2 | J_ASP_108 | OD2 | 2.331 |



---

Table 880: 6NMR-specific salt bridging networks analysis. In this table, a PDB file is specified with a four-letter PDB ID, except that the names of the PDB files corresponding to the single NMR structural model split from the NMR ensemble is specified with a four-letter PDB ID in addition to a hyphen followed by the single NMR structural model numeric ID, the residue naming scheme is **Chain ID\_residue name\_residue number**,  $\angle ADH$  represents the angle formed by acceptor (A), donor (D) and hydrogen (H) ( $\angle ADH$ ).

| PDB ID | Residue A | Atom A | Residue B | Atom B | Distance (Å) |
|--------|-----------|--------|-----------|--------|--------------|
| 6NMS   | L_ARG_24  | NH2    | L_GLU_70  | OE2    | 3.738        |
| 6NMS   | L_ARG_54  | NH1    | L_ASP_60  | OD1    | 3.255        |
| 6NMS   | L_ARG_61  | NH2    | L_ASP_82  | OD1    | 2.892        |
| 6NMS   | L_ARG_61  | NH2    | L_ASP_82  | OD2    | 3.481        |
| 6NMS   | L_ARG_94  | NH2    | S_GLU_111 | OE1    | 3.728        |
| 6NMS   | L_LYS_104 | NZ     | L_GLU_166 | OE1    | 2.765        |
| 6NMS   | L_LYS_104 | NZ     | L_GLU_166 | OE2    | 3.798        |
| 6NMS   | L_LYS_184 | NZ     | L_GLU_188 | OE2    | 3.523        |
| 6NMS   | L_LYS_189 | NZ     | L_ASP_186 | OD1    | 3.714        |
| 6NMS   | L_HIS_190 | ND1    | L_ASP_152 | OD2    | 3.478        |
| 6NMS   | L_ARG_212 | NH1    | L_GLU_188 | OE1    | 3.865        |
| 6NMS   | H_ARG_38  | NH1    | H_ASP_90  | OD1    | 2.876        |
| 6NMS   | H_ARG_38  | NH2    | H_GLU_46  | OE1    | 3.437        |
| 6NMS   | H_ARG_38  | NH2    | H_GLU_46  | OE2    | 3.436        |
| 6NMS   | H_ARG_67  | NH1    | H_ASP_90  | OD2    | 2.785        |
| 6NMS   | H_ARG_67  | NH2    | H_ASP_90  | OD1    | 3.162        |
| 6NMS   | H_ARG_67  | NH2    | H_ASP_90  | OD2    | 3.281        |
| 6NMS   | H_LYS_98  | NZ     | H_ASP_107 | OD2    | 3.621        |
| 6NMS   | H_ARG_104 | NH1    | H_ASP_33  | OD2    | 3.391        |
| 6NMS   | H_ARG_104 | NH1    | H_GLU_99  | OE1    | 2.855        |
| 6NMS   | H_ARG_104 | NH1    | H_GLU_99  | OE2    | 3.265        |
| 6NMS   | H_ARG_104 | NH2    | S_GLU_111 | OE1    | 3.455        |
| 6NMS   | H_ARG_104 | NH2    | S_GLU_111 | OE2    | 2.500        |
| 6NMS   | H_LYS_149 | NZ     | H_ASP_150 | OD1    | 3.443        |
| 6NMS   | H_LYS_149 | NZ     | H_ASP_150 | OD2    | 3.773        |
| 6NMS   | H_LYS_215 | NZ     | L_GLU_124 | OE1    | 3.565        |
| 6NMS   | H_LYS_215 | NZ     | L_GLU_124 | OE2    | 3.270        |
| 6NMS   | H_LYS_220 | NZ     | L_GLU_214 | OE1    | 3.397        |
| 6NMS   | S_LYS_11  | NZ     | H_ASP_33  | OD1    | 3.001        |
| 6NMS   | S_LYS_11  | NZ     | H_GLU_99  | OE1    | 2.549        |
| 6NMS   | S_ARG_40  | NH2    | S_GLU_47  | OE1    | 2.801        |
| 6NMS   | S_ARG_46  | NH1    | S_GLU_103 | OE2    | 2.751        |
| 6NMS   | S_ARG_46  | NH2    | S_GLU_103 | OE2    | 3.693        |
| 6NMS   | S_LYS_53  | NZ     | S_ASP_101 | OD2    | 3.950        |
| 6NMS   | S_HIS_56  | ND1    | A_ASP_60  | OD2    | 2.658        |
| 6NMS   | S_ARG_59  | NH1    | S_ASP_85  | OD1    | 2.788        |
| 6NMS   | S_ARG_59  | NH1    | S_ASP_85  | OD2    | 3.425        |
| 6NMS   | S_ARG_59  | NH2    | S_ASP_85  | OD1    | 3.472        |
| 6NMS   | S_ARG_59  | NH2    | S_ASP_85  | OD2    | 2.622        |
| 6NMS   | A_ARG_54  | NH1    | A_ASP_60  | OD1    | 3.517        |
| 6NMS   | A_ARG_61  | NH2    | A_GLU_81  | OE2    | 3.125        |
| 6NMS   | A_ARG_61  | NH2    | A_ASP_82  | OD1    | 2.833        |
| 6NMS   | A_ARG_61  | NH2    | A_ASP_82  | OD2    | 3.517        |
| 6NMS   | A_ARG_94  | NH2    | C_GLU_111 | OE2    | 3.453        |
| 6NMS   | A_LYS_104 | NZ     | A_GLU_166 | OE1    | 3.888        |
| 6NMS   | A_LYS_104 | NZ     | A_GLU_166 | OE2    | 3.097        |
| 6NMS   | A_LYS_189 | NZ     | A_ASP_186 | OD1    | 3.508        |
| 6NMS   | A_HIS_190 | ND1    | A_ASP_152 | OD2    | 3.250        |
| 6NMS   | A_ARG_212 | NH1    | A_GLU_188 | OE2    | 2.785        |
| 6NMS   | B_ARG_38  | NH1    | B_ASP_90  | OD1    | 2.896        |
| 6NMS   | B_ARG_38  | NH2    | B_GLU_46  | OE1    | 3.127        |
| 6NMS   | B_ARG_38  | NH2    | B_GLU_46  | OE2    | 3.624        |
| 6NMS   | B_ARG_67  | NH1    | B_ASP_90  | OD2    | 3.000        |
| 6NMS   | B_ARG_67  | NH2    | B_ASP_90  | OD1    | 3.281        |
| 6NMS   | B_ARG_67  | NH2    | B_ASP_90  | OD2    | 3.615        |
| 6NMS   | B_LYS_98  | NZ     | B_ASP_108 | OD2    | 3.767        |
| 6NMS   | B_ARG_104 | NH1    | B_ASP_33  | OD2    | 2.846        |

|      |           |     |           |     |       |
|------|-----------|-----|-----------|-----|-------|
| 6NMS | B_ARG_104 | NH1 | B_GLU_99  | OE1 | 2.968 |
| 6NMS | B_ARG_104 | NH1 | B_GLU_99  | OE2 | 3.409 |
| 6NMS | B_ARG_104 | NH2 | C_GLU_111 | OE1 | 2.703 |
| 6NMS | B_ARG_104 | NH2 | C_GLU_111 | OE2 | 3.000 |
| 6NMS | B_LYS_149 | NZ  | B_ASP_150 | OD1 | 3.211 |
| 6NMS | B_LYS_149 | NZ  | B_ASP_150 | OD2 | 3.461 |
| 6NMS | C_LYS_11  | NZ  | B_ASP_33  | OD2 | 3.490 |
| 6NMS | C_LYS_11  | NZ  | B_GLU_99  | OE1 | 2.892 |
| 6NMS | C_ARG_24  | NH1 | C_ASP_10  | OD1 | 2.731 |
| 6NMS | C_ARG_24  | NH1 | C_ASP_10  | OD2 | 2.859 |
| 6NMS | C_ARG_40  | NH2 | C_GLU_47  | OE1 | 2.382 |
| 6NMS | C_ARG_46  | NH1 | C_GLU_103 | OE2 | 2.805 |
| 6NMS | C_ARG_46  | NH2 | C_GLU_103 | OE2 | 3.029 |
| 6NMS | C_ARG_59  | NH1 | C_ASP_85  | OD1 | 3.855 |
| 6NMS | C_ARG_59  | NH1 | C_ASP_85  | OD2 | 3.301 |
| 6NMS | C_ARG_59  | NH2 | C_ASP_85  | OD1 | 2.480 |
| 6NMS | C_ARG_59  | NH2 | C_ASP_85  | OD2 | 3.376 |
| 6NMS | C_ARG_115 | NH1 | B_GLU_56  | OE2 | 3.579 |
| 6NMS | C_ARG_115 | NH2 | B_GLU_56  | OE2 | 2.699 |

Table 881: 6NMS-specific salt bridging networks analysis. In this table, a PDB file is specified with a four-letter PDB ID, except that the names of the PDB files corresponding to the single NMR structural model split from the NMR ensemble is specified with a four-letter PDB ID in addition to a hyphen followed by the single NMR structural model numeric ID, the residue naming scheme is **Chain ID\_residue name\_residue number**,  $\angle ADH$  represents the angle formed by acceptor (A), donor (D) and hydrogen (H) ( $\angle ADH$ ).

| PDB ID | Residue A | Atom A | Residue B | Atom B | Distance (Å) |
|--------|-----------|--------|-----------|--------|--------------|
| 6NMT   | A_ARG_26  | NH1    | A_ASP_46  | OD2    | 3.596        |
| 6NMT   | A_ARG_26  | NH2    | C_ASP_10  | OD1    | 3.433        |
| 6NMT   | A_ARG_26  | NH2    | C_ASP_10  | OD2    | 3.182        |
| 6NMT   | A_ARG_56  | NH2    | A_ASP_76  | OD1    | 3.261        |
| 6NMT   | A_ARG_56  | NH2    | A_ASP_77  | OD1    | 2.770        |
| 6NMT   | A_ARG_56  | NH2    | A_ASP_77  | OD2    | 3.625        |
| 6NMT   | A_LYS_144 | NZ     | A_GLU_190 | OE1    | 2.725        |
| 6NMT   | A_HIS_184 | ND1    | A_ASP_146 | OD2    | 2.798        |
| 6NMT   | A_LYS_185 | NZ     | A_GLU_208 | OE2    | 2.842        |
| 6NMT   | A_ARG_206 | NH1    | A_GLU_182 | OE1    | 3.022        |
| 6NMT   | B_ARG_38  | NH1    | B_ASP_89  | OD1    | 2.805        |
| 6NMT   | B_ARG_38  | NH2    | B_GLU_46  | OE1    | 2.846        |
| 6NMT   | B_ARG_38  | NH2    | B_ASP_89  | OD1    | 3.887        |
| 6NMT   | B_ARG_56  | NH2    | C_GLU_111 | OE2    | 3.542        |
| 6NMT   | B_ARG_66  | NH1    | B_ASP_89  | OD1    | 3.742        |
| 6NMT   | B_ARG_66  | NH1    | B_ASP_89  | OD2    | 2.824        |
| 6NMT   | B_ARG_66  | NH2    | B_ASP_89  | OD1    | 2.986        |
| 6NMT   | B_ARG_66  | NH2    | B_ASP_89  | OD2    | 3.478        |
| 6NMT   | B_ARG_97  | NH2    | B_ASP_107 | OD1    | 3.422        |
| 6NMT   | B_ARG_97  | NH2    | B_ASP_107 | OD2    | 2.766        |
| 6NMT   | B_LYS_149 | NZ     | B_ASP_150 | OD1    | 3.170        |
| 6NMT   | B_LYS_149 | NZ     | B_ASP_150 | OD2    | 2.917        |
| 6NMT   | B_LYS_215 | NZ     | A_GLU_118 | OE2    | 3.496        |
| 6NMT   | C_LYS_11  | NZ     | A_ASP_91  | OD1    | 2.678        |
| 6NMT   | C_LYS_11  | NZ     | A_ASP_91  | OD2    | 3.319        |
| 6NMT   | C_ARG_40  | NH2    | C_GLU_47  | OE2    | 2.784        |
| 6NMT   | C_ARG_46  | NH1    | C_GLU_103 | OE1    | 3.083        |
| 6NMT   | C_ARG_46  | NH2    | C_GLU_103 | OE1    | 3.045        |
| 6NMT   | C_ARG_59  | NH1    | C_ASP_85  | OD1    | 3.125        |
| 6NMT   | C_ARG_59  | NH1    | C_ASP_85  | OD2    | 3.925        |
| 6NMT   | C_ARG_59  | NH2    | C_ASP_85  | OD1    | 3.454        |
| 6NMT   | C_ARG_59  | NH2    | C_ASP_85  | OD2    | 2.809        |
| 6NMT   | C_LYS_105 | NZ     | C_GLU_3   | OE1    | 2.957        |

Table 882: 6NMT-specific salt bridging networks analysis. In this table, a PDB file is specified with a four-letter PDB ID, except that the names of the PDB files corresponding to the single NMR structural model split from the NMR ensemble is specified with a four-letter PDB ID in addition to a hyphen followed by the single NMR structural model numeric ID, the residue naming scheme is **Chain ID\_residue name\_residue number**,  $\angle ADH$  represents the angle formed by acceptor (A), donor (D) and hydrogen (H) ( $\angle ADH$ ).

| PDB ID | Residue A | Atom A | Residue B | Atom B | Distance (Å) |
|--------|-----------|--------|-----------|--------|--------------|
| 6NMU   | L_ARG_24  | NH1    | L_ASP_70  | OD1    | 3.847        |
| 6NMU   | L_ARG_24  | NH1    | L_ASP_70  | OD2    | 3.464        |
| 6NMU   | L_LYS_32  | NZ     | S_ASP_85  | OD1    | 3.326        |
| 6NMU   | L_ARG_61  | NH1    | L_ASP_82  | OD2    | 2.822        |
| 6NMU   | L_ARG_61  | NH2    | L_ASP_82  | OD1    | 2.930        |
| 6NMU   | L_LYS_150 | NH2    | L_ASP_82  | OD2    | 3.243        |
| 6NMU   | L_LYS_150 | NZ     | L_GLU_196 | OE1    | 3.282        |
| 6NMU   | L_HIS_190 | ND1    | L_ASP_152 | OD2    | 3.169        |
| 6NMU   | H_ARG_13  | NH1    | H_GLU_16  | OE2    | 3.522        |
| 6NMU   | H_ARG_13  | NH2    | H_GLU_16  | OE2    | 3.940        |
| 6NMU   | H_ARG_38  | NH1    | H_ASP_90  | OD2    | 3.008        |
| 6NMU   | H_ARG_38  | NH2    | H_GLU_46  | OE1    | 3.672        |
| 6NMU   | H_ARG_38  | NH2    | H_GLU_46  | OE2    | 3.384        |
| 6NMU   | H_ARG_50  | NH1    | S_GLU_47  | OE1    | 3.597        |
| 6NMU   | H_ARG_50  | NH1    | S_GLU_47  | OE2    | 3.084        |
| 6NMU   | H_ARG_50  | NH2    | S_GLU_47  | OE1    | 2.989        |
| 6NMU   | H_ARG_50  | NH2    | S_GLU_47  | OE2    | 3.577        |
| 6NMU   | H_ARG_67  | NH1    | H_ASP_90  | OD1    | 2.716        |
| 6NMU   | H_ARG_67  | NH1    | H_ASP_90  | OD2    | 3.953        |
| 6NMU   | H_ARG_67  | NH2    | H_ASP_90  | OD1    | 3.430        |
| 6NMU   | H_ARG_67  | NH2    | H_ASP_90  | OD2    | 3.165        |
| 6NMU   | H_LYS_98  | NZ     | H_ASP_107 | OD2    | 2.857        |
| 6NMU   | H_LYS_149 | NZ     | H_ASP_150 | OD1    | 3.438        |
| 6NMU   | S_ARG_24  | NH2    | S_ASP_10  | OD1    | 3.643        |
| 6NMU   | S_ARG_24  | NH2    | S_ASP_10  | OD2    | 2.829        |
| 6NMU   | S_ARG_46  | NH1    | S_GLU_103 | OE1    | 3.107        |
| 6NMU   | S_ARG_46  | NH2    | S_GLU_103 | OE1    | 3.375        |
| 6NMU   | S_LYS_53  | NZ     | S_ASP_101 | OD1    | 3.593        |
| 6NMU   | S_LYS_53  | NZ     | S_ASP_101 | OD2    | 3.819        |
| 6NMU   | S_ARG_59  | NH1    | S_ASP_85  | OD1    | 2.826        |
| 6NMU   | S_ARG_59  | NH1    | S_ASP_85  | OD2    | 3.250        |
| 6NMU   | S_ARG_59  | NH2    | H_ASP_101 | OD2    | 3.444        |
| 6NMU   | S_ARG_59  | NH2    | S_ASP_85  | OD1    | 3.666        |
| 6NMU   | S_ARG_59  | NH2    | S_ASP_85  | OD2    | 2.554        |
| 6NMU   | A_LYS_32  | NZ     | C_ASP_85  | OD1    | 3.635        |
| 6NMU   | A_ARG_61  | NH1    | A_ASP_82  | OD2    | 2.912        |
| 6NMU   | A_ARG_61  | NH2    | A_ASP_82  | OD1    | 3.034        |
| 6NMU   | A_ARG_61  | NH2    | A_ASP_82  | OD2    | 3.051        |
| 6NMU   | A_ARG_98  | NH2    | A_GLU_1   | OE2    | 3.553        |
| 6NMU   | B_ARG_38  | NH1    | B_ASP_90  | OD1    | 3.513        |
| 6NMU   | B_ARG_38  | NH2    | B_GLU_46  | OE1    | 3.545        |
| 6NMU   | B_ARG_38  | NH2    | B_GLU_46  | OE2    | 3.227        |
| 6NMU   | B_ARG_50  | NH1    | C_GLU_47  | OE1    | 3.989        |
| 6NMU   | B_ARG_50  | NH1    | C_GLU_47  | OE2    | 3.035        |
| 6NMU   | B_ARG_50  | NH2    | C_GLU_47  | OE1    | 2.804        |
| 6NMU   | B_ARG_50  | NH2    | C_GLU_47  | OE2    | 3.091        |
| 6NMU   | B_ARG_67  | NH1    | B_ASP_90  | OD1    | 3.761        |
| 6NMU   | B_ARG_67  | NH1    | B_ASP_90  | OD2    | 2.940        |
| 6NMU   | B_ARG_67  | NH2    | B_ASP_90  | OD1    | 2.900        |
| 6NMU   | B_ARG_67  | NH2    | B_ASP_90  | OD2    | 3.596        |
| 6NMU   | B_LYS_98  | NZ     | B_ASP_107 | OD1    | 2.896        |
| 6NMU   | B_LYS_149 | NZ     | B_ASP_150 | OD1    | 3.427        |
| 6NMU   | B_LYS_149 | NZ     | B_ASP_150 | OD2    | 3.506        |
| 6NMU   | B_LYS_215 | NZ     | A_GLU_124 | OE1    | 3.494        |
| 6NMU   | B_LYS_215 | NZ     | A_GLU_124 | OE2    | 3.379        |
| 6NMU   | B_LYS_216 | NZ     | B_GLU_218 | OE1    | 3.942        |
| 6NMU   | C_ARG_24  | NH1    | C_ASP_10  | OD1    | 3.661        |

|      |          |     |           |     |       |
|------|----------|-----|-----------|-----|-------|
| 6NMU | C_ARG_24 | NH1 | C_ASP_10  | OD2 | 3.733 |
| 6NMU | C_ARG_24 | NH2 | C_ASP_10  | OD1 | 3.751 |
| 6NMU | C_ARG_46 | NH1 | C_GLU_103 | OE1 | 2.724 |
| 6NMU | C_ARG_46 | NH2 | C_GLU_103 | OE1 | 3.025 |
| 6NMU | C_ARG_59 | NH1 | B_ASP_101 | OD1 | 3.720 |
| 6NMU | C_ARG_59 | NH1 | B_ASP_101 | OD2 | 2.808 |
| 6NMU | C_ARG_59 | NH1 | C_ASP_85  | OD2 | 3.825 |
| 6NMU | C_ARG_59 | NH2 | C_ASP_85  | OD1 | 2.746 |
| 6NMU | C_ARG_59 | NH2 | C_ASP_85  | OD2 | 3.128 |

Table 883: 6NMU-specific salt bridging networks analysis. In this table, a PDB file is specified with a four-letter PDB ID, except that the names of the PDB files corresponding to the single NMR structural model split from the NMR ensemble is specified with a four-letter PDB ID in addition to a hyphen followed by the single NMR structural model numeric ID, the residue naming scheme is **Chain ID\_residue name\_residue number**,  $\angle ADH$  represents the angle formed by acceptor (A), donor (D) and hydrogen (H) ( $\angle ADH$ ).

| PDB ID | Residue A | Atom A | Residue B | Atom B | Distance (Å) |
|--------|-----------|--------|-----------|--------|--------------|
| 6NMV   | S_ARG_40  | NH2    | S_GLU_47  | OE2    | 2.928        |
| 6NMV   | S_ARG_46  | NH1    | S_GLU_103 | OE1    | 2.838        |
| 6NMV   | S_ARG_46  | NH1    | S_GLU_103 | OE2    | 3.875        |
| 6NMV   | S_ARG_46  | NH2    | S_GLU_103 | OE1    | 3.070        |
| 6NMV   | S_ARG_59  | NH1    | S_ASP_85  | OD1    | 2.912        |
| 6NMV   | S_ARG_59  | NH1    | S_ASP_85  | OD2    | 3.273        |
| 6NMV   | S_ARG_59  | NH2    | S_ASP_85  | OD1    | 3.839        |
| 6NMV   | S_ARG_59  | NH2    | S_ASP_85  | OD2    | 2.616        |
| 6NMV   | S_LYS_96  | NZ     | S_ASP_101 | OD1    | 2.456        |
| 6NMV   | S_LYS_96  | NZ     | S_ASP_101 | OD2    | 3.521        |
| 6NMV   | H_ARG_38  | NH1    | H_ASP_90  | OD2    | 2.817        |
| 6NMV   | H_ARG_38  | NH2    | H_ASP_90  | OD2    | 3.510        |
| 6NMV   | H_ARG_67  | NH1    | H_ASP_90  | OD1    | 2.934        |
| 6NMV   | H_ARG_67  | NH1    | H_ASP_90  | OD2    | 3.250        |
| 6NMV   | H_ARG_67  | NH2    | H_ASP_90  | OD1    | 3.025        |
| 6NMV   | H_ARG_67  | NH2    | H_ASP_90  | OD2    | 2.954        |
| 6NMV   | H_LYS_76  | NZ     | H_ASP_73  | OD1    | 2.991        |
| 6NMV   | H_LYS_76  | NZ     | H_ASP_73  | OD2    | 2.854        |
| 6NMV   | H_HIS_103 | ND1    | H_ASP_102 | OD1    | 3.753        |
| 6NMV   | H_HIS_103 | ND1    | H_ASP_102 | OD2    | 3.398        |
| 6NMV   | H_LYS_211 | NZ     | H_GLU_213 | OE2    | 3.838        |
| 6NMV   | L_ARG_56  | NH2    | L_GLU_76  | OE1    | 3.634        |
| 6NMV   | L_ARG_56  | NH2    | L_GLU_76  | OE2    | 3.096        |
| 6NMV   | L_ARG_56  | NH2    | L_ASP_77  | OD1    | 2.690        |
| 6NMV   | L_ARG_56  | NH2    | L_ASP_77  | OD2    | 3.240        |
| 6NMV   | L_LYS_162 | NZ     | L_GLU_78  | OE2    | 3.175        |
| 6NMV   | L_ARG_185 | NH1    | L_ASP_147 | OD2    | 3.022        |

Table 884: 6NMV-specific salt bridging networks analysis. In this table, a PDB file is specified with a four-letter PDB ID, except that the names of the PDB files corresponding to the single NMR structural model split from the NMR ensemble is specified with a four-letter PDB ID in addition to a hyphen followed by the single NMR structural model numeric ID, the residue naming scheme is **Chain ID\_residue name\_residue number**,  $\angle ADH$  represents the angle formed by acceptor (A), donor (D) and hydrogen (H) ( $\angle ADH$ ).

| PDB ID | Residue A | Atom A | Residue B | Atom B | Distance (Å) |
|--------|-----------|--------|-----------|--------|--------------|
| 6O9B   | A_HIS_3   | ND1    | A_ASP_29  | OD1    | 3.484        |
| 6O9B   | A_HIS_3   | ND1    | A_ASP_29  | OD2    | 2.647        |
| 6O9B   | A_ARG_6   | NH2    | A_ASP_102 | OD1    | 3.670        |
| 6O9B   | A_ARG_14  | NH1    | A_ASP_39  | OD1    | 2.811        |
| 6O9B   | A_ARG_14  | NH1    | A_ASP_39  | OD2    | 3.600        |
| 6O9B   | A_ARG_14  | NH2    | A_ASP_39  | OD1    | 3.638        |
| 6O9B   | A_ARG_14  | NH2    | A_ASP_39  | OD2    | 2.902        |
| 6O9B   | A_ARG_21  | NH2    | A_ASP_37  | OD1    | 3.576        |
| 6O9B   | A_ARG_21  | NH2    | A_ASP_37  | OD2    | 2.758        |
| 6O9B   | A_ARG_35  | NH1    | B_ASP_73  | OD1    | 2.773        |
| 6O9B   | A_ARG_35  | NH1    | B_ASP_73  | OD2    | 3.974        |
| 6O9B   | A_ARG_35  | NH2    | A_GLU_46  | OE1    | 3.894        |
| 6O9B   | A_ARG_35  | NH2    | A_GLU_46  | OE2    | 3.171        |
| 6O9B   | A_ARG_44  | NH1    | A_ASP_61  | OD1    | 3.041        |
| 6O9B   | A_ARG_44  | NH2    | A_ASP_61  | OD1    | 3.227        |
| 6O9B   | A_ARG_48  | NH2    | B_ASP_73  | OD2    | 3.479        |
| 6O9B   | A_ARG_75  | NH1    | A_GLU_19  | OE2    | 3.730        |
| 6O9B   | A_HIS_93  | ND1    | A_ASP_119 | OD1    | 3.532        |
| 6O9B   | A_HIS_93  | ND1    | A_ASP_119 | OD2    | 2.838        |
| 6O9B   | A_ARG_111 | NH1    | A_GLU_128 | OE1    | 3.371        |
| 6O9B   | A_ARG_111 | NH2    | A_ASP_102 | OD2    | 3.967        |
| 6O9B   | A_ARG_114 | NH1    | A_ASP_116 | OD1    | 3.450        |
| 6O9B   | A_ARG_114 | NH1    | A_ASP_116 | OD2    | 2.611        |
| 6O9B   | A_HIS_151 | ND1    | A_GLU_154 | OE1    | 3.521        |
| 6O9B   | A_HIS_151 | ND1    | A_GLU_154 | OE2    | 3.425        |
| 6O9B   | A_ARG_169 | NH1    | A_GLU_166 | OE2    | 3.051        |
| 6O9B   | A_ARG_170 | NH1    | A_GLU_166 | OE1    | 3.610        |
| 6O9B   | A_LYS_176 | NZ     | A_GLU_173 | OE2    | 2.914        |
| 6O9B   | A_ARG_181 | NH1    | A_ASP_183 | OD2    | 2.854        |
| 6O9B   | A_HIS_191 | NE2    | A_GLU_254 | OE2    | 2.884        |
| 6O9B   | A_HIS_192 | ND1    | B_ASP_118 | OD2    | 3.864        |
| 6O9B   | A_ARG_256 | NH1    | A_GLU_253 | OE2    | 3.337        |
| 6O9B   | A_ARG_256 | NH2    | A_ASP_220 | OD1    | 3.231        |
| 6O9B   | A_ARG_256 | NH2    | A_ASP_220 | OD2    | 3.184        |
| 6O9B   | B_ARG_65  | NH2    | B_ASP_58  | OD1    | 3.970        |
| 6O9B   | B_LYS_95  | NZ     | B_GLU_94  | OE2    | 3.964        |
| 6O9B   | B_ARG_101 | NH1    | B_ASP_58  | OD2    | 3.244        |
| 6O9B   | C_LYS_9   | NZ     | A_ASP_116 | OD2    | 2.706        |

Table 885: 6O9B-specific salt bridging networks analysis. In this table, a PDB file is specified with a four-letter PDB ID, except that the names of the PDB files corresponding to the single NMR structural model split from the NMR ensemble is specified with a four-letter PDB ID in addition to a hyphen followed by the single NMR structural model numeric ID, the residue naming scheme is **Chain ID\_residue name\_residue number**,  $\angle ADH$  represents the angle formed by acceptor (A), donor (D) and hydrogen (H) ( $\angle ADH$ ).



| PDB ID | Residue A | Atom A | Residue B | Atom B | Distance (Å) |
|--------|-----------|--------|-----------|--------|--------------|
| 6O9C   | A_HIS_3   | ND1    | A_ASP_29  | OD1    | 3.533        |
| 6O9C   | A_HIS_3   | ND1    | A_ASP_29  | OD2    | 2.591        |
| 6O9C   | A_ARG_14  | NH2    | A_ASP_39  | OD1    | 3.395        |
| 6O9C   | A_ARG_14  | NH2    | A_ASP_39  | OD2    | 3.458        |
| 6O9C   | A_ARG_21  | NH1    | A_ASP_39  | OD2    | 3.725        |
| 6O9C   | A_ARG_21  | NH2    | A_ASP_37  | OD1    | 3.787        |
| 6O9C   | A_ARG_21  | NH2    | A_ASP_37  | OD2    | 3.069        |
| 6O9C   | A_ARG_35  | NH1    | A_ASP_37  | OD2    | 3.939        |
| 6O9C   | A_ARG_35  | NH1    | B_ASP_73  | OD1    | 3.395        |
| 6O9C   | A_ARG_35  | NH2    | A_GLU_46  | OE1    | 3.628        |
| 6O9C   | A_ARG_35  | NH2    | A_GLU_46  | OE2    | 2.787        |
| 6O9C   | A_ARG_44  | NH1    | A_ASP_61  | OD1    | 3.116        |
| 6O9C   | A_ARG_44  | NH2    | A_ASP_61  | OD1    | 2.964        |
| 6O9C   | A_ARG_48  | NH1    | A_GLU_46  | OE1    | 3.653        |
| 6O9C   | A_ARG_48  | NH2    | A_GLU_46  | OE1    | 3.457        |
| 6O9C   | A_HIS_93  | ND1    | A_ASP_119 | OD1    | 3.563        |
| 6O9C   | A_HIS_93  | ND1    | A_ASP_119 | OD2    | 2.884        |
| 6O9C   | A_ARG_108 | NH2    | A_ASP_106 | OD1    | 3.075        |
| 6O9C   | A_ARG_111 | NH1    | A_ASP_102 | OD2    | 3.448        |
| 6O9C   | A_ARG_114 | NH1    | A_ASP_116 | OD1    | 3.523        |
| 6O9C   | A_ARG_114 | NH1    | A_ASP_116 | OD2    | 2.739        |
| 6O9C   | A_ARG_169 | NH2    | A_GLU_166 | OE2    | 3.041        |
| 6O9C   | A_ARG_170 | NH1    | A_GLU_166 | OE1    | 3.871        |
| 6O9C   | A_LYS_176 | NZ     | A_GLU_173 | OE2    | 3.474        |
| 6O9C   | A_HIS_191 | NE2    | A_GLU_254 | OE2    | 2.693        |
| 6O9C   | A_HIS_192 | NE2    | B_ASP_118 | OD2    | 3.199        |
| 6O9C   | A_ARG_202 | NH1    | B_ASP_118 | OD2    | 3.014        |
| 6O9C   | A_ARG_256 | NH1    | A_ASP_220 | OD2    | 3.945        |
| 6O9C   | A_ARG_256 | NH1    | A_GLU_253 | OE2    | 3.454        |
| 6O9C   | A_ARG_256 | NH2    | A_ASP_220 | OD1    | 3.827        |
| 6O9C   | A_ARG_256 | NH2    | A_ASP_220 | OD2    | 2.698        |
| 6O9C   | B_ARG_23  | NH1    | B_ASP_79  | OD2    | 3.597        |
| 6O9C   | B_LYS_26  | NZ     | A_GLU_232 | OE2    | 3.913        |
| 6O9C   | B_LYS_39  | NZ     | B_GLU_36  | OE1    | 3.574        |
| 6O9C   | B_ARG_65  | NH1    | B_ASP_58  | OD1    | 3.907        |
| 6O9C   | B_ARG_65  | NH1    | B_GLU_67  | OE2    | 3.387        |
| 6O9C   | B_ARG_101 | NH2    | B_ASP_58  | OD2    | 3.040        |
| 6O9C   | C_LYS_9   | NZ     | A_ASP_77  | OD2    | 3.855        |
| 6O9C   | C_LYS_9   | NZ     | A_ASP_116 | OD2    | 2.984        |

Table 886: 6O9C-specific salt bridging networks analysis. In this table, a PDB file is specified with a four-letter PDB ID, except that the names of the PDB files corresponding to the single NMR structural model split from the NMR ensemble is specified with a four-letter PDB ID in addition to a hyphen followed by the single NMR structural model numeric ID, the residue naming scheme is **Chain ID\_residue name\_residue number**,  $\angle ADH$  represents the angle formed by acceptor (A), donor (D) and hydrogen (H) ( $\angle ADH$ ).

| PDB ID | Residue A | Atom A | Residue B | Atom B | Distance (Å) |
|--------|-----------|--------|-----------|--------|--------------|
| 6OGX   | C_LYS_12  | NZ     | C_GLU_10  | OE2    | 3.904        |
| 6OGX   | C_ARG_38  | NH1    | C_ASP_90  | OD1    | 2.937        |
| 6OGX   | C_ARG_38  | NH2    | C_GLU_46  | OE2    | 3.462        |
| 6OGX   | C_ARG_67  | NH1    | C_ASP_90  | OD1    | 3.674        |
| 6OGX   | C_ARG_67  | NH1    | C_ASP_90  | OD2    | 2.808        |
| 6OGX   | C_ARG_67  | NH2    | C_ASP_90  | OD1    | 2.780        |
| 6OGX   | C_ARG_67  | NH2    | C_ASP_90  | OD2    | 3.408        |
| 6OGX   | C_ARG_101 | NH2    | C_ASP_50  | OD1    | 2.908        |
| 6OGX   | C_ARG_101 | NH2    | C_ASP_50  | OD2    | 3.364        |
| 6OGX   | C_LYS_147 | NZ     | C_ASP_148 | OD1    | 3.403        |
| 6OGX   | C_LYS_147 | NZ     | C_ASP_148 | OD2    | 3.834        |
| 6OGX   | C_LYS_213 | NZ     | D_GLU_123 | OE1    | 2.791        |
| 6OGX   | C_LYS_213 | NZ     | D_GLU_123 | OE2    | 3.773        |
| 6OGX   | C_LYS_218 | NZ     | D_ASP_122 | OD2    | 3.785        |
| 6OGX   | D_ARG_24  | NH1    | D_ASP_70  | OD1    | 2.881        |
| 6OGX   | D_ARG_24  | NH2    | D_ASP_70  | OD1    | 3.409        |
| 6OGX   | D_ARG_24  | NH2    | D_ASP_70  | OD2    | 3.280        |
| 6OGX   | D_ARG_55  | NH2    | G_ASP_117 | OD1    | 2.990        |
| 6OGX   | D_ARG_61  | NH2    | D_GLU_81  | OE1    | 3.619        |
| 6OGX   | D_ARG_61  | NH2    | D_ASP_82  | OD1    | 2.844        |
| 6OGX   | D_ARG_61  | NH2    | D_ASP_82  | OD2    | 3.707        |
| 6OGX   | D_HIS_189 | ND1    | D_ASP_151 | OD2    | 3.260        |
| 6OGX   | D_LYS_190 | NZ     | D_GLU_213 | OE1    | 3.539        |
| 6OGX   | G_ARG_95  | NH1    | H_ASP_99  | OD1    | 3.462        |
| 6OGX   | G_ARG_95  | NH1    | H_ASP_99  | OD2    | 2.833        |
| 6OGX   | G_ARG_95  | NH2    | H_ASP_99  | OD1    | 2.923        |
| 6OGX   | G_ARG_95  | NH2    | H_ASP_99  | OD2    | 3.646        |
| 6OGX   | G_LYS_96  | NZ     | G_GLU_94  | OE2    | 3.997        |
| 6OGX   | G_ARG_110 | NH2    | G_GLU_94  | OE1    | 3.529        |
| 6OGX   | G_LYS_120 | NZ     | G_ASP_117 | OD1    | 3.499        |
| 6OGX   | G_LYS_120 | NZ     | G_ASP_117 | OD2    | 3.674        |
| 6OGX   | H_LYS_12  | NZ     | H_GLU_10  | OE1    | 3.316        |
| 6OGX   | H_ARG_38  | NH1    | H_ASP_90  | OD2    | 2.947        |
| 6OGX   | H_ARG_38  | NH2    | H_GLU_46  | OE1    | 3.229        |
| 6OGX   | H_ARG_38  | NH2    | H_ASP_90  | OD2    | 3.994        |
| 6OGX   | H_LYS_63  | NZ     | H_GLU_46  | OE1    | 3.798        |
| 6OGX   | H_LYS_63  | NZ     | H_GLU_46  | OE2    | 2.760        |
| 6OGX   | H_ARG_67  | NH1    | H_ASP_90  | OD1    | 3.110        |
| 6OGX   | H_ARG_67  | NH1    | H_ASP_90  | OD2    | 3.101        |
| 6OGX   | H_ARG_67  | NH2    | H_ASP_90  | OD1    | 3.614        |
| 6OGX   | H_ARG_67  | NH2    | H_ASP_90  | OD2    | 2.757        |
| 6OGX   | H_ARG_87  | NH2    | H_GLU_89  | OE2    | 3.153        |
| 6OGX   | H_ARG_98  | NH1    | H_ASP_102 | OD1    | 3.528        |
| 6OGX   | H_ARG_98  | NH1    | H_ASP_102 | OD2    | 2.722        |
| 6OGX   | H_ARG_100 | NH1    | L_GLU_55  | OE1    | 3.516        |
| 6OGX   | H_ARG_100 | NH1    | L_GLU_55  | OE2    | 2.787        |
| 6OGX   | H_LYS_144 | NZ     | H_ASP_145 | OD1    | 3.450        |
| 6OGX   | H_LYS_144 | NZ     | H_ASP_145 | OD2    | 2.902        |
| 6OGX   | H_LYS_211 | NZ     | H_GLU_213 | OE1    | 2.815        |
| 6OGX   | L_ARG_61  | NH2    | L_ASP_82  | OD1    | 2.857        |
| 6OGX   | L_ARG_61  | NH2    | L_ASP_82  | OD2    | 3.713        |
| 6OGX   | L_LYS_103 | NZ     | L_GLU_165 | OE1    | 2.789        |
| 6OGX   | L_LYS_103 | NZ     | L_GLU_165 | OE2    | 3.599        |

---

Table 887: 6OGX-specific salt bridging networks analysis. In this table, a PDB file is specified with a four-letter PDB ID, except that the names of the PDB files corresponding to the single NMR structural model split from the NMR ensemble is specified with a four-letter PDB ID in addition to a hyphen followed by the single NMR structural model numeric ID, the residue naming scheme is **Chain ID\_residue name\_residue number**,  $\angle ADH$  represents the angle formed by acceptor (A), donor (D) and hydrogen (H) ( $\angle ADH$ ).

| PDB ID | Residue A | Atom A | Residue B | Atom B | Distance (Å) |
|--------|-----------|--------|-----------|--------|--------------|
| 6OKM   | H_LYS_12  | NZ     | H_GLU_10  | OE1    | 3.648        |
| 6OKM   | H_LYS_19  | NZ     | H_GLU_82  | OE2    | 3.437        |
| 6OKM   | H_ARG_38  | NH1    | H_ASP_90  | OD1    | 2.918        |
| 6OKM   | H_ARG_38  | NH2    | H_GLU_46  | OE1    | 3.013        |
| 6OKM   | H_ARG_38  | NH2    | H_ASP_90  | OD1    | 3.782        |
| 6OKM   | H_LYS_63  | NZ     | H_GLU_46  | OE1    | 3.808        |
| 6OKM   | H_LYS_63  | NZ     | H_GLU_46  | OE2    | 2.757        |
| 6OKM   | H_LYS_65  | NZ     | H_GLU_62  | OE2    | 2.941        |
| 6OKM   | H_ARG_67  | NH1    | H_ASP_90  | OD1    | 3.731        |
| 6OKM   | H_ARG_67  | NH1    | H_ASP_90  | OD2    | 2.994        |
| 6OKM   | H_ARG_67  | NH2    | H_ASP_90  | OD1    | 2.792        |
| 6OKM   | H_ARG_67  | NH2    | H_ASP_90  | OD2    | 3.476        |
| 6OKM   | H_ARG_98  | NH1    | H_ASP_102 | OD1    | 3.580        |
| 6OKM   | H_ARG_98  | NH1    | H_ASP_102 | OD2    | 3.014        |
| 6OKM   | H_ARG_100 | NH1    | L_GLU_55  | OE1    | 2.851        |
| 6OKM   | H_LYS_144 | NZ     | H_ASP_145 | OD1    | 3.343        |
| 6OKM   | H_LYS_144 | NZ     | H_ASP_145 | OD2    | 2.800        |
| 6OKM   | H_HIS_165 | NE2    | L_ASP_167 | OD1    | 3.460        |
| 6OKM   | H_LYS_210 | NZ     | L_GLU_123 | OE2    | 3.540        |
| 6OKM   | H_LYS_211 | NZ     | H_GLU_213 | OE1    | 3.622        |
| 6OKM   | H_LYS_215 | NZ     | L_ASP_122 | OD1    | 3.237        |
| 6OKM   | H_LYS_215 | NZ     | L_ASP_122 | OD2    | 3.538        |
| 6OKM   | L_HIS_24  | ND1    | L_ASP_70  | OD1    | 2.785        |
| 6OKM   | L_HIS_24  | ND1    | L_ASP_70  | OD2    | 3.925        |
| 6OKM   | L_ARG_61  | NH2    | L_GLU_81  | OE2    | 3.773        |
| 6OKM   | L_ARG_61  | NH2    | L_ASP_82  | OD1    | 2.807        |
| 6OKM   | L_ARG_61  | NH2    | L_ASP_82  | OD2    | 3.536        |
| 6OKM   | L_ARG_142 | NH1    | L_GLU_105 | OE2    | 2.944        |
| 6OKM   | L_ARG_142 | NH1    | L_GLU_165 | OE1    | 3.753        |
| 6OKM   | L_ARG_142 | NH2    | L_GLU_165 | OE1    | 3.529        |
| 6OKM   | L_ARG_142 | NH2    | L_GLU_165 | OE2    | 2.617        |
| 6OKM   | L_LYS_145 | NZ     | L_GLU_195 | OE2    | 2.987        |
| 6OKM   | L_LYS_183 | NZ     | L_GLU_187 | OE1    | 3.533        |
| 6OKM   | R_HIS_44  | NE2    | R_ASP_34  | OD1    | 3.867        |
| 6OKM   | R_ARG_47  | NH1    | R_ASP_34  | OD1    | 3.651        |
| 6OKM   | R_LYS_82  | NZ     | R_ASP_74  | OD1    | 3.045        |
| 6OKM   | R_ARG_95  | NH1    | H_ASP_99  | OD1    | 3.347        |
| 6OKM   | R_ARG_95  | NH1    | H_ASP_99  | OD2    | 3.783        |
| 6OKM   | R_ARG_95  | NH2    | H_ASP_99  | OD1    | 3.371        |
| 6OKM   | R_ARG_95  | NH2    | H_ASP_99  | OD2    | 2.555        |

Table 888: 6OKM-specific salt bridging networks analysis. In this table, a PDB file is specified with a four-letter PDB ID, except that the names of the PDB files corresponding to the single NMR structural model split from the NMR ensemble is specified with a four-letter PDB ID in addition to a hyphen followed by the single NMR structural model numeric ID, the residue naming scheme is **Chain ID\_residue name\_residue number**,  $\angle ADH$  represents the angle formed by acceptor (A), donor (D) and hydrogen (H) ( $\angle ADH$ ).

| PDB ID | Residue A | Atom A | Residue B | Atom B | Distance (Å) |
|--------|-----------|--------|-----------|--------|--------------|
| 6OKN   | A_LYS_12  | NZ     | A_GLU_10  | OE2    | 3.091        |
| 6OKN   | A_ARG_38  | NH1    | A_ASP_90  | OD1    | 2.825        |
| 6OKN   | A_ARG_38  | NH2    | A_GLU_46  | OE2    | 3.132        |
| 6OKN   | A_LYS_63  | NZ     | A_GLU_46  | OE1    | 3.198        |
| 6OKN   | A_ARG_67  | NH1    | A_ASP_90  | OD1    | 3.100        |
| 6OKN   | A_ARG_67  | NH1    | A_ASP_90  | OD2    | 3.478        |
| 6OKN   | A_ARG_67  | NH2    | A_ASP_90  | OD1    | 3.897        |
| 6OKN   | A_ARG_67  | NH2    | A_ASP_90  | OD2    | 2.783        |
| 6OKN   | A_ARG_87  | NH1    | A_GLU_89  | OE2    | 3.350        |
| 6OKN   | A_ARG_101 | NH2    | A_ASP_50  | OD1    | 2.814        |
| 6OKN   | A_ARG_101 | NH2    | A_ASP_50  | OD2    | 3.671        |
| 6OKN   | A_LYS_210 | NZ     | A_ASP_212 | OD1    | 3.571        |
| 6OKN   | A_LYS_210 | NZ     | A_ASP_212 | OD2    | 2.910        |
| 6OKN   | A_LYS_213 | NZ     | B_GLU_123 | OE1    | 3.312        |
| 6OKN   | A_LYS_213 | NZ     | B_GLU_123 | OE2    | 2.829        |
| 6OKN   | A_LYS_214 | NZ     | A_GLU_216 | OE1    | 2.957        |
| 6OKN   | B_ARG_24  | NH2    | B_ASP_70  | OD2    | 2.962        |
| 6OKN   | B_ARG_61  | NH2    | B_ASP_82  | OD1    | 2.800        |
| 6OKN   | B_ARG_61  | NH2    | B_ASP_82  | OD2    | 3.520        |
| 6OKN   | B_LYS_103 | NZ     | B_GLU_165 | OE1    | 3.396        |
| 6OKN   | B_ARG_142 | NH2    | B_GLU_165 | OE2    | 3.573        |
| 6OKN   | B_LYS_149 | NZ     | B_GLU_195 | OE1    | 3.927        |
| 6OKN   | B_LYS_149 | NZ     | B_GLU_195 | OE2    | 3.761        |
| 6OKN   | B_LYS_183 | NZ     | B_GLU_187 | OE2    | 3.169        |
| 6OKN   | B_LYS_188 | NZ     | B_ASP_185 | OD2    | 3.891        |
| 6OKN   | B_HIS_189 | ND1    | B_ASP_151 | OD2    | 2.830        |
| 6OKN   | C_LYS_12  | NZ     | C_GLU_10  | OE2    | 3.089        |
| 6OKN   | C_LYS_19  | NZ     | C_GLU_82  | OE1    | 3.422        |
| 6OKN   | C_ARG_38  | NH1    | C_ASP_90  | OD1    | 2.800        |
| 6OKN   | C_ARG_38  | NH2    | C_GLU_46  | OE2    | 3.128        |
| 6OKN   | C_ARG_67  | NH2    | C_ASP_90  | OD1    | 3.311        |
| 6OKN   | C_ARG_67  | NH2    | C_ASP_90  | OD2    | 2.765        |
| 6OKN   | C_ARG_87  | NH1    | C_GLU_89  | OE2    | 3.419        |
| 6OKN   | C_LYS_147 | NZ     | C_ASP_148 | OD1    | 3.408        |
| 6OKN   | C_LYS_147 | NZ     | C_ASP_148 | OD2    | 3.266        |
| 6OKN   | C_LYS_210 | NZ     | C_ASP_212 | OD1    | 3.569        |
| 6OKN   | C_LYS_210 | NZ     | C_ASP_212 | OD2    | 2.918        |
| 6OKN   | C_LYS_213 | NZ     | D_GLU_123 | OE1    | 3.356        |
| 6OKN   | C_LYS_213 | NZ     | D_GLU_123 | OE2    | 2.896        |
| 6OKN   | C_LYS_214 | NZ     | C_GLU_216 | OE1    | 2.949        |
| 6OKN   | C_LYS_218 | NZ     | D_ASP_122 | OD2    | 3.923        |
| 6OKN   | D_ARG_24  | NH2    | D_ASP_70  | OD2    | 2.953        |
| 6OKN   | D_ARG_61  | NH2    | D_ASP_82  | OD1    | 2.797        |
| 6OKN   | D_ARG_61  | NH2    | D_ASP_82  | OD2    | 3.516        |
| 6OKN   | D_LYS_103 | NZ     | D_GLU_165 | OE1    | 3.551        |
| 6OKN   | D_ARG_142 | NH1    | D_GLU_143 | OE2    | 3.897        |
| 6OKN   | D_LYS_149 | NZ     | D_GLU_195 | OE1    | 2.973        |
| 6OKN   | D_LYS_149 | NZ     | D_GLU_195 | OE2    | 3.725        |
| 6OKN   | D_LYS_183 | NZ     | D_GLU_187 | OE2    | 3.166        |
| 6OKN   | D_LYS_188 | NZ     | D_ASP_185 | OD1    | 3.552        |
| 6OKN   | D_LYS_188 | NZ     | D_ASP_185 | OD2    | 2.987        |
| 6OKN   | D_HIS_189 | ND1    | D_ASP_151 | OD2    | 2.861        |
| 6OKN   | E_ARG_108 | NH1    | E_ASP_137 | OD1    | 3.561        |
| 6OKN   | E_ARG_110 | NH1    | E_GLU_94  | OE2    | 3.361        |
| 6OKN   | E_ARG_110 | NH2    | E_GLU_94  | OE2    | 3.771        |
| 6OKN   | R_ARG_108 | NH2    | R_ASP_137 | OD1    | 3.846        |
| 6OKN   | R_ARG_110 | NH2    | R_GLU_94  | OE2    | 3.184        |

---

Table 889: 6OKN-specific salt bridging networks analysis. In this table, a PDB file is specified with a four-letter PDB ID, except that the names of the PDB files corresponding to the single NMR structural model split from the NMR ensemble is specified with a four-letter PDB ID in addition to a hyphen followed by the single NMR structural model numeric ID, the residue naming scheme is **Chain ID\_residue name\_residue number**,  $\angle ADH$  represents the angle formed by acceptor (A), donor (D) and hydrogen (H) ( $\angle ADH$ ).

| PDB ID | Residue A | Atom A | Residue B | Atom B | Distance (Å) |
|--------|-----------|--------|-----------|--------|--------------|
| 6OOR   | A_ARG_25  | NH1    | A_ASP_43  | OD1    | 3.325        |
| 6OOR   | A_ARG_25  | NH1    | A_ASP_43  | OD2    | 3.379        |
| 6OOR   | A_ARG_25  | NH2    | A_ASP_43  | OD2    | 3.436        |
| 6OOR   | A_LYS_51  | NZ     | A_GLU_243 | OE1    | 2.738        |
| 6OOR   | A_LYS_51  | NZ     | A_GLU_243 | OE2    | 3.127        |
| 6OOR   | A_LYS_148 | NZ     | H_ASP_55  | OD2    | 3.250        |
| 6OOR   | A_HIS_203 | ND1    | A_ASP_252 | OD1    | 2.639        |
| 6OOR   | A_HIS_203 | ND1    | A_ASP_252 | OD2    | 3.969        |
| 6OOR   | A_ARG_264 | NH2    | A_ASP_274 | OD2    | 3.670        |
| 6OOR   | A_LYS_266 | NZ     | A_ASP_274 | OD2    | 2.771        |
| 6OOR   | B_ARG_12  | NH2    | A_ASP_242 | OD1    | 3.946        |
| 6OOR   | B_ARG_12  | NH2    | A_ASP_242 | OD2    | 2.705        |
| 6OOR   | B_HIS_34  | NE2    | A_GLU_97  | OE1    | 2.803        |
| 6OOR   | B_HIS_34  | NE2    | A_GLU_97  | OE2    | 3.580        |
| 6OOR   | B_LYS_48  | NZ     | B_GLU_50  | OE2    | 3.789        |
| 6OOR   | B_LYS_48  | NZ     | B_GLU_69  | OE2    | 3.855        |
| 6OOR   | L_ARG_66  | NH2    | L_GLU_86  | OE2    | 3.235        |
| 6OOR   | L_ARG_66  | NH2    | L_ASP_87  | OD1    | 2.858        |
| 6OOR   | L_ARG_66  | NH2    | L_ASP_87  | OD2    | 3.400        |
| 6OOR   | L_LYS_152 | NZ     | L_GLU_159 | OE2    | 3.764        |
| 6OOR   | L_LYS_154 | NZ     | L_GLU_200 | OE1    | 2.808        |
| 6OOR   | L_LYS_154 | NZ     | L_GLU_200 | OE2    | 3.333        |
| 6OOR   | L_ARG_160 | NH2    | L_ASP_190 | OD1    | 3.044        |
| 6OOR   | L_ARG_160 | NH2    | L_ASP_190 | OD2    | 3.065        |
| 6OOR   | L_ARG_161 | NH2    | L_GLU_159 | OE1    | 3.906        |
| 6OOR   | L_ARG_161 | NH2    | L_GLU_159 | OE2    | 3.222        |
| 6OOR   | L_HIS_194 | ND1    | L_ASP_190 | OD1    | 3.947        |
| 6OOR   | L_LYS_204 | NZ     | L_ASP_115 | OD1    | 3.329        |
| 6OOR   | L_LYS_204 | NZ     | L_ASP_115 | OD2    | 2.404        |
| 6OOR   | H_ARG_38  | NH1    | H_ASP_90  | OD1    | 3.007        |
| 6OOR   | H_ARG_38  | NH2    | H_GLU_46  | OE2    | 2.874        |
| 6OOR   | H_ARG_52  | NH1    | H_ASP_33  | OD2    | 2.683        |
| 6OOR   | H_ARG_61  | NH1    | H_GLU_46  | OE1    | 3.910        |
| 6OOR   | H_ARG_61  | NH2    | H_GLU_46  | OE1    | 3.595        |
| 6OOR   | H_ARG_67  | NH1    | H_ASP_90  | OD1    | 3.879        |
| 6OOR   | H_ARG_67  | NH2    | H_ASP_90  | OD1    | 3.229        |
| 6OOR   | H_ARG_67  | NH2    | H_ASP_90  | OD2    | 2.355        |
| 6OOR   | H_ARG_98  | NH2    | H_ASP_115 | OD2    | 3.198        |
| 6OOR   | H_ARG_109 | NH2    | A_ASP_80  | OD1    | 2.917        |
| 6OOR   | H_ARG_109 | NH2    | A_ASP_80  | OD2    | 3.352        |
| 6OOR   | H_LYS_220 | NZ     | L_GLU_128 | OE1    | 2.677        |
| 6OOR   | H_LYS_220 | NZ     | L_GLU_128 | OE2    | 2.872        |

Table 890: 6OOR-specific salt bridging networks analysis. In this table, a PDB file is specified with a four-letter PDB ID, except that the names of the PDB files corresponding to the single NMR structural model split from the NMR ensemble is specified with a four-letter PDB ID in addition to a hyphen followed by the single NMR structural model numeric ID, the residue naming scheme is **Chain ID\_residue name\_residue number**,  $\angle ADH$  represents the angle formed by acceptor (A), donor (D) and hydrogen (H) ( $\angle ADH$ ).

| PDB ID | Residue A | Atom A | Residue B  | Atom B | Distance (Å) |
|--------|-----------|--------|------------|--------|--------------|
| 6OSY   | 2_HIS_216 | NE2    | 2_ASP_57   | OD1    | 3.190        |
| 6OSY   | 2_LYS_229 | NZ     | 2_GLU_83   | OE1    | 3.622        |
| 6OSY   | 2_LYS_229 | NZ     | 2_GLU_83   | OE2    | 2.450        |
| 6OSY   | 2_LYS_231 | NZ     | 2_GLU_269  | OE1    | 3.698        |
| 6OSY   | 2_LYS_231 | NZ     | 2_GLU_269  | OE2    | 3.406        |
| 6OSY   | 2_LYS_282 | NZ     | 8_ASP_100C | OD2    | 3.941        |
| 6OSY   | 2_ARG_298 | NH1    | 2_GLU_381  | OE1    | 3.961        |
| 6OSY   | 2_ARG_469 | NH1    | 2_ASP_457  | OD1    | 3.797        |
| 6OSY   | 2_ARG_469 | NH1    | 2_ASP_457  | OD2    | 2.471        |
| 6OSY   | 2_ARG_469 | NH2    | 2_ASP_457  | OD2    | 3.905        |
| 6OSY   | 2_ARG_480 | NH1    | 2_ASP_477  | OD1    | 2.969        |
| 6OSY   | 2_LYS_487 | NZ     | 2_ASP_47   | OD1    | 2.484        |
| 6OSY   | 2_LYS_487 | NZ     | 2_GLU_91   | OE1    | 3.279        |
| 6OSY   | 5_ARG_38  | NH1    | 5_ASP_86   | OD1    | 2.426        |
| 6OSY   | 5_ARG_38  | NH2    | 5_ASP_86   | OD1    | 3.798        |
| 6OSY   | 5_HIS_52  | ND1    | 5_ASP_53   | OD1    | 3.541        |
| 6OSY   | 5_HIS_52  | NE2    | 5_ASP_53   | OD1    | 2.927        |
| 6OSY   | 5_ARG_66  | NH2    | 5_ASP_86   | OD1    | 2.765        |
| 6OSY   | 5_ARG_66  | NH2    | 5_ASP_86   | OD2    | 3.200        |
| 6OSY   | 6_ARG_54  | NH1    | 6_ASP_60   | OD2    | 3.135        |
| 6OSY   | 6_ARG_54  | NH2    | 6_ASP_60   | OD1    | 3.545        |
| 6OSY   | 6_ARG_54  | NH2    | 6_ASP_60   | OD2    | 3.739        |
| 6OSY   | 6_ARG_61  | NH2    | 6_GLU_79   | OE1    | 3.562        |
| 6OSY   | 6_ARG_61  | NH2    | 6_GLU_79   | OE2    | 2.945        |
| 6OSY   | 7_ARG_60  | NH2    | 7_ASP_78   | OD1    | 3.680        |
| 6OSY   | 7_LYS_76  | NZ     | 7_ASP_78   | OD1    | 3.618        |
| 6OSY   | 8_ARG_38  | NH2    | 8_ASP_86   | OD1    | 2.575        |
| 6OSY   | 8_ARG_61  | NH1    | 2_GLU_466  | OE2    | 3.827        |
| 6OSY   | 8_ARG_71  | NH1    | 2_ASP_368  | OD2    | 3.948        |
| 6OSY   | 8_ARG_71  | NH2    | 2_ASP_368  | OD2    | 3.279        |
| 6OSY   | A_ARG_542 | NH1    | Q_GLU_647  | OE2    | 3.907        |
| 6OSY   | A_ARG_542 | NH2    | Q_GLU_647  | OE1    | 3.187        |
| 6OSY   | A_ARG_542 | NH2    | Q_GLU_647  | OE2    | 2.660        |
| 6OSY   | A_ARG_579 | NH2    | Q_GLU_584  | OE1    | 3.706        |
| 6OSY   | A_ARG_588 | NH2    | A_GLU_584  | OE2    | 3.896        |
| 6OSY   | A_ARG_617 | NH1    | A_GLU_634  | OE1    | 3.782        |
| 6OSY   | A_ARG_617 | NH1    | A_GLU_634  | OE2    | 2.878        |
| 6OSY   | B_HIS_85  | NE2    | B_GLU_87   | OE2    | 3.796        |
| 6OSY   | B_HIS_216 | NE2    | B_ASP_57   | OD1    | 3.161        |
| 6OSY   | B_LYS_229 | NZ     | B_GLU_83   | OE1    | 3.600        |
| 6OSY   | B_LYS_229 | NZ     | B_GLU_83   | OE2    | 2.450        |
| 6OSY   | B_LYS_231 | NZ     | B_GLU_269  | OE1    | 3.715        |
| 6OSY   | B_LYS_231 | NZ     | B_GLU_269  | OE2    | 3.368        |
| 6OSY   | B_LYS_282 | NZ     | F_ASP_100C | OD1    | 3.567        |
| 6OSY   | B_LYS_282 | NZ     | F_ASP_100C | OD2    | 3.346        |
| 6OSY   | B_LYS_421 | NZ     | B_ASP_180  | OD1    | 3.951        |
| 6OSY   | B_ARG_469 | NH1    | B_ASP_457  | OD1    | 3.948        |
| 6OSY   | B_ARG_469 | NH1    | B_ASP_457  | OD2    | 2.695        |
| 6OSY   | B_ARG_469 | NH2    | B_ASP_457  | OD2    | 3.861        |
| 6OSY   | B_ARG_480 | NH1    | B_ASP_477  | OD1    | 3.023        |
| 6OSY   | B_LYS_487 | NZ     | B_ASP_47   | OD1    | 2.451        |
| 6OSY   | B_LYS_487 | NZ     | B_GLU_91   | OE1    | 3.497        |
| 6OSY   | C_ARG_38  | NH1    | C_ASP_86   | OD1    | 2.431        |
| 6OSY   | C_ARG_38  | NH2    | C_ASP_86   | OD1    | 3.856        |
| 6OSY   | C_HIS_52  | ND1    | C_ASP_53   | OD1    | 3.516        |
| 6OSY   | C_HIS_52  | NE2    | C_ASP_53   | OD1    | 2.951        |
| 6OSY   | C_ARG_66  | NH2    | C_ASP_86   | OD1    | 2.899        |



|      |           |     |            |     |       |
|------|-----------|-----|------------|-----|-------|
| 6OSY | C_ARG_66  | NH2 | C_ASP_86   | OD2 | 3.310 |
| 6OSY | D_ARG_54  | NH1 | D_ASP_60   | OD1 | 3.203 |
| 6OSY | D_ARG_54  | NH2 | D_ASP_60   | OD1 | 3.673 |
| 6OSY | D_ARG_54  | NH2 | D_ASP_60   | OD2 | 3.335 |
| 6OSY | D_ARG_61  | NH2 | D_GLU_79   | OE1 | 3.529 |
| 6OSY | D_ARG_61  | NH2 | D_GLU_79   | OE2 | 2.917 |
| 6OSY | E_ARG_60  | NH2 | E_ASP_78   | OD1 | 3.663 |
| 6OSY | E_LYS_76  | NZ  | E_ASP_78   | OD1 | 3.632 |
| 6OSY | F_ARG_38  | NH1 | F_ASP_86   | OD1 | 3.966 |
| 6OSY | F_ARG_38  | NH2 | F_ASP_86   | OD1 | 2.680 |
| 6OSY | F_ARG_66  | NH1 | F_ASP_86   | OD2 | 3.886 |
| 6OSY | F_ARG_71  | NH2 | B_ASP_368  | OD2 | 3.635 |
| 6OSY | G_ARG_542 | NH1 | A_GLU_647  | OE2 | 3.983 |
| 6OSY | G_ARG_542 | NH2 | A_GLU_647  | OE1 | 3.165 |
| 6OSY | G_ARG_542 | NH2 | A_GLU_647  | OE2 | 2.705 |
| 6OSY | G_ARG_579 | NH2 | A_GLU_584  | OE1 | 3.899 |
| 6OSY | G_ARG_588 | NH2 | G_GLU_584  | OE2 | 3.357 |
| 6OSY | G_ARG_617 | NH1 | G_GLU_634  | OE1 | 3.355 |
| 6OSY | G_ARG_617 | NH1 | G_GLU_634  | OE2 | 2.448 |
| 6OSY | H_ARG_38  | NH1 | H_GLU_46   | OE1 | 2.885 |
| 6OSY | H_ARG_38  | NH1 | H_GLU_46   | OE2 | 3.190 |
| 6OSY | H_ARG_38  | NH1 | H_ASP_86   | OD2 | 3.298 |
| 6OSY | H_ARG_38  | NH2 | H_ASP_86   | OD2 | 2.451 |
| 6OSY | H_ARG_66  | NH1 | H_ASP_86   | OD1 | 3.016 |
| 6OSY | H_ARG_66  | NH1 | H_ASP_86   | OD2 | 2.795 |
| 6OSY | H_ARG_66  | NH2 | H_ASP_86   | OD1 | 2.574 |
| 6OSY | H_ARG_66  | NH2 | H_ASP_86   | OD2 | 3.909 |
| 6OSY | H_ARG_96  | NH1 | L_GLU_55   | OE1 | 3.662 |
| 6OSY | H_HIS_100 | ND1 | 2_GLU_87   | OE2 | 3.031 |
| 6OSY | H_HIS_100 | NE2 | 2_GLU_87   | OE2 | 3.785 |
| 6OSY | I_ARG_38  | NH1 | I_GLU_46   | OE1 | 2.963 |
| 6OSY | I_ARG_38  | NH1 | I_GLU_46   | OE2 | 3.677 |
| 6OSY | I_ARG_38  | NH1 | I_ASP_86   | OD1 | 3.365 |
| 6OSY | I_ARG_38  | NH2 | I_ASP_86   | OD1 | 2.431 |
| 6OSY | I_ARG_66  | NH1 | I_ASP_86   | OD1 | 2.805 |
| 6OSY | I_ARG_66  | NH1 | I_ASP_86   | OD2 | 3.496 |
| 6OSY | I_ARG_66  | NH2 | I_ASP_86   | OD1 | 3.389 |
| 6OSY | I_ARG_66  | NH2 | I_ASP_86   | OD2 | 2.439 |
| 6OSY | I_ARG_96  | NH1 | J_GLU_55   | OE2 | 3.419 |
| 6OSY | I_HIS_100 | ND1 | B_GLU_87   | OE2 | 3.029 |
| 6OSY | I_HIS_100 | NE2 | B_GLU_87   | OE2 | 3.781 |
| 6OSY | J_ARG_24  | NH1 | J_GLU_70   | OE2 | 3.291 |
| 6OSY | J_LYS_30  | NZ  | J_ASP_28   | OD2 | 3.933 |
| 6OSY | J_ARG_46  | NH1 | I_ASP_101  | OD1 | 3.411 |
| 6OSY | J_ARG_46  | NH1 | I_ASP_101  | OD2 | 2.599 |
| 6OSY | J_ARG_46  | NH1 | J_GLU_55   | OE2 | 3.676 |
| 6OSY | J_ARG_61  | NH1 | J_GLU_81   | OE1 | 2.792 |
| 6OSY | J_ARG_61  | NH1 | J_ASP_82   | OD1 | 2.601 |
| 6OSY | J_ARG_61  | NH1 | J_ASP_82   | OD2 | 3.417 |
| 6OSY | J_ARG_61  | NH2 | J_GLU_81   | OE1 | 2.918 |
| 6OSY | K_HIS_85  | NE2 | K_GLU_87   | OE2 | 3.406 |
| 6OSY | K_HIS_216 | NE2 | K_ASP_57   | OD1 | 3.206 |
| 6OSY | K_LYS_229 | NZ  | K_GLU_83   | OE1 | 3.712 |
| 6OSY | K_LYS_229 | NZ  | K_GLU_83   | OE2 | 2.837 |
| 6OSY | K_LYS_231 | NZ  | K_GLU_269  | OE1 | 3.711 |
| 6OSY | K_LYS_231 | NZ  | K_GLU_269  | OE2 | 3.385 |
| 6OSY | K_LYS_282 | NZ  | P_ASP_100C | OD2 | 3.859 |
| 6OSY | K_LYS_421 | NZ  | K_ASP_180  | OD1 | 3.938 |

|      |           |     |           |     |       |
|------|-----------|-----|-----------|-----|-------|
| 6OSY | K_ARG_469 | NH1 | K_ASP_457 | OD1 | 3.854 |
| 6OSY | K_ARG_469 | NH1 | K_ASP_457 | OD2 | 2.579 |
| 6OSY | K_ARG_469 | NH2 | K_ASP_457 | OD2 | 3.974 |
| 6OSY | K_ARG_480 | NH1 | K_ASP_477 | OD1 | 3.037 |
| 6OSY | K_LYS_487 | NZ  | K_ASP_47  | OD1 | 2.530 |
| 6OSY | K_LYS_487 | NZ  | K_ASP_47  | OD2 | 3.781 |
| 6OSY | K_LYS_487 | NZ  | K_GLU_91  | OE1 | 2.961 |
| 6OSY | L_ARG_24  | NH1 | L_GLU_70  | OE2 | 3.285 |
| 6OSY | L_LYS_30  | NZ  | L_ASP_28  | OD2 | 3.882 |
| 6OSY | L_ARG_46  | NH1 | H_ASP_101 | OD1 | 3.509 |
| 6OSY | L_ARG_46  | NH1 | H_ASP_101 | OD2 | 2.485 |
| 6OSY | L_ARG_46  | NH1 | L_GLU_55  | OE1 | 3.489 |
| 6OSY | L_ARG_61  | NH1 | L_GLU_81  | OE1 | 2.728 |
| 6OSY | L_ARG_61  | NH1 | L_ASP_82  | OD1 | 2.575 |
| 6OSY | L_ARG_61  | NH1 | L_ASP_82  | OD2 | 3.365 |
| 6OSY | L_ARG_61  | NH2 | L_GLU_81  | OE1 | 2.971 |
| 6OSY | M_ARG_38  | NH1 | M_ASP_86  | OD1 | 2.434 |
| 6OSY | M_ARG_38  | NH2 | M_ASP_86  | OD1 | 3.790 |
| 6OSY | M_HIS_52  | ND1 | M_ASP_53  | OD1 | 3.529 |
| 6OSY | M_HIS_52  | NE2 | M_ASP_53  | OD1 | 2.931 |
| 6OSY | M_ARG_66  | NH2 | M_ASP_86  | OD1 | 2.638 |
| 6OSY | M_ARG_66  | NH2 | M_ASP_86  | OD2 | 3.176 |
| 6OSY | N_ARG_54  | NH1 | N_ASP_60  | OD2 | 3.198 |
| 6OSY | N_ARG_54  | NH2 | N_ASP_60  | OD1 | 3.491 |
| 6OSY | N_ARG_54  | NH2 | N_ASP_60  | OD2 | 3.714 |
| 6OSY | N_ARG_61  | NH2 | N_GLU_79  | OE1 | 3.680 |
| 6OSY | N_ARG_61  | NH2 | N_GLU_79  | OE2 | 2.924 |
| 6OSY | O_ARG_60  | NH2 | O_ASP_78  | OD1 | 3.714 |
| 6OSY | O_LYS_76  | NZ  | O_ASP_78  | OD1 | 3.603 |
| 6OSY | P_ARG_38  | NH1 | P_ASP_86  | OD1 | 3.657 |
| 6OSY | P_ARG_38  | NH2 | P_ASP_86  | OD1 | 2.467 |
| 6OSY | P_ARG_66  | NH1 | P_ASP_86  | OD2 | 3.897 |
| 6OSY | P_ARG_71  | NH1 | K_ASP_368 | OD2 | 3.949 |
| 6OSY | P_ARG_71  | NH2 | K_ASP_368 | OD2 | 3.325 |
| 6OSY | Q_ARG_542 | NH1 | G_GLU_647 | OE2 | 3.913 |
| 6OSY | Q_ARG_542 | NH2 | G_GLU_647 | OE1 | 3.228 |
| 6OSY | Q_ARG_542 | NH2 | G_GLU_647 | OE2 | 2.706 |
| 6OSY | Q_ARG_617 | NH1 | Q_GLU_634 | OE1 | 3.307 |
| 6OSY | Q_ARG_617 | NH1 | Q_GLU_634 | OE2 | 2.450 |
| 6OSY | R_ARG_38  | NH1 | R_GLU_46  | OE1 | 2.894 |
| 6OSY | R_ARG_38  | NH1 | R_ASP_86  | OD1 | 3.489 |
| 6OSY | R_ARG_38  | NH2 | R_ASP_86  | OD1 | 2.425 |
| 6OSY | R_ARG_66  | NH1 | R_ASP_86  | OD1 | 3.291 |
| 6OSY | R_ARG_66  | NH1 | R_ASP_86  | OD2 | 2.545 |
| 6OSY | R_ARG_66  | NH2 | R_ASP_86  | OD1 | 3.724 |
| 6OSY | R_ARG_96  | NH1 | S_GLU_55  | OE2 | 3.423 |
| 6OSY | R_HIS_100 | ND1 | K_GLU_87  | OE1 | 3.719 |
| 6OSY | R_HIS_100 | ND1 | K_GLU_87  | OE2 | 2.905 |
| 6OSY | R_HIS_100 | NE2 | K_GLU_87  | OE1 | 3.960 |
| 6OSY | S_ARG_24  | NH1 | S_GLU_70  | OE2 | 3.276 |
| 6OSY | S_LYS_30  | NZ  | S_ASP_28  | OD1 | 3.818 |
| 6OSY | S_ARG_46  | NH1 | R_ASP_101 | OD1 | 3.488 |
| 6OSY | S_ARG_46  | NH1 | R_ASP_101 | OD2 | 2.503 |
| 6OSY | S_ARG_46  | NH1 | S_GLU_55  | OE2 | 3.494 |
| 6OSY | S_ARG_61  | NH1 | S_GLU_81  | OE1 | 2.746 |
| 6OSY | S_ARG_61  | NH1 | S_ASP_82  | OD1 | 3.377 |
| 6OSY | S_ARG_61  | NH1 | S_ASP_82  | OD2 | 2.556 |
| 6OSY | S_ARG_61  | NH2 | S_GLU_81  | OE1 | 2.966 |

---

Table 891: 6OSY-specific salt bridging networks analysis. In this table, a PDB file is specified with a four-letter PDB ID, except that the names of the PDB files corresponding to the single NMR structural model split from the NMR ensemble is specified with a four-letter PDB ID in addition to a hyphen followed by the single NMR structural model numeric ID, the residue naming scheme is **Chain ID\_residue name\_residue number**,  $\angle ADH$  represents the angle formed by acceptor (A), donor (D) and hydrogen (H) ( $\angle ADH$ ).

| PDB ID | Residue A | Atom A | Residue B  | Atom B | Distance (Å) |
|--------|-----------|--------|------------|--------|--------------|
| 6OT1   | B_ARG_542 | NH2    | D_GLU_647  | OE1    | 2.021        |
| 6OT1   | B_ARG_542 | NH2    | D_GLU_647  | OE2    | 3.827        |
| 6OT1   | B_ARG_588 | NH2    | B_GLU_584  | OE2    | 2.977        |
| 6OT1   | B_LYS_601 | NZ     | D_GLU_657  | OE1    | 3.960        |
| 6OT1   | B_LYS_601 | NZ     | D_GLU_657  | OE2    | 3.832        |
| 6OT1   | B_ARG_617 | NH1    | B_GLU_634  | OE1    | 3.167        |
| 6OT1   | B_ARG_617 | NH1    | B_GLU_634  | OE2    | 2.669        |
| 6OT1   | B_ARG_617 | NH2    | B_GLU_621  | OE1    | 3.234        |
| 6OT1   | B_ARG_617 | NH2    | B_GLU_621  | OE2    | 3.259        |
| 6OT1   | G_HIS_85  | NE2    | G_GLU_87   | OE2    | 3.938        |
| 6OT1   | G_HIS_216 | NE2    | G_ASP_57   | OD1    | 2.810        |
| 6OT1   | G_HIS_216 | NE2    | G_ASP_57   | OD2    | 3.156        |
| 6OT1   | G_LYS_229 | NZ     | G_GLU_83   | OE2    | 3.683        |
| 6OT1   | G_LYS_231 | NZ     | G_GLU_268  | OE1    | 3.079        |
| 6OT1   | G_LYS_231 | NZ     | G_GLU_268  | OE2    | 3.577        |
| 6OT1   | G_HIS_249 | NE2    | G_GLU_482  | OE1    | 3.787        |
| 6OT1   | G_LYS_282 | NZ     | G_GLU_275  | OE2    | 3.607        |
| 6OT1   | G_LYS_282 | NZ     | q_ASP_100C | OD2    | 3.404        |
| 6OT1   | G_ARG_298 | NH1    | G_GLU_381  | OE1    | 2.421        |
| 6OT1   | G_ARG_298 | NH1    | G_GLU_381  | OE2    | 3.196        |
| 6OT1   | G_ARG_327 | NH2    | m_GLU_100I | OE1    | 3.817        |
| 6OT1   | G_LYS_351 | NZ     | G_GLU_269  | OE1    | 3.548        |
| 6OT1   | G_ARG_429 | NH1    | G_ASP_113  | OD1    | 3.405        |
| 6OT1   | G_ARG_429 | NH1    | G_ASP_113  | OD2    | 2.495        |
| 6OT1   | G_ARG_469 | NH1    | G_ASP_457  | OD1    | 2.847        |
| 6OT1   | G_ARG_476 | NH1    | G_GLU_102  | OE1    | 3.389        |
| 6OT1   | G_ARG_476 | NH1    | G_ASP_474  | OD2    | 3.647        |
| 6OT1   | G_ARG_476 | NH2    | G_GLU_102  | OE1    | 3.349        |
| 6OT1   | G_ARG_476 | NH2    | G_GLU_102  | OE2    | 3.433        |
| 6OT1   | G_ARG_480 | NH1    | G_ASP_477  | OD1    | 3.354        |
| 6OT1   | G_LYS_487 | NZ     | G_ASP_47   | OD1    | 2.584        |
| 6OT1   | G_LYS_487 | NZ     | G_ASP_47   | OD2    | 3.393        |
| 6OT1   | G_LYS_487 | NZ     | G_GLU_91   | OE2    | 2.597        |
| 6OT1   | H_ARG_38  | NH2    | H_ASP_86   | OD1    | 3.494        |
| 6OT1   | H_LYS_71  | NZ     | H_GLU_55   | OE2    | 3.697        |
| 6OT1   | L_ARG_54  | NH2    | L_ASP_60   | OD2    | 3.975        |
| 6OT1   | L_ARG_61  | NH1    | L_GLU_81   | OE2    | 3.772        |
| 6OT1   | L_ARG_61  | NH2    | L_GLU_81   | OE2    | 2.479        |
| 6OT1   | m_ARG_38  | NH1    | m_ASP_86   | OD1    | 3.011        |
| 6OT1   | m_ARG_38  | NH2    | m_GLU_46   | OE1    | 2.859        |
| 6OT1   | m_ARG_38  | NH2    | m_GLU_46   | OE2    | 3.063        |
| 6OT1   | m_ARG_38  | NH2    | m_ASP_86   | OD1    | 3.767        |
| 6OT1   | m_HIS_52  | ND1    | m_ASP_53   | OD1    | 3.328        |
| 6OT1   | m_HIS_52  | NE2    | m_ASP_53   | OD1    | 3.028        |
| 6OT1   | m_ARG_66  | NH1    | m_ASP_86   | OD2    | 2.461        |
| 6OT1   | m_ARG_66  | NH2    | m_ASP_86   | OD1    | 3.460        |
| 6OT1   | m_ARG_66  | NH2    | m_ASP_86   | OD2    | 3.125        |
| 6OT1   | m_LYS_73  | NZ     | m_ASP_53   | OD2    | 3.345        |
| 6OT1   | m_LYS_96  | NZ     | m_ASP_100Q | OD1    | 3.813        |
| 6OT1   | m_LYS_96  | NZ     | m_ASP_100Q | OD2    | 2.475        |
| 6OT1   | n_ARG_31  | NH1    | n_ASP_92   | OD2    | 2.719        |
| 6OT1   | n_ARG_54  | NH2    | n_ASP_60   | OD1    | 3.737        |
| 6OT1   | n_ARG_54  | NH2    | n_ASP_60   | OD2    | 2.630        |
| 6OT1   | n_ARG_61  | NH1    | n_ASP_82   | OD2    | 3.959        |
| 6OT1   | n_ARG_61  | NH2    | n_GLU_79   | OE2    | 3.140        |
| 6OT1   | n_ARG_61  | NH2    | n_ASP_82   | OD1    | 3.334        |
| 6OT1   | n_ARG_61  | NH2    | n_ASP_82   | OD2    | 3.994        |

|      |           |     |            |     |       |
|------|-----------|-----|------------|-----|-------|
| 6OT1 | n_ARG_95  | NH2 | n_GLU_25   | OE1 | 3.478 |
| 6OT1 | q_ARG_38  | NH1 | q_ASP_86   | OD1 | 2.452 |
| 6OT1 | q_ARG_38  | NH1 | q_ASP_86   | OD2 | 3.996 |
| 6OT1 | q_ARG_38  | NH2 | q_GLU_46   | OE1 | 2.492 |
| 6OT1 | q_ARG_38  | NH2 | q_GLU_46   | OE2 | 3.367 |
| 6OT1 | q_ARG_66  | NH2 | q_ASP_86   | OD2 | 2.599 |
| 6OT1 | q_ARG_71  | NH2 | G_ASP_368  | OD2 | 3.596 |
| 6OT1 | r_LYS_24  | NZ  | r_ASP_69   | OD1 | 3.076 |
| 6OT1 | r_ARG_52  | NH2 | r_ASP_49   | OD2 | 3.108 |
| 6OT1 | r_ARG_53  | NH1 | r_ASP_59   | OD1 | 3.647 |
| 6OT1 | r_ARG_60  | NH2 | r_ASP_81   | OD1 | 3.037 |
| 6OT1 | r_ARG_60  | NH2 | r_ASP_81   | OD2 | 2.674 |
| 6OT1 | O_ARG_542 | NH2 | B_GLU_647  | OE1 | 2.048 |
| 6OT1 | O_ARG_542 | NH2 | B_GLU_647  | OE2 | 3.874 |
| 6OT1 | O_ARG_588 | NH2 | O_GLU_584  | OE2 | 2.978 |
| 6OT1 | O_LYS_601 | NZ  | B_GLU_657  | OE1 | 3.934 |
| 6OT1 | O_LYS_601 | NZ  | B_GLU_657  | OE2 | 3.759 |
| 6OT1 | O_ARG_617 | NH1 | O_GLU_634  | OE1 | 3.167 |
| 6OT1 | O_ARG_617 | NH1 | O_GLU_634  | OE2 | 2.669 |
| 6OT1 | O_ARG_617 | NH2 | O_GLU_621  | OE1 | 3.234 |
| 6OT1 | O_ARG_617 | NH2 | O_GLU_621  | OE2 | 3.261 |
| 6OT1 | E_HIS_85  | NE2 | E_GLU_87   | OE2 | 3.938 |
| 6OT1 | E_HIS_216 | NE2 | E_ASP_57   | OD1 | 2.811 |
| 6OT1 | E_HIS_216 | NE2 | E_ASP_57   | OD2 | 3.156 |
| 6OT1 | E_LYS_229 | NZ  | E_GLU_83   | OE2 | 3.683 |
| 6OT1 | E_LYS_231 | NZ  | E_GLU_268  | OE1 | 3.077 |
| 6OT1 | E_LYS_231 | NZ  | E_GLU_268  | OE2 | 3.575 |
| 6OT1 | E_HIS_249 | NE2 | E_GLU_482  | OE1 | 3.787 |
| 6OT1 | E_LYS_282 | NZ  | E_GLU_275  | OE2 | 3.608 |
| 6OT1 | E_LYS_282 | NZ  | J_ASP_100C | OD2 | 3.404 |
| 6OT1 | E_ARG_298 | NH1 | E_GLU_381  | OE1 | 2.420 |
| 6OT1 | E_ARG_298 | NH1 | E_GLU_381  | OE2 | 3.196 |
| 6OT1 | E_ARG_327 | NH2 | F_GLU_100I | OE1 | 3.817 |
| 6OT1 | E_LYS_351 | NZ  | E_GLU_269  | OE1 | 3.548 |
| 6OT1 | E_ARG_429 | NH1 | E_ASP_113  | OD1 | 3.405 |
| 6OT1 | E_ARG_429 | NH1 | E_ASP_113  | OD2 | 2.495 |
| 6OT1 | E_ARG_469 | NH1 | E_ASP_457  | OD1 | 2.847 |
| 6OT1 | E_ARG_476 | NH1 | E_GLU_102  | OE1 | 3.389 |
| 6OT1 | E_ARG_476 | NH1 | E_ASP_474  | OD2 | 3.648 |
| 6OT1 | E_ARG_476 | NH2 | E_GLU_102  | OE1 | 3.349 |
| 6OT1 | E_ARG_476 | NH2 | E_GLU_102  | OE2 | 3.433 |
| 6OT1 | E_ARG_480 | NH1 | E_ASP_477  | OD1 | 3.353 |
| 6OT1 | E_LYS_487 | NZ  | E_ASP_47   | OD1 | 2.586 |
| 6OT1 | E_LYS_487 | NZ  | E_ASP_47   | OD2 | 3.398 |
| 6OT1 | E_LYS_487 | NZ  | E_GLU_91   | OE2 | 2.596 |
| 6OT1 | A_ARG_38  | NH2 | A_ASP_86   | OD1 | 3.495 |
| 6OT1 | A_LYS_71  | NZ  | A_GLU_55   | OE2 | 3.697 |
| 6OT1 | C_ARG_54  | NH2 | C_ASP_60   | OD2 | 3.977 |
| 6OT1 | C_ARG_61  | NH1 | C_GLU_81   | OE2 | 3.768 |
| 6OT1 | C_ARG_61  | NH2 | C_GLU_81   | OE2 | 2.478 |
| 6OT1 | F_ARG_38  | NH1 | F_ASP_86   | OD1 | 3.011 |
| 6OT1 | F_ARG_38  | NH2 | F_GLU_46   | OE1 | 2.859 |
| 6OT1 | F_ARG_38  | NH2 | F_GLU_46   | OE2 | 3.063 |
| 6OT1 | F_ARG_38  | NH2 | F_ASP_86   | OD1 | 3.766 |
| 6OT1 | F_HIS_52  | ND1 | F_ASP_53   | OD1 | 3.327 |
| 6OT1 | F_HIS_52  | NE2 | F_ASP_53   | OD1 | 3.026 |
| 6OT1 | F_ARG_66  | NH1 | F_ASP_86   | OD2 | 2.462 |
| 6OT1 | F_ARG_66  | NH2 | F_ASP_86   | OD1 | 3.460 |

|      |           |     |            |     |       |
|------|-----------|-----|------------|-----|-------|
| 6OT1 | F_ARG_66  | NH2 | F_ASP_86   | OD2 | 3.125 |
| 6OT1 | F_LYS_73  | NZ  | F_ASP_53   | OD2 | 3.344 |
| 6OT1 | F_LYS_96  | NZ  | F_ASP_100Q | OD1 | 3.814 |
| 6OT1 | F_LYS_96  | NZ  | F_ASP_100Q | OD2 | 2.475 |
| 6OT1 | I_ARG_31  | NH1 | I_ASP_92   | OD2 | 2.719 |
| 6OT1 | I_ARG_54  | NH2 | I_ASP_60   | OD1 | 3.738 |
| 6OT1 | I_ARG_54  | NH2 | I_ASP_60   | OD2 | 2.630 |
| 6OT1 | I_ARG_61  | NH1 | I_ASP_82   | OD2 | 3.959 |
| 6OT1 | I_ARG_61  | NH2 | I_GLU_79   | OE2 | 3.139 |
| 6OT1 | I_ARG_61  | NH2 | I_ASP_82   | OD1 | 3.334 |
| 6OT1 | I_ARG_61  | NH2 | I_ASP_82   | OD2 | 3.993 |
| 6OT1 | I_ARG_95  | NH2 | I_GLU_25   | OE1 | 3.478 |
| 6OT1 | J_ARG_38  | NH1 | J_ASP_86   | OD1 | 2.453 |
| 6OT1 | J_ARG_38  | NH1 | J_ASP_86   | OD2 | 3.995 |
| 6OT1 | J_ARG_38  | NH2 | J_GLU_46   | OE1 | 2.492 |
| 6OT1 | J_ARG_38  | NH2 | J_GLU_46   | OE2 | 3.368 |
| 6OT1 | J_ARG_66  | NH2 | J_ASP_86   | OD2 | 2.596 |
| 6OT1 | J_ARG_71  | NH2 | E_ASP_368  | OD2 | 3.599 |
| 6OT1 | K_LYS_24  | NZ  | K_ASP_69   | OD1 | 3.078 |
| 6OT1 | K_ARG_52  | NH2 | K_ASP_49   | OD2 | 3.106 |
| 6OT1 | K_ARG_53  | NH1 | K_ASP_59   | OD1 | 3.648 |
| 6OT1 | K_ARG_60  | NH2 | K_ASP_81   | OD1 | 3.037 |
| 6OT1 | K_ARG_60  | NH2 | K_ASP_81   | OD2 | 2.675 |
| 6OT1 | D_ARG_542 | NH2 | O_GLU_647  | OE1 | 2.015 |
| 6OT1 | D_ARG_542 | NH2 | O_GLU_647  | OE2 | 3.816 |
| 6OT1 | D_ARG_588 | NH2 | D_GLU_584  | OE2 | 2.978 |
| 6OT1 | D_LYS_601 | NZ  | O_GLU_657  | OE2 | 3.900 |
| 6OT1 | D_ARG_617 | NH1 | D_GLU_634  | OE1 | 3.168 |
| 6OT1 | D_ARG_617 | NH1 | D_GLU_634  | OE2 | 2.668 |
| 6OT1 | D_ARG_617 | NH2 | D_GLU_621  | OE1 | 3.233 |
| 6OT1 | D_ARG_617 | NH2 | D_GLU_621  | OE2 | 3.260 |
| 6OT1 | P_HIS_85  | NE2 | P_GLU_87   | OE2 | 3.938 |
| 6OT1 | P_HIS_216 | NE2 | P_ASP_57   | OD1 | 2.811 |
| 6OT1 | P_HIS_216 | NE2 | P_ASP_57   | OD2 | 3.156 |
| 6OT1 | P_LYS_229 | NZ  | P_GLU_83   | OE2 | 3.683 |
| 6OT1 | P_LYS_231 | NZ  | P_GLU_268  | OE1 | 3.078 |
| 6OT1 | P_LYS_231 | NZ  | P_GLU_268  | OE2 | 3.576 |
| 6OT1 | P_HIS_249 | NE2 | P_GLU_482  | OE1 | 3.788 |
| 6OT1 | P_LYS_282 | NZ  | P_GLU_275  | OE2 | 3.608 |
| 6OT1 | P_LYS_282 | NZ  | S_ASP_100C | OD2 | 3.405 |
| 6OT1 | P_ARG_298 | NH1 | P_GLU_381  | OE1 | 2.420 |
| 6OT1 | P_ARG_298 | NH1 | P_GLU_381  | OE2 | 3.195 |
| 6OT1 | P_ARG_327 | NH2 | Q_GLU_100I | OE1 | 3.817 |
| 6OT1 | P_LYS_351 | NZ  | P_GLU_269  | OE1 | 3.548 |
| 6OT1 | P_ARG_429 | NH1 | P_ASP_113  | OD1 | 3.405 |
| 6OT1 | P_ARG_429 | NH1 | P_ASP_113  | OD2 | 2.495 |
| 6OT1 | P_ARG_469 | NH1 | P_ASP_457  | OD1 | 2.848 |
| 6OT1 | P_ARG_476 | NH1 | P_GLU_102  | OE1 | 3.390 |
| 6OT1 | P_ARG_476 | NH1 | P_ASP_474  | OD2 | 3.647 |
| 6OT1 | P_ARG_476 | NH2 | P_GLU_102  | OE1 | 3.349 |
| 6OT1 | P_ARG_476 | NH2 | P_GLU_102  | OE2 | 3.433 |
| 6OT1 | P_ARG_480 | NH1 | P_ASP_477  | OD1 | 3.353 |
| 6OT1 | P_LYS_487 | NZ  | P_ASP_47   | OD1 | 2.584 |
| 6OT1 | P_LYS_487 | NZ  | P_ASP_47   | OD2 | 3.393 |
| 6OT1 | P_LYS_487 | NZ  | P_GLU_91   | OE2 | 2.596 |
| 6OT1 | M_ARG_38  | NH2 | M_ASP_86   | OD1 | 3.493 |
| 6OT1 | M_LYS_71  | NZ  | M_GLU_55   | OE2 | 3.697 |
| 6OT1 | N_ARG_54  | NH2 | N_ASP_60   | OD2 | 3.974 |

|      |          |     |            |     |       |
|------|----------|-----|------------|-----|-------|
| 6OT1 | N_ARG_61 | NH1 | N_GLU_81   | OE2 | 3.770 |
| 6OT1 | N_ARG_61 | NH2 | N_GLU_81   | OE2 | 2.479 |
| 6OT1 | Q_ARG_38 | NH1 | Q_ASP_86   | OD1 | 3.012 |
| 6OT1 | Q_ARG_38 | NH2 | Q_GLU_46   | OE1 | 2.859 |
| 6OT1 | Q_ARG_38 | NH2 | Q_GLU_46   | OE2 | 3.063 |
| 6OT1 | Q_ARG_38 | NH2 | Q_ASP_86   | OD1 | 3.766 |
| 6OT1 | Q_HIS_52 | ND1 | Q_ASP_53   | OD1 | 3.327 |
| 6OT1 | Q_HIS_52 | NE2 | Q_ASP_53   | OD1 | 3.026 |
| 6OT1 | Q_ARG_66 | NH1 | Q_ASP_86   | OD2 | 2.462 |
| 6OT1 | Q_ARG_66 | NH2 | Q_ASP_86   | OD1 | 3.460 |
| 6OT1 | Q_ARG_66 | NH2 | Q_ASP_86   | OD2 | 3.125 |
| 6OT1 | Q_LYS_73 | NZ  | Q_ASP_53   | OD2 | 3.344 |
| 6OT1 | Q_LYS_96 | NZ  | Q_ASP_100Q | OD1 | 3.814 |
| 6OT1 | Q_LYS_96 | NZ  | Q_ASP_100Q | OD2 | 2.476 |
| 6OT1 | R_ARG_31 | NH1 | R_ASP_92   | OD2 | 2.718 |
| 6OT1 | R_ARG_54 | NH2 | R_ASP_60   | OD1 | 3.737 |
| 6OT1 | R_ARG_54 | NH2 | R_ASP_60   | OD2 | 2.630 |
| 6OT1 | R_ARG_61 | NH1 | R_ASP_82   | OD2 | 3.960 |
| 6OT1 | R_ARG_61 | NH2 | R_GLU_79   | OE2 | 3.139 |
| 6OT1 | R_ARG_61 | NH2 | R_ASP_82   | OD1 | 3.334 |
| 6OT1 | R_ARG_61 | NH2 | R_ASP_82   | OD2 | 3.995 |
| 6OT1 | R_ARG_95 | NH2 | R_GLU_25   | OE1 | 3.477 |
| 6OT1 | S_ARG_38 | NH1 | S_ASP_86   | OD1 | 2.452 |
| 6OT1 | S_ARG_38 | NH1 | S_ASP_86   | OD2 | 3.995 |
| 6OT1 | S_ARG_38 | NH2 | S_GLU_46   | OE1 | 2.492 |
| 6OT1 | S_ARG_38 | NH2 | S_GLU_46   | OE2 | 3.367 |
| 6OT1 | S_ARG_66 | NH2 | S_ASP_86   | OD2 | 2.599 |
| 6OT1 | S_ARG_71 | NH2 | P_ASP_368  | OD2 | 3.597 |
| 6OT1 | T_LYS_24 | NZ  | T_ASP_69   | OD1 | 3.076 |
| 6OT1 | T_ARG_52 | NH2 | T_ASP_49   | OD2 | 3.107 |
| 6OT1 | T_ARG_53 | NH1 | T_ASP_59   | OD1 | 3.647 |
| 6OT1 | T_ARG_60 | NH2 | T_ASP_81   | OD1 | 3.038 |
| 6OT1 | T_ARG_60 | NH2 | T_ASP_81   | OD2 | 2.673 |

Table 892: 6OT1-specific salt bridging networks analysis. In this table, a PDB file is specified with a four-letter PDB ID, except that the names of the PDB files corresponding to the single NMR structural model split from the NMR ensemble is specified with a four-letter PDB ID in addition to a hyphen followed by the single NMR structural model numeric ID, the residue naming scheme is **Chain ID\_residue name\_residue number**,  $\angle ADH$  represents the angle formed by acceptor (A), donor (D) and hydrogen (H) ( $\angle ADH$ ).

| PDB ID | Residue A | Atom A | Residue B | Atom B | Distance (Å) |
|--------|-----------|--------|-----------|--------|--------------|
| 6P62   | A_LYS_46  | NZ     | A_ASP_632 | OD2    | 2.721        |
| 6P62   | A_LYS_97  | NZ     | A_GLU_275 | OE2    | 3.366        |
| 6P62   | A_ARG_151 | NH2    | A_ASP_140 | OD1    | 3.754        |
| 6P62   | A_LYS_168 | NZ     | B_GLU_190 | OE2    | 3.547        |
| 6P62   | A_LYS_229 | NZ     | A_GLU_83  | OE1    | 3.953        |
| 6P62   | A_LYS_229 | NZ     | A_GLU_83  | OE2    | 2.773        |
| 6P62   | A_LYS_231 | NZ     | A_GLU_267 | OE1    | 3.655        |
| 6P62   | A_LYS_232 | NZ     | A_GLU_268 | OE2    | 3.138        |
| 6P62   | A_LYS_232 | NZ     | A_GLU_269 | OE2    | 2.749        |
| 6P62   | A_HIS_249 | NE2    | A_GLU_482 | OE1    | 3.132        |
| 6P62   | A_LYS_282 | NZ     | A_GLU_275 | OE1    | 3.423        |
| 6P62   | A_ARG_298 | NH1    | A_GLU_381 | OE2    | 2.910        |
| 6P62   | A_ARG_298 | NH2    | A_GLU_381 | OE2    | 3.307        |
| 6P62   | A_LYS_335 | NZ     | A_ASP_412 | OD2    | 2.410        |
| 6P62   | A_LYS_351 | NZ     | A_GLU_269 | OE1    | 3.133        |
| 6P62   | A_LYS_421 | NZ     | A_GLU_370 | OE2    | 2.730        |
| 6P62   | A_ARG_429 | NH1    | A_ASP_113 | OD1    | 3.526        |
| 6P62   | A_ARG_429 | NH1    | A_ASP_113 | OD2    | 2.935        |
| 6P62   | A_ARG_429 | NH2    | A_ASP_113 | OD1    | 2.818        |
| 6P62   | A_ARG_429 | NH2    | A_ASP_113 | OD2    | 3.695        |
| 6P62   | A_ARG_476 | NH1    | A_ASP_474 | OD1    | 3.290        |
| 6P62   | A_ARG_476 | NH1    | A_ASP_474 | OD2    | 3.909        |
| 6P62   | A_ARG_476 | NH2    | A_GLU_102 | OE1    | 3.634        |
| 6P62   | A_ARG_476 | NH2    | A_GLU_102 | OE2    | 3.089        |
| 6P62   | A_LYS_487 | NZ     | A_ASP_47  | OD1    | 3.073        |
| 6P62   | A_LYS_487 | NZ     | A_ASP_47  | OD2    | 2.842        |
| 6P62   | A_LYS_490 | NZ     | A_GLU_492 | OE2    | 3.504        |
| 6P62   | A_ARG_520 | NH2    | A_GLU_87  | OE1    | 3.537        |
| 6P62   | A_ARG_542 | NH1    | B_GLU_647 | OE1    | 2.629        |
| 6P62   | A_ARG_542 | NH1    | B_GLU_647 | OE2    | 3.985        |
| 6P62   | A_ARG_542 | NH2    | B_GLU_648 | OE2    | 3.131        |
| 6P62   | A_LYS_574 | NZ     | A_ASP_107 | OD1    | 2.481        |
| 6P62   | A_LYS_574 | NZ     | A_ASP_107 | OD2    | 3.953        |
| 6P62   | A_ARG_579 | NH1    | B_GLU_584 | OE1    | 3.453        |
| 6P62   | A_ARG_579 | NH1    | B_GLU_584 | OE2    | 2.953        |
| 6P62   | A_ARG_585 | NH2    | A_GLU_492 | OE1    | 3.953        |
| 6P62   | A_ARG_585 | NH2    | A_GLU_492 | OE2    | 2.999        |
| 6P62   | A_ARG_588 | NH1    | A_GLU_584 | OE1    | 3.660        |
| 6P62   | A_ARG_588 | NH2    | A_GLU_584 | OE1    | 3.069        |
| 6P62   | A_ARG_617 | NH1    | A_GLU_634 | OE1    | 3.708        |
| 6P62   | A_ARG_617 | NH1    | A_GLU_634 | OE2    | 3.595        |
| 6P62   | H_ARG_38  | NH1    | H_ASP_86  | OD1    | 3.041        |
| 6P62   | H_ARG_38  | NH2    | H_GLU_46  | OE1    | 2.920        |
| 6P62   | H_ARG_94  | NH2    | H_ASP_101 | OD1    | 3.646        |
| 6P62   | H_ARG_94  | NH2    | H_ASP_101 | OD2    | 2.930        |
| 6P62   | L_LYS_22  | NZ     | L_GLU_70  | OE2    | 3.542        |
| 6P62   | L_ARG_61  | NH1    | L_GLU_79  | OE2    | 3.423        |
| 6P62   | L_ARG_61  | NH1    | L_ASP_82  | OD2    | 3.764        |
| 6P62   | L_ARG_61  | NH2    | L_ASP_77  | OD2    | 2.844        |
| 6P62   | L_ARG_61  | NH2    | L_GLU_79  | OE2    | 2.955        |
| 6P62   | B_LYS_46  | NZ     | B_ASP_632 | OD2    | 2.722        |
| 6P62   | B_LYS_97  | NZ     | B_GLU_275 | OE2    | 3.366        |
| 6P62   | B_ARG_151 | NH2    | B_ASP_140 | OD1    | 3.754        |
| 6P62   | B_LYS_168 | NZ     | E_GLU_190 | OE2    | 3.547        |
| 6P62   | B_LYS_229 | NZ     | B_GLU_83  | OE1    | 3.953        |
| 6P62   | B_LYS_229 | NZ     | B_GLU_83  | OE2    | 2.774        |
| 6P62   | B_LYS_231 | NZ     | B_GLU_267 | OE1    | 3.655        |



|      |           |     |           |     |       |
|------|-----------|-----|-----------|-----|-------|
| 6P62 | B_LYS_232 | NZ  | B_GLU_268 | OE2 | 3.139 |
| 6P62 | B_LYS_232 | NZ  | B_GLU_269 | OE2 | 2.750 |
| 6P62 | B_HIS_249 | NE2 | B_GLU_482 | OE1 | 3.131 |
| 6P62 | B_LYS_282 | NZ  | B_GLU_275 | OE1 | 3.424 |
| 6P62 | B_ARG_298 | NH1 | B_GLU_381 | OE2 | 2.910 |
| 6P62 | B_ARG_298 | NH2 | B_GLU_381 | OE2 | 3.308 |
| 6P62 | B_LYS_335 | NZ  | B_ASP_412 | OD2 | 2.410 |
| 6P62 | B_LYS_351 | NZ  | B_GLU_269 | OE1 | 3.133 |
| 6P62 | B_LYS_421 | NZ  | B_GLU_370 | OE2 | 2.731 |
| 6P62 | B_ARG_429 | NH1 | B_ASP_113 | OD1 | 3.526 |
| 6P62 | B_ARG_429 | NH1 | B_ASP_113 | OD2 | 2.934 |
| 6P62 | B_ARG_429 | NH2 | B_ASP_113 | OD1 | 2.819 |
| 6P62 | B_ARG_429 | NH2 | B_ASP_113 | OD2 | 3.695 |
| 6P62 | B_ARG_476 | NH1 | B_ASP_474 | OD1 | 3.291 |
| 6P62 | B_ARG_476 | NH1 | B_ASP_474 | OD2 | 3.909 |
| 6P62 | B_ARG_476 | NH2 | B_GLU_102 | OE1 | 3.634 |
| 6P62 | B_ARG_476 | NH2 | B_GLU_102 | OE2 | 3.089 |
| 6P62 | B_LYS_487 | NZ  | B_ASP_47  | OD1 | 3.072 |
| 6P62 | B_LYS_487 | NZ  | B_ASP_47  | OD2 | 2.841 |
| 6P62 | B_LYS_490 | NZ  | B_GLU_492 | OE2 | 3.504 |
| 6P62 | B_ARG_520 | NH2 | B_GLU_87  | OE1 | 3.537 |
| 6P62 | B_ARG_542 | NH1 | E_GLU_647 | OE1 | 2.630 |
| 6P62 | B_ARG_542 | NH1 | E_GLU_647 | OE2 | 3.986 |
| 6P62 | B_ARG_542 | NH2 | E_GLU_648 | OE2 | 3.130 |
| 6P62 | B_LYS_574 | NZ  | B_ASP_107 | OD1 | 2.481 |
| 6P62 | B_LYS_574 | NZ  | B_ASP_107 | OD2 | 3.954 |
| 6P62 | B_ARG_579 | NH1 | E_GLU_584 | OE1 | 3.454 |
| 6P62 | B_ARG_579 | NH1 | E_GLU_584 | OE2 | 2.952 |
| 6P62 | B_ARG_585 | NH2 | B_GLU_492 | OE1 | 3.952 |
| 6P62 | B_ARG_585 | NH2 | B_GLU_492 | OE2 | 2.998 |
| 6P62 | B_ARG_588 | NH1 | B_GLU_584 | OE1 | 3.660 |
| 6P62 | B_ARG_588 | NH2 | B_GLU_584 | OE1 | 3.069 |
| 6P62 | B_ARG_617 | NH1 | B_GLU_634 | OE1 | 3.708 |
| 6P62 | B_ARG_617 | NH1 | B_GLU_634 | OE2 | 3.595 |
| 6P62 | C_ARG_38  | NH1 | C_ASP_86  | OD1 | 3.041 |
| 6P62 | C_ARG_38  | NH2 | C_GLU_46  | OE1 | 2.920 |
| 6P62 | C_ARG_94  | NH2 | C_ASP_101 | OD1 | 3.646 |
| 6P62 | C_ARG_94  | NH2 | C_ASP_101 | OD2 | 2.930 |
| 6P62 | D_LYS_22  | NZ  | D_GLU_70  | OE2 | 3.542 |
| 6P62 | D_ARG_61  | NH1 | D_GLU_79  | OE2 | 3.423 |
| 6P62 | D_ARG_61  | NH1 | D_ASP_82  | OD2 | 3.764 |
| 6P62 | D_ARG_61  | NH2 | D_ASP_77  | OD2 | 2.845 |
| 6P62 | D_ARG_61  | NH2 | D_GLU_79  | OE2 | 2.955 |
| 6P62 | E_LYS_46  | NZ  | E_ASP_632 | OD2 | 2.721 |
| 6P62 | E_LYS_97  | NZ  | E_GLU_275 | OE2 | 3.366 |
| 6P62 | E_ARG_151 | NH2 | E_ASP_140 | OD1 | 3.754 |
| 6P62 | E_LYS_168 | NZ  | A_GLU_190 | OE2 | 3.547 |
| 6P62 | E_LYS_229 | NZ  | E_GLU_83  | OE1 | 3.953 |
| 6P62 | E_LYS_229 | NZ  | E_GLU_83  | OE2 | 2.773 |
| 6P62 | E_LYS_231 | NZ  | E_GLU_267 | OE1 | 3.656 |
| 6P62 | E_LYS_232 | NZ  | E_GLU_268 | OE2 | 3.139 |
| 6P62 | E_LYS_232 | NZ  | E_GLU_269 | OE2 | 2.749 |
| 6P62 | E_HIS_249 | NE2 | E_GLU_482 | OE1 | 3.131 |
| 6P62 | E_LYS_282 | NZ  | E_GLU_275 | OE1 | 3.424 |
| 6P62 | E_ARG_298 | NH1 | E_GLU_381 | OE2 | 2.909 |
| 6P62 | E_ARG_298 | NH2 | E_GLU_381 | OE2 | 3.307 |
| 6P62 | E_LYS_335 | NZ  | E_ASP_412 | OD2 | 2.409 |
| 6P62 | E_LYS_351 | NZ  | E_GLU_269 | OE1 | 3.133 |

|      |           |     |           |     |       |
|------|-----------|-----|-----------|-----|-------|
| 6P62 | E_LYS_421 | NZ  | E_GLU_370 | OE2 | 2.731 |
| 6P62 | E_ARG_429 | NH1 | E_ASP_113 | OD1 | 3.526 |
| 6P62 | E_ARG_429 | NH1 | E_ASP_113 | OD2 | 2.935 |
| 6P62 | E_ARG_429 | NH2 | E_ASP_113 | OD1 | 2.819 |
| 6P62 | E_ARG_429 | NH2 | E_ASP_113 | OD2 | 3.695 |
| 6P62 | E_ARG_476 | NH1 | E_ASP_474 | OD1 | 3.291 |
| 6P62 | E_ARG_476 | NH1 | E_ASP_474 | OD2 | 3.910 |
| 6P62 | E_ARG_476 | NH2 | E_GLU_102 | OE1 | 3.634 |
| 6P62 | E_ARG_476 | NH2 | E_GLU_102 | OE2 | 3.089 |
| 6P62 | E_LYS_487 | NZ  | E_ASP_47  | OD1 | 3.071 |
| 6P62 | E_LYS_487 | NZ  | E_ASP_47  | OD2 | 2.841 |
| 6P62 | E_LYS_490 | NZ  | E_GLU_492 | OE2 | 3.504 |
| 6P62 | E_ARG_520 | NH2 | E_GLU_87  | OE1 | 3.537 |
| 6P62 | E_ARG_542 | NH1 | A_GLU_647 | OE1 | 2.629 |
| 6P62 | E_ARG_542 | NH1 | A_GLU_647 | OE2 | 3.985 |
| 6P62 | E_ARG_542 | NH2 | A_GLU_648 | OE2 | 3.130 |
| 6P62 | E_LYS_574 | NZ  | E_ASP_107 | OD1 | 2.480 |
| 6P62 | E_LYS_574 | NZ  | E_ASP_107 | OD2 | 3.952 |
| 6P62 | E_ARG_579 | NH1 | A_GLU_584 | OE1 | 3.453 |
| 6P62 | E_ARG_579 | NH1 | A_GLU_584 | OE2 | 2.952 |
| 6P62 | E_ARG_585 | NH2 | E_GLU_492 | OE1 | 3.953 |
| 6P62 | E_ARG_585 | NH2 | E_GLU_492 | OE2 | 2.998 |
| 6P62 | E_ARG_588 | NH1 | E_GLU_584 | OE1 | 3.660 |
| 6P62 | E_ARG_588 | NH2 | E_GLU_584 | OE1 | 3.069 |
| 6P62 | E_ARG_617 | NH1 | E_GLU_634 | OE1 | 3.708 |
| 6P62 | E_ARG_617 | NH1 | E_GLU_634 | OE2 | 3.595 |
| 6P62 | F_ARG_38  | NH1 | F_ASP_86  | OD1 | 3.041 |
| 6P62 | F_ARG_38  | NH2 | F_GLU_46  | OE1 | 2.921 |
| 6P62 | F_ARG_94  | NH2 | F_ASP_101 | OD1 | 3.646 |
| 6P62 | F_ARG_94  | NH2 | F_ASP_101 | OD2 | 2.930 |
| 6P62 | G_LYS_22  | NZ  | G_GLU_70  | OE2 | 3.542 |
| 6P62 | G_ARG_61  | NH1 | G_GLU_79  | OE2 | 3.423 |
| 6P62 | G_ARG_61  | NH1 | G_ASP_82  | OD2 | 3.763 |
| 6P62 | G_ARG_61  | NH2 | G_ASP_77  | OD2 | 2.844 |
| 6P62 | G_ARG_61  | NH2 | G_GLU_79  | OE2 | 2.955 |

Table 893: 6P62-specific salt bridging networks analysis. In this table, a PDB file is specified with a four-letter PDB ID, except that the names of the PDB files corresponding to the single NMR structural model split from the NMR ensemble is specified with a four-letter PDB ID in addition to a hyphen followed by the single NMR structural model numeric ID, the residue naming scheme is **Chain ID\_residue name\_residue number**,  $\angle ADH$  represents the angle formed by acceptor (A), donor (D) and hydrogen (H) ( $\angle ADH$ ).

| PDB ID | Residue A  | Atom A | Residue B  | Atom B | Distance (Å) |
|--------|------------|--------|------------|--------|--------------|
| 6P65   | A_LYS_46   | NZ     | A_ASP_632  | OD2    | 2.391        |
| 6P65   | A_LYS_185D | NZ     | A_GLU_185A | OE1    | 3.592        |
| 6P65   | A_LYS_185D | NZ     | A_GLU_185A | OE2    | 3.302        |
| 6P65   | A_LYS_227  | NZ     | A_GLU_83   | OE1    | 2.949        |
| 6P65   | A_LYS_227  | NZ     | A_GLU_83   | OE2    | 3.484        |
| 6P65   | A_HIS_249  | NE2    | A_GLU_482  | OE1    | 3.021        |
| 6P65   | A_LYS_282  | NZ     | A_GLU_275  | OE1    | 2.833        |
| 6P65   | A_LYS_282  | NZ     | A_GLU_275  | OE2    | 3.523        |
| 6P65   | A_ARG_298  | NH2    | A_GLU_381  | OE1    | 3.069        |
| 6P65   | A_LYS_305  | NZ     | A_ASP_322  | OD1    | 2.972        |
| 6P65   | A_LYS_305  | NZ     | A_ASP_322  | OD2    | 2.511        |
| 6P65   | A_ARG_340  | NH2    | A_ASP_337  | OD1    | 2.733        |
| 6P65   | A_ARG_340  | NH2    | A_ASP_337  | OD2    | 3.882        |
| 6P65   | A_ARG_344  | NH1    | A_GLU_290  | OE1    | 3.426        |
| 6P65   | A_ARG_344  | NH1    | A_GLU_290  | OE2    | 3.021        |
| 6P65   | A_LYS_348  | NZ     | A_GLU_351  | OE1    | 2.894        |
| 6P65   | A_LYS_348  | NZ     | A_GLU_351  | OE2    | 3.938        |
| 6P65   | A_ARG_419  | NH2    | A_GLU_153  | OE1    | 2.875        |
| 6P65   | A_LYS_421  | NZ     | A_GLU_370  | OE2    | 2.921        |
| 6P65   | A_ARG_429  | NH1    | A_ASP_113  | OD1    | 3.603        |
| 6P65   | A_ARG_429  | NH1    | A_ASP_113  | OD2    | 2.908        |
| 6P65   | A_ARG_429  | NH2    | A_ASP_113  | OD1    | 2.815        |
| 6P65   | A_ARG_429  | NH2    | A_ASP_113  | OD2    | 3.611        |
| 6P65   | A_LYS_446  | NZ     | A_GLU_293  | OE2    | 3.260        |
| 6P65   | A_ARG_456  | NH1    | A_GLU_466  | OE1    | 3.094        |
| 6P65   | A_ARG_456  | NH1    | A_GLU_466  | OE2    | 3.849        |
| 6P65   | A_ARG_469  | NH1    | A_ASP_457  | OD2    | 2.839        |
| 6P65   | A_ARG_469  | NH2    | A_ASP_457  | OD2    | 3.804        |
| 6P65   | A_ARG_476  | NH1    | A_ASP_474  | OD1    | 3.178        |
| 6P65   | A_ARG_476  | NH1    | A_ASP_474  | OD2    | 3.851        |
| 6P65   | A_ARG_476  | NH2    | A_GLU_102  | OE1    | 3.708        |
| 6P65   | A_ARG_476  | NH2    | A_GLU_102  | OE2    | 3.051        |
| 6P65   | A_LYS_485  | NZ     | A_GLU_267  | OE2    | 2.827        |
| 6P65   | A_LYS_487  | NZ     | A_ASP_47   | OD1    | 2.922        |
| 6P65   | A_LYS_487  | NZ     | A_ASP_47   | OD2    | 2.883        |
| 6P65   | A_LYS_492  | NZ     | A_GLU_490  | OE1    | 3.434        |
| 6P65   | A_LYS_492  | NZ     | A_GLU_490  | OE2    | 2.781        |
| 6P65   | A_ARG_500  | NH1    | L_GLU_30   | OE1    | 3.144        |
| 6P65   | A_ARG_500  | NH1    | L_GLU_30   | OE2    | 3.804        |
| 6P65   | A_ARG_500  | NH2    | L_GLU_30   | OE1    | 3.741        |
| 6P65   | A_ARG_500  | NH2    | L_GLU_30   | OE2    | 2.979        |
| 6P65   | A_ARG_542  | NH2    | B_ASP_648  | OD1    | 3.154        |
| 6P65   | A_LYS_574  | NZ     | A_ASP_107  | OD1    | 2.461        |
| 6P65   | A_LYS_574  | NZ     | A_ASP_107  | OD2    | 3.497        |
| 6P65   | A_LYS_588  | NZ     | A_GLU_584  | OE2    | 2.713        |
| 6P65   | A_LYS_617  | NZ     | A_GLU_634  | OE1    | 3.411        |
| 6P65   | A_LYS_658  | NZ     | A_GLU_654  | OE1    | 2.575        |
| 6P65   | H_ARG_38   | NH2    | H_GLU_46   | OE1    | 3.002        |
| 6P65   | H_LYS_71   | NZ     | A_GLU_87   | OE1    | 2.936        |
| 6P65   | H_LYS_71   | NZ     | A_GLU_87   | OE2    | 2.864        |
| 6P65   | H_ARG_94   | NH2    | H_ASP_33   | OD1    | 3.585        |
| 6P65   | H_ARG_94   | NH2    | H_ASP_33   | OD2    | 3.145        |
| 6P65   | H_LYS_100H | NZ     | L_ASP_50   | OD1    | 2.708        |
| 6P65   | H_LYS_100H | NZ     | L_ASP_50   | OD2    | 2.597        |
| 6P65   | L_ARG_95B  | NH2    | L_ASP_95D  | OD2    | 3.668        |
| 6P65   | B_LYS_46   | NZ     | B_ASP_632  | OD2    | 2.391        |
| 6P65   | B_LYS_185D | NZ     | B_GLU_185A | OE1    | 3.593        |

|      |            |     |            |     |       |
|------|------------|-----|------------|-----|-------|
| 6P65 | B_LYS_185D | NZ  | B_GLU_185A | OE2 | 3.302 |
| 6P65 | B_LYS_227  | NZ  | B_GLU_83   | OE1 | 2.949 |
| 6P65 | B_LYS_227  | NZ  | B_GLU_83   | OE2 | 3.484 |
| 6P65 | B_HIS_249  | NE2 | B_GLU_482  | OE1 | 3.021 |
| 6P65 | B_LYS_282  | NZ  | B_GLU_275  | OE1 | 2.833 |
| 6P65 | B_LYS_282  | NZ  | B_GLU_275  | OE2 | 3.523 |
| 6P65 | B_ARG_298  | NH2 | B_GLU_381  | OE1 | 3.068 |
| 6P65 | B_LYS_305  | NZ  | B_ASP_322  | OD1 | 2.972 |
| 6P65 | B_LYS_305  | NZ  | B_ASP_322  | OD2 | 2.511 |
| 6P65 | B_ARG_340  | NH2 | B_ASP_337  | OD1 | 2.733 |
| 6P65 | B_ARG_340  | NH2 | B_ASP_337  | OD2 | 3.883 |
| 6P65 | B_ARG_344  | NH1 | B_GLU_290  | OE1 | 3.427 |
| 6P65 | B_ARG_344  | NH1 | B_GLU_290  | OE2 | 3.022 |
| 6P65 | B_LYS_348  | NZ  | B_GLU_351  | OE1 | 2.895 |
| 6P65 | B_LYS_348  | NZ  | B_GLU_351  | OE2 | 3.939 |
| 6P65 | B_ARG_419  | NH2 | B_GLU_153  | OE1 | 2.875 |
| 6P65 | B_LYS_421  | NZ  | B_GLU_370  | OE2 | 2.921 |
| 6P65 | B_ARG_429  | NH1 | B_ASP_113  | OD1 | 3.603 |
| 6P65 | B_ARG_429  | NH1 | B_ASP_113  | OD2 | 2.908 |
| 6P65 | B_ARG_429  | NH2 | B_ASP_113  | OD1 | 2.816 |
| 6P65 | B_ARG_429  | NH2 | B_ASP_113  | OD2 | 3.612 |
| 6P65 | B_LYS_446  | NZ  | B_GLU_293  | OE2 | 3.260 |
| 6P65 | B_ARG_456  | NH1 | B_GLU_466  | OE1 | 3.095 |
| 6P65 | B_ARG_456  | NH1 | B_GLU_466  | OE2 | 3.849 |
| 6P65 | B_ARG_469  | NH1 | B_ASP_457  | OD2 | 2.839 |
| 6P65 | B_ARG_469  | NH2 | B_ASP_457  | OD2 | 3.803 |
| 6P65 | B_ARG_476  | NH1 | B_ASP_474  | OD1 | 3.178 |
| 6P65 | B_ARG_476  | NH1 | B_ASP_474  | OD2 | 3.851 |
| 6P65 | B_ARG_476  | NH2 | B_GLU_102  | OE1 | 3.708 |
| 6P65 | B_ARG_476  | NH2 | B_GLU_102  | OE2 | 3.050 |
| 6P65 | B_LYS_485  | NZ  | B_GLU_267  | OE2 | 2.826 |
| 6P65 | B_LYS_487  | NZ  | B_ASP_47   | OD1 | 2.922 |
| 6P65 | B_LYS_487  | NZ  | B_ASP_47   | OD2 | 2.883 |
| 6P65 | B_LYS_492  | NZ  | B_GLU_490  | OE1 | 3.434 |
| 6P65 | B_LYS_492  | NZ  | B_GLU_490  | OE2 | 2.782 |
| 6P65 | B_ARG_500  | NH1 | D_GLU_30   | OE1 | 3.143 |
| 6P65 | B_ARG_500  | NH1 | D_GLU_30   | OE2 | 3.804 |
| 6P65 | B_ARG_500  | NH2 | D_GLU_30   | OE1 | 3.741 |
| 6P65 | B_ARG_500  | NH2 | D_GLU_30   | OE2 | 2.979 |
| 6P65 | B_ARG_542  | NH2 | E_ASP_648  | OD1 | 3.155 |
| 6P65 | B_LYS_574  | NZ  | B_ASP_107  | OD1 | 2.460 |
| 6P65 | B_LYS_574  | NZ  | B_ASP_107  | OD2 | 3.496 |
| 6P65 | B_LYS_588  | NZ  | B_GLU_584  | OE2 | 2.714 |
| 6P65 | B_LYS_617  | NZ  | B_GLU_634  | OE1 | 3.411 |
| 6P65 | B_LYS_658  | NZ  | B_GLU_654  | OE1 | 2.576 |
| 6P65 | C_ARG_38   | NH2 | C_GLU_46   | OE1 | 3.002 |
| 6P65 | C_LYS_71   | NZ  | B_GLU_87   | OE1 | 2.936 |
| 6P65 | C_LYS_71   | NZ  | B_GLU_87   | OE2 | 2.864 |
| 6P65 | C_ARG_94   | NH2 | C_ASP_33   | OD1 | 3.585 |
| 6P65 | C_ARG_94   | NH2 | C_ASP_33   | OD2 | 3.145 |
| 6P65 | C_LYS_100H | NZ  | D_ASP_50   | OD1 | 2.708 |
| 6P65 | C_LYS_100H | NZ  | D_ASP_50   | OD2 | 2.597 |
| 6P65 | D_ARG_95B  | NH2 | D_ASP_95D  | OD2 | 3.668 |
| 6P65 | E_LYS_46   | NZ  | E_ASP_632  | OD2 | 2.391 |
| 6P65 | E_LYS_185D | NZ  | E_GLU_185A | OE1 | 3.592 |
| 6P65 | E_LYS_185D | NZ  | E_GLU_185A | OE2 | 3.302 |
| 6P65 | E_LYS_227  | NZ  | E_GLU_83   | OE1 | 2.949 |
| 6P65 | E_LYS_227  | NZ  | E_GLU_83   | OE2 | 3.484 |

|      |            |     |           |     |       |
|------|------------|-----|-----------|-----|-------|
| 6P65 | E_HIS_249  | NE2 | E_GLU_482 | OE1 | 3.021 |
| 6P65 | E_LYS_282  | NZ  | E_GLU_275 | OE1 | 2.834 |
| 6P65 | E_LYS_282  | NZ  | E_GLU_275 | OE2 | 3.523 |
| 6P65 | E_ARG_298  | NH2 | E_GLU_381 | OE1 | 3.068 |
| 6P65 | E_LYS_305  | NZ  | E_ASP_322 | OD1 | 2.973 |
| 6P65 | E_LYS_305  | NZ  | E_ASP_322 | OD2 | 2.510 |
| 6P65 | E_ARG_340  | NH2 | E_ASP_337 | OD1 | 2.733 |
| 6P65 | E_ARG_340  | NH2 | E_ASP_337 | OD2 | 3.883 |
| 6P65 | E_ARG_344  | NH1 | E_GLU_290 | OE1 | 3.426 |
| 6P65 | E_ARG_344  | NH1 | E_GLU_290 | OE2 | 3.021 |
| 6P65 | E_LYS_348  | NZ  | E_GLU_351 | OE1 | 2.895 |
| 6P65 | E_LYS_348  | NZ  | E_GLU_351 | OE2 | 3.939 |
| 6P65 | E_ARG_419  | NH2 | E_GLU_153 | OE1 | 2.874 |
| 6P65 | E_LYS_421  | NZ  | E_GLU_370 | OE2 | 2.921 |
| 6P65 | E_ARG_429  | NH1 | E_ASP_113 | OD1 | 3.603 |
| 6P65 | E_ARG_429  | NH1 | E_ASP_113 | OD2 | 2.907 |
| 6P65 | E_ARG_429  | NH2 | E_ASP_113 | OD1 | 2.816 |
| 6P65 | E_ARG_429  | NH2 | E_ASP_113 | OD2 | 3.611 |
| 6P65 | E_LYS_446  | NZ  | E_GLU_293 | OE2 | 3.260 |
| 6P65 | E_ARG_456  | NH1 | E_GLU_466 | OE1 | 3.094 |
| 6P65 | E_ARG_456  | NH1 | E_GLU_466 | OE2 | 3.849 |
| 6P65 | E_ARG_469  | NH1 | E_ASP_457 | OD2 | 2.839 |
| 6P65 | E_ARG_469  | NH2 | E_ASP_457 | OD2 | 3.804 |
| 6P65 | E_ARG_476  | NH1 | E_ASP_474 | OD1 | 3.178 |
| 6P65 | E_ARG_476  | NH1 | E_ASP_474 | OD2 | 3.850 |
| 6P65 | E_ARG_476  | NH2 | E_GLU_102 | OE1 | 3.708 |
| 6P65 | E_ARG_476  | NH2 | E_GLU_102 | OE2 | 3.050 |
| 6P65 | E_LYS_485  | NZ  | E_GLU_267 | OE2 | 2.828 |
| 6P65 | E_LYS_487  | NZ  | E_ASP_47  | OD1 | 2.921 |
| 6P65 | E_LYS_487  | NZ  | E_ASP_47  | OD2 | 2.883 |
| 6P65 | E_LYS_492  | NZ  | E_GLU_490 | OE1 | 3.434 |
| 6P65 | E_LYS_492  | NZ  | E_GLU_490 | OE2 | 2.782 |
| 6P65 | E_ARG_500  | NH1 | G_GLU_30  | OE1 | 3.143 |
| 6P65 | E_ARG_500  | NH1 | G_GLU_30  | OE2 | 3.804 |
| 6P65 | E_ARG_500  | NH2 | G_GLU_30  | OE1 | 3.741 |
| 6P65 | E_ARG_500  | NH2 | G_GLU_30  | OE2 | 2.979 |
| 6P65 | E_ARG_542  | NH2 | A_ASP_648 | OD1 | 3.154 |
| 6P65 | E_LYS_574  | NZ  | E_ASP_107 | OD1 | 2.460 |
| 6P65 | E_LYS_574  | NZ  | E_ASP_107 | OD2 | 3.496 |
| 6P65 | E_LYS_588  | NZ  | E_GLU_584 | OE2 | 2.714 |
| 6P65 | E_LYS_617  | NZ  | E_GLU_634 | OE1 | 3.411 |
| 6P65 | E_LYS_658  | NZ  | E_GLU_654 | OE1 | 2.576 |
| 6P65 | F_ARG_38   | NH2 | F_GLU_46  | OE1 | 3.002 |
| 6P65 | F_LYS_71   | NZ  | E_GLU_87  | OE1 | 2.935 |
| 6P65 | F_LYS_71   | NZ  | E_GLU_87  | OE2 | 2.865 |
| 6P65 | F_ARG_94   | NH2 | F_ASP_33  | OD1 | 3.585 |
| 6P65 | F_ARG_94   | NH2 | F_ASP_33  | OD2 | 3.145 |
| 6P65 | F_LYS_100H | NZ  | G_ASP_50  | OD1 | 2.708 |
| 6P65 | F_LYS_100H | NZ  | G_ASP_50  | OD2 | 2.596 |
| 6P65 | G_ARG_95B  | NH2 | G_ASP_95D | OD2 | 3.668 |

---

Table 894: 6P65-specific salt bridging networks analysis. In this table, a PDB file is specified with a four-letter PDB ID, except that the names of the PDB files corresponding to the single NMR structural model split from the NMR ensemble is specified with a four-letter PDB ID in addition to a hyphen followed by the single NMR structural model numeric ID, the residue naming scheme is **Chain ID\_residue name\_residue number**,  $\angle ADH$  represents the angle formed by acceptor (A), donor (D) and hydrogen (H) ( $\angle ADH$ ).

| PDB ID | Residue A | Atom A | Residue B | Atom B | Distance (Å) |
|--------|-----------|--------|-----------|--------|--------------|
| 6PE8   | A_ARG_38  | NH1    | A_ASP_90  | OD1    | 3.071        |
| 6PE8   | A_ARG_38  | NH2    | A_GLU_46  | OE1    | 3.098        |
| 6PE8   | A_ARG_38  | NH2    | A_ASP_90  | OD1    | 3.704        |
| 6PE8   | A_LYS_65  | NZ     | A_ASP_62  | OD1    | 3.575        |
| 6PE8   | A_ARG_67  | NH1    | A_ASP_90  | OD1    | 3.779        |
| 6PE8   | A_ARG_67  | NH1    | A_ASP_90  | OD2    | 2.688        |
| 6PE8   | A_ARG_67  | NH2    | A_ASP_90  | OD1    | 3.147        |
| 6PE8   | A_ARG_67  | NH2    | A_ASP_90  | OD2    | 3.558        |
| 6PE8   | A_ARG_98  | NH2    | A_ASP_104 | OD2    | 2.902        |
| 6PE8   | A_LYS_212 | NZ     | B_GLU_129 | OE1    | 3.617        |
| 6PE8   | A_LYS_212 | NZ     | B_GLU_129 | OE2    | 2.921        |
| 6PE8   | A_LYS_213 | NZ     | A_GLU_215 | OE2    | 2.893        |
| 6PE8   | A_LYS_217 | NZ     | B_ASP_128 | OD2    | 3.408        |
| 6PE8   | B_LYS_24  | NZ     | B_ASP_76  | OD1    | 3.379        |
| 6PE8   | B_LYS_36  | NZ     | U_GLU_98  | OE2    | 3.943        |
| 6PE8   | B_ARG_67  | NH2    | B_ASP_88  | OD1    | 2.504        |
| 6PE8   | B_ARG_67  | NH2    | B_ASP_88  | OD2    | 3.136        |
| 6PE8   | B_LYS_109 | NZ     | B_GLU_111 | OE2    | 3.226        |
| 6PE8   | B_LYS_155 | NZ     | B_GLU_201 | OE2    | 3.818        |
| 6PE8   | B_HIS_195 | ND1    | B_ASP_157 | OD2    | 3.341        |
| 6PE8   | H_ARG_38  | NH1    | H_ASP_90  | OD1    | 3.238        |
| 6PE8   | H_ARG_38  | NH2    | H_GLU_46  | OE2    | 3.230        |
| 6PE8   | H_ARG_38  | NH2    | H_ASP_90  | OD1    | 3.857        |
| 6PE8   | H_LYS_65  | NZ     | H_ASP_62  | OD1    | 3.030        |
| 6PE8   | H_ARG_67  | NH1    | H_ASP_90  | OD1    | 3.620        |
| 6PE8   | H_ARG_67  | NH1    | H_ASP_90  | OD2    | 2.656        |
| 6PE8   | H_ARG_67  | NH2    | H_ASP_90  | OD1    | 3.125        |
| 6PE8   | H_ARG_67  | NH2    | H_ASP_90  | OD2    | 3.678        |
| 6PE8   | H_ARG_98  | NH2    | H_ASP_104 | OD1    | 3.497        |
| 6PE8   | H_ARG_98  | NH2    | H_ASP_104 | OD2    | 2.823        |
| 6PE8   | H_LYS_146 | NZ     | H_ASP_147 | OD1    | 3.006        |
| 6PE8   | H_LYS_146 | NZ     | H_ASP_147 | OD2    | 3.312        |
| 6PE8   | H_LYS_212 | NZ     | L_GLU_129 | OE1    | 2.763        |
| 6PE8   | H_LYS_212 | NZ     | L_GLU_129 | OE2    | 3.237        |
| 6PE8   | L_LYS_36  | NZ     | T_GLU_98  | OE1    | 3.975        |
| 6PE8   | L_LYS_36  | NZ     | T_GLU_98  | OE2    | 3.494        |
| 6PE8   | L_ARG_67  | NH1    | L_ASP_88  | OD1    | 2.489        |
| 6PE8   | L_ARG_67  | NH1    | L_ASP_88  | OD2    | 2.664        |
| 6PE8   | L_ARG_67  | NH2    | L_GLU_87  | OE2    | 3.818        |
| 6PE8   | L_LYS_109 | NZ     | L_GLU_171 | OE1    | 2.957        |
| 6PE8   | L_LYS_109 | NZ     | L_GLU_171 | OE2    | 3.577        |
| 6PE8   | L_HIS_195 | ND1    | L_ASP_191 | OD1    | 3.228        |
| 6PE8   | L_ARG_217 | NH1    | L_GLU_193 | OE2    | 3.407        |
| 6PE8   | T_LYS_46  | NZ     | T_GLU_66  | OE1    | 3.537        |
| 6PE8   | T_HIS_78  | NE2    | T_GLU_74  | OE2    | 3.145        |
| 6PE8   | T_LYS_81  | NZ     | T_GLU_117 | OE2    | 3.858        |
| 6PE8   | T_ARG_90  | NH1    | T_GLU_106 | OE2    | 3.299        |
| 6PE8   | T_ARG_90  | NH2    | H_ASP_62  | OD1    | 3.932        |
| 6PE8   | T_LYS_94  | NZ     | L_ASP_97  | OD1    | 2.502        |
| 6PE8   | T_LYS_94  | NZ     | L_ASP_97  | OD2    | 3.872        |
| 6PE8   | T_ARG_123 | NH1    | T_ASP_140 | OD2    | 3.487        |
| 6PE8   | T_ARG_123 | NH2    | T_ASP_140 | OD2    | 3.475        |
| 6PE8   | U_HIS_78  | NE2    | U_GLU_74  | OE2    | 3.728        |
| 6PE8   | U_HIS_162 | NE2    | U_GLU_159 | OE1    | 3.858        |
| 6PE8   | U_HIS_162 | NE2    | U_GLU_159 | OE2    | 3.289        |

---

Table 895: 6PE8-specific salt bridging networks analysis. In this table, a PDB file is specified with a four-letter PDB ID, except that the names of the PDB files corresponding to the single NMR structural model split from the NMR ensemble is specified with a four-letter PDB ID in addition to a hyphen followed by the single NMR structural model numeric ID, the residue naming scheme is **Chain ID\_residue name\_residue number**,  $\angle ADH$  represents the angle formed by acceptor (A), donor (D) and hydrogen (H) ( $\angle ADH$ ).



| PDB ID | Residue A | Atom A | Residue B | Atom B | Distance (Å) |
|--------|-----------|--------|-----------|--------|--------------|
| 6PE9   | A_ARG_38  | NH1    | A_ASP_90  | OD1    | 2.798        |
| 6PE9   | A_ARG_38  | NH2    | A_GLU_46  | OE1    | 3.159        |
| 6PE9   | A_ARG_38  | NH2    | A_GLU_46  | OE2    | 3.251        |
| 6PE9   | A_ARG_38  | NH2    | A_ASP_90  | OD1    | 3.887        |
| 6PE9   | A_ARG_67  | NH1    | A_ASP_90  | OD1    | 3.800        |
| 6PE9   | A_ARG_67  | NH1    | A_ASP_90  | OD2    | 2.750        |
| 6PE9   | A_ARG_67  | NH2    | A_ASP_90  | OD1    | 2.777        |
| 6PE9   | A_ARG_67  | NH2    | A_ASP_90  | OD2    | 3.300        |
| 6PE9   | A_ARG_87  | NH1    | A_ASP_90  | OD1    | 3.204        |
| 6PE9   | A_ARG_98  | NH2    | A_ASP_104 | OD1    | 3.991        |
| 6PE9   | A_ARG_98  | NH2    | A_ASP_104 | OD2    | 3.023        |
| 6PE9   | A_LYS_146 | NZ     | A_ASP_147 | OD1    | 3.217        |
| 6PE9   | A_LYS_146 | NZ     | A_ASP_147 | OD2    | 3.463        |
| 6PE9   | A_LYS_212 | NZ     | B_GLU_129 | OE1    | 3.227        |
| 6PE9   | A_LYS_212 | NZ     | B_GLU_129 | OE2    | 3.311        |
| 6PE9   | A_LYS_213 | NZ     | A_GLU_215 | OE2    | 2.756        |
| 6PE9   | A_LYS_217 | NZ     | B_ASP_128 | OD1    | 3.061        |
| 6PE9   | A_LYS_217 | NZ     | B_ASP_128 | OD2    | 3.113        |
| 6PE9   | B_ARG_60  | NH2    | B_ASP_66  | OD2    | 3.733        |
| 6PE9   | B_ARG_67  | NH2    | B_GLU_87  | OE2    | 3.721        |
| 6PE9   | B_ARG_67  | NH2    | B_ASP_88  | OD1    | 2.626        |
| 6PE9   | B_ARG_67  | NH2    | B_ASP_88  | OD2    | 3.531        |
| 6PE9   | B_LYS_109 | NZ     | B_GLU_171 | OE1    | 3.224        |
| 6PE9   | B_LYS_109 | NZ     | B_GLU_171 | OE2    | 3.604        |
| 6PE9   | B_LYS_155 | NZ     | B_GLU_201 | OE1    | 2.857        |
| 6PE9   | B_LYS_155 | NZ     | B_GLU_201 | OE2    | 3.583        |
| 6PE9   | B_LYS_189 | NZ     | B_GLU_193 | OE1    | 2.706        |
| 6PE9   | B_HIS_195 | ND1    | B_ASP_157 | OD2    | 3.250        |
| 6PE9   | B_HIS_195 | NE2    | B_ASP_191 | OD1    | 3.630        |
| 6PE9   | C_LYS_13  | NZ     | U_GLU_107 | OE2    | 3.461        |
| 6PE9   | C_ARG_38  | NH1    | C_ASP_90  | OD1    | 2.834        |
| 6PE9   | C_ARG_38  | NH2    | C_GLU_46  | OE1    | 3.774        |
| 6PE9   | C_ARG_38  | NH2    | C_ASP_90  | OD1    | 3.862        |
| 6PE9   | C_ARG_67  | NH1    | C_ASP_90  | OD1    | 3.690        |
| 6PE9   | C_ARG_67  | NH1    | C_ASP_90  | OD2    | 2.701        |
| 6PE9   | C_ARG_67  | NH2    | C_ASP_90  | OD1    | 3.027        |
| 6PE9   | C_ARG_67  | NH2    | C_ASP_90  | OD2    | 3.482        |
| 6PE9   | C_ARG_87  | NH1    | C_GLU_89  | OE1    | 2.999        |
| 6PE9   | C_ARG_87  | NH2    | C_GLU_89  | OE1    | 3.050        |
| 6PE9   | C_ARG_98  | NH2    | C_ASP_104 | OD1    | 3.544        |
| 6PE9   | C_ARG_98  | NH2    | C_ASP_104 | OD2    | 2.696        |
| 6PE9   | C_LYS_212 | NZ     | D_GLU_129 | OE1    | 2.716        |
| 6PE9   | D_LYS_24  | NZ     | D_ASP_76  | OD2    | 3.066        |
| 6PE9   | D_LYS_36  | NZ     | G_GLU_98  | OE2    | 3.800        |
| 6PE9   | D_ARG_67  | NH2    | D_GLU_87  | OE2    | 3.276        |
| 6PE9   | D_ARG_67  | NH2    | D_ASP_88  | OD1    | 2.629        |
| 6PE9   | D_ARG_67  | NH2    | D_ASP_88  | OD2    | 2.960        |
| 6PE9   | D_LYS_109 | NZ     | D_GLU_111 | OE2    | 3.968        |
| 6PE9   | D_ARG_148 | NH1    | D_GLU_111 | OE1    | 3.574        |
| 6PE9   | D_ARG_148 | NH1    | D_GLU_111 | OE2    | 3.676        |
| 6PE9   | D_LYS_155 | NZ     | D_GLU_201 | OE1    | 3.155        |
| 6PE9   | D_LYS_189 | NZ     | D_GLU_193 | OE2    | 3.713        |
| 6PE9   | D_HIS_195 | ND1    | D_ASP_157 | OD2    | 3.268        |
| 6PE9   | D_HIS_195 | NE2    | D_ASP_191 | OD1    | 3.868        |
| 6PE9   | D_LYS_196 | NZ     | D_GLU_219 | OE1    | 3.644        |
| 6PE9   | D_LYS_196 | NZ     | D_GLU_219 | OE2    | 3.664        |
| 6PE9   | E_LYS_13  | NZ     | G_GLU_107 | OE2    | 3.510        |

|      |           |     |           |     |       |
|------|-----------|-----|-----------|-----|-------|
| 6PE9 | E_ARG_38  | NH1 | E_ASP_90  | OD1 | 3.156 |
| 6PE9 | E_ARG_38  | NH2 | E_GLU_46  | OE1 | 3.279 |
| 6PE9 | E_ARG_38  | NH2 | E_ASP_90  | OD1 | 3.604 |
| 6PE9 | E_LYS_65  | NZ  | E_ASP_62  | OD1 | 3.311 |
| 6PE9 | E_ARG_67  | NH1 | E_ASP_90  | OD1 | 3.553 |
| 6PE9 | E_ARG_67  | NH1 | E_ASP_90  | OD2 | 2.749 |
| 6PE9 | E_ARG_67  | NH2 | E_ASP_90  | OD1 | 2.879 |
| 6PE9 | E_ARG_67  | NH2 | E_ASP_90  | OD2 | 3.602 |
| 6PE9 | E_ARG_87  | NH1 | E_GLU_89  | OE1 | 2.875 |
| 6PE9 | E_ARG_98  | NH2 | E_ASP_104 | OD1 | 3.656 |
| 6PE9 | E_ARG_98  | NH2 | E_ASP_104 | OD2 | 2.618 |
| 6PE9 | E_LYS_212 | NZ  | F_GLU_129 | OE1 | 3.511 |
| 6PE9 | E_LYS_212 | NZ  | F_GLU_129 | OE2 | 3.915 |
| 6PE9 | F_LYS_36  | NZ  | U_GLU_98  | OE2 | 3.769 |
| 6PE9 | F_ARG_67  | NH2 | F_GLU_87  | OE2 | 3.406 |
| 6PE9 | F_ARG_67  | NH2 | F_ASP_88  | OD1 | 3.433 |
| 6PE9 | F_ARG_67  | NH2 | F_ASP_88  | OD2 | 3.747 |
| 6PE9 | F_ARG_148 | NH1 | F_GLU_149 | OE1 | 2.587 |
| 6PE9 | F_LYS_155 | NZ  | F_GLU_201 | OE1 | 2.986 |
| 6PE9 | F_LYS_189 | NZ  | F_GLU_193 | OE1 | 3.673 |
| 6PE9 | F_HIS_195 | ND1 | F_ASP_157 | OD2 | 2.583 |
| 6PE9 | F_ARG_217 | NH1 | F_GLU_193 | OE2 | 2.594 |
| 6PE9 | F_ARG_217 | NH2 | F_GLU_193 | OE2 | 3.577 |
| 6PE9 | G_ARG_73  | NH1 | J_GLU_74  | OE1 | 3.140 |
| 6PE9 | G_ARG_73  | NH2 | J_GLU_74  | OE1 | 2.423 |
| 6PE9 | G_ARG_73  | NH2 | J_GLU_74  | OE2 | 3.851 |
| 6PE9 | G_LYS_94  | NZ  | D_ASP_97  | OD1 | 2.957 |
| 6PE9 | G_HIS_110 | ND1 | G_ASP_140 | OD1 | 3.723 |
| 6PE9 | G_HIS_110 | ND1 | G_ASP_140 | OD2 | 3.419 |
| 6PE9 | G_HIS_110 | NE2 | G_ASP_140 | OD2 | 3.595 |
| 6PE9 | H_ARG_38  | NH1 | H_ASP_90  | OD1 | 2.812 |
| 6PE9 | H_ARG_38  | NH2 | H_GLU_46  | OE1 | 3.356 |
| 6PE9 | H_ARG_38  | NH2 | H_ASP_90  | OD1 | 3.422 |
| 6PE9 | H_ARG_67  | NH1 | H_ASP_90  | OD1 | 3.929 |
| 6PE9 | H_ARG_67  | NH1 | H_ASP_90  | OD2 | 2.687 |
| 6PE9 | H_ARG_67  | NH2 | H_ASP_90  | OD1 | 3.445 |
| 6PE9 | H_ARG_67  | NH2 | H_ASP_90  | OD2 | 3.625 |
| 6PE9 | H_ARG_98  | NH2 | H_ASP_104 | OD1 | 3.718 |
| 6PE9 | H_ARG_98  | NH2 | H_ASP_104 | OD2 | 3.048 |
| 6PE9 | I_LYS_29  | NZ  | U_ASP_69  | OD2 | 3.034 |
| 6PE9 | I_ARG_73  | NH1 | U_GLU_74  | OE1 | 3.681 |
| 6PE9 | I_ARG_73  | NH1 | U_GLU_74  | OE2 | 2.345 |
| 6PE9 | I_ARG_73  | NH2 | U_GLU_74  | OE2 | 3.507 |
| 6PE9 | I_LYS_    | NZ  | I_GLU_    | OE2 | 3.108 |
| 6PE9 | J_ARG_73  | NH1 | G_GLU_74  | OE1 | 3.931 |
| 6PE9 | J_ARG_73  | NH1 | G_GLU_74  | OE2 | 3.429 |
| 6PE9 | K_ARG_38  | NH1 | K_ASP_90  | OD1 | 3.525 |
| 6PE9 | K_ARG_38  | NH2 | K_GLU_46  | OE1 | 3.767 |
| 6PE9 | K_ARG_38  | NH2 | K_GLU_46  | OE2 | 3.741 |
| 6PE9 | K_LYS_65  | NZ  | K_ASP_62  | OD1 | 3.669 |
| 6PE9 | K_ARG_67  | NH1 | K_ASP_90  | OD2 | 2.819 |
| 6PE9 | K_ARG_67  | NH2 | K_ASP_90  | OD1 | 3.281 |
| 6PE9 | K_ARG_67  | NH2 | K_ASP_90  | OD2 | 2.919 |
| 6PE9 | K_ARG_98  | NH2 | K_ASP_104 | OD2 | 3.783 |
| 6PE9 | L_LYS_24  | NZ  | L_ASP_76  | OD1 | 3.672 |
| 6PE9 | L_LYS_24  | NZ  | L_ASP_76  | OD2 | 3.497 |
| 6PE9 | L_ARG_67  | NH2 | L_ASP_88  | OD1 | 2.613 |
| 6PE9 | L_ARG_67  | NH2 | L_ASP_88  | OD2 | 3.007 |

|      |           |     |           |     |       |
|------|-----------|-----|-----------|-----|-------|
| 6PE9 | L_LYS_109 | NZ  | L_GLU_111 | OE2 | 2.907 |
| 6PE9 | L_LYS_155 | NZ  | L_GLU_201 | OE1 | 3.099 |
| 6PE9 | L_LYS_155 | NZ  | L_GLU_201 | OE2 | 3.866 |
| 6PE9 | L_LYS_194 | NZ  | L_ASP_191 | OD1 | 2.988 |
| 6PE9 | L_LYS_196 | NZ  | L_GLU_219 | OE1 | 3.947 |
| 6PE9 | L_LYS_196 | NZ  | L_GLU_219 | OE2 | 3.563 |
| 6PE9 | M_LYS_24  | NZ  | M_ASP_76  | OD2 | 2.801 |
| 6PE9 | M_LYS_36  | NZ  | J_GLU_98  | OE1 | 2.716 |
| 6PE9 | M_ARG_67  | NH2 | M_GLU_87  | OE2 | 3.490 |
| 6PE9 | M_ARG_67  | NH2 | M_ASP_88  | OD1 | 2.820 |
| 6PE9 | M_ARG_67  | NH2 | M_ASP_88  | OD2 | 3.597 |
| 6PE9 | U_LYS_    | NZ  | L_ASP_    | OD2 | 3.835 |
| 6PE9 | U_LYS_    | NZ  | U_GLU_    | OE1 | 3.844 |
| 6PE9 | U_ARG_    | NH2 | L_GLU_    | OE1 | 3.379 |
| 6PE9 | U_ARG_    | NH2 | L_GLU_    | OE2 | 2.907 |
| 6PE9 | U_ARG_90  | NH2 | U_GLU_107 | OE1 | 3.607 |
| 6PE9 | U_LYS_94  | NZ  | F_ASP_97  | OD1 | 2.940 |
| 6PE9 | U_HIS_110 | ND1 | U_ASP_140 | OD1 | 3.870 |
| 6PE9 | U_HIS_110 | NE2 | U_ASP_140 | OD2 | 3.135 |
| 6PE9 | V_LYS_46  | NZ  | V_GLU_66  | OE1 | 3.793 |
| 6PE9 | V_LYS_81  | NZ  | V_ASP_100 | OD2 | 3.343 |
| 6PE9 | V_ARG_90  | NH1 | L_ASP_1   | OD1 | 3.701 |
| 6PE9 | V_ARG_90  | NH1 | V_GLU_106 | OE1 | 3.470 |
| 6PE9 | V_ARG_90  | NH1 | V_GLU_106 | OE2 | 3.555 |
| 6PE9 | V_ARG_90  | NH2 | L_ASP_1   | OD1 | 3.047 |
| 6PE9 | V_LYS_94  | NZ  | L_ASP_97  | OD1 | 3.203 |

Table 896: 6PE9-specific salt bridging networks analysis. In this table, a PDB file is specified with a four-letter PDB ID, except that the names of the PDB files corresponding to the single NMR structural model split from the NMR ensemble is specified with a four-letter PDB ID in addition to a hyphen followed by the single NMR structural model numeric ID, the residue naming scheme is **Chain ID\_residue name\_residue number**,  $\angle ADH$  represents the angle formed by acceptor (A), donor (D) and hydrogen (H) ( $\angle ADH$ ).

| PDB ID | Residue A | Atom A | Residue B | Atom B | Distance (Å) |
|--------|-----------|--------|-----------|--------|--------------|
| 6PHB   | I.HIS_20  | NE2    | I.GLU_22  | OE2    | 2.552        |
| 6PHB   | I.LYS_43  | NZ     | D.ASP_27  | OD2    | 2.797        |
| 6PHB   | I.LYS_47  | NZ     | C.GLU_55  | OE1    | 3.460        |
| 6PHB   | I.LYS_47  | NZ     | C.GLU_55  | OE2    | 3.396        |
| 6PHB   | I.LYS_47  | NZ     | D.ASP_105 | OD2    | 2.626        |
| 6PHB   | I.LYS_98  | NZ     | I.GLU_22  | OE1    | 3.315        |
| 6PHB   | I.LYS_98  | NZ     | I.GLU_22  | OE2    | 2.997        |
| 6PHB   | I.LYS_118 | NZ     | I.ASP_131 | OD1    | 2.829        |
| 6PHB   | C.ARG_61  | NH2    | C.GLU_81  | OE2    | 3.398        |
| 6PHB   | C.ARG_61  | NH2    | C.ASP_82  | OD1    | 2.798        |
| 6PHB   | C.ARG_61  | NH2    | C.ASP_82  | OD2    | 3.548        |
| 6PHB   | C.ARG_95  | NH1    | I.ASP_28  | OD2    | 3.551        |
| 6PHB   | C.ARG_95  | NH1    | I.GLU_39  | OE2    | 3.728        |
| 6PHB   | C.LYS_104 | NZ     | C.GLU_166 | OE2    | 2.738        |
| 6PHB   | C.LYS_150 | NZ     | C.GLU_196 | OE1    | 2.587        |
| 6PHB   | C.LYS_150 | NZ     | C.GLU_196 | OE2    | 3.892        |
| 6PHB   | C.LYS_189 | NZ     | C.ASP_186 | OD1    | 3.064        |
| 6PHB   | C.ARG_212 | NH1    | C.GLU_188 | OE1    | 3.096        |
| 6PHB   | D.ARG_38  | NH1    | D.ASP_89  | OD1    | 2.792        |
| 6PHB   | D.ARG_38  | NH2    | D.GLU_46  | OE1    | 3.039        |
| 6PHB   | D.ARG_38  | NH2    | D.GLU_46  | OE2    | 3.983        |
| 6PHB   | D.ARG_38  | NH2    | D.ASP_89  | OD1    | 3.789        |
| 6PHB   | D.ARG_50  | NH1    | I.GLU_39  | OE2    | 3.791        |
| 6PHB   | D.ARG_50  | NH2    | I.GLU_39  | OE2    | 2.945        |
| 6PHB   | D.ARG_66  | NH1    | D.ASP_89  | OD1    | 3.229        |
| 6PHB   | D.ARG_66  | NH1    | D.ASP_89  | OD2    | 3.729        |
| 6PHB   | D.ARG_66  | NH2    | D.ASP_89  | OD1    | 3.250        |
| 6PHB   | D.ARG_66  | NH2    | D.ASP_89  | OD2    | 2.491        |
| 6PHB   | D.LYS_147 | NZ     | D.ASP_148 | OD1    | 3.275        |
| 6PHB   | D.LYS_147 | NZ     | D.ASP_148 | OD2    | 3.674        |
| 6PHB   | D.LYS_213 | NZ     | C.GLU_124 | OE1    | 2.534        |
| 6PHB   | D.LYS_213 | NZ     | C.GLU_124 | OE2    | 3.508        |
| 6PHB   | E.HIS_20  | NE2    | E.GLU_22  | OE1    | 2.558        |
| 6PHB   | E.LYS_43  | NZ     | B.ASP_27  | OD2    | 3.033        |
| 6PHB   | E.LYS_47  | NZ     | A.GLU_55  | OE1    | 3.560        |
| 6PHB   | E.LYS_47  | NZ     | A.GLU_55  | OE2    | 3.516        |
| 6PHB   | E.LYS_47  | NZ     | B.ASP_105 | OD1    | 2.522        |
| 6PHB   | E.LYS_98  | NZ     | E.GLU_22  | OE1    | 3.054        |
| 6PHB   | E.LYS_98  | NZ     | E.GLU_22  | OE2    | 3.330        |
| 6PHB   | E.LYS_118 | NZ     | E.ASP_131 | OD1    | 2.740        |
| 6PHB   | E.LYS_142 | NZ     | E.GLU_145 | OE2    | 3.699        |
| 6PHB   | A.ARG_61  | NH2    | A.GLU_81  | OE2    | 3.390        |
| 6PHB   | A.ARG_61  | NH2    | A.ASP_82  | OD1    | 2.898        |
| 6PHB   | A.ARG_61  | NH2    | A.ASP_82  | OD2    | 3.663        |
| 6PHB   | A.ARG_95  | NH1    | E.ASP_28  | OD1    | 3.463        |
| 6PHB   | A.ARG_95  | NH1    | E.GLU_39  | OE2    | 3.694        |
| 6PHB   | A.LYS_104 | NZ     | A.GLU_166 | OE1    | 2.724        |
| 6PHB   | A.LYS_150 | NZ     | A.GLU_196 | OE1    | 2.544        |
| 6PHB   | A.LYS_150 | NZ     | A.GLU_196 | OE2    | 3.867        |
| 6PHB   | A.LYS_189 | NZ     | A.ASP_186 | OD1    | 3.061        |
| 6PHB   | A.ARG_212 | NH2    | A.GLU_188 | OE2    | 2.964        |
| 6PHB   | B.ARG_38  | NH1    | B.ASP_89  | OD1    | 2.781        |
| 6PHB   | B.ARG_38  | NH2    | B.GLU_46  | OE1    | 3.033        |
| 6PHB   | B.ARG_38  | NH2    | B.GLU_46  | OE2    | 3.957        |
| 6PHB   | B.ARG_38  | NH2    | B.ASP_89  | OD1    | 3.799        |
| 6PHB   | B.ARG_50  | NH1    | E.GLU_39  | OE2    | 3.771        |
| 6PHB   | B.ARG_50  | NH2    | E.GLU_39  | OE2    | 2.963        |

|      |           |     |           |     |       |
|------|-----------|-----|-----------|-----|-------|
| 6PHB | B_ARG_66  | NH1 | B_ASP_89  | OD1 | 3.245 |
| 6PHB | B_ARG_66  | NH1 | B_ASP_89  | OD2 | 3.725 |
| 6PHB | B_ARG_66  | NH2 | B_ASP_89  | OD1 | 3.258 |
| 6PHB | B_ARG_66  | NH2 | B_ASP_89  | OD2 | 2.482 |
| 6PHB | B_LYS_147 | NZ  | B_ASP_148 | OD1 | 3.294 |
| 6PHB | B_LYS_147 | NZ  | B_ASP_148 | OD2 | 3.635 |
| 6PHB | B_LYS_213 | NZ  | A_GLU_124 | OE1 | 3.629 |
| 6PHB | B_LYS_213 | NZ  | A_GLU_124 | OE2 | 2.552 |

Table 897: 6PHB-specific salt bridging networks analysis. In this table, a PDB file is specified with a four-letter PDB ID, except that the names of the PDB files corresponding to the single NMR structural model split from the NMR ensemble is specified with a four-letter PDB ID in addition to a hyphen followed by the single NMR structural model numeric ID, the residue naming scheme is **Chain ID\_residue name\_residue number**,  $\angle ADH$  represents the angle formed by acceptor (A), donor (D) and hydrogen (H) ( $\angle ADH$ ).

| PDB ID | Residue A | Atom A | Residue B | Atom B | Distance (Å) |
|--------|-----------|--------|-----------|--------|--------------|
| 6PHC   | I.LYS_2   | NZ     | A.GLU_96  | OE1    | 3.433        |
| 6PHC   | I.HIS_20  | NE2    | I.GLU_22  | OE2    | 2.559        |
| 6PHC   | I.LYS_40  | NZ     | I.ASP_28  | OD1    | 2.981        |
| 6PHC   | I.LYS_40  | NZ     | I.ASP_28  | OD2    | 3.595        |
| 6PHC   | I.LYS_98  | NZ     | I.GLU_22  | OE2    | 3.581        |
| 6PHC   | I.LYS_139 | NZ     | I.ASP_6   | OD1    | 2.833        |
| 6PHC   | A.ARG_38  | NH1    | A.ASP_86  | OD1    | 2.881        |
| 6PHC   | A.ARG_38  | NH2    | A.GLU_46  | OE1    | 3.768        |
| 6PHC   | A.ARG_38  | NH2    | A.GLU_46  | OE2    | 2.978        |
| 6PHC   | A.ARG_38  | NH2    | A.ASP_86  | OD1    | 3.793        |
| 6PHC   | A.LYS_64  | NZ     | A.ASP_61  | OD2    | 2.874        |
| 6PHC   | A.ARG_66  | NH1    | A.ASP_86  | OD1    | 3.869        |
| 6PHC   | A.ARG_66  | NH2    | A.ASP_86  | OD1    | 3.269        |
| 6PHC   | A.ARG_66  | NH2    | A.ASP_86  | OD2    | 2.372        |
| 6PHC   | A.ARG_94  | NH2    | A.ASP_101 | OD1    | 3.528        |
| 6PHC   | A.ARG_94  | NH2    | A.ASP_101 | OD2    | 2.665        |
| 6PHC   | A.LYS_143 | NZ     | A.ASP_144 | OD1    | 3.692        |
| 6PHC   | A.LYS_206 | NZ     | A.ASP_208 | OD1    | 2.966        |
| 6PHC   | A.LYS_206 | NZ     | A.ASP_208 | OD2    | 3.137        |
| 6PHC   | A.LYS_209 | NZ     | B.GLU_122 | OE2    | 3.367        |
| 6PHC   | A.LYS_210 | NZ     | A.GLU_212 | OE2    | 2.900        |
| 6PHC   | B.ARG_24  | NH1    | B.ASP_70  | OD1    | 3.336        |
| 6PHC   | B.ARG_61  | NH1    | B.ASP_82  | OD1    | 3.307        |
| 6PHC   | B.ARG_61  | NH1    | B.ASP_82  | OD2    | 2.292        |
| 6PHC   | B.ARG_61  | NH2    | B.GLU_81  | OE2    | 3.528        |
| 6PHC   | B.ARG_61  | NH2    | B.ASP_82  | OD1    | 3.098        |
| 6PHC   | B.ARG_61  | NH2    | B.ASP_82  | OD2    | 3.416        |
| 6PHC   | B.ARG_102 | NH1    | B.GLU_164 | OE1    | 2.853        |
| 6PHC   | B.LYS_106 | NZ     | B.GLU_17  | OE2    | 3.611        |
| 6PHC   | B.ARG_141 | NH1    | B.GLU_104 | OE1    | 3.956        |
| 6PHC   | B.ARG_141 | NH2    | B.GLU_104 | OE1    | 2.662        |
| 6PHC   | B.ARG_141 | NH2    | B.GLU_104 | OE2    | 2.894        |
| 6PHC   | B.LYS_148 | NZ     | B.GLU_194 | OE1    | 2.588        |
| 6PHC   | B.LYS_187 | NZ     | B.ASP_184 | OD1    | 3.568        |
| 6PHC   | E.LYS_2   | NZ     | C.GLU_96  | OE2    | 3.166        |
| 6PHC   | E.HIS_20  | NE2    | E.GLU_22  | OE2    | 2.761        |
| 6PHC   | E.LYS_118 | NZ     | E.ASP_131 | OD1    | 3.884        |
| 6PHC   | E.LYS_118 | NZ     | E.ASP_131 | OD2    | 3.881        |
| 6PHC   | E.LYS_139 | NZ     | E.ASP_6   | OD1    | 2.752        |
| 6PHC   | E.LYS_139 | NZ     | E.ASP_6   | OD2    | 3.907        |
| 6PHC   | E.LYS_155 | NZ     | E.ASP_157 | OD2    | 3.939        |
| 6PHC   | C.ARG_38  | NH1    | C.ASP_86  | OD1    | 2.792        |
| 6PHC   | C.ARG_38  | NH2    | C.GLU_46  | OE1    | 3.747        |
| 6PHC   | C.ARG_38  | NH2    | C.GLU_46  | OE2    | 2.839        |
| 6PHC   | C.ARG_38  | NH2    | C.ASP_86  | OD1    | 3.865        |
| 6PHC   | C.LYS_64  | NZ     | C.ASP_61  | OD1    | 3.164        |
| 6PHC   | C.ARG_66  | NH2    | C.ASP_86  | OD1    | 3.190        |
| 6PHC   | C.ARG_66  | NH2    | C.ASP_86  | OD2    | 2.357        |
| 6PHC   | C.LYS_75  | NZ     | A.GLU_1   | OE1    | 3.102        |
| 6PHC   | C.ARG_94  | NH2    | C.ASP_101 | OD1    | 3.594        |
| 6PHC   | C.ARG_94  | NH2    | C.ASP_101 | OD2    | 2.564        |
| 6PHC   | C.LYS_143 | NZ     | C.ASP_144 | OD1    | 3.602        |
| 6PHC   | C.LYS_143 | NZ     | C.ASP_144 | OD2    | 3.997        |
| 6PHC   | C.LYS_209 | NZ     | D.GLU_122 | OE2    | 3.075        |
| 6PHC   | D.ARG_24  | NH1    | D.ASP_70  | OD1    | 2.338        |
| 6PHC   | D.ARG_24  | NH1    | D.ASP_70  | OD2    | 2.957        |
| 6PHC   | D.ARG_24  | NH2    | D.ASP_70  | OD1    | 3.768        |

|      |           |     |           |     |       |
|------|-----------|-----|-----------|-----|-------|
| 6PHC | D_ARG_61  | NH2 | D_GLU_81  | OE2 | 3.370 |
| 6PHC | D_ARG_61  | NH2 | D_ASP_82  | OD1 | 3.166 |
| 6PHC | D_ARG_61  | NH2 | D_ASP_82  | OD2 | 3.703 |
| 6PHC | D_LYS_106 | NZ  | D_GLU_17  | OE2 | 3.862 |
| 6PHC | D_ARG_141 | NH1 | D_GLU_104 | OE1 | 3.512 |
| 6PHC | D_ARG_141 | NH1 | D_GLU_104 | OE2 | 3.995 |
| 6PHC | D_ARG_141 | NH2 | D_GLU_104 | OE1 | 3.237 |
| 6PHC | D_ARG_141 | NH2 | D_GLU_104 | OE2 | 2.397 |
| 6PHC | D_LYS_187 | NZ  | D_ASP_184 | OD1 | 3.752 |

Table 898: 6PHC-specific salt bridging networks analysis. In this table, a PDB file is specified with a four-letter PDB ID, except that the names of the PDB files corresponding to the single NMR structural model split from the NMR ensemble is specified with a four-letter PDB ID in addition to a hyphen followed by the single NMR structural model numeric ID, the residue naming scheme is **Chain ID\_residue name\_residue number**,  $\angle ADH$  represents the angle formed by acceptor (A), donor (D) and hydrogen (H) ( $\angle ADH$ ).

| PDB ID | Residue A | Atom A | Residue B | Atom B | Distance (Å) |
|--------|-----------|--------|-----------|--------|--------------|
| 6PHD   | H_HIS_3   | NE2    | H_GLU_1   | OE1    | 3.723        |
| 6PHD   | H_HIS_3   | NE2    | H_GLU_1   | OE2    | 3.479        |
| 6PHD   | H_ARG_38  | NH1    | H_ASP_92  | OD1    | 3.022        |
| 6PHD   | H_ARG_38  | NH2    | H_GLU_46  | OE1    | 3.293        |
| 6PHD   | H_ARG_38  | NH2    | H_GLU_46  | OE2    | 3.635        |
| 6PHD   | H_ARG_38  | NH2    | H_ASP_92  | OD1    | 3.809        |
| 6PHD   | H_ARG_50  | NH1    | H_ASP_35  | OD1    | 3.977        |
| 6PHD   | H_ARG_50  | NH1    | H_ASP_35  | OD2    | 3.398        |
| 6PHD   | H_ARG_52  | NH1    | H_ASP_61  | OD2    | 3.597        |
| 6PHD   | H_ARG_52  | NH2    | H_ASP_61  | OD2    | 3.257        |
| 6PHD   | H_ARG_52  | NH2    | C_ASP_131 | OD2    | 3.559        |
| 6PHD   | H_ARG_69  | NH1    | H_ASP_92  | OD1    | 3.736        |
| 6PHD   | H_ARG_69  | NH1    | H_ASP_92  | OD2    | 2.629        |
| 6PHD   | H_ARG_69  | NH2    | H_ASP_92  | OD1    | 3.118        |
| 6PHD   | H_ARG_69  | NH2    | H_ASP_92  | OD2    | 3.528        |
| 6PHD   | H_ARG_74  | NH2    | H_ASP_76  | OD1    | 3.389        |
| 6PHD   | H_ARG_100 | NH2    | H_ASP_116 | OD1    | 3.601        |
| 6PHD   | H_ARG_100 | NH2    | H_ASP_116 | OD2    | 2.413        |
| 6PHD   | H_ARG_107 | NH1    | H_GLU_106 | OE2    | 3.946        |
| 6PHD   | H_LYS_158 | NZ     | L_GLU_128 | OE2    | 2.649        |
| 6PHD   | H_LYS_224 | NZ     | L_GLU_127 | OE1    | 2.532        |
| 6PHD   | H_LYS_224 | NZ     | L_GLU_127 | OE2    | 2.992        |
| 6PHD   | H_LYS_225 | NZ     | H_GLU_227 | OE2    | 3.183        |
| 6PHD   | L_ARG_61  | NH2    | L_GLU_81  | OE1    | 3.579        |
| 6PHD   | L_ARG_61  | NH2    | L_ASP_82  | OD1    | 3.221        |
| 6PHD   | L_ARG_61  | NH2    | L_ASP_82  | OD2    | 3.791        |
| 6PHD   | L_LYS_106 | NZ     | L_ASP_85  | OD1    | 3.546        |
| 6PHD   | L_LYS_114 | NZ     | L_GLU_202 | OE1    | 3.497        |
| 6PHD   | L_HIS_192 | ND1    | L_ASP_155 | OD2    | 4.000        |
| 6PHD   | C_ARG_11  | NH1    | C_GLU_39  | OE2    | 3.811        |
| 6PHD   | C_ARG_11  | NH2    | C_GLU_39  | OE1    | 3.053        |
| 6PHD   | C_ARG_11  | NH2    | C_GLU_39  | OE2    | 3.487        |
| 6PHD   | C_HIS_20  | NE2    | C_GLU_22  | OE1    | 3.024        |
| 6PHD   | C_LYS_90  | NZ     | C_ASP_78  | OD2    | 3.307        |
| 6PHD   | C_LYS_98  | NZ     | C_GLU_22  | OE1    | 2.852        |
| 6PHD   | C_LYS_98  | NZ     | C_GLU_22  | OE2    | 3.209        |
| 6PHD   | C_LYS_118 | NZ     | H_ASP_109 | OD1    | 3.874        |
| 6PHD   | C_LYS_118 | NZ     | C_ASP_131 | OD1    | 3.023        |
| 6PHD   | C_LYS_127 | NZ     | C_ASP_124 | OD1    | 3.895        |
| 6PHD   | C_LYS_135 | NZ     | L_ASP_51  | OD2    | 3.166        |
| 6PHD   | C_LYS_139 | NZ     | C_ASP_6   | OD1    | 3.503        |
| 6PHD   | C_LYS_148 | NZ     | C_ASP_157 | OD2    | 3.726        |
| 6PHD   | C_LYS_148 | NZ     | C_ASP_160 | OD1    | 3.495        |

Table 899: 6PHD-specific salt bridging networks analysis. In this table, a PDB file is specified with a four-letter PDB ID, except that the names of the PDB files corresponding to the single NMR structural model split from the NMR ensemble is specified with a four-letter PDB ID in addition to a hyphen followed by the single NMR structural model numeric ID, the residue naming scheme is **Chain ID\_residue name\_residue number**,  $\angle ADH$  represents the angle formed by acceptor (A), donor (D) and hydrogen (H) ( $\angle ADH$ ).



| PDB ID | Residue A | Atom A | Residue B | Atom B | Distance (Å) |
|--------|-----------|--------|-----------|--------|--------------|
| 6PHF   | A_ARG_12  | NH2    | A_GLU_10  | OE1    | 2.765        |
| 6PHF   | A_ARG_38  | NH1    | A_ASP_90  | OD1    | 3.178        |
| 6PHF   | A_ARG_38  | NH2    | A_GLU_46  | OE1    | 3.769        |
| 6PHF   | A_ARG_38  | NH2    | A_GLU_89  | OE1    | 3.880        |
| 6PHF   | A_ARG_38  | NH2    | A_GLU_89  | OE2    | 3.467        |
| 6PHF   | A_LYS_63  | NZ     | A_GLU_46  | OE2    | 2.996        |
| 6PHF   | A_LYS_63  | NZ     | C_GLU_89  | OE2    | 2.941        |
| 6PHF   | A_ARG_67  | NH1    | A_ASP_90  | OD1    | 3.640        |
| 6PHF   | A_ARG_67  | NH2    | A_ASP_90  | OD1    | 3.213        |
| 6PHF   | A_ARG_67  | NH2    | A_ASP_90  | OD2    | 2.825        |
| 6PHF   | A_ARG_87  | NH2    | A_GLU_89  | OE1    | 3.635        |
| 6PHF   | A_ARG_98  | NH1    | A_ASP_108 | OD1    | 3.223        |
| 6PHF   | A_ARG_98  | NH1    | A_ASP_108 | OD2    | 2.645        |
| 6PHF   | A_ARG_98  | NH2    | A_ASP_108 | OD2    | 3.048        |
| 6PHF   | A_LYS_150 | NZ     | B_GLU_123 | OE1    | 3.782        |
| 6PHF   | A_LYS_216 | NZ     | B_GLU_122 | OE1    | 2.642        |
| 6PHF   | A_LYS_216 | NZ     | B_GLU_122 | OE2    | 2.832        |
| 6PHF   | G_HIS_20  | NE2    | G_GLU_22  | OE2    | 2.627        |
| 6PHF   | G_LYS_72  | NZ     | G_ASP_78  | OD1    | 3.015        |
| 6PHF   | G_LYS_98  | NZ     | G_GLU_22  | OE1    | 3.385        |
| 6PHF   | G_LYS_98  | NZ     | G_GLU_22  | OE2    | 2.989        |
| 6PHF   | G_LYS_118 | NZ     | G_ASP_131 | OD1    | 2.874        |
| 6PHF   | G_LYS_130 | NZ     | A_GLU_59  | OE2    | 2.793        |
| 6PHF   | G_LYS_135 | NZ     | B_ASP_48  | OD1    | 3.917        |
| 6PHF   | G_LYS_135 | NZ     | B_ASP_48  | OD2    | 2.691        |
| 6PHF   | G_LYS_148 | NZ     | G_ASP_160 | OD1    | 2.301        |
| 6PHF   | G_LYS_148 | NZ     | G_ASP_160 | OD2    | 3.905        |
| 6PHF   | B_LYS_28  | NZ     | B_ASP_89  | OD2    | 3.634        |
| 6PHF   | B_LYS_50  | NZ     | G_ASP_160 | OD1    | 3.948        |
| 6PHF   | B_LYS_50  | NZ     | G_ASP_160 | OD2    | 3.455        |
| 6PHF   | B_ARG_58  | NH1    | B_ASP_79  | OD2    | 3.097        |
| 6PHF   | B_ARG_58  | NH2    | B_ASP_79  | OD1    | 3.588        |
| 6PHF   | B_ARG_58  | NH2    | B_ASP_79  | OD2    | 3.661        |
| 6PHF   | B_LYS_165 | NZ     | B_GLU_80  | OE1    | 2.830        |
| 6PHF   | C_ARG_12  | NH2    | C_GLU_10  | OE1    | 2.671        |
| 6PHF   | C_ARG_38  | NH1    | C_ASP_90  | OD1    | 3.218        |
| 6PHF   | C_LYS_63  | NZ     | A_GLU_89  | OE2    | 3.050        |
| 6PHF   | C_LYS_63  | NZ     | C_GLU_46  | OE2    | 3.084        |
| 6PHF   | C_ARG_67  | NH2    | C_ASP_90  | OD1    | 3.179        |
| 6PHF   | C_ARG_87  | NH1    | C_GLU_89  | OE1    | 3.091        |
| 6PHF   | C_ARG_87  | NH2    | C_GLU_89  | OE1    | 2.353        |
| 6PHF   | C_ARG_87  | NH2    | C_ASP_90  | OD1    | 3.900        |
| 6PHF   | C_ARG_98  | NH2    | C_ASP_108 | OD2    | 3.438        |
| 6PHF   | C_LYS_150 | NZ     | D_GLU_123 | OE2    | 2.663        |
| 6PHF   | C_LYS_216 | NZ     | D_GLU_122 | OE1    | 2.759        |
| 6PHF   | C_LYS_216 | NZ     | D_GLU_122 | OE2    | 3.120        |
| 6PHF   | E_HIS_20  | NE2    | E_GLU_22  | OE1    | 3.442        |
| 6PHF   | E_LYS_72  | NZ     | E_ASP_78  | OD1    | 3.439        |
| 6PHF   | E_LYS_98  | NZ     | E_GLU_22  | OE1    | 2.929        |
| 6PHF   | E_LYS_98  | NZ     | E_GLU_22  | OE2    | 3.612        |
| 6PHF   | E_LYS_118 | NZ     | E_ASP_131 | OD1    | 2.864        |
| 6PHF   | E_LYS_130 | NZ     | C_GLU_59  | OE2    | 2.474        |
| 6PHF   | E_LYS_135 | NZ     | D_ASP_48  | OD1    | 3.909        |
| 6PHF   | E_LYS_135 | NZ     | D_ASP_48  | OD2    | 2.579        |
| 6PHF   | E_LYS_139 | NZ     | E_ASP_6   | OD1    | 2.802        |
| 6PHF   | D_LYS_24  | NZ     | D_ASP_23  | OD1    | 3.810        |
| 6PHF   | D_LYS_28  | NZ     | D_ASP_89  | OD1    | 3.365        |

|      |          |     |          |     |       |
|------|----------|-----|----------|-----|-------|
| 6PHF | D_ARG_58 | NH2 | D_ASP_79 | OD1 | 2.632 |
| 6PHF | D_ARG_58 | NH2 | D_ASP_79 | OD2 | 2.899 |

Table 900: 6PHF-specific salt bridging networks analysis. In this table, a PDB file is specified with a four-letter PDB ID, except that the names of the PDB files corresponding to the single NMR structural model split from the NMR ensemble is specified with a four-letter PDB ID in addition to a hyphen followed by the single NMR structural model numeric ID, the residue naming scheme is **Chain ID\_residue name\_residue number**,  $\angle ADH$  represents the angle formed by acceptor (A), donor (D) and hydrogen (H) ( $\angle ADH$ ).

| PDB ID | Residue A | Atom A | Residue B | Atom B | Distance (Å) |
|--------|-----------|--------|-----------|--------|--------------|
| 6PHG   | A_ARG_38  | NH1    | A_ASP_90  | OD1    | 2.955        |
| 6PHG   | A_ARG_38  | NH2    | A_GLU_46  | OE1    | 3.239        |
| 6PHG   | A_ARG_38  | NH2    | A_ASP_90  | OD1    | 3.782        |
| 6PHG   | A_LYS_65  | NZ     | A_ASP_62  | OD1    | 3.774        |
| 6PHG   | A_ARG_67  | NH1    | A_ASP_90  | OD1    | 3.754        |
| 6PHG   | A_ARG_67  | NH1    | A_ASP_90  | OD2    | 2.801        |
| 6PHG   | A_ARG_67  | NH2    | A_ASP_90  | OD1    | 2.872        |
| 6PHG   | A_ARG_67  | NH2    | A_ASP_90  | OD2    | 3.428        |
| 6PHG   | A_LYS_76  | NZ     | A_ASP_73  | OD2    | 3.739        |
| 6PHG   | A_ARG_98  | NH2    | A_ASP_113 | OD1    | 3.705        |
| 6PHG   | A_ARG_98  | NH2    | A_ASP_113 | OD2    | 2.616        |
| 6PHG   | A_LYS_155 | NZ     | A_ASP_156 | OD1    | 3.341        |
| 6PHG   | A_LYS_155 | NZ     | A_ASP_156 | OD2    | 2.879        |
| 6PHG   | A_LYS_221 | NZ     | B_GLU_126 | OE2    | 3.079        |
| 6PHG   | A_LYS_222 | NZ     | A_GLU_224 | OE1    | 3.525        |
| 6PHG   | B_ARG_65  | NH1    | B_GLU_83  | OE1    | 3.253        |
| 6PHG   | B_ARG_65  | NH1    | B_GLU_83  | OE2    | 3.558        |
| 6PHG   | B_ARG_65  | NH2    | B_GLU_83  | OE1    | 3.939        |
| 6PHG   | B_ARG_65  | NH2    | B_ASP_86  | OD1    | 2.611        |
| 6PHG   | B_ARG_65  | NH2    | B_ASP_86  | OD2    | 2.992        |
| 6PHG   | B_ARG_81  | NH2    | B_GLU_83  | OE2    | 2.886        |
| 6PHG   | B_ARG_106 | NH1    | B_GLU_168 | OE2    | 3.259        |
| 6PHG   | B_LYS_152 | NZ     | B_GLU_198 | OE1    | 3.024        |
| 6PHG   | B_LYS_191 | NZ     | B_ASP_188 | OD1    | 3.125        |
| 6PHG   | B_ARG_214 | NH1    | B_GLU_190 | OE1    | 3.537        |

Table 901: 6PHG-specific salt bridging networks analysis. In this table, a PDB file is specified with a four-letter PDB ID, except that the names of the PDB files corresponding to the single NMR structural model split from the NMR ensemble is specified with a four-letter PDB ID in addition to a hyphen followed by the single NMR structural model numeric ID, the residue naming scheme is **Chain ID\_residue name\_residue number**,  $\angle ADH$  represents the angle formed by acceptor (A), donor (D) and hydrogen (H) ( $\angle ADH$ ).

| PDB ID | Residue A | Atom A | Residue B | Atom B | Distance (Å) |
|--------|-----------|--------|-----------|--------|--------------|
| 6PHH   | C_ARG_38  | NH1    | C_ASP_90  | OD1    | 2.886        |
| 6PHH   | C_ARG_38  | NH2    | C_GLU_46  | OE1    | 3.069        |
| 6PHH   | C_ARG_38  | NH2    | C_GLU_46  | OE2    | 3.921        |
| 6PHH   | C_ARG_38  | NH2    | C_ASP_90  | OD1    | 3.682        |
| 6PHH   | C_ARG_67  | NH1    | C_ASP_90  | OD1    | 3.146        |
| 6PHH   | C_ARG_67  | NH1    | C_ASP_90  | OD2    | 3.531        |
| 6PHH   | C_ARG_67  | NH2    | C_ASP_90  | OD1    | 3.933        |
| 6PHH   | C_ARG_67  | NH2    | C_ASP_90  | OD2    | 2.855        |
| 6PHH   | C_LYS_76  | NZ     | A_GLU_1   | OE1    | 3.897        |
| 6PHH   | C_ARG_98  | NH2    | C_ASP_113 | OD1    | 3.626        |
| 6PHH   | C_ARG_98  | NH2    | C_ASP_113 | OD2    | 2.534        |
| 6PHH   | C_LYS_155 | NZ     | C_ASP_156 | OD1    | 3.705        |
| 6PHH   | D_ARG_58  | NH2    | D_ASP_64  | OD1    | 3.542        |
| 6PHH   | D_ARG_65  | NH2    | D_ASP_86  | OD1    | 2.596        |
| 6PHH   | D_ARG_65  | NH2    | D_ASP_86  | OD2    | 2.751        |
| 6PHH   | D_ARG_106 | NH1    | D_GLU_168 | OE1    | 3.672        |
| 6PHH   | D_ARG_106 | NH1    | D_GLU_168 | OE2    | 2.329        |
| 6PHH   | A_ARG_38  | NH1    | A_ASP_90  | OD1    | 2.820        |
| 6PHH   | A_ARG_38  | NH2    | A_GLU_46  | OE1    | 2.997        |
| 6PHH   | A_ARG_38  | NH2    | A_GLU_46  | OE2    | 3.785        |
| 6PHH   | A_ARG_38  | NH2    | A_ASP_90  | OD1    | 3.734        |
| 6PHH   | A_LYS_65  | NZ     | A_ASP_62  | OD1    | 2.552        |
| 6PHH   | A_ARG_67  | NH1    | A_ASP_90  | OD1    | 3.908        |
| 6PHH   | A_ARG_67  | NH1    | A_ASP_90  | OD2    | 2.904        |
| 6PHH   | A_ARG_67  | NH2    | A_ASP_90  | OD1    | 3.309        |
| 6PHH   | A_ARG_67  | NH2    | A_ASP_90  | OD2    | 3.733        |
| 6PHH   | A_LYS_76  | NZ     | C_GLU_1   | OE1    | 3.451        |
| 6PHH   | A_ARG_98  | NH2    | A_GLU_100 | OE1    | 3.744        |
| 6PHH   | A_ARG_98  | NH2    | A_ASP_113 | OD1    | 3.536        |
| 6PHH   | A_ARG_98  | NH2    | A_ASP_113 | OD2    | 2.500        |
| 6PHH   | A_LYS_218 | NZ     | A_ASP_220 | OD1    | 2.774        |
| 6PHH   | A_LYS_218 | NZ     | A_ASP_220 | OD2    | 3.847        |
| 6PHH   | A_LYS_221 | NZ     | B_GLU_126 | OE2    | 3.327        |
| 6PHH   | B_ARG_24  | NH1    | B_ASP_74  | OD1    | 3.370        |
| 6PHH   | B_ARG_24  | NH1    | B_ASP_74  | OD2    | 3.208        |
| 6PHH   | B_ARG_24  | NH2    | B_ASP_74  | OD1    | 3.944        |
| 6PHH   | B_ARG_58  | NH2    | B_ASP_64  | OD1    | 3.009        |
| 6PHH   | B_ARG_65  | NH2    | B_ASP_86  | OD1    | 2.841        |
| 6PHH   | B_ARG_65  | NH2    | B_ASP_86  | OD2    | 2.510        |
| 6PHH   | B_ARG_106 | NH1    | B_GLU_168 | OE2    | 2.682        |
| 6PHH   | B_ARG_214 | NH1    | B_GLU_190 | OE1    | 3.673        |

Table 902: 6PHH-specific salt bridging networks analysis. In this table, a PDB file is specified with a four-letter PDB ID, except that the names of the PDB files corresponding to the single NMR structural model split from the NMR ensemble is specified with a four-letter PDB ID in addition to a hyphen followed by the single NMR structural model numeric ID, the residue naming scheme is **Chain ID\_residue name\_residue number**,  $\angle ADH$  represents the angle formed by acceptor (A), donor (D) and hydrogen (H) ( $\angle ADH$ ).

| PDB ID | Residue A | Atom A | Residue B | Atom B | Distance (Å) |
|--------|-----------|--------|-----------|--------|--------------|
| 6PI7   | A_HIS_317 | NE2    | A_GLU_316 | OE1    | 3.899        |
| 6PI7   | A_HIS_320 | ND1    | A_GLU_316 | OE2    | 2.374        |
| 6PI7   | A_HIS_320 | NE2    | A_GLU_418 | OE2    | 2.831        |
| 6PI7   | A_HIS_355 | ND1    | A_ASP_358 | OD1    | 3.681        |
| 6PI7   | A_HIS_355 | ND1    | A_ASP_358 | OD2    | 2.824        |
| 6PI7   | A_ARG_372 | NH2    | A_ASP_390 | OD1    | 2.751        |
| 6PI7   | A_ARG_372 | NH2    | A_ASP_390 | OD2    | 3.246        |
| 6PI7   | A_ARG_406 | NH2    | A_ASP_408 | OD1    | 3.871        |
| 6PI7   | A_ARG_406 | NH2    | A_ASP_408 | OD2    | 2.514        |
| 6PI7   | A_ARG_423 | NH1    | A_GLU_494 | OE1    | 3.880        |
| 6PI7   | A_HIS_444 | NE2    | A_ASP_473 | OD2    | 2.887        |
| 6PI7   | A_LYS_449 | NZ     | A_ASP_447 | OD2    | 3.499        |
| 6PI7   | A_LYS_489 | NZ     | A_GLU_485 | OE1    | 2.489        |
| 6PI7   | B_ARG_62  | NH2    | B_ASP_83  | OD1    | 2.896        |
| 6PI7   | B_ARG_62  | NH2    | B_ASP_83  | OD2    | 3.659        |
| 6PI7   | B_ARG_67  | NH2    | A_GLU_345 | OE2    | 3.601        |
| 6PI7   | C_ARG_41  | NH1    | C_GLU_49  | OE1    | 3.463        |
| 6PI7   | C_ARG_41  | NH1    | C_GLU_49  | OE2    | 3.574        |
| 6PI7   | C_ARG_41  | NH1    | C_ASP_93  | OD1    | 3.486        |
| 6PI7   | C_ARG_41  | NH2    | C_ASP_93  | OD1    | 3.043        |
| 6PI7   | C_ARG_70  | NH1    | C_ASP_93  | OD1    | 3.039        |
| 6PI7   | C_ARG_70  | NH1    | C_ASP_93  | OD2    | 3.416        |
| 6PI7   | C_ARG_70  | NH2    | C_ASP_93  | OD1    | 3.898        |
| 6PI7   | C_ARG_70  | NH2    | C_ASP_93  | OD2    | 3.164        |
| 6PI7   | C_ARG_101 | NH2    | C_ASP_115 | OD1    | 3.986        |
| 6PI7   | C_ARG_101 | NH2    | C_ASP_115 | OD2    | 2.837        |
| 6PI7   | C_HIS_103 | NE2    | C_ASP_115 | OD2    | 3.124        |
| 6PI7   | C_ARG_105 | NH1    | A_ASP_334 | OD1    | 2.888        |
| 6PI7   | D_HIS_317 | NE2    | D_GLU_316 | OE1    | 3.914        |
| 6PI7   | D_HIS_320 | ND1    | D_GLU_316 | OE2    | 2.372        |
| 6PI7   | D_HIS_320 | NE2    | D_GLU_418 | OE2    | 2.836        |
| 6PI7   | D_HIS_355 | ND1    | D_ASP_358 | OD2    | 3.434        |
| 6PI7   | D_ARG_372 | NH2    | D_ASP_390 | OD1    | 2.758        |
| 6PI7   | D_ARG_372 | NH2    | D_ASP_390 | OD2    | 3.271        |
| 6PI7   | D_ARG_406 | NH2    | D_ASP_408 | OD1    | 3.860        |
| 6PI7   | D_ARG_406 | NH2    | D_ASP_408 | OD2    | 2.528        |
| 6PI7   | D_ARG_423 | NH1    | D_GLU_494 | OE1    | 3.849        |
| 6PI7   | D_HIS_444 | NE2    | D_ASP_473 | OD2    | 2.883        |
| 6PI7   | D_LYS_449 | NZ     | D_ASP_447 | OD2    | 3.509        |
| 6PI7   | E_ARG_62  | NH2    | E_ASP_83  | OD1    | 2.890        |
| 6PI7   | E_ARG_62  | NH2    | E_ASP_83  | OD2    | 3.662        |
| 6PI7   | E_LYS_104 | NZ     | E_GLU_106 | OE2    | 3.467        |
| 6PI7   | E_LYS_150 | NZ     | E_GLU_196 | OE1    | 3.393        |
| 6PI7   | E_LYS_150 | NZ     | E_GLU_196 | OE2    | 3.111        |
| 6PI7   | F_ARG_41  | NH1    | F_GLU_49  | OE1    | 3.460        |
| 6PI7   | F_ARG_41  | NH1    | F_GLU_49  | OE2    | 3.581        |
| 6PI7   | F_ARG_41  | NH1    | F_ASP_93  | OD1    | 3.467        |
| 6PI7   | F_ARG_41  | NH2    | F_ASP_93  | OD1    | 3.047        |
| 6PI7   | F_ARG_70  | NH1    | F_ASP_93  | OD1    | 3.056        |
| 6PI7   | F_ARG_70  | NH1    | F_ASP_93  | OD2    | 3.386        |
| 6PI7   | F_ARG_70  | NH2    | F_ASP_93  | OD1    | 3.902        |
| 6PI7   | F_ARG_70  | NH2    | F_ASP_93  | OD2    | 3.180        |
| 6PI7   | F_ARG_101 | NH2    | F_ASP_115 | OD1    | 3.992        |
| 6PI7   | F_ARG_101 | NH2    | F_ASP_115 | OD2    | 2.859        |
| 6PI7   | F_HIS_103 | NE2    | F_ASP_115 | OD2    | 3.117        |
| 6PI7   | F_ARG_105 | NH1    | D_ASP_334 | OD1    | 3.009        |
| 6PI7   | G_ARG_4   | NH1    | A_ASP_385 | OD1    | 3.497        |

|      |         |     |           |     |       |
|------|---------|-----|-----------|-----|-------|
| 6PI7 | G_ARG_4 | NH1 | A_ASP_385 | OD2 | 3.823 |
| 6PI7 | G_ARG_4 | NH2 | A_ASP_385 | OD1 | 3.602 |
| 6PI7 | G_ARG_4 | NH2 | A_ASP_385 | OD2 | 3.033 |
| 6PI7 | G_ARG_6 | NH1 | A_GLU_433 | OE2 | 2.847 |
| 6PI7 | G_ARG_6 | NH1 | A_ASP_437 | OD1 | 3.619 |
| 6PI7 | G_ARG_6 | NH2 | A_ASP_437 | OD1 | 2.997 |
| 6PI7 | G_ARG_6 | NH2 | A_ASP_440 | OD2 | 2.762 |

Table 903: 6PI7-specific salt bridging networks analysis. In this table, a PDB file is specified with a four-letter PDB ID, except that the names of the PDB files corresponding to the single NMR structural model split from the NMR ensemble is specified with a four-letter PDB ID in addition to a hyphen followed by the single NMR structural model numeric ID, the residue naming scheme is **Chain ID\_residue name\_residue number**,  $\angle ADH$  represents the angle formed by acceptor (A), donor (D) and hydrogen (H) ( $\angle ADH$ ).

| PDB ID | Residue A | Atom A | Residue B | Atom B | Distance (Å) |
|--------|-----------|--------|-----------|--------|--------------|
| 6PYC   | H_ARG.67  | NH2    | H_GLU.87  | OE2    | 3.339        |
| 6PYC   | H_ARG.67  | NH2    | H_ASP.88  | OD1    | 3.284        |
| 6PYC   | H_ARG.67  | NH2    | H_ASP.88  | OD2    | 3.903        |
| 6PYC   | H_LYS.109 | NZ     | H_GLU.147 | OE1    | 3.975        |
| 6PYC   | H_LYS.142 | NZ     | H_ASP.143 | OD1    | 3.360        |
| 6PYC   | H_LYS.208 | NZ     | L_GLU.124 | OE1    | 2.557        |
| 6PYC   | H_LYS.208 | NZ     | L_GLU.124 | OE2    | 3.571        |
| 6PYC   | L_ARG.62  | NH2    | L_GLU.82  | OE1    | 3.870        |
| 6PYC   | L_ARG.62  | NH2    | L_ASP.83  | OD1    | 2.885        |
| 6PYC   | L_ARG.62  | NH2    | L_ASP.83  | OD2    | 3.362        |
| 6PYC   | L_LYS.108 | NZ     | B_ASP.32  | OD1    | 2.949        |
| 6PYC   | L_LYS.150 | NZ     | L_GLU.196 | OE1    | 3.695        |
| 6PYC   | L_LYS.184 | NZ     | L_GLU.188 | OE1    | 2.615        |
| 6PYC   | L_LYS.189 | NZ     | L_ASP.186 | OD1    | 3.942        |
| 6PYC   | A_ARG.38  | NH1    | A_ASP.90  | OD1    | 2.858        |
| 6PYC   | A_ARG.38  | NH2    | A_GLU.46  | OE1    | 3.193        |
| 6PYC   | A_ARG.38  | NH2    | A_GLU.46  | OE2    | 3.336        |
| 6PYC   | A_LYS.67  | NZ     | A_ASP.90  | OD1    | 3.714        |
| 6PYC   | A_LYS.67  | NZ     | A_ASP.90  | OD2    | 3.477        |
| 6PYC   | A_ARG.99  | NH1    | B_ASP.91  | OD1    | 3.714        |
| 6PYC   | B_LYS.53  | NZ     | L_GLU.17  | OE1    | 3.141        |
| 6PYC   | B_LYS.53  | NZ     | L_GLU.17  | OE2    | 3.254        |
| 6PYC   | B_ARG.61  | NH1    | B_GLU.81  | OE2    | 3.676        |
| 6PYC   | B_ARG.61  | NH1    | B_ASP.82  | OD1    | 2.683        |
| 6PYC   | B_ARG.61  | NH1    | B_ASP.82  | OD2    | 3.599        |
| 6PYC   | B_LYS.149 | NZ     | B_GLU.195 | OE1    | 3.962        |
| 6PYC   | B_LYS.149 | NZ     | B_GLU.195 | OE2    | 3.345        |
| 6PYC   | B_ARG.155 | NH1    | B_GLU.185 | OE1    | 3.962        |
| 6PYC   | B_ARG.155 | NH1    | B_GLU.185 | OE2    | 3.253        |
| 6PYC   | B_ARG.155 | NH2    | B_GLU.185 | OE1    | 2.747        |
| 6PYC   | B_ARG.155 | NH2    | B_GLU.185 | OE2    | 3.418        |
| 6PYC   | B_ARG.188 | NH2    | B_GLU.185 | OE2    | 3.932        |
| 6PYC   | B_LYS.199 | NZ     | B_ASP.110 | OD2    | 3.197        |

Table 904: 6PYC-specific salt bridging networks analysis. In this table, a PDB file is specified with a four-letter PDB ID, except that the names of the PDB files corresponding to the single NMR structural model split from the NMR ensemble is specified with a four-letter PDB ID in addition to a hyphen followed by the single NMR structural model numeric ID, the residue naming scheme is **Chain ID\_residue name\_residue number**,  $\angle ADH$  represents the angle formed by acceptor (A), donor (D) and hydrogen (H) ( $\angle ADH$ ).

| PDB ID | Residue A | Atom A | Residue B | Atom B | Distance (Å) |
|--------|-----------|--------|-----------|--------|--------------|
| 6PYD   | H_ARG_38  | NH1    | H_ASP_89  | OD1    | 2.746        |
| 6PYD   | H_ARG_38  | NH2    | H_GLU_46  | OE1    | 2.703        |
| 6PYD   | H_ARG_38  | NH2    | H_ASP_89  | OD1    | 3.577        |
| 6PYD   | H_ARG_66  | NH1    | H_ASP_89  | OD1    | 3.629        |
| 6PYD   | H_ARG_66  | NH2    | H_ASP_89  | OD1    | 3.377        |
| 6PYD   | H_ARG_66  | NH2    | H_ASP_89  | OD2    | 2.647        |
| 6PYD   | H_ARG_97  | NH1    | H_ASP_27  | OD2    | 2.986        |
| 6PYD   | H_ARG_97  | NH2    | H_ASP_105 | OD1    | 3.627        |
| 6PYD   | H_ARG_97  | NH2    | H_ASP_105 | OD2    | 2.550        |
| 6PYD   | H_LYS_147 | NZ     | H_ASP_148 | OD1    | 3.103        |
| 6PYD   | H_LYS_147 | NZ     | H_ASP_148 | OD2    | 3.216        |
| 6PYD   | H_LYS_213 | NZ     | L_GLU_127 | OE1    | 3.352        |
| 6PYD   | L_ARG_24  | NH2    | L_ASP_74  | OD2    | 3.949        |
| 6PYD   | L_ARG_65  | NH1    | L_GLU_83  | OE2    | 3.750        |
| 6PYD   | L_ARG_65  | NH2    | L_GLU_83  | OE1    | 3.672        |
| 6PYD   | L_ARG_65  | NH2    | L_GLU_85  | OE1    | 3.120        |
| 6PYD   | L_ARG_65  | NH2    | L_ASP_86  | OD1    | 2.800        |
| 6PYD   | L_ARG_65  | NH2    | L_ASP_86  | OD2    | 3.601        |
| 6PYD   | L_LYS_107 | NZ     | L_GLU_169 | OE1    | 2.362        |
| 6PYD   | L_HIS_193 | ND1    | L_ASP_155 | OD2    | 3.270        |
| 6PYD   | A_ARG_38  | NH1    | A_ASP_89  | OD1    | 2.732        |
| 6PYD   | A_ARG_38  | NH2    | A_GLU_46  | OE1    | 2.704        |
| 6PYD   | A_ARG_38  | NH2    | A_ASP_89  | OD1    | 3.554        |
| 6PYD   | A_ARG_66  | NH1    | A_ASP_89  | OD1    | 3.626        |
| 6PYD   | A_ARG_66  | NH2    | A_ASP_89  | OD1    | 3.375        |
| 6PYD   | A_ARG_66  | NH2    | A_ASP_89  | OD2    | 2.645        |
| 6PYD   | A_ARG_97  | NH1    | A_ASP_27  | OD2    | 2.978        |
| 6PYD   | A_ARG_97  | NH2    | A_ASP_105 | OD1    | 3.618        |
| 6PYD   | A_ARG_97  | NH2    | A_ASP_105 | OD2    | 2.545        |
| 6PYD   | A_LYS_147 | NZ     | A_ASP_148 | OD1    | 3.105        |
| 6PYD   | A_LYS_147 | NZ     | A_ASP_148 | OD2    | 3.217        |
| 6PYD   | A_LYS_213 | NZ     | B_GLU_127 | OE1    | 3.596        |
| 6PYD   | B_ARG_24  | NH2    | B_ASP_74  | OD2    | 3.946        |
| 6PYD   | B_ARG_65  | NH1    | B_GLU_83  | OE2    | 3.749        |
| 6PYD   | B_ARG_65  | NH2    | B_GLU_83  | OE1    | 3.670        |
| 6PYD   | B_ARG_65  | NH2    | B_GLU_85  | OE1    | 3.121        |
| 6PYD   | B_ARG_65  | NH2    | B_ASP_86  | OD1    | 2.790        |
| 6PYD   | B_ARG_65  | NH2    | B_ASP_86  | OD2    | 3.597        |
| 6PYD   | B_LYS_107 | NZ     | B_GLU_169 | OE1    | 2.353        |
| 6PYD   | B_LYS_192 | NZ     | B_ASP_189 | OD1    | 3.073        |

Table 905: 6PYD-specific salt bridging networks analysis. In this table, a PDB file is specified with a four-letter PDB ID, except that the names of the PDB files corresponding to the single NMR structural model split from the NMR ensemble is specified with a four-letter PDB ID in addition to a hyphen followed by the single NMR structural model numeric ID, the residue naming scheme is **Chain ID\_residue name\_residue number**,  $\angle ADH$  represents the angle formed by acceptor (A), donor (D) and hydrogen (H) ( $\angle ADH$ ).



| PDB ID | Residue A | Atom A | Residue B | Atom B | Distance (Å) |
|--------|-----------|--------|-----------|--------|--------------|
| 6PZW   | A_HIS_98  | NE2    | B_GLU_214 | OE2    | 3.848        |
| 6PZW   | A_ARG_118 | NH2    | A_GLU_425 | OE1    | 3.722        |
| 6PZW   | A_ARG_118 | NH2    | A_GLU_425 | OE2    | 3.231        |
| 6PZW   | A_ARG_130 | NH1    | A_GLU_128 | OE2    | 2.902        |
| 6PZW   | A_ARG_141 | NH1    | A_GLU_110 | OE2    | 3.585        |
| 6PZW   | A_ARG_156 | NH2    | A_GLU_119 | OE2    | 2.799        |
| 6PZW   | A_ARG_172 | NH2    | A_GLU_174 | OE1    | 3.990        |
| 6PZW   | A_ARG_172 | NH2    | A_GLU_174 | OE2    | 3.068        |
| 6PZW   | A_ARG_189 | NH2    | A_ASP_125 | OD1    | 2.667        |
| 6PZW   | A_ARG_224 | NH2    | A_GLU_276 | OE2    | 3.019        |
| 6PZW   | A_ARG_253 | NH1    | K_ASP_53  | OD2    | 2.854        |
| 6PZW   | A_ARG_253 | NH2    | A_ASP_251 | OD1    | 3.916        |
| 6PZW   | A_ARG_253 | NH2    | A_ASP_251 | OD2    | 3.037        |
| 6PZW   | A_ARG_253 | NH2    | K_ASP_53  | OD2    | 2.999        |
| 6PZW   | A_LYS_264 | NZ     | A_GLU_266 | OE2    | 3.655        |
| 6PZW   | A_LYS_273 | NZ     | A_ASP_339 | OD1    | 2.481        |
| 6PZW   | A_HIS_274 | NE2    | A_GLU_276 | OE2    | 2.952        |
| 6PZW   | A_ARG_292 | NH2    | A_GLU_276 | OE1    | 2.826        |
| 6PZW   | A_ARG_292 | NH2    | A_GLU_277 | OE1    | 3.803        |
| 6PZW   | A_ARG_292 | NH2    | A_GLU_277 | OE2    | 3.606        |
| 6PZW   | A_ARG_300 | NH2    | A_ASP_324 | OD1    | 3.849        |
| 6PZW   | A_HIS_312 | ND1    | A_GLU_266 | OE1    | 2.834        |
| 6PZW   | A_ARG_364 | NH1    | A_ASP_330 | OD1    | 3.531        |
| 6PZW   | A_ARG_364 | NH1    | A_ASP_330 | OD2    | 3.075        |
| 6PZW   | A_ARG_364 | NH2    | A_ASP_330 | OD2    | 3.882        |
| 6PZW   | A_ARG_364 | NH2    | A_GLU_375 | OE2    | 3.232        |
| 6PZW   | A_ARG_387 | NH1    | A_ASP_386 | OD1    | 3.540        |
| 6PZW   | A_ARG_387 | NH1    | A_ASP_386 | OD2    | 2.586        |
| 6PZW   | A_ARG_419 | NH1    | B_GLU_214 | OE2    | 3.897        |
| 6PZW   | A_ARG_428 | NH1    | A_ASP_460 | OD2    | 2.906        |
| 6PZW   | A_ARG_428 | NH2    | A_GLU_433 | OE1    | 3.580        |
| 6PZW   | A_ARG_428 | NH2    | A_GLU_433 | OE2    | 3.020        |
| 6PZW   | A_LYS_435 | NZ     | A_GLU_465 | OE2    | 3.897        |
| 6PZW   | I_ARG_61  | NH1    | I_ASP_82  | OD1    | 3.701        |
| 6PZW   | I_ARG_61  | NH1    | I_ASP_82  | OD2    | 2.929        |
| 6PZW   | I_ARG_61  | NH2    | I_ASP_82  | OD1    | 2.966        |
| 6PZW   | I_ARG_61  | NH2    | I_ASP_82  | OD2    | 3.633        |
| 6PZW   | I_LYS_103 | NZ     | I_ASP_85  | OD1    | 2.829        |
| 6PZW   | I_LYS_103 | NZ     | I_ASP_85  | OD2    | 3.336        |
| 6PZW   | K_HIS_35  | NE2    | K_ASP_95  | OD2    | 2.981        |
| 6PZW   | K_ARG_38  | NH1    | K_ASP_86  | OD1    | 2.818        |
| 6PZW   | K_ARG_38  | NH2    | K_GLU_46  | OE1    | 3.500        |
| 6PZW   | K_ARG_38  | NH2    | K_GLU_46  | OE2    | 3.095        |
| 6PZW   | K_ARG_38  | NH2    | K_ASP_86  | OD1    | 3.867        |
| 6PZW   | K_ARG_66  | NH1    | K_ASP_86  | OD1    | 3.642        |
| 6PZW   | K_ARG_66  | NH1    | K_ASP_86  | OD2    | 2.868        |
| 6PZW   | K_ARG_66  | NH2    | K_ASP_86  | OD1    | 3.050        |
| 6PZW   | K_ARG_66  | NH2    | K_ASP_86  | OD2    | 3.680        |
| 6PZW   | K_LYS_75  | NZ     | K_ASP_72  | OD2    | 2.805        |
| 6PZW   | K_LYS_94  | NZ     | K_ASP_101 | OD2    | 2.905        |
| 6PZW   | K_LYS_96  | NZ     | K_ASP_101 | OD1    | 2.573        |
| 6PZW   | K_LYS_96  | NZ     | K_ASP_101 | OD2    | 3.869        |
| 6PZW   | K_ARG_97  | NH2    | I_ASP_50  | OD1    | 2.825        |
| 6PZW   | K_ARG_97  | NH2    | I_ASP_50  | OD2    | 3.390        |
| 6PZW   | D_HIS_98  | NE2    | A_GLU_214 | OE2    | 3.848        |
| 6PZW   | D_ARG_118 | NH2    | D_GLU_425 | OE1    | 3.722        |
| 6PZW   | D_ARG_118 | NH2    | D_GLU_425 | OE2    | 3.231        |

|      |           |     |           |     |       |
|------|-----------|-----|-----------|-----|-------|
| 6PZW | D_ARG_130 | NH1 | D_GLU_128 | OE2 | 2.902 |
| 6PZW | D_ARG_141 | NH1 | D_GLU_110 | OE2 | 3.585 |
| 6PZW | D_ARG_156 | NH2 | D_GLU_119 | OE2 | 2.799 |
| 6PZW | D_ARG_172 | NH2 | D_GLU_174 | OE1 | 3.990 |
| 6PZW | D_ARG_172 | NH2 | D_GLU_174 | OE2 | 3.068 |
| 6PZW | D_ARG_189 | NH2 | D_ASP_125 | OD1 | 2.667 |
| 6PZW | D_ARG_224 | NH2 | D_GLU_276 | OE2 | 3.019 |
| 6PZW | D_ARG_253 | NH1 | F_ASP_53  | OD2 | 2.854 |
| 6PZW | D_ARG_253 | NH2 | D_ASP_251 | OD1 | 3.916 |
| 6PZW | D_ARG_253 | NH2 | D_ASP_251 | OD2 | 3.037 |
| 6PZW | D_ARG_253 | NH2 | F_ASP_53  | OD2 | 2.999 |
| 6PZW | D_LYS_264 | NZ  | D_GLU_266 | OE2 | 3.655 |
| 6PZW | D_LYS_273 | NZ  | D_ASP_339 | OD1 | 2.481 |
| 6PZW | D_HIS_274 | NE2 | D_GLU_276 | OE2 | 2.952 |
| 6PZW | D_ARG_292 | NH2 | D_GLU_276 | OE1 | 2.826 |
| 6PZW | D_ARG_292 | NH2 | D_GLU_277 | OE1 | 3.803 |
| 6PZW | D_ARG_292 | NH2 | D_GLU_277 | OE2 | 3.606 |
| 6PZW | D_ARG_300 | NH2 | D_ASP_324 | OD1 | 3.849 |
| 6PZW | D_HIS_312 | ND1 | D_GLU_266 | OE1 | 2.834 |
| 6PZW | D_ARG_364 | NH1 | D_ASP_330 | OD1 | 3.531 |
| 6PZW | D_ARG_364 | NH1 | D_ASP_330 | OD2 | 3.075 |
| 6PZW | D_ARG_364 | NH2 | D_ASP_330 | OD2 | 3.882 |
| 6PZW | D_ARG_364 | NH2 | D_GLU_375 | OE2 | 3.232 |
| 6PZW | D_ARG_387 | NH1 | D_ASP_386 | OD1 | 3.540 |
| 6PZW | D_ARG_387 | NH1 | D_ASP_386 | OD2 | 2.586 |
| 6PZW | D_ARG_419 | NH1 | A_GLU_214 | OE2 | 3.897 |
| 6PZW | D_ARG_428 | NH1 | D_ASP_460 | OD2 | 2.906 |
| 6PZW | D_ARG_428 | NH2 | D_GLU_433 | OE1 | 3.580 |
| 6PZW | D_ARG_428 | NH2 | D_GLU_433 | OE2 | 3.020 |
| 6PZW | D_LYS_435 | NZ  | D_GLU_465 | OE2 | 3.897 |
| 6PZW | E_ARG_61  | NH1 | E_ASP_82  | OD1 | 3.701 |
| 6PZW | E_ARG_61  | NH1 | E_ASP_82  | OD2 | 2.929 |
| 6PZW | E_ARG_61  | NH2 | E_ASP_82  | OD1 | 2.966 |
| 6PZW | E_ARG_61  | NH2 | E_ASP_82  | OD2 | 3.633 |
| 6PZW | E_LYS_103 | NZ  | E_ASP_85  | OD1 | 2.829 |
| 6PZW | E_LYS_103 | NZ  | E_ASP_85  | OD2 | 3.336 |
| 6PZW | F_HIS_35  | NE2 | F_ASP_95  | OD2 | 2.981 |
| 6PZW | F_ARG_38  | NH1 | F_ASP_86  | OD1 | 2.818 |
| 6PZW | F_ARG_38  | NH2 | F_GLU_46  | OE1 | 3.500 |
| 6PZW | F_ARG_38  | NH2 | F_GLU_46  | OE2 | 3.095 |
| 6PZW | F_ARG_38  | NH2 | F_ASP_86  | OD1 | 3.867 |
| 6PZW | F_ARG_66  | NH1 | F_ASP_86  | OD1 | 3.642 |
| 6PZW | F_ARG_66  | NH1 | F_ASP_86  | OD2 | 2.868 |
| 6PZW | F_ARG_66  | NH2 | F_ASP_86  | OD1 | 3.050 |
| 6PZW | F_ARG_66  | NH2 | F_ASP_86  | OD2 | 3.680 |
| 6PZW | F_LYS_75  | NZ  | F_ASP_72  | OD2 | 2.805 |
| 6PZW | F_LYS_94  | NZ  | F_ASP_101 | OD2 | 2.905 |
| 6PZW | F_LYS_96  | NZ  | F_ASP_101 | OD1 | 2.573 |
| 6PZW | F_LYS_96  | NZ  | F_ASP_101 | OD2 | 3.869 |
| 6PZW | F_ARG_97  | NH2 | E_ASP_50  | OD1 | 2.825 |
| 6PZW | F_ARG_97  | NH2 | E_ASP_50  | OD2 | 3.390 |
| 6PZW | G_ARG_61  | NH1 | G_ASP_82  | OD1 | 3.701 |
| 6PZW | G_ARG_61  | NH1 | G_ASP_82  | OD2 | 2.929 |
| 6PZW | G_ARG_61  | NH2 | G_ASP_82  | OD1 | 2.966 |
| 6PZW | G_ARG_61  | NH2 | G_ASP_82  | OD2 | 3.633 |
| 6PZW | G_LYS_103 | NZ  | G_ASP_85  | OD1 | 2.829 |
| 6PZW | G_LYS_103 | NZ  | G_ASP_85  | OD2 | 3.336 |
| 6PZW | J_HIS_35  | NE2 | J_ASP_95  | OD2 | 2.981 |

|      |           |     |           |     |       |
|------|-----------|-----|-----------|-----|-------|
| 6PZW | J_ARG_38  | NH1 | J_ASP_86  | OD1 | 2.818 |
| 6PZW | J_ARG_38  | NH2 | J_GLU_46  | OE1 | 3.500 |
| 6PZW | J_ARG_38  | NH2 | J_GLU_46  | OE2 | 3.095 |
| 6PZW | J_ARG_38  | NH2 | J_ASP_86  | OD1 | 3.867 |
| 6PZW | J_ARG_66  | NH1 | J_ASP_86  | OD1 | 3.642 |
| 6PZW | J_ARG_66  | NH1 | J_ASP_86  | OD2 | 2.868 |
| 6PZW | J_ARG_66  | NH2 | J_ASP_86  | OD1 | 3.050 |
| 6PZW | J_ARG_66  | NH2 | J_ASP_86  | OD2 | 3.680 |
| 6PZW | J_LYS_75  | NZ  | J_ASP_72  | OD2 | 2.805 |
| 6PZW | J_LYS_94  | NZ  | J_ASP_101 | OD2 | 2.905 |
| 6PZW | J_LYS_96  | NZ  | J_ASP_101 | OD1 | 2.573 |
| 6PZW | J_LYS_96  | NZ  | J_ASP_101 | OD2 | 3.869 |
| 6PZW | J_ARG_97  | NH2 | G_ASP_50  | OD1 | 2.825 |
| 6PZW | J_ARG_97  | NH2 | G_ASP_50  | OD2 | 3.390 |
| 6PZW | C_HIS_98  | NE2 | D_GLU_214 | OE2 | 3.848 |
| 6PZW | C_ARG_118 | NH2 | C_GLU_425 | OE1 | 3.722 |
| 6PZW | C_ARG_118 | NH2 | C_GLU_425 | OE2 | 3.231 |
| 6PZW | C_ARG_130 | NH1 | C_GLU_128 | OE2 | 2.902 |
| 6PZW | C_ARG_141 | NH1 | C_GLU_110 | OE2 | 3.585 |
| 6PZW | C_ARG_156 | NH2 | C_GLU_119 | OE2 | 2.799 |
| 6PZW | C_ARG_172 | NH2 | C_GLU_174 | OE1 | 3.990 |
| 6PZW | C_ARG_172 | NH2 | C_GLU_174 | OE2 | 3.068 |
| 6PZW | C_ARG_189 | NH2 | C_ASP_125 | OD1 | 2.667 |
| 6PZW | C_ARG_224 | NH2 | C_GLU_276 | OE2 | 3.019 |
| 6PZW | C_ARG_253 | NH1 | J_ASP_53  | OD2 | 2.854 |
| 6PZW | C_ARG_253 | NH2 | J_ASP_53  | OD2 | 2.999 |
| 6PZW | C_ARG_253 | NH2 | C_ASP_251 | OD1 | 3.916 |
| 6PZW | C_ARG_253 | NH2 | C_ASP_251 | OD2 | 3.037 |
| 6PZW | C_LYS_264 | NZ  | C_GLU_266 | OE2 | 3.655 |
| 6PZW | C_LYS_273 | NZ  | C_ASP_339 | OD1 | 2.481 |
| 6PZW | C_HIS_274 | NE2 | C_GLU_276 | OE2 | 2.952 |
| 6PZW | C_ARG_292 | NH2 | C_GLU_276 | OE1 | 2.826 |
| 6PZW | C_ARG_292 | NH2 | C_GLU_277 | OE1 | 3.803 |
| 6PZW | C_ARG_292 | NH2 | C_GLU_277 | OE2 | 3.606 |
| 6PZW | C_ARG_300 | NH2 | C_ASP_324 | OD1 | 3.849 |
| 6PZW | C_HIS_312 | ND1 | C_GLU_266 | OE1 | 2.834 |
| 6PZW | C_ARG_364 | NH1 | C_ASP_330 | OD1 | 3.531 |
| 6PZW | C_ARG_364 | NH1 | C_ASP_330 | OD2 | 3.075 |
| 6PZW | C_ARG_364 | NH2 | C_ASP_330 | OD2 | 3.882 |
| 6PZW | C_ARG_364 | NH2 | C_GLU_375 | OE2 | 3.232 |
| 6PZW | C_ARG_387 | NH1 | C_ASP_386 | OD1 | 3.540 |
| 6PZW | C_ARG_387 | NH1 | C_ASP_386 | OD2 | 2.586 |
| 6PZW | C_ARG_419 | NH1 | D_GLU_214 | OE2 | 3.897 |
| 6PZW | C_ARG_428 | NH1 | C_ASP_460 | OD2 | 2.906 |
| 6PZW | C_ARG_428 | NH2 | C_GLU_433 | OE1 | 3.580 |
| 6PZW | C_ARG_428 | NH2 | C_GLU_433 | OE2 | 3.020 |
| 6PZW | C_LYS_435 | NZ  | C_GLU_465 | OE2 | 3.897 |
| 6PZW | B_HIS_98  | NE2 | C_GLU_214 | OE2 | 3.848 |
| 6PZW | B_ARG_118 | NH2 | B_GLU_425 | OE1 | 3.722 |
| 6PZW | B_ARG_118 | NH2 | B_GLU_425 | OE2 | 3.231 |
| 6PZW | B_ARG_130 | NH1 | B_GLU_128 | OE2 | 2.902 |
| 6PZW | B_ARG_141 | NH1 | B_GLU_110 | OE2 | 3.585 |
| 6PZW | B_ARG_156 | NH2 | B_GLU_119 | OE2 | 2.799 |
| 6PZW | B_ARG_172 | NH2 | B_GLU_174 | OE1 | 3.990 |
| 6PZW | B_ARG_172 | NH2 | B_GLU_174 | OE2 | 3.068 |
| 6PZW | B_ARG_189 | NH2 | B_ASP_125 | OD1 | 2.667 |
| 6PZW | B_ARG_224 | NH2 | B_GLU_276 | OE2 | 3.019 |
| 6PZW | B_ARG_253 | NH1 | H_ASP_53  | OD2 | 2.854 |

|      |           |     |           |     |       |
|------|-----------|-----|-----------|-----|-------|
| 6PZW | B_ARG_253 | NH2 | B_ASP_251 | OD1 | 3.916 |
| 6PZW | B_ARG_253 | NH2 | B_ASP_251 | OD2 | 3.037 |
| 6PZW | B_ARG_253 | NH2 | H_ASP_53  | OD2 | 2.999 |
| 6PZW | B_LYS_264 | NZ  | B_GLU_266 | OE2 | 3.655 |
| 6PZW | B_LYS_273 | NZ  | B_ASP_339 | OD1 | 2.481 |
| 6PZW | B_HIS_274 | NE2 | B_GLU_276 | OE2 | 2.952 |
| 6PZW | B_ARG_292 | NH2 | B_GLU_276 | OE1 | 2.826 |
| 6PZW | B_ARG_292 | NH2 | B_GLU_277 | OE1 | 3.803 |
| 6PZW | B_ARG_292 | NH2 | B_GLU_277 | OE2 | 3.606 |
| 6PZW | B_ARG_300 | NH2 | B_ASP_324 | OD1 | 3.849 |
| 6PZW | B_HIS_312 | ND1 | B_GLU_266 | OE1 | 2.834 |
| 6PZW | B_ARG_364 | NH1 | B_ASP_330 | OD1 | 3.531 |
| 6PZW | B_ARG_364 | NH1 | B_ASP_330 | OD2 | 3.075 |
| 6PZW | B_ARG_364 | NH2 | B_ASP_330 | OD2 | 3.882 |
| 6PZW | B_ARG_364 | NH2 | B_GLU_375 | OE2 | 3.232 |
| 6PZW | B_ARG_387 | NH1 | B_ASP_386 | OD1 | 3.540 |
| 6PZW | B_ARG_387 | NH1 | B_ASP_386 | OD2 | 2.586 |
| 6PZW | B_ARG_419 | NH1 | C_GLU_214 | OE2 | 3.897 |
| 6PZW | B_ARG_428 | NH1 | B_ASP_460 | OD2 | 2.906 |
| 6PZW | B_ARG_428 | NH2 | B_GLU_433 | OE1 | 3.580 |
| 6PZW | B_ARG_428 | NH2 | B_GLU_433 | OE2 | 3.020 |
| 6PZW | B_LYS_435 | NZ  | B_GLU_465 | OE2 | 3.897 |
| 6PZW | L_ARG_61  | NH1 | L_ASP_82  | OD1 | 3.701 |
| 6PZW | L_ARG_61  | NH1 | L_ASP_82  | OD2 | 2.929 |
| 6PZW | L_ARG_61  | NH2 | L_ASP_82  | OD1 | 2.966 |
| 6PZW | L_ARG_61  | NH2 | L_ASP_82  | OD2 | 3.633 |
| 6PZW | L_LYS_103 | NZ  | L_ASP_85  | OD1 | 2.829 |
| 6PZW | L_LYS_103 | NZ  | L_ASP_85  | OD2 | 3.336 |
| 6PZW | H_HIS_35  | NE2 | H_ASP_95  | OD2 | 2.981 |
| 6PZW | H_ARG_38  | NH1 | H_ASP_86  | OD1 | 2.818 |
| 6PZW | H_ARG_38  | NH2 | H_GLU_46  | OE1 | 3.500 |
| 6PZW | H_ARG_38  | NH2 | H_GLU_46  | OE2 | 3.095 |
| 6PZW | H_ARG_38  | NH2 | H_ASP_86  | OD1 | 3.867 |
| 6PZW | H_ARG_66  | NH1 | H_ASP_86  | OD1 | 3.642 |
| 6PZW | H_ARG_66  | NH1 | H_ASP_86  | OD2 | 2.868 |
| 6PZW | H_ARG_66  | NH2 | H_ASP_86  | OD1 | 3.050 |
| 6PZW | H_ARG_66  | NH2 | H_ASP_86  | OD2 | 3.680 |
| 6PZW | H_LYS_75  | NZ  | H_ASP_72  | OD2 | 2.805 |
| 6PZW | H_LYS_94  | NZ  | H_ASP_101 | OD2 | 2.905 |
| 6PZW | H_LYS_96  | NZ  | H_ASP_101 | OD1 | 2.573 |
| 6PZW | H_LYS_96  | NZ  | H_ASP_101 | OD2 | 3.869 |
| 6PZW | H_ARG_97  | NH2 | L_ASP_50  | OD1 | 2.825 |
| 6PZW | H_ARG_97  | NH2 | L_ASP_50  | OD2 | 3.390 |

Table 906: 6PZW-specific salt bridging networks analysis. In this table, a PDB file is specified with a four-letter PDB ID, except that the names of the PDB files corresponding to the single NMR structural model split from the NMR ensemble is specified with a four-letter PDB ID in addition to a hyphen followed by the single NMR structural model numeric ID, the residue naming scheme is **Chain ID\_residue name\_residue number**,  $\angle ADH$  represents the angle formed by acceptor (A), donor (D) and hydrogen (H) ( $\angle ADH$ ).

| PDB ID | Residue A | Atom A | Residue B | Atom B | Distance (Å) |
|--------|-----------|--------|-----------|--------|--------------|
| 6RPS   | A_HIS_34  | ND1    | A_ASP_32  | OD2    | 2.928        |
| 6RPS   | A_HIS_34  | NE2    | A_ASP_36  | OD1    | 3.392        |
| 6RPS   | A_HIS_34  | NE2    | B_ASP_102 | OD2    | 3.097        |
| 6RPS   | A_HIS_64  | NE2    | H_ASP_54  | OD2    | 2.837        |
| 6RPS   | A_HIS_96  | ND1    | A_GLU_106 | OE1    | 3.812        |
| 6RPS   | A_HIS_96  | ND1    | A_GLU_106 | OE2    | 3.696        |
| 6RPS   | A_HIS_96  | NE2    | A_GLU_106 | OE1    | 3.203        |
| 6RPS   | A_HIS_103 | ND1    | A_ASP_102 | OD1    | 3.719        |
| 6RPS   | A_HIS_107 | ND1    | A_GLU_117 | OE1    | 3.830        |
| 6RPS   | A_HIS_107 | ND1    | A_GLU_117 | OE2    | 2.892        |
| 6RPS   | A_HIS_119 | ND1    | A_GLU_106 | OE1    | 3.943        |
| 6RPS   | A_HIS_119 | NE2    | A_GLU_117 | OE2    | 2.681        |
| 6RPS   | A_LYS_170 | NZ     | H_ASP_54  | OD1    | 3.636        |
| 6RPS   | A_LYS_170 | NZ     | H_ASP_54  | OD2    | 2.590        |
| 6RPS   | A_LYS_170 | NZ     | H_ASP_56  | OD2    | 2.821        |
| 6RPS   | A_ARG_213 | NH1    | A_GLU_190 | OE1    | 3.317        |
| 6RPS   | A_ARG_213 | NH1    | A_GLU_190 | OE2    | 3.527        |
| 6RPS   | A_HIS_234 | ND1    | H_ASP_56  | OD2    | 3.904        |
| 6RPS   | A_LYS_250 | NZ     | B_GLU_13  | OE2    | 2.734        |
| 6RPS   | B_HIS_34  | ND1    | B_ASP_32  | OD2    | 2.934        |
| 6RPS   | B_HIS_34  | NE2    | B_ASP_36  | OD1    | 3.758        |
| 6RPS   | B_HIS_34  | NE2    | B_ASP_36  | OD2    | 3.233        |
| 6RPS   | B_HIS_64  | NE2    | N_ASP_54  | OD2    | 2.859        |
| 6RPS   | B_HIS_96  | ND1    | B_GLU_106 | OE1    | 3.814        |
| 6RPS   | B_HIS_96  | ND1    | B_GLU_106 | OE2    | 3.680        |
| 6RPS   | B_HIS_96  | NE2    | B_GLU_106 | OE1    | 3.214        |
| 6RPS   | B_HIS_103 | ND1    | A_ASP_36  | OD1    | 3.129        |
| 6RPS   | B_HIS_103 | ND1    | A_ASP_36  | OD2    | 3.954        |
| 6RPS   | B_HIS_103 | ND1    | B_ASP_102 | OD1    | 3.019        |
| 6RPS   | B_HIS_107 | ND1    | B_GLU_117 | OE1    | 3.839        |
| 6RPS   | B_HIS_107 | ND1    | B_GLU_117 | OE2    | 2.888        |
| 6RPS   | B_HIS_119 | ND1    | B_GLU_106 | OE1    | 3.928        |
| 6RPS   | B_HIS_119 | NE2    | B_GLU_117 | OE2    | 2.683        |
| 6RPS   | B_LYS_170 | NZ     | N_ASP_54  | OD1    | 3.719        |
| 6RPS   | B_LYS_170 | NZ     | N_ASP_54  | OD2    | 2.644        |
| 6RPS   | B_LYS_170 | NZ     | N_ASP_56  | OD2    | 2.839        |
| 6RPS   | B_ARG_213 | NH1    | B_GLU_190 | OE1    | 3.106        |
| 6RPS   | B_ARG_213 | NH1    | B_GLU_190 | OE2    | 3.685        |
| 6RPS   | B_HIS_234 | ND1    | N_ASP_56  | OD2    | 3.922        |
| 6RPS   | B_LYS_250 | NZ     | A_GLU_13  | OE2    | 2.991        |
| 6RPS   | M_ARG_24  | NH1    | M_ASP_70  | OD2    | 3.891        |
| 6RPS   | M_ARG_61  | NH1    | M_GLU_79  | OE1    | 3.422        |
| 6RPS   | M_ARG_61  | NH1    | M_GLU_79  | OE2    | 3.489        |
| 6RPS   | M_ARG_61  | NH2    | M_GLU_79  | OE1    | 3.623        |
| 6RPS   | M_ARG_61  | NH2    | M_GLU_81  | OE1    | 3.600        |
| 6RPS   | M_ARG_61  | NH2    | M_ASP_82  | OD1    | 2.623        |
| 6RPS   | M_ARG_61  | NH2    | M_ASP_82  | OD2    | 3.076        |
| 6RPS   | M_LYS_149 | NZ     | M_GLU_195 | OE1    | 3.183        |
| 6RPS   | M_LYS_149 | NZ     | M_GLU_195 | OE2    | 3.364        |
| 6RPS   | N_ARG_38  | NH1    | N_GLU_86  | OE2    | 2.950        |
| 6RPS   | N_ARG_38  | NH2    | N_GLU_46  | OE1    | 3.142        |
| 6RPS   | N_ARG_38  | NH2    | N_GLU_46  | OE2    | 3.953        |
| 6RPS   | N_ARG_38  | NH2    | N_GLU_86  | OE2    | 3.241        |
| 6RPS   | N_ARG_50  | NH2    | N_ASP_95  | OD2    | 3.876        |
| 6RPS   | N_ARG_66  | NH1    | N_GLU_86  | OE2    | 3.240        |
| 6RPS   | N_ARG_66  | NH2    | N_GLU_86  | OE1    | 2.816        |
| 6RPS   | N_ARG_66  | NH2    | N_GLU_86  | OE2    | 2.704        |

|      |           |     |           |     |       |
|------|-----------|-----|-----------|-----|-------|
| 6RPS | N_ARG_94  | NH2 | N_ASP_101 | OD2 | 3.208 |
| 6RPS | N_LYS_143 | NZ  | N_ASP_144 | OD1 | 3.314 |
| 6RPS | N_LYS_143 | NZ  | N_ASP_144 | OD2 | 3.375 |
| 6RPS | N_LYS_210 | NZ  | N_GLU_212 | OE1 | 3.241 |
| 6RPS | N_LYS_214 | NZ  | M_ASP_122 | OD1 | 3.095 |
| 6RPS | N_LYS_214 | NZ  | M_ASP_122 | OD2 | 3.107 |
| 6RPS | L_ARG_24  | NH1 | L_ASP_70  | OD2 | 3.896 |
| 6RPS | L_LYS_39  | NZ  | L_GLU_81  | OE2 | 3.206 |
| 6RPS | L_ARG_45  | NH2 | L_GLU_81  | OE2 | 3.948 |
| 6RPS | L_ARG_61  | NH1 | L_GLU_79  | OE1 | 3.428 |
| 6RPS | L_ARG_61  | NH1 | L_GLU_79  | OE2 | 3.496 |
| 6RPS | L_ARG_61  | NH2 | L_GLU_79  | OE1 | 3.620 |
| 6RPS | L_ARG_61  | NH2 | L_ASP_82  | OD1 | 2.624 |
| 6RPS | L_ARG_61  | NH2 | L_ASP_82  | OD2 | 3.082 |
| 6RPS | L_LYS_149 | NZ  | L_GLU_195 | OE1 | 3.146 |
| 6RPS | L_LYS_149 | NZ  | L_GLU_195 | OE2 | 3.433 |
| 6RPS | H_ARG_38  | NH1 | H_GLU_86  | OE2 | 2.972 |
| 6RPS | H_ARG_38  | NH2 | H_GLU_46  | OE1 | 3.141 |
| 6RPS | H_ARG_38  | NH2 | H_GLU_46  | OE2 | 3.931 |
| 6RPS | H_ARG_38  | NH2 | H_GLU_86  | OE2 | 3.242 |
| 6RPS | H_ARG_50  | NH2 | H_ASP_95  | OD2 | 3.877 |
| 6RPS | H_ARG_66  | NH1 | H_GLU_86  | OE2 | 3.250 |
| 6RPS | H_ARG_66  | NH2 | H_GLU_86  | OE1 | 2.806 |
| 6RPS | H_ARG_66  | NH2 | H_GLU_86  | OE2 | 2.709 |
| 6RPS | H_ARG_94  | NH2 | H_ASP_101 | OD2 | 3.183 |
| 6RPS | H_LYS_143 | NZ  | H_ASP_144 | OD1 | 3.311 |
| 6RPS | H_LYS_143 | NZ  | H_ASP_144 | OD2 | 3.365 |
| 6RPS | H_LYS_209 | NZ  | L_GLU_123 | OE1 | 2.780 |
| 6RPS | H_LYS_209 | NZ  | L_GLU_123 | OE2 | 3.710 |
| 6RPS | H_LYS_210 | NZ  | H_GLU_212 | OE1 | 3.232 |

Table 907: 6RPS-specific salt bridging networks analysis. In this table, a PDB file is specified with a four-letter PDB ID, except that the names of the PDB files corresponding to the single NMR structural model split from the NMR ensemble is specified with a four-letter PDB ID in addition to a hyphen followed by the single NMR structural model numeric ID, the residue naming scheme is **Chain ID\_residue name\_residue number**,  $\angle ADH$  represents the angle formed by acceptor (A), donor (D) and hydrogen (H) ( $\angle ADH$ ).

| PDB ID | Residue A | Atom A | Residue B | Atom B | Distance (Å) |
|--------|-----------|--------|-----------|--------|--------------|
| 6S3T   | A_HIS_48  | ND1    | A_ASP_79  | OD1    | 3.030        |
| 6S3T   | A_LYS_49  | NZ     | C_GLU_158 | OE1    | 3.663        |
| 6S3T   | A_ARG_66  | NH1    | A_ASP_140 | OD2    | 3.290        |
| 6S3T   | A_ARG_66  | NH2    | A_ASP_140 | OD1    | 3.561        |
| 6S3T   | A_ARG_66  | NH2    | A_ASP_343 | OD1    | 2.921        |
| 6S3T   | A_ARG_66  | NH2    | A_ASP_343 | OD2    | 3.772        |
| 6S3T   | A_LYS_90  | NZ     | A_ASP_63  | OD1    | 3.963        |
| 6S3T   | A_LYS_90  | NZ     | A_ASP_63  | OD2    | 2.710        |
| 6S3T   | A_LYS_110 | NZ     | A_GLU_82  | OE1    | 3.367        |
| 6S3T   | A_LYS_110 | NZ     | A_GLU_82  | OE2    | 3.373        |
| 6S3T   | A_ARG_141 | NH1    | A_ASP_210 | OD1    | 3.859        |
| 6S3T   | A_ARG_141 | NH1    | A_ASP_210 | OD2    | 3.679        |
| 6S3T   | A_ARG_141 | NH2    | A_ASP_61  | OD1    | 2.655        |
| 6S3T   | A_ARG_141 | NH2    | A_ASP_61  | OD2    | 3.839        |
| 6S3T   | A_LYS_148 | NZ     | A_ASP_131 | OD1    | 3.035        |
| 6S3T   | A_LYS_222 | NZ     | A_GLU_158 | OE2    | 3.425        |
| 6S3T   | A_LYS_222 | NZ     | A_GLU_162 | OE2    | 3.965        |
| 6S3T   | A_LYS_268 | NZ     | A_GLU_308 | OE1    | 3.868        |
| 6S3T   | A_LYS_306 | NZ     | A_ASP_334 | OD1    | 3.070        |
| 6S3T   | A_LYS_306 | NZ     | A_ASP_334 | OD2    | 3.336        |
| 6S3T   | A_LYS_327 | NZ     | A_ASP_324 | OD1    | 3.861        |
| 6S3T   | A_LYS_341 | NZ     | A_ASP_140 | OD1    | 3.192        |
| 6S3T   | A_ARG_355 | NH1    | A_GLU_82  | OE1    | 3.960        |
| 6S3T   | A_ARG_355 | NH1    | A_GLU_82  | OE2    | 3.091        |
| 6S3T   | A_ARG_366 | NH1    | A_ASP_150 | OD2    | 3.723        |
| 6S3T   | A_ARG_366 | NH2    | A_ASP_150 | OD2    | 3.506        |
| 6S3T   | A_LYS_383 | NZ     | A_ASP_156 | OD2    | 3.389        |
| 6S3T   | B_HIS_48  | ND1    | B_ASP_79  | OD1    | 3.029        |
| 6S3T   | B_LYS_49  | NZ     | L_GLU_158 | OE1    | 3.761        |
| 6S3T   | B_ARG_66  | NH1    | B_ASP_140 | OD2    | 3.289        |
| 6S3T   | B_ARG_66  | NH2    | B_ASP_140 | OD1    | 3.563        |
| 6S3T   | B_ARG_66  | NH2    | B_ASP_343 | OD1    | 2.924        |
| 6S3T   | B_ARG_66  | NH2    | B_ASP_343 | OD2    | 3.774        |
| 6S3T   | B_LYS_90  | NZ     | B_ASP_63  | OD1    | 3.964        |
| 6S3T   | B_LYS_90  | NZ     | B_ASP_63  | OD2    | 2.710        |
| 6S3T   | B_LYS_110 | NZ     | B_GLU_82  | OE1    | 3.367        |
| 6S3T   | B_LYS_110 | NZ     | B_GLU_82  | OE2    | 3.374        |
| 6S3T   | B_ARG_141 | NH1    | B_ASP_210 | OD1    | 3.858        |
| 6S3T   | B_ARG_141 | NH1    | B_ASP_210 | OD2    | 3.682        |
| 6S3T   | B_ARG_141 | NH2    | B_ASP_61  | OD1    | 2.654        |
| 6S3T   | B_ARG_141 | NH2    | B_ASP_61  | OD2    | 3.837        |
| 6S3T   | B_LYS_148 | NZ     | B_ASP_131 | OD1    | 3.032        |
| 6S3T   | B_LYS_175 | NZ     | B_ASP_177 | OD2    | 3.891        |
| 6S3T   | B_LYS_222 | NZ     | B_GLU_158 | OE2    | 3.419        |
| 6S3T   | B_LYS_222 | NZ     | B_GLU_162 | OE2    | 3.964        |
| 6S3T   | B_LYS_282 | NZ     | B_GLU_241 | OE2    | 3.757        |
| 6S3T   | B_LYS_306 | NZ     | B_ASP_334 | OD1    | 3.070        |
| 6S3T   | B_LYS_306 | NZ     | B_ASP_334 | OD2    | 3.338        |
| 6S3T   | B_LYS_327 | NZ     | B_ASP_324 | OD1    | 3.858        |
| 6S3T   | B_LYS_341 | NZ     | B_ASP_140 | OD1    | 3.192        |
| 6S3T   | B_ARG_355 | NH1    | B_GLU_352 | OE1    | 2.881        |
| 6S3T   | B_ARG_366 | NH2    | B_ASP_150 | OD2    | 3.496        |
| 6S3T   | B_LYS_383 | NZ     | B_ASP_156 | OD2    | 3.383        |
| 6S3T   | C_ARG_24  | NH2    | C_ASP_74  | OD1    | 3.093        |
| 6S3T   | C_ARG_24  | NH2    | C_ASP_74  | OD2    | 3.742        |
| 6S3T   | C_ARG_65  | NH1    | C_ASP_86  | OD1    | 3.788        |
| 6S3T   | C_ARG_65  | NH1    | C_ASP_86  | OD2    | 2.683        |

|      |           |     |           |     |       |
|------|-----------|-----|-----------|-----|-------|
| 6S3T | C_ARG_65  | NH2 | C_GLU_83  | OE1 | 3.619 |
| 6S3T | C_ARG_65  | NH2 | C_ASP_86  | OD1 | 3.107 |
| 6S3T | C_ARG_65  | NH2 | C_ASP_86  | OD2 | 3.458 |
| 6S3T | C_LYS_151 | NZ  | C_GLU_158 | OE2 | 3.956 |
| 6S3T | C_LYS_153 | NZ  | C_GLU_199 | OE2 | 2.738 |
| 6S3T | D_ARG_35  | NH1 | S_ASP_332 | OD1 | 3.467 |
| 6S3T | D_ARG_35  | NH1 | S_ASP_332 | OD2 | 2.946 |
| 6S3T | D_ARG_35  | NH2 | S_ASP_332 | OD2 | 3.071 |
| 6S3T | D_ARG_35  | NH2 | S_ASP_334 | OD1 | 3.408 |
| 6S3T | D_ARG_40  | NH1 | D_GLU_48  | OE1 | 3.019 |
| 6S3T | D_ARG_40  | NH2 | D_ASP_91  | OD2 | 3.639 |
| 6S3T | D_ARG_68  | NH1 | D_ASP_91  | OD1 | 3.381 |
| 6S3T | D_ARG_68  | NH1 | D_ASP_91  | OD2 | 3.003 |
| 6S3T | D_ARG_68  | NH2 | D_ASP_91  | OD1 | 3.560 |
| 6S3T | D_ARG_73  | NH2 | D_ASP_57  | OD2 | 3.930 |
| 6S3T | D_HIS_171 | NE2 | C_ASP_171 | OD2 | 3.832 |
| 6S3T | D_LYS_215 | NZ  | C_GLU_127 | OE1 | 2.814 |
| 6S3T | D_LYS_215 | NZ  | C_GLU_127 | OE2 | 3.990 |
| 6S3T | D_LYS_216 | NZ  | D_GLU_218 | OE2 | 3.949 |
| 6S3T | I_ARG_24  | NH2 | I_ASP_74  | OD1 | 3.090 |
| 6S3T | I_ARG_24  | NH2 | I_ASP_74  | OD2 | 3.744 |
| 6S3T | I_ARG_65  | NH1 | I_GLU_83  | OE1 | 3.576 |
| 6S3T | I_ARG_65  | NH1 | I_ASP_86  | OD1 | 3.791 |
| 6S3T | I_ARG_65  | NH1 | I_ASP_86  | OD2 | 2.684 |
| 6S3T | I_ARG_65  | NH2 | I_ASP_86  | OD1 | 3.110 |
| 6S3T | I_ARG_65  | NH2 | I_ASP_86  | OD2 | 3.459 |
| 6S3T | I_LYS_107 | NZ  | I_GLU_109 | OE2 | 3.962 |
| 6S3T | I_LYS_151 | NZ  | I_GLU_158 | OE1 | 3.422 |
| 6S3T | I_LYS_153 | NZ  | I_GLU_199 | OE2 | 2.741 |
| 6S3T | E_ARG_35  | NH1 | T_ASP_332 | OD1 | 3.561 |
| 6S3T | E_ARG_35  | NH1 | T_ASP_332 | OD2 | 3.035 |
| 6S3T | E_ARG_35  | NH2 | T_ASP_332 | OD2 | 3.163 |
| 6S3T | E_ARG_35  | NH2 | T_ASP_334 | OD1 | 3.432 |
| 6S3T | E_ARG_40  | NH1 | E_ASP_91  | OD1 | 3.668 |
| 6S3T | E_ARG_40  | NH1 | E_ASP_91  | OD2 | 3.638 |
| 6S3T | E_ARG_40  | NH2 | E_GLU_48  | OE1 | 2.851 |
| 6S3T | E_ARG_68  | NH1 | E_ASP_91  | OD1 | 3.381 |
| 6S3T | E_ARG_68  | NH1 | E_ASP_91  | OD2 | 3.005 |
| 6S3T | E_ARG_68  | NH2 | E_ASP_91  | OD1 | 3.559 |
| 6S3T | E_ARG_73  | NH2 | E_ASP_57  | OD2 | 3.938 |
| 6S3T | E_HIS_171 | NE2 | I_ASP_171 | OD2 | 3.931 |
| 6S3T | E_LYS_215 | NZ  | I_GLU_127 | OE1 | 3.013 |
| 6S3T | E_LYS_216 | NZ  | E_GLU_218 | OE2 | 3.946 |
| 6S3T | M_ARG_24  | NH2 | M_ASP_74  | OD1 | 3.084 |
| 6S3T | M_ARG_24  | NH2 | M_ASP_74  | OD2 | 3.751 |
| 6S3T | M_ARG_65  | NH1 | M_GLU_83  | OE1 | 3.576 |
| 6S3T | M_ARG_65  | NH1 | M_ASP_86  | OD1 | 3.781 |
| 6S3T | M_ARG_65  | NH1 | M_ASP_86  | OD2 | 2.680 |
| 6S3T | M_ARG_65  | NH2 | M_ASP_86  | OD1 | 3.107 |
| 6S3T | M_ARG_65  | NH2 | M_ASP_86  | OD2 | 3.455 |
| 6S3T | M_LYS_151 | NZ  | M_GLU_158 | OE2 | 3.920 |
| 6S3T | M_LYS_153 | NZ  | M_GLU_199 | OE1 | 3.748 |
| 6S3T | M_LYS_153 | NZ  | M_GLU_199 | OE2 | 2.775 |
| 6S3T | N_ARG_35  | NH1 | A_ASP_332 | OD1 | 3.796 |
| 6S3T | N_ARG_35  | NH1 | A_ASP_332 | OD2 | 3.195 |
| 6S3T | N_ARG_35  | NH2 | A_ASP_332 | OD1 | 3.883 |
| 6S3T | N_ARG_35  | NH2 | A_ASP_332 | OD2 | 2.517 |
| 6S3T | N_ARG_35  | NH2 | A_ASP_334 | OD2 | 3.989 |



|      |           |     |           |     |       |
|------|-----------|-----|-----------|-----|-------|
| 6S3T | N_ARG_40  | NH1 | N_GLU_48  | OE1 | 3.017 |
| 6S3T | N_ARG_40  | NH2 | N_ASP_91  | OD2 | 3.633 |
| 6S3T | N_ARG_68  | NH1 | N_ASP_91  | OD1 | 3.379 |
| 6S3T | N_ARG_68  | NH1 | N_ASP_91  | OD2 | 3.002 |
| 6S3T | N_ARG_68  | NH2 | N_ASP_91  | OD1 | 3.568 |
| 6S3T | N_ARG_73  | NH2 | S_GLU_44  | OE2 | 2.482 |
| 6S3T | N_HIS_171 | NE2 | M_ASP_171 | OD2 | 3.181 |
| 6S3T | N_LYS_215 | NZ  | M_GLU_127 | OE1 | 2.964 |
| 6S3T | N_LYS_215 | NZ  | M_GLU_127 | OE2 | 3.944 |
| 6S3T | N_LYS_216 | NZ  | N_GLU_218 | OE2 | 3.948 |
| 6S3T | Q_ARG_24  | NH2 | Q_ASP_74  | OD1 | 3.083 |
| 6S3T | Q_ARG_24  | NH2 | Q_ASP_74  | OD2 | 3.750 |
| 6S3T | Q_ARG_65  | NH1 | Q_GLU_83  | OE1 | 3.574 |
| 6S3T | Q_ARG_65  | NH1 | Q_ASP_86  | OD1 | 3.785 |
| 6S3T | Q_ARG_65  | NH1 | Q_ASP_86  | OD2 | 2.681 |
| 6S3T | Q_ARG_65  | NH2 | Q_ASP_86  | OD1 | 3.108 |
| 6S3T | Q_ARG_65  | NH2 | Q_ASP_86  | OD2 | 3.458 |
| 6S3T | Q_LYS_151 | NZ  | Q_GLU_199 | OE1 | 2.666 |
| 6S3T | Q_LYS_151 | NZ  | Q_GLU_199 | OE2 | 3.849 |
| 6S3T | Q_LYS_153 | NZ  | Q_GLU_199 | OE2 | 2.742 |
| 6S3T | R_ARG_35  | NH1 | B_ASP_332 | OD1 | 3.511 |
| 6S3T | R_ARG_35  | NH1 | B_ASP_332 | OD2 | 2.943 |
| 6S3T | R_ARG_35  | NH2 | B_ASP_332 | OD2 | 2.873 |
| 6S3T | R_ARG_35  | NH2 | B_ASP_334 | OD1 | 3.424 |
| 6S3T | R_ARG_40  | NH1 | R_GLU_48  | OE1 | 3.017 |
| 6S3T | R_ARG_40  | NH2 | R_ASP_91  | OD2 | 3.634 |
| 6S3T | R_ARG_68  | NH1 | R_ASP_91  | OD1 | 3.379 |
| 6S3T | R_ARG_68  | NH1 | R_ASP_91  | OD2 | 3.002 |
| 6S3T | R_ARG_68  | NH2 | R_ASP_91  | OD1 | 3.566 |
| 6S3T | R_ARG_73  | NH2 | T_GLU_44  | OE2 | 2.709 |
| 6S3T | R_HIS_171 | NE2 | Q_ASP_171 | OD2 | 3.265 |
| 6S3T | R_LYS_215 | NZ  | Q_GLU_127 | OE1 | 2.948 |
| 6S3T | R_LYS_215 | NZ  | Q_GLU_127 | OE2 | 3.831 |
| 6S3T | R_LYS_216 | NZ  | R_GLU_218 | OE2 | 3.945 |
| 6S3T | S_HIS_48  | ND1 | S_ASP_79  | OD1 | 3.027 |
| 6S3T | S_ARG_66  | NH1 | S_ASP_140 | OD2 | 3.289 |
| 6S3T | S_ARG_66  | NH2 | S_ASP_140 | OD1 | 3.557 |
| 6S3T | S_ARG_66  | NH2 | S_ASP_343 | OD1 | 2.918 |
| 6S3T | S_ARG_66  | NH2 | S_ASP_343 | OD2 | 3.764 |
| 6S3T | S_LYS_90  | NZ  | S_ASP_63  | OD1 | 3.967 |
| 6S3T | S_LYS_90  | NZ  | S_ASP_63  | OD2 | 2.710 |
| 6S3T | S_LYS_110 | NZ  | S_GLU_82  | OE2 | 3.372 |
| 6S3T | S_ARG_141 | NH1 | S_ASP_210 | OD1 | 3.860 |
| 6S3T | S_ARG_141 | NH1 | S_ASP_210 | OD2 | 3.676 |
| 6S3T | S_ARG_141 | NH2 | S_ASP_61  | OD1 | 2.655 |
| 6S3T | S_ARG_141 | NH2 | S_ASP_61  | OD2 | 3.848 |
| 6S3T | S_LYS_148 | NZ  | S_ASP_131 | OD1 | 3.009 |
| 6S3T | S_LYS_175 | NZ  | S_ASP_177 | OD2 | 3.891 |
| 6S3T | S_LYS_306 | NZ  | S_ASP_334 | OD1 | 3.069 |
| 6S3T | S_LYS_306 | NZ  | S_ASP_334 | OD2 | 3.337 |
| 6S3T | S_LYS_327 | NZ  | S_ASP_324 | OD1 | 3.856 |
| 6S3T | S_LYS_341 | NZ  | S_ASP_140 | OD1 | 3.205 |
| 6S3T | S_LYS_383 | NZ  | S_ASP_156 | OD2 | 3.396 |
| 6S3T | T_HIS_48  | ND1 | T_ASP_79  | OD1 | 3.029 |
| 6S3T | T_ARG_66  | NH1 | T_ASP_140 | OD2 | 3.288 |
| 6S3T | T_ARG_66  | NH2 | T_ASP_140 | OD1 | 3.559 |
| 6S3T | T_ARG_66  | NH2 | T_ASP_343 | OD1 | 2.920 |
| 6S3T | T_ARG_66  | NH2 | T_ASP_343 | OD2 | 3.765 |

|      |           |     |           |     |       |
|------|-----------|-----|-----------|-----|-------|
| 6S3T | T_LYS_90  | NZ  | T_ASP_63  | OD1 | 3.971 |
| 6S3T | T_LYS_90  | NZ  | T_ASP_63  | OD2 | 2.711 |
| 6S3T | T_LYS_110 | NZ  | T_GLU_82  | OE1 | 3.369 |
| 6S3T | T_LYS_110 | NZ  | T_GLU_82  | OE2 | 3.374 |
| 6S3T | T_ARG_141 | NH1 | T_ASP_210 | OD1 | 3.860 |
| 6S3T | T_ARG_141 | NH1 | T_ASP_210 | OD2 | 3.680 |
| 6S3T | T_ARG_141 | NH2 | T_ASP_61  | OD1 | 2.654 |
| 6S3T | T_ARG_141 | NH2 | T_ASP_61  | OD2 | 3.845 |
| 6S3T | T_LYS_148 | NZ  | T_ASP_131 | OD1 | 3.022 |
| 6S3T | T_LYS_175 | NZ  | T_ASP_177 | OD1 | 2.862 |
| 6S3T | T_LYS_306 | NZ  | T_ASP_334 | OD1 | 3.070 |
| 6S3T | T_LYS_306 | NZ  | T_ASP_334 | OD2 | 3.338 |
| 6S3T | T_LYS_327 | NZ  | T_ASP_324 | OD1 | 3.858 |
| 6S3T | T_LYS_341 | NZ  | T_ASP_140 | OD1 | 3.202 |
| 6S3T | T_ARG_355 | NH1 | T_GLU_82  | OE1 | 3.957 |
| 6S3T | T_ARG_355 | NH1 | T_GLU_82  | OE2 | 3.099 |
| 6S3T | T_ARG_366 | NH1 | T_GLU_370 | OE2 | 3.935 |
| 6S3T | T_LYS_383 | NZ  | T_ASP_156 | OD2 | 3.383 |

Table 908: 6S3T-specific salt bridging networks analysis. In this table, a PDB file is specified with a four-letter PDB ID, except that the names of the PDB files corresponding to the single NMR structural model split from the NMR ensemble is specified with a four-letter PDB ID in addition to a hyphen followed by the single NMR structural model numeric ID, the residue naming scheme is **Chain ID\_residue name\_residue number**,  $\angle ADH$  represents the angle formed by acceptor (A), donor (D) and hydrogen (H) ( $\angle ADH$ ).

| PDB ID | Residue A | Atom A | Residue B | Atom B | Distance (Å) |
|--------|-----------|--------|-----------|--------|--------------|
| 6U02   | A_HIS_98  | NE2    | B_GLU_214 | OE2    | 3.838        |
| 6U02   | A_ARG_118 | NH2    | A_GLU_425 | OE1    | 3.303        |
| 6U02   | A_ARG_118 | NH2    | A_GLU_425 | OE2    | 3.788        |
| 6U02   | A_ARG_130 | NH1    | A_GLU_128 | OE1    | 3.104        |
| 6U02   | A_ARG_156 | NH2    | A_GLU_119 | OE1    | 3.056        |
| 6U02   | A_ARG_172 | NH2    | A_GLU_174 | OE2    | 3.004        |
| 6U02   | A_ARG_189 | NH2    | A_ASP_125 | OD1    | 2.704        |
| 6U02   | A_ARG_209 | NH1    | J_GLU_128 | OE2    | 3.226        |
| 6U02   | A_ARG_210 | NH2    | J_ASP_412 | OD1    | 3.355        |
| 6U02   | A_ARG_210 | NH2    | J_ASP_412 | OD2    | 3.535        |
| 6U02   | A_ARG_224 | NH2    | A_GLU_276 | OE2    | 2.857        |
| 6U02   | A_ARG_253 | NH2    | A_ASP_251 | OD1    | 3.915        |
| 6U02   | A_ARG_253 | NH2    | A_ASP_251 | OD2    | 3.078        |
| 6U02   | A_LYS_264 | NZ     | A_GLU_266 | OE2    | 3.592        |
| 6U02   | A_ARG_292 | NH1    | A_GLU_276 | OE1    | 3.981        |
| 6U02   | A_ARG_292 | NH2    | A_GLU_276 | OE1    | 3.522        |
| 6U02   | A_ARG_292 | NH2    | A_GLU_277 | OE1    | 3.270        |
| 6U02   | A_ARG_292 | NH2    | A_GLU_277 | OE2    | 3.103        |
| 6U02   | A_ARG_300 | NH2    | A_ASP_324 | OD1    | 3.840        |
| 6U02   | A_HIS_312 | ND1    | A_GLU_266 | OE1    | 2.873        |
| 6U02   | A_ARG_364 | NH1    | A_ASP_330 | OD1    | 3.366        |
| 6U02   | A_ARG_364 | NH1    | A_ASP_330 | OD2    | 3.020        |
| 6U02   | A_ARG_364 | NH2    | A_ASP_330 | OD2    | 3.213        |
| 6U02   | A_ARG_364 | NH2    | A_GLU_375 | OE2    | 3.763        |
| 6U02   | A_ARG_419 | NH1    | B_GLU_214 | OE2    | 3.906        |
| 6U02   | A_ARG_428 | NH1    | A_ASP_460 | OD2    | 2.812        |
| 6U02   | A_ARG_428 | NH2    | A_GLU_433 | OE1    | 3.662        |
| 6U02   | A_ARG_428 | NH2    | A_GLU_433 | OE2    | 3.046        |
| 6U02   | L_ARG_24  | NH2    | L_ASP_70  | OD1    | 2.974        |
| 6U02   | L_ARG_61  | NH2    | L_GLU_81  | OE1    | 3.909        |
| 6U02   | L_ARG_61  | NH2    | L_ASP_82  | OD1    | 2.859        |
| 6U02   | L_ARG_61  | NH2    | L_ASP_82  | OD2    | 3.591        |
| 6U02   | L_LYS_103 | NZ     | L_GLU_105 | OE2    | 3.418        |
| 6U02   | H_ARG_38  | NH1    | H_ASP_86  | OD1    | 2.942        |
| 6U02   | H_ARG_38  | NH2    | H_ASP_86  | OD1    | 3.941        |
| 6U02   | H_LYS_52  | NZ     | H_GLU_56  | OE2    | 2.823        |
| 6U02   | H_LYS_64  | NZ     | H_ASP_61  | OD1    | 2.817        |
| 6U02   | H_ARG_66  | NH1    | H_ASP_86  | OD1    | 3.307        |
| 6U02   | H_ARG_66  | NH1    | H_ASP_86  | OD2    | 3.771        |
| 6U02   | H_ARG_66  | NH2    | H_ASP_86  | OD1    | 3.561        |
| 6U02   | H_ARG_66  | NH2    | H_ASP_86  | OD2    | 2.624        |
| 6U02   | B_HIS_98  | NE2    | E_GLU_214 | OE2    | 3.839        |
| 6U02   | B_ARG_118 | NH2    | B_GLU_425 | OE1    | 3.304        |
| 6U02   | B_ARG_118 | NH2    | B_GLU_425 | OE2    | 3.788        |
| 6U02   | B_ARG_130 | NH1    | B_GLU_128 | OE1    | 3.105        |
| 6U02   | B_ARG_156 | NH2    | B_GLU_119 | OE1    | 3.056        |
| 6U02   | B_ARG_172 | NH2    | B_GLU_174 | OE2    | 3.004        |
| 6U02   | B_ARG_189 | NH2    | B_ASP_125 | OD1    | 2.703        |
| 6U02   | B_ARG_209 | NH1    | A_GLU_128 | OE2    | 3.226        |
| 6U02   | B_ARG_210 | NH2    | A_ASP_412 | OD1    | 3.355        |
| 6U02   | B_ARG_210 | NH2    | A_ASP_412 | OD2    | 3.535        |
| 6U02   | B_ARG_224 | NH2    | B_GLU_276 | OE2    | 2.857        |
| 6U02   | B_ARG_253 | NH2    | B_ASP_251 | OD1    | 3.915        |
| 6U02   | B_ARG_253 | NH2    | B_ASP_251 | OD2    | 3.077        |
| 6U02   | B_LYS_264 | NZ     | B_GLU_266 | OE2    | 3.593        |
| 6U02   | B_ARG_292 | NH1    | B_GLU_276 | OE1    | 3.982        |
| 6U02   | B_ARG_292 | NH2    | B_GLU_276 | OE1    | 3.522        |

|      |           |     |           |     |       |
|------|-----------|-----|-----------|-----|-------|
| 6U02 | B_ARG_292 | NH2 | B_GLU_277 | OE1 | 3.270 |
| 6U02 | B_ARG_292 | NH2 | B_GLU_277 | OE2 | 3.103 |
| 6U02 | B_ARG_300 | NH2 | B_ASP_324 | OD1 | 3.839 |
| 6U02 | B_HIS_312 | ND1 | B_GLU_266 | OE1 | 2.872 |
| 6U02 | B_ARG_364 | NH1 | B_ASP_330 | OD1 | 3.367 |
| 6U02 | B_ARG_364 | NH1 | B_ASP_330 | OD2 | 3.022 |
| 6U02 | B_ARG_364 | NH2 | B_ASP_330 | OD2 | 3.214 |
| 6U02 | B_ARG_364 | NH2 | B_GLU_375 | OE2 | 3.764 |
| 6U02 | B_ARG_419 | NH1 | E_GLU_214 | OE2 | 3.906 |
| 6U02 | B_ARG_428 | NH1 | B_ASP_460 | OD2 | 2.812 |
| 6U02 | B_ARG_428 | NH2 | B_GLU_433 | OE1 | 3.662 |
| 6U02 | B_ARG_428 | NH2 | B_GLU_433 | OE2 | 3.045 |
| 6U02 | C_ARG_24  | NH2 | C_ASP_70  | OD1 | 2.974 |
| 6U02 | C_ARG_61  | NH2 | C_GLU_81  | OE1 | 3.909 |
| 6U02 | C_ARG_61  | NH2 | C_ASP_82  | OD1 | 2.859 |
| 6U02 | C_ARG_61  | NH2 | C_ASP_82  | OD2 | 3.591 |
| 6U02 | C_LYS_103 | NZ  | C_GLU_105 | OE2 | 3.418 |
| 6U02 | D_ARG_38  | NH1 | D_ASP_86  | OD1 | 2.941 |
| 6U02 | D_ARG_38  | NH2 | D_ASP_86  | OD1 | 3.942 |
| 6U02 | D_LYS_52  | NZ  | D_GLU_56  | OE2 | 2.822 |
| 6U02 | D_LYS_64  | NZ  | D_ASP_61  | OD1 | 2.818 |
| 6U02 | D_ARG_66  | NH1 | D_ASP_86  | OD1 | 3.308 |
| 6U02 | D_ARG_66  | NH1 | D_ASP_86  | OD2 | 3.771 |
| 6U02 | D_ARG_66  | NH2 | D_ASP_86  | OD1 | 3.562 |
| 6U02 | D_ARG_66  | NH2 | D_ASP_86  | OD2 | 2.624 |
| 6U02 | E_HIS_98  | NE2 | J_GLU_214 | OE2 | 3.838 |
| 6U02 | E_ARG_118 | NH2 | E_GLU_425 | OE1 | 3.304 |
| 6U02 | E_ARG_118 | NH2 | E_GLU_425 | OE2 | 3.789 |
| 6U02 | E_ARG_130 | NH1 | E_GLU_128 | OE1 | 3.104 |
| 6U02 | E_ARG_156 | NH2 | E_GLU_119 | OE1 | 3.056 |
| 6U02 | E_ARG_172 | NH2 | E_GLU_174 | OE2 | 3.004 |
| 6U02 | E_ARG_189 | NH2 | E_ASP_125 | OD1 | 2.704 |
| 6U02 | E_ARG_209 | NH1 | B_GLU_128 | OE2 | 3.226 |
| 6U02 | E_ARG_210 | NH2 | B_ASP_412 | OD1 | 3.355 |
| 6U02 | E_ARG_210 | NH2 | B_ASP_412 | OD2 | 3.536 |
| 6U02 | E_ARG_224 | NH2 | E_GLU_276 | OE2 | 2.858 |
| 6U02 | E_ARG_253 | NH2 | E_ASP_251 | OD1 | 3.916 |
| 6U02 | E_ARG_253 | NH2 | E_ASP_251 | OD2 | 3.078 |
| 6U02 | E_LYS_264 | NZ  | E_GLU_266 | OE2 | 3.592 |
| 6U02 | E_ARG_292 | NH1 | E_GLU_276 | OE1 | 3.982 |
| 6U02 | E_ARG_292 | NH2 | E_GLU_276 | OE1 | 3.522 |
| 6U02 | E_ARG_292 | NH2 | E_GLU_277 | OE1 | 3.270 |
| 6U02 | E_ARG_292 | NH2 | E_GLU_277 | OE2 | 3.103 |
| 6U02 | E_ARG_300 | NH2 | E_ASP_324 | OD1 | 3.839 |
| 6U02 | E_HIS_312 | ND1 | E_GLU_266 | OE1 | 2.873 |
| 6U02 | E_ARG_364 | NH1 | E_ASP_330 | OD1 | 3.366 |
| 6U02 | E_ARG_364 | NH1 | E_ASP_330 | OD2 | 3.021 |
| 6U02 | E_ARG_364 | NH2 | E_ASP_330 | OD2 | 3.214 |
| 6U02 | E_ARG_364 | NH2 | E_GLU_375 | OE2 | 3.764 |
| 6U02 | E_ARG_419 | NH1 | J_GLU_214 | OE2 | 3.906 |
| 6U02 | E_ARG_428 | NH1 | E_ASP_460 | OD2 | 2.812 |
| 6U02 | E_ARG_428 | NH2 | E_GLU_433 | OE1 | 3.663 |
| 6U02 | E_ARG_428 | NH2 | E_GLU_433 | OE2 | 3.046 |
| 6U02 | F_ARG_24  | NH2 | F_ASP_70  | OD1 | 2.973 |
| 6U02 | F_ARG_61  | NH2 | F_GLU_81  | OE1 | 3.909 |
| 6U02 | F_ARG_61  | NH2 | F_ASP_82  | OD1 | 2.860 |
| 6U02 | F_ARG_61  | NH2 | F_ASP_82  | OD2 | 3.591 |
| 6U02 | F_LYS_103 | NZ  | F_GLU_105 | OE2 | 3.417 |

|      |           |     |           |     |       |
|------|-----------|-----|-----------|-----|-------|
| 6U02 | G_ARG_38  | NH1 | G_ASP_86  | OD1 | 2.942 |
| 6U02 | G_ARG_38  | NH2 | G_ASP_86  | OD1 | 3.942 |
| 6U02 | G_LYS_52  | NZ  | G_GLU_56  | OE2 | 2.823 |
| 6U02 | G_LYS_64  | NZ  | G_ASP_61  | OD1 | 2.819 |
| 6U02 | G_ARG_66  | NH1 | G_ASP_86  | OD1 | 3.308 |
| 6U02 | G_ARG_66  | NH1 | G_ASP_86  | OD2 | 3.771 |
| 6U02 | G_ARG_66  | NH2 | G_ASP_86  | OD1 | 3.561 |
| 6U02 | G_ARG_66  | NH2 | G_ASP_86  | OD2 | 2.624 |
| 6U02 | J_HIS_98  | NE2 | A_GLU_214 | OE2 | 3.838 |
| 6U02 | J_ARG_118 | NH2 | J_GLU_425 | OE1 | 3.304 |
| 6U02 | J_ARG_118 | NH2 | J_GLU_425 | OE2 | 3.788 |
| 6U02 | J_ARG_130 | NH1 | J_GLU_128 | OE1 | 3.104 |
| 6U02 | J_ARG_156 | NH2 | J_GLU_119 | OE1 | 3.055 |
| 6U02 | J_ARG_172 | NH2 | J_GLU_174 | OE2 | 3.005 |
| 6U02 | J_ARG_189 | NH2 | J_ASP_125 | OD1 | 2.704 |
| 6U02 | J_ARG_209 | NH1 | E_GLU_128 | OE2 | 3.226 |
| 6U02 | J_ARG_210 | NH2 | E_ASP_412 | OD1 | 3.356 |
| 6U02 | J_ARG_210 | NH2 | E_ASP_412 | OD2 | 3.535 |
| 6U02 | J_ARG_224 | NH2 | J_GLU_276 | OE2 | 2.857 |
| 6U02 | J_ARG_253 | NH2 | J_ASP_251 | OD1 | 3.916 |
| 6U02 | J_ARG_253 | NH2 | J_ASP_251 | OD2 | 3.078 |
| 6U02 | J_LYS_264 | NZ  | J_GLU_266 | OE2 | 3.593 |
| 6U02 | J_ARG_292 | NH1 | J_GLU_276 | OE1 | 3.982 |
| 6U02 | J_ARG_292 | NH2 | J_GLU_276 | OE1 | 3.522 |
| 6U02 | J_ARG_292 | NH2 | J_GLU_277 | OE1 | 3.270 |
| 6U02 | J_ARG_292 | NH2 | J_GLU_277 | OE2 | 3.103 |
| 6U02 | J_ARG_300 | NH2 | J_ASP_324 | OD1 | 3.839 |
| 6U02 | J_HIS_312 | ND1 | J_GLU_266 | OE1 | 2.872 |
| 6U02 | J_ARG_364 | NH1 | J_ASP_330 | OD1 | 3.366 |
| 6U02 | J_ARG_364 | NH1 | J_ASP_330 | OD2 | 3.021 |
| 6U02 | J_ARG_364 | NH2 | J_ASP_330 | OD2 | 3.215 |
| 6U02 | J_ARG_364 | NH2 | J_GLU_375 | OE2 | 3.763 |
| 6U02 | J_ARG_419 | NH1 | A_GLU_214 | OE2 | 3.906 |
| 6U02 | J_ARG_428 | NH1 | J_ASP_460 | OD2 | 2.812 |
| 6U02 | J_ARG_428 | NH2 | J_GLU_433 | OE1 | 3.663 |
| 6U02 | J_ARG_428 | NH2 | J_GLU_433 | OE2 | 3.047 |
| 6U02 | I_ARG_24  | NH2 | I_ASP_70  | OD1 | 2.974 |
| 6U02 | I_ARG_61  | NH2 | I_GLU_81  | OE1 | 3.910 |
| 6U02 | I_ARG_61  | NH2 | I_ASP_82  | OD1 | 2.860 |
| 6U02 | I_ARG_61  | NH2 | I_ASP_82  | OD2 | 3.591 |
| 6U02 | I_LYS_103 | NZ  | I_GLU_105 | OE2 | 3.418 |
| 6U02 | K_ARG_38  | NH1 | K_ASP_86  | OD1 | 2.942 |
| 6U02 | K_ARG_38  | NH2 | K_ASP_86  | OD1 | 3.942 |
| 6U02 | K_LYS_52  | NZ  | K_GLU_56  | OE2 | 2.823 |
| 6U02 | K_LYS_64  | NZ  | K_ASP_61  | OD1 | 2.819 |
| 6U02 | K_ARG_66  | NH1 | K_ASP_86  | OD1 | 3.307 |
| 6U02 | K_ARG_66  | NH1 | K_ASP_86  | OD2 | 3.771 |
| 6U02 | K_ARG_66  | NH2 | K_ASP_86  | OD1 | 3.561 |
| 6U02 | K_ARG_66  | NH2 | K_ASP_86  | OD2 | 2.624 |

---

Table 909: 6U02-specific salt bridging networks analysis. In this table, a PDB file is specified with a four-letter PDB ID, except that the names of the PDB files corresponding to the single NMR structural model split from the NMR ensemble is specified with a four-letter PDB ID in addition to a hyphen followed by the single NMR structural model numeric ID, the residue naming scheme is **Chain ID\_residue name\_residue number**,  $\angle ADH$  represents the angle formed by acceptor (A), donor (D) and hydrogen (H) ( $\angle ADH$ ).

| PDB ID | Residue A | Atom A | Residue B | Atom B | Distance (Å) |
|--------|-----------|--------|-----------|--------|--------------|
| 6U1T   | H_ARG_38  | NH1    | H_ASP_90  | OD1    | 2.918        |
| 6U1T   | H_ARG_38  | NH2    | H_GLU_46  | OE1    | 3.164        |
| 6U1T   | H_ARG_38  | NH2    | H_ASP_90  | OD1    | 3.940        |
| 6U1T   | H_ARG_67  | NH1    | H_ASP_90  | OD1    | 3.821        |
| 6U1T   | H_ARG_67  | NH1    | H_ASP_90  | OD2    | 2.731        |
| 6U1T   | H_ARG_67  | NH2    | H_ASP_90  | OD1    | 3.017        |
| 6U1T   | H_ARG_67  | NH2    | H_ASP_90  | OD2    | 3.451        |
| 6U1T   | L_ARG_61  | NH2    | L_ASP_82  | OD1    | 2.857        |
| 6U1T   | L_ARG_61  | NH2    | L_ASP_82  | OD2    | 3.548        |
| 6U1T   | L_LYS_142 | NZ     | L_GLU_105 | OE1    | 3.135        |
| 6U1T   | L_LYS_149 | NZ     | L_GLU_195 | OE1    | 3.622        |
| 6U1T   | L_LYS_149 | NZ     | L_GLU_195 | OE2    | 2.931        |
| 6U1T   | L_ARG_155 | NH1    | L_GLU_185 | OE1    | 3.214        |
| 6U1T   | L_ARG_155 | NH1    | L_GLU_185 | OE2    | 3.203        |
| 6U1T   | L_ARG_155 | NH2    | L_GLU_185 | OE1    | 3.040        |
| 6U1T   | L_HIS_189 | ND1    | L_ASP_151 | OD2    | 3.058        |
| 6U1T   | L_LYS_199 | NZ     | L_ASP_110 | OD2    | 3.885        |

Table 910: 6U1T-specific salt bridging networks analysis. In this table, a PDB file is specified with a four-letter PDB ID, except that the names of the PDB files corresponding to the single NMR structural model split from the NMR ensemble is specified with a four-letter PDB ID in addition to a hyphen followed by the single NMR structural model numeric ID, the residue naming scheme is **Chain ID\_residue name\_residue number**,  $\angle ADH$  represents the angle formed by acceptor (A), donor (D) and hydrogen (H) ( $\angle ADH$ ).

| PDB ID | Residue A | Atom A | Residue B  | Atom B | Distance (Å) |
|--------|-----------|--------|------------|--------|--------------|
| 6U59   | A_LYS_34  | NZ     | B_ASP_612  | OD1    | 2.489        |
| 6U59   | A_LYS_46  | NZ     | A_GLU_492  | OE1    | 2.715        |
| 6U59   | A_LYS_170 | NZ     | A_GLU_172  | OE2    | 3.768        |
| 6U59   | A_LYS_227 | NZ     | A_GLU_83   | OE1    | 3.011        |
| 6U59   | A_LYS_227 | NZ     | A_GLU_83   | OE2    | 3.430        |
| 6U59   | A_LYS_231 | NZ     | A_GLU_268  | OE2    | 2.869        |
| 6U59   | A_HIS_249 | NE2    | A_GLU_482  | OE2    | 2.821        |
| 6U59   | A_LYS_282 | NZ     | A_ASP_279  | OD2    | 2.817        |
| 6U59   | A_ARG_298 | NH1    | A_GLU_381  | OE2    | 3.452        |
| 6U59   | A_ARG_298 | NH2    | A_GLU_381  | OE1    | 3.785        |
| 6U59   | A_ARG_298 | NH2    | A_GLU_381  | OE2    | 3.680        |
| 6U59   | A_ARG_327 | NH1    | A_ASP_148A | OD1    | 3.884        |
| 6U59   | A_ARG_327 | NH1    | A_ASP_148A | OD2    | 3.044        |
| 6U59   | A_LYS_335 | NZ     | A_GLU_408  | OE1    | 3.651        |
| 6U59   | A_ARG_337 | NH1    | A_GLU_290  | OE1    | 2.993        |
| 6U59   | A_ARG_337 | NH2    | A_GLU_290  | OE1    | 2.941        |
| 6U59   | A_LYS_356 | NZ     | A_GLU_466  | OE2    | 2.969        |
| 6U59   | A_ARG_399 | NH1    | A_ASP_401  | OD2    | 3.230        |
| 6U59   | A_ARG_419 | NH2    | A_GLU_153  | OE2    | 3.607        |
| 6U59   | A_LYS_421 | NZ     | A_GLU_370  | OE2    | 3.544        |
| 6U59   | A_LYS_432 | NZ     | A_ASP_113  | OD1    | 2.692        |
| 6U59   | A_LYS_432 | NZ     | A_ASP_113  | OD2    | 2.690        |
| 6U59   | A_ARG_456 | NH2    | A_GLU_466  | OE1    | 2.731        |
| 6U59   | A_ARG_456 | NH2    | A_GLU_466  | OE2    | 3.143        |
| 6U59   | A_ARG_469 | NH2    | A_ASP_457  | OD2    | 2.912        |
| 6U59   | A_ARG_476 | NH2    | A_GLU_102  | OE1    | 3.714        |
| 6U59   | A_ARG_476 | NH2    | A_GLU_102  | OE2    | 3.058        |
| 6U59   | A_ARG_480 | NH1    | A_ASP_477  | OD1    | 2.833        |
| 6U59   | A_LYS_487 | NZ     | A_GLU_47   | OE1    | 3.413        |
| 6U59   | A_LYS_487 | NZ     | A_GLU_91   | OE2    | 2.867        |
| 6U59   | A_LYS_490 | NZ     | A_GLU_492  | OE2    | 3.991        |
| 6U59   | A_ARG_504 | NH1    | I_GLU_662  | OE1    | 3.209        |
| 6U59   | A_ARG_504 | NH1    | I_GLU_662  | OE2    | 2.833        |
| 6U59   | A_ARG_504 | NH2    | I_GLU_662  | OE2    | 3.911        |
| 6U59   | B_LYS_574 | NZ     | A_ASP_107  | OD1    | 2.403        |
| 6U59   | B_ARG_579 | NH2    | I_GLU_584  | OE1    | 3.024        |
| 6U59   | B_ARG_588 | NH2    | B_GLU_584  | OE2    | 3.079        |
| 6U59   | B_LYS_617 | NZ     | B_GLU_634  | OE1    | 2.908        |
| 6U59   | B_LYS_617 | NZ     | B_GLU_634  | OE2    | 3.808        |
| 6U59   | L_ARG_28  | NH2    | L_ASP_95D  | OD2    | 3.021        |
| 6U59   | L_ARG_50  | NH1    | A_GLU_269  | OE2    | 3.175        |
| 6U59   | L_ARG_50  | NH2    | A_GLU_268  | OE1    | 2.965        |
| 6U59   | L_ARG_50  | NH2    | A_GLU_269  | OE2    | 3.221        |
| 6U59   | L_ARG_61  | NH1    | L_GLU_79   | OE1    | 3.076        |
| 6U59   | L_ARG_61  | NH1    | L_ASP_82   | OD2    | 2.866        |
| 6U59   | L_ARG_61  | NH2    | L_ASP_77   | OD2    | 3.575        |
| 6U59   | L_ARG_61  | NH2    | L_GLU_79   | OE1    | 3.931        |
| 6U59   | L_ARG_95A | NH1    | A_GLU_350  | OE2    | 3.796        |
| 6U59   | L_ARG_95A | NH2    | A_GLU_350  | OE1    | 3.217        |
| 6U59   | L_ARG_95A | NH2    | A_GLU_350  | OE2    | 3.041        |
| 6U59   | L_ARG_95A | NH2    | A_GLU_351  | OE1    | 3.921        |
| 6U59   | H_ARG_38  | NH1    | H_ASP_86   | OD1    | 2.876        |
| 6U59   | H_ARG_38  | NH2    | H_GLU_46   | OE1    | 2.785        |
| 6U59   | H_ARG_38  | NH2    | H_GLU_46   | OE2    | 3.942        |
| 6U59   | H_ARG_66  | NH1    | H_ASP_86   | OD1    | 2.903        |
| 6U59   | H_ARG_66  | NH1    | H_ASP_86   | OD2    | 3.436        |
| 6U59   | C_LYS_34  | NZ     | D_ASP_612  | OD1    | 2.489        |



|      |           |     |            |     |       |
|------|-----------|-----|------------|-----|-------|
| 6U59 | C_LYS_46  | NZ  | C_GLU_492  | OE1 | 2.715 |
| 6U59 | C_LYS_170 | NZ  | C_GLU_172  | OE2 | 3.768 |
| 6U59 | C_LYS_227 | NZ  | C_GLU_83   | OE1 | 3.011 |
| 6U59 | C_LYS_227 | NZ  | C_GLU_83   | OE2 | 3.430 |
| 6U59 | C_LYS_231 | NZ  | C_GLU_268  | OE2 | 2.869 |
| 6U59 | C_HIS_249 | NE2 | C_GLU_482  | OE2 | 2.820 |
| 6U59 | C_LYS_282 | NZ  | C_ASP_279  | OD2 | 2.817 |
| 6U59 | C_ARG_298 | NH1 | C_GLU_381  | OE2 | 3.453 |
| 6U59 | C_ARG_298 | NH2 | C_GLU_381  | OE1 | 3.785 |
| 6U59 | C_ARG_298 | NH2 | C_GLU_381  | OE2 | 3.680 |
| 6U59 | C_ARG_327 | NH1 | C_ASP_148A | OD1 | 3.883 |
| 6U59 | C_ARG_327 | NH1 | C_ASP_148A | OD2 | 3.044 |
| 6U59 | C_LYS_335 | NZ  | C_GLU_408  | OE1 | 3.651 |
| 6U59 | C_ARG_337 | NH1 | C_GLU_290  | OE1 | 2.993 |
| 6U59 | C_ARG_337 | NH2 | C_GLU_290  | OE1 | 2.942 |
| 6U59 | C_LYS_356 | NZ  | C_GLU_466  | OE2 | 2.969 |
| 6U59 | C_ARG_399 | NH1 | C_ASP_401  | OD2 | 3.229 |
| 6U59 | C_ARG_419 | NH2 | C_GLU_153  | OE2 | 3.607 |
| 6U59 | C_LYS_421 | NZ  | C_GLU_370  | OE2 | 3.543 |
| 6U59 | C_LYS_432 | NZ  | C_ASP_113  | OD1 | 2.692 |
| 6U59 | C_LYS_432 | NZ  | C_ASP_113  | OD2 | 2.691 |
| 6U59 | C_ARG_456 | NH2 | C_GLU_466  | OE1 | 2.732 |
| 6U59 | C_ARG_456 | NH2 | C_GLU_466  | OE2 | 3.144 |
| 6U59 | C_ARG_469 | NH2 | C_ASP_457  | OD2 | 2.911 |
| 6U59 | C_ARG_476 | NH2 | C_GLU_102  | OE1 | 3.714 |
| 6U59 | C_ARG_476 | NH2 | C_GLU_102  | OE2 | 3.058 |
| 6U59 | C_ARG_480 | NH1 | C_ASP_477  | OD1 | 2.832 |
| 6U59 | C_LYS_487 | NZ  | C_GLU_47   | OE1 | 3.414 |
| 6U59 | C_LYS_487 | NZ  | C_GLU_91   | OE2 | 2.866 |
| 6U59 | C_LYS_490 | NZ  | C_GLU_492  | OE2 | 3.991 |
| 6U59 | C_ARG_504 | NH1 | B_GLU_662  | OE1 | 3.208 |
| 6U59 | C_ARG_504 | NH1 | B_GLU_662  | OE2 | 2.832 |
| 6U59 | C_ARG_504 | NH2 | B_GLU_662  | OE2 | 3.910 |
| 6U59 | D_LYS_574 | NZ  | C_ASP_107  | OD1 | 2.403 |
| 6U59 | D_ARG_579 | NH2 | B_GLU_584  | OE1 | 3.024 |
| 6U59 | D_ARG_588 | NH2 | D_GLU_584  | OE2 | 3.079 |
| 6U59 | D_LYS_617 | NZ  | D_GLU_634  | OE1 | 2.908 |
| 6U59 | D_LYS_617 | NZ  | D_GLU_634  | OE2 | 3.808 |
| 6U59 | E_ARG_28  | NH2 | E_ASP_95D  | OD2 | 3.022 |
| 6U59 | E_ARG_50  | NH1 | C_GLU_269  | OE2 | 3.175 |
| 6U59 | E_ARG_50  | NH2 | C_GLU_268  | OE1 | 2.965 |
| 6U59 | E_ARG_50  | NH2 | C_GLU_269  | OE2 | 3.221 |
| 6U59 | E_ARG_61  | NH1 | E_GLU_79   | OE1 | 3.076 |
| 6U59 | E_ARG_61  | NH1 | E_ASP_82   | OD2 | 2.865 |
| 6U59 | E_ARG_61  | NH2 | E_ASP_77   | OD2 | 3.574 |
| 6U59 | E_ARG_61  | NH2 | E_GLU_79   | OE1 | 3.931 |
| 6U59 | E_ARG_95A | NH1 | C_GLU_350  | OE2 | 3.795 |
| 6U59 | E_ARG_95A | NH2 | C_GLU_350  | OE1 | 3.216 |
| 6U59 | E_ARG_95A | NH2 | C_GLU_350  | OE2 | 3.040 |
| 6U59 | E_ARG_95A | NH2 | C_GLU_351  | OE1 | 3.921 |
| 6U59 | F_ARG_38  | NH1 | F_ASP_86   | OD1 | 2.877 |
| 6U59 | F_ARG_38  | NH2 | F_GLU_46   | OE1 | 2.786 |
| 6U59 | F_ARG_38  | NH2 | F_GLU_46   | OE2 | 3.943 |
| 6U59 | F_ARG_66  | NH1 | F_ASP_86   | OD1 | 2.903 |
| 6U59 | F_ARG_66  | NH1 | F_ASP_86   | OD2 | 3.437 |
| 6U59 | G_LYS_34  | NZ  | I_ASP_612  | OD1 | 2.489 |
| 6U59 | G_LYS_46  | NZ  | G_GLU_492  | OE1 | 2.715 |
| 6U59 | G_LYS_170 | NZ  | G_GLU_172  | OE2 | 3.768 |

|      |           |     |            |     |       |
|------|-----------|-----|------------|-----|-------|
| 6U59 | G_LYS_227 | NZ  | G_GLU_83   | OE1 | 3.011 |
| 6U59 | G_LYS_227 | NZ  | G_GLU_83   | OE2 | 3.430 |
| 6U59 | G_LYS_231 | NZ  | G_GLU_268  | OE2 | 2.869 |
| 6U59 | G_HIS_249 | NE2 | G_GLU_482  | OE2 | 2.821 |
| 6U59 | G_LYS_282 | NZ  | G_ASP_279  | OD2 | 2.816 |
| 6U59 | G_ARG_298 | NH1 | G_GLU_381  | OE2 | 3.452 |
| 6U59 | G_ARG_298 | NH2 | G_GLU_381  | OE1 | 3.785 |
| 6U59 | G_ARG_298 | NH2 | G_GLU_381  | OE2 | 3.679 |
| 6U59 | G_ARG_327 | NH1 | G_ASP_148A | OD1 | 3.883 |
| 6U59 | G_ARG_327 | NH1 | G_ASP_148A | OD2 | 3.044 |
| 6U59 | G_LYS_335 | NZ  | G_GLU_408  | OE1 | 3.651 |
| 6U59 | G_ARG_337 | NH1 | G_GLU_290  | OE1 | 2.994 |
| 6U59 | G_ARG_337 | NH2 | G_GLU_290  | OE1 | 2.942 |
| 6U59 | G_LYS_356 | NZ  | G_GLU_466  | OE2 | 2.969 |
| 6U59 | G_ARG_399 | NH1 | G_ASP_401  | OD2 | 3.230 |
| 6U59 | G_ARG_419 | NH2 | G_GLU_153  | OE2 | 3.607 |
| 6U59 | G_LYS_421 | NZ  | G_GLU_370  | OE2 | 3.543 |
| 6U59 | G_LYS_432 | NZ  | G_ASP_113  | OD1 | 2.692 |
| 6U59 | G_LYS_432 | NZ  | G_ASP_113  | OD2 | 2.691 |
| 6U59 | G_ARG_456 | NH2 | G_GLU_466  | OE1 | 2.731 |
| 6U59 | G_ARG_456 | NH2 | G_GLU_466  | OE2 | 3.144 |
| 6U59 | G_ARG_469 | NH2 | G_ASP_457  | OD2 | 2.912 |
| 6U59 | G_ARG_476 | NH2 | G_GLU_102  | OE1 | 3.714 |
| 6U59 | G_ARG_476 | NH2 | G_GLU_102  | OE2 | 3.058 |
| 6U59 | G_ARG_480 | NH1 | G_ASP_477  | OD1 | 2.833 |
| 6U59 | G_LYS_487 | NZ  | G_GLU_47   | OE1 | 3.414 |
| 6U59 | G_LYS_487 | NZ  | G_GLU_91   | OE2 | 2.866 |
| 6U59 | G_LYS_490 | NZ  | G_GLU_492  | OE2 | 3.990 |
| 6U59 | G_ARG_504 | NH1 | D_GLU_662  | OE1 | 3.209 |
| 6U59 | G_ARG_504 | NH1 | D_GLU_662  | OE2 | 2.833 |
| 6U59 | G_ARG_504 | NH2 | D_GLU_662  | OE2 | 3.910 |
| 6U59 | I_LYS_574 | NZ  | G_ASP_107  | OD1 | 2.403 |
| 6U59 | I_ARG_579 | NH2 | D_GLU_584  | OE1 | 3.025 |
| 6U59 | I_ARG_588 | NH2 | I_GLU_584  | OE2 | 3.079 |
| 6U59 | I_LYS_617 | NZ  | I_GLU_634  | OE1 | 2.907 |
| 6U59 | I_LYS_617 | NZ  | I_GLU_634  | OE2 | 3.808 |
| 6U59 | J_ARG_28  | NH2 | J_ASP_95D  | OD2 | 3.022 |
| 6U59 | J_ARG_50  | NH1 | G_GLU_269  | OE2 | 3.175 |
| 6U59 | J_ARG_50  | NH2 | G_GLU_268  | OE1 | 2.965 |
| 6U59 | J_ARG_50  | NH2 | G_GLU_269  | OE2 | 3.220 |
| 6U59 | J_ARG_61  | NH1 | J_GLU_79   | OE1 | 3.077 |
| 6U59 | J_ARG_61  | NH1 | J_ASP_82   | OD2 | 2.866 |
| 6U59 | J_ARG_61  | NH2 | J_ASP_77   | OD2 | 3.574 |
| 6U59 | J_ARG_61  | NH2 | J_GLU_79   | OE1 | 3.931 |
| 6U59 | J_ARG_95A | NH1 | G_GLU_350  | OE2 | 3.796 |
| 6U59 | J_ARG_95A | NH2 | G_GLU_350  | OE1 | 3.217 |
| 6U59 | J_ARG_95A | NH2 | G_GLU_350  | OE2 | 3.041 |
| 6U59 | J_ARG_95A | NH2 | G_GLU_351  | OE1 | 3.921 |
| 6U59 | K_ARG_38  | NH1 | K_ASP_86   | OD1 | 2.876 |
| 6U59 | K_ARG_38  | NH2 | K_GLU_46   | OE1 | 2.786 |
| 6U59 | K_ARG_38  | NH2 | K_GLU_46   | OE2 | 3.943 |
| 6U59 | K_ARG_66  | NH1 | K_ASP_86   | OD1 | 2.904 |
| 6U59 | K_ARG_66  | NH1 | K_ASP_86   | OD2 | 3.437 |

---

Table 911: 6U59-specific salt bridging networks analysis. In this table, a PDB file is specified with a four-letter PDB ID, except that the names of the PDB files corresponding to the single NMR structural model split from the NMR ensemble is specified with a four-letter PDB ID in addition to a hyphen followed by the single NMR structural model numeric ID, the residue naming scheme is **Chain ID\_residue name\_residue number**,  $\angle ADH$  represents the angle formed by acceptor (A), donor (D) and hydrogen (H) ( $\angle ADH$ ).

| PDB ID | Residue A | Atom A | Residue B | Atom B | Distance (Å) |
|--------|-----------|--------|-----------|--------|--------------|
| 6UG7   | L_ARG_60  | NH1    | L_GLU_78  | OE1    | 3.385        |
| 6UG7   | L_ARG_60  | NH1    | L_GLU_78  | OE2    | 3.452        |
| 6UG7   | L_ARG_60  | NH2    | L_GLU_78  | OE1    | 3.649        |
| 6UG7   | L_ARG_60  | NH2    | L_GLU_80  | OE2    | 2.876        |
| 6UG7   | L_ARG_60  | NH2    | L_ASP_81  | OD1    | 2.780        |
| 6UG7   | L_ARG_60  | NH2    | L_ASP_81  | OD2    | 3.537        |
| 6UG7   | L_LYS_148 | NZ     | L_GLU_194 | OE2    | 2.618        |
| 6UG7   | L_LYS_168 | NZ     | L_ASP_166 | OD1    | 3.206        |
| 6UG7   | L_LYS_168 | NZ     | L_ASP_166 | OD2    | 3.551        |
| 6UG7   | L_HIS_188 | ND1    | L_ASP_150 | OD2    | 3.280        |
| 6UG7   | H_ARG_38  | NH1    | H_ASP_89  | OD1    | 2.846        |
| 6UG7   | H_ARG_38  | NH2    | H_ASP_89  | OD1    | 3.706        |
| 6UG7   | H_HIS_60  | NE2    | L_GLU_1   | OE1    | 2.854        |
| 6UG7   | H_HIS_60  | NE2    | L_GLU_1   | OE2    | 3.808        |
| 6UG7   | H_ARG_66  | NH1    | H_ASP_89  | OD1    | 3.754        |
| 6UG7   | H_ARG_66  | NH1    | H_ASP_89  | OD2    | 2.880        |
| 6UG7   | H_ARG_66  | NH2    | H_ASP_89  | OD1    | 3.067        |
| 6UG7   | H_ARG_66  | NH2    | H_ASP_89  | OD2    | 3.547        |
| 6UG7   | H_LYS_147 | NZ     | H_ASP_148 | OD1    | 3.523        |
| 6UG7   | H_LYS_213 | NZ     | L_GLU_122 | OE1    | 2.927        |
| 6UG7   | H_LYS_213 | NZ     | L_GLU_122 | OE2    | 3.960        |
| 6UG7   | H_LYS_214 | NZ     | H_GLU_216 | OE1    | 3.060        |

Table 912: 6UG7-specific salt bridging networks analysis. In this table, a PDB file is specified with a four-letter PDB ID, except that the names of the PDB files corresponding to the single NMR structural model split from the NMR ensemble is specified with a four-letter PDB ID in addition to a hyphen followed by the single NMR structural model numeric ID, the residue naming scheme is **Chain ID\_residue name\_residue number**,  $\angle ADH$  represents the angle formed by acceptor (A), donor (D) and hydrogen (H) ( $\angle ADH$ ).

| PDB ID | Residue A | Atom A | Residue B | Atom B | Distance (Å) |
|--------|-----------|--------|-----------|--------|--------------|
| 6UG8   | L_ARG_60  | NH1    | L_GLU_78  | OE1    | 3.498        |
| 6UG8   | L_ARG_60  | NH2    | L_GLU_78  | OE1    | 3.557        |
| 6UG8   | L_ARG_60  | NH2    | L_GLU_80  | OE2    | 2.819        |
| 6UG8   | L_ARG_60  | NH2    | L_ASP_81  | OD1    | 2.739        |
| 6UG8   | L_ARG_60  | NH2    | L_ASP_81  | OD2    | 3.504        |
| 6UG8   | L_LYS_148 | NZ     | L_GLU_194 | OE1    | 2.956        |
| 6UG8   | L_LYS_148 | NZ     | L_GLU_194 | OE2    | 3.899        |
| 6UG8   | L_HIS_188 | ND1    | L_ASP_184 | OD1    | 3.549        |
| 6UG8   | H_ARG_38  | NH1    | H_ASP_89  | OD1    | 2.810        |
| 6UG8   | H_ARG_38  | NH2    | H_GLU_46  | OE1    | 3.785        |
| 6UG8   | H_ARG_38  | NH2    | H_GLU_46  | OE2    | 2.904        |
| 6UG8   | H_ARG_38  | NH2    | H_ASP_89  | OD1    | 3.679        |
| 6UG8   | H_HIS_60  | NE2    | L_GLU_1   | OE1    | 3.688        |
| 6UG8   | H_ARG_66  | NH1    | H_ASP_89  | OD1    | 3.627        |
| 6UG8   | H_ARG_66  | NH1    | H_ASP_89  | OD2    | 2.995        |
| 6UG8   | H_ARG_66  | NH2    | H_ASP_89  | OD1    | 2.888        |
| 6UG8   | H_ARG_66  | NH2    | H_ASP_89  | OD2    | 3.572        |
| 6UG8   | H_LYS_75  | NZ     | H_ASP_72  | OD2    | 3.818        |
| 6UG8   | H_LYS_147 | NZ     | H_ASP_148 | OD1    | 3.749        |
| 6UG8   | H_LYS_147 | NZ     | H_ASP_148 | OD2    | 3.867        |
| 6UG8   | H_LYS_213 | NZ     | L_GLU_122 | OE1    | 2.779        |
| 6UG8   | H_LYS_213 | NZ     | L_GLU_122 | OE2    | 3.811        |
| 6UG8   | H_LYS_214 | NZ     | H_GLU_216 | OE1    | 3.891        |

Table 913: 6UG8-specific salt bridging networks analysis. In this table, a PDB file is specified with a four-letter PDB ID, except that the names of the PDB files corresponding to the single NMR structural model split from the NMR ensemble is specified with a four-letter PDB ID in addition to a hyphen followed by the single NMR structural model numeric ID, the residue naming scheme is **Chain ID\_residue name\_residue number**,  $\angle ADH$  represents the angle formed by acceptor (A), donor (D) and hydrogen (H) ( $\angle ADH$ ).

| PDB ID | Residue A | Atom A | Residue B | Atom B | Distance (Å) |
|--------|-----------|--------|-----------|--------|--------------|
| 6UG9   | L_ARG_60  | NH1    | L_GLU_78  | OE1    | 3.657        |
| 6UG9   | L_ARG_60  | NH2    | L_GLU_80  | OE2    | 2.753        |
| 6UG9   | L_ARG_60  | NH2    | L_ASP_81  | OD1    | 2.737        |
| 6UG9   | L_ARG_60  | NH2    | L_ASP_81  | OD2    | 3.762        |
| 6UG9   | L_LYS_102 | NZ     | L_GLU_164 | OE1    | 3.252        |
| 6UG9   | L_LYS_102 | NZ     | L_GLU_164 | OE2    | 2.915        |
| 6UG9   | L_LYS_106 | NZ     | L_GLU_17  | OE2    | 3.780        |
| 6UG9   | L_ARG_141 | NH1    | L_GLU_164 | OE2    | 3.279        |
| 6UG9   | L_ARG_141 | NH2    | L_GLU_104 | OE1    | 3.321        |
| 6UG9   | L_ARG_141 | NH2    | L_GLU_104 | OE2    | 3.680        |
| 6UG9   | L_ARG_210 | NH1    | L_GLU_186 | OE2    | 3.814        |
| 6UG9   | H_ARG_38  | NH1    | H_ASP_89  | OD1    | 2.732        |
| 6UG9   | H_ARG_38  | NH2    | H_GLU_46  | OE2    | 3.364        |
| 6UG9   | H_ARG_38  | NH2    | H_ASP_89  | OD1    | 3.514        |
| 6UG9   | H_HIS_60  | NE2    | L_GLU_1   | OE2    | 3.673        |
| 6UG9   | H_HIS_60  | NE2    | H_GLU_46  | OE1    | 3.948        |
| 6UG9   | H_ARG_66  | NH1    | H_ASP_89  | OD1    | 3.412        |
| 6UG9   | H_ARG_66  | NH1    | H_ASP_89  | OD2    | 3.392        |
| 6UG9   | H_ARG_66  | NH2    | H_ASP_89  | OD1    | 3.881        |
| 6UG9   | H_ARG_66  | NH2    | H_ASP_89  | OD2    | 2.589        |
| 6UG9   | H_LYS_147 | NZ     | H_ASP_148 | OD1    | 3.376        |
| 6UG9   | H_LYS_147 | NZ     | H_ASP_148 | OD2    | 3.331        |
| 6UG9   | H_LYS_213 | NZ     | L_GLU_122 | OE1    | 3.853        |
| 6UG9   | H_LYS_214 | NZ     | H_GLU_216 | OE2    | 3.824        |
| 6UG9   | B_LYS_52  | NZ     | B_ASP_49  | OD2    | 3.304        |
| 6UG9   | B_ARG_60  | NH2    | B_GLU_80  | OE2    | 3.597        |
| 6UG9   | B_ARG_60  | NH2    | B_ASP_81  | OD1    | 2.874        |
| 6UG9   | B_ARG_60  | NH2    | B_ASP_81  | OD2    | 3.455        |
| 6UG9   | B_LYS_102 | NZ     | B_GLU_164 | OE1    | 3.160        |
| 6UG9   | B_LYS_102 | NZ     | B_GLU_164 | OE2    | 3.546        |
| 6UG9   | B_ARG_141 | NH1    | B_GLU_104 | OE1    | 3.634        |
| 6UG9   | B_ARG_141 | NH1    | B_GLU_104 | OE2    | 3.870        |
| 6UG9   | B_LYS_148 | NZ     | B_GLU_194 | OE1    | 3.810        |
| 6UG9   | B_LYS_148 | NZ     | B_GLU_194 | OE2    | 3.615        |
| 6UG9   | B_HIS_188 | ND1    | B_ASP_150 | OD2    | 3.288        |
| 6UG9   | B_ARG_210 | NH1    | B_GLU_186 | OE1    | 3.776        |
| 6UG9   | A_ARG_38  | NH1    | A_ASP_89  | OD1    | 2.722        |
| 6UG9   | A_ARG_38  | NH2    | A_GLU_46  | OE2    | 3.287        |
| 6UG9   | A_ARG_38  | NH2    | A_ASP_89  | OD1    | 3.758        |
| 6UG9   | A_HIS_60  | NE2    | B_GLU_1   | OE1    | 3.507        |
| 6UG9   | A_ARG_66  | NH1    | A_ASP_89  | OD1    | 3.675        |
| 6UG9   | A_ARG_66  | NH1    | A_ASP_89  | OD2    | 2.753        |
| 6UG9   | A_ARG_66  | NH2    | A_ASP_89  | OD1    | 3.070        |
| 6UG9   | A_ARG_66  | NH2    | A_ASP_89  | OD2    | 3.506        |
| 6UG9   | A_LYS_147 | NZ     | A_ASP_148 | OD1    | 3.442        |
| 6UG9   | A_LYS_147 | NZ     | A_ASP_148 | OD2    | 3.550        |
| 6UG9   | A_LYS_213 | NZ     | B_GLU_122 | OE1    | 2.877        |
| 6UG9   | A_LYS_214 | NZ     | A_GLU_216 | OE1    | 2.984        |
| 6UG9   | K_ARG_60  | NH1    | K_GLU_78  | OE1    | 3.075        |
| 6UG9   | K_ARG_60  | NH1    | K_GLU_78  | OE2    | 3.972        |
| 6UG9   | K_ARG_60  | NH1    | K_GLU_80  | OE2    | 3.745        |
| 6UG9   | K_ARG_60  | NH1    | K_ASP_81  | OD1    | 2.816        |
| 6UG9   | K_ARG_60  | NH1    | K_ASP_81  | OD2    | 2.993        |
| 6UG9   | K_ARG_60  | NH2    | K_GLU_78  | OE1    | 3.769        |
| 6UG9   | K_ARG_60  | NH2    | K_GLU_80  | OE2    | 2.923        |
| 6UG9   | K_LYS_102 | NZ     | K_GLU_104 | OE1    | 3.987        |
| 6UG9   | K_LYS_102 | NZ     | K_GLU_164 | OE1    | 3.455        |

|      |           |     |           |     |       |
|------|-----------|-----|-----------|-----|-------|
| 6UG9 | K_LYS_102 | NZ  | K_GLU_164 | OE2 | 3.139 |
| 6UG9 | K_ARG_141 | NH1 | K_GLU_104 | OE1 | 3.193 |
| 6UG9 | K_ARG_141 | NH1 | K_GLU_104 | OE2 | 2.932 |
| 6UG9 | K_ARG_141 | NH2 | K_GLU_104 | OE1 | 2.602 |
| 6UG9 | K_ARG_141 | NH2 | K_GLU_104 | OE2 | 3.840 |
| 6UG9 | K_LYS_148 | NZ  | K_GLU_194 | OE1 | 3.594 |
| 6UG9 | K_LYS_148 | NZ  | K_GLU_194 | OE2 | 2.938 |
| 6UG9 | K_HIS_188 | ND1 | K_ASP_150 | OD2 | 3.205 |
| 6UG9 | K_HIS_188 | NE2 | K_ASP_184 | OD1 | 3.818 |
| 6UG9 | K_ARG_210 | NH1 | K_GLU_186 | OE2 | 3.933 |
| 6UG9 | J_ARG_38  | NH1 | J_ASP_89  | OD1 | 2.782 |
| 6UG9 | J_ARG_38  | NH2 | J_GLU_46  | OE2 | 3.597 |
| 6UG9 | J_ARG_38  | NH2 | J_ASP_89  | OD1 | 3.861 |
| 6UG9 | J_HIS_60  | NE2 | K_GLU_1   | OE1 | 3.585 |
| 6UG9 | J_ARG_66  | NH2 | J_ASP_89  | OD1 | 2.909 |
| 6UG9 | J_ARG_66  | NH2 | J_ASP_89  | OD2 | 2.772 |
| 6UG9 | J_LYS_75  | NZ  | J_ASP_72  | OD2 | 3.024 |
| 6UG9 | J_LYS_147 | NZ  | J_ASP_148 | OD1 | 3.646 |
| 6UG9 | J_LYS_213 | NZ  | K_GLU_122 | OE1 | 2.648 |
| 6UG9 | J_LYS_213 | NZ  | K_GLU_122 | OE2 | 3.296 |
| 6UG9 | J_LYS_214 | NZ  | J_GLU_216 | OE1 | 3.149 |

Table 914: 6UG9-specific salt bridging networks analysis. In this table, a PDB file is specified with a four-letter PDB ID, except that the names of the PDB files corresponding to the single NMR structural model split from the NMR ensemble is specified with a four-letter PDB ID in addition to a hyphen followed by the single NMR structural model numeric ID, the residue naming scheme is **Chain ID\_residue name\_residue number**,  $\angle ADH$  represents the angle formed by acceptor (A), donor (D) and hydrogen (H) ( $\angle ADH$ ).

| PDB ID | Residue A | Atom A | Residue B | Atom B | Distance (Å) |
|--------|-----------|--------|-----------|--------|--------------|
| 6UGA   | L_HIS_33  | ND1    | L_ASP_49  | OD1    | 3.961        |
| 6UGA   | L_LYS_52  | NZ     | L_ASP_49  | OD2    | 3.704        |
| 6UGA   | L_ARG_60  | NH2    | L_GLU_80  | OE2    | 3.278        |
| 6UGA   | L_ARG_60  | NH2    | L_ASP_81  | OD1    | 2.749        |
| 6UGA   | L_ARG_60  | NH2    | L_ASP_81  | OD2    | 3.568        |
| 6UGA   | L_LYS_102 | NZ     | L_GLU_104 | OE2    | 3.070        |
| 6UGA   | L_LYS_148 | NZ     | L_GLU_194 | OE2    | 2.966        |
| 6UGA   | L_LYS_182 | NZ     | L_GLU_186 | OE2    | 3.117        |
| 6UGA   | L_HIS_188 | ND1    | L_ASP_150 | OD2    | 2.852        |
| 6UGA   | H_ARG_38  | NH1    | H_ASP_89  | OD1    | 2.990        |
| 6UGA   | H_ARG_38  | NH2    | H_GLU_46  | OE1    | 3.017        |
| 6UGA   | H_ARG_38  | NH2    | H_ASP_89  | OD1    | 3.417        |
| 6UGA   | H_HIS_60  | NE2    | L_GLU_1   | OE1    | 3.306        |
| 6UGA   | H_ARG_66  | NH1    | H_ASP_89  | OD1    | 3.849        |
| 6UGA   | H_ARG_66  | NH1    | H_ASP_89  | OD2    | 2.855        |
| 6UGA   | H_ARG_66  | NH2    | H_ASP_89  | OD1    | 2.858        |
| 6UGA   | H_ARG_66  | NH2    | H_ASP_89  | OD2    | 3.277        |
| 6UGA   | H_LYS_147 | NZ     | H_ASP_148 | OD1    | 3.129        |
| 6UGA   | A_LYS_52  | NZ     | A_ASP_49  | OD2    | 3.881        |
| 6UGA   | A_ARG_60  | NH1    | A_GLU_80  | OE1    | 3.935        |
| 6UGA   | A_ARG_60  | NH2    | A_GLU_80  | OE1    | 2.878        |
| 6UGA   | A_ARG_60  | NH2    | A_ASP_81  | OD1    | 2.757        |
| 6UGA   | A_ARG_60  | NH2    | A_ASP_81  | OD2    | 3.485        |
| 6UGA   | A_LYS_144 | NZ     | A_GLU_194 | OE1    | 3.405        |
| 6UGA   | A_LYS_144 | NZ     | A_GLU_194 | OE2    | 2.645        |
| 6UGA   | A_LYS_182 | NZ     | A_GLU_186 | OE2    | 3.697        |
| 6UGA   | A_LYS_187 | NZ     | A_ASP_184 | OD1    | 3.052        |
| 6UGA   | A_ARG_210 | NH2    | A_GLU_186 | OE1    | 3.370        |
| 6UGA   | B_ARG_38  | NH1    | B_ASP_89  | OD1    | 2.951        |
| 6UGA   | B_ARG_38  | NH2    | B_ASP_89  | OD1    | 3.625        |
| 6UGA   | B_HIS_60  | NE2    | A_GLU_1   | OE2    | 3.932        |
| 6UGA   | B_ARG_66  | NH1    | B_ASP_89  | OD1    | 3.747        |
| 6UGA   | B_ARG_66  | NH1    | B_ASP_89  | OD2    | 3.050        |
| 6UGA   | B_ARG_66  | NH2    | B_ASP_89  | OD1    | 3.323        |
| 6UGA   | B_ARG_66  | NH2    | B_ASP_89  | OD2    | 3.833        |
| 6UGA   | B_LYS_147 | NZ     | B_ASP_148 | OD1    | 3.437        |
| 6UGA   | B_LYS_147 | NZ     | B_ASP_148 | OD2    | 3.600        |
| 6UGA   | B_HIS_168 | NE2    | A_ASP_166 | OD1    | 3.218        |
| 6UGA   | B_LYS_213 | NZ     | A_GLU_122 | OE1    | 3.352        |

Table 915: 6UGA-specific salt bridging networks analysis. In this table, a PDB file is specified with a four-letter PDB ID, except that the names of the PDB files corresponding to the single NMR structural model split from the NMR ensemble is specified with a four-letter PDB ID in addition to a hyphen followed by the single NMR structural model numeric ID, the residue naming scheme is **Chain ID\_residue name\_residue number**,  $\angle ADH$  represents the angle formed by acceptor (A), donor (D) and hydrogen (H) ( $\angle ADH$ ).



| PDB ID | Residue A | Atom A | Residue B | Atom B | Distance (Å) |
|--------|-----------|--------|-----------|--------|--------------|
| 1A14   | N_LYS_432 | NZ     | H_ASP_56  | OD1    | 3.071        |

Table 916: Interfacial 1A14-specific salt bridging networks analysis. In this table, a PDB file is specified with a four-letter PDB ID, except that the names of the PDB files corresponding to the single NMR structural model split from the NMR ensemble is specified with a four-letter PDB ID in addition to a hyphen followed by the single NMR structural model numeric ID, the residue naming scheme is **Chain ID\_residue name\_residue number**,  $\angle ADH$  represents the angle formed by acceptor (A), donor (D) and hydrogen (H) ( $\angle ADH$ ).

| PDB ID | Residue A | Atom A | Residue B | Atom B | Distance (Å) |
|--------|-----------|--------|-----------|--------|--------------|
| 1A2Y   | A_ARG_96  | NH1    | B_GLU_98  | OE1    | 2.846        |
| 1A2Y   | A_ARG_96  | NH1    | B_GLU_98  | OE2    | 3.664        |
| 1A2Y   | A_ARG_96  | NH2    | B_GLU_98  | OE1    | 3.545        |
| 1A2Y   | A_ARG_96  | NH2    | B_GLU_98  | OE2    | 2.882        |

Table 917: Interfacial 1A2Y-specific salt bridging networks analysis. In this table, a PDB file is specified with a four-letter PDB ID, except that the names of the PDB files corresponding to the single NMR structural model split from the NMR ensemble is specified with a four-letter PDB ID in addition to a hyphen followed by the single NMR structural model numeric ID, the residue naming scheme is **Chain ID\_residue name\_residue number**,  $\angle ADH$  represents the angle formed by acceptor (A), donor (D) and hydrogen (H) ( $\angle ADH$ ).

| PDB ID | Residue A | Atom A | Residue B | Atom B | Distance (Å) |
|--------|-----------|--------|-----------|--------|--------------|
| 1A7L   | A_LYS_219 | NZ     | B_GLU_131 | OE1    | 3.835        |

Table 918: Interfacial 1A7L-specific salt bridging networks analysis. In this table, a PDB file is specified with a four-letter PDB ID, except that the names of the PDB files corresponding to the single NMR structural model split from the NMR ensemble is specified with a four-letter PDB ID in addition to a hyphen followed by the single NMR structural model numeric ID, the residue naming scheme is **Chain ID\_residue name\_residue number**,  $\angle ADH$  represents the angle formed by acceptor (A), donor (D) and hydrogen (H) ( $\angle ADH$ ).

| PDB ID | Residue A | Atom A | Residue B | Atom B | Distance (Å) |
|--------|-----------|--------|-----------|--------|--------------|
| 1A7N   | L_ARG_96  | NH1    | H_GLU_298 | OE1    | 2.957        |
| 1A7N   | L_ARG_96  | NH1    | H_GLU_298 | OE2    | 3.249        |
| 1A7N   | L_ARG_96  | NH2    | H_GLU_298 | OE2    | 3.297        |

Table 919: Interfacial 1A7N-specific salt bridging networks analysis. In this table, a PDB file is specified with a four-letter PDB ID, except that the names of the PDB files corresponding to the single NMR structural model split from the NMR ensemble is specified with a four-letter PDB ID in addition to a hyphen followed by the single NMR structural model numeric ID, the residue naming scheme is **Chain ID\_residue name\_residue number**,  $\angle ADH$  represents the angle formed by acceptor (A), donor (D) and hydrogen (H) ( $\angle ADH$ ).

| PDB ID | Residue A | Atom A | Residue B | Atom B | Distance (Å) |
|--------|-----------|--------|-----------|--------|--------------|
| 1A7P   | L_ARG_96  | NH2    | H_GLU_298 | OE1    | 3.845        |
| 1A7P   | L_ARG_96  | NH2    | H_GLU_298 | OE2    | 2.867        |

Table 920: Interfacial 1A7P-specific salt bridging networks analysis. In this table, a PDB file is specified with a four-letter PDB ID, except that the names of the PDB files corresponding to the single NMR structural model split from the NMR ensemble is specified with a four-letter PDB ID in addition to a hyphen followed by the single NMR structural model numeric ID, the residue naming scheme is **Chain ID\_residue name\_residue number**,  $\angle ADH$  represents the angle formed by acceptor (A), donor (D) and hydrogen (H) ( $\angle ADH$ ).

| PDB ID | Residue A | Atom A | Residue B | Atom B | Distance (Å) |
|--------|-----------|--------|-----------|--------|--------------|
| 1A7Q   | L_ARG_96  | NH1    | H_GLU_298 | OE1    | 2.615        |
| 1A7Q   | L_ARG_96  | NH1    | H_GLU_298 | OE2    | 3.239        |
| 1A7Q   | L_ARG_96  | NH2    | H_GLU_298 | OE1    | 3.431        |
| 1A7Q   | L_ARG_96  | NH2    | H_GLU_298 | OE2    | 2.621        |

Table 921: Interfacial 1A7Q-specific salt bridging networks analysis. In this table, a PDB file is specified with a four-letter PDB ID, except that the names of the PDB files corresponding to the single NMR structural model split from the NMR ensemble is specified with a four-letter PDB ID in addition to a hyphen followed by the single NMR structural model numeric ID, the residue naming scheme is **Chain ID\_residue name\_residue number**,  $\angle ADH$  represents the angle formed by acceptor (A), donor (D) and hydrogen (H) ( $\angle ADH$ ).

| PDB ID | Residue A | Atom A | Residue B | Atom B | Distance (Å) |
|--------|-----------|--------|-----------|--------|--------------|
| 1A7R   | L_ARG_96  | NH1    | H_GLU_298 | OE1    | 2.658        |
| 1A7R   | L_ARG_96  | NH1    | H_GLU_298 | OE2    | 3.535        |
| 1A7R   | L_ARG_96  | NH2    | H_GLU_298 | OE1    | 3.614        |
| 1A7R   | L_ARG_96  | NH2    | H_GLU_298 | OE2    | 2.905        |

Table 922: Interfacial 1A7R-specific salt bridging networks analysis. In this table, a PDB file is specified with a four-letter PDB ID, except that the names of the PDB files corresponding to the single NMR structural model split from the NMR ensemble is specified with a four-letter PDB ID in addition to a hyphen followed by the single NMR structural model numeric ID, the residue naming scheme is **Chain ID\_residue name\_residue number**,  $\angle ADH$  represents the angle formed by acceptor (A), donor (D) and hydrogen (H) ( $\angle ADH$ ).

| PDB ID | Residue A | Atom A | Residue B | Atom B | Distance (Å) |
|--------|-----------|--------|-----------|--------|--------------|
| 1ADQ   | A_ARG_255 | NH2    | H_ASP_31  | OD2    | 2.929        |
| 1ADQ   | A_HIS_433 | NE2    | L_ASP_50  | OD1    | 3.394        |
| 1ADQ   | A_HIS_433 | NE2    | L_ASP_50  | OD2    | 3.883        |
| 1ADQ   | L_HIS_95B | NE2    | H_ASP_61  | OD2    | 3.425        |

Table 923: Interfacial 1ADQ-specific salt bridging networks analysis. In this table, a PDB file is specified with a four-letter PDB ID, except that the names of the PDB files corresponding to the single NMR structural model split from the NMR ensemble is specified with a four-letter PDB ID in addition to a hyphen followed by the single NMR structural model numeric ID, the residue naming scheme is **Chain ID\_residue name\_residue number**,  $\angle ADH$  represents the angle formed by acceptor (A), donor (D) and hydrogen (H) ( $\angle ADH$ ).



| PDB ID | Residue A | Atom A | Residue B | Atom B | Distance (Å) |
|--------|-----------|--------|-----------|--------|--------------|
| 1BJ1   | H_LYS_219 | NZ     | L_GLU_123 | OE1    | 2.948        |
| 1BJ1   | H_LYS_224 | NZ     | L ASP_122 | OD2    | 2.691        |
| 1BJ1   | V_ARG_23  | NH1    | W_GLU_30  | OE1    | 3.305        |
| 1BJ1   | W_ARG_23  | NH1    | V_GLU_30  | OE1    | 3.351        |

Table 924: Interfacial 1BJ1-specific salt bridging networks analysis. In this table, a PDB file is specified with a four-letter PDB ID, except that the names of the PDB files corresponding to the single NMR structural model split from the NMR ensemble is specified with a four-letter PDB ID in addition to a hyphen followed by the single NMR structural model numeric ID, the residue naming scheme is **Chain ID\_residue name\_residue number**,  $\angle ADH$  represents the angle formed by acceptor (A), donor (D) and hydrogen (H) ( $\angle ADH$ ).

| PDB ID | Residue A | Atom A | Residue B | Atom B | Distance (Å) |
|--------|-----------|--------|-----------|--------|--------------|
| 1BLN   | B_LYS_221 | NZ     | A_GLU_123 | OE2    | 2.688        |
| 1BLN   | D_LYS_221 | NZ     | C_GLU_123 | OE2    | 2.694        |

Table 925: Interfacial 1BLN-specific salt bridging networks analysis. In this table, a PDB file is specified with a four-letter PDB ID, except that the names of the PDB files corresponding to the single NMR structural model split from the NMR ensemble is specified with a four-letter PDB ID in addition to a hyphen followed by the single NMR structural model numeric ID, the residue naming scheme is **Chain ID\_residue name\_residue number**,  $\angle ADH$  represents the angle formed by acceptor (A), donor (D) and hydrogen (H) ( $\angle ADH$ ).

| PDB ID | Residue A | Atom A | Residue B | Atom B | Distance (Å) |
|--------|-----------|--------|-----------|--------|--------------|
| 1BQL   | L_LYS_44  | NZ     | H_ASP_104 | OD1    | 3.995        |
| 1BQL   | L_ARG_45  | NH2    | H_ASP_104 | OD2    | 3.212        |
| 1BQL   | H_LYS_211 | NZ     | L_GLU_121 | OE1    | 2.714        |
| 1BQL   | H_LYS_211 | NZ     | L_GLU_121 | OE2    | 2.963        |
| 1BQL   | Y_ARG_45  | NH1    | H_GLU_50  | OE1    | 3.800        |
| 1BQL   | Y_ARG_45  | NH1    | H_GLU_50  | OE2    | 2.920        |
| 1BQL   | Y_LYS_68  | NZ     | H_GLU_50  | OE1    | 3.561        |

Table 926: Interfacial 1BQL-specific salt bridging networks analysis. In this table, a PDB file is specified with a four-letter PDB ID, except that the names of the PDB files corresponding to the single NMR structural model split from the NMR ensemble is specified with a four-letter PDB ID in addition to a hyphen followed by the single NMR structural model numeric ID, the residue naming scheme is **Chain ID\_residue name\_residue number**,  $\angle ADH$  represents the angle formed by acceptor (A), donor (D) and hydrogen (H) ( $\angle ADH$ ).

| PDB ID | Residue A | Atom A | Residue B | Atom B | Distance (Å) |
|--------|-----------|--------|-----------|--------|--------------|
| 1BVK   | A_ARG_96  | NH2    | B_GLU_98  | OE1    | 2.978        |
| 1BVK   | A_ARG_96  | NH2    | B_GLU_98  | OE2    | 2.932        |
| 1BVK   | D_ARG_96  | NH2    | E_GLU_98  | OE1    | 2.525        |
| 1BVK   | D_ARG_96  | NH2    | E_GLU_98  | OE2    | 2.753        |

Table 927: Interfacial 1BVK-specific salt bridging networks analysis. In this table, a PDB file is specified with a four-letter PDB ID, except that the names of the PDB files corresponding to the single NMR structural model split from the NMR ensemble is specified with a four-letter PDB ID in addition to a hyphen followed by the single NMR structural model numeric ID, the residue naming scheme is **Chain ID\_residue name\_residue number**,  $\angle ADH$  represents the angle formed by acceptor (A), donor (D) and hydrogen (H) ( $\angle ADH$ ).

| PDB ID | Residue A | Atom A | Residue B | Atom B | Distance (Å) |
|--------|-----------|--------|-----------|--------|--------------|
| 1C08   | C.LYS_97  | NZ     | B.ASP_32  | OD1    | 2.620        |
| 1C08   | C.LYS_97  | NZ     | B.ASP_32  | OD2    | 3.999        |
| 1C08   | C.LYS_97  | NZ     | B.ASP_99  | OD2    | 2.365        |

Table 928: Interfacial 1C08-specific salt bridging networks analysis. In this table, a PDB file is specified with a four-letter PDB ID, except that the names of the PDB files corresponding to the single NMR structural model split from the NMR ensemble is specified with a four-letter PDB ID in addition to a hyphen followed by the single NMR structural model numeric ID, the residue naming scheme is **Chain ID\_residue name\_residue number**,  $\angle ADH$  represents the angle formed by acceptor (A), donor (D) and hydrogen (H) ( $\angle ADH$ ).

| PDB ID | Residue A | Atom A | Residue B | Atom B | Distance (Å) |
|--------|-----------|--------|-----------|--------|--------------|
| 1C12   | B_LYS_508 | NZ     | A_GLU_123 | OE2    | 3.314        |

Table 929: Interfacial 1C12-specific salt bridging networks analysis. In this table, a PDB file is specified with a four-letter PDB ID, except that the names of the PDB files corresponding to the single NMR structural model split from the NMR ensemble is specified with a four-letter PDB ID in addition to a hyphen followed by the single NMR structural model numeric ID, the residue naming scheme is **Chain ID\_residue name\_residue number**,  $\angle ADH$  represents the angle formed by acceptor (A), donor (D) and hydrogen (H) ( $\angle ADH$ ).

| PDB ID | Residue A | Atom A | Residue B | Atom B | Distance (Å) |
|--------|-----------|--------|-----------|--------|--------------|
| 1CE1   | L_ARG_94  | NH2    | H_GLU_61  | OE2    | 3.979        |
| 1CE1   | L_ARG_96  | NH1    | H_GLU_101 | OE1    | 2.707        |
| 1CE1   | L_ARG_96  | NH1    | H_GLU_101 | OE2    | 3.562        |
| 1CE1   | L_ARG_96  | NH2    | H_GLU_101 | OE1    | 3.509        |
| 1CE1   | L_ARG_96  | NH2    | H_GLU_101 | OE2    | 2.787        |
| 1CE1   | H_ARG_52  | NH2    | P_ASP_7   | OD1    | 3.481        |
| 1CE1   | H_LYS_56  | NZ     | P_ASP_7   | OD2    | 2.951        |

Table 930: Interfacial 1CE1-specific salt bridging networks analysis. In this table, a PDB file is specified with a four-letter PDB ID, except that the names of the PDB files corresponding to the single NMR structural model split from the NMR ensemble is specified with a four-letter PDB ID in addition to a hyphen followed by the single NMR structural model numeric ID, the residue naming scheme is **Chain ID\_residue name\_residue number**,  $\angle ADH$  represents the angle formed by acceptor (A), donor (D) and hydrogen (H) ( $\angle ADH$ ).

| PDB ID | Residue A | Atom A | Residue B | Atom B | Distance (Å) |
|--------|-----------|--------|-----------|--------|--------------|
| 1CFS   | B_LYS_207 | NZ     | A_GLU_123 | OE1    | 3.526        |

Table 931: Interfacial 1CFS-specific salt bridging networks analysis. In this table, a PDB file is specified with a four-letter PDB ID, except that the names of the PDB files corresponding to the single NMR structural model split from the NMR ensemble is specified with a four-letter PDB ID in addition to a hyphen followed by the single NMR structural model numeric ID, the residue naming scheme is **Chain ID\_residue name\_residue number**,  $\angle ADH$  represents the angle formed by acceptor (A), donor (D) and hydrogen (H) ( $\angle ADH$ ).



| PDB ID | Residue A | Atom A | Residue B | Atom B | Distance (Å) |
|--------|-----------|--------|-----------|--------|--------------|
| 1CFT   | B_LYS_207 | NZ     | A_GLU_123 | OE1    | 2.550        |
| 1CFT   | C_LYS_2   | NZ     | A_ASP_92  | OD1    | 2.682        |

Table 932: Interfacial 1CFT-specific salt bridging networks analysis. In this table, a PDB file is specified with a four-letter PDB ID, except that the names of the PDB files corresponding to the single NMR structural model split from the NMR ensemble is specified with a four-letter PDB ID in addition to a hyphen followed by the single NMR structural model numeric ID, the residue naming scheme is **Chain ID\_residue name\_residue number**,  $\angle ADH$  represents the angle formed by acceptor (A), donor (D) and hydrogen (H) ( $\angle ADH$ ).

| PDB ID | Residue A | Atom A | Residue B | Atom B | Distance (Å) |
|--------|-----------|--------|-----------|--------|--------------|
| 1CG9   | A_ARG_17  | NH1    | B_ASP_35  | OD2    | 3.201        |
| 1CG9   | A_ARG_17  | NH2    | B_ASP_35  | OD1    | 3.038        |
| 1CG9   | A_ARG_17  | NH2    | B_ASP_35  | OD2    | 3.401        |
| 1CG9   | A_ARG_48  | NH2    | B_ASP_54  | OD1    | 3.456        |
| 1CG9   | A_ARG_48  | NH2    | B_ASP_54  | OD2    | 3.762        |
| 1CG9   | A_HIS_192 | ND1    | B_ASP_99  | OD2    | 3.812        |
| 1CG9   | B_LYS_7   | NZ     | A_GLU_232 | OE1    | 3.887        |

Table 933: Interfacial 1CG9-specific salt bridging networks analysis. In this table, a PDB file is specified with a four-letter PDB ID, except that the names of the PDB files corresponding to the single NMR structural model split from the NMR ensemble is specified with a four-letter PDB ID in addition to a hyphen followed by the single NMR structural model numeric ID, the residue naming scheme is **Chain ID\_residue name\_residue number**,  $\angle ADH$  represents the angle formed by acceptor (A), donor (D) and hydrogen (H) ( $\angle ADH$ ).

| PDB ID | Residue A | Atom A | Residue B | Atom B | Distance (Å) |
|--------|-----------|--------|-----------|--------|--------------|
| 1CLZ   | L_LYS_207 | NZ     | H_ASP_130 | OD1    | 3.119        |
| 1CLZ   | L_LYS_207 | NZ     | H_ASP_130 | OD2    | 3.445        |
| 1CLZ   | H_ARG_172 | NH1    | L_ASP_170 | OD2    | 3.885        |
| 1CLZ   | H_ARG_172 | NH2    | L_ASP_170 | OD2    | 3.384        |
| 1CLZ   | H_LYS_221 | NZ     | L_GLU_123 | OE1    | 3.750        |
| 1CLZ   | H_LYS_221 | NZ     | L_GLU_123 | OE2    | 2.509        |

Table 934: Interfacial 1CLZ-specific salt bridging networks analysis. In this table, a PDB file is specified with a four-letter PDB ID, except that the names of the PDB files corresponding to the single NMR structural model split from the NMR ensemble is specified with a four-letter PDB ID in addition to a hyphen followed by the single NMR structural model numeric ID, the residue naming scheme is **Chain ID\_residue name\_residue number**,  $\angle ADH$  represents the angle formed by acceptor (A), donor (D) and hydrogen (H) ( $\angle ADH$ ).

| PDB ID | Residue A | Atom A | Residue B | Atom B | Distance (Å) |
|--------|-----------|--------|-----------|--------|--------------|
| 1CZ8   | V_ARG_23  | NH1    | W_GLU_30  | OE1    | 3.162        |
| 1CZ8   | V_ARG_23  | NH1    | W_GLU_30  | OE2    | 3.558        |
| 1CZ8   | W_ARG_23  | NH1    | V_GLU_30  | OE1    | 3.011        |
| 1CZ8   | W_ARG_23  | NH1    | V_GLU_30  | OE2    | 3.663        |
| 1CZ8   | H_LYS_219 | NZ     | L_GLU_123 | OE1    | 3.027        |
| 1CZ8   | H_LYS_224 | NZ     | L_ASP_122 | OD1    | 2.846        |
| 1CZ8   | H_LYS_224 | NZ     | L_ASP_122 | OD2    | 3.185        |
| 1CZ8   | Y_LYS_219 | NZ     | X_GLU_123 | OE2    | 3.832        |

Table 935: Interfacial 1CZ8-specific salt bridging networks analysis. In this table, a PDB file is specified with a four-letter PDB ID, except that the names of the PDB files corresponding to the single NMR structural model split from the NMR ensemble is specified with a four-letter PDB ID in addition to a hyphen followed by the single NMR structural model numeric ID, the residue naming scheme is **Chain ID\_residue name\_residue number**,  $\angle ADH$  represents the angle formed by acceptor (A), donor (D) and hydrogen (H) ( $\angle ADH$ ).

| PDB ID | Residue A | Atom A | Residue B | Atom B | Distance (Å) |
|--------|-----------|--------|-----------|--------|--------------|
| 1DBJ   | H_LYS_221 | NZ     | L_GLU_123 | OE1    | 3.386        |
| 1DBJ   | H_LYS_221 | NZ     | L_GLU_123 | OE2    | 2.770        |

Table 936: Interfacial 1DBJ-specific salt bridging networks analysis. In this table, a PDB file is specified with a four-letter PDB ID, except that the names of the PDB files corresponding to the single NMR structural model split from the NMR ensemble is specified with a four-letter PDB ID in addition to a hyphen followed by the single NMR structural model numeric ID, the residue naming scheme is **Chain ID\_residue name\_residue number**,  $\angle ADH$  represents the angle formed by acceptor (A), donor (D) and hydrogen (H) ( $\angle ADH$ ).

| PDB ID | Residue A | Atom A | Residue B | Atom B | Distance (Å) |
|--------|-----------|--------|-----------|--------|--------------|
| 1DBK   | H_HIS_172 | ND1    | L_ASP_167 | OD2    | 3.619        |
| 1DBK   | H_LYS_221 | NZ     | L_GLU_123 | OE2    | 3.030        |

Table 937: Interfacial 1DBK-specific salt bridging networks analysis. In this table, a PDB file is specified with a four-letter PDB ID, except that the names of the PDB files corresponding to the single NMR structural model split from the NMR ensemble is specified with a four-letter PDB ID in addition to a hyphen followed by the single NMR structural model numeric ID, the residue naming scheme is **Chain ID\_residue name\_residue number**,  $\angle ADH$  represents the angle formed by acceptor (A), donor (D) and hydrogen (H) ( $\angle ADH$ ).

| PDB ID | Residue A | Atom A | Residue B | Atom B | Distance (Å) |
|--------|-----------|--------|-----------|--------|--------------|
| 1DBM   | H_LYS_221 | NZ     | L_GLU_123 | OE2    | 3.277        |

Table 938: Interfacial 1DBM-specific salt bridging networks analysis. In this table, a PDB file is specified with a four-letter PDB ID, except that the names of the PDB files corresponding to the single NMR structural model split from the NMR ensemble is specified with a four-letter PDB ID in addition to a hyphen followed by the single NMR structural model numeric ID, the residue naming scheme is **Chain ID\_residue name\_residue number**,  $\angle ADH$  represents the angle formed by acceptor (A), donor (D) and hydrogen (H) ( $\angle ADH$ ).

| PDB ID | Residue A  | Atom A | Residue B  | Atom B | Distance (Å) |
|--------|------------|--------|------------|--------|--------------|
| 1DEE   | A_ARG_24   | NH1    | D_GLU_1555 | OE1    | 3.510        |
| 1DEE   | B_ARG_674  | NH1    | A_ASP_167  | OD2    | 3.579        |
| 1DEE   | B_LYS_719  | NZ     | A_GLU_123  | OE1    | 2.730        |
| 1DEE   | B_LYS_719  | NZ     | A_GLU_123  | OE2    | 3.113        |
| 1DEE   | D_ARG_1519 | NH1    | G_ASP_1834 | OD1    | 3.122        |
| 1DEE   | D_ARG_1519 | NH1    | G_ASP_1834 | OD2    | 3.064        |
| 1DEE   | D_ARG_1519 | NH2    | G_ASP_1834 | OD1    | 3.684        |
| 1DEE   | D_ARG_1519 | NH2    | G_ASP_1834 | OD2    | 2.875        |
| 1DEE   | D_ARG_1674 | NH1    | C_ASP_1167 | OD2    | 3.619        |
| 1DEE   | D_LYS_1719 | NZ     | C_GLU_1123 | OE1    | 3.687        |
| 1DEE   | D_LYS_1719 | NZ     | C_GLU_1123 | OE2    | 2.890        |
| 1DEE   | F_ARG_2519 | NH1    | H_ASP_2834 | OD1    | 3.463        |
| 1DEE   | F_ARG_2519 | NH1    | H_ASP_2834 | OD2    | 2.731        |
| 1DEE   | F_ARG_2519 | NH2    | H_ASP_2834 | OD1    | 3.523        |
| 1DEE   | F_ARG_2519 | NH2    | H_ASP_2834 | OD2    | 3.444        |
| 1DEE   | F_ARG_2674 | NH1    | E_ASP_2167 | OD2    | 3.989        |
| 1DEE   | F_LYS_2719 | NZ     | E_GLU_2123 | OE1    | 2.882        |
| 1DEE   | F_LYS_2719 | NZ     | E_GLU_2123 | OE2    | 3.779        |

Table 939: Interfacial 1DEE-specific salt bridging networks analysis. In this table, a PDB file is specified with a four-letter PDB ID, except that the names of the PDB files corresponding to the single NMR structural model split from the NMR ensemble is specified with a four-letter PDB ID in addition to a hyphen followed by the single NMR structural model numeric ID, the residue naming scheme is **Chain ID\_residue name\_residue number**,  $\angle ADH$  represents the angle formed by acceptor (A), donor (D) and hydrogen (H) ( $\angle ADH$ ).



| PDB ID | Residue A | Atom A | Residue B | Atom B | Distance (Å) |
|--------|-----------|--------|-----------|--------|--------------|
| 1DQD   | H_LYS_217 | NZ     | L_GLU_122 | OE2    | 3.953        |

Table 940: Interfacial 1DQD-specific salt bridging networks analysis. In this table, a PDB file is specified with a four-letter PDB ID, except that the names of the PDB files corresponding to the single NMR structural model split from the NMR ensemble is specified with a four-letter PDB ID in addition to a hyphen followed by the single NMR structural model numeric ID, the residue naming scheme is **Chain ID\_residue name\_residue number**,  $\angle ADH$  represents the angle formed by acceptor (A), donor (D) and hydrogen (H) ( $\angle ADH$ ).

| PDB ID | Residue A | Atom A | Residue B | Atom B | Distance (Å) |
|--------|-----------|--------|-----------|--------|--------------|
| 1DQJ   | B_LYS_219 | NZ     | A_GLU_123 | OE2    | 2.598        |
| 1DQJ   | C_LYS_97  | NZ     | B_ASP_32  | OD2    | 2.665        |

Table 941: Interfacial 1DQJ-specific salt bridging networks analysis. In this table, a PDB file is specified with a four-letter PDB ID, except that the names of the PDB files corresponding to the single NMR structural model split from the NMR ensemble is specified with a four-letter PDB ID in addition to a hyphen followed by the single NMR structural model numeric ID, the residue naming scheme is **Chain ID\_residue name\_residue number**,  $\angle ADH$  represents the angle formed by acceptor (A), donor (D) and hydrogen (H) ( $\angle ADH$ ).

| PDB ID | Residue A | Atom A | Residue B | Atom B | Distance (Å) |
|--------|-----------|--------|-----------|--------|--------------|
| 1DQM   | L_LYS_207 | NZ     | H_ASP_130 | OD1    | 3.491        |
| 1DQM   | L_LYS_207 | NZ     | H_ASP_130 | OD2    | 3.782        |

Table 942: Interfacial 1DQM-specific salt bridging networks analysis. In this table, a PDB file is specified with a four-letter PDB ID, except that the names of the PDB files corresponding to the single NMR structural model split from the NMR ensemble is specified with a four-letter PDB ID in addition to a hyphen followed by the single NMR structural model numeric ID, the residue naming scheme is **Chain ID\_residue name\_residue number**,  $\angle ADH$  represents the angle formed by acceptor (A), donor (D) and hydrogen (H) ( $\angle ADH$ ).

| PDB ID | Residue A | Atom A | Residue B | Atom B | Distance (Å) |
|--------|-----------|--------|-----------|--------|--------------|
| 1DQQ   | A_LYS_49  | NZ     | B_ASP_101 | OD1    | 2.957        |
| 1DQQ   | B_LYS_216 | NZ     | D_ASP_218 | OD1    | 2.965        |
| 1DQQ   | B_LYS_219 | NZ     | A_GLU_123 | OE2    | 2.763        |
| 1DQQ   | C_LYS_49  | NZ     | D_ASP_101 | OD1    | 3.456        |
| 1DQQ   | C_LYS_49  | NZ     | D_ASP_101 | OD2    | 3.943        |
| 1DQQ   | D_LYS_219 | NZ     | C_GLU_123 | OE1    | 3.088        |

Table 943: Interfacial 1DQQ-specific salt bridging networks analysis. In this table, a PDB file is specified with a four-letter PDB ID, except that the names of the PDB files corresponding to the single NMR structural model split from the NMR ensemble is specified with a four-letter PDB ID in addition to a hyphen followed by the single NMR structural model numeric ID, the residue naming scheme is **Chain ID\_residue name\_residue number**,  $\angle ADH$  represents the angle formed by acceptor (A), donor (D) and hydrogen (H) ( $\angle ADH$ ).

| PDB ID | Residue A | Atom A | Residue B | Atom B | Distance (Å) |
|--------|-----------|--------|-----------|--------|--------------|
| 1DVF   | A_ARG_96  | NH1    | B_GLU_98  | OE1    | 2.616        |
| 1DVF   | A_ARG_96  | NH1    | B_GLU_98  | OE2    | 3.746        |
| 1DVF   | A_ARG_96  | NH2    | B_GLU_98  | OE1    | 3.400        |
| 1DVF   | A_ARG_96  | NH2    | B_GLU_98  | OE2    | 2.958        |
| 1DVF   | D_HIS_33  | NE2    | B_ASP_100 | OD1    | 3.569        |
| 1DVF   | D_HIS_33  | NE2    | B_ASP_100 | OD2    | 3.052        |

Table 944: Interfacial 1DVF-specific salt bridging networks analysis. In this table, a PDB file is specified with a four-letter PDB ID, except that the names of the PDB files corresponding to the single NMR structural model split from the NMR ensemble is specified with a four-letter PDB ID in addition to a hyphen followed by the single NMR structural model numeric ID, the residue naming scheme is **Chain ID\_residue name\_residue number**,  $\angle ADH$  represents the angle formed by acceptor (A), donor (D) and hydrogen (H) ( $\angle ADH$ ).

| PDB ID | Residue A | Atom A | Residue B | Atom B | Distance (Å) |
|--------|-----------|--------|-----------|--------|--------------|
| 1DZB   | A.LYS_63  | NZ     | B.GLU_89  | OE1    | 3.983        |
| 1DZB   | A.LYS_67  | NZ     | B.ASP_90  | OD2    | 3.792        |
| 1DZB   | X.ARG_61  | NH2    | A.ASP_256 | OD2    | 3.887        |
| 1DZB   | X.LYS_73  | NZ     | A.ASP_256 | OD1    | 3.412        |
| 1DZB   | X.LYS_73  | NZ     | A.ASP_256 | OD2    | 3.290        |
| 1DZB   | X.ARG_112 | NH2    | A.ASP_31  | OD2    | 3.878        |
| 1DZB   | Y.LYS_73  | NZ     | B.ASP_256 | OD1    | 3.559        |

Table 945: Interfacial 1DZB-specific salt bridging networks analysis. In this table, a PDB file is specified with a four-letter PDB ID, except that the names of the PDB files corresponding to the single NMR structural model split from the NMR ensemble is specified with a four-letter PDB ID in addition to a hyphen followed by the single NMR structural model numeric ID, the residue naming scheme is **Chain ID\_residue name\_residue number**,  $\angle ADH$  represents the angle formed by acceptor (A), donor (D) and hydrogen (H) ( $\angle ADH$ ).

| PDB ID | Residue A | Atom A | Residue B | Atom B | Distance (Å) |
|--------|-----------|--------|-----------|--------|--------------|
| 1E4W   | H_LYS_205 | NZ     | L_GLU_123 | OE1    | 3.384        |
| 1E4W   | H_LYS_205 | NZ     | L_GLU_123 | OE2    | 3.066        |

Table 946: Interfacial 1E4W-specific salt bridging networks analysis. In this table, a PDB file is specified with a four-letter PDB ID, except that the names of the PDB files corresponding to the single NMR structural model split from the NMR ensemble is specified with a four-letter PDB ID in addition to a hyphen followed by the single NMR structural model numeric ID, the residue naming scheme is **Chain ID\_residue name\_residue number**,  $\angle ADH$  represents the angle formed by acceptor (A), donor (D) and hydrogen (H) ( $\angle ADH$ ).

| PDB ID | Residue A | Atom A | Residue B | Atom B | Distance (Å) |
|--------|-----------|--------|-----------|--------|--------------|
| 1E4X   | I.LYS_205 | NZ     | M.GLU_123 | OE1    | 2.874        |
| 1E4X   | I.LYS_205 | NZ     | M.GLU_123 | OE2    | 3.751        |
| 1E4X   | Q.HIS_4   | NE2    | I.ASP_98  | OD2    | 3.960        |

Table 947: Interfacial 1E4X-specific salt bridging networks analysis. In this table, a PDB file is specified with a four-letter PDB ID, except that the names of the PDB files corresponding to the single NMR structural model split from the NMR ensemble is specified with a four-letter PDB ID in addition to a hyphen followed by the single NMR structural model numeric ID, the residue naming scheme is **Chain ID\_residue name\_residue number**,  $\angle ADH$  represents the angle formed by acceptor (A), donor (D) and hydrogen (H) ( $\angle ADH$ ).



| PDB ID | Residue A | Atom A | Residue B | Atom B | Distance (Å) |
|--------|-----------|--------|-----------|--------|--------------|
| 1E6J   | H_LYS_215 | NZ     | L_GLU_121 | OE1    | 3.273        |
| 1E6J   | H_LYS_215 | NZ     | L_GLU_121 | OE2    | 3.199        |

Table 948: Interfacial 1E6J-specific salt bridging networks analysis. In this table, a PDB file is specified with a four-letter PDB ID, except that the names of the PDB files corresponding to the single NMR structural model split from the NMR ensemble is specified with a four-letter PDB ID in addition to a hyphen followed by the single NMR structural model numeric ID, the residue naming scheme is **Chain ID\_residue name\_residue number**,  $\angle ADH$  represents the angle formed by acceptor (A), donor (D) and hydrogen (H) ( $\angle ADH$ ).

| PDB ID | Residue A | Atom A | Residue B | Atom B | Distance (Å) |
|--------|-----------|--------|-----------|--------|--------------|
| 1E6O   | H_LYS_215 | NZ     | L_GLU_121 | OE1    | 2.731        |
| 1E6O   | H_LYS_215 | NZ     | L_GLU_121 | OE2    | 3.094        |

Table 949: Interfacial 1E6O-specific salt bridging networks analysis. In this table, a PDB file is specified with a four-letter PDB ID, except that the names of the PDB files corresponding to the single NMR structural model split from the NMR ensemble is specified with a four-letter PDB ID in addition to a hyphen followed by the single NMR structural model numeric ID, the residue naming scheme is **Chain ID\_residue name\_residue number**,  $\angle ADH$  represents the angle formed by acceptor (A), donor (D) and hydrogen (H) ( $\angle ADH$ ).

| PDB ID | Residue A  | Atom A | Residue B  | Atom B | Distance (Å) |
|--------|------------|--------|------------|--------|--------------|
| 1EJO   | L_HIS_2038 | NE2    | H_ASP_2603 | OD1    | 3.217        |
| 1EJO   | H_ARG_2598 | NH2    | P_ASP_3143 | OD1    | 3.795        |
| 1EJO   | H_ARG_2598 | NH2    | P_ASP_3143 | OD2    | 2.982        |
| 1EJO   | H_LYS_2714 | NZ     | L_GLU_2127 | OE1    | 2.933        |
| 1EJO   | H_LYS_2714 | NZ     | L_GLU_2127 | OE2    | 3.046        |
| 1EJO   | P_ARG_3141 | NH1    | L_GLU_2027 | OE2    | 3.696        |
| 1EJO   | P_ARG_3141 | NH1    | L_GLU_2097 | OE1    | 2.675        |
| 1EJO   | P_ARG_3141 | NH2    | L_GLU_2027 | OE2    | 3.441        |

Table 950: Interfacial 1EJO-specific salt bridging networks analysis. In this table, a PDB file is specified with a four-letter PDB ID, except that the names of the PDB files corresponding to the single NMR structural model split from the NMR ensemble is specified with a four-letter PDB ID in addition to a hyphen followed by the single NMR structural model numeric ID, the residue naming scheme is **Chain ID\_residue name\_residue number**,  $\angle ADH$  represents the angle formed by acceptor (A), donor (D) and hydrogen (H) ( $\angle ADH$ ).

| PDB ID | Residue A | Atom A | Residue B | Atom B | Distance (Å) |
|--------|-----------|--------|-----------|--------|--------------|
| 1EMT   | H_LYS_63  | NZ     | L_ASP_1   | OD1    | 3.310        |
| 1EMT   | H_LYS_211 | NZ     | L_GLU_123 | OE1    | 2.945        |
| 1EMT   | H_LYS_211 | NZ     | L_GLU_123 | OE2    | 2.554        |

Table 951: Interfacial 1EMT-specific salt bridging networks analysis. In this table, a PDB file is specified with a four-letter PDB ID, except that the names of the PDB files corresponding to the single NMR structural model split from the NMR ensemble is specified with a four-letter PDB ID in addition to a hyphen followed by the single NMR structural model numeric ID, the residue naming scheme is **Chain ID\_residue name\_residue number**,  $\angle ADH$  represents the angle formed by acceptor (A), donor (D) and hydrogen (H) ( $\angle ADH$ ).

| PDB ID | Residue A | Atom A | Residue B | Atom B | Distance (Å) |
|--------|-----------|--------|-----------|--------|--------------|
| 1ETZ   | L_ARG_186 | NH1    | B_GLU_48  | OE1    | 2.771        |
| 1ETZ   | L_ARG_186 | NH1    | B_GLU_48  | OE2    | 3.248        |
| 1ETZ   | L_ARG_190 | NH2    | B_GLU_48  | OE2    | 3.331        |
| 1ETZ   | H_LYS_156 | NZ     | L_GLU_127 | OE2    | 3.377        |
| 1ETZ   | H_LYS_221 | NZ     | L_GLU_126 | OE1    | 3.184        |
| 1ETZ   | A_ARG_186 | NH1    | H_GLU_45  | OE2    | 3.236        |
| 1ETZ   | A_ARG_186 | NH2    | H_GLU_48  | OE1    | 3.518        |
| 1ETZ   | B_LYS_156 | NZ     | A_GLU_127 | OE2    | 2.979        |
| 1ETZ   | B_LYS_221 | NZ     | A_GLU_126 | OE1    | 3.572        |

Table 952: Interfacial 1ETZ-specific salt bridging networks analysis. In this table, a PDB file is specified with a four-letter PDB ID, except that the names of the PDB files corresponding to the single NMR structural model split from the NMR ensemble is specified with a four-letter PDB ID in addition to a hyphen followed by the single NMR structural model numeric ID, the residue naming scheme is **Chain ID\_residue name\_residue number**,  $\angle ADH$  represents the angle formed by acceptor (A), donor (D) and hydrogen (H) ( $\angle ADH$ ).

| PDB ID | Residue A | Atom A | Residue B | Atom B | Distance (Å) |
|--------|-----------|--------|-----------|--------|--------------|
| 1F11   | B_LYS_221 | NZ     | A_GLU_123 | OE2    | 3.880        |
| 1F11   | D_LYS_221 | NZ     | C_GLU_123 | OE2    | 3.786        |

Table 953: Interfacial 1F11-specific salt bridging networks analysis. In this table, a PDB file is specified with a four-letter PDB ID, except that the names of the PDB files corresponding to the single NMR structural model split from the NMR ensemble is specified with a four-letter PDB ID in addition to a hyphen followed by the single NMR structural model numeric ID, the residue naming scheme is **Chain ID\_residue name\_residue number**,  $\angle ADH$  represents the angle formed by acceptor (A), donor (D) and hydrogen (H) ( $\angle ADH$ ).

| PDB ID | Residue A | Atom A | Residue B | Atom B | Distance (Å) |
|--------|-----------|--------|-----------|--------|--------------|
| 1F4W   | H_LYS_147 | NZ     | L_GLU_127 | OE2    | 2.611        |
| 1F4W   | H_LYS_212 | NZ     | L_GLU_126 | OE1    | 2.614        |
| 1F4W   | H_LYS_212 | NZ     | L_GLU_126 | OE2    | 2.379        |

Table 954: Interfacial 1F4W-specific salt bridging networks analysis. In this table, a PDB file is specified with a four-letter PDB ID, except that the names of the PDB files corresponding to the single NMR structural model split from the NMR ensemble is specified with a four-letter PDB ID in addition to a hyphen followed by the single NMR structural model numeric ID, the residue naming scheme is **Chain ID\_residue name\_residue number**,  $\angle ADH$  represents the angle formed by acceptor (A), donor (D) and hydrogen (H) ( $\angle ADH$ ).

| PDB ID | Residue A | Atom A | Residue B | Atom B | Distance (Å) |
|--------|-----------|--------|-----------|--------|--------------|
| 1F4X   | H_LYS_147 | NZ     | L_GLU_127 | OE2    | 2.699        |
| 1F4X   | H_LYS_212 | NZ     | L_GLU_126 | OE1    | 2.421        |
| 1F4X   | H_LYS_212 | NZ     | L_GLU_126 | OE2    | 2.990        |

Table 955: Interfacial 1F4X-specific salt bridging networks analysis. In this table, a PDB file is specified with a four-letter PDB ID, except that the names of the PDB files corresponding to the single NMR structural model split from the NMR ensemble is specified with a four-letter PDB ID in addition to a hyphen followed by the single NMR structural model numeric ID, the residue naming scheme is **Chain ID\_residue name\_residue number**,  $\angle ADH$  represents the angle formed by acceptor (A), donor (D) and hydrogen (H) ( $\angle ADH$ ).



| PDB ID | Residue A | Atom A | Residue B | Atom B | Distance (Å) |
|--------|-----------|--------|-----------|--------|--------------|
| 1F4Y   | H_LYS_212 | NZ     | L_GLU_126 | OE2    | 3.609        |

Table 956: Interfacial 1F4Y-specific salt bridging networks analysis. In this table, a PDB file is specified with a four-letter PDB ID, except that the names of the PDB files corresponding to the single NMR structural model split from the NMR ensemble is specified with a four-letter PDB ID in addition to a hyphen followed by the single NMR structural model numeric ID, the residue naming scheme is **Chain ID\_residue name\_residue number**,  $\angle ADH$  represents the angle formed by acceptor (A), donor (D) and hydrogen (H) ( $\angle ADH$ ).

| PDB ID | Residue A | Atom A | Residue B | Atom B | Distance (Å) |
|--------|-----------|--------|-----------|--------|--------------|
| 1F8T   | L_ARG_96  | NH1    | H_ASP_97  | OD1    | 3.105        |
| 1F8T   | L_ARG_96  | NH1    | H_ASP_97  | OD2    | 3.586        |
| 1F8T   | L_ARG_96  | NH2    | H_ASP_97  | OD1    | 3.395        |
| 1F8T   | L_ARG_96  | NH2    | H_ASP_97  | OD2    | 2.424        |
| 1F8T   | H_LYS_221 | NZ     | L_GLU_123 | OE1    | 3.087        |

Table 957: Interfacial 1F8T-specific salt bridging networks analysis. In this table, a PDB file is specified with a four-letter PDB ID, except that the names of the PDB files corresponding to the single NMR structural model split from the NMR ensemble is specified with a four-letter PDB ID in addition to a hyphen followed by the single NMR structural model numeric ID, the residue naming scheme is **Chain ID\_residue name\_residue number**,  $\angle ADH$  represents the angle formed by acceptor (A), donor (D) and hydrogen (H) ( $\angle ADH$ ).

| PDB ID | Residue A | Atom A | Residue B | Atom B | Distance (Å) |
|--------|-----------|--------|-----------|--------|--------------|
| 1F90   | L_LYS_30  | NZ     | E_GLU_4   | OE1    | 2.620        |
| 1F90   | L_LYS_30  | NZ     | E_GLU_4   | OE2    | 2.679        |
| 1F90   | L_ARG_96  | NH2    | H_ASP_97  | OD1    | 2.720        |
| 1F90   | L_ARG_96  | NH2    | H_ASP_97  | OD2    | 2.722        |
| 1F90   | H_LYS_221 | NZ     | L_GLU_123 | OE2    | 3.675        |

Table 958: Interfacial 1F90-specific salt bridging networks analysis. In this table, a PDB file is specified with a four-letter PDB ID, except that the names of the PDB files corresponding to the single NMR structural model split from the NMR ensemble is specified with a four-letter PDB ID in addition to a hyphen followed by the single NMR structural model numeric ID, the residue naming scheme is **Chain ID\_residue name\_residue number**,  $\angle ADH$  represents the angle formed by acceptor (A), donor (D) and hydrogen (H) ( $\angle ADH$ ).

| PDB ID | Residue A | Atom A | Residue B | Atom B | Distance (Å) |
|--------|-----------|--------|-----------|--------|--------------|
| 1FBI   | H.LYS_63  | NZ     | L.ASP_1   | OD1    | 2.933        |
| 1FBI   | H.LYS_63  | NZ     | L.ASP_1   | OD2    | 2.804        |
| 1FBI   | H.LYS_217 | NZ     | L.GLU_123 | OE1    | 3.667        |
| 1FBI   | X.HIS_15  | ND1    | H.ASP_55  | OD1    | 3.190        |
| 1FBI   | X.HIS_15  | ND1    | H.ASP_55  | OD2    | 3.649        |
| 1FBI   | X.LYS_96  | NZ     | H.ASP_52  | OD2    | 2.922        |
| 1FBI   | X.LYS_97  | NZ     | H.GLU_50  | OE1    | 3.586        |
| 1FBI   | X.LYS_97  | NZ     | H.GLU_50  | OE2    | 2.898        |
| 1FBI   | Q.LYS_63  | NZ     | P.ASP_1   | OD1    | 3.020        |
| 1FBI   | Q.LYS_63  | NZ     | P.ASP_1   | OD2    | 3.850        |
| 1FBI   | Y.HIS_15  | ND1    | Q.ASP_55  | OD1    | 3.335        |
| 1FBI   | Y.HIS_15  | ND1    | Q.ASP_55  | OD2    | 3.838        |
| 1FBI   | Y.LYS_96  | NZ     | Q.ASP_52  | OD2    | 2.727        |
| 1FBI   | Y.LYS_97  | NZ     | Q.GLU_50  | OE1    | 2.828        |
| 1FBI   | Y.LYS_97  | NZ     | Q.GLU_50  | OE2    | 3.159        |

Table 959: Interfacial 1FBI-specific salt bridging networks analysis. In this table, a PDB file is specified with a four-letter PDB ID, except that the names of the PDB files corresponding to the single NMR structural model split from the NMR ensemble is specified with a four-letter PDB ID in addition to a hyphen followed by the single NMR structural model numeric ID, the residue naming scheme is **Chain ID\_residue name\_residue number**,  $\angle ADH$  represents the angle formed by acceptor (A), donor (D) and hydrogen (H) ( $\angle ADH$ ).

| PDB ID | Residue A | Atom A | Residue B | Atom B | Distance (Å) |
|--------|-----------|--------|-----------|--------|--------------|
| 1FCC   | A_LYS_370 | NZ     | B_GLU_357 | OE2    | 2.948        |
| 1FCC   | A_LYS_409 | NZ     | B_ASP_399 | OD2    | 2.859        |
| 1FCC   | A_LYS_439 | NZ     | B_GLU_356 | OE1    | 3.550        |
| 1FCC   | A_LYS_439 | NZ     | B_GLU_356 | OE2    | 3.522        |
| 1FCC   | C_LYS_28  | NZ     | A_GLU_380 | OE1    | 2.730        |
| 1FCC   | C_LYS_28  | NZ     | A_GLU_380 | OE2    | 3.982        |
| 1FCC   | C_LYS_28  | NZ     | A_GLU_382 | OE1    | 3.879        |
| 1FCC   | C_LYS_28  | NZ     | A_GLU_382 | OE2    | 2.866        |
| 1FCC   | B_LYS_370 | NZ     | A_GLU_357 | OE2    | 2.633        |
| 1FCC   | B_LYS_409 | NZ     | A_ASP_399 | OD2    | 3.360        |
| 1FCC   | B_LYS_439 | NZ     | A_GLU_356 | OE1    | 3.166        |
| 1FCC   | B_LYS_439 | NZ     | A_GLU_356 | OE2    | 3.295        |
| 1FCC   | D_LYS_28  | NZ     | B_GLU_380 | OE1    | 2.730        |
| 1FCC   | D_LYS_28  | NZ     | B_GLU_380 | OE2    | 3.982        |
| 1FCC   | D_LYS_28  | NZ     | B_GLU_382 | OE1    | 3.879        |
| 1FCC   | D_LYS_28  | NZ     | B_GLU_382 | OE2    | 2.865        |

Table 960: Interfacial 1FCC-specific salt bridging networks analysis. In this table, a PDB file is specified with a four-letter PDB ID, except that the names of the PDB files corresponding to the single NMR structural model split from the NMR ensemble is specified with a four-letter PDB ID in addition to a hyphen followed by the single NMR structural model numeric ID, the residue naming scheme is **Chain ID\_residue name\_residue number**,  $\angle ADH$  represents the angle formed by acceptor (A), donor (D) and hydrogen (H) ( $\angle ADH$ ).

| PDB ID | Residue A | Atom A | Residue B | Atom B | Distance (Å) |
|--------|-----------|--------|-----------|--------|--------------|
| 1FDL   | L_ARG_96  | NH1    | H_GLU_98  | OE1    | 3.307        |
| 1FDL   | L_ARG_96  | NH1    | H_GLU_98  | OE2    | 2.802        |
| 1FDL   | L_ARG_96  | NH2    | H_GLU_98  | OE1    | 2.754        |
| 1FDL   | L_ARG_96  | NH2    | H_GLU_98  | OE2    | 3.656        |
| 1FDL   | H_LYS_211 | NZ     | L_GLU_123 | OE1    | 2.896        |
| 1FDL   | H_LYS_211 | NZ     | L_GLU_123 | OE2    | 3.291        |

Table 961: Interfacial 1FDL-specific salt bridging networks analysis. In this table, a PDB file is specified with a four-letter PDB ID, except that the names of the PDB files corresponding to the single NMR structural model split from the NMR ensemble is specified with a four-letter PDB ID in addition to a hyphen followed by the single NMR structural model numeric ID, the residue naming scheme is **Chain ID\_residue name\_residue number**,  $\angle ADH$  represents the angle formed by acceptor (A), donor (D) and hydrogen (H) ( $\angle ADH$ ).

| PDB ID | Residue A | Atom A | Residue B | Atom B | Distance (Å) |
|--------|-----------|--------|-----------|--------|--------------|
| 1FJ1   | A_ARG_188 | NH2    | E_GLU_196 | OE2    | 3.475        |
| 1FJ1   | A_HIS_189 | ND1    | E_GLU_196 | OE1    | 3.723        |
| 1FJ1   | A_HIS_189 | NE2    | E_GLU_196 | OE1    | 3.502        |
| 1FJ1   | B_ARG_47  | NH1    | A_ASP_1   | OD1    | 3.251        |
| 1FJ1   | B_ARG_47  | NH2    | A_ASP_1   | OD1    | 2.492        |
| 1FJ1   | C_HIS_189 | NE2    | F_GLU_196 | OE1    | 3.808        |
| 1FJ1   | D_ARG_47  | NH1    | C_ASP_1   | OD1    | 3.296        |
| 1FJ1   | D_ARG_47  | NH2    | C_ASP_1   | OD1    | 2.800        |

Table 962: Interfacial 1FJ1-specific salt bridging networks analysis. In this table, a PDB file is specified with a four-letter PDB ID, except that the names of the PDB files corresponding to the single NMR structural model split from the NMR ensemble is specified with a four-letter PDB ID in addition to a hyphen followed by the single NMR structural model numeric ID, the residue naming scheme is **Chain ID\_residue name\_residue number**,  $\angle ADH$  represents the angle formed by acceptor (A), donor (D) and hydrogen (H) ( $\angle ADH$ ).

| PDB ID | Residue A | Atom A | Residue B | Atom B | Distance (Å) |
|--------|-----------|--------|-----------|--------|--------------|
| 1FRG   | L_LYS_213 | NZ     | H_ASP_354 | OD1    | 3.324        |
| 1FRG   | H_ARG_316 | NH1    | L_ASP_97  | OD1    | 2.879        |
| 1FRG   | H_ARG_316 | NH2    | L_ASP_97  | OD1    | 3.078        |
| 1FRG   | H_ARG_316 | NH2    | P_ASP_5   | OD2    | 2.959        |
| 1FRG   | H_LYS_322 | NZ     | L_GLU_61  | OE1    | 2.861        |
| 1FRG   | H_LYS_322 | NZ     | L_GLU_61  | OE2    | 3.997        |
| 1FRG   | H_LYS_432 | NZ     | L_GLU_129 | OE1    | 3.086        |
| 1FRG   | H_LYS_432 | NZ     | L_GLU_129 | OE2    | 3.769        |

Table 963: Interfacial 1FRG-specific salt bridging networks analysis. In this table, a PDB file is specified with a four-letter PDB ID, except that the names of the PDB files corresponding to the single NMR structural model split from the NMR ensemble is specified with a four-letter PDB ID in addition to a hyphen followed by the single NMR structural model numeric ID, the residue naming scheme is **Chain ID\_residue name\_residue number**,  $\angle ADH$  represents the angle formed by acceptor (A), donor (D) and hydrogen (H) ( $\angle ADH$ ).



| PDB ID | Residue A | Atom A | Residue B | Atom B | Distance (Å) |
|--------|-----------|--------|-----------|--------|--------------|
| 1FUJ   | A_LYS_187 | NZ     | B_GLU_97  | OE1    | 3.506        |
| 1FUJ   | B_ARG_143 | NH1    | A_ASP_61  | OD2    | 3.455        |
| 1FUJ   | B_LYS_187 | NZ     | A_GLU_97  | OE1    | 3.870        |
| 1FUJ   | C_ARG_143 | NH2    | D_ASP_61  | OD1    | 3.394        |
| 1FUJ   | C_ARG_143 | NH2    | D_ASP_61  | OD2    | 3.428        |
| 1FUJ   | C_LYS_187 | NZ     | D_GLU_97  | OE2    | 2.917        |
| 1FUJ   | D_HIS_147 | ND1    | C_GLU_97  | OE1    | 3.734        |
| 1FUJ   | D_LYS_187 | NZ     | C_GLU_97  | OE1    | 3.930        |

Table 964: Interfacial 1FUJ-specific salt bridging networks analysis. In this table, a PDB file is specified with a four-letter PDB ID, except that the names of the PDB files corresponding to the single NMR structural model split from the NMR ensemble is specified with a four-letter PDB ID in addition to a hyphen followed by the single NMR structural model numeric ID, the residue naming scheme is **Chain ID\_residue name\_residue number**,  $\angle ADH$  represents the angle formed by acceptor (A), donor (D) and hydrogen (H) ( $\angle ADH$ ).

| PDB ID | Residue A | Atom A | Residue B | Atom B | Distance (Å) |
|--------|-----------|--------|-----------|--------|--------------|
| 1FVD   | A_ARG_18  | NH1    | C_ASP_70  | OD2    | 3.361        |
| 1FVD   | B_LYS_216 | NZ     | A_GLU_123 | OE2    | 3.426        |
| 1FVD   | C_ARG_18  | NH1    | A_ASP_70  | OD2    | 3.065        |
| 1FVD   | D_LYS_216 | NZ     | C_GLU_123 | OE1    | 2.737        |

Table 965: Interfacial 1FVD-specific salt bridging networks analysis. In this table, a PDB file is specified with a four-letter PDB ID, except that the names of the PDB files corresponding to the single NMR structural model split from the NMR ensemble is specified with a four-letter PDB ID in addition to a hyphen followed by the single NMR structural model numeric ID, the residue naming scheme is **Chain ID\_residue name\_residue number**,  $\angle ADH$  represents the angle formed by acceptor (A), donor (D) and hydrogen (H) ( $\angle ADH$ ).

| PDB ID | Residue A | Atom A | Residue B | Atom B | Distance (Å) |
|--------|-----------|--------|-----------|--------|--------------|
| 1FVE   | A_ARG_18  | NH1    | C_ASP_70  | OD1    | 3.613        |
| 1FVE   | A_ARG_18  | NH1    | C_ASP_70  | OD2    | 3.316        |
| 1FVE   | B_LYS_216 | NZ     | A_GLU_123 | OE2    | 3.328        |

Table 966: Interfacial 1FVE-specific salt bridging networks analysis. In this table, a PDB file is specified with a four-letter PDB ID, except that the names of the PDB files corresponding to the single NMR structural model split from the NMR ensemble is specified with a four-letter PDB ID in addition to a hyphen followed by the single NMR structural model numeric ID, the residue naming scheme is **Chain ID\_residue name\_residue number**,  $\angle ADH$  represents the angle formed by acceptor (A), donor (D) and hydrogen (H) ( $\angle ADH$ ).

| PDB ID | Residue A | Atom A | Residue B | Atom B | Distance (Å) |
|--------|-----------|--------|-----------|--------|--------------|
| 1G6V   | K_ARG_907 | NH1    | A_GLU_187 | OE2    | 2.962        |
| 1G6V   | K_ARG_909 | NH1    | A_GLU_187 | OE1    | 3.909        |
| 1G6V   | K_ARG_909 | NH2    | A_GLU_187 | OE1    | 3.477        |

Table 967: Interfacial 1G6V-specific salt bridging networks analysis. In this table, a PDB file is specified with a four-letter PDB ID, except that the names of the PDB files corresponding to the single NMR structural model split from the NMR ensemble is specified with a four-letter PDB ID in addition to a hyphen followed by the single NMR structural model numeric ID, the residue naming scheme is **Chain ID\_residue name\_residue number**,  $\angle ADH$  represents the angle formed by acceptor (A), donor (D) and hydrogen (H) ( $\angle ADH$ ).

| PDB ID | Residue A | Atom A | Residue B | Atom B | Distance (Å) |
|--------|-----------|--------|-----------|--------|--------------|
| 1G7H   | A_ARG_96  | NH1    | B_GLU_98  | OE1    | 2.788        |
| 1G7H   | A_ARG_96  | NH1    | B_GLU_98  | OE2    | 3.317        |
| 1G7H   | A_ARG_96  | NH2    | B_GLU_98  | OE1    | 3.736        |
| 1G7H   | A_ARG_96  | NH2    | B_GLU_98  | OE2    | 2.819        |

Table 968: Interfacial 1G7H-specific salt bridging networks analysis. In this table, a PDB file is specified with a four-letter PDB ID, except that the names of the PDB files corresponding to the single NMR structural model split from the NMR ensemble is specified with a four-letter PDB ID in addition to a hyphen followed by the single NMR structural model numeric ID, the residue naming scheme is **Chain ID\_residue name\_residue number**,  $\angle ADH$  represents the angle formed by acceptor (A), donor (D) and hydrogen (H) ( $\angle ADH$ ).

| PDB ID | Residue A | Atom A | Residue B | Atom B | Distance (Å) |
|--------|-----------|--------|-----------|--------|--------------|
| 1G7I   | A_ARG_96  | NH1    | B_GLU_98  | OE1    | 2.881        |
| 1G7I   | A_ARG_96  | NH1    | B_GLU_98  | OE2    | 3.589        |
| 1G7I   | A_ARG_96  | NH2    | B_GLU_98  | OE1    | 3.599        |
| 1G7I   | A_ARG_96  | NH2    | B_GLU_98  | OE2    | 2.841        |

Table 969: Interfacial 1G7I-specific salt bridging networks analysis. In this table, a PDB file is specified with a four-letter PDB ID, except that the names of the PDB files corresponding to the single NMR structural model split from the NMR ensemble is specified with a four-letter PDB ID in addition to a hyphen followed by the single NMR structural model numeric ID, the residue naming scheme is **Chain ID\_residue name\_residue number**,  $\angle ADH$  represents the angle formed by acceptor (A), donor (D) and hydrogen (H) ( $\angle ADH$ ).

| PDB ID | Residue A | Atom A | Residue B | Atom B | Distance (Å) |
|--------|-----------|--------|-----------|--------|--------------|
| 1G7J   | A_ARG_96  | NH1    | B_GLU_98  | OE1    | 2.834        |
| 1G7J   | A_ARG_96  | NH1    | B_GLU_98  | OE2    | 3.535        |
| 1G7J   | A_ARG_96  | NH2    | B_GLU_98  | OE1    | 3.524        |
| 1G7J   | A_ARG_96  | NH2    | B_GLU_98  | OE2    | 2.694        |

Table 970: Interfacial 1G7J-specific salt bridging networks analysis. In this table, a PDB file is specified with a four-letter PDB ID, except that the names of the PDB files corresponding to the single NMR structural model split from the NMR ensemble is specified with a four-letter PDB ID in addition to a hyphen followed by the single NMR structural model numeric ID, the residue naming scheme is **Chain ID\_residue name\_residue number**,  $\angle ADH$  represents the angle formed by acceptor (A), donor (D) and hydrogen (H) ( $\angle ADH$ ).

| PDB ID | Residue A | Atom A | Residue B | Atom B | Distance (Å) |
|--------|-----------|--------|-----------|--------|--------------|
| 1G7L   | A_ARG_96  | NH1    | B_GLU_98  | OE1    | 2.744        |
| 1G7L   | A_ARG_96  | NH1    | B_GLU_98  | OE2    | 3.483        |
| 1G7L   | A_ARG_96  | NH2    | B_GLU_98  | OE1    | 3.535        |
| 1G7L   | A_ARG_96  | NH2    | B_GLU_98  | OE2    | 2.761        |

Table 971: Interfacial 1G7L-specific salt bridging networks analysis. In this table, a PDB file is specified with a four-letter PDB ID, except that the names of the PDB files corresponding to the single NMR structural model split from the NMR ensemble is specified with a four-letter PDB ID in addition to a hyphen followed by the single NMR structural model numeric ID, the residue naming scheme is **Chain ID\_residue name\_residue number**,  $\angle ADH$  represents the angle formed by acceptor (A), donor (D) and hydrogen (H) ( $\angle ADH$ ).



| PDB ID | Residue A | Atom A | Residue B | Atom B | Distance (Å) |
|--------|-----------|--------|-----------|--------|--------------|
| 1G7M   | A_ARG_96  | NH1    | B_GLU_98  | OE1    | 2.792        |
| 1G7M   | A_ARG_96  | NH1    | B_GLU_98  | OE2    | 3.493        |
| 1G7M   | A_ARG_96  | NH2    | B_GLU_98  | OE1    | 3.544        |
| 1G7M   | A_ARG_96  | NH2    | B_GLU_98  | OE2    | 2.732        |

Table 972: Interfacial 1G7M-specific salt bridging networks analysis. In this table, a PDB file is specified with a four-letter PDB ID, except that the names of the PDB files corresponding to the single NMR structural model split from the NMR ensemble is specified with a four-letter PDB ID in addition to a hyphen followed by the single NMR structural model numeric ID, the residue naming scheme is **Chain ID\_residue name\_residue number**,  $\angle ADH$  represents the angle formed by acceptor (A), donor (D) and hydrogen (H) ( $\angle ADH$ ).

| PDB ID | Residue A | Atom A | Residue B | Atom B | Distance (Å) |
|--------|-----------|--------|-----------|--------|--------------|
| 1G9M   | G_ARG_419 | NH1    | H_GLU_103 | OE2    | 3.773        |
| 1G9M   | G_ARG_419 | NH2    | H_GLU_103 | OE2    | 2.762        |
| 1G9M   | G_ARG_419 | NH2    | H_GLU_108 | OE2    | 3.794        |
| 1G9M   | C_LYS_29  | NZ     | G_ASP_279 | OD2    | 3.077        |
| 1G9M   | C_ARG_59  | NH1    | G_ASP_368 | OD1    | 3.576        |
| 1G9M   | C_ARG_59  | NH1    | G_ASP_368 | OD2    | 3.197        |
| 1G9M   | C_ARG_59  | NH2    | G_ASP_368 | OD1    | 2.550        |
| 1G9M   | C_ARG_59  | NH2    | G_ASP_368 | OD2    | 3.360        |

Table 973: Interfacial 1G9M-specific salt bridging networks analysis. In this table, a PDB file is specified with a four-letter PDB ID, except that the names of the PDB files corresponding to the single NMR structural model split from the NMR ensemble is specified with a four-letter PDB ID in addition to a hyphen followed by the single NMR structural model numeric ID, the residue naming scheme is **Chain ID\_residue name\_residue number**,  $\angle ADH$  represents the angle formed by acceptor (A), donor (D) and hydrogen (H) ( $\angle ADH$ ).

| PDB ID | Residue A | Atom A | Residue B | Atom B | Distance (Å) |
|--------|-----------|--------|-----------|--------|--------------|
| 1G9N   | G_ARG_419 | NH1    | H_GLU_106 | OE1    | 2.930        |
| 1G9N   | G_ARG_419 | NH1    | H_GLU_106 | OE2    | 3.665        |
| 1G9N   | G_ARG_419 | NH2    | H_GLU_103 | OE1    | 2.300        |
| 1G9N   | G_ARG_419 | NH2    | H_GLU_106 | OE2    | 3.990        |
| 1G9N   | C_LYS_35  | NZ     | G_ASP_457 | OD2    | 3.608        |
| 1G9N   | C_ARG_59  | NH1    | G_ASP_368 | OD1    | 3.032        |
| 1G9N   | C_ARG_59  | NH1    | G_ASP_368 | OD2    | 3.045        |
| 1G9N   | C_ARG_59  | NH2    | G_ASP_368 | OD1    | 2.609        |
| 1G9N   | C_ARG_59  | NH2    | G_ASP_368 | OD2    | 3.355        |
| 1G9N   | H_LYS_224 | NZ     | L_GLU_125 | OE1    | 3.507        |
| 1G9N   | H_LYS_224 | NZ     | L_GLU_125 | OE2    | 3.538        |
| 1G9N   | H_LYS_229 | NZ     | L_ASP_124 | OD2    | 3.557        |

Table 974: Interfacial 1G9N-specific salt bridging networks analysis. In this table, a PDB file is specified with a four-letter PDB ID, except that the names of the PDB files corresponding to the single NMR structural model split from the NMR ensemble is specified with a four-letter PDB ID in addition to a hyphen followed by the single NMR structural model numeric ID, the residue naming scheme is **Chain ID residue name residue number**,  $\angle ADH$  represents the angle formed by acceptor (A), donor (D) and hydrogen (H) ( $\angle ADH$ ).

| PDB ID | Residue A | Atom A | Residue B | Atom B | Distance (Å) |
|--------|-----------|--------|-----------|--------|--------------|
| 1GC1   | G_ARG_419 | NH1    | H_GLU_106 | OE1    | 2.761        |
| 1GC1   | G_ARG_419 | NH2    | H_GLU_106 | OE1    | 2.942        |
| 1GC1   | G_ARG_419 | NH2    | H_GLU_108 | OE1    | 3.887        |
| 1GC1   | G_ARG_419 | NH2    | H_GLU_108 | OE2    | 3.401        |
| 1GC1   | C_LYS_29  | NZ     | G_ASP_279 | OD1    | 2.748        |
| 1GC1   | C_ARG_59  | NH1    | G_ASP_368 | OD1    | 2.780        |
| 1GC1   | C_ARG_59  | NH1    | G_ASP_368 | OD2    | 3.645        |
| 1GC1   | C_ARG_59  | NH2    | G_ASP_368 | OD1    | 3.062        |
| 1GC1   | C_ARG_59  | NH2    | G_ASP_368 | OD2    | 2.481        |
| 1GC1   | H_LYS_224 | NZ     | L_GLU_125 | OE1    | 2.581        |
| 1GC1   | H_LYS_224 | NZ     | L_GLU_125 | OE2    | 3.963        |

Table 975: Interfacial 1GC1-specific salt bridging networks analysis. In this table, a PDB file is specified with a four-letter PDB ID, except that the names of the PDB files corresponding to the single NMR structural model split from the NMR ensemble is specified with a four-letter PDB ID in addition to a hyphen followed by the single NMR structural model numeric ID, the residue naming scheme is **Chain ID\_residue name\_residue number**,  $\angle ADH$  represents the angle formed by acceptor (A), donor (D) and hydrogen (H) ( $\angle ADH$ ).

| PDB ID | Residue A | Atom A | Residue B | Atom B | Distance (Å) |
|--------|-----------|--------|-----------|--------|--------------|
| 1GGB   | H_ARG_58  | NH1    | L_ASP_94  | OD1    | 3.623        |
| 1GGB   | H_ARG_58  | NH2    | L_ASP_94  | OD1    | 2.873        |
| 1GGB   | H_LYS_221 | NZ     | L_GLU_123 | OE1    | 2.690        |
| 1GGB   | H_LYS_221 | NZ     | L_GLU_123 | OE2    | 3.205        |

Table 976: Interfacial 1GGB-specific salt bridging networks analysis. In this table, a PDB file is specified with a four-letter PDB ID, except that the names of the PDB files corresponding to the single NMR structural model split from the NMR ensemble is specified with a four-letter PDB ID in addition to a hyphen followed by the single NMR structural model numeric ID, the residue naming scheme is **Chain ID\_residue name\_residue number**,  $\angle ADH$  represents the angle formed by acceptor (A), donor (D) and hydrogen (H) ( $\angle ADH$ ).

| PDB ID | Residue A | Atom A | Residue B | Atom B | Distance (Å) |
|--------|-----------|--------|-----------|--------|--------------|
| 1GGC   | H_ARG_58  | NH2    | L_ASP_94  | OD1    | 3.221        |
| 1GGC   | H_LYS_221 | NZ     | L_GLU_123 | OE1    | 2.942        |

Table 977: Interfacial 1GGC-specific salt bridging networks analysis. In this table, a PDB file is specified with a four-letter PDB ID, except that the names of the PDB files corresponding to the single NMR structural model split from the NMR ensemble is specified with a four-letter PDB ID in addition to a hyphen followed by the single NMR structural model numeric ID, the residue naming scheme is **Chain ID\_residue name\_residue number**,  $\angle ADH$  represents the angle formed by acceptor (A), donor (D) and hydrogen (H) ( $\angle ADH$ ).

| PDB ID | Residue A | Atom A | Residue B | Atom B | Distance (Å) |
|--------|-----------|--------|-----------|--------|--------------|
| 1GGI   | H_ARG_58  | NH2    | L_ASP_94  | OD2    | 3.749        |
| 1GGI   | H_LYS_221 | NZ     | L_GLU_123 | OE2    | 3.900        |
| 1GGI   | P_LYS_312 | NZ     | H_ASP_54  | OD1    | 2.914        |
| 1GGI   | P_LYS_312 | NZ     | H_ASP_54  | OD2    | 3.188        |
| 1GGI   | P_LYS_312 | NZ     | H_ASP_56  | OD1    | 2.830        |
| 1GGI   | P_LYS_312 | NZ     | H_ASP_56  | OD2    | 3.728        |
| 1GGI   | J_ARG_58  | NH2    | M_ASP_94  | OD2    | 3.966        |
| 1GGI   | J_HIS_172 | NE2    | M_ASP_167 | OD2    | 3.287        |
| 1GGI   | J_LYS_221 | NZ     | M_GLU_123 | OE1    | 3.528        |
| 1GGI   | J_LYS_221 | NZ     | M_GLU_123 | OE2    | 3.781        |
| 1GGI   | Q_LYS_312 | NZ     | J_ASP_54  | OD1    | 3.299        |
| 1GGI   | Q_LYS_312 | NZ     | J_ASP_54  | OD2    | 2.967        |
| 1GGI   | Q_LYS_312 | NZ     | J_ASP_56  | OD1    | 3.964        |
| 1GGI   | Q_LYS_312 | NZ     | J_ASP_56  | OD2    | 3.120        |

Table 978: Interfacial 1GGI-specific salt bridging networks analysis. In this table, a PDB file is specified with a four-letter PDB ID, except that the names of the PDB files corresponding to the single NMR structural model split from the NMR ensemble is specified with a four-letter PDB ID in addition to a hyphen followed by the single NMR structural model numeric ID, the residue naming scheme is **Chain ID\_residue name\_residue number**,  $\angle ADH$  represents the angle formed by acceptor (A), donor (D) and hydrogen (H) ( $\angle ADH$ ).

| PDB ID | Residue A | Atom A | Residue B | Atom B | Distance (Å) |
|--------|-----------|--------|-----------|--------|--------------|
| 1GPO   | L_LYS_54  | NZ     | H_ASP_101 | OD1    | 2.768        |
| 1GPO   | L_LYS_54  | NZ     | H_ASP_101 | OD2    | 3.525        |
| 1GPO   | H_LYS_208 | NZ     | L_GLU_128 | OE2    | 3.848        |
| 1GPO   | M_LYS_54  | NZ     | L_ASP_101 | OD1    | 3.704        |
| 1GPO   | I_LYS_208 | NZ     | M_GLU_128 | OE2    | 3.367        |

Table 979: Interfacial 1GPO-specific salt bridging networks analysis. In this table, a PDB file is specified with a four-letter PDB ID, except that the names of the PDB files corresponding to the single NMR structural model split from the NMR ensemble is specified with a four-letter PDB ID in addition to a hyphen followed by the single NMR structural model numeric ID, the residue naming scheme is **Chain ID\_residue name\_residue number**,  $\angle ADH$  represents the angle formed by acceptor (A), donor (D) and hydrogen (H) ( $\angle ADH$ ).



| PDB ID | Residue A | Atom A | Residue B | Atom B | Distance (Å) |
|--------|-----------|--------|-----------|--------|--------------|
| 1HEZ   | A_ARG_24  | NH1    | C_ASP_70  | OD1    | 3.567        |
| 1HEZ   | A_ARG_24  | NH1    | C_ASP_70  | OD2    | 3.209        |
| 1HEZ   | B_LYS_219 | NZ     | A_GLU_123 | OE1    | 2.923        |
| 1HEZ   | B_LYS_219 | NZ     | A_GLU_123 | OE2    | 2.722        |
| 1HEZ   | C_ARG_24  | NH1    | E_ASP_855 | OD1    | 2.717        |
| 1HEZ   | C_LYS_107 | NZ     | E_ASP_867 | OD1    | 2.620        |

Table 980: Interfacial 1HEZ-specific salt bridging networks analysis. In this table, a PDB file is specified with a four-letter PDB ID, except that the names of the PDB files corresponding to the single NMR structural model split from the NMR ensemble is specified with a four-letter PDB ID in addition to a hyphen followed by the single NMR structural model numeric ID, the residue naming scheme is **Chain ID\_residue name\_residue number**,  $\angle ADH$  represents the angle formed by acceptor (A), donor (D) and hydrogen (H) ( $\angle ADH$ ).

| PDB ID | Residue A | Atom A | Residue B | Atom B | Distance (Å) |
|--------|-----------|--------|-----------|--------|--------------|
| 1HGD   | A_LYS_27  | NZ     | B_GLU_97  | OE1    | 2.787        |
| 1HGD   | A_LYS_27  | NZ     | B_GLU_97  | OE2    | 2.801        |
| 1HGD   | A_ARG_109 | NH2    | B_GLU_67  | OE1    | 3.474        |
| 1HGD   | A_ARG_109 | NH2    | B_GLU_67  | OE2    | 2.826        |
| 1HGD   | A_LYS_238 | NZ     | F_GLU_72  | OE1    | 2.925        |
| 1HGD   | A_LYS_238 | NZ     | F_GLU_72  | OE2    | 2.815        |
| 1HGD   | A_ARG_269 | NH1    | B_GLU_67  | OE1    | 2.758        |
| 1HGD   | A_ARG_269 | NH2    | B_GLU_67  | OE1    | 3.754        |
| 1HGD   | A_LYS_299 | NZ     | B_GLU_69  | OE2    | 2.769        |
| 1HGD   | A_LYS_310 | NZ     | B_ASP_86  | OD1    | 2.861        |
| 1HGD   | A_LYS_310 | NZ     | B_ASP_90  | OD1    | 2.569        |
| 1HGD   | A_LYS_326 | NZ     | B_GLU_15  | OE1    | 3.037        |
| 1HGD   | A_LYS_326 | NZ     | B_GLU_15  | OE2    | 2.743        |
| 1HGD   | B_ARG_25  | NH1    | A_GLU_325 | OE2    | 3.743        |
| 1HGD   | B_ARG_25  | NH2    | A_GLU_325 | OE2    | 3.016        |
| 1HGD   | B_ARG_54  | NH1    | F_GLU_97  | OE2    | 3.275        |
| 1HGD   | B_ARG_54  | NH2    | F_GLU_97  | OE2    | 2.774        |
| 1HGD   | B_LYS_62  | NZ     | F_ASP_86  | OD1    | 2.852        |
| 1HGD   | B_LYS_62  | NZ     | F_ASP_86  | OD2    | 2.612        |
| 1HGD   | B_LYS_62  | NZ     | F_ASP_90  | OD1    | 3.620        |
| 1HGD   | B_LYS_62  | NZ     | F_ASP_90  | OD2    | 2.727        |
| 1HGD   | B_ARG_76  | NH1    | D_GLU_74  | OE1    | 3.558        |
| 1HGD   | B_ARG_76  | NH1    | D_GLU_74  | OE2    | 2.838        |
| 1HGD   | B_ARG_76  | NH2    | D_GLU_74  | OE1    | 2.751        |
| 1HGD   | B_ARG_76  | NH2    | D_GLU_74  | OE2    | 3.529        |
| 1HGD   | B_ARG_76  | NH2    | D_GLU_81  | OE1    | 2.707        |
| 1HGD   | B_ARG_76  | NH2    | D_GLU_81  | OE2    | 3.498        |
| 1HGD   | B_ARG_123 | NH2    | F_GLU_132 | OE1    | 3.169        |
| 1HGD   | B_ARG_124 | NH2    | F_GLU_132 | OE1    | 3.011        |
| 1HGD   | B_ARG_124 | NH2    | F_GLU_132 | OE2    | 3.294        |
| 1HGD   | B_ARG_127 | NH1    | F_GLU_131 | OE1    | 2.471        |
| 1HGD   | B_ARG_163 | NH2    | F_GLU_131 | OE1    | 2.583        |
| 1HGD   | B_ARG_163 | NH2    | F_GLU_131 | OE2    | 2.596        |
| 1HGD   | B_ARG_170 | NH1    | D_GLU_128 | OE1    | 3.354        |
| 1HGD   | B_ARG_170 | NH1    | D_GLU_128 | OE2    | 3.628        |
| 1HGD   | B_LYS_174 | NZ     | D_ASP_164 | OD1    | 2.787        |
| 1HGD   | B_LYS_174 | NZ     | D_ASP_164 | OD2    | 2.517        |
| 1HGD   | C_LYS_27  | NZ     | D_GLU_97  | OE1    | 2.760        |
| 1HGD   | C_LYS_27  | NZ     | D_GLU_97  | OE2    | 2.799        |
| 1HGD   | C_ARG_109 | NH2    | D_GLU_67  | OE1    | 3.480        |
| 1HGD   | C_ARG_109 | NH2    | D_GLU_67  | OE2    | 2.867        |
| 1HGD   | C_LYS_238 | NZ     | B_GLU_72  | OE1    | 2.801        |
| 1HGD   | C_LYS_238 | NZ     | B_GLU_72  | OE2    | 2.746        |
| 1HGD   | C_ARG_269 | NH1    | D_GLU_67  | OE1    | 2.720        |
| 1HGD   | C_ARG_269 | NH2    | D_GLU_67  | OE1    | 3.733        |
| 1HGD   | C_LYS_299 | NZ     | D_GLU_69  | OE2    | 2.796        |
| 1HGD   | C_LYS_310 | NZ     | D_ASP_86  | OD1    | 2.878        |
| 1HGD   | C_LYS_310 | NZ     | D_ASP_90  | OD1    | 2.526        |
| 1HGD   | C_LYS_326 | NZ     | D_GLU_15  | OE1    | 2.784        |
| 1HGD   | C_LYS_326 | NZ     | D_GLU_15  | OE2    | 3.881        |
| 1HGD   | D_ARG_54  | NH1    | B_GLU_97  | OE2    | 3.293        |
| 1HGD   | D_ARG_54  | NH2    | B_GLU_97  | OE2    | 2.793        |
| 1HGD   | D_LYS_62  | NZ     | B_ASP_86  | OD1    | 2.884        |
| 1HGD   | D_LYS_62  | NZ     | B_ASP_86  | OD2    | 2.567        |
| 1HGD   | D_LYS_62  | NZ     | B_ASP_90  | OD1    | 3.576        |
| 1HGD   | D_LYS_62  | NZ     | B_ASP_90  | OD2    | 2.617        |
| 1HGD   | D_ARG_76  | NH1    | F_GLU_74  | OE1    | 3.379        |

|      |           |     |           |     |       |
|------|-----------|-----|-----------|-----|-------|
| 1HGD | D_ARG_76  | NH1 | F_GLU_74  | OE2 | 2.785 |
| 1HGD | D_ARG_76  | NH2 | F_GLU_74  | OE1 | 2.687 |
| 1HGD | D_ARG_76  | NH2 | F_GLU_74  | OE2 | 3.593 |
| 1HGD | D_ARG_76  | NH2 | F_GLU_81  | OE1 | 2.649 |
| 1HGD | D_ARG_76  | NH2 | F_GLU_81  | OE2 | 3.537 |
| 1HGD | D_ARG_123 | NH2 | B_GLU_132 | OE1 | 3.120 |
| 1HGD | D_ARG_124 | NH2 | B_GLU_132 | OE1 | 2.998 |
| 1HGD | D_ARG_124 | NH2 | B_GLU_132 | OE2 | 3.261 |
| 1HGD | D_ARG_127 | NH1 | B_GLU_131 | OE1 | 2.513 |
| 1HGD | D_ARG_163 | NH2 | B_GLU_131 | OE1 | 2.583 |
| 1HGD | D_ARG_163 | NH2 | B_GLU_131 | OE2 | 2.616 |
| 1HGD | D_ARG_170 | NH1 | F_GLU_128 | OE1 | 3.487 |
| 1HGD | D_ARG_170 | NH1 | F_GLU_128 | OE2 | 3.741 |
| 1HGD | D_LYS_174 | NZ  | F_ASP_164 | OD1 | 2.806 |
| 1HGD | D_LYS_174 | NZ  | F_ASP_164 | OD2 | 2.686 |
| 1HGD | E_LYS_27  | NZ  | F_GLU_97  | OE1 | 2.794 |
| 1HGD | E_LYS_27  | NZ  | F_GLU_97  | OE2 | 2.792 |
| 1HGD | E_ARG_109 | NH2 | F_GLU_67  | OE1 | 3.474 |
| 1HGD | E_ARG_109 | NH2 | F_GLU_67  | OE2 | 2.818 |
| 1HGD | E_LYS_238 | NZ  | D_GLU_72  | OE1 | 2.872 |
| 1HGD | E_LYS_238 | NZ  | D_GLU_72  | OE2 | 2.843 |
| 1HGD | E_ARG_269 | NH1 | F_GLU_67  | OE1 | 2.732 |
| 1HGD | E_ARG_269 | NH2 | F_GLU_67  | OE1 | 3.760 |
| 1HGD | E_LYS_299 | NZ  | F_GLU_69  | OE2 | 2.767 |
| 1HGD | E_LYS_310 | NZ  | F_ASP_86  | OD1 | 2.884 |
| 1HGD | E_LYS_310 | NZ  | F_ASP_90  | OD1 | 2.533 |
| 1HGD | E_LYS_326 | NZ  | F_GLU_15  | OE1 | 2.967 |
| 1HGD | E_LYS_326 | NZ  | F_GLU_15  | OE2 | 3.203 |
| 1HGD | F_ARG_54  | NH1 | D_GLU_97  | OE2 | 3.306 |
| 1HGD | F_ARG_54  | NH2 | D_GLU_97  | OE2 | 2.719 |
| 1HGD | F_LYS_62  | NZ  | D_ASP_86  | OD1 | 2.854 |
| 1HGD | F_LYS_62  | NZ  | D_ASP_86  | OD2 | 2.590 |
| 1HGD | F_LYS_62  | NZ  | D_ASP_90  | OD1 | 3.656 |
| 1HGD | F_LYS_62  | NZ  | D_ASP_90  | OD2 | 2.713 |
| 1HGD | F_HIS_64  | NE2 | D_ASP_79  | OD2 | 3.996 |
| 1HGD | F_ARG_76  | NH1 | B_GLU_74  | OE1 | 3.419 |
| 1HGD | F_ARG_76  | NH1 | B_GLU_74  | OE2 | 2.766 |
| 1HGD | F_ARG_76  | NH2 | B_GLU_74  | OE1 | 2.711 |
| 1HGD | F_ARG_76  | NH2 | B_GLU_74  | OE2 | 3.568 |
| 1HGD | F_ARG_76  | NH2 | B_GLU_81  | OE1 | 2.637 |
| 1HGD | F_ARG_76  | NH2 | B_GLU_81  | OE2 | 3.557 |
| 1HGD | F_ARG_123 | NH2 | D_GLU_132 | OE1 | 3.156 |
| 1HGD | F_ARG_124 | NH2 | D_GLU_132 | OE1 | 3.098 |
| 1HGD | F_ARG_124 | NH2 | D_GLU_132 | OE2 | 3.292 |
| 1HGD | F_ARG_127 | NH1 | D_GLU_131 | OE1 | 2.558 |
| 1HGD | F_ARG_163 | NH2 | D_GLU_131 | OE1 | 2.583 |
| 1HGD | F_ARG_163 | NH2 | D_GLU_131 | OE2 | 2.699 |
| 1HGD | F_ARG_170 | NH1 | B_GLU_128 | OE1 | 3.398 |
| 1HGD | F_ARG_170 | NH1 | B_GLU_128 | OE2 | 3.736 |
| 1HGD | F_LYS_174 | NZ  | B_ASP_164 | OD1 | 2.545 |
| 1HGD | F_LYS_174 | NZ  | B_ASP_164 | OD2 | 2.838 |

---

Table 981: Interfacial 1HGD-specific salt bridging networks analysis. In this table, a PDB file is specified with a four-letter PDB ID, except that the names of the PDB files corresponding to the single NMR structural model split from the NMR ensemble is specified with a four-letter PDB ID in addition to a hyphen followed by the single NMR structural model numeric ID, the residue naming scheme is **Chain ID\_residue name\_residue number**,  $\angle ADH$  represents the angle formed by acceptor (A), donor (D) and hydrogen (H) ( $\angle ADH$ ).

| PDB ID | Residue A | Atom A | Residue B | Atom B | Distance (Å) |
|--------|-----------|--------|-----------|--------|--------------|
| 1HGE   | A_LYS_27  | NZ     | B_GLU_97  | OE1    | 2.881        |
| 1HGE   | A_LYS_27  | NZ     | B_GLU_97  | OE2    | 2.803        |
| 1HGE   | A_ARG_109 | NH2    | B_GLU_67  | OE1    | 3.666        |
| 1HGE   | A_ARG_109 | NH2    | B_GLU_67  | OE2    | 2.737        |
| 1HGE   | A_LYS_238 | NZ     | F_GLU_72  | OE1    | 2.915        |
| 1HGE   | A_LYS_238 | NZ     | F_GLU_72  | OE2    | 2.732        |
| 1HGE   | A_ARG_269 | NH1    | B_GLU_67  | OE1    | 2.727        |
| 1HGE   | A_ARG_269 | NH2    | B_GLU_67  | OE1    | 3.813        |
| 1HGE   | A_LYS_299 | NZ     | B_GLU_69  | OE2    | 2.765        |
| 1HGE   | A_LYS_310 | NZ     | B_ASP_86  | OD1    | 2.860        |
| 1HGE   | A_LYS_310 | NZ     | B_ASP_90  | OD1    | 2.586        |
| 1HGE   | A_LYS_310 | NZ     | B_ASP_90  | OD2    | 3.982        |
| 1HGE   | A_LYS_326 | NZ     | B_GLU_15  | OE1    | 3.112        |
| 1HGE   | A_LYS_326 | NZ     | B_GLU_15  | OE2    | 2.788        |
| 1HGE   | B_ARG_25  | NH1    | A_GLU_325 | OE2    | 3.901        |
| 1HGE   | B_ARG_25  | NH2    | A_GLU_325 | OE2    | 3.058        |
| 1HGE   | B_ARG_54  | NH1    | F_GLU_97  | OE2    | 3.352        |
| 1HGE   | B_ARG_54  | NH2    | F_GLU_97  | OE2    | 2.840        |
| 1HGE   | B_LYS_62  | NZ     | F_ASP_86  | OD1    | 2.965        |
| 1HGE   | B_LYS_62  | NZ     | F_ASP_86  | OD2    | 2.602        |
| 1HGE   | B_LYS_62  | NZ     | F_ASP_90  | OD1    | 3.562        |
| 1HGE   | B_LYS_62  | NZ     | F_ASP_90  | OD2    | 2.691        |
| 1HGE   | B_ARG_76  | NH1    | D_GLU_74  | OE1    | 3.487        |
| 1HGE   | B_ARG_76  | NH1    | D_GLU_74  | OE2    | 2.838        |
| 1HGE   | B_ARG_76  | NH2    | D_GLU_74  | OE1    | 2.788        |
| 1HGE   | B_ARG_76  | NH2    | D_GLU_74  | OE2    | 3.585        |
| 1HGE   | B_ARG_76  | NH2    | D_GLU_81  | OE1    | 2.698        |
| 1HGE   | B_ARG_76  | NH2    | D_GLU_81  | OE2    | 3.486        |
| 1HGE   | B_ARG_123 | NH2    | F_GLU_132 | OE1    | 3.159        |
| 1HGE   | B_ARG_124 | NH2    | F_GLU_132 | OE1    | 3.028        |
| 1HGE   | B_ARG_124 | NH2    | F_GLU_132 | OE2    | 3.444        |
| 1HGE   | B_ARG_127 | NH1    | F_GLU_131 | OE1    | 2.492        |
| 1HGE   | B_ARG_163 | NH2    | F_GLU_131 | OE1    | 2.609        |
| 1HGE   | B_ARG_163 | NH2    | F_GLU_131 | OE2    | 2.622        |
| 1HGE   | B_ARG_170 | NH1    | D_GLU_128 | OE1    | 3.351        |
| 1HGE   | B_ARG_170 | NH1    | D_GLU_128 | OE2    | 3.595        |
| 1HGE   | B_LYS_174 | NZ     | D_ASP_164 | OD1    | 2.542        |
| 1HGE   | B_LYS_174 | NZ     | D_ASP_164 | OD2    | 2.784        |
| 1HGE   | C_LYS_27  | NZ     | D_GLU_97  | OE1    | 2.850        |
| 1HGE   | C_LYS_27  | NZ     | D_GLU_97  | OE2    | 2.792        |
| 1HGE   | C_ARG_109 | NH2    | D_GLU_67  | OE1    | 3.673        |
| 1HGE   | C_ARG_109 | NH2    | D_GLU_67  | OE2    | 2.784        |
| 1HGE   | C_LYS_238 | NZ     | B_GLU_72  | OE1    | 2.779        |
| 1HGE   | C_LYS_238 | NZ     | B_GLU_72  | OE2    | 2.668        |
| 1HGE   | C_ARG_269 | NH1    | D_GLU_67  | OE1    | 2.720        |
| 1HGE   | C_ARG_269 | NH2    | D_GLU_67  | OE1    | 3.811        |
| 1HGE   | C_LYS_299 | NZ     | D_GLU_69  | OE2    | 2.808        |
| 1HGE   | C_LYS_310 | NZ     | D_ASP_86  | OD1    | 2.890        |
| 1HGE   | C_LYS_310 | NZ     | D_ASP_90  | OD1    | 2.566        |
| 1HGE   | C_LYS_310 | NZ     | D_ASP_90  | OD2    | 3.955        |
| 1HGE   | C_LYS_326 | NZ     | D_GLU_15  | OE1    | 2.739        |
| 1HGE   | C_LYS_326 | NZ     | D_GLU_15  | OE2    | 3.731        |
| 1HGE   | D_ARG_54  | NH1    | B_GLU_97  | OE2    | 3.383        |
| 1HGE   | D_ARG_54  | NH2    | B_GLU_97  | OE2    | 2.866        |
| 1HGE   | D_LYS_62  | NZ     | B_ASP_86  | OD1    | 3.023        |
| 1HGE   | D_LYS_62  | NZ     | B_ASP_86  | OD2    | 2.550        |
| 1HGE   | D_LYS_62  | NZ     | B_ASP_90  | OD1    | 3.565        |

|      |           |     |           |     |       |
|------|-----------|-----|-----------|-----|-------|
| 1HGE | D_LYS_62  | NZ  | B_ASP_90  | OD2 | 2.627 |
| 1HGE | D_ARG_76  | NH1 | F_GLU_74  | OE1 | 3.355 |
| 1HGE | D_ARG_76  | NH1 | F_GLU_74  | OE2 | 2.783 |
| 1HGE | D_ARG_76  | NH2 | F_GLU_74  | OE1 | 2.745 |
| 1HGE | D_ARG_76  | NH2 | F_GLU_74  | OE2 | 3.636 |
| 1HGE | D_ARG_76  | NH2 | F_GLU_81  | OE1 | 2.634 |
| 1HGE | D_ARG_76  | NH2 | F_GLU_81  | OE2 | 3.497 |
| 1HGE | D_ARG_123 | NH2 | B_GLU_132 | OE1 | 3.118 |
| 1HGE | D_ARG_124 | NH2 | B_GLU_132 | OE1 | 3.002 |
| 1HGE | D_ARG_124 | NH2 | B_GLU_132 | OE2 | 3.417 |
| 1HGE | D_ARG_127 | NH1 | B_GLU_131 | OE1 | 2.524 |
| 1HGE | D_ARG_163 | NH2 | B_GLU_131 | OE1 | 2.587 |
| 1HGE | D_ARG_163 | NH2 | B_GLU_131 | OE2 | 2.600 |
| 1HGE | D_ARG_170 | NH1 | F_GLU_128 | OE1 | 3.477 |
| 1HGE | D_ARG_170 | NH1 | F_GLU_128 | OE2 | 3.701 |
| 1HGE | D_LYS_174 | NZ  | F_ASP_164 | OD1 | 2.678 |
| 1HGE | D_LYS_174 | NZ  | F_ASP_164 | OD2 | 2.785 |
| 1HGE | E_LYS_27  | NZ  | F_GLU_97  | OE1 | 2.844 |
| 1HGE | E_LYS_27  | NZ  | F_GLU_97  | OE2 | 2.791 |
| 1HGE | E_ARG_109 | NH2 | F_GLU_67  | OE1 | 3.658 |
| 1HGE | E_ARG_109 | NH2 | F_GLU_67  | OE2 | 2.776 |
| 1HGE | E_LYS_238 | NZ  | D_GLU_72  | OE1 | 2.851 |
| 1HGE | E_LYS_238 | NZ  | D_GLU_72  | OE2 | 2.740 |
| 1HGE | E_ARG_269 | NH1 | F_GLU_67  | OE1 | 2.696 |
| 1HGE | E_ARG_269 | NH2 | F_GLU_67  | OE1 | 3.784 |
| 1HGE | E_LYS_299 | NZ  | F_GLU_69  | OE2 | 2.768 |
| 1HGE | E_LYS_310 | NZ  | F_ASP_86  | OD1 | 2.863 |
| 1HGE | E_LYS_310 | NZ  | F_ASP_90  | OD1 | 2.577 |
| 1HGE | E_LYS_310 | NZ  | F_ASP_90  | OD2 | 3.952 |
| 1HGE | E_LYS_326 | NZ  | F_GLU_15  | OE1 | 2.987 |
| 1HGE | E_LYS_326 | NZ  | F_GLU_15  | OE2 | 3.095 |
| 1HGE | F_ARG_54  | NH1 | D_GLU_97  | OE2 | 3.384 |
| 1HGE | F_ARG_54  | NH2 | D_GLU_97  | OE2 | 2.800 |
| 1HGE | F_LYS_62  | NZ  | D_ASP_86  | OD1 | 2.945 |
| 1HGE | F_LYS_62  | NZ  | D_ASP_86  | OD2 | 2.535 |
| 1HGE | F_LYS_62  | NZ  | D_ASP_90  | OD1 | 3.592 |
| 1HGE | F_LYS_62  | NZ  | D_ASP_90  | OD2 | 2.671 |
| 1HGE | F_ARG_76  | NH1 | B_GLU_74  | OE1 | 3.326 |
| 1HGE | F_ARG_76  | NH1 | B_GLU_74  | OE2 | 2.732 |
| 1HGE | F_ARG_76  | NH2 | B_GLU_74  | OE1 | 2.705 |
| 1HGE | F_ARG_76  | NH2 | B_GLU_74  | OE2 | 3.590 |
| 1HGE | F_ARG_76  | NH2 | B_GLU_81  | OE1 | 2.650 |
| 1HGE | F_ARG_76  | NH2 | B_GLU_81  | OE2 | 3.592 |
| 1HGE | F_ARG_123 | NH2 | D_GLU_132 | OE1 | 3.161 |
| 1HGE | F_ARG_124 | NH2 | D_GLU_132 | OE1 | 3.085 |
| 1HGE | F_ARG_124 | NH2 | D_GLU_132 | OE2 | 3.468 |
| 1HGE | F_ARG_127 | NH1 | D_GLU_131 | OE1 | 2.578 |
| 1HGE | F_ARG_163 | NH2 | D_GLU_131 | OE1 | 2.628 |
| 1HGE | F_ARG_163 | NH2 | D_GLU_131 | OE2 | 2.698 |
| 1HGE | F_ARG_170 | NH1 | B_GLU_128 | OE1 | 3.389 |
| 1HGE | F_ARG_170 | NH1 | B_GLU_128 | OE2 | 3.679 |
| 1HGE | F_LYS_174 | NZ  | B_ASP_164 | OD1 | 2.537 |
| 1HGE | F_LYS_174 | NZ  | B_ASP_164 | OD2 | 2.796 |

---

Table 982: Interfacial 1HGE-specific salt bridging networks analysis. In this table, a PDB file is specified with a four-letter PDB ID, except that the names of the PDB files corresponding to the single NMR structural model split from the NMR ensemble is specified with a four-letter PDB ID in addition to a hyphen followed by the single NMR structural model numeric ID, the residue naming scheme is **Chain ID\_residue name\_residue number**,  $\angle ADH$  represents the angle formed by acceptor (A), donor (D) and hydrogen (H) ( $\angle ADH$ ).

| PDB ID | Residue A | Atom A | Residue B | Atom B | Distance (Å) |
|--------|-----------|--------|-----------|--------|--------------|
| 1HGF   | A_LYS_27  | NZ     | B_GLU_97  | OE1    | 2.809        |
| 1HGF   | A_LYS_27  | NZ     | B_GLU_97  | OE2    | 2.791        |
| 1HGF   | A_ARG_109 | NH2    | B_GLU_67  | OE1    | 3.699        |
| 1HGF   | A_ARG_109 | NH2    | B_GLU_67  | OE2    | 2.917        |
| 1HGF   | A_LYS_238 | NZ     | F_GLU_72  | OE1    | 2.852        |
| 1HGF   | A_LYS_238 | NZ     | F_GLU_72  | OE2    | 2.778        |
| 1HGF   | A_ARG_269 | NH1    | B_GLU_67  | OE1    | 2.939        |
| 1HGF   | A_LYS_299 | NZ     | B_GLU_69  | OE2    | 3.681        |
| 1HGF   | A_LYS_310 | NZ     | B_ASP_86  | OD1    | 2.820        |
| 1HGF   | A_LYS_310 | NZ     | B_ASP_90  | OD1    | 2.555        |
| 1HGF   | A_LYS_310 | NZ     | B_ASP_90  | OD2    | 3.978        |
| 1HGF   | A_LYS_326 | NZ     | B_GLU_15  | OE1    | 3.851        |
| 1HGF   | A_LYS_326 | NZ     | B_GLU_15  | OE2    | 3.863        |
| 1HGF   | B_ARG_25  | NH1    | A_GLU_325 | OE2    | 3.563        |
| 1HGF   | B_ARG_25  | NH2    | A_GLU_325 | OE2    | 2.989        |
| 1HGF   | B_ARG_54  | NH1    | F_GLU_97  | OE2    | 3.282        |
| 1HGF   | B_ARG_54  | NH2    | F_GLU_97  | OE2    | 2.831        |
| 1HGF   | B_LYS_62  | NZ     | F_ASP_86  | OD1    | 3.116        |
| 1HGF   | B_LYS_62  | NZ     | F_ASP_86  | OD2    | 2.708        |
| 1HGF   | B_LYS_62  | NZ     | F_ASP_90  | OD1    | 3.733        |
| 1HGF   | B_LYS_62  | NZ     | F_ASP_90  | OD2    | 2.767        |
| 1HGF   | B_ARG_76  | NH1    | D_GLU_74  | OE1    | 2.859        |
| 1HGF   | B_ARG_76  | NH1    | D_GLU_74  | OE2    | 3.561        |
| 1HGF   | B_ARG_76  | NH2    | D_GLU_74  | OE1    | 3.524        |
| 1HGF   | B_ARG_76  | NH2    | D_GLU_74  | OE2    | 2.746        |
| 1HGF   | B_ARG_76  | NH2    | D_GLU_81  | OE1    | 2.726        |
| 1HGF   | B_ARG_76  | NH2    | D_GLU_81  | OE2    | 3.662        |
| 1HGF   | B_ARG_123 | NH2    | F_GLU_132 | OE1    | 3.495        |
| 1HGF   | B_ARG_124 | NH2    | F_GLU_132 | OE1    | 3.111        |
| 1HGF   | B_ARG_124 | NH2    | F_GLU_132 | OE2    | 3.495        |
| 1HGF   | B_ARG_127 | NH1    | F_GLU_131 | OE1    | 2.468        |
| 1HGF   | B_ARG_163 | NH2    | F_GLU_131 | OE1    | 2.740        |
| 1HGF   | B_ARG_163 | NH2    | F_GLU_131 | OE2    | 2.533        |
| 1HGF   | B_ARG_170 | NH1    | D_GLU_128 | OE1    | 3.455        |
| 1HGF   | B_ARG_170 | NH1    | D_GLU_128 | OE2    | 3.294        |
| 1HGF   | B_LYS_174 | NZ     | D_ASP_164 | OD2    | 3.813        |
| 1HGF   | C_LYS_27  | NZ     | D_GLU_97  | OE1    | 2.824        |
| 1HGF   | C_LYS_27  | NZ     | D_GLU_97  | OE2    | 2.808        |
| 1HGF   | C_ARG_109 | NH2    | D_GLU_67  | OE1    | 3.698        |
| 1HGF   | C_ARG_109 | NH2    | D_GLU_67  | OE2    | 2.914        |
| 1HGF   | C_LYS_238 | NZ     | B_GLU_72  | OE1    | 2.746        |
| 1HGF   | C_LYS_238 | NZ     | B_GLU_72  | OE2    | 2.727        |
| 1HGF   | C_ARG_269 | NH1    | D_GLU_67  | OE1    | 2.900        |
| 1HGF   | C_LYS_299 | NZ     | D_GLU_69  | OE2    | 3.732        |
| 1HGF   | C_LYS_310 | NZ     | D_ASP_86  | OD1    | 2.839        |
| 1HGF   | C_LYS_310 | NZ     | D_ASP_90  | OD1    | 2.507        |
| 1HGF   | C_LYS_310 | NZ     | D_ASP_90  | OD2    | 3.941        |
| 1HGF   | C_LYS_326 | NZ     | D_GLU_15  | OE1    | 3.713        |
| 1HGF   | D_ARG_54  | NH1    | B_GLU_97  | OE2    | 3.314        |
| 1HGF   | D_ARG_54  | NH2    | B_GLU_97  | OE2    | 2.840        |
| 1HGF   | D_LYS_62  | NZ     | B_ASP_86  | OD1    | 3.122        |
| 1HGF   | D_LYS_62  | NZ     | B_ASP_86  | OD2    | 2.686        |
| 1HGF   | D_LYS_62  | NZ     | B_ASP_90  | OD1    | 3.703        |
| 1HGF   | D_LYS_62  | NZ     | B_ASP_90  | OD2    | 2.682        |
| 1HGF   | D_ARG_76  | NH1    | F_GLU_74  | OE1    | 2.790        |
| 1HGF   | D_ARG_76  | NH1    | F_GLU_74  | OE2    | 3.379        |
| 1HGF   | D_ARG_76  | NH2    | F_GLU_74  | OE1    | 3.594        |



|      |           |     |           |     |       |
|------|-----------|-----|-----------|-----|-------|
| 1HGF | D_ARG_76  | NH2 | F_GLU_74  | OE2 | 2.697 |
| 1HGF | D_ARG_76  | NH2 | F_GLU_81  | OE1 | 2.644 |
| 1HGF | D_ARG_76  | NH2 | F_GLU_81  | OE2 | 3.691 |
| 1HGF | D_ARG_123 | NH2 | B_GLU_132 | OE1 | 3.407 |
| 1HGF | D_ARG_124 | NH2 | B_GLU_132 | OE1 | 3.100 |
| 1HGF | D_ARG_124 | NH2 | B_GLU_132 | OE2 | 3.442 |
| 1HGF | D_ARG_127 | NH1 | B_GLU_131 | OE1 | 2.516 |
| 1HGF | D_ARG_163 | NH2 | B_GLU_131 | OE1 | 2.704 |
| 1HGF | D_ARG_163 | NH2 | B_GLU_131 | OE2 | 2.556 |
| 1HGF | D_ARG_170 | NH1 | F_GLU_128 | OE1 | 3.604 |
| 1HGF | D_ARG_170 | NH1 | F_GLU_128 | OE2 | 3.428 |
| 1HGF | E_LYS_27  | NZ  | F_GLU_97  | OE1 | 2.793 |
| 1HGF | E_LYS_27  | NZ  | F_GLU_97  | OE2 | 2.754 |
| 1HGF | E_ARG_109 | NH2 | F_GLU_67  | OE1 | 3.694 |
| 1HGF | E_ARG_109 | NH2 | F_GLU_67  | OE2 | 2.878 |
| 1HGF | E_LYS_238 | NZ  | D_GLU_72  | OE1 | 2.831 |
| 1HGF | E_LYS_238 | NZ  | D_GLU_72  | OE2 | 2.834 |
| 1HGF | E_ARG_269 | NH1 | F_GLU_67  | OE1 | 2.906 |
| 1HGF | E_LYS_299 | NZ  | F_GLU_69  | OE2 | 3.655 |
| 1HGF | E_LYS_310 | NZ  | F_ASP_86  | OD1 | 2.832 |
| 1HGF | E_LYS_310 | NZ  | F_ASP_90  | OD1 | 2.514 |
| 1HGF | E_LYS_310 | NZ  | F_ASP_90  | OD2 | 3.973 |
| 1HGF | E_LYS_326 | NZ  | F_GLU_15  | OE1 | 3.652 |
| 1HGF | E_LYS_326 | NZ  | F_GLU_15  | OE2 | 3.771 |
| 1HGF | F_ARG_54  | NH1 | D_GLU_97  | OE2 | 3.368 |
| 1HGF | F_ARG_54  | NH2 | D_GLU_97  | OE2 | 2.791 |
| 1HGF | F_LYS_62  | NZ  | D_ASP_86  | OD1 | 3.076 |
| 1HGF | F_LYS_62  | NZ  | D_ASP_86  | OD2 | 2.672 |
| 1HGF | F_LYS_62  | NZ  | D_ASP_90  | OD1 | 3.773 |
| 1HGF | F_LYS_62  | NZ  | D_ASP_90  | OD2 | 2.752 |
| 1HGF | F_ARG_76  | NH1 | B_GLU_74  | OE1 | 2.779 |
| 1HGF | F_ARG_76  | NH1 | B_GLU_74  | OE2 | 3.420 |
| 1HGF | F_ARG_76  | NH2 | B_GLU_74  | OE1 | 3.542 |
| 1HGF | F_ARG_76  | NH2 | B_GLU_74  | OE2 | 2.707 |
| 1HGF | F_ARG_76  | NH2 | B_GLU_81  | OE1 | 2.689 |
| 1HGF | F_ARG_76  | NH2 | B_GLU_81  | OE2 | 3.716 |
| 1HGF | F_ARG_123 | NH2 | D_GLU_132 | OE1 | 3.469 |
| 1HGF | F_ARG_124 | NH2 | D_GLU_132 | OE1 | 3.198 |
| 1HGF | F_ARG_124 | NH2 | D_GLU_132 | OE2 | 3.522 |
| 1HGF | F_ARG_127 | NH1 | D_GLU_131 | OE1 | 2.568 |
| 1HGF | F_ARG_163 | NH2 | D_GLU_131 | OE1 | 2.689 |
| 1HGF | F_ARG_163 | NH2 | D_GLU_131 | OE2 | 2.644 |
| 1HGF | F_ARG_170 | NH1 | B_GLU_128 | OE1 | 3.432 |
| 1HGF | F_ARG_170 | NH1 | B_GLU_128 | OE2 | 3.366 |
| 1HGF | F_LYS_174 | NZ  | B_ASP_164 | OD2 | 3.837 |

Table 983: Interfacial 1HGF-specific salt bridging networks analysis. In this table, a PDB file is specified with a four-letter PDB ID, except that the names of the PDB files corresponding to the single NMR structural model split from the NMR ensemble is specified with a four-letter PDB ID in addition to a hyphen followed by the single NMR structural model numeric ID, the residue naming scheme is **Chain ID\_residue name\_residue number**,  $\angle ADH$  represents the angle formed by acceptor (A), donor (D) and hydrogen (H) ( $\angle ADH$ ).

| PDB ID | Residue A | Atom A | Residue B | Atom B | Distance (Å) |
|--------|-----------|--------|-----------|--------|--------------|
| 1HGG   | A_LYS_27  | NZ     | B_GLU_97  | OE1    | 2.679        |
| 1HGG   | A_LYS_27  | NZ     | B_GLU_97  | OE2    | 2.904        |
| 1HGG   | A_ARG_109 | NH2    | B_GLU_67  | OE1    | 3.854        |
| 1HGG   | A_ARG_109 | NH2    | B_GLU_67  | OE2    | 2.838        |
| 1HGG   | A_LYS_238 | NZ     | F_GLU_72  | OE1    | 2.931        |
| 1HGG   | A_LYS_238 | NZ     | F_GLU_72  | OE2    | 2.744        |
| 1HGG   | A_ARG_269 | NH1    | B_GLU_67  | OE1    | 2.694        |
| 1HGG   | A_ARG_269 | NH2    | B_GLU_67  | OE1    | 3.814        |
| 1HGG   | A_LYS_299 | NZ     | B_GLU_69  | OE2    | 2.915        |
| 1HGG   | A_LYS_310 | NZ     | B_ASP_86  | OD1    | 2.852        |
| 1HGG   | A_LYS_310 | NZ     | B_ASP_90  | OD1    | 2.700        |
| 1HGG   | A_LYS_310 | NZ     | B_ASP_90  | OD2    | 3.923        |
| 1HGG   | A_LYS_326 | NZ     | B_GLU_15  | OE1    | 3.039        |
| 1HGG   | A_LYS_326 | NZ     | B_GLU_15  | OE2    | 2.830        |
| 1HGG   | B_ARG_25  | NH1    | A_GLU_325 | OE2    | 3.770        |
| 1HGG   | B_ARG_25  | NH2    | A_GLU_325 | OE2    | 2.944        |
| 1HGG   | B_ARG_54  | NH1    | F_GLU_97  | OE2    | 3.410        |
| 1HGG   | B_ARG_54  | NH2    | F_GLU_97  | OE2    | 2.750        |
| 1HGG   | B_LYS_62  | NZ     | F_ASP_86  | OD1    | 2.889        |
| 1HGG   | B_LYS_62  | NZ     | F_ASP_86  | OD2    | 2.639        |
| 1HGG   | B_LYS_62  | NZ     | F_ASP_90  | OD1    | 3.716        |
| 1HGG   | B_LYS_62  | NZ     | F_ASP_90  | OD2    | 2.650        |
| 1HGG   | B_ARG_76  | NH1    | D_GLU_74  | OE1    | 2.882        |
| 1HGG   | B_ARG_76  | NH1    | D_GLU_74  | OE2    | 3.580        |
| 1HGG   | B_ARG_76  | NH2    | D_GLU_74  | OE1    | 3.459        |
| 1HGG   | B_ARG_76  | NH2    | D_GLU_74  | OE2    | 2.820        |
| 1HGG   | B_ARG_76  | NH2    | D_GLU_81  | OE1    | 2.731        |
| 1HGG   | B_ARG_76  | NH2    | D_GLU_81  | OE2    | 3.473        |
| 1HGG   | B_ARG_123 | NH2    | F_GLU_132 | OE1    | 2.827        |
| 1HGG   | B_ARG_124 | NH2    | F_GLU_132 | OE1    | 3.221        |
| 1HGG   | B_ARG_124 | NH2    | F_GLU_132 | OE2    | 3.297        |
| 1HGG   | B_ARG_127 | NH1    | F_GLU_131 | OE1    | 2.465        |
| 1HGG   | B_ARG_163 | NH2    | F_GLU_131 | OE1    | 2.594        |
| 1HGG   | B_ARG_163 | NH2    | F_GLU_131 | OE2    | 2.562        |
| 1HGG   | B_ARG_170 | NH1    | D_GLU_128 | OE1    | 3.236        |
| 1HGG   | B_ARG_170 | NH1    | D_GLU_128 | OE2    | 3.289        |
| 1HGG   | B_LYS_174 | NZ     | D_ASP_164 | OD1    | 2.736        |
| 1HGG   | B_LYS_174 | NZ     | D_ASP_164 | OD2    | 2.575        |
| 1HGG   | C_LYS_27  | NZ     | D_GLU_97  | OE1    | 2.683        |
| 1HGG   | C_LYS_27  | NZ     | D_GLU_97  | OE2    | 2.941        |
| 1HGG   | C_ARG_109 | NH2    | D_GLU_67  | OE1    | 3.869        |
| 1HGG   | C_ARG_109 | NH2    | D_GLU_67  | OE2    | 2.853        |
| 1HGG   | C_LYS_238 | NZ     | B_GLU_72  | OE1    | 2.830        |
| 1HGG   | C_LYS_238 | NZ     | B_GLU_72  | OE2    | 2.699        |
| 1HGG   | C_ARG_269 | NH1    | D_GLU_67  | OE1    | 2.688        |
| 1HGG   | C_ARG_269 | NH2    | D_GLU_67  | OE1    | 3.820        |
| 1HGG   | C_LYS_299 | NZ     | D_GLU_69  | OE2    | 2.932        |
| 1HGG   | C_LYS_310 | NZ     | D_ASP_86  | OD1    | 2.859        |
| 1HGG   | C_LYS_310 | NZ     | D_ASP_90  | OD1    | 2.651        |
| 1HGG   | C_LYS_310 | NZ     | D_ASP_90  | OD2    | 3.858        |
| 1HGG   | C_LYS_326 | NZ     | D_GLU_15  | OE1    | 2.591        |
| 1HGG   | C_LYS_326 | NZ     | D_GLU_15  | OE2    | 3.450        |
| 1HGG   | D_ARG_54  | NH1    | B_GLU_97  | OE2    | 3.442        |
| 1HGG   | D_ARG_54  | NH2    | B_GLU_97  | OE2    | 2.764        |
| 1HGG   | D_LYS_62  | NZ     | B_ASP_86  | OD1    | 2.924        |
| 1HGG   | D_LYS_62  | NZ     | B_ASP_86  | OD2    | 2.567        |
| 1HGG   | D_LYS_62  | NZ     | B_ASP_90  | OD1    | 3.695        |

|      |           |     |           |     |       |
|------|-----------|-----|-----------|-----|-------|
| 1HGG | D_LYS_62  | NZ  | B_ASP_90  | OD2 | 2.575 |
| 1HGG | D_ARG_76  | NH1 | F_GLU_74  | OE1 | 2.783 |
| 1HGG | D_ARG_76  | NH1 | F_GLU_74  | OE2 | 3.379 |
| 1HGG | D_ARG_76  | NH2 | F_GLU_74  | OE1 | 3.480 |
| 1HGG | D_ARG_76  | NH2 | F_GLU_74  | OE2 | 2.737 |
| 1HGG | D_ARG_76  | NH2 | F_GLU_81  | OE1 | 2.674 |
| 1HGG | D_ARG_76  | NH2 | F_GLU_81  | OE2 | 3.521 |
| 1HGG | D_ARG_123 | NH2 | B_GLU_132 | OE1 | 2.793 |
| 1HGG | D_ARG_124 | NH2 | B_GLU_132 | OE1 | 3.241 |
| 1HGG | D_ARG_124 | NH2 | B_GLU_132 | OE2 | 3.297 |
| 1HGG | D_ARG_127 | NH1 | B_GLU_131 | OE1 | 2.475 |
| 1HGG | D_ARG_163 | NH2 | B_GLU_131 | OE1 | 2.580 |
| 1HGG | D_ARG_163 | NH2 | B_GLU_131 | OE2 | 2.598 |
| 1HGG | D_ARG_170 | NH1 | F_GLU_128 | OE1 | 3.365 |
| 1HGG | D_ARG_170 | NH1 | F_GLU_128 | OE2 | 3.390 |
| 1HGG | D_LYS_174 | NZ  | F_ASP_164 | OD1 | 2.763 |
| 1HGG | D_LYS_174 | NZ  | F_ASP_164 | OD2 | 2.711 |
| 1HGG | E_LYS_27  | NZ  | F_GLU_97  | OE1 | 2.689 |
| 1HGG | E_LYS_27  | NZ  | F_GLU_97  | OE2 | 2.909 |
| 1HGG | E_ARG_109 | NH2 | F_GLU_67  | OE1 | 3.891 |
| 1HGG | E_ARG_109 | NH2 | F_GLU_67  | OE2 | 2.876 |
| 1HGG | E_LYS_238 | NZ  | D_GLU_72  | OE1 | 2.893 |
| 1HGG | E_LYS_238 | NZ  | D_GLU_72  | OE2 | 2.782 |
| 1HGG | E_ARG_269 | NH1 | F_GLU_67  | OE1 | 2.691 |
| 1HGG | E_ARG_269 | NH2 | F_GLU_67  | OE1 | 3.830 |
| 1HGG | E_LYS_299 | NZ  | F_GLU_69  | OE2 | 2.920 |
| 1HGG | E_LYS_310 | NZ  | F_ASP_86  | OD1 | 2.871 |
| 1HGG | E_LYS_310 | NZ  | F_ASP_90  | OD1 | 2.639 |
| 1HGG | E_LYS_310 | NZ  | F_ASP_90  | OD2 | 3.900 |
| 1HGG | E_LYS_326 | NZ  | F_GLU_15  | OE1 | 2.975 |
| 1HGG | E_LYS_326 | NZ  | F_GLU_15  | OE2 | 3.000 |
| 1HGG | F_ARG_54  | NH1 | D_GLU_97  | OE2 | 3.483 |
| 1HGG | F_ARG_54  | NH2 | D_GLU_97  | OE2 | 2.727 |
| 1HGG | F_LYS_62  | NZ  | D_ASP_86  | OD1 | 2.904 |
| 1HGG | F_LYS_62  | NZ  | D_ASP_86  | OD2 | 2.582 |
| 1HGG | F_LYS_62  | NZ  | D_ASP_90  | OD1 | 3.752 |
| 1HGG | F_LYS_62  | NZ  | D_ASP_90  | OD2 | 2.595 |
| 1HGG | F_ARG_76  | NH1 | B_GLU_74  | OE1 | 2.750 |
| 1HGG | F_ARG_76  | NH1 | B_GLU_74  | OE2 | 3.432 |
| 1HGG | F_ARG_76  | NH2 | B_GLU_74  | OE1 | 3.456 |
| 1HGG | F_ARG_76  | NH2 | B_GLU_74  | OE2 | 2.786 |
| 1HGG | F_ARG_76  | NH2 | B_GLU_81  | OE1 | 2.674 |
| 1HGG | F_ARG_76  | NH2 | B_GLU_81  | OE2 | 3.545 |
| 1HGG | F_ARG_123 | NH2 | D_GLU_132 | OE1 | 2.843 |
| 1HGG | F_ARG_124 | NH2 | D_GLU_132 | OE1 | 3.317 |
| 1HGG | F_ARG_124 | NH2 | D_GLU_132 | OE2 | 3.342 |
| 1HGG | F_ARG_127 | NH1 | D_GLU_131 | OE1 | 2.523 |
| 1HGG | F_ARG_163 | NH2 | D_GLU_131 | OE1 | 2.589 |
| 1HGG | F_ARG_163 | NH2 | D_GLU_131 | OE2 | 2.640 |
| 1HGG | F_ARG_170 | NH1 | B_GLU_128 | OE1 | 3.237 |
| 1HGG | F_ARG_170 | NH1 | B_GLU_128 | OE2 | 3.354 |
| 1HGG | F_LYS_174 | NZ  | B_ASP_164 | OD1 | 2.757 |
| 1HGG | F_LYS_174 | NZ  | B_ASP_164 | OD2 | 2.547 |

---

Table 984: Interfacial 1HGG-specific salt bridging networks analysis. In this table, a PDB file is specified with a four-letter PDB ID, except that the names of the PDB files corresponding to the single NMR structural model split from the NMR ensemble is specified with a four-letter PDB ID in addition to a hyphen followed by the single NMR structural model numeric ID, the residue naming scheme is **Chain ID\_residue name\_residue number**,  $\angle ADH$  represents the angle formed by acceptor (A), donor (D) and hydrogen (H) ( $\angle ADH$ ).

| PDB ID | Residue A | Atom A | Residue B | Atom B | Distance (Å) |
|--------|-----------|--------|-----------|--------|--------------|
| 1HGH   | A_LYS_27  | NZ     | B_GLU_97  | OE1    | 2.856        |
| 1HGH   | A_LYS_27  | NZ     | B_GLU_97  | OE2    | 2.781        |
| 1HGH   | A_ARG_109 | NH2    | B_GLU_67  | OE1    | 3.697        |
| 1HGH   | A_ARG_109 | NH2    | B_GLU_67  | OE2    | 2.864        |
| 1HGH   | A_LYS_238 | NZ     | F_GLU_72  | OE1    | 2.921        |
| 1HGH   | A_LYS_238 | NZ     | F_GLU_72  | OE2    | 2.736        |
| 1HGH   | A_ARG_269 | NH1    | B_GLU_67  | OE1    | 2.720        |
| 1HGH   | A_ARG_269 | NH2    | B_GLU_67  | OE1    | 3.718        |
| 1HGH   | A_LYS_299 | NZ     | B_GLU_69  | OE2    | 2.918        |
| 1HGH   | A_LYS_310 | NZ     | B_ASP_86  | OD1    | 2.712        |
| 1HGH   | A_LYS_310 | NZ     | B_ASP_90  | OD1    | 2.578        |
| 1HGH   | A_LYS_310 | NZ     | B_ASP_90  | OD2    | 3.975        |
| 1HGH   | A_LYS_326 | NZ     | B_GLU_15  | OE1    | 3.092        |
| 1HGH   | A_LYS_326 | NZ     | B_GLU_15  | OE2    | 2.707        |
| 1HGH   | B_ARG_25  | NH1    | A_GLU_325 | OE2    | 3.971        |
| 1HGH   | B_ARG_25  | NH2    | A_GLU_325 | OE2    | 3.017        |
| 1HGH   | B_ARG_54  | NH1    | F_GLU_97  | OE2    | 3.285        |
| 1HGH   | B_ARG_54  | NH2    | F_GLU_97  | OE2    | 2.823        |
| 1HGH   | B_LYS_62  | NZ     | F_ASP_86  | OD1    | 3.064        |
| 1HGH   | B_LYS_62  | NZ     | F_ASP_86  | OD2    | 2.661        |
| 1HGH   | B_LYS_62  | NZ     | F_ASP_90  | OD1    | 3.547        |
| 1HGH   | B_LYS_62  | NZ     | F_ASP_90  | OD2    | 2.683        |
| 1HGH   | B_ARG_76  | NH1    | D_GLU_74  | OE1    | 3.707        |
| 1HGH   | B_ARG_76  | NH1    | D_GLU_74  | OE2    | 2.912        |
| 1HGH   | B_ARG_76  | NH2    | D_GLU_74  | OE1    | 2.889        |
| 1HGH   | B_ARG_76  | NH2    | D_GLU_74  | OE2    | 3.526        |
| 1HGH   | B_ARG_76  | NH2    | D_GLU_81  | OE1    | 2.765        |
| 1HGH   | B_ARG_76  | NH2    | D_GLU_81  | OE2    | 3.411        |
| 1HGH   | B_ARG_123 | NH2    | F_GLU_132 | OE1    | 3.134        |
| 1HGH   | B_ARG_124 | NH2    | F_GLU_132 | OE1    | 3.005        |
| 1HGH   | B_ARG_124 | NH2    | F_GLU_132 | OE2    | 3.302        |
| 1HGH   | B_ARG_127 | NH1    | F_GLU_131 | OE1    | 2.524        |
| 1HGH   | B_ARG_163 | NH2    | F_GLU_131 | OE1    | 2.607        |
| 1HGH   | B_ARG_163 | NH2    | F_GLU_131 | OE2    | 2.538        |
| 1HGH   | B_ARG_170 | NH1    | D_GLU_128 | OE1    | 3.253        |
| 1HGH   | B_ARG_170 | NH1    | D_GLU_128 | OE2    | 3.577        |
| 1HGH   | B_LYS_174 | NZ     | D_ASP_164 | OD1    | 2.767        |
| 1HGH   | B_LYS_174 | NZ     | D_ASP_164 | OD2    | 2.573        |
| 1HGH   | C_LYS_27  | NZ     | D_GLU_97  | OE1    | 2.897        |
| 1HGH   | C_LYS_27  | NZ     | D_GLU_97  | OE2    | 2.815        |
| 1HGH   | C_ARG_109 | NH2    | D_GLU_67  | OE1    | 3.686        |
| 1HGH   | C_ARG_109 | NH2    | D_GLU_67  | OE2    | 2.856        |
| 1HGH   | C_LYS_238 | NZ     | B_GLU_72  | OE1    | 2.713        |
| 1HGH   | C_LYS_238 | NZ     | B_GLU_72  | OE2    | 2.597        |
| 1HGH   | C_ARG_269 | NH1    | D_GLU_67  | OE1    | 2.732        |
| 1HGH   | C_ARG_269 | NH2    | D_GLU_67  | OE1    | 3.725        |
| 1HGH   | C_LYS_299 | NZ     | D_GLU_69  | OE2    | 2.939        |
| 1HGH   | C_LYS_310 | NZ     | D_ASP_86  | OD1    | 2.734        |
| 1HGH   | C_LYS_310 | NZ     | D_ASP_90  | OD1    | 2.551        |
| 1HGH   | C_LYS_310 | NZ     | D_ASP_90  | OD2    | 3.913        |
| 1HGH   | C_LYS_326 | NZ     | D_GLU_15  | OE1    | 2.774        |
| 1HGH   | C_LYS_326 | NZ     | D_GLU_15  | OE2    | 3.676        |
| 1HGH   | D_ARG_54  | NH1    | B_GLU_97  | OE2    | 3.277        |
| 1HGH   | D_ARG_54  | NH2    | B_GLU_97  | OE2    | 2.797        |
| 1HGH   | D_LYS_62  | NZ     | B_ASP_86  | OD1    | 3.011        |
| 1HGH   | D_LYS_62  | NZ     | B_ASP_86  | OD2    | 2.510        |
| 1HGH   | D_LYS_62  | NZ     | B_ASP_90  | OD1    | 3.543        |

|      |           |     |           |     |       |
|------|-----------|-----|-----------|-----|-------|
| 1HGH | D_LYS_62  | NZ  | B_ASP_90  | OD2 | 2.589 |
| 1HGH | D_ARG_76  | NH1 | F_GLU_74  | OE1 | 3.430 |
| 1HGH | D_ARG_76  | NH1 | F_GLU_74  | OE2 | 2.765 |
| 1HGH | D_ARG_76  | NH2 | F_GLU_74  | OE1 | 2.747 |
| 1HGH | D_ARG_76  | NH2 | F_GLU_74  | OE2 | 3.553 |
| 1HGH | D_ARG_76  | NH2 | F_GLU_81  | OE1 | 2.698 |
| 1HGH | D_ARG_76  | NH2 | F_GLU_81  | OE2 | 3.487 |
| 1HGH | D_ARG_123 | NH2 | B_GLU_132 | OE1 | 3.141 |
| 1HGH | D_ARG_124 | NH2 | B_GLU_132 | OE1 | 3.050 |
| 1HGH | D_ARG_124 | NH2 | B_GLU_132 | OE2 | 3.354 |
| 1HGH | D_ARG_127 | NH1 | B_GLU_131 | OE1 | 2.536 |
| 1HGH | D_ARG_163 | NH2 | B_GLU_131 | OE1 | 2.609 |
| 1HGH | D_ARG_163 | NH2 | B_GLU_131 | OE2 | 2.570 |
| 1HGH | D_ARG_170 | NH1 | F_GLU_128 | OE1 | 3.352 |
| 1HGH | D_ARG_170 | NH1 | F_GLU_128 | OE2 | 3.641 |
| 1HGH | D_LYS_174 | NZ  | F_ASP_164 | OD1 | 2.863 |
| 1HGH | D_LYS_174 | NZ  | F_ASP_164 | OD2 | 2.724 |
| 1HGH | E_LYS_27  | NZ  | F_GLU_97  | OE1 | 2.917 |
| 1HGH | E_LYS_27  | NZ  | F_GLU_97  | OE2 | 2.767 |
| 1HGH | E_ARG_109 | NH2 | F_GLU_67  | OE1 | 3.698 |
| 1HGH | E_ARG_109 | NH2 | F_GLU_67  | OE2 | 2.878 |
| 1HGH | E_LYS_238 | NZ  | D_GLU_72  | OE1 | 2.870 |
| 1HGH | E_LYS_238 | NZ  | D_GLU_72  | OE2 | 2.766 |
| 1HGH | E_ARG_269 | NH1 | F_GLU_67  | OE1 | 2.705 |
| 1HGH | E_ARG_269 | NH2 | F_GLU_67  | OE1 | 3.715 |
| 1HGH | E_LYS_299 | NZ  | F_GLU_69  | OE2 | 2.896 |
| 1HGH | E_LYS_310 | NZ  | F_ASP_86  | OD1 | 2.740 |
| 1HGH | E_LYS_310 | NZ  | F_ASP_90  | OD1 | 2.571 |
| 1HGH | E_LYS_310 | NZ  | F_ASP_90  | OD2 | 3.948 |
| 1HGH | E_LYS_326 | NZ  | F_GLU_15  | OE1 | 2.900 |
| 1HGH | E_LYS_326 | NZ  | F_GLU_15  | OE2 | 3.072 |
| 1HGH | F_ARG_54  | NH1 | D_GLU_97  | OE2 | 3.293 |
| 1HGH | F_ARG_54  | NH2 | D_GLU_97  | OE2 | 2.723 |
| 1HGH | F_LYS_62  | NZ  | D_ASP_86  | OD1 | 3.012 |
| 1HGH | F_LYS_62  | NZ  | D_ASP_86  | OD2 | 2.546 |
| 1HGH | F_LYS_62  | NZ  | D_ASP_90  | OD1 | 3.612 |
| 1HGH | F_LYS_62  | NZ  | D_ASP_90  | OD2 | 2.682 |
| 1HGH | F_ARG_76  | NH1 | B_GLU_74  | OE1 | 3.509 |
| 1HGH | F_ARG_76  | NH1 | B_GLU_74  | OE2 | 2.732 |
| 1HGH | F_ARG_76  | NH2 | B_GLU_74  | OE1 | 2.780 |
| 1HGH | F_ARG_76  | NH2 | B_GLU_74  | OE2 | 3.488 |
| 1HGH | F_ARG_76  | NH2 | B_GLU_81  | OE1 | 2.709 |
| 1HGH | F_ARG_76  | NH2 | B_GLU_81  | OE2 | 3.513 |
| 1HGH | F_ARG_123 | NH2 | D_GLU_132 | OE1 | 3.148 |
| 1HGH | F_ARG_124 | NH2 | D_GLU_132 | OE1 | 3.099 |
| 1HGH | F_ARG_124 | NH2 | D_GLU_132 | OE2 | 3.356 |
| 1HGH | F_ARG_127 | NH1 | D_GLU_131 | OE1 | 2.577 |
| 1HGH | F_ARG_163 | NH2 | D_GLU_131 | OE1 | 2.600 |
| 1HGH | F_ARG_163 | NH2 | D_GLU_131 | OE2 | 2.611 |
| 1HGH | F_ARG_170 | NH1 | B_GLU_128 | OE1 | 3.225 |
| 1HGH | F_ARG_170 | NH1 | B_GLU_128 | OE2 | 3.576 |
| 1HGH | F_LYS_174 | NZ  | B_ASP_164 | OD1 | 2.776 |
| 1HGH | F_LYS_174 | NZ  | B_ASP_164 | OD2 | 2.495 |

---

Table 985: Interfacial 1HGH-specific salt bridging networks analysis. In this table, a PDB file is specified with a four-letter PDB ID, except that the names of the PDB files corresponding to the single NMR structural model split from the NMR ensemble is specified with a four-letter PDB ID in addition to a hyphen followed by the single NMR structural model numeric ID, the residue naming scheme is **Chain ID\_residue name\_residue number**,  $\angle ADH$  represents the angle formed by acceptor (A), donor (D) and hydrogen (H) ( $\angle ADH$ ).

| PDB ID | Residue A | Atom A | Residue B | Atom B | Distance (Å) |
|--------|-----------|--------|-----------|--------|--------------|
| 1HGI   | A_LYS_27  | NZ     | B_GLU_97  | OE1    | 2.940        |
| 1HGI   | A_LYS_27  | NZ     | B_GLU_97  | OE2    | 2.900        |
| 1HGI   | A_ARG_109 | NH2    | B_GLU_67  | OE1    | 3.638        |
| 1HGI   | A_ARG_109 | NH2    | B_GLU_67  | OE2    | 2.797        |
| 1HGI   | A_LYS_238 | NZ     | F_GLU_72  | OE1    | 2.849        |
| 1HGI   | A_LYS_238 | NZ     | F_GLU_72  | OE2    | 2.839        |
| 1HGI   | A_ARG_269 | NH1    | B_GLU_67  | OE1    | 2.748        |
| 1HGI   | A_ARG_269 | NH2    | B_GLU_67  | OE1    | 3.823        |
| 1HGI   | A_LYS_299 | NZ     | B_GLU_69  | OE2    | 2.728        |
| 1HGI   | A_LYS_310 | NZ     | B_ASP_86  | OD1    | 2.759        |
| 1HGI   | A_LYS_310 | NZ     | B_ASP_90  | OD1    | 2.527        |
| 1HGI   | A_LYS_326 | NZ     | B_GLU_15  | OE1    | 3.374        |
| 1HGI   | A_LYS_326 | NZ     | B_GLU_15  | OE2    | 2.794        |
| 1HGI   | B_ARG_25  | NH1    | A_GLU_325 | OE2    | 3.734        |
| 1HGI   | B_ARG_25  | NH2    | A_GLU_325 | OE2    | 2.929        |
| 1HGI   | B_ARG_54  | NH1    | F_GLU_97  | OE2    | 3.222        |
| 1HGI   | B_ARG_54  | NH2    | F_GLU_97  | OE2    | 2.806        |
| 1HGI   | B_LYS_62  | NZ     | F_ASP_86  | OD1    | 2.942        |
| 1HGI   | B_LYS_62  | NZ     | F_ASP_86  | OD2    | 2.668        |
| 1HGI   | B_LYS_62  | NZ     | F_ASP_90  | OD1    | 3.332        |
| 1HGI   | B_LYS_62  | NZ     | F_ASP_90  | OD2    | 2.667        |
| 1HGI   | B_ARG_76  | NH1    | D_GLU_74  | OE1    | 3.625        |
| 1HGI   | B_ARG_76  | NH1    | D_GLU_74  | OE2    | 2.918        |
| 1HGI   | B_ARG_76  | NH2    | D_GLU_74  | OE1    | 2.861        |
| 1HGI   | B_ARG_76  | NH2    | D_GLU_74  | OE2    | 3.621        |
| 1HGI   | B_ARG_76  | NH2    | D_GLU_81  | OE1    | 2.708        |
| 1HGI   | B_ARG_76  | NH2    | D_GLU_81  | OE2    | 3.474        |
| 1HGI   | B_ARG_123 | NH2    | F_GLU_132 | OE1    | 3.105        |
| 1HGI   | B_ARG_124 | NH2    | F_GLU_132 | OE1    | 3.081        |
| 1HGI   | B_ARG_124 | NH2    | F_GLU_132 | OE2    | 3.356        |
| 1HGI   | B_ARG_127 | NH1    | F_GLU_131 | OE1    | 2.493        |
| 1HGI   | B_ARG_163 | NH2    | F_GLU_131 | OE1    | 2.586        |
| 1HGI   | B_ARG_163 | NH2    | F_GLU_131 | OE2    | 2.598        |
| 1HGI   | B_ARG_170 | NH1    | D_GLU_128 | OE1    | 3.640        |
| 1HGI   | B_ARG_170 | NH1    | D_GLU_128 | OE2    | 3.301        |
| 1HGI   | B_LYS_174 | NZ     | D_ASP_164 | OD1    | 2.745        |
| 1HGI   | B_LYS_174 | NZ     | D_ASP_164 | OD2    | 2.560        |
| 1HGI   | C_LYS_27  | NZ     | D_GLU_97  | OE1    | 2.951        |
| 1HGI   | C_LYS_27  | NZ     | D_GLU_97  | OE2    | 2.876        |
| 1HGI   | C_ARG_109 | NH2    | D_GLU_67  | OE1    | 3.637        |
| 1HGI   | C_ARG_109 | NH2    | D_GLU_67  | OE2    | 2.819        |
| 1HGI   | C_LYS_238 | NZ     | B_GLU_72  | OE1    | 2.671        |
| 1HGI   | C_LYS_238 | NZ     | B_GLU_72  | OE2    | 2.721        |
| 1HGI   | C_ARG_269 | NH1    | D_GLU_67  | OE1    | 2.753        |
| 1HGI   | C_ARG_269 | NH2    | D_GLU_67  | OE1    | 3.850        |
| 1HGI   | C_LYS_299 | NZ     | D_GLU_69  | OE2    | 2.739        |
| 1HGI   | C_LYS_310 | NZ     | D_ASP_86  | OD1    | 2.772        |
| 1HGI   | C_LYS_310 | NZ     | D_ASP_90  | OD1    | 2.525        |
| 1HGI   | C_LYS_326 | NZ     | D_GLU_15  | OE1    | 2.825        |
| 1HGI   | C_LYS_326 | NZ     | D_GLU_15  | OE2    | 3.570        |
| 1HGI   | D_ARG_54  | NH1    | B_GLU_97  | OE2    | 3.254        |
| 1HGI   | D_ARG_54  | NH2    | B_GLU_97  | OE2    | 2.808        |
| 1HGI   | D_LYS_62  | NZ     | B_ASP_86  | OD1    | 2.962        |
| 1HGI   | D_LYS_62  | NZ     | B_ASP_86  | OD2    | 2.570        |
| 1HGI   | D_LYS_62  | NZ     | B_ASP_90  | OD1    | 3.335        |
| 1HGI   | D_LYS_62  | NZ     | B_ASP_90  | OD2    | 2.541        |
| 1HGI   | D_ARG_76  | NH1    | F_GLU_74  | OE1    | 3.375        |



|      |           |     |           |     |       |
|------|-----------|-----|-----------|-----|-------|
| 1HGI | D_ARG_76  | NH1 | F_GLU_74  | OE2 | 2.776 |
| 1HGI | D_ARG_76  | NH2 | F_GLU_74  | OE1 | 2.760 |
| 1HGI | D_ARG_76  | NH2 | F_GLU_74  | OE2 | 3.657 |
| 1HGI | D_ARG_76  | NH2 | F_GLU_81  | OE1 | 2.608 |
| 1HGI | D_ARG_76  | NH2 | F_GLU_81  | OE2 | 3.506 |
| 1HGI | D_ARG_123 | NH2 | B_GLU_132 | OE1 | 3.093 |
| 1HGI | D_ARG_124 | NH2 | B_GLU_132 | OE1 | 3.096 |
| 1HGI | D_ARG_124 | NH2 | B_GLU_132 | OE2 | 3.377 |
| 1HGI | D_ARG_127 | NH1 | B_GLU_131 | OE1 | 2.513 |
| 1HGI | D_ARG_163 | NH2 | B_GLU_131 | OE1 | 2.590 |
| 1HGI | D_ARG_163 | NH2 | B_GLU_131 | OE2 | 2.616 |
| 1HGI | D_ARG_170 | NH1 | F_GLU_128 | OE1 | 3.797 |
| 1HGI | D_ARG_170 | NH1 | F_GLU_128 | OE2 | 3.417 |
| 1HGI | D_LYS_174 | NZ  | F_ASP_164 | OD1 | 2.814 |
| 1HGI | D_LYS_174 | NZ  | F_ASP_164 | OD2 | 2.727 |
| 1HGI | E_LYS_27  | NZ  | F_GLU_97  | OE1 | 2.961 |
| 1HGI | E_LYS_27  | NZ  | F_GLU_97  | OE2 | 2.862 |
| 1HGI | E_ARG_109 | NH2 | F_GLU_67  | OE1 | 3.649 |
| 1HGI | E_ARG_109 | NH2 | F_GLU_67  | OE2 | 2.781 |
| 1HGI | E_LYS_238 | NZ  | D_GLU_72  | OE1 | 2.803 |
| 1HGI | E_LYS_238 | NZ  | D_GLU_72  | OE2 | 2.859 |
| 1HGI | E_ARG_269 | NH1 | F_GLU_67  | OE1 | 2.720 |
| 1HGI | E_ARG_269 | NH2 | F_GLU_67  | OE1 | 3.815 |
| 1HGI | E_LYS_299 | NZ  | F_GLU_69  | OE2 | 2.715 |
| 1HGI | E_LYS_310 | NZ  | F_ASP_86  | OD1 | 2.757 |
| 1HGI | E_LYS_310 | NZ  | F_ASP_90  | OD1 | 2.523 |
| 1HGI | E_LYS_326 | NZ  | F_GLU_15  | OE1 | 2.882 |
| 1HGI | E_LYS_326 | NZ  | F_GLU_15  | OE2 | 3.090 |
| 1HGI | F_ARG_54  | NH1 | D_GLU_97  | OE2 | 3.254 |
| 1HGI | F_ARG_54  | NH2 | D_GLU_97  | OE2 | 2.750 |
| 1HGI | F_LYS_62  | NZ  | D_ASP_86  | OD1 | 2.884 |
| 1HGI | F_LYS_62  | NZ  | D_ASP_86  | OD2 | 2.563 |
| 1HGI | F_LYS_62  | NZ  | D_ASP_90  | OD1 | 3.358 |
| 1HGI | F_LYS_62  | NZ  | D_ASP_90  | OD2 | 2.609 |
| 1HGI | F_ARG_76  | NH1 | B_GLU_74  | OE1 | 3.420 |
| 1HGI | F_ARG_76  | NH1 | B_GLU_74  | OE2 | 2.771 |
| 1HGI | F_ARG_76  | NH2 | B_GLU_74  | OE1 | 2.763 |
| 1HGI | F_ARG_76  | NH2 | B_GLU_74  | OE2 | 3.604 |
| 1HGI | F_ARG_76  | NH2 | B_GLU_81  | OE1 | 2.645 |
| 1HGI | F_ARG_76  | NH2 | B_GLU_81  | OE2 | 3.592 |
| 1HGI | F_ARG_123 | NH2 | D_GLU_132 | OE1 | 3.144 |
| 1HGI | F_ARG_124 | NH2 | D_GLU_132 | OE1 | 3.185 |
| 1HGI | F_ARG_124 | NH2 | D_GLU_132 | OE2 | 3.386 |
| 1HGI | F_ARG_127 | NH1 | D_GLU_131 | OE1 | 2.561 |
| 1HGI | F_ARG_163 | NH2 | D_GLU_131 | OE1 | 2.567 |
| 1HGI | F_ARG_163 | NH2 | D_GLU_131 | OE2 | 2.692 |
| 1HGI | F_ARG_170 | NH1 | B_GLU_128 | OE1 | 3.621 |
| 1HGI | F_ARG_170 | NH1 | B_GLU_128 | OE2 | 3.345 |
| 1HGI | F_LYS_174 | NZ  | B_ASP_164 | OD1 | 2.789 |
| 1HGI | F_LYS_174 | NZ  | B_ASP_164 | OD2 | 2.521 |

---

Table 986: Interfacial 1HGI-specific salt bridging networks analysis. In this table, a PDB file is specified with a four-letter PDB ID, except that the names of the PDB files corresponding to the single NMR structural model split from the NMR ensemble is specified with a four-letter PDB ID in addition to a hyphen followed by the single NMR structural model numeric ID, the residue naming scheme is **Chain ID\_residue name\_residue number**,  $\angle ADH$  represents the angle formed by acceptor (A), donor (D) and hydrogen (H) ( $\angle ADH$ ).

| PDB ID | Residue A | Atom A | Residue B | Atom B | Distance (Å) |
|--------|-----------|--------|-----------|--------|--------------|
| 1HGJ   | A_LYS_27  | NZ     | B_GLU_97  | OE1    | 2.775        |
| 1HGJ   | A_LYS_27  | NZ     | B_GLU_97  | OE2    | 2.807        |
| 1HGJ   | A_ARG_109 | NH2    | B_GLU_67  | OE1    | 3.648        |
| 1HGJ   | A_ARG_109 | NH2    | B_GLU_67  | OE2    | 2.748        |
| 1HGJ   | A_LYS_238 | NZ     | F_GLU_72  | OE1    | 2.903        |
| 1HGJ   | A_LYS_238 | NZ     | F_GLU_72  | OE2    | 2.788        |
| 1HGJ   | A_ARG_269 | NH1    | B_GLU_67  | OE1    | 2.736        |
| 1HGJ   | A_ARG_269 | NH2    | B_GLU_67  | OE1    | 3.791        |
| 1HGJ   | A_LYS_299 | NZ     | B_GLU_69  | OE2    | 2.821        |
| 1HGJ   | A_LYS_310 | NZ     | B_ASP_86  | OD1    | 2.922        |
| 1HGJ   | A_LYS_310 | NZ     | B_ASP_90  | OD1    | 2.569        |
| 1HGJ   | A_LYS_326 | NZ     | B_GLU_15  | OE1    | 3.187        |
| 1HGJ   | A_LYS_326 | NZ     | B_GLU_15  | OE2    | 2.826        |
| 1HGJ   | B_ARG_25  | NH1    | A_GLU_325 | OE2    | 3.775        |
| 1HGJ   | B_ARG_25  | NH2    | A_GLU_325 | OE2    | 2.974        |
| 1HGJ   | B_ARG_54  | NH1    | F_GLU_97  | OE2    | 3.272        |
| 1HGJ   | B_ARG_54  | NH2    | F_GLU_97  | OE2    | 2.774        |
| 1HGJ   | B_LYS_62  | NZ     | F_ASP_86  | OD1    | 2.863        |
| 1HGJ   | B_LYS_62  | NZ     | F_ASP_86  | OD2    | 2.651        |
| 1HGJ   | B_LYS_62  | NZ     | F_ASP_90  | OD1    | 3.453        |
| 1HGJ   | B_LYS_62  | NZ     | F_ASP_90  | OD2    | 2.738        |
| 1HGJ   | B_ARG_76  | NH1    | D_GLU_74  | OE1    | 3.648        |
| 1HGJ   | B_ARG_76  | NH1    | D_GLU_74  | OE2    | 2.885        |
| 1HGJ   | B_ARG_76  | NH2    | D_GLU_74  | OE1    | 2.846        |
| 1HGJ   | B_ARG_76  | NH2    | D_GLU_74  | OE2    | 3.547        |
| 1HGJ   | B_ARG_76  | NH2    | D_GLU_81  | OE1    | 2.721        |
| 1HGJ   | B_ARG_76  | NH2    | D_GLU_81  | OE2    | 3.500        |
| 1HGJ   | B_ARG_123 | NH2    | F_GLU_132 | OE1    | 3.120        |
| 1HGJ   | B_ARG_124 | NH2    | F_GLU_132 | OE1    | 3.095        |
| 1HGJ   | B_ARG_124 | NH2    | F_GLU_132 | OE2    | 3.375        |
| 1HGJ   | B_ARG_127 | NH1    | F_GLU_131 | OE1    | 2.484        |
| 1HGJ   | B_ARG_163 | NH2    | F_GLU_131 | OE1    | 2.591        |
| 1HGJ   | B_ARG_163 | NH2    | F_GLU_131 | OE2    | 2.571        |
| 1HGJ   | B_ARG_170 | NH1    | D_GLU_128 | OE1    | 3.291        |
| 1HGJ   | B_ARG_170 | NH1    | D_GLU_128 | OE2    | 3.706        |
| 1HGJ   | B_LYS_174 | NZ     | D_ASP_164 | OD1    | 2.810        |
| 1HGJ   | B_LYS_174 | NZ     | D_ASP_164 | OD2    | 2.550        |
| 1HGJ   | C_LYS_27  | NZ     | D_GLU_97  | OE1    | 2.755        |
| 1HGJ   | C_LYS_27  | NZ     | D_GLU_97  | OE2    | 2.824        |
| 1HGJ   | C_ARG_109 | NH2    | D_GLU_67  | OE1    | 3.638        |
| 1HGJ   | C_ARG_109 | NH2    | D_GLU_67  | OE2    | 2.758        |
| 1HGJ   | C_LYS_238 | NZ     | B_GLU_72  | OE1    | 2.749        |
| 1HGJ   | C_LYS_238 | NZ     | B_GLU_72  | OE2    | 2.713        |
| 1HGJ   | C_ARG_269 | NH1    | D_GLU_67  | OE1    | 2.708        |
| 1HGJ   | C_ARG_269 | NH2    | D_GLU_67  | OE1    | 3.781        |
| 1HGJ   | C_LYS_299 | NZ     | D_GLU_69  | OE2    | 2.827        |
| 1HGJ   | C_LYS_310 | NZ     | D_ASP_86  | OD1    | 2.943        |
| 1HGJ   | C_LYS_310 | NZ     | D_ASP_90  | OD1    | 2.532        |
| 1HGJ   | C_LYS_326 | NZ     | D_GLU_15  | OE1    | 2.911        |
| 1HGJ   | C_LYS_326 | NZ     | D_GLU_15  | OE2    | 3.904        |
| 1HGJ   | D_ARG_54  | NH1    | B_GLU_97  | OE2    | 3.338        |
| 1HGJ   | D_ARG_54  | NH2    | B_GLU_97  | OE2    | 2.835        |
| 1HGJ   | D_LYS_62  | NZ     | B_ASP_86  | OD1    | 2.910        |
| 1HGJ   | D_LYS_62  | NZ     | B_ASP_86  | OD2    | 2.574        |
| 1HGJ   | D_LYS_62  | NZ     | B_ASP_90  | OD1    | 3.419        |
| 1HGJ   | D_LYS_62  | NZ     | B_ASP_90  | OD2    | 2.622        |
| 1HGJ   | D_ARG_76  | NH1    | F_GLU_74  | OE1    | 3.424        |

|      |           |     |           |     |       |
|------|-----------|-----|-----------|-----|-------|
| 1HGJ | D_ARG_76  | NH1 | F_GLU_74  | OE2 | 2.763 |
| 1HGJ | D_ARG_76  | NH2 | F_GLU_74  | OE1 | 2.714 |
| 1HGJ | D_ARG_76  | NH2 | F_GLU_74  | OE2 | 3.550 |
| 1HGJ | D_ARG_76  | NH2 | F_GLU_81  | OE1 | 2.684 |
| 1HGJ | D_ARG_76  | NH2 | F_GLU_81  | OE2 | 3.574 |
| 1HGJ | D_ARG_123 | NH2 | B_GLU_132 | OE1 | 3.075 |
| 1HGJ | D_ARG_124 | NH2 | B_GLU_132 | OE1 | 3.055 |
| 1HGJ | D_ARG_124 | NH2 | B_GLU_132 | OE2 | 3.342 |
| 1HGJ | D_ARG_127 | NH1 | B_GLU_131 | OE1 | 2.514 |
| 1HGJ | D_ARG_163 | NH2 | B_GLU_131 | OE1 | 2.599 |
| 1HGJ | D_ARG_163 | NH2 | B_GLU_131 | OE2 | 2.594 |
| 1HGJ | D_ARG_170 | NH1 | F_GLU_128 | OE1 | 3.405 |
| 1HGJ | D_ARG_170 | NH1 | F_GLU_128 | OE2 | 3.769 |
| 1HGJ | D_LYS_174 | NZ  | F_ASP_164 | OD1 | 2.824 |
| 1HGJ | D_LYS_174 | NZ  | F_ASP_164 | OD2 | 2.673 |
| 1HGJ | E_LYS_27  | NZ  | F_GLU_97  | OE1 | 2.779 |
| 1HGJ | E_LYS_27  | NZ  | F_GLU_97  | OE2 | 2.813 |
| 1HGJ | E_ARG_109 | NH2 | F_GLU_67  | OE1 | 3.635 |
| 1HGJ | E_ARG_109 | NH2 | F_GLU_67  | OE2 | 2.759 |
| 1HGJ | E_LYS_238 | NZ  | D_GLU_72  | OE1 | 2.865 |
| 1HGJ | E_LYS_238 | NZ  | D_GLU_72  | OE2 | 2.804 |
| 1HGJ | E_ARG_269 | NH1 | F_GLU_67  | OE1 | 2.691 |
| 1HGJ | E_ARG_269 | NH2 | F_GLU_67  | OE1 | 3.759 |
| 1HGJ | E_LYS_299 | NZ  | F_GLU_69  | OE2 | 2.806 |
| 1HGJ | E_LYS_310 | NZ  | F_ASP_86  | OD1 | 2.930 |
| 1HGJ | E_LYS_310 | NZ  | F_ASP_90  | OD1 | 2.553 |
| 1HGJ | E_LYS_326 | NZ  | F_GLU_15  | OE1 | 2.874 |
| 1HGJ | E_LYS_326 | NZ  | F_GLU_15  | OE2 | 3.254 |
| 1HGJ | F_ARG_54  | NH1 | D_GLU_97  | OE2 | 3.349 |
| 1HGJ | F_ARG_54  | NH2 | D_GLU_97  | OE2 | 2.771 |
| 1HGJ | F_LYS_62  | NZ  | D_ASP_86  | OD1 | 2.846 |
| 1HGJ | F_LYS_62  | NZ  | D_ASP_86  | OD2 | 2.568 |
| 1HGJ | F_LYS_62  | NZ  | D_ASP_90  | OD1 | 3.467 |
| 1HGJ | F_LYS_62  | NZ  | D_ASP_90  | OD2 | 2.658 |
| 1HGJ | F_ARG_76  | NH1 | B_GLU_74  | OE1 | 3.383 |
| 1HGJ | F_ARG_76  | NH1 | B_GLU_74  | OE2 | 2.704 |
| 1HGJ | F_ARG_76  | NH2 | B_GLU_74  | OE1 | 2.715 |
| 1HGJ | F_ARG_76  | NH2 | B_GLU_74  | OE2 | 3.551 |
| 1HGJ | F_ARG_76  | NH2 | B_GLU_81  | OE1 | 2.654 |
| 1HGJ | F_ARG_76  | NH2 | B_GLU_81  | OE2 | 3.611 |
| 1HGJ | F_ARG_123 | NH2 | D_GLU_132 | OE1 | 3.110 |
| 1HGJ | F_ARG_124 | NH2 | D_GLU_132 | OE1 | 3.125 |
| 1HGJ | F_ARG_124 | NH2 | D_GLU_132 | OE2 | 3.360 |
| 1HGJ | F_ARG_127 | NH1 | D_GLU_131 | OE1 | 2.554 |
| 1HGJ | F_ARG_163 | NH2 | D_GLU_131 | OE1 | 2.636 |
| 1HGJ | F_ARG_163 | NH2 | D_GLU_131 | OE2 | 2.696 |
| 1HGJ | F_ARG_170 | NH1 | B_GLU_128 | OE1 | 3.311 |
| 1HGJ | F_ARG_170 | NH1 | B_GLU_128 | OE2 | 3.766 |
| 1HGJ | F_LYS_174 | NZ  | B_ASP_164 | OD1 | 2.859 |
| 1HGJ | F_LYS_174 | NZ  | B_ASP_164 | OD2 | 2.554 |

---

Table 987: Interfacial 1HGJ-specific salt bridging networks analysis. In this table, a PDB file is specified with a four-letter PDB ID, except that the names of the PDB files corresponding to the single NMR structural model split from the NMR ensemble is specified with a four-letter PDB ID in addition to a hyphen followed by the single NMR structural model numeric ID, the residue naming scheme is **Chain ID\_residue name\_residue number**,  $\angle ADH$  represents the angle formed by acceptor (A), donor (D) and hydrogen (H) ( $\angle ADH$ ).

| PDB ID | Residue A | Atom A | Residue B | Atom B | Distance (Å) |
|--------|-----------|--------|-----------|--------|--------------|
| 1HIL   | A.LYS_28  | NZ     | B.ASP_99  | OD1    | 3.388        |
| 1HIL   | A.LYS_28  | NZ     | B.ASP_99  | OD2    | 3.371        |
| 1HIL   | A.LYS_30  | NZ     | B.ASP_99  | OD2    | 3.991        |
| 1HIL   | B.ARG_95  | NH1    | A.ASP_91  | OD1    | 2.828        |
| 1HIL   | B.ARG_95  | NH1    | A.ASP_91  | OD2    | 3.804        |
| 1HIL   | B.ARG_95  | NH2    | A.ASP_91  | OD1    | 3.160        |
| 1HIL   | B.ARG_95  | NH2    | A.ASP_91  | OD2    | 3.904        |
| 1HIL   | B.HIS_172 | NE2    | A.ASP_167 | OD2    | 3.701        |
| 1HIL   | B.LYS_221 | NZ     | A.GLU_123 | OE1    | 2.980        |
| 1HIL   | C.LYS_28  | NZ     | D.ASP_99  | OD1    | 3.565        |
| 1HIL   | C.LYS_28  | NZ     | D.ASP_99  | OD2    | 3.509        |
| 1HIL   | D.ARG_95  | NH1    | C.ASP_91  | OD1    | 2.906        |
| 1HIL   | D.ARG_95  | NH1    | C.ASP_91  | OD2    | 3.993        |
| 1HIL   | D.ARG_95  | NH2    | C.ASP_91  | OD1    | 3.045        |
| 1HIL   | D.ARG_95  | NH2    | C.ASP_91  | OD2    | 3.822        |
| 1HIL   | D.LYS_221 | NZ     | C.GLU_123 | OE1    | 2.896        |
| 1HIL   | D.LYS_221 | NZ     | C.GLU_123 | OE2    | 3.091        |

Table 988: Interfacial 1HIL-specific salt bridging networks analysis. In this table, a PDB file is specified with a four-letter PDB ID, except that the names of the PDB files corresponding to the single NMR structural model split from the NMR ensemble is specified with a four-letter PDB ID in addition to a hyphen followed by the single NMR structural model numeric ID, the residue naming scheme is **Chain ID\_residue name\_residue number**,  $\angle ADH$  represents the angle formed by acceptor (A), donor (D) and hydrogen (H) ( $\angle ADH$ ).

| PDB ID | Residue A | Atom A | Residue B | Atom B | Distance (Å) |
|--------|-----------|--------|-----------|--------|--------------|
| 1HIM   | L_ARG_95  | NH1    | H_ASP_91  | OD1    | 3.100        |
| 1HIM   | L_ARG_95  | NH2    | H_ASP_91  | OD1    | 3.427        |
| 1HIM   | L_ARG_95  | NH2    | P_ASP_104 | OD1    | 3.909        |
| 1HIM   | L_ARG_95  | NH2    | P_ASP_104 | OD2    | 3.079        |
| 1HIM   | L_LYS_221 | NZ     | H_GLU_123 | OE1    | 3.486        |
| 1HIM   | L_LYS_221 | NZ     | H_GLU_123 | OE2    | 2.924        |
| 1HIM   | J_LYS_28  | NZ     | M_GLU_100 | OE1    | 3.991        |
| 1HIM   | J_LYS_28  | NZ     | M_GLU_100 | OE2    | 3.433        |
| 1HIM   | M_ARG_95  | NH1    | J_ASP_91  | OD1    | 2.854        |
| 1HIM   | M_ARG_95  | NH2    | J_ASP_91  | OD1    | 3.712        |
| 1HIM   | M_ARG_95  | NH2    | R_ASP_104 | OD1    | 2.834        |
| 1HIM   | M_ARG_95  | NH2    | R_ASP_104 | OD2    | 3.540        |

Table 989: Interfacial 1HIM-specific salt bridging networks analysis. In this table, a PDB file is specified with a four-letter PDB ID, except that the names of the PDB files corresponding to the single NMR structural model split from the NMR ensemble is specified with a four-letter PDB ID in addition to a hyphen followed by the single NMR structural model numeric ID, the residue naming scheme is **Chain ID residue name residue number**,  $\angle ADH$  represents the angle formed by acceptor (A), donor (D) and hydrogen (H) ( $\angle ADH$ ).

| PDB ID | Residue A | Atom A | Residue B | Atom B | Distance (Å) |
|--------|-----------|--------|-----------|--------|--------------|
| 1HIN   | L_LYS_28  | NZ     | H_GLU_100 | OE2    | 2.975        |
| 1HIN   | H_ARG_95  | NH1    | L_ASP_91  | OD1    | 3.169        |
| 1HIN   | H_ARG_95  | NH1    | P_ASP_104 | OD1    | 3.889        |
| 1HIN   | H_ARG_95  | NH2    | L_ASP_91  | OD1    | 2.746        |

Table 990: Interfacial 1HIN-specific salt bridging networks analysis. In this table, a PDB file is specified with a four-letter PDB ID, except that the names of the PDB files corresponding to the single NMR structural model split from the NMR ensemble is specified with a four-letter PDB ID in addition to a hyphen followed by the single NMR structural model numeric ID, the residue naming scheme is **Chain ID\_residue name\_residue number**,  $\angle ADH$  represents the angle formed by acceptor (A), donor (D) and hydrogen (H) ( $\angle ADH$ ).



| PDB ID | Residue A | Atom A | Residue B | Atom B | Distance (Å) |
|--------|-----------|--------|-----------|--------|--------------|
| 1I8I   | B_LYS_343 | NZ     | A_ASP_85  | OD1    | 3.777        |
| 1I8I   | C_LYS_502 | NZ     | A_GLU_50  | OE1    | 3.673        |
| 1I8I   | C_LYS_502 | NZ     | A_GLU_50  | OE2    | 3.232        |

Table 991: Interfacial 1I8I-specific salt bridging networks analysis. In this table, a PDB file is specified with a four-letter PDB ID, except that the names of the PDB files corresponding to the single NMR structural model split from the NMR ensemble is specified with a four-letter PDB ID in addition to a hyphen followed by the single NMR structural model numeric ID, the residue naming scheme is **Chain ID\_residue name\_residue number**,  $\angle ADH$  represents the angle formed by acceptor (A), donor (D) and hydrogen (H) ( $\angle ADH$ ).

| PDB ID | Residue A | Atom A | Residue B | Atom B | Distance (Å) |
|--------|-----------|--------|-----------|--------|--------------|
| 1I8K   | B_LYS_343 | NZ     | A_ASP_85  | OD1    | 3.688        |
| 1I8K   | B_LYS_343 | NZ     | A_ASP_85  | OD2    | 2.833        |
| 1I8K   | C_LYS_502 | NZ     | A_GLU_50  | OE1    | 3.381        |
| 1I8K   | C_LYS_502 | NZ     | A_GLU_50  | OE2    | 3.653        |

Table 992: Interfacial 1I8K-specific salt bridging networks analysis. In this table, a PDB file is specified with a four-letter PDB ID, except that the names of the PDB files corresponding to the single NMR structural model split from the NMR ensemble is specified with a four-letter PDB ID in addition to a hyphen followed by the single NMR structural model numeric ID, the residue naming scheme is **Chain ID\_residue name\_residue number**,  $\angle ADH$  represents the angle formed by acceptor (A), donor (D) and hydrogen (H) ( $\angle ADH$ ).

| PDB ID | Residue A | Atom A | Residue B | Atom B | Distance (Å) |
|--------|-----------|--------|-----------|--------|--------------|
| 1I8M   | H_LYS_208 | NZ     | L_GLU_123 | OE1    | 2.918        |
| 1I8M   | B_LYS_208 | NZ     | A_GLU_123 | OE2    | 2.887        |

Table 993: Interfacial 1I8M-specific salt bridging networks analysis. In this table, a PDB file is specified with a four-letter PDB ID, except that the names of the PDB files corresponding to the single NMR structural model split from the NMR ensemble is specified with a four-letter PDB ID in addition to a hyphen followed by the single NMR structural model numeric ID, the residue naming scheme is **Chain ID\_residue name\_residue number**,  $\angle ADH$  represents the angle formed by acceptor (A), donor (D) and hydrogen (H) ( $\angle ADH$ ).

| PDB ID | Residue A | Atom A | Residue B | Atom B | Distance (Å) |
|--------|-----------|--------|-----------|--------|--------------|
| 1IC4   | Y_LYS_97  | NZ     | H_ASP_99  | OD1    | 2.657        |
| 1IC4   | Y_LYS_97  | NZ     | H_ASP_99  | OD2    | 3.938        |

Table 994: Interfacial 1IC4-specific salt bridging networks analysis. In this table, a PDB file is specified with a four-letter PDB ID, except that the names of the PDB files corresponding to the single NMR structural model split from the NMR ensemble is specified with a four-letter PDB ID in addition to a hyphen followed by the single NMR structural model numeric ID, the residue naming scheme is **Chain ID\_residue name\_residue number**,  $\angle ADH$  represents the angle formed by acceptor (A), donor (D) and hydrogen (H) ( $\angle ADH$ ).

| PDB ID | Residue A | Atom A | Residue B | Atom B | Distance (Å) |
|--------|-----------|--------|-----------|--------|--------------|
| 1IC5   | Y_LYS_97  | NZ     | H_ASP_32  | OD1    | 2.694        |

Table 995: Interfacial 1IC5-specific salt bridging networks analysis. In this table, a PDB file is specified with a four-letter PDB ID, except that the names of the PDB files corresponding to the single NMR structural model split from the NMR ensemble is specified with a four-letter PDB ID in addition to a hyphen followed by the single NMR structural model numeric ID, the residue naming scheme is **Chain ID\_residue name\_residue number**,  $\angle ADH$  represents the angle formed by acceptor (A), donor (D) and hydrogen (H) ( $\angle ADH$ ).

| PDB ID | Residue A | Atom A | Residue B | Atom B | Distance (Å) |
|--------|-----------|--------|-----------|--------|--------------|
| 1IFH   | H_ARG_95  | NH1    | L_ASP_91  | OD1    | 2.782        |
| 1IFH   | H_ARG_95  | NH2    | P_ASP_104 | OD1    | 2.974        |
| 1IFH   | H_ARG_95  | NH2    | P_ASP_104 | OD2    | 2.813        |
| 1IFH   | H_LYS_221 | NZ     | L_GLU_123 | OE1    | 3.267        |
| 1IFH   | H_LYS_221 | NZ     | L_GLU_123 | OE2    | 2.926        |

Table 996: Interfacial 1IFH-specific salt bridging networks analysis. In this table, a PDB file is specified with a four-letter PDB ID, except that the names of the PDB files corresponding to the single NMR structural model split from the NMR ensemble is specified with a four-letter PDB ID in addition to a hyphen followed by the single NMR structural model numeric ID, the residue naming scheme is **Chain ID\_residue name\_residue number**,  $\angle ADH$  represents the angle formed by acceptor (A), donor (D) and hydrogen (H) ( $\angle ADH$ ).

| PDB ID | Residue A | Atom A | Residue B | Atom B | Distance (Å) |
|--------|-----------|--------|-----------|--------|--------------|
| 1IGF   | L_LYS_50  | NZ     | H_ASP_98  | OD2    | 3.036        |
| 1IGF   | H_LYS_221 | NZ     | L_GLU_123 | OE1    | 3.549        |
| 1IGF   | J_LYS_221 | NZ     | M_GLU_123 | OE1    | 3.800        |
| 1IGF   | J_LYS_221 | NZ     | M_GLU_123 | OE2    | 3.750        |

Table 997: Interfacial 1IGF-specific salt bridging networks analysis. In this table, a PDB file is specified with a four-letter PDB ID, except that the names of the PDB files corresponding to the single NMR structural model split from the NMR ensemble is specified with a four-letter PDB ID in addition to a hyphen followed by the single NMR structural model numeric ID, the residue naming scheme is **Chain ID\_residue name\_residue number**,  $\angle ADH$  represents the angle formed by acceptor (A), donor (D) and hydrogen (H) ( $\angle ADH$ ).

| PDB ID | Residue A | Atom A | Residue B | Atom B | Distance (Å) |
|--------|-----------|--------|-----------|--------|--------------|
| 1IND   | H_LYS_143 | NZ     | L_GLU_127 | OE2    | 2.765        |
| 1IND   | H_HIS_164 | NE2    | L_ASP_141 | OD1    | 3.891        |

Table 998: Interfacial 1IND-specific salt bridging networks analysis. In this table, a PDB file is specified with a four-letter PDB ID, except that the names of the PDB files corresponding to the single NMR structural model split from the NMR ensemble is specified with a four-letter PDB ID in addition to a hyphen followed by the single NMR structural model numeric ID, the residue naming scheme is **Chain ID\_residue name\_residue number**,  $\angle ADH$  represents the angle formed by acceptor (A), donor (D) and hydrogen (H) ( $\angle ADH$ ).



| PDB ID | Residue A | Atom A | Residue B | Atom B | Distance (Å) |
|--------|-----------|--------|-----------|--------|--------------|
| 1INE   | H_LYS_143 | NZ     | L_GLU_127 | OE2    | 2.920        |
| 1INE   | H_HIS_164 | NE2    | L_ASP_141 | OD2    | 3.817        |

Table 999: Interfacial 1INE-specific salt bridging networks analysis. In this table, a PDB file is specified with a four-letter PDB ID, except that the names of the PDB files corresponding to the single NMR structural model split from the NMR ensemble is specified with a four-letter PDB ID in addition to a hyphen followed by the single NMR structural model numeric ID, the residue naming scheme is **Chain ID\_residue name\_residue number**,  $\angle ADH$  represents the angle formed by acceptor (A), donor (D) and hydrogen (H) ( $\angle ADH$ ).

| PDB ID | Residue A | Atom A | Residue B | Atom B | Distance (Å) |
|--------|-----------|--------|-----------|--------|--------------|
| 1IQW   | L_ARG_100 | NH2    | H_GLU_50  | OE1    | 2.572        |
| 1IQW   | L_ARG_100 | NH2    | H_GLU_50  | OE2    | 2.799        |
| 1IQW   | H_HIS_172 | NE2    | L_ASP_171 | OD1    | 3.594        |

Table 1000: Interfacial 1IQW-specific salt bridging networks analysis. In this table, a PDB file is specified with a four-letter PDB ID, except that the names of the PDB files corresponding to the single NMR structural model split from the NMR ensemble is specified with a four-letter PDB ID in addition to a hyphen followed by the single NMR structural model numeric ID, the residue naming scheme is **Chain ID\_residue name\_residue number**,  $\angle ADH$  represents the angle formed by acceptor (A), donor (D) and hydrogen (H) ( $\angle ADH$ ).

| PDB ID | Residue A | Atom A | Residue B | Atom B | Distance (Å) |
|--------|-----------|--------|-----------|--------|--------------|
| 1IT9   | L_ARG_100 | NH2    | H_GLU_50  | OE2    | 3.105        |
| 1IT9   | H_LYS_217 | NZ     | L_GLU_127 | OE1    | 3.545        |
| 1IT9   | H_LYS_217 | NZ     | L_GLU_127 | OE2    | 3.302        |

Table 1001: Interfacial 1IT9-specific salt bridging networks analysis. In this table, a PDB file is specified with a four-letter PDB ID, except that the names of the PDB files corresponding to the single NMR structural model split from the NMR ensemble is specified with a four-letter PDB ID in addition to a hyphen followed by the single NMR structural model numeric ID, the residue naming scheme is **Chain ID\_residue name\_residue number**,  $\angle ADH$  represents the angle formed by acceptor (A), donor (D) and hydrogen (H) ( $\angle ADH$ ).

| PDB ID | Residue A | Atom A | Residue B | Atom B | Distance (Å) |
|--------|-----------|--------|-----------|--------|--------------|
| 1J05   | H.LYS_58  | NZ     | L.ASP_94  | OD2    | 2.663        |
| 1J05   | B.LYS_58  | NZ     | A.ASP_94  | OD2    | 2.870        |

Table 1002: Interfacial 1J05-specific salt bridging networks analysis. In this table, a PDB file is specified with a four-letter PDB ID, except that the names of the PDB files corresponding to the single NMR structural model split from the NMR ensemble is specified with a four-letter PDB ID in addition to a hyphen followed by the single NMR structural model numeric ID, the residue naming scheme is **Chain ID\_residue name\_residue number**,  $\angle ADH$  represents the angle formed by acceptor (A), donor (D) and hydrogen (H) ( $\angle ADH$ ).

| PDB ID | Residue A | Atom A | Residue B | Atom B | Distance (Å) |
|--------|-----------|--------|-----------|--------|--------------|
| 1J1O   | Y_LYS_97  | NZ     | H_ASP_32  | OD1    | 2.636        |
| 1J1O   | Y_LYS_97  | NZ     | H_ASP_32  | OD2    | 3.985        |
| 1J1O   | Y_LYS_97  | NZ     | H_ASP_99  | OD1    | 3.590        |
| 1J1O   | Y_LYS_97  | NZ     | H_ASP_99  | OD2    | 2.896        |

Table 1003: Interfacial 1J1O-specific salt bridging networks analysis. In this table, a PDB file is specified with a four-letter PDB ID, except that the names of the PDB files corresponding to the single NMR structural model split from the NMR ensemble is specified with a four-letter PDB ID in addition to a hyphen followed by the single NMR structural model numeric ID, the residue naming scheme is **Chain ID\_residue name\_residue number**,  $\angle ADH$  represents the angle formed by acceptor (A), donor (D) and hydrogen (H) ( $\angle ADH$ ).

| PDB ID | Residue A | Atom A | Residue B | Atom B | Distance (Å) |
|--------|-----------|--------|-----------|--------|--------------|
| 1J1P   | Y_LYS_97  | NZ     | H_ASP_32  | OD1    | 2.700        |
| 1J1P   | Y_LYS_97  | NZ     | H_ASP_99  | OD1    | 3.721        |
| 1J1P   | Y_LYS_97  | NZ     | H_ASP_99  | OD2    | 2.595        |

Table 1004: Interfacial 1J1P-specific salt bridging networks analysis. In this table, a PDB file is specified with a four-letter PDB ID, except that the names of the PDB files corresponding to the single NMR structural model split from the NMR ensemble is specified with a four-letter PDB ID in addition to a hyphen followed by the single NMR structural model numeric ID, the residue naming scheme is **Chain ID\_residue name\_residue number**,  $\angle ADH$  represents the angle formed by acceptor (A), donor (D) and hydrogen (H) ( $\angle ADH$ ).

| PDB ID | Residue A | Atom A | Residue B | Atom B | Distance (Å) |
|--------|-----------|--------|-----------|--------|--------------|
| 1J1X   | Y.LYS_97  | NZ     | H.ASP_32  | OD1    | 2.655        |
| 1J1X   | Y.LYS_97  | NZ     | H.ASP_32  | OD2    | 3.935        |
| 1J1X   | Y.LYS_97  | NZ     | H.ASP_99  | OD1    | 3.479        |
| 1J1X   | Y.LYS_97  | NZ     | H.ASP_99  | OD2    | 2.956        |

Table 1005: Interfacial 1J1X-specific salt bridging networks analysis. In this table, a PDB file is specified with a four-letter PDB ID, except that the names of the PDB files corresponding to the single NMR structural model split from the NMR ensemble is specified with a four-letter PDB ID in addition to a hyphen followed by the single NMR structural model numeric ID, the residue naming scheme is **Chain ID\_residue name\_residue number**,  $\angle ADH$  represents the angle formed by acceptor (A), donor (D) and hydrogen (H) ( $\angle ADH$ ).

| PDB ID | Residue A | Atom A | Residue B | Atom B | Distance (Å) |
|--------|-----------|--------|-----------|--------|--------------|
| 1JFQ   | H_LYS_516 | NZ     | L_GLU_123 | OE1    | 3.003        |
| 1JFQ   | H_LYS_516 | NZ     | L_GLU_123 | OE2    | 3.095        |

Table 1006: Interfacial 1JFQ-specific salt bridging networks analysis. In this table, a PDB file is specified with a four-letter PDB ID, except that the names of the PDB files corresponding to the single NMR structural model split from the NMR ensemble is specified with a four-letter PDB ID in addition to a hyphen followed by the single NMR structural model numeric ID, the residue naming scheme is **Chain ID\_residue name\_residue number**,  $\angle ADH$  represents the angle formed by acceptor (A), donor (D) and hydrogen (H) ( $\angle ADH$ ).



| PDB ID | Residue A | Atom A | Residue B | Atom B | Distance (Å) |
|--------|-----------|--------|-----------|--------|--------------|
| 1JHL   | A_ARG_112 | NH1    | H_ASP_55  | OD1    | 3.828        |
| 1JHL   | A_ARG_112 | NH1    | H_ASP_55  | OD2    | 3.112        |
| 1JHL   | A_LYS_116 | NZ     | H_ASP_99  | OD1    | 3.763        |
| 1JHL   | A_LYS_116 | NZ     | H_ASP_99  | OD2    | 3.232        |

Table 1007: Interfacial 1JHL-specific salt bridging networks analysis. In this table, a PDB file is specified with a four-letter PDB ID, except that the names of the PDB files corresponding to the single NMR structural model split from the NMR ensemble is specified with a four-letter PDB ID in addition to a hyphen followed by the single NMR structural model numeric ID, the residue naming scheme is **Chain ID\_residue name\_residue number**,  $\angle ADH$  represents the angle formed by acceptor (A), donor (D) and hydrogen (H) ( $\angle ADH$ ).

| PDB ID | Residue A | Atom A | Residue B | Atom B | Distance (Å) |
|--------|-----------|--------|-----------|--------|--------------|
| 1JPS   | T_LYS_201 | NZ     | H_ASP_52  | OD1    | 2.781        |

Table 1008: Interfacial 1JPS-specific salt bridging networks analysis. In this table, a PDB file is specified with a four-letter PDB ID, except that the names of the PDB files corresponding to the single NMR structural model split from the NMR ensemble is specified with a four-letter PDB ID in addition to a hyphen followed by the single NMR structural model numeric ID, the residue naming scheme is **Chain ID\_residue name\_residue number**,  $\angle ADH$  represents the angle formed by acceptor (A), donor (D) and hydrogen (H) ( $\angle ADH$ ).

| PDB ID | Residue A | Atom A | Residue B | Atom B | Distance (Å) |
|--------|-----------|--------|-----------|--------|--------------|
| 1JPT   | H_LYS_213 | NZ     | L_GLU_123 | OE1    | 3.226        |
| 1JPT   | H_LYS_213 | NZ     | L_GLU_123 | OE2    | 3.740        |

Table 1009: Interfacial 1JPT-specific salt bridging networks analysis. In this table, a PDB file is specified with a four-letter PDB ID, except that the names of the PDB files corresponding to the single NMR structural model split from the NMR ensemble is specified with a four-letter PDB ID in addition to a hyphen followed by the single NMR structural model numeric ID, the residue naming scheme is **Chain ID\_residue name\_residue number**,  $\angle ADH$  represents the angle formed by acceptor (A), donor (D) and hydrogen (H) ( $\angle ADH$ ).

| PDB ID | Residue A | Atom A | Residue B | Atom B | Distance (Å) |
|--------|-----------|--------|-----------|--------|--------------|
| 1JRH   | LLYS_52   | NZ     | H_ASP_54  | OD1    | 3.471        |
| 1JRH   | LLYS_52   | NZ     | H_ASP_54  | OD2    | 2.819        |
| 1JRH   | LLYS_52   | NZ     | H_ASP_56  | OD2    | 2.824        |
| 1JRH   | L_ARG_84  | NH2    | L_GLU_27  | OE1    | 3.652        |
| 1JRH   | L_ARG_84  | NH2    | L_GLU_27  | OE2    | 3.984        |

Table 1010: Interfacial 1JRH-specific salt bridging networks analysis. In this table, a PDB file is specified with a four-letter PDB ID, except that the names of the PDB files corresponding to the single NMR structural model split from the NMR ensemble is specified with a four-letter PDB ID in addition to a hyphen followed by the single NMR structural model numeric ID, the residue naming scheme is **Chain ID\_residue name\_residue number**,  $\angle ADH$  represents the angle formed by acceptor (A), donor (D) and hydrogen (H) ( $\angle ADH$ ).

| PDB ID | Residue A | Atom A | Residue B | Atom B | Distance (Å) |
|--------|-----------|--------|-----------|--------|--------------|
| 1K6Q   | H_HIS_168 | NE2    | L_ASP_167 | OD1    | 3.896        |

Table 1011: Interfacial 1K6Q-specific salt bridging networks analysis. In this table, a PDB file is specified with a four-letter PDB ID, except that the names of the PDB files corresponding to the single NMR structural model split from the NMR ensemble is specified with a four-letter PDB ID in addition to a hyphen followed by the single NMR structural model numeric ID, the residue naming scheme is **Chain ID\_residue name\_residue number**,  $\angle ADH$  represents the angle formed by acceptor (A), donor (D) and hydrogen (H) ( $\angle ADH$ ).

| PDB ID | Residue A | Atom A | Residue B | Atom B | Distance (Å) |
|--------|-----------|--------|-----------|--------|--------------|
| 1KB5   | A_ARG_93  | NH1    | B_GLU_105 | OE1    | 2.975        |
| 1KB5   | A_ARG_93  | NH1    | B_GLU_105 | OE2    | 3.412        |
| 1KB5   | A_ARG_101 | NH2    | H_ASP_98  | OD1    | 2.690        |
| 1KB5   | L_LYS_27  | NZ     | B_ASP_54  | OD1    | 3.460        |
| 1KB5   | H_ARG_96  | NH1    | A_ASP_26  | OD1    | 2.599        |
| 1KB5   | H_ARG_96  | NH1    | A_ASP_26  | OD2    | 2.834        |
| 1KB5   | H_ARG_96  | NH2    | L_GLU_56  | OE2    | 2.981        |

Table 1012: Interfacial 1KB5-specific salt bridging networks analysis. In this table, a PDB file is specified with a four-letter PDB ID, except that the names of the PDB files corresponding to the single NMR structural model split from the NMR ensemble is specified with a four-letter PDB ID in addition to a hyphen followed by the single NMR structural model numeric ID, the residue naming scheme is **Chain ID\_residue name\_residue number**,  $\angle ADH$  represents the angle formed by acceptor (A), donor (D) and hydrogen (H) ( $\angle ADH$ ).

| PDB ID | Residue A | Atom A | Residue B | Atom B | Distance (Å) |
|--------|-----------|--------|-----------|--------|--------------|
| 1KC5   | H_LYS_211 | NZ     | L_GLU_123 | OE2    | 2.759        |

Table 1013: Interfacial 1KC5-specific salt bridging networks analysis. In this table, a PDB file is specified with a four-letter PDB ID, except that the names of the PDB files corresponding to the single NMR structural model split from the NMR ensemble is specified with a four-letter PDB ID in addition to a hyphen followed by the single NMR structural model numeric ID, the residue naming scheme is **Chain ID\_residue name\_residue number**,  $\angle ADH$  represents the angle formed by acceptor (A), donor (D) and hydrogen (H) ( $\angle ADH$ ).

| PDB ID | Residue A | Atom A | Residue B | Atom B | Distance (Å) |
|--------|-----------|--------|-----------|--------|--------------|
| 1KCS   | H_LYS_211 | NZ     | L_GLU_123 | OE1    | 3.340        |
| 1KCS   | H_LYS_211 | NZ     | L_GLU_123 | OE2    | 2.904        |

Table 1014: Interfacial 1KCS-specific salt bridging networks analysis. In this table, a PDB file is specified with a four-letter PDB ID, except that the names of the PDB files corresponding to the single NMR structural model split from the NMR ensemble is specified with a four-letter PDB ID in addition to a hyphen followed by the single NMR structural model numeric ID, the residue naming scheme is **Chain ID\_residue name\_residue number**,  $\angle ADH$  represents the angle formed by acceptor (A), donor (D) and hydrogen (H) ( $\angle ADH$ ).



| PDB ID | Residue A | Atom A | Residue B | Atom B | Distance (Å) |
|--------|-----------|--------|-----------|--------|--------------|
| 1KIP   | A_ARG_96  | NH1    | B_GLU_98  | OE1    | 2.773        |
| 1KIP   | A_ARG_96  | NH1    | B_GLU_98  | OE2    | 3.817        |
| 1KIP   | A_ARG_96  | NH2    | B_GLU_98  | OE1    | 3.280        |
| 1KIP   | A_ARG_96  | NH2    | B_GLU_98  | OE2    | 2.802        |

Table 1015: Interfacial 1KIP-specific salt bridging networks analysis. In this table, a PDB file is specified with a four-letter PDB ID, except that the names of the PDB files corresponding to the single NMR structural model split from the NMR ensemble is specified with a four-letter PDB ID in addition to a hyphen followed by the single NMR structural model numeric ID, the residue naming scheme is **Chain ID\_residue name\_residue number**,  $\angle ADH$  represents the angle formed by acceptor (A), donor (D) and hydrogen (H) ( $\angle ADH$ ).

| PDB ID | Residue A | Atom A | Residue B | Atom B | Distance (Å) |
|--------|-----------|--------|-----------|--------|--------------|
| 1KIQ   | A_ARG_96  | NH1    | B_GLU_98  | OE1    | 2.812        |
| 1KIQ   | A_ARG_96  | NH1    | B_GLU_98  | OE2    | 3.589        |
| 1KIQ   | A_ARG_96  | NH2    | B_GLU_98  | OE1    | 3.677        |
| 1KIQ   | A_ARG_96  | NH2    | B_GLU_98  | OE2    | 2.919        |

Table 1016: Interfacial 1KIQ-specific salt bridging networks analysis. In this table, a PDB file is specified with a four-letter PDB ID, except that the names of the PDB files corresponding to the single NMR structural model split from the NMR ensemble is specified with a four-letter PDB ID in addition to a hyphen followed by the single NMR structural model numeric ID, the residue naming scheme is **Chain ID\_residue name\_residue number**,  $\angle ADH$  represents the angle formed by acceptor (A), donor (D) and hydrogen (H) ( $\angle ADH$ ).

| PDB ID | Residue A | Atom A | Residue B | Atom B | Distance (Å) |
|--------|-----------|--------|-----------|--------|--------------|
| 1KIR   | A_ARG_96  | NH1    | B_GLU_98  | OE1    | 2.757        |
| 1KIR   | A_ARG_96  | NH1    | B_GLU_98  | OE2    | 3.582        |
| 1KIR   | A_ARG_96  | NH2    | B_GLU_98  | OE1    | 3.625        |
| 1KIR   | A_ARG_96  | NH2    | B_GLU_98  | OE2    | 2.980        |

Table 1017: Interfacial 1KIR-specific salt bridging networks analysis. In this table, a PDB file is specified with a four-letter PDB ID, except that the names of the PDB files corresponding to the single NMR structural model split from the NMR ensemble is specified with a four-letter PDB ID in addition to a hyphen followed by the single NMR structural model numeric ID, the residue naming scheme is **Chain ID\_residue name\_residue number**,  $\angle ADH$  represents the angle formed by acceptor (A), donor (D) and hydrogen (H) ( $\angle ADH$ ).

| PDB ID | Residue A | Atom A | Residue B | Atom B | Distance (Å) |
|--------|-----------|--------|-----------|--------|--------------|
| 1KTR   | P_HIS_4   | NE2    | L_ASP_183 | OD1    | 3.445        |
| 1KTR   | P_HIS_4   | NE2    | L_ASP_183 | OD2    | 2.673        |
| 1KTR   | P_HIS_6   | ND1    | L_GLU_39  | OE1    | 3.223        |
| 1KTR   | P_HIS_6   | ND1    | L_GLU_39  | OE2    | 2.811        |
| 1KTR   | P_HIS_6   | NE2    | L_GLU_230 | OE1    | 3.040        |
| 1KTR   | P_HIS_6   | NE2    | L_GLU_230 | OE2    | 3.199        |

Table 1018: Interfacial 1KTR-specific salt bridging networks analysis. In this table, a PDB file is specified with a four-letter PDB ID, except that the names of the PDB files corresponding to the single NMR structural model split from the NMR ensemble is specified with a four-letter PDB ID in addition to a hyphen followed by the single NMR structural model numeric ID, the residue naming scheme is **Chain ID\_residue name\_residue number**,  $\angle ADH$  represents the angle formed by acceptor (A), donor (D) and hydrogen (H) ( $\angle ADH$ ).

| PDB ID | Residue A | Atom A | Residue B | Atom B | Distance (Å) |
|--------|-----------|--------|-----------|--------|--------------|
| 1L7I   | H_LYS_209 | NZ     | L_GLU_123 | OE1    | 2.718        |

Table 1019: Interfacial 1L7I-specific salt bridging networks analysis. In this table, a PDB file is specified with a four-letter PDB ID, except that the names of the PDB files corresponding to the single NMR structural model split from the NMR ensemble is specified with a four-letter PDB ID in addition to a hyphen followed by the single NMR structural model numeric ID, the residue naming scheme is **Chain ID\_residue name\_residue number**,  $\angle ADH$  represents the angle formed by acceptor (A), donor (D) and hydrogen (H) ( $\angle ADH$ ).

| PDB ID | Residue A | Atom A | Residue B | Atom B | Distance (Å) |
|--------|-----------|--------|-----------|--------|--------------|
| 1LK3   | A_LYS_130 | NZ     | L_ASP_1   | OD1    | 2.906        |
| 1LK3   | L_ARG_31  | NH1    | A_GLU_133 | OE1    | 2.703        |
| 1LK3   | H_LYS_23  | NZ     | L_GLU_121 | OE2    | 2.800        |
| 1LK3   | H_LYS_214 | NZ     | L_GLU_122 | OE1    | 2.517        |
| 1LK3   | B_LYS_130 | NZ     | M_ASP_1   | OD1    | 2.851        |
| 1LK3   | M_ARG_31  | NH1    | B_GLU_133 | OE1    | 2.693        |
| 1LK3   | I_LYS_63  | NZ     | M_ASP_1   | OD2    | 3.881        |
| 1LK3   | I_LYS_214 | NZ     | M_GLU_122 | OE2    | 2.753        |

Table 1020: Interfacial 1LK3-specific salt bridging networks analysis. In this table, a PDB file is specified with a four-letter PDB ID, except that the names of the PDB files corresponding to the single NMR structural model split from the NMR ensemble is specified with a four-letter PDB ID in addition to a hyphen followed by the single NMR structural model numeric ID, the residue naming scheme is **Chain ID\_residue name\_residue number**,  $\angle ADH$  represents the angle formed by acceptor (A), donor (D) and hydrogen (H) ( $\angle ADH$ ).

| PDB ID | Residue A | Atom A | Residue B | Atom B | Distance (Å) |
|--------|-----------|--------|-----------|--------|--------------|
| 1M71   | B_ARG_164 | NH1    | A_ASP_167 | OD2    | 3.246        |
| 1M71   | B_ARG_164 | NH1    | A_ASP_170 | OD1    | 3.912        |
| 1M71   | B_ARG_164 | NH2    | A_ASP_167 | OD2    | 2.886        |
| 1M71   | B_LYS_208 | NZ     | A_GLU_123 | OE1    | 2.546        |
| 1M71   | B_LYS_208 | NZ     | A_GLU_123 | OE2    | 3.594        |

Table 1021: Interfacial 1M71-specific salt bridging networks analysis. In this table, a PDB file is specified with a four-letter PDB ID, except that the names of the PDB files corresponding to the single NMR structural model split from the NMR ensemble is specified with a four-letter PDB ID in addition to a hyphen followed by the single NMR structural model numeric ID, the residue naming scheme is **Chain ID\_residue name\_residue number**,  $\angle ADH$  represents the angle formed by acceptor (A), donor (D) and hydrogen (H) ( $\angle ADH$ ).

| PDB ID | Residue A | Atom A | Residue B | Atom B | Distance (Å) |
|--------|-----------|--------|-----------|--------|--------------|
| 1M7D   | B_ARG_164 | NH1    | A_ASP_167 | OD2    | 3.313        |
| 1M7D   | B_ARG_164 | NH1    | A_ASP_170 | OD1    | 3.795        |
| 1M7D   | B_ARG_164 | NH2    | A_ASP_167 | OD2    | 3.482        |
| 1M7D   | B_LYS_208 | NZ     | A_GLU_123 | OE1    | 2.586        |
| 1M7D   | B_LYS_208 | NZ     | A_GLU_123 | OE2    | 3.420        |

Table 1022: Interfacial 1M7D-specific salt bridging networks analysis. In this table, a PDB file is specified with a four-letter PDB ID, except that the names of the PDB files corresponding to the single NMR structural model split from the NMR ensemble is specified with a four-letter PDB ID in addition to a hyphen followed by the single NMR structural model numeric ID, the residue naming scheme is **Chain ID\_residue name\_residue number**,  $\angle ADH$  represents the angle formed by acceptor (A), donor (D) and hydrogen (H) ( $\angle ADH$ ).



| PDB ID | Residue A | Atom A | Residue B | Atom B | Distance (Å) |
|--------|-----------|--------|-----------|--------|--------------|
| 1M7I   | B_ARG_164 | NH1    | A_ASP_167 | OD2    | 3.340        |
| 1M7I   | B_ARG_164 | NH1    | A_ASP_170 | OD1    | 3.884        |
| 1M7I   | B_ARG_164 | NH2    | A_ASP_167 | OD2    | 3.473        |
| 1M7I   | B_LYS_208 | NZ     | A_GLU_123 | OE1    | 3.031        |
| 1M7I   | B_LYS_208 | NZ     | A_GLU_123 | OE2    | 3.016        |

Table 1023: Interfacial 1M7I-specific salt bridging networks analysis. In this table, a PDB file is specified with a four-letter PDB ID, except that the names of the PDB files corresponding to the single NMR structural model split from the NMR ensemble is specified with a four-letter PDB ID in addition to a hyphen followed by the single NMR structural model numeric ID, the residue naming scheme is **Chain ID\_residue name\_residue number**,  $\angle ADH$  represents the angle formed by acceptor (A), donor (D) and hydrogen (H) ( $\angle ADH$ ).

| PDB ID | Residue A | Atom A | Residue B | Atom B | Distance (Å) |
|--------|-----------|--------|-----------|--------|--------------|
| 1MFB   | H_LYS_398 | NZ     | L_GLU_127 | OE2    | 2.924        |
| 1MFB   | H_LYS_463 | NZ     | L_GLU_126 | OE1    | 3.780        |

Table 1024: Interfacial 1MFB-specific salt bridging networks analysis. In this table, a PDB file is specified with a four-letter PDB ID, except that the names of the PDB files corresponding to the single NMR structural model split from the NMR ensemble is specified with a four-letter PDB ID in addition to a hyphen followed by the single NMR structural model numeric ID, the residue naming scheme is **Chain ID\_residue name\_residue number**,  $\angle ADH$  represents the angle formed by acceptor (A), donor (D) and hydrogen (H) ( $\angle ADH$ ).

| PDB ID | Residue A | Atom A | Residue B | Atom B | Distance (Å) |
|--------|-----------|--------|-----------|--------|--------------|
| 1MFC   | H_LYS_398 | NZ     | L_GLU_127 | OE2    | 2.815        |
| 1MFC   | H_LYS_463 | NZ     | L_GLU_126 | OE1    | 3.807        |

Table 1025: Interfacial 1MFC-specific salt bridging networks analysis. In this table, a PDB file is specified with a four-letter PDB ID, except that the names of the PDB files corresponding to the single NMR structural model split from the NMR ensemble is specified with a four-letter PDB ID in addition to a hyphen followed by the single NMR structural model numeric ID, the residue naming scheme is **Chain ID\_residue name\_residue number**,  $\angle ADH$  represents the angle formed by acceptor (A), donor (D) and hydrogen (H) ( $\angle ADH$ ).

| PDB ID | Residue A  | Atom A | Residue B | Atom B | Distance (Å) |
|--------|------------|--------|-----------|--------|--------------|
| 1MHH   | B_LYS_208  | NZ     | A_GLU_123 | OE2    | 3.019        |
| 1MHH   | C_ARG_188  | NH1    | E_ASP_831 | OD2    | 3.196        |
| 1MHH   | C_ARG_188  | NH2    | E_ASP_831 | OD2    | 3.360        |
| 1MHH   | E_LYS_833  | NZ     | C_GLU_185 | OE2    | 2.489        |
| 1MHH   | F_LYS_1833 | NZ     | C_GLU_17  | OE1    | 3.798        |

Table 1026: Interfacial 1MHH-specific salt bridging networks analysis. In this table, a PDB file is specified with a four-letter PDB ID, except that the names of the PDB files corresponding to the single NMR structural model split from the NMR ensemble is specified with a four-letter PDB ID in addition to a hyphen followed by the single NMR structural model numeric ID, the residue naming scheme is **Chain ID\_residue name\_residue number**,  $\angle ADH$  represents the angle formed by acceptor (A), donor (D) and hydrogen (H) ( $\angle ADH$ ).

| PDB ID | Residue A | Atom A | Residue B | Atom B | Distance (Å) |
|--------|-----------|--------|-----------|--------|--------------|
| 1MLB   | B_LYS_211 | NZ     | A_GLU_123 | OE1    | 3.556        |

Table 1027: Interfacial 1MLB-specific salt bridging networks analysis. In this table, a PDB file is specified with a four-letter PDB ID, except that the names of the PDB files corresponding to the single NMR structural model split from the NMR ensemble is specified with a four-letter PDB ID in addition to a hyphen followed by the single NMR structural model numeric ID, the residue naming scheme is **Chain ID\_residue name\_residue number**,  $\angle ADH$  represents the angle formed by acceptor (A), donor (D) and hydrogen (H) ( $\angle ADH$ ).

| PDB ID | Residue A | Atom A | Residue B | Atom B | Distance (Å) |
|--------|-----------|--------|-----------|--------|--------------|
| 1MLC   | E_ARG_45  | NH2    | B_GLU_50  | OE2    | 3.032        |
| 1MLC   | E_ARG_68  | NH1    | B_GLU_50  | OE2    | 3.781        |
| 1MLC   | E_ARG_68  | NH2    | B_GLU_35  | OE2    | 2.927        |
| 1MLC   | E_ARG_68  | NH2    | B_GLU_50  | OE1    | 2.510        |
| 1MLC   | E_ARG_68  | NH2    | B_GLU_50  | OE2    | 3.189        |
| 1MLC   | F_ARG_45  | NH2    | D_GLU_50  | OE2    | 2.431        |
| 1MLC   | F_ARG_68  | NH2    | D_GLU_35  | OE2    | 3.266        |
| 1MLC   | F_ARG_68  | NH2    | D_GLU_50  | OE1    | 2.710        |
| 1MLC   | F_ARG_68  | NH2    | D_GLU_50  | OE2    | 3.606        |

Table 1028: Interfacial 1MLC-specific salt bridging networks analysis. In this table, a PDB file is specified with a four-letter PDB ID, except that the names of the PDB files corresponding to the single NMR structural model split from the NMR ensemble is specified with a four-letter PDB ID in addition to a hyphen followed by the single NMR structural model numeric ID, the residue naming scheme is **Chain ID\_residue name\_residue number**,  $\angle ADH$  represents the angle formed by acceptor (A), donor (D) and hydrogen (H) ( $\angle ADH$ ).

| PDB ID | Residue A | Atom A | Residue B | Atom B | Distance (Å) |
|--------|-----------|--------|-----------|--------|--------------|
| 1N64   | H_LYS_208 | NZ     | L_GLU_123 | OE1    | 3.752        |

Table 1029: Interfacial 1N64-specific salt bridging networks analysis. In this table, a PDB file is specified with a four-letter PDB ID, except that the names of the PDB files corresponding to the single NMR structural model split from the NMR ensemble is specified with a four-letter PDB ID in addition to a hyphen followed by the single NMR structural model numeric ID, the residue naming scheme is **Chain ID\_residue name\_residue number**,  $\angle ADH$  represents the angle formed by acceptor (A), donor (D) and hydrogen (H) ( $\angle ADH$ ).

| PDB ID | Residue A | Atom A | Residue B | Atom B | Distance (Å) |
|--------|-----------|--------|-----------|--------|--------------|
| 1NBY   | B_LYS_508 | NZ     | A_GLU_123 | OE1    | 2.458        |
| 1NBY   | B_LYS_508 | NZ     | A_GLU_123 | OE2    | 3.274        |
| 1NBY   | C_LYS_697 | NZ     | B_ASP_332 | OD1    | 3.949        |
| 1NBY   | C_LYS_697 | NZ     | B_ASP_332 | OD2    | 2.515        |

Table 1030: Interfacial 1NBY-specific salt bridging networks analysis. In this table, a PDB file is specified with a four-letter PDB ID, except that the names of the PDB files corresponding to the single NMR structural model split from the NMR ensemble is specified with a four-letter PDB ID in addition to a hyphen followed by the single NMR structural model numeric ID, the residue naming scheme is **Chain ID\_residue name\_residue number**,  $\angle ADH$  represents the angle formed by acceptor (A), donor (D) and hydrogen (H) ( $\angle ADH$ ).



| PDB ID | Residue A | Atom A | Residue B | Atom B | Distance (Å) |
|--------|-----------|--------|-----------|--------|--------------|
| 1NDG   | B_HIS_360 | NE2    | A_ASP_1   | OD2    | 3.716        |
| 1NDG   | B_LYS_519 | NZ     | A_GLU_123 | OE2    | 2.645        |
| 1NDG   | C_LYS_697 | NZ     | B_ASP_332 | OD1    | 3.996        |
| 1NDG   | C_LYS_697 | NZ     | B_ASP_332 | OD2    | 2.706        |
| 1NDG   | C_LYS_697 | NZ     | B_ASP_399 | OD1    | 2.922        |
| 1NDG   | C_LYS_697 | NZ     | B_ASP_399 | OD2    | 3.579        |

Table 1031: Interfacial 1NDG-specific salt bridging networks analysis. In this table, a PDB file is specified with a four-letter PDB ID, except that the names of the PDB files corresponding to the single NMR structural model split from the NMR ensemble is specified with a four-letter PDB ID in addition to a hyphen followed by the single NMR structural model numeric ID, the residue naming scheme is **Chain ID\_residue name\_residue number**,  $\angle ADH$  represents the angle formed by acceptor (A), donor (D) and hydrogen (H) ( $\angle ADH$ ).

| PDB ID | Residue A | Atom A | Residue B | Atom B | Distance (Å) |
|--------|-----------|--------|-----------|--------|--------------|
| 1NDM   | B_LYS_519 | NZ     | A_GLU_123 | OE1    | 3.184        |
| 1NDM   | C_LYS_697 | NZ     | B_ASP_332 | OD1    | 3.954        |
| 1NDM   | C_LYS_697 | NZ     | B_ASP_332 | OD2    | 2.468        |
| 1NDM   | C_LYS_697 | NZ     | B_GLU_399 | OE1    | 2.743        |

Table 1032: Interfacial 1NDM-specific salt bridging networks analysis. In this table, a PDB file is specified with a four-letter PDB ID, except that the names of the PDB files corresponding to the single NMR structural model split from the NMR ensemble is specified with a four-letter PDB ID in addition to a hyphen followed by the single NMR structural model numeric ID, the residue naming scheme is **Chain ID\_residue name\_residue number**,  $\angle ADH$  represents the angle formed by acceptor (A), donor (D) and hydrogen (H) ( $\angle ADH$ ).

| PDB ID | Residue A | Atom A | Residue B | Atom B | Distance (Å) |
|--------|-----------|--------|-----------|--------|--------------|
| 1NGW   | H_HIS_165 | NE2    | L_ASP_167 | OD1    | 3.771        |
| 1NGW   | H_LYS_210 | NZ     | L_GLU_123 | OE1    | 3.544        |
| 1NGW   | H_LYS_210 | NZ     | L_GLU_123 | OE2    | 3.092        |
| 1NGW   | B_HIS_165 | NE2    | A_ASP_167 | OD1    | 3.804        |
| 1NGW   | B_LYS_210 | NZ     | A_GLU_123 | OE1    | 3.662        |
| 1NGW   | B_LYS_210 | NZ     | A_GLU_123 | OE2    | 3.240        |

Table 1033: Interfacial 1NGW-specific salt bridging networks analysis. In this table, a PDB file is specified with a four-letter PDB ID, except that the names of the PDB files corresponding to the single NMR structural model split from the NMR ensemble is specified with a four-letter PDB ID in addition to a hyphen followed by the single NMR structural model numeric ID, the residue naming scheme is **Chain ID\_residue name\_residue number**,  $\angle ADH$  represents the angle formed by acceptor (A), donor (D) and hydrogen (H) ( $\angle ADH$ ).

| PDB ID | Residue A | Atom A | Residue B | Atom B | Distance (Å) |
|--------|-----------|--------|-----------|--------|--------------|
| 1NGX   | B_LYS_210 | NZ     | A_GLU_123 | OE1    | 3.994        |
| 1NGX   | L_LYS_45  | NZ     | H_ASP_102 | OD2    | 3.800        |
| 1NGX   | H_LYS_210 | NZ     | L_GLU_123 | OE1    | 3.804        |

Table 1034: Interfacial 1NGX-specific salt bridging networks analysis. In this table, a PDB file is specified with a four-letter PDB ID, except that the names of the PDB files corresponding to the single NMR structural model split from the NMR ensemble is specified with a four-letter PDB ID in addition to a hyphen followed by the single NMR structural model numeric ID, the residue naming scheme is **Chain ID\_residue name\_residue number**,  $\angle ADH$  represents the angle formed by acceptor (A), donor (D) and hydrogen (H) ( $\angle ADH$ ).

| PDB ID | Residue A | Atom A | Residue B | Atom B | Distance (Å) |
|--------|-----------|--------|-----------|--------|--------------|
| 1NGY   | B_LYS_215 | NZ     | A_ASP_122 | OD1    | 3.713        |
| 1NGY   | B_LYS_215 | NZ     | A_ASP_122 | OD2    | 3.325        |

Table 1035: Interfacial 1NGY-specific salt bridging networks analysis. In this table, a PDB file is specified with a four-letter PDB ID, except that the names of the PDB files corresponding to the single NMR structural model split from the NMR ensemble is specified with a four-letter PDB ID in addition to a hyphen followed by the single NMR structural model numeric ID, the residue naming scheme is **Chain ID\_residue name\_residue number**,  $\angle ADH$  represents the angle formed by acceptor (A), donor (D) and hydrogen (H) ( $\angle ADH$ ).

| PDB ID | Residue A | Atom A | Residue B | Atom B | Distance (Å) |
|--------|-----------|--------|-----------|--------|--------------|
| 1NGZ   | B_LYS_    | NZ     | A_GLU_    | OE2    | 3.517        |

Table 1036: Interfacial 1NGZ-specific salt bridging networks analysis. In this table, a PDB file is specified with a four-letter PDB ID, except that the names of the PDB files corresponding to the single NMR structural model split from the NMR ensemble is specified with a four-letter PDB ID in addition to a hyphen followed by the single NMR structural model numeric ID, the residue naming scheme is **Chain ID\_residue name\_residue number**,  $\angle ADH$  represents the angle formed by acceptor (A), donor (D) and hydrogen (H) ( $\angle ADH$ ).

| PDB ID | Residue A | Atom A | Residue B | Atom B | Distance (Å) |
|--------|-----------|--------|-----------|--------|--------------|
| 1NLB   | H_LYS_208 | NZ     | L_GLU_123 | OE1    | 3.572        |

Table 1037: Interfacial 1NLB-specific salt bridging networks analysis. In this table, a PDB file is specified with a four-letter PDB ID, except that the names of the PDB files corresponding to the single NMR structural model split from the NMR ensemble is specified with a four-letter PDB ID in addition to a hyphen followed by the single NMR structural model numeric ID, the residue naming scheme is **Chain ID\_residue name\_residue number**,  $\angle ADH$  represents the angle formed by acceptor (A), donor (D) and hydrogen (H) ( $\angle ADH$ ).

| PDB ID | Residue A | Atom A | Residue B | Atom B | Distance (Å) |
|--------|-----------|--------|-----------|--------|--------------|
| 1NMC   | N_LYS_432 | NZ     | H_ASP_56  | OD1    | 2.750        |
| 1NMC   | A_LYS_432 | NZ     | B_ASP_56  | OD1    | 2.750        |

Table 1038: Interfacial 1NMC-specific salt bridging networks analysis. In this table, a PDB file is specified with a four-letter PDB ID, except that the names of the PDB files corresponding to the single NMR structural model split from the NMR ensemble is specified with a four-letter PDB ID in addition to a hyphen followed by the single NMR structural model numeric ID, the residue naming scheme is **Chain ID\_residue name\_residue number**,  $\angle ADH$  represents the angle formed by acceptor (A), donor (D) and hydrogen (H) ( $\angle ADH$ ).



| PDB ID | Residue A | Atom A | Residue B | Atom B | Distance (Å) |
|--------|-----------|--------|-----------|--------|--------------|
| 1OB1   | A_ARG_61  | NH2    | F_ASP_59  | OD1    | 3.421        |
| 1OB1   | A_ARG_61  | NH2    | F_ASP_59  | OD2    | 2.223        |
| 1OB1   | B_HIS_164 | NE2    | A_ASP_166 | OD2    | 3.671        |
| 1OB1   | C_LYS_10  | NZ     | B_ASP_100 | OD1    | 2.437        |
| 1OB1   | C_LYS_80  | NZ     | D_GLU_79  | OE1    | 3.373        |
| 1OB1   | C_LYS_80  | NZ     | D_GLU_81  | OE1    | 3.553        |
| 1OB1   | C_LYS_80  | NZ     | D_GLU_81  | OE2    | 2.714        |
| 1OB1   | D_ARG_61  | NH2    | C_ASP_59  | OD1    | 3.599        |
| 1OB1   | D_ARG_61  | NH2    | C_ASP_59  | OD2    | 2.460        |
| 1OB1   | E_ARG_98  | NH1    | F_ASP_39  | OD1    | 2.706        |
| 1OB1   | E_HIS_164 | NE2    | D_ASP_166 | OD2    | 3.790        |
| 1OB1   | F_LYS_10  | NZ     | E_ASP_100 | OD1    | 2.524        |
| 1OB1   | F_LYS_80  | NZ     | A_GLU_79  | OE1    | 3.743        |
| 1OB1   | F_LYS_80  | NZ     | A_GLU_81  | OE1    | 3.454        |
| 1OB1   | F_LYS_80  | NZ     | A_GLU_81  | OE2    | 2.796        |
| 1OB1   | F_HIS_96  | NE2    | A_GLU_79  | OE1    | 3.773        |

Table 1039: Interfacial 1OB1-specific salt bridging networks analysis. In this table, a PDB file is specified with a four-letter PDB ID, except that the names of the PDB files corresponding to the single NMR structural model split from the NMR ensemble is specified with a four-letter PDB ID in addition to a hyphen followed by the single NMR structural model numeric ID, the residue naming scheme is **Chain ID\_residue name\_residue number**,  $\angle ADH$  represents the angle formed by acceptor (A), donor (D) and hydrogen (H) ( $\angle ADH$ ).

| PDB ID | Residue A | Atom A | Residue B | Atom B | Distance (Å) |
|--------|-----------|--------|-----------|--------|--------------|
| 1OP9   | B_LYS_97  | NZ     | A_GLU_97  | OE1    | 2.570        |
| 1OP9   | B_ARG_101 | NH1    | A_ASP_109 | OD1    | 3.213        |
| 1OP9   | B_ARG_101 | NH1    | A_ASP_109 | OD2    | 2.829        |
| 1OP9   | B_ARG_101 | NH2    | A_ASP_109 | OD1    | 2.793        |
| 1OP9   | B_ARG_101 | NH2    | A_ASP_109 | OD2    | 3.765        |

Table 1040: Interfacial 1OP9-specific salt bridging networks analysis. In this table, a PDB file is specified with a four-letter PDB ID, except that the names of the PDB files corresponding to the single NMR structural model split from the NMR ensemble is specified with a four-letter PDB ID in addition to a hyphen followed by the single NMR structural model numeric ID, the residue naming scheme is **Chain ID\_residue name\_residue number**,  $\angle ADH$  represents the angle formed by acceptor (A), donor (D) and hydrogen (H) ( $\angle ADH$ ).

| PDB ID | Residue A | Atom A | Residue B | Atom B | Distance (Å) |
|--------|-----------|--------|-----------|--------|--------------|
| 1OSP   | H_ARG_99  | NH1    | L_GLU_55  | OE1    | 3.970        |
| 1OSP   | H_ARG_99  | NH1    | L_GLU_55  | OE2    | 2.686        |
| 1OSP   | H_ARG_99  | NH2    | O_ASP_92  | OD1    | 3.355        |
| 1OSP   | H_ARG_99  | NH2    | O_ASP_92  | OD2    | 2.514        |
| 1OSP   | H_LYS_215 | NZ     | L_GLU_123 | OE1    | 2.783        |
| 1OSP   | H_LYS_215 | NZ     | L_GLU_123 | OE2    | 3.079        |
| 1OSP   | O_LYS_46  | NZ     | L_ASP_66  | OD2    | 3.087        |

Table 1041: Interfacial 1OSP-specific salt bridging networks analysis. In this table, a PDB file is specified with a four-letter PDB ID, except that the names of the PDB files corresponding to the single NMR structural model split from the NMR ensemble is specified with a four-letter PDB ID in addition to a hyphen followed by the single NMR structural model numeric ID, the residue naming scheme is **Chain ID\_residue name\_residue number**,  $\angle ADH$  represents the angle formed by acceptor (A), donor (D) and hydrogen (H) ( $\angle ADH$ ).

| PDB ID | Residue A  | Atom A | Residue B  | Atom B | Distance (Å) |
|--------|------------|--------|------------|--------|--------------|
| 1P2C   | A_ARG_188  | NH2    | F_ASP_1518 | OD1    | 2.778        |
| 1P2C   | B_LYS_511  | NZ     | A_GLU_123  | OE1    | 3.498        |
| 1P2C   | C_ARG_645  | NH2    | B_GLU_350  | OE1    | 2.980        |
| 1P2C   | C_ARG_668  | NH1    | B_GLU_350  | OE1    | 3.355        |
| 1P2C   | C_ARG_668  | NH1    | B_GLU_350  | OE2    | 3.681        |
| 1P2C   | C_ARG_668  | NH2    | B_GLU_335  | OE2    | 3.090        |
| 1P2C   | C_ARG_668  | NH2    | B_GLU_350  | OE1    | 3.316        |
| 1P2C   | C_ARG_668  | NH2    | B_GLU_350  | OE2    | 2.404        |
| 1P2C   | E_LYS_1411 | NZ     | D_GLU_1023 | OE1    | 3.897        |
| 1P2C   | F_ARG_1545 | NH2    | E_GLU_1250 | OE1    | 2.861        |
| 1P2C   | F_ARG_1568 | NH1    | E_GLU_1250 | OE1    | 3.580        |
| 1P2C   | F_ARG_1568 | NH1    | E_GLU_1250 | OE2    | 3.708        |
| 1P2C   | F_ARG_1568 | NH2    | E_GLU_1235 | OE2    | 2.833        |
| 1P2C   | F_ARG_1568 | NH2    | E_GLU_1250 | OE1    | 3.551        |
| 1P2C   | F_ARG_1568 | NH2    | E_GLU_1250 | OE2    | 2.418        |

Table 1042: Interfacial 1P2C-specific salt bridging networks analysis. In this table, a PDB file is specified with a four-letter PDB ID, except that the names of the PDB files corresponding to the single NMR structural model split from the NMR ensemble is specified with a four-letter PDB ID in addition to a hyphen followed by the single NMR structural model numeric ID, the residue naming scheme is **Chain ID\_residue name\_residue number**,  $\angle ADH$  represents the angle formed by acceptor (A), donor (D) and hydrogen (H) ( $\angle ADH$ ).

| PDB ID | Residue A | Atom A | Residue B | Atom B | Distance (Å) |
|--------|-----------|--------|-----------|--------|--------------|
| 1P4B   | P_HIS_2   | NE2    | H_ASP_65  | OD1    | 3.248        |
| 1P4B   | P_HIS_2   | NE2    | H_ASP_65  | OD2    | 3.747        |
| 1P4B   | P_ARG_9   | NH1    | H_ASP_137 | OD1    | 2.804        |
| 1P4B   | P_ARG_9   | NH1    | H_ASP_137 | OD2    | 3.838        |
| 1P4B   | P_ARG_9   | NH2    | H_ASP_137 | OD1    | 3.399        |
| 1P4B   | P_ARG_9   | NH2    | H_ASP_137 | OD2    | 3.080        |

Table 1043: Interfacial 1P4B-specific salt bridging networks analysis. In this table, a PDB file is specified with a four-letter PDB ID, except that the names of the PDB files corresponding to the single NMR structural model split from the NMR ensemble is specified with a four-letter PDB ID in addition to a hyphen followed by the single NMR structural model numeric ID, the residue naming scheme is **Chain ID\_residue name\_residue number**,  $\angle ADH$  represents the angle formed by acceptor (A), donor (D) and hydrogen (H) ( $\angle ADH$ ).

| PDB ID | Residue A | Atom A | Residue B | Atom B | Distance (Å) |
|--------|-----------|--------|-----------|--------|--------------|
| 1P7K   | H.LYS_62  | NZ     | L.GLU_1   | OE2    | 3.723        |
| 1P7K   | H.LYS_208 | NZ     | L.GLU_123 | OE1    | 3.517        |
| 1P7K   | H.LYS_208 | NZ     | L.GLU_123 | OE2    | 2.802        |
| 1P7K   | B.LYS_62  | NZ     | A.GLU_1   | OE2    | 2.848        |

Table 1044: Interfacial 1P7K-specific salt bridging networks analysis. In this table, a PDB file is specified with a four-letter PDB ID, except that the names of the PDB files corresponding to the single NMR structural model split from the NMR ensemble is specified with a four-letter PDB ID in addition to a hyphen followed by the single NMR structural model numeric ID, the residue naming scheme is **Chain ID\_residue name\_residue number**,  $\angle ADH$  represents the angle formed by acceptor (A), donor (D) and hydrogen (H) ( $\angle ADH$ ).

| PDB ID | Residue A | Atom A | Residue B | Atom B | Distance (Å) |
|--------|-----------|--------|-----------|--------|--------------|
| 1PG7   | H_LYS_209 | NZ     | L_GLU_123 | OE1    | 2.828        |
| 1PG7   | H_LYS_209 | NZ     | L_GLU_123 | OE2    | 3.697        |
| 1PG7   | I_LYS_209 | NZ     | M_GLU_123 | OE1    | 2.829        |
| 1PG7   | I_LYS_209 | NZ     | M_GLU_123 | OE2    | 3.963        |
| 1PG7   | L_LYS_30  | NZ     | X_GLU_95  | OE1    | 3.476        |
| 1PG7   | L_LYS_30  | NZ     | X_GLU_95  | OE2    | 2.795        |
| 1PG7   | M_LYS_30  | NZ     | Z_GLU_95  | OE2    | 3.166        |
| 1PG7   | X_ARG_94  | NH1    | H_GLU_53  | OE1    | 3.386        |
| 1PG7   | X_ARG_94  | NH1    | H_GLU_53  | OE2    | 3.321        |
| 1PG7   | X_ARG_94  | NH2    | H_GLU_53  | OE1    | 3.937        |
| 1PG7   | X_ARG_94  | NH2    | H_GLU_53  | OE2    | 2.866        |
| 1PG7   | X_ARG_98  | NH2    | H_ASP_95  | OD1    | 2.990        |
| 1PG7   | X_ARG_98  | NH2    | H_ASP_95  | OD2    | 3.561        |
| 1PG7   | X_LYS_143 | NZ     | W_GLU_125 | OE2    | 2.675        |
| 1PG7   | X_HIS_164 | NE2    | W_GLU_139 | OE2    | 3.801        |
| 1PG7   | X_LYS_208 | NZ     | W_GLU_124 | OE2    | 2.927        |
| 1PG7   | Z_ARG_94  | NH1    | I_GLU_53  | OE1    | 3.259        |
| 1PG7   | Z_ARG_94  | NH1    | I_GLU_53  | OE2    | 3.931        |
| 1PG7   | Z_ARG_94  | NH2    | I_GLU_53  | OE1    | 2.918        |
| 1PG7   | Z_ARG_94  | NH2    | I_GLU_53  | OE2    | 2.525        |
| 1PG7   | Z_ARG_98  | NH2    | I_ASP_95  | OD1    | 3.168        |
| 1PG7   | Z_ARG_98  | NH2    | I_ASP_95  | OD2    | 3.781        |
| 1PG7   | Z_LYS_143 | NZ     | Y_GLU_125 | OE2    | 2.901        |
| 1PG7   | Z_LYS_208 | NZ     | Y_GLU_124 | OE2    | 3.302        |

Table 1045: Interfacial 1PG7-specific salt bridging networks analysis. In this table, a PDB file is specified with a four-letter PDB ID, except that the names of the PDB files corresponding to the single NMR structural model split from the NMR ensemble is specified with a four-letter PDB ID in addition to a hyphen followed by the single NMR structural model numeric ID, the residue naming scheme is **Chain ID\_residue name\_residue number**,  $\angle ADH$  represents the angle formed by acceptor (A), donor (D) and hydrogen (H) ( $\angle ADH$ ).

| PDB ID | Residue A | Atom A | Residue B | Atom B | Distance (Å) |
|--------|-----------|--------|-----------|--------|--------------|
| 1PZ5   | A_HIS_27D | NE2    | C_ASP_2   | OD1    | 2.720        |
| 1PZ5   | B_ARG_164 | NH1    | A_ASP_167 | OD2    | 3.218        |
| 1PZ5   | B_ARG_164 | NH2    | A_ASP_167 | OD2    | 3.712        |
| 1PZ5   | B_LYS_208 | NZ     | A_GLU_123 | OE1    | 2.648        |
| 1PZ5   | B_LYS_208 | NZ     | A_GLU_123 | OE2    | 3.713        |

Table 1046: Interfacial 1PZ5-specific salt bridging networks analysis. In this table, a PDB file is specified with a four-letter PDB ID, except that the names of the PDB files corresponding to the single NMR structural model split from the NMR ensemble is specified with a four-letter PDB ID in addition to a hyphen followed by the single NMR structural model numeric ID, the residue naming scheme is **Chain ID\_residue name\_residue number**,  $\angle ADH$  represents the angle formed by acceptor (A), donor (D) and hydrogen (H) ( $\angle ADH$ ).



| PDB ID | Residue A | Atom A | Residue B | Atom B | Distance (Å) |
|--------|-----------|--------|-----------|--------|--------------|
| 1Q9K   | A_ARG_95  | NH2    | B_ASP_95  | OD1    | 3.932        |
| 1Q9K   | A_ARG_95  | NH2    | B_ASP_95  | OD2    | 3.226        |
| 1Q9K   | B_HIS_162 | NE2    | A_ASP_166 | OD1    | 3.847        |

Table 1047: Interfacial 1Q9K-specific salt bridging networks analysis. In this table, a PDB file is specified with a four-letter PDB ID, except that the names of the PDB files corresponding to the single NMR structural model split from the NMR ensemble is specified with a four-letter PDB ID in addition to a hyphen followed by the single NMR structural model numeric ID, the residue naming scheme is **Chain ID\_residue name\_residue number**,  $\angle ADH$  represents the angle formed by acceptor (A), donor (D) and hydrogen (H) ( $\angle ADH$ ).

| PDB ID | Residue A  | Atom A | Residue B | Atom B | Distance (Å) |
|--------|------------|--------|-----------|--------|--------------|
| 1Q9L   | B_LYS_206  | NZ     | A_GLU_122 | OE2    | 3.242        |
| 1Q9L   | D_ARG_100B | NH1    | B_GLU_85  | OE1    | 3.618        |
| 1Q9L   | D_ARG_100B | NH1    | B_GLU_85  | OE2    | 3.115        |
| 1Q9L   | D_HIS_162  | NE2    | C_ASP_166 | OD1    | 3.172        |
| 1Q9L   | A_ARG_95   | NH2    | B_ASP_95  | OD2    | 3.284        |
| 1Q9L   | C_ARG_95   | NH2    | D_ASP_95  | OD2    | 3.309        |

Table 1048: Interfacial 1Q9L-specific salt bridging networks analysis. In this table, a PDB file is specified with a four-letter PDB ID, except that the names of the PDB files corresponding to the single NMR structural model split from the NMR ensemble is specified with a four-letter PDB ID in addition to a hyphen followed by the single NMR structural model numeric ID, the residue naming scheme is **Chain ID\_residue name\_residue number**,  $\angle ADH$  represents the angle formed by acceptor (A), donor (D) and hydrogen (H) ( $\angle ADH$ ).

| PDB ID | Residue A | Atom A | Residue B | Atom B | Distance (Å) |
|--------|-----------|--------|-----------|--------|--------------|
| 1Q9O   | B_ARG_100 | NH1    | A_GLU_55  | OE1    | 3.447        |
| 1Q9O   | B_ARG_100 | NH1    | A_GLU_55  | OE2    | 3.466        |
| 1Q9O   | B_ARG_100 | NH2    | A_GLU_55  | OE1    | 3.378        |
| 1Q9O   | B_ARG_100 | NH2    | A_GLU_55  | OE2    | 2.999        |
| 1Q9O   | B_LYS_206 | NZ     | A_GLU_122 | OE2    | 3.964        |
| 1Q9O   | D_ARG_100 | NH1    | C_GLU_55  | OE1    | 3.493        |
| 1Q9O   | D_ARG_100 | NH1    | C_GLU_55  | OE2    | 3.040        |
| 1Q9O   | D_ARG_100 | NH2    | C_GLU_55  | OE1    | 3.391        |
| 1Q9O   | D_ARG_100 | NH2    | C_GLU_55  | OE2    | 3.047        |
| 1Q9O   | A_ARG_95  | NH2    | B_ASP_95  | OD1    | 2.958        |
| 1Q9O   | A_ARG_95  | NH2    | B_ASP_95  | OD2    | 3.717        |
| 1Q9O   | C_ARG_95  | NH2    | D_ASP_95  | OD1    | 3.672        |
| 1Q9O   | C_ARG_95  | NH2    | D_ASP_95  | OD2    | 2.974        |

Table 1049: Interfacial 1Q9O-specific salt bridging networks analysis. In this table, a PDB file is specified with a four-letter PDB ID, except that the names of the PDB files corresponding to the single NMR structural model split from the NMR ensemble is specified with a four-letter PDB ID in addition to a hyphen followed by the single NMR structural model numeric ID, the residue naming scheme is **Chain ID\_residue name\_residue number**,  $\angle ADH$  represents the angle formed by acceptor (A), donor (D) and hydrogen (H) ( $\angle ADH$ ).

| PDB ID | Residue A | Atom A | Residue B | Atom B | Distance (Å) |
|--------|-----------|--------|-----------|--------|--------------|
| 1Q9W   | A_ARG_95  | NH2    | B_ASP_95  | OD1    | 2.949        |
| 1Q9W   | A_ARG_95  | NH2    | B_ASP_95  | OD2    | 3.845        |
| 1Q9W   | B_ARG_100 | NH1    | A_GLU_55  | OE1    | 2.615        |
| 1Q9W   | B_ARG_100 | NH1    | A_GLU_55  | OE2    | 3.657        |
| 1Q9W   | B_ARG_100 | NH2    | A_GLU_55  | OE1    | 2.891        |
| 1Q9W   | B_ARG_100 | NH2    | A_GLU_55  | OE2    | 3.820        |
| 1Q9W   | C_ARG_95  | NH2    | D_ASP_95  | OD1    | 2.929        |
| 1Q9W   | C_ARG_95  | NH2    | D_ASP_95  | OD2    | 3.831        |
| 1Q9W   | D_ARG_100 | NH1    | C_GLU_55  | OE1    | 3.356        |
| 1Q9W   | D_ARG_100 | NH1    | C_GLU_55  | OE2    | 3.002        |
| 1Q9W   | D_ARG_100 | NH2    | C_GLU_55  | OE1    | 3.373        |
| 1Q9W   | D_ARG_100 | NH2    | C_GLU_55  | OE2    | 3.045        |

Table 1050: Interfacial 1Q9W-specific salt bridging networks analysis. In this table, a PDB file is specified with a four-letter PDB ID, except that the names of the PDB files corresponding to the single NMR structural model split from the NMR ensemble is specified with a four-letter PDB ID in addition to a hyphen followed by the single NMR structural model numeric ID, the residue naming scheme is **Chain ID residue name residue number**,  $\angle ADH$  represents the angle formed by acceptor (A), donor (D) and hydrogen (H) ( $\angle ADH$ ).

| PDB ID | Residue A | Atom A | Residue B | Atom B | Distance (Å) |
|--------|-----------|--------|-----------|--------|--------------|
| 1QBL   | H_LYS_212 | NZ     | L_GLU_123 | OE1    | 3.581        |

Table 1051: Interfacial 1QBL-specific salt bridging networks analysis. In this table, a PDB file is specified with a four-letter PDB ID, except that the names of the PDB files corresponding to the single NMR structural model split from the NMR ensemble is specified with a four-letter PDB ID in addition to a hyphen followed by the single NMR structural model numeric ID, the residue naming scheme is **Chain ID\_residue name\_residue number**,  $\angle ADH$  represents the angle formed by acceptor (A), donor (D) and hydrogen (H) ( $\angle ADH$ ).

| PDB ID | Residue A | Atom A | Residue B | Atom B | Distance (Å) |
|--------|-----------|--------|-----------|--------|--------------|
| 1QBM   | H_LYS_212 | NZ     | L_GLU_123 | OE1    | 2.762        |
| 1QBM   | H_LYS_212 | NZ     | L_GLU_123 | OE2    | 3.773        |

Table 1052: Interfacial 1QBM-specific salt bridging networks analysis. In this table, a PDB file is specified with a four-letter PDB ID, except that the names of the PDB files corresponding to the single NMR structural model split from the NMR ensemble is specified with a four-letter PDB ID in addition to a hyphen followed by the single NMR structural model numeric ID, the residue naming scheme is **Chain ID\_residue name\_residue number**,  $\angle ADH$  represents the angle formed by acceptor (A), donor (D) and hydrogen (H) ( $\angle ADH$ ).

| PDB ID | Residue A | Atom A | Residue B | Atom B | Distance (Å) |
|--------|-----------|--------|-----------|--------|--------------|
| 1QGC   | 1_ARG_124 | NH1    | 2_ASP_41  | OD1    | 3.642        |
| 1QGC   | 1_ARG_124 | NH1    | 2_ASP_41  | OD2    | 2.877        |
| 1QGC   | 1_ARG_124 | NH2    | 2_ASP_41  | OD1    | 3.740        |
| 1QGC   | 2_ARG_167 | NH2    | 3_ASP_166 | OD1    | 2.757        |
| 1QGC   | 2_ARG_167 | NH2    | 3_ASP_166 | OD2    | 2.777        |
| 1QGC   | A_ARG_99  | NH2    | 5_ASP_143 | OD1    | 3.483        |
| 1QGC   | A_LYS_215 | NZ     | 4_GLU_127 | OE2    | 3.716        |

Table 1053: Interfacial 1QGC-specific salt bridging networks analysis. In this table, a PDB file is specified with a four-letter PDB ID, except that the names of the PDB files corresponding to the single NMR structural model split from the NMR ensemble is specified with a four-letter PDB ID in addition to a hyphen followed by the single NMR structural model numeric ID, the residue naming scheme is **Chain ID\_residue name\_residue number**,  $\angle ADH$  represents the angle formed by acceptor (A), donor (D) and hydrogen (H) ( $\angle ADH$ ).

| PDB ID | Residue A | Atom A | Residue B | Atom B | Distance (Å) |
|--------|-----------|--------|-----------|--------|--------------|
| 1QKZ   | H_LYS_208 | NZ     | L_GLU_123 | OE2    | 2.582        |

Table 1054: Interfacial 1QKZ-specific salt bridging networks analysis. In this table, a PDB file is specified with a four-letter PDB ID, except that the names of the PDB files corresponding to the single NMR structural model split from the NMR ensemble is specified with a four-letter PDB ID in addition to a hyphen followed by the single NMR structural model numeric ID, the residue naming scheme is **Chain ID\_residue name\_residue number**,  $\angle ADH$  represents the angle formed by acceptor (A), donor (D) and hydrogen (H) ( $\angle ADH$ ).



| PDB ID | Residue A | Atom A | Residue B | Atom B | Distance (Å) |
|--------|-----------|--------|-----------|--------|--------------|
| 1RZJ   | G_ARG_419 | NH2    | H_GLU_99  | OE2    | 2.591        |
| 1RZJ   | C_LYS_29  | NZ     | G_ASP_279 | OD2    | 3.209        |
| 1RZJ   | C_LYS_35  | NZ     | G_ASP_457 | OD2    | 3.838        |
| 1RZJ   | C_ARG_59  | NH1    | G_ASP_368 | OD1    | 3.788        |
| 1RZJ   | C_ARG_59  | NH1    | G_ASP_368 | OD2    | 3.342        |
| 1RZJ   | C_ARG_59  | NH2    | G_ASP_368 | OD1    | 2.531        |
| 1RZJ   | C_ARG_59  | NH2    | G_ASP_368 | OD2    | 3.174        |
| 1RZJ   | H_LYS_209 | NZ     | L_GLU_123 | OE1    | 3.812        |

Table 1055: Interfacial 1RZJ-specific salt bridging networks analysis. In this table, a PDB file is specified with a four-letter PDB ID, except that the names of the PDB files corresponding to the single NMR structural model split from the NMR ensemble is specified with a four-letter PDB ID in addition to a hyphen followed by the single NMR structural model numeric ID, the residue naming scheme is **Chain ID\_residue name\_residue number**,  $\angle ADH$  represents the angle formed by acceptor (A), donor (D) and hydrogen (H) ( $\angle ADH$ ).

| PDB ID | Residue A | Atom A | Residue B  | Atom B | Distance (Å) |
|--------|-----------|--------|------------|--------|--------------|
| 1RZK   | G_ARG_419 | NH1    | H_GLU_100B | OE1    | 2.999        |
| 1RZK   | G_ARG_419 | NH1    | H_GLU_100B | OE2    | 3.674        |
| 1RZK   | G_ARG_419 | NH2    | H_GLU_99   | OE1    | 2.292        |
| 1RZK   | G_ARG_419 | NH2    | H_GLU_100B | OE2    | 3.969        |
| 1RZK   | C_LYS_35  | NZ     | G_ASP_457  | OD2    | 3.741        |
| 1RZK   | C_ARG_59  | NH1    | G_ASP_368  | OD1    | 3.343        |
| 1RZK   | C_ARG_59  | NH1    | G_ASP_368  | OD2    | 3.154        |
| 1RZK   | C_ARG_59  | NH2    | G_ASP_368  | OD1    | 2.433        |
| 1RZK   | C_ARG_59  | NH2    | G_ASP_368  | OD2    | 2.977        |
| 1RZK   | H_HIS_164 | NE2    | L_ASP_167  | OD1    | 3.880        |
| 1RZK   | H_HIS_164 | NE2    | L_ASP_167  | OD2    | 2.505        |
| 1RZK   | H_LYS_209 | NZ     | L_GLU_123  | OE1    | 3.513        |
| 1RZK   | H_LYS_209 | NZ     | L_GLU_123  | OE2    | 3.584        |

Table 1056: Interfacial 1RZK-specific salt bridging networks analysis. In this table, a PDB file is specified with a four-letter PDB ID, except that the names of the PDB files corresponding to the single NMR structural model split from the NMR ensemble is specified with a four-letter PDB ID in addition to a hyphen followed by the single NMR structural model numeric ID, the residue naming scheme is **Chain ID\_residue name\_residue number**,  $\angle ADH$  represents the angle formed by acceptor (A), donor (D) and hydrogen (H) ( $\angle ADH$ ).

| PDB ID | Residue A | Atom A | Residue B | Atom B | Distance (Å) |
|--------|-----------|--------|-----------|--------|--------------|
| 1S5I   | L_ARG_96  | NH1    | H_ASP_97  | OD1    | 3.601        |
| 1S5I   | L_ARG_96  | NH2    | H_ASP_97  | OD1    | 2.496        |
| 1S5I   | L_ARG_96  | NH2    | H_ASP_97  | OD2    | 2.511        |
| 1S5I   | H_HIS_172 | NE2    | L_ASP_167 | OD2    | 3.741        |
| 1S5I   | H_LYS_221 | NZ     | L_GLU_123 | OE2    | 3.213        |

Table 1057: Interfacial 1S5I-specific salt bridging networks analysis. In this table, a PDB file is specified with a four-letter PDB ID, except that the names of the PDB files corresponding to the single NMR structural model split from the NMR ensemble is specified with a four-letter PDB ID in addition to a hyphen followed by the single NMR structural model numeric ID, the residue naming scheme is **Chain ID\_residue name\_residue number**,  $\angle ADH$  represents the angle formed by acceptor (A), donor (D) and hydrogen (H) ( $\angle ADH$ ).

| PDB ID | Residue A | Atom A | Residue B | Atom B | Distance (Å) |
|--------|-----------|--------|-----------|--------|--------------|
| 1S78   | D_HIS_164 | NE2    | C_ASP_167 | OD1    | 3.839        |
| 1S78   | D_LYS_209 | NZ     | C_GLU_123 | OE1    | 3.290        |
| 1S78   | D_LYS_214 | NZ     | C_ASP_122 | OD1    | 3.484        |

Table 1058: Interfacial 1S78-specific salt bridging networks analysis. In this table, a PDB file is specified with a four-letter PDB ID, except that the names of the PDB files corresponding to the single NMR structural model split from the NMR ensemble is specified with a four-letter PDB ID in addition to a hyphen followed by the single NMR structural model numeric ID, the residue naming scheme is **Chain ID\_residue name\_residue number**,  $\angle ADH$  represents the angle formed by acceptor (A), donor (D) and hydrogen (H) ( $\angle ADH$ ).

| PDB ID | Residue A | Atom A | Residue B | Atom B | Distance (Å) |
|--------|-----------|--------|-----------|--------|--------------|
| 1SM3   | H_LYS_143 | NZ     | L_GLU_124 | OE2    | 2.757        |

Table 1059: Interfacial 1SM3-specific salt bridging networks analysis. In this table, a PDB file is specified with a four-letter PDB ID, except that the names of the PDB files corresponding to the single NMR structural model split from the NMR ensemble is specified with a four-letter PDB ID in addition to a hyphen followed by the single NMR structural model numeric ID, the residue naming scheme is **Chain ID\_residue name\_residue number**,  $\angle ADH$  represents the angle formed by acceptor (A), donor (D) and hydrogen (H) ( $\angle ADH$ ).

| PDB ID | Residue A | Atom A | Residue B | Atom B | Distance (Å) |
|--------|-----------|--------|-----------|--------|--------------|
| 1SQ2   | L_ARG_73  | NH2    | N_ASP_93  | OD1    | 3.549        |
| 1SQ2   | L_ARG_73  | NH2    | N_ASP_93  | OD2    | 3.002        |
| 1SQ2   | N_ARG_100 | NH1    | L_ASP_52  | OD1    | 3.032        |
| 1SQ2   | N_ARG_100 | NH1    | L_ASP_52  | OD2    | 3.454        |
| 1SQ2   | N_ARG_100 | NH2    | L_ASP_52  | OD1    | 3.561        |
| 1SQ2   | N_ARG_100 | NH2    | L_ASP_52  | OD2    | 3.218        |

Table 1060: Interfacial 1SQ2-specific salt bridging networks analysis. In this table, a PDB file is specified with a four-letter PDB ID, except that the names of the PDB files corresponding to the single NMR structural model split from the NMR ensemble is specified with a four-letter PDB ID in addition to a hyphen followed by the single NMR structural model numeric ID, the residue naming scheme is **Chain ID\_residue name\_residue number**,  $\angle ADH$  represents the angle formed by acceptor (A), donor (D) and hydrogen (H) ( $\angle ADH$ ).

| PDB ID | Residue A | Atom A | Residue B | Atom B | Distance (Å) |
|--------|-----------|--------|-----------|--------|--------------|
| 1T6V   | L_ARG_73  | NH1    | N_ASP_93  | OD2    | 3.564        |
| 1T6V   | L_ARG_73  | NH2    | N_ASP_93  | OD1    | 3.874        |
| 1T6V   | L_ARG_73  | NH2    | N_ASP_93  | OD2    | 2.603        |
| 1T6V   | N_ARG_100 | NH1    | L_ASP_52  | OD1    | 2.973        |
| 1T6V   | N_ARG_100 | NH1    | L_ASP_52  | OD2    | 3.510        |
| 1T6V   | N_ARG_100 | NH2    | L_ASP_52  | OD1    | 3.501        |
| 1T6V   | N_ARG_100 | NH2    | L_ASP_52  | OD2    | 3.094        |
| 1T6V   | M_ARG_73  | NH2    | O_ASP_93  | OD1    | 3.734        |
| 1T6V   | M_ARG_73  | NH2    | O_ASP_93  | OD2    | 2.904        |
| 1T6V   | M_LYS_97  | NZ     | N_ASP_106 | OD1    | 3.749        |
| 1T6V   | M_LYS_97  | NZ     | N_ASP_106 | OD2    | 2.853        |
| 1T6V   | O_ARG_100 | NH1    | M_ASP_52  | OD1    | 3.232        |
| 1T6V   | O_ARG_100 | NH1    | M_ASP_52  | OD2    | 2.872        |
| 1T6V   | O_ARG_100 | NH2    | M_ASP_52  | OD1    | 3.920        |
| 1T6V   | O_ARG_100 | NH2    | M_ASP_52  | OD2    | 2.990        |

Table 1061: Interfacial 1T6V-specific salt bridging networks analysis. In this table, a PDB file is specified with a four-letter PDB ID, except that the names of the PDB files corresponding to the single NMR structural model split from the NMR ensemble is specified with a four-letter PDB ID in addition to a hyphen followed by the single NMR structural model numeric ID, the residue naming scheme is **Chain ID\_residue name\_residue number**,  $\angle ADH$  represents the angle formed by acceptor (A), donor (D) and hydrogen (H) ( $\angle ADH$ ).

| PDB ID | Residue A | Atom A | Residue B | Atom B | Distance (Å) |
|--------|-----------|--------|-----------|--------|--------------|
| 1TYE   | A_HIS_30  | ND1    | E_ASP_429 | OD2    | 3.896        |
| 1TYE   | A_ARG_32  | NH1    | E_ASP_429 | OD1    | 3.657        |
| 1TYE   | A_ARG_32  | NH1    | E_ASP_429 | OD2    | 2.825        |
| 1TYE   | A_ARG_73  | NH1    | C_ASP_71  | OD1    | 3.528        |
| 1TYE   | A_ARG_73  | NH1    | C_ASP_71  | OD2    | 3.396        |
| 1TYE   | A_ARG_73  | NH2    | C_ASP_71  | OD2    | 2.714        |
| 1TYE   | A_ARG_73  | NH2    | C_GLU_75  | OE1    | 3.907        |
| 1TYE   | B_ARG_216 | NH1    | A_GLU_123 | OE1    | 2.702        |
| 1TYE   | B_LYS_253 | NZ     | A_ASP_232 | OD2    | 3.290        |
| 1TYE   | C_ARG_73  | NH1    | A_ASP_71  | OD1    | 3.491        |
| 1TYE   | C_ARG_73  | NH2    | A_ASP_71  | OD1    | 3.688        |
| 1TYE   | C_ARG_73  | NH2    | A_ASP_71  | OD2    | 3.197        |
| 1TYE   | D_ARG_216 | NH1    | C_GLU_123 | OE1    | 2.914        |
| 1TYE   | D_ARG_216 | NH1    | C_GLU_123 | OE2    | 3.969        |
| 1TYE   | D_LYS_253 | NZ     | C_ASP_232 | OD2    | 3.400        |
| 1TYE   | E_ARG_368 | NH2    | A_ASP_429 | OD2    | 3.921        |
| 1TYE   | F_ARG_216 | NH1    | E_GLU_123 | OE1    | 2.938        |
| 1TYE   | F_ARG_216 | NH1    | E_GLU_123 | OE2    | 3.244        |
| 1TYE   | F_LYS_253 | NZ     | E_ASP_232 | OD2    | 3.394        |

Table 1062: Interfacial 1TYE-specific salt bridging networks analysis. In this table, a PDB file is specified with a four-letter PDB ID, except that the names of the PDB files corresponding to the single NMR structural model split from the NMR ensemble is specified with a four-letter PDB ID in addition to a hyphen followed by the single NMR structural model numeric ID, the residue naming scheme is **Chain ID residue name residue number**,  $\angle ADH$  represents the angle formed by acceptor (A), donor (D) and hydrogen (H) ( $\angle ADH$ ).



| PDB ID | Residue A | Atom A | Residue B | Atom B | Distance (Å) |
|--------|-----------|--------|-----------|--------|--------------|
| 1TZH   | V_ARG_23  | NH1    | W_GLU_30  | OE2    | 3.100        |
| 1TZH   | V_HIS_90  | NE2    | H_ASP_33  | OD1    | 2.826        |
| 1TZH   | V_HIS_90  | NE2    | H_ASP_33  | OD2    | 2.524        |
| 1TZH   | W_ARG_23  | NH1    | V_GLU_30  | OE1    | 3.346        |
| 1TZH   | W_HIS_90  | NE2    | B_ASP_33  | OD1    | 3.121        |
| 1TZH   | W_HIS_90  | NE2    | B_ASP_33  | OD2    | 2.585        |
| 1TZH   | B_LYS_209 | NZ     | A_GLU_123 | OE2    | 3.903        |
| 1TZH   | H_HIS_164 | NE2    | L_ASP_167 | OD1    | 3.495        |
| 1TZH   | H_LYS_209 | NZ     | L_GLU_123 | OE1    | 2.754        |
| 1TZH   | H_LYS_209 | NZ     | L_GLU_123 | OE2    | 3.404        |

Table 1063: Interfacial 1TZH-specific salt bridging networks analysis. In this table, a PDB file is specified with a four-letter PDB ID, except that the names of the PDB files corresponding to the single NMR structural model split from the NMR ensemble is specified with a four-letter PDB ID in addition to a hyphen followed by the single NMR structural model numeric ID, the residue naming scheme is **Chain ID\_residue name\_residue number**,  $\angle ADH$  represents the angle formed by acceptor (A), donor (D) and hydrogen (H) ( $\angle ADH$ ).

| PDB ID | Residue A | Atom A | Residue B | Atom B | Distance (Å) |
|--------|-----------|--------|-----------|--------|--------------|
| 1TZI   | B_LYS_209 | NZ     | A_GLU_123 | OE2    | 3.786        |

Table 1064: Interfacial 1TZI-specific salt bridging networks analysis. In this table, a PDB file is specified with a four-letter PDB ID, except that the names of the PDB files corresponding to the single NMR structural model split from the NMR ensemble is specified with a four-letter PDB ID in addition to a hyphen followed by the single NMR structural model numeric ID, the residue naming scheme is **Chain ID\_residue name\_residue number**,  $\angle ADH$  represents the angle formed by acceptor (A), donor (D) and hydrogen (H) ( $\angle ADH$ ).

| PDB ID | Residue A | Atom A | Residue B | Atom B | Distance (Å) |
|--------|-----------|--------|-----------|--------|--------------|
| 1U6A   | H_HIS_164 | NE2    | L_ASP_167 | OD1    | 3.994        |

Table 1065: Interfacial 1U6A-specific salt bridging networks analysis. In this table, a PDB file is specified with a four-letter PDB ID, except that the names of the PDB files corresponding to the single NMR structural model split from the NMR ensemble is specified with a four-letter PDB ID in addition to a hyphen followed by the single NMR structural model numeric ID, the residue naming scheme is **Chain ID\_residue name\_residue number**,  $\angle ADH$  represents the angle formed by acceptor (A), donor (D) and hydrogen (H) ( $\angle ADH$ ).

| PDB ID | Residue A | Atom A | Residue B | Atom B | Distance (Å) |
|--------|-----------|--------|-----------|--------|--------------|
| 1UA6   | Y_LYS_97  | NZ     | H_ASP_32  | OD1    | 2.722        |
| 1UA6   | Y_LYS_97  | NZ     | H_ASP_99  | OD2    | 2.674        |

Table 1066: Interfacial 1UA6-specific salt bridging networks analysis. In this table, a PDB file is specified with a four-letter PDB ID, except that the names of the PDB files corresponding to the single NMR structural model split from the NMR ensemble is specified with a four-letter PDB ID in addition to a hyphen followed by the single NMR structural model numeric ID, the residue naming scheme is **Chain ID\_residue name\_residue number**,  $\angle ADH$  represents the angle formed by acceptor (A), donor (D) and hydrogen (H) ( $\angle ADH$ ).

| PDB ID | Residue A | Atom A | Residue B | Atom B | Distance (Å) |
|--------|-----------|--------|-----------|--------|--------------|
| 1UAC   | Y.LYS_97  | NZ     | H.ASP_32  | OD1    | 2.750        |
| 1UAC   | Y.LYS_97  | NZ     | H.ASP_32  | OD2    | 3.845        |
| 1UAC   | Y.LYS_97  | NZ     | H.ASP_99  | OD2    | 2.749        |

Table 1067: Interfacial 1UAC-specific salt bridging networks analysis. In this table, a PDB file is specified with a four-letter PDB ID, except that the names of the PDB files corresponding to the single NMR structural model split from the NMR ensemble is specified with a four-letter PDB ID in addition to a hyphen followed by the single NMR structural model numeric ID, the residue naming scheme is **Chain ID\_residue name\_residue number**,  $\angle ADH$  represents the angle formed by acceptor (A), donor (D) and hydrogen (H) ( $\angle ADH$ ).

| PDB ID | Residue A | Atom A | Residue B | Atom B | Distance (Å) |
|--------|-----------|--------|-----------|--------|--------------|
| 1UCB   | L_LYS_50  | NZ     | H_ASP_98  | OD1    | 3.160        |
| 1UCB   | H_LYS_221 | NZ     | L_GLU_123 | OE1    | 3.128        |

Table 1068: Interfacial 1UCB-specific salt bridging networks analysis. In this table, a PDB file is specified with a four-letter PDB ID, except that the names of the PDB files corresponding to the single NMR structural model split from the NMR ensemble is specified with a four-letter PDB ID in addition to a hyphen followed by the single NMR structural model numeric ID, the residue naming scheme is **Chain ID\_residue name\_residue number**,  $\angle ADH$  represents the angle formed by acceptor (A), donor (D) and hydrogen (H) ( $\angle ADH$ ).

| PDB ID | Residue A | Atom A | Residue B | Atom B | Distance (Å) |
|--------|-----------|--------|-----------|--------|--------------|
| 1UJ3   | A_HIS_91  | NE2    | B_ASP_399 | OD1    | 3.708        |
| 1UJ3   | A_HIS_91  | NE2    | B_ASP_399 | OD2    | 2.884        |
| 1UJ3   | B_LYS_513 | NZ     | A_GLU_123 | OE1    | 3.554        |
| 1UJ3   | B_LYS_513 | NZ     | A_GLU_123 | OE2    | 3.075        |
| 1UJ3   | C_LYS_766 | NZ     | A_ASP_1   | OD1    | 3.997        |
| 1UJ3   | C_LYS_769 | NZ     | B_ASP_399 | OD1    | 2.791        |
| 1UJ3   | C_LYS_769 | NZ     | B_ASP_399 | OD2    | 3.372        |
| 1UJ3   | C_LYS_801 | NZ     | B_ASP_352 | OD1    | 2.774        |
| 1UJ3   | C_LYS_801 | NZ     | B_ASP_352 | OD2    | 3.632        |

Table 1069: Interfacial 1UJ3-specific salt bridging networks analysis. In this table, a PDB file is specified with a four-letter PDB ID, except that the names of the PDB files corresponding to the single NMR structural model split from the NMR ensemble is specified with a four-letter PDB ID in addition to a hyphen followed by the single NMR structural model numeric ID, the residue naming scheme is **Chain ID\_residue name\_residue number**,  $\angle ADH$  represents the angle formed by acceptor (A), donor (D) and hydrogen (H) ( $\angle ADH$ ).

| PDB ID | Residue A | Atom A | Residue B | Atom B | Distance (Å) |
|--------|-----------|--------|-----------|--------|--------------|
| 1UWX   | H_HIS_164 | NE2    | L_ASP_168 | OD2    | 3.899        |
| 1UWX   | H_LYS_208 | NZ     | L_GLU_124 | OE2    | 2.744        |
| 1UWX   | M_LYS_208 | NZ     | K_GLU_124 | OE2    | 2.705        |

Table 1070: Interfacial 1UWX-specific salt bridging networks analysis. In this table, a PDB file is specified with a four-letter PDB ID, except that the names of the PDB files corresponding to the single NMR structural model split from the NMR ensemble is specified with a four-letter PDB ID in addition to a hyphen followed by the single NMR structural model numeric ID, the residue naming scheme is **Chain ID\_residue name\_residue number**,  $\angle ADH$  represents the angle formed by acceptor (A), donor (D) and hydrogen (H) ( $\angle ADH$ ).



| PDB ID | Residue A | Atom A | Residue B | Atom B | Distance (Å) |
|--------|-----------|--------|-----------|--------|--------------|
| 1UZ6   | F_ARG_164 | NH1    | E_ASP_166 | OD1    | 3.662        |
| 1UZ6   | F_ARG_164 | NH2    | E_ASP_166 | OD1    | 3.708        |
| 1UZ6   | F_ARG_164 | NH2    | E_ASP_169 | OD2    | 3.554        |
| 1UZ6   | F_LYS_208 | NZ     | E_GLU_122 | OE1    | 3.883        |
| 1UZ6   | F_ARG_209 | NH1    | E_GLU_122 | OE2    | 3.531        |
| 1UZ6   | H_ARG_164 | NH1    | L_ASP_166 | OD1    | 3.603        |
| 1UZ6   | H_ARG_164 | NH2    | L_ASP_166 | OD1    | 3.557        |
| 1UZ6   | H_ARG_164 | NH2    | L_ASP_169 | OD2    | 3.746        |
| 1UZ6   | H_LYS_208 | NZ     | L_GLU_122 | OE1    | 3.795        |
| 1UZ6   | H_ARG_209 | NH1    | L_GLU_122 | OE2    | 3.180        |
| 1UZ6   | P_ARG_164 | NH1    | M_ASP_166 | OD1    | 3.636        |
| 1UZ6   | P_ARG_164 | NH2    | M_ASP_166 | OD1    | 3.666        |
| 1UZ6   | P_ARG_164 | NH2    | M_ASP_166 | OD2    | 3.901        |
| 1UZ6   | P_ARG_164 | NH2    | M_ASP_169 | OD2    | 3.942        |
| 1UZ6   | P_LYS_208 | NZ     | M_GLU_122 | OE1    | 3.361        |
| 1UZ6   | W_ARG_164 | NH2    | V_ASP_166 | OD1    | 3.892        |
| 1UZ6   | W_LYS_208 | NZ     | V_GLU_122 | OE1    | 3.069        |

Table 1071: Interfacial 1UZ6-specific salt bridging networks analysis. In this table, a PDB file is specified with a four-letter PDB ID, except that the names of the PDB files corresponding to the single NMR structural model split from the NMR ensemble is specified with a four-letter PDB ID in addition to a hyphen followed by the single NMR structural model numeric ID, the residue naming scheme is **Chain ID\_residue name\_residue number**,  $\angle ADH$  represents the angle formed by acceptor (A), donor (D) and hydrogen (H) ( $\angle ADH$ ).

| PDB ID | Residue A | Atom A | Residue B | Atom B | Distance (Å) |
|--------|-----------|--------|-----------|--------|--------------|
| 1UZ8   | B_ARG_164 | NH1    | A_ASP_166 | OD1    | 3.299        |
| 1UZ8   | B_ARG_164 | NH2    | A_ASP_166 | OD1    | 3.745        |
| 1UZ8   | B_ARG_164 | NH2    | A_ASP_169 | OD2    | 3.660        |
| 1UZ8   | H_ARG_164 | NH1    | L_ASP_166 | OD1    | 3.385        |
| 1UZ8   | H_ARG_164 | NH2    | L_ASP_166 | OD1    | 3.573        |
| 1UZ8   | H_ARG_164 | NH2    | L_ASP_169 | OD2    | 3.234        |

Table 1072: Interfacial 1UZ8-specific salt bridging networks analysis. In this table, a PDB file is specified with a four-letter PDB ID, except that the names of the PDB files corresponding to the single NMR structural model split from the NMR ensemble is specified with a four-letter PDB ID in addition to a hyphen followed by the single NMR structural model numeric ID, the residue naming scheme is **Chain ID\_residue name\_residue number**,  $\angle ADH$  represents the angle formed by acceptor (A), donor (D) and hydrogen (H) ( $\angle ADH$ ).

| PDB ID | Residue A | Atom A | Residue B | Atom B | Distance (Å) |
|--------|-----------|--------|-----------|--------|--------------|
| 1V7M   | L_ARG_95  | NH1    | H_GLU_50  | OE1    | 3.532        |
| 1V7M   | V_ARG_98  | NH2    | H_ASP_31  | OD1    | 3.697        |
| 1V7M   | M_ARG_95  | NH1    | I_GLU_50  | OE1    | 3.801        |
| 1V7M   | X_ARG_98  | NH2    | I_ASP_31  | OD1    | 3.214        |

Table 1073: Interfacial 1V7M-specific salt bridging networks analysis. In this table, a PDB file is specified with a four-letter PDB ID, except that the names of the PDB files corresponding to the single NMR structural model split from the NMR ensemble is specified with a four-letter PDB ID in addition to a hyphen followed by the single NMR structural model numeric ID, the residue naming scheme is **Chain ID\_residue name\_residue number**,  $\angle ADH$  represents the angle formed by acceptor (A), donor (D) and hydrogen (H) ( $\angle ADH$ ).

| PDB ID | Residue A | Atom A | Residue B | Atom B | Distance (Å) |
|--------|-----------|--------|-----------|--------|--------------|
| 1V7N   | L_ARG_95  | NH1    | H_GLU_50  | OE1    | 3.194        |
| 1V7N   | L_ARG_107 | NH1    | O_GLU_78  | OE2    | 3.587        |
| 1V7N   | L_ARG_107 | NH2    | O_GLU_78  | OE1    | 3.844        |
| 1V7N   | L_ARG_107 | NH2    | O_GLU_78  | OE2    | 2.214        |
| 1V7N   | H_ARG_216 | NH2    | Z_ASP_123 | OD2    | 3.997        |
| 1V7N   | M_ARG_95  | NH1    | I_GLU_50  | OE1    | 2.984        |
| 1V7N   | M_ARG_107 | NH1    | N_GLU_78  | OE2    | 3.960        |
| 1V7N   | M_ARG_107 | NH2    | N_GLU_78  | OE1    | 3.607        |
| 1V7N   | M_ARG_107 | NH2    | N_GLU_78  | OE2    | 2.132        |
| 1V7N   | N_ARG_95  | NH1    | J_GLU_50  | OE1    | 3.631        |
| 1V7N   | N_ARG_107 | NH2    | M_GLU_78  | OE1    | 2.980        |
| 1V7N   | N_ARG_107 | NH2    | M_GLU_78  | OE2    | 2.369        |
| 1V7N   | J_ARG_216 | NH2    | X_ASP_123 | OD2    | 3.982        |
| 1V7N   | O_ARG_95  | NH1    | K_GLU_50  | OE1    | 2.735        |
| 1V7N   | O_ARG_107 | NH1    | L_GLU_78  | OE1    | 3.650        |
| 1V7N   | O_ARG_107 | NH1    | L_GLU_78  | OE2    | 3.114        |
| 1V7N   | O_ARG_107 | NH2    | L_GLU_78  | OE2    | 2.402        |
| 1V7N   | V_ARG_98  | NH2    | H_ASP_31  | OD1    | 3.580        |
| 1V7N   | X_ARG_98  | NH2    | I_ASP_31  | OD1    | 3.389        |
| 1V7N   | X_HIS_121 | ND1    | J_ASP_217 | OD1    | 2.619        |
| 1V7N   | X_HIS_121 | NE2    | J_ASP_217 | OD1    | 3.422        |
| 1V7N   | Y_HIS_20  | ND1    | H_ASP_217 | OD1    | 3.368        |
| 1V7N   | Y_HIS_20  | ND1    | H_ASP_217 | OD2    | 3.116        |
| 1V7N   | Y_HIS_20  | NE2    | H_ASP_217 | OD1    | 3.862        |
| 1V7N   | Y_HIS_121 | ND1    | I_ASP_217 | OD1    | 3.108        |
| 1V7N   | Z_ARG_98  | NH2    | K_ASP_31  | OD1    | 3.622        |
| 1V7N   | Z_ARG_140 | NH2    | M_GLU_212 | OE1    | 3.768        |

Table 1074: Interfacial 1V7N-specific salt bridging networks analysis. In this table, a PDB file is specified with a four-letter PDB ID, except that the names of the PDB files corresponding to the single NMR structural model split from the NMR ensemble is specified with a four-letter PDB ID in addition to a hyphen followed by the single NMR structural model numeric ID, the residue naming scheme is **Chain ID\_residue name\_residue number**,  $\angle ADH$  represents the angle formed by acceptor (A), donor (D) and hydrogen (H) ( $\angle ADH$ ).

| PDB ID | Residue A | Atom A | Residue B | Atom B | Distance (Å) |
|--------|-----------|--------|-----------|--------|--------------|
| 1VES   | A_ARG_25  | NH1    | B_ASP_4   | OD1    | 3.636        |
| 1VES   | A_ARG_25  | NH1    | B_ASP_4   | OD2    | 2.836        |
| 1VES   | A_ARG_25  | NH2    | B_ASP_4   | OD1    | 2.879        |
| 1VES   | A_ARG_25  | NH2    | B_ASP_4   | OD2    | 3.552        |
| 1VES   | B_ARG_25  | NH1    | A_ASP_4   | OD1    | 3.762        |
| 1VES   | B_ARG_25  | NH1    | A_ASP_4   | OD2    | 2.782        |
| 1VES   | B_ARG_25  | NH2    | A_ASP_4   | OD1    | 3.070        |
| 1VES   | B_ARG_25  | NH2    | A_ASP_4   | OD2    | 3.548        |

Table 1075: Interfacial 1VES-specific salt bridging networks analysis. In this table, a PDB file is specified with a four-letter PDB ID, except that the names of the PDB files corresponding to the single NMR structural model split from the NMR ensemble is specified with a four-letter PDB ID in addition to a hyphen followed by the single NMR structural model numeric ID, the residue naming scheme is **Chain ID\_residue name\_residue number**,  $\angle ADH$  represents the angle formed by acceptor (A), donor (D) and hydrogen (H) ( $\angle ADH$ ).

| PDB ID | Residue A | Atom A | Residue B | Atom B | Distance (Å) |
|--------|-----------|--------|-----------|--------|--------------|
| 1VFA   | A_ARG_96  | NH1    | B_GLU_98  | OE1    | 2.794        |
| 1VFA   | A_ARG_96  | NH1    | B_GLU_98  | OE2    | 3.600        |
| 1VFA   | A_ARG_96  | NH2    | B_GLU_98  | OE1    | 3.537        |
| 1VFA   | A_ARG_96  | NH2    | B_GLU_98  | OE2    | 2.928        |

Table 1076: Interfacial 1VFA-specific salt bridging networks analysis. In this table, a PDB file is specified with a four-letter PDB ID, except that the names of the PDB files corresponding to the single NMR structural model split from the NMR ensemble is specified with a four-letter PDB ID in addition to a hyphen followed by the single NMR structural model numeric ID, the residue naming scheme is **Chain ID\_residue name\_residue number**,  $\angle ADH$  represents the angle formed by acceptor (A), donor (D) and hydrogen (H) ( $\angle ADH$ ).

| PDB ID | Residue A | Atom A | Residue B | Atom B | Distance (Å) |
|--------|-----------|--------|-----------|--------|--------------|
| 1VFB   | A_ARG_96  | NH1    | B_GLU_98  | OE1    | 2.821        |
| 1VFB   | A_ARG_96  | NH1    | B_GLU_98  | OE2    | 3.695        |
| 1VFB   | A_ARG_96  | NH2    | B_GLU_98  | OE1    | 3.393        |
| 1VFB   | A_ARG_96  | NH2    | B_GLU_98  | OE2    | 2.813        |

Table 1077: Interfacial 1VFB-specific salt bridging networks analysis. In this table, a PDB file is specified with a four-letter PDB ID, except that the names of the PDB files corresponding to the single NMR structural model split from the NMR ensemble is specified with a four-letter PDB ID in addition to a hyphen followed by the single NMR structural model numeric ID, the residue naming scheme is **Chain ID\_residue name\_residue number**,  $\angle ADH$  represents the angle formed by acceptor (A), donor (D) and hydrogen (H) ( $\angle ADH$ ).

| PDB ID | Residue A | Atom A | Residue B | Atom B | Distance (Å) |
|--------|-----------|--------|-----------|--------|--------------|
| 1W72   | A_ARG_35  | NH1    | B_ASP_53  | OD1    | 2.945        |
| 1W72   | A_ARG_48  | NH1    | B_ASP_53  | OD2    | 3.978        |
| 1W72   | A_ARG_48  | NH2    | B_ASP_53  | OD1    | 3.455        |
| 1W72   | A_ARG_48  | NH2    | B_ASP_53  | OD2    | 2.916        |
| 1W72   | A_ARG_65  | NH1    | H_ASP_30  | OD1    | 3.409        |
| 1W72   | A_ARG_65  | NH1    | H_ASP_31  | OD1    | 2.977        |
| 1W72   | A_ARG_114 | NH1    | C_ASP_3   | OD2    | 3.999        |
| 1W72   | A_LYS_146 | NZ     | L_ASP_95A | OD1    | 3.112        |
| 1W72   | A_LYS_146 | NZ     | L_ASP_95A | OD2    | 3.996        |
| 1W72   | A_ARG_156 | NH1    | C_ASP_3   | OD1    | 3.704        |
| 1W72   | A_ARG_156 | NH1    | C_ASP_3   | OD2    | 2.953        |
| 1W72   | A_ARG_163 | NH1    | C_GLU_1   | OE1    | 3.400        |
| 1W72   | A_ARG_163 | NH2    | C_GLU_1   | OE1    | 3.293        |
| 1W72   | A_ARG_163 | NH2    | C_GLU_1   | OE2    | 3.482        |
| 1W72   | A_ARG_170 | NH1    | C_GLU_1   | OE2    | 3.205        |
| 1W72   | A_ARG_170 | NH2    | C_GLU_1   | OE2    | 2.677        |
| 1W72   | A_HIS_192 | NE2    | B_ASP_98  | OD1    | 3.224        |
| 1W72   | A_HIS_192 | NE2    | B_ASP_98  | OD2    | 2.823        |
| 1W72   | B_LYS_6   | NZ     | A_GLU_232 | OE1    | 3.881        |
| 1W72   | D_ARG_35  | NH2    | E_ASP_53  | OD1    | 3.761        |
| 1W72   | D_ARG_65  | NH1    | L_ASP_30  | OD1    | 2.970        |
| 1W72   | D_ARG_65  | NH1    | L_ASP_31  | OD1    | 3.035        |
| 1W72   | D_LYS_146 | NZ     | M_ASP_95A | OD2    | 3.397        |
| 1W72   | D_ARG_156 | NH1    | F_ASP_3   | OD1    | 3.644        |
| 1W72   | D_ARG_156 | NH1    | F_ASP_3   | OD2    | 3.082        |
| 1W72   | D_ARG_163 | NH1    | F_GLU_1   | OE1    | 3.609        |
| 1W72   | D_ARG_163 | NH1    | F_GLU_1   | OE2    | 3.022        |
| 1W72   | D_HIS_192 | NE2    | E_ASP_98  | OD2    | 3.123        |
| 1W72   | E_LYS_6   | NZ     | D_GLU_232 | OE2    | 2.863        |
| 1W72   | H_LYS_145 | NZ     | L_GLU_124 | OE2    | 2.720        |
| 1W72   | H_LYS_221 | NZ     | L_GLU_123 | OE1    | 2.737        |
| 1W72   | H_LYS_221 | NZ     | L_GLU_123 | OE2    | 3.946        |
| 1W72   | I_LYS_145 | NZ     | M_GLU_124 | OE2    | 2.470        |
| 1W72   | I_LYS_228 | NZ     | M_GLU_123 | OE2    | 3.514        |
| 1W72   | M_HIS_95B | NE2    | L_ASP_61  | OD2    | 3.924        |

Table 1078: Interfacial 1W72-specific salt bridging networks analysis. In this table, a PDB file is specified with a four-letter PDB ID, except that the names of the PDB files corresponding to the single NMR structural model split from the NMR ensemble is specified with a four-letter PDB ID in addition to a hyphen followed by the single NMR structural model numeric ID, the residue naming scheme is **Chain ID\_residue name\_residue number**,  $\angle ADH$  represents the angle formed by acceptor (A), donor (D) and hydrogen (H) ( $\angle ADH$ ).



| PDB ID | Residue A | Atom A | Residue B | Atom B | Distance (Å) |
|--------|-----------|--------|-----------|--------|--------------|
| 1WEJ   | L_HIS_30  | ND1    | F_GLU_104 | OE1    | 2.984        |
| 1WEJ   | L_HIS_30  | ND1    | F_GLU_104 | OE2    | 2.758        |
| 1WEJ   | H_ARG_50  | NH1    | F_GLU_62  | OE2    | 3.319        |
| 1WEJ   | H_ARG_50  | NH2    | F_GLU_62  | OE2    | 2.823        |
| 1WEJ   | H_LYS_212 | NZ     | L_GLU_123 | OE2    | 3.963        |
| 1WEJ   | F_LYS_60  | NZ     | H_ASP_100 | OD2    | 3.322        |

Table 1079: Interfacial 1WEJ-specific salt bridging networks analysis. In this table, a PDB file is specified with a four-letter PDB ID, except that the names of the PDB files corresponding to the single NMR structural model split from the NMR ensemble is specified with a four-letter PDB ID in addition to a hyphen followed by the single NMR structural model numeric ID, the residue naming scheme is **Chain ID\_residue name\_residue number**,  $\angle ADH$  represents the angle formed by acceptor (A), donor (D) and hydrogen (H) ( $\angle ADH$ ).

| PDB ID | Residue A | Atom A | Residue B | Atom B | Distance (Å) |
|--------|-----------|--------|-----------|--------|--------------|
| 1XF2   | H.LYS.208 | NZ     | L.GLU.123 | OE1    | 3.369        |
| 1XF2   | H.LYS.208 | NZ     | L.GLU.123 | OE2    | 2.577        |
| 1XF2   | B.LYS.208 | NZ     | A.GLU.123 | OE2    | 2.913        |

Table 1080: Interfacial 1XF2-specific salt bridging networks analysis. In this table, a PDB file is specified with a four-letter PDB ID, except that the names of the PDB files corresponding to the single NMR structural model split from the NMR ensemble is specified with a four-letter PDB ID in addition to a hyphen followed by the single NMR structural model numeric ID, the residue naming scheme is **Chain ID\_residue name\_residue number**,  $\angle ADH$  represents the angle formed by acceptor (A), donor (D) and hydrogen (H) ( $\angle ADH$ ).

| PDB ID | Residue A | Atom A | Residue B | Atom B | Distance (Å) |
|--------|-----------|--------|-----------|--------|--------------|
| 1XGY   | L_ARG_50  | NH2    | P_GLU_6   | OE1    | 2.621        |
| 1XGY   | H_LYS_208 | NZ     | L_GLU_123 | OE2    | 3.768        |
| 1XGY   | M_ARG_50  | NH2    | Q_GLU_6   | OE1    | 3.022        |
| 1XGY   | I_LYS_208 | NZ     | M_GLU_123 | OE2    | 3.551        |

Table 1081: Interfacial 1XGY-specific salt bridging networks analysis. In this table, a PDB file is specified with a four-letter PDB ID, except that the names of the PDB files corresponding to the single NMR structural model split from the NMR ensemble is specified with a four-letter PDB ID in addition to a hyphen followed by the single NMR structural model numeric ID, the residue naming scheme is **Chain ID\_residue name\_residue number**,  $\angle ADH$  represents the angle formed by acceptor (A), donor (D) and hydrogen (H) ( $\angle ADH$ ).

| PDB ID | Residue A | Atom A | Residue B | Atom B | Distance (Å) |
|--------|-----------|--------|-----------|--------|--------------|
| 1XIW   | A_ARG_80  | NH1    | D_ASP_106 | OD2    | 2.879        |
| 1XIW   | A_ARG_94  | NH2    | B_GLU_7   | OE1    | 3.648        |
| 1XIW   | A_ARG_94  | NH2    | B_GLU_7   | OE2    | 2.974        |
| 1XIW   | B_LYS_2   | NZ     | A_ASP_42  | OD1    | 3.017        |
| 1XIW   | B_LYS_2   | NZ     | A_ASP_42  | OD2    | 2.678        |
| 1XIW   | C_ARG_31  | NH1    | A_ASP_86  | OD1    | 2.919        |
| 1XIW   | C_ARG_31  | NH1    | A_ASP_86  | OD2    | 3.491        |
| 1XIW   | C_ARG_31  | NH2    | A_ASP_86  | OD1    | 3.709        |
| 1XIW   | C_ARG_31  | NH2    | A_ASP_86  | OD2    | 2.755        |
| 1XIW   | C_ARG_54  | NH1    | F_GLU_6   | OE1    | 2.951        |
| 1XIW   | C_ARG_54  | NH2    | F_GLU_6   | OE1    | 3.193        |
| 1XIW   | C_ARG_54  | NH2    | F_GLU_6   | OE2    | 3.073        |
| 1XIW   | C_HIS_56  | ND1    | F_GLU_9   | OE1    | 3.139        |
| 1XIW   | C_HIS_56  | ND1    | F_GLU_9   | OE2    | 2.963        |
| 1XIW   | D_LYS_55  | NZ     | A_ASP_57  | OD1    | 3.690        |
| 1XIW   | E_ARG_80  | NH1    | H_ASP_106 | OD2    | 2.741        |
| 1XIW   | E_ARG_94  | NH2    | F_GLU_7   | OE2    | 3.577        |
| 1XIW   | F_LYS_2   | NZ     | E_ASP_42  | OD1    | 3.079        |
| 1XIW   | F_LYS_2   | NZ     | E_ASP_42  | OD2    | 3.491        |
| 1XIW   | G_ARG_31  | NH1    | E_ASP_86  | OD1    | 3.076        |
| 1XIW   | G_ARG_31  | NH1    | E_ASP_86  | OD2    | 3.219        |
| 1XIW   | G_ARG_31  | NH2    | E_ASP_86  | OD2    | 2.817        |
| 1XIW   | G_ARG_54  | NH1    | B_GLU_6   | OE1    | 2.839        |
| 1XIW   | G_ARG_54  | NH2    | B_GLU_6   | OE1    | 3.146        |
| 1XIW   | G_ARG_54  | NH2    | B_GLU_6   | OE2    | 3.222        |
| 1XIW   | G_HIS_56  | ND1    | B_GLU_9   | OE1    | 2.509        |
| 1XIW   | G_HIS_56  | ND1    | B_GLU_9   | OE2    | 3.961        |

Table 1082: Interfacial 1XIW-specific salt bridging networks analysis. In this table, a PDB file is specified with a four-letter PDB ID, except that the names of the PDB files corresponding to the single NMR structural model split from the NMR ensemble is specified with a four-letter PDB ID in addition to a hyphen followed by the single NMR structural model numeric ID, the residue naming scheme is **Chain ID\_residue name\_residue number**,  $\angle ADH$  represents the angle formed by acceptor (A), donor (D) and hydrogen (H) ( $\angle ADH$ ).

| PDB ID | Residue A | Atom A | Residue B  | Atom B | Distance (Å) |
|--------|-----------|--------|------------|--------|--------------|
| 1YEI   | L_LYS_30  | NZ     | H_GLU_100B | OE1    | 2.979        |
| 1YEI   | L_LYS_45  | NZ     | H_ASP_101  | OD1    | 2.746        |
| 1YEI   | L_LYS_45  | NZ     | H_ASP_101  | OD2    | 3.891        |
| 1YEI   | L_ARG_46  | NH2    | H_ASP_101  | OD1    | 3.707        |
| 1YEI   | L_HIS_49  | NE2    | H_ASP_100C | OD1    | 3.542        |

Table 1083: Interfacial 1YEI-specific salt bridging networks analysis. In this table, a PDB file is specified with a four-letter PDB ID, except that the names of the PDB files corresponding to the single NMR structural model split from the NMR ensemble is specified with a four-letter PDB ID in addition to a hyphen followed by the single NMR structural model numeric ID, the residue naming scheme is **Chain ID\_residue name\_residue number**,  $\angle ADH$  represents the angle formed by acceptor (A), donor (D) and hydrogen (H) ( $\angle ADH$ ).

| PDB ID | Residue A | Atom A | Residue B  | Atom B | Distance (Å) |
|--------|-----------|--------|------------|--------|--------------|
| 1YEJ   | L_LYS_45  | NZ     | H_ASP_101  | OD1    | 2.790        |
| 1YEJ   | L_LYS_45  | NZ     | H_ASP_101  | OD2    | 3.988        |
| 1YEJ   | L_ARG_46  | NH2    | H_ASP_101  | OD1    | 3.745        |
| 1YEJ   | L_HIS_49  | NE2    | H_ASP_100C | OD1    | 3.536        |
| 1YEJ   | L_LYS_53  | NZ     | H_ASP_100C | OD1    | 3.377        |
| 1YEJ   | L_LYS_53  | NZ     | H_ASP_100C | OD2    | 3.298        |

Table 1084: Interfacial 1YEJ-specific salt bridging networks analysis. In this table, a PDB file is specified with a four-letter PDB ID, except that the names of the PDB files corresponding to the single NMR structural model split from the NMR ensemble is specified with a four-letter PDB ID in addition to a hyphen followed by the single NMR structural model numeric ID, the residue naming scheme is **Chain ID\_residue name\_residue number**,  $\angle ADH$  represents the angle formed by acceptor (A), donor (D) and hydrogen (H) ( $\angle ADH$ ).

| PDB ID | Residue A | Atom A | Residue B  | Atom B | Distance (Å) |
|--------|-----------|--------|------------|--------|--------------|
| 1YEK   | L-LYS_30  | NZ     | H-GLU_100B | OE1    | 2.464        |
| 1YEK   | L-LYS_45  | NZ     | H-ASP_101  | OD1    | 2.830        |
| 1YEK   | L-ARG_46  | NH2    | H-ASP_101  | OD1    | 3.853        |
| 1YEK   | L-HIS_49  | NE2    | H-ASP_100C | OD1    | 3.610        |

Table 1085: Interfacial 1YEK-specific salt bridging networks analysis. In this table, a PDB file is specified with a four-letter PDB ID, except that the names of the PDB files corresponding to the single NMR structural model split from the NMR ensemble is specified with a four-letter PDB ID in addition to a hyphen followed by the single NMR structural model numeric ID, the residue naming scheme is **Chain ID\_residue name\_residue number**,  $\angle ADH$  represents the angle formed by acceptor (A), donor (D) and hydrogen (H) ( $\angle ADH$ ).

| PDB ID | Residue A  | Atom A | Residue B  | Atom B | Distance (Å) |
|--------|------------|--------|------------|--------|--------------|
| 1YNT   | A_ARG_24   | NH1    | C_ASP_1070 | OD2    | 3.114        |
| 1YNT   | A_ARG_24   | NH2    | C_ASP_1070 | OD2    | 3.728        |
| 1YNT   | B_LYS_563  | NZ     | A_ASP_1    | OD1    | 2.935        |
| 1YNT   | B_LYS_563  | NZ     | A_ASP_1    | OD2    | 3.384        |
| 1YNT   | B_LYS_713  | NZ     | A_GLU_123  | OE1    | 3.645        |
| 1YNT   | C_ARG_1024 | NH1    | A_ASP_70   | OD2    | 3.173        |
| 1YNT   | C_ARG_1024 | NH2    | A_ASP_70   | OD2    | 3.802        |
| 1YNT   | C_LYS_1107 | NZ     | E_GLU_869  | OE1    | 3.719        |
| 1YNT   | D_LYS_1563 | NZ     | C_ASP_1001 | OD1    | 2.913        |
| 1YNT   | D_LYS_1563 | NZ     | C_ASP_1001 | OD2    | 3.385        |
| 1YNT   | D_LYS_1713 | NZ     | C_GLU_1123 | OE1    | 3.557        |
| 1YNT   | E_LYS_824  | NZ     | A_ASP_143  | OD1    | 3.012        |
| 1YNT   | E_LYS_824  | NZ     | A_ASP_143  | OD2    | 3.238        |
| 1YNT   | E_LYS_833  | NZ     | A_ASP_17   | OD2    | 3.941        |

Table 1086: Interfacial 1YNT-specific salt bridging networks analysis. In this table, a PDB file is specified with a four-letter PDB ID, except that the names of the PDB files corresponding to the single NMR structural model split from the NMR ensemble is specified with a four-letter PDB ID in addition to a hyphen followed by the single NMR structural model numeric ID, the residue naming scheme is **Chain ID\_residue name\_residue number**,  $\angle ADH$  represents the angle formed by acceptor (A), donor (D) and hydrogen (H) ( $\angle ADH$ ).



| PDB ID | Residue A | Atom A | Residue B | Atom B | Distance (Å) |
|--------|-----------|--------|-----------|--------|--------------|
| 1YQV   | L_ARG_46  | NH2    | H_ASP_101 | OD2    | 3.072        |
| 1YQV   | H_LYS_221 | NZ     | L_GLU_123 | OE1    | 3.123        |
| 1YQV   | H_LYS_221 | NZ     | L_GLU_123 | OE2    | 2.724        |
| 1YQV   | Y_ARG_45  | NH1    | H_GLU_50  | OE1    | 3.514        |
| 1YQV   | Y_ARG_45  | NH1    | H_GLU_50  | OE2    | 2.957        |
| 1YQV   | Y_ARG_68  | NH1    | H_GLU_50  | OE1    | 2.746        |
| 1YQV   | Y_ARG_68  | NH1    | H_GLU_50  | OE2    | 3.759        |
| 1YQV   | Y_ARG_68  | NH2    | H_GLU_50  | OE1    | 3.492        |
| 1YQV   | Y_ARG_68  | NH2    | H_GLU_50  | OE2    | 2.963        |

Table 1087: Interfacial 1YQV-specific salt bridging networks analysis. In this table, a PDB file is specified with a four-letter PDB ID, except that the names of the PDB files corresponding to the single NMR structural model split from the NMR ensemble is specified with a four-letter PDB ID in addition to a hyphen followed by the single NMR structural model numeric ID, the residue naming scheme is **Chain ID\_residue name\_residue number**,  $\angle ADH$  represents the angle formed by acceptor (A), donor (D) and hydrogen (H) ( $\angle ADH$ ).

| PDB ID | Residue A  | Atom A | Residue B   | Atom B | Distance (Å) |
|--------|------------|--------|-------------|--------|--------------|
| 1YYL   | G_ARG_419  | NH1    | H_GLU_100D  | OE2    | 3.749        |
| 1YYL   | G_ARG_419  | NH2    | H_GLU_99    | OE2    | 2.852        |
| 1YYL   | G_ARG_419  | NH2    | H_GLU_100D  | OE1    | 3.510        |
| 1YYL   | G_ARG_419  | NH2    | H_GLU_100D  | OE2    | 2.773        |
| 1YYL   | H_LYS_209  | NZ     | L_GLU_123   | OE1    | 2.745        |
| 1YYL   | H_LYS_209  | NZ     | L_GLU_123   | OE2    | 3.202        |
| 1YYL   | P_ARG_1419 | NH1    | R_GLU_1100B | OE1    | 3.247        |
| 1YYL   | P_ARG_1419 | NH2    | R_GLU_1099  | OE1    | 2.456        |
| 1YYL   | P_ARG_1419 | NH2    | R_GLU_1100D | OE1    | 3.853        |
| 1YYL   | R_LYS_1201 | NZ     | H_GLU_10    | OE1    | 3.633        |
| 1YYL   | R_LYS_1209 | NZ     | Q_GLU_1123  | OE2    | 3.934        |
| 1YYL   | S_ARG_1009 | NH1    | P_ASP_1368  | OD2    | 3.204        |
| 1YYL   | S_ARG_1009 | NH2    | P_ASP_1368  | OD2    | 2.930        |

Table 1088: Interfacial 1YYL-specific salt bridging networks analysis. In this table, a PDB file is specified with a four-letter PDB ID, except that the names of the PDB files corresponding to the single NMR structural model split from the NMR ensemble is specified with a four-letter PDB ID in addition to a hyphen followed by the single NMR structural model numeric ID, the residue naming scheme is **Chain ID\_residue name\_residue number**,  $\angle ADH$  represents the angle formed by acceptor (A), donor (D) and hydrogen (H) ( $\angle ADH$ ).

| PDB ID | Residue A  | Atom A | Residue B   | Atom B | Distance (Å) |
|--------|------------|--------|-------------|--------|--------------|
| 1YYM   | G_ARG_419  | NH2    | H_GLU_99    | OE2    | 2.868        |
| 1YYM   | G_ARG_419  | NH2    | H_GLU_100D  | OE1    | 3.511        |
| 1YYM   | H_LYS_209  | NZ     | L_GLU_123   | OE1    | 2.715        |
| 1YYM   | H_LYS_209  | NZ     | L_GLU_123   | OE2    | 2.976        |
| 1YYM   | P_ARG_1419 | NH1    | R_GLU_1100B | OE1    | 2.635        |
| 1YYM   | P_ARG_1419 | NH2    | R_GLU_1099  | OE1    | 3.192        |
| 1YYM   | S_ARG_1009 | NH1    | P_ASP_1368  | OD2    | 3.572        |
| 1YYM   | S_ARG_1009 | NH2    | P_ASP_1368  | OD2    | 2.725        |

Table 1089: Interfacial 1YYM-specific salt bridging networks analysis. In this table, a PDB file is specified with a four-letter PDB ID, except that the names of the PDB files corresponding to the single NMR structural model split from the NMR ensemble is specified with a four-letter PDB ID in addition to a hyphen followed by the single NMR structural model numeric ID, the residue naming scheme is **Chain ID\_residue name\_residue number**,  $\angle ADH$  represents the angle formed by acceptor (A), donor (D) and hydrogen (H) ( $\angle ADH$ ).

| PDB ID | Residue A | Atom A | Residue B | Atom B | Distance (Å) |
|--------|-----------|--------|-----------|--------|--------------|
| 1ZEA   | H_ARG_95  | NH1    | L_GLU_34  | OE1    | 2.842        |
| 1ZEA   | H_ARG_95  | NH1    | L_GLU_34  | OE2    | 3.642        |
| 1ZEA   | H_ARG_95  | NH2    | L_GLU_34  | OE1    | 3.613        |
| 1ZEA   | H_ARG_95  | NH2    | L_GLU_34  | OE2    | 2.859        |
| 1ZEA   | H_LYS_208 | NZ     | L_GLU_123 | OE2    | 2.817        |

Table 1090: Interfacial 1ZEA-specific salt bridging networks analysis. In this table, a PDB file is specified with a four-letter PDB ID, except that the names of the PDB files corresponding to the single NMR structural model split from the NMR ensemble is specified with a four-letter PDB ID in addition to a hyphen followed by the single NMR structural model numeric ID, the residue naming scheme is **Chain ID\_residue name\_residue number**,  $\angle ADH$  represents the angle formed by acceptor (A), donor (D) and hydrogen (H) ( $\angle ADH$ ).

| PDB ID | Residue A | Atom A | Residue B | Atom B | Distance (Å) |
|--------|-----------|--------|-----------|--------|--------------|
| 2AAB   | H_LYS_208 | NZ     | L_GLU_123 | OE1    | 3.545        |

Table 1091: Interfacial 2AAB-specific salt bridging networks analysis. In this table, a PDB file is specified with a four-letter PDB ID, except that the names of the PDB files corresponding to the single NMR structural model split from the NMR ensemble is specified with a four-letter PDB ID in addition to a hyphen followed by the single NMR structural model numeric ID, the residue naming scheme is **Chain ID\_residue name\_residue number**,  $\angle ADH$  represents the angle formed by acceptor (A), donor (D) and hydrogen (H) ( $\angle ADH$ ).

| PDB ID | Residue A | Atom A | Residue B | Atom B | Distance (Å) |
|--------|-----------|--------|-----------|--------|--------------|
| 2B2X   | A_HIS_261 | NE2    | H_ASP_101 | OD2    | 3.121        |
| 2B2X   | H_HIS_169 | NE2    | L_ASP_171 | OD2    | 3.832        |
| 2B2X   | H_LYS_213 | NZ     | L_GLU_127 | OE1    | 2.709        |
| 2B2X   | H_LYS_213 | NZ     | L_GLU_127 | OE2    | 3.416        |
| 2B2X   | L_HIS_31  | NE2    | A_GLU_259 | OE2    | 3.821        |
| 2B2X   | B_HIS_261 | NE2    | I_ASP_101 | OD2    | 3.107        |
| 2B2X   | I_HIS_169 | NE2    | M_ASP_171 | OD2    | 3.874        |
| 2B2X   | I_LYS_213 | NZ     | M_GLU_127 | OE2    | 3.245        |
| 2B2X   | M_HIS_31  | NE2    | B_GLU_259 | OE2    | 3.848        |

Table 1092: Interfacial 2B2X-specific salt bridging networks analysis. In this table, a PDB file is specified with a four-letter PDB ID, except that the names of the PDB files corresponding to the single NMR structural model split from the NMR ensemble is specified with a four-letter PDB ID in addition to a hyphen followed by the single NMR structural model numeric ID, the residue naming scheme is **Chain ID\_residue name\_residue number**,  $\angle ADH$  represents the angle formed by acceptor (A), donor (D) and hydrogen (H) ( $\angle ADH$ ).

| PDB ID | Residue A | Atom A | Residue B | Atom B | Distance (Å) |
|--------|-----------|--------|-----------|--------|--------------|
| 2B4C   | G_ARG_    | NH1    | H_ASP_    | OD2    | 3.237        |
| 2B4C   | G_ARG_    | NH2    | H_ASP_    | OD2    | 2.859        |
| 2B4C   | G_LYS_    | NZ     | H_ASP_    | OD2    | 2.598        |
| 2B4C   | C_ARG_    | NH1    | H_GLU_    | OE2    | 3.957        |
| 2B4C   | C_ARG_    | NH2    | H_GLU_    | OE2    | 3.405        |
| 2B4C   | C_ARG_    | NH1    | G_ASP_    | OD1    | 2.937        |
| 2B4C   | C_ARG_    | NH1    | G_ASP_    | OD2    | 3.245        |
| 2B4C   | H_LYS_    | NZ     | L_GLU_    | OE1    | 3.365        |
| 2B4C   | H_LYS_209 | NZ     | L_GLU_123 | OE2    | 3.837        |

Table 1093: Interfacial 2B4C-specific salt bridging networks analysis. In this table, a PDB file is specified with a four-letter PDB ID, except that the names of the PDB files corresponding to the single NMR structural model split from the NMR ensemble is specified with a four-letter PDB ID in addition to a hyphen followed by the single NMR structural model numeric ID, the residue naming scheme is **Chain ID\_residue name\_residue number**,  $\angle ADH$  represents the angle formed by acceptor (A), donor (D) and hydrogen (H) ( $\angle ADH$ ).

| PDB ID | Residue A | Atom A | Residue B | Atom B | Distance (Å) |
|--------|-----------|--------|-----------|--------|--------------|
| 2BDN   | A_LYS_56  | NZ     | H_ASP_52  | OD1    | 2.539        |
| 2BDN   | A_LYS_56  | NZ     | H_ASP_52  | OD2    | 3.792        |
| 2BDN   | L_ARG_32  | NH1    | A_ASP_65  | OD1    | 3.196        |
| 2BDN   | L_ARG_32  | NH1    | A_ASP_68  | OD1    | 2.578        |
| 2BDN   | L_ARG_32  | NH2    | A_ASP_65  | OD1    | 2.774        |
| 2BDN   | H_ARG_98  | NH1    | A_GLU_39  | OE2    | 3.155        |
| 2BDN   | H_LYS_212 | NZ     | L_GLU_123 | OE2    | 3.177        |

Table 1094: Interfacial 2BDN-specific salt bridging networks analysis. In this table, a PDB file is specified with a four-letter PDB ID, except that the names of the PDB files corresponding to the single NMR structural model split from the NMR ensemble is specified with a four-letter PDB ID in addition to a hyphen followed by the single NMR structural model numeric ID, the residue naming scheme is **Chain ID\_residue name\_residue number**,  $\angle ADH$  represents the angle formed by acceptor (A), donor (D) and hydrogen (H) ( $\angle ADH$ ).



| PDB ID | Residue A | Atom A | Residue B | Atom B | Distance (Å) |
|--------|-----------|--------|-----------|--------|--------------|
| 2BRR   | H_ARG_213 | NH1    | L_GLU_123 | OE1    | 2.600        |
| 2BRR   | H_ARG_213 | NH1    | L_GLU_123 | OE2    | 3.932        |
| 2BRR   | H_ARG_213 | NH2    | L_GLU_123 | OE1    | 3.110        |
| 2BRR   | H_ARG_213 | NH2    | L_GLU_123 | OE2    | 3.029        |
| 2BRR   | P_LYS_7   | NZ     | H_ASP_95  | OD1    | 3.067        |
| 2BRR   | P_LYS_7   | NZ     | H_ASP_95  | OD2    | 2.549        |
| 2BRR   | P_HIS_11  | ND1    | Y_ASP_95  | OD2    | 2.841        |
| 2BRR   | Y_LYS_208 | NZ     | X_GLU_123 | OE2    | 3.359        |
| 2BRR   | Y_ARG_213 | NH1    | X_GLU_123 | OE1    | 2.523        |
| 2BRR   | Y_ARG_213 | NH1    | X_GLU_123 | OE2    | 3.327        |
| 2BRR   | Y_ARG_213 | NH2    | X_GLU_123 | OE1    | 3.468        |
| 2BRR   | Y_ARG_213 | NH2    | X_GLU_123 | OE2    | 2.546        |

Table 1095: Interfacial 2BRR-specific salt bridging networks analysis. In this table, a PDB file is specified with a four-letter PDB ID, except that the names of the PDB files corresponding to the single NMR structural model split from the NMR ensemble is specified with a four-letter PDB ID in addition to a hyphen followed by the single NMR structural model numeric ID, the residue naming scheme is **Chain ID residue name residue number**,  $\angle ADH$  represents the angle formed by acceptor (A), donor (D) and hydrogen (H) ( $\angle ADH$ ).

| PDB ID | Residue A | Atom A | Residue B | Atom B | Distance (Å) |
|--------|-----------|--------|-----------|--------|--------------|
| 2DBL   | H_LYS_221 | NZ     | L_GLU_123 | OE2    | 3.660        |

Table 1096: Interfacial 2DBL-specific salt bridging networks analysis. In this table, a PDB file is specified with a four-letter PDB ID, except that the names of the PDB files corresponding to the single NMR structural model split from the NMR ensemble is specified with a four-letter PDB ID in addition to a hyphen followed by the single NMR structural model numeric ID, the residue naming scheme is **Chain ID\_residue name\_residue number**,  $\angle ADH$  represents the angle formed by acceptor (A), donor (D) and hydrogen (H) ( $\angle ADH$ ).

| PDB ID | Residue A | Atom A | Residue B | Atom B | Distance (Å) |
|--------|-----------|--------|-----------|--------|--------------|
| 2DQC   | Y.LYS_97  | NZ     | H.ASP_32  | OD1    | 2.612        |
| 2DQC   | Y.LYS_97  | NZ     | H.ASP_32  | OD2    | 3.998        |
| 2DQC   | Y.LYS_97  | NZ     | H.ASP_99  | OD1    | 3.500        |
| 2DQC   | Y.LYS_97  | NZ     | H.ASP_99  | OD2    | 2.637        |

Table 1097: Interfacial 2DQC-specific salt bridging networks analysis. In this table, a PDB file is specified with a four-letter PDB ID, except that the names of the PDB files corresponding to the single NMR structural model split from the NMR ensemble is specified with a four-letter PDB ID in addition to a hyphen followed by the single NMR structural model numeric ID, the residue naming scheme is **Chain ID\_residue name\_residue number**,  $\angle ADH$  represents the angle formed by acceptor (A), donor (D) and hydrogen (H) ( $\angle ADH$ ).

| PDB ID | Residue A | Atom A | Residue B | Atom B | Distance (Å) |
|--------|-----------|--------|-----------|--------|--------------|
| 2DQD   | Y.LYS_97  | NZ     | H.ASP_32  | OD1    | 2.767        |
| 2DQD   | Y.LYS_97  | NZ     | H.ASP_32  | OD2    | 3.965        |
| 2DQD   | Y.LYS_97  | NZ     | H.ASP_99  | OD1    | 3.334        |
| 2DQD   | Y.LYS_97  | NZ     | H.ASP_99  | OD2    | 3.048        |

Table 1098: Interfacial 2DQD-specific salt bridging networks analysis. In this table, a PDB file is specified with a four-letter PDB ID, except that the names of the PDB files corresponding to the single NMR structural model split from the NMR ensemble is specified with a four-letter PDB ID in addition to a hyphen followed by the single NMR structural model numeric ID, the residue naming scheme is **Chain ID\_residue name\_residue number**,  $\angle ADH$  represents the angle formed by acceptor (A), donor (D) and hydrogen (H) ( $\angle ADH$ ).

| PDB ID | Residue A | Atom A | Residue B | Atom B | Distance (Å) |
|--------|-----------|--------|-----------|--------|--------------|
| 2DQE   | Y_LYS_97  | NZ     | H_ASP_32  | OD1    | 2.650        |
| 2DQE   | Y_LYS_97  | NZ     | H_ASP_99  | OD1    | 3.314        |
| 2DQE   | Y_LYS_97  | NZ     | H_ASP_99  | OD2    | 2.899        |

Table 1099: Interfacial 2DQE-specific salt bridging networks analysis. In this table, a PDB file is specified with a four-letter PDB ID, except that the names of the PDB files corresponding to the single NMR structural model split from the NMR ensemble is specified with a four-letter PDB ID in addition to a hyphen followed by the single NMR structural model numeric ID, the residue naming scheme is **Chain ID\_residue name\_residue number**,  $\angle ADH$  represents the angle formed by acceptor (A), donor (D) and hydrogen (H) ( $\angle ADH$ ).

| PDB ID | Residue A | Atom A | Residue B | Atom B | Distance (Å) |
|--------|-----------|--------|-----------|--------|--------------|
| 2DQF   | A_ARG_45  | NH1    | E_ASP_1   | OD2    | 3.511        |
| 2DQF   | A_LYS_49  | NZ     | B_ASP_99  | OD1    | 3.470        |
| 2DQF   | A_ARG_61  | NH1    | E_ASP_27  | OD1    | 3.814        |
| 2DQF   | C_LYS_97  | NZ     | B_ASP_99  | OD1    | 3.543        |
| 2DQF   | C_LYS_97  | NZ     | B_ASP_99  | OD2    | 2.851        |
| 2DQF   | D_LYS_39  | NZ     | B_ASP_1   | OD1    | 3.005        |
| 2DQF   | D_ARG_61  | NH1    | B_ASP_27  | OD1    | 3.581        |
| 2DQF   | F_LYS_97  | NZ     | E_ASP_99  | OD2    | 3.165        |

Table 1100: Interfacial 2DQF-specific salt bridging networks analysis. In this table, a PDB file is specified with a four-letter PDB ID, except that the names of the PDB files corresponding to the single NMR structural model split from the NMR ensemble is specified with a four-letter PDB ID in addition to a hyphen followed by the single NMR structural model numeric ID, the residue naming scheme is **Chain ID\_residue name\_residue number**,  $\angle ADH$  represents the angle formed by acceptor (A), donor (D) and hydrogen (H) ( $\angle ADH$ ).

| PDB ID | Residue A | Atom A | Residue B | Atom B | Distance (Å) |
|--------|-----------|--------|-----------|--------|--------------|
| 2DQG   | Y_LYS_97  | NZ     | H_ASP_32  | OD1    | 3.992        |
| 2DQG   | Y_LYS_97  | NZ     | H_ASP_32  | OD2    | 2.695        |
| 2DQG   | Y_LYS_97  | NZ     | H_ASP_99  | OD1    | 3.156        |
| 2DQG   | Y_LYS_97  | NZ     | H_ASP_99  | OD2    | 3.019        |

Table 1101: Interfacial 2DQG-specific salt bridging networks analysis. In this table, a PDB file is specified with a four-letter PDB ID, except that the names of the PDB files corresponding to the single NMR structural model split from the NMR ensemble is specified with a four-letter PDB ID in addition to a hyphen followed by the single NMR structural model numeric ID, the residue naming scheme is **Chain ID\_residue name\_residue number**,  $\angle ADH$  represents the angle formed by acceptor (A), donor (D) and hydrogen (H) ( $\angle ADH$ ).

| PDB ID | Residue A | Atom A | Residue B | Atom B | Distance (Å) |
|--------|-----------|--------|-----------|--------|--------------|
| 2DQH   | Y_LYS_97  | NZ     | H_ASP_32  | OD1    | 2.777        |
| 2DQH   | Y_LYS_97  | NZ     | H_ASP_99  | OD1    | 3.694        |
| 2DQH   | Y_LYS_97  | NZ     | H_ASP_99  | OD2    | 2.635        |

Table 1102: Interfacial 2DQH-specific salt bridging networks analysis. In this table, a PDB file is specified with a four-letter PDB ID, except that the names of the PDB files corresponding to the single NMR structural model split from the NMR ensemble is specified with a four-letter PDB ID in addition to a hyphen followed by the single NMR structural model numeric ID, the residue naming scheme is **Chain ID\_residue name\_residue number**,  $\angle ADH$  represents the angle formed by acceptor (A), donor (D) and hydrogen (H) ( $\angle ADH$ ).



| PDB ID | Residue A | Atom A | Residue B | Atom B | Distance (Å) |
|--------|-----------|--------|-----------|--------|--------------|
| 2DQI   | L.LYS_49  | NZ     | H.ASP_99  | OD1    | 2.843        |
| 2DQI   | L.LYS_49  | NZ     | H.ASP_101 | OD1    | 3.541        |
| 2DQI   | L.LYS_49  | NZ     | H.ASP_101 | OD2    | 3.285        |
| 2DQI   | Y.LYS_97  | NZ     | H.ASP_32  | OD1    | 2.729        |

Table 1103: Interfacial 2DQI-specific salt bridging networks analysis. In this table, a PDB file is specified with a four-letter PDB ID, except that the names of the PDB files corresponding to the single NMR structural model split from the NMR ensemble is specified with a four-letter PDB ID in addition to a hyphen followed by the single NMR structural model numeric ID, the residue naming scheme is **Chain ID\_residue name\_residue number**,  $\angle ADH$  represents the angle formed by acceptor (A), donor (D) and hydrogen (H) ( $\angle ADH$ ).

| PDB ID | Residue A | Atom A | Residue B | Atom B | Distance (Å) |
|--------|-----------|--------|-----------|--------|--------------|
| 2DQJ   | Y_LYS_97  | NZ     | H_ASP_32  | OD1    | 2.638        |
| 2DQJ   | Y_LYS_97  | NZ     | H_ASP_32  | OD2    | 3.939        |
| 2DQJ   | Y_LYS_97  | NZ     | H_ASP_99  | OD1    | 3.482        |
| 2DQJ   | Y_LYS_97  | NZ     | H_ASP_99  | OD2    | 2.865        |

Table 1104: Interfacial 2DQJ-specific salt bridging networks analysis. In this table, a PDB file is specified with a four-letter PDB ID, except that the names of the PDB files corresponding to the single NMR structural model split from the NMR ensemble is specified with a four-letter PDB ID in addition to a hyphen followed by the single NMR structural model numeric ID, the residue naming scheme is **Chain ID\_residue name\_residue number**,  $\angle ADH$  represents the angle formed by acceptor (A), donor (D) and hydrogen (H) ( $\angle ADH$ ).

| PDB ID | Residue A  | Atom A | Residue B  | Atom B | Distance (Å) |
|--------|------------|--------|------------|--------|--------------|
| 2DQT   | L_LYS_50   | NZ     | H_ASP_100C | OD1    | 3.056        |
| 2DQT   | H_ARG_100B | NH2    | L_ASP_30   | OD1    | 3.486        |
| 2DQT   | H_ARG_100B | NH2    | L_ASP_30   | OD2    | 3.745        |

Table 1105: Interfacial 2DQT-specific salt bridging networks analysis. In this table, a PDB file is specified with a four-letter PDB ID, except that the names of the PDB files corresponding to the single NMR structural model split from the NMR ensemble is specified with a four-letter PDB ID in addition to a hyphen followed by the single NMR structural model numeric ID, the residue naming scheme is **Chain ID\_residue name\_residue number**,  $\angle ADH$  represents the angle formed by acceptor (A), donor (D) and hydrogen (H) ( $\angle ADH$ ).

| PDB ID | Residue A  | Atom A | Residue B  | Atom B | Distance (Å) |
|--------|------------|--------|------------|--------|--------------|
| 2DQU   | L.LYS.50   | NZ     | H.ASP.100C | OD1    | 2.628        |
| 2DQU   | L.LYS.50   | NZ     | H.ASP.100C | OD2    | 3.616        |
| 2DQU   | H.ARG.100B | NH2    | L.ASP.30   | OD2    | 2.721        |
| 2DQU   | H.LYS.208  | NZ     | L.GLU.123  | OE2    | 2.915        |
| 2DQU   | H.ARG.213  | NH1    | L.GLU.123  | OE1    | 3.471        |

Table 1106: Interfacial 2DQU-specific salt bridging networks analysis. In this table, a PDB file is specified with a four-letter PDB ID, except that the names of the PDB files corresponding to the single NMR structural model split from the NMR ensemble is specified with a four-letter PDB ID in addition to a hyphen followed by the single NMR structural model numeric ID, the residue naming scheme is **Chain ID\_residue name\_residue number**,  $\angle ADH$  represents the angle formed by acceptor (A), donor (D) and hydrogen (H) ( $\angle ADH$ ).

| PDB ID | Residue A | Atom A | Residue B | Atom B | Distance (Å) |
|--------|-----------|--------|-----------|--------|--------------|
| 2FB4   | H_LYS_148 | NZ     | L_GLU_126 | OE2    | 2.805        |
| 2FB4   | H_LYS_214 | NZ     | L_GLU_125 | OE1    | 3.053        |
| 2FB4   | H_LYS_214 | NZ     | L_GLU_125 | OE2    | 2.759        |

Table 1107: Interfacial 2FB4-specific salt bridging networks analysis. In this table, a PDB file is specified with a four-letter PDB ID, except that the names of the PDB files corresponding to the single NMR structural model split from the NMR ensemble is specified with a four-letter PDB ID in addition to a hyphen followed by the single NMR structural model numeric ID, the residue naming scheme is **Chain ID\_residue name\_residue number**,  $\angle ADH$  represents the angle formed by acceptor (A), donor (D) and hydrogen (H) ( $\angle ADH$ ).

| PDB ID | Residue A | Atom A | Residue B | Atom B | Distance (Å) |
|--------|-----------|--------|-----------|--------|--------------|
| 2FD6   | A_HIS_87  | ND1    | U_ASP_11  | OD2    | 3.705        |
| 2FD6   | H_HIS_98  | ND1    | L_GLU_50  | OE1    | 3.050        |
| 2FD6   | H_HIS_98  | ND1    | L_GLU_50  | OE2    | 3.997        |
| 2FD6   | H_LYS_203 | NZ     | L_GLU_122 | OE2    | 2.585        |
| 2FD6   | U_ARG_192 | NH1    | H_GLU_58  | OE2    | 2.359        |
| 2FD6   | U_ARG_192 | NH2    | H_GLU_58  | OE2    | 3.898        |

Table 1108: Interfacial 2FD6-specific salt bridging networks analysis. In this table, a PDB file is specified with a four-letter PDB ID, except that the names of the PDB files corresponding to the single NMR structural model split from the NMR ensemble is specified with a four-letter PDB ID in addition to a hyphen followed by the single NMR structural model numeric ID, the residue naming scheme is **Chain ID\_residue name\_residue number**,  $\angle ADH$  represents the angle formed by acceptor (A), donor (D) and hydrogen (H) ( $\angle ADH$ ).

| PDB ID | Residue A | Atom A | Residue B | Atom B | Distance (Å) |
|--------|-----------|--------|-----------|--------|--------------|
| 2FR4   | H_LYS_208 | NZ     | L_GLU_123 | OE2    | 3.199        |
| 2FR4   | B_LYS_208 | NZ     | A_GLU_123 | OE1    | 2.539        |

Table 1109: Interfacial 2FR4-specific salt bridging networks analysis. In this table, a PDB file is specified with a four-letter PDB ID, except that the names of the PDB files corresponding to the single NMR structural model split from the NMR ensemble is specified with a four-letter PDB ID in addition to a hyphen followed by the single NMR structural model numeric ID, the residue naming scheme is **Chain ID\_residue name\_residue number**,  $\angle ADH$  represents the angle formed by acceptor (A), donor (D) and hydrogen (H) ( $\angle ADH$ ).

| PDB ID | Residue A | Atom A | Residue B | Atom B | Distance (Å) |
|--------|-----------|--------|-----------|--------|--------------|
| 2H32   | H_ARG_59  | NH1    | A_GLU_106 | OE1    | 3.937        |
| 2H32   | H_ARG_59  | NH1    | A_GLU_106 | OE2    | 3.372        |
| 2H32   | H_ARG_59  | NH2    | A_GLU_106 | OE2    | 3.412        |

Table 1110: Interfacial 2H32-specific salt bridging networks analysis. In this table, a PDB file is specified with a four-letter PDB ID, except that the names of the PDB files corresponding to the single NMR structural model split from the NMR ensemble is specified with a four-letter PDB ID in addition to a hyphen followed by the single NMR structural model numeric ID, the residue naming scheme is **Chain ID\_residue name\_residue number**,  $\angle ADH$  represents the angle formed by acceptor (A), donor (D) and hydrogen (H) ( $\angle ADH$ ).



| PDB ID | Residue A | Atom A | Residue B | Atom B | Distance (Å) |
|--------|-----------|--------|-----------|--------|--------------|
| 2H9G   | B_HIS_53  | ND1    | R_GLU_36  | OE2    | 3.471        |
| 2H9G   | B_LYS_209 | NZ     | A_GLU_123 | OE1    | 2.713        |
| 2H9G   | H_LYS_209 | NZ     | L_GLU_123 | OE1    | 2.570        |

Table 1111: Interfacial 2H9G-specific salt bridging networks analysis. In this table, a PDB file is specified with a four-letter PDB ID, except that the names of the PDB files corresponding to the single NMR structural model split from the NMR ensemble is specified with a four-letter PDB ID in addition to a hyphen followed by the single NMR structural model numeric ID, the residue naming scheme is **Chain ID\_residue name\_residue number**,  $\angle ADH$  represents the angle formed by acceptor (A), donor (D) and hydrogen (H) ( $\angle ADH$ ).

| PDB ID | Residue A | Atom A | Residue B | Atom B | Distance (Å) |
|--------|-----------|--------|-----------|--------|--------------|
| 2HFG   | H_ARG_95  | NH2    | R_ASP_26  | OD1    | 2.783        |
| 2HFG   | H_ARG_95  | NH2    | R_ASP_26  | OD2    | 3.667        |
| 2HFG   | H_LYS_209 | NZ     | L_GLU_122 | OE1    | 3.336        |
| 2HFG   | H_LYS_209 | NZ     | L_GLU_122 | OE2    | 2.886        |

Table 1112: Interfacial 2HFG-specific salt bridging networks analysis. In this table, a PDB file is specified with a four-letter PDB ID, except that the names of the PDB files corresponding to the single NMR structural model split from the NMR ensemble is specified with a four-letter PDB ID in addition to a hyphen followed by the single NMR structural model numeric ID, the residue naming scheme is **Chain ID\_residue name\_residue number**,  $\angle ADH$  represents the angle formed by acceptor (A), donor (D) and hydrogen (H) ( $\angle ADH$ ).

| PDB ID | Residue A | Atom A | Residue B | Atom B | Distance (Å) |
|--------|-----------|--------|-----------|--------|--------------|
| 2HKF   | L_LYS_55  | NZ     | P_ASP_6   | OD1    | 2.651        |
| 2HKF   | H_ARG_50  | NH2    | P_GLU_5   | OE1    | 3.869        |
| 2HKF   | H_ARG_50  | NH2    | P_GLU_5   | OE2    | 2.886        |
| 2HKF   | H_ARG_52  | NH2    | P_GLU_5   | OE1    | 3.116        |
| 2HKF   | H_LYS_214 | NZ     | L_GLU_128 | OE2    | 2.891        |

Table 1113: Interfacial 2HKF-specific salt bridging networks analysis. In this table, a PDB file is specified with a four-letter PDB ID, except that the names of the PDB files corresponding to the single NMR structural model split from the NMR ensemble is specified with a four-letter PDB ID in addition to a hyphen followed by the single NMR structural model numeric ID, the residue naming scheme is **Chain ID\_residue name\_residue number**,  $\angle ADH$  represents the angle formed by acceptor (A), donor (D) and hydrogen (H) ( $\angle ADH$ ).

| PDB ID | Residue A | Atom A | Residue B | Atom B | Distance (Å) |
|--------|-----------|--------|-----------|--------|--------------|
| 2HMG   | A.LYS_27  | NZ     | B.GLU_97  | OE1    | 2.762        |
| 2HMG   | A.LYS_27  | NZ     | B.GLU_97  | OE2    | 3.001        |
| 2HMG   | A.ARG_109 | NH1    | B.GLU_67  | OE1    | 3.634        |
| 2HMG   | A.ARG_109 | NH1    | B.GLU_67  | OE2    | 2.959        |
| 2HMG   | A.ARG_269 | NH2    | B.GLU_67  | OE1    | 2.999        |
| 2HMG   | A.LYS_299 | NZ     | B.GLU_69  | OE1    | 3.169        |
| 2HMG   | B.ARG_54  | NH1    | F.GLU_97  | OE1    | 2.721        |
| 2HMG   | B.ARG_54  | NH2    | F.GLU_97  | OE1    | 3.280        |
| 2HMG   | B.LYS_62  | NZ     | F.ASP_86  | OD1    | 3.023        |
| 2HMG   | B.LYS_62  | NZ     | F.ASP_86  | OD2    | 2.718        |
| 2HMG   | B.LYS_62  | NZ     | F.ASP_90  | OD1    | 3.256        |
| 2HMG   | B.LYS_62  | NZ     | F.ASP_90  | OD2    | 2.780        |
| 2HMG   | B.HIS_64  | NE2    | F.ASP_79  | OD2    | 3.863        |
| 2HMG   | B.ARG_76  | NH1    | D.GLU_74  | OE1    | 3.508        |
| 2HMG   | B.ARG_76  | NH1    | D.GLU_74  | OE2    | 2.816        |
| 2HMG   | B.ARG_76  | NH1    | D.GLU_81  | OE1    | 2.774        |
| 2HMG   | B.ARG_76  | NH1    | D.GLU_81  | OE2    | 3.655        |
| 2HMG   | B.ARG_76  | NH2    | D.GLU_74  | OE1    | 2.915        |
| 2HMG   | B.ARG_76  | NH2    | D.GLU_74  | OE2    | 3.598        |
| 2HMG   | B.ARG_123 | NH1    | F.GLU_132 | OE2    | 3.122        |
| 2HMG   | B.ARG_124 | NH1    | F.GLU_132 | OE1    | 3.544        |
| 2HMG   | B.ARG_124 | NH1    | F.GLU_132 | OE2    | 3.040        |
| 2HMG   | B.ARG_127 | NH2    | F.GLU_131 | OE1    | 2.502        |
| 2HMG   | B.ARG_163 | NH1    | F.GLU_131 | OE1    | 2.668        |
| 2HMG   | B.ARG_163 | NH1    | F.GLU_131 | OE2    | 2.605        |
| 2HMG   | B.ARG_170 | NH1    | D.GLU_128 | OE1    | 3.860        |
| 2HMG   | B.ARG_170 | NH2    | D.GLU_128 | OE1    | 2.750        |
| 2HMG   | B.ARG_170 | NH2    | D.GLU_128 | OE2    | 3.837        |
| 2HMG   | C.LYS_27  | NZ     | D.GLU_97  | OE1    | 2.819        |
| 2HMG   | C.LYS_27  | NZ     | D.GLU_97  | OE2    | 3.060        |
| 2HMG   | C.ARG_109 | NH1    | D.GLU_67  | OE1    | 3.653        |
| 2HMG   | C.ARG_109 | NH1    | D.GLU_67  | OE2    | 2.947        |
| 2HMG   | C.ARG_269 | NH2    | D.GLU_67  | OE1    | 2.972        |
| 2HMG   | C.LYS_299 | NZ     | D.GLU_69  | OE1    | 3.147        |
| 2HMG   | D.ARG_54  | NH1    | B.GLU_97  | OE1    | 2.735        |
| 2HMG   | D.ARG_54  | NH2    | B.GLU_97  | OE1    | 3.312        |
| 2HMG   | D.LYS_62  | NZ     | B.ASP_86  | OD1    | 3.037        |
| 2HMG   | D.LYS_62  | NZ     | B.ASP_86  | OD2    | 2.683        |
| 2HMG   | D.LYS_62  | NZ     | B.ASP_90  | OD1    | 3.222        |
| 2HMG   | D.LYS_62  | NZ     | B.ASP_90  | OD2    | 2.673        |
| 2HMG   | D.HIS_64  | NE2    | B.ASP_79  | OD2    | 3.737        |
| 2HMG   | D.ARG_76  | NH1    | F.GLU_74  | OE1    | 3.549        |
| 2HMG   | D.ARG_76  | NH1    | F.GLU_74  | OE2    | 2.731        |
| 2HMG   | D.ARG_76  | NH1    | F.GLU_81  | OE1    | 2.698        |
| 2HMG   | D.ARG_76  | NH1    | F.GLU_81  | OE2    | 3.690        |
| 2HMG   | D.ARG_76  | NH2    | F.GLU_74  | OE1    | 2.828        |
| 2HMG   | D.ARG_76  | NH2    | F.GLU_74  | OE2    | 3.390        |
| 2HMG   | D.ARG_123 | NH1    | B.GLU_132 | OE2    | 3.058        |
| 2HMG   | D.ARG_124 | NH1    | B.GLU_132 | OE1    | 3.508        |
| 2HMG   | D.ARG_124 | NH1    | B.GLU_132 | OE2    | 3.040        |
| 2HMG   | D.ARG_127 | NH2    | B.GLU_131 | OE1    | 2.517        |
| 2HMG   | D.ARG_163 | NH1    | B.GLU_131 | OE1    | 2.667        |
| 2HMG   | D.ARG_163 | NH1    | B.GLU_131 | OE2    | 2.648        |
| 2HMG   | D.ARG_170 | NH1    | F.GLU_128 | OE1    | 3.974        |
| 2HMG   | D.ARG_170 | NH2    | F.GLU_128 | OE1    | 2.843        |
| 2HMG   | E.LYS_27  | NZ     | F.GLU_97  | OE1    | 2.743        |
| 2HMG   | E.LYS_27  | NZ     | F.GLU_97  | OE2    | 3.029        |

|      |           |     |           |     |       |
|------|-----------|-----|-----------|-----|-------|
| 2HMG | E_ARG_109 | NH1 | F_GLU_67  | OE1 | 3.629 |
| 2HMG | E_ARG_109 | NH1 | F_GLU_67  | OE2 | 2.891 |
| 2HMG | E_ARG_269 | NH2 | F_GLU_67  | OE1 | 2.967 |
| 2HMG | E_LYS_299 | NZ  | F_GLU_69  | OE1 | 3.127 |
| 2HMG | F_ARG_54  | NH1 | D_GLU_97  | OE1 | 2.701 |
| 2HMG | F_ARG_54  | NH2 | D_GLU_97  | OE1 | 3.310 |
| 2HMG | F_LYS_62  | NZ  | D_ASP_86  | OD1 | 2.945 |
| 2HMG | F_LYS_62  | NZ  | D_ASP_86  | OD2 | 2.624 |
| 2HMG | F_LYS_62  | NZ  | D_ASP_90  | OD1 | 3.290 |
| 2HMG | F_LYS_62  | NZ  | D_ASP_90  | OD2 | 2.741 |
| 2HMG | F_HIS_64  | NE2 | D_ASP_79  | OD2 | 3.679 |
| 2HMG | F_ARG_76  | NH1 | B_GLU_74  | OE1 | 3.499 |
| 2HMG | F_ARG_76  | NH1 | B_GLU_74  | OE2 | 2.732 |
| 2HMG | F_ARG_76  | NH1 | B_GLU_81  | OE1 | 2.710 |
| 2HMG | F_ARG_76  | NH1 | B_GLU_81  | OE2 | 3.754 |
| 2HMG | F_ARG_76  | NH2 | B_GLU_74  | OE1 | 2.743 |
| 2HMG | F_ARG_76  | NH2 | B_GLU_74  | OE2 | 3.373 |
| 2HMG | F_ARG_123 | NH1 | D_GLU_132 | OE2 | 3.112 |
| 2HMG | F_ARG_124 | NH1 | D_GLU_132 | OE1 | 3.531 |
| 2HMG | F_ARG_124 | NH1 | D_GLU_132 | OE2 | 3.090 |
| 2HMG | F_ARG_127 | NH2 | D_GLU_131 | OE1 | 2.569 |
| 2HMG | F_ARG_163 | NH1 | D_GLU_131 | OE1 | 2.672 |
| 2HMG | F_ARG_163 | NH1 | D_GLU_131 | OE2 | 2.717 |
| 2HMG | F_ARG_170 | NH1 | B_GLU_128 | OE1 | 3.849 |
| 2HMG | F_ARG_170 | NH2 | B_GLU_128 | OE1 | 2.798 |
| 2HMG | F_ARG_170 | NH2 | B_GLU_128 | OE2 | 3.855 |

Table 1114: Interfacial 2HMG-specific salt bridging networks analysis. In this table, a PDB file is specified with a four-letter PDB ID, except that the names of the PDB files corresponding to the single NMR structural model split from the NMR ensemble is specified with a four-letter PDB ID in addition to a hyphen followed by the single NMR structural model numeric ID, the residue naming scheme is **Chain ID\_residue name\_residue number**,  $\angle ADH$  represents the angle formed by acceptor (A), donor (D) and hydrogen (H) ( $\angle ADH$ ).

| PDB ID | Residue A | Atom A | Residue B  | Atom B | Distance (Å) |
|--------|-----------|--------|------------|--------|--------------|
| 2HRP   | L_LYS_30  | NZ     | H_ASP_100B | OD2    | 3.323        |
| 2HRP   | L_ARG_61  | NH1    | M_GLU_79   | OE1    | 2.692        |
| 2HRP   | L_ARG_61  | NH1    | M_GLU_79   | OE2    | 2.607        |
| 2HRP   | L_ARG_108 | NH1    | N_ASP_1    | OD1    | 3.613        |
| 2HRP   | L_ARG_108 | NH1    | N_ASP_1    | OD2    | 2.869        |
| 2HRP   | L_ARG_108 | NH2    | N_ASP_1    | OD1    | 3.306        |
| 2HRP   | L_ARG_108 | NH2    | N_ASP_1    | OD2    | 3.988        |
| 2HRP   | H_LYS_205 | NZ     | N_ASP_207  | OD2    | 3.339        |
| 2HRP   | H_LYS_208 | NZ     | L_GLU_123  | OE1    | 2.834        |
| 2HRP   | M_LYS_30  | NZ     | N_ASP_100B | OD2    | 3.922        |
| 2HRP   | M_ARG_61  | NH1    | L_GLU_79   | OE1    | 2.827        |
| 2HRP   | M_ARG_61  | NH1    | L_GLU_79   | OE2    | 2.489        |
| 2HRP   | M_ARG_61  | NH2    | L_GLU_79   | OE1    | 3.658        |
| 2HRP   | M_ARG_108 | NH1    | H_ASP_1    | OD2    | 3.449        |
| 2HRP   | N_LYS_208 | NZ     | M_GLU_123  | OE1    | 2.875        |
| 2HRP   | N_LYS_208 | NZ     | M_GLU_123  | OE2    | 3.117        |

Table 1115: Interfacial 2HRP-specific salt bridging networks analysis. In this table, a PDB file is specified with a four-letter PDB ID, except that the names of the PDB files corresponding to the single NMR structural model split from the NMR ensemble is specified with a four-letter PDB ID in addition to a hyphen followed by the single NMR structural model numeric ID, the residue naming scheme is **Chain ID\_residue name\_residue number**,  $\angle ADH$  represents the angle formed by acceptor (A), donor (D) and hydrogen (H) ( $\angle ADH$ ).

| PDB ID | Residue A | Atom A | Residue B | Atom B | Distance (Å) |
|--------|-----------|--------|-----------|--------|--------------|
| 2I25   | N_ARG_25  | NH1    | O_ASP_101 | OD1    | 3.459        |
| 2I25   | N_ARG_25  | NH1    | O_ASP_101 | OD2    | 3.204        |
| 2I25   | N_ARG_25  | NH2    | O_ASP_101 | OD1    | 2.762        |
| 2I25   | N_ARG_25  | NH2    | O_ASP_101 | OD2    | 3.967        |
| 2I25   | N_ARG_88  | NH2    | L_ASP_101 | OD1    | 2.875        |
| 2I25   | N_ARG_88  | NH2    | L_ASP_101 | OD2    | 3.303        |
| 2I25   | L_ARG_61  | NH2    | N_ASP_101 | OD2    | 3.227        |
| 2I25   | L_ARG_73  | NH1    | N_GLU_86  | OE1    | 3.764        |
| 2I25   | L_ARG_73  | NH1    | N_GLU_86  | OE2    | 2.771        |
| 2I25   | L_ARG_112 | NH2    | N_ASP_93  | OD1    | 2.693        |
| 2I25   | O_ARG_44  | NH2    | N_GLU_57  | OE1    | 3.011        |
| 2I25   | O_ARG_88  | NH2    | M_ASP_101 | OD1    | 2.850        |
| 2I25   | O_ARG_88  | NH2    | M_ASP_101 | OD2    | 3.440        |
| 2I25   | M_ARG_61  | NH2    | O_ASP_101 | OD2    | 2.975        |
| 2I25   | M_ARG_73  | NH1    | O_GLU_86  | OE1    | 3.850        |
| 2I25   | M_ARG_73  | NH1    | O_GLU_86  | OE2    | 2.851        |
| 2I25   | M_ARG_112 | NH1    | O_ASP_93  | OD1    | 3.660        |
| 2I25   | M_ARG_112 | NH2    | O_ASP_93  | OD1    | 3.176        |

Table 1116: Interfacial 2I25-specific salt bridging networks analysis. In this table, a PDB file is specified with a four-letter PDB ID, except that the names of the PDB files corresponding to the single NMR structural model split from the NMR ensemble is specified with a four-letter PDB ID in addition to a hyphen followed by the single NMR structural model numeric ID, the residue naming scheme is **Chain ID\_residue name\_residue number**,  $\angle ADH$  represents the angle formed by acceptor (A), donor (D) and hydrogen (H) ( $\angle ADH$ ).

| PDB ID | Residue A | Atom A | Residue B | Atom B | Distance (Å) |
|--------|-----------|--------|-----------|--------|--------------|
| 2I26   | N_ARG.88  | NH2    | L_ASP.101 | OD1    | 3.268        |
| 2I26   | N_ARG.88  | NH2    | L_ASP.101 | OD2    | 3.652        |
| 2I26   | L_ARG.73  | NH1    | N_GLU.86  | OE2    | 3.511        |
| 2I26   | L_ARG.73  | NH2    | N_GLU.86  | OE1    | 3.590        |
| 2I26   | L_ARG.73  | NH2    | N_GLU.86  | OE2    | 3.542        |
| 2I26   | L_ARG.112 | NH1    | N_ASP.93  | OD2    | 3.838        |
| 2I26   | L_ARG.112 | NH2    | N_ASP.93  | OD2    | 3.391        |
| 2I26   | O_ARG.88  | NH1    | M_ASP.101 | OD1    | 2.648        |
| 2I26   | O_ARG.88  | NH1    | M_ASP.101 | OD2    | 2.840        |
| 2I26   | M_ARG.73  | NH1    | O_GLU.86  | OE1    | 2.832        |
| 2I26   | M_ARG.73  | NH1    | O_GLU.86  | OE2    | 3.677        |
| 2I26   | M_ARG.112 | NH1    | O_ASP.93  | OD2    | 3.127        |
| 2I26   | M_ARG.112 | NH2    | O_ASP.93  | OD2    | 3.198        |
| 2I26   | P_ARG.88  | NH1    | Q_ASP.101 | OD1    | 3.139        |
| 2I26   | P_ARG.88  | NH1    | Q_ASP.101 | OD2    | 3.016        |
| 2I26   | Q_ARG.61  | NH2    | P_ASP.101 | OD2    | 3.115        |
| 2I26   | Q_ARG.73  | NH1    | P_GLU.86  | OE2    | 2.623        |
| 2I26   | Q_ARG.112 | NH1    | P_ASP.93  | OD2    | 3.805        |
| 2I26   | Q_ARG.112 | NH2    | P_ASP.93  | OD2    | 3.685        |

Table 1117: Interfacial 2I26-specific salt bridging networks analysis. In this table, a PDB file is specified with a four-letter PDB ID, except that the names of the PDB files corresponding to the single NMR structural model split from the NMR ensemble is specified with a four-letter PDB ID in addition to a hyphen followed by the single NMR structural model numeric ID, the residue naming scheme is **Chain ID** **residue name** **residue number**,  $\angle ADH$  represents the angle formed by acceptor (A), donor (D) and hydrogen (H) ( $\angle ADH$ ).



| PDB ID | Residue A | Atom A | Residue B | Atom B | Distance (Å) |
|--------|-----------|--------|-----------|--------|--------------|
| 2I27   | N_ARG_25  | NH2    | O_GLU_46  | OE2    | 3.350        |

Table 1118: Interfacial 2I27-specific salt bridging networks analysis. In this table, a PDB file is specified with a four-letter PDB ID, except that the names of the PDB files corresponding to the single NMR structural model split from the NMR ensemble is specified with a four-letter PDB ID in addition to a hyphen followed by the single NMR structural model numeric ID, the residue naming scheme is **Chain ID\_residue name\_residue number**,  $\angle ADH$  represents the angle formed by acceptor (A), donor (D) and hydrogen (H) ( $\angle ADH$ ).

| PDB ID | Residue A | Atom A | Residue B  | Atom B | Distance (Å) |
|--------|-----------|--------|------------|--------|--------------|
| 2I5Y   | G_ARG_419 | NH1    | H_GLU_100B | OE1    | 3.248        |
| 2I5Y   | G_ARG_419 | NH2    | H_GLU_99   | OE2    | 3.146        |
| 2I5Y   | G_ARG_419 | NH2    | H_GLU_100D | OE2    | 2.601        |
| 2I5Y   | H_LYS_201 | NZ     | R_GLU_10   | OE2    | 3.615        |
| 2I5Y   | H_LYS_209 | NZ     | L_GLU_123  | OE1    | 2.531        |
| 2I5Y   | H_LYS_209 | NZ     | L_GLU_123  | OE2    | 3.403        |
| 2I5Y   | P_ARG_419 | NH1    | R_GLU_99   | OE2    | 3.800        |
| 2I5Y   | P_ARG_419 | NH1    | R_GLU_100D | OE1    | 2.563        |
| 2I5Y   | P_ARG_419 | NH1    | R_GLU_100D | OE2    | 3.898        |
| 2I5Y   | R_LYS_209 | NZ     | Q_GLU_123  | OE2    | 3.373        |
| 2I5Y   | S_ARG_9   | NH1    | P_ASP_368  | OD2    | 2.853        |
| 2I5Y   | S_ARG_9   | NH2    | P_ASP_368  | OD2    | 3.453        |

Table 1119: Interfacial 2I5Y-specific salt bridging networks analysis. In this table, a PDB file is specified with a four-letter PDB ID, except that the names of the PDB files corresponding to the single NMR structural model split from the NMR ensemble is specified with a four-letter PDB ID in addition to a hyphen followed by the single NMR structural model numeric ID, the residue naming scheme is **Chain ID residue name residue number**,  $\angle ADH$  represents the angle formed by acceptor (A), donor (D) and hydrogen (H) ( $\angle ADH$ ).

| PDB ID | Residue A | Atom A | Residue B  | Atom B | Distance (Å) |
|--------|-----------|--------|------------|--------|--------------|
| 2I60   | G_ARG_419 | NH2    | H_GLU_99   | OE1    | 3.736        |
| 2I60   | G_ARG_419 | NH2    | H_GLU_99   | OE2    | 2.767        |
| 2I60   | G_ARG_419 | NH2    | H_GLU_100D | OE2    | 3.611        |
| 2I60   | H_LYS_209 | NZ     | L_GLU_123  | OE1    | 3.997        |
| 2I60   | P_ARG_419 | NH1    | R_GLU_100B | OE1    | 3.610        |
| 2I60   | P_ARG_419 | NH2    | R_GLU_99   | OE1    | 3.892        |
| 2I60   | R_LYS_209 | NZ     | Q_GLU_123  | OE2    | 3.485        |
| 2I60   | S_ARG_9   | NH1    | P_ASP_368  | OD2    | 3.268        |
| 2I60   | S_ARG_9   | NH2    | P_ASP_368  | OD1    | 3.938        |
| 2I60   | S_ARG_9   | NH2    | P_ASP_368  | OD2    | 2.664        |

Table 1120: Interfacial 2I60-specific salt bridging networks analysis. In this table, a PDB file is specified with a four-letter PDB ID, except that the names of the PDB files corresponding to the single NMR structural model split from the NMR ensemble is specified with a four-letter PDB ID in addition to a hyphen followed by the single NMR structural model numeric ID, the residue naming scheme is **Chain ID\_residue name\_residue number**,  $\angle ADH$  represents the angle formed by acceptor (A), donor (D) and hydrogen (H) ( $\angle ADH$ ).

| PDB ID | Residue A | Atom A | Residue B | Atom B | Distance (Å) |
|--------|-----------|--------|-----------|--------|--------------|
| 2IFF   | L_LYS_44  | NZ     | H_ASP_104 | OD1    | 2.935        |
| 2IFF   | L_ARG_45  | NH2    | H_ASP_104 | OD2    | 3.348        |
| 2IFF   | H_LYS_211 | NZ     | L_GLU_121 | OE1    | 3.040        |
| 2IFF   | H_LYS_211 | NZ     | L_GLU_121 | OE2    | 2.921        |
| 2IFF   | Y_ARG_45  | NH1    | H_GLU_50  | OE1    | 3.425        |
| 2IFF   | Y_ARG_45  | NH1    | H_GLU_50  | OE2    | 2.959        |

Table 1121: Interfacial 2IFF-specific salt bridging networks analysis. In this table, a PDB file is specified with a four-letter PDB ID, except that the names of the PDB files corresponding to the single NMR structural model split from the NMR ensemble is specified with a four-letter PDB ID in addition to a hyphen followed by the single NMR structural model numeric ID, the residue naming scheme is **Chain ID\_residue name\_residue number**,  $\angle ADH$  represents the angle formed by acceptor (A), donor (D) and hydrogen (H) ( $\angle ADH$ ).

| PDB ID | Residue A | Atom A | Residue B | Atom B | Distance (Å) |
|--------|-----------|--------|-----------|--------|--------------|
| 2IG2   | H_LYS_148 | NZ     | L_GLU_126 | OE2    | 2.854        |
| 2IG2   | H_LYS_214 | NZ     | L_GLU_125 | OE1    | 3.816        |
| 2IG2   | H_LYS_214 | NZ     | L_GLU_125 | OE2    | 2.866        |

Table 1122: Interfacial 2IG2-specific salt bridging networks analysis. In this table, a PDB file is specified with a four-letter PDB ID, except that the names of the PDB files corresponding to the single NMR structural model split from the NMR ensemble is specified with a four-letter PDB ID in addition to a hyphen followed by the single NMR structural model numeric ID, the residue naming scheme is **Chain ID\_residue name\_residue number**,  $\angle ADH$  represents the angle formed by acceptor (A), donor (D) and hydrogen (H) ( $\angle ADH$ ).

| PDB ID | Residue A | Atom A | Residue B | Atom B | Distance (Å) |
|--------|-----------|--------|-----------|--------|--------------|
| 2IGF   | H_LYS_221 | NZ     | L_GLU_123 | OE1    | 3.203        |
| 2IGF   | P_LYS_75  | NZ     | L_ASP_28  | OD1    | 3.253        |
| 2IGF   | P_LYS_75  | NZ     | L_ASP_28  | OD2    | 2.849        |
| 2IGF   | P_LYS_75  | NZ     | L_ASP_30  | OD2    | 3.458        |

Table 1123: Interfacial 2IGF-specific salt bridging networks analysis. In this table, a PDB file is specified with a four-letter PDB ID, except that the names of the PDB files corresponding to the single NMR structural model split from the NMR ensemble is specified with a four-letter PDB ID in addition to a hyphen followed by the single NMR structural model numeric ID, the residue naming scheme is **Chain ID\_residue name\_residue number**,  $\angle ADH$  represents the angle formed by acceptor (A), donor (D) and hydrogen (H) ( $\angle ADH$ ).

| PDB ID | Residue A | Atom A | Residue B | Atom B | Distance (Å) |
|--------|-----------|--------|-----------|--------|--------------|
| 2J4W   | D_LYS_427 | NZ     | H_ASP_52A | OD1    | 3.478        |
| 2J4W   | D_LYS_427 | NZ     | H_ASP_52A | OD2    | 2.864        |
| 2J4W   | H_LYS_221 | NZ     | L_GLU_123 | OE1    | 3.280        |
| 2J4W   | H_LYS_221 | NZ     | L_GLU_123 | OE2    | 3.313        |

Table 1124: Interfacial 2J4W-specific salt bridging networks analysis. In this table, a PDB file is specified with a four-letter PDB ID, except that the names of the PDB files corresponding to the single NMR structural model split from the NMR ensemble is specified with a four-letter PDB ID in addition to a hyphen followed by the single NMR structural model numeric ID, the residue naming scheme is **Chain ID\_residue name\_residue number**,  $\angle ADH$  represents the angle formed by acceptor (A), donor (D) and hydrogen (H) ( $\angle ADH$ ).

| PDB ID | Residue A | Atom A | Residue B | Atom B | Distance (Å) |
|--------|-----------|--------|-----------|--------|--------------|
| 2J5L   | A_LYS_485 | NZ     | C_ASP_52A | OD1    | 3.476        |
| 2J5L   | A_LYS_485 | NZ     | C_ASP_52A | OD2    | 3.193        |

Table 1125: Interfacial 2J5L-specific salt bridging networks analysis. In this table, a PDB file is specified with a four-letter PDB ID, except that the names of the PDB files corresponding to the single NMR structural model split from the NMR ensemble is specified with a four-letter PDB ID in addition to a hyphen followed by the single NMR structural model numeric ID, the residue naming scheme is **Chain ID\_residue name\_residue number**,  $\angle ADH$  represents the angle formed by acceptor (A), donor (D) and hydrogen (H) ( $\angle ADH$ ).



| PDB ID | Residue A | Atom A | Residue B | Atom B | Distance (Å) |
|--------|-----------|--------|-----------|--------|--------------|
| 2JB6   | B_LYS_216 | NZ     | A_GLU_128 | OE2    | 3.078        |

Table 1126: Interfacial 2JB6-specific salt bridging networks analysis. In this table, a PDB file is specified with a four-letter PDB ID, except that the names of the PDB files corresponding to the single NMR structural model split from the NMR ensemble is specified with a four-letter PDB ID in addition to a hyphen followed by the single NMR structural model numeric ID, the residue naming scheme is **Chain ID\_residue name\_residue number**,  $\angle ADH$  represents the angle formed by acceptor (A), donor (D) and hydrogen (H) ( $\angle ADH$ ).

| PDB ID | Residue A | Atom A | Residue B | Atom B | Distance (Å) |
|--------|-----------|--------|-----------|--------|--------------|
| 2JEL   | L_LYS_50  | NZ     | H_GLU_98  | OE1    | 2.874        |
| 2JEL   | L_LYS_50  | NZ     | P_GLU_66  | OE1    | 3.050        |
| 2JEL   | L_LYS_50  | NZ     | P_GLU_66  | OE2    | 3.051        |

Table 1127: Interfacial 2JEL-specific salt bridging networks analysis. In this table, a PDB file is specified with a four-letter PDB ID, except that the names of the PDB files corresponding to the single NMR structural model split from the NMR ensemble is specified with a four-letter PDB ID in addition to a hyphen followed by the single NMR structural model numeric ID, the residue naming scheme is **Chain ID\_residue name\_residue number**,  $\angle ADH$  represents the angle formed by acceptor (A), donor (D) and hydrogen (H) ( $\angle ADH$ ).

| PDB ID | Residue A  | Atom A | Residue B  | Atom B | Distance (Å) |
|--------|------------|--------|------------|--------|--------------|
| 2NXY   | A_ARG_419  | NH1    | D_GLU_3103 | OE2    | 3.305        |
| 2NXY   | A_ARG_419  | NH2    | D_GLU_3103 | OE2    | 2.288        |
| 2NXY   | B_LYS_1029 | NZ     | A_ASP_279  | OD2    | 2.892        |
| 2NXY   | B_ARG_1059 | NH1    | A_ASP_368  | OD1    | 3.350        |
| 2NXY   | B_ARG_1059 | NH1    | A_ASP_368  | OD2    | 2.835        |
| 2NXY   | B_ARG_1059 | NH2    | A_ASP_368  | OD1    | 2.856        |
| 2NXY   | B_ARG_1059 | NH2    | A_ASP_368  | OD2    | 3.647        |
| 2NXY   | D_LYS_3224 | NZ     | C_GLU_2125 | OE2    | 3.113        |

Table 1128: Interfacial 2NXY-specific salt bridging networks analysis. In this table, a PDB file is specified with a four-letter PDB ID, except that the names of the PDB files corresponding to the single NMR structural model split from the NMR ensemble is specified with a four-letter PDB ID in addition to a hyphen followed by the single NMR structural model numeric ID, the residue naming scheme is **Chain ID\_residue name\_residue number**,  $\angle ADH$  represents the angle formed by acceptor (A), donor (D) and hydrogen (H) ( $\angle ADH$ ).

| PDB ID | Residue A  | Atom A | Residue B  | Atom B | Distance (Å) |
|--------|------------|--------|------------|--------|--------------|
| 2NXZ   | A_ARG_419  | NH1    | D_GLU_3103 | OE2    | 3.647        |
| 2NXZ   | A_ARG_419  | NH2    | D_GLU_3103 | OE2    | 2.536        |
| 2NXZ   | B_LYS_1029 | NZ     | A_ASP_279  | OD2    | 3.046        |
| 2NXZ   | B_ARG_1059 | NH1    | A_ASP_368  | OD1    | 3.623        |
| 2NXZ   | B_ARG_1059 | NH1    | A_ASP_368  | OD2    | 3.029        |
| 2NXZ   | B_ARG_1059 | NH2    | A_ASP_368  | OD1    | 2.916        |
| 2NXZ   | B_ARG_1059 | NH2    | A_ASP_368  | OD2    | 3.612        |
| 2NXZ   | D_HIS_3179 | NE2    | C_ASP_2169 | OD2    | 3.986        |
| 2NXZ   | D_LYS_3224 | NZ     | C_GLU_2125 | OE1    | 3.503        |
| 2NXZ   | D_LYS_3224 | NZ     | C_GLU_2125 | OE2    | 2.801        |

Table 1129: Interfacial 2NXZ-specific salt bridging networks analysis. In this table, a PDB file is specified with a four-letter PDB ID, except that the names of the PDB files corresponding to the single NMR structural model split from the NMR ensemble is specified with a four-letter PDB ID in addition to a hyphen followed by the single NMR structural model numeric ID, the residue naming scheme is **Chain ID\_residue name\_residue number**,  $\angle ADH$  represents the angle formed by acceptor (A), donor (D) and hydrogen (H) ( $\angle ADH$ ).

| PDB ID | Residue A  | Atom A | Residue B  | Atom B | Distance (Å) |
|--------|------------|--------|------------|--------|--------------|
| 2NY0   | A_ARG_419  | NH1    | D_GLU_3103 | OE2    | 3.320        |
| 2NY0   | A_ARG_419  | NH2    | D_GLU_3103 | OE2    | 2.328        |
| 2NY0   | B_LYS_1029 | NZ     | A_ASP_279  | OD2    | 2.858        |
| 2NY0   | B_ARG_1059 | NH1    | A_ASP_368  | OD1    | 3.389        |
| 2NY0   | B_ARG_1059 | NH1    | A_ASP_368  | OD2    | 2.874        |
| 2NY0   | B_ARG_1059 | NH2    | A_ASP_368  | OD1    | 2.859        |
| 2NY0   | B_ARG_1059 | NH2    | A_ASP_368  | OD2    | 3.661        |
| 2NY0   | D_LYS_3224 | NZ     | C_GLU_2125 | OE2    | 3.518        |

Table 1130: Interfacial 2NY0-specific salt bridging networks analysis. In this table, a PDB file is specified with a four-letter PDB ID, except that the names of the PDB files corresponding to the single NMR structural model split from the NMR ensemble is specified with a four-letter PDB ID in addition to a hyphen followed by the single NMR structural model numeric ID, the residue naming scheme is **Chain ID\_residue name\_residue number**,  $\angle ADH$  represents the angle formed by acceptor (A), donor (D) and hydrogen (H) ( $\angle ADH$ ).

| PDB ID | Residue A  | Atom A | Residue B  | Atom B | Distance (Å) |
|--------|------------|--------|------------|--------|--------------|
| 2NY1   | A_ARG_419  | NH1    | D_GLU_3103 | OE2    | 3.396        |
| 2NY1   | A_ARG_419  | NH2    | D_GLU_3103 | OE1    | 3.789        |
| 2NY1   | A_ARG_419  | NH2    | D_GLU_3103 | OE2    | 2.363        |
| 2NY1   | B_LYS_1029 | NZ     | A_ASP_279  | OD2    | 3.031        |
| 2NY1   | B_ARG_1059 | NH1    | A_ASP_368  | OD1    | 3.481        |
| 2NY1   | B_ARG_1059 | NH1    | A_ASP_368  | OD2    | 3.131        |
| 2NY1   | B_ARG_1059 | NH2    | A_ASP_368  | OD1    | 2.526        |
| 2NY1   | B_ARG_1059 | NH2    | A_ASP_368  | OD2    | 3.458        |
| 2NY1   | D_LYS_3224 | NZ     | C_GLU_2125 | OE1    | 3.100        |
| 2NY1   | D_LYS_3224 | NZ     | C_GLU_2125 | OE2    | 3.945        |

Table 1131: Interfacial 2NY1-specific salt bridging networks analysis. In this table, a PDB file is specified with a four-letter PDB ID, except that the names of the PDB files corresponding to the single NMR structural model split from the NMR ensemble is specified with a four-letter PDB ID in addition to a hyphen followed by the single NMR structural model numeric ID, the residue naming scheme is **Chain ID\_residue name\_residue number**,  $\angle ADH$  represents the angle formed by acceptor (A), donor (D) and hydrogen (H) ( $\angle ADH$ ).

| PDB ID | Residue A  | Atom A | Residue B  | Atom B | Distance (Å) |
|--------|------------|--------|------------|--------|--------------|
| 2NY2   | A_ARG_419  | NH1    | D_GLU_3103 | OE2    | 2.325        |
| 2NY2   | A_ARG_419  | NH2    | D_GLU_3103 | OE2    | 3.124        |
| 2NY2   | B_LYS_1029 | NZ     | A_ASP_279  | OD2    | 2.981        |
| 2NY2   | B_ARG_1059 | NH1    | A_ASP_368  | OD1    | 3.464        |
| 2NY2   | B_ARG_1059 | NH1    | A_ASP_368  | OD2    | 2.895        |
| 2NY2   | B_ARG_1059 | NH2    | A_ASP_368  | OD1    | 2.934        |
| 2NY2   | B_ARG_1059 | NH2    | A_ASP_368  | OD2    | 3.638        |
| 2NY2   | D_LYS_3224 | NZ     | C_GLU_2125 | OE2    | 2.721        |

Table 1132: Interfacial 2NY2-specific salt bridging networks analysis. In this table, a PDB file is specified with a four-letter PDB ID, except that the names of the PDB files corresponding to the single NMR structural model split from the NMR ensemble is specified with a four-letter PDB ID in addition to a hyphen followed by the single NMR structural model numeric ID, the residue naming scheme is **Chain ID\_residue name\_residue number**,  $\angle ADH$  represents the angle formed by acceptor (A), donor (D) and hydrogen (H) ( $\angle ADH$ ).

| PDB ID | Residue A  | Atom A | Residue B  | Atom B | Distance (Å) |
|--------|------------|--------|------------|--------|--------------|
| 2NY3   | A_ARG_419  | NH1    | D_GLU_3103 | OE2    | 3.671        |
| 2NY3   | A_ARG_419  | NH2    | D_GLU_3103 | OE1    | 3.681        |
| 2NY3   | A_ARG_419  | NH2    | D_GLU_3103 | OE2    | 2.058        |
| 2NY3   | B_LYS_1029 | NZ     | A_ASP_279  | OD2    | 3.124        |
| 2NY3   | B_ARG_1059 | NH1    | A_ASP_368  | OD1    | 2.775        |
| 2NY3   | B_ARG_1059 | NH1    | A_ASP_368  | OD2    | 3.550        |
| 2NY3   | B_ARG_1059 | NH2    | A_ASP_368  | OD1    | 3.449        |
| 2NY3   | B_ARG_1059 | NH2    | A_ASP_368  | OD2    | 2.862        |
| 2NY3   | D_LYS_3224 | NZ     | C_GLU_2125 | OE1    | 3.624        |
| 2NY3   | D_LYS_3224 | NZ     | C_GLU_2125 | OE2    | 2.832        |

Table 1133: Interfacial 2NY3-specific salt bridging networks analysis. In this table, a PDB file is specified with a four-letter PDB ID, except that the names of the PDB files corresponding to the single NMR structural model split from the NMR ensemble is specified with a four-letter PDB ID in addition to a hyphen followed by the single NMR structural model numeric ID, the residue naming scheme is **Chain ID\_residue name\_residue number**,  $\angle ADH$  represents the angle formed by acceptor (A), donor (D) and hydrogen (H) ( $\angle ADH$ ).



| PDB ID | Residue A  | Atom A | Residue B  | Atom B | Distance (Å) |
|--------|------------|--------|------------|--------|--------------|
| 2NY4   | A_ARG_419  | NH1    | D_GLU_3103 | OE2    | 3.167        |
| 2NY4   | A_ARG_419  | NH2    | D_GLU_3103 | OE2    | 2.562        |
| 2NY4   | B_LYS_1029 | NZ     | A_ASP_279  | OD2    | 3.126        |
| 2NY4   | B_ARG_1059 | NH1    | A_ASP_368  | OD1    | 3.376        |
| 2NY4   | B_ARG_1059 | NH1    | A_ASP_368  | OD2    | 2.816        |
| 2NY4   | B_ARG_1059 | NH2    | A_ASP_368  | OD1    | 2.784        |
| 2NY4   | B_ARG_1059 | NH2    | A_ASP_368  | OD2    | 3.537        |
| 2NY4   | D_LYS_3224 | NZ     | C_GLU_2125 | OE1    | 3.625        |
| 2NY4   | D_LYS_3224 | NZ     | C_GLU_2125 | OE2    | 3.179        |

Table 1134: Interfacial 2NY4-specific salt bridging networks analysis. In this table, a PDB file is specified with a four-letter PDB ID, except that the names of the PDB files corresponding to the single NMR structural model split from the NMR ensemble is specified with a four-letter PDB ID in addition to a hyphen followed by the single NMR structural model numeric ID, the residue naming scheme is **Chain ID\_residue name\_residue number**,  $\angle ADH$  represents the angle formed by acceptor (A), donor (D) and hydrogen (H) ( $\angle ADH$ ).

| PDB ID | Residue A  | Atom A | Residue B  | Atom B | Distance (Å) |
|--------|------------|--------|------------|--------|--------------|
| 2NY5   | G_ARG_419  | NH2    | H_GLU_3103 | OE2    | 3.818        |
| 2NY5   | C_LYS_1029 | NZ     | G_ASP_279  | OD2    | 3.358        |
| 2NY5   | C_ARG_1059 | NH1    | G_ASP_368  | OD1    | 3.253        |
| 2NY5   | C_ARG_1059 | NH1    | G_ASP_368  | OD2    | 2.656        |
| 2NY5   | C_ARG_1059 | NH2    | G_ASP_368  | OD1    | 2.825        |
| 2NY5   | C_ARG_1059 | NH2    | G_ASP_368  | OD2    | 3.554        |
| 2NY5   | H_LYS_3224 | NZ     | L_GLU_2125 | OE1    | 3.285        |
| 2NY5   | H_LYS_3224 | NZ     | L_GLU_2125 | OE2    | 3.364        |

Table 1135: Interfacial 2NY5-specific salt bridging networks analysis. In this table, a PDB file is specified with a four-letter PDB ID, except that the names of the PDB files corresponding to the single NMR structural model split from the NMR ensemble is specified with a four-letter PDB ID in addition to a hyphen followed by the single NMR structural model numeric ID, the residue naming scheme is **Chain ID\_residue name\_residue number**,  $\angle ADH$  represents the angle formed by acceptor (A), donor (D) and hydrogen (H) ( $\angle ADH$ ).

| PDB ID | Residue A  | Atom A | Residue B  | Atom B | Distance (Å) |
|--------|------------|--------|------------|--------|--------------|
| 2NY6   | A_ARG_419  | NH2    | D_GLU_3103 | OE1    | 3.563        |
| 2NY6   | A_ARG_419  | NH2    | D_GLU_3103 | OE2    | 2.589        |
| 2NY6   | B_LYS_1029 | NZ     | A_ASP_279  | OD2    | 3.061        |
| 2NY6   | B_ARG_1059 | NH1    | A_ASP_368  | OD1    | 2.945        |
| 2NY6   | B_ARG_1059 | NH1    | A_ASP_368  | OD2    | 2.767        |
| 2NY6   | B_ARG_1059 | NH2    | A_ASP_368  | OD1    | 3.097        |
| 2NY6   | D_LYS_3224 | NZ     | C_GLU_2125 | OE1    | 3.158        |
| 2NY6   | D_LYS_3224 | NZ     | C_GLU_2125 | OE2    | 2.701        |

Table 1136: Interfacial 2NY6-specific salt bridging networks analysis. In this table, a PDB file is specified with a four-letter PDB ID, except that the names of the PDB files corresponding to the single NMR structural model split from the NMR ensemble is specified with a four-letter PDB ID in addition to a hyphen followed by the single NMR structural model numeric ID, the residue naming scheme is **Chain ID\_residue name\_residue number**,  $\angle ADH$  represents the angle formed by acceptor (A), donor (D) and hydrogen (H) ( $\angle ADH$ ).

| PDB ID | Residue A | Atom A | Residue B  | Atom B | Distance (Å) |
|--------|-----------|--------|------------|--------|--------------|
| 2NY7   | H.LYS_221 | NZ     | L.GLU_123  | OE1    | 3.153        |
| 2NY7   | L.ARG_32  | NH1    | H.ASP_100F | OD2    | 2.962        |

Table 1137: Interfacial 2NY7-specific salt bridging networks analysis. In this table, a PDB file is specified with a four-letter PDB ID, except that the names of the PDB files corresponding to the single NMR structural model split from the NMR ensemble is specified with a four-letter PDB ID in addition to a hyphen followed by the single NMR structural model numeric ID, the residue naming scheme is **Chain ID\_residue name\_residue number**,  $\angle ADH$  represents the angle formed by acceptor (A), donor (D) and hydrogen (H) ( $\angle ADH$ ).

| PDB ID | Residue A | Atom A | Residue B | Atom B | Distance (Å) |
|--------|-----------|--------|-----------|--------|--------------|
| 2OR9   | H_ARG_53  | NH2    | P_GLU_8   | OE2    | 3.967        |
| 2OR9   | I_LYS_208 | NZ     | M_GLU_123 | OE2    | 3.803        |

Table 1138: Interfacial 2OR9-specific salt bridging networks analysis. In this table, a PDB file is specified with a four-letter PDB ID, except that the names of the PDB files corresponding to the single NMR structural model split from the NMR ensemble is specified with a four-letter PDB ID in addition to a hyphen followed by the single NMR structural model numeric ID, the residue naming scheme is **Chain ID\_residue name\_residue number**,  $\angle ADH$  represents the angle formed by acceptor (A), donor (D) and hydrogen (H) ( $\angle ADH$ ).

| PDB ID | Residue A | Atom A | Residue B | Atom B | Distance (Å) |
|--------|-----------|--------|-----------|--------|--------------|
| 2OSL   | L_HIS_33  | NE2    | H_ASP_105 | OD1    | 3.260        |
| 2OSL   | L_HIS_33  | NE2    | H_ASP_105 | OD2    | 2.885        |
| 2OSL   | L_ARG_107 | NH2    | B_GLU_194 | OE2    | 3.976        |
| 2OSL   | B_HIS_33  | ND1    | A_ASP_105 | OD2    | 3.615        |
| 2OSL   | B_HIS_33  | NE2    | A_ASP_105 | OD2    | 3.957        |
| 2OSL   | A_LYS_217 | NZ     | B_GLU_122 | OE1    | 2.793        |

Table 1139: Interfacial 2OSL-specific salt bridging networks analysis. In this table, a PDB file is specified with a four-letter PDB ID, except that the names of the PDB files corresponding to the single NMR structural model split from the NMR ensemble is specified with a four-letter PDB ID in addition to a hyphen followed by the single NMR structural model numeric ID, the residue naming scheme is **Chain ID\_residue name\_residue number**,  $\angle ADH$  represents the angle formed by acceptor (A), donor (D) and hydrogen (H) ( $\angle ADH$ ).

| PDB ID | Residue A | Atom A | Residue B | Atom B | Distance (Å) |
|--------|-----------|--------|-----------|--------|--------------|
| 2OTU   | B.LYS_87  | NZ     | F.ASP_31  | OD1    | 3.793        |
| 2OTU   | B.LYS_87  | NZ     | F.ASP_31  | OD2    | 2.711        |
| 2OTU   | F.ARG_100 | NH1    | E.ASP_60  | OD1    | 3.255        |
| 2OTU   | F.ARG_100 | NH1    | E.ASP_60  | OD2    | 3.915        |
| 2OTU   | H.ARG_44  | NH1    | C.ASP_60  | OD1    | 3.017        |
| 2OTU   | H.ARG_44  | NH1    | C.ASP_60  | OD2    | 3.518        |
| 2OTU   | H.ARG_44  | NH2    | C.ASP_60  | OD1    | 3.945        |
| 2OTU   | H.ARG_44  | NH2    | C.ASP_60  | OD2    | 3.013        |
| 2OTU   | H.LYS_87  | NZ     | D.ASP_31  | OD1    | 3.910        |
| 2OTU   | H.LYS_87  | NZ     | D.ASP_31  | OD2    | 2.759        |

Table 1140: Interfacial 2OTU-specific salt bridging networks analysis. In this table, a PDB file is specified with a four-letter PDB ID, except that the names of the PDB files corresponding to the single NMR structural model split from the NMR ensemble is specified with a four-letter PDB ID in addition to a hyphen followed by the single NMR structural model numeric ID, the residue naming scheme is **Chain ID\_residue name\_residue number**,  $\angle ADH$  represents the angle formed by acceptor (A), donor (D) and hydrogen (H) ( $\angle ADH$ ).

| PDB ID | Residue A | Atom A | Residue B | Atom B | Distance (Å) |
|--------|-----------|--------|-----------|--------|--------------|
| 2OTW   | B_LYS_87  | NZ     | D_ASP_31  | OD1    | 3.659        |
| 2OTW   | B_LYS_87  | NZ     | D_ASP_31  | OD2    | 2.671        |
| 2OTW   | B_ARG_100 | NH1    | A_ASP_60  | OD1    | 3.223        |
| 2OTW   | B_ARG_100 | NH1    | A_ASP_60  | OD2    | 3.943        |
| 2OTW   | D_ARG_100 | NH1    | C_ASP_60  | OD1    | 3.882        |
| 2OTW   | D_ARG_100 | NH1    | C_ASP_60  | OD2    | 3.653        |

Table 1141: Interfacial 2OTW-specific salt bridging networks analysis. In this table, a PDB file is specified with a four-letter PDB ID, except that the names of the PDB files corresponding to the single NMR structural model split from the NMR ensemble is specified with a four-letter PDB ID in addition to a hyphen followed by the single NMR structural model numeric ID, the residue naming scheme is **Chain ID\_residue name\_residue number**,  $\angle ADH$  represents the angle formed by acceptor (A), donor (D) and hydrogen (H) ( $\angle ADH$ ).



| PDB ID | Residue A | Atom A | Residue B | Atom B | Distance (Å) |
|--------|-----------|--------|-----------|--------|--------------|
| 2P8L   | A_HIS_96  | NE2    | C_ASP_5   | OD1    | 2.766        |
| 2P8L   | B_ARG_58  | NH1    | C_GLU_3   | OE1    | 1.911        |
| 2P8L   | B_ARG_58  | NH1    | C_GLU_3   | OE2    | 3.223        |
| 2P8L   | B_ARG_58  | NH2    | C_GLU_3   | OE1    | 3.943        |
| 2P8L   | B_ARG_95  | NH1    | C_ASP_5   | OD1    | 2.951        |
| 2P8L   | B_ARG_95  | NH1    | C_ASP_5   | OD2    | 3.619        |
| 2P8L   | B_ARG_95  | NH2    | C_ASP_5   | OD1    | 3.420        |
| 2P8L   | B_ARG_95  | NH2    | C_ASP_5   | OD2    | 2.971        |
| 2P8L   | B_ARG_96  | NH1    | A_GLU_55  | OE1    | 3.236        |
| 2P8L   | B_ARG_96  | NH1    | A_GLU_55  | OE2    | 3.320        |
| 2P8L   | B_ARG_96  | NH2    | A_GLU_55  | OE1    | 3.018        |
| 2P8L   | B_LYS_209 | NZ     | A_GLU_123 | OE1    | 3.743        |
| 2P8L   | C_LYS_6   | NZ     | B_ASP_54  | OD1    | 3.641        |
| 2P8L   | C_LYS_6   | NZ     | B_ASP_54  | OD2    | 3.025        |
| 2P8L   | C_LYS_6   | NZ     | B_ASP_56  | OD1    | 2.878        |

Table 1142: Interfacial 2P8L-specific salt bridging networks analysis. In this table, a PDB file is specified with a four-letter PDB ID, except that the names of the PDB files corresponding to the single NMR structural model split from the NMR ensemble is specified with a four-letter PDB ID in addition to a hyphen followed by the single NMR structural model numeric ID, the residue naming scheme is **Chain ID\_residue name\_residue number**,  $\angle ADH$  represents the angle formed by acceptor (A), donor (D) and hydrogen (H) ( $\angle ADH$ ).

| PDB ID | Residue A | Atom A | Residue B | Atom B | Distance (Å) |
|--------|-----------|--------|-----------|--------|--------------|
| 2P8M   | A_HIS_96  | NE2    | C_ASP_3   | OD2    | 2.613        |
| 2P8M   | B_ARG_1   | NH2    | A_GLU_55  | OE2    | 3.915        |
| 2P8M   | B_ARG_58  | NH2    | C_GLU_1   | OE1    | 2.510        |
| 2P8M   | B_ARG_95  | NH1    | C_ASP_3   | OD1    | 2.973        |
| 2P8M   | B_ARG_95  | NH1    | C_ASP_3   | OD2    | 3.042        |
| 2P8M   | B_ARG_95  | NH2    | C_ASP_3   | OD1    | 3.169        |
| 2P8M   | B_ARG_96  | NH1    | A_GLU_55  | OE1    | 3.351        |
| 2P8M   | B_ARG_96  | NH1    | A_GLU_55  | OE2    | 3.448        |
| 2P8M   | B_ARG_96  | NH2    | A_GLU_55  | OE1    | 3.393        |
| 2P8M   | B_LYS_209 | NZ     | A_GLU_123 | OE1    | 3.649        |
| 2P8M   | C_LYS_4   | NZ     | B_ASP_54  | OD1    | 2.903        |
| 2P8M   | C_LYS_4   | NZ     | B_ASP_54  | OD2    | 2.371        |
| 2P8M   | C_LYS_4   | NZ     | B_ASP_56  | OD2    | 3.183        |

Table 1143: Interfacial 2P8M-specific salt bridging networks analysis. In this table, a PDB file is specified with a four-letter PDB ID, except that the names of the PDB files corresponding to the single NMR structural model split from the NMR ensemble is specified with a four-letter PDB ID in addition to a hyphen followed by the single NMR structural model numeric ID, the residue naming scheme is **Chain ID\_residue name\_residue number**,  $\angle ADH$  represents the angle formed by acceptor (A), donor (D) and hydrogen (H) ( $\angle ADH$ ).

| PDB ID | Residue A | Atom A | Residue B | Atom B | Distance (Å) |
|--------|-----------|--------|-----------|--------|--------------|
| 2P8P   | A_HIS_96  | NE2    | C_ASP_3   | OD1    | 3.214        |
| 2P8P   | B_ARG_58  | NH2    | C_GLU_1   | OE2    | 3.147        |
| 2P8P   | B_ARG_95  | NH1    | C_ASP_3   | OD1    | 2.805        |
| 2P8P   | B_ARG_95  | NH1    | C_ASP_3   | OD2    | 3.510        |
| 2P8P   | B_ARG_95  | NH2    | C_ASP_3   | OD1    | 3.459        |
| 2P8P   | B_ARG_95  | NH2    | C_ASP_3   | OD2    | 2.629        |
| 2P8P   | B_ARG_96  | NH1    | A_GLU_55  | OE1    | 3.239        |
| 2P8P   | B_ARG_96  | NH1    | A_GLU_55  | OE2    | 3.518        |
| 2P8P   | B_ARG_96  | NH2    | A_GLU_55  | OE1    | 3.128        |
| 2P8P   | B_LYS_210 | NZ     | A_GLU_123 | OE1    | 3.349        |
| 2P8P   | B_LYS_210 | NZ     | A_GLU_123 | OE2    | 3.192        |
| 2P8P   | C_LYS_4   | NZ     | B_ASP_54  | OD1    | 3.623        |
| 2P8P   | C_LYS_4   | NZ     | B_ASP_54  | OD2    | 3.010        |
| 2P8P   | C_LYS_4   | NZ     | B_ASP_56  | OD2    | 2.836        |

Table 1144: Interfacial 2P8P-specific salt bridging networks analysis. In this table, a PDB file is specified with a four-letter PDB ID, except that the names of the PDB files corresponding to the single NMR structural model split from the NMR ensemble is specified with a four-letter PDB ID in addition to a hyphen followed by the single NMR structural model numeric ID, the residue naming scheme is **Chain ID\_residue name\_residue number**,  $\angle ADH$  represents the angle formed by acceptor (A), donor (D) and hydrogen (H) ( $\angle ADH$ ).

| PDB ID | Residue A | Atom A | Residue B | Atom B | Distance (Å) |
|--------|-----------|--------|-----------|--------|--------------|
| 2PR4   | H_ARG_101 | NH1    | L_GLU_55  | OE1    | 3.296        |
| 2PR4   | H_ARG_101 | NH1    | L_GLU_55  | OE2    | 3.376        |
| 2PR4   | H_ARG_101 | NH2    | L_GLU_55  | OE1    | 3.286        |
| 2PR4   | H_LYS_228 | NZ     | L_GLU_123 | OE1    | 3.151        |

Table 1145: Interfacial 2PR4-specific salt bridging networks analysis. In this table, a PDB file is specified with a four-letter PDB ID, except that the names of the PDB files corresponding to the single NMR structural model split from the NMR ensemble is specified with a four-letter PDB ID in addition to a hyphen followed by the single NMR structural model numeric ID, the residue naming scheme is **Chain ID\_residue name\_residue number**,  $\angle ADH$  represents the angle formed by acceptor (A), donor (D) and hydrogen (H) ( $\angle ADH$ ).

| PDB ID | Residue A | Atom A | Residue B | Atom B | Distance (Å) |
|--------|-----------|--------|-----------|--------|--------------|
| 2Q8A   | A_LYS_203 | NZ     | L_ASP_32  | OD1    | 3.044        |
| 2Q8A   | A_LYS_203 | NZ     | L_ASP_32  | OD2    | 2.513        |
| 2Q8A   | L_ARG_96  | NH1    | A_ASP_204 | OD1    | 2.971        |
| 2Q8A   | L_ARG_96  | NH1    | A_ASP_204 | OD2    | 2.580        |
| 2Q8A   | L_ARG_96  | NH2    | A_ASP_204 | OD1    | 2.882        |
| 2Q8A   | L_ARG_96  | NH2    | A_ASP_204 | OD2    | 3.927        |
| 2Q8A   | L_ARG_96  | NH2    | H_GLU_59  | OE2    | 3.755        |
| 2Q8A   | H_HIS_35  | NE2    | A_ASP_204 | OD2    | 3.930        |

Table 1146: Interfacial 2Q8A-specific salt bridging networks analysis. In this table, a PDB file is specified with a four-letter PDB ID, except that the names of the PDB files corresponding to the single NMR structural model split from the NMR ensemble is specified with a four-letter PDB ID in addition to a hyphen followed by the single NMR structural model numeric ID, the residue naming scheme is **Chain ID\_residue name\_residue number**,  $\angle ADH$  represents the angle formed by acceptor (A), donor (D) and hydrogen (H) ( $\angle ADH$ ).

| PDB ID | Residue A | Atom A | Residue B | Atom B | Distance (Å) |
|--------|-----------|--------|-----------|--------|--------------|
| 2Q8B   | A_LYS_203 | NZ     | L_ASP_32  | OD1    | 3.779        |
| 2Q8B   | A_LYS_203 | NZ     | L_ASP_32  | OD2    | 2.847        |
| 2Q8B   | L_ARG_96  | NH1    | A_ASP_204 | OD1    | 3.458        |
| 2Q8B   | L_ARG_96  | NH1    | A_ASP_204 | OD2    | 2.952        |
| 2Q8B   | L_ARG_96  | NH2    | A_ASP_204 | OD1    | 2.667        |
| 2Q8B   | L_ARG_96  | NH2    | A_ASP_204 | OD2    | 3.462        |

Table 1147: Interfacial 2Q8B-specific salt bridging networks analysis. In this table, a PDB file is specified with a four-letter PDB ID, except that the names of the PDB files corresponding to the single NMR structural model split from the NMR ensemble is specified with a four-letter PDB ID in addition to a hyphen followed by the single NMR structural model numeric ID, the residue naming scheme is **Chain ID\_residue name\_residue number**,  $\angle ADH$  represents the angle formed by acceptor (A), donor (D) and hydrogen (H) ( $\angle ADH$ ).

| PDB ID | Residue A | Atom A | Residue B  | Atom B | Distance (Å) |
|--------|-----------|--------|------------|--------|--------------|
| 2QAD   | B_ARG_59  | NH1    | A_ASP_368  | OD1    | 3.394        |
| 2QAD   | B_ARG_59  | NH1    | A_ASP_368  | OD2    | 2.749        |
| 2QAD   | B_ARG_59  | NH2    | A_ASP_368  | OD1    | 3.764        |
| 2QAD   | C_LYS_50  | NZ     | D_GLU_100F | OE2    | 2.989        |
| 2QAD   | C_LYS_55  | NZ     | D_ASP_101  | OD1    | 3.312        |
| 2QAD   | C_LYS_55  | NZ     | D_ASP_101  | OD2    | 3.736        |
| 2QAD   | F_ARG_59  | NH1    | E_ASP_368  | OD1    | 2.855        |
| 2QAD   | F_ARG_59  | NH1    | E_ASP_368  | OD2    | 2.624        |
| 2QAD   | F_ARG_59  | NH2    | E_ASP_368  | OD1    | 3.681        |
| 2QAD   | G_LYS_50  | NZ     | H_GLU_100F | OE2    | 3.151        |
| 2QAD   | G_LYS_55  | NZ     | H_ASP_101  | OD1    | 3.191        |
| 2QAD   | G_LYS_55  | NZ     | H_ASP_101  | OD2    | 3.496        |

Table 1148: Interfacial 2QAD-specific salt bridging networks analysis. In this table, a PDB file is specified with a four-letter PDB ID, except that the names of the PDB files corresponding to the single NMR structural model split from the NMR ensemble is specified with a four-letter PDB ID in addition to a hyphen followed by the single NMR structural model numeric ID, the residue naming scheme is **Chain ID residue name residue number**,  $\angle ADH$  represents the angle formed by acceptor (A), donor (D) and hydrogen (H) ( $\angle ADH$ ).

| PDB ID | Residue A | Atom A | Residue B | Atom B | Distance (Å) |
|--------|-----------|--------|-----------|--------|--------------|
| 2QQN   | H_LYS_209 | NZ     | L_GLU_123 | OE1    | 2.782        |
| 2QQN   | H_LYS_209 | NZ     | L_GLU_123 | OE2    | 3.506        |
| 2QQN   | H_LYS_214 | NZ     | L_ASP_122 | OD1    | 3.854        |

Table 1149: Interfacial 2QQN-specific salt bridging networks analysis. In this table, a PDB file is specified with a four-letter PDB ID, except that the names of the PDB files corresponding to the single NMR structural model split from the NMR ensemble is specified with a four-letter PDB ID in addition to a hyphen followed by the single NMR structural model numeric ID, the residue naming scheme is **Chain ID\_residue name\_residue number**,  $\angle ADH$  represents the angle formed by acceptor (A), donor (D) and hydrogen (H) ( $\angle ADH$ ).



| PDB ID | Residue A | Atom A | Residue B | Atom B | Distance (Å) |
|--------|-----------|--------|-----------|--------|--------------|
| 2R29   | A_LYS_307 | NZ     | H_ASP_99  | OD1    | 2.956        |
| 2R29   | A_LYS_307 | NZ     | L_GLU_59  | OE1    | 3.335        |
| 2R29   | A_LYS_310 | NZ     | H_ASP_52  | OD1    | 3.449        |
| 2R29   | A_LYS_310 | NZ     | H_ASP_52  | OD2    | 2.764        |
| 2R29   | H_LYS_59  | NZ     | L_ASP_98  | OD2    | 3.485        |
| 2R29   | L_ARG_54  | NH2    | H_GLU_101 | OE1    | 3.814        |
| 2R29   | L_ARG_54  | NH2    | H_GLU_101 | OE2    | 3.270        |
| 2R29   | L_LYS_107 | NZ     | H_GLU_42  | OE1    | 3.937        |

Table 1150: Interfacial 2R29-specific salt bridging networks analysis. In this table, a PDB file is specified with a four-letter PDB ID, except that the names of the PDB files corresponding to the single NMR structural model split from the NMR ensemble is specified with a four-letter PDB ID in addition to a hyphen followed by the single NMR structural model numeric ID, the residue naming scheme is **Chain ID\_residue name\_residue number**,  $\angle ADH$  represents the angle formed by acceptor (A), donor (D) and hydrogen (H) ( $\angle ADH$ ).

| PDB ID | Residue A | Atom A | Residue B | Atom B | Distance (Å) |
|--------|-----------|--------|-----------|--------|--------------|
| 2R69   | A_LYS_307 | NZ     | H_ASP_99  | OD2    | 3.631        |
| 2R69   | H_LYS_59  | NZ     | L_ASP_98  | OD2    | 3.723        |
| 2R69   | H_LYS_211 | NZ     | L_GLU_127 | OE1    | 3.695        |
| 2R69   | H_LYS_211 | NZ     | L_GLU_127 | OE2    | 3.159        |
| 2R69   | L_ARG_31  | NH2    | A_GLU_311 | OE2    | 3.151        |
| 2R69   | L_ARG_54  | NH2    | H_GLU_101 | OE1    | 2.992        |
| 2R69   | L_ARG_54  | NH2    | H_GLU_101 | OE2    | 2.911        |

Table 1151: Interfacial 2R69-specific salt bridging networks analysis. In this table, a PDB file is specified with a four-letter PDB ID, except that the names of the PDB files corresponding to the single NMR structural model split from the NMR ensemble is specified with a four-letter PDB ID in addition to a hyphen followed by the single NMR structural model numeric ID, the residue naming scheme is **Chain ID\_residue name\_residue number**,  $\angle ADH$  represents the angle formed by acceptor (A), donor (D) and hydrogen (H) ( $\angle ADH$ ).

| PDB ID | Residue A | Atom A | Residue B | Atom B | Distance (Å) |
|--------|-----------|--------|-----------|--------|--------------|
| 2UYL   | A_ARG_101 | NH1    | B_GLU_99  | OE1    | 3.183        |
| 2UYL   | A_ARG_101 | NH1    | B_GLU_99  | OE2    | 3.530        |
| 2UYL   | A_ARG_101 | NH2    | B_GLU_99  | OE2    | 3.803        |
| 2UYL   | M_ARG_101 | NH1    | N_GLU_99  | OE1    | 3.058        |
| 2UYL   | M_ARG_101 | NH1    | N_GLU_99  | OE2    | 3.775        |
| 2UYL   | M_ARG_101 | NH2    | N_GLU_99  | OE2    | 3.923        |
| 2UYL   | N_HIS_170 | NE2    | M_ASP_172 | OD1    | 3.811        |
| 2UYL   | V_ARG_101 | NH1    | W_GLU_99  | OE1    | 2.958        |
| 2UYL   | V_ARG_101 | NH1    | W_GLU_99  | OE2    | 3.417        |
| 2UYL   | V_ARG_101 | NH2    | W_GLU_99  | OE2    | 3.369        |
| 2UYL   | X_ARG_101 | NH1    | Y_GLU_99  | OE1    | 2.789        |
| 2UYL   | X_ARG_101 | NH1    | Y_GLU_99  | OE2    | 3.483        |
| 2UYL   | X_ARG_101 | NH2    | Y_GLU_99  | OE2    | 3.405        |

Table 1152: Interfacial 2UYL-specific salt bridging networks analysis. In this table, a PDB file is specified with a four-letter PDB ID, except that the names of the PDB files corresponding to the single NMR structural model split from the NMR ensemble is specified with a four-letter PDB ID in addition to a hyphen followed by the single NMR structural model numeric ID, the residue naming scheme is **Chain ID\_residue name\_residue number**,  $\angle ADH$  represents the angle formed by acceptor (A), donor (D) and hydrogen (H) ( $\angle ADH$ ).

| PDB ID | Residue A | Atom A | Residue B | Atom B | Distance (Å) |
|--------|-----------|--------|-----------|--------|--------------|
| 2VC2   | A_ARG_77  | NH1    | H_ASP_102 | OD1    | 3.536        |
| 2VC2   | A_ARG_77  | NH1    | H_ASP_102 | OD2    | 3.007        |
| 2VC2   | A_ARG_77  | NH2    | H_ASP_102 | OD1    | 2.794        |
| 2VC2   | A_ARG_77  | NH2    | H_ASP_102 | OD2    | 3.630        |
| 2VC2   | B_ARG_216 | NH2    | A_GLU_123 | OE2    | 3.081        |
| 2VC2   | B_LYS_253 | NZ     | A_ASP_232 | OD2    | 2.805        |
| 2VC2   | H_LYS_214 | NZ     | L_GLU_123 | OE2    | 3.240        |

Table 1153: Interfacial 2VC2-specific salt bridging networks analysis. In this table, a PDB file is specified with a four-letter PDB ID, except that the names of the PDB files corresponding to the single NMR structural model split from the NMR ensemble is specified with a four-letter PDB ID in addition to a hyphen followed by the single NMR structural model numeric ID, the residue naming scheme is **Chain ID\_residue name\_residue number**,  $\angle ADH$  represents the angle formed by acceptor (A), donor (D) and hydrogen (H) ( $\angle ADH$ ).

| PDB ID | Residue A | Atom A | Residue B | Atom B | Distance (Å) |
|--------|-----------|--------|-----------|--------|--------------|
| 2VDK   | A_ARG_77  | NH1    | H_ASP_102 | OD1    | 3.535        |
| 2VDK   | A_ARG_77  | NH1    | H_ASP_102 | OD2    | 3.168        |
| 2VDK   | A_ARG_77  | NH2    | H_ASP_102 | OD1    | 2.738        |
| 2VDK   | A_ARG_77  | NH2    | H_ASP_102 | OD2    | 3.673        |
| 2VDK   | B_ARG_216 | NH2    | A_GLU_123 | OE2    | 3.072        |
| 2VDK   | B_LYS_253 | NZ     | A_ASP_232 | OD2    | 2.921        |
| 2VDK   | H_LYS_214 | NZ     | L_GLU_123 | OE2    | 3.461        |

Table 1154: Interfacial 2VDK-specific salt bridging networks analysis. In this table, a PDB file is specified with a four-letter PDB ID, except that the names of the PDB files corresponding to the single NMR structural model split from the NMR ensemble is specified with a four-letter PDB ID in addition to a hyphen followed by the single NMR structural model numeric ID, the residue naming scheme is **Chain ID\_residue name\_residue number**,  $\angle ADH$  represents the angle formed by acceptor (A), donor (D) and hydrogen (H) ( $\angle ADH$ ).

| PDB ID | Residue A | Atom A | Residue B | Atom B | Distance (Å) |
|--------|-----------|--------|-----------|--------|--------------|
| 2VDL   | A_ARG_77  | NH1    | H_ASP_102 | OD1    | 3.566        |
| 2VDL   | A_ARG_77  | NH1    | H_ASP_102 | OD2    | 3.106        |
| 2VDL   | A_ARG_77  | NH2    | H_ASP_102 | OD1    | 2.722        |
| 2VDL   | A_ARG_77  | NH2    | H_ASP_102 | OD2    | 3.538        |
| 2VDL   | B_ARG_216 | NH2    | A_GLU_123 | OE2    | 3.160        |
| 2VDL   | B_LYS_253 | NZ     | A_ASP_232 | OD2    | 2.886        |
| 2VDL   | H_LYS_59  | NZ     | A_GLU_117 | OE2    | 3.964        |
| 2VDL   | H_LYS_214 | NZ     | L_GLU_123 | OE2    | 3.400        |

Table 1155: Interfacial 2VDL-specific salt bridging networks analysis. In this table, a PDB file is specified with a four-letter PDB ID, except that the names of the PDB files corresponding to the single NMR structural model split from the NMR ensemble is specified with a four-letter PDB ID in addition to a hyphen followed by the single NMR structural model numeric ID, the residue naming scheme is **Chain ID\_residue name\_residue number**,  $\angle ADH$  represents the angle formed by acceptor (A), donor (D) and hydrogen (H) ( $\angle ADH$ ).

| PDB ID | Residue A | Atom A | Residue B | Atom B | Distance (Å) |
|--------|-----------|--------|-----------|--------|--------------|
| 2VDM   | A_ARG_77  | NH1    | H_ASP_102 | OD1    | 3.512        |
| 2VDM   | A_ARG_77  | NH1    | H_ASP_102 | OD2    | 3.196        |
| 2VDM   | A_ARG_77  | NH2    | H_ASP_102 | OD1    | 2.762        |
| 2VDM   | A_ARG_77  | NH2    | H_ASP_102 | OD2    | 3.757        |
| 2VDM   | B_ARG_216 | NH2    | A_GLU_123 | OE2    | 2.982        |
| 2VDM   | B_LYS_253 | NZ     | A_ASP_232 | OD2    | 3.306        |
| 2VDM   | H_LYS_214 | NZ     | L_GLU_123 | OE2    | 3.334        |

Table 1156: Interfacial 2VDM-specific salt bridging networks analysis. In this table, a PDB file is specified with a four-letter PDB ID, except that the names of the PDB files corresponding to the single NMR structural model split from the NMR ensemble is specified with a four-letter PDB ID in addition to a hyphen followed by the single NMR structural model numeric ID, the residue naming scheme is **Chain ID\_residue name\_residue number**,  $\angle ADH$  represents the angle formed by acceptor (A), donor (D) and hydrogen (H) ( $\angle ADH$ ).

| PDB ID | Residue A | Atom A | Residue B | Atom B | Distance (Å) |
|--------|-----------|--------|-----------|--------|--------------|
| 2VDN   | A_ARG_77  | NH1    | H_ASP_102 | OD1    | 3.491        |
| 2VDN   | A_ARG_77  | NH1    | H_ASP_102 | OD2    | 3.169        |
| 2VDN   | A_ARG_77  | NH2    | H_ASP_102 | OD1    | 2.808        |
| 2VDN   | A_ARG_77  | NH2    | H_ASP_102 | OD2    | 3.762        |
| 2VDN   | B_ARG_216 | NH2    | A_GLU_123 | OE2    | 2.995        |
| 2VDN   | H_LYS_214 | NZ     | L_GLU_123 | OE2    | 3.685        |

Table 1157: Interfacial 2VDN-specific salt bridging networks analysis. In this table, a PDB file is specified with a four-letter PDB ID, except that the names of the PDB files corresponding to the single NMR structural model split from the NMR ensemble is specified with a four-letter PDB ID in addition to a hyphen followed by the single NMR structural model numeric ID, the residue naming scheme is **Chain ID\_residue name\_residue number**,  $\angle ADH$  represents the angle formed by acceptor (A), donor (D) and hydrogen (H) ( $\angle ADH$ ).



| PDB ID | Residue A | Atom A | Residue B | Atom B | Distance (Å) |
|--------|-----------|--------|-----------|--------|--------------|
| 2VDO   | A_ARG_77  | NH1    | H_ASP_102 | OD1    | 3.703        |
| 2VDO   | A_ARG_77  | NH1    | H_ASP_102 | OD2    | 3.042        |
| 2VDO   | A_ARG_77  | NH2    | H_ASP_102 | OD1    | 2.789        |
| 2VDO   | A_ARG_77  | NH2    | H_ASP_102 | OD2    | 3.375        |
| 2VDO   | B_ARG_216 | NH2    | A_GLU_123 | OE2    | 3.092        |
| 2VDO   | B_LYS_253 | NZ     | A_ASP_232 | OD2    | 2.836        |
| 2VDO   | C_LYS_406 | NZ     | A_ASP_224 | OD1    | 2.673        |
| 2VDO   | C_LYS_406 | NZ     | A_ASP_224 | OD2    | 3.263        |

Table 1158: Interfacial 2VDO-specific salt bridging networks analysis. In this table, a PDB file is specified with a four-letter PDB ID, except that the names of the PDB files corresponding to the single NMR structural model split from the NMR ensemble is specified with a four-letter PDB ID in addition to a hyphen followed by the single NMR structural model numeric ID, the residue naming scheme is **Chain ID\_residue name\_residue number**,  $\angle ADH$  represents the angle formed by acceptor (A), donor (D) and hydrogen (H) ( $\angle ADH$ ).

| PDB ID | Residue A | Atom A | Residue B | Atom B | Distance (Å) |
|--------|-----------|--------|-----------|--------|--------------|
| 2VDP   | A_ARG_77  | NH1    | H_ASP_102 | OD1    | 3.519        |
| 2VDP   | A_ARG_77  | NH1    | H_ASP_102 | OD2    | 3.089        |
| 2VDP   | A_ARG_77  | NH2    | H_ASP_102 | OD1    | 2.733        |
| 2VDP   | A_ARG_77  | NH2    | H_ASP_102 | OD2    | 3.585        |
| 2VDP   | B_ARG_216 | NH2    | A_GLU_123 | OE2    | 3.038        |
| 2VDP   | B_LYS_253 | NZ     | A_ASP_232 | OD2    | 2.914        |
| 2VDP   | C_LYS_406 | NZ     | A_ASP_224 | OD1    | 2.604        |
| 2VDP   | C_LYS_406 | NZ     | A_ASP_224 | OD2    | 3.297        |
| 2VDP   | H_LYS_214 | NZ     | L_GLU_123 | OE2    | 3.425        |

Table 1159: Interfacial 2VDP-specific salt bridging networks analysis. In this table, a PDB file is specified with a four-letter PDB ID, except that the names of the PDB files corresponding to the single NMR structural model split from the NMR ensemble is specified with a four-letter PDB ID in addition to a hyphen followed by the single NMR structural model numeric ID, the residue naming scheme is **Chain ID\_residue name\_residue number**,  $\angle ADH$  represents the angle formed by acceptor (A), donor (D) and hydrogen (H) ( $\angle ADH$ ).

| PDB ID | Residue A | Atom A | Residue B | Atom B | Distance (Å) |
|--------|-----------|--------|-----------|--------|--------------|
| 2VDQ   | A_ARG_77  | NH1    | H_ASP_102 | OD1    | 3.603        |
| 2VDQ   | A_ARG_77  | NH1    | H_ASP_102 | OD2    | 3.057        |
| 2VDQ   | A_ARG_77  | NH2    | H_ASP_102 | OD1    | 2.765        |
| 2VDQ   | A_ARG_77  | NH2    | H_ASP_102 | OD2    | 3.398        |
| 2VDQ   | B_ARG_216 | NH2    | A_GLU_123 | OE2    | 2.900        |
| 2VDQ   | B_LYS_253 | NZ     | A_ASP_232 | OD2    | 3.522        |
| 2VDQ   | C_ARG_408 | NH1    | A_ASP_224 | OD1    | 3.059        |
| 2VDQ   | C_ARG_408 | NH1    | A_ASP_224 | OD2    | 3.490        |
| 2VDQ   | C_ARG_408 | NH2    | A_ASP_224 | OD1    | 3.054        |
| 2VDQ   | C_ARG_408 | NH2    | A_ASP_224 | OD2    | 3.761        |
| 2VDQ   | H_LYS_59  | NZ     | A_GLU_117 | OE2    | 3.921        |
| 2VDQ   | H_LYS_214 | NZ     | L_GLU_123 | OE2    | 3.223        |

Table 1160: Interfacial 2VDQ-specific salt bridging networks analysis. In this table, a PDB file is specified with a four-letter PDB ID, except that the names of the PDB files corresponding to the single NMR structural model split from the NMR ensemble is specified with a four-letter PDB ID in addition to a hyphen followed by the single NMR structural model numeric ID, the residue naming scheme is **Chain ID residue name residue number**,  $\angle ADH$  represents the angle formed by acceptor (A), donor (D) and hydrogen (H) ( $\angle ADH$ ).

| PDB ID | Residue A | Atom A | Residue B | Atom B | Distance (Å) |
|--------|-----------|--------|-----------|--------|--------------|
| 2VDR   | A_ARG_77  | NH1    | H_ASP_102 | OD1    | 3.703        |
| 2VDR   | A_ARG_77  | NH1    | H_ASP_102 | OD2    | 3.091        |
| 2VDR   | A_ARG_77  | NH2    | H_ASP_102 | OD1    | 2.791        |
| 2VDR   | A_ARG_77  | NH2    | H_ASP_102 | OD2    | 3.414        |
| 2VDR   | B_ARG_216 | NH2    | A_GLU_123 | OE2    | 2.956        |
| 2VDR   | B_LYS_253 | NZ     | A_ASP_232 | OD2    | 3.191        |
| 2VDR   | C_ARG_408 | NH1    | A_ASP_224 | OD1    | 3.062        |
| 2VDR   | C_ARG_408 | NH1    | A_ASP_224 | OD2    | 3.850        |
| 2VDR   | C_ARG_408 | NH2    | A_ASP_224 | OD1    | 3.028        |
| 2VDR   | C_ARG_408 | NH2    | A_ASP_224 | OD2    | 3.839        |
| 2VDR   | H_LYS_214 | NZ     | L_GLU_123 | OE2    | 3.860        |

Table 1161: Interfacial 2VDR-specific salt bridging networks analysis. In this table, a PDB file is specified with a four-letter PDB ID, except that the names of the PDB files corresponding to the single NMR structural model split from the NMR ensemble is specified with a four-letter PDB ID in addition to a hyphen followed by the single NMR structural model numeric ID, the residue naming scheme is **Chain ID\_residue name\_residue number**,  $\angle ADH$  represents the angle formed by acceptor (A), donor (D) and hydrogen (H) ( $\angle ADH$ ).

| PDB ID | Residue A | Atom A | Residue B | Atom B | Distance (Å) |
|--------|-----------|--------|-----------|--------|--------------|
| 2VIR   | B_LYS_    | NZ     | A_GLU_127 | OE2    | 3.017        |
| 2VIR   | B_HIS_173 | NE2    | A_ASP_141 | OD1    | 3.726        |
| 2VIR   | B_HIS_173 | NE2    | A_ASP_141 | OD2    | 3.076        |
| 2VIR   | B_LYS_217 | NZ     | A_GLU_126 | OE2    | 3.903        |

Table 1162: Interfacial 2VIR-specific salt bridging networks analysis. In this table, a PDB file is specified with a four-letter PDB ID, except that the names of the PDB files corresponding to the single NMR structural model split from the NMR ensemble is specified with a four-letter PDB ID in addition to a hyphen followed by the single NMR structural model numeric ID, the residue naming scheme is **Chain ID\_residue name\_residue number**,  $\angle ADH$  represents the angle formed by acceptor (A), donor (D) and hydrogen (H) ( $\angle ADH$ ).

| PDB ID | Residue A | Atom A | Residue B | Atom B | Distance (Å) |
|--------|-----------|--------|-----------|--------|--------------|
| 2VIS   | B_LYS_    | NZ     | A_GLU_127 | OE2    | 2.999        |
| 2VIS   | B_HIS_173 | NE2    | A_ASP_141 | OD1    | 3.763        |
| 2VIS   | B_HIS_173 | NE2    | A_ASP_141 | OD2    | 3.158        |
| 2VIS   | B_LYS_217 | NZ     | A_GLU_126 | OE2    | 3.709        |

Table 1163: Interfacial 2VIS-specific salt bridging networks analysis. In this table, a PDB file is specified with a four-letter PDB ID, except that the names of the PDB files corresponding to the single NMR structural model split from the NMR ensemble is specified with a four-letter PDB ID in addition to a hyphen followed by the single NMR structural model numeric ID, the residue naming scheme is **Chain ID\_residue name\_residue number**,  $\angle ADH$  represents the angle formed by acceptor (A), donor (D) and hydrogen (H) ( $\angle ADH$ ).

| PDB ID | Residue A | Atom A | Residue B | Atom B | Distance (Å) |
|--------|-----------|--------|-----------|--------|--------------|
| 2VIT   | B_LYS_    | NZ     | A_GLU_127 | OE2    | 2.939        |
| 2VIT   | B_HIS_173 | NE2    | A_ASP_141 | OD1    | 3.614        |
| 2VIT   | B_HIS_173 | NE2    | A_ASP_141 | OD2    | 3.333        |
| 2VIT   | B_LYS_217 | NZ     | A_GLU_126 | OE2    | 3.872        |

Table 1164: Interfacial 2VIT-specific salt bridging networks analysis. In this table, a PDB file is specified with a four-letter PDB ID, except that the names of the PDB files corresponding to the single NMR structural model split from the NMR ensemble is specified with a four-letter PDB ID in addition to a hyphen followed by the single NMR structural model numeric ID, the residue naming scheme is **Chain ID\_residue name\_residue number**,  $\angle ADH$  represents the angle formed by acceptor (A), donor (D) and hydrogen (H) ( $\angle ADH$ ).

| PDB ID | Residue A | Atom A | Residue B | Atom B | Distance (Å) |
|--------|-----------|--------|-----------|--------|--------------|
| 2VIU   | A_LYS_27  | NZ     | B_GLU_97  | OE1    | 3.686        |
| 2VIU   | A_LYS_27  | NZ     | B_GLU_97  | OE2    | 2.721        |
| 2VIU   | A_ARG_109 | NH1    | B_GLU_67  | OE1    | 3.978        |
| 2VIU   | A_ARG_109 | NH1    | B_GLU_67  | OE2    | 3.053        |
| 2VIU   | A_ARG_269 | NH1    | B_GLU_67  | OE1    | 2.986        |
| 2VIU   | A_LYS_310 | NZ     | B_ASP_90  | OD1    | 2.868        |

Table 1165: Interfacial 2VIU-specific salt bridging networks analysis. In this table, a PDB file is specified with a four-letter PDB ID, except that the names of the PDB files corresponding to the single NMR structural model split from the NMR ensemble is specified with a four-letter PDB ID in addition to a hyphen followed by the single NMR structural model numeric ID, the residue naming scheme is **Chain ID\_residue name\_residue number**,  $\angle ADH$  represents the angle formed by acceptor (A), donor (D) and hydrogen (H) ( $\angle ADH$ ).



| PDB ID | Residue A | Atom A | Residue B | Atom B | Distance (Å) |
|--------|-----------|--------|-----------|--------|--------------|
| 2VXS   | H_LYS_143 | NZ     | L_GLU_125 | OE2    | 2.772        |
| 2VXS   | I_LYS_214 | NZ     | M_GLU_124 | OE1    | 3.186        |
| 2VXS   | J_LYS_    | NZ     | N_GLU_    | OE1    | 2.922        |
| 2VXS   | K_LYS_214 | NZ     | O_GLU_124 | OE1    | 3.391        |
| 2VXS   | N_LYS_    | NZ     | J_ASP_    | OD2    | 3.949        |

Table 1166: Interfacial 2VXS-specific salt bridging networks analysis. In this table, a PDB file is specified with a four-letter PDB ID, except that the names of the PDB files corresponding to the single NMR structural model split from the NMR ensemble is specified with a four-letter PDB ID in addition to a hyphen followed by the single NMR structural model numeric ID, the residue naming scheme is **Chain ID\_residue name\_residue number**,  $\angle ADH$  represents the angle formed by acceptor (A), donor (D) and hydrogen (H) ( $\angle ADH$ ).

| PDB ID | Residue A | Atom A | Residue B | Atom B | Distance (Å) |
|--------|-----------|--------|-----------|--------|--------------|
| 2VXT   | H_ARG_94  | NH2    | L_GLU_179 | OE1    | 2.816        |
| 2VXT   | H_ARG_94  | NH2    | L_GLU_179 | OE2    | 3.466        |
| 2VXT   | H_ARG_101 | NH1    | L_GLU_179 | OE1    | 2.914        |
| 2VXT   | H_LYS_208 | NZ     | L_GLU_123 | OE2    | 2.940        |
| 2VXT   | L_HIS_145 | NE2    | H_ASP_50  | OD1    | 2.753        |
| 2VXT   | L_LYS_148 | NZ     | H_ASP_56  | OD2    | 2.664        |

Table 1167: Interfacial 2VXT-specific salt bridging networks analysis. In this table, a PDB file is specified with a four-letter PDB ID, except that the names of the PDB files corresponding to the single NMR structural model split from the NMR ensemble is specified with a four-letter PDB ID in addition to a hyphen followed by the single NMR structural model numeric ID, the residue naming scheme is **Chain ID\_residue name\_residue number**,  $\angle ADH$  represents the angle formed by acceptor (A), donor (D) and hydrogen (H) ( $\angle ADH$ ).

| PDB ID | Residue A | Atom A | Residue B | Atom B | Distance (Å) |
|--------|-----------|--------|-----------|--------|--------------|
| 2VXU   | H.LYS_43  | NZ     | L.ASP_85  | OD1    | 3.097        |
| 2VXU   | I.LYS_208 | NZ     | M.GLU_123 | OE1    | 2.734        |
| 2VXU   | I.LYS_208 | NZ     | M.GLU_123 | OE2    | 2.893        |

Table 1168: Interfacial 2VXU-specific salt bridging networks analysis. In this table, a PDB file is specified with a four-letter PDB ID, except that the names of the PDB files corresponding to the single NMR structural model split from the NMR ensemble is specified with a four-letter PDB ID in addition to a hyphen followed by the single NMR structural model numeric ID, the residue naming scheme is **Chain ID\_residue name\_residue number**,  $\angle ADH$  represents the angle formed by acceptor (A), donor (D) and hydrogen (H) ( $\angle ADH$ ).

| PDB ID | Residue A | Atom A | Residue B | Atom B | Distance (Å) |
|--------|-----------|--------|-----------|--------|--------------|
| 2VXV   | H_LYS_214 | NZ     | L_ASP_122 | OD1    | 3.721        |
| 2VXV   | H_LYS_214 | NZ     | L_ASP_122 | OD2    | 2.868        |

Table 1169: Interfacial 2VXV-specific salt bridging networks analysis. In this table, a PDB file is specified with a four-letter PDB ID, except that the names of the PDB files corresponding to the single NMR structural model split from the NMR ensemble is specified with a four-letter PDB ID in addition to a hyphen followed by the single NMR structural model numeric ID, the residue naming scheme is **Chain ID\_residue name\_residue number**,  $\angle ADH$  represents the angle formed by acceptor (A), donor (D) and hydrogen (H) ( $\angle ADH$ ).

| PDB ID | Residue A | Atom A | Residue B | Atom B | Distance (Å) |
|--------|-----------|--------|-----------|--------|--------------|
| 2XZQ   | H_LYS_150 | NZ     | L_GLU_127 | OE2    | 3.822        |
| 2XZQ   | H_LYS_215 | NZ     | L_GLU_126 | OE2    | 2.689        |

Table 1170: Interfacial 2XZQ-specific salt bridging networks analysis. In this table, a PDB file is specified with a four-letter PDB ID, except that the names of the PDB files corresponding to the single NMR structural model split from the NMR ensemble is specified with a four-letter PDB ID in addition to a hyphen followed by the single NMR structural model numeric ID, the residue naming scheme is **Chain ID\_residue name\_residue number**,  $\angle ADH$  represents the angle formed by acceptor (A), donor (D) and hydrogen (H) ( $\angle ADH$ ).

| PDB ID | Residue A | Atom A | Residue B | Atom B | Distance (Å) |
|--------|-----------|--------|-----------|--------|--------------|
| 2Y06   | H_LYS_215 | NZ     | L_GLU_126 | OE2    | 2.373        |

Table 1171: Interfacial 2Y06-specific salt bridging networks analysis. In this table, a PDB file is specified with a four-letter PDB ID, except that the names of the PDB files corresponding to the single NMR structural model split from the NMR ensemble is specified with a four-letter PDB ID in addition to a hyphen followed by the single NMR structural model numeric ID, the residue naming scheme is **Chain ID\_residue name\_residue number**,  $\angle ADH$  represents the angle formed by acceptor (A), donor (D) and hydrogen (H) ( $\angle ADH$ ).

| PDB ID | Residue A | Atom A | Residue B | Atom B | Distance (Å) |
|--------|-----------|--------|-----------|--------|--------------|
| 2Y07   | H_LYS_215 | NZ     | L_GLU_126 | OE2    | 2.390        |

Table 1172: Interfacial 2Y07-specific salt bridging networks analysis. In this table, a PDB file is specified with a four-letter PDB ID, except that the names of the PDB files corresponding to the single NMR structural model split from the NMR ensemble is specified with a four-letter PDB ID in addition to a hyphen followed by the single NMR structural model numeric ID, the residue naming scheme is **Chain ID\_residue name\_residue number**,  $\angle ADH$  represents the angle formed by acceptor (A), donor (D) and hydrogen (H) ( $\angle ADH$ ).

| PDB ID | Residue A | Atom A | Residue B | Atom B | Distance (Å) |
|--------|-----------|--------|-----------|--------|--------------|
| 2Y36   | H_LYS_150 | NZ     | L_GLU_127 | OE2    | 3.849        |
| 2Y36   | H_LYS_215 | NZ     | L_GLU_126 | OE2    | 2.707        |

Table 1173: Interfacial 2Y36-specific salt bridging networks analysis. In this table, a PDB file is specified with a four-letter PDB ID, except that the names of the PDB files corresponding to the single NMR structural model split from the NMR ensemble is specified with a four-letter PDB ID in addition to a hyphen followed by the single NMR structural model numeric ID, the residue naming scheme is **Chain ID\_residue name\_residue number**,  $\angle ADH$  represents the angle formed by acceptor (A), donor (D) and hydrogen (H) ( $\angle ADH$ ).



| PDB ID | Residue A | Atom A | Residue B | Atom B | Distance (Å) |
|--------|-----------|--------|-----------|--------|--------------|
| 2Y7S   | A_ARG_127 | NH1    | B_GLU_118 | OE1    | 3.457        |
| 2Y7S   | A_LYS_218 | NZ     | B_ASP_85  | OD1    | 3.014        |
| 2Y7S   | B_ARG_41  | NH2    | A_GLU_238 | OE2    | 2.757        |

Table 1174: Interfacial 2Y7S-specific salt bridging networks analysis. In this table, a PDB file is specified with a four-letter PDB ID, except that the names of the PDB files corresponding to the single NMR structural model split from the NMR ensemble is specified with a four-letter PDB ID in addition to a hyphen followed by the single NMR structural model numeric ID, the residue naming scheme is **Chain ID\_residue name\_residue number**,  $\angle ADH$  represents the angle formed by acceptor (A), donor (D) and hydrogen (H) ( $\angle ADH$ ).

| PDB ID | Residue A | Atom A | Residue B | Atom B | Distance (Å) |
|--------|-----------|--------|-----------|--------|--------------|
| 2YPV   | A_ARG_130 | NH2    | L_ASP_92  | OD1    | 2.916        |
| 2YPV   | A_LYS_219 | NZ     | H_ASP_52  | OD2    | 3.469        |
| 2YPV   | A_LYS_241 | NZ     | H_ASP_99  | OD2    | 2.741        |
| 2YPV   | H_LYS_214 | NZ     | L_GLU_123 | OE1    | 2.788        |
| 2YPV   | H_LYS_214 | NZ     | L_GLU_123 | OE2    | 2.975        |
| 2YPV   | L_ARG_50  | NH2    | A_GLU_239 | OE1    | 3.110        |
| 2YPV   | L_ARG_50  | NH2    | A_GLU_239 | OE2    | 3.975        |

Table 1175: Interfacial 2YPV-specific salt bridging networks analysis. In this table, a PDB file is specified with a four-letter PDB ID, except that the names of the PDB files corresponding to the single NMR structural model split from the NMR ensemble is specified with a four-letter PDB ID in addition to a hyphen followed by the single NMR structural model numeric ID, the residue naming scheme is **Chain ID\_residue name\_residue number**,  $\angle ADH$  represents the angle formed by acceptor (A), donor (D) and hydrogen (H) ( $\angle ADH$ ).

| PDB ID | Residue A | Atom A | Residue B | Atom B | Distance (Å) |
|--------|-----------|--------|-----------|--------|--------------|
| 2YWY   | A.LYS_48  | NZ     | B.GLU_32  | OE1    | 3.306        |
| 2YWY   | A.LYS_48  | NZ     | B.GLU_32  | OE2    | 2.998        |
| 2YWY   | A.LYS_61  | NZ     | B.GLU_57  | OE1    | 2.550        |
| 2YWY   | A.LYS_61  | NZ     | B.GLU_57  | OE2    | 3.211        |
| 2YWY   | A.LYS_82  | NZ     | C.ASP_89  | OD1    | 3.260        |
| 2YWY   | B.ARG_33  | NH2    | A.GLU_32  | OE1    | 3.506        |
| 2YWY   | B.LYS_48  | NZ     | A.GLU_32  | OE1    | 3.520        |
| 2YWY   | B.LYS_48  | NZ     | A.GLU_32  | OE2    | 2.757        |
| 2YWY   | B.LYS_61  | NZ     | A.GLU_57  | OE1    | 3.086        |
| 2YWY   | C.LYS_48  | NZ     | D.GLU_32  | OE1    | 2.723        |
| 2YWY   | C.LYS_48  | NZ     | D.GLU_32  | OE2    | 3.404        |
| 2YWY   | C.LYS_61  | NZ     | D.GLU_57  | OE1    | 2.801        |
| 2YWY   | C.LYS_61  | NZ     | D.GLU_57  | OE2    | 3.948        |
| 2YWY   | D.LYS_48  | NZ     | C.GLU_32  | OE1    | 3.239        |
| 2YWY   | D.LYS_48  | NZ     | C.GLU_32  | OE2    | 2.447        |
| 2YWY   | D.LYS_61  | NZ     | C.GLU_57  | OE1    | 2.837        |
| 2YWY   | D.LYS_61  | NZ     | C.GLU_57  | OE2    | 3.637        |

Table 1176: Interfacial 2YWY-specific salt bridging networks analysis. In this table, a PDB file is specified with a four-letter PDB ID, except that the names of the PDB files corresponding to the single NMR structural model split from the NMR ensemble is specified with a four-letter PDB ID in addition to a hyphen followed by the single NMR structural model numeric ID, the residue naming scheme is **Chain ID\_residue name\_residue number**,  $\angle ADH$  represents the angle formed by acceptor (A), donor (D) and hydrogen (H) ( $\angle ADH$ ).

| PDB ID | Residue A | Atom A | Residue B  | Atom B | Distance (Å) |
|--------|-----------|--------|------------|--------|--------------|
| 2ZCH   | P_LYS_178 | NZ     | H_ASP_96   | OD1    | 3.502        |
| 2ZCH   | P_LYS_178 | NZ     | H_ASP_96   | OD2    | 3.400        |
| 2ZCH   | P_ARG_235 | NH1    | L_ASP_28   | OD2    | 2.443        |
| 2ZCH   | P_ARG_235 | NH2    | L_ASP_28   | OD2    | 3.166        |
| 2ZCH   | P_LYS_236 | NZ     | H_GLU_100C | OE2    | 3.089        |
| 2ZCH   | H_ARG_50  | NH2    | L_ASP_94   | OD1    | 2.658        |
| 2ZCH   | H_ARG_50  | NH2    | L_ASP_94   | OD2    | 2.887        |
| 2ZCH   | H_LYS_208 | NZ     | L_GLU_123  | OE1    | 3.921        |
| 2ZCH   | H_LYS_208 | NZ     | L_GLU_123  | OE2    | 3.396        |

Table 1177: Interfacial 2ZCH-specific salt bridging networks analysis. In this table, a PDB file is specified with a four-letter PDB ID, except that the names of the PDB files corresponding to the single NMR structural model split from the NMR ensemble is specified with a four-letter PDB ID in addition to a hyphen followed by the single NMR structural model numeric ID, the residue naming scheme is **Chain ID\_residue name\_residue number**,  $\angle ADH$  represents the angle formed by acceptor (A), donor (D) and hydrogen (H) ( $\angle ADH$ ).

| PDB ID | Residue A | Atom A | Residue B | Atom B | Distance (Å) |
|--------|-----------|--------|-----------|--------|--------------|
| 2ZCK   | P_LYS_178 | NZ     | H_ASP_96  | OD1    | 3.892        |
| 2ZCK   | P_LYS_178 | NZ     | H_ASP_96  | OD2    | 3.060        |
| 2ZCK   | P_ARG_236 | NH2    | L_ASP_28  | OD1    | 3.496        |
| 2ZCK   | H_ARG_50  | NH2    | L_ASP_94  | OD1    | 3.095        |
| 2ZCK   | H_ARG_50  | NH2    | L_ASP_94  | OD2    | 2.679        |
| 2ZCK   | H_LYS_208 | NZ     | L_GLU_123 | OE2    | 2.731        |

Table 1178: Interfacial 2ZCK-specific salt bridging networks analysis. In this table, a PDB file is specified with a four-letter PDB ID, except that the names of the PDB files corresponding to the single NMR structural model split from the NMR ensemble is specified with a four-letter PDB ID in addition to a hyphen followed by the single NMR structural model numeric ID, the residue naming scheme is **Chain ID\_residue name\_residue number**,  $\angle ADH$  represents the angle formed by acceptor (A), donor (D) and hydrogen (H) ( $\angle ADH$ ).

| PDB ID | Residue A | Atom A | Residue B | Atom B | Distance (Å) |
|--------|-----------|--------|-----------|--------|--------------|
| 2ZCL   | P_LYS_178 | NZ     | H_ASP_96  | OD1    | 3.272        |
| 2ZCL   | P_LYS_178 | NZ     | H_ASP_96  | OD2    | 2.771        |
| 2ZCL   | P_ARG_235 | NH2    | L_ASP_28  | OD1    | 3.392        |
| 2ZCL   | H_ARG_50  | NH2    | L_ASP_94  | OD1    | 3.155        |
| 2ZCL   | H_ARG_50  | NH2    | L_ASP_94  | OD2    | 2.864        |

Table 1179: Interfacial 2ZCL-specific salt bridging networks analysis. In this table, a PDB file is specified with a four-letter PDB ID, except that the names of the PDB files corresponding to the single NMR structural model split from the NMR ensemble is specified with a four-letter PDB ID in addition to a hyphen followed by the single NMR structural model numeric ID, the residue naming scheme is **Chain ID\_residue name\_residue number**,  $\angle ADH$  represents the angle formed by acceptor (A), donor (D) and hydrogen (H) ( $\angle ADH$ ).

| PDB ID | Residue A | Atom A | Residue B | Atom B | Distance (Å) |
|--------|-----------|--------|-----------|--------|--------------|
| 2ZNW   | Y_LYS_97  | NZ     | A_ASP_154 | OD1    | 2.612        |
| 2ZNW   | Y_LYS_97  | NZ     | A_ASP_154 | OD2    | 3.786        |
| 2ZNW   | Y_LYS_97  | NZ     | A_ASP_221 | OD1    | 3.143        |
| 2ZNW   | Y_LYS_97  | NZ     | A_ASP_221 | OD2    | 3.719        |
| 2ZNW   | Y_LYS_116 | NZ     | B_ASP_203 | OD1    | 2.664        |
| 2ZNW   | Z_LYS_97  | NZ     | B_ASP_154 | OD1    | 3.042        |
| 2ZNW   | Z_LYS_97  | NZ     | B_ASP_221 | OD1    | 2.782        |
| 2ZNW   | Z_LYS_97  | NZ     | B_ASP_221 | OD2    | 3.319        |
| 2ZNW   | Z_LYS_116 | NZ     | A_ASP_203 | OD1    | 2.989        |

Table 1180: Interfacial 2ZNW-specific salt bridging networks analysis. In this table, a PDB file is specified with a four-letter PDB ID, except that the names of the PDB files corresponding to the single NMR structural model split from the NMR ensemble is specified with a four-letter PDB ID in addition to a hyphen followed by the single NMR structural model numeric ID, the residue naming scheme is **Chain ID\_residue name\_residue number**,  $\angle ADH$  represents the angle formed by acceptor (A), donor (D) and hydrogen (H) ( $\angle ADH$ ).

| PDB ID | Residue A | Atom A | Residue B | Atom B | Distance (Å) |
|--------|-----------|--------|-----------|--------|--------------|
| 2ZNX   | Y_LYS_97  | NZ     | A_ASP_154 | OD1    | 2.701        |
| 2ZNX   | Y_LYS_97  | NZ     | A_ASP_221 | OD1    | 2.716        |
| 2ZNX   | Y_LYS_97  | NZ     | A_ASP_221 | OD2    | 3.355        |
| 2ZNX   | Y_LYS_116 | NZ     | B_ASP_203 | OD1    | 3.871        |
| 2ZNX   | Y_LYS_116 | NZ     | B_ASP_203 | OD2    | 2.956        |
| 2ZNX   | B_LYS_135 | NZ     | Y_ASP_119 | OD2    | 3.744        |
| 2ZNX   | Z_LYS_97  | NZ     | B_ASP_154 | OD1    | 2.804        |
| 2ZNX   | Z_LYS_97  | NZ     | B_ASP_221 | OD1    | 3.005        |
| 2ZNX   | Z_LYS_97  | NZ     | B_ASP_221 | OD2    | 3.520        |
| 2ZNX   | Z_LYS_116 | NZ     | A_ASP_203 | OD1    | 3.699        |
| 2ZNX   | Z_LYS_116 | NZ     | A_ASP_203 | OD2    | 3.427        |

Table 1181: Interfacial 2ZNX-specific salt bridging networks analysis. In this table, a PDB file is specified with a four-letter PDB ID, except that the names of the PDB files corresponding to the single NMR structural model split from the NMR ensemble is specified with a four-letter PDB ID in addition to a hyphen followed by the single NMR structural model numeric ID, the residue naming scheme is **Chain ID\_residue name\_residue number**,  $\angle ADH$  represents the angle formed by acceptor (A), donor (D) and hydrogen (H) ( $\angle ADH$ ).



| PDB ID | Residue A | Atom A | Residue B | Atom B | Distance (Å) |
|--------|-----------|--------|-----------|--------|--------------|
| 2ZPK   | L.HIS_95  | NE2    | H.ASP_62  | OD1    | 3.977        |
| 2ZPK   | H.LYS_143 | NZ     | L.GLU_125 | OE2    | 2.882        |
| 2ZPK   | H.LYS_208 | NZ     | L.GLU_124 | OE2    | 3.548        |
| 2ZPK   | I.LYS_143 | NZ     | M.GLU_125 | OE2    | 2.672        |
| 2ZPK   | I.LYS_208 | NZ     | M.GLU_124 | OE2    | 3.137        |

Table 1182: Interfacial 2ZPK-specific salt bridging networks analysis. In this table, a PDB file is specified with a four-letter PDB ID, except that the names of the PDB files corresponding to the single NMR structural model split from the NMR ensemble is specified with a four-letter PDB ID in addition to a hyphen followed by the single NMR structural model numeric ID, the residue naming scheme is **Chain ID\_residue name\_residue number**,  $\angle ADH$  represents the angle formed by acceptor (A), donor (D) and hydrogen (H) ( $\angle ADH$ ).

| PDB ID | Residue A | Atom A | Residue B | Atom B | Distance (Å) |
|--------|-----------|--------|-----------|--------|--------------|
| 32C2   | B_LYS_214 | NZ     | A_GLU_126 | OE1    | 3.056        |
| 32C2   | B_LYS_214 | NZ     | A_GLU_126 | OE2    | 3.702        |

Table 1183: Interfacial 32C2-specific salt bridging networks analysis. In this table, a PDB file is specified with a four-letter PDB ID, except that the names of the PDB files corresponding to the single NMR structural model split from the NMR ensemble is specified with a four-letter PDB ID in addition to a hyphen followed by the single NMR structural model numeric ID, the residue naming scheme is **Chain ID\_residue name\_residue number**,  $\angle ADH$  represents the angle formed by acceptor (A), donor (D) and hydrogen (H) ( $\angle ADH$ ).

| PDB ID | Residue A | Atom A | Residue B | Atom B | Distance (Å) |
|--------|-----------|--------|-----------|--------|--------------|
| 3A67   | Y_LYS_96  | NZ     | L_ASP_31  | OD1    | 2.774        |
| 3A67   | Y_LYS_96  | NZ     | L_ASP_31  | OD2    | 3.727        |
| 3A67   | Y_LYS_97  | NZ     | H_ASP_32  | OD1    | 2.657        |
| 3A67   | Y_LYS_97  | NZ     | H_ASP_99  | OD1    | 3.291        |
| 3A67   | Y_LYS_97  | NZ     | H_ASP_99  | OD2    | 2.885        |

Table 1184: Interfacial 3A67-specific salt bridging networks analysis. In this table, a PDB file is specified with a four-letter PDB ID, except that the names of the PDB files corresponding to the single NMR structural model split from the NMR ensemble is specified with a four-letter PDB ID in addition to a hyphen followed by the single NMR structural model numeric ID, the residue naming scheme is **Chain ID\_residue name\_residue number**,  $\angle ADH$  represents the angle formed by acceptor (A), donor (D) and hydrogen (H) ( $\angle ADH$ ).

| PDB ID | Residue A | Atom A | Residue B | Atom B | Distance (Å) |
|--------|-----------|--------|-----------|--------|--------------|
| 3A6B   | Y_LYS_96  | NZ     | L_ASP_32  | OD1    | 2.734        |
| 3A6B   | Y_LYS_97  | NZ     | H_ASP_32  | OD1    | 2.700        |
| 3A6B   | Y_LYS_97  | NZ     | H_ASP_32  | OD2    | 3.941        |
| 3A6B   | Y_LYS_97  | NZ     | H_ASP_99  | OD1    | 2.956        |
| 3A6B   | Y_LYS_97  | NZ     | H_ASP_99  | OD2    | 3.259        |

Table 1185: Interfacial 3A6B-specific salt bridging networks analysis. In this table, a PDB file is specified with a four-letter PDB ID, except that the names of the PDB files corresponding to the single NMR structural model split from the NMR ensemble is specified with a four-letter PDB ID in addition to a hyphen followed by the single NMR structural model numeric ID, the residue naming scheme is **Chain ID\_residue name\_residue number**,  $\angle ADH$  represents the angle formed by acceptor (A), donor (D) and hydrogen (H) ( $\angle ADH$ ).

| PDB ID | Residue A | Atom A | Residue B | Atom B | Distance (Å) |
|--------|-----------|--------|-----------|--------|--------------|
| 3A6C   | Y_LYS_97  | NZ     | H_ASP_32  | OD1    | 2.672        |
| 3A6C   | Y_LYS_97  | NZ     | H_ASP_32  | OD2    | 3.916        |
| 3A6C   | Y_LYS_97  | NZ     | H_ASP_99  | OD1    | 2.965        |
| 3A6C   | Y_LYS_97  | NZ     | H_ASP_99  | OD2    | 3.291        |

Table 1186: Interfacial 3A6C-specific salt bridging networks analysis. In this table, a PDB file is specified with a four-letter PDB ID, except that the names of the PDB files corresponding to the single NMR structural model split from the NMR ensemble is specified with a four-letter PDB ID in addition to a hyphen followed by the single NMR structural model numeric ID, the residue naming scheme is **Chain ID\_residue name\_residue number**,  $\angle ADH$  represents the angle formed by acceptor (A), donor (D) and hydrogen (H) ( $\angle ADH$ ).

| PDB ID | Residue A | Atom A | Residue B | Atom B | Distance (Å) |
|--------|-----------|--------|-----------|--------|--------------|
| 3B9K   | H_LYS_221 | NZ     | L_GLU_123 | OE1    | 2.886        |
| 3B9K   | A_LYS_13  | NZ     | B_ASP_42  | OD2    | 3.894        |
| 3B9K   | B_LYS_27  | NZ     | H_ASP_32  | OD1    | 2.409        |
| 3B9K   | B_ARG_77  | NH2    | L_ASP_92  | OD1    | 3.184        |
| 3B9K   | B_ARG_78  | NH2    | L_ASP_92  | OD1    | 2.834        |
| 3B9K   | B_LYS_103 | NZ     | A_ASP_66  | OD1    | 3.058        |
| 3B9K   | D_LYS_221 | NZ     | C_GLU_123 | OE1    | 3.178        |
| 3B9K   | F_LYS_27  | NZ     | D_ASP_32  | OD1    | 2.318        |
| 3B9K   | F_ARG_77  | NH2    | C_ASP_92  | OD1    | 2.984        |
| 3B9K   | F_ARG_78  | NH2    | C_ASP_92  | OD1    | 3.141        |
| 3B9K   | F_ARG_78  | NH2    | C_ASP_92  | OD2    | 3.951        |
| 3B9K   | F_LYS_103 | NZ     | E_ASP_    | OD1    | 3.044        |

Table 1187: Interfacial 3B9K-specific salt bridging networks analysis. In this table, a PDB file is specified with a four-letter PDB ID, except that the names of the PDB files corresponding to the single NMR structural model split from the NMR ensemble is specified with a four-letter PDB ID in addition to a hyphen followed by the single NMR structural model numeric ID, the residue naming scheme is **Chain ID residue name residue number**,  $\angle ADH$  represents the angle formed by acceptor (A), donor (D) and hydrogen (H) ( $\angle ADH$ ).

| PDB ID | Residue A | Atom A | Residue B | Atom B | Distance (Å) |
|--------|-----------|--------|-----------|--------|--------------|
| 3BDY   | H_LYS_211 | NZ     | L_GLU_123 | OE2    | 2.706        |

Table 1188: Interfacial 3BDY-specific salt bridging networks analysis. In this table, a PDB file is specified with a four-letter PDB ID, except that the names of the PDB files corresponding to the single NMR structural model split from the NMR ensemble is specified with a four-letter PDB ID in addition to a hyphen followed by the single NMR structural model numeric ID, the residue naming scheme is **Chain ID\_residue name\_residue number**,  $\angle ADH$  represents the angle formed by acceptor (A), donor (D) and hydrogen (H) ( $\angle ADH$ ).

| PDB ID | Residue A | Atom A | Residue B | Atom B | Distance (Å) |
|--------|-----------|--------|-----------|--------|--------------|
| 3BE1   | H_ARG_50  | NH1    | A_ASP_560 | OD2    | 3.215        |
| 3BE1   | H_ARG_50  | NH2    | A_GLU_558 | OE1    | 3.092        |
| 3BE1   | H_ARG_50  | NH2    | A_GLU_558 | OE2    | 3.263        |
| 3BE1   | H_ARG_50  | NH2    | A_ASP_560 | OD1    | 3.492        |
| 3BE1   | H_ARG_50  | NH2    | A_ASP_560 | OD2    | 3.175        |

Table 1189: Interfacial 3BE1-specific salt bridging networks analysis. In this table, a PDB file is specified with a four-letter PDB ID, except that the names of the PDB files corresponding to the single NMR structural model split from the NMR ensemble is specified with a four-letter PDB ID in addition to a hyphen followed by the single NMR structural model numeric ID, the residue naming scheme is **Chain ID\_residue name\_residue number**,  $\angle ADH$  represents the angle formed by acceptor (A), donor (D) and hydrogen (H) ( $\angle ADH$ ).



| PDB ID | Residue A | Atom A | Residue B | Atom B | Distance (Å) |
|--------|-----------|--------|-----------|--------|--------------|
| 3BGF   | S_ARG_426 | NH1    | H_ASP_56  | OD1    | 3.504        |
| 3BGF   | S_ARG_426 | NH1    | H_ASP_56  | OD2    | 2.403        |
| 3BGF   | S_LYS_439 | NZ     | A_ASP_480 | OD2    | 3.161        |
| 3BGF   | A_LYS_439 | NZ     | S_ASP_480 | OD2    | 2.520        |
| 3BGF   | H_LYS_210 | NZ     | L_GLU_123 | OE1    | 3.997        |

Table 1190: Interfacial 3BGF-specific salt bridging networks analysis. In this table, a PDB file is specified with a four-letter PDB ID, except that the names of the PDB files corresponding to the single NMR structural model split from the NMR ensemble is specified with a four-letter PDB ID in addition to a hyphen followed by the single NMR structural model numeric ID, the residue naming scheme is **Chain ID\_residue name\_residue number**,  $\angle ADH$  represents the angle formed by acceptor (A), donor (D) and hydrogen (H) ( $\angle ADH$ ).

| PDB ID | Residue A | Atom A | Residue B | Atom B | Distance (Å) |
|--------|-----------|--------|-----------|--------|--------------|
| 3BIK   | A_ARG_113 | NH2    | B_GLU_136 | OE2    | 3.149        |
| 3BIK   | A_ARG_125 | NH2    | B_GLU_136 | OE1    | 3.033        |
| 3BIK   | A_ARG_125 | NH2    | B_GLU_136 | OE2    | 3.001        |

Table 1191: Interfacial 3BIK-specific salt bridging networks analysis. In this table, a PDB file is specified with a four-letter PDB ID, except that the names of the PDB files corresponding to the single NMR structural model split from the NMR ensemble is specified with a four-letter PDB ID in addition to a hyphen followed by the single NMR structural model numeric ID, the residue naming scheme is **Chain ID\_residue name\_residue number**,  $\angle ADH$  represents the angle formed by acceptor (A), donor (D) and hydrogen (H) ( $\angle ADH$ ).

| PDB ID | Residue A | Atom A | Residue B | Atom B | Distance (Å) |
|--------|-----------|--------|-----------|--------|--------------|
| 3BKY   | H_LYS_138 | NZ     | L_GLU_212 | OE2    | 2.743        |

Table 1192: Interfacial 3BKY-specific salt bridging networks analysis. In this table, a PDB file is specified with a four-letter PDB ID, except that the names of the PDB files corresponding to the single NMR structural model split from the NMR ensemble is specified with a four-letter PDB ID in addition to a hyphen followed by the single NMR structural model numeric ID, the residue naming scheme is **Chain ID\_residue name\_residue number**,  $\angle ADH$  represents the angle formed by acceptor (A), donor (D) and hydrogen (H) ( $\angle ADH$ ).

| PDB ID | Residue A | Atom A | Residue B | Atom B | Distance (Å) |
|--------|-----------|--------|-----------|--------|--------------|
| 3BO8   | A_ARG_35  | NH1    | B_ASP_53  | OD1    | 3.541        |
| 3BO8   | A_ARG_48  | NH1    | B_ASP_53  | OD1    | 3.101        |
| 3BO8   | A_ARG_48  | NH1    | B_ASP_53  | OD2    | 3.041        |
| 3BO8   | A_ARG_48  | NH2    | B_ASP_53  | OD1    | 3.771        |
| 3BO8   | A_ARG_48  | NH2    | B_ASP_53  | OD2    | 3.368        |
| 3BO8   | A_ARG_156 | NH1    | C_ASP_3   | OD1    | 3.842        |
| 3BO8   | A_ARG_156 | NH1    | C_ASP_3   | OD2    | 2.711        |
| 3BO8   | A_ARG_163 | NH2    | C_GLU_1   | OE1    | 3.484        |
| 3BO8   | A_ARG_163 | NH2    | C_GLU_1   | OE2    | 2.848        |
| 3BO8   | A_ARG_170 | NH1    | C_GLU_1   | OE2    | 2.801        |
| 3BO8   | A_ARG_170 | NH2    | C_GLU_1   | OE2    | 3.023        |
| 3BO8   | A_HIS_192 | NE2    | B_ASP_98  | OD1    | 3.566        |
| 3BO8   | A_HIS_192 | NE2    | B_ASP_98  | OD2    | 3.950        |

Table 1193: Interfacial 3BO8-specific salt bridging networks analysis. In this table, a PDB file is specified with a four-letter PDB ID, except that the names of the PDB files corresponding to the single NMR structural model split from the NMR ensemble is specified with a four-letter PDB ID in addition to a hyphen followed by the single NMR structural model numeric ID, the residue naming scheme is **Chain ID\_residue name\_residue number**,  $\angle ADH$  represents the angle formed by acceptor (A), donor (D) and hydrogen (H) ( $\angle ADH$ ).

| PDB ID | Residue A | Atom A | Residue B | Atom B | Distance (Å) |
|--------|-----------|--------|-----------|--------|--------------|
| 3BT2   | A_HIS_87  | ND1    | U_ASP_11  | OD2    | 3.629        |
| 3BT2   | H_HIS_98  | ND1    | L_GLU_50  | OE1    | 2.845        |
| 3BT2   | H_HIS_98  | ND1    | L_GLU_50  | OE2    | 2.191        |
| 3BT2   | H_HIS_98  | NE2    | L_GLU_50  | OE1    | 3.301        |
| 3BT2   | H_HIS_98  | NE2    | L_GLU_50  | OE2    | 3.904        |
| 3BT2   | H_LYS_203 | NZ     | L_GLU_122 | OE2    | 3.715        |
| 3BT2   | U_ARG_91  | NH1    | B_ASP_22  | OD1    | 3.502        |
| 3BT2   | U_ARG_91  | NH1    | B_ASP_22  | OD2    | 3.574        |
| 3BT2   | U_ARG_91  | NH2    | B_ASP_22  | OD1    | 3.066        |
| 3BT2   | U_ARG_192 | NH1    | H_GLU_58  | OE2    | 2.836        |

Table 1194: Interfacial 3BT2-specific salt bridging networks analysis. In this table, a PDB file is specified with a four-letter PDB ID, except that the names of the PDB files corresponding to the single NMR structural model split from the NMR ensemble is specified with a four-letter PDB ID in addition to a hyphen followed by the single NMR structural model numeric ID, the residue naming scheme is **Chain ID\_residue name\_residue number**,  $\angle ADH$  represents the angle formed by acceptor (A), donor (D) and hydrogen (H) ( $\angle ADH$ ).

| PDB ID | Residue A | Atom A | Residue B | Atom B | Distance (Å) |
|--------|-----------|--------|-----------|--------|--------------|
| 3BZ4   | A_LYS_27  | NZ     | E_ASP_1   | OD1    | 3.348        |
| 3BZ4   | A_LYS_27  | NZ     | E_ASP_1   | OD2    | 3.551        |
| 3BZ4   | A_ARG_96  | NH2    | B_GLU_50  | OE1    | 3.591        |
| 3BZ4   | A_ARG_96  | NH2    | B_GLU_50  | OE2    | 2.914        |
| 3BZ4   | B_LYS_210 | NZ     | A_GLU_123 | OE2    | 2.839        |
| 3BZ4   | C_ARG_96  | NH2    | D_GLU_50  | OE1    | 3.615        |
| 3BZ4   | C_ARG_96  | NH2    | D_GLU_50  | OE2    | 2.938        |
| 3BZ4   | D_LYS_210 | NZ     | C_GLU_123 | OE2    | 2.929        |
| 3BZ4   | E_ARG_96  | NH2    | F_GLU_50  | OE1    | 3.659        |
| 3BZ4   | E_ARG_96  | NH2    | F_GLU_50  | OE2    | 3.062        |
| 3BZ4   | F_LYS_210 | NZ     | E_GLU_123 | OE2    | 2.855        |
| 3BZ4   | G_ARG_96  | NH2    | H_GLU_50  | OE1    | 3.659        |
| 3BZ4   | G_ARG_96  | NH2    | H_GLU_50  | OE2    | 3.021        |
| 3BZ4   | G_LYS_147 | NZ     | C_GLU_154 | OE1    | 3.559        |

Table 1195: Interfacial 3BZ4-specific salt bridging networks analysis. In this table, a PDB file is specified with a four-letter PDB ID, except that the names of the PDB files corresponding to the single NMR structural model split from the NMR ensemble is specified with a four-letter PDB ID in addition to a hyphen followed by the single NMR structural model numeric ID, the residue naming scheme is **Chain ID\_residue name\_residue number**,  $\angle ADH$  represents the angle formed by acceptor (A), donor (D) and hydrogen (H) ( $\angle ADH$ ).

| PDB ID | Residue A | Atom A | Residue B | Atom B | Distance (Å) |
|--------|-----------|--------|-----------|--------|--------------|
| 3C09   | L_HIS_93  | NE2    | D_ASP_434 | OD1    | 2.739        |
| 3C09   | L_HIS_93  | NE2    | D_ASP_434 | OD2    | 3.466        |
| 3C09   | H_ARG_57  | NH2    | D_GLU_431 | OE1    | 3.682        |
| 3C09   | A_LYS_454 | NZ     | C_ASP_100 | OD1    | 2.467        |
| 3C09   | A_LYS_463 | NZ     | B_ASP_49  | OD2    | 2.856        |
| 3C09   | B_HIS_93  | NE2    | A_ASP_434 | OD1    | 2.346        |
| 3C09   | D_LYS_454 | NZ     | H_ASP_100 | OD2    | 3.482        |
| 3C09   | D_LYS_463 | NZ     | L_ASP_49  | OD2    | 3.418        |

Table 1196: Interfacial 3C09-specific salt bridging networks analysis. In this table, a PDB file is specified with a four-letter PDB ID, except that the names of the PDB files corresponding to the single NMR structural model split from the NMR ensemble is specified with a four-letter PDB ID in addition to a hyphen followed by the single NMR structural model numeric ID, the residue naming scheme is **Chain ID\_residue name\_residue number**,  $\angle ADH$  represents the angle formed by acceptor (A), donor (D) and hydrogen (H) ( $\angle ADH$ ).

| PDB ID | Residue A | Atom A | Residue B | Atom B | Distance (Å) |
|--------|-----------|--------|-----------|--------|--------------|
| 3C5S   | A_ARG_96  | NH2    | B_GLU_50  | OE1    | 3.517        |
| 3C5S   | A_ARG_96  | NH2    | B_GLU_50  | OE2    | 2.932        |
| 3C5S   | B_LYS_210 | NZ     | A_GLU_123 | OE2    | 3.553        |
| 3C5S   | C_ARG_96  | NH2    | D_GLU_50  | OE1    | 3.571        |
| 3C5S   | C_ARG_96  | NH2    | D_GLU_50  | OE2    | 2.973        |

Table 1197: Interfacial 3C5S-specific salt bridging networks analysis. In this table, a PDB file is specified with a four-letter PDB ID, except that the names of the PDB files corresponding to the single NMR structural model split from the NMR ensemble is specified with a four-letter PDB ID in addition to a hyphen followed by the single NMR structural model numeric ID, the residue naming scheme is **Chain ID\_residue name\_residue number**,  $\angle ADH$  represents the angle formed by acceptor (A), donor (D) and hydrogen (H) ( $\angle ADH$ ).



| PDB ID | Residue A | Atom A | Residue B | Atom B | Distance (Å) |
|--------|-----------|--------|-----------|--------|--------------|
| 3C6S   | A_LYS_27  | NZ     | F_GLU_61  | OE1    | 2.945        |
| 3C6S   | A_ARG_96  | NH2    | B_GLU_50  | OE1    | 3.551        |
| 3C6S   | A_ARG_96  | NH2    | B_GLU_50  | OE2    | 2.936        |
| 3C6S   | B_LYS_210 | NZ     | A_GLU_123 | OE2    | 2.871        |
| 3C6S   | C_ARG_96  | NH2    | D_GLU_50  | OE1    | 3.699        |
| 3C6S   | C_ARG_96  | NH2    | D_GLU_50  | OE2    | 2.915        |
| 3C6S   | D_LYS_115 | NZ     | H_GLU_85  | OE1    | 3.000        |
| 3C6S   | D_LYS_115 | NZ     | H_GLU_85  | OE2    | 3.884        |
| 3C6S   | D_LYS_210 | NZ     | C_GLU_123 | OE2    | 2.801        |
| 3C6S   | E_LYS_27  | NZ     | A_ASP_1   | OD1    | 3.387        |
| 3C6S   | E_LYS_27  | NZ     | A_ASP_1   | OD2    | 3.431        |
| 3C6S   | E_ARG_96  | NH2    | F_GLU_50  | OE1    | 3.703        |
| 3C6S   | E_ARG_96  | NH2    | F_GLU_50  | OE2    | 3.164        |
| 3C6S   | F_LYS_210 | NZ     | E_GLU_123 | OE2    | 3.016        |
| 3C6S   | G_ARG_96  | NH2    | H_GLU_50  | OE1    | 3.733        |
| 3C6S   | G_ARG_96  | NH2    | H_GLU_50  | OE2    | 2.958        |
| 3C6S   | H_LYS_210 | NZ     | G_GLU_123 | OE2    | 2.402        |

Table 1198: Interfacial 3C6S-specific salt bridging networks analysis. In this table, a PDB file is specified with a four-letter PDB ID, except that the names of the PDB files corresponding to the single NMR structural model split from the NMR ensemble is specified with a four-letter PDB ID in addition to a hyphen followed by the single NMR structural model numeric ID, the residue naming scheme is **Chain ID\_residue name\_residue number**,  $\angle ADH$  represents the angle formed by acceptor (A), donor (D) and hydrogen (H) ( $\angle ADH$ ).

| PDB ID | Residue A | Atom A | Residue B | Atom B | Distance (Å) |
|--------|-----------|--------|-----------|--------|--------------|
| 3CVH   | A_ARG_48  | NH1    | B_ASP_53  | OD2    | 3.820        |
| 3CVH   | A_ARG_48  | NH2    | B_ASP_53  | OD2    | 2.637        |
| 3CVH   | A_ARG_62  | NH1    | L_GLU_26  | OE1    | 3.514        |
| 3CVH   | A_ARG_62  | NH1    | L_GLU_26  | OE2    | 3.458        |
| 3CVH   | A_ARG_62  | NH2    | L_GLU_26  | OE1    | 3.664        |
| 3CVH   | A_ARG_108 | NH2    | M_GLU_223 | OE2    | 3.938        |
| 3CVH   | A_HIS_192 | ND1    | B_ASP_98  | OD2    | 3.410        |
| 3CVH   | C_LYS_7   | NZ     | H_ASP_49  | OD1    | 3.577        |
| 3CVH   | C_LYS_7   | NZ     | H_ASP_49  | OD2    | 3.552        |
| 3CVH   | H_LYS_215 | NZ     | L_GLU_122 | OE2    | 2.643        |
| 3CVH   | M_ARG_48  | NH1    | N_ASP_53  | OD2    | 3.601        |
| 3CVH   | M_ARG_48  | NH2    | N_ASP_53  | OD2    | 2.621        |
| 3CVH   | M_ARG_62  | NH1    | R_GLU_26  | OE1    | 3.418        |
| 3CVH   | M_ARG_62  | NH2    | R_GLU_26  | OE1    | 3.162        |
| 3CVH   | M_ARG_62  | NH2    | R_GLU_26  | OE2    | 2.706        |
| 3CVH   | M_ARG_108 | NH2    | A_GLU_223 | OE1    | 3.207        |
| 3CVH   | M_ARG_108 | NH2    | A_GLU_223 | OE2    | 3.250        |
| 3CVH   | M_ARG_169 | NH1    | A_GLU_268 | OE2    | 3.364        |
| 3CVH   | O_LYS_7   | NZ     | Q_ASP_49  | OD1    | 3.648        |
| 3CVH   | O_LYS_7   | NZ     | Q_ASP_49  | OD2    | 3.052        |
| 3CVH   | Q_LYS_215 | NZ     | R_GLU_122 | OE1    | 3.557        |

Table 1199: Interfacial 3CVH-specific salt bridging networks analysis. In this table, a PDB file is specified with a four-letter PDB ID, except that the names of the PDB files corresponding to the single NMR structural model split from the NMR ensemble is specified with a four-letter PDB ID in addition to a hyphen followed by the single NMR structural model numeric ID, the residue naming scheme is **Chain ID\_residue name\_residue number**,  $\angle ADH$  represents the angle formed by acceptor (A), donor (D) and hydrogen (H) ( $\angle ADH$ ).

| PDB ID | Residue A | Atom A | Residue B | Atom B | Distance (Å) |
|--------|-----------|--------|-----------|--------|--------------|
| 3CXD   | H_ARG_52  | NH1    | P_ASP_47  | OD1    | 3.830        |
| 3CXD   | H_ARG_52  | NH1    | P_ASP_47  | OD2    | 3.528        |

Table 1200: Interfacial 3CXD-specific salt bridging networks analysis. In this table, a PDB file is specified with a four-letter PDB ID, except that the names of the PDB files corresponding to the single NMR structural model split from the NMR ensemble is specified with a four-letter PDB ID in addition to a hyphen followed by the single NMR structural model numeric ID, the residue naming scheme is **Chain ID\_residue name\_residue number**,  $\angle ADH$  represents the angle formed by acceptor (A), donor (D) and hydrogen (H) ( $\angle ADH$ ).

| PDB ID | Residue A | Atom A | Residue B | Atom B | Distance (Å) |
|--------|-----------|--------|-----------|--------|--------------|
| 3D0L   | A_HIS_96  | NE2    | C_ASP_5   | OD1    | 3.014        |
| 3D0L   | B_ARG_58  | NH2    | C_GLU_3   | OE1    | 3.473        |
| 3D0L   | B_ARG_58  | NH2    | C_GLU_3   | OE2    | 3.109        |
| 3D0L   | B_ARG_95  | NH1    | C_ASP_5   | OD1    | 2.695        |
| 3D0L   | B_ARG_95  | NH1    | C_ASP_5   | OD2    | 3.449        |
| 3D0L   | B_ARG_95  | NH2    | C_ASP_5   | OD1    | 3.596        |
| 3D0L   | B_ARG_95  | NH2    | C_ASP_5   | OD2    | 3.078        |
| 3D0L   | B_ARG_96  | NH1    | A_GLU_55  | OE1    | 3.284        |
| 3D0L   | B_ARG_96  | NH1    | A_GLU_55  | OE2    | 3.522        |
| 3D0L   | B_ARG_96  | NH2    | A_GLU_55  | OE1    | 3.455        |
| 3D0L   | C_LYS_6   | NZ     | B_ASP_54  | OD1    | 2.251        |
| 3D0L   | C_LYS_6   | NZ     | B_ASP_54  | OD2    | 2.930        |
| 3D0L   | C_LYS_6   | NZ     | B_ASP_56  | OD2    | 3.751        |

Table 1201: Interfacial 3D0L-specific salt bridging networks analysis. In this table, a PDB file is specified with a four-letter PDB ID, except that the names of the PDB files corresponding to the single NMR structural model split from the NMR ensemble is specified with a four-letter PDB ID in addition to a hyphen followed by the single NMR structural model numeric ID, the residue naming scheme is **Chain ID\_residue name\_residue number**,  $\angle ADH$  represents the angle formed by acceptor (A), donor (D) and hydrogen (H) ( $\angle ADH$ ).

| PDB ID | Residue A | Atom A | Residue B | Atom B | Distance (Å) |
|--------|-----------|--------|-----------|--------|--------------|
| 3D0V   | A_HIS_96  | NE2    | C_ASP_5   | OD1    | 2.775        |
| 3D0V   | B_ARG_58  | NH2    | C_GLU_3   | OE1    | 2.733        |
| 3D0V   | B_ARG_95  | NH1    | C_ASP_5   | OD1    | 2.808        |
| 3D0V   | B_ARG_95  | NH1    | C_ASP_5   | OD2    | 3.484        |
| 3D0V   | B_ARG_95  | NH2    | C_ASP_5   | OD1    | 3.359        |
| 3D0V   | B_ARG_95  | NH2    | C_ASP_5   | OD2    | 2.831        |
| 3D0V   | B_ARG_96  | NH1    | A_GLU_55  | OE1    | 3.250        |
| 3D0V   | B_ARG_96  | NH1    | A_GLU_55  | OE2    | 3.216        |
| 3D0V   | B_ARG_96  | NH2    | A_GLU_55  | OE1    | 3.184        |
| 3D0V   | B_LYS_209 | NZ     | A_GLU_123 | OE1    | 3.487        |
| 3D0V   | C_LYS_6   | NZ     | B_ASP_54  | OD1    | 3.609        |
| 3D0V   | C_LYS_6   | NZ     | B_ASP_54  | OD2    | 2.826        |
| 3D0V   | C_LYS_6   | NZ     | B_ASP_56  | OD1    | 3.006        |

Table 1202: Interfacial 3D0V-specific salt bridging networks analysis. In this table, a PDB file is specified with a four-letter PDB ID, except that the names of the PDB files corresponding to the single NMR structural model split from the NMR ensemble is specified with a four-letter PDB ID in addition to a hyphen followed by the single NMR structural model numeric ID, the residue naming scheme is **Chain ID\_residue name\_residue number**,  $\angle ADH$  represents the angle formed by acceptor (A), donor (D) and hydrogen (H) ( $\angle ADH$ ).

| PDB ID | Residue A | Atom A | Residue B | Atom B | Distance (Å) |
|--------|-----------|--------|-----------|--------|--------------|
| 3D9A   | C_LYS_697 | NZ     | H_ASP_332 | OD2    | 2.741        |
| 3D9A   | C_LYS_697 | NZ     | H_ASP_399 | OD1    | 2.864        |
| 3D9A   | C_LYS_697 | NZ     | H_ASP_399 | OD2    | 3.300        |
| 3D9A   | H_LYS_508 | NZ     | L_GLU_123 | OE1    | 3.029        |
| 3D9A   | H_LYS_508 | NZ     | L_GLU_123 | OE2    | 3.809        |

Table 1203: Interfacial 3D9A-specific salt bridging networks analysis. In this table, a PDB file is specified with a four-letter PDB ID, except that the names of the PDB files corresponding to the single NMR structural model split from the NMR ensemble is specified with a four-letter PDB ID in addition to a hyphen followed by the single NMR structural model numeric ID, the residue naming scheme is **Chain ID\_residue name\_residue number**,  $\angle ADH$  represents the angle formed by acceptor (A), donor (D) and hydrogen (H) ( $\angle ADH$ ).

| PDB ID | Residue A | Atom A | Residue B | Atom B | Distance (Å) |
|--------|-----------|--------|-----------|--------|--------------|
| 3DRO   | B_ARG_95  | NH1    | P_ASP_5   | OD1    | 3.590        |
| 3DRO   | B_ARG_95  | NH1    | P_ASP_5   | OD2    | 3.370        |
| 3DRO   | B_ARG_95  | NH2    | P_ASP_5   | OD2    | 3.007        |
| 3DRO   | B_ARG_96  | NH2    | A_GLU_55  | OE1    | 2.727        |
| 3DRO   | B_ARG_96  | NH2    | A_GLU_55  | OE2    | 3.426        |
| 3DRO   | B_LYS_209 | NZ     | A_GLU_123 | OE1    | 3.782        |
| 3DRO   | P_LYS_6   | NZ     | B_ASP_54  | OD1    | 2.913        |
| 3DRO   | P_LYS_6   | NZ     | B_ASP_54  | OD2    | 3.775        |
| 3DRO   | P_LYS_6   | NZ     | B_ASP_56  | OD1    | 3.330        |
| 3DRO   | P_LYS_6   | NZ     | B_ASP_56  | OD2    | 3.868        |

Table 1204: Interfacial 3DRO-specific salt bridging networks analysis. In this table, a PDB file is specified with a four-letter PDB ID, except that the names of the PDB files corresponding to the single NMR structural model split from the NMR ensemble is specified with a four-letter PDB ID in addition to a hyphen followed by the single NMR structural model numeric ID, the residue naming scheme is **Chain ID\_residue name\_residue number**,  $\angle ADH$  represents the angle formed by acceptor (A), donor (D) and hydrogen (H) ( $\angle ADH$ ).

| PDB ID | Residue A | Atom A | Residue B | Atom B | Distance (Å) |
|--------|-----------|--------|-----------|--------|--------------|
| 3DRQ   | A_HIS_96  | NE2    | C_ASP_5   | OD1    | 2.866        |
| 3DRQ   | B_ARG_58  | NH2    | C_GLU_3   | OE1    | 3.516        |
| 3DRQ   | B_ARG_95  | NH1    | C_ASP_5   | OD1    | 2.806        |
| 3DRQ   | B_ARG_95  | NH1    | C_ASP_5   | OD2    | 3.209        |
| 3DRQ   | B_ARG_95  | NH2    | C_ASP_5   | OD1    | 3.572        |
| 3DRQ   | B_ARG_95  | NH2    | C_ASP_5   | OD2    | 2.688        |
| 3DRQ   | B_ARG_96  | NH1    | A_GLU_55  | OE1    | 2.721        |
| 3DRQ   | B_ARG_96  | NH1    | A_GLU_55  | OE2    | 2.397        |
| 3DRQ   | B_ARG_96  | NH2    | A_GLU_55  | OE1    | 3.293        |
| 3DRQ   | B_LYS_209 | NZ     | A_GLU_123 | OE1    | 3.837        |
| 3DRQ   | C_LYS_6   | NZ     | B_ASP_54  | OD1    | 2.921        |
| 3DRQ   | C_LYS_6   | NZ     | B_ASP_54  | OD2    | 2.342        |
| 3DRQ   | C_LYS_6   | NZ     | B_ASP_56  | OD1    | 3.006        |

Table 1205: Interfacial 3DRQ-specific salt bridging networks analysis. In this table, a PDB file is specified with a four-letter PDB ID, except that the names of the PDB files corresponding to the single NMR structural model split from the NMR ensemble is specified with a four-letter PDB ID in addition to a hyphen followed by the single NMR structural model numeric ID, the residue naming scheme is **Chain ID\_residue name\_residue number**,  $\angle ADH$  represents the angle formed by acceptor (A), donor (D) and hydrogen (H) ( $\angle ADH$ ).



| PDB ID | Residue A | Atom A | Residue B | Atom B | Distance (Å) |
|--------|-----------|--------|-----------|--------|--------------|
| 3DSF   | H_ARG_52  | NH1    | P_ASP_47  | OD2    | 3.172        |

Table 1206: Interfacial 3DSF-specific salt bridging networks analysis. In this table, a PDB file is specified with a four-letter PDB ID, except that the names of the PDB files corresponding to the single NMR structural model split from the NMR ensemble is specified with a four-letter PDB ID in addition to a hyphen followed by the single NMR structural model numeric ID, the residue naming scheme is **Chain ID\_residue name\_residue number**,  $\angle ADH$  represents the angle formed by acceptor (A), donor (D) and hydrogen (H) ( $\angle ADH$ ).

| PDB ID | Residue A | Atom A | Residue B | Atom B | Distance (Å) |
|--------|-----------|--------|-----------|--------|--------------|
| 3EBA   | B_LYS_97  | NZ     | A_GLU_97  | OE2    | 3.240        |
| 3EBA   | B_ARG_101 | NH1    | A_ASP_109 | OD1    | 3.083        |
| 3EBA   | B_ARG_101 | NH1    | A_ASP_109 | OD2    | 2.691        |
| 3EBA   | B_ARG_101 | NH2    | A_ASP_109 | OD1    | 3.308        |
| 3EBA   | B_ARG_101 | NH2    | A_ASP_109 | OD2    | 3.134        |

Table 1207: Interfacial 3EBA-specific salt bridging networks analysis. In this table, a PDB file is specified with a four-letter PDB ID, except that the names of the PDB files corresponding to the single NMR structural model split from the NMR ensemble is specified with a four-letter PDB ID in addition to a hyphen followed by the single NMR structural model numeric ID, the residue naming scheme is **Chain ID\_residue name\_residue number**,  $\angle ADH$  represents the angle formed by acceptor (A), donor (D) and hydrogen (H) ( $\angle ADH$ ).

| PDB ID | Residue A | Atom A | Residue B | Atom B | Distance (Å) |
|--------|-----------|--------|-----------|--------|--------------|
| 3EOA   | H_LYS_217 | NZ     | L_GLU_123 | OE2    | 3.037        |
| 3EOA   | I_LYS_197 | NZ     | H_ASP_55  | OD1    | 3.170        |
| 3EOA   | I_LYS_197 | NZ     | H_GLU_57  | OE1    | 2.719        |
| 3EOA   | I_HIS_198 | NE2    | H_GLU_57  | OE1    | 3.638        |
| 3EOA   | I_HIS_198 | NE2    | H_GLU_57  | OE2    | 3.098        |
| 3EOA   | B_LYS_    | NZ     | A_GLU_    | OE2    | 3.673        |
| 3EOA   | J_LYS_197 | NZ     | B_ASP_55  | OD1    | 2.626        |
| 3EOA   | J_LYS_197 | NZ     | B_ASP_55  | OD2    | 2.997        |
| 3EOA   | J_LYS_197 | NZ     | B_GLU_57  | OE1    | 2.784        |
| 3EOA   | J_HIS_198 | NE2    | B_GLU_57  | OE1    | 3.322        |
| 3EOA   | J_HIS_198 | NE2    | B_GLU_57  | OE2    | 2.793        |

Table 1208: Interfacial 3EOA-specific salt bridging networks analysis. In this table, a PDB file is specified with a four-letter PDB ID, except that the names of the PDB files corresponding to the single NMR structural model split from the NMR ensemble is specified with a four-letter PDB ID in addition to a hyphen followed by the single NMR structural model numeric ID, the residue naming scheme is **Chain ID\_residue name\_residue number**,  $\angle ADH$  represents the angle formed by acceptor (A), donor (D) and hydrogen (H) ( $\angle ADH$ ).

| PDB ID | Residue A | Atom A | Residue B | Atom B | Distance (Å) |
|--------|-----------|--------|-----------|--------|--------------|
| 3EOB   | H_LYS_217 | NZ     | L_GLU_123 | OE2    | 3.176        |
| 3EOB   | I_LYS_197 | NZ     | H_GLU_57  | OE1    | 2.792        |
| 3EOB   | I_LYS_197 | NZ     | H_GLU_57  | OE2    | 3.051        |
| 3EOB   | I_HIS_198 | ND1    | H_GLU_57  | OE2    | 3.691        |
| 3EOB   | I_HIS_198 | NE2    | H_GLU_57  | OE1    | 2.182        |
| 3EOB   | I_HIS_198 | NE2    | H_GLU_57  | OE2    | 2.522        |
| 3EOB   | I_HIS_264 | NE2    | J_GLU_241 | OE1    | 2.369        |
| 3EOB   | I_HIS_264 | NE2    | J_GLU_241 | OE2    | 2.595        |
| 3EOB   | B_LYS_    | NZ     | A_GLU_    | OE1    | 3.788        |
| 3EOB   | B_LYS_    | NZ     | A_GLU_    | OE2    | 3.219        |
| 3EOB   | J_LYS_197 | NZ     | B_ASP_55  | OD1    | 3.833        |
| 3EOB   | J_LYS_197 | NZ     | B_GLU_57  | OE1    | 2.107        |
| 3EOB   | J_LYS_197 | NZ     | B_GLU_57  | OE2    | 3.802        |
| 3EOB   | J_HIS_198 | ND1    | B_GLU_57  | OE2    | 3.839        |
| 3EOB   | J_HIS_198 | NE2    | B_GLU_57  | OE1    | 2.356        |
| 3EOB   | J_HIS_198 | NE2    | B_GLU_57  | OE2    | 2.609        |
| 3EOB   | J_HIS_264 | NE2    | I_GLU_241 | OE1    | 2.434        |
| 3EOB   | J_HIS_264 | NE2    | I_GLU_241 | OE2    | 2.722        |

Table 1209: Interfacial 3EOB-specific salt bridging networks analysis. In this table, a PDB file is specified with a four-letter PDB ID, except that the names of the PDB files corresponding to the single NMR structural model split from the NMR ensemble is specified with a four-letter PDB ID in addition to a hyphen followed by the single NMR structural model numeric ID, the residue naming scheme is **Chain ID\_residue name\_residue number**,  $\angle ADH$  represents the angle formed by acceptor (A), donor (D) and hydrogen (H) ( $\angle ADH$ ).

| PDB ID | Residue A | Atom A | Residue B  | Atom B | Distance (Å) |
|--------|-----------|--------|------------|--------|--------------|
| 3ESV   | F_LYS_0   | NZ     | G_ASP_1054 | OD1    | 3.499        |
| 3ESV   | F_LYS_0   | NZ     | G_ASP_1054 | OD2    | 2.774        |
| 3ESV   | F_LYS_0   | NZ     | G_ASP_1056 | OD2    | 3.090        |
| 3ESV   | G_ARG_53  | NH1    | F_ASP_1056 | OD1    | 2.802        |
| 3ESV   | G_ARG_53  | NH2    | F_ASP_1056 | OD1    | 3.489        |

Table 1210: Interfacial 3ESV-specific salt bridging networks analysis. In this table, a PDB file is specified with a four-letter PDB ID, except that the names of the PDB files corresponding to the single NMR structural model split from the NMR ensemble is specified with a four-letter PDB ID in addition to a hyphen followed by the single NMR structural model numeric ID, the residue naming scheme is **Chain ID\_residue name\_residue number**,  $\angle ADH$  represents the angle formed by acceptor (A), donor (D) and hydrogen (H) ( $\angle ADH$ ).

| PDB ID | Residue A  | Atom A | Residue B  | Atom B | Distance (Å) |
|--------|------------|--------|------------|--------|--------------|
| 3ETB   | F_ARG_24   | NH1    | G_ASP_70   | OD1    | 3.579        |
| 3ETB   | F_ARG_24   | NH1    | G_ASP_70   | OD2    | 3.034        |
| 3ETB   | F_ARG_24   | NH2    | G_ASP_70   | OD1    | 3.608        |
| 3ETB   | F_ARG_24   | NH2    | G_ASP_70   | OD2    | 3.774        |
| 3ETB   | F_ARG_30   | NH1    | J_ASP_658  | OD2    | 3.129        |
| 3ETB   | F_ARG_53   | NH1    | J_GLU_654  | OE1    | 3.838        |
| 3ETB   | F_ARG_53   | NH2    | J_GLU_654  | OE1    | 3.771        |
| 3ETB   | F_ARG_1050 | NH2    | J_ASP_683  | OD2    | 3.114        |
| 3ETB   | G_ARG_24   | NH1    | F_ASP_70   | OD1    | 3.633        |
| 3ETB   | G_ARG_24   | NH1    | F_ASP_70   | OD2    | 3.127        |
| 3ETB   | G_ARG_24   | NH2    | F_ASP_70   | OD1    | 3.702        |
| 3ETB   | G_ARG_24   | NH2    | F_ASP_70   | OD2    | 3.878        |
| 3ETB   | G_ARG_30   | NH1    | K_ASP_658  | OD2    | 3.266        |
| 3ETB   | G_ARG_53   | NH2    | K_ASP_648  | OD2    | 3.972        |
| 3ETB   | G_ARG_53   | NH2    | K_GLU_654  | OE1    | 3.990        |
| 3ETB   | G_ARG_1050 | NH2    | K_ASP_683  | OD1    | 3.853        |
| 3ETB   | G_ARG_1050 | NH2    | K_ASP_683  | OD2    | 2.796        |
| 3ETB   | H_ARG_24   | NH1    | I_ASP_70   | OD1    | 3.544        |
| 3ETB   | H_ARG_24   | NH1    | I_ASP_70   | OD2    | 3.118        |
| 3ETB   | H_ARG_24   | NH2    | I_ASP_70   | OD1    | 3.662        |
| 3ETB   | H_ARG_24   | NH2    | I_ASP_70   | OD2    | 3.905        |
| 3ETB   | H_ARG_30   | NH1    | L_ASP_658  | OD1    | 3.824        |
| 3ETB   | H_ARG_30   | NH1    | L_ASP_658  | OD2    | 2.913        |
| 3ETB   | H_ARG_53   | NH1    | L_GLU_654  | OE1    | 3.771        |
| 3ETB   | H_ARG_53   | NH2    | L_GLU_654  | OE1    | 3.669        |
| 3ETB   | H_ARG_1050 | NH2    | L_ASP_683  | OD2    | 3.159        |
| 3ETB   | I_ARG_24   | NH1    | H_ASP_70   | OD1    | 3.448        |
| 3ETB   | I_ARG_24   | NH1    | H_ASP_70   | OD2    | 2.998        |
| 3ETB   | I_ARG_24   | NH2    | H_ASP_70   | OD1    | 3.537        |
| 3ETB   | I_ARG_24   | NH2    | H_ASP_70   | OD2    | 3.789        |
| 3ETB   | I_ARG_30   | NH1    | M_ASP_658  | OD2    | 3.315        |
| 3ETB   | I_ARG_53   | NH1    | M_GLU_654  | OE1    | 3.885        |
| 3ETB   | I_ARG_53   | NH2    | M_GLU_654  | OE1    | 3.890        |
| 3ETB   | I_ARG_1050 | NH2    | M_ASP_683  | OD2    | 3.093        |
| 3ETB   | J_LYS_653  | NZ     | G_ASP_17   | OD1    | 2.972        |
| 3ETB   | J_LYS_684  | NZ     | F_ASP_1054 | OD1    | 3.728        |
| 3ETB   | J_LYS_684  | NZ     | F_ASP_1054 | OD2    | 3.401        |
| 3ETB   | J_LYS_684  | NZ     | F_ASP_1056 | OD1    | 3.220        |
| 3ETB   | J_LYS_684  | NZ     | F_ASP_1056 | OD2    | 3.481        |
| 3ETB   | K_LYS_653  | NZ     | F_ASP_17   | OD1    | 3.083        |
| 3ETB   | K_LYS_684  | NZ     | G_ASP_1054 | OD1    | 3.379        |
| 3ETB   | K_LYS_684  | NZ     | G_ASP_1054 | OD2    | 3.075        |
| 3ETB   | K_LYS_684  | NZ     | G_ASP_1056 | OD1    | 3.162        |
| 3ETB   | K_LYS_684  | NZ     | G_ASP_1056 | OD2    | 3.578        |
| 3ETB   | L_LYS_653  | NZ     | I_ASP_17   | OD1    | 2.978        |
| 3ETB   | L_LYS_684  | NZ     | H_ASP_1056 | OD1    | 3.616        |
| 3ETB   | L_LYS_684  | NZ     | H_ASP_1056 | OD2    | 3.187        |
| 3ETB   | M_LYS_653  | NZ     | H_ASP_17   | OD1    | 3.060        |
| 3ETB   | M_LYS_684  | NZ     | I_ASP_1054 | OD1    | 3.625        |
| 3ETB   | M_LYS_684  | NZ     | I_ASP_1054 | OD2    | 3.167        |
| 3ETB   | M_LYS_684  | NZ     | I_ASP_1056 | OD1    | 3.241        |
| 3ETB   | M_LYS_684  | NZ     | I_ASP_1056 | OD2    | 3.478        |

---

Table 1211: Interfacial 3ETB-specific salt bridging networks analysis. In this table, a PDB file is specified with a four-letter PDB ID, except that the names of the PDB files corresponding to the single NMR structural model split from the NMR ensemble is specified with a four-letter PDB ID in addition to a hyphen followed by the single NMR structural model numeric ID, the residue naming scheme is **Chain ID\_residue name\_residue number**,  $\angle ADH$  represents the angle formed by acceptor (A), donor (D) and hydrogen (H) ( $\angle ADH$ ).

| PDB ID | Residue A | Atom A | Residue B | Atom B | Distance (Å) |
|--------|-----------|--------|-----------|--------|--------------|
| 3EYV   | L_LYS_55  | NZ     | H_ASP_102 | OD2    | 3.565        |
| 3EYV   | H_LYS_215 | NZ     | L_GLU_128 | OE2    | 3.627        |
| 3EYV   | A_LYS_55  | NZ     | B_ASP_102 | OD2    | 3.151        |
| 3EYV   | B_LYS_220 | NZ     | A_ASP_127 | OD2    | 3.402        |

Table 1212: Interfacial 3EYV-specific salt bridging networks analysis. In this table, a PDB file is specified with a four-letter PDB ID, except that the names of the PDB files corresponding to the single NMR structural model split from the NMR ensemble is specified with a four-letter PDB ID in addition to a hyphen followed by the single NMR structural model numeric ID, the residue naming scheme is **Chain ID\_residue name\_residue number**,  $\angle ADH$  represents the angle formed by acceptor (A), donor (D) and hydrogen (H) ( $\angle ADH$ ).



| PDB ID | Residue A | Atom A | Residue B | Atom B | Distance (Å) |
|--------|-----------|--------|-----------|--------|--------------|
| 3FMG   | L_LYS_50  | NZ     | H_ASP_106 | OD1    | 3.132        |
| 3FMG   | H_LYS_64  | NZ     | L_ASP_1   | OD2    | 3.241        |

Table 1213: Interfacial 3FMG-specific salt bridging networks analysis. In this table, a PDB file is specified with a four-letter PDB ID, except that the names of the PDB files corresponding to the single NMR structural model split from the NMR ensemble is specified with a four-letter PDB ID in addition to a hyphen followed by the single NMR structural model numeric ID, the residue naming scheme is **Chain ID\_residue name\_residue number**,  $\angle ADH$  represents the angle formed by acceptor (A), donor (D) and hydrogen (H) ( $\angle ADH$ ).

| PDB ID | Residue A | Atom A | Residue B | Atom B | Distance (Å) |
|--------|-----------|--------|-----------|--------|--------------|
| 3G3A   | B_ARG_61  | NH2    | A_ASP_59  | OD2    | 3.447        |
| 3G3A   | B_ARG_73  | NH1    | A_ASP_61  | OD1    | 2.630        |
| 3G3A   | B_ARG_73  | NH1    | A_ASP_61  | OD2    | 3.494        |
| 3G3A   | B_ARG_73  | NH2    | A_ASP_59  | OD2    | 3.260        |
| 3G3A   | B_ARG_73  | NH2    | A_ASP_61  | OD1    | 3.287        |
| 3G3A   | B_ARG_73  | NH2    | A_ASP_61  | OD2    | 2.479        |
| 3G3A   | B_ARG_112 | NH1    | A_ASP_141 | OD1    | 3.611        |
| 3G3A   | B_ARG_112 | NH1    | A_ASP_141 | OD2    | 2.906        |
| 3G3A   | B_ARG_112 | NH2    | A_ASP_141 | OD1    | 2.901        |
| 3G3A   | B_ARG_112 | NH2    | A_ASP_141 | OD2    | 3.689        |
| 3G3A   | B_ARG_112 | NH2    | A_ASP_143 | OD2    | 3.389        |
| 3G3A   | D_ARG_61  | NH1    | C_ASP_59  | OD2    | 3.676        |
| 3G3A   | D_ARG_61  | NH2    | C_ASP_59  | OD1    | 3.900        |
| 3G3A   | D_ARG_61  | NH2    | C_ASP_59  | OD2    | 3.137        |
| 3G3A   | D_ARG_73  | NH1    | C_ASP_61  | OD1    | 3.720        |
| 3G3A   | D_ARG_73  | NH1    | C_ASP_61  | OD2    | 2.705        |
| 3G3A   | D_ARG_73  | NH2    | C_ASP_59  | OD2    | 2.913        |
| 3G3A   | D_ARG_73  | NH2    | C_ASP_61  | OD1    | 2.638        |
| 3G3A   | D_ARG_73  | NH2    | C_ASP_61  | OD2    | 3.209        |
| 3G3A   | D_ARG_112 | NH1    | C_ASP_141 | OD1    | 3.483        |
| 3G3A   | D_ARG_112 | NH1    | C_ASP_141 | OD2    | 2.837        |
| 3G3A   | D_ARG_112 | NH2    | C_ASP_141 | OD1    | 2.752        |
| 3G3A   | D_ARG_112 | NH2    | C_ASP_141 | OD2    | 3.622        |
| 3G3A   | D_ARG_112 | NH2    | C_ASP_143 | OD2    | 3.602        |
| 3G3A   | F_ARG_61  | NH1    | E_ASP_59  | OD2    | 3.922        |
| 3G3A   | F_ARG_61  | NH2    | E_ASP_59  | OD1    | 3.681        |
| 3G3A   | F_ARG_61  | NH2    | E_ASP_59  | OD2    | 2.804        |
| 3G3A   | F_ARG_73  | NH1    | E_ASP_61  | OD1    | 3.367        |
| 3G3A   | F_ARG_73  | NH1    | E_ASP_61  | OD2    | 2.915        |
| 3G3A   | F_ARG_73  | NH2    | E_ASP_59  | OD2    | 2.686        |
| 3G3A   | F_ARG_73  | NH2    | E_ASP_61  | OD1    | 2.874        |
| 3G3A   | F_ARG_73  | NH2    | E_ASP_61  | OD2    | 3.960        |
| 3G3A   | F_ARG_112 | NH1    | E_ASP_141 | OD1    | 3.733        |
| 3G3A   | F_ARG_112 | NH1    | E_ASP_141 | OD2    | 3.195        |
| 3G3A   | F_ARG_112 | NH2    | E_ASP_141 | OD1    | 3.001        |
| 3G3A   | F_ARG_112 | NH2    | E_ASP_141 | OD2    | 3.839        |
| 3G3A   | F_ARG_112 | NH2    | E_ASP_143 | OD2    | 3.491        |
| 3G3A   | H_ARG_61  | NH2    | G_ASP_59  | OD2    | 3.367        |
| 3G3A   | H_ARG_73  | NH1    | G_ASP_59  | OD2    | 3.259        |
| 3G3A   | H_ARG_73  | NH2    | G_ASP_59  | OD2    | 3.473        |
| 3G3A   | H_ARG_73  | NH2    | G_ASP_61  | OD1    | 2.486        |
| 3G3A   | H_ARG_73  | NH2    | G_ASP_61  | OD2    | 2.698        |
| 3G3A   | H_ARG_112 | NH1    | G_ASP_141 | OD1    | 3.280        |
| 3G3A   | H_ARG_112 | NH1    | G_ASP_143 | OD2    | 3.578        |
| 3G3A   | H_ARG_112 | NH2    | G_ASP_141 | OD1    | 3.102        |
| 3G3A   | H_ARG_112 | NH2    | G_ASP_141 | OD2    | 2.609        |

---

Table 1214: Interfacial 3G3A-specific salt bridging networks analysis. In this table, a PDB file is specified with a four-letter PDB ID, except that the names of the PDB files corresponding to the single NMR structural model split from the NMR ensemble is specified with a four-letter PDB ID in addition to a hyphen followed by the single NMR structural model numeric ID, the residue naming scheme is **Chain ID\_residue name\_residue number**,  $\angle ADH$  represents the angle formed by acceptor (A), donor (D) and hydrogen (H) ( $\angle ADH$ ).

| PDB ID | Residue A | Atom A | Residue B | Atom B | Distance (Å) |
|--------|-----------|--------|-----------|--------|--------------|
| 3G3B   | B_ARG_61  | NH2    | A_ASP_59  | OD1    | 3.551        |
| 3G3B   | B_ARG_61  | NH2    | A_ASP_59  | OD2    | 3.590        |
| 3G3B   | B_ARG_73  | NH1    | A_ASP_61  | OD1    | 2.527        |
| 3G3B   | B_ARG_73  | NH1    | A_ASP_61  | OD2    | 3.439        |
| 3G3B   | B_ARG_73  | NH2    | A_ASP_59  | OD2    | 2.967        |
| 3G3B   | B_ARG_73  | NH2    | A_ASP_61  | OD1    | 3.469        |
| 3G3B   | B_ARG_73  | NH2    | A_ASP_61  | OD2    | 2.765        |
| 3G3B   | B_ARG_112 | NH1    | A_ASP_141 | OD1    | 3.569        |
| 3G3B   | B_ARG_112 | NH1    | A_ASP_141 | OD2    | 2.625        |
| 3G3B   | B_ARG_112 | NH2    | A_ASP_141 | OD1    | 2.926        |
| 3G3B   | B_ARG_112 | NH2    | A_ASP_141 | OD2    | 3.538        |
| 3G3B   | B_ARG_112 | NH2    | A_ASP_143 | OD2    | 3.804        |
| 3G3B   | D_ARG_61  | NH2    | C_ASP_59  | OD1    | 3.954        |
| 3G3B   | D_ARG_73  | NH1    | C_ASP_61  | OD1    | 2.753        |
| 3G3B   | D_ARG_73  | NH1    | C_ASP_61  | OD2    | 3.824        |
| 3G3B   | D_ARG_73  | NH2    | C_ASP_59  | OD2    | 3.136        |
| 3G3B   | D_ARG_73  | NH2    | C_ASP_61  | OD1    | 3.224        |
| 3G3B   | D_ARG_73  | NH2    | C_ASP_61  | OD2    | 2.702        |
| 3G3B   | D_ARG_112 | NH1    | C_ASP_141 | OD1    | 3.812        |
| 3G3B   | D_ARG_112 | NH1    | C_ASP_141 | OD2    | 2.690        |
| 3G3B   | D_ARG_112 | NH2    | C_ASP_141 | OD1    | 2.826        |
| 3G3B   | D_ARG_112 | NH2    | C_ASP_141 | OD2    | 3.301        |
| 3G3B   | D_ARG_112 | NH2    | C_ASP_143 | OD2    | 3.656        |
| 3G3B   | F_ARG_61  | NH2    | E_ASP_59  | OD2    | 3.820        |
| 3G3B   | F_ARG_73  | NH1    | E_ASP_61  | OD1    | 2.535        |
| 3G3B   | F_ARG_73  | NH1    | E_ASP_61  | OD2    | 3.949        |
| 3G3B   | F_ARG_73  | NH2    | E_ASP_59  | OD2    | 2.812        |
| 3G3B   | F_ARG_73  | NH2    | E_ASP_61  | OD1    | 3.056        |
| 3G3B   | F_ARG_73  | NH2    | E_ASP_61  | OD2    | 2.934        |
| 3G3B   | F_ARG_112 | NH1    | E_ASP_141 | OD2    | 2.714        |
| 3G3B   | F_ARG_112 | NH2    | E_ASP_141 | OD1    | 3.020        |
| 3G3B   | F_ARG_112 | NH2    | E_ASP_141 | OD2    | 3.176        |
| 3G3B   | F_ARG_112 | NH2    | E_ASP_143 | OD2    | 3.737        |
| 3G3B   | H_ARG_73  | NH1    | G_ASP_61  | OD1    | 2.839        |
| 3G3B   | H_ARG_73  | NH1    | G_ASP_61  | OD2    | 3.791        |
| 3G3B   | H_ARG_73  | NH2    | G_ASP_59  | OD2    | 2.431        |
| 3G3B   | H_ARG_73  | NH2    | G_ASP_61  | OD1    | 3.464        |
| 3G3B   | H_ARG_73  | NH2    | G_ASP_61  | OD2    | 2.896        |
| 3G3B   | H_ARG_112 | NH1    | G_ASP_141 | OD1    | 3.676        |
| 3G3B   | H_ARG_112 | NH1    | G_ASP_141 | OD2    | 2.564        |
| 3G3B   | H_ARG_112 | NH2    | G_ASP_141 | OD1    | 2.813        |
| 3G3B   | H_ARG_112 | NH2    | G_ASP_141 | OD2    | 3.280        |
| 3G3B   | H_ARG_112 | NH2    | G_ASP_143 | OD2    | 3.506        |

Table 1215: Interfacial 3G3B-specific salt bridging networks analysis. In this table, a PDB file is specified with a four-letter PDB ID, except that the names of the PDB files corresponding to the single NMR structural model split from the NMR ensemble is specified with a four-letter PDB ID in addition to a hyphen followed by the single NMR structural model numeric ID, the residue naming scheme is **Chain ID\_residue name\_residue number**,  $\angle ADH$  represents the angle formed by acceptor (A), donor (D) and hydrogen (H) ( $\angle ADH$ ).

| PDB ID | Residue A | Atom A | Residue B | Atom B | Distance (Å) |
|--------|-----------|--------|-----------|--------|--------------|
| 3GGW   | A_ARG_96  | NH2    | B_GLU_50  | OE1    | 3.590        |
| 3GGW   | A_ARG_96  | NH2    | B_GLU_50  | OE2    | 2.762        |
| 3GGW   | B_ARG_52  | NH1    | E_ASP_4   | OD2    | 3.092        |
| 3GGW   | B_LYS_210 | NZ     | A_GLU_123 | OE2    | 3.208        |
| 3GGW   | C_ARG_96  | NH2    | D_GLU_50  | OE1    | 3.555        |
| 3GGW   | C_ARG_96  | NH2    | D_GLU_50  | OE2    | 2.962        |
| 3GGW   | D_ARG_52  | NH1    | F_ASP_4   | OD2    | 3.127        |
| 3GGW   | D_LYS_210 | NZ     | C_GLU_123 | OE2    | 2.871        |
| 3GGW   | D_ARG_215 | NH2    | C_GLU_213 | OE1    | 3.834        |
| 3GGW   | D_ARG_215 | NH2    | C_GLU_213 | OE2    | 2.618        |

Table 1216: Interfacial 3GGW-specific salt bridging networks analysis. In this table, a PDB file is specified with a four-letter PDB ID, except that the names of the PDB files corresponding to the single NMR structural model split from the NMR ensemble is specified with a four-letter PDB ID in addition to a hyphen followed by the single NMR structural model numeric ID, the residue naming scheme is **Chain ID\_residue name\_residue number**,  $\angle ADH$  represents the angle formed by acceptor (A), donor (D) and hydrogen (H) ( $\angle ADH$ ).

| PDB ID | Residue A | Atom A | Residue B  | Atom B | Distance (Å) |
|--------|-----------|--------|------------|--------|--------------|
| 3GHB   | H.LYS_143 | NZ     | L.GLU_124  | OE2    | 2.614        |
| 3GHB   | H.LYS_209 | NZ     | L.GLU_123  | OE1    | 2.751        |
| 3GHB   | H.LYS_209 | NZ     | L.GLU_123  | OE2    | 3.411        |
| 3GHB   | P.LYS_305 | NZ     | H.GLU_100E | OE1    | 3.508        |
| 3GHB   | P.LYS_305 | NZ     | H.ASP_100F | OD2    | 3.835        |
| 3GHB   | I.LYS_143 | NZ     | M.GLU_124  | OE2    | 2.607        |
| 3GHB   | I.LYS_209 | NZ     | M.GLU_123  | OE1    | 2.988        |
| 3GHB   | I.LYS_209 | NZ     | M.GLU_123  | OE2    | 3.773        |
| 3GHB   | Q.LYS_305 | NZ     | I.ASP_100F | OD1    | 3.174        |

Table 1217: Interfacial 3GHB-specific salt bridging networks analysis. In this table, a PDB file is specified with a four-letter PDB ID, except that the names of the PDB files corresponding to the single NMR structural model split from the NMR ensemble is specified with a four-letter PDB ID in addition to a hyphen followed by the single NMR structural model numeric ID, the residue naming scheme is **Chain ID\_residue name\_residue number**,  $\angle ADH$  represents the angle formed by acceptor (A), donor (D) and hydrogen (H) ( $\angle ADH$ ).

| PDB ID | Residue A | Atom A | Residue B  | Atom B | Distance (Å) |
|--------|-----------|--------|------------|--------|--------------|
| 3GHE   | H.LYS.143 | NZ     | L.GLU.124  | OE2    | 2.684        |
| 3GHE   | H.LYS.209 | NZ     | L.GLU.123  | OE1    | 2.541        |
| 3GHE   | H.LYS.209 | NZ     | L.GLU.123  | OE2    | 3.149        |
| 3GHE   | P.ARG.304 | NH1    | H.ASP.100A | OD1    | 3.397        |
| 3GHE   | P.ARG.304 | NH2    | H.ASP.100A | OD1    | 3.243        |
| 3GHE   | P.ARG.304 | NH2    | H.ASP.100A | OD2    | 3.833        |
| 3GHE   | P.HIS.308 | ND1    | H.ASP.100H | OD2    | 3.415        |
| 3GHE   | P.ARG.315 | NH1    | H.GLU.95   | OE1    | 3.518        |
| 3GHE   | P.ARG.315 | NH1    | H.GLU.95   | OE2    | 2.720        |
| 3GHE   | P.ARG.315 | NH2    | H.GLU.95   | OE2    | 3.104        |

Table 1218: Interfacial 3GHE-specific salt bridging networks analysis. In this table, a PDB file is specified with a four-letter PDB ID, except that the names of the PDB files corresponding to the single NMR structural model split from the NMR ensemble is specified with a four-letter PDB ID in addition to a hyphen followed by the single NMR structural model numeric ID, the residue naming scheme is **Chain ID\_residue name\_residue number**,  $\angle ADH$  represents the angle formed by acceptor (A), donor (D) and hydrogen (H) ( $\angle ADH$ ).

| PDB ID | Residue A | Atom A | Residue B | Atom B | Distance (Å) |
|--------|-----------|--------|-----------|--------|--------------|
| 3GJF   | A_ARG_48  | NH2    | B_ASP_53  | OD2    | 3.786        |
| 3GJF   | A_ARG_65  | NH1    | L_ASP_52  | OD1    | 3.134        |
| 3GJF   | A_ARG_65  | NH1    | L_ASP_52  | OD2    | 3.382        |
| 3GJF   | A_ARG_65  | NH2    | L_ASP_52  | OD1    | 2.989        |
| 3GJF   | A_ARG_65  | NH2    | L_ASP_52  | OD2    | 3.338        |
| 3GJF   | D_ARG_35  | NH2    | E_ASP_53  | OD1    | 3.050        |
| 3GJF   | D_ARG_35  | NH2    | E_ASP_53  | OD2    | 3.940        |
| 3GJF   | D_ARG_48  | NH2    | E_ASP_53  | OD1    | 3.764        |
| 3GJF   | D_ARG_48  | NH2    | E_ASP_53  | OD2    | 3.452        |
| 3GJF   | D_ARG_65  | NH1    | K_ASP_52  | OD1    | 3.173        |
| 3GJF   | D_ARG_65  | NH1    | K_ASP_52  | OD2    | 3.530        |
| 3GJF   | D_ARG_65  | NH2    | K_ASP_52  | OD1    | 3.166        |
| 3GJF   | D_ARG_65  | NH2    | K_ASP_52  | OD2    | 2.445        |
| 3GJF   | E_LYS_6   | NZ     | D_GLU_232 | OE1    | 3.774        |
| 3GJF   | E_LYS_6   | NZ     | D_GLU_232 | OE2    | 2.502        |
| 3GJF   | M_LYS_215 | NZ     | K_GLU_126 | OE1    | 3.244        |
| 3GJF   | M_LYS_215 | NZ     | K_GLU_126 | OE2    | 2.553        |

Table 1219: Interfacial 3GJF-specific salt bridging networks analysis. In this table, a PDB file is specified with a four-letter PDB ID, except that the names of the PDB files corresponding to the single NMR structural model split from the NMR ensemble is specified with a four-letter PDB ID in addition to a hyphen followed by the single NMR structural model numeric ID, the residue naming scheme is **Chain ID\_residue name\_residue number**,  $\angle ADH$  represents the angle formed by acceptor (A), donor (D) and hydrogen (H) ( $\angle ADH$ ).



| PDB ID | Residue A | Atom A | Residue B | Atom B | Distance (Å) |
|--------|-----------|--------|-----------|--------|--------------|
| 3GNM   | H_ARG_169 | NH1    | L_ASP_172 | OD1    | 3.348        |
| 3GNM   | H_ARG_169 | NH2    | L_ASP_172 | OD1    | 3.542        |
| 3GNM   | H_ARG_169 | NH2    | L_ASP_175 | OD1    | 3.297        |
| 3GNM   | H_LYS_213 | NZ     | L_GLU_128 | OE1    | 2.721        |
| 3GNM   | H_LYS_213 | NZ     | L_GLU_128 | OE2    | 3.840        |

Table 1220: Interfacial 3GNM-specific salt bridging networks analysis. In this table, a PDB file is specified with a four-letter PDB ID, except that the names of the PDB files corresponding to the single NMR structural model split from the NMR ensemble is specified with a four-letter PDB ID in addition to a hyphen followed by the single NMR structural model numeric ID, the residue naming scheme is **Chain ID\_residue name\_residue number**,  $\angle ADH$  represents the angle formed by acceptor (A), donor (D) and hydrogen (H) ( $\angle ADH$ ).

| PDB ID | Residue A | Atom A | Residue B  | Atom B | Distance (Å) |
|--------|-----------|--------|------------|--------|--------------|
| 3GO1   | H.LYS.209 | NZ     | L.GLU.123  | OE1    | 2.728        |
| 3GO1   | H.LYS.209 | NZ     | L.GLU.123  | OE2    | 3.471        |
| 3GO1   | P.LYS.305 | NZ     | L.ASP.51   | OD1    | 2.931        |
| 3GO1   | P.ARG.315 | NH1    | H.GLU.95   | OE2    | 3.127        |
| 3GO1   | P.ARG.315 | NH2    | H.GLU.95   | OE2    | 2.921        |
| 3GO1   | P.ARG.315 | NH2    | H.ASP.100A | OD2    | 3.393        |

Table 1221: Interfacial 3GO1-specific salt bridging networks analysis. In this table, a PDB file is specified with a four-letter PDB ID, except that the names of the PDB files corresponding to the single NMR structural model split from the NMR ensemble is specified with a four-letter PDB ID in addition to a hyphen followed by the single NMR structural model numeric ID, the residue naming scheme is **Chain ID\_residue name\_residue number**,  $\angle ADH$  represents the angle formed by acceptor (A), donor (D) and hydrogen (H) ( $\angle ADH$ ).

| PDB ID | Residue A | Atom A | Residue B | Atom B | Distance (Å) |
|--------|-----------|--------|-----------|--------|--------------|
| 3HAE   | A_ARG_35  | NH1    | B_ASP_53  | OD1    | 3.527        |
| 3HAE   | A_ARG_35  | NH1    | B_ASP_53  | OD2    | 2.844        |
| 3HAE   | A_ARG_48  | NH2    | B_ASP_53  | OD2    | 3.583        |
| 3HAE   | A_ARG_65  | NH1    | L_ASP_52  | OD1    | 3.495        |
| 3HAE   | A_ARG_65  | NH1    | L_ASP_52  | OD2    | 2.908        |
| 3HAE   | A_ARG_65  | NH2    | L_ASP_52  | OD1    | 3.452        |
| 3HAE   | A_ARG_65  | NH2    | L_ASP_52  | OD2    | 3.099        |
| 3HAE   | B_LYS_6   | NZ     | A_GLU_232 | OE2    | 2.622        |
| 3HAE   | D_ARG_35  | NH1    | E_ASP_53  | OD1    | 3.949        |
| 3HAE   | D_ARG_35  | NH1    | E_ASP_53  | OD2    | 3.963        |
| 3HAE   | D_ARG_35  | NH2    | E_ASP_53  | OD1    | 3.106        |
| 3HAE   | D_ARG_48  | NH2    | E_ASP_53  | OD2    | 3.593        |
| 3HAE   | D_ARG_65  | NH1    | G_ASP_52  | OD1    | 3.201        |
| 3HAE   | D_ARG_65  | NH2    | G_ASP_52  | OD1    | 2.885        |
| 3HAE   | D_ARG_65  | NH2    | G_ASP_52  | OD2    | 3.031        |
| 3HAE   | J_ARG_35  | NH2    | K_ASP_53  | OD1    | 3.520        |
| 3HAE   | J_ARG_48  | NH2    | K_ASP_53  | OD1    | 3.945        |
| 3HAE   | J_ARG_48  | NH2    | K_ASP_53  | OD2    | 3.051        |
| 3HAE   | J_ARG_65  | NH1    | N_ASP_52  | OD1    | 3.749        |
| 3HAE   | J_ARG_65  | NH2    | N_ASP_52  | OD1    | 2.440        |
| 3HAE   | J_ARG_65  | NH2    | N_ASP_52  | OD2    | 2.989        |
| 3HAE   | P_ARG_35  | NH1    | Q_ASP_53  | OD2    | 3.921        |
| 3HAE   | P_ARG_48  | NH2    | Q_ASP_53  | OD1    | 3.566        |
| 3HAE   | P_ARG_48  | NH2    | Q_ASP_53  | OD2    | 2.872        |
| 3HAE   | P_ARG_65  | NH1    | S_ASP_52  | OD1    | 3.579        |
| 3HAE   | P_ARG_65  | NH1    | S_ASP_52  | OD2    | 3.466        |
| 3HAE   | P_ARG_65  | NH2    | S_ASP_52  | OD1    | 3.120        |
| 3HAE   | P_ARG_65  | NH2    | S_ASP_52  | OD2    | 2.826        |
| 3HAE   | Q_LYS_6   | NZ     | P_GLU_232 | OE2    | 3.965        |
| 3HAE   | N_LYS_132 | NZ     | O_ASP_150 | OD2    | 3.615        |
| 3HAE   | H_LYS_215 | NZ     | L_GLU_126 | OE1    | 3.537        |
| 3HAE   | H_LYS_215 | NZ     | L_GLU_126 | OE2    | 3.674        |
| 3HAE   | I_LYS_215 | NZ     | G_GLU_126 | OE1    | 3.678        |
| 3HAE   | O_LYS_215 | NZ     | N_GLU_126 | OE2    | 3.736        |
| 3HAE   | T_LYS_215 | NZ     | S_GLU_126 | OE1    | 2.660        |
| 3HAE   | T_LYS_215 | NZ     | S_GLU_126 | OE2    | 3.779        |

Table 1222: Interfacial 3HAE-specific salt bridging networks analysis. In this table, a PDB file is specified with a four-letter PDB ID, except that the names of the PDB files corresponding to the single NMR structural model split from the NMR ensemble is specified with a four-letter PDB ID in addition to a hyphen followed by the single NMR structural model numeric ID, the residue naming scheme is **Chain ID\_residue name\_residue number**,  $\angle ADH$  represents the angle formed by acceptor (A), donor (D) and hydrogen (H) ( $\angle ADH$ ).

| PDB ID | Residue A | Atom A | Residue B | Atom B | Distance (Å) |
|--------|-----------|--------|-----------|--------|--------------|
| 3HFM   | L_HIS_34  | ND1    | H_ASP_99  | OD1    | 3.756        |
| 3HFM   | L_HIS_34  | ND1    | H_ASP_99  | OD2    | 3.698        |
| 3HFM   | L_LYS_49  | NZ     | H_ASP_99  | OD1    | 3.423        |
| 3HFM   | H_LYS_209 | NZ     | L_GLU_123 | OE1    | 2.622        |
| 3HFM   | H_ARG_213 | NH2    | L_GLU_123 | OE1    | 3.991        |
| 3HFM   | Y_LYS_97  | NZ     | H_ASP_32  | OD1    | 3.609        |

Table 1223: Interfacial 3HFM-specific salt bridging networks analysis. In this table, a PDB file is specified with a four-letter PDB ID, except that the names of the PDB files corresponding to the single NMR structural model split from the NMR ensemble is specified with a four-letter PDB ID in addition to a hyphen followed by the single NMR structural model numeric ID, the residue naming scheme is **Chain ID\_residue name\_residue number**,  $\angle ADH$  represents the angle formed by acceptor (A), donor (D) and hydrogen (H) ( $\angle ADH$ ).

| PDB ID | Residue A | Atom A | Residue B | Atom B | Distance (Å) |
|--------|-----------|--------|-----------|--------|--------------|
| 3HI6   | H_LYS_216 | NZ     | L_GLU_122 | OE1    | 2.896        |
| 3HI6   | H_LYS_216 | NZ     | L_GLU_122 | OE2    | 3.887        |
| 3HI6   | X_LYS_216 | NZ     | Y_GLU_122 | OE1    | 3.212        |

Table 1224: Interfacial 3HI6-specific salt bridging networks analysis. In this table, a PDB file is specified with a four-letter PDB ID, except that the names of the PDB files corresponding to the single NMR structural model split from the NMR ensemble is specified with a four-letter PDB ID in addition to a hyphen followed by the single NMR structural model numeric ID, the residue naming scheme is **Chain ID\_residue name\_residue number**,  $\angle ADH$  represents the angle formed by acceptor (A), donor (D) and hydrogen (H) ( $\angle ADH$ ).

| PDB ID | Residue A | Atom A | Residue B | Atom B | Distance (Å) |
|--------|-----------|--------|-----------|--------|--------------|
| 3HMG   | A_ARG_109 | NH1    | B_GLU_67  | OE1    | 3.372        |
| 3HMG   | A_ARG_109 | NH1    | B_GLU_67  | OE2    | 2.849        |
| 3HMG   | A_LYS_238 | NZ     | F_GLU_72  | OE2    | 2.747        |
| 3HMG   | A_ARG_269 | NH2    | B_GLU_67  | OE1    | 2.883        |
| 3HMG   | A_LYS_299 | NZ     | B_GLU_69  | OE1    | 3.233        |
| 3HMG   | A_LYS_310 | NZ     | B_ASP_90  | OD1    | 2.577        |
| 3HMG   | B_ARG_25  | NH1    | A_GLU_325 | OE1    | 3.777        |
| 3HMG   | B_ARG_54  | NH1    | F_GLU_97  | OE1    | 2.798        |
| 3HMG   | B_ARG_54  | NH2    | F_GLU_97  | OE1    | 3.127        |
| 3HMG   | B_LYS_62  | NZ     | F_ASP_86  | OD1    | 2.986        |
| 3HMG   | B_LYS_62  | NZ     | F_ASP_86  | OD2    | 2.761        |
| 3HMG   | B_LYS_62  | NZ     | F_ASP_90  | OD1    | 3.490        |
| 3HMG   | B_LYS_62  | NZ     | F_ASP_90  | OD2    | 2.774        |
| 3HMG   | B_HIS_64  | NE2    | F_ASP_79  | OD1    | 3.991        |
| 3HMG   | B_HIS_64  | NE2    | F_ASP_79  | OD2    | 3.618        |
| 3HMG   | B_ARG_76  | NH1    | D_GLU_74  | OE1    | 3.445        |
| 3HMG   | B_ARG_76  | NH1    | D_GLU_74  | OE2    | 2.823        |
| 3HMG   | B_ARG_76  | NH1    | D_GLU_81  | OE1    | 2.738        |
| 3HMG   | B_ARG_76  | NH1    | D_GLU_81  | OE2    | 3.615        |
| 3HMG   | B_ARG_76  | NH2    | D_GLU_74  | OE1    | 2.830        |
| 3HMG   | B_ARG_76  | NH2    | D_GLU_74  | OE2    | 3.630        |
| 3HMG   | B_ARG_123 | NH1    | F_GLU_132 | OE2    | 3.281        |
| 3HMG   | B_ARG_124 | NH1    | F_GLU_132 | OE1    | 3.422        |
| 3HMG   | B_ARG_124 | NH1    | F_GLU_132 | OE2    | 3.128        |
| 3HMG   | B_ARG_127 | NH2    | F_GLU_131 | OE1    | 2.404        |
| 3HMG   | B_ARG_163 | NH1    | F_GLU_131 | OE1    | 2.713        |
| 3HMG   | B_ARG_163 | NH1    | F_GLU_131 | OE2    | 2.661        |
| 3HMG   | B_ARG_170 | NH2    | D_GLU_128 | OE1    | 3.667        |
| 3HMG   | B_ARG_170 | NH2    | D_GLU_128 | OE2    | 3.704        |
| 3HMG   | C_ARG_109 | NH1    | D_GLU_67  | OE1    | 3.376        |
| 3HMG   | C_ARG_109 | NH1    | D_GLU_67  | OE2    | 2.842        |
| 3HMG   | C_LYS_238 | NZ     | B_GLU_72  | OE2    | 2.625        |
| 3HMG   | C_ARG_269 | NH2    | D_GLU_67  | OE1    | 2.813        |
| 3HMG   | C_LYS_299 | NZ     | D_GLU_69  | OE1    | 3.251        |
| 3HMG   | C_LYS_310 | NZ     | D_ASP_90  | OD1    | 2.544        |
| 3HMG   | D_ARG_54  | NH1    | B_GLU_97  | OE1    | 2.804        |
| 3HMG   | D_ARG_54  | NH2    | B_GLU_97  | OE1    | 3.138        |
| 3HMG   | D_LYS_62  | NZ     | B_ASP_86  | OD1    | 2.985        |
| 3HMG   | D_LYS_62  | NZ     | B_ASP_86  | OD2    | 2.721        |
| 3HMG   | D_LYS_62  | NZ     | B_ASP_90  | OD1    | 3.453        |
| 3HMG   | D_LYS_62  | NZ     | B_ASP_90  | OD2    | 2.701        |
| 3HMG   | D_HIS_64  | NE2    | B_ASP_79  | OD1    | 3.960        |
| 3HMG   | D_HIS_64  | NE2    | B_ASP_79  | OD2    | 3.444        |
| 3HMG   | D_ARG_76  | NH1    | F_GLU_74  | OE1    | 3.513        |
| 3HMG   | D_ARG_76  | NH1    | F_GLU_74  | OE2    | 2.767        |
| 3HMG   | D_ARG_76  | NH1    | F_GLU_81  | OE1    | 2.643        |
| 3HMG   | D_ARG_76  | NH1    | F_GLU_81  | OE2    | 3.636        |
| 3HMG   | D_ARG_76  | NH2    | F_GLU_74  | OE1    | 2.766        |
| 3HMG   | D_ARG_76  | NH2    | F_GLU_74  | OE2    | 3.449        |
| 3HMG   | D_ARG_123 | NH1    | B_GLU_132 | OE2    | 3.299        |
| 3HMG   | D_ARG_124 | NH1    | B_GLU_132 | OE1    | 3.459        |
| 3HMG   | D_ARG_124 | NH1    | B_GLU_132 | OE2    | 3.169        |
| 3HMG   | D_ARG_127 | NH2    | B_GLU_131 | OE1    | 2.449        |
| 3HMG   | D_ARG_163 | NH1    | B_GLU_131 | OE1    | 2.694        |
| 3HMG   | D_ARG_163 | NH1    | B_GLU_131 | OE2    | 2.707        |
| 3HMG   | D_ARG_170 | NH2    | F_GLU_128 | OE1    | 3.716        |
| 3HMG   | D_ARG_170 | NH2    | F_GLU_128 | OE2    | 3.859        |

|      |           |     |           |     |       |
|------|-----------|-----|-----------|-----|-------|
| 3HMG | E_ARG_109 | NH1 | F_GLU_67  | OE1 | 3.402 |
| 3HMG | E_ARG_109 | NH1 | F_GLU_67  | OE2 | 2.841 |
| 3HMG | E_LYS_238 | NZ  | D_GLU_72  | OE2 | 2.745 |
| 3HMG | E_ARG_269 | NH2 | F_GLU_67  | OE1 | 2.840 |
| 3HMG | E_LYS_299 | NZ  | F_GLU_69  | OE1 | 3.192 |
| 3HMG | E_LYS_310 | NZ  | F_ASP_90  | OD1 | 2.563 |
| 3HMG | F_ARG_25  | NH1 | E_GLU_325 | OE2 | 3.879 |
| 3HMG | F_ARG_25  | NH2 | E_GLU_325 | OE2 | 3.668 |
| 3HMG | F_ARG_54  | NH1 | D_GLU_97  | OE1 | 2.700 |
| 3HMG | F_ARG_54  | NH2 | D_GLU_97  | OE1 | 3.155 |
| 3HMG | F_LYS_62  | NZ  | D_ASP_86  | OD1 | 2.928 |
| 3HMG | F_LYS_62  | NZ  | D_ASP_86  | OD2 | 2.697 |
| 3HMG | F_LYS_62  | NZ  | D_ASP_90  | OD1 | 3.563 |
| 3HMG | F_LYS_62  | NZ  | D_ASP_90  | OD2 | 2.800 |
| 3HMG | F_HIS_64  | NE2 | D_ASP_79  | OD1 | 3.875 |
| 3HMG | F_HIS_64  | NE2 | D_ASP_79  | OD2 | 3.441 |
| 3HMG | F_ARG_76  | NH1 | B_GLU_74  | OE1 | 3.414 |
| 3HMG | F_ARG_76  | NH1 | B_GLU_74  | OE2 | 2.793 |
| 3HMG | F_ARG_76  | NH1 | B_GLU_81  | OE1 | 2.687 |
| 3HMG | F_ARG_76  | NH1 | B_GLU_81  | OE2 | 3.711 |
| 3HMG | F_ARG_76  | NH2 | B_GLU_74  | OE1 | 2.734 |
| 3HMG | F_ARG_76  | NH2 | B_GLU_74  | OE2 | 3.548 |
| 3HMG | F_ARG_123 | NH1 | D_GLU_132 | OE2 | 3.319 |
| 3HMG | F_ARG_124 | NH1 | D_GLU_132 | OE1 | 3.517 |
| 3HMG | F_ARG_124 | NH1 | D_GLU_132 | OE2 | 3.294 |
| 3HMG | F_ARG_127 | NH2 | D_GLU_131 | OE1 | 2.559 |
| 3HMG | F_ARG_163 | NH1 | D_GLU_131 | OE1 | 2.673 |
| 3HMG | F_ARG_163 | NH1 | D_GLU_131 | OE2 | 2.666 |
| 3HMG | F_ARG_170 | NH2 | B_GLU_128 | OE1 | 3.705 |
| 3HMG | F_ARG_170 | NH2 | B_GLU_128 | OE2 | 3.753 |

Table 1225: Interfacial 3HMG-specific salt bridging networks analysis. In this table, a PDB file is specified with a four-letter PDB ID, except that the names of the PDB files corresponding to the single NMR structural model split from the NMR ensemble is specified with a four-letter PDB ID in addition to a hyphen followed by the single NMR structural model numeric ID, the residue naming scheme is **Chain ID\_residue name\_residue number**,  $\angle ADH$  represents the angle formed by acceptor (A), donor (D) and hydrogen (H) ( $\angle ADH$ ).

| PDB ID | Residue A | Atom A | Residue B | Atom B | Distance (Å) |
|--------|-----------|--------|-----------|--------|--------------|
| 3HZK   | A_ARG_95  | NH2    | B_ASP_95  | OD1    | 3.611        |
| 3HZK   | A_ARG_95  | NH2    | B_ASP_95  | OD2    | 2.795        |
| 3HZK   | B_LYS_207 | NZ     | A_GLU_122 | OE2    | 3.993        |

Table 1226: Interfacial 3HZK-specific salt bridging networks analysis. In this table, a PDB file is specified with a four-letter PDB ID, except that the names of the PDB files corresponding to the single NMR structural model split from the NMR ensemble is specified with a four-letter PDB ID in addition to a hyphen followed by the single NMR structural model numeric ID, the residue naming scheme is **Chain ID\_residue name\_residue number**,  $\angle ADH$  represents the angle formed by acceptor (A), donor (D) and hydrogen (H) ( $\angle ADH$ ).



| PDB ID | Residue A | Atom A | Residue B  | Atom B | Distance (Å) |
|--------|-----------|--------|------------|--------|--------------|
| 3HZM   | A_ARG_95  | NH2    | B_ASP_95   | OD1    | 3.493        |
| 3HZM   | A_ARG_95  | NH2    | B_ASP_95   | OD2    | 2.771        |
| 3HZM   | A_ARG_95  | NH2    | B_ASP_100E | OD1    | 3.831        |
| 3HZM   | B_LYS_207 | NZ     | A_GLU_122  | OE2    | 3.353        |

Table 1227: Interfacial 3HZM-specific salt bridging networks analysis. In this table, a PDB file is specified with a four-letter PDB ID, except that the names of the PDB files corresponding to the single NMR structural model split from the NMR ensemble is specified with a four-letter PDB ID in addition to a hyphen followed by the single NMR structural model numeric ID, the residue naming scheme is **Chain ID\_residue name\_residue number**,  $\angle ADH$  represents the angle formed by acceptor (A), donor (D) and hydrogen (H) ( $\angle ADH$ ).

| PDB ID | Residue A | Atom A | Residue B  | Atom B | Distance (Å) |
|--------|-----------|--------|------------|--------|--------------|
| 3HZV   | A_ARG_95  | NH2    | B_ASP_95   | OD1    | 3.498        |
| 3HZV   | A_ARG_95  | NH2    | B_ASP_95   | OD2    | 2.821        |
| 3HZV   | A_ARG_95  | NH2    | B_ASP_100E | OD1    | 3.905        |
| 3HZV   | B_LYS_207 | NZ     | A_GLU_122  | OE2    | 3.521        |

Table 1228: Interfacial 3HZV-specific salt bridging networks analysis. In this table, a PDB file is specified with a four-letter PDB ID, except that the names of the PDB files corresponding to the single NMR structural model split from the NMR ensemble is specified with a four-letter PDB ID in addition to a hyphen followed by the single NMR structural model numeric ID, the residue naming scheme is **Chain ID\_residue name\_residue number**,  $\angle ADH$  represents the angle formed by acceptor (A), donor (D) and hydrogen (H) ( $\angle ADH$ ).

| PDB ID | Residue A | Atom A | Residue B  | Atom B | Distance (Å) |
|--------|-----------|--------|------------|--------|--------------|
| 3HZY   | A_ARG_95  | NH2    | B_ASP_95   | OD1    | 3.688        |
| 3HZY   | A_ARG_95  | NH2    | B_ASP_95   | OD2    | 3.045        |
| 3HZY   | A_ARG_95  | NH2    | B_ASP_100E | OD1    | 3.820        |
| 3HZY   | B_LYS_207 | NZ     | A_GLU_122  | OE2    | 3.902        |

Table 1229: Interfacial 3HZY-specific salt bridging networks analysis. In this table, a PDB file is specified with a four-letter PDB ID, except that the names of the PDB files corresponding to the single NMR structural model split from the NMR ensemble is specified with a four-letter PDB ID in addition to a hyphen followed by the single NMR structural model numeric ID, the residue naming scheme is **Chain ID\_residue name\_residue number**,  $\angle ADH$  represents the angle formed by acceptor (A), donor (D) and hydrogen (H) ( $\angle ADH$ ).

| PDB ID | Residue A | Atom A | Residue B | Atom B | Distance (Å) |
|--------|-----------|--------|-----------|--------|--------------|
| 3I02   | A_ARG_95  | NH2    | B_ASP_95  | OD2    | 3.028        |
| 3I02   | C_ARG_95  | NH2    | D_ASP_95  | OD1    | 3.601        |
| 3I02   | C_ARG_95  | NH2    | D_ASP_95  | OD2    | 2.826        |
| 3I02   | D_LYS_208 | NZ     | C_GLU_122 | OE2    | 3.585        |

Table 1230: Interfacial 3I02-specific salt bridging networks analysis. In this table, a PDB file is specified with a four-letter PDB ID, except that the names of the PDB files corresponding to the single NMR structural model split from the NMR ensemble is specified with a four-letter PDB ID in addition to a hyphen followed by the single NMR structural model numeric ID, the residue naming scheme is **Chain ID\_residue name\_residue number**,  $\angle ADH$  represents the angle formed by acceptor (A), donor (D) and hydrogen (H) ( $\angle ADH$ ).

| PDB ID | Residue A | Atom A | Residue B | Atom B | Distance (Å) |
|--------|-----------|--------|-----------|--------|--------------|
| 3IET   | A_LYS_50  | NZ     | X_GLU_8   | OE1    | 3.701        |
| 3IET   | A_LYS_50  | NZ     | X_GLU_8   | OE2    | 3.403        |
| 3IET   | B_LYS_208 | NZ     | A_GLU_123 | OE1    | 3.818        |
| 3IET   | D_HIS_55  | ND1    | A_ASP_143 | OD1    | 3.412        |
| 3IET   | D_HIS_55  | ND1    | A_ASP_143 | OD2    | 3.385        |
| 3IET   | D_LYS_208 | NZ     | C_GLU_123 | OE2    | 3.321        |

Table 1231: Interfacial 3IET-specific salt bridging networks analysis. In this table, a PDB file is specified with a four-letter PDB ID, except that the names of the PDB files corresponding to the single NMR structural model split from the NMR ensemble is specified with a four-letter PDB ID in addition to a hyphen followed by the single NMR structural model numeric ID, the residue naming scheme is **Chain ID\_residue name\_residue number**,  $\angle ADH$  represents the angle formed by acceptor (A), donor (D) and hydrogen (H) ( $\angle ADH$ ).

| PDB ID | Residue A | Atom A | Residue B | Atom B | Distance (Å) |
|--------|-----------|--------|-----------|--------|--------------|
| 3IF1   | D_LYS_52B | NZ     | A_ASP_143 | OD2    | 3.658        |
| 3IF1   | D_HIS_55  | ND1    | A_ASP_143 | OD1    | 3.559        |
| 3IF1   | D_HIS_55  | ND1    | A_ASP_143 | OD2    | 3.251        |

Table 1232: Interfacial 3IF1-specific salt bridging networks analysis. In this table, a PDB file is specified with a four-letter PDB ID, except that the names of the PDB files corresponding to the single NMR structural model split from the NMR ensemble is specified with a four-letter PDB ID in addition to a hyphen followed by the single NMR structural model numeric ID, the residue naming scheme is **Chain ID\_residue name\_residue number**,  $\angle ADH$  represents the angle formed by acceptor (A), donor (D) and hydrogen (H) ( $\angle ADH$ ).

| PDB ID | Residue A | Atom A | Residue B  | Atom B | Distance (Å) |
|--------|-----------|--------|------------|--------|--------------|
| 3IJH   | A_ARG_95  | NH2    | B_ASP_95   | OD1    | 3.392        |
| 3IJH   | A_ARG_95  | NH2    | B_ASP_95   | OD2    | 2.832        |
| 3IJH   | A_ARG_95  | NH2    | B_GLU_100E | OE1    | 3.920        |
| 3IJH   | B_ARG_164 | NH1    | A_ASP_166  | OD1    | 3.428        |
| 3IJH   | B_ARG_164 | NH2    | A_ASP_166  | OD1    | 3.938        |
| 3IJH   | B_LYS_208 | NZ     | A_GLU_122  | OE1    | 2.744        |
| 3IJH   | C_ARG_95  | NH2    | D_ASP_95   | OD1    | 3.394        |
| 3IJH   | C_ARG_95  | NH2    | D_ASP_95   | OD2    | 2.734        |
| 3IJH   | D_ARG_164 | NH1    | C_ASP_166  | OD1    | 3.593        |
| 3IJH   | D_ARG_164 | NH2    | C_ASP_166  | OD1    | 3.440        |

Table 1233: Interfacial 3IJH-specific salt bridging networks analysis. In this table, a PDB file is specified with a four-letter PDB ID, except that the names of the PDB files corresponding to the single NMR structural model split from the NMR ensemble is specified with a four-letter PDB ID in addition to a hyphen followed by the single NMR structural model numeric ID, the residue naming scheme is **Chain ID\_residue name\_residue number**,  $\angle ADH$  represents the angle formed by acceptor (A), donor (D) and hydrogen (H) ( $\angle ADH$ ).

| PDB ID | Residue A | Atom A | Residue B  | Atom B | Distance (Å) |
|--------|-----------|--------|------------|--------|--------------|
| 3IJS   | A_ARG_95  | NH2    | B_ASP_95   | OD1    | 3.603        |
| 3IJS   | A_ARG_95  | NH2    | B_ASP_95   | OD2    | 3.018        |
| 3IJS   | A_ARG_95  | NH2    | B_GLU_100E | OE1    | 3.734        |
| 3IJS   | B_ARG_164 | NH1    | A_ASP_166  | OD1    | 3.855        |
| 3IJS   | B_LYS_208 | NZ     | A_GLU_122  | OE1    | 2.963        |
| 3IJS   | C_ARG_95  | NH2    | D_ASP_95   | OD1    | 3.466        |
| 3IJS   | C_ARG_95  | NH2    | D_ASP_95   | OD2    | 2.795        |
| 3IJS   | C_ARG_95  | NH2    | D_GLU_100E | OE1    | 3.752        |
| 3IJS   | D_ARG_164 | NH1    | C_ASP_166  | OD1    | 3.815        |
| 3IJS   | D_ARG_164 | NH2    | C_ASP_166  | OD1    | 3.576        |
| 3IJS   | D_LYS_208 | NZ     | C_GLU_122  | OE1    | 3.219        |
| 3IJS   | D_LYS_208 | NZ     | C_GLU_122  | OE2    | 2.679        |

Table 1234: Interfacial 3IJS-specific salt bridging networks analysis. In this table, a PDB file is specified with a four-letter PDB ID, except that the names of the PDB files corresponding to the single NMR structural model split from the NMR ensemble is specified with a four-letter PDB ID in addition to a hyphen followed by the single NMR structural model numeric ID, the residue naming scheme is **Chain ID residue name residue number**,  $\angle ADH$  represents the angle formed by acceptor (A), donor (D) and hydrogen (H) ( $\angle ADH$ ).



| PDB ID | Residue A | Atom A | Residue B  | Atom B | Distance (Å) |
|--------|-----------|--------|------------|--------|--------------|
| 3IJY   | A_ARG_95  | NH2    | B_ASP_95   | OD1    | 3.420        |
| 3IJY   | A_ARG_95  | NH2    | B_ASP_95   | OD2    | 2.800        |
| 3IJY   | A_ARG_95  | NH2    | B_GLU_100E | OE1    | 3.751        |
| 3IJY   | B_ARG_164 | NH2    | A_ASP_166  | OD1    | 3.730        |
| 3IJY   | B_ARG_164 | NH2    | A_ASP_166  | OD2    | 3.693        |
| 3IJY   | B_LYS_208 | NZ     | A_GLU_122  | OE1    | 2.748        |
| 3IJY   | C_ARG_95  | NH2    | D_ASP_95   | OD1    | 2.992        |
| 3IJY   | C_ARG_95  | NH2    | D_ASP_95   | OD2    | 2.767        |
| 3IJY   | C_ARG_95  | NH2    | D_GLU_100E | OE1    | 3.905        |
| 3IJY   | D_ARG_164 | NH2    | C_ASP_166  | OD1    | 3.199        |

Table 1235: Interfacial 3IJY-specific salt bridging networks analysis. In this table, a PDB file is specified with a four-letter PDB ID, except that the names of the PDB files corresponding to the single NMR structural model split from the NMR ensemble is specified with a four-letter PDB ID in addition to a hyphen followed by the single NMR structural model numeric ID, the residue naming scheme is **Chain ID\_residue name\_residue number**,  $\angle ADH$  represents the angle formed by acceptor (A), donor (D) and hydrogen (H) ( $\angle ADH$ ).

| PDB ID | Residue A | Atom A | Residue B  | Atom B | Distance (Å) |
|--------|-----------|--------|------------|--------|--------------|
| 3IKC   | A_ARG_95  | NH2    | B_ASP_95   | OD1    | 3.326        |
| 3IKC   | A_ARG_95  | NH2    | B_ASP_95   | OD2    | 2.867        |
| 3IKC   | A_ARG_95  | NH2    | B_GLU_100E | OE1    | 3.865        |
| 3IKC   | B_LYS_208 | NZ     | A_GLU_122  | OE1    | 3.042        |
| 3IKC   | C_ARG_95  | NH2    | D_ASP_95   | OD1    | 3.250        |
| 3IKC   | C_ARG_95  | NH2    | D_ASP_95   | OD2    | 2.670        |
| 3IKC   | D_ARG_164 | NH1    | C_ASP_166  | OD1    | 3.903        |
| 3IKC   | D_ARG_164 | NH2    | C_ASP_166  | OD1    | 3.107        |

Table 1236: Interfacial 3IKC-specific salt bridging networks analysis. In this table, a PDB file is specified with a four-letter PDB ID, except that the names of the PDB files corresponding to the single NMR structural model split from the NMR ensemble is specified with a four-letter PDB ID in addition to a hyphen followed by the single NMR structural model numeric ID, the residue naming scheme is **Chain ID\_residue name\_residue number**,  $\angle ADH$  represents the angle formed by acceptor (A), donor (D) and hydrogen (H) ( $\angle ADH$ ).

| PDB ID | Residue A | Atom A | Residue B | Atom B | Distance (Å) |
|--------|-----------|--------|-----------|--------|--------------|
| 3IU3   | A_ARG_29  | NH2    | K_ASP_6   | OD1    | 2.779        |
| 3IU3   | A_LYS_211 | NZ     | B_GLU_120 | OE1    | 2.457        |
| 3IU3   | B_ARG_90  | NH1    | K_ASP_56  | OD2    | 3.059        |
| 3IU3   | C_ARG_29  | NH1    | J_ASP_6   | OD1    | 3.038        |
| 3IU3   | C_ARG_29  | NH1    | J_ASP_6   | OD2    | 3.788        |
| 3IU3   | C_ARG_29  | NH2    | J_ASP_6   | OD1    | 3.464        |
| 3IU3   | C_LYS_211 | NZ     | D_GLU_120 | OE2    | 3.231        |
| 3IU3   | D_ARG_90  | NH2    | J_ASP_56  | OD2    | 3.101        |
| 3IU3   | H_ARG_29  | NH1    | I_ASP_6   | OD1    | 3.964        |
| 3IU3   | H_ARG_29  | NH1    | I_ASP_6   | OD2    | 3.865        |
| 3IU3   | H_ARG_29  | NH2    | I_ASP_6   | OD1    | 2.749        |
| 3IU3   | H_ARG_29  | NH2    | I_ASP_6   | OD2    | 3.378        |
| 3IU3   | H_HIS_166 | NE2    | L_ASP_164 | OD1    | 3.898        |
| 3IU3   | H_LYS_211 | NZ     | L_GLU_120 | OE2    | 3.694        |
| 3IU3   | L_ARG_29  | NH2    | I_ASP_56  | OD2    | 3.164        |
| 3IU3   | L_ARG_90  | NH2    | I_ASP_56  | OD1    | 2.806        |
| 3IU3   | L_ARG_36  | NH1    | H_ASP_55  | OD1    | 3.819        |
| 3IU3   | L_ARG_36  | NH2    | H_ASP_55  | OD1    | 3.008        |
| 3IU3   | L_ARG_36  | NH2    | H_ASP_55  | OD2    | 2.747        |

Table 1237: Interfacial 3IU3-specific salt bridging networks analysis. In this table, a PDB file is specified with a four-letter PDB ID, except that the names of the PDB files corresponding to the single NMR structural model split from the NMR ensemble is specified with a four-letter PDB ID in addition to a hyphen followed by the single NMR structural model numeric ID, the residue naming scheme is **Chain ID residue name residue number**,  $\angle ADH$  represents the angle formed by acceptor (A), donor (D) and hydrogen (H) ( $\angle ADH$ ).

| PDB ID | Residue A | Atom A | Residue B | Atom B | Distance (Å) |
|--------|-----------|--------|-----------|--------|--------------|
| 3J5M   | A_ARG_429 | NH2    | D_ASP_74  | OD1    | 3.207        |
| 3J5M   | A_ARG_429 | NH2    | D_ASP_74  | OD2    | 3.203        |
| 3J5M   | D_LYS_52  | NZ     | A_ASP_474 | OD2    | 2.827        |
| 3J5M   | D_ARG_64  | NH2    | A_ASP_457 | OD2    | 3.079        |
| 3J5M   | D_LYS_209 | NZ     | C_GLU_123 | OE1    | 3.480        |
| 3J5M   | D_LYS_209 | NZ     | C_GLU_123 | OE2    | 2.844        |
| 3J5M   | D_LYS_214 | NZ     | C_ASP_122 | OD2    | 2.841        |
| 3J5M   | E_ARG_429 | NH2    | H_ASP_74  | OD1    | 3.207        |
| 3J5M   | E_ARG_429 | NH2    | H_ASP_74  | OD2    | 3.202        |
| 3J5M   | H_LYS_52  | NZ     | E_ASP_474 | OD2    | 2.827        |
| 3J5M   | H_ARG_64  | NH2    | E_ASP_457 | OD2    | 3.078        |
| 3J5M   | H_LYS_209 | NZ     | G_GLU_123 | OE1    | 3.479        |
| 3J5M   | H_LYS_209 | NZ     | G_GLU_123 | OE2    | 2.843        |
| 3J5M   | H_LYS_214 | NZ     | G_ASP_122 | OD2    | 2.842        |
| 3J5M   | I_ARG_429 | NH2    | L_ASP_74  | OD1    | 3.207        |
| 3J5M   | I_ARG_429 | NH2    | L_ASP_74  | OD2    | 3.202        |
| 3J5M   | L_LYS_52  | NZ     | I_ASP_474 | OD2    | 2.827        |
| 3J5M   | L_ARG_64  | NH2    | I_ASP_457 | OD2    | 3.078        |
| 3J5M   | L_LYS_209 | NZ     | K_GLU_123 | OE1    | 3.480        |
| 3J5M   | L_LYS_209 | NZ     | K_GLU_123 | OE2    | 2.844        |
| 3J5M   | L_LYS_214 | NZ     | K_ASP_122 | OD2    | 2.841        |

Table 1238: Interfacial 3J5M-specific salt bridging networks analysis. In this table, a PDB file is specified with a four-letter PDB ID, except that the names of the PDB files corresponding to the single NMR structural model split from the NMR ensemble is specified with a four-letter PDB ID in addition to a hyphen followed by the single NMR structural model numeric ID, the residue naming scheme is **Chain ID\_residue name\_residue number**,  $\angle ADH$  represents the angle formed by acceptor (A), donor (D) and hydrogen (H) ( $\angle ADH$ ).

| PDB ID | Residue A | Atom A | Residue B | Atom B | Distance (Å) |
|--------|-----------|--------|-----------|--------|--------------|
| 3J70   | A_ARG_64  | NH2    | B_ASP_1   | OD1    | 2.676        |
| 3J70   | A_LYS_209 | NZ     | B_GLU_123 | OE1    | 3.744        |
| 3J70   | A_LYS_209 | NZ     | B_GLU_123 | OE2    | 2.604        |
| 3J70   | C_LYS_29  | NZ     | D_ASP_279 | OD2    | 2.704        |
| 3J70   | C_ARG_59  | NH1    | D_ASP_368 | OD1    | 3.842        |
| 3J70   | C_ARG_59  | NH1    | D_ASP_368 | OD2    | 2.986        |
| 3J70   | C_ARG_59  | NH2    | D_ASP_368 | OD1    | 2.621        |
| 3J70   | C_ARG_59  | NH2    | D_ASP_368 | OD2    | 3.173        |
| 3J70   | D_ARG_146 | NH1    | C_GLU_169 | OE1    | 2.841        |
| 3J70   | D_ARG_146 | NH1    | C_GLU_169 | OE2    | 2.796        |
| 3J70   | D_ARG_146 | NH2    | C_GLU_169 | OE1    | 3.599        |
| 3J70   | D_LYS_171 | NZ     | C_GLU_13  | OE1    | 3.949        |
| 3J70   | D_LYS_322 | NZ     | A_ASP_95  | OD2    | 2.908        |
| 3J70   | D_ARG_327 | NH2    | A_ASP_52  | OD2    | 3.286        |
| 3J70   | D_ARG_419 | NH1    | A_ASP_54  | OD1    | 3.985        |
| 3J70   | M_ARG_64  | NH2    | N_ASP_1   | OD1    | 2.677        |
| 3J70   | M_LYS_209 | NZ     | N_GLU_123 | OE1    | 3.744        |
| 3J70   | M_LYS_209 | NZ     | N_GLU_123 | OE2    | 2.604        |
| 3J70   | O_LYS_29  | NZ     | P_ASP_279 | OD2    | 2.704        |
| 3J70   | O_ARG_59  | NH1    | P_ASP_368 | OD1    | 3.842        |
| 3J70   | O_ARG_59  | NH1    | P_ASP_368 | OD2    | 2.986        |
| 3J70   | O_ARG_59  | NH2    | P_ASP_368 | OD1    | 2.620        |
| 3J70   | O_ARG_59  | NH2    | P_ASP_368 | OD2    | 3.173        |
| 3J70   | P_ARG_146 | NH1    | O_GLU_169 | OE1    | 2.841        |
| 3J70   | P_ARG_146 | NH1    | O_GLU_169 | OE2    | 2.796        |
| 3J70   | P_ARG_146 | NH2    | O_GLU_169 | OE1    | 3.599        |
| 3J70   | P_LYS_171 | NZ     | O_GLU_13  | OE1    | 3.948        |
| 3J70   | P_LYS_322 | NZ     | M_ASP_95  | OD2    | 2.909        |
| 3J70   | P_ARG_327 | NH2    | M_ASP_52  | OD2    | 3.286        |
| 3J70   | P_ARG_419 | NH1    | M_ASP_54  | OD1    | 3.985        |
| 3J70   | R_ARG_64  | NH2    | S_ASP_1   | OD1    | 2.677        |
| 3J70   | R_LYS_209 | NZ     | S_GLU_123 | OE1    | 3.743        |
| 3J70   | R_LYS_209 | NZ     | S_GLU_123 | OE2    | 2.603        |
| 3J70   | T_LYS_29  | NZ     | U_ASP_279 | OD2    | 2.704        |
| 3J70   | T_ARG_59  | NH1    | U_ASP_368 | OD1    | 3.842        |
| 3J70   | T_ARG_59  | NH1    | U_ASP_368 | OD2    | 2.986        |
| 3J70   | T_ARG_59  | NH2    | U_ASP_368 | OD1    | 2.621        |
| 3J70   | T_ARG_59  | NH2    | U_ASP_368 | OD2    | 3.174        |
| 3J70   | U_ARG_146 | NH1    | T_GLU_169 | OE1    | 2.840        |
| 3J70   | U_ARG_146 | NH1    | T_GLU_169 | OE2    | 2.796        |
| 3J70   | U_ARG_146 | NH2    | T_GLU_169 | OE1    | 3.599        |
| 3J70   | U_LYS_171 | NZ     | T_GLU_13  | OE1    | 3.949        |
| 3J70   | U_LYS_322 | NZ     | R_ASP_95  | OD2    | 2.909        |
| 3J70   | U_ARG_327 | NH2    | R_ASP_52  | OD2    | 3.287        |
| 3J70   | U_ARG_419 | NH1    | R_ASP_54  | OD1    | 3.985        |

Table 1239: Interfacial 3J70-specific salt bridging networks analysis. In this table, a PDB file is specified with a four-letter PDB ID, except that the names of the PDB files corresponding to the single NMR structural model split from the NMR ensemble is specified with a four-letter PDB ID in addition to a hyphen followed by the single NMR structural model numeric ID, the residue naming scheme is **Chain ID\_residue name\_residue number**,  $\angle ADH$  represents the angle formed by acceptor (A), donor (D) and hydrogen (H) ( $\angle ADH$ ).

| PDB ID | Residue A | Atom A | Residue B | Atom B | Distance (Å) |
|--------|-----------|--------|-----------|--------|--------------|
| 3JCC   | A_ARG_429 | NH2    | D_ASP_63  | OD2    | 3.854        |
| 3JCC   | C_LYS_207 | NZ     | B_GLU_124 | OE1    | 3.629        |
| 3JCC   | D_ARG_59  | NH2    | A_ASP_368 | OD1    | 2.961        |
| 3JCC   | D_ARG_59  | NH2    | A_ASP_368 | OD2    | 3.986        |

Table 1240: Interfacial 3JCC-specific salt bridging networks analysis. In this table, a PDB file is specified with a four-letter PDB ID, except that the names of the PDB files corresponding to the single NMR structural model split from the NMR ensemble is specified with a four-letter PDB ID in addition to a hyphen followed by the single NMR structural model numeric ID, the residue naming scheme is **Chain ID\_residue name\_residue number**,  $\angle ADH$  represents the angle formed by acceptor (A), donor (D) and hydrogen (H) ( $\angle ADH$ ).

| PDB ID | Residue A | Atom A | Residue B | Atom B | Distance (Å) |
|--------|-----------|--------|-----------|--------|--------------|
| 3KS0   | H_LYS_39  | NZ     | L_GLU_40  | OE1    | 3.686        |
| 3KS0   | H_LYS_39  | NZ     | L_GLU_40  | OE2    | 2.843        |
| 3KS0   | H_LYS_147 | NZ     | L_GLU_127 | OE2    | 3.112        |
| 3KS0   | H_LYS_212 | NZ     | L_GLU_126 | OE1    | 3.920        |
| 3KS0   | H_LYS_212 | NZ     | L_GLU_126 | OE2    | 3.042        |
| 3KS0   | K_LYS_39  | NZ     | J_GLU_40  | OE1    | 3.754        |
| 3KS0   | K_LYS_39  | NZ     | J_GLU_40  | OE2    | 2.934        |
| 3KS0   | K_LYS_147 | NZ     | J_GLU_127 | OE2    | 3.169        |
| 3KS0   | K_LYS_212 | NZ     | J_GLU_126 | OE1    | 3.344        |
| 3KS0   | K_LYS_212 | NZ     | J_GLU_126 | OE2    | 2.562        |

Table 1241: Interfacial 3KS0-specific salt bridging networks analysis. In this table, a PDB file is specified with a four-letter PDB ID, except that the names of the PDB files corresponding to the single NMR structural model split from the NMR ensemble is specified with a four-letter PDB ID in addition to a hyphen followed by the single NMR structural model numeric ID, the residue naming scheme is **Chain ID\_residue name\_residue number**,  $\angle ADH$  represents the angle formed by acceptor (A), donor (D) and hydrogen (H) ( $\angle ADH$ ).

| PDB ID | Residue A | Atom A | Residue B | Atom B | Distance (Å) |
|--------|-----------|--------|-----------|--------|--------------|
| 3L7E   | H.LYS.217 | NZ     | L.GLU.123 | OE1    | 3.175        |
| 3L7E   | B.LYS.217 | NZ     | A.GLU.123 | OE1    | 2.697        |
| 3L7E   | B.LYS.217 | NZ     | A.GLU.123 | OE2    | 3.970        |

Table 1242: Interfacial 3L7E-specific salt bridging networks analysis. In this table, a PDB file is specified with a four-letter PDB ID, except that the names of the PDB files corresponding to the single NMR structural model split from the NMR ensemble is specified with a four-letter PDB ID in addition to a hyphen followed by the single NMR structural model numeric ID, the residue naming scheme is **Chain ID\_residue name\_residue number**,  $\angle ADH$  represents the angle formed by acceptor (A), donor (D) and hydrogen (H) ( $\angle ADH$ ).



| PDB ID | Residue A | Atom A | Residue B | Atom B | Distance (Å) |
|--------|-----------|--------|-----------|--------|--------------|
| 3LZF   | A_ARG_109 | NH2    | B_GLU_69  | OE1    | 3.970        |
| 3LZF   | A_ARG_109 | NH2    | B_GLU_69  | OE2    | 2.555        |
| 3LZF   | A_LYS_157 | NZ     | H_ASP_52  | OD1    | 3.712        |
| 3LZF   | A_LYS_157 | NZ     | H_ASP_52  | OD2    | 3.952        |
| 3LZF   | A_LYS_157 | NZ     | H_ASP_54  | OD2    | 2.960        |
| 3LZF   | A_LYS_166 | NZ     | L_ASP_93  | OD1    | 2.890        |
| 3LZF   | A_LYS_166 | NZ     | L_ASP_93  | OD2    | 2.667        |
| 3LZF   | A_ARG_310 | NH1    | B_ASP_90  | OD1    | 2.412        |
| 3LZF   | A_ARG_310 | NH2    | B_ASP_90  | OD1    | 3.228        |
| 3LZF   | B_LYS_68  | NZ     | A_GLU_110 | OE1    | 3.290        |
| 3LZF   | B_LYS_68  | NZ     | A_GLU_110 | OE2    | 2.778        |
| 3LZF   | H_LYS_221 | NZ     | L_GLU_123 | OE2    | 3.483        |

Table 1243: Interfacial 3LZF-specific salt bridging networks analysis. In this table, a PDB file is specified with a four-letter PDB ID, except that the names of the PDB files corresponding to the single NMR structural model split from the NMR ensemble is specified with a four-letter PDB ID in addition to a hyphen followed by the single NMR structural model numeric ID, the residue naming scheme is **Chain ID residue name residue number**,  $\angle ADH$  represents the angle formed by acceptor (A), donor (D) and hydrogen (H) ( $\angle ADH$ ).

| PDB ID | Residue A | Atom A | Residue B | Atom B | Distance (Å) |
|--------|-----------|--------|-----------|--------|--------------|
| 3MLR   | H_LYS_129 | NZ     | L_ASP_142 | OD2    | 3.806        |
| 3MLR   | H_LYS_209 | NZ     | L_GLU_127 | OE2    | 3.182        |
| 3MLR   | P_LYS_304 | NZ     | H_ASP_31  | OD1    | 3.470        |
| 3MLR   | P_LYS_305 | NZ     | H_ASP_54  | OD1    | 2.683        |
| 3MLR   | P_LYS_305 | NZ     | H_ASP_54  | OD2    | 3.624        |
| 3MLR   | P_LYS_305 | NZ     | H_ASP_56  | OD2    | 3.011        |

Table 1244: Interfacial 3MLR-specific salt bridging networks analysis. In this table, a PDB file is specified with a four-letter PDB ID, except that the names of the PDB files corresponding to the single NMR structural model split from the NMR ensemble is specified with a four-letter PDB ID in addition to a hyphen followed by the single NMR structural model numeric ID, the residue naming scheme is **Chain ID\_residue name\_residue number**,  $\angle ADH$  represents the angle formed by acceptor (A), donor (D) and hydrogen (H) ( $\angle ADH$ ).

| PDB ID | Residue A | Atom A | Residue B | Atom B | Distance (Å) |
|--------|-----------|--------|-----------|--------|--------------|
| 3MLS   | H.LYS_73  | NZ     | I.ASP_31  | OD1    | 3.962        |
| 3MLS   | H.LYS_73  | NZ     | I.ASP_31  | OD2    | 2.716        |
| 3MLS   | H.LYS_73  | NZ     | I.ASP_53  | OD1    | 3.242        |
| 3MLS   | H.LYS_73  | NZ     | I.ASP_53  | OD2    | 3.339        |
| 3MLS   | H.LYS_117 | NZ     | J.GLU_10  | OE1    | 3.515        |
| 3MLS   | H.LYS_143 | NZ     | L.GLU_128 | OE2    | 2.664        |
| 3MLS   | H.LYS_209 | NZ     | L.GLU_127 | OE1    | 2.677        |
| 3MLS   | P.ARG_11  | NH1    | H.GLU_99  | OE1    | 3.690        |
| 3MLS   | P.ARG_11  | NH1    | H.GLU_99  | OE2    | 3.548        |
| 3MLS   | P.ARG_11  | NH2    | H.GLU_99  | OE1    | 3.097        |
| 3MLS   | P.ARG_11  | NH2    | H.GLU_99  | OE2    | 3.355        |
| 3MLS   | P.LYS_12  | NZ     | H.ASP_54  | OD1    | 3.420        |
| 3MLS   | P.LYS_12  | NZ     | H.ASP_54  | OD2    | 2.807        |
| 3MLS   | P.LYS_12  | NZ     | H.ASP_56  | OD1    | 3.833        |
| 3MLS   | P.LYS_12  | NZ     | H.ASP_56  | OD2    | 3.175        |
| 3MLS   | I.LYS_143 | NZ     | M.GLU_128 | OE2    | 2.744        |
| 3MLS   | Q.LYS_12  | NZ     | I.ASP_54  | OD1    | 2.683        |
| 3MLS   | Q.LYS_12  | NZ     | I.ASP_54  | OD2    | 3.484        |
| 3MLS   | Q.LYS_12  | NZ     | I.ASP_56  | OD1    | 3.650        |
| 3MLS   | N.LYS_97  | NZ     | J.GLU_64  | OE2    | 3.402        |
| 3MLS   | J.LYS_117 | NZ     | H.GLU_10  | OE1    | 3.984        |
| 3MLS   | J.LYS_209 | NZ     | N.GLU_127 | OE2    | 3.428        |
| 3MLS   | R.LYS_12  | NZ     | J.ASP_54  | OD1    | 2.569        |
| 3MLS   | R.LYS_12  | NZ     | J.ASP_54  | OD2    | 3.629        |
| 3MLS   | R.LYS_12  | NZ     | J.ASP_56  | OD2    | 2.975        |
| 3MLS   | K.LYS_117 | NZ     | L.GLU_10  | OE1    | 3.985        |
| 3MLS   | S.LYS_12  | NZ     | K.ASP_54  | OD1    | 2.573        |
| 3MLS   | S.LYS_12  | NZ     | K.ASP_54  | OD2    | 3.736        |
| 3MLS   | S.LYS_12  | NZ     | K.ASP_56  | OD2    | 3.122        |

Table 1245: Interfacial 3MLS-specific salt bridging networks analysis. In this table, a PDB file is specified with a four-letter PDB ID, except that the names of the PDB files corresponding to the single NMR structural model split from the NMR ensemble is specified with a four-letter PDB ID in addition to a hyphen followed by the single NMR structural model numeric ID, the residue naming scheme is **Chain ID\_residue name\_residue number**,  $\angle ADH$  represents the angle formed by acceptor (A), donor (D) and hydrogen (H) ( $\angle ADH$ ).

| PDB ID | Residue A | Atom A | Residue B | Atom B | Distance (Å) |
|--------|-----------|--------|-----------|--------|--------------|
| 3MLT   | P_ARG_304 | NH1    | H_ASP_31  | OD1    | 2.766        |
| 3MLT   | P_LYS_305 | NZ     | H_ASP_54  | OD1    | 2.503        |
| 3MLT   | P_LYS_305 | NZ     | H_ASP_54  | OD2    | 3.276        |
| 3MLT   | P_LYS_305 | NZ     | H_ASP_56  | OD2    | 2.482        |
| 3MLT   | B_LYS_209 | NZ     | A_GLU_127 | OE2    | 3.807        |
| 3MLT   | C_LYS_305 | NZ     | B_ASP_54  | OD1    | 3.099        |
| 3MLT   | C_LYS_305 | NZ     | B_ASP_54  | OD2    | 3.737        |
| 3MLT   | C_LYS_305 | NZ     | B_ASP_56  | OD2    | 3.095        |
| 3MLT   | E_LYS_209 | NZ     | D_GLU_127 | OE2    | 3.591        |
| 3MLT   | I_LYS_209 | NZ     | G_GLU_127 | OE2    | 3.669        |

Table 1246: Interfacial 3MLT-specific salt bridging networks analysis. In this table, a PDB file is specified with a four-letter PDB ID, except that the names of the PDB files corresponding to the single NMR structural model split from the NMR ensemble is specified with a four-letter PDB ID in addition to a hyphen followed by the single NMR structural model numeric ID, the residue naming scheme is **Chain ID\_residue name\_residue number**,  $\angle ADH$  represents the angle formed by acceptor (A), donor (D) and hydrogen (H) ( $\angle ADH$ ).

| PDB ID | Residue A | Atom A | Residue B | Atom B | Distance (Å) |
|--------|-----------|--------|-----------|--------|--------------|
| 3MLU   | L_LYS_133 | NZ     | H_ASP_144 | OD2    | 3.641        |
| 3MLU   | P_LYS_305 | NZ     | H_ASP_54  | OD1    | 2.586        |
| 3MLU   | P_LYS_305 | NZ     | H_ASP_54  | OD2    | 3.496        |
| 3MLU   | P_LYS_305 | NZ     | H_ASP_56  | OD2    | 3.684        |

Table 1247: Interfacial 3MLU-specific salt bridging networks analysis. In this table, a PDB file is specified with a four-letter PDB ID, except that the names of the PDB files corresponding to the single NMR structural model split from the NMR ensemble is specified with a four-letter PDB ID in addition to a hyphen followed by the single NMR structural model numeric ID, the residue naming scheme is **Chain ID\_residue name\_residue number**,  $\angle ADH$  represents the angle formed by acceptor (A), donor (D) and hydrogen (H) ( $\angle ADH$ ).

| PDB ID | Residue A | Atom A | Residue B | Atom B | Distance (Å) |
|--------|-----------|--------|-----------|--------|--------------|
| 3MLV   | P_ARG_304 | NH1    | H_ASP_31  | OD1    | 3.750        |
| 3MLV   | P_LYS_305 | NZ     | H_ASP_54  | OD1    | 2.508        |
| 3MLV   | P_LYS_305 | NZ     | H_ASP_54  | OD2    | 3.477        |
| 3MLV   | P_LYS_305 | NZ     | H_ASP_56  | OD2    | 2.918        |
| 3MLV   | M_LYS_97  | NZ     | N_GLU_64  | OE1    | 2.901        |
| 3MLV   | Q_ARG_304 | NH1    | N_GLU_99  | OE2    | 3.900        |
| 3MLV   | Q_ARG_304 | NH2    | N_GLU_99  | OE2    | 3.849        |
| 3MLV   | Q_LYS_305 | NZ     | N_ASP_54  | OD1    | 3.154        |
| 3MLV   | Q_LYS_305 | NZ     | N_ASP_54  | OD2    | 3.686        |
| 3MLV   | Q_LYS_305 | NZ     | N_ASP_56  | OD2    | 2.702        |

Table 1248: Interfacial 3MLV-specific salt bridging networks analysis. In this table, a PDB file is specified with a four-letter PDB ID, except that the names of the PDB files corresponding to the single NMR structural model split from the NMR ensemble is specified with a four-letter PDB ID in addition to a hyphen followed by the single NMR structural model numeric ID, the residue naming scheme is **Chain ID\_residue name\_residue number**,  $\angle ADH$  represents the angle formed by acceptor (A), donor (D) and hydrogen (H) ( $\angle ADH$ ).

| PDB ID | Residue A | Atom A | Residue B  | Atom B | Distance (Å) |
|--------|-----------|--------|------------|--------|--------------|
| 3MLW   | L_ARG_50  | NH1    | H_ASP_100G | OD1    | 2.178        |
| 3MLW   | L_ARG_50  | NH1    | H_ASP_100G | OD2    | 3.432        |
| 3MLW   | L_LYS_129 | NZ     | H_ASP_144  | OD2    | 3.472        |
| 3MLW   | H_ARG_58  | NH1    | L_ASP_95D  | OD1    | 3.535        |
| 3MLW   | H_ARG_58  | NH1    | L_ASP_95D  | OD2    | 2.585        |
| 3MLW   | P_LYS_303 | NZ     | H_ASP_31   | OD2    | 3.075        |
| 3MLW   | P_ARG_304 | NH1    | H_ASP_31   | OD1    | 3.646        |
| 3MLW   | P_LYS_305 | NZ     | H_ASP_54   | OD1    | 3.646        |
| 3MLW   | P_LYS_305 | NZ     | H_ASP_54   | OD2    | 2.863        |
| 3MLW   | P_LYS_305 | NZ     | H_ASP_56   | OD1    | 3.537        |
| 3MLW   | P_ARG_315 | NH1    | L_ASP_93   | OD1    | 2.718        |
| 3MLW   | P_ARG_315 | NH1    | L_ASP_93   | OD2    | 3.239        |
| 3MLW   | M_ARG_50  | NH2    | L_ASP_100G | OD1    | 2.708        |
| 3MLW   | M_ARG_50  | NH2    | L_ASP_100G | OD2    | 3.923        |
| 3MLW   | L_ARG_58  | NH1    | M_ASP_95D  | OD1    | 2.653        |
| 3MLW   | L_ARG_58  | NH1    | M_ASP_95D  | OD2    | 3.643        |
| 3MLW   | L_LYS_209 | NZ     | M_GLU_123  | OE1    | 2.581        |
| 3MLW   | L_LYS_209 | NZ     | M_GLU_123  | OE2    | 3.213        |
| 3MLW   | Q_LYS_305 | NZ     | L_ASP_54   | OD2    | 3.005        |
| 3MLW   | Q_LYS_305 | NZ     | L_ASP_56   | OD1    | 2.747        |
| 3MLW   | Q_ARG_315 | NH1    | M_ASP_93   | OD1    | 3.021        |

Table 1249: Interfacial 3MLW-specific salt bridging networks analysis. In this table, a PDB file is specified with a four-letter PDB ID, except that the names of the PDB files corresponding to the single NMR structural model split from the NMR ensemble is specified with a four-letter PDB ID in addition to a hyphen followed by the single NMR structural model numeric ID, the residue naming scheme is **Chain ID\_residue name\_residue number**,  $\angle ADH$  represents the angle formed by acceptor (A), donor (D) and hydrogen (H) ( $\angle ADH$ ).

| PDB ID | Residue A | Atom A | Residue B | Atom B | Distance (Å) |
|--------|-----------|--------|-----------|--------|--------------|
| 3MLX   | H_LYS_143 | NZ     | L_GLU_124 | OE2    | 3.021        |
| 3MLX   | P_HIS_308 | ND1    | H_GLU_98  | OE2    | 3.800        |
| 3MLX   | P_HIS_308 | NE2    | H_GLU_98  | OE2    | 3.892        |
| 3MLX   | I_LYS_143 | NZ     | M_GLU_124 | OE2    | 2.608        |
| 3MLX   | I_LYS_214 | NZ     | M_GLU_123 | OE1    | 3.588        |
| 3MLX   | Q_HIS_308 | ND1    | L_GLU_98  | OE1    | 3.280        |

Table 1250: Interfacial 3MLX-specific salt bridging networks analysis. In this table, a PDB file is specified with a four-letter PDB ID, except that the names of the PDB files corresponding to the single NMR structural model split from the NMR ensemble is specified with a four-letter PDB ID in addition to a hyphen followed by the single NMR structural model numeric ID, the residue naming scheme is **Chain ID\_residue name\_residue number**,  $\angle ADH$  represents the angle formed by acceptor (A), donor (D) and hydrogen (H) ( $\angle ADH$ ).



| PDB ID | Residue A | Atom A | Residue B | Atom B | Distance (Å) |
|--------|-----------|--------|-----------|--------|--------------|
| 3MLY   | H_LYS_143 | NZ     | L_GLU_124 | OE2    | 3.991        |
| 3MLY   | H_LYS_214 | NZ     | L_GLU_123 | OE1    | 3.745        |
| 3MLY   | P_LYS_308 | NZ     | L_GLU_50  | OE1    | 3.397        |
| 3MLY   | P_LYS_308 | NZ     | L_GLU_50  | OE2    | 3.390        |
| 3MLY   | I_LYS_143 | NZ     | M_GLU_124 | OE2    | 2.661        |
| 3MLY   | I_LYS_214 | NZ     | M_GLU_123 | OE1    | 3.594        |

Table 1251: Interfacial 3MLY-specific salt bridging networks analysis. In this table, a PDB file is specified with a four-letter PDB ID, except that the names of the PDB files corresponding to the single NMR structural model split from the NMR ensemble is specified with a four-letter PDB ID in addition to a hyphen followed by the single NMR structural model numeric ID, the residue naming scheme is **Chain ID\_residue name\_residue number**,  $\angle ADH$  represents the angle formed by acceptor (A), donor (D) and hydrogen (H) ( $\angle ADH$ ).

| PDB ID | Residue A | Atom A | Residue B | Atom B | Distance (Å) |
|--------|-----------|--------|-----------|--------|--------------|
| 3MLZ   | H_LYS_    | NZ     | L_GLU_    | OE1    | 3.724        |
| 3MLZ   | H_LYS_    | NZ     | L_GLU_    | OE2    | 3.184        |
| 3MLZ   | H_LYS_    | NZ     | L_GLU_    | OE2    | 2.805        |
| 3MLZ   | H_LYS_    | NZ     | L_GLU_    | OE1    | 3.039        |
| 3MLZ   | H_LYS_    | NZ     | L_GLU_    | OE2    | 3.262        |

Table 1252: Interfacial 3MLZ-specific salt bridging networks analysis. In this table, a PDB file is specified with a four-letter PDB ID, except that the names of the PDB files corresponding to the single NMR structural model split from the NMR ensemble is specified with a four-letter PDB ID in addition to a hyphen followed by the single NMR structural model numeric ID, the residue naming scheme is **Chain ID\_residue name\_residue number**,  $\angle ADH$  represents the angle formed by acceptor (A), donor (D) and hydrogen (H) ( $\angle ADH$ ).

| PDB ID | Residue A | Atom A | Residue B | Atom B | Distance (Å) |
|--------|-----------|--------|-----------|--------|--------------|
| 3NFP   | A_ARG_33  | NH1    | K_ASP_4   | OD1    | 3.227        |
| 3NFP   | A_ARG_33  | NH2    | K_ASP_6   | OD1    | 3.995        |
| 3NFP   | A_ARG_33  | NH2    | K_ASP_6   | OD2    | 2.804        |
| 3NFP   | A_HIS_35  | NE2    | K_ASP_4   | OD1    | 3.568        |
| 3NFP   | A_HIS_35  | NE2    | K_ASP_4   | OD2    | 3.384        |
| 3NFP   | H_ARG_33  | NH1    | I_ASP_4   | OD2    | 2.868        |
| 3NFP   | H_ARG_33  | NH2    | I_ASP_6   | OD2    | 3.531        |
| 3NFP   | H_HIS_35  | NE2    | I_ASP_4   | OD1    | 3.314        |
| 3NFP   | H_HIS_35  | NE2    | I_ASP_4   | OD2    | 3.660        |
| 3NFP   | H_LYS_212 | NZ     | L_GLU_122 | OE1    | 3.767        |
| 3NFP   | I_HIS_120 | NE2    | H_GLU_59  | OE1    | 3.799        |
| 3NFP   | I_HIS_120 | NE2    | H_GLU_59  | OE2    | 3.285        |
| 3NFP   | K_HIS_120 | NE2    | A_GLU_59  | OE2    | 3.393        |

Table 1253: Interfacial 3NFP-specific salt bridging networks analysis. In this table, a PDB file is specified with a four-letter PDB ID, except that the names of the PDB files corresponding to the single NMR structural model split from the NMR ensemble is specified with a four-letter PDB ID in addition to a hyphen followed by the single NMR structural model numeric ID, the residue naming scheme is **Chain ID\_residue name\_residue number**,  $\angle ADH$  represents the angle formed by acceptor (A), donor (D) and hydrogen (H) ( $\angle ADH$ ).

| PDB ID | Residue A | Atom A | Residue B | Atom B | Distance (Å) |
|--------|-----------|--------|-----------|--------|--------------|
| 3NGB   | G_LYS_97  | NZ     | H_ASP_99  | OD2    | 3.903        |
| 3NGB   | H_ARG_71  | NH1    | G_ASP_368 | OD1    | 3.623        |
| 3NGB   | H_ARG_71  | NH1    | G_ASP_368 | OD2    | 3.004        |
| 3NGB   | H_ARG_71  | NH2    | G_ASP_368 | OD1    | 2.815        |
| 3NGB   | H_ARG_71  | NH2    | G_ASP_368 | OD2    | 3.723        |
| 3NGB   | H_LYS_209 | NZ     | L_GLU_125 | OE1    | 3.421        |
| 3NGB   | H_LYS_209 | NZ     | L_GLU_125 | OE2    | 3.841        |
| 3NGB   | A_LYS_97  | NZ     | B_ASP_99  | OD2    | 3.768        |
| 3NGB   | B_ARG_71  | NH1    | A_ASP_368 | OD1    | 3.647        |
| 3NGB   | B_ARG_71  | NH1    | A_ASP_368 | OD2    | 2.944        |
| 3NGB   | B_ARG_71  | NH2    | A_ASP_368 | OD1    | 2.895        |
| 3NGB   | B_ARG_71  | NH2    | A_ASP_368 | OD2    | 3.718        |
| 3NGB   | B_LYS_209 | NZ     | C_GLU_125 | OE1    | 2.774        |
| 3NGB   | B_LYS_209 | NZ     | C_GLU_125 | OE2    | 2.799        |
| 3NGB   | D_LYS_97  | NZ     | E_ASP_99  | OD1    | 3.709        |
| 3NGB   | E_ARG_71  | NH1    | D_ASP_368 | OD1    | 3.715        |
| 3NGB   | E_ARG_71  | NH1    | D_ASP_368 | OD2    | 3.074        |
| 3NGB   | E_ARG_71  | NH2    | D_ASP_368 | OD1    | 3.026        |
| 3NGB   | E_ARG_71  | NH2    | D_ASP_368 | OD2    | 3.848        |
| 3NGB   | E_HIS_164 | ND1    | F_ASP_169 | OD1    | 3.984        |
| 3NGB   | E_LYS_    | NZ     | F_GLU_    | OE1    | 3.345        |
| 3NGB   | E_LYS_    | NZ     | F_GLU_    | OE2    | 2.927        |
| 3NGB   | L_LYS_97  | NZ     | J_ASP_99  | OD1    | 3.443        |
| 3NGB   | J_ARG_71  | NH1    | I_ASP_368 | OD1    | 3.645        |
| 3NGB   | J_ARG_71  | NH1    | I_ASP_368 | OD2    | 3.125        |
| 3NGB   | J_ARG_71  | NH2    | I_ASP_368 | OD1    | 3.120        |
| 3NGB   | J_LYS_209 | NZ     | K_GLU_125 | OE1    | 2.929        |
| 3NGB   | J_LYS_209 | NZ     | K_GLU_125 | OE2    | 3.060        |
| 3NGB   | J_LYS_214 | NZ     | K_ASP_124 | OD1    | 3.305        |

Table 1254: Interfacial 3NGB-specific salt bridging networks analysis. In this table, a PDB file is specified with a four-letter PDB ID, except that the names of the PDB files corresponding to the single NMR structural model split from the NMR ensemble is specified with a four-letter PDB ID in addition to a hyphen followed by the single NMR structural model numeric ID, the residue naming scheme is **Chain ID\_residue name\_residue number**,  $\angle ADH$  represents the angle formed by acceptor (A), donor (D) and hydrogen (H) ( $\angle ADH$ ).

| PDB ID | Residue A | Atom A | Residue B | Atom B | Distance (Å) |
|--------|-----------|--------|-----------|--------|--------------|
| 3NH7   | H_ARG_98  | NH1    | A_ASP_67  | OD2    | 3.819        |
| 3NH7   | H_ARG_98  | NH2    | A_ASP_67  | OD1    | 2.850        |
| 3NH7   | H_ARG_98  | NH2    | A_ASP_67  | OD2    | 2.389        |
| 3NH7   | H_ARG_100 | NH2    | A_GLU_64  | OE2    | 3.004        |
| 3NH7   | H_HIS_102 | ND1    | A_GLU_64  | OE1    | 2.378        |
| 3NH7   | H_ARG_104 | NH2    | A_GLU_81  | OE1    | 3.515        |
| 3NH7   | H_ARG_104 | NH2    | A_GLU_81  | OE2    | 2.462        |
| 3NH7   | H_LYS_216 | NZ     | L_GLU_125 | OE2    | 3.557        |
| 3NH7   | A_LYS_79  | NZ     | L_ASP_50  | OD1    | 3.333        |
| 3NH7   | A_LYS_79  | NZ     | L_ASP_50  | OD2    | 3.058        |
| 3NH7   | A_LYS_92  | NZ     | H_GLU_99  | OE1    | 3.975        |
| 3NH7   | A_LYS_92  | NZ     | H_GLU_99  | OE2    | 3.561        |
| 3NH7   | I_ARG_98  | NH1    | B_ASP_67  | OD2    | 3.924        |
| 3NH7   | I_ARG_98  | NH2    | B_ASP_67  | OD1    | 3.388        |
| 3NH7   | I_ARG_98  | NH2    | B_ASP_67  | OD2    | 2.296        |
| 3NH7   | I_ARG_100 | NH2    | B_GLU_64  | OE2    | 2.996        |
| 3NH7   | I_HIS_102 | ND1    | B_GLU_64  | OE1    | 2.707        |
| 3NH7   | I_ARG_104 | NH2    | B_GLU_81  | OE1    | 3.637        |
| 3NH7   | I_ARG_104 | NH2    | B_GLU_81  | OE2    | 2.502        |
| 3NH7   | I_LYS_216 | NZ     | M_GLU_125 | OE1    | 3.301        |
| 3NH7   | I_LYS_216 | NZ     | M_GLU_125 | OE2    | 3.320        |
| 3NH7   | B_LYS_79  | NZ     | M_ASP_50  | OD1    | 3.625        |
| 3NH7   | B_LYS_79  | NZ     | M_ASP_50  | OD2    | 2.953        |
| 3NH7   | B_LYS_92  | NZ     | L_GLU_99  | OE1    | 3.831        |
| 3NH7   | B_LYS_92  | NZ     | L_GLU_99  | OE2    | 3.683        |
| 3NH7   | J_ARG_98  | NH1    | C_ASP_67  | OD2    | 3.893        |
| 3NH7   | J_ARG_98  | NH2    | C_ASP_67  | OD1    | 3.313        |
| 3NH7   | J_ARG_98  | NH2    | C_ASP_67  | OD2    | 2.401        |
| 3NH7   | J_ARG_100 | NH2    | C_GLU_64  | OE2    | 3.173        |
| 3NH7   | J_HIS_102 | ND1    | C_GLU_64  | OE1    | 2.668        |
| 3NH7   | J_ARG_104 | NH2    | C_GLU_81  | OE1    | 3.595        |
| 3NH7   | J_ARG_104 | NH2    | C_GLU_81  | OE2    | 2.634        |
| 3NH7   | J_LYS_216 | NZ     | N_GLU_125 | OE1    | 2.816        |
| 3NH7   | J_LYS_216 | NZ     | N_GLU_125 | OE2    | 3.044        |
| 3NH7   | C_LYS_79  | NZ     | N_ASP_50  | OD1    | 3.064        |
| 3NH7   | C_LYS_79  | NZ     | N_ASP_50  | OD2    | 3.315        |
| 3NH7   | C_LYS_92  | NZ     | J_GLU_99  | OE1    | 3.721        |
| 3NH7   | C_LYS_92  | NZ     | J_GLU_99  | OE2    | 3.806        |
| 3NH7   | K_ARG_98  | NH1    | D_ASP_67  | OD2    | 3.348        |
| 3NH7   | K_ARG_98  | NH2    | D_ASP_67  | OD1    | 3.350        |
| 3NH7   | K_ARG_98  | NH2    | D_ASP_67  | OD2    | 2.647        |
| 3NH7   | K_ARG_100 | NH2    | D_GLU_64  | OE2    | 3.101        |
| 3NH7   | K_HIS_102 | ND1    | D_GLU_64  | OE1    | 2.313        |
| 3NH7   | K_ARG_104 | NH2    | D_GLU_81  | OE1    | 3.830        |
| 3NH7   | K_ARG_104 | NH2    | D_GLU_81  | OE2    | 2.800        |
| 3NH7   | K_LYS_216 | NZ     | O_GLU_125 | OE1    | 3.159        |
| 3NH7   | K_LYS_216 | NZ     | O_GLU_125 | OE2    | 3.376        |
| 3NH7   | D_LYS_79  | NZ     | O_ASP_50  | OD1    | 3.661        |
| 3NH7   | D_LYS_79  | NZ     | O_ASP_50  | OD2    | 3.355        |
| 3NH7   | D_LYS_92  | NZ     | K_GLU_99  | OE1    | 3.766        |
| 3NH7   | D_LYS_92  | NZ     | K_GLU_99  | OE2    | 3.832        |

---

Table 1255: Interfacial 3NH7-specific salt bridging networks analysis. In this table, a PDB file is specified with a four-letter PDB ID, except that the names of the PDB files corresponding to the single NMR structural model split from the NMR ensemble is specified with a four-letter PDB ID in addition to a hyphen followed by the single NMR structural model numeric ID, the residue naming scheme is **Chain ID\_residue name\_residue number**,  $\angle ADH$  represents the angle formed by acceptor (A), donor (D) and hydrogen (H) ( $\angle ADH$ ).

| PDB ID | Residue A | Atom A | Residue B | Atom B | Distance (Å) |
|--------|-----------|--------|-----------|--------|--------------|
| 3NZ8   | A_HIS_164 | NE2    | B_ASP_167 | OD1    | 3.115        |
| 3NZ8   | A_LYS_208 | NZ     | B_GLU_123 | OE2    | 3.283        |
| 3NZ8   | H_LYS_208 | NZ     | L_GLU_123 | OE2    | 3.808        |

Table 1256: Interfacial 3NZ8-specific salt bridging networks analysis. In this table, a PDB file is specified with a four-letter PDB ID, except that the names of the PDB files corresponding to the single NMR structural model split from the NMR ensemble is specified with a four-letter PDB ID in addition to a hyphen followed by the single NMR structural model numeric ID, the residue naming scheme is **Chain ID\_residue name\_residue number**,  $\angle ADH$  represents the angle formed by acceptor (A), donor (D) and hydrogen (H) ( $\angle ADH$ ).

| PDB ID | Residue A | Atom A | Residue B | Atom B | Distance (Å) |
|--------|-----------|--------|-----------|--------|--------------|
| 3O2D   | L_ARG_95  | NH1    | H_GLU_95  | OE2    | 2.847        |
| 3O2D   | L_ARG_95  | NH2    | H_GLU_95  | OE2    | 3.717        |
| 3O2D   | H_LYS_209 | NZ     | L_GLU_122 | OE1    | 2.503        |
| 3O2D   | H_LYS_209 | NZ     | L_GLU_122 | OE2    | 3.547        |

Table 1257: Interfacial 3O2D-specific salt bridging networks analysis. In this table, a PDB file is specified with a four-letter PDB ID, except that the names of the PDB files corresponding to the single NMR structural model split from the NMR ensemble is specified with a four-letter PDB ID in addition to a hyphen followed by the single NMR structural model numeric ID, the residue naming scheme is **Chain ID\_residue name\_residue number**,  $\angle ADH$  represents the angle formed by acceptor (A), donor (D) and hydrogen (H) ( $\angle ADH$ ).



| PDB ID | Residue A | Atom A | Residue B | Atom B | Distance (Å) |
|--------|-----------|--------|-----------|--------|--------------|
| 3O41   | H_ARG_94  | NH1    | A_GLU_191 | OE1    | 2.970        |
| 3O41   | H_ARG_94  | NH1    | A_GLU_191 | OE2    | 3.394        |
| 3O41   | H_ARG_94  | NH2    | A_GLU_191 | OE1    | 3.744        |
| 3O41   | H_ARG_94  | NH2    | A_GLU_191 | OE2    | 2.660        |
| 3O41   | H_LYS_208 | NZ     | L_GLU_123 | OE2    | 3.054        |
| 3O41   | A_LYS_208 | NZ     | B_GLU_123 | OE2    | 2.651        |
| 3O41   | P_LYS_433 | NZ     | H_ASP_54  | OD1    | 3.659        |
| 3O41   | P_LYS_433 | NZ     | H_ASP_54  | OD2    | 2.887        |
| 3O41   | P_LYS_433 | NZ     | H_ASP_56  | OD2    | 2.760        |
| 3O41   | C_LYS_433 | NZ     | A_ASP_54  | OD1    | 3.503        |
| 3O41   | C_LYS_433 | NZ     | A_ASP_54  | OD2    | 2.671        |
| 3O41   | C_LYS_433 | NZ     | A_ASP_56  | OD2    | 2.936        |

Table 1258: Interfacial 3O41-specific salt bridging networks analysis. In this table, a PDB file is specified with a four-letter PDB ID, except that the names of the PDB files corresponding to the single NMR structural model split from the NMR ensemble is specified with a four-letter PDB ID in addition to a hyphen followed by the single NMR structural model numeric ID, the residue naming scheme is **Chain ID** **residue name** **residue number**,  $\angle ADH$  represents the angle formed by acceptor (A), donor (D) and hydrogen (H) ( $\angle ADH$ ).

| PDB ID | Residue A | Atom A | Residue B | Atom B | Distance (Å) |
|--------|-----------|--------|-----------|--------|--------------|
| 3O45   | H_ARG_94  | NH1    | A_GLU_191 | OE1    | 3.085        |
| 3O45   | H_ARG_94  | NH1    | A_GLU_191 | OE2    | 3.621        |
| 3O45   | H_ARG_94  | NH2    | A_GLU_191 | OE1    | 3.709        |
| 3O45   | H_ARG_94  | NH2    | A_GLU_191 | OE2    | 2.802        |
| 3O45   | H_LYS_208 | NZ     | L_GLU_123 | OE2    | 3.033        |
| 3O45   | A_LYS_208 | NZ     | B_GLU_123 | OE2    | 2.878        |
| 3O45   | P_LYS_433 | NZ     | H_ASP_54  | OD1    | 3.518        |
| 3O45   | P_LYS_433 | NZ     | H_ASP_54  | OD2    | 2.818        |
| 3O45   | P_LYS_433 | NZ     | H_ASP_56  | OD2    | 2.927        |
| 3O45   | C_LYS_433 | NZ     | A_ASP_54  | OD1    | 3.297        |
| 3O45   | C_LYS_433 | NZ     | A_ASP_54  | OD2    | 2.723        |
| 3O45   | C_LYS_433 | NZ     | A_ASP_56  | OD2    | 2.899        |

Table 1259: Interfacial 3O45-specific salt bridging networks analysis. In this table, a PDB file is specified with a four-letter PDB ID, except that the names of the PDB files corresponding to the single NMR structural model split from the NMR ensemble is specified with a four-letter PDB ID in addition to a hyphen followed by the single NMR structural model numeric ID, the residue naming scheme is **Chain ID** **residue name** **residue number**,  $\angle ADH$  represents the angle formed by acceptor (A), donor (D) and hydrogen (H) ( $\angle ADH$ ).

| PDB ID | Residue A | Atom A | Residue B | Atom B | Distance (Å) |
|--------|-----------|--------|-----------|--------|--------------|
| 3OJD   | B_LYS_208 | NZ     | A_GLU_123 | OE2    | 3.588        |
| 3OJD   | B_ARG_213 | NH1    | A_GLU_213 | OE2    | 3.118        |
| 3OJD   | B_ARG_213 | NH2    | A_GLU_213 | OE2    | 3.609        |

Table 1260: Interfacial 3OJD-specific salt bridging networks analysis. In this table, a PDB file is specified with a four-letter PDB ID, except that the names of the PDB files corresponding to the single NMR structural model split from the NMR ensemble is specified with a four-letter PDB ID in addition to a hyphen followed by the single NMR structural model numeric ID, the residue naming scheme is **Chain ID\_residue name\_residue number**,  $\angle ADH$  represents the angle formed by acceptor (A), donor (D) and hydrogen (H) ( $\angle ADH$ ).

| PDB ID | Residue A | Atom A | Residue B | Atom B | Distance (Å) |
|--------|-----------|--------|-----------|--------|--------------|
| 3P0Y   | A_LYS_463 | NZ     | H_GLU_95  | OE2    | 2.859        |
| 3P0Y   | A_LYS_465 | NZ     | H_GLU_50  | OE1    | 2.656        |
| 3P0Y   | A_LYS_465 | NZ     | H_GLU_50  | OE2    | 3.845        |
| 3P0Y   | A_LYS_465 | NZ     | H_GLU_95  | OE1    | 2.777        |
| 3P0Y   | A_LYS_465 | NZ     | H_GLU_95  | OE2    | 3.671        |
| 3P0Y   | H_ARG_97  | NH1    | A_ASP_436 | OD1    | 2.876        |
| 3P0Y   | H_ARG_97  | NH1    | A_ASP_436 | OD2    | 3.533        |
| 3P0Y   | H_ARG_97  | NH2    | A_ASP_436 | OD1    | 3.647        |
| 3P0Y   | H_ARG_97  | NH2    | A_ASP_436 | OD2    | 2.823        |
| 3P0Y   | H_LYS_209 | NZ     | L_GLU_123 | OE1    | 2.674        |
| 3P0Y   | H_LYS_209 | NZ     | L_GLU_123 | OE2    | 3.317        |

Table 1261: Interfacial 3P0Y-specific salt bridging networks analysis. In this table, a PDB file is specified with a four-letter PDB ID, except that the names of the PDB files corresponding to the single NMR structural model split from the NMR ensemble is specified with a four-letter PDB ID in addition to a hyphen followed by the single NMR structural model numeric ID, the residue naming scheme is **Chain ID\_residue name\_residue number**,  $\angle ADH$  represents the angle formed by acceptor (A), donor (D) and hydrogen (H) ( $\angle ADH$ ).

| PDB ID | Residue A | Atom A | Residue B | Atom B | Distance (Å) |
|--------|-----------|--------|-----------|--------|--------------|
| 3P11   | A_ARG_441 | NH1    | H_ASP_58  | OD2    | 3.356        |
| 3P11   | A_ARG_441 | NH1    | L_GLU_94  | OE1    | 2.859        |
| 3P11   | A_ARG_441 | NH1    | L_GLU_94  | OE2    | 3.310        |
| 3P11   | A_ARG_441 | NH2    | L_GLU_94  | OE2    | 3.075        |
| 3P11   | A_LYS_466 | NZ     | H_GLU_95  | OE1    | 2.568        |
| 3P11   | A_LYS_466 | NZ     | H_GLU_95  | OE2    | 3.227        |
| 3P11   | A_HIS_467 | ND1    | H_GLU_50  | OE2    | 3.466        |
| 3P11   | A_HIS_467 | ND1    | L_GLU_94  | OE2    | 3.926        |
| 3P11   | A_HIS_467 | NE2    | H_GLU_50  | OE1    | 3.754        |
| 3P11   | A_HIS_467 | NE2    | H_GLU_50  | OE2    | 3.679        |
| 3P11   | A_HIS_467 | NE2    | H_GLU_95  | OE2    | 3.533        |

Table 1262: Interfacial 3P11-specific salt bridging networks analysis. In this table, a PDB file is specified with a four-letter PDB ID, except that the names of the PDB files corresponding to the single NMR structural model split from the NMR ensemble is specified with a four-letter PDB ID in addition to a hyphen followed by the single NMR structural model numeric ID, the residue naming scheme is **Chain ID\_residue name\_residue number**,  $\angle ADH$  represents the angle formed by acceptor (A), donor (D) and hydrogen (H) ( $\angle ADH$ ).

| PDB ID | Residue A | Atom A | Residue B | Atom B | Distance (Å) |
|--------|-----------|--------|-----------|--------|--------------|
| 3PGF   | L_ARG_66  | NH1    | A_GLU_309 | OE2    | 3.045        |
| 3PGF   | L_ARG_66  | NH2    | A_GLU_309 | OE2    | 2.501        |

Table 1263: Interfacial 3PGF-specific salt bridging networks analysis. In this table, a PDB file is specified with a four-letter PDB ID, except that the names of the PDB files corresponding to the single NMR structural model split from the NMR ensemble is specified with a four-letter PDB ID in addition to a hyphen followed by the single NMR structural model numeric ID, the residue naming scheme is **Chain ID\_residue name\_residue number**,  $\angle ADH$  represents the angle formed by acceptor (A), donor (D) and hydrogen (H) ( $\angle ADH$ ).

| PDB ID | Residue A | Atom A | Residue B | Atom B | Distance (Å) |
|--------|-----------|--------|-----------|--------|--------------|
| 3PNW   | B_ARG_104 | NH1    | C_GLU_599 | OE1    | 3.048        |
| 3PNW   | D_ARG_25  | NH1    | J_GLU_82  | OE1    | 2.858        |
| 3PNW   | D_ARG_25  | NH1    | J_GLU_82  | OE2    | 3.430        |
| 3PNW   | D_ARG_25  | NH2    | J_GLU_82  | OE1    | 3.626        |
| 3PNW   | D_ARG_25  | NH2    | J_GLU_82  | OE2    | 3.034        |
| 3PNW   | E_ARG_104 | NH1    | F_GLU_599 | OE2    | 2.653        |
| 3PNW   | H_ARG_104 | NH1    | I_GLU_599 | OE1    | 3.020        |
| 3PNW   | K_ARG_104 | NH1    | L_GLU_599 | OE1    | 2.888        |
| 3PNW   | K_ARG_104 | NH1    | L_GLU_599 | OE2    | 2.772        |
| 3PNW   | K_ARG_104 | NH2    | L_GLU_599 | OE2    | 3.083        |
| 3PNW   | Q_ARG_104 | NH1    | R_GLU_599 | OE1    | 3.284        |
| 3PNW   | T_ARG_104 | NH1    | U_GLU_599 | OE2    | 2.955        |
| 3PNW   | W_ARG_104 | NH2    | X_GLU_599 | OE2    | 3.113        |

Table 1264: Interfacial 3PNW-specific salt bridging networks analysis. In this table, a PDB file is specified with a four-letter PDB ID, except that the names of the PDB files corresponding to the single NMR structural model split from the NMR ensemble is specified with a four-letter PDB ID in addition to a hyphen followed by the single NMR structural model numeric ID, the residue naming scheme is **Chain ID\_residue name\_residue number**,  $\angle ADH$  represents the angle formed by acceptor (A), donor (D) and hydrogen (H) ( $\angle ADH$ ).

| PDB ID | Residue A | Atom A | Residue B | Atom B | Distance (Å) |
|--------|-----------|--------|-----------|--------|--------------|
| 3PP4   | H_LYS_215 | NZ     | L_GLU_128 | OE1    | 3.038        |
| 3PP4   | H_LYS_215 | NZ     | L_GLU_128 | OE2    | 2.948        |
| 3PP4   | P_LYS_175 | NZ     | H_ASP_57  | OD2    | 3.518        |

Table 1265: Interfacial 3PP4-specific salt bridging networks analysis. In this table, a PDB file is specified with a four-letter PDB ID, except that the names of the PDB files corresponding to the single NMR structural model split from the NMR ensemble is specified with a four-letter PDB ID in addition to a hyphen followed by the single NMR structural model numeric ID, the residue naming scheme is **Chain ID\_residue name\_residue number**,  $\angle ADH$  represents the angle formed by acceptor (A), donor (D) and hydrogen (H) ( $\angle ADH$ ).



| PDB ID | Residue A | Atom A | Residue B | Atom B | Distance (Å) |
|--------|-----------|--------|-----------|--------|--------------|
| 3Q3G   | C_LYS_109 | NZ     | D_GLU_44  | OE1    | 3.620        |
| 3Q3G   | D_LYS_21  | NZ     | H_GLU_202 | OE2    | 2.633        |
| 3Q3G   | D_ARG_52  | NH1    | G_GLU_179 | OE2    | 3.405        |
| 3Q3G   | D_ARG_52  | NH2    | G_GLU_178 | OE1    | 2.845        |
| 3Q3G   | D_ARG_52  | NH2    | G_GLU_179 | OE2    | 2.628        |
| 3Q3G   | D_LYS_219 | NZ     | C_GLU_129 | OE2    | 3.237        |
| 3Q3G   | G_ARG_208 | NH1    | D_GLU_101 | OE1    | 3.693        |
| 3Q3G   | G_ARG_208 | NH1    | D_GLU_101 | OE2    | 2.792        |
| 3Q3G   | G_ARG_208 | NH2    | D_GLU_101 | OE1    | 2.994        |
| 3Q3G   | G_ARG_208 | NH2    | D_GLU_101 | OE2    | 3.045        |
| 3Q3G   | B_LYS_21  | NZ     | K_GLU_202 | OE2    | 2.668        |
| 3Q3G   | B_ARG_52  | NH1    | E_GLU_179 | OE2    | 3.409        |
| 3Q3G   | B_ARG_52  | NH2    | E_GLU_178 | OE1    | 2.858        |
| 3Q3G   | B_ARG_52  | NH2    | E_GLU_179 | OE2    | 2.617        |
| 3Q3G   | B_LYS_219 | NZ     | A_GLU_129 | OE2    | 3.294        |
| 3Q3G   | E_ARG_208 | NH1    | B_GLU_101 | OE1    | 3.701        |
| 3Q3G   | E_ARG_208 | NH1    | B_GLU_101 | OE2    | 2.888        |
| 3Q3G   | E_ARG_208 | NH2    | B_GLU_101 | OE1    | 3.046        |
| 3Q3G   | E_ARG_208 | NH2    | B_GLU_101 | OE2    | 3.227        |
| 3Q3G   | H_ARG_52  | NH1    | I_GLU_179 | OE2    | 3.532        |
| 3Q3G   | H_ARG_52  | NH2    | I_GLU_178 | OE1    | 2.972        |
| 3Q3G   | H_ARG_52  | NH2    | I_GLU_179 | OE2    | 2.629        |
| 3Q3G   | H_LYS_61  | NZ     | I_GLU_179 | OE2    | 3.923        |
| 3Q3G   | H_LYS_219 | NZ     | F_GLU_129 | OE2    | 3.319        |
| 3Q3G   | I_ARG_208 | NH1    | H_GLU_101 | OE1    | 3.704        |
| 3Q3G   | I_ARG_208 | NH1    | H_GLU_101 | OE2    | 2.809        |
| 3Q3G   | I_ARG_208 | NH2    | H_GLU_101 | OE1    | 3.098        |
| 3Q3G   | I_ARG_208 | NH2    | H_GLU_101 | OE2    | 3.125        |
| 3Q3G   | J_LYS_109 | NZ     | K_GLU_44  | OE1    | 3.972        |
| 3Q3G   | K_ARG_52  | NH1    | L_GLU_179 | OE2    | 3.394        |
| 3Q3G   | K_ARG_52  | NH2    | L_GLU_178 | OE1    | 2.871        |
| 3Q3G   | K_ARG_52  | NH2    | L_GLU_179 | OE2    | 2.626        |
| 3Q3G   | K_LYS_219 | NZ     | J_GLU_129 | OE2    | 3.216        |
| 3Q3G   | L_ARG_208 | NH1    | K_GLU_101 | OE1    | 3.706        |
| 3Q3G   | L_ARG_208 | NH1    | K_GLU_101 | OE2    | 2.777        |
| 3Q3G   | L_ARG_208 | NH2    | K_GLU_101 | OE1    | 3.099        |
| 3Q3G   | L_ARG_208 | NH2    | K_GLU_101 | OE2    | 3.162        |

Table 1266: Interfacial 3Q3G-specific salt bridging networks analysis. In this table, a PDB file is specified with a four-letter PDB ID, except that the names of the PDB files corresponding to the single NMR structural model split from the NMR ensemble is specified with a four-letter PDB ID in addition to a hyphen followed by the single NMR structural model numeric ID, the residue naming scheme is **Chain ID\_residue name\_residue number**,  $\angle ADH$  represents the angle formed by acceptor (A), donor (D) and hydrogen (H) ( $\angle ADH$ ).

| PDB ID | Residue A | Atom A | Residue B | Atom B | Distance (Å) |
|--------|-----------|--------|-----------|--------|--------------|
| 3QA3   | C_LYS_109 | NZ     | D_GLU_44  | OE1    | 3.919        |
| 3QA3   | D_LYS_21  | NZ     | B_GLU_202 | OE2    | 2.710        |
| 3QA3   | D_ARG_52  | NH1    | G_GLU_179 | OE2    | 3.492        |
| 3QA3   | D_ARG_52  | NH2    | G_GLU_178 | OE1    | 3.012        |
| 3QA3   | D_ARG_52  | NH2    | G_GLU_179 | OE2    | 2.776        |
| 3QA3   | D_LYS_61  | NZ     | G_GLU_179 | OE1    | 3.896        |
| 3QA3   | D_LYS_61  | NZ     | G_GLU_179 | OE2    | 3.867        |
| 3QA3   | D_LYS_219 | NZ     | C_GLU_129 | OE2    | 3.586        |
| 3QA3   | G_ARG_208 | NH1    | D_GLU_101 | OE1    | 3.094        |
| 3QA3   | G_ARG_208 | NH1    | D_GLU_101 | OE2    | 3.755        |
| 3QA3   | G_ARG_208 | NH2    | D_GLU_101 | OE1    | 2.802        |
| 3QA3   | G_LYS_306 | NZ     | F_GLU_61  | OE1    | 2.676        |
| 3QA3   | G_LYS_306 | NZ     | F_GLU_61  | OE2    | 3.962        |
| 3QA3   | B_ARG_52  | NH1    | E_GLU_179 | OE2    | 3.674        |
| 3QA3   | B_ARG_52  | NH2    | E_GLU_178 | OE1    | 3.139        |
| 3QA3   | B_ARG_52  | NH2    | E_GLU_179 | OE2    | 2.772        |
| 3QA3   | B_LYS_61  | NZ     | E_GLU_179 | OE1    | 3.626        |
| 3QA3   | B_LYS_61  | NZ     | E_GLU_179 | OE2    | 3.531        |
| 3QA3   | B_LYS_219 | NZ     | A_GLU_129 | OE2    | 3.689        |
| 3QA3   | E_ARG_208 | NH1    | B_GLU_101 | OE1    | 3.112        |
| 3QA3   | E_ARG_208 | NH1    | B_GLU_101 | OE2    | 3.639        |
| 3QA3   | E_ARG_208 | NH2    | B_GLU_101 | OE1    | 2.913        |
| 3QA3   | E_ARG_208 | NH2    | B_GLU_101 | OE2    | 3.978        |
| 3QA3   | H_LYS_21  | NZ     | K_GLU_202 | OE1    | 2.630        |
| 3QA3   | H_ARG_52  | NH1    | I_GLU_179 | OE2    | 3.536        |
| 3QA3   | H_ARG_52  | NH2    | I_GLU_178 | OE1    | 3.079        |
| 3QA3   | H_ARG_52  | NH2    | I_GLU_179 | OE2    | 2.753        |
| 3QA3   | H_LYS_61  | NZ     | I_GLU_179 | OE1    | 3.833        |
| 3QA3   | H_LYS_61  | NZ     | I_GLU_179 | OE2    | 3.714        |
| 3QA3   | H_LYS_219 | NZ     | F_GLU_129 | OE2    | 3.683        |
| 3QA3   | I_ARG_208 | NH1    | H_GLU_101 | OE1    | 2.952        |
| 3QA3   | I_ARG_208 | NH1    | H_GLU_101 | OE2    | 3.280        |
| 3QA3   | I_ARG_208 | NH2    | H_GLU_101 | OE1    | 2.858        |
| 3QA3   | I_ARG_208 | NH2    | H_GLU_101 | OE2    | 3.749        |
| 3QA3   | I_LYS_306 | NZ     | C_GLU_61  | OE1    | 3.836        |
| 3QA3   | J_LYS_109 | NZ     | K_GLU_44  | OE1    | 3.982        |
| 3QA3   | K_ARG_52  | NH1    | L_GLU_179 | OE2    | 3.477        |
| 3QA3   | K_ARG_52  | NH2    | L_GLU_178 | OE1    | 3.052        |
| 3QA3   | K_ARG_52  | NH2    | L_GLU_179 | OE2    | 2.734        |
| 3QA3   | K_LYS_61  | NZ     | L_GLU_179 | OE1    | 3.839        |
| 3QA3   | K_LYS_61  | NZ     | L_GLU_179 | OE2    | 3.819        |
| 3QA3   | K_LYS_219 | NZ     | J_GLU_129 | OE2    | 3.538        |
| 3QA3   | L_ARG_208 | NH1    | K_GLU_101 | OE1    | 3.296        |
| 3QA3   | L_ARG_208 | NH1    | K_GLU_101 | OE2    | 3.152        |
| 3QA3   | L_ARG_208 | NH2    | K_GLU_101 | OE1    | 3.120        |
| 3QA3   | L_ARG_208 | NH2    | K_GLU_101 | OE2    | 3.548        |

---

Table 1267: Interfacial 3QA3-specific salt bridging networks analysis. In this table, a PDB file is specified with a four-letter PDB ID, except that the names of the PDB files corresponding to the single NMR structural model split from the NMR ensemble is specified with a four-letter PDB ID in addition to a hyphen followed by the single NMR structural model numeric ID, the residue naming scheme is **Chain ID\_residue name\_residue number**,  $\angle ADH$  represents the angle formed by acceptor (A), donor (D) and hydrogen (H) ( $\angle ADH$ ).

| PDB ID | Residue A | Atom A | Residue B | Atom B | Distance (Å) |
|--------|-----------|--------|-----------|--------|--------------|
| 3QG6   | A_ARG_188 | NH1    | H_ASP_86  | OD2    | 3.997        |
| 3QG6   | A_ARG_188 | NH2    | H_ASP_86  | OD1    | 3.422        |
| 3QG6   | A_HIS_189 | NE2    | H_GLU_85  | OE1    | 3.361        |
| 3QG6   | A_HIS_189 | NE2    | H_GLU_85  | OE2    | 3.215        |
| 3QG6   | B_LYS_44  | NZ     | L_ASP_151 | OD2    | 2.912        |
| 3QG6   | B_LYS_64  | NZ     | L_GLU_187 | OE1    | 3.778        |
| 3QG6   | B_LYS_221 | NZ     | A_GLU_123 | OE1    | 2.433        |
| 3QG6   | H_LYS_44  | NZ     | A_ASP_151 | OD2    | 2.924        |
| 3QG6   | H_LYS_64  | NZ     | A_GLU_187 | OE1    | 3.924        |
| 3QG6   | H_LYS_221 | NZ     | L_GLU_123 | OE1    | 2.733        |
| 3QG6   | L_HIS_189 | NE2    | B_GLU_85  | OE1    | 3.320        |
| 3QG6   | L_HIS_189 | NE2    | B_GLU_85  | OE2    | 3.623        |

Table 1268: Interfacial 3QG6-specific salt bridging networks analysis. In this table, a PDB file is specified with a four-letter PDB ID, except that the names of the PDB files corresponding to the single NMR structural model split from the NMR ensemble is specified with a four-letter PDB ID in addition to a hyphen followed by the single NMR structural model numeric ID, the residue naming scheme is **Chain ID residue name residue number**,  $\angle ADH$  represents the angle formed by acceptor (A), donor (D) and hydrogen (H) ( $\angle ADH$ ).

| PDB ID | Residue A | Atom A | Residue B | Atom B | Distance (Å) |
|--------|-----------|--------|-----------|--------|--------------|
| 3QG7   | H_LYS_221 | NZ     | L_GLU_123 | OE2    | 2.769        |

Table 1269: Interfacial 3QG7-specific salt bridging networks analysis. In this table, a PDB file is specified with a four-letter PDB ID, except that the names of the PDB files corresponding to the single NMR structural model split from the NMR ensemble is specified with a four-letter PDB ID in addition to a hyphen followed by the single NMR structural model numeric ID, the residue naming scheme is **Chain ID\_residue name\_residue number**,  $\angle ADH$  represents the angle formed by acceptor (A), donor (D) and hydrogen (H) ( $\angle ADH$ ).

| PDB ID | Residue A | Atom A | Residue B | Atom B | Distance (Å) |
|--------|-----------|--------|-----------|--------|--------------|
| 3QO1   | B_ARG_101 | NH1    | A_GLU_39  | OE1    | 3.830        |
| 3QO1   | B_ARG_101 | NH1    | A_GLU_39  | OE2    | 2.711        |
| 3QO1   | B_ARG_101 | NH2    | A_GLU_39  | OE1    | 2.782        |
| 3QO1   | B_ARG_101 | NH2    | A_GLU_39  | OE2    | 3.238        |
| 3QO1   | B_LYS_215 | NZ     | A_GLU_128 | OE1    | 3.939        |

Table 1270: Interfacial 3QO1-specific salt bridging networks analysis. In this table, a PDB file is specified with a four-letter PDB ID, except that the names of the PDB files corresponding to the single NMR structural model split from the NMR ensemble is specified with a four-letter PDB ID in addition to a hyphen followed by the single NMR structural model numeric ID, the residue naming scheme is **Chain ID\_residue name\_residue number**,  $\angle ADH$  represents the angle formed by acceptor (A), donor (D) and hydrogen (H) ( $\angle ADH$ ).

| PDB ID | Residue A | Atom A | Residue B | Atom B | Distance (Å) |
|--------|-----------|--------|-----------|--------|--------------|
| 3QUM   | P_ARG_36  | NH1    | A_ASP_94  | OD2    | 3.603        |
| 3QUM   | P_ARG_36  | NH1    | B_GLU_58  | OE1    | 3.234        |
| 3QUM   | P_ARG_36  | NH1    | B_GLU_58  | OE2    | 3.373        |
| 3QUM   | P_ARG_36  | NH2    | B_GLU_58  | OE1    | 3.423        |
| 3QUM   | P_LYS_62  | NZ     | B_GLU_58  | OE2    | 3.762        |
| 3QUM   | P_LYS_119 | NZ     | H_ASP_54  | OD1    | 2.788        |
| 3QUM   | P_LYS_119 | NZ     | H_ASP_54  | OD2    | 3.700        |
| 3QUM   | P_LYS_119 | NZ     | H_ASP_56  | OD2    | 3.000        |
| 3QUM   | L_ARG_50  | NH2    | P_GLU_23  | OE1    | 2.715        |
| 3QUM   | H_ARG_98  | NH2    | P_ASP_159 | OD1    | 3.868        |
| 3QUM   | H_ARG_98  | NH2    | P_ASP_159 | OD2    | 3.474        |
| 3QUM   | H_HIS_164 | NE2    | L_ASP_167 | OD1    | 3.746        |
| 3QUM   | H_LYS_208 | NZ     | L_GLU_123 | OE1    | 3.317        |
| 3QUM   | A_LYS_207 | NZ     | M_ASP_70  | OD2    | 3.646        |
| 3QUM   | B_LYS_62  | NZ     | A_ASP_1   | OD1    | 3.967        |
| 3QUM   | B_LYS_62  | NZ     | A_ASP_1   | OD2    | 3.654        |
| 3QUM   | B_LYS_209 | NZ     | A_GLU_123 | OE1    | 3.994        |
| 3QUM   | B_LYS_209 | NZ     | A_GLU_123 | OE2    | 2.553        |
| 3QUM   | Q_LYS_119 | NZ     | K_ASP_54  | OD1    | 3.579        |
| 3QUM   | Q_LYS_119 | NZ     | K_ASP_54  | OD2    | 2.557        |
| 3QUM   | Q_LYS_119 | NZ     | K_ASP_56  | OD2    | 3.138        |
| 3QUM   | M_ARG_24  | NH2    | B_ASP_131 | OD1    | 2.867        |
| 3QUM   | M_ARG_24  | NH2    | B_ASP_131 | OD2    | 3.402        |
| 3QUM   | M_ARG_50  | NH1    | Q_GLU_21  | OE2    | 3.456        |
| 3QUM   | M_ARG_50  | NH2    | Q_GLU_21  | OE2    | 3.792        |
| 3QUM   | K_LYS_58  | NZ     | Q_ASP_116 | OD2    | 3.811        |
| 3QUM   | K_LYS_62  | NZ     | M_ASP_1   | OD1    | 2.803        |
| 3QUM   | K_ARG_98  | NH2    | Q_ASP_159 | OD2    | 3.098        |
| 3QUM   | K_LYS_208 | NZ     | M_GLU_123 | OE1    | 3.358        |
| 3QUM   | D_ARG_97  | NH1    | C_GLU_55  | OE1    | 3.578        |
| 3QUM   | D_ARG_97  | NH1    | C_GLU_55  | OE2    | 3.784        |
| 3QUM   | D_ARG_97  | NH2    | Q_GLU_110 | OE2    | 3.547        |

Table 1271: Interfacial 3QUM-specific salt bridging networks analysis. In this table, a PDB file is specified with a four-letter PDB ID, except that the names of the PDB files corresponding to the single NMR structural model split from the NMR ensemble is specified with a four-letter PDB ID in addition to a hyphen followed by the single NMR structural model numeric ID, the residue naming scheme is **Chain ID\_residue name\_residue number**,  $\angle ADH$  represents the angle formed by acceptor (A), donor (D) and hydrogen (H) ( $\angle ADH$ ).

| PDB ID | Residue A | Atom A | Residue B | Atom B | Distance (Å) |
|--------|-----------|--------|-----------|--------|--------------|
| 3R08   | L_LYS_207 | NZ     | H_ASP_129 | OD1    | 3.653        |
| 3R08   | L_LYS_207 | NZ     | H_ASP_129 | OD2    | 2.868        |
| 3R08   | H_LYS_58  | NZ     | E_GLU_4   | OE2    | 3.175        |
| 3R08   | H_LYS_99  | NZ     | L_ASP_56  | OD2    | 3.746        |

Table 1272: Interfacial 3R08-specific salt bridging networks analysis. In this table, a PDB file is specified with a four-letter PDB ID, except that the names of the PDB files corresponding to the single NMR structural model split from the NMR ensemble is specified with a four-letter PDB ID in addition to a hyphen followed by the single NMR structural model numeric ID, the residue naming scheme is **Chain ID\_residue name\_residue number**,  $\angle ADH$  represents the angle formed by acceptor (A), donor (D) and hydrogen (H) ( $\angle ADH$ ).



| PDB ID | Residue A | Atom A | Residue B  | Atom B | Distance (Å) |
|--------|-----------|--------|------------|--------|--------------|
| 3SE8   | G_LYS_282 | NZ     | H_ASP_100C | OD2    | 3.668        |
| 3SE8   | H_ARG_71  | NH1    | G_ASP_368  | OD1    | 3.115        |
| 3SE8   | H_ARG_71  | NH1    | G_ASP_368  | OD2    | 3.763        |
| 3SE8   | H_ARG_71  | NH2    | G_ASP_368  | OD1    | 3.733        |
| 3SE8   | H_ARG_71  | NH2    | G_ASP_368  | OD2    | 2.907        |
| 3SE8   | H_LYS_209 | NZ     | L_GLU_123  | OE1    | 3.768        |

Table 1273: Interfacial 3SE8-specific salt bridging networks analysis. In this table, a PDB file is specified with a four-letter PDB ID, except that the names of the PDB files corresponding to the single NMR structural model split from the NMR ensemble is specified with a four-letter PDB ID in addition to a hyphen followed by the single NMR structural model numeric ID, the residue naming scheme is **Chain ID\_residue name\_residue number**,  $\angle ADH$  represents the angle formed by acceptor (A), donor (D) and hydrogen (H) ( $\angle ADH$ ).

| PDB ID | Residue A | Atom A | Residue B | Atom B | Distance (Å) |
|--------|-----------|--------|-----------|--------|--------------|
| 3SE9   | H_ARG_64  | NH1    | G_ASP_457 | OD2    | 3.853        |
| 3SE9   | H_ARG_64  | NH2    | G_ASP_457 | OD1    | 3.358        |
| 3SE9   | H_ARG_64  | NH2    | G_ASP_457 | OD2    | 3.280        |
| 3SE9   | H_ARG_71  | NH1    | G_ASP_368 | OD1    | 3.515        |
| 3SE9   | H_ARG_71  | NH1    | G_ASP_368 | OD2    | 2.768        |
| 3SE9   | H_ARG_71  | NH2    | G_ASP_368 | OD1    | 3.012        |
| 3SE9   | H_ARG_71  | NH2    | G_ASP_368 | OD2    | 3.769        |
| 3SE9   | H_LYS_209 | NZ     | L_GLU_123 | OE1    | 3.388        |
| 3SE9   | H_LYS_214 | NZ     | L_ASP_122 | OD1    | 3.332        |

Table 1274: Interfacial 3SE9-specific salt bridging networks analysis. In this table, a PDB file is specified with a four-letter PDB ID, except that the names of the PDB files corresponding to the single NMR structural model split from the NMR ensemble is specified with a four-letter PDB ID in addition to a hyphen followed by the single NMR structural model numeric ID, the residue naming scheme is **Chain ID\_residue name\_residue number**,  $\angle ADH$  represents the angle formed by acceptor (A), donor (D) and hydrogen (H) ( $\angle ADH$ ).

| PDB ID | Residue A | Atom A | Residue B | Atom B | Distance (Å) |
|--------|-----------|--------|-----------|--------|--------------|
| 3SGD   | L_LYS_204 | NZ     | J_ASP_75  | OD1    | 3.665        |
| 3SGD   | L_LYS_204 | NZ     | J_ASP_75  | OD2    | 3.246        |
| 3SGD   | H_LYS_43  | NZ     | J_ASP_68  | OD1    | 3.910        |
| 3SGD   | H_LYS_210 | NZ     | L_GLU_128 | OE1    | 3.898        |
| 3SGD   | J_LYS_19  | NZ     | L_ASP_148 | OD1    | 3.248        |
| 3SGD   | J_LYS_19  | NZ     | L_ASP_148 | OD2    | 2.952        |

Table 1275: Interfacial 3SGD-specific salt bridging networks analysis. In this table, a PDB file is specified with a four-letter PDB ID, except that the names of the PDB files corresponding to the single NMR structural model split from the NMR ensemble is specified with a four-letter PDB ID in addition to a hyphen followed by the single NMR structural model numeric ID, the residue naming scheme is **Chain ID\_residue name\_residue number**,  $\angle ADH$  represents the angle formed by acceptor (A), donor (D) and hydrogen (H) ( $\angle ADH$ ).

| PDB ID | Residue A | Atom A | Residue B  | Atom B | Distance (Å) |
|--------|-----------|--------|------------|--------|--------------|
| 3SKJ   | L_ARG_96  | NH1    | H_GLU_100I | OE1    | 2.505        |
| 3SKJ   | L_ARG_96  | NH1    | H_GLU_100I | OE2    | 2.799        |
| 3SKJ   | H_HIS_31  | NE2    | E_GLU_133  | OE2    | 3.297        |
| 3SKJ   | H_HIS_161 | NE2    | L ASP_167  | OD2    | 3.763        |
| 3SKJ   | H_LYS_206 | NZ     | L_GLU_123  | OE1    | 2.501        |
| 3SKJ   | H_LYS_206 | NZ     | L_GLU_123  | OE2    | 3.323        |
| 3SKJ   | M_ARG_96  | NH2    | I_GLU_100I | OE1    | 3.081        |
| 3SKJ   | M_ARG_96  | NH2    | I_GLU_100I | OE2    | 3.831        |
| 3SKJ   | I_LYS_43  | NZ     | L ASP_1    | OD1    | 3.862        |
| 3SKJ   | I_LYS_211 | NZ     | M ASP_122  | OD2    | 3.816        |
| 3SKJ   | I_LYS_211 | NZ     | M_GLU_123  | OE1    | 3.612        |

Table 1276: Interfacial 3SKJ-specific salt bridging networks analysis. In this table, a PDB file is specified with a four-letter PDB ID, except that the names of the PDB files corresponding to the single NMR structural model split from the NMR ensemble is specified with a four-letter PDB ID in addition to a hyphen followed by the single NMR structural model numeric ID, the residue naming scheme is **Chain ID\_residue name\_residue number**,  $\angle ADH$  represents the angle formed by acceptor (A), donor (D) and hydrogen (H) ( $\angle ADH$ ).

| PDB ID | Residue A  | Atom A | Residue B | Atom B | Distance (Å) |
|--------|------------|--------|-----------|--------|--------------|
| 3SY0   | A_ARG_95   | NH2    | B_ASP_95  | OD1    | 3.609        |
| 3SY0   | A_ARG_95   | NH2    | B_ASP_95  | OD2    | 2.821        |
| 3SY0   | B_ARG_100B | NH1    | A_GLU_55  | OE1    | 2.843        |
| 3SY0   | B_ARG_100B | NH1    | A_GLU_55  | OE2    | 3.786        |
| 3SY0   | B_LYS_206  | NZ     | A_GLU_122 | OE1    | 3.980        |

Table 1277: Interfacial 3SY0-specific salt bridging networks analysis. In this table, a PDB file is specified with a four-letter PDB ID, except that the names of the PDB files corresponding to the single NMR structural model split from the NMR ensemble is specified with a four-letter PDB ID in addition to a hyphen followed by the single NMR structural model numeric ID, the residue naming scheme is **Chain ID\_residue name\_residue number**,  $\angle ADH$  represents the angle formed by acceptor (A), donor (D) and hydrogen (H) ( $\angle ADH$ ).

| PDB ID | Residue A  | Atom A | Residue B | Atom B | Distance (Å) |
|--------|------------|--------|-----------|--------|--------------|
| 3T4Y   | A_ARG_95   | NH2    | B_ASP_95  | OD1    | 3.796        |
| 3T4Y   | A_ARG_95   | NH2    | B_ASP_95  | OD2    | 2.951        |
| 3T4Y   | B_ARG_100B | NH1    | A_GLU_55  | OE1    | 3.824        |
| 3T4Y   | B_ARG_100B | NH1    | A_GLU_55  | OE2    | 2.840        |
| 3T4Y   | B_LYS_206  | NZ     | A_GLU_122 | OE2    | 2.652        |

Table 1278: Interfacial 3T4Y-specific salt bridging networks analysis. In this table, a PDB file is specified with a four-letter PDB ID, except that the names of the PDB files corresponding to the single NMR structural model split from the NMR ensemble is specified with a four-letter PDB ID in addition to a hyphen followed by the single NMR structural model numeric ID, the residue naming scheme is **Chain ID\_residue name\_residue number**,  $\angle ADH$  represents the angle formed by acceptor (A), donor (D) and hydrogen (H) ( $\angle ADH$ ).

| PDB ID | Residue A  | Atom A | Residue B | Atom B | Distance (Å) |
|--------|------------|--------|-----------|--------|--------------|
| 3T65   | B_ARG_100B | NH1    | A_GLU_55  | OE1    | 3.841        |
| 3T65   | B_ARG_100B | NH1    | A_GLU_55  | OE2    | 2.883        |
| 3T65   | A_ARG_95   | NH2    | B_ASP_95  | OD1    | 3.666        |
| 3T65   | A_ARG_95   | NH2    | B_ASP_95  | OD2    | 2.866        |

Table 1279: Interfacial 3T65-specific salt bridging networks analysis. In this table, a PDB file is specified with a four-letter PDB ID, except that the names of the PDB files corresponding to the single NMR structural model split from the NMR ensemble is specified with a four-letter PDB ID in addition to a hyphen followed by the single NMR structural model numeric ID, the residue naming scheme is **Chain ID\_residue name\_residue number**,  $\angle ADH$  represents the angle formed by acceptor (A), donor (D) and hydrogen (H) ( $\angle ADH$ ).

| PDB ID | Residue A  | Atom A | Residue B | Atom B | Distance (Å) |
|--------|------------|--------|-----------|--------|--------------|
| 3T77   | A_ARG_95   | NH2    | B_ASP_95  | OD1    | 3.723        |
| 3T77   | A_ARG_95   | NH2    | B_ASP_95  | OD2    | 2.997        |
| 3T77   | B_ARG_100B | NH1    | A_GLU_55  | OE1    | 3.125        |
| 3T77   | B_ARG_100B | NH1    | A_GLU_55  | OE2    | 2.687        |
| 3T77   | B_LYS_206  | NZ     | A_GLU_122 | OE2    | 3.917        |

Table 1280: Interfacial 3T77-specific salt bridging networks analysis. In this table, a PDB file is specified with a four-letter PDB ID, except that the names of the PDB files corresponding to the single NMR structural model split from the NMR ensemble is specified with a four-letter PDB ID in addition to a hyphen followed by the single NMR structural model numeric ID, the residue naming scheme is **Chain ID\_residue name\_residue number**,  $\angle ADH$  represents the angle formed by acceptor (A), donor (D) and hydrogen (H) ( $\angle ADH$ ).



| PDB ID | Residue A | Atom A | Residue B | Atom B | Distance (Å) |
|--------|-----------|--------|-----------|--------|--------------|
| 3THM   | F_LYS_45  | NZ     | L_GLU_97  | OE2    | 3.172        |
| 3THM   | F_LYS_78  | NZ     | L_ASP_52  | OD1    | 3.702        |

Table 1281: Interfacial 3THM-specific salt bridging networks analysis. In this table, a PDB file is specified with a four-letter PDB ID, except that the names of the PDB files corresponding to the single NMR structural model split from the NMR ensemble is specified with a four-letter PDB ID in addition to a hyphen followed by the single NMR structural model numeric ID, the residue naming scheme is **Chain ID\_residue name\_residue number**,  $\angle ADH$  represents the angle formed by acceptor (A), donor (D) and hydrogen (H) ( $\angle ADH$ ).

| PDB ID | Residue A | Atom A | Residue B  | Atom B | Distance (Å) |
|--------|-----------|--------|------------|--------|--------------|
| 3U1S   | L.HIS_27D | NE2    | H.ASP_100B | OD2    | 2.859        |
| 3U1S   | H.LYS_214 | NZ     | L.GLU_123  | OE1    | 3.475        |

Table 1282: Interfacial 3U1S-specific salt bridging networks analysis. In this table, a PDB file is specified with a four-letter PDB ID, except that the names of the PDB files corresponding to the single NMR structural model split from the NMR ensemble is specified with a four-letter PDB ID in addition to a hyphen followed by the single NMR structural model numeric ID, the residue naming scheme is **Chain ID\_residue name\_residue number**,  $\angle ADH$  represents the angle formed by acceptor (A), donor (D) and hydrogen (H) ( $\angle ADH$ ).

| PDB ID | Residue A | Atom A | Residue B  | Atom B | Distance (Å) |
|--------|-----------|--------|------------|--------|--------------|
| 3U2S   | L_ARG_54  | NH2    | C_ASP_167  | OD1    | 3.525        |
| 3U2S   | L_ARG_54  | NH2    | C_ASP_167  | OD2    | 3.282        |
| 3U2S   | L_ARG_95A | NH1    | H_ASP_61   | OD1    | 2.794        |
| 3U2S   | L_ARG_95A | NH1    | H_ASP_61   | OD2    | 3.373        |
| 3U2S   | L_ARG_95A | NH2    | H_ASP_61   | OD1    | 2.338        |
| 3U2S   | L_ARG_96  | NH2    | H_GLU_95   | OE1    | 3.743        |
| 3U2S   | L_ARG_96  | NH2    | H_GLU_95   | OE2    | 2.869        |
| 3U2S   | L_LYS_129 | NZ     | H_ASP_144  | OD1    | 3.881        |
| 3U2S   | G_ARG_168 | NH2    | H_ASP_100L | OD1    | 3.358        |
| 3U2S   | G_ARG_168 | NH2    | H_ASP_100L | OD2    | 3.104        |
| 3U2S   | G_LYS_171 | NZ     | H_ASP_100I | OD1    | 3.178        |
| 3U2S   | A_LYS_143 | NZ     | B_GLU_124  | OE2    | 3.550        |
| 3U2S   | B_ARG_95A | NH1    | A_ASP_61   | OD1    | 2.632        |
| 3U2S   | B_ARG_95A | NH1    | A_ASP_61   | OD2    | 3.483        |
| 3U2S   | B_ARG_95A | NH2    | A_ASP_61   | OD1    | 3.270        |
| 3U2S   | B_ARG_96  | NH2    | A_GLU_95   | OE1    | 3.738        |
| 3U2S   | B_ARG_96  | NH2    | A_GLU_95   | OE2    | 2.983        |
| 3U2S   | C_ARG_168 | NH2    | A_ASP_100L | OD1    | 2.424        |
| 3U2S   | C_ARG_168 | NH2    | A_ASP_100L | OD2    | 3.228        |
| 3U2S   | C_LYS_171 | NZ     | A_ASP_100I | OD1    | 3.279        |

Table 1283: Interfacial 3U2S-specific salt bridging networks analysis. In this table, a PDB file is specified with a four-letter PDB ID, except that the names of the PDB files corresponding to the single NMR structural model split from the NMR ensemble is specified with a four-letter PDB ID in addition to a hyphen followed by the single NMR structural model numeric ID, the residue naming scheme is **Chain ID\_residue name\_residue number**,  $\angle ADH$  represents the angle formed by acceptor (A), donor (D) and hydrogen (H) ( $\angle ADH$ ).

| PDB ID | Residue A | Atom A | Residue B | Atom B | Distance (Å) |
|--------|-----------|--------|-----------|--------|--------------|
| 3U36   | L_LYS_89  | NZ     | H_GLU_95  | OE1    | 3.857        |
| 3U36   | L_ARG_95A | NH1    | H_ASP_61  | OD1    | 3.290        |
| 3U36   | L_ARG_95A | NH1    | H_ASP_61  | OD2    | 1.959        |
| 3U36   | L_ARG_95A | NH2    | H_ASP_61  | OD1    | 3.530        |
| 3U36   | L_ARG_95A | NH2    | H_ASP_61  | OD2    | 3.624        |
| 3U36   | L_ARG_96  | NH2    | H_GLU_95  | OE2    | 3.606        |
| 3U36   | B_LYS_89  | NZ     | A_GLU_95  | OE1    | 3.772        |
| 3U36   | B_ARG_95A | NH1    | A_ASP_61  | OD1    | 3.519        |
| 3U36   | B_ARG_95A | NH1    | A_ASP_61  | OD2    | 2.198        |
| 3U36   | B_ARG_95A | NH2    | A_ASP_61  | OD1    | 3.831        |
| 3U36   | B_ARG_95A | NH2    | A_ASP_61  | OD2    | 3.817        |
| 3U36   | B_ARG_96  | NH2    | A_GLU_95  | OE2    | 3.395        |
| 3U36   | B_LYS_129 | NZ     | A_ASP_144 | OD1    | 3.769        |
| 3U36   | D_LYS_89  | NZ     | C_GLU_95  | OE1    | 3.877        |
| 3U36   | D_ARG_95A | NH1    | C_ASP_61  | OD1    | 3.266        |
| 3U36   | D_ARG_95A | NH1    | C_ASP_61  | OD2    | 2.045        |
| 3U36   | D_ARG_95A | NH2    | C_ASP_61  | OD1    | 3.629        |
| 3U36   | D_ARG_95A | NH2    | C_ASP_61  | OD2    | 3.782        |
| 3U36   | D_ARG_96  | NH2    | C_GLU_95  | OE2    | 3.569        |
| 3U36   | F_ARG_95A | NH1    | E_ASP_61  | OD1    | 3.076        |
| 3U36   | F_ARG_95A | NH1    | E_ASP_61  | OD2    | 1.876        |
| 3U36   | F_ARG_95A | NH2    | E_ASP_61  | OD1    | 3.424        |
| 3U36   | F_ARG_95A | NH2    | E_ASP_61  | OD2    | 3.670        |
| 3U36   | F_ARG_96  | NH2    | E_GLU_95  | OE2    | 3.739        |

Table 1284: Interfacial 3U36-specific salt bridging networks analysis. In this table, a PDB file is specified with a four-letter PDB ID, except that the names of the PDB files corresponding to the single NMR structural model split from the NMR ensemble is specified with a four-letter PDB ID in addition to a hyphen followed by the single NMR structural model numeric ID, the residue naming scheme is **Chain ID\_residue name\_residue number**,  $\angle ADH$  represents the angle formed by acceptor (A), donor (D) and hydrogen (H) ( $\angle ADH$ ).

| PDB ID | Residue A | Atom A | Residue B | Atom B | Distance (Å) |
|--------|-----------|--------|-----------|--------|--------------|
| 3UBX   | A_ARG_39  | NH2    | B_ASP_53  | OD2    | 3.336        |
| 3UBX   | A_HIS_282 | NE2    | B_ASP_98  | OD1    | 3.815        |
| 3UBX   | A_HIS_282 | NE2    | B_ASP_98  | OD2    | 3.128        |
| 3UBX   | B_ARG_12  | NH2    | A_ASP_242 | OD1    | 3.715        |
| 3UBX   | B_ARG_12  | NH2    | A_ASP_242 | OD2    | 3.324        |
| 3UBX   | D_ARG_    | NH2    | E_ASP_    | OD2    | 3.464        |
| 3UBX   | D_HIS_    | NE2    | E_ASP_    | OD1    | 3.963        |
| 3UBX   | D_HIS_    | NE2    | E_ASP_    | OD2    | 3.193        |
| 3UBX   | E_ARG_    | NH2    | D_ASP_    | OD1    | 3.594        |
| 3UBX   | E_ARG_    | NH2    | D_ASP_    | OD2    | 3.257        |
| 3UBX   | E_HIS_    | ND1    | D_GLU_97  | OE1    | 3.846        |
| 3UBX   | L_ARG_32  | NH2    | A_ASP_80  | OD1    | 3.479        |
| 3UBX   | L_ARG_32  | NH2    | A_ASP_80  | OD2    | 3.348        |
| 3UBX   | L_ARG_32  | NH2    | A_ASP_153 | OD2    | 3.795        |
| 3UBX   | L_LYS_169 | NZ     | L_GLU_81  | OE1    | 3.852        |
| 3UBX   | L_LYS_169 | NZ     | L_GLU_81  | OE2    | 3.096        |
| 3UBX   | H_ARG_103 | NH2    | A_ASP_80  | OD1    | 2.578        |
| 3UBX   | H_LYS_215 | NZ     | L_GLU_123 | OE1    | 3.082        |
| 3UBX   | H_LYS_215 | NZ     | L_GLU_123 | OE2    | 3.481        |
| 3UBX   | I_ARG_32  | NH2    | D_ASP_80  | OD1    | 3.383        |
| 3UBX   | I_ARG_32  | NH2    | D_ASP_80  | OD2    | 3.294        |
| 3UBX   | I_ARG_32  | NH2    | D_ASP_153 | OD2    | 3.950        |
| 3UBX   | I_LYS_169 | NZ     | L_GLU_81  | OE1    | 3.837        |
| 3UBX   | I_LYS_169 | NZ     | L_GLU_81  | OE2    | 3.130        |
| 3UBX   | G_ARG_103 | NH2    | D_ASP_80  | OD1    | 2.614        |
| 3UBX   | G_LYS_215 | NZ     | L_GLU_123 | OE1    | 3.204        |
| 3UBX   | G_LYS_215 | NZ     | L_GLU_123 | OE2    | 3.514        |

Table 1285: Interfacial 3UBX-specific salt bridging networks analysis. In this table, a PDB file is specified with a four-letter PDB ID, except that the names of the PDB files corresponding to the single NMR structural model split from the NMR ensemble is specified with a four-letter PDB ID in addition to a hyphen followed by the single NMR structural model numeric ID, the residue naming scheme is **Chain ID\_residue name\_residue number**,  $\angle ADH$  represents the angle formed by acceptor (A), donor (D) and hydrogen (H) ( $\angle ADH$ ).

| PDB ID | Residue A | Atom A | Residue B | Atom B | Distance (Å) |
|--------|-----------|--------|-----------|--------|--------------|
| 3UJI   | H_LYS_143 | NZ     | L_GLU_124 | OE2    | 2.632        |
| 3UJI   | H_LYS_209 | NZ     | L_GLU_123 | OE1    | 3.097        |
| 3UJI   | H_LYS_209 | NZ     | L_GLU_123 | OE2    | 2.701        |
| 3UJI   | P_LYS_305 | NZ     | H_ASP_54  | OD1    | 2.722        |
| 3UJI   | P_LYS_305 | NZ     | H_ASP_54  | OD2    | 3.687        |
| 3UJI   | P_LYS_305 | NZ     | H_ASP_56  | OD2    | 2.744        |
| 3UJI   | P_HIS_308 | ND1    | H_GLU_98  | OE1    | 2.731        |
| 3UJI   | P_HIS_308 | ND1    | H_GLU_98  | OE2    | 3.371        |

Table 1286: Interfacial 3UJI-specific salt bridging networks analysis. In this table, a PDB file is specified with a four-letter PDB ID, except that the names of the PDB files corresponding to the single NMR structural model split from the NMR ensemble is specified with a four-letter PDB ID in addition to a hyphen followed by the single NMR structural model numeric ID, the residue naming scheme is **Chain ID\_residue name\_residue number**,  $\angle ADH$  represents the angle formed by acceptor (A), donor (D) and hydrogen (H) ( $\angle ADH$ ).

| PDB ID | Residue A | Atom A | Residue B | Atom B | Distance (Å) |
|--------|-----------|--------|-----------|--------|--------------|
| 3UJJ   | H_LYS_209 | NZ     | L_GLU_123 | OE1    | 2.859        |
| 3UJJ   | H_LYS_209 | NZ     | L_GLU_123 | OE2    | 2.771        |
| 3UJJ   | P_LYS_305 | NZ     | H_ASP_54  | OD1    | 3.600        |
| 3UJJ   | P_LYS_305 | NZ     | H_ASP_54  | OD2    | 2.628        |
| 3UJJ   | P_LYS_305 | NZ     | H_ASP_56  | OD2    | 2.857        |
| 3UJJ   | P_ARG_308 | NH2    | L_GLU_50  | OE2    | 2.898        |

Table 1287: Interfacial 3UJJ-specific salt bridging networks analysis. In this table, a PDB file is specified with a four-letter PDB ID, except that the names of the PDB files corresponding to the single NMR structural model split from the NMR ensemble is specified with a four-letter PDB ID in addition to a hyphen followed by the single NMR structural model numeric ID, the residue naming scheme is **Chain ID\_residue name\_residue number**,  $\angle ADH$  represents the angle formed by acceptor (A), donor (D) and hydrogen (H) ( $\angle ADH$ ).

| PDB ID | Residue A | Atom A | Residue B | Atom B | Distance (Å) |
|--------|-----------|--------|-----------|--------|--------------|
| 3UJT   | H.LYS.143 | NZ     | M.ASP.60  | OD2    | 3.914        |
| 3UJT   | H.LYS.208 | NZ     | L.GLU.123 | OE2    | 2.966        |
| 3UJT   | L.HIS.164 | NE2    | M.ASP.167 | OD1    | 3.917        |
| 3UJT   | L.LYS.208 | NZ     | M.GLU.123 | OE2    | 3.024        |

Table 1288: Interfacial 3UJT-specific salt bridging networks analysis. In this table, a PDB file is specified with a four-letter PDB ID, except that the names of the PDB files corresponding to the single NMR structural model split from the NMR ensemble is specified with a four-letter PDB ID in addition to a hyphen followed by the single NMR structural model numeric ID, the residue naming scheme is **Chain ID\_residue name\_residue number**,  $\angle ADH$  represents the angle formed by acceptor (A), donor (D) and hydrogen (H) ( $\angle ADH$ ).



| PDB ID | Residue A | Atom A | Residue B | Atom B | Distance (Å) |
|--------|-----------|--------|-----------|--------|--------------|
| 3UO1   | H_LYS_212 | NZ     | L_GLU_127 | OE2    | 2.634        |

Table 1289: Interfacial 3UO1-specific salt bridging networks analysis. In this table, a PDB file is specified with a four-letter PDB ID, except that the names of the PDB files corresponding to the single NMR structural model split from the NMR ensemble is specified with a four-letter PDB ID in addition to a hyphen followed by the single NMR structural model numeric ID, the residue naming scheme is **Chain ID\_residue name\_residue number**,  $\angle ADH$  represents the angle formed by acceptor (A), donor (D) and hydrogen (H) ( $\angle ADH$ ).

| PDB ID | Residue A | Atom A | Residue B | Atom B | Distance (Å) |
|--------|-----------|--------|-----------|--------|--------------|
| 3UYR   | H_LYS_212 | NZ     | L_GLU_127 | OE2    | 2.869        |

Table 1290: Interfacial 3UYR-specific salt bridging networks analysis. In this table, a PDB file is specified with a four-letter PDB ID, except that the names of the PDB files corresponding to the single NMR structural model split from the NMR ensemble is specified with a four-letter PDB ID in addition to a hyphen followed by the single NMR structural model numeric ID, the residue naming scheme is **Chain ID\_residue name\_residue number**,  $\angle ADH$  represents the angle formed by acceptor (A), donor (D) and hydrogen (H) ( $\angle ADH$ ).

| PDB ID | Residue A | Atom A | Residue B | Atom B | Distance (Å) |
|--------|-----------|--------|-----------|--------|--------------|
| 3V4P   | B_ARG_194 | NH1    | H_ASP_102 | OD1    | 2.860        |
| 3V4P   | B_ARG_194 | NH1    | H_ASP_102 | OD2    | 2.764        |
| 3V4P   | B_ARG_200 | NH2    | H_ASP_102 | OD1    | 3.172        |
| 3V4P   | D_ARG_194 | NH1    | M_ASP_102 | OD1    | 2.738        |
| 3V4P   | D_ARG_194 | NH1    | M_ASP_102 | OD2    | 2.760        |
| 3V4P   | D_ARG_200 | NH2    | M_ASP_102 | OD1    | 3.233        |
| 3V4P   | H_HIS_172 | ND1    | L_ASP_172 | OD2    | 3.780        |
| 3V4P   | H_LYS_216 | NZ     | L_GLU_128 | OE2    | 3.270        |
| 3V4P   | M_HIS_172 | ND1    | N_ASP_172 | OD2    | 3.600        |
| 3V4P   | M_LYS_216 | NZ     | N_GLU_128 | OE2    | 3.408        |

Table 1291: Interfacial 3V4P-specific salt bridging networks analysis. In this table, a PDB file is specified with a four-letter PDB ID, except that the names of the PDB files corresponding to the single NMR structural model split from the NMR ensemble is specified with a four-letter PDB ID in addition to a hyphen followed by the single NMR structural model numeric ID, the residue naming scheme is **Chain ID\_residue name\_residue number**,  $\angle ADH$  represents the angle formed by acceptor (A), donor (D) and hydrogen (H) ( $\angle ADH$ ).

| PDB ID | Residue A | Atom A | Residue B | Atom B | Distance (Å) |
|--------|-----------|--------|-----------|--------|--------------|
| 3V4U   | H_LYS_212 | NZ     | L_GLU_127 | OE2    | 2.667        |

Table 1292: Interfacial 3V4U-specific salt bridging networks analysis. In this table, a PDB file is specified with a four-letter PDB ID, except that the names of the PDB files corresponding to the single NMR structural model split from the NMR ensemble is specified with a four-letter PDB ID in addition to a hyphen followed by the single NMR structural model numeric ID, the residue naming scheme is **Chain ID\_residue name\_residue number**,  $\angle ADH$  represents the angle formed by acceptor (A), donor (D) and hydrogen (H) ( $\angle ADH$ ).

| PDB ID | Residue A | Atom A | Residue B | Atom B | Distance (Å) |
|--------|-----------|--------|-----------|--------|--------------|
| 3V4V   | B_ARG_194 | NH1    | H_ASP_102 | OD1    | 2.874        |
| 3V4V   | B_ARG_194 | NH1    | H_ASP_102 | OD2    | 3.211        |
| 3V4V   | B_ARG_200 | NH2    | H_ASP_102 | OD1    | 3.237        |
| 3V4V   | H_HIS_172 | ND1    | L_ASP_172 | OD1    | 3.644        |
| 3V4V   | H_LYS_216 | NZ     | L_GLU_128 | OE2    | 3.607        |
| 3V4V   | D_ARG_194 | NH1    | M_ASP_102 | OD1    | 2.657        |
| 3V4V   | D_ARG_194 | NH1    | M_ASP_102 | OD2    | 2.923        |
| 3V4V   | D_ARG_200 | NH2    | M_ASP_102 | OD1    | 3.070        |
| 3V4V   | M_HIS_172 | ND1    | N_ASP_172 | OD1    | 3.594        |
| 3V4V   | M_LYS_216 | NZ     | N_GLU_128 | OE2    | 3.217        |

Table 1293: Interfacial 3V4V-specific salt bridging networks analysis. In this table, a PDB file is specified with a four-letter PDB ID, except that the names of the PDB files corresponding to the single NMR structural model split from the NMR ensemble is specified with a four-letter PDB ID in addition to a hyphen followed by the single NMR structural model numeric ID, the residue naming scheme is **Chain ID\_residue name\_residue number**,  $\angle ADH$  represents the angle formed by acceptor (A), donor (D) and hydrogen (H) ( $\angle ADH$ ).

| PDB ID | Residue A | Atom A | Residue B | Atom B | Distance (Å) |
|--------|-----------|--------|-----------|--------|--------------|
| 3V52   | H_LYS_212 | NZ     | L_GLU_127 | OE2    | 2.929        |

Table 1294: Interfacial 3V52-specific salt bridging networks analysis. In this table, a PDB file is specified with a four-letter PDB ID, except that the names of the PDB files corresponding to the single NMR structural model split from the NMR ensemble is specified with a four-letter PDB ID in addition to a hyphen followed by the single NMR structural model numeric ID, the residue naming scheme is **Chain ID\_residue name\_residue number**,  $\angle ADH$  represents the angle formed by acceptor (A), donor (D) and hydrogen (H) ( $\angle ADH$ ).

| PDB ID | Residue A | Atom A | Residue B | Atom B | Distance (Å) |
|--------|-----------|--------|-----------|--------|--------------|
| 3V6F   | A_LYS.213 | NZ     | B_GLU_130 | OE1    | 3.799        |
| 3V6F   | C_LYS.213 | NZ     | D_GLU_130 | OE1    | 3.956        |
| 3V6F   | E_LYS.213 | NZ     | F_GLU_130 | OE1    | 3.763        |
| 3V6F   | H_HIS.169 | NE2    | L_ASP_174 | OD1    | 3.656        |

Table 1295: Interfacial 3V6F-specific salt bridging networks analysis. In this table, a PDB file is specified with a four-letter PDB ID, except that the names of the PDB files corresponding to the single NMR structural model split from the NMR ensemble is specified with a four-letter PDB ID in addition to a hyphen followed by the single NMR structural model numeric ID, the residue naming scheme is **Chain ID\_residue name\_residue number**,  $\angle ADH$  represents the angle formed by acceptor (A), donor (D) and hydrogen (H) ( $\angle ADH$ ).

| PDB ID | Residue A | Atom A | Residue B | Atom B | Distance (Å) |
|--------|-----------|--------|-----------|--------|--------------|
| 3WIIH  | H.LYS_214 | NZ     | L.GLU_123 | OE2    | 3.755        |
| 3WIIH  | I.LYS_214 | NZ     | M.GLU_123 | OE1    | 2.678        |
| 3WIIH  | I.LYS_214 | NZ     | M.GLU_123 | OE2    | 3.619        |

Table 1296: Interfacial 3WIIH-specific salt bridging networks analysis. In this table, a PDB file is specified with a four-letter PDB ID, except that the names of the PDB files corresponding to the single NMR structural model split from the NMR ensemble is specified with a four-letter PDB ID in addition to a hyphen followed by the single NMR structural model numeric ID, the residue naming scheme is **Chain ID\_residue name\_residue number**,  $\angle ADH$  represents the angle formed by acceptor (A), donor (D) and hydrogen (H) ( $\angle ADH$ ).



| PDB ID | Residue A | Atom A | Residue B | Atom B | Distance (Å) |
|--------|-----------|--------|-----------|--------|--------------|
| 3WN5   | A_LYS_370 | NZ     | B_GLU_357 | OE2    | 3.815        |
| 3WN5   | A_LYS_409 | NZ     | B_ASP_399 | OD2    | 3.327        |
| 3WN5   | B_LYS_370 | NZ     | A_GLU_357 | OE1    | 3.801        |
| 3WN5   | B_LYS_409 | NZ     | A_ASP_399 | OD1    | 3.830        |
| 3WN5   | B_LYS_409 | NZ     | A_ASP_399 | OD2    | 3.511        |
| 3WN5   | C_LYS_117 | NZ     | B_ASP_265 | OD2    | 2.853        |
| 3WN5   | C_HIS_131 | NE2    | B_ASP_270 | OD1    | 3.342        |
| 3WN5   | C_HIS_131 | NE2    | B_ASP_270 | OD2    | 2.619        |
| 3WN5   | D_LYS_370 | NZ     | E_GLU_357 | OE2    | 3.279        |
| 3WN5   | D_LYS_409 | NZ     | E_ASP_399 | OD2    | 3.246        |
| 3WN5   | E_LYS_370 | NZ     | D_GLU_357 | OE1    | 3.843        |
| 3WN5   | E_LYS_409 | NZ     | D_ASP_399 | OD2    | 2.789        |
| 3WN5   | F_LYS_117 | NZ     | E_ASP_265 | OD2    | 3.157        |
| 3WN5   | F_HIS_131 | NE2    | E_ASP_270 | OD2    | 2.923        |

Table 1297: Interfacial 3WN5-specific salt bridging networks analysis. In this table, a PDB file is specified with a four-letter PDB ID, except that the names of the PDB files corresponding to the single NMR structural model split from the NMR ensemble is specified with a four-letter PDB ID in addition to a hyphen followed by the single NMR structural model numeric ID, the residue naming scheme is **Chain ID\_residue name\_residue number**,  $\angle ADH$  represents the angle formed by acceptor (A), donor (D) and hydrogen (H) ( $\angle ADH$ ).

| PDB ID | Residue A | Atom A | Residue B | Atom B | Distance (Å) |
|--------|-----------|--------|-----------|--------|--------------|
| 4A6Y   | A_ARG_186 | NH2    | H_ASP_180 | OD2    | 3.656        |
| 4A6Y   | A_ARG_190 | NH1    | H_GLU_89  | OE2    | 3.969        |
| 4A6Y   | B_LYS_150 | NZ     | A_GLU_127 | OE2    | 3.258        |
| 4A6Y   | H_LYS_150 | NZ     | L_GLU_127 | OE2    | 3.131        |
| 4A6Y   | H_HIS_171 | NE2    | L_ASP_141 | OD1    | 3.968        |
| 4A6Y   | L_ARG_190 | NH2    | B_GLU_89  | OE2    | 3.440        |

Table 1298: Interfacial 4A6Y-specific salt bridging networks analysis. In this table, a PDB file is specified with a four-letter PDB ID, except that the names of the PDB files corresponding to the single NMR structural model split from the NMR ensemble is specified with a four-letter PDB ID in addition to a hyphen followed by the single NMR structural model numeric ID, the residue naming scheme is **Chain ID\_residue name\_residue number**,  $\angle ADH$  represents the angle formed by acceptor (A), donor (D) and hydrogen (H) ( $\angle ADH$ ).

| PDB ID | Residue A | Atom A | Residue B | Atom B | Distance (Å) |
|--------|-----------|--------|-----------|--------|--------------|
| 4AG4   | H_LYS_208 | NZ     | L_GLU_123 | OE2    | 2.708        |

Table 1299: Interfacial 4AG4-specific salt bridging networks analysis. In this table, a PDB file is specified with a four-letter PDB ID, except that the names of the PDB files corresponding to the single NMR structural model split from the NMR ensemble is specified with a four-letter PDB ID in addition to a hyphen followed by the single NMR structural model numeric ID, the residue naming scheme is **Chain ID\_residue name\_residue number**,  $\angle ADH$  represents the angle formed by acceptor (A), donor (D) and hydrogen (H) ( $\angle ADH$ ).

| PDB ID | Residue A | Atom A | Residue B | Atom B | Distance (Å) |
|--------|-----------|--------|-----------|--------|--------------|
| 4C83   | C_LYS_208 | NZ     | D_GLU_123 | OE1    | 2.304        |
| 4C83   | C_LYS_208 | NZ     | D_GLU_123 | OE2    | 2.598        |

Table 1300: Interfacial 4C83-specific salt bridging networks analysis. In this table, a PDB file is specified with a four-letter PDB ID, except that the names of the PDB files corresponding to the single NMR structural model split from the NMR ensemble is specified with a four-letter PDB ID in addition to a hyphen followed by the single NMR structural model numeric ID, the residue naming scheme is **Chain ID\_residue name\_residue number**,  $\angle ADH$  represents the angle formed by acceptor (A), donor (D) and hydrogen (H) ( $\angle ADH$ ).

| PDB ID | Residue A | Atom A | Residue B | Atom B | Distance (Å) |
|--------|-----------|--------|-----------|--------|--------------|
| 4DAG   | H_ARG_101 | NH2    | A_GLU_33  | OE1    | 3.620        |
| 4DAG   | H_ARG_101 | NH2    | A_GLU_33  | OE2    | 2.107        |
| 4DAG   | L_LYS_46  | NZ     | A_ASP_414 | OD1    | 3.558        |
| 4DAG   | L_LYS_46  | NZ     | A_ASP_414 | OD2    | 3.550        |

Table 1301: Interfacial 4DAG-specific salt bridging networks analysis. In this table, a PDB file is specified with a four-letter PDB ID, except that the names of the PDB files corresponding to the single NMR structural model split from the NMR ensemble is specified with a four-letter PDB ID in addition to a hyphen followed by the single NMR structural model numeric ID, the residue naming scheme is **Chain ID\_residue name\_residue number**,  $\angle ADH$  represents the angle formed by acceptor (A), donor (D) and hydrogen (H) ( $\angle ADH$ ).

| PDB ID | Residue A | Atom A | Residue B | Atom B | Distance (Å) |
|--------|-----------|--------|-----------|--------|--------------|
| 4DGV   | H_LYS_209 | NZ     | L_GLU_123 | OE1    | 2.915        |
| 4DGV   | H_LYS_209 | NZ     | L_GLU_123 | OE2    | 3.422        |

Table 1302: Interfacial 4DGV-specific salt bridging networks analysis. In this table, a PDB file is specified with a four-letter PDB ID, except that the names of the PDB files corresponding to the single NMR structural model split from the NMR ensemble is specified with a four-letter PDB ID in addition to a hyphen followed by the single NMR structural model numeric ID, the residue naming scheme is **Chain ID\_residue name\_residue number**,  $\angle ADH$  represents the angle formed by acceptor (A), donor (D) and hydrogen (H) ( $\angle ADH$ ).

| PDB ID | Residue A | Atom A | Residue B | Atom B | Distance (Å) |
|--------|-----------|--------|-----------|--------|--------------|
| 4DGY   | H_LYS_214 | NZ     | L_ASP_122 | OD1    | 3.699        |
| 4DGY   | H_LYS_214 | NZ     | L_ASP_122 | OD2    | 2.517        |

Table 1303: Interfacial 4DGY-specific salt bridging networks analysis. In this table, a PDB file is specified with a four-letter PDB ID, except that the names of the PDB files corresponding to the single NMR structural model split from the NMR ensemble is specified with a four-letter PDB ID in addition to a hyphen followed by the single NMR structural model numeric ID, the residue naming scheme is **Chain ID\_residue name\_residue number**,  $\angle ADH$  represents the angle formed by acceptor (A), donor (D) and hydrogen (H) ( $\angle ADH$ ).

| PDB ID | Residue A | Atom A | Residue B | Atom B | Distance (Å) |
|--------|-----------|--------|-----------|--------|--------------|
| 4EBQ   | H_LYS_215 | NZ     | L_GLU_123 | OE2    | 2.960        |

Table 1304: Interfacial 4EBQ-specific salt bridging networks analysis. In this table, a PDB file is specified with a four-letter PDB ID, except that the names of the PDB files corresponding to the single NMR structural model split from the NMR ensemble is specified with a four-letter PDB ID in addition to a hyphen followed by the single NMR structural model numeric ID, the residue naming scheme is **Chain ID\_residue name\_residue number**,  $\angle ADH$  represents the angle formed by acceptor (A), donor (D) and hydrogen (H) ( $\angle ADH$ ).



| PDB ID | Residue A | Atom A | Residue B | Atom B | Distance (Å) |
|--------|-----------|--------|-----------|--------|--------------|
| 4EDW   | H_LYS_209 | NZ     | L_GLU_123 | OE2    | 2.707        |

Table 1305: Interfacial 4EDW-specific salt bridging networks analysis. In this table, a PDB file is specified with a four-letter PDB ID, except that the names of the PDB files corresponding to the single NMR structural model split from the NMR ensemble is specified with a four-letter PDB ID in addition to a hyphen followed by the single NMR structural model numeric ID, the residue naming scheme is **Chain ID\_residue name\_residue number**,  $\angle ADH$  represents the angle formed by acceptor (A), donor (D) and hydrogen (H) ( $\angle ADH$ ).

| PDB ID | Residue A | Atom A | Residue B | Atom B | Distance (Å) |
|--------|-----------|--------|-----------|--------|--------------|
| 4EDX   | W.LYS_32  | NZ     | H.ASP_58  | OD1    | 2.886        |
| 4EDX   | W.LYS_32  | NZ     | H.ASP_58  | OD2    | 2.677        |
| 4EDX   | A.ARG_53  | NH1    | W.GLU_11  | OE1    | 2.795        |
| 4EDX   | B.LYS_221 | NZ     | A.GLU_123 | OE2    | 3.878        |
| 4EDX   | V.LYS_32  | NZ     | B.ASP_58  | OD1    | 3.117        |
| 4EDX   | V.LYS_32  | NZ     | B.ASP_58  | OD2    | 2.681        |
| 4EDX   | V.LYS_88  | NZ     | B.ASP_54  | OD2    | 3.805        |
| 4EDX   | L.ARG_53  | NH1    | V.GLU_11  | OE1    | 3.269        |
| 4EDX   | H.LYS_221 | NZ     | L.GLU_123 | OE2    | 3.893        |

Table 1306: Interfacial 4EDX-specific salt bridging networks analysis. In this table, a PDB file is specified with a four-letter PDB ID, except that the names of the PDB files corresponding to the single NMR structural model split from the NMR ensemble is specified with a four-letter PDB ID in addition to a hyphen followed by the single NMR structural model numeric ID, the residue naming scheme is **Chain ID\_residue name\_residue number**,  $\angle ADH$  represents the angle formed by acceptor (A), donor (D) and hydrogen (H) ( $\angle ADH$ ).

| PDB ID | Residue A | Atom A | Residue B | Atom B | Distance (Å) |
|--------|-----------|--------|-----------|--------|--------------|
| 4ETQ   | H_ARG_60  | NH1    | C_ASP_179 | OD1    | 3.609        |
| 4ETQ   | H_ARG_60  | NH2    | C_ASP_179 | OD1    | 3.375        |
| 4ETQ   | H_ARG_103 | NH1    | C_GLU_217 | OE1    | 3.862        |
| 4ETQ   | H_ARG_103 | NH1    | C_GLU_217 | OE2    | 2.754        |
| 4ETQ   | H_ARG_103 | NH2    | C_GLU_217 | OE2    | 2.933        |
| 4ETQ   | H_LYS_215 | NZ     | L_GLU_123 | OE2    | 3.075        |
| 4ETQ   | A_ARG_103 | NH1    | X_GLU_217 | OE1    | 2.753        |
| 4ETQ   | A_ARG_103 | NH1    | X_GLU_217 | OE2    | 3.565        |
| 4ETQ   | A_ARG_103 | NH2    | X_GLU_217 | OE1    | 2.983        |
| 4ETQ   | A_ARG_103 | NH2    | X_GLU_217 | OE2    | 3.995        |
| 4ETQ   | A_LYS_215 | NZ     | B_GLU_123 | OE2    | 3.774        |
| 4ETQ   | X_ARG_44  | NH1    | A_GLU_56  | OE1    | 3.611        |
| 4ETQ   | X_ARG_44  | NH1    | A_GLU_56  | OE2    | 3.023        |
| 4ETQ   | X_LYS_108 | NZ     | A_GLU_58  | OE2    | 3.014        |
| 4ETQ   | X_ARG_220 | NH1    | A_ASP_105 | OD1    | 3.937        |
| 4ETQ   | X_ARG_220 | NH2    | A_ASP_105 | OD1    | 2.929        |
| 4ETQ   | C_ARG_44  | NH1    | H_GLU_56  | OE1    | 2.601        |
| 4ETQ   | C_ARG_220 | NH1    | H_ASP_105 | OD1    | 3.872        |
| 4ETQ   | C_ARG_220 | NH2    | H_ASP_105 | OD1    | 3.103        |

Table 1307: Interfacial 4ETQ-specific salt bridging networks analysis. In this table, a PDB file is specified with a four-letter PDB ID, except that the names of the PDB files corresponding to the single NMR structural model split from the NMR ensemble is specified with a four-letter PDB ID in addition to a hyphen followed by the single NMR structural model numeric ID, the residue naming scheme is **Chain ID residue name residue number**,  $\angle ADH$  represents the angle formed by acceptor (A), donor (D) and hydrogen (H) ( $\angle ADH$ ).

| PDB ID | Residue A | Atom A | Residue B | Atom B | Distance (Å) |
|--------|-----------|--------|-----------|--------|--------------|
| 4F33   | B_LYS_215 | NZ     | A_GLU_123 | OE1    | 2.676        |
| 4F33   | B_LYS_215 | NZ     | A_GLU_123 | OE2    | 3.528        |
| 4F33   | D_LYS_215 | NZ     | C_GLU_123 | OE1    | 2.787        |
| 4F33   | D_LYS_215 | NZ     | C_GLU_123 | OE2    | 3.695        |
| 4F33   | F_LYS_212 | NZ     | D_ASP_214 | OD2    | 3.519        |
| 4F33   | F_LYS_215 | NZ     | E_GLU_123 | OE1    | 2.609        |
| 4F33   | F_LYS_215 | NZ     | E_GLU_123 | OE2    | 3.626        |
| 4F33   | H_LYS_215 | NZ     | G_GLU_123 | OE1    | 2.968        |
| 4F33   | H_LYS_215 | NZ     | G_GLU_123 | OE2    | 3.966        |

Table 1308: Interfacial 4F33-specific salt bridging networks analysis. In this table, a PDB file is specified with a four-letter PDB ID, except that the names of the PDB files corresponding to the single NMR structural model split from the NMR ensemble is specified with a four-letter PDB ID in addition to a hyphen followed by the single NMR structural model numeric ID, the residue naming scheme is **Chain ID\_residue name\_residue number**,  $\angle ADH$  represents the angle formed by acceptor (A), donor (D) and hydrogen (H) ( $\angle ADH$ ).

| PDB ID | Residue A | Atom A | Residue B | Atom B | Distance (Å) |
|--------|-----------|--------|-----------|--------|--------------|
| 4F3F   | A_HIS_94  | NE2    | C_GLU_18  | OE1    | 3.664        |
| 4F3F   | A_HIS_94  | NE2    | C_GLU_18  | OE2    | 3.880        |
| 4F3F   | C_LYS_24  | NZ     | A_ASP_50  | OD1    | 2.832        |
| 4F3F   | C_LYS_24  | NZ     | A_ASP_50  | OD2    | 3.865        |

Table 1309: Interfacial 4F3F-specific salt bridging networks analysis. In this table, a PDB file is specified with a four-letter PDB ID, except that the names of the PDB files corresponding to the single NMR structural model split from the NMR ensemble is specified with a four-letter PDB ID in addition to a hyphen followed by the single NMR structural model numeric ID, the residue naming scheme is **Chain ID\_residue name\_residue number**,  $\angle ADH$  represents the angle formed by acceptor (A), donor (D) and hydrogen (H) ( $\angle ADH$ ).

| PDB ID | Residue A | Atom A | Residue B | Atom B | Distance (Å) |
|--------|-----------|--------|-----------|--------|--------------|
| 4FFV   | A_ARG_659 | NH2    | B_GLU_242 | OE2    | 2.683        |
| 4FFV   | A_HIS_755 | ND1    | B_ASP_730 | OD1    | 2.996        |
| 4FFV   | B_ARG_659 | NH2    | A_GLU_242 | OE2    | 2.592        |
| 4FFV   | B_HIS_755 | ND1    | A_ASP_730 | OD1    | 2.989        |
| 4FFV   | B_HIS_755 | ND1    | A_ASP_730 | OD2    | 3.942        |
| 4FFV   | D_LYS_54  | NZ     | B_GLU_89  | OE1    | 3.460        |
| 4FFV   | D_LYS_54  | NZ     | B_GLU_89  | OE2    | 3.556        |
| 4FFV   | H_LYS_54  | NZ     | A_GLU_89  | OE1    | 3.584        |
| 4FFV   | H_LYS_54  | NZ     | A_GLU_89  | OE2    | 3.871        |
| 4FFV   | H_HIS_168 | NE2    | L_ASP_166 | OD1    | 3.178        |
| 4FFV   | H_HIS_168 | NE2    | L_ASP_166 | OD2    | 3.870        |

Table 1310: Interfacial 4FFV-specific salt bridging networks analysis. In this table, a PDB file is specified with a four-letter PDB ID, except that the names of the PDB files corresponding to the single NMR structural model split from the NMR ensemble is specified with a four-letter PDB ID in addition to a hyphen followed by the single NMR structural model numeric ID, the residue naming scheme is **Chain ID\_residue name\_residue number**,  $\angle ADH$  represents the angle formed by acceptor (A), donor (D) and hydrogen (H) ( $\angle ADH$ ).

| PDB ID | Residue A | Atom A | Residue B | Atom B | Distance (Å) |
|--------|-----------|--------|-----------|--------|--------------|
| 4FFW   | A_ARG_659 | NH2    | B_GLU_242 | OE2    | 3.187        |
| 4FFW   | A_HIS_755 | ND1    | B_ASP_730 | OD1    | 3.111        |
| 4FFW   | B_ARG_659 | NH2    | A_GLU_242 | OE2    | 3.068        |
| 4FFW   | D_LYS_54  | NZ     | B_GLU_89  | OE1    | 3.085        |
| 4FFW   | D_LYS_54  | NZ     | B_GLU_89  | OE2    | 3.381        |
| 4FFW   | H_LYS_54  | NZ     | A_GLU_89  | OE1    | 3.517        |
| 4FFW   | H_LYS_54  | NZ     | A_GLU_89  | OE2    | 3.666        |
| 4FFW   | H_HIS_168 | NE2    | L_ASP_166 | OD1    | 3.737        |

Table 1311: Interfacial 4FFW-specific salt bridging networks analysis. In this table, a PDB file is specified with a four-letter PDB ID, except that the names of the PDB files corresponding to the single NMR structural model split from the NMR ensemble is specified with a four-letter PDB ID in addition to a hyphen followed by the single NMR structural model numeric ID, the residue naming scheme is **Chain ID\_residue name\_residue number**,  $\angle ADH$  represents the angle formed by acceptor (A), donor (D) and hydrogen (H) ( $\angle ADH$ ).

| PDB ID | Residue A | Atom A | Residue B | Atom B | Distance (Å) |
|--------|-----------|--------|-----------|--------|--------------|
| 4FQH   | H_LYS_143 | NZ     | L_GLU_124 | OE2    | 2.906        |
| 4FQH   | H_LYS_214 | NZ     | L_GLU_123 | OE1    | 3.752        |
| 4FQH   | H_LYS_214 | NZ     | L_GLU_123 | OE2    | 2.217        |
| 4FQH   | A_LYS_143 | NZ     | B_GLU_124 | OE2    | 3.049        |
| 4FQH   | A_LYS_214 | NZ     | B_GLU_123 | OE1    | 3.132        |

Table 1312: Interfacial 4FQH-specific salt bridging networks analysis. In this table, a PDB file is specified with a four-letter PDB ID, except that the names of the PDB files corresponding to the single NMR structural model split from the NMR ensemble is specified with a four-letter PDB ID in addition to a hyphen followed by the single NMR structural model numeric ID, the residue naming scheme is **Chain ID\_residue name\_residue number**,  $\angle ADH$  represents the angle formed by acceptor (A), donor (D) and hydrogen (H) ( $\angle ADH$ ).



| PDB ID | Residue A | Atom A | Residue B | Atom B | Distance (Å) |
|--------|-----------|--------|-----------|--------|--------------|
| 4FQI   | A_LYS_109 | NZ     | B_GLU_69  | OE1    | 2.615        |
| 4FQI   | A_LYS_109 | NZ     | B_GLU_69  | OE2    | 3.205        |
| 4FQI   | A_LYS_307 | NZ     | B_GLU_64  | OE2    | 3.371        |
| 4FQI   | A_LYS_310 | NZ     | B_ASP_90  | OD1    | 2.687        |
| 4FQI   | A_LYS_310 | NZ     | B_ASP_90  | OD2    | 3.739        |
| 4FQI   | H_LYS_143 | NZ     | L_GLU_124 | OE2    | 2.947        |

Table 1313: Interfacial 4FQI-specific salt bridging networks analysis. In this table, a PDB file is specified with a four-letter PDB ID, except that the names of the PDB files corresponding to the single NMR structural model split from the NMR ensemble is specified with a four-letter PDB ID in addition to a hyphen followed by the single NMR structural model numeric ID, the residue naming scheme is **Chain ID\_residue name\_residue number**,  $\angle ADH$  represents the angle formed by acceptor (A), donor (D) and hydrogen (H) ( $\angle ADH$ ).

| PDB ID | Residue A | Atom A | Residue B | Atom B | Distance (Å) |
|--------|-----------|--------|-----------|--------|--------------|
| 4G6A   | C_ARG_64  | NH1    | D_ASP_94  | OD1    | 3.792        |
| 4G6A   | C_ARG_64  | NH1    | D_ASP_94  | OD2    | 3.701        |
| 4G6A   | C_LYS_209 | NZ     | D_GLU_123 | OE1    | 2.784        |
| 4G6A   | C_LYS_209 | NZ     | D_GLU_123 | OE2    | 3.529        |
| 4G6A   | D_ARG_18  | NH2    | L_GLU_27  | OE2    | 3.721        |
| 4G6A   | H_ARG_64  | NH2    | L_ASP_94  | OD1    | 3.443        |
| 4G6A   | H_ARG_64  | NH2    | L_ASP_94  | OD2    | 3.275        |
| 4G6A   | H_LYS_209 | NZ     | L_GLU_123 | OE1    | 2.940        |
| 4G6A   | H_LYS_209 | NZ     | L_GLU_123 | OE2    | 3.622        |

Table 1314: Interfacial 4G6A-specific salt bridging networks analysis. In this table, a PDB file is specified with a four-letter PDB ID, except that the names of the PDB files corresponding to the single NMR structural model split from the NMR ensemble is specified with a four-letter PDB ID in addition to a hyphen followed by the single NMR structural model numeric ID, the residue naming scheme is **Chain ID\_residue name\_residue number**,  $\angle ADH$  represents the angle formed by acceptor (A), donor (D) and hydrogen (H) ( $\angle ADH$ ).

| PDB ID | Residue A | Atom A | Residue B  | Atom B | Distance (Å) |
|--------|-----------|--------|------------|--------|--------------|
| 4G6F   | H.LYS_143 | NZ     | L.GLU_125  | OE2    | 3.341        |
| 4G6F   | H.LYS_209 | NZ     | L.GLU_124  | OE1    | 3.080        |
| 4G6F   | H.LYS_209 | NZ     | L.GLU_124  | OE2    | 2.558        |
| 4G6F   | B.LYS_143 | NZ     | D.GLU_125  | OE2    | 2.735        |
| 4G6F   | B.LYS_209 | NZ     | D.GLU_124  | OE1    | 3.470        |
| 4G6F   | B.LYS_209 | NZ     | D.GLU_124  | OE2    | 2.107        |
| 4G6F   | L.HIS_31  | ND1    | H.GLU_100I | OE2    | 2.912        |
| 4G6F   | L.ARG_91  | NH1    | H.GLU_100J | OE2    | 2.715        |
| 4G6F   | L.ARG_91  | NH2    | H.GLU_100J | OE2    | 2.951        |
| 4G6F   | D.HIS_31  | ND1    | B.GLU_100I | OE2    | 2.954        |
| 4G6F   | D.ARG_91  | NH1    | B.GLU_100J | OE2    | 2.854        |
| 4G6F   | D.ARG_91  | NH2    | B.GLU_100J | OE2    | 2.880        |
| 4G6F   | D.ARG_95B | NH2    | B.ASP_58   | OD1    | 3.343        |

Table 1315: Interfacial 4G6F-specific salt bridging networks analysis. In this table, a PDB file is specified with a four-letter PDB ID, except that the names of the PDB files corresponding to the single NMR structural model split from the NMR ensemble is specified with a four-letter PDB ID in addition to a hyphen followed by the single NMR structural model numeric ID, the residue naming scheme is **Chain ID\_residue name\_residue number**,  $\angle ADH$  represents the angle formed by acceptor (A), donor (D) and hydrogen (H) ( $\angle ADH$ ).

| PDB ID | Residue A | Atom A | Residue B | Atom B | Distance (Å) |
|--------|-----------|--------|-----------|--------|--------------|
| 4GMT   | H_HIS_164 | NE2    | L_ASP_167 | OD2    | 3.650        |

Table 1316: Interfacial 4GMT-specific salt bridging networks analysis. In this table, a PDB file is specified with a four-letter PDB ID, except that the names of the PDB files corresponding to the single NMR structural model split from the NMR ensemble is specified with a four-letter PDB ID in addition to a hyphen followed by the single NMR structural model numeric ID, the residue naming scheme is **Chain ID\_residue name\_residue number**,  $\angle ADH$  represents the angle formed by acceptor (A), donor (D) and hydrogen (H) ( $\angle ADH$ ).

| PDB ID | Residue A | Atom A | Residue B | Atom B | Distance (Å) |
|--------|-----------|--------|-----------|--------|--------------|
| 4GXU   | A_LYS_    | NZ     | F_GLU_    | OE1    | 3.529        |
| 4GXU   | A_LYS_    | NZ     | F_GLU_    | OE2    | 3.469        |
| 4GXU   | A_ARG_109 | NH2    | B_GLU_69  | OE1    | 3.987        |
| 4GXU   | A_ARG_109 | NH2    | B_GLU_69  | OE2    | 3.286        |
| 4GXU   | A_ARG_    | NH1    | B_ASP_    | OD1    | 2.648        |
| 4GXU   | A_ARG_    | NH2    | B_ASP_    | OD1    | 2.545        |
| 4GXU   | B_LYS_58  | NZ     | D_GLU_97  | OE1    | 3.748        |
| 4GXU   | B_LYS_68  | NZ     | A_GLU_110 | OE2    | 3.492        |
| 4GXU   | B_ARG_76  | NH1    | F_GLU_74  | OE1    | 3.015        |
| 4GXU   | B_ARG_76  | NH1    | F_GLU_74  | OE2    | 2.935        |
| 4GXU   | B_ARG_76  | NH2    | E_GLU_107 | OE2    | 3.559        |
| 4GXU   | B_ARG_76  | NH2    | F_GLU_74  | OE2    | 2.547        |
| 4GXU   | B_LYS_83  | NZ     | F_ASP_85  | OD1    | 3.431        |
| 4GXU   | B_LYS_83  | NZ     | F_ASP_85  | OD2    | 3.614        |
| 4GXU   | B_ARG_    | NH2    | D_ASP_    | OD2    | 3.432        |
| 4GXU   | B_ARG_    | NH1    | F_GLU_    | OE1    | 3.168        |
| 4GXU   | B_ARG_    | NH2    | F_GLU_    | OE1    | 3.085        |
| 4GXU   | B_ARG_    | NH2    | F_GLU_    | OE2    | 3.110        |
| 4GXU   | C_LYS_32  | NZ     | B_GLU_57  | OE1    | 3.823        |
| 4GXU   | C_LYS_32  | NZ     | B_GLU_57  | OE2    | 3.681        |
| 4GXU   | C_ARG_109 | NH2    | D_GLU_69  | OE1    | 3.507        |
| 4GXU   | C_ARG_109 | NH2    | D_GLU_69  | OE2    | 3.205        |
| 4GXU   | C_ARG_310 | NH1    | D_ASP_90  | OD1    | 3.385        |
| 4GXU   | C_ARG_310 | NH2    | D_ASP_90  | OD1    | 3.336        |
| 4GXU   | D_LYS_68  | NZ     | C_GLU_110 | OE2    | 3.981        |
| 4GXU   | D_ARG_76  | NH1    | B_GLU_74  | OE1    | 2.948        |
| 4GXU   | D_ARG_76  | NH1    | B_GLU_74  | OE2    | 3.453        |
| 4GXU   | D_ARG_76  | NH2    | A_GLU_107 | OE2    | 3.465        |
| 4GXU   | D_ARG_76  | NH2    | B_GLU_74  | OE1    | 3.835        |
| 4GXU   | D_ARG_76  | NH2    | B_GLU_74  | OE2    | 2.916        |
| 4GXU   | D_LYS_83  | NZ     | B_ASP_85  | OD1    | 3.057        |
| 4GXU   | D_LYS_83  | NZ     | B_ASP_85  | OD2    | 3.527        |
| 4GXU   | D_ARG_    | NH2    | F_ASP_    | OD2    | 3.392        |
| 4GXU   | D_ARG_    | NH1    | B_GLU_    | OE1    | 2.743        |
| 4GXU   | D_ARG_    | NH1    | B_GLU_    | OE2    | 3.931        |
| 4GXU   | D_ARG_    | NH2    | B_GLU_    | OE1    | 2.897        |
| 4GXU   | D_ARG_    | NH2    | B_GLU_    | OE2    | 2.579        |
| 4GXU   | E_LYS_    | NZ     | D_GLU_    | OE1    | 3.848        |
| 4GXU   | E_LYS_    | NZ     | D_GLU_    | OE2    | 3.549        |
| 4GXU   | E_ARG_109 | NH2    | F_GLU_69  | OE1    | 3.819        |
| 4GXU   | E_ARG_109 | NH2    | F_GLU_69  | OE2    | 3.459        |
| 4GXU   | E_ARG_310 | NH1    | F_ASP_90  | OD1    | 2.704        |
| 4GXU   | E_ARG_310 | NH2    | F_ASP_90  | OD1    | 2.770        |
| 4GXU   | F_LYS_    | NZ     | B_GLU_    | OE1    | 3.893        |
| 4GXU   | F_LYS_68  | NZ     | E_GLU_110 | OE2    | 3.968        |
| 4GXU   | F_ARG_76  | NH1    | D_GLU_74  | OE1    | 2.787        |
| 4GXU   | F_ARG_76  | NH1    | D_GLU_74  | OE2    | 3.366        |
| 4GXU   | F_ARG_76  | NH2    | C_GLU_107 | OE2    | 3.548        |
| 4GXU   | F_ARG_76  | NH2    | D_GLU_74  | OE1    | 3.616        |
| 4GXU   | F_ARG_76  | NH2    | D_GLU_74  | OE2    | 2.732        |
| 4GXU   | F_LYS_83  | NZ     | D_ASP_85  | OD1    | 3.339        |
| 4GXU   | F_LYS_83  | NZ     | D_ASP_85  | OD2    | 3.717        |
| 4GXU   | F_ARG_    | NH2    | B_ASP_    | OD2    | 3.670        |
| 4GXU   | F_ARG_    | NH1    | D_GLU_    | OE1    | 3.077        |
| 4GXU   | F_ARG_    | NH2    | D_GLU_    | OE1    | 2.952        |
| 4GXU   | F_ARG_    | NH2    | D_GLU_    | OE2    | 3.074        |
| 4GXU   | G_LYS_    | NZ     | J_GLU_    | OE1    | 3.601        |

|      |           |     |           |     |       |
|------|-----------|-----|-----------|-----|-------|
| 4GXU | G_LYS_    | NZ  | J_GLU_    | OE2 | 3.403 |
| 4GXU | G_ARG_    | NH2 | H_GLU_    | OE2 | 3.183 |
| 4GXU | G_ARG_    | NH1 | H_ASP_    | OD1 | 2.337 |
| 4GXU | G_ARG_    | NH2 | H_ASP_    | OD1 | 2.900 |
| 4GXU | H_LYS_    | NZ  | L_GLU_    | OE1 | 3.639 |
| 4GXU | H_LYS_    | NZ  | G_GLU_    | OE2 | 3.438 |
| 4GXU | H_ARG_    | NH1 | J_GLU_    | OE1 | 2.612 |
| 4GXU | H_ARG_    | NH1 | J_GLU_    | OE2 | 3.374 |
| 4GXU | H_ARG_    | NH2 | I_GLU_    | OE2 | 3.506 |
| 4GXU | H_ARG_    | NH2 | J_GLU_    | OE1 | 3.326 |
| 4GXU | H_ARG_    | NH2 | J_GLU_    | OE2 | 2.517 |
| 4GXU | H_LYS_    | NZ  | J_ASP_    | OD1 | 2.938 |
| 4GXU | H_LYS_    | NZ  | J_ASP_    | OD2 | 3.368 |
| 4GXU | H_ARG_    | NH2 | L_ASP_    | OD2 | 3.212 |
| 4GXU | H_ARG_    | NH1 | J_GLU_    | OE1 | 3.044 |
| 4GXU | H_ARG_    | NH2 | J_GLU_    | OE1 | 2.714 |
| 4GXU | H_ARG_    | NH2 | J_GLU_    | OE2 | 3.067 |
| 4GXU | L_LYS_    | NZ  | L_GLU_    | OE1 | 3.747 |
| 4GXU | L_LYS_    | NZ  | L_GLU_    | OE2 | 3.353 |
| 4GXU | L_ARG_    | NH2 | J_GLU_    | OE1 | 3.762 |
| 4GXU | L_ARG_    | NH2 | J_GLU_    | OE2 | 2.924 |
| 4GXU | L_ARG_    | NH1 | J_ASP_    | OD1 | 2.388 |
| 4GXU | L_ARG_    | NH2 | J_ASP_    | OD1 | 2.649 |
| 4GXU | J_LYS_    | NZ  | H_GLU_    | OE1 | 3.949 |
| 4GXU | J_LYS_    | NZ  | I_GLU_    | OE2 | 3.674 |
| 4GXU | J_ARG_    | NH1 | L_GLU_    | OE1 | 2.912 |
| 4GXU | J_ARG_    | NH1 | L_GLU_    | OE2 | 3.322 |
| 4GXU | J_ARG_    | NH2 | K_GLU_    | OE2 | 3.542 |
| 4GXU | J_ARG_    | NH2 | L_GLU_    | OE1 | 3.621 |
| 4GXU | J_ARG_    | NH2 | L_GLU_    | OE2 | 2.520 |
| 4GXU | J_LYS_    | NZ  | L_ASP_    | OD1 | 3.139 |
| 4GXU | J_LYS_    | NZ  | L_ASP_    | OD2 | 3.566 |
| 4GXU | J_ARG_    | NH2 | H_ASP_    | OD2 | 3.270 |
| 4GXU | J_ARG_    | NH1 | L_GLU_    | OE1 | 3.377 |
| 4GXU | J_ARG_    | NH2 | L_GLU_    | OE1 | 2.504 |
| 4GXU | J_ARG_    | NH2 | L_GLU_    | OE2 | 3.208 |
| 4GXU | K_LYS_    | NZ  | H_GLU_    | OE2 | 3.068 |
| 4GXU | K_ARG_    | NH2 | L_GLU_    | OE1 | 3.835 |
| 4GXU | K_ARG_    | NH2 | L_GLU_    | OE2 | 3.159 |
| 4GXU | K_ARG_    | NH1 | L_ASP_    | OD1 | 2.447 |
| 4GXU | K_ARG_    | NH2 | L_ASP_    | OD1 | 2.754 |
| 4GXU | L_LYS_    | NZ  | J_GLU_    | OE1 | 3.674 |
| 4GXU | L_LYS_    | NZ  | K_GLU_    | OE2 | 3.305 |
| 4GXU | L_ARG_    | NH1 | H_GLU_    | OE1 | 2.958 |
| 4GXU | L_ARG_    | NH1 | H_GLU_    | OE2 | 3.138 |
| 4GXU | L_ARG_    | NH2 | G_GLU_    | OE2 | 3.886 |
| 4GXU | L_ARG_    | NH2 | H_GLU_    | OE1 | 3.887 |
| 4GXU | L_ARG_    | NH2 | H_GLU_    | OE2 | 2.595 |
| 4GXU | L_LYS_    | NZ  | H_ASP_    | OD1 | 2.732 |
| 4GXU | L_LYS_    | NZ  | H_ASP_    | OD2 | 3.190 |
| 4GXU | L_ARG_    | NH2 | J_ASP_    | OD2 | 3.583 |
| 4GXU | L_ARG_    | NH1 | H_GLU_    | OE1 | 3.044 |
| 4GXU | L_ARG_    | NH2 | H_GLU_    | OE1 | 2.477 |
| 4GXU | L_ARG_    | NH2 | H_GLU_    | OE2 | 3.036 |
| 4GXU | M_ARG_    | NH2 | H_GLU_    | OE2 | 3.356 |
| 4GXU | M_LYS_    | NZ  | N_GLU_    | OE2 | 2.851 |
| 4GXU | M_LYS_    | NZ  | N_GLU_    | OE1 | 3.371 |
| 4GXU | Q_LYS_143 | NZ  | R_GLU_124 | OE2 | 3.025 |

|      |           |    |           |     |       |
|------|-----------|----|-----------|-----|-------|
| 4GXU | Q-LYS_209 | NZ | R-GLU_123 | OE1 | 3.619 |
| 4GXU | Q-LYS_209 | NZ | R-GLU_123 | OE2 | 3.564 |

Table 1317: Interfacial 4GXU-specific salt bridging networks analysis. In this table, a PDB file is specified with a four-letter PDB ID, except that the names of the PDB files corresponding to the single NMR structural model split from the NMR ensemble is specified with a four-letter PDB ID in addition to a hyphen followed by the single NMR structural model numeric ID, the residue naming scheme is **Chain ID\_residue name\_residue number**,  $\angle ADH$  represents the angle formed by acceptor (A), donor (D) and hydrogen (H) ( $\angle ADH$ ).

| PDB ID | Residue A | Atom A | Residue B | Atom B | Distance (Å) |
|--------|-----------|--------|-----------|--------|--------------|
| 4GXV   | H_LYS_143 | NZ     | L_GLU_124 | OE2    | 2.866        |
| 4GXV   | H_LYS_209 | NZ     | L_GLU_123 | OE1    | 3.472        |
| 4GXV   | H_LYS_209 | NZ     | L_GLU_123 | OE2    | 2.731        |
| 4GXV   | I_LYS_143 | NZ     | M_GLU_124 | OE2    | 2.455        |
| 4GXV   | I_LYS_209 | NZ     | M_GLU_123 | OE1    | 2.930        |
| 4GXV   | I_LYS_209 | NZ     | M_GLU_123 | OE2    | 3.487        |

Table 1318: Interfacial 4GXV-specific salt bridging networks analysis. In this table, a PDB file is specified with a four-letter PDB ID, except that the names of the PDB files corresponding to the single NMR structural model split from the NMR ensemble is specified with a four-letter PDB ID in addition to a hyphen followed by the single NMR structural model numeric ID, the residue naming scheme is **Chain ID\_residue name\_residue number**,  $\angle ADH$  represents the angle formed by acceptor (A), donor (D) and hydrogen (H) ( $\angle ADH$ ).



| PDB ID | Residue A | Atom A | Residue B | Atom B | Distance (Å) |
|--------|-----------|--------|-----------|--------|--------------|
| 4GXX   | A_LYS_32  | NZ     | D_GLU_57  | OE1    | 3.386        |
| 4GXX   | A_ARG_109 | NH2    | B_GLU_69  | OE2    | 3.594        |
| 4GXX   | A_ARG_310 | NH1    | B_ASP_90  | OD1    | 2.488        |
| 4GXX   | A_ARG_310 | NH2    | B_ASP_90  | OD1    | 2.951        |
| 4GXX   | B_LYS_58  | NZ     | F_GLU_97  | OE1    | 3.721        |
| 4GXX   | B_LYS_68  | NZ     | A_GLU_110 | OE2    | 2.734        |
| 4GXX   | B_ARG_76  | NH1    | D_GLU_74  | OE1    | 2.782        |
| 4GXX   | B_ARG_76  | NH1    | D_GLU_74  | OE2    | 3.511        |
| 4GXX   | B_ARG_76  | NH2    | C_GLU_107 | OE2    | 3.651        |
| 4GXX   | B_ARG_76  | NH2    | D_GLU_74  | OE1    | 3.625        |
| 4GXX   | B_ARG_76  | NH2    | D_GLU_74  | OE2    | 2.818        |
| 4GXX   | B_LYS_83  | NZ     | D_ASP_85  | OD1    | 2.661        |
| 4GXX   | B_LYS_83  | NZ     | D_ASP_85  | OD2    | 3.421        |
| 4GXX   | B_ARG_106 | NH2    | F_ASP_109 | OD2    | 3.780        |
| 4GXX   | B_ARG_116 | NH2    | D_GLU_120 | OE1    | 2.669        |
| 4GXX   | C_LYS_32  | NZ     | F_GLU_57  | OE2    | 3.165        |
| 4GXX   | C_ARG_109 | NH2    | D_GLU_69  | OE1    | 3.802        |
| 4GXX   | C_ARG_109 | NH2    | D_GLU_69  | OE2    | 3.427        |
| 4GXX   | C_ARG_310 | NH1    | D_ASP_90  | OD1    | 2.336        |
| 4GXX   | C_ARG_310 | NH2    | D_ASP_86  | OD1    | 3.727        |
| 4GXX   | C_ARG_310 | NH2    | D_ASP_90  | OD1    | 3.012        |
| 4GXX   | D_LYS_58  | NZ     | B_GLU_97  | OE1    | 3.529        |
| 4GXX   | D_LYS_68  | NZ     | C_GLU_110 | OE2    | 2.872        |
| 4GXX   | D_ARG_76  | NH1    | F_GLU_74  | OE1    | 2.910        |
| 4GXX   | D_ARG_76  | NH1    | F_GLU_74  | OE2    | 3.571        |
| 4GXX   | D_ARG_76  | NH2    | E_GLU_107 | OE2    | 3.622        |
| 4GXX   | D_ARG_76  | NH2    | F_GLU_74  | OE1    | 3.615        |
| 4GXX   | D_ARG_76  | NH2    | F_GLU_74  | OE2    | 2.803        |
| 4GXX   | D_LYS_83  | NZ     | F_ASP_85  | OD1    | 2.774        |
| 4GXX   | D_LYS_83  | NZ     | F_ASP_85  | OD2    | 3.514        |
| 4GXX   | D_ARG_106 | NH2    | B_ASP_109 | OD2    | 3.920        |
| 4GXX   | D_ARG_116 | NH1    | F_GLU_120 | OE1    | 3.357        |
| 4GXX   | D_ARG_116 | NH2    | F_GLU_120 | OE1    | 3.225        |
| 4GXX   | D_ARG_116 | NH2    | F_GLU_120 | OE2    | 3.007        |
| 4GXX   | E_LYS_32  | NZ     | B_GLU_57  | OE2    | 3.237        |
| 4GXX   | E_ARG_109 | NH2    | F_GLU_69  | OE1    | 3.858        |
| 4GXX   | E_ARG_109 | NH2    | F_GLU_69  | OE2    | 2.773        |
| 4GXX   | E_ARG_310 | NH1    | F_ASP_90  | OD1    | 2.470        |
| 4GXX   | E_ARG_310 | NH2    | F_ASP_90  | OD1    | 2.925        |
| 4GXX   | F_LYS_58  | NZ     | D_GLU_97  | OE1    | 3.142        |
| 4GXX   | F_LYS_68  | NZ     | E_GLU_110 | OE2    | 2.982        |
| 4GXX   | F_ARG_76  | NH1    | B_GLU_74  | OE1    | 2.798        |
| 4GXX   | F_ARG_76  | NH1    | B_GLU_74  | OE2    | 3.572        |
| 4GXX   | F_ARG_76  | NH2    | A_GLU_107 | OE2    | 3.644        |
| 4GXX   | F_ARG_76  | NH2    | B_GLU_74  | OE1    | 3.566        |
| 4GXX   | F_ARG_76  | NH2    | B_GLU_74  | OE2    | 2.823        |
| 4GXX   | F_LYS_83  | NZ     | B_ASP_85  | OD1    | 2.859        |
| 4GXX   | F_LYS_83  | NZ     | B_ASP_85  | OD2    | 3.462        |
| 4GXX   | F_ARG_106 | NH2    | D_ASP_109 | OD2    | 3.576        |
| 4GXX   | F_ARG_116 | NH1    | B_GLU_120 | OE1    | 2.775        |
| 4GXX   | F_ARG_116 | NH1    | B_GLU_120 | OE2    | 3.643        |
| 4GXX   | F_ARG_116 | NH2    | B_GLU_120 | OE1    | 3.285        |
| 4GXX   | F_ARG_116 | NH2    | B_GLU_120 | OE2    | 2.552        |

---

Table 1319: Interfacial 4GXX-specific salt bridging networks analysis. In this table, a PDB file is specified with a four-letter PDB ID, except that the names of the PDB files corresponding to the single NMR structural model split from the NMR ensemble is specified with a four-letter PDB ID in addition to a hyphen followed by the single NMR structural model numeric ID, the residue naming scheme is **Chain ID\_residue name\_residue number**,  $\angle ADH$  represents the angle formed by acceptor (A), donor (D) and hydrogen (H) ( $\angle ADH$ ).

| PDB ID | Residue A | Atom A | Residue B | Atom B | Distance (Å) |
|--------|-----------|--------|-----------|--------|--------------|
| 4H8W   | H_ARG_55  | NH1    | G_ASP_107 | OD1    | 3.623        |
| 4H8W   | H_ARG_55  | NH1    | G_ASP_107 | OD2    | 3.025        |
| 4H8W   | H_LYS_209 | NZ     | L_GLU_124 | OE1    | 2.673        |
| 4H8W   | H_LYS_209 | NZ     | L_GLU_124 | OE2    | 2.808        |
| 4H8W   | C_ARG_59  | NH1    | G_ASP_368 | OD1    | 2.952        |
| 4H8W   | C_ARG_59  | NH1    | G_ASP_368 | OD2    | 3.318        |
| 4H8W   | C_ARG_59  | NH2    | G_ASP_368 | OD1    | 3.741        |
| 4H8W   | C_ARG_59  | NH2    | G_ASP_368 | OD2    | 2.611        |

Table 1320: Interfacial 4H8W-specific salt bridging networks analysis. In this table, a PDB file is specified with a four-letter PDB ID, except that the names of the PDB files corresponding to the single NMR structural model split from the NMR ensemble is specified with a four-letter PDB ID in addition to a hyphen followed by the single NMR structural model numeric ID, the residue naming scheme is **Chain ID\_residue name\_residue number**,  $\angle ADH$  represents the angle formed by acceptor (A), donor (D) and hydrogen (H) ( $\angle ADH$ ).

| PDB ID | Residue A | Atom A | Residue B | Atom B | Distance (Å) |
|--------|-----------|--------|-----------|--------|--------------|
| 4HF5   | A_LYS_109 | NZ     | B_GLU_69  | OE1    | 3.017        |
| 4HF5   | A_ARG_137 | NH1    | H_ASP_97  | OD2    | 2.969        |
| 4HF5   | A_ARG_137 | NH2    | H_ASP_97  | OD1    | 3.008        |
| 4HF5   | A_ARG_137 | NH2    | H_ASP_97  | OD2    | 2.797        |
| 4HF5   | A_LYS_269 | NZ     | B_GLU_69  | OE1    | 2.931        |
| 4HF5   | A_LYS_269 | NZ     | B_GLU_69  | OE2    | 3.200        |
| 4HF5   | A_LYS_307 | NZ     | B_GLU_64  | OE2    | 3.558        |
| 4HF5   | A_LYS_310 | NZ     | B_ASP_90  | OD1    | 2.877        |
| 4HF5   | B_LYS_143 | NZ     | A_ASP_11  | OD2    | 3.934        |

Table 1321: Interfacial 4HF5-specific salt bridging networks analysis. In this table, a PDB file is specified with a four-letter PDB ID, except that the names of the PDB files corresponding to the single NMR structural model split from the NMR ensemble is specified with a four-letter PDB ID in addition to a hyphen followed by the single NMR structural model numeric ID, the residue naming scheme is **Chain ID\_residue name\_residue number**,  $\angle ADH$  represents the angle formed by acceptor (A), donor (D) and hydrogen (H) ( $\angle ADH$ ).

| PDB ID | Residue A | Atom A | Residue B | Atom B | Distance (Å) |
|--------|-----------|--------|-----------|--------|--------------|
| 4HGK   | C_LYS_65  | NZ     | B_GLU_230 | OE1    | 3.917        |
| 4HGK   | C_ARG_103 | NH1    | B_GLU_230 | OE1    | 3.099        |
| 4HGK   | C_ARG_103 | NH2    | B_GLU_230 | OE1    | 3.263        |
| 4HGK   | C_ARG_103 | NH2    | B_GLU_230 | OE2    | 3.968        |
| 4HGK   | D_LYS_65  | NZ     | A_GLU_230 | OE1    | 3.741        |
| 4HGK   | D_ARG_103 | NH1    | A_GLU_230 | OE1    | 3.115        |
| 4HGK   | D_ARG_103 | NH2    | A_GLU_230 | OE1    | 3.112        |
| 4HGK   | D_ARG_103 | NH2    | A_GLU_230 | OE2    | 3.907        |

Table 1322: Interfacial 4HGK-specific salt bridging networks analysis. In this table, a PDB file is specified with a four-letter PDB ID, except that the names of the PDB files corresponding to the single NMR structural model split from the NMR ensemble is specified with a four-letter PDB ID in addition to a hyphen followed by the single NMR structural model numeric ID, the residue naming scheme is **Chain ID\_residue name\_residue number**,  $\angle ADH$  represents the angle formed by acceptor (A), donor (D) and hydrogen (H) ( $\angle ADH$ ).

| PDB ID | Residue A | Atom A | Residue B | Atom B | Distance (Å) |
|--------|-----------|--------|-----------|--------|--------------|
| 4HH9   | A_ARG_54  | NH1    | C_ASP_50  | OD2    | 3.238        |
| 4HH9   | A_ARG_54  | NH2    | C_ASP_50  | OD2    | 3.183        |
| 4HH9   | B_LYS_209 | NZ     | A_GLU_123 | OE1    | 3.274        |
| 4HH9   | B_LYS_209 | NZ     | A_GLU_123 | OE2    | 3.488        |
| 4HH9   | B_LYS_214 | NZ     | A_ASP_122 | OD1    | 3.788        |
| 4HH9   | C_ARG_54  | NH1    | A_ASP_50  | OD2    | 2.782        |
| 4HH9   | C_ARG_54  | NH2    | A_ASP_50  | OD2    | 3.752        |
| 4HH9   | D_LYS_129 | NZ     | C_GLU_213 | OE1    | 3.401        |
| 4HH9   | D_LYS_129 | NZ     | C_GLU_213 | OE2    | 3.163        |
| 4HH9   | D_LYS_209 | NZ     | C_GLU_123 | OE2    | 3.057        |
| 4HH9   | D_LYS_214 | NZ     | C_ASP_122 | OD2    | 3.367        |

Table 1323: Interfacial 4HH9-specific salt bridging networks analysis. In this table, a PDB file is specified with a four-letter PDB ID, except that the names of the PDB files corresponding to the single NMR structural model split from the NMR ensemble is specified with a four-letter PDB ID in addition to a hyphen followed by the single NMR structural model numeric ID, the residue naming scheme is **Chain ID\_residue name\_residue number**,  $\angle ADH$  represents the angle formed by acceptor (A), donor (D) and hydrogen (H) ( $\angle ADH$ ).

| PDB ID | Residue A | Atom A | Residue B | Atom B | Distance (Å) |
|--------|-----------|--------|-----------|--------|--------------|
| 4HHA   | B_HIS_32  | ND1    | P_GLU_1   | OE1    | 4.000        |
| 4HHA   | B_HIS_32  | NE2    | P_GLU_1   | OE1    | 3.076        |
| 4HHA   | B_HIS_32  | NE2    | P_GLU_1   | OE2    | 2.639        |
| 4HHA   | B_ARG_94  | NH1    | P_GLU_1   | OE2    | 3.723        |
| 4HHA   | B_ARG_94  | NH2    | P_GLU_1   | OE2    | 3.026        |
| 4HHA   | B_HIS_164 | NE2    | A_ASP_167 | OD1    | 3.917        |
| 4HHA   | B_LYS_209 | NZ     | A_GLU_123 | OE2    | 2.754        |

Table 1324: Interfacial 4HHA-specific salt bridging networks analysis. In this table, a PDB file is specified with a four-letter PDB ID, except that the names of the PDB files corresponding to the single NMR structural model split from the NMR ensemble is specified with a four-letter PDB ID in addition to a hyphen followed by the single NMR structural model numeric ID, the residue naming scheme is **Chain ID\_residue name\_residue number**,  $\angle ADH$  represents the angle formed by acceptor (A), donor (D) and hydrogen (H) ( $\angle ADH$ ).

| PDB ID | Residue A | Atom A | Residue B | Atom B | Distance (Å) |
|--------|-----------|--------|-----------|--------|--------------|
| 4HIE   | A_ARG_91  | NH2    | B_GLU_95  | OE1    | 3.457        |
| 4HIE   | A_ARG_91  | NH2    | B_GLU_95  | OE2    | 3.317        |

Table 1325: Interfacial 4HIE-specific salt bridging networks analysis. In this table, a PDB file is specified with a four-letter PDB ID, except that the names of the PDB files corresponding to the single NMR structural model split from the NMR ensemble is specified with a four-letter PDB ID in addition to a hyphen followed by the single NMR structural model numeric ID, the residue naming scheme is **Chain ID\_residue name\_residue number**,  $\angle ADH$  represents the angle formed by acceptor (A), donor (D) and hydrogen (H) ( $\angle ADH$ ).



| PDB ID | Residue A | Atom A | Residue B | Atom B | Distance (Å) |
|--------|-----------|--------|-----------|--------|--------------|
| 4HIH   | A_ARG_91  | NH2    | B_GLU_95  | OE1    | 3.470        |
| 4HIH   | A_ARG_91  | NH2    | B_GLU_95  | OE2    | 3.314        |
| 4HIH   | B_LYS_209 | NZ     | A_GLU_123 | OE1    | 2.853        |
| 4HIH   | B_LYS_209 | NZ     | A_GLU_123 | OE2    | 3.685        |
| 4HIH   | C_ARG_91  | NH2    | D_GLU_95  | OE1    | 3.527        |
| 4HIH   | C_ARG_91  | NH2    | D_GLU_95  | OE2    | 3.339        |
| 4HIH   | D_LYS_209 | NZ     | C_GLU_123 | OE1    | 2.616        |
| 4HIH   | D_LYS_209 | NZ     | C_GLU_123 | OE2    | 2.820        |

Table 1326: Interfacial 4HIH-specific salt bridging networks analysis. In this table, a PDB file is specified with a four-letter PDB ID, except that the names of the PDB files corresponding to the single NMR structural model split from the NMR ensemble is specified with a four-letter PDB ID in addition to a hyphen followed by the single NMR structural model numeric ID, the residue naming scheme is **Chain ID\_residue name\_residue number**,  $\angle ADH$  represents the angle formed by acceptor (A), donor (D) and hydrogen (H) ( $\angle ADH$ ).

| PDB ID | Residue A | Atom A | Residue B | Atom B | Distance (Å) |
|--------|-----------|--------|-----------|--------|--------------|
| 4HII   | A_ARG_91  | NH2    | B_GLU_95  | OE1    | 3.439        |
| 4HII   | A_ARG_91  | NH2    | B_GLU_95  | OE2    | 3.542        |
| 4HII   | B_LYS_209 | NZ     | A_GLU_123 | OE1    | 2.845        |
| 4HII   | B_LYS_209 | NZ     | A_GLU_123 | OE2    | 2.723        |
| 4HII   | C_ARG_91  | NH1    | D_GLU_95  | OE2    | 3.915        |
| 4HII   | C_ARG_91  | NH2    | D_GLU_95  | OE1    | 3.687        |
| 4HII   | C_ARG_91  | NH2    | D_GLU_95  | OE2    | 3.380        |

Table 1327: Interfacial 4HII-specific salt bridging networks analysis. In this table, a PDB file is specified with a four-letter PDB ID, except that the names of the PDB files corresponding to the single NMR structural model split from the NMR ensemble is specified with a four-letter PDB ID in addition to a hyphen followed by the single NMR structural model numeric ID, the residue naming scheme is **Chain ID\_residue name\_residue number**,  $\angle ADH$  represents the angle formed by acceptor (A), donor (D) and hydrogen (H) ( $\angle ADH$ ).

| PDB ID | Residue A | Atom A | Residue B | Atom B | Distance (Å) |
|--------|-----------|--------|-----------|--------|--------------|
| 4HIJ   | A_ARG_91  | NH1    | B_GLU_95  | OE2    | 3.962        |
| 4HIJ   | A_ARG_91  | NH2    | B_GLU_95  | OE1    | 3.390        |
| 4HIJ   | A_ARG_91  | NH2    | B_GLU_95  | OE2    | 3.274        |
| 4HIJ   | C_ARG_91  | NH2    | D_GLU_95  | OE1    | 3.772        |
| 4HIJ   | C_ARG_91  | NH2    | D_GLU_95  | OE2    | 3.260        |
| 4HIJ   | D_LYS_209 | NZ     | C_GLU_123 | OE2    | 3.644        |

Table 1328: Interfacial 4HIJ-specific salt bridging networks analysis. In this table, a PDB file is specified with a four-letter PDB ID, except that the names of the PDB files corresponding to the single NMR structural model split from the NMR ensemble is specified with a four-letter PDB ID in addition to a hyphen followed by the single NMR structural model numeric ID, the residue naming scheme is **Chain ID\_residue name\_residue number**,  $\angle ADH$  represents the angle formed by acceptor (A), donor (D) and hydrogen (H) ( $\angle ADH$ ).

| PDB ID | Residue A | Atom A | Residue B | Atom B | Distance (Å) |
|--------|-----------|--------|-----------|--------|--------------|
| 4HK0   | A_LYS_222 | NZ     | B_GLU_125 | OE2    | 2.735        |
| 4HK0   | C_ARG_104 | NH2    | D_ASP_95  | OD2    | 3.573        |
| 4HK0   | D_LYS_104 | NZ     | B_ASP_50  | OD1    | 3.601        |
| 4HK0   | D_LYS_104 | NZ     | B_ASP_50  | OD2    | 2.755        |

Table 1329: Interfacial 4HK0-specific salt bridging networks analysis. In this table, a PDB file is specified with a four-letter PDB ID, except that the names of the PDB files corresponding to the single NMR structural model split from the NMR ensemble is specified with a four-letter PDB ID in addition to a hyphen followed by the single NMR structural model numeric ID, the residue naming scheme is **Chain ID\_residue name\_residue number**,  $\angle ADH$  represents the angle formed by acceptor (A), donor (D) and hydrogen (H) ( $\angle ADH$ ).

| PDB ID | Residue A | Atom A | Residue B | Atom B | Distance (Å) |
|--------|-----------|--------|-----------|--------|--------------|
| 4HK3   | J_LYS_222 | NZ     | N_GLU_125 | OE2    | 3.801        |

Table 1330: Interfacial 4HK3-specific salt bridging networks analysis. In this table, a PDB file is specified with a four-letter PDB ID, except that the names of the PDB files corresponding to the single NMR structural model split from the NMR ensemble is specified with a four-letter PDB ID in addition to a hyphen followed by the single NMR structural model numeric ID, the residue naming scheme is **Chain ID\_residue name\_residue number**,  $\angle ADH$  represents the angle formed by acceptor (A), donor (D) and hydrogen (H) ( $\angle ADH$ ).

| PDB ID | Residue A | Atom A | Residue B | Atom B | Distance (Å) |
|--------|-----------|--------|-----------|--------|--------------|
| 4HKB   | J_LYS_23  | NZ     | C_ASP_73  | OD1    | 3.505        |
| 4HKB   | J_ARG_72  | NH2    | A_GLU_10  | OE1    | 3.065        |
| 4HKB   | J_ARG_72  | NH2    | A_GLU_10  | OE2    | 2.664        |
| 4HKB   | J_LYS_222 | NZ     | N_GLU_125 | OE1    | 3.188        |
| 4HKB   | J_LYS_222 | NZ     | N_GLU_125 | OE2    | 3.564        |
| 4HKB   | A_ARG_72  | NH2    | C_GLU_10  | OE1    | 3.154        |
| 4HKB   | A_ARG_72  | NH2    | C_GLU_10  | OE2    | 2.755        |
| 4HKB   | A_LYS_156 | NZ     | B_GLU_126 | OE2    | 3.919        |
| 4HKB   | A_LYS_222 | NZ     | B_GLU_125 | OE1    | 3.019        |
| 4HKB   | A_LYS_222 | NZ     | B_GLU_125 | OE2    | 3.903        |
| 4HKB   | C_LYS_63  | NZ     | E_ASP_89  | OD1    | 3.939        |
| 4HKB   | C_LYS_63  | NZ     | E_ASP_89  | OD2    | 3.374        |
| 4HKB   | C_ARG_87  | NH2    | E_ASP_90  | OD1    | 3.045        |
| 4HKB   | C_ARG_87  | NH2    | E_ASP_90  | OD2    | 2.962        |
| 4HKB   | C_LYS_222 | NZ     | D_GLU_125 | OE1    | 3.332        |
| 4HKB   | C_LYS_222 | NZ     | D_GLU_125 | OE2    | 3.836        |
| 4HKB   | E_LYS_23  | NZ     | G_ASP_73  | OD1    | 2.630        |
| 4HKB   | E_LYS_63  | NZ     | C_ASP_89  | OD1    | 3.625        |
| 4HKB   | E_LYS_63  | NZ     | C_ASP_89  | OD2    | 3.095        |
| 4HKB   | E_ARG_72  | NH1    | I_GLU_10  | OE1    | 2.874        |
| 4HKB   | E_ARG_72  | NH1    | I_GLU_10  | OE2    | 2.849        |
| 4HKB   | E_ARG_87  | NH1    | C_ASP_90  | OD1    | 3.489        |
| 4HKB   | E_ARG_87  | NH1    | C_ASP_90  | OD2    | 3.954        |
| 4HKB   | E_ARG_87  | NH2    | C_ASP_90  | OD1    | 3.930        |
| 4HKB   | E_ARG_87  | NH2    | C_ASP_90  | OD2    | 3.219        |
| 4HKB   | E_LYS_222 | NZ     | F_GLU_125 | OE2    | 3.327        |
| 4HKB   | G_ARG_87  | NH1    | J_ASP_90  | OD1    | 3.108        |
| 4HKB   | G_ARG_87  | NH1    | J_ASP_90  | OD2    | 3.912        |
| 4HKB   | G_ARG_87  | NH2    | J_ASP_90  | OD2    | 3.607        |
| 4HKB   | I_ARG_72  | NH2    | G_GLU_10  | OE1    | 3.560        |
| 4HKB   | I_ARG_72  | NH2    | G_GLU_10  | OE2    | 2.553        |
| 4HKB   | I_LYS_222 | NZ     | K_GLU_125 | OE2    | 3.211        |
| 4HKB   | N_ARG_29  | NH1    | J_ASP_107 | OD1    | 3.664        |
| 4HKB   | N_ARG_29  | NH1    | J_ASP_107 | OD2    | 2.469        |
| 4HKB   | N_LYS_131 | NZ     | J_ASP_157 | OD2    | 3.951        |
| 4HKB   | B_ARG_29  | NH1    | A_ASP_107 | OD2    | 3.659        |
| 4HKB   | D_ARG_29  | NH1    | C_ASP_107 | OD2    | 3.254        |
| 4HKB   | H_ARG_29  | NH1    | G_ASP_107 | OD2    | 3.325        |
| 4HKB   | H_ARG_29  | NH2    | G_ASP_107 | OD2    | 3.189        |
| 4HKB   | K_ARG_31  | NH1    | I_ASP_107 | OD2    | 3.242        |

Table 1331: Interfacial 4HKB-specific salt bridging networks analysis. In this table, a PDB file is specified with a four-letter PDB ID, except that the names of the PDB files corresponding to the single NMR structural model split from the NMR ensemble is specified with a four-letter PDB ID in addition to a hyphen followed by the single NMR structural model numeric ID, the residue naming scheme is **Chain ID\_residue name\_residue number**,  $\angle ADH$  represents the angle formed by acceptor (A), donor (D) and hydrogen (H) ( $\angle ADH$ ).

| PDB ID | Residue A | Atom A | Residue B | Atom B | Distance (Å) |
|--------|-----------|--------|-----------|--------|--------------|
| 4HKX   | E_ARG_192 | NH1    | B_ASP_95  | OD2    | 3.293        |
| 4HKX   | E_LYS_219 | NZ     | B_ASP_93  | OD1    | 2.877        |
| 4HKX   | E_LYS_219 | NZ     | B_ASP_93  | OD2    | 3.792        |
| 4HKX   | A_LYS_222 | NZ     | B_GLU_125 | OE1    | 3.981        |
| 4HKX   | B_ARG_29  | NH2    | A_ASP_107 | OD2    | 3.853        |
| 4HKX   | B_LYS_131 | NZ     | A_ASP_157 | OD2    | 3.310        |

Table 1332: Interfacial 4HKX-specific salt bridging networks analysis. In this table, a PDB file is specified with a four-letter PDB ID, except that the names of the PDB files corresponding to the single NMR structural model split from the NMR ensemble is specified with a four-letter PDB ID in addition to a hyphen followed by the single NMR structural model numeric ID, the residue naming scheme is **Chain ID\_residue name\_residue number**,  $\angle ADH$  represents the angle formed by acceptor (A), donor (D) and hydrogen (H) ( $\angle ADH$ ).

| PDB ID | Residue A | Atom A | Residue B | Atom B | Distance (Å) |
|--------|-----------|--------|-----------|--------|--------------|
| 4HLZ   | A_LYS_109 | NZ     | B_GLU_69  | OE1    | 3.478        |
| 4HLZ   | A_LYS_109 | NZ     | B_GLU_69  | OE2    | 2.999        |
| 4HLZ   | A_LYS_310 | NZ     | B_ASP_90  | OD1    | 2.429        |
| 4HLZ   | A_LYS_310 | NZ     | B_ASP_90  | OD2    | 3.948        |
| 4HLZ   | B_LYS_58  | NZ     | F_GLU_97  | OE1    | 3.865        |
| 4HLZ   | B_LYS_58  | NZ     | F_GLU_97  | OE2    | 3.885        |
| 4HLZ   | B_ARG_76  | NH1    | D_GLU_74  | OE1    | 2.838        |
| 4HLZ   | B_ARG_76  | NH1    | D_GLU_74  | OE2    | 3.993        |
| 4HLZ   | B_ARG_76  | NH2    | D_GLU_74  | OE1    | 3.145        |
| 4HLZ   | B_ARG_76  | NH2    | D_GLU_74  | OE2    | 2.917        |
| 4HLZ   | B_LYS_83  | NZ     | D_GLU_85  | OE2    | 2.459        |
| 4HLZ   | B_ARG_106 | NH2    | F_ASP_109 | OD2    | 3.278        |
| 4HLZ   | B_LYS_143 | NZ     | A_ASP_11  | OD1    | 3.527        |
| 4HLZ   | B_LYS_143 | NZ     | A_ASP_11  | OD2    | 3.714        |
| 4HLZ   | C_ARG_32  | NH1    | F_GLU_57  | OE1    | 3.413        |
| 4HLZ   | C_LYS_109 | NZ     | D_GLU_69  | OE1    | 2.904        |
| 4HLZ   | C_LYS_109 | NZ     | D_GLU_69  | OE2    | 3.394        |
| 4HLZ   | C_LYS_310 | NZ     | D_ASP_86  | OD2    | 2.827        |
| 4HLZ   | C_LYS_310 | NZ     | D_ASP_90  | OD1    | 2.357        |
| 4HLZ   | C_LYS_310 | NZ     | D_ASP_90  | OD2    | 3.459        |
| 4HLZ   | D_LYS_58  | NZ     | B_GLU_97  | OE1    | 2.796        |
| 4HLZ   | D_ARG_76  | NH1    | F_GLU_74  | OE1    | 3.279        |
| 4HLZ   | D_ARG_76  | NH1    | F_GLU_74  | OE2    | 2.976        |
| 4HLZ   | D_ARG_76  | NH2    | E_GLU_107 | OE2    | 3.277        |
| 4HLZ   | D_ARG_76  | NH2    | F_GLU_74  | OE2    | 2.480        |
| 4HLZ   | D_LYS_83  | NZ     | F_GLU_85  | OE2    | 2.714        |
| 4HLZ   | D_ARG_106 | NH2    | B_ASP_109 | OD2    | 3.865        |
| 4HLZ   | D_LYS_131 | NZ     | F_ASP_128 | OD1    | 3.317        |
| 4HLZ   | E_LYS_109 | NZ     | F_GLU_69  | OE1    | 2.572        |
| 4HLZ   | E_LYS_109 | NZ     | F_GLU_69  | OE2    | 3.930        |
| 4HLZ   | E_LYS_310 | NZ     | F_ASP_86  | OD1    | 3.890        |
| 4HLZ   | E_LYS_310 | NZ     | F_ASP_90  | OD1    | 3.800        |
| 4HLZ   | F_LYS_58  | NZ     | D_GLU_97  | OE1    | 3.641        |
| 4HLZ   | F_ARG_76  | NH1    | B_GLU_74  | OE1    | 3.514        |
| 4HLZ   | F_ARG_76  | NH1    | B_GLU_74  | OE2    | 3.227        |
| 4HLZ   | F_ARG_76  | NH2    | B_GLU_74  | OE1    | 3.962        |
| 4HLZ   | F_ARG_76  | NH2    | B_GLU_74  | OE2    | 2.467        |
| 4HLZ   | I_LYS_96  | NZ     | D_ASP_46  | OD1    | 2.912        |
| 4HLZ   | I_LYS_96  | NZ     | D_ASP_46  | OD2    | 3.655        |
| 4HLZ   | I_LYS_208 | NZ     | J_GLU_125 | OE2    | 3.495        |
| 4HLZ   | I_ARG_213 | NH2    | J_GLU_125 | OE1    | 3.227        |
| 4HLZ   | I_ARG_213 | NH2    | J_GLU_125 | OE2    | 3.829        |

Table 1333: Interfacial 4HLZ-specific salt bridging networks analysis. In this table, a PDB file is specified with a four-letter PDB ID, except that the names of the PDB files corresponding to the single NMR structural model split from the NMR ensemble is specified with a four-letter PDB ID in addition to a hyphen followed by the single NMR structural model numeric ID, the residue naming scheme is **Chain ID\_residue name\_residue number**,  $\angle ADH$  represents the angle formed by acceptor (A), donor (D) and hydrogen (H) ( $\angle ADH$ ).



| PDB ID | Residue A | Atom A | Residue B | Atom B | Distance (Å) |
|--------|-----------|--------|-----------|--------|--------------|
| 4HMG   | A.LYS_27  | NZ     | B.GLU_97  | OE1    | 2.795        |
| 4HMG   | A.LYS_27  | NZ     | B.GLU_97  | OE2    | 3.247        |
| 4HMG   | A.ARG_109 | NH1    | B.GLU_67  | OE1    | 3.584        |
| 4HMG   | A.ARG_109 | NH1    | B.GLU_67  | OE2    | 2.773        |
| 4HMG   | A.LYS_238 | NZ     | F.GLU_72  | OE2    | 2.782        |
| 4HMG   | A.ARG_269 | NH2    | B.GLU_67  | OE1    | 2.783        |
| 4HMG   | A.LYS_310 | NZ     | B.ASP_90  | OD1    | 3.350        |
| 4HMG   | A.LYS_310 | NZ     | B.ASP_90  | OD2    | 2.711        |
| 4HMG   | B.ARG_54  | NH1    | F.GLU_97  | OE1    | 3.078        |
| 4HMG   | B.ARG_54  | NH2    | E.ASP_32  | OD2    | 3.863        |
| 4HMG   | B.ARG_54  | NH2    | F.GLU_97  | OE1    | 3.088        |
| 4HMG   | B.LYS_62  | NZ     | F.ASP_86  | OD1    | 2.890        |
| 4HMG   | B.LYS_62  | NZ     | F.ASP_86  | OD2    | 2.630        |
| 4HMG   | B.LYS_62  | NZ     | F.ASP_90  | OD1    | 3.620        |
| 4HMG   | B.LYS_62  | NZ     | F.ASP_90  | OD2    | 3.931        |
| 4HMG   | B.HIS_64  | NE2    | F.ASP_79  | OD2    | 3.785        |
| 4HMG   | B.ARG_76  | NH1    | D.GLU_74  | OE1    | 2.796        |
| 4HMG   | B.ARG_76  | NH1    | D.GLU_74  | OE2    | 3.711        |
| 4HMG   | B.ARG_76  | NH1    | D.GLU_81  | OE1    | 2.672        |
| 4HMG   | B.ARG_76  | NH1    | D.GLU_81  | OE2    | 3.308        |
| 4HMG   | B.ARG_76  | NH2    | D.GLU_74  | OE1    | 3.404        |
| 4HMG   | B.ARG_76  | NH2    | D.GLU_74  | OE2    | 2.827        |
| 4HMG   | B.ARG_123 | NH1    | F.GLU_132 | OE2    | 3.178        |
| 4HMG   | B.ARG_124 | NH1    | F.GLU_132 | OE1    | 3.359        |
| 4HMG   | B.ARG_124 | NH1    | F.GLU_132 | OE2    | 3.102        |
| 4HMG   | B.ARG_127 | NH2    | F.GLU_131 | OE1    | 2.525        |
| 4HMG   | B.ARG_163 | NH1    | F.GLU_131 | OE1    | 3.338        |
| 4HMG   | B.ARG_163 | NH1    | F.GLU_131 | OE2    | 2.796        |
| 4HMG   | B.ARG_163 | NH2    | F.GLU_131 | OE1    | 2.694        |
| 4HMG   | B.ARG_163 | NH2    | F.GLU_131 | OE2    | 3.492        |
| 4HMG   | B.ARG_170 | NH2    | D.GLU_128 | OE1    | 3.784        |
| 4HMG   | B.ARG_170 | NH2    | D.GLU_128 | OE2    | 3.698        |
| 4HMG   | C.LYS_27  | NZ     | D.GLU_97  | OE1    | 2.789        |
| 4HMG   | C.LYS_27  | NZ     | D.GLU_97  | OE2    | 3.246        |
| 4HMG   | C.ARG_109 | NH1    | D.GLU_67  | OE1    | 3.616        |
| 4HMG   | C.ARG_109 | NH1    | D.GLU_67  | OE2    | 2.791        |
| 4HMG   | C.LYS_238 | NZ     | B.GLU_72  | OE2    | 2.606        |
| 4HMG   | C.ARG_269 | NH2    | D.GLU_67  | OE1    | 2.764        |
| 4HMG   | C.LYS_310 | NZ     | D.ASP_90  | OD1    | 3.321        |
| 4HMG   | C.LYS_310 | NZ     | D.ASP_90  | OD2    | 2.697        |
| 4HMG   | C.LYS_326 | NZ     | D.GLU_15  | OE1    | 3.836        |
| 4HMG   | C.LYS_326 | NZ     | D.GLU_15  | OE2    | 2.684        |
| 4HMG   | D.ARG_54  | NH1    | B.GLU_97  | OE1    | 3.076        |
| 4HMG   | D.ARG_54  | NH2    | A.ASP_32  | OD2    | 3.995        |
| 4HMG   | D.ARG_54  | NH2    | B.GLU_97  | OE1    | 3.112        |
| 4HMG   | D.LYS_62  | NZ     | B.ASP_86  | OD1    | 2.940        |
| 4HMG   | D.LYS_62  | NZ     | B.ASP_86  | OD2    | 2.591        |
| 4HMG   | D.LYS_62  | NZ     | B.ASP_90  | OD1    | 3.586        |
| 4HMG   | D.LYS_62  | NZ     | B.ASP_90  | OD2    | 3.891        |
| 4HMG   | D.HIS_64  | NE2    | B.ASP_79  | OD2    | 3.731        |
| 4HMG   | D.ARG_76  | NH1    | F.GLU_74  | OE1    | 2.745        |
| 4HMG   | D.ARG_76  | NH1    | F.GLU_74  | OE2    | 3.756        |
| 4HMG   | D.ARG_76  | NH1    | F.GLU_81  | OE1    | 2.644        |
| 4HMG   | D.ARG_76  | NH1    | F.GLU_81  | OE2    | 3.314        |
| 4HMG   | D.ARG_76  | NH2    | F.GLU_74  | OE1    | 3.255        |
| 4HMG   | D.ARG_76  | NH2    | F.GLU_74  | OE2    | 2.777        |
| 4HMG   | D.ARG_123 | NH1    | B.GLU_132 | OE2    | 3.157        |

|      |           |     |           |     |       |
|------|-----------|-----|-----------|-----|-------|
| 4HMG | D_ARG_124 | NH1 | B_GLU_132 | OE1 | 3.347 |
| 4HMG | D_ARG_124 | NH1 | B_GLU_132 | OE2 | 3.074 |
| 4HMG | D_ARG_127 | NH2 | B_GLU_131 | OE1 | 2.541 |
| 4HMG | D_ARG_163 | NH1 | B_GLU_131 | OE1 | 3.321 |
| 4HMG | D_ARG_163 | NH1 | B_GLU_131 | OE2 | 2.801 |
| 4HMG | D_ARG_163 | NH2 | B_GLU_131 | OE1 | 2.729 |
| 4HMG | D_ARG_163 | NH2 | B_GLU_131 | OE2 | 3.526 |
| 4HMG | D_ARG_170 | NH2 | F_GLU_128 | OE1 | 3.859 |
| 4HMG | D_ARG_170 | NH2 | F_GLU_128 | OE2 | 3.829 |
| 4HMG | E_LYS_27  | NZ  | F_GLU_97  | OE1 | 2.764 |
| 4HMG | E_LYS_27  | NZ  | F_GLU_97  | OE2 | 3.247 |
| 4HMG | E_ARG_109 | NH1 | F_GLU_67  | OE1 | 3.614 |
| 4HMG | E_ARG_109 | NH1 | F_GLU_67  | OE2 | 2.773 |
| 4HMG | E_LYS_238 | NZ  | D_GLU_72  | OE2 | 2.707 |
| 4HMG | E_ARG_269 | NH2 | F_GLU_67  | OE1 | 2.739 |
| 4HMG | E_LYS_310 | NZ  | F_ASP_90  | OD1 | 3.300 |
| 4HMG | E_LYS_310 | NZ  | F_ASP_90  | OD2 | 2.685 |
| 4HMG | F_ARG_25  | NH1 | E_GLU_325 | OE1 | 3.853 |
| 4HMG | F_ARG_54  | NH1 | D_GLU_97  | OE1 | 3.052 |
| 4HMG | F_ARG_54  | NH2 | C_ASP_32  | OD2 | 3.923 |
| 4HMG | F_ARG_54  | NH2 | D_GLU_97  | OE1 | 3.130 |
| 4HMG | F_LYS_62  | NZ  | D_ASP_86  | OD1 | 2.900 |
| 4HMG | F_LYS_62  | NZ  | D_ASP_86  | OD2 | 2.597 |
| 4HMG | F_LYS_62  | NZ  | D_ASP_90  | OD1 | 3.664 |
| 4HMG | F_LYS_62  | NZ  | D_ASP_90  | OD2 | 3.951 |
| 4HMG | F_HIS_64  | NE2 | D_ASP_79  | OD2 | 3.646 |
| 4HMG | F_ARG_76  | NH1 | B_GLU_74  | OE1 | 2.714 |
| 4HMG | F_ARG_76  | NH1 | B_GLU_74  | OE2 | 3.687 |
| 4HMG | F_ARG_76  | NH1 | B_GLU_81  | OE1 | 2.651 |
| 4HMG | F_ARG_76  | NH1 | B_GLU_81  | OE2 | 3.434 |
| 4HMG | F_ARG_76  | NH2 | B_GLU_74  | OE1 | 3.281 |
| 4HMG | F_ARG_76  | NH2 | B_GLU_74  | OE2 | 2.711 |
| 4HMG | F_ARG_123 | NH1 | D_GLU_132 | OE2 | 3.178 |
| 4HMG | F_ARG_124 | NH1 | D_GLU_132 | OE1 | 3.402 |
| 4HMG | F_ARG_124 | NH1 | D_GLU_132 | OE2 | 3.132 |
| 4HMG | F_ARG_127 | NH2 | D_GLU_131 | OE1 | 2.579 |
| 4HMG | F_ARG_163 | NH1 | D_GLU_131 | OE1 | 3.299 |
| 4HMG | F_ARG_163 | NH1 | D_GLU_131 | OE2 | 2.816 |
| 4HMG | F_ARG_163 | NH2 | D_GLU_131 | OE1 | 2.752 |
| 4HMG | F_ARG_163 | NH2 | D_GLU_131 | OE2 | 3.575 |
| 4HMG | F_ARG_170 | NH2 | B_GLU_128 | OE1 | 3.815 |
| 4HMG | F_ARG_170 | NH2 | B_GLU_128 | OE2 | 3.719 |

Table 1334: Interfacial 4HMG-specific salt bridging networks analysis. In this table, a PDB file is specified with a four-letter PDB ID, except that the names of the PDB files corresponding to the single NMR structural model split from the NMR ensemble is specified with a four-letter PDB ID in addition to a hyphen followed by the single NMR structural model numeric ID, the residue naming scheme is **Chain ID\_residue name\_residue number**,  $\angle ADH$  represents the angle formed by acceptor (A), donor (D) and hydrogen (H) ( $\angle ADH$ ).

| PDB ID | Residue A | Atom A | Residue B | Atom B | Distance (Å) |
|--------|-----------|--------|-----------|--------|--------------|
| 4HWB   | A_ARG_230 | NH2    | H_ASP_56  | OD2    | 3.246        |
| 4HWB   | H_LYS_215 | NZ     | L_GLU_120 | OE2    | 3.469        |

Table 1335: Interfacial 4HWB-specific salt bridging networks analysis. In this table, a PDB file is specified with a four-letter PDB ID, except that the names of the PDB files corresponding to the single NMR structural model split from the NMR ensemble is specified with a four-letter PDB ID in addition to a hyphen followed by the single NMR structural model numeric ID, the residue naming scheme is **Chain ID\_residue name\_residue number**,  $\angle ADH$  represents the angle formed by acceptor (A), donor (D) and hydrogen (H) ( $\angle ADH$ ).

| PDB ID | Residue A | Atom A | Residue B | Atom B | Distance (Å) |
|--------|-----------|--------|-----------|--------|--------------|
| 4HXA   | H_ARG_98  | NH1    | L_ASP_50  | OD1    | 2.959        |
| 4HXA   | H_ARG_98  | NH1    | L_ASP_50  | OD2    | 3.607        |
| 4HXA   | H_HIS_164 | NE2    | L_ASP_167 | OD1    | 3.601        |

Table 1336: Interfacial 4HXA-specific salt bridging networks analysis. In this table, a PDB file is specified with a four-letter PDB ID, except that the names of the PDB files corresponding to the single NMR structural model split from the NMR ensemble is specified with a four-letter PDB ID in addition to a hyphen followed by the single NMR structural model numeric ID, the residue naming scheme is **Chain ID\_residue name\_residue number**,  $\angle ADH$  represents the angle formed by acceptor (A), donor (D) and hydrogen (H) ( $\angle ADH$ ).

| PDB ID | Residue A | Atom A | Residue B | Atom B | Distance (Å) |
|--------|-----------|--------|-----------|--------|--------------|
| 4HXB   | H_ARG_96  | NH1    | L_ASP_94  | OD1    | 3.212        |
| 4HXB   | H_ARG_96  | NH1    | L_ASP_94  | OD2    | 2.665        |
| 4HXB   | H_ARG_96  | NH2    | L_ASP_94  | OD1    | 2.669        |
| 4HXB   | H_ARG_96  | NH2    | L_ASP_94  | OD2    | 3.708        |

Table 1337: Interfacial 4HXB-specific salt bridging networks analysis. In this table, a PDB file is specified with a four-letter PDB ID, except that the names of the PDB files corresponding to the single NMR structural model split from the NMR ensemble is specified with a four-letter PDB ID in addition to a hyphen followed by the single NMR structural model numeric ID, the residue naming scheme is **Chain ID\_residue name\_residue number**,  $\angle ADH$  represents the angle formed by acceptor (A), donor (D) and hydrogen (H) ( $\angle ADH$ ).

| PDB ID | Residue A | Atom A | Residue B | Atom B | Distance (Å) |
|--------|-----------|--------|-----------|--------|--------------|
| 4I2X   | B.LYS_59  | NZ     | E.GLU_10  | OE2    | 3.418        |
| 4I2X   | B.LYS_65  | NZ     | E.ASP_208 | OD1    | 3.256        |
| 4I2X   | B.LYS_214 | NZ     | A.GLU_123 | OE2    | 3.742        |
| 4I2X   | D.LYS_63  | NZ     | C.ASP_1   | OD2    | 3.656        |
| 4I2X   | D.LYS_65  | NZ     | F.ASP_208 | OD1    | 3.848        |
| 4I2X   | D.HIS_170 | ND1    | C.ASP_167 | OD2    | 3.958        |
| 4I2X   | D.LYS_214 | NZ     | C.GLU_123 | OE2    | 3.815        |
| 4I2X   | F.ARG_180 | NH1    | E.GLU_47  | OE1    | 3.834        |

Table 1338: Interfacial 4I2X-specific salt bridging networks analysis. In this table, a PDB file is specified with a four-letter PDB ID, except that the names of the PDB files corresponding to the single NMR structural model split from the NMR ensemble is specified with a four-letter PDB ID in addition to a hyphen followed by the single NMR structural model numeric ID, the residue naming scheme is **Chain ID\_residue name\_residue number**,  $\angle ADH$  represents the angle formed by acceptor (A), donor (D) and hydrogen (H) ( $\angle ADH$ ).

| PDB ID | Residue A | Atom A | Residue B | Atom B | Distance (Å) |
|--------|-----------|--------|-----------|--------|--------------|
| 4I3R   | G_LYS_282 | NZ     | H_GLU_33  | OE1    | 3.996        |
| 4I3R   | G_LYS_282 | NZ     | H_GLU_33  | OE2    | 2.684        |
| 4I3R   | H_ARG_64  | NH2    | G_ASP_457 | OD1    | 3.551        |
| 4I3R   | H_ARG_64  | NH2    | G_ASP_457 | OD2    | 3.482        |
| 4I3R   | H_ARG_71  | NH1    | G_ASP_368 | OD1    | 3.996        |
| 4I3R   | H_ARG_71  | NH1    | G_ASP_368 | OD2    | 2.319        |
| 4I3R   | H_ARG_71  | NH2    | G_ASP_368 | OD1    | 3.997        |
| 4I3R   | H_ARG_71  | NH2    | G_ASP_368 | OD2    | 3.530        |
| 4I3R   | H_LYS_209 | NZ     | L_GLU_123 | OE2    | 2.484        |

Table 1339: Interfacial 4I3R-specific salt bridging networks analysis. In this table, a PDB file is specified with a four-letter PDB ID, except that the names of the PDB files corresponding to the single NMR structural model split from the NMR ensemble is specified with a four-letter PDB ID in addition to a hyphen followed by the single NMR structural model numeric ID, the residue naming scheme is **Chain ID\_residue name\_residue number**,  $\angle ADH$  represents the angle formed by acceptor (A), donor (D) and hydrogen (H) ( $\angle ADH$ ).

| PDB ID | Residue A | Atom A | Residue B | Atom B | Distance (Å) |
|--------|-----------|--------|-----------|--------|--------------|
| 4I3S   | G_LYS_282 | NZ     | H_GLU_33  | OE1    | 3.669        |
| 4I3S   | G_LYS_282 | NZ     | H_GLU_33  | OE2    | 3.690        |
| 4I3S   | H_ARG_64  | NH2    | G_ASP_457 | OD1    | 3.430        |
| 4I3S   | H_ARG_64  | NH2    | G_ASP_457 | OD2    | 3.082        |
| 4I3S   | H_ARG_71  | NH1    | G_ASP_368 | OD1    | 3.370        |
| 4I3S   | H_ARG_71  | NH1    | G_ASP_368 | OD2    | 3.053        |
| 4I3S   | H_ARG_71  | NH2    | G_ASP_368 | OD1    | 3.484        |
| 4I3S   | H_LYS_209 | NZ     | L_GLU_123 | OE1    | 2.882        |

Table 1340: Interfacial 4I3S-specific salt bridging networks analysis. In this table, a PDB file is specified with a four-letter PDB ID, except that the names of the PDB files corresponding to the single NMR structural model split from the NMR ensemble is specified with a four-letter PDB ID in addition to a hyphen followed by the single NMR structural model numeric ID, the residue naming scheme is **Chain ID\_residue name\_residue number**,  $\angle ADH$  represents the angle formed by acceptor (A), donor (D) and hydrogen (H) ( $\angle ADH$ ).



| PDB ID | Residue A | Atom A | Residue B | Atom B | Distance (Å) |
|--------|-----------|--------|-----------|--------|--------------|
| 4JAM   | H_LYS_209 | NZ     | L_GLU_123 | OE2    | 3.865        |
| 4JAM   | A_LYS_209 | NZ     | B_GLU_123 | OE2    | 3.814        |

Table 1341: Interfacial 4JAM-specific salt bridging networks analysis. In this table, a PDB file is specified with a four-letter PDB ID, except that the names of the PDB files corresponding to the single NMR structural model split from the NMR ensemble is specified with a four-letter PDB ID in addition to a hyphen followed by the single NMR structural model numeric ID, the residue naming scheme is **Chain ID\_residue name\_residue number**,  $\angle ADH$  represents the angle formed by acceptor (A), donor (D) and hydrogen (H) ( $\angle ADH$ ).

| PDB ID | Residue A | Atom A | Residue B | Atom B | Distance (Å) |
|--------|-----------|--------|-----------|--------|--------------|
| 4JAN   | H_ARG_97  | NH2    | G_ASP_368 | OD2    | 2.609        |
| 4JAN   | H_ARG_97  | NH2    | G_GLU_370 | OE1    | 2.554        |
| 4JAN   | H_LYS_143 | NZ     | L_GLU_124 | OE2    | 3.811        |
| 4JAN   | H_LYS_209 | NZ     | L_GLU_123 | OE1    | 2.888        |
| 4JAN   | L_LYS_129 | NZ     | H_ASP_144 | OD2    | 3.458        |
| 4JAN   | A_ARG_97  | NH2    | I_ASP_368 | OD1    | 2.825        |
| 4JAN   | A_ARG_97  | NH2    | I_ASP_368 | OD2    | 3.792        |
| 4JAN   | A_ARG_97  | NH2    | I_GLU_370 | OE1    | 3.106        |
| 4JAN   | A_LYS_209 | NZ     | B_GLU_123 | OE1    | 3.788        |
| 4JAN   | A_LYS_209 | NZ     | B_GLU_123 | OE2    | 3.189        |

Table 1342: Interfacial 4JAN-specific salt bridging networks analysis. In this table, a PDB file is specified with a four-letter PDB ID, except that the names of the PDB files corresponding to the single NMR structural model split from the NMR ensemble is specified with a four-letter PDB ID in addition to a hyphen followed by the single NMR structural model numeric ID, the residue naming scheme is **Chain ID\_residue name\_residue number**,  $\angle ADH$  represents the angle formed by acceptor (A), donor (D) and hydrogen (H) ( $\angle ADH$ ).

| PDB ID | Residue A | Atom A | Residue B | Atom B | Distance (Å) |
|--------|-----------|--------|-----------|--------|--------------|
| 4JHW   | F_LYS_209 | NZ     | H_ASP_101 | OD2    | 3.535        |
| 4JHW   | F_LYS_209 | NZ     | L_GLU_55  | OE1    | 2.845        |
| 4JHW   | F_LYS_209 | NZ     | L_GLU_55  | OE2    | 3.356        |

Table 1343: Interfacial 4JHW-specific salt bridging networks analysis. In this table, a PDB file is specified with a four-letter PDB ID, except that the names of the PDB files corresponding to the single NMR structural model split from the NMR ensemble is specified with a four-letter PDB ID in addition to a hyphen followed by the single NMR structural model numeric ID, the residue naming scheme is **Chain ID\_residue name\_residue number**,  $\angle ADH$  represents the angle formed by acceptor (A), donor (D) and hydrogen (H) ( $\angle ADH$ ).

| PDB ID | Residue A | Atom A | Residue B | Atom B | Distance (Å) |
|--------|-----------|--------|-----------|--------|--------------|
| 4JO1   | P_ARG_304 | NH1    | H_ASP_34  | OD1    | 3.045        |
| 4JO1   | P_ARG_304 | NH1    | H_ASP_34  | OD2    | 3.346        |
| 4JO1   | P_ARG_304 | NH2    | H_ASP_34  | OD2    | 2.892        |
| 4JO1   | Q_ARG_304 | NH1    | L_ASP_34  | OD1    | 2.949        |
| 4JO1   | Q_ARG_304 | NH1    | L_ASP_34  | OD2    | 3.344        |
| 4JO1   | Q_ARG_304 | NH2    | L_ASP_34  | OD1    | 3.946        |
| 4JO1   | Q_ARG_304 | NH2    | L_ASP_34  | OD2    | 2.878        |

Table 1344: Interfacial 4JO1-specific salt bridging networks analysis. In this table, a PDB file is specified with a four-letter PDB ID, except that the names of the PDB files corresponding to the single NMR structural model split from the NMR ensemble is specified with a four-letter PDB ID in addition to a hyphen followed by the single NMR structural model numeric ID, the residue naming scheme is **Chain ID\_residue name\_residue number**,  $\angle ADH$  represents the angle formed by acceptor (A), donor (D) and hydrogen (H) ( $\angle ADH$ ).

| PDB ID | Residue A | Atom A | Residue B | Atom B | Distance (Å) |
|--------|-----------|--------|-----------|--------|--------------|
| 4JO2   | P_ARG_304 | NH1    | H_ASP_34  | OD1    | 2.726        |
| 4JO2   | P_ARG_304 | NH1    | H_ASP_34  | OD2    | 3.333        |
| 4JO2   | P_ARG_304 | NH2    | H_ASP_34  | OD1    | 3.721        |
| 4JO2   | P_ARG_304 | NH2    | H_ASP_34  | OD2    | 2.854        |
| 4JO2   | Q_ARG_304 | NH1    | I_ASP_34  | OD1    | 2.965        |
| 4JO2   | Q_ARG_304 | NH1    | I_ASP_34  | OD2    | 3.252        |
| 4JO2   | Q_ARG_304 | NH2    | I_ASP_34  | OD2    | 3.328        |

Table 1345: Interfacial 4JO2-specific salt bridging networks analysis. In this table, a PDB file is specified with a four-letter PDB ID, except that the names of the PDB files corresponding to the single NMR structural model split from the NMR ensemble is specified with a four-letter PDB ID in addition to a hyphen followed by the single NMR structural model numeric ID, the residue naming scheme is **Chain ID\_residue name\_residue number**,  $\angle ADH$  represents the angle formed by acceptor (A), donor (D) and hydrogen (H) ( $\angle ADH$ ).

| PDB ID | Residue A | Atom A | Residue B | Atom B | Distance (Å) |
|--------|-----------|--------|-----------|--------|--------------|
| 4JO3   | H_ARG_54  | NH1    | P_GLU_321 | OE1    | 3.970        |
| 4JO3   | P_ARG_327 | NH1    | L_ASP_1   | OD1    | 2.994        |
| 4JO3   | P_ARG_327 | NH2    | L_ASP_1   | OD1    | 2.732        |
| 4JO3   | P_ARG_327 | NH2    | L_GLU_27  | OE1    | 3.272        |
| 4JO3   | P_ARG_327 | NH2    | L_GLU_27  | OE2    | 3.099        |
| 4JO3   | Q_ARG_327 | NH1    | M_ASP_1   | OD1    | 3.248        |
| 4JO3   | Q_ARG_327 | NH2    | M_ASP_1   | OD1    | 2.447        |
| 4JO3   | Q_ARG_327 | NH2    | M_ASP_1   | OD2    | 3.524        |
| 4JO3   | Q_ARG_327 | NH2    | M_GLU_27  | OE1    | 3.837        |
| 4JO3   | Q_ARG_327 | NH2    | M_GLU_27  | OE2    | 3.723        |

Table 1346: Interfacial 4JO3-specific salt bridging networks analysis. In this table, a PDB file is specified with a four-letter PDB ID, except that the names of the PDB files corresponding to the single NMR structural model split from the NMR ensemble is specified with a four-letter PDB ID in addition to a hyphen followed by the single NMR structural model numeric ID, the residue naming scheme is **Chain ID\_residue name\_residue number**,  $\angle ADH$  represents the angle formed by acceptor (A), donor (D) and hydrogen (H) ( $\angle ADH$ ).

| PDB ID | Residue A | Atom A | Residue B | Atom B | Distance (Å) |
|--------|-----------|--------|-----------|--------|--------------|
| 4K24   | A.LYS_46  | NZ     | U.GLU_33  | OE2    | 3.632        |
| 4K24   | A.LYS_46  | NZ     | U.GLU_36  | OE2    | 2.856        |
| 4K24   | A.HIS_87  | ND1    | U.ASP_11  | OD1    | 3.994        |
| 4K24   | H.LYS_62  | NZ     | L.ASP_1   | OD1    | 3.610        |
| 4K24   | H.LYS_208 | NZ     | L.GLU_123 | OE1    | 2.286        |
| 4K24   | H.LYS_208 | NZ     | L.GLU_123 | OE2    | 3.345        |
| 4K24   | U.ARG_91  | NH1    | B.ASP_22  | OD2    | 3.233        |
| 4K24   | U.ARG_91  | NH2    | B.ASP_22  | OD1    | 3.988        |
| 4K24   | U.ARG_91  | NH2    | B.ASP_22  | OD2    | 3.635        |

Table 1347: Interfacial 4K24-specific salt bridging networks analysis. In this table, a PDB file is specified with a four-letter PDB ID, except that the names of the PDB files corresponding to the single NMR structural model split from the NMR ensemble is specified with a four-letter PDB ID in addition to a hyphen followed by the single NMR structural model numeric ID, the residue naming scheme is **Chain ID\_residue name\_residue number**,  $\angle ADH$  represents the angle formed by acceptor (A), donor (D) and hydrogen (H) ( $\angle ADH$ ).

| PDB ID | Residue A | Atom A | Residue B | Atom B | Distance (Å) |
|--------|-----------|--------|-----------|--------|--------------|
| 4K2U   | H_LYS_    | NZ     | L_ASP_    | OD2    | 2.646        |
| 4K2U   | H_LYS_    | NZ     | L_GLU_    | OE2    | 3.160        |
| 4K2U   | L_LYS_    | NZ     | M_ASP_    | OD2    | 2.895        |
| 4K2U   | L_ARG_    | NH1    | A_GLU_    | OE1    | 2.808        |
| 4K2U   | L_ARG_    | NH1    | A_GLU_    | OE2    | 3.439        |
| 4K2U   | L_ARG_    | NH2    | A_GLU_    | OE1    | 3.591        |
| 4K2U   | L_ARG_    | NH2    | A_GLU_    | OE2    | 2.619        |
| 4K2U   | M_ARG_    | NH1    | B_GLU_    | OE1    | 2.744        |
| 4K2U   | M_ARG_    | NH1    | B_GLU_    | OE2    | 3.321        |
| 4K2U   | M_ARG_    | NH2    | B_GLU_    | OE1    | 3.489        |
| 4K2U   | M_ARG_    | NH2    | B_GLU_    | OE2    | 2.673        |
| 4K2U   | M_HIS_    | ND1    | L_GLU_    | OE2    | 3.997        |

Table 1348: Interfacial 4K2U-specific salt bridging networks analysis. In this table, a PDB file is specified with a four-letter PDB ID, except that the names of the PDB files corresponding to the single NMR structural model split from the NMR ensemble is specified with a four-letter PDB ID in addition to a hyphen followed by the single NMR structural model numeric ID, the residue naming scheme is **Chain ID** **residue name** **residue number**,  $\angle ADH$  represents the angle formed by acceptor (A), donor (D) and hydrogen (H) ( $\angle ADH$ ).



| PDB ID | Residue A  | Atom A | Residue B | Atom B | Distance (Å) |
|--------|------------|--------|-----------|--------|--------------|
| 4KI5   | C_LYS_211  | NZ     | D_GLU_122 | OE2    | 2.907        |
| 4KI5   | E_LYS_217  | NZ     | F_GLU_123 | OE2    | 3.401        |
| 4KI5   | E_ARG_222  | NH1    | F_GLU_123 | OE1    | 3.106        |
| 4KI5   | E_ARG_222  | NH1    | F_GLU_123 | OE2    | 3.925        |
| 4KI5   | E_ARG_222  | NH2    | F_GLU_123 | OE1    | 3.823        |
| 4KI5   | E_ARG_222  | NH2    | F_GLU_123 | OE2    | 3.234        |
| 4KI5   | M_ARG_2215 | NH1    | C_ASP_100 | OD1    | 2.868        |
| 4KI5   | M_ARG_2215 | NH1    | C_ASP_100 | OD2    | 3.241        |
| 4KI5   | M_ARG_2215 | NH2    | C_ASP_100 | OD1    | 3.324        |
| 4KI5   | M_ARG_2215 | NH2    | C_ASP_100 | OD2    | 2.939        |
| 4KI5   | M_ARG_2215 | NH2    | C_ASP_101 | OD2    | 3.819        |
| 4KI5   | M_LYS_2227 | NZ     | E_GLU_50  | OE1    | 3.493        |

Table 1349: Interfacial 4KI5-specific salt bridging networks analysis. In this table, a PDB file is specified with a four-letter PDB ID, except that the names of the PDB files corresponding to the single NMR structural model split from the NMR ensemble is specified with a four-letter PDB ID in addition to a hyphen followed by the single NMR structural model numeric ID, the residue naming scheme is **Chain ID residue name residue number**,  $\angle ADH$  represents the angle formed by acceptor (A), donor (D) and hydrogen (H) ( $\angle ADH$ ).

| PDB ID | Residue A | Atom A | Residue B | Atom B | Distance (Å) |
|--------|-----------|--------|-----------|--------|--------------|
| 4KJY   | A.LYS_39  | NZ     | B.ASP_100 | OD1    | 2.809        |
| 4KJY   | B.ARG_53  | NH1    | A.GLU_97  | OE2    | 3.571        |
| 4KJY   | B.ARG_53  | NH1    | A.GLU_106 | OE1    | 3.135        |
| 4KJY   | B.ARG_69  | NH1    | A.GLU_35  | OE1    | 2.737        |
| 4KJY   | B.ARG_69  | NH1    | A.GLU_35  | OE2    | 3.607        |
| 4KJY   | B.ARG_69  | NH1    | A.GLU_100 | OE2    | 2.961        |
| 4KJY   | B.ARG_69  | NH2    | A.GLU_35  | OE1    | 3.476        |
| 4KJY   | B.ARG_69  | NH2    | A.GLU_35  | OE2    | 2.813        |
| 4KJY   | B.LYS_96  | NZ     | A.GLU_97  | OE1    | 2.567        |
| 4KJY   | D.ARG_40  | NH1    | A.GLU_29  | OE1    | 3.310        |
| 4KJY   | D.ARG_40  | NH2    | A.GLU_29  | OE1    | 3.253        |
| 4KJY   | D.ARG_40  | NH2    | A.GLU_29  | OE2    | 2.999        |
| 4KJY   | D.ARG_40  | NH2    | B.GLU_70  | OE1    | 3.440        |
| 4KJY   | D.ARG_53  | NH1    | C.GLU_97  | OE2    | 3.949        |
| 4KJY   | D.ARG_53  | NH2    | C.GLU_104 | OE1    | 3.112        |
| 4KJY   | D.ARG_53  | NH2    | C.GLU_104 | OE2    | 3.607        |
| 4KJY   | D.ARG_69  | NH1    | C.GLU_35  | OE1    | 2.786        |
| 4KJY   | D.ARG_69  | NH1    | C.GLU_35  | OE2    | 3.903        |
| 4KJY   | D.ARG_69  | NH1    | C.GLU_100 | OE2    | 3.005        |
| 4KJY   | D.ARG_69  | NH2    | C.GLU_35  | OE1    | 3.286        |
| 4KJY   | D.ARG_69  | NH2    | C.GLU_35  | OE2    | 2.868        |
| 4KJY   | D.LYS_96  | NZ     | C.GLU_97  | OE1    | 2.747        |

Table 1350: Interfacial 4KJY-specific salt bridging networks analysis. In this table, a PDB file is specified with a four-letter PDB ID, except that the names of the PDB files corresponding to the single NMR structural model split from the NMR ensemble is specified with a four-letter PDB ID in addition to a hyphen followed by the single NMR structural model numeric ID, the residue naming scheme is **Chain ID\_residue name\_residue number**,  $\angle ADH$  represents the angle formed by acceptor (A), donor (D) and hydrogen (H) ( $\angle ADH$ ).

| PDB ID | Residue A | Atom A | Residue B | Atom B | Distance (Å) |
|--------|-----------|--------|-----------|--------|--------------|
| 4KPH   | L_ARG_61  | NH2    | L_GLU_85  | OE2    | 3.345        |
| 4KPH   | H_LYS_208 | NZ     | L_GLU_123 | OE2    | 2.903        |
| 4KPH   | L_LYS_208 | NZ     | M_GLU_123 | OE2    | 2.312        |

Table 1351: Interfacial 4KPH-specific salt bridging networks analysis. In this table, a PDB file is specified with a four-letter PDB ID, except that the names of the PDB files corresponding to the single NMR structural model split from the NMR ensemble is specified with a four-letter PDB ID in addition to a hyphen followed by the single NMR structural model numeric ID, the residue naming scheme is **Chain ID\_residue name\_residue number**,  $\angle ADH$  represents the angle formed by acceptor (A), donor (D) and hydrogen (H) ( $\angle ADH$ ).

| PDB ID | Residue A | Atom A | Residue B | Atom B | Distance (Å) |
|--------|-----------|--------|-----------|--------|--------------|
| 4KRL   | B_ARG_30  | NH1    | A_ASP_355 | OD1    | 3.258        |
| 4KRL   | B_ARG_30  | NH1    | A_ASP_355 | OD2    | 2.275        |
| 4KRL   | B_ARG_30  | NH2    | A_ASP_355 | OD1    | 3.549        |
| 4KRL   | B_ARG_30  | NH2    | A_ASP_355 | OD2    | 3.938        |
| 4KRL   | A_ARG_353 | NH1    | B_GLU_110 | OE1    | 2.654        |
| 4KRL   | A_ARG_353 | NH2    | B_ASP_112 | OD1    | 3.873        |
| 4KRL   | A_ARG_353 | NH2    | B_ASP_112 | OD2    | 2.978        |

Table 1352: Interfacial 4KRL-specific salt bridging networks analysis. In this table, a PDB file is specified with a four-letter PDB ID, except that the names of the PDB files corresponding to the single NMR structural model split from the NMR ensemble is specified with a four-letter PDB ID in addition to a hyphen followed by the single NMR structural model numeric ID, the residue naming scheme is **Chain ID\_residue name\_residue number**,  $\angle ADH$  represents the angle formed by acceptor (A), donor (D) and hydrogen (H) ( $\angle ADH$ ).

| PDB ID | Residue A | Atom A | Residue B | Atom B | Distance (Å) |
|--------|-----------|--------|-----------|--------|--------------|
| 4KRM   | A_ARG_353 | NH1    | B_GLU_110 | OE1    | 2.811        |
| 4KRM   | A_ARG_353 | NH2    | B_ASP_112 | OD1    | 3.965        |
| 4KRM   | A_ARG_353 | NH2    | B_ASP_112 | OD2    | 2.932        |
| 4KRM   | A_LYS_407 | NZ     | H_GLU_5   | OE1    | 3.498        |
| 4KRM   | A_LYS_407 | NZ     | H_GLU_5   | OE2    | 3.022        |
| 4KRM   | B_ARG_30  | NH1    | A_ASP_355 | OD1    | 3.162        |
| 4KRM   | B_ARG_30  | NH1    | A_ASP_355 | OD2    | 2.423        |
| 4KRM   | B_ARG_30  | NH2    | A_ASP_355 | OD1    | 3.525        |
| 4KRM   | C_ARG_353 | NH1    | D_GLU_110 | OE1    | 2.866        |
| 4KRM   | C_ARG_353 | NH2    | D_ASP_112 | OD2    | 3.218        |
| 4KRM   | D_ARG_30  | NH1    | C_ASP_355 | OD1    | 3.295        |
| 4KRM   | D_ARG_30  | NH1    | C_ASP_355 | OD2    | 2.452        |
| 4KRM   | D_ARG_30  | NH2    | C_ASP_355 | OD1    | 3.096        |
| 4KRM   | D_ARG_30  | NH2    | C_ASP_355 | OD2    | 3.699        |
| 4KRM   | E_ARG_353 | NH1    | F_GLU_110 | OE1    | 2.855        |
| 4KRM   | E_ARG_353 | NH2    | F_ASP_112 | OD2    | 2.965        |
| 4KRM   | E_LYS_407 | NZ     | L_GLU_5   | OE1    | 3.054        |
| 4KRM   | E_LYS_407 | NZ     | L_GLU_5   | OE2    | 2.995        |
| 4KRM   | F_ARG_30  | NH1    | E_ASP_355 | OD1    | 3.119        |
| 4KRM   | F_ARG_30  | NH1    | E_ASP_355 | OD2    | 2.396        |
| 4KRM   | F_ARG_30  | NH2    | E_ASP_355 | OD1    | 3.504        |
| 4KRM   | G_ARG_353 | NH1    | H_GLU_110 | OE1    | 3.021        |
| 4KRM   | G_ARG_353 | NH2    | H_ASP_112 | OD2    | 3.118        |
| 4KRM   | G_LYS_407 | NZ     | B_GLU_5   | OE1    | 3.493        |
| 4KRM   | G_LYS_407 | NZ     | B_GLU_5   | OE2    | 2.984        |
| 4KRM   | H_ARG_27  | NH1    | G_ASP_323 | OD1    | 2.688        |
| 4KRM   | H_ARG_27  | NH2    | G_ASP_323 | OD1    | 3.952        |
| 4KRM   | H_ARG_30  | NH1    | G_ASP_355 | OD1    | 3.358        |
| 4KRM   | H_ARG_30  | NH1    | G_ASP_355 | OD2    | 2.448        |
| 4KRM   | H_ARG_30  | NH2    | G_ASP_355 | OD1    | 3.423        |
| 4KRM   | H_ARG_30  | NH2    | G_ASP_355 | OD2    | 3.935        |
| 4KRM   | I_ARG_353 | NH1    | J_GLU_110 | OE1    | 2.862        |
| 4KRM   | I_ARG_353 | NH2    | J_ASP_112 | OD2    | 2.998        |
| 4KRM   | J_ARG_30  | NH1    | I_ASP_355 | OD1    | 3.164        |
| 4KRM   | J_ARG_30  | NH1    | I_ASP_355 | OD2    | 2.382        |
| 4KRM   | J_ARG_30  | NH2    | I_ASP_355 | OD1    | 3.707        |
| 4KRM   | K_ARG_353 | NH1    | L_GLU_110 | OE1    | 2.887        |
| 4KRM   | K_ARG_353 | NH1    | L_ASP_112 | OD2    | 3.973        |
| 4KRM   | K_ARG_353 | NH2    | L_ASP_112 | OD2    | 2.890        |
| 4KRM   | L_ARG_30  | NH1    | K_ASP_355 | OD1    | 3.487        |
| 4KRM   | L_ARG_30  | NH1    | K_ASP_355 | OD2    | 2.441        |
| 4KRM   | L_ARG_30  | NH2    | K_ASP_355 | OD1    | 3.452        |
| 4KRM   | L_ARG_30  | NH2    | K_ASP_355 | OD2    | 3.835        |

Table 1353: Interfacial 4KRM-specific salt bridging networks analysis. In this table, a PDB file is specified with a four-letter PDB ID, except that the names of the PDB files corresponding to the single NMR structural model split from the NMR ensemble is specified with a four-letter PDB ID in addition to a hyphen followed by the single NMR structural model numeric ID, the residue naming scheme is **Chain ID\_residue name\_residue number**,  $\angle ADH$  represents the angle formed by acceptor (A), donor (D) and hydrogen (H) ( $\angle ADH$ ).

| PDB ID | Residue A | Atom A | Residue B | Atom B | Distance (Å) |
|--------|-----------|--------|-----------|--------|--------------|
| 4KRO   | A_ARG_403 | NH2    | B_ASP_118 | OD2    | 3.168        |
| 4KRO   | A_ARG_405 | NH2    | B_ASP_118 | OD1    | 3.123        |
| 4KRO   | A_ARG_405 | NH2    | B_ASP_118 | OD2    | 3.849        |
| 4KRO   | A_LYS_443 | NZ     | D_ASP_58  | OD1    | 2.597        |
| 4KRO   | A_LYS_443 | NZ     | D_ASP_58  | OD2    | 3.457        |
| 4KRO   | A_LYS_465 | NZ     | D_ASP_103 | OD2    | 2.400        |
| 4KRO   | B_ARG_27  | NH1    | A_GLU_431 | OE1    | 3.073        |
| 4KRO   | B_ARG_27  | NH2    | A_GLU_431 | OE1    | 3.933        |
| 4KRO   | C_LYS_49  | NZ     | D_GLU_105 | OE2    | 3.247        |

Table 1354: Interfacial 4KRO-specific salt bridging networks analysis. In this table, a PDB file is specified with a four-letter PDB ID, except that the names of the PDB files corresponding to the single NMR structural model split from the NMR ensemble is specified with a four-letter PDB ID in addition to a hyphen followed by the single NMR structural model numeric ID, the residue naming scheme is **Chain ID\_residue name\_residue number**,  $\angle ADH$  represents the angle formed by acceptor (A), donor (D) and hydrogen (H) ( $\angle ADH$ ).

| PDB ID | Residue A | Atom A | Residue B | Atom B | Distance (Å) |
|--------|-----------|--------|-----------|--------|--------------|
| 4KRP   | A_ARG_403 | NH2    | B_ASP_115 | OD2    | 3.818        |
| 4KRP   | A_ARG_405 | NH1    | B_GLU_113 | OE1    | 2.923        |
| 4KRP   | A_ARG_405 | NH2    | B_GLU_113 | OE1    | 3.376        |
| 4KRP   | A_ARG_405 | NH2    | B_ASP_115 | OD1    | 2.626        |
| 4KRP   | A_LYS_443 | NZ     | D_ASP_58  | OD1    | 2.649        |
| 4KRP   | A_LYS_443 | NZ     | D_ASP_58  | OD2    | 3.951        |
| 4KRP   | A_LYS_465 | NZ     | D_ASP_103 | OD2    | 2.931        |
| 4KRP   | B_ARG_27  | NH1    | A_GLU_431 | OE1    | 3.144        |

Table 1355: Interfacial 4KRP-specific salt bridging networks analysis. In this table, a PDB file is specified with a four-letter PDB ID, except that the names of the PDB files corresponding to the single NMR structural model split from the NMR ensemble is specified with a four-letter PDB ID in addition to a hyphen followed by the single NMR structural model numeric ID, the residue naming scheme is **Chain ID\_residue name\_residue number**,  $\angle ADH$  represents the angle formed by acceptor (A), donor (D) and hydrogen (H) ( $\angle ADH$ ).

| PDB ID | Residue A | Atom A | Residue B | Atom B | Distance (Å) |
|--------|-----------|--------|-----------|--------|--------------|
| 4KV5   | C.LYS_60  | NZ     | G.ASP_56  | OD2    | 3.911        |
| 4KV5   | C.LYS_60  | NZ     | G.GLU_74  | OE2    | 3.252        |
| 4KV5   | C.ARG_94  | NH1    | E.ASP_231 | OD2    | 3.776        |
| 4KV5   | D.LYS_60  | NZ     | E.GLU_74  | OE2    | 3.237        |
| 4KV5   | A.ARG_94  | NH1    | H.ASP_231 | OD2    | 3.628        |
| 4KV5   | B.LYS_60  | NZ     | H.ASP_56  | OD2    | 3.938        |
| 4KV5   | B.LYS_60  | NZ     | H.GLU_74  | OE2    | 3.524        |

Table 1356: Interfacial 4KV5-specific salt bridging networks analysis. In this table, a PDB file is specified with a four-letter PDB ID, except that the names of the PDB files corresponding to the single NMR structural model split from the NMR ensemble is specified with a four-letter PDB ID in addition to a hyphen followed by the single NMR structural model numeric ID, the residue naming scheme is **Chain ID\_residue name\_residue number**,  $\angle ADH$  represents the angle formed by acceptor (A), donor (D) and hydrogen (H) ( $\angle ADH$ ).



| PDB ID | Residue A | Atom A | Residue B | Atom B | Distance (Å) |
|--------|-----------|--------|-----------|--------|--------------|
| 4KXZ   | A_ARG_60  | NH2    | J_GLU_74  | OE1    | 3.804        |
| 4KXZ   | B_ARG_60  | NH2    | H_ASP_56  | OD1    | 3.585        |
| 4KXZ   | B_ARG_60  | NH2    | H_GLU_74  | OE1    | 3.374        |
| 4KXZ   | B_ARG_60  | NH2    | H_GLU_74  | OE2    | 3.199        |
| 4KXZ   | D_ARG_60  | NH1    | N_GLU_74  | OE2    | 3.775        |
| 4KXZ   | D_ARG_60  | NH2    | N_GLU_74  | OE2    | 2.746        |
| 4KXZ   | E_ARG_60  | NH1    | Q_GLU_74  | OE1    | 3.619        |
| 4KXZ   | H_HIS_219 | NE2    | Q_ASP_56  | OD2    | 3.789        |
| 4KXZ   | H_HIS_223 | ND1    | Q_GLU_82  | OE1    | 3.688        |
| 4KXZ   | H_HIS_223 | ND1    | Q_GLU_82  | OE2    | 3.984        |
| 4KXZ   | H_HIS_223 | ND1    | L_ASP_123 | OD1    | 3.085        |
| 4KXZ   | H_HIS_223 | NE2    | Q_GLU_82  | OE2    | 3.368        |
| 4KXZ   | H_HIS_223 | NE2    | L_ASP_123 | OD1    | 3.457        |
| 4KXZ   | J_LYS_216 | NZ     | I_GLU_124 | OE1    | 2.736        |
| 4KXZ   | J_LYS_216 | NZ     | I_GLU_124 | OE2    | 3.105        |
| 4KXZ   | N_HIS_219 | NE2    | J_ASP_56  | OD2    | 3.889        |
| 4KXZ   | N_HIS_223 | ND1    | J_GLU_82  | OE1    | 3.240        |
| 4KXZ   | N_HIS_223 | ND1    | M_ASP_123 | OD1    | 3.197        |
| 4KXZ   | N_HIS_223 | NE2    | J_GLU_82  | OE1    | 3.650        |
| 4KXZ   | N_HIS_223 | NE2    | J_GLU_82  | OE2    | 3.394        |
| 4KXZ   | N_HIS_223 | NE2    | M_ASP_123 | OD1    | 3.310        |

Table 1357: Interfacial 4KXZ-specific salt bridging networks analysis. In this table, a PDB file is specified with a four-letter PDB ID, except that the names of the PDB files corresponding to the single NMR structural model split from the NMR ensemble is specified with a four-letter PDB ID in addition to a hyphen followed by the single NMR structural model numeric ID, the residue naming scheme is **Chain ID\_residue name\_residue number**,  $\angle ADH$  represents the angle formed by acceptor (A), donor (D) and hydrogen (H) ( $\angle ADH$ ).

| PDB ID | Residue A | Atom A | Residue B | Atom B | Distance (Å) |
|--------|-----------|--------|-----------|--------|--------------|
| 4LQF   | H_LYS_212 | NZ     | L_GLU_129 | OE1    | 2.714        |
| 4LQF   | H_LYS_212 | NZ     | L_GLU_129 | OE2    | 3.879        |
| 4LQF   | L_LYS_55  | NZ     | A_ASP_170 | OD2    | 2.731        |

Table 1358: Interfacial 4LQF-specific salt bridging networks analysis. In this table, a PDB file is specified with a four-letter PDB ID, except that the names of the PDB files corresponding to the single NMR structural model split from the NMR ensemble is specified with a four-letter PDB ID in addition to a hyphen followed by the single NMR structural model numeric ID, the residue naming scheme is **Chain ID\_residue name\_residue number**,  $\angle ADH$  represents the angle formed by acceptor (A), donor (D) and hydrogen (H) ( $\angle ADH$ ).

| PDB ID | Residue A | Atom A | Residue B | Atom B | Distance (Å) |
|--------|-----------|--------|-----------|--------|--------------|
| 4LSS   | G_LYS_97  | NZ     | H_ASP_99  | OD2    | 3.791        |
| 4LSS   | G_ARG_476 | NH2    | H_ASP_31  | OD1    | 3.839        |
| 4LSS   | H_ARG_61  | NH2    | G_GLU_466 | OE1    | 3.951        |
| 4LSS   | H_ARG_71  | NH1    | G_ASP_368 | OD1    | 3.719        |
| 4LSS   | H_ARG_71  | NH1    | G_ASP_368 | OD2    | 3.126        |
| 4LSS   | H_ARG_71  | NH2    | G_ASP_368 | OD1    | 3.278        |
| 4LSS   | H_LYS_209 | NZ     | L_GLU_125 | OE1    | 3.429        |
| 4LSS   | H_LYS_209 | NZ     | L_GLU_125 | OE2    | 3.562        |

Table 1359: Interfacial 4LSS-specific salt bridging networks analysis. In this table, a PDB file is specified with a four-letter PDB ID, except that the names of the PDB files corresponding to the single NMR structural model split from the NMR ensemble is specified with a four-letter PDB ID in addition to a hyphen followed by the single NMR structural model numeric ID, the residue naming scheme is **Chain ID\_residue name\_residue number**,  $\angle ADH$  represents the angle formed by acceptor (A), donor (D) and hydrogen (H) ( $\angle ADH$ ).

| PDB ID | Residue A | Atom A | Residue B | Atom B | Distance (Å) |
|--------|-----------|--------|-----------|--------|--------------|
| 4LST   | G_LYS_357 | NZ     | L_GLU_1   | OE1    | 2.783        |
| 4LST   | H_ARG_61  | NH1    | G_GLU_466 | OE1    | 3.812        |
| 4LST   | H_ARG_61  | NH2    | G_ASP_461 | OD1    | 2.947        |
| 4LST   | H_ARG_71  | NH1    | G_ASP_368 | OD1    | 3.527        |
| 4LST   | H_ARG_71  | NH1    | G_ASP_368 | OD2    | 2.632        |
| 4LST   | H_ARG_71  | NH2    | G_ASP_368 | OD1    | 2.939        |
| 4LST   | H_ARG_71  | NH2    | G_ASP_368 | OD2    | 3.624        |
| 4LST   | H_LYS_209 | NZ     | L_GLU_125 | OE2    | 3.921        |
| 4LST   | H_LYS_214 | NZ     | L_ASP_124 | OD1    | 3.010        |
| 4LST   | H_LYS_214 | NZ     | L_ASP_124 | OD2    | 3.020        |

Table 1360: Interfacial 4LST-specific salt bridging networks analysis. In this table, a PDB file is specified with a four-letter PDB ID, except that the names of the PDB files corresponding to the single NMR structural model split from the NMR ensemble is specified with a four-letter PDB ID in addition to a hyphen followed by the single NMR structural model numeric ID, the residue naming scheme is **Chain ID\_residue name\_residue number**,  $\angle ADH$  represents the angle formed by acceptor (A), donor (D) and hydrogen (H) ( $\angle ADH$ ).

| PDB ID | Residue A | Atom A | Residue B | Atom B | Distance (Å) |
|--------|-----------|--------|-----------|--------|--------------|
| 4LU5   | H_ARG_98  | NH2    | B_ASP_168 | OD2    | 3.392        |
| 4LU5   | H_LYS_208 | NZ     | L_GLU_128 | OE1    | 3.058        |
| 4LU5   | H_LYS_208 | NZ     | L_GLU_128 | OE2    | 3.445        |
| 4LU5   | L_ARG_51  | NH1    | H_ASP_101 | OD1    | 3.227        |
| 4LU5   | L_ARG_51  | NH2    | H_ASP_101 | OD1    | 2.925        |
| 4LU5   | L_ARG_98  | NH2    | A_ASP_168 | OD2    | 3.317        |
| 4LU5   | M_ARG_51  | NH1    | I_ASP_101 | OD2    | 3.086        |
| 4LU5   | M_ARG_51  | NH2    | I_ASP_101 | OD1    | 3.927        |
| 4LU5   | M_ARG_51  | NH2    | I_ASP_101 | OD2    | 2.770        |

Table 1361: Interfacial 4LU5-specific salt bridging networks analysis. In this table, a PDB file is specified with a four-letter PDB ID, except that the names of the PDB files corresponding to the single NMR structural model split from the NMR ensemble is specified with a four-letter PDB ID in addition to a hyphen followed by the single NMR structural model numeric ID, the residue naming scheme is **Chain ID\_residue name\_residue number**,  $\angle ADH$  represents the angle formed by acceptor (A), donor (D) and hydrogen (H) ( $\angle ADH$ ).

| PDB ID | Residue A | Atom A | Residue B | Atom B | Distance (Å) |
|--------|-----------|--------|-----------|--------|--------------|
| 4M1D   | L_LYS_129 | NZ     | H_ASP_144 | OD2    | 3.436        |
| 4M1D   | H_LYS_143 | NZ     | L_GLU_124 | OE2    | 2.547        |
| 4M1D   | H_LYS_209 | NZ     | L_GLU_123 | OE1    | 2.798        |
| 4M1D   | H_LYS_209 | NZ     | L_GLU_123 | OE2    | 2.782        |
| 4M1D   | P_ARG_315 | NH2    | H_ASP_95  | OD2    | 3.175        |
| 4M1D   | I_LYS_209 | NZ     | M_GLU_123 | OE1    | 3.060        |
| 4M1D   | I_LYS_209 | NZ     | M_GLU_123 | OE2    | 2.485        |
| 4M1D   | Q_ARG_315 | NH2    | I_ASP_95  | OD2    | 3.051        |

Table 1362: Interfacial 4M1D-specific salt bridging networks analysis. In this table, a PDB file is specified with a four-letter PDB ID, except that the names of the PDB files corresponding to the single NMR structural model split from the NMR ensemble is specified with a four-letter PDB ID in addition to a hyphen followed by the single NMR structural model numeric ID, the residue naming scheme is **Chain ID\_residue name\_residue number**,  $\angle ADH$  represents the angle formed by acceptor (A), donor (D) and hydrogen (H) ( $\angle ADH$ ).

| PDB ID | Residue A | Atom A | Residue B | Atom B | Distance (Å) |
|--------|-----------|--------|-----------|--------|--------------|
| 4M1G   | H_LYS_213 | NZ     | L_GLU_124 | OE2    | 2.837        |
| 4M1G   | H_ARG_218 | NH2    | L_GLU_124 | OE1    | 2.657        |
| 4M1G   | H_ARG_218 | NH2    | L_GLU_124 | OE2    | 3.648        |
| 4M1G   | A_LYS_161 | NZ     | H_ASP_31  | OD1    | 3.895        |

Table 1363: Interfacial 4M1G-specific salt bridging networks analysis. In this table, a PDB file is specified with a four-letter PDB ID, except that the names of the PDB files corresponding to the single NMR structural model split from the NMR ensemble is specified with a four-letter PDB ID in addition to a hyphen followed by the single NMR structural model numeric ID, the residue naming scheme is **Chain ID\_residue name\_residue number**,  $\angle ADH$  represents the angle formed by acceptor (A), donor (D) and hydrogen (H) ( $\angle ADH$ ).

| PDB ID | Residue A | Atom A | Residue B | Atom B | Distance (Å) |
|--------|-----------|--------|-----------|--------|--------------|
| 4M5Y   | H.LYS_143 | NZ     | L.GLU_124 | OE2    | 2.602        |
| 4M5Y   | I.LYS_143 | NZ     | M.GLU_124 | OE2    | 2.668        |

Table 1364: Interfacial 4M5Y-specific salt bridging networks analysis. In this table, a PDB file is specified with a four-letter PDB ID, except that the names of the PDB files corresponding to the single NMR structural model split from the NMR ensemble is specified with a four-letter PDB ID in addition to a hyphen followed by the single NMR structural model numeric ID, the residue naming scheme is **Chain ID\_residue name\_residue number**,  $\angle ADH$  represents the angle formed by acceptor (A), donor (D) and hydrogen (H) ( $\angle ADH$ ).



| PDB ID | Residue A | Atom A | Residue B | Atom B | Distance (Å) |
|--------|-----------|--------|-----------|--------|--------------|
| 4M7J   | H_LYS_208 | NZ     | L_GLU_123 | OE1    | 3.727        |
| 4M7J   | H_LYS_208 | NZ     | L_GLU_123 | OE2    | 3.593        |

Table 1365: Interfacial 4M7J-specific salt bridging networks analysis. In this table, a PDB file is specified with a four-letter PDB ID, except that the names of the PDB files corresponding to the single NMR structural model split from the NMR ensemble is specified with a four-letter PDB ID in addition to a hyphen followed by the single NMR structural model numeric ID, the residue naming scheme is **Chain ID\_residue name\_residue number**,  $\angle ADH$  represents the angle formed by acceptor (A), donor (D) and hydrogen (H) ( $\angle ADH$ ).

| PDB ID | Residue A | Atom A | Residue B | Atom B | Distance (Å) |
|--------|-----------|--------|-----------|--------|--------------|
| 4M7Z   | B_LYS_208 | NZ     | C_GLU_123 | OE1    | 3.318        |
| 4M7Z   | B_LYS_208 | NZ     | C_GLU_123 | OE2    | 3.881        |
| 4M7Z   | H_LYS_208 | NZ     | L_GLU_123 | OE1    | 3.192        |

Table 1366: Interfacial 4M7Z-specific salt bridging networks analysis. In this table, a PDB file is specified with a four-letter PDB ID, except that the names of the PDB files corresponding to the single NMR structural model split from the NMR ensemble is specified with a four-letter PDB ID in addition to a hyphen followed by the single NMR structural model numeric ID, the residue naming scheme is **Chain ID\_residue name\_residue number**,  $\angle ADH$  represents the angle formed by acceptor (A), donor (D) and hydrogen (H) ( $\angle ADH$ ).

| PDB ID | Residue A | Atom A | Residue B | Atom B | Distance (Å) |
|--------|-----------|--------|-----------|--------|--------------|
| 4M93   | H_LYS_208 | NZ     | L_GLU_123 | OE1    | 3.795        |
| 4M93   | B_LYS_208 | NZ     | C_GLU_123 | OE1    | 3.203        |

Table 1367: Interfacial 4M93-specific salt bridging networks analysis. In this table, a PDB file is specified with a four-letter PDB ID, except that the names of the PDB files corresponding to the single NMR structural model split from the NMR ensemble is specified with a four-letter PDB ID in addition to a hyphen followed by the single NMR structural model numeric ID, the residue naming scheme is **Chain ID\_residue name\_residue number**,  $\angle ADH$  represents the angle formed by acceptor (A), donor (D) and hydrogen (H) ( $\angle ADH$ ).

| PDB ID | Residue A | Atom A | Residue B | Atom B | Distance (Å) |
|--------|-----------|--------|-----------|--------|--------------|
| 4MA1   | B.LYS_5   | NZ     | F_GLU_187 | OE1    | 3.315        |
| 4MA1   | B.LYS_208 | NZ     | C_GLU_123 | OE1    | 3.857        |
| 4MA1   | H.LYS_208 | NZ     | L_GLU_123 | OE1    | 3.752        |

Table 1368: Interfacial 4MA1-specific salt bridging networks analysis. In this table, a PDB file is specified with a four-letter PDB ID, except that the names of the PDB files corresponding to the single NMR structural model split from the NMR ensemble is specified with a four-letter PDB ID in addition to a hyphen followed by the single NMR structural model numeric ID, the residue naming scheme is **Chain ID\_residue name\_residue number**,  $\angle ADH$  represents the angle formed by acceptor (A), donor (D) and hydrogen (H) ( $\angle ADH$ ).

| PDB ID | Residue A | Atom A | Residue B | Atom B | Distance (Å) |
|--------|-----------|--------|-----------|--------|--------------|
| 4N0Y   | H_LYS_209 | NZ     | L_GLU_123 | OE1    | 2.939        |

Table 1369: Interfacial 4N0Y-specific salt bridging networks analysis. In this table, a PDB file is specified with a four-letter PDB ID, except that the names of the PDB files corresponding to the single NMR structural model split from the NMR ensemble is specified with a four-letter PDB ID in addition to a hyphen followed by the single NMR structural model numeric ID, the residue naming scheme is **Chain ID\_residue name\_residue number**,  $\angle ADH$  represents the angle formed by acceptor (A), donor (D) and hydrogen (H) ( $\angle ADH$ ).

| PDB ID | Residue A | Atom A | Residue B | Atom B | Distance (Å) |
|--------|-----------|--------|-----------|--------|--------------|
| 4N1H   | A_LYS_111 | NZ     | C_GLU_202 | OE1    | 3.097        |
| 4N1H   | A_LYS_111 | NZ     | C_GLU_202 | OE2    | 2.712        |
| 4N1H   | A_HIS_112 | ND1    | C_GLU_205 | OE2    | 3.407        |
| 4N1H   | A_HIS_112 | NE2    | C_GLU_202 | OE1    | 2.950        |
| 4N1H   | A_HIS_112 | NE2    | C_GLU_205 | OE2    | 3.971        |
| 4N1H   | A_ARG_128 | NH1    | C_GLU_89  | OE1    | 3.101        |
| 4N1H   | A_LYS_150 | NZ     | B_ASP_115 | OD2    | 2.748        |
| 4N1H   | A_ARG_153 | NH2    | B_ASP_106 | OD1    | 3.262        |
| 4N1H   | A_ARG_153 | NH2    | B_ASP_106 | OD2    | 3.262        |
| 4N1H   | C_LYS_149 | NZ     | D_ASP_106 | OD1    | 3.587        |
| 4N1H   | C_LYS_149 | NZ     | D_ASP_106 | OD2    | 3.735        |
| 4N1H   | C_LYS_150 | NZ     | D_ASP_115 | OD1    | 3.157        |
| 4N1H   | C_ARG_153 | NH2    | D_ASP_106 | OD1    | 2.772        |
| 4N1H   | C_ARG_204 | NH2    | A_GLU_121 | OE2    | 3.425        |

Table 1370: Interfacial 4N1H-specific salt bridging networks analysis. In this table, a PDB file is specified with a four-letter PDB ID, except that the names of the PDB files corresponding to the single NMR structural model split from the NMR ensemble is specified with a four-letter PDB ID in addition to a hyphen followed by the single NMR structural model numeric ID, the residue naming scheme is **Chain ID\_residue name\_residue number**,  $\angle ADH$  represents the angle formed by acceptor (A), donor (D) and hydrogen (H) ( $\angle ADH$ ).

| PDB ID | Residue A | Atom A | Residue B | Atom B | Distance (Å) |
|--------|-----------|--------|-----------|--------|--------------|
| 4NC1   | A_ARG_133 | NH1    | D_ASP_115 | OD2    | 3.145        |
| 4NC1   | C_ARG_114 | NH1    | D_ASP_115 | OD1    | 3.051        |
| 4NC1   | C_ARG_114 | NH1    | D_ASP_115 | OD2    | 3.046        |
| 4NC1   | C_ARG_114 | NH2    | D_ASP_115 | OD1    | 2.896        |
| 4NC1   | B_ARG_133 | NH2    | C_ASP_115 | OD2    | 3.404        |
| 4NC1   | D_ARG_63  | NH1    | B_ASP_112 | OD2    | 3.125        |
| 4NC1   | D_ARG_114 | NH1    | C_ASP_115 | OD1    | 2.908        |
| 4NC1   | D_ARG_114 | NH2    | C_ASP_115 | OD1    | 2.942        |

Table 1371: Interfacial 4NC1-specific salt bridging networks analysis. In this table, a PDB file is specified with a four-letter PDB ID, except that the names of the PDB files corresponding to the single NMR structural model split from the NMR ensemble is specified with a four-letter PDB ID in addition to a hyphen followed by the single NMR structural model numeric ID, the residue naming scheme is **Chain ID\_residue name\_residue number**,  $\angle ADH$  represents the angle formed by acceptor (A), donor (D) and hydrogen (H) ( $\angle ADH$ ).

| PDB ID | Residue A | Atom A | Residue B | Atom B | Distance (Å) |
|--------|-----------|--------|-----------|--------|--------------|
| 4NGH   | HLYS_228  | NZ     | LASP_122  | OD1    | 3.887        |

Table 1372: Interfacial 4NGH-specific salt bridging networks analysis. In this table, a PDB file is specified with a four-letter PDB ID, except that the names of the PDB files corresponding to the single NMR structural model split from the NMR ensemble is specified with a four-letter PDB ID in addition to a hyphen followed by the single NMR structural model numeric ID, the residue naming scheme is **Chain ID\_residue name\_residue number**,  $\angle ADH$  represents the angle formed by acceptor (A), donor (D) and hydrogen (H) ( $\angle ADH$ ).



| PDB ID | Residue A | Atom A | Residue B | Atom B | Distance (Å) |
|--------|-----------|--------|-----------|--------|--------------|
| 4NIK   | A_LYS_153 | NZ     | B_ASP_104 | OD1    | 3.730        |
| 4NIK   | A_LYS_153 | NZ     | B_ASP_104 | OD2    | 2.794        |
| 4NIK   | A_LYS_153 | NZ     | B_GLU_186 | OE2    | 2.639        |

Table 1373: Interfacial 4NIK-specific salt bridging networks analysis. In this table, a PDB file is specified with a four-letter PDB ID, except that the names of the PDB files corresponding to the single NMR structural model split from the NMR ensemble is specified with a four-letter PDB ID in addition to a hyphen followed by the single NMR structural model numeric ID, the residue naming scheme is **Chain ID\_residue name\_residue number**,  $\angle ADH$  represents the angle formed by acceptor (A), donor (D) and hydrogen (H) ( $\angle ADH$ ).

| PDB ID | Residue A | Atom A | Residue B | Atom B | Distance (Å) |
|--------|-----------|--------|-----------|--------|--------------|
| 4NZR   | H_LYS_60  | NZ     | L_GLU_1   | OE1    | 3.647        |
| 4NZR   | H_HIS_97  | NE2    | L_GLU_50  | OE2    | 3.635        |
| 4NZR   | H_HIS_98  | NE2    | L_GLU_50  | OE1    | 2.875        |
| 4NZR   | H_HIS_172 | NE2    | L ASP_167 | OD2    | 3.398        |
| 4NZR   | H_LYS_221 | NZ     | L_GLU_123 | OE2    | 2.989        |
| 4NZR   | M_LYS_114 | NZ     | L_GLU_17  | OE1    | 3.119        |
| 4NZR   | M_ARG_384 | NH2    | L_GLU_81  | OE1    | 3.444        |
| 4NZR   | M_ARG_384 | NH2    | L_GLU_81  | OE2    | 3.239        |
| 4NZR   | M_ARG_457 | NH1    | H ASP_31E | OD1    | 2.958        |
| 4NZR   | M_ARG_457 | NH1    | H ASP_31E | OD2    | 3.096        |
| 4NZR   | M_ARG_457 | NH2    | H ASP_31E | OD1    | 3.746        |
| 4NZR   | M_ARG_457 | NH2    | H ASP_31E | OD2    | 2.554        |

Table 1374: Interfacial 4NZR-specific salt bridging networks analysis. In this table, a PDB file is specified with a four-letter PDB ID, except that the names of the PDB files corresponding to the single NMR structural model split from the NMR ensemble is specified with a four-letter PDB ID in addition to a hyphen followed by the single NMR structural model numeric ID, the residue naming scheme is **Chain ID residue name residue number**,  $\angle ADH$  represents the angle formed by acceptor (A), donor (D) and hydrogen (H) ( $\angle ADH$ ).

| PDB ID | Residue A | Atom A | Residue B | Atom B | Distance (Å) |
|--------|-----------|--------|-----------|--------|--------------|
| 4NZT   | M_ARG_99  | NH2    | L_ASP_60  | OD1    | 3.096        |
| 4NZT   | M_ARG_384 | NH2    | L_GLU_81  | OE1    | 3.193        |
| 4NZT   | M_ARG_384 | NH2    | L_GLU_81  | OE2    | 3.684        |
| 4NZT   | H_LYS_145 | NZ     | L_GLU_124 | OE2    | 2.541        |

Table 1375: Interfacial 4NZT-specific salt bridging networks analysis. In this table, a PDB file is specified with a four-letter PDB ID, except that the names of the PDB files corresponding to the single NMR structural model split from the NMR ensemble is specified with a four-letter PDB ID in addition to a hyphen followed by the single NMR structural model numeric ID, the residue naming scheme is **Chain ID\_residue name\_residue number**,  $\angle ADH$  represents the angle formed by acceptor (A), donor (D) and hydrogen (H) ( $\angle ADH$ ).

| PDB ID | Residue A  | Atom A | Residue B | Atom B | Distance (Å) |
|--------|------------|--------|-----------|--------|--------------|
| 4NZU   | H.LYS_100E | NZ     | L.ASP_50  | OD1    | 3.991        |
| 4NZU   | H.LYS_100E | NZ     | L.ASP_50  | OD2    | 2.752        |
| 4NZU   | H.LYS_221  | NZ     | L.GLU_123 | OE2    | 2.899        |

Table 1376: Interfacial 4NZU-specific salt bridging networks analysis. In this table, a PDB file is specified with a four-letter PDB ID, except that the names of the PDB files corresponding to the single NMR structural model split from the NMR ensemble is specified with a four-letter PDB ID in addition to a hyphen followed by the single NMR structural model numeric ID, the residue naming scheme is **Chain ID\_residue name\_residue number**,  $\angle ADH$  represents the angle formed by acceptor (A), donor (D) and hydrogen (H) ( $\angle ADH$ ).

| PDB ID | Residue A  | Atom A | Residue B | Atom B | Distance (Å) |
|--------|------------|--------|-----------|--------|--------------|
| 4O5L   | H.LYS_100I | NZ     | L.ASP_93  | OD1    | 2.723        |
| 4O5L   | H.LYS_100I | NZ     | L.ASP_93  | OD2    | 3.455        |

Table 1377: Interfacial 4O5L-specific salt bridging networks analysis. In this table, a PDB file is specified with a four-letter PDB ID, except that the names of the PDB files corresponding to the single NMR structural model split from the NMR ensemble is specified with a four-letter PDB ID in addition to a hyphen followed by the single NMR structural model numeric ID, the residue naming scheme is **Chain ID\_residue name\_residue number**,  $\angle ADH$  represents the angle formed by acceptor (A), donor (D) and hydrogen (H) ( $\angle ADH$ ).

| PDB ID | Residue A | Atom A | Residue B  | Atom B | Distance (Å) |
|--------|-----------|--------|------------|--------|--------------|
| 4OLU   | G_LYS_97  | NZ     | H_ASP_100B | OD1    | 3.513        |
| 4OLU   | G_LYS_97  | NZ     | H_ASP_100B | OD2    | 2.385        |
| 4OLU   | H_ARG_61  | NH1    | G_GLU_466  | OE1    | 2.734        |
| 4OLU   | H_ARG_71  | NH1    | G_ASP_368  | OD1    | 3.753        |
| 4OLU   | H_ARG_71  | NH1    | G_ASP_368  | OD2    | 2.863        |
| 4OLU   | H_ARG_71  | NH2    | G_ASP_368  | OD1    | 3.092        |
| 4OLU   | H_ARG_71  | NH2    | G_ASP_368  | OD2    | 3.692        |
| 4OLU   | H_LYS_209 | NZ     | L_GLU_125  | OE1    | 3.927        |
| 4OLU   | H_LYS_209 | NZ     | L_GLU_125  | OE2    | 3.166        |

Table 1378: Interfacial 4OLU-specific salt bridging networks analysis. In this table, a PDB file is specified with a four-letter PDB ID, except that the names of the PDB files corresponding to the single NMR structural model split from the NMR ensemble is specified with a four-letter PDB ID in addition to a hyphen followed by the single NMR structural model numeric ID, the residue naming scheme is **Chain ID\_residue name\_residue number**,  $\angle ADH$  represents the angle formed by acceptor (A), donor (D) and hydrogen (H) ( $\angle ADH$ ).

| PDB ID | Residue A | Atom A | Residue B  | Atom B | Distance (Å) |
|--------|-----------|--------|------------|--------|--------------|
| 4OLV   | G_LYS_97  | NZ     | H_ASP_100B | OD1    | 3.067        |
| 4OLV   | G_LYS_97  | NZ     | H_ASP_100B | OD2    | 2.942        |
| 4OLV   | H_ARG_61  | NH1    | G_GLU_466  | OE1    | 2.769        |
| 4OLV   | H_ARG_71  | NH1    | G_ASP_368  | OD1    | 3.700        |
| 4OLV   | H_ARG_71  | NH1    | G_ASP_368  | OD2    | 2.815        |
| 4OLV   | H_ARG_71  | NH2    | G_ASP_368  | OD1    | 3.136        |
| 4OLV   | H_ARG_71  | NH2    | G_ASP_368  | OD2    | 3.717        |
| 4OLV   | H_LYS_209 | NZ     | L_GLU_125  | OE1    | 3.978        |
| 4OLV   | H_LYS_209 | NZ     | L_GLU_125  | OE2    | 3.214        |

Table 1379: Interfacial 4OLV-specific salt bridging networks analysis. In this table, a PDB file is specified with a four-letter PDB ID, except that the names of the PDB files corresponding to the single NMR structural model split from the NMR ensemble is specified with a four-letter PDB ID in addition to a hyphen followed by the single NMR structural model numeric ID, the residue naming scheme is **Chain ID\_residue name\_residue number**,  $\angle ADH$  represents the angle formed by acceptor (A), donor (D) and hydrogen (H) ( $\angle ADH$ ).

| PDB ID | Residue A  | Atom A | Residue B  | Atom B | Distance (Å) |
|--------|------------|--------|------------|--------|--------------|
| 4OLW   | G_LYS_97   | NZ     | H_ASP_100B | OD1    | 3.637        |
| 4OLW   | G_LYS_97   | NZ     | H_ASP_100B | OD2    | 3.575        |
| 4OLW   | H_ARG_61   | NH1    | G_GLU_466  | OE1    | 2.598        |
| 4OLW   | H_ARG_61   | NH2    | G_GLU_466  | OE1    | 3.969        |
| 4OLW   | H_ARG_71   | NH1    | G_ASP_368  | OD1    | 3.570        |
| 4OLW   | H_ARG_71   | NH1    | G_ASP_368  | OD2    | 2.966        |
| 4OLW   | H_ARG_71   | NH2    | G_ASP_368  | OD1    | 3.028        |
| 4OLW   | H_ARG_71   | NH2    | G_ASP_368  | OD2    | 3.898        |
| 4OLW   | H_ARG_100A | NH2    | G_GLU_106  | OE1    | 3.908        |
| 4OLW   | H_LYS_209  | NZ     | L_GLU_125  | OE1    | 2.861        |
| 4OLW   | H_LYS_209  | NZ     | L_GLU_125  | OE2    | 2.764        |
| 4OLW   | H_LYS_214  | NZ     | L_ASP_124  | OD1    | 3.031        |
| 4OLW   | H_LYS_214  | NZ     | L_ASP_124  | OD2    | 3.691        |

Table 1380: Interfacial 4OLW-specific salt bridging networks analysis. In this table, a PDB file is specified with a four-letter PDB ID, except that the names of the PDB files corresponding to the single NMR structural model split from the NMR ensemble is specified with a four-letter PDB ID in addition to a hyphen followed by the single NMR structural model numeric ID, the residue naming scheme is **Chain ID\_residue name\_residue number**,  $\angle ADH$  represents the angle formed by acceptor (A), donor (D) and hydrogen (H) ( $\angle ADH$ ).



| PDB ID | Residue A  | Atom A | Residue B  | Atom B | Distance (Å) |
|--------|------------|--------|------------|--------|--------------|
| 4OLX   | G_LYS_97   | NZ     | H_ASP_100B | OD1    | 3.339        |
| 4OLX   | G_LYS_97   | NZ     | H_ASP_100B | OD2    | 2.904        |
| 4OLX   | H_ARG_61   | NH1    | G_GLU_466  | OE1    | 2.655        |
| 4OLX   | H_ARG_71   | NH1    | G_ASP_368  | OD1    | 3.883        |
| 4OLX   | H_ARG_71   | NH1    | G_ASP_368  | OD2    | 2.896        |
| 4OLX   | H_ARG_71   | NH2    | G_ASP_368  | OD1    | 3.066        |
| 4OLX   | H_ARG_71   | NH2    | G_ASP_368  | OD2    | 3.572        |
| 4OLX   | H_ARG_100A | NH2    | G_GLU_106  | OE1    | 3.646        |
| 4OLX   | H_LYS_209  | NZ     | L_GLU_125  | OE2    | 3.132        |

Table 1381: Interfacial 4OLX-specific salt bridging networks analysis. In this table, a PDB file is specified with a four-letter PDB ID, except that the names of the PDB files corresponding to the single NMR structural model split from the NMR ensemble is specified with a four-letter PDB ID in addition to a hyphen followed by the single NMR structural model numeric ID, the residue naming scheme is **Chain ID\_residue name\_residue number**,  $\angle ADH$  represents the angle formed by acceptor (A), donor (D) and hydrogen (H) ( $\angle ADH$ ).

| PDB ID | Residue A | Atom A | Residue B  | Atom B | Distance (Å) |
|--------|-----------|--------|------------|--------|--------------|
| 4OLY   | G_LYS_97  | NZ     | H_ASP_100B | OD1    | 3.240        |
| 4OLY   | G_LYS_97  | NZ     | H_ASP_100B | OD2    | 2.829        |
| 4OLY   | H_ARG_61  | NH1    | G_GLU_466  | OE1    | 2.641        |
| 4OLY   | H_ARG_71  | NH1    | G_ASP_368  | OD1    | 3.538        |
| 4OLY   | H_ARG_71  | NH1    | G_ASP_368  | OD2    | 2.816        |
| 4OLY   | H_ARG_71  | NH2    | G_ASP_368  | OD1    | 3.002        |
| 4OLY   | H_ARG_71  | NH2    | G_ASP_368  | OD2    | 3.765        |
| 4OLY   | H_LYS_209 | NZ     | L_GLU_125  | OE1    | 3.888        |
| 4OLY   | H_LYS_209 | NZ     | L_GLU_125  | OE2    | 3.336        |

Table 1382: Interfacial 4OLY-specific salt bridging networks analysis. In this table, a PDB file is specified with a four-letter PDB ID, except that the names of the PDB files corresponding to the single NMR structural model split from the NMR ensemble is specified with a four-letter PDB ID in addition to a hyphen followed by the single NMR structural model numeric ID, the residue naming scheme is **Chain ID\_residue name\_residue number**,  $\angle ADH$  represents the angle formed by acceptor (A), donor (D) and hydrogen (H) ( $\angle ADH$ ).

| PDB ID | Residue A | Atom A | Residue B  | Atom B | Distance (Å) |
|--------|-----------|--------|------------|--------|--------------|
| 4OLZ   | G_LYS_97  | NZ     | H_ASP_100B | OD1    | 3.552        |
| 4OLZ   | G_LYS_97  | NZ     | H_ASP_100B | OD2    | 3.545        |
| 4OLZ   | H_ARG_61  | NH1    | G_GLU_466  | OE1    | 2.620        |
| 4OLZ   | H_ARG_71  | NH1    | G_ASP_368  | OD1    | 3.472        |
| 4OLZ   | H_ARG_71  | NH1    | G_ASP_368  | OD2    | 2.715        |
| 4OLZ   | H_ARG_71  | NH2    | G_ASP_368  | OD1    | 2.877        |
| 4OLZ   | H_ARG_71  | NH2    | G_ASP_368  | OD2    | 3.685        |
| 4OLZ   | H_LYS_209 | NZ     | L_GLU_125  | OE1    | 3.703        |
| 4OLZ   | H_LYS_209 | NZ     | L_GLU_125  | OE2    | 3.063        |
| 4OLZ   | H_LYS_214 | NZ     | L_ASP_124  | OD1    | 3.528        |
| 4OLZ   | H_LYS_214 | NZ     | L_ASP_124  | OD2    | 3.896        |

Table 1383: Interfacial 4OLZ-specific salt bridging networks analysis. In this table, a PDB file is specified with a four-letter PDB ID, except that the names of the PDB files corresponding to the single NMR structural model split from the NMR ensemble is specified with a four-letter PDB ID in addition to a hyphen followed by the single NMR structural model numeric ID, the residue naming scheme is **Chain ID\_residue name\_residue number**,  $\angle ADH$  represents the angle formed by acceptor (A), donor (D) and hydrogen (H) ( $\angle ADH$ ).

| PDB ID | Residue A | Atom A | Residue B  | Atom B | Distance (Å) |
|--------|-----------|--------|------------|--------|--------------|
| 4OM0   | G_LYS_97  | NZ     | H_ASP_100B | OD1    | 3.843        |
| 4OM0   | G_LYS_97  | NZ     | H_ASP_100B | OD2    | 3.296        |
| 4OM0   | H_ARG_61  | NH1    | G_GLU_466  | OE1    | 2.871        |
| 4OM0   | H_ARG_71  | NH1    | G_ASP_368  | OD1    | 3.724        |
| 4OM0   | H_ARG_71  | NH1    | G_ASP_368  | OD2    | 2.771        |
| 4OM0   | H_ARG_71  | NH2    | G_ASP_368  | OD1    | 3.189        |
| 4OM0   | H_ARG_71  | NH2    | G_ASP_368  | OD2    | 3.713        |
| 4OM0   | H_LYS_209 | NZ     | L_GLU_125  | OE2    | 3.121        |

Table 1384: Interfacial 4OM0-specific salt bridging networks analysis. In this table, a PDB file is specified with a four-letter PDB ID, except that the names of the PDB files corresponding to the single NMR structural model split from the NMR ensemble is specified with a four-letter PDB ID in addition to a hyphen followed by the single NMR structural model numeric ID, the residue naming scheme is **Chain ID\_residue name\_residue number**,  $\angle ADH$  represents the angle formed by acceptor (A), donor (D) and hydrogen (H) ( $\angle ADH$ ).

| PDB ID | Residue A | Atom A | Residue B  | Atom B | Distance (Å) |
|--------|-----------|--------|------------|--------|--------------|
| 4OM1   | G_LYS_97  | NZ     | H_ASP_100B | OD1    | 3.927        |
| 4OM1   | G_LYS_97  | NZ     | H_ASP_100B | OD2    | 3.635        |
| 4OM1   | G_LYS_357 | NZ     | L_GLU_1    | OE2    | 3.763        |
| 4OM1   | H_ARG_71  | NH1    | G_ASP_368  | OD1    | 3.565        |
| 4OM1   | H_ARG_71  | NH1    | G_ASP_368  | OD2    | 2.752        |
| 4OM1   | H_ARG_71  | NH2    | G_ASP_368  | OD1    | 3.031        |
| 4OM1   | H_ARG_71  | NH2    | G_ASP_368  | OD2    | 3.734        |
| 4OM1   | H_LYS_209 | NZ     | L_GLU_125  | OE1    | 3.639        |
| 4OM1   | H_LYS_209 | NZ     | L_GLU_125  | OE2    | 3.008        |

Table 1385: Interfacial 4OM1-specific salt bridging networks analysis. In this table, a PDB file is specified with a four-letter PDB ID, except that the names of the PDB files corresponding to the single NMR structural model split from the NMR ensemble is specified with a four-letter PDB ID in addition to a hyphen followed by the single NMR structural model numeric ID, the residue naming scheme is **Chain ID\_residue name\_residue number**,  $\angle ADH$  represents the angle formed by acceptor (A), donor (D) and hydrogen (H) ( $\angle ADH$ ).

| PDB ID | Residue A | Atom A | Residue B | Atom B | Distance (Å) |
|--------|-----------|--------|-----------|--------|--------------|
| 4OT1   | H_LYS_161 | NZ     | L_GLU_127 | OE2    | 2.572        |
| 4OT1   | H_LYS_227 | NZ     | L_GLU_126 | OE1    | 2.521        |
| 4OT1   | H_LYS_227 | NZ     | L_GLU_126 | OE2    | 3.241        |
| 4OT1   | L_LYS_67  | NZ     | A_GLU_361 | OE2    | 3.026        |

Table 1386: Interfacial 4OT1-specific salt bridging networks analysis. In this table, a PDB file is specified with a four-letter PDB ID, except that the names of the PDB files corresponding to the single NMR structural model split from the NMR ensemble is specified with a four-letter PDB ID in addition to a hyphen followed by the single NMR structural model numeric ID, the residue naming scheme is **Chain ID\_residue name\_residue number**,  $\angle ADH$  represents the angle formed by acceptor (A), donor (D) and hydrogen (H) ( $\angle ADH$ ).

| PDB ID | Residue A | Atom A | Residue B | Atom B | Distance (Å) |
|--------|-----------|--------|-----------|--------|--------------|
| 4P9H   | C_ARG_59  | NH1    | G_ASP_368 | OD1    | 2.832        |
| 4P9H   | C_ARG_59  | NH1    | G_ASP_368 | OD2    | 3.395        |
| 4P9H   | C_ARG_59  | NH2    | G_ASP_368 | OD1    | 3.561        |
| 4P9H   | C_ARG_59  | NH2    | G_ASP_368 | OD2    | 2.514        |
| 4P9H   | H_HIS_61  | NE2    | L_ASP_1   | OD2    | 3.817        |

Table 1387: Interfacial 4P9H-specific salt bridging networks analysis. In this table, a PDB file is specified with a four-letter PDB ID, except that the names of the PDB files corresponding to the single NMR structural model split from the NMR ensemble is specified with a four-letter PDB ID in addition to a hyphen followed by the single NMR structural model numeric ID, the residue naming scheme is **Chain ID\_residue name\_residue number**,  $\angle ADH$  represents the angle formed by acceptor (A), donor (D) and hydrogen (H) ( $\angle ADH$ ).

| PDB ID | Residue A | Atom A | Residue B | Atom B | Distance (Å) |
|--------|-----------|--------|-----------|--------|--------------|
| 4PTT   | A_ARG_91  | NH2    | B_GLU_95  | OE1    | 3.477        |
| 4PTT   | A_ARG_91  | NH2    | B_GLU_95  | OE2    | 3.208        |
| 4PTT   | B_LYS_209 | NZ     | A_GLU_123 | OE2    | 3.476        |

Table 1388: Interfacial 4PTT-specific salt bridging networks analysis. In this table, a PDB file is specified with a four-letter PDB ID, except that the names of the PDB files corresponding to the single NMR structural model split from the NMR ensemble is specified with a four-letter PDB ID in addition to a hyphen followed by the single NMR structural model numeric ID, the residue naming scheme is **Chain ID\_residue name\_residue number**,  $\angle ADH$  represents the angle formed by acceptor (A), donor (D) and hydrogen (H) ( $\angle ADH$ ).



| PDB ID | Residue A | Atom A | Residue B | Atom B | Distance (Å) |
|--------|-----------|--------|-----------|--------|--------------|
| 4PTU   | A_ARG_91  | NH2    | B_GLU_95  | OE1    | 3.438        |
| 4PTU   | A_ARG_91  | NH2    | B_GLU_95  | OE2    | 3.334        |
| 4PTU   | B_LYS_209 | NZ     | A_GLU_123 | OE1    | 3.628        |

Table 1389: Interfacial 4PTU-specific salt bridging networks analysis. In this table, a PDB file is specified with a four-letter PDB ID, except that the names of the PDB files corresponding to the single NMR structural model split from the NMR ensemble is specified with a four-letter PDB ID in addition to a hyphen followed by the single NMR structural model numeric ID, the residue naming scheme is **Chain ID\_residue name\_residue number**,  $\angle ADH$  represents the angle formed by acceptor (A), donor (D) and hydrogen (H) ( $\angle ADH$ ).

| PDB ID | Residue A | Atom A | Residue B  | Atom B | Distance (Å) |
|--------|-----------|--------|------------|--------|--------------|
| 4Q6I   | A_LYS_49  | NZ     | B_ASP_100A | OD1    | 2.964        |
| 4Q6I   | B_LYS_208 | NZ     | A_GLU_123  | OE2    | 2.822        |
| 4Q6I   | C_LYS_50  | NZ     | L_GLU_93   | OE2    | 2.549        |
| 4Q6I   | C_LYS_181 | NZ     | G_GLU_56   | OE1    | 2.499        |
| 4Q6I   | D_LYS_49  | NZ     | E_ASP_100A | OD1    | 3.008        |
| 4Q6I   | E_LYS_208 | NZ     | D_GLU_123  | OE2    | 3.047        |
| 4Q6I   | F_LYS_49  | NZ     | G_ASP_100A | OD1    | 3.146        |
| 4Q6I   | G_LYS_208 | NZ     | F_GLU_123  | OE2    | 3.409        |
| 4Q6I   | H_LYS_208 | NZ     | L_GLU_123  | OE2    | 3.045        |
| 4Q6I   | I_LYS_50  | NZ     | F_GLU_93   | OE2    | 2.473        |
| 4Q6I   | I_LYS_181 | NZ     | H_GLU_56   | OE1    | 3.345        |
| 4Q6I   | J_LYS_50  | NZ     | D_GLU_93   | OE2    | 2.666        |
| 4Q6I   | K_LYS_50  | NZ     | A_GLU_93   | OE2    | 2.835        |
| 4Q6I   | L_LYS_49  | NZ     | H_ASP_100A | OD1    | 3.063        |

Table 1390: Interfacial 4Q6I-specific salt bridging networks analysis. In this table, a PDB file is specified with a four-letter PDB ID, except that the names of the PDB files corresponding to the single NMR structural model split from the NMR ensemble is specified with a four-letter PDB ID in addition to a hyphen followed by the single NMR structural model numeric ID, the residue naming scheme is **Chain ID\_residue name\_residue number**,  $\angle ADH$  represents the angle formed by acceptor (A), donor (D) and hydrogen (H) ( $\angle ADH$ ).

| PDB ID | Residue A | Atom A | Residue B | Atom B | Distance (Å) |
|--------|-----------|--------|-----------|--------|--------------|
| 4Q9B   | A_ARG_309 | NH1    | B_GLU_255 | OE1    | 3.484        |
| 4Q9B   | A_ARG_309 | NH1    | B_GLU_255 | OE2    | 2.912        |
| 4Q9B   | A_ARG_309 | NH2    | B_GLU_255 | OE2    | 3.212        |
| 4Q9B   | B_ARG_309 | NH1    | A_GLU_255 | OE1    | 3.145        |
| 4Q9B   | B_ARG_309 | NH1    | A_GLU_255 | OE2    | 2.858        |

Table 1391: Interfacial 4Q9B-specific salt bridging networks analysis. In this table, a PDB file is specified with a four-letter PDB ID, except that the names of the PDB files corresponding to the single NMR structural model split from the NMR ensemble is specified with a four-letter PDB ID in addition to a hyphen followed by the single NMR structural model numeric ID, the residue naming scheme is **Chain ID\_residue name\_residue number**,  $\angle ADH$  represents the angle formed by acceptor (A), donor (D) and hydrogen (H) ( $\angle ADH$ ).

| PDB ID | Residue A | Atom A | Residue B | Atom B | Distance (Å) |
|--------|-----------|--------|-----------|--------|--------------|
| 4QEX   | A_LYS_341 | NZ     | H_ASP_53  | OD1    | 3.875        |
| 4QEX   | A_ARG_422 | NH2    | H_ASP_97  | OD2    | 3.116        |

Table 1392: Interfacial 4QEX-specific salt bridging networks analysis. In this table, a PDB file is specified with a four-letter PDB ID, except that the names of the PDB files corresponding to the single NMR structural model split from the NMR ensemble is specified with a four-letter PDB ID in addition to a hyphen followed by the single NMR structural model numeric ID, the residue naming scheme is **Chain ID\_residue name\_residue number**,  $\angle ADH$  represents the angle formed by acceptor (A), donor (D) and hydrogen (H) ( $\angle ADH$ ).

| PDB ID | Residue A | Atom A | Residue B | Atom B | Distance (Å) |
|--------|-----------|--------|-----------|--------|--------------|
| 4QHU   | B_LYS_145 | NZ     | A_GLU_126 | OE2    | 2.821        |
| 4QHU   | C_HIS_29  | ND1    | D_GLU_113 | OE1    | 3.672        |
| 4QHU   | C_ARG_31  | NH1    | D_GLU_113 | OE2    | 3.297        |
| 4QHU   | C_ARG_31  | NH2    | D_GLU_113 | OE1    | 3.241        |
| 4QHU   | C_ARG_31  | NH2    | D_GLU_113 | OE2    | 3.844        |
| 4QHU   | C_ARG_39  | NH1    | L_ASP_52  | OD1    | 3.835        |
| 4QHU   | C_ARG_39  | NH1    | L_ASP_52  | OD2    | 2.646        |
| 4QHU   | C_ARG_55  | NH1    | L_ASP_49  | OD1    | 2.860        |
| 4QHU   | C_ARG_55  | NH1    | L_ASP_49  | OD2    | 3.543        |

Table 1393: Interfacial 4QHU-specific salt bridging networks analysis. In this table, a PDB file is specified with a four-letter PDB ID, except that the names of the PDB files corresponding to the single NMR structural model split from the NMR ensemble is specified with a four-letter PDB ID in addition to a hyphen followed by the single NMR structural model numeric ID, the residue naming scheme is **Chain ID\_residue name\_residue number**,  $\angle ADH$  represents the angle formed by acceptor (A), donor (D) and hydrogen (H) ( $\angle ADH$ ).

| PDB ID | Residue A | Atom A | Residue B | Atom B | Distance (Å) |
|--------|-----------|--------|-----------|--------|--------------|
| 4QTI   | H_LYS_217 | NZ     | L_GLU_123 | OE2    | 2.684        |
| 4QTI   | U_ARG_58  | NH2    | H_ASP_103 | OD2    | 2.819        |
| 4QTI   | U_ARG_89  | NH1    | H_ASP_99  | OD2    | 3.048        |
| 4QTI   | U_ARG_91  | NH1    | H_ASP_99  | OD1    | 2.759        |
| 4QTI   | U_ARG_91  | NH1    | H_ASP_99  | OD2    | 2.751        |
| 4QTI   | U_ARG_91  | NH2    | H_ASP_99  | OD2    | 3.786        |
| 4QTI   | U_ARG_116 | NH1    | H_ASP_103 | OD2    | 3.777        |
| 4QTI   | U_ARG_116 | NH2    | H_ASP_103 | OD1    | 3.889        |

Table 1394: Interfacial 4QTI-specific salt bridging networks analysis. In this table, a PDB file is specified with a four-letter PDB ID, except that the names of the PDB files corresponding to the single NMR structural model split from the NMR ensemble is specified with a four-letter PDB ID in addition to a hyphen followed by the single NMR structural model numeric ID, the residue naming scheme is **Chain ID\_residue name\_residue number**,  $\angle ADH$  represents the angle formed by acceptor (A), donor (D) and hydrogen (H) ( $\angle ADH$ ).

| PDB ID | Residue A | Atom A | Residue B | Atom B | Distance (Å) |
|--------|-----------|--------|-----------|--------|--------------|
| 4QXG   | H_LYS_213 | NZ     | L_GLU_124 | OE2    | 3.477        |

Table 1395: Interfacial 4QXG-specific salt bridging networks analysis. In this table, a PDB file is specified with a four-letter PDB ID, except that the names of the PDB files corresponding to the single NMR structural model split from the NMR ensemble is specified with a four-letter PDB ID in addition to a hyphen followed by the single NMR structural model numeric ID, the residue naming scheme is **Chain ID\_residue name\_residue number**,  $\angle ADH$  represents the angle formed by acceptor (A), donor (D) and hydrogen (H) ( $\angle ADH$ ).

| PDB ID | Residue A | Atom A | Residue B  | Atom B | Distance (Å) |
|--------|-----------|--------|------------|--------|--------------|
| 4R2G   | F_LYS_29  | NZ     | E_ASP_279  | OD2    | 2.979        |
| 4R2G   | F_ARG_59  | NH1    | E_ASP_368  | OD1    | 2.950        |
| 4R2G   | F_ARG_59  | NH1    | E_ASP_368  | OD2    | 2.577        |
| 4R2G   | F_ARG_59  | NH2    | E_ASP_368  | OD2    | 3.352        |
| 4R2G   | Q_ARG_100 | NH2    | P_ASP_66A  | OD2    | 2.815        |
| 4R2G   | Q_LYS_227 | NZ     | P_GLU_124  | OE2    | 3.083        |
| 4R2G   | B_LYS_29  | NZ     | O_ASP_279  | OD2    | 3.448        |
| 4R2G   | B_ARG_59  | NH1    | O_ASP_368  | OD1    | 2.838        |
| 4R2G   | B_ARG_59  | NH1    | O_ASP_368  | OD2    | 3.428        |
| 4R2G   | B_ARG_59  | NH2    | O_ASP_368  | OD1    | 3.471        |
| 4R2G   | B_ARG_59  | NH2    | O_ASP_368  | OD2    | 2.776        |
| 4R2G   | D_ARG_100 | NH2    | C_ASP_66A  | OD2    | 3.131        |
| 4R2G   | D_LYS_227 | NZ     | C_GLU_124  | OE1    | 3.473        |
| 4R2G   | D_LYS_227 | NZ     | C_GLU_124  | OE2    | 3.405        |
| 4R2G   | H_LYS_29  | NZ     | K_ASP_279  | OD1    | 2.934        |
| 4R2G   | H_ARG_59  | NH1    | K_ASP_368  | OD1    | 2.502        |
| 4R2G   | H_ARG_59  | NH1    | K_ASP_368  | OD2    | 3.259        |
| 4R2G   | J_ARG_100 | NH2    | L_ASP_66A  | OD2    | 3.189        |
| 4R2G   | J_LYS_161 | NZ     | L_GLU_125  | OE2    | 3.537        |
| 4R2G   | L_LYS_29  | NZ     | A_ASP_279  | OD1    | 3.450        |
| 4R2G   | L_ARG_59  | NH1    | A_ASP_368  | OD1    | 2.642        |
| 4R2G   | L_ARG_59  | NH1    | A_ASP_368  | OD2    | 2.825        |
| 4R2G   | L_ARG_59  | NH2    | A_ASP_368  | OD1    | 3.793        |
| 4R2G   | L_ARG_59  | NH2    | A_ASP_368  | OD2    | 2.422        |
| 4R2G   | N_ARG_100 | NH2    | M_ASP_66A  | OD2    | 3.592        |
| 4R2G   | N_LYS_161 | NZ     | M_GLU_125  | OE2    | 2.706        |
| 4R2G   | O_ARG_327 | NH1    | D_GLU_100I | OE2    | 3.858        |
| 4R2G   | A_ARG_327 | NH1    | N_GLU_100I | OE1    | 3.235        |

Table 1396: Interfacial 4R2G-specific salt bridging networks analysis. In this table, a PDB file is specified with a four-letter PDB ID, except that the names of the PDB files corresponding to the single NMR structural model split from the NMR ensemble is specified with a four-letter PDB ID in addition to a hyphen followed by the single NMR structural model numeric ID, the residue naming scheme is **Chain ID\_residue name\_residue number**,  $\angle ADH$  represents the angle formed by acceptor (A), donor (D) and hydrogen (H) ( $\angle ADH$ ).



| PDB ID | Residue A | Atom A | Residue B | Atom B | Distance (Å) |
|--------|-----------|--------|-----------|--------|--------------|
| 4R4H   | B_LYS_29  | NZ     | A_ASP_279 | OD1    | 2.795        |
| 4R4H   | B_ARG_59  | NH1    | A_ASP_367 | OD1    | 3.294        |
| 4R4H   | B_ARG_59  | NH1    | A_ASP_367 | OD2    | 3.409        |
| 4R4H   | B_ARG_59  | NH2    | A_ASP_367 | OD2    | 3.834        |
| 4R4H   | H_LYS_52  | NZ     | A_ASP_78  | OD1    | 3.615        |
| 4R4H   | H_LYS_    | NZ     | L_ASP_    | OD2    | 3.470        |

Table 1397: Interfacial 4R4H-specific salt bridging networks analysis. In this table, a PDB file is specified with a four-letter PDB ID, except that the names of the PDB files corresponding to the single NMR structural model split from the NMR ensemble is specified with a four-letter PDB ID in addition to a hyphen followed by the single NMR structural model numeric ID, the residue naming scheme is **Chain ID\_residue name\_residue number**,  $\angle ADH$  represents the angle formed by acceptor (A), donor (D) and hydrogen (H) ( $\angle ADH$ ).

| PDB ID | Residue A | Atom A | Residue B | Atom B | Distance (Å) |
|--------|-----------|--------|-----------|--------|--------------|
| 4R7D   | A_LYS_214 | NZ     | B_GLU_123 | OE1    | 3.736        |
| 4R7D   | B_LYS_107 | NZ     | D_ASP_9   | OD2    | 3.947        |
| 4R7D   | D_LYS_18  | NZ     | B_ASP_70  | OD2    | 3.792        |
| 4R7D   | D_LYS_107 | NZ     | B_ASP_9   | OD2    | 3.503        |
| 4R7D   | E_LYS_214 | NZ     | F_GLU_123 | OE1    | 3.862        |
| 4R7D   | E_LYS_214 | NZ     | F_GLU_123 | OE2    | 3.571        |
| 4R7D   | I_HIS_169 | NE2    | J_ASP_167 | OD1    | 3.970        |
| 4R7D   | J_LYS_18  | NZ     | N_ASP_70  | OD1    | 3.913        |
| 4R7D   | J_ARG_24  | NH2    | N_GLU_17  | OE1    | 3.275        |
| 4R7D   | J_ARG_24  | NH2    | N_GLU_17  | OE2    | 2.135        |
| 4R7D   | K_HIS_169 | NE2    | L_ASP_167 | OD2    | 3.666        |
| 4R7D   | K_LYS_214 | NZ     | L_GLU_123 | OE1    | 3.074        |
| 4R7D   | L_LYS_49  | NZ     | K_ASP_100 | OD2    | 3.591        |
| 4R7D   | M_LYS_214 | NZ     | N_GLU_123 | OE1    | 3.058        |
| 4R7D   | M_LYS_214 | NZ     | N_GLU_123 | OE2    | 2.866        |
| 4R7D   | N_LYS_107 | NZ     | J_ASP_9   | OD2    | 3.244        |
| 4R7D   | O_LYS_214 | NZ     | P_GLU_123 | OE1    | 2.454        |
| 4R7D   | O_LYS_214 | NZ     | P_GLU_123 | OE2    | 3.167        |

Table 1398: Interfacial 4R7D-specific salt bridging networks analysis. In this table, a PDB file is specified with a four-letter PDB ID, except that the names of the PDB files corresponding to the single NMR structural model split from the NMR ensemble is specified with a four-letter PDB ID in addition to a hyphen followed by the single NMR structural model numeric ID, the residue naming scheme is **Chain ID\_residue name\_residue number**,  $\angle ADH$  represents the angle formed by acceptor (A), donor (D) and hydrogen (H) ( $\angle ADH$ ).

| PDB ID | Residue A | Atom A | Residue B | Atom B | Distance (Å) |
|--------|-----------|--------|-----------|--------|--------------|
| 4R7N   | A_LYS_214 | NZ     | B_GLU_123 | OE1    | 3.674        |
| 4R7N   | A_LYS_214 | NZ     | B_GLU_123 | OE2    | 3.683        |
| 4R7N   | B_ARG_24  | NH2    | J_GLU_17  | OE1    | 3.625        |
| 4R7N   | B_ARG_24  | NH2    | J_GLU_17  | OE2    | 2.355        |
| 4R7N   | B_LYS_107 | NZ     | J ASP_9   | OD2    | 3.605        |
| 4R7N   | C_LYS_214 | NZ     | D_GLU_123 | OE1    | 2.537        |
| 4R7N   | C_LYS_214 | NZ     | D_GLU_123 | OE2    | 3.321        |
| 4R7N   | D_ARG_24  | NH2    | F_GLU_17  | OE1    | 3.787        |
| 4R7N   | D_ARG_24  | NH2    | F_GLU_17  | OE2    | 2.414        |
| 4R7N   | D_LYS_107 | NZ     | F ASP_9   | OD2    | 3.633        |
| 4R7N   | E_HIS_169 | NE2    | F ASP_167 | OD1    | 3.616        |
| 4R7N   | E_HIS_169 | NE2    | F ASP_167 | OD2    | 3.474        |
| 4R7N   | E_LYS_214 | NZ     | F_GLU_123 | OE2    | 3.072        |
| 4R7N   | F_ARG_24  | NH2    | D_GLU_17  | OE1    | 3.696        |
| 4R7N   | F_ARG_24  | NH2    | D_GLU_17  | OE2    | 2.325        |
| 4R7N   | F_LYS_107 | NZ     | D ASP_9   | OD2    | 3.641        |
| 4R7N   | G_LYS_214 | NZ     | H_GLU_123 | OE1    | 2.389        |
| 4R7N   | G_LYS_214 | NZ     | H_GLU_123 | OE2    | 3.440        |
| 4R7N   | H_ARG_24  | NH2    | L_GLU_17  | OE1    | 3.413        |
| 4R7N   | H_ARG_24  | NH2    | L_GLU_17  | OE2    | 2.312        |
| 4R7N   | I_LYS_214 | NZ     | J_GLU_123 | OE1    | 3.635        |
| 4R7N   | I_LYS_214 | NZ     | J_GLU_123 | OE2    | 2.942        |
| 4R7N   | J_ARG_24  | NH2    | B_GLU_17  | OE1    | 3.555        |
| 4R7N   | J_ARG_24  | NH2    | B_GLU_17  | OE2    | 2.304        |
| 4R7N   | K_LYS_214 | NZ     | L_GLU_123 | OE2    | 3.794        |
| 4R7N   | L_ARG_24  | NH2    | H_GLU_17  | OE1    | 3.531        |
| 4R7N   | L_ARG_24  | NH2    | H_GLU_17  | OE2    | 2.313        |
| 4R7N   | N_ARG_24  | NH2    | P_GLU_17  | OE1    | 3.814        |
| 4R7N   | N_ARG_24  | NH2    | P_GLU_17  | OE2    | 2.289        |
| 4R7N   | N_LYS_107 | NZ     | P ASP_9   | OD2    | 3.591        |
| 4R7N   | O_HIS_169 | NE2    | P ASP_167 | OD2    | 3.725        |
| 4R7N   | P_ARG_24  | NH2    | N_GLU_17  | OE1    | 3.525        |
| 4R7N   | P_ARG_24  | NH2    | N_GLU_17  | OE2    | 2.277        |
| 4R7N   | Q_LYS_211 | NZ     | G ASP_213 | OD2    | 3.009        |
| 4R7N   | Q_LYS_214 | NZ     | R_GLU_123 | OE1    | 3.438        |
| 4R7N   | Q_LYS_214 | NZ     | R_GLU_123 | OE2    | 3.002        |
| 4R7N   | R_LYS_145 | NZ     | F ASP_93  | OD2    | 3.627        |
| 4R7N   | S_LYS_214 | NZ     | T_GLU_123 | OE1    | 3.934        |
| 4R7N   | S_LYS_214 | NZ     | T_GLU_123 | OE2    | 3.931        |

Table 1399: Interfacial 4R7N-specific salt bridging networks analysis. In this table, a PDB file is specified with a four-letter PDB ID, except that the names of the PDB files corresponding to the single NMR structural model split from the NMR ensemble is specified with a four-letter PDB ID in addition to a hyphen followed by the single NMR structural model numeric ID, the residue naming scheme is **Chain ID\_residue name\_residue number**,  $\angle ADH$  represents the angle formed by acceptor (A), donor (D) and hydrogen (H) ( $\angle ADH$ ).

| PDB ID | Residue A | Atom A | Residue B | Atom B | Distance (Å) |
|--------|-----------|--------|-----------|--------|--------------|
| 4R9Y   | H_LYS_214 | NZ     | L_GLU_148 | OE2    | 2.745        |
| 4R9Y   | N_LYS_    | NZ     | M_GLU_    | OE2    | 3.272        |

Table 1400: Interfacial 4R9Y-specific salt bridging networks analysis. In this table, a PDB file is specified with a four-letter PDB ID, except that the names of the PDB files corresponding to the single NMR structural model split from the NMR ensemble is specified with a four-letter PDB ID in addition to a hyphen followed by the single NMR structural model numeric ID, the residue naming scheme is **Chain ID\_residue name\_residue number**,  $\angle ADH$  represents the angle formed by acceptor (A), donor (D) and hydrogen (H) ( $\angle ADH$ ).

| PDB ID | Residue A | Atom A | Residue B | Atom B | Distance (Å) |
|--------|-----------|--------|-----------|--------|--------------|
| 4RAU   | A.LYS_95  | NZ     | C.ASP_7   | OD1    | 3.997        |
| 4RAU   | A.LYS_95  | NZ     | C.ASP_7   | OD2    | 3.077        |
| 4RAU   | D.LYS_95  | NZ     | F.ASP_7   | OD1    | 3.860        |
| 4RAU   | G.LYS_95  | NZ     | I.ASP_7   | OD1    | 3.805        |
| 4RAU   | G.LYS_95  | NZ     | I.ASP_7   | OD2    | 2.755        |
| 4RAU   | K.LYS_216 | NZ     | J.GLU_125 | OE2    | 3.935        |
| 4RAU   | O.ARG_49  | NH2    | X.ASP_7   | OD1    | 2.993        |
| 4RAU   | O.ARG_49  | NH2    | X.ASP_7   | OD2    | 3.647        |
| 4RAU   | P.LYS_    | NZ     | R.ASP_    | OD1    | 3.104        |
| 4RAU   | V.LYS_95  | NZ     | X.ASP_7   | OD1    | 3.972        |
| 4RAU   | V.LYS_95  | NZ     | X.ASP_7   | OD2    | 3.050        |
| 4RAU   | X.ARG_49  | NH2    | O.ASP_7   | OD1    | 2.791        |
| 4RAU   | X.ARG_49  | NH2    | O.ASP_7   | OD2    | 3.699        |

Table 1401: Interfacial 4RAU-specific salt bridging networks analysis. In this table, a PDB file is specified with a four-letter PDB ID, except that the names of the PDB files corresponding to the single NMR structural model split from the NMR ensemble is specified with a four-letter PDB ID in addition to a hyphen followed by the single NMR structural model numeric ID, the residue naming scheme is **Chain ID\_residue name\_residue number**,  $\angle ADH$  represents the angle formed by acceptor (A), donor (D) and hydrogen (H) ( $\angle ADH$ ).

| PDB ID | Residue A | Atom A | Residue B | Atom B | Distance (Å) |
|--------|-----------|--------|-----------|--------|--------------|
| 4RRP   | G_LYS_214 | NZ     | A_ASP_122 | OD1    | 3.271        |
| 4RRP   | G_LYS_214 | NZ     | A_ASP_122 | OD2    | 3.253        |
| 4RRP   | B_ARG_61  | NH1    | Q_GLU_32  | OE1    | 3.055        |
| 4RRP   | B_ARG_61  | NH1    | Q_GLU_32  | OE2    | 3.683        |
| 4RRP   | B_ARG_61  | NH2    | Q_GLU_32  | OE2    | 3.637        |
| 4RRP   | J_LYS_214 | NZ     | D_ASP_122 | OD1    | 3.176        |
| 4RRP   | J_LYS_214 | NZ     | D_ASP_122 | OD2    | 2.924        |
| 4RRP   | L_HIS_164 | NE2    | F_ASP_167 | OD1    | 3.853        |
| 4RRP   | L_LYS_214 | NZ     | F_ASP_122 | OD2    | 3.247        |
| 4RRP   | M_LYS_10  | NZ     | N_GLU_29  | OE1    | 3.876        |
| 4RRP   | M_LYS_10  | NZ     | N_GLU_29  | OE2    | 3.237        |
| 4RRP   | N_LYS_10  | NZ     | M_GLU_29  | OE1    | 3.319        |
| 4RRP   | N_LYS_10  | NZ     | M_GLU_29  | OE2    | 2.389        |
| 4RRP   | O_ARG_123 | NH1    | Q_ASP_54  | OD1    | 3.356        |
| 4RRP   | O_ARG_123 | NH1    | Q_ASP_54  | OD2    | 3.533        |
| 4RRP   | O_ARG_123 | NH2    | Q_ASP_54  | OD2    | 3.134        |
| 4RRP   | O_HIS_134 | NE2    | N_GLU_121 | OE1    | 3.780        |
| 4RRP   | O_HIS_134 | NE2    | N_GLU_121 | OE2    | 3.192        |
| 4RRP   | O_ARG_145 | NH2    | Q_GLU_116 | OE1    | 3.921        |
| 4RRP   | O_ARG_145 | NH2    | Q_GLU_116 | OE2    | 3.324        |
| 4RRP   | Q_ARG_145 | NH1    | O_GLU_116 | OE2    | 3.050        |
| 4RRP   | Q_ARG_145 | NH2    | O_GLU_116 | OE2    | 3.244        |

Table 1402: Interfacial 4RRP-specific salt bridging networks analysis. In this table, a PDB file is specified with a four-letter PDB ID, except that the names of the PDB files corresponding to the single NMR structural model split from the NMR ensemble is specified with a four-letter PDB ID in addition to a hyphen followed by the single NMR structural model numeric ID, the residue naming scheme is **Chain ID\_residue name\_residue number**,  $\angle ADH$  represents the angle formed by acceptor (A), donor (D) and hydrogen (H) ( $\angle ADH$ ).

| PDB ID | Residue A | Atom A | Residue B | Atom B | Distance (Å) |
|--------|-----------|--------|-----------|--------|--------------|
| 4TRP   | H_LYS_208 | NZ     | L_GLU_129 | OE2    | 3.281        |

Table 1403: Interfacial 4TRP-specific salt bridging networks analysis. In this table, a PDB file is specified with a four-letter PDB ID, except that the names of the PDB files corresponding to the single NMR structural model split from the NMR ensemble is specified with a four-letter PDB ID in addition to a hyphen followed by the single NMR structural model numeric ID, the residue naming scheme is **Chain ID\_residue name\_residue number**,  $\angle ADH$  represents the angle formed by acceptor (A), donor (D) and hydrogen (H) ( $\angle ADH$ ).

| PDB ID | Residue A | Atom A | Residue B | Atom B | Distance (Å) |
|--------|-----------|--------|-----------|--------|--------------|
| 4TUK   | H_LYS_208 | NZ     | L_GLU_129 | OE2    | 3.061        |

Table 1404: Interfacial 4TUK-specific salt bridging networks analysis. In this table, a PDB file is specified with a four-letter PDB ID, except that the names of the PDB files corresponding to the single NMR structural model split from the NMR ensemble is specified with a four-letter PDB ID in addition to a hyphen followed by the single NMR structural model numeric ID, the residue naming scheme is **Chain ID\_residue name\_residue number**,  $\angle ADH$  represents the angle formed by acceptor (A), donor (D) and hydrogen (H) ( $\angle ADH$ ).



| PDB ID | Residue A | Atom A | Residue B | Atom B | Distance (Å) |
|--------|-----------|--------|-----------|--------|--------------|
| 4TUL   | H_LYS_208 | NZ     | L_GLU_129 | OE1    | 3.059        |
| 4TUL   | H_LYS_208 | NZ     | L_GLU_129 | OE2    | 2.741        |

Table 1405: Interfacial 4TUL-specific salt bridging networks analysis. In this table, a PDB file is specified with a four-letter PDB ID, except that the names of the PDB files corresponding to the single NMR structural model split from the NMR ensemble is specified with a four-letter PDB ID in addition to a hyphen followed by the single NMR structural model numeric ID, the residue naming scheme is **Chain ID\_residue name\_residue number**,  $\angle ADH$  represents the angle formed by acceptor (A), donor (D) and hydrogen (H) ( $\angle ADH$ ).

| PDB ID | Residue A | Atom A | Residue B | Atom B | Distance (Å) |
|--------|-----------|--------|-----------|--------|--------------|
| 4TUO   | A_LYS_208 | NZ     | B_GLU_129 | OE1    | 3.043        |
| 4TUO   | B_LYS_153 | NZ     | C_GLU_10  | OE2    | 3.051        |
| 4TUO   | C_LYS_208 | NZ     | D_GLU_129 | OE1    | 2.720        |
| 4TUO   | C_LYS_208 | NZ     | D_GLU_129 | OE2    | 3.136        |

Table 1406: Interfacial 4TUO-specific salt bridging networks analysis. In this table, a PDB file is specified with a four-letter PDB ID, except that the names of the PDB files corresponding to the single NMR structural model split from the NMR ensemble is specified with a four-letter PDB ID in addition to a hyphen followed by the single NMR structural model numeric ID, the residue naming scheme is **Chain ID\_residue name\_residue number**,  $\angle ADH$  represents the angle formed by acceptor (A), donor (D) and hydrogen (H) ( $\angle ADH$ ).

| PDB ID | Residue A | Atom A | Residue B | Atom B | Distance (Å) |
|--------|-----------|--------|-----------|--------|--------------|
| 4U0Q   | A_HIS_495 | NE2    | D_GLU_31  | OE1    | 3.802        |
| 4U0Q   | A_HIS_495 | NE2    | D_GLU_31  | OE2    | 2.620        |
| 4U0Q   | A_HIS_496 | ND1    | D_GLU_31  | OE1    | 3.680        |
| 4U0Q   | B_HIS_170 | ND1    | D_GLU_172 | OE1    | 2.788        |
| 4U0Q   | C_HIS_495 | ND1    | B_ASP_32  | OD2    | 3.411        |
| 4U0Q   | D_HIS_170 | ND1    | B_GLU_172 | OE1    | 2.879        |
| 4U0Q   | D_HIS_170 | ND1    | B_GLU_172 | OE2    | 2.959        |
| 4U0Q   | D_LYS_191 | NZ     | C_GLU_362 | OE2    | 3.108        |

Table 1407: Interfacial 4U0Q-specific salt bridging networks analysis. In this table, a PDB file is specified with a four-letter PDB ID, except that the names of the PDB files corresponding to the single NMR structural model split from the NMR ensemble is specified with a four-letter PDB ID in addition to a hyphen followed by the single NMR structural model numeric ID, the residue naming scheme is **Chain ID\_residue name\_residue number**,  $\angle ADH$  represents the angle formed by acceptor (A), donor (D) and hydrogen (H) ( $\angle ADH$ ).

| PDB ID | Residue A | Atom A | Residue B | Atom B | Distance (Å) |
|--------|-----------|--------|-----------|--------|--------------|
| 4U3X   | A_HIS_106 | NE2    | B_GLU_35  | OE1    | 2.597        |
| 4U3X   | A_HIS_106 | NE2    | B_GLU_35  | OE2    | 3.650        |
| 4U3X   | B_ARG_61  | NH1    | A_ASP_33  | OD2    | 2.723        |
| 4U3X   | B_ARG_61  | NH2    | A_ASP_33  | OD2    | 2.983        |
| 4U3X   | B_ARG_112 | NH2    | A_ASP_109 | OD1    | 3.763        |
| 4U3X   | B_ARG_112 | NH2    | A_ASP_109 | OD2    | 3.035        |
| 4U3X   | C_HIS_106 | NE2    | D_GLU_35  | OE1    | 2.720        |
| 4U3X   | C_HIS_106 | NE2    | D_GLU_35  | OE2    | 3.669        |
| 4U3X   | D_ARG_61  | NH1    | C_ASP_33  | OD2    | 3.116        |
| 4U3X   | D_ARG_61  | NH2    | C_ASP_33  | OD2    | 3.400        |
| 4U3X   | D_ARG_112 | NH2    | C_ASP_109 | OD2    | 3.567        |

Table 1408: Interfacial 4U3X-specific salt bridging networks analysis. In this table, a PDB file is specified with a four-letter PDB ID, except that the names of the PDB files corresponding to the single NMR structural model split from the NMR ensemble is specified with a four-letter PDB ID in addition to a hyphen followed by the single NMR structural model numeric ID, the residue naming scheme is **Chain ID\_residue name\_residue number**,  $\angle ADH$  represents the angle formed by acceptor (A), donor (D) and hydrogen (H) ( $\angle ADH$ ).

| PDB ID | Residue A | Atom A | Residue B  | Atom B | Distance (Å) |
|--------|-----------|--------|------------|--------|--------------|
| 4U6G   | H.LYS_143 | NZ     | L.GLU_125  | OE2    | 3.603        |
| 4U6G   | H.LYS_209 | NZ     | L.GLU_124  | OE1    | 2.829        |
| 4U6G   | H.LYS_209 | NZ     | L.GLU_124  | OE2    | 2.866        |
| 4U6G   | L.HIS_31  | ND1    | H.GLU_100I | OE2    | 3.196        |
| 4U6G   | L.ARG_91  | NH1    | B.GLU_81   | OE1    | 3.298        |
| 4U6G   | L.ARG_91  | NH1    | H.GLU_100J | OE1    | 3.679        |
| 4U6G   | L.ARG_91  | NH1    | H.GLU_100J | OE2    | 3.478        |
| 4U6G   | L.ARG_91  | NH2    | H.GLU_100J | OE2    | 3.428        |
| 4U6G   | A.LYS_143 | NZ     | B.GLU_125  | OE2    | 3.217        |
| 4U6G   | A.LYS_201 | NZ     | H.ASP_30   | OD1    | 3.983        |
| 4U6G   | A.LYS_209 | NZ     | B.GLU_124  | OE1    | 2.769        |
| 4U6G   | A.LYS_209 | NZ     | B.GLU_124  | OE2    | 3.063        |
| 4U6G   | B.HIS_31  | ND1    | A.GLU_100I | OE2    | 3.102        |
| 4U6G   | B.ARG_91  | NH1    | A.GLU_100J | OE1    | 3.587        |
| 4U6G   | B.ARG_91  | NH1    | A.GLU_100J | OE2    | 3.310        |
| 4U6G   | B.ARG_91  | NH2    | A.GLU_100J | OE2    | 3.407        |

Table 1409: Interfacial 4U6G-specific salt bridging networks analysis. In this table, a PDB file is specified with a four-letter PDB ID, except that the names of the PDB files corresponding to the single NMR structural model split from the NMR ensemble is specified with a four-letter PDB ID in addition to a hyphen followed by the single NMR structural model numeric ID, the residue naming scheme is **Chain ID\_residue name\_residue number**,  $\angle ADH$  represents the angle formed by acceptor (A), donor (D) and hydrogen (H) ( $\angle ADH$ ).

| PDB ID | Residue A | Atom A | Residue B | Atom B | Distance (Å) |
|--------|-----------|--------|-----------|--------|--------------|
| 4U6V   | H_ARG_99  | NH2    | L_GLU_55  | OE1    | 2.660        |
| 4U6V   | H_ARG_99  | NH2    | L_GLU_55  | OE2    | 2.823        |
| 4U6V   | H_HIS_105 | NE2    | A_ASP_183 | OD1    | 3.150        |
| 4U6V   | H_HIS_105 | NE2    | A_ASP_183 | OD2    | 3.236        |
| 4U6V   | H_LYS_218 | NZ     | L_GLU_122 | OE1    | 2.258        |
| 4U6V   | H_LYS_218 | NZ     | L_GLU_122 | OE2    | 3.923        |
| 4U6V   | A_ARG_200 | NH1    | H_ASP_56  | OD1    | 3.722        |
| 4U6V   | A_ARG_200 | NH1    | H_ASP_56  | OD2    | 3.481        |
| 4U6V   | A_LYS_266 | NZ     | L_ASP_93  | OD1    | 2.981        |
| 4U6V   | K_ARG_99  | NH2    | M_GLU_55  | OE1    | 2.606        |
| 4U6V   | K_ARG_99  | NH2    | M_GLU_55  | OE2    | 2.857        |
| 4U6V   | K_HIS_105 | NE2    | B_ASP_183 | OD1    | 2.992        |
| 4U6V   | K_HIS_105 | NE2    | B_ASP_183 | OD2    | 3.142        |
| 4U6V   | K_LYS_218 | NZ     | M_GLU_122 | OE1    | 2.653        |
| 4U6V   | B_ARG_200 | NH1    | K_ASP_56  | OD1    | 3.809        |
| 4U6V   | B_ARG_200 | NH1    | K_ASP_56  | OD2    | 3.557        |
| 4U6V   | B_LYS_266 | NZ     | M_ASP_93  | OD1    | 3.145        |

Table 1410: Interfacial 4U6V-specific salt bridging networks analysis. In this table, a PDB file is specified with a four-letter PDB ID, except that the names of the PDB files corresponding to the single NMR structural model split from the NMR ensemble is specified with a four-letter PDB ID in addition to a hyphen followed by the single NMR structural model numeric ID, the residue naming scheme is **Chain ID\_residue name\_residue number**,  $\angle ADH$  represents the angle formed by acceptor (A), donor (D) and hydrogen (H) ( $\angle ADH$ ).

| PDB ID | Residue A | Atom A | Residue B  | Atom B | Distance (Å) |
|--------|-----------|--------|------------|--------|--------------|
| 4UAO   | A_ARG_317 | NH1    | C_GLU_100B | OE2    | 3.537        |
| 4UAO   | A_ARG_317 | NH2    | C_GLU_100B | OE1    | 3.794        |
| 4UAO   | A_ARG_317 | NH2    | C_GLU_100B | OE2    | 2.800        |
| 4UAO   | C_ARG_56  | NH1    | A_GLU_81   | OE2    | 2.819        |
| 4UAO   | C_ARG_56  | NH2    | A_ASP_174  | OD1    | 3.129        |
| 4UAO   | C_ARG_56  | NH2    | A_ASP_174  | OD2    | 2.857        |
| 4UAO   | C_ARG_95  | NH2    | A_GLU_173  | OE2    | 3.027        |

Table 1411: Interfacial 4UAO-specific salt bridging networks analysis. In this table, a PDB file is specified with a four-letter PDB ID, except that the names of the PDB files corresponding to the single NMR structural model split from the NMR ensemble is specified with a four-letter PDB ID in addition to a hyphen followed by the single NMR structural model numeric ID, the residue naming scheme is **Chain ID\_residue name\_residue number**,  $\angle ADH$  represents the angle formed by acceptor (A), donor (D) and hydrogen (H) ( $\angle ADH$ ).

| PDB ID | Residue A | Atom A | Residue B | Atom B | Distance (Å) |
|--------|-----------|--------|-----------|--------|--------------|
| 4UV6   | B_ARG_180 | NH2    | A_GLU_396 | OE2    | 2.784        |
| 4UV6   | B_ARG_313 | NH2    | A_GLU_60  | OE1    | 2.768        |

Table 1412: Interfacial 4UV6-specific salt bridging networks analysis. In this table, a PDB file is specified with a four-letter PDB ID, except that the names of the PDB files corresponding to the single NMR structural model split from the NMR ensemble is specified with a four-letter PDB ID in addition to a hyphen followed by the single NMR structural model numeric ID, the residue naming scheme is **Chain ID\_residue name\_residue number**,  $\angle ADH$  represents the angle formed by acceptor (A), donor (D) and hydrogen (H) ( $\angle ADH$ ).



| PDB ID | Residue A | Atom A | Residue B | Atom B | Distance (Å) |
|--------|-----------|--------|-----------|--------|--------------|
| 4WEU   | D_LYS_887 | NZ     | A_GLU_145 | OE1    | 3.143        |
| 4WEU   | A_ARG_96  | NH1    | B_GLU_94  | OE1    | 3.636        |
| 4WEU   | A_ARG_96  | NH1    | B_GLU_94  | OE2    | 3.058        |
| 4WEU   | A_ARG_96  | NH2    | B_GLU_94  | OE1    | 2.949        |
| 4WEU   | A_ARG_96  | NH2    | B_GLU_94  | OE2    | 3.852        |
| 4WEU   | A_ARG_136 | NH1    | D_GLU_889 | OE1    | 2.898        |
| 4WEU   | B_ARG_96  | NH1    | A_GLU_94  | OE1    | 3.754        |
| 4WEU   | B_ARG_96  | NH1    | A_GLU_94  | OE2    | 2.795        |
| 4WEU   | B_ARG_96  | NH2    | A_GLU_94  | OE1    | 2.707        |
| 4WEU   | B_ARG_96  | NH2    | A_GLU_94  | OE2    | 3.344        |

Table 1413: Interfacial 4WEU-specific salt bridging networks analysis. In this table, a PDB file is specified with a four-letter PDB ID, except that the names of the PDB files corresponding to the single NMR structural model split from the NMR ensemble is specified with a four-letter PDB ID in addition to a hyphen followed by the single NMR structural model numeric ID, the residue naming scheme is **Chain ID\_residue name\_residue number**,  $\angle ADH$  represents the angle formed by acceptor (A), donor (D) and hydrogen (H) ( $\angle ADH$ ).

| PDB ID | Residue A | Atom A | Residue B | Atom B | Distance (Å) |
|--------|-----------|--------|-----------|--------|--------------|
| 4WHT   | A_LYS_207 | NZ     | B_GLU_127 | OE1    | 2.607        |
| 4WHT   | A_LYS_207 | NZ     | B_GLU_127 | OE2    | 3.670        |
| 4WHT   | C_LYS_207 | NZ     | D_GLU_127 | OE1    | 3.293        |
| 4WHT   | E_LYS_207 | NZ     | F_GLU_127 | OE1    | 3.118        |
| 4WHT   | G_LYS_204 | NZ     | U_ASP_206 | OD2    | 3.854        |
| 4WHT   | I_LYS_65  | NZ     | R_GLU_84  | OE2    | 3.044        |
| 4WHT   | I_LYS_207 | NZ     | J_GLU_127 | OE1    | 2.774        |
| 4WHT   | I_LYS_207 | NZ     | J_GLU_127 | OE2    | 3.846        |
| 4WHT   | K_LYS_207 | NZ     | L_GLU_127 | OE1    | 2.813        |
| 4WHT   | M_LYS_204 | NZ     | K_ASP_206 | OD2    | 2.701        |
| 4WHT   | M_LYS_207 | NZ     | N_GLU_127 | OE1    | 3.186        |
| 4WHT   | O_LYS_207 | NZ     | P_GLU_127 | OE1    | 3.812        |
| 4WHT   | O_LYS_207 | NZ     | P_GLU_127 | OE2    | 2.822        |
| 4WHT   | Q_LYS_207 | NZ     | R_GLU_127 | OE1    | 2.572        |
| 4WHT   | Q_LYS_207 | NZ     | R_GLU_127 | OE2    | 3.627        |
| 4WHT   | S_LYS_207 | NZ     | T_GLU_127 | OE1    | 3.197        |
| 4WHT   | U_LYS_204 | NZ     | G_ASP_206 | OD2    | 3.954        |
| 4WHT   | U_LYS_207 | NZ     | V_GLU_127 | OE1    | 3.622        |
| 4WHT   | X_LYS_207 | NZ     | Y_GLU_127 | OE2    | 2.718        |
| 4WHT   | B_LYS_111 | NZ     | J_GLU_73  | OE2    | 3.842        |
| 4WHT   | D_LYS_151 | NZ     | L_GLU_191 | OE2    | 3.259        |
| 4WHT   | D_LYS_187 | NZ     | I_GLU_114 | OE1    | 3.576        |
| 4WHT   | D_LYS_187 | NZ     | I_GLU_114 | OE2    | 3.498        |
| 4WHT   | H_ARG_66  | NH1    | Q_ASP_62  | OD2    | 3.949        |
| 4WHT   | N_LYS_187 | NZ     | K_GLU_114 | OE1    | 3.270        |
| 4WHT   | N_LYS_187 | NZ     | K_GLU_114 | OE2    | 3.221        |
| 4WHT   | V_LYS_187 | NZ     | G_GLU_114 | OE1    | 3.353        |
| 4WHT   | V_LYS_187 | NZ     | G_GLU_114 | OE2    | 3.189        |

Table 1414: Interfacial 4WHT-specific salt bridging networks analysis. In this table, a PDB file is specified with a four-letter PDB ID, except that the names of the PDB files corresponding to the single NMR structural model split from the NMR ensemble is specified with a four-letter PDB ID in addition to a hyphen followed by the single NMR structural model numeric ID, the residue naming scheme is **Chain ID\_residue name\_residue number**,  $\angle ADH$  represents the angle formed by acceptor (A), donor (D) and hydrogen (H) ( $\angle ADH$ ).

| PDB ID | Residue A | Atom A | Residue B | Atom B | Distance (Å) |
|--------|-----------|--------|-----------|--------|--------------|
| 4WHY   | K_LYS_204 | NZ     | G_ASP_206 | OD2    | 3.182        |
| 4WHY   | K_LYS_207 | NZ     | L_GLU_127 | OE1    | 3.798        |
| 4WHY   | L_LYS_187 | NZ     | G_GLU_114 | OE1    | 3.275        |
| 4WHY   | L_LYS_187 | NZ     | G_GLU_114 | OE2    | 3.634        |
| 4WHY   | M_LYS_207 | NZ     | N_GLU_127 | OE1    | 3.795        |
| 4WHY   | N_LYS_187 | NZ     | L_GLU_114 | OE1    | 2.397        |
| 4WHY   | N_LYS_187 | NZ     | L_GLU_114 | OE2    | 3.551        |

Table 1415: Interfacial 4WHY-specific salt bridging networks analysis. In this table, a PDB file is specified with a four-letter PDB ID, except that the names of the PDB files corresponding to the single NMR structural model split from the NMR ensemble is specified with a four-letter PDB ID in addition to a hyphen followed by the single NMR structural model numeric ID, the residue naming scheme is **Chain ID\_residue name\_residue number**,  $\angle ADH$  represents the angle formed by acceptor (A), donor (D) and hydrogen (H) ( $\angle ADH$ ).

| PDB ID | Residue A | Atom A | Residue B | Atom B | Distance (Å) |
|--------|-----------|--------|-----------|--------|--------------|
| 4WUU   | A_ARG_35  | NH1    | B_ASP_53  | OD1    | 3.025        |
| 4WUU   | A_ARG_35  | NH1    | B_ASP_53  | OD2    | 3.278        |
| 4WUU   | A_ARG_48  | NH2    | B_ASP_53  | OD1    | 3.607        |
| 4WUU   | A_ARG_48  | NH2    | B_ASP_53  | OD2    | 3.368        |
| 4WUU   | E_ARG_50  | NH1    | A_GLU_166 | OE2    | 3.181        |
| 4WUU   | E_ARG_50  | NH2    | A_GLU_166 | OE1    | 3.839        |
| 4WUU   | E_ARG_50  | NH2    | A_GLU_166 | OE2    | 2.671        |

Table 1416: Interfacial 4WUU-specific salt bridging networks analysis. In this table, a PDB file is specified with a four-letter PDB ID, except that the names of the PDB files corresponding to the single NMR structural model split from the NMR ensemble is specified with a four-letter PDB ID in addition to a hyphen followed by the single NMR structural model numeric ID, the residue naming scheme is **Chain ID\_residue name\_residue number**,  $\angle ADH$  represents the angle formed by acceptor (A), donor (D) and hydrogen (H) ( $\angle ADH$ ).

| PDB ID | Residue A | Atom A | Residue B | Atom B | Distance (Å) |
|--------|-----------|--------|-----------|--------|--------------|
| 4XVJ   | A_ARG_1   | NH2    | L_ASP_51  | OD1    | 3.482        |

Table 1417: Interfacial 4XVJ-specific salt bridging networks analysis. In this table, a PDB file is specified with a four-letter PDB ID, except that the names of the PDB files corresponding to the single NMR structural model split from the NMR ensemble is specified with a four-letter PDB ID in addition to a hyphen followed by the single NMR structural model numeric ID, the residue naming scheme is **Chain ID\_residue name\_residue number**,  $\angle ADH$  represents the angle formed by acceptor (A), donor (D) and hydrogen (H) ( $\angle ADH$ ).

| PDB ID | Residue A | Atom A | Residue B | Atom B | Distance (Å) |
|--------|-----------|--------|-----------|--------|--------------|
| 4YHP   | P_LYS_4   | NZ     | H_ASP_62  | OD1    | 3.318        |
| 4YHP   | A_LYS_222 | NZ     | B_ASP_123 | OD2    | 3.677        |
| 4YHP   | Q_LYS_4   | NZ     | C_ASP_62  | OD1    | 3.313        |
| 4YHP   | C_LYS_222 | NZ     | D_ASP_123 | OD1    | 3.776        |
| 4YHP   | C_LYS_222 | NZ     | D_ASP_123 | OD2    | 3.442        |
| 4YHP   | D_HIS_190 | NE2    | L_GLU_59  | OE2    | 2.478        |
| 4YHP   | E_LYS_222 | NZ     | F_ASP_123 | OD1    | 3.304        |
| 4YHP   | E_LYS_222 | NZ     | F_ASP_123 | OD2    | 2.842        |

Table 1418: Interfacial 4YHP-specific salt bridging networks analysis. In this table, a PDB file is specified with a four-letter PDB ID, except that the names of the PDB files corresponding to the single NMR structural model split from the NMR ensemble is specified with a four-letter PDB ID in addition to a hyphen followed by the single NMR structural model numeric ID, the residue naming scheme is **Chain ID\_residue name\_residue number**,  $\angle ADH$  represents the angle formed by acceptor (A), donor (D) and hydrogen (H) ( $\angle ADH$ ).

| PDB ID | Residue A | Atom A | Residue B | Atom B | Distance (Å) |
|--------|-----------|--------|-----------|--------|--------------|
| 4YHZ   | H_ARG_102 | NH1    | L_ASP_52  | OD2    | 3.952        |

Table 1419: Interfacial 4YHZ-specific salt bridging networks analysis. In this table, a PDB file is specified with a four-letter PDB ID, except that the names of the PDB files corresponding to the single NMR structural model split from the NMR ensemble is specified with a four-letter PDB ID in addition to a hyphen followed by the single NMR structural model numeric ID, the residue naming scheme is **Chain ID\_residue name\_residue number**,  $\angle ADH$  represents the angle formed by acceptor (A), donor (D) and hydrogen (H) ( $\angle ADH$ ).

| PDB ID | Residue A | Atom A | Residue B | Atom B | Distance (Å) |
|--------|-----------|--------|-----------|--------|--------------|
| 4YNY   | A_LYS_166 | NZ     | B_GLU_146 | OE2    | 2.702        |
| 4YNY   | C_LYS_166 | NZ     | D_GLU_146 | OE2    | 2.776        |

Table 1420: Interfacial 4YNY-specific salt bridging networks analysis. In this table, a PDB file is specified with a four-letter PDB ID, except that the names of the PDB files corresponding to the single NMR structural model split from the NMR ensemble is specified with a four-letter PDB ID in addition to a hyphen followed by the single NMR structural model numeric ID, the residue naming scheme is **Chain ID\_residue name\_residue number**,  $\angle ADH$  represents the angle formed by acceptor (A), donor (D) and hydrogen (H) ( $\angle ADH$ ).



| PDB ID | Residue A | Atom A | Residue B | Atom B | Distance (Å) |
|--------|-----------|--------|-----------|--------|--------------|
| 4YO0   | A.LYS_76  | NZ     | E.ASP_11  | OD1    | 3.807        |
| 4YO0   | A.LYS_76  | NZ     | E.ASP_11  | OD2    | 3.094        |
| 4YO0   | A.LYS_166 | NZ     | B.GLU_146 | OE2    | 2.816        |
| 4YO0   | C.LYS_76  | NZ     | F.GLU_10  | OE2    | 3.111        |
| 4YO0   | C.LYS_76  | NZ     | F.ASP_11  | OD1    | 3.515        |
| 4YO0   | C.LYS_76  | NZ     | F.ASP_11  | OD2    | 2.782        |
| 4YO0   | C.LYS_166 | NZ     | D.GLU_146 | OE2    | 2.660        |
| 4YO0   | C.LYS_231 | NZ     | D.GLU_145 | OE1    | 3.828        |
| 4YO0   | C.LYS_231 | NZ     | D.GLU_145 | OE2    | 3.815        |

Table 1421: Interfacial 4YO0-specific salt bridging networks analysis. In this table, a PDB file is specified with a four-letter PDB ID, except that the names of the PDB files corresponding to the single NMR structural model split from the NMR ensemble is specified with a four-letter PDB ID in addition to a hyphen followed by the single NMR structural model numeric ID, the residue naming scheme is **Chain ID\_residue name\_residue number**,  $\angle ADH$  represents the angle formed by acceptor (A), donor (D) and hydrogen (H) ( $\angle ADH$ ).

| PDB ID | Residue A | Atom A | Residue B | Atom B | Distance (Å) |
|--------|-----------|--------|-----------|--------|--------------|
| 4Z0X   | C_LYS_446 | NZ     | A_ASP_50  | OD1    | 3.873        |
| 4Z0X   | C_LYS_446 | NZ     | A_ASP_50  | OD2    | 2.440        |

Table 1422: Interfacial 4Z0X-specific salt bridging networks analysis. In this table, a PDB file is specified with a four-letter PDB ID, except that the names of the PDB files corresponding to the single NMR structural model split from the NMR ensemble is specified with a four-letter PDB ID in addition to a hyphen followed by the single NMR structural model numeric ID, the residue naming scheme is **Chain ID\_residue name\_residue number**,  $\angle ADH$  represents the angle formed by acceptor (A), donor (D) and hydrogen (H) ( $\angle ADH$ ).

| PDB ID | Residue A | Atom A | Residue B | Atom B | Distance (Å) |
|--------|-----------|--------|-----------|--------|--------------|
| 4ZD3   | H_HIS_108 | NE2    | L_GLU_68  | OE1    | 2.549        |
| 4ZD3   | H_HIS_108 | NE2    | L_GLU_68  | OE2    | 3.986        |
| 4ZD3   | H_LYS_224 | NZ     | L_GLU_143 | OE2    | 2.997        |

Table 1423: Interfacial 4ZD3-specific salt bridging networks analysis. In this table, a PDB file is specified with a four-letter PDB ID, except that the names of the PDB files corresponding to the single NMR structural model split from the NMR ensemble is specified with a four-letter PDB ID in addition to a hyphen followed by the single NMR structural model numeric ID, the residue naming scheme is **Chain ID\_residue name\_residue number**,  $\angle ADH$  represents the angle formed by acceptor (A), donor (D) and hydrogen (H) ( $\angle ADH$ ).

| PDB ID | Residue A | Atom A | Residue B | Atom B | Distance (Å) |
|--------|-----------|--------|-----------|--------|--------------|
| 4ZFF   | A_LYS_209 | NZ     | B_GLU_123 | OE1    | 3.193        |
| 4ZFF   | C_ARG_23  | NH1    | D_GLU_30  | OE1    | 3.414        |
| 4ZFF   | H_LYS_209 | NZ     | L_GLU_123 | OE1    | 3.731        |

Table 1424: Interfacial 4ZFF-specific salt bridging networks analysis. In this table, a PDB file is specified with a four-letter PDB ID, except that the names of the PDB files corresponding to the single NMR structural model split from the NMR ensemble is specified with a four-letter PDB ID in addition to a hyphen followed by the single NMR structural model numeric ID, the residue naming scheme is **Chain ID\_residue name\_residue number**,  $\angle ADH$  represents the angle formed by acceptor (A), donor (D) and hydrogen (H) ( $\angle ADH$ ).

| PDB ID | Residue A | Atom A | Residue B | Atom B | Distance (Å) |
|--------|-----------|--------|-----------|--------|--------------|
| 4ZFG   | H_LYS_209 | NZ     | L_GLU_123 | OE1    | 2.808        |

Table 1425: Interfacial 4ZFG-specific salt bridging networks analysis. In this table, a PDB file is specified with a four-letter PDB ID, except that the names of the PDB files corresponding to the single NMR structural model split from the NMR ensemble is specified with a four-letter PDB ID in addition to a hyphen followed by the single NMR structural model numeric ID, the residue naming scheme is **Chain ID\_residue name\_residue number**,  $\angle ADH$  represents the angle formed by acceptor (A), donor (D) and hydrogen (H) ( $\angle ADH$ ).

| PDB ID | Residue A | Atom A | Residue B | Atom B | Distance (Å) |
|--------|-----------|--------|-----------|--------|--------------|
| 4ZFO   | F_HIS_19  | NE2    | A_GLU_50  | OE1    | 2.994        |
| 4ZFO   | F_HIS_19  | NE2    | A_GLU_50  | OE2    | 3.320        |
| 4ZFO   | H_ARG_39  | NH1    | L_GLU_85  | OE2    | 3.425        |
| 4ZFO   | H_ARG_39  | NH2    | L_GLU_85  | OE1    | 3.703        |
| 4ZFO   | H_ARG_39  | NH2    | L_GLU_85  | OE2    | 2.644        |
| 4ZFO   | H_LYS_216 | NZ     | L_GLU_123 | OE2    | 3.666        |
| 4ZFO   | A_ARG_39  | NH1    | B_GLU_85  | OE1    | 3.845        |
| 4ZFO   | A_ARG_39  | NH2    | B_GLU_85  | OE1    | 2.855        |
| 4ZFO   | A_ARG_39  | NH2    | B_GLU_85  | OE2    | 3.746        |
| 4ZFO   | K_HIS_19  | NE2    | H_GLU_50  | OE1    | 2.755        |
| 4ZFO   | K_HIS_19  | NE2    | H_GLU_50  | OE2    | 3.392        |

Table 1426: Interfacial 4ZFO-specific salt bridging networks analysis. In this table, a PDB file is specified with a four-letter PDB ID, except that the names of the PDB files corresponding to the single NMR structural model split from the NMR ensemble is specified with a four-letter PDB ID in addition to a hyphen followed by the single NMR structural model numeric ID, the residue naming scheme is **Chain ID\_residue name\_residue number**,  $\angle ADH$  represents the angle formed by acceptor (A), donor (D) and hydrogen (H) ( $\angle ADH$ ).

| PDB ID | Residue A | Atom A | Residue B  | Atom B | Distance (Å) |
|--------|-----------|--------|------------|--------|--------------|
| 5A7X   | A_ARG_419 | NH1    | D_GLU_100B | OE1    | 3.000        |
| 5A7X   | A_ARG_419 | NH1    | D_GLU_100B | OE2    | 3.675        |
| 5A7X   | A_ARG_419 | NH2    | D_GLU_99   | OE1    | 2.292        |
| 5A7X   | A_ARG_419 | NH2    | D_GLU_100B | OE2    | 3.969        |
| 5A7X   | B_LYS_35  | NZ     | A_ASP_457  | OD1    | 3.741        |
| 5A7X   | B_ARG_59  | NH1    | A_ASP_368  | OD1    | 3.154        |
| 5A7X   | B_ARG_59  | NH1    | A_ASP_368  | OD2    | 3.344        |
| 5A7X   | B_ARG_59  | NH2    | A_ASP_368  | OD1    | 2.976        |
| 5A7X   | B_ARG_59  | NH2    | A_ASP_368  | OD2    | 2.433        |
| 5A7X   | D_HIS_164 | NE2    | C_ASP_167  | OD1    | 3.880        |
| 5A7X   | D_HIS_164 | NE2    | C_ASP_167  | OD2    | 2.506        |
| 5A7X   | D_LYS_209 | NZ     | C_GLU_123  | OE1    | 3.513        |
| 5A7X   | D_LYS_209 | NZ     | C_GLU_123  | OE2    | 3.583        |
| 5A7X   | E_ARG_419 | NH1    | H_GLU_100B | OE1    | 2.998        |
| 5A7X   | E_ARG_419 | NH1    | H_GLU_100B | OE2    | 3.674        |
| 5A7X   | E_ARG_419 | NH2    | H_GLU_99   | OE1    | 2.293        |
| 5A7X   | E_ARG_419 | NH2    | H_GLU_100B | OE2    | 3.968        |
| 5A7X   | F_LYS_35  | NZ     | E_ASP_457  | OD1    | 3.741        |
| 5A7X   | F_ARG_59  | NH1    | E_ASP_368  | OD1    | 3.154        |
| 5A7X   | F_ARG_59  | NH1    | E_ASP_368  | OD2    | 3.343        |
| 5A7X   | F_ARG_59  | NH2    | E_ASP_368  | OD1    | 2.977        |
| 5A7X   | F_ARG_59  | NH2    | E_ASP_368  | OD2    | 2.434        |
| 5A7X   | H_HIS_164 | NE2    | G_ASP_167  | OD1    | 3.880        |
| 5A7X   | H_HIS_164 | NE2    | G_ASP_167  | OD2    | 2.505        |
| 5A7X   | H_LYS_209 | NZ     | G_GLU_123  | OE1    | 3.512        |
| 5A7X   | H_LYS_209 | NZ     | G_GLU_123  | OE2    | 3.584        |
| 5A7X   | I_ARG_419 | NH1    | L_GLU_100B | OE1    | 2.999        |
| 5A7X   | I_ARG_419 | NH1    | L_GLU_100B | OE2    | 3.675        |
| 5A7X   | I_ARG_419 | NH2    | L_GLU_99   | OE1    | 2.293        |
| 5A7X   | I_ARG_419 | NH2    | L_GLU_100B | OE2    | 3.968        |
| 5A7X   | J_LYS_35  | NZ     | I_ASP_457  | OD1    | 3.740        |
| 5A7X   | J_ARG_59  | NH1    | I_ASP_368  | OD1    | 3.154        |
| 5A7X   | J_ARG_59  | NH1    | I_ASP_368  | OD2    | 3.344        |
| 5A7X   | J_ARG_59  | NH2    | I_ASP_368  | OD1    | 2.976        |
| 5A7X   | J_ARG_59  | NH2    | I_ASP_368  | OD2    | 2.433        |
| 5A7X   | L_HIS_164 | NE2    | K_ASP_167  | OD1    | 3.880        |
| 5A7X   | L_HIS_164 | NE2    | K_ASP_167  | OD2    | 2.504        |
| 5A7X   | L_LYS_209 | NZ     | K_GLU_123  | OE1    | 3.514        |
| 5A7X   | L_LYS_209 | NZ     | K_GLU_123  | OE2    | 3.585        |

Table 1427: Interfacial 5A7X-specific salt bridging networks analysis. In this table, a PDB file is specified with a four-letter PDB ID, except that the names of the PDB files corresponding to the single NMR structural model split from the NMR ensemble is specified with a four-letter PDB ID in addition to a hyphen followed by the single NMR structural model numeric ID, the residue naming scheme is **Chain ID\_residue name\_residue number**,  $\angle ADH$  represents the angle formed by acceptor (A), donor (D) and hydrogen (H) ( $\angle ADH$ ).

| PDB ID | Residue A  | Atom A | Residue B  | Atom B | Distance (Å) |
|--------|------------|--------|------------|--------|--------------|
| 5A8H   | A_ARG_419  | NH1    | D_GLU_100B | OE1    | 2.999        |
| 5A8H   | A_ARG_419  | NH1    | D_GLU_100B | OE2    | 3.674        |
| 5A8H   | A_ARG_419  | NH2    | D_GLU_99   | OE1    | 2.292        |
| 5A8H   | A_ARG_419  | NH2    | D_GLU_100B | OE2    | 3.968        |
| 5A8H   | B_LYS_35   | NZ     | A_ASP_457  | OD1    | 3.740        |
| 5A8H   | B_ARG_59   | NH1    | A_ASP_368  | OD1    | 3.154        |
| 5A8H   | B_ARG_59   | NH1    | A_ASP_368  | OD2    | 3.342        |
| 5A8H   | B_ARG_59   | NH2    | A_ASP_368  | OD1    | 2.977        |
| 5A8H   | B_ARG_59   | NH2    | A_ASP_368  | OD2    | 2.433        |
| 5A8H   | D_HIS_164  | NE2    | C_ASP_167  | OD1    | 3.880        |
| 5A8H   | D_HIS_164  | NE2    | C_ASP_167  | OD2    | 2.505        |
| 5A8H   | D_LYS_209  | NZ     | C_GLU_123  | OE1    | 3.514        |
| 5A8H   | D_LYS_209  | NZ     | C_GLU_123  | OE2    | 3.584        |
| 5A8H   | F_LYS_100  | NZ     | A_GLU_91   | OE1    | 3.015        |
| 5A8H   | F_LYS_100  | NZ     | A_GLU_91   | OE2    | 3.536        |
| 5A8H   | G_ARG_419  | NH1    | J_GLU_100B | OE1    | 2.998        |
| 5A8H   | G_ARG_419  | NH1    | J_GLU_100B | OE2    | 3.675        |
| 5A8H   | G_ARG_419  | NH2    | J_GLU_99   | OE1    | 2.292        |
| 5A8H   | G_ARG_419  | NH2    | J_GLU_100B | OE2    | 3.969        |
| 5A8H   | H_LYS_35   | NZ     | G_ASP_457  | OD1    | 3.741        |
| 5A8H   | H_ARG_59   | NH1    | G_ASP_368  | OD1    | 3.154        |
| 5A8H   | H_ARG_59   | NH1    | G_ASP_368  | OD2    | 3.343        |
| 5A8H   | H_ARG_59   | NH2    | G_ASP_368  | OD1    | 2.977        |
| 5A8H   | H_ARG_59   | NH2    | G_ASP_368  | OD2    | 2.433        |
| 5A8H   | J_HIS_164  | NE2    | I_ASP_167  | OD1    | 3.881        |
| 5A8H   | J_HIS_164  | NE2    | I_ASP_167  | OD2    | 2.505        |
| 5A8H   | J_LYS_209  | NZ     | I_GLU_123  | OE1    | 3.513        |
| 5A8H   | J_LYS_209  | NZ     | I_GLU_123  | OE2    | 3.584        |
| 5A8H   | L_LYS_100  | NZ     | G_GLU_87   | OE1    | 2.922        |
| 5A8H   | L_LYS_100  | NZ     | G_GLU_87   | OE2    | 3.552        |
| 5A8H   | L_HIS_100E | NE2    | G_GLU_91   | OE2    | 3.049        |
| 5A8H   | M_ARG_419  | NH1    | P_GLU_100B | OE1    | 2.999        |
| 5A8H   | M_ARG_419  | NH1    | P_GLU_100B | OE2    | 3.675        |
| 5A8H   | M_ARG_419  | NH2    | P_GLU_99   | OE1    | 2.292        |
| 5A8H   | M_ARG_419  | NH2    | P_GLU_100B | OE2    | 3.969        |
| 5A8H   | N_LYS_35   | NZ     | M_ASP_457  | OD1    | 3.741        |
| 5A8H   | N_ARG_59   | NH1    | M_ASP_368  | OD1    | 3.154        |
| 5A8H   | N_ARG_59   | NH1    | M_ASP_368  | OD2    | 3.343        |
| 5A8H   | N_ARG_59   | NH2    | M_ASP_368  | OD1    | 2.977        |
| 5A8H   | N_ARG_59   | NH2    | M_ASP_368  | OD2    | 2.433        |
| 5A8H   | O_LYS_145  | NZ     | C_GLU_17   | OE1    | 3.474        |
| 5A8H   | O_LYS_145  | NZ     | C_GLU_17   | OE2    | 2.123        |
| 5A8H   | P_HIS_164  | NE2    | O_ASP_167  | OD1    | 3.881        |
| 5A8H   | P_HIS_164  | NE2    | O_ASP_167  | OD2    | 2.505        |
| 5A8H   | P_LYS_209  | NZ     | O_GLU_123  | OE1    | 3.514        |
| 5A8H   | P_LYS_209  | NZ     | O_GLU_123  | OE2    | 3.584        |
| 5A8H   | R_HIS_100E | ND1    | M_GLU_87   | OE2    | 2.709        |
| 5A8H   | R_HIS_100E | NE2    | M_GLU_87   | OE2    | 3.097        |



---

Table 1428: Interfacial 5A8H-specific salt bridging networks analysis. In this table, a PDB file is specified with a four-letter PDB ID, except that the names of the PDB files corresponding to the single NMR structural model split from the NMR ensemble is specified with a four-letter PDB ID in addition to a hyphen followed by the single NMR structural model numeric ID, the residue naming scheme is **Chain ID\_residue name\_residue number**,  $\angle ADH$  represents the angle formed by acceptor (A), donor (D) and hydrogen (H) ( $\angle ADH$ ).

| PDB ID | Residue A | Atom A | Residue B | Atom B | Distance (Å) |
|--------|-----------|--------|-----------|--------|--------------|
| 5AZE   | L_HIS_36  | NE2    | H_GLU_105 | OE2    | 2.756        |
| 5AZE   | H_LYS_137 | NZ     | L_ASP_143 | OD2    | 2.939        |
| 5AZE   | H_LYS_217 | NZ     | L_GLU_128 | OE2    | 2.701        |

Table 1429: Interfacial 5AZE-specific salt bridging networks analysis. In this table, a PDB file is specified with a four-letter PDB ID, except that the names of the PDB files corresponding to the single NMR structural model split from the NMR ensemble is specified with a four-letter PDB ID in addition to a hyphen followed by the single NMR structural model numeric ID, the residue naming scheme is **Chain ID\_residue name\_residue number**,  $\angle ADH$  represents the angle formed by acceptor (A), donor (D) and hydrogen (H) ( $\angle ADH$ ).

| PDB ID | Residue A | Atom A | Residue B | Atom B | Distance (Å) |
|--------|-----------|--------|-----------|--------|--------------|
| 5BW7   | A_LYS_370 | NZ     | B_GLU_357 | OE2    | 3.993        |
| 5BW7   | A_LYS_409 | NZ     | B_ASP_399 | OD1    | 3.864        |
| 5BW7   | A_LYS_409 | NZ     | B_ASP_399 | OD2    | 2.990        |
| 5BW7   | B_LYS_370 | NZ     | A_GLU_357 | OE2    | 3.748        |
| 5BW7   | B_LYS_409 | NZ     | A_ASP_399 | OD1    | 3.328        |
| 5BW7   | B_LYS_409 | NZ     | A_ASP_399 | OD2    | 2.988        |
| 5BW7   | C_LYS_120 | NZ     | A_ASP_265 | OD2    | 2.730        |
| 5BW7   | C_LYS_131 | NZ     | A_GLU_269 | OE1    | 3.414        |
| 5BW7   | C_LYS_131 | NZ     | A_GLU_269 | OE2    | 2.642        |

Table 1430: Interfacial 5BW7-specific salt bridging networks analysis. In this table, a PDB file is specified with a four-letter PDB ID, except that the names of the PDB files corresponding to the single NMR structural model split from the NMR ensemble is specified with a four-letter PDB ID in addition to a hyphen followed by the single NMR structural model numeric ID, the residue naming scheme is **Chain ID\_residue name\_residue number**,  $\angle ADH$  represents the angle formed by acceptor (A), donor (D) and hydrogen (H) ( $\angle ADH$ ).

| PDB ID | Residue A | Atom A | Residue B | Atom B | Distance (Å) |
|--------|-----------|--------|-----------|--------|--------------|
| 5CMA   | B_LYS_214 | NZ     | A_GLU_123 | OE1    | 2.706        |
| 5CMA   | B_LYS_214 | NZ     | A_GLU_123 | OE2    | 3.531        |

Table 1431: Interfacial 5CMA-specific salt bridging networks analysis. In this table, a PDB file is specified with a four-letter PDB ID, except that the names of the PDB files corresponding to the single NMR structural model split from the NMR ensemble is specified with a four-letter PDB ID in addition to a hyphen followed by the single NMR structural model numeric ID, the residue naming scheme is **Chain ID\_residue name\_residue number**,  $\angle ADH$  represents the angle formed by acceptor (A), donor (D) and hydrogen (H) ( $\angle ADH$ ).

| PDB ID | Residue A | Atom A | Residue B | Atom B | Distance (Å) |
|--------|-----------|--------|-----------|--------|--------------|
| 5CP3   | H_LYS_207 | NZ     | A_GLU_128 | OE2    | 2.762        |

Table 1432: Interfacial 5CP3-specific salt bridging networks analysis. In this table, a PDB file is specified with a four-letter PDB ID, except that the names of the PDB files corresponding to the single NMR structural model split from the NMR ensemble is specified with a four-letter PDB ID in addition to a hyphen followed by the single NMR structural model numeric ID, the residue naming scheme is **Chain ID\_residue name\_residue number**,  $\angle ADH$  represents the angle formed by acceptor (A), donor (D) and hydrogen (H) ( $\angle ADH$ ).

| PDB ID | Residue A | Atom A | Residue B | Atom B | Distance (Å) |
|--------|-----------|--------|-----------|--------|--------------|
| 5CP7   | B_LYS_207 | NZ     | C_GLU_128 | OE2    | 3.335        |
| 5CP7   | C_LYS_58  | NZ     | H_ASP_1   | OD1    | 3.663        |
| 5CP7   | C_LYS_58  | NZ     | H_ASP_1   | OD2    | 3.316        |
| 5CP7   | D_LYS_207 | NZ     | E_GLU_128 | OE2    | 2.825        |
| 5CP7   | F_HIS_163 | ND1    | G_ASP_172 | OD2    | 3.652        |
| 5CP7   | F_LYS_207 | NZ     | G_GLU_128 | OE2    | 3.951        |
| 5CP7   | H_LYS_207 | NZ     | A_GLU_128 | OE2    | 3.290        |

Table 1433: Interfacial 5CP7-specific salt bridging networks analysis. In this table, a PDB file is specified with a four-letter PDB ID, except that the names of the PDB files corresponding to the single NMR structural model split from the NMR ensemble is specified with a four-letter PDB ID in addition to a hyphen followed by the single NMR structural model numeric ID, the residue naming scheme is **Chain ID\_residue name\_residue number**,  $\angle ADH$  represents the angle formed by acceptor (A), donor (D) and hydrogen (H) ( $\angle ADH$ ).

| PDB ID | Residue A  | Atom A | Residue B  | Atom B | Distance (Å) |
|--------|------------|--------|------------|--------|--------------|
| 5DFV   | A_LYS_171  | NZ     | C_ASP_288  | OD1    | 3.582        |
| 5DFV   | A_LYS_171  | NZ     | C_ASP_288  | OD2    | 2.737        |
| 5DFV   | A_LYS_171  | NZ     | C_ASP_290  | OD2    | 2.874        |
| 5DFV   | B_LYS_171  | NZ     | E_ASP_288  | OD1    | 3.695        |
| 5DFV   | B_LYS_171  | NZ     | E_ASP_288  | OD2    | 3.653        |
| 5DFV   | B_LYS_171  | NZ     | E_ASP_290  | OD2    | 2.646        |
| 5DFV   | C_ARG_398  | NH2    | D_GLU_698  | OE1    | 3.277        |
| 5DFV   | E_ARG_398  | NH1    | F_GLU_698  | OE2    | 3.319        |
| 5DFV   | E_LYS_1094 | NZ     | F_GLU_2015 | OE1    | 3.713        |
| 5DFV   | E_ARG_1099 | NH1    | F_GLU_2105 | OE2    | 3.679        |

Table 1434: Interfacial 5DFV-specific salt bridging networks analysis. In this table, a PDB file is specified with a four-letter PDB ID, except that the names of the PDB files corresponding to the single NMR structural model split from the NMR ensemble is specified with a four-letter PDB ID in addition to a hyphen followed by the single NMR structural model numeric ID, the residue naming scheme is **Chain ID\_residue name\_residue number**,  $\angle ADH$  represents the angle formed by acceptor (A), donor (D) and hydrogen (H) ( $\angle ADH$ ).

| PDB ID | Residue A | Atom A | Residue B | Atom B | Distance (Å) |
|--------|-----------|--------|-----------|--------|--------------|
| 5DFW   | A_LYS_171 | NZ     | H_ASP_156 | OD2    | 2.691        |
| 5DFW   | A_LYS_171 | NZ     | H_ASP_253 | OD1    | 2.751        |
| 5DFW   | A_LYS_171 | NZ     | H_ASP_253 | OD2    | 3.799        |
| 5DFW   | H_ARG_251 | NH2    | A_ASP_138 | OD1    | 3.392        |
| 5DFW   | H_ARG_251 | NH2    | A_ASP_138 | OD2    | 2.698        |
| 5DFW   | H_LYS_292 | NZ     | A_ASP_138 | OD1    | 3.884        |
| 5DFW   | H_LYS_292 | NZ     | A_ASP_138 | OD2    | 2.950        |
| 5DFW   | H_LYS_292 | NZ     | A_ASP_139 | OD1    | 3.019        |

Table 1435: Interfacial 5DFW-specific salt bridging networks analysis. In this table, a PDB file is specified with a four-letter PDB ID, except that the names of the PDB files corresponding to the single NMR structural model split from the NMR ensemble is specified with a four-letter PDB ID in addition to a hyphen followed by the single NMR structural model numeric ID, the residue naming scheme is **Chain ID\_residue name\_residue number**,  $\angle ADH$  represents the angle formed by acceptor (A), donor (D) and hydrogen (H) ( $\angle ADH$ ).



| PDB ID | Residue A | Atom A | Residue B  | Atom B | Distance (Å) |
|--------|-----------|--------|------------|--------|--------------|
| 5DMI   | A_LYS_46  | NZ     | L_ASP_31   | OD1    | 2.761        |
| 5DMI   | A_LYS_46  | NZ     | L_ASP_31   | OD2    | 3.234        |
| 5DMI   | A_HIS_76  | ND1    | H_ASP_100A | OD2    | 3.977        |
| 5DMI   | H_LYS_221 | NZ     | L_GLU_123  | OE2    | 3.105        |

Table 1436: Interfacial 5DMI-specific salt bridging networks analysis. In this table, a PDB file is specified with a four-letter PDB ID, except that the names of the PDB files corresponding to the single NMR structural model split from the NMR ensemble is specified with a four-letter PDB ID in addition to a hyphen followed by the single NMR structural model numeric ID, the residue naming scheme is **Chain ID\_residue name\_residue number**,  $\angle ADH$  represents the angle formed by acceptor (A), donor (D) and hydrogen (H) ( $\angle ADH$ ).

| PDB ID | Residue A | Atom A | Residue B | Atom B | Distance (Å) |
|--------|-----------|--------|-----------|--------|--------------|
| 5DMJ   | B_ARG_83  | NH2    | G_ASP_72  | OD1    | 3.449        |
| 5DMJ   | G_LYS_75  | NZ     | B_GLU_85  | OE1    | 3.187        |

Table 1437: Interfacial 5DMJ-specific salt bridging networks analysis. In this table, a PDB file is specified with a four-letter PDB ID, except that the names of the PDB files corresponding to the single NMR structural model split from the NMR ensemble is specified with a four-letter PDB ID in addition to a hyphen followed by the single NMR structural model numeric ID, the residue naming scheme is **Chain ID\_residue name\_residue number**,  $\angle ADH$  represents the angle formed by acceptor (A), donor (D) and hydrogen (H) ( $\angle ADH$ ).

| PDB ID | Residue A | Atom A | Residue B | Atom B | Distance (Å) |
|--------|-----------|--------|-----------|--------|--------------|
| 5DWU   | H_ARG_52  | NH1    | A_ASP_107 | OD1    | 3.435        |
| 5DWU   | H_ARG_52  | NH1    | A_ASP_107 | OD2    | 2.568        |
| 5DWU   | H_ARG_52  | NH2    | A_ASP_107 | OD1    | 2.685        |
| 5DWU   | H_ARG_52  | NH2    | A_ASP_107 | OD2    | 3.250        |

Table 1438: Interfacial 5DWU-specific salt bridging networks analysis. In this table, a PDB file is specified with a four-letter PDB ID, except that the names of the PDB files corresponding to the single NMR structural model split from the NMR ensemble is specified with a four-letter PDB ID in addition to a hyphen followed by the single NMR structural model numeric ID, the residue naming scheme is **Chain ID\_residue name\_residue number**,  $\angle ADH$  represents the angle formed by acceptor (A), donor (D) and hydrogen (H) ( $\angle ADH$ ).

| PDB ID | Residue A | Atom A | Residue B | Atom B | Distance (Å) |
|--------|-----------|--------|-----------|--------|--------------|
| 5ERW   | A_ARG_103 | NH1    | B_ASP_49  | OD2    | 2.990        |
| 5ERW   | A_LYS_214 | NZ     | B_GLU_122 | OE1    | 2.490        |
| 5ERW   | C_LYS_446 | NZ     | B_ASP_50  | OD1    | 3.926        |
| 5ERW   | C_LYS_446 | NZ     | B_ASP_50  | OD2    | 2.398        |

Table 1439: Interfacial 5ERW-specific salt bridging networks analysis. In this table, a PDB file is specified with a four-letter PDB ID, except that the names of the PDB files corresponding to the single NMR structural model split from the NMR ensemble is specified with a four-letter PDB ID in addition to a hyphen followed by the single NMR structural model numeric ID, the residue naming scheme is **Chain ID\_residue name\_residue number**,  $\angle ADH$  represents the angle formed by acceptor (A), donor (D) and hydrogen (H) ( $\angle ADH$ ).

| PDB ID | Residue A | Atom A | Residue B | Atom B | Distance (Å) |
|--------|-----------|--------|-----------|--------|--------------|
| 5EZI   | L_ARG_120 | NH1    | H_GLU_64  | OE1    | 3.561        |
| 5EZI   | L_ARG_120 | NH1    | H_GLU_64  | OE2    | 2.826        |

Table 1440: Interfacial 5EZI-specific salt bridging networks analysis. In this table, a PDB file is specified with a four-letter PDB ID, except that the names of the PDB files corresponding to the single NMR structural model split from the NMR ensemble is specified with a four-letter PDB ID in addition to a hyphen followed by the single NMR structural model numeric ID, the residue naming scheme is **Chain ID\_residue name\_residue number**,  $\angle ADH$  represents the angle formed by acceptor (A), donor (D) and hydrogen (H) ( $\angle ADH$ ).

| PDB ID | Residue A | Atom A | Residue B | Atom B | Distance (Å) |
|--------|-----------|--------|-----------|--------|--------------|
| 5EZJ   | A_LYS_228 | NZ     | B_GLU_147 | OE1    | 3.274        |
| 5EZJ   | B_ARG_120 | NH1    | A_GLU_64  | OE1    | 3.637        |
| 5EZJ   | B_ARG_120 | NH1    | A_GLU_64  | OE2    | 2.843        |

Table 1441: Interfacial 5EZJ-specific salt bridging networks analysis. In this table, a PDB file is specified with a four-letter PDB ID, except that the names of the PDB files corresponding to the single NMR structural model split from the NMR ensemble is specified with a four-letter PDB ID in addition to a hyphen followed by the single NMR structural model numeric ID, the residue naming scheme is **Chain ID\_residue name\_residue number**,  $\angle ADH$  represents the angle formed by acceptor (A), donor (D) and hydrogen (H) ( $\angle ADH$ ).

| PDB ID | Residue A | Atom A | Residue B | Atom B | Distance (Å) |
|--------|-----------|--------|-----------|--------|--------------|
| 5EZL   | A_LYS_228 | NZ     | B_GLU_147 | OE1    | 3.314        |
| 5EZL   | B_ARG_120 | NH1    | A_GLU_64  | OE1    | 3.901        |
| 5EZL   | B_ARG_120 | NH1    | A_GLU_64  | OE2    | 2.804        |
| 5EZL   | H_LYS_228 | NZ     | L_GLU_147 | OE2    | 3.445        |
| 5EZL   | L_ARG_120 | NH1    | H_GLU_64  | OE1    | 3.668        |
| 5EZL   | L_ARG_120 | NH1    | H_GLU_64  | OE2    | 2.626        |

Table 1442: Interfacial 5EZL-specific salt bridging networks analysis. In this table, a PDB file is specified with a four-letter PDB ID, except that the names of the PDB files corresponding to the single NMR structural model split from the NMR ensemble is specified with a four-letter PDB ID in addition to a hyphen followed by the single NMR structural model numeric ID, the residue naming scheme is **Chain ID\_residue name\_residue number**,  $\angle ADH$  represents the angle formed by acceptor (A), donor (D) and hydrogen (H) ( $\angle ADH$ ).

| PDB ID | Residue A | Atom A | Residue B | Atom B | Distance (Å) |
|--------|-----------|--------|-----------|--------|--------------|
| 5EZN   | A_ARG_58  | NH1    | E_ASP_336 | OD2    | 3.940        |
| 5EZN   | A_ARG_58  | NH2    | E_ASP_336 | OD2    | 2.479        |
| 5EZN   | E_LYS_204 | NZ     | A_GLU_113 | OE1    | 2.243        |
| 5EZN   | E_LYS_204 | NZ     | A_GLU_113 | OE2    | 3.142        |
| 5EZN   | E_LYS_251 | NZ     | B_GLU_72  | OE2    | 3.130        |
| 5EZN   | B_ARG_135 | NH1    | G_GLU_206 | OE2    | 3.927        |
| 5EZN   | B_ARG_135 | NH2    | G_GLU_206 | OE2    | 3.596        |
| 5EZN   | G_LYS_204 | NZ     | B_GLU_112 | OE1    | 2.749        |
| 5EZN   | G_LYS_204 | NZ     | B_GLU_112 | OE2    | 3.972        |
| 5EZN   | G_LYS_204 | NZ     | B_GLU_113 | OE2    | 3.260        |

Table 1443: Interfacial 5EZN-specific salt bridging networks analysis. In this table, a PDB file is specified with a four-letter PDB ID, except that the names of the PDB files corresponding to the single NMR structural model split from the NMR ensemble is specified with a four-letter PDB ID in addition to a hyphen followed by the single NMR structural model numeric ID, the residue naming scheme is **Chain ID\_residue name\_residue number**,  $\angle ADH$  represents the angle formed by acceptor (A), donor (D) and hydrogen (H) ( $\angle ADH$ ).



| PDB ID | Residue A | Atom A | Residue B | Atom B | Distance (Å) |
|--------|-----------|--------|-----------|--------|--------------|
| 5EZO   | H_LYS_232 | NZ     | L_GLU_143 | OE1    | 3.314        |
| 5EZO   | H_LYS_232 | NZ     | L_GLU_143 | OE2    | 2.456        |
| 5EZO   | L_ARG_50  | NH1    | A_ASP_66  | OD1    | 3.943        |
| 5EZO   | L_ARG_50  | NH1    | A_ASP_66  | OD2    | 3.721        |
| 5EZO   | L_ARG_116 | NH1    | H_GLU_68  | OE1    | 3.718        |
| 5EZO   | L_ARG_116 | NH1    | H_GLU_68  | OE2    | 2.774        |

Table 1444: Interfacial 5EZO-specific salt bridging networks analysis. In this table, a PDB file is specified with a four-letter PDB ID, except that the names of the PDB files corresponding to the single NMR structural model split from the NMR ensemble is specified with a four-letter PDB ID in addition to a hyphen followed by the single NMR structural model numeric ID, the residue naming scheme is **Chain ID\_residue name\_residue number**,  $\angle ADH$  represents the angle formed by acceptor (A), donor (D) and hydrogen (H) ( $\angle ADH$ ).

| PDB ID | Residue A | Atom A | Residue B | Atom B | Distance (Å) |
|--------|-----------|--------|-----------|--------|--------------|
| 5GGV   | H_ARG_101 | NH1    | Y_GLU_97  | OE2    | 3.572        |
| 5GGV   | H_LYS_221 | NZ     | L_GLU_123 | OE1    | 2.304        |
| 5GGV   | H_LYS_221 | NZ     | L_GLU_123 | OE2    | 3.975        |

Table 1445: Interfacial 5GGV-specific salt bridging networks analysis. In this table, a PDB file is specified with a four-letter PDB ID, except that the names of the PDB files corresponding to the single NMR structural model split from the NMR ensemble is specified with a four-letter PDB ID in addition to a hyphen followed by the single NMR structural model numeric ID, the residue naming scheme is **Chain ID\_residue name\_residue number**,  $\angle ADH$  represents the angle formed by acceptor (A), donor (D) and hydrogen (H) ( $\angle ADH$ ).

| PDB ID | Residue A | Atom A | Residue B | Atom B | Distance (Å) |
|--------|-----------|--------|-----------|--------|--------------|
| 5GKR   | A_LYS_143 | NZ     | B_GLU_125 | OE2    | 2.806        |
| 5GKR   | A_LYS_209 | NZ     | B_GLU_124 | OE1    | 2.825        |
| 5GKR   | A_LYS_209 | NZ     | B_GLU_124 | OE2    | 3.325        |
| 5GKR   | B_LYS_130 | NZ     | A_ASP_144 | OD2    | 3.639        |
| 5GKR   | C_LYS_143 | NZ     | D_GLU_125 | OE2    | 2.591        |
| 5GKR   | C_LYS_209 | NZ     | D_GLU_124 | OE1    | 2.486        |
| 5GKR   | C_LYS_209 | NZ     | D_GLU_124 | OE2    | 2.893        |
| 5GKR   | D_LYS_130 | NZ     | C_ASP_144 | OD2    | 3.574        |

Table 1446: Interfacial 5GKR-specific salt bridging networks analysis. In this table, a PDB file is specified with a four-letter PDB ID, except that the names of the PDB files corresponding to the single NMR structural model split from the NMR ensemble is specified with a four-letter PDB ID in addition to a hyphen followed by the single NMR structural model numeric ID, the residue naming scheme is **Chain ID\_residue name\_residue number**,  $\angle ADH$  represents the angle formed by acceptor (A), donor (D) and hydrogen (H) ( $\angle ADH$ ).

| PDB ID | Residue A | Atom A | Residue B | Atom B | Distance (Å) |
|--------|-----------|--------|-----------|--------|--------------|
| 5GKS   | A_LYS_    | NZ     | B_GLU_124 | OE1    | 3.518        |
| 5GKS   | A_LYS_    | NZ     | B_GLU_124 | OE2    | 2.790        |
| 5GKS   | B_LYS_130 | NZ     | A_ASP_144 | OD2    | 3.783        |
| 5GKS   | C_LYS_    | NZ     | D_GLU_    | OE1    | 3.455        |
| 5GKS   | C_LYS_    | NZ     | D_GLU_    | OE2    | 2.665        |

Table 1447: Interfacial 5GKS-specific salt bridging networks analysis. In this table, a PDB file is specified with a four-letter PDB ID, except that the names of the PDB files corresponding to the single NMR structural model split from the NMR ensemble is specified with a four-letter PDB ID in addition to a hyphen followed by the single NMR structural model numeric ID, the residue naming scheme is **Chain ID\_residue name\_residue number**,  $\angle ADH$  represents the angle formed by acceptor (A), donor (D) and hydrogen (H) ( $\angle ADH$ ).

| PDB ID | Residue A | Atom A | Residue B | Atom B | Distance (Å) |
|--------|-----------|--------|-----------|--------|--------------|
| 5HDQ   | A_HIS_234 | ND1    | H_ASP_97  | OD2    | 3.865        |
| 5HDQ   | H_LYS_95  | NZ     | A_ASP_256 | OD2    | 3.739        |
| 5HDQ   | H_LYS_208 | NZ     | L_GLU_123 | OE1    | 2.947        |

Table 1448: Interfacial 5HDQ-specific salt bridging networks analysis. In this table, a PDB file is specified with a four-letter PDB ID, except that the names of the PDB files corresponding to the single NMR structural model split from the NMR ensemble is specified with a four-letter PDB ID in addition to a hyphen followed by the single NMR structural model numeric ID, the residue naming scheme is **Chain ID\_residue name\_residue number**,  $\angle ADH$  represents the angle formed by acceptor (A), donor (D) and hydrogen (H) ( $\angle ADH$ ).

| PDB ID | Residue A | Atom A | Residue B | Atom B | Distance (Å) |
|--------|-----------|--------|-----------|--------|--------------|
| 5HMG   | A_LYS_27  | NZ     | B_GLU_97  | OE1    | 2.931        |
| 5HMG   | A_LYS_27  | NZ     | B_GLU_97  | OE2    | 3.005        |
| 5HMG   | A_ARG_109 | NH1    | B_GLU_67  | OE1    | 2.841        |
| 5HMG   | A_ARG_109 | NH1    | B_GLU_67  | OE2    | 3.185        |
| 5HMG   | A_ARG_269 | NH1    | B_GLU_67  | OE1    | 3.577        |
| 5HMG   | A_ARG_269 | NH2    | B_GLU_67  | OE1    | 3.220        |
| 5HMG   | A_LYS_299 | NZ     | B_GLU_69  | OE1    | 3.343        |
| 5HMG   | A_LYS_310 | NZ     | B_ASP_86  | OD1    | 3.434        |
| 5HMG   | A_LYS_310 | NZ     | B_ASP_90  | OD1    | 2.661        |
| 5HMG   | B_ARG_54  | NH1    | F_GLU_97  | OE1    | 2.843        |
| 5HMG   | B_ARG_54  | NH2    | F_GLU_97  | OE1    | 2.937        |
| 5HMG   | B_LYS_58  | NZ     | F_GLU_97  | OE1    | 3.606        |
| 5HMG   | B_LYS_58  | NZ     | F_GLU_97  | OE2    | 3.524        |
| 5HMG   | B_LYS_62  | NZ     | F_ASP_86  | OD1    | 3.085        |
| 5HMG   | B_LYS_62  | NZ     | F_ASP_86  | OD2    | 2.792        |
| 5HMG   | B_LYS_62  | NZ     | F_ASP_90  | OD1    | 3.679        |
| 5HMG   | B_LYS_62  | NZ     | F_ASP_90  | OD2    | 2.748        |
| 5HMG   | B_HIS_64  | NE2    | F_ASP_79  | OD2    | 3.617        |
| 5HMG   | B_ARG_76  | NH1    | D_GLU_74  | OE1    | 3.275        |
| 5HMG   | B_ARG_76  | NH1    | D_GLU_74  | OE2    | 2.882        |
| 5HMG   | B_ARG_76  | NH1    | D_GLU_81  | OE1    | 2.781        |
| 5HMG   | B_ARG_76  | NH1    | D_GLU_81  | OE2    | 3.484        |
| 5HMG   | B_ARG_76  | NH2    | D_GLU_74  | OE1    | 2.814        |
| 5HMG   | B_ARG_76  | NH2    | D_GLU_74  | OE2    | 3.691        |
| 5HMG   | B_ARG_123 | NH1    | F_GLU_132 | OE2    | 3.002        |
| 5HMG   | B_ARG_124 | NH1    | F_GLU_132 | OE1    | 3.424        |
| 5HMG   | B_ARG_124 | NH1    | F_GLU_132 | OE2    | 3.265        |
| 5HMG   | B_ARG_127 | NH2    | F_GLU_131 | OE1    | 2.537        |
| 5HMG   | B_ARG_163 | NH1    | F_GLU_131 | OE1    | 2.770        |
| 5HMG   | B_ARG_163 | NH1    | F_GLU_131 | OE2    | 2.532        |
| 5HMG   | B_ARG_170 | NH1    | D_GLU_128 | OE1    | 3.169        |
| 5HMG   | B_ARG_170 | NH1    | D_GLU_128 | OE2    | 3.597        |
| 5HMG   | C_LYS_27  | NZ     | D_GLU_97  | OE1    | 2.934        |
| 5HMG   | C_LYS_27  | NZ     | D_GLU_97  | OE2    | 2.988        |
| 5HMG   | C_ARG_109 | NH1    | D_GLU_67  | OE1    | 2.853        |
| 5HMG   | C_ARG_109 | NH1    | D_GLU_67  | OE2    | 3.184        |
| 5HMG   | C_ARG_269 | NH1    | D_GLU_67  | OE1    | 3.552        |
| 5HMG   | C_ARG_269 | NH2    | D_GLU_67  | OE1    | 3.173        |
| 5HMG   | C_LYS_299 | NZ     | D_GLU_69  | OE1    | 3.348        |
| 5HMG   | C_LYS_310 | NZ     | D_ASP_86  | OD1    | 3.449        |
| 5HMG   | C_LYS_310 | NZ     | D_ASP_90  | OD1    | 2.638        |
| 5HMG   | D_ARG_54  | NH1    | B_GLU_97  | OE1    | 2.819        |
| 5HMG   | D_ARG_54  | NH2    | B_GLU_97  | OE1    | 2.943        |
| 5HMG   | D_LYS_58  | NZ     | B_GLU_97  | OE1    | 3.646        |
| 5HMG   | D_LYS_58  | NZ     | B_GLU_97  | OE2    | 3.528        |
| 5HMG   | D_LYS_62  | NZ     | B_ASP_86  | OD1    | 3.110        |
| 5HMG   | D_LYS_62  | NZ     | B_ASP_86  | OD2    | 2.718        |
| 5HMG   | D_LYS_62  | NZ     | B_ASP_90  | OD1    | 3.686        |
| 5HMG   | D_LYS_62  | NZ     | B_ASP_90  | OD2    | 2.685        |
| 5HMG   | D_HIS_64  | NE2    | B_ASP_79  | OD2    | 3.446        |
| 5HMG   | D_ARG_76  | NH1    | F_GLU_74  | OE1    | 3.349        |
| 5HMG   | D_ARG_76  | NH1    | F_GLU_74  | OE2    | 2.805        |
| 5HMG   | D_ARG_76  | NH1    | F_GLU_81  | OE1    | 2.685        |
| 5HMG   | D_ARG_76  | NH1    | F_GLU_81  | OE2    | 3.513        |
| 5HMG   | D_ARG_76  | NH2    | F_GLU_74  | OE1    | 2.710        |
| 5HMG   | D_ARG_76  | NH2    | F_GLU_74  | OE2    | 3.478        |
| 5HMG   | D_ARG_123 | NH1    | B_GLU_132 | OE2    | 2.981        |

|      |           |     |           |     |       |
|------|-----------|-----|-----------|-----|-------|
| 5HMG | D_ARG_124 | NH1 | B_GLU_132 | OE1 | 3.466 |
| 5HMG | D_ARG_124 | NH1 | B_GLU_132 | OE2 | 3.303 |
| 5HMG | D_ARG_127 | NH2 | B_GLU_131 | OE1 | 2.578 |
| 5HMG | D_ARG_163 | NH1 | B_GLU_131 | OE1 | 2.694 |
| 5HMG | D_ARG_163 | NH1 | B_GLU_131 | OE2 | 2.571 |
| 5HMG | D_ARG_170 | NH1 | F_GLU_128 | OE1 | 3.252 |
| 5HMG | D_ARG_170 | NH1 | F_GLU_128 | OE2 | 3.705 |
| 5HMG | E_LYS_27  | NZ  | F_GLU_97  | OE1 | 2.935 |
| 5HMG | E_LYS_27  | NZ  | F_GLU_97  | OE2 | 3.012 |
| 5HMG | E_ARG_109 | NH1 | F_GLU_67  | OE1 | 2.825 |
| 5HMG | E_ARG_109 | NH1 | F_GLU_67  | OE2 | 3.180 |
| 5HMG | E_ARG_269 | NH1 | F_GLU_67  | OE1 | 3.584 |
| 5HMG | E_ARG_269 | NH2 | F_GLU_67  | OE1 | 3.233 |
| 5HMG | E_LYS_299 | NZ  | F_GLU_69  | OE1 | 3.318 |
| 5HMG | E_LYS_310 | NZ  | F_ASP_86  | OD1 | 3.440 |
| 5HMG | E_LYS_310 | NZ  | F_ASP_90  | OD1 | 2.621 |
| 5HMG | F_ARG_54  | NH1 | D_GLU_97  | OE1 | 2.726 |
| 5HMG | F_ARG_54  | NH2 | D_GLU_97  | OE1 | 2.912 |
| 5HMG | F_LYS_58  | NZ  | D_GLU_97  | OE1 | 3.765 |
| 5HMG | F_LYS_58  | NZ  | D_GLU_97  | OE2 | 3.593 |
| 5HMG | F_LYS_62  | NZ  | D_ASP_86  | OD1 | 3.013 |
| 5HMG | F_LYS_62  | NZ  | D_ASP_86  | OD2 | 2.694 |
| 5HMG | F_LYS_62  | NZ  | D_ASP_90  | OD1 | 3.718 |
| 5HMG | F_LYS_62  | NZ  | D_ASP_90  | OD2 | 2.750 |
| 5HMG | F_HIS_64  | NE2 | D_ASP_79  | OD1 | 3.885 |
| 5HMG | F_HIS_64  | NE2 | D_ASP_79  | OD2 | 3.364 |
| 5HMG | F_ARG_76  | NH1 | B_GLU_74  | OE1 | 3.251 |
| 5HMG | F_ARG_76  | NH1 | B_GLU_74  | OE2 | 2.826 |
| 5HMG | F_ARG_76  | NH1 | B_GLU_81  | OE1 | 2.735 |
| 5HMG | F_ARG_76  | NH1 | B_GLU_81  | OE2 | 3.601 |
| 5HMG | F_ARG_76  | NH2 | B_GLU_74  | OE1 | 2.649 |
| 5HMG | F_ARG_76  | NH2 | B_GLU_74  | OE2 | 3.569 |
| 5HMG | F_ARG_123 | NH1 | D_GLU_132 | OE2 | 2.992 |
| 5HMG | F_ARG_124 | NH1 | D_GLU_132 | OE1 | 3.514 |
| 5HMG | F_ARG_124 | NH1 | D_GLU_132 | OE2 | 3.395 |
| 5HMG | F_ARG_127 | NH2 | D_GLU_131 | OE1 | 2.609 |
| 5HMG | F_ARG_163 | NH1 | D_GLU_131 | OE1 | 2.712 |
| 5HMG | F_ARG_163 | NH1 | D_GLU_131 | OE2 | 2.596 |
| 5HMG | F_ARG_170 | NH1 | B_GLU_128 | OE1 | 3.210 |
| 5HMG | F_ARG_170 | NH1 | B_GLU_128 | OE2 | 3.530 |

Table 1449: Interfacial 5HMG-specific salt bridging networks analysis. In this table, a PDB file is specified with a four-letter PDB ID, except that the names of the PDB files corresponding to the single NMR structural model split from the NMR ensemble is specified with a four-letter PDB ID in addition to a hyphen followed by the single NMR structural model numeric ID, the residue naming scheme is **Chain ID\_residue name\_residue number**,  $\angle ADH$  represents the angle formed by acceptor (A), donor (D) and hydrogen (H) ( $\angle ADH$ ).

| PDB ID | Residue A | Atom A | Residue B | Atom B | Distance (Å) |
|--------|-----------|--------|-----------|--------|--------------|
| 5I76   | A_LYS_49  | NZ     | B_GLU_105 | OE1    | 3.995        |
| 5I76   | B_LYS_215 | NZ     | A_GLU_123 | OE1    | 2.731        |
| 5I76   | B_LYS_215 | NZ     | A_GLU_123 | OE2    | 2.888        |
| 5I76   | B_LYS_220 | NZ     | A_ASP_122 | OD2    | 3.474        |
| 5I76   | C_ARG_24  | NH1    | A_ASP_70  | OD1    | 3.725        |
| 5I76   | C_ARG_24  | NH1    | A_ASP_70  | OD2    | 2.949        |
| 5I76   | C_ARG_24  | NH2    | A_ASP_70  | OD1    | 3.138        |
| 5I76   | C_ARG_24  | NH2    | A_ASP_70  | OD2    | 3.394        |
| 5I76   | D_LYS_215 | NZ     | C_GLU_123 | OE1    | 2.596        |
| 5I76   | D_LYS_215 | NZ     | C_GLU_123 | OE2    | 3.738        |

Table 1450: Interfacial 5I76-specific salt bridging networks analysis. In this table, a PDB file is specified with a four-letter PDB ID, except that the names of the PDB files corresponding to the single NMR structural model split from the NMR ensemble is specified with a four-letter PDB ID in addition to a hyphen followed by the single NMR structural model numeric ID, the residue naming scheme is **Chain ID\_residue name\_residue number**,  $\angle ADH$  represents the angle formed by acceptor (A), donor (D) and hydrogen (H) ( $\angle ADH$ ).



| PDB ID | Residue A | Atom A | Residue B | Atom B | Distance (Å) |
|--------|-----------|--------|-----------|--------|--------------|
| 5ITB   | H_ARG_111 | NH1    | L_GLU_68  | OE1    | 3.426        |
| 5ITB   | H_ARG_111 | NH2    | L_GLU_68  | OE1    | 2.856        |
| 5ITB   | H_LYS_224 | NZ     | L_GLU_143 | OE1    | 3.323        |
| 5ITB   | H_LYS_224 | NZ     | L_GLU_143 | OE2    | 2.099        |

Table 1451: Interfacial 5ITB-specific salt bridging networks analysis. In this table, a PDB file is specified with a four-letter PDB ID, except that the names of the PDB files corresponding to the single NMR structural model split from the NMR ensemble is specified with a four-letter PDB ID in addition to a hyphen followed by the single NMR structural model numeric ID, the residue naming scheme is **Chain ID\_residue name\_residue number**,  $\angle ADH$  represents the angle formed by acceptor (A), donor (D) and hydrogen (H) ( $\angle ADH$ ).

| PDB ID | Residue A | Atom A | Residue B | Atom B | Distance (Å) |
|--------|-----------|--------|-----------|--------|--------------|
| 5J3D   | A_ARG_111 | NH2    | B_GLU_68  | OE1    | 3.664        |
| 5J3D   | A_LYS_224 | NZ     | B_GLU_143 | OE1    | 3.390        |
| 5J3D   | A_LYS_229 | NZ     | B_ASP_142 | OD1    | 3.902        |
| 5J3D   | A_LYS_229 | NZ     | B_ASP_142 | OD2    | 3.196        |
| 5J3D   | C_ARG_111 | NH2    | D_GLU_68  | OE1    | 3.489        |
| 5J3D   | C_LYS_    | NZ     | D_GLU_    | OE1    | 3.377        |
| 5J3D   | C_LYS_    | NZ     | D_ASP_    | OD1    | 2.847        |
| 5J3D   | C_LYS_    | NZ     | D_ASP_    | OD2    | 2.791        |
| 5J3D   | E_ARG_49  | NH2    | F_ASP_368 | OD1    | 2.801        |
| 5J3D   | E_ARG_49  | NH2    | F_ASP_368 | OD2    | 3.628        |
| 5J3D   | F_LYS_    | NZ     | I_GLU_    | OE2    | 3.850        |
| 5J3D   | F_LYS_196 | NZ     | I_ASP_489 | OD1    | 2.634        |
| 5J3D   | F_LYS_196 | NZ     | I_ASP_489 | OD2    | 3.067        |
| 5J3D   | F_ARG_235 | NH1    | I_GLU_232 | OE1    | 3.071        |
| 5J3D   | F_ARG_235 | NH1    | I_GLU_232 | OE2    | 2.514        |
| 5J3D   | F_LYS_272 | NZ     | B_ASP_56  | OD2    | 3.606        |
| 5J3D   | F_LYS_399 | NZ     | K_ASP_392 | OD1    | 3.567        |
| 5J3D   | F_LYS_470 | NZ     | J_GLU_60  | OE1    | 3.190        |
| 5J3D   | F_LYS_470 | NZ     | J_GLU_60  | OE2    | 3.891        |
| 5J3D   | G_ARG_49  | NH2    | I_ASP_368 | OD1    | 3.151        |
| 5J3D   | H_ARG_111 | NH2    | L_GLU_68  | OE1    | 3.466        |
| 5J3D   | H_LYS_224 | NZ     | L_GLU_143 | OE1    | 3.364        |
| 5J3D   | H_LYS_    | NZ     | L_ASP_    | OD1    | 3.352        |
| 5J3D   | H_LYS_    | NZ     | L_ASP_    | OD2    | 3.692        |
| 5J3D   | I_LYS_    | NZ     | K_GLU_    | OE1    | 3.226        |
| 5J3D   | I_LYS_    | NZ     | K_GLU_    | OE2    | 3.914        |
| 5J3D   | I_LYS_196 | NZ     | K_ASP_489 | OD1    | 2.833        |
| 5J3D   | I_LYS_196 | NZ     | K_ASP_489 | OD2    | 3.027        |
| 5J3D   | I_ARG_235 | NH1    | K_GLU_232 | OE1    | 3.110        |
| 5J3D   | I_ARG_235 | NH1    | K_GLU_232 | OE2    | 2.664        |
| 5J3D   | I_LYS_272 | NZ     | D_ASP_56  | OD2    | 3.795        |
| 5J3D   | I_LYS_399 | NZ     | F_ASP_392 | OD1    | 3.746        |
| 5J3D   | I_LYS_470 | NZ     | E_GLU_60  | OE1    | 3.634        |
| 5J3D   | I_LYS_470 | NZ     | E_GLU_60  | OE2    | 3.872        |
| 5J3D   | J_ARG_49  | NH2    | K_ASP_368 | OD1    | 3.049        |
| 5J3D   | J_ARG_49  | NH2    | K_ASP_368 | OD2    | 3.898        |
| 5J3D   | J_LYS_87  | NZ     | K_GLU_294 | OE1    | 3.791        |
| 5J3D   | K_LYS_    | NZ     | F_GLU_    | OE1    | 2.905        |
| 5J3D   | K_LYS_196 | NZ     | F_ASP_489 | OD1    | 2.822        |
| 5J3D   | K_LYS_196 | NZ     | F_ASP_489 | OD2    | 3.022        |
| 5J3D   | K_ARG_235 | NH1    | F_GLU_232 | OE1    | 2.445        |
| 5J3D   | K_ARG_235 | NH1    | F_GLU_232 | OE2    | 2.683        |
| 5J3D   | K_ARG_235 | NH2    | F_GLU_232 | OE2    | 3.814        |
| 5J3D   | K_LYS_399 | NZ     | I_ASP_392 | OD1    | 3.598        |
| 5J3D   | K_LYS_470 | NZ     | G_GLU_60  | OE1    | 3.953        |

Table 1452: Interfacial 5J3D-specific salt bridging networks analysis. In this table, a PDB file is specified with a four-letter PDB ID, except that the names of the PDB files corresponding to the single NMR structural model split from the NMR ensemble is specified with a four-letter PDB ID in addition to a hyphen followed by the single NMR structural model numeric ID, the residue naming scheme is **Chain ID\_residue name\_residue number**,  $\angle ADH$  represents the angle formed by acceptor (A), donor (D) and hydrogen (H) ( $\angle ADH$ ).

| PDB ID | Residue A | Atom A | Residue B  | Atom B | Distance (Å) |
|--------|-----------|--------|------------|--------|--------------|
| 5JO5   | H.LYS_143 | NZ     | L.GLU_124  | OE2    | 2.459        |
| 5JO5   | H.LYS_209 | NZ     | L.GLU_     | OE2    | 2.531        |
| 5JO5   | L.ARG_91  | NH1    | H.GLU_100J | OE2    | 3.301        |
| 5JO5   | L.ARG_91  | NH2    | H.GLU_100J | OE2    | 2.691        |
| 5JO5   | L.ARG_95B | NH2    | H.ASP_58   | OD1    | 3.439        |
| 5JO5   | A.LYS_143 | NZ     | B.GLU_124  | OE2    | 2.618        |
| 5JO5   | A.LYS_209 | NZ     | B.GLU_123  | OE2    | 2.545        |
| 5JO5   | B.ARG_91  | NH1    | A.GLU_100J | OE2    | 3.353        |
| 5JO5   | B.ARG_91  | NH2    | A.GLU_100J | OE2    | 3.038        |
| 5JO5   | C.LYS_143 | NZ     | D.GLU_124  | OE2    | 2.788        |
| 5JO5   | C.LYS_209 | NZ     | D.GLU_123  | OE2    | 2.583        |
| 5JO5   | D.ARG_91  | NH1    | C.GLU_100J | OE2    | 3.302        |
| 5JO5   | D.ARG_91  | NH2    | C.GLU_100J | OE2    | 3.077        |
| 5JO5   | D.ARG_95B | NH2    | C.ASP_58   | OD1    | 3.978        |
| 5JO5   | E.LYS_143 | NZ     | F.GLU_124  | OE2    | 2.545        |
| 5JO5   | E.LYS_209 | NZ     | F.GLU_123  | OE2    | 2.567        |
| 5JO5   | F.ARG_91  | NH1    | E.GLU_100J | OE2    | 3.369        |
| 5JO5   | F.ARG_91  | NH2    | E.GLU_100J | OE2    | 2.722        |
| 5JO5   | F.ARG_95B | NH2    | E.ASP_58   | OD1    | 3.518        |

Table 1453: Interfacial 5JO5-specific salt bridging networks analysis. In this table, a PDB file is specified with a four-letter PDB ID, except that the names of the PDB files corresponding to the single NMR structural model split from the NMR ensemble is specified with a four-letter PDB ID in addition to a hyphen followed by the single NMR structural model numeric ID, the residue naming scheme is **Chain ID residue name residue number**,  $\angle ADH$  represents the angle formed by acceptor (A), donor (D) and hydrogen (H) ( $\angle ADH$ ).

| PDB ID | Residue A | Atom A | Residue B | Atom B | Distance (Å) |
|--------|-----------|--------|-----------|--------|--------------|
| 5JOF   | H_LYS_212 | NZ     | L_GLU_123 | OE2    | 3.883        |
| 5JOF   | H_LYS_217 | NZ     | L_ASP_122 | OD2    | 3.165        |
| 5JOF   | A_LYS_209 | NZ     | B_GLU_123 | OE1    | 3.449        |
| 5JOF   | A_LYS_209 | NZ     | B_GLU_123 | OE2    | 3.809        |
| 5JOF   | B_ARG_24  | NH1    | C_ASP_99  | OD1    | 2.692        |
| 5JOF   | B_ARG_24  | NH1    | C_ASP_99  | OD2    | 3.960        |
| 5JOF   | C_ARG_94  | NH1    | B_GLU_1   | OE2    | 2.653        |
| 5JOF   | C_ARG_94  | NH2    | B_GLU_1   | OE2    | 3.195        |
| 5JOF   | C_LYS_214 | NZ     | D_ASP_122 | OD2    | 3.772        |
| 5JOF   | C_LYS_214 | NZ     | D_GLU_123 | OE1    | 2.987        |
| 5JOF   | C_LYS_214 | NZ     | D_GLU_123 | OE2    | 3.631        |
| 5JOF   | E_LYS_209 | NZ     | F_GLU_123 | OE1    | 2.331        |
| 5JOF   | E_LYS_209 | NZ     | F_GLU_123 | OE2    | 3.588        |
| 5JOF   | E_LYS_214 | NZ     | F_ASP_122 | OD2    | 3.802        |

Table 1454: Interfacial 5JOF-specific salt bridging networks analysis. In this table, a PDB file is specified with a four-letter PDB ID, except that the names of the PDB files corresponding to the single NMR structural model split from the NMR ensemble is specified with a four-letter PDB ID in addition to a hyphen followed by the single NMR structural model numeric ID, the residue naming scheme is **Chain ID\_residue name\_residue number**,  $\angle ADH$  represents the angle formed by acceptor (A), donor (D) and hydrogen (H) ( $\angle ADH$ ).

| PDB ID | Residue A | Atom A | Residue B  | Atom B | Distance (Å) |
|--------|-----------|--------|------------|--------|--------------|
| 5JR1   | H_HIS_164 | NE2    | L_ASP_139  | OD1    | 3.232        |
| 5JR1   | H_HIS_164 | NE2    | L_ASP_139  | OD2    | 3.168        |
| 5JR1   | L_HIS_31  | ND1    | H_ASP_100  | OD2    | 3.496        |
| 5JR1   | L_HIS_31  | ND1    | H_GLU_100I | OE2    | 3.149        |
| 5JR1   | L_ARG_95B | NH1    | H_ASP_58   | OD1    | 3.367        |
| 5JR1   | L_ARG_95B | NH1    | H_ASP_58   | OD2    | 3.787        |
| 5JR1   | L_ARG_95B | NH2    | H_ASP_58   | OD1    | 3.502        |
| 5JR1   | L_ARG_95B | NH2    | H_ASP_58   | OD2    | 2.474        |

Table 1455: Interfacial 5JR1-specific salt bridging networks analysis. In this table, a PDB file is specified with a four-letter PDB ID, except that the names of the PDB files corresponding to the single NMR structural model split from the NMR ensemble is specified with a four-letter PDB ID in addition to a hyphen followed by the single NMR structural model numeric ID, the residue naming scheme is **Chain ID\_residue name\_residue number**,  $\angle ADH$  represents the angle formed by acceptor (A), donor (D) and hydrogen (H) ( $\angle ADH$ ).

| PDB ID | Residue A | Atom A | Residue B | Atom B | Distance (Å) |
|--------|-----------|--------|-----------|--------|--------------|
| 5JUE   | H_LYS_208 | NZ     | L_GLU_123 | OE1    | 2.809        |
| 5JUE   | H_LYS_208 | NZ     | L_GLU_123 | OE2    | 2.812        |

Table 1456: Interfacial 5JUE-specific salt bridging networks analysis. In this table, a PDB file is specified with a four-letter PDB ID, except that the names of the PDB files corresponding to the single NMR structural model split from the NMR ensemble is specified with a four-letter PDB ID in addition to a hyphen followed by the single NMR structural model numeric ID, the residue naming scheme is **Chain ID\_residue name\_residue number**,  $\angle ADH$  represents the angle formed by acceptor (A), donor (D) and hydrogen (H) ( $\angle ADH$ ).

| PDB ID | Residue A | Atom A | Residue B | Atom B | Distance (Å) |
|--------|-----------|--------|-----------|--------|--------------|
| 5JXA   | H_LYS_209 | NZ     | L_GLU_123 | OE1    | 3.277        |
| 5JXA   | H_LYS_214 | NZ     | L_ASP_122 | OD1    | 2.755        |
| 5JXA   | H_LYS_214 | NZ     | L_ASP_122 | OD2    | 3.275        |

Table 1457: Interfacial 5JXA-specific salt bridging networks analysis. In this table, a PDB file is specified with a four-letter PDB ID, except that the names of the PDB files corresponding to the single NMR structural model split from the NMR ensemble is specified with a four-letter PDB ID in addition to a hyphen followed by the single NMR structural model numeric ID, the residue naming scheme is **Chain ID\_residue name\_residue number**,  $\angle ADH$  represents the angle formed by acceptor (A), donor (D) and hydrogen (H) ( $\angle ADH$ ).

| PDB ID | Residue A | Atom A | Residue B | Atom B | Distance (Å) |
|--------|-----------|--------|-----------|--------|--------------|
| 5KZP   | H_LYS_224 | NZ     | L_ASP_122 | OD2    | 3.852        |
| 5KZP   | E_ARG_65  | NH2    | K_GLU_1   | OE2    | 3.580        |
| 5KZP   | E_LYS_219 | NZ     | I_GLU_123 | OE1    | 2.944        |
| 5KZP   | E_LYS_219 | NZ     | I_GLU_123 | OE2    | 2.510        |
| 5KZP   | F_LYS_139 | NZ     | J_GLU_213 | OE2    | 2.615        |
| 5KZP   | G_LYS_219 | NZ     | K_GLU_123 | OE2    | 3.381        |

Table 1458: Interfacial 5KZP-specific salt bridging networks analysis. In this table, a PDB file is specified with a four-letter PDB ID, except that the names of the PDB files corresponding to the single NMR structural model split from the NMR ensemble is specified with a four-letter PDB ID in addition to a hyphen followed by the single NMR structural model numeric ID, the residue naming scheme is **Chain ID\_residue name\_residue number**,  $\angle ADH$  represents the angle formed by acceptor (A), donor (D) and hydrogen (H) ( $\angle ADH$ ).



| PDB ID | Residue A | Atom A | Residue B | Atom B | Distance (Å) |
|--------|-----------|--------|-----------|--------|--------------|
| 5LDN   | H_LYS_    | NZ     | L_GLU_    | OE1    | 3.019        |

Table 1459: Interfacial 5LDN-specific salt bridging networks analysis. In this table, a PDB file is specified with a four-letter PDB ID, except that the names of the PDB files corresponding to the single NMR structural model split from the NMR ensemble is specified with a four-letter PDB ID in addition to a hyphen followed by the single NMR structural model numeric ID, the residue naming scheme is **Chain ID\_residue name\_residue number**,  $\angle ADH$  represents the angle formed by acceptor (A), donor (D) and hydrogen (H) ( $\angle ADH$ ).

| PDB ID | Residue A | Atom A | Residue B | Atom B | Distance (Å) |
|--------|-----------|--------|-----------|--------|--------------|
| 5MO9   | H_LYS_212 | NZ     | L_GLU_128 | OE2    | 3.509        |
| 5MO9   | L_LYS_55  | NZ     | X_GLU_371 | OE2    | 2.811        |
| 5MO9   | X_LYS_364 | NZ     | H_GLU_33  | OE2    | 2.799        |
| 5MO9   | X_LYS_364 | NZ     | H_ASP_52  | OD1    | 3.966        |

Table 1460: Interfacial 5MO9-specific salt bridging networks analysis. In this table, a PDB file is specified with a four-letter PDB ID, except that the names of the PDB files corresponding to the single NMR structural model split from the NMR ensemble is specified with a four-letter PDB ID in addition to a hyphen followed by the single NMR structural model numeric ID, the residue naming scheme is **Chain ID\_residue name\_residue number**,  $\angle ADH$  represents the angle formed by acceptor (A), donor (D) and hydrogen (H) ( $\angle ADH$ ).

| PDB ID | Residue A | Atom A | Residue B | Atom B | Distance (Å) |
|--------|-----------|--------|-----------|--------|--------------|
| 5N4J   | L_ARG_38  | NH1    | H_ASP_100 | OD1    | 2.794        |
| 5N4J   | L_ARG_38  | NH1    | H_ASP_100 | OD2    | 3.589        |
| 5N4J   | H_LYS_210 | NZ     | L_GLU_131 | OE1    | 2.936        |
| 5N4J   | H_LYS_210 | NZ     | L_GLU_131 | OE2    | 3.282        |

Table 1461: Interfacial 5N4J-specific salt bridging networks analysis. In this table, a PDB file is specified with a four-letter PDB ID, except that the names of the PDB files corresponding to the single NMR structural model split from the NMR ensemble is specified with a four-letter PDB ID in addition to a hyphen followed by the single NMR structural model numeric ID, the residue naming scheme is **Chain ID\_residue name\_residue number**,  $\angle ADH$  represents the angle formed by acceptor (A), donor (D) and hydrogen (H) ( $\angle ADH$ ).

| PDB ID | Residue A | Atom A | Residue B | Atom B | Distance (Å) |
|--------|-----------|--------|-----------|--------|--------------|
| 5N7W   | A_LYS.149 | NZ     | B_GLU.126 | OE2    | 2.961        |
| 5N7W   | A_LYS.215 | NZ     | B_GLU.125 | OE1    | 2.755        |
| 5N7W   | A_LYS.215 | NZ     | B_GLU.125 | OE2    | 3.335        |
| 5N7W   | H_LYS.149 | NZ     | L_GLU.126 | OE2    | 2.605        |

Table 1462: Interfacial 5N7W-specific salt bridging networks analysis. In this table, a PDB file is specified with a four-letter PDB ID, except that the names of the PDB files corresponding to the single NMR structural model split from the NMR ensemble is specified with a four-letter PDB ID in addition to a hyphen followed by the single NMR structural model numeric ID, the residue naming scheme is **Chain ID\_residue name\_residue number**,  $\angle ADH$  represents the angle formed by acceptor (A), donor (D) and hydrogen (H) ( $\angle ADH$ ).

| PDB ID | Residue A | Atom A | Residue B | Atom B | Distance (Å) |
|--------|-----------|--------|-----------|--------|--------------|
| 5NPH   | H_LYS_215 | NZ     | L_GLU_123 | OE2    | 2.787        |
| 5NPH   | L_LYS_93  | NZ     | A_GLU_533 | OE1    | 3.679        |

Table 1463: Interfacial 5NPH-specific salt bridging networks analysis. In this table, a PDB file is specified with a four-letter PDB ID, except that the names of the PDB files corresponding to the single NMR structural model split from the NMR ensemble is specified with a four-letter PDB ID in addition to a hyphen followed by the single NMR structural model numeric ID, the residue naming scheme is **Chain ID\_residue name\_residue number**,  $\angle ADH$  represents the angle formed by acceptor (A), donor (D) and hydrogen (H) ( $\angle ADH$ ).

| PDB ID | Residue A | Atom A | Residue B | Atom B | Distance (Å) |
|--------|-----------|--------|-----------|--------|--------------|
| 5NPI   | A_HIS_181 | NE2    | B_GLU_10  | OE1    | 3.570        |
| 5NPI   | A_HIS_181 | NE2    | B_GLU_10  | OE2    | 3.750        |
| 5NPI   | B_HIS_181 | NE2    | A_GLU_10  | OE1    | 3.757        |
| 5NPI   | B_HIS_181 | NE2    | A_GLU_10  | OE2    | 3.882        |
| 5NPI   | B_LYS_233 | NZ     | E_GLU_533 | OE1    | 3.924        |

Table 1464: Interfacial 5NPI-specific salt bridging networks analysis. In this table, a PDB file is specified with a four-letter PDB ID, except that the names of the PDB files corresponding to the single NMR structural model split from the NMR ensemble is specified with a four-letter PDB ID in addition to a hyphen followed by the single NMR structural model numeric ID, the residue naming scheme is **Chain ID\_residue name\_residue number**,  $\angle ADH$  represents the angle formed by acceptor (A), donor (D) and hydrogen (H) ( $\angle ADH$ ).

| PDB ID | Residue A | Atom A | Residue B | Atom B | Distance (Å) |
|--------|-----------|--------|-----------|--------|--------------|
| 5NPJ   | A.HIS.181 | NE2    | B.GLU.10  | OE1    | 3.540        |
| 5NPJ   | A.HIS.181 | NE2    | B.GLU.10  | OE2    | 3.793        |
| 5NPJ   | B.HIS.181 | NE2    | A.GLU.10  | OE1    | 3.734        |
| 5NPJ   | B.HIS.181 | NE2    | A.GLU.10  | OE2    | 3.967        |

Table 1465: Interfacial 5NPJ-specific salt bridging networks analysis. In this table, a PDB file is specified with a four-letter PDB ID, except that the names of the PDB files corresponding to the single NMR structural model split from the NMR ensemble is specified with a four-letter PDB ID in addition to a hyphen followed by the single NMR structural model numeric ID, the residue naming scheme is **Chain ID\_residue name\_residue number**,  $\angle ADH$  represents the angle formed by acceptor (A), donor (D) and hydrogen (H) ( $\angle ADH$ ).

| PDB ID | Residue A | Atom A | Residue B | Atom B | Distance (Å) |
|--------|-----------|--------|-----------|--------|--------------|
| 5NST   | A_ARG_39  | NH1    | C_GLU_81  | OE1    | 3.260        |
| 5NST   | A_ARG_39  | NH1    | C_GLU_81  | OE2    | 3.263        |
| 5NST   | A_ARG_39  | NH2    | C_GLU_81  | OE1    | 3.038        |
| 5NST   | B_LYS_345 | NZ     | A_GLU_123 | OE1    | 3.069        |
| 5NST   | C_ARG_39  | NH1    | A_GLU_81  | OE1    | 3.247        |
| 5NST   | C_ARG_39  | NH1    | A_GLU_81  | OE2    | 3.139        |
| 5NST   | C_ARG_39  | NH2    | A_GLU_81  | OE1    | 3.004        |
| 5NST   | D_LYS_345 | NZ     | C_GLU_123 | OE2    | 3.272        |

Table 1466: Interfacial 5NST-specific salt bridging networks analysis. In this table, a PDB file is specified with a four-letter PDB ID, except that the names of the PDB files corresponding to the single NMR structural model split from the NMR ensemble is specified with a four-letter PDB ID in addition to a hyphen followed by the single NMR structural model numeric ID, the residue naming scheme is **Chain ID\_residue name\_residue number**,  $\angle ADH$  represents the angle formed by acceptor (A), donor (D) and hydrogen (H) ( $\angle ADH$ ).



| PDB ID | Residue A | Atom A | Residue B | Atom B | Distance (Å) |
|--------|-----------|--------|-----------|--------|--------------|
| 5NUZ   | A_ARG_95  | NH1    | C_ASP_114 | OD1    | 3.502        |
| 5NUZ   | A_ARG_95  | NH1    | C_ASP_114 | OD2    | 2.701        |
| 5NUZ   | A_ARG_95  | NH2    | C_ASP_114 | OD1    | 2.822        |
| 5NUZ   | A_ARG_95  | NH2    | C_ASP_114 | OD2    | 3.585        |
| 5NUZ   | A_LYS_208 | NZ     | B_GLU_123 | OE1    | 3.889        |
| 5NUZ   | A_LYS_208 | NZ     | B_GLU_123 | OE2    | 2.684        |
| 5NUZ   | H_ARG_95  | NH1    | D_ASP_114 | OD1    | 3.679        |
| 5NUZ   | H_ARG_95  | NH1    | D_ASP_114 | OD2    | 2.753        |
| 5NUZ   | H_ARG_95  | NH2    | D_ASP_114 | OD1    | 2.850        |
| 5NUZ   | H_ARG_95  | NH2    | D_ASP_114 | OD2    | 3.470        |
| 5NUZ   | H_LYS_208 | NZ     | L_GLU_123 | OE2    | 2.982        |
| 5NUZ   | B_ARG_61  | NH2    | L_GLU_79  | OE1    | 3.072        |
| 5NUZ   | B_ARG_61  | NH2    | L_GLU_79  | OE2    | 3.676        |
| 5NUZ   | C_LYS_211 | NZ     | A_ASP_54  | OD1    | 3.758        |
| 5NUZ   | C_LYS_211 | NZ     | A_ASP_54  | OD2    | 3.058        |
| 5NUZ   | C_LYS_211 | NZ     | A_ASP_56  | OD2    | 2.861        |
| 5NUZ   | L_ARG_61  | NH2    | B_GLU_79  | OE1    | 3.765        |
| 5NUZ   | L_ARG_61  | NH2    | B_GLU_79  | OE2    | 2.966        |
| 5NUZ   | D_LYS_211 | NZ     | H_ASP_54  | OD1    | 3.910        |
| 5NUZ   | D_LYS_211 | NZ     | H_ASP_54  | OD2    | 3.105        |
| 5NUZ   | D_LYS_211 | NZ     | H_ASP_56  | OD2    | 2.803        |

Table 1467: Interfacial 5NUZ-specific salt bridging networks analysis. In this table, a PDB file is specified with a four-letter PDB ID, except that the names of the PDB files corresponding to the single NMR structural model split from the NMR ensemble is specified with a four-letter PDB ID in addition to a hyphen followed by the single NMR structural model numeric ID, the residue naming scheme is **Chain ID\_residue name\_residue number**,  $\angle ADH$  represents the angle formed by acceptor (A), donor (D) and hydrogen (H) ( $\angle ADH$ ).

| PDB ID | Residue A | Atom A | Residue B | Atom B | Distance (Å) |
|--------|-----------|--------|-----------|--------|--------------|
| 5O14   | A_LYS_185 | NZ     | H_ASP_55  | OD1    | 3.249        |
| 5O14   | A_LYS_185 | NZ     | H_ASP_55  | OD2    | 2.764        |
| 5O14   | A_LYS_185 | NZ     | H_ASP_57  | OD2    | 2.802        |
| 5O14   | A_ARG_204 | NH1    | B_GLU_218 | OE1    | 3.625        |
| 5O14   | B_LYS_185 | NZ     | C_ASP_55  | OD1    | 3.234        |
| 5O14   | B_LYS_185 | NZ     | C_ASP_55  | OD2    | 2.720        |
| 5O14   | B_LYS_185 | NZ     | C_ASP_57  | OD2    | 2.736        |
| 5O14   | C_ARG_54  | NH2    | B_ASP_161 | OD1    | 2.870        |
| 5O14   | C_ARG_54  | NH2    | B_ASP_161 | OD2    | 3.505        |
| 5O14   | C_LYS_218 | NZ     | D_GLU_124 | OE1    | 3.107        |
| 5O14   | D_ARG_18  | NH1    | A_GLU_218 | OE1    | 3.301        |
| 5O14   | H_ARG_54  | NH1    | A_ASP_161 | OD1    | 2.861        |
| 5O14   | H_ARG_54  | NH1    | A_ASP_161 | OD2    | 3.283        |
| 5O14   | H_ARG_59  | NH1    | L_ASP_94  | OD1    | 3.733        |
| 5O14   | H_ARG_59  | NH1    | L_ASP_94  | OD2    | 3.698        |

Table 1468: Interfacial 5O14-specific salt bridging networks analysis. In this table, a PDB file is specified with a four-letter PDB ID, except that the names of the PDB files corresponding to the single NMR structural model split from the NMR ensemble is specified with a four-letter PDB ID in addition to a hyphen followed by the single NMR structural model numeric ID, the residue naming scheme is **Chain ID\_residue name\_residue number**,  $\angle ADH$  represents the angle formed by acceptor (A), donor (D) and hydrogen (H) ( $\angle ADH$ ).

| PDB ID | Residue A | Atom A | Residue B | Atom B | Distance (Å) |
|--------|-----------|--------|-----------|--------|--------------|
| 5O1R   | A_ARG_339 | NH1    | H_ASP_100 | OD1    | 3.968        |
| 5O1R   | A_ARG_339 | NH1    | H_ASP_100 | OD2    | 3.203        |
| 5O1R   | B_ARG_339 | NH1    | L_ASP_100 | OD1    | 3.595        |
| 5O1R   | B_ARG_339 | NH1    | L_ASP_100 | OD2    | 2.991        |

Table 1469: Interfacial 5O1R-specific salt bridging networks analysis. In this table, a PDB file is specified with a four-letter PDB ID, except that the names of the PDB files corresponding to the single NMR structural model split from the NMR ensemble is specified with a four-letter PDB ID in addition to a hyphen followed by the single NMR structural model numeric ID, the residue naming scheme is **Chain ID\_residue name\_residue number**,  $\angle ADH$  represents the angle formed by acceptor (A), donor (D) and hydrogen (H) ( $\angle ADH$ ).

| PDB ID | Residue A | Atom A | Residue B | Atom B | Distance (Å) |
|--------|-----------|--------|-----------|--------|--------------|
| 5OLM   | A_HIS_0   | NE2    | B_GLU_97  | OE1    | 2.769        |
| 5OLM   | A_HIS_0   | NE2    | B_GLU_97  | OE2    | 2.598        |
| 5OLM   | A_ARG_6   | NH2    | B_GLU_82  | OE1    | 3.071        |
| 5OLM   | B_HIS_0   | NE2    | A_GLU_97  | OE1    | 2.741        |
| 5OLM   | B_HIS_0   | NE2    | A_GLU_97  | OE2    | 3.001        |
| 5OLM   | B_ARG_6   | NH2    | A_GLU_82  | OE2    | 2.559        |

Table 1470: Interfacial 5OLM-specific salt bridging networks analysis. In this table, a PDB file is specified with a four-letter PDB ID, except that the names of the PDB files corresponding to the single NMR structural model split from the NMR ensemble is specified with a four-letter PDB ID in addition to a hyphen followed by the single NMR structural model numeric ID, the residue naming scheme is **Chain ID\_residue name\_residue number**,  $\angle ADH$  represents the angle formed by acceptor (A), donor (D) and hydrogen (H) ( $\angle ADH$ ).

| PDB ID | Residue A | Atom A | Residue B | Atom B | Distance (Å) |
|--------|-----------|--------|-----------|--------|--------------|
| 5OPY   | H_LYS_212 | NZ     | L_GLU_123 | OE2    | 3.578        |

Table 1471: Interfacial 5OPY-specific salt bridging networks analysis. In this table, a PDB file is specified with a four-letter PDB ID, except that the names of the PDB files corresponding to the single NMR structural model split from the NMR ensemble is specified with a four-letter PDB ID in addition to a hyphen followed by the single NMR structural model numeric ID, the residue naming scheme is **Chain ID\_residue name\_residue number**,  $\angle ADH$  represents the angle formed by acceptor (A), donor (D) and hydrogen (H) ( $\angle ADH$ ).

| PDB ID | Residue A | Atom A | Residue B | Atom B | Distance (Å) |
|--------|-----------|--------|-----------|--------|--------------|
| 5T6P   | A_LYS_58  | NZ     | F_ASP_3   | OD2    | 1.997        |
| 5T6P   | A_LYS_174 | NZ     | C_GLU_128 | OE2    | 3.605        |
| 5T6P   | C_ARG_55  | NH1    | E_ASP_3   | OD2    | 3.191        |
| 5T6P   | C_LYS_58  | NZ     | E_ASP_3   | OD2    | 2.925        |
| 5T6P   | E_ARG_5   | NH2    | C_GLU_39  | OE1    | 3.351        |
| 5T6P   | E_ARG_5   | NH2    | C_GLU_39  | OE2    | 2.626        |
| 5T6P   | F_ARG_5   | NH2    | A_GLU_39  | OE1    | 3.661        |
| 5T6P   | F_ARG_5   | NH2    | A_GLU_39  | OE2    | 2.718        |

Table 1472: Interfacial 5T6P-specific salt bridging networks analysis. In this table, a PDB file is specified with a four-letter PDB ID, except that the names of the PDB files corresponding to the single NMR structural model split from the NMR ensemble is specified with a four-letter PDB ID in addition to a hyphen followed by the single NMR structural model numeric ID, the residue naming scheme is **Chain ID\_residue name\_residue number**,  $\angle ADH$  represents the angle formed by acceptor (A), donor (D) and hydrogen (H) ( $\angle ADH$ ).

| PDB ID | Residue A | Atom A | Residue B | Atom B | Distance (Å) |
|--------|-----------|--------|-----------|--------|--------------|
| 5T78   | A.LYS_58  | NZ     | F.ASP_3   | OD1    | 2.579        |
| 5T78   | A.LYS_58  | NZ     | F.ASP_3   | OD2    | 3.334        |
| 5T78   | F.ARG_5   | NH1    | A.GLU_39  | OE1    | 2.678        |
| 5T78   | F.ARG_5   | NH1    | A.GLU_39  | OE2    | 2.480        |
| 5T78   | C.ARG_55  | NH2    | E.ASP_3   | OD1    | 3.685        |
| 5T78   | C.LYS_58  | NZ     | E.ASP_3   | OD1    | 2.753        |
| 5T78   | C.LYS_58  | NZ     | E.ASP_3   | OD2    | 2.872        |
| 5T78   | D.LYS_211 | NZ     | C.GLU_128 | OE1    | 3.376        |
| 5T78   | E.ARG_5   | NH1    | C.GLU_39  | OE1    | 2.693        |
| 5T78   | E.ARG_5   | NH1    | C.GLU_39  | OE2    | 2.664        |

Table 1473: Interfacial 5T78-specific salt bridging networks analysis. In this table, a PDB file is specified with a four-letter PDB ID, except that the names of the PDB files corresponding to the single NMR structural model split from the NMR ensemble is specified with a four-letter PDB ID in addition to a hyphen followed by the single NMR structural model numeric ID, the residue naming scheme is **Chain ID\_residue name\_residue number**,  $\angle ADH$  represents the angle formed by acceptor (A), donor (D) and hydrogen (H) ( $\angle ADH$ ).

| PDB ID | Residue A | Atom A | Residue B | Atom B | Distance (Å) |
|--------|-----------|--------|-----------|--------|--------------|
| 5TIH   | A_LYS_66  | NZ     | L_ASP_92  | OD1    | 3.482        |
| 5TIH   | H_HIS_35  | NE2    | A_ASP_69  | OD1    | 2.973        |
| 5TIH   | H_HIS_35  | NE2    | A_ASP_69  | OD2    | 3.535        |
| 5TIH   | H_ARG_100 | NH2    | A_ASP_69  | OD1    | 3.080        |
| 5TIH   | H_ARG_101 | NH2    | A_GLU_119 | OE1    | 3.357        |
| 5TIH   | H_ARG_101 | NH2    | A_GLU_119 | OE2    | 3.359        |

Table 1474: Interfacial 5TIH-specific salt bridging networks analysis. In this table, a PDB file is specified with a four-letter PDB ID, except that the names of the PDB files corresponding to the single NMR structural model split from the NMR ensemble is specified with a four-letter PDB ID in addition to a hyphen followed by the single NMR structural model numeric ID, the residue naming scheme is **Chain ID\_residue name\_residue number**,  $\angle ADH$  represents the angle formed by acceptor (A), donor (D) and hydrogen (H) ( $\angle ADH$ ).



| PDB ID | Residue A | Atom A | Residue B | Atom B | Distance (Å) |
|--------|-----------|--------|-----------|--------|--------------|
| 5TIK   | A_HIS_3   | ND1    | D_GLU_9   | OE2    | 3.832        |
| 5TIK   | A_HIS_3   | NE2    | B_GLU_9   | OE2    | 3.597        |
| 5TIK   | B_HIS_3   | NE2    | A_GLU_9   | OE1    | 3.627        |
| 5TIK   | B_HIS_3   | NE2    | A_GLU_9   | OE2    | 3.175        |
| 5TIK   | B_HIS_3   | NE2    | C_GLU_9   | OE1    | 3.296        |
| 5TIK   | B_HIS_3   | NE2    | C_GLU_9   | OE2    | 3.823        |
| 5TIK   | B_LYS_290 | NZ     | A_GLU_281 | OE1    | 3.703        |
| 5TIK   | C_HIS_3   | NE2    | B_GLU_9   | OE1    | 2.908        |
| 5TIK   | C_ARG_29  | NH2    | B_ASP_259 | OD2    | 3.311        |
| 5TIK   | D_HIS_3   | NE2    | A_GLU_9   | OE1    | 2.950        |
| 5TIK   | D_HIS_3   | NE2    | A_GLU_9   | OE2    | 2.918        |

Table 1475: Interfacial 5TIK-specific salt bridging networks analysis. In this table, a PDB file is specified with a four-letter PDB ID, except that the names of the PDB files corresponding to the single NMR structural model split from the NMR ensemble is specified with a four-letter PDB ID in addition to a hyphen followed by the single NMR structural model numeric ID, the residue naming scheme is **Chain ID\_residue name\_residue number**,  $\angle ADH$  represents the angle formed by acceptor (A), donor (D) and hydrogen (H) ( $\angle ADH$ ).

| PDB ID | Residue A | Atom A | Residue B | Atom B | Distance (Å) |
|--------|-----------|--------|-----------|--------|--------------|
| 5TL5   | H_ARG_50  | NH1    | L_ASP_98  | OD1    | 2.887        |
| 5TL5   | H_ARG_50  | NH1    | L_ASP_98  | OD2    | 3.532        |
| 5TL5   | H_ARG_50  | NH2    | L_ASP_98  | OD1    | 3.785        |
| 5TL5   | H_ARG_50  | NH2    | L_ASP_98  | OD2    | 2.933        |
| 5TL5   | H_LYS_216 | NZ     | L_GLU_127 | OE1    | 3.027        |
| 5TL5   | H_LYS_216 | NZ     | L_GLU_127 | OE2    | 3.571        |
| 5TL5   | A_LYS_17  | NZ     | H_ASP_55  | OD1    | 3.610        |
| 5TL5   | A_LYS_17  | NZ     | H_ASP_55  | OD2    | 2.637        |
| 5TL5   | A_LYS_17  | NZ     | H_ASP_57  | OD1    | 2.990        |
| 5TL5   | A_HIS_36  | NE2    | H_ASP_104 | OD1    | 3.017        |
| 5TL5   | A_HIS_36  | NE2    | H_ASP_104 | OD2    | 2.947        |
| 5TL5   | A_ARG_37  | NH2    | H_ASP_104 | OD2    | 2.895        |

Table 1476: Interfacial 5TL5-specific salt bridging networks analysis. In this table, a PDB file is specified with a four-letter PDB ID, except that the names of the PDB files corresponding to the single NMR structural model split from the NMR ensemble is specified with a four-letter PDB ID in addition to a hyphen followed by the single NMR structural model numeric ID, the residue naming scheme is **Chain ID residue name residue number**,  $\angle ADH$  represents the angle formed by acceptor (A), donor (D) and hydrogen (H) ( $\angle ADH$ ).

| PDB ID | Residue A | Atom A | Residue B | Atom B | Distance (Å) |
|--------|-----------|--------|-----------|--------|--------------|
| 5TLJ   | B_ARG_50  | NH1    | A_ASP_98  | OD1    | 2.672        |
| 5TLJ   | B_ARG_50  | NH1    | A_ASP_98  | OD2    | 3.926        |
| 5TLJ   | D_ARG_100 | NH1    | X_ASP_43  | OD2    | 3.396        |
| 5TLJ   | D_ARG_100 | NH2    | C_GLU_59  | OE1    | 2.703        |
| 5TLJ   | D_ARG_100 | NH2    | C_GLU_59  | OE2    | 3.403        |
| 5TLJ   | D_ARG_100 | NH2    | X_ASP_43  | OD2    | 3.844        |
| 5TLJ   | F_ARG_50  | NH1    | E_ASP_98  | OD1    | 3.689        |
| 5TLJ   | F_ARG_50  | NH1    | E_ASP_98  | OD2    | 2.897        |
| 5TLJ   | F_ARG_50  | NH2    | E_ASP_98  | OD1    | 3.671        |
| 5TLJ   | F_ARG_50  | NH2    | E_ASP_98  | OD2    | 3.575        |
| 5TLJ   | F_HIS_171 | ND1    | E_ASP_171 | OD1    | 3.892        |
| 5TLJ   | F_HIS_171 | NE2    | E_ASP_171 | OD2    | 3.411        |
| 5TLJ   | H_ARG_100 | NH2    | G_GLU_59  | OE1    | 2.761        |
| 5TLJ   | X_LYS_17  | NZ     | B_ASP_57  | OD2    | 3.053        |
| 5TLJ   | X_HIS_36  | NE2    | B_ASP_104 | OD1    | 3.121        |
| 5TLJ   | X_HIS_36  | NE2    | B_ASP_104 | OD2    | 2.886        |

Table 1477: Interfacial 5TLJ-specific salt bridging networks analysis. In this table, a PDB file is specified with a four-letter PDB ID, except that the names of the PDB files corresponding to the single NMR structural model split from the NMR ensemble is specified with a four-letter PDB ID in addition to a hyphen followed by the single NMR structural model numeric ID, the residue naming scheme is **Chain ID\_residue name\_residue number**,  $\angle ADH$  represents the angle formed by acceptor (A), donor (D) and hydrogen (H) ( $\angle ADH$ ).

| PDB ID | Residue A | Atom A | Residue B | Atom B | Distance (Å) |
|--------|-----------|--------|-----------|--------|--------------|
| 5TLK   | B_ARG_50  | NH1    | A_ASP_98  | OD1    | 3.277        |
| 5TLK   | B_ARG_50  | NH1    | A_ASP_98  | OD2    | 2.898        |
| 5TLK   | B_ARG_50  | NH2    | A_ASP_98  | OD1    | 2.923        |
| 5TLK   | B_LYS_216 | NZ     | A_GLU_127 | OE1    | 3.067        |
| 5TLK   | B_LYS_216 | NZ     | A_GLU_127 | OE2    | 3.588        |
| 5TLK   | C_ARG_57  | NH2    | X_ASP_43  | OD1    | 3.384        |
| 5TLK   | D_ARG_100 | NH1    | X_ASP_43  | OD2    | 2.904        |
| 5TLK   | D_ARG_100 | NH2    | C_GLU_59  | OE1    | 2.708        |
| 5TLK   | D_ARG_100 | NH2    | C_GLU_59  | OE2    | 3.299        |
| 5TLK   | D_ARG_100 | NH2    | X_ASP_43  | OD2    | 3.882        |
| 5TLK   | F_ARG_50  | NH1    | E_ASP_98  | OD1    | 3.086        |
| 5TLK   | F_ARG_50  | NH1    | E_ASP_98  | OD2    | 3.224        |
| 5TLK   | F_ARG_50  | NH2    | E_ASP_98  | OD1    | 2.767        |
| 5TLK   | F_ARG_50  | NH2    | E_ASP_98  | OD2    | 3.943        |
| 5TLK   | G_ARG_33  | NH1    | Y_GLU_24  | OE2    | 3.993        |
| 5TLK   | G_ARG_33  | NH2    | Y_GLU_24  | OE2    | 3.475        |
| 5TLK   | H_ARG_100 | NH1    | G_GLU_59  | OE1    | 3.531        |
| 5TLK   | H_ARG_100 | NH1    | Y_ASP_43  | OD2    | 3.423        |
| 5TLK   | H_ARG_100 | NH2    | G_GLU_59  | OE1    | 2.787        |
| 5TLK   | H_ARG_100 | NH2    | G_GLU_59  | OE2    | 3.306        |
| 5TLK   | H_LYS_213 | NZ     | G_GLU_127 | OE1    | 3.569        |
| 5TLK   | X_LYS_17  | NZ     | B_ASP_55  | OD1    | 3.914        |
| 5TLK   | X_LYS_17  | NZ     | B_ASP_55  | OD2    | 3.018        |
| 5TLK   | X_LYS_17  | NZ     | B_ASP_57  | OD2    | 3.114        |
| 5TLK   | X_HIS_36  | NE2    | B_ASP_104 | OD1    | 3.010        |
| 5TLK   | X_HIS_36  | NE2    | B_ASP_104 | OD2    | 2.891        |
| 5TLK   | X_ARG_37  | NH2    | B_ASP_104 | OD1    | 2.703        |
| 5TLK   | Y_LYS_17  | NZ     | F_ASP_55  | OD1    | 3.581        |
| 5TLK   | Y_LYS_17  | NZ     | F_ASP_55  | OD2    | 3.170        |
| 5TLK   | Y_LYS_17  | NZ     | F_ASP_57  | OD2    | 3.380        |
| 5TLK   | Y_HIS_36  | NE2    | F_ASP_104 | OD1    | 3.198        |
| 5TLK   | Y_HIS_36  | NE2    | F_ASP_104 | OD2    | 2.793        |
| 5TLK   | Y_ARG_37  | NH2    | F_ASP_104 | OD1    | 3.616        |

Table 1478: Interfacial 5TLK-specific salt bridging networks analysis. In this table, a PDB file is specified with a four-letter PDB ID, except that the names of the PDB files corresponding to the single NMR structural model split from the NMR ensemble is specified with a four-letter PDB ID in addition to a hyphen followed by the single NMR structural model numeric ID, the residue naming scheme is **Chain ID\_residue name\_residue number**,  $\angle ADH$  represents the angle formed by acceptor (A), donor (D) and hydrogen (H) ( $\angle ADH$ ).

| PDB ID | Residue A | Atom A | Residue B | Atom B | Distance (Å) |
|--------|-----------|--------|-----------|--------|--------------|
| 5TRU   | h_HIS_169 | NE2    | l_ASP_168 | OD2    | 3.995        |

Table 1479: Interfacial 5TRU-specific salt bridging networks analysis. In this table, a PDB file is specified with a four-letter PDB ID, except that the names of the PDB files corresponding to the single NMR structural model split from the NMR ensemble is specified with a four-letter PDB ID in addition to a hyphen followed by the single NMR structural model numeric ID, the residue naming scheme is **Chain ID\_residue name\_residue number**,  $\angle ADH$  represents the angle formed by acceptor (A), donor (D) and hydrogen (H) ( $\angle ADH$ ).

| PDB ID | Residue A | Atom A | Residue B | Atom B | Distance (Å) |
|--------|-----------|--------|-----------|--------|--------------|
| 5TZ2   | H_ARG_101 | NH1    | C_ASP_46  | OD2    | 3.182        |
| 5TZ2   | H_HIS_105 | NE2    | C_ASP_51  | OD1    | 2.798        |
| 5TZ2   | H_HIS_105 | NE2    | C_ASP_51  | OD2    | 2.654        |
| 5TZ2   | C_LYS_56  | NZ     | H_ASP_55  | OD1    | 3.222        |
| 5TZ2   | C_LYS_56  | NZ     | H_ASP_55  | OD2    | 2.489        |
| 5TZ2   | C_LYS_56  | NZ     | H_ASP_57  | OD2    | 3.354        |

Table 1480: Interfacial 5TZ2-specific salt bridging networks analysis. In this table, a PDB file is specified with a four-letter PDB ID, except that the names of the PDB files corresponding to the single NMR structural model split from the NMR ensemble is specified with a four-letter PDB ID in addition to a hyphen followed by the single NMR structural model numeric ID, the residue naming scheme is **Chain ID\_residue name\_residue number**,  $\angle ADH$  represents the angle formed by acceptor (A), donor (D) and hydrogen (H) ( $\angle ADH$ ).

| PDB ID | Residue A | Atom A | Residue B | Atom B | Distance (Å) |
|--------|-----------|--------|-----------|--------|--------------|
| 5TZT   | B_ARG_82  | NH2    | H_ASP_31  | OD1    | 2.783        |
| 5TZT   | B_ARG_82  | NH2    | H_ASP_31  | OD2    | 3.806        |
| 5TZT   | A_HIS_102 | ND1    | D_GLU_104 | OE2    | 3.803        |
| 5TZT   | L_LYS_55  | NZ     | C_GLU_104 | OE1    | 3.704        |
| 5TZT   | L_LYS_55  | NZ     | C_GLU_104 | OE2    | 2.899        |
| 5TZT   | H_HIS_102 | ND1    | C_GLU_104 | OE1    | 2.856        |

Table 1481: Interfacial 5TZT-specific salt bridging networks analysis. In this table, a PDB file is specified with a four-letter PDB ID, except that the names of the PDB files corresponding to the single NMR structural model split from the NMR ensemble is specified with a four-letter PDB ID in addition to a hyphen followed by the single NMR structural model numeric ID, the residue naming scheme is **Chain ID\_residue name\_residue number**,  $\angle ADH$  represents the angle formed by acceptor (A), donor (D) and hydrogen (H) ( $\angle ADH$ ).

| PDB ID | Residue A | Atom A | Residue B | Atom B | Distance (Å) |
|--------|-----------|--------|-----------|--------|--------------|
| 5TZU   | L_LYS_49  | NZ     | C_ASP_51  | OD1    | 3.523        |
| 5TZU   | L_LYS_49  | NZ     | C_ASP_51  | OD2    | 2.772        |
| 5TZU   | L_ARG_96  | NH1    | C_GLU_104 | OE1    | 3.230        |
| 5TZU   | L_ARG_96  | NH1    | C_GLU_104 | OE2    | 3.808        |
| 5TZU   | L_ARG_96  | NH2    | C_GLU_104 | OE1    | 2.901        |
| 5TZU   | H_LYS_214 | NZ     | L_GLU_123 | OE1    | 2.584        |
| 5TZU   | H_LYS_214 | NZ     | L_GLU_123 | OE2    | 3.416        |
| 5TZU   | C_LYS_39  | NZ     | L_ASP_31  | OD1    | 3.076        |
| 5TZU   | C_LYS_39  | NZ     | L_ASP_31  | OD2    | 2.978        |

Table 1482: Interfacial 5TZU-specific salt bridging networks analysis. In this table, a PDB file is specified with a four-letter PDB ID, except that the names of the PDB files corresponding to the single NMR structural model split from the NMR ensemble is specified with a four-letter PDB ID in addition to a hyphen followed by the single NMR structural model numeric ID, the residue naming scheme is **Chain ID\_residue name\_residue number**,  $\angle ADH$  represents the angle formed by acceptor (A), donor (D) and hydrogen (H) ( $\angle ADH$ ).



| PDB ID | Residue A | Atom A | Residue B | Atom B | Distance (Å) |
|--------|-----------|--------|-----------|--------|--------------|
| 5U3J   | H_ARG_52A | NH1    | A_ASP_674 | OD1    | 3.805        |
| 5U3J   | H_ARG_52A | NH1    | A_ASP_674 | OD2    | 3.646        |
| 5U3J   | H_ARG_52A | NH2    | A_ASP_674 | OD2    | 3.216        |
| 5U3J   | H_LYS_52C | NZ     | A_ASP_674 | OD1    | 3.151        |
| 5U3J   | H_LYS_52C | NZ     | A_ASP_674 | OD2    | 3.836        |
| 5U3J   | H_LYS_209 | NZ     | L_GLU_123 | OE1    | 3.171        |
| 5U3J   | H_LYS_209 | NZ     | L_GLU_123 | OE2    | 2.412        |

Table 1483: Interfacial 5U3J-specific salt bridging networks analysis. In this table, a PDB file is specified with a four-letter PDB ID, except that the names of the PDB files corresponding to the single NMR structural model split from the NMR ensemble is specified with a four-letter PDB ID in addition to a hyphen followed by the single NMR structural model numeric ID, the residue naming scheme is **Chain ID\_residue name\_residue number**,  $\angle ADH$  represents the angle formed by acceptor (A), donor (D) and hydrogen (H) ( $\angle ADH$ ).

| PDB ID | Residue A  | Atom A | Residue B  | Atom B | Distance (Å) |
|--------|------------|--------|------------|--------|--------------|
| 5U3N   | H_ARG_52A  | NH1    | A_ASP_674  | OD2    | 2.997        |
| 5U3N   | H_ARG_52A  | NH2    | A_ASP_674  | OD1    | 3.173        |
| 5U3N   | H_ARG_52A  | NH2    | A_ASP_674  | OD2    | 3.047        |
| 5U3N   | H_ARG_100B | NH1    | L_ASP_31   | OD1    | 3.593        |
| 5U3N   | H_ARG_100B | NH1    | L_ASP_31   | OD2    | 2.967        |
| 5U3N   | H_ARG_100B | NH2    | L_ASP_31   | OD1    | 2.974        |
| 5U3N   | H_ARG_100B | NH2    | L_ASP_31   | OD2    | 3.816        |
| 5U3N   | H_LYS_209  | NZ     | L_GLU_123  | OE1    | 3.254        |
| 5U3N   | L_LYS_30   | NZ     | H_GLU_100E | OE1    | 3.899        |
| 5U3N   | L_ARG_55   | NH2    | H_ASP_101  | OD1    | 3.682        |
| 5U3N   | L_ARG_55   | NH2    | H_ASP_101  | OD2    | 2.901        |

Table 1484: Interfacial 5U3N-specific salt bridging networks analysis. In this table, a PDB file is specified with a four-letter PDB ID, except that the names of the PDB files corresponding to the single NMR structural model split from the NMR ensemble is specified with a four-letter PDB ID in addition to a hyphen followed by the single NMR structural model numeric ID, the residue naming scheme is **Chain ID\_residue name\_residue number**,  $\angle ADH$  represents the angle formed by acceptor (A), donor (D) and hydrogen (H) ( $\angle ADH$ ).

| PDB ID | Residue A | Atom A | Residue B | Atom B | Distance (Å) |
|--------|-----------|--------|-----------|--------|--------------|
| 5UCB   | L_ARG_66  | NH2    | B_ASP_51  | OD1    | 2.894        |
| 5UCB   | B_ARG_144 | NH2    | L_ASP_91  | OD1    | 2.844        |
| 5UCB   | B_ARG_144 | NH2    | L_ASP_91  | OD2    | 3.495        |

Table 1485: Interfacial 5UCB-specific salt bridging networks analysis. In this table, a PDB file is specified with a four-letter PDB ID, except that the names of the PDB files corresponding to the single NMR structural model split from the NMR ensemble is specified with a four-letter PDB ID in addition to a hyphen followed by the single NMR structural model numeric ID, the residue naming scheme is **Chain ID\_residue name\_residue number**,  $\angle ADH$  represents the angle formed by acceptor (A), donor (D) and hydrogen (H) ( $\angle ADH$ ).

| PDB ID | Residue A | Atom A | Residue B | Atom B | Distance (Å) |
|--------|-----------|--------|-----------|--------|--------------|
| 5UEA   | X.LYS_10  | NZ     | D.GLU_29  | OE1    | 3.740        |
| 5UEA   | X.LYS_10  | NZ     | D.GLU_29  | OE2    | 2.855        |
| 5UEA   | X.LYS_71  | NZ     | D.GLU_29  | OE2    | 3.320        |
| 5UEA   | D.LYS_10  | NZ     | X.GLU_29  | OE1    | 3.485        |
| 5UEA   | D.LYS_10  | NZ     | X.GLU_29  | OE2    | 2.490        |
| 5UEA   | D.LYS_70  | NZ     | X.GLU_29  | OE2    | 3.861        |

Table 1486: Interfacial 5UEA-specific salt bridging networks analysis. In this table, a PDB file is specified with a four-letter PDB ID, except that the names of the PDB files corresponding to the single NMR structural model split from the NMR ensemble is specified with a four-letter PDB ID in addition to a hyphen followed by the single NMR structural model numeric ID, the residue naming scheme is **Chain ID\_residue name\_residue number**,  $\angle ADH$  represents the angle formed by acceptor (A), donor (D) and hydrogen (H) ( $\angle ADH$ ).

| PDB ID | Residue A | Atom A | Residue B | Atom B | Distance (Å) |
|--------|-----------|--------|-----------|--------|--------------|
| 5UEK   | A_ARG_145 | NH2    | L_ASP_91  | OD1    | 2.787        |
| 5UEK   | A_ARG_145 | NH2    | L_ASP_91  | OD2    | 3.426        |
| 5UEK   | L_ARG_66  | NH2    | A_ASP_52  | OD1    | 2.873        |

Table 1487: Interfacial 5UEK-specific salt bridging networks analysis. In this table, a PDB file is specified with a four-letter PDB ID, except that the names of the PDB files corresponding to the single NMR structural model split from the NMR ensemble is specified with a four-letter PDB ID in addition to a hyphen followed by the single NMR structural model numeric ID, the residue naming scheme is **Chain ID\_residue name\_residue number**,  $\angle ADH$  represents the angle formed by acceptor (A), donor (D) and hydrogen (H) ( $\angle ADH$ ).

| PDB ID | Residue A | Atom A | Residue B | Atom B | Distance (Å) |
|--------|-----------|--------|-----------|--------|--------------|
| 5UG0   | A_ARG_106 | NH1    | B_GLU_69  | OE1    | 3.096        |
| 5UG0   | A_ARG_106 | NH1    | B_GLU_69  | OE2    | 3.964        |
| 5UG0   | A_ARG_106 | NH2    | B_GLU_69  | OE1    | 3.415        |
| 5UG0   | A_ARG_106 | NH2    | B_GLU_69  | OE2    | 3.059        |
| 5UG0   | A_LYS_222 | NZ     | D_ASP_107 | OD2    | 3.472        |
| 5UG0   | A_ARG_311 | NH1    | B_ASP_90  | OD1    | 2.840        |
| 5UG0   | A_ARG_311 | NH2    | B_ASP_86  | OD1    | 2.770        |
| 5UG0   | A_ARG_311 | NH2    | B_ASP_90  | OD1    | 3.313        |
| 5UG0   | B_LYS_68  | NZ     | A_GLU_107 | OE2    | 3.009        |
| 5UG0   | D_ARG_100 | NH1    | A_ASP_190 | OD1    | 3.522        |
| 5UG0   | D_ARG_100 | NH1    | A_ASP_190 | OD2    | 3.877        |
| 5UG0   | D_HIS_178 | NE2    | C_ASP_169 | OD2    | 3.490        |
| 5UG0   | D_LYS_223 | NZ     | C_GLU_125 | OE2    | 3.392        |

Table 1488: Interfacial 5UG0-specific salt bridging networks analysis. In this table, a PDB file is specified with a four-letter PDB ID, except that the names of the PDB files corresponding to the single NMR structural model split from the NMR ensemble is specified with a four-letter PDB ID in addition to a hyphen followed by the single NMR structural model numeric ID, the residue naming scheme is **Chain ID\_residue name\_residue number**,  $\angle ADH$  represents the angle formed by acceptor (A), donor (D) and hydrogen (H) ( $\angle ADH$ ).

| PDB ID | Residue A | Atom A | Residue B | Atom B | Distance (Å) |
|--------|-----------|--------|-----------|--------|--------------|
| 5UJZ   | A_ARG_106 | NH1    | B_GLU_569 | OE2    | 3.797        |
| 5UJZ   | A_ARG_106 | NH2    | B_GLU_569 | OE1    | 3.958        |
| 5UJZ   | A_ARG_106 | NH2    | B_GLU_569 | OE2    | 3.070        |
| 5UJZ   | A_ARG_311 | NH1    | B_ASP_586 | OD1    | 3.689        |
| 5UJZ   | A_ARG_311 | NH1    | B_ASP_590 | OD1    | 3.217        |
| 5UJZ   | A_ARG_311 | NH1    | B_ASP_590 | OD2    | 3.955        |
| 5UJZ   | A_ARG_311 | NH2    | B_ASP_586 | OD1    | 2.782        |
| 5UJZ   | B_LYS_558 | NZ     | F_GLU_597 | OE1    | 3.688        |
| 5UJZ   | B_LYS_558 | NZ     | F_GLU_597 | OE2    | 3.874        |
| 5UJZ   | B_ARG_576 | NH1    | D_GLU_574 | OE1    | 3.986        |
| 5UJZ   | B_ARG_576 | NH1    | D_GLU_574 | OE2    | 3.042        |
| 5UJZ   | B_ARG_576 | NH2    | C_GLU_104 | OE2    | 3.168        |
| 5UJZ   | B_LYS_583 | NZ     | D_ASP_585 | OD1    | 3.717        |
| 5UJZ   | B_ARG_606 | NH2    | F_ASP_609 | OD2    | 2.744        |
| 5UJZ   | B_LYS_643 | NZ     | A_GLU_4   | OE1    | 2.954        |
| 5UJZ   | B_LYS_643 | NZ     | A_ASP_5   | OD1    | 2.763        |
| 5UJZ   | B_LYS_643 | NZ     | A_ASP_5   | OD2    | 3.863        |
| 5UJZ   | C_ARG_106 | NH1    | D_GLU_569 | OE2    | 3.872        |
| 5UJZ   | C_ARG_106 | NH2    | D_GLU_569 | OE2    | 3.260        |
| 5UJZ   | C_ARG_311 | NH1    | D_ASP_586 | OD1    | 3.865        |
| 5UJZ   | C_ARG_311 | NH1    | D_ASP_590 | OD1    | 3.148        |
| 5UJZ   | C_ARG_311 | NH1    | D_ASP_590 | OD2    | 3.998        |
| 5UJZ   | C_ARG_311 | NH2    | D_ASP_586 | OD1    | 2.921        |
| 5UJZ   | D_LYS_558 | NZ     | B_GLU_597 | OE1    | 3.772        |
| 5UJZ   | D_LYS_572 | NZ     | E_GLU_238 | OE1    | 3.910        |
| 5UJZ   | D_ARG_576 | NH1    | F_GLU_574 | OE1    | 3.863        |
| 5UJZ   | D_ARG_576 | NH1    | F_GLU_574 | OE2    | 2.716        |
| 5UJZ   | D_ARG_576 | NH2    | E_GLU_104 | OE2    | 3.170        |
| 5UJZ   | D_LYS_583 | NZ     | F_ASP_585 | OD1    | 3.807        |
| 5UJZ   | D_ARG_606 | NH2    | B_ASP_609 | OD2    | 2.766        |
| 5UJZ   | D_LYS_643 | NZ     | C_GLU_4   | OE1    | 3.185        |
| 5UJZ   | D_LYS_643 | NZ     | C_ASP_5   | OD1    | 2.519        |
| 5UJZ   | D_LYS_643 | NZ     | C_ASP_5   | OD2    | 3.642        |
| 5UJZ   | E_ARG_106 | NH2    | F_GLU_569 | OE2    | 3.361        |
| 5UJZ   | E_ARG_311 | NH1    | F_ASP_586 | OD1    | 3.477        |
| 5UJZ   | E_ARG_311 | NH1    | F_ASP_590 | OD1    | 3.629        |
| 5UJZ   | E_ARG_311 | NH2    | F_ASP_586 | OD1    | 2.793        |
| 5UJZ   | F_ARG_576 | NH1    | B_GLU_574 | OE1    | 3.655        |
| 5UJZ   | F_ARG_576 | NH1    | B_GLU_574 | OE2    | 2.847        |
| 5UJZ   | F_ARG_576 | NH2    | A_GLU_104 | OE2    | 3.211        |
| 5UJZ   | F_LYS_583 | NZ     | B_ASP_585 | OD1    | 3.548        |
| 5UJZ   | F_ARG_606 | NH2    | D_ASP_609 | OD2    | 2.609        |
| 5UJZ   | F_LYS_643 | NZ     | E_GLU_4   | OE1    | 3.009        |
| 5UJZ   | F_LYS_643 | NZ     | E_ASP_5   | OD1    | 2.882        |
| 5UJZ   | F_LYS_643 | NZ     | E_ASP_5   | OD2    | 3.935        |
| 5UJZ   | G_ARG_225 | NH1    | A_ASP_190 | OD1    | 3.090        |
| 5UJZ   | G_ARG_225 | NH1    | A_ASP_190 | OD2    | 3.996        |
| 5UJZ   | G_ARG_225 | NH2    | A_ASP_190 | OD1    | 3.715        |
| 5UJZ   | G_ARG_225 | NH2    | A_ASP_190 | OD2    | 3.410        |
| 5UJZ   | H_ARG_225 | NH1    | C_ASP_190 | OD1    | 3.041        |
| 5UJZ   | H_ARG_225 | NH2    | C_ASP_190 | OD1    | 3.552        |
| 5UJZ   | H_ARG_225 | NH2    | C_ASP_190 | OD2    | 3.366        |
| 5UJZ   | I_ARG_225 | NH1    | E_ASP_190 | OD1    | 3.119        |
| 5UJZ   | I_ARG_225 | NH1    | E_ASP_190 | OD2    | 3.970        |
| 5UJZ   | I_ARG_225 | NH2    | E_ASP_190 | OD1    | 3.713        |
| 5UJZ   | I_ARG_225 | NH2    | E_ASP_190 | OD2    | 3.347        |

---

Table 1489: Interfacial 5UJZ-specific salt bridging networks analysis. In this table, a PDB file is specified with a four-letter PDB ID, except that the names of the PDB files corresponding to the single NMR structural model split from the NMR ensemble is specified with a four-letter PDB ID in addition to a hyphen followed by the single NMR structural model numeric ID, the residue naming scheme is **Chain ID\_residue name\_residue number**,  $\angle ADH$  represents the angle formed by acceptor (A), donor (D) and hydrogen (H) ( $\angle ADH$ ).



| PDB ID | Residue A | Atom A | Residue B | Atom B | Distance (Å) |
|--------|-----------|--------|-----------|--------|--------------|
| 5UK0   | A_ARG_106 | NH1    | B_GLU_569 | OE2    | 3.967        |
| 5UK0   | A_ARG_106 | NH2    | B_GLU_569 | OE2    | 3.244        |
| 5UK0   | A_ARG_220 | NH2    | C_ASP_241 | OD1    | 3.711        |
| 5UK0   | A_ARG_220 | NH2    | C_ASP_241 | OD2    | 3.819        |
| 5UK0   | A_ARG_311 | NH1    | B_ASP_590 | OD1    | 3.139        |
| 5UK0   | A_ARG_311 | NH1    | B_ASP_590 | OD2    | 3.961        |
| 5UK0   | A_ARG_311 | NH2    | B_ASP_586 | OD1    | 3.197        |
| 5UK0   | B_LYS_558 | NZ     | F_GLU_597 | OE1    | 3.717        |
| 5UK0   | B_LYS_568 | NZ     | A_GLU_107 | OE2    | 3.962        |
| 5UK0   | B_ARG_576 | NH1    | D_GLU_574 | OE1    | 2.500        |
| 5UK0   | B_ARG_576 | NH1    | D_GLU_574 | OE2    | 3.431        |
| 5UK0   | B_ARG_576 | NH2    | C_GLU_104 | OE2    | 3.446        |
| 5UK0   | B_ARG_576 | NH2    | D_GLU_574 | OE1    | 3.430        |
| 5UK0   | B_ARG_576 | NH2    | D_GLU_574 | OE2    | 3.016        |
| 5UK0   | B_ARG_606 | NH2    | F_ASP_609 | OD2    | 2.765        |
| 5UK0   | B_LYS_643 | NZ     | A_GLU_4   | OE1    | 2.724        |
| 5UK0   | B_LYS_643 | NZ     | A_ASP_5   | OD1    | 2.705        |
| 5UK0   | B_LYS_643 | NZ     | A_ASP_5   | OD2    | 3.831        |
| 5UK0   | C_ARG_106 | NH1    | D_GLU_569 | OE2    | 3.998        |
| 5UK0   | C_ARG_106 | NH2    | D_GLU_569 | OE2    | 3.213        |
| 5UK0   | C_ARG_220 | NH2    | E_ASP_241 | OD1    | 3.755        |
| 5UK0   | C_ARG_220 | NH2    | E_ASP_241 | OD2    | 3.891        |
| 5UK0   | C_ARG_311 | NH1    | D_ASP_586 | OD1    | 3.901        |
| 5UK0   | C_ARG_311 | NH1    | D_ASP_590 | OD1    | 3.110        |
| 5UK0   | C_ARG_311 | NH1    | D_ASP_590 | OD2    | 3.851        |
| 5UK0   | C_ARG_311 | NH2    | D_ASP_586 | OD1    | 2.981        |
| 5UK0   | D_LYS_558 | NZ     | B_GLU_597 | OE1    | 3.800        |
| 5UK0   | D_LYS_572 | NZ     | E_GLU_238 | OE1    | 3.723        |
| 5UK0   | D_ARG_576 | NH1    | F_GLU_574 | OE1    | 2.823        |
| 5UK0   | D_ARG_576 | NH1    | F_GLU_574 | OE2    | 3.743        |
| 5UK0   | D_ARG_576 | NH2    | E_GLU_104 | OE2    | 3.003        |
| 5UK0   | D_ARG_576 | NH2    | F_GLU_574 | OE1    | 3.596        |
| 5UK0   | D_ARG_576 | NH2    | F_GLU_574 | OE2    | 3.278        |
| 5UK0   | D_ARG_606 | NH2    | B_ASP_609 | OD2    | 2.683        |
| 5UK0   | D_LYS_643 | NZ     | C_GLU_4   | OE1    | 2.844        |
| 5UK0   | D_LYS_643 | NZ     | C_ASP_5   | OD1    | 2.693        |
| 5UK0   | D_LYS_643 | NZ     | C_ASP_5   | OD2    | 3.673        |
| 5UK0   | E_ARG_106 | NH1    | F_GLU_569 | OE2    | 3.924        |
| 5UK0   | E_ARG_106 | NH2    | F_GLU_569 | OE2    | 3.130        |
| 5UK0   | E_ARG_220 | NH2    | A_ASP_241 | OD1    | 3.703        |
| 5UK0   | E_ARG_220 | NH2    | A_ASP_241 | OD2    | 3.860        |
| 5UK0   | E_ARG_311 | NH1    | F_ASP_586 | OD1    | 3.927        |
| 5UK0   | E_ARG_311 | NH1    | F_ASP_590 | OD1    | 3.174        |
| 5UK0   | E_ARG_311 | NH1    | F_ASP_590 | OD2    | 3.882        |
| 5UK0   | E_ARG_311 | NH2    | F_ASP_586 | OD1    | 3.095        |
| 5UK0   | F_LYS_558 | NZ     | D_GLU_597 | OE1    | 3.758        |
| 5UK0   | F_LYS_568 | NZ     | E_GLU_107 | OE2    | 3.989        |
| 5UK0   | F_LYS_572 | NZ     | A_GLU_238 | OE1    | 3.995        |
| 5UK0   | F_ARG_576 | NH1    | B_GLU_574 | OE1    | 2.515        |
| 5UK0   | F_ARG_576 | NH1    | B_GLU_574 | OE2    | 3.607        |
| 5UK0   | F_ARG_576 | NH2    | A_GLU_104 | OE2    | 3.281        |
| 5UK0   | F_ARG_576 | NH2    | B_GLU_574 | OE1    | 3.248        |
| 5UK0   | F_ARG_576 | NH2    | B_GLU_574 | OE2    | 3.003        |
| 5UK0   | F_ARG_606 | NH2    | D_ASP_609 | OD2    | 2.740        |
| 5UK0   | F_LYS_643 | NZ     | E_GLU_4   | OE1    | 2.987        |
| 5UK0   | F_LYS_643 | NZ     | E_ASP_5   | OD1    | 2.694        |
| 5UK0   | F_LYS_643 | NZ     | E_ASP_5   | OD2    | 3.721        |

|      |           |     |           |     |       |
|------|-----------|-----|-----------|-----|-------|
| 5UK0 | G_ARG_225 | NH1 | A_ASP_190 | OD1 | 3.056 |
| 5UK0 | G_ARG_225 | NH1 | A_ASP_190 | OD2 | 3.844 |
| 5UK0 | G_ARG_225 | NH2 | A_ASP_190 | OD1 | 3.909 |
| 5UK0 | G_ARG_225 | NH2 | A_ASP_190 | OD2 | 3.442 |
| 5UK0 | H_ARG_225 | NH1 | C_ASP_190 | OD1 | 3.008 |
| 5UK0 | H_ARG_225 | NH1 | C_ASP_190 | OD2 | 3.873 |
| 5UK0 | H_ARG_225 | NH2 | C_ASP_190 | OD1 | 3.782 |
| 5UK0 | H_ARG_225 | NH2 | C_ASP_190 | OD2 | 3.377 |
| 5UK0 | I_ARG_225 | NH1 | E_ASP_190 | OD1 | 3.078 |
| 5UK0 | I_ARG_225 | NH1 | E_ASP_190 | OD2 | 3.875 |
| 5UK0 | I_ARG_225 | NH2 | E_ASP_190 | OD1 | 3.886 |
| 5UK0 | I_ARG_225 | NH2 | E_ASP_190 | OD2 | 3.433 |

Table 1490: Interfacial 5UK0-specific salt bridging networks analysis. In this table, a PDB file is specified with a four-letter PDB ID, except that the names of the PDB files corresponding to the single NMR structural model split from the NMR ensemble is specified with a four-letter PDB ID in addition to a hyphen followed by the single NMR structural model numeric ID, the residue naming scheme is **Chain ID\_residue name\_residue number**,  $\angle ADH$  represents the angle formed by acceptor (A), donor (D) and hydrogen (H) ( $\angle ADH$ ).

| PDB ID | Residue A | Atom A | Residue B | Atom B | Distance (Å) |
|--------|-----------|--------|-----------|--------|--------------|
| 5UK1   | A_ARG_106 | NH1    | B_GLU_569 | OE2    | 3.892        |
| 5UK1   | A_ARG_106 | NH2    | B_GLU_569 | OE2    | 2.755        |
| 5UK1   | A_ARG_311 | NH1    | B_ASP_590 | OD1    | 2.545        |
| 5UK1   | A_ARG_311 | NH1    | B_ASP_590 | OD2    | 3.367        |
| 5UK1   | A_ARG_311 | NH2    | B_ASP_586 | OD1    | 3.117        |
| 5UK1   | B_LYS_558 | NZ     | F_GLU_597 | OE1    | 3.470        |
| 5UK1   | B_ARG_576 | NH1    | D_GLU_574 | OE1    | 3.845        |
| 5UK1   | B_ARG_576 | NH1    | D_GLU_574 | OE2    | 3.273        |
| 5UK1   | B_ARG_576 | NH2    | C_GLU_104 | OE2    | 2.839        |
| 5UK1   | B_ARG_606 | NH2    | F_ASP_609 | OD2    | 3.320        |
| 5UK1   | B_LYS_643 | NZ     | A_GLU_4   | OE1    | 2.898        |
| 5UK1   | B_LYS_643 | NZ     | A_ASP_5   | OD1    | 2.632        |
| 5UK1   | B_LYS_643 | NZ     | A_ASP_5   | OD2    | 3.703        |
| 5UK1   | C_ARG_106 | NH2    | D_GLU_569 | OE2    | 3.108        |
| 5UK1   | C_ARG_311 | NH1    | D_ASP_590 | OD1    | 2.901        |
| 5UK1   | C_ARG_311 | NH1    | D_ASP_590 | OD2    | 3.798        |
| 5UK1   | C_ARG_311 | NH2    | D_ASP_586 | OD1    | 3.261        |
| 5UK1   | D_LYS_558 | NZ     | B_GLU_597 | OE1    | 3.543        |
| 5UK1   | D_ARG_576 | NH1    | F_GLU_574 | OE1    | 3.490        |
| 5UK1   | D_ARG_576 | NH1    | F_GLU_574 | OE2    | 3.058        |
| 5UK1   | D_ARG_576 | NH2    | E_GLU_104 | OE2    | 3.186        |
| 5UK1   | D_ARG_606 | NH2    | B_ASP_609 | OD2    | 3.177        |
| 5UK1   | D_LYS_643 | NZ     | C_GLU_4   | OE1    | 3.015        |
| 5UK1   | D_LYS_643 | NZ     | C_ASP_5   | OD1    | 2.615        |
| 5UK1   | D_LYS_643 | NZ     | C_ASP_5   | OD2    | 3.806        |
| 5UK1   | E_ARG_106 | NH2    | F_GLU_569 | OE2    | 2.991        |
| 5UK1   | E_ARG_311 | NH1    | F_ASP_590 | OD1    | 2.696        |
| 5UK1   | E_ARG_311 | NH1    | F_ASP_590 | OD2    | 3.637        |
| 5UK1   | E_ARG_311 | NH2    | F_ASP_586 | OD1    | 3.291        |
| 5UK1   | F_LYS_558 | NZ     | D_GLU_597 | OE1    | 3.566        |
| 5UK1   | F_ARG_576 | NH1    | B_GLU_574 | OE1    | 3.570        |
| 5UK1   | F_ARG_576 | NH1    | B_GLU_574 | OE2    | 3.065        |
| 5UK1   | F_ARG_576 | NH2    | A_GLU_104 | OE2    | 3.295        |
| 5UK1   | F_ARG_606 | NH2    | D_ASP_609 | OD2    | 3.182        |
| 5UK1   | F_LYS_643 | NZ     | E_GLU_4   | OE1    | 3.024        |
| 5UK1   | F_LYS_643 | NZ     | E_ASP_5   | OD1    | 2.503        |
| 5UK1   | F_LYS_643 | NZ     | E_ASP_5   | OD2    | 3.650        |
| 5UK1   | G_ARG_225 | NH1    | A_ASP_190 | OD1    | 2.887        |
| 5UK1   | G_ARG_225 | NH1    | A_ASP_190 | OD2    | 3.709        |
| 5UK1   | G_ARG_225 | NH2    | A_ASP_190 | OD1    | 3.956        |
| 5UK1   | G_ARG_225 | NH2    | A_ASP_190 | OD2    | 3.555        |
| 5UK1   | H_ARG_225 | NH1    | C_ASP_190 | OD1    | 2.683        |
| 5UK1   | H_ARG_225 | NH1    | C_ASP_190 | OD2    | 3.511        |
| 5UK1   | H_ARG_225 | NH2    | C_ASP_190 | OD1    | 3.809        |
| 5UK1   | H_ARG_225 | NH2    | C_ASP_190 | OD2    | 3.346        |
| 5UK1   | I_ARG_225 | NH1    | E_ASP_190 | OD1    | 2.885        |
| 5UK1   | I_ARG_225 | NH1    | E_ASP_190 | OD2    | 3.789        |
| 5UK1   | I_ARG_225 | NH2    | E_ASP_190 | OD1    | 3.888        |
| 5UK1   | I_ARG_225 | NH2    | E_ASP_190 | OD2    | 3.567        |

---

Table 1491: Interfacial 5UK1-specific salt bridging networks analysis. In this table, a PDB file is specified with a four-letter PDB ID, except that the names of the PDB files corresponding to the single NMR structural model split from the NMR ensemble is specified with a four-letter PDB ID in addition to a hyphen followed by the single NMR structural model numeric ID, the residue naming scheme is **Chain ID\_residue name\_residue number**,  $\angle ADH$  represents the angle formed by acceptor (A), donor (D) and hydrogen (H) ( $\angle ADH$ ).

| PDB ID | Residue A | Atom A | Residue B | Atom B | Distance (Å) |
|--------|-----------|--------|-----------|--------|--------------|
| 5UK2   | A_ARG_106 | NH1    | B_GLU_569 | OE2    | 3.935        |
| 5UK2   | A_ARG_106 | NH2    | B_GLU_569 | OE2    | 2.216        |
| 5UK2   | A_ARG_311 | NH1    | B_ASP_586 | OD1    | 3.877        |
| 5UK2   | A_ARG_311 | NH1    | B_ASP_590 | OD1    | 2.946        |
| 5UK2   | A_ARG_311 | NH1    | B_ASP_590 | OD2    | 3.729        |
| 5UK2   | A_ARG_311 | NH2    | B_ASP_586 | OD1    | 3.044        |
| 5UK2   | B_LYS_558 | NZ     | F_GLU_597 | OE1    | 3.672        |
| 5UK2   | B_LYS_568 | NZ     | A_GLU_107 | OE1    | 3.896        |
| 5UK2   | B_ARG_576 | NH1    | D_GLU_574 | OE1    | 3.949        |
| 5UK2   | B_ARG_576 | NH1    | D_GLU_574 | OE2    | 2.806        |
| 5UK2   | B_ARG_576 | NH2    | C_GLU_104 | OE2    | 3.501        |
| 5UK2   | B_LYS_583 | NZ     | D_ASP_585 | OD1    | 3.241        |
| 5UK2   | B_LYS_583 | NZ     | D_ASP_585 | OD2    | 3.954        |
| 5UK2   | B_ARG_606 | NH2    | F_ASP_609 | OD2    | 2.779        |
| 5UK2   | B_LYS_643 | NZ     | A_GLU_4   | OE1    | 3.076        |
| 5UK2   | B_LYS_643 | NZ     | A_ASP_5   | OD1    | 2.565        |
| 5UK2   | B_LYS_643 | NZ     | A_ASP_5   | OD2    | 3.717        |
| 5UK2   | C_ARG_106 | NH1    | D_GLU_569 | OE2    | 3.977        |
| 5UK2   | C_ARG_106 | NH2    | D_GLU_569 | OE2    | 2.287        |
| 5UK2   | C_ARG_311 | NH1    | D_ASP_586 | OD1    | 3.894        |
| 5UK2   | C_ARG_311 | NH1    | D_ASP_590 | OD1    | 2.932        |
| 5UK2   | C_ARG_311 | NH1    | D_ASP_590 | OD2    | 3.727        |
| 5UK2   | C_ARG_311 | NH2    | D_ASP_586 | OD1    | 3.043        |
| 5UK2   | D_LYS_558 | NZ     | B_GLU_597 | OE1    | 3.518        |
| 5UK2   | D_LYS_558 | NZ     | B_GLU_597 | OE2    | 3.929        |
| 5UK2   | D_LYS_568 | NZ     | C_GLU_107 | OE1    | 3.830        |
| 5UK2   | D_ARG_576 | NH1    | F_GLU_574 | OE1    | 3.823        |
| 5UK2   | D_ARG_576 | NH1    | F_GLU_574 | OE2    | 2.724        |
| 5UK2   | D_ARG_576 | NH2    | E_GLU_104 | OE2    | 3.539        |
| 5UK2   | D_LYS_583 | NZ     | F_ASP_585 | OD1    | 3.067        |
| 5UK2   | D_LYS_583 | NZ     | F_ASP_585 | OD2    | 3.783        |
| 5UK2   | D_ARG_606 | NH2    | B_ASP_609 | OD2    | 2.604        |
| 5UK2   | D_LYS_643 | NZ     | C_GLU_4   | OE1    | 3.112        |
| 5UK2   | D_LYS_643 | NZ     | C_ASP_5   | OD1    | 2.525        |
| 5UK2   | D_LYS_643 | NZ     | C_ASP_5   | OD2    | 3.631        |
| 5UK2   | E_ARG_106 | NH1    | F_GLU_569 | OE2    | 3.948        |
| 5UK2   | E_ARG_106 | NH2    | F_GLU_569 | OE2    | 2.300        |
| 5UK2   | E_ARG_311 | NH1    | F_ASP_586 | OD1    | 3.963        |
| 5UK2   | E_ARG_311 | NH1    | F_ASP_590 | OD1    | 2.962        |
| 5UK2   | E_ARG_311 | NH1    | F_ASP_590 | OD2    | 3.800        |
| 5UK2   | E_ARG_311 | NH2    | F_ASP_586 | OD1    | 3.154        |
| 5UK2   | F_LYS_558 | NZ     | D_GLU_597 | OE1    | 3.583        |
| 5UK2   | F_LYS_558 | NZ     | D_GLU_597 | OE2    | 3.900        |
| 5UK2   | F_LYS_568 | NZ     | E_GLU_107 | OE1    | 3.789        |
| 5UK2   | F_ARG_576 | NH1    | B_GLU_574 | OE1    | 3.881        |
| 5UK2   | F_ARG_576 | NH1    | B_GLU_574 | OE2    | 2.699        |
| 5UK2   | F_ARG_576 | NH2    | A_GLU_104 | OE2    | 3.688        |
| 5UK2   | F_LYS_583 | NZ     | B_ASP_585 | OD1    | 3.058        |
| 5UK2   | F_LYS_583 | NZ     | B_ASP_585 | OD2    | 3.745        |
| 5UK2   | F_ARG_606 | NH2    | D_ASP_609 | OD2    | 2.605        |
| 5UK2   | F_LYS_643 | NZ     | E_GLU_4   | OE1    | 3.293        |
| 5UK2   | F_LYS_643 | NZ     | E_ASP_5   | OD1    | 2.450        |
| 5UK2   | F_LYS_643 | NZ     | E_ASP_5   | OD2    | 3.677        |
| 5UK2   | G_ARG_225 | NH1    | A_ASP_190 | OD1    | 2.979        |
| 5UK2   | G_ARG_225 | NH1    | A_ASP_190 | OD2    | 3.894        |
| 5UK2   | G_ARG_225 | NH2    | A_ASP_190 | OD1    | 3.206        |
| 5UK2   | G_ARG_225 | NH2    | A_ASP_190 | OD2    | 2.785        |

|      |           |     |           |     |       |
|------|-----------|-----|-----------|-----|-------|
| 5UK2 | H_ARG_225 | NH1 | C_ASP_190 | OD1 | 3.085 |
| 5UK2 | H_ARG_225 | NH2 | C_ASP_190 | OD1 | 3.195 |
| 5UK2 | H_ARG_225 | NH2 | C_ASP_190 | OD2 | 2.865 |
| 5UK2 | I_ARG_225 | NH1 | E_ASP_190 | OD1 | 2.888 |
| 5UK2 | I_ARG_225 | NH1 | E_ASP_190 | OD2 | 3.869 |
| 5UK2 | I_ARG_225 | NH2 | E_ASP_190 | OD1 | 3.014 |
| 5UK2 | I_ARG_225 | NH2 | E_ASP_190 | OD2 | 2.625 |

Table 1492: Interfacial 5UK2-specific salt bridging networks analysis. In this table, a PDB file is specified with a four-letter PDB ID, except that the names of the PDB files corresponding to the single NMR structural model split from the NMR ensemble is specified with a four-letter PDB ID in addition to a hyphen followed by the single NMR structural model numeric ID, the residue naming scheme is **Chain ID\_residue name\_residue number**,  $\angle ADH$  represents the angle formed by acceptor (A), donor (D) and hydrogen (H) ( $\angle ADH$ ).

| PDB ID | Residue A | Atom A | Residue B | Atom B | Distance (Å) |
|--------|-----------|--------|-----------|--------|--------------|
| 5UR8   | A_ARG_59  | NH1    | B_ASP_95  | OD1    | 3.084        |
| 5UR8   | A_ARG_59  | NH1    | B_ASP_95  | OD2    | 3.357        |
| 5UR8   | A_LYS_138 | NZ     | B_GLU_215 | OE2    | 2.961        |

Table 1493: Interfacial 5UR8-specific salt bridging networks analysis. In this table, a PDB file is specified with a four-letter PDB ID, except that the names of the PDB files corresponding to the single NMR structural model split from the NMR ensemble is specified with a four-letter PDB ID in addition to a hyphen followed by the single NMR structural model numeric ID, the residue naming scheme is **Chain ID\_residue name\_residue number**,  $\angle ADH$  represents the angle formed by acceptor (A), donor (D) and hydrogen (H) ( $\angle ADH$ ).

| PDB ID | Residue A | Atom A | Residue B | Atom B | Distance (Å) |
|--------|-----------|--------|-----------|--------|--------------|
| 5VL3   | Q_HIS_213 | NE2    | H_GLU_58  | OE2    | 3.352        |
| 5VL3   | R_ARG_120 | NH2    | T_GLU_54  | OE2    | 3.782        |
| 5VL3   | R_LYS_127 | NZ     | T_GLU_54  | OE1    | 2.927        |
| 5VL3   | R_LYS_127 | NZ     | T_GLU_122 | OE1    | 2.999        |
| 5VL3   | R_HIS_213 | NE2    | A_GLU_58  | OE2    | 3.157        |
| 5VL3   | S_HIS_213 | NE2    | C_GLU_58  | OE2    | 3.140        |
| 5VL3   | T_LYS_127 | NZ     | R_GLU_54  | OE1    | 3.658        |
| 5VL3   | T_LYS_127 | NZ     | R_GLU_122 | OE1    | 3.863        |
| 5VL3   | T_HIS_213 | NE2    | E_GLU_58  | OE2    | 3.636        |
| 5VL3   | A_ARG_53  | NH2    | R_ASP_232 | OD1    | 3.883        |
| 5VL3   | A_ARG_53  | NH2    | R_ASP_232 | OD2    | 3.340        |
| 5VL3   | A_ARG_95  | NH1    | R_GLU_179 | OE1    | 3.121        |
| 5VL3   | A_ARG_95  | NH1    | R_GLU_179 | OE2    | 3.607        |
| 5VL3   | A_ARG_95  | NH2    | R_GLU_179 | OE2    | 3.046        |
| 5VL3   | A_LYS_210 | NZ     | B_GLU_124 | OE2    | 3.976        |
| 5VL3   | C_ARG_53  | NH2    | S_ASP_232 | OD2    | 3.370        |
| 5VL3   | C_ARG_95  | NH1    | S_GLU_179 | OE1    | 3.505        |
| 5VL3   | C_ARG_95  | NH1    | S_GLU_179 | OE2    | 3.184        |
| 5VL3   | C_ARG_95  | NH2    | S_GLU_179 | OE2    | 3.815        |
| 5VL3   | E_ARG_53  | NH2    | T_ASP_232 | OD1    | 3.852        |
| 5VL3   | E_ARG_53  | NH2    | T_ASP_232 | OD2    | 3.470        |
| 5VL3   | E_ARG_95  | NH1    | T_GLU_179 | OE1    | 2.688        |
| 5VL3   | E_ARG_95  | NH1    | T_GLU_179 | OE2    | 2.993        |
| 5VL3   | E_ARG_95  | NH2    | T_GLU_179 | OE2    | 3.079        |
| 5VL3   | E_LYS_210 | NZ     | F_GLU_    | OE2    | 3.778        |
| 5VL3   | E_LYS_    | NZ     | F_ASP_    | OD2    | 3.984        |
| 5VL3   | H_ARG_53  | NH2    | Q_ASP_232 | OD1    | 3.950        |
| 5VL3   | H_ARG_53  | NH2    | Q_ASP_232 | OD2    | 3.411        |
| 5VL3   | H_ARG_95  | NH1    | Q_GLU_179 | OE1    | 3.431        |
| 5VL3   | H_ARG_95  | NH1    | Q_GLU_179 | OE2    | 3.819        |
| 5VL3   | H_ARG_95  | NH2    | Q_GLU_179 | OE2    | 3.149        |
| 5VL3   | L_ARG_18  | NH2    | R_GLU_36  | OE2    | 3.892        |

Table 1494: Interfacial 5VL3-specific salt bridging networks analysis. In this table, a PDB file is specified with a four-letter PDB ID, except that the names of the PDB files corresponding to the single NMR structural model split from the NMR ensemble is specified with a four-letter PDB ID in addition to a hyphen followed by the single NMR structural model numeric ID, the residue naming scheme is **Chain ID\_residue name\_residue number**,  $\angle ADH$  represents the angle formed by acceptor (A), donor (D) and hydrogen (H) ( $\angle ADH$ ).



| PDB ID | Residue A | Atom A | Residue B | Atom B | Distance (Å) |
|--------|-----------|--------|-----------|--------|--------------|
| 5VN8   | G_LYS_34  | NZ     | A_ASP_612 | OD1    | 3.263        |
| 5VN8   | G_LYS_46  | NZ     | A_GLU_632 | OE1    | 3.416        |
| 5VN8   | G_LYS_46  | NZ     | A_GLU_632 | OE2    | 2.866        |
| 5VN8   | A_ARG_542 | NH2    | C_GLU_647 | OE2    | 2.749        |
| 5VN8   | A_ARG_579 | NH1    | C_GLU_584 | OE1    | 3.931        |
| 5VN8   | H_ARG_28  | NH1    | G_ASP_457 | OD1    | 2.893        |
| 5VN8   | L_HIS_49  | ND1    | H_ASP_101 | OD1    | 3.097        |
| 5VN8   | D_LYS_34  | NZ     | B_ASP_612 | OD1    | 3.397        |
| 5VN8   | D_LYS_46  | NZ     | B_GLU_632 | OE1    | 3.407        |
| 5VN8   | D_LYS_46  | NZ     | B_GLU_632 | OE2    | 2.853        |
| 5VN8   | B_ARG_542 | NH2    | A_GLU_647 | OE1    | 3.985        |
| 5VN8   | B_ARG_542 | NH2    | A_GLU_647 | OE2    | 2.712        |
| 5VN8   | B_ARG_579 | NH1    | A_GLU_584 | OE1    | 3.986        |
| 5VN8   | F_ARG_28  | NH1    | D_ASP_457 | OD1    | 2.808        |
| 5VN8   | J_HIS_49  | ND1    | F_ASP_101 | OD1    | 3.213        |
| 5VN8   | E_LYS_34  | NZ     | C_ASP_612 | OD1    | 3.266        |
| 5VN8   | E_LYS_46  | NZ     | C_GLU_632 | OE1    | 3.380        |
| 5VN8   | E_LYS_46  | NZ     | C_GLU_632 | OE2    | 2.776        |
| 5VN8   | C_ARG_542 | NH2    | B_GLU_647 | OE2    | 2.738        |
| 5VN8   | C_ARG_579 | NH1    | B_GLU_584 | OE1    | 3.772        |
| 5VN8   | I_ARG_28  | NH1    | E_ASP_457 | OD1    | 3.234        |
| 5VN8   | K_HIS_49  | ND1    | I_ASP_101 | OD1    | 3.072        |
| 5VN8   | K_HIS_49  | NE2    | I_ASP_101 | OD1    | 3.981        |

Table 1495: Interfacial 5VN8-specific salt bridging networks analysis. In this table, a PDB file is specified with a four-letter PDB ID, except that the names of the PDB files corresponding to the single NMR structural model split from the NMR ensemble is specified with a four-letter PDB ID in addition to a hyphen followed by the single NMR structural model numeric ID, the residue naming scheme is **Chain ID\_residue name\_residue number**,  $\angle ADH$  represents the angle formed by acceptor (A), donor (D) and hydrogen (H) ( $\angle ADH$ ).

| PDB ID | Residue A | Atom A | Residue B | Atom B | Distance (Å) |
|--------|-----------|--------|-----------|--------|--------------|
| 5VXJ   | B_ARG_19  | NH2    | A_ASP_97  | OD1    | 2.652        |
| 5VXJ   | B_ARG_50  | NH1    | I_GLU_200 | OE1    | 2.921        |
| 5VXJ   | B_ARG_50  | NH2    | I_GLU_200 | OE1    | 3.757        |
| 5VXJ   | B_LYS_76  | NZ     | A_GLU_122 | OE1    | 2.874        |
| 5VXJ   | B_HIS_80  | NE2    | A_ASP_144 | OD1    | 3.165        |
| 5VXJ   | B_HIS_80  | NE2    | A_ASP_144 | OD2    | 3.364        |
| 5VXJ   | D_ARG_19  | NH1    | C_ASP_97  | OD1    | 3.252        |
| 5VXJ   | D_ARG_50  | NH1    | E_GLU_200 | OE1    | 3.721        |
| 5VXJ   | D_ARG_50  | NH2    | E_GLU_200 | OE1    | 3.781        |
| 5VXJ   | D_LYS_76  | NZ     | C_GLU_122 | OE1    | 3.854        |
| 5VXJ   | D_HIS_80  | NE2    | C_ASP_144 | OD1    | 3.067        |
| 5VXJ   | D_HIS_80  | NE2    | C_ASP_144 | OD2    | 3.196        |
| 5VXJ   | E_LYS_137 | NZ     | F_ASP_73  | OD1    | 3.543        |
| 5VXJ   | E_LYS_137 | NZ     | F_ASP_73  | OD2    | 2.771        |
| 5VXJ   | F_ARG_19  | NH2    | E_ASP_97  | OD1    | 2.921        |
| 5VXJ   | F_ARG_50  | NH1    | G_GLU_200 | OE1    | 3.576        |
| 5VXJ   | F_ARG_50  | NH2    | G_GLU_200 | OE1    | 2.702        |
| 5VXJ   | F_LYS_76  | NZ     | E_GLU_122 | OE1    | 3.693        |
| 5VXJ   | F_HIS_80  | NE2    | E_ASP_144 | OD1    | 3.009        |
| 5VXJ   | F_HIS_80  | NE2    | E_ASP_144 | OD2    | 3.134        |
| 5VXJ   | G_LYS_137 | NZ     | H_ASP_73  | OD1    | 3.131        |
| 5VXJ   | G_LYS_137 | NZ     | H_ASP_73  | OD2    | 2.336        |
| 5VXJ   | H_ARG_19  | NH2    | G_ASP_97  | OD1    | 2.467        |
| 5VXJ   | H_LYS_76  | NZ     | G_ASP_124 | OD2    | 3.951        |
| 5VXJ   | H_HIS_80  | NE2    | G_ASP_144 | OD1    | 3.186        |
| 5VXJ   | H_HIS_80  | NE2    | G_ASP_144 | OD2    | 3.321        |
| 5VXJ   | I_LYS_137 | NZ     | J_ASP_73  | OD1    | 3.804        |
| 5VXJ   | I_LYS_137 | NZ     | J_ASP_73  | OD2    | 2.902        |
| 5VXJ   | J_ARG_19  | NH2    | I_ASP_97  | OD1    | 2.772        |
| 5VXJ   | J_LYS_76  | NZ     | I_GLU_122 | OE2    | 2.338        |
| 5VXJ   | J_HIS_80  | NE2    | I_ASP_144 | OD1    | 3.036        |
| 5VXJ   | J_HIS_80  | NE2    | I_ASP_144 | OD2    | 3.151        |

Table 1496: Interfacial 5VXJ-specific salt bridging networks analysis. In this table, a PDB file is specified with a four-letter PDB ID, except that the names of the PDB files corresponding to the single NMR structural model split from the NMR ensemble is specified with a four-letter PDB ID in addition to a hyphen followed by the single NMR structural model numeric ID, the residue naming scheme is **Chain ID\_residue name\_residue number**,  $\angle ADH$  represents the angle formed by acceptor (A), donor (D) and hydrogen (H) ( $\angle ADH$ ).

| PDB ID | Residue A | Atom A | Residue B | Atom B | Distance (Å) |
|--------|-----------|--------|-----------|--------|--------------|
| 5VXL   | A_LYS_205 | NZ     | B_ASP_52  | OD2    | 2.998        |
| 5VXL   | B_ARG_102 | NH1    | A_GLU_201 | OE1    | 3.097        |
| 5VXL   | B_ARG_102 | NH2    | A_GLU_201 | OE1    | 3.202        |
| 5VXL   | B_ARG_102 | NH2    | A_GLU_201 | OE2    | 2.871        |

Table 1497: Interfacial 5VXL-specific salt bridging networks analysis. In this table, a PDB file is specified with a four-letter PDB ID, except that the names of the PDB files corresponding to the single NMR structural model split from the NMR ensemble is specified with a four-letter PDB ID in addition to a hyphen followed by the single NMR structural model numeric ID, the residue naming scheme is **Chain ID\_residue name\_residue number**,  $\angle ADH$  represents the angle formed by acceptor (A), donor (D) and hydrogen (H) ( $\angle ADH$ ).

| PDB ID | Residue A | Atom A | Residue B | Atom B | Distance (Å) |
|--------|-----------|--------|-----------|--------|--------------|
| 5VXM   | A_LYS_205 | NZ     | B_ASP_53  | OD1    | 3.221        |
| 5VXM   | A_LYS_205 | NZ     | B_ASP_53  | OD2    | 3.090        |
| 5VXM   | B_ARG_59  | NH2    | A_GLU_201 | OE1    | 3.364        |

Table 1498: Interfacial 5VXM-specific salt bridging networks analysis. In this table, a PDB file is specified with a four-letter PDB ID, except that the names of the PDB files corresponding to the single NMR structural model split from the NMR ensemble is specified with a four-letter PDB ID in addition to a hyphen followed by the single NMR structural model numeric ID, the residue naming scheme is **Chain ID\_residue name\_residue number**,  $\angle ADH$  represents the angle formed by acceptor (A), donor (D) and hydrogen (H) ( $\angle ADH$ ).

| PDB ID | Residue A | Atom A | Residue B | Atom B | Distance (Å) |
|--------|-----------|--------|-----------|--------|--------------|
| 5VXR   | H_LYS_214 | NZ     | L_GLU_123 | OE2    | 2.932        |

Table 1499: Interfacial 5VXR-specific salt bridging networks analysis. In this table, a PDB file is specified with a four-letter PDB ID, except that the names of the PDB files corresponding to the single NMR structural model split from the NMR ensemble is specified with a four-letter PDB ID in addition to a hyphen followed by the single NMR structural model numeric ID, the residue naming scheme is **Chain ID\_residue name\_residue number**,  $\angle ADH$  represents the angle formed by acceptor (A), donor (D) and hydrogen (H) ( $\angle ADH$ ).

| PDB ID | Residue A | Atom A | Residue B  | Atom B | Distance (Å) |
|--------|-----------|--------|------------|--------|--------------|
| 5VZR   | H.LYS_219 | NZ     | L.GLU_123  | OE2    | 3.208        |
| 5VZR   | L.ARG_96  | NH2    | H.ASP_100C | OD2    | 3.042        |
| 5VZR   | A.LYS_219 | NZ     | B.GLU_123  | OE1    | 3.381        |
| 5VZR   | B.ARG_96  | NH2    | A.ASP_100C | OD2    | 2.983        |

Table 1500: Interfacial 5VZR-specific salt bridging networks analysis. In this table, a PDB file is specified with a four-letter PDB ID, except that the names of the PDB files corresponding to the single NMR structural model split from the NMR ensemble is specified with a four-letter PDB ID in addition to a hyphen followed by the single NMR structural model numeric ID, the residue naming scheme is **Chain ID\_residue name\_residue number**,  $\angle ADH$  represents the angle formed by acceptor (A), donor (D) and hydrogen (H) ( $\angle ADH$ ).

| PDB ID | Residue A  | Atom A | Residue B  | Atom B | Distance (Å) |
|--------|------------|--------|------------|--------|--------------|
| 5W9H   | A_ARG_758  | NH1    | p_ASP_740  | OD1    | 3.106        |
| 5W9H   | A_ARG_1113 | NH2    | D_GLU_1105 | OE1    | 3.583        |
| 5W9H   | A_ARG_1179 | NH2    | B_ASP_31   | OD1    | 2.752        |
| 5W9H   | C_ARG_96   | NH1    | B_ASP_100C | OD2    | 2.859        |
| 5W9H   | C_ARG_96   | NH2    | A_GLU_1183 | OE1    | 3.871        |
| 5W9H   | C_ARG_96   | NH2    | A_GLU_1183 | OE2    | 2.827        |
| 5W9H   | C_ARG_96   | NH2    | B_ASP_100C | OD2    | 2.885        |
| 5W9H   | D_ARG_1113 | NH1    | G_GLU_1105 | OE1    | 3.247        |
| 5W9H   | F_ARG_96   | NH1    | E_ASP_100C | OD2    | 2.830        |
| 5W9H   | F_ARG_96   | NH2    | E_ASP_100C | OD2    | 2.948        |
| 5W9H   | G_ARG_758  | NH1    | r_ASP_740  | OD1    | 2.922        |
| 5W9H   | G_ARG_1113 | NH2    | A_GLU_1105 | OE1    | 3.110        |
| 5W9H   | G_ARG_1179 | NH2    | H_ASP_31   | OD1    | 2.809        |
| 5W9H   | I_ARG_96   | NH1    | H_ASP_100C | OD2    | 2.791        |
| 5W9H   | I_ARG_96   | NH2    | G_GLU_1183 | OE2    | 2.911        |
| 5W9H   | I_ARG_96   | NH2    | H_ASP_100C | OD2    | 2.950        |
| 5W9H   | p_HIS_681  | NE2    | D_ASP_910  | OD1    | 2.819        |
| 5W9H   | p_HIS_681  | NE2    | D_ASP_910  | OD2    | 3.760        |
| 5W9H   | r_HIS_681  | NE2    | A_ASP_910  | OD1    | 2.850        |
| 5W9H   | r_HIS_681  | NE2    | A_ASP_910  | OD2    | 3.840        |

Table 1501: Interfacial 5W9H-specific salt bridging networks analysis. In this table, a PDB file is specified with a four-letter PDB ID, except that the names of the PDB files corresponding to the single NMR structural model split from the NMR ensemble is specified with a four-letter PDB ID in addition to a hyphen followed by the single NMR structural model numeric ID, the residue naming scheme is **Chain ID\_residue name\_residue number**,  $\angle ADH$  represents the angle formed by acceptor (A), donor (D) and hydrogen (H) ( $\angle ADH$ ).

| PDB ID | Residue A  | Atom A | Residue B  | Atom B | Distance (Å) |
|--------|------------|--------|------------|--------|--------------|
| 5W9I   | A_ARG.758  | NH1    | B_ASP.740  | OD1    | 2.830        |
| 5W9I   | A_ARG.847  | NH1    | F_ASP.726  | OD1    | 3.733        |
| 5W9I   | A_ARG.847  | NH1    | F_ASP.726  | OD2    | 2.884        |
| 5W9I   | A_ARG.1113 | NH2    | I_GLU.1105 | OE2    | 2.773        |
| 5W9I   | A_ARG.1179 | NH2    | C_ASP.31   | OD1    | 2.834        |
| 5W9I   | B_HIS.681  | NE2    | I_ASP.910  | OD1    | 2.801        |
| 5W9I   | B_HIS.681  | NE2    | I_ASP.910  | OD2    | 3.893        |
| 5W9I   | D_ARG.96   | NH1    | C_ASP.100C | OD2    | 2.837        |
| 5W9I   | D_ARG.96   | NH2    | A_GLU.1183 | OE2    | 2.862        |
| 5W9I   | D_ARG.96   | NH2    | C_ASP.100C | OD2    | 2.920        |
| 5W9I   | E_ARG.758  | NH1    | F_ASP.740  | OD1    | 2.820        |
| 5W9I   | E_ARG.847  | NH1    | J_ASP.726  | OD1    | 3.709        |
| 5W9I   | E_ARG.847  | NH1    | J_ASP.726  | OD2    | 2.881        |
| 5W9I   | E_ARG.1179 | NH2    | G_ASP.31   | OD1    | 2.831        |
| 5W9I   | F_HIS.681  | NE2    | A_ASP.910  | OD1    | 2.878        |
| 5W9I   | F_HIS.681  | NE2    | A_ASP.910  | OD2    | 3.982        |
| 5W9I   | H_ARG.96   | NH1    | G_ASP.100C | OD2    | 2.856        |
| 5W9I   | H_ARG.96   | NH2    | E_GLU.1183 | OE2    | 2.871        |
| 5W9I   | H_ARG.96   | NH2    | G_ASP.100C | OD2    | 2.925        |
| 5W9I   | I_ARG.758  | NH1    | J_ASP.740  | OD1    | 2.804        |
| 5W9I   | I_ARG.847  | NH1    | B_ASP.726  | OD1    | 3.716        |
| 5W9I   | I_ARG.847  | NH1    | B_ASP.726  | OD2    | 2.881        |
| 5W9I   | I_ARG.1113 | NH2    | E_GLU.1105 | OE2    | 2.821        |
| 5W9I   | I_ARG.1179 | NH2    | K_ASP.31   | OD1    | 2.785        |
| 5W9I   | J_HIS.681  | NE2    | E_ASP.910  | OD1    | 2.832        |
| 5W9I   | L_ARG.96   | NH1    | K_ASP.100C | OD2    | 2.856        |
| 5W9I   | L_ARG.96   | NH2    | I_GLU.1183 | OE2    | 2.872        |
| 5W9I   | L_ARG.96   | NH2    | K_ASP.100C | OD2    | 2.922        |

Table 1502: Interfacial 5W9I-specific salt bridging networks analysis. In this table, a PDB file is specified with a four-letter PDB ID, except that the names of the PDB files corresponding to the single NMR structural model split from the NMR ensemble is specified with a four-letter PDB ID in addition to a hyphen followed by the single NMR structural model numeric ID, the residue naming scheme is **Chain ID\_residue name\_residue number**,  $\angle ADH$  represents the angle formed by acceptor (A), donor (D) and hydrogen (H) ( $\angle ADH$ ).



| PDB ID | Residue A  | Atom A | Residue B  | Atom B | Distance (Å) |
|--------|------------|--------|------------|--------|--------------|
| 5W9J   | D_ARG_1113 | NH2    | G_GLU_1105 | OE1    | 3.627        |
| 5W9J   | D_ARG_1113 | NH2    | G_GLU_1105 | OE2    | 2.779        |
| 5W9J   | F_ARG_96   | NH1    | E_ASP_100C | OD1    | 3.873        |
| 5W9J   | F_ARG_96   | NH1    | E_ASP_100C | OD2    | 3.469        |
| 5W9J   | A_ARG_1113 | NH2    | D_GLU_1105 | OE1    | 3.626        |
| 5W9J   | A_ARG_1113 | NH2    | D_GLU_1105 | OE2    | 2.778        |
| 5W9J   | C_ARG_96   | NH1    | B_ASP_100C | OD1    | 3.873        |
| 5W9J   | C_ARG_96   | NH1    | B_ASP_100C | OD2    | 3.470        |
| 5W9J   | G_ARG_1113 | NH2    | A_GLU_1105 | OE1    | 3.626        |
| 5W9J   | G_ARG_1113 | NH2    | A_GLU_1105 | OE2    | 2.777        |
| 5W9J   | I_ARG_96   | NH1    | H_ASP_100C | OD1    | 3.873        |
| 5W9J   | I_ARG_96   | NH1    | H_ASP_100C | OD2    | 3.470        |

Table 1503: Interfacial 5W9J-specific salt bridging networks analysis. In this table, a PDB file is specified with a four-letter PDB ID, except that the names of the PDB files corresponding to the single NMR structural model split from the NMR ensemble is specified with a four-letter PDB ID in addition to a hyphen followed by the single NMR structural model numeric ID, the residue naming scheme is **Chain ID** **residue name** **residue number**,  $\angle ADH$  represents the angle formed by acceptor (A), donor (D) and hydrogen (H) ( $\angle ADH$ ).

| PDB ID | Residue A  | Atom A | Residue B  | Atom B | Distance (Å) |
|--------|------------|--------|------------|--------|--------------|
| 5W9K   | A_ARG_758  | NH1    | J_ASP_740  | OD1    | 3.054        |
| 5W9K   | A_ARG_1113 | NH2    | D_GLU_1105 | OE1    | 3.698        |
| 5W9K   | C_ARG_96   | NH1    | B_ASP_100C | OD2    | 2.822        |
| 5W9K   | C_ARG_96   | NH2    | A_GLU_1183 | OE1    | 3.683        |
| 5W9K   | C_ARG_96   | NH2    | B_ASP_100C | OD2    | 3.420        |
| 5W9K   | D_ARG_847  | NH2    | A_GLU_1017 | OE2    | 3.108        |
| 5W9K   | D_ARG_1113 | NH1    | G_GLU_1105 | OE2    | 3.336        |
| 5W9K   | F_ARG_96   | NH1    | E_ASP_100C | OD2    | 2.856        |
| 5W9K   | F_ARG_96   | NH2    | D_GLU_1183 | OE2    | 3.059        |
| 5W9K   | F_ARG_96   | NH2    | E_ASP_100C | OD2    | 3.317        |
| 5W9K   | G_ARG_758  | NH1    | L_ASP_740  | OD1    | 3.028        |
| 5W9K   | G_ARG_758  | NH2    | L_ASP_740  | OD1    | 3.483        |
| 5W9K   | G_ARG_847  | NH1    | K_ASP_726  | OD2    | 3.336        |
| 5W9K   | G_ARG_1113 | NH2    | A_GLU_1105 | OE2    | 3.565        |
| 5W9K   | I_ARG_96   | NH1    | H_ASP_100C | OD2    | 2.828        |
| 5W9K   | I_ARG_96   | NH2    | G_GLU_1183 | OE2    | 3.651        |
| 5W9K   | I_ARG_96   | NH2    | H_ASP_100C | OD2    | 3.553        |
| 5W9K   | J_HIS_681  | NE2    | D_ASP_910  | OD1    | 2.963        |
| 5W9K   | J_ARG_700  | NH2    | A_GLU_756  | OE2    | 2.841        |
| 5W9K   | L_HIS_681  | NE2    | A_ASP_910  | OD1    | 3.027        |
| 5W9K   | L_HIS_681  | NE2    | A_ASP_910  | OD2    | 3.875        |
| 5W9K   | L_ARG_700  | NH2    | G_GLU_756  | OE2    | 2.893        |

Table 1504: Interfacial 5W9K-specific salt bridging networks analysis. In this table, a PDB file is specified with a four-letter PDB ID, except that the names of the PDB files corresponding to the single NMR structural model split from the NMR ensemble is specified with a four-letter PDB ID in addition to a hyphen followed by the single NMR structural model numeric ID, the residue naming scheme is **Chain ID\_residue name\_residue number**,  $\angle ADH$  represents the angle formed by acceptor (A), donor (D) and hydrogen (H) ( $\angle ADH$ ).

| PDB ID | Residue A  | Atom A | Residue B  | Atom B | Distance (Å) |
|--------|------------|--------|------------|--------|--------------|
| 5W9L   | A_ARG.758  | NH1    | B_ASP.740  | OD1    | 2.964        |
| 5W9L   | A_ARG.758  | NH2    | B_ASP.740  | OD1    | 3.858        |
| 5W9L   | A_ARG.1113 | NH2    | D_GLU.1105 | OE1    | 3.448        |
| 5W9L   | A_ARG.1113 | NH2    | D_GLU.1105 | OE2    | 2.879        |
| 5W9L   | F_ARG.96   | NH1    | E_ASP.100C | OD2    | 3.246        |
| 5W9L   | F_ARG.96   | NH2    | D_GLU.1183 | OE2    | 2.643        |
| 5W9L   | F_ARG.96   | NH2    | E_ASP.100C | OD2    | 3.370        |
| 5W9L   | G_ARG.758  | NH1    | J_ASP.740  | OD1    | 2.859        |
| 5W9L   | G_ARG.758  | NH2    | J_ASP.740  | OD1    | 3.792        |
| 5W9L   | G_ARG.1179 | NH2    | H_ASP.31   | OD1    | 2.753        |
| 5W9L   | I_ARG.96   | NH1    | H_ASP.100C | OD2    | 2.945        |
| 5W9L   | I_ARG.96   | NH2    | H_ASP.100C | OD2    | 2.982        |
| 5W9L   | B_HIS.681  | NE2    | D_ASP.910  | OD1    | 2.803        |
| 5W9L   | B_HIS.681  | NE2    | D_ASP.910  | OD2    | 3.795        |
| 5W9L   | B_ARG.700  | NH1    | A_GLU.756  | OE2    | 2.893        |
| 5W9L   | J_HIS.681  | NE2    | A_ASP.910  | OD1    | 2.810        |
| 5W9L   | J_HIS.681  | NE2    | A_ASP.910  | OD2    | 3.815        |

Table 1505: Interfacial 5W9L-specific salt bridging networks analysis. In this table, a PDB file is specified with a four-letter PDB ID, except that the names of the PDB files corresponding to the single NMR structural model split from the NMR ensemble is specified with a four-letter PDB ID in addition to a hyphen followed by the single NMR structural model numeric ID, the residue naming scheme is **Chain ID\_residue name\_residue number**,  $\angle ADH$  represents the angle formed by acceptor (A), donor (D) and hydrogen (H) ( $\angle ADH$ ).

| PDB ID | Residue A  | Atom A | Residue B  | Atom B | Distance (Å) |
|--------|------------|--------|------------|--------|--------------|
| 5W9M   | A_ARG.758  | NH1    | E_ASP.740  | OD1    | 2.862        |
| 5W9M   | A_ARG.758  | NH2    | E_ASP.740  | OD1    | 2.970        |
| 5W9M   | A_ARG.847  | NH1    | J_ASP.726  | OD2    | 3.850        |
| 5W9M   | C_ARG.96   | NH1    | B_ASP.100C | OD2    | 2.894        |
| 5W9M   | C_ARG.96   | NH2    | A_GLU.1183 | OE2    | 2.938        |
| 5W9M   | C_ARG.96   | NH2    | B_ASP.100C | OD2    | 2.940        |
| 5W9M   | D_ARG.847  | NH1    | A_GLU.1017 | OE2    | 3.300        |
| 5W9M   | D_ARG.847  | NH2    | A_GLU.1017 | OE2    | 3.532        |
| 5W9M   | G_ARG.758  | NH1    | J_ASP.740  | OD1    | 2.816        |
| 5W9M   | G_ARG.758  | NH2    | J_ASP.740  | OD1    | 3.407        |
| 5W9M   | G_ARG.1113 | NH2    | A_GLU.1105 | OE1    | 3.823        |
| 5W9M   | G_ARG.1113 | NH2    | A_GLU.1105 | OE2    | 2.800        |
| 5W9M   | G_ARG.1179 | NH1    | H_ASP.31   | OD1    | 3.713        |
| 5W9M   | I_ARG.96   | NH1    | H_ASP.100C | OD2    | 2.840        |
| 5W9M   | I_ARG.96   | NH2    | G_GLU.1183 | OE2    | 2.957        |
| 5W9M   | I_ARG.96   | NH2    | H_ASP.100C | OD2    | 3.363        |
| 5W9M   | E_HIS.681  | NE2    | D_ASP.910  | OD1    | 2.869        |
| 5W9M   | E_HIS.681  | NE2    | D_ASP.910  | OD2    | 3.974        |
| 5W9M   | E_ARG.700  | NH2    | A_GLU.756  | OE1    | 3.024        |
| 5W9M   | E_ARG.700  | NH2    | A_GLU.756  | OE2    | 3.469        |
| 5W9M   | F_HIS.681  | NE2    | G_ASP.910  | OD1    | 2.934        |
| 5W9M   | F_HIS.681  | NE2    | G_ASP.910  | OD2    | 3.892        |
| 5W9M   | J_HIS.681  | NE2    | A_ASP.910  | OD1    | 3.021        |

Table 1506: Interfacial 5W9M-specific salt bridging networks analysis. In this table, a PDB file is specified with a four-letter PDB ID, except that the names of the PDB files corresponding to the single NMR structural model split from the NMR ensemble is specified with a four-letter PDB ID in addition to a hyphen followed by the single NMR structural model numeric ID, the residue naming scheme is **Chain ID\_residue name\_residue number**,  $\angle ADH$  represents the angle formed by acceptor (A), donor (D) and hydrogen (H) ( $\angle ADH$ ).

| PDB ID | Residue A  | Atom A | Residue B  | Atom B | Distance (Å) |
|--------|------------|--------|------------|--------|--------------|
| 5W9N   | A_ARG_758  | NH1    | H_ASP_740  | OD1    | 3.061        |
| 5W9N   | A_ARG_758  | NH2    | H_ASP_740  | OD1    | 3.534        |
| 5W9N   | C_ARG_96   | NH1    | B_ASP_100C | OD2    | 2.860        |
| 5W9N   | C_ARG_96   | NH2    | A_GLU_1183 | OE2    | 2.942        |
| 5W9N   | C_ARG_96   | NH2    | B_ASP_100C | OD2    | 3.629        |
| 5W9N   | F_ARG_96   | NH1    | E_ASP_100C | OD2    | 2.898        |
| 5W9N   | F_ARG_96   | NH2    | D_GLU_1183 | OE2    | 3.465        |
| 5W9N   | F_ARG_96   | NH2    | E_ASP_100C | OD2    | 3.359        |
| 5W9N   | G_ARG_758  | NH1    | J_ASP_740  | OD1    | 2.883        |
| 5W9N   | G_ARG_758  | NH2    | J_ASP_740  | OD1    | 3.992        |
| 5W9N   | G_ARG_1113 | NH2    | A_GLU_1105 | OE1    | 3.089        |
| 5W9N   | H_HIS_681  | NE2    | D_ASP_910  | OD1    | 2.909        |
| 5W9N   | H_HIS_681  | NE2    | D_ASP_910  | OD2    | 3.885        |
| 5W9N   | J_HIS_681  | NE2    | A_ASP_910  | OD1    | 2.923        |
| 5W9N   | J_HIS_681  | NE2    | A_ASP_910  | OD2    | 3.770        |

Table 1507: Interfacial 5W9N-specific salt bridging networks analysis. In this table, a PDB file is specified with a four-letter PDB ID, except that the names of the PDB files corresponding to the single NMR structural model split from the NMR ensemble is specified with a four-letter PDB ID in addition to a hyphen followed by the single NMR structural model numeric ID, the residue naming scheme is **Chain ID\_residue name\_residue number**,  $\angle ADH$  represents the angle formed by acceptor (A), donor (D) and hydrogen (H) ( $\angle ADH$ ).

| PDB ID | Residue A  | Atom A | Residue B  | Atom B | Distance (Å) |
|--------|------------|--------|------------|--------|--------------|
| 5W9O   | A_ARG.758  | NH1    | J_ASP.740  | OD1    | 2.989        |
| 5W9O   | A_ARG.1113 | NH2    | D_GLU.1105 | OE1    | 3.178        |
| 5W9O   | A_ARG.1179 | NH2    | B_ASP.31   | OD1    | 2.796        |
| 5W9O   | C_ARG.96   | NH1    | B_ASP.100C | OD2    | 3.180        |
| 5W9O   | C_ARG.96   | NH2    | B_ASP.100C | OD2    | 2.879        |
| 5W9O   | D_ARG.847  | NH1    | J_ASP.726  | OD2    | 2.979        |
| 5W9O   | D_ARG.1113 | NH1    | G_GLU.1105 | OE1    | 3.664        |
| 5W9O   | F_ARG.96   | NH1    | E_ASP.100C | OD2    | 2.799        |
| 5W9O   | F_ARG.96   | NH2    | D_GLU.1183 | OE2    | 3.799        |
| 5W9O   | F_ARG.96   | NH2    | E_ASP.100C | OD2    | 3.255        |
| 5W9O   | G_ARG.758  | NH1    | L_ASP.740  | OD1    | 2.934        |
| 5W9O   | G_ARG.847  | NH1    | K_ASP.726  | OD2    | 3.097        |
| 5W9O   | G_ARG.1179 | NH2    | H_ASP.31   | OD1    | 2.843        |
| 5W9O   | I_ARG.96   | NH1    | H_ASP.100C | OD2    | 3.979        |
| 5W9O   | I_ARG.96   | NH2    | G_GLU.1183 | OE2    | 2.715        |
| 5W9O   | I_ARG.96   | NH2    | H_ASP.100C | OD2    | 3.993        |
| 5W9O   | J_HIS.681  | NE2    | D_ASP.910  | OD1    | 2.932        |
| 5W9O   | J_ARG.700  | NH2    | A_GLU.756  | OE1    | 3.931        |
| 5W9O   | J_ARG.700  | NH2    | A_GLU.756  | OE2    | 2.914        |
| 5W9O   | L_HIS.681  | NE2    | A_ASP.910  | OD1    | 3.028        |
| 5W9O   | L_HIS.681  | NE2    | A_ASP.910  | OD2    | 3.886        |

Table 1508: Interfacial 5W9O-specific salt bridging networks analysis. In this table, a PDB file is specified with a four-letter PDB ID, except that the names of the PDB files corresponding to the single NMR structural model split from the NMR ensemble is specified with a four-letter PDB ID in addition to a hyphen followed by the single NMR structural model numeric ID, the residue naming scheme is **Chain ID\_residue name\_residue number**,  $\angle ADH$  represents the angle formed by acceptor (A), donor (D) and hydrogen (H) ( $\angle ADH$ ).

| PDB ID | Residue A  | Atom A | Residue B  | Atom B | Distance (Å) |
|--------|------------|--------|------------|--------|--------------|
| 5W9P   | J_ARG.758  | NH2    | A_ASP.740  | OD1    | 2.970        |
| 5W9P   | J_ARG.847  | NH1    | C_ASP.726  | OD1    | 3.573        |
| 5W9P   | J_ARG.847  | NH1    | C_ASP.726  | OD2    | 2.973        |
| 5W9P   | J_ARG.1113 | NH2    | H_GLU.1105 | OE1    | 3.990        |
| 5W9P   | J_ARG.1113 | NH2    | H_GLU.1105 | OE2    | 2.796        |
| 5W9P   | J_ARG.1179 | NH2    | F_ASP.31   | OD1    | 2.888        |
| 5W9P   | A_HIS.681  | NE2    | H_ASP.910  | OD1    | 3.149        |
| 5W9P   | A_HIS.681  | NE2    | H_ASP.910  | OD2    | 3.352        |
| 5W9P   | A_ARG.691  | NH2    | H_GLU.818  | OE2    | 2.969        |
| 5W9P   | A_ARG.700  | NH2    | J_GLU.756  | OE2    | 2.978        |
| 5W9P   | G_ARG.1212 | NH1    | J_GLU.1183 | OE2    | 3.421        |
| 5W9P   | G_ARG.1212 | NH2    | J_GLU.1183 | OE2    | 2.921        |
| 5W9P   | G_ARG.1212 | NH2    | F_ASP.100C | OD2    | 2.848        |
| 5W9P   | B_ARG.758  | NH2    | C_ASP.740  | OD1    | 2.971        |
| 5W9P   | B_ARG.847  | NH1    | I_ASP.726  | OD1    | 3.572        |
| 5W9P   | B_ARG.847  | NH1    | I_ASP.726  | OD2    | 2.973        |
| 5W9P   | B_ARG.1113 | NH2    | J_GLU.1105 | OE1    | 3.989        |
| 5W9P   | B_ARG.1113 | NH2    | J_GLU.1105 | OE2    | 2.795        |
| 5W9P   | B_ARG.1179 | NH2    | D_ASP.31   | OD1    | 2.887        |
| 5W9P   | C_HIS.681  | NE2    | J_ASP.910  | OD1    | 3.149        |
| 5W9P   | C_HIS.681  | NE2    | J_ASP.910  | OD2    | 3.352        |
| 5W9P   | C_ARG.691  | NH2    | J_GLU.818  | OE2    | 2.970        |
| 5W9P   | C_ARG.700  | NH2    | B_GLU.756  | OE2    | 2.978        |
| 5W9P   | E_ARG.1212 | NH1    | B_GLU.1183 | OE2    | 3.420        |
| 5W9P   | E_ARG.1212 | NH2    | B_GLU.1183 | OE2    | 2.920        |
| 5W9P   | E_ARG.1212 | NH2    | D_ASP.100C | OD2    | 2.848        |
| 5W9P   | H_ARG.758  | NH2    | I_ASP.740  | OD1    | 2.969        |
| 5W9P   | H_ARG.847  | NH1    | A_ASP.726  | OD1    | 3.572        |
| 5W9P   | H_ARG.847  | NH1    | A_ASP.726  | OD2    | 2.973        |
| 5W9P   | H_ARG.1113 | NH2    | B_GLU.1105 | OE1    | 3.989        |
| 5W9P   | H_ARG.1113 | NH2    | B_GLU.1105 | OE2    | 2.795        |
| 5W9P   | H_ARG.1179 | NH2    | K_ASP.31   | OD1    | 2.888        |
| 5W9P   | I_HIS.681  | NE2    | B_ASP.910  | OD1    | 3.149        |
| 5W9P   | I_HIS.681  | NE2    | B_ASP.910  | OD2    | 3.352        |
| 5W9P   | I_ARG.691  | NH2    | B_GLU.818  | OE2    | 2.970        |
| 5W9P   | I_ARG.700  | NH2    | H_GLU.756  | OE2    | 2.977        |
| 5W9P   | L_ARG.1212 | NH1    | H_GLU.1183 | OE2    | 3.420        |
| 5W9P   | L_ARG.1212 | NH2    | H_GLU.1183 | OE2    | 2.921        |
| 5W9P   | L_ARG.1212 | NH2    | K_ASP.100C | OD2    | 2.848        |

Table 1509: Interfacial 5W9P-specific salt bridging networks analysis. In this table, a PDB file is specified with a four-letter PDB ID, except that the names of the PDB files corresponding to the single NMR structural model split from the NMR ensemble is specified with a four-letter PDB ID in addition to a hyphen followed by the single NMR structural model numeric ID, the residue naming scheme is **Chain ID\_residue name\_residue number**,  $\angle ADH$  represents the angle formed by acceptor (A), donor (D) and hydrogen (H) ( $\angle ADH$ ).

| PDB ID | Residue A | Atom A | Residue B | Atom B | Distance (Å) |
|--------|-----------|--------|-----------|--------|--------------|
| 5WK4   | D_ARG_29  | NH2    | E_ASP_36  | OD1    | 3.168        |
| 5WK4   | D_ARG_29  | NH2    | E_ASP_36  | OD2    | 3.056        |
| 5WK4   | D_ARG_101 | NH2    | E_ASP_50  | OD2    | 3.021        |
| 5WK4   | A_HIS_174 | NE2    | D_GLU_65  | OE2    | 2.738        |
| 5WK4   | B_ARG_29  | NH2    | C_ASP_36  | OD1    | 3.257        |
| 5WK4   | B_ARG_29  | NH2    | C_ASP_36  | OD2    | 2.944        |
| 5WK4   | B_ARG_101 | NH1    | C_ASP_50  | OD2    | 3.997        |
| 5WK4   | B_ARG_101 | NH2    | C_ASP_50  | OD2    | 2.811        |
| 5WK4   | C_ARG_29  | NH2    | B_ASP_36  | OD1    | 3.196        |
| 5WK4   | C_ARG_29  | NH2    | B_ASP_36  | OD2    | 3.146        |
| 5WK4   | C_ARG_101 | NH1    | B_ASP_50  | OD2    | 3.840        |
| 5WK4   | C_ARG_101 | NH2    | B_ASP_50  | OD2    | 2.874        |
| 5WK4   | E_ARG_29  | NH2    | D_ASP_36  | OD1    | 3.889        |
| 5WK4   | E_ARG_101 | NH2    | D_ASP_50  | OD2    | 2.922        |

Table 1510: Interfacial 5WK4-specific salt bridging networks analysis. In this table, a PDB file is specified with a four-letter PDB ID, except that the names of the PDB files corresponding to the single NMR structural model split from the NMR ensemble is specified with a four-letter PDB ID in addition to a hyphen followed by the single NMR structural model numeric ID, the residue naming scheme is **Chain ID\_residue name\_residue number**,  $\angle ADH$  represents the angle formed by acceptor (A), donor (D) and hydrogen (H) ( $\angle ADH$ ).



| PDB ID | Residue A | Atom A | Residue B | Atom B | Distance (Å) |
|--------|-----------|--------|-----------|--------|--------------|
| 5WKQ   | A_ARG_135 | NH1    | B_ASP_212 | OD1    | 3.924        |
| 5WKQ   | A_ARG_135 | NH2    | B_ASP_212 | OD1    | 3.057        |
| 5WKQ   | B_HIS_207 | ND1    | A_GLU_131 | OE1    | 3.383        |
| 5WKQ   | B_HIS_207 | ND1    | A_GLU_131 | OE2    | 2.652        |

Table 1511: Interfacial 5WKQ-specific salt bridging networks analysis. In this table, a PDB file is specified with a four-letter PDB ID, except that the names of the PDB files corresponding to the single NMR structural model split from the NMR ensemble is specified with a four-letter PDB ID in addition to a hyphen followed by the single NMR structural model numeric ID, the residue naming scheme is **Chain ID\_residue name\_residue number**,  $\angle ADH$  represents the angle formed by acceptor (A), donor (D) and hydrogen (H) ( $\angle ADH$ ).

| PDB ID | Residue A | Atom A | Residue B | Atom B | Distance (Å) |
|--------|-----------|--------|-----------|--------|--------------|
| 5WNA   | H_LYS_220 | NZ     | L_GLU_122 | OE2    | 3.667        |
| 5WNA   | H_LYS_225 | NZ     | L_ASP_121 | OD1    | 3.706        |
| 5WNA   | L_LYS_39  | NZ     | D_GLU_81  | OE1    | 2.898        |
| 5WNA   | L_LYS_39  | NZ     | D_GLU_81  | OE2    | 2.887        |
| 5WNA   | C_LYS_220 | NZ     | D_GLU_122 | OE2    | 3.567        |
| 5WNA   | D_LYS_39  | NZ     | L_GLU_81  | OE1    | 3.744        |

Table 1512: Interfacial 5WNA-specific salt bridging networks analysis. In this table, a PDB file is specified with a four-letter PDB ID, except that the names of the PDB files corresponding to the single NMR structural model split from the NMR ensemble is specified with a four-letter PDB ID in addition to a hyphen followed by the single NMR structural model numeric ID, the residue naming scheme is **Chain ID\_residue name\_residue number**,  $\angle ADH$  represents the angle formed by acceptor (A), donor (D) and hydrogen (H) ( $\angle ADH$ ).

| PDB ID | Residue A | Atom A | Residue B | Atom B | Distance (Å) |
|--------|-----------|--------|-----------|--------|--------------|
| 5WNB   | H_LYS_140 | NZ     | L_GLU_212 | OE1    | 3.467        |
| 5WNB   | H_LYS_140 | NZ     | L_GLU_212 | OE2    | 3.708        |
| 5WNB   | L_ARG_61  | NH1    | M_GLU_79  | OE2    | 3.612        |

Table 1513: Interfacial 5WNB-specific salt bridging networks analysis. In this table, a PDB file is specified with a four-letter PDB ID, except that the names of the PDB files corresponding to the single NMR structural model split from the NMR ensemble is specified with a four-letter PDB ID in addition to a hyphen followed by the single NMR structural model numeric ID, the residue naming scheme is **Chain ID\_residue name\_residue number**,  $\angle ADH$  represents the angle formed by acceptor (A), donor (D) and hydrogen (H) ( $\angle ADH$ ).

| PDB ID | Residue A | Atom A | Residue B | Atom B | Distance (Å) |
|--------|-----------|--------|-----------|--------|--------------|
| 5XBM   | A_LYS_205 | NZ     | B_ASP_139 | OD1    | 3.654        |
| 5XBM   | B_LYS_217 | NZ     | A_GLU_121 | OE1    | 2.614        |
| 5XBM   | B_LYS_217 | NZ     | A_GLU_121 | OE2    | 3.625        |
| 5XBM   | E_LYS_217 | NZ     | D_GLU_121 | OE2    | 3.463        |
| 5XBM   | F_ARG_77  | NH1    | D_ASP_31  | OD1    | 3.188        |
| 5XBM   | F_ARG_77  | NH2    | D_ASP_31  | OD1    | 3.156        |
| 5XBM   | F_ARG_77  | NH2    | D_ASP_31  | OD2    | 3.938        |
| 5XBM   | F_LYS_161 | NZ     | C_GLU_154 | OE2    | 3.149        |

Table 1514: Interfacial 5XBM-specific salt bridging networks analysis. In this table, a PDB file is specified with a four-letter PDB ID, except that the names of the PDB files corresponding to the single NMR structural model split from the NMR ensemble is specified with a four-letter PDB ID in addition to a hyphen followed by the single NMR structural model numeric ID, the residue naming scheme is **Chain ID\_residue name\_residue number**,  $\angle ADH$  represents the angle formed by acceptor (A), donor (D) and hydrogen (H) ( $\angle ADH$ ).

| PDB ID | Residue A | Atom A | Residue B | Atom B | Distance (Å) |
|--------|-----------|--------|-----------|--------|--------------|
| 5XCQ   | A_LYS_13  | NZ     | B_ASP_154 | OD1    | 3.910        |
| 5XCQ   | B_LYS_144 | NZ     | A_GLU_142 | OE1    | 3.005        |
| 5XCQ   | B_LYS_144 | NZ     | A_GLU_142 | OE2    | 2.931        |

Table 1515: Interfacial 5XCQ-specific salt bridging networks analysis. In this table, a PDB file is specified with a four-letter PDB ID, except that the names of the PDB files corresponding to the single NMR structural model split from the NMR ensemble is specified with a four-letter PDB ID in addition to a hyphen followed by the single NMR structural model numeric ID, the residue naming scheme is **Chain ID\_residue name\_residue number**,  $\angle ADH$  represents the angle formed by acceptor (A), donor (D) and hydrogen (H) ( $\angle ADH$ ).

| PDB ID | Residue A | Atom A | Residue B | Atom B | Distance (Å) |
|--------|-----------|--------|-----------|--------|--------------|
| 5XCR   | A_LYS_13  | NZ     | B_ASP_154 | OD1    | 3.316        |
| 5XCR   | A_LYS_13  | NZ     | B_ASP_154 | OD2    | 2.938        |
| 5XCR   | A_ARG_147 | NH2    | B_GLU_135 | OE2    | 3.104        |
| 5XCR   | A_LYS_149 | NZ     | B_ASP_41  | OD1    | 2.692        |
| 5XCR   | A_LYS_149 | NZ     | B_ASP_41  | OD2    | 3.682        |
| 5XCR   | A_LYS_153 | NZ     | B_ASP_41  | OD1    | 3.567        |
| 5XCR   | A_LYS_153 | NZ     | B_ASP_41  | OD2    | 3.385        |
| 5XCR   | B_LYS_144 | NZ     | A_GLU_142 | OE1    | 2.665        |
| 5XCR   | B_LYS_144 | NZ     | A_GLU_142 | OE2    | 3.686        |
| 5XCR   | D_LYS_149 | NZ     | E_ASP_41  | OD1    | 2.596        |
| 5XCR   | D_LYS_149 | NZ     | E_ASP_41  | OD2    | 3.537        |
| 5XCR   | D_LYS_149 | NZ     | E_GLU_137 | OE1    | 2.552        |
| 5XCR   | D_LYS_149 | NZ     | E_GLU_137 | OE2    | 3.483        |
| 5XCR   | D_ARG_154 | NH2    | E_ASP_131 | OD1    | 2.972        |
| 5XCR   | E_LYS_144 | NZ     | D_GLU_142 | OE1    | 2.644        |
| 5XCR   | E_LYS_144 | NZ     | D_GLU_142 | OE2    | 3.385        |

Table 1516: Interfacial 5XCR-specific salt bridging networks analysis. In this table, a PDB file is specified with a four-letter PDB ID, except that the names of the PDB files corresponding to the single NMR structural model split from the NMR ensemble is specified with a four-letter PDB ID in addition to a hyphen followed by the single NMR structural model numeric ID, the residue naming scheme is **Chain ID\_residue name\_residue number**,  $\angle ADH$  represents the angle formed by acceptor (A), donor (D) and hydrogen (H) ( $\angle ADH$ ).

| PDB ID | Residue A  | Atom A | Residue B | Atom B | Distance (Å) |
|--------|------------|--------|-----------|--------|--------------|
| 5XCS   | A_LYS_43   | NZ     | B_GLU_140 | OE2    | 2.517        |
| 5XCS   | A_ARG_95   | NH1    | B_ASP_91  | OD1    | 2.738        |
| 5XCS   | A_ARG_95   | NH1    | B_ASP_91  | OD2    | 3.741        |
| 5XCS   | A_ARG_95   | NH2    | B_ASP_91  | OD1    | 3.421        |
| 5XCS   | A_ARG_95   | NH2    | C_ASP_7   | OD1    | 3.700        |
| 5XCS   | A_ARG_95   | NH2    | C_ASP_7   | OD2    | 2.872        |
| 5XCS   | A_LYS_100A | NZ     | B_GLU_55  | OE1    | 2.609        |
| 5XCS   | A_LYS_100A | NZ     | B_GLU_55  | OE2    | 3.239        |
| 5XCS   | A_LYS_149  | NZ     | B_GLU_137 | OE1    | 3.069        |
| 5XCS   | A_LYS_149  | NZ     | B_GLU_137 | OE2    | 3.874        |
| 5XCS   | B_HIS_94   | NE2    | C_ASP_7   | OD2    | 3.772        |
| 5XCS   | B_LYS_144  | NZ     | A_GLU_142 | OE1    | 3.111        |
| 5XCS   | B_LYS_144  | NZ     | A_GLU_142 | OE2    | 3.511        |
| 5XCS   | B_ARG_149  | NH1    | A_ASP_136 | OD1    | 2.816        |

Table 1517: Interfacial 5XCS-specific salt bridging networks analysis. In this table, a PDB file is specified with a four-letter PDB ID, except that the names of the PDB files corresponding to the single NMR structural model split from the NMR ensemble is specified with a four-letter PDB ID in addition to a hyphen followed by the single NMR structural model numeric ID, the residue naming scheme is **Chain ID\_residue name\_residue number**,  $\angle ADH$  represents the angle formed by acceptor (A), donor (D) and hydrogen (H) ( $\angle ADH$ ).

| PDB ID | Residue A | Atom A | Residue B | Atom B | Distance (Å) |
|--------|-----------|--------|-----------|--------|--------------|
| 5XCT   | B_LYS_144 | NZ     | A_GLU_142 | OE1    | 2.822        |
| 5XCT   | B_LYS_144 | NZ     | A_GLU_142 | OE2    | 3.117        |

Table 1518: Interfacial 5XCT-specific salt bridging networks analysis. In this table, a PDB file is specified with a four-letter PDB ID, except that the names of the PDB files corresponding to the single NMR structural model split from the NMR ensemble is specified with a four-letter PDB ID in addition to a hyphen followed by the single NMR structural model numeric ID, the residue naming scheme is **Chain ID\_residue name\_residue number**,  $\angle ADH$  represents the angle formed by acceptor (A), donor (D) and hydrogen (H) ( $\angle ADH$ ).



| PDB ID | Residue A  | Atom A | Residue B | Atom B | Distance (Å) |
|--------|------------|--------|-----------|--------|--------------|
| 5XCU   | A_LYS_13   | NZ     | B_ASP_154 | OD2    | 3.098        |
| 5XCU   | A_ARG_95   | NH1    | B_ASP_91  | OD1    | 2.822        |
| 5XCU   | A_ARG_95   | NH1    | B_ASP_91  | OD2    | 3.880        |
| 5XCU   | A_ARG_95   | NH2    | B_ASP_91  | OD1    | 3.668        |
| 5XCU   | A_ARG_95   | NH2    | C_ASP_7   | OD1    | 3.592        |
| 5XCU   | A_ARG_95   | NH2    | C_ASP_7   | OD2    | 2.664        |
| 5XCU   | A_LYS_100A | NZ     | B_GLU_55  | OE1    | 3.292        |
| 5XCU   | A_LYS_100A | NZ     | B_GLU_55  | OE2    | 3.457        |
| 5XCU   | A_LYS_149  | NZ     | B_GLU_137 | OE1    | 3.142        |
| 5XCU   | A_LYS_149  | NZ     | B_GLU_137 | OE2    | 3.674        |
| 5XCU   | B_HIS_94   | NE2    | C_ASP_7   | OD2    | 3.530        |
| 5XCU   | B_ARG_142  | NH2    | D_GLU_100 | OE1    | 3.626        |
| 5XCU   | B_ARG_142  | NH2    | D_GLU_100 | OE2    | 3.496        |
| 5XCU   | B_LYS_144  | NZ     | A_GLU_142 | OE1    | 2.843        |
| 5XCU   | B_LYS_144  | NZ     | A_GLU_142 | OE2    | 2.719        |
| 5XCU   | B_ARG_149  | NH2    | A_ASP_136 | OD1    | 3.520        |
| 5XCU   | D_LYS_13   | NZ     | E_ASP_154 | OD2    | 2.965        |
| 5XCU   | D_ARG_52A  | NH1    | A_GLU_144 | OE1    | 3.014        |
| 5XCU   | D_ARG_52A  | NH1    | A_GLU_144 | OE2    | 3.323        |
| 5XCU   | D_ARG_52A  | NH2    | A_GLU_144 | OE2    | 3.086        |
| 5XCU   | D_ARG_95   | NH1    | E_ASP_91  | OD1    | 2.736        |
| 5XCU   | D_ARG_95   | NH1    | E_ASP_91  | OD2    | 3.660        |
| 5XCU   | D_ARG_95   | NH2    | E_ASP_91  | OD1    | 3.272        |
| 5XCU   | D_ARG_95   | NH2    | F_ASP_7   | OD1    | 3.878        |
| 5XCU   | D_ARG_95   | NH2    | F_ASP_7   | OD2    | 3.169        |
| 5XCU   | D_LYS_100A | NZ     | E_GLU_55  | OE1    | 3.852        |
| 5XCU   | D_LYS_100A | NZ     | E_GLU_55  | OE2    | 2.994        |
| 5XCU   | D_LYS_149  | NZ     | E_GLU_137 | OE1    | 2.785        |
| 5XCU   | D_LYS_149  | NZ     | E_GLU_137 | OE2    | 3.293        |
| 5XCU   | E_LYS_30F  | NZ     | B_GLU_139 | OE1    | 2.662        |
| 5XCU   | E_LYS_30F  | NZ     | B_GLU_139 | OE2    | 3.287        |
| 5XCU   | E_HIS_94   | NE2    | F_ASP_7   | OD2    | 3.551        |
| 5XCU   | E_ARG_142  | NH2    | D_GLU_140 | OE2    | 3.967        |
| 5XCU   | E_LYS_144  | NZ     | D_GLU_142 | OE1    | 3.438        |
| 5XCU   | E_LYS_144  | NZ     | D_GLU_142 | OE2    | 2.648        |

Table 1519: Interfacial 5XCU-specific salt bridging networks analysis. In this table, a PDB file is specified with a four-letter PDB ID, except that the names of the PDB files corresponding to the single NMR structural model split from the NMR ensemble is specified with a four-letter PDB ID in addition to a hyphen followed by the single NMR structural model numeric ID, the residue naming scheme is **Chain ID\_residue name\_residue number**,  $\angle ADH$  represents the angle formed by acceptor (A), donor (D) and hydrogen (H) ( $\angle ADH$ ).

| PDB ID | Residue A | Atom A | Residue B | Atom B | Distance (Å) |
|--------|-----------|--------|-----------|--------|--------------|
| 5XCV   | A_LYS_56  | NZ     | C_GLU_10  | OE2    | 3.165        |
| 5XCV   | A_LYS_56  | NZ     | C_ASP_11  | OD1    | 3.842        |
| 5XCV   | A_LYS_56  | NZ     | C_ASP_11  | OD2    | 2.877        |
| 5XCV   | A_ARG_131 | NH1    | D_GLU_142 | OE2    | 2.857        |
| 5XCV   | A_ARG_131 | NH2    | D_GLU_142 | OE2    | 3.651        |
| 5XCV   | A_LYS_149 | NZ     | B_GLU_137 | OE1    | 3.135        |
| 5XCV   | A_LYS_149 | NZ     | B_GLU_137 | OE2    | 2.706        |
| 5XCV   | A_ARG_154 | NH2    | B_ASP_131 | OD1    | 2.532        |
| 5XCV   | B_LYS_144 | NZ     | A_GLU_142 | OE1    | 2.798        |
| 5XCV   | B_LYS_144 | NZ     | A_GLU_142 | OE2    | 3.295        |
| 5XCV   | B_ARG_149 | NH2    | A_ASP_136 | OD1    | 3.863        |
| 5XCV   | B_ARG_149 | NH2    | A_ASP_136 | OD2    | 3.941        |
| 5XCV   | D_ARG_131 | NH1    | A_GLU_142 | OE2    | 2.791        |
| 5XCV   | D_ARG_131 | NH2    | A_GLU_142 | OE2    | 3.693        |
| 5XCV   | D_LYS_149 | NZ     | E_GLU_137 | OE1    | 2.622        |
| 5XCV   | D_LYS_149 | NZ     | E_GLU_137 | OE2    | 3.565        |
| 5XCV   | D_LYS_153 | NZ     | E_GLU_40  | OE2    | 3.944        |
| 5XCV   | E_LYS_144 | NZ     | D_GLU_142 | OE1    | 2.798        |
| 5XCV   | E_LYS_144 | NZ     | D_GLU_142 | OE2    | 3.738        |

Table 1520: Interfacial 5XCV-specific salt bridging networks analysis. In this table, a PDB file is specified with a four-letter PDB ID, except that the names of the PDB files corresponding to the single NMR structural model split from the NMR ensemble is specified with a four-letter PDB ID in addition to a hyphen followed by the single NMR structural model numeric ID, the residue naming scheme is **Chain ID residue name residue number**,  $\angle ADH$  represents the angle formed by acceptor (A), donor (D) and hydrogen (H) ( $\angle ADH$ ).

| PDB ID | Residue A | Atom A | Residue B | Atom B | Distance (Å) |
|--------|-----------|--------|-----------|--------|--------------|
| 5XRT   | A_LYS_27  | NZ     | B_GLU_97  | OE2    | 3.178        |
| 5XRT   | A_ARG_109 | NH1    | B_GLU_67  | OE2    | 3.059        |
| 5XRT   | A_ARG_109 | NH2    | B_GLU_67  | OE2    | 3.511        |
| 5XRT   | A_LYS_238 | NZ     | F_GLU_72  | OE1    | 3.452        |
| 5XRT   | A_LYS_238 | NZ     | F_GLU_72  | OE2    | 2.683        |
| 5XRT   | A_ARG_269 | NH1    | B_GLU_67  | OE1    | 3.465        |
| 5XRT   | A_ARG_307 | NH1    | F_ASP_90  | OD2    | 3.867        |
| 5XRT   | A_ARG_307 | NH2    | F_ASP_90  | OD2    | 3.590        |
| 5XRT   | A_LYS_310 | NZ     | B_ASP_90  | OD1    | 2.844        |
| 5XRT   | A_LYS_326 | NZ     | B_GLU_11  | OE1    | 2.808        |
| 5XRT   | A_LYS_326 | NZ     | B_GLU_11  | OE2    | 2.925        |
| 5XRT   | B_ARG_54  | NH1    | F_GLU_97  | OE2    | 3.836        |
| 5XRT   | B_ARG_54  | NH2    | F_GLU_97  | OE2    | 2.767        |
| 5XRT   | B_LYS_62  | NZ     | F_ASP_86  | OD1    | 3.336        |
| 5XRT   | B_LYS_62  | NZ     | F_ASP_86  | OD2    | 2.617        |
| 5XRT   | B_LYS_62  | NZ     | F_ASP_90  | OD1    | 3.654        |
| 5XRT   | B_LYS_62  | NZ     | F_ASP_90  | OD2    | 2.589        |
| 5XRT   | B_HIS_64  | NE2    | F_ASP_79  | OD2    | 3.582        |
| 5XRT   | B_ARG_76  | NH1    | D_GLU_74  | OE1    | 3.704        |
| 5XRT   | B_ARG_76  | NH1    | D_GLU_74  | OE2    | 3.032        |
| 5XRT   | B_ARG_76  | NH2    | D_GLU_74  | OE1    | 2.984        |
| 5XRT   | B_ARG_76  | NH2    | D_GLU_74  | OE2    | 3.801        |
| 5XRT   | B_ARG_76  | NH2    | D_GLU_81  | OE1    | 2.864        |
| 5XRT   | B_ARG_76  | NH2    | D_GLU_81  | OE2    | 3.722        |
| 5XRT   | B_ARG_123 | NH2    | F_ASP_132 | OD2    | 3.663        |
| 5XRT   | B_ARG_124 | NH1    | F_ASP_132 | OD2    | 2.812        |
| 5XRT   | B_ARG_127 | NH2    | F_GLU_131 | OE1    | 3.103        |
| 5XRT   | B_ARG_163 | NH1    | F_GLU_131 | OE1    | 3.194        |
| 5XRT   | B_ARG_163 | NH1    | F_GLU_131 | OE2    | 3.563        |
| 5XRT   | B_ARG_163 | NH2    | F_GLU_131 | OE1    | 3.596        |
| 5XRT   | B_ARG_163 | NH2    | F_GLU_131 | OE2    | 2.598        |
| 5XRT   | B_ARG_170 | NH2    | D_GLU_128 | OE1    | 3.449        |
| 5XRT   | B_ARG_170 | NH2    | D_GLU_128 | OE2    | 3.578        |
| 5XRT   | C_LYS_27  | NZ     | D_GLU_97  | OE1    | 3.926        |
| 5XRT   | C_LYS_27  | NZ     | D_GLU_97  | OE2    | 3.340        |
| 5XRT   | C_ARG_109 | NH1    | D_GLU_67  | OE2    | 2.932        |
| 5XRT   | C_LYS_238 | NZ     | B_GLU_72  | OE2    | 3.031        |
| 5XRT   | C_ARG_269 | NH1    | D_GLU_67  | OE1    | 3.251        |
| 5XRT   | C_ARG_307 | NH2    | B_ASP_90  | OD2    | 3.134        |
| 5XRT   | C_LYS_310 | NZ     | D_ASP_90  | OD1    | 3.206        |
| 5XRT   | C_LYS_310 | NZ     | D_ASP_90  | OD2    | 3.892        |
| 5XRT   | D_ARG_54  | NH2    | B_GLU_97  | OE2    | 3.066        |
| 5XRT   | D_LYS_62  | NZ     | B_ASP_86  | OD1    | 3.579        |
| 5XRT   | D_LYS_62  | NZ     | B_ASP_86  | OD2    | 3.058        |
| 5XRT   | D_LYS_62  | NZ     | B_ASP_90  | OD1    | 3.574        |
| 5XRT   | D_LYS_62  | NZ     | B_ASP_90  | OD2    | 2.797        |
| 5XRT   | D_HIS_64  | NE2    | B_ASP_79  | OD2    | 3.856        |
| 5XRT   | D_ARG_76  | NH1    | F_GLU_74  | OE1    | 3.338        |
| 5XRT   | D_ARG_76  | NH1    | F_GLU_74  | OE2    | 2.885        |
| 5XRT   | D_ARG_76  | NH2    | F_GLU_74  | OE1    | 2.652        |
| 5XRT   | D_ARG_76  | NH2    | F_GLU_74  | OE2    | 3.749        |
| 5XRT   | D_ARG_76  | NH2    | F_GLU_81  | OE1    | 2.506        |
| 5XRT   | D_ARG_76  | NH2    | F_GLU_81  | OE2    | 3.677        |
| 5XRT   | D_ARG_123 | NH2    | B_ASP_132 | OD2    | 3.975        |
| 5XRT   | D_ARG_124 | NH1    | B_ASP_132 | OD1    | 3.986        |
| 5XRT   | D_ARG_124 | NH1    | B_ASP_132 | OD2    | 2.717        |
| 5XRT   | D_ARG_127 | NH2    | B_GLU_131 | OE1    | 2.649        |

|      |           |     |           |     |       |
|------|-----------|-----|-----------|-----|-------|
| 5XRT | D_ARG_163 | NH1 | B_GLU_131 | OE1 | 3.152 |
| 5XRT | D_ARG_163 | NH1 | B_GLU_131 | OE2 | 3.070 |
| 5XRT | D_ARG_163 | NH2 | B_GLU_131 | OE1 | 3.267 |
| 5XRT | D_ARG_163 | NH2 | B_GLU_131 | OE2 | 2.951 |
| 5XRT | D_ARG_170 | NH2 | F_GLU_128 | OE1 | 2.950 |
| 5XRT | D_ARG_170 | NH2 | F_GLU_128 | OE2 | 3.791 |
| 5XRT | E_LYS_27  | NZ  | F_GLU_97  | OE1 | 3.896 |
| 5XRT | E_LYS_27  | NZ  | F_GLU_97  | OE2 | 3.675 |
| 5XRT | E_ARG_109 | NH1 | F_GLU_67  | OE2 | 2.719 |
| 5XRT | E_ARG_109 | NH2 | F_GLU_67  | OE2 | 3.732 |
| 5XRT | E_LYS_238 | NZ  | D_GLU_72  | OE2 | 3.742 |
| 5XRT | E_ARG_269 | NH1 | F_GLU_67  | OE1 | 2.954 |
| 5XRT | E_ARG_269 | NH1 | F_GLU_67  | OE2 | 3.996 |
| 5XRT | E_ARG_307 | NH1 | D_ASP_90  | OD2 | 3.580 |
| 5XRT | E_ARG_307 | NH2 | D_ASP_90  | OD2 | 3.837 |
| 5XRT | E_LYS_310 | NZ  | F_ASP_90  | OD1 | 3.115 |
| 5XRT | E_LYS_326 | NZ  | F_GLU_11  | OE1 | 3.300 |
| 5XRT | F_ARG_54  | NH2 | D_GLU_97  | OE2 | 3.005 |
| 5XRT | F_LYS_62  | NZ  | D_ASP_86  | OD1 | 3.549 |
| 5XRT | F_LYS_62  | NZ  | D_ASP_86  | OD2 | 2.499 |
| 5XRT | F_LYS_62  | NZ  | D_ASP_90  | OD1 | 3.666 |
| 5XRT | F_LYS_62  | NZ  | D_ASP_90  | OD2 | 2.972 |
| 5XRT | F_HIS_64  | NE2 | D_ASP_79  | OD2 | 3.194 |
| 5XRT | F_ARG_76  | NH1 | B_GLU_74  | OE1 | 3.311 |
| 5XRT | F_ARG_76  | NH1 | B_GLU_74  | OE2 | 3.105 |
| 5XRT | F_ARG_76  | NH2 | B_GLU_74  | OE1 | 2.768 |
| 5XRT | F_ARG_76  | NH2 | B_GLU_74  | OE2 | 3.989 |
| 5XRT | F_ARG_76  | NH2 | B_GLU_81  | OE1 | 2.869 |
| 5XRT | F_ARG_76  | NH2 | B_GLU_81  | OE2 | 3.812 |
| 5XRT | F_ARG_124 | NH1 | D_ASP_132 | OD2 | 3.024 |
| 5XRT | F_ARG_127 | NH2 | D_GLU_131 | OE1 | 2.415 |
| 5XRT | F_ARG_163 | NH1 | D_GLU_131 | OE1 | 3.516 |
| 5XRT | F_ARG_163 | NH2 | D_GLU_131 | OE1 | 3.296 |
| 5XRT | F_ARG_163 | NH2 | D_GLU_131 | OE2 | 2.611 |
| 5XRT | F_ARG_170 | NH2 | B_GLU_128 | OE1 | 3.475 |
| 5XRT | F_ARG_170 | NH2 | B_GLU_128 | OE2 | 3.657 |
| 5XRT | F_LYS_174 | NZ  | B_ASP_160 | OD1 | 3.902 |
| 5XRT | G_LYS_27  | NZ  | H_GLU_97  | OE2 | 3.228 |
| 5XRT | G_LYS_82  | NZ  | E_GLU_119 | OE1 | 3.805 |
| 5XRT | G_ARG_109 | NH1 | H_GLU_67  | OE1 | 3.826 |
| 5XRT | G_ARG_109 | NH1 | H_GLU_67  | OE2 | 2.804 |
| 5XRT | G_ARG_269 | NH1 | H_GLU_67  | OE1 | 3.306 |
| 5XRT | G_LYS_299 | NZ  | H_GLU_69  | OE2 | 3.918 |
| 5XRT | G_LYS_310 | NZ  | H_ASP_90  | OD1 | 2.955 |

Table 1521: Interfacial 5XRT-specific salt bridging networks analysis. In this table, a PDB file is specified with a four-letter PDB ID, except that the names of the PDB files corresponding to the single NMR structural model split from the NMR ensemble is specified with a four-letter PDB ID in addition to a hyphen followed by the single NMR structural model numeric ID, the residue naming scheme is **Chain ID\_residue name\_residue number**,  $\angle ADH$  represents the angle formed by acceptor (A), donor (D) and hydrogen (H) ( $\angle ADH$ ).

| PDB ID | Residue A | Atom A | Residue B | Atom B | Distance (Å) |
|--------|-----------|--------|-----------|--------|--------------|
| 5XWD   | A_ARG_353 | NH2    | D_ASP_96  | OD2    | 3.335        |
| 5XWD   | A_HIS_409 | NE2    | H_ASP_108 | OD2    | 2.707        |
| 5XWD   | A_LYS_443 | NZ     | D_ASP_51  | OD2    | 2.907        |
| 5XWD   | A_LYS_465 | NZ     | D_ASP_53  | OD2    | 3.314        |

Table 1522: Interfacial 5XWD-specific salt bridging networks analysis. In this table, a PDB file is specified with a four-letter PDB ID, except that the names of the PDB files corresponding to the single NMR structural model split from the NMR ensemble is specified with a four-letter PDB ID in addition to a hyphen followed by the single NMR structural model numeric ID, the residue naming scheme is **Chain ID\_residue name\_residue number**,  $\angle ADH$  represents the angle formed by acceptor (A), donor (D) and hydrogen (H) ( $\angle ADH$ ).

| PDB ID | Residue A | Atom A | Residue B | Atom B | Distance (Å) |
|--------|-----------|--------|-----------|--------|--------------|
| 5YC5   | A_LYS_409 | NZ     | B_ASP_399 | OD1    | 3.635        |
| 5YC5   | A_LYS_409 | NZ     | B_ASP_399 | OD2    | 2.875        |
| 5YC5   | A_LYS_439 | NZ     | B_ASP_356 | OD1    | 3.309        |
| 5YC5   | B_LYS_409 | NZ     | A_ASP_399 | OD1    | 3.731        |
| 5YC5   | B_LYS_409 | NZ     | A_ASP_399 | OD2    | 2.920        |
| 5YC5   | C_LYS_120 | NZ     | A_ASP_265 | OD2    | 2.563        |
| 5YC5   | C_LYS_131 | NZ     | A_GLU_269 | OE1    | 3.549        |
| 5YC5   | C_LYS_131 | NZ     | A_GLU_269 | OE2    | 2.940        |

Table 1523: Interfacial 5YC5-specific salt bridging networks analysis. In this table, a PDB file is specified with a four-letter PDB ID, except that the names of the PDB files corresponding to the single NMR structural model split from the NMR ensemble is specified with a four-letter PDB ID in addition to a hyphen followed by the single NMR structural model numeric ID, the residue naming scheme is **Chain ID\_residue name\_residue number**,  $\angle ADH$  represents the angle formed by acceptor (A), donor (D) and hydrogen (H) ( $\angle ADH$ ).

| PDB ID | Residue A | Atom A | Residue B | Atom B | Distance (Å) |
|--------|-----------|--------|-----------|--------|--------------|
| 5ZV3   | A.LYS_67  | NZ     | H.ASP_54  | OD1    | 3.656        |
| 5ZV3   | A.LYS_67  | NZ     | H.ASP_54  | OD2    | 2.636        |
| 5ZV3   | A.LYS_67  | NZ     | H.ASP_56  | OD2    | 3.213        |
| 5ZV3   | H.ARG_58  | NH2    | A.ASP_65  | OD1    | 3.187        |
| 5ZV3   | H.ARG_97  | NH1    | A.GLU_62  | OE2    | 3.412        |
| 5ZV3   | H.ARG_97  | NH2    | A.GLU_62  | OE1    | 3.676        |
| 5ZV3   | H.ARG_97  | NH2    | A.GLU_62  | OE2    | 3.134        |
| 5ZV3   | H.LYS_100 | NZ     | A.GLU_62  | OE1    | 2.715        |
| 5ZV3   | H.LYS_209 | NZ     | L.GLU_123 | OE1    | 3.860        |

Table 1524: Interfacial 5ZV3-specific salt bridging networks analysis. In this table, a PDB file is specified with a four-letter PDB ID, except that the names of the PDB files corresponding to the single NMR structural model split from the NMR ensemble is specified with a four-letter PDB ID in addition to a hyphen followed by the single NMR structural model numeric ID, the residue naming scheme is **Chain ID\_residue name\_residue number**,  $\angle ADH$  represents the angle formed by acceptor (A), donor (D) and hydrogen (H) ( $\angle ADH$ ).

| PDB ID | Residue A | Atom A | Residue B | Atom B | Distance (Å) |
|--------|-----------|--------|-----------|--------|--------------|
| 6A3V   | E_ARG_193 | NH1    | C_ASP_184 | OD1    | 3.333        |
| 6A3V   | I_ARG_193 | NH1    | K_ASP_184 | OD1    | 3.791        |
| 6A3V   | U_ARG_193 | NH1    | W_ASP_184 | OD1    | 2.218        |
| 6A3V   | U_ARG_193 | NH1    | W_ASP_184 | OD2    | 3.282        |
| 6A3V   | U_ARG_193 | NH2    | W_ASP_184 | OD1    | 3.966        |
| 6A3V   | U_ARG_193 | NH2    | W_ASP_184 | OD2    | 3.892        |

Table 1525: Interfacial 6A3V-specific salt bridging networks analysis. In this table, a PDB file is specified with a four-letter PDB ID, except that the names of the PDB files corresponding to the single NMR structural model split from the NMR ensemble is specified with a four-letter PDB ID in addition to a hyphen followed by the single NMR structural model numeric ID, the residue naming scheme is **Chain ID\_residue name\_residue number**,  $\angle ADH$  represents the angle formed by acceptor (A), donor (D) and hydrogen (H) ( $\angle ADH$ ).



| PDB ID | Residue A | Atom A | Residue B | Atom B | Distance (Å) |
|--------|-----------|--------|-----------|--------|--------------|
| 6A3W   | C_LYS_107 | NZ     | E_ASP_30  | OD2    | 3.465        |
| 6A3W   | C_LYS_114 | NZ     | B_ASP_51  | OD2    | 2.835        |
| 6A3W   | C_ARG_134 | NH2    | A_ASP_55  | OD2    | 3.122        |
| 6A3W   | D_LYS_43  | NZ     | K_ASP_26  | OD1    | 2.407        |
| 6A3W   | D_LYS_43  | NZ     | K_ASP_26  | OD2    | 3.696        |
| 6A3W   | F_LYS_114 | NZ     | E_ASP_51  | OD2    | 2.834        |
| 6A3W   | F_ARG_134 | NH2    | D_ASP_55  | OD1    | 3.962        |
| 6A3W   | F_ARG_134 | NH2    | D_ASP_55  | OD2    | 2.895        |
| 6A3W   | I_LYS_114 | NZ     | H_ASP_51  | OD2    | 2.757        |
| 6A3W   | I_LYS_115 | NZ     | L_ASP_119 | OD1    | 3.708        |
| 6A3W   | I_LYS_115 | NZ     | L_ASP_119 | OD2    | 3.946        |
| 6A3W   | I_ARG_134 | NH2    | G_ASP_55  | OD1    | 3.740        |
| 6A3W   | I_ARG_134 | NH2    | G_ASP_55  | OD2    | 2.630        |
| 6A3W   | I_ARG_154 | NH1    | E_ASP_26  | OD1    | 2.965        |
| 6A3W   | I_ARG_154 | NH2    | E_ASP_26  | OD1    | 3.042        |
| 6A3W   | L_LYS_107 | NZ     | H_ASP_30  | OD1    | 3.282        |
| 6A3W   | L_LYS_107 | NZ     | H_ASP_30  | OD2    | 2.525        |
| 6A3W   | L_LYS_114 | NZ     | K_ASP_51  | OD2    | 2.893        |
| 6A3W   | L_ARG_134 | NH2    | J_ASP_55  | OD1    | 3.749        |
| 6A3W   | L_ARG_134 | NH2    | J_ASP_55  | OD2    | 2.496        |

Table 1526: Interfacial 6A3W-specific salt bridging networks analysis. In this table, a PDB file is specified with a four-letter PDB ID, except that the names of the PDB files corresponding to the single NMR structural model split from the NMR ensemble is specified with a four-letter PDB ID in addition to a hyphen followed by the single NMR structural model numeric ID, the residue naming scheme is **Chain ID\_residue name\_residue number**,  $\angle ADH$  represents the angle formed by acceptor (A), donor (D) and hydrogen (H) ( $\angle ADH$ ).

| PDB ID | Residue A | Atom A | Residue B | Atom B | Distance (Å) |
|--------|-----------|--------|-----------|--------|--------------|
| 6A76   | H_LYS_213 | NZ     | L_GLU_123 | OE1    | 3.460        |

Table 1527: Interfacial 6A76-specific salt bridging networks analysis. In this table, a PDB file is specified with a four-letter PDB ID, except that the names of the PDB files corresponding to the single NMR structural model split from the NMR ensemble is specified with a four-letter PDB ID in addition to a hyphen followed by the single NMR structural model numeric ID, the residue naming scheme is **Chain ID\_residue name\_residue number**,  $\angle ADH$  represents the angle formed by acceptor (A), donor (D) and hydrogen (H) ( $\angle ADH$ ).

| PDB ID | Residue A | Atom A | Residue B | Atom B | Distance (Å) |
|--------|-----------|--------|-----------|--------|--------------|
| 6A77   | A_ARG_67  | NH1    | H_GLU_97  | OE1    | 2.680        |
| 6A77   | A_ARG_67  | NH2    | H_GLU_97  | OE1    | 3.115        |
| 6A77   | A_ARG_67  | NH2    | H_GLU_97  | OE2    | 3.032        |

Table 1528: Interfacial 6A77-specific salt bridging networks analysis. In this table, a PDB file is specified with a four-letter PDB ID, except that the names of the PDB files corresponding to the single NMR structural model split from the NMR ensemble is specified with a four-letter PDB ID in addition to a hyphen followed by the single NMR structural model numeric ID, the residue naming scheme is **Chain ID\_residue name\_residue number**,  $\angle ADH$  represents the angle formed by acceptor (A), donor (D) and hydrogen (H) ( $\angle ADH$ ).

| PDB ID | Residue A | Atom A | Residue B | Atom B | Distance (Å) |
|--------|-----------|--------|-----------|--------|--------------|
| 6A78   | A_LYS_57  | NZ     | H_GLU_97  | OE1    | 3.795        |
| 6A78   | L_LYS_63  | NZ     | B_ASP_23  | OD1    | 3.699        |

Table 1529: Interfacial 6A78-specific salt bridging networks analysis. In this table, a PDB file is specified with a four-letter PDB ID, except that the names of the PDB files corresponding to the single NMR structural model split from the NMR ensemble is specified with a four-letter PDB ID in addition to a hyphen followed by the single NMR structural model numeric ID, the residue naming scheme is **Chain ID\_residue name\_residue number**,  $\angle ADH$  represents the angle formed by acceptor (A), donor (D) and hydrogen (H) ( $\angle ADH$ ).

| PDB ID | Residue A | Atom A | Residue B | Atom B | Distance (Å) |
|--------|-----------|--------|-----------|--------|--------------|
| 6A79   | B_ARG_67  | NH1    | L_GLU_97  | OE2    | 3.582        |

Table 1530: Interfacial 6A79-specific salt bridging networks analysis. In this table, a PDB file is specified with a four-letter PDB ID, except that the names of the PDB files corresponding to the single NMR structural model split from the NMR ensemble is specified with a four-letter PDB ID in addition to a hyphen followed by the single NMR structural model numeric ID, the residue naming scheme is **Chain ID\_residue name\_residue number**,  $\angle ADH$  represents the angle formed by acceptor (A), donor (D) and hydrogen (H) ( $\angle ADH$ ).

| PDB ID | Residue A | Atom A | Residue B | Atom B | Distance (Å) |
|--------|-----------|--------|-----------|--------|--------------|
| 6AL5   | A_LYS_155 | NZ     | H_GLU_74  | OE1    | 3.542        |
| 6AL5   | A_LYS_220 | NZ     | H_ASP_55  | OD1    | 3.389        |
| 6AL5   | A_LYS_220 | NZ     | H_ASP_55  | OD2    | 2.832        |
| 6AL5   | A_LYS_220 | NZ     | H_ASP_57  | OD2    | 3.301        |
| 6AL5   | H_ARG_106 | NH2    | L_ASP_54  | OD1    | 3.142        |
| 6AL5   | H_ARG_106 | NH2    | L_ASP_54  | OD2    | 3.298        |
| 6AL5   | H_LYS_220 | NZ     | L_GLU_127 | OE1    | 3.220        |

Table 1531: Interfacial 6AL5-specific salt bridging networks analysis. In this table, a PDB file is specified with a four-letter PDB ID, except that the names of the PDB files corresponding to the single NMR structural model split from the NMR ensemble is specified with a four-letter PDB ID in addition to a hyphen followed by the single NMR structural model numeric ID, the residue naming scheme is **Chain ID\_residue name\_residue number**,  $\angle ADH$  represents the angle formed by acceptor (A), donor (D) and hydrogen (H) ( $\angle ADH$ ).

| PDB ID | Residue A | Atom A | Residue B | Atom B | Distance (Å) |
|--------|-----------|--------|-----------|--------|--------------|
| 6AND   | H_LYS_209 | NZ     | L_GLU_123 | OE1    | 2.684        |
| 6AND   | H_LYS_209 | NZ     | L_GLU_123 | OE2    | 3.876        |
| 6AND   | L_LYS_50  | NZ     | H_ASP_100 | OD1    | 3.188        |

Table 1532: Interfacial 6AND-specific salt bridging networks analysis. In this table, a PDB file is specified with a four-letter PDB ID, except that the names of the PDB files corresponding to the single NMR structural model split from the NMR ensemble is specified with a four-letter PDB ID in addition to a hyphen followed by the single NMR structural model numeric ID, the residue naming scheme is **Chain ID\_residue name\_residue number**,  $\angle ADH$  represents the angle formed by acceptor (A), donor (D) and hydrogen (H) ( $\angle ADH$ ).

| PDB ID | Residue A | Atom A | Residue B | Atom B | Distance (Å) |
|--------|-----------|--------|-----------|--------|--------------|
| 6ANI   | H_LYS_209 | NZ     | L_GLU_123 | OE1    | 2.397        |
| 6ANI   | I_LYS_209 | NZ     | M_GLU_123 | OE2    | 3.950        |

Table 1533: Interfacial 6ANI-specific salt bridging networks analysis. In this table, a PDB file is specified with a four-letter PDB ID, except that the names of the PDB files corresponding to the single NMR structural model split from the NMR ensemble is specified with a four-letter PDB ID in addition to a hyphen followed by the single NMR structural model numeric ID, the residue naming scheme is **Chain ID\_residue name\_residue number**,  $\angle ADH$  represents the angle formed by acceptor (A), donor (D) and hydrogen (H) ( $\angle ADH$ ).



| PDB ID | Residue A | Atom A | Residue B | Atom B | Distance (Å) |
|--------|-----------|--------|-----------|--------|--------------|
| 6AQ7   | H_HIS_34  | NE2    | A_GLU_199 | OE1    | 3.934        |
| 6AQ7   | H_HIS_34  | NE2    | A_GLU_199 | OE2    | 2.717        |
| 6AQ7   | H_ARG_49  | NH1    | A_GLU_199 | OE2    | 2.744        |
| 6AQ7   | H_LYS_209 | NZ     | L_GLU_127 | OE2    | 2.651        |

Table 1534: Interfacial 6AQ7-specific salt bridging networks analysis. In this table, a PDB file is specified with a four-letter PDB ID, except that the names of the PDB files corresponding to the single NMR structural model split from the NMR ensemble is specified with a four-letter PDB ID in addition to a hyphen followed by the single NMR structural model numeric ID, the residue naming scheme is **Chain ID\_residue name\_residue number**,  $\angle ADH$  represents the angle formed by acceptor (A), donor (D) and hydrogen (H) ( $\angle ADH$ ).

| PDB ID | Residue A | Atom A | Residue B | Atom B | Distance (Å) |
|--------|-----------|--------|-----------|--------|--------------|
| 6ATT   | H_LYS_217 | NZ     | L_GLU_129 | OE1    | 3.069        |
| 6ATT   | H_LYS_222 | NZ     | L_ASP_128 | OD1    | 2.688        |
| 6ATT   | L_ARG_32  | NH1    | A_GLU_216 | OE1    | 2.742        |

Table 1535: Interfacial 6ATT-specific salt bridging networks analysis. In this table, a PDB file is specified with a four-letter PDB ID, except that the names of the PDB files corresponding to the single NMR structural model split from the NMR ensemble is specified with a four-letter PDB ID in addition to a hyphen followed by the single NMR structural model numeric ID, the residue naming scheme is **Chain ID\_residue name\_residue number**,  $\angle ADH$  represents the angle formed by acceptor (A), donor (D) and hydrogen (H) ( $\angle ADH$ ).

| PDB ID | Residue A | Atom A | Residue B | Atom B | Distance (Å) |
|--------|-----------|--------|-----------|--------|--------------|
| 6AZZ   | F_LYS_209 | NZ     | E_GLU_124 | OE2    | 3.461        |
| 6AZZ   | E_ARG_77  | NH1    | B_GLU_79  | OE2    | 3.685        |
| 6AZZ   | E_ARG_77  | NH2    | B_GLU_79  | OE1    | 3.407        |
| 6AZZ   | E_ARG_77  | NH2    | B_GLU_79  | OE2    | 3.489        |
| 6AZZ   | E_LYS_130 | NZ     | F_ASP_144 | OD2    | 3.330        |
| 6AZZ   | C_LYS_209 | NZ     | B_GLU_124 | OE1    | 3.784        |
| 6AZZ   | C_LYS_209 | NZ     | B_GLU_124 | OE2    | 2.655        |
| 6AZZ   | B_LYS_130 | NZ     | C_ASP_144 | OD2    | 3.121        |
| 6AZZ   | A_LYS_90  | NZ     | B_ASP_51  | OD1    | 3.552        |
| 6AZZ   | A_LYS_90  | NZ     | B_ASP_51  | OD2    | 2.501        |
| 6AZZ   | A_LYS_108 | NZ     | B_ASP_53  | OD2    | 3.868        |
| 6AZZ   | D_LYS_90  | NZ     | E_ASP_51  | OD1    | 3.639        |
| 6AZZ   | D_LYS_90  | NZ     | E_ASP_51  | OD2    | 2.901        |

Table 1536: Interfacial 6AZZ-specific salt bridging networks analysis. In this table, a PDB file is specified with a four-letter PDB ID, except that the names of the PDB files corresponding to the single NMR structural model split from the NMR ensemble is specified with a four-letter PDB ID in addition to a hyphen followed by the single NMR structural model numeric ID, the residue naming scheme is **Chain ID\_residue name\_residue number**,  $\angle ADH$  represents the angle formed by acceptor (A), donor (D) and hydrogen (H) ( $\angle ADH$ ).

| PDB ID | Residue A | Atom A | Residue B | Atom B | Distance (Å) |
|--------|-----------|--------|-----------|--------|--------------|
| 6B08   | C_LYS_143 | NZ     | B_GLU_125 | OE2    | 2.599        |
| 6B08   | A_LYS_90  | NZ     | B_ASP_51  | OD1    | 2.529        |
| 6B08   | A_LYS_90  | NZ     | B_ASP_51  | OD2    | 3.708        |

Table 1537: Interfacial 6B08-specific salt bridging networks analysis. In this table, a PDB file is specified with a four-letter PDB ID, except that the names of the PDB files corresponding to the single NMR structural model split from the NMR ensemble is specified with a four-letter PDB ID in addition to a hyphen followed by the single NMR structural model numeric ID, the residue naming scheme is **Chain ID\_residue name\_residue number**,  $\angle ADH$  represents the angle formed by acceptor (A), donor (D) and hydrogen (H) ( $\angle ADH$ ).

| PDB ID | Residue A | Atom A | Residue B | Atom B | Distance (Å) |
|--------|-----------|--------|-----------|--------|--------------|
| 6B0E   | B_HIS_164 | ND1    | A_ASP_167 | OD2    | 3.677        |
| 6B0E   | E_LYS_155 | NZ     | B_ASP_98  | OD2    | 3.864        |

Table 1538: Interfacial 6B0E-specific salt bridging networks analysis. In this table, a PDB file is specified with a four-letter PDB ID, except that the names of the PDB files corresponding to the single NMR structural model split from the NMR ensemble is specified with a four-letter PDB ID in addition to a hyphen followed by the single NMR structural model numeric ID, the residue naming scheme is **Chain ID\_residue name\_residue number**,  $\angle ADH$  represents the angle formed by acceptor (A), donor (D) and hydrogen (H) ( $\angle ADH$ ).

| PDB ID | Residue A  | Atom A | Residue B | Atom B | Distance (Å) |
|--------|------------|--------|-----------|--------|--------------|
| 6B0G   | D_ARG_100B | NH1    | C_ASP_91  | OD2    | 3.003        |
| 6B0G   | D_ARG_100B | NH2    | C_ASP_91  | OD2    | 3.130        |
| 6B0G   | D_LYS_214  | NZ     | C_GLU_123 | OE2    | 3.176        |
| 6B0G   | E_LYS_155  | NZ     | D_ASP_98  | OD2    | 2.837        |

Table 1539: Interfacial 6B0G-specific salt bridging networks analysis. In this table, a PDB file is specified with a four-letter PDB ID, except that the names of the PDB files corresponding to the single NMR structural model split from the NMR ensemble is specified with a four-letter PDB ID in addition to a hyphen followed by the single NMR structural model numeric ID, the residue naming scheme is **Chain ID\_residue name\_residue number**,  $\angle ADH$  represents the angle formed by acceptor (A), donor (D) and hydrogen (H) ( $\angle ADH$ ).

| PDB ID | Residue A | Atom A | Residue B | Atom B | Distance (Å) |
|--------|-----------|--------|-----------|--------|--------------|
| 6BE2   | H_LYS_154 | NZ     | L_GLU_129 | OE2    | 2.747        |
| 6BE2   | L_LYS_49  | NZ     | H_GLU_108 | OE2    | 2.828        |
| 6BE2   | L_ARG_100 | NH2    | H_ASP_98  | OD1    | 2.914        |

Table 1540: Interfacial 6BE2-specific salt bridging networks analysis. In this table, a PDB file is specified with a four-letter PDB ID, except that the names of the PDB files corresponding to the single NMR structural model split from the NMR ensemble is specified with a four-letter PDB ID in addition to a hyphen followed by the single NMR structural model numeric ID, the residue naming scheme is **Chain ID\_residue name\_residue number**,  $\angle ADH$  represents the angle formed by acceptor (A), donor (D) and hydrogen (H) ( $\angle ADH$ ).

| PDB ID | Residue A | Atom A | Residue B | Atom B | Distance (Å) |
|--------|-----------|--------|-----------|--------|--------------|
| 6BE3   | H_LYS_154 | NZ     | L_GLU_129 | OE2    | 2.742        |
| 6BE3   | H_LYS_220 | NZ     | L_GLU_128 | OE1    | 3.265        |
| 6BE3   | H_LYS_220 | NZ     | L_GLU_128 | OE2    | 2.896        |
| 6BE3   | L_LYS_49  | NZ     | H_GLU_108 | OE2    | 2.860        |
| 6BE3   | L_ARG_100 | NH2    | H_ASP_98  | OD1    | 3.147        |
| 6BE3   | L_ARG_100 | NH2    | H_ASP_109 | OD1    | 3.865        |

Table 1541: Interfacial 6BE3-specific salt bridging networks analysis. In this table, a PDB file is specified with a four-letter PDB ID, except that the names of the PDB files corresponding to the single NMR structural model split from the NMR ensemble is specified with a four-letter PDB ID in addition to a hyphen followed by the single NMR structural model numeric ID, the residue naming scheme is **Chain ID\_residue name\_residue number**,  $\angle ADH$  represents the angle formed by acceptor (A), donor (D) and hydrogen (H) ( $\angle ADH$ ).



| PDB ID | Residue A | Atom A | Residue B | Atom B | Distance (Å) |
|--------|-----------|--------|-----------|--------|--------------|
| 6BE4   | H_LYS_154 | NZ     | L_GLU_129 | OE1    | 2.824        |
| 6BE4   | L_ARG_100 | NH2    | H_ASP_98  | OD1    | 3.253        |
| 6BE4   | L_ARG_100 | NH2    | H_ASP_109 | OD1    | 3.926        |

Table 1542: Interfacial 6BE4-specific salt bridging networks analysis. In this table, a PDB file is specified with a four-letter PDB ID, except that the names of the PDB files corresponding to the single NMR structural model split from the NMR ensemble is specified with a four-letter PDB ID in addition to a hyphen followed by the single NMR structural model numeric ID, the residue naming scheme is **Chain ID\_residue name\_residue number**,  $\angle ADH$  represents the angle formed by acceptor (A), donor (D) and hydrogen (H) ( $\angle ADH$ ).

| PDB ID | Residue A | Atom A | Residue B | Atom B | Distance (Å) |
|--------|-----------|--------|-----------|--------|--------------|
| 6BIT   | I.HIS_35  | NE2    | H.GLU_54  | OE1    | 3.340        |
| 6BIT   | I.ARG_50  | NH2    | H.ASP_100 | OD1    | 3.331        |
| 6BIT   | I.ARG_50  | NH2    | H.ASP_101 | OD1    | 3.135        |
| 6BIT   | I.ARG_50  | NH2    | H.ASP_101 | OD2    | 3.871        |
| 6BIT   | I.LYS_59  | NZ     | H.ASP_100 | OD1    | 3.680        |
| 6BIT   | I.LYS_208 | NZ     | K.GLU_123 | OE2    | 3.567        |
| 6BIT   | I.ARG_213 | NH1    | L.ASP_143 | OD1    | 3.423        |
| 6BIT   | K.ARG_96  | NH1    | H.GLU_54  | OE1    | 3.223        |
| 6BIT   | K.ARG_96  | NH2    | H.GLU_54  | OE1    | 2.904        |
| 6BIT   | K.ARG_96  | NH2    | H.GLU_54  | OE2    | 3.687        |
| 6BIT   | H.LYS_53  | NZ     | L.ASP_52  | OD1    | 3.518        |
| 6BIT   | H.LYS_53  | NZ     | L.GLU_54  | OE1    | 2.817        |
| 6BIT   | H.LYS_96  | NZ     | L.ASP_52  | OD2    | 2.786        |
| 6BIT   | H.LYS_96  | NZ     | L.ASP_55  | OD1    | 3.426        |
| 6BIT   | H.LYS_96  | NZ     | L.ASP_55  | OD2    | 2.655        |
| 6BIT   | H.LYS_96  | NZ     | L.GLU_57  | OE1    | 2.771        |
| 6BIT   | J.HIS_35  | NE2    | G.GLU_54  | OE1    | 3.221        |
| 6BIT   | J.ARG_50  | NH2    | G.ASP_100 | OD1    | 3.724        |
| 6BIT   | J.ARG_50  | NH2    | G.ASP_101 | OD1    | 3.330        |
| 6BIT   | J.LYS_208 | NZ     | L.GLU_123 | OE2    | 3.539        |
| 6BIT   | L.ARG_96  | NH1    | G.GLU_54  | OE1    | 3.007        |
| 6BIT   | L.ARG_96  | NH2    | G.GLU_54  | OE1    | 2.768        |
| 6BIT   | L.ARG_96  | NH2    | G.GLU_54  | OE2    | 3.419        |
| 6BIT   | G.LYS_53  | NZ     | J.ASP_52  | OD1    | 2.843        |
| 6BIT   | G.LYS_53  | NZ     | J.ASP_52  | OD2    | 3.656        |
| 6BIT   | G.LYS_53  | NZ     | J.GLU_54  | OE1    | 2.681        |
| 6BIT   | G.LYS_96  | NZ     | J.ASP_52  | OD2    | 2.719        |
| 6BIT   | G.LYS_96  | NZ     | J.ASP_55  | OD1    | 3.165        |
| 6BIT   | G.LYS_96  | NZ     | J.ASP_55  | OD2    | 2.701        |
| 6BIT   | G.LYS_96  | NZ     | J.GLU_57  | OE2    | 2.943        |

Table 1543: Interfacial 6BIT-specific salt bridging networks analysis. In this table, a PDB file is specified with a four-letter PDB ID, except that the names of the PDB files corresponding to the single NMR structural model split from the NMR ensemble is specified with a four-letter PDB ID in addition to a hyphen followed by the single NMR structural model numeric ID, the residue naming scheme is **Chain ID\_residue name\_residue number**,  $\angle ADH$  represents the angle formed by acceptor (A), donor (D) and hydrogen (H) ( $\angle ADH$ ).

| PDB ID | Residue A | Atom A | Residue B | Atom B | Distance (Å) |
|--------|-----------|--------|-----------|--------|--------------|
| 6BXA   | A_ARG_37  | NH1    | C_GLU_101 | OE1    | 3.957        |
| 6BXA   | A_ARG_37  | NH1    | C_GLU_101 | OE2    | 3.920        |
| 6BXA   | A_ARG_37  | NH2    | C_GLU_101 | OE1    | 3.689        |
| 6BXA   | A_ARG_37  | NH2    | C_GLU_101 | OE2    | 2.525        |
| 6BXA   | A_LYS_77  | NZ     | C_ASP_34  | OD2    | 2.860        |
| 6BXA   | A_LYS_102 | NZ     | C_ASP_34  | OD1    | 2.955        |
| 6BXA   | A_LYS_184 | NZ     | B_ASP_133 | OD2    | 2.709        |
| 6BXA   | B_ARG_37  | NH2    | D_GLU_101 | OE1    | 3.840        |
| 6BXA   | B_ARG_37  | NH2    | D_GLU_101 | OE2    | 2.839        |
| 6BXA   | B_LYS_77  | NZ     | D_ASP_34  | OD1    | 2.907        |
| 6BXA   | B_LYS_102 | NZ     | D_ASP_34  | OD2    | 3.845        |
| 6BXA   | B_LYS_184 | NZ     | A_ASP_133 | OD2    | 2.771        |

Table 1544: Interfacial 6BXA-specific salt bridging networks analysis. In this table, a PDB file is specified with a four-letter PDB ID, except that the names of the PDB files corresponding to the single NMR structural model split from the NMR ensemble is specified with a four-letter PDB ID in addition to a hyphen followed by the single NMR structural model numeric ID, the residue naming scheme is **Chain ID residue name residue number**,  $\angle ADH$  represents the angle formed by acceptor (A), donor (D) and hydrogen (H) ( $\angle ADH$ ).

| PDB ID | Residue A | Atom A | Residue B | Atom B | Distance (Å) |
|--------|-----------|--------|-----------|--------|--------------|
| 6BXC   | A_LYS_184 | NZ     | C_ASP_34  | OD2    | 3.851        |
| 6BXC   | A_HIS_198 | NE2    | D_GLU_65  | OE2    | 3.317        |
| 6BXC   | B_LYS_159 | NZ     | D_ASP_34  | OD2    | 3.891        |
| 6BXC   | B_LYS_182 | NZ     | D_GLU_81  | OE2    | 3.361        |
| 6BXC   | B_LYS_184 | NZ     | D_ASP_34  | OD2    | 3.547        |

Table 1545: Interfacial 6BXC-specific salt bridging networks analysis. In this table, a PDB file is specified with a four-letter PDB ID, except that the names of the PDB files corresponding to the single NMR structural model split from the NMR ensemble is specified with a four-letter PDB ID in addition to a hyphen followed by the single NMR structural model numeric ID, the residue naming scheme is **Chain ID\_residue name\_residue number**,  $\angle ADH$  represents the angle formed by acceptor (A), donor (D) and hydrogen (H) ( $\angle ADH$ ).

| PDB ID | Residue A | Atom A | Residue B | Atom B | Distance (Å) |
|--------|-----------|--------|-----------|--------|--------------|
| 6BXE   | A_HIS_125 | NE2    | B_GLU_81  | OE2    | 2.552        |
| 6BXE   | B_HIS_125 | NE2    | A_GLU_81  | OE2    | 3.833        |

Table 1546: Interfacial 6BXE-specific salt bridging networks analysis. In this table, a PDB file is specified with a four-letter PDB ID, except that the names of the PDB files corresponding to the single NMR structural model split from the NMR ensemble is specified with a four-letter PDB ID in addition to a hyphen followed by the single NMR structural model numeric ID, the residue naming scheme is **Chain ID\_residue name\_residue number**,  $\angle ADH$  represents the angle formed by acceptor (A), donor (D) and hydrogen (H) ( $\angle ADH$ ).

| PDB ID | Residue A | Atom A | Residue B | Atom B | Distance (Å) |
|--------|-----------|--------|-----------|--------|--------------|
| 6BZU   | A_ARG_64  | NH2    | B_ASP_94  | OD1    | 3.703        |
| 6BZU   | A_LYS_209 | NZ     | B_GLU_123 | OE2    | 3.980        |
| 6BZU   | B_ARG_18  | NH2    | F_ASP_70  | OD2    | 2.642        |
| 6BZU   | B_ARG_24  | NH1    | F_ASP_76  | OD1    | 3.597        |
| 6BZU   | B_ARG_24  | NH1    | F_ASP_76  | OD2    | 2.861        |
| 6BZU   | C_ARG_64  | NH2    | D_ASP_94  | OD1    | 3.618        |
| 6BZU   | E_ARG_64  | NH2    | F_ASP_94  | OD1    | 3.701        |
| 6BZU   | F_ARG_24  | NH1    | B_ASP_76  | OD1    | 3.333        |
| 6BZU   | F_ARG_24  | NH1    | B_ASP_76  | OD2    | 3.080        |
| 6BZU   | G_ARG_64  | NH2    | H_ASP_94  | OD1    | 3.197        |
| 6BZU   | G_ARG_64  | NH2    | H_ASP_94  | OD2    | 3.837        |
| 6BZU   | G_LYS_209 | NZ     | H_GLU_123 | OE1    | 2.734        |
| 6BZU   | G_LYS_209 | NZ     | H_GLU_123 | OE2    | 3.547        |

Table 1547: Interfacial 6BZU-specific salt bridging networks analysis. In this table, a PDB file is specified with a four-letter PDB ID, except that the names of the PDB files corresponding to the single NMR structural model split from the NMR ensemble is specified with a four-letter PDB ID in addition to a hyphen followed by the single NMR structural model numeric ID, the residue naming scheme is **Chain ID\_residue name\_residue number**,  $\angle ADH$  represents the angle formed by acceptor (A), donor (D) and hydrogen (H) ( $\angle ADH$ ).

| PDB ID | Residue A | Atom A | Residue B | Atom B | Distance (Å) |
|--------|-----------|--------|-----------|--------|--------------|
| 6BZV   | E_ARG_66  | NH1    | C_GLU_85  | OE2    | 3.540        |
| 6BZV   | E_ARG_66  | NH2    | C_GLU_85  | OE2    | 3.482        |
| 6BZV   | E_LYS_206 | NZ     | G_ASP_208 | OD2    | 3.271        |
| 6BZV   | E_LYS_209 | NZ     | F_GLU_123 | OE1    | 3.953        |
| 6BZV   | E_LYS_209 | NZ     | F_GLU_123 | OE2    | 2.713        |
| 6BZV   | A_LYS_209 | NZ     | B_GLU_123 | OE1    | 2.709        |
| 6BZV   | A_LYS_209 | NZ     | B_GLU_123 | OE2    | 3.439        |
| 6BZV   | C_LYS_209 | NZ     | D_GLU_123 | OE1    | 2.619        |
| 6BZV   | C_LYS_209 | NZ     | D_GLU_123 | OE2    | 2.945        |
| 6BZV   | G_HIS_164 | NE2    | H_ASP_167 | OD1    | 3.817        |
| 6BZV   | G_LYS_209 | NZ     | H_GLU_123 | OE1    | 3.054        |
| 6BZV   | G_LYS_209 | NZ     | H_GLU_123 | OE2    | 3.192        |

Table 1548: Interfacial 6BZV-specific salt bridging networks analysis. In this table, a PDB file is specified with a four-letter PDB ID, except that the names of the PDB files corresponding to the single NMR structural model split from the NMR ensemble is specified with a four-letter PDB ID in addition to a hyphen followed by the single NMR structural model numeric ID, the residue naming scheme is **Chain ID residue name residue number**,  $\angle ADH$  represents the angle formed by acceptor (A), donor (D) and hydrogen (H) ( $\angle ADH$ ).

| PDB ID | Residue A | Atom A | Residue B | Atom B | Distance (Å) |
|--------|-----------|--------|-----------|--------|--------------|
| 6BZW   | C_LYS_209 | NZ     | D_GLU_123 | OE1    | 2.857        |
| 6BZW   | C_LYS_209 | NZ     | D_GLU_123 | OE2    | 3.990        |
| 6BZW   | D_ARG_18  | NH2    | H_GLU_93  | OE1    | 3.070        |
| 6BZW   | A_LYS_209 | NZ     | B_GLU_123 | OE1    | 2.988        |
| 6BZW   | E_LYS_209 | NZ     | F_GLU_123 | OE1    | 2.583        |
| 6BZW   | E_LYS_209 | NZ     | F_GLU_123 | OE2    | 3.254        |
| 6BZW   | G_LYS_209 | NZ     | H_GLU_123 | OE1    | 2.709        |
| 6BZW   | G_LYS_209 | NZ     | H_GLU_123 | OE2    | 2.569        |

Table 1549: Interfacial 6BZW-specific salt bridging networks analysis. In this table, a PDB file is specified with a four-letter PDB ID, except that the names of the PDB files corresponding to the single NMR structural model split from the NMR ensemble is specified with a four-letter PDB ID in addition to a hyphen followed by the single NMR structural model numeric ID, the residue naming scheme is **Chain ID\_residue name\_residue number**,  $\angle ADH$  represents the angle formed by acceptor (A), donor (D) and hydrogen (H) ( $\angle ADH$ ).



| PDB ID | Residue A | Atom A | Residue B | Atom B | Distance (Å) |
|--------|-----------|--------|-----------|--------|--------------|
| 6C5H   | H_LYS_208 | NZ     | L_GLU_123 | OE1    | 3.569        |

Table 1550: Interfacial 6C5H-specific salt bridging networks analysis. In this table, a PDB file is specified with a four-letter PDB ID, except that the names of the PDB files corresponding to the single NMR structural model split from the NMR ensemble is specified with a four-letter PDB ID in addition to a hyphen followed by the single NMR structural model numeric ID, the residue naming scheme is **Chain ID\_residue name\_residue number**,  $\angle ADH$  represents the angle formed by acceptor (A), donor (D) and hydrogen (H) ( $\angle ADH$ ).

| PDB ID | Residue A | Atom A | Residue B | Atom B | Distance (Å) |
|--------|-----------|--------|-----------|--------|--------------|
| 6C5I   | H_HIS_164 | NE2    | L_ASP_167 | OD2    | 3.802        |
| 6C5I   | H_LYS_208 | NZ     | L_GLU_123 | OE1    | 3.192        |

Table 1551: Interfacial 6C5I-specific salt bridging networks analysis. In this table, a PDB file is specified with a four-letter PDB ID, except that the names of the PDB files corresponding to the single NMR structural model split from the NMR ensemble is specified with a four-letter PDB ID in addition to a hyphen followed by the single NMR structural model numeric ID, the residue naming scheme is **Chain ID\_residue name\_residue number**,  $\angle ADH$  represents the angle formed by acceptor (A), donor (D) and hydrogen (H) ( $\angle ADH$ ).

| PDB ID | Residue A | Atom A | Residue B | Atom B | Distance (Å) |
|--------|-----------|--------|-----------|--------|--------------|
| 6C5J   | H_HIS_164 | ND1    | L_ASP_167 | OD1    | 3.598        |

Table 1552: Interfacial 6C5J-specific salt bridging networks analysis. In this table, a PDB file is specified with a four-letter PDB ID, except that the names of the PDB files corresponding to the single NMR structural model split from the NMR ensemble is specified with a four-letter PDB ID in addition to a hyphen followed by the single NMR structural model numeric ID, the residue naming scheme is **Chain ID\_residue name\_residue number**,  $\angle ADH$  represents the angle formed by acceptor (A), donor (D) and hydrogen (H) ( $\angle ADH$ ).

| PDB ID | Residue A | Atom A | Residue B | Atom B | Distance (Å) |
|--------|-----------|--------|-----------|--------|--------------|
| 6C6X   | B_LYS_207 | NZ     | A_GLU_133 | OE1    | 3.861        |

Table 1553: Interfacial 6C6X-specific salt bridging networks analysis. In this table, a PDB file is specified with a four-letter PDB ID, except that the names of the PDB files corresponding to the single NMR structural model split from the NMR ensemble is specified with a four-letter PDB ID in addition to a hyphen followed by the single NMR structural model numeric ID, the residue naming scheme is **Chain ID\_residue name\_residue number**,  $\angle ADH$  represents the angle formed by acceptor (A), donor (D) and hydrogen (H) ( $\angle ADH$ ).

| PDB ID | Residue A | Atom A | Residue B | Atom B | Distance (Å) |
|--------|-----------|--------|-----------|--------|--------------|
| 6C6Y   | R_LYS_400 | NZ     | L_ASP_28  | OD2    | 3.363        |
| 6C6Y   | R_LYS_543 | NZ     | L_GLU_55  | OE2    | 2.973        |
| 6C6Y   | S_LYS_400 | NZ     | B_ASP_28  | OD1    | 3.764        |
| 6C6Y   | S_LYS_400 | NZ     | B_ASP_28  | OD2    | 2.712        |
| 6C6Y   | S_LYS_543 | NZ     | B_GLU_55  | OE2    | 3.134        |

Table 1554: Interfacial 6C6Y-specific salt bridging networks analysis. In this table, a PDB file is specified with a four-letter PDB ID, except that the names of the PDB files corresponding to the single NMR structural model split from the NMR ensemble is specified with a four-letter PDB ID in addition to a hyphen followed by the single NMR structural model numeric ID, the residue naming scheme is **Chain ID\_residue name\_residue number**,  $\angle ADH$  represents the angle formed by acceptor (A), donor (D) and hydrogen (H) ( $\angle ADH$ ).

| PDB ID | Residue A | Atom A | Residue B | Atom B | Distance (Å) |
|--------|-----------|--------|-----------|--------|--------------|
| 6C6Z   | A_ARG_542 | NH1    | C_GLU_95  | OE1    | 3.387        |
| 6C6Z   | A_ARG_542 | NH1    | C_GLU_95  | OE2    | 2.704        |
| 6C6Z   | A_ARG_542 | NH2    | C_GLU_95  | OE1    | 2.635        |
| 6C6Z   | A_ARG_542 | NH2    | C_GLU_95  | OE2    | 3.577        |
| 6C6Z   | B_ARG_542 | NH1    | H_GLU_95  | OE1    | 3.238        |
| 6C6Z   | B_ARG_542 | NH1    | H_GLU_95  | OE2    | 2.770        |
| 6C6Z   | B_ARG_542 | NH2    | H_GLU_95  | OE1    | 2.578        |
| 6C6Z   | B_ARG_542 | NH2    | H_GLU_95  | OE2    | 3.689        |
| 6C6Z   | C_LYS_209 | NZ     | D_GLU_123 | OE1    | 2.970        |
| 6C6Z   | C_LYS_209 | NZ     | D_GLU_123 | OE2    | 3.150        |
| 6C6Z   | C_LYS_214 | NZ     | D_ASP_122 | OD2    | 2.844        |
| 6C6Z   | D_HIS_27D | NE2    | A_GLU_536 | OE1    | 2.616        |
| 6C6Z   | H_LYS_209 | NZ     | L_GLU_123 | OE1    | 3.044        |
| 6C6Z   | H_LYS_209 | NZ     | L_GLU_123 | OE2    | 3.156        |
| 6C6Z   | L_HIS_27D | NE2    | B_GLU_536 | OE1    | 2.931        |

Table 1555: Interfacial 6C6Z-specific salt bridging networks analysis. In this table, a PDB file is specified with a four-letter PDB ID, except that the names of the PDB files corresponding to the single NMR structural model split from the NMR ensemble is specified with a four-letter PDB ID in addition to a hyphen followed by the single NMR structural model numeric ID, the residue naming scheme is **Chain ID\_residue name\_residue number**,  $\angle ADH$  represents the angle formed by acceptor (A), donor (D) and hydrogen (H) ( $\angle ADH$ ).

| PDB ID | Residue A | Atom A | Residue B | Atom B | Distance (Å) |
|--------|-----------|--------|-----------|--------|--------------|
| 6CUJ   | B_LYS_404 | NZ     | A_GLU_292 | OE1    | 3.957        |

Table 1556: Interfacial 6CUJ-specific salt bridging networks analysis. In this table, a PDB file is specified with a four-letter PDB ID, except that the names of the PDB files corresponding to the single NMR structural model split from the NMR ensemble is specified with a four-letter PDB ID in addition to a hyphen followed by the single NMR structural model numeric ID, the residue naming scheme is **Chain ID\_residue name\_residue number**,  $\angle ADH$  represents the angle formed by acceptor (A), donor (D) and hydrogen (H) ( $\angle ADH$ ).

| PDB ID | Residue A | Atom A | Residue B | Atom B | Distance (Å) |
|--------|-----------|--------|-----------|--------|--------------|
| 6DC3   | H_LYS_143 | NZ     | L_GLU_125 | OE2    | 3.101        |
| 6DC3   | H_LYS_209 | NZ     | L_GLU_124 | OE1    | 3.719        |
| 6DC3   | F_LYS_168 | NZ     | H_ASP_53  | OD2    | 2.485        |

Table 1557: Interfacial 6DC3-specific salt bridging networks analysis. In this table, a PDB file is specified with a four-letter PDB ID, except that the names of the PDB files corresponding to the single NMR structural model split from the NMR ensemble is specified with a four-letter PDB ID in addition to a hyphen followed by the single NMR structural model numeric ID, the residue naming scheme is **Chain ID\_residue name\_residue number**,  $\angle ADH$  represents the angle formed by acceptor (A), donor (D) and hydrogen (H) ( $\angle ADH$ ).



| PDB ID | Residue A | Atom A | Residue B | Atom B | Distance (Å) |
|--------|-----------|--------|-----------|--------|--------------|
| 6DC4   | H_LYS_209 | NZ     | L_GLU_123 | OE1    | 3.056        |

Table 1558: Interfacial 6DC4-specific salt bridging networks analysis. In this table, a PDB file is specified with a four-letter PDB ID, except that the names of the PDB files corresponding to the single NMR structural model split from the NMR ensemble is specified with a four-letter PDB ID in addition to a hyphen followed by the single NMR structural model numeric ID, the residue naming scheme is **Chain ID\_residue name\_residue number**,  $\angle ADH$  represents the angle formed by acceptor (A), donor (D) and hydrogen (H) ( $\angle ADH$ ).

| PDB ID | Residue A | Atom A | Residue B  | Atom B | Distance (Å) |
|--------|-----------|--------|------------|--------|--------------|
| 6DC5   | A.LYS.156 | NZ     | D.GLU.463  | OE1    | 3.876        |
| 6DC5   | A.LYS.399 | NZ     | G.GLU.497  | OE2    | 2.871        |
| 6DC5   | D.LYS.75  | NZ     | G.GLU.218  | OE2    | 2.912        |
| 6DC5   | D.LYS.209 | NZ     | E.GLU.53   | OE2    | 3.142        |
| 6DC5   | D.LYS.209 | NZ     | E.ASP.100G | OD2    | 3.755        |
| 6DC5   | G.LYS.77  | NZ     | A.GLU.222  | OE2    | 3.675        |
| 6DC5   | G.LYS.209 | NZ     | H.GLU.53   | OE2    | 3.533        |
| 6DC5   | G.LYS.209 | NZ     | H.ASP.100G | OD2    | 3.715        |
| 6DC5   | G.LYS.399 | NZ     | D.GLU.497  | OE1    | 3.390        |
| 6DC5   | G.LYS.399 | NZ     | D.GLU.497  | OE2    | 2.804        |
| 6DC5   | B.LYS.209 | NZ     | C.GLU.123  | OE1    | 2.374        |
| 6DC5   | B.LYS.209 | NZ     | C.GLU.123  | OE2    | 3.312        |
| 6DC5   | E.LYS.209 | NZ     | F.GLU.123  | OE1    | 3.793        |
| 6DC5   | H.LYS.    | NZ     | I.GLU.     | OE1    | 2.846        |
| 6DC5   | H.LYS.    | NZ     | I.ASP.     | OD1    | 3.400        |
| 6DC5   | H.LYS.    | NZ     | I.ASP.     | OD2    | 3.825        |

Table 1559: Interfacial 6DC5-specific salt bridging networks analysis. In this table, a PDB file is specified with a four-letter PDB ID, except that the names of the PDB files corresponding to the single NMR structural model split from the NMR ensemble is specified with a four-letter PDB ID in addition to a hyphen followed by the single NMR structural model numeric ID, the residue naming scheme is **Chain ID\_residue name\_residue number**,  $\angle ADH$  represents the angle formed by acceptor (A), donor (D) and hydrogen (H) ( $\angle ADH$ ).

| PDB ID | Residue A | Atom A | Residue B | Atom B | Distance (Å) |
|--------|-----------|--------|-----------|--------|--------------|
| 6DCV   | H.LYS_43  | NZ     | L.ASP_9   | OD1    | 3.193        |
| 6DCV   | H.LYS_221 | NZ     | L.GLU_123 | OE1    | 3.166        |
| 6DCV   | B.LYS_43  | NZ     | A.ASP_9   | OD1    | 3.127        |
| 6DCV   | B.LYS_221 | NZ     | A.GLU_123 | OE1    | 3.096        |

Table 1560: Interfacial 6DCV-specific salt bridging networks analysis. In this table, a PDB file is specified with a four-letter PDB ID, except that the names of the PDB files corresponding to the single NMR structural model split from the NMR ensemble is specified with a four-letter PDB ID in addition to a hyphen followed by the single NMR structural model numeric ID, the residue naming scheme is **Chain ID\_residue name\_residue number**,  $\angle ADH$  represents the angle formed by acceptor (A), donor (D) and hydrogen (H) ( $\angle ADH$ ).

| PDB ID | Residue A | Atom A | Residue B | Atom B | Distance (Å) |
|--------|-----------|--------|-----------|--------|--------------|
| 6DCW   | H_LYS_43  | NZ     | L_ASP_9   | OD1    | 3.018        |
| 6DCW   | T_LYS_317 | NZ     | H_ASP_54  | OD1    | 3.849        |
| 6DCW   | T_LYS_317 | NZ     | H_ASP_54  | OD2    | 2.833        |
| 6DCW   | T_LYS_317 | NZ     | H_ASP_56  | OD2    | 2.597        |

Table 1561: Interfacial 6DCW-specific salt bridging networks analysis. In this table, a PDB file is specified with a four-letter PDB ID, except that the names of the PDB files corresponding to the single NMR structural model split from the NMR ensemble is specified with a four-letter PDB ID in addition to a hyphen followed by the single NMR structural model numeric ID, the residue naming scheme is **Chain ID\_residue name\_residue number**,  $\angle ADH$  represents the angle formed by acceptor (A), donor (D) and hydrogen (H) ( $\angle ADH$ ).

| PDB ID | Residue A | Atom A | Residue B | Atom B | Distance (Å) |
|--------|-----------|--------|-----------|--------|--------------|
| 6DDM   | B_LYS_62  | NZ     | A_GLU_1   | OE1    | 3.434        |
| 6DDM   | B_LYS_62  | NZ     | A_GLU_1   | OE2    | 2.992        |

Table 1562: Interfacial 6DDM-specific salt bridging networks analysis. In this table, a PDB file is specified with a four-letter PDB ID, except that the names of the PDB files corresponding to the single NMR structural model split from the NMR ensemble is specified with a four-letter PDB ID in addition to a hyphen followed by the single NMR structural model numeric ID, the residue naming scheme is **Chain ID\_residue name\_residue number**,  $\angle ADH$  represents the angle formed by acceptor (A), donor (D) and hydrogen (H) ( $\angle ADH$ ).

| PDB ID | Residue A | Atom A | Residue B | Atom B | Distance (Å) |
|--------|-----------|--------|-----------|--------|--------------|
| 6DDR   | B_LYS_209 | NZ     | A_GLU_123 | OE1    | 3.270        |

Table 1563: Interfacial 6DDR-specific salt bridging networks analysis. In this table, a PDB file is specified with a four-letter PDB ID, except that the names of the PDB files corresponding to the single NMR structural model split from the NMR ensemble is specified with a four-letter PDB ID in addition to a hyphen followed by the single NMR structural model numeric ID, the residue naming scheme is **Chain ID\_residue name\_residue number**,  $\angle ADH$  represents the angle formed by acceptor (A), donor (D) and hydrogen (H) ( $\angle ADH$ ).

| PDB ID | Residue A | Atom A | Residue B | Atom B | Distance (Å) |
|--------|-----------|--------|-----------|--------|--------------|
| 6DDV   | B_LYS_209 | NZ     | A_GLU_123 | OE1    | 3.050        |
| 6DDV   | B_LYS_209 | NZ     | A_GLU_123 | OE2    | 3.197        |
| 6DDV   | C_ARG_226 | NH1    | B_ASP_31  | OD1    | 3.652        |
| 6DDV   | C_ARG_226 | NH1    | B_ASP_31  | OD2    | 2.831        |
| 6DDV   | C_ARG_226 | NH2    | B_ASP_31  | OD1    | 3.123        |
| 6DDV   | C_ARG_226 | NH2    | B_ASP_31  | OD2    | 3.778        |
| 6DDV   | A_LYS_50  | NZ     | C_ASP_255 | OD1    | 3.063        |
| 6DDV   | A_LYS_50  | NZ     | C_ASP_255 | OD2    | 3.312        |

Table 1564: Interfacial 6DDV-specific salt bridging networks analysis. In this table, a PDB file is specified with a four-letter PDB ID, except that the names of the PDB files corresponding to the single NMR structural model split from the NMR ensemble is specified with a four-letter PDB ID in addition to a hyphen followed by the single NMR structural model numeric ID, the residue naming scheme is **Chain ID\_residue name\_residue number**,  $\angle ADH$  represents the angle formed by acceptor (A), donor (D) and hydrogen (H) ( $\angle ADH$ ).

| PDB ID | Residue A | Atom A | Residue B | Atom B | Distance (Å) |
|--------|-----------|--------|-----------|--------|--------------|
| 6DFG   | B_HIS_585 | NE2    | A_GLU_492 | OE2    | 3.210        |
| 6DFG   | B_ARG_588 | NH2    | A_GLU_492 | OE1    | 2.981        |
| 6DFG   | B_ARG_588 | NH2    | A_GLU_492 | OE2    | 3.149        |
| 6DFG   | L_ARG_31  | NH1    | A_ASP_140 | OD2    | 3.569        |
| 6DFG   | L_ARG_54  | NH2    | A_ASP_322 | OD2    | 3.922        |
| 6DFG   | L_LYS_96  | NZ     | H_ASP_50  | OD2    | 3.294        |
| 6DFG   | E_HIS_585 | NE2    | C_GLU_492 | OE2    | 3.225        |
| 6DFG   | E_ARG_588 | NH2    | C_GLU_492 | OE1    | 2.984        |
| 6DFG   | E_ARG_588 | NH2    | C_GLU_492 | OE2    | 3.072        |
| 6DFG   | J_ARG_31  | NH1    | C_ASP_140 | OD2    | 3.924        |
| 6DFG   | J_LYS_96  | NZ     | G_ASP_50  | OD2    | 3.096        |
| 6DFG   | F_HIS_585 | NE2    | D_GLU_492 | OE2    | 3.337        |
| 6DFG   | F_ARG_588 | NH2    | D_GLU_492 | OE1    | 2.974        |
| 6DFG   | F_ARG_588 | NH2    | D_GLU_492 | OE2    | 3.036        |
| 6DFG   | K_ARG_31  | NH1    | D_ASP_140 | OD2    | 3.732        |
| 6DFG   | K_LYS_96  | NZ     | I_ASP_50  | OD2    | 3.268        |

Table 1565: Interfacial 6DFG-specific salt bridging networks analysis. In this table, a PDB file is specified with a four-letter PDB ID, except that the names of the PDB files corresponding to the single NMR structural model split from the NMR ensemble is specified with a four-letter PDB ID in addition to a hyphen followed by the single NMR structural model numeric ID, the residue naming scheme is **Chain ID\_residue name\_residue number**,  $\angle ADH$  represents the angle formed by acceptor (A), donor (D) and hydrogen (H) ( $\angle ADH$ ).



| PDB ID | Residue A | Atom A | Residue B | Atom B | Distance (Å) |
|--------|-----------|--------|-----------|--------|--------------|
| 6DFH   | A_LYS_137 | NZ     | L_ASP_51  | OD2    | 2.491        |
| 6DFH   | A_ARG_192 | NH1    | D_GLU_164 | OE2    | 3.939        |
| 6DFH   | B_ARG_542 | NH1    | E_GLU_647 | OE2    | 2.777        |
| 6DFH   | B_LYS_574 | NZ     | A_ASP_107 | OD1    | 3.419        |
| 6DFH   | B_LYS_574 | NZ     | A_ASP_107 | OD2    | 3.383        |
| 6DFH   | B_ARG_588 | NH2    | A_GLU_492 | OE1    | 3.118        |
| 6DFH   | B_ARG_588 | NH2    | A_GLU_492 | OE2    | 3.874        |
| 6DFH   | C_LYS_137 | NZ     | J_ASP_51  | OD2    | 2.536        |
| 6DFH   | C_ARG_192 | NH1    | A_GLU_164 | OE2    | 3.905        |
| 6DFH   | E_ARG_542 | NH1    | F_GLU_647 | OE2    | 2.777        |
| 6DFH   | E_LYS_574 | NZ     | C_ASP_107 | OD1    | 3.423        |
| 6DFH   | E_LYS_574 | NZ     | C_ASP_107 | OD2    | 3.381        |
| 6DFH   | E_ARG_588 | NH2    | C_GLU_492 | OE1    | 3.158        |
| 6DFH   | E_ARG_588 | NH2    | C_GLU_492 | OE2    | 3.904        |
| 6DFH   | D_LYS_137 | NZ     | K_ASP_51  | OD2    | 2.448        |
| 6DFH   | D_ARG_192 | NH1    | C_GLU_164 | OE2    | 3.902        |
| 6DFH   | F_ARG_542 | NH1    | B_GLU_647 | OE2    | 2.778        |
| 6DFH   | F_LYS_574 | NZ     | D_ASP_107 | OD1    | 3.408        |
| 6DFH   | F_LYS_574 | NZ     | D_ASP_107 | OD2    | 3.378        |
| 6DFH   | F_ARG_588 | NH2    | D_GLU_492 | OE1    | 3.059        |
| 6DFH   | F_ARG_588 | NH2    | D_GLU_492 | OE2    | 3.839        |

Table 1566: Interfacial 6DFH-specific salt bridging networks analysis. In this table, a PDB file is specified with a four-letter PDB ID, except that the names of the PDB files corresponding to the single NMR structural model split from the NMR ensemble is specified with a four-letter PDB ID in addition to a hyphen followed by the single NMR structural model numeric ID, the residue naming scheme is **Chain ID\_residue name\_residue number**,  $\angle ADH$  represents the angle formed by acceptor (A), donor (D) and hydrogen (H) ( $\angle ADH$ ).

| PDB ID | Residue A | Atom A | Residue B | Atom B | Distance (Å) |
|--------|-----------|--------|-----------|--------|--------------|
| 6DG2   | A_ARG_57  | NH1    | C_GLU_50  | OE1    | 2.686        |
| 6DG2   | A_ARG_57  | NH1    | C_GLU_50  | OE2    | 3.712        |
| 6DG2   | A_ARG_57  | NH1    | C_ASP_59  | OD1    | 3.923        |
| 6DG2   | A_ARG_57  | NH2    | C_GLU_50  | OE1    | 3.412        |
| 6DG2   | A_ARG_57  | NH2    | C_GLU_50  | OE2    | 2.876        |
| 6DG2   | A_LYS_219 | NZ     | B_ASP_123 | OD1    | 3.620        |
| 6DG2   | A_LYS_219 | NZ     | B_ASP_123 | OD2    | 3.832        |
| 6DG2   | C_ARG_57  | NH1    | A_GLU_50  | OE1    | 3.739        |
| 6DG2   | C_ARG_57  | NH1    | A_GLU_50  | OE2    | 2.758        |
| 6DG2   | C_ARG_57  | NH1    | A_ASP_59  | OD1    | 3.719        |
| 6DG2   | C_ARG_57  | NH2    | A_GLU_50  | OE1    | 2.935        |
| 6DG2   | C_ARG_57  | NH2    | A_GLU_50  | OE2    | 3.488        |

Table 1567: Interfacial 6DG2-specific salt bridging networks analysis. In this table, a PDB file is specified with a four-letter PDB ID, except that the names of the PDB files corresponding to the single NMR structural model split from the NMR ensemble is specified with a four-letter PDB ID in addition to a hyphen followed by the single NMR structural model numeric ID, the residue naming scheme is **Chain ID residue name residue number**,  $\angle ADH$  represents the angle formed by acceptor (A), donor (D) and hydrogen (H) ( $\angle ADH$ ).

| PDB ID | Residue A | Atom A | Residue B | Atom B | Distance (Å) |
|--------|-----------|--------|-----------|--------|--------------|
| 6E62   | P_LYS_413 | NZ     | H_ASP_100 | OD1    | 3.190        |
| 6E62   | P_LYS_413 | NZ     | H_ASP_100 | OD2    | 2.736        |
| 6E62   | P_LYS_416 | NZ     | L_ASP_51  | OD2    | 2.614        |
| 6E62   | H_ARG_97  | NH1    | P_ASP_347 | OD2    | 3.575        |
| 6E62   | H_LYS_143 | NZ     | L_GLU_124 | OE2    | 2.458        |
| 6E62   | H_LYS_209 | NZ     | L_GLU_123 | OE1    | 3.996        |
| 6E62   | H_LYS_209 | NZ     | L_GLU_123 | OE2    | 3.607        |
| 6E62   | A_LYS_413 | NZ     | B_ASP_100 | OD1    | 3.041        |
| 6E62   | A_LYS_413 | NZ     | B_ASP_100 | OD2    | 2.916        |
| 6E62   | A_LYS_416 | NZ     | C_ASP_51  | OD2    | 2.944        |
| 6E62   | B_ARG_83  | NH1    | H_GLU_1   | OE1    | 3.696        |
| 6E62   | B_ARG_83  | NH1    | H_GLU_1   | OE2    | 3.867        |
| 6E62   | B_ARG_83  | NH2    | H_GLU_1   | OE1    | 3.783        |
| 6E62   | B_ARG_83  | NH2    | H_GLU_1   | OE2    | 3.983        |
| 6E62   | B_LYS_143 | NZ     | C_GLU_124 | OE2    | 2.797        |
| 6E62   | C_LYS_156 | NZ     | L_GLU_81  | OE2    | 3.985        |

Table 1568: Interfacial 6E62-specific salt bridging networks analysis. In this table, a PDB file is specified with a four-letter PDB ID, except that the names of the PDB files corresponding to the single NMR structural model split from the NMR ensemble is specified with a four-letter PDB ID in addition to a hyphen followed by the single NMR structural model numeric ID, the residue naming scheme is **Chain ID\_residue name\_residue number**,  $\angle ADH$  represents the angle formed by acceptor (A), donor (D) and hydrogen (H) ( $\angle ADH$ ).

| PDB ID | Residue A | Atom A | Residue B | Atom B | Distance (Å) |
|--------|-----------|--------|-----------|--------|--------------|
| 6E63   | P_LYS_413 | NZ     | H_ASP_100 | OD1    | 3.187        |
| 6E63   | P_LYS_413 | NZ     | H_ASP_100 | OD2    | 2.904        |
| 6E63   | P_LYS_416 | NZ     | L_ASP_51  | OD1    | 3.564        |
| 6E63   | P_LYS_416 | NZ     | L_ASP_51  | OD2    | 2.955        |
| 6E63   | H_ARG_97  | NH1    | P_ASP_347 | OD2    | 3.407        |
| 6E63   | H_LYS_143 | NZ     | L_GLU_124 | OE2    | 2.665        |
| 6E63   | H_LYS_209 | NZ     | L_GLU_123 | OE1    | 2.498        |
| 6E63   | L_LYS_17  | NZ     | B_GLU_85  | OE1    | 3.318        |
| 6E63   | L_LYS_17  | NZ     | B_GLU_85  | OE2    | 3.250        |
| 6E63   | A_LYS_413 | NZ     | B_ASP_100 | OD1    | 2.369        |
| 6E63   | A_LYS_413 | NZ     | B_ASP_100 | OD2    | 3.029        |
| 6E63   | A_LYS_416 | NZ     | C_ASP_51  | OD2    | 3.236        |
| 6E63   | B_ARG_83  | NH1    | L_GLU_13  | OE1    | 3.486        |
| 6E63   | B_ARG_83  | NH1    | L_GLU_13  | OE2    | 2.814        |
| 6E63   | B_ARG_97  | NH1    | A_ASP_347 | OD1    | 3.859        |

Table 1569: Interfacial 6E63-specific salt bridging networks analysis. In this table, a PDB file is specified with a four-letter PDB ID, except that the names of the PDB files corresponding to the single NMR structural model split from the NMR ensemble is specified with a four-letter PDB ID in addition to a hyphen followed by the single NMR structural model numeric ID, the residue naming scheme is **Chain ID\_residue name\_residue number**,  $\angle ADH$  represents the angle formed by acceptor (A), donor (D) and hydrogen (H) ( $\angle ADH$ ).

| PDB ID | Residue A | Atom A | Residue B | Atom B | Distance (Å) |
|--------|-----------|--------|-----------|--------|--------------|
| 6E64   | H.LYS.143 | NZ     | L.GLU.124 | OE2    | 2.942        |
| 6E64   | H.LYS.209 | NZ     | L.GLU.123 | OE2    | 2.774        |
| 6E64   | A.LYS.209 | NZ     | B.GLU.123 | OE1    | 3.569        |
| 6E64   | A.LYS.209 | NZ     | B.GLU.123 | OE2    | 2.777        |

Table 1570: Interfacial 6E64-specific salt bridging networks analysis. In this table, a PDB file is specified with a four-letter PDB ID, except that the names of the PDB files corresponding to the single NMR structural model split from the NMR ensemble is specified with a four-letter PDB ID in addition to a hyphen followed by the single NMR structural model numeric ID, the residue naming scheme is **Chain ID\_residue name\_residue number**,  $\angle ADH$  represents the angle formed by acceptor (A), donor (D) and hydrogen (H) ( $\angle ADH$ ).

| PDB ID | Residue A | Atom A | Residue B | Atom B | Distance (Å) |
|--------|-----------|--------|-----------|--------|--------------|
| 6E65   | H_LYS_209 | NZ     | L_GLU_123 | OE1    | 2.900        |
| 6E65   | H_LYS_209 | NZ     | L_GLU_123 | OE2    | 3.402        |

Table 1571: Interfacial 6E65-specific salt bridging networks analysis. In this table, a PDB file is specified with a four-letter PDB ID, except that the names of the PDB files corresponding to the single NMR structural model split from the NMR ensemble is specified with a four-letter PDB ID in addition to a hyphen followed by the single NMR structural model numeric ID, the residue naming scheme is **Chain ID\_residue name\_residue number**,  $\angle ADH$  represents the angle formed by acceptor (A), donor (D) and hydrogen (H) ( $\angle ADH$ ).

| PDB ID | Residue A | Atom A | Residue B | Atom B | Distance (Å) |
|--------|-----------|--------|-----------|--------|--------------|
| 6E8V   | A_LYS_69  | NZ     | H_GLU_114 | OE1    | 3.919        |
| 6E8V   | A_LYS_69  | NZ     | H_GLU_114 | OE2    | 3.267        |
| 6E8V   | A_LYS_290 | NZ     | B_GLU_128 | OE1    | 3.297        |
| 6E8V   | A_LYS_290 | NZ     | B_GLU_128 | OE2    | 3.454        |
| 6E8V   | B_LYS_154 | NZ     | E_ASP_98  | OD2    | 3.855        |
| 6E8V   | E_LYS_290 | NZ     | F_GLU_128 | OE1    | 2.548        |
| 6E8V   | E_LYS_290 | NZ     | F_GLU_128 | OE2    | 3.232        |
| 6E8V   | H_LYS_290 | NZ     | L_GLU_127 | OE1    | 2.706        |
| 6E8V   | H_LYS_290 | NZ     | L_GLU_127 | OE2    | 2.554        |
| 6E8V   | J_LYS_290 | NZ     | K_GLU_128 | OE1    | 3.173        |
| 6E8V   | J_LYS_290 | NZ     | K_GLU_128 | OE2    | 2.611        |
| 6E8V   | K_LYS_212 | NZ     | H_GLU_101 | OE1    | 3.767        |
| 6E8V   | K_LYS_212 | NZ     | H_GLU_101 | OE2    | 3.490        |
| 6E8V   | O_HIS_129 | NE2    | L_ASP_61  | OD1    | 3.511        |
| 6E8V   | O_LYS_290 | NZ     | P_GLU_128 | OE1    | 3.591        |
| 6E8V   | U_LYS_290 | NZ     | V_GLU_128 | OE1    | 2.346        |
| 6E8V   | U_LYS_290 | NZ     | V_GLU_128 | OE2    | 3.693        |
| 6E8V   | Y_LYS_290 | NZ     | Z_GLU_128 | OE1    | 3.390        |
| 6E8V   | c_HIS_125 | ND1    | K_ASP_62  | OD1    | 3.174        |
| 6E8V   | c_HIS_125 | ND1    | K_ASP_62  | OD2    | 3.139        |
| 6E8V   | c_LYS_290 | NZ     | d_GLU_128 | OE1    | 2.357        |
| 6E8V   | c_LYS_290 | NZ     | d_GLU_128 | OE2    | 3.486        |

Table 1572: Interfacial 6E8V-specific salt bridging networks analysis. In this table, a PDB file is specified with a four-letter PDB ID, except that the names of the PDB files corresponding to the single NMR structural model split from the NMR ensemble is specified with a four-letter PDB ID in addition to a hyphen followed by the single NMR structural model numeric ID, the residue naming scheme is **Chain ID\_residue name\_residue number**,  $\angle ADH$  represents the angle formed by acceptor (A), donor (D) and hydrogen (H) ( $\angle ADH$ ).

| PDB ID | Residue A | Atom A | Residue B | Atom B | Distance (Å) |
|--------|-----------|--------|-----------|--------|--------------|
| 6E9G   | A_LYS_262 | NZ     | B_GLU_127 | OE1    | 3.021        |
| 6E9G   | A_LYS_262 | NZ     | B_GLU_127 | OE2    | 3.870        |

Table 1573: Interfacial 6E9G-specific salt bridging networks analysis. In this table, a PDB file is specified with a four-letter PDB ID, except that the names of the PDB files corresponding to the single NMR structural model split from the NMR ensemble is specified with a four-letter PDB ID in addition to a hyphen followed by the single NMR structural model numeric ID, the residue naming scheme is **Chain ID\_residue name\_residue number**,  $\angle ADH$  represents the angle formed by acceptor (A), donor (D) and hydrogen (H) ( $\angle ADH$ ).



| PDB ID | Residue A | Atom A | Residue B | Atom B | Distance (Å) |
|--------|-----------|--------|-----------|--------|--------------|
| 6E9H   | A_LYS_292 | NZ     | B_GLU_128 | OE1    | 2.895        |
| 6E9H   | A_LYS_292 | NZ     | B_GLU_128 | OE2    | 3.744        |

Table 1574: Interfacial 6E9H-specific salt bridging networks analysis. In this table, a PDB file is specified with a four-letter PDB ID, except that the names of the PDB files corresponding to the single NMR structural model split from the NMR ensemble is specified with a four-letter PDB ID in addition to a hyphen followed by the single NMR structural model numeric ID, the residue naming scheme is **Chain ID\_residue name\_residue number**,  $\angle ADH$  represents the angle formed by acceptor (A), donor (D) and hydrogen (H) ( $\angle ADH$ ).

| PDB ID | Residue A | Atom A | Residue B | Atom B | Distance (Å) |
|--------|-----------|--------|-----------|--------|--------------|
| 6E9I   | A_ARG_109 | NH2    | D_ASP_95  | OD1    | 3.782        |
| 6E9I   | A_ARG_109 | NH2    | D_ASP_95  | OD2    | 3.931        |
| 6E9I   | A_LYS_289 | NZ     | B_GLU_128 | OE1    | 3.746        |
| 6E9I   | A_LYS_289 | NZ     | B_GLU_128 | OE2    | 2.925        |
| 6E9I   | C_LYS_289 | NZ     | D_GLU_128 | OE1    | 2.528        |
| 6E9I   | C_LYS_289 | NZ     | D_GLU_128 | OE2    | 3.968        |
| 6E9I   | H_LYS_289 | NZ     | L_GLU_128 | OE1    | 3.811        |
| 6E9I   | H_LYS_289 | NZ     | L_GLU_128 | OE2    | 2.547        |

Table 1575: Interfacial 6E9I-specific salt bridging networks analysis. In this table, a PDB file is specified with a four-letter PDB ID, except that the names of the PDB files corresponding to the single NMR structural model split from the NMR ensemble is specified with a four-letter PDB ID in addition to a hyphen followed by the single NMR structural model numeric ID, the residue naming scheme is **Chain ID\_residue name\_residue number**,  $\angle ADH$  represents the angle formed by acceptor (A), donor (D) and hydrogen (H) ( $\angle ADH$ ).

| PDB ID | Residue A | Atom A | Residue B | Atom B | Distance (Å) |
|--------|-----------|--------|-----------|--------|--------------|
| 6E9K   | A_LYS_257 | NZ     | B_GLU_128 | OE1    | 3.997        |
| 6E9K   | A_LYS_257 | NZ     | B_GLU_128 | OE2    | 3.056        |

Table 1576: Interfacial 6E9K-specific salt bridging networks analysis. In this table, a PDB file is specified with a four-letter PDB ID, except that the names of the PDB files corresponding to the single NMR structural model split from the NMR ensemble is specified with a four-letter PDB ID in addition to a hyphen followed by the single NMR structural model numeric ID, the residue naming scheme is **Chain ID\_residue name\_residue number**,  $\angle ADH$  represents the angle formed by acceptor (A), donor (D) and hydrogen (H) ( $\angle ADH$ ).

| PDB ID | Residue A | Atom A | Residue B | Atom B | Distance (Å) |
|--------|-----------|--------|-----------|--------|--------------|
| 6E9Q   | A_LYS.253 | NZ     | B_GLU.128 | OE1    | 3.048        |
| 6E9Q   | A_LYS.253 | NZ     | B_GLU.128 | OE2    | 2.978        |
| 6E9Q   | E_LYS.253 | NZ     | F_GLU.128 | OE1    | 2.966        |
| 6E9Q   | E_LYS.253 | NZ     | F_GLU.128 | OE2    | 2.802        |

Table 1577: Interfacial 6E9Q-specific salt bridging networks analysis. In this table, a PDB file is specified with a four-letter PDB ID, except that the names of the PDB files corresponding to the single NMR structural model split from the NMR ensemble is specified with a four-letter PDB ID in addition to a hyphen followed by the single NMR structural model numeric ID, the residue naming scheme is **Chain ID\_residue name\_residue number**,  $\angle ADH$  represents the angle formed by acceptor (A), donor (D) and hydrogen (H) ( $\angle ADH$ ).

| PDB ID | Residue A | Atom A | Residue B | Atom B | Distance (Å) |
|--------|-----------|--------|-----------|--------|--------------|
| 6E9U   | A_LYS_266 | NZ     | B_GLU_128 | OE1    | 2.942        |
| 6E9U   | A_LYS_266 | NZ     | B_GLU_128 | OE2    | 2.747        |

Table 1578: Interfacial 6E9U-specific salt bridging networks analysis. In this table, a PDB file is specified with a four-letter PDB ID, except that the names of the PDB files corresponding to the single NMR structural model split from the NMR ensemble is specified with a four-letter PDB ID in addition to a hyphen followed by the single NMR structural model numeric ID, the residue naming scheme is **Chain ID\_residue name\_residue number**,  $\angle ADH$  represents the angle formed by acceptor (A), donor (D) and hydrogen (H) ( $\angle ADH$ ).

| PDB ID | Residue A | Atom A | Residue B | Atom B | Distance (Å) |
|--------|-----------|--------|-----------|--------|--------------|
| 6EDU   | D_LYS_421 | NZ     | L_GLU_54  | OE2    | 2.920        |
| 6EDU   | D_LYS_432 | NZ     | L_GLU_55  | OE1    | 3.655        |
| 6EDU   | D_LYS_432 | NZ     | L_GLU_55  | OE2    | 3.439        |
| 6EDU   | E_LYS_421 | NZ     | N_GLU_54  | OE2    | 3.004        |
| 6EDU   | E_LYS_432 | NZ     | N_GLU_55  | OE1    | 3.579        |
| 6EDU   | E_LYS_432 | NZ     | N_GLU_55  | OE2    | 3.398        |
| 6EDU   | F_LYS_421 | NZ     | J_GLU_54  | OE2    | 3.064        |
| 6EDU   | F_LYS_432 | NZ     | J_GLU_55  | OE1    | 3.805        |
| 6EDU   | F_LYS_432 | NZ     | J_GLU_55  | OE2    | 3.577        |
| 6EDU   | G_LYS_22  | NZ     | F_GLU_102 | OE1    | 3.040        |
| 6EDU   | G_ARG_59  | NH2    | F ASP_368 | OD1    | 3.059        |
| 6EDU   | H_LYS_22  | NZ     | E_GLU_102 | OE1    | 3.174        |
| 6EDU   | H_ARG_59  | NH2    | E ASP_368 | OD1    | 3.166        |
| 6EDU   | I_LYS_22  | NZ     | D_GLU_102 | OE1    | 3.053        |
| 6EDU   | I_ARG_59  | NH2    | D ASP_368 | OD1    | 3.238        |
| 6EDU   | P_LYS_107 | NZ     | F_GLU_91  | OE1    | 3.324        |
| 6EDU   | R_LYS_107 | NZ     | D_GLU_91  | OE1    | 3.704        |
| 6EDU   | T_LYS_107 | NZ     | E_GLU_91  | OE1    | 3.475        |

Table 1579: Interfacial 6EDU-specific salt bridging networks analysis. In this table, a PDB file is specified with a four-letter PDB ID, except that the names of the PDB files corresponding to the single NMR structural model split from the NMR ensemble is specified with a four-letter PDB ID in addition to a hyphen followed by the single NMR structural model numeric ID, the residue naming scheme is **Chain ID\_residue name\_residue number**,  $\angle ADH$  represents the angle formed by acceptor (A), donor (D) and hydrogen (H) ( $\angle ADH$ ).

| PDB ID | Residue A | Atom A | Residue B | Atom B | Distance (Å) |
|--------|-----------|--------|-----------|--------|--------------|
| 6EJG   | A_LYS_171 | NZ     | C_ASP_224 | OD2    | 3.396        |
| 6EJG   | A_LYS_171 | NZ     | C_ASP_226 | OD2    | 2.901        |
| 6EJG   | B_LYS_    | NZ     | D_ASP_    | OD1    | 3.521        |
| 6EJG   | B_LYS_    | NZ     | D_ASP_    | OD2    | 2.547        |
| 6EJG   | B_LYS_    | NZ     | D_ASP_    | OD2    | 2.932        |

Table 1580: Interfacial 6EJG-specific salt bridging networks analysis. In this table, a PDB file is specified with a four-letter PDB ID, except that the names of the PDB files corresponding to the single NMR structural model split from the NMR ensemble is specified with a four-letter PDB ID in addition to a hyphen followed by the single NMR structural model numeric ID, the residue naming scheme is **Chain ID\_residue name\_residue number**,  $\angle ADH$  represents the angle formed by acceptor (A), donor (D) and hydrogen (H) ( $\angle ADH$ ).

| PDB ID | Residue A | Atom A | Residue B | Atom B | Distance (Å) |
|--------|-----------|--------|-----------|--------|--------------|
| 6EJM   | A_HIS_204 | ND1    | B_GLU_152 | OE2    | 3.786        |

Table 1581: Interfacial 6EJM-specific salt bridging networks analysis. In this table, a PDB file is specified with a four-letter PDB ID, except that the names of the PDB files corresponding to the single NMR structural model split from the NMR ensemble is specified with a four-letter PDB ID in addition to a hyphen followed by the single NMR structural model numeric ID, the residue naming scheme is **Chain ID\_residue name\_residue number**,  $\angle ADH$  represents the angle formed by acceptor (A), donor (D) and hydrogen (H) ( $\angle ADH$ ).



| PDB ID | Residue A | Atom A | Residue B | Atom B | Distance (Å) |
|--------|-----------|--------|-----------|--------|--------------|
| 6EK2   | H_ARG_370 | NH1    | A_GLU_188 | OE2    | 3.014        |
| 6EK2   | H_ARG_370 | NH2    | A_GLU_188 | OE1    | 3.920        |
| 6EK2   | H_ARG_370 | NH2    | A_GLU_188 | OE2    | 3.261        |
| 6EK2   | I_ARG_370 | NH1    | B_GLU_188 | OE1    | 2.817        |
| 6EK2   | I_ARG_370 | NH1    | B_GLU_188 | OE2    | 3.286        |
| 6EK2   | I_ARG_370 | NH2    | B_GLU_188 | OE1    | 3.837        |
| 6EK2   | I_ARG_370 | NH2    | B_GLU_188 | OE2    | 3.095        |

Table 1582: Interfacial 6EK2-specific salt bridging networks analysis. In this table, a PDB file is specified with a four-letter PDB ID, except that the names of the PDB files corresponding to the single NMR structural model split from the NMR ensemble is specified with a four-letter PDB ID in addition to a hyphen followed by the single NMR structural model numeric ID, the residue naming scheme is **Chain ID\_residue name\_residue number**,  $\angle ADH$  represents the angle formed by acceptor (A), donor (D) and hydrogen (H) ( $\angle ADH$ ).

| PDB ID | Residue A | Atom A | Residue B | Atom B | Distance (Å) |
|--------|-----------|--------|-----------|--------|--------------|
| 6EUN   | A_LYS_87  | NZ     | B_GLU_47  | OE1    | 3.058        |
| 6EUN   | A_LYS_107 | NZ     | C_ASP_105 | OD1    | 3.488        |
| 6EUN   | A_LYS_167 | NZ     | C_ASP_165 | OD1    | 3.883        |
| 6EUN   | B_LYS_87  | NZ     | C_GLU_47  | OE1    | 3.021        |
| 6EUN   | B_LYS_107 | NZ     | A_ASP_105 | OD1    | 3.579        |
| 6EUN   | C_LYS_87  | NZ     | A_GLU_47  | OE1    | 3.007        |
| 6EUN   | C_LYS_107 | NZ     | B_ASP_105 | OD1    | 3.525        |

Table 1583: Interfacial 6EUN-specific salt bridging networks analysis. In this table, a PDB file is specified with a four-letter PDB ID, except that the names of the PDB files corresponding to the single NMR structural model split from the NMR ensemble is specified with a four-letter PDB ID in addition to a hyphen followed by the single NMR structural model numeric ID, the residue naming scheme is **Chain ID\_residue name\_residue number**,  $\angle ADH$  represents the angle formed by acceptor (A), donor (D) and hydrogen (H) ( $\angle ADH$ ).

| PDB ID | Residue A | Atom A | Residue B | Atom B | Distance (Å) |
|--------|-----------|--------|-----------|--------|--------------|
| 6EUP   | A.LYS_87  | NZ     | B.GLU_47  | OE1    | 2.842        |
| 6EUP   | A.LYS_87  | NZ     | B.ASP_79  | OD1    | 3.786        |
| 6EUP   | A.LYS_107 | NZ     | C.ASP_105 | OD1    | 3.538        |
| 6EUP   | B.LYS_87  | NZ     | C.GLU_47  | OE1    | 2.811        |
| 6EUP   | B.LYS_87  | NZ     | C.ASP_79  | OD1    | 3.799        |
| 6EUP   | B.LYS_107 | NZ     | A.ASP_105 | OD1    | 3.723        |
| 6EUP   | C.LYS_87  | NZ     | A.GLU_47  | OE1    | 2.814        |
| 6EUP   | C.LYS_87  | NZ     | A.ASP_79  | OD1    | 3.752        |
| 6EUP   | C.LYS_107 | NZ     | B.ASP_105 | OD1    | 3.560        |

Table 1584: Interfacial 6EUP-specific salt bridging networks analysis. In this table, a PDB file is specified with a four-letter PDB ID, except that the names of the PDB files corresponding to the single NMR structural model split from the NMR ensemble is specified with a four-letter PDB ID in addition to a hyphen followed by the single NMR structural model numeric ID, the residue naming scheme is **Chain ID\_residue name\_residue number**,  $\angle ADH$  represents the angle formed by acceptor (A), donor (D) and hydrogen (H) ( $\angle ADH$ ).

| PDB ID | Residue A | Atom A | Residue B | Atom B | Distance (Å) |
|--------|-----------|--------|-----------|--------|--------------|
| 6EV1   | A_LYS_213 | NZ     | B_GLU_122 | OE1    | 3.565        |
| 6EV1   | B_ARG_45  | NH1    | A_ASP_105 | OD1    | 3.400        |
| 6EV1   | E_LYS_213 | NZ     | F_GLU_122 | OE2    | 3.696        |
| 6EV1   | F_ARG_45  | NH1    | E_ASP_105 | OD1    | 3.598        |
| 6EV1   | G_LYS_213 | NZ     | H_GLU_122 | OE2    | 3.127        |
| 6EV1   | I_LYS_213 | NZ     | J_GLU_122 | OE1    | 2.884        |
| 6EV1   | I_LYS_213 | NZ     | J_GLU_122 | OE2    | 3.812        |
| 6EV1   | J_ARG_45  | NH2    | I_ASP_105 | OD1    | 3.213        |
| 6EV1   | J_ARG_45  | NH2    | I_ASP_105 | OD2    | 3.457        |
| 6EV1   | K_HIS_168 | NE2    | L_ASP_166 | OD2    | 3.740        |
| 6EV1   | K_LYS_213 | NZ     | L_GLU_122 | OE1    | 3.450        |
| 6EV1   | L_ARG_45  | NH2    | K_ASP_105 | OD1    | 3.857        |

Table 1585: Interfacial 6EV1-specific salt bridging networks analysis. In this table, a PDB file is specified with a four-letter PDB ID, except that the names of the PDB files corresponding to the single NMR structural model split from the NMR ensemble is specified with a four-letter PDB ID in addition to a hyphen followed by the single NMR structural model numeric ID, the residue naming scheme is **Chain ID** **residue name** **residue number**,  $\angle ADH$  represents the angle formed by acceptor (A), donor (D) and hydrogen (H) ( $\angle ADH$ ).

| PDB ID | Residue A | Atom A | Residue B | Atom B | Distance (Å) |
|--------|-----------|--------|-----------|--------|--------------|
| 6EV2   | A_LYS_213 | NZ     | B_GLU_122 | OE1    | 3.442        |
| 6EV2   | B_ARG_45  | NH1    | A_ASP_105 | OD1    | 3.088        |
| 6EV2   | B_LYS_168 | NZ     | F_GLU_78  | OE2    | 2.948        |
| 6EV2   | D_LYS_44  | NZ     | C_ASP_105 | OD2    | 3.822        |
| 6EV2   | D_ARG_45  | NH1    | C_ASP_105 | OD1    | 3.142        |
| 6EV2   | D_LYS_168 | NZ     | H_GLU_78  | OE2    | 3.198        |
| 6EV2   | E_LYS_213 | NZ     | F_GLU_122 | OE1    | 3.493        |
| 6EV2   | E_LYS_218 | NZ     | F_ASP_121 | OD2    | 3.835        |
| 6EV2   | F_ARG_45  | NH1    | E_ASP_105 | OD1    | 2.818        |
| 6EV2   | F_LYS_168 | NZ     | B_GLU_78  | OE1    | 3.747        |
| 6EV2   | G_LYS_210 | NZ     | A_ASP_73  | OD1    | 3.883        |
| 6EV2   | G_LYS_210 | NZ     | A_ASP_73  | OD2    | 2.404        |
| 6EV2   | G_LYS_213 | NZ     | H_GLU_122 | OE1    | 3.330        |
| 6EV2   | G_LYS_213 | NZ     | H_GLU_122 | OE2    | 3.779        |
| 6EV2   | H_ARG_45  | NH1    | G_ASP_105 | OD1    | 3.108        |
| 6EV2   | H_LYS_168 | NZ     | D_GLU_78  | OE2    | 3.686        |

Table 1586: Interfacial 6EV2-specific salt bridging networks analysis. In this table, a PDB file is specified with a four-letter PDB ID, except that the names of the PDB files corresponding to the single NMR structural model split from the NMR ensemble is specified with a four-letter PDB ID in addition to a hyphen followed by the single NMR structural model numeric ID, the residue naming scheme is **Chain ID\_residue name\_residue number**,  $\angle ADH$  represents the angle formed by acceptor (A), donor (D) and hydrogen (H) ( $\angle ADH$ ).

| PDB ID | Residue A | Atom A | Residue B | Atom B | Distance (Å) |
|--------|-----------|--------|-----------|--------|--------------|
| 6EWB   | D_HIS_417 | NE2    | L_GLU_80  | OE2    | 3.932        |
| 6EWB   | E_ARG_98  | NH1    | B_ASP_341 | OD1    | 3.977        |
| 6EWB   | E_ARG_98  | NH2    | B_ASP_341 | OD1    | 3.813        |
| 6EWB   | E_ARG_101 | NH1    | F_ASP_49  | OD1    | 2.895        |
| 6EWB   | E_ARG_101 | NH1    | F_ASP_49  | OD2    | 3.620        |
| 6EWB   | F_ARG_    | NH1    | E_ASP_    | OD1    | 3.803        |
| 6EWB   | F_ARG_    | NH1    | E_ASP_    | OD2    | 3.536        |
| 6EWB   | F_LYS_52  | NZ     | A_ASP_448 | OD1    | 3.722        |
| 6EWB   | F_LYS_52  | NZ     | A_ASP_448 | OD2    | 2.304        |
| 6EWB   | G_ARG_98  | NH1    | D_ASP_341 | OD1    | 3.850        |
| 6EWB   | G_ARG_98  | NH2    | D_ASP_341 | OD1    | 3.731        |
| 6EWB   | G_ARG_101 | NH1    | I_ASP_49  | OD1    | 2.830        |
| 6EWB   | G_ARG_101 | NH1    | I_ASP_49  | OD2    | 3.797        |
| 6EWB   | H_ARG_98  | NH1    | A_ASP_341 | OD2    | 3.948        |
| 6EWB   | H_ARG_98  | NH2    | A_ASP_341 | OD2    | 3.896        |
| 6EWB   | H_ARG_101 | NH1    | L_ASP_49  | OD1    | 2.509        |
| 6EWB   | H_ARG_101 | NH1    | L_ASP_49  | OD2    | 3.441        |
| 6EWB   | I_ARG_45  | NH1    | G_ASP_104 | OD1    | 3.731        |
| 6EWB   | I_ARG_45  | NH1    | G_ASP_104 | OD2    | 3.636        |
| 6EWB   | I_LYS_52  | NZ     | C_ASP_448 | OD1    | 3.564        |
| 6EWB   | I_LYS_52  | NZ     | C_ASP_448 | OD2    | 2.694        |
| 6EWB   | J_ARG_98  | NH1    | C_ASP_341 | OD2    | 3.957        |
| 6EWB   | J_ARG_98  | NH2    | C_ASP_341 | OD2    | 3.467        |
| 6EWB   | J_ARG_101 | NH1    | K_ASP_49  | OD1    | 2.726        |
| 6EWB   | J_ARG_101 | NH1    | K_ASP_49  | OD2    | 3.581        |
| 6EWB   | J_LYS_211 | NZ     | K_GLU_122 | OE2    | 2.945        |
| 6EWB   | K_ARG_45  | NH1    | J_ASP_104 | OD2    | 3.826        |
| 6EWB   | K_LYS_52  | NZ     | D_ASP_448 | OD1    | 3.845        |
| 6EWB   | K_LYS_52  | NZ     | D_ASP_448 | OD2    | 2.608        |
| 6EWB   | L_ARG_45  | NH1    | H_ASP_104 | OD1    | 3.721        |
| 6EWB   | L_ARG_45  | NH1    | H_ASP_104 | OD2    | 3.560        |
| 6EWB   | L_LYS_52  | NZ     | B_ASP_448 | OD1    | 3.690        |
| 6EWB   | L_LYS_52  | NZ     | B_ASP_448 | OD2    | 2.585        |
| 6EWB   | L_ARG_60  | NH1    | D_GLU_316 | OE1    | 3.251        |
| 6EWB   | L_ARG_60  | NH1    | D_GLU_316 | OE2    | 3.266        |

Table 1587: Interfacial 6EWB-specific salt bridging networks analysis. In this table, a PDB file is specified with a four-letter PDB ID, except that the names of the PDB files corresponding to the single NMR structural model split from the NMR ensemble is specified with a four-letter PDB ID in addition to a hyphen followed by the single NMR structural model numeric ID, the residue naming scheme is **Chain ID\_residue name\_residue number**,  $\angle ADH$  represents the angle formed by acceptor (A), donor (D) and hydrogen (H) ( $\angle ADH$ ).

| PDB ID | Residue A | Atom A | Residue B | Atom B | Distance (Å) |
|--------|-----------|--------|-----------|--------|--------------|
| 6FAB   | H_LYS_216 | NZ     | L_GLU_123 | OE1    | 2.624        |
| 6FAB   | H_LYS_216 | NZ     | L_GLU_123 | OE2    | 2.770        |

Table 1588: Interfacial 6FAB-specific salt bridging networks analysis. In this table, a PDB file is specified with a four-letter PDB ID, except that the names of the PDB files corresponding to the single NMR structural model split from the NMR ensemble is specified with a four-letter PDB ID in addition to a hyphen followed by the single NMR structural model numeric ID, the residue naming scheme is **Chain ID\_residue name\_residue number**,  $\angle ADH$  represents the angle formed by acceptor (A), donor (D) and hydrogen (H) ( $\angle ADH$ ).

| PDB ID | Residue A | Atom A | Residue B | Atom B | Distance (Å) |
|--------|-----------|--------|-----------|--------|--------------|
| 6FAX   | H_ARG_104 | NH2    | R_GLU_21  | OE1    | 3.986        |
| 6FAX   | H_HIS_173 | NE2    | L_ASP_167 | OD1    | 3.928        |
| 6FAX   | H_LYS_218 | NZ     | L_GLU_123 | OE1    | 3.125        |
| 6FAX   | H_LYS_218 | NZ     | L_GLU_123 | OE2    | 3.415        |

Table 1589: Interfacial 6FAX-specific salt bridging networks analysis. In this table, a PDB file is specified with a four-letter PDB ID, except that the names of the PDB files corresponding to the single NMR structural model split from the NMR ensemble is specified with a four-letter PDB ID in addition to a hyphen followed by the single NMR structural model numeric ID, the residue naming scheme is **Chain ID\_residue name\_residue number**,  $\angle ADH$  represents the angle formed by acceptor (A), donor (D) and hydrogen (H) ( $\angle ADH$ ).



| PDB ID | Residue A | Atom A | Residue B | Atom B | Distance (Å) |
|--------|-----------|--------|-----------|--------|--------------|
| 6FN1   | C_LYS_217 | NZ     | B_GLU_129 | OE1    | 3.462        |
| 6FN1   | C_LYS_217 | NZ     | B_GLU_129 | OE2    | 2.375        |

Table 1590: Interfacial 6FN1-specific salt bridging networks analysis. In this table, a PDB file is specified with a four-letter PDB ID, except that the names of the PDB files corresponding to the single NMR structural model split from the NMR ensemble is specified with a four-letter PDB ID in addition to a hyphen followed by the single NMR structural model numeric ID, the residue naming scheme is **Chain ID\_residue name\_residue number**,  $\angle ADH$  represents the angle formed by acceptor (A), donor (D) and hydrogen (H) ( $\angle ADH$ ).

| PDB ID | Residue A | Atom A | Residue B | Atom B | Distance (Å) |
|--------|-----------|--------|-----------|--------|--------------|
| 6FN4   | B.LYS_55  | NZ     | A.ASP_743 | OD1    | 2.728        |
| 6FN4   | B.LYS_55  | NZ     | A.ASP_743 | OD2    | 3.540        |
| 6FN4   | C.LYS_217 | NZ     | B.GLU_129 | OE2    | 3.828        |

Table 1591: Interfacial 6FN4-specific salt bridging networks analysis. In this table, a PDB file is specified with a four-letter PDB ID, except that the names of the PDB files corresponding to the single NMR structural model split from the NMR ensemble is specified with a four-letter PDB ID in addition to a hyphen followed by the single NMR structural model numeric ID, the residue naming scheme is **Chain ID\_residue name\_residue number**,  $\angle ADH$  represents the angle formed by acceptor (A), donor (D) and hydrogen (H) ( $\angle ADH$ ).

| PDB ID | Residue A | Atom A | Residue B | Atom B | Distance (Å) |
|--------|-----------|--------|-----------|--------|--------------|
| 6GK7   | H_LYS_43  | NZ     | L_ASP_9   | OD1    | 3.203        |
| 6GK7   | H_LYS_218 | NZ     | L_GLU_129 | OE1    | 3.512        |
| 6GK7   | H_LYS_218 | NZ     | L_GLU_129 | OE2    | 3.016        |
| 6GK7   | H_LYS_223 | NZ     | L_ASP_128 | OD2    | 3.231        |
| 6GK7   | A_LYS_317 | NZ     | H_ASP_55  | OD2    | 2.761        |
| 6GK7   | A_LYS_317 | NZ     | H_ASP_57  | OD2    | 2.983        |

Table 1592: Interfacial 6GK7-specific salt bridging networks analysis. In this table, a PDB file is specified with a four-letter PDB ID, except that the names of the PDB files corresponding to the single NMR structural model split from the NMR ensemble is specified with a four-letter PDB ID in addition to a hyphen followed by the single NMR structural model numeric ID, the residue naming scheme is **Chain ID\_residue name\_residue number**,  $\angle ADH$  represents the angle formed by acceptor (A), donor (D) and hydrogen (H) ( $\angle ADH$ ).

| PDB ID | Residue A | Atom A | Residue B | Atom B | Distance (Å) |
|--------|-----------|--------|-----------|--------|--------------|
| 6GK8   | H_ARG_59  | NH2    | L ASP_65  | OD1    | 3.295        |
| 6GK8   | H_ARG_101 | NH1    | L GLU_62  | OE2    | 2.742        |
| 6GK8   | H_ARG_101 | NH2    | L GLU_62  | OE2    | 3.142        |
| 6GK8   | H_LYS_104 | NZ     | L GLU_62  | OE1    | 2.762        |
| 6GK8   | H_LYS_104 | NZ     | L GLU_62  | OE2    | 3.928        |
| 6GK8   | H_LYS_222 | NZ     | L ASP_128 | OD2    | 2.761        |
| 6GK8   | L_ARG_32  | NH1    | L GLU_57  | OE2    | 3.709        |
| 6GK8   | L_LYS_67  | NZ     | H ASP_55  | OD1    | 3.586        |
| 6GK8   | L_LYS_67  | NZ     | H ASP_55  | OD2    | 3.183        |
| 6GK8   | L_LYS_67  | NZ     | H ASP_57  | OD2    | 3.085        |

Table 1593: Interfacial 6GK8-specific salt bridging networks analysis. In this table, a PDB file is specified with a four-letter PDB ID, except that the names of the PDB files corresponding to the single NMR structural model split from the NMR ensemble is specified with a four-letter PDB ID in addition to a hyphen followed by the single NMR structural model numeric ID, the residue naming scheme is **Chain ID\_residue name\_residue number**,  $\angle ADH$  represents the angle formed by acceptor (A), donor (D) and hydrogen (H) ( $\angle ADH$ ).

| PDB ID | Residue A | Atom A | Residue B | Atom B | Distance (Å) |
|--------|-----------|--------|-----------|--------|--------------|
| 6H2Y   | D_LYS_79  | NZ     | L_ASP_52  | OD1    | 3.126        |
| 6H2Y   | D_LYS_120 | NZ     | L_ASP_95  | OD2    | 2.910        |
| 6H2Y   | D_LYS_191 | NZ     | L_ASP_50  | OD2    | 2.715        |
| 6H2Y   | H_ARG_56  | NH2    | D_GLU_58  | OE1    | 3.564        |
| 6H2Y   | H_ARG_56  | NH2    | D_GLU_58  | OE2    | 3.905        |
| 6H2Y   | H_LYS_215 | NZ     | L_GLU_125 | OE1    | 3.261        |
| 6H2Y   | H_LYS_215 | NZ     | L_GLU_125 | OE2    | 2.865        |
| 6H2Y   | L_ARG_92  | NH1    | D_ASP_166 | OD2    | 3.217        |
| 6H2Y   | L_ARG_92  | NH2    | D_GLU_119 | OE1    | 3.274        |
| 6H2Y   | L_ARG_92  | NH2    | D_GLU_119 | OE2    | 3.244        |
| 6H2Y   | L_ARG_92  | NH2    | D_ASP_166 | OD1    | 3.891        |
| 6H2Y   | L_ARG_92  | NH2    | D_ASP_166 | OD2    | 2.328        |

Table 1594: Interfacial 6H2Y-specific salt bridging networks analysis. In this table, a PDB file is specified with a four-letter PDB ID, except that the names of the PDB files corresponding to the single NMR structural model split from the NMR ensemble is specified with a four-letter PDB ID in addition to a hyphen followed by the single NMR structural model numeric ID, the residue naming scheme is **Chain ID residue name residue number**,  $\angle ADH$  represents the angle formed by acceptor (A), donor (D) and hydrogen (H) ( $\angle ADH$ ).

| PDB ID | Residue A | Atom A | Residue B | Atom B | Distance (Å) |
|--------|-----------|--------|-----------|--------|--------------|
| 6I3Z   | A_LYS_201 | NZ     | L_ASP_92  | OD1    | 3.556        |
| 6I3Z   | A_LYS_290 | NZ     | H_ASP_33  | OD1    | 3.699        |
| 6I3Z   | L_ARG_53  | NH1    | A_GLU_204 | OE1    | 2.383        |
| 6I3Z   | L_ARG_53  | NH1    | A_GLU_204 | OE2    | 3.516        |

Table 1595: Interfacial 6I3Z-specific salt bridging networks analysis. In this table, a PDB file is specified with a four-letter PDB ID, except that the names of the PDB files corresponding to the single NMR structural model split from the NMR ensemble is specified with a four-letter PDB ID in addition to a hyphen followed by the single NMR structural model numeric ID, the residue naming scheme is **Chain ID\_residue name\_residue number**,  $\angle ADH$  represents the angle formed by acceptor (A), donor (D) and hydrogen (H) ( $\angle ADH$ ).

| PDB ID | Residue A | Atom A | Residue B | Atom B | Distance (Å) |
|--------|-----------|--------|-----------|--------|--------------|
| 6IAP   | D_ARG_96  | NH2    | A_GLU_80  | OE1    | 3.466        |
| 6IAP   | E_HIS_35  | NE2    | A_GLU_80  | OE1    | 3.445        |
| 6IAP   | H_ARG_99  | NH2    | A_ASP_98  | OD1    | 2.689        |
| 6IAP   | L_ARG_94  | NH1    | H_GLU_50  | OE2    | 2.973        |
| 6IAP   | L_ARG_94  | NH2    | A_ASP_123 | OD2    | 3.888        |

Table 1596: Interfacial 6IAP-specific salt bridging networks analysis. In this table, a PDB file is specified with a four-letter PDB ID, except that the names of the PDB files corresponding to the single NMR structural model split from the NMR ensemble is specified with a four-letter PDB ID in addition to a hyphen followed by the single NMR structural model numeric ID, the residue naming scheme is **Chain ID\_residue name\_residue number**,  $\angle ADH$  represents the angle formed by acceptor (A), donor (D) and hydrogen (H) ( $\angle ADH$ ).

| PDB ID | Residue A | Atom A | Residue B | Atom B | Distance (Å) |
|--------|-----------|--------|-----------|--------|--------------|
| 6JMQ   | C_HIS_169 | NE2    | D_ASP_173 | OD2    | 3.860        |
| 6JMQ   | C_LYS_213 | NZ     | D_GLU_129 | OE1    | 3.825        |

Table 1597: Interfacial 6JMQ-specific salt bridging networks analysis. In this table, a PDB file is specified with a four-letter PDB ID, except that the names of the PDB files corresponding to the single NMR structural model split from the NMR ensemble is specified with a four-letter PDB ID in addition to a hyphen followed by the single NMR structural model numeric ID, the residue naming scheme is **Chain ID\_residue name\_residue number**,  $\angle ADH$  represents the angle formed by acceptor (A), donor (D) and hydrogen (H) ( $\angle ADH$ ).



| PDB ID | Residue A | Atom A | Residue B | Atom B | Distance (Å) |
|--------|-----------|--------|-----------|--------|--------------|
| 6JMR   | C_HIS_169 | NE2    | D_ASP_173 | OD1    | 3.922        |

Table 1598: Interfacial 6JMR-specific salt bridging networks analysis. In this table, a PDB file is specified with a four-letter PDB ID, except that the names of the PDB files corresponding to the single NMR structural model split from the NMR ensemble is specified with a four-letter PDB ID in addition to a hyphen followed by the single NMR structural model numeric ID, the residue naming scheme is **Chain ID\_residue name\_residue number**,  $\angle ADH$  represents the angle formed by acceptor (A), donor (D) and hydrogen (H) ( $\angle ADH$ ).

| PDB ID | Residue A | Atom A | Residue B | Atom B | Distance (Å) |
|--------|-----------|--------|-----------|--------|--------------|
| 6K7O   | A_LYS_55  | NZ     | H_ASP_106 | OD1    | 3.027        |
| 6K7O   | A_ARG_78  | NH1    | L_ASP_94  | OD1    | 3.792        |
| 6K7O   | A_ARG_78  | NH2    | L_ASP_94  | OD1    | 2.709        |
| 6K7O   | B_LYS_218 | NZ     | C_GLU_127 | OE1    | 3.816        |
| 6K7O   | B_LYS_218 | NZ     | C_GLU_127 | OE2    | 2.813        |
| 6K7O   | B_LYS_223 | NZ     | C_ASP_126 | OD1    | 2.273        |
| 6K7O   | B_LYS_223 | NZ     | C_ASP_126 | OD2    | 2.907        |
| 6K7O   | D_LYS_215 | NZ     | G_ASP_189 | OD2    | 2.832        |
| 6K7O   | D_LYS_218 | NZ     | E_GLU_127 | OE1    | 2.290        |
| 6K7O   | D_LYS_218 | NZ     | E_GLU_127 | OE2    | 3.074        |
| 6K7O   | D_LYS_223 | NZ     | E_ASP_126 | OD1    | 3.765        |
| 6K7O   | D_LYS_223 | NZ     | E_ASP_126 | OD2    | 3.552        |
| 6K7O   | F_HIS_173 | NE2    | G_ASP_171 | OD2    | 3.941        |
| 6K7O   | G_ARG_51  | NH2    | F_ASP_106 | OD2    | 3.980        |
| 6K7O   | H_HIS_173 | NE2    | L_ASP_171 | OD2    | 3.862        |
| 6K7O   | H_LYS_218 | NZ     | L_GLU_127 | OE1    | 3.981        |
| 6K7O   | H_LYS_223 | NZ     | L_ASP_126 | OD1    | 3.964        |
| 6K7O   | P_LYS_55  | NZ     | B_ASP_106 | OD1    | 3.340        |
| 6K7O   | P_ARG_78  | NH1    | C_ASP_94  | OD1    | 2.583        |
| 6K7O   | P_ARG_78  | NH2    | C_ASP_94  | OD1    | 2.609        |
| 6K7O   | R_LYS_55  | NZ     | F_ASP_106 | OD1    | 2.834        |
| 6K7O   | Q_LYS_55  | NZ     | D_ASP_106 | OD1    | 3.172        |
| 6K7O   | Q_ARG_59  | NH1    | H_GLU_221 | OE1    | 3.018        |
| 6K7O   | Q_ARG_59  | NH1    | H_GLU_221 | OE2    | 3.413        |
| 6K7O   | Q_ARG_59  | NH2    | H_GLU_221 | OE1    | 3.299        |
| 6K7O   | Q_ARG_59  | NH2    | H_GLU_221 | OE2    | 2.855        |
| 6K7O   | Q_ARG_78  | NH1    | E_ASP_94  | OD1    | 3.546        |
| 6K7O   | Q_ARG_78  | NH2    | E_ASP_94  | OD1    | 2.499        |

Table 1599: Interfacial 6K7O-specific salt bridging networks analysis. In this table, a PDB file is specified with a four-letter PDB ID, except that the names of the PDB files corresponding to the single NMR structural model split from the NMR ensemble is specified with a four-letter PDB ID in addition to a hyphen followed by the single NMR structural model numeric ID, the residue naming scheme is **Chain ID\_residue name\_residue number**,  $\angle ADH$  represents the angle formed by acceptor (A), donor (D) and hydrogen (H) ( $\angle ADH$ ).

| PDB ID | Residue A | Atom A | Residue B | Atom B | Distance (Å) |
|--------|-----------|--------|-----------|--------|--------------|
| 6KN9   | A_ARG_281 | NH1    | D_ASP_111 | OD1    | 2.228        |
| 6KN9   | A_ARG_281 | NH1    | D_ASP_111 | OD2    | 3.976        |
| 6KN9   | B_ARG_281 | NH2    | E_ASP_111 | OD1    | 2.487        |
| 6KN9   | B_ARG_281 | NH2    | E_ASP_111 | OD2    | 3.660        |
| 6KN9   | C_ARG_281 | NH2    | F_ASP_111 | OD2    | 3.907        |

Table 1600: Interfacial 6KN9-specific salt bridging networks analysis. In this table, a PDB file is specified with a four-letter PDB ID, except that the names of the PDB files corresponding to the single NMR structural model split from the NMR ensemble is specified with a four-letter PDB ID in addition to a hyphen followed by the single NMR structural model numeric ID, the residue naming scheme is **Chain ID\_residue name\_residue number**,  $\angle ADH$  represents the angle formed by acceptor (A), donor (D) and hydrogen (H) ( $\angle ADH$ ).

| PDB ID | Residue A | Atom A | Residue B | Atom B | Distance (Å) |
|--------|-----------|--------|-----------|--------|--------------|
| 6MHR   | E_ARG_91  | NH1    | D_GLU_50  | OE1    | 3.108        |
| 6MHR   | E_ARG_91  | NH1    | D_ASP_98  | OD2    | 3.892        |
| 6MHR   | E_ARG_91  | NH2    | D_GLU_50  | OE1    | 3.238        |
| 6MHR   | E_ARG_91  | NH2    | D_GLU_50  | OE2    | 3.082        |
| 6MHR   | A_LYS_217 | NZ     | B_GLU_125 | OE2    | 2.775        |
| 6MHR   | B_ARG_91  | NH1    | A_GLU_50  | OE1    | 3.086        |
| 6MHR   | B_ARG_91  | NH1    | A_GLU_50  | OE2    | 3.775        |
| 6MHR   | B_ARG_91  | NH1    | A_ASP_98  | OD2    | 3.351        |
| 6MHR   | B_ARG_91  | NH2    | A_GLU_50  | OE1    | 3.608        |
| 6MHR   | B_ARG_91  | NH2    | A_GLU_50  | OE2    | 2.934        |

Table 1601: Interfacial 6MHR-specific salt bridging networks analysis. In this table, a PDB file is specified with a four-letter PDB ID, except that the names of the PDB files corresponding to the single NMR structural model split from the NMR ensemble is specified with a four-letter PDB ID in addition to a hyphen followed by the single NMR structural model numeric ID, the residue naming scheme is **Chain ID\_residue name\_residue number**,  $\angle ADH$  represents the angle formed by acceptor (A), donor (D) and hydrogen (H) ( $\angle ADH$ ).

| PDB ID | Residue A | Atom A | Residue B | Atom B | Distance (Å) |
|--------|-----------|--------|-----------|--------|--------------|
| 6MI2   | F_LYS_114 | NZ     | E_ASP_50  | OD1    | 2.776        |
| 6MI2   | F_LYS_114 | NZ     | E_ASP_50  | OD2    | 3.977        |
| 6MI2   | F_ARG_134 | NH2    | D_ASP_55  | OD2    | 3.507        |
| 6MI2   | C_LYS_114 | NZ     | B_ASP_50  | OD1    | 3.683        |
| 6MI2   | C_LYS_114 | NZ     | B_ASP_50  | OD2    | 2.434        |

Table 1602: Interfacial 6MI2-specific salt bridging networks analysis. In this table, a PDB file is specified with a four-letter PDB ID, except that the names of the PDB files corresponding to the single NMR structural model split from the NMR ensemble is specified with a four-letter PDB ID in addition to a hyphen followed by the single NMR structural model numeric ID, the residue naming scheme is **Chain ID\_residue name\_residue number**,  $\angle ADH$  represents the angle formed by acceptor (A), donor (D) and hydrogen (H) ( $\angle ADH$ ).

| PDB ID | Residue A | Atom A | Residue B | Atom B | Distance (Å) |
|--------|-----------|--------|-----------|--------|--------------|
| 6MN7   | B_ARG_542 | NH1    | F_GLU_647 | OE2    | 3.229        |
| 6MN7   | B_LYS_574 | NZ     | A_ASP_107 | OD1    | 3.285        |
| 6MN7   | B_LYS_574 | NZ     | A_ASP_107 | OD2    | 3.696        |
| 6MN7   | B_ARG_579 | NH2    | F_GLU_584 | OE1    | 2.844        |
| 6MN7   | B_ARG_579 | NH2    | F_GLU_584 | OE2    | 3.533        |
| 6MN7   | E_ARG_542 | NH1    | B_GLU_647 | OE2    | 3.076        |
| 6MN7   | E_LYS_574 | NZ     | C_ASP_107 | OD1    | 3.286        |
| 6MN7   | E_LYS_574 | NZ     | C_ASP_107 | OD2    | 3.697        |
| 6MN7   | E_ARG_579 | NH2    | B_GLU_584 | OE1    | 2.796        |
| 6MN7   | E_ARG_579 | NH2    | B_GLU_584 | OE2    | 3.568        |
| 6MN7   | F_ARG_542 | NH1    | E_GLU_647 | OE2    | 3.126        |
| 6MN7   | F_LYS_574 | NZ     | D_ASP_107 | OD1    | 3.285        |
| 6MN7   | F_LYS_574 | NZ     | D_ASP_107 | OD2    | 3.696        |
| 6MN7   | F_ARG_579 | NH2    | E_GLU_584 | OE1    | 2.859        |
| 6MN7   | F_ARG_579 | NH2    | E_GLU_584 | OE2    | 3.579        |

Table 1603: Interfacial 6MN7-specific salt bridging networks analysis. In this table, a PDB file is specified with a four-letter PDB ID, except that the names of the PDB files corresponding to the single NMR structural model split from the NMR ensemble is specified with a four-letter PDB ID in addition to a hyphen followed by the single NMR structural model numeric ID, the residue naming scheme is **Chain ID\_residue name\_residue number**,  $\angle ADH$  represents the angle formed by acceptor (A), donor (D) and hydrogen (H) ( $\angle ADH$ ).

| PDB ID | Residue A | Atom A | Residue B  | Atom B | Distance (Å) |
|--------|-----------|--------|------------|--------|--------------|
| 6MPG   | U_ARG_542 | NH2    | D_GLU_647  | OE1    | 3.141        |
| 6MPG   | U_ARG_542 | NH2    | D_GLU_647  | OE2    | 2.524        |
| 6MPG   | U_ARG_579 | NH2    | D_GLU_584  | OE1    | 2.488        |
| 6MPG   | V_LYS_229 | NZ     | B_ASP_1    | OD1    | 2.776        |
| 6MPG   | W_HIS_105 | NE2    | B_GLU_61   | OE2    | 3.652        |
| 6MPG   | n_ARG_94  | NH1    | V_ASP_321A | OD1    | 3.878        |
| 6MPG   | 2_LYS_229 | NZ     | 4_ASP_1    | OD1    | 2.776        |
| 6MPG   | 3_HIS_105 | NE2    | 4_GLU_61   | OE2    | 3.651        |
| 6MPG   | 6_ARG_94  | NH1    | 2_ASP_321A | OD1    | 3.878        |
| 6MPG   | A_ARG_542 | NH2    | U_GLU_647  | OE1    | 3.132        |
| 6MPG   | A_ARG_542 | NH2    | U_GLU_647  | OE2    | 2.525        |
| 6MPG   | A_ARG_579 | NH2    | U_GLU_584  | OE1    | 2.474        |
| 6MPG   | C_LYS_229 | NZ     | Y_ASP_1    | OD1    | 2.776        |
| 6MPG   | D_ARG_542 | NH2    | A_GLU_647  | OE1    | 3.137        |
| 6MPG   | D_ARG_542 | NH2    | A_GLU_647  | OE2    | 2.533        |
| 6MPG   | D_ARG_579 | NH2    | A_GLU_584  | OE1    | 2.479        |
| 6MPG   | N_ARG_94  | NH1    | C_ASP_321A | OD1    | 3.878        |
| 6MPG   | X_HIS_105 | NE2    | Y_GLU_61   | OE2    | 3.651        |

Table 1604: Interfacial 6MPG-specific salt bridging networks analysis. In this table, a PDB file is specified with a four-letter PDB ID, except that the names of the PDB files corresponding to the single NMR structural model split from the NMR ensemble is specified with a four-letter PDB ID in addition to a hyphen followed by the single NMR structural model numeric ID, the residue naming scheme is **Chain ID\_residue name\_residue number**,  $\angle ADH$  represents the angle formed by acceptor (A), donor (D) and hydrogen (H) ( $\angle ADH$ ).

| PDB ID | Residue A | Atom A | Residue B  | Atom B | Distance (Å) |
|--------|-----------|--------|------------|--------|--------------|
| 6MPH   | 1_LYS_31A | NZ     | A_GLU_87   | OE1    | 2.457        |
| 6MPH   | 1_LYS_31A | NZ     | A_GLU_87   | OE2    | 3.919        |
| 6MPH   | 2_ARG_96  | NH1    | 1_GLU_95   | OE1    | 3.340        |
| 6MPH   | 2_ARG_96  | NH1    | 1_GLU_95   | OE2    | 2.522        |
| 6MPH   | 3_LYS_31A | NZ     | B_GLU_87   | OE1    | 2.448        |
| 6MPH   | 3_LYS_31A | NZ     | B_GLU_87   | OE2    | 3.973        |
| 6MPH   | 4_ARG_96  | NH1    | 3_GLU_95   | OE1    | 3.339        |
| 6MPH   | 4_ARG_96  | NH1    | 3_GLU_95   | OE2    | 2.507        |
| 6MPH   | 6_ARG_542 | NH1    | E_GLU_647  | OE2    | 3.863        |
| 6MPH   | 6_ARG_542 | NH2    | E_GLU_647  | OE1    | 3.449        |
| 6MPH   | 6_ARG_542 | NH2    | E_GLU_647  | OE2    | 2.484        |
| 6MPH   | 6_ARG_579 | NH2    | E_GLU_584  | OE1    | 2.833        |
| 6MPH   | A_LYS_282 | NZ     | f_ASP_114  | OD1    | 3.470        |
| 6MPH   | A_LYS_282 | NZ     | f_ASP_114  | OD2    | 3.288        |
| 6MPH   | A_ARG_327 | NH2    | X_GLU_100I | OE1    | 3.876        |
| 6MPH   | B_LYS_282 | NZ     | g_ASP_114  | OD1    | 3.432        |
| 6MPH   | B_LYS_282 | NZ     | g_ASP_114  | OD2    | 3.289        |
| 6MPH   | B_ARG_327 | NH2    | Y_GLU_100I | OE1    | 3.899        |
| 6MPH   | C_LYS_282 | NZ     | Q_ASP_114  | OD1    | 3.383        |
| 6MPH   | C_LYS_282 | NZ     | Q_ASP_114  | OD2    | 3.272        |
| 6MPH   | C_ARG_327 | NH2    | M_GLU_100I | OE1    | 3.872        |
| 6MPH   | D_ARG_542 | NH1    | 6_GLU_647  | OE2    | 3.853        |
| 6MPH   | D_ARG_542 | NH2    | 6_GLU_647  | OE1    | 3.460        |
| 6MPH   | D_ARG_542 | NH2    | 6_GLU_647  | OE2    | 2.476        |
| 6MPH   | D_ARG_579 | NH2    | 6_GLU_584  | OE1    | 2.760        |
| 6MPH   | E_ARG_542 | NH1    | D_GLU_647  | OE2    | 3.888        |
| 6MPH   | E_ARG_542 | NH2    | D_GLU_647  | OE1    | 3.465        |
| 6MPH   | E_ARG_542 | NH2    | D_GLU_647  | OE2    | 2.463        |
| 6MPH   | E_ARG_579 | NH2    | D_GLU_584  | OE1    | 2.789        |
| 6MPH   | H_LYS_31A | NZ     | C_GLU_87   | OE1    | 2.458        |
| 6MPH   | H_LYS_31A | NZ     | C_GLU_87   | OE2    | 3.969        |
| 6MPH   | L_ARG_96  | NH1    | H_GLU_95   | OE1    | 3.309        |
| 6MPH   | L_ARG_96  | NH1    | H_GLU_95   | OE2    | 2.530        |
| 6MPH   | N_ARG_94  | NH1    | C_ASP_321A | OD1    | 3.859        |
| 6MPH   | Q_ARG_72  | NH2    | C_ASP_368  | OD2    | 3.534        |
| 6MPH   | Z_ARG_94  | NH1    | A_ASP_321A | OD1    | 3.890        |
| 6MPH   | a_ARG_94  | NH1    | B_ASP_321A | OD1    | 3.861        |
| 6MPH   | f_ARG_72  | NH2    | A_ASP_368  | OD2    | 3.577        |
| 6MPH   | g_ARG_72  | NH2    | B_ASP_368  | OD2    | 3.570        |

Table 1605: Interfacial 6MPH-specific salt bridging networks analysis. In this table, a PDB file is specified with a four-letter PDB ID, except that the names of the PDB files corresponding to the single NMR structural model split from the NMR ensemble is specified with a four-letter PDB ID in addition to a hyphen followed by the single NMR structural model numeric ID, the residue naming scheme is **Chain ID\_residue name\_residue number**,  $\angle ADH$  represents the angle formed by acceptor (A), donor (D) and hydrogen (H) ( $\angle ADH$ ).



| PDB ID | Residue A | Atom A | Residue B | Atom B | Distance (Å) |
|--------|-----------|--------|-----------|--------|--------------|
| 6MQC   | A_ARG_    | NH1    | B_ASP_    | OD1    | 2.994        |
| 6MQC   | A_ARG_    | NH2    | B_ASP_    | OD1    | 2.820        |
| 6MQC   | A_ARG_    | NH1    | B_ASP_    | OD1    | 3.399        |
| 6MQC   | A_ARG_    | NH1    | B_ASP_    | OD2    | 3.078        |
| 6MQC   | A_ARG_    | NH1    | B_ASP_    | OD1    | 2.829        |
| 6MQC   | A_ARG_    | NH2    | B_ASP_    | OD1    | 2.822        |
| 6MQC   | A_ARG_    | NH2    | B_ASP_    | OD2    | 3.673        |
| 6MQC   | H_ARG_    | NH1    | L_ASP_    | OD1    | 2.906        |
| 6MQC   | H_ARG_    | NH2    | L_ASP_    | OD1    | 2.999        |
| 6MQC   | H_ARG_    | NH1    | L_ASP_    | OD1    | 2.856        |
| 6MQC   | H_ARG_    | NH1    | L_ASP_    | OD2    | 3.748        |
| 6MQC   | H_ARG_    | NH2    | L_ASP_    | OD1    | 3.439        |
| 6MQC   | H_ARG_    | NH2    | L_ASP_    | OD2    | 3.140        |
| 6MQC   | H_ARG_    | NH2    | L_ASP_    | OD1    | 2.780        |
| 6MQC   | H_ARG_    | NH2    | L_ASP_    | OD2    | 3.923        |

Table 1606: Interfacial 6MQC-specific salt bridging networks analysis. In this table, a PDB file is specified with a four-letter PDB ID, except that the names of the PDB files corresponding to the single NMR structural model split from the NMR ensemble is specified with a four-letter PDB ID in addition to a hyphen followed by the single NMR structural model numeric ID, the residue naming scheme is **Chain ID\_residue name\_residue number**,  $\angle ADH$  represents the angle formed by acceptor (A), donor (D) and hydrogen (H) ( $\angle ADH$ ).

| PDB ID | Residue A  | Atom A | Residue B | Atom B | Distance (Å) |
|--------|------------|--------|-----------|--------|--------------|
| 6MQE   | A_ARG_95   | NH2    | B_ASP_91  | OD2    | 3.864        |
| 6MQE   | A_ARG_100H | NH2    | B_ASP_91  | OD2    | 3.610        |
| 6MQE   | H_ARG_95   | NH1    | L_ASP_91  | OD1    | 3.360        |
| 6MQE   | H_ARG_95   | NH2    | L_ASP_91  | OD1    | 2.956        |
| 6MQE   | H_ARG_100H | NH1    | L_ASP_91  | OD1    | 2.604        |
| 6MQE   | H_ARG_100H | NH1    | L_ASP_91  | OD2    | 3.888        |
| 6MQE   | L_LYS_155  | NZ     | A_GLU_56  | OE1    | 2.786        |
| 6MQE   | L_HIS_189  | NE2    | A_GLU_56  | OE1    | 3.428        |
| 6MQE   | L_HIS_189  | NE2    | A_GLU_56  | OE2    | 2.569        |

Table 1607: Interfacial 6MQE-specific salt bridging networks analysis. In this table, a PDB file is specified with a four-letter PDB ID, except that the names of the PDB files corresponding to the single NMR structural model split from the NMR ensemble is specified with a four-letter PDB ID in addition to a hyphen followed by the single NMR structural model numeric ID, the residue naming scheme is **Chain ID\_residue name\_residue number**,  $\angle ADH$  represents the angle formed by acceptor (A), donor (D) and hydrogen (H) ( $\angle ADH$ ).

| PDB ID | Residue A | Atom A | Residue B | Atom B | Distance (Å) |
|--------|-----------|--------|-----------|--------|--------------|
| 6MQM   | B_ARG_96  | NH1    | A_GLU_95  | OE1    | 3.968        |
| 6MQM   | B_ARG_96  | NH1    | A_GLU_95  | OE2    | 2.460        |
| 6MQM   | E_ARG_96  | NH1    | D_GLU_95  | OE2    | 2.376        |
| 6MQM   | H_ARG_96  | NH1    | G_GLU_95  | OE2    | 2.480        |
| 6MQM   | K_ARG_96  | NH1    | J_GLU_95  | OE1    | 3.782        |
| 6MQM   | K_ARG_96  | NH1    | J_GLU_95  | OE2    | 2.262        |

Table 1608: Interfacial 6MQM-specific salt bridging networks analysis. In this table, a PDB file is specified with a four-letter PDB ID, except that the names of the PDB files corresponding to the single NMR structural model split from the NMR ensemble is specified with a four-letter PDB ID in addition to a hyphen followed by the single NMR structural model numeric ID, the residue naming scheme is **Chain ID\_residue name\_residue number**,  $\angle ADH$  represents the angle formed by acceptor (A), donor (D) and hydrogen (H) ( $\angle ADH$ ).

| PDB ID | Residue A | Atom A | Residue B | Atom B | Distance (Å) |
|--------|-----------|--------|-----------|--------|--------------|
| 6MQR   | H_ARG_96  | NH1    | L_GLU_55  | OE1    | 2.553        |
| 6MQR   | L_ARG_46  | NH1    | H_ASP_101 | OD2    | 2.970        |
| 6MQR   | L_ARG_46  | NH2    | H_GLU_95  | OE2    | 3.587        |
| 6MQR   | L_ARG_46  | NH2    | H_ASP_101 | OD2    | 3.723        |

Table 1609: Interfacial 6MQR-specific salt bridging networks analysis. In this table, a PDB file is specified with a four-letter PDB ID, except that the names of the PDB files corresponding to the single NMR structural model split from the NMR ensemble is specified with a four-letter PDB ID in addition to a hyphen followed by the single NMR structural model numeric ID, the residue naming scheme is **Chain ID\_residue name\_residue number**,  $\angle ADH$  represents the angle formed by acceptor (A), donor (D) and hydrogen (H) ( $\angle ADH$ ).

| PDB ID | Residue A | Atom A | Residue B | Atom B | Distance (Å) |
|--------|-----------|--------|-----------|--------|--------------|
| 6MQS   | A_LYS_44  | NZ     | B_ASP_86  | OD1    | 3.511        |
| 6MQS   | A_ARG_138 | NH1    | B_GLU_214 | OE1    | 3.046        |
| 6MQS   | A_ARG_138 | NH1    | B_GLU_214 | OE2    | 2.728        |
| 6MQS   | A_LYS_218 | NZ     | B_GLU_127 | OE1    | 2.743        |
| 6MQS   | A_LYS_218 | NZ     | B_GLU_127 | OE2    | 3.002        |
| 6MQS   | C_LYS_44  | NZ     | D_ASP_86  | OD1    | 2.946        |
| 6MQS   | C_ARG_138 | NH2    | D_GLU_214 | OE1    | 2.736        |
| 6MQS   | C_ARG_138 | NH2    | D_GLU_214 | OE2    | 3.220        |
| 6MQS   | C_LYS_152 | NZ     | D_GLU_128 | OE1    | 3.230        |
| 6MQS   | C_LYS_218 | NZ     | D_GLU_127 | OE1    | 2.641        |
| 6MQS   | C_LYS_218 | NZ     | D_GLU_127 | OE2    | 3.160        |

Table 1610: Interfacial 6MQS-specific salt bridging networks analysis. In this table, a PDB file is specified with a four-letter PDB ID, except that the names of the PDB files corresponding to the single NMR structural model split from the NMR ensemble is specified with a four-letter PDB ID in addition to a hyphen followed by the single NMR structural model numeric ID, the residue naming scheme is **Chain ID\_residue name\_residue number**,  $\angle ADH$  represents the angle formed by acceptor (A), donor (D) and hydrogen (H) ( $\angle ADH$ ).

| PDB ID | Residue A | Atom A | Residue B | Atom B | Distance (Å) |
|--------|-----------|--------|-----------|--------|--------------|
| 6N16   | A_ARG_105 | NH1    | C_GLU_64  | OE1    | 3.566        |
| 6N16   | A_ARG_105 | NH2    | C_GLU_64  | OE1    | 3.522        |
| 6N16   | A_ARG_105 | NH2    | C_GLU_64  | OE2    | 3.717        |
| 6N16   | A_HIS_164 | NE2    | B_ASP_167 | OD2    | 3.486        |
| 6N16   | H_HIS_164 | NE2    | L_ASP_167 | OD1    | 3.075        |
| 6N16   | K_ARG_105 | NH2    | H_GLU_64  | OE1    | 2.463        |
| 6N16   | K_ARG_105 | NH2    | H_GLU_64  | OE2    | 3.174        |
| 6N16   | C_LYS_209 | NZ     | D_ASP_123 | OD2    | 3.251        |

Table 1611: Interfacial 6N16-specific salt bridging networks analysis. In this table, a PDB file is specified with a four-letter PDB ID, except that the names of the PDB files corresponding to the single NMR structural model split from the NMR ensemble is specified with a four-letter PDB ID in addition to a hyphen followed by the single NMR structural model numeric ID, the residue naming scheme is **Chain ID\_residue name\_residue number**,  $\angle ADH$  represents the angle formed by acceptor (A), donor (D) and hydrogen (H) ( $\angle ADH$ ).

| PDB ID | Residue A | Atom A | Residue B | Atom B | Distance (Å) |
|--------|-----------|--------|-----------|--------|--------------|
| 6N1V   | 3_LYS_44  | NZ     | 4_ASP_86  | OD1    | 3.675        |
| 6N1V   | 3_LYS_44  | NZ     | 4_ASP_86  | OD2    | 2.472        |
| 6N1V   | 3_LYS_44  | NZ     | 4_GLU_106 | OE1    | 3.723        |
| 6N1V   | 3_ARG_138 | NH1    | 4_GLU_214 | OE1    | 2.573        |
| 6N1V   | 3_ARG_138 | NH1    | 4_GLU_214 | OE2    | 3.070        |
| 6N1V   | 3_ARG_138 | NH2    | 4_GLU_214 | OE2    | 3.291        |
| 6N1V   | 3_LYS_218 | NZ     | 4_GLU_127 | OE1    | 3.611        |
| 6N1V   | B_LYS_282 | NZ     | g_ASP_114 | OD2    | 3.730        |
| 6N1V   | B_ARG_504 | NH2    | D_GLU_657 | OE2    | 3.905        |
| 6N1V   | F_ARG_542 | NH2    | D_GLU_647 | OE1    | 3.326        |
| 6N1V   | F_ARG_542 | NH2    | D_GLU_647 | OE2    | 2.831        |
| 6N1V   | F_ARG_579 | NH2    | D_GLU_584 | OE1    | 3.581        |
| 6N1V   | g_ARG_72  | NH1    | B_ASP_368 | OD2    | 3.927        |
| 6N1V   | g_ARG_72  | NH2    | B_ASP_368 | OD2    | 3.974        |
| 6N1V   | 1_LYS_44  | NZ     | 2_ASP_86  | OD1    | 3.676        |
| 6N1V   | 1_LYS_44  | NZ     | 2_ASP_86  | OD2    | 2.473        |
| 6N1V   | 1_LYS_44  | NZ     | 2_GLU_106 | OE1    | 3.723        |
| 6N1V   | 1_ARG_138 | NH1    | 2_GLU_214 | OE1    | 2.573        |
| 6N1V   | 1_ARG_138 | NH1    | 2_GLU_214 | OE2    | 3.069        |
| 6N1V   | 1_ARG_138 | NH2    | 2_GLU_214 | OE2    | 3.291        |
| 6N1V   | 1_LYS_218 | NZ     | 2_GLU_127 | OE1    | 3.611        |
| 6N1V   | A_LYS_282 | NZ     | f_ASP_114 | OD2    | 3.729        |
| 6N1V   | A_ARG_504 | NH2    | F_GLU_657 | OE2    | 3.909        |
| 6N1V   | E_ARG_542 | NH2    | F_GLU_647 | OE1    | 3.328        |
| 6N1V   | E_ARG_542 | NH2    | F_GLU_647 | OE2    | 2.831        |
| 6N1V   | E_ARG_579 | NH2    | F_GLU_584 | OE1    | 3.583        |
| 6N1V   | f_ARG_72  | NH1    | A_ASP_368 | OD2    | 3.927        |
| 6N1V   | f_ARG_72  | NH2    | A_ASP_368 | OD2    | 3.974        |
| 6N1V   | C_LYS_282 | NZ     | Q_ASP_114 | OD2    | 3.730        |
| 6N1V   | C_ARG_504 | NH2    | E_GLU_657 | OE2    | 3.907        |
| 6N1V   | D_ARG_542 | NH2    | E_GLU_647 | OE1    | 3.330        |
| 6N1V   | D_ARG_542 | NH2    | E_GLU_647 | OE2    | 2.832        |
| 6N1V   | D_ARG_579 | NH2    | E_GLU_584 | OE1    | 3.585        |
| 6N1V   | H_LYS_44  | NZ     | L_ASP_86  | OD1    | 3.676        |
| 6N1V   | H_LYS_44  | NZ     | L_ASP_86  | OD2    | 2.472        |
| 6N1V   | H_LYS_44  | NZ     | L_GLU_106 | OE1    | 3.722        |
| 6N1V   | H_ARG_138 | NH1    | L_GLU_214 | OE1    | 2.573        |
| 6N1V   | H_ARG_138 | NH1    | L_GLU_214 | OE2    | 3.069        |
| 6N1V   | H_ARG_138 | NH2    | L_GLU_214 | OE2    | 3.291        |
| 6N1V   | H_LYS_218 | NZ     | L_GLU_127 | OE1    | 3.611        |
| 6N1V   | Q_ARG_72  | NH1    | C_ASP_368 | OD2    | 3.927        |
| 6N1V   | Q_ARG_72  | NH2    | C_ASP_368 | OD2    | 3.975        |

Table 1612: Interfacial 6N1V-specific salt bridging networks analysis. In this table, a PDB file is specified with a four-letter PDB ID, except that the names of the PDB files corresponding to the single NMR structural model split from the NMR ensemble is specified with a four-letter PDB ID in addition to a hyphen followed by the single NMR structural model numeric ID, the residue naming scheme is **Chain ID\_residue name\_residue number**,  $\angle ADH$  represents the angle formed by acceptor (A), donor (D) and hydrogen (H) ( $\angle ADH$ ).

| PDB ID | Residue A  | Atom A | Residue B  | Atom B | Distance (Å) |
|--------|------------|--------|------------|--------|--------------|
| 6N1W   | 2_ARG_327  | NH2    | m_GLU_100I | OE1    | 3.996        |
| 6N1W   | 2_ARG_504  | NH2    | d_GLU_657  | OE2    | 3.118        |
| 6N1W   | 3_ARG_100H | NH2    | 4_ASP_91   | OD2    | 3.241        |
| 6N1W   | A_ARG_542  | NH1    | d_GLU_647  | OE1    | 3.516        |
| 6N1W   | A_ARG_542  | NH1    | d_GLU_647  | OE2    | 3.474        |
| 6N1W   | A_ARG_542  | NH2    | d_GLU_647  | OE1    | 2.848        |
| 6N1W   | A_ARG_579  | NH2    | d_GLU_584  | OE2    | 3.464        |
| 6N1W   | A_LYS_601  | NZ     | d_GLU_654  | OE1    | 3.802        |
| 6N1W   | A_LYS_601  | NZ     | d_GLU_654  | OE2    | 3.060        |
| 6N1W   | C_ARG_504  | NH2    | A_GLU_657  | OE2    | 3.221        |
| 6N1W   | D_ARG_542  | NH1    | A_GLU_647  | OE1    | 3.273        |
| 6N1W   | D_ARG_542  | NH1    | A_GLU_647  | OE2    | 3.289        |
| 6N1W   | D_ARG_542  | NH2    | A_GLU_647  | OE1    | 2.942        |
| 6N1W   | D_ARG_579  | NH1    | A_GLU_584  | OE1    | 3.854        |
| 6N1W   | D_ARG_579  | NH2    | A_GLU_584  | OE2    | 3.567        |
| 6N1W   | D_LYS_601  | NZ     | A_GLU_654  | OE1    | 3.837        |
| 6N1W   | D_LYS_601  | NZ     | A_GLU_654  | OE2    | 3.044        |
| 6N1W   | H_ARG_100H | NH2    | L_ASP_91   | OD2    | 3.150        |
| 6N1W   | c_ARG_504  | NH2    | D_GLU_657  | OE2    | 3.061        |
| 6N1W   | d_ARG_542  | NH1    | D_GLU_647  | OE1    | 3.482        |
| 6N1W   | d_ARG_542  | NH1    | D_GLU_647  | OE2    | 3.280        |
| 6N1W   | d_ARG_542  | NH2    | D_GLU_647  | OE1    | 2.854        |
| 6N1W   | d_ARG_579  | NH1    | D_GLU_584  | OE1    | 3.913        |
| 6N1W   | d_ARG_579  | NH2    | D_GLU_584  | OE2    | 3.653        |
| 6N1W   | d_LYS_601  | NZ     | D_GLU_654  | OE1    | 3.862        |
| 6N1W   | d_LYS_601  | NZ     | D_GLU_654  | OE2    | 3.082        |
| 6N1W   | h_ARG_100H | NH2    | L_ASP_91   | OD2    | 3.226        |

Table 1613: Interfacial 6N1W-specific salt bridging networks analysis. In this table, a PDB file is specified with a four-letter PDB ID, except that the names of the PDB files corresponding to the single NMR structural model split from the NMR ensemble is specified with a four-letter PDB ID in addition to a hyphen followed by the single NMR structural model numeric ID, the residue naming scheme is **Chain ID\_residue name\_residue number**,  $\angle ADH$  represents the angle formed by acceptor (A), donor (D) and hydrogen (H) ( $\angle ADH$ ).



| PDB ID | Residue A | Atom A | Residue B | Atom B | Distance (Å) |
|--------|-----------|--------|-----------|--------|--------------|
| 6N5B   | H_LYS_149 | NZ     | L_GLU_128 | OE2    | 3.031        |
| 6N5B   | H_LYS_214 | NZ     | L_GLU_127 | OE2    | 3.139        |

Table 1614: Interfacial 6N5B-specific salt bridging networks analysis. In this table, a PDB file is specified with a four-letter PDB ID, except that the names of the PDB files corresponding to the single NMR structural model split from the NMR ensemble is specified with a four-letter PDB ID in addition to a hyphen followed by the single NMR structural model numeric ID, the residue naming scheme is **Chain ID\_residue name\_residue number**,  $\angle ADH$  represents the angle formed by acceptor (A), donor (D) and hydrogen (H) ( $\angle ADH$ ).

| PDB ID | Residue A | Atom A | Residue B | Atom B | Distance (Å) |
|--------|-----------|--------|-----------|--------|--------------|
| 6N5D   | C_LYS_149 | NZ     | D_GLU_127 | OE2    | 2.211        |
| 6N5D   | C_LYS_215 | NZ     | D_GLU_126 | OE1    | 3.361        |
| 6N5D   | C_LYS_215 | NZ     | D_GLU_126 | OE2    | 3.815        |
| 6N5D   | E_LYS_149 | NZ     | F_GLU_127 | OE2    | 3.376        |
| 6N5D   | L_LYS_149 | NZ     | N_GLU_127 | OE2    | 2.091        |
| 6N5D   | L_HIS_170 | NE2    | N_ASP_141 | OD2    | 3.244        |

Table 1615: Interfacial 6N5D-specific salt bridging networks analysis. In this table, a PDB file is specified with a four-letter PDB ID, except that the names of the PDB files corresponding to the single NMR structural model split from the NMR ensemble is specified with a four-letter PDB ID in addition to a hyphen followed by the single NMR structural model numeric ID, the residue naming scheme is **Chain ID\_residue name\_residue number**,  $\angle ADH$  represents the angle formed by acceptor (A), donor (D) and hydrogen (H) ( $\angle ADH$ ).

| PDB ID | Residue A | Atom A | Residue B | Atom B | Distance (Å) |
|--------|-----------|--------|-----------|--------|--------------|
| 6N5E   | H_LYS_217 | NZ     | I_GLU_126 | OE2    | 2.748        |
| 6N5E   | E_LYS_217 | NZ     | D_GLU_126 | OE1    | 2.995        |
| 6N5E   | E_LYS_217 | NZ     | D_GLU_126 | OE2    | 2.272        |
| 6N5E   | E_LYS_222 | NZ     | D_GLU_126 | OE1    | 3.688        |
| 6N5E   | G_LYS_217 | NZ     | F_GLU_126 | OE2    | 3.351        |

Table 1616: Interfacial 6N5E-specific salt bridging networks analysis. In this table, a PDB file is specified with a four-letter PDB ID, except that the names of the PDB files corresponding to the single NMR structural model split from the NMR ensemble is specified with a four-letter PDB ID in addition to a hyphen followed by the single NMR structural model numeric ID, the residue naming scheme is **Chain ID\_residue name\_residue number**,  $\angle ADH$  represents the angle formed by acceptor (A), donor (D) and hydrogen (H) ( $\angle ADH$ ).

| PDB ID | Residue A | Atom A | Residue B | Atom B | Distance (Å) |
|--------|-----------|--------|-----------|--------|--------------|
| 6N6B   | A_LYS_296 | NZ     | L_ASP_28  | OD1    | 3.122        |
| 6N6B   | A_LYS_296 | NZ     | L_ASP_28  | OD2    | 3.000        |
| 6N6B   | A_LYS_296 | NZ     | L_GLU_68  | OE2    | 2.842        |
| 6N6B   | A_LYS_431 | NZ     | K_ASP_101 | OD1    | 3.959        |
| 6N6B   | A_LYS_431 | NZ     | K_ASP_101 | OD2    | 3.832        |
| 6N6B   | K_HIS_169 | NE2    | L_ASP_167 | OD1    | 3.738        |
| 6N6B   | K_LYS_213 | NZ     | L_GLU_123 | OE1    | 2.814        |
| 6N6B   | K_LYS_213 | NZ     | L_GLU_123 | OE2    | 3.044        |

Table 1617: Interfacial 6N6B-specific salt bridging networks analysis. In this table, a PDB file is specified with a four-letter PDB ID, except that the names of the PDB files corresponding to the single NMR structural model split from the NMR ensemble is specified with a four-letter PDB ID in addition to a hyphen followed by the single NMR structural model numeric ID, the residue naming scheme is **Chain ID\_residue name\_residue number**,  $\angle ADH$  represents the angle formed by acceptor (A), donor (D) and hydrogen (H) ( $\angle ADH$ ).

| PDB ID | Residue A | Atom A | Residue B | Atom B | Distance (Å) |
|--------|-----------|--------|-----------|--------|--------------|
| 6NB5   | H.LYS.223 | NZ     | L.GLU.126 | OE1    | 3.229        |
| 6NB5   | H.LYS.223 | NZ     | L.GLU.126 | OE2    | 2.760        |
| 6NB5   | I.LYS.157 | NZ     | M.GLU.127 | OE2    | 3.828        |
| 6NB5   | I.LYS.223 | NZ     | M.GLU.126 | OE2    | 3.316        |

Table 1618: Interfacial 6NB5-specific salt bridging networks analysis. In this table, a PDB file is specified with a four-letter PDB ID, except that the names of the PDB files corresponding to the single NMR structural model split from the NMR ensemble is specified with a four-letter PDB ID in addition to a hyphen followed by the single NMR structural model numeric ID, the residue naming scheme is **Chain ID\_residue name\_residue number**,  $\angle ADH$  represents the angle formed by acceptor (A), donor (D) and hydrogen (H) ( $\angle ADH$ ).

| PDB ID | Residue A | Atom A | Residue B | Atom B | Distance (Å) |
|--------|-----------|--------|-----------|--------|--------------|
| 6NB8   | H_LYS_223 | NZ     | L_GLU_128 | OE1    | 2.783        |
| 6NB8   | H_LYS_223 | NZ     | L_GLU_128 | OE2    | 3.341        |
| 6NB8   | L_ARG_51  | NH1    | H_ASP_113 | OD1    | 2.821        |
| 6NB8   | L_ARG_51  | NH2    | H_ASP_113 | OD1    | 3.921        |
| 6NB8   | L_ARG_51  | NH2    | H_ASP_115 | OD1    | 3.423        |

Table 1619: Interfacial 6NB8-specific salt bridging networks analysis. In this table, a PDB file is specified with a four-letter PDB ID, except that the names of the PDB files corresponding to the single NMR structural model split from the NMR ensemble is specified with a four-letter PDB ID in addition to a hyphen followed by the single NMR structural model numeric ID, the residue naming scheme is **Chain ID\_residue name\_residue number**,  $\angle ADH$  represents the angle formed by acceptor (A), donor (D) and hydrogen (H) ( $\angle ADH$ ).

| PDB ID | Residue A | Atom A | Residue B | Atom B | Distance (Å) |
|--------|-----------|--------|-----------|--------|--------------|
| 6NC2   | A_LYS_46  | NZ     | B_ASP_636 | OD1    | 3.909        |
| 6NC2   | A_LYS_500 | NZ     | I_ASP_664 | OD1    | 2.780        |
| 6NC2   | A_LYS_500 | NZ     | I_ASP_664 | OD2    | 3.992        |
| 6NC2   | A_ARG_503 | NH1    | B_GLU_654 | OE1    | 3.759        |
| 6NC2   | A_ARG_503 | NH1    | B_GLU_654 | OE2    | 3.172        |
| 6NC2   | B_ARG_542 | NH1    | I_GLU_647 | OE1    | 2.800        |
| 6NC2   | B_ARG_542 | NH1    | I_ASP_648 | OD1    | 3.191        |
| 6NC2   | B_ARG_542 | NH2    | I_ASP_648 | OD1    | 3.498        |
| 6NC2   | B_LYS_574 | NZ     | A_ASP_107 | OD1    | 2.510        |
| 6NC2   | B_LYS_574 | NZ     | A_ASP_107 | OD2    | 3.688        |
| 6NC2   | H_ARG_96  | NH1    | L_ASP_50  | OD1    | 3.082        |
| 6NC2   | H_ARG_96  | NH1    | L_ASP_50  | OD2    | 3.706        |
| 6NC2   | H_ARG_96  | NH2    | L_ASP_50  | OD1    | 3.892        |
| 6NC2   | H_ARG_96  | NH2    | L_ASP_50  | OD2    | 3.158        |
| 6NC2   | C_LYS_46  | NZ     | I_ASP_636 | OD1    | 3.909        |
| 6NC2   | C_LYS_500 | NZ     | J_ASP_664 | OD1    | 2.780        |
| 6NC2   | C_LYS_500 | NZ     | J_ASP_664 | OD2    | 3.991        |
| 6NC2   | C_ARG_503 | NH1    | I_GLU_654 | OE1    | 3.760        |
| 6NC2   | C_ARG_503 | NH1    | I_GLU_654 | OE2    | 3.173        |
| 6NC2   | I_ARG_542 | NH1    | J_GLU_647 | OE1    | 2.801        |
| 6NC2   | I_ARG_542 | NH1    | J_ASP_648 | OD1    | 3.190        |
| 6NC2   | I_ARG_542 | NH2    | J_ASP_648 | OD1    | 3.498        |
| 6NC2   | I_LYS_574 | NZ     | C_ASP_107 | OD1    | 2.510        |
| 6NC2   | I_LYS_574 | NZ     | C_ASP_107 | OD2    | 3.688        |
| 6NC2   | O_ARG_96  | NH1    | T_ASP_50  | OD1    | 3.082        |
| 6NC2   | O_ARG_96  | NH1    | T_ASP_50  | OD2    | 3.706        |
| 6NC2   | O_ARG_96  | NH2    | T_ASP_50  | OD1    | 3.892        |
| 6NC2   | O_ARG_96  | NH2    | T_ASP_50  | OD2    | 3.158        |
| 6NC2   | D_LYS_46  | NZ     | J_ASP_636 | OD1    | 3.909        |
| 6NC2   | D_LYS_500 | NZ     | B_ASP_664 | OD1    | 2.780        |
| 6NC2   | D_LYS_500 | NZ     | B_ASP_664 | OD2    | 3.992        |
| 6NC2   | D_ARG_503 | NH1    | J_GLU_654 | OE1    | 3.759        |
| 6NC2   | D_ARG_503 | NH1    | J_GLU_654 | OE2    | 3.173        |
| 6NC2   | J_ARG_542 | NH1    | B_GLU_647 | OE1    | 2.800        |
| 6NC2   | J_ARG_542 | NH1    | B_ASP_648 | OD1    | 3.191        |
| 6NC2   | J_ARG_542 | NH2    | B_ASP_648 | OD1    | 3.498        |
| 6NC2   | J_LYS_574 | NZ     | D_ASP_107 | OD1    | 2.510        |
| 6NC2   | J_LYS_574 | NZ     | D_ASP_107 | OD2    | 3.688        |
| 6NC2   | P_ARG_96  | NH1    | U_ASP_50  | OD1    | 3.083        |
| 6NC2   | P_ARG_96  | NH1    | U_ASP_50  | OD2    | 3.706        |
| 6NC2   | P_ARG_96  | NH2    | U_ASP_50  | OD1    | 3.893        |
| 6NC2   | P_ARG_96  | NH2    | U_ASP_50  | OD2    | 3.158        |
| 6NC2   | E_LYS_46  | NZ     | K_ASP_636 | OD1    | 3.909        |
| 6NC2   | E_LYS_500 | NZ     | M_ASP_664 | OD1    | 2.780        |
| 6NC2   | E_LYS_500 | NZ     | M_ASP_664 | OD2    | 3.992        |
| 6NC2   | E_ARG_503 | NH1    | K_GLU_654 | OE1    | 3.759        |
| 6NC2   | E_ARG_503 | NH1    | K_GLU_654 | OE2    | 3.172        |
| 6NC2   | K_ARG_542 | NH1    | M_GLU_647 | OE1    | 2.800        |
| 6NC2   | K_ARG_542 | NH1    | M_ASP_648 | OD1    | 3.191        |
| 6NC2   | K_ARG_542 | NH2    | M_ASP_648 | OD1    | 3.498        |
| 6NC2   | K_LYS_574 | NZ     | E_ASP_107 | OD1    | 2.510        |
| 6NC2   | K_LYS_574 | NZ     | E_ASP_107 | OD2    | 3.688        |
| 6NC2   | Q_ARG_96  | NH1    | V_ASP_50  | OD1    | 3.082        |
| 6NC2   | Q_ARG_96  | NH1    | V_ASP_50  | OD2    | 3.706        |
| 6NC2   | Q_ARG_96  | NH2    | V_ASP_50  | OD1    | 3.892        |
| 6NC2   | Q_ARG_96  | NH2    | V_ASP_50  | OD2    | 3.158        |
| 6NC2   | F_LYS_46  | NZ     | M_ASP_636 | OD1    | 3.909        |

|      |           |     |           |     |       |
|------|-----------|-----|-----------|-----|-------|
| 6NC2 | F_LYS_500 | NZ  | N_ASP_664 | OD1 | 2.780 |
| 6NC2 | F_LYS_500 | NZ  | N_ASP_664 | OD2 | 3.991 |
| 6NC2 | F_ARG_503 | NH1 | M_GLU_654 | OE1 | 3.759 |
| 6NC2 | F_ARG_503 | NH1 | M_GLU_654 | OE2 | 3.173 |
| 6NC2 | M_ARG_542 | NH1 | N_GLU_647 | OE1 | 2.801 |
| 6NC2 | M_ARG_542 | NH1 | N_ASP_648 | OD1 | 3.191 |
| 6NC2 | M_ARG_542 | NH2 | N_ASP_648 | OD1 | 3.498 |
| 6NC2 | M_LYS_574 | NZ  | F_ASP_107 | OD1 | 2.510 |
| 6NC2 | M_LYS_574 | NZ  | F_ASP_107 | OD2 | 3.688 |
| 6NC2 | R_ARG_96  | NH1 | W_ASP_50  | OD1 | 3.082 |
| 6NC2 | R_ARG_96  | NH1 | W_ASP_50  | OD2 | 3.706 |
| 6NC2 | R_ARG_96  | NH2 | W_ASP_50  | OD1 | 3.892 |
| 6NC2 | R_ARG_96  | NH2 | W_ASP_50  | OD2 | 3.157 |
| 6NC2 | G_LYS_46  | NZ  | N_ASP_636 | OD1 | 3.909 |
| 6NC2 | G_LYS_500 | NZ  | K_ASP_664 | OD1 | 2.780 |
| 6NC2 | G_LYS_500 | NZ  | K_ASP_664 | OD2 | 3.992 |
| 6NC2 | G_ARG_503 | NH1 | N_GLU_654 | OE1 | 3.759 |
| 6NC2 | G_ARG_503 | NH1 | N_GLU_654 | OE2 | 3.173 |
| 6NC2 | N_ARG_542 | NH1 | K_GLU_647 | OE1 | 2.800 |
| 6NC2 | N_ARG_542 | NH1 | K_ASP_648 | OD1 | 3.191 |
| 6NC2 | N_ARG_542 | NH2 | K_ASP_648 | OD1 | 3.498 |
| 6NC2 | N_LYS_574 | NZ  | G_ASP_107 | OD1 | 2.510 |
| 6NC2 | N_LYS_574 | NZ  | G_ASP_107 | OD2 | 3.688 |
| 6NC2 | S_ARG_96  | NH1 | X_ASP_50  | OD1 | 3.082 |
| 6NC2 | S_ARG_96  | NH1 | X_ASP_50  | OD2 | 3.706 |
| 6NC2 | S_ARG_96  | NH2 | X_ASP_50  | OD1 | 3.892 |
| 6NC2 | S_ARG_96  | NH2 | X_ASP_50  | OD2 | 3.158 |

Table 1620: Interfacial 6NC2-specific salt bridging networks analysis. In this table, a PDB file is specified with a four-letter PDB ID, except that the names of the PDB files corresponding to the single NMR structural model split from the NMR ensemble is specified with a four-letter PDB ID in addition to a hyphen followed by the single NMR structural model numeric ID, the residue naming scheme is **Chain ID\_residue name\_residue number**,  $\angle ADH$  represents the angle formed by acceptor (A), donor (D) and hydrogen (H) ( $\angle ADH$ ).



| PDB ID | Residue A | Atom A | Residue B | Atom B | Distance (Å) |
|--------|-----------|--------|-----------|--------|--------------|
| 6NC3   | A_LYS_46  | NZ     | B_ASP_636 | OD1    | 2.912        |
| 6NC3   | A_LYS_46  | NZ     | B_ASP_636 | OD2    | 3.719        |
| 6NC3   | A_ARG_192 | NH2    | C_ASP_167 | OD1    | 3.709        |
| 6NC3   | A_ARG_192 | NH2    | C_ASP_167 | OD2    | 3.548        |
| 6NC3   | A_ARG_503 | NH2    | B_GLU_654 | OE1    | 3.773        |
| 6NC3   | A_ARG_503 | NH2    | B_GLU_654 | OE2    | 3.161        |
| 6NC3   | B_ARG_542 | NH2    | J_GLU_647 | OE1    | 2.826        |
| 6NC3   | B_ARG_542 | NH2    | J_ASP_648 | OD1    | 2.949        |
| 6NC3   | B_ARG_542 | NH2    | J_ASP_648 | OD2    | 3.670        |
| 6NC3   | B_LYS_574 | NZ     | A_ASP_107 | OD1    | 2.582        |
| 6NC3   | B_LYS_574 | NZ     | A_ASP_107 | OD2    | 2.711        |
| 6NC3   | B_ARG_579 | NH1    | J_GLU_584 | OE2    | 3.194        |
| 6NC3   | B_ARG_585 | NH2    | A_GLU_492 | OE1    | 2.939        |
| 6NC3   | B_ARG_585 | NH2    | A_GLU_492 | OE2    | 3.498        |
| 6NC3   | C_LYS_46  | NZ     | I_ASP_636 | OD1    | 2.913        |
| 6NC3   | C_LYS_46  | NZ     | I_ASP_636 | OD2    | 3.719        |
| 6NC3   | C_ARG_192 | NH2    | D_ASP_167 | OD1    | 3.709        |
| 6NC3   | C_ARG_192 | NH2    | D_ASP_167 | OD2    | 3.548        |
| 6NC3   | C_ARG_503 | NH2    | I_GLU_654 | OE1    | 3.773        |
| 6NC3   | C_ARG_503 | NH2    | I_GLU_654 | OE2    | 3.161        |
| 6NC3   | I_ARG_542 | NH2    | B_GLU_647 | OE1    | 2.826        |
| 6NC3   | I_ARG_542 | NH2    | B_ASP_648 | OD1    | 2.949        |
| 6NC3   | I_ARG_542 | NH2    | B_ASP_648 | OD2    | 3.670        |
| 6NC3   | I_LYS_574 | NZ     | C_ASP_107 | OD1    | 2.581        |
| 6NC3   | I_LYS_574 | NZ     | C_ASP_107 | OD2    | 2.711        |
| 6NC3   | I_ARG_579 | NH1    | B_GLU_584 | OE2    | 3.194        |
| 6NC3   | I_ARG_585 | NH2    | C_GLU_492 | OE1    | 2.939        |
| 6NC3   | I_ARG_585 | NH2    | C_GLU_492 | OE2    | 3.498        |
| 6NC3   | D_LYS_46  | NZ     | J_ASP_636 | OD1    | 2.913        |
| 6NC3   | D_LYS_46  | NZ     | J_ASP_636 | OD2    | 3.719        |
| 6NC3   | D_ARG_192 | NH2    | A_ASP_167 | OD1    | 3.708        |
| 6NC3   | D_ARG_192 | NH2    | A_ASP_167 | OD2    | 3.548        |
| 6NC3   | D_ARG_503 | NH2    | J_GLU_654 | OE1    | 3.773        |
| 6NC3   | D_ARG_503 | NH2    | J_GLU_654 | OE2    | 3.160        |
| 6NC3   | J_ARG_542 | NH2    | I_GLU_647 | OE1    | 2.825        |
| 6NC3   | J_ARG_542 | NH2    | I_ASP_648 | OD1    | 2.949        |
| 6NC3   | J_ARG_542 | NH2    | I_ASP_648 | OD2    | 3.670        |
| 6NC3   | J_LYS_574 | NZ     | D_ASP_107 | OD1    | 2.581        |
| 6NC3   | J_LYS_574 | NZ     | D_ASP_107 | OD2    | 2.710        |
| 6NC3   | J_ARG_579 | NH1    | I_GLU_584 | OE2    | 3.194        |
| 6NC3   | J_ARG_585 | NH2    | D_GLU_492 | OE1    | 2.939        |
| 6NC3   | J_ARG_585 | NH2    | D_GLU_492 | OE2    | 3.498        |
| 6NC3   | E_LYS_46  | NZ     | K_ASP_636 | OD1    | 2.912        |
| 6NC3   | E_LYS_46  | NZ     | K_ASP_636 | OD2    | 3.719        |
| 6NC3   | E_ARG_192 | NH2    | F_ASP_167 | OD1    | 3.709        |
| 6NC3   | E_ARG_192 | NH2    | F_ASP_167 | OD2    | 3.548        |
| 6NC3   | E_ARG_503 | NH2    | K_GLU_654 | OE1    | 3.773        |
| 6NC3   | E_ARG_503 | NH2    | K_GLU_654 | OE2    | 3.161        |
| 6NC3   | K_ARG_542 | NH2    | N_GLU_647 | OE1    | 2.826        |
| 6NC3   | K_ARG_542 | NH2    | N_ASP_648 | OD1    | 2.949        |
| 6NC3   | K_ARG_542 | NH2    | N_ASP_648 | OD2    | 3.670        |
| 6NC3   | K_LYS_574 | NZ     | E_ASP_107 | OD1    | 2.582        |
| 6NC3   | K_LYS_574 | NZ     | E_ASP_107 | OD2    | 2.711        |
| 6NC3   | K_ARG_579 | NH1    | N_GLU_584 | OE2    | 3.194        |
| 6NC3   | K_ARG_585 | NH2    | E_GLU_492 | OE1    | 2.939        |
| 6NC3   | K_ARG_585 | NH2    | E_GLU_492 | OE2    | 3.498        |
| 6NC3   | F_LYS_46  | NZ     | M_ASP_636 | OD1    | 2.913        |

|      |           |     |           |     |       |
|------|-----------|-----|-----------|-----|-------|
| 6NC3 | F_LYS_46  | NZ  | M_ASP_636 | OD2 | 3.719 |
| 6NC3 | F_ARG_192 | NH2 | G_ASP_167 | OD1 | 3.709 |
| 6NC3 | F_ARG_192 | NH2 | G_ASP_167 | OD2 | 3.548 |
| 6NC3 | F_ARG_503 | NH2 | M_GLU_654 | OE1 | 3.773 |
| 6NC3 | F_ARG_503 | NH2 | M_GLU_654 | OE2 | 3.161 |
| 6NC3 | M_ARG_542 | NH2 | K_GLU_647 | OE1 | 2.826 |
| 6NC3 | M_ARG_542 | NH2 | K_ASP_648 | OD1 | 2.949 |
| 6NC3 | M_ARG_542 | NH2 | K_ASP_648 | OD2 | 3.670 |
| 6NC3 | M_LYS_574 | NZ  | F_ASP_107 | OD1 | 2.581 |
| 6NC3 | M_LYS_574 | NZ  | F_ASP_107 | OD2 | 2.711 |
| 6NC3 | M_ARG_579 | NH1 | K_GLU_584 | OE2 | 3.194 |
| 6NC3 | M_ARG_585 | NH2 | F_GLU_492 | OE1 | 2.939 |
| 6NC3 | M_ARG_585 | NH2 | F_GLU_492 | OE2 | 3.498 |
| 6NC3 | G_LYS_46  | NZ  | N_ASP_636 | OD1 | 2.913 |
| 6NC3 | G_LYS_46  | NZ  | N_ASP_636 | OD2 | 3.719 |
| 6NC3 | G_ARG_192 | NH2 | E_ASP_167 | OD1 | 3.708 |
| 6NC3 | G_ARG_192 | NH2 | E_ASP_167 | OD2 | 3.548 |
| 6NC3 | G_ARG_503 | NH2 | N_GLU_654 | OE1 | 3.773 |
| 6NC3 | G_ARG_503 | NH2 | N_GLU_654 | OE2 | 3.160 |
| 6NC3 | N_ARG_542 | NH2 | M_GLU_647 | OE1 | 2.825 |
| 6NC3 | N_ARG_542 | NH2 | M_ASP_648 | OD1 | 2.949 |
| 6NC3 | N_ARG_542 | NH2 | M_ASP_648 | OD2 | 3.670 |
| 6NC3 | N_LYS_574 | NZ  | G_ASP_107 | OD1 | 2.581 |
| 6NC3 | N_LYS_574 | NZ  | G_ASP_107 | OD2 | 2.710 |
| 6NC3 | N_ARG_579 | NH1 | M_GLU_584 | OE2 | 3.194 |
| 6NC3 | N_ARG_585 | NH2 | G_GLU_492 | OE1 | 2.939 |
| 6NC3 | N_ARG_585 | NH2 | G_GLU_492 | OE2 | 3.498 |

Table 1621: Interfacial 6NC3-specific salt bridging networks analysis. In this table, a PDB file is specified with a four-letter PDB ID, except that the names of the PDB files corresponding to the single NMR structural model split from the NMR ensemble is specified with a four-letter PDB ID in addition to a hyphen followed by the single NMR structural model numeric ID, the residue naming scheme is **Chain ID\_residue name\_residue number**,  $\angle ADH$  represents the angle formed by acceptor (A), donor (D) and hydrogen (H) ( $\angle ADH$ ).

| PDB ID | Residue A | Atom A | Residue B | Atom B | Distance (Å) |
|--------|-----------|--------|-----------|--------|--------------|
| 6NEX   | B_LYS_209 | NZ     | A_GLU_126 | OE2    | 3.298        |

Table 1622: Interfacial 6NEX-specific salt bridging networks analysis. In this table, a PDB file is specified with a four-letter PDB ID, except that the names of the PDB files corresponding to the single NMR structural model split from the NMR ensemble is specified with a four-letter PDB ID in addition to a hyphen followed by the single NMR structural model numeric ID, the residue naming scheme is **Chain ID\_residue name\_residue number**,  $\angle ADH$  represents the angle formed by acceptor (A), donor (D) and hydrogen (H) ( $\angle ADH$ ).

| PDB ID | Residue A  | Atom A | Residue B | Atom B | Distance (Å) |
|--------|------------|--------|-----------|--------|--------------|
| 6NF2   | A_LYS_46   | NZ     | I_ASP_632 | OD2    | 2.876        |
| 6NF2   | A_ARG_504  | NH2    | R_GLU_657 | OE2    | 3.927        |
| 6NF2   | B_ARG_579  | NH1    | I_GLU_584 | OE2    | 3.681        |
| 6NF2   | B_LYS_601  | NZ     | I_GLU_654 | OE1    | 2.983        |
| 6NF2   | B_LYS_601  | NZ     | I_GLU_654 | OE2    | 3.256        |
| 6NF2   | C_ARG_61   | NH1    | G_GLU_466 | OE1    | 3.610        |
| 6NF2   | C_ARG_61   | NH2    | G_GLU_466 | OE2    | 3.748        |
| 6NF2   | C_ARG_71   | NH2    | G_ASP_368 | OD1    | 3.504        |
| 6NF2   | G_LYS_46   | NZ     | B_ASP_632 | OD2    | 2.943        |
| 6NF2   | G_ARG_504  | NH2    | I_GLU_657 | OE2    | 3.805        |
| 6NF2   | H_ARG_100F | NH1    | L_ASP_50  | OD2    | 2.403        |
| 6NF2   | H_ARG_100F | NH2    | L_ASP_50  | OD2    | 3.926        |
| 6NF2   | I_ARG_579  | NH1    | R_GLU_584 | OE2    | 3.624        |
| 6NF2   | I_LYS_601  | NZ     | R_GLU_654 | OE1    | 3.068        |
| 6NF2   | I_LYS_601  | NZ     | R_GLU_654 | OE2    | 3.333        |
| 6NF2   | N_ARG_61   | NH1    | A_GLU_466 | OE1    | 3.592        |
| 6NF2   | N_ARG_61   | NH2    | A_GLU_466 | OE2    | 3.737        |
| 6NF2   | N_ARG_71   | NH2    | A_ASP_368 | OD1    | 3.532        |
| 6NF2   | O_ARG_100F | NH1    | P_ASP_50  | OD2    | 2.825        |
| 6NF2   | Q_LYS_46   | NZ     | R_ASP_632 | OD2    | 2.912        |
| 6NF2   | Q_ARG_504  | NH2    | B_GLU_657 | OE2    | 3.920        |
| 6NF2   | R_ARG_579  | NH1    | B_GLU_584 | OE2    | 3.657        |
| 6NF2   | R_LYS_601  | NZ     | B_GLU_654 | OE1    | 3.130        |
| 6NF2   | R_LYS_601  | NZ     | B_GLU_654 | OE2    | 3.363        |
| 6NF2   | V_ARG_61   | NH1    | Q_GLU_466 | OE1    | 3.626        |
| 6NF2   | V_ARG_61   | NH2    | Q_GLU_466 | OE2    | 3.762        |
| 6NF2   | V_ARG_71   | NH2    | Q_ASP_368 | OD1    | 3.511        |
| 6NF2   | W_ARG_100F | NH1    | X_ASP_50  | OD2    | 2.242        |
| 6NF2   | W_ARG_100F | NH2    | X_ASP_50  | OD2    | 3.856        |

Table 1623: Interfacial 6NF2-specific salt bridging networks analysis. In this table, a PDB file is specified with a four-letter PDB ID, except that the names of the PDB files corresponding to the single NMR structural model split from the NMR ensemble is specified with a four-letter PDB ID in addition to a hyphen followed by the single NMR structural model numeric ID, the residue naming scheme is **Chain ID\_residue name\_residue number**,  $\angle ADH$  represents the angle formed by acceptor (A), donor (D) and hydrogen (H) ( $\angle ADH$ ).

| PDB ID | Residue A | Atom A | Residue B | Atom B | Distance (Å) |
|--------|-----------|--------|-----------|--------|--------------|
| 6NF5   | A_LYS_46  | NZ     | B_ASP_632 | OD2    | 2.410        |
| 6NF5   | A_LYS_137 | NZ     | L_ASP_51  | OD2    | 2.736        |
| 6NF5   | A_ARG_192 | NH1    | J_GLU_164 | OE2    | 3.009        |
| 6NF5   | A_ARG_192 | NH2    | J_GLU_164 | OE2    | 3.825        |
| 6NF5   | B_ARG_542 | NH1    | D_GLU_647 | OE1    | 3.182        |
| 6NF5   | B_ARG_542 | NH1    | D_GLU_647 | OE2    | 3.535        |
| 6NF5   | B_ARG_542 | NH2    | D_GLU_647 | OE1    | 3.979        |
| 6NF5   | B_LYS_574 | NZ     | A_ASP_107 | OD1    | 2.887        |
| 6NF5   | B_HIS_585 | NE2    | A_GLU_492 | OE1    | 3.726        |
| 6NF5   | B_LYS_601 | NZ     | D_GLU_657 | OE1    | 3.026        |
| 6NF5   | K_ARG_53  | NH1    | B_ASP_659 | OD1    | 3.261        |
| 6NF5   | K_ARG_53  | NH1    | B_ASP_659 | OD2    | 3.240        |
| 6NF5   | K_ARG_53  | NH2    | B_ASP_659 | OD1    | 3.591        |
| 6NF5   | K_ARG_53  | NH2    | B_ASP_659 | OD2    | 2.651        |
| 6NF5   | C_LYS_46  | NZ     | D_ASP_632 | OD2    | 2.410        |
| 6NF5   | C_LYS_137 | NZ     | F_ASP_51  | OD2    | 2.736        |
| 6NF5   | C_ARG_192 | NH1    | A_GLU_164 | OE2    | 3.009        |
| 6NF5   | C_ARG_192 | NH2    | A_GLU_164 | OE2    | 3.825        |
| 6NF5   | D_ARG_542 | NH1    | M_GLU_647 | OE1    | 3.182        |
| 6NF5   | D_ARG_542 | NH1    | M_GLU_647 | OE2    | 3.535        |
| 6NF5   | D_ARG_542 | NH2    | M_GLU_647 | OE1    | 3.978        |
| 6NF5   | D_LYS_574 | NZ     | C_ASP_107 | OD1    | 2.887        |
| 6NF5   | D_HIS_585 | NE2    | C_GLU_492 | OE1    | 3.725        |
| 6NF5   | D_LYS_601 | NZ     | M_GLU_657 | OE1    | 3.026        |
| 6NF5   | G_ARG_53  | NH1    | D_ASP_659 | OD1    | 3.261        |
| 6NF5   | G_ARG_53  | NH1    | D_ASP_659 | OD2    | 3.240        |
| 6NF5   | G_ARG_53  | NH2    | D_ASP_659 | OD1    | 3.591        |
| 6NF5   | G_ARG_53  | NH2    | D_ASP_659 | OD2    | 2.651        |
| 6NF5   | J_LYS_46  | NZ     | M_ASP_632 | OD2    | 2.410        |
| 6NF5   | J_LYS_137 | NZ     | P_ASP_51  | OD2    | 2.735        |
| 6NF5   | J_ARG_192 | NH1    | C_GLU_164 | OE2    | 3.010        |
| 6NF5   | J_ARG_192 | NH2    | C_GLU_164 | OE2    | 3.825        |
| 6NF5   | M_ARG_542 | NH1    | B_GLU_647 | OE1    | 3.182        |
| 6NF5   | M_ARG_542 | NH1    | B_GLU_647 | OE2    | 3.534        |
| 6NF5   | M_ARG_542 | NH2    | B_GLU_647 | OE1    | 3.979        |
| 6NF5   | M_LYS_574 | NZ     | J_ASP_107 | OD1    | 2.887        |
| 6NF5   | M_HIS_585 | NE2    | J_GLU_492 | OE1    | 3.726        |
| 6NF5   | M_LYS_601 | NZ     | B_GLU_657 | OE1    | 3.027        |
| 6NF5   | Q_ARG_53  | NH1    | M_ASP_659 | OD1    | 3.262        |
| 6NF5   | Q_ARG_53  | NH1    | M_ASP_659 | OD2    | 3.240        |
| 6NF5   | Q_ARG_53  | NH2    | M_ASP_659 | OD1    | 3.591        |
| 6NF5   | Q_ARG_53  | NH2    | M_ASP_659 | OD2    | 2.650        |

Table 1624: Interfacial 6NF5-specific salt bridging networks analysis. In this table, a PDB file is specified with a four-letter PDB ID, except that the names of the PDB files corresponding to the single NMR structural model split from the NMR ensemble is specified with a four-letter PDB ID in addition to a hyphen followed by the single NMR structural model numeric ID, the residue naming scheme is **Chain ID\_residue name\_residue number**,  $\angle ADH$  represents the angle formed by acceptor (A), donor (D) and hydrogen (H) ( $\angle ADH$ ).

| PDB ID | Residue A | Atom A | Residue B | Atom B | Distance (Å) |
|--------|-----------|--------|-----------|--------|--------------|
| 6NFC   | C_ARG_53  | NH1    | L_ASP_659 | OD1    | 3.890        |
| 6NFC   | C_ARG_53  | NH1    | L_ASP_659 | OD2    | 2.842        |
| 6NFC   | C_ARG_53  | NH2    | L_ASP_659 | OD2    | 2.675        |
| 6NFC   | A_LYS_46  | NZ     | B_ASP_632 | OD1    | 3.913        |
| 6NFC   | A_LYS_46  | NZ     | B_ASP_632 | OD2    | 2.455        |
| 6NFC   | A_LYS_137 | NZ     | L_ASP_51  | OD2    | 2.690        |
| 6NFC   | B_ARG_542 | NH1    | G_GLU_647 | OE1    | 3.297        |
| 6NFC   | B_ARG_542 | NH1    | G_GLU_647 | OE2    | 3.640        |
| 6NFC   | B_LYS_574 | NZ     | A_GLU_106 | OE1    | 3.608        |
| 6NFC   | B_LYS_574 | NZ     | A_GLU_106 | OE2    | 2.473        |
| 6NFC   | B_ARG_579 | NH2    | G_GLU_584 | OE1    | 3.071        |
| 6NFC   | B_ARG_579 | NH2    | G_GLU_584 | OE2    | 3.850        |
| 6NFC   | L_LYS_50  | NZ     | H_GLU_99  | OE1    | 3.024        |
| 6NFC   | J_ARG_53  | NH1    | G_ASP_659 | OD1    | 3.783        |
| 6NFC   | J_ARG_53  | NH1    | G_ASP_659 | OD2    | 2.774        |
| 6NFC   | J_ARG_53  | NH2    | G_ASP_659 | OD2    | 2.735        |
| 6NFC   | E_LYS_46  | NZ     | G_ASP_632 | OD1    | 3.927        |
| 6NFC   | E_LYS_46  | NZ     | G_ASP_632 | OD2    | 2.442        |
| 6NFC   | E_ARG_500 | NH2    | L_ASP_664 | OD1    | 2.950        |
| 6NFC   | E_ARG_500 | NH2    | L_ASP_664 | OD2    | 3.747        |
| 6NFC   | G_ARG_542 | NH1    | L_GLU_647 | OE1    | 3.321        |
| 6NFC   | G_ARG_542 | NH1    | L_GLU_647 | OE2    | 3.884        |
| 6NFC   | G_LYS_574 | NZ     | E_GLU_106 | OE1    | 3.312        |
| 6NFC   | G_LYS_574 | NZ     | E_GLU_106 | OE2    | 2.741        |
| 6NFC   | G_ARG_579 | NH2    | L_GLU_584 | OE1    | 3.032        |
| 6NFC   | G_ARG_579 | NH2    | L_GLU_584 | OE2    | 3.885        |
| 6NFC   | G_LYS_601 | NZ     | L_GLU_657 | OE1    | 2.933        |
| 6NFC   | G_LYS_601 | NZ     | L_GLU_657 | OE2    | 3.730        |
| 6NFC   | F_LYS_46  | NZ     | L_ASP_632 | OD1    | 3.960        |
| 6NFC   | F_LYS_46  | NZ     | L_ASP_632 | OD2    | 2.474        |
| 6NFC   | F_LYS_502 | NZ     | B_ASP_664 | OD1    | 3.023        |
| 6NFC   | I_ARG_542 | NH1    | B_GLU_647 | OE1    | 3.339        |
| 6NFC   | I_ARG_542 | NH1    | B_GLU_647 | OE2    | 3.856        |
| 6NFC   | I_LYS_574 | NZ     | F_ASP_107 | OD1    | 2.742        |
| 6NFC   | I_ARG_579 | NH2    | B_GLU_584 | OE1    | 3.222        |
| 6NFC   | I_ARG_579 | NH2    | B_GLU_584 | OE2    | 3.762        |
| 6NFC   | I_LYS_601 | NZ     | B_GLU_657 | OE1    | 3.945        |
| 6NFC   | K_ARG_53  | NH1    | B_ASP_659 | OD1    | 3.915        |
| 6NFC   | K_ARG_53  | NH1    | B_ASP_659 | OD2    | 2.784        |
| 6NFC   | K_ARG_53  | NH2    | B_ASP_659 | OD2    | 2.738        |

Table 1625: Interfacial 6NFC-specific salt bridging networks analysis. In this table, a PDB file is specified with a four-letter PDB ID, except that the names of the PDB files corresponding to the single NMR structural model split from the NMR ensemble is specified with a four-letter PDB ID in addition to a hyphen followed by the single NMR structural model numeric ID, the residue naming scheme is **Chain ID\_residue name\_residue number**,  $\angle ADH$  represents the angle formed by acceptor (A), donor (D) and hydrogen (H) ( $\angle ADH$ ).

| PDB ID | Residue A | Atom A | Residue B | Atom B | Distance (Å) |
|--------|-----------|--------|-----------|--------|--------------|
| 6NMR   | H_LYS_216 | NZ     | L_GLU_124 | OE1    | 3.273        |
| 6NMR   | H_LYS_216 | NZ     | L_GLU_124 | OE2    | 3.010        |
| 6NMR   | S_ARG_69  | NH1    | L_GLU_55  | OE1    | 3.247        |
| 6NMR   | S_ARG_69  | NH1    | L_GLU_55  | OE2    | 3.038        |
| 6NMR   | S_ARG_69  | NH2    | L_GLU_55  | OE2    | 3.173        |
| 6NMR   | E_ARG_69  | NH1    | B_GLU_55  | OE1    | 2.733        |
| 6NMR   | E_ARG_69  | NH1    | B_GLU_55  | OE2    | 2.469        |
| 6NMR   | E_ARG_69  | NH2    | B_GLU_55  | OE1    | 2.510        |
| 6NMR   | E_ARG_69  | NH2    | B_GLU_55  | OE2    | 3.637        |
| 6NMR   | I_ARG_69  | NH1    | G_GLU_55  | OE1    | 3.183        |
| 6NMR   | I_ARG_69  | NH1    | G_GLU_55  | OE2    | 2.119        |
| 6NMR   | I_ARG_69  | NH1    | F_ASP_108 | OD2    | 3.629        |
| 6NMR   | I_ARG_69  | NH2    | G_GLU_55  | OE1    | 2.639        |
| 6NMR   | I_ARG_69  | NH2    | G_GLU_55  | OE2    | 3.327        |
| 6NMR   | M_ARG_69  | NH1    | J_ASP_108 | OD1    | 3.945        |
| 6NMR   | M_ARG_69  | NH1    | J_ASP_108 | OD2    | 3.140        |
| 6NMR   | M_ARG_69  | NH2    | K_GLU_55  | OE1    | 3.608        |
| 6NMR   | M_ARG_69  | NH2    | J_ASP_108 | OD1    | 1.901        |
| 6NMR   | M_ARG_69  | NH2    | J_ASP_108 | OD2    | 2.331        |

Table 1626: Interfacial 6NMR-specific salt bridging networks analysis. In this table, a PDB file is specified with a four-letter PDB ID, except that the names of the PDB files corresponding to the single NMR structural model split from the NMR ensemble is specified with a four-letter PDB ID in addition to a hyphen followed by the single NMR structural model numeric ID, the residue naming scheme is **Chain ID residue name residue number**,  $\angle ADH$  represents the angle formed by acceptor (A), donor (D) and hydrogen (H) ( $\angle ADH$ ).

| PDB ID | Residue A | Atom A | Residue B | Atom B | Distance (Å) |
|--------|-----------|--------|-----------|--------|--------------|
| 6NMS   | L_ARG_94  | NH2    | S_GLU_111 | OE1    | 3.728        |
| 6NMS   | H_ARG_104 | NH2    | S_GLU_111 | OE1    | 3.455        |
| 6NMS   | H_ARG_104 | NH2    | S_GLU_111 | OE2    | 2.500        |
| 6NMS   | H_LYS_215 | NZ     | L_GLU_124 | OE1    | 3.565        |
| 6NMS   | H_LYS_215 | NZ     | L_GLU_124 | OE2    | 3.270        |
| 6NMS   | H_LYS_220 | NZ     | L_GLU_214 | OE1    | 3.397        |
| 6NMS   | S_LYS_11  | NZ     | H_ASP_33  | OD1    | 3.001        |
| 6NMS   | S_LYS_11  | NZ     | H_GLU_99  | OE1    | 2.549        |
| 6NMS   | S_HIS_56  | ND1    | A_ASP_60  | OD2    | 2.658        |
| 6NMS   | A_ARG_94  | NH2    | C_GLU_111 | OE2    | 3.453        |
| 6NMS   | B_ARG_104 | NH2    | C_GLU_111 | OE1    | 2.703        |
| 6NMS   | B_ARG_104 | NH2    | C_GLU_111 | OE2    | 3.000        |
| 6NMS   | C_LYS_11  | NZ     | B_ASP_33  | OD2    | 3.490        |
| 6NMS   | C_LYS_11  | NZ     | B_GLU_99  | OE1    | 2.892        |
| 6NMS   | C_ARG_115 | NH1    | B_GLU_56  | OE2    | 3.579        |
| 6NMS   | C_ARG_115 | NH2    | B_GLU_56  | OE2    | 2.699        |

Table 1627: Interfacial 6NMS-specific salt bridging networks analysis. In this table, a PDB file is specified with a four-letter PDB ID, except that the names of the PDB files corresponding to the single NMR structural model split from the NMR ensemble is specified with a four-letter PDB ID in addition to a hyphen followed by the single NMR structural model numeric ID, the residue naming scheme is **Chain ID\_residue name\_residue number**,  $\angle ADH$  represents the angle formed by acceptor (A), donor (D) and hydrogen (H) ( $\angle ADH$ ).



| PDB ID | Residue A | Atom A | Residue B | Atom B | Distance (Å) |
|--------|-----------|--------|-----------|--------|--------------|
| 6NMT   | A_ARG_26  | NH2    | C_ASP_10  | OD1    | 3.433        |
| 6NMT   | A_ARG_26  | NH2    | C_ASP_10  | OD2    | 3.182        |
| 6NMT   | B_ARG_56  | NH2    | C_GLU_111 | OE2    | 3.542        |
| 6NMT   | B_LYS_215 | NZ     | A_GLU_118 | OE2    | 3.496        |
| 6NMT   | C_LYS_11  | NZ     | A_ASP_91  | OD1    | 2.678        |
| 6NMT   | C_LYS_11  | NZ     | A_ASP_91  | OD2    | 3.319        |

Table 1628: Interfacial 6NMT-specific salt bridging networks analysis. In this table, a PDB file is specified with a four-letter PDB ID, except that the names of the PDB files corresponding to the single NMR structural model split from the NMR ensemble is specified with a four-letter PDB ID in addition to a hyphen followed by the single NMR structural model numeric ID, the residue naming scheme is **Chain ID\_residue name\_residue number**,  $\angle ADH$  represents the angle formed by acceptor (A), donor (D) and hydrogen (H) ( $\angle ADH$ ).

| PDB ID | Residue A | Atom A | Residue B | Atom B | Distance (Å) |
|--------|-----------|--------|-----------|--------|--------------|
| 6NMU   | L_LYS_32  | NZ     | S_ASP_85  | OD1    | 3.326        |
| 6NMU   | H_ARG_50  | NH1    | S_GLU_47  | OE1    | 3.597        |
| 6NMU   | H_ARG_50  | NH1    | S_GLU_47  | OE2    | 3.084        |
| 6NMU   | H_ARG_50  | NH2    | S_GLU_47  | OE1    | 2.989        |
| 6NMU   | H_ARG_50  | NH2    | S_GLU_47  | OE2    | 3.577        |
| 6NMU   | S_ARG_59  | NH2    | H_ASP_101 | OD2    | 3.444        |
| 6NMU   | A_LYS_32  | NZ     | C_ASP_85  | OD1    | 3.635        |
| 6NMU   | B_ARG_50  | NH1    | C_GLU_47  | OE1    | 3.989        |
| 6NMU   | B_ARG_50  | NH1    | C_GLU_47  | OE2    | 3.035        |
| 6NMU   | B_ARG_50  | NH2    | C_GLU_47  | OE1    | 2.804        |
| 6NMU   | B_ARG_50  | NH2    | C_GLU_47  | OE2    | 3.091        |
| 6NMU   | B_LYS_215 | NZ     | A_GLU_124 | OE1    | 3.494        |
| 6NMU   | B_LYS_215 | NZ     | A_GLU_124 | OE2    | 3.379        |
| 6NMU   | C_ARG_59  | NH1    | B_ASP_101 | OD1    | 3.720        |
| 6NMU   | C_ARG_59  | NH1    | B_ASP_101 | OD2    | 2.808        |

Table 1629: Interfacial 6NMU-specific salt bridging networks analysis. In this table, a PDB file is specified with a four-letter PDB ID, except that the names of the PDB files corresponding to the single NMR structural model split from the NMR ensemble is specified with a four-letter PDB ID in addition to a hyphen followed by the single NMR structural model numeric ID, the residue naming scheme is **Chain ID\_residue name\_residue number**,  $\angle ADH$  represents the angle formed by acceptor (A), donor (D) and hydrogen (H) ( $\angle ADH$ ).

| PDB ID | Residue A | Atom A | Residue B | Atom B | Distance (Å) |
|--------|-----------|--------|-----------|--------|--------------|
| 6O9B   | A_ARG_35  | NH1    | B_ASP_73  | OD1    | 2.773        |
| 6O9B   | A_ARG_35  | NH1    | B_ASP_73  | OD2    | 3.974        |
| 6O9B   | A_ARG_48  | NH2    | B_ASP_73  | OD2    | 3.479        |
| 6O9B   | A_HIS_192 | ND1    | B_ASP_118 | OD2    | 3.864        |
| 6O9B   | C_LYS_9   | NZ     | A_ASP_116 | OD2    | 2.706        |

Table 1630: Interfacial 6O9B-specific salt bridging networks analysis. In this table, a PDB file is specified with a four-letter PDB ID, except that the names of the PDB files corresponding to the single NMR structural model split from the NMR ensemble is specified with a four-letter PDB ID in addition to a hyphen followed by the single NMR structural model numeric ID, the residue naming scheme is **Chain ID\_residue name\_residue number**,  $\angle ADH$  represents the angle formed by acceptor (A), donor (D) and hydrogen (H) ( $\angle ADH$ ).

| PDB ID | Residue A | Atom A | Residue B | Atom B | Distance (Å) |
|--------|-----------|--------|-----------|--------|--------------|
| 6O9C   | A_ARG_35  | NH1    | B_ASP_73  | OD1    | 3.395        |
| 6O9C   | A_HIS_192 | NE2    | B_ASP_118 | OD2    | 3.199        |
| 6O9C   | A_ARG_202 | NH1    | B_ASP_118 | OD2    | 3.014        |
| 6O9C   | B_LYS_26  | NZ     | A_GLU_232 | OE2    | 3.913        |
| 6O9C   | C_LYS_9   | NZ     | A_ASP_77  | OD2    | 3.855        |
| 6O9C   | C_LYS_9   | NZ     | A_ASP_116 | OD2    | 2.984        |

Table 1631: Interfacial 6O9C-specific salt bridging networks analysis. In this table, a PDB file is specified with a four-letter PDB ID, except that the names of the PDB files corresponding to the single NMR structural model split from the NMR ensemble is specified with a four-letter PDB ID in addition to a hyphen followed by the single NMR structural model numeric ID, the residue naming scheme is **Chain ID\_residue name\_residue number**,  $\angle ADH$  represents the angle formed by acceptor (A), donor (D) and hydrogen (H) ( $\angle ADH$ ).

| PDB ID | Residue A | Atom A | Residue B | Atom B | Distance (Å) |
|--------|-----------|--------|-----------|--------|--------------|
| 6OGX   | C_LYS_213 | NZ     | D_GLU_123 | OE1    | 2.791        |
| 6OGX   | C_LYS_213 | NZ     | D_GLU_123 | OE2    | 3.773        |
| 6OGX   | C_LYS_218 | NZ     | D_ASP_122 | OD2    | 3.785        |
| 6OGX   | D_ARG_55  | NH2    | G_ASP_117 | OD1    | 2.990        |
| 6OGX   | G_ARG_95  | NH1    | H_ASP_99  | OD1    | 3.462        |
| 6OGX   | G_ARG_95  | NH1    | H_ASP_99  | OD2    | 2.833        |
| 6OGX   | G_ARG_95  | NH2    | H_ASP_99  | OD1    | 2.923        |
| 6OGX   | G_ARG_95  | NH2    | H_ASP_99  | OD2    | 3.646        |
| 6OGX   | H_ARG_100 | NH1    | L_GLU_55  | OE1    | 3.516        |
| 6OGX   | H_ARG_100 | NH1    | L_GLU_55  | OE2    | 2.787        |

Table 1632: Interfacial 6OGX-specific salt bridging networks analysis. In this table, a PDB file is specified with a four-letter PDB ID, except that the names of the PDB files corresponding to the single NMR structural model split from the NMR ensemble is specified with a four-letter PDB ID in addition to a hyphen followed by the single NMR structural model numeric ID, the residue naming scheme is **Chain ID\_residue name\_residue number**,  $\angle ADH$  represents the angle formed by acceptor (A), donor (D) and hydrogen (H) ( $\angle ADH$ ).

| PDB ID | Residue A | Atom A | Residue B | Atom B | Distance (Å) |
|--------|-----------|--------|-----------|--------|--------------|
| 6OKM   | H_ARG_100 | NH1    | L_GLU_55  | OE1    | 2.851        |
| 6OKM   | H_HIS_165 | NE2    | L ASP_167 | OD1    | 3.460        |
| 6OKM   | H_LYS_210 | NZ     | L_GLU_123 | OE2    | 3.540        |
| 6OKM   | H_LYS_215 | NZ     | L ASP_122 | OD1    | 3.237        |
| 6OKM   | H_LYS_215 | NZ     | L ASP_122 | OD2    | 3.538        |
| 6OKM   | R_ARG_95  | NH1    | H ASP_99  | OD1    | 3.347        |
| 6OKM   | R_ARG_95  | NH1    | H ASP_99  | OD2    | 3.783        |
| 6OKM   | R_ARG_95  | NH2    | H ASP_99  | OD1    | 3.371        |
| 6OKM   | R_ARG_95  | NH2    | H ASP_99  | OD2    | 2.555        |

Table 1633: Interfacial 6OKM-specific salt bridging networks analysis. In this table, a PDB file is specified with a four-letter PDB ID, except that the names of the PDB files corresponding to the single NMR structural model split from the NMR ensemble is specified with a four-letter PDB ID in addition to a hyphen followed by the single NMR structural model numeric ID, the residue naming scheme is **Chain ID\_residue name\_residue number**,  $\angle ADH$  represents the angle formed by acceptor (A), donor (D) and hydrogen (H) ( $\angle ADH$ ).

| PDB ID | Residue A | Atom A | Residue B | Atom B | Distance (Å) |
|--------|-----------|--------|-----------|--------|--------------|
| 6OKN   | A_LYS_213 | NZ     | B_GLU_123 | OE1    | 3.312        |
| 6OKN   | A_LYS_213 | NZ     | B_GLU_123 | OE2    | 2.829        |
| 6OKN   | C_LYS_213 | NZ     | D_GLU_123 | OE1    | 3.356        |
| 6OKN   | C_LYS_213 | NZ     | D_GLU_123 | OE2    | 2.896        |
| 6OKN   | C_LYS_218 | NZ     | D_ASP_122 | OD2    | 3.923        |

Table 1634: Interfacial 6OKN-specific salt bridging networks analysis. In this table, a PDB file is specified with a four-letter PDB ID, except that the names of the PDB files corresponding to the single NMR structural model split from the NMR ensemble is specified with a four-letter PDB ID in addition to a hyphen followed by the single NMR structural model numeric ID, the residue naming scheme is **Chain ID\_residue name\_residue number**,  $\angle ADH$  represents the angle formed by acceptor (A), donor (D) and hydrogen (H) ( $\angle ADH$ ).

| PDB ID | Residue A | Atom A | Residue B | Atom B | Distance (Å) |
|--------|-----------|--------|-----------|--------|--------------|
| 6OOR   | A_LYS_148 | NZ     | H_ASP_55  | OD2    | 3.250        |
| 6OOR   | B_ARG_12  | NH2    | A_ASP_242 | OD1    | 3.946        |
| 6OOR   | B_ARG_12  | NH2    | A_ASP_242 | OD2    | 2.705        |
| 6OOR   | B_HIS_34  | NE2    | A_GLU_97  | OE1    | 2.803        |
| 6OOR   | B_HIS_34  | NE2    | A_GLU_97  | OE2    | 3.580        |
| 6OOR   | H_ARG_109 | NH2    | A_ASP_80  | OD1    | 2.917        |
| 6OOR   | H_ARG_109 | NH2    | A_ASP_80  | OD2    | 3.352        |
| 6OOR   | H_LYS_220 | NZ     | L_GLU_128 | OE1    | 2.677        |
| 6OOR   | H_LYS_220 | NZ     | L_GLU_128 | OE2    | 2.872        |

Table 1635: Interfacial 6OOR-specific salt bridging networks analysis. In this table, a PDB file is specified with a four-letter PDB ID, except that the names of the PDB files corresponding to the single NMR structural model split from the NMR ensemble is specified with a four-letter PDB ID in addition to a hyphen followed by the single NMR structural model numeric ID, the residue naming scheme is **Chain ID\_residue name\_residue number**,  $\angle ADH$  represents the angle formed by acceptor (A), donor (D) and hydrogen (H) ( $\angle ADH$ ).



| PDB ID | Residue A | Atom A | Residue B  | Atom B | Distance (Å) |
|--------|-----------|--------|------------|--------|--------------|
| 6OSY   | 2_LYS_282 | NZ     | 8_ASP_100C | OD2    | 3.941        |
| 6OSY   | 8_ARG_61  | NH1    | 2_GLU_466  | OE2    | 3.827        |
| 6OSY   | 8_ARG_71  | NH1    | 2_ASP_368  | OD2    | 3.948        |
| 6OSY   | 8_ARG_71  | NH2    | 2_ASP_368  | OD2    | 3.279        |
| 6OSY   | A_ARG_542 | NH1    | Q_GLU_647  | OE2    | 3.907        |
| 6OSY   | A_ARG_542 | NH2    | Q_GLU_647  | OE1    | 3.187        |
| 6OSY   | A_ARG_542 | NH2    | Q_GLU_647  | OE2    | 2.660        |
| 6OSY   | A_ARG_579 | NH2    | Q_GLU_584  | OE1    | 3.706        |
| 6OSY   | B_LYS_282 | NZ     | F_ASP_100C | OD1    | 3.567        |
| 6OSY   | B_LYS_282 | NZ     | F_ASP_100C | OD2    | 3.346        |
| 6OSY   | F_ARG_71  | NH2    | B_ASP_368  | OD2    | 3.635        |
| 6OSY   | G_ARG_542 | NH1    | A_GLU_647  | OE2    | 3.983        |
| 6OSY   | G_ARG_542 | NH2    | A_GLU_647  | OE1    | 3.165        |
| 6OSY   | G_ARG_542 | NH2    | A_GLU_647  | OE2    | 2.705        |
| 6OSY   | G_ARG_579 | NH2    | A_GLU_584  | OE1    | 3.899        |
| 6OSY   | H_ARG_96  | NH1    | L_GLU_55   | OE1    | 3.662        |
| 6OSY   | H_HIS_100 | ND1    | 2_GLU_87   | OE2    | 3.031        |
| 6OSY   | H_HIS_100 | NE2    | 2_GLU_87   | OE2    | 3.785        |
| 6OSY   | I_ARG_96  | NH1    | J_GLU_55   | OE2    | 3.419        |
| 6OSY   | I_HIS_100 | ND1    | B_GLU_87   | OE2    | 3.029        |
| 6OSY   | I_HIS_100 | NE2    | B_GLU_87   | OE2    | 3.781        |
| 6OSY   | J_ARG_46  | NH1    | I_ASP_101  | OD1    | 3.411        |
| 6OSY   | J_ARG_46  | NH1    | I_ASP_101  | OD2    | 2.599        |
| 6OSY   | K_LYS_282 | NZ     | P_ASP_100C | OD2    | 3.859        |
| 6OSY   | L_ARG_46  | NH1    | H_ASP_101  | OD1    | 3.509        |
| 6OSY   | L_ARG_46  | NH1    | H_ASP_101  | OD2    | 2.485        |
| 6OSY   | P_ARG_71  | NH1    | K_ASP_368  | OD2    | 3.949        |
| 6OSY   | P_ARG_71  | NH2    | K_ASP_368  | OD2    | 3.325        |
| 6OSY   | Q_ARG_542 | NH1    | G_GLU_647  | OE2    | 3.913        |
| 6OSY   | Q_ARG_542 | NH2    | G_GLU_647  | OE1    | 3.228        |
| 6OSY   | Q_ARG_542 | NH2    | G_GLU_647  | OE2    | 2.706        |
| 6OSY   | R_ARG_96  | NH1    | S_GLU_55   | OE2    | 3.423        |
| 6OSY   | R_HIS_100 | ND1    | K_GLU_87   | OE1    | 3.719        |
| 6OSY   | R_HIS_100 | ND1    | K_GLU_87   | OE2    | 2.905        |
| 6OSY   | R_HIS_100 | NE2    | K_GLU_87   | OE1    | 3.960        |
| 6OSY   | S_ARG_46  | NH1    | R_ASP_101  | OD1    | 3.488        |
| 6OSY   | S_ARG_46  | NH1    | R_ASP_101  | OD2    | 2.503        |

Table 1636: Interfacial 6OSY-specific salt bridging networks analysis. In this table, a PDB file is specified with a four-letter PDB ID, except that the names of the PDB files corresponding to the single NMR structural model split from the NMR ensemble is specified with a four-letter PDB ID in addition to a hyphen followed by the single NMR structural model numeric ID, the residue naming scheme is **Chain ID\_residue name\_residue number**,  $\angle ADH$  represents the angle formed by acceptor (A), donor (D) and hydrogen (H) ( $\angle ADH$ ).

| PDB ID | Residue A | Atom A | Residue B  | Atom B | Distance (Å) |
|--------|-----------|--------|------------|--------|--------------|
| 6OT1   | B_ARG_542 | NH2    | D_GLU_647  | OE1    | 2.021        |
| 6OT1   | B_ARG_542 | NH2    | D_GLU_647  | OE2    | 3.827        |
| 6OT1   | B_LYS_601 | NZ     | D_GLU_657  | OE1    | 3.960        |
| 6OT1   | B_LYS_601 | NZ     | D_GLU_657  | OE2    | 3.832        |
| 6OT1   | G_LYS_282 | NZ     | q_ASP_100C | OD2    | 3.404        |
| 6OT1   | G_ARG_327 | NH2    | m_GLU_100I | OE1    | 3.817        |
| 6OT1   | q_ARG_71  | NH2    | G_ASP_368  | OD2    | 3.596        |
| 6OT1   | O_ARG_542 | NH2    | B_GLU_647  | OE1    | 2.048        |
| 6OT1   | O_ARG_542 | NH2    | B_GLU_647  | OE2    | 3.874        |
| 6OT1   | O_LYS_601 | NZ     | B_GLU_657  | OE1    | 3.934        |
| 6OT1   | O_LYS_601 | NZ     | B_GLU_657  | OE2    | 3.759        |
| 6OT1   | E_LYS_282 | NZ     | J_ASP_100C | OD2    | 3.404        |
| 6OT1   | E_ARG_327 | NH2    | F_GLU_100I | OE1    | 3.817        |
| 6OT1   | J_ARG_71  | NH2    | E_ASP_368  | OD2    | 3.599        |
| 6OT1   | D_ARG_542 | NH2    | O_GLU_647  | OE1    | 2.015        |
| 6OT1   | D_ARG_542 | NH2    | O_GLU_647  | OE2    | 3.816        |
| 6OT1   | D_LYS_601 | NZ     | O_GLU_657  | OE2    | 3.900        |
| 6OT1   | P_LYS_282 | NZ     | S_ASP_100C | OD2    | 3.405        |
| 6OT1   | P_ARG_327 | NH2    | Q_GLU_100I | OE1    | 3.817        |
| 6OT1   | S_ARG_71  | NH2    | P_ASP_368  | OD2    | 3.597        |

Table 1637: Interfacial 6OT1-specific salt bridging networks analysis. In this table, a PDB file is specified with a four-letter PDB ID, except that the names of the PDB files corresponding to the single NMR structural model split from the NMR ensemble is specified with a four-letter PDB ID in addition to a hyphen followed by the single NMR structural model numeric ID, the residue naming scheme is **Chain ID\_residue name\_residue number**,  $\angle ADH$  represents the angle formed by acceptor (A), donor (D) and hydrogen (H) ( $\angle ADH$ ).

| PDB ID | Residue A | Atom A | Residue B | Atom B | Distance (Å) |
|--------|-----------|--------|-----------|--------|--------------|
| 6P62   | A_LYS_168 | NZ     | B_GLU_190 | OE2    | 3.547        |
| 6P62   | A_ARG_542 | NH1    | B_GLU_647 | OE1    | 2.629        |
| 6P62   | A_ARG_542 | NH1    | B_GLU_647 | OE2    | 3.985        |
| 6P62   | A_ARG_542 | NH2    | B_GLU_648 | OE2    | 3.131        |
| 6P62   | A_ARG_579 | NH1    | B_GLU_584 | OE1    | 3.453        |
| 6P62   | A_ARG_579 | NH1    | B_GLU_584 | OE2    | 2.953        |
| 6P62   | B_LYS_168 | NZ     | E_GLU_190 | OE2    | 3.547        |
| 6P62   | B_ARG_542 | NH1    | E_GLU_647 | OE1    | 2.630        |
| 6P62   | B_ARG_542 | NH1    | E_GLU_647 | OE2    | 3.986        |
| 6P62   | B_ARG_542 | NH2    | E_GLU_648 | OE2    | 3.130        |
| 6P62   | B_ARG_579 | NH1    | E_GLU_584 | OE1    | 3.454        |
| 6P62   | B_ARG_579 | NH1    | E_GLU_584 | OE2    | 2.952        |
| 6P62   | E_LYS_168 | NZ     | A_GLU_190 | OE2    | 3.547        |
| 6P62   | E_ARG_542 | NH1    | A_GLU_647 | OE1    | 2.629        |
| 6P62   | E_ARG_542 | NH1    | A_GLU_647 | OE2    | 3.985        |
| 6P62   | E_ARG_542 | NH2    | A_GLU_648 | OE2    | 3.130        |
| 6P62   | E_ARG_579 | NH1    | A_GLU_584 | OE1    | 3.453        |
| 6P62   | E_ARG_579 | NH1    | A_GLU_584 | OE2    | 2.952        |

Table 1638: Interfacial 6P62-specific salt bridging networks analysis. In this table, a PDB file is specified with a four-letter PDB ID, except that the names of the PDB files corresponding to the single NMR structural model split from the NMR ensemble is specified with a four-letter PDB ID in addition to a hyphen followed by the single NMR structural model numeric ID, the residue naming scheme is **Chain ID\_residue name\_residue number**,  $\angle ADH$  represents the angle formed by acceptor (A), donor (D) and hydrogen (H) ( $\angle ADH$ ).

| PDB ID | Residue A  | Atom A | Residue B | Atom B | Distance (Å) |
|--------|------------|--------|-----------|--------|--------------|
| 6P65   | A_ARG_500  | NH1    | L_GLU_30  | OE1    | 3.144        |
| 6P65   | A_ARG_500  | NH1    | L_GLU_30  | OE2    | 3.804        |
| 6P65   | A_ARG_500  | NH2    | L_GLU_30  | OE1    | 3.741        |
| 6P65   | A_ARG_500  | NH2    | L_GLU_30  | OE2    | 2.979        |
| 6P65   | A_ARG_542  | NH2    | B_ASP_648 | OD1    | 3.154        |
| 6P65   | H_LYS_71   | NZ     | A_GLU_87  | OE1    | 2.936        |
| 6P65   | H_LYS_71   | NZ     | A_GLU_87  | OE2    | 2.864        |
| 6P65   | H_LYS_100H | NZ     | L_ASP_50  | OD1    | 2.708        |
| 6P65   | H_LYS_100H | NZ     | L_ASP_50  | OD2    | 2.597        |
| 6P65   | B_ARG_500  | NH1    | D_GLU_30  | OE1    | 3.143        |
| 6P65   | B_ARG_500  | NH1    | D_GLU_30  | OE2    | 3.804        |
| 6P65   | B_ARG_500  | NH2    | D_GLU_30  | OE1    | 3.741        |
| 6P65   | B_ARG_500  | NH2    | D_GLU_30  | OE2    | 2.979        |
| 6P65   | B_ARG_542  | NH2    | E_ASP_648 | OD1    | 3.155        |
| 6P65   | C_LYS_71   | NZ     | B_GLU_87  | OE1    | 2.936        |
| 6P65   | C_LYS_71   | NZ     | B_GLU_87  | OE2    | 2.864        |
| 6P65   | C_LYS_100H | NZ     | D_ASP_50  | OD1    | 2.708        |
| 6P65   | C_LYS_100H | NZ     | D_ASP_50  | OD2    | 2.597        |
| 6P65   | E_ARG_500  | NH1    | G_GLU_30  | OE1    | 3.143        |
| 6P65   | E_ARG_500  | NH1    | G_GLU_30  | OE2    | 3.804        |
| 6P65   | E_ARG_500  | NH2    | G_GLU_30  | OE1    | 3.741        |
| 6P65   | E_ARG_500  | NH2    | G_GLU_30  | OE2    | 2.979        |
| 6P65   | E_ARG_542  | NH2    | A_ASP_648 | OD1    | 3.154        |
| 6P65   | F_LYS_71   | NZ     | E_GLU_87  | OE1    | 2.935        |
| 6P65   | F_LYS_71   | NZ     | E_GLU_87  | OE2    | 2.865        |
| 6P65   | F_LYS_100H | NZ     | G_ASP_50  | OD1    | 2.708        |
| 6P65   | F_LYS_100H | NZ     | G_ASP_50  | OD2    | 2.596        |

Table 1639: Interfacial 6P65-specific salt bridging networks analysis. In this table, a PDB file is specified with a four-letter PDB ID, except that the names of the PDB files corresponding to the single NMR structural model split from the NMR ensemble is specified with a four-letter PDB ID in addition to a hyphen followed by the single NMR structural model numeric ID, the residue naming scheme is **Chain ID\_residue name\_residue number**,  $\angle ADH$  represents the angle formed by acceptor (A), donor (D) and hydrogen (H) ( $\angle ADH$ ).

| PDB ID | Residue A | Atom A | Residue B | Atom B | Distance (Å) |
|--------|-----------|--------|-----------|--------|--------------|
| 6PE8   | A_LYS_212 | NZ     | B_GLU_129 | OE1    | 3.617        |
| 6PE8   | A_LYS_212 | NZ     | B_GLU_129 | OE2    | 2.921        |
| 6PE8   | A_LYS_217 | NZ     | B_ASP_128 | OD2    | 3.408        |
| 6PE8   | B_LYS_36  | NZ     | U_GLU_98  | OE2    | 3.943        |
| 6PE8   | H_LYS_212 | NZ     | L_GLU_129 | OE1    | 2.763        |
| 6PE8   | H_LYS_212 | NZ     | L_GLU_129 | OE2    | 3.237        |
| 6PE8   | L_LYS_36  | NZ     | T_GLU_98  | OE1    | 3.975        |
| 6PE8   | L_LYS_36  | NZ     | T_GLU_98  | OE2    | 3.494        |
| 6PE8   | T_ARG_90  | NH2    | H_ASP_62  | OD1    | 3.932        |
| 6PE8   | T_LYS_94  | NZ     | L_ASP_97  | OD1    | 2.502        |
| 6PE8   | T_LYS_94  | NZ     | L_ASP_97  | OD2    | 3.872        |

Table 1640: Interfacial 6PE8-specific salt bridging networks analysis. In this table, a PDB file is specified with a four-letter PDB ID, except that the names of the PDB files corresponding to the single NMR structural model split from the NMR ensemble is specified with a four-letter PDB ID in addition to a hyphen followed by the single NMR structural model numeric ID, the residue naming scheme is **Chain ID\_residue name\_residue number**,  $\angle ADH$  represents the angle formed by acceptor (A), donor (D) and hydrogen (H) ( $\angle ADH$ ).

| PDB ID | Residue A | Atom A | Residue B | Atom B | Distance (Å) |
|--------|-----------|--------|-----------|--------|--------------|
| 6PE9   | A_LYS_212 | NZ     | B_GLU_129 | OE1    | 3.227        |
| 6PE9   | A_LYS_212 | NZ     | B_GLU_129 | OE2    | 3.311        |
| 6PE9   | A_LYS_217 | NZ     | B_ASP_128 | OD1    | 3.061        |
| 6PE9   | A_LYS_217 | NZ     | B_ASP_128 | OD2    | 3.113        |
| 6PE9   | C_LYS_13  | NZ     | U_GLU_107 | OE2    | 3.461        |
| 6PE9   | C_LYS_212 | NZ     | D_GLU_129 | OE1    | 2.716        |
| 6PE9   | D_LYS_36  | NZ     | G_GLU_98  | OE2    | 3.800        |
| 6PE9   | E_LYS_13  | NZ     | G_GLU_107 | OE2    | 3.510        |
| 6PE9   | E_LYS_212 | NZ     | F_GLU_129 | OE1    | 3.511        |
| 6PE9   | E_LYS_212 | NZ     | F_GLU_129 | OE2    | 3.915        |
| 6PE9   | F_LYS_36  | NZ     | U_GLU_98  | OE2    | 3.769        |
| 6PE9   | G_ARG_73  | NH1    | J_GLU_74  | OE1    | 3.140        |
| 6PE9   | G_ARG_73  | NH2    | J_GLU_74  | OE1    | 2.423        |
| 6PE9   | G_ARG_73  | NH2    | J_GLU_74  | OE2    | 3.851        |
| 6PE9   | G_LYS_94  | NZ     | D_ASP_97  | OD1    | 2.957        |
| 6PE9   | I_LYS_29  | NZ     | U_ASP_69  | OD2    | 3.034        |
| 6PE9   | I_ARG_73  | NH1    | U_GLU_74  | OE1    | 3.681        |
| 6PE9   | I_ARG_73  | NH1    | U_GLU_74  | OE2    | 2.345        |
| 6PE9   | I_ARG_73  | NH2    | U_GLU_74  | OE2    | 3.507        |
| 6PE9   | J_ARG_73  | NH1    | G_GLU_74  | OE1    | 3.931        |
| 6PE9   | J_ARG_73  | NH1    | G_GLU_74  | OE2    | 3.429        |
| 6PE9   | M_LYS_36  | NZ     | J_GLU_98  | OE1    | 2.716        |
| 6PE9   | U_LYS_    | NZ     | L_ASP_    | OD2    | 3.835        |
| 6PE9   | U_ARG_    | NH2    | L_GLU_    | OE1    | 3.379        |
| 6PE9   | U_ARG_    | NH2    | L_GLU_    | OE2    | 2.907        |
| 6PE9   | U_LYS_94  | NZ     | F_ASP_97  | OD1    | 2.940        |
| 6PE9   | V_ARG_90  | NH1    | L_ASP_1   | OD1    | 3.701        |
| 6PE9   | V_ARG_90  | NH2    | L_ASP_1   | OD1    | 3.047        |
| 6PE9   | V_LYS_94  | NZ     | L_ASP_97  | OD1    | 3.203        |

Table 1641: Interfacial 6PE9-specific salt bridging networks analysis. In this table, a PDB file is specified with a four-letter PDB ID, except that the names of the PDB files corresponding to the single NMR structural model split from the NMR ensemble is specified with a four-letter PDB ID in addition to a hyphen followed by the single NMR structural model numeric ID, the residue naming scheme is **Chain ID\_residue name\_residue number**,  $\angle ADH$  represents the angle formed by acceptor (A), donor (D) and hydrogen (H) ( $\angle ADH$ ).

| PDB ID | Residue A | Atom A | Residue B | Atom B | Distance (Å) |
|--------|-----------|--------|-----------|--------|--------------|
| 6PHB   | LLYS_43   | NZ     | D_ASP_27  | OD2    | 2.797        |
| 6PHB   | LLYS_47   | NZ     | C_GLU_55  | OE1    | 3.460        |
| 6PHB   | LLYS_47   | NZ     | C_GLU_55  | OE2    | 3.396        |
| 6PHB   | LLYS_47   | NZ     | D_ASP_105 | OD2    | 2.626        |
| 6PHB   | C_ARG_95  | NH1    | L_ASP_28  | OD2    | 3.551        |
| 6PHB   | C_ARG_95  | NH1    | L_GLU_39  | OE2    | 3.728        |
| 6PHB   | D_ARG_50  | NH1    | L_GLU_39  | OE2    | 3.791        |
| 6PHB   | D_ARG_50  | NH2    | L_GLU_39  | OE2    | 2.945        |
| 6PHB   | D_LYS_213 | NZ     | C_GLU_124 | OE1    | 2.534        |
| 6PHB   | D_LYS_213 | NZ     | C_GLU_124 | OE2    | 3.508        |
| 6PHB   | E_LYS_43  | NZ     | B_ASP_27  | OD2    | 3.033        |
| 6PHB   | E_LYS_47  | NZ     | A_GLU_55  | OE1    | 3.560        |
| 6PHB   | E_LYS_47  | NZ     | A_GLU_55  | OE2    | 3.516        |
| 6PHB   | E_LYS_47  | NZ     | B_ASP_105 | OD1    | 2.522        |
| 6PHB   | A_ARG_95  | NH1    | E_ASP_28  | OD1    | 3.463        |
| 6PHB   | A_ARG_95  | NH1    | E_GLU_39  | OE2    | 3.694        |
| 6PHB   | B_ARG_50  | NH1    | E_GLU_39  | OE2    | 3.771        |
| 6PHB   | B_ARG_50  | NH2    | E_GLU_39  | OE2    | 2.963        |
| 6PHB   | B_LYS_213 | NZ     | A_GLU_124 | OE1    | 3.629        |
| 6PHB   | B_LYS_213 | NZ     | A_GLU_124 | OE2    | 2.552        |

Table 1642: Interfacial 6PHB-specific salt bridging networks analysis. In this table, a PDB file is specified with a four-letter PDB ID, except that the names of the PDB files corresponding to the single NMR structural model split from the NMR ensemble is specified with a four-letter PDB ID in addition to a hyphen followed by the single NMR structural model numeric ID, the residue naming scheme is **Chain ID\_residue name\_residue number**,  $\angle ADH$  represents the angle formed by acceptor (A), donor (D) and hydrogen (H) ( $\angle ADH$ ).

| PDB ID | Residue A | Atom A | Residue B | Atom B | Distance (Å) |
|--------|-----------|--------|-----------|--------|--------------|
| 6PHC   | I_LYS_2   | NZ     | A_GLU_96  | OE1    | 3.433        |
| 6PHC   | A_LYS_209 | NZ     | B_GLU_122 | OE2    | 3.367        |
| 6PHC   | E_LYS_2   | NZ     | C_GLU_96  | OE2    | 3.166        |
| 6PHC   | C_LYS_75  | NZ     | A_GLU_1   | OE1    | 3.102        |
| 6PHC   | C_LYS_209 | NZ     | D_GLU_122 | OE2    | 3.075        |

Table 1643: Interfacial 6PHC-specific salt bridging networks analysis. In this table, a PDB file is specified with a four-letter PDB ID, except that the names of the PDB files corresponding to the single NMR structural model split from the NMR ensemble is specified with a four-letter PDB ID in addition to a hyphen followed by the single NMR structural model numeric ID, the residue naming scheme is **Chain ID\_residue name\_residue number**,  $\angle ADH$  represents the angle formed by acceptor (A), donor (D) and hydrogen (H) ( $\angle ADH$ ).



| PDB ID | Residue A | Atom A | Residue B | Atom B | Distance (Å) |
|--------|-----------|--------|-----------|--------|--------------|
| 6PHD   | H_ARG_52  | NH2    | C_ASP_131 | OD2    | 3.559        |
| 6PHD   | H_LYS_158 | NZ     | L_GLU_128 | OE2    | 2.649        |
| 6PHD   | H_LYS_224 | NZ     | L_GLU_127 | OE1    | 2.532        |
| 6PHD   | H_LYS_224 | NZ     | L_GLU_127 | OE2    | 2.992        |
| 6PHD   | C_LYS_118 | NZ     | H_ASP_109 | OD1    | 3.874        |
| 6PHD   | C_LYS_135 | NZ     | L_ASP_51  | OD2    | 3.166        |

Table 1644: Interfacial 6PHD-specific salt bridging networks analysis. In this table, a PDB file is specified with a four-letter PDB ID, except that the names of the PDB files corresponding to the single NMR structural model split from the NMR ensemble is specified with a four-letter PDB ID in addition to a hyphen followed by the single NMR structural model numeric ID, the residue naming scheme is **Chain ID\_residue name\_residue number**,  $\angle ADH$  represents the angle formed by acceptor (A), donor (D) and hydrogen (H) ( $\angle ADH$ ).

| PDB ID | Residue A | Atom A | Residue B | Atom B | Distance (Å) |
|--------|-----------|--------|-----------|--------|--------------|
| 6PHF   | A_LYS_63  | NZ     | C_GLU_89  | OE2    | 2.941        |
| 6PHF   | A_LYS_150 | NZ     | B_GLU_123 | OE1    | 3.782        |
| 6PHF   | A_LYS_216 | NZ     | B_GLU_122 | OE1    | 2.642        |
| 6PHF   | A_LYS_216 | NZ     | B_GLU_122 | OE2    | 2.832        |
| 6PHF   | G_LYS_130 | NZ     | A_GLU_59  | OE2    | 2.793        |
| 6PHF   | G_LYS_135 | NZ     | B_ASP_48  | OD1    | 3.917        |
| 6PHF   | G_LYS_135 | NZ     | B_ASP_48  | OD2    | 2.691        |
| 6PHF   | B_LYS_50  | NZ     | G_ASP_160 | OD1    | 3.948        |
| 6PHF   | B_LYS_50  | NZ     | G_ASP_160 | OD2    | 3.455        |
| 6PHF   | C_LYS_63  | NZ     | A_GLU_89  | OE2    | 3.050        |
| 6PHF   | C_LYS_150 | NZ     | D_GLU_123 | OE2    | 2.663        |
| 6PHF   | C_LYS_216 | NZ     | D_GLU_122 | OE1    | 2.759        |
| 6PHF   | C_LYS_216 | NZ     | D_GLU_122 | OE2    | 3.120        |
| 6PHF   | E_LYS_130 | NZ     | C_GLU_59  | OE2    | 2.474        |
| 6PHF   | E_LYS_135 | NZ     | D_ASP_48  | OD1    | 3.909        |
| 6PHF   | E_LYS_135 | NZ     | D_ASP_48  | OD2    | 2.579        |

Table 1645: Interfacial 6PHF-specific salt bridging networks analysis. In this table, a PDB file is specified with a four-letter PDB ID, except that the names of the PDB files corresponding to the single NMR structural model split from the NMR ensemble is specified with a four-letter PDB ID in addition to a hyphen followed by the single NMR structural model numeric ID, the residue naming scheme is **Chain ID\_residue name\_residue number**,  $\angle ADH$  represents the angle formed by acceptor (A), donor (D) and hydrogen (H) ( $\angle ADH$ ).

| PDB ID | Residue A | Atom A | Residue B | Atom B | Distance (Å) |
|--------|-----------|--------|-----------|--------|--------------|
| 6PHG   | A_LYS_221 | NZ     | B_GLU_126 | OE2    | 3.079        |

Table 1646: Interfacial 6PHG-specific salt bridging networks analysis. In this table, a PDB file is specified with a four-letter PDB ID, except that the names of the PDB files corresponding to the single NMR structural model split from the NMR ensemble is specified with a four-letter PDB ID in addition to a hyphen followed by the single NMR structural model numeric ID, the residue naming scheme is **Chain ID\_residue name\_residue number**,  $\angle ADH$  represents the angle formed by acceptor (A), donor (D) and hydrogen (H) ( $\angle ADH$ ).

| PDB ID | Residue A | Atom A | Residue B | Atom B | Distance (Å) |
|--------|-----------|--------|-----------|--------|--------------|
| 6PHH   | C.LYS_76  | NZ     | A.GLU_1   | OE1    | 3.897        |
| 6PHH   | A.LYS_76  | NZ     | C.GLU_1   | OE1    | 3.451        |
| 6PHH   | A.LYS_221 | NZ     | B.GLU_126 | OE2    | 3.327        |

Table 1647: Interfacial 6PHH-specific salt bridging networks analysis. In this table, a PDB file is specified with a four-letter PDB ID, except that the names of the PDB files corresponding to the single NMR structural model split from the NMR ensemble is specified with a four-letter PDB ID in addition to a hyphen followed by the single NMR structural model numeric ID, the residue naming scheme is **Chain ID\_residue name\_residue number**,  $\angle ADH$  represents the angle formed by acceptor (A), donor (D) and hydrogen (H) ( $\angle ADH$ ).

| PDB ID | Residue A | Atom A | Residue B | Atom B | Distance (Å) |
|--------|-----------|--------|-----------|--------|--------------|
| 6PI7   | B_ARG_67  | NH2    | A_GLU_345 | OE2    | 3.601        |
| 6PI7   | C_ARG_105 | NH1    | A_ASP_334 | OD1    | 2.888        |
| 6PI7   | F_ARG_105 | NH1    | D_ASP_334 | OD1    | 3.009        |
| 6PI7   | G_ARG_4   | NH1    | A_ASP_385 | OD1    | 3.497        |
| 6PI7   | G_ARG_4   | NH1    | A_ASP_385 | OD2    | 3.823        |
| 6PI7   | G_ARG_4   | NH2    | A_ASP_385 | OD1    | 3.602        |
| 6PI7   | G_ARG_4   | NH2    | A_ASP_385 | OD2    | 3.033        |
| 6PI7   | G_ARG_6   | NH1    | A_GLU_433 | OE2    | 2.847        |
| 6PI7   | G_ARG_6   | NH1    | A_ASP_437 | OD1    | 3.619        |
| 6PI7   | G_ARG_6   | NH2    | A_ASP_437 | OD1    | 2.997        |
| 6PI7   | G_ARG_6   | NH2    | A_ASP_440 | OD2    | 2.762        |

Table 1648: Interfacial 6PI7-specific salt bridging networks analysis. In this table, a PDB file is specified with a four-letter PDB ID, except that the names of the PDB files corresponding to the single NMR structural model split from the NMR ensemble is specified with a four-letter PDB ID in addition to a hyphen followed by the single NMR structural model numeric ID, the residue naming scheme is **Chain ID\_residue name\_residue number**,  $\angle ADH$  represents the angle formed by acceptor (A), donor (D) and hydrogen (H) ( $\angle ADH$ ).

| PDB ID | Residue A | Atom A | Residue B | Atom B | Distance (Å) |
|--------|-----------|--------|-----------|--------|--------------|
| 6PYC   | H_LYS_208 | NZ     | L_GLU_124 | OE1    | 2.557        |
| 6PYC   | H_LYS_208 | NZ     | L_GLU_124 | OE2    | 3.571        |
| 6PYC   | L_LYS_108 | NZ     | B_ASP_32  | OD1    | 2.949        |
| 6PYC   | A_ARG_99  | NH1    | B_ASP_91  | OD1    | 3.714        |
| 6PYC   | B_LYS_53  | NZ     | L_GLU_17  | OE1    | 3.141        |
| 6PYC   | B_LYS_53  | NZ     | L_GLU_17  | OE2    | 3.254        |

Table 1649: Interfacial 6PYC-specific salt bridging networks analysis. In this table, a PDB file is specified with a four-letter PDB ID, except that the names of the PDB files corresponding to the single NMR structural model split from the NMR ensemble is specified with a four-letter PDB ID in addition to a hyphen followed by the single NMR structural model numeric ID, the residue naming scheme is **Chain ID\_residue name\_residue number**,  $\angle ADH$  represents the angle formed by acceptor (A), donor (D) and hydrogen (H) ( $\angle ADH$ ).

| PDB ID | Residue A | Atom A | Residue B | Atom B | Distance (Å) |
|--------|-----------|--------|-----------|--------|--------------|
| 6PYD   | H_LYS_213 | NZ     | L_GLU_127 | OE1    | 3.352        |
| 6PYD   | A_LYS_213 | NZ     | B_GLU_127 | OE1    | 3.596        |

Table 1650: Interfacial 6PYD-specific salt bridging networks analysis. In this table, a PDB file is specified with a four-letter PDB ID, except that the names of the PDB files corresponding to the single NMR structural model split from the NMR ensemble is specified with a four-letter PDB ID in addition to a hyphen followed by the single NMR structural model numeric ID, the residue naming scheme is **Chain ID\_residue name\_residue number**,  $\angle ADH$  represents the angle formed by acceptor (A), donor (D) and hydrogen (H) ( $\angle ADH$ ).

| PDB ID | Residue A | Atom A | Residue B | Atom B | Distance (Å) |
|--------|-----------|--------|-----------|--------|--------------|
| 6PZW   | A_HIS_98  | NE2    | B_GLU_214 | OE2    | 3.848        |
| 6PZW   | A_ARG_253 | NH1    | K_ASP_53  | OD2    | 2.854        |
| 6PZW   | A_ARG_253 | NH2    | K_ASP_53  | OD2    | 2.999        |
| 6PZW   | A_ARG_419 | NH1    | B_GLU_214 | OE2    | 3.897        |
| 6PZW   | K_ARG_97  | NH2    | L_ASP_50  | OD1    | 2.825        |
| 6PZW   | K_ARG_97  | NH2    | L_ASP_50  | OD2    | 3.390        |
| 6PZW   | D_HIS_98  | NE2    | A_GLU_214 | OE2    | 3.848        |
| 6PZW   | D_ARG_253 | NH1    | F_ASP_53  | OD2    | 2.854        |
| 6PZW   | D_ARG_253 | NH2    | F_ASP_53  | OD2    | 2.999        |
| 6PZW   | D_ARG_419 | NH1    | A_GLU_214 | OE2    | 3.897        |
| 6PZW   | F_ARG_97  | NH2    | E_ASP_50  | OD1    | 2.825        |
| 6PZW   | F_ARG_97  | NH2    | E_ASP_50  | OD2    | 3.390        |
| 6PZW   | J_ARG_97  | NH2    | G_ASP_50  | OD1    | 2.825        |
| 6PZW   | J_ARG_97  | NH2    | G_ASP_50  | OD2    | 3.390        |
| 6PZW   | C_HIS_98  | NE2    | D_GLU_214 | OE2    | 3.848        |
| 6PZW   | C_ARG_253 | NH1    | J_ASP_53  | OD2    | 2.854        |
| 6PZW   | C_ARG_253 | NH2    | J_ASP_53  | OD2    | 2.999        |
| 6PZW   | C_ARG_419 | NH1    | D_GLU_214 | OE2    | 3.897        |
| 6PZW   | B_HIS_98  | NE2    | C_GLU_214 | OE2    | 3.848        |
| 6PZW   | B_ARG_253 | NH1    | H_ASP_53  | OD2    | 2.854        |
| 6PZW   | B_ARG_253 | NH2    | H_ASP_53  | OD2    | 2.999        |
| 6PZW   | B_ARG_419 | NH1    | C_GLU_214 | OE2    | 3.897        |
| 6PZW   | H_ARG_97  | NH2    | L_ASP_50  | OD1    | 2.825        |
| 6PZW   | H_ARG_97  | NH2    | L_ASP_50  | OD2    | 3.390        |

Table 1651: Interfacial 6PZW-specific salt bridging networks analysis. In this table, a PDB file is specified with a four-letter PDB ID, except that the names of the PDB files corresponding to the single NMR structural model split from the NMR ensemble is specified with a four-letter PDB ID in addition to a hyphen followed by the single NMR structural model numeric ID, the residue naming scheme is **Chain ID\_residue name\_residue number**,  $\angle ADH$  represents the angle formed by acceptor (A), donor (D) and hydrogen (H) ( $\angle ADH$ ).



| PDB ID | Residue A | Atom A | Residue B | Atom B | Distance (Å) |
|--------|-----------|--------|-----------|--------|--------------|
| 6RPS   | A_HIS_34  | NE2    | B_ASP_102 | OD2    | 3.097        |
| 6RPS   | A_HIS_64  | NE2    | H_ASP_54  | OD2    | 2.837        |
| 6RPS   | A_LYS_170 | NZ     | H_ASP_54  | OD1    | 3.636        |
| 6RPS   | A_LYS_170 | NZ     | H_ASP_54  | OD2    | 2.590        |
| 6RPS   | A_LYS_170 | NZ     | H_ASP_56  | OD2    | 2.821        |
| 6RPS   | A_HIS_234 | ND1    | H_ASP_56  | OD2    | 3.904        |
| 6RPS   | A_LYS_250 | NZ     | B_GLU_13  | OE2    | 2.734        |
| 6RPS   | B_HIS_64  | NE2    | N_ASP_54  | OD2    | 2.859        |
| 6RPS   | B_HIS_103 | ND1    | A_ASP_36  | OD1    | 3.129        |
| 6RPS   | B_HIS_103 | ND1    | A_ASP_36  | OD2    | 3.954        |
| 6RPS   | B_LYS_170 | NZ     | N_ASP_54  | OD1    | 3.719        |
| 6RPS   | B_LYS_170 | NZ     | N_ASP_54  | OD2    | 2.644        |
| 6RPS   | B_LYS_170 | NZ     | N_ASP_56  | OD2    | 2.839        |
| 6RPS   | B_HIS_234 | ND1    | N_ASP_56  | OD2    | 3.922        |
| 6RPS   | B_LYS_250 | NZ     | A_GLU_13  | OE2    | 2.991        |
| 6RPS   | N_LYS_214 | NZ     | M_ASP_122 | OD1    | 3.095        |
| 6RPS   | N_LYS_214 | NZ     | M_ASP_122 | OD2    | 3.107        |
| 6RPS   | H_LYS_209 | NZ     | L_GLU_123 | OE1    | 2.780        |
| 6RPS   | H_LYS_209 | NZ     | L_GLU_123 | OE2    | 3.710        |

Table 1652: Interfacial 6RPS-specific salt bridging networks analysis. In this table, a PDB file is specified with a four-letter PDB ID, except that the names of the PDB files corresponding to the single NMR structural model split from the NMR ensemble is specified with a four-letter PDB ID in addition to a hyphen followed by the single NMR structural model numeric ID, the residue naming scheme is **Chain ID residue name residue number**,  $\angle ADH$  represents the angle formed by acceptor (A), donor (D) and hydrogen (H) ( $\angle ADH$ ).

| PDB ID | Residue A | Atom A | Residue B | Atom B | Distance (Å) |
|--------|-----------|--------|-----------|--------|--------------|
| 6S3T   | A_LYS_49  | NZ     | C_GLU_158 | OE1    | 3.663        |
| 6S3T   | B_LYS_49  | NZ     | L_GLU_158 | OE1    | 3.761        |
| 6S3T   | D_ARG_35  | NH1    | S_ASP_332 | OD1    | 3.467        |
| 6S3T   | D_ARG_35  | NH1    | S_ASP_332 | OD2    | 2.946        |
| 6S3T   | D_ARG_35  | NH2    | S_ASP_332 | OD2    | 3.071        |
| 6S3T   | D_ARG_35  | NH2    | S_ASP_334 | OD1    | 3.408        |
| 6S3T   | D_HIS_171 | NE2    | C_ASP_171 | OD2    | 3.832        |
| 6S3T   | D_LYS_215 | NZ     | C_GLU_127 | OE1    | 2.814        |
| 6S3T   | D_LYS_215 | NZ     | C_GLU_127 | OE2    | 3.990        |
| 6S3T   | E_ARG_35  | NH1    | T_ASP_332 | OD1    | 3.561        |
| 6S3T   | E_ARG_35  | NH1    | T_ASP_332 | OD2    | 3.035        |
| 6S3T   | E_ARG_35  | NH2    | T_ASP_332 | OD2    | 3.163        |
| 6S3T   | E_ARG_35  | NH2    | T_ASP_334 | OD1    | 3.432        |
| 6S3T   | E_HIS_171 | NE2    | L_ASP_171 | OD2    | 3.931        |
| 6S3T   | E_LYS_215 | NZ     | L_GLU_127 | OE1    | 3.013        |
| 6S3T   | N_ARG_35  | NH1    | A_ASP_332 | OD1    | 3.796        |
| 6S3T   | N_ARG_35  | NH1    | A_ASP_332 | OD2    | 3.195        |
| 6S3T   | N_ARG_35  | NH2    | A_ASP_332 | OD1    | 3.883        |
| 6S3T   | N_ARG_35  | NH2    | A_ASP_332 | OD2    | 2.517        |
| 6S3T   | N_ARG_35  | NH2    | A_ASP_334 | OD2    | 3.989        |
| 6S3T   | N_ARG_73  | NH2    | S_GLU_44  | OE2    | 2.482        |
| 6S3T   | N_HIS_171 | NE2    | M_ASP_171 | OD2    | 3.181        |
| 6S3T   | N_LYS_215 | NZ     | M_GLU_127 | OE1    | 2.964        |
| 6S3T   | N_LYS_215 | NZ     | M_GLU_127 | OE2    | 3.944        |
| 6S3T   | R_ARG_35  | NH1    | B_ASP_332 | OD1    | 3.511        |
| 6S3T   | R_ARG_35  | NH1    | B_ASP_332 | OD2    | 2.943        |
| 6S3T   | R_ARG_35  | NH2    | B_ASP_332 | OD2    | 2.873        |
| 6S3T   | R_ARG_35  | NH2    | B_ASP_334 | OD1    | 3.424        |
| 6S3T   | R_ARG_73  | NH2    | T_GLU_44  | OE2    | 2.709        |
| 6S3T   | R_HIS_171 | NE2    | Q_ASP_171 | OD2    | 3.265        |
| 6S3T   | R_LYS_215 | NZ     | Q_GLU_127 | OE1    | 2.948        |
| 6S3T   | R_LYS_215 | NZ     | Q_GLU_127 | OE2    | 3.831        |

Table 1653: Interfacial 6S3T-specific salt bridging networks analysis. In this table, a PDB file is specified with a four-letter PDB ID, except that the names of the PDB files corresponding to the single NMR structural model split from the NMR ensemble is specified with a four-letter PDB ID in addition to a hyphen followed by the single NMR structural model numeric ID, the residue naming scheme is **Chain ID\_residue name\_residue number**,  $\angle ADH$  represents the angle formed by acceptor (A), donor (D) and hydrogen (H) ( $\angle ADH$ ).

| PDB ID | Residue A | Atom A | Residue B | Atom B | Distance (Å) |
|--------|-----------|--------|-----------|--------|--------------|
| 6U02   | A_HIS_98  | NE2    | B_GLU_214 | OE2    | 3.838        |
| 6U02   | A_ARG_209 | NH1    | J_GLU_128 | OE2    | 3.226        |
| 6U02   | A_ARG_210 | NH2    | J_ASP_412 | OD1    | 3.355        |
| 6U02   | A_ARG_210 | NH2    | J_ASP_412 | OD2    | 3.535        |
| 6U02   | A_ARG_419 | NH1    | B_GLU_214 | OE2    | 3.906        |
| 6U02   | B_HIS_98  | NE2    | E_GLU_214 | OE2    | 3.839        |
| 6U02   | B_ARG_209 | NH1    | A_GLU_128 | OE2    | 3.226        |
| 6U02   | B_ARG_210 | NH2    | A_ASP_412 | OD1    | 3.355        |
| 6U02   | B_ARG_210 | NH2    | A_ASP_412 | OD2    | 3.535        |
| 6U02   | B_ARG_419 | NH1    | E_GLU_214 | OE2    | 3.906        |
| 6U02   | E_HIS_98  | NE2    | J_GLU_214 | OE2    | 3.838        |
| 6U02   | E_ARG_209 | NH1    | B_GLU_128 | OE2    | 3.226        |
| 6U02   | E_ARG_210 | NH2    | B_ASP_412 | OD1    | 3.355        |
| 6U02   | E_ARG_210 | NH2    | B_ASP_412 | OD2    | 3.536        |
| 6U02   | E_ARG_419 | NH1    | J_GLU_214 | OE2    | 3.906        |
| 6U02   | J_HIS_98  | NE2    | A_GLU_214 | OE2    | 3.838        |
| 6U02   | J_ARG_209 | NH1    | E_GLU_128 | OE2    | 3.226        |
| 6U02   | J_ARG_210 | NH2    | E_ASP_412 | OD1    | 3.356        |
| 6U02   | J_ARG_210 | NH2    | E_ASP_412 | OD2    | 3.535        |
| 6U02   | J_ARG_419 | NH1    | A_GLU_214 | OE2    | 3.906        |

Table 1654: Interfacial 6U02-specific salt bridging networks analysis. In this table, a PDB file is specified with a four-letter PDB ID, except that the names of the PDB files corresponding to the single NMR structural model split from the NMR ensemble is specified with a four-letter PDB ID in addition to a hyphen followed by the single NMR structural model numeric ID, the residue naming scheme is **Chain ID\_residue name\_residue number**,  $\angle ADH$  represents the angle formed by acceptor (A), donor (D) and hydrogen (H) ( $\angle ADH$ ).

| PDB ID | Residue A | Atom A | Residue B | Atom B | Distance (Å) |
|--------|-----------|--------|-----------|--------|--------------|
| 6U59   | A.LYS_34  | NZ     | B.ASP_612 | OD1    | 2.489        |
| 6U59   | A_ARG_504 | NH1    | I.GLU_662 | OE1    | 3.209        |
| 6U59   | A_ARG_504 | NH1    | I.GLU_662 | OE2    | 2.833        |
| 6U59   | A_ARG_504 | NH2    | I.GLU_662 | OE2    | 3.911        |
| 6U59   | B.LYS_574 | NZ     | A.ASP_107 | OD1    | 2.403        |
| 6U59   | B_ARG_579 | NH2    | I.GLU_584 | OE1    | 3.024        |
| 6U59   | L_ARG_50  | NH1    | A.GLU_269 | OE2    | 3.175        |
| 6U59   | L_ARG_50  | NH2    | A.GLU_268 | OE1    | 2.965        |
| 6U59   | L_ARG_50  | NH2    | A.GLU_269 | OE2    | 3.221        |
| 6U59   | L_ARG_95A | NH1    | A.GLU_350 | OE2    | 3.796        |
| 6U59   | L_ARG_95A | NH2    | A.GLU_350 | OE1    | 3.217        |
| 6U59   | L_ARG_95A | NH2    | A.GLU_350 | OE2    | 3.041        |
| 6U59   | L_ARG_95A | NH2    | A.GLU_351 | OE1    | 3.921        |
| 6U59   | C.LYS_34  | NZ     | D.ASP_612 | OD1    | 2.489        |
| 6U59   | C_ARG_504 | NH1    | B.GLU_662 | OE1    | 3.208        |
| 6U59   | C_ARG_504 | NH1    | B.GLU_662 | OE2    | 2.832        |
| 6U59   | C_ARG_504 | NH2    | B.GLU_662 | OE2    | 3.910        |
| 6U59   | D.LYS_574 | NZ     | C.ASP_107 | OD1    | 2.403        |
| 6U59   | D_ARG_579 | NH2    | B.GLU_584 | OE1    | 3.024        |
| 6U59   | E_ARG_50  | NH1    | C.GLU_269 | OE2    | 3.175        |
| 6U59   | E_ARG_50  | NH2    | C.GLU_268 | OE1    | 2.965        |
| 6U59   | E_ARG_50  | NH2    | C.GLU_269 | OE2    | 3.221        |
| 6U59   | E_ARG_95A | NH1    | C.GLU_350 | OE2    | 3.795        |
| 6U59   | E_ARG_95A | NH2    | C.GLU_350 | OE1    | 3.216        |
| 6U59   | E_ARG_95A | NH2    | C.GLU_350 | OE2    | 3.040        |
| 6U59   | E_ARG_95A | NH2    | C.GLU_351 | OE1    | 3.921        |
| 6U59   | G.LYS_34  | NZ     | I.ASP_612 | OD1    | 2.489        |
| 6U59   | G_ARG_504 | NH1    | D.GLU_662 | OE1    | 3.209        |
| 6U59   | G_ARG_504 | NH1    | D.GLU_662 | OE2    | 2.833        |
| 6U59   | G_ARG_504 | NH2    | D.GLU_662 | OE2    | 3.910        |
| 6U59   | I.LYS_574 | NZ     | G.ASP_107 | OD1    | 2.403        |
| 6U59   | I_ARG_579 | NH2    | D.GLU_584 | OE1    | 3.025        |
| 6U59   | J_ARG_50  | NH1    | G.GLU_269 | OE2    | 3.175        |
| 6U59   | J_ARG_50  | NH2    | G.GLU_268 | OE1    | 2.965        |
| 6U59   | J_ARG_50  | NH2    | G.GLU_269 | OE2    | 3.220        |
| 6U59   | J_ARG_95A | NH1    | G.GLU_350 | OE2    | 3.796        |
| 6U59   | J_ARG_95A | NH2    | G.GLU_350 | OE1    | 3.217        |
| 6U59   | J_ARG_95A | NH2    | G.GLU_350 | OE2    | 3.041        |
| 6U59   | J_ARG_95A | NH2    | G.GLU_351 | OE1    | 3.921        |

Table 1655: Interfacial 6U59-specific salt bridging networks analysis. In this table, a PDB file is specified with a four-letter PDB ID, except that the names of the PDB files corresponding to the single NMR structural model split from the NMR ensemble is specified with a four-letter PDB ID in addition to a hyphen followed by the single NMR structural model numeric ID, the residue naming scheme is **Chain ID\_residue name\_residue number**,  $\angle ADH$  represents the angle formed by acceptor (A), donor (D) and hydrogen (H) ( $\angle ADH$ ).

| PDB ID | Residue A | Atom A | Residue B | Atom B | Distance (Å) |
|--------|-----------|--------|-----------|--------|--------------|
| 6UG7   | H_HIS_60  | NE2    | L_GLU_1   | OE1    | 2.854        |
| 6UG7   | H_HIS_60  | NE2    | L_GLU_1   | OE2    | 3.808        |
| 6UG7   | H_LYS_213 | NZ     | L_GLU_122 | OE1    | 2.927        |
| 6UG7   | H_LYS_213 | NZ     | L_GLU_122 | OE2    | 3.960        |

Table 1656: Interfacial 6UG7-specific salt bridging networks analysis. In this table, a PDB file is specified with a four-letter PDB ID, except that the names of the PDB files corresponding to the single NMR structural model split from the NMR ensemble is specified with a four-letter PDB ID in addition to a hyphen followed by the single NMR structural model numeric ID, the residue naming scheme is **Chain ID\_residue name\_residue number**,  $\angle ADH$  represents the angle formed by acceptor (A), donor (D) and hydrogen (H) ( $\angle ADH$ ).

| PDB ID | Residue A | Atom A | Residue B | Atom B | Distance (Å) |
|--------|-----------|--------|-----------|--------|--------------|
| 6UG8   | H_HIS_60  | NE2    | L_GLU_1   | OE1    | 3.688        |
| 6UG8   | H_LYS_213 | NZ     | L_GLU_122 | OE1    | 2.779        |
| 6UG8   | H_LYS_213 | NZ     | L_GLU_122 | OE2    | 3.811        |

Table 1657: Interfacial 6UG8-specific salt bridging networks analysis. In this table, a PDB file is specified with a four-letter PDB ID, except that the names of the PDB files corresponding to the single NMR structural model split from the NMR ensemble is specified with a four-letter PDB ID in addition to a hyphen followed by the single NMR structural model numeric ID, the residue naming scheme is **Chain ID\_residue name\_residue number**,  $\angle ADH$  represents the angle formed by acceptor (A), donor (D) and hydrogen (H) ( $\angle ADH$ ).

| PDB ID | Residue A | Atom A | Residue B | Atom B | Distance (Å) |
|--------|-----------|--------|-----------|--------|--------------|
| 6UG9   | H_HIS_60  | NE2    | L_GLU_1   | OE2    | 3.673        |
| 6UG9   | H_LYS_213 | NZ     | L_GLU_122 | OE1    | 3.853        |
| 6UG9   | A_HIS_60  | NE2    | B_GLU_1   | OE1    | 3.507        |
| 6UG9   | A_LYS_213 | NZ     | B_GLU_122 | OE1    | 2.877        |
| 6UG9   | J_HIS_60  | NE2    | K_GLU_1   | OE1    | 3.585        |
| 6UG9   | J_LYS_213 | NZ     | K_GLU_122 | OE1    | 2.648        |
| 6UG9   | J_LYS_213 | NZ     | K_GLU_122 | OE2    | 3.296        |

Table 1658: Interfacial 6UG9-specific salt bridging networks analysis. In this table, a PDB file is specified with a four-letter PDB ID, except that the names of the PDB files corresponding to the single NMR structural model split from the NMR ensemble is specified with a four-letter PDB ID in addition to a hyphen followed by the single NMR structural model numeric ID, the residue naming scheme is **Chain ID\_residue name\_residue number**,  $\angle ADH$  represents the angle formed by acceptor (A), donor (D) and hydrogen (H) ( $\angle ADH$ ).

| PDB ID | Residue A | Atom A | Residue B | Atom B | Distance (Å) |
|--------|-----------|--------|-----------|--------|--------------|
| 6UGA   | H_HIS_60  | NE2    | L_GLU_1   | OE1    | 3.306        |
| 6UGA   | B_HIS_60  | NE2    | A_GLU_1   | OE2    | 3.932        |
| 6UGA   | B_HIS_168 | NE2    | A_ASP_166 | OD1    | 3.218        |
| 6UGA   | B_LYS_213 | NZ     | A_GLU_122 | OE1    | 3.352        |

Table 1659: Interfacial 6UGA-specific salt bridging networks analysis. In this table, a PDB file is specified with a four-letter PDB ID, except that the names of the PDB files corresponding to the single NMR structural model split from the NMR ensemble is specified with a four-letter PDB ID in addition to a hyphen followed by the single NMR structural model numeric ID, the residue naming scheme is **Chain ID\_residue name\_residue number**,  $\angle ADH$  represents the angle formed by acceptor (A), donor (D) and hydrogen (H) ( $\angle ADH$ ).



| PDB      | Acceptor (A)   | Donor (D)      | Hydrogen (H)   | D-A (Å) | H-A (Å) | $\angle ADH(^{\circ})$ |
|----------|----------------|----------------|----------------|---------|---------|------------------------|
| 1A14.PDB | O, H.SER_25    | N, H.GLN_3     | H, H.GLN_3     | 2.77    | 1.89    | 21.99                  |
| 1A14.PDB | OG, H.SER_25   | NE2, H.GLN_5   | HE21, H.GLN_5  | 2.94    | 2.02    | 15.87                  |
| 1A14.PDB | O, H.TYR_90    | NE2, H.GLN_6   | HE21, H.GLN_6  | 2.72    | 1.83    | 18.57                  |
| 1A14.PDB | O, H.THR_108   | N, H.GLU_10    | H, H.GLU_10    | 2.84    | 1.94    | 19.84                  |
| 1A14.PDB | O, H.THR_110   | N, H.VAL_12    | H, H.VAL_12    | 2.96    | 2.06    | 20.79                  |
| 1A14.PDB | O, H.LEU_82C   | N, H.GLY_15    | H, H.GLY_15    | 2.91    | 2.08    | 27.09                  |
| 1A14.PDB | O, H.GLN_5     | N, H.LYS_23    | H, H.LYS_23    | 2.75    | 1.80    | 7.95                   |
| 1A14.PDB | O, H.ASN_76    | N, H.ALA_24    | H, H.ALA_24    | 2.78    | 1.85    | 14.53                  |
| 1A14.PDB | O, H.THR_28    | N, H.ASN_31    | H, H.ASN_31    | 2.81    | 1.88    | 13.65                  |
| 1A14.PDB | O, H.PHE_51    | N, H.MET_34    | H, H.MET_34    | 2.88    | 1.94    | 13.17                  |
| 1A14.PDB | O, H.ALA_93    | N, H.TYR_35    | H, H.TYR_35    | 2.86    | 1.93    | 13.77                  |
| 1A14.PDB | O, H.TYR_91    | N, H.VAL_37    | H, H.VAL_37    | 2.95    | 2.02    | 16.35                  |
| 1A14.PDB | O, H.GLU_46    | N, H.LYS_38    | H, H.LYS_38    | 2.72    | 1.78    | 11.05                  |
| 1A14.PDB | OE1, L.GLN_38  | NE2, H.GLN_39  | HE21, H.GLN_39 | 2.62    | 1.69    | 9.24                   |
| 1A14.PDB | O, H.SER_40    | N, H.GLN_43    | H, H.GLN_43    | 2.91    | 2.06    | 24.59                  |
| 1A14.PDB | O, H.TRP_36    | N, H.ILE_48    | H, H.ILE_48    | 2.85    | 1.93    | 16.00                  |
| 1A14.PDB | O, H.SER_58    | N, H.ILE_50    | H, H.ILE_50    | 2.72    | 1.81    | 16.55                  |
| 1A14.PDB | O, H.MET_34    | N, H.PHE_51    | H, H.PHE_51    | 2.91    | 2.00    | 17.30                  |
| 1A14.PDB | O, H.ASP_56    | N, H.TYR_52    | H, H.TYR_52    | 2.91    | 1.96    | 11.43                  |
| 1A14.PDB | OD1, H.ASN_54  | N, H.ASP_56    | H, H.ASP_56    | 2.82    | 2.01    | 27.91                  |
| 1A14.PDB | O, H.ILE_48    | N, H.ASN_60    | H, H.ASN_60    | 2.52    | 1.70    | 23.11                  |
| 1A14.PDB | O, H.TRP_47    | ND2, H.ASN_60  | HD22, H.ASN_60 | 2.76    | 1.87    | 19.57                  |
| 1A14.PDB | O, H.PHE_63    | N, H.ALA_67    | H, H.ALA_67    | 2.95    | 1.99    | 5.88                   |
| 1A14.PDB | OH, H.TYR_59   | N, H.LEU_69    | H, H.LEU_69    | 2.81    | 1.86    | 9.44                   |
| 1A14.PDB | O, H.THR_77    | N, H.ASP_72    | H, H.ASP_72    | 2.72    | 1.79    | 11.50                  |
| 1A14.PDB | OD2, H.ASP_72  | N, H.SER_75    | H, H.SER_75    | 2.80    | 1.92    | 19.95                  |
| 1A14.PDB | OG1, H.THR_77  | OG, H.SER_75   | HG, H.SER_75   | 2.86    | 2.04    | 27.11                  |
| 1A14.PDB | O, H.ASP_72    | N, H.THR_77    | H, H.THR_77    | 2.99    | 2.04    | 11.91                  |
| 1A14.PDB | O, H.CYS_22    | N, H.ALA_78    | H, H.ALA_78    | 2.74    | 1.87    | 21.95                  |
| 1A14.PDB | O, H.MET_20    | N, H.MET_80    | H, H.MET_80    | 2.96    | 2.07    | 20.70                  |
| 1A14.PDB | OE2, H.GLU_85  | OG, H.SER_84   | HG, H.SER_84   | 2.91    | 1.99    | 12.42                  |
| 1A14.PDB | O, H.THR_83    | N, H.ASP_86    | H, H.ASP_86    | 2.92    | 1.98    | 13.36                  |
| 1A14.PDB | O, H.TYR_102   | N, H.ARG_94    | H, H.ARG_94    | 2.71    | 1.83    | 20.03                  |
| 1A14.PDB | OD2, H.ASP_101 | NH2, H.ARG_94  | HH21, H.ARG_94 | 2.75    | 1.83    | 16.91                  |
| 1A14.PDB | O, H.GLY_97    | N, H.ARG_100   | H, H.ARG_100   | 2.82    | 1.90    | 14.18                  |
| 1A14.PDB | OH, L.TYR_36   | N, H.PHE_100E  | H, H.PHE_100E  | 2.73    | 1.81    | 13.85                  |
| 1A14.PDB | OE1, H.GLN_6   | N, H.GLY_106   | H, H.GLY_106   | 2.85    | 1.98    | 22.46                  |
| 1A14.PDB | O, H.ALA_88    | N, H.VAL_109   | H, H.VAL_109   | 2.80    | 1.86    | 11.06                  |
| 1A14.PDB | O, H.GLU_10    | N, H.THR_110   | H, H.THR_110   | 2.78    | 1.95    | 26.41                  |
| 1A14.PDB | O, H.GLU_10    | OG1, H.THR_110 | HG1, H.THR_110 | 2.94    | 1.99    | 6.65                   |
| 1A14.PDB | OG, H.SER_87   | N, H.VAL_111   | H, H.VAL_111   | 2.68    | 1.82    | 20.55                  |

Table 1660: 1A14-specific side chain and main chain hydrogen bonding analysis. In this table, a PDB file is specified with a four-letter PDB ID, except that the names of the PDB files corresponding to the single NMR structural model split from the NMR ensemble is specified with a four-letter PDB ID in addition to a hyphen followed by the single NMR structural model numeric ID, the residue naming scheme is **Chain ID\_residue name\_residue number**,  $\angle ADH$  represents the angle formed by acceptor (A), donor (D) and hydrogen (H) ( $\angle ADH$ ).

| PDB      | Acceptor (A)  | Donor (D)      | Hydrogen (H)    | D-A (Å) | H-A (Å) | $\angle ADH(^{\circ})$ |
|----------|---------------|----------------|-----------------|---------|---------|------------------------|
| 1E6J.PDB | O, H.TYR_94   | NE2, H_GLN_6   | HE22, H_GLN_6   | 2.85    | 1.90    | 10.79                  |
| 1E6J.PDB | O, H_GLN_6    | NE2, H_GLN_112 | HE22, H_GLN_112 | 2.88    | 2.04    | 26.17                  |
| 1E6J.PDB | O, L.TYR_85   | NE2, L_GLN_6   | HE22, L_GLN_6   | 2.85    | 1.96    | 20.67                  |
| 1E6J.PDB | OH, L.TYR_85  | NE2, L_GLN_36  | HE21, L_GLN_36  | 2.83    | 1.87    | 8.49                   |
| 1E6J.PDB | OE1, H_GLN_39 | NE2, L_GLN_37  | HE22, L_GLN_37  | 2.69    | 1.84    | 23.98                  |
| 1E6J.PDB | OG, L_SER_129 | NE2, L_GLN_122 | HE22, L_GLN_122 | 2.94    | 2.00    | 13.76                  |
| 1E6J.PDB | O, L_ILE_104  | NE2, L_GLN_164 | HE22, L_GLN_164 | 2.87    | 1.92    | 11.35                  |
| 1E6J.PDB | O, P_GLU_159  | NE2, P_GLN_155 | HE21, P_GLN_155 | 2.82    | 1.93    | 20.03                  |

Table 1661: 1E6J-specific side chain and main chain hydrogen bonding analysis. In this table, a PDB file is specified with a four-letter PDB ID, except that the names of the PDB files corresponding to the single NMR structural model split from the NMR ensemble is specified with a four-letter PDB ID in addition to a hyphen followed by the single NMR structural model numeric ID, the residue naming scheme is **Chain ID\_residue name\_residue number**,  $\angle ADH$  represents the angle formed by acceptor (A), donor (D) and hydrogen (H) ( $\angle ADH$ ).

| PDB      | Acceptor (A)   | Donor (D)      | Hydrogen (H)    | D-A (Å) | H-A (Å) | $\angle ADH(^{\circ})$ |
|----------|----------------|----------------|-----------------|---------|---------|------------------------|
| 1F3R.PDB | O, A_ASN_68    | N, A_TYR_72    | H, A_TYR_72     | 2.96    | 1.94    | 7.79                   |
| 1F3R.PDB | O, B_ASN_230   | OH, A_TYR_72   | HH, A_TYR_72    | 2.67    | 1.70    | 2.56                   |
| 1F3R.PDB | O, B_THR_21    | N, B_SER_7     | H, B_SER_7      | 2.87    | 1.87    | 9.61                   |
| 1F3R.PDB | O, B_LEU_85    | N, B_SER_15    | H, B_SER_15     | 2.82    | 1.79    | 2.70                   |
| 1F3R.PDB | OD1, B_ASN_83  | OG1, B_THR_17  | HG1, B_THR_17   | 2.73    | 1.80    | 13.32                  |
| 1F3R.PDB | O, B_LEU_80    | N, B_LEU_20    | H, B_LEU_20     | 2.98    | 2.06    | 21.36                  |
| 1F3R.PDB | O, B_VAL_78    | N, B_CYS_22    | H, B_CYS_22     | 2.90    | 1.88    | 6.63                   |
| 1F3R.PDB | O, B_ASN_76    | N, B_VAL_24    | H, B_VAL_24     | 2.91    | 1.89    | 6.46                   |
| 1F3R.PDB | O, B_SER_28    | OG, B_SER_31   | HG, B_SER_31    | 2.64    | 1.68    | 8.32                   |
| 1F3R.PDB | O, B_THR_96    | N, B_SER_35    | H, B_SER_35     | 2.97    | 1.94    | 2.64                   |
| 1F3R.PDB | O, B_GLY_49    | N, B_TRP_36    | H, B_TRP_36     | 2.92    | 1.90    | 3.05                   |
| 1F3R.PDB | O, B_THR_90    | N, B_SER_41    | H, B_SER_41     | 2.88    | 1.87    | 9.24                   |
| 1F3R.PDB | O, B_ARG_38    | N, B_GLU_46    | H, B_GLU_46     | 2.92    | 1.91    | 7.52                   |
| 1F3R.PDB | O, B_TRP_36    | N, B_MET_48    | H, B_MET_48     | 2.89    | 1.95    | 18.67                  |
| 1F3R.PDB | O, B_ALA_58    | N, B_ARG_50    | H, B_ARG_50     | 2.87    | 1.86    | 10.08                  |
| 1F3R.PDB | O, A_GLY_70    | NH2, B_ARG_50  | HH21, B_ARG_50  | 2.81    | 1.79    | 6.29                   |
| 1F3R.PDB | O, B_TYR_100   | OH, B_TYR_53   | HH, B_TYR_53    | 2.66    | 1.70    | 6.56                   |
| 1F3R.PDB | O, B_LEU_67    | OH, B_TYR_59   | HH, B_TYR_59    | 2.69    | 1.77    | 15.53                  |
| 1F3R.PDB | O, B_TRP_47    | ND2, B_ASN_60  | HD21, B_ASN_60  | 2.98    | 1.99    | 12.26                  |
| 1F3R.PDB | NE1, A_TRP_67  | OG, B_SER_61   | HG, B_SER_61    | 2.86    | 1.89    | 6.31                   |
| 1F3R.PDB | O, B_GLN_77    | N, B_ASP_72    | H, B_ASP_72     | 2.95    | 1.93    | 8.00                   |
| 1F3R.PDB | O, B_SER_70    | N, B_PHE_79    | H, B_PHE_79     | 2.87    | 1.91    | 16.42                  |
| 1F3R.PDB | O, B_LEU_20    | N, B_LEU_80    | H, B_LEU_80     | 2.97    | 1.97    | 11.86                  |
| 1F3R.PDB | O, B_SER_68    | N, B_LYS_81    | H, B_LYS_81     | 3.00    | 2.04    | 17.31                  |
| 1F3R.PDB | O, B_LEU_18    | N, B_MET_82    | H, B_MET_82     | 2.89    | 1.88    | 9.85                   |
| 1F3R.PDB | O, B_ARG_66    | N, B_ASN_83    | H, B_ASN_83     | 2.93    | 1.91    | 7.12                   |
| 1F3R.PDB | O, B_ASP_89    | OH, B_TYR_93   | HH, B_TYR_93    | 2.65    | 1.76    | 18.66                  |
| 1F3R.PDB | O, B_VAL_37    | N, B_TYR_94    | H, B_TYR_94     | 2.86    | 1.87    | 13.22                  |
| 1F3R.PDB | O, B_SER_35    | N, B_THR_96    | H, B_THR_96     | 2.85    | 1.83    | 6.85                   |
| 1F3R.PDB | O, B_PHE_112   | N, B_ARG_97    | H, B_ARG_97     | 2.97    | 1.94    | 0.13                   |
| 1F3R.PDB | O, B_TYR_109   | N, B_LEU_99    | H, B_LEU_99     | 2.82    | 1.80    | 6.09                   |
| 1F3R.PDB | O, B_LEU_105   | OH, B_TYR_100  | HH, B_TYR_100   | 2.81    | 1.87    | 9.55                   |
| 1F3R.PDB | O, B_ARG_97    | N, B_ASP_111   | H, B_ASP_111    | 3.00    | 1.99    | 8.87                   |
| 1F3R.PDB | OD2, B_ASP_111 | N, B_PHE_112   | H, B_PHE_112    | 2.95    | 1.99    | 17.02                  |
| 1F3R.PDB | O, B_CYS_95    | N, B_GLY_114   | H, B_GLY_114    | 2.93    | 1.91    | 8.69                   |
| 1F3R.PDB | O, B_GLY_91    | N, B_VAL_119   | H, B_VAL_119    | 2.99    | 2.03    | 17.54                  |
| 1F3R.PDB | O, B_GLY_10    | N, B_THR_120   | H, B_THR_120    | 2.83    | 1.81    | 7.39                   |
| 1F3R.PDB | O, B_ASN_257   | N, B_LEU_142   | H, B_LEU_142    | 2.85    | 1.82    | 6.57                   |
| 1F3R.PDB | O, B_LYS_162   | OG1, B_THR_143 | HG1, B_THR_143  | 2.81    | 1.98    | 25.43                  |
| 1F3R.PDB | O, B_TYR_224   | NE2, B_GLN_144 | HE22, B_GLN_144 | 2.91    | 1.91    | 11.14                  |
| 1F3R.PDB | O, B_SER_160   | N, B_SER_145   | H, B_SER_145    | 2.97    | 1.94    | 2.29                   |
| 1F3R.PDB | O, B_GLY_238   | OG, B_SER_147  | HG, B_SER_147   | 2.70    | 1.74    | 5.62                   |
| 1F3R.PDB | O, B_LEU_216   | N, B_GLY_154   | H, B_GLY_154    | 2.96    | 1.97    | 13.26                  |
| 1F3R.PDB | OG1, B_THR_212 | OG1, B_THR_158 | HG1, B_THR_158  | 2.80    | 1.87    | 11.10                  |
| 1F3R.PDB | O, B_LEU_211   | N, B_LEU_159   | H, B_LEU_159    | 2.93    | 1.90    | 5.82                   |
| 1F3R.PDB | O, B_SER_145   | N, B_SER_160   | H, B_SER_160    | 2.85    | 1.84    | 8.61                   |
| 1F3R.PDB | O, B_TYR_209   | N, B_CYS_161   | H, B_CYS_161    | 2.83    | 1.82    | 9.85                   |
| 1F3R.PDB | O, B_THR_143   | N, B_LYS_162   | H, B_LYS_162    | 2.92    | 1.94    | 14.43                  |
| 1F3R.PDB | O, A_ILE_75    | OH, B_TYR_170  | HH, B_TYR_170   | 2.72    | 1.77    | 10.88                  |
| 1F3R.PDB | O, B_ILE_186   | N, B_TRP_173   | H, B_TRP_173    | 2.96    | 1.95    | 8.06                   |
| 1F3R.PDB | O, B_PHE_225   | N, B_TYR_174   | H, B_TYR_174    | 2.93    | 1.90    | 0.94                   |
| 1F3R.PDB | O, B_LYS_183   | N, B_GLN_175   | H, B_GLN_175    | 2.88    | 1.90    | 13.28                  |
| 1F3R.PDB | O, B_THR_223   | N, B_GLN_176   | H, B_GLN_176    | 2.93    | 1.91    | 6.88                   |
| 1F3R.PDB | O, B_TRP_173   | N, B_LEU_185   | H, B_LEU_185    | 2.95    | 2.01    | 19.35                  |
| 1F3R.PDB | O, B_SER_191   | N, B_TYR_187   | H, B_TYR_187    | 2.91    | 1.92    | 11.97                  |
| 1F3R.PDB | O, B_LEU_171   | N, B_THR_189   | H, B_THR_189    | 2.92    | 1.94    | 15.09                  |
| 1F3R.PDB | O, B_ASN_169   | OG1, B_THR_189 | HG1, B_THR_189  | 2.78    | 1.86    | 13.97                  |

|          |                |                |                 |      |      |       |
|----------|----------------|----------------|-----------------|------|------|-------|
| 1F3R.PDB | O, B_ASN_188   | N, B_ASN_190   | H, B_ASN_190    | 2.99 | 2.10 | 24.68 |
| 1F3R.PDB | O, B_ASN_190   | OG, B_SER_191  | HG, B_SER_191   | 2.83 | 1.89 | 11.19 |
| 1F3R.PDB | O, B_PRO_197   | N, B_ARG_199   | H, B_ARG_199    | 2.94 | 2.05 | 24.65 |
| 1F3R.PDB | OD1, B_ASP_220 | NH1, B_ARG_199 | HH12, B_ARG_199 | 2.89 | 1.98 | 22.15 |
| 1F3R.PDB | O, B_THR_210   | N, B_SER_203   | H, B_SER_203    | 2.88 | 1.86 | 4.33  |
| 1F3R.PDB | O, B_ASN_168   | N, B_GLY_206   | H, B_GLY_206    | 2.87 | 1.85 | 8.80  |
| 1F3R.PDB | O, B_CYS_161   | N, B_TYR_209   | H, B_TYR_209    | 2.98 | 1.97 | 8.84  |
| 1F3R.PDB | O, B_GLY_206   | OH, B_TYR_209  | HH, B_TYR_209   | 2.72 | 1.77 | 8.74  |
| 1F3R.PDB | O, B_SER_203   | N, B_THR_210   | H, B_THR_210    | 2.89 | 1.91 | 14.26 |
| 1F3R.PDB | O, B_SER_203   | OG1, B_THR_210 | HG1, B_THR_210  | 2.67 | 1.72 | 9.35  |
| 1F3R.PDB | O, B_LEU_159   | N, B_LEU_211   | H, B_LEU_211    | 2.96 | 1.94 | 7.42  |
| 1F3R.PDB | O, B_VAL_157   | N, B_ILE_213   | H, B_ILE_213    | 2.95 | 1.95 | 11.15 |
| 1F3R.PDB | O, B_ARG_199   | OG, B_SER_214  | HG, B_SER_214   | 2.60 | 1.65 | 8.60  |
| 1F3R.PDB | OG, B_SER_214  | N, B_SER_215   | H, B_SER_215    | 2.99 | 2.14 | 28.78 |
| 1F3R.PDB | OE1, B_GLN_217 | OG, B_SER_215  | HG, B_SER_215   | 2.66 | 1.72 | 13.57 |
| 1F3R.PDB | O, B_GLN_217   | N, B_ASP_220   | H, B_ASP_220    | 2.93 | 1.97 | 17.91 |
| 1F3R.PDB | O, B_GLN_176   | N, B_THR_223   | H, B_THR_223    | 2.88 | 1.86 | 6.84  |
| 1F3R.PDB | O, B_THR_239   | OG1, B_THR_223 | HG1, B_THR_223  | 2.65 | 1.69 | 5.79  |
| 1F3R.PDB | O, B_ASP_220   | OH, B_TYR_224  | HH, B_TYR_224   | 2.64 | 1.71 | 12.61 |
| 1F3R.PDB | O, B_TYR_174   | N, B_PHE_225   | H, B_PHE_225    | 2.92 | 1.99 | 20.78 |
| 1F3R.PDB | O, B_ALA_172   | N, B_TYR_227   | H, B_TYR_227    | 3.00 | 2.00 | 11.62 |
| 1F3R.PDB | NE1, B_TRP_47  | OH, B_TYR_227  | HH, B_TYR_227   | 2.99 | 2.20 | 29.73 |
| 1F3R.PDB | O, B_TYR_170   | N, B_TYR_229   | H, B_TYR_229    | 2.94 | 1.91 | 4.24  |
| 1F3R.PDB | OD1, B_ASN_188 | OH, B_TYR_229  | HH, B_TYR_229   | 2.66 | 1.70 | 7.44  |
| 1F3R.PDB | OD1, B_ASN_231 | N, B_GLY_232   | H, B_GLY_232    | 2.89 | 1.87 | 6.19  |
| 1F3R.PDB | O, A_ASP_71    | OH, B_TYR_233  | HH, B_TYR_233   | 2.71 | 1.89 | 25.38 |
| 1F3R.PDB | OE1, B_GLN_144 | N, B_GLY_238   | H, B_GLY_238    | 2.97 | 1.99 | 15.42 |
| 1F3R.PDB | O, B_SER_147   | N, B_LYS_240   | H, B_LYS_240    | 2.89 | 1.86 | 4.01  |
| 1F3R.PDB | O, B_LEU_149   | OE2, B_GLU_242 | HE2, B_GLU_242  | 2.59 | 1.65 | 10.05 |
| 1F3R.PDB | O, B_LEU_243   | NE2, B_GLN_248 | HE21, B_GLN_248 | 2.97 | 2.01 | 16.74 |
| 1F3R.PDB | O, B_GLY_136   | N, B_ILE_251   | H, B_ILE_251    | 2.88 | 1.88 | 10.81 |
| 1F3R.PDB | O, B_SER_41    | OE2, B_GLU_253 | HE2, B_GLU_253  | 2.63 | 1.68 | 6.51  |
| 1F3R.PDB | O, B_ASP_139   | N, B_ASP_255   | H, B_ASP_255    | 2.95 | 1.95 | 13.03 |

Table 1662: 1F3R-specific side chain and main chain hydrogen bonding analysis. In this table, a PDB file is specified with a four-letter PDB ID, except that the names of the PDB files corresponding to the single NMR structural model split from the NMR ensemble is specified with a four-letter PDB ID in addition to a hyphen followed by the single NMR structural model numeric ID, the residue naming scheme is **Chain ID\_residue name\_residue number**,  $\angle ADH$  represents the angle formed by acceptor (A), donor (D) and hydrogen (H) ( $\angle ADH$ ).

| PDB      | Acceptor (A)  | Donor (D)     | Hydrogen (H)   | D-A (Å) | H-A (Å) | $\angle ADH(^{\circ})$ |
|----------|---------------|---------------|----------------|---------|---------|------------------------|
| 1HCV.PDB | O, A_THR_110  | N, A_VAL_12   | H, A_VAL_12    | 2.93    | 2.02    | 18.33                  |
| 1HCV.PDB | O, A_SER_112  | N, A_ALA_14   | H, A_ALA_14    | 2.93    | 2.13    | 29.46                  |
| 1HCV.PDB | O, A_LEU_82C  | N, A_GLY_15   | H, A_GLY_15    | 2.71    | 1.79    | 13.54                  |
| 1HCV.PDB | O, A_GLN_13   | N, A_GLY_16   | H, A_GLY_16    | 2.86    | 1.94    | 16.16                  |
| 1HCV.PDB | O, A_MET_82   | N, A_LEU_18   | H, A_LEU_18    | 2.92    | 1.99    | 16.49                  |
| 1HCV.PDB | O, A_LEU_80   | N, A_LEU_20   | H, A_LEU_20    | 2.95    | 1.97    | 7.19                   |
| 1HCV.PDB | O, A_SER_7    | N, A_SER_21   | H, A_SER_21    | 2.87    | 1.92    | 9.29                   |
| 1HCV.PDB | O, A_VAL_78   | N, A_CYS_22   | H, A_CYS_22    | 2.90    | 2.03    | 23.01                  |
| 1HCV.PDB | O, A_GLN_5    | N, A_ALA_23   | H, A_ALA_23    | 2.91    | 1.94    | 8.72                   |
| 1HCV.PDB | O, A_LYS_76   | N, A_ALA_24   | H, A_ALA_24    | 2.84    | 1.87    | 5.65                   |
| 1HCV.PDB | O, A_GLY_95   | N, A_ASP_33   | H, A_ASP_33    | 2.78    | 1.82    | 4.32                   |
| 1HCV.PDB | O, A_ILE_51   | N, A_MET_34   | H, A_MET_34    | 2.93    | 1.96    | 6.74                   |
| 1HCV.PDB | O, A_GLY_93   | N, A_GLY_35   | H, A_GLY_35    | 2.81    | 1.88    | 14.94                  |
| 1HCV.PDB | O, A_ALA_49   | N, A_TRP_36   | H, A_TRP_36    | 2.79    | 1.84    | 9.16                   |
| 1HCV.PDB | O, A_THR_91   | N, A_PHE_37   | H, A_PHE_37    | 2.79    | 1.88    | 17.50                  |
| 1HCV.PDB | O, A_GLU_46   | N, A_ARG_38   | H, A_ARG_38    | 2.85    | 1.92    | 14.14                  |
| 1HCV.PDB | OE2, A_GLU_46 | NE, A_ARG_38  | HE, A_ARG_38   | 2.98    | 2.01    | 4.47                   |
| 1HCV.PDB | OH, A_TYR_90  | NH1, A_ARG_38 | HH11, A_ARG_38 | 2.93    | 1.98    | 14.34                  |
| 1HCV.PDB | OD1, A_ASP_86 | NH1, A_ARG_38 | HH12, A_ARG_38 | 2.86    | 1.90    | 11.61                  |
| 1HCV.PDB | O, A_VAL_89   | N, A_GLN_39   | H, A_GLN_39    | 2.97    | 2.07    | 19.93                  |
| 1HCV.PDB | O, A_LYS_43   | NE2, A_GLN_39 | HE22, A_GLN_39 | 2.89    | 1.95    | 12.02                  |
| 1HCV.PDB | O, A_ALA_40   | N, A_LYS_43   | H, A_LYS_43    | 2.92    | 2.01    | 18.86                  |
| 1HCV.PDB | O, A_ARG_38   | N, A_GLU_46   | H, A_GLU_46    | 2.84    | 1.93    | 16.72                  |
| 1HCV.PDB | O, A_TRP_36   | N, A_VAL_48   | H, A_VAL_48    | 2.86    | 1.95    | 18.09                  |
| 1HCV.PDB | O, A_MET_34   | N, A_ILE_51   | H, A_ILE_51    | 2.83    | 1.91    | 16.34                  |
| 1HCV.PDB | O, A_ARG_56   | N, A_ASN_52   | H, A_ASN_52    | 2.98    | 2.06    | 16.59                  |
| 1HCV.PDB | O, A_ASN_52   | N, A_ALA_55   | H, A_ALA_55    | 2.92    | 2.11    | 28.15                  |
| 1HCV.PDB | O, A_TYR_59   | NE, A_ARG_64  | HE, A_ARG_64   | 2.96    | 2.11    | 24.27                  |
| 1HCV.PDB | O, A_TYR_59   | NH2, A_ARG_64 | HH21, A_ARG_64 | 2.85    | 1.95    | 21.66                  |
| 1HCV.PDB | O, A_VAL_63   | N, A_ARG_66   | H, A_ARG_66    | 2.97    | 2.05    | 16.00                  |
| 1HCV.PDB | O, A_GLN_81   | N, A_THR_68   | H, A_THR_68    | 2.89    | 1.97    | 16.73                  |
| 1HCV.PDB | OH, A_TYR_59  | N, A_ILE_69   | H, A_ILE_69    | 2.86    | 1.90    | 7.83                   |
| 1HCV.PDB | O, A_TRP_52A  | NE, A_ARG_71  | HE, A_ARG_71   | 2.79    | 1.83    | 3.79                   |
| 1HCV.PDB | O, A_THR_77   | N, A_ASP_72   | H, A_ASP_72    | 2.82    | 1.84    | 2.73                   |
| 1HCV.PDB | OD1, A_ASP_72 | N, A_LYS_75   | H, A_LYS_75    | 2.94    | 2.05    | 18.63                  |
| 1HCV.PDB | O, A_CYS_22   | N, A_VAL_78   | H, A_VAL_78    | 2.93    | 1.97    | 8.95                   |
| 1HCV.PDB | O, A_SER_70   | N, A_TYR_79   | H, A_TYR_79    | 2.83    | 1.88    | 10.07                  |
| 1HCV.PDB | O, A_LEU_20   | N, A_LEU_80   | H, A_LEU_80    | 2.95    | 2.00    | 12.10                  |
| 1HCV.PDB | O, A_THR_68   | N, A_GLN_81   | H, A_GLN_81    | 2.77    | 1.81    | 7.49                   |
| 1HCV.PDB | O, A_LEU_18   | N, A_MET_82   | H, A_MET_82    | 2.84    | 1.89    | 10.75                  |
| 1HCV.PDB | OD2, A_ASP_86 | N, A_LYS_83   | H, A_LYS_83    | 2.81    | 1.93    | 18.86                  |
| 1HCV.PDB | O, A_LYS_83   | N, A_ASP_86   | H, A_ASP_86    | 2.78    | 1.84    | 11.83                  |
| 1HCV.PDB | O, A_THR_107  | N, A_TYR_90   | H, A_TYR_90    | 2.77    | 1.82    | 10.83                  |
| 1HCV.PDB | O, A_ASP_86   | OH, A_TYR_90  | HH, A_TYR_90   | 2.78    | 1.82    | 4.95                   |
| 1HCV.PDB | O, A_PHE_37   | N, A_THR_91   | H, A_THR_91    | 2.79    | 1.83    | 10.98                  |
| 1HCV.PDB | OE2, A_GLU_6  | N, A_CYS_92   | H, A_CYS_92    | 2.92    | 1.93    | 9.32                   |
| 1HCV.PDB | O, A_GLY_35   | N, A_GLY_93   | H, A_GLY_93    | 2.87    | 1.92    | 15.71                  |
| 1HCV.PDB | O, A_ALA_94   | N, A_ASP_101  | H, A_ASP_101   | 2.95    | 2.03    | 16.44                  |
| 1HCV.PDB | O, A_CYS_92   | N, A_GLY_104  | H, A_GLY_104   | 2.85    | 1.98    | 21.84                  |
| 1HCV.PDB | OE2, A_GLU_6  | N, A_GLY_106  | H, A_GLY_106   | 2.97    | 2.18    | 29.00                  |
| 1HCV.PDB | O, A_TYR_90   | N, A_THR_107  | H, A_THR_107   | 2.83    | 1.98    | 25.29                  |
| 1HCV.PDB | O, A_GLY_10   | N, A_THR_110  | H, A_THR_110   | 2.96    | 1.98    | 5.57                   |

---

Table 1663: 1HCV-specific side chain and main chain hydrogen bonding analysis. In this table, a PDB file is specified with a four-letter PDB ID, except that the names of the PDB files corresponding to the single NMR structural model split from the NMR ensemble is specified with a four-letter PDB ID in addition to a hyphen followed by the single NMR structural model numeric ID, the residue naming scheme is **Chain ID\_residue name\_residue number**,  $\angle ADH$  represents the angle formed by acceptor (A), donor (D) and hydrogen (H) ( $\angle ADH$ ).

| PDB      | Acceptor (A)   | Donor (D)      | Hydrogen (H)    | D-A (Å) | H-A (Å) | $\angle ADH(^{\circ})$ |
|----------|----------------|----------------|-----------------|---------|---------|------------------------|
| 1HGD.PDB | O, B_ILE_140   | N, A_ALA_11    | H, A_ALA_11     | 2.90    | 2.03    | 23.17                  |
| 1HGD.PDB | O, B_PHE_138   | N, A_LEU_13    | H, A_LEU_13     | 2.95    | 2.00    | 13.08                  |
| 1HGD.PDB | O, B_ARG_25    | N, A_CYS_14    | H, A_CYS_14     | 2.89    | 1.92    | 6.63                   |
| 1HGD.PDB | O, B_GLY_136   | N, A_LEU_15    | H, A_LEU_15     | 2.87    | 1.90    | 8.68                   |
| 1HGD.PDB | O, B_GLY_23    | N, A_GLY_16    | H, A_GLY_16     | 2.93    | 2.02    | 18.64                  |
| 1HGD.PDB | O, A_HIS_18    | ND1, A_HIS_17  | HD1, A_HIS_17   | 2.93    | 2.05    | 21.54                  |
| 1HGD.PDB | O, B_TRP_21    | N, A_HIS_18    | H, A_HIS_18     | 2.86    | 2.01    | 24.44                  |
| 1HGD.PDB | OD1, A_ASN_322 | N, A_VAL_20    | H, A_VAL_20     | 2.77    | 1.82    | 9.61                   |
| 1HGD.PDB | O, A_VAL_36    | N, A_THR_24    | H, A_THR_24     | 2.85    | 1.96    | 19.97                  |
| 1HGD.PDB | O, A_ILE_34    | N, A_VAL_26    | H, A_VAL_26     | 2.82    | 1.91    | 17.04                  |
| 1HGD.PDB | OE2, B_GLU_97  | NZ, A_LYS_27   | HZ1, A_LYS_27   | 2.80    | 1.78    | 9.95                   |
| 1HGD.PDB | O, A_VAL_26    | N, A_ILE_34    | H, A_ILE_34     | 2.88    | 1.94    | 11.85                  |
| 1HGD.PDB | O, A_THR_24    | N, A_VAL_36    | H, A_VAL_36     | 2.80    | 1.84    | 8.97                   |
| 1HGD.PDB | O, A_MET_320   | N, A_THR_37    | H, A_THR_37     | 2.84    | 1.87    | 4.46                   |
| 1HGD.PDB | O, A_LEU_316   | N, A_THR_40    | H, A_THR_40     | 2.81    | 1.96    | 24.53                  |
| 1HGD.PDB | O, A_LEU_314   | N, A_LEU_42    | H, A_LEU_42     | 2.82    | 1.97    | 25.11                  |
| 1HGD.PDB | O, A_PHE_294   | N, A_GLN_44    | H, A_GLN_44     | 2.82    | 1.85    | 6.79                   |
| 1HGD.PDB | O, A_SER_46    | NE2, A_GLN_44  | HE22, A_GLN_44  | 2.87    | 1.99    | 21.11                  |
| 1HGD.PDB | OD2, A_ASP_275 | NZ, A_LYS_50   | HZ1, A_LYS_50   | 2.70    | 1.79    | 23.99                  |
| 1HGD.PDB | O, A_PRO_273   | N, A_ILE_51    | H, A_ILE_51     | 2.81    | 1.86    | 10.46                  |
| 1HGD.PDB | O, A_ASP_275   | N, A_ASN_53    | H, A_ASN_53     | 2.82    | 1.93    | 20.82                  |
| 1HGD.PDB | OD2, A_ASP_85  | N, A_ARG_57    | H, A_ARG_57     | 2.86    | 1.92    | 12.52                  |
| 1HGD.PDB | O, A_THR_83    | NE, A_ARG_57   | HE, A_ARG_57    | 2.79    | 1.82    | 8.87                   |
| 1HGD.PDB | O, A_LEU_86    | N, A_LEU_59    | H, A_LEU_59     | 2.85    | 1.91    | 13.74                  |
| 1HGD.PDB | O, A_VAL_88    | N, A_GLY_61    | H, A_GLY_61     | 2.95    | 2.09    | 23.46                  |
| 1HGD.PDB | OD1, A_ASP_60  | N, A_ILE_62    | H, A_ILE_62     | 2.87    | 1.95    | 16.02                  |
| 1HGD.PDB | O, A_GLY_61    | N, A_CYS_64    | H, A_CYS_64     | 2.88    | 1.96    | 16.57                  |
| 1HGD.PDB | OE2, A_GLU_89  | N, A_LEU_66    | H, A_LEU_66     | 2.99    | 2.02    | 7.24                   |
| 1HGD.PDB | O, A_LEU_66    | N, A_LEU_70    | H, A_LEU_70     | 2.89    | 2.00    | 21.06                  |
| 1HGD.PDB | O, A_ILE_67    | N, A_LEU_71    | H, A_LEU_71     | 2.83    | 1.86    | 7.61                   |
| 1HGD.PDB | O, A_ASP_68    | N, A_GLY_72    | H, A_GLY_72     | 2.86    | 1.93    | 13.78                  |
| 1HGD.PDB | OD1, A_ASP_73  | N, A_HIS_75    | H, A_HIS_75     | 2.94    | 2.08    | 23.98                  |
| 1HGD.PDB | OD1, A_ASP_73  | ND1, A_HIS_75  | HD1, A_HIS_75   | 2.82    | 1.92    | 19.21                  |
| 1HGD.PDB | O, A_ASP_63    | NE2, A_HIS_75  | HE2, A_HIS_75   | 2.89    | 1.98    | 18.26                  |
| 1HGD.PDB | O, A_ASP_73    | N, A_CYS_76    | H, A_CYS_76     | 2.82    | 1.87    | 12.30                  |
| 1HGD.PDB | O, A_PRO_74    | N, A_ASP_77    | H, A_ASP_77     | 2.96    | 2.01    | 12.30                  |
| 1HGD.PDB | OE1, A_GLU_82  | N, A_THR_83    | H, A_THR_83     | 2.91    | 2.00    | 18.21                  |
| 1HGD.PDB | O, A_ARG_57    | N, A_ASP_85    | H, A_ASP_85     | 2.78    | 1.87    | 17.48                  |
| 1HGD.PDB | O, A_LEU_59    | N, A_VAL_88    | H, A_VAL_88     | 2.92    | 1.95    | 5.25                   |
| 1HGD.PDB | O, A_MET_268   | N, A_GLU_89    | H, A_GLU_89     | 2.76    | 1.82    | 11.67                  |
| 1HGD.PDB | OD1, A_ASP_60  | NE, A_ARG_90   | HE, A_ARG_90    | 2.88    | 1.91    | 7.55                   |
| 1HGD.PDB | O, A_SER_270   | NH1, A_ARG_90  | HH11, A_ARG_90  | 2.66    | 1.79    | 24.65                  |
| 1HGD.PDB | O, A_ALA_272   | NH1, A_ARG_90  | HH12, A_ARG_90  | 2.63    | 1.70    | 17.53                  |
| 1HGD.PDB | OD2, A_ASP_60  | NH2, A_ARG_90  | HH21, A_ARG_90  | 2.80    | 1.82    | 10.07                  |
| 1HGD.PDB | OD1, A_ASP_271 | N, A_SER_91    | H, A_SER_91     | 2.89    | 1.92    | 6.25                   |
| 1HGD.PDB | OD1, A_ASP_271 | OG, A_SER_91   | HG, A_SER_91    | 2.93    | 2.12    | 28.00                  |
| 1HGD.PDB | OD2, A_ASP_271 | OG, A_SER_91   | HG, A_SER_91    | 2.81    | 1.91    | 17.78                  |
| 1HGD.PDB | OD2, A_ASP_68  | OG, A_SER_95   | HG, A_SER_95    | 2.92    | 1.99    | 16.11                  |
| 1HGD.PDB | OD2, A_ASP_73  | N, A_ASN_96    | H, A_ASN_96     | 2.94    | 1.97    | 9.87                   |
| 1HGD.PDB | OD1, A_ASP_68  | OH, A_TYR_100  | HH, A_TYR_100   | 2.88    | 1.90    | 0.98                   |
| 1HGD.PDB | OD2, A_ASP_104 | OG, A_SER_107  | HG, A_SER_107   | 2.86    | 1.96    | 19.52                  |
| 1HGD.PDB | O, A_TYR_105   | N, A_ARG_109   | H, A_ARG_109    | 2.82    | 1.85    | 4.81                   |
| 1HGD.PDB | OE2, B_GLU_67  | NH2, A_ARG_109 | HH21, A_ARG_109 | 2.83    | 1.84    | 13.41                  |
| 1HGD.PDB | OD2, F_ASP_79  | OG, A_SER_110  | HG, A_SER_110   | 2.92    | 1.96    | 11.03                  |
| 1HGD.PDB | O, A_SER_107   | N, A_LEU_111   | H, A_LEU_111    | 2.89    | 1.94    | 11.30                  |
| 1HGD.PDB | O, A_LEU_108   | N, A_VAL_112   | H, A_VAL_112    | 2.97    | 2.01    | 7.23                   |
| 1HGD.PDB | O, A_ARG_109   | N, A_ALA_113   | H, A_ALA_113    | 2.92    | 2.01    | 17.77                  |

|          |                |                |                 |      |      |       |
|----------|----------------|----------------|-----------------|------|------|-------|
| 1HGD.PDB | O, A_SER_110   | N, A_SER_114   | H, A_SER_114    | 2.96 | 2.05 | 17.15 |
| 1HGD.PDB | OE2, A_GLU_119 | OG1, A_THR_117 | HG1, A_THR_117  | 2.87 | 1.92 | 9.92  |
| 1HGD.PDB | O, A_GLU_82    | N, A_LEU_118   | H, A_LEU_118    | 2.91 | 1.98 | 15.32 |
| 1HGD.PDB | O, A_TYR_257   | N, A_ILE_121   | H, A_ILE_121    | 2.85 | 1.89 | 7.79  |
| 1HGD.PDB | O, A_ARG_255   | N, A_GLU_123   | H, A_GLU_123    | 2.91 | 1.96 | 11.30 |
| 1HGD.PDB | O, A_THR_155   | N, A_THR_131   | H, A_THR_131    | 2.76 | 1.86 | 18.36 |
| 1HGD.PDB | OD1, A_ASN_152 | N, A_ASN_133   | H, A_ASN_133    | 2.80 | 1.88 | 15.39 |
| 1HGD.PDB | O, A_GLY_146   | N, A_SER_136   | H, A_SER_136    | 2.72 | 1.80 | 14.38 |
| 1HGD.PDB | O, A_GLY_144   | NZ, A_LYS_140  | HZ1, A_LYS_140  | 2.72 | 1.75 | 16.12 |
| 1HGD.PDB | OD1, A_ASN_137 | NZ, A_LYS_140  | HZ2, A_LYS_140  | 2.76 | 1.82 | 19.96 |
| 1HGD.PDB | OD2, A_ASP_77  | NE, A_ARG_141  | HE, A_ARG_141   | 2.80 | 1.97 | 26.87 |
| 1HGD.PDB | O, A_PHE_147   | NH1, A_ARG_141 | HH12, A_ARG_141 | 2.57 | 1.62 | 14.73 |
| 1HGD.PDB | OD1, A_ASP_77  | NH2, A_ARG_141 | HH21, A_ARG_141 | 2.86 | 1.95 | 21.98 |
| 1HGD.PDB | OD2, A_ASP_77  | NH2, A_ARG_141 | HH21, A_ARG_141 | 2.74 | 1.86 | 23.87 |
| 1HGD.PDB | O, A_GLY_72    | NH2, A_ARG_141 | HH22, A_ARG_141 | 2.95 | 1.97 | 11.26 |
| 1HGD.PDB | O, A_SER_136   | N, A_GLY_146   | H, A_GLY_146    | 2.96 | 2.04 | 13.96 |
| 1HGD.PDB | O, A_GLY_72    | N, A_SER_149   | H, A_SER_149    | 2.84 | 1.94 | 17.77 |
| 1HGD.PDB | O, A_ALA_253   | N, A_ASN_152   | H, A_ASN_152    | 2.80 | 1.94 | 23.17 |
| 1HGD.PDB | OH, A_TYR_195  | NE1, A_TRP_153 | HE1, A_TRP_153  | 2.81 | 1.92 | 20.45 |
| 1HGD.PDB | O, A_LEU_194   | N, A_LYS_156   | H, A_LYS_156    | 2.95 | 2.06 | 19.92 |
| 1HGD.PDB | O, A_SER_193   | NZ, A_LYS_156  | HZ2, A_LYS_156  | 2.80 | 1.80 | 13.32 |
| 1HGD.PDB | O, A_SER_247   | N, A_LEU_164   | H, A_LEU_164    | 2.66 | 1.83 | 25.34 |
| 1HGD.PDB | O, A_ILE_245   | N, A_VAL_166   | H, A_VAL_166    | 2.93 | 1.97 | 10.28 |
| 1HGD.PDB | O, A_LEU_243   | OG1, A_THR_167 | HG1, A_THR_167  | 2.93 | 2.00 | 13.12 |
| 1HGD.PDB | O, A_LEU_243   | N, A_MET_168   | H, A_MET_168    | 2.89 | 1.96 | 14.94 |
| 1HGD.PDB | O, A_ASP_241   | N, A_ASN_170   | H, A_ASN_170    | 2.96 | 1.98 | 6.23  |
| 1HGD.PDB | O, A_PHE_174   | ND2, A_ASN_170 | HD21, A_ASN_170 | 2.82 | 1.87 | 11.30 |
| 1HGD.PDB | O, A_VAL_237   | ND2, A_ASN_170 | HD22, A_ASN_170 | 2.83 | 2.02 | 27.43 |
| 1HGD.PDB | O, A_VAL_237   | N, A_LYS_176   | H, A_LYS_176    | 2.97 | 2.05 | 17.24 |
| 1HGD.PDB | OE2, A_GLU_123 | NZ, A_LYS_176  | HZ2, A_LYS_176  | 2.69 | 1.80 | 25.20 |
| 1HGD.PDB | O, A_THR_235   | N, A_TYR_178   | H, A_TYR_178    | 2.79 | 1.82 | 5.26  |
| 1HGD.PDB | OE1, A_GLU_123 | OH, A_TYR_178  | HH, A_TYR_178   | 2.75 | 1.82 | 12.48 |
| 1HGD.PDB | OG1, A_THR_235 | NE1, A_TRP_180 | HE1, A_TRP_180  | 2.94 | 1.95 | 4.39  |
| 1HGD.PDB | O, A_ASN_250   | N, A_HIS_183   | H, A_HIS_183    | 2.86 | 1.94 | 16.37 |
| 1HGD.PDB | O, A_ARG_229   | N, A_HIS_184   | H, A_HIS_184    | 2.80 | 1.84 | 6.46  |
| 1HGD.PDB | OG, A_SER_231  | NE2, A_HIS_184 | HE2, A_HIS_184  | 2.78 | 1.93 | 25.06 |
| 1HGD.PDB | OE1, A_GLU_190 | N, A_SER_186   | H, A_SER_186    | 2.93 | 1.98 | 11.85 |
| 1HGD.PDB | OG1, A_THR_187 | N, A_GLU_190   | H, A_GLU_190    | 2.88 | 1.93 | 10.33 |
| 1HGD.PDB | O, A_GLN_197   | NE2, A_GLN_191 | HE22, A_GLN_191 | 2.88 | 1.95 | 15.50 |
| 1HGD.PDB | O, A_ASN_188   | OG1, A_THR_192 | HG1, A_THR_192  | 2.99 | 2.04 | 7.10  |
| 1HGD.PDB | O, A_GLN_189   | N, A_SER_193   | H, A_SER_193    | 2.80 | 1.83 | 3.68  |
| 1HGD.PDB | O, A_GLU_190   | N, A_LEU_194   | H, A_LEU_194    | 2.97 | 2.01 | 9.56  |
| 1HGD.PDB | O, A_GLN_191   | N, A_TYR_195   | H, A_TYR_195    | 2.77 | 1.82 | 9.83  |
| 1HGD.PDB | O, A_TYR_161   | NE2, A_GLN_197 | HE21, A_GLN_197 | 2.91 | 1.96 | 11.57 |
| 1HGD.PDB | O, A_ASN_248   | NE2, A_GLN_197 | HE22, A_GLN_197 | 2.95 | 2.02 | 15.49 |
| 1HGD.PDB | OD1, A_ASN_246 | NH2, A_ARG_201 | HH21, A_ARG_201 | 2.59 | 1.75 | 26.83 |
| 1HGD.PDB | O, A_ILE_213   | N, A_VAL_202   | H, A_VAL_202    | 3.00 | 2.02 | 5.97  |
| 1HGD.PDB | O, A_ASN_246   | N, A_THR_203   | H, A_THR_203    | 2.83 | 1.91 | 16.65 |
| 1HGD.PDB | O, A_GLN_211   | N, A_VAL_204   | H, A_VAL_204    | 2.85 | 1.94 | 18.50 |
| 1HGD.PDB | O, A_SER_209   | N, A_THR_206   | H, A_THR_206    | 2.89 | 1.92 | 7.99  |
| 1HGD.PDB | OD1, A_ASP_241 | N, A_ARG_207   | H, A_ARG_207    | 2.92 | 1.95 | 8.05  |
| 1HGD.PDB | OG1, A_THR_206 | OG, A_SER_209  | HG, A_SER_209   | 2.90 | 1.96 | 11.12 |
| 1HGD.PDB | OD1, E_ASP_101 | NE2, A_GLN_210 | HE22, A_GLN_210 | 3.00 | 2.15 | 26.33 |
| 1HGD.PDB | O, A_VAL_204   | N, A_GLN_211   | H, A_GLN_211    | 2.82 | 1.90 | 17.10 |
| 1HGD.PDB | OG1, A_THR_203 | OG1, A_THR_212 | HG1, A_THR_212  | 2.90 | 1.94 | 6.68  |
| 1HGD.PDB | O, A_VAL_202   | N, A_ILE_213   | H, A_ILE_213    | 2.87 | 1.94 | 15.45 |
| 1HGD.PDB | OE1, C_GLN_210 | NH2, A_ARG_220 | HH21, A_ARG_220 | 2.78 | 1.86 | 19.99 |
| 1HGD.PDB | O, A_ASN_216   | NH2, A_ARG_220 | HH22, A_ARG_220 | 2.74 | 1.85 | 22.34 |



|          |                |                |                 |      |      |       |
|----------|----------------|----------------|-----------------|------|------|-------|
| 1HGD.PDB | O, A_LEU_226   | N, A_VAL_223   | H, A_VAL_223    | 2.88 | 1.93 | 9.40  |
| 1HGD.PDB | O, A_CYS_97    | NE, A_ARG_224  | HE, A_ARG_224   | 2.82 | 1.98 | 25.92 |
| 1HGD.PDB | O, A_CYS_97    | NH2, A_ARG_224 | HH21, A_ARG_224 | 2.84 | 1.96 | 24.52 |
| 1HGD.PDB | O, A_VAL_223   | N, A_LEU_226   | H, A_LEU_226    | 2.93 | 1.98 | 11.82 |
| 1HGD.PDB | OE2, A_GLU_190 | OG, A_SER_228  | HG, A_SER_228   | 2.98 | 2.00 | 5.61  |
| 1HGD.PDB | O, A_SER_228   | NH1, A_ARG_229 | HH11, A_ARG_229 | 2.71 | 1.76 | 17.21 |
| 1HGD.PDB | O, A_PRO_221   | NH2, A_ARG_229 | HH22, A_ARG_229 | 2.60 | 1.67 | 16.74 |
| 1HGD.PDB | OD1, A_ASP_101 | OG, A_SER_231  | HG, A_SER_231   | 2.84 | 1.88 | 8.92  |
| 1HGD.PDB | O, A_ASP_101   | N, A_ILE_232   | H, A_ILE_232    | 2.89 | 1.95 | 14.22 |
| 1HGD.PDB | O, A_TRP_180   | N, A_TYR_233   | H, A_TYR_233    | 2.92 | 1.95 | 10.20 |
| 1HGD.PDB | O, A_TYR_178   | N, A_THR_235   | H, A_THR_235    | 2.88 | 1.99 | 20.72 |
| 1HGD.PDB | O, A_LYS_176   | N, A_VAL_237   | H, A_VAL_237    | 2.78 | 1.85 | 14.71 |
| 1HGD.PDB | O, F_SER_71    | NZ, A_LYS_238  | HZ2, A_LYS_238  | 2.63 | 1.73 | 23.20 |
| 1HGD.PDB | OE1, F_GLU_72  | NZ, A_LYS_238  | HZ3, A_LYS_238  | 2.93 | 1.92 | 13.44 |
| 1HGD.PDB | O, A_ASN_170   | N, A_GLY_240   | H, A_GLY_240    | 2.86 | 1.99 | 22.42 |
| 1HGD.PDB | O, A_LYS_238   | N, A_ASP_241   | H, A_ASP_241    | 2.97 | 2.03 | 13.82 |
| 1HGD.PDB | OD1, A_ASP_241 | N, A_VAL_242   | H, A_VAL_242    | 2.76 | 1.95 | 27.32 |
| 1HGD.PDB | O, A_MET_168   | N, A_LEU_243   | H, A_LEU_243    | 2.90 | 1.93 | 5.35  |
| 1HGD.PDB | O, A_SER_205   | N, A_VAL_244   | H, A_VAL_244    | 2.96 | 2.02 | 12.84 |
| 1HGD.PDB | O, A_VAL_166   | N, A_ILE_245   | H, A_ILE_245    | 2.91 | 1.97 | 12.42 |
| 1HGD.PDB | O, A_THR_203   | N, A_ASN_246   | H, A_ASN_246    | 2.92 | 1.96 | 6.49  |
| 1HGD.PDB | OD1, A_ASN_165 | ND2, A_ASN_246 | HD22, A_ASN_246 | 2.92 | 1.97 | 12.69 |
| 1HGD.PDB | O, A_LEU_164   | N, A_SER_247   | H, A_SER_247    | 2.92 | 2.01 | 18.72 |
| 1HGD.PDB | O, A_SER_199   | ND2, A_ASN_248 | HD21, A_ASN_248 | 3.00 | 2.19 | 29.63 |
| 1HGD.PDB | OE1, A_GLN_191 | ND2, A_ASN_250 | HD21, A_ASN_250 | 2.94 | 1.98 | 9.96  |
| 1HGD.PDB | O, A_HIS_183   | ND2, A_ASN_250 | HD22, A_ASN_250 | 2.85 | 1.91 | 14.80 |
| 1HGD.PDB | O, A_ASN_152   | N, A_ALA_253   | H, A_ALA_253    | 2.86 | 1.95 | 18.07 |
| 1HGD.PDB | OD1, A_ASN_133 | NH2, A_ARG_255 | HH22, A_ARG_255 | 2.53 | 1.69 | 26.82 |
| 1HGD.PDB | O, A_ILE_121   | N, A_TYR_257   | H, A_TYR_257    | 2.95 | 2.09 | 24.12 |
| 1HGD.PDB | O, A_LEU_177   | N, A_PHE_258   | H, A_PHE_258    | 2.93 | 1.97 | 8.57  |
| 1HGD.PDB | OE2, A_GLU_119 | NH1, A_ARG_261 | HH12, A_ARG_261 | 2.65 | 1.81 | 27.93 |
| 1HGD.PDB | OE1, A_GLU_119 | NH2, A_ARG_261 | HH22, A_ARG_261 | 2.88 | 1.97 | 22.77 |
| 1HGD.PDB | OD2, A_ASP_85  | NZ, A_LYS_264  | HZ3, A_LYS_264  | 2.85 | 1.86 | 16.67 |
| 1HGD.PDB | O, A_PHE_87    | N, A_MET_268   | H, A_MET_268    | 2.83 | 1.94 | 19.49 |
| 1HGD.PDB | O, A_PRO_284   | OG, A_SER_270  | HG, A_SER_270   | 2.85 | 1.89 | 8.52  |
| 1HGD.PDB | OG, A_SER_270  | N, A_ALA_272   | H, A_ALA_272    | 2.92 | 1.98 | 12.23 |
| 1HGD.PDB | O, A_ILE_51    | N, A_ASP_275   | H, A_ASP_275    | 2.87 | 1.97 | 19.56 |
| 1HGD.PDB | OD1, A_ASP_275 | N, A_THR_276   | H, A_THR_276    | 2.83 | 1.98 | 24.15 |
| 1HGD.PDB | O, A_ASN_54    | N, A_SER_279   | H, A_SER_279    | 2.79 | 1.86 | 14.12 |
| 1HGD.PDB | O, A_TYR_302   | N, A_ILE_282   | H, A_ILE_282    | 2.86 | 1.91 | 10.03 |
| 1HGD.PDB | O, A_THR_283   | N, A_GLY_286   | H, A_GLY_286    | 2.82 | 1.91 | 15.39 |
| 1HGD.PDB | O, A_LYS_50    | N, A_SER_287   | H, A_SER_287    | 2.87 | 1.90 | 3.72  |
| 1HGD.PDB | O, A_ALA_304   | ND2, A_ASN_290 | HD22, A_ASN_290 | 2.80 | 1.90 | 19.37 |
| 1HGD.PDB | OE1, A_GLN_44  | NZ, A_LYS_292  | HZ1, A_LYS_292  | 2.71 | 1.70 | 11.58 |
| 1HGD.PDB | OD2, A_ASP_291 | NZ, A_LYS_292  | HZ3, A_LYS_292  | 2.78 | 1.85 | 22.68 |
| 1HGD.PDB | O, A_LYS_307   | N, A_GLN_295   | H, A_GLN_295    | 2.79 | 1.92 | 22.70 |
| 1HGD.PDB | O, A_ASN_298   | NE2, A_GLN_295 | HE21, A_GLN_295 | 2.79 | 1.82 | 3.80  |
| 1HGD.PDB | O, A_GLN_44    | N, A_ASN_296   | H, A_ASN_296    | 2.83 | 1.90 | 14.13 |
| 1HGD.PDB | OE1, A_GLN_295 | N, A_VAL_297   | H, A_VAL_297    | 2.66 | 1.88 | 29.86 |
| 1HGD.PDB | OD1, A_ASN_285 | ND2, A_ASN_298 | HD22, A_ASN_298 | 2.98 | 2.04 | 13.52 |
| 1HGD.PDB | O, B_LYS_68    | NZ, A_LYS_299  | HZ2, A_LYS_299  | 2.96 | 1.95 | 12.60 |
| 1HGD.PDB | OD1, A_ASN_298 | N, A_ILE_300   | H, A_ILE_300    | 2.94 | 2.01 | 15.36 |
| 1HGD.PDB | O, A_ILE_282   | N, A_TYR_302   | H, A_TYR_302    | 2.90 | 2.05 | 25.49 |
| 1HGD.PDB | O, B_LYS_62    | N, A_GLY_303   | H, A_GLY_303    | 2.91 | 1.96 | 9.72  |
| 1HGD.PDB | O, A_GLN_295   | N, A_VAL_309   | H, A_VAL_309    | 2.97 | 2.17 | 29.89 |
| 1HGD.PDB | OG, B_SER_93   | N, A_LYS_310   | H, A_LYS_310    | 2.92 | 1.97 | 11.29 |
| 1HGD.PDB | OE2, A_GLU_41  | N, A_LEU_314   | H, A_LEU_314    | 2.80 | 1.88 | 15.00 |
| 1HGD.PDB | OE1, A_GLU_41  | NZ, A_LYS_315  | HZ3, A_LYS_315  | 2.76 | 1.81 | 20.40 |

|          |                |                |                 |      |      |       |
|----------|----------------|----------------|-----------------|------|------|-------|
| 1HGD.PDB | O, A_THR_40    | N, A_LEU_316   | H, A_LEU_316    | 2.77 | 1.84 | 12.70 |
| 1HGD.PDB | OD1, B_ASN_104 | N, A_ALA_317   | H, A_ALA_317    | 2.78 | 1.85 | 14.55 |
| 1HGD.PDB | O, A_ASN_38    | N, A_THR_318   | H, A_THR_318    | 2.93 | 2.00 | 15.92 |
| 1HGD.PDB | O, A_VAL_20    | ND2, A_ASN_322 | HD21, A_ASN_322 | 2.87 | 1.96 | 17.38 |
| 1HGD.PDB | OE2, A_GLU_35  | ND2, A_ASN_322 | HD22, A_ASN_322 | 2.84 | 1.97 | 23.40 |
| 1HGD.PDB | O, A_PRO_21    | NE2, A_GLN_327 | HE22, A_GLN_327 | 2.81 | 1.92 | 20.13 |
| 1HGD.PDB | OD2, B_ASP_112 | N, B_GLY_1     | H2, B_GLY_1     | 2.82 | 1.82 | 14.61 |
| 1HGD.PDB | OD1, B_ASP_109 | N, B_LEU_2     | H, B_LEU_2      | 2.82 | 1.95 | 22.22 |
| 1HGD.PDB | OD2, B_ASP_112 | N, B_PHE_3     | H, B_PHE_3      | 2.80 | 1.98 | 27.04 |
| 1HGD.PDB | OD2, B_ASP_112 | N, B_GLY_4     | H, B_GLY_4      | 2.93 | 2.05 | 20.30 |
| 1HGD.PDB | OD1, B_ASP_112 | N, B_ALA_5     | H, B_ALA_5      | 2.88 | 1.99 | 20.94 |
| 1HGD.PDB | O, B_GLY_4     | N, B_PHE_9     | H, B_PHE_9      | 2.78 | 1.84 | 12.99 |
| 1HGD.PDB | O, B_GLY_13    | ND2, B_ASN_12  | HD22, B_ASN_12  | 2.80 | 1.93 | 22.87 |
| 1HGD.PDB | O, A_VAL_323   | N, B_GLY_13    | H, B_GLY_13     | 2.71 | 1.77 | 11.58 |
| 1HGD.PDB | O, A_HIS_17    | N, B_TRP_14    | H, B_TRP_14     | 2.85 | 1.93 | 15.85 |
| 1HGD.PDB | OG1, B_THR_41  | N, B_TRP_21    | H, B_TRP_21     | 2.86 | 1.96 | 18.16 |
| 1HGD.PDB | O, A_GLY_16    | N, B_GLY_23    | H, B_GLY_23     | 2.92 | 1.99 | 15.76 |
| 1HGD.PDB | O, B_ALA_35    | N, B_PHE_24    | H, B_PHE_24     | 2.78 | 1.82 | 5.68  |
| 1HGD.PDB | O, A_CYS_14    | N, B_ARG_25    | H, B_ARG_25     | 2.96 | 2.02 | 13.01 |
| 1HGD.PDB | OE1, B_GLN_34  | NE, B_ARG_25   | HE, B_ARG_25    | 2.65 | 1.77 | 20.51 |
| 1HGD.PDB | O, B_GLY_33    | N, B_HIS_26    | H, B_HIS_26     | 2.63 | 1.81 | 26.83 |
| 1HGD.PDB | O, B_GLY_31    | N, B_ASN_28    | H, B_ASN_28     | 2.74 | 1.82 | 15.78 |
| 1HGD.PDB | O, B_HIS_26    | N, B_GLY_33    | H, B_GLY_33     | 2.76 | 1.88 | 21.28 |
| 1HGD.PDB | O, B_TYR_22    | N, B_ASP_37    | H, B_ASP_37     | 2.70 | 1.77 | 14.05 |
| 1HGD.PDB | OD2, B_ASP_37  | N, B_SER_40    | H, B_SER_40     | 2.90 | 1.95 | 12.27 |
| 1HGD.PDB | O, B_ASP_37    | OG1, B_THR_41  | HG1, B_THR_41   | 2.77 | 1.84 | 15.28 |
| 1HGD.PDB | O, B_LEU_38    | N, B_GLN_42    | H, B_GLN_42     | 2.99 | 2.05 | 13.49 |
| 1HGD.PDB | OD1, B_ASP_46  | NE2, B_GLN_42  | HE22, B_GLN_42  | 2.84 | 1.95 | 20.63 |
| 1HGD.PDB | O, B_LYS_39    | N, B_ALA_43    | H, B_ALA_43     | 2.96 | 2.04 | 16.02 |
| 1HGD.PDB | O, B_SER_40    | N, B_ALA_44    | H, B_ALA_44     | 2.96 | 1.99 | 5.57  |
| 1HGD.PDB | O, B_THR_41    | N, B_ILE_45    | H, B_ILE_45     | 2.90 | 1.93 | 6.90  |
| 1HGD.PDB | O, B_GLN_42    | N, B_ASP_46    | H, B_ASP_46     | 2.81 | 1.84 | 1.31  |
| 1HGD.PDB | O, B_ALA_43    | NE2, B_GLN_47  | HE22, B_GLN_47  | 2.89 | 1.99 | 19.00 |
| 1HGD.PDB | O, B_ILE_45    | N, B_ASN_49    | H, B_ASN_49     | 2.87 | 1.93 | 13.87 |
| 1HGD.PDB | O, B_ASP_46    | N, B_GLY_50    | H, B_GLY_50     | 2.87 | 1.98 | 20.63 |
| 1HGD.PDB | OG1, B_THR_107 | NZ, B_LYS_51   | HZ1, B_LYS_51   | 2.96 | 1.97 | 16.32 |
| 1HGD.PDB | OE1, B_GLU_103 | NZ, B_LYS_51   | HZ2, B_LYS_51   | 2.73 | 1.71 | 9.93  |
| 1HGD.PDB | ND1, B_HIS_106 | NZ, B_LYS_51   | HZ3, B_LYS_51   | 2.75 | 1.79 | 17.84 |
| 1HGD.PDB | O, B_ILE_48    | N, B_LEU_52    | H, B_LEU_52     | 2.92 | 2.00 | 15.14 |
| 1HGD.PDB | O, B_ASN_49    | N, B_ASN_53    | H, B_ASN_53     | 2.88 | 1.92 | 9.70  |
| 1HGD.PDB | OE1, B_GLU_57  | NH1, B_ARG_54  | HH11, B_ARG_54  | 2.86 | 1.87 | 11.55 |
| 1HGD.PDB | OE2, F_GLU_97  | NH2, B_ARG_54  | HH22, B_ARG_54  | 2.77 | 1.80 | 12.79 |
| 1HGD.PDB | OE2, B_GLU_61  | NZ, B_LYS_58   | HZ2, B_LYS_58   | 2.91 | 1.88 | 11.49 |
| 1HGD.PDB | OD2, F_ASP_86  | NZ, B_LYS_62   | HZ1, B_LYS_62   | 2.61 | 1.78 | 29.53 |
| 1HGD.PDB | OD2, F_ASP_90  | NZ, B_LYS_62   | HZ3, B_LYS_62   | 2.73 | 1.84 | 25.56 |
| 1HGD.PDB | OG, A_SER_110  | NE2, B_HIS_64  | HE2, B_HIS_64   | 2.96 | 2.01 | 12.34 |
| 1HGD.PDB | O, A_LYS_299   | NZ, B_LYS_68   | HZ1, B_LYS_68   | 2.92 | 1.90 | 10.17 |
| 1HGD.PDB | OE2, B_GLU_85  | NZ, B_LYS_68   | HZ2, B_LYS_68   | 2.76 | 1.74 | 9.73  |
| 1HGD.PDB | OG, C_SER_107  | N, B_ARG_76    | H, B_ARG_76     | 2.80 | 1.86 | 12.47 |
| 1HGD.PDB | OE2, D_GLU_81  | NE, B_ARG_76   | HE, B_ARG_76    | 2.88 | 1.91 | 8.67  |
| 1HGD.PDB | OE2, D_GLU_74  | NH1, B_ARG_76  | HH12, B_ARG_76  | 2.84 | 1.82 | 2.51  |
| 1HGD.PDB | OE1, D_GLU_81  | NH2, B_ARG_76  | HH21, B_ARG_76  | 2.71 | 1.71 | 6.80  |
| 1HGD.PDB | OE1, D_GLU_74  | NH2, B_ARG_76  | HH22, B_ARG_76  | 2.75 | 1.75 | 3.21  |
| 1HGD.PDB | OE1, B_GLU_74  | NE2, B_GLN_78  | HE22, B_GLN_78  | 2.92 | 1.97 | 11.55 |
| 1HGD.PDB | O, B_GLY_75    | N, B_ASP_79    | H, B_ASP_79     | 2.93 | 1.97 | 10.45 |
| 1HGD.PDB | O, B_GLN_78    | N, B_LYS_82    | H, B_LYS_82     | 2.98 | 2.01 | 8.27  |
| 1HGD.PDB | O, B_ASP_79    | N, B_TYR_83    | H, B_TYR_83     | 2.92 | 1.98 | 12.82 |
| 1HGD.PDB | OE1, D_GLU_85  | OH, B_TYR_83   | HH, B_TYR_83    | 2.65 | 1.81 | 23.27 |

|          |                |                |                 |      |      |       |
|----------|----------------|----------------|-----------------|------|------|-------|
| 1HGD.PDB | O, B_LEU_80    | N, B_VAL_84    | H, B_VAL_84     | 2.91 | 1.93 | 4.90  |
| 1HGD.PDB | O, B_LYS_82    | N, B_ASP_86    | H, B_ASP_86     | 2.94 | 1.97 | 5.83  |
| 1HGD.PDB | O, B_TYR_83    | N, B_THR_87    | H, B_THR_87     | 2.89 | 1.93 | 10.17 |
| 1HGD.PDB | O, B_VAL_84    | N, B_LYS_88    | H, B_LYS_88     | 2.91 | 1.99 | 16.72 |
| 1HGD.PDB | OH, F_TYR_83   | NZ, B_LYS_88   | HZ1, B_LYS_88   | 2.76 | 1.72 | 5.59  |
| 1HGD.PDB | O, B_GLU_85    | N, B_ILE_89    | H, B_ILE_89     | 2.85 | 1.88 | 3.45  |
| 1HGD.PDB | O, B_LYS_88    | N, B_TRP_92    | H, B_TRP_92     | 2.96 | 1.98 | 5.21  |
| 1HGD.PDB | O, B_ILE_89    | N, B_SER_93    | H, B_SER_93     | 2.89 | 1.98 | 17.56 |
| 1HGD.PDB | O, B_ILE_89    | OG, B_SER_93   | HG, B_SER_93    | 2.80 | 1.87 | 12.12 |
| 1HGD.PDB | O, B_ASP_90    | N, B_TYR_94    | H, B_TYR_94     | 2.87 | 1.95 | 15.58 |
| 1HGD.PDB | O, B_TRP_92    | N, B_ALA_96    | H, B_ALA_96     | 2.88 | 1.94 | 15.13 |
| 1HGD.PDB | O, B_SER_93    | N, B_GLU_97    | H, B_GLU_97     | 2.98 | 2.02 | 8.64  |
| 1HGD.PDB | O, B_TYR_94    | N, B_LEU_98    | H, B_LEU_98     | 2.95 | 1.97 | 4.16  |
| 1HGD.PDB | O, B_ASN_95    | N, B_LEU_99    | H, B_LEU_99     | 2.94 | 2.03 | 17.77 |
| 1HGD.PDB | O, B_LEU_98    | N, B_LEU_102   | H, B_LEU_102    | 3.00 | 2.02 | 4.33  |
| 1HGD.PDB | O, B_LEU_99    | N, B_GLU_103   | H, B_GLU_103    | 2.95 | 1.99 | 9.69  |
| 1HGD.PDB | O, B_VAL_100   | N, B_ASN_104   | H, B_ASN_104    | 2.89 | 1.92 | 9.01  |
| 1HGD.PDB | O, A_LYS_27    | ND2, B_ASN_104 | HD22, B_ASN_104 | 2.94 | 1.98 | 9.01  |
| 1HGD.PDB | O, B_LEU_102   | N, B_HIS_106   | H, B_HIS_106    | 2.93 | 1.96 | 7.40  |
| 1HGD.PDB | O, B_GLU_103   | N, B_THR_107   | H, B_THR_107    | 2.77 | 1.89 | 20.47 |
| 1HGD.PDB | O, B_ASN_104   | N, B_ILE_108   | H, B_ILE_108    | 2.98 | 2.01 | 9.27  |
| 1HGD.PDB | O, B_HIS_106   | N, B_LEU_110   | H, B_LEU_110    | 2.82 | 1.87 | 10.47 |
| 1HGD.PDB | O, B_THR_107   | OG1, B_THR_111 | HG1, B_THR_111  | 2.97 | 2.00 | 4.65  |
| 1HGD.PDB | O, B_ASP_109   | N, B_SER_113   | H, B_SER_113    | 2.81 | 1.86 | 10.44 |
| 1HGD.PDB | O, F_LEU_2     | OG, B_SER_113  | HG, B_SER_113   | 2.69 | 1.91 | 29.59 |
| 1HGD.PDB | O, B_SER_113   | N, B_LYS_117   | H, B_LYS_117    | 2.72 | 1.85 | 22.52 |
| 1HGD.PDB | O, B_MET_115   | N, B_PHE_119   | H, B_PHE_119    | 3.00 | 2.05 | 11.89 |
| 1HGD.PDB | O, B_ASN_116   | N, B_GLU_120   | H, B_GLU_120    | 2.91 | 1.94 | 4.94  |
| 1HGD.PDB | O, B_LYS_117   | N, B_LYS_121   | H, B_LYS_121    | 2.92 | 2.03 | 20.84 |
| 1HGD.PDB | O, B_PHE_119   | N, B_ARG_123   | H, B_ARG_123    | 2.95 | 1.99 | 8.27  |
| 1HGD.PDB | OE2, B_GLU_120 | NH1, B_ARG_123 | HH11, B_ARG_123 | 2.79 | 1.91 | 24.17 |
| 1HGD.PDB | O, B_GLU_120   | N, B_ARG_124   | H, B_ARG_124    | 2.97 | 2.00 | 6.65  |
| 1HGD.PDB | OE1, F_GLU_132 | NE, B_ARG_124  | HE, B_ARG_124   | 2.83 | 2.02 | 28.17 |
| 1HGD.PDB | OE2, F_GLU_132 | NE, B_ARG_124  | HE, B_ARG_124   | 2.88 | 2.01 | 22.00 |
| 1HGD.PDB | O, B_HIS_159   | ND2, B_ASN_129 | HD21, B_ASN_129 | 2.97 | 2.01 | 9.55  |
| 1HGD.PDB | OH, B_TYR_157  | ND2, B_ASN_129 | HD22, B_ASN_129 | 2.78 | 1.83 | 11.22 |
| 1HGD.PDB | O, B_LYS_139   | N, B_GLU_131   | H, B_GLU_131    | 2.96 | 2.05 | 17.87 |
| 1HGD.PDB | O, B_CYS_137   | N, B_MET_133   | H, B_MET_133    | 2.86 | 1.91 | 11.95 |
| 1HGD.PDB | O, A_LEU_13    | N, B_PHE_138   | H, B_PHE_138    | 2.71 | 1.82 | 20.20 |
| 1HGD.PDB | O, B_GLU_131   | N, B_LYS_139   | H, B_LYS_139    | 2.85 | 1.91 | 12.79 |
| 1HGD.PDB | O, A_ALA_11    | N, B_ILE_140   | H, B_ILE_140    | 2.81 | 1.89 | 16.38 |
| 1HGD.PDB | O, B_ASN_129   | N, B_TYR_141   | H, B_TYR_141    | 2.94 | 2.01 | 16.23 |
| 1HGD.PDB | O, B_LYS_143   | ND1, B_HIS_142 | HD1, B_HIS_142  | 2.98 | 2.08 | 18.98 |
| 1HGD.PDB | OE2, B_GLU_165 | N, B_LYS_143   | H, B_LYS_143    | 2.93 | 1.99 | 13.81 |
| 1HGD.PDB | O, B_ASP_145   | N, B_ILE_149   | H, B_ILE_149    | 2.84 | 1.89 | 10.47 |
| 1HGD.PDB | O, B_ASN_146   | N, B_GLU_150   | H, B_GLU_150    | 2.92 | 1.97 | 11.35 |
| 1HGD.PDB | O, B_ALA_147   | N, B_SER_151   | H, B_SER_151    | 2.92 | 2.06 | 22.74 |
| 1HGD.PDB | O, B_CYS_148   | OG, B_SER_151  | HG, B_SER_151   | 2.66 | 1.81 | 21.47 |
| 1HGD.PDB | O, B_GLU_150   | N, B_ASN_154   | H, B_ASN_154    | 2.80 | 1.83 | 3.48  |
| 1HGD.PDB | OE2, B_GLU_150 | ND2, B_ASN_154 | HD21, B_ASN_154 | 2.98 | 2.09 | 22.34 |
| 1HGD.PDB | O, B_SER_151   | N, B_THR_156   | H, B_THR_156    | 2.74 | 1.92 | 27.01 |
| 1HGD.PDB | OD1, B_ASN_154 | OG1, B_THR_156 | HG1, B_THR_156  | 2.75 | 1.84 | 16.14 |
| 1HGD.PDB | OD1, B_ASP_158 | N, B_ASP_160   | H, B_ASP_160    | 2.88 | 2.02 | 24.02 |
| 1HGD.PDB | O, B_HIS_159   | N, B_TYR_162   | H, B_TYR_162    | 2.92 | 2.06 | 23.47 |
| 1HGD.PDB | O, F_ARG_170   | NH1, B_ARG_163 | HH12, B_ARG_163 | 2.75 | 1.79 | 14.15 |
| 1HGD.PDB | O, B_TYR_162   | N, B_ALA_166   | H, B_ALA_166    | 2.93 | 1.95 | 5.06  |
| 1HGD.PDB | O, B_ARG_163   | N, B_LEU_167   | H, B_LEU_167    | 2.77 | 1.81 | 7.70  |
| 1HGD.PDB | O, B_ASP_164   | N, B_ASN_168   | H, B_ASN_168    | 2.97 | 2.02 | 11.42 |

|          |                |                |                 |      |      |       |
|----------|----------------|----------------|-----------------|------|------|-------|
| 1HGD.PDB | O, B_GLU_165   | ND2, B_ASN_169 | HD22, B_ASN_169 | 2.96 | 2.00 | 8.67  |
| 1HGD.PDB | O, B_ALA_166   | N, B_ARG_170   | H, B_ARG_170    | 2.80 | 1.92 | 20.27 |
| 1HGD.PDB | O, B_GLU_128   | NE, B_ARG_170  | HE, B_ARG_170   | 2.73 | 1.86 | 22.68 |
| 1HGD.PDB | OE2, B_GLU_131 | NH1, B_ARG_170 | HH11, B_ARG_170 | 2.78 | 1.79 | 7.42  |
| 1HGD.PDB | O, B_LEU_167   | N, B_PHE_171   | H, B_PHE_171    | 2.95 | 2.04 | 17.43 |
| 1HGD.PDB | O, D_ILE_140   | N, C_ALA_11    | H, C_ALA_11     | 2.91 | 2.01 | 19.96 |
| 1HGD.PDB | O, D_GLN_27    | N, C_THR_12    | H, C_THR_12     | 2.92 | 1.96 | 10.52 |
| 1HGD.PDB | O, D_PHE_138   | N, C_LEU_13    | H, C_LEU_13     | 2.98 | 2.02 | 9.60  |
| 1HGD.PDB | O, D_ARG_25    | N, C_CYS_14    | H, C_CYS_14     | 2.74 | 1.84 | 19.68 |
| 1HGD.PDB | O, D_GLY_136   | N, C_LEU_15    | H, C_LEU_15     | 2.88 | 1.91 | 5.44  |
| 1HGD.PDB | O, D_GLY_23    | N, C_GLY_16    | H, C_GLY_16     | 2.97 | 2.07 | 19.04 |
| 1HGD.PDB | O, C_HIS_18    | ND1, C_HIS_17  | HD1, C_HIS_17   | 2.93 | 2.06 | 23.26 |
| 1HGD.PDB | O, D_TRP_21    | N, C_HIS_18    | H, C_HIS_18     | 2.85 | 1.99 | 23.00 |
| 1HGD.PDB | OD1, C_ASN_322 | N, C_VAL_20    | H, C_VAL_20     | 2.80 | 1.83 | 3.81  |
| 1HGD.PDB | O, C_VAL_36    | N, C_THR_24    | H, C_THR_24     | 2.84 | 1.91 | 15.31 |
| 1HGD.PDB | O, C_ILE_34    | N, C_VAL_26    | H, C_VAL_26     | 2.82 | 1.89 | 14.49 |
| 1HGD.PDB | OE2, D_GLU_97  | NZ, C_LYS_27   | HZ1, C_LYS_27   | 2.80 | 1.77 | 7.54  |
| 1HGD.PDB | O, C_VAL_26    | N, C_ILE_34    | H, C_ILE_34     | 2.89 | 1.94 | 12.21 |
| 1HGD.PDB | O, C_THR_24    | N, C_VAL_36    | H, C_VAL_36     | 2.79 | 1.83 | 9.80  |
| 1HGD.PDB | O, C_MET_320   | N, C_THR_37    | H, C_THR_37     | 2.88 | 1.90 | 4.85  |
| 1HGD.PDB | O, C_LEU_316   | N, C_THR_40    | H, C_THR_40     | 2.84 | 1.97 | 22.14 |
| 1HGD.PDB | O, C_LEU_314   | N, C_LEU_42    | H, C_LEU_42     | 2.78 | 1.93 | 24.47 |
| 1HGD.PDB | O, C_PHE_294   | N, C_GLN_44    | H, C_GLN_44     | 2.79 | 1.83 | 6.90  |
| 1HGD.PDB | O, C_SER_46    | NE2, C_GLN_44  | HE22, C_GLN_44  | 2.85 | 1.96 | 21.38 |
| 1HGD.PDB | O, C_ASN_285   | OG, C_SER_47   | HG, C_SER_47    | 2.81 | 1.90 | 15.43 |
| 1HGD.PDB | OD2, C_ASP_275 | NZ, C_LYS_50   | HZ1, C_LYS_50   | 2.66 | 1.78 | 25.77 |
| 1HGD.PDB | O, C_PRO_273   | N, C_ILE_51    | H, C_ILE_51     | 2.78 | 1.83 | 8.71  |
| 1HGD.PDB | O, C_ASP_275   | N, C_ASN_53    | H, C_ASN_53     | 2.80 | 1.94 | 23.81 |
| 1HGD.PDB | OD2, C_ASP_85  | N, C_ARG_57    | H, C_ARG_57     | 2.85 | 1.91 | 10.75 |
| 1HGD.PDB | O, C_THR_83    | NE, C_ARG_57   | HE, C_ARG_57    | 2.80 | 1.83 | 7.46  |
| 1HGD.PDB | O, C_LEU_86    | N, C_LEU_59    | H, C_LEU_59     | 2.86 | 1.91 | 11.22 |
| 1HGD.PDB | O, C_VAL_88    | N, C_GLY_61    | H, C_GLY_61     | 2.98 | 2.11 | 22.39 |
| 1HGD.PDB | OD1, C_ASP_60  | N, C_ILE_62    | H, C_ILE_62     | 2.86 | 1.95 | 16.63 |
| 1HGD.PDB | O, C_GLY_61    | N, C_CYS_64    | H, C_CYS_64     | 2.87 | 1.95 | 15.76 |
| 1HGD.PDB | OE2, C_GLU_89  | N, C_LEU_66    | H, C_LEU_66     | 2.99 | 2.02 | 7.77  |
| 1HGD.PDB | O, C_LEU_66    | N, C_LEU_70    | H, C_LEU_70     | 2.88 | 2.00 | 21.00 |
| 1HGD.PDB | O, C_ILE_67    | N, C_LEU_71    | H, C_LEU_71     | 2.81 | 1.86 | 10.52 |
| 1HGD.PDB | O, C_ASP_68    | N, C_GLY_72    | H, C_GLY_72     | 2.84 | 1.91 | 15.63 |
| 1HGD.PDB | OD1, C_ASP_73  | N, C_HIS_75    | H, C_HIS_75     | 2.89 | 2.01 | 22.22 |
| 1HGD.PDB | OD1, C_ASP_73  | ND1, C_HIS_75  | HD1, C_HIS_75   | 2.77 | 1.87 | 19.67 |
| 1HGD.PDB | O, C_ASP_63    | NE2, C_HIS_75  | HE2, C_HIS_75   | 2.86 | 1.94 | 17.12 |
| 1HGD.PDB | O, C_ASP_73    | N, C_CYS_76    | H, C_CYS_76     | 2.80 | 1.86 | 11.97 |
| 1HGD.PDB | O, C_PRO_74    | N, C_ASP_77    | H, C_ASP_77     | 2.94 | 1.99 | 12.51 |
| 1HGD.PDB | O, C_ARG_57    | N, C_ASP_85    | H, C_ASP_85     | 2.79 | 1.90 | 19.56 |
| 1HGD.PDB | O, C_LEU_59    | N, C_VAL_88    | H, C_VAL_88     | 2.93 | 1.95 | 4.90  |
| 1HGD.PDB | O, C_MET_268   | N, C_GLU_89    | H, C_GLU_89     | 2.78 | 1.84 | 12.72 |
| 1HGD.PDB | OD1, C_ASP_60  | NE, C_ARG_90   | HE, C_ARG_90    | 2.86 | 1.89 | 9.66  |
| 1HGD.PDB | O, C_SER_270   | NH1, C_ARG_90  | HH11, C_ARG_90  | 2.68 | 1.81 | 24.44 |
| 1HGD.PDB | O, C_ALA_272   | NH1, C_ARG_90  | HH12, C_ARG_90  | 2.62 | 1.70 | 17.91 |
| 1HGD.PDB | OD2, C_ASP_60  | NH2, C_ARG_90  | HH21, C_ARG_90  | 2.78 | 1.79 | 10.49 |
| 1HGD.PDB | OD1, C_ASP_271 | N, C_SER_91    | H, C_SER_91     | 2.89 | 1.92 | 5.66  |
| 1HGD.PDB | OD1, C_ASP_271 | OG, C_SER_91   | HG, C_SER_91    | 2.93 | 2.11 | 26.93 |
| 1HGD.PDB | OD2, C_ASP_271 | OG, C_SER_91   | HG, C_SER_91    | 2.86 | 1.96 | 18.80 |
| 1HGD.PDB | OD2, C_ASP_68  | OG, C_SER_95   | HG, C_SER_95    | 2.88 | 1.96 | 15.18 |
| 1HGD.PDB | OD2, C_ASP_73  | N, C_ASN_96    | H, C_ASN_96     | 2.93 | 1.97 | 11.12 |
| 1HGD.PDB | OD1, C_ASP_68  | OH, C_TYR_100  | HH, C_TYR_100   | 2.89 | 1.96 | 14.39 |
| 1HGD.PDB | OD2, C_ASP_104 | OG, C_SER_107  | HG, C_SER_107   | 2.91 | 2.00 | 17.92 |
| 1HGD.PDB | O, C_TYR_105   | N, C_ARG_109   | H, C_ARG_109    | 2.82 | 1.85 | 5.75  |

|          |                |                |                 |      |      |       |
|----------|----------------|----------------|-----------------|------|------|-------|
| 1HGD.PDB | OE2, D_GLU_67  | NH2, C_ARG_109 | HH21, C_ARG_109 | 2.87 | 1.88 | 13.44 |
| 1HGD.PDB | OD2, B_ASP_79  | OG, C_SER_110  | HG, C_SER_110   | 2.73 | 1.84 | 19.59 |
| 1HGD.PDB | O, C_SER_107   | N, C_LEU_111   | H, C_LEU_111    | 2.87 | 1.93 | 12.86 |
| 1HGD.PDB | O, C_ARG_109   | N, C_ALA_113   | H, C_ALA_113    | 2.95 | 2.03 | 17.38 |
| 1HGD.PDB | OE2, C_GLU_119 | OG1, C_THR_117 | HG1, C_THR_117  | 2.86 | 1.93 | 10.42 |
| 1HGD.PDB | O, C_GLU_82    | N, C_LEU_118   | H, C_LEU_118    | 2.89 | 1.96 | 15.85 |
| 1HGD.PDB | O, C_TYR_257   | N, C_ILE_121   | H, C_ILE_121    | 2.88 | 1.91 | 7.92  |
| 1HGD.PDB | O, C_ARG_255   | N, C_GLU_123   | H, C_GLU_123    | 2.91 | 1.95 | 11.07 |
| 1HGD.PDB | O, C_THR_155   | N, C_THR_131   | H, C_THR_131    | 2.77 | 1.87 | 18.56 |
| 1HGD.PDB | OD1, C_ASN_152 | N, C_ASN_133   | H, C_ASN_133    | 2.82 | 1.89 | 13.60 |
| 1HGD.PDB | O, C_GLY_146   | N, C_SER_136   | H, C_SER_136    | 2.73 | 1.81 | 14.22 |
| 1HGD.PDB | O, C_GLY_144   | NZ, C_LYS_140  | HZ1, C_LYS_140  | 2.66 | 1.71 | 18.26 |
| 1HGD.PDB | OD1, C_ASN_137 | NZ, C_LYS_140  | HZ2, C_LYS_140  | 2.78 | 1.84 | 20.52 |
| 1HGD.PDB | OD2, C_ASP_77  | NE, C_ARG_141  | HE, C_ARG_141   | 2.80 | 1.97 | 27.06 |
| 1HGD.PDB | O, C_PHE_147   | NH1, C_ARG_141 | HH12, C_ARG_141 | 2.57 | 1.62 | 14.51 |
| 1HGD.PDB | OD1, C_ASP_77  | NH2, C_ARG_141 | HH21, C_ARG_141 | 2.87 | 1.96 | 21.76 |
| 1HGD.PDB | OD2, C_ASP_77  | NH2, C_ARG_141 | HH21, C_ARG_141 | 2.75 | 1.86 | 23.93 |
| 1HGD.PDB | O, C_GLY_72    | NH2, C_ARG_141 | HH22, C_ARG_141 | 2.96 | 1.99 | 11.64 |
| 1HGD.PDB | OD1, C_ASN_137 | OG, C_SER_145  | HG, C_SER_145   | 2.98 | 2.13 | 22.87 |
| 1HGD.PDB | O, C_SER_136   | N, C_GLY_146   | H, C_GLY_146    | 2.97 | 2.04 | 13.75 |
| 1HGD.PDB | O, C_GLY_72    | N, C_SER_149   | H, C_SER_149    | 2.83 | 1.92 | 17.38 |
| 1HGD.PDB | O, C_ALA_253   | N, C_ASN_152   | H, C_ASN_152    | 2.78 | 1.92 | 22.70 |
| 1HGD.PDB | OH, C_TYR_195  | NE1, C_TRP_153 | HE1, C_TRP_153  | 2.80 | 1.95 | 24.25 |
| 1HGD.PDB | O, C_LEU_194   | N, C_LYS_156   | H, C_LYS_156    | 2.95 | 2.05 | 20.33 |
| 1HGD.PDB | O, C_SER_247   | N, C_LEU_164   | H, C_LEU_164    | 2.68 | 1.84 | 25.44 |
| 1HGD.PDB | O, C_ILE_245   | N, C_VAL_166   | H, C_VAL_166    | 2.92 | 1.97 | 10.65 |
| 1HGD.PDB | O, C_LEU_243   | OG1, C_THR_167 | HG1, C_THR_167  | 2.91 | 2.00 | 16.96 |
| 1HGD.PDB | O, C_LEU_243   | N, C_MET_168   | H, C_MET_168    | 2.93 | 2.00 | 16.08 |
| 1HGD.PDB | O, C_ASP_241   | N, C_ASN_170   | H, C_ASN_170    | 2.92 | 1.95 | 7.54  |
| 1HGD.PDB | O, C_PHE_174   | ND2, C_ASN_170 | HD21, C_ASN_170 | 2.81 | 1.86 | 10.36 |
| 1HGD.PDB | O, C_VAL_237   | ND2, C_ASN_170 | HD22, C_ASN_170 | 2.83 | 2.02 | 27.86 |
| 1HGD.PDB | O, C_VAL_237   | N, C_LYS_176   | H, C_LYS_176    | 2.96 | 2.03 | 15.89 |
| 1HGD.PDB | OE2, C_GLU_123 | NZ, C_LYS_176  | HZ2, C_LYS_176  | 2.69 | 1.80 | 25.35 |
| 1HGD.PDB | O, C_THR_235   | N, C_TYR_178   | H, C_TYR_178    | 2.78 | 1.82 | 3.58  |
| 1HGD.PDB | OE1, C_GLU_123 | OH, C_TYR_178  | HH, C_TYR_178   | 2.73 | 1.80 | 13.21 |
| 1HGD.PDB | OG1, C_THR_235 | NE1, C_TRP_180 | HE1, C_TRP_180  | 2.91 | 1.93 | 2.97  |
| 1HGD.PDB | O, C_ASN_250   | N, C_HIS_183   | H, C_HIS_183    | 2.86 | 1.94 | 17.04 |
| 1HGD.PDB | O, C_ARG_229   | N, C_HIS_184   | H, C_HIS_184    | 2.84 | 1.87 | 6.25  |
| 1HGD.PDB | OG, C_SER_231  | NE2, C_HIS_184 | HE2, C_HIS_184  | 2.75 | 1.91 | 25.20 |
| 1HGD.PDB | OE1, C_GLU_190 | N, C_SER_186   | H, C_SER_186    | 2.94 | 1.99 | 11.52 |
| 1HGD.PDB | OG1, C_THR_187 | N, C_GLU_190   | H, C_GLU_190    | 2.91 | 1.96 | 11.66 |
| 1HGD.PDB | OD1, C_ASN_250 | NE2, C_GLN_191 | HE21, C_GLN_191 | 2.98 | 2.02 | 9.43  |
| 1HGD.PDB | O, C_GLN_197   | NE2, C_GLN_191 | HE22, C_GLN_191 | 2.89 | 1.96 | 15.69 |
| 1HGD.PDB | O, C_GLN_189   | OG1, C_THR_192 | HG1, C_THR_192  | 2.81 | 1.97 | 23.75 |
| 1HGD.PDB | O, C_GLN_189   | N, C_SER_193   | H, C_SER_193    | 2.79 | 1.85 | 12.90 |
| 1HGD.PDB | O, C_GLN_191   | N, C_TYR_195   | H, C_TYR_195    | 2.80 | 1.85 | 11.05 |
| 1HGD.PDB | O, C_TYR_161   | NE2, C_GLN_197 | HE21, C_GLN_197 | 2.91 | 1.96 | 11.66 |
| 1HGD.PDB | O, C_ASN_248   | NE2, C_GLN_197 | HE22, C_GLN_197 | 2.97 | 2.05 | 15.65 |
| 1HGD.PDB | OD1, C_ASN_246 | NH2, C_ARG_201 | HH21, C_ARG_201 | 2.60 | 1.77 | 27.30 |
| 1HGD.PDB | O, C_ILE_213   | N, C_VAL_202   | H, C_VAL_202    | 3.00 | 2.04 | 9.35  |
| 1HGD.PDB | O, C_ASN_246   | N, C_THR_203   | H, C_THR_203    | 2.89 | 1.94 | 12.58 |
| 1HGD.PDB | OG1, C_THR_212 | OG1, C_THR_203 | HG1, C_THR_203  | 2.89 | 1.96 | 13.30 |
| 1HGD.PDB | O, C_GLN_211   | N, C_VAL_204   | H, C_VAL_204    | 2.87 | 1.96 | 17.77 |
| 1HGD.PDB | O, C_SER_209   | N, C_THR_206   | H, C_THR_206    | 2.90 | 1.94 | 8.48  |
| 1HGD.PDB | OD1, C_ASP_241 | N, C_ARG_207   | H, C_ARG_207    | 2.91 | 1.95 | 9.04  |
| 1HGD.PDB | OD2, C_ASP_241 | NE, C_ARG_208  | HE, C_ARG_208   | 2.97 | 2.08 | 21.42 |
| 1HGD.PDB | OG1, C_THR_206 | OG, C_SER_209  | HG, C_SER_209   | 2.92 | 1.98 | 10.99 |
| 1HGD.PDB | OD1, A_ASP_101 | NE2, C_GLN_210 | HE22, C_GLN_210 | 2.97 | 2.13 | 27.21 |

|          |                |                |                 |      |      |       |
|----------|----------------|----------------|-----------------|------|------|-------|
| 1HGD.PDB | O, C_VAL_204   | N, C_GLN_211   | H, C_GLN_211    | 2.82 | 1.89 | 16.07 |
| 1HGD.PDB | O, C_VAL_202   | N, C_ILE_213   | H, C_ILE_213    | 2.87 | 1.94 | 15.07 |
| 1HGD.PDB | O, C_ASN_216   | NH1, C_ARG_220 | HH12, C_ARG_220 | 2.88 | 2.06 | 29.71 |
| 1HGD.PDB | OE1, E_GLN_210 | NH2, C_ARG_220 | HH21, C_ARG_220 | 2.69 | 1.80 | 23.00 |
| 1HGD.PDB | O, C_ASN_216   | NH2, C_ARG_220 | HH22, C_ARG_220 | 2.74 | 1.85 | 22.78 |
| 1HGD.PDB | O, C_LEU_226   | N, C_VAL_223   | H, C_VAL_223    | 2.86 | 1.90 | 8.93  |
| 1HGD.PDB | O, C_CYS_97    | NE, C_ARG_224  | HE, C_ARG_224   | 2.81 | 1.97 | 26.63 |
| 1HGD.PDB | O, C_CYS_97    | NH2, C_ARG_224 | HH21, C_ARG_224 | 2.83 | 1.96 | 24.41 |
| 1HGD.PDB | O, C_VAL_223   | N, C_LEU_226   | H, C_LEU_226    | 2.96 | 2.01 | 12.56 |
| 1HGD.PDB | OE2, C_GLU_190 | OG, C_SER_228  | HG, C_SER_228   | 3.00 | 2.02 | 4.69  |
| 1HGD.PDB | O, C_SER_228   | NH1, C_ARG_229 | HH11, C_ARG_229 | 2.69 | 1.75 | 17.13 |
| 1HGD.PDB | O, C_PRO_221   | NH2, C_ARG_229 | HH22, C_ARG_229 | 2.59 | 1.67 | 18.22 |
| 1HGD.PDB | OD1, C_ASP_101 | OG, C_SER_231  | HG, C_SER_231   | 2.87 | 1.90 | 8.39  |
| 1HGD.PDB | O, C_ASP_101   | N, C_ILE_232   | H, C_ILE_232    | 2.91 | 1.97 | 13.69 |
| 1HGD.PDB | O, C_TRP_180   | N, C_TYR_233   | H, C_TYR_233    | 2.92 | 1.96 | 10.09 |
| 1HGD.PDB | O, C_TYR_178   | N, C_THR_235   | H, C_THR_235    | 2.86 | 1.97 | 20.86 |
| 1HGD.PDB | O, C_LYS_176   | N, C_VAL_237   | H, C_VAL_237    | 2.76 | 1.84 | 16.40 |
| 1HGD.PDB | OE1, B_GLU_72  | NZ, C_LYS_238  | HZ1, C_LYS_238  | 2.80 | 1.83 | 17.68 |
| 1HGD.PDB | O, B_SER_71    | NZ, C_LYS_238  | HZ3, C_LYS_238  | 2.57 | 1.67 | 23.33 |
| 1HGD.PDB | O, C_ASN_170   | N, C_GLY_240   | H, C_GLY_240    | 2.86 | 1.98 | 22.33 |
| 1HGD.PDB | O, C_LYS_238   | N, C_ASP_241   | H, C_ASP_241    | 2.97 | 2.04 | 14.16 |
| 1HGD.PDB | OD1, C_ASP_241 | N, C_VAL_242   | H, C_VAL_242    | 2.79 | 1.97 | 27.05 |
| 1HGD.PDB | O, C_MET_168   | N, C_LEU_243   | H, C_LEU_243    | 2.90 | 1.93 | 5.78  |
| 1HGD.PDB | O, C_SER_205   | N, C_VAL_244   | H, C_VAL_244    | 2.99 | 2.03 | 11.79 |
| 1HGD.PDB | O, C_VAL_166   | N, C_ILE_245   | H, C_ILE_245    | 2.96 | 2.02 | 13.67 |
| 1HGD.PDB | O, C_THR_203   | N, C_ASN_246   | H, C_ASN_246    | 2.93 | 1.96 | 5.65  |
| 1HGD.PDB | OD1, C_ASN_165 | ND2, C_ASN_246 | HD22, C_ASN_246 | 2.91 | 1.96 | 13.56 |
| 1HGD.PDB | O, C_LEU_164   | N, C_SER_247   | H, C_SER_247    | 2.95 | 2.05 | 18.82 |
| 1HGD.PDB | OE1, C_GLN_191 | ND2, C_ASN_250 | HD21, C_ASN_250 | 2.90 | 1.95 | 10.99 |
| 1HGD.PDB | O, C_HIS_183   | ND2, C_ASN_250 | HD22, C_ASN_250 | 2.89 | 1.96 | 14.74 |
| 1HGD.PDB | O, C_ASN_152   | N, C_ALA_253   | H, C_ALA_253    | 2.86 | 1.97 | 19.68 |
| 1HGD.PDB | OD1, C_ASN_133 | NH2, C_ARG_255 | HH22, C_ARG_255 | 2.52 | 1.69 | 27.35 |
| 1HGD.PDB | O, C_ILE_121   | N, C_TYR_257   | H, C_TYR_257    | 2.92 | 2.07 | 24.63 |
| 1HGD.PDB | O, C_LEU_177   | N, C_PHE_258   | H, C_PHE_258    | 2.93 | 1.97 | 8.49  |
| 1HGD.PDB | OE2, C_GLU_119 | NH1, C_ARG_261 | HH12, C_ARG_261 | 2.66 | 1.83 | 27.96 |
| 1HGD.PDB | OE1, C_GLU_119 | NH2, C_ARG_261 | HH22, C_ARG_261 | 2.90 | 2.00 | 23.32 |
| 1HGD.PDB | OD2, C_ASP_85  | NZ, C_LYS_264  | HZ3, C_LYS_264  | 2.82 | 1.84 | 16.88 |
| 1HGD.PDB | O, C_PHE_87    | N, C_MET_268   | H, C_MET_268    | 2.82 | 1.92 | 19.58 |
| 1HGD.PDB | O, C_PRO_284   | OG, C_SER_270  | HG, C_SER_270   | 2.86 | 1.93 | 14.34 |
| 1HGD.PDB | OG, C_SER_270  | N, C_ALA_272   | H, C_ALA_272    | 2.88 | 1.93 | 11.04 |
| 1HGD.PDB | O, C_ILE_51    | N, C_ASP_275   | H, C_ASP_275    | 2.89 | 2.02 | 21.61 |
| 1HGD.PDB | OD1, C_ASP_275 | N, C_THR_276   | H, C_THR_276    | 2.82 | 1.97 | 24.34 |
| 1HGD.PDB | O, C_ASN_54    | N, C_SER_279   | H, C_SER_279    | 2.80 | 1.87 | 14.30 |
| 1HGD.PDB | O, C_TYR_302   | N, C_ILE_282   | H, C_ILE_282    | 2.89 | 1.91 | 5.26  |
| 1HGD.PDB | O, C_THR_283   | N, C_GLY_286   | H, C_GLY_286    | 2.83 | 1.91 | 15.19 |
| 1HGD.PDB | O, C_LYS_50    | N, C_SER_287   | H, C_SER_287    | 2.85 | 1.88 | 6.04  |
| 1HGD.PDB | O, C_ALA_304   | ND2, C_ASN_290 | HD22, C_ASN_290 | 2.83 | 1.94 | 20.74 |
| 1HGD.PDB | OE1, C_GLN_44  | NZ, C_LYS_292  | HZ1, C_LYS_292  | 2.73 | 1.73 | 12.00 |
| 1HGD.PDB | OD2, C_ASP_291 | NZ, C_LYS_292  | HZ3, C_LYS_292  | 2.79 | 1.88 | 23.81 |
| 1HGD.PDB | O, C_LYS_307   | N, C_GLN_295   | H, C_GLN_295    | 2.80 | 1.93 | 22.24 |
| 1HGD.PDB | O, C_ASN_298   | NE2, C_GLN_295 | HE21, C_GLN_295 | 2.78 | 1.81 | 6.87  |
| 1HGD.PDB | O, C_GLN_44    | N, C_ASN_296   | H, C_ASN_296    | 2.84 | 1.92 | 15.89 |
| 1HGD.PDB | OE1, C_GLN_295 | N, C_VAL_297   | H, C_VAL_297    | 2.67 | 1.87 | 28.66 |
| 1HGD.PDB | OD1, C_ASN_285 | ND2, C_ASN_298 | HD22, C_ASN_298 | 2.96 | 2.02 | 13.09 |
| 1HGD.PDB | O, D_LYS_68    | NZ, C_LYS_299  | HZ2, C_LYS_299  | 2.97 | 1.97 | 13.11 |
| 1HGD.PDB | OD1, C_ASN_298 | N, C_ILE_300   | H, C_ILE_300    | 2.91 | 2.01 | 18.95 |
| 1HGD.PDB | O, C_ILE_282   | N, C_TYR_302   | H, C_TYR_302    | 2.86 | 2.02 | 25.59 |
| 1HGD.PDB | O, D_LYS_62    | N, C_GLY_303   | H, C_GLY_303    | 2.92 | 1.97 | 11.11 |

|          |                |                |                 |      |      |       |
|----------|----------------|----------------|-----------------|------|------|-------|
| 1HGD.PDB | O, C_GLN_295   | N, C_VAL_309   | H, C_VAL_309    | 2.96 | 2.15 | 29.17 |
| 1HGD.PDB | OG, D_SER_93   | N, C_LYS_310   | H, C_LYS_310    | 2.96 | 2.01 | 12.70 |
| 1HGD.PDB | OE2, C_GLU_41  | N, C_LEU_314   | H, C_LEU_314    | 2.81 | 1.88 | 14.84 |
| 1HGD.PDB | OE1, C_GLU_41  | NZ, C_LYS_315  | HZ3, C_LYS_315  | 2.78 | 1.84 | 20.99 |
| 1HGD.PDB | O, C_THR_40    | N, C_LEU_316   | H, C_LEU_316    | 2.76 | 1.82 | 12.19 |
| 1HGD.PDB | OD1, D_ASN_104 | N, C_ALA_317   | H, C_ALA_317    | 2.76 | 1.81 | 11.23 |
| 1HGD.PDB | O, C_ASN_38    | N, C_THR_318   | H, C_THR_318    | 2.95 | 2.04 | 17.98 |
| 1HGD.PDB | O, C_VAL_20    | ND2, C_ASN_322 | HD21, C_ASN_322 | 2.90 | 1.99 | 17.62 |
| 1HGD.PDB | OE2, C_GLU_35  | ND2, C_ASN_322 | HD22, C_ASN_322 | 2.83 | 1.94 | 21.17 |
| 1HGD.PDB | OE1, D_GLU_15  | NZ, C_LYS_326  | HZ1, C_LYS_326  | 2.78 | 1.77 | 11.96 |
| 1HGD.PDB | OXT, C_THR_328 | NE2, C_GLN_327 | HE22, C_GLN_327 | 2.97 | 2.03 | 15.01 |
| 1HGD.PDB | OD2, D_ASP_112 | N, D_GLY_1     | H2, D_GLY_1     | 2.80 | 1.80 | 13.51 |
| 1HGD.PDB | OD1, D_ASP_109 | N, D_LEU_2     | H, D_LEU_2      | 2.86 | 1.98 | 21.55 |
| 1HGD.PDB | OD2, D_ASP_112 | N, D_PHE_3     | H, D_PHE_3      | 2.84 | 2.05 | 29.38 |
| 1HGD.PDB | OD2, D_ASP_112 | N, D_GLY_4     | H, D_GLY_4      | 2.94 | 2.04 | 18.50 |
| 1HGD.PDB | OD1, D_ASP_112 | N, D_ALA_5     | H, D_ALA_5      | 2.90 | 2.02 | 22.02 |
| 1HGD.PDB | O, D_GLY_4     | N, D_PHE_9     | H, D_PHE_9      | 2.79 | 1.85 | 14.03 |
| 1HGD.PDB | O, D_GLY_13    | ND2, D_ASN_12  | HD22, D_ASN_12  | 2.84 | 1.96 | 21.33 |
| 1HGD.PDB | O, C_VAL_323   | N, D_GLY_13    | H, D_GLY_13     | 2.70 | 1.78 | 14.49 |
| 1HGD.PDB | O, C_HIS_17    | N, D_TRP_14    | H, D_TRP_14     | 2.85 | 1.91 | 13.36 |
| 1HGD.PDB | OG1, D_THR_41  | N, D_TRP_21    | H, D_TRP_21     | 2.90 | 2.00 | 19.11 |
| 1HGD.PDB | O, C_GLY_16    | N, D_GLY_23    | H, D_GLY_23     | 2.93 | 2.01 | 16.45 |
| 1HGD.PDB | O, D_ALA_35    | N, D_PHE_24    | H, D_PHE_24     | 2.81 | 1.84 | 5.01  |
| 1HGD.PDB | O, C_CYS_14    | N, D_ARG_25    | H, D_ARG_25     | 2.91 | 1.95 | 9.92  |
| 1HGD.PDB | OE1, D_GLN_34  | NE, D_ARG_25   | HE, D_ARG_25    | 2.61 | 1.77 | 24.43 |
| 1HGD.PDB | O, D_GLY_33    | N, D_HIS_26    | H, D_HIS_26     | 2.84 | 1.92 | 15.70 |
| 1HGD.PDB | O, C_THR_12    | N, D_GLN_27    | H, D_GLN_27     | 2.91 | 1.98 | 16.00 |
| 1HGD.PDB | O, D_GLY_31    | N, D_ASN_28    | H, D_ASN_28     | 2.90 | 1.95 | 12.05 |
| 1HGD.PDB | OD1, D_ASN_146 | ND2, D_ASN_28  | HD21, D_ASN_28  | 3.00 | 2.03 | 9.16  |
| 1HGD.PDB | O, D_PHE_24    | N, D_ALA_35    | H, D_ALA_35     | 2.79 | 1.99 | 28.44 |
| 1HGD.PDB | O, D_TYR_22    | N, D_ASP_37    | H, D_ASP_37     | 2.70 | 1.79 | 16.23 |
| 1HGD.PDB | OD2, D_ASP_37  | N, D_SER_40    | H, D_SER_40     | 2.91 | 1.96 | 11.03 |
| 1HGD.PDB | OD2, D_ASP_37  | OG, D_SER_40   | HG, D_SER_40    | 2.86 | 1.96 | 18.80 |
| 1HGD.PDB | O, D_ASP_37    | OG1, D_THR_41  | HG1, D_THR_41   | 2.74 | 1.83 | 16.22 |
| 1HGD.PDB | O, D_LEU_38    | N, D_GLN_42    | H, D_GLN_42     | 2.97 | 2.03 | 13.89 |
| 1HGD.PDB | OD1, D_ASP_46  | NE2, D_GLN_42  | HE22, D_GLN_42  | 2.84 | 1.95 | 20.82 |
| 1HGD.PDB | O, D_LYS_39    | N, D_ALA_43    | H, D_ALA_43     | 2.97 | 2.02 | 11.21 |
| 1HGD.PDB | O, D_SER_40    | N, D_ALA_44    | H, D_ALA_44     | 2.97 | 2.00 | 5.30  |
| 1HGD.PDB | O, D_THR_41    | N, D_ILE_45    | H, D_ILE_45     | 2.92 | 1.97 | 10.66 |
| 1HGD.PDB | O, D_GLN_42    | N, D_ASP_46    | H, D_ASP_46     | 2.81 | 1.84 | 5.79  |
| 1HGD.PDB | O, D_ALA_43    | NE2, D_GLN_47  | HE22, D_GLN_47  | 2.86 | 1.96 | 18.91 |
| 1HGD.PDB | O, D_ILE_45    | N, D_ASN_49    | H, D_ASN_49     | 2.87 | 1.93 | 14.90 |
| 1HGD.PDB | O, D_ASP_46    | N, D_GLY_50    | H, D_GLY_50     | 2.89 | 1.97 | 17.25 |
| 1HGD.PDB | OG1, D_THR_107 | NZ, D_LYS_51   | HZ1, D_LYS_51   | 2.96 | 1.98 | 16.97 |
| 1HGD.PDB | OE1, D_GLU_103 | NZ, D_LYS_51   | HZ2, D_LYS_51   | 2.74 | 1.72 | 8.47  |
| 1HGD.PDB | ND1, D_HIS_106 | NZ, D_LYS_51   | HZ3, D_LYS_51   | 2.74 | 1.78 | 16.91 |
| 1HGD.PDB | O, D_ILE_48    | N, D_LEU_52    | H, D_LEU_52     | 2.95 | 2.04 | 18.99 |
| 1HGD.PDB | O, D_ASN_49    | N, D_ASN_53    | H, D_ASN_53     | 2.85 | 1.90 | 9.27  |
| 1HGD.PDB | O, A_THR_28    | NE, D_ARG_54   | HE, D_ARG_54    | 3.00 | 2.06 | 13.94 |
| 1HGD.PDB | OE1, D_GLU_57  | NH1, D_ARG_54  | HH11, D_ARG_54  | 2.85 | 1.86 | 12.06 |
| 1HGD.PDB | OE2, B_GLU_97  | NH2, D_ARG_54  | HH22, D_ARG_54  | 2.79 | 1.82 | 13.03 |
| 1HGD.PDB | OE2, D_GLU_61  | NZ, D_LYS_58   | HZ2, D_LYS_58   | 2.90 | 1.87 | 10.86 |
| 1HGD.PDB | OD2, B_ASP_90  | NZ, D_LYS_62   | HZ3, D_LYS_62   | 2.62 | 1.79 | 29.99 |
| 1HGD.PDB | OG, C_SER_110  | NE2, D_HIS_64  | HE2, D_HIS_64   | 2.96 | 1.98 | 5.65  |
| 1HGD.PDB | O, C_LYS_299   | NZ, D_LYS_68   | HZ1, D_LYS_68   | 2.93 | 1.92 | 12.36 |
| 1HGD.PDB | OE2, D_GLU_85  | NZ, D_LYS_68   | HZ2, D_LYS_68   | 2.78 | 1.76 | 10.92 |
| 1HGD.PDB | OG, E_SER_107  | N, D_ARG_76    | H, D_ARG_76     | 2.86 | 1.90 | 9.40  |
| 1HGD.PDB | OE2, F_GLU_81  | NE, D_ARG_76   | HE, D_ARG_76    | 2.83 | 1.87 | 10.56 |

|          |                |                |                 |      |      |       |
|----------|----------------|----------------|-----------------|------|------|-------|
| 1HGD.PDB | OE2, F_GLU.74  | NH1, D_ARG.76  | HH12, D_ARG.76  | 2.78 | 1.77 | 3.14  |
| 1HGD.PDB | OE1, F_GLU.81  | NH2, D_ARG.76  | HH21, D_ARG.76  | 2.65 | 1.67 | 9.42  |
| 1HGD.PDB | OE1, F_GLU.74  | NH2, D_ARG.76  | HH22, D_ARG.76  | 2.69 | 1.70 | 6.24  |
| 1HGD.PDB | OE1, D_GLU.74  | NE2, D_GLN.78  | HE22, D_GLN.78  | 2.94 | 1.97 | 10.43 |
| 1HGD.PDB | O, D_GLY.75    | N, D_ASP.79    | H, D_ASP.79     | 2.94 | 1.98 | 9.81  |
| 1HGD.PDB | O, D_GLN.78    | N, D_LYS.82    | H, D_LYS.82     | 2.95 | 1.98 | 5.44  |
| 1HGD.PDB | O, D_ASP.79    | N, D_TYR.83    | H, D_TYR.83     | 2.91 | 1.98 | 15.53 |
| 1HGD.PDB | OE1, F_GLU.85  | OH, D_TYR.83   | HH, D_TYR.83    | 2.57 | 1.79 | 29.87 |
| 1HGD.PDB | O, D_LEU.80    | N, D_VAL.84    | H, D_VAL.84     | 2.86 | 1.89 | 6.82  |
| 1HGD.PDB | O, D_LYS.82    | N, D_ASP.86    | H, D_ASP.86     | 2.94 | 1.97 | 2.92  |
| 1HGD.PDB | O, D_TYR.83    | N, D_THR.87    | H, D_THR.87     | 2.90 | 1.95 | 11.15 |
| 1HGD.PDB | O, D_VAL.84    | N, D_LYS.88    | H, D_LYS.88     | 2.90 | 2.00 | 19.38 |
| 1HGD.PDB | OH, B_TYR.83   | NZ, D_LYS.88   | HZ1, D_LYS.88   | 2.76 | 1.72 | 5.75  |
| 1HGD.PDB | O, D_GLU.85    | N, D_ILE.89    | H, D_ILE.89     | 2.85 | 1.88 | 3.25  |
| 1HGD.PDB | O, D_LYS.88    | N, D_TRP.92    | H, D_TRP.92     | 2.93 | 1.96 | 4.18  |
| 1HGD.PDB | O, D_ILE.89    | N, D_SER.93    | H, D_SER.93     | 2.87 | 1.96 | 17.31 |
| 1HGD.PDB | O, D_ILE.89    | OG, D_SER.93   | HG, D_SER.93    | 2.77 | 1.86 | 16.92 |
| 1HGD.PDB | O, D_ASP.90    | N, D_TYR.94    | H, D_TYR.94     | 2.87 | 1.97 | 18.94 |
| 1HGD.PDB | O, D_TRP.92    | N, D_ALA.96    | H, D_ALA.96     | 2.89 | 1.94 | 12.43 |
| 1HGD.PDB | O, D_TYR.94    | N, D_LEU.98    | H, D_LEU.98     | 2.91 | 1.95 | 7.12  |
| 1HGD.PDB | O, D_ASN.95    | N, D_LEU.99    | H, D_LEU.99     | 2.95 | 2.03 | 17.99 |
| 1HGD.PDB | O, D_LEU.98    | N, D_LEU.102   | H, D_LEU.102    | 2.99 | 2.01 | 6.26  |
| 1HGD.PDB | O, D_LEU.99    | N, D_GLU.103   | H, D_GLU.103    | 2.96 | 2.00 | 10.90 |
| 1HGD.PDB | O, D_VAL.100   | N, D_ASN.104   | H, D_ASN.104    | 2.84 | 1.88 | 8.49  |
| 1HGD.PDB | O, C_LYS.27    | ND2, D_ASN.104 | HD22, D_ASN.104 | 2.96 | 2.00 | 10.74 |
| 1HGD.PDB | O, D_LEU.102   | N, D_HIS.106   | H, D_HIS.106    | 2.92 | 1.96 | 8.43  |
| 1HGD.PDB | O, D_GLU.103   | N, D_THR.107   | H, D_THR.107    | 2.81 | 1.91 | 18.55 |
| 1HGD.PDB | O, D_ASN.104   | N, D_ILE.108   | H, D_ILE.108    | 2.99 | 2.03 | 8.56  |
| 1HGD.PDB | O, D_HIS.106   | N, D_LEU.110   | H, D_LEU.110    | 2.82 | 1.88 | 11.88 |
| 1HGD.PDB | O, D_ASP.109   | N, D_SER.113   | H, D_SER.113    | 2.84 | 1.89 | 12.44 |
| 1HGD.PDB | O, D_SER.113   | N, D_LYS.117   | H, D_LYS.117    | 2.74 | 1.87 | 21.85 |
| 1HGD.PDB | O, D_MET.115   | N, D_PHE.119   | H, D_PHE.119    | 2.99 | 2.05 | 13.34 |
| 1HGD.PDB | O, D_ASN.116   | N, D_GLU.120   | H, D_GLU.120    | 2.89 | 1.91 | 1.87  |
| 1HGD.PDB | O, D_LYS.117   | N, D_LYS.121   | H, D_LYS.121    | 2.92 | 2.02 | 19.68 |
| 1HGD.PDB | O, D_PHE.119   | N, D_ARG.123   | H, D_ARG.123    | 2.95 | 1.99 | 11.55 |
| 1HGD.PDB | OE2, D_GLU.120 | NH1, D_ARG.123 | HH11, D_ARG.123 | 2.80 | 1.92 | 24.08 |
| 1HGD.PDB | O, D_GLU.120   | N, D_ARG.124   | H, D_ARG.124    | 2.98 | 2.01 | 7.42  |
| 1HGD.PDB | OE1, B_GLU.132 | NE, D_ARG.124  | HE, D_ARG.124   | 2.80 | 2.01 | 29.31 |
| 1HGD.PDB | OE2, B_GLU.132 | NE, D_ARG.124  | HE, D_ARG.124   | 2.82 | 1.95 | 21.73 |
| 1HGD.PDB | O, D_HIS.159   | ND2, D_ASN.129 | HD21, D_ASN.129 | 2.95 | 1.98 | 9.02  |
| 1HGD.PDB | OH, D_TYR.157  | ND2, D_ASN.129 | HD22, D_ASN.129 | 2.79 | 1.82 | 6.93  |
| 1HGD.PDB | O, D_CYS.137   | N, D_MET.133   | H, D_MET.133    | 2.89 | 1.94 | 11.36 |
| 1HGD.PDB | O, C_LEU.13    | N, D_PHE.138   | H, D_PHE.138    | 2.74 | 1.85 | 19.25 |
| 1HGD.PDB | O, D_GLU.131   | N, D_LYS.139   | H, D_LYS.139    | 2.83 | 1.88 | 9.21  |
| 1HGD.PDB | O, C_ALA.11    | N, D_ILE.140   | H, D_ILE.140    | 2.85 | 1.94 | 17.95 |
| 1HGD.PDB | O, D_ASN.129   | N, D_TYR.141   | H, D_TYR.141    | 2.95 | 2.00 | 12.47 |
| 1HGD.PDB | O, D_LYS.143   | ND1, D_HIS.142 | HD1, D_HIS.142  | 2.95 | 2.07 | 22.42 |
| 1HGD.PDB | OE2, D_GLU.165 | N, D_LYS.143   | H, D_LYS.143    | 2.98 | 2.08 | 20.43 |
| 1HGD.PDB | OE2, D_GLU.30  | N, D_ASN.146   | H, D_ASN.146    | 2.83 | 1.93 | 17.92 |
| 1HGD.PDB | O, D_ASP.145   | N, D_ILE.149   | H, D_ILE.149    | 2.88 | 1.92 | 11.10 |
| 1HGD.PDB | O, D_ASN.146   | N, D_GLU.150   | H, D_GLU.150    | 2.93 | 2.00 | 14.93 |
| 1HGD.PDB | O, D_ALA.147   | N, D_SER.151   | H, D_SER.151    | 2.95 | 2.03 | 16.03 |
| 1HGD.PDB | O, D_CYS.148   | OG, D_SER.151  | HG, D_SER.151   | 2.69 | 1.83 | 21.65 |
| 1HGD.PDB | O, D_GLU.150   | N, D_ASN.154   | H, D_ASN.154    | 2.80 | 1.83 | 6.06  |
| 1HGD.PDB | OE2, D_GLU.150 | ND2, D_ASN.154 | HD21, D_ASN.154 | 2.88 | 2.05 | 27.54 |
| 1HGD.PDB | OD1, D_ASN.154 | OG1, D_THR.156 | HG1, D_THR.156  | 2.79 | 1.83 | 8.53  |
| 1HGD.PDB | NE2, D_HIS.142 | OH, D_TYR.157  | HH, D_TYR.157   | 2.78 | 1.89 | 18.65 |
| 1HGD.PDB | OD1, D_ASP.158 | N, D_ASP.160   | H, D_ASP.160    | 2.88 | 2.02 | 23.43 |



|          |                |                |                 |      |      |       |
|----------|----------------|----------------|-----------------|------|------|-------|
| 1HGD.PDB | O, D_HIS_159   | N, D_TYR_162   | H, D_TYR_162    | 2.96 | 2.10 | 23.77 |
| 1HGD.PDB | O, B_ARG_170   | NH1, D_ARG_163 | HH12, D_ARG_163 | 2.77 | 1.79 | 12.64 |
| 1HGD.PDB | O, D_TYR_162   | N, D_ALA_166   | H, D_ALA_166    | 2.92 | 1.95 | 4.89  |
| 1HGD.PDB | O, D_ARG_163   | N, D_LEU_167   | H, D_LEU_167    | 2.76 | 1.80 | 8.07  |
| 1HGD.PDB | O, D_ASP_164   | N, D_ASN_168   | H, D_ASN_168    | 2.96 | 2.00 | 8.71  |
| 1HGD.PDB | O, D_GLU_165   | ND2, D_ASN_169 | HD22, D_ASN_169 | 2.94 | 1.98 | 8.39  |
| 1HGD.PDB | O, D_ALA_166   | N, D_ARG_170   | H, D_ARG_170    | 2.81 | 1.93 | 20.44 |
| 1HGD.PDB | O, D_GLU_128   | NE, D_ARG_170  | HE, D_ARG_170   | 2.73 | 1.86 | 22.22 |
| 1HGD.PDB | OE2, D_GLU_131 | NH1, D_ARG_170 | HH11, D_ARG_170 | 2.77 | 1.78 | 7.65  |
| 1HGD.PDB | O, D_LEU_167   | N, D_PHE_171   | H, D_PHE_171    | 2.96 | 2.02 | 14.05 |
| 1HGD.PDB | O, F_ILE_140   | N, E_ALA_11    | H, E_ALA_11     | 2.92 | 2.03 | 20.36 |
| 1HGD.PDB | O, F_GLN_27    | N, E_THR_12    | H, E_THR_12     | 2.97 | 2.03 | 14.03 |
| 1HGD.PDB | O, F_PHE_138   | N, E_LEU_13    | H, E_LEU_13     | 2.98 | 2.02 | 11.10 |
| 1HGD.PDB | O, F_ARG_25    | N, E_CYS_14    | H, E_CYS_14     | 2.65 | 1.79 | 21.42 |
| 1HGD.PDB | O, F_GLY_136   | N, E_LEU_15    | H, E_LEU_15     | 2.85 | 1.88 | 5.88  |
| 1HGD.PDB | O, F_GLY_23    | N, E_GLY_16    | H, E_GLY_16     | 2.93 | 2.04 | 20.98 |
| 1HGD.PDB | O, E_HIS_18    | ND1, E_HIS_17  | HD1, E_HIS_17   | 2.90 | 2.05 | 24.96 |
| 1HGD.PDB | O, F_TRP_21    | N, E_HIS_18    | H, E_HIS_18     | 2.83 | 1.98 | 25.03 |
| 1HGD.PDB | OD1, E_ASN_322 | N, E_VAL_20    | H, E_VAL_20     | 2.79 | 1.83 | 7.78  |
| 1HGD.PDB | O, E_VAL_36    | N, E_THR_24    | H, E_THR_24     | 2.83 | 1.94 | 19.94 |
| 1HGD.PDB | O, E_ILE_34    | N, E_VAL_26    | H, E_VAL_26     | 2.83 | 1.90 | 15.73 |
| 1HGD.PDB | OE2, F_GLU_97  | NZ, E_LYS_27   | HZ1, E_LYS_27   | 2.79 | 1.77 | 8.77  |
| 1HGD.PDB | O, E_VAL_26    | N, E_ILE_34    | H, E_ILE_34     | 2.86 | 1.91 | 10.68 |
| 1HGD.PDB | O, E_THR_24    | N, E_VAL_36    | H, E_VAL_36     | 2.80 | 1.85 | 11.38 |
| 1HGD.PDB | O, E_MET_320   | N, E_THR_37    | H, E_THR_37     | 2.88 | 1.91 | 4.25  |
| 1HGD.PDB | O, E_LEU_316   | N, E_THR_40    | H, E_THR_40     | 2.82 | 1.95 | 22.86 |
| 1HGD.PDB | O, E_LEU_314   | N, E_LEU_42    | H, E_LEU_42     | 2.82 | 1.94 | 21.92 |
| 1HGD.PDB | O, E_PHE_294   | N, E_GLN_44    | H, E_GLN_44     | 2.85 | 1.88 | 5.47  |
| 1HGD.PDB | O, E_SER_46    | NE2, E_GLN_44  | HE22, E_GLN_44  | 2.85 | 1.97 | 21.62 |
| 1HGD.PDB | O, E_ASN_285   | OG, E_SER_47   | HG, E_SER_47    | 2.85 | 1.99 | 21.23 |
| 1HGD.PDB | OD2, E_ASP_275 | NZ, E_LYS_50   | HZ1, E_LYS_50   | 2.69 | 1.80 | 25.14 |
| 1HGD.PDB | O, E_PRO_273   | N, E_ILE_51    | H, E_ILE_51     | 2.79 | 1.84 | 10.59 |
| 1HGD.PDB | O, E_ASP_275   | N, E_ASN_53    | H, E_ASN_53     | 2.81 | 1.95 | 23.64 |
| 1HGD.PDB | OD2, E_ASP_85  | N, E_ARG_57    | H, E_ARG_57     | 2.85 | 1.91 | 12.33 |
| 1HGD.PDB | O, E_THR_83    | NE, E_ARG_57   | HE, E_ARG_57    | 2.81 | 1.84 | 7.04  |
| 1HGD.PDB | O, E_LEU_86    | N, E_LEU_59    | H, E_LEU_59     | 2.86 | 1.91 | 10.61 |
| 1HGD.PDB | O, E_VAL_88    | N, E_GLY_61    | H, E_GLY_61     | 2.96 | 2.07 | 21.18 |
| 1HGD.PDB | OD1, E_ASP_60  | N, E_ILE_62    | H, E_ILE_62     | 2.88 | 1.95 | 15.04 |
| 1HGD.PDB | O, E_GLY_61    | N, E_CYS_64    | H, E_CYS_64     | 2.89 | 1.98 | 17.49 |
| 1HGD.PDB | OE2, E_GLU_89  | N, E_LEU_66    | H, E_LEU_66     | 2.97 | 1.99 | 5.61  |
| 1HGD.PDB | O, E_LEU_66    | N, E_LEU_70    | H, E_LEU_70     | 2.90 | 2.02 | 20.74 |
| 1HGD.PDB | O, E_ILE_67    | N, E_LEU_71    | H, E_LEU_71     | 2.80 | 1.84 | 6.52  |
| 1HGD.PDB | O, E_ASP_68    | N, E_GLY_72    | H, E_GLY_72     | 2.91 | 1.98 | 15.31 |
| 1HGD.PDB | OD1, E_ASP_73  | N, E_HIS_75    | H, E_HIS_75     | 2.96 | 2.07 | 21.14 |
| 1HGD.PDB | OD1, E_ASP_73  | ND1, E_HIS_75  | HD1, E_HIS_75   | 2.79 | 1.88 | 18.25 |
| 1HGD.PDB | O, E_ASP_63    | NE2, E_HIS_75  | HE2, E_HIS_75   | 2.89 | 1.97 | 16.27 |
| 1HGD.PDB | O, E_ASP_73    | N, E_CYS_76    | H, E_CYS_76     | 2.81 | 1.87 | 13.32 |
| 1HGD.PDB | O, E_PRO_74    | N, E_ASP_77    | H, E_ASP_77     | 2.91 | 1.96 | 10.31 |
| 1HGD.PDB | O, E_ARG_57    | N, E_ASP_85    | H, E_ASP_85     | 2.78 | 1.89 | 18.76 |
| 1HGD.PDB | O, E_LEU_59    | N, E_VAL_88    | H, E_VAL_88     | 2.91 | 1.94 | 5.45  |
| 1HGD.PDB | O, E_MET_268   | N, E_GLU_89    | H, E_GLU_89     | 2.76 | 1.82 | 11.82 |
| 1HGD.PDB | OD1, E_ASP_60  | NE, E_ARG_90   | HE, E_ARG_90    | 2.88 | 1.91 | 7.90  |
| 1HGD.PDB | O, E_SER_270   | NH1, E_ARG_90  | HH11, E_ARG_90  | 2.66 | 1.80 | 24.67 |
| 1HGD.PDB | O, E_ALA_272   | NH1, E_ARG_90  | HH12, E_ARG_90  | 2.60 | 1.68 | 18.53 |
| 1HGD.PDB | OD2, E_ASP_60  | NH2, E_ARG_90  | HH21, E_ARG_90  | 2.82 | 1.83 | 10.15 |
| 1HGD.PDB | OD1, E_ASP_271 | N, E_SER_91    | H, E_SER_91     | 2.88 | 1.92 | 9.41  |
| 1HGD.PDB | OD1, E_ASP_271 | OG, E_SER_91   | HG, E_SER_91    | 2.94 | 2.13 | 28.39 |
| 1HGD.PDB | OD2, E_ASP_271 | OG, E_SER_91   | HG, E_SER_91    | 2.84 | 1.93 | 17.47 |

|          |                |                |                 |      |      |       |
|----------|----------------|----------------|-----------------|------|------|-------|
| 1HGD.PDB | OD2, E_ASP.68  | OG, E_SER.95   | HG, E_SER.95    | 2.91 | 1.98 | 14.66 |
| 1HGD.PDB | OD2, E_ASP.73  | N, E_ASN.96    | H, E_ASN.96     | 2.95 | 1.99 | 11.30 |
| 1HGD.PDB | OD1, E_ASP.68  | OH, E_TYR.100  | HH, E_TYR.100   | 2.86 | 1.93 | 14.06 |
| 1HGD.PDB | OD2, E_ASP.104 | OG, E_SER.107  | HG, E_SER.107   | 2.90 | 1.98 | 16.44 |
| 1HGD.PDB | O, E_TYR.105   | N, E_ARG.109   | H, E_ARG.109    | 2.86 | 1.88 | 0.77  |
| 1HGD.PDB | OE2, F_GLU.67  | NH2, E_ARG.109 | HH21, E_ARG.109 | 2.82 | 1.85 | 14.73 |
| 1HGD.PDB | OD2, D_ASP.79  | OG, E_SER.110  | HG, E_SER.110   | 2.81 | 1.89 | 15.50 |
| 1HGD.PDB | O, E_SER.107   | N, E_LEU.111   | H, E_LEU.111    | 2.92 | 1.96 | 10.24 |
| 1HGD.PDB | O, E_LEU.108   | N, E_VAL.112   | H, E_VAL.112    | 2.98 | 2.02 | 7.44  |
| 1HGD.PDB | O, E_ARG.109   | N, E_ALA.113   | H, E_ALA.113    | 2.92 | 2.02 | 18.83 |
| 1HGD.PDB | O, E_SER.110   | N, E_SER.114   | H, E_SER.114    | 2.98 | 2.03 | 12.50 |
| 1HGD.PDB | OE2, E_GLU.119 | OG1, E_THR.117 | HG1, E_THR.117  | 2.90 | 1.95 | 9.79  |
| 1HGD.PDB | O, E_GLU.82    | N, E_LEU.118   | H, E_LEU.118    | 2.92 | 1.99 | 15.84 |
| 1HGD.PDB | O, E_TYR.257   | N, E_ILE.121   | H, E_ILE.121    | 2.87 | 1.90 | 6.59  |
| 1HGD.PDB | O, E_ARG.255   | N, E_GLU.123   | H, E_GLU.123    | 2.92 | 1.97 | 11.75 |
| 1HGD.PDB | O, E_THR.155   | N, E_THR.131   | H, E_THR.131    | 2.76 | 1.86 | 18.28 |
| 1HGD.PDB | OD1, E_ASN.152 | N, E_ASN.133   | H, E_ASN.133    | 2.85 | 1.91 | 14.28 |
| 1HGD.PDB | O, E_GLY.146   | N, E_SER.136   | H, E_SER.136    | 2.73 | 1.79 | 12.16 |
| 1HGD.PDB | O, E_GLY.144   | NZ, E_LYS.140  | HZ1, E_LYS.140  | 2.69 | 1.72 | 15.78 |
| 1HGD.PDB | OD1, E_ASN.137 | NZ, E_LYS.140  | HZ2, E_LYS.140  | 2.79 | 1.84 | 19.51 |
| 1HGD.PDB | OD2, E_ASP.77  | NE, E_ARG.141  | HE, E_ARG.141   | 2.82 | 1.98 | 26.95 |
| 1HGD.PDB | O, E_PHE.147   | NH1, E_ARG.141 | HH12, E_ARG.141 | 2.57 | 1.63 | 15.28 |
| 1HGD.PDB | OD1, E_ASP.77  | NH2, E_ARG.141 | HH21, E_ARG.141 | 2.88 | 1.95 | 21.13 |
| 1HGD.PDB | OD2, E_ASP.77  | NH2, E_ARG.141 | HH21, E_ARG.141 | 2.75 | 1.86 | 24.62 |
| 1HGD.PDB | O, E_GLY.72    | NH2, E_ARG.141 | HH22, E_ARG.141 | 2.94 | 1.97 | 11.68 |
| 1HGD.PDB | O, E_SER.136   | N, E_GLY.146   | H, E_GLY.146    | 2.97 | 2.03 | 13.31 |
| 1HGD.PDB | O, E_GLY.72    | N, E_SER.149   | H, E_SER.149    | 2.84 | 1.94 | 18.94 |
| 1HGD.PDB | O, E_ALA.253   | N, E_ASN.152   | H, E_ASN.152    | 2.83 | 1.97 | 23.36 |
| 1HGD.PDB | OH, E_TYR.195  | NE1, E_TRP.153 | HE1, E_TRP.153  | 2.82 | 1.91 | 19.17 |
| 1HGD.PDB | O, E_LEU.194   | N, E_LYS.156   | H, E_LYS.156    | 2.96 | 2.06 | 18.57 |
| 1HGD.PDB | O, E_SER.193   | NZ, E_LYS.156  | HZ2, E_LYS.156  | 2.80 | 1.84 | 19.27 |
| 1HGD.PDB | O, E_SER.247   | N, E_LEU.164   | H, E_LEU.164    | 2.67 | 1.83 | 24.46 |
| 1HGD.PDB | O, E_ILE.245   | N, E_VAL.166   | H, E_VAL.166    | 2.95 | 1.99 | 10.02 |
| 1HGD.PDB | O, E_LEU.243   | OG1, E_THR.167 | HG1, E_THR.167  | 2.95 | 2.08 | 21.06 |
| 1HGD.PDB | O, E_LEU.243   | N, E_MET.168   | H, E_MET.168    | 2.92 | 1.99 | 16.02 |
| 1HGD.PDB | O, E_ASP.241   | N, E_ASN.170   | H, E_ASN.170    | 2.93 | 1.96 | 7.59  |
| 1HGD.PDB | O, E_PHE.174   | ND2, E_ASN.170 | HD21, E_ASN.170 | 2.84 | 1.88 | 9.66  |
| 1HGD.PDB | O, E_VAL.237   | ND2, E_ASN.170 | HD22, E_ASN.170 | 2.82 | 2.02 | 28.84 |
| 1HGD.PDB | O, E_VAL.237   | N, E_LYS.176   | H, E_LYS.176    | 2.95 | 2.02 | 16.27 |
| 1HGD.PDB | OE2, E_GLU.123 | NZ, E_LYS.176  | HZ2, E_LYS.176  | 2.69 | 1.80 | 25.12 |
| 1HGD.PDB | O, E_THR.235   | N, E_TYR.178   | H, E_TYR.178    | 2.82 | 1.85 | 5.66  |
| 1HGD.PDB | OE1, E_GLU.123 | OH, E_TYR.178  | HH, E_TYR.178   | 2.75 | 1.83 | 13.46 |
| 1HGD.PDB | OG1, E_THR.235 | NE1, E_TRP.180 | HE1, E_TRP.180  | 2.93 | 1.94 | 3.75  |
| 1HGD.PDB | O, E_ASN.250   | N, E_HIS.183   | H, E_HIS.183    | 2.87 | 1.97 | 19.16 |
| 1HGD.PDB | O, E_ARG.229   | N, E_HIS.184   | H, E_HIS.184    | 2.83 | 1.87 | 8.20  |
| 1HGD.PDB | OG, E_SER.231  | NE2, E_HIS.184 | HE2, E_HIS.184  | 2.80 | 1.95 | 25.42 |
| 1HGD.PDB | OE1, E_GLU.190 | N, E_SER.186   | H, E_SER.186    | 2.91 | 1.96 | 11.07 |
| 1HGD.PDB | OG1, E_THR.187 | N, E_GLU.190   | H, E_GLU.190    | 2.91 | 1.97 | 13.39 |
| 1HGD.PDB | O, E_GLN.197   | NE2, E_GLN.191 | HE22, E_GLN.191 | 2.89 | 1.97 | 15.90 |
| 1HGD.PDB | O, E_ASN.188   | OG1, E_THR.192 | HG1, E_THR.192  | 2.98 | 2.03 | 7.22  |
| 1HGD.PDB | O, E_GLN.189   | N, E_SER.193   | H, E_SER.193    | 2.81 | 1.84 | 3.50  |
| 1HGD.PDB | O, E_GLU.190   | N, E_LEU.194   | H, E_LEU.194    | 2.98 | 2.02 | 10.79 |
| 1HGD.PDB | O, E_GLN.191   | N, E_TYR.195   | H, E_TYR.195    | 2.77 | 1.82 | 10.72 |
| 1HGD.PDB | O, E_TYR.161   | NE2, E_GLN.197 | HE21, E_GLN.197 | 2.91 | 1.96 | 10.54 |
| 1HGD.PDB | O, E_ASN.248   | NE2, E_GLN.197 | HE22, E_GLN.197 | 2.95 | 2.02 | 14.25 |
| 1HGD.PDB | OD1, E_ASN.246 | NH2, E_ARG.201 | HH21, E_ARG.201 | 2.60 | 1.77 | 27.54 |
| 1HGD.PDB | O, E_ASN.246   | N, E_THR.203   | H, E_THR.203    | 2.88 | 1.92 | 8.43  |
| 1HGD.PDB | OG1, E_THR.212 | OG1, E_THR.203 | HG1, E_THR.203  | 2.93 | 1.99 | 12.22 |

|          |                |                |                 |      |      |       |
|----------|----------------|----------------|-----------------|------|------|-------|
| 1HGD.PDB | O, E_GLN_211   | N, E_VAL_204   | H, E_VAL_204    | 2.87 | 1.96 | 17.47 |
| 1HGD.PDB | O, E_SER_209   | N, E_THR_206   | H, E_THR_206    | 2.95 | 1.99 | 8.08  |
| 1HGD.PDB | OD1, E_ASP_241 | N, E_ARG_207   | H, E_ARG_207    | 2.90 | 1.93 | 8.79  |
| 1HGD.PDB | OG1, E_THR_206 | OG, E_SER_209  | HG, E_SER_209   | 2.91 | 1.97 | 11.26 |
| 1HGD.PDB | OD1, C_ASP_101 | NE2, E_GLN_210 | HE22, E_GLN_210 | 2.98 | 2.14 | 27.07 |
| 1HGD.PDB | O, E_VAL_204   | N, E_GLN_211   | H, E_GLN_211    | 2.82 | 1.90 | 15.66 |
| 1HGD.PDB | O, E_VAL_202   | N, E_ILE_213   | H, E_ILE_213    | 2.89 | 1.96 | 14.67 |
| 1HGD.PDB | O, E_ASN_216   | NH1, E_ARG_220 | HH12, E_ARG_220 | 2.89 | 2.08 | 29.65 |
| 1HGD.PDB | OE1, A_GLN_210 | NH2, E_ARG_220 | HH21, E_ARG_220 | 2.77 | 1.90 | 25.11 |
| 1HGD.PDB | O, E_ASN_216   | NH2, E_ARG_220 | HH22, E_ARG_220 | 2.74 | 1.86 | 23.30 |
| 1HGD.PDB | O, E_LEU_226   | N, E_VAL_223   | H, E_VAL_223    | 2.87 | 1.91 | 7.72  |
| 1HGD.PDB | O, E_CYS_97    | NE, E_ARG_224  | HE, E_ARG_224   | 2.84 | 2.00 | 26.20 |
| 1HGD.PDB | O, E_CYS_97    | NH2, E_ARG_224 | HH21, E_ARG_224 | 2.84 | 1.97 | 24.48 |
| 1HGD.PDB | O, E_VAL_223   | N, E_LEU_226   | H, E_LEU_226    | 2.93 | 1.99 | 12.03 |
| 1HGD.PDB | OE2, E_GLU_190 | OG, E_SER_228  | HG, E_SER_228   | 2.96 | 1.98 | 4.78  |
| 1HGD.PDB | O, E_SER_228   | NH1, E_ARG_229 | HH11, E_ARG_229 | 2.70 | 1.76 | 17.46 |
| 1HGD.PDB | O, E_PRO_221   | NH2, E_ARG_229 | HH22, E_ARG_229 | 2.58 | 1.65 | 17.47 |
| 1HGD.PDB | OD1, E_ASP_101 | OG, E_SER_231  | HG, E_SER_231   | 2.85 | 1.91 | 13.25 |
| 1HGD.PDB | O, E_ASP_101   | N, E_ILE_232   | H, E_ILE_232    | 2.91 | 1.98 | 14.92 |
| 1HGD.PDB | O, E_TRP_180   | N, E_TYR_233   | H, E_TYR_233    | 2.93 | 1.97 | 9.20  |
| 1HGD.PDB | O, E_TYR_178   | N, E_THR_235   | H, E_THR_235    | 2.86 | 1.97 | 20.35 |
| 1HGD.PDB | O, E_LYS_176   | N, E_VAL_237   | H, E_VAL_237    | 2.77 | 1.86 | 16.39 |
| 1HGD.PDB | O, D_SER_71    | NZ, E_LYS_238  | HZ2, E_LYS_238  | 2.73 | 1.80 | 21.39 |
| 1HGD.PDB | OE1, D_GLU_72  | NZ, E_LYS_238  | HZ3, E_LYS_238  | 2.87 | 1.86 | 13.40 |
| 1HGD.PDB | O, E_ASN_170   | N, E_GLY_240   | H, E_GLY_240    | 2.89 | 2.02 | 22.44 |
| 1HGD.PDB | O, E_LYS_238   | N, E_ASP_241   | H, E_ASP_241    | 2.96 | 2.03 | 13.52 |
| 1HGD.PDB | OD1, E_ASP_241 | N, E_VAL_242   | H, E_VAL_242    | 2.79 | 1.95 | 26.27 |
| 1HGD.PDB | O, E_MET_168   | N, E_LEU_243   | H, E_LEU_243    | 2.89 | 1.92 | 5.48  |
| 1HGD.PDB | O, E_VAL_166   | N, E_ILE_245   | H, E_ILE_245    | 2.95 | 2.01 | 13.26 |
| 1HGD.PDB | O, E_THR_203   | N, E_ASN_246   | H, E_ASN_246    | 2.94 | 1.96 | 4.93  |
| 1HGD.PDB | OD1, E_ASN_165 | ND2, E_ASN_246 | HD22, E_ASN_246 | 2.91 | 1.96 | 12.66 |
| 1HGD.PDB | O, E_LEU_164   | N, E_SER_247   | H, E_SER_247    | 2.95 | 2.04 | 18.22 |
| 1HGD.PDB | OE1, E_GLN_191 | ND2, E_ASN_250 | HD21, E_ASN_250 | 2.95 | 1.99 | 9.92  |
| 1HGD.PDB | O, E_HIS_183   | ND2, E_ASN_250 | HD22, E_ASN_250 | 2.86 | 1.93 | 15.05 |
| 1HGD.PDB | O, E_ASN_152   | N, E_ALA_253   | H, E_ALA_253    | 2.88 | 1.99 | 19.87 |
| 1HGD.PDB | OD1, E_ASN_133 | NH2, E_ARG_255 | HH22, E_ARG_255 | 2.52 | 1.69 | 27.28 |
| 1HGD.PDB | O, E_ILE_121   | N, E_TYR_257   | H, E_TYR_257    | 2.94 | 2.11 | 26.29 |
| 1HGD.PDB | O, E_LEU_177   | N, E_PHE_258   | H, E_PHE_258    | 2.92 | 1.95 | 7.16  |
| 1HGD.PDB | OE2, E_GLU_119 | NH1, E_ARG_261 | HH12, E_ARG_261 | 2.64 | 1.81 | 27.92 |
| 1HGD.PDB | OE1, E_GLU_119 | NH2, E_ARG_261 | HH22, E_ARG_261 | 2.88 | 1.97 | 22.94 |
| 1HGD.PDB | OD2, E_ASP_85  | NZ, E_LYS_264  | HZ3, E_LYS_264  | 2.87 | 1.88 | 16.50 |
| 1HGD.PDB | O, E_PHE_87    | N, E_MET_268   | H, E_MET_268    | 2.81 | 1.92 | 20.02 |
| 1HGD.PDB | O, E_PRO_284   | OG, E_SER_270  | HG, E_SER_270   | 2.87 | 1.93 | 12.39 |
| 1HGD.PDB | OG, E_SER_270  | N, E_ALA_272   | H, E_ALA_272    | 2.92 | 1.98 | 12.12 |
| 1HGD.PDB | O, E_ILE_51    | N, E_ASP_275   | H, E_ASP_275    | 2.91 | 2.01 | 19.96 |
| 1HGD.PDB | OD1, E_ASP_275 | N, E_THR_276   | H, E_THR_276    | 2.81 | 1.96 | 24.15 |
| 1HGD.PDB | O, E_ASN_54    | N, E_SER_279   | H, E_SER_279    | 2.80 | 1.87 | 14.43 |
| 1HGD.PDB | O, E_TYR_302   | N, E_ILE_282   | H, E_ILE_282    | 2.87 | 1.90 | 8.73  |
| 1HGD.PDB | O, E_THR_283   | N, E_GLY_286   | H, E_GLY_286    | 2.82 | 1.89 | 12.51 |
| 1HGD.PDB | O, E_LYS_50    | N, E_SER_287   | H, E_SER_287    | 2.87 | 1.90 | 5.78  |
| 1HGD.PDB | O, E_ALA_304   | ND2, E_ASN_290 | HD22, E_ASN_290 | 2.83 | 1.94 | 19.46 |
| 1HGD.PDB | OE1, E_GLN_44  | NZ, E_LYS_292  | HZ1, E_LYS_292  | 2.70 | 1.70 | 12.87 |
| 1HGD.PDB | OD2, E_ASP_291 | NZ, E_LYS_292  | HZ3, E_LYS_292  | 2.83 | 1.91 | 23.60 |
| 1HGD.PDB | O, E_LYS_307   | N, E_GLN_295   | H, E_GLN_295    | 2.78 | 1.92 | 23.12 |
| 1HGD.PDB | O, E_ASN_298   | NE2, E_GLN_295 | HE21, E_GLN_295 | 2.76 | 1.79 | 7.00  |
| 1HGD.PDB | O, E_GLN_44    | N, E_ASN_296   | H, E_ASN_296    | 2.84 | 1.90 | 13.14 |
| 1HGD.PDB | OE1, E_GLN_295 | N, E_VAL_297   | H, E_VAL_297    | 2.67 | 1.86 | 28.12 |
| 1HGD.PDB | OD1, E_ASN_285 | ND2, E_ASN_298 | HD22, E_ASN_298 | 2.95 | 2.01 | 14.15 |

|          |                |                |                 |      |      |       |
|----------|----------------|----------------|-----------------|------|------|-------|
| 1HGD.PDB | O, F_LYS_68    | NZ, E_LYS_299  | HZ1, E_LYS_299  | 2.98 | 1.98 | 14.54 |
| 1HGD.PDB | OD1, E_ASN_298 | N, E_ILE_300   | H, E_ILE_300    | 2.90 | 1.99 | 17.71 |
| 1HGD.PDB | O, E_ILE_282   | N, E_TYR_302   | H, E_TYR_302    | 2.88 | 2.05 | 26.69 |
| 1HGD.PDB | O, E_LYS_264   | OH, E_TYR_302  | HH, E_TYR_302   | 2.65 | 1.86 | 28.82 |
| 1HGD.PDB | O, F_LYS_62    | N, E_GLY_303   | H, E_GLY_303    | 2.94 | 1.98 | 8.87  |
| 1HGD.PDB | O, E_GLN_295   | N, E_VAL_309   | H, E_VAL_309    | 2.96 | 2.15 | 28.43 |
| 1HGD.PDB | OG, F_SER_93   | N, E_LYS_310   | H, E_LYS_310    | 2.95 | 2.00 | 12.05 |
| 1HGD.PDB | OE2, E_GLU_41  | N, E_LEU_314   | H, E_LEU_314    | 2.81 | 1.89 | 15.95 |
| 1HGD.PDB | OE1, E_GLU_41  | NZ, E_LYS_315  | HZ3, E_LYS_315  | 2.76 | 1.83 | 22.10 |
| 1HGD.PDB | O, E_THR_40    | N, E_LEU_316   | H, E_LEU_316    | 2.76 | 1.83 | 14.34 |
| 1HGD.PDB | OD1, F_ASN_104 | N, E_ALA_317   | H, E_ALA_317    | 2.79 | 1.84 | 10.01 |
| 1HGD.PDB | O, E_ASN_38    | N, E_THR_318   | H, E_THR_318    | 2.97 | 2.03 | 14.24 |
| 1HGD.PDB | O, E_VAL_20    | ND2, E_ASN_322 | HD21, E_ASN_322 | 2.90 | 2.00 | 18.79 |
| 1HGD.PDB | OE2, E_GLU_35  | ND2, E_ASN_322 | HD22, E_ASN_322 | 2.82 | 1.95 | 23.13 |
| 1HGD.PDB | OE2, F_GLU_15  | N, E_GLU_325   | H, E_GLU_325    | 2.91 | 2.10 | 28.29 |
| 1HGD.PDB | O, E_GLN_327   | NZ, E_LYS_326  | HZ1, E_LYS_326  | 2.81 | 1.89 | 22.57 |
| 1HGD.PDB | OE1, F_GLU_15  | NZ, E_LYS_326  | HZ3, E_LYS_326  | 2.97 | 1.97 | 16.19 |
| 1HGD.PDB | O, E_LYS_326   | NE2, E_GLN_327 | HE22, E_GLN_327 | 2.85 | 1.95 | 19.55 |
| 1HGD.PDB | OD2, F_ASP_112 | N, F_GLY_1     | H2, F_GLY_1     | 2.81 | 1.81 | 13.59 |
| 1HGD.PDB | OD1, F_ASP_109 | N, F_LEU_2     | H, F_LEU_2      | 2.86 | 1.96 | 19.63 |
| 1HGD.PDB | OD2, F_ASP_112 | N, F_PHE_3     | H, F_PHE_3      | 2.81 | 2.02 | 29.56 |
| 1HGD.PDB | OD2, F_ASP_112 | N, F_GLY_4     | H, F_GLY_4      | 2.92 | 2.06 | 23.22 |
| 1HGD.PDB | OD1, F_ASP_112 | N, F_ALA_5     | H, F_ALA_5      | 2.89 | 2.02 | 22.37 |
| 1HGD.PDB | O, F_GLY_4     | N, F_PHE_9     | H, F_PHE_9      | 2.78 | 1.84 | 12.30 |
| 1HGD.PDB | O, F_GLY_13    | ND2, F_ASN_12  | HD22, F_ASN_12  | 2.80 | 1.95 | 24.70 |
| 1HGD.PDB | O, E_VAL_323   | N, F_GLY_13    | H, F_GLY_13     | 2.71 | 1.79 | 15.38 |
| 1HGD.PDB | O, E_HIS_17    | N, F_TRP_14    | H, F_TRP_14     | 2.87 | 1.92 | 12.04 |
| 1HGD.PDB | OG1, F_THR_41  | N, F_TRP_21    | H, F_TRP_21     | 2.87 | 1.95 | 16.02 |
| 1HGD.PDB | O, E_GLY_16    | N, F_GLY_23    | H, F_GLY_23     | 2.91 | 2.00 | 17.89 |
| 1HGD.PDB | O, F_ALA_35    | N, F_PHE_24    | H, F_PHE_24     | 2.81 | 1.84 | 4.26  |
| 1HGD.PDB | O, E_CYS_14    | N, F_ARG_25    | H, F_ARG_25     | 2.88 | 1.94 | 13.26 |
| 1HGD.PDB | OE1, F_GLN_34  | NE, F_ARG_25   | HE, F_ARG_25    | 2.93 | 2.07 | 24.69 |
| 1HGD.PDB | OE1, F_GLN_34  | NH2, F_ARG_25  | HH21, F_ARG_25  | 2.80 | 1.89 | 20.31 |
| 1HGD.PDB | O, F_GLY_33    | N, F_HIS_26    | H, F_HIS_26     | 2.91 | 2.03 | 21.54 |
| 1HGD.PDB | O, E_THR_12    | N, F_GLN_27    | H, F_GLN_27     | 2.97 | 2.04 | 16.25 |
| 1HGD.PDB | O, F_GLY_31    | N, F_ASN_28    | H, F_ASN_28     | 2.78 | 1.85 | 13.40 |
| 1HGD.PDB | OD1, F_ASN_146 | ND2, F_ASN_28  | HD21, F_ASN_28  | 2.81 | 1.89 | 15.27 |
| 1HGD.PDB | O, F_CYS_144   | ND2, F_ASN_28  | HD22, F_ASN_28  | 2.83 | 1.93 | 18.14 |
| 1HGD.PDB | O, F_HIS_26    | N, F_GLY_33    | H, F_GLY_33     | 2.97 | 2.11 | 23.75 |
| 1HGD.PDB | O, F_PHE_24    | N, F_ALA_35    | H, F_ALA_35     | 2.78 | 1.98 | 28.59 |
| 1HGD.PDB | O, F_TYR_22    | N, F_ASP_37    | H, F_ASP_37     | 2.69 | 1.77 | 12.88 |
| 1HGD.PDB | OD2, F_ASP_37  | N, F_SER_40    | H, F_SER_40     | 2.92 | 1.96 | 9.75  |
| 1HGD.PDB | OD2, F_ASP_37  | OG, F_SER_40   | HG, F_SER_40    | 2.84 | 1.98 | 23.42 |
| 1HGD.PDB | O, F_ASP_37    | OG1, F_THR_41  | HG1, F_THR_41   | 2.75 | 1.88 | 21.07 |
| 1HGD.PDB | O, F_LEU_38    | N, F_GLN_42    | H, F_GLN_42     | 2.93 | 2.03 | 18.28 |
| 1HGD.PDB | OD1, F_ASP_46  | NE2, F_GLN_42  | HE22, F_GLN_42  | 2.83 | 1.94 | 21.51 |
| 1HGD.PDB | O, F_LYS_39    | N, F_ALA_43    | H, F_ALA_43     | 2.93 | 1.98 | 11.56 |
| 1HGD.PDB | O, F_SER_40    | N, F_ALA_44    | H, F_ALA_44     | 2.97 | 1.99 | 2.55  |
| 1HGD.PDB | O, F_THR_41    | N, F_ILE_45    | H, F_ILE_45     | 2.91 | 1.96 | 10.99 |
| 1HGD.PDB | O, F_GLN_42    | N, F_ASP_46    | H, F_ASP_46     | 2.80 | 1.82 | 0.60  |
| 1HGD.PDB | O, F_ALA_43    | NE2, F_GLN_47  | HE22, F_GLN_47  | 2.90 | 2.01 | 20.21 |
| 1HGD.PDB | O, F_ILE_45    | N, F_ASN_49    | H, F_ASN_49     | 2.84 | 1.94 | 18.12 |
| 1HGD.PDB | O, F_ASP_46    | N, F_GLY_50    | H, F_GLY_50     | 2.84 | 1.95 | 20.14 |
| 1HGD.PDB | OE1, F_GLU_103 | NZ, F_LYS_51   | HZ2, F_LYS_51   | 2.72 | 1.70 | 8.28  |
| 1HGD.PDB | ND1, F_HIS_106 | NZ, F_LYS_51   | HZ3, F_LYS_51   | 2.73 | 1.76 | 16.89 |
| 1HGD.PDB | O, F_ILE_48    | N, F_LEU_52    | H, F_LEU_52     | 2.94 | 2.02 | 16.22 |
| 1HGD.PDB | O, F_ASN_49    | N, F_ASN_53    | H, F_ASN_53     | 2.85 | 1.92 | 14.75 |
| 1HGD.PDB | OE1, F_GLU_57  | NH1, F_ARG_54  | HH11, F_ARG_54  | 2.86 | 1.85 | 10.37 |

|          |                |                |                 |      |      |       |
|----------|----------------|----------------|-----------------|------|------|-------|
| 1HGD.PDB | OE2, D_GLU_97  | NH2, F_ARG_54  | HH22, F_ARG_54  | 2.72 | 1.75 | 12.85 |
| 1HGD.PDB | OE2, F_GLU_61  | NZ, F_LYS_58   | HZ2, F_LYS_58   | 2.92 | 1.89 | 10.22 |
| 1HGD.PDB | OD2, D_ASP_90  | NZ, F_LYS_62   | HZ3, F_LYS_62   | 2.71 | 1.86 | 28.09 |
| 1HGD.PDB | OG, E_SER_110  | NE2, F_HIS_64  | HE2, F_HIS_64   | 2.95 | 1.98 | 9.92  |
| 1HGD.PDB | O, E_LYS_299   | NZ, F_LYS_68   | HZ1, F_LYS_68   | 2.97 | 1.94 | 5.85  |
| 1HGD.PDB | OE2, F_GLU_85  | NZ, F_LYS_68   | HZ2, F_LYS_68   | 2.72 | 1.77 | 19.94 |
| 1HGD.PDB | OG, A_SER_107  | N, F_ARG_76    | H, F_ARG_76     | 2.82 | 1.86 | 9.34  |
| 1HGD.PDB | OE2, B_GLU_81  | NE, F_ARG_76   | HE, F_ARG_76    | 2.86 | 1.90 | 10.66 |
| 1HGD.PDB | OE2, B_GLU_74  | NH1, F_ARG_76  | HH12, F_ARG_76  | 2.77 | 1.75 | 1.42  |
| 1HGD.PDB | OE1, B_GLU_81  | NH2, F_ARG_76  | HH21, F_ARG_76  | 2.64 | 1.65 | 5.37  |
| 1HGD.PDB | OE1, B_GLU_74  | NH2, F_ARG_76  | HH22, F_ARG_76  | 2.71 | 1.72 | 7.42  |
| 1HGD.PDB | OE1, F_GLU_74  | NE2, F_GLN_78  | HE22, F_GLN_78  | 2.96 | 1.99 | 9.91  |
| 1HGD.PDB | O, F_GLY_75    | N, F_ASP_79    | H, F_ASP_79     | 2.93 | 1.98 | 10.55 |
| 1HGD.PDB | O, F_GLN_78    | N, F_LYS_82    | H, F_LYS_82     | 2.98 | 2.01 | 9.35  |
| 1HGD.PDB | O, F_ASP_79    | N, F_TYR_83    | H, F_TYR_83     | 2.93 | 1.99 | 14.99 |
| 1HGD.PDB | OE1, B_GLU_85  | OH, F_TYR_83   | HH, F_TYR_83    | 2.53 | 1.75 | 27.84 |
| 1HGD.PDB | O, F_LEU_80    | N, F_VAL_84    | H, F_VAL_84     | 2.89 | 1.92 | 3.19  |
| 1HGD.PDB | O, F_LYS_82    | N, F_ASP_86    | H, F_ASP_86     | 2.94 | 1.97 | 9.39  |
| 1HGD.PDB | O, F_TYR_83    | N, F_THR_87    | H, F_THR_87     | 2.90 | 1.96 | 11.94 |
| 1HGD.PDB | O, F_VAL_84    | N, F_LYS_88    | H, F_LYS_88     | 2.92 | 1.96 | 11.08 |
| 1HGD.PDB | OH, D_TYR_83   | NZ, F_LYS_88   | HZ1, F_LYS_88   | 2.67 | 1.66 | 8.83  |
| 1HGD.PDB | O, F_GLU_85    | N, F_ILE_89    | H, F_ILE_89     | 2.88 | 1.90 | 4.38  |
| 1HGD.PDB | O, F_LYS_88    | N, F_TRP_92    | H, F_TRP_92     | 2.95 | 1.98 | 4.36  |
| 1HGD.PDB | O, F_ILE_89    | N, F_SER_93    | H, F_SER_93     | 2.85 | 1.95 | 19.01 |
| 1HGD.PDB | O, F_ILE_89    | OG, F_SER_93   | HG, F_SER_93    | 2.82 | 1.88 | 12.37 |
| 1HGD.PDB | O, F_ASP_90    | N, F_TYR_94    | H, F_TYR_94     | 2.87 | 1.95 | 17.83 |
| 1HGD.PDB | O, F_TRP_92    | N, F_ALA_96    | H, F_ALA_96     | 2.93 | 1.99 | 13.63 |
| 1HGD.PDB | O, F_SER_93    | N, F_GLU_97    | H, F_GLU_97     | 2.98 | 2.03 | 11.78 |
| 1HGD.PDB | O, F_TYR_94    | N, F_LEU_98    | H, F_LEU_98     | 2.95 | 1.97 | 4.49  |
| 1HGD.PDB | O, F_ASN_95    | N, F_LEU_99    | H, F_LEU_99     | 2.94 | 2.01 | 15.31 |
| 1HGD.PDB | O, F_LEU_99    | N, F_GLU_103   | H, F_GLU_103    | 2.96 | 2.00 | 11.56 |
| 1HGD.PDB | O, F_VAL_100   | N, F_ASN_104   | H, F_ASN_104    | 2.88 | 1.92 | 8.65  |
| 1HGD.PDB | O, E_LYS_27    | ND2, F_ASN_104 | HD22, F_ASN_104 | 2.95 | 1.99 | 8.95  |
| 1HGD.PDB | O, F_LEU_102   | N, F_HIS_106   | H, F_HIS_106    | 2.94 | 1.97 | 6.97  |
| 1HGD.PDB | O, F_GLU_103   | N, F_THR_107   | H, F_THR_107    | 2.81 | 1.90 | 17.76 |
| 1HGD.PDB | O, F_ASN_104   | N, F_ILE_108   | H, F_ILE_108    | 2.98 | 2.03 | 11.71 |
| 1HGD.PDB | O, F_HIS_106   | N, F_LEU_110   | H, F_LEU_110    | 2.80 | 1.85 | 9.01  |
| 1HGD.PDB | O, F_ASP_109   | N, F_SER_113   | H, F_SER_113    | 2.83 | 1.87 | 7.95  |
| 1HGD.PDB | O, D_LEU_2     | OG, F_SER_113  | HG, F_SER_113   | 2.74 | 1.91 | 25.98 |
| 1HGD.PDB | O, F_SER_113   | N, F_LYS_117   | H, F_LYS_117    | 2.74 | 1.84 | 18.35 |
| 1HGD.PDB | O, F_MET_115   | N, F_PHE_119   | H, F_PHE_119    | 3.00 | 2.07 | 16.22 |
| 1HGD.PDB | O, F_ASN_116   | N, F_GLU_120   | H, F_GLU_120    | 2.89 | 1.91 | 4.65  |
| 1HGD.PDB | O, F_LYS_117   | N, F_LYS_121   | H, F_LYS_121    | 2.95 | 2.02 | 15.04 |
| 1HGD.PDB | O, F_PHE_119   | N, F_ARG_123   | H, F_ARG_123    | 2.94 | 2.00 | 14.04 |
| 1HGD.PDB | OE2, F_GLU_120 | NH1, F_ARG_123 | HH11, F_ARG_123 | 2.77 | 1.88 | 23.82 |
| 1HGD.PDB | O, F_GLU_120   | N, F_ARG_124   | H, F_ARG_124    | 2.95 | 1.97 | 3.23  |
| 1HGD.PDB | OE1, D_GLU_132 | NE, F_ARG_124  | HE, F_ARG_124   | 2.96 | 2.14 | 28.71 |
| 1HGD.PDB | OE2, D_GLU_132 | NE, F_ARG_124  | HE, F_ARG_124   | 2.94 | 2.05 | 20.84 |
| 1HGD.PDB | O, F_HIS_159   | ND2, F_ASN_129 | HD21, F_ASN_129 | 2.96 | 2.01 | 10.95 |
| 1HGD.PDB | OH, F_TYR_157  | ND2, F_ASN_129 | HD22, F_ASN_129 | 2.80 | 1.85 | 12.13 |
| 1HGD.PDB | O, F_LYS_139   | N, F_GLU_131   | H, F_GLU_131    | 2.97 | 2.05 | 16.87 |
| 1HGD.PDB | O, F_CYS_137   | N, F_MET_133   | H, F_MET_133    | 2.88 | 1.93 | 10.80 |
| 1HGD.PDB | O, E_LEU_13    | N, F_PHE_138   | H, F_PHE_138    | 2.72 | 1.85 | 21.62 |
| 1HGD.PDB | O, F_GLU_131   | N, F_LYS_139   | H, F_LYS_139    | 2.85 | 1.89 | 9.90  |
| 1HGD.PDB | O, E_ALA_11    | N, F_ILE_140   | H, F_ILE_140    | 2.82 | 1.92 | 18.45 |
| 1HGD.PDB | O, F_ASN_129   | N, F_TYR_141   | H, F_TYR_141    | 2.97 | 2.05 | 16.46 |
| 1HGD.PDB | OE2, F_GLU_165 | N, F_LYS_143   | H, F_LYS_143    | 2.96 | 2.04 | 17.35 |
| 1HGD.PDB | O, F_ASP_145   | N, F_ILE_149   | H, F_ILE_149    | 2.86 | 1.91 | 11.09 |

|          |                |                |                 |      |      |       |
|----------|----------------|----------------|-----------------|------|------|-------|
| 1HGD.PDB | O, F_ASN_146   | N, F_GLU_150   | H, F_GLU_150    | 2.91 | 1.98 | 15.29 |
| 1HGD.PDB | O, F_ALA_147   | N, F_SER_151   | H, F_SER_151    | 2.97 | 2.10 | 22.90 |
| 1HGD.PDB | O, F_CYS_148   | OG, F_SER_151  | HG, F_SER_151   | 2.68 | 1.83 | 22.68 |
| 1HGD.PDB | O, F_GLU_150   | N, F_ASN_154   | H, F_ASN_154    | 2.77 | 1.80 | 3.19  |
| 1HGD.PDB | OD1, F_ASP_158 | N, F_ASP_160   | H, F_ASP_160    | 2.93 | 2.09 | 25.30 |
| 1HGD.PDB | O, F_HIS_159   | N, F_TYR_162   | H, F_TYR_162    | 2.96 | 2.06 | 19.25 |
| 1HGD.PDB | O, D_ARG_170   | NH1, F_ARG_163 | HH12, F_ARG_163 | 2.94 | 1.98 | 14.11 |
| 1HGD.PDB | O, F_TYR_162   | N, F_ALA_166   | H, F_ALA_166    | 2.95 | 1.98 | 6.51  |
| 1HGD.PDB | O, F_ARG_163   | N, F_LEU_167   | H, F_LEU_167    | 2.76 | 1.80 | 7.00  |
| 1HGD.PDB | O, F_ASP_164   | N, F_ASN_168   | H, F_ASN_168    | 2.95 | 1.99 | 8.58  |
| 1HGD.PDB | O, F_GLU_165   | ND2, F_ASN_169 | HD22, F_ASN_169 | 3.00 | 2.04 | 9.28  |
| 1HGD.PDB | O, F_ALA_166   | N, F_ARG_170   | H, F_ARG_170    | 2.83 | 1.97 | 23.51 |
| 1HGD.PDB | O, F_GLU_128   | NE, F_ARG_170  | HE, F_ARG_170   | 2.72 | 1.86 | 23.45 |
| 1HGD.PDB | OE2, F_GLU_131 | NH1, F_ARG_170 | HH11, F_ARG_170 | 2.76 | 1.77 | 6.97  |
| 1HGD.PDB | O, F_LEU_167   | N, F_PHE_171   | H, F_PHE_171    | 2.98 | 2.05 | 14.52 |

Table 1664: 1HGD-specific side chain and main chain hydrogen bonding analysis. In this table, a PDB file is specified with a four-letter PDB ID, except that the names of the PDB files corresponding to the single NMR structural model split from the NMR ensemble is specified with a four-letter PDB ID in addition to a hyphen followed by the single NMR structural model numeric ID, the residue naming scheme is **Chain ID\_residue name\_residue number**,  $\angle ADH$  represents the angle formed by acceptor (A), donor (D) and hydrogen (H) ( $\angle ADH$ ).

| PDB      | Acceptor (A)   | Donor (D)      | Hydrogen (H)    | D-A (Å) | H-A (Å) | $\angle ADH(^{\circ})$ |
|----------|----------------|----------------|-----------------|---------|---------|------------------------|
| 1HGE.PDB | O, B_ILE_140   | N, A_ALA_11    | H, A_ALA_11     | 2.81    | 1.93    | 21.75                  |
| 1HGE.PDB | O, B_PHE_138   | N, A_LEU_13    | H, A_LEU_13     | 2.99    | 2.04    | 13.41                  |
| 1HGE.PDB | O, B_ARG_25    | N, A_CYS_14    | H, A_CYS_14     | 2.88    | 1.92    | 6.83                   |
| 1HGE.PDB | O, B_GLY_136   | N, A_LEU_15    | H, A_LEU_15     | 2.86    | 1.90    | 7.71                   |
| 1HGE.PDB | O, B_GLY_23    | N, A_GLY_16    | H, A_GLY_16     | 2.95    | 2.03    | 17.76                  |
| 1HGE.PDB | O, A_HIS_18    | ND1, A_HIS_17  | HD1, A_HIS_17   | 2.99    | 2.09    | 20.69                  |
| 1HGE.PDB | O, B_TRP_21    | N, A_HIS_18    | H, A_HIS_18     | 2.85    | 1.97    | 21.20                  |
| 1HGE.PDB | OD1, A_ASN_322 | N, A_VAL_20    | H, A_VAL_20     | 2.78    | 1.83    | 11.31                  |
| 1HGE.PDB | O, A_VAL_36    | N, A_THR_24    | H, A_THR_24     | 2.84    | 1.95    | 19.98                  |
| 1HGE.PDB | O, A_ILE_34    | N, A_VAL_26    | H, A_VAL_26     | 2.81    | 1.88    | 13.67                  |
| 1HGE.PDB | OE2, B_GLU_97  | NZ, A_LYS_27   | HZ1, A_LYS_27   | 2.80    | 1.78    | 10.14                  |
| 1HGE.PDB | O, A_VAL_26    | N, A_ILE_34    | H, A_ILE_34     | 2.90    | 1.96    | 12.32                  |
| 1HGE.PDB | O, A_THR_24    | N, A_VAL_36    | H, A_VAL_36     | 2.80    | 1.84    | 9.48                   |
| 1HGE.PDB | O, A_MET_320   | N, A_THR_37    | H, A_THR_37     | 2.86    | 1.89    | 5.71                   |
| 1HGE.PDB | O, A_LEU_316   | N, A_THR_40    | H, A_THR_40     | 2.78    | 1.95    | 26.07                  |
| 1HGE.PDB | O, A_LEU_314   | N, A_LEU_42    | H, A_LEU_42     | 2.81    | 1.99    | 27.51                  |
| 1HGE.PDB | O, A_PHE_294   | N, A_GLN_44    | H, A_GLN_44     | 2.80    | 1.84    | 7.08                   |
| 1HGE.PDB | O, A_SER_46    | NE2, A_GLN_44  | HE22, A_GLN_44  | 2.87    | 1.99    | 22.46                  |
| 1HGE.PDB | OD2, A_ASP_275 | NZ, A_LYS_50   | HZ1, A_LYS_50   | 2.75    | 1.80    | 21.09                  |
| 1HGE.PDB | O, A_PRO_273   | N, A_ILE_51    | H, A_ILE_51     | 2.81    | 1.86    | 12.28                  |
| 1HGE.PDB | O, A_ASP_275   | N, A_ASN_53    | H, A_ASN_53     | 2.79    | 1.91    | 21.52                  |
| 1HGE.PDB | OD2, A_ASP_85  | N, A_ARG_57    | H, A_ARG_57     | 2.92    | 1.99    | 13.17                  |
| 1HGE.PDB | O, A_THR_83    | NE, A_ARG_57   | HE, A_ARG_57    | 2.79    | 1.83    | 9.22                   |
| 1HGE.PDB | O, A_LEU_86    | N, A_LEU_59    | H, A_LEU_59     | 2.90    | 1.96    | 12.31                  |
| 1HGE.PDB | O, A_VAL_88    | N, A_GLY_61    | H, A_GLY_61     | 2.97    | 2.14    | 26.58                  |
| 1HGE.PDB | OD1, A_ASP_60  | N, A_ILE_62    | H, A_ILE_62     | 2.87    | 1.94    | 14.68                  |
| 1HGE.PDB | O, A_GLY_61    | N, A_CYS_64    | H, A_CYS_64     | 2.85    | 1.93    | 16.81                  |
| 1HGE.PDB | O, A_LEU_66    | N, A_LEU_70    | H, A_LEU_70     | 2.85    | 1.96    | 19.99                  |
| 1HGE.PDB | O, A_ILE_67    | N, A_LEU_71    | H, A_LEU_71     | 2.84    | 1.88    | 8.15                   |
| 1HGE.PDB | O, A_ASP_68    | N, A_GLY_72    | H, A_GLY_72     | 2.86    | 1.94    | 15.74                  |
| 1HGE.PDB | OD1, A_ASP_73  | ND1, A_HIS_75  | HD1, A_HIS_75   | 2.80    | 1.89    | 17.62                  |
| 1HGE.PDB | O, A_ASP_63    | NE2, A_HIS_75  | HE2, A_HIS_75   | 2.86    | 1.95    | 18.71                  |
| 1HGE.PDB | O, A_ASP_73    | N, A_CYS_76    | H, A_CYS_76     | 2.78    | 1.83    | 10.81                  |
| 1HGE.PDB | O, A_PRO_74    | N, A_ASP_77    | H, A_ASP_77     | 2.92    | 1.97    | 11.94                  |
| 1HGE.PDB | O, A_CYS_76    | N, A_PHE_79    | H, A_PHE_79     | 3.00    | 2.02    | 2.98                   |
| 1HGE.PDB | OE1, A_GLU_82  | N, A_THR_83    | H, A_THR_83     | 2.93    | 2.04    | 19.92                  |
| 1HGE.PDB | O, A_ARG_57    | N, A_ASP_85    | H, A_ASP_85     | 2.80    | 1.89    | 17.89                  |
| 1HGE.PDB | O, A_LEU_59    | N, A_VAL_88    | H, A_VAL_88     | 2.95    | 1.98    | 5.20                   |
| 1HGE.PDB | O, A_MET_268   | N, A_GLU_89    | H, A_GLU_89     | 2.78    | 1.83    | 9.22                   |
| 1HGE.PDB | OD1, A_ASP_60  | NE, A_ARG_90   | HE, A_ARG_90    | 2.85    | 1.89    | 7.94                   |
| 1HGE.PDB | O, A_SER_270   | NH1, A_ARG_90  | HH11, A_ARG_90  | 2.62    | 1.75    | 23.79                  |
| 1HGE.PDB | O, A_ALA_272   | NH1, A_ARG_90  | HH12, A_ARG_90  | 2.62    | 1.69    | 16.06                  |
| 1HGE.PDB | OD2, A_ASP_60  | NH2, A_ARG_90  | HH21, A_ARG_90  | 2.79    | 1.80    | 8.90                   |
| 1HGE.PDB | OD1, A_ASP_271 | N, A_SER_91    | H, A_SER_91     | 2.91    | 1.94    | 6.37                   |
| 1HGE.PDB | OD2, A_ASP_271 | OG, A_SER_91   | HG, A_SER_91    | 2.81    | 1.90    | 18.10                  |
| 1HGE.PDB | OD2, A_ASP_68  | OG, A_SER_95   | HG, A_SER_95    | 2.90    | 1.97    | 15.50                  |
| 1HGE.PDB | OD2, A_ASP_73  | N, A_ASN_96    | H, A_ASN_96     | 2.90    | 1.93    | 6.89                   |
| 1HGE.PDB | OD1, A_ASP_68  | OH, A_TYR_100  | HH, A_TYR_100   | 2.91    | 1.93    | 2.88                   |
| 1HGE.PDB | O, A_ILE_230   | N, A_ASP_101   | H, A_ASP_101    | 3.00    | 2.11    | 21.52                  |
| 1HGE.PDB | OD2, A_ASP_104 | OG, A_SER_107  | HG, A_SER_107   | 2.86    | 1.94    | 16.59                  |
| 1HGE.PDB | O, A_TYR_105   | N, A_ARG_109   | H, A_ARG_109    | 2.83    | 1.86    | 3.58                   |
| 1HGE.PDB | OE2, B_GLU_67  | NH2, A_ARG_109 | HH21, A_ARG_109 | 2.74    | 1.75    | 12.19                  |
| 1HGE.PDB | OD2, F_ASP_79  | OG, A_SER_110  | HG, A_SER_110   | 2.90    | 1.95    | 11.19                  |
| 1HGE.PDB | O, A_SER_107   | N, A_LEU_111   | H, A_LEU_111    | 2.85    | 1.87    | 2.87                   |
| 1HGE.PDB | O, A_LEU_108   | N, A_VAL_112   | H, A_VAL_112    | 2.99    | 2.03    | 8.13                   |
| 1HGE.PDB | O, A_ARG_109   | N, A_ALA_113   | H, A_ALA_113    | 2.94    | 2.03    | 18.27                  |
| 1HGE.PDB | O, A_SER_110   | N, A_SER_114   | H, A_SER_114    | 2.87    | 1.96    | 18.01                  |

|          |                |                |                 |      |      |       |
|----------|----------------|----------------|-----------------|------|------|-------|
| 1HGE.PDB | OE2, A_GLU_119 | OG1, A_THR_117 | HG1, A_THR_117  | 2.90 | 1.95 | 8.88  |
| 1HGE.PDB | O, A_GLU_82    | N, A_LEU_118   | H, A_LEU_118    | 2.96 | 2.03 | 16.11 |
| 1HGE.PDB | O, A_TYR_257   | N, A_ILE_121   | H, A_ILE_121    | 2.88 | 1.91 | 6.47  |
| 1HGE.PDB | O, A_ARG_255   | N, A_GLU_123   | H, A_GLU_123    | 2.93 | 1.98 | 10.93 |
| 1HGE.PDB | O, A_THR_155   | N, A_THR_131   | H, A_THR_131    | 2.74 | 1.84 | 18.66 |
| 1HGE.PDB | OD1, A_ASN_152 | N, A_ASN_133   | H, A_ASN_133    | 2.88 | 1.96 | 16.29 |
| 1HGE.PDB | O, A_TRP_153   | N, A_GLY_134   | H, A_GLY_134    | 2.96 | 2.06 | 19.55 |
| 1HGE.PDB | O, A_GLY_146   | N, A_SER_136   | H, A_SER_136    | 2.83 | 1.88 | 10.81 |
| 1HGE.PDB | OG, A_SER_136  | N, A_ALA_138   | H, A_ALA_138    | 2.95 | 2.01 | 13.95 |
| 1HGE.PDB | O, A_GLY_144   | NZ, A_LYS_140  | HZ1, A_LYS_140  | 2.75 | 1.77 | 16.24 |
| 1HGE.PDB | OD1, A_ASN_137 | NZ, A_LYS_140  | HZ2, A_LYS_140  | 2.81 | 1.83 | 16.67 |
| 1HGE.PDB | OD2, A_ASP_77  | NE, A_ARG_141  | HE, A_ARG_141   | 2.81 | 1.97 | 26.71 |
| 1HGE.PDB | O, A_PHE_147   | NH1, A_ARG_141 | HH12, A_ARG_141 | 2.55 | 1.62 | 16.38 |
| 1HGE.PDB | OD1, A_ASP_77  | NH2, A_ARG_141 | HH21, A_ARG_141 | 2.89 | 1.98 | 21.76 |
| 1HGE.PDB | OD2, A_ASP_77  | NH2, A_ARG_141 | HH21, A_ARG_141 | 2.75 | 1.86 | 23.90 |
| 1HGE.PDB | O, A_GLY_72    | NH2, A_ARG_141 | HH22, A_ARG_141 | 2.93 | 1.96 | 12.25 |
| 1HGE.PDB | O, A_GLY_72    | N, A_SER_149   | H, A_SER_149    | 2.83 | 1.92 | 17.48 |
| 1HGE.PDB | O, A_ALA_253   | N, A_ASN_152   | H, A_ASN_152    | 2.79 | 1.91 | 21.99 |
| 1HGE.PDB | OH, A_TYR_195  | NE1, A_TRP_153 | HE1, A_TRP_153  | 2.88 | 1.99 | 20.14 |
| 1HGE.PDB | O, A_LEU_194   | N, A_LYS_156   | H, A_LYS_156    | 2.98 | 2.08 | 19.15 |
| 1HGE.PDB | O, A_SER_193   | NZ, A_LYS_156  | HZ2, A_LYS_156  | 2.68 | 1.68 | 12.99 |
| 1HGE.PDB | O, A_THR_160   | N, A_SER_157   | H, A_SER_157    | 2.99 | 2.09 | 20.22 |
| 1HGE.PDB | O, A_SER_247   | N, A_LEU_164   | H, A_LEU_164    | 2.68 | 1.85 | 26.14 |
| 1HGE.PDB | O, A_ILE_245   | N, A_VAL_166   | H, A_VAL_166    | 2.88 | 1.93 | 12.18 |
| 1HGE.PDB | O, A_LEU_243   | OG1, A_THR_167 | HG1, A_THR_167  | 2.88 | 1.97 | 16.07 |
| 1HGE.PDB | O, A_LEU_243   | N, A_MET_168   | H, A_MET_168    | 2.92 | 1.99 | 15.75 |
| 1HGE.PDB | O, A_ASP_241   | N, A_ASN_170   | H, A_ASN_170    | 2.93 | 1.96 | 5.62  |
| 1HGE.PDB | O, A_PHE_174   | ND2, A_ASN_170 | HD21, A_ASN_170 | 2.84 | 1.88 | 9.34  |
| 1HGE.PDB | O, A_VAL_237   | ND2, A_ASN_170 | HD22, A_ASN_170 | 2.86 | 2.05 | 28.37 |
| 1HGE.PDB | O, A_VAL_237   | N, A_LYS_176   | H, A_LYS_176    | 2.98 | 2.05 | 15.51 |
| 1HGE.PDB | OE2, A_GLU_123 | NZ, A_LYS_176  | HZ1, A_LYS_176  | 2.71 | 1.79 | 22.78 |
| 1HGE.PDB | O, A_THR_235   | N, A_TYR_178   | H, A_TYR_178    | 2.82 | 1.86 | 5.77  |
| 1HGE.PDB | OE1, A_GLU_123 | OH, A_TYR_178  | HH, A_TYR_178   | 2.75 | 1.82 | 10.80 |
| 1HGE.PDB | O, A_TYR_233   | N, A_TRP_180   | H, A_TRP_180    | 2.99 | 2.02 | 8.32  |
| 1HGE.PDB | OG1, A_THR_235 | NE1, A_TRP_180 | HE1, A_TRP_180  | 2.92 | 1.93 | 3.33  |
| 1HGE.PDB | O, A_ASN_250   | N, A_HIS_183   | H, A_HIS_183    | 2.92 | 2.01 | 18.32 |
| 1HGE.PDB | O, A_ARG_229   | N, A_HIS_184   | H, A_HIS_184    | 2.86 | 1.90 | 8.10  |
| 1HGE.PDB | OG, A_SER_231  | NE2, A_HIS_184 | HE2, A_HIS_184  | 2.72 | 1.88 | 25.40 |
| 1HGE.PDB | OG1, A_THR_187 | N, A_GLU_190   | H, A_GLU_190    | 2.97 | 2.02 | 10.04 |
| 1HGE.PDB | O, A_GLN_197   | NE2, A_GLN_191 | HE22, A_GLN_191 | 2.96 | 2.04 | 16.90 |
| 1HGE.PDB | O, A_ASN_188   | OG1, A_THR_192 | HG1, A_THR_192  | 3.00 | 2.04 | 5.15  |
| 1HGE.PDB | O, A_GLN_189   | N, A_SER_193   | H, A_SER_193    | 2.84 | 1.87 | 3.05  |
| 1HGE.PDB | O, A_GLU_190   | N, A_LEU_194   | H, A_LEU_194    | 2.96 | 1.99 | 8.69  |
| 1HGE.PDB | O, A_GLN_191   | N, A_TYR_195   | H, A_TYR_195    | 2.77 | 1.82 | 9.81  |
| 1HGE.PDB | O, A_TYR_161   | NE2, A_GLN_197 | HE21, A_GLN_197 | 2.88 | 1.93 | 11.11 |
| 1HGE.PDB | O, A_ASN_248   | NE2, A_GLN_197 | HE22, A_GLN_197 | 2.92 | 1.99 | 15.44 |
| 1HGE.PDB | OD1, A_ASN_246 | NH2, A_ARG_201 | HH21, A_ARG_201 | 2.60 | 1.73 | 24.24 |
| 1HGE.PDB | O, A_ILE_213   | N, A_VAL_202   | H, A_VAL_202    | 2.96 | 1.99 | 9.62  |
| 1HGE.PDB | O, A_ASN_246   | N, A_THR_203   | H, A_THR_203    | 2.84 | 1.92 | 16.80 |
| 1HGE.PDB | O, A_GLN_211   | N, A_VAL_204   | H, A_VAL_204    | 2.83 | 1.93 | 18.95 |
| 1HGE.PDB | O, A_SER_209   | N, A_THR_206   | H, A_THR_206    | 2.97 | 2.00 | 7.75  |
| 1HGE.PDB | OD1, A_ASP_241 | N, A_ARG_207   | H, A_ARG_207    | 2.90 | 1.93 | 8.60  |
| 1HGE.PDB | OG1, A_THR_206 | OG, A_SER_209  | HG, A_SER_209   | 2.97 | 2.03 | 10.25 |
| 1HGE.PDB | OD1, E_ASP_101 | NE2, A_GLN_210 | HE22, A_GLN_210 | 2.91 | 2.05 | 24.48 |
| 1HGE.PDB | O, A_VAL_204   | N, A_GLN_211   | H, A_GLN_211    | 2.84 | 1.93 | 17.53 |
| 1HGE.PDB | OG1, A_THR_203 | OG1, A_THR_212 | HG1, A_THR_212  | 2.85 | 1.89 | 3.04  |
| 1HGE.PDB | O, A_VAL_202   | N, A_ILE_213   | H, A_ILE_213    | 2.83 | 1.91 | 16.11 |
| 1HGE.PDB | OE1, C_GLN_210 | NH2, A_ARG_220 | HH21, A_ARG_220 | 2.71 | 1.78 | 19.14 |



|          |                |                |                 |      |      |       |
|----------|----------------|----------------|-----------------|------|------|-------|
| 1HGE.PDB | O, A_ASN_216   | NH2, A_ARG_220 | HH22, A_ARG_220 | 2.65 | 1.77 | 22.20 |
| 1HGE.PDB | O, A_LEU_226   | N, A_VAL_223   | H, A_VAL_223    | 2.87 | 1.92 | 10.90 |
| 1HGE.PDB | O, A_CYS_97    | NE, A_ARG_224  | HE, A_ARG_224   | 2.88 | 2.06 | 27.84 |
| 1HGE.PDB | O, A_CYS_97    | NH2, A_ARG_224 | HH21, A_ARG_224 | 2.81 | 1.91 | 22.36 |
| 1HGE.PDB | O, A_VAL_223   | N, A_LEU_226   | H, A_LEU_226    | 2.91 | 1.96 | 11.44 |
| 1HGE.PDB | O, A_SER_228   | NH1, A_ARG_229 | HH11, A_ARG_229 | 2.68 | 1.74 | 17.50 |
| 1HGE.PDB | O, A_PRO_221   | NH2, A_ARG_229 | HH22, A_ARG_229 | 2.64 | 1.68 | 14.09 |
| 1HGE.PDB | OD1, A_ASP_101 | OG, A_SER_231  | HG, A_SER_231   | 2.85 | 1.89 | 7.16  |
| 1HGE.PDB | O, A_ASP_101   | N, A_ILE_232   | H, A_ILE_232    | 2.93 | 2.00 | 16.40 |
| 1HGE.PDB | O, A_TRP_180   | N, A_TYR_233   | H, A_TYR_233    | 2.87 | 1.90 | 8.23  |
| 1HGE.PDB | O, A_TYR_178   | N, A_THR_235   | H, A_THR_235    | 2.87 | 1.97 | 18.03 |
| 1HGE.PDB | O, A_LYS_176   | N, A_VAL_237   | H, A_VAL_237    | 2.80 | 1.88 | 15.84 |
| 1HGE.PDB | O, F_SER_71    | NZ, A_LYS_238  | HZ2, A_LYS_238  | 2.67 | 1.73 | 19.84 |
| 1HGE.PDB | OE1, F_GLU_72  | NZ, A_LYS_238  | HZ3, A_LYS_238  | 2.91 | 1.89 | 11.73 |
| 1HGE.PDB | O, A_ASN_170   | N, A_GLY_240   | H, A_GLY_240    | 2.86 | 1.99 | 22.30 |
| 1HGE.PDB | O, A_LYS_238   | N, A_ASP_241   | H, A_ASP_241    | 2.94 | 2.01 | 14.08 |
| 1HGE.PDB | OD1, A_ASP_241 | N, A_VAL_242   | H, A_VAL_242    | 2.76 | 1.94 | 27.44 |
| 1HGE.PDB | O, A_MET_168   | N, A_LEU_243   | H, A_LEU_243    | 2.90 | 1.93 | 4.25  |
| 1HGE.PDB | O, A_SER_205   | N, A_VAL_244   | H, A_VAL_244    | 2.95 | 2.01 | 13.31 |
| 1HGE.PDB | O, A_VAL_166   | N, A_ILE_245   | H, A_ILE_245    | 2.85 | 1.92 | 14.45 |
| 1HGE.PDB | O, A_THR_203   | N, A_ASN_246   | H, A_ASN_246    | 2.90 | 1.93 | 7.70  |
| 1HGE.PDB | OD1, A_ASN_165 | ND2, A_ASN_246 | HD22, A_ASN_246 | 2.88 | 1.94 | 13.15 |
| 1HGE.PDB | O, A_LEU_164   | N, A_SER_247   | H, A_SER_247    | 2.96 | 2.05 | 18.81 |
| 1HGE.PDB | OE1, A_GLN_191 | ND2, A_ASN_250 | HD21, A_ASN_250 | 2.94 | 1.97 | 8.25  |
| 1HGE.PDB | O, A_HIS_183   | ND2, A_ASN_250 | HD22, A_ASN_250 | 2.88 | 1.92 | 10.41 |
| 1HGE.PDB | O, A_ASN_152   | N, A_ALA_253   | H, A_ALA_253    | 2.86 | 1.98 | 21.30 |
| 1HGE.PDB | OD1, A_ASN_133 | NH2, A_ARG_255 | HH22, A_ARG_255 | 2.48 | 1.67 | 28.93 |
| 1HGE.PDB | O, A_LEU_177   | N, A_PHE_258   | H, A_PHE_258    | 2.96 | 1.99 | 5.50  |
| 1HGE.PDB | OE2, A_GLU_119 | NH1, A_ARG_261 | HH12, A_ARG_261 | 2.64 | 1.81 | 27.97 |
| 1HGE.PDB | OE1, A_GLU_119 | NH2, A_ARG_261 | HH22, A_ARG_261 | 2.84 | 1.95 | 24.23 |
| 1HGE.PDB | OD2, A_ASP_85  | NZ, A_LYS_264  | HZ3, A_LYS_264  | 2.77 | 1.79 | 16.96 |
| 1HGE.PDB | O, A_PHE_87    | N, A_MET_268   | H, A_MET_268    | 2.82 | 1.93 | 21.12 |
| 1HGE.PDB | O, A_PRO_284   | OG, A_SER_270  | HG, A_SER_270   | 2.79 | 1.85 | 11.32 |
| 1HGE.PDB | OG, A_SER_270  | N, A_ALA_272   | H, A_ALA_272    | 2.96 | 2.01 | 11.61 |
| 1HGE.PDB | O, A_ILE_51    | N, A_ASP_275   | H, A_ASP_275    | 2.94 | 2.05 | 20.45 |
| 1HGE.PDB | OD1, A_ASP_275 | N, A_THR_276   | H, A_THR_276    | 2.79 | 1.94 | 23.69 |
| 1HGE.PDB | O, A_ASN_54    | N, A_SER_279   | H, A_SER_279    | 2.78 | 1.85 | 13.75 |
| 1HGE.PDB | O, A_TYR_302   | N, A_ILE_282   | H, A_ILE_282    | 2.91 | 1.94 | 8.25  |
| 1HGE.PDB | O, A_THR_283   | N, A_GLY_286   | H, A_GLY_286    | 2.83 | 1.90 | 13.31 |
| 1HGE.PDB | O, A_LYS_50    | N, A_SER_287   | H, A_SER_287    | 2.88 | 1.91 | 2.15  |
| 1HGE.PDB | O, A_ALA_304   | ND2, A_ASN_290 | HD22, A_ASN_290 | 2.81 | 1.91 | 18.81 |
| 1HGE.PDB | OE1, A_GLN_44  | NZ, A_LYS_292  | HZ1, A_LYS_292  | 2.69 | 1.69 | 12.67 |
| 1HGE.PDB | OD2, A_ASP_291 | NZ, A_LYS_292  | HZ3, A_LYS_292  | 2.82 | 1.86 | 19.03 |
| 1HGE.PDB | O, A_LYS_307   | N, A_GLN_295   | H, A_GLN_295    | 2.84 | 1.95 | 20.46 |
| 1HGE.PDB | O, A_ASN_298   | NE2, A_GLN_295 | HE21, A_GLN_295 | 2.75 | 1.79 | 6.17  |
| 1HGE.PDB | O, A_GLN_44    | N, A_ASN_296   | H, A_ASN_296    | 2.80 | 1.87 | 13.84 |
| 1HGE.PDB | OE1, A_GLN_295 | N, A_VAL_297   | H, A_VAL_297    | 2.67 | 1.87 | 28.35 |
| 1HGE.PDB | O, B_LYS_68    | NZ, A_LYS_299  | HZ2, A_LYS_299  | 2.95 | 1.93 | 10.27 |
| 1HGE.PDB | OD1, A_ASN_298 | N, A_ILE_300   | H, A_ILE_300    | 2.94 | 2.01 | 15.45 |
| 1HGE.PDB | O, A_ILE_282   | N, A_TYR_302   | H, A_TYR_302    | 2.95 | 2.08 | 23.09 |
| 1HGE.PDB | O, B_LYS_62    | N, A_GLY_303   | H, A_GLY_303    | 2.95 | 1.98 | 8.88  |
| 1HGE.PDB | OG, B_SER_93   | N, A_LYS_310   | H, A_LYS_310    | 2.91 | 1.95 | 10.06 |
| 1HGE.PDB | OE2, A_GLU_41  | N, A_LEU_314   | H, A_LEU_314    | 2.82 | 1.89 | 14.30 |
| 1HGE.PDB | OE1, A_GLU_41  | NZ, A_LYS_315  | HZ3, A_LYS_315  | 2.82 | 1.87 | 21.00 |
| 1HGE.PDB | O, A_THR_40    | N, A_LEU_316   | H, A_LEU_316    | 2.80 | 1.85 | 10.41 |
| 1HGE.PDB | OD1, B_ASN_104 | N, A_ALA_317   | H, A_ALA_317    | 2.72 | 1.81 | 16.15 |
| 1HGE.PDB | O, A_ASN_38    | N, A_THR_318   | H, A_THR_318    | 2.85 | 1.93 | 17.18 |
| 1HGE.PDB | O, A_VAL_20    | ND2, A_ASN_322 | HD21, A_ASN_322 | 2.93 | 2.01 | 15.29 |

|          |                |                |                 |      |      |       |
|----------|----------------|----------------|-----------------|------|------|-------|
| 1HGE.PDB | OE2, A_GLU_35  | ND2, A_ASN_322 | HD22, A_ASN_322 | 2.88 | 1.99 | 21.26 |
| 1HGE.PDB | OE1, A_GLU_325 | NZ, A_LYS_326  | HZ3, A_LYS_326  | 2.85 | 1.86 | 15.04 |
| 1HGE.PDB | O, A_PRO_21    | NE2, A_GLN_327 | HE22, A_GLN_327 | 2.79 | 1.93 | 23.89 |
| 1HGE.PDB | OD2, B_ASP_112 | N, B_GLY_1     | H2, B_GLY_1     | 2.79 | 1.81 | 15.88 |
| 1HGE.PDB | OD1, B_ASP_109 | N, B_LEU_2     | H, B_LEU_2      | 2.80 | 1.92 | 21.49 |
| 1HGE.PDB | OD2, B_ASP_112 | N, B_PHE_3     | H, B_PHE_3      | 2.74 | 1.95 | 29.38 |
| 1HGE.PDB | OD2, B_ASP_112 | N, B_GLY_4     | H, B_GLY_4      | 2.91 | 2.02 | 19.87 |
| 1HGE.PDB | OD1, B_ASP_112 | N, B_ALA_5     | H, B_ALA_5      | 2.93 | 2.03 | 18.95 |
| 1HGE.PDB | O, B_GLY_4     | N, B_PHE_9     | H, B_PHE_9      | 2.82 | 1.87 | 12.40 |
| 1HGE.PDB | O, B_GLY_13    | ND2, B_ASN_12  | HD22, B_ASN_12  | 2.77 | 1.94 | 25.78 |
| 1HGE.PDB | O, A_VAL_323   | N, B_GLY_13    | H, B_GLY_13     | 2.72 | 1.79 | 12.30 |
| 1HGE.PDB | O, A_HIS_17    | N, B_TRP_14    | H, B_TRP_14     | 2.85 | 1.92 | 15.18 |
| 1HGE.PDB | OG1, B_THR_41  | N, B_TRP_21    | H, B_TRP_21     | 2.88 | 1.97 | 18.39 |
| 1HGE.PDB | O, A_GLY_16    | N, B_GLY_23    | H, B_GLY_23     | 2.92 | 2.01 | 18.67 |
| 1HGE.PDB | O, B_ALA_35    | N, B_PHE_24    | H, B_PHE_24     | 2.78 | 1.82 | 3.34  |
| 1HGE.PDB | O, A_CYS_14    | N, B_ARG_25    | H, B_ARG_25     | 3.00 | 2.06 | 13.87 |
| 1HGE.PDB | OE1, B_GLN_34  | NE, B_ARG_25   | HE, B_ARG_25    | 2.59 | 1.77 | 25.60 |
| 1HGE.PDB | O, B_GLY_33    | N, B_HIS_26    | H, B_HIS_26     | 2.68 | 1.83 | 22.72 |
| 1HGE.PDB | OG1, B_THR_32  | NE2, B_GLN_27  | HE22, B_GLN_27  | 2.99 | 2.08 | 18.28 |
| 1HGE.PDB | O, B_GLY_31    | N, B_ASN_28    | H, B_ASN_28     | 2.82 | 1.91 | 16.99 |
| 1HGE.PDB | O, B_ASN_28    | N, B_GLY_31    | H, B_GLY_31     | 3.00 | 2.09 | 18.25 |
| 1HGE.PDB | O, B_HIS_26    | N, B_GLY_33    | H, B_GLY_33     | 2.86 | 1.95 | 17.40 |
| 1HGE.PDB | O, B_TYR_22    | N, B_ASP_37    | H, B_ASP_37     | 2.72 | 1.79 | 12.23 |
| 1HGE.PDB | OD2, B_ASP_37  | N, B_SER_40    | H, B_SER_40     | 2.87 | 1.91 | 9.83  |
| 1HGE.PDB | O, B_ASP_37    | OG1, B_THR_41  | HG1, B_THR_41   | 2.70 | 1.82 | 19.30 |
| 1HGE.PDB | O, B_LEU_38    | N, B_GLN_42    | H, B_GLN_42     | 2.86 | 1.93 | 14.86 |
| 1HGE.PDB | OD1, B_ASP_46  | NE2, B_GLN_42  | HE22, B_GLN_42  | 2.87 | 1.96 | 19.05 |
| 1HGE.PDB | O, B_LYS_39    | N, B_ALA_43    | H, B_ALA_43     | 2.94 | 2.00 | 12.81 |
| 1HGE.PDB | O, B_SER_40    | N, B_ALA_44    | H, B_ALA_44     | 2.93 | 1.95 | 3.59  |
| 1HGE.PDB | O, B_GLN_42    | N, B_ASP_46    | H, B_ASP_46     | 2.81 | 1.84 | 1.45  |
| 1HGE.PDB | O, B_ALA_43    | NE2, B_GLN_47  | HE22, B_GLN_47  | 2.88 | 1.96 | 16.21 |
| 1HGE.PDB | O, B_ILE_45    | N, B_ASN_49    | H, B_ASN_49     | 2.85 | 1.89 | 11.27 |
| 1HGE.PDB | O, B_ASP_46    | N, B_GLY_50    | H, B_GLY_50     | 2.84 | 1.93 | 18.21 |
| 1HGE.PDB | OG1, B_THR_107 | NZ, B_LYS_51   | HZ1, B_LYS_51   | 2.97 | 1.99 | 17.16 |
| 1HGE.PDB | OE1, B_GLU_103 | NZ, B_LYS_51   | HZ2, B_LYS_51   | 2.76 | 1.73 | 6.92  |
| 1HGE.PDB | ND1, B_HIS_106 | NZ, B_LYS_51   | HZ3, B_LYS_51   | 2.73 | 1.78 | 18.14 |
| 1HGE.PDB | O, B_ILE_48    | N, B_LEU_52    | H, B_LEU_52     | 2.84 | 1.93 | 16.73 |
| 1HGE.PDB | O, B_ASN_49    | N, B_ASN_53    | H, B_ASN_53     | 2.78 | 1.86 | 14.52 |
| 1HGE.PDB | OE1, B_GLU_57  | NH1, B_ARG_54  | HH11, B_ARG_54  | 2.83 | 1.84 | 12.19 |
| 1HGE.PDB | OE2, F_GLU_97  | NH2, B_ARG_54  | HH22, B_ARG_54  | 2.84 | 1.86 | 12.76 |
| 1HGE.PDB | OD2, F_ASP_86  | NZ, B_LYS_62   | HZ1, B_LYS_62   | 2.60 | 1.76 | 28.82 |
| 1HGE.PDB | OD2, F_ASP_90  | NZ, B_LYS_62   | HZ3, B_LYS_62   | 2.69 | 1.82 | 26.81 |
| 1HGE.PDB | OG, A_SER_110  | NE2, B_HIS_64  | HE2, B_HIS_64   | 2.97 | 2.02 | 12.36 |
| 1HGE.PDB | O, B_PHE_63    | NE2, B_GLN_65  | HE22, B_GLN_65  | 2.99 | 2.02 | 6.59  |
| 1HGE.PDB | O, A_LYS_299   | NZ, B_LYS_68   | HZ1, B_LYS_68   | 2.93 | 1.92 | 11.15 |
| 1HGE.PDB | OE2, B_GLU_85  | NZ, B_LYS_68   | HZ2, B_LYS_68   | 2.78 | 1.76 | 9.50  |
| 1HGE.PDB | OG, C_SER_107  | N, B_ARG_76    | H, B_ARG_76     | 2.82 | 1.86 | 9.28  |
| 1HGE.PDB | OE2, D_GLU_81  | NE, B_ARG_76   | HE, B_ARG_76    | 2.87 | 1.91 | 11.56 |
| 1HGE.PDB | OE2, D_GLU_74  | NH1, B_ARG_76  | HH12, B_ARG_76  | 2.84 | 1.83 | 5.81  |
| 1HGE.PDB | OE1, D_GLU_81  | NH2, B_ARG_76  | HH21, B_ARG_76  | 2.70 | 1.70 | 6.45  |
| 1HGE.PDB | OE1, D_GLU_74  | NH2, B_ARG_76  | HH22, B_ARG_76  | 2.79 | 1.79 | 3.91  |
| 1HGE.PDB | OE1, B_GLU_74  | NE2, B_GLN_78  | HE22, B_GLN_78  | 2.97 | 2.00 | 7.88  |
| 1HGE.PDB | O, B_GLY_75    | N, B_ASP_79    | H, B_ASP_79     | 2.91 | 1.96 | 12.34 |
| 1HGE.PDB | O, B_ILE_77    | N, B_GLU_81    | H, B_GLU_81     | 2.94 | 1.98 | 9.95  |
| 1HGE.PDB | O, B_ASP_79    | N, B_TYR_83    | H, B_TYR_83     | 2.93 | 2.00 | 15.72 |
| 1HGE.PDB | OE1, D_GLU_85  | OH, B_TYR_83   | HH, B_TYR_83    | 2.65 | 1.81 | 24.86 |
| 1HGE.PDB | O, B_LEU_80    | N, B_VAL_84    | H, B_VAL_84     | 2.83 | 1.87 | 9.05  |
| 1HGE.PDB | O, B_LYS_82    | N, B_ASP_86    | H, B_ASP_86     | 2.93 | 1.97 | 10.28 |

|          |                |                |                 |      |      |       |
|----------|----------------|----------------|-----------------|------|------|-------|
| 1HGE.PDB | O, B_TYR.83    | N, B_THR.87    | H, B_THR.87     | 2.93 | 1.97 | 8.81  |
| 1HGE.PDB | O, B_VAL.84    | N, B_LYS.88    | H, B_LYS.88     | 2.94 | 2.02 | 16.73 |
| 1HGE.PDB | OH, F_TYR.83   | NZ, B_LYS.88   | HZ1, B_LYS.88   | 2.75 | 1.71 | 5.62  |
| 1HGE.PDB | O, B_GLU.85    | N, B_ILE.89    | H, B_ILE.89     | 2.88 | 1.90 | 4.71  |
| 1HGE.PDB | O, B_LYS.88    | N, B_TRP.92    | H, B_TRP.92     | 2.97 | 1.99 | 5.16  |
| 1HGE.PDB | O, B_ILE.89    | N, B_SER.93    | H, B_SER.93     | 2.85 | 1.95 | 18.50 |
| 1HGE.PDB | O, B_ILE.89    | OG, B_SER.93   | HG, B_SER.93    | 2.88 | 1.95 | 13.07 |
| 1HGE.PDB | O, B_ASP.90    | N, B_TYR.94    | H, B_TYR.94     | 2.86 | 1.94 | 16.10 |
| 1HGE.PDB | O, B_TRP.92    | N, B_ALA.96    | H, B_ALA.96     | 2.95 | 2.01 | 14.83 |
| 1HGE.PDB | O, B_TYR.94    | N, B_LEU.98    | H, B_LEU.98     | 2.99 | 2.01 | 4.40  |
| 1HGE.PDB | O, B_ASN.95    | N, B_LEU.99    | H, B_LEU.99     | 2.90 | 1.98 | 15.69 |
| 1HGE.PDB | O, B_LEU.98    | N, B_LEU.102   | H, B_LEU.102    | 2.96 | 1.99 | 5.20  |
| 1HGE.PDB | O, B_LEU.99    | N, B_GLU.103   | H, B_GLU.103    | 2.88 | 1.92 | 7.57  |
| 1HGE.PDB | O, B_VAL.100   | N, B_ASN.104   | H, B_ASN.104    | 2.90 | 1.95 | 12.33 |
| 1HGE.PDB | O, A_LYS.27    | ND2, B_ASN.104 | HD22, B_ASN.104 | 2.93 | 1.97 | 10.25 |
| 1HGE.PDB | O, B_LEU.102   | N, B_HIS.106   | H, B_HIS.106    | 2.92 | 1.96 | 11.10 |
| 1HGE.PDB | O, B_GLU.103   | N, B_THR.107   | H, B_THR.107    | 2.81 | 1.94 | 21.77 |
| 1HGE.PDB | O, B_ASN.104   | N, B_ILE.108   | H, B_ILE.108    | 2.89 | 1.93 | 10.01 |
| 1HGE.PDB | O, B_HIS.106   | N, B_LEU.110   | H, B_LEU.110    | 2.83 | 1.87 | 9.77  |
| 1HGE.PDB | O, B_THR.107   | OG1, B_THR.111 | HG1, B_THR.111  | 2.88 | 1.91 | 3.54  |
| 1HGE.PDB | O, B_ASP.109   | N, B_SER.113   | H, B_SER.113    | 2.82 | 1.87 | 9.66  |
| 1HGE.PDB | O, B_LEU.110   | N, B_GLU.114   | H, B_GLU.114    | 2.93 | 1.98 | 10.47 |
| 1HGE.PDB | O, B_ASP.112   | N, B_ASN.116   | H, B_ASN.116    | 2.97 | 2.00 | 6.50  |
| 1HGE.PDB | O, B_SER.113   | N, B_LYS.117   | H, B_LYS.117    | 2.76 | 1.88 | 21.74 |
| 1HGE.PDB | O, B_GLU.114   | N, B_LEU.118   | H, B_LEU.118    | 2.98 | 2.03 | 12.99 |
| 1HGE.PDB | O, B_MET.115   | N, B_PHE.119   | H, B_PHE.119    | 3.00 | 2.05 | 11.74 |
| 1HGE.PDB | O, B_ASN.116   | N, B_GLU.120   | H, B_GLU.120    | 2.94 | 1.96 | 5.48  |
| 1HGE.PDB | O, B_LYS.117   | N, B_LYS.121   | H, B_LYS.121    | 2.93 | 2.04 | 20.65 |
| 1HGE.PDB | O, B_PHE.119   | N, B_ARG.123   | H, B_ARG.123    | 2.92 | 1.95 | 6.37  |
| 1HGE.PDB | OE2, B_GLU.120 | NH1, B_ARG.123 | HH11, B_ARG.123 | 2.84 | 1.95 | 23.29 |
| 1HGE.PDB | O, B_GLU.120   | N, B_ARG.124   | H, B_ARG.124    | 2.99 | 2.03 | 10.10 |
| 1HGE.PDB | OE1, F_GLU.132 | NE, B_ARG.124  | HE, B_ARG.124   | 2.80 | 1.98 | 27.36 |
| 1HGE.PDB | OE2, F_GLU.132 | NE, B_ARG.124  | HE, B_ARG.124   | 2.94 | 2.06 | 21.65 |
| 1HGE.PDB | O, B_LEU.126   | N, B_ASN.129   | H, B_ASN.129    | 2.92 | 1.98 | 14.64 |
| 1HGE.PDB | O, B_HIS.159   | ND2, B_ASN.129 | HD21, B_ASN.129 | 2.96 | 2.01 | 10.21 |
| 1HGE.PDB | OH, B_TYR.157  | ND2, B_ASN.129 | HD22, B_ASN.129 | 2.79 | 1.85 | 12.68 |
| 1HGE.PDB | O, B_LYS.139   | N, B_GLU.131   | H, B_GLU.131    | 2.95 | 2.03 | 17.07 |
| 1HGE.PDB | O, B_CYS.137   | N, B_MET.133   | H, B_MET.133    | 2.86 | 1.91 | 11.42 |
| 1HGE.PDB | O, A_LEU.13    | N, B_PHE.138   | H, B_PHE.138    | 2.71 | 1.84 | 21.33 |
| 1HGE.PDB | O, B_GLU.131   | N, B_LYS.139   | H, B_LYS.139    | 2.81 | 1.88 | 12.91 |
| 1HGE.PDB | O, A_ALA.11    | N, B_ILE.140   | H, B_ILE.140    | 2.75 | 1.86 | 18.72 |
| 1HGE.PDB | O, B_ASN.129   | N, B_TYR.141   | H, B_TYR.141    | 2.86 | 1.94 | 15.94 |
| 1HGE.PDB | OD2, B_ASP.145 | NZ, B_LYS.143  | HZ1, B_LYS.143  | 2.79 | 1.94 | 29.42 |
| 1HGE.PDB | OE1, B_GLU.30  | N, B_ASN.146   | H, B_ASN.146    | 2.97 | 2.02 | 12.34 |
| 1HGE.PDB | O, B_ASP.145   | N, B_ILE.149   | H, B_ILE.149    | 2.91 | 1.95 | 10.07 |
| 1HGE.PDB | O, B_ASN.146   | N, B_GLU.150   | H, B_GLU.150    | 2.95 | 2.00 | 12.08 |
| 1HGE.PDB | O, B_ALA.147   | N, B_SER.151   | H, B_SER.151    | 2.90 | 2.05 | 24.74 |
| 1HGE.PDB | O, B_CYS.148   | OG, B_SER.151  | HG, B_SER.151   | 2.68 | 1.83 | 21.90 |
| 1HGE.PDB | O, B_GLU.150   | N, B_ASN.154   | H, B_ASN.154    | 2.81 | 1.84 | 3.57  |
| 1HGE.PDB | OE2, B_GLU.150 | ND2, B_ASN.154 | HD21, B_ASN.154 | 2.93 | 2.05 | 22.48 |
| 1HGE.PDB | O, B_SER.151   | N, B_THR.156   | H, B_THR.156    | 2.73 | 1.90 | 26.23 |
| 1HGE.PDB | OD1, B_ASN.154 | OG1, B_THR.156 | HG1, B_THR.156  | 2.71 | 1.82 | 17.99 |
| 1HGE.PDB | OD1, B_ASP.158 | N, B_ASP.160   | H, B_ASP.160    | 2.83 | 1.98 | 24.58 |
| 1HGE.PDB | O, B_HIS.159   | N, B_TYR.162   | H, B_TYR.162    | 2.90 | 2.00 | 20.06 |
| 1HGE.PDB | O, F_ARG.170   | NH1, B_ARG.163 | HH12, B_ARG.163 | 2.78 | 1.81 | 13.88 |
| 1HGE.PDB | O, B_TYR.162   | N, B_ALA.166   | H, B_ALA.166    | 2.88 | 1.91 | 5.46  |
| 1HGE.PDB | O, B_ARG.163   | N, B_LEU.167   | H, B_LEU.167    | 2.76 | 1.81 | 10.04 |
| 1HGE.PDB | O, B_ALA.166   | N, B_ARG.170   | H, B_ARG.170    | 2.82 | 1.95 | 21.77 |

|          |                |                |                 |      |      |       |
|----------|----------------|----------------|-----------------|------|------|-------|
| 1HGE.PDB | O, B_GLU_128   | NE, B_ARG_170  | HE, B_ARG_170   | 2.74 | 1.87 | 22.54 |
| 1HGE.PDB | OE2, B_GLU_131 | NH1, B_ARG_170 | HH11, B_ARG_170 | 2.80 | 1.80 | 6.47  |
| 1HGE.PDB | O, B_LEU_167   | N, B_PHE_171   | H, B_PHE_171    | 2.90 | 1.98 | 16.40 |
| 1HGE.PDB | O, D_ILE_140   | N, C_ALA_11    | H, C_ALA_11     | 2.80 | 1.91 | 19.98 |
| 1HGE.PDB | O, D_PHE_138   | N, C_LEU_13    | H, C_LEU_13     | 2.99 | 2.04 | 12.20 |
| 1HGE.PDB | O, D_ARG_25    | N, C_CYS_14    | H, C_CYS_14     | 2.73 | 1.82 | 16.85 |
| 1HGE.PDB | O, D_GLY_136   | N, C_LEU_15    | H, C_LEU_15     | 2.89 | 1.92 | 5.03  |
| 1HGE.PDB | O, D_GLY_23    | N, C_GLY_16    | H, C_GLY_16     | 2.98 | 2.07 | 18.60 |
| 1HGE.PDB | O, C_HIS_18    | ND1, C_HIS_17  | HD1, C_HIS_17   | 3.00 | 2.12 | 21.91 |
| 1HGE.PDB | O, D_TRP_21    | N, C_HIS_18    | H, C_HIS_18     | 2.85 | 1.96 | 19.89 |
| 1HGE.PDB | OD1, C_ASN_322 | N, C_VAL_20    | H, C_VAL_20     | 2.80 | 1.84 | 8.99  |
| 1HGE.PDB | O, C_VAL_36    | N, C_THR_24    | H, C_THR_24     | 2.83 | 1.91 | 16.33 |
| 1HGE.PDB | O, C_ILE_34    | N, C_VAL_26    | H, C_VAL_26     | 2.82 | 1.87 | 10.60 |
| 1HGE.PDB | OE2, D_GLU_97  | NZ, C_LYS_27   | HZ1, C_LYS_27   | 2.79 | 1.77 | 8.74  |
| 1HGE.PDB | O, C_VAL_26    | N, C_ILE_34    | H, C_ILE_34     | 2.90 | 1.95 | 12.39 |
| 1HGE.PDB | O, C_THR_24    | N, C_VAL_36    | H, C_VAL_36     | 2.79 | 1.83 | 9.59  |
| 1HGE.PDB | O, C_MET_320   | N, C_THR_37    | H, C_THR_37     | 2.87 | 1.90 | 5.65  |
| 1HGE.PDB | O, C_LEU_316   | N, C_THR_40    | H, C_THR_40     | 2.80 | 1.96 | 24.94 |
| 1HGE.PDB | O, C_LEU_314   | N, C_LEU_42    | H, C_LEU_42     | 2.79 | 1.97 | 26.99 |
| 1HGE.PDB | O, C_PHE_294   | N, C_GLN_44    | H, C_GLN_44     | 2.81 | 1.85 | 7.78  |
| 1HGE.PDB | O, C_SER_46    | NE2, C_GLN_44  | HE22, C_GLN_44  | 2.87 | 1.98 | 21.20 |
| 1HGE.PDB | O, C_ASN_285   | OG, C_SER_47   | HG, C_SER_47    | 2.85 | 1.92 | 13.60 |
| 1HGE.PDB | OG1, C_THR_48  | N, C_LYS_50    | H, C_LYS_50     | 2.99 | 2.04 | 10.77 |
| 1HGE.PDB | OD2, C_ASP_275 | NZ, C_LYS_50   | HZ1, C_LYS_50   | 2.70 | 1.77 | 22.15 |
| 1HGE.PDB | O, C_PRO_273   | N, C_ILE_51    | H, C_ILE_51     | 2.80 | 1.85 | 11.79 |
| 1HGE.PDB | O, C_ASP_275   | N, C_ASN_53    | H, C_ASN_53     | 2.75 | 1.91 | 24.79 |
| 1HGE.PDB | OD2, C_ASP_85  | N, C_ARG_57    | H, C_ARG_57     | 2.90 | 1.96 | 11.88 |
| 1HGE.PDB | O, C_THR_83    | NE, C_ARG_57   | HE, C_ARG_57    | 2.79 | 1.83 | 9.16  |
| 1HGE.PDB | O, C_LEU_86    | N, C_LEU_59    | H, C_LEU_59     | 2.93 | 1.97 | 10.15 |
| 1HGE.PDB | O, C_VAL_88    | N, C_GLY_61    | H, C_GLY_61     | 2.98 | 2.14 | 25.88 |
| 1HGE.PDB | OD1, C_ASP_60  | N, C_ILE_62    | H, C_ILE_62     | 2.86 | 1.94 | 15.66 |
| 1HGE.PDB | O, C_GLY_61    | N, C_CYS_64    | H, C_CYS_64     | 2.85 | 1.93 | 16.26 |
| 1HGE.PDB | O, C_LEU_66    | N, C_LEU_70    | H, C_LEU_70     | 2.86 | 1.97 | 20.20 |
| 1HGE.PDB | O, C_ILE_67    | N, C_LEU_71    | H, C_LEU_71     | 2.82 | 1.86 | 10.15 |
| 1HGE.PDB | O, C_ASP_68    | N, C_GLY_72    | H, C_GLY_72     | 2.84 | 1.92 | 16.44 |
| 1HGE.PDB | OD1, C_ASP_73  | ND1, C_HIS_75  | HD1, C_HIS_75   | 2.76 | 1.85 | 18.20 |
| 1HGE.PDB | O, C_ASP_63    | NE2, C_HIS_75  | HE2, C_HIS_75   | 2.82 | 1.90 | 17.58 |
| 1HGE.PDB | O, C_ASP_73    | N, C_CYS_76    | H, C_CYS_76     | 2.77 | 1.82 | 10.67 |
| 1HGE.PDB | O, C_PRO_74    | N, C_ASP_77    | H, C_ASP_77     | 2.88 | 1.93 | 11.27 |
| 1HGE.PDB | O, C_CYS_76    | N, C_PHE_79    | H, C_PHE_79     | 2.99 | 2.01 | 4.04  |
| 1HGE.PDB | O, C_ARG_57    | N, C_ASP_85    | H, C_ASP_85     | 2.79 | 1.90 | 19.22 |
| 1HGE.PDB | O, C_LEU_59    | N, C_VAL_88    | H, C_VAL_88     | 2.96 | 1.98 | 5.43  |
| 1HGE.PDB | O, C_MET_268   | N, C_GLU_89    | H, C_GLU_89     | 2.78 | 1.83 | 10.28 |
| 1HGE.PDB | OD1, C_ASP_60  | NE, C_ARG_90   | HE, C_ARG_90    | 2.84 | 1.88 | 10.34 |
| 1HGE.PDB | O, C_SER_270   | NH1, C_ARG_90  | HH11, C_ARG_90  | 2.64 | 1.77 | 24.86 |
| 1HGE.PDB | O, C_ALA_272   | NH1, C_ARG_90  | HH12, C_ARG_90  | 2.61 | 1.68 | 16.52 |
| 1HGE.PDB | OD2, C_ASP_60  | NH2, C_ARG_90  | HH21, C_ARG_90  | 2.77 | 1.78 | 9.61  |
| 1HGE.PDB | OD1, C_ASP_271 | N, C_SER_91    | H, C_SER_91     | 2.89 | 1.92 | 5.94  |
| 1HGE.PDB | OD2, C_ASP_271 | OG, C_SER_91   | HG, C_SER_91    | 2.80 | 1.91 | 19.19 |
| 1HGE.PDB | OD2, C_ASP_68  | OG, C_SER_95   | HG, C_SER_95    | 2.88 | 1.95 | 14.90 |
| 1HGE.PDB | OD2, C_ASP_73  | N, C_ASN_96    | H, C_ASN_96     | 2.89 | 1.91 | 7.72  |
| 1HGE.PDB | OD1, C_ASP_68  | OH, C_TYR_100  | HH, C_TYR_100   | 2.89 | 1.97 | 15.01 |
| 1HGE.PDB | O, C_ILE_230   | N, C_ASP_101   | H, C_ASP_101    | 2.99 | 2.10 | 21.29 |
| 1HGE.PDB | OD2, C_ASP_104 | OG, C_SER_107  | HG, C_SER_107   | 2.88 | 1.96 | 15.70 |
| 1HGE.PDB | O, C_TYR_105   | N, C_ARG_109   | H, C_ARG_109    | 2.82 | 1.85 | 4.05  |
| 1HGE.PDB | OE2, D_GLU_67  | NH2, C_ARG_109 | HH21, C_ARG_109 | 2.78 | 1.79 | 11.19 |
| 1HGE.PDB | OD2, B_ASP_79  | OG, C_SER_110  | HG, C_SER_110   | 2.78 | 1.86 | 15.09 |
| 1HGE.PDB | O, C_SER_107   | N, C_LEU_111   | H, C_LEU_111    | 2.85 | 1.88 | 4.99  |

|          |                |                |                 |      |      |       |
|----------|----------------|----------------|-----------------|------|------|-------|
| 1HGE.PDB | O, C_ARG_109   | N, C_ALA_113   | H, C_ALA_113    | 2.95 | 2.04 | 18.55 |
| 1HGE.PDB | O, C_SER_110   | N, C_SER_114   | H, C_SER_114    | 2.89 | 1.95 | 14.50 |
| 1HGE.PDB | OE2, C_GLU_119 | OG1, C_THR_117 | HG1, C_THR_117  | 2.89 | 1.94 | 9.29  |
| 1HGE.PDB | O, C_GLU_82    | N, C_LEU_118   | H, C_LEU_118    | 2.97 | 2.03 | 15.52 |
| 1HGE.PDB | O, C_TYR_257   | N, C_ILE_121   | H, C_ILE_121    | 2.88 | 1.91 | 6.31  |
| 1HGE.PDB | O, C_ARG_255   | N, C_GLU_123   | H, C_GLU_123    | 2.94 | 1.98 | 10.94 |
| 1HGE.PDB | O, C_THR_155   | N, C_THR_131   | H, C_THR_131    | 2.77 | 1.87 | 18.82 |
| 1HGE.PDB | OD1, C_ASN_152 | N, C_ASN_133   | H, C_ASN_133    | 2.88 | 1.96 | 16.12 |
| 1HGE.PDB | O, C_TRP_153   | N, C_GLY_134   | H, C_GLY_134    | 2.94 | 2.05 | 19.45 |
| 1HGE.PDB | O, C_GLY_146   | N, C_SER_136   | H, C_SER_136    | 2.85 | 1.90 | 10.46 |
| 1HGE.PDB | OG, C_SER_136  | N, C_ALA_138   | H, C_ALA_138    | 2.96 | 2.02 | 13.07 |
| 1HGE.PDB | O, C_GLY_144   | NZ, C_LYS_140  | HZ1, C_LYS_140  | 2.72 | 1.75 | 17.13 |
| 1HGE.PDB | OD1, C_ASN_137 | NZ, C_LYS_140  | HZ2, C_LYS_140  | 2.83 | 1.86 | 16.66 |
| 1HGE.PDB | OD2, C_ASP_77  | NE, C_ARG_141  | HE, C_ARG_141   | 2.80 | 1.97 | 26.96 |
| 1HGE.PDB | O, C_PHE_147   | NH1, C_ARG_141 | HH12, C_ARG_141 | 2.55 | 1.62 | 15.87 |
| 1HGE.PDB | OD1, C_ASP_77  | NH2, C_ARG_141 | HH21, C_ARG_141 | 2.88 | 1.96 | 21.42 |
| 1HGE.PDB | OD2, C_ASP_77  | NH2, C_ARG_141 | HH21, C_ARG_141 | 2.74 | 1.86 | 24.30 |
| 1HGE.PDB | O, C_GLY_72    | NH2, C_ARG_141 | HH22, C_ARG_141 | 2.91 | 1.94 | 12.79 |
| 1HGE.PDB | O, C_GLY_72    | N, C_SER_149   | H, C_SER_149    | 2.84 | 1.92 | 17.14 |
| 1HGE.PDB | O, C_ALA_253   | N, C_ASN_152   | H, C_ASN_152    | 2.77 | 1.90 | 22.09 |
| 1HGE.PDB | OH, C_TYR_195  | NE1, C_TRP_153 | HE1, C_TRP_153  | 2.85 | 1.98 | 22.78 |
| 1HGE.PDB | O, C_LEU_194   | N, C_LYS_156   | H, C_LYS_156    | 2.97 | 2.07 | 19.03 |
| 1HGE.PDB | O, C_THR_160   | N, C_SER_157   | H, C_SER_157    | 2.96 | 2.05 | 18.03 |
| 1HGE.PDB | O, C_SER_247   | N, C_LEU_164   | H, C_LEU_164    | 2.70 | 1.87 | 25.69 |
| 1HGE.PDB | O, C_ILE_245   | N, C_VAL_166   | H, C_VAL_166    | 2.88 | 1.93 | 12.26 |
| 1HGE.PDB | O, C_LEU_243   | OG1, C_THR_167 | HG1, C_THR_167  | 2.89 | 2.00 | 19.24 |
| 1HGE.PDB | O, C_LEU_243   | N, C_MET_168   | H, C_MET_168    | 2.95 | 2.03 | 16.73 |
| 1HGE.PDB | O, C_ASP_241   | N, C_ASN_170   | H, C_ASN_170    | 2.90 | 1.92 | 6.43  |
| 1HGE.PDB | O, C_PHE_174   | ND2, C_ASN_170 | HD21, C_ASN_170 | 2.84 | 1.87 | 8.31  |
| 1HGE.PDB | O, C_VAL_237   | ND2, C_ASN_170 | HD22, C_ASN_170 | 2.85 | 2.06 | 29.16 |
| 1HGE.PDB | O, C_VAL_237   | N, C_LYS_176   | H, C_LYS_176    | 2.96 | 2.03 | 15.33 |
| 1HGE.PDB | OE2, C_GLU_123 | NZ, C_LYS_176  | HZ1, C_LYS_176  | 2.71 | 1.80 | 23.44 |
| 1HGE.PDB | O, C_PHE_258   | N, C_LEU_177   | H, C_LEU_177    | 2.95 | 1.98 | 5.56  |
| 1HGE.PDB | O, C_THR_235   | N, C_TYR_178   | H, C_TYR_178    | 2.82 | 1.85 | 5.01  |
| 1HGE.PDB | OE1, C_GLU_123 | OH, C_TYR_178  | HH, C_TYR_178   | 2.73 | 1.80 | 12.29 |
| 1HGE.PDB | OG1, C_THR_235 | NE1, C_TRP_180 | HE1, C_TRP_180  | 2.92 | 1.93 | 1.68  |
| 1HGE.PDB | O, C_ASN_250   | N, C_HIS_183   | H, C_HIS_183    | 2.90 | 2.00 | 18.95 |
| 1HGE.PDB | O, C_ARG_229   | N, C_HIS_184   | H, C_HIS_184    | 2.88 | 1.92 | 7.36  |
| 1HGE.PDB | OG, C_SER_231  | NE2, C_HIS_184 | HE2, C_HIS_184  | 2.71 | 1.87 | 25.48 |
| 1HGE.PDB | OG1, C_THR_187 | N, C_GLU_190   | H, C_GLU_190    | 2.99 | 2.05 | 11.81 |
| 1HGE.PDB | OD1, C_ASN_250 | NE2, C_GLN_191 | HE21, C_GLN_191 | 3.00 | 2.03 | 7.73  |
| 1HGE.PDB | O, C_GLN_197   | NE2, C_GLN_191 | HE22, C_GLN_191 | 2.95 | 2.03 | 16.39 |
| 1HGE.PDB | O, C_GLN_189   | OG1, C_THR_192 | HG1, C_THR_192  | 2.80 | 1.94 | 21.49 |
| 1HGE.PDB | O, C_GLN_189   | N, C_SER_193   | H, C_SER_193    | 2.84 | 1.90 | 12.38 |
| 1HGE.PDB | O, C_GLU_190   | N, C_LEU_194   | H, C_LEU_194    | 3.00 | 2.03 | 8.39  |
| 1HGE.PDB | O, C_GLN_191   | N, C_TYR_195   | H, C_TYR_195    | 2.79 | 1.84 | 10.35 |
| 1HGE.PDB | O, C_TYR_161   | NE2, C_GLN_197 | HE21, C_GLN_197 | 2.87 | 1.92 | 10.94 |
| 1HGE.PDB | O, C_ASN_248   | NE2, C_GLN_197 | HE22, C_GLN_197 | 2.96 | 2.03 | 16.11 |
| 1HGE.PDB | OD1, C_ASN_246 | NH2, C_ARG_201 | HH21, C_ARG_201 | 2.62 | 1.75 | 24.53 |
| 1HGE.PDB | O, C_ILE_213   | N, C_VAL_202   | H, C_VAL_202    | 2.99 | 2.05 | 14.11 |
| 1HGE.PDB | O, C_ASN_246   | N, C_THR_203   | H, C_THR_203    | 2.91 | 1.96 | 12.23 |
| 1HGE.PDB | OG1, C_THR_212 | OG1, C_THR_203 | HG1, C_THR_203  | 2.89 | 1.94 | 9.07  |
| 1HGE.PDB | O, C_GLN_211   | N, C_VAL_204   | H, C_VAL_204    | 2.84 | 1.94 | 18.37 |
| 1HGE.PDB | O, C_SER_209   | N, C_THR_206   | H, C_THR_206    | 2.97 | 2.00 | 8.35  |
| 1HGE.PDB | OD1, C_ASP_241 | N, C_ARG_207   | H, C_ARG_207    | 2.89 | 1.93 | 9.60  |
| 1HGE.PDB | OG1, C_THR_206 | OG, C_SER_209  | HG, C_SER_209   | 2.98 | 2.03 | 9.68  |
| 1HGE.PDB | OD1, A_ASP_101 | NE2, C_GLN_210 | HE22, C_GLN_210 | 2.93 | 2.07 | 24.92 |
| 1HGE.PDB | O, C_VAL_204   | N, C_GLN_211   | H, C_GLN_211    | 2.83 | 1.91 | 16.68 |

|          |                |                |                 |      |      |       |
|----------|----------------|----------------|-----------------|------|------|-------|
| 1HGE.PDB | O, C_VAL_202   | N, C_ILE_213   | H, C_ILE_213    | 2.84 | 1.91 | 15.11 |
| 1HGE.PDB | ND1, C_HIS_184 | N, C_ASN_216   | H, C_ASN_216    | 2.76 | 1.97 | 29.84 |
| 1HGE.PDB | OE1, E_GLN_210 | NH2, C_ARG_220 | HH21, C_ARG_220 | 2.64 | 1.76 | 23.09 |
| 1HGE.PDB | O, C_ASN_216   | NH2, C_ARG_220 | HH22, C_ARG_220 | 2.68 | 1.79 | 22.17 |
| 1HGE.PDB | O, C_LEU_226   | N, C_VAL_223   | H, C_VAL_223    | 2.85 | 1.89 | 10.14 |
| 1HGE.PDB | O, C_CYS_97    | NE, C_ARG_224  | HE, C_ARG_224   | 2.86 | 2.04 | 28.35 |
| 1HGE.PDB | O, C_CYS_97    | NH2, C_ARG_224 | HH21, C_ARG_224 | 2.80 | 1.90 | 22.90 |
| 1HGE.PDB | O, C_VAL_223   | N, C_LEU_226   | H, C_LEU_226    | 2.92 | 1.98 | 11.69 |
| 1HGE.PDB | O, C_SER_228   | NH1, C_ARG_229 | HH11, C_ARG_229 | 2.66 | 1.73 | 17.65 |
| 1HGE.PDB | O, C_PRO_221   | NH2, C_ARG_229 | HH22, C_ARG_229 | 2.66 | 1.70 | 14.45 |
| 1HGE.PDB | OD1, C_ASP_101 | OG, C_SER_231  | HG, C_SER_231   | 2.89 | 1.93 | 7.03  |
| 1HGE.PDB | O, C_ASP_101   | N, C_ILE_232   | H, C_ILE_232    | 2.94 | 2.01 | 16.06 |
| 1HGE.PDB | O, C_TRP_180   | N, C_TYR_233   | H, C_TYR_233    | 2.87 | 1.91 | 8.74  |
| 1HGE.PDB | O, C_TYR_178   | N, C_THR_235   | H, C_THR_235    | 2.86 | 1.95 | 17.72 |
| 1HGE.PDB | O, C_LYS_176   | N, C_VAL_237   | H, C_VAL_237    | 2.76 | 1.86 | 18.21 |
| 1HGE.PDB | OE1, B_GLU_72  | NZ, C_LYS_238  | HZ1, C_LYS_238  | 2.78 | 1.80 | 16.75 |
| 1HGE.PDB | O, B_SER_71    | NZ, C_LYS_238  | HZ3, C_LYS_238  | 2.65 | 1.71 | 19.56 |
| 1HGE.PDB | O, C_ASN_170   | N, C_GLY_240   | H, C_GLY_240    | 2.86 | 1.99 | 22.04 |
| 1HGE.PDB | O, C_LYS_238   | N, C_ASP_241   | H, C_ASP_241    | 2.92 | 1.99 | 14.19 |
| 1HGE.PDB | OD1, C_ASP_241 | N, C_VAL_242   | H, C_VAL_242    | 2.80 | 1.97 | 26.99 |
| 1HGE.PDB | O, C_MET_168   | N, C_LEU_243   | H, C_LEU_243    | 2.92 | 1.94 | 4.20  |
| 1HGE.PDB | O, C_SER_205   | N, C_VAL_244   | H, C_VAL_244    | 2.96 | 2.01 | 12.41 |
| 1HGE.PDB | O, C_VAL_166   | N, C_ILE_245   | H, C_ILE_245    | 2.89 | 1.96 | 15.45 |
| 1HGE.PDB | O, C_THR_203   | N, C_ASN_246   | H, C_ASN_246    | 2.90 | 1.93 | 6.52  |
| 1HGE.PDB | OD1, C_ASN_165 | ND2, C_ASN_246 | HD22, C_ASN_246 | 2.89 | 1.94 | 13.09 |
| 1HGE.PDB | O, C_LEU_164   | N, C_SER_247   | H, C_SER_247    | 2.96 | 2.05 | 18.85 |
| 1HGE.PDB | O, C_ARG_201   | OG, C_SER_247  | HG, C_SER_247   | 2.74 | 1.95 | 29.12 |
| 1HGE.PDB | OE1, C_GLN_191 | ND2, C_ASN_250 | HD21, C_ASN_250 | 2.89 | 1.93 | 9.19  |
| 1HGE.PDB | O, C_HIS_183   | ND2, C_ASN_250 | HD22, C_ASN_250 | 2.90 | 1.94 | 11.40 |
| 1HGE.PDB | O, C_ASN_152   | N, C_ALA_253   | H, C_ALA_253    | 2.88 | 2.01 | 23.02 |
| 1HGE.PDB | OD1, C_ASN_133 | NH2, C_ARG_255 | HH22, C_ARG_255 | 2.48 | 1.68 | 29.46 |
| 1HGE.PDB | O, C_ILE_121   | N, C_TYR_257   | H, C_TYR_257    | 2.98 | 2.14 | 25.04 |
| 1HGE.PDB | O, C_LEU_177   | N, C_PHE_258   | H, C_PHE_258    | 2.95 | 1.97 | 4.47  |
| 1HGE.PDB | OE2, C_GLU_119 | NH1, C_ARG_261 | HH12, C_ARG_261 | 2.65 | 1.82 | 27.69 |
| 1HGE.PDB | OE1, C_GLU_119 | NH2, C_ARG_261 | HH22, C_ARG_261 | 2.84 | 1.95 | 24.41 |
| 1HGE.PDB | OD2, C_ASP_85  | NZ, C_LYS_264  | HZ3, C_LYS_264  | 2.77 | 1.79 | 16.79 |
| 1HGE.PDB | O, C_PHE_87    | N, C_MET_268   | H, C_MET_268    | 2.81 | 1.93 | 20.65 |
| 1HGE.PDB | O, C_PRO_284   | OG, C_SER_270  | HG, C_SER_270   | 2.77 | 1.85 | 14.90 |
| 1HGE.PDB | OG, C_SER_270  | N, C_ALA_272   | H, C_ALA_272    | 2.95 | 2.00 | 10.98 |
| 1HGE.PDB | O, C_ILE_51    | N, C_ASP_275   | H, C_ASP_275    | 2.98 | 2.09 | 21.88 |
| 1HGE.PDB | OD1, C_ASP_275 | N, C_THR_276   | H, C_THR_276    | 2.79 | 1.93 | 23.11 |
| 1HGE.PDB | O, C_ASN_54    | N, C_SER_279   | H, C_SER_279    | 2.78 | 1.85 | 13.73 |
| 1HGE.PDB | O, C_TYR_302   | N, C_ILE_282   | H, C_ILE_282    | 2.90 | 1.93 | 4.89  |
| 1HGE.PDB | O, C_THR_283   | N, C_GLY_286   | H, C_GLY_286    | 2.85 | 1.91 | 13.86 |
| 1HGE.PDB | O, C_LYS_50    | N, C_SER_287   | H, C_SER_287    | 2.85 | 1.88 | 3.50  |
| 1HGE.PDB | O, C_ALA_304   | ND2, C_ASN_290 | HD22, C_ASN_290 | 2.82 | 1.93 | 19.75 |
| 1HGE.PDB | OE1, C_GLN_44  | NZ, C_LYS_292  | HZ1, C_LYS_292  | 2.72 | 1.72 | 12.77 |
| 1HGE.PDB | OD2, C_ASP_291 | NZ, C_LYS_292  | HZ3, C_LYS_292  | 2.84 | 1.88 | 19.72 |
| 1HGE.PDB | O, C_LYS_307   | N, C_GLN_295   | H, C_GLN_295    | 2.83 | 1.94 | 20.43 |
| 1HGE.PDB | O, C_ASN_298   | NE2, C_GLN_295 | HE21, C_GLN_295 | 2.74 | 1.79 | 8.05  |
| 1HGE.PDB | O, C_GLN_44    | N, C_ASN_296   | H, C_ASN_296    | 2.82 | 1.89 | 15.19 |
| 1HGE.PDB | OE1, C_GLN_295 | N, C_VAL_297   | H, C_VAL_297    | 2.70 | 1.88 | 26.95 |
| 1HGE.PDB | OD1, C_ASN_285 | ND2, C_ASN_298 | HD22, C_ASN_298 | 2.99 | 2.05 | 12.60 |
| 1HGE.PDB | O, D_LYS_68    | NZ, C_LYS_299  | HZ2, C_LYS_299  | 2.96 | 1.94 | 10.83 |
| 1HGE.PDB | OD1, C_ASN_298 | N, C_ILE_300   | H, C_ILE_300    | 2.91 | 2.01 | 19.01 |
| 1HGE.PDB | O, C_ILE_282   | N, C_TYR_302   | H, C_TYR_302    | 2.93 | 2.07 | 24.01 |
| 1HGE.PDB | O, C_LYS_264   | OH, C_TYR_302  | HH, C_TYR_302   | 2.65 | 1.87 | 29.65 |
| 1HGE.PDB | O, D_LYS_62    | N, C_GLY_303   | H, C_GLY_303    | 2.94 | 1.98 | 10.89 |

|          |                |                |                 |      |      |       |
|----------|----------------|----------------|-----------------|------|------|-------|
| 1HGE.PDB | OG, D_SER_93   | N, C_LYS_310   | H, C_LYS_310    | 2.92 | 1.96 | 11.23 |
| 1HGE.PDB | OE2, C_GLU_41  | N, C_LEU_314   | H, C_LEU_314    | 2.83 | 1.89 | 13.54 |
| 1HGE.PDB | OE1, C_GLU_41  | NZ, C_LYS_315  | HZ3, C_LYS_315  | 2.82 | 1.88 | 21.70 |
| 1HGE.PDB | O, C_THR_40    | N, C_LEU_316   | H, C_LEU_316    | 2.80 | 1.84 | 9.83  |
| 1HGE.PDB | OD1, D_ASN_104 | N, C_ALA_317   | H, C_ALA_317    | 2.73 | 1.80 | 14.37 |
| 1HGE.PDB | O, C_ASN_38    | N, C_THR_318   | H, C_THR_318    | 2.85 | 1.95 | 18.88 |
| 1HGE.PDB | O, C_VAL_20    | ND2, C_ASN_322 | HD21, C_ASN_322 | 2.96 | 2.03 | 15.20 |
| 1HGE.PDB | OE2, C_GLU_35  | ND2, C_ASN_322 | HD22, C_ASN_322 | 2.89 | 2.00 | 20.86 |
| 1HGE.PDB | OE1, D_GLU_15  | NZ, C_LYS_326  | HZ1, C_LYS_326  | 2.74 | 1.73 | 12.73 |
| 1HGE.PDB | OXT, C_THR_328 | NE2, C_GLN_327 | HE22, C_GLN_327 | 2.97 | 2.01 | 12.27 |
| 1HGE.PDB | OD2, D_ASP_112 | N, D_GLY_1     | H2, D_GLY_1     | 2.75 | 1.76 | 15.00 |
| 1HGE.PDB | OD1, D_ASP_109 | N, D_LEU_2     | H, D_LEU_2      | 2.82 | 1.93 | 20.06 |
| 1HGE.PDB | OD2, D_ASP_112 | N, D_PHE_3     | H, D_PHE_3      | 2.80 | 2.00 | 29.38 |
| 1HGE.PDB | OD2, D_ASP_112 | N, D_GLY_4     | H, D_GLY_4      | 2.92 | 2.03 | 19.66 |
| 1HGE.PDB | OD1, D_ASP_112 | N, D_ALA_5     | H, D_ALA_5      | 2.94 | 2.04 | 19.74 |
| 1HGE.PDB | O, D_GLY_4     | N, D_PHE_9     | H, D_PHE_9      | 2.82 | 1.88 | 13.73 |
| 1HGE.PDB | O, D_GLY_13    | ND2, D_ASN_12  | HD22, D_ASN_12  | 2.81 | 1.95 | 23.47 |
| 1HGE.PDB | O, C_VAL_323   | N, D_GLY_13    | H, D_GLY_13     | 2.71 | 1.79 | 14.79 |
| 1HGE.PDB | O, C_HIS_17    | N, D_TRP_14    | H, D_TRP_14     | 2.88 | 1.94 | 13.07 |
| 1HGE.PDB | OG1, D_THR_41  | N, D_TRP_21    | H, D_TRP_21     | 2.86 | 1.96 | 18.92 |
| 1HGE.PDB | O, C_GLY_16    | N, D_GLY_23    | H, D_GLY_23     | 2.94 | 2.04 | 19.95 |
| 1HGE.PDB | O, D_ALA_35    | N, D_PHE_24    | H, D_PHE_24     | 2.84 | 1.86 | 3.41  |
| 1HGE.PDB | O, C_CYS_14    | N, D_ARG_25    | H, D_ARG_25     | 2.94 | 1.98 | 9.40  |
| 1HGE.PDB | OE1, D_GLN_34  | NE, D_ARG_25   | HE, D_ARG_25    | 2.56 | 1.76 | 28.50 |
| 1HGE.PDB | O, D_GLY_33    | N, D_HIS_26    | H, D_HIS_26     | 2.85 | 1.95 | 19.13 |
| 1HGE.PDB | O, C_THR_12    | N, D_GLN_27    | H, D_GLN_27     | 2.86 | 1.95 | 18.04 |
| 1HGE.PDB | O, D_GLY_31    | N, D_ASN_28    | H, D_ASN_28     | 2.82 | 1.88 | 13.03 |
| 1HGE.PDB | OD1, D_ASN_28  | N, D_GLU_30    | H, D_GLU_30     | 2.96 | 2.16 | 29.70 |
| 1HGE.PDB | O, D_ASN_28    | N, D_GLY_31    | H, D_GLY_31     | 2.97 | 2.06 | 18.30 |
| 1HGE.PDB | O, D_PHE_24    | N, D_ALA_35    | H, D_ALA_35     | 2.79 | 1.99 | 28.92 |
| 1HGE.PDB | O, D_TYR_22    | N, D_ASP_37    | H, D_ASP_37     | 2.72 | 1.80 | 13.99 |
| 1HGE.PDB | OD2, D_ASP_37  | N, D_SER_40    | H, D_SER_40     | 2.88 | 1.92 | 10.60 |
| 1HGE.PDB | OD2, D_ASP_37  | OG, D_SER_40   | HG, D_SER_40    | 2.78 | 1.93 | 24.10 |
| 1HGE.PDB | O, D_ASP_37    | OG1, D_THR_41  | HG1, D_THR_41   | 2.71 | 1.83 | 19.19 |
| 1HGE.PDB | O, D_LEU_38    | N, D_GLN_42    | H, D_GLN_42     | 2.87 | 1.94 | 14.92 |
| 1HGE.PDB | OD1, D_ASP_46  | NE2, D_GLN_42  | HE22, D_GLN_42  | 2.87 | 1.96 | 19.33 |
| 1HGE.PDB | O, D_LYS_39    | N, D_ALA_43    | H, D_ALA_43     | 2.95 | 2.00 | 11.25 |
| 1HGE.PDB | O, D_SER_40    | N, D_ALA_44    | H, D_ALA_44     | 2.93 | 1.96 | 3.43  |
| 1HGE.PDB | O, D_GLN_42    | N, D_ASP_46    | H, D_ASP_46     | 2.80 | 1.83 | 3.78  |
| 1HGE.PDB | OE2, D_GLU_114 | NE2, D_GLN_47  | HE21, D_GLN_47  | 2.99 | 2.06 | 16.53 |
| 1HGE.PDB | O, D_ALA_43    | NE2, D_GLN_47  | HE22, D_GLN_47  | 2.87 | 1.96 | 16.48 |
| 1HGE.PDB | O, D_ILE_45    | N, D_ASN_49    | H, D_ASN_49     | 2.89 | 1.94 | 10.31 |
| 1HGE.PDB | O, D_ASP_46    | N, D_GLY_50    | H, D_GLY_50     | 2.85 | 1.93 | 16.23 |
| 1HGE.PDB | OG1, D_THR_107 | NZ, D_LYS_51   | HZ1, D_LYS_51   | 2.96 | 1.98 | 16.83 |
| 1HGE.PDB | OE1, D_GLU_103 | NZ, D_LYS_51   | HZ2, D_LYS_51   | 2.76 | 1.73 | 6.47  |
| 1HGE.PDB | ND1, D_HIS_106 | NZ, D_LYS_51   | HZ3, D_LYS_51   | 2.77 | 1.82 | 18.39 |
| 1HGE.PDB | O, D_ILE_48    | N, D_LEU_52    | H, D_LEU_52     | 2.84 | 1.95 | 19.97 |
| 1HGE.PDB | O, D_ASN_49    | N, D_ASN_53    | H, D_ASN_53     | 2.80 | 1.87 | 13.93 |
| 1HGE.PDB | OE1, D_GLU_57  | NH1, D_ARG_54  | HH11, D_ARG_54  | 2.82 | 1.84 | 12.42 |
| 1HGE.PDB | OE2, B_GLU_97  | NH2, D_ARG_54  | HH22, D_ARG_54  | 2.87 | 1.89 | 12.82 |
| 1HGE.PDB | OG, C_SER_110  | NE2, D_HIS_64  | HE2, D_HIS_64   | 2.96 | 1.98 | 6.23  |
| 1HGE.PDB | O, C_LYS_299   | NZ, D_LYS_68   | HZ1, D_LYS_68   | 2.92 | 1.91 | 12.00 |
| 1HGE.PDB | OE2, D_GLU_85  | NZ, D_LYS_68   | HZ2, D_LYS_68   | 2.80 | 1.78 | 10.75 |
| 1HGE.PDB | OG, E_SER_107  | N, D_ARG_76    | H, D_ARG_76     | 2.87 | 1.90 | 6.58  |
| 1HGE.PDB | OE2, F_GLU_81  | NE, D_ARG_76   | HE, D_ARG_76    | 2.79 | 1.85 | 14.06 |
| 1HGE.PDB | OE2, F_GLU_74  | NH1, D_ARG_76  | HH12, D_ARG_76  | 2.78 | 1.78 | 7.91  |
| 1HGE.PDB | OE1, F_GLU_81  | NH2, D_ARG_76  | HH21, D_ARG_76  | 2.63 | 1.67 | 11.36 |
| 1HGE.PDB | OE1, F_GLU_74  | NH2, D_ARG_76  | HH22, D_ARG_76  | 2.74 | 1.75 | 7.04  |

|          |                |                |                 |      |      |       |
|----------|----------------|----------------|-----------------|------|------|-------|
| 1HGE.PDB | OE1, D_GLU_74  | NE2, D_GLN_78  | HE22, D_GLN_78  | 2.96 | 1.99 | 8.03  |
| 1HGE.PDB | O, D_GLY_75    | N, D_ASP_79    | H, D_ASP_79     | 2.95 | 2.00 | 12.34 |
| 1HGE.PDB | O, D_ILE_77    | N, D_GLU_81    | H, D_GLU_81     | 2.96 | 2.00 | 10.54 |
| 1HGE.PDB | O, D_ASP_79    | N, D_TYR_83    | H, D_TYR_83     | 2.91 | 1.99 | 16.75 |
| 1HGE.PDB | OE1, F_GLU_85  | OH, D_TYR_83   | HH, D_TYR_83    | 2.58 | 1.80 | 29.40 |
| 1HGE.PDB | O, D_LEU_80    | N, D_VAL_84    | H, D_VAL_84     | 2.82 | 1.87 | 12.05 |
| 1HGE.PDB | O, D_LYS_82    | N, D_ASP_86    | H, D_ASP_86     | 2.94 | 1.98 | 8.49  |
| 1HGE.PDB | O, D_TYR_83    | N, D_THR_87    | H, D_THR_87     | 2.92 | 1.95 | 7.61  |
| 1HGE.PDB | O, D_VAL_84    | N, D_LYS_88    | H, D_LYS_88     | 2.93 | 2.04 | 19.95 |
| 1HGE.PDB | OH, B_TYR_83   | NZ, D_LYS_88   | HZ1, D_LYS_88   | 2.71 | 1.68 | 6.52  |
| 1HGE.PDB | O, D_GLU_85    | N, D_ILE_89    | H, D_ILE_89     | 2.88 | 1.90 | 2.66  |
| 1HGE.PDB | O, D_LYS_88    | N, D_TRP_92    | H, D_TRP_92     | 2.96 | 1.98 | 4.29  |
| 1HGE.PDB | O, D_ILE_89    | N, D_SER_93    | H, D_SER_93     | 2.83 | 1.92 | 17.54 |
| 1HGE.PDB | O, D_ILE_89    | OG, D_SER_93   | HG, D_SER_93    | 2.86 | 1.94 | 14.79 |
| 1HGE.PDB | O, D_ASP_90    | N, D_TYR_94    | H, D_TYR_94     | 2.87 | 1.96 | 18.12 |
| 1HGE.PDB | O, D_TRP_92    | N, D_ALA_96    | H, D_ALA_96     | 2.95 | 2.01 | 13.60 |
| 1HGE.PDB | O, D_TYR_94    | N, D_LEU_98    | H, D_LEU_98     | 2.96 | 1.98 | 4.20  |
| 1HGE.PDB | O, D_ASN_95    | N, D_LEU_99    | H, D_LEU_99     | 2.91 | 1.98 | 15.66 |
| 1HGE.PDB | O, D_LEU_98    | N, D_LEU_102   | H, D_LEU_102    | 2.98 | 2.00 | 6.37  |
| 1HGE.PDB | O, D_LEU_99    | N, D_GLU_103   | H, D_GLU_103    | 2.91 | 1.94 | 7.56  |
| 1HGE.PDB | O, D_VAL_100   | N, D_ASN_104   | H, D_ASN_104    | 2.91 | 1.96 | 12.51 |
| 1HGE.PDB | O, C_LYS_27    | ND2, D_ASN_104 | HD22, D_ASN_104 | 2.96 | 2.00 | 10.88 |
| 1HGE.PDB | O, D_LEU_102   | N, D_HIS_106   | H, D_HIS_106    | 2.92 | 1.97 | 11.35 |
| 1HGE.PDB | O, D_GLU_103   | N, D_THR_107   | H, D_THR_107    | 2.85 | 1.96 | 20.31 |
| 1HGE.PDB | O, D_ASN_104   | N, D_ILE_108   | H, D_ILE_108    | 2.91 | 1.95 | 9.12  |
| 1HGE.PDB | O, D_HIS_106   | N, D_LEU_110   | H, D_LEU_110    | 2.80 | 1.85 | 9.79  |
| 1HGE.PDB | O, D_THR_107   | OG1, D_THR_111 | HG1, D_THR_111  | 2.87 | 1.91 | 5.65  |
| 1HGE.PDB | O, D_ASP_109   | N, D_SER_113   | H, D_SER_113    | 2.84 | 1.89 | 10.30 |
| 1HGE.PDB | O, D_LEU_110   | N, D_GLU_114   | H, D_GLU_114    | 2.93 | 1.97 | 9.88  |
| 1HGE.PDB | O, D_ASP_112   | N, D_ASN_116   | H, D_ASN_116    | 2.98 | 2.01 | 8.80  |
| 1HGE.PDB | O, D_SER_113   | N, D_LYS_117   | H, D_LYS_117    | 2.78 | 1.90 | 20.87 |
| 1HGE.PDB | O, D_MET_115   | N, D_PHE_119   | H, D_PHE_119    | 3.00 | 2.05 | 13.31 |
| 1HGE.PDB | O, D_ASN_116   | N, D_GLU_120   | H, D_GLU_120    | 2.94 | 1.96 | 2.22  |
| 1HGE.PDB | O, D_LYS_117   | N, D_LYS_121   | H, D_LYS_121    | 2.93 | 2.03 | 20.11 |
| 1HGE.PDB | O, D_PHE_119   | N, D_ARG_123   | H, D_ARG_123    | 2.91 | 1.95 | 8.55  |
| 1HGE.PDB | OE2, D_GLU_120 | NH1, D_ARG_123 | HH11, D_ARG_123 | 2.83 | 1.93 | 23.01 |
| 1HGE.PDB | O, D_GLU_120   | N, D_ARG_124   | H, D_ARG_124    | 3.00 | 2.04 | 10.14 |
| 1HGE.PDB | OE1, B_GLU_132 | NE, D_ARG_124  | HE, D_ARG_124   | 2.78 | 1.98 | 28.90 |
| 1HGE.PDB | OE2, B_GLU_132 | NE, D_ARG_124  | HE, D_ARG_124   | 2.90 | 2.01 | 20.41 |
| 1HGE.PDB | O, D_LEU_126   | N, D_ASN_129   | H, D_ASN_129    | 2.94 | 1.99 | 12.91 |
| 1HGE.PDB | O, D_HIS_159   | ND2, D_ASN_129 | HD21, D_ASN_129 | 2.92 | 1.97 | 10.53 |
| 1HGE.PDB | OH, D_TYR_157  | ND2, D_ASN_129 | HD22, D_ASN_129 | 2.81 | 1.85 | 9.24  |
| 1HGE.PDB | O, D_LYS_139   | N, D_GLU_131   | H, D_GLU_131    | 2.97 | 2.05 | 17.56 |
| 1HGE.PDB | O, D_CYS_137   | N, D_MET_133   | H, D_MET_133    | 2.89 | 1.93 | 10.58 |
| 1HGE.PDB | O, C_LEU_13    | N, D_PHE_138   | H, D_PHE_138    | 2.74 | 1.87 | 21.30 |
| 1HGE.PDB | O, D_GLU_131   | N, D_LYS_139   | H, D_LYS_139    | 2.81 | 1.87 | 11.30 |
| 1HGE.PDB | O, C_ALA_11    | N, D_ILE_140   | H, D_ILE_140    | 2.78 | 1.88 | 18.97 |
| 1HGE.PDB | O, D_ASN_129   | N, D_TYR_141   | H, D_TYR_141    | 2.89 | 1.95 | 13.56 |
| 1HGE.PDB | OE2, D_GLU_30  | N, D_ASN_146   | H, D_ASN_146    | 2.83 | 1.92 | 17.98 |
| 1HGE.PDB | O, D_ASP_145   | N, D_ILE_149   | H, D_ILE_149    | 2.93 | 1.97 | 9.93  |
| 1HGE.PDB | O, D_ASN_146   | N, D_GLU_150   | H, D_GLU_150    | 2.95 | 2.02 | 14.34 |
| 1HGE.PDB | O, D_ALA_147   | N, D_SER_151   | H, D_SER_151    | 2.92 | 2.03 | 19.70 |
| 1HGE.PDB | O, D_CYS_148   | OG, D_SER_151  | HG, D_SER_151   | 2.69 | 1.84 | 22.52 |
| 1HGE.PDB | O, D_GLU_150   | N, D_ASN_154   | H, D_ASN_154    | 2.82 | 1.85 | 7.63  |
| 1HGE.PDB | O, D_SER_151   | N, D_THR_156   | H, D_THR_156    | 2.75 | 1.94 | 27.92 |
| 1HGE.PDB | OD1, D_ASN_154 | OG1, D_THR_156 | HG1, D_THR_156  | 2.74 | 1.81 | 12.51 |
| 1HGE.PDB | NE2, D_HIS_142 | OH, D_TYR_157  | HH, D_TYR_157   | 2.73 | 1.86 | 21.01 |
| 1HGE.PDB | OD1, D_ASP_158 | N, D_ASP_160   | H, D_ASP_160    | 2.84 | 1.98 | 23.52 |



|          |                |                |                 |      |      |       |
|----------|----------------|----------------|-----------------|------|------|-------|
| 1HGE.PDB | O, D_HIS_159   | N, D_TYR_162   | H, D_TYR_162    | 2.91 | 2.02 | 20.55 |
| 1HGE.PDB | O, D_ASP_160   | N, D_ARG_163   | H, D_ARG_163    | 2.99 | 2.03 | 9.92  |
| 1HGE.PDB | O, B_ARG_170   | NH1, D_ARG_163 | HH12, D_ARG_163 | 2.79 | 1.82 | 14.16 |
| 1HGE.PDB | O, D_TYR_162   | N, D_ALA_166   | H, D_ALA_166    | 2.87 | 1.90 | 5.91  |
| 1HGE.PDB | O, D_ARG_163   | N, D_LEU_167   | H, D_LEU_167    | 2.73 | 1.80 | 11.73 |
| 1HGE.PDB | O, D_ALA_166   | N, D_ARG_170   | H, D_ARG_170    | 2.84 | 1.97 | 22.00 |
| 1HGE.PDB | O, D_GLU_128   | NE, D_ARG_170  | HE, D_ARG_170   | 2.74 | 1.87 | 22.62 |
| 1HGE.PDB | OE2, D_GLU_131 | NH1, D_ARG_170 | HH11, D_ARG_170 | 2.79 | 1.79 | 6.83  |
| 1HGE.PDB | O, D_LEU_167   | N, D_PHE_171   | H, D_PHE_171    | 2.89 | 1.96 | 14.77 |
| 1HGE.PDB | O, F_ILE_140   | N, E_ALA_11    | H, E_ALA_11     | 2.82 | 1.93 | 19.79 |
| 1HGE.PDB | O, F_GLN_27    | N, E_THR_12    | H, E_THR_12     | 2.91 | 1.97 | 12.43 |
| 1HGE.PDB | O, F_PHE_138   | N, E_LEU_13    | H, E_LEU_13     | 2.98 | 2.03 | 12.93 |
| 1HGE.PDB | O, F_ARG_25    | N, E_CYS_14    | H, E_CYS_14     | 2.61 | 1.80 | 26.88 |
| 1HGE.PDB | O, F_GLY_136   | N, E_LEU_15    | H, E_LEU_15     | 2.88 | 1.90 | 5.56  |
| 1HGE.PDB | O, F_GLY_23    | N, E_GLY_16    | H, E_GLY_16     | 2.95 | 2.06 | 19.95 |
| 1HGE.PDB | O, E_HIS_18    | ND1, E_HIS_17  | HD1, E_HIS_17   | 2.98 | 2.10 | 22.18 |
| 1HGE.PDB | O, F_TRP_21    | N, E_HIS_18    | H, E_HIS_18     | 2.85 | 1.97 | 21.43 |
| 1HGE.PDB | OD1, E_ASN_322 | N, E_VAL_20    | H, E_VAL_20     | 2.81 | 1.86 | 11.30 |
| 1HGE.PDB | O, E_VAL_36    | N, E_THR_24    | H, E_THR_24     | 2.83 | 1.94 | 19.47 |
| 1HGE.PDB | O, E_ILE_34    | N, E_VAL_26    | H, E_VAL_26     | 2.83 | 1.88 | 11.74 |
| 1HGE.PDB | OE2, F_GLU_97  | NZ, E_LYS_27   | HZ1, E_LYS_27   | 2.79 | 1.77 | 9.75  |
| 1HGE.PDB | O, E_LYS_27    | OG1, E_THR_28  | HG1, E_THR_28   | 2.99 | 2.20 | 29.66 |
| 1HGE.PDB | O, E_VAL_26    | N, E_ILE_34    | H, E_ILE_34     | 2.89 | 1.94 | 12.30 |
| 1HGE.PDB | O, E_THR_24    | N, E_VAL_36    | H, E_VAL_36     | 2.81 | 1.85 | 9.59  |
| 1HGE.PDB | O, E_MET_320   | N, E_THR_37    | H, E_THR_37     | 2.89 | 1.91 | 5.80  |
| 1HGE.PDB | O, E_LEU_316   | N, E_THR_40    | H, E_THR_40     | 2.78 | 1.93 | 24.64 |
| 1HGE.PDB | O, E_LEU_314   | N, E_LEU_42    | H, E_LEU_42     | 2.80 | 1.97 | 26.27 |
| 1HGE.PDB | O, E_PHE_294   | N, E_GLN_44    | H, E_GLN_44     | 2.81 | 1.85 | 6.62  |
| 1HGE.PDB | O, E_SER_46    | NE2, E_GLN_44  | HE22, E_GLN_44  | 2.85 | 1.98 | 22.39 |
| 1HGE.PDB | O, E_ASN_285   | OG, E_SER_47   | HG, E_SER_47    | 2.87 | 1.96 | 16.37 |
| 1HGE.PDB | OD2, E_ASP_275 | NZ, E_LYS_50   | HZ1, E_LYS_50   | 2.73 | 1.80 | 21.86 |
| 1HGE.PDB | O, E_PRO_273   | N, E_ILE_51    | H, E_ILE_51     | 2.78 | 1.85 | 13.53 |
| 1HGE.PDB | O, E_ASP_275   | N, E_ASN_53    | H, E_ASN_53     | 2.78 | 1.91 | 23.30 |
| 1HGE.PDB | OD2, E_ASP_85  | N, E_ARG_57    | H, E_ARG_57     | 2.91 | 1.97 | 12.45 |
| 1HGE.PDB | O, E_THR_83    | NE, E_ARG_57   | HE, E_ARG_57    | 2.83 | 1.86 | 9.17  |
| 1HGE.PDB | O, E_LEU_86    | N, E_LEU_59    | H, E_LEU_59     | 2.93 | 1.97 | 10.59 |
| 1HGE.PDB | O, E_VAL_88    | N, E_GLY_61    | H, E_GLY_61     | 2.95 | 2.10 | 25.32 |
| 1HGE.PDB | OD1, E_ASP_60  | N, E_ILE_62    | H, E_ILE_62     | 2.86 | 1.93 | 15.29 |
| 1HGE.PDB | O, E_GLY_61    | N, E_CYS_64    | H, E_CYS_64     | 2.87 | 1.96 | 17.48 |
| 1HGE.PDB | O, E_LEU_66    | N, E_LEU_70    | H, E_LEU_70     | 2.86 | 1.97 | 20.45 |
| 1HGE.PDB | O, E_ILE_67    | N, E_LEU_71    | H, E_LEU_71     | 2.83 | 1.87 | 6.72  |
| 1HGE.PDB | O, E_ASP_68    | N, E_GLY_72    | H, E_GLY_72     | 2.87 | 1.96 | 17.08 |
| 1HGE.PDB | OD1, E_ASP_73  | ND1, E_HIS_75  | HD1, E_HIS_75   | 2.77 | 1.85 | 16.90 |
| 1HGE.PDB | O, E_ASP_63    | NE2, E_HIS_75  | HE2, E_HIS_75   | 2.86 | 1.94 | 17.47 |
| 1HGE.PDB | O, E_ASP_73    | N, E_CYS_76    | H, E_CYS_76     | 2.76 | 1.81 | 11.37 |
| 1HGE.PDB | O, E_PRO_74    | N, E_ASP_77    | H, E_ASP_77     | 2.86 | 1.91 | 10.86 |
| 1HGE.PDB | O, E_CYS_76    | N, E_PHE_79    | H, E_PHE_79     | 2.97 | 1.99 | 3.02  |
| 1HGE.PDB | OE1, E_GLU_82  | N, E_THR_83    | H, E_THR_83     | 2.88 | 1.98 | 19.27 |
| 1HGE.PDB | O, E_ARG_57    | N, E_ASP_85    | H, E_ASP_85     | 2.78 | 1.89 | 19.36 |
| 1HGE.PDB | O, E_LEU_59    | N, E_VAL_88    | H, E_VAL_88     | 2.96 | 1.98 | 5.16  |
| 1HGE.PDB | O, E_MET_268   | N, E_GLU_89    | H, E_GLU_89     | 2.77 | 1.81 | 8.69  |
| 1HGE.PDB | OD1, E_ASP_60  | NE, E_ARG_90   | HE, E_ARG_90    | 2.88 | 1.91 | 8.59  |
| 1HGE.PDB | O, E_SER_270   | NH1, E_ARG_90  | HH11, E_ARG_90  | 2.63 | 1.77 | 25.17 |
| 1HGE.PDB | O, E_ALA_272   | NH1, E_ARG_90  | HH12, E_ARG_90  | 2.61 | 1.68 | 16.51 |
| 1HGE.PDB | OD2, E_ASP_60  | NH2, E_ARG_90  | HH21, E_ARG_90  | 2.80 | 1.80 | 8.94  |
| 1HGE.PDB | OD1, E_ASP_271 | N, E_SER_91    | H, E_SER_91     | 2.89 | 1.92 | 7.24  |
| 1HGE.PDB | OD2, E_ASP_271 | OG, E_SER_91   | HG, E_SER_91    | 2.83 | 1.92 | 17.26 |
| 1HGE.PDB | OD2, E_ASP_68  | OG, E_SER_95   | HG, E_SER_95    | 2.91 | 1.97 | 13.28 |

|          |                |                |                 |      |      |       |
|----------|----------------|----------------|-----------------|------|------|-------|
| 1HGE.PDB | OD2, E_ASP_73  | N, E_ASN_96    | H, E_ASN_96     | 2.90 | 1.94 | 8.49  |
| 1HGE.PDB | OD1, E_ASP_68  | OH, E_TYR_100  | HH, E_TYR_100   | 2.88 | 1.95 | 14.25 |
| 1HGE.PDB | OD2, E_ASP_104 | OG, E_SER_107  | HG, E_SER_107   | 2.86 | 1.93 | 15.15 |
| 1HGE.PDB | O, E_TYR_105   | N, E_ARG_109   | H, E_ARG_109    | 2.86 | 1.88 | 1.80  |
| 1HGE.PDB | OE2, F_GLU_67  | NH2, E_ARG_109 | HH21, E_ARG_109 | 2.78 | 1.79 | 11.63 |
| 1HGE.PDB | OD2, D_ASP_79  | OG, E_SER_110  | HG, E_SER_110   | 2.82 | 1.89 | 14.19 |
| 1HGE.PDB | O, E_SER_107   | N, E_LEU_111   | H, E_LEU_111    | 2.87 | 1.89 | 3.10  |
| 1HGE.PDB | O, E_ARG_109   | N, E_ALA_113   | H, E_ALA_113    | 2.93 | 2.03 | 20.07 |
| 1HGE.PDB | O, E_SER_110   | N, E_SER_114   | H, E_SER_114    | 2.88 | 1.93 | 13.24 |
| 1HGE.PDB | OE2, E_GLU_119 | OG1, E_THR_117 | HG1, E_THR_117  | 2.93 | 1.97 | 8.29  |
| 1HGE.PDB | O, E_GLU_82    | N, E_LEU_118   | H, E_LEU_118    | 2.98 | 2.05 | 15.39 |
| 1HGE.PDB | O, E_TYR_257   | N, E_ILE_121   | H, E_ILE_121    | 2.89 | 1.92 | 6.39  |
| 1HGE.PDB | O, E_ARG_255   | N, E_GLU_123   | H, E_GLU_123    | 2.92 | 1.96 | 10.72 |
| 1HGE.PDB | O, E_THR_155   | N, E_THR_131   | H, E_THR_131    | 2.77 | 1.88 | 19.94 |
| 1HGE.PDB | OD1, E_ASN_152 | N, E_ASN_133   | H, E_ASN_133    | 2.90 | 1.97 | 15.58 |
| 1HGE.PDB | O, E_TRP_153   | N, E_GLY_134   | H, E_GLY_134    | 2.95 | 2.06 | 19.92 |
| 1HGE.PDB | O, E_GLY_146   | N, E_SER_136   | H, E_SER_136    | 2.84 | 1.87 | 9.56  |
| 1HGE.PDB | OG, E_SER_136  | N, E_ALA_138   | H, E_ALA_138    | 2.99 | 2.05 | 13.25 |
| 1HGE.PDB | O, E_GLY_144   | NZ, E_LYS_140  | HZ1, E_LYS_140  | 2.71 | 1.74 | 16.73 |
| 1HGE.PDB | OD1, E_ASN_137 | NZ, E_LYS_140  | HZ2, E_LYS_140  | 2.84 | 1.86 | 16.83 |
| 1HGE.PDB | OD2, E_ASP_77  | NE, E_ARG_141  | HE, E_ARG_141   | 2.80 | 1.96 | 26.48 |
| 1HGE.PDB | O, E_PHE_147   | NH1, E_ARG_141 | HH12, E_ARG_141 | 2.55 | 1.62 | 17.30 |
| 1HGE.PDB | OD1, E_ASP_77  | NH2, E_ARG_141 | HH21, E_ARG_141 | 2.91 | 2.00 | 21.55 |
| 1HGE.PDB | OD2, E_ASP_77  | NH2, E_ARG_141 | HH21, E_ARG_141 | 2.75 | 1.87 | 24.36 |
| 1HGE.PDB | O, E_GLY_72    | NH2, E_ARG_141 | HH22, E_ARG_141 | 2.92 | 1.95 | 12.66 |
| 1HGE.PDB | O, E_GLY_72    | N, E_SER_149   | H, E_SER_149    | 2.84 | 1.93 | 17.58 |
| 1HGE.PDB | OD1, E_ASP_77  | OG, E_SER_149  | HG, E_SER_149   | 2.99 | 2.14 | 24.93 |
| 1HGE.PDB | O, E_ALA_253   | N, E_ASN_152   | H, E_ASN_152    | 2.82 | 1.95 | 22.18 |
| 1HGE.PDB | OH, E_TYR_195  | NE1, E_TRP_153 | HE1, E_TRP_153  | 2.90 | 1.99 | 18.82 |
| 1HGE.PDB | O, E_LEU_194   | N, E_LYS_156   | H, E_LYS_156    | 2.96 | 2.06 | 18.56 |
| 1HGE.PDB | O, E_SER_193   | NZ, E_LYS_156  | HZ2, E_LYS_156  | 2.79 | 1.81 | 17.51 |
| 1HGE.PDB | O, E_THR_160   | N, E_SER_157   | H, E_SER_157    | 2.99 | 2.08 | 19.06 |
| 1HGE.PDB | O, E_SER_247   | N, E_LEU_164   | H, E_LEU_164    | 2.69 | 1.86 | 25.19 |
| 1HGE.PDB | O, E_ILE_245   | N, E_VAL_166   | H, E_VAL_166    | 2.91 | 1.96 | 12.45 |
| 1HGE.PDB | O, E_LEU_243   | OG1, E_THR_167 | HG1, E_THR_167  | 2.92 | 2.05 | 21.37 |
| 1HGE.PDB | O, E_LEU_243   | N, E_MET_168   | H, E_MET_168    | 2.94 | 2.02 | 16.59 |
| 1HGE.PDB | O, E_ASP_241   | N, E_ASN_170   | H, E_ASN_170    | 2.92 | 1.94 | 6.42  |
| 1HGE.PDB | O, E_PHE_174   | ND2, E_ASN_170 | HD21, E_ASN_170 | 2.85 | 1.88 | 8.67  |
| 1HGE.PDB | O, E_VAL_237   | ND2, E_ASN_170 | HD22, E_ASN_170 | 2.84 | 2.05 | 29.41 |
| 1HGE.PDB | O, E_VAL_237   | N, E_LYS_176   | H, E_LYS_176    | 2.97 | 2.04 | 15.22 |
| 1HGE.PDB | OE2, E_GLU_123 | NZ, E_LYS_176  | HZ1, E_LYS_176  | 2.73 | 1.81 | 23.24 |
| 1HGE.PDB | O, E_PHE_258   | N, E_LEU_177   | H, E_LEU_177    | 2.99 | 2.02 | 5.44  |
| 1HGE.PDB | O, E_THR_235   | N, E_TYR_178   | H, E_TYR_178    | 2.85 | 1.89 | 6.94  |
| 1HGE.PDB | OE1, E_GLU_123 | OH, E_TYR_178  | HH, E_TYR_178   | 2.75 | 1.82 | 12.06 |
| 1HGE.PDB | O, E_TYR_233   | N, E_TRP_180   | H, E_TRP_180    | 2.98 | 2.01 | 9.33  |
| 1HGE.PDB | OG1, E_THR_235 | NE1, E_TRP_180 | HE1, E_TRP_180  | 2.93 | 1.94 | 2.48  |
| 1HGE.PDB | O, E_ASN_250   | N, E_HIS_183   | H, E_HIS_183    | 2.93 | 2.02 | 18.57 |
| 1HGE.PDB | O, E_ARG_229   | N, E_HIS_184   | H, E_HIS_184    | 2.91 | 1.95 | 9.81  |
| 1HGE.PDB | OG, E_SER_231  | NE2, E_HIS_184 | HE2, E_HIS_184  | 2.75 | 1.91 | 25.72 |
| 1HGE.PDB | OG1, E_THR_187 | N, E_GLU_190   | H, E_GLU_190    | 3.00 | 2.05 | 12.79 |
| 1HGE.PDB | O, E_GLN_197   | NE2, E_GLN_191 | HE22, E_GLN_191 | 2.96 | 2.04 | 16.74 |
| 1HGE.PDB | O, E_GLN_189   | N, E_SER_193   | H, E_SER_193    | 2.85 | 1.87 | 3.50  |
| 1HGE.PDB | O, E_GLU_190   | N, E_LEU_194   | H, E_LEU_194    | 2.96 | 2.00 | 9.57  |
| 1HGE.PDB | O, E_GLN_191   | N, E_TYR_195   | H, E_TYR_195    | 2.77 | 1.82 | 10.43 |
| 1HGE.PDB | O, E_TYR_161   | NE2, E_GLN_197 | HE21, E_GLN_197 | 2.88 | 1.92 | 10.46 |
| 1HGE.PDB | O, E_ASN_248   | NE2, E_GLN_197 | HE22, E_GLN_197 | 2.96 | 2.02 | 14.87 |
| 1HGE.PDB | OD1, E_ASN_246 | NH2, E_ARG_201 | HH21, E_ARG_201 | 2.61 | 1.75 | 25.36 |
| 1HGE.PDB | O, E_ILE_213   | N, E_VAL_202   | H, E_VAL_202    | 2.98 | 2.03 | 12.89 |

|          |                |                |                 |      |      |       |
|----------|----------------|----------------|-----------------|------|------|-------|
| 1HGE.PDB | O, E_ASN_246   | N, E_THR_203   | H, E_THR_203    | 2.89 | 1.93 | 9.46  |
| 1HGE.PDB | OG1, E_THR_212 | OG1, E_THR_203 | HG1, E_THR_203  | 2.89 | 1.95 | 10.14 |
| 1HGE.PDB | O, E_GLN_211   | N, E_VAL_204   | H, E_VAL_204    | 2.86 | 1.96 | 18.79 |
| 1HGE.PDB | OD1, E_ASP_241 | N, E_ARG_207   | H, E_ARG_207    | 2.88 | 1.92 | 9.18  |
| 1HGE.PDB | OG1, E_THR_206 | OG, E_SER_209  | HG, E_SER_209   | 2.98 | 2.04 | 10.06 |
| 1HGE.PDB | OD1, C_ASP_101 | NE2, E_GLN_210 | HE22, E_GLN_210 | 2.89 | 2.04 | 25.02 |
| 1HGE.PDB | O, E_VAL_204   | N, E_GLN_211   | H, E_GLN_211    | 2.84 | 1.92 | 15.49 |
| 1HGE.PDB | O, E_VAL_202   | N, E_ILE_213   | H, E_ILE_213    | 2.85 | 1.92 | 15.02 |
| 1HGE.PDB | ND1, E_HIS_184 | N, E_ASN_216   | H, E_ASN_216    | 2.79 | 1.98 | 28.16 |
| 1HGE.PDB | OE1, A_GLN_210 | NH2, E_ARG_220 | HH21, E_ARG_220 | 2.74 | 1.87 | 25.04 |
| 1HGE.PDB | O, E_ASN_216   | NH2, E_ARG_220 | HH22, E_ARG_220 | 2.66 | 1.79 | 23.30 |
| 1HGE.PDB | O, E_LEU_226   | N, E_VAL_223   | H, E_VAL_223    | 2.87 | 1.91 | 9.50  |
| 1HGE.PDB | O, E_CYS_97    | NE, E_ARG_224  | HE, E_ARG_224   | 2.88 | 2.06 | 27.97 |
| 1HGE.PDB | O, E_CYS_97    | NH2, E_ARG_224 | HH21, E_ARG_224 | 2.81 | 1.92 | 22.85 |
| 1HGE.PDB | O, E_VAL_223   | N, E_LEU_226   | H, E_LEU_226    | 2.92 | 1.97 | 11.57 |
| 1HGE.PDB | O, E_SER_228   | NH1, E_ARG_229 | HH11, E_ARG_229 | 2.68 | 1.75 | 17.61 |
| 1HGE.PDB | O, E_PRO_221   | NH2, E_ARG_229 | HH22, E_ARG_229 | 2.62 | 1.67 | 14.07 |
| 1HGE.PDB | OD1, E_ASP_101 | OG, E_SER_231  | HG, E_SER_231   | 2.87 | 1.92 | 12.10 |
| 1HGE.PDB | O, E_ASP_101   | N, E_ILE_232   | H, E_ILE_232    | 2.95 | 2.02 | 16.05 |
| 1HGE.PDB | O, E_TRP_180   | N, E_TYR_233   | H, E_TYR_233    | 2.88 | 1.91 | 8.62  |
| 1HGE.PDB | O, E_TYR_178   | N, E_THR_235   | H, E_THR_235    | 2.87 | 1.96 | 17.45 |
| 1HGE.PDB | O, E_LYS_176   | N, E_VAL_237   | H, E_VAL_237    | 2.79 | 1.88 | 17.98 |
| 1HGE.PDB | O, D_SER_71    | NZ, E_LYS_238  | HZ2, E_LYS_238  | 2.75 | 1.79 | 18.19 |
| 1HGE.PDB | OE1, D_GLU_72  | NZ, E_LYS_238  | HZ3, E_LYS_238  | 2.85 | 1.84 | 12.25 |
| 1HGE.PDB | O, E_ASN_170   | N, E_GLY_240   | H, E_GLY_240    | 2.89 | 2.02 | 22.60 |
| 1HGE.PDB | O, E_LYS_238   | N, E_ASP_241   | H, E_ASP_241    | 2.92 | 1.99 | 13.81 |
| 1HGE.PDB | OD1, E_ASP_241 | N, E_VAL_242   | H, E_VAL_242    | 2.79 | 1.97 | 26.69 |
| 1HGE.PDB | O, E_MET_168   | N, E_LEU_243   | H, E_LEU_243    | 2.88 | 1.91 | 4.05  |
| 1HGE.PDB | O, E_SER_205   | N, E_VAL_244   | H, E_VAL_244    | 2.98 | 2.03 | 12.64 |
| 1HGE.PDB | O, E_VAL_166   | N, E_ILE_245   | H, E_ILE_245    | 2.88 | 1.95 | 14.55 |
| 1HGE.PDB | O, E_THR_203   | N, E_ASN_246   | H, E_ASN_246    | 2.93 | 1.96 | 6.89  |
| 1HGE.PDB | OD1, E_ASN_165 | ND2, E_ASN_246 | HD22, E_ASN_246 | 2.88 | 1.93 | 12.25 |
| 1HGE.PDB | O, E_LEU_164   | N, E_SER_247   | H, E_SER_247    | 2.96 | 2.05 | 17.92 |
| 1HGE.PDB | O, E_ARG_201   | OG, E_SER_247  | HG, E_SER_247   | 2.74 | 1.94 | 28.66 |
| 1HGE.PDB | OE1, E_GLN_191 | ND2, E_ASN_250 | HD21, E_ASN_250 | 2.94 | 1.97 | 8.28  |
| 1HGE.PDB | O, E_HIS_183   | ND2, E_ASN_250 | HD22, E_ASN_250 | 2.89 | 1.94 | 10.81 |
| 1HGE.PDB | O, E_ASN_152   | N, E_ALA_253   | H, E_ALA_253    | 2.87 | 2.00 | 21.77 |
| 1HGE.PDB | OD1, E_ASN_133 | NH2, E_ARG_255 | HH22, E_ARG_255 | 2.49 | 1.68 | 28.65 |
| 1HGE.PDB | O, E_ILE_121   | N, E_TYR_257   | H, E_TYR_257    | 3.00 | 2.15 | 25.48 |
| 1HGE.PDB | O, E_LEU_177   | N, E_PHE_258   | H, E_PHE_258    | 2.95 | 1.98 | 4.40  |
| 1HGE.PDB | OE2, E_GLU_119 | NH1, E_ARG_261 | HH12, E_ARG_261 | 2.65 | 1.81 | 27.82 |
| 1HGE.PDB | OE1, E_GLU_119 | NH2, E_ARG_261 | HH22, E_ARG_261 | 2.83 | 1.95 | 24.52 |
| 1HGE.PDB | OD2, E_ASP_85  | NZ, E_LYS_264  | HZ3, E_LYS_264  | 2.81 | 1.83 | 16.30 |
| 1HGE.PDB | O, E_PHE_87    | N, E_MET_268   | H, E_MET_268    | 2.79 | 1.90 | 20.72 |
| 1HGE.PDB | O, E_PRO_284   | OG, E_SER_270  | HG, E_SER_270   | 2.79 | 1.86 | 13.35 |
| 1HGE.PDB | OG, E_SER_270  | N, E_ALA_272   | H, E_ALA_272    | 2.97 | 2.02 | 11.52 |
| 1HGE.PDB | O, E_ILE_51    | N, E_ASP_275   | H, E_ASP_275    | 2.97 | 2.07 | 20.34 |
| 1HGE.PDB | OD1, E_ASP_275 | N, E_THR_276   | H, E_THR_276    | 2.78 | 1.93 | 23.65 |
| 1HGE.PDB | O, E_ASN_54    | N, E_SER_279   | H, E_SER_279    | 2.80 | 1.87 | 14.21 |
| 1HGE.PDB | O, E_TYR_302   | N, E_ILE_282   | H, E_ILE_282    | 2.89 | 1.92 | 7.96  |
| 1HGE.PDB | O, E_THR_283   | N, E_GLY_286   | H, E_GLY_286    | 2.82 | 1.88 | 11.76 |
| 1HGE.PDB | O, E_LYS_50    | N, E_SER_287   | H, E_SER_287    | 2.88 | 1.91 | 4.05  |
| 1HGE.PDB | O, E_ALA_304   | ND2, E_ASN_290 | HD22, E_ASN_290 | 2.85 | 1.96 | 19.63 |
| 1HGE.PDB | OE1, E_GLN_44  | NZ, E_LYS_292  | HZ1, E_LYS_292  | 2.72 | 1.72 | 11.93 |
| 1HGE.PDB | OD2, E_ASP_291 | NZ, E_LYS_292  | HZ3, E_LYS_292  | 2.84 | 1.89 | 19.87 |
| 1HGE.PDB | O, E_LYS_307   | N, E_GLN_295   | H, E_GLN_295    | 2.82 | 1.93 | 20.26 |
| 1HGE.PDB | O, E_ASN_298   | NE2, E_GLN_295 | HE21, E_GLN_295 | 2.75 | 1.80 | 8.98  |
| 1HGE.PDB | O, E_GLN_44    | N, E_ASN_296   | H, E_ASN_296    | 2.82 | 1.88 | 13.69 |

|          |                |                |                 |      |      |       |
|----------|----------------|----------------|-----------------|------|------|-------|
| 1HGE.PDB | OE1, E_GLN_295 | N, E_VAL_297   | H, E_VAL_297    | 2.67 | 1.86 | 27.79 |
| 1HGE.PDB | OD1, E_ASN_285 | ND2, E_ASN_298 | HD22, E_ASN_298 | 2.98 | 2.04 | 13.10 |
| 1HGE.PDB | O, F_LYS_68    | NZ, E_LYS_299  | HZ2, E_LYS_299  | 2.95 | 1.93 | 11.73 |
| 1HGE.PDB | OD1, E_ASN_298 | N, E_ILE_300   | H, E_ILE_300    | 2.89 | 1.97 | 16.82 |
| 1HGE.PDB | O, E_ILE_282   | N, E_TYR_302   | H, E_TYR_302    | 2.94 | 2.07 | 23.45 |
| 1HGE.PDB | O, F_LYS_62    | N, E_GLY_303   | H, E_GLY_303    | 2.95 | 1.98 | 8.29  |
| 1HGE.PDB | OG, F_SER_93   | N, E_LYS_310   | H, E_LYS_310    | 2.93 | 1.97 | 10.15 |
| 1HGE.PDB | OD1, F_ASP_86  | NZ, E_LYS_310  | HZ3, E_LYS_310  | 2.86 | 2.02 | 29.64 |
| 1HGE.PDB | OE2, E_GLU_41  | N, E_LEU_314   | H, E_LEU_314    | 2.81 | 1.89 | 15.15 |
| 1HGE.PDB | OE1, E_GLU_41  | NZ, E_LYS_315  | HZ3, E_LYS_315  | 2.80 | 1.87 | 22.54 |
| 1HGE.PDB | O, E_THR_40    | N, E_LEU_316   | H, E_LEU_316    | 2.80 | 1.85 | 9.95  |
| 1HGE.PDB | OD1, F_ASN_104 | N, E_ALA_317   | H, E_ALA_317    | 2.73 | 1.80 | 13.22 |
| 1HGE.PDB | O, E_ASN_38    | N, E_THR_318   | H, E_THR_318    | 2.85 | 1.93 | 15.97 |
| 1HGE.PDB | O, E_VAL_20    | ND2, E_ASN_322 | HD21, E_ASN_322 | 2.99 | 2.07 | 17.11 |
| 1HGE.PDB | OE2, E_GLU_35  | ND2, E_ASN_322 | HD22, E_ASN_322 | 2.87 | 1.98 | 21.90 |
| 1HGE.PDB | O, E_GLN_327   | NZ, E_LYS_326  | HZ1, E_LYS_326  | 2.74 | 1.86 | 25.33 |
| 1HGE.PDB | OE1, F_GLU_15  | NZ, E_LYS_326  | HZ3, E_LYS_326  | 2.99 | 2.00 | 17.08 |
| 1HGE.PDB | O, E_LYS_326   | NE2, E_GLN_327 | HE22, E_GLN_327 | 2.76 | 1.89 | 22.95 |
| 1HGE.PDB | OD2, F_ASP_112 | N, F_GLY_1     | H2, F_GLY_1     | 2.78 | 1.80 | 14.95 |
| 1HGE.PDB | OD1, F_ASP_109 | N, F_LEU_2     | H, F_LEU_2      | 2.80 | 1.91 | 20.53 |
| 1HGE.PDB | OD2, F_ASP_112 | N, F_GLY_4     | H, F_GLY_4      | 2.92 | 2.04 | 21.78 |
| 1HGE.PDB | OD1, F_ASP_112 | N, F_ALA_5     | H, F_ALA_5      | 2.92 | 2.02 | 19.47 |
| 1HGE.PDB | O, F_GLY_4     | N, F_PHE_9     | H, F_PHE_9      | 2.81 | 1.87 | 11.92 |
| 1HGE.PDB | O, F_GLY_13    | ND2, F_ASN_12  | HD22, F_ASN_12  | 2.79 | 1.96 | 26.47 |
| 1HGE.PDB | O, E_VAL_323   | N, F_GLY_13    | H, F_GLY_13     | 2.72 | 1.79 | 12.93 |
| 1HGE.PDB | O, E_HIS_17    | N, F_TRP_14    | H, F_TRP_14     | 2.85 | 1.91 | 12.63 |
| 1HGE.PDB | OG1, F_THR_41  | N, F_TRP_21    | H, F_TRP_21     | 2.88 | 1.97 | 17.81 |
| 1HGE.PDB | O, E_GLY_16    | N, F_GLY_23    | H, F_GLY_23     | 2.91 | 2.01 | 19.90 |
| 1HGE.PDB | O, F_ALA_35    | N, F_PHE_24    | H, F_PHE_24     | 2.82 | 1.85 | 3.58  |
| 1HGE.PDB | O, E_CYS_14    | N, F_ARG_25    | H, F_ARG_25     | 2.88 | 1.93 | 12.79 |
| 1HGE.PDB | OE1, F_GLN_34  | NE, F_ARG_25   | HE, F_ARG_25    | 2.92 | 2.07 | 24.83 |
| 1HGE.PDB | OE1, F_GLN_34  | NH2, F_ARG_25  | HH21, F_ARG_25  | 2.81 | 1.90 | 20.25 |
| 1HGE.PDB | O, F_GLY_33    | N, F_HIS_26    | H, F_HIS_26     | 2.96 | 2.07 | 20.60 |
| 1HGE.PDB | O, E_THR_12    | N, F_GLN_27    | H, F_GLN_27     | 2.82 | 1.90 | 16.16 |
| 1HGE.PDB | O, F_GLY_31    | N, F_ASN_28    | H, F_ASN_28     | 2.84 | 1.88 | 9.14  |
| 1HGE.PDB | OD1, F_ASN_146 | ND2, F_ASN_28  | HD21, F_ASN_28  | 2.81 | 1.89 | 15.75 |
| 1HGE.PDB | O, F_CYS_144   | ND2, F_ASN_28  | HD22, F_ASN_28  | 2.90 | 1.97 | 14.42 |
| 1HGE.PDB | O, F_ASN_28    | N, F_GLY_31    | H, F_GLY_31     | 2.92 | 2.08 | 25.93 |
| 1HGE.PDB | O, F_PHE_24    | N, F_ALA_35    | H, F_ALA_35     | 2.77 | 1.97 | 29.32 |
| 1HGE.PDB | O, F_TYR_22    | N, F_ASP_37    | H, F_ASP_37     | 2.73 | 1.79 | 11.31 |
| 1HGE.PDB | OD2, F_ASP_37  | N, F_SER_40    | H, F_SER_40     | 2.89 | 1.93 | 8.53  |
| 1HGE.PDB | OD2, F_ASP_37  | OG, F_SER_40   | HG, F_SER_40    | 2.76 | 1.94 | 26.96 |
| 1HGE.PDB | O, F_ASP_37    | OG1, F_THR_41  | HG1, F_THR_41   | 2.69 | 1.84 | 22.88 |
| 1HGE.PDB | O, F_LEU_38    | N, F_GLN_42    | H, F_GLN_42     | 2.83 | 1.92 | 17.33 |
| 1HGE.PDB | OD1, F_ASP_46  | NE2, F_GLN_42  | HE22, F_GLN_42  | 2.86 | 1.96 | 19.38 |
| 1HGE.PDB | O, F_LYS_39    | N, F_ALA_43    | H, F_ALA_43     | 2.93 | 1.98 | 9.94  |
| 1HGE.PDB | O, F_SER_40    | N, F_ALA_44    | H, F_ALA_44     | 2.92 | 1.94 | 4.84  |
| 1HGE.PDB | O, F_GLN_42    | N, F_ASP_46    | H, F_ASP_46     | 2.81 | 1.84 | 1.16  |
| 1HGE.PDB | OE2, F_GLU_114 | NE2, F_GLN_47  | HE21, F_GLN_47  | 3.00 | 2.09 | 17.78 |
| 1HGE.PDB | O, F_ALA_43    | NE2, F_GLN_47  | HE22, F_GLN_47  | 2.91 | 2.00 | 18.24 |
| 1HGE.PDB | O, F_ILE_45    | N, F_ASN_49    | H, F_ASN_49     | 2.83 | 1.89 | 13.28 |
| 1HGE.PDB | O, F_ASP_46    | N, F_GLY_50    | H, F_GLY_50     | 2.83 | 1.91 | 17.15 |
| 1HGE.PDB | OG1, F_THR_107 | NZ, F_LYS_51   | HZ1, F_LYS_51   | 2.97 | 2.00 | 18.12 |
| 1HGE.PDB | OE1, F_GLU_103 | NZ, F_LYS_51   | HZ2, F_LYS_51   | 2.77 | 1.74 | 6.40  |
| 1HGE.PDB | ND1, F_HIS_106 | NZ, F_LYS_51   | HZ3, F_LYS_51   | 2.74 | 1.79 | 17.89 |
| 1HGE.PDB | O, F_ILE_48    | N, F_LEU_52    | H, F_LEU_52     | 2.89 | 1.97 | 17.49 |
| 1HGE.PDB | O, F_ASN_49    | N, F_ASN_53    | H, F_ASN_53     | 2.78 | 1.88 | 17.70 |
| 1HGE.PDB | OE1, F_GLU_57  | NH1, F_ARG_54  | HH11, F_ARG_54  | 2.82 | 1.83 | 11.59 |

|          |                |                |                 |      |      |       |
|----------|----------------|----------------|-----------------|------|------|-------|
| 1HGE.PDB | OE2, D_GLU_97  | NH2, F_ARG_54  | HH22, F_ARG_54  | 2.80 | 1.82 | 12.52 |
| 1HGE.PDB | OD2, D_ASP_90  | NZ, F_LYS_62   | HZ2, F_LYS_62   | 2.67 | 1.83 | 29.15 |
| 1HGE.PDB | OG, E_SER_110  | NE2, F_HIS_64  | HE2, F_HIS_64   | 2.94 | 1.97 | 9.11  |
| 1HGE.PDB | O, E_LYS_299   | NZ, F_LYS_68   | HZ1, F_LYS_68   | 2.97 | 1.93 | 4.62  |
| 1HGE.PDB | OE2, F_GLU_85  | NZ, F_LYS_68   | HZ2, F_LYS_68   | 2.75 | 1.78 | 18.51 |
| 1HGE.PDB | OG, A_SER_107  | N, F_ARG_76    | H, F_ARG_76     | 2.81 | 1.83 | 4.38  |
| 1HGE.PDB | OE2, B_GLU_81  | NE, F_ARG_76   | HE, F_ARG_76    | 2.85 | 1.89 | 11.64 |
| 1HGE.PDB | OE2, B_GLU_74  | NH1, F_ARG_76  | HH12, F_ARG_76  | 2.73 | 1.73 | 6.19  |
| 1HGE.PDB | OE1, B_GLU_81  | NH2, F_ARG_76  | HH21, F_ARG_76  | 2.65 | 1.66 | 5.51  |
| 1HGE.PDB | OE1, B_GLU_74  | NH2, F_ARG_76  | HH22, F_ARG_76  | 2.70 | 1.73 | 9.07  |
| 1HGE.PDB | OE1, F_GLU_74  | NE2, F_GLN_78  | HE22, F_GLN_78  | 2.96 | 1.99 | 8.87  |
| 1HGE.PDB | O, F_GLY_75    | N, F_ASP_79    | H, F_ASP_79     | 2.92 | 1.98 | 13.37 |
| 1HGE.PDB | O, F_ILE_77    | N, F_GLU_81    | H, F_GLU_81     | 2.95 | 1.99 | 8.53  |
| 1HGE.PDB | O, F_ASP_79    | N, F_TYR_83    | H, F_TYR_83     | 2.94 | 2.02 | 17.09 |
| 1HGE.PDB | OE1, B_GLU_85  | OH, F_TYR_83   | HH, F_TYR_83    | 2.51 | 1.76 | 30.00 |
| 1HGE.PDB | O, F_LEU_80    | N, F_VAL_84    | H, F_VAL_84     | 2.83 | 1.87 | 8.33  |
| 1HGE.PDB | O, F_LYS_82    | N, F_ASP_86    | H, F_ASP_86     | 2.92 | 1.97 | 11.17 |
| 1HGE.PDB | O, F_TYR_83    | N, F_THR_87    | H, F_THR_87     | 2.93 | 1.97 | 9.90  |
| 1HGE.PDB | O, F_VAL_84    | N, F_LYS_88    | H, F_LYS_88     | 2.95 | 2.01 | 12.83 |
| 1HGE.PDB | OH, D_TYR_83   | NZ, F_LYS_88   | HZ1, F_LYS_88   | 2.67 | 1.65 | 8.34  |
| 1HGE.PDB | O, F_GLU_85    | N, F_ILE_89    | H, F_ILE_89     | 2.92 | 1.94 | 4.91  |
| 1HGE.PDB | O, F_LYS_88    | N, F_TRP_92    | H, F_TRP_92     | 2.97 | 2.00 | 5.01  |
| 1HGE.PDB | O, F_ILE_89    | N, F_SER_93    | H, F_SER_93     | 2.84 | 1.93 | 17.22 |
| 1HGE.PDB | O, F_ILE_89    | OG, F_SER_93   | HG, F_SER_93    | 2.85 | 1.93 | 13.60 |
| 1HGE.PDB | O, F_ASP_90    | N, F_TYR_94    | H, F_TYR_94     | 2.85 | 1.93 | 16.45 |
| 1HGE.PDB | O, F_TYR_94    | N, F_LEU_98    | H, F_LEU_98     | 2.97 | 1.99 | 3.80  |
| 1HGE.PDB | O, F_ASN_95    | N, F_LEU_99    | H, F_LEU_99     | 2.92 | 1.99 | 14.65 |
| 1HGE.PDB | O, F_LEU_98    | N, F_LEU_102   | H, F_LEU_102    | 2.96 | 1.98 | 4.54  |
| 1HGE.PDB | O, F_LEU_99    | N, F_GLU_103   | H, F_GLU_103    | 2.90 | 1.93 | 9.01  |
| 1HGE.PDB | O, F_VAL_100   | N, F_ASN_104   | H, F_ASN_104    | 2.88 | 1.94 | 12.72 |
| 1HGE.PDB | O, E_LYS_27    | ND2, F_ASN_104 | HD22, F_ASN_104 | 2.94 | 1.99 | 10.01 |
| 1HGE.PDB | O, F_LEU_102   | N, F_HIS_106   | H, F_HIS_106    | 2.93 | 1.98 | 10.60 |
| 1HGE.PDB | O, F_GLU_103   | N, F_THR_107   | H, F_THR_107    | 2.85 | 1.95 | 19.04 |
| 1HGE.PDB | O, F_ASN_104   | N, F_ILE_108   | H, F_ILE_108    | 2.91 | 1.95 | 10.63 |
| 1HGE.PDB | O, F_HIS_106   | N, F_LEU_110   | H, F_LEU_110    | 2.81 | 1.84 | 7.77  |
| 1HGE.PDB | O, F_THR_107   | OG1, F_THR_111 | HG1, F_THR_111  | 2.90 | 1.93 | 1.70  |
| 1HGE.PDB | O, F_ASP_109   | N, F_SER_113   | H, F_SER_113    | 2.83 | 1.87 | 8.23  |
| 1HGE.PDB | O, F_LEU_110   | N, F_GLU_114   | H, F_GLU_114    | 2.90 | 1.94 | 9.48  |
| 1HGE.PDB | O, F_SER_113   | N, F_LYS_117   | H, F_LYS_117    | 2.79 | 1.89 | 18.58 |
| 1HGE.PDB | O, F_GLU_114   | N, F_LEU_118   | H, F_LEU_118    | 2.97 | 2.01 | 10.63 |
| 1HGE.PDB | O, F_ASN_116   | N, F_GLU_120   | H, F_GLU_120    | 2.93 | 1.96 | 5.04  |
| 1HGE.PDB | O, F_LYS_117   | N, F_LYS_121   | H, F_LYS_121    | 2.93 | 2.01 | 16.80 |
| 1HGE.PDB | O, F_PHE_119   | N, F_ARG_123   | H, F_ARG_123    | 2.92 | 1.96 | 9.49  |
| 1HGE.PDB | OE2, F_GLU_120 | NH1, F_ARG_123 | HH11, F_ARG_123 | 2.81 | 1.92 | 23.28 |
| 1HGE.PDB | O, F_GLU_120   | N, F_ARG_124   | H, F_ARG_124    | 2.97 | 2.00 | 7.42  |
| 1HGE.PDB | OE1, D_GLU_132 | NE, F_ARG_124  | HE, F_ARG_124   | 2.92 | 2.09 | 27.36 |
| 1HGE.PDB | O, F_LEU_126   | N, F_ASN_129   | H, F_ASN_129    | 2.94 | 2.00 | 13.52 |
| 1HGE.PDB | O, F_HIS_159   | ND2, F_ASN_129 | HD21, F_ASN_129 | 2.95 | 2.00 | 10.63 |
| 1HGE.PDB | OH, F_TYR_157  | ND2, F_ASN_129 | HD22, F_ASN_129 | 2.80 | 1.87 | 15.30 |
| 1HGE.PDB | O, F_LYS_139   | N, F_GLU_131   | H, F_GLU_131    | 2.96 | 2.04 | 15.90 |
| 1HGE.PDB | O, F_CYS_137   | N, F_MET_133   | H, F_MET_133    | 2.88 | 1.92 | 10.66 |
| 1HGE.PDB | O, E_LEU_13    | N, F_PHE_138   | H, F_PHE_138    | 2.73 | 1.86 | 22.03 |
| 1HGE.PDB | O, F_GLU_131   | N, F_LYS_139   | H, F_LYS_139    | 2.82 | 1.86 | 10.37 |
| 1HGE.PDB | O, E_ALA_11    | N, F_ILE_140   | H, F_ILE_140    | 2.75 | 1.87 | 19.65 |
| 1HGE.PDB | O, F_ASN_129   | N, F_TYR_141   | H, F_TYR_141    | 2.90 | 1.98 | 16.42 |
| 1HGE.PDB | O, F_ASP_145   | N, F_ILE_149   | H, F_ILE_149    | 2.91 | 1.95 | 10.01 |
| 1HGE.PDB | O, F_ASN_146   | N, F_GLU_150   | H, F_GLU_150    | 2.93 | 1.99 | 14.06 |
| 1HGE.PDB | O, F_ALA_147   | N, F_SER_151   | H, F_SER_151    | 2.92 | 2.06 | 23.67 |

|          |                |                |                 |      |      |       |
|----------|----------------|----------------|-----------------|------|------|-------|
| 1HGE.PDB | O, F_CYS_148   | OG, F_SER_151  | HG, F_SER_151   | 2.68 | 1.84 | 23.64 |
| 1HGE.PDB | O, F_GLU_150   | N, F_ASN_154   | H, F_ASN_154    | 2.79 | 1.81 | 1.42  |
| 1HGE.PDB | OD1, F_ASP_158 | N, F_ASP_160   | H, F_ASP_160    | 2.88 | 2.02 | 24.16 |
| 1HGE.PDB | O, F_HIS_159   | N, F_TYR_162   | H, F_TYR_162    | 2.92 | 2.01 | 17.85 |
| 1HGE.PDB | O, D_ARG_170   | NH1, F_ARG_163 | HH12, F_ARG_163 | 2.95 | 1.99 | 14.32 |
| 1HGE.PDB | O, F_TYR_162   | N, F_ALA_166   | H, F_ALA_166    | 2.88 | 1.91 | 5.83  |
| 1HGE.PDB | O, F_ARG_163   | N, F_LEU_167   | H, F_LEU_167    | 2.74 | 1.79 | 10.43 |
| 1HGE.PDB | O, F_ALA_166   | N, F_ARG_170   | H, F_ARG_170    | 2.84 | 1.99 | 23.33 |
| 1HGE.PDB | O, F_GLU_128   | NE, F_ARG_170  | HE, F_ARG_170   | 2.74 | 1.87 | 22.99 |
| 1HGE.PDB | OE2, F_GLU_131 | NH1, F_ARG_170 | HH11, F_ARG_170 | 2.78 | 1.79 | 6.04  |
| 1HGE.PDB | O, F_LEU_167   | N, F_PHE_171   | H, F_PHE_171    | 2.91 | 1.98 | 14.72 |

Table 1665: 1HGE-specific side chain and main chain hydrogen bonding analysis. In this table, a PDB file is specified with a four-letter PDB ID, except that the names of the PDB files corresponding to the single NMR structural model split from the NMR ensemble is specified with a four-letter PDB ID in addition to a hyphen followed by the single NMR structural model numeric ID, the residue naming scheme is **Chain ID\_residue name\_residue number**,  $\angle ADH$  represents the angle formed by acceptor (A), donor (D) and hydrogen (H) ( $\angle ADH$ ).

| PDB      | Acceptor (A)   | Donor (D)      | Hydrogen (H)    | D-A (Å) | H-A (Å) | $\angle ADH(^{\circ})$ |
|----------|----------------|----------------|-----------------|---------|---------|------------------------|
| 1HGF.PDB | O, B_ILE_140   | N, A_ALA_11    | H, A_ALA_11     | 2.90    | 2.03    | 22.48                  |
| 1HGF.PDB | O, B_PHE_138   | N, A_LEU_13    | H, A_LEU_13     | 2.96    | 1.99    | 8.07                   |
| 1HGF.PDB | O, B_ARG_25    | N, A_CYS_14    | H, A_CYS_14     | 2.98    | 2.02    | 8.89                   |
| 1HGF.PDB | O, B_GLY_136   | N, A_LEU_15    | H, A_LEU_15     | 2.92    | 1.95    | 7.83                   |
| 1HGF.PDB | O, B_GLY_23    | N, A_GLY_16    | H, A_GLY_16     | 2.92    | 2.03    | 19.80                  |
| 1HGF.PDB | O, B_TRP_21    | N, A_HIS_18    | H, A_HIS_18     | 2.92    | 2.01    | 18.08                  |
| 1HGF.PDB | OD1, A_ASN_322 | N, A_VAL_20    | H, A_VAL_20     | 2.80    | 1.83    | 7.05                   |
| 1HGF.PDB | O, A_VAL_36    | N, A_THR_24    | H, A_THR_24     | 2.86    | 1.98    | 20.85                  |
| 1HGF.PDB | O, A_ILE_34    | N, A_VAL_26    | H, A_VAL_26     | 2.85    | 1.90    | 12.10                  |
| 1HGF.PDB | OE2, B_GLU_97  | NZ, A_LYS_27   | HZ1, A_LYS_27   | 2.79    | 1.86    | 21.55                  |
| 1HGF.PDB | O, A_ASP_31    | N, A_THR_28    | H, A_THR_28     | 2.70    | 1.89    | 28.68                  |
| 1HGF.PDB | O, A_VAL_26    | N, A_ILE_34    | H, A_ILE_34     | 2.96    | 2.01    | 12.92                  |
| 1HGF.PDB | O, A_THR_24    | N, A_VAL_36    | H, A_VAL_36     | 2.81    | 1.84    | 5.89                   |
| 1HGF.PDB | O, A_MET_320   | N, A_THR_37    | H, A_THR_37     | 2.89    | 1.91    | 4.82                   |
| 1HGF.PDB | O, A_LEU_316   | N, A_THR_40    | H, A_THR_40     | 2.76    | 1.85    | 17.44                  |
| 1HGF.PDB | O, A_LEU_314   | N, A_LEU_42    | H, A_LEU_42     | 2.79    | 1.94    | 25.04                  |
| 1HGF.PDB | O, A_PHE_294   | N, A_GLN_44    | H, A_GLN_44     | 2.99    | 2.01    | 3.16                   |
| 1HGF.PDB | O, A_SER_46    | NE2, A_GLN_44  | HE21, A_GLN_44  | 2.84    | 1.96    | 21.79                  |
| 1HGF.PDB | OD2, A_ASP_275 | NZ, A_LYS_50   | HZ2, A_LYS_50   | 2.91    | 1.91    | 15.13                  |
| 1HGF.PDB | O, A_PRO_273   | N, A_ILE_51    | H, A_ILE_51     | 2.77    | 1.81    | 8.80                   |
| 1HGF.PDB | O, A_ASP_275   | N, A_ASN_53    | H, A_ASN_53     | 2.88    | 1.94    | 13.18                  |
| 1HGF.PDB | OD2, A_ASP_85  | N, A_ARG_57    | H, A_ARG_57     | 2.93    | 1.98    | 11.29                  |
| 1HGF.PDB | O, A_THR_83    | NE, A_ARG_57   | HE, A_ARG_57    | 2.79    | 1.82    | 4.94                   |
| 1HGF.PDB | O, A_LEU_86    | N, A_LEU_59    | H, A_LEU_59     | 2.87    | 1.93    | 13.63                  |
| 1HGF.PDB | OD1, A_ASP_60  | N, A_ILE_62    | H, A_ILE_62     | 2.92    | 1.97    | 12.05                  |
| 1HGF.PDB | O, A_GLY_61    | N, A_CYS_64    | H, A_CYS_64     | 2.90    | 1.96    | 15.17                  |
| 1HGF.PDB | O, A_LEU_66    | N, A_LEU_70    | H, A_LEU_70     | 2.80    | 1.89    | 17.51                  |
| 1HGF.PDB | O, A_ILE_67    | N, A_LEU_71    | H, A_LEU_71     | 2.92    | 1.94    | 5.50                   |
| 1HGF.PDB | O, A_ASP_68    | N, A_GLY_72    | H, A_GLY_72     | 2.85    | 1.95    | 18.27                  |
| 1HGF.PDB | OD1, A_ASP_73  | N, A_HIS_75    | H, A_HIS_75     | 2.98    | 2.09    | 20.20                  |
| 1HGF.PDB | OD1, A_ASP_73  | ND1, A_HIS_75  | HD1, A_HIS_75   | 2.84    | 1.91    | 15.59                  |
| 1HGF.PDB | O, A_ASP_63    | NE2, A_HIS_75  | HE2, A_HIS_75   | 2.88    | 1.95    | 16.02                  |
| 1HGF.PDB | O, A_ASP_73    | N, A_CYS_76    | H, A_CYS_76     | 2.81    | 1.89    | 15.96                  |
| 1HGF.PDB | O, A_PRO_74    | N, A_ASP_77    | H, A_ASP_77     | 2.94    | 1.99    | 11.05                  |
| 1HGF.PDB | O, A_CYS_76    | N, A_PHE_79    | H, A_PHE_79     | 2.97    | 2.00    | 8.63                   |
| 1HGF.PDB | OE1, A_GLU_82  | N, A_THR_83    | H, A_THR_83     | 2.98    | 2.09    | 20.75                  |
| 1HGF.PDB | O, A_ARG_57    | N, A_ASP_85    | H, A_ASP_85     | 2.83    | 1.91    | 16.22                  |
| 1HGF.PDB | O, A_MET_268   | N, A_GLU_89    | H, A_GLU_89     | 2.80    | 1.87    | 13.08                  |
| 1HGF.PDB | OD1, A_ASP_60  | NE, A_ARG_90   | HE, A_ARG_90    | 2.77    | 1.85    | 16.11                  |
| 1HGF.PDB | O, A_SER_270   | NH1, A_ARG_90  | HH11, A_ARG_90  | 2.64    | 1.79    | 25.97                  |
| 1HGF.PDB | O, A_ALA_272   | NH1, A_ARG_90  | HH12, A_ARG_90  | 2.67    | 1.74    | 16.70                  |
| 1HGF.PDB | OD2, A_ASP_60  | NH2, A_ARG_90  | HH21, A_ARG_90  | 2.84    | 1.84    | 8.73                   |
| 1HGF.PDB | OD1, A_ASP_271 | N, A_SER_91    | H, A_SER_91     | 2.96    | 1.99    | 10.09                  |
| 1HGF.PDB | OD2, A_ASP_271 | OG, A_SER_91   | HG, A_SER_91    | 2.85    | 1.91    | 12.59                  |
| 1HGF.PDB | OD2, A_ASP_73  | N, A_ASN_96    | H, A_ASN_96     | 2.89    | 1.95    | 14.63                  |
| 1HGF.PDB | O, A_ILE_230   | N, A_ASP_101   | H, A_ASP_101    | 2.99    | 2.15    | 25.68                  |
| 1HGF.PDB | OD2, A_ASP_104 | OG, A_SER_107  | HG, A_SER_107   | 2.89    | 1.97    | 16.55                  |
| 1HGF.PDB | O, A_TYR_105   | N, A_ARG_109   | H, A_ARG_109    | 2.87    | 1.89    | 3.75                   |
| 1HGF.PDB | OE2, B_GLU_67  | NH2, A_ARG_109 | HH21, A_ARG_109 | 2.92    | 1.92    | 10.51                  |
| 1HGF.PDB | OD2, F_ASP_79  | OG, A_SER_110  | HG, A_SER_110   | 2.82    | 1.90    | 15.87                  |
| 1HGF.PDB | O, A_SER_107   | N, A_LEU_111   | H, A_LEU_111    | 2.96    | 2.00    | 9.75                   |
| 1HGF.PDB | O, A_LEU_108   | N, A_VAL_112   | H, A_VAL_112    | 2.99    | 2.02    | 7.62                   |
| 1HGF.PDB | O, A_ARG_109   | N, A_ALA_113   | H, A_ALA_113    | 2.92    | 2.00    | 16.71                  |
| 1HGF.PDB | O, A_SER_110   | N, A_SER_114   | H, A_SER_114    | 2.94    | 2.06    | 21.84                  |
| 1HGF.PDB | OE2, A_GLU_119 | OG1, A_THR_117 | HG1, A_THR_117  | 2.95    | 1.98    | 3.95                   |
| 1HGF.PDB | O, A_GLU_82    | N, A_LEU_118   | H, A_LEU_118    | 2.98    | 2.00    | 4.41                   |
| 1HGF.PDB | O, A_TYR_257   | N, A_ILE_121   | H, A_ILE_121    | 2.82    | 1.84    | 1.82                   |

|          |                |                |                 |      |      |       |
|----------|----------------|----------------|-----------------|------|------|-------|
| 1HGF.PDB | O, A_ARG_255   | N, A_GLU_123   | H, A_GLU_123    | 2.84 | 1.88 | 9.80  |
| 1HGF.PDB | O, A_THR_155   | N, A_THR_131   | H, A_THR_131    | 2.73 | 1.79 | 9.00  |
| 1HGF.PDB | O, A_LYS_156   | OG1, A_THR_131 | HG1, A_THR_131  | 2.73 | 1.79 | 7.60  |
| 1HGF.PDB | ND2, A_ASN_152 | NE2, A_GLN_132 | HE21, A_GLN_132 | 2.94 | 2.00 | 10.26 |
| 1HGF.PDB | OD1, A_ASN_152 | N, A_ASN_133   | H, A_ASN_133    | 2.91 | 1.97 | 13.50 |
| 1HGF.PDB | O, A_TRP_153   | N, A_GLY_134   | H, A_GLY_134    | 3.00 | 2.07 | 15.59 |
| 1HGF.PDB | O, A_GLY_146   | N, A_SER_136   | H, A_SER_136    | 2.70 | 1.84 | 23.70 |
| 1HGF.PDB | O, A_GLY_144   | NZ, A_LYS_140  | HZ2, A_LYS_140  | 2.83 | 1.99 | 29.88 |
| 1HGF.PDB | O, A_GLY_144   | N, A_ARG_141   | H, A_ARG_141    | 2.92 | 2.09 | 26.49 |
| 1HGF.PDB | OD2, A_ASP_77  | NE, A_ARG_141  | HE, A_ARG_141   | 2.91 | 2.06 | 25.46 |
| 1HGF.PDB | O, A_PHE_147   | NH1, A_ARG_141 | HH12, A_ARG_141 | 2.58 | 1.65 | 16.41 |
| 1HGF.PDB | OD1, A_ASP_77  | NH2, A_ARG_141 | HH21, A_ARG_141 | 2.84 | 1.97 | 26.05 |
| 1HGF.PDB | OD2, A_ASP_77  | NH2, A_ARG_141 | HH21, A_ARG_141 | 2.78 | 1.86 | 20.91 |
| 1HGF.PDB | O, A_SER_136   | N, A_GLY_146   | H, A_GLY_146    | 2.98 | 2.14 | 25.61 |
| 1HGF.PDB | O, A_GLY_72    | N, A_SER_149   | H, A_SER_149    | 2.87 | 1.95 | 15.87 |
| 1HGF.PDB | O, A_ALA_253   | N, A_ASN_152   | H, A_ASN_152    | 2.85 | 1.95 | 19.48 |
| 1HGF.PDB | OH, A_TYR_195  | NE1, A_TRP_153 | HE1, A_TRP_153  | 2.84 | 1.90 | 13.02 |
| 1HGF.PDB | O, A_THR_131   | N, A_THR_155   | H, A_THR_155    | 2.99 | 2.03 | 10.01 |
| 1HGF.PDB | O, A_LEU_194   | N, A_LYS_156   | H, A_LYS_156    | 2.84 | 1.97 | 22.10 |
| 1HGF.PDB | O, A_THR_160   | N, A_SER_157   | H, A_SER_157    | 3.00 | 2.11 | 20.90 |
| 1HGF.PDB | O, A_SER_247   | N, A_LEU_164   | H, A_LEU_164    | 2.70 | 1.86 | 25.60 |
| 1HGF.PDB | O, A_ILE_245   | N, A_VAL_166   | H, A_VAL_166    | 2.89 | 1.93 | 10.88 |
| 1HGF.PDB | O, A_LEU_243   | N, A_MET_168   | H, A_MET_168    | 3.00 | 2.06 | 14.85 |
| 1HGF.PDB | O, A_ASP_241   | N, A_ASN_170   | H, A_ASN_170    | 2.88 | 1.90 | 0.71  |
| 1HGF.PDB | O, A_PHE_174   | ND2, A_ASN_170 | HD22, A_ASN_170 | 2.75 | 1.81 | 11.59 |
| 1HGF.PDB | O, A_VAL_237   | N, A_LYS_176   | H, A_LYS_176    | 2.94 | 2.04 | 19.01 |
| 1HGF.PDB | OE2, A_GLU_123 | NZ, A_LYS_176  | HZ1, A_LYS_176  | 2.72 | 1.80 | 23.85 |
| 1HGF.PDB | O, A_THR_235   | N, A_TYR_178   | H, A_TYR_178    | 2.82 | 1.85 | 7.11  |
| 1HGF.PDB | OG1, A_THR_235 | NE1, A_TRP_180 | HE1, A_TRP_180  | 2.87 | 1.89 | 5.46  |
| 1HGF.PDB | O, A_ASN_250   | N, A_HIS_183   | H, A_HIS_183    | 2.77 | 1.92 | 24.91 |
| 1HGF.PDB | OH, A_TYR_98   | NE2, A_HIS_183 | HE2, A_HIS_183  | 2.90 | 1.98 | 15.32 |
| 1HGF.PDB | O, A_ARG_229   | N, A_HIS_184   | H, A_HIS_184    | 2.84 | 1.88 | 9.30  |
| 1HGF.PDB | OG, A_SER_231  | NE2, A_HIS_184 | HE2, A_HIS_184  | 2.68 | 1.88 | 29.05 |
| 1HGF.PDB | OD1, A_ASN_250 | NE2, A_GLN_191 | HE22, A_GLN_191 | 2.90 | 1.94 | 8.27  |
| 1HGF.PDB | O, A_ASN_188   | N, A_THR_192   | H, A_THR_192    | 2.96 | 2.06 | 18.82 |
| 1HGF.PDB | O, A_GLN_189   | N, A_SER_193   | H, A_SER_193    | 2.83 | 1.90 | 13.84 |
| 1HGF.PDB | O, A_GLU_190   | N, A_LEU_194   | H, A_LEU_194    | 2.93 | 1.96 | 8.30  |
| 1HGF.PDB | O, A_GLN_191   | N, A_TYR_195   | H, A_TYR_195    | 2.75 | 1.81 | 10.35 |
| 1HGF.PDB | O, A_TYR_195   | N, A_GLN_197   | H, A_GLN_197    | 2.73 | 1.94 | 29.33 |
| 1HGF.PDB | O, A_ASN_248   | NE2, A_GLN_197 | HE21, A_GLN_197 | 2.87 | 2.00 | 23.13 |
| 1HGF.PDB | O, A_TYR_161   | NE2, A_GLN_197 | HE22, A_GLN_197 | 2.98 | 2.03 | 11.50 |
| 1HGF.PDB | O, A_ILE_213   | N, A_VAL_202   | H, A_VAL_202    | 2.99 | 2.02 | 6.97  |
| 1HGF.PDB | O, A_ASN_246   | N, A_THR_203   | H, A_THR_203    | 2.96 | 2.06 | 19.01 |
| 1HGF.PDB | O, A_GLN_211   | N, A_VAL_204   | H, A_VAL_204    | 2.92 | 1.99 | 15.84 |
| 1HGF.PDB | O, A_SER_209   | N, A_THR_206   | H, A_THR_206    | 2.95 | 2.03 | 15.35 |
| 1HGF.PDB | OD1, A_ASP_241 | N, A_ARG_207   | H, A_ARG_207    | 2.92 | 1.95 | 7.62  |
| 1HGF.PDB | O, A_VAL_204   | N, A_GLN_211   | H, A_GLN_211    | 2.87 | 1.98 | 21.25 |
| 1HGF.PDB | OG1, A_THR_203 | OG1, A_THR_212 | HG1, A_THR_212  | 2.83 | 1.91 | 15.11 |
| 1HGF.PDB | O, A_VAL_202   | N, A_ILE_213   | H, A_ILE_213    | 2.85 | 1.94 | 17.93 |
| 1HGF.PDB | ND1, A_HIS_184 | N, A_ASN_216   | H, A_ASN_216    | 2.73 | 1.89 | 25.27 |
| 1HGF.PDB | OE1, C_GLN_210 | NH2, A_ARG_220 | HH21, A_ARG_220 | 2.64 | 1.76 | 23.62 |
| 1HGF.PDB | O, A_ASN_216   | NH2, A_ARG_220 | HH22, A_ARG_220 | 2.77 | 1.87 | 21.15 |
| 1HGF.PDB | O, A_LEU_226   | N, A_VAL_223   | H, A_VAL_223    | 2.86 | 1.91 | 11.57 |
| 1HGF.PDB | O, A_CYS_97    | NE, A_ARG_224  | HE, A_ARG_224   | 2.81 | 1.94 | 23.65 |
| 1HGF.PDB | O, A_CYS_97    | NH2, A_ARG_224 | HH21, A_ARG_224 | 2.95 | 2.11 | 27.74 |
| 1HGF.PDB | O, A_VAL_223   | N, A_LEU_226   | H, A_LEU_226    | 2.93 | 1.98 | 11.09 |
| 1HGF.PDB | O, A_SER_228   | NH1, A_ARG_229 | HH11, A_ARG_229 | 2.75 | 1.83 | 19.84 |
| 1HGF.PDB | O, A_PRO_221   | NH2, A_ARG_229 | HH22, A_ARG_229 | 2.63 | 1.68 | 15.15 |



|          |                |                |                 |      |      |       |
|----------|----------------|----------------|-----------------|------|------|-------|
| 1HGF.PDB | O, A_PRO_99    | N, A_ILE_230   | H, A_ILE_230    | 2.95 | 2.09 | 24.07 |
| 1HGF.PDB | OD1, A_ASP_101 | OG, A_SER_231  | HG, A_SER_231   | 2.83 | 1.87 | 7.29  |
| 1HGF.PDB | O, A_ASP_101   | N, A_ILE_232   | H, A_ILE_232    | 2.89 | 1.95 | 14.12 |
| 1HGF.PDB | O, A_TRP_180   | N, A_TYR_233   | H, A_TYR_233    | 2.93 | 1.97 | 10.39 |
| 1HGF.PDB | O, A_TYR_178   | N, A_THR_235   | H, A_THR_235    | 2.85 | 1.97 | 21.16 |
| 1HGF.PDB | O, A_LYS_176   | N, A_VAL_237   | H, A_VAL_237    | 2.78 | 1.84 | 14.11 |
| 1HGF.PDB | OE1, F_GLU_72  | NZ, A_LYS_238  | HZ2, A_LYS_238  | 2.85 | 1.85 | 14.58 |
| 1HGF.PDB | O, F_SER_71    | NZ, A_LYS_238  | HZ3, A_LYS_238  | 2.63 | 1.67 | 16.71 |
| 1HGF.PDB | O, A_ASN_170   | N, A_GLY_240   | H, A_GLY_240    | 2.91 | 2.09 | 27.97 |
| 1HGF.PDB | O, A_MET_168   | N, A_LEU_243   | H, A_LEU_243    | 2.94 | 1.98 | 7.98  |
| 1HGF.PDB | O, A_SER_205   | N, A_VAL_244   | H, A_VAL_244    | 2.89 | 1.97 | 15.63 |
| 1HGF.PDB | O, A_VAL_166   | N, A_ILE_245   | H, A_ILE_245    | 2.94 | 2.01 | 15.58 |
| 1HGF.PDB | O, A_THR_203   | N, A_ASN_246   | H, A_ASN_246    | 2.92 | 1.96 | 10.40 |
| 1HGF.PDB | OD1, A_ASN_165 | ND2, A_ASN_246 | HD21, A_ASN_246 | 2.93 | 2.03 | 19.92 |
| 1HGF.PDB | O, A_LEU_164   | N, A_SER_247   | H, A_SER_247    | 2.90 | 2.00 | 19.06 |
| 1HGF.PDB | OG, A_SER_247  | N, A_GLY_249   | H, A_GLY_249    | 2.99 | 2.00 | 4.05  |
| 1HGF.PDB | O, A_HIS_183   | ND2, A_ASN_250 | HD21, A_ASN_250 | 2.77 | 1.81 | 6.63  |
| 1HGF.PDB | OE1, A_GLN_191 | ND2, A_ASN_250 | HD22, A_ASN_250 | 2.86 | 1.90 | 9.57  |
| 1HGF.PDB | O, A_ASN_152   | N, A_ALA_253   | H, A_ALA_253    | 2.98 | 2.05 | 15.63 |
| 1HGF.PDB | OD1, A_ASN_133 | NH2, A_ARG_255 | HH22, A_ARG_255 | 2.49 | 1.67 | 28.52 |
| 1HGF.PDB | O, A_LEU_177   | N, A_PHE_258   | H, A_PHE_258    | 2.98 | 2.01 | 4.56  |
| 1HGF.PDB | OE1, A_GLU_119 | NH2, A_ARG_261 | HH22, A_ARG_261 | 2.74 | 1.90 | 27.76 |
| 1HGF.PDB | O, A_PHE_87    | N, A_MET_268   | H, A_MET_268    | 2.93 | 2.03 | 19.50 |
| 1HGF.PDB | O, A_PRO_284   | OG, A_SER_270  | HG, A_SER_270   | 2.80 | 1.83 | 2.11  |
| 1HGF.PDB | OG, A_SER_270  | N, A_ALA_272   | H, A_ALA_272    | 2.94 | 2.02 | 16.24 |
| 1HGF.PDB | O, A_ILE_51    | N, A_ASP_275   | H, A_ASP_275    | 2.90 | 2.00 | 18.80 |
| 1HGF.PDB | OD1, A_ASP_275 | N, A_THR_276   | H, A_THR_276    | 2.77 | 1.92 | 24.49 |
| 1HGF.PDB | O, A_ASN_54    | N, A_SER_279   | H, A_SER_279    | 2.78 | 1.84 | 13.06 |
| 1HGF.PDB | O, A_TYR_302   | N, A_ILE_282   | H, A_ILE_282    | 2.94 | 1.97 | 5.53  |
| 1HGF.PDB | O, A_THR_283   | N, A_GLY_286   | H, A_GLY_286    | 2.80 | 1.86 | 12.05 |
| 1HGF.PDB | O, A_LYS_50    | N, A_SER_287   | H, A_SER_287    | 2.81 | 1.89 | 15.58 |
| 1HGF.PDB | O, A_ALA_304   | ND2, A_ASN_290 | HD21, A_ASN_290 | 2.79 | 1.88 | 15.92 |
| 1HGF.PDB | OE1, A_GLN_44  | NZ, A_LYS_292  | HZ1, A_LYS_292  | 2.87 | 1.83 | 0.68  |
| 1HGF.PDB | OD1, A_ASP_291 | NZ, A_LYS_292  | HZ2, A_LYS_292  | 2.86 | 1.83 | 8.47  |
| 1HGF.PDB | O, A_LYS_307   | N, A_GLN_295   | H, A_GLN_295    | 2.82 | 1.98 | 25.98 |
| 1HGF.PDB | O, A_ASN_298   | NE2, A_GLN_295 | HE22, A_GLN_295 | 2.74 | 1.81 | 14.12 |
| 1HGF.PDB | O, A_GLN_44    | N, A_ASN_296   | H, A_ASN_296    | 2.86 | 1.90 | 9.96  |
| 1HGF.PDB | OD1, A_ASN_298 | N, A_ILE_300   | H, A_ILE_300    | 2.89 | 2.00 | 19.34 |
| 1HGF.PDB | O, A_ILE_282   | N, A_TYR_302   | H, A_TYR_302    | 2.80 | 1.95 | 24.99 |
| 1HGF.PDB | O, B_LYS_62    | N, A_GLY_303   | H, A_GLY_303    | 2.90 | 1.93 | 4.88  |
| 1HGF.PDB | O, A_GLN_295   | N, A_VAL_309   | H, A_VAL_309    | 2.94 | 2.08 | 24.38 |
| 1HGF.PDB | OG, B_SER_93   | N, A_LYS_310   | H, A_LYS_310    | 2.89 | 1.97 | 16.03 |
| 1HGF.PDB | OE1, A_GLU_41  | OG1, A_THR_313 | HG1, A_THR_313  | 2.68 | 1.87 | 27.57 |
| 1HGF.PDB | OE2, A_GLU_41  | N, A_LEU_314   | H, A_LEU_314    | 2.78 | 1.85 | 12.25 |
| 1HGF.PDB | OG1, A_THR_313 | NZ, A_LYS_315  | HZ2, A_LYS_315  | 2.95 | 2.00 | 20.61 |
| 1HGF.PDB | O, A_THR_40    | N, A_LEU_316   | H, A_LEU_316    | 2.77 | 1.84 | 13.98 |
| 1HGF.PDB | OD1, B_ASN_104 | N, A_ALA_317   | H, A_ALA_317    | 2.74 | 1.82 | 15.07 |
| 1HGF.PDB | O, A_ASN_38    | N, A_THR_318   | H, A_THR_318    | 2.85 | 1.92 | 14.74 |
| 1HGF.PDB | OE2, A_GLU_35  | ND2, A_ASN_322 | HD21, A_ASN_322 | 2.76 | 1.93 | 26.44 |
| 1HGF.PDB | O, A_VAL_20    | ND2, A_ASN_322 | HD22, A_ASN_322 | 2.95 | 2.02 | 15.09 |
| 1HGF.PDB | O, A_PRO_21    | NE2, A_GLN_327 | HE21, A_GLN_327 | 2.80 | 2.01 | 29.67 |
| 1HGF.PDB | OD2, B_ASP_112 | N, B_GLY_1     | H1, B_GLY_1     | 2.90 | 1.93 | 18.51 |
| 1HGF.PDB | OD1, B_ASP_109 | N, B_LEU_2     | H, B_LEU_2      | 2.91 | 2.01 | 19.54 |
| 1HGF.PDB | OD2, B_ASP_112 | N, B_PHE_3     | H, B_PHE_3      | 2.80 | 1.99 | 27.59 |
| 1HGF.PDB | OD2, B_ASP_112 | N, B_GLY_4     | H, B_GLY_4      | 2.97 | 2.05 | 16.11 |
| 1HGF.PDB | OD1, B_ASP_112 | N, B_ALA_5     | H, B_ALA_5      | 2.98 | 2.10 | 21.76 |
| 1HGF.PDB | O, B_GLY_4     | N, B_PHE_9     | H, B_PHE_9      | 2.80 | 1.88 | 14.94 |
| 1HGF.PDB | O, B_GLY_13    | ND2, B_ASN_12  | HD21, B_ASN_12  | 2.79 | 1.93 | 22.97 |

|          |                |               |                |      |      |       |
|----------|----------------|---------------|----------------|------|------|-------|
| 1HGF.PDB | O, A_VAL_323   | N, B_GLY_13   | H, B_GLY_13    | 2.74 | 1.86 | 21.47 |
| 1HGF.PDB | O, A_HIS_17    | N, B_TRP_14   | H, B_TRP_14    | 2.87 | 1.97 | 19.18 |
| 1HGF.PDB | OG1, B_THR_41  | N, B_TRP_21   | H, B_TRP_21    | 2.88 | 1.96 | 17.54 |
| 1HGF.PDB | O, B_ALA_35    | N, B_PHE_24   | H, B_PHE_24    | 2.83 | 1.86 | 5.03  |
| 1HGF.PDB | O, A_CYS_14    | N, B_ARG_25   | H, B_ARG_25    | 2.97 | 2.03 | 13.73 |
| 1HGF.PDB | OE1, B_GLN_34  | NE, B_ARG_25  | HE, B_ARG_25   | 2.64 | 1.77 | 20.89 |
| 1HGF.PDB | OE1, B_GLN_34  | NH2, B_ARG_25 | HH21, B_ARG_25 | 2.81 | 1.99 | 28.67 |
| 1HGF.PDB | OE2, A_GLU_325 | NH2, B_ARG_25 | HH22, B_ARG_25 | 2.99 | 2.04 | 16.52 |
| 1HGF.PDB | O, B_GLY_31    | N, B_ASN_28   | H, B_ASN_28    | 2.76 | 1.82 | 13.38 |
| 1HGF.PDB | O, B_TYR_22    | N, B_ASP_37   | H, B_ASP_37    | 2.72 | 1.76 | 1.26  |
| 1HGF.PDB | OD2, B_ASP_37  | N, B_SER_40   | H, B_SER_40    | 2.89 | 1.91 | 1.46  |
| 1HGF.PDB | O, B_ASP_37    | OG1, B_THR_41 | HG1, B_THR_41  | 2.68 | 1.88 | 27.80 |
| 1HGF.PDB | O, B_LEU_38    | N, B_GLN_42   | H, B_GLN_42    | 2.87 | 1.93 | 12.73 |
| 1HGF.PDB | OD1, B_ASP_46  | NE2, B_GLN_42 | HE21, B_GLN_42 | 2.87 | 1.99 | 22.40 |
| 1HGF.PDB | O, B_LYS_39    | N, B_ALA_43   | H, B_ALA_43    | 2.92 | 1.97 | 11.63 |
| 1HGF.PDB | O, B_SER_40    | N, B_ALA_44   | H, B_ALA_44    | 2.94 | 1.96 | 4.26  |
| 1HGF.PDB | O, B_GLN_42    | N, B_ASP_46   | H, B_ASP_46    | 2.81 | 1.84 | 4.31  |
| 1HGF.PDB | O, B_ALA_43    | NE2, B_GLN_47 | HE21, B_GLN_47 | 2.89 | 1.94 | 12.17 |
| 1HGF.PDB | O, B_ILE_45    | N, B_ASN_49   | H, B_ASN_49    | 2.90 | 1.97 | 14.22 |
| 1HGF.PDB | O, B_ASP_46    | N, B_GLY_50   | H, B_GLY_50    | 2.85 | 1.93 | 16.88 |
| 1HGF.PDB | O, B_GLN_47    | N, B_LYS_51   | H, B_LYS_51    | 2.96 | 2.00 | 10.44 |
| 1HGF.PDB | OE1, B_GLU_103 | NZ, B_LYS_51  | HZ1, B_LYS_51  | 2.74 | 1.70 | 5.26  |
| 1HGF.PDB | ND1, B_HIS_106 | NZ, B_LYS_51  | HZ3, B_LYS_51  | 2.67 | 1.72 | 18.38 |
| 1HGF.PDB | O, B_ILE_48    | N, B_LEU_52   | H, B_LEU_52    | 2.92 | 2.01 | 17.60 |
| 1HGF.PDB | O, B_ASN_49    | N, B_ASN_53   | H, B_ASN_53    | 2.84 | 1.91 | 14.80 |
| 1HGF.PDB | O, E_THR_28    | NE, B_ARG_54  | HE, B_ARG_54   | 2.92 | 1.94 | 6.13  |
| 1HGF.PDB | OE2, F_GLU_97  | NH2, B_ARG_54 | HH22, B_ARG_54 | 2.83 | 1.86 | 13.50 |
| 1HGF.PDB | OD2, F_ASP_86  | NZ, B_LYS_62  | HZ2, B_LYS_62  | 2.71 | 1.70 | 11.44 |
| 1HGF.PDB | OD2, F_ASP_90  | NZ, B_LYS_62  | HZ3, B_LYS_62  | 2.77 | 1.82 | 20.37 |
| 1HGF.PDB | OG, A_SER_266  | ND1, B_HIS_64 | HD1, B_HIS_64  | 2.66 | 1.79 | 20.68 |
| 1HGF.PDB | OG, A_SER_110  | NE2, B_HIS_64 | HE2, B_HIS_64  | 2.89 | 1.92 | 10.70 |
| 1HGF.PDB | O, B_PHE_63    | NE2, B_GLN_65 | HE21, B_GLN_65 | 2.92 | 1.95 | 7.46  |
| 1HGF.PDB | OE2, B_GLU_85  | NZ, B_LYS_68  | HZ1, B_LYS_68  | 2.67 | 1.75 | 22.44 |
| 1HGF.PDB | O, A_LYS_299   | NZ, B_LYS_68  | HZ2, B_LYS_68  | 2.93 | 1.89 | 4.53  |
| 1HGF.PDB | OG, C_SER_107  | N, B_ARG_76   | H, B_ARG_76    | 2.84 | 1.90 | 13.38 |
| 1HGF.PDB | OE2, D_GLU_81  | NE, B_ARG_76  | HE, B_ARG_76   | 2.92 | 1.92 | 2.47  |
| 1HGF.PDB | OE1, D_GLU_74  | NH1, B_ARG_76 | HH12, B_ARG_76 | 2.86 | 1.84 | 3.80  |
| 1HGF.PDB | OE1, D_GLU_81  | NH2, B_ARG_76 | HH21, B_ARG_76 | 2.73 | 1.74 | 10.29 |
| 1HGF.PDB | OE2, D_GLU_74  | NH2, B_ARG_76 | HH22, B_ARG_76 | 2.75 | 1.74 | 3.91  |
| 1HGF.PDB | O, B_GLY_75    | N, B_ASP_79   | H, B_ASP_79    | 2.96 | 2.00 | 9.52  |
| 1HGF.PDB | O, B_ILE_77    | N, B_GLU_81   | H, B_GLU_81    | 2.94 | 1.98 | 10.87 |
| 1HGF.PDB | O, B_GLN_78    | N, B_LYS_82   | H, B_LYS_82    | 3.00 | 2.09 | 18.29 |
| 1HGF.PDB | OE1, D_GLU_85  | OH, B_TYR_83  | HH, B_TYR_83   | 2.57 | 1.80 | 29.66 |
| 1HGF.PDB | O, B_LEU_80    | N, B_VAL_84   | H, B_VAL_84    | 2.91 | 1.98 | 14.24 |
| 1HGF.PDB | O, B_LYS_82    | N, B_ASP_86   | H, B_ASP_86    | 2.93 | 1.99 | 11.73 |
| 1HGF.PDB | O, B_TYR_83    | N, B_THR_87   | H, B_THR_87    | 2.99 | 2.04 | 12.38 |
| 1HGF.PDB | O, B_VAL_84    | N, B_LYS_88   | H, B_LYS_88    | 2.93 | 2.07 | 23.33 |
| 1HGF.PDB | OH, F_TYR_83   | NZ, B_LYS_88  | HZ1, B_LYS_88  | 2.72 | 1.70 | 9.91  |
| 1HGF.PDB | O, B_GLU_85    | N, B_ILE_89   | H, B_ILE_89    | 2.93 | 1.96 | 7.36  |
| 1HGF.PDB | O, B_LYS_88    | N, B_TRP_92   | H, B_TRP_92    | 2.91 | 1.95 | 10.80 |
| 1HGF.PDB | O, B_ILE_89    | N, B_SER_93   | H, B_SER_93    | 2.91 | 2.02 | 20.72 |
| 1HGF.PDB | O, B_ILE_89    | OG, B_SER_93  | HG, B_SER_93   | 2.78 | 1.94 | 24.66 |
| 1HGF.PDB | O, B_ASP_90    | N, B_TYR_94   | H, B_TYR_94    | 3.00 | 2.07 | 16.60 |
| 1HGF.PDB | O, B_TRP_92    | N, B_ALA_96   | H, B_ALA_96    | 2.98 | 2.04 | 14.15 |
| 1HGF.PDB | O, B_TYR_94    | N, B_LEU_98   | H, B_LEU_98    | 2.94 | 1.99 | 11.23 |
| 1HGF.PDB | O, B_ASN_95    | N, B_LEU_99   | H, B_LEU_99    | 3.00 | 2.03 | 11.07 |
| 1HGF.PDB | O, B_LEU_98    | N, B_LEU_102  | H, B_LEU_102   | 2.98 | 2.01 | 7.33  |
| 1HGF.PDB | O, B_LEU_99    | N, B_GLU_103  | H, B_GLU_103   | 2.91 | 1.94 | 8.79  |

|          |                |                |                 |      |      |       |
|----------|----------------|----------------|-----------------|------|------|-------|
| 1HGF.PDB | O, B_VAL_100   | N, B_ASN_104   | H, B_ASN_104    | 2.86 | 1.91 | 12.70 |
| 1HGF.PDB | O, A_LYS_27    | ND2, B_ASN_104 | HD21, B_ASN_104 | 2.88 | 1.94 | 13.97 |
| 1HGF.PDB | O, B_LEU_102   | N, B_HIS_106   | H, B_HIS_106    | 2.90 | 1.94 | 9.48  |
| 1HGF.PDB | O, B_GLU_103   | N, B_THR_107   | H, B_THR_107    | 2.84 | 1.94 | 18.07 |
| 1HGF.PDB | O, B_ASN_104   | N, B_ILE_108   | H, B_ILE_108    | 2.93 | 1.99 | 13.61 |
| 1HGF.PDB | O, B_HIS_106   | N, B_LEU_110   | H, B_LEU_110    | 2.78 | 1.84 | 12.67 |
| 1HGF.PDB | O, B_ASP_109   | N, B_SER_113   | H, B_SER_113    | 2.79 | 1.85 | 13.76 |
| 1HGF.PDB | O, F_LEU_2     | OG, B_SER_113  | HG, B_SER_113   | 2.68 | 1.90 | 29.80 |
| 1HGF.PDB | O, B_SER_113   | N, B_LYS_117   | H, B_LYS_117    | 2.74 | 1.85 | 20.16 |
| 1HGF.PDB | O, B_GLU_114   | N, B_LEU_118   | H, B_LEU_118    | 2.99 | 2.05 | 15.07 |
| 1HGF.PDB | O, B_MET_115   | N, B_PHE_119   | H, B_PHE_119    | 2.97 | 2.01 | 9.96  |
| 1HGF.PDB | O, B_ASN_116   | N, B_GLU_120   | H, B_GLU_120    | 2.92 | 1.94 | 1.95  |
| 1HGF.PDB | OE2, B_GLU_120 | NH1, B_ARG_123 | HH11, B_ARG_123 | 2.78 | 1.93 | 26.74 |
| 1HGF.PDB | O, B_GLU_120   | N, B_ARG_124   | H, B_ARG_124    | 2.96 | 2.04 | 16.03 |
| 1HGF.PDB | OE1, F_GLU_132 | NE, B_ARG_124  | HE, B_ARG_124   | 2.80 | 1.86 | 13.00 |
| 1HGF.PDB | OH, B_TYR_157  | ND2, B_ASN_129 | HD21, B_ASN_129 | 2.81 | 1.86 | 11.58 |
| 1HGF.PDB | O, B_HIS_159   | ND2, B_ASN_129 | HD22, B_ASN_129 | 2.97 | 2.06 | 17.16 |
| 1HGF.PDB | O, B_LYS_139   | N, B_GLU_131   | H, B_GLU_131    | 2.94 | 2.04 | 19.21 |
| 1HGF.PDB | O, B_CYS_137   | N, B_MET_133   | H, B_MET_133    | 2.88 | 1.93 | 11.45 |
| 1HGF.PDB | O, A_LEU_13    | N, B_PHE_138   | H, B_PHE_138    | 2.73 | 1.88 | 23.58 |
| 1HGF.PDB | O, B_GLU_131   | N, B_LYS_139   | H, B_LYS_139    | 2.85 | 1.91 | 11.21 |
| 1HGF.PDB | O, A_ALA_11    | N, B_ILE_140   | H, B_ILE_140    | 2.80 | 1.87 | 14.66 |
| 1HGF.PDB | O, B_ASN_129   | N, B_TYR_141   | H, B_TYR_141    | 2.87 | 1.93 | 12.99 |
| 1HGF.PDB | OD2, B_ASP_145 | N, B_ALA_147   | H, B_ALA_147    | 2.86 | 1.98 | 21.48 |
| 1HGF.PDB | O, B_ASP_145   | N, B_ILE_149   | H, B_ILE_149    | 2.90 | 1.94 | 9.97  |
| 1HGF.PDB | O, B_ASN_146   | N, B_GLU_150   | H, B_GLU_150    | 2.94 | 1.99 | 11.66 |
| 1HGF.PDB | O, B_ALA_147   | N, B_SER_151   | H, B_SER_151    | 2.85 | 2.06 | 29.61 |
| 1HGF.PDB | O, B_CYS_148   | OG, B_SER_151  | HG, B_SER_151   | 2.68 | 1.81 | 19.96 |
| 1HGF.PDB | O, B_GLU_150   | N, B_ASN_154   | H, B_ASN_154    | 2.87 | 1.89 | 5.04  |
| 1HGF.PDB | O, B_SER_151   | N, B_THR_156   | H, B_THR_156    | 2.77 | 1.91 | 23.09 |
| 1HGF.PDB | OD1, B_ASN_154 | OG1, B_THR_156 | HG1, B_THR_156  | 2.68 | 1.80 | 19.09 |
| 1HGF.PDB | OD1, B_ASP_158 | N, B_ASP_160   | H, B_ASP_160    | 2.97 | 2.10 | 23.68 |
| 1HGF.PDB | O, B_HIS_159   | N, B_TYR_162   | H, B_TYR_162    | 2.85 | 2.05 | 29.20 |
| 1HGF.PDB | O, F_ARG_170   | NH1, B_ARG_163 | HH12, B_ARG_163 | 2.79 | 1.78 | 1.27  |
| 1HGF.PDB | OE1, F_GLU_131 | NH2, B_ARG_163 | HH21, B_ARG_163 | 2.74 | 1.86 | 24.20 |
| 1HGF.PDB | O, B_TYR_162   | N, B_ALA_166   | H, B_ALA_166    | 2.86 | 1.89 | 4.35  |
| 1HGF.PDB | O, B_ARG_163   | N, B_LEU_167   | H, B_LEU_167    | 2.79 | 1.83 | 5.57  |
| 1HGF.PDB | O, B_GLU_165   | ND2, B_ASN_169 | HD21, B_ASN_169 | 3.00 | 2.06 | 13.38 |
| 1HGF.PDB | O, B_ALA_166   | N, B_ARG_170   | H, B_ARG_170    | 2.82 | 1.94 | 21.74 |
| 1HGF.PDB | O, B_GLU_128   | NE, B_ARG_170  | HE, B_ARG_170   | 2.78 | 1.88 | 20.28 |
| 1HGF.PDB | OE2, B_GLU_131 | NH1, B_ARG_170 | HH11, B_ARG_170 | 2.84 | 1.84 | 5.96  |
| 1HGF.PDB | O, B_LEU_167   | N, B_PHE_171   | H, B_PHE_171    | 2.90 | 1.97 | 15.47 |
| 1HGF.PDB | O, D_ILE_140   | N, C_ALA_11    | H, C_ALA_11     | 2.89 | 2.00 | 20.42 |
| 1HGF.PDB | O, D_GLN_27    | N, C_THR_12    | H, C_THR_12     | 2.90 | 1.96 | 12.68 |
| 1HGF.PDB | O, D_PHE_138   | N, C_LEU_13    | H, C_LEU_13     | 2.97 | 1.99 | 7.01  |
| 1HGF.PDB | O, D_ARG_25    | N, C_CYS_14    | H, C_CYS_14     | 2.79 | 1.86 | 15.57 |
| 1HGF.PDB | O, D_GLY_136   | N, C_LEU_15    | H, C_LEU_15     | 2.95 | 1.97 | 3.72  |
| 1HGF.PDB | O, D_GLY_23    | N, C_GLY_16    | H, C_GLY_16     | 2.95 | 2.05 | 18.06 |
| 1HGF.PDB | O, D_TRP_21    | N, C_HIS_18    | H, C_HIS_18     | 2.91 | 2.01 | 18.40 |
| 1HGF.PDB | OD1, C_ASN_322 | N, C_VAL_20    | H, C_VAL_20     | 2.80 | 1.83 | 2.80  |
| 1HGF.PDB | O, C_VAL_36    | N, C_THR_24    | H, C_THR_24     | 2.88 | 1.97 | 16.83 |
| 1HGF.PDB | O, C_ILE_34    | N, C_VAL_26    | H, C_VAL_26     | 2.85 | 1.90 | 10.38 |
| 1HGF.PDB | OE2, D_GLU_97  | NZ, C_LYS_27   | HZ1, C_LYS_27   | 2.81 | 1.85 | 19.93 |
| 1HGF.PDB | O, C_ASP_31    | N, C_THR_28    | H, C_THR_28     | 2.69 | 1.91 | 29.80 |
| 1HGF.PDB | O, C_VAL_26    | N, C_ILE_34    | H, C_ILE_34     | 2.94 | 1.99 | 12.34 |
| 1HGF.PDB | O, C_THR_24    | N, C_VAL_36    | H, C_VAL_36     | 2.81 | 1.85 | 7.51  |
| 1HGF.PDB | O, C_MET_320   | N, C_THR_37    | H, C_THR_37     | 2.93 | 1.95 | 5.43  |
| 1HGF.PDB | O, C_LEU_316   | N, C_THR_40    | H, C_THR_40     | 2.80 | 1.89 | 17.62 |

|          |                |                |                 |      |      |       |
|----------|----------------|----------------|-----------------|------|------|-------|
| 1HGF.PDB | O, C_LEU_314   | N, C_LEU_42    | H, C_LEU_42     | 2.77 | 1.92 | 23.28 |
| 1HGF.PDB | O, C_PHE_294   | N, C_GLN_44    | H, C_GLN_44     | 2.95 | 1.98 | 8.35  |
| 1HGF.PDB | O, C_SER_46    | NE2, C_GLN_44  | HE21, C_GLN_44  | 2.83 | 1.96 | 22.13 |
| 1HGF.PDB | O, C_ASN_285   | OG, C_SER_47   | HG, C_SER_47    | 2.88 | 1.94 | 10.85 |
| 1HGF.PDB | OD2, C_ASP_275 | NZ, C_LYS_50   | HZ2, C_LYS_50   | 2.88 | 1.87 | 13.71 |
| 1HGF.PDB | O, C_PRO_273   | N, C_ILE_51    | H, C_ILE_51     | 2.76 | 1.80 | 7.14  |
| 1HGF.PDB | O, C_ASP_275   | N, C_ASN_53    | H, C_ASN_53     | 2.87 | 1.97 | 19.35 |
| 1HGF.PDB | OD2, C_ASP_85  | N, C_ARG_57    | H, C_ARG_57     | 2.92 | 1.96 | 10.20 |
| 1HGF.PDB | O, C_THR_83    | NE, C_ARG_57   | HE, C_ARG_57    | 2.76 | 1.82 | 12.66 |
| 1HGF.PDB | O, C_LEU_86    | N, C_LEU_59    | H, C_LEU_59     | 2.88 | 1.92 | 8.76  |
| 1HGF.PDB | O, C_VAL_88    | N, C_GLY_61    | H, C_GLY_61     | 2.99 | 2.18 | 28.94 |
| 1HGF.PDB | OD1, C_ASP_60  | N, C_ILE_62    | H, C_ILE_62     | 2.90 | 1.96 | 13.08 |
| 1HGF.PDB | O, C_GLY_61    | N, C_CYS_64    | H, C_CYS_64     | 2.89 | 1.95 | 14.15 |
| 1HGF.PDB | O, C_THR_65    | N, C_ALA_69    | H, C_ALA_69     | 2.99 | 2.03 | 9.48  |
| 1HGF.PDB | O, C_LEU_66    | N, C_LEU_70    | H, C_LEU_70     | 2.84 | 1.91 | 15.42 |
| 1HGF.PDB | O, C_ILE_67    | N, C_LEU_71    | H, C_LEU_71     | 2.90 | 1.93 | 5.47  |
| 1HGF.PDB | O, C_ASP_68    | N, C_GLY_72    | H, C_GLY_72     | 2.81 | 1.92 | 21.42 |
| 1HGF.PDB | OD1, C_ASP_73  | N, C_HIS_75    | H, C_HIS_75     | 2.97 | 2.06 | 19.07 |
| 1HGF.PDB | OD1, C_ASP_73  | ND1, C_HIS_75  | HD1, C_HIS_75   | 2.84 | 1.90 | 12.73 |
| 1HGF.PDB | O, C_ASP_63    | NE2, C_HIS_75  | HE2, C_HIS_75   | 2.86 | 1.91 | 13.30 |
| 1HGF.PDB | O, C_ASP_73    | N, C_CYS_76    | H, C_CYS_76     | 2.82 | 1.90 | 14.90 |
| 1HGF.PDB | O, C_PRO_74    | N, C_ASP_77    | H, C_ASP_77     | 2.92 | 1.97 | 11.55 |
| 1HGF.PDB | O, C_CYS_76    | N, C_PHE_79    | H, C_PHE_79     | 2.95 | 1.98 | 6.66  |
| 1HGF.PDB | OE1, C_GLU_82  | N, C_THR_83    | H, C_THR_83     | 2.95 | 2.02 | 15.89 |
| 1HGF.PDB | O, C_ARG_57    | N, C_ASP_85    | H, C_ASP_85     | 2.80 | 1.92 | 20.17 |
| 1HGF.PDB | O, C_MET_268   | N, C_GLU_89    | H, C_GLU_89     | 2.83 | 1.88 | 10.14 |
| 1HGF.PDB | OD1, C_ASP_60  | NE, C_ARG_90   | HE, C_ARG_90    | 2.76 | 1.85 | 16.46 |
| 1HGF.PDB | O, C_SER_270   | NH1, C_ARG_90  | HH11, C_ARG_90  | 2.67 | 1.81 | 25.78 |
| 1HGF.PDB | O, C_ALA_272   | NH1, C_ARG_90  | HH12, C_ARG_90  | 2.65 | 1.72 | 16.33 |
| 1HGF.PDB | OD2, C_ASP_60  | NH2, C_ARG_90  | HH21, C_ARG_90  | 2.84 | 1.85 | 9.99  |
| 1HGF.PDB | OD1, C_ASP_271 | N, C_SER_91    | H, C_SER_91     | 2.94 | 1.98 | 10.16 |
| 1HGF.PDB | OD1, C_ASP_271 | OG, C_SER_91   | HG, C_SER_91    | 2.91 | 2.11 | 29.01 |
| 1HGF.PDB | OD2, C_ASP_271 | OG, C_SER_91   | HG, C_SER_91    | 2.86 | 1.95 | 16.65 |
| 1HGF.PDB | OD2, C_ASP_73  | N, C_ASN_96    | H, C_ASN_96     | 2.88 | 1.95 | 14.97 |
| 1HGF.PDB | SG, C_CYS_97   | N, C_TYR_98    | H, C_TYR_98     | 2.99 | 2.15 | 25.59 |
| 1HGF.PDB | OD1, C_ASP_68  | OH, C_TYR_100  | HH, C_TYR_100   | 2.97 | 2.03 | 12.15 |
| 1HGF.PDB | O, C_ILE_230   | N, C_ASP_101   | H, C_ASP_101    | 2.99 | 2.16 | 26.80 |
| 1HGF.PDB | OD2, C_ASP_104 | OG, C_SER_107  | HG, C_SER_107   | 2.91 | 1.98 | 14.76 |
| 1HGF.PDB | O, C_TYR_105   | N, C_ARG_109   | H, C_ARG_109    | 2.87 | 1.90 | 5.89  |
| 1HGF.PDB | OE2, D_GLU_67  | NH2, C_ARG_109 | HH21, C_ARG_109 | 2.91 | 1.92 | 11.49 |
| 1HGF.PDB | OD2, B_ASP_79  | OG, C_SER_110  | HG, C_SER_110   | 2.69 | 1.85 | 25.37 |
| 1HGF.PDB | O, C_SER_107   | N, C_LEU_111   | H, C_LEU_111    | 2.95 | 2.00 | 12.48 |
| 1HGF.PDB | O, C_ARG_109   | N, C_ALA_113   | H, C_ALA_113    | 2.94 | 2.02 | 17.14 |
| 1HGF.PDB | O, C_SER_110   | N, C_SER_114   | H, C_SER_114    | 2.95 | 2.04 | 18.89 |
| 1HGF.PDB | O, C_VAL_112   | N, C_GLY_116   | H, C_GLY_116    | 3.00 | 2.03 | 6.34  |
| 1HGF.PDB | OE2, C_GLU_119 | OG1, C_THR_117 | HG1, C_THR_117  | 2.97 | 2.00 | 2.16  |
| 1HGF.PDB | O, C_GLU_82    | N, C_LEU_118   | H, C_LEU_118    | 2.97 | 2.00 | 8.06  |
| 1HGF.PDB | OD1, C_ASN_81  | N, C_PHE_120   | H, C_PHE_120    | 3.00 | 2.07 | 15.52 |
| 1HGF.PDB | O, C_TYR_257   | N, C_ILE_121   | H, C_ILE_121    | 2.83 | 1.85 | 1.84  |
| 1HGF.PDB | O, C_ARG_255   | N, C_GLU_123   | H, C_GLU_123    | 2.86 | 1.90 | 9.31  |
| 1HGF.PDB | O, C_THR_155   | N, C_THR_131   | H, C_THR_131    | 2.75 | 1.81 | 11.67 |
| 1HGF.PDB | ND2, C_ASN_152 | NE2, C_GLN_132 | HE21, C_GLN_132 | 2.94 | 2.00 | 12.42 |
| 1HGF.PDB | OD1, C_ASN_152 | N, C_ASN_133   | H, C_ASN_133    | 2.91 | 1.95 | 9.50  |
| 1HGF.PDB | O, C_TRP_153   | N, C_GLY_134   | H, C_GLY_134    | 2.99 | 2.07 | 16.29 |
| 1HGF.PDB | O, C_GLY_146   | N, C_SER_136   | H, C_SER_136    | 2.71 | 1.85 | 23.34 |
| 1HGF.PDB | O, C_GLY_144   | N, C_ARG_141   | H, C_ARG_141    | 2.89 | 2.08 | 28.20 |
| 1HGF.PDB | OD2, C_ASP_77  | NE, C_ARG_141  | HE, C_ARG_141   | 2.91 | 2.05 | 25.56 |
| 1HGF.PDB | O, C_PHE_147   | NH1, C_ARG_141 | HH12, C_ARG_141 | 2.59 | 1.66 | 16.99 |

|          |                |                |                 |      |      |       |
|----------|----------------|----------------|-----------------|------|------|-------|
| 1HGF.PDB | OD1, C_ASP.77  | NH2, C_ARG.141 | HH21, C_ARG.141 | 2.84 | 1.98 | 26.48 |
| 1HGF.PDB | OD2, C_ASP.77  | NH2, C_ARG.141 | HH21, C_ARG.141 | 2.79 | 1.86 | 20.63 |
| 1HGF.PDB | O, C_SER.136   | N, C_GLY.146   | H, C_GLY.146    | 2.99 | 2.14 | 25.31 |
| 1HGF.PDB | O, C_GLY.72    | N, C_SER.149   | H, C_SER.149    | 2.87 | 1.95 | 17.40 |
| 1HGF.PDB | O, C_ALA.253   | N, C_ASN.152   | H, C_ASN.152    | 2.81 | 1.90 | 18.05 |
| 1HGF.PDB | OH, C_TYR.195  | NE1, C_TRP.153 | HE1, C_TRP.153  | 2.82 | 1.92 | 18.47 |
| 1HGF.PDB | O, C_LEU.194   | N, C_LYS.156   | H, C_LYS.156    | 2.86 | 2.00 | 23.97 |
| 1HGF.PDB | O, C_THR.160   | N, C_SER.157   | H, C_SER.157    | 2.96 | 2.07 | 20.42 |
| 1HGF.PDB | O, C_SER.247   | N, C_LEU.164   | H, C_LEU.164    | 2.70 | 1.88 | 26.53 |
| 1HGF.PDB | O, C_ILE.245   | N, C_VAL.166   | H, C_VAL.166    | 2.89 | 1.93 | 11.49 |
| 1HGF.PDB | O, C_LEU.243   | OG1, C_THR.167 | HG1, C_THR.167  | 2.95 | 2.01 | 11.60 |
| 1HGF.PDB | O, C_ASP.241   | N, C_ASN.170   | H, C_ASN.170    | 2.84 | 1.87 | 6.38  |
| 1HGF.PDB | O, C_PHE.174   | ND2, C_ASN.170 | HD22, C_ASN.170 | 2.74 | 1.80 | 12.05 |
| 1HGF.PDB | O, C_VAL.237   | N, C_LYS.176   | H, C_LYS.176    | 2.93 | 1.99 | 14.60 |
| 1HGF.PDB | OE2, C_GLU.123 | NZ, C_LYS.176  | HZ1, C_LYS.176  | 2.72 | 1.80 | 22.47 |
| 1HGF.PDB | O, C_THR.235   | N, C_TYR.178   | H, C_TYR.178    | 2.78 | 1.81 | 4.50  |
| 1HGF.PDB | OG1, C_THR.235 | NE1, C_TRP.180 | HE1, C_TRP.180  | 2.86 | 1.88 | 3.91  |
| 1HGF.PDB | O, C_ASN.250   | N, C_HIS.183   | H, C_HIS.183    | 2.79 | 1.92 | 22.35 |
| 1HGF.PDB | OH, C_TYR.98   | NE2, C_HIS.183 | HE2, C_HIS.183  | 2.89 | 1.99 | 18.89 |
| 1HGF.PDB | O, C_ARG.229   | N, C_HIS.184   | H, C_HIS.184    | 2.87 | 1.90 | 8.03  |
| 1HGF.PDB | OG, C_SER.231  | NE2, C_HIS.184 | HE2, C_HIS.184  | 2.67 | 1.86 | 27.83 |
| 1HGF.PDB | OD1, C_ASN.250 | NE2, C_GLN.191 | HE22, C_GLN.191 | 2.91 | 1.94 | 7.66  |
| 1HGF.PDB | O, C_ASN.188   | N, C_THR.192   | H, C_THR.192    | 2.94 | 2.00 | 14.19 |
| 1HGF.PDB | O, C_GLN.189   | OG1, C_THR.192 | HG1, C_THR.192  | 2.86 | 2.05 | 27.70 |
| 1HGF.PDB | O, C_GLN.189   | N, C_SER.193   | H, C_SER.193    | 2.81 | 1.91 | 19.71 |
| 1HGF.PDB | O, C_GLU.190   | N, C_LEU.194   | H, C_LEU.194    | 2.96 | 2.00 | 9.41  |
| 1HGF.PDB | O, C_GLN.191   | N, C_TYR.195   | H, C_TYR.195    | 2.79 | 1.84 | 10.04 |
| 1HGF.PDB | O, C_ASN.248   | NE2, C_GLN.197 | HE21, C_GLN.197 | 2.92 | 2.05 | 22.87 |
| 1HGF.PDB | O, C_TYR.161   | NE2, C_GLN.197 | HE22, C_GLN.197 | 2.98 | 2.03 | 10.03 |
| 1HGF.PDB | OG1, C_THR.212 | OG1, C_THR.203 | HG1, C_THR.203  | 2.82 | 1.90 | 14.76 |
| 1HGF.PDB | O, C_GLN.211   | N, C_VAL.204   | H, C_VAL.204    | 2.93 | 2.00 | 14.76 |
| 1HGF.PDB | O, C_SER.209   | N, C_THR.206   | H, C_THR.206    | 2.97 | 2.04 | 14.71 |
| 1HGF.PDB | OD1, C_ASP.241 | N, C_ARG.207   | H, C_ARG.207    | 2.91 | 1.95 | 9.01  |
| 1HGF.PDB | O, C_VAL.204   | N, C_GLN.211   | H, C_GLN.211    | 2.84 | 1.94 | 18.99 |
| 1HGF.PDB | O, C_VAL.202   | N, C_ILE.213   | H, C_ILE.213    | 2.85 | 1.95 | 18.52 |
| 1HGF.PDB | ND1, C_HIS.184 | N, C_ASN.216   | H, C_ASN.216    | 2.71 | 1.89 | 26.19 |
| 1HGF.PDB | O, C_ASN.216   | NH1, C_ARG.220 | HH12, C_ARG.220 | 2.97 | 2.15 | 29.93 |
| 1HGF.PDB | OE1, E_GLN.210 | NH2, C_ARG.220 | HH21, C_ARG.220 | 2.56 | 1.72 | 26.72 |
| 1HGF.PDB | O, C_ASN.216   | NH2, C_ARG.220 | HH22, C_ARG.220 | 2.74 | 1.84 | 20.57 |
| 1HGF.PDB | O, C_LEU.226   | N, C_VAL.223   | H, C_VAL.223    | 2.83 | 1.89 | 12.06 |
| 1HGF.PDB | O, C_CYS.97    | NE, C_ARG.224  | HE, C_ARG.224   | 2.75 | 1.89 | 23.47 |
| 1HGF.PDB | O, C_CYS.97    | NH2, C_ARG.224 | HH21, C_ARG.224 | 2.93 | 2.09 | 27.24 |
| 1HGF.PDB | O, C_VAL.223   | N, C_LEU.226   | H, C_LEU.226    | 2.93 | 1.99 | 12.10 |
| 1HGF.PDB | O, C_SER.228   | NH1, C_ARG.229 | HH11, C_ARG.229 | 2.74 | 1.82 | 20.52 |
| 1HGF.PDB | O, C_PRO.221   | NH2, C_ARG.229 | HH22, C_ARG.229 | 2.64 | 1.70 | 16.37 |
| 1HGF.PDB | O, C_PRO.99    | N, C_ILE.230   | H, C_ILE.230    | 2.97 | 2.09 | 21.38 |
| 1HGF.PDB | OD1, C_ASP.101 | OG, C_SER.231  | HG, C_SER.231   | 2.86 | 1.89 | 4.34  |
| 1HGF.PDB | O, C_ASP.101   | N, C_ILE.232   | H, C_ILE.232    | 2.92 | 1.98 | 14.28 |
| 1HGF.PDB | O, C_TRP.180   | N, C_TYR.233   | H, C_TYR.233    | 2.92 | 1.97 | 12.47 |
| 1HGF.PDB | O, C_TYR.178   | N, C_THR.235   | H, C_THR.235    | 2.83 | 1.96 | 22.49 |
| 1HGF.PDB | O, C_LYS.176   | N, C_VAL.237   | H, C_VAL.237    | 2.78 | 1.86 | 15.74 |
| 1HGF.PDB | OE1, B_GLU.72  | NZ, C_LYS.238  | HZ2, C_LYS.238  | 2.75 | 1.78 | 18.48 |
| 1HGF.PDB | O, B_SER.71    | NZ, C_LYS.238  | HZ3, C_LYS.238  | 2.61 | 1.62 | 12.67 |
| 1HGF.PDB | O, C_ASN.170   | N, C_GLY.240   | H, C_GLY.240    | 2.91 | 2.11 | 29.28 |
| 1HGF.PDB | O, C_LYS.238   | N, C_ASP.241   | H, C_ASP.241    | 2.98 | 2.06 | 15.29 |
| 1HGF.PDB | O, C_MET.168   | N, C_LEU.243   | H, C_LEU.243    | 2.96 | 1.99 | 7.32  |
| 1HGF.PDB | O, C_SER.205   | N, C_VAL.244   | H, C_VAL.244    | 2.94 | 1.99 | 13.35 |
| 1HGF.PDB | O, C_VAL.166   | N, C_ILE.245   | H, C_ILE.245    | 2.97 | 2.05 | 16.82 |

|          |                |                |                 |      |      |       |
|----------|----------------|----------------|-----------------|------|------|-------|
| 1HGF.PDB | O, C_THR_203   | N, C_ASN_246   | H, C_ASN_246    | 2.92 | 1.97 | 10.97 |
| 1HGF.PDB | OD1, C_ASN_165 | ND2, C_ASN_246 | HD21, C_ASN_246 | 2.93 | 2.04 | 21.38 |
| 1HGF.PDB | O, C_LEU_164   | N, C_SER_247   | H, C_SER_247    | 2.93 | 2.02 | 18.68 |
| 1HGF.PDB | OG, C_SER_247  | N, C_GLY_249   | H, C_GLY_249    | 2.99 | 2.02 | 6.95  |
| 1HGF.PDB | O, C_HIS_183   | ND2, C_ASN_250 | HD21, C_ASN_250 | 2.81 | 1.85 | 7.16  |
| 1HGF.PDB | OE1, C_GLN_191 | ND2, C_ASN_250 | HD22, C_ASN_250 | 2.84 | 1.89 | 10.62 |
| 1HGF.PDB | O, C_ASN_152   | N, C_ALA_253   | H, C_ALA_253    | 2.97 | 2.05 | 17.09 |
| 1HGF.PDB | OD1, C_ASN_133 | NH2, C_ARG_255 | HH22, C_ARG_255 | 2.47 | 1.67 | 28.90 |
| 1HGF.PDB | O, C_ILE_121   | N, C_TYR_257   | H, C_TYR_257    | 2.98 | 2.13 | 24.91 |
| 1HGF.PDB | O, C_LEU_177   | N, C_PHE_258   | H, C_PHE_258    | 3.00 | 2.02 | 5.00  |
| 1HGF.PDB | OE1, C_GLU_119 | NH2, C_ARG_261 | HH22, C_ARG_261 | 2.72 | 1.88 | 28.14 |
| 1HGF.PDB | O, C_PHE_87    | N, C_MET_268   | H, C_MET_268    | 2.91 | 1.98 | 16.01 |
| 1HGF.PDB | OG, C_SER_270  | N, C_ALA_272   | H, C_ALA_272    | 2.93 | 2.02 | 16.95 |
| 1HGF.PDB | O, C_ILE_51    | N, C_ASP_275   | H, C_ASP_275    | 2.92 | 2.05 | 22.55 |
| 1HGF.PDB | OD1, C_ASP_275 | N, C_THR_276   | H, C_THR_276    | 2.75 | 1.92 | 25.58 |
| 1HGF.PDB | O, C_ASN_54    | N, C_SER_279   | H, C_SER_279    | 2.77 | 1.83 | 12.02 |
| 1HGF.PDB | O, C_TYR_302   | N, C_ILE_282   | H, C_ILE_282    | 2.94 | 1.96 | 4.09  |
| 1HGF.PDB | O, C_THR_283   | N, C_GLY_286   | H, C_GLY_286    | 2.80 | 1.85 | 9.72  |
| 1HGF.PDB | O, C_LYS_50    | N, C_SER_287   | H, C_SER_287    | 2.77 | 1.82 | 8.64  |
| 1HGF.PDB | O, C_ALA_304   | ND2, C_ASN_290 | HD21, C_ASN_290 | 2.81 | 1.90 | 17.53 |
| 1HGF.PDB | OE1, C_GLN_44  | NZ, C_LYS_292  | HZ1, C_LYS_292  | 2.89 | 1.84 | 2.00  |
| 1HGF.PDB | OD1, C_ASP_291 | NZ, C_LYS_292  | HZ2, C_LYS_292  | 2.88 | 1.85 | 8.89  |
| 1HGF.PDB | O, C_LYS_307   | N, C_GLN_295   | H, C_GLN_295    | 2.79 | 1.95 | 25.63 |
| 1HGF.PDB | O, C_ASN_298   | NE2, C_GLN_295 | HE22, C_GLN_295 | 2.74 | 1.82 | 15.41 |
| 1HGF.PDB | O, C_GLN_44    | N, C_ASN_296   | H, C_ASN_296    | 2.86 | 1.91 | 11.96 |
| 1HGF.PDB | OD1, C_ASN_298 | N, C_ILE_300   | H, C_ILE_300    | 2.86 | 2.02 | 25.28 |
| 1HGF.PDB | O, C_ILE_282   | N, C_TYR_302   | H, C_TYR_302    | 2.79 | 1.95 | 25.47 |
| 1HGF.PDB | O, D_LYS_62    | N, C_GLY_303   | H, C_GLY_303    | 2.91 | 1.95 | 8.09  |
| 1HGF.PDB | O, C_GLN_295   | N, C_VAL_309   | H, C_VAL_309    | 2.90 | 2.02 | 21.20 |
| 1HGF.PDB | OG, D_SER_93   | N, C_LYS_310   | H, C_LYS_310    | 2.89 | 1.98 | 17.69 |
| 1HGF.PDB | OE1, C_GLU_41  | OG1, C_THR_313 | HG1, C_THR_313  | 2.66 | 1.87 | 29.10 |
| 1HGF.PDB | OE2, C_GLU_41  | N, C_LEU_314   | H, C_LEU_314    | 2.78 | 1.84 | 12.61 |
| 1HGF.PDB | OG1, C_THR_313 | NZ, C_LYS_315  | HZ2, C_LYS_315  | 2.92 | 1.98 | 21.54 |
| 1HGF.PDB | O, C_THR_40    | N, C_LEU_316   | H, C_LEU_316    | 2.78 | 1.85 | 14.66 |
| 1HGF.PDB | OD1, D_ASN_104 | N, C_ALA_317   | H, C_ALA_317    | 2.78 | 1.83 | 11.25 |
| 1HGF.PDB | O, C_ASN_38    | N, C_THR_318   | H, C_THR_318    | 2.88 | 1.93 | 11.29 |
| 1HGF.PDB | OE2, C_GLU_35  | ND2, C_ASN_322 | HD21, C_ASN_322 | 2.77 | 1.93 | 25.57 |
| 1HGF.PDB | O, C_VAL_20    | ND2, C_ASN_322 | HD22, C_ASN_322 | 2.97 | 2.05 | 15.45 |
| 1HGF.PDB | OXT, C_THR_328 | NE2, C_GLN_327 | HE21, C_GLN_327 | 2.93 | 2.09 | 26.28 |
| 1HGF.PDB | OD2, D_ASP_112 | N, D_GLY_1     | H1, D_GLY_1     | 2.88 | 1.90 | 17.37 |
| 1HGF.PDB | OD1, D_ASP_109 | N, D_LEU_2     | H, D_LEU_2      | 2.92 | 2.02 | 20.08 |
| 1HGF.PDB | O, D_GLY_4     | N, D_PHE_9     | H, D_PHE_9      | 2.80 | 1.88 | 16.46 |
| 1HGF.PDB | O, D_GLY_13    | ND2, D_ASN_12  | HD21, D_ASN_12  | 2.79 | 1.92 | 22.00 |
| 1HGF.PDB | O, C_VAL_323   | N, D_GLY_13    | H, D_GLY_13     | 2.72 | 1.85 | 21.39 |
| 1HGF.PDB | O, C_HIS_17    | N, D_TRP_14    | H, D_TRP_14     | 2.87 | 1.96 | 16.75 |
| 1HGF.PDB | OG1, D_THR_41  | N, D_TRP_21    | H, D_TRP_21     | 2.91 | 2.00 | 17.91 |
| 1HGF.PDB | O, D_ALA_35    | N, D_PHE_24    | H, D_PHE_24     | 2.85 | 1.87 | 3.45  |
| 1HGF.PDB | O, C_CYS_14    | N, D_ARG_25    | H, D_ARG_25     | 2.90 | 1.93 | 7.59  |
| 1HGF.PDB | OE1, D_GLN_34  | NE, D_ARG_25   | HE, D_ARG_25    | 2.69 | 1.78 | 17.17 |
| 1HGF.PDB | O, D_GLY_33    | N, D_HIS_26    | H, D_HIS_26     | 2.88 | 2.02 | 23.62 |
| 1HGF.PDB | O, C_THR_12    | N, D_GLN_27    | H, D_GLN_27     | 2.86 | 1.94 | 17.23 |
| 1HGF.PDB | O, D_GLY_31    | N, D_ASN_28    | H, D_ASN_28     | 2.96 | 1.98 | 6.01  |
| 1HGF.PDB | OD1, D_ASN_146 | ND2, D_ASN_28  | HD22, D_ASN_28  | 2.89 | 1.97 | 17.31 |
| 1HGF.PDB | O, D_ASN_28    | N, D_GLY_31    | H, D_GLY_31     | 2.88 | 1.99 | 19.79 |
| 1HGF.PDB | O, D_HIS_26    | N, D_GLY_33    | H, D_GLY_33     | 2.97 | 2.16 | 28.69 |
| 1HGF.PDB | O, D_PHE_24    | N, D_ALA_35    | H, D_ALA_35     | 2.78 | 1.98 | 29.25 |
| 1HGF.PDB | O, D_TYR_22    | N, D_ASP_37    | H, D_ASP_37     | 2.72 | 1.76 | 4.61  |
| 1HGF.PDB | OD2, D_ASP_37  | N, D_SER_40    | H, D_SER_40     | 2.90 | 1.92 | 1.16  |

|          |                |                |                 |      |      |       |
|----------|----------------|----------------|-----------------|------|------|-------|
| 1HGF.PDB | OD2, D_ASP_37  | OG, D_SER_40   | HG, D_SER_40    | 2.85 | 1.95 | 18.29 |
| 1HGF.PDB | O, D_ASP_37    | OG1, D_THR_41  | HG1, D_THR_41   | 2.68 | 1.81 | 21.66 |
| 1HGF.PDB | O, D_LEU_38    | N, D_GLN_42    | H, D_GLN_42     | 2.88 | 1.96 | 16.52 |
| 1HGF.PDB | OD1, D_ASP_46  | NE2, D_GLN_42  | HE21, D_GLN_42  | 2.85 | 1.97 | 22.40 |
| 1HGF.PDB | O, D_LYS_39    | N, D_ALA_43    | H, D_ALA_43     | 2.92 | 1.96 | 7.79  |
| 1HGF.PDB | O, D_SER_40    | N, D_ALA_44    | H, D_ALA_44     | 2.95 | 1.98 | 3.84  |
| 1HGF.PDB | O, D_GLN_42    | N, D_ASP_46    | H, D_ASP_46     | 2.80 | 1.83 | 2.08  |
| 1HGF.PDB | O, D_ALA_43    | NE2, D_GLN_47  | HE21, D_GLN_47  | 2.88 | 1.93 | 11.54 |
| 1HGF.PDB | O, D_ILE_45    | N, D_ASN_49    | H, D_ASN_49     | 2.91 | 1.99 | 16.85 |
| 1HGF.PDB | O, D_ASP_46    | N, D_GLY_50    | H, D_GLY_50     | 2.87 | 1.93 | 13.85 |
| 1HGF.PDB | O, D_GLN_47    | N, D_LYS_51    | H, D_LYS_51     | 2.95 | 1.98 | 9.03  |
| 1HGF.PDB | OE1, D_GLU_103 | NZ, D_LYS_51   | HZ1, D_LYS_51   | 2.74 | 1.71 | 5.53  |
| 1HGF.PDB | ND1, D_HIS_106 | NZ, D_LYS_51   | HZ3, D_LYS_51   | 2.69 | 1.73 | 17.89 |
| 1HGF.PDB | O, D_ILE_48    | N, D_LEU_52    | H, D_LEU_52     | 2.91 | 2.04 | 22.13 |
| 1HGF.PDB | O, D_ASN_49    | N, D_ASN_53    | H, D_ASN_53     | 2.86 | 1.92 | 13.32 |
| 1HGF.PDB | O, A_THR_28    | NE, D_ARG_54   | HE, D_ARG_54    | 2.88 | 1.90 | 8.46  |
| 1HGF.PDB | OE2, B_GLU_97  | NH2, D_ARG_54  | HH22, D_ARG_54  | 2.84 | 1.86 | 12.74 |
| 1HGF.PDB | OD2, B_ASP_86  | NZ, D_LYS_62   | HZ2, D_LYS_62   | 2.69 | 1.69 | 13.49 |
| 1HGF.PDB | OD2, B_ASP_90  | NZ, D_LYS_62   | HZ3, D_LYS_62   | 2.68 | 1.77 | 22.81 |
| 1HGF.PDB | OG, C_SER_266  | ND1, D_HIS_64  | HD1, D_HIS_64   | 2.64 | 1.83 | 27.58 |
| 1HGF.PDB | OG, C_SER_110  | NE2, D_HIS_64  | HE2, D_HIS_64   | 2.90 | 1.92 | 7.33  |
| 1HGF.PDB | O, D_PHE_63    | NE2, D_GLN_65  | HE21, D_GLN_65  | 2.97 | 2.00 | 7.06  |
| 1HGF.PDB | OE2, D_GLU_85  | NZ, D_LYS_68   | HZ1, D_LYS_68   | 2.73 | 1.78 | 19.48 |
| 1HGF.PDB | O, C_LYS_299   | NZ, D_LYS_68   | HZ2, D_LYS_68   | 2.93 | 1.89 | 4.98  |
| 1HGF.PDB | OG, E_SER_107  | N, D_ARG_76    | H, D_ARG_76     | 2.91 | 1.94 | 7.76  |
| 1HGF.PDB | OE2, F_GLU_81  | NE, D_ARG_76   | HE, D_ARG_76    | 2.82 | 1.85 | 5.34  |
| 1HGF.PDB | OE1, F_GLU_74  | NH1, D_ARG_76  | HH12, D_ARG_76  | 2.79 | 1.78 | 3.81  |
| 1HGF.PDB | OE1, F_GLU_81  | NH2, D_ARG_76  | HH21, D_ARG_76  | 2.64 | 1.68 | 12.43 |
| 1HGF.PDB | OE2, F_GLU_74  | NH2, D_ARG_76  | HH22, D_ARG_76  | 2.70 | 1.71 | 7.38  |
| 1HGF.PDB | O, D_GLY_75    | N, D_ASP_79    | H, D_ASP_79     | 2.98 | 2.03 | 12.51 |
| 1HGF.PDB | O, D_ILE_77    | N, D_GLU_81    | H, D_GLU_81     | 2.96 | 2.00 | 8.84  |
| 1HGF.PDB | O, D_GLN_78    | N, D_LYS_82    | H, D_LYS_82     | 2.96 | 2.03 | 15.61 |
| 1HGF.PDB | O, D_ASP_79    | N, D_TYR_83    | H, D_TYR_83     | 2.99 | 2.06 | 16.44 |
| 1HGF.PDB | OE1, F_GLU_85  | OH, D_TYR_83   | HH, D_TYR_83    | 2.58 | 1.80 | 29.87 |
| 1HGF.PDB | O, D_LEU_80    | N, D_VAL_84    | H, D_VAL_84     | 2.89 | 1.96 | 15.53 |
| 1HGF.PDB | O, D_LYS_82    | N, D_ASP_86    | H, D_ASP_86     | 2.88 | 1.93 | 10.60 |
| 1HGF.PDB | O, D_TYR_83    | N, D_THR_87    | H, D_THR_87     | 2.98 | 2.05 | 15.57 |
| 1HGF.PDB | O, D_VAL_84    | N, D_LYS_88    | H, D_LYS_88     | 2.92 | 2.03 | 20.52 |
| 1HGF.PDB | OH, B_TYR_83   | NZ, D_LYS_88   | HZ1, D_LYS_88   | 2.68 | 1.69 | 13.85 |
| 1HGF.PDB | O, D_GLU_85    | N, D_ILE_89    | H, D_ILE_89     | 2.92 | 1.94 | 5.05  |
| 1HGF.PDB | O, D_LYS_88    | N, D_TRP_92    | H, D_TRP_92     | 2.90 | 1.93 | 7.06  |
| 1HGF.PDB | O, D_ILE_89    | N, D_SER_93    | H, D_SER_93     | 2.93 | 2.03 | 18.97 |
| 1HGF.PDB | O, D_ILE_89    | OG, D_SER_93   | HG, D_SER_93    | 2.79 | 1.87 | 14.25 |
| 1HGF.PDB | O, D_ASP_90    | N, D_TYR_94    | H, D_TYR_94     | 2.98 | 2.09 | 20.66 |
| 1HGF.PDB | O, D_TRP_92    | N, D_ALA_96    | H, D_ALA_96     | 2.99 | 2.03 | 9.70  |
| 1HGF.PDB | O, D_TYR_94    | N, D_LEU_98    | H, D_LEU_98     | 2.90 | 1.96 | 13.51 |
| 1HGF.PDB | O, D_ASN_95    | N, D_LEU_99    | H, D_LEU_99     | 2.97 | 2.01 | 11.18 |
| 1HGF.PDB | O, D_LEU_98    | N, D_LEU_102   | H, D_LEU_102    | 2.98 | 2.02 | 11.36 |
| 1HGF.PDB | O, D_LEU_99    | N, D_GLU_103   | H, D_GLU_103    | 2.92 | 1.96 | 10.07 |
| 1HGF.PDB | O, D_VAL_100   | N, D_ASN_104   | H, D_ASN_104    | 2.84 | 1.89 | 11.66 |
| 1HGF.PDB | O, C_LYS_27    | ND2, D_ASN_104 | HD21, D_ASN_104 | 2.89 | 1.96 | 15.72 |
| 1HGF.PDB | O, D_LEU_102   | N, D_HIS_106   | H, D_HIS_106    | 2.92 | 1.97 | 11.28 |
| 1HGF.PDB | O, D_GLU_103   | N, D_THR_107   | H, D_THR_107    | 2.85 | 1.92 | 13.38 |
| 1HGF.PDB | O, D_ASN_104   | N, D_ILE_108   | H, D_ILE_108    | 2.97 | 2.03 | 13.33 |
| 1HGF.PDB | O, D_HIS_106   | N, D_LEU_110   | H, D_LEU_110    | 2.77 | 1.83 | 11.73 |
| 1HGF.PDB | O, D_ASP_109   | N, D_SER_113   | H, D_SER_113    | 2.82 | 1.90 | 15.73 |
| 1HGF.PDB | O, D_SER_113   | N, D_LYS_117   | H, D_LYS_117    | 2.74 | 1.83 | 18.58 |
| 1HGF.PDB | O, D_MET_115   | N, D_PHE_119   | H, D_PHE_119    | 2.96 | 2.01 | 11.81 |

|          |                |                |                 |      |      |       |
|----------|----------------|----------------|-----------------|------|------|-------|
| 1HGF.PDB | O, D_ASN_116   | N, D_GLU_120   | H, D_GLU_120    | 2.90 | 1.92 | 4.93  |
| 1HGF.PDB | O, D_PHE_119   | N, D_ARG_123   | H, D_ARG_123    | 3.00 | 2.03 | 9.49  |
| 1HGF.PDB | OE2, D_GLU_120 | NH1, D_ARG_123 | HH11, D_ARG_123 | 2.79 | 1.92 | 25.71 |
| 1HGF.PDB | O, D_GLU_120   | N, D_ARG_124   | H, D_ARG_124    | 2.96 | 2.04 | 16.78 |
| 1HGF.PDB | OE1, B_GLU_132 | NE, D_ARG_124  | HE, D_ARG_124   | 2.79 | 1.88 | 16.40 |
| 1HGF.PDB | OH, D_TYR_157  | ND2, D_ASN_129 | HD21, D_ASN_129 | 2.81 | 1.84 | 5.39  |
| 1HGF.PDB | O, D_HIS_159   | ND2, D_ASN_129 | HD22, D_ASN_129 | 2.94 | 2.01 | 14.46 |
| 1HGF.PDB | O, D_LYS_139   | N, D_GLU_131   | H, D_GLU_131    | 2.98 | 2.08 | 19.93 |
| 1HGF.PDB | O, D_CYS_137   | N, D_MET_133   | H, D_MET_133    | 2.92 | 1.96 | 10.87 |
| 1HGF.PDB | OD1, D_ASN_135 | N, D_CYS_137   | H, D_CYS_137    | 2.83 | 1.95 | 20.45 |
| 1HGF.PDB | O, C_LEU_13    | N, D_PHE_138   | H, D_PHE_138    | 2.75 | 1.91 | 24.76 |
| 1HGF.PDB | O, D_GLU_131   | N, D_LYS_139   | H, D_LYS_139    | 2.83 | 1.88 | 9.91  |
| 1HGF.PDB | O, C_ALA_11    | N, D_ILE_140   | H, D_ILE_140    | 2.82 | 1.90 | 15.68 |
| 1HGF.PDB | O, D_ASN_129   | N, D_TYR_141   | H, D_TYR_141    | 2.87 | 1.92 | 10.75 |
| 1HGF.PDB | OG, D_SER_29   | NZ, D_LYS_143  | HZ1, D_LYS_143  | 2.83 | 1.89 | 20.16 |
| 1HGF.PDB | OE2, D_GLU_30  | N, D_ASN_146   | H, D_ASN_146    | 2.80 | 1.88 | 14.92 |
| 1HGF.PDB | OD2, D_ASP_145 | N, D_ALA_147   | H, D_ALA_147    | 2.87 | 2.00 | 23.24 |
| 1HGF.PDB | O, D_ASP_145   | N, D_ILE_149   | H, D_ILE_149    | 2.93 | 1.97 | 10.46 |
| 1HGF.PDB | O, D_ASN_146   | N, D_GLU_150   | H, D_GLU_150    | 2.94 | 2.01 | 15.42 |
| 1HGF.PDB | O, D_ALA_147   | N, D_SER_151   | H, D_SER_151    | 2.89 | 2.02 | 22.93 |
| 1HGF.PDB | O, D_CYS_148   | OG, D_SER_151  | HG, D_SER_151   | 2.73 | 1.81 | 12.37 |
| 1HGF.PDB | O, D_GLU_150   | N, D_ASN_154   | H, D_ASN_154    | 2.87 | 1.89 | 5.22  |
| 1HGF.PDB | O, D_SER_151   | N, D_THR_156   | H, D_THR_156    | 2.79 | 1.97 | 26.84 |
| 1HGF.PDB | OD1, D_ASN_154 | OG1, D_THR_156 | HG1, D_THR_156  | 2.72 | 1.80 | 12.72 |
| 1HGF.PDB | NE2, D_HIS_142 | OH, D_TYR_157  | HH, D_TYR_157   | 2.72 | 1.85 | 19.75 |
| 1HGF.PDB | OD1, D_ASP_158 | N, D_ASP_160   | H, D_ASP_160    | 3.00 | 2.13 | 23.50 |
| 1HGF.PDB | O, D_HIS_159   | N, D_TYR_162   | H, D_TYR_162    | 2.89 | 2.08 | 29.06 |
| 1HGF.PDB | O, D_ASP_160   | N, D_ARG_163   | H, D_ARG_163    | 3.00 | 2.09 | 17.80 |
| 1HGF.PDB | O, B_ARG_170   | NH1, D_ARG_163 | HH12, D_ARG_163 | 2.84 | 1.83 | 3.71  |
| 1HGF.PDB | OE1, B_GLU_131 | NH2, D_ARG_163 | HH21, D_ARG_163 | 2.70 | 1.83 | 24.43 |
| 1HGF.PDB | O, D_TYR_162   | N, D_ALA_166   | H, D_ALA_166    | 2.86 | 1.89 | 3.57  |
| 1HGF.PDB | O, D_ARG_163   | N, D_LEU_167   | H, D_LEU_167    | 2.79 | 1.83 | 4.62  |
| 1HGF.PDB | O, D_GLU_165   | ND2, D_ASN_169 | HD21, D_ASN_169 | 2.97 | 2.03 | 11.99 |
| 1HGF.PDB | O, D_ALA_166   | N, D_ARG_170   | H, D_ARG_170    | 2.84 | 1.97 | 21.75 |
| 1HGF.PDB | O, D_GLU_128   | NE, D_ARG_170  | HE, D_ARG_170   | 2.76 | 1.87 | 20.27 |
| 1HGF.PDB | OE2, D_GLU_131 | NH1, D_ARG_170 | HH11, D_ARG_170 | 2.84 | 1.84 | 5.29  |
| 1HGF.PDB | O, D_LEU_167   | N, D_PHE_171   | H, D_PHE_171    | 2.90 | 1.96 | 12.84 |
| 1HGF.PDB | O, F_ILE_140   | N, E_ALA_11    | H, E_ALA_11     | 2.95 | 2.06 | 20.63 |
| 1HGF.PDB | O, F_GLN_27    | N, E_THR_12    | H, E_THR_12     | 2.87 | 1.93 | 12.24 |
| 1HGF.PDB | O, F_PHE_138   | N, E_LEU_13    | H, E_LEU_13     | 2.96 | 1.99 | 8.43  |
| 1HGF.PDB | O, F_ARG_25    | N, E_CYS_14    | H, E_CYS_14     | 2.65 | 1.83 | 26.13 |
| 1HGF.PDB | O, F_GLY_136   | N, E_LEU_15    | H, E_LEU_15     | 2.91 | 1.93 | 3.45  |
| 1HGF.PDB | O, F_GLY_23    | N, E_GLY_16    | H, E_GLY_16     | 2.94 | 2.06 | 22.45 |
| 1HGF.PDB | O, E_HIS_18    | ND1, E_HIS_17  | HD1, E_HIS_17   | 2.99 | 2.14 | 25.53 |
| 1HGF.PDB | O, F_TRP_21    | N, E_HIS_18    | H, E_HIS_18     | 2.91 | 2.00 | 17.81 |
| 1HGF.PDB | OD1, E_ASN_322 | N, E_VAL_20    | H, E_VAL_20     | 2.80 | 1.82 | 2.55  |
| 1HGF.PDB | O, E_VAL_36    | N, E_THR_24    | H, E_THR_24     | 2.87 | 1.98 | 19.96 |
| 1HGF.PDB | O, E_ILE_34    | N, E_VAL_26    | H, E_VAL_26     | 2.89 | 1.93 | 10.60 |
| 1HGF.PDB | OE2, F_GLU_97  | NZ, E_LYS_27   | HZ1, E_LYS_27   | 2.75 | 1.83 | 22.30 |
| 1HGF.PDB | O, E_VAL_26    | N, E_ILE_34    | H, E_ILE_34     | 2.94 | 1.98 | 10.18 |
| 1HGF.PDB | O, E_THR_24    | N, E_VAL_36    | H, E_VAL_36     | 2.81 | 1.85 | 7.38  |
| 1HGF.PDB | O, E_MET_320   | N, E_THR_37    | H, E_THR_37     | 2.91 | 1.94 | 5.79  |
| 1HGF.PDB | O, E_LEU_316   | N, E_THR_40    | H, E_THR_40     | 2.78 | 1.86 | 16.07 |
| 1HGF.PDB | O, E_LEU_314   | N, E_LEU_42    | H, E_LEU_42     | 2.78 | 1.90 | 19.77 |
| 1HGF.PDB | O, E_PHE_294   | N, E_GLN_44    | H, E_GLN_44     | 2.96 | 1.98 | 3.65  |
| 1HGF.PDB | O, E_SER_46    | NE2, E_GLN_44  | HE21, E_GLN_44  | 2.83 | 1.95 | 21.77 |
| 1HGF.PDB | O, E_ASN_285   | OG, E_SER_47   | HG, E_SER_47    | 2.86 | 1.95 | 16.70 |
| 1HGF.PDB | OD2, E_ASP_275 | NZ, E_LYS_50   | HZ2, E_LYS_50   | 2.90 | 1.90 | 14.56 |



|          |                |                |                 |      |      |       |
|----------|----------------|----------------|-----------------|------|------|-------|
| 1HGF.PDB | O, E_PRO_273   | N, E_ILE_51    | H, E_ILE_51     | 2.76 | 1.81 | 9.83  |
| 1HGF.PDB | O, E_ASP_275   | N, E_ASN_53    | H, E_ASN_53     | 2.89 | 1.97 | 17.56 |
| 1HGF.PDB | OD2, E_ASP_85  | N, E_ARG_57    | H, E_ARG_57     | 2.93 | 1.98 | 11.47 |
| 1HGF.PDB | O, E_THR_83    | NE, E_ARG_57   | HE, E_ARG_57    | 2.82 | 1.86 | 10.06 |
| 1HGF.PDB | O, E_LEU_86    | N, E_LEU_59    | H, E_LEU_59     | 2.87 | 1.91 | 9.41  |
| 1HGF.PDB | OD1, E_ASP_60  | N, E_ILE_62    | H, E_ILE_62     | 2.91 | 1.96 | 11.31 |
| 1HGF.PDB | O, E_GLY_61    | N, E_CYS_64    | H, E_CYS_64     | 2.88 | 1.96 | 16.75 |
| 1HGF.PDB | O, E_THR_65    | N, E_ALA_69    | H, E_ALA_69     | 3.00 | 2.07 | 14.88 |
| 1HGF.PDB | O, E_LEU_66    | N, E_LEU_70    | H, E_LEU_70     | 2.82 | 1.89 | 15.13 |
| 1HGF.PDB | O, E_ILE_67    | N, E_LEU_71    | H, E_LEU_71     | 2.91 | 1.95 | 6.47  |
| 1HGF.PDB | O, E_ASP_68    | N, E_GLY_72    | H, E_GLY_72     | 2.87 | 1.99 | 21.64 |
| 1HGF.PDB | OD1, E_ASP_73  | ND1, E_HIS_75  | HD1, E_HIS_75   | 2.85 | 1.91 | 12.17 |
| 1HGF.PDB | O, E_ASP_63    | NE2, E_HIS_75  | HE2, E_HIS_75   | 2.89 | 1.94 | 12.08 |
| 1HGF.PDB | O, E_ASP_73    | N, E_CYS_76    | H, E_CYS_76     | 2.81 | 1.88 | 15.29 |
| 1HGF.PDB | O, E_PRO_74    | N, E_ASP_77    | H, E_ASP_77     | 2.90 | 1.94 | 7.27  |
| 1HGF.PDB | O, E_CYS_76    | N, E_PHE_79    | H, E_PHE_79     | 2.95 | 1.97 | 5.01  |
| 1HGF.PDB | O, E_ARG_57    | N, E_ASP_85    | H, E_ASP_85     | 2.81 | 1.92 | 19.34 |
| 1HGF.PDB | O, E_MET_268   | N, E_GLU_89    | H, E_GLU_89     | 2.79 | 1.84 | 8.93  |
| 1HGF.PDB | OD1, E_ASP_60  | NE, E_ARG_90   | HE, E_ARG_90    | 2.80 | 1.85 | 10.51 |
| 1HGF.PDB | O, E_SER_270   | NH1, E_ARG_90  | HH11, E_ARG_90  | 2.63 | 1.77 | 25.28 |
| 1HGF.PDB | O, E_ALA_272   | NH1, E_ARG_90  | HH12, E_ARG_90  | 2.66 | 1.73 | 17.47 |
| 1HGF.PDB | OD2, E_ASP_60  | NH2, E_ARG_90  | HH21, E_ARG_90  | 2.88 | 1.89 | 10.22 |
| 1HGF.PDB | OD1, E_ASP_271 | N, E_SER_91    | H, E_SER_91     | 2.94 | 1.98 | 11.41 |
| 1HGF.PDB | OD2, E_ASP_73  | N, E_ASN_96    | H, E_ASN_96     | 2.93 | 1.99 | 16.05 |
| 1HGF.PDB | OD2, E_ASP_104 | OG, E_SER_107  | HG, E_SER_107   | 2.88 | 1.94 | 12.45 |
| 1HGF.PDB | O, E_TYR_105   | N, E_ARG_109   | H, E_ARG_109    | 2.91 | 1.93 | 1.03  |
| 1HGF.PDB | OE2, E_GLU_67  | NH2, E_ARG_109 | HH21, E_ARG_109 | 2.88 | 1.88 | 11.28 |
| 1HGF.PDB | OD2, E_ASP_79  | OG, E_SER_110  | HG, E_SER_110   | 2.78 | 1.90 | 21.69 |
| 1HGF.PDB | O, E_SER_107   | N, E_LEU_111   | H, E_LEU_111    | 2.99 | 2.02 | 8.11  |
| 1HGF.PDB | O, E_ARG_109   | N, E_ALA_113   | H, E_ALA_113    | 2.91 | 2.02 | 19.90 |
| 1HGF.PDB | O, E_SER_110   | N, E_SER_114   | H, E_SER_114    | 2.94 | 2.02 | 16.55 |
| 1HGF.PDB | OE2, E_GLU_119 | OG1, E_THR_117 | HG1, E_THR_117  | 2.96 | 1.99 | 6.08  |
| 1HGF.PDB | O, E_TYR_257   | N, E_ILE_121   | H, E_ILE_121    | 2.83 | 1.86 | 2.31  |
| 1HGF.PDB | O, E_ARG_255   | N, E_GLU_123   | H, E_GLU_123    | 2.87 | 1.92 | 11.49 |
| 1HGF.PDB | O, E_GLU_123   | N, E_PHE_125   | H, E_PHE_125    | 2.96 | 2.16 | 29.94 |
| 1HGF.PDB | O, E_THR_155   | N, E_THR_131   | H, E_THR_131    | 2.77 | 1.83 | 12.18 |
| 1HGF.PDB | ND2, E_ASN_152 | NE2, E_GLN_132 | HE21, E_GLN_132 | 2.95 | 2.01 | 11.55 |
| 1HGF.PDB | OD1, E_ASN_152 | N, E_ASN_133   | H, E_ASN_133    | 2.94 | 1.99 | 11.33 |
| 1HGF.PDB | O, E_TRP_153   | N, E_GLY_134   | H, E_GLY_134    | 2.99 | 2.07 | 16.55 |
| 1HGF.PDB | O, E_GLY_146   | N, E_SER_136   | H, E_SER_136    | 2.71 | 1.82 | 20.23 |
| 1HGF.PDB | OD2, E_ASP_77  | NE, E_ARG_141  | HE, E_ARG_141   | 2.92 | 2.06 | 25.46 |
| 1HGF.PDB | O, E_PHE_147   | NH1, E_ARG_141 | HH12, E_ARG_141 | 2.60 | 1.67 | 17.74 |
| 1HGF.PDB | OD1, E_ASP_77  | NH2, E_ARG_141 | HH21, E_ARG_141 | 2.83 | 1.96 | 25.41 |
| 1HGF.PDB | OD2, E_ASP_77  | NH2, E_ARG_141 | HH21, E_ARG_141 | 2.77 | 1.86 | 21.24 |
| 1HGF.PDB | O, E_SER_136   | N, E_GLY_146   | H, E_GLY_146    | 2.98 | 2.12 | 24.01 |
| 1HGF.PDB | O, E_GLY_72    | N, E_SER_149   | H, E_SER_149    | 2.88 | 1.98 | 19.21 |
| 1HGF.PDB | O, E_ALA_253   | N, E_ASN_152   | H, E_ASN_152    | 2.87 | 1.95 | 17.97 |
| 1HGF.PDB | OH, E_TYR_195  | NE1, E_TRP_153 | HE1, E_TRP_153  | 2.83 | 1.89 | 12.15 |
| 1HGF.PDB | O, E_LEU_194   | N, E_LYS_156   | H, E_LYS_156    | 2.87 | 1.98 | 19.42 |
| 1HGF.PDB | O, E_THR_160   | N, E_SER_157   | H, E_SER_157    | 2.99 | 2.11 | 21.85 |
| 1HGF.PDB | O, E_SER_247   | N, E_LEU_164   | H, E_LEU_164    | 2.72 | 1.84 | 21.47 |
| 1HGF.PDB | O, E_ILE_245   | N, E_VAL_166   | H, E_VAL_166    | 2.90 | 1.96 | 13.03 |
| 1HGF.PDB | O, E_ASP_241   | N, E_ASN_170   | H, E_ASN_170    | 2.87 | 1.90 | 4.85  |
| 1HGF.PDB | O, E_PHE_174   | ND2, E_ASN_170 | HD22, E_ASN_170 | 2.77 | 1.82 | 9.34  |
| 1HGF.PDB | O, E_VAL_237   | N, E_LYS_176   | H, E_LYS_176    | 2.92 | 1.99 | 15.75 |
| 1HGF.PDB | OE2, E_GLU_123 | NZ, E_LYS_176  | HZ1, E_LYS_176  | 2.76 | 1.80 | 18.44 |
| 1HGF.PDB | O, E_THR_235   | N, E_TYR_178   | H, E_TYR_178    | 2.83 | 1.85 | 2.97  |
| 1HGF.PDB | OE1, E_GLU_123 | OH, E_TYR_178  | HH, E_TYR_178   | 2.88 | 1.93 | 11.71 |

|          |                |                |                 |      |      |       |
|----------|----------------|----------------|-----------------|------|------|-------|
| 1HGF.PDB | OG1, E_THR_235 | NE1, E_TRP_180 | HE1, E_TRP_180  | 2.85 | 1.87 | 2.94  |
| 1HGF.PDB | O, E_ASN_250   | N, E_HIS_183   | H, E_HIS_183    | 2.80 | 1.96 | 25.59 |
| 1HGF.PDB | OH, E_TYR_98   | NE2, E_HIS_183 | HE2, E_HIS_183  | 2.91 | 1.99 | 15.99 |
| 1HGF.PDB | O, E_ARG_229   | N, E_HIS_184   | H, E_HIS_184    | 2.88 | 1.94 | 13.07 |
| 1HGF.PDB | OG, E_SER_231  | NE2, E_HIS_184 | HE2, E_HIS_184  | 2.70 | 1.89 | 28.56 |
| 1HGF.PDB | OD1, E_ASN_250 | NE2, E_GLN_191 | HE22, E_GLN_191 | 2.96 | 1.99 | 7.90  |
| 1HGF.PDB | O, E_ASN_188   | N, E_THR_192   | H, E_THR_192    | 2.94 | 2.01 | 14.37 |
| 1HGF.PDB | O, E_GLN_189   | N, E_SER_193   | H, E_SER_193    | 2.83 | 1.90 | 13.82 |
| 1HGF.PDB | O, E_GLU_190   | N, E_LEU_194   | H, E_LEU_194    | 2.94 | 1.99 | 12.89 |
| 1HGF.PDB | O, E_GLN_191   | N, E_TYR_195   | H, E_TYR_195    | 2.77 | 1.83 | 10.66 |
| 1HGF.PDB | O, E_ASN_248   | NE2, E_GLN_197 | HE21, E_GLN_197 | 2.89 | 2.01 | 21.02 |
| 1HGF.PDB | O, E_TYR_161   | NE2, E_GLN_197 | HE22, E_GLN_197 | 2.98 | 2.02 | 7.72  |
| 1HGF.PDB | O, E_ASN_246   | N, E_THR_203   | H, E_THR_203    | 2.97 | 2.01 | 9.92  |
| 1HGF.PDB | OG1, E_THR_212 | OG1, E_THR_203 | HG1, E_THR_203  | 2.89 | 1.95 | 9.70  |
| 1HGF.PDB | O, E_GLN_211   | N, E_VAL_204   | H, E_VAL_204    | 2.94 | 2.02 | 15.91 |
| 1HGF.PDB | OD1, E_ASP_241 | N, E_ARG_207   | H, E_ARG_207    | 2.90 | 1.94 | 9.22  |
| 1HGF.PDB | O, E_VAL_204   | N, E_GLN_211   | H, E_GLN_211    | 2.86 | 1.97 | 20.41 |
| 1HGF.PDB | O, E_VAL_202   | N, E_ILE_213   | H, E_ILE_213    | 2.88 | 1.97 | 17.74 |
| 1HGF.PDB | ND1, E_HIS_184 | N, E_ASN_216   | H, E_ASN_216    | 2.74 | 1.89 | 23.44 |
| 1HGF.PDB | O, E_ASN_216   | NH1, E_ARG_220 | HH12, E_ARG_220 | 2.97 | 2.15 | 29.37 |
| 1HGF.PDB | OE1, A_GLN_210 | NH2, E_ARG_220 | HH21, E_ARG_220 | 2.65 | 1.79 | 25.97 |
| 1HGF.PDB | O, E_ASN_216   | NH2, E_ARG_220 | HH22, E_ARG_220 | 2.76 | 1.86 | 21.47 |
| 1HGF.PDB | O, E_LEU_226   | N, E_VAL_223   | H, E_VAL_223    | 2.85 | 1.89 | 8.19  |
| 1HGF.PDB | O, E_CYS_97    | NE, E_ARG_224  | HE, E_ARG_224   | 2.78 | 1.93 | 24.07 |
| 1HGF.PDB | O, E_CYS_97    | NH2, E_ARG_224 | HH21, E_ARG_224 | 2.92 | 2.07 | 26.92 |
| 1HGF.PDB | O, E_VAL_223   | N, E_LEU_226   | H, E_LEU_226    | 2.92 | 1.97 | 10.75 |
| 1HGF.PDB | O, E_SER_228   | NH1, E_ARG_229 | HH11, E_ARG_229 | 2.73 | 1.81 | 20.22 |
| 1HGF.PDB | O, E_PRO_221   | NH2, E_ARG_229 | HH22, E_ARG_229 | 2.63 | 1.68 | 15.58 |
| 1HGF.PDB | O, E_PRO_99    | N, E_ILE_230   | H, E_ILE_230    | 2.96 | 2.12 | 25.49 |
| 1HGF.PDB | OD1, E_ASP_101 | OG, E_SER_231  | HG, E_SER_231   | 2.82 | 1.90 | 15.36 |
| 1HGF.PDB | O, E_ASP_101   | N, E_ILE_232   | H, E_ILE_232    | 2.91 | 1.98 | 14.67 |
| 1HGF.PDB | O, E_TRP_180   | N, E_TYR_233   | H, E_TYR_233    | 2.95 | 1.99 | 9.60  |
| 1HGF.PDB | O, E_TYR_178   | N, E_THR_235   | H, E_THR_235    | 2.86 | 1.98 | 21.39 |
| 1HGF.PDB | O, E_LYS_176   | N, E_VAL_237   | H, E_VAL_237    | 2.79 | 1.87 | 16.02 |
| 1HGF.PDB | OE1, D_GLU_72  | NZ, E_LYS_238  | HZ2, E_LYS_238  | 2.83 | 1.84 | 16.42 |
| 1HGF.PDB | O, D_SER_71    | NZ, E_LYS_238  | HZ3, E_LYS_238  | 2.74 | 1.75 | 13.85 |
| 1HGF.PDB | O, E_ASN_170   | N, E_GLY_240   | H, E_GLY_240    | 2.92 | 2.12 | 29.34 |
| 1HGF.PDB | O, E_LYS_238   | N, E_ASP_241   | H, E_ASP_241    | 2.98 | 2.04 | 13.06 |
| 1HGF.PDB | OD1, E_ASP_241 | N, E_VAL_242   | H, E_VAL_242    | 2.72 | 1.93 | 29.38 |
| 1HGF.PDB | O, E_MET_168   | N, E_LEU_243   | H, E_LEU_243    | 2.94 | 1.97 | 6.95  |
| 1HGF.PDB | O, E_SER_205   | N, E_VAL_244   | H, E_VAL_244    | 2.94 | 1.98 | 11.07 |
| 1HGF.PDB | O, E_VAL_166   | N, E_ILE_245   | H, E_ILE_245    | 2.96 | 2.03 | 15.13 |
| 1HGF.PDB | O, E_THR_203   | N, E_ASN_246   | H, E_ASN_246    | 2.93 | 1.96 | 7.07  |
| 1HGF.PDB | OD1, E_ASN_165 | ND2, E_ASN_246 | HD21, E_ASN_246 | 2.93 | 2.02 | 19.67 |
| 1HGF.PDB | O, E_LEU_164   | N, E_SER_247   | H, E_SER_247    | 2.91 | 2.00 | 17.82 |
| 1HGF.PDB | O, E_ARG_201   | OG, E_SER_247  | HG, E_SER_247   | 2.77 | 1.98 | 29.79 |
| 1HGF.PDB | OG, E_SER_247  | N, E_GLY_249   | H, E_GLY_249    | 3.00 | 2.01 | 1.54  |
| 1HGF.PDB | O, E_HIS_183   | ND2, E_ASN_250 | HD21, E_ASN_250 | 2.78 | 1.81 | 7.40  |
| 1HGF.PDB | OE1, E_GLN_191 | ND2, E_ASN_250 | HD22, E_ASN_250 | 2.87 | 1.91 | 8.14  |
| 1HGF.PDB | O, E_ASN_152   | N, E_ALA_253   | H, E_ALA_253    | 2.95 | 2.04 | 17.49 |
| 1HGF.PDB | OD1, E_ASN_133 | NH2, E_ARG_255 | HH22, E_ARG_255 | 2.47 | 1.67 | 29.09 |
| 1HGF.PDB | O, E_ILE_121   | N, E_TYR_257   | H, E_TYR_257    | 2.99 | 2.17 | 27.08 |
| 1HGF.PDB | O, E_LEU_177   | N, E_PHE_258   | H, E_PHE_258    | 2.97 | 1.99 | 6.56  |
| 1HGF.PDB | OE1, E_GLU_119 | NH2, E_ARG_261 | HH22, E_ARG_261 | 2.73 | 1.89 | 28.16 |
| 1HGF.PDB | O, E_PHE_87    | N, E_MET_268   | H, E_MET_268    | 2.88 | 1.97 | 18.30 |
| 1HGF.PDB | O, E_PRO_284   | OG, E_SER_270  | HG, E_SER_270   | 2.78 | 1.84 | 9.58  |
| 1HGF.PDB | OG, E_SER_270  | N, E_ALA_272   | H, E_ALA_272    | 2.96 | 2.02 | 14.55 |
| 1HGF.PDB | O, E_ILE_51    | N, E_ASP_275   | H, E_ASP_275    | 2.91 | 2.03 | 21.67 |

|          |                |                |                 |      |      |       |
|----------|----------------|----------------|-----------------|------|------|-------|
| 1HGF.PDB | OD1, E_ASP_275 | N, E_THR_276   | H, E_THR_276    | 2.76 | 1.89 | 22.50 |
| 1HGF.PDB | O, E_ASN_54    | N, E_SER_279   | H, E_SER_279    | 2.78 | 1.83 | 11.19 |
| 1HGF.PDB | O, E_TYR_302   | N, E_ILE_282   | H, E_ILE_282    | 2.94 | 1.96 | 6.32  |
| 1HGF.PDB | O, E_THR_283   | N, E_GLY_286   | H, E_GLY_286    | 2.80 | 1.84 | 8.27  |
| 1HGF.PDB | O, E_LYS_50    | N, E_SER_287   | H, E_SER_287    | 2.79 | 1.82 | 5.70  |
| 1HGF.PDB | O, E_ALA_304   | ND2, E_ASN_290 | HD21, E_ASN_290 | 2.83 | 1.91 | 16.09 |
| 1HGF.PDB | OE1, E_GLN_44  | NZ, E_LYS_292  | HZ1, E_LYS_292  | 2.90 | 1.86 | 1.40  |
| 1HGF.PDB | OD1, E_ASP_291 | NZ, E_LYS_292  | HZ2, E_LYS_292  | 2.87 | 1.84 | 9.03  |
| 1HGF.PDB | O, E_LYS_307   | N, E_GLN_295   | H, E_GLN_295    | 2.82 | 1.98 | 25.22 |
| 1HGF.PDB | O, E_ASN_298   | NE2, E_GLN_295 | HE22, E_GLN_295 | 2.75 | 1.83 | 15.52 |
| 1HGF.PDB | O, E_GLN_44    | N, E_ASN_296   | H, E_ASN_296    | 2.89 | 1.94 | 10.75 |
| 1HGF.PDB | OD1, E_ASN_298 | N, E_ILE_300   | H, E_ILE_300    | 2.86 | 1.98 | 21.35 |
| 1HGF.PDB | O, E_ILE_282   | N, E_TYR_302   | H, E_TYR_302    | 2.78 | 1.95 | 26.52 |
| 1HGF.PDB | O, F_LYS_62    | N, E_GLY_303   | H, E_GLY_303    | 2.90 | 1.93 | 6.18  |
| 1HGF.PDB | O, E_GLN_295   | N, E_VAL_309   | H, E_VAL_309    | 2.93 | 2.06 | 22.44 |
| 1HGF.PDB | OG, F_SER_93   | N, E_LYS_310   | H, E_LYS_310    | 2.86 | 1.93 | 14.59 |
| 1HGF.PDB | OE1, E_GLU_41  | OG1, E_THR_313 | HG1, E_THR_313  | 2.68 | 1.89 | 29.15 |
| 1HGF.PDB | OE2, E_GLU_41  | N, E_LEU_314   | H, E_LEU_314    | 2.77 | 1.85 | 15.04 |
| 1HGF.PDB | OG1, E_THR_313 | NZ, E_LYS_315  | HZ2, E_LYS_315  | 2.94 | 2.00 | 21.30 |
| 1HGF.PDB | O, E_THR_40    | N, E_LEU_316   | H, E_LEU_316    | 2.76 | 1.85 | 16.85 |
| 1HGF.PDB | OD1, F_ASN_104 | N, E_ALA_317   | H, E_ALA_317    | 2.72 | 1.78 | 10.77 |
| 1HGF.PDB | O, E_ASN_38    | N, E_THR_318   | H, E_THR_318    | 2.90 | 1.95 | 12.98 |
| 1HGF.PDB | OE2, E_GLU_35  | ND2, E_ASN_322 | HD21, E_ASN_322 | 2.77 | 1.93 | 26.11 |
| 1HGF.PDB | O, E_VAL_20    | ND2, E_ASN_322 | HD22, E_ASN_322 | 2.96 | 2.04 | 16.53 |
| 1HGF.PDB | O, E_GLN_327   | NZ, E_LYS_326  | HZ2, E_LYS_326  | 2.70 | 1.74 | 17.93 |
| 1HGF.PDB | O, E_LYS_326   | NE2, E_GLN_327 | HE21, E_GLN_327 | 2.79 | 1.87 | 16.74 |
| 1HGF.PDB | OD2, F_ASP_112 | N, F_GLY_1     | H1, F_GLY_1     | 2.89 | 1.91 | 17.14 |
| 1HGF.PDB | OD1, F_ASP_109 | N, F_LEU_2     | H, F_LEU_2      | 2.91 | 2.00 | 18.77 |
| 1HGF.PDB | OD2, F_ASP_112 | N, F_GLY_4     | H, F_GLY_4      | 2.97 | 2.08 | 20.30 |
| 1HGF.PDB | OD1, F_ASP_112 | N, F_ALA_5     | H, F_ALA_5      | 2.98 | 2.11 | 23.47 |
| 1HGF.PDB | O, F_GLY_4     | N, F_PHE_9     | H, F_PHE_9      | 2.81 | 1.86 | 10.76 |
| 1HGF.PDB | O, F_GLY_13    | ND2, F_ASN_12  | HD21, F_ASN_12  | 2.77 | 1.93 | 24.90 |
| 1HGF.PDB | O, E_VAL_323   | N, F_GLY_13    | H, F_GLY_13     | 2.75 | 1.85 | 19.07 |
| 1HGF.PDB | O, E_HIS_17    | N, F_TRP_14    | H, F_TRP_14     | 2.87 | 1.96 | 16.52 |
| 1HGF.PDB | OG1, F_THR_41  | N, F_TRP_21    | H, F_TRP_21     | 2.91 | 1.99 | 16.39 |
| 1HGF.PDB | O, F_ALA_35    | N, F_PHE_24    | H, F_PHE_24     | 2.84 | 1.87 | 3.09  |
| 1HGF.PDB | O, E_CYS_14    | N, F_ARG_25    | H, F_ARG_25     | 2.91 | 1.94 | 8.25  |
| 1HGF.PDB | OE1, F_GLN_34  | NE, F_ARG_25   | HE, F_ARG_25    | 2.89 | 2.02 | 23.18 |
| 1HGF.PDB | OE1, F_GLN_34  | NH2, F_ARG_25  | HH21, F_ARG_25  | 2.91 | 2.03 | 24.46 |
| 1HGF.PDB | O, E_THR_12    | N, F_GLN_27    | H, F_GLN_27     | 3.00 | 2.08 | 17.91 |
| 1HGF.PDB | O, F_GLY_31    | N, F_ASN_28    | H, F_ASN_28     | 2.88 | 1.94 | 13.45 |
| 1HGF.PDB | O, F_CYS_144   | ND2, F_ASN_28  | HD21, F_ASN_28  | 2.81 | 1.91 | 20.19 |
| 1HGF.PDB | OD1, F_ASN_146 | ND2, F_ASN_28  | HD22, F_ASN_28  | 2.88 | 2.02 | 23.75 |
| 1HGF.PDB | O, F_ASN_28    | N, F_GLY_31    | H, F_GLY_31     | 2.91 | 2.04 | 22.35 |
| 1HGF.PDB | O, F_PHE_24    | N, F_ALA_35    | H, F_ALA_35     | 2.75 | 1.95 | 28.87 |
| 1HGF.PDB | O, F_TYR_22    | N, F_ASP_37    | H, F_ASP_37     | 2.72 | 1.77 | 3.63  |
| 1HGF.PDB | OD2, F_ASP_37  | N, F_SER_40    | H, F_SER_40     | 2.90 | 1.92 | 3.34  |
| 1HGF.PDB | O, F_ASP_37    | OG1, F_THR_41  | HG1, F_THR_41   | 2.65 | 1.82 | 24.28 |
| 1HGF.PDB | O, F_LEU_38    | N, F_GLN_42    | H, F_GLN_42     | 2.83 | 1.96 | 21.43 |
| 1HGF.PDB | OD1, F_ASP_46  | NE2, F_GLN_42  | HE21, F_GLN_42  | 2.86 | 1.99 | 23.71 |
| 1HGF.PDB | O, F_LYS_39    | N, F_ALA_43    | H, F_ALA_43     | 2.91 | 1.95 | 8.37  |
| 1HGF.PDB | O, F_SER_40    | N, F_ALA_44    | H, F_ALA_44     | 2.92 | 1.95 | 0.99  |
| 1HGF.PDB | O, F_GLN_42    | N, F_ASP_46    | H, F_ASP_46     | 2.79 | 1.83 | 7.98  |
| 1HGF.PDB | O, F_ALA_43    | NE2, F_GLN_47  | HE21, F_GLN_47  | 2.92 | 1.97 | 13.01 |
| 1HGF.PDB | O, F_ILE_45    | N, F_ASN_49    | H, F_ASN_49     | 2.88 | 1.99 | 20.58 |
| 1HGF.PDB | O, F_ASP_46    | N, F_GLY_50    | H, F_GLY_50     | 2.83 | 1.92 | 17.00 |
| 1HGF.PDB | O, F_GLN_47    | N, F_LYS_51    | H, F_LYS_51     | 2.95 | 1.98 | 4.87  |
| 1HGF.PDB | OE1, F_GLU_103 | NZ, F_LYS_51   | HZ1, F_LYS_51   | 2.72 | 1.69 | 6.79  |

|          |                |                |                 |      |      |       |
|----------|----------------|----------------|-----------------|------|------|-------|
| 1HGF.PDB | ND1, F_HIS_106 | NZ, F_LYS_51   | HZ3, F_LYS_51   | 2.66 | 1.70 | 17.89 |
| 1HGF.PDB | O, F_ILE_48    | N, F_LEU_52    | H, F_LEU_52     | 2.92 | 2.02 | 18.86 |
| 1HGF.PDB | O, F_ASN_49    | N, F_ASN_53    | H, F_ASN_53     | 2.83 | 1.96 | 22.00 |
| 1HGF.PDB | OE2, D_GLU_97  | NH2, F_ARG_54  | HH22, F_ARG_54  | 2.79 | 1.81 | 11.74 |
| 1HGF.PDB | OD2, D_ASP_86  | NZ, F_LYS_62   | HZ2, F_LYS_62   | 2.67 | 1.68 | 13.64 |
| 1HGF.PDB | OD2, D_ASP_90  | NZ, F_LYS_62   | HZ3, F_LYS_62   | 2.75 | 1.81 | 20.23 |
| 1HGF.PDB | OG, E_SER_266  | ND1, F_HIS_64  | HD1, F_HIS_64   | 2.65 | 1.77 | 20.25 |
| 1HGF.PDB | OG, E_SER_110  | NE2, F_HIS_64  | HE2, F_HIS_64   | 2.89 | 1.92 | 9.46  |
| 1HGF.PDB | O, F_PHE_63    | NE2, F_GLN_65  | HE21, F_GLN_65  | 2.97 | 2.00 | 6.66  |
| 1HGF.PDB | OE2, F_GLU_85  | NZ, F_LYS_68   | HZ1, F_LYS_68   | 2.64 | 1.77 | 26.62 |
| 1HGF.PDB | O, E_LYS_299   | NZ, F_LYS_68   | HZ2, F_LYS_68   | 2.97 | 1.95 | 8.70  |
| 1HGF.PDB | OG, A_SER_107  | N, F_ARG_76    | H, F_ARG_76     | 2.83 | 1.87 | 9.12  |
| 1HGF.PDB | OE2, B_GLU_81  | NE, F_ARG_76   | HE, F_ARG_76    | 2.86 | 1.88 | 5.84  |
| 1HGF.PDB | OE1, B_GLU_74  | NH1, F_ARG_76  | HH12, F_ARG_76  | 2.78 | 1.77 | 1.59  |
| 1HGF.PDB | OE1, B_GLU_81  | NH2, F_ARG_76  | HH21, F_ARG_76  | 2.69 | 1.70 | 7.61  |
| 1HGF.PDB | OE2, B_GLU_74  | NH2, F_ARG_76  | HH22, F_ARG_76  | 2.71 | 1.73 | 8.88  |
| 1HGF.PDB | O, F_GLY_75    | N, F_ASP_79    | H, F_ASP_79     | 2.99 | 2.05 | 14.09 |
| 1HGF.PDB | O, F_ILE_77    | N, F_GLU_81    | H, F_GLU_81     | 2.97 | 2.01 | 7.31  |
| 1HGF.PDB | O, F_GLN_78    | N, F_LYS_82    | H, F_LYS_82     | 2.99 | 2.12 | 23.13 |
| 1HGF.PDB | O, F_ASP_79    | N, F_TYR_83    | H, F_TYR_83     | 2.99 | 2.06 | 15.58 |
| 1HGF.PDB | O, F_LEU_80    | N, F_VAL_84    | H, F_VAL_84     | 2.90 | 1.94 | 9.23  |
| 1HGF.PDB | O, F_LYS_82    | N, F_ASP_86    | H, F_ASP_86     | 2.91 | 2.00 | 17.05 |
| 1HGF.PDB | O, F_TYR_83    | N, F_THR_87    | H, F_THR_87     | 2.99 | 2.06 | 14.57 |
| 1HGF.PDB | O, F_VAL_84    | N, F_LYS_88    | H, F_LYS_88     | 2.93 | 1.98 | 10.82 |
| 1HGF.PDB | OH, D_TYR_83   | NZ, F_LYS_88   | HZ1, F_LYS_88   | 2.55 | 1.63 | 21.75 |
| 1HGF.PDB | O, F_GLU_85    | N, F_ILE_89    | H, F_ILE_89     | 2.95 | 2.00 | 10.35 |
| 1HGF.PDB | O, F_LYS_88    | N, F_TRP_92    | H, F_TRP_92     | 2.92 | 1.96 | 8.47  |
| 1HGF.PDB | O, F_ILE_89    | N, F_SER_93    | H, F_SER_93     | 2.89 | 2.01 | 22.68 |
| 1HGF.PDB | O, F_ASP_90    | N, F_TYR_94    | H, F_TYR_94     | 2.99 | 2.08 | 18.84 |
| 1HGF.PDB | O, F_TRP_92    | N, F_ALA_96    | H, F_ALA_96     | 3.00 | 2.04 | 10.19 |
| 1HGF.PDB | O, F_TYR_94    | N, F_LEU_98    | H, F_LEU_98     | 2.95 | 2.00 | 11.08 |
| 1HGF.PDB | O, F_ASN_95    | N, F_LEU_99    | H, F_LEU_99     | 2.97 | 2.00 | 8.54  |
| 1HGF.PDB | O, F_LEU_98    | N, F_LEU_102   | H, F_LEU_102    | 2.99 | 2.02 | 4.18  |
| 1HGF.PDB | O, F_LEU_99    | N, F_GLU_103   | H, F_GLU_103    | 2.91 | 1.96 | 12.29 |
| 1HGF.PDB | O, F_VAL_100   | N, F_ASN_104   | H, F_ASN_104    | 2.82 | 1.88 | 14.39 |
| 1HGF.PDB | O, E_LYS_27    | ND2, F_ASN_104 | HD21, F_ASN_104 | 2.91 | 1.99 | 15.12 |
| 1HGF.PDB | O, F_LEU_102   | N, F_HIS_106   | H, F_HIS_106    | 2.96 | 1.99 | 6.92  |
| 1HGF.PDB | O, F_GLU_103   | N, F_THR_107   | H, F_THR_107    | 2.86 | 1.92 | 13.75 |
| 1HGF.PDB | O, F_ASN_104   | N, F_ILE_108   | H, F_ILE_108    | 2.95 | 2.03 | 17.77 |
| 1HGF.PDB | O, F_HIS_106   | N, F_LEU_110   | H, F_LEU_110    | 2.80 | 1.84 | 8.75  |
| 1HGF.PDB | O, F_ASP_109   | N, F_SER_113   | H, F_SER_113    | 2.83 | 1.88 | 9.86  |
| 1HGF.PDB | O, D_LEU_2     | OG, F_SER_113  | HG, F_SER_113   | 2.73 | 1.92 | 27.40 |
| 1HGF.PDB | O, F_SER_113   | N, F_LYS_117   | H, F_LYS_117    | 2.77 | 1.85 | 14.47 |
| 1HGF.PDB | O, F_GLU_114   | N, F_LEU_118   | H, F_LEU_118    | 2.99 | 2.05 | 13.43 |
| 1HGF.PDB | O, F_MET_115   | N, F_PHE_119   | H, F_PHE_119    | 2.96 | 2.03 | 15.65 |
| 1HGF.PDB | O, F_ASN_116   | N, F_GLU_120   | H, F_GLU_120    | 2.89 | 1.91 | 2.90  |
| 1HGF.PDB | O, F_PHE_119   | N, F_ARG_123   | H, F_ARG_123    | 2.99 | 2.04 | 11.96 |
| 1HGF.PDB | OE2, F_GLU_120 | NH1, F_ARG_123 | HH11, F_ARG_123 | 2.79 | 1.92 | 25.30 |
| 1HGF.PDB | O, F_GLU_120   | N, F_ARG_124   | H, F_ARG_124    | 2.94 | 1.99 | 12.33 |
| 1HGF.PDB | OE1, D_GLU_132 | NE, F_ARG_124  | HE, F_ARG_124   | 2.90 | 1.96 | 15.73 |
| 1HGF.PDB | OH, F_TYR_157  | ND2, F_ASN_129 | HD21, F_ASN_129 | 2.83 | 1.89 | 13.44 |
| 1HGF.PDB | O, F_HIS_159   | ND2, F_ASN_129 | HD22, F_ASN_129 | 2.96 | 2.06 | 18.90 |
| 1HGF.PDB | O, F_LYS_139   | N, F_GLU_131   | H, F_GLU_131    | 2.97 | 2.06 | 18.31 |
| 1HGF.PDB | O, F_CYS_137   | N, F_MET_133   | H, F_MET_133    | 2.91 | 1.96 | 10.70 |
| 1HGF.PDB | O, E_LEU_13    | N, F_PHE_138   | H, F_PHE_138    | 2.75 | 1.92 | 26.04 |
| 1HGF.PDB | O, F_GLU_131   | N, F_LYS_139   | H, F_LYS_139    | 2.85 | 1.90 | 10.44 |
| 1HGF.PDB | O, E_ALA_11    | N, F_ILE_140   | H, F_ILE_140    | 2.82 | 1.90 | 16.36 |
| 1HGF.PDB | O, F_ASN_129   | N, F_TYR_141   | H, F_TYR_141    | 2.91 | 1.97 | 14.31 |

|          |                |                |                 |      |      |       |
|----------|----------------|----------------|-----------------|------|------|-------|
| 1HGF.PDB | OD2, F_ASP_145 | N, F_ALA_147   | H, F_ALA_147    | 2.85 | 1.95 | 18.91 |
| 1HGF.PDB | O, F_ASP_145   | N, F_ILE_149   | H, F_ILE_149    | 2.92 | 1.96 | 9.99  |
| 1HGF.PDB | O, F_ASN_146   | N, F_GLU_150   | H, F_GLU_150    | 2.92 | 2.01 | 16.83 |
| 1HGF.PDB | O, F_GLU_150   | N, F_ASN_154   | H, F_ASN_154    | 2.85 | 1.95 | 19.47 |
| 1HGF.PDB | O, F_SER_151   | N, F_THR_156   | H, F_THR_156    | 2.79 | 1.97 | 27.62 |
| 1HGF.PDB | O, F_HIS_159   | N, F_TYR_162   | H, F_TYR_162    | 2.90 | 2.05 | 24.52 |
| 1HGF.PDB | OE1, D_GLU_131 | NH2, F_ARG_163 | HH21, F_ARG_163 | 2.69 | 1.84 | 27.00 |
| 1HGF.PDB | O, F_TYR_162   | N, F_ALA_166   | H, F_ALA_166    | 2.88 | 1.92 | 7.02  |
| 1HGF.PDB | O, F_ARG_163   | N, F_LEU_167   | H, F_LEU_167    | 2.80 | 1.84 | 8.02  |
| 1HGF.PDB | O, F_GLU_165   | ND2, F_ASN_169 | HD21, F_ASN_169 | 3.00 | 2.05 | 10.68 |
| 1HGF.PDB | O, F_ALA_166   | N, F_ARG_170   | H, F_ARG_170    | 2.86 | 2.02 | 25.68 |
| 1HGF.PDB | O, F_GLU_128   | NE, F_ARG_170  | HE, F_ARG_170   | 2.79 | 1.90 | 20.12 |
| 1HGF.PDB | OE2, F_GLU_131 | NH1, F_ARG_170 | HH11, F_ARG_170 | 2.85 | 1.84 | 3.96  |
| 1HGF.PDB | O, F_LEU_167   | N, F_PHE_171   | H, F_PHE_171    | 2.90 | 1.96 | 11.83 |

Table 1666: 1HGF-specific side chain and main chain hydrogen bonding analysis. In this table, a PDB file is specified with a four-letter PDB ID, except that the names of the PDB files corresponding to the single NMR structural model split from the NMR ensemble is specified with a four-letter PDB ID in addition to a hyphen followed by the single NMR structural model numeric ID, the residue naming scheme is **Chain ID\_residue name\_residue number**,  $\angle ADH$  represents the angle formed by acceptor (A), donor (D) and hydrogen (H) ( $\angle ADH$ ).

| PDB      | Acceptor (A)   | Donor (D)      | Hydrogen (H)    | D-A (Å) | H-A (Å) | $\angle ADH(^{\circ})$ |
|----------|----------------|----------------|-----------------|---------|---------|------------------------|
| 1HGG.PDB | O, B_ILE_140   | N, A_ALA_11    | H, A_ALA_11     | 2.90    | 1.98    | 16.87                  |
| 1HGG.PDB | O, B_PHE_138   | N, A_LEU_13    | H, A_LEU_13     | 2.97    | 2.01    | 10.10                  |
| 1HGG.PDB | O, B_ARG_25    | N, A_CYS_14    | H, A_CYS_14     | 2.92    | 1.97    | 11.02                  |
| 1HGG.PDB | O, B_GLY_136   | N, A_LEU_15    | H, A_LEU_15     | 2.86    | 1.89    | 7.78                   |
| 1HGG.PDB | O, B_GLY_23    | N, A_GLY_16    | H, A_GLY_16     | 2.90    | 2.00    | 20.11                  |
| 1HGG.PDB | O, B_TRP_21    | N, A_HIS_18    | H, A_HIS_18     | 2.90    | 1.99    | 17.50                  |
| 1HGG.PDB | OD1, A_ASN_322 | N, A_VAL_20    | H, A_VAL_20     | 2.82    | 1.84    | 4.55                   |
| 1HGG.PDB | O, A_VAL_36    | N, A_THR_24    | H, A_THR_24     | 2.85    | 1.98    | 22.87                  |
| 1HGG.PDB | O, A_ILE_34    | N, A_VAL_26    | H, A_VAL_26     | 2.77    | 1.83    | 12.78                  |
| 1HGG.PDB | OE2, B_GLU_97  | NZ, A_LYS_27   | HZ1, A_LYS_27   | 2.90    | 1.87    | 9.15                   |
| 1HGG.PDB | O, A_VAL_26    | N, A_ILE_34    | H, A_ILE_34     | 2.94    | 2.01    | 14.94                  |
| 1HGG.PDB | O, A_THR_24    | N, A_VAL_36    | H, A_VAL_36     | 2.80    | 1.84    | 7.79                   |
| 1HGG.PDB | O, A_MET_320   | N, A_THR_37    | H, A_THR_37     | 2.90    | 1.93    | 7.41                   |
| 1HGG.PDB | O, A_LEU_316   | N, A_THR_40    | H, A_THR_40     | 2.81    | 1.95    | 23.35                  |
| 1HGG.PDB | O, A_LEU_314   | N, A_LEU_42    | H, A_LEU_42     | 2.87    | 2.00    | 23.31                  |
| 1HGG.PDB | O, A_PHE_294   | N, A_GLN_44    | H, A_GLN_44     | 2.82    | 1.86    | 8.73                   |
| 1HGG.PDB | OD2, A_ASP_275 | NZ, A_LYS_50   | HZ1, A_LYS_50   | 2.71    | 1.78    | 22.40                  |
| 1HGG.PDB | O, A_PRO_273   | N, A_ILE_51    | H, A_ILE_51     | 2.76    | 1.80    | 7.18                   |
| 1HGG.PDB | O, A_ASP_275   | N, A_ASN_53    | H, A_ASN_53     | 2.78    | 1.93    | 24.69                  |
| 1HGG.PDB | OD2, A_ASP_85  | N, A_ARG_57    | H, A_ARG_57     | 2.88    | 1.93    | 11.04                  |
| 1HGG.PDB | O, A_THR_83    | NE, A_ARG_57   | HE, A_ARG_57    | 2.76    | 1.79    | 4.99                   |
| 1HGG.PDB | O, A_LEU_86    | N, A_LEU_59    | H, A_LEU_59     | 2.94    | 1.98    | 9.64                   |
| 1HGG.PDB | O, A_VAL_88    | N, A_GLY_61    | H, A_GLY_61     | 2.99    | 2.14    | 24.72                  |
| 1HGG.PDB | OD1, A_ASP_60  | N, A_ILE_62    | H, A_ILE_62     | 2.86    | 1.94    | 14.24                  |
| 1HGG.PDB | O, A_GLY_61    | N, A_CYS_64    | H, A_CYS_64     | 2.94    | 2.01    | 15.60                  |
| 1HGG.PDB | O, A_LEU_66    | N, A_LEU_70    | H, A_LEU_70     | 2.85    | 1.95    | 18.25                  |
| 1HGG.PDB | O, A_ILE_67    | N, A_LEU_71    | H, A_LEU_71     | 2.83    | 1.86    | 6.13                   |
| 1HGG.PDB | O, A_ASP_68    | N, A_GLY_72    | H, A_GLY_72     | 2.84    | 1.93    | 17.70                  |
| 1HGG.PDB | OD1, A_ASP_73  | N, A_HIS_75    | H, A_HIS_75     | 2.97    | 2.06    | 18.51                  |
| 1HGG.PDB | OD1, A_ASP_73  | ND1, A_HIS_75  | HD1, A_HIS_75   | 2.77    | 1.87    | 17.99                  |
| 1HGG.PDB | O, A_ASP_63    | NE2, A_HIS_75  | HE2, A_HIS_75   | 2.83    | 1.88    | 12.09                  |
| 1HGG.PDB | O, A_ASP_73    | N, A_CYS_76    | H, A_CYS_76     | 2.73    | 1.81    | 15.45                  |
| 1HGG.PDB | O, A_PRO_74    | N, A_ASP_77    | H, A_ASP_77     | 2.92    | 1.97    | 11.68                  |
| 1HGG.PDB | O, A_CYS_76    | N, A_PHE_79    | H, A_PHE_79     | 2.99    | 2.02    | 6.69                   |
| 1HGG.PDB | O, A_PHE_79    | N, A_GLU_82    | H, A_GLU_82     | 3.00    | 2.09    | 17.80                  |
| 1HGG.PDB | O, A_ARG_57    | N, A_ASP_85    | H, A_ASP_85     | 2.86    | 1.95    | 17.16                  |
| 1HGG.PDB | O, A_SER_266   | N, A_PHE_87    | H, A_PHE_87     | 2.98    | 2.05    | 14.85                  |
| 1HGG.PDB | O, A_LEU_59    | N, A_VAL_88    | H, A_VAL_88     | 2.95    | 1.98    | 7.50                   |
| 1HGG.PDB | O, A_MET_268   | N, A_GLU_89    | H, A_GLU_89     | 2.80    | 1.85    | 11.55                  |
| 1HGG.PDB | OD1, A_ASP_60  | NE, A_ARG_90   | HE, A_ARG_90    | 2.94    | 1.96    | 6.92                   |
| 1HGG.PDB | O, A_SER_270   | NH1, A_ARG_90  | HH11, A_ARG_90  | 2.63    | 1.77    | 25.03                  |
| 1HGG.PDB | O, A_ALA_272   | NH1, A_ARG_90  | HH12, A_ARG_90  | 2.66    | 1.75    | 18.96                  |
| 1HGG.PDB | OD2, A_ASP_60  | NH2, A_ARG_90  | HH21, A_ARG_90  | 2.79    | 1.81    | 10.63                  |
| 1HGG.PDB | OD1, A_ASP_271 | N, A_SER_91    | H, A_SER_91     | 2.92    | 1.99    | 16.08                  |
| 1HGG.PDB | OD1, A_ASP_271 | OG, A_SER_91   | HG, A_SER_91    | 2.86    | 2.03    | 25.78                  |
| 1HGG.PDB | OD2, A_ASP_271 | OG, A_SER_91   | HG, A_SER_91    | 2.85    | 1.97    | 21.46                  |
| 1HGG.PDB | O, A_ASP_63    | N, A_PHE_94    | H, A_PHE_94     | 3.00    | 2.04    | 11.56                  |
| 1HGG.PDB | OD2, A_ASP_68  | OG, A_SER_95   | HG, A_SER_95    | 2.94    | 1.99    | 11.26                  |
| 1HGG.PDB | OD2, A_ASP_73  | N, A_ASN_96    | H, A_ASN_96     | 2.86    | 1.92    | 13.44                  |
| 1HGG.PDB | SG, A_CYS_97   | N, A_TYR_98    | H, A_TYR_98     | 2.99    | 2.16    | 26.19                  |
| 1HGG.PDB | OD1, A_ASP_68  | OH, A_TYR_100  | HH, A_TYR_100   | 2.94    | 1.99    | 11.28                  |
| 1HGG.PDB | O, A_ILE_230   | N, A_ASP_101   | H, A_ASP_101    | 2.99    | 2.10    | 21.45                  |
| 1HGG.PDB | OD1, A_ASP_104 | N, A_SER_107   | H, A_SER_107    | 2.91    | 2.03    | 21.37                  |
| 1HGG.PDB | OD2, A_ASP_104 | OG, A_SER_107  | HG, A_SER_107   | 2.84    | 1.92    | 16.45                  |
| 1HGG.PDB | O, A_TYR_105   | N, A_ARG_109   | H, A_ARG_109    | 2.79    | 1.82    | 3.79                   |
| 1HGG.PDB | OE2, B_GLU_67  | NH2, A_ARG_109 | HH21, A_ARG_109 | 2.84    | 1.86    | 14.43                  |
| 1HGG.PDB | OD2, F_ASP_79  | OG, A_SER_110  | HG, A_SER_110   | 2.88    | 1.95    | 14.29                  |

|          |                |                |                 |      |      |       |
|----------|----------------|----------------|-----------------|------|------|-------|
| 1HGG.PDB | O, A_SER_107   | N, A_LEU_111   | H, A_LEU_111    | 2.81 | 1.85 | 7.66  |
| 1HGG.PDB | O, A_ARG_109   | N, A_ALA_113   | H, A_ALA_113    | 2.89 | 1.98 | 17.55 |
| 1HGG.PDB | O, A_SER_110   | N, A_SER_114   | H, A_SER_114    | 2.94 | 2.01 | 15.84 |
| 1HGG.PDB | OE2, A_GLU_119 | OG1, A_THR_117 | HG1, A_THR_117  | 2.88 | 1.93 | 9.58  |
| 1HGG.PDB | O, A_TYR_257   | N, A_ILE_121   | H, A_ILE_121    | 2.89 | 1.92 | 8.73  |
| 1HGG.PDB | O, A_ARG_255   | N, A_GLU_123   | H, A_GLU_123    | 2.94 | 2.00 | 13.79 |
| 1HGG.PDB | O, A_THR_155   | N, A_THR_131   | H, A_THR_131    | 2.73 | 1.83 | 17.36 |
| 1HGG.PDB | OD1, A_ASN_152 | N, A_ASN_133   | H, A_ASN_133    | 2.89 | 1.97 | 16.60 |
| 1HGG.PDB | O, A_GLY_146   | N, A_SER_136   | H, A_SER_136    | 2.76 | 1.85 | 17.88 |
| 1HGG.PDB | OG, A_SER_136  | N, A_ALA_138   | H, A_ALA_138    | 2.88 | 1.92 | 8.65  |
| 1HGG.PDB | O, A_GLY_144   | NZ, A_LYS_140  | HZ1, A_LYS_140  | 2.89 | 1.90 | 15.38 |
| 1HGG.PDB | OD1, A_ASN_137 | NZ, A_LYS_140  | HZ2, A_LYS_140  | 2.76 | 1.76 | 13.87 |
| 1HGG.PDB | OD2, A_ASP_77  | NE, A_ARG_141  | HE, A_ARG_141   | 2.89 | 2.07 | 28.91 |
| 1HGG.PDB | O, A_PHE_147   | NH1, A_ARG_141 | HH12, A_ARG_141 | 2.49 | 1.65 | 25.86 |
| 1HGG.PDB | OD1, A_ASP_77  | NH2, A_ARG_141 | HH21, A_ARG_141 | 2.76 | 1.85 | 22.03 |
| 1HGG.PDB | OD2, A_ASP_77  | NH2, A_ARG_141 | HH21, A_ARG_141 | 2.76 | 1.87 | 24.00 |
| 1HGG.PDB | O, A_GLY_72    | NH2, A_ARG_141 | HH22, A_ARG_141 | 2.92 | 1.93 | 7.80  |
| 1HGG.PDB | O, A_SER_136   | N, A_GLY_146   | H, A_GLY_146    | 2.98 | 2.09 | 20.80 |
| 1HGG.PDB | O, A_GLY_72    | N, A_SER_149   | H, A_SER_149    | 2.90 | 1.98 | 16.68 |
| 1HGG.PDB | O, A_ALA_253   | N, A_ASN_152   | H, A_ASN_152    | 2.72 | 1.87 | 24.29 |
| 1HGG.PDB | OH, A_TYR_195  | NE1, A_TRP_153 | HE1, A_TRP_153  | 2.91 | 1.96 | 13.96 |
| 1HGG.PDB | O, A_THR_131   | N, A_THR_155   | H, A_THR_155    | 2.93 | 1.99 | 12.97 |
| 1HGG.PDB | O, A_LEU_194   | N, A_LYS_156   | H, A_LYS_156    | 2.97 | 2.08 | 20.53 |
| 1HGG.PDB | O, A_SER_193   | NZ, A_LYS_156  | HZ2, A_LYS_156  | 2.65 | 1.69 | 18.25 |
| 1HGG.PDB | O, A_THR_160   | N, A_SER_157   | H, A_SER_157    | 2.97 | 2.06 | 18.87 |
| 1HGG.PDB | O, A_ILE_245   | N, A_VAL_166   | H, A_VAL_166    | 2.87 | 1.91 | 9.82  |
| 1HGG.PDB | O, A_LEU_243   | OG1, A_THR_167 | HG1, A_THR_167  | 2.86 | 1.98 | 20.98 |
| 1HGG.PDB | O, A_LEU_243   | N, A_MET_168   | H, A_MET_168    | 2.89 | 1.96 | 15.80 |
| 1HGG.PDB | O, A_ASP_241   | N, A_ASN_170   | H, A_ASN_170    | 2.91 | 1.93 | 5.10  |
| 1HGG.PDB | O, A_PHE_174   | ND2, A_ASN_170 | HD21, A_ASN_170 | 2.81 | 1.87 | 12.89 |
| 1HGG.PDB | O, A_VAL_237   | ND2, A_ASN_170 | HD22, A_ASN_170 | 2.85 | 1.98 | 22.66 |
| 1HGG.PDB | O, A_VAL_237   | N, A_LYS_176   | H, A_LYS_176    | 2.93 | 1.99 | 14.07 |
| 1HGG.PDB | OE2, A_GLU_123 | NZ, A_LYS_176  | HZ1, A_LYS_176  | 2.65 | 1.77 | 25.92 |
| 1HGG.PDB | O, A_THR_235   | N, A_TYR_178   | H, A_TYR_178    | 2.78 | 1.81 | 6.55  |
| 1HGG.PDB | OE1, A_GLU_123 | OH, A_TYR_178  | HH, A_TYR_178   | 2.78 | 1.83 | 8.16  |
| 1HGG.PDB | OG1, A_THR_235 | NE1, A_TRP_180 | HE1, A_TRP_180  | 2.92 | 1.93 | 2.35  |
| 1HGG.PDB | O, A_ASN_250   | N, A_HIS_183   | H, A_HIS_183    | 2.79 | 1.91 | 21.79 |
| 1HGG.PDB | O, A_ARG_229   | N, A_HIS_184   | H, A_HIS_184    | 2.85 | 1.88 | 5.64  |
| 1HGG.PDB | OG, A_SER_231  | NE2, A_HIS_184 | HE2, A_HIS_184  | 2.80 | 1.92 | 21.87 |
| 1HGG.PDB | OG1, A_THR_187 | N, A_GLU_190   | H, A_GLU_190    | 2.84 | 1.88 | 9.16  |
| 1HGG.PDB | O, A_THR_187   | N, A_GLN_191   | H, A_GLN_191    | 3.00 | 2.05 | 11.25 |
| 1HGG.PDB | O, A_GLN_197   | NE2, A_GLN_191 | HE22, A_GLN_191 | 2.89 | 1.99 | 19.48 |
| 1HGG.PDB | O, A_ASN_188   | OG1, A_THR_192 | HG1, A_THR_192  | 2.94 | 2.01 | 12.14 |
| 1HGG.PDB | O, A_GLN_189   | N, A_SER_193   | H, A_SER_193    | 2.84 | 1.87 | 5.56  |
| 1HGG.PDB | O, A_GLN_189   | OG, A_SER_193  | HG, A_SER_193   | 2.70 | 1.82 | 19.80 |
| 1HGG.PDB | O, A_GLU_190   | N, A_LEU_194   | H, A_LEU_194    | 2.99 | 2.04 | 11.68 |
| 1HGG.PDB | O, A_GLN_191   | N, A_TYR_195   | H, A_TYR_195    | 2.81 | 1.87 | 11.54 |
| 1HGG.PDB | O, A_THR_192   | N, A_VAL_196   | H, A_VAL_196    | 2.94 | 2.12 | 27.19 |
| 1HGG.PDB | O, A_TYR_161   | NE2, A_GLN_197 | HE21, A_GLN_197 | 2.91 | 1.94 | 6.31  |
| 1HGG.PDB | O, A_ASN_248   | NE2, A_GLN_197 | HE22, A_GLN_197 | 2.93 | 2.04 | 20.44 |
| 1HGG.PDB | OD1, A_ASN_246 | NH2, A_ARG_201 | HH21, A_ARG_201 | 2.65 | 1.72 | 18.81 |
| 1HGG.PDB | O, A_ILE_213   | N, A_VAL_202   | H, A_VAL_202    | 2.91 | 1.94 | 9.19  |
| 1HGG.PDB | O, A_ASN_246   | N, A_THR_203   | H, A_THR_203    | 2.82 | 1.89 | 14.13 |
| 1HGG.PDB | O, A_GLN_211   | N, A_VAL_204   | H, A_VAL_204    | 2.88 | 1.97 | 18.00 |
| 1HGG.PDB | O, A_SER_209   | N, A_THR_206   | H, A_THR_206    | 2.97 | 2.00 | 7.26  |
| 1HGG.PDB | OD1, A_ASP_241 | N, A_ARG_207   | H, A_ARG_207    | 2.89 | 1.94 | 12.62 |
| 1HGG.PDB | OD2, A_ASP_241 | NE, A_ARG_208  | HE, A_ARG_208   | 2.96 | 2.06 | 20.34 |
| 1HGG.PDB | OG1, A_THR_206 | OG, A_SER_209  | HG, A_SER_209   | 2.95 | 2.03 | 14.98 |

|          |                |                |                 |      |      |       |
|----------|----------------|----------------|-----------------|------|------|-------|
| 1HGG.PDB | OD1, E.ASP.101 | NE2, A.GLN.210 | HE22, A.GLN.210 | 2.99 | 2.07 | 17.95 |
| 1HGG.PDB | O, A.VAL.204   | N, A.GLN.211   | H, A.GLN.211    | 2.83 | 1.92 | 18.11 |
| 1HGG.PDB | OG1, A.THR.203 | OG1, A.THR.212 | HG1, A.THR.212  | 2.88 | 1.92 | 6.20  |
| 1HGG.PDB | O, A.VAL.202   | N, A.ILE.213   | H, A.ILE.213    | 2.82 | 1.90 | 15.67 |
| 1HGG.PDB | OE1, C.GLN.210 | NH2, A.ARG.220 | HH21, A.ARG.220 | 2.73 | 1.78 | 15.93 |
| 1HGG.PDB | O, A.ASN.216   | NH2, A.ARG.220 | HH22, A.ARG.220 | 2.70 | 1.79 | 20.31 |
| 1HGG.PDB | O, A.LEU.226   | N, A.VAL.223   | H, A.VAL.223    | 2.90 | 1.94 | 11.61 |
| 1HGG.PDB | O, A.CYS.97    | NE, A.ARG.224  | HE, A.ARG.224   | 2.79 | 1.96 | 26.10 |
| 1HGG.PDB | O, A.CYS.97    | NH2, A.ARG.224 | HH21, A.ARG.224 | 2.82 | 1.96 | 25.99 |
| 1HGG.PDB | O, A.VAL.223   | N, A.LEU.226   | H, A.LEU.226    | 2.95 | 2.01 | 13.46 |
| 1HGG.PDB | O, A.SER.228   | NH1, A.ARG.229 | HH11, A.ARG.229 | 2.74 | 1.81 | 18.53 |
| 1HGG.PDB | O, A.PRO.221   | NH2, A.ARG.229 | HH22, A.ARG.229 | 2.60 | 1.67 | 16.87 |
| 1HGG.PDB | OD1, A.ASP.101 | OG, A.SER.231  | HG, A.SER.231   | 2.88 | 1.92 | 8.82  |
| 1HGG.PDB | O, A.ASP.101   | N, A.ILE.232   | H, A.ILE.232    | 2.92 | 2.00 | 16.64 |
| 1HGG.PDB | O, A.TRP.180   | N, A.TYR.233   | H, A.TYR.233    | 2.89 | 1.93 | 10.84 |
| 1HGG.PDB | O, A.TYR.178   | N, A.THR.235   | H, A.THR.235    | 2.90 | 2.00 | 18.55 |
| 1HGG.PDB | O, A.LYS.176   | N, A.VAL.237   | H, A.VAL.237    | 2.81 | 1.85 | 9.01  |
| 1HGG.PDB | O, F.SER.71    | NZ, A.LYS.238  | HZ2, A.LYS.238  | 2.70 | 1.77 | 20.55 |
| 1HGG.PDB | OE1, F.GLU.72  | NZ, A.LYS.238  | HZ3, A.LYS.238  | 2.93 | 1.93 | 14.31 |
| 1HGG.PDB | OE2, F.GLU.72  | NZ, A.LYS.238  | HZ3, A.LYS.238  | 2.74 | 1.91 | 29.92 |
| 1HGG.PDB | O, A.ASN.170   | N, A.GLY.240   | H, A.GLY.240    | 2.85 | 1.99 | 23.50 |
| 1HGG.PDB | O, A.LYS.238   | N, A.ASP.241   | H, A.ASP.241    | 2.97 | 2.05 | 16.90 |
| 1HGG.PDB | OD1, A.ASP.241 | N, A.VAL.242   | H, A.VAL.242    | 2.79 | 1.98 | 28.57 |
| 1HGG.PDB | O, A.MET.168   | N, A.LEU.243   | H, A.LEU.243    | 2.88 | 1.91 | 4.58  |
| 1HGG.PDB | O, A.SER.205   | N, A.VAL.244   | H, A.VAL.244    | 2.92 | 1.98 | 13.47 |
| 1HGG.PDB | O, A.VAL.166   | N, A.ILE.245   | H, A.ILE.245    | 2.93 | 2.00 | 14.39 |
| 1HGG.PDB | O, A.THR.203   | N, A.ASN.246   | H, A.ASN.246    | 2.89 | 1.94 | 11.24 |
| 1HGG.PDB | OD1, A.ASN.165 | ND2, A.ASN.246 | HD22, A.ASN.246 | 2.90 | 1.98 | 17.02 |
| 1HGG.PDB | O, A.LEU.164   | N, A.SER.247   | H, A.SER.247    | 2.90 | 1.99 | 18.81 |
| 1HGG.PDB | OE1, A.GLN.191 | ND2, A.ASN.250 | HD21, A.ASN.250 | 2.92 | 1.96 | 11.11 |
| 1HGG.PDB | O, A.HIS.183   | ND2, A.ASN.250 | HD22, A.ASN.250 | 2.85 | 1.89 | 9.48  |
| 1HGG.PDB | O, A.ASN.152   | N, A.ALA.253   | H, A.ALA.253    | 2.86 | 1.94 | 16.70 |
| 1HGG.PDB | OD1, A.ASN.133 | NH2, A.ARG.255 | HH22, A.ARG.255 | 2.52 | 1.66 | 24.50 |
| 1HGG.PDB | O, A.ILE.121   | N, A.TYR.257   | H, A.TYR.257    | 2.96 | 2.12 | 25.89 |
| 1HGG.PDB | O, A.LEU.177   | N, A.PHE.258   | H, A.PHE.258    | 2.95 | 2.01 | 12.69 |
| 1HGG.PDB | OG, A.SER.115  | N, A.ARG.261   | H, A.ARG.261    | 2.99 | 2.03 | 11.53 |
| 1HGG.PDB | OE2, A.GLU.119 | NH1, A.ARG.261 | HH12, A.ARG.261 | 2.68 | 1.87 | 29.79 |
| 1HGG.PDB | OE1, A.GLU.119 | NH2, A.ARG.261 | HH22, A.ARG.261 | 2.74 | 1.88 | 26.75 |
| 1HGG.PDB | OH, A.TYR.302  | NZ, A.LYS.264  | HZ1, A.LYS.264  | 2.93 | 1.98 | 19.58 |
| 1HGG.PDB | ND1, A.HIS.56  | NZ, A.LYS.264  | HZ2, A.LYS.264  | 2.66 | 1.73 | 19.87 |
| 1HGG.PDB | OD2, A.ASP.85  | NZ, A.LYS.264  | HZ3, A.LYS.264  | 2.83 | 1.83 | 12.74 |
| 1HGG.PDB | O, A.PHE.87    | N, A.MET.268   | H, A.MET.268    | 2.85 | 1.96 | 20.36 |
| 1HGG.PDB | OE1, B.GLU.67  | NH1, A.ARG.269 | HH12, A.ARG.269 | 2.69 | 1.86 | 28.34 |
| 1HGG.PDB | O, A.PRO.284   | OG, A.SER.270  | HG, A.SER.270   | 2.78 | 1.86 | 15.49 |
| 1HGG.PDB | OG, A.SER.270  | N, A.ALA.272   | H, A.ALA.272    | 2.95 | 2.00 | 11.38 |
| 1HGG.PDB | O, A.ILE.51    | N, A.ASP.275   | H, A.ASP.275    | 2.83 | 1.95 | 21.40 |
| 1HGG.PDB | OD1, A.ASP.275 | N, A.THR.276   | H, A.THR.276    | 2.80 | 1.95 | 24.62 |
| 1HGG.PDB | O, A.ASN.54    | N, A.SER.279   | H, A.SER.279    | 2.79 | 1.85 | 12.05 |
| 1HGG.PDB | O, A.TYR.302   | N, A.ILE.282   | H, A.ILE.282    | 2.87 | 1.93 | 13.76 |
| 1HGG.PDB | O, A.THR.283   | N, A.GLY.286   | H, A.GLY.286    | 2.80 | 1.86 | 11.09 |
| 1HGG.PDB | O, A.LYS.50    | N, A.SER.287   | H, A.SER.287    | 2.87 | 1.90 | 6.27  |
| 1HGG.PDB | O, A.ALA.304   | ND2, A.ASN.290 | HD22, A.ASN.290 | 2.86 | 1.98 | 20.93 |
| 1HGG.PDB | OE1, A.GLN.44  | NZ, A.LYS.292  | HZ1, A.LYS.292  | 2.74 | 1.73 | 11.51 |
| 1HGG.PDB | OD2, A.ASP.291 | NZ, A.LYS.292  | HZ3, A.LYS.292  | 2.77 | 1.90 | 27.56 |
| 1HGG.PDB | O, A.LYS.307   | N, A.GLN.295   | H, A.GLN.295    | 2.78 | 1.90 | 20.19 |
| 1HGG.PDB | O, A.ASN.298   | NE2, A.GLN.295 | HE21, A.GLN.295 | 2.82 | 1.86 | 7.25  |
| 1HGG.PDB | O, A.GLN.44    | N, A.ASN.296   | H, A.ASN.296    | 2.89 | 1.94 | 10.48 |
| 1HGG.PDB | OD1, A.ASN.285 | ND2, A.ASN.298 | HD22, A.ASN.298 | 2.97 | 2.01 | 11.28 |



|          |                |                |                 |      |      |       |
|----------|----------------|----------------|-----------------|------|------|-------|
| 1HGG.PDB | O, B_LYS_68    | NZ, A_LYS_299  | HZ1, A_LYS_299  | 2.91 | 1.88 | 9.16  |
| 1HGG.PDB | OD1, A_ASN_298 | N, A_ILE_300   | H, A_ILE_300    | 2.88 | 1.94 | 13.01 |
| 1HGG.PDB | O, A_ILE_282   | N, A_TYR_302   | H, A_TYR_302    | 2.82 | 1.93 | 21.11 |
| 1HGG.PDB | O, A_LYS_264   | OH, A_TYR_302  | HH, A_TYR_302   | 2.68 | 1.87 | 27.38 |
| 1HGG.PDB | O, B_LYS_62    | N, A_GLY_303   | H, A_GLY_303    | 2.91 | 1.94 | 6.06  |
| 1HGG.PDB | O, A_GLN_295   | N, A_VAL_309   | H, A_VAL_309    | 2.91 | 2.09 | 27.06 |
| 1HGG.PDB | OG, B_SER_93   | N, A_LYS_310   | H, A_LYS_310    | 2.89 | 1.96 | 14.59 |
| 1HGG.PDB | OD1, B_ASP_90  | NZ, A_LYS_310  | HZ2, A_LYS_310  | 2.70 | 1.74 | 18.08 |
| 1HGG.PDB | OE2, A_GLU_41  | N, A_LEU_314   | H, A_LEU_314    | 2.82 | 1.91 | 16.70 |
| 1HGG.PDB | OE1, A_GLU_41  | NZ, A_LYS_315  | HZ3, A_LYS_315  | 2.73 | 1.81 | 23.14 |
| 1HGG.PDB | O, A_THR_40    | N, A_LEU_316   | H, A_LEU_316    | 2.77 | 1.85 | 15.18 |
| 1HGG.PDB | OD1, B_ASN_104 | N, A_ALA_317   | H, A_ALA_317    | 2.79 | 1.88 | 16.20 |
| 1HGG.PDB | O, A_ASN_38    | N, A_THR_318   | H, A_THR_318    | 2.90 | 1.97 | 14.69 |
| 1HGG.PDB | O, A_VAL_20    | ND2, A_ASN_322 | HD21, A_ASN_322 | 2.85 | 1.93 | 15.64 |
| 1HGG.PDB | OE2, A_GLU_35  | ND2, A_ASN_322 | HD22, A_ASN_322 | 2.81 | 1.95 | 25.01 |
| 1HGG.PDB | OE2, B_GLU_15  | NZ, A_LYS_326  | HZ1, A_LYS_326  | 2.83 | 1.89 | 21.04 |
| 1HGG.PDB | OE1, A_GLU_325 | NZ, A_LYS_326  | HZ3, A_LYS_326  | 2.82 | 1.86 | 18.51 |
| 1HGG.PDB | OD2, B_ASP_112 | N, B_GLY_1     | H2, B_GLY_1     | 2.70 | 1.71 | 13.07 |
| 1HGG.PDB | OD1, B_ASP_109 | N, B_LEU_2     | H, B_LEU_2      | 2.95 | 2.05 | 19.45 |
| 1HGG.PDB | OD2, B_ASP_112 | N, B_PHE_3     | H, B_PHE_3      | 2.84 | 2.02 | 27.93 |
| 1HGG.PDB | OD2, B_ASP_112 | N, B_GLY_4     | H, B_GLY_4      | 2.94 | 2.03 | 17.01 |
| 1HGG.PDB | OD1, B_ASP_112 | N, B_ALA_5     | H, B_ALA_5      | 2.91 | 2.04 | 23.33 |
| 1HGG.PDB | O, B_GLY_4     | N, B_PHE_9     | H, B_PHE_9      | 2.76 | 1.84 | 15.80 |
| 1HGG.PDB | O, A_VAL_323   | N, B_GLY_13    | H, B_GLY_13     | 2.71 | 1.78 | 13.00 |
| 1HGG.PDB | O, A_HIS_17    | N, B_TRP_14    | H, B_TRP_14     | 2.79 | 1.88 | 17.76 |
| 1HGG.PDB | OG1, B_THR_41  | N, B_TRP_21    | H, B_TRP_21     | 2.85 | 1.90 | 11.01 |
| 1HGG.PDB | O, A_GLY_16    | N, B_GLY_23    | H, B_GLY_23     | 2.99 | 2.09 | 20.32 |
| 1HGG.PDB | O, B_ALA_35    | N, B_PHE_24    | H, B_PHE_24     | 2.82 | 1.86 | 7.34  |
| 1HGG.PDB | OE1, B_GLN_34  | NE, B_ARG_25   | HE, B_ARG_25    | 2.80 | 1.89 | 18.36 |
| 1HGG.PDB | OE1, B_GLN_34  | NH2, B_ARG_25  | HH21, B_ARG_25  | 2.91 | 2.04 | 24.97 |
| 1HGG.PDB | OE2, A_GLU_325 | NH2, B_ARG_25  | HH22, B_ARG_25  | 2.94 | 1.96 | 12.23 |
| 1HGG.PDB | O, B_GLY_33    | N, B_HIS_26    | H, B_HIS_26     | 2.74 | 1.85 | 19.00 |
| 1HGG.PDB | O, B_GLY_31    | N, B_ASN_28    | H, B_ASN_28     | 2.71 | 1.77 | 11.36 |
| 1HGG.PDB | O, B_ASN_28    | N, B_GLY_31    | H, B_GLY_31     | 2.90 | 1.97 | 14.90 |
| 1HGG.PDB | O, B_PHE_24    | N, B_ALA_35    | H, B_ALA_35     | 2.88 | 2.07 | 28.80 |
| 1HGG.PDB | O, B_TYR_22    | N, B_ASP_37    | H, B_ASP_37     | 2.72 | 1.76 | 2.83  |
| 1HGG.PDB | OD2, B_ASP_37  | N, B_SER_40    | H, B_SER_40     | 2.85 | 1.90 | 11.78 |
| 1HGG.PDB | OD2, B_ASP_37  | OG, B_SER_40   | HG, B_SER_40    | 2.80 | 1.93 | 21.69 |
| 1HGG.PDB | O, B_ASP_37    | OG1, B_THR_41  | HG1, B_THR_41   | 2.72 | 1.82 | 17.56 |
| 1HGG.PDB | O, B_LEU_38    | N, B_GLN_42    | H, B_GLN_42     | 2.94 | 1.99 | 12.08 |
| 1HGG.PDB | OD1, B_ASP_46  | NE2, B_GLN_42  | HE22, B_GLN_42  | 2.83 | 1.95 | 21.37 |
| 1HGG.PDB | O, B_LYS_39    | N, B_ALA_43    | H, B_ALA_43     | 2.99 | 2.02 | 7.45  |
| 1HGG.PDB | O, B_SER_40    | N, B_ALA_44    | H, B_ALA_44     | 2.94 | 1.96 | 2.17  |
| 1HGG.PDB | O, B_THR_41    | N, B_ILE_45    | H, B_ILE_45     | 2.95 | 2.02 | 15.56 |
| 1HGG.PDB | O, B_GLN_42    | N, B_ASP_46    | H, B_ASP_46     | 2.79 | 1.82 | 3.46  |
| 1HGG.PDB | OE2, B_GLU_114 | NE2, B_GLN_47  | HE21, B_GLN_47  | 2.96 | 2.05 | 17.92 |
| 1HGG.PDB | O, B_ALA_43    | NE2, B_GLN_47  | HE22, B_GLN_47  | 2.97 | 2.06 | 17.51 |
| 1HGG.PDB | O, B_ILE_45    | N, B_ASN_49    | H, B_ASN_49     | 2.86 | 1.94 | 16.30 |
| 1HGG.PDB | O, B_ASP_46    | N, B_GLY_50    | H, B_GLY_50     | 2.92 | 2.06 | 23.80 |
| 1HGG.PDB | O, B_GLN_47    | N, B_LYS_51    | H, B_LYS_51     | 2.94 | 1.96 | 0.16  |
| 1HGG.PDB | OG1, B_THR_107 | NZ, B_LYS_51   | HZ1, B_LYS_51   | 2.97 | 2.00 | 18.19 |
| 1HGG.PDB | OE1, B_GLU_103 | NZ, B_LYS_51   | HZ2, B_LYS_51   | 2.76 | 1.73 | 5.86  |
| 1HGG.PDB | ND1, B_HIS_106 | NZ, B_LYS_51   | HZ3, B_LYS_51   | 2.77 | 1.79 | 14.96 |
| 1HGG.PDB | O, B_ILE_48    | N, B_LEU_52    | H, B_LEU_52     | 2.89 | 1.99 | 19.12 |
| 1HGG.PDB | O, B_ASN_49    | N, B_ASN_53    | H, B_ASN_53     | 2.89 | 1.99 | 19.14 |
| 1HGG.PDB | O, E_THR_28    | NE, B_ARG_54   | HE, B_ARG_54    | 2.94 | 1.97 | 7.82  |
| 1HGG.PDB | OE1, B_GLU_57  | NH1, B_ARG_54  | HH11, B_ARG_54  | 2.86 | 1.86 | 11.23 |
| 1HGG.PDB | OE2, F_GLU_97  | NH2, B_ARG_54  | HH22, B_ARG_54  | 2.75 | 1.76 | 9.96  |

|          |                |                |                 |      |      |       |
|----------|----------------|----------------|-----------------|------|------|-------|
| 1HGG.PDB | OE2, B_GLU_61  | NZ, B_LYS_58   | HZ3, B_LYS_58   | 2.94 | 1.92 | 12.53 |
| 1HGG.PDB | OD2, F_ASP_90  | NZ, B_LYS_62   | HZ2, B_LYS_62   | 2.65 | 1.82 | 29.87 |
| 1HGG.PDB | OD2, F_ASP_86  | NZ, B_LYS_62   | HZ3, B_LYS_62   | 2.64 | 1.73 | 23.35 |
| 1HGG.PDB | OG, A_SER_110  | NE2, B_HIS_64  | HE2, B_HIS_64   | 2.90 | 1.96 | 14.63 |
| 1HGG.PDB | O, B_PHE_63    | NE2, B_GLN_65  | HE22, B_GLN_65  | 2.94 | 1.96 | 4.34  |
| 1HGG.PDB | O, A_LYS_299   | NZ, B_LYS_68   | HZ1, B_LYS_68   | 2.86 | 1.83 | 9.73  |
| 1HGG.PDB | OE2, B_GLU_85  | NZ, B_LYS_68   | HZ2, B_LYS_68   | 2.75 | 1.72 | 7.06  |
| 1HGG.PDB | OE2, B_GLU_72  | OG, B_SER_71   | HG, B_SER_71    | 2.84 | 2.03 | 27.31 |
| 1HGG.PDB | OG, C_SER_107  | N, B_ARG_76    | H, B_ARG_76     | 2.77 | 1.82 | 10.45 |
| 1HGG.PDB | OE2, D_GLU_81  | NE, B_ARG_76   | HE, B_ARG_76    | 2.94 | 1.96 | 10.47 |
| 1HGG.PDB | OE1, D_GLU_74  | NH1, B_ARG_76  | HH12, B_ARG_76  | 2.88 | 1.89 | 10.69 |
| 1HGG.PDB | OE1, D_GLU_81  | NH2, B_ARG_76  | HH21, B_ARG_76  | 2.73 | 1.73 | 5.91  |
| 1HGG.PDB | OE2, D_GLU_74  | NH2, B_ARG_76  | HH22, B_ARG_76  | 2.82 | 1.82 | 7.26  |
| 1HGG.PDB | O, B_GLY_75    | N, B_ASP_79    | H, B_ASP_79     | 2.85 | 1.93 | 16.05 |
| 1HGG.PDB | OE1, D_GLU_85  | OH, B_TYR_83   | HH, B_TYR_83    | 2.68 | 1.80 | 19.99 |
| 1HGG.PDB | O, B_LEU_80    | N, B_VAL_84    | H, B_VAL_84     | 2.87 | 1.91 | 8.71  |
| 1HGG.PDB | O, B_LYS_82    | N, B_ASP_86    | H, B_ASP_86     | 2.95 | 2.00 | 10.58 |
| 1HGG.PDB | O, B_TYR_83    | N, B_THR_87    | H, B_THR_87     | 2.90 | 1.95 | 10.43 |
| 1HGG.PDB | O, B_VAL_84    | N, B_LYS_88    | H, B_LYS_88     | 2.87 | 2.00 | 23.09 |
| 1HGG.PDB | OH, F_TYR_83   | NZ, B_LYS_88   | HZ1, B_LYS_88   | 2.77 | 1.73 | 5.14  |
| 1HGG.PDB | O, B_GLU_85    | N, B_ILE_89    | H, B_ILE_89     | 2.84 | 1.88 | 8.66  |
| 1HGG.PDB | O, B_LYS_88    | N, B_TRP_92    | H, B_TRP_92     | 2.93 | 1.96 | 6.86  |
| 1HGG.PDB | O, B_ILE_89    | N, B_SER_93    | H, B_SER_93     | 2.84 | 1.95 | 20.72 |
| 1HGG.PDB | O, B_ILE_89    | OG, B_SER_93   | HG, B_SER_93    | 2.79 | 1.89 | 17.30 |
| 1HGG.PDB | O, B_ASP_90    | N, B_TYR_94    | H, B_TYR_94     | 2.97 | 2.04 | 15.33 |
| 1HGG.PDB | O, B_TRP_92    | N, B_ALA_96    | H, B_ALA_96     | 2.98 | 2.05 | 15.46 |
| 1HGG.PDB | O, B_TYR_94    | N, B_LEU_98    | H, B_LEU_98     | 2.95 | 2.00 | 9.66  |
| 1HGG.PDB | O, B_ASN_95    | N, B_LEU_99    | H, B_LEU_99     | 2.89 | 1.99 | 18.59 |
| 1HGG.PDB | O, B_ALA_96    | N, B_VAL_100   | H, B_VAL_100    | 2.98 | 2.01 | 8.53  |
| 1HGG.PDB | O, B_LEU_98    | N, B_LEU_102   | H, B_LEU_102    | 2.92 | 1.98 | 12.12 |
| 1HGG.PDB | O, B_VAL_100   | N, B_ASN_104   | H, B_ASN_104    | 2.85 | 1.94 | 17.67 |
| 1HGG.PDB | O, A_LYS_27    | ND2, B_ASN_104 | HD22, B_ASN_104 | 2.88 | 1.95 | 14.60 |
| 1HGG.PDB | O, B_LEU_102   | N, B_HIS_106   | H, B_HIS_106    | 2.96 | 2.00 | 9.47  |
| 1HGG.PDB | O, B_GLU_103   | N, B_THR_107   | H, B_THR_107    | 2.81 | 1.95 | 23.40 |
| 1HGG.PDB | O, B_HIS_106   | N, B_LEU_110   | H, B_LEU_110    | 2.81 | 1.86 | 11.06 |
| 1HGG.PDB | O, B_THR_107   | N, B_THR_111   | H, B_THR_111    | 2.99 | 2.04 | 11.06 |
| 1HGG.PDB | O, B_THR_107   | OG1, B_THR_111 | HG1, B_THR_111  | 2.84 | 1.91 | 11.39 |
| 1HGG.PDB | O, B_ASP_109   | N, B_SER_113   | H, B_SER_113    | 2.78 | 1.86 | 16.47 |
| 1HGG.PDB | O, B_SER_113   | N, B_LYS_117   | H, B_LYS_117    | 2.73 | 1.85 | 21.24 |
| 1HGG.PDB | O, B_GLU_114   | N, B_LEU_118   | H, B_LEU_118    | 2.99 | 2.06 | 15.73 |
| 1HGG.PDB | O, B_MET_115   | N, B_PHE_119   | H, B_PHE_119    | 3.00 | 2.05 | 12.47 |
| 1HGG.PDB | O, B_ASN_116   | N, B_GLU_120   | H, B_GLU_120    | 2.95 | 1.97 | 4.00  |
| 1HGG.PDB | O, B_LYS_117   | N, B_LYS_121   | H, B_LYS_121    | 2.90 | 2.02 | 20.57 |
| 1HGG.PDB | O, B_LEU_118   | N, B_THR_122   | H, B_THR_122    | 2.96 | 1.98 | 6.92  |
| 1HGG.PDB | O, B_PHE_119   | N, B_ARG_123   | H, B_ARG_123    | 2.91 | 1.95 | 9.73  |
| 1HGG.PDB | OE2, B_GLU_120 | NH1, B_ARG_123 | HH11, B_ARG_123 | 2.73 | 1.87 | 25.50 |
| 1HGG.PDB | O, B_GLU_120   | N, B_ARG_124   | H, B_ARG_124    | 2.98 | 2.01 | 8.72  |
| 1HGG.PDB | OE1, F_GLU_132 | NE, B_ARG_124  | HE, B_ARG_124   | 2.84 | 1.98 | 22.96 |
| 1HGG.PDB | OE2, F_GLU_132 | NE, B_ARG_124  | HE, B_ARG_124   | 2.81 | 1.98 | 25.54 |
| 1HGG.PDB | O, B_HIS_159   | ND2, B_ASN_129 | HD21, B_ASN_129 | 2.98 | 2.03 | 11.68 |
| 1HGG.PDB | OH, B_TYR_157  | ND2, B_ASN_129 | HD22, B_ASN_129 | 2.80 | 1.86 | 13.18 |
| 1HGG.PDB | O, B_LYS_139   | N, B_GLU_131   | H, B_GLU_131    | 2.96 | 2.02 | 13.20 |
| 1HGG.PDB | O, B_CYS_137   | N, B_MET_133   | H, B_MET_133    | 2.89 | 1.98 | 18.42 |
| 1HGG.PDB | O, A_LEU_13    | N, B_PHE_138   | H, B_PHE_138    | 2.70 | 1.86 | 24.49 |
| 1HGG.PDB | O, B_GLU_131   | N, B_LYS_139   | H, B_LYS_139    | 2.86 | 1.90 | 8.51  |
| 1HGG.PDB | O, A_ALA_11    | N, B_ILE_140   | H, B_ILE_140    | 2.77 | 1.86 | 18.05 |
| 1HGG.PDB | O, B_ASN_129   | N, B_TYR_141   | H, B_TYR_141    | 2.90 | 1.92 | 3.10  |
| 1HGG.PDB | OE2, B_GLU_165 | N, B_LYS_143   | H, B_LYS_143    | 2.97 | 2.08 | 21.83 |

|          |                |                |                 |      |      |       |
|----------|----------------|----------------|-----------------|------|------|-------|
| 1HGG.PDB | OD1, B.ASP.145 | N, B.ALA.147   | H, B.ALA.147    | 2.99 | 2.19 | 29.06 |
| 1HGG.PDB | O, B.ASP.145   | N, B.ILE.149   | H, B.ILE.149    | 2.94 | 1.98 | 9.40  |
| 1HGG.PDB | O, B.ASN.146   | N, B.GLU.150   | H, B.GLU.150    | 2.89 | 1.95 | 12.57 |
| 1HGG.PDB | O, B.ALA.147   | N, B.SER.151   | H, B.SER.151    | 2.85 | 1.98 | 22.55 |
| 1HGG.PDB | O, B.CYS.148   | OG, B.SER.151  | HG, B.SER.151   | 2.71 | 1.85 | 21.43 |
| 1HGG.PDB | O, B.GLU.150   | N, B.ASN.154   | H, B.ASN.154    | 2.84 | 1.87 | 3.20  |
| 1HGG.PDB | O, B.SER.151   | N, B.THR.156   | H, B.THR.156    | 2.76 | 1.93 | 25.42 |
| 1HGG.PDB | OD1, B.ASN.154 | OG1, B.THR.156 | HG1, B.THR.156  | 2.71 | 1.81 | 17.64 |
| 1HGG.PDB | OD1, B.ASP.158 | N, B.ASP.160   | H, B.ASP.160    | 2.97 | 2.06 | 18.02 |
| 1HGG.PDB | O, B.HIS.159   | N, B.TYR.162   | H, B.TYR.162    | 2.94 | 2.02 | 17.18 |
| 1HGG.PDB | O, B.ASP.160   | N, B.ARG.163   | H, B.ARG.163    | 2.91 | 1.94 | 6.47  |
| 1HGG.PDB | O, F.ARG.170   | NH1, B.ARG.163 | HH12, B.ARG.163 | 2.76 | 1.82 | 18.13 |
| 1HGG.PDB | O, B.TYR.162   | N, B.ALA.166   | H, B.ALA.166    | 2.87 | 1.91 | 8.33  |
| 1HGG.PDB | O, B.ARG.163   | N, B.LEU.167   | H, B.LEU.167    | 2.76 | 1.83 | 12.88 |
| 1HGG.PDB | O, B.ALA.166   | N, B.ARG.170   | H, B.ARG.170    | 2.86 | 1.99 | 22.15 |
| 1HGG.PDB | O, B.GLU.128   | NE, B.ARG.170  | HE, B.ARG.170   | 2.71 | 1.86 | 24.52 |
| 1HGG.PDB | OE2, B.GLU.131 | NH1, B.ARG.170 | HH11, B.ARG.170 | 2.85 | 1.85 | 6.28  |
| 1HGG.PDB | O, B.LEU.167   | N, B.PHE.171   | H, B.PHE.171    | 2.94 | 1.99 | 10.53 |
| 1HGG.PDB | O, D.ILE.140   | N, C.ALA.11    | H, C.ALA.11     | 2.88 | 1.96 | 16.67 |
| 1HGG.PDB | O, D.PHE.138   | N, C.LEU.13    | H, C.LEU.13     | 3.00 | 2.04 | 10.72 |
| 1HGG.PDB | O, D.ARG.25    | N, C.CYS.14    | H, C.CYS.14     | 2.73 | 1.80 | 13.70 |
| 1HGG.PDB | O, D.GLY.136   | N, C.LEU.15    | H, C.LEU.15     | 2.90 | 1.94 | 8.49  |
| 1HGG.PDB | O, D.GLY.23    | N, C.GLY.16    | H, C.GLY.16     | 2.91 | 2.01 | 20.14 |
| 1HGG.PDB | O, D.TRP.21    | N, C.HIS.18    | H, C.HIS.18     | 2.90 | 2.00 | 17.75 |
| 1HGG.PDB | OD1, C.ASN.322 | N, C.VAL.20    | H, C.VAL.20     | 2.83 | 1.86 | 5.96  |
| 1HGG.PDB | O, C.VAL.36    | N, C.THR.24    | H, C.THR.24     | 2.85 | 1.97 | 21.07 |
| 1HGG.PDB | O, C.ILE.34    | N, C.VAL.26    | H, C.VAL.26     | 2.78 | 1.85 | 13.27 |
| 1HGG.PDB | OE2, D.GLU.97  | NZ, C.LYS.27   | HZ1, C.LYS.27   | 2.94 | 1.91 | 8.28  |
| 1HGG.PDB | O, C.VAL.26    | N, C.ILE.34    | H, C.ILE.34     | 2.94 | 2.00 | 14.30 |
| 1HGG.PDB | O, C.THR.24    | N, C.VAL.36    | H, C.VAL.36     | 2.78 | 1.83 | 9.33  |
| 1HGG.PDB | O, C.MET.320   | N, C.THR.37    | H, C.THR.37     | 2.95 | 1.98 | 6.39  |
| 1HGG.PDB | O, C.LEU.316   | N, C.THR.40    | H, C.THR.40     | 2.80 | 1.94 | 23.65 |
| 1HGG.PDB | O, C.LEU.314   | N, C.LEU.42    | H, C.LEU.42     | 2.84 | 1.98 | 23.25 |
| 1HGG.PDB | O, C.PHE.294   | N, C.GLN.44    | H, C.GLN.44     | 2.77 | 1.82 | 9.57  |
| 1HGG.PDB | O, C.ASN.285   | OG, C.SER.47   | HG, C.SER.47    | 2.86 | 1.92 | 11.28 |
| 1HGG.PDB | OD2, C.ASP.275 | NZ, C.LYS.50   | HZ1, C.LYS.50   | 2.68 | 1.77 | 23.74 |
| 1HGG.PDB | O, C.PRO.273   | N, C.ILE.51    | H, C.ILE.51     | 2.76 | 1.81 | 7.91  |
| 1HGG.PDB | O, C.ASP.275   | N, C.ASN.53    | H, C.ASN.53     | 2.74 | 1.92 | 26.97 |
| 1HGG.PDB | OD2, C.ASP.85  | N, C.ARG.57    | H, C.ARG.57     | 2.86 | 1.92 | 11.42 |
| 1HGG.PDB | O, C.THR.83    | NE, C.ARG.57   | HE, C.ARG.57    | 2.73 | 1.76 | 4.62  |
| 1HGG.PDB | OE1, C.GLU.82  | NH2, C.ARG.57  | HH21, C.ARG.57  | 2.59 | 1.77 | 28.22 |
| 1HGG.PDB | O, C.LEU.86    | N, C.LEU.59    | H, C.LEU.59     | 2.91 | 1.94 | 7.95  |
| 1HGG.PDB | O, C.VAL.88    | N, C.GLY.61    | H, C.GLY.61     | 2.96 | 2.11 | 24.97 |
| 1HGG.PDB | OD1, C.ASP.60  | N, C.ILE.62    | H, C.ILE.62     | 2.85 | 1.92 | 14.37 |
| 1HGG.PDB | O, C.GLY.61    | N, C.CYS.64    | H, C.CYS.64     | 2.95 | 2.02 | 15.64 |
| 1HGG.PDB | O, C.LEU.66    | N, C.LEU.70    | H, C.LEU.70     | 2.88 | 1.98 | 18.83 |
| 1HGG.PDB | O, C.ILE.67    | N, C.LEU.71    | H, C.LEU.71     | 2.81 | 1.85 | 6.57  |
| 1HGG.PDB | O, C.ASP.68    | N, C.GLY.72    | H, C.GLY.72     | 2.83 | 1.91 | 16.32 |
| 1HGG.PDB | OD1, C.ASP.73  | N, C.HIS.75    | H, C.HIS.75     | 2.95 | 2.04 | 19.03 |
| 1HGG.PDB | OD1, C.ASP.73  | ND1, C.HIS.75  | HD1, C.HIS.75   | 2.72 | 1.84 | 20.87 |
| 1HGG.PDB | O, C.ASP.63    | NE2, C.HIS.75  | HE2, C.HIS.75   | 2.81 | 1.85 | 11.39 |
| 1HGG.PDB | O, C.ASP.73    | N, C.CYS.76    | H, C.CYS.76     | 2.75 | 1.83 | 14.81 |
| 1HGG.PDB | O, C.PRO.74    | N, C.ASP.77    | H, C.ASP.77     | 2.88 | 1.94 | 12.22 |
| 1HGG.PDB | O, C.PHE.79    | N, C.GLU.82    | H, C.GLU.82     | 2.98 | 2.06 | 16.43 |
| 1HGG.PDB | O, C.ARG.57    | N, C.ASP.85    | H, C.ASP.85     | 2.82 | 1.92 | 18.11 |
| 1HGG.PDB | O, C.LEU.59    | N, C.VAL.88    | H, C.VAL.88     | 2.94 | 1.97 | 7.31  |
| 1HGG.PDB | O, C.MET.268   | N, C.GLU.89    | H, C.GLU.89     | 2.84 | 1.90 | 11.81 |
| 1HGG.PDB | OD1, C.ASP.60  | NE, C.ARG.90   | HE, C.ARG.90    | 2.93 | 1.95 | 8.71  |

|          |                |                |                 |      |      |       |
|----------|----------------|----------------|-----------------|------|------|-------|
| 1HGG.PDB | O, C_SER_270   | NH1, C_ARG_90  | HH11, C_ARG_90  | 2.63 | 1.77 | 25.40 |
| 1HGG.PDB | O, C_ALA_272   | NH1, C_ARG_90  | HH12, C_ARG_90  | 2.64 | 1.73 | 19.40 |
| 1HGG.PDB | OD2, C_ASP_60  | NH2, C_ARG_90  | HH21, C_ARG_90  | 2.79 | 1.80 | 9.72  |
| 1HGG.PDB | OD1, C_ASP_271 | N, C_SER_91    | H, C_SER_91     | 2.91 | 1.98 | 14.77 |
| 1HGG.PDB | OD1, C_ASP_271 | OG, C_SER_91   | HG, C_SER_91    | 2.89 | 2.06 | 25.85 |
| 1HGG.PDB | OD2, C_ASP_271 | OG, C_SER_91   | HG, C_SER_91    | 2.90 | 2.02 | 21.44 |
| 1HGG.PDB | O, C_ASP_63    | N, C_PHE_94    | H, C_PHE_94     | 2.99 | 2.03 | 11.00 |
| 1HGG.PDB | OD2, C_ASP_68  | OG, C_SER_95   | HG, C_SER_95    | 2.90 | 1.95 | 11.80 |
| 1HGG.PDB | OD2, C_ASP_73  | N, C_ASN_96    | H, C_ASN_96     | 2.84 | 1.91 | 15.44 |
| 1HGG.PDB | SG, C_CYS_97   | N, C_TYR_98    | H, C_TYR_98     | 2.98 | 2.13 | 24.49 |
| 1HGG.PDB | OD1, C_ASP_68  | OH, C_TYR_100  | HH, C_TYR_100   | 2.93 | 1.98 | 11.50 |
| 1HGG.PDB | O, C_ILE_230   | N, C_ASP_101   | H, C_ASP_101    | 2.95 | 2.06 | 21.39 |
| 1HGG.PDB | OD1, C_ASP_104 | N, C_SER_107   | H, C_SER_107    | 2.96 | 2.07 | 20.96 |
| 1HGG.PDB | OD2, C_ASP_104 | OG, C_SER_107  | HG, C_SER_107   | 2.88 | 1.95 | 15.82 |
| 1HGG.PDB | O, C_TYR_105   | N, C_ARG_109   | H, C_ARG_109    | 2.77 | 1.80 | 4.85  |
| 1HGG.PDB | OE2, D_GLU_67  | NH2, C_ARG_109 | HH21, C_ARG_109 | 2.85 | 1.88 | 14.56 |
| 1HGG.PDB | OD2, B_ASP_79  | OG, C_SER_110  | HG, C_SER_110   | 2.76 | 1.86 | 17.83 |
| 1HGG.PDB | O, C_SER_107   | N, C_LEU_111   | H, C_LEU_111    | 2.84 | 1.88 | 8.80  |
| 1HGG.PDB | O, C_ARG_109   | N, C_ALA_113   | H, C_ALA_113    | 2.92 | 2.01 | 17.55 |
| 1HGG.PDB | O, C_SER_110   | N, C_SER_114   | H, C_SER_114    | 2.96 | 2.00 | 11.10 |
| 1HGG.PDB | OE2, C_GLU_119 | OG1, C_THR_117 | HG1, C_THR_117  | 2.92 | 1.97 | 8.69  |
| 1HGG.PDB | O, C_GLU_82    | N, C_LEU_118   | H, C_LEU_118    | 2.98 | 2.02 | 11.62 |
| 1HGG.PDB | O, C_TYR_257   | N, C_ILE_121   | H, C_ILE_121    | 2.89 | 1.93 | 9.59  |
| 1HGG.PDB | O, C_ARG_255   | N, C_GLU_123   | H, C_GLU_123    | 2.97 | 2.02 | 13.93 |
| 1HGG.PDB | O, C_THR_155   | N, C_THR_131   | H, C_THR_131    | 2.76 | 1.85 | 16.88 |
| 1HGG.PDB | OD1, C_ASN_152 | N, C_ASN_133   | H, C_ASN_133    | 2.89 | 1.97 | 17.25 |
| 1HGG.PDB | O, C_GLY_146   | N, C_SER_136   | H, C_SER_136    | 2.76 | 1.84 | 16.68 |
| 1HGG.PDB | OG, C_SER_136  | N, C_ALA_138   | H, C_ALA_138    | 2.90 | 1.94 | 8.35  |
| 1HGG.PDB | O, C_GLY_144   | NZ, C_LYS_140  | HZ1, C_LYS_140  | 2.87 | 1.89 | 15.96 |
| 1HGG.PDB | OD1, C_ASN_137 | NZ, C_LYS_140  | HZ2, C_LYS_140  | 2.78 | 1.78 | 13.21 |
| 1HGG.PDB | OD2, C_ASP_77  | NE, C_ARG_141  | HE, C_ARG_141   | 2.87 | 2.06 | 29.23 |
| 1HGG.PDB | O, C_PHE_147   | NH1, C_ARG_141 | HH12, C_ARG_141 | 2.49 | 1.65 | 25.79 |
| 1HGG.PDB | OD1, C_ASP_77  | NH2, C_ARG_141 | HH21, C_ARG_141 | 2.76 | 1.85 | 22.10 |
| 1HGG.PDB | OD2, C_ASP_77  | NH2, C_ARG_141 | HH21, C_ARG_141 | 2.74 | 1.86 | 24.28 |
| 1HGG.PDB | O, C_GLY_72    | NH2, C_ARG_141 | HH22, C_ARG_141 | 2.93 | 1.94 | 7.19  |
| 1HGG.PDB | OD1, C_ASN_137 | OG, C_SER_145  | HG, C_SER_145   | 2.90 | 2.03 | 20.82 |
| 1HGG.PDB | O, C_SER_136   | N, C_GLY_146   | H, C_GLY_146    | 2.99 | 2.11 | 21.11 |
| 1HGG.PDB | O, C_GLY_72    | N, C_SER_149   | H, C_SER_149    | 2.87 | 1.95 | 15.72 |
| 1HGG.PDB | O, C_ALA_253   | N, C_ASN_152   | H, C_ASN_152    | 2.70 | 1.87 | 25.79 |
| 1HGG.PDB | OH, C_TYR_195  | NE1, C_TRP_153 | HE1, C_TRP_153  | 2.90 | 1.98 | 17.08 |
| 1HGG.PDB | O, C_THR_131   | N, C_THR_155   | H, C_THR_155    | 2.97 | 2.01 | 10.26 |
| 1HGG.PDB | O, C_LEU_194   | N, C_LYS_156   | H, C_LYS_156    | 2.96 | 2.09 | 22.28 |
| 1HGG.PDB | O, C_THR_160   | N, C_SER_157   | H, C_SER_157    | 2.94 | 2.03 | 17.38 |
| 1HGG.PDB | O, C_ILE_245   | N, C_VAL_166   | H, C_VAL_166    | 2.88 | 1.92 | 11.02 |
| 1HGG.PDB | O, C_LEU_243   | OG1, C_THR_167 | HG1, C_THR_167  | 2.88 | 1.99 | 19.69 |
| 1HGG.PDB | O, C_LEU_243   | N, C_MET_168   | H, C_MET_168    | 2.95 | 2.02 | 15.96 |
| 1HGG.PDB | O, C_ASP_241   | N, C_ASN_170   | H, C_ASN_170    | 2.87 | 1.89 | 5.24  |
| 1HGG.PDB | O, C_PHE_174   | ND2, C_ASN_170 | HD21, C_ASN_170 | 2.80 | 1.86 | 12.52 |
| 1HGG.PDB | O, C_VAL_237   | ND2, C_ASN_170 | HD22, C_ASN_170 | 2.86 | 2.00 | 22.88 |
| 1HGG.PDB | O, C_VAL_237   | N, C_LYS_176   | H, C_LYS_176    | 2.90 | 1.97 | 14.96 |
| 1HGG.PDB | OE2, C_GLU_123 | NZ, C_LYS_176  | HZ1, C_LYS_176  | 2.63 | 1.76 | 26.89 |
| 1HGG.PDB | O, C_PHE_258   | N, C_LEU_177   | H, C_LEU_177    | 2.95 | 1.99 | 9.21  |
| 1HGG.PDB | O, C_THR_235   | N, C_TYR_178   | H, C_TYR_178    | 2.76 | 1.80 | 6.43  |
| 1HGG.PDB | OE1, C_GLU_123 | OH, C_TYR_178  | HH, C_TYR_178   | 2.78 | 1.82 | 5.18  |
| 1HGG.PDB | OG1, C_THR_235 | NE1, C_TRP_180 | HE1, C_TRP_180  | 2.92 | 1.93 | 1.99  |
| 1HGG.PDB | O, C_ASN_250   | N, C_HIS_183   | H, C_HIS_183    | 2.79 | 1.93 | 23.13 |
| 1HGG.PDB | O, C_ARG_229   | N, C_HIS_184   | H, C_HIS_184    | 2.88 | 1.91 | 4.45  |
| 1HGG.PDB | OG, C_SER_231  | NE2, C_HIS_184 | HE2, C_HIS_184  | 2.79 | 1.91 | 21.48 |

|          |                |                |                 |      |      |       |
|----------|----------------|----------------|-----------------|------|------|-------|
| 1HGG.PDB | OG1, C_THR_187 | N, C_GLU_190   | H, C_GLU_190    | 2.85 | 1.91 | 12.50 |
| 1HGG.PDB | OD1, C_ASN_250 | NE2, C_GLN_191 | HE21, C_GLN_191 | 2.95 | 1.99 | 11.16 |
| 1HGG.PDB | O, C_GLN_197   | NE2, C_GLN_191 | HE22, C_GLN_191 | 2.91 | 2.02 | 19.58 |
| 1HGG.PDB | O, C_GLN_189   | OG1, C_THR_192 | HG1, C_THR_192  | 2.78 | 1.95 | 25.67 |
| 1HGG.PDB | O, C_GLN_189   | N, C_SER_193   | H, C_SER_193    | 2.82 | 1.90 | 15.79 |
| 1HGG.PDB | O, C_GLN_191   | N, C_TYR_195   | H, C_TYR_195    | 2.84 | 1.90 | 11.98 |
| 1HGG.PDB | O, C_THR_192   | N, C_VAL_196   | H, C_VAL_196    | 2.94 | 2.12 | 27.31 |
| 1HGG.PDB | O, C_TYR_161   | NE2, C_GLN_197 | HE21, C_GLN_197 | 2.93 | 1.96 | 5.46  |
| 1HGG.PDB | O, C_ASN_248   | NE2, C_GLN_197 | HE22, C_GLN_197 | 2.96 | 2.07 | 20.53 |
| 1HGG.PDB | OD1, C_ASN_246 | NH2, C_ARG_201 | HH21, C_ARG_201 | 2.66 | 1.74 | 19.39 |
| 1HGG.PDB | O, C_ILE_213   | N, C_VAL_202   | H, C_VAL_202    | 2.95 | 2.00 | 11.94 |
| 1HGG.PDB | O, C_ASN_246   | N, C_THR_203   | H, C_THR_203    | 2.86 | 1.90 | 8.48  |
| 1HGG.PDB | OG1, C_THR_212 | OG1, C_THR_203 | HG1, C_THR_203  | 2.83 | 1.91 | 13.70 |
| 1HGG.PDB | O, C_GLN_211   | N, C_VAL_204   | H, C_VAL_204    | 2.89 | 1.98 | 18.00 |
| 1HGG.PDB | O, C_SER_209   | N, C_THR_206   | H, C_THR_206    | 2.98 | 2.01 | 7.02  |
| 1HGG.PDB | OD1, C_ASP_241 | N, C_ARG_207   | H, C_ARG_207    | 2.89 | 1.95 | 13.44 |
| 1HGG.PDB | OD2, C_ASP_241 | NE, C_ARG_208  | HE, C_ARG_208   | 2.93 | 2.03 | 20.59 |
| 1HGG.PDB | OG1, C_THR_206 | OG, C_SER_209  | HG, C_SER_209   | 2.99 | 2.06 | 14.06 |
| 1HGG.PDB | O, C_VAL_204   | N, C_GLN_211   | H, C_GLN_211    | 2.82 | 1.90 | 16.88 |
| 1HGG.PDB | O, C_VAL_202   | N, C_ILE_213   | H, C_ILE_213    | 2.82 | 1.89 | 15.37 |
| 1HGG.PDB | OE1, E_GLN_210 | NH2, C_ARG_220 | HH21, C_ARG_220 | 2.61 | 1.71 | 21.26 |
| 1HGG.PDB | O, C_ASN_216   | NH2, C_ARG_220 | HH22, C_ARG_220 | 2.71 | 1.81 | 20.71 |
| 1HGG.PDB | O, C_LEU_226   | N, C_VAL_223   | H, C_VAL_223    | 2.85 | 1.90 | 10.41 |
| 1HGG.PDB | O, C_CYS_97    | NE, C_ARG_224  | HE, C_ARG_224   | 2.77 | 1.94 | 26.89 |
| 1HGG.PDB | O, C_CYS_97    | NH2, C_ARG_224 | HH21, C_ARG_224 | 2.80 | 1.94 | 26.26 |
| 1HGG.PDB | O, C_VAL_223   | N, C_LEU_226   | H, C_LEU_226    | 2.98 | 2.05 | 14.11 |
| 1HGG.PDB | O, C_ARG_220   | OG, C_SER_227  | HG, C_SER_227   | 2.93 | 1.98 | 9.94  |
| 1HGG.PDB | O, C_SER_228   | NH1, C_ARG_229 | HH11, C_ARG_229 | 2.73 | 1.79 | 17.88 |
| 1HGG.PDB | O, C_PRO_221   | NH2, C_ARG_229 | HH22, C_ARG_229 | 2.58 | 1.66 | 18.11 |
| 1HGG.PDB | OD1, C_ASP_101 | OG, C_SER_231  | HG, C_SER_231   | 2.91 | 1.95 | 9.20  |
| 1HGG.PDB | O, C_ASP_101   | N, C_ILE_232   | H, C_ILE_232    | 2.94 | 2.02 | 16.10 |
| 1HGG.PDB | O, C_TRP_180   | N, C_TYR_233   | H, C_TYR_233    | 2.88 | 1.93 | 12.54 |
| 1HGG.PDB | O, C_TYR_178   | N, C_THR_235   | H, C_THR_235    | 2.88 | 1.98 | 19.07 |
| 1HGG.PDB | O, C_LYS_176   | N, C_VAL_237   | H, C_VAL_237    | 2.77 | 1.82 | 10.57 |
| 1HGG.PDB | OE1, B_GLU_72  | NZ, C_LYS_238  | HZ1, C_LYS_238  | 2.83 | 1.86 | 17.18 |
| 1HGG.PDB | OE2, B_GLU_72  | NZ, C_LYS_238  | HZ1, C_LYS_238  | 2.70 | 1.87 | 29.85 |
| 1HGG.PDB | O, B_SER_71    | NZ, C_LYS_238  | HZ3, C_LYS_238  | 2.64 | 1.71 | 20.39 |
| 1HGG.PDB | O, C_ASN_170   | N, C_GLY_240   | H, C_GLY_240    | 2.87 | 2.00 | 22.99 |
| 1HGG.PDB | O, C_LYS_238   | N, C_ASP_241   | H, C_ASP_241    | 2.94 | 2.02 | 16.73 |
| 1HGG.PDB | OD1, C_ASP_241 | N, C_VAL_242   | H, C_VAL_242    | 2.79 | 1.98 | 28.74 |
| 1HGG.PDB | O, C_MET_168   | N, C_LEU_243   | H, C_LEU_243    | 2.90 | 1.93 | 4.41  |
| 1HGG.PDB | O, C_SER_205   | N, C_VAL_244   | H, C_VAL_244    | 2.94 | 1.99 | 13.16 |
| 1HGG.PDB | O, C_VAL_166   | N, C_ILE_245   | H, C_ILE_245    | 2.96 | 2.03 | 15.63 |
| 1HGG.PDB | O, C_THR_203   | N, C_ASN_246   | H, C_ASN_246    | 2.89 | 1.94 | 11.37 |
| 1HGG.PDB | OD1, C_ASN_165 | ND2, C_ASN_246 | HD22, C_ASN_246 | 2.88 | 1.97 | 17.94 |
| 1HGG.PDB | O, C_LEU_164   | N, C_SER_247   | H, C_SER_247    | 2.93 | 2.03 | 18.95 |
| 1HGG.PDB | OE1, C_GLN_191 | ND2, C_ASN_250 | HD21, C_ASN_250 | 2.88 | 1.93 | 11.32 |
| 1HGG.PDB | O, C_HIS_183   | ND2, C_ASN_250 | HD22, C_ASN_250 | 2.88 | 1.92 | 9.88  |
| 1HGG.PDB | O, C_ASN_152   | N, C_ALA_253   | H, C_ALA_253    | 2.89 | 1.98 | 18.52 |
| 1HGG.PDB | OD1, C_ASN_133 | NH2, C_ARG_255 | HH22, C_ARG_255 | 2.54 | 1.68 | 24.43 |
| 1HGG.PDB | O, C_ILE_121   | N, C_TYR_257   | H, C_TYR_257    | 2.94 | 2.10 | 25.61 |
| 1HGG.PDB | O, C_LEU_177   | N, C_PHE_258   | H, C_PHE_258    | 2.95 | 2.00 | 12.32 |
| 1HGG.PDB | OG, C_SER_115  | N, C_ARG_261   | H, C_ARG_261    | 2.98 | 2.02 | 10.79 |
| 1HGG.PDB | OE2, C_GLU_119 | NH1, C_ARG_261 | HH12, C_ARG_261 | 2.67 | 1.86 | 29.79 |
| 1HGG.PDB | OE1, C_GLU_119 | NH2, C_ARG_261 | HH22, C_ARG_261 | 2.73 | 1.87 | 26.76 |
| 1HGG.PDB | OH, C_TYR_302  | NZ, C_LYS_264  | HZ1, C_LYS_264  | 2.88 | 1.92 | 18.77 |
| 1HGG.PDB | ND1, C_HIS_56  | NZ, C_LYS_264  | HZ2, C_LYS_264  | 2.66 | 1.73 | 19.57 |
| 1HGG.PDB | OD2, C_ASP_85  | NZ, C_LYS_264  | HZ3, C_LYS_264  | 2.85 | 1.83 | 11.83 |

|          |                |                |                 |      |      |       |
|----------|----------------|----------------|-----------------|------|------|-------|
| 1HGG.PDB | O, C_PHE_87    | N, C_MET_268   | H, C_MET_268    | 2.84 | 1.93 | 18.75 |
| 1HGG.PDB | OE1, D_GLU_67  | NH1, C_ARG_269 | HH12, C_ARG_269 | 2.69 | 1.85 | 27.75 |
| 1HGG.PDB | O, C_PRO_284   | OG, C_SER_270  | HG, C_SER_270   | 2.81 | 1.87 | 12.03 |
| 1HGG.PDB | OG, C_SER_270  | N, C_ALA_272   | H, C_ALA_272    | 2.94 | 2.00 | 11.74 |
| 1HGG.PDB | O, C_ILE_51    | N, C_ASP_275   | H, C_ASP_275    | 2.84 | 1.97 | 21.56 |
| 1HGG.PDB | OD1, C_ASP_275 | N, C_THR_276   | H, C_THR_276    | 2.78 | 1.93 | 24.05 |
| 1HGG.PDB | O, C_ASN_54    | N, C_SER_279   | H, C_SER_279    | 2.77 | 1.82 | 11.28 |
| 1HGG.PDB | O, C_TYR_302   | N, C_ILE_282   | H, C_ILE_282    | 2.90 | 1.95 | 12.03 |
| 1HGG.PDB | O, C_THR_283   | N, C_GLY_286   | H, C_GLY_286    | 2.78 | 1.84 | 12.37 |
| 1HGG.PDB | O, C_LYS_50    | N, C_SER_287   | H, C_SER_287    | 2.83 | 1.87 | 6.69  |
| 1HGG.PDB | O, C_ALA_304   | ND2, C_ASN_290 | HD22, C_ASN_290 | 2.88 | 2.00 | 21.32 |
| 1HGG.PDB | OE1, C_GLN_44  | NZ, C_LYS_292  | HZ1, C_LYS_292  | 2.77 | 1.76 | 11.69 |
| 1HGG.PDB | OD2, C_ASP_291 | NZ, C_LYS_292  | HZ3, C_LYS_292  | 2.78 | 1.91 | 27.51 |
| 1HGG.PDB | O, C_LYS_307   | N, C_GLN_295   | H, C_GLN_295    | 2.80 | 1.92 | 20.69 |
| 1HGG.PDB | O, C_ASN_298   | NE2, C_GLN_295 | HE21, C_GLN_295 | 2.82 | 1.85 | 7.30  |
| 1HGG.PDB | O, C_GLN_44    | N, C_ASN_296   | H, C_ASN_296    | 2.86 | 1.91 | 11.10 |
| 1HGG.PDB | OD1, C_ASN_285 | ND2, C_ASN_298 | HD22, C_ASN_298 | 2.95 | 2.00 | 10.88 |
| 1HGG.PDB | O, D_LYS_68    | NZ, C_LYS_299  | HZ1, C_LYS_299  | 2.94 | 1.91 | 9.55  |
| 1HGG.PDB | OD1, C_ASN_298 | N, C_ILE_300   | H, C_ILE_300    | 2.84 | 1.92 | 15.94 |
| 1HGG.PDB | O, C_ILE_282   | N, C_TYR_302   | H, C_TYR_302    | 2.82 | 1.94 | 22.26 |
| 1HGG.PDB | O, C_LYS_264   | OH, C_TYR_302  | HH, C_TYR_302   | 2.69 | 1.86 | 25.98 |
| 1HGG.PDB | O, D_LYS_62    | N, C_GLY_303   | H, C_GLY_303    | 2.91 | 1.94 | 5.10  |
| 1HGG.PDB | O, C_GLN_295   | N, C_VAL_309   | H, C_VAL_309    | 2.92 | 2.09 | 26.95 |
| 1HGG.PDB | OG, D_SER_93   | N, C_LYS_310   | H, C_LYS_310    | 2.89 | 1.96 | 14.95 |
| 1HGG.PDB | OD1, D_ASP_90  | NZ, C_LYS_310  | HZ2, C_LYS_310  | 2.65 | 1.73 | 21.74 |
| 1HGG.PDB | OE2, C_GLU_41  | N, C_LEU_314   | H, C_LEU_314    | 2.79 | 1.88 | 17.71 |
| 1HGG.PDB | OE1, C_GLU_41  | NZ, C_LYS_315  | HZ3, C_LYS_315  | 2.73 | 1.82 | 23.48 |
| 1HGG.PDB | O, C_THR_40    | N, C_LEU_316   | H, C_LEU_316    | 2.76 | 1.85 | 16.07 |
| 1HGG.PDB | OD1, D_ASN_104 | N, C_ALA_317   | H, C_ALA_317    | 2.78 | 1.87 | 17.02 |
| 1HGG.PDB | O, C_ASN_38    | N, C_THR_318   | H, C_THR_318    | 2.91 | 1.99 | 16.68 |
| 1HGG.PDB | O, C_VAL_20    | ND2, C_ASN_322 | HD21, C_ASN_322 | 2.89 | 1.97 | 16.73 |
| 1HGG.PDB | OE2, C_GLU_35  | ND2, C_ASN_322 | HD22, C_ASN_322 | 2.82 | 1.96 | 24.18 |
| 1HGG.PDB | OXT, C_THR_328 | NE2, C_GLN_327 | HE22, C_GLN_327 | 2.99 | 2.05 | 16.22 |
| 1HGG.PDB | OD2, D_ASP_112 | N, D_GLY_1     | H2, D_GLY_1     | 2.72 | 1.72 | 12.91 |
| 1HGG.PDB | OD1, D_ASP_109 | N, D_LEU_2     | H, D_LEU_2      | 2.98 | 2.06 | 18.06 |
| 1HGG.PDB | OD2, D_ASP_112 | N, D_PHE_3     | H, D_PHE_3      | 2.89 | 2.07 | 26.93 |
| 1HGG.PDB | OD2, D_ASP_112 | N, D_GLY_4     | H, D_GLY_4      | 2.95 | 2.04 | 17.54 |
| 1HGG.PDB | OD1, D_ASP_112 | N, D_ALA_5     | H, D_ALA_5      | 2.93 | 2.07 | 23.70 |
| 1HGG.PDB | O, D_GLY_4     | N, D_PHE_9     | H, D_PHE_9      | 2.79 | 1.86 | 14.01 |
| 1HGG.PDB | O, C_VAL_323   | N, D_GLY_13    | H, D_GLY_13     | 2.71 | 1.79 | 13.39 |
| 1HGG.PDB | O, C_HIS_17    | N, D_TRP_14    | H, D_TRP_14     | 2.80 | 1.89 | 17.21 |
| 1HGG.PDB | OG1, D_THR_41  | N, D_TRP_21    | H, D_TRP_21     | 2.88 | 1.93 | 11.49 |
| 1HGG.PDB | O, C_GLY_16    | N, D_GLY_23    | H, D_GLY_23     | 2.99 | 2.09 | 20.18 |
| 1HGG.PDB | O, D_ALA_35    | N, D_PHE_24    | H, D_PHE_24     | 2.85 | 1.88 | 4.85  |
| 1HGG.PDB | O, C_CYS_14    | N, D_ARG_25    | H, D_ARG_25     | 2.94 | 1.98 | 8.24  |
| 1HGG.PDB | OE1, D_GLN_34  | NE, D_ARG_25   | HE, D_ARG_25    | 2.69 | 1.81 | 20.51 |
| 1HGG.PDB | OE1, D_GLN_34  | NH2, D_ARG_25  | HH21, D_ARG_25  | 2.92 | 2.08 | 27.66 |
| 1HGG.PDB | O, D_GLY_33    | N, D_HIS_26    | H, D_HIS_26     | 2.93 | 2.01 | 17.07 |
| 1HGG.PDB | O, D_GLY_31    | N, D_ASN_28    | H, D_ASN_28     | 2.87 | 1.91 | 10.16 |
| 1HGG.PDB | OD1, D_ASN_146 | ND2, D_ASN_28  | HD21, D_ASN_28  | 2.95 | 1.98 | 8.75  |
| 1HGG.PDB | O, D_HIS_26    | N, D_GLY_33    | H, D_GLY_33     | 2.99 | 2.09 | 19.19 |
| 1HGG.PDB | O, D_PHE_24    | N, D_ALA_35    | H, D_ALA_35     | 2.88 | 2.07 | 28.42 |
| 1HGG.PDB | O, D_TYR_22    | N, D_ASP_37    | H, D_ASP_37     | 2.74 | 1.77 | 2.87  |
| 1HGG.PDB | OD2, D_ASP_37  | N, D_SER_40    | H, D_SER_40     | 2.86 | 1.92 | 11.90 |
| 1HGG.PDB | OD2, D_ASP_37  | OG, D_SER_40   | HG, D_SER_40    | 2.77 | 1.93 | 24.58 |
| 1HGG.PDB | O, D_ASP_37    | OG1, D_THR_41  | HG1, D_THR_41   | 2.70 | 1.81 | 19.22 |
| 1HGG.PDB | O, D_LEU_38    | N, D_GLN_42    | H, D_GLN_42     | 2.95 | 2.02 | 14.26 |
| 1HGG.PDB | OD1, D_ASP_46  | NE2, D_GLN_42  | HE22, D_GLN_42  | 2.85 | 1.96 | 21.08 |

|          |                |                |                 |      |      |       |
|----------|----------------|----------------|-----------------|------|------|-------|
| 1HGG.PDB | O, D_LYS_39    | N, D_ALA_43    | H, D_ALA_43     | 2.99 | 2.03 | 8.86  |
| 1HGG.PDB | O, D_SER_40    | N, D_ALA_44    | H, D_ALA_44     | 2.95 | 1.97 | 1.83  |
| 1HGG.PDB | O, D_THR_41    | N, D_ILE_45    | H, D_ILE_45     | 2.97 | 2.03 | 14.64 |
| 1HGG.PDB | O, D_GLN_42    | N, D_ASP_46    | H, D_ASP_46     | 2.77 | 1.81 | 4.12  |
| 1HGG.PDB | OE2, D_GLU_114 | NE2, D_GLN_47  | HE21, D_GLN_47  | 2.97 | 2.05 | 17.17 |
| 1HGG.PDB | O, D_ALA_43    | NE2, D_GLN_47  | HE22, D_GLN_47  | 2.95 | 2.03 | 16.72 |
| 1HGG.PDB | O, D_ILE_45    | N, D_ASN_49    | H, D_ASN_49     | 2.86 | 1.93 | 14.78 |
| 1HGG.PDB | O, D_ASP_46    | N, D_GLY_50    | H, D_GLY_50     | 2.93 | 2.07 | 23.90 |
| 1HGG.PDB | O, D_GLN_47    | N, D_LYS_51    | H, D_LYS_51     | 2.93 | 1.95 | 0.82  |
| 1HGG.PDB | OG1, D_THR_107 | NZ, D_LYS_51   | HZ1, D_LYS_51   | 2.98 | 2.00 | 17.66 |
| 1HGG.PDB | OE1, D_GLU_103 | NZ, D_LYS_51   | HZ2, D_LYS_51   | 2.77 | 1.73 | 6.39  |
| 1HGG.PDB | ND1, D_HIS_106 | NZ, D_LYS_51   | HZ3, D_LYS_51   | 2.76 | 1.78 | 15.09 |
| 1HGG.PDB | O, D_ILE_48    | N, D_LEU_52    | H, D_LEU_52     | 2.86 | 1.96 | 19.21 |
| 1HGG.PDB | O, D_ASN_49    | N, D_ASN_53    | H, D_ASN_53     | 2.89 | 1.99 | 19.47 |
| 1HGG.PDB | O, A_THR_28    | NE, D_ARG_54   | HE, D_ARG_54    | 2.88 | 1.91 | 8.15  |
| 1HGG.PDB | OE1, D_GLU_57  | NH1, D_ARG_54  | HH11, D_ARG_54  | 2.86 | 1.86 | 11.12 |
| 1HGG.PDB | OE2, B_GLU_97  | NH2, D_ARG_54  | HH22, D_ARG_54  | 2.76 | 1.78 | 10.56 |
| 1HGG.PDB | O, D_ASN_53    | N, D_ILE_56    | H, D_ILE_56     | 2.92 | 2.12 | 28.93 |
| 1HGG.PDB | OE2, D_GLU_61  | NZ, D_LYS_58   | HZ3, D_LYS_58   | 2.91 | 1.89 | 12.30 |
| 1HGG.PDB | OG, C_SER_110  | NE2, D_HIS_64  | HE2, D_HIS_64   | 2.86 | 1.90 | 9.42  |
| 1HGG.PDB | O, D_PHE_63    | NE2, D_GLN_65  | HE22, D_GLN_65  | 2.97 | 2.00 | 6.28  |
| 1HGG.PDB | O, C_LYS_299   | NZ, D_LYS_68   | HZ1, D_LYS_68   | 2.84 | 1.83 | 12.46 |
| 1HGG.PDB | OE2, D_GLU_85  | NZ, D_LYS_68   | HZ2, D_LYS_68   | 2.77 | 1.74 | 6.59  |
| 1HGG.PDB | OE2, D_GLU_72  | OG, D_SER_71   | HG, D_SER_71    | 2.82 | 2.00 | 26.77 |
| 1HGG.PDB | OG, E_SER_107  | N, D_ARG_76    | H, D_ARG_76     | 2.84 | 1.88 | 7.98  |
| 1HGG.PDB | OE2, F_GLU_81  | NE, D_ARG_76   | HE, D_ARG_76    | 2.86 | 1.89 | 9.57  |
| 1HGG.PDB | OE1, F_GLU_74  | NH1, D_ARG_76  | HH12, D_ARG_76  | 2.78 | 1.80 | 12.10 |
| 1HGG.PDB | OE1, F_GLU_81  | NH2, D_ARG_76  | HH21, D_ARG_76  | 2.67 | 1.68 | 6.66  |
| 1HGG.PDB | OE2, F_GLU_74  | NH2, D_ARG_76  | HH22, D_ARG_76  | 2.74 | 1.75 | 9.29  |
| 1HGG.PDB | O, D_GLY_75    | N, D_ASP_79    | H, D_ASP_79     | 2.89 | 1.95 | 14.50 |
| 1HGG.PDB | OE1, F_GLU_85  | OH, D_TYR_83   | HH, D_TYR_83    | 2.59 | 1.78 | 26.83 |
| 1HGG.PDB | O, D_LEU_80    | N, D_VAL_84    | H, D_VAL_84     | 2.86 | 1.90 | 9.21  |
| 1HGG.PDB | O, D_LYS_82    | N, D_ASP_86    | H, D_ASP_86     | 2.98 | 2.01 | 8.40  |
| 1HGG.PDB | O, D_TYR_83    | N, D_THR_87    | H, D_THR_87     | 2.88 | 1.92 | 7.85  |
| 1HGG.PDB | O, D_VAL_84    | N, D_LYS_88    | H, D_LYS_88     | 2.88 | 2.03 | 24.81 |
| 1HGG.PDB | OH, B_TYR_83   | NZ, D_LYS_88   | HZ1, D_LYS_88   | 2.73 | 1.70 | 8.35  |
| 1HGG.PDB | O, D_GLU_85    | N, D_ILE_89    | H, D_ILE_89     | 2.83 | 1.87 | 9.71  |
| 1HGG.PDB | O, D_LYS_88    | N, D_TRP_92    | H, D_TRP_92     | 2.89 | 1.92 | 6.21  |
| 1HGG.PDB | O, D_ILE_89    | N, D_SER_93    | H, D_SER_93     | 2.82 | 1.94 | 21.49 |
| 1HGG.PDB | O, D_ILE_89    | OG, D_SER_93   | HG, D_SER_93    | 2.77 | 1.87 | 18.00 |
| 1HGG.PDB | O, D_ASP_90    | N, D_TYR_94    | H, D_TYR_94     | 2.96 | 2.03 | 15.50 |
| 1HGG.PDB | O, D_TRP_92    | N, D_ALA_96    | H, D_ALA_96     | 3.00 | 2.06 | 15.10 |
| 1HGG.PDB | O, D_TYR_94    | N, D_LEU_98    | H, D_LEU_98     | 2.95 | 1.99 | 9.12  |
| 1HGG.PDB | O, D_ASN_95    | N, D_LEU_99    | H, D_LEU_99     | 2.88 | 1.98 | 19.51 |
| 1HGG.PDB | O, D_ALA_96    | N, D_VAL_100   | H, D_VAL_100    | 2.99 | 2.02 | 8.75  |
| 1HGG.PDB | O, D_LEU_98    | N, D_LEU_102   | H, D_LEU_102    | 2.93 | 1.97 | 11.16 |
| 1HGG.PDB | O, D_VAL_100   | N, D_ASN_104   | H, D_ASN_104    | 2.84 | 1.93 | 18.38 |
| 1HGG.PDB | O, C_LYS_27    | ND2, D_ASN_104 | HD22, D_ASN_104 | 2.86 | 1.93 | 13.53 |
| 1HGG.PDB | O, D_LEU_102   | N, D_HIS_106   | H, D_HIS_106    | 2.95 | 2.00 | 11.00 |
| 1HGG.PDB | O, D_GLU_103   | N, D_THR_107   | H, D_THR_107    | 2.82 | 1.97 | 24.04 |
| 1HGG.PDB | O, D_HIS_106   | N, D_LEU_110   | H, D_LEU_110    | 2.77 | 1.83 | 11.18 |
| 1HGG.PDB | O, D_THR_107   | N, D_THR_111   | H, D_THR_111    | 2.98 | 2.03 | 10.32 |
| 1HGG.PDB | O, D_THR_107   | OG1, D_THR_111 | HG1, D_THR_111  | 2.86 | 1.91 | 10.45 |
| 1HGG.PDB | O, D_ASP_109   | N, D_SER_113   | H, D_SER_113    | 2.78 | 1.86 | 15.73 |
| 1HGG.PDB | O, D_ASP_112   | N, D_ASN_116   | H, D_ASN_116    | 3.00 | 2.01 | 4.28  |
| 1HGG.PDB | O, D_SER_113   | N, D_LYS_117   | H, D_LYS_117    | 2.76 | 1.87 | 19.86 |
| 1HGG.PDB | O, D_ASN_116   | N, D_GLU_120   | H, D_GLU_120    | 2.94 | 1.96 | 4.15  |
| 1HGG.PDB | O, D_LYS_117   | N, D_LYS_121   | H, D_LYS_121    | 2.89 | 1.99 | 19.16 |

|          |                |                |                 |      |      |       |
|----------|----------------|----------------|-----------------|------|------|-------|
| 1HGG.PDB | O, D_LEU_118   | N, D_THR_122   | H, D_THR_122    | 2.95 | 1.98 | 8.05  |
| 1HGG.PDB | O, D_PHE_119   | N, D_ARG_123   | H, D_ARG_123    | 2.95 | 1.99 | 9.23  |
| 1HGG.PDB | OE2, D_GLU_120 | NH1, D_ARG_123 | HH11, D_ARG_123 | 2.73 | 1.87 | 25.59 |
| 1HGG.PDB | O, D_GLU_120   | N, D_ARG_124   | H, D_ARG_124    | 2.99 | 2.02 | 7.97  |
| 1HGG.PDB | OE1, B_GLU_132 | NE, D_ARG_124  | HE, D_ARG_124   | 2.86 | 2.00 | 22.57 |
| 1HGG.PDB | OE2, B_GLU_132 | NE, D_ARG_124  | HE, D_ARG_124   | 2.78 | 1.96 | 26.12 |
| 1HGG.PDB | O, D_HIS_159   | ND2, D_ASN_129 | HD21, D_ASN_129 | 2.94 | 1.99 | 11.72 |
| 1HGG.PDB | OH, D_TYR_157  | ND2, D_ASN_129 | HD22, D_ASN_129 | 2.80 | 1.84 | 10.50 |
| 1HGG.PDB | O, D_LYS_139   | N, D_GLU_131   | H, D_GLU_131    | 2.99 | 2.04 | 13.39 |
| 1HGG.PDB | O, D_CYS_137   | N, D_MET_133   | H, D_MET_133    | 2.90 | 1.98 | 17.30 |
| 1HGG.PDB | OD1, D_ASN_135 | N, D_CYS_137   | H, D_CYS_137    | 3.00 | 2.10 | 19.46 |
| 1HGG.PDB | O, C_LEU_13    | N, D_PHE_138   | H, D_PHE_138    | 2.73 | 1.88 | 23.87 |
| 1HGG.PDB | O, D_GLU_131   | N, D_LYS_139   | H, D_LYS_139    | 2.86 | 1.90 | 10.04 |
| 1HGG.PDB | O, C_ALA_11    | N, D_ILE_140   | H, D_ILE_140    | 2.80 | 1.89 | 17.21 |
| 1HGG.PDB | O, D_ASN_129   | N, D_TYR_141   | H, D_TYR_141    | 2.89 | 1.92 | 4.81  |
| 1HGG.PDB | OE2, D_GLU_30  | N, D_ASN_146   | H, D_ASN_146    | 2.84 | 1.92 | 15.86 |
| 1HGG.PDB | O, D_ASP_145   | N, D_ILE_149   | H, D_ILE_149    | 2.98 | 2.02 | 9.24  |
| 1HGG.PDB | O, D_ASN_146   | N, D_GLU_150   | H, D_GLU_150    | 2.89 | 1.95 | 13.07 |
| 1HGG.PDB | O, D_ALA_147   | N, D_SER_151   | H, D_SER_151    | 2.89 | 2.01 | 20.94 |
| 1HGG.PDB | O, D_CYS_148   | OG, D_SER_151  | HG, D_SER_151   | 2.72 | 1.85 | 20.20 |
| 1HGG.PDB | O, D_GLU_150   | N, D_ASN_154   | H, D_ASN_154    | 2.84 | 1.87 | 4.45  |
| 1HGG.PDB | O, D_SER_151   | N, D_THR_156   | H, D_THR_156    | 2.78 | 1.93 | 25.02 |
| 1HGG.PDB | OD1, D_ASN_154 | OG1, D_THR_156 | HG1, D_THR_156  | 2.73 | 1.82 | 15.46 |
| 1HGG.PDB | NE2, D_HIS_142 | OH, D_TYR_157  | HH, D_TYR_157   | 2.72 | 1.85 | 20.87 |
| 1HGG.PDB | OD1, D_ASP_158 | N, D_ASP_160   | H, D_ASP_160    | 2.97 | 2.05 | 17.87 |
| 1HGG.PDB | O, D_HIS_159   | N, D_TYR_162   | H, D_TYR_162    | 2.93 | 2.01 | 16.79 |
| 1HGG.PDB | O, D_ASP_160   | N, D_ARG_163   | H, D_ARG_163    | 2.89 | 1.92 | 6.62  |
| 1HGG.PDB | O, B_ARG_170   | NH1, D_ARG_163 | HH12, D_ARG_163 | 2.79 | 1.85 | 17.60 |
| 1HGG.PDB | O, D_TYR_162   | N, D_ALA_166   | H, D_ALA_166    | 2.86 | 1.90 | 8.06  |
| 1HGG.PDB | O, D_ARG_163   | N, D_LEU_167   | H, D_LEU_167    | 2.77 | 1.84 | 14.60 |
| 1HGG.PDB | O, D_ALA_166   | N, D_ARG_170   | H, D_ARG_170    | 2.87 | 2.00 | 22.89 |
| 1HGG.PDB | O, D_GLU_128   | NE, D_ARG_170  | HE, D_ARG_170   | 2.70 | 1.85 | 24.63 |
| 1HGG.PDB | OE2, D_GLU_131 | NH1, D_ARG_170 | HH11, D_ARG_170 | 2.85 | 1.86 | 6.70  |
| 1HGG.PDB | O, D_LEU_167   | N, D_PHE_171   | H, D_PHE_171    | 2.94 | 1.98 | 10.64 |
| 1HGG.PDB | O, F_ILE_140   | N, E_ALA_11    | H, E_ALA_11     | 2.91 | 1.98 | 15.76 |
| 1HGG.PDB | O, F_GLN_27    | N, E_THR_12    | H, E_THR_12     | 2.92 | 1.99 | 15.18 |
| 1HGG.PDB | O, F_PHE_138   | N, E_LEU_13    | H, E_LEU_13     | 2.97 | 2.01 | 11.10 |
| 1HGG.PDB | O, F_ARG_25    | N, E_CYS_14    | H, E_CYS_14     | 2.71 | 1.83 | 19.57 |
| 1HGG.PDB | O, F_GLY_136   | N, E_LEU_15    | H, E_LEU_15     | 2.87 | 1.90 | 6.84  |
| 1HGG.PDB | O, F_GLY_23    | N, E_GLY_16    | H, E_GLY_16     | 2.91 | 2.01 | 19.19 |
| 1HGG.PDB | O, F_TRP_21    | N, E_HIS_18    | H, E_HIS_18     | 2.89 | 1.99 | 18.05 |
| 1HGG.PDB | OD1, E_ASN_322 | N, E_VAL_20    | H, E_VAL_20     | 2.81 | 1.84 | 7.14  |
| 1HGG.PDB | O, E_VAL_36    | N, E_THR_24    | H, E_THR_24     | 2.86 | 1.99 | 23.32 |
| 1HGG.PDB | O, E_ILE_34    | N, E_VAL_26    | H, E_VAL_26     | 2.80 | 1.86 | 12.97 |
| 1HGG.PDB | OE2, F_GLU_97  | NZ, E_LYS_27   | HZ1, E_LYS_27   | 2.91 | 1.88 | 8.89  |
| 1HGG.PDB | O, E_VAL_26    | N, E_ILE_34    | H, E_ILE_34     | 2.91 | 1.98 | 15.06 |
| 1HGG.PDB | O, E_THR_24    | N, E_VAL_36    | H, E_VAL_36     | 2.79 | 1.84 | 9.17  |
| 1HGG.PDB | O, E_MET_320   | N, E_THR_37    | H, E_THR_37     | 2.93 | 1.96 | 8.79  |
| 1HGG.PDB | O, E_LEU_316   | N, E_THR_40    | H, E_THR_40     | 2.83 | 1.96 | 23.13 |
| 1HGG.PDB | O, E_LEU_314   | N, E_LEU_42    | H, E_LEU_42     | 2.84 | 1.97 | 22.62 |
| 1HGG.PDB | O, E_PHE_294   | N, E_GLN_44    | H, E_GLN_44     | 2.82 | 1.86 | 8.10  |
| 1HGG.PDB | O, E_ASN_285   | OG, E_SER_47   | HG, E_SER_47    | 2.85 | 1.92 | 11.49 |
| 1HGG.PDB | OD2, E_ASP_275 | NZ, E_LYS_50   | HZ1, E_LYS_50   | 2.68 | 1.77 | 24.10 |
| 1HGG.PDB | O, E_PRO_273   | N, E_ILE_51    | H, E_ILE_51     | 2.76 | 1.80 | 7.93  |
| 1HGG.PDB | O, E_ASP_275   | N, E_ASN_53    | H, E_ASN_53     | 2.76 | 1.93 | 26.21 |
| 1HGG.PDB | OD2, E_ASP_85  | N, E_ARG_57    | H, E_ARG_57     | 2.88 | 1.93 | 10.58 |
| 1HGG.PDB | O, E_THR_83    | NE, E_ARG_57   | HE, E_ARG_57    | 2.76 | 1.79 | 2.44  |
| 1HGG.PDB | O, E_LEU_86    | N, E_LEU_59    | H, E_LEU_59     | 2.92 | 1.95 | 8.87  |



|          |                |                |                 |      |      |       |
|----------|----------------|----------------|-----------------|------|------|-------|
| 1HGG.PDB | O, E_VAL.88    | N, E_GLY.61    | H, E_GLY.61     | 2.97 | 2.12 | 24.82 |
| 1HGG.PDB | OD1, E_ASP.60  | N, E_ILE.62    | H, E_ILE.62     | 2.87 | 1.94 | 14.20 |
| 1HGG.PDB | O, E_GLY.61    | N, E_CYS.64    | H, E_CYS.64     | 2.97 | 2.05 | 16.18 |
| 1HGG.PDB | O, E_LEU.66    | N, E_LEU.70    | H, E_LEU.70     | 2.87 | 1.97 | 18.30 |
| 1HGG.PDB | O, E_ILE.67    | N, E_LEU.71    | H, E_LEU.71     | 2.81 | 1.85 | 7.87  |
| 1HGG.PDB | O, E_ASP.68    | N, E_GLY.72    | H, E_GLY.72     | 2.86 | 1.95 | 17.48 |
| 1HGG.PDB | OD1, E_ASP.73  | ND1, E_HIS.75  | HD1, E_HIS.75   | 2.75 | 1.85 | 17.34 |
| 1HGG.PDB | O, E_ASP.63    | NE2, E_HIS.75  | HE2, E_HIS.75   | 2.82 | 1.87 | 11.87 |
| 1HGG.PDB | O, E_ASP.73    | N, E_CYS.76    | H, E_CYS.76     | 2.74 | 1.82 | 15.22 |
| 1HGG.PDB | O, E_PRO.74    | N, E_ASP.77    | H, E_ASP.77     | 2.89 | 1.94 | 11.95 |
| 1HGG.PDB | O, E_PHE.79    | N, E_GLU.82    | H, E_GLU.82     | 3.00 | 2.09 | 17.70 |
| 1HGG.PDB | OE1, E_GLU.82  | N, E_THR.83    | H, E_THR.83     | 2.96 | 2.07 | 21.15 |
| 1HGG.PDB | O, E_ARG.57    | N, E_ASP.85    | H, E_ASP.85     | 2.82 | 1.91 | 18.08 |
| 1HGG.PDB | O, E_LEU.59    | N, E_VAL.88    | H, E_VAL.88     | 2.92 | 1.95 | 6.94  |
| 1HGG.PDB | O, E_MET.268   | N, E_GLU.89    | H, E_GLU.89     | 2.82 | 1.88 | 11.27 |
| 1HGG.PDB | OD1, E_ASP.60  | NE, E_ARG.90   | HE, E_ARG.90    | 2.91 | 1.94 | 9.27  |
| 1HGG.PDB | O, E_SER.270   | NH1, E_ARG.90  | HH11, E_ARG.90  | 2.66 | 1.80 | 25.54 |
| 1HGG.PDB | O, E_ALA.272   | NH1, E_ARG.90  | HH12, E_ARG.90  | 2.63 | 1.72 | 18.75 |
| 1HGG.PDB | OD2, E_ASP.60  | NH2, E_ARG.90  | HH21, E_ARG.90  | 2.83 | 1.84 | 9.64  |
| 1HGG.PDB | OD1, E_ASP.271 | N, E_SER.91    | H, E_SER.91     | 2.89 | 1.97 | 16.48 |
| 1HGG.PDB | OD1, E_ASP.271 | OG, E_SER.91   | HG, E_SER.91    | 2.92 | 2.07 | 24.79 |
| 1HGG.PDB | OD2, E_ASP.271 | OG, E_SER.91   | HG, E_SER.91    | 2.93 | 2.06 | 22.08 |
| 1HGG.PDB | O, E_ASP.63    | N, E_PHE.94    | H, E_PHE.94     | 3.00 | 2.05 | 12.31 |
| 1HGG.PDB | OD2, E_ASP.68  | OG, E_SER.95   | HG, E_SER.95    | 2.93 | 1.98 | 13.19 |
| 1HGG.PDB | OD2, E_ASP.73  | N, E_ASN.96    | H, E_ASN.96     | 2.88 | 1.94 | 14.23 |
| 1HGG.PDB | SG, E_CYS.97   | N, E_TYR.98    | H, E_TYR.98     | 2.97 | 2.12 | 24.47 |
| 1HGG.PDB | OD1, E_ASP.68  | OH, E_TYR.100  | HH, E_TYR.100   | 2.92 | 1.96 | 10.90 |
| 1HGG.PDB | O, E_ILE.230   | N, E_ASP.101   | H, E_ASP.101    | 2.99 | 2.10 | 20.87 |
| 1HGG.PDB | OD1, E_ASP.104 | N, E_SER.107   | H, E_SER.107    | 2.92 | 2.04 | 21.12 |
| 1HGG.PDB | OD2, E_ASP.104 | OG, E_SER.107  | HG, E_SER.107   | 2.85 | 1.93 | 15.56 |
| 1HGG.PDB | O, E_ASP.104   | N, E_LEU.108   | H, E_LEU.108    | 2.97 | 2.01 | 9.00  |
| 1HGG.PDB | O, E_TYR.105   | N, E_ARG.109   | H, E_ARG.109    | 2.81 | 1.84 | 2.88  |
| 1HGG.PDB | OE2, F_GLU.67  | NH2, E_ARG.109 | HH21, E_ARG.109 | 2.88 | 1.90 | 14.20 |
| 1HGG.PDB | OD2, D_ASP.79  | OG, E_SER.110  | HG, E_SER.110   | 2.79 | 1.88 | 16.48 |
| 1HGG.PDB | O, E_SER.107   | N, E_LEU.111   | H, E_LEU.111    | 2.86 | 1.89 | 6.99  |
| 1HGG.PDB | O, E_ARG.109   | N, E_ALA.113   | H, E_ALA.113    | 2.89 | 1.98 | 18.53 |
| 1HGG.PDB | O, E_SER.110   | N, E_SER.114   | H, E_SER.114    | 2.92 | 1.95 | 9.29  |
| 1HGG.PDB | OE2, E_GLU.119 | OG1, E_THR.117 | HG1, E_THR.117  | 2.95 | 1.99 | 7.33  |
| 1HGG.PDB | O, E_TYR.257   | N, E_ILE.121   | H, E_ILE.121    | 2.88 | 1.93 | 10.40 |
| 1HGG.PDB | O, E_ARG.255   | N, E_GLU.123   | H, E_GLU.123    | 2.93 | 1.99 | 13.52 |
| 1HGG.PDB | O, E_THR.155   | N, E_THR.131   | H, E_THR.131    | 2.74 | 1.86 | 19.96 |
| 1HGG.PDB | OD1, E_ASN.152 | N, E_ASN.133   | H, E_ASN.133    | 2.93 | 2.01 | 17.35 |
| 1HGG.PDB | O, E_GLY.146   | N, E_SER.136   | H, E_SER.136    | 2.75 | 1.83 | 16.47 |
| 1HGG.PDB | OG, E_SER.136  | N, E_ALA.138   | H, E_ALA.138    | 2.92 | 1.95 | 8.13  |
| 1HGG.PDB | O, E_GLY.144   | NZ, E_LYS.140  | HZ1, E_LYS.140  | 2.88 | 1.90 | 15.75 |
| 1HGG.PDB | OD1, E_ASN.137 | NZ, E_LYS.140  | HZ2, E_LYS.140  | 2.76 | 1.76 | 13.40 |
| 1HGG.PDB | OD2, E_ASP.77  | NE, E_ARG.141  | HE, E_ARG.141   | 2.90 | 2.09 | 29.10 |
| 1HGG.PDB | O, E_PHE.147   | NH1, E_ARG.141 | HH12, E_ARG.141 | 2.48 | 1.65 | 26.20 |
| 1HGG.PDB | OD1, E_ASP.77  | NH2, E_ARG.141 | HH21, E_ARG.141 | 2.80 | 1.90 | 22.17 |
| 1HGG.PDB | OD2, E_ASP.77  | NH2, E_ARG.141 | HH21, E_ARG.141 | 2.74 | 1.86 | 23.74 |
| 1HGG.PDB | O, E_GLY.72    | NH2, E_ARG.141 | HH22, E_ARG.141 | 2.91 | 1.92 | 8.01  |
| 1HGG.PDB | OD1, E_ASN.137 | OG, E_SER.145  | HG, E_SER.145   | 2.95 | 2.08 | 20.42 |
| 1HGG.PDB | O, E_SER.136   | N, E_GLY.146   | H, E_GLY.146    | 2.98 | 2.09 | 20.70 |
| 1HGG.PDB | O, E_GLY.72    | N, E_SER.149   | H, E_SER.149    | 2.94 | 2.02 | 16.43 |
| 1HGG.PDB | O, E_ALA.253   | N, E_ASN.152   | H, E_ASN.152    | 2.76 | 1.91 | 24.30 |
| 1HGG.PDB | OH, E_TYR.195  | NE1, E_TRP.153 | HE1, E_TRP.153  | 2.91 | 1.97 | 14.69 |
| 1HGG.PDB | O, E_LEU.194   | N, E_LYS.156   | H, E_LYS.156    | 2.96 | 2.09 | 22.38 |
| 1HGG.PDB | O, E_SER.193   | NZ, E_LYS.156  | HZ2, E_LYS.156  | 2.92 | 2.00 | 22.42 |

|          |                |                |                 |      |      |       |
|----------|----------------|----------------|-----------------|------|------|-------|
| 1HGG.PDB | O, E_THR_160   | N, E_SER_157   | H, E_SER_157    | 2.97 | 2.06 | 18.55 |
| 1HGG.PDB | O, E_ILE_245   | N, E_VAL_166   | H, E_VAL_166    | 2.88 | 1.92 | 9.84  |
| 1HGG.PDB | O, E_LEU_243   | OG1, E_THR_167 | HG1, E_THR_167  | 2.89 | 2.02 | 20.67 |
| 1HGG.PDB | O, E_LEU_243   | N, E_MET_168   | H, E_MET_168    | 2.91 | 1.99 | 16.43 |
| 1HGG.PDB | O, E_ASP_241   | N, E_ASN_170   | H, E_ASN_170    | 2.89 | 1.91 | 4.36  |
| 1HGG.PDB | O, E_PHE_174   | ND2, E_ASN_170 | HD21, E_ASN_170 | 2.83 | 1.89 | 11.99 |
| 1HGG.PDB | O, E_VAL_237   | ND2, E_ASN_170 | HD22, E_ASN_170 | 2.85 | 1.99 | 23.32 |
| 1HGG.PDB | O, E_VAL_237   | N, E_LYS_176   | H, E_LYS_176    | 2.89 | 1.95 | 13.18 |
| 1HGG.PDB | OE2, E_GLU_123 | NZ, E_LYS_176  | HZ1, E_LYS_176  | 2.65 | 1.78 | 26.50 |
| 1HGG.PDB | O, E_THR_235   | N, E_TYR_178   | H, E_TYR_178    | 2.81 | 1.85 | 6.71  |
| 1HGG.PDB | OE1, E_GLU_123 | OH, E_TYR_178  | HH, E_TYR_178   | 2.80 | 1.84 | 8.47  |
| 1HGG.PDB | OG1, E_THR_235 | NE1, E_TRP_180 | HE1, E_TRP_180  | 2.93 | 1.94 | 2.01  |
| 1HGG.PDB | O, E_ASN_250   | N, E_HIS_183   | H, E_HIS_183    | 2.79 | 1.92 | 22.01 |
| 1HGG.PDB | O, E_ARG_229   | N, E_HIS_184   | H, E_HIS_184    | 2.88 | 1.92 | 7.25  |
| 1HGG.PDB | OG, E_SER_231  | NE2, E_HIS_184 | HE2, E_HIS_184  | 2.81 | 1.94 | 22.49 |
| 1HGG.PDB | OG1, E_THR_187 | N, E_GLU_190   | H, E_GLU_190    | 2.87 | 1.93 | 12.79 |
| 1HGG.PDB | O, E_GLN_197   | NE2, E_GLN_191 | HE22, E_GLN_191 | 2.91 | 2.01 | 19.48 |
| 1HGG.PDB | O, E_ASN_188   | OG1, E_THR_192 | HG1, E_THR_192  | 2.94 | 1.99 | 8.04  |
| 1HGG.PDB | O, E_GLN_189   | N, E_SER_193   | H, E_SER_193    | 2.85 | 1.88 | 6.48  |
| 1HGG.PDB | O, E_GLN_191   | N, E_TYR_195   | H, E_TYR_195    | 2.82 | 1.87 | 11.82 |
| 1HGG.PDB | O, E_THR_192   | N, E_VAL_196   | H, E_VAL_196    | 2.95 | 2.13 | 27.67 |
| 1HGG.PDB | O, E_TYR_161   | NE2, E_GLN_197 | HE21, E_GLN_197 | 2.93 | 1.96 | 5.53  |
| 1HGG.PDB | O, E_ASN_248   | NE2, E_GLN_197 | HE22, E_GLN_197 | 2.94 | 2.04 | 19.72 |
| 1HGG.PDB | OD1, E_ASN_246 | NH2, E_ARG_201 | HH21, E_ARG_201 | 2.66 | 1.74 | 20.08 |
| 1HGG.PDB | O, E_ILE_213   | N, E_VAL_202   | H, E_VAL_202    | 2.94 | 1.98 | 10.96 |
| 1HGG.PDB | O, E_ASN_246   | N, E_THR_203   | H, E_THR_203    | 2.86 | 1.89 | 5.92  |
| 1HGG.PDB | OG1, E_THR_212 | OG1, E_THR_203 | HG1, E_THR_203  | 2.88 | 1.95 | 13.34 |
| 1HGG.PDB | O, E_GLN_211   | N, E_VAL_204   | H, E_VAL_204    | 2.86 | 1.96 | 18.23 |
| 1HGG.PDB | OD1, E_ASP_241 | N, E_ARG_207   | H, E_ARG_207    | 2.89 | 1.94 | 12.68 |
| 1HGG.PDB | OD2, E_ASP_241 | NE, E_ARG_208  | HE, E_ARG_208   | 2.96 | 2.05 | 19.90 |
| 1HGG.PDB | OG1, E_THR_206 | OG, E_SER_209  | HG, E_SER_209   | 2.99 | 2.07 | 14.54 |
| 1HGG.PDB | OD1, C_ASP_101 | NE2, E_GLN_210 | HE22, E_GLN_210 | 2.96 | 2.04 | 17.70 |
| 1HGG.PDB | O, E_VAL_204   | N, E_GLN_211   | H, E_GLN_211    | 2.83 | 1.91 | 15.52 |
| 1HGG.PDB | O, E_VAL_202   | N, E_ILE_213   | H, E_ILE_213    | 2.83 | 1.91 | 15.44 |
| 1HGG.PDB | OE1, A_GLN_210 | NH2, E_ARG_220 | HH21, E_ARG_220 | 2.72 | 1.80 | 20.26 |
| 1HGG.PDB | O, E_ASN_216   | NH2, E_ARG_220 | HH22, E_ARG_220 | 2.70 | 1.80 | 21.11 |
| 1HGG.PDB | O, E_LEU_226   | N, E_VAL_223   | H, E_VAL_223    | 2.87 | 1.91 | 9.88  |
| 1HGG.PDB | O, E_CYS_97    | NE, E_ARG_224  | HE, E_ARG_224   | 2.79 | 1.95 | 26.52 |
| 1HGG.PDB | O, E_CYS_97    | NH2, E_ARG_224 | HH21, E_ARG_224 | 2.81 | 1.95 | 25.91 |
| 1HGG.PDB | O, E_VAL_223   | N, E_LEU_226   | H, E_LEU_226    | 2.99 | 2.06 | 14.12 |
| 1HGG.PDB | O, E_ARG_220   | OG, E_SER_227  | HG, E_SER_227   | 2.91 | 1.97 | 11.08 |
| 1HGG.PDB | O, E_SER_228   | NH1, E_ARG_229 | HH11, E_ARG_229 | 2.74 | 1.81 | 18.43 |
| 1HGG.PDB | O, E_PRO_221   | NH2, E_ARG_229 | HH22, E_ARG_229 | 2.61 | 1.67 | 16.25 |
| 1HGG.PDB | O, E_ILE_182   | N, E_SER_231   | H, E_SER_231    | 3.00 | 2.12 | 21.85 |
| 1HGG.PDB | OD1, E_ASP_101 | OG, E_SER_231  | HG, E_SER_231   | 2.91 | 1.96 | 10.31 |
| 1HGG.PDB | O, E_ASP_101   | N, E_ILE_232   | H, E_ILE_232    | 2.93 | 2.00 | 14.76 |
| 1HGG.PDB | O, E_TRP_180   | N, E_TYR_233   | H, E_TYR_233    | 2.93 | 1.97 | 11.34 |
| 1HGG.PDB | O, E_TYR_178   | N, E_THR_235   | H, E_THR_235    | 2.90 | 2.00 | 18.66 |
| 1HGG.PDB | O, E_LYS_176   | N, E_VAL_237   | H, E_VAL_237    | 2.79 | 1.84 | 9.36  |
| 1HGG.PDB | OE1, D_GLU_72  | NZ, E_LYS_238  | HZ1, E_LYS_238  | 2.89 | 1.89 | 13.93 |
| 1HGG.PDB | O, D_SER_71    | NZ, E_LYS_238  | HZ3, E_LYS_238  | 2.80 | 1.86 | 20.00 |
| 1HGG.PDB | O, E_ASN_170   | N, E_GLY_240   | H, E_GLY_240    | 2.86 | 1.99 | 23.07 |
| 1HGG.PDB | O, E_LYS_238   | N, E_ASP_241   | H, E_ASP_241    | 2.93 | 2.02 | 17.28 |
| 1HGG.PDB | OD1, E_ASP_241 | N, E_VAL_242   | H, E_VAL_242    | 2.79 | 1.99 | 28.45 |
| 1HGG.PDB | O, E_MET_168   | N, E_LEU_243   | H, E_LEU_243    | 2.88 | 1.91 | 4.89  |
| 1HGG.PDB | O, E_SER_205   | N, E_VAL_244   | H, E_VAL_244    | 2.93 | 1.99 | 13.01 |
| 1HGG.PDB | O, E_VAL_166   | N, E_ILE_245   | H, E_ILE_245    | 2.98 | 2.06 | 15.80 |
| 1HGG.PDB | O, E_THR_203   | N, E_ASN_246   | H, E_ASN_246    | 2.92 | 1.97 | 11.38 |

|          |                |                |                 |      |      |       |
|----------|----------------|----------------|-----------------|------|------|-------|
| 1HGG.PDB | OD1, E_ASN_165 | ND2, E_ASN_246 | HD22, E_ASN_246 | 2.88 | 1.96 | 17.66 |
| 1HGG.PDB | O, E_LEU_164   | N, E_SER_247   | H, E_SER_247    | 2.92 | 2.01 | 18.12 |
| 1HGG.PDB | OE1, E_GLN_191 | ND2, E_ASN_250 | HD21, E_ASN_250 | 2.89 | 1.94 | 10.20 |
| 1HGG.PDB | O, E_HIS_183   | ND2, E_ASN_250 | HD22, E_ASN_250 | 2.88 | 1.93 | 10.21 |
| 1HGG.PDB | O, E_ASN_152   | N, E_ALA_253   | H, E_ALA_253    | 2.90 | 1.98 | 17.67 |
| 1HGG.PDB | OD1, E_ASN_133 | NH2, E_ARG_255 | HH22, E_ARG_255 | 2.55 | 1.68 | 24.24 |
| 1HGG.PDB | O, E_ILE_121   | N, E_TYR_257   | H, E_TYR_257    | 2.94 | 2.10 | 26.15 |
| 1HGG.PDB | O, E_LEU_177   | N, E_PHE_258   | H, E_PHE_258    | 2.94 | 2.00 | 12.72 |
| 1HGG.PDB | OG, E_SER_115  | N, E_ARG_261   | H, E_ARG_261    | 2.99 | 2.04 | 12.07 |
| 1HGG.PDB | OE2, E_GLU_119 | NH1, E_ARG_261 | HH12, E_ARG_261 | 2.69 | 1.87 | 29.29 |
| 1HGG.PDB | OE1, E_GLU_119 | NH2, E_ARG_261 | HH22, E_ARG_261 | 2.74 | 1.88 | 26.67 |
| 1HGG.PDB | OH, E_TYR_302  | NZ, E_LYS_264  | HZ1, E_LYS_264  | 2.90 | 1.93 | 18.14 |
| 1HGG.PDB | ND1, E_HIS_56  | NZ, E_LYS_264  | HZ2, E_LYS_264  | 2.66 | 1.73 | 20.09 |
| 1HGG.PDB | OD2, E_ASP_85  | NZ, E_LYS_264  | HZ3, E_LYS_264  | 2.85 | 1.83 | 11.84 |
| 1HGG.PDB | O, E_PHE_87    | N, E_MET_268   | H, E_MET_268    | 2.81 | 1.91 | 19.55 |
| 1HGG.PDB | OE1, F_GLU_67  | NH1, E_ARG_269 | HH12, E_ARG_269 | 2.69 | 1.85 | 27.32 |
| 1HGG.PDB | O, E_PRO_284   | OG, E_SER_270  | HG, E_SER_270   | 2.76 | 1.85 | 15.69 |
| 1HGG.PDB | OG, E_SER_270  | N, E_ALA_272   | H, E_ALA_272    | 2.95 | 2.00 | 11.61 |
| 1HGG.PDB | O, E_ILE_51    | N, E_ASP_275   | H, E_ASP_275    | 2.87 | 1.99 | 21.60 |
| 1HGG.PDB | OD1, E_ASP_275 | N, E_THR_276   | H, E_THR_276    | 2.79 | 1.94 | 24.39 |
| 1HGG.PDB | O, E_ASN_54    | N, E_SER_279   | H, E_SER_279    | 2.79 | 1.84 | 11.36 |
| 1HGG.PDB | O, E_TYR_302   | N, E_ILE_282   | H, E_ILE_282    | 2.87 | 1.92 | 10.52 |
| 1HGG.PDB | O, E_THR_283   | N, E_GLY_286   | H, E_GLY_286    | 2.79 | 1.84 | 9.62  |
| 1HGG.PDB | O, E_LYS_50    | N, E_SER_287   | H, E_SER_287    | 2.89 | 1.92 | 6.20  |
| 1HGG.PDB | O, E_ALA_304   | ND2, E_ASN_290 | HD22, E_ASN_290 | 2.87 | 2.00 | 21.60 |
| 1HGG.PDB | OE1, E_GLN_44  | NZ, E_LYS_292  | HZ1, E_LYS_292  | 2.77 | 1.75 | 10.61 |
| 1HGG.PDB | OD2, E_ASP_291 | NZ, E_LYS_292  | HZ3, E_LYS_292  | 2.76 | 1.90 | 27.94 |
| 1HGG.PDB | O, E_LYS_307   | N, E_GLN_295   | H, E_GLN_295    | 2.79 | 1.91 | 20.65 |
| 1HGG.PDB | O, E_ASN_298   | NE2, E_GLN_295 | HE21, E_GLN_295 | 2.79 | 1.83 | 8.95  |
| 1HGG.PDB | O, E_GLN_44    | N, E_ASN_296   | H, E_ASN_296    | 2.89 | 1.93 | 10.60 |
| 1HGG.PDB | OD1, E_ASN_285 | ND2, E_ASN_298 | HD22, E_ASN_298 | 2.95 | 2.00 | 11.31 |
| 1HGG.PDB | O, F_LYS_68    | NZ, E_LYS_299  | HZ1, E_LYS_299  | 2.93 | 1.91 | 9.86  |
| 1HGG.PDB | OD1, E_ASN_298 | N, E_ILE_300   | H, E_ILE_300    | 2.82 | 1.91 | 16.92 |
| 1HGG.PDB | O, E_ILE_282   | N, E_TYR_302   | H, E_TYR_302    | 2.82 | 1.94 | 21.27 |
| 1HGG.PDB | O, E_LYS_264   | OH, E_TYR_302  | HH, E_TYR_302   | 2.63 | 1.84 | 28.99 |
| 1HGG.PDB | O, F_LYS_62    | N, E_GLY_303   | H, E_GLY_303    | 2.92 | 1.95 | 6.71  |
| 1HGG.PDB | O, E_GLN_295   | N, E_VAL_309   | H, E_VAL_309    | 2.89 | 2.05 | 25.47 |
| 1HGG.PDB | OG, F_SER_93   | N, E_LYS_310   | H, E_LYS_310    | 2.89 | 1.95 | 15.34 |
| 1HGG.PDB | OD1, F_ASP_90  | NZ, E_LYS_310  | HZ2, E_LYS_310  | 2.64 | 1.72 | 22.12 |
| 1HGG.PDB | OE2, E_GLU_41  | N, E_LEU_314   | H, E_LEU_314    | 2.79 | 1.89 | 17.95 |
| 1HGG.PDB | OE1, E_GLU_41  | NZ, E_LYS_315  | HZ3, E_LYS_315  | 2.68 | 1.80 | 26.22 |
| 1HGG.PDB | O, E_THR_40    | N, E_LEU_316   | H, E_LEU_316    | 2.77 | 1.85 | 15.13 |
| 1HGG.PDB | OD1, F_ASN_104 | N, E_ALA_317   | H, E_ALA_317    | 2.80 | 1.89 | 16.99 |
| 1HGG.PDB | O, E_ASN_38    | N, E_THR_318   | H, E_THR_318    | 2.92 | 1.99 | 14.27 |
| 1HGG.PDB | O, E_VAL_20    | ND2, E_ASN_322 | HD21, E_ASN_322 | 2.88 | 1.96 | 16.01 |
| 1HGG.PDB | OE2, E_GLU_35  | ND2, E_ASN_322 | HD22, E_ASN_322 | 2.79 | 1.94 | 25.02 |
| 1HGG.PDB | OE2, F_GLU_15  | N, E_GLU_325   | H, E_GLU_325    | 2.88 | 2.08 | 28.79 |
| 1HGG.PDB | O, E_GLN_327   | NZ, E_LYS_326  | HZ1, E_LYS_326  | 2.71 | 1.82 | 24.99 |
| 1HGG.PDB | OE1, F_GLU_15  | NZ, E_LYS_326  | HZ3, E_LYS_326  | 2.98 | 1.97 | 15.13 |
| 1HGG.PDB | O, E_LYS_326   | NE2, E_GLN_327 | HE22, E_GLN_327 | 2.77 | 1.84 | 14.97 |
| 1HGG.PDB | OD2, F_ASP_112 | N, F_GLY_1     | H2, F_GLY_1     | 2.68 | 1.70 | 14.41 |
| 1HGG.PDB | OD1, F_ASP_109 | N, F_LEU_2     | H, F_LEU_2      | 2.94 | 2.03 | 18.76 |
| 1HGG.PDB | OD2, F_ASP_112 | N, F_PHE_3     | H, F_PHE_3      | 2.87 | 2.05 | 27.28 |
| 1HGG.PDB | OD2, F_ASP_112 | N, F_GLY_4     | H, F_GLY_4      | 2.93 | 2.02 | 17.67 |
| 1HGG.PDB | OD1, F_ASP_112 | N, F_ALA_5     | H, F_ALA_5      | 2.93 | 2.06 | 23.45 |
| 1HGG.PDB | O, F_GLY_4     | N, F_PHE_9     | H, F_PHE_9      | 2.76 | 1.83 | 14.86 |
| 1HGG.PDB | O, E_VAL_323   | N, F_GLY_13    | H, F_GLY_13     | 2.73 | 1.78 | 9.21  |
| 1HGG.PDB | O, E_HIS_17    | N, F_TRP_14    | H, F_TRP_14     | 2.81 | 1.90 | 18.17 |

|          |                |               |                |      |      |       |
|----------|----------------|---------------|----------------|------|------|-------|
| 1HGG.PDB | OG1, F_THR_41  | N, F_TRP_21   | H, F_TRP_21    | 2.87 | 1.92 | 11.28 |
| 1HGG.PDB | O, E_GLY_16    | N, F_GLY_23   | H, F_GLY_23    | 2.97 | 2.08 | 20.37 |
| 1HGG.PDB | O, F_ALA_35    | N, F_PHE_24   | H, F_PHE_24    | 2.85 | 1.88 | 5.77  |
| 1HGG.PDB | O, E_CYS_14    | N, F_ARG_25   | H, F_ARG_25    | 2.99 | 2.04 | 12.72 |
| 1HGG.PDB | O, F_GLY_33    | N, F_HIS_26   | H, F_HIS_26    | 2.87 | 1.99 | 21.57 |
| 1HGG.PDB | O, E_THR_12    | N, F_GLN_27   | H, F_GLN_27    | 2.98 | 2.05 | 15.41 |
| 1HGG.PDB | O, F_GLY_31    | N, F_ASN_28   | H, F_ASN_28    | 2.80 | 1.85 | 12.20 |
| 1HGG.PDB | O, F_CYS_144   | ND2, F_ASN_28 | HD22, F_ASN_28 | 2.83 | 1.93 | 18.95 |
| 1HGG.PDB | O, F_PHE_24    | N, F_ALA_35   | H, F_ALA_35    | 2.83 | 2.02 | 27.51 |
| 1HGG.PDB | O, F_TYR_22    | N, F_ASP_37   | H, F_ASP_37    | 2.73 | 1.77 | 4.79  |
| 1HGG.PDB | OD2, F_ASP_37  | N, F_SER_40   | H, F_SER_40    | 2.88 | 1.93 | 12.27 |
| 1HGG.PDB | OD2, F_ASP_37  | OG, F_SER_40  | HG, F_SER_40   | 2.74 | 1.92 | 26.19 |
| 1HGG.PDB | O, F_ASP_37    | OG1, F_THR_41 | HG1, F_THR_41  | 2.71 | 1.82 | 18.81 |
| 1HGG.PDB | O, F_LEU_38    | N, F_GLN_42   | H, F_GLN_42    | 2.91 | 1.98 | 13.94 |
| 1HGG.PDB | OD1, F_ASP_46  | NE2, F_GLN_42 | HE22, F_GLN_42 | 2.82 | 1.94 | 21.99 |
| 1HGG.PDB | O, F_LYS_39    | N, F_ALA_43   | H, F_ALA_43    | 2.96 | 1.99 | 8.07  |
| 1HGG.PDB | O, F_SER_40    | N, F_ALA_44   | H, F_ALA_44    | 2.94 | 1.96 | 1.69  |
| 1HGG.PDB | O, F_THR_41    | N, F_ILE_45   | H, F_ILE_45    | 2.95 | 2.01 | 14.67 |
| 1HGG.PDB | O, F_GLN_42    | N, F_ASP_46   | H, F_ASP_46    | 2.77 | 1.80 | 0.61  |
| 1HGG.PDB | OE2, F_GLU_114 | NE2, F_GLN_47 | HE21, F_GLN_47 | 2.97 | 2.06 | 18.05 |
| 1HGG.PDB | O, F_ALA_43    | NE2, F_GLN_47 | HE22, F_GLN_47 | 2.99 | 2.07 | 16.84 |
| 1HGG.PDB | O, F_ILE_45    | N, F_ASN_49   | H, F_ASN_49    | 2.83 | 1.91 | 16.15 |
| 1HGG.PDB | O, F_ASP_46    | N, F_GLY_50   | H, F_GLY_50    | 2.91 | 2.04 | 23.57 |
| 1HGG.PDB | O, F_GLN_47    | N, F_LYS_51   | H, F_LYS_51    | 2.91 | 1.93 | 0.37  |
| 1HGG.PDB | OG1, F_THR_107 | NZ, F_LYS_51  | HZ1, F_LYS_51  | 2.98 | 2.02 | 18.55 |
| 1HGG.PDB | OE1, F_GLU_103 | NZ, F_LYS_51  | HZ2, F_LYS_51  | 2.79 | 1.76 | 6.25  |
| 1HGG.PDB | ND1, F_HIS_106 | NZ, F_LYS_51  | HZ3, F_LYS_51  | 2.72 | 1.74 | 15.22 |
| 1HGG.PDB | O, F_ILE_48    | N, F_LEU_52   | H, F_LEU_52    | 2.90 | 2.00 | 18.64 |
| 1HGG.PDB | O, F_ASN_49    | N, F_ASN_53   | H, F_ASN_53    | 2.88 | 1.99 | 19.93 |
| 1HGG.PDB | OE1, F_GLU_57  | NH1, F_ARG_54 | HH11, F_ARG_54 | 2.85 | 1.85 | 10.83 |
| 1HGG.PDB | OE2, D_GLU_97  | NH2, F_ARG_54 | HH22, F_ARG_54 | 2.73 | 1.74 | 10.16 |
| 1HGG.PDB | O, F_ASN_53    | N, F_ILE_56   | H, F_ILE_56    | 2.96 | 2.16 | 29.26 |
| 1HGG.PDB | OE2, F_GLU_61  | NZ, F_LYS_58  | HZ3, F_LYS_58  | 2.94 | 1.92 | 12.48 |
| 1HGG.PDB | OD2, D_ASP_86  | NZ, F_LYS_62  | HZ3, F_LYS_62  | 2.58 | 1.75 | 29.01 |
| 1HGG.PDB | OG, E_SER_110  | NE2, F_HIS_64 | HE2, F_HIS_64  | 2.87 | 1.91 | 10.03 |
| 1HGG.PDB | O, F_PHE_63    | NE2, F_GLN_65 | HE22, F_GLN_65 | 2.98 | 2.01 | 5.05  |
| 1HGG.PDB | O, E_LYS_299   | NZ, F_LYS_68  | HZ1, F_LYS_68  | 2.85 | 1.83 | 8.63  |
| 1HGG.PDB | OE2, F_GLU_85  | NZ, F_LYS_68  | HZ2, F_LYS_68  | 2.75 | 1.74 | 10.05 |
| 1HGG.PDB | OE2, F_GLU_72  | OG, F_SER_71  | HG, F_SER_71   | 2.86 | 2.03 | 26.49 |
| 1HGG.PDB | OG, A_SER_107  | N, F_ARG_76   | H, F_ARG_76    | 2.79 | 1.82 | 4.90  |
| 1HGG.PDB | OE2, B_GLU_81  | NE, F_ARG_76  | HE, F_ARG_76   | 2.88 | 1.92 | 11.44 |
| 1HGG.PDB | OE1, B_GLU_74  | NH1, F_ARG_76 | HH12, F_ARG_76 | 2.75 | 1.76 | 9.13  |
| 1HGG.PDB | OE1, B_GLU_81  | NH2, F_ARG_76 | HH21, F_ARG_76 | 2.67 | 1.68 | 1.99  |
| 1HGG.PDB | OE2, B_GLU_74  | NH2, F_ARG_76 | HH22, F_ARG_76 | 2.79 | 1.81 | 10.64 |
| 1HGG.PDB | O, F_GLY_75    | N, F_ASP_79   | H, F_ASP_79    | 2.85 | 1.92 | 13.80 |
| 1HGG.PDB | O, F_LEU_80    | N, F_VAL_84   | H, F_VAL_84    | 2.86 | 1.90 | 9.26  |
| 1HGG.PDB | O, F_LYS_82    | N, F_ASP_86   | H, F_ASP_86    | 2.94 | 1.98 | 10.58 |
| 1HGG.PDB | O, F_TYR_83    | N, F_THR_87   | H, F_THR_87    | 2.89 | 1.95 | 12.08 |
| 1HGG.PDB | O, F_VAL_84    | N, F_LYS_88   | H, F_LYS_88    | 2.90 | 2.00 | 19.38 |
| 1HGG.PDB | OH, D_TYR_83   | NZ, F_LYS_88  | HZ1, F_LYS_88  | 2.68 | 1.67 | 10.46 |
| 1HGG.PDB | O, F_GLU_85    | N, F_ILE_89   | H, F_ILE_89    | 2.87 | 1.91 | 8.62  |
| 1HGG.PDB | O, F_LYS_88    | N, F_TRP_92   | H, F_TRP_92    | 2.93 | 1.97 | 10.23 |
| 1HGG.PDB | O, F_ILE_89    | N, F_SER_93   | H, F_SER_93    | 2.82 | 1.93 | 20.13 |
| 1HGG.PDB | O, F_ILE_89    | OG, F_SER_93  | HG, F_SER_93   | 2.82 | 1.91 | 16.61 |
| 1HGG.PDB | O, F_ASP_90    | N, F_TYR_94   | H, F_TYR_94    | 2.98 | 2.04 | 13.91 |
| 1HGG.PDB | O, F_TYR_94    | N, F_LEU_98   | H, F_LEU_98    | 2.96 | 1.99 | 8.41  |
| 1HGG.PDB | O, F_ASN_95    | N, F_LEU_99   | H, F_LEU_99    | 2.87 | 1.98 | 19.54 |
| 1HGG.PDB | O, F_LEU_98    | N, F_LEU_102  | H, F_LEU_102   | 2.91 | 1.95 | 11.26 |

|          |                |                |                 |      |      |       |
|----------|----------------|----------------|-----------------|------|------|-------|
| 1HGG.PDB | O, F_VAL_100   | N, F_ASN_104   | H, F_ASN_104    | 2.83 | 1.90 | 15.88 |
| 1HGG.PDB | O, E_LYS_27    | ND2, F_ASN_104 | HD22, F_ASN_104 | 2.91 | 1.98 | 14.98 |
| 1HGG.PDB | O, F_LEU_102   | N, F_HIS_106   | H, F_HIS_106    | 2.95 | 2.00 | 11.41 |
| 1HGG.PDB | O, F_GLU_103   | N, F_THR_107   | H, F_THR_107    | 2.84 | 1.97 | 22.50 |
| 1HGG.PDB | O, F_HIS_106   | N, F_LEU_110   | H, F_LEU_110    | 2.81 | 1.85 | 10.10 |
| 1HGG.PDB | O, F_THR_107   | N, F_THR_111   | H, F_THR_111    | 2.97 | 2.01 | 8.66  |
| 1HGG.PDB | O, F_THR_107   | OG1, F_THR_111 | HG1, F_THR_111  | 2.90 | 1.95 | 9.89  |
| 1HGG.PDB | O, F_ASP_109   | N, F_SER_113   | H, F_SER_113    | 2.78 | 1.87 | 15.88 |
| 1HGG.PDB | O, F_ASP_112   | N, F_ASN_116   | H, F_ASN_116    | 2.99 | 2.01 | 3.50  |
| 1HGG.PDB | O, F_SER_113   | N, F_LYS_117   | H, F_LYS_117    | 2.76 | 1.88 | 19.98 |
| 1HGG.PDB | O, F_ASN_116   | N, F_GLU_120   | H, F_GLU_120    | 2.92 | 1.95 | 3.79  |
| 1HGG.PDB | O, F_LYS_117   | N, F_LYS_121   | H, F_LYS_121    | 2.87 | 1.96 | 17.48 |
| 1HGG.PDB | O, F_LEU_118   | N, F_THR_122   | H, F_THR_122    | 2.98 | 2.04 | 13.60 |
| 1HGG.PDB | O, F_PHE_119   | N, F_ARG_123   | H, F_ARG_123    | 2.90 | 1.95 | 11.29 |
| 1HGG.PDB | OE2, F_GLU_120 | NH1, F_ARG_123 | HH11, F_ARG_123 | 2.72 | 1.86 | 25.68 |
| 1HGG.PDB | O, F_GLU_120   | N, F_ARG_124   | H, F_ARG_124    | 2.96 | 1.99 | 8.37  |
| 1HGG.PDB | OE1, D_GLU_132 | NE, F_ARG_124  | HE, F_ARG_124   | 2.96 | 2.09 | 22.59 |
| 1HGG.PDB | OE2, D_GLU_132 | NE, F_ARG_124  | HE, F_ARG_124   | 2.87 | 2.01 | 24.00 |
| 1HGG.PDB | O, F_HIS_159   | ND2, F_ASN_129 | HD21, F_ASN_129 | 2.99 | 2.04 | 11.15 |
| 1HGG.PDB | OH, F_TYR_157  | ND2, F_ASN_129 | HD22, F_ASN_129 | 2.79 | 1.86 | 14.20 |
| 1HGG.PDB | O, F_LYS_139   | N, F_GLU_131   | H, F_GLU_131    | 2.96 | 2.01 | 12.55 |
| 1HGG.PDB | O, F_CYS_137   | N, F_MET_133   | H, F_MET_133    | 2.88 | 1.96 | 16.91 |
| 1HGG.PDB | O, E_LEU_13    | N, F_PHE_138   | H, F_PHE_138    | 2.72 | 1.87 | 23.38 |
| 1HGG.PDB | O, F_GLU_131   | N, F_LYS_139   | H, F_LYS_139    | 2.84 | 1.88 | 8.34  |
| 1HGG.PDB | O, E_ALA_11    | N, F_ILE_140   | H, F_ILE_140    | 2.79 | 1.89 | 17.86 |
| 1HGG.PDB | O, F_ASN_129   | N, F_TYR_141   | H, F_TYR_141    | 2.91 | 1.94 | 4.20  |
| 1HGG.PDB | OE2, F_GLU_165 | N, F_LYS_143   | H, F_LYS_143    | 2.98 | 2.11 | 23.38 |
| 1HGG.PDB | OE2, F_GLU_30  | N, F_ASN_146   | H, F_ASN_146    | 2.87 | 1.90 | 7.26  |
| 1HGG.PDB | OD1, F_ASP_145 | N, F_ALA_147   | H, F_ALA_147    | 2.98 | 2.17 | 28.99 |
| 1HGG.PDB | O, F_ASP_145   | N, F_ILE_149   | H, F_ILE_149    | 2.98 | 2.02 | 9.29  |
| 1HGG.PDB | O, F_ASN_146   | N, F_GLU_150   | H, F_GLU_150    | 2.88 | 1.93 | 11.94 |
| 1HGG.PDB | O, F_ALA_147   | N, F_SER_151   | H, F_SER_151    | 2.86 | 1.99 | 21.94 |
| 1HGG.PDB | O, F_CYS_148   | OG, F_SER_151  | HG, F_SER_151   | 2.70 | 1.85 | 23.21 |
| 1HGG.PDB | O, F_GLU_150   | N, F_ASN_154   | H, F_ASN_154    | 2.81 | 1.84 | 3.77  |
| 1HGG.PDB | O, F_HIS_159   | N, F_TYR_162   | H, F_TYR_162    | 2.96 | 2.05 | 18.31 |
| 1HGG.PDB | O, F_ASP_160   | N, F_ARG_163   | H, F_ARG_163    | 2.93 | 1.96 | 6.26  |
| 1HGG.PDB | O, D_ARG_170   | NH1, F_ARG_163 | HH12, F_ARG_163 | 2.94 | 2.00 | 17.69 |
| 1HGG.PDB | O, F_TYR_162   | N, F_ALA_166   | H, F_ALA_166    | 2.88 | 1.92 | 7.73  |
| 1HGG.PDB | O, F_ARG_163   | N, F_LEU_167   | H, F_LEU_167    | 2.76 | 1.84 | 14.20 |
| 1HGG.PDB | O, F_ALA_166   | N, F_ARG_170   | H, F_ARG_170    | 2.89 | 2.02 | 22.61 |
| 1HGG.PDB | O, F_GLU_128   | NE, F_ARG_170  | HE, F_ARG_170   | 2.70 | 1.85 | 24.72 |
| 1HGG.PDB | OE2, F_GLU_131 | NH1, F_ARG_170 | HH11, F_ARG_170 | 2.84 | 1.84 | 6.38  |
| 1HGG.PDB | O, F_LEU_167   | N, F_PHE_171   | H, F_PHE_171    | 2.94 | 1.99 | 11.68 |

Table 1667: 1HGG-specific side chain and main chain hydrogen bonding analysis. In this table, a PDB file is specified with a four-letter PDB ID, except that the names of the PDB files corresponding to the single NMR structural model split from the NMR ensemble is specified with a four-letter PDB ID in addition to a hyphen followed by the single NMR structural model numeric ID, the residue naming scheme is **Chain ID\_residue name\_residue number**,  $\angle ADH$  represents the angle formed by acceptor (A), donor (D) and hydrogen (H) ( $\angle ADH$ ).

| PDB      | Acceptor (A)   | Donor (D)      | Hydrogen (H)    | D-A (Å) | H-A (Å) | $\angle ADH(^{\circ})$ |
|----------|----------------|----------------|-----------------|---------|---------|------------------------|
| 1HGH.PDB | O, B_ILE_140   | N, A_ALA_11    | H, A_ALA_11     | 2.91    | 2.03    | 21.75                  |
| 1HGH.PDB | O, B_PHE_138   | N, A_LEU_13    | H, A_LEU_13     | 2.96    | 1.99    | 9.24                   |
| 1HGH.PDB | O, B_ARG_25    | N, A_CYS_14    | H, A_CYS_14     | 2.90    | 1.93    | 6.13                   |
| 1HGH.PDB | O, B_GLY_136   | N, A_LEU_15    | H, A_LEU_15     | 2.89    | 1.92    | 5.59                   |
| 1HGH.PDB | O, B_GLY_23    | N, A_GLY_16    | H, A_GLY_16     | 2.92    | 2.07    | 24.71                  |
| 1HGH.PDB | O, B_TRP_21    | N, A_HIS_18    | H, A_HIS_18     | 2.92    | 2.03    | 20.10                  |
| 1HGH.PDB | OD1, A_ASN_322 | N, A_VAL_20    | H, A_VAL_20     | 2.77    | 1.82    | 11.72                  |
| 1HGH.PDB | O, A_VAL_36    | N, A_THR_24    | H, A_THR_24     | 2.85    | 1.96    | 20.21                  |
| 1HGH.PDB | O, A_ILE_34    | N, A_VAL_26    | H, A_VAL_26     | 2.81    | 1.89    | 15.81                  |
| 1HGH.PDB | OE2, B_GLU_97  | NZ, A_LYS_27   | HZ1, A_LYS_27   | 2.78    | 1.76    | 9.03                   |
| 1HGH.PDB | O, A_ASP_31    | N, A_THR_28    | H, A_THR_28     | 2.74    | 1.91    | 26.60                  |
| 1HGH.PDB | O, A_VAL_26    | N, A_ILE_34    | H, A_ILE_34     | 2.88    | 1.93    | 10.35                  |
| 1HGH.PDB | O, A_THR_24    | N, A_VAL_36    | H, A_VAL_36     | 2.78    | 1.83    | 9.24                   |
| 1HGH.PDB | O, A_MET_320   | N, A_THR_37    | H, A_THR_37     | 2.90    | 1.93    | 5.37                   |
| 1HGH.PDB | O, A_LEU_316   | N, A_THR_40    | H, A_THR_40     | 2.78    | 1.95    | 25.57                  |
| 1HGH.PDB | O, A_LEU_314   | N, A_LEU_42    | H, A_LEU_42     | 2.85    | 1.99    | 23.14                  |
| 1HGH.PDB | O, A_PHE_294   | N, A_GLN_44    | H, A_GLN_44     | 2.90    | 1.92    | 4.45                   |
| 1HGH.PDB | O, A_SER_46    | NE2, A_GLN_44  | HE22, A_GLN_44  | 2.81    | 1.96    | 24.37                  |
| 1HGH.PDB | OD2, A_ASP_275 | NZ, A_LYS_50   | HZ1, A_LYS_50   | 2.79    | 1.83    | 19.36                  |
| 1HGH.PDB | O, A_PRO_273   | N, A_ILE_51    | H, A_ILE_51     | 2.82    | 1.89    | 14.41                  |
| 1HGH.PDB | O, A_ASP_275   | N, A_ASN_53    | H, A_ASN_53     | 2.86    | 1.97    | 20.86                  |
| 1HGH.PDB | O, A_GLU_280   | NE2, A_HIS_56  | HE2, A_HIS_56   | 2.98    | 2.02    | 10.58                  |
| 1HGH.PDB | OD2, A_ASP_85  | N, A_ARG_57    | H, A_ARG_57     | 2.81    | 1.91    | 18.42                  |
| 1HGH.PDB | O, A_THR_83    | NE, A_ARG_57   | HE, A_ARG_57    | 2.77    | 1.81    | 8.25                   |
| 1HGH.PDB | O, A_LEU_86    | N, A_LEU_59    | H, A_LEU_59     | 2.96    | 2.03    | 13.96                  |
| 1HGH.PDB | O, A_VAL_88    | N, A_GLY_61    | H, A_GLY_61     | 2.98    | 2.14    | 25.31                  |
| 1HGH.PDB | OD1, A_ASP_60  | N, A_ILE_62    | H, A_ILE_62     | 2.86    | 1.93    | 13.55                  |
| 1HGH.PDB | O, A_GLY_61    | N, A_CYS_64    | H, A_CYS_64     | 2.88    | 1.98    | 19.17                  |
| 1HGH.PDB | OE2, A_GLU_89  | N, A_LEU_66    | H, A_LEU_66     | 2.90    | 1.95    | 10.87                  |
| 1HGH.PDB | O, A_LEU_66    | N, A_LEU_70    | H, A_LEU_70     | 2.83    | 1.95    | 21.65                  |
| 1HGH.PDB | O, A_ILE_67    | N, A_LEU_71    | H, A_LEU_71     | 2.79    | 1.83    | 6.52                   |
| 1HGH.PDB | O, A_ASP_68    | N, A_GLY_72    | H, A_GLY_72     | 2.91    | 1.99    | 15.72                  |
| 1HGH.PDB | OD1, A_ASP_73  | ND1, A_HIS_75  | HD1, A_HIS_75   | 2.74    | 1.85    | 19.20                  |
| 1HGH.PDB | O, A_ASP_63    | NE2, A_HIS_75  | HE2, A_HIS_75   | 2.75    | 1.84    | 17.13                  |
| 1HGH.PDB | O, A_ASP_73    | N, A_CYS_76    | H, A_CYS_76     | 2.78    | 1.88    | 17.74                  |
| 1HGH.PDB | O, A_PRO_74    | N, A_ASP_77    | H, A_ASP_77     | 2.92    | 1.95    | 6.24                   |
| 1HGH.PDB | O, A_PHE_79    | N, A_GLU_82    | H, A_GLU_82     | 2.94    | 2.02    | 16.23                  |
| 1HGH.PDB | OE1, A_GLU_82  | N, A_THR_83    | H, A_THR_83     | 2.95    | 2.06    | 20.13                  |
| 1HGH.PDB | O, A_ARG_57    | N, A_ASP_85    | H, A_ASP_85     | 2.82    | 1.89    | 15.27                  |
| 1HGH.PDB | O, A_MET_268   | N, A_GLU_89    | H, A_GLU_89     | 2.83    | 1.89    | 11.77                  |
| 1HGH.PDB | OD1, A_ASP_60  | NE, A_ARG_90   | HE, A_ARG_90    | 2.85    | 1.88    | 8.50                   |
| 1HGH.PDB | O, A_SER_270   | NH1, A_ARG_90  | HH11, A_ARG_90  | 2.64    | 1.77    | 24.75                  |
| 1HGH.PDB | O, A_ALA_272   | NH1, A_ARG_90  | HH12, A_ARG_90  | 2.63    | 1.72    | 19.06                  |
| 1HGH.PDB | OD2, A_ASP_60  | NH2, A_ARG_90  | HH21, A_ARG_90  | 2.79    | 1.80    | 9.33                   |
| 1HGH.PDB | OD1, A_ASP_271 | N, A_SER_91    | H, A_SER_91     | 2.85    | 1.90    | 11.89                  |
| 1HGH.PDB | OD2, A_ASP_271 | OG, A_SER_91   | HG, A_SER_91    | 2.76    | 1.89    | 21.30                  |
| 1HGH.PDB | OD2, A_ASP_68  | OG, A_SER_95   | HG, A_SER_95    | 2.83    | 1.95    | 21.96                  |
| 1HGH.PDB | OD2, A_ASP_73  | N, A_ASN_96    | H, A_ASN_96     | 2.91    | 1.94    | 7.26                   |
| 1HGH.PDB | OD1, A_ASP_68  | OH, A_TYR_100  | HH, A_TYR_100   | 2.95    | 2.07    | 21.37                  |
| 1HGH.PDB | O, A_ILE_230   | N, A_ASP_101   | H, A_ASP_101    | 2.93    | 2.05    | 22.44                  |
| 1HGH.PDB | OD2, A_ASP_104 | OG, A_SER_107  | HG, A_SER_107   | 2.88    | 1.94    | 14.34                  |
| 1HGH.PDB | O, A_TYR_105   | N, A_ARG_109   | H, A_ARG_109    | 2.84    | 1.87    | 3.70                   |
| 1HGH.PDB | OE2, B_GLU_67  | NH2, A_ARG_109 | HH21, A_ARG_109 | 2.86    | 1.88    | 13.48                  |
| 1HGH.PDB | OD2, F_ASP_79  | OG, A_SER_110  | HG, A_SER_110   | 2.97    | 2.01    | 11.65                  |
| 1HGH.PDB | O, A_SER_107   | N, A_LEU_111   | H, A_LEU_111    | 2.86    | 1.91    | 11.39                  |
| 1HGH.PDB | O, A_LEU_108   | N, A_VAL_112   | H, A_VAL_112    | 2.97    | 2.00    | 6.33                   |
| 1HGH.PDB | O, A_ARG_109   | N, A_ALA_113   | H, A_ALA_113    | 2.87    | 1.97    | 18.74                  |

|          |                |                |                 |      |      |       |
|----------|----------------|----------------|-----------------|------|------|-------|
| 1HGH.PDB | O, A_SER_110   | N, A_SER_114   | H, A_SER_114    | 2.97 | 2.06 | 18.17 |
| 1HGH.PDB | OE2, A_GLU_119 | OG1, A_THR_117 | HG1, A_THR_117  | 2.86 | 1.91 | 8.00  |
| 1HGH.PDB | O, A_GLU_82    | N, A_LEU_118   | H, A_LEU_118    | 2.97 | 2.03 | 14.27 |
| 1HGH.PDB | O, A_TYR_257   | N, A_ILE_121   | H, A_ILE_121    | 2.88 | 1.93 | 10.50 |
| 1HGH.PDB | O, A_ARG_255   | N, A_GLU_123   | H, A_GLU_123    | 2.86 | 1.91 | 11.35 |
| 1HGH.PDB | O, A_THR_155   | N, A_THR_131   | H, A_THR_131    | 2.70 | 1.82 | 20.96 |
| 1HGH.PDB | O, A_LYS_156   | OG1, A_THR_131 | HG1, A_THR_131  | 2.65 | 1.86 | 28.53 |
| 1HGH.PDB | OD1, A_ASN_152 | N, A_ASN_133   | H, A_ASN_133    | 2.91 | 2.01 | 19.83 |
| 1HGH.PDB | O, A_TRP_153   | N, A_GLY_134   | H, A_GLY_134    | 2.97 | 2.05 | 15.71 |
| 1HGH.PDB | O, A_GLY_146   | N, A_SER_136   | H, A_SER_136    | 2.71 | 1.82 | 19.78 |
| 1HGH.PDB | OG, A_SER_136  | N, A_ALA_138   | H, A_ALA_138    | 2.92 | 1.99 | 15.62 |
| 1HGH.PDB | O, A_GLY_144   | NZ, A_LYS_140  | HZ1, A_LYS_140  | 2.88 | 1.90 | 16.19 |
| 1HGH.PDB | OD1, A_ASN_137 | NZ, A_LYS_140  | HZ2, A_LYS_140  | 2.74 | 1.73 | 12.09 |
| 1HGH.PDB | OD2, A_ASP_77  | NE, A_ARG_141  | HE, A_ARG_141   | 2.85 | 2.03 | 27.72 |
| 1HGH.PDB | O, A_PHE_147   | NH1, A_ARG_141 | HH12, A_ARG_141 | 2.57 | 1.64 | 17.56 |
| 1HGH.PDB | OD1, A_ASP_77  | NH2, A_ARG_141 | HH21, A_ARG_141 | 2.86 | 1.95 | 21.78 |
| 1HGH.PDB | OD2, A_ASP_77  | NH2, A_ARG_141 | HH21, A_ARG_141 | 2.74 | 1.85 | 23.60 |
| 1HGH.PDB | O, A_GLY_72    | NH2, A_ARG_141 | HH22, A_ARG_141 | 2.97 | 1.99 | 11.22 |
| 1HGH.PDB | O, A_SER_136   | N, A_GLY_146   | H, A_GLY_146    | 2.94 | 1.99 | 12.07 |
| 1HGH.PDB | O, A_GLY_72    | N, A_SER_149   | H, A_SER_149    | 2.87 | 1.96 | 17.76 |
| 1HGH.PDB | O, A_ALA_253   | N, A_ASN_152   | H, A_ASN_152    | 2.72 | 1.90 | 27.60 |
| 1HGH.PDB | OH, A_TYR_195  | NE1, A_TRP_153 | HE1, A_TRP_153  | 2.96 | 2.05 | 18.96 |
| 1HGH.PDB | O, A_THR_131   | N, A_THR_155   | H, A_THR_155    | 2.98 | 2.04 | 12.93 |
| 1HGH.PDB | O, A_LEU_194   | N, A_LYS_156   | H, A_LYS_156    | 2.93 | 1.99 | 14.05 |
| 1HGH.PDB | O, A_SER_193   | NZ, A_LYS_156  | HZ2, A_LYS_156  | 2.80 | 1.78 | 10.99 |
| 1HGH.PDB | O, A_THR_160   | N, A_SER_157   | H, A_SER_157    | 2.94 | 2.03 | 18.60 |
| 1HGH.PDB | O, A_SER_247   | N, A_LEU_164   | H, A_LEU_164    | 2.69 | 1.86 | 25.54 |
| 1HGH.PDB | O, A_ILE_245   | N, A_VAL_166   | H, A_VAL_166    | 2.85 | 1.89 | 11.06 |
| 1HGH.PDB | O, A_LEU_243   | OG1, A_THR_167 | HG1, A_THR_167  | 2.91 | 1.96 | 8.56  |
| 1HGH.PDB | O, A_LEU_243   | N, A_MET_168   | H, A_MET_168    | 2.82 | 1.89 | 14.71 |
| 1HGH.PDB | O, A_ASP_241   | N, A_ASN_170   | H, A_ASN_170    | 2.96 | 1.99 | 7.35  |
| 1HGH.PDB | O, A_PHE_174   | ND2, A_ASN_170 | HD21, A_ASN_170 | 2.81 | 1.86 | 12.55 |
| 1HGH.PDB | O, A_VAL_237   | ND2, A_ASN_170 | HD22, A_ASN_170 | 2.88 | 2.03 | 25.05 |
| 1HGH.PDB | O, A_VAL_237   | N, A_LYS_176   | H, A_LYS_176    | 3.00 | 2.06 | 14.88 |
| 1HGH.PDB | OE2, A_GLU_123 | NZ, A_LYS_176  | HZ1, A_LYS_176  | 2.68 | 1.79 | 24.70 |
| 1HGH.PDB | O, A_PHE_258   | N, A_LEU_177   | H, A_LEU_177    | 2.99 | 2.01 | 5.13  |
| 1HGH.PDB | O, A_THR_235   | N, A_TYR_178   | H, A_TYR_178    | 2.85 | 1.88 | 6.04  |
| 1HGH.PDB | OE1, A_GLU_123 | OH, A_TYR_178  | HH, A_TYR_178   | 2.75 | 1.81 | 10.37 |
| 1HGH.PDB | OG1, A_THR_235 | NE1, A_TRP_180 | HE1, A_TRP_180  | 2.89 | 1.90 | 1.65  |
| 1HGH.PDB | O, A_ASN_250   | N, A_HIS_183   | H, A_HIS_183    | 2.85 | 1.97 | 21.49 |
| 1HGH.PDB | O, A_ARG_229   | N, A_HIS_184   | H, A_HIS_184    | 2.86 | 1.93 | 14.05 |
| 1HGH.PDB | OG, A_SER_231  | NE2, A_HIS_184 | HE2, A_HIS_184  | 2.74 | 1.90 | 25.48 |
| 1HGH.PDB | OG1, A_THR_187 | N, A_GLU_190   | H, A_GLU_190    | 2.92 | 1.98 | 12.65 |
| 1HGH.PDB | O, A_THR_187   | N, A_GLN_191   | H, A_GLN_191    | 2.99 | 2.03 | 10.21 |
| 1HGH.PDB | OD1, A_ASN_250 | NE2, A_GLN_191 | HE21, A_GLN_191 | 2.96 | 2.00 | 8.72  |
| 1HGH.PDB | O, A_GLN_197   | NE2, A_GLN_191 | HE22, A_GLN_191 | 2.95 | 2.00 | 12.41 |
| 1HGH.PDB | O, A_GLN_189   | N, A_SER_193   | H, A_SER_193    | 2.92 | 1.94 | 4.94  |
| 1HGH.PDB | O, A_GLN_189   | OG, A_SER_193  | HG, A_SER_193   | 2.79 | 2.00 | 29.43 |
| 1HGH.PDB | O, A_GLU_190   | N, A_LEU_194   | H, A_LEU_194    | 2.95 | 1.99 | 10.19 |
| 1HGH.PDB | O, A_GLN_191   | N, A_TYR_195   | H, A_TYR_195    | 2.79 | 1.83 | 8.10  |
| 1HGH.PDB | O, A_TYR_161   | NE2, A_GLN_197 | HE21, A_GLN_197 | 2.92 | 1.97 | 11.79 |
| 1HGH.PDB | O, A_ASN_248   | NE2, A_GLN_197 | HE22, A_GLN_197 | 2.87 | 1.96 | 16.95 |
| 1HGH.PDB | OD1, A_ASN_246 | NH2, A_ARG_201 | HH21, A_ARG_201 | 2.63 | 1.71 | 19.32 |
| 1HGH.PDB | O, A_ILE_213   | N, A_VAL_202   | H, A_VAL_202    | 2.95 | 2.00 | 12.25 |
| 1HGH.PDB | O, A_ASN_246   | N, A_THR_203   | H, A_THR_203    | 2.81 | 1.89 | 15.97 |
| 1HGH.PDB | O, A_GLN_211   | N, A_VAL_204   | H, A_VAL_204    | 2.84 | 1.93 | 17.60 |
| 1HGH.PDB | O, A_SER_209   | N, A_THR_206   | H, A_THR_206    | 2.88 | 1.91 | 6.84  |
| 1HGH.PDB | OD1, A_ASP_241 | N, A_ARG_207   | H, A_ARG_207    | 2.88 | 1.92 | 8.24  |

|          |                |                |                 |      |      |       |
|----------|----------------|----------------|-----------------|------|------|-------|
| 1HGH.PDB | OG1, A_THR.206 | OG, A_SER.209  | HG, A_SER.209   | 2.93 | 1.98 | 8.14  |
| 1HGH.PDB | OD1, E_ASP.101 | NE2, A_GLN.210 | HE22, A_GLN.210 | 2.97 | 2.14 | 27.61 |
| 1HGH.PDB | O, A_VAL.204   | N, A_GLN.211   | H, A_GLN.211    | 2.88 | 1.95 | 14.72 |
| 1HGH.PDB | OG1, A_THR.203 | OG1, A_THR.212 | HG1, A_THR.212  | 2.93 | 1.98 | 7.92  |
| 1HGH.PDB | O, A_VAL.202   | N, A_ILE.213   | H, A_ILE.213    | 2.89 | 1.95 | 14.76 |
| 1HGH.PDB | ND1, A_HIS.184 | N, A_ASN.216   | H, A_ASN.216    | 2.75 | 1.96 | 29.57 |
| 1HGH.PDB | OE1, C_GLN.210 | NH2, A_ARG.220 | HH21, A_ARG.220 | 2.66 | 1.73 | 18.15 |
| 1HGH.PDB | O, A_ASN.216   | NH2, A_ARG.220 | HH22, A_ARG.220 | 2.69 | 1.79 | 20.62 |
| 1HGH.PDB | O, A_LEU.226   | N, A_VAL.223   | H, A_VAL.223    | 2.87 | 1.91 | 10.54 |
| 1HGH.PDB | O, A_CYS.97    | NE, A_ARG.224  | HE, A_ARG.224   | 2.80 | 1.97 | 26.34 |
| 1HGH.PDB | O, A_CYS.97    | NH2, A_ARG.224 | HH21, A_ARG.224 | 2.81 | 1.94 | 24.94 |
| 1HGH.PDB | O, A_VAL.223   | N, A_LEU.226   | H, A_LEU.226    | 2.81 | 1.89 | 14.05 |
| 1HGH.PDB | O, A_SER.228   | NH1, A_ARG.229 | HH11, A_ARG.229 | 2.68 | 1.73 | 15.83 |
| 1HGH.PDB | O, A_PRO.221   | NH2, A_ARG.229 | HH22, A_ARG.229 | 2.59 | 1.64 | 14.22 |
| 1HGH.PDB | OD1, A_ASP.101 | OG, A_SER.231  | HG, A_SER.231   | 2.86 | 1.91 | 11.01 |
| 1HGH.PDB | O, A_ASP.101   | N, A_ILE.232   | H, A_ILE.232    | 2.88 | 1.97 | 18.41 |
| 1HGH.PDB | O, A_TRP.180   | N, A_TYR.233   | H, A_TYR.233    | 2.88 | 1.92 | 10.18 |
| 1HGH.PDB | O, A_TYR.178   | N, A_THR.235   | H, A_THR.235    | 2.91 | 2.01 | 18.50 |
| 1HGH.PDB | O, A_LYS.176   | N, A_VAL.237   | H, A_VAL.237    | 2.76 | 1.84 | 16.06 |
| 1HGH.PDB | O, F_SER.71    | NZ, A_LYS.238  | HZ2, A_LYS.238  | 2.69 | 1.74 | 19.56 |
| 1HGH.PDB | OE1, F_GLU.72  | NZ, A_LYS.238  | HZ3, A_LYS.238  | 2.92 | 1.93 | 15.64 |
| 1HGH.PDB | O, A_ASN.170   | N, A_GLY.240   | H, A_GLY.240    | 2.92 | 2.05 | 22.76 |
| 1HGH.PDB | O, A_LYS.238   | N, A_ASP.241   | H, A_ASP.241    | 2.96 | 2.03 | 14.77 |
| 1HGH.PDB | OD1, A_ASP.241 | N, A_VAL.242   | H, A_VAL.242    | 2.75 | 1.93 | 27.28 |
| 1HGH.PDB | O, A_MET.168   | N, A_LEU.243   | H, A_LEU.243    | 2.84 | 1.87 | 3.34  |
| 1HGH.PDB | O, A_SER.205   | N, A_VAL.244   | H, A_VAL.244    | 2.95 | 2.00 | 12.06 |
| 1HGH.PDB | O, A_VAL.166   | N, A_ILE.245   | H, A_ILE.245    | 2.85 | 1.91 | 12.74 |
| 1HGH.PDB | O, A_THR.203   | N, A_ASN.246   | H, A_ASN.246    | 2.92 | 1.96 | 9.76  |
| 1HGH.PDB | OD1, A_ASN.165 | ND2, A_ASN.246 | HD22, A_ASN.246 | 2.95 | 1.98 | 10.57 |
| 1HGH.PDB | O, A_LEU.164   | N, A_SER.247   | H, A_SER.247    | 2.89 | 1.97 | 17.06 |
| 1HGH.PDB | OE1, A_GLN.191 | ND2, A_ASN.250 | HD21, A_ASN.250 | 2.87 | 1.90 | 5.96  |
| 1HGH.PDB | O, A_HIS.183   | ND2, A_ASN.250 | HD22, A_ASN.250 | 2.85 | 1.88 | 6.67  |
| 1HGH.PDB | O, A_GLY.181   | N, A_ILE.252   | H, A_ILE.252    | 2.94 | 1.99 | 11.06 |
| 1HGH.PDB | O, A_ASN.152   | N, A_ALA.253   | H, A_ALA.253    | 2.83 | 1.93 | 19.98 |
| 1HGH.PDB | O, A_ILE.121   | N, A_TYR.257   | H, A_TYR.257    | 3.00 | 2.13 | 23.55 |
| 1HGH.PDB | O, A_LEU.177   | N, A_PHE.258   | H, A_PHE.258    | 2.88 | 1.93 | 9.88  |
| 1HGH.PDB | OG, A_SER.115  | N, A_ARG.261   | H, A_ARG.261    | 2.95 | 1.99 | 11.60 |
| 1HGH.PDB | OE2, A_GLU.119 | NH1, A_ARG.261 | HH12, A_ARG.261 | 2.62 | 1.81 | 29.53 |
| 1HGH.PDB | OE1, A_GLU.119 | NH2, A_ARG.261 | HH22, A_ARG.261 | 2.87 | 1.97 | 23.64 |
| 1HGH.PDB | OD2, A_ASP.85  | NZ, A_LYS.264  | HZ3, A_LYS.264  | 2.81 | 1.82 | 15.33 |
| 1HGH.PDB | O, A_PHE.87    | N, A_MET.268   | H, A_MET.268    | 2.83 | 1.97 | 23.14 |
| 1HGH.PDB | O, A_GLU.89    | N, A_SER.270   | H, A_SER.270    | 3.00 | 2.03 | 9.88  |
| 1HGH.PDB | O, A_PRO.284   | OG, A_SER.270  | HG, A_SER.270   | 2.79 | 1.85 | 11.64 |
| 1HGH.PDB | OG, A_SER.270  | N, A_ALA.272   | H, A_ALA.272    | 2.97 | 2.03 | 13.38 |
| 1HGH.PDB | O, A_ILE.51    | N, A_ASP.275   | H, A_ASP.275    | 2.90 | 1.99 | 17.90 |
| 1HGH.PDB | OD1, A_ASP.275 | N, A_THR.276   | H, A_THR.276    | 2.83 | 1.96 | 22.54 |
| 1HGH.PDB | O, A_ASN.54    | N, A_SER.279   | H, A_SER.279    | 2.78 | 1.84 | 12.84 |
| 1HGH.PDB | O, A_TYR.302   | N, A_ILE.282   | H, A_ILE.282    | 2.85 | 1.90 | 11.45 |
| 1HGH.PDB | O, A_THR.283   | N, A_GLY.286   | H, A_GLY.286    | 2.81 | 1.91 | 17.80 |
| 1HGH.PDB | O, A_LYS.50    | N, A_SER.287   | H, A_SER.287    | 2.92 | 1.95 | 4.60  |
| 1HGH.PDB | O, A_ALA.304   | ND2, A_ASN.290 | HD22, A_ASN.290 | 2.87 | 1.97 | 19.64 |
| 1HGH.PDB | OE1, A_GLN.44  | NZ, A_LYS.292  | HZ1, A_LYS.292  | 2.68 | 1.67 | 11.56 |
| 1HGH.PDB | OD2, A_ASP.291 | NZ, A_LYS.292  | HZ3, A_LYS.292  | 2.82 | 1.85 | 18.01 |
| 1HGH.PDB | O, A_LYS.307   | N, A_GLN.295   | H, A_GLN.295    | 2.87 | 1.98 | 21.43 |
| 1HGH.PDB | O, A_ASN.298   | NE2, A_GLN.295 | HE21, A_GLN.295 | 2.73 | 1.78 | 8.62  |
| 1HGH.PDB | O, A_GLN.44    | N, A_ASN.296   | H, A_ASN.296    | 2.92 | 1.96 | 9.49  |
| 1HGH.PDB | O, B_LYS.68    | NZ, A_LYS.299  | HZ1, A_LYS.299  | 2.98 | 1.97 | 13.59 |
| 1HGH.PDB | OD1, A_ASN.298 | N, A_ILE.300   | H, A_ILE.300    | 2.92 | 1.97 | 10.82 |



|          |                |                |                 |      |      |       |
|----------|----------------|----------------|-----------------|------|------|-------|
| 1HGH.PDB | O, A_ILE_282   | N, A_TYR_302   | H, A_TYR_302    | 2.84 | 2.02 | 27.55 |
| 1HGH.PDB | O, A_LYS_264   | OH, A_TYR_302  | HH, A_TYR_302   | 2.68 | 1.89 | 29.18 |
| 1HGH.PDB | O, B_LYS_62    | N, A_GLY_303   | H, A_GLY_303    | 3.00 | 2.03 | 6.35  |
| 1HGH.PDB | O, A_GLN_295   | N, A_VAL_309   | H, A_VAL_309    | 2.94 | 2.11 | 27.12 |
| 1HGH.PDB | OG, B_SER_93   | N, A_LYS_310   | H, A_LYS_310    | 2.90 | 1.94 | 8.41  |
| 1HGH.PDB | OD1, B_ASP_86  | NZ, A_LYS_310  | HZ2, A_LYS_310  | 2.71 | 1.84 | 27.09 |
| 1HGH.PDB | OE2, A_GLU_41  | N, A_LEU_314   | H, A_LEU_314    | 2.82 | 1.88 | 12.85 |
| 1HGH.PDB | OE1, A_GLU_41  | NZ, A_LYS_315  | HZ3, A_LYS_315  | 2.87 | 1.90 | 18.83 |
| 1HGH.PDB | O, A_THR_40    | N, A_LEU_316   | H, A_LEU_316    | 2.77 | 1.84 | 14.60 |
| 1HGH.PDB | OD1, B_ASN_104 | N, A_ALA_317   | H, A_ALA_317    | 2.74 | 1.80 | 10.38 |
| 1HGH.PDB | O, A_ASN_38    | N, A_THR_318   | H, A_THR_318    | 2.93 | 1.99 | 13.50 |
| 1HGH.PDB | O, A_GLU_35    | N, A_ASN_322   | H, A_ASN_322    | 2.96 | 1.98 | 2.64  |
| 1HGH.PDB | O, A_VAL_20    | ND2, A_ASN_322 | HD21, A_ASN_322 | 2.83 | 1.91 | 15.77 |
| 1HGH.PDB | OE2, A_GLU_35  | ND2, A_ASN_322 | HD22, A_ASN_322 | 2.83 | 1.93 | 20.02 |
| 1HGH.PDB | OE1, A_GLU_325 | NZ, A_LYS_326  | HZ3, A_LYS_326  | 2.84 | 1.87 | 17.61 |
| 1HGH.PDB | O, A_PRO_21    | NE2, A_GLN_327 | HE22, A_GLN_327 | 2.76 | 1.93 | 26.05 |
| 1HGH.PDB | OD2, B_ASP_112 | N, B_GLY_1     | H2, B_GLY_1     | 2.83 | 1.83 | 12.80 |
| 1HGH.PDB | OD1, B_ASP_109 | N, B_LEU_2     | H, B_LEU_2      | 2.87 | 1.94 | 15.91 |
| 1HGH.PDB | OD2, B_ASP_112 | N, B_PHE_3     | H, B_PHE_3      | 2.80 | 1.99 | 28.74 |
| 1HGH.PDB | OD2, B_ASP_112 | N, B_GLY_4     | H, B_GLY_4      | 2.97 | 2.08 | 20.13 |
| 1HGH.PDB | OD1, B_ASP_112 | N, B_ALA_5     | H, B_ALA_5      | 2.90 | 2.00 | 18.43 |
| 1HGH.PDB | O, B_GLY_4     | N, B_PHE_9     | H, B_PHE_9      | 2.83 | 1.90 | 13.47 |
| 1HGH.PDB | O, B_GLY_13    | ND2, B_ASN_12  | HD22, B_ASN_12  | 2.81 | 1.93 | 21.84 |
| 1HGH.PDB | O, A_VAL_323   | N, B_GLY_13    | H, B_GLY_13     | 2.69 | 1.78 | 16.40 |
| 1HGH.PDB | O, A_HIS_17    | N, B_TRP_14    | H, B_TRP_14     | 2.80 | 1.87 | 14.18 |
| 1HGH.PDB | OG1, B_THR_41  | N, B_TRP_21    | H, B_TRP_21     | 2.88 | 1.96 | 16.52 |
| 1HGH.PDB | O, A_GLY_16    | N, B_GLY_23    | H, B_GLY_23     | 2.92 | 2.01 | 18.42 |
| 1HGH.PDB | O, B_ALA_35    | N, B_PHE_24    | H, B_PHE_24     | 2.84 | 1.87 | 5.30  |
| 1HGH.PDB | O, A_CYS_14    | N, B_ARG_25    | H, B_ARG_25     | 2.97 | 2.02 | 12.29 |
| 1HGH.PDB | OE1, B_GLN_34  | NE, B_ARG_25   | HE, B_ARG_25    | 2.67 | 1.79 | 21.37 |
| 1HGH.PDB | OE1, B_GLN_34  | NH2, B_ARG_25  | HH21, B_ARG_25  | 2.91 | 2.10 | 29.24 |
| 1HGH.PDB | O, B_GLY_33    | N, B_HIS_26    | H, B_HIS_26     | 2.69 | 1.85 | 24.63 |
| 1HGH.PDB | O, B_GLY_31    | N, B_ASN_28    | H, B_ASN_28     | 2.77 | 1.84 | 14.31 |
| 1HGH.PDB | O, B_ASN_28    | N, B_GLY_31    | H, B_GLY_31     | 2.97 | 2.09 | 21.15 |
| 1HGH.PDB | O, B_HIS_26    | N, B_GLY_33    | H, B_GLY_33     | 2.87 | 1.95 | 17.09 |
| 1HGH.PDB | O, B_PHE_24    | N, B_ALA_35    | H, B_ALA_35     | 2.82 | 2.00 | 27.92 |
| 1HGH.PDB | O, B_TYR_22    | N, B_ASP_37    | H, B_ASP_37     | 2.71 | 1.77 | 10.18 |
| 1HGH.PDB | OD2, B_ASP_37  | N, B_SER_40    | H, B_SER_40     | 2.86 | 1.90 | 7.81  |
| 1HGH.PDB | O, B_ASP_37    | OG1, B_THR_41  | HG1, B_THR_41   | 2.73 | 1.82 | 16.31 |
| 1HGH.PDB | O, B_LEU_38    | N, B_GLN_42    | H, B_GLN_42     | 2.96 | 2.02 | 13.86 |
| 1HGH.PDB | OD1, B_ASP_46  | NE2, B_GLN_42  | HE22, B_GLN_42  | 2.86 | 1.97 | 20.47 |
| 1HGH.PDB | O, B_LYS_39    | N, B_ALA_43    | H, B_ALA_43     | 2.95 | 2.01 | 14.38 |
| 1HGH.PDB | O, B_SER_40    | N, B_ALA_44    | H, B_ALA_44     | 2.94 | 1.96 | 4.02  |
| 1HGH.PDB | O, B_THR_41    | N, B_ILE_45    | H, B_ILE_45     | 2.92 | 1.98 | 12.98 |
| 1HGH.PDB | O, B_GLN_42    | N, B_ASP_46    | H, B_ASP_46     | 2.79 | 1.82 | 1.49  |
| 1HGH.PDB | O, B_ALA_43    | NE2, B_GLN_47  | HE22, B_GLN_47  | 2.86 | 1.96 | 17.99 |
| 1HGH.PDB | O, B_ILE_45    | N, B_ASN_49    | H, B_ASN_49     | 2.86 | 1.93 | 14.26 |
| 1HGH.PDB | O, B_ASP_46    | N, B_GLY_50    | H, B_GLY_50     | 2.92 | 2.02 | 19.62 |
| 1HGH.PDB | O, B_GLN_47    | N, B_LYS_51    | H, B_LYS_51     | 2.97 | 2.01 | 11.02 |
| 1HGH.PDB | OE1, B_GLU_103 | NZ, B_LYS_51   | HZ1, B_LYS_51   | 2.79 | 1.76 | 7.63  |
| 1HGH.PDB | ND1, B_HIS_106 | NZ, B_LYS_51   | HZ2, B_LYS_51   | 2.80 | 1.85 | 18.51 |
| 1HGH.PDB | OG1, B_THR_107 | NZ, B_LYS_51   | HZ3, B_LYS_51   | 2.89 | 1.91 | 15.99 |
| 1HGH.PDB | O, B_ILE_48    | N, B_LEU_52    | H, B_LEU_52     | 2.93 | 2.02 | 17.94 |
| 1HGH.PDB | O, B_ASN_49    | N, B_ASN_53    | H, B_ASN_53     | 2.82 | 1.92 | 18.53 |
| 1HGH.PDB | OE1, B_GLU_57  | NH1, B_ARG_54  | HH11, B_ARG_54  | 2.86 | 1.87 | 11.36 |
| 1HGH.PDB | OE2, F_GLU_97  | NH2, B_ARG_54  | HH22, B_ARG_54  | 2.82 | 1.86 | 15.60 |
| 1HGH.PDB | OD2, F_ASP_86  | NZ, B_LYS_62   | HZ1, B_LYS_62   | 2.66 | 1.80 | 27.71 |
| 1HGH.PDB | OD2, F_ASP_90  | NZ, B_LYS_62   | HZ3, B_LYS_62   | 2.68 | 1.82 | 27.13 |

|          |                |                |                 |      |      |       |
|----------|----------------|----------------|-----------------|------|------|-------|
| 1HGH.PDB | OG, A_SER.110  | NE2, B_HIS.64  | HE2, B_HIS.64   | 2.87 | 1.91 | 11.96 |
| 1HGH.PDB | O, B_PHE.63    | NE2, B_GLN.65  | HE22, B_GLN.65  | 2.98 | 2.01 | 7.37  |
| 1HGH.PDB | O, A_LYS.299   | NZ, B_LYS.68   | HZ1, B_LYS.68   | 2.89 | 1.86 | 6.42  |
| 1HGH.PDB | OE2, B_GLU.85  | NZ, B_LYS.68   | HZ2, B_LYS.68   | 2.73 | 1.71 | 6.94  |
| 1HGH.PDB | OG, C_SER.107  | N, B_ARG.76    | H, B_ARG.76     | 2.88 | 1.92 | 9.13  |
| 1HGH.PDB | OE2, D_GLU.81  | NE, B_ARG.76   | HE, B_ARG.76    | 2.87 | 1.90 | 9.70  |
| 1HGH.PDB | OE2, D_GLU.74  | NH1, B_ARG.76  | HH12, B_ARG.76  | 2.91 | 1.90 | 8.45  |
| 1HGH.PDB | OE1, D_GLU.81  | NH2, B_ARG.76  | HH21, B_ARG.76  | 2.77 | 1.76 | 5.47  |
| 1HGH.PDB | OE1, D_GLU.74  | NH2, B_ARG.76  | HH22, B_ARG.76  | 2.89 | 1.87 | 2.83  |
| 1HGH.PDB | O, B_GLU.72    | NE2, B_GLN.78  | HE21, B_GLN.78  | 2.94 | 1.96 | 7.72  |
| 1HGH.PDB | OE1, B_GLU.74  | NE2, B_GLN.78  | HE22, B_GLN.78  | 2.91 | 1.95 | 10.12 |
| 1HGH.PDB | O, B_GLY.75    | N, B_ASP.79    | H, B_ASP.79     | 2.86 | 1.93 | 16.21 |
| 1HGH.PDB | O, B_ASP.79    | N, B_TYR.83    | H, B_TYR.83     | 2.90 | 2.00 | 19.79 |
| 1HGH.PDB | OE1, D_GLU.85  | OH, B_TYR.83   | HH, B_TYR.83    | 2.69 | 1.84 | 23.96 |
| 1HGH.PDB | O, B_LEU.80    | N, B_VAL.84    | H, B_VAL.84     | 2.72 | 1.80 | 14.22 |
| 1HGH.PDB | O, B_LYS.82    | N, B_ASP.86    | H, B_ASP.86     | 2.94 | 2.00 | 12.60 |
| 1HGH.PDB | OH, F_TYR.83   | NZ, B_LYS.88   | HZ1, B_LYS.88   | 2.74 | 1.71 | 7.44  |
| 1HGH.PDB | O, B_GLU.85    | N, B_ILE.89    | H, B_ILE.89     | 2.85 | 1.87 | 2.68  |
| 1HGH.PDB | O, B_LYS.88    | N, B_TRP.92    | H, B_TRP.92     | 2.92 | 1.94 | 4.60  |
| 1HGH.PDB | O, B_ILE.89    | N, B_SER.93    | H, B_SER.93     | 2.91 | 2.02 | 21.18 |
| 1HGH.PDB | O, B_ILE.89    | OG, B_SER.93   | HG, B_SER.93    | 2.79 | 1.87 | 15.47 |
| 1HGH.PDB | O, B_ASP.90    | N, B_TYR.94    | H, B_TYR.94     | 2.88 | 1.97 | 17.78 |
| 1HGH.PDB | O, B_LEU.91    | N, B_ASN.95    | H, B_ASN.95     | 3.00 | 2.02 | 1.45  |
| 1HGH.PDB | O, B_TRP.92    | N, B_ALA.96    | H, B_ALA.96     | 2.97 | 2.04 | 15.59 |
| 1HGH.PDB | O, B_TYR.94    | N, B_LEU.98    | H, B_LEU.98     | 2.93 | 1.96 | 5.82  |
| 1HGH.PDB | O, B_ASN.95    | N, B_LEU.99    | H, B_LEU.99     | 2.94 | 2.02 | 15.77 |
| 1HGH.PDB | O, B_VAL.100   | N, B_ASN.104   | H, B_ASN.104    | 2.89 | 1.94 | 12.26 |
| 1HGH.PDB | O, A_LYS.27    | ND2, B_ASN.104 | HD22, B_ASN.104 | 2.88 | 1.93 | 11.07 |
| 1HGH.PDB | O, B_LEU.102   | N, B_HIS.106   | H, B_HIS.106    | 2.96 | 1.99 | 8.01  |
| 1HGH.PDB | O, B_GLU.103   | N, B_THR.107   | H, B_THR.107    | 2.84 | 1.93 | 17.70 |
| 1HGH.PDB | O, B_HIS.106   | N, B_LEU.110   | H, B_LEU.110    | 2.80 | 1.84 | 8.73  |
| 1HGH.PDB | O, B_THR.107   | OG1, B_THR.111 | HG1, B_THR.111  | 2.85 | 1.90 | 7.42  |
| 1HGH.PDB | O, B_ASP.109   | N, B_SER.113   | H, B_SER.113    | 2.77 | 1.82 | 9.55  |
| 1HGH.PDB | O, B_ASP.112   | N, B_ASN.116   | H, B_ASN.116    | 3.00 | 2.02 | 6.31  |
| 1HGH.PDB | O, B_SER.113   | N, B_LYS.117   | H, B_LYS.117    | 2.71 | 1.89 | 26.84 |
| 1HGH.PDB | O, B_GLU.114   | N, B_LEU.118   | H, B_LEU.118    | 2.99 | 2.02 | 7.88  |
| 1HGH.PDB | O, B_ASN.116   | N, B_GLU.120   | H, B_GLU.120    | 2.94 | 1.96 | 2.10  |
| 1HGH.PDB | O, B_LYS.117   | N, B_LYS.121   | H, B_LYS.121    | 2.86 | 1.96 | 18.76 |
| 1HGH.PDB | O, B_LEU.118   | N, B_THR.122   | H, B_THR.122    | 2.99 | 2.01 | 4.84  |
| 1HGH.PDB | O, B_PHE.119   | N, B_ARG.123   | H, B_ARG.123    | 2.90 | 1.94 | 9.49  |
| 1HGH.PDB | OE2, B_GLU.120 | NH1, B_ARG.123 | HH11, B_ARG.123 | 2.74 | 1.85 | 22.74 |
| 1HGH.PDB | O, B_GLU.120   | N, B_ARG.124   | H, B_ARG.124    | 2.98 | 2.02 | 10.15 |
| 1HGH.PDB | OE1, F_GLU.132 | NE, B_ARG.124  | HE, B_ARG.124   | 2.76 | 1.94 | 26.47 |
| 1HGH.PDB | OE2, F_GLU.132 | NE, B_ARG.124  | HE, B_ARG.124   | 2.83 | 1.98 | 23.62 |
| 1HGH.PDB | O, B_LEU.126   | N, B_ASN.129   | H, B_ASN.129    | 2.97 | 2.04 | 14.58 |
| 1HGH.PDB | OH, B_TYR.157  | ND2, B_ASN.129 | HD22, B_ASN.129 | 2.83 | 1.87 | 11.09 |
| 1HGH.PDB | O, B_LYS.139   | N, B_GLU.131   | H, B_GLU.131    | 2.93 | 2.01 | 16.63 |
| 1HGH.PDB | O, B_CYS.137   | N, B_MET.133   | H, B_MET.133    | 2.84 | 1.90 | 13.58 |
| 1HGH.PDB | O, A_LEU.13    | N, B_PHE.138   | H, B_PHE.138    | 2.71 | 1.82 | 19.17 |
| 1HGH.PDB | O, B_GLU.131   | N, B_LYS.139   | H, B_LYS.139    | 2.85 | 1.89 | 6.05  |
| 1HGH.PDB | O, A_ALA.11    | N, B_ILE.140   | H, B_ILE.140    | 2.77 | 1.85 | 16.34 |
| 1HGH.PDB | O, B_ASN.129   | N, B_TYR.141   | H, B_TYR.141    | 2.84 | 1.90 | 13.40 |
| 1HGH.PDB | O, B_ILE.140   | N, B_HIS.142   | H, B_HIS.142    | 3.00 | 2.21 | 29.95 |
| 1HGH.PDB | OE2, B_GLU.165 | N, B_LYS.143   | H, B_LYS.143    | 2.98 | 2.03 | 13.49 |
| 1HGH.PDB | OE1, B_GLU.30  | N, B_ASN.146   | H, B_ASN.146    | 2.90 | 1.99 | 19.37 |
| 1HGH.PDB | O, B_ASP.145   | N, B_ILE.149   | H, B_ILE.149    | 2.89 | 1.93 | 10.45 |
| 1HGH.PDB | O, B_ASN.146   | N, B_GLU.150   | H, B_GLU.150    | 2.91 | 1.99 | 15.45 |
| 1HGH.PDB | O, B_ALA.147   | N, B_SER.151   | H, B_SER.151    | 2.92 | 2.08 | 25.20 |

|          |                |                |                 |      |      |       |
|----------|----------------|----------------|-----------------|------|------|-------|
| 1HGH.PDB | O, B_CYS_148   | OG, B_SER_151  | HG, B_SER_151   | 2.72 | 1.85 | 19.70 |
| 1HGH.PDB | O, B_GLU_150   | N, B_ASN_154   | H, B_ASN_154    | 2.82 | 1.84 | 0.36  |
| 1HGH.PDB | OE2, B_GLU_150 | ND2, B_ASN_154 | HD21, B_ASN_154 | 2.97 | 2.10 | 23.74 |
| 1HGH.PDB | O, B_SER_151   | N, B_THR_156   | H, B_THR_156    | 2.77 | 1.95 | 26.55 |
| 1HGH.PDB | OD1, B_ASN_154 | OG1, B_THR_156 | HG1, B_THR_156  | 2.66 | 1.78 | 19.28 |
| 1HGH.PDB | OD1, B_ASP_158 | N, B_ASP_160   | H, B_ASP_160    | 2.94 | 2.06 | 21.76 |
| 1HGH.PDB | O, B_HIS_159   | N, B_TYR_162   | H, B_TYR_162    | 2.90 | 2.01 | 20.57 |
| 1HGH.PDB | O, F_ARG_170   | NH1, B_ARG_163 | HH12, B_ARG_163 | 2.69 | 1.71 | 10.72 |
| 1HGH.PDB | O, B_TYR_162   | N, B_ALA_166   | H, B_ALA_166    | 2.89 | 1.91 | 4.63  |
| 1HGH.PDB | O, B_ARG_163   | N, B_LEU_167   | H, B_LEU_167    | 2.82 | 1.86 | 7.93  |
| 1HGH.PDB | O, B_GLU_165   | ND2, B_ASN_169 | HD22, B_ASN_169 | 2.96 | 1.99 | 6.61  |
| 1HGH.PDB | O, B_ALA_166   | N, B_ARG_170   | H, B_ARG_170    | 2.78 | 1.91 | 21.64 |
| 1HGH.PDB | O, B_GLU_128   | NE, B_ARG_170  | HE, B_ARG_170   | 2.74 | 1.88 | 23.26 |
| 1HGH.PDB | OE2, B_GLU_131 | NH1, B_ARG_170 | HH11, B_ARG_170 | 2.83 | 1.83 | 5.81  |
| 1HGH.PDB | O, B_LEU_167   | N, B_PHE_171   | H, B_PHE_171    | 2.96 | 2.03 | 15.44 |
| 1HGH.PDB | O, D_ILE_140   | N, C_ALA_11    | H, C_ALA_11     | 2.90 | 2.02 | 21.17 |
| 1HGH.PDB | O, D_GLN_27    | N, C_THR_12    | H, C_THR_12     | 2.94 | 1.99 | 10.37 |
| 1HGH.PDB | O, D_PHE_138   | N, C_LEU_13    | H, C_LEU_13     | 2.98 | 2.01 | 8.63  |
| 1HGH.PDB | O, D_ARG_25    | N, C_CYS_14    | H, C_CYS_14     | 2.74 | 1.80 | 11.01 |
| 1HGH.PDB | O, D_GLY_136   | N, C_LEU_15    | H, C_LEU_15     | 2.92 | 1.95 | 6.34  |
| 1HGH.PDB | O, D_GLY_23    | N, C_GLY_16    | H, C_GLY_16     | 2.95 | 2.08 | 23.40 |
| 1HGH.PDB | O, D_TRP_21    | N, C_HIS_18    | H, C_HIS_18     | 2.93 | 2.04 | 20.66 |
| 1HGH.PDB | OD1, C_ASN_322 | N, C_VAL_20    | H, C_VAL_20     | 2.77 | 1.84 | 13.32 |
| 1HGH.PDB | O, C_VAL_36    | N, C_THR_24    | H, C_THR_24     | 2.84 | 1.94 | 18.88 |
| 1HGH.PDB | O, C_ILE_34    | N, C_VAL_26    | H, C_VAL_26     | 2.81 | 1.89 | 15.19 |
| 1HGH.PDB | OE2, D_GLU_97  | NZ, C_LYS_27   | HZ1, C_LYS_27   | 2.82 | 1.78 | 7.61  |
| 1HGH.PDB | O, C_ASP_31    | N, C_THR_28    | H, C_THR_28     | 2.72 | 1.89 | 26.38 |
| 1HGH.PDB | O, C_VAL_26    | N, C_ILE_34    | H, C_ILE_34     | 2.87 | 1.91 | 10.12 |
| 1HGH.PDB | O, C_THR_24    | N, C_VAL_36    | H, C_VAL_36     | 2.79 | 1.83 | 8.93  |
| 1HGH.PDB | O, C_MET_320   | N, C_THR_37    | H, C_THR_37     | 2.94 | 1.96 | 4.71  |
| 1HGH.PDB | O, C_LEU_316   | N, C_THR_40    | H, C_THR_40     | 2.84 | 2.01 | 25.77 |
| 1HGH.PDB | O, C_LEU_314   | N, C_LEU_42    | H, C_LEU_42     | 2.83 | 1.98 | 24.51 |
| 1HGH.PDB | O, C_PHE_294   | N, C_GLN_44    | H, C_GLN_44     | 2.92 | 1.94 | 4.18  |
| 1HGH.PDB | O, C_SER_46    | NE2, C_GLN_44  | HE22, C_GLN_44  | 2.81 | 1.95 | 23.93 |
| 1HGH.PDB | O, C_ASN_285   | OG, C_SER_47   | HG, C_SER_47    | 2.78 | 1.85 | 12.35 |
| 1HGH.PDB | OD2, C_ASP_275 | NZ, C_LYS_50   | HZ1, C_LYS_50   | 2.77 | 1.81 | 19.74 |
| 1HGH.PDB | O, C_PRO_273   | N, C_ILE_51    | H, C_ILE_51     | 2.79 | 1.88 | 17.33 |
| 1HGH.PDB | O, C_ASP_275   | N, C_ASN_53    | H, C_ASN_53     | 2.82 | 1.92 | 18.86 |
| 1HGH.PDB | O, C_GLU_280   | NE2, C_HIS_56  | HE2, C_HIS_56   | 2.96 | 2.00 | 11.12 |
| 1HGH.PDB | OD2, C_ASP_85  | N, C_ARG_57    | H, C_ARG_57     | 2.82 | 1.94 | 21.49 |
| 1HGH.PDB | O, C_THR_83    | NE, C_ARG_57   | HE, C_ARG_57    | 2.74 | 1.79 | 9.49  |
| 1HGH.PDB | O, C_LEU_86    | N, C_LEU_59    | H, C_LEU_59     | 2.97 | 2.04 | 15.48 |
| 1HGH.PDB | O, C_VAL_88    | N, C_GLY_61    | H, C_GLY_61     | 2.96 | 2.15 | 28.24 |
| 1HGH.PDB | OD1, C_ASP_60  | N, C_ILE_62    | H, C_ILE_62     | 2.88 | 1.94 | 12.53 |
| 1HGH.PDB | O, C_GLY_61    | N, C_CYS_64    | H, C_CYS_64     | 2.87 | 1.98 | 20.97 |
| 1HGH.PDB | OE2, C_GLU_89  | N, C_LEU_66    | H, C_LEU_66     | 2.91 | 1.94 | 8.58  |
| 1HGH.PDB | O, C_LEU_66    | N, C_LEU_70    | H, C_LEU_70     | 2.86 | 2.00 | 23.48 |
| 1HGH.PDB | O, C_ILE_67    | N, C_LEU_71    | H, C_LEU_71     | 2.80 | 1.84 | 8.28  |
| 1HGH.PDB | O, C_ASP_68    | N, C_GLY_72    | H, C_GLY_72     | 2.90 | 1.96 | 13.34 |
| 1HGH.PDB | OD1, C_ASP_73  | ND1, C_HIS_75  | HD1, C_HIS_75   | 2.71 | 1.84 | 22.23 |
| 1HGH.PDB | O, C_ASP_63    | NE2, C_HIS_75  | HE2, C_HIS_75   | 2.74 | 1.84 | 19.08 |
| 1HGH.PDB | O, C_ASP_73    | N, C_CYS_76    | H, C_CYS_76     | 2.76 | 1.88 | 21.08 |
| 1HGH.PDB | O, C_PRO_74    | N, C_ASP_77    | H, C_ASP_77     | 2.92 | 1.94 | 6.05  |
| 1HGH.PDB | O, C_CYS_76    | N, C_PHE_79    | H, C_PHE_79     | 2.99 | 2.01 | 3.05  |
| 1HGH.PDB | O, C_PHE_79    | N, C_GLU_82    | H, C_GLU_82     | 2.96 | 2.04 | 15.86 |
| 1HGH.PDB | OE1, C_GLU_82  | N, C_THR_83    | H, C_THR_83     | 2.89 | 2.00 | 20.79 |
| 1HGH.PDB | O, C_ARG_57    | N, C_ASP_85    | H, C_ASP_85     | 2.82 | 1.87 | 10.67 |
| 1HGH.PDB | O, C_MET_268   | N, C_GLU_89    | H, C_GLU_89     | 2.85 | 1.91 | 11.22 |

|          |                |                |                 |      |      |       |
|----------|----------------|----------------|-----------------|------|------|-------|
| 1HGH.PDB | OD1, C_ASP.60  | NE, C_ARG.90   | HE, C_ARG.90    | 2.80 | 1.87 | 15.44 |
| 1HGH.PDB | O, C_SER.270   | NH1, C_ARG.90  | HH11, C_ARG.90  | 2.64 | 1.80 | 26.46 |
| 1HGH.PDB | O, C_ALA.272   | NH1, C_ARG.90  | HH12, C_ARG.90  | 2.63 | 1.73 | 20.12 |
| 1HGH.PDB | OD2, C_ASP.60  | NH2, C_ARG.90  | HH21, C_ARG.90  | 2.76 | 1.77 | 8.79  |
| 1HGH.PDB | OD1, C_ASP.271 | N, C_SER.91    | H, C_SER.91     | 2.85 | 1.89 | 10.15 |
| 1HGH.PDB | OD2, C_ASP.271 | OG, C_SER.91   | HG, C_SER.91    | 2.80 | 1.87 | 12.62 |
| 1HGH.PDB | OD2, C_ASP.68  | OG, C_SER.95   | HG, C_SER.95    | 2.83 | 1.92 | 18.04 |
| 1HGH.PDB | OD2, C_ASP.73  | N, C_ASN.96    | H, C_ASN.96     | 2.88 | 1.92 | 9.38  |
| 1HGH.PDB | OD1, C_ASP.68  | OH, C_TYR.100  | HH, C_TYR.100   | 2.94 | 2.01 | 15.20 |
| 1HGH.PDB | O, C_ILE.230   | N, C_ASP.101   | H, C_ASP.101    | 2.88 | 2.00 | 21.91 |
| 1HGH.PDB | OD2, C_ASP.104 | OG, C_SER.107  | HG, C_SER.107   | 2.88 | 1.96 | 17.02 |
| 1HGH.PDB | O, C_TYR.105   | N, C_ARG.109   | H, C_ARG.109    | 2.83 | 1.86 | 3.16  |
| 1HGH.PDB | OE2, D_GLU.67  | NH2, C_ARG.109 | HH21, C_ARG.109 | 2.86 | 1.88 | 13.66 |
| 1HGH.PDB | OD2, B_ASP.79  | OG, C_SER.110  | HG, C_SER.110   | 2.78 | 1.85 | 13.87 |
| 1HGH.PDB | O, C_SER.107   | N, C_LEU.111   | H, C_LEU.111    | 2.85 | 1.90 | 10.01 |
| 1HGH.PDB | O, C_ARG.109   | N, C_ALA.113   | H, C_ALA.113    | 2.90 | 1.99 | 17.86 |
| 1HGH.PDB | O, C_SER.110   | N, C_SER.114   | H, C_SER.114    | 2.98 | 2.02 | 11.21 |
| 1HGH.PDB | OE2, C_GLU.119 | OG1, C_THR.117 | HG1, C_THR.117  | 2.87 | 1.92 | 8.14  |
| 1HGH.PDB | O, C_GLU.82    | N, C_LEU.118   | H, C_LEU.118    | 2.94 | 1.98 | 9.54  |
| 1HGH.PDB | O, C_TYR.257   | N, C_ILE.121   | H, C_ILE.121    | 2.91 | 1.96 | 13.11 |
| 1HGH.PDB | O, C_ARG.255   | N, C_GLU.123   | H, C_GLU.123    | 2.84 | 1.89 | 11.27 |
| 1HGH.PDB | O, C_THR.155   | N, C_THR.131   | H, C_THR.131    | 2.73 | 1.84 | 19.41 |
| 1HGH.PDB | OD1, C_ASN.152 | N, C_ASN.133   | H, C_ASN.133    | 2.88 | 2.02 | 23.07 |
| 1HGH.PDB | O, C_TRP.153   | N, C_GLY.134   | H, C_GLY.134    | 3.00 | 2.07 | 15.16 |
| 1HGH.PDB | O, C_GLY.146   | N, C_SER.136   | H, C_SER.136    | 2.72 | 1.83 | 18.30 |
| 1HGH.PDB | OG, C_SER.136  | N, C_ALA.138   | H, C_ALA.138    | 2.92 | 2.02 | 18.99 |
| 1HGH.PDB | O, C_GLY.144   | NZ, C_LYS.140  | HZ1, C_LYS.140  | 2.84 | 1.87 | 16.40 |
| 1HGH.PDB | OD1, C_ASN.137 | NZ, C_LYS.140  | HZ2, C_LYS.140  | 2.76 | 1.74 | 10.11 |
| 1HGH.PDB | OD2, C_ASP.77  | NE, C_ARG.141  | HE, C_ARG.141   | 2.85 | 2.02 | 26.86 |
| 1HGH.PDB | O, C_PHE.147   | NH1, C_ARG.141 | HH12, C_ARG.141 | 2.56 | 1.64 | 18.32 |
| 1HGH.PDB | OD1, C_ASP.77  | NH2, C_ARG.141 | HH21, C_ARG.141 | 2.88 | 1.98 | 22.59 |
| 1HGH.PDB | OD2, C_ASP.77  | NH2, C_ARG.141 | HH21, C_ARG.141 | 2.75 | 1.86 | 23.43 |
| 1HGH.PDB | O, C_GLY.72    | NH2, C_ARG.141 | HH22, C_ARG.141 | 2.92 | 1.95 | 11.58 |
| 1HGH.PDB | OD1, C_ASN.137 | OG, C_SER.145  | HG, C_SER.145   | 2.89 | 2.04 | 23.42 |
| 1HGH.PDB | O, C_SER.136   | N, C_GLY.146   | H, C_GLY.146    | 2.94 | 2.00 | 12.32 |
| 1HGH.PDB | O, C_GLY.72    | N, C_SER.149   | H, C_SER.149    | 2.86 | 1.93 | 14.59 |
| 1HGH.PDB | OH, C_TYR.195  | NE1, C_TRP.153 | HE1, C_TRP.153  | 2.92 | 2.00 | 17.94 |
| 1HGH.PDB | O, C_LEU.194   | N, C_LYS.156   | H, C_LYS.156    | 2.95 | 2.02 | 15.17 |
| 1HGH.PDB | O, C_THR.160   | N, C_SER.157   | H, C_SER.157    | 2.91 | 1.98 | 14.73 |
| 1HGH.PDB | O, C_SER.247   | N, C_LEU.164   | H, C_LEU.164    | 2.74 | 1.91 | 26.14 |
| 1HGH.PDB | O, C_ILE.245   | N, C_VAL.166   | H, C_VAL.166    | 2.84 | 1.89 | 12.07 |
| 1HGH.PDB | O, C_LEU.243   | OG1, C_THR.167 | HG1, C_THR.167  | 2.87 | 1.97 | 18.05 |
| 1HGH.PDB | O, C_LEU.243   | N, C_MET.168   | H, C_MET.168    | 2.84 | 1.91 | 14.36 |
| 1HGH.PDB | O, C_ASP.241   | N, C_ASN.170   | H, C_ASN.170    | 2.92 | 1.95 | 6.13  |
| 1HGH.PDB | O, C_PHE.174   | ND2, C_ASN.170 | HD21, C_ASN.170 | 2.82 | 1.87 | 11.99 |
| 1HGH.PDB | O, C_VAL.237   | ND2, C_ASN.170 | HD22, C_ASN.170 | 2.87 | 2.05 | 26.77 |
| 1HGH.PDB | O, C_VAL.237   | N, C_LYS.176   | H, C_LYS.176    | 2.98 | 2.08 | 18.97 |
| 1HGH.PDB | OE2, C_GLU.123 | NZ, C_LYS.176  | HZ1, C_LYS.176  | 2.65 | 1.80 | 28.51 |
| 1HGH.PDB | O, C_PHE.258   | N, C_LEU.177   | H, C_LEU.177    | 2.96 | 1.98 | 4.25  |
| 1HGH.PDB | O, C_THR.235   | N, C_TYR.178   | H, C_TYR.178    | 2.84 | 1.89 | 11.44 |
| 1HGH.PDB | OE1, C_GLU.123 | OH, C_TYR.178  | HH, C_TYR.178   | 2.74 | 1.81 | 11.36 |
| 1HGH.PDB | OG1, C_THR.235 | NE1, C_TRP.180 | HE1, C_TRP.180  | 2.88 | 1.89 | 0.71  |
| 1HGH.PDB | O, C_ASN.250   | N, C_HIS.183   | H, C_HIS.183    | 2.86 | 2.01 | 24.69 |
| 1HGH.PDB | O, C_ARG.229   | N, C_HIS.184   | H, C_HIS.184    | 2.88 | 1.93 | 10.57 |
| 1HGH.PDB | OG, C_SER.231  | NE2, C_HIS.184 | HE2, C_HIS.184  | 2.77 | 1.92 | 24.69 |
| 1HGH.PDB | OG1, C_THR.187 | N, C_GLU.190   | H, C_GLU.190    | 2.94 | 2.00 | 12.64 |
| 1HGH.PDB | OD1, C_ASN.250 | NE2, C_GLN.191 | HE21, C_GLN.191 | 2.95 | 1.99 | 9.46  |
| 1HGH.PDB | O, C_GLN.197   | NE2, C_GLN.191 | HE22, C_GLN.191 | 2.94 | 1.99 | 11.67 |

|          |                |                |                 |      |      |       |
|----------|----------------|----------------|-----------------|------|------|-------|
| 1HGH.PDB | O, C_GLN_189   | OG1, C_THR_192 | HG1, C_THR_192  | 2.82 | 1.90 | 13.51 |
| 1HGH.PDB | O, C_GLN_189   | N, C_SER_193   | H, C_SER_193    | 2.90 | 1.95 | 11.34 |
| 1HGH.PDB | O, C_GLU_190   | N, C_LEU_194   | H, C_LEU_194    | 2.97 | 1.99 | 6.33  |
| 1HGH.PDB | O, C_GLN_191   | N, C_TYR_195   | H, C_TYR_195    | 2.80 | 1.84 | 8.79  |
| 1HGH.PDB | O, C_TYR_195   | N, C_GLN_197   | H, C_GLN_197    | 2.68 | 1.90 | 29.95 |
| 1HGH.PDB | O, C_TYR_161   | NE2, C_GLN_197 | HE21, C_GLN_197 | 2.92 | 1.98 | 11.92 |
| 1HGH.PDB | O, C_ASN_248   | NE2, C_GLN_197 | HE22, C_GLN_197 | 2.88 | 1.96 | 16.62 |
| 1HGH.PDB | OD1, C_ASN_246 | NH2, C_ARG_201 | HH21, C_ARG_201 | 2.65 | 1.73 | 20.02 |
| 1HGH.PDB | O, C_ILE_213   | N, C_VAL_202   | H, C_VAL_202    | 2.96 | 2.02 | 14.06 |
| 1HGH.PDB | O, C_ASN_246   | N, C_THR_203   | H, C_THR_203    | 2.85 | 1.89 | 9.27  |
| 1HGH.PDB | OG1, C_THR_212 | OG1, C_THR_203 | HG1, C_THR_203  | 2.92 | 1.98 | 11.43 |
| 1HGH.PDB | O, C_GLN_211   | N, C_VAL_204   | H, C_VAL_204    | 2.86 | 1.95 | 18.48 |
| 1HGH.PDB | O, C_SER_209   | N, C_THR_206   | H, C_THR_206    | 2.88 | 1.91 | 6.25  |
| 1HGH.PDB | OD1, C_ASP_241 | N, C_ARG_207   | H, C_ARG_207    | 2.87 | 1.91 | 10.07 |
| 1HGH.PDB | OD2, C_ASP_241 | NE, C_ARG_208  | HE, C_ARG_208   | 2.97 | 2.08 | 22.63 |
| 1HGH.PDB | OG1, C_THR_206 | OG, C_SER_209  | HG, C_SER_209   | 2.95 | 2.00 | 8.11  |
| 1HGH.PDB | OD1, A_ASP_101 | NE2, C_GLN_210 | HE22, C_GLN_210 | 2.93 | 2.07 | 24.87 |
| 1HGH.PDB | O, C_VAL_204   | N, C_GLN_211   | H, C_GLN_211    | 2.87 | 1.94 | 15.75 |
| 1HGH.PDB | O, C_VAL_202   | N, C_ILE_213   | H, C_ILE_213    | 2.87 | 1.94 | 14.37 |
| 1HGH.PDB | ND1, C_HIS_184 | N, C_ASN_216   | H, C_ASN_216    | 2.74 | 1.94 | 28.49 |
| 1HGH.PDB | O, C_ASN_216   | NH1, C_ARG_220 | HH12, C_ARG_220 | 2.90 | 2.08 | 29.68 |
| 1HGH.PDB | OE1, E_GLN_210 | NH2, C_ARG_220 | HH21, C_ARG_220 | 2.57 | 1.72 | 26.03 |
| 1HGH.PDB | O, C_ASN_216   | NH2, C_ARG_220 | HH22, C_ARG_220 | 2.69 | 1.80 | 21.79 |
| 1HGH.PDB | O, C_LEU_226   | N, C_VAL_223   | H, C_VAL_223    | 2.85 | 1.88 | 8.82  |
| 1HGH.PDB | O, C_CYS_97    | NE, C_ARG_224  | HE, C_ARG_224   | 2.79 | 1.97 | 28.26 |
| 1HGH.PDB | O, C_CYS_97    | NH2, C_ARG_224 | HH21, C_ARG_224 | 2.81 | 1.96 | 27.50 |
| 1HGH.PDB | O, C_VAL_223   | N, C_LEU_226   | H, C_LEU_226    | 2.85 | 1.93 | 15.63 |
| 1HGH.PDB | O, C_ARG_220   | OG, C_SER_227  | HG, C_SER_227   | 2.97 | 2.04 | 13.65 |
| 1HGH.PDB | O, C_SER_228   | NH1, C_ARG_229 | HH11, C_ARG_229 | 2.65 | 1.70 | 16.09 |
| 1HGH.PDB | O, C_PRO_221   | NH2, C_ARG_229 | HH22, C_ARG_229 | 2.62 | 1.66 | 13.46 |
| 1HGH.PDB | OD1, C_ASP_101 | OG, C_SER_231  | HG, C_SER_231   | 2.86 | 1.92 | 12.68 |
| 1HGH.PDB | O, C_ASP_101   | N, C_ILE_232   | H, C_ILE_232    | 2.90 | 1.98 | 16.86 |
| 1HGH.PDB | O, C_TRP_180   | N, C_TYR_233   | H, C_TYR_233    | 2.89 | 1.92 | 6.98  |
| 1HGH.PDB | O, C_TYR_178   | N, C_THR_235   | H, C_THR_235    | 2.90 | 1.98 | 17.23 |
| 1HGH.PDB | O, C_LYS_176   | N, C_VAL_237   | H, C_VAL_237    | 2.74 | 1.82 | 16.60 |
| 1HGH.PDB | OE1, B_GLU_72  | NZ, C_LYS_238  | HZ1, C_LYS_238  | 2.71 | 1.80 | 22.72 |
| 1HGH.PDB | O, B_SER_71    | NZ, C_LYS_238  | HZ3, C_LYS_238  | 2.68 | 1.75 | 20.57 |
| 1HGH.PDB | O, C_ASN_170   | N, C_GLY_240   | H, C_GLY_240    | 2.92 | 2.04 | 20.96 |
| 1HGH.PDB | O, C_LYS_238   | N, C_ASP_241   | H, C_ASP_241    | 2.93 | 1.99 | 14.39 |
| 1HGH.PDB | OD1, C_ASP_241 | N, C_VAL_242   | H, C_VAL_242    | 2.78 | 1.96 | 27.73 |
| 1HGH.PDB | O, C_MET_168   | N, C_LEU_243   | H, C_LEU_243    | 2.86 | 1.89 | 2.64  |
| 1HGH.PDB | O, C_SER_205   | N, C_VAL_244   | H, C_VAL_244    | 2.96 | 2.02 | 14.40 |
| 1HGH.PDB | O, C_VAL_166   | N, C_ILE_245   | H, C_ILE_245    | 2.87 | 1.93 | 13.03 |
| 1HGH.PDB | O, C_THR_203   | N, C_ASN_246   | H, C_ASN_246    | 2.89 | 1.95 | 12.42 |
| 1HGH.PDB | OD1, C_ASN_165 | ND2, C_ASN_246 | HD22, C_ASN_246 | 2.97 | 2.00 | 10.03 |
| 1HGH.PDB | O, C_LEU_164   | N, C_SER_247   | H, C_SER_247    | 2.91 | 2.00 | 17.54 |
| 1HGH.PDB | O, C_ARG_201   | OG, C_SER_247  | HG, C_SER_247   | 2.73 | 1.94 | 29.65 |
| 1HGH.PDB | OE1, C_GLN_191 | ND2, C_ASN_250 | HD21, C_ASN_250 | 2.86 | 1.89 | 6.98  |
| 1HGH.PDB | O, C_HIS_183   | ND2, C_ASN_250 | HD22, C_ASN_250 | 2.87 | 1.90 | 8.13  |
| 1HGH.PDB | O, C_GLY_181   | N, C_ILE_252   | H, C_ILE_252    | 2.97 | 2.02 | 11.25 |
| 1HGH.PDB | O, C_ASN_152   | N, C_ALA_253   | H, C_ALA_253    | 2.87 | 2.00 | 22.06 |
| 1HGH.PDB | O, C_ILE_121   | N, C_TYR_257   | H, C_TYR_257    | 2.97 | 2.09 | 21.43 |
| 1HGH.PDB | O, C_LEU_177   | N, C_PHE_258   | H, C_PHE_258    | 2.89 | 1.95 | 13.32 |
| 1HGH.PDB | O, C_GLU_119   | N, C_LYS_259   | H, C_LYS_259    | 2.98 | 2.10 | 21.28 |
| 1HGH.PDB | OG, C_SER_115  | N, C_ARG_261   | H, C_ARG_261    | 2.95 | 2.00 | 12.02 |
| 1HGH.PDB | OE2, C_GLU_119 | NH1, C_ARG_261 | HH12, C_ARG_261 | 2.64 | 1.82 | 29.37 |
| 1HGH.PDB | OE1, C_GLU_119 | NH2, C_ARG_261 | HH22, C_ARG_261 | 2.85 | 1.97 | 24.44 |
| 1HGH.PDB | OD2, C_ASP_85  | NZ, C_LYS_264  | HZ3, C_LYS_264  | 2.79 | 1.81 | 15.90 |

|          |                |                |                 |      |      |       |
|----------|----------------|----------------|-----------------|------|------|-------|
| 1HGH.PDB | O, C_PHE_87    | N, C_MET_268   | H, C_MET_268    | 2.82 | 1.96 | 23.69 |
| 1HGH.PDB | O, C_GLU_89    | N, C_SER_270   | H, C_SER_270    | 2.99 | 2.02 | 9.99  |
| 1HGH.PDB | O, C_PRO_284   | OG, C_SER_270  | HG, C_SER_270   | 2.79 | 1.83 | 6.01  |
| 1HGH.PDB | OG, C_SER_270  | N, C_ALA_272   | H, C_ALA_272    | 2.92 | 1.99 | 14.61 |
| 1HGH.PDB | O, C_ILE_51    | N, C_ASP_275   | H, C_ASP_275    | 2.92 | 1.99 | 15.40 |
| 1HGH.PDB | OD1, C_ASP_275 | N, C_THR_276   | H, C_THR_276    | 2.82 | 1.95 | 22.45 |
| 1HGH.PDB | O, C_ASN_54    | N, C_SER_279   | H, C_SER_279    | 2.78 | 1.84 | 13.60 |
| 1HGH.PDB | O, C_TYR_302   | N, C_ILE_282   | H, C_ILE_282    | 2.88 | 1.95 | 15.61 |
| 1HGH.PDB | O, C_THR_283   | N, C_GLY_286   | H, C_GLY_286    | 2.83 | 1.94 | 19.20 |
| 1HGH.PDB | O, C_LYS_50    | N, C_SER_287   | H, C_SER_287    | 2.85 | 1.88 | 2.68  |
| 1HGH.PDB | O, C_ALA_304   | ND2, C_ASN_290 | HD22, C_ASN_290 | 2.89 | 2.00 | 20.66 |
| 1HGH.PDB | OE1, C_GLN_44  | NZ, C_LYS_292  | HZ1, C_LYS_292  | 2.68 | 1.68 | 11.00 |
| 1HGH.PDB | OD2, C_ASP_291 | NZ, C_LYS_292  | HZ3, C_LYS_292  | 2.82 | 1.84 | 17.38 |
| 1HGH.PDB | O, C_LYS_307   | N, C_GLN_295   | H, C_GLN_295    | 2.85 | 2.00 | 24.78 |
| 1HGH.PDB | O, C_ASN_298   | NE2, C_GLN_295 | HE21, C_GLN_295 | 2.73 | 1.77 | 6.42  |
| 1HGH.PDB | O, C_GLN_44    | N, C_ASN_296   | H, C_ASN_296    | 2.89 | 1.94 | 9.83  |
| 1HGH.PDB | OD1, C_ASN_285 | ND2, C_ASN_298 | HD22, C_ASN_298 | 2.99 | 2.06 | 14.92 |
| 1HGH.PDB | OD1, C_ASN_298 | N, C_ILE_300   | H, C_ILE_300    | 2.90 | 1.96 | 12.51 |
| 1HGH.PDB | O, C_ILE_282   | N, C_TYR_302   | H, C_TYR_302    | 2.82 | 1.98 | 25.76 |
| 1HGH.PDB | O, C_GLN_295   | N, C_VAL_309   | H, C_VAL_309    | 2.93 | 2.12 | 28.37 |
| 1HGH.PDB | OG, D_SER_93   | N, C_LYS_310   | H, C_LYS_310    | 2.93 | 1.96 | 8.29  |
| 1HGH.PDB | OD1, D_ASP_86  | NZ, C_LYS_310  | HZ2, C_LYS_310  | 2.73 | 1.85 | 26.20 |
| 1HGH.PDB | OE2, C_GLU_41  | N, C_LEU_314   | H, C_LEU_314    | 2.81 | 1.86 | 11.11 |
| 1HGH.PDB | OE1, C_GLU_41  | NZ, C_LYS_315  | HZ3, C_LYS_315  | 2.87 | 1.91 | 19.47 |
| 1HGH.PDB | O, C_THR_40    | N, C_LEU_316   | H, C_LEU_316    | 2.77 | 1.83 | 12.11 |
| 1HGH.PDB | OD1, D_ASN_104 | N, C_ALA_317   | H, C_ALA_317    | 2.74 | 1.81 | 14.42 |
| 1HGH.PDB | O, C_ASN_38    | N, C_THR_318   | H, C_THR_318    | 2.94 | 1.99 | 12.96 |
| 1HGH.PDB | O, C_GLU_35    | N, C_ASN_322   | H, C_ASN_322    | 2.96 | 1.98 | 1.89  |
| 1HGH.PDB | O, C_VAL_20    | ND2, C_ASN_322 | HD21, C_ASN_322 | 2.84 | 1.92 | 16.39 |
| 1HGH.PDB | OE2, C_GLU_35  | ND2, C_ASN_322 | HD22, C_ASN_322 | 2.82 | 1.91 | 18.57 |
| 1HGH.PDB | OE1, D_GLU_15  | NZ, C_LYS_326  | HZ1, C_LYS_326  | 2.77 | 1.75 | 11.00 |
| 1HGH.PDB | OXT, C_THR_328 | NE2, C_GLN_327 | HE22, C_GLN_327 | 2.93 | 1.99 | 14.57 |
| 1HGH.PDB | OD2, D_ASP_112 | N, D_GLY_1     | H2, D_GLY_1     | 2.82 | 1.82 | 12.93 |
| 1HGH.PDB | OD1, D_ASP_109 | N, D_LEU_2     | H, D_LEU_2      | 2.90 | 1.96 | 14.04 |
| 1HGH.PDB | OD2, D_ASP_112 | N, D_PHE_3     | H, D_PHE_3      | 2.83 | 2.03 | 28.69 |
| 1HGH.PDB | OD2, D_ASP_112 | N, D_GLY_4     | H, D_GLY_4      | 2.96 | 2.09 | 21.45 |
| 1HGH.PDB | OD1, D_ASP_112 | N, D_ALA_5     | H, D_ALA_5      | 2.95 | 2.04 | 18.20 |
| 1HGH.PDB | O, D_GLY_4     | N, D_PHE_9     | H, D_PHE_9      | 2.82 | 1.88 | 12.35 |
| 1HGH.PDB | O, D_GLY_13    | ND2, D_ASN_12  | HD22, D_ASN_12  | 2.83 | 1.93 | 18.16 |
| 1HGH.PDB | O, C_VAL_323   | N, D_GLY_13    | H, D_GLY_13     | 2.68 | 1.77 | 15.36 |
| 1HGH.PDB | O, C_HIS_17    | N, D_TRP_14    | H, D_TRP_14     | 2.80 | 1.87 | 13.64 |
| 1HGH.PDB | OG1, D_THR_41  | N, D_TRP_21    | H, D_TRP_21     | 2.88 | 1.96 | 16.44 |
| 1HGH.PDB | O, C_GLY_16    | N, D_GLY_23    | H, D_GLY_23     | 2.92 | 2.01 | 18.18 |
| 1HGH.PDB | O, D_ALA_35    | N, D_PHE_24    | H, D_PHE_24     | 2.87 | 1.90 | 5.65  |
| 1HGH.PDB | O, C_CYS_14    | N, D_ARG_25    | H, D_ARG_25     | 2.90 | 1.94 | 10.42 |
| 1HGH.PDB | OE1, D_GLN_34  | NE, D_ARG_25   | HE, D_ARG_25    | 2.91 | 1.96 | 12.36 |
| 1HGH.PDB | O, D_GLY_33    | N, D_HIS_26    | H, D_HIS_26     | 2.85 | 1.94 | 18.22 |
| 1HGH.PDB | O, C_THR_12    | N, D_GLN_27    | H, D_GLN_27     | 2.91 | 1.98 | 14.85 |
| 1HGH.PDB | O, D_GLY_31    | N, D_ASN_28    | H, D_ASN_28     | 2.93 | 1.97 | 10.70 |
| 1HGH.PDB | OD1, D_ASN_28  | N, D_GLU_30    | H, D_GLU_30     | 2.88 | 2.06 | 26.85 |
| 1HGH.PDB | O, D_HIS_26    | N, D_GLY_33    | H, D_GLY_33     | 2.86 | 2.05 | 27.85 |
| 1HGH.PDB | O, D_PHE_24    | N, D_ALA_35    | H, D_ALA_35     | 2.81 | 1.99 | 27.43 |
| 1HGH.PDB | O, D_TYR_22    | N, D_ASP_37    | H, D_ASP_37     | 2.72 | 1.78 | 9.80  |
| 1HGH.PDB | OD2, D_ASP_37  | N, D_SER_40    | H, D_SER_40     | 2.86 | 1.91 | 10.58 |
| 1HGH.PDB | OD2, D_ASP_37  | OG, D_SER_40   | HG, D_SER_40    | 2.74 | 1.93 | 27.28 |
| 1HGH.PDB | O, D_ASP_37    | OG1, D_THR_41  | HG1, D_THR_41   | 2.73 | 1.83 | 18.40 |
| 1HGH.PDB | O, D_LEU_38    | N, D_GLN_42    | H, D_GLN_42     | 2.92 | 1.99 | 14.71 |
| 1HGH.PDB | OD1, D_ASP_46  | NE2, D_GLN_42  | HE22, D_GLN_42  | 2.87 | 1.96 | 19.71 |

|          |                |                |                 |      |      |       |
|----------|----------------|----------------|-----------------|------|------|-------|
| 1HGH.PDB | O, D_LYS_39    | N, D_ALA_43    | H, D_ALA_43     | 2.95 | 2.04 | 17.64 |
| 1HGH.PDB | O, D_SER_40    | N, D_ALA_44    | H, D_ALA_44     | 2.94 | 1.96 | 3.83  |
| 1HGH.PDB | O, D_THR_41    | N, D_ILE_45    | H, D_ILE_45     | 2.94 | 1.99 | 10.18 |
| 1HGH.PDB | O, D_GLN_42    | N, D_ASP_46    | H, D_ASP_46     | 2.79 | 1.82 | 1.60  |
| 1HGH.PDB | O, D_ALA_43    | NE2, D_GLN_47  | HE22, D_GLN_47  | 2.84 | 1.94 | 17.94 |
| 1HGH.PDB | O, D_ILE_45    | N, D_ASN_49    | H, D_ASN_49     | 2.88 | 1.92 | 10.54 |
| 1HGH.PDB | O, D_ASP_46    | N, D_GLY_50    | H, D_GLY_50     | 2.97 | 2.07 | 20.28 |
| 1HGH.PDB | O, D_GLN_47    | N, D_LYS_51    | H, D_LYS_51     | 2.96 | 2.00 | 10.33 |
| 1HGH.PDB | OE1, D_GLU_103 | NZ, D_LYS_51   | HZ1, D_LYS_51   | 2.74 | 1.72 | 7.43  |
| 1HGH.PDB | ND1, D_HIS_106 | NZ, D_LYS_51   | HZ2, D_LYS_51   | 2.80 | 1.84 | 18.41 |
| 1HGH.PDB | OG1, D_THR_107 | NZ, D_LYS_51   | HZ3, D_LYS_51   | 2.90 | 1.93 | 16.98 |
| 1HGH.PDB | O, D_ILE_48    | N, D_LEU_52    | H, D_LEU_52     | 2.94 | 2.02 | 16.46 |
| 1HGH.PDB | O, D_ASN_49    | N, D_ASN_53    | H, D_ASN_53     | 2.80 | 1.89 | 17.97 |
| 1HGH.PDB | O, A_THR_28    | NE, D_ARG_54   | HE, D_ARG_54    | 2.96 | 1.98 | 3.97  |
| 1HGH.PDB | OE1, D_GLU_57  | NH1, D_ARG_54  | HH11, D_ARG_54  | 2.86 | 1.86 | 11.45 |
| 1HGH.PDB | OE2, B_GLU_97  | NH2, D_ARG_54  | HH22, D_ARG_54  | 2.80 | 1.85 | 16.64 |
| 1HGH.PDB | OG, C_SER_110  | NE2, D_HIS_64  | HE2, D_HIS_64   | 2.84 | 1.88 | 10.18 |
| 1HGH.PDB | O, C_LYS_299   | NZ, D_LYS_68   | HZ1, D_LYS_68   | 2.88 | 1.85 | 6.67  |
| 1HGH.PDB | OE2, D_GLU_85  | NZ, D_LYS_68   | HZ2, D_LYS_68   | 2.75 | 1.73 | 9.37  |
| 1HGH.PDB | OG, E_SER_107  | N, D_ARG_76    | H, D_ARG_76     | 2.91 | 1.94 | 8.23  |
| 1HGH.PDB | OE2, F_GLU_81  | NE, D_ARG_76   | HE, D_ARG_76    | 2.79 | 1.84 | 10.45 |
| 1HGH.PDB | OE2, F_GLU_74  | NH1, D_ARG_76  | HH12, D_ARG_76  | 2.77 | 1.77 | 10.38 |
| 1HGH.PDB | OE1, F_GLU_81  | NH2, D_ARG_76  | HH21, D_ARG_76  | 2.70 | 1.70 | 6.41  |
| 1HGH.PDB | OE1, F_GLU_74  | NH2, D_ARG_76  | HH22, D_ARG_76  | 2.75 | 1.75 | 5.88  |
| 1HGH.PDB | O, D_GLU_72    | NE2, D_GLN_78  | HE21, D_GLN_78  | 2.93 | 1.96 | 8.18  |
| 1HGH.PDB | OE1, D_GLU_74  | NE2, D_GLN_78  | HE22, D_GLN_78  | 2.92 | 1.96 | 9.79  |
| 1HGH.PDB | O, D_GLY_75    | N, D_ASP_79    | H, D_ASP_79     | 2.84 | 1.88 | 10.94 |
| 1HGH.PDB | O, D_ASP_79    | N, D_TYR_83    | H, D_TYR_83     | 2.86 | 1.93 | 15.47 |
| 1HGH.PDB | OE1, F_GLU_85  | OH, D_TYR_83   | HH, D_TYR_83    | 2.59 | 1.81 | 29.86 |
| 1HGH.PDB | O, D_LEU_80    | N, D_VAL_84    | H, D_VAL_84     | 2.71 | 1.80 | 16.30 |
| 1HGH.PDB | O, D_LYS_82    | N, D_ASP_86    | H, D_ASP_86     | 2.95 | 1.99 | 9.46  |
| 1HGH.PDB | O, D_VAL_84    | N, D_LYS_88    | H, D_LYS_88     | 2.98 | 2.09 | 19.67 |
| 1HGH.PDB | OH, B_TYR_83   | NZ, D_LYS_88   | HZ1, D_LYS_88   | 2.66 | 1.64 | 7.83  |
| 1HGH.PDB | O, D_GLU_85    | N, D_ILE_89    | H, D_ILE_89     | 2.85 | 1.88 | 5.79  |
| 1HGH.PDB | O, D_LYS_88    | N, D_TRP_92    | H, D_TRP_92     | 2.90 | 1.92 | 5.72  |
| 1HGH.PDB | O, D_ILE_89    | N, D_SER_93    | H, D_SER_93     | 2.89 | 1.99 | 19.16 |
| 1HGH.PDB | O, D_ILE_89    | OG, D_SER_93   | HG, D_SER_93    | 2.76 | 1.84 | 13.71 |
| 1HGH.PDB | O, D_ASP_90    | N, D_TYR_94    | H, D_TYR_94     | 2.86 | 1.93 | 14.89 |
| 1HGH.PDB | O, D_LEU_91    | N, D_ASN_95    | H, D_ASN_95     | 3.00 | 2.01 | 2.40  |
| 1HGH.PDB | O, D_TRP_92    | N, D_ALA_96    | H, D_ALA_96     | 2.97 | 2.07 | 19.88 |
| 1HGH.PDB | O, D_TYR_94    | N, D_LEU_98    | H, D_LEU_98     | 2.95 | 1.98 | 4.96  |
| 1HGH.PDB | O, D_ASN_95    | N, D_LEU_99    | H, D_LEU_99     | 2.96 | 2.05 | 17.05 |
| 1HGH.PDB | O, D_VAL_100   | N, D_ASN_104   | H, D_ASN_104    | 2.87 | 1.94 | 14.58 |
| 1HGH.PDB | O, C_LYS_27    | ND2, D_ASN_104 | HD22, D_ASN_104 | 2.89 | 1.94 | 11.70 |
| 1HGH.PDB | O, D_LEU_102   | N, D_HIS_106   | H, D_HIS_106    | 2.95 | 1.98 | 8.89  |
| 1HGH.PDB | O, D_GLU_103   | N, D_THR_107   | H, D_THR_107    | 2.84 | 1.94 | 18.36 |
| 1HGH.PDB | O, D_HIS_106   | N, D_LEU_110   | H, D_LEU_110    | 2.82 | 1.86 | 9.68  |
| 1HGH.PDB | O, D_THR_107   | OG1, D_THR_111 | HG1, D_THR_111  | 2.89 | 1.92 | 2.49  |
| 1HGH.PDB | O, D_ASP_109   | N, D_SER_113   | H, D_SER_113    | 2.77 | 1.82 | 8.06  |
| 1HGH.PDB | O, D_ASP_112   | N, D_ASN_116   | H, D_ASN_116    | 2.96 | 1.98 | 6.25  |
| 1HGH.PDB | O, D_SER_113   | N, D_LYS_117   | H, D_LYS_117    | 2.75 | 1.92 | 25.56 |
| 1HGH.PDB | O, D_GLU_114   | N, D_LEU_118   | H, D_LEU_118    | 3.00 | 2.03 | 9.32  |
| 1HGH.PDB | O, D_ASN_116   | N, D_GLU_120   | H, D_GLU_120    | 2.93 | 1.95 | 1.97  |
| 1HGH.PDB | O, D_LYS_117   | N, D_LYS_121   | H, D_LYS_121    | 2.85 | 1.95 | 19.21 |
| 1HGH.PDB | O, D_LEU_118   | N, D_THR_122   | H, D_THR_122    | 2.98 | 2.00 | 5.78  |
| 1HGH.PDB | O, D_PHE_119   | N, D_ARG_123   | H, D_ARG_123    | 2.89 | 1.93 | 8.77  |
| 1HGH.PDB | OE2, D_GLU_120 | NH1, D_ARG_123 | HH11, D_ARG_123 | 2.77 | 1.87 | 22.36 |
| 1HGH.PDB | OE1, B_GLU_132 | NE, D_ARG_124  | HE, D_ARG_124   | 2.80 | 1.98 | 26.35 |

|          |                |                |                 |      |      |       |
|----------|----------------|----------------|-----------------|------|------|-------|
| 1HGH.PDB | OE2, B_GLU_132 | NE, D_ARG_124  | HE, D_ARG_124   | 2.84 | 1.99 | 23.38 |
| 1HGH.PDB | O, D_LEU_126   | N, D_ASN_129   | H, D_ASN_129    | 2.98 | 2.04 | 13.91 |
| 1HGH.PDB | O, D_HIS_159   | ND2, D_ASN_129 | HD21, D_ASN_129 | 2.99 | 2.06 | 14.65 |
| 1HGH.PDB | OH, D_TYR_157  | ND2, D_ASN_129 | HD22, D_ASN_129 | 2.83 | 1.87 | 7.67  |
| 1HGH.PDB | O, D_LYS_139   | N, D_GLU_131   | H, D_GLU_131    | 2.96 | 2.04 | 16.55 |
| 1HGH.PDB | O, D_CYS_137   | N, D_MET_133   | H, D_MET_133    | 2.85 | 1.91 | 13.04 |
| 1HGH.PDB | OD1, D_ASN_135 | N, D_CYS_137   | H, D_CYS_137    | 2.95 | 2.05 | 19.26 |
| 1HGH.PDB | O, C_LEU_13    | N, D_PHE_138   | H, D_PHE_138    | 2.75 | 1.85 | 18.05 |
| 1HGH.PDB | O, D_GLU_131   | N, D_LYS_139   | H, D_LYS_139    | 2.80 | 1.84 | 6.99  |
| 1HGH.PDB | O, C_ALA_11    | N, D_ILE_140   | H, D_ILE_140    | 2.83 | 1.90 | 15.57 |
| 1HGH.PDB | O, D_ASN_129   | N, D_TYR_141   | H, D_TYR_141    | 2.84 | 1.91 | 14.49 |
| 1HGH.PDB | OE2, D_GLU_30  | N, D_ASN_146   | H, D_ASN_146    | 2.90 | 1.97 | 15.32 |
| 1HGH.PDB | O, D_ASP_145   | N, D_ILE_149   | H, D_ILE_149    | 2.92 | 1.97 | 10.33 |
| 1HGH.PDB | O, D_ASN_146   | N, D_GLU_150   | H, D_GLU_150    | 2.92 | 1.99 | 14.54 |
| 1HGH.PDB | O, D_ALA_147   | N, D_SER_151   | H, D_SER_151    | 2.94 | 2.07 | 23.02 |
| 1HGH.PDB | O, D_CYS_148   | OG, D_SER_151  | HG, D_SER_151   | 2.73 | 1.84 | 17.19 |
| 1HGH.PDB | O, D_GLU_150   | N, D_ASN_154   | H, D_ASN_154    | 2.82 | 1.84 | 3.73  |
| 1HGH.PDB | O, D_SER_151   | N, D_THR_156   | H, D_THR_156    | 2.80 | 1.97 | 26.19 |
| 1HGH.PDB | OD1, D_ASN_154 | OG1, D_THR_156 | HG1, D_THR_156  | 2.69 | 1.80 | 16.96 |
| 1HGH.PDB | NE2, D_HIS_142 | OH, D_TYR_157  | HH, D_TYR_157   | 2.68 | 1.87 | 26.02 |
| 1HGH.PDB | OD1, D_ASP_158 | N, D_ASP_160   | H, D_ASP_160    | 2.94 | 2.07 | 22.26 |
| 1HGH.PDB | O, D_HIS_159   | N, D_TYR_162   | H, D_TYR_162    | 2.94 | 2.06 | 20.90 |
| 1HGH.PDB | O, B_ARG_170   | NH1, D_ARG_163 | HH12, D_ARG_163 | 2.75 | 1.77 | 10.76 |
| 1HGH.PDB | O, D_TYR_162   | N, D_ALA_166   | H, D_ALA_166    | 2.89 | 1.92 | 5.05  |
| 1HGH.PDB | O, D_ARG_163   | N, D_LEU_167   | H, D_LEU_167    | 2.82 | 1.86 | 8.99  |
| 1HGH.PDB | O, D_ASP_164   | N, D_ASN_168   | H, D_ASN_168    | 2.99 | 2.02 | 7.50  |
| 1HGH.PDB | O, D_GLU_165   | ND2, D_ASN_169 | HD22, D_ASN_169 | 2.97 | 2.00 | 7.05  |
| 1HGH.PDB | O, D_ALA_166   | N, D_ARG_170   | H, D_ARG_170    | 2.80 | 1.93 | 21.90 |
| 1HGH.PDB | O, D_GLU_128   | NE, D_ARG_170  | HE, D_ARG_170   | 2.74 | 1.87 | 23.06 |
| 1HGH.PDB | OE2, D_GLU_131 | NH1, D_ARG_170 | HH11, D_ARG_170 | 2.83 | 1.83 | 5.85  |
| 1HGH.PDB | O, D_LEU_167   | N, D_PHE_171   | H, D_PHE_171    | 2.95 | 2.02 | 15.80 |
| 1HGH.PDB | O, F_ILE_140   | N, E_ALA_11    | H, E_ALA_11     | 2.92 | 2.02 | 19.53 |
| 1HGH.PDB | O, F_PHE_138   | N, E_LEU_13    | H, E_LEU_13     | 2.96 | 1.99 | 9.34  |
| 1HGH.PDB | O, F_ARG_25    | N, E_CYS_14    | H, E_CYS_14     | 2.64 | 1.78 | 21.59 |
| 1HGH.PDB | O, F_GLY_136   | N, E_LEU_15    | H, E_LEU_15     | 2.90 | 1.93 | 5.74  |
| 1HGH.PDB | O, F_GLY_23    | N, E_GLY_16    | H, E_GLY_16     | 2.92 | 2.05 | 22.72 |
| 1HGH.PDB | O, E_HIS_18    | ND1, E_HIS_17  | HD1, E_HIS_17   | 2.99 | 2.08 | 18.51 |
| 1HGH.PDB | O, F_TRP_21    | N, E_HIS_18    | H, E_HIS_18     | 2.92 | 2.03 | 19.54 |
| 1HGH.PDB | OD1, E_ASN_322 | N, E_VAL_20    | H, E_VAL_20     | 2.74 | 1.82 | 16.04 |
| 1HGH.PDB | O, E_VAL_36    | N, E_THR_24    | H, E_THR_24     | 2.82 | 1.93 | 20.03 |
| 1HGH.PDB | O, E_ILE_34    | N, E_VAL_26    | H, E_VAL_26     | 2.82 | 1.88 | 13.02 |
| 1HGH.PDB | OE2, F_GLU_97  | NZ, E_LYS_27   | HZ1, E_LYS_27   | 2.77 | 1.74 | 8.08  |
| 1HGH.PDB | O, E_ASP_31    | N, E_THR_28    | H, E_THR_28     | 2.77 | 1.94 | 26.92 |
| 1HGH.PDB | O, E_VAL_26    | N, E_ILE_34    | H, E_ILE_34     | 2.87 | 1.92 | 12.72 |
| 1HGH.PDB | O, E_THR_24    | N, E_VAL_36    | H, E_VAL_36     | 2.79 | 1.83 | 5.74  |
| 1HGH.PDB | O, E_MET_320   | N, E_THR_37    | H, E_THR_37     | 2.91 | 1.94 | 5.98  |
| 1HGH.PDB | O, E_LEU_316   | N, E_THR_40    | H, E_THR_40     | 2.81 | 1.97 | 25.58 |
| 1HGH.PDB | O, E_LEU_314   | N, E_LEU_42    | H, E_LEU_42     | 2.86 | 1.99 | 23.51 |
| 1HGH.PDB | O, E_PHE_294   | N, E_GLN_44    | H, E_GLN_44     | 2.90 | 1.92 | 3.60  |
| 1HGH.PDB | O, E_SER_46    | NE2, E_GLN_44  | HE22, E_GLN_44  | 2.79 | 1.94 | 24.07 |
| 1HGH.PDB | O, E_ASN_285   | OG, E_SER_47   | HG, E_SER_47    | 2.82 | 1.86 | 5.68  |
| 1HGH.PDB | OD2, E_ASP_275 | NZ, E_LYS_50   | HZ1, E_LYS_50   | 2.78 | 1.83 | 20.38 |
| 1HGH.PDB | O, E_PRO_273   | N, E_ILE_51    | H, E_ILE_51     | 2.79 | 1.86 | 14.05 |
| 1HGH.PDB | O, E_ASP_275   | N, E_ASN_53    | H, E_ASN_53     | 2.84 | 1.95 | 20.03 |
| 1HGH.PDB | O, E_GLU_280   | NE2, E_HIS_56  | HE2, E_HIS_56   | 3.00 | 2.04 | 11.75 |
| 1HGH.PDB | OD2, E_ASP_85  | N, E_ARG_57    | H, E_ARG_57     | 2.80 | 1.92 | 20.20 |
| 1HGH.PDB | O, E_THR_83    | NE, E_ARG_57   | HE, E_ARG_57    | 2.76 | 1.81 | 9.61  |
| 1HGH.PDB | O, E_LEU_86    | N, E_LEU_59    | H, E_LEU_59     | 2.94 | 2.02 | 16.24 |



|          |                |                |                 |      |      |       |
|----------|----------------|----------------|-----------------|------|------|-------|
| 1HGH.PDB | O, E_VAL.88    | N, E_GLY.61    | H, E_GLY.61     | 2.97 | 2.17 | 29.53 |
| 1HGH.PDB | OD1, E_ASP.60  | N, E_ILE.62    | H, E_ILE.62     | 2.88 | 1.95 | 12.63 |
| 1HGH.PDB | O, E_GLY.61    | N, E_CYS.64    | H, E_CYS.64     | 2.91 | 2.01 | 19.21 |
| 1HGH.PDB | OE2, E_GLU.89  | N, E_LEU.66    | H, E_LEU.66     | 2.90 | 1.94 | 8.52  |
| 1HGH.PDB | O, E_LEU.66    | N, E_LEU.70    | H, E_LEU.70     | 2.83 | 1.96 | 22.59 |
| 1HGH.PDB | O, E_ILE.67    | N, E_LEU.71    | H, E_LEU.71     | 2.80 | 1.85 | 10.15 |
| 1HGH.PDB | O, E_ASP.68    | N, E_GLY.72    | H, E_GLY.72     | 2.92 | 1.98 | 13.98 |
| 1HGH.PDB | OD1, E_ASP.73  | ND1, E_HIS.75  | HD1, E_HIS.75   | 2.70 | 1.83 | 21.52 |
| 1HGH.PDB | O, E_ASP.63    | NE2, E_HIS.75  | HE2, E_HIS.75   | 2.76 | 1.85 | 18.40 |
| 1HGH.PDB | O, E_ASP.73    | N, E_CYS.76    | H, E_CYS.76     | 2.77 | 1.88 | 19.19 |
| 1HGH.PDB | O, E_PRO.74    | N, E_ASP.77    | H, E_ASP.77     | 2.89 | 1.93 | 8.73  |
| 1HGH.PDB | O, E_CYS.76    | N, E_PHE.79    | H, E_PHE.79     | 2.99 | 2.02 | 3.39  |
| 1HGH.PDB | O, E_PHE.79    | N, E_GLU.82    | H, E_GLU.82     | 2.96 | 2.03 | 14.49 |
| 1HGH.PDB | OE1, E_GLU.82  | N, E_THR.83    | H, E_THR.83     | 2.87 | 2.01 | 22.92 |
| 1HGH.PDB | O, E_ARG.57    | N, E_ASP.85    | H, E_ASP.85     | 2.80 | 1.87 | 13.06 |
| 1HGH.PDB | O, E_MET.268   | N, E_GLU.89    | H, E_GLU.89     | 2.80 | 1.86 | 11.55 |
| 1HGH.PDB | OD1, E_ASP.60  | NE, E_ARG.90   | HE, E_ARG.90    | 2.82 | 1.87 | 13.57 |
| 1HGH.PDB | O, E_SER.270   | NH1, E_ARG.90  | HH11, E_ARG.90  | 2.65 | 1.80 | 26.29 |
| 1HGH.PDB | O, E_ALA.272   | NH1, E_ARG.90  | HH12, E_ARG.90  | 2.63 | 1.72 | 19.05 |
| 1HGH.PDB | OD2, E_ASP.60  | NH2, E_ARG.90  | HH21, E_ARG.90  | 2.82 | 1.82 | 8.69  |
| 1HGH.PDB | OD1, E_ASP.271 | N, E_SER.91    | H, E_SER.91     | 2.82 | 1.87 | 11.20 |
| 1HGH.PDB | OD2, E_ASP.271 | OG, E_SER.91   | HG, E_SER.91    | 2.81 | 1.88 | 14.87 |
| 1HGH.PDB | OD2, E_ASP.68  | OG, E_SER.95   | HG, E_SER.95    | 2.88 | 1.94 | 13.28 |
| 1HGH.PDB | OD2, E_ASP.73  | N, E_ASN.96    | H, E_ASN.96     | 2.91 | 1.94 | 6.86  |
| 1HGH.PDB | OD1, E_ASP.68  | OH, E_TYR.100  | HH, E_TYR.100   | 2.91 | 1.97 | 12.96 |
| 1HGH.PDB | O, E_ILE.230   | N, E_ASP.101   | H, E_ASP.101    | 2.92 | 2.05 | 22.42 |
| 1HGH.PDB | OD2, E_ASP.104 | OG, E_SER.107  | HG, E_SER.107   | 2.88 | 1.97 | 18.12 |
| 1HGH.PDB | O, E_TYR.105   | N, E_ARG.109   | H, E_ARG.109    | 2.86 | 1.89 | 4.60  |
| 1HGH.PDB | OE2, F_GLU.67  | NH2, E_ARG.109 | HH21, E_ARG.109 | 2.88 | 1.90 | 13.56 |
| 1HGH.PDB | OD2, D_ASP.79  | OG, E_SER.110  | HG, E_SER.110   | 2.90 | 1.94 | 9.49  |
| 1HGH.PDB | O, E_SER.107   | N, E_LEU.111   | H, E_LEU.111    | 2.88 | 1.93 | 12.85 |
| 1HGH.PDB | O, E_ARG.109   | N, E_ALA.113   | H, E_ALA.113    | 2.87 | 1.96 | 17.46 |
| 1HGH.PDB | O, E_SER.110   | N, E_SER.114   | H, E_SER.114    | 2.96 | 2.00 | 10.70 |
| 1HGH.PDB | OE2, E_GLU.119 | OG1, E_THR.117 | HG1, E_THR.117  | 2.88 | 1.94 | 11.16 |
| 1HGH.PDB | O, E_GLU.82    | N, E_LEU.118   | H, E_LEU.118    | 2.97 | 2.01 | 10.67 |
| 1HGH.PDB | O, E_TYR.257   | N, E_ILE.121   | H, E_ILE.121    | 2.91 | 1.96 | 12.67 |
| 1HGH.PDB | O, E_ARG.255   | N, E_GLU.123   | H, E_GLU.123    | 2.88 | 1.92 | 10.98 |
| 1HGH.PDB | O, E_THR.155   | N, E_THR.131   | H, E_THR.131    | 2.72 | 1.85 | 21.27 |
| 1HGH.PDB | OD1, E_ASN.152 | N, E_ASN.133   | H, E_ASN.133    | 2.90 | 2.03 | 22.25 |
| 1HGH.PDB | O, E_TRP.153   | N, E_GLY.134   | H, E_GLY.134    | 2.97 | 2.04 | 15.57 |
| 1HGH.PDB | O, E_GLY.146   | N, E_SER.136   | H, E_SER.136    | 2.72 | 1.83 | 19.86 |
| 1HGH.PDB | OG, E_SER.136  | N, E_ALA.138   | H, E_ALA.138    | 2.95 | 2.04 | 18.21 |
| 1HGH.PDB | O, E_GLY.144   | NZ, E_LYS.140  | HZ1, E_LYS.140  | 2.90 | 1.92 | 16.43 |
| 1HGH.PDB | OD1, E_ASN.137 | NZ, E_LYS.140  | HZ2, E_LYS.140  | 2.75 | 1.75 | 11.91 |
| 1HGH.PDB | OD2, E_ASP.77  | NE, E_ARG.141  | HE, E_ARG.141   | 2.85 | 2.01 | 27.16 |
| 1HGH.PDB | O, E_PHE.147   | NH1, E_ARG.141 | HH12, E_ARG.141 | 2.56 | 1.64 | 18.71 |
| 1HGH.PDB | OD1, E_ASP.77  | NH2, E_ARG.141 | HH21, E_ARG.141 | 2.89 | 1.99 | 22.46 |
| 1HGH.PDB | OD2, E_ASP.77  | NH2, E_ARG.141 | HH21, E_ARG.141 | 2.74 | 1.84 | 23.25 |
| 1HGH.PDB | O, E_GLY.72    | NH2, E_ARG.141 | HH22, E_ARG.141 | 2.94 | 1.96 | 11.25 |
| 1HGH.PDB | OD1, E_ASN.137 | OG, E_SER.145  | HG, E_SER.145   | 2.98 | 2.07 | 15.03 |
| 1HGH.PDB | O, E_SER.136   | N, E_GLY.146   | H, E_GLY.146    | 2.94 | 1.99 | 13.35 |
| 1HGH.PDB | O, E_GLY.72    | N, E_SER.149   | H, E_SER.149    | 2.91 | 1.97 | 14.68 |
| 1HGH.PDB | O, E_ALA.253   | N, E_ASN.152   | H, E_ASN.152    | 2.75 | 1.96 | 29.93 |
| 1HGH.PDB | OH, E_TYR.195  | NE1, E_TRP.153 | HE1, E_TRP.153  | 2.94 | 2.03 | 18.49 |
| 1HGH.PDB | O, E_LEU.194   | N, E_LYS.156   | H, E_LYS.156    | 2.95 | 2.04 | 17.92 |
| 1HGH.PDB | O, E_SER.193   | NZ, E_LYS.156  | HZ2, E_LYS.156  | 2.74 | 1.77 | 17.07 |
| 1HGH.PDB | O, E_THR.160   | N, E_SER.157   | H, E_SER.157    | 2.95 | 2.02 | 16.56 |
| 1HGH.PDB | O, E_SER.247   | N, E_LEU.164   | H, E_LEU.164    | 2.73 | 1.90 | 26.43 |

|          |                |                |                 |      |      |       |
|----------|----------------|----------------|-----------------|------|------|-------|
| 1HGH.PDB | O, E_ILE.245   | N, E_VAL.166   | H, E_VAL.166    | 2.87 | 1.94 | 14.01 |
| 1HGH.PDB | O, E_LEU.243   | OG1, E_THR.167 | HG1, E_THR.167  | 2.95 | 2.02 | 14.19 |
| 1HGH.PDB | O, E_LEU.243   | N, E_MET.168   | H, E_MET.168    | 2.85 | 1.92 | 14.04 |
| 1HGH.PDB | O, E_ASP.241   | N, E_ASN.170   | H, E_ASN.170    | 2.95 | 1.97 | 5.59  |
| 1HGH.PDB | O, E_PHE.174   | ND2, E_ASN.170 | HD21, E_ASN.170 | 2.82 | 1.88 | 12.75 |
| 1HGH.PDB | O, E_VAL.237   | ND2, E_ASN.170 | HD22, E_ASN.170 | 2.89 | 2.06 | 25.88 |
| 1HGH.PDB | O, E_VAL.237   | N, E_LYS.176   | H, E_LYS.176    | 2.98 | 2.06 | 17.00 |
| 1HGH.PDB | OE2, E_GLU.123 | NZ, E_LYS.176  | HZ1, E_LYS.176  | 2.69 | 1.82 | 26.87 |
| 1HGH.PDB | O, E_PHE.258   | N, E_LEU.177   | H, E_LEU.177    | 2.97 | 2.00 | 4.18  |
| 1HGH.PDB | O, E_THR.235   | N, E_TYR.178   | H, E_TYR.178    | 2.86 | 1.90 | 10.67 |
| 1HGH.PDB | OE1, E_GLU.123 | OH, E_TYR.178  | HH, E_TYR.178   | 2.77 | 1.82 | 8.79  |
| 1HGH.PDB | OG1, E_THR.235 | NE1, E_TRP.180 | HE1, E_TRP.180  | 2.88 | 1.89 | 0.99  |
| 1HGH.PDB | O, E_ASN.250   | N, E_HIS.183   | H, E_HIS.183    | 2.86 | 1.99 | 21.99 |
| 1HGH.PDB | O, E_ARG.229   | N, E_HIS.184   | H, E_HIS.184    | 2.88 | 1.94 | 12.21 |
| 1HGH.PDB | OG, E_SER.231  | NE2, E_HIS.184 | HE2, E_HIS.184  | 2.78 | 1.93 | 25.10 |
| 1HGH.PDB | OG1, E_THR.187 | N, E_GLU.190   | H, E_GLU.190    | 2.95 | 2.00 | 11.05 |
| 1HGH.PDB | OD1, E_ASN.250 | NE2, E_GLN.191 | HE21, E_GLN.191 | 2.99 | 2.02 | 8.22  |
| 1HGH.PDB | O, E_GLN.197   | NE2, E_GLN.191 | HE22, E_GLN.191 | 2.93 | 1.98 | 11.58 |
| 1HGH.PDB | O, E_GLN.189   | N, E_SER.193   | H, E_SER.193    | 2.93 | 1.94 | 3.87  |
| 1HGH.PDB | O, E_GLU.190   | N, E_LEU.194   | H, E_LEU.194    | 2.96 | 1.97 | 5.03  |
| 1HGH.PDB | O, E_GLN.191   | N, E_TYR.195   | H, E_TYR.195    | 2.79 | 1.83 | 8.93  |
| 1HGH.PDB | O, E_TYR.195   | N, E_GLN.197   | H, E_GLN.197    | 2.65 | 1.86 | 29.33 |
| 1HGH.PDB | O, E_TYR.161   | NE2, E_GLN.197 | HE21, E_GLN.197 | 2.94 | 1.99 | 11.18 |
| 1HGH.PDB | O, E_ASN.248   | NE2, E_GLN.197 | HE22, E_GLN.197 | 2.86 | 1.94 | 17.19 |
| 1HGH.PDB | OD1, E_ASN.246 | NH2, E_ARG.201 | HH21, E_ARG.201 | 2.64 | 1.73 | 21.41 |
| 1HGH.PDB | O, E_ILE.213   | N, E_VAL.202   | H, E_VAL.202    | 2.96 | 2.00 | 10.60 |
| 1HGH.PDB | O, E_ASN.246   | N, E_THR.203   | H, E_THR.203    | 2.87 | 1.91 | 9.98  |
| 1HGH.PDB | OG1, E_THR.212 | OG1, E_THR.203 | HG1, E_THR.203  | 2.98 | 2.08 | 17.30 |
| 1HGH.PDB | O, E_GLN.211   | N, E_VAL.204   | H, E_VAL.204    | 2.87 | 1.97 | 20.15 |
| 1HGH.PDB | O, E_SER.209   | N, E_THR.206   | H, E_THR.206    | 2.92 | 1.96 | 6.97  |
| 1HGH.PDB | OD1, E_ASP.241 | N, E_ARG.207   | H, E_ARG.207    | 2.86 | 1.90 | 9.49  |
| 1HGH.PDB | OG1, E_THR.206 | OG, E_SER.209  | HG, E_SER.209   | 2.95 | 2.00 | 8.64  |
| 1HGH.PDB | OD1, C_ASP.101 | NE2, E_GLN.210 | HE22, E_GLN.210 | 2.95 | 2.09 | 25.33 |
| 1HGH.PDB | O, E_VAL.204   | N, E_GLN.211   | H, E_GLN.211    | 2.89 | 1.95 | 12.74 |
| 1HGH.PDB | O, E_VAL.202   | N, E_ILE.213   | H, E_ILE.213    | 2.90 | 1.97 | 14.56 |
| 1HGH.PDB | ND1, E_HIS.184 | N, E_ASN.216   | H, E_ASN.216    | 2.77 | 1.96 | 27.61 |
| 1HGH.PDB | OE1, A_GLN.210 | NH2, E_ARG.220 | HH21, E_ARG.220 | 2.68 | 1.79 | 22.30 |
| 1HGH.PDB | O, E_ASN.216   | NH2, E_ARG.220 | HH22, E_ARG.220 | 2.67 | 1.78 | 21.90 |
| 1HGH.PDB | O, E_LEU.226   | N, E_VAL.223   | H, E_VAL.223    | 2.86 | 1.90 | 9.88  |
| 1HGH.PDB | O, E_CYS.97    | NE, E_ARG.224  | HE, E_ARG.224   | 2.82 | 1.98 | 26.83 |
| 1HGH.PDB | O, E_CYS.97    | NH2, E_ARG.224 | HH21, E_ARG.224 | 2.83 | 1.97 | 26.23 |
| 1HGH.PDB | O, E_VAL.223   | N, E_LEU.226   | H, E_LEU.226    | 2.83 | 1.91 | 14.82 |
| 1HGH.PDB | O, E_ARG.220   | OG, E_SER.227  | HG, E_SER.227   | 2.98 | 2.06 | 16.39 |
| 1HGH.PDB | O, E_SER.228   | NH1, E_ARG.229 | HH11, E_ARG.229 | 2.68 | 1.73 | 16.77 |
| 1HGH.PDB | O, E_PRO.221   | NH2, E_ARG.229 | HH22, E_ARG.229 | 2.59 | 1.64 | 14.71 |
| 1HGH.PDB | OD1, E_ASP.101 | OG, E_SER.231  | HG, E_SER.231   | 2.86 | 1.91 | 11.78 |
| 1HGH.PDB | O, E_ASP.101   | N, E_ILE.232   | H, E_ILE.232    | 2.89 | 1.97 | 15.99 |
| 1HGH.PDB | O, E_TRP.180   | N, E_TYR.233   | H, E_TYR.233    | 2.91 | 1.95 | 8.91  |
| 1HGH.PDB | O, E_TYR.178   | N, E_THR.235   | H, E_THR.235    | 2.90 | 1.99 | 17.41 |
| 1HGH.PDB | O, E_LYS.176   | N, E_VAL.237   | H, E_VAL.237    | 2.74 | 1.82 | 15.90 |
| 1HGH.PDB | O, D_SER.71    | NZ, E_LYS.238  | HZ2, E_LYS.238  | 2.84 | 1.88 | 19.22 |
| 1HGH.PDB | OE1, D_GLU.72  | NZ, E_LYS.238  | HZ3, E_LYS.238  | 2.87 | 1.88 | 15.42 |
| 1HGH.PDB | O, E_ASN.170   | N, E_GLY.240   | H, E_GLY.240    | 2.93 | 2.05 | 21.68 |
| 1HGH.PDB | O, E_LYS.238   | N, E_ASP.241   | H, E_ASP.241    | 2.93 | 2.01 | 15.54 |
| 1HGH.PDB | OD1, E_ASP.241 | N, E_VAL.242   | H, E_VAL.242    | 2.78 | 1.96 | 27.21 |
| 1HGH.PDB | O, E_MET.168   | N, E_LEU.243   | H, E_LEU.243    | 2.84 | 1.87 | 3.13  |
| 1HGH.PDB | O, E_SER.205   | N, E_VAL.244   | H, E_VAL.244    | 2.97 | 2.03 | 14.34 |
| 1HGH.PDB | O, E_VAL.166   | N, E_ILE.245   | H, E_ILE.245    | 2.86 | 1.92 | 13.73 |

|          |                |                |                 |      |      |       |
|----------|----------------|----------------|-----------------|------|------|-------|
| 1HGH.PDB | O, E_THR_203   | N, E_ASN_246   | H, E_ASN_246    | 2.93 | 2.00 | 14.46 |
| 1HGH.PDB | OD1, E_ASN_165 | ND2, E_ASN_246 | HD22, E_ASN_246 | 2.98 | 2.01 | 10.13 |
| 1HGH.PDB | O, E_LEU_164   | N, E_SER_247   | H, E_SER_247    | 2.90 | 1.99 | 17.74 |
| 1HGH.PDB | OE1, E_GLN_191 | ND2, E_ASN_250 | HD21, E_ASN_250 | 2.89 | 1.92 | 6.88  |
| 1HGH.PDB | O, E_HIS_183   | ND2, E_ASN_250 | HD22, E_ASN_250 | 2.85 | 1.88 | 7.17  |
| 1HGH.PDB | O, E_GLY_181   | N, E_ILE_252   | H, E_ILE_252    | 2.96 | 2.00 | 10.43 |
| 1HGH.PDB | O, E_ASN_152   | N, E_ALA_253   | H, E_ALA_253    | 2.86 | 1.96 | 18.53 |
| 1HGH.PDB | O, E_ILE_121   | N, E_TYR_257   | H, E_TYR_257    | 2.97 | 2.09 | 21.21 |
| 1HGH.PDB | O, E_LEU_177   | N, E_PHE_258   | H, E_PHE_258    | 2.87 | 1.92 | 12.22 |
| 1HGH.PDB | OG, E_SER_115  | N, E_ARG_261   | H, E_ARG_261    | 2.96 | 2.00 | 11.47 |
| 1HGH.PDB | OE2, E_GLU_119 | NH1, E_ARG_261 | HH12, E_ARG_261 | 2.63 | 1.81 | 29.30 |
| 1HGH.PDB | OE1, E_GLU_119 | NH2, E_ARG_261 | HH22, E_ARG_261 | 2.85 | 1.96 | 24.42 |
| 1HGH.PDB | OD2, E_ASP_85  | NZ, E_LYS_264  | HZ3, E_LYS_264  | 2.81 | 1.82 | 14.94 |
| 1HGH.PDB | O, E_PHE_87    | N, E_MET_268   | H, E_MET_268    | 2.82 | 1.95 | 22.70 |
| 1HGH.PDB | OE1, F_GLU_67  | NH1, E_ARG_269 | HH12, E_ARG_269 | 2.71 | 1.88 | 29.19 |
| 1HGH.PDB | O, E_GLU_89    | N, E_SER_270   | H, E_SER_270    | 2.97 | 2.01 | 10.37 |
| 1HGH.PDB | O, E_PRO_284   | OG, E_SER_270  | HG, E_SER_270   | 2.79 | 1.83 | 6.34  |
| 1HGH.PDB | OG, E_SER_270  | N, E_ALA_272   | H, E_ALA_272    | 2.93 | 2.00 | 13.96 |
| 1HGH.PDB | O, E_ILE_51    | N, E_ASP_275   | H, E_ASP_275    | 2.89 | 1.98 | 17.07 |
| 1HGH.PDB | OD1, E_ASP_275 | N, E_THR_276   | H, E_THR_276    | 2.81 | 1.94 | 22.67 |
| 1HGH.PDB | O, E_ASN_54    | N, E_SER_279   | H, E_SER_279    | 2.79 | 1.85 | 12.96 |
| 1HGH.PDB | O, E_TYR_302   | N, E_ILE_282   | H, E_ILE_282    | 2.90 | 1.96 | 14.02 |
| 1HGH.PDB | O, E_THR_283   | N, E_GLY_286   | H, E_GLY_286    | 2.82 | 1.92 | 18.13 |
| 1HGH.PDB | O, E_LYS_50    | N, E_SER_287   | H, E_SER_287    | 2.89 | 1.92 | 2.42  |
| 1HGH.PDB | O, E_ALA_304   | ND2, E_ASN_290 | HD22, E_ASN_290 | 2.86 | 1.98 | 20.69 |
| 1HGH.PDB | OE1, E_GLN_44  | NZ, E_LYS_292  | HZ1, E_LYS_292  | 2.67 | 1.66 | 10.24 |
| 1HGH.PDB | OD2, E_ASP_291 | NZ, E_LYS_292  | HZ3, E_LYS_292  | 2.84 | 1.86 | 17.36 |
| 1HGH.PDB | O, E_LYS_307   | N, E_GLN_295   | H, E_GLN_295    | 2.84 | 1.97 | 22.67 |
| 1HGH.PDB | O, E_ASN_298   | NE2, E_GLN_295 | HE21, E_GLN_295 | 2.75 | 1.79 | 8.52  |
| 1HGH.PDB | O, E_GLN_44    | N, E_ASN_296   | H, E_ASN_296    | 2.90 | 1.94 | 9.06  |
| 1HGH.PDB | OD1, E_ASN_298 | N, E_ILE_300   | H, E_ILE_300    | 2.92 | 1.98 | 13.95 |
| 1HGH.PDB | O, E_ILE_282   | N, E_TYR_302   | H, E_TYR_302    | 2.84 | 2.00 | 26.34 |
| 1HGH.PDB | O, F_LYS_62    | N, E_GLY_303   | H, E_GLY_303    | 2.98 | 2.01 | 7.92  |
| 1HGH.PDB | O, E_PRO_293   | N, E_LYS_307   | H, E_LYS_307    | 3.00 | 2.03 | 9.04  |
| 1HGH.PDB | O, E_GLN_295   | N, E_VAL_309   | H, E_VAL_309    | 2.91 | 2.07 | 25.95 |
| 1HGH.PDB | OG, F_SER_93   | N, E_LYS_310   | H, E_LYS_310    | 2.93 | 1.97 | 10.42 |
| 1HGH.PDB | OD1, F_ASP_86  | NZ, E_LYS_310  | HZ2, E_LYS_310  | 2.74 | 1.87 | 26.77 |
| 1HGH.PDB | O, F_SER_93    | NE2, E_GLN_311 | HE21, E_GLN_311 | 2.99 | 2.02 | 4.65  |
| 1HGH.PDB | OE2, E_GLU_41  | N, E_LEU_314   | H, E_LEU_314    | 2.81 | 1.87 | 11.19 |
| 1HGH.PDB | OE1, E_GLU_41  | NZ, E_LYS_315  | HZ3, E_LYS_315  | 2.85 | 1.89 | 19.70 |
| 1HGH.PDB | O, E_THR_40    | N, E_LEU_316   | H, E_LEU_316    | 2.77 | 1.82 | 9.99  |
| 1HGH.PDB | OD1, F_ASN_104 | N, E_ALA_317   | H, E_ALA_317    | 2.75 | 1.81 | 11.69 |
| 1HGH.PDB | O, E_ASN_38    | N, E_THR_318   | H, E_THR_318    | 2.95 | 2.00 | 12.19 |
| 1HGH.PDB | O, E_GLU_35    | N, E_ASN_322   | H, E_ASN_322    | 2.96 | 1.98 | 2.25  |
| 1HGH.PDB | O, E_VAL_20    | ND2, E_ASN_322 | HD21, E_ASN_322 | 2.82 | 1.91 | 16.60 |
| 1HGH.PDB | OE2, E_GLU_35  | ND2, E_ASN_322 | HD22, E_ASN_322 | 2.80 | 1.90 | 19.14 |
| 1HGH.PDB | OE2, F_GLU_15  | N, E_GLU_325   | H, E_GLU_325    | 2.97 | 2.16 | 28.37 |
| 1HGH.PDB | O, E_GLN_327   | NZ, E_LYS_326  | HZ1, E_LYS_326  | 2.85 | 1.92 | 22.31 |
| 1HGH.PDB | OE1, F_GLU_15  | NZ, E_LYS_326  | HZ3, E_LYS_326  | 2.90 | 1.89 | 12.96 |
| 1HGH.PDB | O, E_LYS_326   | NE2, E_GLN_327 | HE22, E_GLN_327 | 2.81 | 1.89 | 16.48 |
| 1HGH.PDB | OD2, F_ASP_112 | N, F_GLY_1     | H2, F_GLY_1     | 2.82 | 1.82 | 13.22 |
| 1HGH.PDB | OD1, F_ASP_109 | N, F_LEU_2     | H, F_LEU_2      | 2.91 | 1.98 | 15.54 |
| 1HGH.PDB | OD2, F_ASP_112 | N, F_PHE_3     | H, F_PHE_3      | 2.80 | 2.01 | 28.96 |
| 1HGH.PDB | OD2, F_ASP_112 | N, F_GLY_4     | H, F_GLY_4      | 2.95 | 2.06 | 19.48 |
| 1HGH.PDB | OD1, F_ASP_112 | N, F_ALA_5     | H, F_ALA_5      | 2.92 | 2.00 | 17.34 |
| 1HGH.PDB | O, F_GLY_4     | N, F_PHE_9     | H, F_PHE_9      | 2.86 | 1.91 | 12.98 |
| 1HGH.PDB | O, F_GLY_13    | ND2, F_ASN_12  | HD22, F_ASN_12  | 2.80 | 1.92 | 21.14 |
| 1HGH.PDB | O, E_VAL_323   | N, F_GLY_13    | H, F_GLY_13     | 2.70 | 1.77 | 11.97 |

|          |                |               |                |      |      |       |
|----------|----------------|---------------|----------------|------|------|-------|
| 1HGH.PDB | O, E_HIS_17    | N, F_TRP_14   | H, F_TRP_14    | 2.81 | 1.87 | 12.50 |
| 1HGH.PDB | OG1, F_THR_41  | N, F_TRP_21   | H, F_TRP_21    | 2.88 | 1.96 | 16.20 |
| 1HGH.PDB | O, E_GLY_16    | N, F_GLY_23   | H, F_GLY_23    | 2.91 | 2.00 | 17.53 |
| 1HGH.PDB | O, F_ALA_35    | N, F_PHE_24   | H, F_PHE_24    | 2.86 | 1.89 | 4.90  |
| 1HGH.PDB | O, E_CYS_14    | N, F_ARG_25   | H, F_ARG_25    | 2.90 | 1.98 | 16.77 |
| 1HGH.PDB | OE1, F_GLN_34  | NH2, F_ARG_25 | HH21, F_ARG_25 | 2.92 | 2.03 | 23.48 |
| 1HGH.PDB | O, F_GLY_33    | N, F_HIS_26   | H, F_HIS_26    | 2.90 | 2.03 | 21.65 |
| 1HGH.PDB | O, E_THR_12    | N, F_GLN_27   | H, F_GLN_27    | 2.91 | 2.03 | 20.46 |
| 1HGH.PDB | O, F_GLY_31    | N, F_ASN_28   | H, F_ASN_28    | 2.72 | 1.81 | 16.52 |
| 1HGH.PDB | OD1, F_ASN_146 | ND2, F_ASN_28 | HD21, F_ASN_28 | 2.91 | 1.96 | 12.69 |
| 1HGH.PDB | O, F_CYS_144   | ND2, F_ASN_28 | HD22, F_ASN_28 | 2.96 | 2.10 | 23.78 |
| 1HGH.PDB | O, F_PHE_24    | N, F_ALA_35   | H, F_ALA_35    | 2.81 | 2.00 | 28.47 |
| 1HGH.PDB | O, F_TYR_22    | N, F_ASP_37   | H, F_ASP_37    | 2.69 | 1.76 | 12.03 |
| 1HGH.PDB | OD2, F_ASP_37  | N, F_SER_40   | H, F_SER_40    | 2.86 | 1.90 | 9.36  |
| 1HGH.PDB | OD2, F_ASP_37  | OG, F_SER_40  | HG, F_SER_40   | 2.73 | 1.92 | 26.94 |
| 1HGH.PDB | O, F_ASP_37    | OG1, F_THR_41 | HG1, F_THR_41  | 2.73 | 1.82 | 16.92 |
| 1HGH.PDB | O, F_LEU_38    | N, F_GLN_42   | H, F_GLN_42    | 2.93 | 1.99 | 14.39 |
| 1HGH.PDB | OD1, F_ASP_46  | NE2, F_GLN_42 | HE22, F_GLN_42 | 2.85 | 1.95 | 20.25 |
| 1HGH.PDB | O, F_LYS_39    | N, F_ALA_43   | H, F_ALA_43    | 2.92 | 1.99 | 14.06 |
| 1HGH.PDB | O, F_SER_40    | N, F_ALA_44   | H, F_ALA_44    | 2.94 | 1.96 | 3.72  |
| 1HGH.PDB | O, F_THR_41    | N, F_ILE_45   | H, F_ILE_45    | 2.94 | 2.00 | 13.08 |
| 1HGH.PDB | O, F_GLN_42    | N, F_ASP_46   | H, F_ASP_46    | 2.77 | 1.80 | 1.50  |
| 1HGH.PDB | OE2, F_GLU_114 | NE2, F_GLN_47 | HE21, F_GLN_47 | 2.99 | 2.08 | 19.28 |
| 1HGH.PDB | O, F_ALA_43    | NE2, F_GLN_47 | HE22, F_GLN_47 | 2.86 | 1.96 | 18.47 |
| 1HGH.PDB | O, F_ILE_45    | N, F_ASN_49   | H, F_ASN_49    | 2.86 | 1.91 | 11.74 |
| 1HGH.PDB | O, F_ASP_46    | N, F_GLY_50   | H, F_GLY_50    | 2.93 | 2.01 | 18.13 |
| 1HGH.PDB | O, F_GLN_47    | N, F_LYS_51   | H, F_LYS_51    | 2.95 | 2.01 | 12.39 |
| 1HGH.PDB | OE1, F_GLU_103 | NZ, F_LYS_51  | HZ1, F_LYS_51  | 2.75 | 1.72 | 7.02  |
| 1HGH.PDB | ND1, F_HIS_106 | NZ, F_LYS_51  | HZ2, F_LYS_51  | 2.77 | 1.82 | 19.11 |
| 1HGH.PDB | OG1, F_THR_107 | NZ, F_LYS_51  | HZ3, F_LYS_51  | 2.93 | 1.96 | 17.40 |
| 1HGH.PDB | O, F_ILE_48    | N, F_LEU_52   | H, F_LEU_52    | 2.94 | 2.03 | 18.13 |
| 1HGH.PDB | O, F_ASN_49    | N, F_ASN_53   | H, F_ASN_53    | 2.82 | 1.91 | 17.65 |
| 1HGH.PDB | OE1, F_GLU_57  | NH1, F_ARG_54 | HH11, F_ARG_54 | 2.88 | 1.88 | 10.86 |
| 1HGH.PDB | OE2, D_GLU_97  | NH2, F_ARG_54 | HH22, F_ARG_54 | 2.72 | 1.77 | 15.67 |
| 1HGH.PDB | OD2, D_ASP_90  | NZ, F_LYS_62  | HZ2, F_LYS_62  | 2.68 | 1.83 | 28.02 |
| 1HGH.PDB | OG, E_SER_110  | NE2, F_HIS_64 | HE2, F_HIS_64  | 2.87 | 1.91 | 9.23  |
| 1HGH.PDB | O, E_LYS_299   | NZ, F_LYS_68  | HZ1, F_LYS_68  | 2.91 | 1.87 | 1.37  |
| 1HGH.PDB | OE2, F_GLU_85  | NZ, F_LYS_68  | HZ2, F_LYS_68  | 2.73 | 1.74 | 15.07 |
| 1HGH.PDB | OG, A_SER_107  | N, F_ARG_76   | H, F_ARG_76    | 2.80 | 1.83 | 4.45  |
| 1HGH.PDB | OE2, B_GLU_81  | NE, F_ARG_76  | HE, F_ARG_76   | 2.84 | 1.87 | 10.72 |
| 1HGH.PDB | OE2, B_GLU_74  | NH1, F_ARG_76 | HH12, F_ARG_76 | 2.73 | 1.73 | 5.34  |
| 1HGH.PDB | OE1, B_GLU_81  | NH2, F_ARG_76 | HH21, F_ARG_76 | 2.71 | 1.70 | 1.21  |
| 1HGH.PDB | OE1, B_GLU_74  | NH2, F_ARG_76 | HH22, F_ARG_76 | 2.78 | 1.78 | 7.19  |
| 1HGH.PDB | O, F_GLU_72    | NE2, F_GLN_78 | HE21, F_GLN_78 | 2.90 | 1.94 | 9.41  |
| 1HGH.PDB | OE1, F_GLU_74  | NE2, F_GLN_78 | HE22, F_GLN_78 | 2.92 | 1.95 | 8.97  |
| 1HGH.PDB | O, F_GLY_75    | N, F_ASP_79   | H, F_ASP_79    | 2.84 | 1.89 | 11.67 |
| 1HGH.PDB | O, F_ASP_79    | N, F_TYR_83   | H, F_TYR_83    | 2.85 | 1.92 | 14.40 |
| 1HGH.PDB | OE1, B_GLU_85  | OH, F_TYR_83  | HH, F_TYR_83   | 2.53 | 1.74 | 27.23 |
| 1HGH.PDB | O, F_LEU_80    | N, F_VAL_84   | H, F_VAL_84    | 2.73 | 1.81 | 14.79 |
| 1HGH.PDB | O, F_LYS_82    | N, F_ASP_86   | H, F_ASP_86    | 2.93 | 1.98 | 9.76  |
| 1HGH.PDB | OH, D_TYR_83   | NZ, F_LYS_88  | HZ1, F_LYS_88  | 2.65 | 1.63 | 9.88  |
| 1HGH.PDB | O, F_GLU_85    | N, F_ILE_89   | H, F_ILE_89    | 2.87 | 1.89 | 5.28  |
| 1HGH.PDB | O, F_LYS_88    | N, F_TRP_92   | H, F_TRP_92    | 2.94 | 1.97 | 7.63  |
| 1HGH.PDB | O, F_ILE_89    | N, F_SER_93   | H, F_SER_93    | 2.86 | 1.97 | 18.83 |
| 1HGH.PDB | O, F_ILE_89    | OG, F_SER_93  | HG, F_SER_93   | 2.78 | 1.88 | 16.61 |
| 1HGH.PDB | O, F_ASP_90    | N, F_TYR_94   | H, F_TYR_94    | 2.84 | 1.92 | 15.99 |
| 1HGH.PDB | O, F_LEU_91    | N, F_ASN_95   | H, F_ASN_95    | 3.00 | 2.02 | 3.46  |
| 1HGH.PDB | O, F_TRP_92    | N, F_ALA_96   | H, F_ALA_96    | 2.98 | 2.07 | 17.48 |

|          |                |                |                 |      |      |       |
|----------|----------------|----------------|-----------------|------|------|-------|
| 1HGH.PDB | O, F_TYR_94    | N, F_LEU_98    | H, F_LEU_98     | 2.95 | 1.97 | 6.50  |
| 1HGH.PDB | O, F_ASN_95    | N, F_LEU_99    | H, F_LEU_99     | 2.94 | 2.05 | 19.69 |
| 1HGH.PDB | O, F_LEU_98    | N, F_LEU_102   | H, F_LEU_102    | 3.00 | 2.02 | 4.44  |
| 1HGH.PDB | O, F_VAL_100   | N, F_ASN_104   | H, F_ASN_104    | 2.88 | 1.93 | 12.02 |
| 1HGH.PDB | O, E_LYS_27    | ND2, F_ASN_104 | HD22, F_ASN_104 | 2.90 | 1.95 | 12.28 |
| 1HGH.PDB | O, F_LEU_102   | N, F_HIS_106   | H, F_HIS_106    | 2.96 | 2.00 | 11.13 |
| 1HGH.PDB | O, F_GLU_103   | N, F_THR_107   | H, F_THR_107    | 2.86 | 1.95 | 17.81 |
| 1HGH.PDB | O, F_HIS_106   | N, F_LEU_110   | H, F_LEU_110    | 2.81 | 1.86 | 10.81 |
| 1HGH.PDB | O, F_THR_107   | OG1, F_THR_111 | HG1, F_THR_111  | 2.90 | 1.94 | 2.05  |
| 1HGH.PDB | O, F_ASP_109   | N, F_SER_113   | H, F_SER_113    | 2.77 | 1.83 | 10.08 |
| 1HGH.PDB | O, F_ASP_112   | N, F_ASN_116   | H, F_ASN_116    | 2.97 | 1.99 | 5.76  |
| 1HGH.PDB | O, F_SER_113   | N, F_LYS_117   | H, F_LYS_117    | 2.73 | 1.90 | 25.90 |
| 1HGH.PDB | O, F_GLU_114   | N, F_LEU_118   | H, F_LEU_118    | 2.99 | 2.02 | 8.75  |
| 1HGH.PDB | O, F_ASN_116   | N, F_GLU_120   | H, F_GLU_120    | 2.90 | 1.92 | 2.56  |
| 1HGH.PDB | O, F_LYS_117   | N, F_LYS_121   | H, F_LYS_121    | 2.86 | 1.95 | 17.55 |
| 1HGH.PDB | O, F_LEU_118   | N, F_THR_122   | H, F_THR_122    | 3.00 | 2.04 | 9.77  |
| 1HGH.PDB | O, F_PHE_119   | N, F_ARG_123   | H, F_ARG_123    | 2.88 | 1.91 | 8.40  |
| 1HGH.PDB | OE2, F_GLU_120 | NH1, F_ARG_123 | HH11, F_ARG_123 | 2.74 | 1.84 | 22.63 |
| 1HGH.PDB | O, F_GLU_120   | N, F_ARG_124   | H, F_ARG_124    | 2.97 | 2.00 | 8.45  |
| 1HGH.PDB | OE1, D_GLU_132 | NE, F_ARG_124  | HE, F_ARG_124   | 2.89 | 2.06 | 26.55 |
| 1HGH.PDB | OE2, D_GLU_132 | NE, F_ARG_124  | HE, F_ARG_124   | 2.92 | 2.03 | 21.52 |
| 1HGH.PDB | O, F_LEU_126   | N, F_ASN_129   | H, F_ASN_129    | 2.97 | 2.04 | 14.05 |
| 1HGH.PDB | OH, F_TYR_157  | ND2, F_ASN_129 | HD22, F_ASN_129 | 2.82 | 1.88 | 14.11 |
| 1HGH.PDB | O, F_LYS_139   | N, F_GLU_131   | H, F_GLU_131    | 2.96 | 2.04 | 16.53 |
| 1HGH.PDB | O, F_CYS_137   | N, F_MET_133   | H, F_MET_133    | 2.86 | 1.92 | 14.22 |
| 1HGH.PDB | O, E_LEU_13    | N, F_PHE_138   | H, F_PHE_138    | 2.71 | 1.82 | 18.02 |
| 1HGH.PDB | O, F_GLU_131   | N, F_LYS_139   | H, F_LYS_139    | 2.82 | 1.86 | 5.73  |
| 1HGH.PDB | O, E_ALA_11    | N, F_ILE_140   | H, F_ILE_140    | 2.79 | 1.87 | 15.45 |
| 1HGH.PDB | O, F_ASN_129   | N, F_TYR_141   | H, F_TYR_141    | 2.86 | 1.92 | 14.36 |
| 1HGH.PDB | OE2, F_GLU_165 | N, F_LYS_143   | H, F_LYS_143    | 2.98 | 2.04 | 16.16 |
| 1HGH.PDB | O, F_ASP_145   | N, F_ILE_149   | H, F_ILE_149    | 2.90 | 1.94 | 10.21 |
| 1HGH.PDB | O, F_ASN_146   | N, F_GLU_150   | H, F_GLU_150    | 2.92 | 1.99 | 14.40 |
| 1HGH.PDB | O, F_ALA_147   | N, F_SER_151   | H, F_SER_151    | 2.95 | 2.08 | 22.59 |
| 1HGH.PDB | O, F_CYS_148   | OG, F_SER_151  | HG, F_SER_151   | 2.76 | 1.89 | 20.46 |
| 1HGH.PDB | O, F_GLU_150   | N, F_ASN_154   | H, F_ASN_154    | 2.79 | 1.82 | 2.73  |
| 1HGH.PDB | OD1, F_ASP_158 | N, F_ASP_160   | H, F_ASP_160    | 2.98 | 2.10 | 21.90 |
| 1HGH.PDB | O, F_HIS_159   | N, F_TYR_162   | H, F_TYR_162    | 2.95 | 2.07 | 22.27 |
| 1HGH.PDB | O, D_ARG_170   | NH1, F_ARG_163 | HH12, F_ARG_163 | 2.89 | 1.90 | 10.67 |
| 1HGH.PDB | O, F_TYR_162   | N, F_ALA_166   | H, F_ALA_166    | 2.94 | 1.96 | 4.91  |
| 1HGH.PDB | O, F_ARG_163   | N, F_LEU_167   | H, F_LEU_167    | 2.82 | 1.86 | 8.96  |
| 1HGH.PDB | O, F_GLU_165   | ND2, F_ASN_169 | HD22, F_ASN_169 | 2.99 | 2.03 | 7.50  |
| 1HGH.PDB | O, F_ALA_166   | N, F_ARG_170   | H, F_ARG_170    | 2.83 | 1.95 | 20.78 |
| 1HGH.PDB | O, F_GLU_128   | NE, F_ARG_170  | HE, F_ARG_170   | 2.76 | 1.89 | 22.46 |
| 1HGH.PDB | OE2, F_GLU_131 | NH1, F_ARG_170 | HH11, F_ARG_170 | 2.84 | 1.84 | 5.40  |
| 1HGH.PDB | O, F_LEU_167   | N, F_PHE_171   | H, F_PHE_171    | 2.96 | 2.05 | 17.03 |

Table 1668: 1HGH-specific side chain and main chain hydrogen bonding analysis. In this table, a PDB file is specified with a four-letter PDB ID, except that the names of the PDB files corresponding to the single NMR structural model split from the NMR ensemble is specified with a four-letter PDB ID in addition to a hyphen followed by the single NMR structural model numeric ID, the residue naming scheme is **Chain ID\_residue name\_residue number**,  $\angle ADH$  represents the angle formed by acceptor (A), donor (D) and hydrogen (H) ( $\angle ADH$ ).

| PDB      | Acceptor (A)   | Donor (D)      | Hydrogen (H)    | D-A (Å) | H-A (Å) | $\angle ADH(^{\circ})$ |
|----------|----------------|----------------|-----------------|---------|---------|------------------------|
| 1HGI.PDB | O, B_ILE_140   | N, A_ALA_11    | H, A_ALA_11     | 2.84    | 1.92    | 15.59                  |
| 1HGI.PDB | O, B_PHE_138   | N, A_LEU_13    | H, A_LEU_13     | 3.00    | 2.03    | 9.98                   |
| 1HGI.PDB | O, B_ARG_25    | N, A_CYS_14    | H, A_CYS_14     | 2.96    | 2.03    | 15.50                  |
| 1HGI.PDB | O, B_GLY_136   | N, A_LEU_15    | H, A_LEU_15     | 2.93    | 1.96    | 7.25                   |
| 1HGI.PDB | O, B_GLY_23    | N, A_GLY_16    | H, A_GLY_16     | 2.98    | 2.12    | 23.40                  |
| 1HGI.PDB | O, A_HIS_18    | ND1, A_HIS_17  | HD1, A_HIS_17   | 2.95    | 2.05    | 20.26                  |
| 1HGI.PDB | O, B_TRP_21    | N, A_HIS_18    | H, A_HIS_18     | 2.89    | 1.98    | 18.40                  |
| 1HGI.PDB | OD1, A_ASN_322 | N, A_VAL_20    | H, A_VAL_20     | 2.77    | 1.82    | 10.44                  |
| 1HGI.PDB | O, A_VAL_36    | N, A_THR_24    | H, A_THR_24     | 2.83    | 1.89    | 12.49                  |
| 1HGI.PDB | O, A_ILE_34    | N, A_VAL_26    | H, A_VAL_26     | 2.77    | 1.82    | 9.67                   |
| 1HGI.PDB | OE2, B_GLU_97  | NZ, A_LYS_27   | HZ1, A_LYS_27   | 2.90    | 1.86    | 7.66                   |
| 1HGI.PDB | O, A_ASP_31    | N, A_THR_28    | H, A_THR_28     | 2.78    | 1.96    | 27.36                  |
| 1HGI.PDB | O, A_VAL_26    | N, A_ILE_34    | H, A_ILE_34     | 2.91    | 2.01    | 18.80                  |
| 1HGI.PDB | O, A_THR_24    | N, A_VAL_36    | H, A_VAL_36     | 2.78    | 1.82    | 5.76                   |
| 1HGI.PDB | O, A_MET_320   | N, A_THR_37    | H, A_THR_37     | 2.84    | 1.88    | 8.46                   |
| 1HGI.PDB | O, A_LEU_316   | N, A_THR_40    | H, A_THR_40     | 2.88    | 2.01    | 22.14                  |
| 1HGI.PDB | O, A_LEU_314   | N, A_LEU_42    | H, A_LEU_42     | 2.85    | 1.98    | 22.93                  |
| 1HGI.PDB | OE2, A_GLU_41  | N, A_VAL_43    | H, A_VAL_43     | 2.99    | 2.05    | 14.68                  |
| 1HGI.PDB | O, A_PHE_294   | N, A_GLN_44    | H, A_GLN_44     | 2.83    | 1.87    | 6.80                   |
| 1HGI.PDB | O, A_SER_46    | NE2, A_GLN_44  | HE22, A_GLN_44  | 2.80    | 1.99    | 27.53                  |
| 1HGI.PDB | OD2, A_ASP_275 | NZ, A_LYS_50   | HZ1, A_LYS_50   | 2.71    | 1.78    | 22.79                  |
| 1HGI.PDB | O, A_PRO_273   | N, A_ILE_51    | H, A_ILE_51     | 2.80    | 1.85    | 10.62                  |
| 1HGI.PDB | O, A_ASP_275   | N, A_ASN_53    | H, A_ASN_53     | 2.87    | 2.01    | 23.36                  |
| 1HGI.PDB | O, A_GLU_280   | NE2, A_HIS_56  | HE2, A_HIS_56   | 2.99    | 2.05    | 14.61                  |
| 1HGI.PDB | OD2, A_ASP_85  | N, A_ARG_57    | H, A_ARG_57     | 2.87    | 1.92    | 11.71                  |
| 1HGI.PDB | O, A_THR_83    | NE, A_ARG_57   | HE, A_ARG_57    | 2.85    | 1.87    | 3.06                   |
| 1HGI.PDB | O, A_LEU_86    | N, A_LEU_59    | H, A_LEU_59     | 2.86    | 1.91    | 10.36                  |
| 1HGI.PDB | O, A_VAL_88    | N, A_GLY_61    | H, A_GLY_61     | 2.97    | 2.12    | 24.22                  |
| 1HGI.PDB | OD1, A_ASP_60  | N, A_ILE_62    | H, A_ILE_62     | 2.84    | 1.91    | 13.27                  |
| 1HGI.PDB | O, A_GLY_61    | N, A_CYS_64    | H, A_CYS_64     | 2.89    | 1.98    | 18.14                  |
| 1HGI.PDB | OE2, A_GLU_89  | N, A_LEU_66    | H, A_LEU_66     | 3.00    | 2.06    | 15.37                  |
| 1HGI.PDB | O, A_LEU_66    | N, A_LEU_70    | H, A_LEU_70     | 2.81    | 1.92    | 20.22                  |
| 1HGI.PDB | O, A_ILE_67    | N, A_LEU_71    | H, A_LEU_71     | 2.84    | 1.88    | 6.23                   |
| 1HGI.PDB | O, A_ASP_68    | N, A_GLY_72    | H, A_GLY_72     | 2.79    | 1.85    | 12.70                  |
| 1HGI.PDB | OD1, A_ASP_73  | ND1, A_HIS_75  | HD1, A_HIS_75   | 2.90    | 1.96    | 15.34                  |
| 1HGI.PDB | O, A_ASP_63    | NE2, A_HIS_75  | HE2, A_HIS_75   | 2.84    | 1.90    | 14.11                  |
| 1HGI.PDB | O, A_ASP_73    | N, A_CYS_76    | H, A_CYS_76     | 2.75    | 1.84    | 16.03                  |
| 1HGI.PDB | O, A_PRO_74    | N, A_ASP_77    | H, A_ASP_77     | 2.94    | 1.98    | 10.08                  |
| 1HGI.PDB | O, A_CYS_76    | N, A_PHE_79    | H, A_PHE_79     | 2.96    | 1.99    | 3.40                   |
| 1HGI.PDB | OE1, A_GLU_82  | N, A_THR_83    | H, A_THR_83     | 2.96    | 2.07    | 20.90                  |
| 1HGI.PDB | O, A_ARG_57    | N, A_ASP_85    | H, A_ASP_85     | 2.81    | 1.90    | 17.53                  |
| 1HGI.PDB | O, A_MET_268   | N, A_GLU_89    | H, A_GLU_89     | 2.81    | 1.85    | 7.54                   |
| 1HGI.PDB | OD1, A_ASP_60  | NE, A_ARG_90   | HE, A_ARG_90    | 2.89    | 1.91    | 4.93                   |
| 1HGI.PDB | O, A_SER_270   | NH1, A_ARG_90  | HH11, A_ARG_90  | 2.65    | 1.78    | 23.88                  |
| 1HGI.PDB | O, A_ALA_272   | NH1, A_ARG_90  | HH12, A_ARG_90  | 2.62    | 1.72    | 20.22                  |
| 1HGI.PDB | OD2, A_ASP_60  | NH2, A_ARG_90  | HH21, A_ARG_90  | 2.83    | 1.85    | 11.60                  |
| 1HGI.PDB | OD1, A_ASP_271 | N, A_SER_91    | H, A_SER_91     | 2.91    | 1.95    | 10.73                  |
| 1HGI.PDB | OD1, A_ASP_271 | OG, A_SER_91   | HG, A_SER_91    | 2.93    | 2.10    | 25.86                  |
| 1HGI.PDB | OD2, A_ASP_271 | OG, A_SER_91   | HG, A_SER_91    | 2.80    | 1.92    | 20.51                  |
| 1HGI.PDB | OD2, A_ASP_68  | OG, A_SER_95   | HG, A_SER_95    | 2.89    | 1.96    | 14.00                  |
| 1HGI.PDB | OD2, A_ASP_73  | N, A_ASN_96    | H, A_ASN_96     | 2.87    | 1.92    | 13.04                  |
| 1HGI.PDB | OD1, A_ASP_68  | OH, A_TYR_100  | HH, A_TYR_100   | 2.99    | 2.05    | 13.08                  |
| 1HGI.PDB | OD2, A_ASP_104 | OG, A_SER_107  | HG, A_SER_107   | 2.89    | 1.96    | 15.23                  |
| 1HGI.PDB | O, A_TYR_105   | N, A_ARG_109   | H, A_ARG_109    | 2.86    | 1.88    | 3.08                   |
| 1HGI.PDB | OE2, B_GLU_67  | NH2, A_ARG_109 | HH21, A_ARG_109 | 2.80    | 1.81    | 13.24                  |
| 1HGI.PDB | O, A_SER_107   | N, A_LEU_111   | H, A_LEU_111    | 2.85    | 1.89    | 7.63                   |
| 1HGI.PDB | O, A_LEU_108   | N, A_VAL_112   | H, A_VAL_112    | 2.97    | 1.99    | 2.18                   |

|          |                |                |                 |      |      |       |
|----------|----------------|----------------|-----------------|------|------|-------|
| 1HGI.PDB | O, A_ARG_109   | N, A_ALA_113   | H, A_ALA_113    | 2.95 | 2.04 | 17.40 |
| 1HGI.PDB | O, A_SER_110   | N, A_SER_114   | H, A_SER_114    | 2.94 | 2.06 | 20.96 |
| 1HGI.PDB | OE2, A_GLU_119 | OG1, A_THR_117 | HG1, A_THR_117  | 2.93 | 2.01 | 15.43 |
| 1HGI.PDB | O, A_GLU_82    | N, A_LEU_118   | H, A_LEU_118    | 2.94 | 2.01 | 15.84 |
| 1HGI.PDB | O, A_TYR_257   | N, A_ILE_121   | H, A_ILE_121    | 2.92 | 1.95 | 6.91  |
| 1HGI.PDB | O, A_ARG_255   | N, A_GLU_123   | H, A_GLU_123    | 2.88 | 1.93 | 11.84 |
| 1HGI.PDB | O, A_THR_155   | N, A_THR_131   | H, A_THR_131    | 2.73 | 1.85 | 20.63 |
| 1HGI.PDB | OD1, A_ASN_152 | N, A_ASN_133   | H, A_ASN_133    | 2.84 | 1.92 | 17.02 |
| 1HGI.PDB | O, A_GLY_146   | N, A_SER_136   | H, A_SER_136    | 2.75 | 1.87 | 20.99 |
| 1HGI.PDB | OG, A_SER_136  | N, A_ALA_138   | H, A_ALA_138    | 2.84 | 1.93 | 17.99 |
| 1HGI.PDB | O, A_GLY_144   | NZ, A_LYS_140  | HZ1, A_LYS_140  | 2.89 | 1.92 | 16.20 |
| 1HGI.PDB | OD1, A_ASN_137 | NZ, A_LYS_140  | HZ2, A_LYS_140  | 2.79 | 1.79 | 13.01 |
| 1HGI.PDB | OD2, A_ASP_77  | NE, A_ARG_141  | HE, A_ARG_141   | 2.82 | 2.01 | 29.43 |
| 1HGI.PDB | O, A_PHE_147   | NH1, A_ARG_141 | HH12, A_ARG_141 | 2.56 | 1.66 | 20.36 |
| 1HGI.PDB | OD1, A_ASP_77  | NH2, A_ARG_141 | HH21, A_ARG_141 | 2.93 | 2.01 | 20.43 |
| 1HGI.PDB | OD2, A_ASP_77  | NH2, A_ARG_141 | HH21, A_ARG_141 | 2.69 | 1.82 | 24.99 |
| 1HGI.PDB | O, A_GLY_72    | NH2, A_ARG_141 | HH22, A_ARG_141 | 3.00 | 2.01 | 9.22  |
| 1HGI.PDB | O, A_SER_136   | N, A_GLY_146   | H, A_GLY_146    | 2.98 | 2.04 | 14.64 |
| 1HGI.PDB | O, A_GLY_72    | N, A_SER_149   | H, A_SER_149    | 2.91 | 1.98 | 15.28 |
| 1HGI.PDB | O, A_ALA_253   | N, A_ASN_152   | H, A_ASN_152    | 2.76 | 1.90 | 23.60 |
| 1HGI.PDB | OH, A_TYR_195  | NE1, A_TRP_153 | HE1, A_TRP_153  | 2.87 | 1.98 | 21.02 |
| 1HGI.PDB | O, A_THR_131   | N, A_THR_155   | H, A_THR_155    | 2.95 | 1.99 | 10.46 |
| 1HGI.PDB | O, A_LEU_194   | N, A_LYS_156   | H, A_LYS_156    | 2.87 | 1.97 | 18.02 |
| 1HGI.PDB | O, A_SER_193   | NZ, A_LYS_156  | HZ2, A_LYS_156  | 2.75 | 1.76 | 15.14 |
| 1HGI.PDB | O, A_THR_160   | N, A_SER_157   | H, A_SER_157    | 2.90 | 2.01 | 20.69 |
| 1HGI.PDB | OG1, A_THR_131 | OG, A_SER_157  | HG, A_SER_157   | 2.97 | 2.02 | 9.12  |
| 1HGI.PDB | O, A_SER_247   | N, A_LEU_164   | H, A_LEU_164    | 2.71 | 1.88 | 25.60 |
| 1HGI.PDB | O, A_ILE_245   | N, A_VAL_166   | H, A_VAL_166    | 2.88 | 1.93 | 12.13 |
| 1HGI.PDB | O, A_LEU_243   | OG1, A_THR_167 | HG1, A_THR_167  | 2.87 | 2.00 | 20.84 |
| 1HGI.PDB | O, A_LEU_243   | N, A_MET_168   | H, A_MET_168    | 2.94 | 2.01 | 15.31 |
| 1HGI.PDB | O, A_ASP_241   | N, A_ASN_170   | H, A_ASN_170    | 2.98 | 2.00 | 3.78  |
| 1HGI.PDB | O, A_PHE_174   | ND2, A_ASN_170 | HD21, A_ASN_170 | 2.83 | 1.88 | 13.11 |
| 1HGI.PDB | O, A_VAL_237   | ND2, A_ASN_170 | HD22, A_ASN_170 | 2.97 | 2.11 | 23.66 |
| 1HGI.PDB | O, A_VAL_237   | N, A_LYS_176   | H, A_LYS_176    | 2.96 | 2.02 | 13.33 |
| 1HGI.PDB | OE2, A_GLU_123 | NZ, A_LYS_176  | HZ1, A_LYS_176  | 2.68 | 1.79 | 25.50 |
| 1HGI.PDB | O, A_THR_235   | N, A_TYR_178   | H, A_TYR_178    | 2.83 | 1.86 | 3.17  |
| 1HGI.PDB | OE1, A_GLU_123 | OH, A_TYR_178  | HH, A_TYR_178   | 2.78 | 1.82 | 7.33  |
| 1HGI.PDB | OG1, A_THR_235 | NE1, A_TRP_180 | HE1, A_TRP_180  | 2.85 | 1.87 | 3.02  |
| 1HGI.PDB | O, A_ILE_252   | N, A_GLY_181   | H, A_GLY_181    | 2.99 | 2.17 | 27.41 |
| 1HGI.PDB | O, A_ASN_250   | N, A_HIS_183   | H, A_HIS_183    | 2.91 | 2.02 | 20.40 |
| 1HGI.PDB | O, A_ARG_229   | N, A_HIS_184   | H, A_HIS_184    | 2.87 | 1.91 | 8.12  |
| 1HGI.PDB | OG, A_SER_231  | NE2, A_HIS_184 | HE2, A_HIS_184  | 2.81 | 1.93 | 22.19 |
| 1HGI.PDB | OE1, A_GLU_190 | N, A_SER_186   | H, A_SER_186    | 2.97 | 2.07 | 20.08 |
| 1HGI.PDB | OD1, A_ASN_250 | NE2, A_GLN_191 | HE21, A_GLN_191 | 2.93 | 1.97 | 11.19 |
| 1HGI.PDB | O, A_GLN_197   | NE2, A_GLN_191 | HE22, A_GLN_191 | 2.94 | 1.98 | 10.63 |
| 1HGI.PDB | O, A_ASN_188   | N, A_THR_192   | H, A_THR_192    | 2.97 | 2.03 | 12.91 |
| 1HGI.PDB | O, A_ASN_188   | OG1, A_THR_192 | HG1, A_THR_192  | 2.95 | 1.99 | 5.36  |
| 1HGI.PDB | O, A_GLN_189   | N, A_SER_193   | H, A_SER_193    | 2.83 | 1.86 | 5.01  |
| 1HGI.PDB | O, A_GLN_191   | N, A_TYR_195   | H, A_TYR_195    | 2.74 | 1.78 | 5.84  |
| 1HGI.PDB | O, A_TYR_161   | NE2, A_GLN_197 | HE21, A_GLN_197 | 2.98 | 2.02 | 10.94 |
| 1HGI.PDB | O, A_ASN_248   | NE2, A_GLN_197 | HE22, A_GLN_197 | 2.92 | 2.01 | 18.40 |
| 1HGI.PDB | OD1, A_ASN_246 | NH2, A_ARG_201 | HH21, A_ARG_201 | 2.54 | 1.71 | 26.99 |
| 1HGI.PDB | O, A_ILE_213   | N, A_VAL_202   | H, A_VAL_202    | 2.93 | 1.95 | 5.55  |
| 1HGI.PDB | O, A_ASN_246   | N, A_THR_203   | H, A_THR_203    | 2.85 | 1.91 | 12.85 |
| 1HGI.PDB | O, A_GLN_211   | N, A_VAL_204   | H, A_VAL_204    | 2.83 | 1.91 | 15.32 |
| 1HGI.PDB | O, A_VAL_244   | N, A_SER_205   | H, A_SER_205    | 2.95 | 2.02 | 15.55 |
| 1HGI.PDB | O, A_SER_209   | N, A_THR_206   | H, A_THR_206    | 2.90 | 1.93 | 7.39  |
| 1HGI.PDB | OD1, A_ASP_241 | N, A_ARG_207   | H, A_ARG_207    | 2.92 | 1.95 | 9.91  |

|          |                |                |                 |      |      |       |
|----------|----------------|----------------|-----------------|------|------|-------|
| 1HGI.PDB | OD2, A_ASP_241 | NE, A_ARG_208  | HE, A_ARG_208   | 2.96 | 2.05 | 19.55 |
| 1HGI.PDB | O, A_VAL_204   | N, A_GLN_211   | H, A_GLN_211    | 2.90 | 1.98 | 16.08 |
| 1HGI.PDB | OG1, A_THR_203 | OG1, A_THR_212 | HG1, A_THR_212  | 2.96 | 2.00 | 2.15  |
| 1HGI.PDB | O, A_VAL_202   | N, A_ILE_213   | H, A_ILE_213    | 2.83 | 1.91 | 15.65 |
| 1HGI.PDB | OE1, C_GLN_210 | NH2, A_ARG_220 | HH21, A_ARG_220 | 2.65 | 1.73 | 18.55 |
| 1HGI.PDB | O, A_ASN_216   | NH2, A_ARG_220 | HH22, A_ARG_220 | 2.69 | 1.79 | 20.57 |
| 1HGI.PDB | O, A_LEU_226   | N, A_VAL_223   | H, A_VAL_223    | 2.88 | 1.91 | 8.35  |
| 1HGI.PDB | O, A_CYS_97    | NE, A_ARG_224  | HE, A_ARG_224   | 2.78 | 1.93 | 25.49 |
| 1HGI.PDB | O, A_CYS_97    | NH2, A_ARG_224 | HH21, A_ARG_224 | 2.83 | 1.97 | 25.33 |
| 1HGI.PDB | O, A_VAL_223   | N, A_LEU_226   | H, A_LEU_226    | 2.93 | 2.00 | 15.45 |
| 1HGI.PDB | O, A_SER_228   | NH1, A_ARG_229 | HH11, A_ARG_229 | 2.68 | 1.75 | 18.52 |
| 1HGI.PDB | O, A_PRO_221   | NH2, A_ARG_229 | HH22, A_ARG_229 | 2.62 | 1.67 | 14.70 |
| 1HGI.PDB | O, A_PRO_99    | N, A_ILE_230   | H, A_ILE_230    | 2.99 | 2.15 | 25.83 |
| 1HGI.PDB | O, A_ILE_182   | N, A_SER_231   | H, A_SER_231    | 2.99 | 2.14 | 24.63 |
| 1HGI.PDB | OD1, A_ASP_101 | OG, A_SER_231  | HG, A_SER_231   | 2.96 | 2.01 | 11.74 |
| 1HGI.PDB | O, A_ASP_101   | N, A_ILE_232   | H, A_ILE_232    | 2.92 | 1.99 | 15.11 |
| 1HGI.PDB | O, A_TRP_180   | N, A_TYR_233   | H, A_TYR_233    | 2.89 | 1.92 | 9.03  |
| 1HGI.PDB | O, A_TYR_178   | N, A_THR_235   | H, A_THR_235    | 2.82 | 1.93 | 19.14 |
| 1HGI.PDB | O, A_LYS_176   | N, A_VAL_237   | H, A_VAL_237    | 2.80 | 1.86 | 12.56 |
| 1HGI.PDB | O, F_SER_71    | NZ, A_LYS_238  | HZ2, A_LYS_238  | 2.65 | 1.80 | 28.67 |
| 1HGI.PDB | OE1, F_GLU_72  | NZ, A_LYS_238  | HZ3, A_LYS_238  | 2.85 | 1.85 | 15.00 |
| 1HGI.PDB | O, A_ASN_170   | N, A_GLY_240   | H, A_GLY_240    | 2.91 | 2.07 | 25.35 |
| 1HGI.PDB | OD1, A_ASP_241 | N, A_VAL_242   | H, A_VAL_242    | 2.74 | 1.94 | 29.06 |
| 1HGI.PDB | O, A_MET_168   | N, A_LEU_243   | H, A_LEU_243    | 2.93 | 1.96 | 6.54  |
| 1HGI.PDB | O, A_SER_205   | N, A_VAL_244   | H, A_VAL_244    | 2.95 | 2.00 | 12.56 |
| 1HGI.PDB | O, A_VAL_166   | N, A_ILE_245   | H, A_ILE_245    | 2.98 | 2.04 | 14.27 |
| 1HGI.PDB | O, A_THR_203   | N, A_ASN_246   | H, A_ASN_246    | 2.86 | 1.93 | 15.27 |
| 1HGI.PDB | O, A_LEU_164   | N, A_SER_247   | H, A_SER_247    | 2.86 | 1.96 | 18.93 |
| 1HGI.PDB | O, A_ARG_201   | OG, A_SER_247  | HG, A_SER_247   | 2.80 | 2.00 | 29.04 |
| 1HGI.PDB | OE1, A_GLN_191 | ND2, A_ASN_250 | HD21, A_ASN_250 | 2.89 | 1.93 | 10.00 |
| 1HGI.PDB | O, A_HIS_183   | ND2, A_ASN_250 | HD22, A_ASN_250 | 2.85 | 1.88 | 5.42  |
| 1HGI.PDB | O, A_GLY_181   | N, A_ILE_252   | H, A_ILE_252    | 2.93 | 1.97 | 10.35 |
| 1HGI.PDB | O, A_ASN_152   | N, A_ALA_253   | H, A_ALA_253    | 2.80 | 1.92 | 21.29 |
| 1HGI.PDB | O, A_LEU_177   | N, A_PHE_258   | H, A_PHE_258    | 2.93 | 1.97 | 9.46  |
| 1HGI.PDB | OE2, A_GLU_119 | NH1, A_ARG_261 | HH12, A_ARG_261 | 2.66 | 1.83 | 28.46 |
| 1HGI.PDB | OE1, A_GLU_119 | NH2, A_ARG_261 | HH22, A_ARG_261 | 2.85 | 1.99 | 27.12 |
| 1HGI.PDB | OD2, A_ASP_85  | NZ, A_LYS_264  | HZ3, A_LYS_264  | 2.82 | 1.85 | 17.23 |
| 1HGI.PDB | O, A_PHE_87    | N, A_MET_268   | H, A_MET_268    | 2.89 | 2.01 | 22.03 |
| 1HGI.PDB | O, A_PRO_284   | OG, A_SER_270  | HG, A_SER_270   | 2.81 | 1.87 | 11.59 |
| 1HGI.PDB | OG, A_SER_270  | N, A_ALA_272   | H, A_ALA_272    | 2.98 | 2.03 | 12.37 |
| 1HGI.PDB | O, A_ILE_51    | N, A_ASP_275   | H, A_ASP_275    | 2.92 | 2.02 | 19.41 |
| 1HGI.PDB | OD1, A_ASP_275 | N, A_THR_276   | H, A_THR_276    | 2.85 | 2.00 | 24.58 |
| 1HGI.PDB | O, A_ASN_54    | N, A_SER_279   | H, A_SER_279    | 2.79 | 1.86 | 13.88 |
| 1HGI.PDB | O, A_TYR_302   | N, A_ILE_282   | H, A_ILE_282    | 2.88 | 1.92 | 8.64  |
| 1HGI.PDB | O, A_THR_283   | N, A_GLY_286   | H, A_GLY_286    | 2.81 | 1.89 | 14.79 |
| 1HGI.PDB | O, A_LYS_50    | N, A_SER_287   | H, A_SER_287    | 2.89 | 1.91 | 3.39  |
| 1HGI.PDB | O, A_ALA_304   | ND2, A_ASN_290 | HD22, A_ASN_290 | 2.73 | 1.85 | 20.49 |
| 1HGI.PDB | OE1, A_GLN_44  | NZ, A_LYS_292  | HZ1, A_LYS_292  | 2.74 | 1.74 | 11.73 |
| 1HGI.PDB | OD2, A_ASP_291 | NZ, A_LYS_292  | HZ3, A_LYS_292  | 2.81 | 1.89 | 23.33 |
| 1HGI.PDB | O, A_LYS_307   | N, A_GLN_295   | H, A_GLN_295    | 2.85 | 1.96 | 20.30 |
| 1HGI.PDB | O, A_ASN_298   | NE2, A_GLN_295 | HE21, A_GLN_295 | 2.82 | 1.86 | 9.08  |
| 1HGI.PDB | O, A_GLN_44    | N, A_ASN_296   | H, A_ASN_296    | 2.91 | 1.97 | 13.42 |
| 1HGI.PDB | OE1, A_GLN_295 | N, A_VAL_297   | H, A_VAL_297    | 2.73 | 1.93 | 28.60 |
| 1HGI.PDB | OD1, A_ASN_298 | N, A_ILE_300   | H, A_ILE_300    | 2.93 | 1.98 | 12.80 |
| 1HGI.PDB | O, A_ILE_282   | N, A_TYR_302   | H, A_TYR_302    | 2.98 | 2.09 | 21.95 |
| 1HGI.PDB | O, A_LYS_264   | OH, A_TYR_302  | HH, A_TYR_302   | 2.75 | 1.94 | 27.71 |
| 1HGI.PDB | O, B_LYS_62    | N, A_GLY_303   | H, A_GLY_303    | 2.96 | 1.99 | 7.07  |
| 1HGI.PDB | O, A_GLN_295   | N, A_VAL_309   | H, A_VAL_309    | 2.99 | 2.14 | 25.08 |



|          |                |                |                 |      |      |       |
|----------|----------------|----------------|-----------------|------|------|-------|
| 1HGI.PDB | OG, B_SER_93   | N, A_LYS_310   | H, A_LYS_310    | 2.98 | 2.05 | 15.58 |
| 1HGI.PDB | OD1, B_ASP_86  | NZ, A_LYS_310  | HZ3, A_LYS_310  | 2.76 | 1.92 | 29.34 |
| 1HGI.PDB | OE2, A_GLU_41  | N, A_LEU_314   | H, A_LEU_314    | 2.86 | 1.90 | 8.56  |
| 1HGI.PDB | OE1, A_GLU_41  | NZ, A_LYS_315  | HZ3, A_LYS_315  | 2.77 | 1.82 | 19.86 |
| 1HGI.PDB | O, A_THR_40    | N, A_LEU_316   | H, A_LEU_316    | 2.86 | 1.94 | 16.90 |
| 1HGI.PDB | OD1, B_ASN_104 | N, A_ALA_317   | H, A_ALA_317    | 2.74 | 1.83 | 15.76 |
| 1HGI.PDB | O, A_ASN_38    | N, A_THR_318   | H, A_THR_318    | 2.82 | 1.93 | 19.87 |
| 1HGI.PDB | O, A_VAL_20    | ND2, A_ASN_322 | HD21, A_ASN_322 | 2.87 | 1.93 | 13.77 |
| 1HGI.PDB | OE2, A_GLU_35  | ND2, A_ASN_322 | HD22, A_ASN_322 | 2.93 | 1.97 | 12.34 |
| 1HGI.PDB | OE2, B_GLU_15  | NZ, A_LYS_326  | HZ1, A_LYS_326  | 2.79 | 1.93 | 27.33 |
| 1HGI.PDB | OE1, A_GLU_325 | NZ, A_LYS_326  | HZ3, A_LYS_326  | 2.91 | 1.94 | 17.77 |
| 1HGI.PDB | OE1, B_GLU_15  | N, A_THR_328   | H, A_THR_328    | 2.87 | 1.93 | 12.65 |
| 1HGI.PDB | OD2, B_ASP_112 | N, B_GLY_1     | H2, B_GLY_1     | 2.79 | 1.78 | 11.80 |
| 1HGI.PDB | OD1, B_ASP_109 | N, B_LEU_2     | H, B_LEU_2      | 2.89 | 1.95 | 13.58 |
| 1HGI.PDB | OD2, B_ASP_112 | N, B_PHE_3     | H, B_PHE_3      | 2.82 | 2.00 | 27.10 |
| 1HGI.PDB | OD2, B_ASP_112 | N, B_GLY_4     | H, B_GLY_4      | 2.93 | 2.02 | 17.65 |
| 1HGI.PDB | OD1, B_ASP_112 | N, B_ALA_5     | H, B_ALA_5      | 2.82 | 1.90 | 16.18 |
| 1HGI.PDB | O, B_GLY_4     | N, B_PHE_9     | H, B_PHE_9      | 2.84 | 1.90 | 12.47 |
| 1HGI.PDB | O, B_GLY_13    | ND2, B_ASN_12  | HD22, B_ASN_12  | 2.81 | 1.91 | 19.43 |
| 1HGI.PDB | O, A_VAL_323   | N, B_GLY_13    | H, B_GLY_13     | 2.68 | 1.79 | 18.45 |
| 1HGI.PDB | O, A_HIS_17    | N, B_TRP_14    | H, B_TRP_14     | 2.78 | 1.88 | 17.65 |
| 1HGI.PDB | OG1, B_THR_41  | N, B_TRP_21    | H, B_TRP_21     | 2.98 | 2.13 | 25.10 |
| 1HGI.PDB | O, A_GLY_16    | N, B_GLY_23    | H, B_GLY_23     | 2.97 | 2.06 | 17.58 |
| 1HGI.PDB | O, B_ALA_35    | N, B_PHE_24    | H, B_PHE_24     | 2.80 | 1.84 | 7.18  |
| 1HGI.PDB | OE1, B_GLN_34  | NE, B_ARG_25   | HE, B_ARG_25    | 2.60 | 1.78 | 26.17 |
| 1HGI.PDB | OE1, B_GLN_34  | NH2, B_ARG_25  | HH21, B_ARG_25  | 2.75 | 1.92 | 27.98 |
| 1HGI.PDB | OE2, A_GLU_325 | NH2, B_ARG_25  | HH22, B_ARG_25  | 2.93 | 1.95 | 13.46 |
| 1HGI.PDB | O, B_GLY_33    | N, B_HIS_26    | H, B_HIS_26     | 2.73 | 1.82 | 16.37 |
| 1HGI.PDB | O, B_GLY_31    | N, B_ASN_28    | H, B_ASN_28     | 2.73 | 1.84 | 19.89 |
| 1HGI.PDB | O, B_ASN_28    | N, B_GLY_31    | H, B_GLY_31     | 2.85 | 2.01 | 25.49 |
| 1HGI.PDB | O, B_PHE_24    | N, B_ALA_35    | H, B_ALA_35     | 2.80 | 2.01 | 29.31 |
| 1HGI.PDB | O, B_TYR_22    | N, B_ASP_37    | H, B_ASP_37     | 2.70 | 1.78 | 14.64 |
| 1HGI.PDB | OD2, B_ASP_37  | N, B_SER_40    | H, B_SER_40     | 2.90 | 1.93 | 5.57  |
| 1HGI.PDB | O, B_ASP_37    | OG1, B_THR_41  | HG1, B_THR_41   | 2.74 | 1.83 | 15.44 |
| 1HGI.PDB | OD1, B_ASP_46  | NE2, B_GLN_42  | HE22, B_GLN_42  | 2.89 | 2.02 | 23.36 |
| 1HGI.PDB | O, B_SER_40    | N, B_ALA_44    | H, B_ALA_44     | 2.95 | 1.97 | 3.32  |
| 1HGI.PDB | O, B_THR_41    | N, B_ILE_45    | H, B_ILE_45     | 2.96 | 2.03 | 14.49 |
| 1HGI.PDB | O, B_GLN_42    | N, B_ASP_46    | H, B_ASP_46     | 2.71 | 1.76 | 6.05  |
| 1HGI.PDB | O, B_ALA_43    | NE2, B_GLN_47  | HE22, B_GLN_47  | 2.94 | 2.02 | 16.15 |
| 1HGI.PDB | O, B_ILE_45    | N, B_ASN_49    | H, B_ASN_49     | 2.87 | 1.98 | 20.49 |
| 1HGI.PDB | O, B_ASP_46    | N, B_GLY_50    | H, B_GLY_50     | 2.94 | 2.01 | 16.14 |
| 1HGI.PDB | O, B_GLN_47    | N, B_LYS_51    | H, B_LYS_51     | 3.00 | 2.02 | 5.35  |
| 1HGI.PDB | OG1, B_THR_107 | NZ, B_LYS_51   | HZ1, B_LYS_51   | 2.96 | 1.97 | 15.88 |
| 1HGI.PDB | OE1, B_GLU_103 | NZ, B_LYS_51   | HZ2, B_LYS_51   | 2.82 | 1.78 | 6.88  |
| 1HGI.PDB | ND1, B_HIS_106 | NZ, B_LYS_51   | HZ3, B_LYS_51   | 2.81 | 1.87 | 19.52 |
| 1HGI.PDB | O, B_ILE_48    | N, B_LEU_52    | H, B_LEU_52     | 2.94 | 2.01 | 15.10 |
| 1HGI.PDB | O, B_ASN_49    | N, B_ASN_53    | H, B_ASN_53     | 2.79 | 1.92 | 22.20 |
| 1HGI.PDB | O, E_THR_28    | NE, B_ARG_54   | HE, B_ARG_54    | 2.88 | 1.92 | 10.21 |
| 1HGI.PDB | OE1, B_GLU_57  | NH1, B_ARG_54  | HH11, B_ARG_54  | 2.86 | 1.87 | 11.02 |
| 1HGI.PDB | OE2, F_GLU_97  | NH2, B_ARG_54  | HH22, B_ARG_54  | 2.81 | 1.84 | 14.63 |
| 1HGI.PDB | OD2, F_ASP_86  | NZ, B_LYS_62   | HZ1, B_LYS_62   | 2.67 | 1.78 | 25.75 |
| 1HGI.PDB | OG, A_SER_110  | NE2, B_HIS_64  | HE2, B_HIS_64   | 2.87 | 1.89 | 8.13  |
| 1HGI.PDB | O, B_PHE_63    | NE2, B_GLN_65  | HE22, B_GLN_65  | 2.93 | 1.95 | 3.70  |
| 1HGI.PDB | O, A_LYS_299   | NZ, B_LYS_68   | HZ1, B_LYS_68   | 2.81 | 1.78 | 9.15  |
| 1HGI.PDB | OE2, B_GLU_85  | NZ, B_LYS_68   | HZ2, B_LYS_68   | 2.79 | 1.75 | 2.13  |
| 1HGI.PDB | OG, C_SER_107  | N, B_ARG_76    | H, B_ARG_76     | 2.85 | 1.90 | 10.66 |
| 1HGI.PDB | OE2, D_GLU_81  | NE, B_ARG_76   | HE, B_ARG_76    | 2.86 | 1.89 | 7.04  |
| 1HGI.PDB | OE2, D_GLU_74  | NH1, B_ARG_76  | HH12, B_ARG_76  | 2.92 | 1.89 | 1.72  |

|          |                |                |                 |      |      |       |
|----------|----------------|----------------|-----------------|------|------|-------|
| 1HGI.PDB | OE1, D_GLU_81  | NH2, B_ARG_76  | HH21, B_ARG_76  | 2.71 | 1.72 | 8.42  |
| 1HGI.PDB | OE1, D_GLU_74  | NH2, B_ARG_76  | HH22, B_ARG_76  | 2.86 | 1.86 | 6.93  |
| 1HGI.PDB | O, B_GLU_72    | NE2, B_GLN_78  | HE21, B_GLN_78  | 2.96 | 1.98 | 5.26  |
| 1HGI.PDB | OE1, B_GLU_74  | NE2, B_GLN_78  | HE22, B_GLN_78  | 2.94 | 1.97 | 8.23  |
| 1HGI.PDB | O, B_ASP_79    | N, B_TYR_83    | H, B_TYR_83     | 2.91 | 2.00 | 18.32 |
| 1HGI.PDB | OE1, D_GLU_85  | OH, B_TYR_83   | HH, B_TYR_83    | 2.78 | 1.84 | 13.46 |
| 1HGI.PDB | O, B_LEU_80    | N, B_VAL_84    | H, B_VAL_84     | 2.75 | 1.83 | 14.22 |
| 1HGI.PDB | O, B_LYS_82    | N, B_ASP_86    | H, B_ASP_86     | 2.90 | 1.94 | 10.51 |
| 1HGI.PDB | O, B_TYR_83    | N, B_THR_87    | H, B_THR_87     | 2.96 | 2.01 | 11.07 |
| 1HGI.PDB | OH, F_TYR_83   | NZ, B_LYS_88   | HZ1, B_LYS_88   | 2.65 | 1.64 | 9.94  |
| 1HGI.PDB | O, B_GLU_85    | N, B_ILE_89    | H, B_ILE_89     | 2.86 | 1.89 | 9.56  |
| 1HGI.PDB | O, B_LYS_88    | N, B_TRP_92    | H, B_TRP_92     | 2.97 | 1.99 | 6.73  |
| 1HGI.PDB | O, B_ILE_89    | N, B_SER_93    | H, B_SER_93     | 2.87 | 1.94 | 14.62 |
| 1HGI.PDB | O, B_ILE_89    | OG, B_SER_93   | HG, B_SER_93    | 2.83 | 1.94 | 18.39 |
| 1HGI.PDB | O, B_ASP_90    | N, B_TYR_94    | H, B_TYR_94     | 2.94 | 2.02 | 16.85 |
| 1HGI.PDB | O, B_TRP_92    | N, B_ALA_96    | H, B_ALA_96     | 2.90 | 1.95 | 10.47 |
| 1HGI.PDB | O, B_TYR_94    | N, B_LEU_98    | H, B_LEU_98     | 2.90 | 1.94 | 9.73  |
| 1HGI.PDB | O, B_ASN_95    | N, B_LEU_99    | H, B_LEU_99     | 2.85 | 1.96 | 19.61 |
| 1HGI.PDB | O, B_ALA_96    | N, B_VAL_100   | H, B_VAL_100    | 2.99 | 2.03 | 8.76  |
| 1HGI.PDB | O, B_LEU_98    | N, B_LEU_102   | H, B_LEU_102    | 2.99 | 2.01 | 3.39  |
| 1HGI.PDB | O, B_LEU_99    | N, B_GLU_103   | H, B_GLU_103    | 2.93 | 1.96 | 7.47  |
| 1HGI.PDB | O, B_VAL_100   | N, B_ASN_104   | H, B_ASN_104    | 2.87 | 1.90 | 6.79  |
| 1HGI.PDB | O, A_LYS_27    | ND2, B_ASN_104 | HD22, B_ASN_104 | 2.86 | 1.90 | 10.00 |
| 1HGI.PDB | O, B_LEU_102   | N, B_HIS_106   | H, B_HIS_106    | 2.92 | 1.98 | 15.03 |
| 1HGI.PDB | O, B_GLU_103   | N, B_THR_107   | H, B_THR_107    | 2.76 | 1.89 | 21.30 |
| 1HGI.PDB | O, B_ASN_104   | N, B_ILE_108   | H, B_ILE_108    | 2.93 | 1.97 | 9.63  |
| 1HGI.PDB | O, B_HIS_106   | N, B_LEU_110   | H, B_LEU_110    | 2.81 | 1.86 | 12.25 |
| 1HGI.PDB | O, B_THR_107   | OG1, B_THR_111 | HG1, B_THR_111  | 2.94 | 1.97 | 3.25  |
| 1HGI.PDB | O, B_ASP_109   | N, B_SER_113   | H, B_SER_113    | 2.80 | 1.86 | 12.43 |
| 1HGI.PDB | O, F_LEU_2     | OG, B_SER_113  | HG, B_SER_113   | 2.77 | 1.90 | 22.05 |
| 1HGI.PDB | O, B_LEU_110   | N, B_GLU_114   | H, B_GLU_114    | 2.95 | 1.99 | 9.30  |
| 1HGI.PDB | O, B_ASP_112   | N, B_ASN_116   | H, B_ASN_116    | 2.96 | 2.02 | 13.43 |
| 1HGI.PDB | O, B_SER_113   | N, B_LYS_117   | H, B_LYS_117    | 2.68 | 1.82 | 23.27 |
| 1HGI.PDB | O, B_ASN_116   | N, B_GLU_120   | H, B_GLU_120    | 2.93 | 1.95 | 4.31  |
| 1HGI.PDB | O, B_LYS_117   | N, B_LYS_121   | H, B_LYS_121    | 2.92 | 2.00 | 16.22 |
| 1HGI.PDB | OE2, B_GLU_120 | NH1, B_ARG_123 | HH11, B_ARG_123 | 2.84 | 1.97 | 25.22 |
| 1HGI.PDB | O, B_GLU_120   | N, B_ARG_124   | H, B_ARG_124    | 2.91 | 1.93 | 5.01  |
| 1HGI.PDB | OE1, F_GLU_132 | NE, B_ARG_124  | HE, B_ARG_124   | 2.81 | 1.96 | 23.50 |
| 1HGI.PDB | OE2, F_GLU_132 | NE, B_ARG_124  | HE, B_ARG_124   | 2.86 | 2.02 | 24.92 |
| 1HGI.PDB | O, B_LEU_126   | N, B_ASN_129   | H, B_ASN_129    | 2.99 | 2.06 | 15.00 |
| 1HGI.PDB | O, B_HIS_159   | ND2, B_ASN_129 | HD21, B_ASN_129 | 3.00 | 2.06 | 13.30 |
| 1HGI.PDB | OH, B_TYR_157  | ND2, B_ASN_129 | HD22, B_ASN_129 | 2.81 | 1.86 | 9.72  |
| 1HGI.PDB | O, B_LYS_139   | N, B_GLU_131   | H, B_GLU_131    | 2.91 | 1.98 | 14.55 |
| 1HGI.PDB | O, B_CYS_137   | N, B_MET_133   | H, B_MET_133    | 2.81 | 1.88 | 13.30 |
| 1HGI.PDB | O, A_LEU_13    | N, B_PHE_138   | H, B_PHE_138    | 2.74 | 1.89 | 23.78 |
| 1HGI.PDB | O, B_GLU_131   | N, B_LYS_139   | H, B_LYS_139    | 2.82 | 1.86 | 8.55  |
| 1HGI.PDB | O, A_ALA_11    | N, B_ILE_140   | H, B_ILE_140    | 2.77 | 1.87 | 18.46 |
| 1HGI.PDB | O, B_ASN_129   | N, B_TYR_141   | H, B_TYR_141    | 2.82 | 1.85 | 4.69  |
| 1HGI.PDB | OE2, B_GLU_165 | N, B_LYS_143   | H, B_LYS_143    | 2.87 | 1.93 | 14.38 |
| 1HGI.PDB | OE1, B_GLU_30  | N, B_ASN_146   | H, B_ASN_146    | 2.95 | 2.07 | 23.02 |
| 1HGI.PDB | O, B_ASP_145   | N, B_ILE_149   | H, B_ILE_149    | 2.90 | 1.94 | 7.96  |
| 1HGI.PDB | O, B_ASN_146   | N, B_GLU_150   | H, B_GLU_150    | 2.83 | 1.92 | 17.44 |
| 1HGI.PDB | O, B_ALA_147   | N, B_SER_151   | H, B_SER_151    | 2.90 | 2.01 | 20.08 |
| 1HGI.PDB | O, B_CYS_148   | OG, B_SER_151  | HG, B_SER_151   | 2.68 | 1.84 | 23.42 |
| 1HGI.PDB | O, B_GLU_150   | N, B_ASN_154   | H, B_ASN_154    | 2.81 | 1.83 | 1.94  |
| 1HGI.PDB | OE2, B_GLU_150 | ND2, B_ASN_154 | HD21, B_ASN_154 | 2.84 | 2.01 | 27.47 |
| 1HGI.PDB | O, B_SER_151   | N, B_THR_156   | H, B_THR_156    | 2.77 | 1.94 | 25.73 |
| 1HGI.PDB | OD1, B_ASN_154 | OG1, B_THR_156 | HG1, B_THR_156  | 2.64 | 1.78 | 21.15 |

|          |                |                |                 |      |      |       |
|----------|----------------|----------------|-----------------|------|------|-------|
| 1HGI.PDB | O, B_HIS_159   | N, B_TYR_162   | H, B_TYR_162    | 2.88 | 2.01 | 22.48 |
| 1HGI.PDB | O, F_ARG_170   | NH1, B_ARG_163 | HH12, B_ARG_163 | 2.73 | 1.76 | 13.86 |
| 1HGI.PDB | O, B_TYR_162   | N, B_ALA_166   | H, B_ALA_166    | 2.86 | 1.88 | 1.82  |
| 1HGI.PDB | O, B_ARG_163   | N, B_LEU_167   | H, B_LEU_167    | 2.77 | 1.81 | 5.67  |
| 1HGI.PDB | O, B_ALA_166   | N, B_ARG_170   | H, B_ARG_170    | 2.78 | 1.90 | 21.33 |
| 1HGI.PDB | O, B_GLU_128   | NE, B_ARG_170  | HE, B_ARG_170   | 2.72 | 1.88 | 25.72 |
| 1HGI.PDB | OE2, B_GLU_131 | NH1, B_ARG_170 | HH11, B_ARG_170 | 2.77 | 1.77 | 6.54  |
| 1HGI.PDB | O, B_LEU_167   | N, B_PHE_171   | H, B_PHE_171    | 2.90 | 1.96 | 12.85 |
| 1HGI.PDB | O, D_ILE_140   | N, C_ALA_11    | H, C_ALA_11     | 2.86 | 1.93 | 15.33 |
| 1HGI.PDB | O, D_GLN_27    | N, C_THR_12    | H, C_THR_12     | 2.98 | 2.01 | 4.69  |
| 1HGI.PDB | O, D_PHE_138   | N, C_LEU_13    | H, C_LEU_13     | 2.99 | 2.03 | 9.93  |
| 1HGI.PDB | O, D_ARG_25    | N, C_CYS_14    | H, C_CYS_14     | 2.67 | 1.83 | 24.75 |
| 1HGI.PDB | O, D_GLY_136   | N, C_LEU_15    | H, C_LEU_15     | 2.95 | 1.98 | 7.51  |
| 1HGI.PDB | O, D_GLY_23    | N, C_GLY_16    | H, C_GLY_16     | 2.99 | 2.12 | 22.96 |
| 1HGI.PDB | O, C_HIS_18    | ND1, C_HIS_17  | HD1, C_HIS_17   | 2.96 | 2.07 | 20.32 |
| 1HGI.PDB | O, D_TRP_21    | N, C_HIS_18    | H, C_HIS_18     | 2.88 | 1.97 | 18.12 |
| 1HGI.PDB | OD1, C_ASN_322 | N, C_VAL_20    | H, C_VAL_20     | 2.78 | 1.82 | 9.40  |
| 1HGI.PDB | O, C_VAL_36    | N, C_THR_24    | H, C_THR_24     | 2.85 | 1.90 | 11.53 |
| 1HGI.PDB | O, C_ILE_34    | N, C_VAL_26    | H, C_VAL_26     | 2.78 | 1.84 | 11.07 |
| 1HGI.PDB | OE2, D_GLU_97  | NZ, C_LYS_27   | HZ1, C_LYS_27   | 2.88 | 1.83 | 6.58  |
| 1HGI.PDB | O, C_ASP_31    | N, C_THR_28    | H, C_THR_28     | 2.76 | 1.94 | 27.36 |
| 1HGI.PDB | O, C_VAL_26    | N, C_ILE_34    | H, C_ILE_34     | 2.92 | 2.01 | 18.98 |
| 1HGI.PDB | O, C_THR_24    | N, C_VAL_36    | H, C_VAL_36     | 2.78 | 1.82 | 7.09  |
| 1HGI.PDB | O, C_MET_320   | N, C_THR_37    | H, C_THR_37     | 2.89 | 1.92 | 7.75  |
| 1HGI.PDB | O, C_LEU_316   | N, C_THR_40    | H, C_THR_40     | 2.92 | 2.04 | 21.59 |
| 1HGI.PDB | O, C_LEU_314   | N, C_LEU_42    | H, C_LEU_42     | 2.81 | 1.95 | 23.61 |
| 1HGI.PDB | OE2, C_GLU_41  | N, C_VAL_43    | H, C_VAL_43     | 2.99 | 2.05 | 14.73 |
| 1HGI.PDB | O, C_PHE_294   | N, C_GLN_44    | H, C_GLN_44     | 2.82 | 1.86 | 6.96  |
| 1HGI.PDB | O, C_SER_46    | NE2, C_GLN_44  | HE22, C_GLN_44  | 2.83 | 2.00 | 26.47 |
| 1HGI.PDB | O, C_ASN_285   | OG, C_SER_47   | HG, C_SER_47    | 2.79 | 1.92 | 20.46 |
| 1HGI.PDB | OD2, C_ASP_275 | NZ, C_LYS_50   | HZ1, C_LYS_50   | 2.68 | 1.77 | 23.91 |
| 1HGI.PDB | O, C_PRO_273   | N, C_ILE_51    | H, C_ILE_51     | 2.79 | 1.84 | 11.72 |
| 1HGI.PDB | O, C_ASP_275   | N, C_ASN_53    | H, C_ASN_53     | 2.84 | 1.98 | 23.59 |
| 1HGI.PDB | O, C_GLU_280   | NE2, C_HIS_56  | HE2, C_HIS_56   | 3.00 | 2.06 | 15.07 |
| 1HGI.PDB | OD2, C_ASP_85  | N, C_ARG_57    | H, C_ARG_57     | 2.85 | 1.91 | 11.94 |
| 1HGI.PDB | O, C_THR_83    | NE, C_ARG_57   | HE, C_ARG_57    | 2.81 | 1.84 | 5.65  |
| 1HGI.PDB | O, C_LEU_86    | N, C_LEU_59    | H, C_LEU_59     | 2.86 | 1.90 | 10.05 |
| 1HGI.PDB | O, C_VAL_88    | N, C_GLY_61    | H, C_GLY_61     | 2.94 | 2.11 | 25.94 |
| 1HGI.PDB | OD1, C_ASP_60  | N, C_ILE_62    | H, C_ILE_62     | 2.85 | 1.91 | 12.59 |
| 1HGI.PDB | O, C_GLY_61    | N, C_CYS_64    | H, C_CYS_64     | 2.89 | 1.99 | 19.13 |
| 1HGI.PDB | O, C_LEU_66    | N, C_LEU_70    | H, C_LEU_70     | 2.83 | 1.94 | 20.67 |
| 1HGI.PDB | O, C_ILE_67    | N, C_LEU_71    | H, C_LEU_71     | 2.84 | 1.87 | 6.00  |
| 1HGI.PDB | O, C_ASP_68    | N, C_GLY_72    | H, C_GLY_72     | 2.79 | 1.85 | 12.61 |
| 1HGI.PDB | OD1, C_ASP_73  | ND1, C_HIS_75  | HD1, C_HIS_75   | 2.88 | 1.94 | 15.46 |
| 1HGI.PDB | O, C_ASP_63    | NE2, C_HIS_75  | HE2, C_HIS_75   | 2.82 | 1.88 | 14.02 |
| 1HGI.PDB | O, C_ASP_73    | N, C_CYS_76    | H, C_CYS_76     | 2.75 | 1.84 | 16.01 |
| 1HGI.PDB | O, C_PRO_74    | N, C_ASP_77    | H, C_ASP_77     | 2.91 | 1.96 | 10.58 |
| 1HGI.PDB | O, C_CYS_76    | N, C_PHE_79    | H, C_PHE_79     | 2.94 | 1.96 | 2.92  |
| 1HGI.PDB | OE1, C_GLU_82  | N, C_THR_83    | H, C_THR_83     | 2.93 | 2.02 | 17.21 |
| 1HGI.PDB | O, C_ARG_57    | N, C_ASP_85    | H, C_ASP_85     | 2.81 | 1.91 | 18.21 |
| 1HGI.PDB | O, C_MET_268   | N, C_GLU_89    | H, C_GLU_89     | 2.80 | 1.84 | 7.26  |
| 1HGI.PDB | OD1, C_ASP_60  | NE, C_ARG_90   | HE, C_ARG_90    | 2.83 | 1.88 | 11.13 |
| 1HGI.PDB | O, C_SER_270   | NH1, C_ARG_90  | HH11, C_ARG_90  | 2.67 | 1.81 | 25.47 |
| 1HGI.PDB | O, C_ALA_272   | NH1, C_ARG_90  | HH12, C_ARG_90  | 2.60 | 1.70 | 21.36 |
| 1HGI.PDB | OD2, C_ASP_60  | NH2, C_ARG_90  | HH21, C_ARG_90  | 2.77 | 1.79 | 11.02 |
| 1HGI.PDB | OD1, C_ASP_271 | N, C_SER_91    | H, C_SER_91     | 2.90 | 1.94 | 8.90  |
| 1HGI.PDB | OD1, C_ASP_271 | OG, C_SER_91   | HG, C_SER_91    | 2.95 | 2.13 | 27.22 |
| 1HGI.PDB | OD2, C_ASP_271 | OG, C_SER_91   | HG, C_SER_91    | 2.83 | 1.94 | 19.64 |

|          |                |                |                 |      |      |       |
|----------|----------------|----------------|-----------------|------|------|-------|
| 1HGI.PDB | OD2, C_ASP_68  | OG, C_SER_95   | HG, C_SER_95    | 2.89 | 1.96 | 14.85 |
| 1HGI.PDB | OD2, C_ASP_73  | N, C_ASN_96    | H, C_ASN_96     | 2.88 | 1.93 | 14.25 |
| 1HGI.PDB | OD1, C_ASP_68  | OH, C_TYR_100  | HH, C_TYR_100   | 2.94 | 1.99 | 10.92 |
| 1HGI.PDB | OD2, C_ASP_104 | OG, C_SER_107  | HG, C_SER_107   | 2.90 | 1.96 | 13.90 |
| 1HGI.PDB | O, C_TYR_105   | N, C_ARG_109   | H, C_ARG_109    | 2.86 | 1.89 | 3.57  |
| 1HGI.PDB | OE2, D_GLU_67  | NH2, C_ARG_109 | HH21, C_ARG_109 | 2.82 | 1.84 | 15.02 |
| 1HGI.PDB | OD2, B_ASP_79  | OG, C_SER_110  | HG, C_SER_110   | 2.85 | 1.90 | 11.29 |
| 1HGI.PDB | O, C_SER_107   | N, C_LEU_111   | H, C_LEU_111    | 2.85 | 1.89 | 7.56  |
| 1HGI.PDB | O, C_LEU_108   | N, C_VAL_112   | H, C_VAL_112    | 3.00 | 2.02 | 3.49  |
| 1HGI.PDB | O, C_ARG_109   | N, C_ALA_113   | H, C_ALA_113    | 2.96 | 2.06 | 18.71 |
| 1HGI.PDB | O, C_SER_110   | N, C_SER_114   | H, C_SER_114    | 2.95 | 2.00 | 13.25 |
| 1HGI.PDB | OE2, C_GLU_119 | OG1, C_THR_117 | HG1, C_THR_117  | 2.95 | 2.03 | 14.67 |
| 1HGI.PDB | O, C_GLU_82    | N, C_LEU_118   | H, C_LEU_118    | 2.88 | 1.95 | 16.18 |
| 1HGI.PDB | O, C_TYR_257   | N, C_ILE_121   | H, C_ILE_121    | 2.94 | 1.97 | 6.04  |
| 1HGI.PDB | O, C_ARG_255   | N, C_GLU_123   | H, C_GLU_123    | 2.89 | 1.94 | 11.68 |
| 1HGI.PDB | O, C_THR_155   | N, C_THR_131   | H, C_THR_131    | 2.76 | 1.87 | 19.24 |
| 1HGI.PDB | OD1, C_ASN_152 | N, C_ASN_133   | H, C_ASN_133    | 2.83 | 1.91 | 16.95 |
| 1HGI.PDB | O, C_GLY_146   | N, C_SER_136   | H, C_SER_136    | 2.76 | 1.88 | 20.67 |
| 1HGI.PDB | OG, C_SER_136  | N, C_ALA_138   | H, C_ALA_138    | 2.86 | 1.95 | 18.03 |
| 1HGI.PDB | O, C_GLY_144   | NZ, C_LYS_140  | HZ1, C_LYS_140  | 2.86 | 1.89 | 16.83 |
| 1HGI.PDB | OD1, C_ASN_137 | NZ, C_LYS_140  | HZ2, C_LYS_140  | 2.83 | 1.83 | 12.62 |
| 1HGI.PDB | OD2, C_ASP_77  | NE, C_ARG_141  | HE, C_ARG_141   | 2.83 | 2.02 | 29.40 |
| 1HGI.PDB | O, C_PHE_147   | NH1, C_ARG_141 | HH12, C_ARG_141 | 2.56 | 1.65 | 20.19 |
| 1HGI.PDB | OD1, C_ASP_77  | NH2, C_ARG_141 | HH21, C_ARG_141 | 2.93 | 2.01 | 20.50 |
| 1HGI.PDB | OD2, C_ASP_77  | NH2, C_ARG_141 | HH21, C_ARG_141 | 2.70 | 1.83 | 25.10 |
| 1HGI.PDB | O, C_GLY_72    | NH2, C_ARG_141 | HH22, C_ARG_141 | 2.97 | 1.99 | 9.60  |
| 1HGI.PDB | O, C_SER_136   | N, C_GLY_146   | H, C_GLY_146    | 2.99 | 2.05 | 14.57 |
| 1HGI.PDB | O, C_GLY_72    | N, C_SER_149   | H, C_SER_149    | 2.90 | 1.97 | 15.40 |
| 1HGI.PDB | O, C_ALA_253   | N, C_ASN_152   | H, C_ASN_152    | 2.73 | 1.88 | 24.43 |
| 1HGI.PDB | OH, C_TYR_195  | NE1, C_TRP_153 | HE1, C_TRP_153  | 2.82 | 1.96 | 22.98 |
| 1HGI.PDB | O, C_LEU_194   | N, C_LYS_156   | H, C_LYS_156    | 2.88 | 1.99 | 20.12 |
| 1HGI.PDB | O, C_THR_160   | N, C_SER_157   | H, C_SER_157    | 2.87 | 1.98 | 19.55 |
| 1HGI.PDB | O, C_SER_247   | N, C_LEU_164   | H, C_LEU_164    | 2.73 | 1.90 | 26.15 |
| 1HGI.PDB | O, C_ILE_245   | N, C_VAL_166   | H, C_VAL_166    | 2.88 | 1.93 | 12.15 |
| 1HGI.PDB | O, C_LEU_243   | OG1, C_THR_167 | HG1, C_THR_167  | 2.85 | 1.95 | 18.23 |
| 1HGI.PDB | O, C_LEU_243   | N, C_MET_168   | H, C_MET_168    | 2.97 | 2.05 | 16.15 |
| 1HGI.PDB | O, C_ASP_241   | N, C_ASN_170   | H, C_ASN_170    | 2.92 | 1.94 | 4.90  |
| 1HGI.PDB | O, C_PHE_174   | ND2, C_ASN_170 | HD21, C_ASN_170 | 2.83 | 1.88 | 12.32 |
| 1HGI.PDB | O, C_VAL_237   | ND2, C_ASN_170 | HD22, C_ASN_170 | 2.96 | 2.10 | 24.31 |
| 1HGI.PDB | O, C_VAL_237   | N, C_LYS_176   | H, C_LYS_176    | 2.94 | 2.00 | 13.35 |
| 1HGI.PDB | OE2, C_GLU_123 | NZ, C_LYS_176  | HZ1, C_LYS_176  | 2.68 | 1.80 | 26.11 |
| 1HGI.PDB | O, C_PHE_258   | N, C_LEU_177   | H, C_LEU_177    | 2.96 | 1.99 | 8.81  |
| 1HGI.PDB | O, C_THR_235   | N, C_TYR_178   | H, C_TYR_178    | 2.82 | 1.85 | 3.86  |
| 1HGI.PDB | OE1, C_GLU_123 | OH, C_TYR_178  | HH, C_TYR_178   | 2.75 | 1.80 | 7.25  |
| 1HGI.PDB | OG1, C_THR_235 | NE1, C_TRP_180 | HE1, C_TRP_180  | 2.84 | 1.86 | 3.22  |
| 1HGI.PDB | O, C_ILE_252   | N, C_GLY_181   | H, C_GLY_181    | 2.98 | 2.16 | 27.47 |
| 1HGI.PDB | O, C_ASN_250   | N, C_HIS_183   | H, C_HIS_183    | 2.91 | 2.02 | 20.05 |
| 1HGI.PDB | O, C_ARG_229   | N, C_HIS_184   | H, C_HIS_184    | 2.89 | 1.92 | 8.40  |
| 1HGI.PDB | OG, C_SER_231  | NE2, C_HIS_184 | HE2, C_HIS_184  | 2.81 | 1.93 | 22.34 |
| 1HGI.PDB | OE1, C_GLU_190 | N, C_SER_186   | H, C_SER_186    | 3.00 | 2.10 | 20.23 |
| 1HGI.PDB | OD1, C_ASN_250 | NE2, C_GLN_191 | HE21, C_GLN_191 | 2.86 | 1.91 | 10.94 |
| 1HGI.PDB | O, C_GLN_197   | NE2, C_GLN_191 | HE22, C_GLN_191 | 2.97 | 2.02 | 11.67 |
| 1HGI.PDB | O, C_ASN_188   | N, C_THR_192   | H, C_THR_192    | 2.98 | 2.00 | 5.60  |
| 1HGI.PDB | O, C_GLN_189   | OG1, C_THR_192 | HG1, C_THR_192  | 2.81 | 1.90 | 15.34 |
| 1HGI.PDB | O, C_GLN_189   | N, C_SER_193   | H, C_SER_193    | 2.84 | 1.90 | 13.29 |
| 1HGI.PDB | O, C_GLN_191   | N, C_TYR_195   | H, C_TYR_195    | 2.76 | 1.80 | 7.13  |
| 1HGI.PDB | O, C_TYR_161   | NE2, C_GLN_197 | HE21, C_GLN_197 | 2.96 | 2.01 | 11.19 |
| 1HGI.PDB | O, C_ASN_248   | NE2, C_GLN_197 | HE22, C_GLN_197 | 2.92 | 2.02 | 18.87 |

|          |                |                |                 |      |      |       |
|----------|----------------|----------------|-----------------|------|------|-------|
| 1HGI.PDB | OD1, C_ASN_246 | NH2, C_ARG_201 | HH21, C_ARG_201 | 2.55 | 1.72 | 27.61 |
| 1HGI.PDB | O, C_ILE_213   | N, C_VAL_202   | H, C_VAL_202    | 2.94 | 1.98 | 9.08  |
| 1HGI.PDB | O, C_ASN_246   | N, C_THR_203   | H, C_THR_203    | 2.86 | 1.89 | 7.88  |
| 1HGI.PDB | OG1, C_THR_212 | OG1, C_THR_203 | HG1, C_THR_203  | 2.94 | 2.00 | 11.06 |
| 1HGI.PDB | O, C_GLN_211   | N, C_VAL_204   | H, C_VAL_204    | 2.84 | 1.92 | 15.35 |
| 1HGI.PDB | O, C_VAL_244   | N, C_SER_205   | H, C_SER_205    | 2.96 | 2.05 | 17.13 |
| 1HGI.PDB | O, C_SER_209   | N, C_THR_206   | H, C_THR_206    | 2.90 | 1.93 | 7.31  |
| 1HGI.PDB | OD1, C_ASP_241 | N, C_ARG_207   | H, C_ARG_207    | 2.90 | 1.95 | 10.96 |
| 1HGI.PDB | OD2, C_ASP_241 | NE, C_ARG_208  | HE, C_ARG_208   | 2.92 | 2.01 | 19.66 |
| 1HGI.PDB | O, C_VAL_204   | N, C_GLN_211   | H, C_GLN_211    | 2.87 | 1.93 | 14.30 |
| 1HGI.PDB | O, C_VAL_202   | N, C_ILE_213   | H, C_ILE_213    | 2.82 | 1.89 | 14.72 |
| 1HGI.PDB | O, C_ASN_216   | NH1, C_ARG_220 | HH12, C_ARG_220 | 2.89 | 2.08 | 29.98 |
| 1HGI.PDB | OE1, E_GLN_210 | NH2, C_ARG_220 | HH21, C_ARG_220 | 2.62 | 1.75 | 23.70 |
| 1HGI.PDB | O, C_ASN_216   | NH2, C_ARG_220 | HH22, C_ARG_220 | 2.69 | 1.79 | 20.70 |
| 1HGI.PDB | O, C_LEU_226   | N, C_VAL_223   | H, C_VAL_223    | 2.85 | 1.88 | 6.86  |
| 1HGI.PDB | O, C_CYS_97    | NE, C_ARG_224  | HE, C_ARG_224   | 2.75 | 1.92 | 26.67 |
| 1HGI.PDB | O, C_CYS_97    | NH2, C_ARG_224 | HH21, C_ARG_224 | 2.83 | 1.98 | 26.45 |
| 1HGI.PDB | O, C_VAL_223   | N, C_LEU_226   | H, C_LEU_226    | 2.94 | 2.02 | 16.27 |
| 1HGI.PDB | O, C_SER_228   | NH1, C_ARG_229 | HH11, C_ARG_229 | 2.65 | 1.73 | 19.05 |
| 1HGI.PDB | O, C_PRO_221   | NH2, C_ARG_229 | HH22, C_ARG_229 | 2.65 | 1.69 | 14.06 |
| 1HGI.PDB | OD1, C_ASP_101 | OG, C_SER_231  | HG, C_SER_231   | 2.97 | 2.02 | 12.14 |
| 1HGI.PDB | O, C_ASP_101   | N, C_ILE_232   | H, C_ILE_232    | 2.92 | 1.98 | 14.17 |
| 1HGI.PDB | O, C_TRP_180   | N, C_TYR_233   | H, C_TYR_233    | 2.88 | 1.92 | 9.12  |
| 1HGI.PDB | O, C_TYR_178   | N, C_THR_235   | H, C_THR_235    | 2.81 | 1.91 | 19.71 |
| 1HGI.PDB | O, C_LYS_176   | N, C_VAL_237   | H, C_VAL_237    | 2.80 | 1.87 | 14.88 |
| 1HGI.PDB | OE1, B_GLU_72  | NZ, C_LYS_238  | HZ1, C_LYS_238  | 2.67 | 1.77 | 23.68 |
| 1HGI.PDB | O, B_SER_71    | NZ, C_LYS_238  | HZ3, C_LYS_238  | 2.57 | 1.73 | 28.43 |
| 1HGI.PDB | O, C_ASN_170   | N, C_GLY_240   | H, C_GLY_240    | 2.88 | 2.03 | 25.25 |
| 1HGI.PDB | OD1, C_ASP_241 | N, C_VAL_242   | H, C_VAL_242    | 2.77 | 1.97 | 28.83 |
| 1HGI.PDB | O, C_MET_168   | N, C_LEU_243   | H, C_LEU_243    | 2.92 | 1.95 | 6.19  |
| 1HGI.PDB | O, C_SER_205   | N, C_VAL_244   | H, C_VAL_244    | 2.97 | 2.02 | 12.13 |
| 1HGI.PDB | O, C_VAL_166   | N, C_ILE_245   | H, C_ILE_245    | 2.97 | 2.04 | 14.87 |
| 1HGI.PDB | O, C_THR_203   | N, C_ASN_246   | H, C_ASN_246    | 2.85 | 1.92 | 14.46 |
| 1HGI.PDB | O, C_LEU_164   | N, C_SER_247   | H, C_SER_247    | 2.86 | 1.95 | 18.44 |
| 1HGI.PDB | O, C_ARG_201   | OG, C_SER_247  | HG, C_SER_247   | 2.81 | 2.01 | 28.50 |
| 1HGI.PDB | OE1, C_GLN_191 | ND2, C_ASN_250 | HD21, C_ASN_250 | 2.87 | 1.92 | 11.00 |
| 1HGI.PDB | O, C_HIS_183   | ND2, C_ASN_250 | HD22, C_ASN_250 | 2.85 | 1.88 | 5.75  |
| 1HGI.PDB | O, C_ASN_152   | N, C_ALA_253   | H, C_ALA_253    | 2.82 | 1.96 | 22.89 |
| 1HGI.PDB | O, C_ILE_121   | N, C_TYR_257   | H, C_TYR_257    | 2.97 | 2.10 | 23.39 |
| 1HGI.PDB | O, C_LEU_177   | N, C_PHE_258   | H, C_PHE_258    | 2.92 | 1.96 | 9.71  |
| 1HGI.PDB | OE2, C_GLU_119 | NH1, C_ARG_261 | HH12, C_ARG_261 | 2.66 | 1.84 | 29.01 |
| 1HGI.PDB | OE1, C_GLU_119 | NH2, C_ARG_261 | HH22, C_ARG_261 | 2.84 | 1.99 | 27.78 |
| 1HGI.PDB | OD2, C_ASP_85  | NZ, C_LYS_264  | HZ3, C_LYS_264  | 2.83 | 1.86 | 17.28 |
| 1HGI.PDB | O, C_PHE_87    | N, C_MET_268   | H, C_MET_268    | 2.86 | 1.97 | 20.48 |
| 1HGI.PDB | O, C_PRO_284   | OG, C_SER_270  | HG, C_SER_270   | 2.81 | 1.86 | 9.17  |
| 1HGI.PDB | OG, C_SER_270  | N, C_ALA_272   | H, C_ALA_272    | 2.97 | 2.03 | 11.96 |
| 1HGI.PDB | O, C_ILE_51    | N, C_ASP_275   | H, C_ASP_275    | 2.97 | 2.06 | 19.21 |
| 1HGI.PDB | OD1, C_ASP_275 | N, C_THR_276   | H, C_THR_276    | 2.80 | 1.96 | 24.61 |
| 1HGI.PDB | O, C_ASN_54    | N, C_SER_279   | H, C_SER_279    | 2.76 | 1.83 | 13.77 |
| 1HGI.PDB | O, C_TYR_302   | N, C_ILE_282   | H, C_ILE_282    | 2.89 | 1.93 | 9.00  |
| 1HGI.PDB | O, C_THR_283   | N, C_GLY_286   | H, C_GLY_286    | 2.81 | 1.89 | 16.23 |
| 1HGI.PDB | O, C_LYS_50    | N, C_SER_287   | H, C_SER_287    | 2.84 | 1.87 | 3.21  |
| 1HGI.PDB | O, C_ALA_304   | ND2, C_ASN_290 | HD22, C_ASN_290 | 2.76 | 1.88 | 20.58 |
| 1HGI.PDB | OE1, C_GLN_44  | NZ, C_LYS_292  | HZ1, C_LYS_292  | 2.75 | 1.75 | 12.02 |
| 1HGI.PDB | OD2, C_ASP_291 | NZ, C_LYS_292  | HZ3, C_LYS_292  | 2.82 | 1.90 | 23.36 |
| 1HGI.PDB | O, C_LYS_307   | N, C_GLN_295   | H, C_GLN_295    | 2.80 | 1.92 | 20.79 |
| 1HGI.PDB | O, C_ASN_298   | NE2, C_GLN_295 | HE21, C_GLN_295 | 2.79 | 1.83 | 9.85  |
| 1HGI.PDB | O, C_GLN_44    | N, C_ASN_296   | H, C_ASN_296    | 2.86 | 1.93 | 14.90 |

|          |                |                |                 |      |      |       |
|----------|----------------|----------------|-----------------|------|------|-------|
| 1HGI.PDB | OE1, C_GLN_295 | N, C_VAL_297   | H, C_VAL_297    | 2.80 | 1.98 | 27.59 |
| 1HGI.PDB | OD1, C_ASN_285 | ND2, C_ASN_298 | HD22, C_ASN_298 | 3.00 | 2.03 | 7.73  |
| 1HGI.PDB | OD1, C_ASN_298 | N, C_ILE_300   | H, C_ILE_300    | 2.91 | 2.01 | 18.61 |
| 1HGI.PDB | O, C_ILE_282   | N, C_TYR_302   | H, C_TYR_302    | 2.94 | 2.06 | 21.76 |
| 1HGI.PDB | O, C_LYS_264   | OH, C_TYR_302  | HH, C_TYR_302   | 2.75 | 1.95 | 27.81 |
| 1HGI.PDB | O, D_LYS_62    | N, C_GLY_303   | H, C_GLY_303    | 2.97 | 2.00 | 7.92  |
| 1HGI.PDB | O, C_PRO_293   | N, C_LYS_307   | H, C_LYS_307    | 2.99 | 2.03 | 8.70  |
| 1HGI.PDB | O, C_GLN_295   | N, C_VAL_309   | H, C_VAL_309    | 2.93 | 2.08 | 24.45 |
| 1HGI.PDB | OD1, D_ASP_86  | NZ, C_LYS_310  | HZ3, C_LYS_310  | 2.77 | 1.93 | 29.51 |
| 1HGI.PDB | OE2, C_GLU_41  | N, C_LEU_314   | H, C_LEU_314    | 2.83 | 1.87 | 8.52  |
| 1HGI.PDB | OE1, C_GLU_41  | NZ, C_LYS_315  | HZ3, C_LYS_315  | 2.75 | 1.80 | 20.43 |
| 1HGI.PDB | O, C_THR_40    | N, C_LEU_316   | H, C_LEU_316    | 2.83 | 1.90 | 15.29 |
| 1HGI.PDB | OD1, D_ASN_104 | N, C_ALA_317   | H, C_ALA_317    | 2.74 | 1.83 | 16.29 |
| 1HGI.PDB | O, C_ASN_38    | N, C_THR_318   | H, C_THR_318    | 2.87 | 1.98 | 20.30 |
| 1HGI.PDB | O, C_VAL_20    | ND2, C_ASN_322 | HD21, C_ASN_322 | 2.87 | 1.94 | 14.86 |
| 1HGI.PDB | OE2, C_GLU_35  | ND2, C_ASN_322 | HD22, C_ASN_322 | 2.90 | 1.95 | 11.70 |
| 1HGI.PDB | OE1, D_GLU_15  | NZ, C_LYS_326  | HZ1, C_LYS_326  | 2.83 | 1.84 | 16.25 |
| 1HGI.PDB | OD2, D_ASP_112 | N, D_GLY_1     | H1, D_GLY_1     | 2.77 | 1.76 | 11.64 |
| 1HGI.PDB | OD1, D_ASP_109 | N, D_LEU_2     | H, D_LEU_2      | 2.92 | 1.97 | 13.20 |
| 1HGI.PDB | OD2, D_ASP_112 | N, D_PHE_3     | H, D_PHE_3      | 2.88 | 2.06 | 26.84 |
| 1HGI.PDB | OD2, D_ASP_112 | N, D_GLY_4     | H, D_GLY_4      | 2.95 | 2.06 | 19.72 |
| 1HGI.PDB | OD1, D_ASP_112 | N, D_ALA_5     | H, D_ALA_5      | 2.82 | 1.91 | 16.74 |
| 1HGI.PDB | O, D_GLY_4     | N, D_PHE_9     | H, D_PHE_9      | 2.83 | 1.89 | 12.42 |
| 1HGI.PDB | O, D_GLY_13    | ND2, D_ASN_12  | HD22, D_ASN_12  | 2.80 | 1.89 | 16.05 |
| 1HGI.PDB | O, C_VAL_323   | N, D_GLY_13    | H, D_GLY_13     | 2.65 | 1.77 | 19.23 |
| 1HGI.PDB | O, C_HIS_17    | N, D_TRP_14    | H, D_TRP_14     | 2.83 | 1.92 | 16.86 |
| 1HGI.PDB | OG1, D_THR_41  | N, D_TRP_21    | H, D_TRP_21     | 2.98 | 2.14 | 26.03 |
| 1HGI.PDB | O, C_GLY_16    | N, D_GLY_23    | H, D_GLY_23     | 2.94 | 2.02 | 16.89 |
| 1HGI.PDB | O, D_ALA_35    | N, D_PHE_24    | H, D_PHE_24     | 2.82 | 1.86 | 6.63  |
| 1HGI.PDB | O, C_CYS_14    | N, D_ARG_25    | H, D_ARG_25     | 2.88 | 1.94 | 13.44 |
| 1HGI.PDB | OE1, D_GLN_34  | NE, D_ARG_25   | HE, D_ARG_25    | 2.62 | 1.78 | 23.70 |
| 1HGI.PDB | O, D_GLY_33    | N, D_HIS_26    | H, D_HIS_26     | 2.88 | 1.93 | 11.28 |
| 1HGI.PDB | O, C_THR_12    | N, D_GLN_27    | H, D_GLN_27     | 2.95 | 2.00 | 13.47 |
| 1HGI.PDB | O, D_GLY_31    | N, D_ASN_28    | H, D_ASN_28     | 2.97 | 2.06 | 18.59 |
| 1HGI.PDB | OD1, D_ASN_146 | ND2, D_ASN_28  | HD21, D_ASN_28  | 2.93 | 1.98 | 12.39 |
| 1HGI.PDB | OD1, D_ASN_28  | N, D_GLU_30    | H, D_GLU_30     | 2.83 | 1.95 | 21.69 |
| 1HGI.PDB | O, D_HIS_26    | N, D_GLY_33    | H, D_GLY_33     | 2.99 | 2.10 | 20.01 |
| 1HGI.PDB | O, D_PHE_24    | N, D_ALA_35    | H, D_ALA_35     | 2.80 | 1.98 | 27.73 |
| 1HGI.PDB | O, D_TYR_22    | N, D_ASP_37    | H, D_ASP_37     | 2.72 | 1.78 | 11.42 |
| 1HGI.PDB | OD2, D_ASP_37  | N, D_SER_40    | H, D_SER_40     | 2.89 | 1.92 | 6.59  |
| 1HGI.PDB | OD2, D_ASP_37  | OG, D_SER_40   | HG, D_SER_40    | 2.78 | 1.93 | 23.19 |
| 1HGI.PDB | O, D_ASP_37    | OG1, D_THR_41  | HG1, D_THR_41   | 2.73 | 1.82 | 16.18 |
| 1HGI.PDB | OD1, D_ASP_46  | NE2, D_GLN_42  | HE22, D_GLN_42  | 2.88 | 2.01 | 23.38 |
| 1HGI.PDB | O, D_SER_40    | N, D_ALA_44    | H, D_ALA_44     | 2.93 | 1.95 | 3.19  |
| 1HGI.PDB | O, D_THR_41    | N, D_ILE_45    | H, D_ILE_45     | 2.97 | 2.03 | 13.52 |
| 1HGI.PDB | O, D_GLN_42    | N, D_ASP_46    | H, D_ASP_46     | 2.71 | 1.76 | 6.20  |
| 1HGI.PDB | O, D_ALA_43    | NE2, D_GLN_47  | HE22, D_GLN_47  | 2.88 | 1.96 | 16.19 |
| 1HGI.PDB | O, D_ILE_45    | N, D_ASN_49    | H, D_ASN_49     | 2.89 | 1.98 | 17.77 |
| 1HGI.PDB | O, D_ASP_46    | N, D_GLY_50    | H, D_GLY_50     | 2.98 | 2.04 | 15.66 |
| 1HGI.PDB | O, D_GLN_47    | N, D_LYS_51    | H, D_LYS_51     | 2.98 | 2.01 | 5.63  |
| 1HGI.PDB | OE1, D_GLU_103 | NZ, D_LYS_51   | HZ2, D_LYS_51   | 2.81 | 1.77 | 5.89  |
| 1HGI.PDB | ND1, D_HIS_106 | NZ, D_LYS_51   | HZ3, D_LYS_51   | 2.78 | 1.83 | 18.78 |
| 1HGI.PDB | O, D_ILE_48    | N, D_LEU_52    | H, D_LEU_52     | 2.93 | 2.01 | 16.44 |
| 1HGI.PDB | O, D_ASN_49    | N, D_ASN_53    | H, D_ASN_53     | 2.77 | 1.91 | 22.51 |
| 1HGI.PDB | O, A_THR_28    | NE, D_ARG_54   | HE, D_ARG_54    | 2.83 | 1.87 | 10.21 |
| 1HGI.PDB | OE1, D_GLU_57  | NH1, D_ARG_54  | HH11, D_ARG_54  | 2.85 | 1.86 | 11.80 |
| 1HGI.PDB | OE2, B_GLU_97  | NH2, D_ARG_54  | HH22, D_ARG_54  | 2.81 | 1.85 | 15.40 |
| 1HGI.PDB | OE2, D_GLU_61  | NZ, D_LYS_58   | HZ2, D_LYS_58   | 3.00 | 2.01 | 17.14 |

|          |                |                |                 |      |      |       |
|----------|----------------|----------------|-----------------|------|------|-------|
| 1HGI.PDB | OG, C_SER_110  | NE2, D_HIS_64  | HE2, D_HIS_64   | 2.83 | 1.85 | 2.78  |
| 1HGI.PDB | O, D_PHE_63    | NE2, D_GLN_65  | HE22, D_GLN_65  | 2.98 | 2.00 | 3.57  |
| 1HGI.PDB | O, C_LYS_299   | NZ, D_LYS_68   | HZ1, D_LYS_68   | 2.79 | 1.78 | 10.55 |
| 1HGI.PDB | OE2, D_GLU_85  | NZ, D_LYS_68   | HZ2, D_LYS_68   | 2.81 | 1.76 | 2.16  |
| 1HGI.PDB | OG, E_SER_107  | N, D_ARG_76    | H, D_ARG_76     | 2.89 | 1.92 | 9.17  |
| 1HGI.PDB | OE2, F_GLU_81  | NE, D_ARG_76   | HE, D_ARG_76    | 2.80 | 1.82 | 5.40  |
| 1HGI.PDB | OE2, F_GLU_74  | NH1, D_ARG_76  | HH12, D_ARG_76  | 2.78 | 1.76 | 4.18  |
| 1HGI.PDB | OE1, F_GLU_81  | NH2, D_ARG_76  | HH21, D_ARG_76  | 2.61 | 1.67 | 15.38 |
| 1HGI.PDB | OE1, F_GLU_74  | NH2, D_ARG_76  | HH22, D_ARG_76  | 2.76 | 1.77 | 8.75  |
| 1HGI.PDB | O, D_GLU_72    | NE2, D_GLN_78  | HE21, D_GLN_78  | 2.97 | 2.00 | 4.85  |
| 1HGI.PDB | OE1, D_GLU_74  | NE2, D_GLN_78  | HE22, D_GLN_78  | 2.92 | 1.95 | 8.47  |
| 1HGI.PDB | O, D_ASP_79    | N, D_TYR_83    | H, D_TYR_83     | 2.89 | 2.00 | 19.78 |
| 1HGI.PDB | OE1, F_GLU_85  | OH, D_TYR_83   | HH, D_TYR_83    | 2.69 | 1.81 | 20.41 |
| 1HGI.PDB | O, D_LEU_80    | N, D_VAL_84    | H, D_VAL_84     | 2.72 | 1.83 | 17.89 |
| 1HGI.PDB | O, D_LYS_82    | N, D_ASP_86    | H, D_ASP_86     | 2.90 | 1.94 | 8.30  |
| 1HGI.PDB | O, D_TYR_83    | N, D_THR_87    | H, D_THR_87     | 2.92 | 1.96 | 7.87  |
| 1HGI.PDB | OH, B_TYR_83   | NZ, D_LYS_88   | HZ1, D_LYS_88   | 2.66 | 1.64 | 7.30  |
| 1HGI.PDB | O, D_GLU_85    | N, D_ILE_89    | H, D_ILE_89     | 2.88 | 1.92 | 10.07 |
| 1HGI.PDB | O, D_ASP_86    | N, D_ASP_90    | H, D_ASP_90     | 2.97 | 2.00 | 6.24  |
| 1HGI.PDB | O, D_LYS_88    | N, D_TRP_92    | H, D_TRP_92     | 2.97 | 2.00 | 6.54  |
| 1HGI.PDB | O, D_ILE_89    | N, D_SER_93    | H, D_SER_93     | 2.87 | 1.94 | 14.13 |
| 1HGI.PDB | O, D_ILE_89    | OG, D_SER_93   | HG, D_SER_93    | 2.80 | 1.92 | 19.66 |
| 1HGI.PDB | O, D_ASP_90    | N, D_TYR_94    | H, D_TYR_94     | 2.93 | 2.00 | 16.49 |
| 1HGI.PDB | O, D_TRP_92    | N, D_ALA_96    | H, D_ALA_96     | 2.93 | 1.97 | 9.70  |
| 1HGI.PDB | O, D_TYR_94    | N, D_LEU_98    | H, D_LEU_98     | 2.90 | 1.94 | 9.34  |
| 1HGI.PDB | O, D_ASN_95    | N, D_LEU_99    | H, D_LEU_99     | 2.84 | 1.96 | 21.05 |
| 1HGI.PDB | O, D_LEU_98    | N, D_LEU_102   | H, D_LEU_102    | 2.99 | 2.02 | 4.46  |
| 1HGI.PDB | O, D_LEU_99    | N, D_GLU_103   | H, D_GLU_103    | 2.97 | 2.00 | 7.39  |
| 1HGI.PDB | O, D_VAL_100   | N, D_ASN_104   | H, D_ASN_104    | 2.87 | 1.91 | 10.16 |
| 1HGI.PDB | O, C_LYS_27    | ND2, D_ASN_104 | HD22, D_ASN_104 | 2.83 | 1.88 | 11.60 |
| 1HGI.PDB | O, D_LEU_102   | N, D_HIS_106   | H, D_HIS_106    | 2.93 | 2.00 | 15.62 |
| 1HGI.PDB | O, D_GLU_103   | N, D_THR_107   | H, D_THR_107    | 2.78 | 1.91 | 22.01 |
| 1HGI.PDB | O, D_ASN_104   | N, D_ILE_108   | H, D_ILE_108    | 2.95 | 2.00 | 10.44 |
| 1HGI.PDB | O, D_HIS_106   | N, D_LEU_110   | H, D_LEU_110    | 2.81 | 1.86 | 10.24 |
| 1HGI.PDB | O, D_THR_107   | OG1, D_THR_111 | HG1, D_THR_111  | 2.94 | 1.97 | 4.08  |
| 1HGI.PDB | O, D_ASP_109   | N, D_SER_113   | H, D_SER_113    | 2.82 | 1.87 | 9.43  |
| 1HGI.PDB | O, B_LEU_2     | OG, D_SER_113  | HG, D_SER_113   | 2.77 | 1.91 | 22.96 |
| 1HGI.PDB | O, D_LEU_110   | N, D_GLU_114   | H, D_GLU_114    | 2.96 | 2.00 | 9.06  |
| 1HGI.PDB | O, D_ASP_112   | N, D_ASN_116   | H, D_ASN_116    | 2.95 | 2.00 | 13.00 |
| 1HGI.PDB | O, D_SER_113   | N, D_LYS_117   | H, D_LYS_117    | 2.70 | 1.83 | 21.74 |
| 1HGI.PDB | O, D_ASN_116   | N, D_GLU_120   | H, D_GLU_120    | 2.92 | 1.95 | 4.03  |
| 1HGI.PDB | O, D_LYS_117   | N, D_LYS_121   | H, D_LYS_121    | 2.93 | 2.00 | 15.48 |
| 1HGI.PDB | OE2, D_GLU_120 | NH1, D_ARG_123 | HH11, D_ARG_123 | 2.83 | 1.97 | 25.69 |
| 1HGI.PDB | O, D_GLU_120   | N, D_ARG_124   | H, D_ARG_124    | 2.93 | 1.95 | 3.12  |
| 1HGI.PDB | OE1, B_GLU_132 | NE, D_ARG_124  | HE, D_ARG_124   | 2.84 | 1.98 | 23.95 |
| 1HGI.PDB | OE2, B_GLU_132 | NE, D_ARG_124  | HE, D_ARG_124   | 2.88 | 2.03 | 24.96 |
| 1HGI.PDB | O, D_LEU_126   | N, D_ASN_129   | H, D_ASN_129    | 3.00 | 2.06 | 14.34 |
| 1HGI.PDB | O, D_HIS_159   | ND2, D_ASN_129 | HD21, D_ASN_129 | 2.99 | 2.04 | 12.91 |
| 1HGI.PDB | OH, D_TYR_157  | ND2, D_ASN_129 | HD22, D_ASN_129 | 2.81 | 1.84 | 5.40  |
| 1HGI.PDB | O, D_LYS_139   | N, D_GLU_131   | H, D_GLU_131    | 2.93 | 2.00 | 14.77 |
| 1HGI.PDB | O, D_CYS_137   | N, D_MET_133   | H, D_MET_133    | 2.81 | 1.87 | 12.15 |
| 1HGI.PDB | OD1, D_ASN_135 | N, D_CYS_137   | H, D_CYS_137    | 2.87 | 1.99 | 20.31 |
| 1HGI.PDB | O, C_LEU_13    | N, D_PHE_138   | H, D_PHE_138    | 2.79 | 1.92 | 22.46 |
| 1HGI.PDB | O, D_GLU_131   | N, D_LYS_139   | H, D_LYS_139    | 2.79 | 1.84 | 9.37  |
| 1HGI.PDB | O, C_ALA_11    | N, D_ILE_140   | H, D_ILE_140    | 2.81 | 1.91 | 18.30 |
| 1HGI.PDB | O, D_ASN_129   | N, D_TYR_141   | H, D_TYR_141    | 2.85 | 1.88 | 4.18  |
| 1HGI.PDB | OE2, D_GLU_165 | N, D_LYS_143   | H, D_LYS_143    | 2.89 | 1.96 | 16.92 |
| 1HGI.PDB | OE2, D_GLU_30  | N, D_ASN_146   | H, D_ASN_146    | 2.90 | 1.95 | 12.47 |

|          |                |                |                 |      |      |       |
|----------|----------------|----------------|-----------------|------|------|-------|
| 1HGI.PDB | O, D_ASP_145   | N, D_ILE_149   | H, D_ILE_149    | 2.94 | 1.98 | 8.42  |
| 1HGI.PDB | O, D_ASN_146   | N, D_GLU_150   | H, D_GLU_150    | 2.83 | 1.93 | 18.07 |
| 1HGI.PDB | O, D_ALA_147   | N, D_SER_151   | H, D_SER_151    | 2.92 | 2.00 | 16.50 |
| 1HGI.PDB | O, D_CYS_148   | OG, D_SER_151  | HG, D_SER_151   | 2.71 | 1.85 | 21.05 |
| 1HGI.PDB | O, D_GLU_150   | N, D_ASN_154   | H, D_ASN_154    | 2.81 | 1.83 | 1.56  |
| 1HGI.PDB | O, D_SER_151   | N, D_THR_156   | H, D_THR_156    | 2.80 | 1.97 | 25.47 |
| 1HGI.PDB | OD1, D_ASN_154 | OG1, D_THR_156 | HG1, D_THR_156  | 2.68 | 1.79 | 17.62 |
| 1HGI.PDB | NE2, D_HIS_142 | OH, D_TYR_157  | HH, D_TYR_157   | 2.72 | 1.85 | 20.80 |
| 1HGI.PDB | O, D_HIS_159   | N, D_TYR_162   | H, D_TYR_162    | 2.90 | 2.02 | 21.56 |
| 1HGI.PDB | O, B_ARG_170   | NH1, D_ARG_163 | HH12, D_ARG_163 | 2.80 | 1.83 | 13.94 |
| 1HGI.PDB | O, D_TYR_162   | N, D_ALA_166   | H, D_ALA_166    | 2.86 | 1.89 | 1.04  |
| 1HGI.PDB | O, D_ARG_163   | N, D_LEU_167   | H, D_LEU_167    | 2.77 | 1.81 | 6.36  |
| 1HGI.PDB | O, D_ALA_166   | N, D_ARG_170   | H, D_ARG_170    | 2.80 | 1.93 | 22.25 |
| 1HGI.PDB | O, D_GLU_128   | NE, D_ARG_170  | HE, D_ARG_170   | 2.72 | 1.87 | 25.38 |
| 1HGI.PDB | OE2, D_GLU_131 | NH1, D_ARG_170 | HH11, D_ARG_170 | 2.77 | 1.78 | 6.80  |
| 1HGI.PDB | O, D_LEU_167   | N, D_PHE_171   | H, D_PHE_171    | 2.90 | 1.96 | 13.08 |
| 1HGI.PDB | O, F_ILE_140   | N, E_ALA_11    | H, E_ALA_11     | 2.89 | 1.95 | 14.83 |
| 1HGI.PDB | O, F_GLN_27    | N, E_THR_12    | H, E_THR_12     | 2.94 | 2.00 | 13.31 |
| 1HGI.PDB | O, F_PHE_138   | N, E_LEU_13    | H, E_LEU_13     | 2.97 | 2.02 | 11.46 |
| 1HGI.PDB | O, F_ARG_25    | N, E_CYS_14    | H, E_CYS_14     | 2.66 | 1.84 | 26.53 |
| 1HGI.PDB | O, F_GLY_136   | N, E_LEU_15    | H, E_LEU_15     | 2.92 | 1.95 | 6.28  |
| 1HGI.PDB | O, F_GLY_23    | N, E_GLY_16    | H, E_GLY_16     | 2.99 | 2.12 | 22.78 |
| 1HGI.PDB | O, E_HIS_18    | ND1, E_HIS_17  | HD1, E_HIS_17   | 2.91 | 2.01 | 19.98 |
| 1HGI.PDB | O, F_TRP_21    | N, E_HIS_18    | H, E_HIS_18     | 2.89 | 1.99 | 19.14 |
| 1HGI.PDB | OD1, E_ASN_322 | N, E_VAL_20    | H, E_VAL_20     | 2.75 | 1.81 | 12.01 |
| 1HGI.PDB | O, E_VAL_36    | N, E_THR_24    | H, E_THR_24     | 2.83 | 1.90 | 13.27 |
| 1HGI.PDB | O, E_ILE_34    | N, E_VAL_26    | H, E_VAL_26     | 2.80 | 1.85 | 10.53 |
| 1HGI.PDB | OE2, F_GLU_97  | NZ, E_LYS_27   | HZ1, E_LYS_27   | 2.86 | 1.82 | 7.44  |
| 1HGI.PDB | O, E_ASP_31    | N, E_THR_28    | H, E_THR_28     | 2.81 | 2.00 | 28.11 |
| 1HGI.PDB | O, E_VAL_26    | N, E_ILE_34    | H, E_ILE_34     | 2.91 | 2.01 | 19.08 |
| 1HGI.PDB | O, E_THR_24    | N, E_VAL_36    | H, E_VAL_36     | 2.78 | 1.82 | 6.19  |
| 1HGI.PDB | O, E_MET_320   | N, E_THR_37    | H, E_THR_37     | 2.83 | 1.86 | 7.80  |
| 1HGI.PDB | O, E_LEU_316   | N, E_THR_40    | H, E_THR_40     | 2.86 | 1.98 | 21.93 |
| 1HGI.PDB | O, E_LEU_314   | N, E_LEU_42    | H, E_LEU_42     | 2.82 | 1.95 | 22.62 |
| 1HGI.PDB | O, E_PHE_294   | N, E_GLN_44    | H, E_GLN_44     | 2.83 | 1.86 | 6.11  |
| 1HGI.PDB | O, E_SER_46    | NE2, E_GLN_44  | HE22, E_GLN_44  | 2.78 | 1.97 | 27.44 |
| 1HGI.PDB | O, E_ASN_285   | OG, E_SER_47   | HG, E_SER_47    | 2.82 | 1.91 | 15.52 |
| 1HGI.PDB | OD2, E_ASP_275 | NZ, E_LYS_50   | HZ1, E_LYS_50   | 2.70 | 1.78 | 22.89 |
| 1HGI.PDB | O, E_PRO_273   | N, E_ILE_51    | H, E_ILE_51     | 2.78 | 1.83 | 10.95 |
| 1HGI.PDB | O, E_ASP_275   | N, E_ASN_53    | H, E_ASN_53     | 2.86 | 2.00 | 23.91 |
| 1HGI.PDB | O, E_GLU_280   | NE2, E_HIS_56  | HE2, E_HIS_56   | 3.00 | 2.06 | 15.06 |
| 1HGI.PDB | OD2, E_ASP_85  | N, E_ARG_57    | H, E_ARG_57     | 2.84 | 1.90 | 11.96 |
| 1HGI.PDB | O, E_THR_83    | NE, E_ARG_57   | HE, E_ARG_57    | 2.81 | 1.83 | 5.10  |
| 1HGI.PDB | O, E_LEU_86    | N, E_LEU_59    | H, E_LEU_59     | 2.85 | 1.89 | 9.90  |
| 1HGI.PDB | O, E_VAL_88    | N, E_GLY_61    | H, E_GLY_61     | 2.94 | 2.11 | 26.55 |
| 1HGI.PDB | OD1, E_ASP_60  | N, E_ILE_62    | H, E_ILE_62     | 2.85 | 1.91 | 12.99 |
| 1HGI.PDB | O, E_GLY_61    | N, E_CYS_64    | H, E_CYS_64     | 2.89 | 1.99 | 18.65 |
| 1HGI.PDB | OE2, E_GLU_89  | N, E_LEU_66    | H, E_LEU_66     | 2.99 | 2.04 | 13.34 |
| 1HGI.PDB | O, E_LEU_66    | N, E_LEU_70    | H, E_LEU_70     | 2.83 | 1.95 | 21.53 |
| 1HGI.PDB | O, E_ILE_67    | N, E_LEU_71    | H, E_LEU_71     | 2.87 | 1.90 | 5.23  |
| 1HGI.PDB | O, E_ASP_68    | N, E_GLY_72    | H, E_GLY_72     | 2.81 | 1.87 | 13.53 |
| 1HGI.PDB | OD1, E_ASP_73  | ND1, E_HIS_75  | HD1, E_HIS_75   | 2.87 | 1.94 | 15.26 |
| 1HGI.PDB | O, E_ASP_63    | NE2, E_HIS_75  | HE2, E_HIS_75   | 2.82 | 1.88 | 13.89 |
| 1HGI.PDB | O, E_ASP_73    | N, E_CYS_76    | H, E_CYS_76     | 2.75 | 1.83 | 16.25 |
| 1HGI.PDB | O, E_PRO_74    | N, E_ASP_77    | H, E_ASP_77     | 2.91 | 1.96 | 9.76  |
| 1HGI.PDB | O, E_CYS_76    | N, E_PHE_79    | H, E_PHE_79     | 2.93 | 1.96 | 3.56  |
| 1HGI.PDB | OE1, E_GLU_82  | N, E_THR_83    | H, E_THR_83     | 2.89 | 2.00 | 21.36 |
| 1HGI.PDB | O, E_ARG_57    | N, E_ASP_85    | H, E_ASP_85     | 2.76 | 1.87 | 19.11 |



|          |                |                |                 |      |      |       |
|----------|----------------|----------------|-----------------|------|------|-------|
| 1HGI.PDB | O, E_MET.268   | N, E_GLU.89    | H, E_GLU.89     | 2.77 | 1.81 | 7.27  |
| 1HGI.PDB | OD1, E_ASP.60  | NE, E_ARG.90   | HE, E_ARG.90    | 2.89 | 1.92 | 8.33  |
| 1HGI.PDB | O, E_SER.270   | NH1, E_ARG.90  | HH11, E_ARG.90  | 2.67 | 1.80 | 24.87 |
| 1HGI.PDB | O, E_ALA.272   | NH1, E_ARG.90  | HH12, E_ARG.90  | 2.58 | 1.69 | 21.42 |
| 1HGI.PDB | OD2, E_ASP.60  | NH2, E_ARG.90  | HH21, E_ARG.90  | 2.84 | 1.85 | 10.04 |
| 1HGI.PDB | OD1, E_ASP.271 | N, E_SER.91    | H, E_SER.91     | 2.90 | 1.95 | 11.41 |
| 1HGI.PDB | OD1, E_ASP.271 | OG, E_SER.91   | HG, E_SER.91    | 2.94 | 2.11 | 26.21 |
| 1HGI.PDB | OD2, E_ASP.271 | OG, E_SER.91   | HG, E_SER.91    | 2.82 | 1.93 | 20.43 |
| 1HGI.PDB | OD2, E_ASP.68  | OG, E_SER.95   | HG, E_SER.95    | 2.90 | 1.96 | 13.54 |
| 1HGI.PDB | OD2, E_ASP.73  | N, E_ASN.96    | H, E_ASN.96     | 2.90 | 1.96 | 13.19 |
| 1HGI.PDB | OD1, E_ASP.68  | OH, E_TYR.100  | HH, E_TYR.100   | 2.94 | 1.98 | 8.32  |
| 1HGI.PDB | OD2, E_ASP.104 | OG, E_SER.107  | HG, E_SER.107   | 2.91 | 1.98 | 14.52 |
| 1HGI.PDB | O, E_TYR.105   | N, E_ARG.109   | H, E_ARG.109    | 2.90 | 1.93 | 4.30  |
| 1HGI.PDB | OE2, F_GLU.67  | NH2, E_ARG.109 | HH21, E_ARG.109 | 2.78 | 1.80 | 14.37 |
| 1HGI.PDB | OD2, D_ASP.79  | OG, E_SER.110  | HG, E_SER.110   | 2.90 | 1.94 | 10.08 |
| 1HGI.PDB | O, E_SER.107   | N, E_LEU.111   | H, E_LEU.111    | 2.87 | 1.91 | 6.91  |
| 1HGI.PDB | O, E_LEU.108   | N, E_VAL.112   | H, E_VAL.112    | 2.97 | 1.99 | 3.20  |
| 1HGI.PDB | O, E_ARG.109   | N, E_ALA.113   | H, E_ALA.113    | 2.98 | 2.07 | 18.10 |
| 1HGI.PDB | O, E_SER.110   | N, E_SER.114   | H, E_SER.114    | 2.94 | 2.00 | 13.83 |
| 1HGI.PDB | OE2, E_GLU.119 | OG1, E_THR.117 | HG1, E_THR.117  | 2.98 | 2.05 | 12.54 |
| 1HGI.PDB | O, E_GLU.82    | N, E_LEU.118   | H, E_LEU.118    | 2.91 | 1.97 | 15.20 |
| 1HGI.PDB | O, E_TYR.257   | N, E_ILE.121   | H, E_ILE.121    | 2.92 | 1.95 | 7.25  |
| 1HGI.PDB | O, E_ARG.255   | N, E_GLU.123   | H, E_GLU.123    | 2.89 | 1.94 | 11.77 |
| 1HGI.PDB | O, E_THR.155   | N, E_THR.131   | H, E_THR.131    | 2.77 | 1.89 | 21.32 |
| 1HGI.PDB | OD1, E_ASN.152 | N, E_ASN.133   | H, E_ASN.133    | 2.84 | 1.93 | 17.00 |
| 1HGI.PDB | O, E_GLY.146   | N, E_SER.136   | H, E_SER.136    | 2.77 | 1.88 | 19.62 |
| 1HGI.PDB | OG, E_SER.136  | N, E_ALA.138   | H, E_ALA.138    | 2.87 | 1.96 | 18.10 |
| 1HGI.PDB | O, E_GLY.144   | NZ, E_LYS.140  | HZ1, E_LYS.140  | 2.89 | 1.92 | 16.40 |
| 1HGI.PDB | OD1, E_ASN.137 | NZ, E_LYS.140  | HZ2, E_LYS.140  | 2.83 | 1.82 | 12.93 |
| 1HGI.PDB | OD2, E_ASP.77  | NE, E_ARG.141  | HE, E_ARG.141   | 2.83 | 2.01 | 29.05 |
| 1HGI.PDB | O, E_PHE.147   | NH1, E_ARG.141 | HH12, E_ARG.141 | 2.55 | 1.65 | 20.15 |
| 1HGI.PDB | OD1, E_ASP.77  | NH2, E_ARG.141 | HH21, E_ARG.141 | 2.94 | 2.01 | 20.45 |
| 1HGI.PDB | OD2, E_ASP.77  | NH2, E_ARG.141 | HH21, E_ARG.141 | 2.70 | 1.83 | 24.80 |
| 1HGI.PDB | O, E_GLY.72    | NH2, E_ARG.141 | HH22, E_ARG.141 | 2.98 | 2.00 | 9.93  |
| 1HGI.PDB | OD1, E_ASN.137 | OG, E_SER.145  | HG, E_SER.145   | 2.92 | 2.15 | 29.94 |
| 1HGI.PDB | O, E_SER.136   | N, E_GLY.146   | H, E_GLY.146    | 2.98 | 2.04 | 14.06 |
| 1HGI.PDB | O, E_GLY.72    | N, E_SER.149   | H, E_SER.149    | 2.92 | 1.99 | 15.35 |
| 1HGI.PDB | O, E_ALA.253   | N, E_ASN.152   | H, E_ASN.152    | 2.77 | 1.92 | 24.49 |
| 1HGI.PDB | OH, E_TYR.195  | NE1, E_TRP.153 | HE1, E_TRP.153  | 2.87 | 1.98 | 20.67 |
| 1HGI.PDB | O, E_LEU.194   | N, E_LYS.156   | H, E_LYS.156    | 2.89 | 2.00 | 19.98 |
| 1HGI.PDB | O, E_SER.193   | NZ, E_LYS.156  | HZ2, E_LYS.156  | 2.74 | 1.75 | 15.56 |
| 1HGI.PDB | O, E_THR.160   | N, E_SER.157   | H, E_SER.157    | 2.90 | 2.00 | 19.80 |
| 1HGI.PDB | O, E_SER.247   | N, E_LEU.164   | H, E_LEU.164    | 2.73 | 1.89 | 25.21 |
| 1HGI.PDB | O, E_ILE.245   | N, E_VAL.166   | H, E_VAL.166    | 2.92 | 1.98 | 12.27 |
| 1HGI.PDB | O, E_LEU.243   | OG1, E_THR.167 | HG1, E_THR.167  | 2.89 | 2.00 | 19.18 |
| 1HGI.PDB | O, E_LEU.243   | N, E_MET.168   | H, E_MET.168    | 2.98 | 2.05 | 15.68 |
| 1HGI.PDB | O, E_ASP.241   | N, E_ASN.170   | H, E_ASN.170    | 2.96 | 1.98 | 4.05  |
| 1HGI.PDB | O, E_PHE.174   | ND2, E_ASN.170 | HD21, E_ASN.170 | 2.85 | 1.90 | 12.31 |
| 1HGI.PDB | O, E_VAL.237   | ND2, E_ASN.170 | HD22, E_ASN.170 | 2.95 | 2.11 | 25.03 |
| 1HGI.PDB | O, E_VAL.237   | N, E_LYS.176   | H, E_LYS.176    | 2.94 | 2.00 | 12.53 |
| 1HGI.PDB | OE2, E_GLU.123 | NZ, E_LYS.176  | HZ1, E_LYS.176  | 2.69 | 1.80 | 25.89 |
| 1HGI.PDB | O, E_PHE.258   | N, E_LEU.177   | H, E_LEU.177    | 2.98 | 2.01 | 8.00  |
| 1HGI.PDB | O, E_THR.235   | N, E_TYR.178   | H, E_TYR.178    | 2.83 | 1.86 | 3.40  |
| 1HGI.PDB | OE1, E_GLU.123 | OH, E_TYR.178  | HH, E_TYR.178   | 2.77 | 1.82 | 8.27  |
| 1HGI.PDB | OG1, E_THR.235 | NE1, E_TRP.180 | HE1, E_TRP.180  | 2.85 | 1.87 | 2.03  |
| 1HGI.PDB | O, E_ASN.250   | N, E_HIS.183   | H, E_HIS.183    | 2.94 | 2.04 | 20.19 |
| 1HGI.PDB | O, E_ARG.229   | N, E_HIS.184   | H, E_HIS.184    | 2.89 | 1.93 | 8.27  |
| 1HGI.PDB | OG, E_SER.231  | NE2, E_HIS.184 | HE2, E_HIS.184  | 2.81 | 1.95 | 23.57 |

|          |                |                |                 |      |      |       |
|----------|----------------|----------------|-----------------|------|------|-------|
| 1HGI.PDB | OD1, E_ASN_250 | NE2, E_GLN_191 | HE21, E_GLN_191 | 2.93 | 1.97 | 10.64 |
| 1HGI.PDB | O, E_GLN_197   | NE2, E_GLN_191 | HE22, E_GLN_191 | 2.95 | 1.99 | 10.71 |
| 1HGI.PDB | O, E_ASN_188   | N, E_THR_192   | H, E_THR_192    | 2.98 | 2.03 | 12.25 |
| 1HGI.PDB | O, E_ASN_188   | OG1, E_THR_192 | HG1, E_THR_192  | 2.95 | 1.99 | 2.99  |
| 1HGI.PDB | O, E_GLN_189   | N, E_SER_193   | H, E_SER_193    | 2.85 | 1.88 | 3.98  |
| 1HGI.PDB | O, E_GLN_191   | N, E_TYR_195   | H, E_TYR_195    | 2.76 | 1.80 | 5.82  |
| 1HGI.PDB | O, E_TYR_161   | NE2, E_GLN_197 | HE21, E_GLN_197 | 3.00 | 2.04 | 10.17 |
| 1HGI.PDB | O, E_ASN_248   | NE2, E_GLN_197 | HE22, E_GLN_197 | 2.91 | 2.00 | 18.24 |
| 1HGI.PDB | OD1, E_ASN_246 | NH2, E_ARG_201 | HH21, E_ARG_201 | 2.57 | 1.74 | 27.51 |
| 1HGI.PDB | O, E_ILE_213   | N, E_VAL_202   | H, E_VAL_202    | 2.95 | 1.98 | 8.47  |
| 1HGI.PDB | O, E_ASN_246   | N, E_THR_203   | H, E_THR_203    | 2.89 | 1.92 | 4.39  |
| 1HGI.PDB | O, E_GLN_211   | N, E_VAL_204   | H, E_VAL_204    | 2.85 | 1.92 | 15.24 |
| 1HGI.PDB | O, E_VAL_244   | N, E_SER_205   | H, E_SER_205    | 2.97 | 2.05 | 16.25 |
| 1HGI.PDB | O, E_SER_209   | N, E_THR_206   | H, E_THR_206    | 2.94 | 1.97 | 8.14  |
| 1HGI.PDB | OD1, E_ASP_241 | N, E_ARG_207   | H, E_ARG_207    | 2.91 | 1.95 | 10.57 |
| 1HGI.PDB | OD2, E_ASP_241 | NE, E_ARG_208  | HE, E_ARG_208   | 2.98 | 2.07 | 19.52 |
| 1HGI.PDB | O, E_VAL_204   | N, E_GLN_211   | H, E_GLN_211    | 2.91 | 1.97 | 13.40 |
| 1HGI.PDB | O, E_VAL_202   | N, E_ILE_213   | H, E_ILE_213    | 2.85 | 1.92 | 15.12 |
| 1HGI.PDB | ND1, E_HIS_184 | N, E_ASN_216   | H, E_ASN_216    | 2.74 | 1.94 | 28.99 |
| 1HGI.PDB | O, E_ASN_216   | NH1, E_ARG_220 | HH12, E_ARG_220 | 2.87 | 2.06 | 29.75 |
| 1HGI.PDB | OE1, A_GLN_210 | NH2, E_ARG_220 | HH21, E_ARG_220 | 2.69 | 1.80 | 23.03 |
| 1HGI.PDB | O, E_ASN_216   | NH2, E_ARG_220 | HH22, E_ARG_220 | 2.70 | 1.80 | 21.47 |
| 1HGI.PDB | O, E_LEU_226   | N, E_VAL_223   | H, E_VAL_223    | 2.88 | 1.90 | 5.13  |
| 1HGI.PDB | O, E_CYS_97    | NE, E_ARG_224  | HE, E_ARG_224   | 2.81 | 1.97 | 26.09 |
| 1HGI.PDB | O, E_CYS_97    | NH2, E_ARG_224 | HH21, E_ARG_224 | 2.85 | 1.99 | 25.73 |
| 1HGI.PDB | O, E_VAL_223   | N, E_LEU_226   | H, E_LEU_226    | 2.93 | 2.00 | 15.87 |
| 1HGI.PDB | O, E_SER_228   | NH1, E_ARG_229 | HH11, E_ARG_229 | 2.68 | 1.75 | 18.51 |
| 1HGI.PDB | O, E_PRO_221   | NH2, E_ARG_229 | HH22, E_ARG_229 | 2.66 | 1.70 | 13.51 |
| 1HGI.PDB | OD1, E_ASP_101 | OG, E_SER_231  | HG, E_SER_231   | 2.99 | 2.05 | 12.53 |
| 1HGI.PDB | O, E_ASP_101   | N, E_ILE_232   | H, E_ILE_232    | 2.94 | 2.00 | 13.40 |
| 1HGI.PDB | O, E_TRP_180   | N, E_TYR_233   | H, E_TYR_233    | 2.90 | 1.93 | 7.29  |
| 1HGI.PDB | O, E_TYR_178   | N, E_THR_235   | H, E_THR_235    | 2.82 | 1.92 | 19.31 |
| 1HGI.PDB | O, E_LYS_176   | N, E_VAL_237   | H, E_VAL_237    | 2.80 | 1.86 | 13.21 |
| 1HGI.PDB | O, D_SER_71    | NZ, E_LYS_238  | HZ2, E_LYS_238  | 2.75 | 1.87 | 26.62 |
| 1HGI.PDB | OE1, D_GLU_72  | NZ, E_LYS_238  | HZ3, E_LYS_238  | 2.80 | 1.81 | 15.90 |
| 1HGI.PDB | O, E_ASN_170   | N, E_GLY_240   | H, E_GLY_240    | 2.90 | 2.05 | 25.02 |
| 1HGI.PDB | OD1, E_ASP_241 | N, E_VAL_242   | H, E_VAL_242    | 2.76 | 1.96 | 28.65 |
| 1HGI.PDB | O, E_MET_168   | N, E_LEU_243   | H, E_LEU_243    | 2.92 | 1.95 | 5.56  |
| 1HGI.PDB | O, E_SER_205   | N, E_VAL_244   | H, E_VAL_244    | 2.99 | 2.04 | 11.95 |
| 1HGI.PDB | O, E_THR_203   | N, E_ASN_246   | H, E_ASN_246    | 2.86 | 1.93 | 15.06 |
| 1HGI.PDB | O, E_LEU_164   | N, E_SER_247   | H, E_SER_247    | 2.89 | 1.98 | 17.96 |
| 1HGI.PDB | O, E_ARG_201   | OG, E_SER_247  | HG, E_SER_247   | 2.86 | 2.05 | 28.14 |
| 1HGI.PDB | OE1, E_GLN_191 | ND2, E_ASN_250 | HD21, E_ASN_250 | 2.90 | 1.94 | 10.02 |
| 1HGI.PDB | O, E_HIS_183   | ND2, E_ASN_250 | HD22, E_ASN_250 | 2.84 | 1.87 | 6.39  |
| 1HGI.PDB | O, E_ASN_152   | N, E_ALA_253   | H, E_ALA_253    | 2.82 | 1.94 | 21.84 |
| 1HGI.PDB | O, E_ILE_121   | N, E_TYR_257   | H, E_TYR_257    | 2.96 | 2.09 | 22.80 |
| 1HGI.PDB | O, E_LEU_177   | N, E_PHE_258   | H, E_PHE_258    | 2.90 | 1.94 | 8.58  |
| 1HGI.PDB | OE2, E_GLU_119 | NH1, E_ARG_261 | HH12, E_ARG_261 | 2.65 | 1.83 | 28.50 |
| 1HGI.PDB | OE1, E_GLU_119 | NH2, E_ARG_261 | HH22, E_ARG_261 | 2.84 | 1.99 | 27.52 |
| 1HGI.PDB | OD2, E_ASP_85  | NZ, E_LYS_264  | HZ3, E_LYS_264  | 2.86 | 1.87 | 16.39 |
| 1HGI.PDB | O, E_ASP_85    | N, E_SER_266   | H, E_SER_266    | 2.99 | 2.14 | 25.54 |
| 1HGI.PDB | O, E_PHE_87    | N, E_MET_268   | H, E_MET_268    | 2.85 | 1.97 | 21.63 |
| 1HGI.PDB | O, E_PRO_284   | OG, E_SER_270  | HG, E_SER_270   | 2.79 | 1.85 | 10.23 |
| 1HGI.PDB | OG, E_SER_270  | N, E_ALA_272   | H, E_ALA_272    | 2.98 | 2.03 | 12.01 |
| 1HGI.PDB | O, E_ILE_51    | N, E_ASP_275   | H, E_ASP_275    | 2.93 | 2.03 | 19.68 |
| 1HGI.PDB | OD1, E_ASP_275 | N, E_THR_276   | H, E_THR_276    | 2.83 | 1.98 | 25.02 |
| 1HGI.PDB | O, E_ASN_54    | N, E_SER_279   | H, E_SER_279    | 2.79 | 1.86 | 14.40 |
| 1HGI.PDB | O, E_TYR_302   | N, E_ILE_282   | H, E_ILE_282    | 2.87 | 1.91 | 9.87  |

|          |                |                |                 |      |      |       |
|----------|----------------|----------------|-----------------|------|------|-------|
| 1HGI.PDB | O, E_THR_283   | N, E_GLY_286   | H, E_GLY_286    | 2.80 | 1.87 | 13.74 |
| 1HGI.PDB | O, E_LYS_50    | N, E_SER_287   | H, E_SER_287    | 2.85 | 1.88 | 3.05  |
| 1HGI.PDB | O, E_ALA_304   | ND2, E_ASN_290 | HD22, E_ASN_290 | 2.75 | 1.86 | 20.40 |
| 1HGI.PDB | OE1, E_GLN_44  | NZ, E_LYS_292  | HZ1, E_LYS_292  | 2.73 | 1.72 | 12.13 |
| 1HGI.PDB | OD2, E_ASP_291 | NZ, E_LYS_292  | HZ3, E_LYS_292  | 2.87 | 1.94 | 23.09 |
| 1HGI.PDB | O, E_LYS_307   | N, E_GLN_295   | H, E_GLN_295    | 2.79 | 1.91 | 21.81 |
| 1HGI.PDB | O, E_ASN_298   | NE2, E_GLN_295 | HE21, E_GLN_295 | 2.78 | 1.83 | 10.67 |
| 1HGI.PDB | O, E_GLN_44    | N, E_ASN_296   | H, E_ASN_296    | 2.87 | 1.95 | 15.01 |
| 1HGI.PDB | OE1, E_GLN_295 | N, E_VAL_297   | H, E_VAL_297    | 2.74 | 1.92 | 27.74 |
| 1HGI.PDB | OD1, E_ASN_285 | ND2, E_ASN_298 | HD22, E_ASN_298 | 2.97 | 2.00 | 7.97  |
| 1HGI.PDB | OD1, E_ASN_298 | N, E_ILE_300   | H, E_ILE_300    | 2.91 | 1.99 | 17.07 |
| 1HGI.PDB | O, E_ILE_282   | N, E_TYR_302   | H, E_TYR_302    | 2.94 | 2.05 | 21.12 |
| 1HGI.PDB | O, E_LYS_264   | OH, E_TYR_302  | HH, E_TYR_302   | 2.73 | 1.93 | 27.81 |
| 1HGI.PDB | O, F_LYS_62    | N, E_GLY_303   | H, E_GLY_303    | 2.93 | 1.96 | 6.65  |
| 1HGI.PDB | O, E_PRO_293   | N, E_LYS_307   | H, E_LYS_307    | 2.98 | 2.02 | 9.39  |
| 1HGI.PDB | O, E_GLN_295   | N, E_VAL_309   | H, E_VAL_309    | 2.93 | 2.07 | 24.14 |
| 1HGI.PDB | OG, F_SER_93   | N, E_LYS_310   | H, E_LYS_310    | 2.99 | 2.05 | 13.79 |
| 1HGI.PDB | OD1, F_ASP_86  | NZ, E_LYS_310  | HZ3, E_LYS_310  | 2.76 | 1.91 | 29.16 |
| 1HGI.PDB | OE2, E_GLU_41  | N, E_LEU_314   | H, E_LEU_314    | 2.84 | 1.88 | 8.62  |
| 1HGI.PDB | OE1, E_GLU_41  | NZ, E_LYS_315  | HZ3, E_LYS_315  | 2.74 | 1.81 | 21.50 |
| 1HGI.PDB | O, E_THR_40    | N, E_LEU_316   | H, E_LEU_316    | 2.81 | 1.89 | 15.98 |
| 1HGI.PDB | OD1, F_ASN_104 | N, E_ALA_317   | H, E_ALA_317    | 2.72 | 1.81 | 15.78 |
| 1HGI.PDB | O, E_ASN_38    | N, E_THR_318   | H, E_THR_318    | 2.88 | 1.97 | 18.20 |
| 1HGI.PDB | O, E_VAL_20    | ND2, E_ASN_322 | HD21, E_ASN_322 | 2.90 | 1.97 | 15.71 |
| 1HGI.PDB | OE2, E_GLU_35  | ND2, E_ASN_322 | HD22, E_ASN_322 | 2.92 | 1.96 | 12.59 |
| 1HGI.PDB | O, E_GLN_327   | NZ, E_LYS_326  | HZ1, E_LYS_326  | 2.69 | 1.77 | 22.48 |
| 1HGI.PDB | OE1, F_GLU_15  | NZ, E_LYS_326  | HZ3, E_LYS_326  | 2.88 | 1.86 | 11.05 |
| 1HGI.PDB | O, E_LYS_326   | NE2, E_GLN_327 | HE22, E_GLN_327 | 2.82 | 1.87 | 11.22 |
| 1HGI.PDB | OD2, F_ASP_112 | N, F_GLY_1     | H1, F_GLY_1     | 2.78 | 1.77 | 11.25 |
| 1HGI.PDB | OD1, F_ASP_109 | N, F_LEU_2     | H, F_LEU_2      | 2.91 | 1.97 | 13.16 |
| 1HGI.PDB | OD2, F_ASP_112 | N, F_PHE_3     | H, F_PHE_3      | 2.84 | 2.03 | 27.46 |
| 1HGI.PDB | OD2, F_ASP_112 | N, F_GLY_4     | H, F_GLY_4      | 2.93 | 2.03 | 18.14 |
| 1HGI.PDB | OD1, F_ASP_112 | N, F_ALA_5     | H, F_ALA_5      | 2.81 | 1.90 | 16.38 |
| 1HGI.PDB | O, F_GLY_4     | N, F_PHE_9     | H, F_PHE_9      | 2.85 | 1.90 | 11.24 |
| 1HGI.PDB | O, F_GLY_13    | ND2, F_ASN_12  | HD22, F_ASN_12  | 2.79 | 1.91 | 21.41 |
| 1HGI.PDB | O, E_VAL_323   | N, F_GLY_13    | H, F_GLY_13     | 2.66 | 1.77 | 18.62 |
| 1HGI.PDB | O, E_HIS_17    | N, F_TRP_14    | H, F_TRP_14     | 2.84 | 1.93 | 16.42 |
| 1HGI.PDB | OG1, F_THR_41  | N, F_TRP_21    | H, F_TRP_21     | 2.99 | 2.14 | 24.96 |
| 1HGI.PDB | O, E_GLY_16    | N, F_GLY_23    | H, F_GLY_23     | 2.97 | 2.05 | 16.89 |
| 1HGI.PDB | O, F_ALA_35    | N, F_PHE_24    | H, F_PHE_24     | 2.82 | 1.85 | 6.25  |
| 1HGI.PDB | O, E_CYS_14    | N, F_ARG_25    | H, F_ARG_25     | 2.91 | 2.04 | 22.96 |
| 1HGI.PDB | OE1, F_GLN_34  | NH2, F_ARG_25  | HH21, F_ARG_25  | 2.91 | 1.98 | 18.85 |
| 1HGI.PDB | O, F_GLY_33    | N, F_HIS_26    | H, F_HIS_26     | 2.85 | 1.94 | 17.98 |
| 1HGI.PDB | O, E_THR_12    | N, F_GLN_27    | H, F_GLN_27     | 2.93 | 1.99 | 14.92 |
| 1HGI.PDB | O, F_GLY_31    | N, F_ASN_28    | H, F_ASN_28     | 2.87 | 1.90 | 8.27  |
| 1HGI.PDB | OD1, F_ASN_146 | ND2, F_ASN_28  | HD21, F_ASN_28  | 2.93 | 2.01 | 16.48 |
| 1HGI.PDB | O, F_CYS_144   | ND2, F_ASN_28  | HD22, F_ASN_28  | 3.00 | 2.14 | 23.86 |
| 1HGI.PDB | O, F_PHE_24    | N, F_ALA_35    | H, F_ALA_35     | 2.77 | 1.97 | 29.03 |
| 1HGI.PDB | O, F_TYR_22    | N, F_ASP_37    | H, F_ASP_37     | 2.70 | 1.78 | 13.02 |
| 1HGI.PDB | OD2, F_ASP_37  | N, F_SER_40    | H, F_SER_40     | 2.93 | 1.96 | 6.56  |
| 1HGI.PDB | OD2, F_ASP_37  | OG, F_SER_40   | HG, F_SER_40    | 2.76 | 1.92 | 24.70 |
| 1HGI.PDB | O, F_ASP_37    | OG1, F_THR_41  | HG1, F_THR_41   | 2.70 | 1.81 | 18.66 |
| 1HGI.PDB | O, F_LEU_38    | N, F_GLN_42    | H, F_GLN_42     | 3.00 | 2.08 | 17.54 |
| 1HGI.PDB | OD1, F_ASP_46  | NE2, F_GLN_42  | HE22, F_GLN_42  | 2.86 | 1.99 | 23.93 |
| 1HGI.PDB | O, F_LYS_39    | N, F_ALA_43    | H, F_ALA_43     | 2.96 | 2.00 | 7.28  |
| 1HGI.PDB | O, F_SER_40    | N, F_ALA_44    | H, F_ALA_44     | 2.94 | 1.96 | 3.55  |
| 1HGI.PDB | O, F_THR_41    | N, F_ILE_45    | H, F_ILE_45     | 2.94 | 2.00 | 13.26 |
| 1HGI.PDB | O, F_GLN_42    | N, F_ASP_46    | H, F_ASP_46     | 2.71 | 1.76 | 8.22  |

|          |                |                |                 |      |      |       |
|----------|----------------|----------------|-----------------|------|------|-------|
| 1HGI.PDB | O, F_ALA_43    | NE2, F_GLN_47  | HE22, F_GLN_47  | 2.92 | 1.99 | 15.42 |
| 1HGI.PDB | O, F_ILE_45    | N, F_ASN_49    | H, F_ASN_49     | 2.88 | 1.98 | 19.70 |
| 1HGI.PDB | O, F_ASP_46    | N, F_GLY_50    | H, F_GLY_50     | 2.94 | 2.01 | 15.37 |
| 1HGI.PDB | OE1, F_GLU_103 | NZ, F_LYS_51   | HZ2, F_LYS_51   | 2.80 | 1.76 | 5.82  |
| 1HGI.PDB | ND1, F_HIS_106 | NZ, F_LYS_51   | HZ3, F_LYS_51   | 2.75 | 1.80 | 19.60 |
| 1HGI.PDB | O, F_ILE_48    | N, F_LEU_52    | H, F_LEU_52     | 2.96 | 2.03 | 15.82 |
| 1HGI.PDB | O, F_ASN_49    | N, F_ASN_53    | H, F_ASN_53     | 2.80 | 1.95 | 24.38 |
| 1HGI.PDB | O, C_THR_28    | NE, F_ARG_54   | HE, F_ARG_54    | 2.95 | 1.99 | 9.70  |
| 1HGI.PDB | OE1, F_GLU_57  | NH1, F_ARG_54  | HH11, F_ARG_54  | 2.83 | 1.84 | 11.68 |
| 1HGI.PDB | OE2, D_GLU_97  | NH2, F_ARG_54  | HH22, F_ARG_54  | 2.75 | 1.79 | 14.82 |
| 1HGI.PDB | OG, E_SER_110  | NE2, F_HIS_64  | HE2, F_HIS_64   | 2.84 | 1.87 | 3.62  |
| 1HGI.PDB | O, E_LYS_299   | NZ, F_LYS_68   | HZ1, F_LYS_68   | 2.80 | 1.76 | 2.37  |
| 1HGI.PDB | OE2, F_GLU_85  | NZ, F_LYS_68   | HZ2, F_LYS_68   | 2.74 | 1.72 | 8.70  |
| 1HGI.PDB | OG, A_SER_107  | N, F_ARG_76    | H, F_ARG_76     | 2.79 | 1.83 | 7.22  |
| 1HGI.PDB | OE2, B_GLU_81  | NE, F_ARG_76   | HE, F_ARG_76    | 2.85 | 1.88 | 7.37  |
| 1HGI.PDB | OE2, B_GLU_74  | NH1, F_ARG_76  | HH12, F_ARG_76  | 2.77 | 1.76 | 3.93  |
| 1HGI.PDB | OE1, B_GLU_81  | NH2, F_ARG_76  | HH21, F_ARG_76  | 2.64 | 1.66 | 4.79  |
| 1HGI.PDB | OE1, B_GLU_74  | NH2, F_ARG_76  | HH22, F_ARG_76  | 2.76 | 1.78 | 10.40 |
| 1HGI.PDB | O, F_GLU_72    | NE2, F_GLN_78  | HE21, F_GLN_78  | 2.93 | 1.96 | 6.67  |
| 1HGI.PDB | OE1, F_GLU_74  | NE2, F_GLN_78  | HE22, F_GLN_78  | 2.95 | 1.98 | 8.40  |
| 1HGI.PDB | O, F_ASP_79    | N, F_TYR_83    | H, F_TYR_83     | 2.90 | 1.99 | 17.92 |
| 1HGI.PDB | OE1, B_GLU_85  | OH, F_TYR_83   | HH, F_TYR_83    | 2.58 | 1.75 | 24.06 |
| 1HGI.PDB | O, F_LEU_80    | N, F_VAL_84    | H, F_VAL_84     | 2.77 | 1.86 | 16.15 |
| 1HGI.PDB | O, F_LYS_82    | N, F_ASP_86    | H, F_ASP_86     | 2.91 | 1.96 | 11.16 |
| 1HGI.PDB | O, F_TYR_83    | N, F_THR_87    | H, F_THR_87     | 2.92 | 1.97 | 10.81 |
| 1HGI.PDB | OH, D_TYR_83   | NZ, F_LYS_88   | HZ1, F_LYS_88   | 2.61 | 1.62 | 12.49 |
| 1HGI.PDB | O, F_GLU_85    | N, F_ILE_89    | H, F_ILE_89     | 2.88 | 1.92 | 9.04  |
| 1HGI.PDB | O, F_LYS_88    | N, F_TRP_92    | H, F_TRP_92     | 2.96 | 1.99 | 7.36  |
| 1HGI.PDB | O, F_ILE_89    | N, F_SER_93    | H, F_SER_93     | 2.88 | 1.94 | 13.75 |
| 1HGI.PDB | O, F_ILE_89    | OG, F_SER_93   | HG, F_SER_93    | 2.83 | 1.94 | 18.22 |
| 1HGI.PDB | O, F_ASP_90    | N, F_TYR_94    | H, F_TYR_94     | 2.93 | 2.00 | 16.36 |
| 1HGI.PDB | O, F_TRP_92    | N, F_ALA_96    | H, F_ALA_96     | 2.93 | 1.97 | 9.62  |
| 1HGI.PDB | O, F_TYR_94    | N, F_LEU_98    | H, F_LEU_98     | 2.91 | 1.95 | 9.75  |
| 1HGI.PDB | O, F_ASN_95    | N, F_LEU_99    | H, F_LEU_99     | 2.85 | 1.97 | 20.80 |
| 1HGI.PDB | O, F_LEU_99    | N, F_GLU_103   | H, F_GLU_103    | 2.93 | 1.96 | 7.51  |
| 1HGI.PDB | O, F_VAL_100   | N, F_ASN_104   | H, F_ASN_104    | 2.86 | 1.89 | 6.57  |
| 1HGI.PDB | O, E_LYS_27    | ND2, F_ASN_104 | HD22, F_ASN_104 | 2.88 | 1.93 | 10.77 |
| 1HGI.PDB | O, F_LEU_102   | N, F_HIS_106   | H, F_HIS_106    | 2.94 | 2.01 | 16.17 |
| 1HGI.PDB | O, F_GLU_103   | N, F_THR_107   | H, F_THR_107    | 2.77 | 1.88 | 20.29 |
| 1HGI.PDB | O, F_ASN_104   | N, F_ILE_108   | H, F_ILE_108    | 2.98 | 2.02 | 10.32 |
| 1HGI.PDB | O, F_HIS_106   | N, F_LEU_110   | H, F_LEU_110    | 2.83 | 1.87 | 10.55 |
| 1HGI.PDB | O, F_THR_107   | OG1, F_THR_111 | HG1, F_THR_111  | 2.97 | 2.00 | 2.90  |
| 1HGI.PDB | O, F_ASP_109   | N, F_SER_113   | H, F_SER_113    | 2.84 | 1.88 | 8.44  |
| 1HGI.PDB | O, D_LEU_2     | OG, F_SER_113  | HG, F_SER_113   | 2.78 | 1.94 | 24.17 |
| 1HGI.PDB | O, F_LEU_110   | N, F_GLU_114   | H, F_GLU_114    | 2.93 | 1.97 | 9.47  |
| 1HGI.PDB | O, F_THR_111   | N, F_MET_115   | H, F_MET_115    | 3.00 | 2.05 | 12.25 |
| 1HGI.PDB | O, F_ASP_112   | N, F_ASN_116   | H, F_ASN_116    | 2.97 | 2.03 | 13.76 |
| 1HGI.PDB | O, F_SER_113   | N, F_LYS_117   | H, F_LYS_117    | 2.72 | 1.85 | 21.38 |
| 1HGI.PDB | O, F_GLU_114   | N, F_LEU_118   | H, F_LEU_118    | 2.97 | 2.00 | 4.23  |
| 1HGI.PDB | O, F_ASN_116   | N, F_GLU_120   | H, F_GLU_120    | 2.90 | 1.92 | 4.14  |
| 1HGI.PDB | O, F_LYS_117   | N, F_LYS_121   | H, F_LYS_121    | 2.95 | 2.01 | 14.18 |
| 1HGI.PDB | O, F_LEU_118   | OG1, F_THR_122 | HG1, F_THR_122  | 2.94 | 1.99 | 9.77  |
| 1HGI.PDB | OE2, F_GLU_120 | NH1, F_ARG_123 | HH11, F_ARG_123 | 2.81 | 1.95 | 25.91 |
| 1HGI.PDB | O, F_GLU_120   | N, F_ARG_124   | H, F_ARG_124    | 2.91 | 1.93 | 3.14  |
| 1HGI.PDB | OE1, D_GLU_132 | NE, F_ARG_124  | HE, F_ARG_124   | 2.96 | 2.09 | 23.50 |
| 1HGI.PDB | OE2, D_GLU_132 | NE, F_ARG_124  | HE, F_ARG_124   | 2.96 | 2.09 | 23.34 |
| 1HGI.PDB | O, F_LEU_126   | N, F_ASN_129   | H, F_ASN_129    | 2.99 | 2.06 | 14.77 |
| 1HGI.PDB | OH, F_TYR_157  | ND2, F_ASN_129 | HD22, F_ASN_129 | 2.81 | 1.86 | 11.53 |

|          |                |                |                 |      |      |       |
|----------|----------------|----------------|-----------------|------|------|-------|
| 1HGI.PDB | O, F_LYS_139   | N, F_GLU_131   | H, F_GLU_131    | 2.91 | 1.97 | 13.98 |
| 1HGI.PDB | O, F_CYS_137   | N, F_MET_133   | H, F_MET_133    | 2.82 | 1.88 | 11.89 |
| 1HGI.PDB | O, E_LEU_13    | N, F_PHE_138   | H, F_PHE_138    | 2.75 | 1.89 | 22.82 |
| 1HGI.PDB | O, F_GLU_131   | N, F_LYS_139   | H, F_LYS_139    | 2.80 | 1.85 | 8.12  |
| 1HGI.PDB | O, E_ALA_11    | N, F_ILE_140   | H, F_ILE_140    | 2.78 | 1.89 | 18.92 |
| 1HGI.PDB | O, F_ASN_129   | N, F_TYR_141   | H, F_TYR_141    | 2.85 | 1.88 | 5.59  |
| 1HGI.PDB | OE2, F_GLU_165 | N, F_LYS_143   | H, F_LYS_143    | 2.88 | 1.95 | 16.12 |
| 1HGI.PDB | OE1, F_GLU_30  | N, F_ASN_146   | H, F_ASN_146    | 2.87 | 1.93 | 13.21 |
| 1HGI.PDB | O, F_ASP_145   | N, F_ILE_149   | H, F_ILE_149    | 2.92 | 1.96 | 7.67  |
| 1HGI.PDB | O, F_ASN_146   | N, F_GLU_150   | H, F_GLU_150    | 2.82 | 1.91 | 17.13 |
| 1HGI.PDB | O, F_ALA_147   | N, F_SER_151   | H, F_SER_151    | 2.94 | 2.03 | 17.96 |
| 1HGI.PDB | O, F_CYS_148   | OG, F_SER_151  | HG, F_SER_151   | 2.72 | 1.86 | 20.78 |
| 1HGI.PDB | O, F_GLU_150   | N, F_ASN_154   | H, F_ASN_154    | 2.78 | 1.81 | 2.53  |
| 1HGI.PDB | O, F_HIS_159   | N, F_TYR_162   | H, F_TYR_162    | 2.91 | 2.05 | 22.85 |
| 1HGI.PDB | O, D_ARG_170   | NH1, F_ARG_163 | HH12, F_ARG_163 | 2.92 | 1.95 | 13.55 |
| 1HGI.PDB | OE2, D_GLU_131 | NH2, F_ARG_163 | HH22, F_ARG_163 | 2.69 | 1.85 | 26.81 |
| 1HGI.PDB | O, F_TYR_162   | N, F_ALA_166   | H, F_ALA_166    | 2.89 | 1.91 | 1.45  |
| 1HGI.PDB | O, F_ARG_163   | N, F_LEU_167   | H, F_LEU_167    | 2.78 | 1.81 | 5.41  |
| 1HGI.PDB | O, F_ALA_166   | N, F_ARG_170   | H, F_ARG_170    | 2.82 | 1.95 | 21.63 |
| 1HGI.PDB | O, F_GLU_128   | NE, F_ARG_170  | HE, F_ARG_170   | 2.73 | 1.88 | 25.04 |
| 1HGI.PDB | OE2, F_GLU_131 | NH1, F_ARG_170 | HH11, F_ARG_170 | 2.75 | 1.76 | 6.67  |
| 1HGI.PDB | O, F_LEU_167   | N, F_PHE_171   | H, F_PHE_171    | 2.92 | 1.98 | 13.87 |

Table 1669: 1HGI-specific side chain and main chain hydrogen bonding analysis. In this table, a PDB file is specified with a four-letter PDB ID, except that the names of the PDB files corresponding to the single NMR structural model split from the NMR ensemble is specified with a four-letter PDB ID in addition to a hyphen followed by the single NMR structural model numeric ID, the residue naming scheme is **Chain ID\_residue name\_residue number**,  $\angle ADH$  represents the angle formed by acceptor (A), donor (D) and hydrogen (H) ( $\angle ADH$ ).

| PDB      | Acceptor (A)   | Donor (D)      | Hydrogen (H)    | D-A (Å) | H-A (Å) | $\angle ADH(^{\circ})$ |
|----------|----------------|----------------|-----------------|---------|---------|------------------------|
| 1HGJ.PDB | O, B_ILE_140   | N, A_ALA_11    | H, A_ALA_11     | 2.85    | 1.95    | 18.97                  |
| 1HGJ.PDB | O, B_PHE_138   | N, A_LEU_13    | H, A_LEU_13     | 2.97    | 2.00    | 8.62                   |
| 1HGJ.PDB | O, B_ARG_25    | N, A_CYS_14    | H, A_CYS_14     | 2.88    | 1.94    | 12.89                  |
| 1HGJ.PDB | O, B_GLY_136   | N, A_LEU_15    | H, A_LEU_15     | 2.93    | 1.95    | 2.37                   |
| 1HGJ.PDB | O, B_GLY_23    | N, A_GLY_16    | H, A_GLY_16     | 2.86    | 1.96    | 18.97                  |
| 1HGJ.PDB | O, A_HIS_18    | ND1, A_HIS_17  | HD1, A_HIS_17   | 2.94    | 2.07    | 22.50                  |
| 1HGJ.PDB | O, B_TRP_21    | N, A_HIS_18    | H, A_HIS_18     | 2.85    | 1.98    | 21.54                  |
| 1HGJ.PDB | OD1, A_ASN_322 | N, A_VAL_20    | H, A_VAL_20     | 2.76    | 1.81    | 10.35                  |
| 1HGJ.PDB | O, A_VAL_36    | N, A_THR_24    | H, A_THR_24     | 2.86    | 1.95    | 16.84                  |
| 1HGJ.PDB | O, A_ILE_34    | N, A_VAL_26    | H, A_VAL_26     | 2.80    | 1.86    | 12.04                  |
| 1HGJ.PDB | OE2, B_GLU_97  | NZ, A_LYS_27   | HZ1, A_LYS_27   | 2.81    | 1.78    | 9.30                   |
| 1HGJ.PDB | O, A_ASP_31    | N, A_THR_28    | H, A_THR_28     | 2.73    | 1.88    | 24.26                  |
| 1HGJ.PDB | O, A_VAL_26    | N, A_ILE_34    | H, A_ILE_34     | 2.90    | 1.95    | 11.45                  |
| 1HGJ.PDB | O, A_THR_24    | N, A_VAL_36    | H, A_VAL_36     | 2.81    | 1.84    | 5.48                   |
| 1HGJ.PDB | O, A_MET_320   | N, A_THR_37    | H, A_THR_37     | 2.87    | 1.90    | 7.32                   |
| 1HGJ.PDB | O, A_LEU_316   | N, A_THR_40    | H, A_THR_40     | 2.84    | 2.00    | 24.78                  |
| 1HGJ.PDB | O, A_LEU_314   | N, A_LEU_42    | H, A_LEU_42     | 2.83    | 1.95    | 21.41                  |
| 1HGJ.PDB | O, A_PHE_294   | N, A_GLN_44    | H, A_GLN_44     | 2.83    | 1.86    | 6.97                   |
| 1HGJ.PDB | O, A_SER_46    | NE2, A_GLN_44  | HE22, A_GLN_44  | 2.92    | 2.02    | 20.25                  |
| 1HGJ.PDB | OD2, A_ASP_275 | NZ, A_LYS_50   | HZ1, A_LYS_50   | 2.74    | 1.82    | 22.91                  |
| 1HGJ.PDB | O, A_PRO_273   | N, A_ILE_51    | H, A_ILE_51     | 2.86    | 1.90    | 9.76                   |
| 1HGJ.PDB | O, A_ASP_275   | N, A_ASN_53    | H, A_ASN_53     | 2.80    | 1.95    | 24.33                  |
| 1HGJ.PDB | O, A_GLU_280   | NE2, A_HIS_56  | HE2, A_HIS_56   | 2.97    | 2.05    | 17.77                  |
| 1HGJ.PDB | OD2, A_ASP_85  | N, A_ARG_57    | H, A_ARG_57     | 2.86    | 1.92    | 12.38                  |
| 1HGJ.PDB | O, A_THR_83    | NE, A_ARG_57   | HE, A_ARG_57    | 2.77    | 1.80    | 8.03                   |
| 1HGJ.PDB | O, A_LEU_86    | N, A_LEU_59    | H, A_LEU_59     | 2.86    | 1.91    | 11.37                  |
| 1HGJ.PDB | O, A_VAL_88    | N, A_GLY_61    | H, A_GLY_61     | 2.97    | 2.09    | 22.25                  |
| 1HGJ.PDB | OD1, A_ASP_60  | N, A_ILE_62    | H, A_ILE_62     | 2.87    | 1.94    | 15.09                  |
| 1HGJ.PDB | O, A_GLY_61    | N, A_CYS_64    | H, A_CYS_64     | 2.89    | 1.97    | 17.07                  |
| 1HGJ.PDB | O, A_LEU_66    | N, A_LEU_70    | H, A_LEU_70     | 2.88    | 1.99    | 19.66                  |
| 1HGJ.PDB | O, A_ILE_67    | N, A_LEU_71    | H, A_LEU_71     | 2.83    | 1.87    | 6.71                   |
| 1HGJ.PDB | O, A_ASP_68    | N, A_GLY_72    | H, A_GLY_72     | 2.88    | 1.97    | 18.26                  |
| 1HGJ.PDB | OD1, A_ASP_73  | N, A_HIS_75    | H, A_HIS_75     | 2.98    | 2.07    | 18.75                  |
| 1HGJ.PDB | OD1, A_ASP_73  | ND1, A_HIS_75  | HD1, A_HIS_75   | 2.83    | 1.91    | 17.40                  |
| 1HGJ.PDB | O, A_ASP_63    | NE2, A_HIS_75  | HE2, A_HIS_75   | 2.85    | 1.95    | 19.40                  |
| 1HGJ.PDB | O, A_ASP_73    | N, A_CYS_76    | H, A_CYS_76     | 2.78    | 1.84    | 13.08                  |
| 1HGJ.PDB | O, A_PRO_74    | N, A_ASP_77    | H, A_ASP_77     | 2.97    | 2.01    | 11.14                  |
| 1HGJ.PDB | O, A_ARG_57    | N, A_ASP_85    | H, A_ASP_85     | 2.81    | 1.89    | 16.54                  |
| 1HGJ.PDB | O, A_LEU_59    | N, A_VAL_88    | H, A_VAL_88     | 2.98    | 2.01    | 7.07                   |
| 1HGJ.PDB | O, A_MET_268   | N, A_GLU_89    | H, A_GLU_89     | 2.79    | 1.84    | 8.85                   |
| 1HGJ.PDB | OD1, A_ASP_60  | NE, A_ARG_90   | HE, A_ARG_90    | 2.88    | 1.91    | 7.56                   |
| 1HGJ.PDB | O, A_SER_270   | NH1, A_ARG_90  | HH11, A_ARG_90  | 2.70    | 1.81    | 23.07                  |
| 1HGJ.PDB | O, A_ALA_272   | NH1, A_ARG_90  | HH12, A_ARG_90  | 2.62    | 1.70    | 17.78                  |
| 1HGJ.PDB | OD2, A_ASP_60  | NH2, A_ARG_90  | HH21, A_ARG_90  | 2.81    | 1.82    | 10.05                  |
| 1HGJ.PDB | OD1, A_ASP_271 | N, A_SER_91    | H, A_SER_91     | 2.92    | 1.95    | 7.81                   |
| 1HGJ.PDB | OD1, A_ASP_271 | OG, A_SER_91   | HG, A_SER_91    | 2.98    | 2.13    | 24.27                  |
| 1HGJ.PDB | OD2, A_ASP_271 | OG, A_SER_91   | HG, A_SER_91    | 2.78    | 1.90    | 20.01                  |
| 1HGJ.PDB | OD2, A_ASP_68  | OG, A_SER_95   | HG, A_SER_95    | 2.95    | 2.05    | 19.19                  |
| 1HGJ.PDB | OD2, A_ASP_73  | N, A_ASN_96    | H, A_ASN_96     | 2.89    | 1.93    | 9.91                   |
| 1HGJ.PDB | O, A_ILE_230   | N, A_ASP_101   | H, A_ASP_101    | 2.95    | 2.08    | 23.05                  |
| 1HGJ.PDB | OD2, A_ASP_104 | OG, A_SER_107  | HG, A_SER_107   | 2.84    | 1.95    | 18.85                  |
| 1HGJ.PDB | O, A_TYR_105   | N, A_ARG_109   | H, A_ARG_109    | 2.84    | 1.86    | 2.92                   |
| 1HGJ.PDB | OE2, B_GLU_67  | NH2, A_ARG_109 | HH21, A_ARG_109 | 2.75    | 1.77    | 12.07                  |
| 1HGJ.PDB | OD2, F_ASP_79  | OG, A_SER_110  | HG, A_SER_110   | 2.94    | 1.98    | 10.39                  |
| 1HGJ.PDB | O, A_SER_107   | N, A_LEU_111   | H, A_LEU_111    | 2.86    | 1.89    | 5.37                   |
| 1HGJ.PDB | O, A_ARG_109   | N, A_ALA_113   | H, A_ALA_113    | 2.93    | 2.03    | 18.98                  |
| 1HGJ.PDB | O, A_SER_110   | N, A_SER_114   | H, A_SER_114    | 2.89    | 1.97    | 15.80                  |

|          |                |                |                 |      |      |       |
|----------|----------------|----------------|-----------------|------|------|-------|
| 1HGJ.PDB | OE2, A_GLU_119 | OG1, A_THR_117 | HG1, A_THR_117  | 2.87 | 1.94 | 12.44 |
| 1HGJ.PDB | O, A_GLU_82    | N, A_LEU_118   | H, A_LEU_118    | 2.93 | 2.00 | 16.05 |
| 1HGJ.PDB | O, A_TYR_257   | N, A_ILE_121   | H, A_ILE_121    | 2.85 | 1.88 | 7.23  |
| 1HGJ.PDB | O, A_ARG_255   | N, A_GLU_123   | H, A_GLU_123    | 2.94 | 1.98 | 10.39 |
| 1HGJ.PDB | O, A_THR_155   | N, A_THR_131   | H, A_THR_131    | 2.71 | 1.83 | 19.42 |
| 1HGJ.PDB | OD1, A_ASN_152 | N, A_ASN_133   | H, A_ASN_133    | 2.86 | 1.94 | 16.50 |
| 1HGJ.PDB | O, A_GLY_146   | N, A_SER_136   | H, A_SER_136    | 2.74 | 1.85 | 19.18 |
| 1HGJ.PDB | OG, A_SER_136  | N, A_ALA_138   | H, A_ALA_138    | 2.90 | 1.96 | 14.29 |
| 1HGJ.PDB | O, A_GLY_144   | NZ, A_LYS_140  | HZ1, A_LYS_140  | 2.76 | 1.78 | 16.23 |
| 1HGJ.PDB | OD1, A_ASN_137 | NZ, A_LYS_140  | HZ2, A_LYS_140  | 2.70 | 1.70 | 13.62 |
| 1HGJ.PDB | OD2, A_ASP_77  | NE, A_ARG_141  | HE, A_ARG_141   | 2.82 | 1.99 | 27.09 |
| 1HGJ.PDB | O, A_PHE_147   | NH1, A_ARG_141 | HH12, A_ARG_141 | 2.55 | 1.62 | 16.97 |
| 1HGJ.PDB | OD1, A_ASP_77  | NH2, A_ARG_141 | HH21, A_ARG_141 | 2.82 | 1.90 | 21.48 |
| 1HGJ.PDB | OD2, A_ASP_77  | NH2, A_ARG_141 | HH21, A_ARG_141 | 2.75 | 1.86 | 24.28 |
| 1HGJ.PDB | O, A_GLY_72    | NH2, A_ARG_141 | HH22, A_ARG_141 | 2.89 | 1.91 | 10.49 |
| 1HGJ.PDB | O, A_SER_136   | N, A_GLY_146   | H, A_GLY_146    | 2.92 | 1.99 | 15.16 |
| 1HGJ.PDB | O, A_GLY_72    | N, A_SER_149   | H, A_SER_149    | 2.81 | 1.92 | 19.89 |
| 1HGJ.PDB | O, A_ALA_253   | N, A_ASN_152   | H, A_ASN_152    | 2.77 | 1.94 | 25.94 |
| 1HGJ.PDB | OH, A_TYR_195  | NE1, A_TRP_153 | HE1, A_TRP_153  | 2.85 | 1.94 | 18.91 |
| 1HGJ.PDB | O, A_THR_131   | N, A_THR_155   | H, A_THR_155    | 2.98 | 2.03 | 13.10 |
| 1HGJ.PDB | O, A_LEU_194   | N, A_LYS_156   | H, A_LYS_156    | 2.96 | 2.04 | 16.82 |
| 1HGJ.PDB | O, A_SER_193   | NZ, A_LYS_156  | HZ2, A_LYS_156  | 2.76 | 1.77 | 15.28 |
| 1HGJ.PDB | O, A_SER_247   | N, A_LEU_164   | H, A_LEU_164    | 2.71 | 1.86 | 23.94 |
| 1HGJ.PDB | O, A_ILE_245   | N, A_VAL_166   | H, A_VAL_166    | 2.96 | 2.01 | 11.11 |
| 1HGJ.PDB | O, A_LEU_243   | OG1, A_THR_167 | HG1, A_THR_167  | 2.95 | 2.00 | 7.14  |
| 1HGJ.PDB | O, A_LEU_243   | N, A_MET_168   | H, A_MET_168    | 2.88 | 1.96 | 15.85 |
| 1HGJ.PDB | O, A_ASP_241   | N, A_ASN_170   | H, A_ASN_170    | 2.94 | 1.97 | 10.04 |
| 1HGJ.PDB | O, A_PHE_174   | ND2, A_ASN_170 | HD21, A_ASN_170 | 2.85 | 1.90 | 10.43 |
| 1HGJ.PDB | O, A_VAL_237   | ND2, A_ASN_170 | HD22, A_ASN_170 | 2.88 | 2.05 | 26.57 |
| 1HGJ.PDB | O, A_VAL_237   | N, A_LYS_176   | H, A_LYS_176    | 2.93 | 1.99 | 13.19 |
| 1HGJ.PDB | OE2, A_GLU_123 | NZ, A_LYS_176  | HZ1, A_LYS_176  | 2.68 | 1.78 | 24.65 |
| 1HGJ.PDB | O, A_THR_235   | N, A_TYR_178   | H, A_TYR_178    | 2.81 | 1.83 | 1.66  |
| 1HGJ.PDB | OE1, A_GLU_123 | OH, A_TYR_178  | HH, A_TYR_178   | 2.79 | 1.84 | 8.91  |
| 1HGJ.PDB | OG1, A_THR_235 | NE1, A_TRP_180 | HE1, A_TRP_180  | 2.92 | 1.93 | 4.44  |
| 1HGJ.PDB | O, A_ASN_250   | N, A_HIS_183   | H, A_HIS_183    | 2.90 | 1.98 | 16.84 |
| 1HGJ.PDB | O, A_ARG_229   | N, A_HIS_184   | H, A_HIS_184    | 2.83 | 1.87 | 9.59  |
| 1HGJ.PDB | OG, A_SER_231  | NE2, A_HIS_184 | HE2, A_HIS_184  | 2.75 | 1.92 | 26.36 |
| 1HGJ.PDB | OG1, A_THR_187 | N, A_GLU_190   | H, A_GLU_190    | 2.88 | 1.93 | 10.33 |
| 1HGJ.PDB | O, A_GLN_197   | NE2, A_GLN_191 | HE22, A_GLN_191 | 2.90 | 1.98 | 16.92 |
| 1HGJ.PDB | O, A_ASN_188   | OG1, A_THR_192 | HG1, A_THR_192  | 2.97 | 2.01 | 7.08  |
| 1HGJ.PDB | O, A_GLN_189   | N, A_SER_193   | H, A_SER_193    | 2.85 | 1.87 | 2.99  |
| 1HGJ.PDB | O, A_GLU_190   | N, A_LEU_194   | H, A_LEU_194    | 2.97 | 2.00 | 9.61  |
| 1HGJ.PDB | O, A_GLN_191   | N, A_TYR_195   | H, A_TYR_195    | 2.80 | 1.85 | 9.60  |
| 1HGJ.PDB | O, A_TYR_161   | NE2, A_GLN_197 | HE21, A_GLN_197 | 2.87 | 1.93 | 12.14 |
| 1HGJ.PDB | O, A_ASN_248   | NE2, A_GLN_197 | HE22, A_GLN_197 | 2.87 | 1.94 | 14.83 |
| 1HGJ.PDB | OD1, A_ASN_246 | NH2, A_ARG_201 | HH21, A_ARG_201 | 2.58 | 1.73 | 25.49 |
| 1HGJ.PDB | O, A_ILE_213   | N, A_VAL_202   | H, A_VAL_202    | 2.97 | 2.02 | 12.20 |
| 1HGJ.PDB | O, A_ASN_246   | N, A_THR_203   | H, A_THR_203    | 2.90 | 1.99 | 17.82 |
| 1HGJ.PDB | O, A_GLN_211   | N, A_VAL_204   | H, A_VAL_204    | 2.83 | 1.93 | 18.94 |
| 1HGJ.PDB | O, A_SER_209   | N, A_THR_206   | H, A_THR_206    | 2.89 | 1.93 | 8.74  |
| 1HGJ.PDB | OD1, A_ASP_241 | N, A_ARG_207   | H, A_ARG_207    | 2.88 | 1.92 | 9.03  |
| 1HGJ.PDB | OG1, A_THR_206 | OG, A_SER_209  | HG, A_SER_209   | 3.00 | 2.04 | 8.15  |
| 1HGJ.PDB | O, A_VAL_204   | N, A_GLN_211   | H, A_GLN_211    | 2.91 | 2.00 | 17.89 |
| 1HGJ.PDB | OG1, A_THR_203 | OG1, A_THR_212 | HG1, A_THR_212  | 2.89 | 1.93 | 3.12  |
| 1HGJ.PDB | O, A_VAL_202   | N, A_ILE_213   | H, A_ILE_213    | 2.84 | 1.92 | 16.69 |
| 1HGJ.PDB | OE1, C_GLN_210 | NH2, A_ARG_220 | HH21, A_ARG_220 | 2.67 | 1.78 | 22.50 |
| 1HGJ.PDB | O, A_ASN_216   | NH2, A_ARG_220 | HH22, A_ARG_220 | 2.78 | 1.89 | 22.30 |
| 1HGJ.PDB | O, A_LEU_226   | N, A_VAL_223   | H, A_VAL_223    | 2.84 | 1.88 | 10.14 |

|          |                |                |                 |      |      |       |
|----------|----------------|----------------|-----------------|------|------|-------|
| 1HGJ.PDB | O, A_CYS_97    | NE, A_ARG_224  | HE, A_ARG_224   | 2.80 | 1.95 | 24.47 |
| 1HGJ.PDB | O, A_CYS_97    | NH2, A_ARG_224 | HH21, A_ARG_224 | 2.93 | 2.07 | 26.25 |
| 1HGJ.PDB | O, A_VAL_223   | N, A_LEU_226   | H, A_LEU_226    | 2.91 | 1.97 | 13.14 |
| 1HGJ.PDB | O, A_SER_228   | NH1, A_ARG_229 | HH11, A_ARG_229 | 2.72 | 1.77 | 16.65 |
| 1HGJ.PDB | O, A_PRO_221   | NH2, A_ARG_229 | HH22, A_ARG_229 | 2.62 | 1.66 | 13.73 |
| 1HGJ.PDB | OD1, A_ASP_101 | OG, A_SER_231  | HG, A_SER_231   | 2.87 | 1.91 | 9.73  |
| 1HGJ.PDB | O, A_ASP_101   | N, A_ILE_232   | H, A_ILE_232    | 2.86 | 1.94 | 17.01 |
| 1HGJ.PDB | O, A_TRP_180   | N, A_TYR_233   | H, A_TYR_233    | 2.94 | 1.96 | 7.60  |
| 1HGJ.PDB | O, A_TYR_178   | N, A_THR_235   | H, A_THR_235    | 2.91 | 2.02 | 19.93 |
| 1HGJ.PDB | O, A_LYS_176   | N, A_VAL_237   | H, A_VAL_237    | 2.80 | 1.86 | 14.26 |
| 1HGJ.PDB | O, F_SER_71    | NZ, A_LYS_238  | HZ2, A_LYS_238  | 2.62 | 1.72 | 23.44 |
| 1HGJ.PDB | OE1, F_GLU_72  | NZ, A_LYS_238  | HZ3, A_LYS_238  | 2.90 | 1.90 | 13.91 |
| 1HGJ.PDB | O, A_ASN_170   | N, A_GLY_240   | H, A_GLY_240    | 2.83 | 1.97 | 23.20 |
| 1HGJ.PDB | OD1, A_ASP_241 | N, A_VAL_242   | H, A_VAL_242    | 2.77 | 1.93 | 25.51 |
| 1HGJ.PDB | O, A_MET_168   | N, A_LEU_243   | H, A_LEU_243    | 2.93 | 1.96 | 5.60  |
| 1HGJ.PDB | O, A_SER_205   | N, A_VAL_244   | H, A_VAL_244    | 2.98 | 2.03 | 12.76 |
| 1HGJ.PDB | O, A_VAL_166   | N, A_ILE_245   | H, A_ILE_245    | 2.88 | 1.93 | 13.19 |
| 1HGJ.PDB | O, A_THR_203   | N, A_ASN_246   | H, A_ASN_246    | 2.93 | 1.96 | 5.50  |
| 1HGJ.PDB | OD1, A_ASN_165 | ND2, A_ASN_246 | HD22, A_ASN_246 | 2.91 | 1.95 | 11.26 |
| 1HGJ.PDB | O, A_LEU_164   | N, A_SER_247   | H, A_SER_247    | 2.91 | 2.00 | 18.09 |
| 1HGJ.PDB | O, A_HIS_183   | ND2, A_ASN_250 | HD22, A_ASN_250 | 2.81 | 1.86 | 11.47 |
| 1HGJ.PDB | O, A_GLY_181   | N, A_ILE_252   | H, A_ILE_252    | 2.95 | 1.99 | 11.10 |
| 1HGJ.PDB | O, A_ASN_152   | N, A_ALA_253   | H, A_ALA_253    | 2.89 | 2.00 | 20.87 |
| 1HGJ.PDB | OD1, A_ASN_133 | NH2, A_ARG_255 | HH22, A_ARG_255 | 2.53 | 1.70 | 27.52 |
| 1HGJ.PDB | O, A_ILE_121   | N, A_TYR_257   | H, A_TYR_257    | 2.95 | 2.11 | 25.99 |
| 1HGJ.PDB | O, A_LEU_177   | N, A_PHE_258   | H, A_PHE_258    | 2.93 | 1.97 | 8.17  |
| 1HGJ.PDB | OG, A_SER_115  | N, A_ARG_261   | H, A_ARG_261    | 2.93 | 1.99 | 14.40 |
| 1HGJ.PDB | OE2, A_GLU_119 | NH1, A_ARG_261 | HH12, A_ARG_261 | 2.65 | 1.82 | 28.35 |
| 1HGJ.PDB | OE1, A_GLU_119 | NH2, A_ARG_261 | HH22, A_ARG_261 | 2.90 | 1.99 | 23.18 |
| 1HGJ.PDB | OD2, A_ASP_85  | NZ, A_LYS_264  | HZ3, A_LYS_264  | 2.84 | 1.85 | 15.53 |
| 1HGJ.PDB | O, A_PHE_87    | N, A_MET_268   | H, A_MET_268    | 2.87 | 1.96 | 18.47 |
| 1HGJ.PDB | O, A_PRO_284   | OG, A_SER_270  | HG, A_SER_270   | 2.82 | 1.88 | 11.71 |
| 1HGJ.PDB | OG, A_SER_270  | N, A_ALA_272   | H, A_ALA_272    | 2.99 | 2.05 | 13.78 |
| 1HGJ.PDB | O, A_ILE_51    | N, A_ASP_275   | H, A_ASP_275    | 2.92 | 2.02 | 19.32 |
| 1HGJ.PDB | OD1, A_ASP_275 | N, A_THR_276   | H, A_THR_276    | 2.81 | 1.96 | 23.63 |
| 1HGJ.PDB | O, A_ASN_54    | N, A_SER_279   | H, A_SER_279    | 2.81 | 1.88 | 14.91 |
| 1HGJ.PDB | O, A_TYR_302   | N, A_ILE_282   | H, A_ILE_282    | 2.92 | 1.95 | 7.78  |
| 1HGJ.PDB | O, A_THR_283   | N, A_GLY_286   | H, A_GLY_286    | 2.78 | 1.86 | 14.62 |
| 1HGJ.PDB | O, A_LYS_50    | N, A_SER_287   | H, A_SER_287    | 2.84 | 1.87 | 6.72  |
| 1HGJ.PDB | O, A_ALA_304   | ND2, A_ASN_290 | HD22, A_ASN_290 | 2.82 | 1.91 | 18.14 |
| 1HGJ.PDB | OE1, A_GLN_44  | NZ, A_LYS_292  | HZ1, A_LYS_292  | 2.71 | 1.70 | 11.30 |
| 1HGJ.PDB | OD2, A_ASP_291 | NZ, A_LYS_292  | HZ3, A_LYS_292  | 2.80 | 1.82 | 17.27 |
| 1HGJ.PDB | O, A_LYS_307   | N, A_GLN_295   | H, A_GLN_295    | 2.89 | 1.99 | 19.47 |
| 1HGJ.PDB | O, A_ASN_298   | NE2, A_GLN_295 | HE21, A_GLN_295 | 2.78 | 1.82 | 8.78  |
| 1HGJ.PDB | O, A_GLN_44    | N, A_ASN_296   | H, A_ASN_296    | 2.84 | 1.91 | 14.48 |
| 1HGJ.PDB | OE1, A_GLN_295 | N, A_VAL_297   | H, A_VAL_297    | 2.74 | 1.95 | 29.44 |
| 1HGJ.PDB | O, B_LYS_68    | NZ, A_LYS_299  | HZ2, A_LYS_299  | 2.95 | 1.96 | 14.91 |
| 1HGJ.PDB | OD1, A_ASN_298 | N, A_ILE_300   | H, A_ILE_300    | 2.86 | 1.95 | 16.95 |
| 1HGJ.PDB | O, A_ILE_282   | N, A_TYR_302   | H, A_TYR_302    | 2.88 | 2.05 | 26.62 |
| 1HGJ.PDB | O, A_LYS_264   | OH, A_TYR_302  | HH, A_TYR_302   | 2.66 | 1.88 | 29.88 |
| 1HGJ.PDB | O, B_LYS_62    | N, A_GLY_303   | H, A_GLY_303    | 2.93 | 1.97 | 8.41  |
| 1HGJ.PDB | O, A_GLN_295   | N, A_VAL_309   | H, A_VAL_309    | 2.92 | 2.10 | 27.87 |
| 1HGJ.PDB | OE2, A_GLU_41  | N, A_LEU_314   | H, A_LEU_314    | 2.79 | 1.86 | 13.81 |
| 1HGJ.PDB | OE1, A_GLU_41  | NZ, A_LYS_315  | HZ3, A_LYS_315  | 2.85 | 1.90 | 20.12 |
| 1HGJ.PDB | O, A_THR_40    | N, A_LEU_316   | H, A_LEU_316    | 2.80 | 1.86 | 11.89 |
| 1HGJ.PDB | OD1, B_ASN_104 | N, A_ALA_317   | H, A_ALA_317    | 2.74 | 1.81 | 13.01 |
| 1HGJ.PDB | O, A_ASN_38    | N, A_THR_318   | H, A_THR_318    | 2.86 | 1.94 | 16.91 |
| 1HGJ.PDB | O, A_VAL_20    | ND2, A_ASN_322 | HD21, A_ASN_322 | 2.87 | 1.93 | 14.22 |



|          |                |                |                 |      |      |       |
|----------|----------------|----------------|-----------------|------|------|-------|
| 1HGJ.PDB | OE2, A_GLU_35  | ND2, A_ASN_322 | HD22, A_ASN_322 | 2.88 | 1.99 | 20.96 |
| 1HGJ.PDB | OE1, A_GLU_325 | NZ, A_LYS_326  | HZ3, A_LYS_326  | 2.92 | 1.93 | 15.95 |
| 1HGJ.PDB | O, A_PRO_21    | NE2, A_GLN_327 | HE22, A_GLN_327 | 2.76 | 1.91 | 24.52 |
| 1HGJ.PDB | OE1, B_GLU_15  | N, A_THR_328   | H, A_THR_328    | 2.99 | 2.03 | 9.44  |
| 1HGJ.PDB | OD2, B_ASP_112 | N, B_GLY_1     | H2, B_GLY_1     | 2.78 | 1.79 | 13.86 |
| 1HGJ.PDB | OD1, B_ASP_109 | N, B_LEU_2     | H, B_LEU_2      | 2.86 | 1.98 | 21.89 |
| 1HGJ.PDB | OD2, B_ASP_112 | N, B_PHE_3     | H, B_PHE_3      | 2.78 | 1.97 | 28.02 |
| 1HGJ.PDB | OD2, B_ASP_112 | N, B_GLY_4     | H, B_GLY_4      | 2.88 | 1.96 | 16.60 |
| 1HGJ.PDB | OD1, B_ASP_112 | N, B_ALA_5     | H, B_ALA_5      | 2.84 | 1.99 | 24.18 |
| 1HGJ.PDB | OD1, B_ASP_112 | N, B_ILE_6     | H, B_ILE_6      | 3.00 | 2.08 | 16.65 |
| 1HGJ.PDB | O, B_GLY_4     | N, B_PHE_9     | H, B_PHE_9      | 2.78 | 1.85 | 13.96 |
| 1HGJ.PDB | O, B_GLY_13    | ND2, B_ASN_12  | HD22, B_ASN_12  | 2.87 | 1.99 | 21.80 |
| 1HGJ.PDB | O, A_VAL_323   | N, B_GLY_13    | H, B_GLY_13     | 2.69 | 1.76 | 11.68 |
| 1HGJ.PDB | O, A_HIS_17    | N, B_TRP_14    | H, B_TRP_14     | 2.84 | 1.89 | 12.22 |
| 1HGJ.PDB | OG1, B_THR_41  | N, B_TRP_21    | H, B_TRP_21     | 2.94 | 2.02 | 16.97 |
| 1HGJ.PDB | O, A_GLY_16    | N, B_GLY_23    | H, B_GLY_23     | 2.94 | 2.02 | 17.07 |
| 1HGJ.PDB | O, B_ALA_35    | N, B_PHE_24    | H, B_PHE_24     | 2.82 | 1.86 | 8.22  |
| 1HGJ.PDB | O, A_CYS_14    | N, B_ARG_25    | H, B_ARG_25     | 2.98 | 2.05 | 15.51 |
| 1HGJ.PDB | OE1, B_GLN_34  | NE, B_ARG_25   | HE, B_ARG_25    | 2.57 | 1.79 | 29.34 |
| 1HGJ.PDB | OE2, A_GLU_325 | NH2, B_ARG_25  | HH22, B_ARG_25  | 2.97 | 2.01 | 15.94 |
| 1HGJ.PDB | O, B_GLY_33    | N, B_HIS_26    | H, B_HIS_26     | 2.69 | 1.82 | 21.72 |
| 1HGJ.PDB | O, B_GLY_31    | N, B_ASN_28    | H, B_ASN_28     | 2.73 | 1.80 | 14.27 |
| 1HGJ.PDB | O, B_ASN_28    | N, B_GLY_31    | H, B_GLY_31     | 2.95 | 2.06 | 20.54 |
| 1HGJ.PDB | O, B_HIS_26    | N, B_GLY_33    | H, B_GLY_33     | 2.91 | 1.99 | 16.91 |
| 1HGJ.PDB | O, B_PHE_24    | N, B_ALA_35    | H, B_ALA_35     | 2.77 | 1.91 | 23.35 |
| 1HGJ.PDB | O, B_TYR_22    | N, B_ASP_37    | H, B_ASP_37     | 2.68 | 1.76 | 13.66 |
| 1HGJ.PDB | OD2, B_ASP_37  | N, B_SER_40    | H, B_SER_40     | 2.93 | 1.96 | 8.36  |
| 1HGJ.PDB | O, B_ASP_37    | OG1, B_THR_41  | HG1, B_THR_41   | 2.75 | 1.82 | 13.86 |
| 1HGJ.PDB | O, B_LEU_38    | N, B_GLN_42    | H, B_GLN_42     | 2.95 | 2.02 | 15.28 |
| 1HGJ.PDB | OD1, B_ASP_46  | NE2, B_GLN_42  | HE22, B_GLN_42  | 2.81 | 1.92 | 21.14 |
| 1HGJ.PDB | O, B_LYS_39    | N, B_ALA_43    | H, B_ALA_43     | 2.97 | 2.02 | 10.62 |
| 1HGJ.PDB | O, B_SER_40    | N, B_ALA_44    | H, B_ALA_44     | 2.96 | 1.98 | 1.15  |
| 1HGJ.PDB | O, B_THR_41    | N, B_ILE_45    | H, B_ILE_45     | 2.88 | 1.92 | 10.00 |
| 1HGJ.PDB | O, B_GLN_42    | N, B_ASP_46    | H, B_ASP_46     | 2.77 | 1.81 | 2.39  |
| 1HGJ.PDB | OE2, B_GLU_114 | NE2, B_GLN_47  | HE21, B_GLN_47  | 2.96 | 2.05 | 17.93 |
| 1HGJ.PDB | O, B_ALA_43    | NE2, B_GLN_47  | HE22, B_GLN_47  | 2.92 | 2.04 | 21.05 |
| 1HGJ.PDB | O, B_ILE_45    | N, B_ASN_49    | H, B_ASN_49     | 2.87 | 1.94 | 16.22 |
| 1HGJ.PDB | O, B_ASP_46    | N, B_GLY_50    | H, B_GLY_50     | 2.84 | 1.96 | 21.96 |
| 1HGJ.PDB | OG1, B_THR_107 | NZ, B_LYS_51   | HZ1, B_LYS_51   | 2.96 | 1.99 | 17.76 |
| 1HGJ.PDB | OE1, B_GLU_103 | NZ, B_LYS_51   | HZ2, B_LYS_51   | 2.78 | 1.74 | 6.16  |
| 1HGJ.PDB | ND1, B_HIS_106 | NZ, B_LYS_51   | HZ3, B_LYS_51   | 2.79 | 1.82 | 16.46 |
| 1HGJ.PDB | O, B_ILE_48    | N, B_LEU_52    | H, B_LEU_52     | 2.87 | 1.97 | 17.59 |
| 1HGJ.PDB | O, B_ASN_49    | N, B_ASN_53    | H, B_ASN_53     | 2.88 | 1.95 | 13.58 |
| 1HGJ.PDB | O, E_THR_28    | NE, B_ARG_54   | HE, B_ARG_54    | 3.00 | 2.04 | 10.82 |
| 1HGJ.PDB | OE1, B_GLU_57  | NH1, B_ARG_54  | HH11, B_ARG_54  | 2.87 | 1.87 | 9.43  |
| 1HGJ.PDB | OE2, F_GLU_97  | NH2, B_ARG_54  | HH22, B_ARG_54  | 2.77 | 1.81 | 15.09 |
| 1HGJ.PDB | OD2, F_ASP_86  | NZ, B_LYS_62   | HZ1, B_LYS_62   | 2.65 | 1.75 | 23.55 |
| 1HGJ.PDB | OD2, F_ASP_90  | NZ, B_LYS_62   | HZ3, B_LYS_62   | 2.74 | 1.89 | 28.52 |
| 1HGJ.PDB | OG, A_SER_110  | NE2, B_HIS_64  | HE2, B_HIS_64   | 2.89 | 1.93 | 11.21 |
| 1HGJ.PDB | O, A_LYS_299   | NZ, B_LYS_68   | HZ1, B_LYS_68   | 2.90 | 1.89 | 11.39 |
| 1HGJ.PDB | OE2, B_GLU_85  | NZ, B_LYS_68   | HZ2, B_LYS_68   | 2.78 | 1.76 | 8.72  |
| 1HGJ.PDB | OG, C_SER_107  | N, B_ARG_76    | H, B_ARG_76     | 2.84 | 1.89 | 10.24 |
| 1HGJ.PDB | OE2, D_GLU_81  | NE, B_ARG_76   | HE, B_ARG_76    | 2.90 | 1.93 | 10.80 |
| 1HGJ.PDB | OE2, D_GLU_74  | NH1, B_ARG_76  | HH12, B_ARG_76  | 2.88 | 1.87 | 5.28  |
| 1HGJ.PDB | OE1, D_GLU_81  | NH2, B_ARG_76  | HH21, B_ARG_76  | 2.72 | 1.72 | 3.64  |
| 1HGJ.PDB | OE1, D_GLU_74  | NH2, B_ARG_76  | HH22, B_ARG_76  | 2.85 | 1.84 | 3.19  |
| 1HGJ.PDB | OE1, B_GLU_74  | NE2, B_GLN_78  | HE22, B_GLN_78  | 2.90 | 1.95 | 12.93 |
| 1HGJ.PDB | O, B_GLY_75    | N, B_ASP_79    | H, B_ASP_79     | 2.93 | 2.00 | 14.44 |

|          |                |                |                 |      |      |       |
|----------|----------------|----------------|-----------------|------|------|-------|
| 1HGJ.PDB | O, B_ILE_77    | N, B_GLU_81    | H, B_GLU_81     | 2.99 | 2.02 | 6.22  |
| 1HGJ.PDB | O, B_GLN_78    | N, B_LYS_82    | H, B_LYS_82     | 2.95 | 1.99 | 7.96  |
| 1HGJ.PDB | O, B_ASP_79    | N, B_TYR_83    | H, B_TYR_83     | 2.84 | 1.90 | 13.83 |
| 1HGJ.PDB | OE1, D_GLU_85  | OH, B_TYR_83   | HH, B_TYR_83    | 2.67 | 1.83 | 24.12 |
| 1HGJ.PDB | O, B_LEU_80    | N, B_VAL_84    | H, B_VAL_84     | 2.83 | 1.86 | 5.05  |
| 1HGJ.PDB | O, B_LYS_82    | N, B_ASP_86    | H, B_ASP_86     | 2.93 | 1.98 | 11.14 |
| 1HGJ.PDB | O, B_TYR_83    | N, B_THR_87    | H, B_THR_87     | 2.88 | 1.94 | 13.57 |
| 1HGJ.PDB | O, B_VAL_84    | N, B_LYS_88    | H, B_LYS_88     | 2.97 | 2.03 | 12.68 |
| 1HGJ.PDB | OH, F_TYR_83   | NZ, B_LYS_88   | HZ1, B_LYS_88   | 2.78 | 1.75 | 7.42  |
| 1HGJ.PDB | O, B_GLU_85    | N, B_ILE_89    | H, B_ILE_89     | 2.86 | 1.88 | 2.57  |
| 1HGJ.PDB | O, B_LYS_88    | N, B_TRP_92    | H, B_TRP_92     | 2.95 | 1.97 | 4.34  |
| 1HGJ.PDB | O, B_ILE_89    | N, B_SER_93    | H, B_SER_93     | 2.84 | 1.96 | 21.34 |
| 1HGJ.PDB | O, B_ILE_89    | OG, B_SER_93   | HG, B_SER_93    | 2.85 | 1.94 | 16.10 |
| 1HGJ.PDB | O, B_ASP_90    | N, B_TYR_94    | H, B_TYR_94     | 2.84 | 1.94 | 19.37 |
| 1HGJ.PDB | O, B_TRP_92    | N, B_ALA_96    | H, B_ALA_96     | 2.98 | 2.03 | 11.55 |
| 1HGJ.PDB | O, B_TYR_94    | N, B_LEU_98    | H, B_LEU_98     | 2.96 | 1.99 | 5.51  |
| 1HGJ.PDB | O, B_ASN_95    | N, B_LEU_99    | H, B_LEU_99     | 2.87 | 1.95 | 16.33 |
| 1HGJ.PDB | O, B_LEU_98    | N, B_LEU_102   | H, B_LEU_102    | 2.95 | 1.98 | 7.34  |
| 1HGJ.PDB | O, B_LEU_99    | N, B_GLU_103   | H, B_GLU_103    | 2.95 | 1.99 | 9.27  |
| 1HGJ.PDB | O, B_VAL_100   | N, B_ASN_104   | H, B_ASN_104    | 2.84 | 1.88 | 10.60 |
| 1HGJ.PDB | O, A_LYS_27    | ND2, B_ASN_104 | HD22, B_ASN_104 | 2.89 | 1.94 | 10.52 |
| 1HGJ.PDB | O, B_LEU_102   | N, B_HIS_106   | H, B_HIS_106    | 2.93 | 1.97 | 8.51  |
| 1HGJ.PDB | O, B_GLU_103   | N, B_THR_107   | H, B_THR_107    | 2.83 | 1.93 | 19.44 |
| 1HGJ.PDB | O, B_HIS_106   | N, B_LEU_110   | H, B_LEU_110    | 2.81 | 1.85 | 8.24  |
| 1HGJ.PDB | O, B_THR_107   | OG1, B_THR_111 | HG1, B_THR_111  | 2.81 | 1.92 | 19.54 |
| 1HGJ.PDB | O, B_ASP_109   | N, B_SER_113   | H, B_SER_113    | 2.79 | 1.83 | 7.83  |
| 1HGJ.PDB | O, F_LEU_2     | OG, B_SER_113  | HG, B_SER_113   | 2.74 | 1.91 | 25.16 |
| 1HGJ.PDB | O, B_LEU_110   | N, B_GLU_114   | H, B_GLU_114    | 2.95 | 1.99 | 10.32 |
| 1HGJ.PDB | O, B_ASP_112   | N, B_ASN_116   | H, B_ASN_116    | 2.97 | 2.01 | 9.78  |
| 1HGJ.PDB | O, B_SER_113   | N, B_LYS_117   | H, B_LYS_117    | 2.71 | 1.84 | 21.48 |
| 1HGJ.PDB | O, B_GLU_114   | N, B_LEU_118   | H, B_LEU_118    | 2.97 | 2.01 | 9.85  |
| 1HGJ.PDB | O, B_ASN_116   | N, B_GLU_120   | H, B_GLU_120    | 2.95 | 1.98 | 2.37  |
| 1HGJ.PDB | O, B_LYS_117   | N, B_LYS_121   | H, B_LYS_121    | 2.92 | 2.02 | 19.46 |
| 1HGJ.PDB | O, B_PHE_119   | N, B_ARG_123   | H, B_ARG_123    | 2.95 | 1.98 | 8.48  |
| 1HGJ.PDB | OE2, B_GLU_120 | NH1, B_ARG_123 | HH11, B_ARG_123 | 2.74 | 1.86 | 23.95 |
| 1HGJ.PDB | OE1, F_GLU_132 | NE, B_ARG_124  | HE, B_ARG_124   | 2.82 | 2.00 | 27.29 |
| 1HGJ.PDB | OE2, F_GLU_132 | NE, B_ARG_124  | HE, B_ARG_124   | 2.91 | 2.02 | 20.91 |
| 1HGJ.PDB | O, B_HIS_159   | ND2, B_ASN_129 | HD21, B_ASN_129 | 2.96 | 2.00 | 9.85  |
| 1HGJ.PDB | OH, B_TYR_157  | ND2, B_ASN_129 | HD22, B_ASN_129 | 2.77 | 1.84 | 15.18 |
| 1HGJ.PDB | O, B_LYS_139   | N, B_GLU_131   | H, B_GLU_131    | 2.92 | 1.98 | 12.78 |
| 1HGJ.PDB | O, B_CYS_137   | N, B_MET_133   | H, B_MET_133    | 2.85 | 1.92 | 15.10 |
| 1HGJ.PDB | O, A_LEU_13    | N, B_PHE_138   | H, B_PHE_138    | 2.71 | 1.86 | 23.78 |
| 1HGJ.PDB | O, B_GLU_131   | N, B_LYS_139   | H, B_LYS_139    | 2.83 | 1.87 | 8.18  |
| 1HGJ.PDB | O, A_ALA_11    | N, B_ILE_140   | H, B_ILE_140    | 2.77 | 1.86 | 16.77 |
| 1HGJ.PDB | O, B_ASN_129   | N, B_TYR_141   | H, B_TYR_141    | 2.93 | 1.98 | 12.18 |
| 1HGJ.PDB | OE2, B_GLU_165 | N, B_LYS_143   | H, B_LYS_143    | 2.97 | 2.02 | 13.21 |
| 1HGJ.PDB | OE1, B_GLU_30  | N, B_ASN_146   | H, B_ASN_146    | 2.90 | 1.96 | 14.42 |
| 1HGJ.PDB | O, B_ASP_145   | N, B_ILE_149   | H, B_ILE_149    | 2.89 | 1.94 | 10.22 |
| 1HGJ.PDB | O, B_ASN_146   | N, B_GLU_150   | H, B_GLU_150    | 2.88 | 1.95 | 15.40 |
| 1HGJ.PDB | O, B_ALA_147   | N, B_SER_151   | H, B_SER_151    | 2.86 | 1.97 | 19.97 |
| 1HGJ.PDB | O, B_CYS_148   | OG, B_SER_151  | HG, B_SER_151   | 2.69 | 1.85 | 23.77 |
| 1HGJ.PDB | O, B_GLU_150   | N, B_ASN_154   | H, B_ASN_154    | 2.80 | 1.82 | 1.74  |
| 1HGJ.PDB | OE2, B_GLU_150 | ND2, B_ASN_154 | HD21, B_ASN_154 | 2.81 | 2.00 | 28.55 |
| 1HGJ.PDB | O, B_SER_151   | N, B_THR_156   | H, B_THR_156    | 2.71 | 1.89 | 26.64 |
| 1HGJ.PDB | OD1, B_ASN_154 | OG1, B_THR_156 | HG1, B_THR_156  | 2.67 | 1.80 | 19.98 |
| 1HGJ.PDB | OD1, B_ASP_158 | N, B_ASP_160   | H, B_ASP_160    | 2.91 | 2.05 | 23.96 |
| 1HGJ.PDB | O, B_HIS_159   | N, B_TYR_162   | H, B_TYR_162    | 2.94 | 2.06 | 21.10 |
| 1HGJ.PDB | O, F_ARG_170   | NH1, B_ARG_163 | HH12, B_ARG_163 | 2.72 | 1.75 | 12.61 |

|          |                |                |                 |      |      |       |
|----------|----------------|----------------|-----------------|------|------|-------|
| 1HGJ.PDB | O, B_TYR_162   | N, B_ALA_166   | H, B_ALA_166    | 2.86 | 1.89 | 2.61  |
| 1HGJ.PDB | O, B_ARG_163   | N, B_LEU_167   | H, B_LEU_167    | 2.77 | 1.81 | 8.42  |
| 1HGJ.PDB | O, B_ALA_166   | N, B_ARG_170   | H, B_ARG_170    | 2.83 | 1.95 | 21.36 |
| 1HGJ.PDB | O, B_GLU_128   | NE, B_ARG_170  | HE, B_ARG_170   | 2.79 | 1.92 | 22.95 |
| 1HGJ.PDB | OE2, B_GLU_131 | NH1, B_ARG_170 | HH11, B_ARG_170 | 2.80 | 1.80 | 6.39  |
| 1HGJ.PDB | O, B_LEU_167   | N, B_PHE_171   | H, B_PHE_171    | 2.93 | 2.01 | 16.69 |
| 1HGJ.PDB | O, D_ILE_140   | N, C_ALA_11    | H, C_ALA_11     | 2.85 | 1.95 | 19.06 |
| 1HGJ.PDB | O, D_GLN_27    | N, C_THR_12    | H, C_THR_12     | 2.99 | 2.03 | 8.05  |
| 1HGJ.PDB | O, D_PHE_138   | N, C_LEU_13    | H, C_LEU_13     | 2.99 | 2.02 | 7.89  |
| 1HGJ.PDB | O, D_ARG_25    | N, C_CYS_14    | H, C_CYS_14     | 2.76 | 1.85 | 16.80 |
| 1HGJ.PDB | O, D_GLY_136   | N, C_LEU_15    | H, C_LEU_15     | 2.95 | 1.97 | 3.95  |
| 1HGJ.PDB | O, D_GLY_23    | N, C_GLY_16    | H, C_GLY_16     | 2.89 | 1.98 | 18.54 |
| 1HGJ.PDB | O, C_HIS_18    | ND1, C_HIS_17  | HD1, C_HIS_17   | 2.94 | 2.08 | 23.78 |
| 1HGJ.PDB | O, D_TRP_21    | N, C_HIS_18    | H, C_HIS_18     | 2.86 | 1.97 | 20.63 |
| 1HGJ.PDB | OD1, C_ASN_322 | N, C_VAL_20    | H, C_VAL_20     | 2.78 | 1.82 | 9.76  |
| 1HGJ.PDB | O, C_VAL_36    | N, C_THR_24    | H, C_THR_24     | 2.86 | 1.93 | 13.58 |
| 1HGJ.PDB | O, C_ILE_34    | N, C_VAL_26    | H, C_VAL_26     | 2.80 | 1.85 | 11.08 |
| 1HGJ.PDB | OE2, D_GLU_97  | NZ, C_LYS_27   | HZ1, C_LYS_27   | 2.82 | 1.80 | 8.63  |
| 1HGJ.PDB | O, C_ASP_31    | N, C_THR_28    | H, C_THR_28     | 2.73 | 1.88 | 23.51 |
| 1HGJ.PDB | O, C_VAL_26    | N, C_ILE_34    | H, C_ILE_34     | 2.90 | 1.95 | 12.50 |
| 1HGJ.PDB | O, C_THR_24    | N, C_VAL_36    | H, C_VAL_36     | 2.82 | 1.85 | 5.74  |
| 1HGJ.PDB | O, C_MET_320   | N, C_THR_37    | H, C_THR_37     | 2.89 | 1.92 | 6.83  |
| 1HGJ.PDB | O, C_LEU_316   | N, C_THR_40    | H, C_THR_40     | 2.90 | 2.05 | 25.12 |
| 1HGJ.PDB | O, C_LEU_314   | N, C_LEU_42    | H, C_LEU_42     | 2.80 | 1.93 | 22.39 |
| 1HGJ.PDB | O, C_PHE_294   | N, C_GLN_44    | H, C_GLN_44     | 2.82 | 1.85 | 7.42  |
| 1HGJ.PDB | O, C_SER_46    | NE2, C_GLN_44  | HE22, C_GLN_44  | 2.90 | 2.00 | 19.73 |
| 1HGJ.PDB | O, C_ASN_285   | OG, C_SER_47   | HG, C_SER_47    | 2.83 | 1.92 | 15.29 |
| 1HGJ.PDB | OD2, C_ASP_275 | NZ, C_LYS_50   | HZ1, C_LYS_50   | 2.74 | 1.82 | 22.76 |
| 1HGJ.PDB | O, C_PRO_273   | N, C_ILE_51    | H, C_ILE_51     | 2.85 | 1.89 | 9.03  |
| 1HGJ.PDB | O, C_ASP_275   | N, C_ASN_53    | H, C_ASN_53     | 2.78 | 1.94 | 25.31 |
| 1HGJ.PDB | O, C_GLU_280   | NE2, C_HIS_56  | HE2, C_HIS_56   | 2.97 | 2.05 | 17.85 |
| 1HGJ.PDB | OD2, C_ASP_85  | N, C_ARG_57    | H, C_ARG_57     | 2.84 | 1.90 | 12.58 |
| 1HGJ.PDB | O, C_THR_83    | NE, C_ARG_57   | HE, C_ARG_57    | 2.76 | 1.80 | 8.04  |
| 1HGJ.PDB | O, C_LEU_86    | N, C_LEU_59    | H, C_LEU_59     | 2.87 | 1.92 | 10.21 |
| 1HGJ.PDB | O, C_VAL_88    | N, C_GLY_61    | H, C_GLY_61     | 2.97 | 2.10 | 22.49 |
| 1HGJ.PDB | OD1, C_ASP_60  | N, C_ILE_62    | H, C_ILE_62     | 2.85 | 1.93 | 15.07 |
| 1HGJ.PDB | O, C_GLY_61    | N, C_CYS_64    | H, C_CYS_64     | 2.87 | 1.96 | 17.46 |
| 1HGJ.PDB | O, C_LEU_66    | N, C_LEU_70    | H, C_LEU_70     | 2.89 | 2.00 | 19.99 |
| 1HGJ.PDB | O, C_ILE_67    | N, C_LEU_71    | H, C_LEU_71     | 2.82 | 1.86 | 8.52  |
| 1HGJ.PDB | O, C_ASP_68    | N, C_GLY_72    | H, C_GLY_72     | 2.86 | 1.96 | 18.14 |
| 1HGJ.PDB | OD1, C_ASP_73  | N, C_HIS_75    | H, C_HIS_75     | 2.96 | 2.05 | 18.04 |
| 1HGJ.PDB | OD1, C_ASP_73  | ND1, C_HIS_75  | HD1, C_HIS_75   | 2.80 | 1.89 | 17.49 |
| 1HGJ.PDB | O, C_ASP_63    | NE2, C_HIS_75  | HE2, C_HIS_75   | 2.82 | 1.92 | 19.39 |
| 1HGJ.PDB | O, C_ASP_73    | N, C_CYS_76    | H, C_CYS_76     | 2.78 | 1.84 | 12.95 |
| 1HGJ.PDB | O, C_PRO_74    | N, C_ASP_77    | H, C_ASP_77     | 2.96 | 2.00 | 11.06 |
| 1HGJ.PDB | O, C_ARG_57    | N, C_ASP_85    | H, C_ASP_85     | 2.81 | 1.90 | 16.89 |
| 1HGJ.PDB | O, C_LEU_59    | N, C_VAL_88    | H, C_VAL_88     | 2.97 | 2.00 | 6.49  |
| 1HGJ.PDB | O, C_MET_268   | N, C_GLU_89    | H, C_GLU_89     | 2.80 | 1.85 | 10.39 |
| 1HGJ.PDB | OD1, C_ASP_60  | NE, C_ARG_90   | HE, C_ARG_90    | 2.88 | 1.91 | 9.03  |
| 1HGJ.PDB | O, C_SER_270   | NH1, C_ARG_90  | HH11, C_ARG_90  | 2.68 | 1.80 | 24.07 |
| 1HGJ.PDB | O, C_ALA_272   | NH1, C_ARG_90  | HH12, C_ARG_90  | 2.62 | 1.70 | 18.50 |
| 1HGJ.PDB | OD2, C_ASP_60  | NH2, C_ARG_90  | HH21, C_ARG_90  | 2.78 | 1.79 | 9.66  |
| 1HGJ.PDB | OD1, C_ASP_271 | N, C_SER_91    | H, C_SER_91     | 2.92 | 1.95 | 7.70  |
| 1HGJ.PDB | OD1, C_ASP_271 | OG, C_SER_91   | HG, C_SER_91    | 2.99 | 2.16 | 26.38 |
| 1HGJ.PDB | OD2, C_ASP_271 | OG, C_SER_91   | HG, C_SER_91    | 2.81 | 1.92 | 18.67 |
| 1HGJ.PDB | OD2, C_ASP_68  | OG, C_SER_95   | HG, C_SER_95    | 2.93 | 1.99 | 14.68 |
| 1HGJ.PDB | OD2, C_ASP_73  | N, C_ASN_96    | H, C_ASN_96     | 2.87 | 1.92 | 11.70 |
| 1HGJ.PDB | OD1, C_ASP_68  | OH, C_TYR_100  | HH, C_TYR_100   | 2.88 | 1.95 | 14.58 |

|          |                |                |                 |      |      |       |
|----------|----------------|----------------|-----------------|------|------|-------|
| 1HGJ.PDB | O, C_ILE_230   | N, C_ASP_101   | H, C_ASP_101    | 2.91 | 2.04 | 23.02 |
| 1HGJ.PDB | OD2, C_ASP_104 | OG, C_SER_107  | HG, C_SER_107   | 2.90 | 1.99 | 17.96 |
| 1HGJ.PDB | O, C_TYR_105   | N, C_ARG_109   | H, C_ARG_109    | 2.82 | 1.85 | 3.87  |
| 1HGJ.PDB | OE2, D_GLU_67  | NH2, C_ARG_109 | HH21, C_ARG_109 | 2.76 | 1.78 | 13.33 |
| 1HGJ.PDB | OD2, B_ASP_79  | OG, C_SER_110  | HG, C_SER_110   | 2.79 | 1.87 | 14.95 |
| 1HGJ.PDB | O, C_SER_107   | N, C_LEU_111   | H, C_LEU_111    | 2.85 | 1.89 | 7.06  |
| 1HGJ.PDB | O, C_ARG_109   | N, C_ALA_113   | H, C_ALA_113    | 2.95 | 2.06 | 19.71 |
| 1HGJ.PDB | O, C_SER_110   | N, C_SER_114   | H, C_SER_114    | 2.92 | 1.97 | 12.30 |
| 1HGJ.PDB | OE2, C_GLU_119 | OG1, C_THR_117 | HG1, C_THR_117  | 2.88 | 1.94 | 11.85 |
| 1HGJ.PDB | O, C_GLU_82    | N, C_LEU_118   | H, C_LEU_118    | 2.91 | 1.97 | 15.15 |
| 1HGJ.PDB | O, C_TYR_257   | N, C_ILE_121   | H, C_ILE_121    | 2.86 | 1.89 | 7.41  |
| 1HGJ.PDB | O, C_ARG_255   | N, C_GLU_123   | H, C_GLU_123    | 2.93 | 1.97 | 10.38 |
| 1HGJ.PDB | O, C_THR_155   | N, C_THR_131   | H, C_THR_131    | 2.74 | 1.84 | 18.58 |
| 1HGJ.PDB | OD1, C_ASN_152 | N, C_ASN_133   | H, C_ASN_133    | 2.86 | 1.94 | 15.99 |
| 1HGJ.PDB | O, C_GLY_146   | N, C_SER_136   | H, C_SER_136    | 2.75 | 1.85 | 18.24 |
| 1HGJ.PDB | OG, C_SER_136  | N, C_ALA_138   | H, C_ALA_138    | 2.91 | 1.97 | 13.65 |
| 1HGJ.PDB | O, C_GLY_144   | NZ, C_LYS_140  | HZ1, C_LYS_140  | 2.72 | 1.76 | 17.33 |
| 1HGJ.PDB | OD1, C_ASN_137 | NZ, C_LYS_140  | HZ2, C_LYS_140  | 2.71 | 1.72 | 13.24 |
| 1HGJ.PDB | OD2, C_ASP_77  | NE, C_ARG_141  | HE, C_ARG_141   | 2.82 | 1.99 | 27.42 |
| 1HGJ.PDB | O, C_PHE_147   | NH1, C_ARG_141 | HH12, C_ARG_141 | 2.55 | 1.62 | 17.29 |
| 1HGJ.PDB | OD1, C_ASP_77  | NH2, C_ARG_141 | HH21, C_ARG_141 | 2.81 | 1.89 | 21.37 |
| 1HGJ.PDB | OD2, C_ASP_77  | NH2, C_ARG_141 | HH21, C_ARG_141 | 2.74 | 1.86 | 24.47 |
| 1HGJ.PDB | O, C_GLY_72    | NH2, C_ARG_141 | HH22, C_ARG_141 | 2.89 | 1.91 | 10.48 |
| 1HGJ.PDB | OD1, C_ASN_137 | OG, C_SER_145  | HG, C_SER_145   | 2.92 | 2.08 | 24.33 |
| 1HGJ.PDB | O, C_SER_136   | N, C_GLY_146   | H, C_GLY_146    | 2.93 | 2.00 | 15.25 |
| 1HGJ.PDB | O, C_GLY_72    | N, C_SER_149   | H, C_SER_149    | 2.81 | 1.91 | 18.87 |
| 1HGJ.PDB | O, C_ALA_253   | N, C_ASN_152   | H, C_ASN_152    | 2.77 | 1.94 | 26.39 |
| 1HGJ.PDB | OH, C_TYR_195  | NE1, C_TRP_153 | HE1, C_TRP_153  | 2.84 | 1.96 | 21.72 |
| 1HGJ.PDB | O, C_THR_131   | N, C_THR_155   | H, C_THR_155    | 2.99 | 2.03 | 9.79  |
| 1HGJ.PDB | O, C_LEU_194   | N, C_LYS_156   | H, C_LYS_156    | 2.97 | 2.05 | 16.86 |
| 1HGJ.PDB | O, C_SER_247   | N, C_LEU_164   | H, C_LEU_164    | 2.72 | 1.87 | 24.03 |
| 1HGJ.PDB | O, C_ILE_245   | N, C_VAL_166   | H, C_VAL_166    | 2.96 | 2.01 | 10.78 |
| 1HGJ.PDB | O, C_LEU_243   | OG1, C_THR_167 | HG1, C_THR_167  | 2.93 | 2.04 | 19.65 |
| 1HGJ.PDB | O, C_LEU_243   | N, C_MET_168   | H, C_MET_168    | 2.91 | 1.99 | 17.19 |
| 1HGJ.PDB | O, C_ASP_241   | N, C_ASN_170   | H, C_ASN_170    | 2.89 | 1.92 | 9.78  |
| 1HGJ.PDB | O, C_PHE_174   | ND2, C_ASN_170 | HD21, C_ASN_170 | 2.84 | 1.88 | 9.63  |
| 1HGJ.PDB | O, C_VAL_237   | ND2, C_ASN_170 | HD22, C_ASN_170 | 2.87 | 2.05 | 26.94 |
| 1HGJ.PDB | O, C_VAL_237   | N, C_LYS_176   | H, C_LYS_176    | 2.90 | 1.97 | 14.44 |
| 1HGJ.PDB | OE2, C_GLU_123 | NZ, C_LYS_176  | HZ1, C_LYS_176  | 2.69 | 1.80 | 24.96 |
| 1HGJ.PDB | O, C_PHE_258   | N, C_LEU_177   | H, C_LEU_177    | 2.97 | 2.00 | 6.71  |
| 1HGJ.PDB | O, C_THR_235   | N, C_TYR_178   | H, C_TYR_178    | 2.79 | 1.83 | 4.13  |
| 1HGJ.PDB | OE1, C_GLU_123 | OH, C_TYR_178  | HH, C_TYR_178   | 2.77 | 1.82 | 8.51  |
| 1HGJ.PDB | OG1, C_THR_235 | NE1, C_TRP_180 | HE1, C_TRP_180  | 2.91 | 1.92 | 4.72  |
| 1HGJ.PDB | O, C_ASN_250   | N, C_HIS_183   | H, C_HIS_183    | 2.91 | 2.00 | 17.12 |
| 1HGJ.PDB | O, C_ARG_229   | N, C_HIS_184   | H, C_HIS_184    | 2.88 | 1.92 | 8.64  |
| 1HGJ.PDB | OG, C_SER_231  | NE2, C_HIS_184 | HE2, C_HIS_184  | 2.74 | 1.91 | 26.34 |
| 1HGJ.PDB | OG1, C_THR_187 | N, C_GLU_190   | H, C_GLU_190    | 2.91 | 1.96 | 12.15 |
| 1HGJ.PDB | OD1, C_ASN_250 | NE2, C_GLN_191 | HE21, C_GLN_191 | 2.99 | 2.02 | 8.22  |
| 1HGJ.PDB | O, C_GLN_197   | NE2, C_GLN_191 | HE22, C_GLN_191 | 2.89 | 1.97 | 17.35 |
| 1HGJ.PDB | O, C_GLN_189   | OG1, C_THR_192 | HG1, C_THR_192  | 2.84 | 1.97 | 20.14 |
| 1HGJ.PDB | O, C_GLN_189   | N, C_SER_193   | H, C_SER_193    | 2.85 | 1.90 | 9.95  |
| 1HGJ.PDB | O, C_GLN_191   | N, C_TYR_195   | H, C_TYR_195    | 2.82 | 1.86 | 10.13 |
| 1HGJ.PDB | O, C_TYR_161   | NE2, C_GLN_197 | HE21, C_GLN_197 | 2.90 | 1.95 | 11.26 |
| 1HGJ.PDB | O, C_ASN_248   | NE2, C_GLN_197 | HE22, C_GLN_197 | 2.87 | 1.94 | 15.42 |
| 1HGJ.PDB | OD1, C_ASN_246 | NH2, C_ARG_201 | HH21, C_ARG_201 | 2.59 | 1.74 | 25.86 |
| 1HGJ.PDB | O, C_ILE_213   | N, C_VAL_202   | H, C_VAL_202    | 2.99 | 2.07 | 16.15 |
| 1HGJ.PDB | O, C_ASN_246   | N, C_THR_203   | H, C_THR_203    | 2.94 | 2.00 | 13.61 |
| 1HGJ.PDB | OG1, C_THR_212 | OG1, C_THR_203 | HG1, C_THR_203  | 2.89 | 1.94 | 9.95  |

|          |                |                |                 |      |      |       |
|----------|----------------|----------------|-----------------|------|------|-------|
| 1HGJ.PDB | O, C_GLN_211   | N, C_VAL_204   | H, C_VAL_204    | 2.83 | 1.93 | 19.04 |
| 1HGJ.PDB | O, C_SER_209   | N, C_THR_206   | H, C_THR_206    | 2.91 | 1.95 | 8.75  |
| 1HGJ.PDB | OD1, C_ASP_241 | N, C_ARG_207   | H, C_ARG_207    | 2.88 | 1.92 | 10.11 |
| 1HGJ.PDB | O, C_VAL_204   | N, C_GLN_211   | H, C_GLN_211    | 2.90 | 1.98 | 16.77 |
| 1HGJ.PDB | O, C_VAL_202   | N, C_ILE_213   | H, C_ILE_213    | 2.84 | 1.92 | 15.65 |
| 1HGJ.PDB | O, C_ASN_216   | NH1, C_ARG_220 | HH12, C_ARG_220 | 2.91 | 2.10 | 29.44 |
| 1HGJ.PDB | OE1, E_GLN_210 | NH2, C_ARG_220 | HH21, C_ARG_220 | 2.66 | 1.82 | 26.85 |
| 1HGJ.PDB | O, C_ASN_216   | NH2, C_ARG_220 | HH22, C_ARG_220 | 2.76 | 1.88 | 22.85 |
| 1HGJ.PDB | O, C_LEU_226   | N, C_VAL_223   | H, C_VAL_223    | 2.82 | 1.86 | 9.59  |
| 1HGJ.PDB | O, C_CYS_97    | NE, C_ARG_224  | HE, C_ARG_224   | 2.77 | 1.91 | 24.59 |
| 1HGJ.PDB | O, C_CYS_97    | NH2, C_ARG_224 | HH21, C_ARG_224 | 2.94 | 2.09 | 27.65 |
| 1HGJ.PDB | O, C_VAL_223   | N, C_LEU_226   | H, C_LEU_226    | 2.93 | 1.99 | 13.69 |
| 1HGJ.PDB | O, C_SER_228   | NH1, C_ARG_229 | HH11, C_ARG_229 | 2.68 | 1.74 | 16.79 |
| 1HGJ.PDB | O, C_PRO_221   | NH2, C_ARG_229 | HH22, C_ARG_229 | 2.63 | 1.67 | 13.79 |
| 1HGJ.PDB | OD1, C_ASP_101 | OG, C_SER_231  | HG, C_SER_231   | 2.91 | 1.95 | 9.37  |
| 1HGJ.PDB | O, C_ASP_101   | N, C_ILE_232   | H, C_ILE_232    | 2.88 | 1.96 | 16.46 |
| 1HGJ.PDB | O, C_TRP_180   | N, C_TYR_233   | H, C_TYR_233    | 2.93 | 1.96 | 7.62  |
| 1HGJ.PDB | O, C_TYR_178   | N, C_THR_235   | H, C_THR_235    | 2.88 | 1.98 | 19.28 |
| 1HGJ.PDB | O, C_LYS_176   | N, C_VAL_237   | H, C_VAL_237    | 2.78 | 1.87 | 16.51 |
| 1HGJ.PDB | OE1, B_GLU_72  | NZ, C_LYS_238  | HZ1, C_LYS_238  | 2.75 | 1.79 | 18.67 |
| 1HGJ.PDB | O, B_SER_71    | NZ, C_LYS_238  | HZ3, C_LYS_238  | 2.55 | 1.67 | 24.42 |
| 1HGJ.PDB | O, C_ASN_170   | N, C_GLY_240   | H, C_GLY_240    | 2.83 | 1.96 | 22.49 |
| 1HGJ.PDB | O, C_LYS_238   | N, C_ASP_241   | H, C_ASP_241    | 3.00 | 2.07 | 14.48 |
| 1HGJ.PDB | OD1, C_ASP_241 | N, C_VAL_242   | H, C_VAL_242    | 2.79 | 1.95 | 25.43 |
| 1HGJ.PDB | O, C_MET_168   | N, C_LEU_243   | H, C_LEU_243    | 2.93 | 1.95 | 4.94  |
| 1HGJ.PDB | O, C_SER_205   | N, C_VAL_244   | H, C_VAL_244    | 2.99 | 2.04 | 12.22 |
| 1HGJ.PDB | O, C_VAL_166   | N, C_ILE_245   | H, C_ILE_245    | 2.91 | 1.98 | 14.47 |
| 1HGJ.PDB | O, C_THR_203   | N, C_ASN_246   | H, C_ASN_246    | 2.94 | 1.97 | 6.29  |
| 1HGJ.PDB | OD1, C_ASN_165 | ND2, C_ASN_246 | HD22, C_ASN_246 | 2.89 | 1.93 | 12.15 |
| 1HGJ.PDB | O, C_LEU_164   | N, C_SER_247   | H, C_SER_247    | 2.92 | 2.00 | 17.46 |
| 1HGJ.PDB | O, C_HIS_183   | ND2, C_ASN_250 | HD22, C_ASN_250 | 2.86 | 1.91 | 11.73 |
| 1HGJ.PDB | O, C_GLY_181   | N, C_ILE_252   | H, C_ILE_252    | 3.00 | 2.04 | 10.63 |
| 1HGJ.PDB | O, C_ASN_152   | N, C_ALA_253   | H, C_ALA_253    | 2.89 | 2.00 | 20.86 |
| 1HGJ.PDB | OD1, C_ASN_133 | NH2, C_ARG_255 | HH22, C_ARG_255 | 2.54 | 1.71 | 27.08 |
| 1HGJ.PDB | O, C_ILE_121   | N, C_TYR_257   | H, C_TYR_257    | 2.90 | 2.06 | 24.92 |
| 1HGJ.PDB | O, C_LEU_177   | N, C_PHE_258   | H, C_PHE_258    | 2.92 | 1.95 | 7.10  |
| 1HGJ.PDB | OG, C_SER_115  | N, C_ARG_261   | H, C_ARG_261    | 2.96 | 2.02 | 14.08 |
| 1HGJ.PDB | OE2, C_GLU_119 | NH1, C_ARG_261 | HH12, C_ARG_261 | 2.65 | 1.83 | 28.56 |
| 1HGJ.PDB | OE1, C_GLU_119 | NH2, C_ARG_261 | HH22, C_ARG_261 | 2.92 | 2.03 | 23.97 |
| 1HGJ.PDB | OD2, C_ASP_85  | NZ, C_LYS_264  | HZ3, C_LYS_264  | 2.82 | 1.83 | 14.94 |
| 1HGJ.PDB | O, C_PHE_87    | N, C_MET_268   | H, C_MET_268    | 2.85 | 1.94 | 18.47 |
| 1HGJ.PDB | O, C_PRO_284   | OG, C_SER_270  | HG, C_SER_270   | 2.82 | 1.88 | 11.05 |
| 1HGJ.PDB | O, C_ILE_51    | N, C_ASP_275   | H, C_ASP_275    | 2.97 | 2.06 | 19.32 |
| 1HGJ.PDB | OD1, C_ASP_275 | N, C_THR_276   | H, C_THR_276    | 2.79 | 1.94 | 23.72 |
| 1HGJ.PDB | O, C_ASN_54    | N, C_SER_279   | H, C_SER_279    | 2.79 | 1.87 | 15.26 |
| 1HGJ.PDB | O, C_TYR_302   | N, C_ILE_282   | H, C_ILE_282    | 2.92 | 1.95 | 6.05  |
| 1HGJ.PDB | O, C_THR_283   | N, C_GLY_286   | H, C_GLY_286    | 2.79 | 1.87 | 14.96 |
| 1HGJ.PDB | O, C_LYS_50    | N, C_SER_287   | H, C_SER_287    | 2.81 | 1.85 | 7.28  |
| 1HGJ.PDB | O, C_ALA_304   | ND2, C_ASN_290 | HD22, C_ASN_290 | 2.84 | 1.93 | 18.26 |
| 1HGJ.PDB | OE1, C_GLN_44  | NZ, C_LYS_292  | HZ1, C_LYS_292  | 2.73 | 1.72 | 10.59 |
| 1HGJ.PDB | OD2, C_ASP_291 | NZ, C_LYS_292  | HZ3, C_LYS_292  | 2.82 | 1.84 | 16.66 |
| 1HGJ.PDB | O, C_LYS_307   | N, C_GLN_295   | H, C_GLN_295    | 2.91 | 2.01 | 20.39 |
| 1HGJ.PDB | O, C_ASN_298   | NE2, C_GLN_295 | HE21, C_GLN_295 | 2.78 | 1.83 | 8.19  |
| 1HGJ.PDB | O, C_GLN_44    | N, C_ASN_296   | H, C_ASN_296    | 2.84 | 1.91 | 13.62 |
| 1HGJ.PDB | OE1, C_GLN_295 | N, C_VAL_297   | H, C_VAL_297    | 2.75 | 1.95 | 28.92 |
| 1HGJ.PDB | O, D_LYS_68    | NZ, C_LYS_299  | HZ2, C_LYS_299  | 2.96 | 1.96 | 14.80 |
| 1HGJ.PDB | OD1, C_ASN_298 | N, C_ILE_300   | H, C_ILE_300    | 2.82 | 1.93 | 19.65 |
| 1HGJ.PDB | O, C_ILE_282   | N, C_TYR_302   | H, C_TYR_302    | 2.87 | 2.05 | 27.80 |

|          |                |                |                 |      |      |       |
|----------|----------------|----------------|-----------------|------|------|-------|
| 1HGJ.PDB | O, C_LYS_264   | OH, C_TYR_302  | HH, C_TYR_302   | 2.65 | 1.87 | 29.71 |
| 1HGJ.PDB | O, D_LYS_62    | N, C_GLY_303   | H, C_GLY_303    | 2.93 | 1.98 | 10.54 |
| 1HGJ.PDB | O, C_GLN_295   | N, C_VAL_309   | H, C_VAL_309    | 2.88 | 2.06 | 26.91 |
| 1HGJ.PDB | OG, D_SER_93   | N, C_LYS_310   | H, C_LYS_310    | 3.00 | 2.04 | 11.61 |
| 1HGJ.PDB | OD1, D_ASP_86  | NZ, C_LYS_310  | HZ3, C_LYS_310  | 2.94 | 2.10 | 29.37 |
| 1HGJ.PDB | OE2, C_GLU_41  | N, C_LEU_314   | H, C_LEU_314    | 2.78 | 1.85 | 13.27 |
| 1HGJ.PDB | OE1, C_GLU_41  | NZ, C_LYS_315  | HZ3, C_LYS_315  | 2.86 | 1.91 | 20.22 |
| 1HGJ.PDB | O, C_THR_40    | N, C_LEU_316   | H, C_LEU_316    | 2.82 | 1.87 | 11.05 |
| 1HGJ.PDB | OD1, D_ASN_104 | N, C_ALA_317   | H, C_ALA_317    | 2.74 | 1.82 | 13.77 |
| 1HGJ.PDB | O, C_ASN_38    | N, C_THR_318   | H, C_THR_318    | 2.92 | 2.00 | 16.68 |
| 1HGJ.PDB | O, C_VAL_20    | ND2, C_ASN_322 | HD21, C_ASN_322 | 2.87 | 1.94 | 14.85 |
| 1HGJ.PDB | OE2, C_GLU_35  | ND2, C_ASN_322 | HD22, C_ASN_322 | 2.88 | 1.97 | 19.99 |
| 1HGJ.PDB | OE1, D_GLU_15  | NZ, C_LYS_326  | HZ1, C_LYS_326  | 2.91 | 1.86 | 5.48  |
| 1HGJ.PDB | OD2, D_ASP_112 | N, D_GLY_1     | H2, D_GLY_1     | 2.78 | 1.78 | 13.54 |
| 1HGJ.PDB | OD1, D_ASP_109 | N, D_LEU_2     | H, D_LEU_2      | 2.88 | 1.99 | 20.57 |
| 1HGJ.PDB | OD2, D_ASP_112 | N, D_PHE_3     | H, D_PHE_3      | 2.81 | 2.00 | 27.45 |
| 1HGJ.PDB | OD2, D_ASP_112 | N, D_GLY_4     | H, D_GLY_4      | 2.87 | 1.96 | 16.53 |
| 1HGJ.PDB | OD1, D_ASP_112 | N, D_ALA_5     | H, D_ALA_5      | 2.85 | 1.99 | 23.99 |
| 1HGJ.PDB | O, D_GLY_4     | N, D_PHE_9     | H, D_PHE_9      | 2.80 | 1.87 | 14.24 |
| 1HGJ.PDB | O, D_GLY_13    | ND2, D_ASN_12  | HD22, D_ASN_12  | 2.90 | 2.01 | 19.14 |
| 1HGJ.PDB | O, C_VAL_323   | N, D_GLY_13    | H, D_GLY_13     | 2.70 | 1.77 | 13.01 |
| 1HGJ.PDB | O, C_HIS_17    | N, D_TRP_14    | H, D_TRP_14     | 2.84 | 1.88 | 10.47 |
| 1HGJ.PDB | OG1, D_THR_41  | N, D_TRP_21    | H, D_TRP_21     | 2.94 | 2.03 | 16.88 |
| 1HGJ.PDB | O, C_GLY_16    | N, D_GLY_23    | H, D_GLY_23     | 2.95 | 2.03 | 16.60 |
| 1HGJ.PDB | O, D_ALA_35    | N, D_PHE_24    | H, D_PHE_24     | 2.84 | 1.87 | 6.75  |
| 1HGJ.PDB | O, C_CYS_14    | N, D_ARG_25    | H, D_ARG_25     | 2.96 | 2.03 | 15.69 |
| 1HGJ.PDB | OE1, D_GLN_34  | NE, D_ARG_25   | HE, D_ARG_25    | 2.65 | 1.80 | 23.08 |
| 1HGJ.PDB | O, D_GLY_33    | N, D_HIS_26    | H, D_HIS_26     | 2.87 | 1.95 | 17.26 |
| 1HGJ.PDB | O, C_THR_12    | N, D_GLN_27    | H, D_GLN_27     | 2.96 | 2.04 | 16.68 |
| 1HGJ.PDB | O, D_GLY_31    | N, D_ASN_28    | H, D_ASN_28     | 2.92 | 1.97 | 10.77 |
| 1HGJ.PDB | OD1, D_ASN_146 | ND2, D_ASN_28  | HD21, D_ASN_28  | 2.98 | 2.03 | 11.81 |
| 1HGJ.PDB | OD1, D_ASN_28  | N, D_GLU_30    | H, D_GLU_30     | 2.82 | 1.99 | 26.55 |
| 1HGJ.PDB | O, D_HIS_26    | N, D_GLY_33    | H, D_GLY_33     | 2.97 | 2.10 | 23.23 |
| 1HGJ.PDB | O, D_PHE_24    | N, D_ALA_35    | H, D_ALA_35     | 2.80 | 1.92 | 21.75 |
| 1HGJ.PDB | O, D_TYR_22    | N, D_ASP_37    | H, D_ASP_37     | 2.70 | 1.76 | 11.08 |
| 1HGJ.PDB | OD2, D_ASP_37  | N, D_SER_40    | H, D_SER_40     | 2.95 | 1.99 | 9.26  |
| 1HGJ.PDB | OD2, D_ASP_37  | OG, D_SER_40   | HG, D_SER_40    | 2.82 | 1.96 | 22.49 |
| 1HGJ.PDB | O, D_ASP_37    | OG1, D_THR_41  | HG1, D_THR_41   | 2.76 | 1.85 | 16.95 |
| 1HGJ.PDB | O, D_LEU_38    | N, D_GLN_42    | H, D_GLN_42     | 2.96 | 2.03 | 15.57 |
| 1HGJ.PDB | OD1, D_ASP_46  | NE2, D_GLN_42  | HE22, D_GLN_42  | 2.81 | 1.92 | 21.12 |
| 1HGJ.PDB | O, D_LYS_39    | N, D_ALA_43    | H, D_ALA_43     | 2.97 | 2.01 | 10.81 |
| 1HGJ.PDB | O, D_SER_40    | N, D_ALA_44    | H, D_ALA_44     | 2.97 | 1.99 | 1.97  |
| 1HGJ.PDB | O, D_THR_41    | N, D_ILE_45    | H, D_ILE_45     | 2.89 | 1.93 | 10.07 |
| 1HGJ.PDB | O, D_GLN_42    | N, D_ASP_46    | H, D_ASP_46     | 2.76 | 1.79 | 4.41  |
| 1HGJ.PDB | OE2, D_GLU_114 | NE2, D_GLN_47  | HE21, D_GLN_47  | 2.94 | 2.03 | 18.44 |
| 1HGJ.PDB | O, D_ALA_43    | NE2, D_GLN_47  | HE22, D_GLN_47  | 2.90 | 2.02 | 20.80 |
| 1HGJ.PDB | O, D_ILE_45    | N, D_ASN_49    | H, D_ASN_49     | 2.90 | 1.96 | 15.06 |
| 1HGJ.PDB | O, D_ASP_46    | N, D_GLY_50    | H, D_GLY_50     | 2.88 | 2.00 | 21.98 |
| 1HGJ.PDB | OG1, D_THR_107 | NZ, D_LYS_51   | HZ1, D_LYS_51   | 2.97 | 1.99 | 16.18 |
| 1HGJ.PDB | OE1, D_GLU_103 | NZ, D_LYS_51   | HZ2, D_LYS_51   | 2.80 | 1.76 | 6.89  |
| 1HGJ.PDB | ND1, D_HIS_106 | NZ, D_LYS_51   | HZ3, D_LYS_51   | 2.79 | 1.82 | 16.80 |
| 1HGJ.PDB | O, D_ILE_48    | N, D_LEU_52    | H, D_LEU_52     | 2.89 | 1.98 | 17.52 |
| 1HGJ.PDB | O, D_ASN_49    | N, D_ASN_53    | H, D_ASN_53     | 2.86 | 1.92 | 13.12 |
| 1HGJ.PDB | O, A_THR_28    | NE, D_ARG_54   | HE, D_ARG_54    | 2.94 | 1.98 | 10.71 |
| 1HGJ.PDB | OE1, D_GLU_57  | NH1, D_ARG_54  | HH11, D_ARG_54  | 2.87 | 1.86 | 9.17  |
| 1HGJ.PDB | OE2, B_GLU_97  | NH2, D_ARG_54  | HH22, D_ARG_54  | 2.84 | 1.88 | 15.58 |
| 1HGJ.PDB | OG, C_SER_110  | NE2, D_HIS_64  | HE2, D_HIS_64   | 2.89 | 1.91 | 5.59  |
| 1HGJ.PDB | O, C_LYS_299   | NZ, D_LYS_68   | HZ1, D_LYS_68   | 2.93 | 1.91 | 11.63 |

|          |                |                |                 |      |      |       |
|----------|----------------|----------------|-----------------|------|------|-------|
| 1HGJ.PDB | OE2, D_GLU_85  | NZ, D_LYS_68   | HZ2, D_LYS_68   | 2.82 | 1.80 | 11.23 |
| 1HGJ.PDB | OG, E_SER_107  | N, D_ARG_76    | H, D_ARG_76     | 2.86 | 1.90 | 9.67  |
| 1HGJ.PDB | OE2, F_GLU_81  | NE, D_ARG_76   | HE, D_ARG_76    | 2.85 | 1.89 | 10.87 |
| 1HGJ.PDB | OE2, F_GLU_74  | NH1, D_ARG_76  | HH12, D_ARG_76  | 2.76 | 1.76 | 7.89  |
| 1HGJ.PDB | OE1, F_GLU_81  | NH2, D_ARG_76  | HH21, D_ARG_76  | 2.68 | 1.69 | 5.65  |
| 1HGJ.PDB | OE1, F_GLU_74  | NH2, D_ARG_76  | HH22, D_ARG_76  | 2.71 | 1.72 | 5.59  |
| 1HGJ.PDB | OE1, D_GLU_74  | NE2, D_GLN_78  | HE22, D_GLN_78  | 2.88 | 1.94 | 14.79 |
| 1HGJ.PDB | O, D_GLY_75    | N, D_ASP_79    | H, D_ASP_79     | 2.96 | 2.02 | 12.85 |
| 1HGJ.PDB | O, D_GLN_78    | N, D_LYS_82    | H, D_LYS_82     | 2.93 | 1.96 | 6.74  |
| 1HGJ.PDB | O, D_ASP_79    | N, D_TYR_83    | H, D_TYR_83     | 2.85 | 1.90 | 12.33 |
| 1HGJ.PDB | OE1, F_GLU_85  | OH, D_TYR_83   | HH, D_TYR_83    | 2.63 | 1.81 | 25.72 |
| 1HGJ.PDB | O, D_LEU_80    | N, D_VAL_84    | H, D_VAL_84     | 2.81 | 1.84 | 7.09  |
| 1HGJ.PDB | O, D_LYS_82    | N, D_ASP_86    | H, D_ASP_86     | 2.93 | 1.96 | 7.56  |
| 1HGJ.PDB | O, D_TYR_83    | N, D_THR_87    | H, D_THR_87     | 2.89 | 1.94 | 10.26 |
| 1HGJ.PDB | O, D_VAL_84    | N, D_LYS_88    | H, D_LYS_88     | 2.98 | 2.07 | 17.30 |
| 1HGJ.PDB | OH, B_TYR_83   | NZ, D_LYS_88   | HZ1, D_LYS_88   | 2.75 | 1.72 | 7.31  |
| 1HGJ.PDB | O, D_GLU_85    | N, D_ILE_89    | H, D_ILE_89     | 2.85 | 1.88 | 2.88  |
| 1HGJ.PDB | O, D_LYS_88    | N, D_TRP_92    | H, D_TRP_92     | 2.93 | 1.96 | 4.62  |
| 1HGJ.PDB | O, D_ILE_89    | N, D_SER_93    | H, D_SER_93     | 2.81 | 1.94 | 21.33 |
| 1HGJ.PDB | O, D_ILE_89    | OG, D_SER_93   | HG, D_SER_93    | 2.87 | 1.95 | 15.74 |
| 1HGJ.PDB | O, D_ASP_90    | N, D_TYR_94    | H, D_TYR_94     | 2.84 | 1.94 | 18.59 |
| 1HGJ.PDB | O, D_LEU_91    | N, D_ASN_95    | H, D_ASN_95     | 2.98 | 2.00 | 5.61  |
| 1HGJ.PDB | O, D_TYR_94    | N, D_LEU_98    | H, D_LEU_98     | 2.94 | 1.97 | 5.79  |
| 1HGJ.PDB | O, D_ASN_95    | N, D_LEU_99    | H, D_LEU_99     | 2.89 | 1.98 | 17.69 |
| 1HGJ.PDB | O, D_LEU_98    | N, D_LEU_102   | H, D_LEU_102    | 2.94 | 1.98 | 8.88  |
| 1HGJ.PDB | O, D_LEU_99    | N, D_GLU_103   | H, D_GLU_103    | 2.96 | 1.99 | 8.34  |
| 1HGJ.PDB | O, D_VAL_100   | N, D_ASN_104   | H, D_ASN_104    | 2.80 | 1.86 | 13.01 |
| 1HGJ.PDB | O, C_LYS_27    | ND2, D_ASN_104 | HD22, D_ASN_104 | 2.90 | 1.94 | 10.67 |
| 1HGJ.PDB | O, D_LEU_102   | N, D_HIS_106   | H, D_HIS_106    | 2.93 | 1.97 | 8.46  |
| 1HGJ.PDB | O, D_GLU_103   | N, D_THR_107   | H, D_THR_107    | 2.85 | 1.96 | 20.31 |
| 1HGJ.PDB | O, D_HIS_106   | N, D_LEU_110   | H, D_LEU_110    | 2.79 | 1.83 | 9.65  |
| 1HGJ.PDB | O, D_THR_107   | OG1, D_THR_111 | HG1, D_THR_111  | 2.84 | 1.88 | 5.73  |
| 1HGJ.PDB | O, D_ASP_109   | N, D_SER_113   | H, D_SER_113    | 2.82 | 1.86 | 7.21  |
| 1HGJ.PDB | O, B_LEU_2     | OG, D_SER_113  | HG, D_SER_113   | 2.68 | 1.87 | 27.58 |
| 1HGJ.PDB | O, D_LEU_110   | N, D_GLU_114   | H, D_GLU_114    | 2.94 | 1.99 | 11.05 |
| 1HGJ.PDB | O, D_ASP_112   | N, D_ASN_116   | H, D_ASN_116    | 2.97 | 2.01 | 9.82  |
| 1HGJ.PDB | O, D_SER_113   | N, D_LYS_117   | H, D_LYS_117    | 2.74 | 1.86 | 21.58 |
| 1HGJ.PDB | O, D_GLU_114   | N, D_LEU_118   | H, D_LEU_118    | 2.99 | 2.04 | 11.08 |
| 1HGJ.PDB | O, D_ASN_116   | N, D_GLU_120   | H, D_GLU_120    | 2.94 | 1.96 | 1.58  |
| 1HGJ.PDB | O, D_LYS_117   | N, D_LYS_121   | H, D_LYS_121    | 2.92 | 2.02 | 18.90 |
| 1HGJ.PDB | O, D_PHE_119   | N, D_ARG_123   | H, D_ARG_123    | 2.94 | 1.98 | 8.81  |
| 1HGJ.PDB | OE2, D_GLU_120 | NH1, D_ARG_123 | HH11, D_ARG_123 | 2.74 | 1.85 | 23.39 |
| 1HGJ.PDB | OE1, B_GLU_132 | NE, D_ARG_124  | HE, D_ARG_124   | 2.80 | 1.98 | 27.33 |
| 1HGJ.PDB | OE2, B_GLU_132 | NE, D_ARG_124  | HE, D_ARG_124   | 2.87 | 2.00 | 21.99 |
| 1HGJ.PDB | OH, B_TYR_141  | NH1, D_ARG_127 | HH12, D_ARG_127 | 2.99 | 2.02 | 12.89 |
| 1HGJ.PDB | O, D_HIS_159   | ND2, D_ASN_129 | HD21, D_ASN_129 | 2.95 | 1.99 | 10.63 |
| 1HGJ.PDB | OH, D_TYR_157  | ND2, D_ASN_129 | HD22, D_ASN_129 | 2.79 | 1.84 | 10.20 |
| 1HGJ.PDB | O, D_LYS_139   | N, D_GLU_131   | H, D_GLU_131    | 2.95 | 2.01 | 13.86 |
| 1HGJ.PDB | O, D_CYS_137   | N, D_MET_133   | H, D_MET_133    | 2.85 | 1.92 | 14.74 |
| 1HGJ.PDB | OD1, D_ASN_135 | N, D_CYS_137   | H, D_CYS_137    | 2.89 | 1.99 | 19.26 |
| 1HGJ.PDB | O, C_LEU_13    | N, D_PHE_138   | H, D_PHE_138    | 2.74 | 1.87 | 22.25 |
| 1HGJ.PDB | O, D_GLU_131   | N, D_LYS_139   | H, D_LYS_139    | 2.81 | 1.86 | 10.15 |
| 1HGJ.PDB | O, C_ALA_11    | N, D_ILE_140   | H, D_ILE_140    | 2.80 | 1.87 | 15.19 |
| 1HGJ.PDB | O, D_ASN_129   | N, D_TYR_141   | H, D_TYR_141    | 2.96 | 2.02 | 12.67 |
| 1HGJ.PDB | OE2, D_GLU_30  | N, D_ASN_146   | H, D_ASN_146    | 2.86 | 1.92 | 14.29 |
| 1HGJ.PDB | O, D_ASP_145   | N, D_ILE_149   | H, D_ILE_149    | 2.91 | 1.96 | 10.44 |
| 1HGJ.PDB | O, D_ASN_146   | N, D_GLU_150   | H, D_GLU_150    | 2.91 | 1.98 | 15.92 |
| 1HGJ.PDB | O, D_ALA_147   | N, D_SER_151   | H, D_SER_151    | 2.90 | 1.98 | 17.07 |

|          |                |                |                 |      |      |       |
|----------|----------------|----------------|-----------------|------|------|-------|
| 1HGJ.PDB | O, D_CYS_148   | OG, D_SER_151  | HG, D_SER_151   | 2.70 | 1.86 | 22.84 |
| 1HGJ.PDB | O, D_GLU_150   | N, D_ASN_154   | H, D_ASN_154    | 2.80 | 1.83 | 5.11  |
| 1HGJ.PDB | O, D_SER_151   | N, D_THR_156   | H, D_THR_156    | 2.73 | 1.90 | 25.93 |
| 1HGJ.PDB | OD1, D_ASN_154 | OG1, D_THR_156 | HG1, D_THR_156  | 2.71 | 1.81 | 16.75 |
| 1HGJ.PDB | NE2, D_HIS_142 | OH, D_TYR_157  | HH, D_TYR_157   | 2.78 | 1.88 | 18.06 |
| 1HGJ.PDB | OD1, D_ASP_158 | N, D_ASP_160   | H, D_ASP_160    | 2.92 | 2.05 | 23.79 |
| 1HGJ.PDB | O, D_HIS_159   | N, D_TYR_162   | H, D_TYR_162    | 2.94 | 2.05 | 20.16 |
| 1HGJ.PDB | O, B_ARG_170   | NH1, D_ARG_163 | HH12, D_ARG_163 | 2.74 | 1.76 | 11.80 |
| 1HGJ.PDB | O, D_TYR_162   | N, D_ALA_166   | H, D_ALA_166    | 2.85 | 1.88 | 3.22  |
| 1HGJ.PDB | O, D_ARG_163   | N, D_LEU_167   | H, D_LEU_167    | 2.76 | 1.82 | 10.09 |
| 1HGJ.PDB | O, D_ASP_164   | N, D_ASN_168   | H, D_ASN_168    | 3.00 | 2.04 | 9.26  |
| 1HGJ.PDB | O, D_ALA_166   | N, D_ARG_170   | H, D_ARG_170    | 2.83 | 1.97 | 22.68 |
| 1HGJ.PDB | O, D_GLU_128   | NE, D_ARG_170  | HE, D_ARG_170   | 2.77 | 1.90 | 22.62 |
| 1HGJ.PDB | OE2, D_GLU_131 | NH1, D_ARG_170 | HH11, D_ARG_170 | 2.79 | 1.80 | 6.55  |
| 1HGJ.PDB | O, D_LEU_167   | N, D_PHE_171   | H, D_PHE_171    | 2.92 | 2.00 | 16.37 |
| 1HGJ.PDB | O, F_ILE_140   | N, E_ALA_11    | H, E_ALA_11     | 2.86 | 1.96 | 18.18 |
| 1HGJ.PDB | O, F_GLN_27    | N, E_THR_12    | H, E_THR_12     | 2.93 | 2.00 | 15.55 |
| 1HGJ.PDB | O, F_PHE_138   | N, E_LEU_13    | H, E_LEU_13     | 2.96 | 1.99 | 8.56  |
| 1HGJ.PDB | O, F_ARG_25    | N, E_CYS_14    | H, E_CYS_14     | 2.66 | 1.82 | 24.90 |
| 1HGJ.PDB | O, F_GLY_136   | N, E_LEU_15    | H, E_LEU_15     | 2.91 | 1.94 | 3.68  |
| 1HGJ.PDB | O, F_GLY_23    | N, E_GLY_16    | H, E_GLY_16     | 2.87 | 1.96 | 18.32 |
| 1HGJ.PDB | O, E_HIS_18    | ND1, E_HIS_17  | HD1, E_HIS_17   | 2.90 | 2.02 | 21.78 |
| 1HGJ.PDB | O, F_TRP_21    | N, E_HIS_18    | H, E_HIS_18     | 2.83 | 1.96 | 22.19 |
| 1HGJ.PDB | OD1, E_ASN_322 | N, E_VAL_20    | H, E_VAL_20     | 2.78 | 1.83 | 10.50 |
| 1HGJ.PDB | O, E_VAL_36    | N, E_THR_24    | H, E_THR_24     | 2.85 | 1.93 | 16.11 |
| 1HGJ.PDB | O, E_ILE_34    | N, E_VAL_26    | H, E_VAL_26     | 2.82 | 1.87 | 11.16 |
| 1HGJ.PDB | OE2, F_GLU_97  | NZ, E_LYS_27   | HZ1, E_LYS_27   | 2.81 | 1.79 | 8.50  |
| 1HGJ.PDB | O, E_ASP_31    | N, E_THR_28    | H, E_THR_28     | 2.74 | 1.89 | 24.59 |
| 1HGJ.PDB | O, E_VAL_26    | N, E_ILE_34    | H, E_ILE_34     | 2.87 | 1.93 | 12.94 |
| 1HGJ.PDB | O, E_THR_24    | N, E_VAL_36    | H, E_VAL_36     | 2.82 | 1.85 | 5.68  |
| 1HGJ.PDB | O, E_MET_320   | N, E_THR_37    | H, E_THR_37     | 2.86 | 1.90 | 7.27  |
| 1HGJ.PDB | O, E_LEU_316   | N, E_THR_40    | H, E_THR_40     | 2.85 | 2.00 | 25.13 |
| 1HGJ.PDB | O, E_LEU_314   | N, E_LEU_42    | H, E_LEU_42     | 2.82 | 1.95 | 22.41 |
| 1HGJ.PDB | O, E_PHE_294   | N, E_GLN_44    | H, E_GLN_44     | 2.85 | 1.88 | 6.55  |
| 1HGJ.PDB | O, E_SER_46    | NE2, E_GLN_44  | HE22, E_GLN_44  | 2.90 | 2.00 | 19.51 |
| 1HGJ.PDB | O, E_ASN_285   | OG, E_SER_47   | HG, E_SER_47    | 2.83 | 1.92 | 15.25 |
| 1HGJ.PDB | OD2, E_ASP_275 | NZ, E_LYS_50   | HZ1, E_LYS_50   | 2.74 | 1.82 | 22.90 |
| 1HGJ.PDB | O, E_PRO_273   | N, E_ILE_51    | H, E_ILE_51     | 2.84 | 1.88 | 9.36  |
| 1HGJ.PDB | O, E_ASP_275   | N, E_ASN_53    | H, E_ASN_53     | 2.80 | 1.95 | 24.30 |
| 1HGJ.PDB | O, E_GLU_280   | NE2, E_HIS_56  | HE2, E_HIS_56   | 2.98 | 2.06 | 17.67 |
| 1HGJ.PDB | OD2, E_ASP_85  | N, E_ARG_57    | H, E_ARG_57     | 2.82 | 1.89 | 13.47 |
| 1HGJ.PDB | O, E_THR_83    | NE, E_ARG_57   | HE, E_ARG_57    | 2.78 | 1.81 | 7.69  |
| 1HGJ.PDB | O, E_LEU_86    | N, E_LEU_59    | H, E_LEU_59     | 2.87 | 1.91 | 10.09 |
| 1HGJ.PDB | O, E_VAL_88    | N, E_GLY_61    | H, E_GLY_61     | 2.97 | 2.10 | 22.60 |
| 1HGJ.PDB | OD1, E_ASP_60  | N, E_ILE_62    | H, E_ILE_62     | 2.86 | 1.94 | 15.40 |
| 1HGJ.PDB | O, E_GLY_61    | N, E_CYS_64    | H, E_CYS_64     | 2.90 | 1.99 | 17.47 |
| 1HGJ.PDB | O, E_LEU_66    | N, E_LEU_70    | H, E_LEU_70     | 2.91 | 2.02 | 20.49 |
| 1HGJ.PDB | O, E_ILE_67    | N, E_LEU_71    | H, E_LEU_71     | 2.82 | 1.86 | 7.76  |
| 1HGJ.PDB | O, E_ASP_68    | N, E_GLY_72    | H, E_GLY_72     | 2.90 | 1.99 | 18.41 |
| 1HGJ.PDB | OD1, E_ASP_73  | ND1, E_HIS_75  | HD1, E_HIS_75   | 2.80 | 1.88 | 17.19 |
| 1HGJ.PDB | O, E_ASP_63    | NE2, E_HIS_75  | HE2, E_HIS_75   | 2.86 | 1.95 | 19.12 |
| 1HGJ.PDB | O, E_ASP_73    | N, E_CYS_76    | H, E_CYS_76     | 2.76 | 1.82 | 13.01 |
| 1HGJ.PDB | O, E_PRO_74    | N, E_ASP_77    | H, E_ASP_77     | 2.93 | 1.97 | 10.57 |
| 1HGJ.PDB | O, E_CYS_76    | N, E_PHE_79    | H, E_PHE_79     | 2.99 | 2.02 | 4.96  |
| 1HGJ.PDB | O, E_ARG_57    | N, E_ASP_85    | H, E_ASP_85     | 2.80 | 1.90 | 17.59 |
| 1HGJ.PDB | O, E_LEU_59    | N, E_VAL_88    | H, E_VAL_88     | 2.98 | 2.01 | 5.78  |
| 1HGJ.PDB | O, E_MET_268   | N, E_GLU_89    | H, E_GLU_89     | 2.79 | 1.83 | 9.12  |
| 1HGJ.PDB | OD1, E_ASP_60  | NE, E_ARG_90   | HE, E_ARG_90    | 2.91 | 1.94 | 8.87  |



|          |                |                |                 |      |      |       |
|----------|----------------|----------------|-----------------|------|------|-------|
| 1HGJ.PDB | O, E_SER.270   | NH1, E_ARG.90  | HH11, E_ARG.90  | 2.71 | 1.84 | 24.06 |
| 1HGJ.PDB | O, E_ALA.272   | NH1, E_ARG.90  | HH12, E_ARG.90  | 2.60 | 1.68 | 18.01 |
| 1HGJ.PDB | OD2, E_ASP.60  | NH2, E_ARG.90  | HH21, E_ARG.90  | 2.83 | 1.83 | 8.62  |
| 1HGJ.PDB | OD1, E_ASP.271 | N, E_SER.91    | H, E_SER.91     | 2.91 | 1.94 | 8.21  |
| 1HGJ.PDB | OD1, E_ASP.271 | OG, E_SER.91   | HG, E_SER.91    | 2.99 | 2.15 | 25.95 |
| 1HGJ.PDB | OD2, E_ASP.271 | OG, E_SER.91   | HG, E_SER.91    | 2.82 | 1.92 | 18.47 |
| 1HGJ.PDB | OD2, E_ASP.68  | OG, E_SER.95   | HG, E_SER.95    | 2.94 | 2.00 | 13.81 |
| 1HGJ.PDB | OD2, E_ASP.73  | N, E_ASN.96    | H, E_ASN.96     | 2.91 | 1.95 | 10.69 |
| 1HGJ.PDB | OD1, E_ASP.68  | OH, E_TYR.100  | HH, E_TYR.100   | 2.88 | 1.94 | 12.28 |
| 1HGJ.PDB | O, E_ILE.230   | N, E_ASP.101   | H, E_ASP.101    | 2.96 | 2.10 | 23.29 |
| 1HGJ.PDB | OD2, E_ASP.104 | OG, E_SER.107  | HG, E_SER.107   | 2.85 | 1.94 | 18.67 |
| 1HGJ.PDB | O, E_TYR.105   | N, E_ARG.109   | H, E_ARG.109    | 2.87 | 1.90 | 3.75  |
| 1HGJ.PDB | OE2, F_GLU.67  | NH2, E_ARG.109 | HH21, E_ARG.109 | 2.76 | 1.77 | 12.82 |
| 1HGJ.PDB | OD2, D_ASP.79  | OG, E_SER.110  | HG, E_SER.110   | 2.79 | 1.87 | 15.96 |
| 1HGJ.PDB | O, E_SER.107   | N, E_LEU.111   | H, E_LEU.111    | 2.87 | 1.90 | 6.50  |
| 1HGJ.PDB | O, E_ARG.109   | N, E_ALA.113   | H, E_ALA.113    | 2.94 | 2.05 | 20.26 |
| 1HGJ.PDB | O, E_SER.110   | N, E_SER.114   | H, E_SER.114    | 2.90 | 1.95 | 11.85 |
| 1HGJ.PDB | OE2, E_GLU.119 | OG1, E_THR.117 | HG1, E_THR.117  | 2.91 | 1.96 | 10.96 |
| 1HGJ.PDB | O, E_GLU.82    | N, E_LEU.118   | H, E_LEU.118    | 2.93 | 2.00 | 15.98 |
| 1HGJ.PDB | O, E_TYR.257   | N, E_ILE.121   | H, E_ILE.121    | 2.86 | 1.90 | 7.59  |
| 1HGJ.PDB | O, E_ARG.255   | N, E_GLU.123   | H, E_GLU.123    | 2.95 | 1.98 | 9.79  |
| 1HGJ.PDB | O, E_THR.155   | N, E_THR.131   | H, E_THR.131    | 2.73 | 1.86 | 21.20 |
| 1HGJ.PDB | OD1, E_ASN.152 | N, E_ASN.133   | H, E_ASN.133    | 2.87 | 1.94 | 15.99 |
| 1HGJ.PDB | O, E_GLY.146   | N, E_SER.136   | H, E_SER.136    | 2.74 | 1.83 | 17.73 |
| 1HGJ.PDB | OG, E_SER.136  | N, E_ALA.138   | H, E_ALA.138    | 2.94 | 2.00 | 14.03 |
| 1HGJ.PDB | O, E_GLY.144   | NZ, E_LYS.140  | HZ1, E_LYS.140  | 2.75 | 1.78 | 16.45 |
| 1HGJ.PDB | OD1, E_ASN.137 | NZ, E_LYS.140  | HZ2, E_LYS.140  | 2.71 | 1.72 | 13.56 |
| 1HGJ.PDB | OD2, E_ASP.77  | NE, E_ARG.141  | HE, E_ARG.141   | 2.84 | 2.00 | 27.31 |
| 1HGJ.PDB | O, E_PHE.147   | NH1, E_ARG.141 | HH12, E_ARG.141 | 2.54 | 1.62 | 17.41 |
| 1HGJ.PDB | OD1, E_ASP.77  | NH2, E_ARG.141 | HH21, E_ARG.141 | 2.84 | 1.92 | 21.35 |
| 1HGJ.PDB | OD2, E_ASP.77  | NH2, E_ARG.141 | HH21, E_ARG.141 | 2.75 | 1.86 | 24.32 |
| 1HGJ.PDB | O, E_GLY.72    | NH2, E_ARG.141 | HH22, E_ARG.141 | 2.88 | 1.90 | 10.71 |
| 1HGJ.PDB | OD1, E_ASN.137 | OG, E_SER.145  | HG, E_SER.145   | 2.96 | 2.12 | 24.46 |
| 1HGJ.PDB | O, E_SER.136   | N, E_GLY.146   | H, E_GLY.146    | 2.92 | 1.99 | 15.20 |
| 1HGJ.PDB | O, E_GLY.72    | N, E_SER.149   | H, E_SER.149    | 2.83 | 1.94 | 19.83 |
| 1HGJ.PDB | O, E_ALA.253   | N, E_ASN.152   | H, E_ASN.152    | 2.81 | 1.98 | 26.27 |
| 1HGJ.PDB | OH, E_TYR.195  | NE1, E_TRP.153 | HE1, E_TRP.153  | 2.83 | 1.93 | 19.26 |
| 1HGJ.PDB | O, E_LEU.194   | N, E_LYS.156   | H, E_LYS.156    | 2.96 | 2.04 | 16.52 |
| 1HGJ.PDB | O, E_SER.193   | NZ, E_LYS.156  | HZ2, E_LYS.156  | 2.72 | 1.80 | 21.90 |
| 1HGJ.PDB | O, E_SER.247   | N, E_LEU.164   | H, E_LEU.164    | 2.72 | 1.87 | 23.95 |
| 1HGJ.PDB | O, E_ILE.245   | N, E_VAL.166   | H, E_VAL.166    | 2.99 | 2.04 | 11.20 |
| 1HGJ.PDB | O, E_LEU.243   | OG1, E_THR.167 | HG1, E_THR.167  | 2.97 | 2.09 | 21.09 |
| 1HGJ.PDB | O, E_LEU.243   | N, E_MET.168   | H, E_MET.168    | 2.90 | 1.98 | 16.52 |
| 1HGJ.PDB | O, E_ASP.241   | N, E_ASN.170   | H, E_ASN.170    | 2.90 | 1.94 | 11.02 |
| 1HGJ.PDB | O, E_PHE.174   | ND2, E_ASN.170 | HD21, E_ASN.170 | 2.85 | 1.90 | 10.04 |
| 1HGJ.PDB | O, E_VAL.237   | ND2, E_ASN.170 | HD22, E_ASN.170 | 2.87 | 2.05 | 27.43 |
| 1HGJ.PDB | O, E_VAL.237   | N, E_LYS.176   | H, E_LYS.176    | 2.91 | 1.97 | 13.40 |
| 1HGJ.PDB | OE2, E_GLU.123 | NZ, E_LYS.176  | HZ1, E_LYS.176  | 2.69 | 1.80 | 25.95 |
| 1HGJ.PDB | O, E_PHE.258   | N, E_LEU.177   | H, E_LEU.177    | 2.99 | 2.02 | 6.31  |
| 1HGJ.PDB | O, E_THR.235   | N, E_TYR.178   | H, E_TYR.178    | 2.83 | 1.86 | 3.63  |
| 1HGJ.PDB | OE1, E_GLU.123 | OH, E_TYR.178  | HH, E_TYR.178   | 2.77 | 1.83 | 11.08 |
| 1HGJ.PDB | OG1, E_THR.235 | NE1, E_TRP.180 | HE1, E_TRP.180  | 2.94 | 1.96 | 4.45  |
| 1HGJ.PDB | O, E_ASN.250   | N, E_HIS.183   | H, E_HIS.183    | 2.92 | 2.00 | 17.04 |
| 1HGJ.PDB | O, E_ARG.229   | N, E_HIS.184   | H, E_HIS.184    | 2.87 | 1.92 | 10.49 |
| 1HGJ.PDB | OG, E_SER.231  | NE2, E_HIS.184 | HE2, E_HIS.184  | 2.75 | 1.92 | 26.56 |
| 1HGJ.PDB | OG1, E_THR.187 | N, E_GLU.190   | H, E_GLU.190    | 2.90 | 1.96 | 12.58 |
| 1HGJ.PDB | O, E_GLN.197   | NE2, E_GLN.191 | HE22, E_GLN.191 | 2.91 | 1.99 | 17.51 |
| 1HGJ.PDB | O, E_ASN.188   | OG1, E_THR.192 | HG1, E_THR.192  | 2.94 | 1.98 | 6.07  |

|          |                |                |                 |      |      |       |
|----------|----------------|----------------|-----------------|------|------|-------|
| 1HGJ.PDB | O, E_GLN_189   | N, E_SER_193   | H, E_SER_193    | 2.85 | 1.87 | 2.13  |
| 1HGJ.PDB | O, E_GLU_190   | N, E_LEU_194   | H, E_LEU_194    | 2.97 | 2.00 | 9.20  |
| 1HGJ.PDB | O, E_GLN_191   | N, E_TYR_195   | H, E_TYR_195    | 2.80 | 1.85 | 9.91  |
| 1HGJ.PDB | O, E_TYR_195   | N, E_GLN_197   | H, E_GLN_197    | 2.71 | 1.92 | 29.63 |
| 1HGJ.PDB | O, E_TYR_161   | NE2, E_GLN_197 | HE21, E_GLN_197 | 2.91 | 1.96 | 10.54 |
| 1HGJ.PDB | O, E_ASN_248   | NE2, E_GLN_197 | HE22, E_GLN_197 | 2.87 | 1.94 | 14.62 |
| 1HGJ.PDB | OD1, E_ASN_246 | NH2, E_ARG_201 | HH21, E_ARG_201 | 2.59 | 1.74 | 26.30 |
| 1HGJ.PDB | O, E_ILE_213   | N, E_VAL_202   | H, E_VAL_202    | 3.00 | 2.07 | 14.91 |
| 1HGJ.PDB | O, E_ASN_246   | N, E_THR_203   | H, E_THR_203    | 2.93 | 1.98 | 11.44 |
| 1HGJ.PDB | OG1, E_THR_212 | OG1, E_THR_203 | HG1, E_THR_203  | 2.93 | 1.99 | 12.00 |
| 1HGJ.PDB | O, E_GLN_211   | N, E_VAL_204   | H, E_VAL_204    | 2.84 | 1.94 | 19.22 |
| 1HGJ.PDB | O, E_SER_209   | N, E_THR_206   | H, E_THR_206    | 2.94 | 1.97 | 8.33  |
| 1HGJ.PDB | OD1, E_ASP_241 | N, E_ARG_207   | H, E_ARG_207    | 2.88 | 1.92 | 9.33  |
| 1HGJ.PDB | OD1, C_ASP_101 | NE2, E_GLN_210 | HE22, E_GLN_210 | 2.94 | 2.10 | 26.45 |
| 1HGJ.PDB | O, E_VAL_204   | N, E_GLN_211   | H, E_GLN_211    | 2.90 | 1.97 | 16.00 |
| 1HGJ.PDB | O, E_VAL_202   | N, E_ILE_213   | H, E_ILE_213    | 2.86 | 1.94 | 15.90 |
| 1HGJ.PDB | OE1, A_GLN_210 | NH2, E_ARG_220 | HH21, E_ARG_220 | 2.69 | 1.86 | 28.41 |
| 1HGJ.PDB | O, E_ASN_216   | NH2, E_ARG_220 | HH22, E_ARG_220 | 2.77 | 1.90 | 23.93 |
| 1HGJ.PDB | O, E_LEU_226   | N, E_VAL_223   | H, E_VAL_223    | 2.82 | 1.86 | 9.44  |
| 1HGJ.PDB | O, E_CYS_97    | NE, E_ARG_224  | HE, E_ARG_224   | 2.81 | 1.96 | 24.68 |
| 1HGJ.PDB | O, E_CYS_97    | NH2, E_ARG_224 | HH21, E_ARG_224 | 2.94 | 2.09 | 27.02 |
| 1HGJ.PDB | O, E_VAL_223   | N, E_LEU_226   | H, E_LEU_226    | 2.92 | 1.98 | 13.32 |
| 1HGJ.PDB | O, E_SER_228   | NH1, E_ARG_229 | HH11, E_ARG_229 | 2.73 | 1.78 | 16.61 |
| 1HGJ.PDB | O, E_PRO_221   | NH2, E_ARG_229 | HH22, E_ARG_229 | 2.62 | 1.66 | 13.20 |
| 1HGJ.PDB | OD1, E_ASP_101 | OG, E_SER_231  | HG, E_SER_231   | 2.90 | 1.95 | 11.36 |
| 1HGJ.PDB | O, E_ASP_101   | N, E_ILE_232   | H, E_ILE_232    | 2.88 | 1.96 | 15.95 |
| 1HGJ.PDB | O, E_TRP_180   | N, E_TYR_233   | H, E_TYR_233    | 2.94 | 1.97 | 6.84  |
| 1HGJ.PDB | O, E_TYR_178   | N, E_THR_235   | H, E_THR_235    | 2.90 | 2.00 | 19.30 |
| 1HGJ.PDB | O, E_LYS_176   | N, E_VAL_237   | H, E_VAL_237    | 2.80 | 1.88 | 15.33 |
| 1HGJ.PDB | O, D_SER_71    | NZ, E_LYS_238  | HZ2, E_LYS_238  | 2.65 | 1.73 | 22.71 |
| 1HGJ.PDB | OE1, D_GLU_72  | NZ, E_LYS_238  | HZ3, E_LYS_238  | 2.87 | 1.86 | 13.82 |
| 1HGJ.PDB | O, E_ASN_170   | N, E_GLY_240   | H, E_GLY_240    | 2.85 | 1.98 | 22.38 |
| 1HGJ.PDB | OD1, E_ASP_241 | N, E_VAL_242   | H, E_VAL_242    | 2.79 | 1.95 | 25.35 |
| 1HGJ.PDB | O, E_MET_168   | N, E_LEU_243   | H, E_LEU_243    | 2.92 | 1.95 | 5.02  |
| 1HGJ.PDB | O, E_VAL_166   | N, E_ILE_245   | H, E_ILE_245    | 2.90 | 1.96 | 13.71 |
| 1HGJ.PDB | O, E_THR_203   | N, E_ASN_246   | H, E_ASN_246    | 2.96 | 1.99 | 5.52  |
| 1HGJ.PDB | OD1, E_ASN_165 | ND2, E_ASN_246 | HD22, E_ASN_246 | 2.89 | 1.94 | 11.88 |
| 1HGJ.PDB | O, E_LEU_164   | N, E_SER_247   | H, E_SER_247    | 2.94 | 2.02 | 17.47 |
| 1HGJ.PDB | O, E_HIS_183   | ND2, E_ASN_250 | HD22, E_ASN_250 | 2.83 | 1.88 | 12.22 |
| 1HGJ.PDB | O, E_ASN_152   | N, E_ALA_253   | H, E_ALA_253    | 2.89 | 2.00 | 20.06 |
| 1HGJ.PDB | OD1, E_ASN_133 | NH2, E_ARG_255 | HH22, E_ARG_255 | 2.55 | 1.71 | 26.62 |
| 1HGJ.PDB | O, E_ILE_121   | N, E_TYR_257   | H, E_TYR_257    | 2.92 | 2.08 | 25.41 |
| 1HGJ.PDB | O, E_LEU_177   | N, E_PHE_258   | H, E_PHE_258    | 2.92 | 1.95 | 7.34  |
| 1HGJ.PDB | OG, E_SER_115  | N, E_ARG_261   | H, E_ARG_261    | 2.94 | 2.00 | 14.60 |
| 1HGJ.PDB | OE2, E_GLU_119 | NH1, E_ARG_261 | HH12, E_ARG_261 | 2.65 | 1.82 | 28.15 |
| 1HGJ.PDB | OE1, E_GLU_119 | NH2, E_ARG_261 | HH22, E_ARG_261 | 2.91 | 2.01 | 23.66 |
| 1HGJ.PDB | OD2, E_ASP_85  | NZ, E_LYS_264  | HZ3, E_LYS_264  | 2.86 | 1.86 | 15.01 |
| 1HGJ.PDB | O, E_PHE_87    | N, E_MET_268   | H, E_MET_268    | 2.83 | 1.92 | 18.18 |
| 1HGJ.PDB | O, E_PRO_284   | OG, E_SER_270  | HG, E_SER_270   | 2.82 | 1.88 | 11.49 |
| 1HGJ.PDB | OG, E_SER_270  | N, E_ALA_272   | H, E_ALA_272    | 2.99 | 2.05 | 12.84 |
| 1HGJ.PDB | O, E_ILE_51    | N, E_ASP_275   | H, E_ASP_275    | 2.93 | 2.03 | 19.50 |
| 1HGJ.PDB | OD1, E_ASP_275 | N, E_THR_276   | H, E_THR_276    | 2.79 | 1.94 | 24.04 |
| 1HGJ.PDB | O, E_ASN_54    | N, E_SER_279   | H, E_SER_279    | 2.81 | 1.88 | 14.80 |
| 1HGJ.PDB | O, E_TYR_302   | N, E_ILE_282   | H, E_ILE_282    | 2.91 | 1.94 | 6.79  |
| 1HGJ.PDB | O, E_THR_283   | N, E_GLY_286   | H, E_GLY_286    | 2.81 | 1.88 | 13.99 |
| 1HGJ.PDB | O, E_LYS_50    | N, E_SER_287   | H, E_SER_287    | 2.83 | 1.86 | 7.05  |
| 1HGJ.PDB | O, E_ALA_304   | ND2, E_ASN_290 | HD22, E_ASN_290 | 2.82 | 1.92 | 17.80 |
| 1HGJ.PDB | OE1, E_GLN_44  | NZ, E_LYS_292  | HZ1, E_LYS_292  | 2.72 | 1.70 | 10.33 |

|          |                |                |                 |      |      |       |
|----------|----------------|----------------|-----------------|------|------|-------|
| 1HGJ.PDB | OD2, E_ASP_291 | NZ, E_LYS_292  | HZ3, E_LYS_292  | 2.83 | 1.86 | 17.49 |
| 1HGJ.PDB | O, E_LYS_307   | N, E_GLN_295   | H, E_GLN_295    | 2.87 | 1.98 | 20.11 |
| 1HGJ.PDB | O, E_ASN_298   | NE2, E_GLN_295 | HE21, E_GLN_295 | 2.74 | 1.78 | 8.06  |
| 1HGJ.PDB | O, E_GLN_44    | N, E_ASN_296   | H, E_ASN_296    | 2.84 | 1.90 | 13.41 |
| 1HGJ.PDB | OE1, E_GLN_295 | N, E_VAL_297   | H, E_VAL_297    | 2.70 | 1.91 | 29.61 |
| 1HGJ.PDB | O, F_LYS_68    | NZ, E_LYS_299  | HZ1, E_LYS_299  | 2.94 | 1.95 | 15.31 |
| 1HGJ.PDB | OD1, E_ASN_298 | N, E_ILE_300   | H, E_ILE_300    | 2.84 | 1.96 | 20.15 |
| 1HGJ.PDB | O, E_ILE_282   | N, E_TYR_302   | H, E_TYR_302    | 2.88 | 2.04 | 26.30 |
| 1HGJ.PDB | O, E_LYS_264   | OH, E_TYR_302  | HH, E_TYR_302   | 2.66 | 1.88 | 29.67 |
| 1HGJ.PDB | O, F_LYS_62    | N, E_GLY_303   | H, E_GLY_303    | 2.92 | 1.96 | 9.12  |
| 1HGJ.PDB | O, E_GLN_295   | N, E_VAL_309   | H, E_VAL_309    | 2.91 | 2.08 | 26.42 |
| 1HGJ.PDB | OG, F_SER_93   | N, E_LYS_310   | H, E_LYS_310    | 2.99 | 2.03 | 10.38 |
| 1HGJ.PDB | OD1, F_ASP_86  | NZ, E_LYS_310  | HZ3, E_LYS_310  | 2.93 | 2.08 | 29.22 |
| 1HGJ.PDB | OE2, E_GLU_41  | N, E_LEU_314   | H, E_LEU_314    | 2.79 | 1.86 | 13.14 |
| 1HGJ.PDB | OE1, E_GLU_41  | NZ, E_LYS_315  | HZ3, E_LYS_315  | 2.86 | 1.91 | 20.65 |
| 1HGJ.PDB | O, E_THR_40    | N, E_LEU_316   | H, E_LEU_316    | 2.79 | 1.84 | 10.66 |
| 1HGJ.PDB | OD1, F_ASN_104 | N, E_ALA_317   | H, E_ALA_317    | 2.73 | 1.80 | 11.35 |
| 1HGJ.PDB | O, E_ASN_38    | N, E_THR_318   | H, E_THR_318    | 2.91 | 1.98 | 16.58 |
| 1HGJ.PDB | O, E_VAL_20    | ND2, E_ASN_322 | HD21, E_ASN_322 | 2.87 | 1.94 | 14.58 |
| 1HGJ.PDB | OE2, E_GLU_35  | ND2, E_ASN_322 | HD22, E_ASN_322 | 2.86 | 1.96 | 20.74 |
| 1HGJ.PDB | OE2, F_GLU_15  | N, E_GLU_325   | H, E_GLU_325    | 2.88 | 2.08 | 29.65 |
| 1HGJ.PDB | O, E_GLN_327   | NZ, E_LYS_326  | HZ1, E_LYS_326  | 2.81 | 1.90 | 23.82 |
| 1HGJ.PDB | OE1, F_GLU_15  | NZ, E_LYS_326  | HZ3, E_LYS_326  | 2.87 | 1.86 | 12.83 |
| 1HGJ.PDB | O, E_LYS_326   | NE2, E_GLN_327 | HE22, E_GLN_327 | 2.82 | 1.90 | 17.58 |
| 1HGJ.PDB | OD2, F_ASP_112 | N, F_GLY_1     | H2, F_GLY_1     | 2.75 | 1.76 | 14.31 |
| 1HGJ.PDB | OD1, F_ASP_109 | N, F_LEU_2     | H, F_LEU_2      | 2.87 | 1.99 | 21.90 |
| 1HGJ.PDB | OD2, F_ASP_112 | N, F_PHE_3     | H, F_PHE_3      | 2.83 | 2.02 | 27.46 |
| 1HGJ.PDB | OD2, F_ASP_112 | N, F_GLY_4     | H, F_GLY_4      | 2.87 | 1.95 | 16.24 |
| 1HGJ.PDB | OD1, F_ASP_112 | N, F_ALA_5     | H, F_ALA_5      | 2.84 | 1.98 | 23.38 |
| 1HGJ.PDB | OD1, F_ASP_112 | N, F_ILE_6     | H, F_ILE_6      | 3.00 | 2.08 | 18.28 |
| 1HGJ.PDB | O, F_GLY_4     | N, F_PHE_9     | H, F_PHE_9      | 2.79 | 1.86 | 13.96 |
| 1HGJ.PDB | O, F_GLY_13    | ND2, F_ASN_12  | HD22, F_ASN_12  | 2.89 | 2.02 | 22.28 |
| 1HGJ.PDB | O, E_VAL_323   | N, F_GLY_13    | H, F_GLY_13     | 2.69 | 1.76 | 10.96 |
| 1HGJ.PDB | O, E_HIS_17    | N, F_TRP_14    | H, F_TRP_14     | 2.84 | 1.89 | 11.67 |
| 1HGJ.PDB | OG1, F_THR_41  | N, F_TRP_21    | H, F_TRP_21     | 2.96 | 2.04 | 16.61 |
| 1HGJ.PDB | O, E_GLY_16    | N, F_GLY_23    | H, F_GLY_23     | 2.93 | 2.01 | 16.90 |
| 1HGJ.PDB | O, F_ALA_35    | N, F_PHE_24    | H, F_PHE_24     | 2.82 | 1.85 | 6.05  |
| 1HGJ.PDB | O, E_CYS_14    | N, F_ARG_25    | H, F_ARG_25     | 2.87 | 1.99 | 20.85 |
| 1HGJ.PDB | OE1, F_GLN_34  | NE, F_ARG_25   | HE, F_ARG_25    | 2.86 | 2.05 | 28.42 |
| 1HGJ.PDB | OE1, F_GLN_34  | NH2, F_ARG_25  | HH21, F_ARG_25  | 2.64 | 1.73 | 20.69 |
| 1HGJ.PDB | O, F_GLY_33    | N, F_HIS_26    | H, F_HIS_26     | 2.93 | 2.04 | 19.59 |
| 1HGJ.PDB | O, E_THR_12    | N, F_GLN_27    | H, F_GLN_27     | 2.89 | 1.97 | 15.73 |
| 1HGJ.PDB | O, F_GLY_31    | N, F_ASN_28    | H, F_ASN_28     | 2.76 | 1.81 | 11.08 |
| 1HGJ.PDB | OD1, F_ASN_146 | ND2, F_ASN_28  | HD21, F_ASN_28  | 2.81 | 1.89 | 16.64 |
| 1HGJ.PDB | O, F_CYS_144   | ND2, F_ASN_28  | HD22, F_ASN_28  | 2.86 | 1.94 | 16.87 |
| 1HGJ.PDB | O, F_PHE_24    | N, F_ALA_35    | H, F_ALA_35     | 2.77 | 1.91 | 22.75 |
| 1HGJ.PDB | O, F_TYR_22    | N, F_ASP_37    | H, F_ASP_37     | 2.70 | 1.77 | 12.58 |
| 1HGJ.PDB | OD2, F_ASP_37  | N, F_SER_40    | H, F_SER_40     | 2.96 | 1.99 | 8.62  |
| 1HGJ.PDB | OD2, F_ASP_37  | OG, F_SER_40   | HG, F_SER_40    | 2.80 | 1.95 | 24.06 |
| 1HGJ.PDB | O, F_ASP_37    | OG1, F_THR_41  | HG1, F_THR_41   | 2.72 | 1.84 | 19.21 |
| 1HGJ.PDB | O, F_LEU_38    | N, F_GLN_42    | H, F_GLN_42     | 2.93 | 2.00 | 15.35 |
| 1HGJ.PDB | OD1, F_ASP_46  | NE2, F_GLN_42  | HE22, F_GLN_42  | 2.80 | 1.92 | 21.18 |
| 1HGJ.PDB | O, F_LYS_39    | N, F_ALA_43    | H, F_ALA_43     | 2.93 | 1.97 | 8.45  |
| 1HGJ.PDB | O, F_SER_40    | N, F_ALA_44    | H, F_ALA_44     | 2.96 | 1.98 | 2.14  |
| 1HGJ.PDB | O, F_THR_41    | N, F_ILE_45    | H, F_ILE_45     | 2.88 | 1.94 | 11.66 |
| 1HGJ.PDB | O, F_GLN_42    | N, F_ASP_46    | H, F_ASP_46     | 2.77 | 1.80 | 2.95  |
| 1HGJ.PDB | OE2, F_GLU_114 | NE2, F_GLN_47  | HE21, F_GLN_47  | 2.95 | 2.04 | 18.06 |
| 1HGJ.PDB | O, F_ALA_43    | NE2, F_GLN_47  | HE22, F_GLN_47  | 2.95 | 2.07 | 21.45 |

|          |                |                |                 |      |      |       |
|----------|----------------|----------------|-----------------|------|------|-------|
| 1HGJ.PDB | O, F_ILE.45    | N, F_ASN.49    | H, F_ASN.49     | 2.87 | 1.94 | 15.82 |
| 1HGJ.PDB | O, F_ASP.46    | N, F_GLY.50    | H, F_GLY.50     | 2.83 | 1.94 | 20.73 |
| 1HGJ.PDB | OE1, F_GLU.103 | NZ, F_LYS.51   | HZ2, F_LYS.51   | 2.79 | 1.75 | 5.77  |
| 1HGJ.PDB | ND1, F_HIS.106 | NZ, F_LYS.51   | HZ3, F_LYS.51   | 2.75 | 1.79 | 17.21 |
| 1HGJ.PDB | O, F_ILE.48    | N, F_LEU.52    | H, F_LEU.52     | 2.90 | 1.98 | 16.71 |
| 1HGJ.PDB | O, F_ASN.49    | N, F_ASN.53    | H, F_ASN.53     | 2.87 | 1.94 | 13.91 |
| 1HGJ.PDB | OE1, F_GLU.57  | NH1, F_ARG.54  | HH11, F_ARG.54  | 2.86 | 1.86 | 9.70  |
| 1HGJ.PDB | OE2, D_GLU.97  | NH2, F_ARG.54  | HH22, F_ARG.54  | 2.77 | 1.81 | 14.54 |
| 1HGJ.PDB | OG, E_SER.110  | NE2, F_HIS.64  | HE2, F_HIS.64   | 2.90 | 1.93 | 7.02  |
| 1HGJ.PDB | O, E_LYS.299   | NZ, F_LYS.68   | HZ1, F_LYS.68   | 2.93 | 1.90 | 4.77  |
| 1HGJ.PDB | OE2, F_GLU.85  | NZ, F_LYS.68   | HZ2, F_LYS.68   | 2.74 | 1.77 | 18.09 |
| 1HGJ.PDB | OG, A_SER.107  | N, F_ARG.76    | H, F_ARG.76     | 2.85 | 1.88 | 6.29  |
| 1HGJ.PDB | OE2, B_GLU.81  | NE, F_ARG.76   | HE, F_ARG.76    | 2.85 | 1.89 | 12.57 |
| 1HGJ.PDB | OE2, B_GLU.74  | NH1, F_ARG.76  | HH12, F_ARG.76  | 2.70 | 1.70 | 4.55  |
| 1HGJ.PDB | OE1, B_GLU.81  | NH2, F_ARG.76  | HH21, F_ARG.76  | 2.65 | 1.66 | 2.84  |
| 1HGJ.PDB | OE1, B_GLU.74  | NH2, F_ARG.76  | HH22, F_ARG.76  | 2.72 | 1.73 | 7.95  |
| 1HGJ.PDB | OE1, F_GLU.74  | NE2, F_GLN.78  | HE22, F_GLN.78  | 2.92 | 1.97 | 13.10 |
| 1HGJ.PDB | O, F_GLY.75    | N, F_ASP.79    | H, F_ASP.79     | 2.96 | 2.02 | 12.63 |
| 1HGJ.PDB | O, F_GLN.78    | N, F_LYS.82    | H, F_LYS.82     | 2.96 | 1.99 | 6.52  |
| 1HGJ.PDB | O, F_ASP.79    | N, F_TYR.83    | H, F_TYR.83     | 2.83 | 1.89 | 13.63 |
| 1HGJ.PDB | OE1, B_GLU.85  | OH, F_TYR.83   | HH, F_TYR.83    | 2.53 | 1.75 | 28.54 |
| 1HGJ.PDB | O, F_LEU.80    | N, F_VAL.84    | H, F_VAL.84     | 2.82 | 1.86 | 7.45  |
| 1HGJ.PDB | O, F_LYS.82    | N, F_ASP.86    | H, F_ASP.86     | 2.93 | 1.97 | 9.90  |
| 1HGJ.PDB | O, F_TYR.83    | N, F_THR.87    | H, F_THR.87     | 2.88 | 1.95 | 13.71 |
| 1HGJ.PDB | O, F_VAL.84    | N, F_LYS.88    | H, F_LYS.88     | 2.98 | 2.03 | 12.44 |
| 1HGJ.PDB | OH, D_TYR.83   | NZ, F_LYS.88   | HZ1, F_LYS.88   | 2.70 | 1.68 | 8.19  |
| 1HGJ.PDB | O, F_GLU.85    | N, F_ILE.89    | H, F_ILE.89     | 2.86 | 1.88 | 2.87  |
| 1HGJ.PDB | O, F_LYS.88    | N, F_TRP.92    | H, F_TRP.92     | 2.93 | 1.96 | 5.23  |
| 1HGJ.PDB | O, F_ILE.89    | N, F_SER.93    | H, F_SER.93     | 2.83 | 1.94 | 19.77 |
| 1HGJ.PDB | O, F_ILE.89    | OG, F_SER.93   | HG, F_SER.93    | 2.86 | 1.95 | 15.80 |
| 1HGJ.PDB | O, F_ASP.90    | N, F_TYR.94    | H, F_TYR.94     | 2.83 | 1.93 | 19.07 |
| 1HGJ.PDB | O, F_TYR.94    | N, F_LEU.98    | H, F_LEU.98     | 2.95 | 1.98 | 6.19  |
| 1HGJ.PDB | O, F_ASN.95    | N, F_LEU.99    | H, F_LEU.99     | 2.87 | 1.97 | 18.16 |
| 1HGJ.PDB | O, F_LEU.98    | N, F_LEU.102   | H, F_LEU.102    | 2.95 | 1.98 | 8.07  |
| 1HGJ.PDB | O, F_LEU.99    | N, F_GLU.103   | H, F_GLU.103    | 2.95 | 1.99 | 9.09  |
| 1HGJ.PDB | O, F_VAL.100   | N, F_ASN.104   | H, F_ASN.104    | 2.81 | 1.86 | 11.07 |
| 1HGJ.PDB | O, E_LYS.27    | ND2, F_ASN.104 | HD22, F_ASN.104 | 2.91 | 1.96 | 11.78 |
| 1HGJ.PDB | O, F_LEU.102   | N, F_HIS.106   | H, F_HIS.106    | 2.94 | 1.98 | 8.79  |
| 1HGJ.PDB | O, F_GLU.103   | N, F_THR.107   | H, F_THR.107    | 2.86 | 1.95 | 17.68 |
| 1HGJ.PDB | O, F_HIS.106   | N, F_LEU.110   | H, F_LEU.110    | 2.80 | 1.84 | 7.98  |
| 1HGJ.PDB | O, F_THR.107   | OG1, F_THR.111 | HG1, F_THR.111  | 2.89 | 1.92 | 1.87  |
| 1HGJ.PDB | O, F_ASP.109   | N, F_SER.113   | H, F_SER.113    | 2.81 | 1.84 | 6.27  |
| 1HGJ.PDB | O, D_LEU.2     | OG, F_SER.113  | HG, F_SER.113   | 2.74 | 1.92 | 26.51 |
| 1HGJ.PDB | O, F_LEU.110   | N, F_GLU.114   | H, F_GLU.114    | 2.93 | 1.97 | 10.83 |
| 1HGJ.PDB | O, F_ASP.112   | N, F_ASN.116   | H, F_ASN.116    | 2.99 | 2.03 | 9.83  |
| 1HGJ.PDB | O, F_SER.113   | N, F_LYS.117   | H, F_LYS.117    | 2.74 | 1.86 | 21.34 |
| 1HGJ.PDB | O, F_GLU.114   | N, F_LEU.118   | H, F_LEU.118    | 2.96 | 2.00 | 9.84  |
| 1HGJ.PDB | O, F_ASN.116   | N, F_GLU.120   | H, F_GLU.120    | 2.93 | 1.95 | 2.43  |
| 1HGJ.PDB | O, F_LYS.117   | N, F_LYS.121   | H, F_LYS.121    | 2.95 | 2.03 | 16.46 |
| 1HGJ.PDB | O, F_PHE.119   | N, F_ARG.123   | H, F_ARG.123    | 2.92 | 1.97 | 10.33 |
| 1HGJ.PDB | OE2, F_GLU.120 | NH1, F_ARG.123 | HH11, F_ARG.123 | 2.73 | 1.86 | 24.44 |
| 1HGJ.PDB | OE1, D_GLU.132 | NE, F_ARG.124  | HE, F_ARG.124   | 2.92 | 2.09 | 27.65 |
| 1HGJ.PDB | OE2, D_GLU.132 | NE, F_ARG.124  | HE, F_ARG.124   | 2.96 | 2.06 | 20.98 |
| 1HGJ.PDB | O, F_HIS.159   | ND2, F_ASN.129 | HD21, F_ASN.129 | 2.97 | 2.01 | 8.92  |
| 1HGJ.PDB | OH, F_TYR.157  | ND2, F_ASN.129 | HD22, F_ASN.129 | 2.75 | 1.85 | 17.65 |
| 1HGJ.PDB | O, F_LYS.139   | N, F_GLU.131   | H, F_GLU.131    | 2.94 | 1.99 | 12.85 |
| 1HGJ.PDB | O, F_CYS.137   | N, F_MET.133   | H, F_MET.133    | 2.84 | 1.91 | 14.51 |
| 1HGJ.PDB | OD1, F_ASN.135 | N, F_CYS.137   | H, F_CYS.137    | 2.98 | 2.16 | 26.53 |

|          |                |                |                 |      |      |       |
|----------|----------------|----------------|-----------------|------|------|-------|
| 1HGJ.PDB | O, E_LEU_13    | N, F_PHE_138   | H, F_PHE_138    | 2.73 | 1.87 | 22.18 |
| 1HGJ.PDB | O, F_GLU_131   | N, F_LYS_139   | H, F_LYS_139    | 2.81 | 1.86 | 9.38  |
| 1HGJ.PDB | O, E_ALA_11    | N, F_ILE_140   | H, F_ILE_140    | 2.78 | 1.87 | 17.89 |
| 1HGJ.PDB | O, F_ASN_129   | N, F_TYR_141   | H, F_TYR_141    | 2.96 | 2.03 | 14.20 |
| 1HGJ.PDB | OE2, F_GLU_165 | N, F_LYS_143   | H, F_LYS_143    | 2.99 | 2.05 | 14.57 |
| 1HGJ.PDB | O, F_ASP_145   | N, F_ILE_149   | H, F_ILE_149    | 2.90 | 1.95 | 10.28 |
| 1HGJ.PDB | O, F_ASN_146   | N, F_GLU_150   | H, F_GLU_150    | 2.89 | 1.95 | 14.81 |
| 1HGJ.PDB | O, F_ALA_147   | N, F_SER_151   | H, F_SER_151    | 2.90 | 2.00 | 18.77 |
| 1HGJ.PDB | O, F_CYS_148   | OG, F_SER_151  | HG, F_SER_151   | 2.72 | 1.92 | 27.65 |
| 1HGJ.PDB | O, F_GLU_150   | N, F_ASN_154   | H, F_ASN_154    | 2.78 | 1.81 | 1.94  |
| 1HGJ.PDB | OD1, F_ASP_158 | N, F_ASP_160   | H, F_ASP_160    | 2.95 | 2.08 | 23.42 |
| 1HGJ.PDB | O, F_HIS_159   | N, F_TYR_162   | H, F_TYR_162    | 2.96 | 2.07 | 20.30 |
| 1HGJ.PDB | O, D_ARG_170   | NH1, F_ARG_163 | HH12, F_ARG_163 | 2.89 | 1.91 | 11.37 |
| 1HGJ.PDB | O, F_TYR_162   | N, F_ALA_166   | H, F_ALA_166    | 2.89 | 1.92 | 3.44  |
| 1HGJ.PDB | O, F_ARG_163   | N, F_LEU_167   | H, F_LEU_167    | 2.76 | 1.81 | 9.28  |
| 1HGJ.PDB | O, F_ASP_164   | N, F_ASN_168   | H, F_ASN_168    | 2.99 | 2.03 | 9.70  |
| 1HGJ.PDB | O, F_ALA_166   | N, F_ARG_170   | H, F_ARG_170    | 2.86 | 1.98 | 21.69 |
| 1HGJ.PDB | O, F_GLU_128   | NE, F_ARG_170  | HE, F_ARG_170   | 2.77 | 1.90 | 22.39 |
| 1HGJ.PDB | OE2, F_GLU_131 | NH1, F_ARG_170 | HH11, F_ARG_170 | 2.79 | 1.80 | 6.77  |
| 1HGJ.PDB | O, F_LEU_167   | N, F_PHE_171   | H, F_PHE_171    | 2.94 | 2.02 | 16.73 |

Table 1670: 1HGJ-specific side chain and main chain hydrogen bonding analysis. In this table, a PDB file is specified with a four-letter PDB ID, except that the names of the PDB files corresponding to the single NMR structural model split from the NMR ensemble is specified with a four-letter PDB ID in addition to a hyphen followed by the single NMR structural model numeric ID, the residue naming scheme is **Chain ID\_residue name\_residue number**,  $\angle ADH$  represents the angle formed by acceptor (A), donor (D) and hydrogen (H) ( $\angle ADH$ ).

| PDB      | Acceptor (A)  | Donor (D)      | Hydrogen (H)   | D-A (Å) | H-A (Å) | $\angle ADH(^{\circ})$ |
|----------|---------------|----------------|----------------|---------|---------|------------------------|
| 1OSP.PDB | OG, L.SER.26  | N, L.GLN.3     | H, L.GLN.3     | 2.70    | 1.79    | 13.92                  |
| 1OSP.PDB | O, L.LYS.24   | N, L.SER.5     | H, L.SER.5     | 2.66    | 1.74    | 13.88                  |
| 1OSP.PDB | O, L.TYR.86   | NE2, L.GLN.6   | HE21, L.GLN.6  | 2.96    | 2.00    | 8.59                   |
| 1OSP.PDB | O, L.LYS.103  | N, L.PHE.11    | H, L.PHE.11    | 2.89    | 1.98    | 18.16                  |
| 1OSP.PDB | O, L.GLU.105  | N, L.VAL.13    | H, L.VAL.13    | 2.80    | 1.85    | 11.83                  |
| 1OSP.PDB | O, L.LEU.78   | N, L.GLY.16    | H, L.GLY.16    | 2.67    | 1.75    | 12.23                  |
| 1OSP.PDB | OD1, L.ASP.17 | N, L.ARG.18    | H, L.ARG.18    | 2.90    | 2.10    | 29.03                  |
| 1OSP.PDB | O, L.ILE.75   | N, L.VAL.19    | H, L.VAL.19    | 2.73    | 1.79    | 10.56                  |
| 1OSP.PDB | O, L.LEU.73   | N, L.ILE.21    | H, L.ILE.21    | 2.79    | 1.84    | 10.88                  |
| 1OSP.PDB | O, L.TYR.71   | N, L.CYS.23    | H, L.CYS.23    | 2.71    | 1.82    | 18.30                  |
| 1OSP.PDB | O, L.SER.5    | N, L.LYS.24    | H, L.LYS.24    | 2.95    | 2.04    | 17.66                  |
| 1OSP.PDB | OH, L.TYR.71  | N, L.SER.31    | H, L.SER.31    | 2.95    | 2.08    | 22.39                  |
| 1OSP.PDB | O, L.TYR.30   | NH1, L.ARG.32  | HH11, L.ARG.32 | 2.63    | 1.69    | 15.15                  |
| 1OSP.PDB | O, O.LYS.44   | NH1, L.ARG.32  | HH12, L.ARG.32 | 2.98    | 2.09    | 22.73                  |
| 1OSP.PDB | O, O.SER.43   | NH2, L.ARG.32  | HH22, L.ARG.32 | 2.91    | 1.93    | 9.19                   |
| 1OSP.PDB | O, L.SER.31   | N, L.LEU.33    | H, L.LEU.33    | 2.98    | 2.14    | 25.04                  |
| 1OSP.PDB | O, L.GLN.89   | N, L.ALA.34    | H, L.ALA.34    | 2.77    | 1.82    | 10.76                  |
| 1OSP.PDB | O, L.ILE.48   | N, L.TRP.35    | H, L.TRP.35    | 2.95    | 2.03    | 16.19                  |
| 1OSP.PDB | O, L.PHE.87   | N, L.TYR.36    | H, L.TYR.36    | 2.75    | 1.89    | 22.90                  |
| 1OSP.PDB | OE1, L.GLN.89 | OH, L.TYR.36   | HH, L.TYR.36   | 2.81    | 1.86    | 10.05                  |
| 1OSP.PDB | O, L.ARG.45   | N, L.GLN.37    | H, L.GLN.37    | 2.92    | 1.98    | 13.78                  |
| 1OSP.PDB | O, L.THR.85   | N, L.GLN.38    | H, L.GLN.38    | 2.68    | 1.77    | 15.79                  |
| 1OSP.PDB | O, L.ASN.42   | NE2, L.GLN.38  | HE22, L.GLN.38 | 2.84    | 1.91    | 14.33                  |
| 1OSP.PDB | O, L.GLN.37   | N, L.ARG.45    | H, L.ARG.45    | 2.71    | 1.86    | 23.84                  |
| 1OSP.PDB | O, L.TRP.35   | N, L.LEU.47    | H, L.LEU.47    | 2.77    | 1.81    | 8.27                   |
| 1OSP.PDB | O, L.SER.53   | N, L.SER.49    | H, L.SER.49    | 2.83    | 1.86    | 5.93                   |
| 1OSP.PDB | OH, L.TYR.91  | N, L.GLY.50    | H, L.GLY.50    | 2.94    | 2.04    | 18.66                  |
| 1OSP.PDB | O, L.LEU.33   | N, L.ALA.51    | H, L.ALA.51    | 2.85    | 1.96    | 19.10                  |
| 1OSP.PDB | O, L.GLY.50   | N, L.THR.52    | H, L.THR.52    | 2.84    | 2.01    | 25.88                  |
| 1OSP.PDB | O, L.SER.49   | N, L.SER.53    | H, L.SER.53    | 2.91    | 2.11    | 29.67                  |
| 1OSP.PDB | O, L.LEU.47   | N, L.GLU.55    | H, L.GLU.55    | 2.98    | 2.09    | 21.52                  |
| 1OSP.PDB | O, L.LEU.46   | NE1, L.TRP.57  | HE1, L.TRP.57  | 2.86    | 1.90    | 10.61                  |
| 1OSP.PDB | O, L.SER.74   | N, L.SER.63    | H, L.SER.63    | 2.92    | 2.11    | 28.83                  |
| 1OSP.PDB | O, L.THR.72   | N, L.SER.65    | H, L.SER.65    | 2.98    | 2.07    | 17.30                  |
| 1OSP.PDB | O, L.CYS.23   | N, L.TYR.71    | H, L.TYR.71    | 2.86    | 1.98    | 20.08                  |
| 1OSP.PDB | O, L.ILE.21   | N, L.LEU.73    | H, L.LEU.73    | 2.87    | 1.98    | 20.14                  |
| 1OSP.PDB | O, L.SER.63   | N, L.SER.74    | H, L.SER.74    | 2.74    | 1.79    | 7.99                   |
| 1OSP.PDB | O, L.VAL.19   | N, L.ILE.75    | H, L.ILE.75    | 2.84    | 1.89    | 12.51                  |
| 1OSP.PDB | O, L.ASP.17   | N, L.LEU.78    | H, L.LEU.78    | 2.81    | 1.87    | 13.11                  |
| 1OSP.PDB | O, L.GLN.79   | N, L.ASP.82    | H, L.ASP.82    | 2.86    | 1.91    | 11.93                  |
| 1OSP.PDB | O, L.GLN.38   | N, L.THR.85    | H, L.THR.85    | 2.92    | 1.95    | 4.18                   |
| 1OSP.PDB | O, L.THR.102  | N, L.TYR.86    | H, L.TYR.86    | 2.89    | 1.93    | 8.08                   |
| 1OSP.PDB | O, L.ASP.82   | OH, L.TYR.86   | HH, L.TYR.86   | 2.85    | 1.91    | 12.11                  |
| 1OSP.PDB | O, L.TYR.36   | N, L.PHE.87    | H, L.PHE.87    | 2.96    | 2.01    | 13.11                  |
| 1OSP.PDB | O, L.ALA.34   | N, L.GLN.89    | H, L.GLN.89    | 2.85    | 2.04    | 28.87                  |
| 1OSP.PDB | O, L.GLN.90   | NE2, L.GLN.89  | HE22, L.GLN.89 | 2.86    | 2.00    | 23.53                  |
| 1OSP.PDB | O, L.THR.97   | N, L.GLN.90    | H, L.GLN.90    | 2.93    | 2.01    | 16.17                  |
| 1OSP.PDB | O, L.SER.93   | NE2, L.GLN.90  | HE21, L.GLN.90 | 2.98    | 2.01    | 7.86                   |
| 1OSP.PDB | OG1, L.THR.97 | NE2, L.GLN.90  | HE22, L.GLN.90 | 3.00    | 2.06    | 15.72                  |
| 1OSP.PDB | O, L.ARG.32   | N, L.TYR.91    | H, L.TYR.91    | 2.95    | 1.99    | 9.54                   |
| 1OSP.PDB | OE1, L.GLN.90 | N, L.TRP.92    | H, L.TRP.92    | 2.79    | 1.98    | 27.96                  |
| 1OSP.PDB | O, L.CYS.88   | N, L.GLY.99    | H, L.GLY.99    | 2.75    | 1.80    | 9.69                   |
| 1OSP.PDB | OE1, L.GLN.6  | N, L.GLY.101   | H, L.GLY.101   | 2.85    | 1.99    | 22.93                  |
| 1OSP.PDB | O, L.TYR.86   | N, L.THR.102   | H, L.THR.102   | 2.94    | 2.02    | 17.58                  |
| 1OSP.PDB | O, L.SER.8    | OG1, L.THR.102 | HG1, L.THR.102 | 2.69    | 1.79    | 17.03                  |
| 1OSP.PDB | O, L.SER.9    | N, L.LYS.103   | H, L.LYS.103   | 2.69    | 1.74    | 5.66                   |
| 1OSP.PDB | O, L.ALA.84   | N, L.LEU.104   | H, L.LEU.104   | 2.92    | 2.02    | 18.72                  |

|          |                |                |                 |      |      |       |
|----------|----------------|----------------|-----------------|------|------|-------|
| 1OSP.PDB | O, L_PHE.11    | N, L_GLU.105   | H, L_GLU.105    | 2.91 | 2.04 | 22.49 |
| 1OSP.PDB | OE1, L_GLN.166 | N, L_ILE.106   | H, L_ILE.106    | 2.92 | 1.96 | 10.71 |
| 1OSP.PDB | O, L_VAL.13    | N, L_LYS.107   | H, L_LYS.107    | 2.80 | 1.92 | 21.29 |
| 1OSP.PDB | O, L_ALA.109   | NE, L_ARG.108  | HE, L_ARG.108   | 2.74 | 1.82 | 13.78 |
| 1OSP.PDB | O, L_ASP.170   | NH1, L_ARG.108 | HH11, L_ARG.108 | 2.91 | 1.95 | 11.72 |
| 1OSP.PDB | O, L_TYR.140   | N, L_ALA.111   | H, L_ALA.111    | 2.99 | 2.03 | 8.54  |
| 1OSP.PDB | O, L_ASN.137   | N, L_THR.114   | H, L_THR.114    | 2.83 | 1.86 | 3.43  |
| 1OSP.PDB | O, L_PHE.135   | N, L_SER.116   | H, L_SER.116    | 2.91 | 2.00 | 18.69 |
| 1OSP.PDB | O, L_VAL.133   | N, L_PHE.118   | H, L_PHE.118    | 2.70 | 1.85 | 23.89 |
| 1OSP.PDB | O, L_SER.122   | N, L_THR.126   | H, L_THR.126    | 2.83 | 1.95 | 20.51 |
| 1OSP.PDB | O, L_SER.122   | OG1, L_THR.126 | HG1, L_THR.126  | 2.68 | 1.79 | 17.62 |
| 1OSP.PDB | O, L_LEU.125   | N, L_GLY.128   | H, L_GLY.128    | 2.89 | 1.98 | 18.00 |
| 1OSP.PDB | OE1, L_GLN.124 | N, L_SER.131   | H, L_SER.131    | 2.84 | 2.03 | 28.15 |
| 1OSP.PDB | O, L_LEU.179   | N, L_VAL.132   | H, L_VAL.132    | 2.99 | 2.03 | 9.27  |
| 1OSP.PDB | O, L_PHE.118   | N, L_VAL.133   | H, L_VAL.133    | 2.94 | 1.99 | 10.25 |
| 1OSP.PDB | O, L_SER.177   | N, L_CYS.134   | H, L_CYS.134    | 2.87 | 1.96 | 17.37 |
| 1OSP.PDB | O, L_SER.116   | N, L_PHE.135   | H, L_PHE.135    | 2.92 | 2.02 | 19.40 |
| 1OSP.PDB | O, L_MET.175   | N, L_LEU.136   | H, L_LEU.136    | 2.84 | 1.89 | 10.42 |
| 1OSP.PDB | O, L_THR.114   | N, L_ASN.137   | H, L_ASN.137    | 2.82 | 1.87 | 10.96 |
| 1OSP.PDB | O, L_TYR.173   | N, L_PHE.139   | H, L_PHE.139    | 2.82 | 1.85 | 4.99  |
| 1OSP.PDB | OE1, L_GLU.105 | OH, L_TYR.140  | HH, L_TYR.140   | 2.90 | 2.03 | 21.23 |
| 1OSP.PDB | O, L_THR.197   | N, L_ASN.145   | H, L_ASN.145    | 2.93 | 2.05 | 21.16 |
| 1OSP.PDB | O, L_GLU.195   | N, L_LYS.147   | H, L_LYS.147    | 2.84 | 1.90 | 13.83 |
| 1OSP.PDB | OG, L_SER.177  | NE1, L_TRP.148 | HE1, L_TRP.148  | 2.94 | 1.97 | 6.03  |
| 1OSP.PDB | O, L_THR.193   | N, L_LYS.149   | H, L_LYS.149    | 2.86 | 1.89 | 5.27  |
| 1OSP.PDB | O, L_SER.153   | N, L_ILE.150   | H, L_ILE.150    | 2.73 | 1.84 | 20.13 |
| 1OSP.PDB | O, L_SER.191   | N, L_ASP.151   | H, L_ASP.151    | 2.90 | 1.94 | 7.97  |
| 1OSP.PDB | O, L_TRP.148   | N, L_ARG.155   | H, L_ARG.155    | 2.67 | 1.85 | 27.49 |
| 1OSP.PDB | O, L_SER.176   | N, L_SER.162   | H, L_SER.162    | 2.90 | 1.97 | 13.57 |
| 1OSP.PDB | O, L_ILE.106   | NE2, L_GLN.166 | HE21, L_GLN.166 | 2.72 | 1.85 | 21.90 |
| 1OSP.PDB | OD1, L_ASP.167 | N, L_LYS.169   | H, L_LYS.169    | 2.91 | 2.06 | 23.22 |
| 1OSP.PDB | OD1, L_ASP.167 | N, L_ASP.170   | H, L_ASP.170    | 2.97 | 2.06 | 17.28 |
| 1OSP.PDB | OD1, L_ASP.170 | N, L_THR.172   | H, L_THR.172    | 2.93 | 1.99 | 11.17 |
| 1OSP.PDB | O, L_PHE.139   | N, L_TYR.173   | H, L_TYR.173    | 2.78 | 1.85 | 13.38 |
| 1OSP.PDB | O, L_LEU.136   | N, L_MET.175   | H, L_MET.175    | 2.90 | 2.00 | 19.13 |
| 1OSP.PDB | O, L_SER.162   | N, L_SER.176   | H, L_SER.176    | 2.94 | 1.99 | 10.89 |
| 1OSP.PDB | O, L_CYS.134   | N, L_SER.177   | H, L_SER.177    | 2.92 | 1.98 | 13.57 |
| 1OSP.PDB | O, L_LEU.160   | N, L_THR.178   | H, L_THR.178    | 2.95 | 1.99 | 8.96  |
| 1OSP.PDB | O, L_VAL.132   | N, L_LEU.179   | H, L_LEU.179    | 2.86 | 1.89 | 6.54  |
| 1OSP.PDB | O, L_GLY.158   | N, L_THR.180   | H, L_THR.180    | 2.81 | 1.87 | 11.29 |
| 1OSP.PDB | OG, L_SER.131  | OG1, L_THR.180 | HG1, L_THR.180  | 2.85 | 1.92 | 11.66 |
| 1OSP.PDB | O, L_ALA.130   | N, L_LEU.181   | H, L_LEU.181    | 2.78 | 1.82 | 7.56  |
| 1OSP.PDB | O, L_GLY.128   | N, L_LYS.183   | H, L_LYS.183    | 2.85 | 1.89 | 9.20  |
| 1OSP.PDB | O, L_THR.182   | N, L_TYR.186   | H, L_TYR.186    | 2.97 | 2.01 | 7.10  |
| 1OSP.PDB | O, L_LYS.183   | N, L_GLU.187   | H, L_GLU.187    | 2.92 | 1.97 | 10.78 |
| 1OSP.PDB | O, L_GLU.185   | N, L_ARG.188   | H, L_ARG.188    | 2.88 | 2.00 | 21.14 |
| 1OSP.PDB | O, L_PHE.209   | N, L_TYR.192   | H, L_TYR.192    | 2.89 | 1.92 | 5.15  |
| 1OSP.PDB | O, L_LYS.207   | N, L_CYS.194   | H, L_CYS.194    | 3.00 | 2.06 | 13.98 |
| 1OSP.PDB | O, L_LYS.147   | N, L_GLU.195   | H, L_GLU.195    | 2.86 | 1.93 | 14.83 |
| 1OSP.PDB | O, L_ILE.205   | N, L_ALA.196   | H, L_ALA.196    | 2.74 | 1.78 | 0.99  |
| 1OSP.PDB | O, L_ASN.145   | N, L_THR.197   | H, L_THR.197    | 2.74 | 1.79 | 7.28  |
| 1OSP.PDB | OD2, L_ASP.110 | NZ, L_LYS.199  | HZ3, L_LYS.199  | 2.64 | 1.82 | 29.88 |
| 1OSP.PDB | O, L_ALA.196   | N, L_ILE.205   | H, L_ILE.205    | 2.88 | 2.01 | 22.87 |
| 1OSP.PDB | O, L_TYR.192   | N, L_PHE.209   | H, L_PHE.209    | 2.99 | 2.09 | 20.05 |
| 1OSP.PDB | O, L_ASN.190   | N, L_ARG.211   | H, L_ARG.211    | 2.57 | 1.73 | 22.30 |
| 1OSP.PDB | OD1, L_ASN.190 | N, L_ASN.212   | H, L_ASN.212    | 2.63 | 1.70 | 14.44 |
| 1OSP.PDB | O, H_THR.25    | N, H_GLN.3     | H, H_GLN.3      | 2.84 | 1.98 | 24.33 |
| 1OSP.PDB | O, H_THR.21    | N, H_SER.7     | H, H_SER.7      | 2.81 | 1.95 | 22.81 |

|          |               |                |                |      |      |       |
|----------|---------------|----------------|----------------|------|------|-------|
| 1OSP.PDB | O, H_THR_117  | N, H_VAL_12    | H, H_VAL_12    | 2.94 | 2.00 | 13.37 |
| 1OSP.PDB | O, H_VAL_85   | N, H_SER_15    | H, H_SER_15    | 2.92 | 1.95 | 6.64  |
| 1OSP.PDB | O, H_LYS_13   | N, H_GLN_16    | H, H_GLN_16    | 3.00 | 2.09 | 18.64 |
| 1OSP.PDB | OD1, H_ASN_83 | OG1, H_THR_17  | HG1, H_THR_17  | 2.79 | 1.95 | 24.49 |
| 1OSP.PDB | O, H_LEU_82   | N, H_LEU_18    | H, H_LEU_18    | 2.68 | 1.78 | 16.36 |
| 1OSP.PDB | O, H_LEU_80   | N, H_LEU_20    | H, H_LEU_20    | 2.94 | 1.99 | 11.52 |
| 1OSP.PDB | O, H_SER_7    | N, H_THR_21    | H, H_THR_21    | 2.82 | 1.88 | 11.48 |
| 1OSP.PDB | O, H_TYR_78   | N, H_CYS_22    | H, H_CYS_22    | 2.86 | 1.91 | 11.66 |
| 1OSP.PDB | O, H_GLN_5    | N, H_SER_23    | H, H_SER_23    | 2.89 | 1.92 | 6.27  |
| 1OSP.PDB | O, H_GLN_3    | N, H_THR_25    | H, H_THR_25    | 2.88 | 1.93 | 10.50 |
| 1OSP.PDB | OD1, H_ASN_76 | N, H_ILE_29    | H, H_ILE_29    | 2.92 | 1.99 | 15.63 |
| 1OSP.PDB | O, H_ILE_51   | N, H_TRP_34    | H, H_TRP_34    | 2.95 | 1.99 | 10.12 |
| 1OSP.PDB | O, H_SER_31   | NE1, H_TRP_34  | HE1, H_TRP_34  | 2.85 | 1.98 | 23.03 |
| 1OSP.PDB | O, H_ALA_96   | N, H_ASP_35    | H, H_ASP_35    | 2.77 | 1.81 | 7.66  |
| 1OSP.PDB | O, H_GLY_49   | N, H_TRP_36    | H, H_TRP_36    | 2.89 | 2.03 | 23.14 |
| 1OSP.PDB | O, H_TYR_94   | N, H_ILE_37    | H, H_ILE_37    | 2.84 | 1.87 | 8.13  |
| 1OSP.PDB | O, H_GLU_46   | N, H_ARG_38    | H, H_ARG_38    | 2.95 | 1.99 | 11.63 |
| 1OSP.PDB | OE1, H_GLU_46 | NH1, H_ARG_38  | HH11, H_ARG_38 | 2.77 | 1.80 | 9.20  |
| 1OSP.PDB | OH, H_TYR_93  | NH2, H_ARG_38  | HH21, H_ARG_38 | 2.83 | 1.87 | 12.82 |
| 1OSP.PDB | OD1, H_ASP_89 | NH2, H_ARG_38  | HH22, H_ARG_38 | 2.83 | 1.91 | 19.07 |
| 1OSP.PDB | O, H_THR_92   | N, H_LYS_39    | H, H_LYS_39    | 2.72 | 1.83 | 19.36 |
| 1OSP.PDB | O, H_LYS_44   | N, H_PHE_40    | H, H_PHE_40    | 2.72 | 1.83 | 18.74 |
| 1OSP.PDB | O, H_PHE_40   | N, H_ASN_43    | H, H_ASN_43    | 2.74 | 1.91 | 24.90 |
| 1OSP.PDB | O, H_ARG_38   | N, H_GLU_46    | H, H_GLU_46    | 2.94 | 2.08 | 24.27 |
| 1OSP.PDB | O, H_TRP_36   | N, H_MET_48    | H, H_MET_48    | 2.82 | 1.92 | 18.56 |
| 1OSP.PDB | O, H_TRP_34   | N, H_ILE_51    | H, H_ILE_51    | 2.94 | 2.01 | 16.05 |
| 1OSP.PDB | O, H_GLY_56   | N, H_ARG_52    | H, H_ARG_52    | 2.70 | 1.82 | 20.54 |
| 1OSP.PDB | O, H_ARG_52   | N, H_GLY_55    | H, H_GLY_55    | 2.98 | 2.16 | 28.05 |
| 1OSP.PDB | O, H_MET_48   | N, H_ASN_60    | H, H_ASN_60    | 2.81 | 1.84 | 4.94  |
| 1OSP.PDB | O, H_PHE_47   | ND2, H_ASN_60  | HD22, H_ASN_60 | 2.80 | 1.84 | 6.91  |
| 1OSP.PDB | OD1, H_ASN_60 | N, H_SER_62    | H, H_SER_62    | 2.92 | 1.99 | 15.17 |
| 1OSP.PDB | OD2, L_ASP_1  | OG, H_SER_62   | HG, H_SER_62   | 2.98 | 2.17 | 26.53 |
| 1OSP.PDB | O, H_GLN_81   | N, H_SER_68    | H, H_SER_68    | 2.92 | 2.02 | 18.77 |
| 1OSP.PDB | OH, H_TYR_59  | N, H_ILE_69    | H, H_ILE_69    | 2.83 | 1.90 | 13.21 |
| 1OSP.PDB | O, H_HIS_77   | N, H_ASP_72    | H, H_ASP_72    | 2.76 | 1.83 | 13.63 |
| 1OSP.PDB | OD1, H_ASP_72 | N, H_LYS_75    | H, H_LYS_75    | 2.98 | 2.11 | 21.21 |
| 1OSP.PDB | O, H_GLU_27   | ND2, H_ASN_76  | HD21, H_ASN_76 | 2.87 | 1.93 | 13.17 |
| 1OSP.PDB | O, H_VAL_24   | ND2, H_ASN_76  | HD22, H_ASN_76 | 2.88 | 1.97 | 18.51 |
| 1OSP.PDB | O, H_ASN_76   | ND1, H_HIS_77  | HD1, H_HIS_77  | 2.92 | 1.96 | 10.26 |
| 1OSP.PDB | O, H_THR_70   | N, H_TYR_79    | H, H_TYR_79    | 2.78 | 1.83 | 9.64  |
| 1OSP.PDB | O, H_SER_68   | N, H_GLN_81    | H, H_GLN_81    | 2.98 | 2.10 | 21.73 |
| 1OSP.PDB | O, H_LEU_18   | N, H_LEU_82    | H, H_LEU_82    | 2.92 | 1.99 | 15.92 |
| 1OSP.PDB | O, H_GLN_16   | N, H_VAL_85    | H, H_VAL_85    | 2.82 | 1.85 | 6.22  |
| 1OSP.PDB | OD2, H_ASP_89 | N, H_VAL_86    | H, H_VAL_86    | 2.80 | 1.88 | 11.59 |
| 1OSP.PDB | O, H_VAL_86   | N, H_ASP_89    | H, H_ASP_89    | 2.89 | 1.96 | 13.81 |
| 1OSP.PDB | O, H_THR_114  | N, H_TYR_93    | H, H_TYR_93    | 2.83 | 1.88 | 11.95 |
| 1OSP.PDB | O, H_ASP_89   | OH, H_TYR_93   | HH, H_TYR_93   | 2.70 | 1.77 | 11.96 |
| 1OSP.PDB | O, H_ILE_37   | N, H_TYR_94    | H, H_TYR_94    | 2.68 | 1.76 | 13.41 |
| 1OSP.PDB | OE2, H_GLU_6  | N, H_CYS_95    | H, H_CYS_95    | 2.95 | 2.01 | 11.90 |
| 1OSP.PDB | O, H_PHE_109  | N, H_ARG_97    | H, H_ARG_97    | 2.87 | 1.96 | 17.07 |
| 1OSP.PDB | O, H_PHE_33   | N, H_SER_98    | H, H_SER_98    | 2.89 | 1.95 | 12.66 |
| 1OSP.PDB | O, H_GLY_106  | N, H_ARG_99    | H, H_ARG_99    | 2.65 | 1.77 | 20.05 |
| 1OSP.PDB | OG, H_SER_105 | N, H_ASP_100   | H, H_ASP_100   | 2.96 | 2.05 | 15.15 |
| 1OSP.PDB | O, O_ASP_93   | N, H_TYR_101   | H, H_TYR_101   | 2.96 | 2.00 | 9.88  |
| 1OSP.PDB | OH, L_TYR_36  | N, H_PHE_107   | H, H_PHE_107   | 2.90 | 1.92 | 4.68  |
| 1OSP.PDB | O, H_PHE_107  | NE1, H_TRP_110 | HE1, H_TRP_110 | 2.73 | 1.93 | 28.89 |
| 1OSP.PDB | OE1, H_GLU_6  | N, H_GLY_113   | H, H_GLY_113   | 2.71 | 1.88 | 24.91 |
| 1OSP.PDB | O, H_ALA_91   | N, H_VAL_116   | H, H_VAL_116   | 2.85 | 1.88 | 5.20  |



|          |                |                |                |      |      |       |
|----------|----------------|----------------|----------------|------|------|-------|
| 1OSP.PDB | O, H_SER.10    | N, H_THR.117   | H, H_THR.117   | 2.78 | 1.82 | 8.67  |
| 1OSP.PDB | O, H_LYS.150   | N, H_SER.127   | H, H_SER.127   | 2.92 | 1.96 | 10.41 |
| 1OSP.PDB | O, H_LEU.148   | N, H_TYR.129   | H, H_TYR.129   | 2.81 | 1.85 | 8.10  |
| 1OSP.PDB | O, H_GLY.146   | N, H_LEU.131   | H, H_LEU.131   | 2.76 | 1.84 | 15.39 |
| 1OSP.PDB | O, H_VAL.190   | N, H_VAL.143   | H, H_VAL.143   | 2.73 | 1.81 | 13.86 |
| 1OSP.PDB | O, H_VAL.188   | N, H_LEU.145   | H, H_LEU.145   | 2.82 | 1.87 | 9.83  |
| 1OSP.PDB | O, H_LEU.131   | N, H_GLY.146   | H, H_GLY.146   | 2.94 | 2.07 | 22.39 |
| 1OSP.PDB | O, H_SER.186   | N, H_CYS.147   | H, H_CYS.147   | 3.00 | 2.12 | 21.82 |
| 1OSP.PDB | O, H_TYR.129   | N, H_LEU.148   | H, H_LEU.148   | 2.83 | 1.89 | 14.70 |
| 1OSP.PDB | O, H_MET.184   | N, H_VAL.149   | H, H_VAL.149   | 2.83 | 1.86 | 7.67  |
| 1OSP.PDB | O, H_SER.127   | N, H_LYS.150   | H, H_LYS.150   | 2.86 | 1.89 | 5.15  |
| 1OSP.PDB | O, H_THR.124   | N, H_PHE.153   | H, H_PHE.153   | 2.99 | 2.11 | 20.08 |
| 1OSP.PDB | OE1, H_GLU.155 | N, H_SER.156   | H, H_SER.156   | 2.82 | 1.96 | 21.80 |
| 1OSP.PDB | O, H_SER.203   | N, H_THR.160   | H, H_THR.160   | 2.81 | 1.86 | 11.32 |
| 1OSP.PDB | OG, H_SER.186  | NE1, H_TRP.161 | HE1, H_TRP.161 | 2.94 | 1.96 | 6.92  |
| 1OSP.PDB | O, H_SER.187   | N, H_HIS.171   | H, H_HIS.171   | 2.90 | 1.95 | 12.27 |
| 1OSP.PDB | O, H_SER.185   | N, H_PHE.173   | H, H_PHE.173   | 2.83 | 1.89 | 14.13 |
| 1OSP.PDB | O, H_LEU.181   | N, H_GLN.178   | H, H_GLN.178   | 2.99 | 2.02 | 8.47  |
| 1OSP.PDB | O, H_TYR.152   | N, H_TYR.182   | H, H_TYR.182   | 2.70 | 1.78 | 13.65 |
| 1OSP.PDB | O, H_VAL.149   | N, H_MET.184   | H, H_MET.184   | 2.88 | 1.94 | 12.78 |
| 1OSP.PDB | OG, L_SER.176  | OG, H_SER.185  | HG, H_SER.185  | 2.74 | 1.91 | 24.72 |
| 1OSP.PDB | O, H_HIS.171   | N, H_SER.187   | H, H_SER.187   | 2.79 | 1.91 | 19.94 |
| 1OSP.PDB | O, H_LEU.145   | N, H_VAL.188   | H, H_VAL.188   | 2.91 | 1.95 | 10.57 |
| 1OSP.PDB | O, H_SER.169   | N, H_THR.189   | H, H_THR.189   | 2.97 | 2.10 | 22.89 |
| 1OSP.PDB | O, H_VAL.143   | N, H_VAL.190   | H, H_VAL.190   | 2.87 | 1.94 | 15.00 |
| 1OSP.PDB | O, H_SER.141   | N, H_SER.192   | H, H_SER.192   | 2.75 | 1.80 | 9.03  |
| 1OSP.PDB | O, H_PRO.191   | N, H_THR.194   | H, H_THR.194   | 2.85 | 1.95 | 18.47 |
| 1OSP.PDB | O, H_PRO.191   | OG1, H_THR.194 | HG1, H_THR.194 | 2.70 | 1.91 | 28.34 |
| 1OSP.PDB | O, H_ASN.162   | N, H_THR.201   | H, H_THR.201   | 2.71 | 1.81 | 16.91 |
| 1OSP.PDB | O, H_LYS.215   | N, H_CYS.202   | H, H_CYS.202   | 2.91 | 1.95 | 9.86  |
| 1OSP.PDB | O, H_THR.160   | N, H_SER.203   | H, H_SER.203   | 2.69 | 1.78 | 14.42 |
| 1OSP.PDB | O, H_VAL.213   | N, H_VAL.204   | H, H_VAL.204   | 2.76 | 1.80 | 5.73  |
| 1OSP.PDB | O, H_THR.158   | N, H_ALA.205   | H, H_ALA.205   | 2.97 | 2.01 | 9.69  |
| 1OSP.PDB | O, H_THR.211   | N, H_HIS.206   | H, H_HIS.206   | 2.87 | 1.90 | 7.50  |
| 1OSP.PDB | OG, H_SER.209  | ND1, H_HIS.206 | HD1, H_HIS.206 | 2.73 | 1.88 | 25.05 |
| 1OSP.PDB | O, H_PRO.154   | NE2, H_HIS.206 | HE2, H_HIS.206 | 2.71 | 1.78 | 13.27 |
| 1OSP.PDB | O, H_PRO.207   | N, H_SER.210   | H, H_SER.210   | 2.91 | 1.98 | 12.92 |
| 1OSP.PDB | O, H_VAL.204   | N, H_VAL.213   | H, H_VAL.213   | 2.78 | 1.87 | 17.04 |
| 1OSP.PDB | O, H_CYS.202   | N, H_LYS.215   | H, H_LYS.215   | 2.75 | 1.83 | 14.50 |
| 1OSP.PDB | OE1, L_GLU.123 | NZ, H_LYS.215  | HZ2, H_LYS.215 | 2.78 | 1.85 | 20.53 |
| 1OSP.PDB | O, H_VAL.200   | N, H_LEU.217   | H, H_LEU.217   | 2.88 | 1.93 | 11.66 |
| 1OSP.PDB | O, O_ASP.25    | OG, O_SER.29   | HG, O_SER.29   | 2.96 | 2.06 | 17.60 |
| 1OSP.PDB | O, O_VAL.42    | N, O_VAL.30    | H, O_VAL.30    | 2.74 | 1.80 | 11.57 |
| 1OSP.PDB | O, O_VAL.40    | N, O_VAL.32    | H, O_VAL.32    | 2.79 | 1.86 | 14.04 |
| 1OSP.PDB | O, O_MET.38    | N, O_LEU.34    | H, O_LEU.34    | 2.77 | 1.93 | 25.21 |
| 1OSP.PDB | OD1, O_ASP.33  | NZ, O_LYS.39   | HZ2, O_LYS.39  | 2.81 | 1.85 | 17.76 |
| 1OSP.PDB | O, O_VAL.32    | N, O_VAL.40    | H, O_VAL.40    | 2.85 | 1.95 | 18.60 |
| 1OSP.PDB | O, O_ILE.55    | N, O_LEU.41    | H, O_LEU.41    | 2.73 | 1.77 | 2.80  |
| 1OSP.PDB | O, O_VAL.30    | N, O_VAL.42    | H, O_VAL.42    | 2.79 | 1.83 | 5.03  |
| 1OSP.PDB | O, O_LYS.51    | N, O_ASN.47    | H, O_ASN.47    | 2.68 | 1.74 | 7.05  |
| 1OSP.PDB | OD1, O_ASN.47  | N, O_ASP.49    | H, O_ASP.49    | 2.77 | 1.90 | 22.03 |
| 1OSP.PDB | O, O_ASN.47    | N, O_GLY.50    | H, O_GLY.50    | 2.81 | 1.86 | 10.63 |
| 1OSP.PDB | OD1, O_ASN.47  | N, O_LYS.51    | H, O_LYS.51    | 2.98 | 2.06 | 16.48 |
| 1OSP.PDB | O, O_SER.67    | N, O_TYR.52    | H, O_TYR.52    | 2.69 | 1.80 | 18.76 |
| 1OSP.PDB | OG, O_SER.43   | N, O_ASP.53    | H, O_ASP.53    | 2.84 | 1.87 | 5.15  |
| 1OSP.PDB | O, O_GLY.65    | N, O_LEU.54    | H, O_LEU.54    | 2.75 | 1.89 | 23.21 |
| 1OSP.PDB | O, O_LEU.61    | N, O_VAL.58    | H, O_VAL.58    | 2.83 | 1.87 | 9.77  |
| 1OSP.PDB | O, O_ALA.56    | N, O_LEU.63    | H, O_LEU.63    | 2.76 | 1.81 | 6.30  |

|          |                |                |                 |      |      |       |
|----------|----------------|----------------|-----------------|------|------|-------|
| 1OSP.PDB | O, O_GLU_77    | N, O_LYS_64    | H, O_LYS_64     | 2.80 | 1.86 | 12.67 |
| 1OSP.PDB | O, O_TYR_52    | N, O_SER_67    | H, O_SER_67     | 2.91 | 2.05 | 23.91 |
| 1OSP.PDB | O, O_LEU_88    | N, O_LEU_76    | H, O_LEU_76     | 2.81 | 1.86 | 9.34  |
| 1OSP.PDB | O, O_LYS_64    | N, O_GLU_77    | H, O_GLU_77     | 2.89 | 2.01 | 22.35 |
| 1OSP.PDB | O, O_VAL_86    | N, O_GLY_78    | H, O_GLY_78     | 2.92 | 2.04 | 22.03 |
| 1OSP.PDB | O, O_CYS_84    | N, O_LYS_80    | H, O_LYS_80     | 2.88 | 1.91 | 7.18  |
| 1OSP.PDB | O, O_LYS_80    | N, O_LYS_83    | H, O_LYS_83     | 2.97 | 2.11 | 23.34 |
| 1OSP.PDB | OD1, O_ASP_82  | N, O_CYS_84    | H, O_CYS_84     | 2.94 | 2.02 | 12.85 |
| 1OSP.PDB | O, O_GLY_78    | N, O_VAL_86    | H, O_VAL_86     | 2.78 | 1.82 | 7.53  |
| 1OSP.PDB | O, O_GLU_100   | N, O_LYS_87    | H, O_LYS_87     | 2.83 | 1.86 | 6.51  |
| 1OSP.PDB | O, O_LEU_76    | N, O_LEU_88    | H, O_LEU_88     | 2.85 | 1.88 | 3.67  |
| 1OSP.PDB | O, O_THR_98    | N, O_THR_89    | H, O_THR_89     | 2.87 | 1.91 | 8.56  |
| 1OSP.PDB | O, O_GLY_74    | N, O_ILE_90    | H, O_ILE_90     | 2.80 | 1.83 | 2.30  |
| 1OSP.PDB | O, O_GLN_96    | N, O_SER_91    | H, O_SER_91     | 2.90 | 1.92 | 4.64  |
| 1OSP.PDB | O, O_SER_91    | N, O_LEU_94    | H, O_LEU_94     | 2.77 | 1.86 | 16.57 |
| 1OSP.PDB | O, O_THR_115   | N, O_THR_97    | H, O_THR_97     | 2.95 | 2.01 | 13.77 |
| 1OSP.PDB | O, O_THR_89    | N, O_THR_98    | H, O_THR_98     | 2.94 | 2.04 | 19.56 |
| 1OSP.PDB | O, O_LYS_113   | N, O_LEU_99    | H, O_LEU_99     | 2.95 | 1.99 | 7.52  |
| 1OSP.PDB | O, O_LYS_87    | N, O_GLU_100   | H, O_GLU_100    | 2.86 | 1.89 | 3.85  |
| 1OSP.PDB | O, O_LYS_85    | N, O_PHE_102   | H, O_PHE_102    | 2.73 | 1.77 | 4.67  |
| 1OSP.PDB | O, O_THR_108   | N, O_LYS_103   | H, O_LYS_103    | 2.81 | 1.88 | 14.70 |
| 1OSP.PDB | O, O_LYS_103   | N, O_GLY_106   | H, O_GLY_106    | 2.79 | 1.88 | 17.21 |
| 1OSP.PDB | O, O_VAL_101   | N, O_VAL_110   | H, O_VAL_110    | 2.84 | 1.89 | 11.58 |
| 1OSP.PDB | O, O_GLU_124   | N, O_LYS_112   | H, O_LYS_112    | 2.97 | 2.14 | 27.43 |
| 1OSP.PDB | O, O_LEU_99    | N, O_LYS_113   | H, O_LYS_113    | 2.94 | 1.98 | 9.26  |
| 1OSP.PDB | O, O_THR_122   | N, O_VAL_114   | H, O_VAL_114    | 2.91 | 1.95 | 10.05 |
| 1OSP.PDB | O, O_THR_97    | N, O_THR_115   | H, O_THR_115    | 2.93 | 1.98 | 12.74 |
| 1OSP.PDB | O, O_SER_120   | N, O_SER_116   | H, O_SER_116    | 2.84 | 1.87 | 6.23  |
| 1OSP.PDB | O, O_GLY_95    | N, O_LYS_117   | H, O_LYS_117    | 2.85 | 2.02 | 26.58 |
| 1OSP.PDB | O, O_SER_116   | N, O_LYS_119   | H, O_LYS_119    | 3.00 | 2.13 | 23.54 |
| 1OSP.PDB | OD1, O_ASP_118 | N, O_SER_120   | H, O_SER_120    | 2.97 | 2.05 | 14.24 |
| 1OSP.PDB | O, O_THR_138   | N, O_SER_121   | H, O_SER_121    | 2.84 | 1.93 | 17.68 |
| 1OSP.PDB | O, O_VAL_114   | N, O_THR_122   | H, O_THR_122    | 2.89 | 1.97 | 16.41 |
| 1OSP.PDB | O, O_ILE_136   | N, O_GLU_123   | H, O_GLU_123    | 2.84 | 1.88 | 8.73  |
| 1OSP.PDB | O, O_LYS_112   | N, O_GLU_124   | H, O_GLU_124    | 2.76 | 1.80 | 4.84  |
| 1OSP.PDB | O, O_GLU_134   | N, O_LYS_125   | H, O_LYS_125    | 2.97 | 2.02 | 11.11 |
| 1OSP.PDB | O, O_GLU_131   | N, O_ASN_127   | H, O_ASN_127    | 2.72 | 1.91 | 28.14 |
| 1OSP.PDB | OD1, O_ASN_127 | N, O_LYS_129   | H, O_LYS_129    | 2.89 | 2.06 | 25.72 |
| 1OSP.PDB | O, O_ASN_127   | N, O_GLY_130   | H, O_GLY_130    | 2.88 | 1.93 | 10.26 |
| 1OSP.PDB | OD1, O_ASN_127 | N, O_GLU_131   | H, O_GLU_131    | 2.98 | 2.04 | 13.29 |
| 1OSP.PDB | O, O_LYS_125   | N, O_SER_133   | H, O_SER_133    | 2.75 | 1.83 | 15.11 |
| 1OSP.PDB | O, O_TYR_147   | N, O_LYS_135   | H, O_LYS_135    | 2.89 | 1.94 | 12.24 |
| 1OSP.PDB | O, O_GLU_123   | N, O_ILE_136   | H, O_ILE_136    | 2.91 | 1.99 | 16.85 |
| 1OSP.PDB | O, O_LEU_145   | N, O_ILE_137   | H, O_ILE_137    | 2.93 | 1.95 | 4.82  |
| 1OSP.PDB | O, O_SER_121   | N, O_THR_138   | H, O_THR_138    | 2.76 | 1.86 | 18.89 |
| 1OSP.PDB | O, O_THR_143   | N, O_ARG_139   | H, O_ARG_139    | 2.90 | 1.93 | 8.66  |
| 1OSP.PDB | OG1, O_THR_143 | NH1, O_ARG_139 | HH11, O_ARG_139 | 2.73 | 1.78 | 14.74 |
| 1OSP.PDB | OE2, O_GLU_160 | NH2, O_ARG_139 | HH22, O_ARG_139 | 2.96 | 2.05 | 19.95 |
| 1OSP.PDB | O, O_ARG_139   | N, O_GLY_142   | H, O_GLY_142    | 2.82 | 1.89 | 14.20 |
| 1OSP.PDB | O, O_VAL_161   | N, O_ARG_144   | H, O_ARG_144    | 2.86 | 1.92 | 11.75 |
| 1OSP.PDB | O, O_LYS_159   | N, O_GLU_146   | H, O_GLU_146    | 2.74 | 1.79 | 9.08  |
| 1OSP.PDB | O, O_LYS_135   | N, O_TYR_147   | H, O_TYR_147    | 2.76 | 1.82 | 11.54 |
| 1OSP.PDB | O, O_SER_155   | N, O_LYS_151   | H, O_LYS_151    | 2.82 | 1.90 | 16.12 |
| 1OSP.PDB | O, O_LYS_151   | N, O_GLY_154   | H, O_GLY_154    | 3.00 | 2.15 | 24.39 |
| 1OSP.PDB | O, O_THR_148   | N, O_LYS_157   | H, O_LYS_157    | 2.96 | 2.06 | 18.52 |
| 1OSP.PDB | O, O_GLU_146   | N, O_LYS_159   | H, O_LYS_159    | 2.90 | 2.10 | 29.35 |
| 1OSP.PDB | O, O_LEU_167   | N, O_GLU_160   | H, O_GLU_160    | 2.80 | 1.84 | 8.36  |
| 1OSP.PDB | O, O_ARG_144   | N, O_VAL_161   | H, O_VAL_161    | 2.67 | 1.80 | 21.27 |

|          |                |                |                 |      |      |       |
|----------|----------------|----------------|-----------------|------|------|-------|
| 1OSP.PDB | O, O_TYR_165   | N, O_LEU_162   | H, O_LEU_162    | 2.97 | 2.08 | 19.74 |
| 1OSP.PDB | O, O_GLU_160   | N, O_LEU_167   | H, O_LEU_167    | 2.98 | 2.02 | 8.76  |
| 1OSP.PDB | O, O_THR_177   | N, O_THR_170   | H, O_THR_170    | 2.94 | 2.08 | 23.59 |
| 1OSP.PDB | O, O_GLY_156   | N, O_LEU_171   | H, O_LEU_171    | 2.97 | 2.15 | 28.04 |
| 1OSP.PDB | O, O_ILE_191   | N, O_THR_176   | H, O_THR_176    | 2.77 | 1.81 | 7.44  |
| 1OSP.PDB | O, O_THR_170   | N, O_THR_177   | H, O_THR_177    | 2.90 | 1.94 | 8.28  |
| 1OSP.PDB | O, O_LYS_189   | N, O_LEU_178   | H, O_LEU_178    | 2.85 | 1.91 | 12.14 |
| 1OSP.PDB | O, O_GLU_168   | N, O_VAL_179   | H, O_VAL_179    | 2.80 | 1.83 | 5.32  |
| 1OSP.PDB | O, O_LEU_187   | N, O_VAL_180   | H, O_VAL_180    | 2.82 | 1.89 | 14.25 |
| 1OSP.PDB | O, O_GLU_182   | N, O_VAL_185   | H, O_VAL_185    | 2.98 | 2.06 | 16.93 |
| 1OSP.PDB | O, O_ASN_202   | N, O_THR_186   | H, O_THR_186    | 2.75 | 1.80 | 6.91  |
| 1OSP.PDB | O, O_VAL_180   | N, O_LEU_187   | H, O_LEU_187    | 2.73 | 1.77 | 7.01  |
| 1OSP.PDB | O, O_GLU_200   | N, O_SER_188   | H, O_SER_188    | 2.94 | 1.96 | 4.07  |
| 1OSP.PDB | O, O_LEU_178   | N, O_LYS_189   | H, O_LYS_189    | 2.81 | 1.84 | 6.92  |
| 1OSP.PDB | OE1, O_GLU_160 | NZ, O_LYS_189  | HZ1, O_LYS_189  | 2.95 | 1.93 | 9.44  |
| 1OSP.PDB | O, O_SER_198   | N, O_ASN_190   | H, O_ASN_190    | 2.85 | 1.88 | 7.09  |
| 1OSP.PDB | OG, O_SER_198  | ND2, O_ASN_190 | HD22, O_ASN_190 | 2.97 | 2.02 | 11.75 |
| 1OSP.PDB | O, O_THR_176   | N, O_ILE_191   | H, O_ILE_191    | 2.86 | 1.92 | 14.23 |
| 1OSP.PDB | O, O_GLU_196   | N, O_SER_192   | H, O_SER_192    | 2.84 | 1.90 | 12.51 |
| 1OSP.PDB | O, O_SER_192   | N, O_GLY_195   | H, O_GLY_195    | 2.80 | 1.87 | 14.11 |
| 1OSP.PDB | O, O_THR_186   | N, O_ASN_202   | H, O_ASN_202    | 2.98 | 2.04 | 13.31 |
| 1OSP.PDB | O, O_THR_184   | N, O_THR_204   | H, O_THR_204    | 2.90 | 1.95 | 13.33 |
| 1OSP.PDB | OD1, O_ASP_203 | N, O_ASP_205   | H, O_ASP_205    | 2.93 | 2.02 | 16.29 |
| 1OSP.PDB | O, O_SER_207   | N, O_THR_210   | H, O_THR_210    | 2.99 | 2.05 | 13.36 |
| 1OSP.PDB | OD2, O_ASP_203 | N, O_LYS_212   | H, O_LYS_212    | 2.91 | 1.95 | 1.32  |
| 1OSP.PDB | O, O_THR_210   | NZ, O_LYS_212  | HZ1, O_LYS_212  | 2.94 | 1.97 | 16.29 |
| 1OSP.PDB | O, O_THR_224   | N, O_ALA_215   | H, O_ALA_215    | 2.95 | 2.06 | 20.55 |
| 1OSP.PDB | O, O_THR_222   | N, O_ASN_217   | H, O_ASN_217    | 2.94 | 2.00 | 14.86 |
| 1OSP.PDB | O, O_SER_218   | N, O_SER_221   | H, O_SER_221    | 2.93 | 2.08 | 24.26 |
| 1OSP.PDB | O, O_LEU_235   | N, O_LEU_223   | H, O_LEU_223    | 2.82 | 1.86 | 8.38  |
| 1OSP.PDB | O, O_ALA_215   | N, O_THR_224   | H, O_THR_224    | 2.90 | 1.97 | 14.17 |
| 1OSP.PDB | OD1, O_ASP_234 | OG1, O_THR_224 | HG1, O_THR_224  | 2.71 | 1.92 | 27.50 |
| 1OSP.PDB | O, O_LYS_233   | N, O_ILE_225   | H, O_ILE_225    | 2.88 | 1.93 | 10.58 |
| 1OSP.PDB | O, O_THR_213   | N, O_THR_226   | H, O_THR_226    | 2.78 | 1.85 | 13.98 |
| 1OSP.PDB | O, O_LYS_230   | N, O_VAL_227   | H, O_VAL_227    | 2.89 | 1.96 | 15.17 |
| 1OSP.PDB | O, O_VAL_227   | N, O_LYS_230   | H, O_LYS_230    | 2.93 | 2.00 | 15.15 |
| 1OSP.PDB | O, O_SER_250   | NZ, O_LYS_230  | HZ1, O_LYS_230  | 2.95 | 1.95 | 11.76 |
| 1OSP.PDB | O, O_ILE_225   | N, O_THR_232   | H, O_THR_232    | 2.81 | 1.85 | 8.22  |
| 1OSP.PDB | O, O_GLN_246   | N, O_ASP_234   | H, O_ASP_234    | 2.97 | 2.05 | 16.64 |
| 1OSP.PDB | O, O_LEU_223   | N, O_LEU_235   | H, O_LEU_235    | 2.73 | 1.78 | 7.98  |
| 1OSP.PDB | O, O_THR_244   | N, O_VAL_236   | H, O_VAL_236    | 2.90 | 1.94 | 9.91  |
| 1OSP.PDB | O, O_SER_221   | N, O_PHE_237   | H, O_PHE_237    | 2.91 | 1.92 | 1.81  |
| 1OSP.PDB | O, O_VAL_236   | N, O_THR_244   | H, O_THR_244    | 2.91 | 2.01 | 19.80 |
| 1OSP.PDB | O, O_VAL_260   | N, O_VAL_245   | H, O_VAL_245    | 2.75 | 1.81 | 11.28 |
| 1OSP.PDB | O, O_GLU_256   | NE2, O_GLN_246 | HE22, O_GLN_246 | 2.92 | 1.95 | 7.48  |
| 1OSP.PDB | O, O_THR_232   | N, O_TYR_248   | H, O_TYR_248    | 2.90 | 2.01 | 20.77 |
| 1OSP.PDB | OD1, O_ASP_234 | OH, O_TYR_248  | HH, O_TYR_248   | 2.73 | 1.90 | 24.06 |
| 1OSP.PDB | O, O_LYS_254   | N, O_ASP_249   | H, O_ASP_249    | 2.87 | 1.94 | 14.75 |
| 1OSP.PDB | O, O_ASP_249   | N, O_GLY_252   | H, O_GLY_252    | 2.85 | 1.98 | 21.02 |
| 1OSP.PDB | OD2, O_ASP_249 | N, O_LYS_254   | H, O_LYS_254    | 2.80 | 1.86 | 5.31  |
| 1OSP.PDB | O, O_GLN_247   | N, O_GLU_256   | H, O_GLU_256    | 2.93 | 1.98 | 13.89 |
| 1OSP.PDB | O, O_VAL_245   | N, O_VAL_260   | H, O_VAL_260    | 2.77 | 1.81 | 5.97  |
| 1OSP.PDB | O, O_ILE_243   | N, O_ILE_262   | H, O_ILE_262    | 2.80 | 1.83 | 3.81  |
| 1OSP.PDB | OE1, O_GLU_267 | N, O_THR_263   | H, O_THR_263    | 2.83 | 1.90 | 11.29 |
| 1OSP.PDB | O, O_ASP_266   | N, O_ASN_270   | H, O_ASN_270    | 2.79 | 1.90 | 19.11 |

---

Table 1671: 1OSP-specific side chain and main chain hydrogen bonding analysis. In this table, a PDB file is specified with a four-letter PDB ID, except that the names of the PDB files corresponding to the single NMR structural model split from the NMR ensemble is specified with a four-letter PDB ID in addition to a hyphen followed by the single NMR structural model numeric ID, the residue naming scheme is **Chain ID\_residue name\_residue number**,  $\angle ADH$  represents the angle formed by acceptor (A), donor (D) and hydrogen (H) ( $\angle ADH$ ).

| PDB      | Acceptor (A)   | Donor (D)      | Hydrogen (H)    | D-A (Å) | H-A (Å) | $\angle ADH(^{\circ})$ |
|----------|----------------|----------------|-----------------|---------|---------|------------------------|
| 1PSK.PDB | O, L_TYR_85    | NE2, L_GLN_6   | HE21, L_GLN_6   | 2.81    | 1.89    | 16.29                  |
| 1PSK.PDB | O, L_LYS_102   | N, L_MET_11    | H, L_MET_11     | 2.72    | 1.89    | 26.00                  |
| 1PSK.PDB | O, L_GLU_104   | N, L_ALA_13    | H, L_ALA_13     | 2.83    | 1.92    | 17.43                  |
| 1PSK.PDB | O, L_MET_77    | N, L_GLY_16    | H, L_GLY_16     | 2.73    | 1.77    | 6.44                   |
| 1PSK.PDB | O, L_ILE_74    | N, L_VAL_19    | H, L_VAL_19     | 2.88    | 2.00    | 21.06                  |
| 1PSK.PDB | O, L_LEU_72    | N, L_ILE_21    | H, L_ILE_21     | 2.81    | 1.98    | 26.09                  |
| 1PSK.PDB | O, L_SER_7     | N, L_THR_22    | H, L_THR_22     | 2.98    | 2.05    | 14.20                  |
| 1PSK.PDB | O, L_TYR_70    | N, L_CYS_23    | H, L_CYS_23     | 2.74    | 1.94    | 28.83                  |
| 1PSK.PDB | O, L_THR_68    | N, L_ALA_25    | H, L_ALA_25     | 2.80    | 1.83    | 4.30                   |
| 1PSK.PDB | O, L_VAL_3     | N, L_SER_26    | H, L_SER_26     | 2.84    | 1.92    | 15.77                  |
| 1PSK.PDB | O, L_GLN_88    | N, L_HIS_33    | H, L_HIS_33     | 2.77    | 1.93    | 24.90                  |
| 1PSK.PDB | O, L_ILE_47    | N, L_TRP_34    | H, L_TRP_34     | 2.73    | 1.83    | 16.95                  |
| 1PSK.PDB | O, L_TYR_86    | N, L_PHE_35    | H, L_PHE_35     | 2.70    | 1.82    | 20.29                  |
| 1PSK.PDB | O, L_LYS_44    | N, L_GLN_36    | H, L_GLN_36     | 2.74    | 1.81    | 13.25                  |
| 1PSK.PDB | O, L_THR_41    | NE2, L_GLN_37  | HE22, L_GLN_37  | 2.64    | 1.76    | 19.44                  |
| 1PSK.PDB | O, L_GLU_80    | NZ, L_LYS_38   | HZ2, L_LYS_38   | 2.69    | 1.82    | 26.34                  |
| 1PSK.PDB | O, L_LYS_38    | N, L_THR_41    | H, L_THR_41     | 2.90    | 1.99    | 18.24                  |
| 1PSK.PDB | O, L_TRP_34    | N, L_TRP_46    | H, L_TRP_46     | 2.75    | 1.83    | 15.53                  |
| 1PSK.PDB | O, L_THR_52    | N, L_TYR_48    | H, L_TYR_48     | 2.90    | 2.05    | 25.41                  |
| 1PSK.PDB | O, L_ILE_32    | N, L_THR_50    | H, L_THR_50     | 2.83    | 2.01    | 27.59                  |
| 1PSK.PDB | O, L_SER_49    | N, L_SER_51    | H, L_SER_51     | 2.81    | 1.95    | 22.62                  |
| 1PSK.PDB | O, L_SER_71    | N, L_SER_64    | H, L_SER_64     | 2.93    | 2.00    | 15.47                  |
| 1PSK.PDB | O, L_SER_69    | N, L_SER_66    | H, L_SER_66     | 2.87    | 2.04    | 26.16                  |
| 1PSK.PDB | O, L_CYS_23    | N, L_TYR_70    | H, L_TYR_70     | 2.88    | 1.92    | 9.26                   |
| 1PSK.PDB | O, L_SER_64    | N, L_SER_71    | H, L_SER_71     | 2.83    | 1.87    | 10.56                  |
| 1PSK.PDB | O, L_ILE_21    | N, L_LEU_72    | H, L_LEU_72     | 2.84    | 1.87    | 7.12                   |
| 1PSK.PDB | O, L_VAL_19    | N, L_ILE_74    | H, L_ILE_74     | 2.66    | 1.77    | 18.08                  |
| 1PSK.PDB | O, L_ARG_60    | N, L_SER_75    | H, L_SER_75     | 2.95    | 2.02    | 15.07                  |
| 1PSK.PDB | O, L_GLU_17    | N, L_MET_77    | H, L_MET_77     | 2.56    | 1.73    | 24.40                  |
| 1PSK.PDB | O, L_THR_101   | N, L_TYR_85    | H, L_TYR_85     | 2.97    | 2.05    | 16.35                  |
| 1PSK.PDB | O, L_PHE_35    | N, L_TYR_86    | H, L_TYR_86     | 2.89    | 2.04    | 24.71                  |
| 1PSK.PDB | OE1, L_GLN_6   | N, L_CYS_87    | H, L_CYS_87     | 2.90    | 2.04    | 23.69                  |
| 1PSK.PDB | O, L_HIS_33    | N, L_GLN_88    | H, L_GLN_88     | 2.64    | 1.77    | 19.96                  |
| 1PSK.PDB | O, L_ALA_9     | N, L_LYS_102   | H, L_LYS_102    | 2.79    | 1.82    | 7.68                   |
| 1PSK.PDB | O, L_ALA_83    | N, L_LEU_103   | H, L_LEU_103    | 2.67    | 1.77    | 17.39                  |
| 1PSK.PDB | O, L_MET_11    | N, L_GLU_104   | H, L_GLU_104    | 2.63    | 1.81    | 26.11                  |
| 1PSK.PDB | O, L_ALA_13    | N, L_LYS_106   | H, L_LYS_106    | 2.86    | 1.91    | 10.19                  |
| 1PSK.PDB | O, L_ALA_108   | NE, L_ARG_107  | HE, L_ARG_107   | 2.69    | 1.87    | 26.11                  |
| 1PSK.PDB | O, L ASP_169   | NH1, L_ARG_107 | HH11, L_ARG_107 | 2.89    | 1.94    | 13.94                  |
| 1PSK.PDB | O, L_ALA_108   | NH2, L_ARG_107 | HH21, L_ARG_107 | 2.77    | 1.96    | 29.27                  |
| 1PSK.PDB | O, L_TYR_139   | N, L_ALA_110   | H, L_ALA_110    | 2.80    | 1.90    | 19.51                  |
| 1PSK.PDB | O, L ASN_136   | N, L_THR_113   | H, L_THR_113    | 2.79    | 1.85    | 11.43                  |
| 1PSK.PDB | O, L_SER_120   | N, L_LEU_124   | H, L_LEU_124    | 2.82    | 1.86    | 7.62                   |
| 1PSK.PDB | O, L_SER_121   | N, L_THR_125   | H, L_THR_125    | 2.73    | 1.80    | 12.63                  |
| 1PSK.PDB | O, L_SER_121   | OG1, L_THR_125 | HG1, L_THR_125  | 2.84    | 1.90    | 10.36                  |
| 1PSK.PDB | O, L_GLU_122   | OG, L_SER_126  | HG, L_SER_126   | 2.94    | 2.08    | 22.24                  |
| 1PSK.PDB | O, L_LEU_180   | N, L_ALA_129   | H, L_ALA_129    | 2.84    | 1.94    | 18.85                  |
| 1PSK.PDB | O, L_LEU_178   | N, L_VAL_131   | H, L_VAL_131    | 2.87    | 2.03    | 25.59                  |
| 1PSK.PDB | OG, L_SER_173  | N, L ASN_137   | H, L ASN_137    | 2.92    | 1.98    | 12.28                  |
| 1PSK.PDB | O, L_TYR_172   | N, L_PHE_138   | H, L_PHE_138    | 2.85    | 1.88    | 6.49                   |
| 1PSK.PDB | O, L_GLU_194   | N, L_LYS_146   | H, L_LYS_146    | 2.97    | 2.01    | 10.09                  |
| 1PSK.PDB | OG, L_SER_176  | NE1, L_TRP_147 | HE1, L_TRP_147  | 2.73    | 1.78    | 10.14                  |
| 1PSK.PDB | O, L_THR_192   | N, L_LYS_148   | H, L_LYS_148    | 2.68    | 1.78    | 17.05                  |
| 1PSK.PDB | O, L_SER_152   | N, L_ILE_149   | H, L_ILE_149    | 2.76    | 1.81    | 9.00                   |
| 1PSK.PDB | O, L_SER_190   | N, L ASP_150   | H, L ASP_150    | 2.82    | 1.85    | 2.71                   |
| 1PSK.PDB | O, L_ILE_149   | N, L_SER_152   | H, L_SER_152    | 2.78    | 1.90    | 20.78                  |
| 1PSK.PDB | OE1, L_GLN_155 | N, L ASN_156   | H, L ASN_156    | 2.98    | 2.05    | 13.77                  |

|          |                |                |                 |      |      |       |
|----------|----------------|----------------|-----------------|------|------|-------|
| 1PSK.PDB | O, L_THR_177   | N, L_LEU_159   | H, L_LEU_159    | 2.87 | 2.02 | 24.21 |
| 1PSK.PDB | O, H_PRO_168   | OG, L_SER_161  | HG, L_SER_161   | 2.76 | 1.90 | 22.64 |
| 1PSK.PDB | O, L_ILE_105   | NE2, L_GLN_165 | HE21, L_GLN_165 | 2.92 | 2.00 | 17.26 |
| 1PSK.PDB | O, L_THR_171   | N, L_ASP_166   | H, L_ASP_166    | 2.81 | 1.87 | 10.96 |
| 1PSK.PDB | OD2, L_ASP_166 | N, L_ASP_169   | H, L_ASP_169    | 2.99 | 2.04 | 7.95  |
| 1PSK.PDB | O, L_PHE_138   | N, L_TYR_172   | H, L_TYR_172    | 2.85 | 1.92 | 14.74 |
| 1PSK.PDB | O, L_LEU_135   | N, L_MET_174   | H, L_MET_174    | 2.76 | 1.79 | 2.98  |
| 1PSK.PDB | O, L_CYS_133   | N, L_SER_176   | H, L_SER_176    | 2.88 | 1.92 | 9.72  |
| 1PSK.PDB | OD1, L_ASN_160 | OG, L_SER_176  | HG, L_SER_176   | 2.79 | 1.87 | 14.99 |
| 1PSK.PDB | O, L_GLY_157   | N, L_THR_179   | H, L_THR_179    | 2.95 | 2.12 | 26.59 |
| 1PSK.PDB | O, L_ALA_129   | N, L_LEU_180   | H, L_LEU_180    | 2.80 | 1.83 | 2.82  |
| 1PSK.PDB | O, L_THR_181   | N, L_TYR_185   | H, L_TYR_185    | 2.95 | 2.01 | 13.19 |
| 1PSK.PDB | O, L_LYS_182   | N, L_GLU_186   | H, L_GLU_186    | 2.95 | 1.99 | 9.74  |
| 1PSK.PDB | O, L_PHE_208   | N, L_TYR_191   | H, L_TYR_191    | 2.94 | 1.97 | 6.75  |
| 1PSK.PDB | O, L_LYS_148   | N, L_THR_192   | H, L_THR_192    | 2.84 | 1.87 | 6.81  |
| 1PSK.PDB | O, L_LYS_146   | N, L_GLU_194   | H, L_GLU_194    | 2.94 | 2.02 | 16.13 |
| 1PSK.PDB | O, L_ILE_204   | N, L_ALA_195   | H, L_ALA_195    | 2.94 | 2.01 | 15.37 |
| 1PSK.PDB | O, L_ASN_144   | N, L_THR_196   | H, L_THR_196    | 2.65 | 1.83 | 27.50 |
| 1PSK.PDB | O, L_TYR_191   | N, L_PHE_208   | H, L_PHE_208    | 2.94 | 2.02 | 17.53 |
| 1PSK.PDB | O, L_ASN_189   | N, L_ARG_210   | H, L_ARG_210    | 2.72 | 1.78 | 9.08  |
| 1PSK.PDB | O, L_HIS_188   | NH1, L_ARG_210 | HH11, L_ARG_210 | 2.85 | 1.95 | 20.39 |
| 1PSK.PDB | O, H_TYR_94    | NE2, H_GLN_6   | HE21, H_GLN_6   | 2.75 | 1.83 | 14.83 |
| 1PSK.PDB | O, H_THR_109   | N, H_GLU_10    | H, H_GLU_10     | 2.94 | 2.04 | 19.11 |
| 1PSK.PDB | O, H_THR_111   | N, H_VAL_12    | H, H_VAL_12     | 2.75 | 1.86 | 19.89 |
| 1PSK.PDB | O, H_LYS_13    | N, H_ALA_16    | H, H_ALA_16     | 2.98 | 2.05 | 15.84 |
| 1PSK.PDB | O, H_LEU_83    | N, H_VAL_18    | H, H_VAL_18     | 2.94 | 2.01 | 16.46 |
| 1PSK.PDB | OG, H_SER_7    | N, H_SER_21    | H, H_SER_21     | 2.91 | 1.95 | 7.05  |
| 1PSK.PDB | O, H_THR_77    | N, H_THR_24    | H, H_THR_24     | 2.84 | 1.91 | 14.03 |
| 1PSK.PDB | O, H_THR_97    | N, H_HIS_35    | H, H_HIS_35     | 2.81 | 1.88 | 13.42 |
| 1PSK.PDB | NE1, H_TRP_47  | ND1, H_HIS_35  | HD1, H_HIS_35   | 2.92 | 2.03 | 20.19 |
| 1PSK.PDB | O, H_TYR_95    | N, H_VAL_37    | H, H_VAL_37     | 2.78 | 1.85 | 13.12 |
| 1PSK.PDB | O, H_GLU_46    | N, H_LYS_38    | H, H_LYS_38     | 2.74 | 1.81 | 11.82 |
| 1PSK.PDB | O, H_VAL_93    | N, H_GLN_39    | H, H_GLN_39     | 2.70 | 1.83 | 20.61 |
| 1PSK.PDB | O, H_SER_40    | NE2, H_GLN_39  | HE22, H_GLN_39  | 2.98 | 2.06 | 16.51 |
| 1PSK.PDB | O, H_SER_44    | N, H_SER_40    | H, H_SER_40     | 2.86 | 1.90 | 10.36 |
| 1PSK.PDB | O, H_LYS_38    | N, H_GLU_46    | H, H_GLU_46     | 2.72 | 1.82 | 17.92 |
| 1PSK.PDB | O, H_TRP_36    | N, H_ILE_48    | H, H_ILE_48     | 2.97 | 2.07 | 18.37 |
| 1PSK.PDB | O, H_ASN_59    | N, H_ASP_50    | H, H_ASP_50     | 2.89 | 1.96 | 16.23 |
| 1PSK.PDB | O, H_GLY_57    | N, H_ASN_52    | H, H_ASN_52     | 2.75 | 1.93 | 27.30 |
| 1PSK.PDB | O, H_PRO_53    | N, H_ASN_55    | H, H_ASN_55     | 2.75 | 1.87 | 20.51 |
| 1PSK.PDB | O, H_PRO_53    | ND2, H_ASN_55  | HD22, H_ASN_55  | 2.76 | 1.94 | 26.77 |
| 1PSK.PDB | O, H_ILE_48    | N, H_ASN_61    | H, H_ASN_61     | 2.93 | 2.02 | 18.42 |
| 1PSK.PDB | O, H_TRP_47    | ND2, H_ASN_61  | HD22, H_ASN_61  | 2.88 | 1.97 | 18.24 |
| 1PSK.PDB | OD1, H_ASN_61  | N, H_LYS_63    | H, H_LYS_63     | 2.93 | 2.01 | 16.11 |
| 1PSK.PDB | O, H_PHE_64    | N, H_ALA_68    | H, H_ALA_68     | 2.83 | 1.93 | 18.74 |
| 1PSK.PDB | OH, H_TYR_60   | N, H_LEU_70    | H, H_LEU_70     | 2.73 | 1.84 | 18.80 |
| 1PSK.PDB | O, H_THR_78    | N, H_HIS_73    | H, H_HIS_73     | 2.82 | 2.01 | 28.97 |
| 1PSK.PDB | OG1, H_THR_78  | OG, H_SER_76   | HG, H_SER_76    | 2.94 | 2.03 | 16.27 |
| 1PSK.PDB | O, H_THR_71    | N, H_TYR_80    | H, H_TYR_80     | 2.94 | 2.09 | 24.76 |
| 1PSK.PDB | O, H_VAL_18    | N, H_LEU_83    | H, H_LEU_83     | 2.81 | 1.85 | 9.28  |
| 1PSK.PDB | OD2, H_ASP_90  | N, H_THR_87    | H, H_THR_87     | 2.99 | 2.12 | 22.62 |
| 1PSK.PDB | O, H_THR_87    | N, H_ASP_90    | H, H_ASP_90     | 2.83 | 1.90 | 13.61 |
| 1PSK.PDB | O, H_SER_88    | OG, H_SER_91   | HG, H_SER_91    | 2.90 | 1.97 | 12.52 |
| 1PSK.PDB | O, H_GLN_39    | N, H_VAL_93    | H, H_VAL_93     | 2.97 | 1.99 | 0.74  |
| 1PSK.PDB | O, H_THR_108   | N, H_TYR_94    | H, H_TYR_94     | 2.81 | 1.89 | 15.61 |
| 1PSK.PDB | O, H_ASP_90    | OH, H_TYR_94   | HH, H_TYR_94    | 2.77 | 1.87 | 17.15 |
| 1PSK.PDB | O, H_VAL_37    | N, H_TYR_95    | H, H_TYR_95     | 2.95 | 1.97 | 7.17  |
| 1PSK.PDB | O, H_HIS_35    | N, H_THR_97    | H, H_THR_97     | 2.81 | 1.92 | 20.68 |

|          |                |                |                |      |      |       |
|----------|----------------|----------------|----------------|------|------|-------|
| 1PSK.PDB | O, H_TYR_103   | N, H_SER_98    | H, H_SER_98    | 2.80 | 1.88 | 15.11 |
| 1PSK.PDB | OH, H_TYR_27   | OG, H_SER_98   | HG, H_SER_98   | 2.95 | 2.06 | 19.06 |
| 1PSK.PDB | O, H_TYR_94    | N, H_THR_108   | H, H_THR_108   | 2.86 | 2.00 | 23.11 |
| 1PSK.PDB | O, H_SER_7     | OG1, H_THR_108 | HG1, H_THR_108 | 2.62 | 1.79 | 24.94 |
| 1PSK.PDB | O, H_ALA_92    | N, H_LEU_110   | H, H_LEU_110   | 2.97 | 2.02 | 12.06 |
| 1PSK.PDB | O, H_GLU_10    | N, H_THR_111   | H, H_THR_111   | 2.77 | 1.82 | 9.08  |
| 1PSK.PDB | O, H_LYS_144   | N, H_SER_121   | H, H_SER_121   | 2.81 | 1.84 | 4.61  |
| 1PSK.PDB | O, H_LEU_142   | N, H_TYR_123   | H, H_TYR_123   | 2.75 | 1.89 | 23.66 |
| 1PSK.PDB | O, H_GLY_140   | N, H_LEU_125   | H, H_LEU_125   | 2.83 | 1.96 | 22.70 |
| 1PSK.PDB | O, H_VAL_182   | N, H_LEU_139   | H, H_LEU_139   | 2.94 | 1.97 | 6.89  |
| 1PSK.PDB | O, H_SER_180   | N, H_CYS_141   | H, H_CYS_141   | 2.84 | 1.96 | 21.90 |
| 1PSK.PDB | O, H_TYR_123   | N, H_LEU_142   | H, H_LEU_142   | 2.94 | 1.96 | 5.65  |
| 1PSK.PDB | O, H_LEU_178   | N, H_VAL_143   | H, H_VAL_143   | 2.80 | 1.85 | 10.99 |
| 1PSK.PDB | O, H_SER_121   | N, H_LYS_144   | H, H_LYS_144   | 2.73 | 1.77 | 7.35  |
| 1PSK.PDB | O, H_LEU_175   | N, H_GLN_172   | H, H_GLN_172   | 2.99 | 2.02 | 7.12  |
| 1PSK.PDB | O, H_TYR_146   | N, H_TYR_176   | H, H_TYR_176   | 2.73 | 1.77 | 6.58  |
| 1PSK.PDB | O, H_VAL_170   | N, H_THR_177   | H, H_THR_177   | 3.00 | 2.15 | 24.71 |
| 1PSK.PDB | O, H_HIS_165   | N, H_SER_181   | H, H_SER_181   | 2.93 | 1.97 | 9.97  |
| 1PSK.PDB | O, H_GLY_163   | N, H_THR_183   | H, H_THR_183   | 2.96 | 2.11 | 24.27 |
| 1PSK.PDB | O, H_VAL_137   | N, H_VAL_184   | H, H_VAL_184   | 2.80 | 1.88 | 17.57 |
| 1PSK.PDB | O, H_THR_188   | N, H_GLN_192   | H, H_GLN_192   | 2.60 | 1.80 | 26.98 |
| 1PSK.PDB | OD1, H_ASN_156 | N, H_THR_195   | H, H_THR_195   | 2.91 | 1.95 | 9.28  |
| 1PSK.PDB | O, H_THR_154   | N, H_ASN_197   | H, H_ASN_197   | 2.76 | 1.83 | 13.92 |
| 1PSK.PDB | O, H_LYS_206   | N, H_VAL_198   | H, H_VAL_198   | 2.73 | 1.84 | 18.50 |
| 1PSK.PDB | O, H_HIS_200   | N, H_SER_204   | H, H_SER_204   | 2.75 | 1.84 | 15.81 |
| 1PSK.PDB | O, H_VAL_198   | N, H_LYS_206   | H, H_LYS_206   | 2.77 | 1.84 | 13.06 |
| 1PSK.PDB | O, H_PRO_120   | NZ, H_LYS_206  | HZ1, H_LYS_206 | 2.63 | 1.80 | 29.01 |

Table 1672: 1PSK-specific side chain and main chain hydrogen bonding analysis. In this table, a PDB file is specified with a four-letter PDB ID, except that the names of the PDB files corresponding to the single NMR structural model split from the NMR ensemble is specified with a four-letter PDB ID in addition to a hyphen followed by the single NMR structural model numeric ID, the residue naming scheme is **Chain ID\_residue name\_residue number**,  $\angle ADH$  represents the angle formed by acceptor (A), donor (D) and hydrogen (H) ( $\angle ADH$ ).

| PDB         | Acceptor (A)  | Donor (D)     | Hydrogen (H)   | D-A (Å) | H-A (Å) | $\angle ADH(^{\circ})$ |
|-------------|---------------|---------------|----------------|---------|---------|------------------------|
| 1R21-1.PDB  | O, A_ARG.96   | N, A_VAL.8    | H, A_VAL.8     | 2.92    | 2.11    | 28.07                  |
| 1R21-1.PDB  | O, A_ILE.51   | N, A_CYS.27   | H, A_CYS.27    | 2.73    | 1.80    | 13.77                  |
| 1R21-1.PDB  | O, A_CYS.49   | N, A_PHE.29   | H, A_PHE.29    | 2.63    | 1.76    | 21.39                  |
| 1R21-1.PDB  | O, A_GLY.32   | N, A_CYS.35   | H, A_CYS.35    | 2.97    | 2.04    | 15.31                  |
| 1R21-1.PDB  | O, A_LEU.28   | N, A_ILE.37   | H, A_ILE.37    | 2.58    | 1.63    | 11.44                  |
| 1R21-1.PDB  | O, A_CYS.27   | N, A_ILE.51   | H, A_ILE.51    | 2.59    | 1.74    | 23.78                  |
| 1R21-1.PDB  | O, A_ILE.59   | N, A_GLU.52   | H, A_GLU.52    | 2.42    | 1.47    | 10.01                  |
| 1R21-1.PDB  | O, A_SER.25   | N, A_ILE.53   | H, A_ILE.53    | 2.91    | 2.02    | 20.16                  |
| 1R21-1.PDB  | O, A_GLU.57   | N, A_HIS.54   | H, A_HIS.54    | 2.41    | 1.54    | 20.64                  |
| 1R21-1.PDB  | O, A_GLU.52   | N, A_ILE.59   | H, A_ILE.59    | 2.67    | 1.74    | 15.06                  |
| 1R21-1.PDB  | OG1, A_THR.69 | ND2, A_ASN.62 | HD21, A_ASN.62 | 2.86    | 1.99    | 21.79                  |
| 1R21-1.PDB  | ND2, A_ASN.62 | N, A_THR.69   | H, A_THR.69    | 2.75    | 1.81    | 12.35                  |
| 1R21-1.PDB  | O, A_THR.89   | N, A_GLN.70   | H, A_GLN.70    | 2.50    | 1.71    | 28.49                  |
| 1R21-1.PDB  | O, A_SER.74   | N, A_VAL.71   | H, A_VAL.71    | 2.82    | 1.84    | 3.74                   |
| 1R21-1.PDB  | O, A_VAL.87   | N, A_ASN.72   | H, A_ASN.72    | 2.95    | 2.00    | 10.39                  |
| 1R21-1.PDB  | O, A_VAL.71   | N, A_SER.74   | H, A_SER.74    | 2.47    | 1.61    | 23.41                  |
| 1R21-1.PDB  | OD2, A_ASP.86 | N, A_LYS.83   | H, A_LYS.83    | 2.35    | 1.40    | 9.85                   |
| 1R21-1.PDB  | O, A_TYR.97   | N, A_GLY.85   | H, A_GLY.85    | 2.98    | 2.05    | 14.93                  |
| 1R21-1.PDB  | O, A_PHE.95   | N, A_ILE.88   | H, A_ILE.88    | 2.64    | 1.67    | 7.14                   |
| 1R21-1.PDB  | O, A_GLN.70   | N, A_THR.89   | H, A_THR.89    | 2.52    | 1.55    | 4.70                   |
| 1R21-1.PDB  | O, A_ARG.93   | N, A_ILE.90   | H, A_ILE.90    | 2.76    | 1.81    | 12.04                  |
| 1R21-1.PDB  | O, A_ILE.88   | N, A_PHE.95   | H, A_PHE.95    | 2.52    | 1.55    | 6.84                   |
| 1R21-1.PDB  | O, A_VAL.8    | N, A_ARG.96   | H, A_ARG.96    | 2.54    | 1.67    | 21.94                  |
| 1R21-1.PDB  | O, A_ARG.6    | N, A_GLU.98   | H, A_GLU.98    | 2.97    | 1.99    | 7.38                   |
| 1R21-1.PDB  | ND1, A_HIS.84 | N, A_ASN.99   | H, A_ASN.99    | 2.78    | 1.83    | 11.23                  |
| 1R21-10.PDB | O, A_PHE.20   | N, A_LEU.7    | H, A_LEU.7     | 2.54    | 1.63    | 17.03                  |
| 1R21-10.PDB | O, A_ARG.96   | N, A_VAL.8    | H, A_VAL.8     | 2.88    | 1.97    | 16.93                  |
| 1R21-10.PDB | O, A_PRO.18   | N, A_THR.9    | H, A_THR.9     | 2.64    | 1.77    | 22.03                  |
| 1R21-10.PDB | O, A_ARG.5    | N, A_LEU.22   | H, A_LEU.22    | 2.90    | 2.07    | 26.17                  |
| 1R21-10.PDB | O, A_ILE.51   | N, A_CYS.27   | H, A_CYS.27    | 2.90    | 1.97    | 15.62                  |
| 1R21-10.PDB | O, A_CYS.49   | N, A_PHE.29   | H, A_PHE.29    | 2.63    | 1.76    | 20.96                  |
| 1R21-10.PDB | O, A_LEU.28   | N, A_ILE.37   | H, A_ILE.37    | 2.61    | 1.66    | 11.11                  |
| 1R21-10.PDB | O, A_GLY.30   | N, A_ILE.39   | H, A_ILE.39    | 2.86    | 1.97    | 19.93                  |
| 1R21-10.PDB | O, A_LEU.41   | N, A_VAL.44   | H, A_VAL.44    | 2.90    | 2.09    | 27.66                  |
| 1R21-10.PDB | O, A_CYS.27   | N, A_ILE.51   | H, A_ILE.51    | 2.67    | 1.79    | 22.06                  |
| 1R21-10.PDB | O, A_ILE.59   | N, A_GLU.52   | H, A_GLU.52    | 2.49    | 1.61    | 19.99                  |
| 1R21-10.PDB | O, A_GLU.57   | N, A_HIS.54   | H, A_HIS.54    | 2.63    | 1.74    | 19.91                  |
| 1R21-10.PDB | O, A_GLU.52   | N, A_ILE.59   | H, A_ILE.59    | 2.58    | 1.65    | 14.41                  |
| 1R21-10.PDB | O, A_VAL.80   | N, A_LEU.60   | H, A_LEU.60    | 2.98    | 2.07    | 18.84                  |
| 1R21-10.PDB | OG1, A_THR.69 | ND2, A_ASN.62 | HD21, A_ASN.62 | 2.90    | 2.06    | 25.22                  |
| 1R21-10.PDB | ND2, A_ASN.62 | N, A_THR.69   | H, A_THR.69    | 2.86    | 1.92    | 14.24                  |
| 1R21-10.PDB | O, A_SER.74   | N, A_VAL.71   | H, A_VAL.71    | 2.72    | 1.74    | 5.16                   |
| 1R21-10.PDB | O, A_VAL.87   | N, A_ASN.72   | H, A_ASN.72    | 2.98    | 2.03    | 12.85                  |
| 1R21-10.PDB | O, A_VAL.71   | N, A_SER.74   | H, A_SER.74    | 2.40    | 1.47    | 14.75                  |
| 1R21-10.PDB | O, A_THR.69   | N, A_ILE.76   | H, A_ILE.76    | 2.93    | 2.09    | 24.54                  |
| 1R21-10.PDB | O, A_ALA.58   | N, A_LEU.82   | H, A_LEU.82    | 2.93    | 2.12    | 28.18                  |
| 1R21-10.PDB | OD2, A_ASP.86 | N, A_LYS.83   | H, A_LYS.83    | 2.34    | 1.37    | 8.83                   |
| 1R21-10.PDB | O, A_TYR.97   | N, A_GLY.85   | H, A_GLY.85    | 2.85    | 2.03    | 27.50                  |
| 1R21-10.PDB | O, A_LYS.83   | N, A_ASP.86   | H, A_ASP.86    | 2.93    | 2.10    | 26.57                  |
| 1R21-10.PDB | O, A_PHE.95   | N, A_ILE.88   | H, A_ILE.88    | 2.55    | 1.60    | 10.99                  |
| 1R21-10.PDB | O, A_GLN.70   | N, A_THR.89   | H, A_THR.89    | 2.70    | 1.75    | 9.37                   |
| 1R21-10.PDB | O, A_ARG.93   | N, A_ILE.90   | H, A_ILE.90    | 2.66    | 1.70    | 9.59                   |
| 1R21-10.PDB | O, A_ILE.88   | N, A_PHE.95   | H, A_PHE.95    | 2.60    | 1.73    | 21.06                  |
| 1R21-10.PDB | O, A_VAL.8    | N, A_ARG.96   | H, A_ARG.96    | 2.52    | 1.64    | 21.43                  |
| 1R21-10.PDB | ND1, A_HIS.84 | N, A_ASN.99   | H, A_ASN.99    | 2.77    | 1.80    | 7.83                   |
| 1R21-11.PDB | O, A_LEU.7    | N, A_PHE.20   | H, A_PHE.20    | 2.62    | 1.83    | 29.77                  |
| 1R21-11.PDB | O, A_ILE.51   | N, A_CYS.27   | H, A_CYS.27    | 2.93    | 1.97    | 9.94                   |



|             |               |               |                |      |      |       |
|-------------|---------------|---------------|----------------|------|------|-------|
| 1R21-11.PDB | O, A_CYS_49   | N, A_PHE_29   | H, A_PHE_29    | 2.82 | 1.94 | 21.59 |
| 1R21-11.PDB | O, A_LEU_28   | N, A_ILE_37   | H, A_ILE_37    | 2.67 | 1.76 | 16.89 |
| 1R21-11.PDB | O, A_GLY_30   | N, A_ILE_39   | H, A_ILE_39    | 2.89 | 1.99 | 18.61 |
| 1R21-11.PDB | O, A_LEU_41   | N, A_VAL_44   | H, A_VAL_44    | 2.87 | 2.01 | 24.14 |
| 1R21-11.PDB | O, A_CYS_27   | N, A_ILE_51   | H, A_ILE_51    | 2.91 | 2.09 | 27.62 |
| 1R21-11.PDB | O, A_ILE_59   | N, A_GLU_52   | H, A_GLU_52    | 2.50 | 1.54 | 7.92  |
| 1R21-11.PDB | O, A_GLU_57   | N, A_HIS_54   | H, A_HIS_54    | 2.47 | 1.52 | 11.34 |
| 1R21-11.PDB | O, A_GLU_52   | N, A_ILE_59   | H, A_ILE_59    | 2.50 | 1.53 | 7.38  |
| 1R21-11.PDB | O, A_LYS_50   | N, A_HIS_61   | H, A_HIS_61    | 2.34 | 1.55 | 28.69 |
| 1R21-11.PDB | OG, A_SER_64  | ND2, A_ASN_62 | HD22, A_ASN_62 | 2.35 | 1.48 | 21.77 |
| 1R21-11.PDB | ND2, A_ASN_62 | N, A_THR_69   | H, A_THR_69    | 2.87 | 1.91 | 9.38  |
| 1R21-11.PDB | O, A_THR_89   | N, A_GLN_70   | H, A_GLN_70    | 2.52 | 1.62 | 18.25 |
| 1R21-11.PDB | O, A_VAL_71   | N, A_SER_74   | H, A_SER_74    | 2.43 | 1.53 | 18.84 |
| 1R21-11.PDB | O, A_VAL_71   | OG, A_SER_74  | HG, A_SER_74   | 2.65 | 1.87 | 28.98 |
| 1R21-11.PDB | N, A_GLY_85   | ND1, A_HIS_84 | HD1, A_HIS_84  | 2.62 | 1.77 | 24.61 |
| 1R21-11.PDB | O, A_LYS_83   | N, A_ASP_86   | H, A_ASP_86    | 2.93 | 2.08 | 25.03 |
| 1R21-11.PDB | O, A_PHE_95   | N, A_ILE_88   | H, A_ILE_88    | 2.49 | 1.58 | 17.48 |
| 1R21-11.PDB | O, A_GLN_70   | N, A_THR_89   | H, A_THR_89    | 2.50 | 1.53 | 3.27  |
| 1R21-11.PDB | O, A_ARG_93   | N, A_ILE_90   | H, A_ILE_90    | 2.78 | 1.90 | 20.94 |
| 1R21-11.PDB | O, A_ILE_88   | N, A_PHE_95   | H, A_PHE_95    | 2.50 | 1.61 | 19.58 |
| 1R21-11.PDB | O, A_VAL_8    | N, A_ARG_96   | H, A_ARG_96    | 2.62 | 1.79 | 25.65 |
| 1R21-11.PDB | O, A_ASP_86   | N, A_TYR_97   | H, A_TYR_97    | 2.89 | 1.91 | 5.12  |
| 1R21-12.PDB | O, A_HIS_54   | NH1, A_ARG_5  | HH12, A_ARG_5  | 2.35 | 1.46 | 20.98 |
| 1R21-12.PDB | O, A_ASP_16   | N, A_LYS_11   | H, A_LYS_11    | 2.75 | 1.92 | 26.57 |
| 1R21-12.PDB | O, A_LEU_7    | N, A_PHE_20   | H, A_PHE_20    | 2.75 | 1.93 | 26.79 |
| 1R21-12.PDB | O, A_ILE_51   | N, A_CYS_27   | H, A_CYS_27    | 2.63 | 1.69 | 14.10 |
| 1R21-12.PDB | O, A_CYS_49   | N, A_PHE_29   | H, A_PHE_29    | 2.60 | 1.71 | 19.44 |
| 1R21-12.PDB | O, A_LEU_28   | N, A_ILE_37   | H, A_ILE_37    | 2.57 | 1.63 | 12.93 |
| 1R21-12.PDB | O, A_LEU_41   | N, A_VAL_44   | H, A_VAL_44    | 2.87 | 2.03 | 25.37 |
| 1R21-12.PDB | O, A_CYS_27   | N, A_ILE_51   | H, A_ILE_51    | 2.54 | 1.72 | 26.76 |
| 1R21-12.PDB | O, A_ILE_59   | N, A_GLU_52   | H, A_GLU_52    | 2.50 | 1.60 | 18.41 |
| 1R21-12.PDB | O, A_SER_25   | N, A_ILE_53   | H, A_ILE_53    | 2.75 | 1.90 | 23.58 |
| 1R21-12.PDB | O, A_GLU_57   | N, A_HIS_54   | H, A_HIS_54    | 2.53 | 1.59 | 12.83 |
| 1R21-12.PDB | O, A_GLU_52   | N, A_ILE_59   | H, A_ILE_59    | 2.53 | 1.55 | 3.06  |
| 1R21-12.PDB | OD1, A_ASN_67 | OG1, A_THR_66 | HG1, A_THR_66  | 2.34 | 1.38 | 3.67  |
| 1R21-12.PDB | ND2, A_ASN_62 | N, A_THR_69   | H, A_THR_69    | 2.95 | 1.98 | 4.80  |
| 1R21-12.PDB | O, A_SER_74   | N, A_VAL_71   | H, A_VAL_71    | 2.74 | 1.76 | 4.25  |
| 1R21-12.PDB | O, A_VAL_87   | N, A_ASN_72   | H, A_ASN_72    | 2.97 | 2.02 | 11.55 |
| 1R21-12.PDB | O, A_VAL_71   | N, A_SER_74   | H, A_SER_74    | 2.46 | 1.58 | 19.54 |
| 1R21-12.PDB | O, A_TYR_97   | N, A_GLY_85   | H, A_GLY_85    | 2.87 | 2.02 | 24.88 |
| 1R21-12.PDB | O, A_PHE_95   | N, A_ILE_88   | H, A_ILE_88    | 2.84 | 1.89 | 12.15 |
| 1R21-12.PDB | O, A_GLN_70   | N, A_THR_89   | H, A_THR_89    | 2.50 | 1.53 | 5.45  |
| 1R21-12.PDB | O, A_ARG_93   | N, A_ILE_90   | H, A_ILE_90    | 2.66 | 1.75 | 17.37 |
| 1R21-12.PDB | O, A_ILE_88   | N, A_PHE_95   | H, A_PHE_95    | 2.61 | 1.63 | 4.84  |
| 1R21-12.PDB | O, A_VAL_8    | N, A_ARG_96   | H, A_ARG_96    | 2.92 | 2.06 | 24.15 |
| 1R21-12.PDB | ND1, A_HIS_84 | N, A_ASN_99   | H, A_ASN_99    | 2.78 | 1.81 | 6.29  |
| 1R21-13.PDB | O, A_PHE_20   | N, A_LEU_7    | H, A_LEU_7     | 2.91 | 1.96 | 10.96 |
| 1R21-13.PDB | O, A_LEU_7    | N, A_PHE_20   | H, A_PHE_20    | 2.60 | 1.77 | 25.97 |
| 1R21-13.PDB | O, A_ILE_51   | N, A_CYS_27   | H, A_CYS_27    | 2.75 | 1.81 | 13.78 |
| 1R21-13.PDB | O, A_CYS_49   | N, A_PHE_29   | H, A_PHE_29    | 2.85 | 1.88 | 7.67  |
| 1R21-13.PDB | O, A_GLY_32   | N, A_CYS_35   | H, A_CYS_35    | 2.95 | 2.05 | 19.20 |
| 1R21-13.PDB | O, A_LEU_28   | N, A_ILE_37   | H, A_ILE_37    | 2.62 | 1.65 | 8.44  |
| 1R21-13.PDB | OG, A_SER_45  | N, A_GLN_47   | H, A_GLN_47    | 2.99 | 2.17 | 27.24 |
| 1R21-13.PDB | O, A_CYS_27   | N, A_ILE_51   | H, A_ILE_51    | 2.43 | 1.49 | 12.20 |
| 1R21-13.PDB | O, A_ILE_59   | N, A_GLU_52   | H, A_GLU_52    | 2.43 | 1.54 | 19.61 |
| 1R21-13.PDB | O, A_GLU_57   | N, A_HIS_54   | H, A_HIS_54    | 2.39 | 1.45 | 12.69 |
| 1R21-13.PDB | O, A_GLU_52   | N, A_ILE_59   | H, A_ILE_59    | 2.60 | 1.64 | 9.03  |
| 1R21-13.PDB | O, A_LYS_50   | N, A_HIS_61   | H, A_HIS_61    | 2.72 | 1.77 | 12.00 |

|             |               |               |                |      |      |       |
|-------------|---------------|---------------|----------------|------|------|-------|
| 1R21-13.PDB | OG1, A_THR_69 | ND2, A_ASN_62 | HD22, A_ASN_62 | 2.50 | 1.62 | 19.65 |
| 1R21-13.PDB | O, A_HIS_48   | N, A_PHE_63   | H, A_PHE_63    | 2.98 | 2.08 | 19.86 |
| 1R21-13.PDB | O, A_HIS_48   | N, A_SER_64   | H, A_SER_64    | 3.00 | 2.09 | 18.58 |
| 1R21-13.PDB | O, A_THR_89   | N, A_GLN_70   | H, A_GLN_70    | 2.61 | 1.74 | 22.03 |
| 1R21-13.PDB | O, A_SER_74   | N, A_VAL_71   | H, A_VAL_71    | 2.72 | 1.81 | 16.96 |
| 1R21-13.PDB | O, A_VAL_71   | N, A_SER_74   | H, A_SER_74    | 2.42 | 1.47 | 9.86  |
| 1R21-13.PDB | O, A_PHE_95   | N, A_ILE_88   | H, A_ILE_88    | 2.49 | 1.53 | 9.17  |
| 1R21-13.PDB | O, A_GLN_70   | N, A_THR_89   | H, A_THR_89    | 2.84 | 1.88 | 8.15  |
| 1R21-13.PDB | O, A_ARG_93   | N, A_ILE_90   | H, A_ILE_90    | 2.77 | 1.79 | 2.62  |
| 1R21-13.PDB | O, A_ILE_88   | N, A_PHE_95   | H, A_PHE_95    | 2.53 | 1.57 | 8.67  |
| 1R21-13.PDB | O, A_VAL_8    | N, A_ARG_96   | H, A_ARG_96    | 2.67 | 1.79 | 21.65 |
| 1R21-13.PDB | ND1, A_HIS_84 | N, A_ASN_99   | H, A_ASN_99    | 2.75 | 1.78 | 6.35  |
| 1R21-13.PDB | OH, A_TYR_97  | ND2, A_ASN_99 | HD21, A_ASN_99 | 2.51 | 1.54 | 7.69  |
| 1R21-14.PDB | O, A_LYS_11   | N, A_GLY_14   | H, A_GLY_14    | 2.87 | 1.98 | 19.78 |
| 1R21-14.PDB | O, A_LEU_7    | N, A_PHE_20   | H, A_PHE_20    | 2.54 | 1.58 | 9.83  |
| 1R21-14.PDB | O, A_ILE_51   | N, A_CYS_27   | H, A_CYS_27    | 2.51 | 1.56 | 10.89 |
| 1R21-14.PDB | O, A_CYS_49   | N, A_PHE_29   | H, A_PHE_29    | 2.67 | 1.74 | 15.50 |
| 1R21-14.PDB | O, A_LEU_28   | N, A_ILE_37   | H, A_ILE_37    | 2.59 | 1.64 | 10.66 |
| 1R21-14.PDB | O, A_GLY_30   | N, A_ILE_39   | H, A_ILE_39    | 2.98 | 2.01 | 7.49  |
| 1R21-14.PDB | O, A_CYS_27   | N, A_ILE_51   | H, A_ILE_51    | 2.41 | 1.51 | 18.34 |
| 1R21-14.PDB | O, A_ILE_59   | N, A_GLU_52   | H, A_GLU_52    | 2.40 | 1.49 | 17.73 |
| 1R21-14.PDB | O, A_GLU_57   | N, A_HIS_54   | H, A_HIS_54    | 2.54 | 1.66 | 20.37 |
| 1R21-14.PDB | O, A_GLU_52   | N, A_ILE_59   | H, A_ILE_59    | 2.44 | 1.48 | 8.49  |
| 1R21-14.PDB | OG1, A_THR_69 | ND2, A_ASN_62 | HD21, A_ASN_62 | 2.52 | 1.57 | 12.09 |
| 1R21-14.PDB | ND2, A_ASN_62 | N, A_THR_69   | H, A_THR_69    | 2.79 | 1.90 | 20.15 |
| 1R21-14.PDB | O, A_SER_74   | N, A_VAL_71   | H, A_VAL_71    | 2.76 | 1.80 | 9.73  |
| 1R21-14.PDB | O, A_VAL_71   | N, A_SER_74   | H, A_SER_74    | 2.68 | 1.86 | 26.85 |
| 1R21-14.PDB | O, A_THR_69   | N, A_ILE_76   | H, A_ILE_76    | 2.74 | 1.79 | 12.00 |
| 1R21-14.PDB | OE1, A_GLU_57 | NE, A_ARG_81  | HE, A_ARG_81   | 2.82 | 2.02 | 29.06 |
| 1R21-14.PDB | OE2, A_GLU_57 | NH2, A_ARG_81 | HH21, A_ARG_81 | 2.46 | 1.50 | 12.90 |
| 1R21-14.PDB | O, A_LYS_83   | N, A ASP_86   | H, A ASP_86    | 2.90 | 2.01 | 20.84 |
| 1R21-14.PDB | O, A_PHE_95   | N, A_ILE_88   | H, A_ILE_88    | 2.88 | 1.96 | 15.69 |
| 1R21-14.PDB | O, A_GLN_70   | N, A_THR_89   | H, A_THR_89    | 2.35 | 1.46 | 19.02 |
| 1R21-14.PDB | O, A_ARG_93   | N, A_ILE_90   | H, A_ILE_90    | 2.73 | 1.76 | 5.94  |
| 1R21-14.PDB | O, A_ILE_88   | N, A_PHE_95   | H, A_PHE_95    | 2.68 | 1.71 | 6.73  |
| 1R21-14.PDB | O, A_VAL_8    | N, A_ARG_96   | H, A_ARG_96    | 2.64 | 1.79 | 24.33 |
| 1R21-14.PDB | ND1, A_HIS_84 | N, A_ASN_99   | H, A_ASN_99    | 2.72 | 1.75 | 7.22  |
| 1R21-14.PDB | OH, A_TYR_97  | ND2, A_ASN_99 | HD22, A_ASN_99 | 2.66 | 1.70 | 8.32  |
| 1R21-14.PDB | O, A_THR_4    | N, A_GLU_100  | H, A_GLU_100   | 2.70 | 1.78 | 16.06 |
| 1R21-15.PDB | O, A_ARG_96   | N, A_VAL_8    | H, A_VAL_8     | 2.88 | 1.93 | 10.65 |
| 1R21-15.PDB | O, A_SER_13   | N, A_VAL_15   | H, A_VAL_15    | 2.35 | 1.44 | 16.35 |
| 1R21-15.PDB | O, A_LEU_7    | N, A_PHE_20   | H, A_PHE_20    | 2.72 | 1.80 | 16.28 |
| 1R21-15.PDB | O, A_ILE_51   | N, A_CYS_27   | H, A_CYS_27    | 2.61 | 1.66 | 12.03 |
| 1R21-15.PDB | O, A_CYS_49   | N, A_PHE_29   | H, A_PHE_29    | 2.69 | 1.83 | 22.46 |
| 1R21-15.PDB | O, A_LEU_28   | N, A_ILE_37   | H, A_ILE_37    | 2.63 | 1.74 | 19.85 |
| 1R21-15.PDB | O, A_GLY_30   | N, A_ILE_39   | H, A_ILE_39    | 2.35 | 1.52 | 25.02 |
| 1R21-15.PDB | O, A_LEU_41   | N, A_VAL_44   | H, A_VAL_44    | 2.84 | 1.98 | 24.12 |
| 1R21-15.PDB | O, A_CYS_27   | N, A_ILE_51   | H, A_ILE_51    | 2.47 | 1.55 | 15.28 |
| 1R21-15.PDB | O, A_ILE_59   | N, A_GLU_52   | H, A_GLU_52    | 2.51 | 1.64 | 21.23 |
| 1R21-15.PDB | O, A_SER_25   | N, A_ILE_53   | H, A_ILE_53    | 2.58 | 1.68 | 18.87 |
| 1R21-15.PDB | O, A_GLU_57   | N, A_HIS_54   | H, A_HIS_54    | 2.77 | 1.90 | 21.35 |
| 1R21-15.PDB | O, A_GLU_52   | N, A_ILE_59   | H, A_ILE_59    | 2.58 | 1.61 | 8.20  |
| 1R21-15.PDB | ND2, A_ASN_62 | N, A_THR_69   | H, A_THR_69    | 2.81 | 1.84 | 7.15  |
| 1R21-15.PDB | O, A_THR_89   | N, A_GLN_70   | H, A_GLN_70    | 2.43 | 1.52 | 17.31 |
| 1R21-15.PDB | O, A_SER_74   | N, A_VAL_71   | H, A_VAL_71    | 2.74 | 1.76 | 5.74  |
| 1R21-15.PDB | O, A_VAL_87   | N, A_ASN_72   | H, A_ASN_72    | 2.86 | 1.91 | 10.94 |
| 1R21-15.PDB | O, A_VAL_71   | N, A_SER_74   | H, A_SER_74    | 2.38 | 1.51 | 21.59 |
| 1R21-15.PDB | O, A_LYS_83   | N, A ASP_86   | H, A ASP_86    | 2.97 | 2.11 | 23.04 |

|             |               |               |               |      |      |       |
|-------------|---------------|---------------|---------------|------|------|-------|
| 1R21-15.PDB | O, A_PHE.95   | N, A_ILE.88   | H, A_ILE.88   | 2.57 | 1.60 | 8.14  |
| 1R21-15.PDB | O, A_GLN.70   | N, A_THR.89   | H, A_THR.89   | 2.38 | 1.41 | 5.21  |
| 1R21-15.PDB | O, A_ARG.93   | N, A_ILE.90   | H, A_ILE.90   | 2.86 | 1.91 | 12.34 |
| 1R21-15.PDB | O, A_ILE.88   | N, A_PHE.95   | H, A_PHE.95   | 2.57 | 1.60 | 6.79  |
| 1R21-15.PDB | O, A_VAL.8    | N, A_ARG.96   | H, A_ARG.96   | 2.52 | 1.57 | 12.45 |
| 1R21-15.PDB | O, A_ASP.86   | N, A_TYR.97   | H, A_TYR.97   | 2.93 | 1.95 | 3.90  |
| 1R21-15.PDB | ND1, A_HIS.84 | N, A_ASN.99   | H, A_ASN.99   | 2.69 | 1.85 | 25.22 |
| 1R21-16.PDB | O, A_GLN.56   | NH2, A_ARG.5  | HH22, A_ARG.5 | 2.34 | 1.43 | 18.03 |
| 1R21-16.PDB | O, A_PRO.18   | N, A_THR.9    | H, A_THR.9    | 2.87 | 1.96 | 17.95 |
| 1R21-16.PDB | O, A_LEU.7    | N, A_PHE.20   | H, A_PHE.20   | 2.79 | 1.90 | 20.16 |
| 1R21-16.PDB | O, A_ILE.51   | N, A_CYS.27   | H, A_CYS.27   | 2.97 | 2.01 | 9.41  |
| 1R21-16.PDB | O, A_CYS.49   | N, A_PHE.29   | H, A_PHE.29   | 2.70 | 1.82 | 20.83 |
| 1R21-16.PDB | O, A_LEU.28   | N, A_ILE.37   | H, A_ILE.37   | 2.64 | 1.66 | 6.75  |
| 1R21-16.PDB | O, A_GLY.30   | N, A_ILE.39   | H, A_ILE.39   | 2.92 | 2.04 | 21.29 |
| 1R21-16.PDB | O, A_LEU.41   | N, A_VAL.44   | H, A_VAL.44   | 2.78 | 1.86 | 16.48 |
| 1R21-16.PDB | N, A_LYS.50   | SG, A_CYS.49  | HG, A_CYS.49  | 2.71 | 1.94 | 29.78 |
| 1R21-16.PDB | O, A_CYS.27   | N, A_ILE.51   | H, A_ILE.51   | 2.66 | 1.76 | 18.43 |
| 1R21-16.PDB | O, A_ILE.59   | N, A_GLU.52   | H, A_GLU.52   | 2.35 | 1.42 | 13.61 |
| 1R21-16.PDB | O, A_GLU.57   | N, A_HIS.54   | H, A_HIS.54   | 2.48 | 1.61 | 21.21 |
| 1R21-16.PDB | O, A_GLU.52   | N, A_ILE.59   | H, A_ILE.59   | 2.45 | 1.49 | 8.62  |
| 1R21-16.PDB | O, A_LYS.50   | N, A_HIS.61   | H, A_HIS.61   | 2.79 | 1.86 | 14.54 |
| 1R21-16.PDB | O, A_ASN.67   | OG, A_SER.64  | HG, A_SER.64  | 2.30 | 1.47 | 23.15 |
| 1R21-16.PDB | ND2, A_ASN.62 | N, A_THR.69   | H, A_THR.69   | 2.78 | 1.82 | 9.93  |
| 1R21-16.PDB | O, A_THR.89   | N, A_GLN.70   | H, A_GLN.70   | 2.50 | 1.67 | 25.41 |
| 1R21-16.PDB | O, A_SER.74   | N, A_VAL.71   | H, A_VAL.71   | 2.80 | 1.83 | 8.69  |
| 1R21-16.PDB | O, A_VAL.87   | N, A_ASN.72   | H, A_ASN.72   | 2.98 | 2.02 | 10.53 |
| 1R21-16.PDB | O, A_VAL.71   | N, A_SER.74   | H, A_SER.74   | 2.44 | 1.53 | 16.98 |
| 1R21-16.PDB | OE1, A_GLU.57 | NE, A_ARG.81  | HE, A_ARG.81  | 2.43 | 1.60 | 25.79 |
| 1R21-16.PDB | OD2, A_ASP.86 | N, A_LYS.83   | H, A_LYS.83   | 2.35 | 1.45 | 17.98 |
| 1R21-16.PDB | O, A_PHE.95   | N, A_ILE.88   | H, A_ILE.88   | 2.63 | 1.69 | 13.56 |
| 1R21-16.PDB | O, A_GLN.70   | N, A_THR.89   | H, A_THR.89   | 2.63 | 1.67 | 7.81  |
| 1R21-16.PDB | O, A_ARG.93   | N, A_ILE.90   | H, A_ILE.90   | 2.81 | 1.86 | 12.00 |
| 1R21-16.PDB | O, A_ILE.88   | N, A_PHE.95   | H, A_PHE.95   | 2.55 | 1.60 | 9.47  |
| 1R21-16.PDB | O, A_VAL.8    | N, A_ARG.96   | H, A_ARG.96   | 2.56 | 1.67 | 20.20 |
| 1R21-16.PDB | ND1, A_HIS.84 | N, A_ASN.99   | H, A_ASN.99   | 2.73 | 1.80 | 13.70 |
| 1R21-17.PDB | ND2, A_ASN.99 | NE, A_ARG.5   | HE, A_ARG.5   | 2.79 | 1.84 | 10.87 |
| 1R21-17.PDB | O, A_MET.1    | NH2, A_ARG.6  | HH21, A_ARG.6 | 2.74 | 1.87 | 24.11 |
| 1R21-17.PDB | O, A_LYS.11   | N, A_GLY.14   | H, A_GLY.14   | 2.90 | 2.08 | 27.87 |
| 1R21-17.PDB | O, A_ILE.51   | N, A_CYS.27   | H, A_CYS.27   | 2.92 | 1.99 | 13.70 |
| 1R21-17.PDB | O, A_CYS.49   | N, A_PHE.29   | H, A_PHE.29   | 2.53 | 1.61 | 15.83 |
| 1R21-17.PDB | O, A_LEU.28   | N, A_ILE.37   | H, A_ILE.37   | 2.62 | 1.67 | 11.05 |
| 1R21-17.PDB | O, A_LEU.41   | N, A_VAL.44   | H, A_VAL.44   | 2.81 | 1.91 | 19.33 |
| 1R21-17.PDB | N, A_LYS.50   | SG, A_CYS.49  | HG, A_CYS.49  | 2.88 | 2.09 | 29.10 |
| 1R21-17.PDB | O, A_CYS.27   | N, A_ILE.51   | H, A_ILE.51   | 2.65 | 1.79 | 22.63 |
| 1R21-17.PDB | O, A_ILE.59   | N, A_GLU.52   | H, A_GLU.52   | 2.52 | 1.59 | 14.29 |
| 1R21-17.PDB | O, A_GLU.57   | N, A_HIS.54   | H, A_HIS.54   | 2.65 | 1.75 | 18.68 |
| 1R21-17.PDB | OH, A_TYR.97  | N, A_ALA.58   | H, A_ALA.58   | 2.72 | 1.89 | 26.01 |
| 1R21-17.PDB | O, A_GLU.52   | N, A_ILE.59   | H, A_ILE.59   | 2.54 | 1.61 | 14.09 |
| 1R21-17.PDB | ND2, A_ASN.62 | N, A_THR.69   | H, A_THR.69   | 2.79 | 1.83 | 10.71 |
| 1R21-17.PDB | O, A_THR.89   | N, A_GLN.70   | H, A_GLN.70   | 2.59 | 1.75 | 25.37 |
| 1R21-17.PDB | O, A_SER.74   | N, A_VAL.71   | H, A_VAL.71   | 2.94 | 1.96 | 5.72  |
| 1R21-17.PDB | O, A_VAL.71   | N, A_SER.74   | H, A_SER.74   | 2.46 | 1.58 | 20.03 |
| 1R21-17.PDB | OD2, A_ASP.86 | N, A_LYS.83   | H, A_LYS.83   | 2.55 | 1.59 | 9.81  |
| 1R21-17.PDB | O, A_LYS.83   | N, A_ASP.86   | H, A_ASP.86   | 2.89 | 2.09 | 28.87 |
| 1R21-17.PDB | O, A_GLN.70   | N, A_THR.89   | H, A_THR.89   | 2.44 | 1.48 | 5.59  |
| 1R21-17.PDB | OG, A_SER.94  | OG1, A_THR.89 | HG1, A_THR.89 | 2.85 | 1.94 | 16.35 |
| 1R21-17.PDB | O, A_ARG.93   | N, A_ILE.90   | H, A_ILE.90   | 2.85 | 1.87 | 5.40  |
| 1R21-17.PDB | O, A_ILE.88   | N, A_PHE.95   | H, A_PHE.95   | 2.73 | 1.78 | 13.00 |

|             |                |               |                |      |      |       |
|-------------|----------------|---------------|----------------|------|------|-------|
| 1R21-17.PDB | O, A_VAL.8     | N, A_ARG.96   | H, A_ARG.96    | 2.69 | 1.78 | 16.86 |
| 1R21-17.PDB | ND1, A_HIS.84  | N, A_ASN.99   | H, A_ASN.99    | 2.76 | 1.87 | 19.62 |
| 1R21-18.PDB | O, A_ARG.96    | N, A_VAL.8    | H, A_VAL.8     | 2.73 | 1.79 | 13.70 |
| 1R21-18.PDB | O, A_LEU.7     | N, A_PHE.20   | H, A_PHE.20    | 2.72 | 1.86 | 23.59 |
| 1R21-18.PDB | O, A_ILE.51    | N, A_CYS.27   | H, A_CYS.27    | 2.72 | 1.82 | 18.54 |
| 1R21-18.PDB | O, A_CYS.49    | N, A_PHE.29   | H, A_PHE.29    | 2.70 | 1.85 | 23.94 |
| 1R21-18.PDB | O, A_LEU.28    | N, A_ILE.37   | H, A_ILE.37    | 2.69 | 1.74 | 12.20 |
| 1R21-18.PDB | O, A_LEU.41    | N, A_VAL.44   | H, A_VAL.44    | 2.84 | 2.03 | 28.77 |
| 1R21-18.PDB | O, A_CYS.27    | N, A_ILE.51   | H, A_ILE.51    | 2.61 | 1.76 | 24.32 |
| 1R21-18.PDB | O, A_ILE.59    | N, A_GLU.52   | H, A_GLU.52    | 2.43 | 1.48 | 11.54 |
| 1R21-18.PDB | O, A_GLU.57    | N, A_HIS.54   | H, A_HIS.54    | 2.49 | 1.54 | 10.72 |
| 1R21-18.PDB | O, A_GLU.52    | N, A_ILE.59   | H, A_ILE.59    | 2.56 | 1.66 | 18.64 |
| 1R21-18.PDB | OD1, A_ASN.67  | OG1, A_THR.66 | HG1, A_THR.66  | 2.60 | 1.66 | 10.07 |
| 1R21-18.PDB | ND2, A_ASN.62  | N, A_THR.69   | H, A_THR.69    | 2.83 | 1.90 | 12.87 |
| 1R21-18.PDB | O, A_THR.89    | N, A_GLN.70   | H, A_GLN.70    | 2.37 | 1.53 | 24.51 |
| 1R21-18.PDB | O, A_SER.74    | N, A_VAL.71   | H, A_VAL.71    | 2.79 | 1.82 | 9.69  |
| 1R21-18.PDB | O, A_VAL.71    | N, A_SER.74   | H, A_SER.74    | 2.46 | 1.62 | 24.85 |
| 1R21-18.PDB | OE2, A_GLU.100 | NE2, A_HIS.84 | HE2, A_HIS.84  | 2.44 | 1.60 | 25.14 |
| 1R21-18.PDB | O, A_PHE.95    | N, A_ILE.88   | H, A_ILE.88    | 2.60 | 1.64 | 8.44  |
| 1R21-18.PDB | O, A_GLN.70    | N, A_THR.89   | H, A_THR.89    | 2.43 | 1.45 | 2.51  |
| 1R21-18.PDB | O, A_ARG.93    | N, A_ILE.90   | H, A_ILE.90    | 2.78 | 1.81 | 6.62  |
| 1R21-18.PDB | O, A_ILE.88    | N, A_PHE.95   | H, A_PHE.95    | 2.57 | 1.60 | 5.68  |
| 1R21-18.PDB | O, A_VAL.8     | N, A_ARG.96   | H, A_ARG.96    | 2.51 | 1.63 | 20.84 |
| 1R21-18.PDB | ND1, A_HIS.84  | N, A_ASN.99   | H, A_ASN.99    | 2.90 | 1.93 | 9.14  |
| 1R21-19.PDB | O, A_ARG.96    | N, A_VAL.8    | H, A_VAL.8     | 2.99 | 2.07 | 17.19 |
| 1R21-19.PDB | O, A_LEU.7     | N, A_PHE.20   | H, A_PHE.20    | 2.60 | 1.69 | 17.39 |
| 1R21-19.PDB | O, A_ILE.51    | N, A_CYS.27   | H, A_CYS.27    | 2.92 | 1.99 | 15.89 |
| 1R21-19.PDB | O, A_CYS.49    | N, A_PHE.29   | H, A_PHE.29    | 2.60 | 1.72 | 21.65 |
| 1R21-19.PDB | O, A_LEU.28    | N, A_ILE.37   | H, A_ILE.37    | 2.59 | 1.64 | 12.32 |
| 1R21-19.PDB | OE2, A_GLU.34  | NE2, A_GLN.47 | HE21, A_GLN.47 | 2.80 | 1.93 | 22.82 |
| 1R21-19.PDB | O, A_CYS.27    | N, A_ILE.51   | H, A_ILE.51    | 2.77 | 1.98 | 29.09 |
| 1R21-19.PDB | O, A_ILE.59    | N, A_GLU.52   | H, A_GLU.52    | 2.43 | 1.48 | 11.27 |
| 1R21-19.PDB | O, A_GLU.57    | N, A_HIS.54   | H, A_HIS.54    | 2.56 | 1.64 | 15.53 |
| 1R21-19.PDB | OH, A_TYR.97   | N, A_ALA.58   | H, A_ALA.58    | 2.88 | 2.06 | 27.15 |
| 1R21-19.PDB | O, A_GLU.52    | N, A_ILE.59   | H, A_ILE.59    | 2.44 | 1.53 | 17.22 |
| 1R21-19.PDB | OG1, A_THR.69  | ND2, A_ASN.62 | HD21, A_ASN.62 | 2.83 | 2.03 | 29.57 |
| 1R21-19.PDB | ND2, A_ASN.62  | N, A_THR.69   | H, A_THR.69    | 2.67 | 1.78 | 19.68 |
| 1R21-19.PDB | O, A_THR.89    | N, A_GLN.70   | H, A_GLN.70    | 2.64 | 1.78 | 22.36 |
| 1R21-19.PDB | O, A_SER.74    | N, A_VAL.71   | H, A_VAL.71    | 2.64 | 1.69 | 11.33 |
| 1R21-19.PDB | O, A_VAL.71    | N, A_SER.74   | H, A_SER.74    | 2.48 | 1.59 | 19.12 |
| 1R21-19.PDB | O, A_THR.69    | N, A_ILE.76   | H, A_ILE.76    | 2.76 | 1.93 | 26.34 |
| 1R21-19.PDB | O, A_LYS.83    | N, A_ASP.86   | H, A_ASP.86    | 2.90 | 2.02 | 21.05 |
| 1R21-19.PDB | O, A_PHE.95    | N, A_ILE.88   | H, A_ILE.88    | 2.84 | 1.95 | 19.79 |
| 1R21-19.PDB | O, A_GLN.70    | N, A_THR.89   | H, A_THR.89    | 2.66 | 1.69 | 6.71  |
| 1R21-19.PDB | O, A_ARG.93    | N, A_ILE.90   | H, A_ILE.90    | 2.72 | 1.76 | 8.86  |
| 1R21-19.PDB | O, A_ILE.88    | N, A_PHE.95   | H, A_PHE.95    | 2.54 | 1.63 | 17.83 |
| 1R21-19.PDB | O, A_VAL.8     | N, A_ARG.96   | H, A_ARG.96    | 2.59 | 1.69 | 17.99 |
| 1R21-19.PDB | ND1, A_HIS.84  | N, A_ASN.99   | H, A_ASN.99    | 2.84 | 1.89 | 10.70 |
| 1R21-2.PDB  | N, A_ARG.5     | OG1, A_THR.4  | HG1, A_THR.4   | 2.74 | 1.85 | 17.56 |
| 1R21-2.PDB  | O, A_PHE.20    | N, A_LEU.7    | H, A_LEU.7     | 2.95 | 1.98 | 8.03  |
| 1R21-2.PDB  | O, A_LEU.7     | N, A_PHE.20   | H, A_PHE.20    | 2.59 | 1.74 | 24.59 |
| 1R21-2.PDB  | O, A_CYS.49    | N, A_PHE.29   | H, A_PHE.29    | 2.72 | 1.83 | 19.71 |
| 1R21-2.PDB  | O, A_LEU.28    | N, A_ILE.37   | H, A_ILE.37    | 2.57 | 1.60 | 6.95  |
| 1R21-2.PDB  | OE2, A_GLU.34  | NE2, A_GLN.47 | HE21, A_GLN.47 | 2.62 | 1.65 | 7.42  |
| 1R21-2.PDB  | O, A_CYS.27    | N, A_ILE.51   | H, A_ILE.51    | 2.67 | 1.82 | 25.05 |
| 1R21-2.PDB  | O, A_ILE.59    | N, A_GLU.52   | H, A_GLU.52    | 2.42 | 1.55 | 22.16 |
| 1R21-2.PDB  | O, A_GLU.57    | N, A_HIS.54   | H, A_HIS.54    | 2.50 | 1.69 | 27.80 |
| 1R21-2.PDB  | O, A_GLU.52    | N, A_ILE.59   | H, A_ILE.59    | 2.46 | 1.49 | 3.05  |

|             |               |               |                |      |      |       |
|-------------|---------------|---------------|----------------|------|------|-------|
| 1R21-2.PDB  | OG1, A_THR_69 | ND2, A_ASN_62 | HD21, A_ASN_62 | 2.81 | 1.92 | 20.56 |
| 1R21-2.PDB  | OG, A_SER_64  | ND2, A_ASN_62 | HD22, A_ASN_62 | 2.42 | 1.53 | 18.22 |
| 1R21-2.PDB  | ND2, A_ASN_62 | N, A_THR_69   | H, A_THR_69    | 2.76 | 1.81 | 12.74 |
| 1R21-2.PDB  | O, A_THR_89   | N, A_GLN_70   | H, A_GLN_70    | 2.51 | 1.65 | 23.32 |
| 1R21-2.PDB  | O, A_VAL_87   | N, A_ASN_72   | H, A_ASN_72    | 2.97 | 2.02 | 10.02 |
| 1R21-2.PDB  | O, A_VAL_71   | N, A_SER_74   | H, A_SER_74    | 2.58 | 1.65 | 14.58 |
| 1R21-2.PDB  | OD2, A_ASP_86 | N, A_LYS_83   | H, A_LYS_83    | 2.34 | 1.53 | 27.15 |
| 1R21-2.PDB  | O, A_TYR_97   | N, A_GLY_85   | H, A_GLY_85    | 2.88 | 2.06 | 27.73 |
| 1R21-2.PDB  | O, A_PHE_95   | N, A_ILE_88   | H, A_ILE_88    | 2.71 | 1.73 | 6.39  |
| 1R21-2.PDB  | O, A_GLN_70   | N, A_THR_89   | H, A_THR_89    | 2.55 | 1.58 | 6.68  |
| 1R21-2.PDB  | OG, A_SER_94  | OG1, A_THR_89 | HG1, A_THR_89  | 2.98 | 2.02 | 6.58  |
| 1R21-2.PDB  | O, A_ARG_93   | N, A_ILE_90   | H, A_ILE_90    | 2.82 | 1.89 | 14.80 |
| 1R21-2.PDB  | O, A_ILE_88   | N, A_PHE_95   | H, A_PHE_95    | 2.61 | 1.65 | 9.22  |
| 1R21-2.PDB  | O, A_VAL_8    | N, A_ARG_96   | H, A_ARG_96    | 2.61 | 1.75 | 22.96 |
| 1R21-2.PDB  | OD2, A_ASP_16 | NH1, A_ARG_96 | HH12, A_ARG_96 | 2.71 | 1.87 | 26.03 |
| 1R21-2.PDB  | ND1, A_HIS_84 | N, A_ASN_99   | H, A_ASN_99    | 2.71 | 1.73 | 1.63  |
| 1R21-20.PDB | O, A_PHE_20   | N, A_LEU_7    | H, A_LEU_7     | 2.89 | 1.97 | 16.40 |
| 1R21-20.PDB | O, A_LEU_7    | N, A_PHE_20   | H, A_PHE_20    | 2.54 | 1.59 | 11.23 |
| 1R21-20.PDB | O, A_ILE_51   | N, A_CYS_27   | H, A_CYS_27    | 2.71 | 1.75 | 9.33  |
| 1R21-20.PDB | O, A_CYS_49   | N, A_PHE_29   | H, A_PHE_29    | 2.67 | 1.77 | 18.32 |
| 1R21-20.PDB | O, A_LEU_28   | N, A_ILE_37   | H, A_ILE_37    | 2.61 | 1.64 | 6.85  |
| 1R21-20.PDB | N, A_LYS_46   | OG, A_SER_45  | HG, A_SER_45   | 2.70 | 1.79 | 15.25 |
| 1R21-20.PDB | O, A_CYS_27   | N, A_ILE_51   | H, A_ILE_51    | 2.42 | 1.58 | 23.81 |
| 1R21-20.PDB | O, A_ILE_59   | N, A_GLU_52   | H, A_GLU_52    | 2.32 | 1.45 | 21.34 |
| 1R21-20.PDB | O, A_GLU_57   | N, A_HIS_54   | H, A_HIS_54    | 2.45 | 1.51 | 12.30 |
| 1R21-20.PDB | O, A_GLU_52   | N, A_ILE_59   | H, A_ILE_59    | 2.48 | 1.51 | 4.91  |
| 1R21-20.PDB | O, A_VAL_80   | N, A_LEU_60   | H, A_LEU_60    | 2.94 | 1.97 | 6.46  |
| 1R21-20.PDB | O, A_LYS_50   | N, A_HIS_61   | H, A_HIS_61    | 2.71 | 1.83 | 20.97 |
| 1R21-20.PDB | ND2, A_ASN_62 | N, A_THR_69   | H, A_THR_69    | 2.81 | 1.85 | 8.55  |
| 1R21-20.PDB | O, A_THR_89   | N, A_GLN_70   | H, A_GLN_70    | 2.55 | 1.71 | 24.95 |
| 1R21-20.PDB | O, A_VAL_87   | N, A_ASN_72   | H, A_ASN_72    | 2.84 | 1.89 | 10.53 |
| 1R21-20.PDB | O, A_VAL_71   | N, A_SER_74   | H, A_SER_74    | 2.53 | 1.62 | 17.33 |
| 1R21-20.PDB | O, A_VAL_71   | OG, A_SER_74  | HG, A_SER_74   | 2.49 | 1.70 | 27.88 |
| 1R21-20.PDB | O, A_PHE_95   | N, A_ILE_88   | H, A_ILE_88    | 2.46 | 1.49 | 5.80  |
| 1R21-20.PDB | O, A_GLN_70   | N, A_THR_89   | H, A_THR_89    | 2.46 | 1.50 | 7.24  |
| 1R21-20.PDB | O, A_ARG_93   | N, A_ILE_90   | H, A_ILE_90    | 2.66 | 1.69 | 6.47  |
| 1R21-20.PDB | O, A_ILE_88   | N, A_PHE_95   | H, A_PHE_95    | 2.54 | 1.58 | 8.65  |
| 1R21-20.PDB | O, A_VAL_8    | N, A_ARG_96   | H, A_ARG_96    | 2.64 | 1.79 | 24.11 |
| 1R21-20.PDB | ND1, A_HIS_84 | N, A_ASN_99   | H, A_ASN_99    | 2.96 | 2.01 | 12.19 |
| 1R21-21.PDB | O, A_PHE_20   | N, A_LEU_7    | H, A_LEU_7     | 2.96 | 2.07 | 20.84 |
| 1R21-21.PDB | O, A_ARG_96   | N, A_VAL_8    | H, A_VAL_8     | 2.59 | 1.62 | 4.25  |
| 1R21-21.PDB | O, A_LEU_7    | N, A_PHE_20   | H, A_PHE_20    | 2.61 | 1.64 | 5.69  |
| 1R21-21.PDB | O, A_ILE_51   | N, A_CYS_27   | H, A_CYS_27    | 2.91 | 1.95 | 10.90 |
| 1R21-21.PDB | O, A_CYS_49   | N, A_PHE_29   | H, A_PHE_29    | 2.68 | 1.81 | 22.17 |
| 1R21-21.PDB | O, A_LEU_28   | N, A_ILE_37   | H, A_ILE_37    | 2.56 | 1.62 | 13.05 |
| 1R21-21.PDB | O, A_LEU_41   | N, A_VAL_44   | H, A_VAL_44    | 2.91 | 2.06 | 24.25 |
| 1R21-21.PDB | O, A_CYS_27   | N, A_ILE_51   | H, A_ILE_51    | 2.73 | 1.89 | 24.96 |
| 1R21-21.PDB | O, A_ILE_59   | N, A_GLU_52   | H, A_GLU_52    | 2.35 | 1.50 | 22.81 |
| 1R21-21.PDB | O, A_GLU_57   | N, A_HIS_54   | H, A_HIS_54    | 2.92 | 1.97 | 10.24 |
| 1R21-21.PDB | O, A_GLU_52   | N, A_ILE_59   | H, A_ILE_59    | 2.54 | 1.70 | 24.70 |
| 1R21-21.PDB | ND2, A_ASN_62 | N, A_THR_69   | H, A_THR_69    | 2.75 | 1.85 | 18.29 |
| 1R21-21.PDB | O, A_THR_89   | N, A_GLN_70   | H, A_GLN_70    | 2.65 | 1.74 | 16.82 |
| 1R21-21.PDB | O, A_SER_74   | N, A_VAL_71   | H, A_VAL_71    | 2.64 | 1.68 | 10.54 |
| 1R21-21.PDB | O, A_VAL_87   | N, A_ASN_72   | H, A_ASN_72    | 2.70 | 1.73 | 7.44  |
| 1R21-21.PDB | O, A_VAL_71   | N, A_SER_74   | H, A_SER_74    | 2.70 | 1.91 | 29.55 |
| 1R21-21.PDB | OD2, A_ASP_86 | N, A_LYS_83   | H, A_LYS_83    | 2.35 | 1.45 | 17.97 |
| 1R21-21.PDB | OD1, A_ASN_72 | N, A_VAL_87   | H, A_VAL_87    | 2.99 | 2.03 | 10.40 |
| 1R21-21.PDB | O, A_PHE_95   | N, A_ILE_88   | H, A_ILE_88    | 2.42 | 1.51 | 16.26 |

|             |               |               |                |      |      |       |
|-------------|---------------|---------------|----------------|------|------|-------|
| 1R21-21.PDB | O, A_GLN_70   | N, A_THR_89   | H, A_THR_89    | 2.52 | 1.56 | 6.68  |
| 1R21-21.PDB | O, A_ARG_93   | N, A_ILE_90   | H, A_ILE_90    | 2.78 | 1.92 | 23.35 |
| 1R21-21.PDB | O, A_ILE_88   | N, A_PHE_95   | H, A_PHE_95    | 2.32 | 1.44 | 19.20 |
| 1R21-21.PDB | O, A_VAL_8    | N, A_ARG_96   | H, A_ARG_96    | 2.40 | 1.50 | 17.53 |
| 1R21-21.PDB | ND1, A_HIS_84 | N, A_ASN_99   | H, A_ASN_99    | 2.69 | 1.78 | 18.43 |
| 1R21-22.PDB | O, A_LYS_11   | N, A_GLY_14   | H, A_GLY_14    | 2.92 | 1.99 | 15.41 |
| 1R21-22.PDB | OD1, A_ASP_16 | N, A_GLY_17   | H, A_GLY_17    | 2.32 | 1.45 | 19.59 |
| 1R21-22.PDB | O, A_LEU_7    | N, A_PHE_20   | H, A_PHE_20    | 2.61 | 1.65 | 9.53  |
| 1R21-22.PDB | O, A_ILE_51   | N, A_CYS_27   | H, A_CYS_27    | 2.87 | 1.96 | 17.01 |
| 1R21-22.PDB | O, A_CYS_49   | N, A_PHE_29   | H, A_PHE_29    | 2.60 | 1.70 | 18.19 |
| 1R21-22.PDB | O, A_VAL_44   | NH1, A_ARG_31 | HH11, A_ARG_31 | 2.32 | 1.43 | 20.44 |
| 1R21-22.PDB | O, A_LEU_28   | N, A_ILE_37   | H, A_ILE_37    | 2.50 | 1.57 | 14.67 |
| 1R21-22.PDB | O, A_GLY_30   | N, A_ILE_39   | H, A_ILE_39    | 2.87 | 1.93 | 13.15 |
| 1R21-22.PDB | O, A_CYS_27   | N, A_ILE_51   | H, A_ILE_51    | 2.68 | 1.88 | 28.33 |
| 1R21-22.PDB | O, A_ILE_59   | N, A_GLU_52   | H, A_GLU_52    | 2.35 | 1.46 | 18.95 |
| 1R21-22.PDB | O, A_SER_25   | N, A_ILE_53   | H, A_ILE_53    | 2.75 | 1.92 | 25.97 |
| 1R21-22.PDB | O, A_GLU_57   | N, A_HIS_54   | H, A_HIS_54    | 2.43 | 1.49 | 13.42 |
| 1R21-22.PDB | O, A_GLU_52   | N, A_ILE_59   | H, A_ILE_59    | 2.51 | 1.56 | 11.28 |
| 1R21-22.PDB | OG, A_SER_64  | ND2, A_ASN_62 | HD22, A_ASN_62 | 2.37 | 1.45 | 16.21 |
| 1R21-22.PDB | ND2, A_ASN_62 | N, A_THR_69   | H, A_THR_69    | 2.75 | 1.81 | 13.92 |
| 1R21-22.PDB | O, A_THR_89   | N, A_GLN_70   | H, A_GLN_70    | 2.39 | 1.49 | 18.52 |
| 1R21-22.PDB | O, A_SER_74   | N, A_VAL_71   | H, A_VAL_71    | 2.73 | 1.76 | 7.13  |
| 1R21-22.PDB | O, A_VAL_71   | N, A_SER_74   | H, A_SER_74    | 2.40 | 1.54 | 22.50 |
| 1R21-22.PDB | OD2, A_ASP_86 | N, A_LYS_83   | H, A_LYS_83    | 2.34 | 1.47 | 21.74 |
| 1R21-22.PDB | O, A_TYR_97   | N, A_GLY_85   | H, A_GLY_85    | 2.95 | 2.10 | 24.40 |
| 1R21-22.PDB | O, A_PHE_95   | N, A_ILE_88   | H, A_ILE_88    | 2.63 | 1.67 | 6.98  |
| 1R21-22.PDB | O, A_GLN_70   | N, A_THR_89   | H, A_THR_89    | 2.41 | 1.52 | 18.90 |
| 1R21-22.PDB | O, A_ARG_93   | N, A_ILE_90   | H, A_ILE_90    | 2.74 | 1.77 | 6.10  |
| 1R21-22.PDB | O, A_ILE_88   | N, A_PHE_95   | H, A_PHE_95    | 2.64 | 1.72 | 15.76 |
| 1R21-22.PDB | O, A_VAL_8    | N, A_ARG_96   | H, A_ARG_96    | 2.37 | 1.47 | 18.14 |
| 1R21-22.PDB | O, A_ASP_86   | N, A_TYR_97   | H, A_TYR_97    | 2.99 | 2.03 | 9.81  |
| 1R21-22.PDB | ND1, A_HIS_84 | N, A_ASN_99   | H, A_ASN_99    | 2.84 | 1.90 | 14.56 |
| 1R21-23.PDB | O, A_ARG_96   | N, A_VAL_8    | H, A_VAL_8     | 2.86 | 1.92 | 13.31 |
| 1R21-23.PDB | O, A_CYS_49   | N, A_PHE_29   | H, A_PHE_29    | 2.64 | 1.75 | 19.18 |
| 1R21-23.PDB | O, A_LEU_28   | N, A_ILE_37   | H, A_ILE_37    | 2.58 | 1.62 | 9.88  |
| 1R21-23.PDB | O, A_CYS_27   | N, A_ILE_51   | H, A_ILE_51    | 2.71 | 1.91 | 29.18 |
| 1R21-23.PDB | O, A_SER_25   | N, A_ILE_53   | H, A_ILE_53    | 2.69 | 1.85 | 24.46 |
| 1R21-23.PDB | O, A_GLU_57   | N, A_HIS_54   | H, A_HIS_54    | 2.99 | 2.01 | 4.94  |
| 1R21-23.PDB | ND1, A_HIS_54 | N, A_GLU_57   | H, A_GLU_57    | 2.90 | 2.03 | 23.13 |
| 1R21-23.PDB | O, A_GLU_52   | N, A_ILE_59   | H, A_ILE_59    | 2.62 | 1.77 | 23.57 |
| 1R21-23.PDB | ND2, A_ASN_62 | N, A_THR_69   | H, A_THR_69    | 2.86 | 1.89 | 7.90  |
| 1R21-23.PDB | O, A_VAL_71   | N, A_SER_74   | H, A_SER_74    | 2.40 | 1.48 | 15.27 |
| 1R21-23.PDB | OE1, A_GLU_57 | NE, A_ARG_81  | HE, A_ARG_81   | 2.65 | 1.70 | 11.54 |
| 1R21-23.PDB | OD2, A_ASP_86 | N, A_LYS_83   | H, A_LYS_83    | 2.56 | 1.66 | 17.59 |
| 1R21-23.PDB | O, A_PHE_95   | N, A_ILE_88   | H, A_ILE_88    | 2.67 | 1.71 | 9.77  |
| 1R21-23.PDB | O, A_GLN_70   | N, A_THR_89   | H, A_THR_89    | 2.44 | 1.47 | 4.21  |
| 1R21-23.PDB | O, A_ARG_93   | N, A_ILE_90   | H, A_ILE_90    | 2.77 | 1.83 | 11.81 |
| 1R21-23.PDB | O, A_ILE_88   | N, A_PHE_95   | H, A_PHE_95    | 2.62 | 1.66 | 9.26  |
| 1R21-23.PDB | O, A_VAL_8    | N, A_ARG_96   | H, A_ARG_96    | 2.53 | 1.67 | 22.54 |
| 1R21-23.PDB | ND1, A_HIS_84 | N, A_ASN_99   | H, A_ASN_99    | 2.78 | 1.83 | 12.42 |
| 1R21-3.PDB  | O, A_PRO_18   | N, A_THR_9    | H, A_THR_9     | 2.75 | 1.82 | 15.55 |
| 1R21-3.PDB  | OD1, A_ASP_16 | NE2, A_HIS_19 | HE2, A_HIS_19  | 2.71 | 1.85 | 23.51 |
| 1R21-3.PDB  | O, A_LEU_7    | N, A_PHE_20   | H, A_PHE_20    | 2.81 | 2.01 | 29.61 |
| 1R21-3.PDB  | O, A_ILE_51   | N, A_CYS_27   | H, A_CYS_27    | 2.79 | 1.88 | 18.32 |
| 1R21-3.PDB  | O, A_CYS_49   | N, A_PHE_29   | H, A_PHE_29    | 2.76 | 1.82 | 13.22 |
| 1R21-3.PDB  | O, A_LEU_28   | N, A_ILE_37   | H, A_ILE_37    | 2.65 | 1.72 | 14.66 |
| 1R21-3.PDB  | O, A_GLY_30   | N, A_ILE_39   | H, A_ILE_39    | 2.90 | 1.94 | 10.95 |
| 1R21-3.PDB  | OE2, A_GLU_34 | NE2, A_GLN_47 | HE22, A_GLN_47 | 2.72 | 1.92 | 29.24 |

|            |               |               |                |      |      |       |
|------------|---------------|---------------|----------------|------|------|-------|
| 1R21-3.PDB | O, A_ILE_59   | N, A_GLU_52   | H, A_GLU_52    | 2.41 | 1.46 | 10.14 |
| 1R21-3.PDB | O, A_SER_25   | N, A_ILE_53   | H, A_ILE_53    | 2.44 | 1.55 | 19.50 |
| 1R21-3.PDB | O, A_GLU_57   | N, A_HIS_54   | H, A_HIS_54    | 2.46 | 1.55 | 16.84 |
| 1R21-3.PDB | O, A_GLU_52   | N, A_ILE_59   | H, A_ILE_59    | 2.65 | 1.70 | 10.74 |
| 1R21-3.PDB | O, A_LYS_50   | N, A_HIS_61   | H, A_HIS_61    | 2.72 | 1.91 | 28.48 |
| 1R21-3.PDB | OG1, A_THR_69 | ND2, A_ASN_62 | HD21, A_ASN_62 | 2.87 | 2.01 | 23.40 |
| 1R21-3.PDB | O, A_HIS_48   | N, A_PHE_63   | H, A_PHE_63    | 2.66 | 1.74 | 15.84 |
| 1R21-3.PDB | ND2, A_ASN_62 | N, A_THR_69   | H, A_THR_69    | 2.80 | 1.85 | 9.14  |
| 1R21-3.PDB | O, A_SER_74   | N, A_VAL_71   | H, A_VAL_71    | 2.76 | 1.79 | 6.23  |
| 1R21-3.PDB | O, A_VAL_87   | N, A_ASN_72   | H, A_ASN_72    | 2.81 | 1.87 | 12.50 |
| 1R21-3.PDB | O, A_VAL_71   | N, A_SER_74   | H, A_SER_74    | 2.52 | 1.65 | 22.26 |
| 1R21-3.PDB | O, A_PHE_95   | N, A_ILE_88   | H, A_ILE_88    | 2.38 | 1.42 | 9.04  |
| 1R21-3.PDB | O, A_GLN_70   | N, A_THR_89   | H, A_THR_89    | 2.58 | 1.62 | 7.30  |
| 1R21-3.PDB | O, A_ARG_93   | N, A_ILE_90   | H, A_ILE_90    | 2.88 | 1.98 | 18.52 |
| 1R21-3.PDB | O, A_ILE_88   | N, A_PHE_95   | H, A_PHE_95    | 2.49 | 1.52 | 2.60  |
| 1R21-3.PDB | O, A_VAL_8    | N, A_ARG_96   | H, A_ARG_96    | 2.86 | 1.93 | 15.31 |
| 1R21-3.PDB | ND1, A_HIS_84 | N, A_ASN_99   | H, A_ASN_99    | 2.73 | 1.81 | 16.46 |
| 1R21-4.PDB | O, A_GLN_56   | NH2, A_ARG_5  | HH21, A_ARG_5  | 2.90 | 2.09 | 29.83 |
| 1R21-4.PDB | O, A_LEU_7    | N, A_PHE_20   | H, A_PHE_20    | 2.67 | 1.82 | 24.01 |
| 1R21-4.PDB | O, A_ILE_51   | N, A_CYS_27   | H, A_CYS_27    | 2.66 | 1.75 | 17.27 |
| 1R21-4.PDB | O, A_CYS_49   | N, A_PHE_29   | H, A_PHE_29    | 2.65 | 1.73 | 16.15 |
| 1R21-4.PDB | O, A_LEU_28   | N, A_ILE_37   | H, A_ILE_37    | 2.58 | 1.63 | 11.12 |
| 1R21-4.PDB | O, A_GLY_30   | N, A_ILE_39   | H, A_ILE_39    | 2.96 | 2.02 | 14.09 |
| 1R21-4.PDB | O, A_LEU_41   | N, A_VAL_44   | H, A_VAL_44    | 2.78 | 1.93 | 24.60 |
| 1R21-4.PDB | O, A_CYS_27   | N, A_ILE_51   | H, A_ILE_51    | 2.64 | 1.83 | 27.83 |
| 1R21-4.PDB | O, A_ILE_59   | N, A_GLU_52   | H, A_GLU_52    | 2.49 | 1.57 | 16.14 |
| 1R21-4.PDB | O, A_SER_25   | N, A_ILE_53   | H, A_ILE_53    | 2.85 | 2.00 | 24.05 |
| 1R21-4.PDB | N, A_GLU_55   | ND1, A_HIS_54 | HD1, A_HIS_54  | 2.58 | 1.78 | 28.52 |
| 1R21-4.PDB | O, A_GLU_52   | N, A_ILE_59   | H, A_ILE_59    | 2.59 | 1.66 | 14.45 |
| 1R21-4.PDB | OD1, A_ASN_67 | OG1, A_THR_66 | HG1, A_THR_66  | 2.40 | 1.45 | 5.76  |
| 1R21-4.PDB | ND2, A_ASN_62 | N, A_THR_69   | H, A_THR_69    | 2.80 | 1.85 | 11.39 |
| 1R21-4.PDB | O, A_THR_89   | N, A_GLN_70   | H, A_GLN_70    | 2.55 | 1.67 | 20.25 |
| 1R21-4.PDB | O, A_SER_74   | N, A_VAL_71   | H, A_VAL_71    | 2.68 | 1.77 | 17.57 |
| 1R21-4.PDB | O, A_VAL_71   | N, A_SER_74   | H, A_SER_74    | 2.43 | 1.52 | 16.62 |
| 1R21-4.PDB | OE1, A_GLU_57 | NE, A_ARG_81  | HE, A_ARG_81   | 2.76 | 1.87 | 19.46 |
| 1R21-4.PDB | OE1, A_GLU_57 | NH2, A_ARG_81 | HH21, A_ARG_81 | 2.93 | 2.10 | 27.48 |
| 1R21-4.PDB | OD2, A_ASP_86 | N, A_LYS_83   | H, A_LYS_83    | 2.52 | 1.72 | 28.30 |
| 1R21-4.PDB | O, A_PHE_95   | N, A_ILE_88   | H, A_ILE_88    | 2.41 | 1.51 | 17.89 |
| 1R21-4.PDB | O, A_GLN_70   | N, A_THR_89   | H, A_THR_89    | 2.59 | 1.62 | 4.11  |
| 1R21-4.PDB | O, A_ARG_93   | N, A_ILE_90   | H, A_ILE_90    | 2.76 | 1.91 | 24.78 |
| 1R21-4.PDB | O, A_ILE_88   | N, A_PHE_95   | H, A_PHE_95    | 2.36 | 1.44 | 14.85 |
| 1R21-4.PDB | ND1, A_HIS_84 | N, A_ASN_99   | H, A_ASN_99    | 2.80 | 1.85 | 12.02 |
| 1R21-5.PDB | O, A_VAL_15   | N, A_LYS_11   | H, A_LYS_11    | 2.78 | 1.94 | 24.72 |
| 1R21-5.PDB | O, A_LYS_11   | N, A_GLY_14   | H, A_GLY_14    | 2.58 | 1.71 | 22.29 |
| 1R21-5.PDB | O, A_LEU_7    | N, A_PHE_20   | H, A_PHE_20    | 2.74 | 1.95 | 29.42 |
| 1R21-5.PDB | O, A_ILE_51   | N, A_CYS_27   | H, A_CYS_27    | 2.96 | 2.03 | 16.24 |
| 1R21-5.PDB | O, A_CYS_49   | N, A_PHE_29   | H, A_PHE_29    | 2.56 | 1.68 | 20.60 |
| 1R21-5.PDB | O, A_GLY_32   | N, A_CYS_35   | H, A_CYS_35    | 3.00 | 2.10 | 20.00 |
| 1R21-5.PDB | O, A_LEU_28   | N, A_ILE_37   | H, A_ILE_37    | 2.63 | 1.66 | 7.71  |
| 1R21-5.PDB | O, A_CYS_27   | N, A_ILE_51   | H, A_ILE_51    | 2.67 | 1.84 | 25.60 |
| 1R21-5.PDB | O, A_ILE_59   | N, A_GLU_52   | H, A_GLU_52    | 2.45 | 1.51 | 13.28 |
| 1R21-5.PDB | O, A_SER_25   | N, A_ILE_53   | H, A_ILE_53    | 2.88 | 2.00 | 20.92 |
| 1R21-5.PDB | O, A_GLU_57   | N, A_HIS_54   | H, A_HIS_54    | 2.45 | 1.55 | 17.67 |
| 1R21-5.PDB | O, A_GLU_52   | N, A_ILE_59   | H, A_ILE_59    | 2.73 | 1.80 | 15.41 |
| 1R21-5.PDB | OG1, A_THR_69 | ND2, A_ASN_62 | HD22, A_ASN_62 | 2.62 | 1.75 | 21.48 |
| 1R21-5.PDB | O, A_THR_89   | N, A_GLN_70   | H, A_GLN_70    | 2.61 | 1.83 | 29.99 |
| 1R21-5.PDB | O, A_VAL_87   | N, A_ASN_72   | H, A_ASN_72    | 2.99 | 2.02 | 8.39  |
| 1R21-5.PDB | O, A_VAL_71   | N, A_SER_74   | H, A_SER_74    | 2.41 | 1.47 | 13.31 |

|            |               |               |                |      |      |       |
|------------|---------------|---------------|----------------|------|------|-------|
| 1R21-5.PDB | OD2, A_ASP_86 | N, A_LYS_83   | H, A_LYS_83    | 2.31 | 1.52 | 27.57 |
| 1R21-5.PDB | O, A_PHE_95   | N, A_ILE_88   | H, A_ILE_88    | 2.66 | 1.72 | 14.09 |
| 1R21-5.PDB | O, A_GLN_70   | N, A_THR_89   | H, A_THR_89    | 2.73 | 1.76 | 5.33  |
| 1R21-5.PDB | O, A_ARG_93   | N, A_ILE_90   | H, A_ILE_90    | 2.64 | 1.71 | 14.23 |
| 1R21-5.PDB | O, A_ILE_88   | N, A_PHE_95   | H, A_PHE_95    | 2.55 | 1.58 | 4.54  |
| 1R21-5.PDB | O, A_VAL_8    | N, A_ARG_96   | H, A_ARG_96    | 2.68 | 1.85 | 26.28 |
| 1R21-5.PDB | ND1, A_HIS_84 | N, A_ASN_99   | H, A_ASN_99    | 2.79 | 1.81 | 1.91  |
| 1R21-6.PDB | O, A_LEU_7    | N, A_PHE_20   | H, A_PHE_20    | 2.66 | 1.77 | 20.35 |
| 1R21-6.PDB | O, A_CYS_49   | N, A_PHE_29   | H, A_PHE_29    | 2.75 | 1.83 | 16.30 |
| 1R21-6.PDB | O, A_LEU_28   | N, A_ILE_37   | H, A_ILE_37    | 2.59 | 1.63 | 9.82  |
| 1R21-6.PDB | O, A_GLY_30   | N, A_ILE_39   | H, A_ILE_39    | 2.91 | 2.07 | 25.97 |
| 1R21-6.PDB | O, A_LEU_41   | N, A_VAL_44   | H, A_VAL_44    | 2.95 | 2.04 | 17.93 |
| 1R21-6.PDB | N, A_LYS_50   | SG, A_CYS_49  | HG, A_CYS_49   | 2.71 | 1.89 | 25.56 |
| 1R21-6.PDB | O, A_CYS_27   | N, A_ILE_51   | H, A_ILE_51    | 2.75 | 1.91 | 25.39 |
| 1R21-6.PDB | O, A_ILE_59   | N, A_GLU_52   | H, A_GLU_52    | 2.40 | 1.53 | 21.67 |
| 1R21-6.PDB | O, A_GLU_57   | N, A_HIS_54   | H, A_HIS_54    | 2.79 | 1.89 | 19.06 |
| 1R21-6.PDB | O, A_GLU_52   | N, A_ILE_59   | H, A_ILE_59    | 2.58 | 1.61 | 5.50  |
| 1R21-6.PDB | OG1, A_THR_69 | ND2, A_ASN_62 | HD21, A_ASN_62 | 2.81 | 1.95 | 22.23 |
| 1R21-6.PDB | OD1, A_ASN_67 | OG1, A_THR_66 | HG1, A_THR_66  | 2.30 | 1.42 | 18.29 |
| 1R21-6.PDB | ND2, A_ASN_62 | N, A_THR_69   | H, A_THR_69    | 2.77 | 1.82 | 9.89  |
| 1R21-6.PDB | O, A_THR_89   | N, A_GLN_70   | H, A_GLN_70    | 2.74 | 1.83 | 16.28 |
| 1R21-6.PDB | O, A_SER_74   | N, A_VAL_71   | H, A_VAL_71    | 2.71 | 1.73 | 5.25  |
| 1R21-6.PDB | O, A_VAL_87   | N, A_ASN_72   | H, A_ASN_72    | 2.81 | 1.83 | 4.97  |
| 1R21-6.PDB | O, A_VAL_71   | N, A_SER_74   | H, A_SER_74    | 2.47 | 1.57 | 18.72 |
| 1R21-6.PDB | O, A_TYR_97   | N, A_GLY_85   | H, A_GLY_85    | 2.85 | 1.98 | 22.19 |
| 1R21-6.PDB | O, A_PHE_95   | N, A_ILE_88   | H, A_ILE_88    | 2.58 | 1.60 | 5.92  |
| 1R21-6.PDB | O, A_GLN_70   | N, A_THR_89   | H, A_THR_89    | 2.72 | 1.76 | 7.04  |
| 1R21-6.PDB | O, A_ARG_93   | N, A_ILE_90   | H, A_ILE_90    | 2.73 | 1.78 | 11.89 |
| 1R21-6.PDB | O, A_ILE_88   | N, A_PHE_95   | H, A_PHE_95    | 2.50 | 1.55 | 9.80  |
| 1R21-6.PDB | O, A_VAL_8    | N, A_ARG_96   | H, A_ARG_96    | 2.94 | 2.02 | 15.77 |
| 1R21-6.PDB | ND1, A_HIS_84 | N, A_ASN_99   | H, A_ASN_99    | 2.78 | 1.82 | 10.56 |
| 1R21-6.PDB | O, A_THR_4    | N, A_GLU_100  | H, A_GLU_100   | 2.69 | 1.89 | 28.90 |
| 1R21-7.PDB | O, A_ARG_96   | N, A_VAL_8    | H, A_VAL_8     | 2.93 | 2.00 | 14.50 |
| 1R21-7.PDB | O, A_SER_94   | N, A_ILE_10   | H, A_ILE_10    | 2.75 | 1.83 | 17.27 |
| 1R21-7.PDB | O, A_LEU_7    | N, A_PHE_20   | H, A_PHE_20    | 2.62 | 1.73 | 19.92 |
| 1R21-7.PDB | O, A_ILE_51   | N, A_CYS_27   | H, A_CYS_27    | 2.70 | 1.75 | 13.12 |
| 1R21-7.PDB | O, A_CYS_49   | N, A_PHE_29   | H, A_PHE_29    | 2.69 | 1.79 | 18.19 |
| 1R21-7.PDB | O, A_LEU_28   | N, A_ILE_37   | H, A_ILE_37    | 2.66 | 1.71 | 12.73 |
| 1R21-7.PDB | O, A_GLY_30   | N, A_ILE_39   | H, A_ILE_39    | 2.93 | 2.03 | 19.31 |
| 1R21-7.PDB | O, A_CYS_27   | N, A_ILE_51   | H, A_ILE_51    | 2.59 | 1.76 | 25.78 |
| 1R21-7.PDB | O, A_ILE_59   | N, A_GLU_52   | H, A_GLU_52    | 2.42 | 1.57 | 22.98 |
| 1R21-7.PDB | O, A_SER_25   | N, A_ILE_53   | H, A_ILE_53    | 2.58 | 1.70 | 20.39 |
| 1R21-7.PDB | O, A_GLU_57   | N, A_HIS_54   | H, A_HIS_54    | 2.55 | 1.59 | 6.66  |
| 1R21-7.PDB | O, A_GLU_52   | N, A_ILE_59   | H, A_ILE_59    | 2.51 | 1.62 | 19.11 |
| 1R21-7.PDB | OD1, A_ASN_67 | OG1, A_THR_66 | HG1, A_THR_66  | 2.91 | 2.05 | 21.54 |
| 1R21-7.PDB | ND2, A_ASN_62 | N, A_THR_69   | H, A_THR_69    | 2.80 | 1.87 | 14.50 |
| 1R21-7.PDB | O, A_THR_89   | N, A_GLN_70   | H, A_GLN_70    | 2.81 | 2.02 | 29.36 |
| 1R21-7.PDB | O, A_SER_74   | N, A_VAL_71   | H, A_VAL_71    | 2.67 | 1.70 | 5.32  |
| 1R21-7.PDB | O, A_VAL_71   | N, A_SER_74   | H, A_SER_74    | 2.40 | 1.46 | 12.46 |
| 1R21-7.PDB | O, A_PHE_95   | N, A_ILE_88   | H, A_ILE_88    | 2.42 | 1.50 | 16.16 |
| 1R21-7.PDB | O, A_GLN_70   | N, A_THR_89   | H, A_THR_89    | 2.72 | 1.75 | 6.96  |
| 1R21-7.PDB | O, A_ARG_93   | N, A_ILE_90   | H, A_ILE_90    | 2.79 | 1.96 | 26.27 |
| 1R21-7.PDB | O, A_ILE_88   | N, A_PHE_95   | H, A_PHE_95    | 2.39 | 1.47 | 15.58 |
| 1R21-7.PDB | O, A_VAL_8    | N, A_ARG_96   | H, A_ARG_96    | 2.62 | 1.75 | 22.19 |
| 1R21-7.PDB | O, A_ASP_86   | N, A_TYR_97   | H, A_TYR_97    | 2.95 | 1.97 | 3.22  |
| 1R21-7.PDB | ND1, A_HIS_84 | N, A_ASN_99   | H, A_ASN_99    | 2.74 | 1.77 | 3.18  |
| 1R21-7.PDB | O, A_THR_4    | N, A_GLU_100  | H, A_GLU_100   | 2.96 | 1.98 | 1.07  |
| 1R21-8.PDB | O, A_LEU_7    | N, A_PHE_20   | H, A_PHE_20    | 2.64 | 1.67 | 5.83  |



|            |               |               |                |      |      |       |
|------------|---------------|---------------|----------------|------|------|-------|
| 1R21-8.PDB | O, A_ILE.51   | N, A_CYS.27   | H, A_CYS.27    | 2.97 | 2.06 | 18.29 |
| 1R21-8.PDB | O, A_CYS.49   | N, A_PHE.29   | H, A_PHE.29    | 2.74 | 1.82 | 17.14 |
| 1R21-8.PDB | O, A_GLY.32   | N, A_CYS.35   | H, A_CYS.35    | 2.97 | 2.06 | 17.41 |
| 1R21-8.PDB | O, A_LEU.28   | N, A_ILE.37   | H, A_ILE.37    | 2.56 | 1.64 | 16.71 |
| 1R21-8.PDB | O, A_CYS.27   | N, A_ILE.51   | H, A_ILE.51    | 2.90 | 2.08 | 27.50 |
| 1R21-8.PDB | O, A_ILE.59   | N, A_GLU.52   | H, A_GLU.52    | 2.39 | 1.51 | 20.05 |
| 1R21-8.PDB | O, A_SER.25   | N, A_ILE.53   | H, A_ILE.53    | 2.86 | 1.97 | 19.70 |
| 1R21-8.PDB | O, A_GLU.57   | N, A_HIS.54   | H, A_HIS.54    | 2.63 | 1.73 | 17.57 |
| 1R21-8.PDB | O, A_GLU.52   | N, A_ILE.59   | H, A_ILE.59    | 2.67 | 1.74 | 13.79 |
| 1R21-8.PDB | O, A_HIS.48   | N, A_PHE.63   | H, A_PHE.63    | 2.95 | 1.99 | 8.40  |
| 1R21-8.PDB | ND2, A_ASN.62 | N, A_THR.69   | H, A_THR.69    | 2.77 | 1.82 | 11.69 |
| 1R21-8.PDB | O, A_THR.89   | N, A_GLN.70   | H, A_GLN.70    | 2.54 | 1.69 | 23.06 |
| 1R21-8.PDB | O, A_SER.74   | N, A_VAL.71   | H, A_VAL.71    | 2.87 | 1.96 | 17.78 |
| 1R21-8.PDB | O, A_VAL.87   | N, A_ASN.72   | H, A_ASN.72    | 2.79 | 1.84 | 10.06 |
| 1R21-8.PDB | O, A_VAL.71   | N, A_SER.74   | H, A_SER.74    | 2.39 | 1.49 | 18.17 |
| 1R21-8.PDB | OD2, A_ASP.86 | N, A_LYS.83   | H, A_LYS.83    | 2.70 | 1.83 | 21.74 |
| 1R21-8.PDB | O, A_LYS.83   | N, A_ASP.86   | H, A_ASP.86    | 2.99 | 2.13 | 23.27 |
| 1R21-8.PDB | O, A_PHE.95   | N, A_ILE.88   | H, A_ILE.88    | 2.50 | 1.64 | 22.70 |
| 1R21-8.PDB | O, A_GLN.70   | N, A_THR.89   | H, A_THR.89    | 2.52 | 1.55 | 4.58  |
| 1R21-8.PDB | O, A_ARG.93   | N, A_ILE.90   | H, A_ILE.90    | 2.80 | 1.96 | 25.17 |
| 1R21-8.PDB | O, A_ILE.88   | N, A_PHE.95   | H, A_PHE.95    | 2.40 | 1.51 | 18.62 |
| 1R21-8.PDB | O, A_VAL.8    | N, A_ARG.96   | H, A_ARG.96    | 2.59 | 1.64 | 10.89 |
| 1R21-8.PDB | ND1, A_HIS.84 | N, A_ASN.99   | H, A_ASN.99    | 2.79 | 1.82 | 9.29  |
| 1R21-9.PDB | O, A_ARG.96   | N, A_VAL.8    | H, A_VAL.8     | 2.95 | 2.02 | 15.16 |
| 1R21-9.PDB | O, A_VAL.15   | N, A_LYS.11   | H, A_LYS.11    | 2.46 | 1.54 | 16.41 |
| 1R21-9.PDB | O, A_LYS.11   | N, A_GLY.14   | H, A_GLY.14    | 2.77 | 1.83 | 13.31 |
| 1R21-9.PDB | O, A_THR.9    | N, A_GLY.17   | H, A_GLY.17    | 2.92 | 2.09 | 26.43 |
| 1R21-9.PDB | O, A_LEU.7    | N, A_PHE.20   | H, A_PHE.20    | 2.73 | 1.90 | 26.46 |
| 1R21-9.PDB | O, A_ILE.51   | N, A_CYS.27   | H, A_CYS.27    | 2.80 | 1.95 | 24.06 |
| 1R21-9.PDB | O, A_CYS.49   | N, A_PHE.29   | H, A_PHE.29    | 2.58 | 1.68 | 18.54 |
| 1R21-9.PDB | O, A_LEU.28   | N, A_ILE.37   | H, A_ILE.37    | 2.61 | 1.66 | 11.75 |
| 1R21-9.PDB | O, A_GLY.30   | N, A_ILE.39   | H, A_ILE.39    | 2.95 | 2.00 | 11.86 |
| 1R21-9.PDB | O, A_CYS.27   | N, A_ILE.51   | H, A_ILE.51    | 2.58 | 1.76 | 26.53 |
| 1R21-9.PDB | O, A_ILE.59   | N, A_GLU.52   | H, A_GLU.52    | 2.41 | 1.49 | 15.40 |
| 1R21-9.PDB | O, A_GLU.57   | N, A_HIS.54   | H, A_HIS.54    | 2.39 | 1.49 | 17.88 |
| 1R21-9.PDB | O, A_GLU.52   | N, A_ILE.59   | H, A_ILE.59    | 2.53 | 1.64 | 19.17 |
| 1R21-9.PDB | OG1, A_THR.69 | ND2, A_ASN.62 | HD21, A_ASN.62 | 2.59 | 1.65 | 13.02 |
| 1R21-9.PDB | ND2, A_ASN.62 | N, A_THR.69   | H, A_THR.69    | 2.80 | 1.88 | 16.74 |
| 1R21-9.PDB | O, A_THR.89   | N, A_GLN.70   | H, A_GLN.70    | 2.54 | 1.65 | 19.35 |
| 1R21-9.PDB | O, A_SER.74   | N, A_VAL.71   | H, A_VAL.71    | 2.88 | 1.97 | 18.35 |
| 1R21-9.PDB | O, A_VAL.71   | N, A_SER.74   | H, A_SER.74    | 2.82 | 1.99 | 26.19 |
| 1R21-9.PDB | O, A_LYS.83   | N, A_ASP.86   | H, A_ASP.86    | 2.95 | 2.09 | 23.46 |
| 1R21-9.PDB | O, A_PHE.95   | N, A_ILE.88   | H, A_ILE.88    | 2.79 | 1.83 | 9.96  |
| 1R21-9.PDB | O, A_GLN.70   | N, A_THR.89   | H, A_THR.89    | 2.38 | 1.46 | 15.43 |
| 1R21-9.PDB | O, A_ARG.93   | N, A_ILE.90   | H, A_ILE.90    | 2.76 | 1.79 | 6.89  |
| 1R21-9.PDB | O, A_ILE.88   | N, A_PHE.95   | H, A_PHE.95    | 2.67 | 1.69 | 5.04  |
| 1R21-9.PDB | O, A_VAL.8    | N, A_ARG.96   | H, A_ARG.96    | 2.57 | 1.73 | 25.04 |
| 1R21-9.PDB | ND1, A_HIS.84 | N, A_ASN.99   | H, A_ASN.99    | 2.74 | 1.83 | 17.89 |

---

Table 1673: 1R21-specific side chain and main chain hydrogen bonding analysis. In this table, a PDB file is specified with a four-letter PDB ID, except that the names of the PDB files corresponding to the single NMR structural model split from the NMR ensemble is specified with a four-letter PDB ID in addition to a hyphen followed by the single NMR structural model numeric ID, the residue naming scheme is **Chain ID\_residue name\_residue number**,  $\angle ADH$  represents the angle formed by acceptor (A), donor (D) and hydrogen (H) ( $\angle ADH$ ).

| PDB        | Acceptor (A) | Donor (D)  | Hydrogen (H) | D-A (Å) | H-A (Å) | $\angle ADH(^{\circ})$ |
|------------|--------------|------------|--------------|---------|---------|------------------------|
| 1S4H-8.PDB | OE1, A_GLU_2 | N, A_GLU_1 | H3, A_GLU_1  | 3.00    | 2.12    | 26.52                  |

Table 1674: 1S4H-specific side chain and main chain hydrogen bonding analysis. In this table, a PDB file is specified with a four-letter PDB ID, except that the names of the PDB files corresponding to the single NMR structural model split from the NMR ensemble is specified with a four-letter PDB ID in addition to a hyphen followed by the single NMR structural model numeric ID, the residue naming scheme is **Chain ID\_residue name\_residue number**,  $\angle ADH$  represents the angle formed by acceptor (A), donor (D) and hydrogen (H) ( $\angle ADH$ ).

| PDB         | Acceptor (A) | Donor (D)   | Hydrogen (H) | D-A (Å) | H-A (Å) | $\angle ADH(^{\circ})$ |
|-------------|--------------|-------------|--------------|---------|---------|------------------------|
| 1S4J-1.PDB  | O, A_MET_7   | N, A_SER_3  | H, A_SER_3   | 2.68    | 1.88    | 28.39                  |
| 1S4J-10.PDB | O, A_MET_7   | N, A_SER_3  | H, A_SER_3   | 2.70    | 1.89    | 28.31                  |
| 1S4J-10.PDB | OD2, A_ASP_5 | N, A_LEU_11 | H, A_LEU_11  | 2.97    | 2.11    | 23.51                  |
| 1S4J-11.PDB | O, A_MET_7   | N, A_SER_3  | H, A_SER_3   | 2.71    | 1.88    | 26.65                  |
| 1S4J-12.PDB | O, A_MET_7   | N, A_SER_3  | H, A_SER_3   | 2.58    | 1.69    | 19.82                  |
| 1S4J-14.PDB | O, A_MET_7   | N, A_SER_3  | H, A_SER_3   | 2.62    | 1.79    | 26.02                  |
| 1S4J-14.PDB | OD2, A_ASP_5 | N, A_LEU_11 | H, A_LEU_11  | 2.83    | 2.00    | 26.13                  |
| 1S4J-15.PDB | O, A_MET_7   | N, A_SER_3  | H, A_SER_3   | 2.73    | 1.91    | 26.73                  |
| 1S4J-16.PDB | O, A_MET_7   | N, A_SER_3  | H, A_SER_3   | 2.76    | 1.95    | 28.49                  |
| 1S4J-17.PDB | O, A_MET_7   | N, A_SER_3  | H, A_SER_3   | 2.73    | 1.90    | 26.91                  |
| 1S4J-18.PDB | O, A_MET_7   | N, A_SER_3  | H, A_SER_3   | 2.72    | 1.86    | 23.67                  |
| 1S4J-19.PDB | O, A_MET_7   | N, A_SER_3  | H, A_SER_3   | 2.72    | 1.87    | 24.36                  |
| 1S4J-2.PDB  | O, A_MET_7   | N, A_SER_3  | H, A_SER_3   | 2.72    | 1.90    | 26.68                  |
| 1S4J-20.PDB | O, A_MET_7   | N, A_SER_3  | H, A_SER_3   | 2.77    | 1.95    | 27.92                  |
| 1S4J-20.PDB | O, A_GLY_10  | N, A_PHE_12 | H, A_PHE_12  | 2.84    | 1.99    | 23.23                  |
| 1S4J-3.PDB  | O, A_MET_7   | N, A_SER_3  | H, A_SER_3   | 2.75    | 1.93    | 27.51                  |
| 1S4J-5.PDB  | O, A_MET_7   | N, A_SER_3  | H, A_SER_3   | 2.72    | 1.90    | 26.53                  |
| 1S4J-6.PDB  | O, A_MET_7   | N, A_SER_3  | H, A_SER_3   | 2.73    | 1.90    | 26.66                  |
| 1S4J-7.PDB  | O, A_MET_7   | N, A_SER_3  | H, A_SER_3   | 2.73    | 1.90    | 26.44                  |
| 1S4J-8.PDB  | O, A_MET_7   | N, A_SER_3  | H, A_SER_3   | 2.73    | 1.90    | 26.61                  |
| 1S4J-9.PDB  | O, A_MET_7   | N, A_SER_3  | H, A_SER_3   | 2.64    | 1.83    | 27.37                  |
| 1S4J-9.PDB  | OD2, A_ASP_5 | N, A_LEU_11 | H, A_LEU_11  | 2.83    | 2.00    | 25.25                  |

Table 1675: 1S4J-specific side chain and main chain hydrogen bonding analysis. In this table, a PDB file is specified with a four-letter PDB ID, except that the names of the PDB files corresponding to the single NMR structural model split from the NMR ensemble is specified with a four-letter PDB ID in addition to a hyphen followed by the single NMR structural model numeric ID, the residue naming scheme is **Chain ID\_residue name\_residue number**,  $\angle ADH$  represents the angle formed by acceptor (A), donor (D) and hydrogen (H) ( $\angle ADH$ ).

| PDB        | Acceptor (A) | Donor (D)  | Hydrogen (H) | D-A (Å) | H-A (Å) | $\angle ADH(^{\circ})$ |
|------------|--------------|------------|--------------|---------|---------|------------------------|
| 1TOR-5.PDB | O, A_ASN_2   | N, A_ASP_5 | H, A_ASP_5   | 2.95    | 2.03    | 21.29                  |

Table 1676: 1TOR-specific side chain and main chain hydrogen bonding analysis. In this table, a PDB file is specified with a four-letter PDB ID, except that the names of the PDB files corresponding to the single NMR structural model split from the NMR ensemble is specified with a four-letter PDB ID in addition to a hyphen followed by the single NMR structural model numeric ID, the residue naming scheme is **Chain ID\_residue name\_residue number**,  $\angle ADH$  represents the angle formed by acceptor (A), donor (D) and hydrogen (H) ( $\angle ADH$ ).

| PDB        | Acceptor (A) | Donor (D)  | Hydrogen (H) | D-A (Å) | H-A (Å) | $\angle ADH(^{\circ})$ |
|------------|--------------|------------|--------------|---------|---------|------------------------|
| 1TOS-2.PDB | O, A_ASN_2   | N, A_ASP_5 | H, A_ASP_5   | 2.88    | 1.98    | 23.42                  |

Table 1677: 1TOS-specific side chain and main chain hydrogen bonding analysis. In this table, a PDB file is specified with a four-letter PDB ID, except that the names of the PDB files corresponding to the single NMR structural model split from the NMR ensemble is specified with a four-letter PDB ID in addition to a hyphen followed by the single NMR structural model numeric ID, the residue naming scheme is **Chain ID\_residue name\_residue number**,  $\angle ADH$  represents the angle formed by acceptor (A), donor (D) and hydrogen (H) ( $\angle ADH$ ).

| PDB      | Acceptor (A)   | Donor (D)      | Hydrogen (H)   | D-A (Å) | H-A (Å) | $\angle ADH(^{\circ})$ |
|----------|----------------|----------------|----------------|---------|---------|------------------------|
| 1VFB.PDB | OG, A_SER_26   | N, A_VAL_3     | H, A_VAL_3     | 2.94    | 1.97    | 6.30                   |
| 1VFB.PDB | O, A_ARG_24    | N, A_THR_5     | H, A_THR_5     | 2.90    | 1.93    | 5.77                   |
| 1VFB.PDB | O, A_THR_22    | N, A_SER_7     | H, A_SER_7     | 2.99    | 2.11    | 22.15                  |
| 1VFB.PDB | O, A_LYS_103   | N, A_LEU_11    | H, A_LEU_11    | 2.94    | 2.05    | 20.26                  |
| 1VFB.PDB | O, A_GLU_105   | N, A_ALA_13    | H, A_ALA_13    | 2.80    | 1.93    | 21.73                  |
| 1VFB.PDB | O, A_LEU_78    | N, A_GLY_16    | H, A_GLY_16    | 2.82    | 1.99    | 26.99                  |
| 1VFB.PDB | O, A_LEU_73    | N, A_ILE_21    | H, A_ILE_21    | 2.85    | 1.95    | 18.65                  |
| 1VFB.PDB | O, A_SER_7     | N, A_THR_22    | H, A_THR_22    | 2.95    | 1.97    | 3.77                   |
| 1VFB.PDB | O, A_TYR_71    | N, A_CYS_23    | H, A_CYS_23    | 2.89    | 1.95    | 12.19                  |
| 1VFB.PDB | O, A_THR_5     | N, A_ARG_24    | H, A_ARG_24    | 2.86    | 1.97    | 19.64                  |
| 1VFB.PDB | O, A_THR_69    | N, A_ALA_25    | H, A_ALA_25    | 2.80    | 1.83    | 9.00                   |
| 1VFB.PDB | OD1, A_ASN_28  | N, A_HIS_30    | H, A_HIS_30    | 2.87    | 2.03    | 25.94                  |
| 1VFB.PDB | O, A_GLN_89    | N, A_ALA_34    | H, A_ALA_34    | 2.86    | 1.95    | 17.31                  |
| 1VFB.PDB | O, A_VAL_48    | N, A_TRP_35    | H, A_TRP_35    | 2.90    | 1.96    | 12.47                  |
| 1VFB.PDB | O, A_TYR_87    | N, A_TYR_36    | H, A_TYR_36    | 2.90    | 1.97    | 14.82                  |
| 1VFB.PDB | OE1, A_GLN_89  | OH, A_TYR_36   | HH, A_TYR_36   | 2.84    | 2.00    | 25.31                  |
| 1VFB.PDB | O, A_GLN_45    | N, A_GLN_37    | H, A_GLN_37    | 2.94    | 2.00    | 11.43                  |
| 1VFB.PDB | O, A_SER_85    | N, A_GLN_38    | H, A_GLN_38    | 2.78    | 1.86    | 16.10                  |
| 1VFB.PDB | O, A_LYS_42    | NE2, A_GLN_38  | HE22, A_GLN_38 | 2.95    | 2.03    | 15.93                  |
| 1VFB.PDB | O, A_LYS_39    | N, A_LYS_42    | H, A_LYS_42    | 2.94    | 2.06    | 21.86                  |
| 1VFB.PDB | O, A_GLN_37    | N, A_GLN_45    | H, A_GLN_45    | 2.83    | 1.94    | 20.43                  |
| 1VFB.PDB | O, A_TRP_35    | N, A_LEU_47    | H, A_LEU_47    | 2.87    | 1.94    | 14.84                  |
| 1VFB.PDB | O, A_THR_53    | N, A_TYR_49    | H, A_TYR_49    | 2.88    | 1.94    | 13.56                  |
| 1VFB.PDB | O, A_TYR_49    | N, A_THR_53    | H, A_THR_53    | 2.96    | 2.04    | 16.01                  |
| 1VFB.PDB | O, A_LEU_47    | N, A_ALA_55    | H, A_ALA_55    | 2.84    | 1.93    | 17.83                  |
| 1VFB.PDB | OD2, A_ASP_82  | NE, A_ARG_61   | HE, A_ARG_61   | 2.88    | 1.96    | 15.15                  |
| 1VFB.PDB | OD1, A_ASP_82  | NH2, A_ARG_61  | HH21, A_ARG_61 | 2.85    | 1.87    | 9.42                   |
| 1VFB.PDB | O, A_LYS_74    | N, A_SER_63    | H, A_SER_63    | 2.88    | 1.93    | 11.55                  |
| 1VFB.PDB | O, A_SER_72    | N, A_SER_65    | H, A_SER_65    | 2.96    | 2.03    | 16.59                  |
| 1VFB.PDB | O, A_CYS_23    | N, A_TYR_71    | H, A_TYR_71    | 2.90    | 2.02    | 21.95                  |
| 1VFB.PDB | O, A_GLY_68    | OH, A_TYR_71   | HH, A_TYR_71   | 2.83    | 1.87    | 7.60                   |
| 1VFB.PDB | O, A_SER_65    | N, A_SER_72    | H, A_SER_72    | 2.93    | 1.97    | 9.57                   |
| 1VFB.PDB | O, A_ILE_21    | N, A_LEU_73    | H, A_LEU_73    | 2.93    | 1.98    | 10.05                  |
| 1VFB.PDB | O, A_SER_63    | N, A_LYS_74    | H, A_LYS_74    | 2.78    | 1.85    | 14.93                  |
| 1VFB.PDB | O, A_VAL_19    | N, A_ILE_75    | H, A_ILE_75    | 3.00    | 2.05    | 11.89                  |
| 1VFB.PDB | O, A_ARG_61    | N, A_ASN_76    | H, A_ASN_76    | 2.94    | 1.97    | 4.92                   |
| 1VFB.PDB | O, A_GLU_17    | N, A_LEU_78    | H, A_LEU_78    | 2.98    | 2.01    | 6.59                   |
| 1VFB.PDB | OD2, A_ASP_82  | N, A_GLN_79    | H, A_GLN_79    | 2.99    | 2.09    | 19.33                  |
| 1VFB.PDB | O, A_GLN_79    | N, A_ASP_82    | H, A_ASP_82    | 2.90    | 1.94    | 8.94                   |
| 1VFB.PDB | O, A_GLN_38    | N, A_SER_85    | H, A_SER_85    | 2.92    | 1.96    | 9.01                   |
| 1VFB.PDB | O, A_THR_102   | N, A_TYR_86    | H, A_TYR_86    | 2.97    | 2.09    | 22.04                  |
| 1VFB.PDB | O, A_ASP_82    | OH, A_TYR_86   | HH, A_TYR_86   | 2.70    | 1.75    | 6.61                   |
| 1VFB.PDB | O, A_ALA_34    | N, A_GLN_89    | H, A_GLN_89    | 2.89    | 2.00    | 22.07                  |
| 1VFB.PDB | O, A_TYR_32    | N, A_PHE_91    | H, A_PHE_91    | 2.82    | 1.88    | 13.65                  |
| 1VFB.PDB | OE1, C_GLN_121 | N, A_SER_93    | H, A_SER_93    | 2.89    | 1.92    | 8.17                   |
| 1VFB.PDB | OE1, B_GLU_98  | NH1, A_ARG_96  | HH12, A_ARG_96 | 2.82    | 1.84    | 8.38                   |
| 1VFB.PDB | OE2, B_GLU_98  | NH2, A_ARG_96  | HH22, A_ARG_96 | 2.81    | 1.85    | 10.74                  |
| 1VFB.PDB | O, A_CYS_88    | N, A_GLY_99    | H, A_GLY_99    | 2.78    | 1.86    | 15.50                  |
| 1VFB.PDB | O, A_TYR_86    | N, A_THR_102   | H, A_THR_102   | 2.95    | 2.08    | 22.50                  |
| 1VFB.PDB | O, A_PRO_8     | OG1, A_THR_102 | HG1, A_THR_102 | 2.77    | 1.85    | 14.39                  |
| 1VFB.PDB | O, A_ALA_9     | N, A_LYS_103   | H, A_LYS_103   | 2.90    | 1.93    | 7.79                   |
| 1VFB.PDB | O, A_GLY_84    | N, A_LEU_104   | H, A_LEU_104   | 2.88    | 1.91    | 5.85                   |
| 1VFB.PDB | O, A_LEU_11    | N, A_GLU_105   | H, A_GLU_105   | 2.89    | 1.94    | 12.21                  |
| 1VFB.PDB | O, B_SER_25    | N, B_GLN_3     | H, B_GLN_3     | 2.88    | 1.92    | 9.87                   |
| 1VFB.PDB | O, B_THR_23    | N, B_GLN_5     | H, B_GLN_5     | 2.98    | 2.10    | 21.16                  |
| 1VFB.PDB | O, B_THR_21    | N, B_SER_7     | H, B_SER_7     | 2.85    | 2.00    | 24.61                  |
| 1VFB.PDB | O, B_PRO_9     | N, B_LEU_11    | H, B_LEU_11    | 2.92    | 2.13    | 29.55                  |

|          |                |                |                 |      |      |       |
|----------|----------------|----------------|-----------------|------|------|-------|
| 1VFB.PDB | OE1, B_GLN_16  | N, B_ALA_13    | H, B_ALA_13     | 2.78 | 1.85 | 14.74 |
| 1VFB.PDB | O, B_ALA_13    | N, B_GLN_16    | H, B_GLN_16     | 2.90 | 1.97 | 15.84 |
| 1VFB.PDB | O, B_MET_82    | N, B_LEU_18    | H, B_LEU_18     | 2.72 | 1.87 | 23.78 |
| 1VFB.PDB | O, B_LEU_80    | N, B_ILE_20    | H, B_ILE_20     | 2.91 | 2.00 | 17.66 |
| 1VFB.PDB | O, B_SER_7     | N, B_THR_21    | H, B_THR_21     | 2.89 | 1.93 | 9.84  |
| 1VFB.PDB | O, B_VAL_78    | N, B_CYS_22    | H, B_CYS_22     | 2.86 | 1.89 | 3.27  |
| 1VFB.PDB | O, B_GLN_5     | N, B_THR_23    | H, B_THR_23     | 2.86 | 1.92 | 12.65 |
| 1VFB.PDB | O, B_SER_76    | N, B_VAL_24    | H, B_VAL_24     | 2.97 | 2.00 | 3.39  |
| 1VFB.PDB | O, B_GLN_3     | N, B_SER_25    | H, B_SER_25     | 2.93 | 2.07 | 23.55 |
| 1VFB.PDB | OG, B_SER_28   | OG1, B_THR_30  | HG1, B_THR_30   | 2.97 | 2.08 | 19.82 |
| 1VFB.PDB | O, B_ILE_51    | N, B_VAL_34    | H, B_VAL_34     | 2.91 | 2.01 | 18.80 |
| 1VFB.PDB | O, B_ALA_96    | N, B_ASN_35    | H, B_ASN_35     | 2.89 | 1.92 | 5.93  |
| 1VFB.PDB | OE1, B_GLU_98  | ND2, B_ASN_35  | HD21, B_ASN_35  | 2.85 | 2.00 | 23.37 |
| 1VFB.PDB | O, B_GLY_49    | N, B_TRP_36    | H, B_TRP_36     | 2.96 | 2.02 | 15.17 |
| 1VFB.PDB | O, B_TYR_94    | N, B_VAL_37    | H, B_VAL_37     | 2.92 | 1.95 | 9.63  |
| 1VFB.PDB | O, B_GLU_46    | N, B_ARG_38    | H, B_ARG_38     | 2.89 | 1.95 | 14.15 |
| 1VFB.PDB | OD1, B_ASP_89  | NH1, B_ARG_38  | HH12, B_ARG_38  | 3.00 | 2.07 | 17.31 |
| 1VFB.PDB | O, B_ARG_92    | N, B_GLN_39    | H, B_GLN_39     | 2.82 | 1.90 | 16.49 |
| 1VFB.PDB | OE1, A_GLN_38  | NE2, B_GLN_39  | HE21, B_GLN_39  | 2.95 | 1.98 | 8.04  |
| 1VFB.PDB | O, B_LYS_43    | NE2, B_GLN_39  | HE22, B_GLN_39  | 2.95 | 2.05 | 19.96 |
| 1VFB.PDB | O, B_PRO_40    | N, B_LYS_43    | H, B_LYS_43     | 2.85 | 1.98 | 21.72 |
| 1VFB.PDB | O, B_ARG_38    | N, B_GLU_46    | H, B_GLU_46     | 2.84 | 1.96 | 21.55 |
| 1VFB.PDB | OD1, B_ASN_35  | NE1, B_TRP_47  | HE1, B_TRP_47   | 2.80 | 1.83 | 5.78  |
| 1VFB.PDB | O, B_TRP_36    | N, B_LEU_48    | H, B_LEU_48     | 2.92 | 1.98 | 13.84 |
| 1VFB.PDB | O, B_ASP_58    | N, B_MET_50    | H, B_MET_50     | 2.89 | 1.97 | 17.18 |
| 1VFB.PDB | O, B_ASN_56    | N, B_TRP_52    | H, B_TRP_52     | 2.90 | 1.95 | 9.28  |
| 1VFB.PDB | O, B_TRP_52    | N, B_GLY_55    | H, B_GLY_55     | 2.85 | 1.92 | 14.57 |
| 1VFB.PDB | O, B_LEU_48    | N, B_ASN_60    | H, B_ASN_60     | 2.94 | 1.98 | 8.25  |
| 1VFB.PDB | O, B_TRP_47    | ND2, B_ASN_60  | HD22, B_ASN_60  | 2.87 | 1.90 | 6.16  |
| 1VFB.PDB | OD1, B_ASN_60  | N, B_ALA_62    | H, B_ALA_62     | 2.90 | 2.08 | 27.74 |
| 1VFB.PDB | O, B_LEU_63    | N, B_ARG_66    | H, B_ARG_66     | 2.99 | 2.04 | 12.74 |
| 1VFB.PDB | OD2, B_ASP_89  | NH1, B_ARG_66  | HH12, B_ARG_66  | 2.89 | 1.97 | 19.13 |
| 1VFB.PDB | OD1, B_ASP_89  | NH2, B_ARG_66  | HH22, B_ARG_66  | 2.93 | 1.93 | 3.85  |
| 1VFB.PDB | O, B_LYS_81    | N, B_SER_68    | H, B_SER_68     | 2.97 | 2.10 | 22.66 |
| 1VFB.PDB | OH, B_TYR_59   | N, B_ILE_69    | H, B_ILE_69     | 2.97 | 2.01 | 7.63  |
| 1VFB.PDB | OD1, B_ASN_73  | NZ, B_LYS_71   | HZ1, B_LYS_71   | 2.93 | 2.08 | 28.65 |
| 1VFB.PDB | O, B_GLY_53    | NZ, B_LYS_71   | HZ3, B_LYS_71   | 2.92 | 2.04 | 25.68 |
| 1VFB.PDB | O, B_GLN_77    | N, B_ASP_72    | H, B_ASP_72     | 2.85 | 1.88 | 5.90  |
| 1VFB.PDB | O, B_CYS_22    | N, B_VAL_78    | H, B_VAL_78     | 2.96 | 2.07 | 20.13 |
| 1VFB.PDB | O, B_SER_70    | N, B_PHE_79    | H, B_PHE_79     | 2.82 | 1.89 | 14.11 |
| 1VFB.PDB | O, B_SER_68    | N, B_LYS_81    | H, B_LYS_81     | 2.78 | 1.89 | 20.09 |
| 1VFB.PDB | OG, B_SER_70   | NZ, B_LYS_81   | HZ2, B_LYS_81   | 2.92 | 2.05 | 26.58 |
| 1VFB.PDB | O, B_LEU_18    | N, B_MET_82    | H, B_MET_82     | 2.84 | 1.92 | 15.27 |
| 1VFB.PDB | OD1, B_ASN_83  | OG, B_SER_84   | HG, B_SER_84    | 2.99 | 2.04 | 8.51  |
| 1VFB.PDB | OD2, B_ASP_89  | N, B_HIS_86    | H, B_HIS_86     | 3.00 | 2.17 | 27.32 |
| 1VFB.PDB | O, B_THR_87    | OG1, B_THR_90  | HG1, B_THR_90   | 2.90 | 1.94 | 9.38  |
| 1VFB.PDB | O, B_GLN_39    | N, B_ARG_92    | H, B_ARG_92     | 2.99 | 2.02 | 2.81  |
| 1VFB.PDB | O, B_THR_110   | N, B_TYR_93    | H, B_TYR_93     | 2.83 | 1.90 | 15.51 |
| 1VFB.PDB | OE2, B_GLU_6   | N, B_CYS_95    | H, B_CYS_95     | 2.85 | 2.00 | 23.74 |
| 1VFB.PDB | O, B_ASN_35    | N, B_ALA_96    | H, B_ALA_96     | 2.98 | 2.12 | 24.00 |
| 1VFB.PDB | O, B_TYR_105   | N, B_ARG_97    | H, B_ARG_97     | 2.78 | 1.93 | 24.54 |
| 1VFB.PDB | OD1, B_ASP_104 | NE, B_ARG_97   | HE, B_ARG_97    | 2.99 | 2.02 | 4.50  |
| 1VFB.PDB | OD2, B_ASP_104 | NH2, B_ARG_97  | HH21, B_ARG_97  | 2.86 | 1.87 | 3.52  |
| 1VFB.PDB | O, B_GLY_33    | N, B_GLU_98    | H, B_GLU_98     | 2.83 | 1.86 | 4.19  |
| 1VFB.PDB | O, B_ARG_102   | N, B_ARG_99    | H, B_ARG_99     | 2.95 | 2.00 | 10.93 |
| 1VFB.PDB | O, B_ASP_100   | NH1, B_ARG_102 | HH11, B_ARG_102 | 3.00 | 2.15 | 26.78 |
| 1VFB.PDB | O, C_GLY_22    | NH1, B_ARG_102 | HH12, B_ARG_102 | 2.82 | 1.90 | 18.81 |
| 1VFB.PDB | O, B_CYS_95    | N, B_GLY_107   | H, B_GLY_107    | 2.97 | 2.01 | 8.78  |



|          |                |                |                |      |      |       |
|----------|----------------|----------------|----------------|------|------|-------|
| 1VFB.PDB | OE1, B_GLU_6   | N, B_GLY_109   | H, B_GLY_109   | 2.89 | 1.99 | 17.04 |
| 1VFB.PDB | O, B_TYR_93    | N, B_THR_110   | H, B_THR_110   | 2.94 | 2.04 | 19.36 |
| 1VFB.PDB | O, B_ALA_91    | N, B_LEU_112   | H, B_LEU_112   | 2.81 | 1.84 | 5.13  |
| 1VFB.PDB | O, B_GLY_10    | N, B_THR_113   | H, B_THR_113   | 2.88 | 1.92 | 9.03  |
| 1VFB.PDB | OG1, B_THR_90  | N, B_VAL_114   | H, B_VAL_114   | 2.95 | 1.97 | 3.76  |
| 1VFB.PDB | O, B_VAL_12    | N, B_SER_115   | H, B_SER_115   | 2.89 | 1.92 | 7.04  |
| 1VFB.PDB | OG1, C_THR_40  | N, C_LYS_1     | H1, C_LYS_1    | 2.88 | 1.92 | 18.01 |
| 1VFB.PDB | O, C_PHE_38    | N, C_PHE_3     | H, C_PHE_3     | 2.97 | 2.01 | 11.57 |
| 1VFB.PDB | O, C_ARG_5     | N, C_ALA_9     | H, C_ALA_9     | 2.93 | 1.95 | 4.49  |
| 1VFB.PDB | O, C_CYS_6     | N, C_ALA_10    | H, C_ALA_10    | 2.92 | 1.95 | 7.61  |
| 1VFB.PDB | O, C_LEU_8     | N, C_MET_12    | H, C_MET_12    | 2.84 | 1.91 | 15.62 |
| 1VFB.PDB | O, C_ALA_9     | N, C_LYS_13    | H, C_LYS_13    | 2.90 | 1.96 | 13.16 |
| 1VFB.PDB | O, C_ALA_11    | ND1, C_HIS_15  | HD1, C_HIS_15  | 2.83 | 1.90 | 15.15 |
| 1VFB.PDB | OG1, C_THR_89  | NE2, C_HIS_15  | HE2, C_HIS_15  | 2.84 | 1.94 | 19.37 |
| 1VFB.PDB | O, C_ASN_19    | N, C_GLY_22    | H, C_GLY_22    | 2.99 | 2.09 | 19.97 |
| 1VFB.PDB | O, C_TYR_20    | N, C_TYR_23    | H, C_TYR_23    | 2.95 | 1.99 | 10.86 |
| 1VFB.PDB | OD2, B_ASP_100 | N, C_SER_24    | H, C_SER_24    | 2.91 | 2.09 | 27.47 |
| 1VFB.PDB | O, C_GLY_26    | N, C_CYS_30    | H, C_CYS_30    | 2.84 | 1.96 | 21.71 |
| 1VFB.PDB | O, C_ASN_27    | N, C_ALA_31    | H, C_ALA_31    | 2.91 | 1.97 | 11.60 |
| 1VFB.PDB | O, C_ALA_31    | N, C_GLU_35    | H, C_GLU_35    | 2.82 | 1.95 | 22.11 |
| 1VFB.PDB | O, C_ALA_32    | N, C_SER_36    | H, C_SER_36    | 2.95 | 2.06 | 19.79 |
| 1VFB.PDB | O, C_ILE_55    | OG, C_SER_36   | HG, C_SER_36   | 2.79 | 1.88 | 15.77 |
| 1VFB.PDB | O, C_LYS_1     | N, C_THR_40    | H, C_THR_40    | 2.90 | 1.95 | 9.98  |
| 1VFB.PDB | OE1, C_GLN_41  | OG1, C_THR_40  | HG1, C_THR_40  | 2.88 | 1.98 | 18.75 |
| 1VFB.PDB | OD1, C_ASN_39  | N, C_GLN_41    | H, C_GLN_41    | 2.92 | 2.01 | 18.23 |
| 1VFB.PDB | O, C_LEU_84    | NE2, C_GLN_41  | HE21, C_GLN_41 | 2.78 | 1.99 | 29.59 |
| 1VFB.PDB | O, C_ASP_52    | N, C_ASN_44    | H, C_ASN_44    | 2.91 | 2.02 | 19.92 |
| 1VFB.PDB | O, C_SER_50    | ND2, C_ASN_46  | HD22, C_ASN_46 | 2.86 | 1.97 | 19.52 |
| 1VFB.PDB | O, C_ASN_46    | N, C_ASP_48    | H, C_ASP_48    | 2.84 | 1.95 | 20.51 |
| 1VFB.PDB | OG, C_SER_60   | N, C_THR_51    | H, C_THR_51    | 2.85 | 1.89 | 9.75  |
| 1VFB.PDB | O, C_ASN_44    | N, C_ASP_52    | H, C_ASP_52    | 2.77 | 1.89 | 21.40 |
| 1VFB.PDB | O, C_ILE_58    | N, C_TYR_53    | H, C_TYR_53    | 2.84 | 1.91 | 14.87 |
| 1VFB.PDB | O, C_ALA_42    | N, C_GLY_54    | H, C_GLY_54    | 2.75 | 1.87 | 21.13 |
| 1VFB.PDB | O, C_GLY_54    | NE2, C_GLN_57  | HE22, C_GLN_57 | 2.80 | 1.83 | 6.26  |
| 1VFB.PDB | OG1, C_THR_69  | OG, C_SER_60   | HG, C_SER_60   | 2.78 | 1.84 | 10.98 |
| 1VFB.PDB | O, C_PRO_70    | NE, C_ARG_61   | HE, C_ARG_61   | 2.72 | 1.91 | 27.72 |
| 1VFB.PDB | O, C_ILE_78    | N, C_ASN_65    | H, C_ASN_65    | 2.88 | 1.94 | 12.38 |
| 1VFB.PDB | O, C_SER_60    | OG, C_SER_72   | HG, C_SER_72   | 2.95 | 1.99 | 6.61  |
| 1VFB.PDB | O, C_ARG_61    | N, C_ARG_73    | H, C_ARG_73    | 2.84 | 1.87 | 6.21  |
| 1VFB.PDB | O, C_TRP_62    | N, C_LEU_75    | H, C_LEU_75    | 2.82 | 1.88 | 12.22 |
| 1VFB.PDB | O, C_TRP_63    | N, C_CYS_76    | H, C_CYS_76    | 2.88 | 1.99 | 20.44 |
| 1VFB.PDB | O, C_ASN_74    | N, C_ASN_77    | H, C_ASN_77    | 2.92 | 2.10 | 27.67 |
| 1VFB.PDB | O, C_ASN_65    | N, C_CYS_80    | H, C_CYS_80    | 2.95 | 1.99 | 9.67  |
| 1VFB.PDB | O, C_PRO_79    | N, C_ALA_82    | H, C_ALA_82    | 2.89 | 1.99 | 18.39 |
| 1VFB.PDB | O, C_ILE_88    | N, C_VAL_92    | H, C_VAL_92    | 2.91 | 2.06 | 24.26 |
| 1VFB.PDB | O, C_THR_89    | N, C_ASN_93    | H, C_ASN_93    | 2.88 | 1.92 | 8.98  |
| 1VFB.PDB | O, C_VAL_92    | N, C_LYS_96    | H, C_LYS_96    | 2.88 | 1.94 | 14.28 |
| 1VFB.PDB | O, C_ALA_95    | N, C_VAL_99    | H, C_VAL_99    | 2.93 | 2.05 | 20.53 |
| 1VFB.PDB | O, C_ASP_101   | N, C_GLY_104   | H, C_GLY_104   | 2.99 | 2.10 | 19.98 |
| 1VFB.PDB | O, C_LEU_56    | NE1, C_TRP_108 | HE1, C_TRP_108 | 2.75 | 1.86 | 21.02 |
| 1VFB.PDB | OD1, C_ASN_27  | NE1, C_TRP_111 | HE1, C_TRP_111 | 2.95 | 2.01 | 14.04 |
| 1VFB.PDB | O, C_VAL_109   | N, C_ASN_113   | H, C_ASN_113   | 2.97 | 2.00 | 6.92  |
| 1VFB.PDB | O, C_ALA_110   | N, C_ARG_114   | H, C_ARG_114   | 2.73 | 1.86 | 21.81 |
| 1VFB.PDB | O, C_TRP_111   | N, C_CYS_115   | H, C_CYS_115   | 2.84 | 1.99 | 24.09 |
| 1VFB.PDB | O, C_TRP_111   | N, C_LYS_116   | H, C_LYS_116   | 2.81 | 1.93 | 20.73 |
| 1VFB.PDB | O, C_CYS_115   | N, C_THR_118   | H, C_THR_118   | 2.99 | 2.13 | 23.03 |
| 1VFB.PDB | O, C_CYS_115   | OG1, C_THR_118 | HG1, C_THR_118 | 2.73 | 1.80 | 11.89 |
| 1VFB.PDB | O, C_THR_118   | N, C_VAL_120   | H, C_VAL_120   | 2.89 | 2.08 | 27.51 |

|          |                |                |                 |      |      |       |
|----------|----------------|----------------|-----------------|------|------|-------|
| 1VFB.PDB | O, A_PHE_91    | NE2, C_GLN_121 | HE21, C_GLN_121 | 2.82 | 1.88 | 14.37 |
| 1VFB.PDB | O, C_GLN_121   | N, C_ILE_124   | H, C_ILE_124    | 2.94 | 2.00 | 13.68 |
| 1VFB.PDB | OE1, C_GLN_121 | NH1, C_ARG_125 | HH11, C_ARG_125 | 2.96 | 2.02 | 16.36 |

Table 1678: 1VFB-specific side chain and main chain hydrogen bonding analysis. In this table, a PDB file is specified with a four-letter PDB ID, except that the names of the PDB files corresponding to the single NMR structural model split from the NMR ensemble is specified with a four-letter PDB ID in addition to a hyphen followed by the single NMR structural model numeric ID, the residue naming scheme is **Chain ID\_residue name\_residue number**,  $\angle ADH$  represents the angle formed by acceptor (A), donor (D) and hydrogen (H) ( $\angle ADH$ ).

| PDB         | Acceptor (A)   | Donor (D)     | Hydrogen (H)   | D-A (Å) | H-A (Å) | $\angle ADH(^{\circ})$ |
|-------------|----------------|---------------|----------------|---------|---------|------------------------|
| 2MKL-1.PDB  | O, C_VAL_32    | N, C_SER_8    | H, C_SER_8     | 2.87    | 1.94    | 15.13                  |
| 2MKL-1.PDB  | O, C_GLU_30    | N, C_SER_10   | H, C_SER_10    | 2.78    | 1.81    | 7.07                   |
| 2MKL-1.PDB  | O, C_VAL_28    | N, C_LEU_12   | H, C_LEU_12    | 2.85    | 1.96    | 21.36                  |
| 2MKL-1.PDB  | OXT, C_ALA_105 | NZ, C_LYS_13  | HZ3, C_LYS_13  | 2.65    | 1.63    | 10.83                  |
| 2MKL-1.PDB  | OD1, C_ASP_80  | OG1, C_THR_21 | HG1, C_THR_21  | 2.65    | 1.79    | 22.35                  |
| 2MKL-1.PDB  | OD2, C_ASP_80  | NE2, C_GLN_22 | HE21, C_GLN_22 | 2.86    | 1.96    | 18.61                  |
| 2MKL-1.PDB  | O, C_VAL_74    | OG1, C_THR_24 | HG1, C_THR_24  | 2.53    | 1.57    | 5.32                   |
| 2MKL-1.PDB  | O, C_LEU_72    | N, C_ILE_27   | H, C_ILE_27    | 2.90    | 1.93    | 8.25                   |
| 2MKL-1.PDB  | O, C_SER_70    | N, C_CYS_29   | H, C_CYS_29    | 2.74    | 1.79    | 13.45                  |
| 2MKL-1.PDB  | O, C_SER_10    | N, C_GLU_30   | H, C_GLU_30    | 2.74    | 1.77    | 7.68                   |
| 2MKL-1.PDB  | O, C_ILE_68    | N, C_ILE_31   | H, C_ILE_31    | 2.71    | 1.73    | 3.33                   |
| 2MKL-1.PDB  | O, C_SER_8     | N, C_VAL_32   | H, C_VAL_32    | 2.86    | 1.94    | 16.02                  |
| 2MKL-1.PDB  | O, C_SER_66    | N, C_TYR_33   | H, C_TYR_33    | 2.96    | 2.02    | 12.76                  |
| 2MKL-1.PDB  | O, C_GLU_90    | N, C_LYS_40   | H, C_LYS_40    | 2.75    | 1.77    | 6.32                   |
| 2MKL-1.PDB  | O, C_LEU_88    | N, C_PHE_42   | H, C_PHE_42    | 2.83    | 1.96    | 23.06                  |
| 2MKL-1.PDB  | O, C_VAL_86    | N, C_GLN_44   | H, C_GLN_44    | 2.98    | 2.06    | 17.99                  |
| 2MKL-1.PDB  | O, C_VAL_48    | N, C_VAL_45   | H, C_VAL_45    | 2.89    | 1.93    | 11.14                  |
| 2MKL-1.PDB  | O, C_VAL_45    | N, C_VAL_48   | H, C_VAL_48    | 2.85    | 1.96    | 20.78                  |
| 2MKL-1.PDB  | O, C_TRP_43    | NH1, C_ARG_50 | HH11, C_ARG_50 | 2.73    | 1.80    | 17.42                  |
| 2MKL-1.PDB  | O, C_LYS_71    | N, C_GLU_55   | H, C_GLU_55    | 2.87    | 2.01    | 24.71                  |
| 2MKL-1.PDB  | O, C_VAL_69    | N, C_GLN_57   | H, C_GLN_57    | 2.76    | 1.79    | 7.63                   |
| 2MKL-1.PDB  | O, C_THR_67    | N, C_GLU_60   | H, C_GLU_60    | 2.78    | 1.84    | 14.09                  |
| 2MKL-1.PDB  | O, C_LYS_65    | N, C_SER_62   | H, C_SER_62    | 2.90    | 1.94    | 10.66                  |
| 2MKL-1.PDB  | O, C_SER_62    | N, C_LYS_65   | H, C_LYS_65    | 2.95    | 2.06    | 20.90                  |
| 2MKL-1.PDB  | OG, C_SER_34   | NZ, C_LYS_65  | HZ2, C_LYS_65  | 2.81    | 1.84    | 16.47                  |
| 2MKL-1.PDB  | O, C_TYR_33    | N, C_SER_66   | H, C_SER_66    | 2.85    | 2.01    | 24.96                  |
| 2MKL-1.PDB  | O, C_GLU_60    | N, C_THR_67   | H, C_THR_67    | 2.81    | 1.89    | 17.79                  |
| 2MKL-1.PDB  | O, C_ILE_31    | N, C_ILE_68   | H, C_ILE_68    | 2.81    | 1.84    | 9.32                   |
| 2MKL-1.PDB  | O, C_CYS_29    | N, C_SER_70   | H, C_SER_70    | 2.78    | 1.84    | 15.75                  |
| 2MKL-1.PDB  | O, C_GLU_55    | N, C_LYS_71   | H, C_LYS_71    | 2.94    | 2.02    | 16.84                  |
| 2MKL-1.PDB  | O, C_ILE_27    | N, C_LEU_72   | H, C_LEU_72    | 2.65    | 1.82    | 25.39                  |
| 2MKL-1.PDB  | O, C_GLY_53    | N, C_LYS_73   | H, C_LYS_73    | 2.72    | 1.81    | 18.13                  |
| 2MKL-1.PDB  | O, C_ALA_25    | NZ, C_LYS_73  | HZ3, C_LYS_73  | 2.77    | 1.77    | 11.66                  |
| 2MKL-1.PDB  | O, C_ALA_76    | N, C_ASP_80   | H, C_ASP_80    | 2.69    | 1.74    | 10.81                  |
| 2MKL-1.PDB  | O, C_GLU_78    | N, C_SER_81   | H, C_SER_81    | 2.94    | 2.13    | 29.26                  |
| 2MKL-1.PDB  | O, C_TRP_79    | N, C_GLY_82   | H, C_GLY_82    | 2.98    | 2.06    | 17.42                  |
| 2MKL-1.PDB  | OE1, C_GLU_78  | OG1, C_THR_83 | HG1, C_THR_83  | 2.66    | 1.70    | 8.48                   |
| 2MKL-1.PDB  | O, C_ALA_100   | N, C_CYS_87   | H, C_CYS_87    | 2.70    | 1.74    | 9.85                   |
| 2MKL-1.PDB  | O, C_PHE_42    | N, C_LEU_88   | H, C_LEU_88    | 2.74    | 1.76    | 6.64                   |
| 2MKL-1.PDB  | O, C_VAL_98    | N, C_VAL_89   | H, C_VAL_89    | 2.86    | 1.96    | 19.19                  |
| 2MKL-1.PDB  | O, C_LYS_40    | N, C_GLU_90   | H, C_GLU_90    | 2.85    | 1.91    | 13.13                  |
| 2MKL-1.PDB  | OD2, C_ASP_91  | N, C_GLU_93   | H, C_GLU_93    | 2.91    | 2.06    | 25.41                  |
| 2MKL-1.PDB  | O, C_ASP_91    | N, C_LEU_94   | H, C_LEU_94    | 2.97    | 2.04    | 16.30                  |
| 2MKL-1.PDB  | O, C_CYS_87    | N, C_ALA_100  | H, C_ALA_100   | 2.87    | 2.07    | 29.58                  |
| 2MKL-1.PDB  | O, C_TYR_85    | N, C_ILE_102  | H, C_ILE_102   | 2.75    | 1.93    | 27.29                  |
| 2MKL-1.PDB  | OD1, C_ASP_80  | NZ, C_LYS_104 | HZ1, C_LYS_104 | 2.72    | 1.78    | 20.43                  |
| 2MKL-1.PDB  | O, C_ASP_80    | NZ, C_LYS_104 | HZ3, C_LYS_104 | 2.71    | 1.81    | 23.71                  |
| 2MKL-10.PDB | O, C_VAL_32    | N, C_SER_8    | H, C_SER_8     | 2.91    | 1.92    | 0.91                   |
| 2MKL-10.PDB | O, C_GLU_30    | N, C_SER_10   | H, C_SER_10    | 2.77    | 1.80    | 6.96                   |
| 2MKL-10.PDB | O, C_VAL_28    | N, C_LEU_12   | H, C_LEU_12    | 2.68    | 1.71    | 4.93                   |
| 2MKL-10.PDB | O, C_PRO_15    | NE2, C_GLN_22 | HE21, C_GLN_22 | 2.70    | 1.72    | 5.44                   |
| 2MKL-10.PDB | O, C_LEU_72    | OG1, C_THR_26 | HG1, C_THR_26  | 2.68    | 1.73    | 10.60                  |
| 2MKL-10.PDB | O, C_LEU_72    | N, C_ILE_27   | H, C_ILE_27    | 2.84    | 2.02    | 27.43                  |
| 2MKL-10.PDB | O, C_LEU_12    | N, C_VAL_28   | H, C_VAL_28    | 2.99    | 2.05    | 14.29                  |
| 2MKL-10.PDB | O, C_SER_70    | N, C_CYS_29   | H, C_CYS_29    | 2.68    | 1.70    | 4.32                   |
| 2MKL-10.PDB | O, C_SER_10    | N, C_GLU_30   | H, C_GLU_30    | 2.73    | 1.81    | 16.56                  |
| 2MKL-10.PDB | O, C_SER_8     | N, C_VAL_32   | H, C_VAL_32    | 2.77    | 1.79    | 4.04                   |

|             |                |               |                |      |      |       |
|-------------|----------------|---------------|----------------|------|------|-------|
| 2MKL-10.PDB | O, C_SER.66    | N, C_TYR.33   | H, C_TYR.33    | 2.97 | 2.01 | 10.13 |
| 2MKL-10.PDB | OD1, C_ASP.91  | N, C_GLU.37   | H, C_GLU.37    | 2.80 | 1.93 | 22.75 |
| 2MKL-10.PDB | O, C_GLU.90    | N, C_LYS.40   | H, C_LYS.40    | 2.92 | 1.97 | 11.19 |
| 2MKL-10.PDB | OE2, C_GLU.90  | NZ, C_LYS.40  | HZ2, C_LYS.40  | 2.58 | 1.67 | 23.06 |
| 2MKL-10.PDB | O, C_LEU.88    | N, C_PHE.42   | H, C_PHE.42    | 2.92 | 1.94 | 6.40  |
| 2MKL-10.PDB | O, C_VAL.48    | N, C_VAL.45   | H, C_VAL.45    | 2.84 | 1.89 | 12.91 |
| 2MKL-10.PDB | O, C_VAL.45    | N, C_VAL.48   | H, C_VAL.48    | 2.85 | 2.01 | 25.64 |
| 2MKL-10.PDB | O, C_LYS.71    | N, C_GLU.55   | H, C_GLU.55    | 2.68 | 1.75 | 14.91 |
| 2MKL-10.PDB | O, C_VAL.69    | N, C_GLN.57   | H, C_GLN.57    | 2.86 | 1.90 | 10.97 |
| 2MKL-10.PDB | O, C_THR.67    | N, C_GLU.60   | H, C_GLU.60    | 2.97 | 2.01 | 8.51  |
| 2MKL-10.PDB | O, C_SER.62    | N, C_LYS.65   | H, C_LYS.65    | 2.88 | 1.95 | 14.30 |
| 2MKL-10.PDB | O, C_TYR.33    | N, C_SER.66   | H, C_SER.66    | 2.72 | 1.86 | 23.25 |
| 2MKL-10.PDB | OG, C_SER.62   | OG1, C_THR.67 | HG1, C_THR.67  | 2.83 | 1.88 | 6.13  |
| 2MKL-10.PDB | O, C_CYS.29    | N, C_SER.70   | H, C_SER.70    | 2.83 | 1.85 | 7.06  |
| 2MKL-10.PDB | O, C_GLU.55    | N, C_LYS.71   | H, C_LYS.71    | 2.73 | 1.76 | 7.85  |
| 2MKL-10.PDB | O, C_ILE.27    | N, C_LEU.72   | H, C_LEU.72    | 2.69 | 1.71 | 7.54  |
| 2MKL-10.PDB | O, C_GLY.53    | N, C_LYS.73   | H, C_LYS.73    | 2.74 | 1.76 | 5.67  |
| 2MKL-10.PDB | O, C_ALA.76    | N, C_ASP.80   | H, C_ASP.80    | 2.74 | 1.79 | 12.95 |
| 2MKL-10.PDB | O, C_GLU.78    | N, C_SER.81   | H, C_SER.81    | 2.92 | 2.10 | 27.95 |
| 2MKL-10.PDB | O, C_TRP.79    | N, C_GLY.82   | H, C_GLY.82    | 2.95 | 2.02 | 15.81 |
| 2MKL-10.PDB | O, C_ALA.100   | N, C_CYS.87   | H, C_CYS.87    | 2.74 | 1.76 | 5.71  |
| 2MKL-10.PDB | O, C_PHE.42    | N, C_LEU.88   | H, C_LEU.88    | 2.71 | 1.75 | 9.91  |
| 2MKL-10.PDB | O, C_VAL.98    | N, C_VAL.89   | H, C_VAL.89    | 2.70 | 1.81 | 20.27 |
| 2MKL-10.PDB | O, C_LYS.40    | N, C_GLU.90   | H, C_GLU.90    | 2.78 | 1.93 | 24.87 |
| 2MKL-10.PDB | OD2, C_ASP.91  | N, C_GLU.93   | H, C_GLU.93    | 2.71 | 1.82 | 20.62 |
| 2MKL-10.PDB | O, C_VAL.89    | N, C_VAL.98   | H, C_VAL.98    | 2.95 | 1.97 | 2.47  |
| 2MKL-10.PDB | O, C_CYS.87    | N, C_ALA.100  | H, C_ALA.100   | 2.90 | 2.06 | 26.13 |
| 2MKL-10.PDB | O, C_TYR.85    | N, C_ILE.102  | H, C_ILE.102   | 2.78 | 1.86 | 16.84 |
| 2MKL-10.PDB | OXT, C_ALA.105 | NZ, C_LYS.104 | HZ3, C_LYS.104 | 2.68 | 1.72 | 17.77 |
| 2MKL-2.PDB  | OD1, C_ASP.6   | N, C_GLY.2    | H, C_GLY.2     | 2.76 | 1.77 | 3.72  |
| 2MKL-2.PDB  | O, C_ARG.3     | N, C_THR.5    | H, C_THR.5     | 2.70 | 1.90 | 29.18 |
| 2MKL-2.PDB  | O, C_VAL.32    | N, C_SER.8    | H, C_SER.8     | 2.91 | 1.93 | 2.96  |
| 2MKL-2.PDB  | O, C_GLU.30    | N, C_SER.10   | H, C_SER.10    | 2.85 | 1.91 | 14.14 |
| 2MKL-2.PDB  | O, C_VAL.28    | N, C_LEU.12   | H, C_LEU.12    | 2.67 | 1.73 | 13.23 |
| 2MKL-2.PDB  | OXT, C_ALA.105 | NZ, C_LYS.13  | HZ3, C_LYS.13  | 2.61 | 1.67 | 20.57 |
| 2MKL-2.PDB  | O, C_PRO.14    | N, C_PHE.16   | H, C_PHE.16    | 2.68 | 1.84 | 24.86 |
| 2MKL-2.PDB  | O, C_THR.24    | N, C_THR.26   | H, C_THR.26    | 2.87 | 2.01 | 23.54 |
| 2MKL-2.PDB  | O, C_LEU.72    | OG1, C_THR.26 | HG1, C_THR.26  | 2.63 | 1.69 | 10.64 |
| 2MKL-2.PDB  | O, C_LEU.72    | N, C_ILE.27   | H, C_ILE.27    | 2.90 | 2.08 | 27.91 |
| 2MKL-2.PDB  | O, C_SER.70    | N, C_CYS.29   | H, C_CYS.29    | 2.73 | 1.79 | 13.27 |
| 2MKL-2.PDB  | O, C_SER.10    | N, C_GLU.30   | H, C_GLU.30    | 2.88 | 1.96 | 17.58 |
| 2MKL-2.PDB  | O, C_ILE.68    | N, C_ILE.31   | H, C_ILE.31    | 2.87 | 1.90 | 7.16  |
| 2MKL-2.PDB  | O, C_SER.8     | N, C_VAL.32   | H, C_VAL.32    | 2.78 | 1.81 | 9.22  |
| 2MKL-2.PDB  | O, C_SER.66    | N, C_TYR.33   | H, C_TYR.33    | 2.94 | 2.00 | 12.67 |
| 2MKL-2.PDB  | OD1, C_ASP.35  | OG, C_SER.34  | HG, C_SER.34   | 2.77 | 1.81 | 5.76  |
| 2MKL-2.PDB  | O, C_GLU.90    | N, C_LYS.40   | H, C_LYS.40    | 2.89 | 1.95 | 12.75 |
| 2MKL-2.PDB  | O, C_LEU.88    | N, C_PHE.42   | H, C_PHE.42    | 2.81 | 1.85 | 8.44  |
| 2MKL-2.PDB  | O, C_VAL.48    | N, C_VAL.45   | H, C_VAL.45    | 2.78 | 1.87 | 17.34 |
| 2MKL-2.PDB  | O, C_VAL.45    | N, C_VAL.48   | H, C_VAL.48    | 2.84 | 2.02 | 27.01 |
| 2MKL-2.PDB  | OH, C_TYR.85   | NH1, C_ARG.50 | HH11, C_ARG.50 | 2.66 | 1.70 | 14.67 |
| 2MKL-2.PDB  | OE2, C_GLU.78  | NH1, C_ARG.50 | HH12, C_ARG.50 | 2.73 | 1.79 | 17.34 |
| 2MKL-2.PDB  | O, C_LYS.71    | N, C_GLU.55   | H, C_GLU.55    | 2.70 | 1.82 | 21.14 |
| 2MKL-2.PDB  | O, C_THR.67    | N, C_GLU.60   | H, C_GLU.60    | 2.77 | 1.81 | 9.91  |
| 2MKL-2.PDB  | O, C_SER.62    | N, C_LYS.65   | H, C_LYS.65    | 2.89 | 2.03 | 23.66 |
| 2MKL-2.PDB  | O, C_TYR.33    | N, C_SER.66   | H, C_SER.66    | 2.85 | 2.01 | 26.03 |
| 2MKL-2.PDB  | O, C_GLU.60    | N, C_THR.67   | H, C_THR.67    | 2.83 | 1.98 | 24.85 |
| 2MKL-2.PDB  | O, C_ILE.31    | N, C_ILE.68   | H, C_ILE.68    | 2.88 | 1.91 | 9.29  |
| 2MKL-2.PDB  | O, C_CYS.29    | N, C_SER.70   | H, C_SER.70    | 2.83 | 1.87 | 10.79 |

|            |                |               |               |      |      |       |
|------------|----------------|---------------|---------------|------|------|-------|
| 2MKL-2.PDB | O, C_GLU_55    | N, C_LYS_71   | H, C_LYS_71   | 2.73 | 1.79 | 13.88 |
| 2MKL-2.PDB | OE1, C_GLU_55  | NZ, C_LYS_71  | HZ1, C_LYS_71 | 2.72 | 1.71 | 11.97 |
| 2MKL-2.PDB | O, C_ILE_27    | N, C_LEU_72   | H, C_LEU_72   | 2.68 | 1.70 | 2.15  |
| 2MKL-2.PDB | O, C_GLY_53    | N, C_LYS_73   | H, C_LYS_73   | 2.69 | 1.73 | 8.58  |
| 2MKL-2.PDB | O, C_ALA_76    | N, C_ASP_80   | H, C_ASP_80   | 2.99 | 2.07 | 17.02 |
| 2MKL-2.PDB | O, C_SER_77    | OG, C_SER_81  | HG, C_SER_81  | 2.59 | 1.64 | 9.12  |
| 2MKL-2.PDB | O, C_TRP_79    | N, C_GLY_82   | H, C_GLY_82   | 2.99 | 2.06 | 16.33 |
| 2MKL-2.PDB | OD1, C_ASN_46  | OG1, C_THR_83 | HG1, C_THR_83 | 2.72 | 1.91 | 26.52 |
| 2MKL-2.PDB | O, C_GLN_44    | N, C_VAL_86   | H, C_VAL_86   | 2.87 | 1.99 | 21.54 |
| 2MKL-2.PDB | O, C_ALA_100   | N, C_CYS_87   | H, C_CYS_87   | 2.71 | 1.74 | 6.36  |
| 2MKL-2.PDB | O, C_PHE_42    | N, C_LEU_88   | H, C_LEU_88   | 2.70 | 1.72 | 2.99  |
| 2MKL-2.PDB | O, C_VAL_98    | N, C_VAL_89   | H, C_VAL_89   | 2.79 | 1.88 | 17.49 |
| 2MKL-2.PDB | OD2, C_ASP_91  | N, C_GLU_93   | H, C_GLU_93   | 2.95 | 2.05 | 18.82 |
| 2MKL-2.PDB | O, C_ASP_91    | N, C_LEU_94   | H, C_LEU_94   | 2.91 | 2.01 | 20.37 |
| 2MKL-2.PDB | O, C_VAL_89    | N, C_VAL_98   | H, C_VAL_98   | 2.92 | 1.98 | 13.93 |
| 2MKL-2.PDB | O, C_CYS_87    | N, C_ALA_100  | H, C_ALA_100  | 2.93 | 2.10 | 27.00 |
| 2MKL-2.PDB | O, C_TYR_85    | OG, C_SER_101 | HG, C_SER_101 | 2.98 | 2.03 | 8.67  |
| 2MKL-2.PDB | O, C_TYR_85    | N, C_ILE_102  | H, C_ILE_102  | 2.79 | 1.86 | 15.51 |
| 2MKL-3.PDB | OE1, C_GLU_93  | NH1, C_ARG_3  | HH12, C_ARG_3 | 2.68 | 1.70 | 11.24 |
| 2MKL-3.PDB | O, C_VAL_32    | N, C_SER_8    | H, C_SER_8    | 2.88 | 1.97 | 17.61 |
| 2MKL-3.PDB | O, C_GLU_30    | N, C_SER_10   | H, C_SER_10   | 2.89 | 1.92 | 6.89  |
| 2MKL-3.PDB | O, C_VAL_28    | N, C_LEU_12   | H, C_LEU_12   | 2.65 | 1.67 | 5.19  |
| 2MKL-3.PDB | OXT, C_ALA_105 | NZ, C_LYS_13  | HZ1, C_LYS_13 | 2.67 | 1.72 | 19.52 |
| 2MKL-3.PDB | O, C_TRP_20    | OG1, C_THR_21 | HG1, C_THR_21 | 2.91 | 1.97 | 13.27 |
| 2MKL-3.PDB | O, C_THR_24    | N, C_THR_26   | H, C_THR_26   | 2.76 | 1.91 | 24.64 |
| 2MKL-3.PDB | O, C_LEU_72    | OG1, C_THR_26 | HG1, C_THR_26 | 2.58 | 1.64 | 12.96 |
| 2MKL-3.PDB | O, C_SER_70    | N, C_CYS_29   | H, C_CYS_29   | 2.68 | 1.74 | 12.62 |
| 2MKL-3.PDB | O, C_SER_10    | N, C_GLU_30   | H, C_GLU_30   | 2.90 | 1.95 | 12.95 |
| 2MKL-3.PDB | O, C_ILE_68    | N, C_ILE_31   | H, C_ILE_31   | 2.92 | 1.94 | 7.65  |
| 2MKL-3.PDB | O, C_SER_8     | N, C_VAL_32   | H, C_VAL_32   | 2.84 | 1.90 | 14.60 |
| 2MKL-3.PDB | O, C_SER_66    | N, C_TYR_33   | H, C_TYR_33   | 2.81 | 1.86 | 12.33 |
| 2MKL-3.PDB | OD1, C_ASP_91  | N, C_GLU_37   | H, C_GLU_37   | 2.74 | 1.89 | 24.66 |
| 2MKL-3.PDB | O, C_GLU_90    | N, C_LYS_40   | H, C_LYS_40   | 2.97 | 1.99 | 6.05  |
| 2MKL-3.PDB | O, C_LEU_88    | N, C_PHE_42   | H, C_PHE_42   | 2.73 | 1.79 | 14.89 |
| 2MKL-3.PDB | OE2, C_GLU_84  | N, C_GLY_47   | H, C_GLY_47   | 2.89 | 2.08 | 28.18 |
| 2MKL-3.PDB | O, C_VAL_45    | N, C_VAL_48   | H, C_VAL_48   | 2.92 | 2.02 | 19.65 |
| 2MKL-3.PDB | O, C_LYS_71    | N, C_GLU_55   | H, C_GLU_55   | 2.68 | 1.79 | 20.49 |
| 2MKL-3.PDB | O, C_VAL_69    | N, C_GLN_57   | H, C_GLN_57   | 2.76 | 1.79 | 7.77  |
| 2MKL-3.PDB | O, C_GLY_63    | NE1, C_TRP_61 | HE1, C_TRP_61 | 2.71 | 1.80 | 19.18 |
| 2MKL-3.PDB | O, C_LYS_65    | N, C_SER_62   | H, C_SER_62   | 2.68 | 1.70 | 4.43  |
| 2MKL-3.PDB | O, C_SER_62    | N, C_LYS_65   | H, C_LYS_65   | 2.91 | 1.97 | 14.37 |
| 2MKL-3.PDB | OG, C_SER_34   | NZ, C_LYS_65  | HZ3, C_LYS_65 | 2.80 | 1.76 | 6.92  |
| 2MKL-3.PDB | O, C_TYR_33    | N, C_SER_66   | H, C_SER_66   | 2.69 | 1.79 | 19.81 |
| 2MKL-3.PDB | O, C_GLU_60    | N, C_THR_67   | H, C_THR_67   | 2.89 | 1.96 | 15.80 |
| 2MKL-3.PDB | O, C_ILE_31    | N, C_ILE_68   | H, C_ILE_68   | 2.71 | 1.77 | 14.66 |
| 2MKL-3.PDB | O, C_CYS_29    | N, C_SER_70   | H, C_SER_70   | 2.78 | 1.85 | 15.96 |
| 2MKL-3.PDB | O, C_GLU_55    | N, C_LYS_71   | H, C_LYS_71   | 2.82 | 1.90 | 15.66 |
| 2MKL-3.PDB | OE2, C_GLU_55  | NZ, C_LYS_71  | HZ1, C_LYS_71 | 2.64 | 1.59 | 1.73  |
| 2MKL-3.PDB | OG1, C_THR_26  | NZ, C_LYS_71  | HZ3, C_LYS_71 | 2.86 | 1.95 | 23.23 |
| 2MKL-3.PDB | O, C_ILE_27    | N, C_LEU_72   | H, C_LEU_72   | 2.71 | 1.73 | 2.63  |
| 2MKL-3.PDB | O, C_GLY_53    | N, C_LYS_73   | H, C_LYS_73   | 2.74 | 1.75 | 3.68  |
| 2MKL-3.PDB | O, C_ALA_76    | N, C_ASP_80   | H, C_ASP_80   | 2.72 | 1.79 | 14.15 |
| 2MKL-3.PDB | O, C_GLU_78    | N, C_SER_81   | H, C_SER_81   | 2.92 | 2.06 | 23.97 |
| 2MKL-3.PDB | O, C_TRP_79    | N, C_GLY_82   | H, C_GLY_82   | 2.95 | 2.01 | 14.70 |
| 2MKL-3.PDB | OD1, C_ASN_46  | OG1, C_THR_83 | HG1, C_THR_83 | 2.91 | 1.97 | 11.57 |
| 2MKL-3.PDB | O, C_ALA_100   | N, C_CYS_87   | H, C_CYS_87   | 2.69 | 1.73 | 11.27 |
| 2MKL-3.PDB | O, C_PHE_42    | N, C_LEU_88   | H, C_LEU_88   | 2.93 | 2.02 | 18.64 |
| 2MKL-3.PDB | O, C_VAL_98    | N, C_VAL_89   | H, C_VAL_89   | 2.70 | 1.79 | 17.71 |

|            |               |               |                |      |      |       |
|------------|---------------|---------------|----------------|------|------|-------|
| 2MKL-3.PDB | O, C_LYS_40   | N, C_GLU_90   | H, C_GLU_90    | 2.89 | 1.98 | 17.88 |
| 2MKL-3.PDB | OD2, C_ASP_91 | N, C_GLU_93   | H, C_GLU_93    | 2.68 | 1.74 | 15.47 |
| 2MKL-3.PDB | O, C_ASP_91   | N, C_LEU_94   | H, C_LEU_94    | 2.96 | 2.02 | 14.82 |
| 2MKL-3.PDB | O, C_VAL_89   | N, C_VAL_98   | H, C_VAL_98    | 2.70 | 1.73 | 7.23  |
| 2MKL-3.PDB | O, C_TYR_85   | N, C_ILE_102  | H, C_ILE_102   | 2.70 | 1.82 | 21.56 |
| 2MKL-3.PDB | OD1, C_ASP_80 | NZ, C_LYS_104 | HZ2, C_LYS_104 | 2.61 | 1.56 | 1.39  |
| 2MKL-4.PDB | OD1, C_ASP_6  | N, C_GLY_2    | H, C_GLY_2     | 2.67 | 1.68 | 4.84  |
| 2MKL-4.PDB | O, C_VAL_32   | N, C_SER_8    | H, C_SER_8     | 2.78 | 1.82 | 11.31 |
| 2MKL-4.PDB | O, C_GLU_30   | N, C_SER_10   | H, C_SER_10    | 2.90 | 2.00 | 20.41 |
| 2MKL-4.PDB | O, C_VAL_28   | N, C_LEU_12   | H, C_LEU_12    | 2.69 | 1.71 | 3.92  |
| 2MKL-4.PDB | O, C_ALA_105  | NZ, C_LYS_13  | HZ1, C_LYS_13  | 2.63 | 1.64 | 14.05 |
| 2MKL-4.PDB | OE1, C_GLU_17 | NE1, C_TRP_20 | HE1, C_TRP_20  | 2.69 | 1.70 | 6.61  |
| 2MKL-4.PDB | O, C_THR_24   | N, C_THR_26   | H, C_THR_26    | 2.90 | 2.07 | 26.74 |
| 2MKL-4.PDB | O, C_LEU_72   | OG1, C_THR_26 | HG1, C_THR_26  | 2.72 | 1.81 | 15.12 |
| 2MKL-4.PDB | O, C_SER_70   | N, C_CYS_29   | H, C_CYS_29    | 2.72 | 1.78 | 13.99 |
| 2MKL-4.PDB | O, C_SER_10   | N, C_GLU_30   | H, C_GLU_30    | 2.82 | 1.87 | 12.27 |
| 2MKL-4.PDB | O, C_ILE_68   | N, C_ILE_31   | H, C_ILE_31    | 2.81 | 1.83 | 5.53  |
| 2MKL-4.PDB | O, C_SER_8    | N, C_VAL_32   | H, C_VAL_32    | 2.75 | 1.77 | 3.26  |
| 2MKL-4.PDB | O, C_SER_66   | N, C_TYR_33   | H, C_TYR_33    | 2.94 | 1.97 | 7.56  |
| 2MKL-4.PDB | O, C_SER_64   | OG, C_SER_34  | HG, C_SER_34   | 2.77 | 1.80 | 1.75  |
| 2MKL-4.PDB | OE1, C_GLU_37 | ND2, C_ASN_38 | HD21, C_ASN_38 | 2.75 | 1.84 | 18.89 |
| 2MKL-4.PDB | O, C_LEU_88   | N, C_PHE_42   | H, C_PHE_42    | 2.69 | 1.73 | 9.14  |
| 2MKL-4.PDB | O, C_VAL_48   | N, C_VAL_45   | H, C_VAL_45    | 2.71 | 1.78 | 15.12 |
| 2MKL-4.PDB | OE1, C_GLU_84 | ND2, C_ASN_46 | HD21, C_ASN_46 | 2.79 | 1.87 | 17.49 |
| 2MKL-4.PDB | O, C_VAL_45   | N, C_VAL_48   | H, C_VAL_48    | 2.77 | 1.89 | 22.69 |
| 2MKL-4.PDB | OH, C_TYR_85  | NE, C_ARG_50  | HE, C_ARG_50   | 2.95 | 2.07 | 22.98 |
| 2MKL-4.PDB | OE1, C_GLU_78 | NH2, C_ARG_50 | HH21, C_ARG_50 | 2.70 | 1.74 | 15.78 |
| 2MKL-4.PDB | O, C_LYS_71   | N, C_GLU_55   | H, C_GLU_55    | 2.71 | 1.81 | 18.61 |
| 2MKL-4.PDB | O, C_VAL_69   | N, C_GLN_57   | H, C_GLN_57    | 2.73 | 1.78 | 11.53 |
| 2MKL-4.PDB | O, C_SER_62   | N, C_LYS_65   | H, C_LYS_65    | 2.84 | 1.85 | 4.44  |
| 2MKL-4.PDB | O, C_TYR_33   | N, C_SER_66   | H, C_SER_66    | 2.69 | 1.77 | 16.96 |
| 2MKL-4.PDB | O, C_ILE_31   | N, C_ILE_68   | H, C_ILE_68    | 2.81 | 1.88 | 14.11 |
| 2MKL-4.PDB | O, C_CYS_29   | N, C_SER_70   | H, C_SER_70    | 2.73 | 1.81 | 16.08 |
| 2MKL-4.PDB | O, C_GLU_55   | N, C_LYS_71   | H, C_LYS_71    | 2.71 | 1.78 | 13.91 |
| 2MKL-4.PDB | OE2, C_GLU_55 | NZ, C_LYS_71  | HZ1, C_LYS_71  | 2.65 | 1.66 | 15.29 |
| 2MKL-4.PDB | O, C_ILE_27   | N, C_LEU_72   | H, C_LEU_72    | 2.71 | 1.73 | 8.37  |
| 2MKL-4.PDB | O, C_GLY_53   | N, C_LYS_73   | H, C_LYS_73    | 2.76 | 1.78 | 6.24  |
| 2MKL-4.PDB | OE1, C_GLU_78 | N, C_MET_75   | H, C_MET_75    | 2.82 | 1.87 | 13.55 |
| 2MKL-4.PDB | O, C_ALA_76   | N, C_ASP_80   | H, C_ASP_80    | 2.90 | 2.02 | 21.07 |
| 2MKL-4.PDB | O, C_TRP_79   | N, C_GLY_82   | H, C_GLY_82    | 2.93 | 2.03 | 19.45 |
| 2MKL-4.PDB | O, C_ALA_100  | N, C_CYS_87   | H, C_CYS_87    | 2.67 | 1.71 | 9.36  |
| 2MKL-4.PDB | O, C_PHE_42   | N, C_LEU_88   | H, C_LEU_88    | 2.83 | 2.00 | 27.21 |
| 2MKL-4.PDB | O, C_VAL_98   | N, C_VAL_89   | H, C_VAL_89    | 2.69 | 1.75 | 13.90 |
| 2MKL-4.PDB | O, C_LYS_40   | N, C_GLU_90   | H, C_GLU_90    | 2.95 | 1.97 | 6.05  |
| 2MKL-4.PDB | OD2, C_ASP_91 | N, C_GLU_93   | H, C_GLU_93    | 2.83 | 1.95 | 21.47 |
| 2MKL-4.PDB | O, C_VAL_89   | N, C_VAL_98   | H, C_VAL_98    | 2.84 | 1.87 | 7.29  |
| 2MKL-4.PDB | O, C_TYR_85   | N, C_ILE_102  | H, C_ILE_102   | 2.72 | 1.78 | 13.87 |
| 2MKL-5.PDB | OG1, C_THR_5  | NE2, C_GLN_4  | HE21, C_GLN_4  | 2.80 | 1.92 | 21.71 |
| 2MKL-5.PDB | O, C_VAL_32   | N, C_SER_8    | H, C_SER_8     | 2.85 | 1.89 | 10.14 |
| 2MKL-5.PDB | O, C_GLU_30   | N, C_SER_10   | H, C_SER_10    | 2.70 | 1.73 | 5.85  |
| 2MKL-5.PDB | O, C_VAL_28   | N, C_LEU_12   | H, C_LEU_12    | 2.69 | 1.72 | 7.27  |
| 2MKL-5.PDB | O, C_ALA_105  | NZ, C_LYS_13  | HZ2, C_LYS_13  | 2.70 | 1.67 | 8.50  |
| 2MKL-5.PDB | O, C_LEU_72   | N, C_ILE_27   | H, C_ILE_27    | 2.84 | 2.03 | 28.89 |
| 2MKL-5.PDB | O, C_SER_70   | N, C_CYS_29   | H, C_CYS_29    | 2.69 | 1.72 | 7.41  |
| 2MKL-5.PDB | O, C_SER_10   | N, C_GLU_30   | H, C_GLU_30    | 2.79 | 1.82 | 7.58  |
| 2MKL-5.PDB | O, C_ILE_68   | N, C_ILE_31   | H, C_ILE_31    | 2.79 | 1.81 | 2.50  |
| 2MKL-5.PDB | O, C_SER_8    | N, C_VAL_32   | H, C_VAL_32    | 2.80 | 1.83 | 9.41  |
| 2MKL-5.PDB | O, C_SER_66   | N, C_TYR_33   | H, C_TYR_33    | 2.93 | 1.97 | 10.84 |

|            |                |               |                |      |      |       |
|------------|----------------|---------------|----------------|------|------|-------|
| 2MKL-5.PDB | OD1, C_ASP_35  | OG, C_SER_34  | HG, C_SER_34   | 2.85 | 1.91 | 12.30 |
| 2MKL-5.PDB | O, C_GLU_90    | N, C_LYS_40   | H, C_LYS_40    | 2.94 | 1.96 | 3.61  |
| 2MKL-5.PDB | O, C_LEU_88    | N, C_PHE_42   | H, C_PHE_42    | 2.90 | 1.95 | 11.88 |
| 2MKL-5.PDB | O, C_VAL_48    | N, C_VAL_45   | H, C_VAL_45    | 2.81 | 1.90 | 17.99 |
| 2MKL-5.PDB | O, C_VAL_45    | N, C_VAL_48   | H, C_VAL_48    | 2.85 | 1.99 | 24.39 |
| 2MKL-5.PDB | OE1, C_GLU_78  | NH2, C_ARG_50 | HH22, C_ARG_50 | 2.76 | 1.81 | 16.18 |
| 2MKL-5.PDB | O, C_LYS_71    | N, C_GLU_55   | H, C_GLU_55    | 2.78 | 1.82 | 12.33 |
| 2MKL-5.PDB | O, C_VAL_69    | N, C_GLN_57   | H, C_GLN_57    | 2.78 | 1.80 | 6.57  |
| 2MKL-5.PDB | O, C_THR_67    | N, C_GLU_60   | H, C_GLU_60    | 2.84 | 1.94 | 20.40 |
| 2MKL-5.PDB | O, C_SER_62    | N, C_SER_64   | H, C_SER_64    | 2.53 | 1.70 | 25.66 |
| 2MKL-5.PDB | OD2, C_ASP_6   | NZ, C_LYS_65  | HZ2, C_LYS_65  | 2.68 | 1.69 | 14.66 |
| 2MKL-5.PDB | O, C_TYR_33    | N, C_SER_66   | H, C_SER_66    | 2.80 | 1.91 | 20.20 |
| 2MKL-5.PDB | O, C_ILE_31    | N, C_ILE_68   | H, C_ILE_68    | 2.76 | 1.80 | 8.71  |
| 2MKL-5.PDB | O, C_CYS_29    | N, C_SER_70   | H, C_SER_70    | 2.77 | 1.81 | 10.20 |
| 2MKL-5.PDB | O, C_GLU_55    | N, C_LYS_71   | H, C_LYS_71    | 2.74 | 1.78 | 6.80  |
| 2MKL-5.PDB | O, C_ILE_27    | N, C_LEU_72   | H, C_LEU_72    | 2.68 | 1.70 | 3.69  |
| 2MKL-5.PDB | O, C_GLY_53    | N, C_LYS_73   | H, C_LYS_73    | 2.68 | 1.72 | 8.29  |
| 2MKL-5.PDB | O, C_ALA_76    | N, C_ASP_80   | H, C_ASP_80    | 2.74 | 1.77 | 7.96  |
| 2MKL-5.PDB | O, C_TRP_79    | N, C_GLY_82   | H, C_GLY_82    | 2.89 | 1.97 | 17.29 |
| 2MKL-5.PDB | OE2, C_GLU_78  | OG1, C_THR_83 | HG1, C_THR_83  | 2.81 | 1.87 | 12.01 |
| 2MKL-5.PDB | O, C_ALA_100   | N, C_CYS_87   | H, C_CYS_87    | 2.72 | 1.76 | 9.78  |
| 2MKL-5.PDB | O, C_PHE_42    | N, C_LEU_88   | H, C_LEU_88    | 2.71 | 1.74 | 7.08  |
| 2MKL-5.PDB | O, C_VAL_98    | N, C_VAL_89   | H, C_VAL_89    | 2.71 | 1.78 | 15.68 |
| 2MKL-5.PDB | OD2, C_ASP_91  | N, C_GLU_93   | H, C_GLU_93    | 2.93 | 2.06 | 22.91 |
| 2MKL-5.PDB | O, C_VAL_89    | N, C_VAL_98   | H, C_VAL_98    | 2.95 | 1.98 | 7.21  |
| 2MKL-5.PDB | O, C_CYS_87    | N, C_ALA_100  | H, C_ALA_100   | 2.91 | 2.10 | 28.19 |
| 2MKL-5.PDB | O, C_TYR_85    | N, C_ILE_102  | H, C_ILE_102   | 2.65 | 1.75 | 17.77 |
| 2MKL-5.PDB | OXT, C_ALA_105 | NZ, C_LYS_104 | HZ2, C_LYS_104 | 2.74 | 1.74 | 13.81 |
| 2MKL-6.PDB | O, C_VAL_32    | N, C_SER_8    | H, C_SER_8     | 2.70 | 1.80 | 19.33 |
| 2MKL-6.PDB | O, C_VAL_28    | N, C_LEU_12   | H, C_LEU_12    | 2.64 | 1.67 | 9.36  |
| 2MKL-6.PDB | OXT, C_ALA_105 | NZ, C_LYS_13  | HZ2, C_LYS_13  | 2.64 | 1.69 | 18.78 |
| 2MKL-6.PDB | OE2, C_GLU_17  | NZ, C_LYS_13  | HZ3, C_LYS_13  | 2.63 | 1.59 | 5.83  |
| 2MKL-6.PDB | O, C_VAL_74    | OG1, C_THR_24 | HG1, C_THR_24  | 2.63 | 1.68 | 6.20  |
| 2MKL-6.PDB | O, C_LEU_72    | N, C_ILE_27   | H, C_ILE_27    | 2.81 | 1.83 | 4.74  |
| 2MKL-6.PDB | O, C_SER_70    | N, C_CYS_29   | H, C_CYS_29    | 2.68 | 1.72 | 9.63  |
| 2MKL-6.PDB | O, C_SER_10    | N, C_GLU_30   | H, C_GLU_30    | 2.74 | 1.79 | 11.80 |
| 2MKL-6.PDB | O, C_SER_8     | N, C_VAL_32   | H, C_VAL_32    | 2.94 | 1.99 | 13.64 |
| 2MKL-6.PDB | O, C_SER_66    | N, C_TYR_33   | H, C_TYR_33    | 2.94 | 1.99 | 12.36 |
| 2MKL-6.PDB | OD2, C_ASP_91  | N, C_GLU_37   | H, C_GLU_37    | 2.93 | 1.96 | 8.54  |
| 2MKL-6.PDB | O, C_GLU_90    | N, C_LYS_40   | H, C_LYS_40    | 2.93 | 1.96 | 4.64  |
| 2MKL-6.PDB | O, C_LEU_88    | N, C_PHE_42   | H, C_PHE_42    | 2.84 | 1.91 | 15.28 |
| 2MKL-6.PDB | O, C_GLY_47    | NE2, C_GLN_44 | HE21, C_GLN_44 | 2.88 | 2.02 | 23.44 |
| 2MKL-6.PDB | O, C_VAL_48    | N, C_VAL_45   | H, C_VAL_45    | 2.83 | 1.89 | 14.07 |
| 2MKL-6.PDB | OE1, C_GLU_84  | ND2, C_ASN_46 | HD21, C_ASN_46 | 2.90 | 1.97 | 15.36 |
| 2MKL-6.PDB | O, C_VAL_45    | N, C_VAL_48   | H, C_VAL_48    | 2.91 | 2.02 | 21.18 |
| 2MKL-6.PDB | OE2, C_GLU_78  | NH2, C_ARG_50 | HH22, C_ARG_50 | 2.72 | 1.70 | 3.73  |
| 2MKL-6.PDB | O, C_LYS_71    | N, C_GLU_55   | H, C_GLU_55    | 2.82 | 1.99 | 26.45 |
| 2MKL-6.PDB | O, C_VAL_69    | N, C_GLN_57   | H, C_GLN_57    | 2.71 | 1.75 | 9.51  |
| 2MKL-6.PDB | O, C_THR_67    | N, C_GLU_60   | H, C_GLU_60    | 2.83 | 1.87 | 9.90  |
| 2MKL-6.PDB | O, C_LYS_65    | N, C_SER_62   | H, C_SER_62    | 2.99 | 2.02 | 8.78  |
| 2MKL-6.PDB | O, C_SER_62    | N, C_LYS_65   | H, C_LYS_65    | 2.93 | 2.00 | 16.12 |
| 2MKL-6.PDB | OD2, C_ASP_6   | NZ, C_LYS_65  | HZ3, C_LYS_65  | 2.59 | 1.63 | 17.95 |
| 2MKL-6.PDB | O, C_TYR_33    | N, C_SER_66   | H, C_SER_66    | 2.80 | 1.88 | 16.03 |
| 2MKL-6.PDB | O, C_GLU_60    | N, C_THR_67   | H, C_THR_67    | 2.90 | 2.10 | 28.48 |
| 2MKL-6.PDB | O, C_ILE_31    | N, C_ILE_68   | H, C_ILE_68    | 2.89 | 1.92 | 9.05  |
| 2MKL-6.PDB | O, C_CYS_29    | N, C_SER_70   | H, C_SER_70    | 2.88 | 1.94 | 13.67 |
| 2MKL-6.PDB | O, C_GLU_55    | N, C_LYS_71   | H, C_LYS_71    | 2.76 | 1.80 | 10.17 |
| 2MKL-6.PDB | OE2, C_GLU_55  | NZ, C_LYS_71  | HZ1, C_LYS_71  | 2.70 | 1.72 | 16.34 |

|            |               |               |                |      |      |       |
|------------|---------------|---------------|----------------|------|------|-------|
| 2MKL-6.PDB | O, C_ILE_27   | N, C_LEU_72   | H, C_LEU_72    | 2.65 | 1.75 | 19.43 |
| 2MKL-6.PDB | O, C_GLY_53   | N, C_LYS_73   | H, C_LYS_73    | 2.75 | 1.77 | 6.62  |
| 2MKL-6.PDB | O, C_ALA_76   | N, C_ASP_80   | H, C_ASP_80    | 2.70 | 1.73 | 7.99  |
| 2MKL-6.PDB | O, C_TRP_79   | N, C_GLY_82   | H, C_GLY_82    | 2.93 | 2.02 | 19.18 |
| 2MKL-6.PDB | OD1, C_ASN_46 | OG1, C_THR_83 | HG1, C_THR_83  | 2.65 | 1.71 | 11.83 |
| 2MKL-6.PDB | O, C_ALA_100  | N, C_CYS_87   | H, C_CYS_87    | 2.74 | 1.76 | 5.40  |
| 2MKL-6.PDB | O, C_PHE_42   | N, C_LEU_88   | H, C_LEU_88    | 2.76 | 1.79 | 7.22  |
| 2MKL-6.PDB | O, C_VAL_98   | N, C_VAL_89   | H, C_VAL_89    | 2.69 | 1.77 | 16.78 |
| 2MKL-6.PDB | O, C_VAL_89   | N, C_VAL_98   | H, C_VAL_98    | 2.99 | 2.01 | 1.37  |
| 2MKL-6.PDB | O, C_CYS_87   | N, C_ALA_100  | H, C_ALA_100   | 2.94 | 2.11 | 26.98 |
| 2MKL-6.PDB | O, C_TYR_85   | N, C_ILE_102  | H, C_ILE_102   | 2.75 | 1.80 | 12.64 |
| 2MKL-6.PDB | OD1, C_ASP_80 | NZ, C_LYS_104 | HZ1, C_LYS_104 | 2.64 | 1.71 | 20.84 |
| 2MKL-7.PDB | OD1, C_ASP_6  | NE, C_ARG_3   | HE, C_ARG_3    | 2.80 | 1.90 | 20.83 |
| 2MKL-7.PDB | OD2, C_ASP_6  | NE, C_ARG_3   | HE, C_ARG_3    | 2.95 | 2.13 | 27.86 |
| 2MKL-7.PDB | OD2, C_ASP_6  | NH2, C_ARG_3  | HH21, C_ARG_3  | 2.72 | 1.79 | 18.49 |
| 2MKL-7.PDB | O, C_GLY_2    | N, C_GLN_4    | H, C_GLN_4     | 2.91 | 2.07 | 25.29 |
| 2MKL-7.PDB | O, C_VAL_32   | N, C_SER_8    | H, C_SER_8     | 2.86 | 1.92 | 13.37 |
| 2MKL-7.PDB | O, C_GLU_30   | N, C_SER_10   | H, C_SER_10    | 2.76 | 1.78 | 0.59  |
| 2MKL-7.PDB | O, C_VAL_28   | N, C_LEU_12   | H, C_LEU_12    | 2.69 | 1.70 | 3.11  |
| 2MKL-7.PDB | O, C_PRO_14   | N, C_PHE_16   | H, C_PHE_16    | 2.65 | 1.73 | 16.96 |
| 2MKL-7.PDB | O, C_PHE_16   | N, C_GLU_18   | H, C_GLU_18    | 2.58 | 1.74 | 25.12 |
| 2MKL-7.PDB | O, C_PHE_16   | N, C_TRP_20   | H, C_TRP_20    | 2.98 | 2.12 | 23.41 |
| 2MKL-7.PDB | O, C_GLN_22   | N, C_THR_24   | H, C_THR_24    | 2.67 | 1.86 | 27.69 |
| 2MKL-7.PDB | O, C_LEU_72   | OG1, C_THR_26 | HG1, C_THR_26  | 2.61 | 1.71 | 16.80 |
| 2MKL-7.PDB | O, C_LEU_72   | N, C_ILE_27   | H, C_ILE_27    | 2.83 | 2.01 | 27.24 |
| 2MKL-7.PDB | O, C_SER_70   | N, C_CYS_29   | H, C_CYS_29    | 2.71 | 1.75 | 8.90  |
| 2MKL-7.PDB | O, C_SER_10   | N, C_GLU_30   | H, C_GLU_30    | 2.79 | 1.83 | 10.18 |
| 2MKL-7.PDB | O, C_ILE_68   | N, C_ILE_31   | H, C_ILE_31    | 2.98 | 2.00 | 2.29  |
| 2MKL-7.PDB | O, C_SER_8    | N, C_VAL_32   | H, C_VAL_32    | 2.74 | 1.76 | 3.52  |
| 2MKL-7.PDB | O, C_SER_66   | N, C_TYR_33   | H, C_TYR_33    | 2.95 | 2.00 | 12.03 |
| 2MKL-7.PDB | O, C_SER_64   | OG, C_SER_34  | HG, C_SER_34   | 2.66 | 1.69 | 4.53  |
| 2MKL-7.PDB | O, C_LEU_88   | N, C_PHE_42   | H, C_PHE_42    | 2.87 | 1.89 | 4.70  |
| 2MKL-7.PDB | O, C_VAL_45   | N, C_VAL_48   | H, C_VAL_48    | 2.96 | 2.07 | 20.95 |
| 2MKL-7.PDB | O, C_VAL_54   | NZ, C_LYS_52  | HZ1, C_LYS_52  | 2.71 | 1.68 | 7.22  |
| 2MKL-7.PDB | O, C_LYS_71   | N, C_GLU_55   | H, C_GLU_55    | 2.76 | 1.91 | 24.53 |
| 2MKL-7.PDB | O, C_VAL_69   | N, C_GLN_57   | H, C_GLN_57    | 2.73 | 1.77 | 10.49 |
| 2MKL-7.PDB | O, C_THR_67   | N, C_GLU_60   | H, C_GLU_60    | 2.81 | 1.87 | 13.84 |
| 2MKL-7.PDB | OE1, C_GLU_60 | N, C_TRP_61   | H, C_TRP_61    | 2.86 | 1.94 | 17.90 |
| 2MKL-7.PDB | O, C_LYS_65   | N, C_SER_62   | H, C_SER_62    | 2.88 | 1.90 | 4.45  |
| 2MKL-7.PDB | O, C_SER_62   | N, C_LYS_65   | H, C_LYS_65    | 2.88 | 1.96 | 16.75 |
| 2MKL-7.PDB | OD1, C_ASP_6  | NZ, C_LYS_65  | HZ2, C_LYS_65  | 2.61 | 1.57 | 4.07  |
| 2MKL-7.PDB | O, C_TYR_33   | N, C_SER_66   | H, C_SER_66    | 2.78 | 1.94 | 25.87 |
| 2MKL-7.PDB | O, C_GLU_60   | N, C_THR_67   | H, C_THR_67    | 2.69 | 1.81 | 21.94 |
| 2MKL-7.PDB | O, C_ILE_31   | N, C_ILE_68   | H, C_ILE_68    | 2.96 | 1.98 | 7.22  |
| 2MKL-7.PDB | O, C_CYS_29   | N, C_SER_70   | H, C_SER_70    | 2.75 | 1.80 | 11.18 |
| 2MKL-7.PDB | O, C_GLU_55   | N, C_LYS_71   | H, C_LYS_71    | 2.75 | 1.91 | 24.82 |
| 2MKL-7.PDB | O, C_ILE_27   | N, C_LEU_72   | H, C_LEU_72    | 2.67 | 1.73 | 13.09 |
| 2MKL-7.PDB | O, C_GLY_53   | N, C_LYS_73   | H, C_LYS_73    | 2.80 | 1.82 | 6.40  |
| 2MKL-7.PDB | OG1, C_THR_24 | NZ, C_LYS_73  | HZ1, C_LYS_73  | 2.79 | 1.84 | 19.74 |
| 2MKL-7.PDB | O, C_ALA_76   | N, C_ASP_80   | H, C_ASP_80    | 2.73 | 1.79 | 13.61 |
| 2MKL-7.PDB | O, C_GLU_78   | N, C_SER_81   | H, C_SER_81    | 2.92 | 2.09 | 26.88 |
| 2MKL-7.PDB | O, C_TRP_79   | N, C_GLY_82   | H, C_GLY_82    | 2.96 | 2.03 | 15.54 |
| 2MKL-7.PDB | OE2, C_GLU_78 | OG1, C_THR_83 | HG1, C_THR_83  | 2.59 | 1.64 | 9.74  |
| 2MKL-7.PDB | O, C_ALA_100  | N, C_CYS_87   | H, C_CYS_87    | 2.73 | 1.75 | 2.91  |
| 2MKL-7.PDB | O, C_PHE_42   | N, C_LEU_88   | H, C_LEU_88    | 2.67 | 1.75 | 17.26 |
| 2MKL-7.PDB | O, C_VAL_98   | N, C_VAL_89   | H, C_VAL_89    | 2.85 | 1.96 | 20.95 |
| 2MKL-7.PDB | OD2, C_ASP_91 | N, C_GLU_93   | H, C_GLU_93    | 2.83 | 1.89 | 14.21 |
| 2MKL-7.PDB | O, C_VAL_89   | N, C_VAL_98   | H, C_VAL_98    | 2.92 | 1.95 | 4.26  |



|            |               |                |                 |      |      |       |
|------------|---------------|----------------|-----------------|------|------|-------|
| 2MKL-7.PDB | O, C_CYS_87   | N, C_ALA_100   | H, C_ALA_100    | 2.86 | 2.03 | 26.56 |
| 2MKL-7.PDB | O, C_TYR_85   | N, C_ILE_102   | H, C_ILE_102    | 2.82 | 1.93 | 20.79 |
| 2MKL-7.PDB | O, C_ALA_105  | NZ, C_LYS_104  | HZ3, C_LYS_104  | 2.60 | 1.63 | 17.04 |
| 2MKL-8.PDB | O, C_VAL_32   | N, C_SER_8     | H, C_SER_8      | 2.76 | 1.79 | 7.90  |
| 2MKL-8.PDB | O, C_GLU_30   | N, C_SER_10    | H, C_SER_10     | 2.88 | 1.92 | 12.44 |
| 2MKL-8.PDB | O, C_VAL_28   | N, C_LEU_12    | H, C_LEU_12     | 2.63 | 1.65 | 4.98  |
| 2MKL-8.PDB | O, C_ALA_105  | NZ, C_LYS_13   | HZ2, C_LYS_13   | 2.61 | 1.57 | 5.41  |
| 2MKL-8.PDB | OE2, C_GLU_17 | N, C_GLU_18    | H, C_GLU_18     | 2.97 | 2.09 | 21.14 |
| 2MKL-8.PDB | O, C_LEU_72   | OG1, C_THR_26  | HG1, C_THR_26   | 2.97 | 2.06 | 16.54 |
| 2MKL-8.PDB | O, C_LEU_72   | N, C_ILE_27    | H, C_ILE_27     | 2.76 | 1.84 | 17.21 |
| 2MKL-8.PDB | O, C_SER_70   | N, C_CYS_29    | H, C_CYS_29     | 2.80 | 1.87 | 15.66 |
| 2MKL-8.PDB | O, C_SER_10   | N, C_GLU_30    | H, C_GLU_30     | 2.74 | 1.81 | 16.35 |
| 2MKL-8.PDB | O, C_ILE_68   | N, C_ILE_31    | H, C_ILE_31     | 2.87 | 1.90 | 7.35  |
| 2MKL-8.PDB | O, C_SER_8    | N, C_VAL_32    | H, C_VAL_32     | 2.73 | 1.75 | 6.64  |
| 2MKL-8.PDB | O, C_SER_64   | OG, C_SER_34   | HG, C_SER_34    | 2.72 | 1.87 | 22.15 |
| 2MKL-8.PDB | OD2, C_ASP_91 | N, C_ASN_38    | H, C_ASN_38     | 2.62 | 1.64 | 4.38  |
| 2MKL-8.PDB | O, C_GLU_37   | ND2, C_ASN_38  | HD21, C_ASN_38  | 2.58 | 1.65 | 16.81 |
| 2MKL-8.PDB | O, C_LEU_88   | N, C_PHE_42    | H, C_PHE_42     | 2.73 | 1.76 | 7.97  |
| 2MKL-8.PDB | OG, C_SER_70  | NE1, C_TRP_43  | HE1, C_TRP_43   | 2.82 | 1.83 | 2.10  |
| 2MKL-8.PDB | O, C_VAL_86   | N, C_GLN_44    | H, C_GLN_44     | 3.00 | 2.07 | 16.25 |
| 2MKL-8.PDB | O, C_VAL_48   | N, C_VAL_45    | H, C_VAL_45     | 2.73 | 1.82 | 17.50 |
| 2MKL-8.PDB | O, C_VAL_45   | N, C_VAL_48    | H, C_VAL_48     | 2.98 | 2.08 | 19.95 |
| 2MKL-8.PDB | OE2, C_GLU_78 | NH1, C_ARG_50  | HH12, C_ARG_50  | 2.63 | 1.62 | 3.58  |
| 2MKL-8.PDB | O, C_LYS_73   | NH2, C_ARG_50  | HH21, C_ARG_50  | 2.93 | 1.96 | 12.60 |
| 2MKL-8.PDB | O, C_GLU_49   | NZ, C_LYS_51   | HZ2, C_LYS_51   | 2.93 | 1.94 | 14.57 |
| 2MKL-8.PDB | O, C_LYS_71   | N, C_GLU_55    | H, C_GLU_55     | 2.75 | 1.82 | 14.98 |
| 2MKL-8.PDB | O, C_VAL_69   | N, C_GLN_57    | H, C_GLN_57     | 2.96 | 2.01 | 12.37 |
| 2MKL-8.PDB | O, C_THR_67   | N, C_GLU_60    | H, C_GLU_60     | 2.98 | 2.10 | 22.35 |
| 2MKL-8.PDB | O, C_SER_62   | N, C_LYS_65    | H, C_LYS_65     | 2.98 | 2.01 | 8.55  |
| 2MKL-8.PDB | OD2, C_ASP_6  | NZ, C_LYS_65   | HZ3, C_LYS_65   | 2.64 | 1.68 | 18.41 |
| 2MKL-8.PDB | O, C_TYR_33   | N, C_SER_66    | H, C_SER_66     | 2.73 | 1.81 | 16.99 |
| 2MKL-8.PDB | O, C_ILE_31   | N, C_ILE_68    | H, C_ILE_68     | 2.80 | 1.84 | 10.07 |
| 2MKL-8.PDB | O, C_CYS_29   | N, C_SER_70    | H, C_SER_70     | 2.86 | 1.88 | 5.47  |
| 2MKL-8.PDB | O, C_GLU_55   | N, C_LYS_71    | H, C_LYS_71     | 2.77 | 1.80 | 6.52  |
| 2MKL-8.PDB | O, C_ILE_27   | N, C_LEU_72    | H, C_LEU_72     | 2.69 | 1.74 | 12.28 |
| 2MKL-8.PDB | O, C_GLY_53   | N, C_LYS_73    | H, C_LYS_73     | 2.71 | 1.74 | 7.49  |
| 2MKL-8.PDB | O, C_ALA_25   | N, C_VAL_74    | H, C_VAL_74     | 2.97 | 2.03 | 14.41 |
| 2MKL-8.PDB | OE1, C_GLU_78 | N, C_MET_75    | H, C_MET_75     | 2.72 | 1.76 | 9.33  |
| 2MKL-8.PDB | O, C_ALA_76   | N, C_ASP_80    | H, C_ASP_80     | 2.65 | 1.71 | 13.15 |
| 2MKL-8.PDB | O, C_GLU_78   | N, C_SER_81    | H, C_SER_81     | 2.97 | 2.14 | 27.36 |
| 2MKL-8.PDB | O, C_SER_77   | OG, C_SER_81   | HG, C_SER_81    | 2.56 | 1.60 | 6.14  |
| 2MKL-8.PDB | O, C_TRP_79   | N, C_GLY_82    | H, C_GLY_82     | 2.98 | 2.06 | 16.79 |
| 2MKL-8.PDB | O, C_ALA_100  | N, C_CYS_87    | H, C_CYS_87     | 2.71 | 1.76 | 12.28 |
| 2MKL-8.PDB | O, C_PHE_42   | N, C_LEU_88    | H, C_LEU_88     | 2.77 | 1.80 | 5.62  |
| 2MKL-8.PDB | O, C_LYS_40   | N, C_GLU_90    | H, C_GLU_90     | 2.83 | 1.87 | 9.17  |
| 2MKL-8.PDB | OD1, C_ASP_91 | N, C_GLU_93    | H, C_GLU_93     | 2.62 | 1.67 | 12.30 |
| 2MKL-8.PDB | O, C_CYS_87   | N, C_ALA_100   | H, C_ALA_100    | 2.89 | 2.08 | 28.20 |
| 2MKL-8.PDB | O, C_TYR_85   | N, C_ILE_102   | H, C_ILE_102    | 2.83 | 1.93 | 19.99 |
| 2MKL-8.PDB | O, C_GLY_82   | NH1, C_ARG_103 | HH11, C_ARG_103 | 2.70 | 1.75 | 16.11 |
| 2MKL-8.PDB | OD1, C_ASP_80 | NZ, C_LYS_104  | HZ1, C_LYS_104  | 2.61 | 1.59 | 9.01  |
| 2MKL-9.PDB | OG1, C_THR_96 | N, C_MET_1     | H2, C_MET_1     | 2.76 | 1.75 | 11.34 |
| 2MKL-9.PDB | O, C_VAL_9    | OG, C_SER_10   | HG, C_SER_10    | 2.88 | 1.94 | 11.21 |
| 2MKL-9.PDB | O, C_VAL_28   | N, C_LEU_12    | H, C_LEU_12     | 2.61 | 1.63 | 7.07  |
| 2MKL-9.PDB | O, C_THR_24   | N, C_THR_26    | H, C_THR_26     | 2.89 | 2.03 | 23.40 |
| 2MKL-9.PDB | O, C_LEU_72   | OG1, C_THR_26  | HG1, C_THR_26   | 2.65 | 1.69 | 6.28  |
| 2MKL-9.PDB | O, C_LEU_72   | N, C_ILE_27    | H, C_ILE_27     | 2.89 | 2.04 | 24.93 |
| 2MKL-9.PDB | O, C_SER_70   | N, C_CYS_29    | H, C_CYS_29     | 2.74 | 1.78 | 9.84  |
| 2MKL-9.PDB | O, C_SER_10   | N, C_GLU_30    | H, C_GLU_30     | 2.88 | 1.91 | 6.77  |

|            |               |               |                |      |      |       |
|------------|---------------|---------------|----------------|------|------|-------|
| 2MKL-9.PDB | O, C_ILE_68   | N, C_ILE_31   | H, C_ILE_31    | 2.89 | 1.92 | 7.18  |
| 2MKL-9.PDB | O, C_SER_8    | N, C_VAL_32   | H, C_VAL_32    | 2.76 | 1.81 | 11.14 |
| 2MKL-9.PDB | O, C_SER_66   | N, C_TYR_33   | H, C_TYR_33    | 2.98 | 2.04 | 15.18 |
| 2MKL-9.PDB | O, C_LEU_88   | N, C_PHE_42   | H, C_PHE_42    | 2.92 | 1.99 | 16.26 |
| 2MKL-9.PDB | O, C_GLY_47   | NE2, C_GLN_44 | HE21, C_GLN_44 | 2.91 | 2.11 | 28.91 |
| 2MKL-9.PDB | O, C_VAL_48   | N, C_VAL_45   | H, C_VAL_45    | 2.81 | 1.87 | 13.63 |
| 2MKL-9.PDB | O, C_VAL_45   | N, C_VAL_48   | H, C_VAL_48    | 2.87 | 2.01 | 23.76 |
| 2MKL-9.PDB | OE2, C_GLU_78 | NH2, C_ARG_50 | HH22, C_ARG_50 | 2.68 | 1.69 | 8.63  |
| 2MKL-9.PDB | O, C_LYS_71   | N, C_GLU_55   | H, C_GLU_55    | 2.70 | 1.82 | 21.75 |
| 2MKL-9.PDB | O, C_THR_67   | N, C_GLU_60   | H, C_GLU_60    | 2.71 | 1.77 | 13.93 |
| 2MKL-9.PDB | O, C_LYS_65   | N, C_SER_62   | H, C_SER_62    | 2.85 | 1.92 | 15.49 |
| 2MKL-9.PDB | O, C_SER_62   | N, C_LYS_65   | H, C_LYS_65    | 2.77 | 1.83 | 13.89 |
| 2MKL-9.PDB | OD2, C_ASP_6  | NZ, C_LYS_65  | HZ2, C_LYS_65  | 2.75 | 1.71 | 7.05  |
| 2MKL-9.PDB | O, C_ILE_31   | N, C_ILE_68   | H, C_ILE_68    | 2.77 | 1.81 | 8.93  |
| 2MKL-9.PDB | O, C_CYS_29   | N, C_SER_70   | H, C_SER_70    | 2.85 | 1.87 | 7.34  |
| 2MKL-9.PDB | O, C_GLU_55   | N, C_LYS_71   | H, C_LYS_71    | 2.73 | 1.77 | 9.92  |
| 2MKL-9.PDB | O, C_ILE_27   | N, C_LEU_72   | H, C_LEU_72    | 2.68 | 1.70 | 5.96  |
| 2MKL-9.PDB | O, C_GLY_53   | N, C_LYS_73   | H, C_LYS_73    | 2.69 | 1.71 | 1.06  |
| 2MKL-9.PDB | O, C_ALA_76   | N, C_ASP_80   | H, C_ASP_80    | 2.94 | 2.03 | 18.41 |
| 2MKL-9.PDB | O, C_GLU_78   | N, C_SER_81   | H, C_SER_81    | 2.94 | 2.11 | 27.71 |
| 2MKL-9.PDB | O, C_TRP_79   | N, C_GLY_82   | H, C_GLY_82    | 2.94 | 2.01 | 15.71 |
| 2MKL-9.PDB | O, C_ALA_100  | N, C_CYS_87   | H, C_CYS_87    | 2.71 | 1.74 | 7.57  |
| 2MKL-9.PDB | O, C_PHE_42   | N, C_LEU_88   | H, C_LEU_88    | 2.76 | 1.77 | 3.30  |
| 2MKL-9.PDB | O, C_VAL_98   | N, C_VAL_89   | H, C_VAL_89    | 2.84 | 1.93 | 17.52 |
| 2MKL-9.PDB | OE2, C_GLU_37 | OG, C_SER_92  | HG, C_SER_92   | 3.00 | 2.20 | 28.49 |
| 2MKL-9.PDB | O, C_ASP_91   | N, C_LEU_94   | H, C_LEU_94    | 2.98 | 2.06 | 17.03 |
| 2MKL-9.PDB | O, C_CYS_87   | N, C_ALA_100  | H, C_ALA_100   | 2.97 | 2.14 | 27.19 |
| 2MKL-9.PDB | O, C_TYR_85   | OG, C_SER_101 | HG, C_SER_101  | 2.85 | 1.92 | 13.62 |
| 2MKL-9.PDB | O, C_TYR_85   | N, C_ILE_102  | H, C_ILE_102   | 2.74 | 1.79 | 13.03 |

Table 1679: 2MKL-specific side chain and main chain hydrogen bonding analysis. In this table, a PDB file is specified with a four-letter PDB ID, except that the names of the PDB files corresponding to the single NMR structural model split from the NMR ensemble is specified with a four-letter PDB ID in addition to a hyphen followed by the single NMR structural model numeric ID, the residue naming scheme is **Chain ID\_residue name\_residue number**,  $\angle ADH$  represents the angle formed by acceptor (A), donor (D) and hydrogen (H) ( $\angle ADH$ ).

| PDB      | Acceptor (A) | Donor (D)   | Hydrogen (H) | D-A (Å) | H-A (Å) | $\angle ADH(^{\circ})$ |
|----------|--------------|-------------|--------------|---------|---------|------------------------|
| 2RLL.PDB | O, A_PRO_8   | N, A_ASP_11 | H, A_ASP_11  | 2.97    | 2.17    | 28.89                  |

Table 1680: 2RLL-specific side chain and main chain hydrogen bonding analysis. In this table, a PDB file is specified with a four-letter PDB ID, except that the names of the PDB files corresponding to the single NMR structural model split from the NMR ensemble is specified with a four-letter PDB ID in addition to a hyphen followed by the single NMR structural model numeric ID, the residue naming scheme is **Chain ID\_residue name\_residue number**,  $\angle ADH$  represents the angle formed by acceptor (A), donor (D) and hydrogen (H) ( $\angle ADH$ ).

| PDB      | Acceptor (A)   | Donor (D)      | Hydrogen (H)    | D-A (Å) | H-A (Å) | $\angle ADH(^{\circ})$ |
|----------|----------------|----------------|-----------------|---------|---------|------------------------|
| 3SE8.PDB | OE2, G_GLU_91  | NE1, G_TRP_45  | HE1, G_TRP_45   | 2.78    | 2.03    | 24.08                  |
| 3SE8.PDB | OE1, G_GLN_103 | N, G_LEU_52    | H, G_LEU_52     | 2.91    | 2.05    | 3.20                   |
| 3SE8.PDB | O, G_HIS_216   | N, G_ALA_55    | H, G_ALA_55     | 2.90    | 2.11    | 20.01                  |
| 3SE8.PDB | O, G_VAL_75    | N, G_SER_56    | H, G_SER_56     | 2.97    | 2.22    | 24.79                  |
| 3SE8.PDB | OD1, G_ASN_67  | N, G_LYS_59    | H, G_LYS_59     | 2.79    | 1.96    | 12.33                  |
| 3SE8.PDB | O, G_SER_209   | N, G_VAL_65    | H, G_VAL_65     | 2.99    | 2.15    | 12.16                  |
| 3SE8.PDB | OE2, G_GLU_64  | N, G_HIS_66    | H, G_HIS_66     | 2.94    | 2.09    | 3.80                   |
| 3SE8.PDB | OE2, G_GLU_64  | ND1, G_HIS_66  | HD1, G_HIS_66   | 2.82    | 1.98    | 11.41                  |
| 3SE8.PDB | OE1, G_GLU_64  | N, G_ASN_67    | H, G_ASN_67     | 2.93    | 2.14    | 18.64                  |
| 3SE8.PDB | OE1, G_GLU_64  | ND2, G_ASN_67  | HD22, G_ASN_67  | 2.82    | 2.00    | 14.84                  |
| 3SE8.PDB | O, G_HIS_66    | N, G_ALA_70    | H, G_ALA_70     | 2.99    | 2.14    | 6.51                   |
| 3SE8.PDB | O, G_ASN_67    | N, G_THR_71    | H, G_THR_71     | 2.92    | 2.13    | 19.42                  |
| 3SE8.PDB | O, G_ALA_70    | N, G_CYS_74    | H, G_CYS_74     | 2.70    | 1.91    | 18.43                  |
| 3SE8.PDB | O, G_CYS_54    | N, G_VAL_75    | H, G_VAL_75     | 2.88    | 2.07    | 16.86                  |
| 3SE8.PDB | OD1, G_ASP_78  | N, G_ASN_80    | H, G_ASN_80     | 2.97    | 2.17    | 18.12                  |
| 3SE8.PDB | O, G_SER_244   | N, G_ILE_84    | H, G_ILE_84     | 2.94    | 2.12    | 14.64                  |
| 3SE8.PDB | O, G_VAL_242   | N, G_LEU_86    | H, G_LEU_86     | 2.80    | 1.94    | 0.64                   |
| 3SE8.PDB | O, G_CYS_239   | N, G_GLU_91    | H, G_GLU_91     | 2.91    | 2.11    | 18.25                  |
| 3SE8.PDB | O, G_GLY_237   | N, G_PHE_93    | H, G_PHE_93     | 2.87    | 2.06    | 15.53                  |
| 3SE8.PDB | O, G_GLY_235   | N, G_MET_95    | H, G_MET_95     | 2.80    | 1.96    | 10.44                  |
| 3SE8.PDB | O, G_ASN_94    | N, G_LYS_97    | H, G_LYS_97     | 2.95    | 2.11    | 10.82                  |
| 3SE8.PDB | O, G_ASN_98    | N, G_VAL_101   | H, G_VAL_101    | 2.85    | 2.03    | 14.99                  |
| 3SE8.PDB | O, G_THR_50    | NE2, G_GLN_103 | HE21, G_GLN_103 | 2.73    | 1.97    | 22.93                  |
| 3SE8.PDB | OD1, G_ASN_99  | NE2, G_GLN_103 | HE22, G_GLN_103 | 2.99    | 2.17    | 14.68                  |
| 3SE8.PDB | O, G_VAL_101   | N, G_GLN_105   | H, G_GLN_105    | 2.96    | 2.12    | 10.76                  |
| 3SE8.PDB | O, G_MET_104   | N, G_VAL_108   | H, G_VAL_108    | 2.93    | 2.11    | 15.74                  |
| 3SE8.PDB | O, G_GLN_105   | N, G_ILE_109   | H, G_ILE_109    | 2.97    | 2.12    | 7.19                   |
| 3SE8.PDB | O, G_GLU_106   | N, G_SER_110   | H, G_SER_110    | 2.87    | 2.05    | 13.15                  |
| 3SE8.PDB | O, G_ASP_107   | N, G_LEU_111   | H, G_LEU_111    | 2.87    | 2.07    | 18.28                  |
| 3SE8.PDB | O, G_VAL_108   | N, G_TRP_112   | H, G_TRP_112    | 2.94    | 2.10    | 9.73                   |
| 3SE8.PDB | O, G_ILE_109   | N, G_ASP_113   | H, G_ASP_113    | 2.91    | 2.13    | 20.04                  |
| 3SE8.PDB | O, G_TRP_112   | N, G_LEU_116   | H, G_LEU_116    | 2.87    | 2.03    | 11.15                  |
| 3SE8.PDB | O, G_ILE_201   | N, G_LYS_121   | H, G_LYS_121    | 2.84    | 2.08    | 23.60                  |
| 3SE8.PDB | O, G_GLN_432   | N, G_LEU_122   | H, G_LEU_122    | 2.84    | 1.98    | 3.70                   |
| 3SE8.PDB | OE2, G_GLU_381 | NZ, G_LYS_207  | HZ2, G_LYS_207  | 2.74    | 1.86    | 4.82                   |
| 3SE8.PDB | OE2, G_GLU_64  | N, G_ASP_211   | H, G_ASP_211    | 2.86    | 2.06    | 17.85                  |
| 3SE8.PDB | O, G_ILE_251   | N, G_ILE_215   | H, G_ILE_215    | 2.86    | 2.03    | 14.34                  |
| 3SE8.PDB | O, G_ALA_55    | N, G_HIS_216   | H, G_HIS_216    | 2.88    | 2.03    | 9.08                   |
| 3SE8.PDB | O, G_THR_248   | ND1, G_HIS_216 | HD1, G_HIS_216  | 2.90    | 2.07    | 13.28                  |
| 3SE8.PDB | O, G_PHE_53    | N, G_CYS_218   | H, G_CYS_218    | 2.89    | 2.13    | 22.85                  |
| 3SE8.PDB | O, G_VAL_489   | N, G_VAL_224   | H, G_VAL_224    | 2.98    | 2.17    | 16.77                  |
| 3SE8.PDB | O, G_LYS_487   | N, G_LEU_226   | H, G_LEU_226    | 2.72    | 1.91    | 15.99                  |
| 3SE8.PDB | O, G_SER_243   | N, G_LYS_227   | H, G_LYS_227    | 2.80    | 1.97    | 12.53                  |
| 3SE8.PDB | O, G_LYS_485   | N, G_CYS_228   | H, G_CYS_228    | 2.74    | 1.93    | 16.67                  |
| 3SE8.PDB | O, G_ASN_241   | N, G_ASN_229   | H, G_ASN_229    | 2.73    | 1.90    | 11.23                  |
| 3SE8.PDB | O, G_GLU_91    | N, G_CYS_239   | H, G_CYS_239    | 2.59    | 1.79    | 18.72                  |
| 3SE8.PDB | OD2, G_ASP_230 | N, G_LYS_240   | H, G_LYS_240    | 2.98    | 2.13    | 6.94                   |
| 3SE8.PDB | OD1, G_ASP_230 | N, G_ASN_241   | H, G_ASN_241    | 2.67    | 1.87    | 17.74                  |
| 3SE8.PDB | O, G_LYS_227   | N, G_SER_243   | H, G_SER_243    | 2.97    | 2.15    | 15.16                  |
| 3SE8.PDB | OE2, G_GLU_83  | OG, G_SER_243  | HG, G_SER_243   | 2.64    | 1.83    | 7.57                   |
| 3SE8.PDB | O, G_ILE_84    | N, G_SER_244   | H, G_SER_244    | 2.68    | 1.89    | 18.10                  |
| 3SE8.PDB | O, G_ILE_225   | N, G_VAL_245   | H, G_VAL_245    | 2.90    | 2.07    | 10.51                  |
| 3SE8.PDB | O, G_TYR_217   | N, G_THR_248   | H, G_THR_248    | 2.72    | 1.92    | 16.92                  |
| 3SE8.PDB | OH, G_TYR_486  | ND1, G_HIS_249 | HD1, G_HIS_249  | 2.64    | 1.81    | 12.83                  |
| 3SE8.PDB | OE1, G_GLU_482 | NE2, G_HIS_249 | HE2, G_HIS_249  | 3.00    | 2.16    | 9.93                   |
| 3SE8.PDB | O, G_ILE_215   | N, G_ILE_251   | H, G_ILE_251    | 2.96    | 2.12    | 9.55                   |
| 3SE8.PDB | O, G_HIS_375   | N, G_THR_257   | H, G_THR_257    | 2.97    | 2.23    | 26.05                  |

|          |                |                |                 |      |      |       |
|----------|----------------|----------------|-----------------|------|------|-------|
| 3SE8.PDB | O, G_THR_257   | N, G_LEU_259   | H, G_LEU_259    | 2.81 | 2.06 | 25.63 |
| 3SE8.PDB | O, G_GLY_451   | N, G_LEU_260   | H, G_LEU_260    | 2.87 | 2.03 | 11.95 |
| 3SE8.PDB | O, G_ASN_448   | N, G_ASN_262   | H, G_ASN_262    | 2.71 | 1.88 | 12.07 |
| 3SE8.PDB | OE2, G_GLU_482 | N, G_SER_264   | H, G_SER_264    | 2.73 | 1.91 | 13.91 |
| 3SE8.PDB | O, G_LEU_288   | N, G_ALA_266   | H, G_ALA_266    | 2.78 | 2.00 | 20.85 |
| 3SE8.PDB | O, G_ILE_285   | N, G_ARG_273   | H, G_ARG_273    | 2.79 | 1.98 | 16.42 |
| 3SE8.PDB | O, G_PHE_233   | NH2, G_ARG_273 | HH22, G_ARG_273 | 2.82 | 2.02 | 18.59 |
| 3SE8.PDB | O, G_ASN_276   | N, G_ASN_279   | H, G_ASN_279    | 2.78 | 1.96 | 14.69 |
| 3SE8.PDB | OD1, G_ASN_279 | N, G_ALA_281   | H, G_ALA_281    | 2.86 | 2.06 | 17.39 |
| 3SE8.PDB | O, G_LEU_454   | N, G_ILE_284   | H, G_ILE_284    | 2.84 | 1.98 | 2.93  |
| 3SE8.PDB | O, G_ARG_273   | N, G_ILE_285   | H, G_ILE_285    | 2.70 | 1.87 | 12.33 |
| 3SE8.PDB | O, G_ILE_452   | N, G_VAL_286   | H, G_VAL_286    | 2.88 | 2.04 | 10.30 |
| 3SE8.PDB | O, G_ILE_271   | N, G_HIS_287   | H, G_HIS_287    | 2.82 | 1.96 | 3.43  |
| 3SE8.PDB | O, G_SER_264   | NE2, G_HIS_287 | HE2, G_HIS_287  | 2.67 | 1.83 | 10.99 |
| 3SE8.PDB | O, G_SER_447   | N, G_ILE_294   | H, G_ILE_294    | 2.75 | 1.94 | 17.22 |
| 3SE8.PDB | O, G_GLU_332   | N, G_ASN_295   | H, G_ASN_295    | 2.93 | 2.13 | 18.46 |
| 3SE8.PDB | O, G_TYR_330   | N, G_THR_297   | H, G_THR_297    | 2.85 | 2.02 | 13.88 |
| 3SE8.PDB | O, G_ILE_443   | N, G_ARG_298   | H, G_ARG_298    | 2.74 | 1.91 | 12.06 |
| 3SE8.PDB | O, G_ILE_326   | NH1, G_ARG_298 | HH11, G_ARG_298 | 2.83 | 2.00 | 11.83 |
| 3SE8.PDB | O, G_GLY_441   | NH2, G_ARG_298 | HH21, G_ARG_298 | 2.55 | 1.70 | 4.64  |
| 3SE8.PDB | O, G_ILE_439   | NH2, G_ARG_298 | HH22, G_ARG_298 | 2.90 | 2.10 | 18.34 |
| 3SE8.PDB | O, G_CYS_418   | N, G_ALA_329   | H, G_ALA_329    | 2.90 | 2.06 | 11.88 |
| 3SE8.PDB | O, G_LEU_416   | N, G_CYS_331   | H, G_CYS_331    | 2.98 | 2.19 | 20.31 |
| 3SE8.PDB | O, G_ASN_295   | N, G_GLU_332   | H, G_GLU_332    | 2.74 | 1.92 | 15.11 |
| 3SE8.PDB | O, G_ILE_414   | N, G_ILE_333   | H, G_ILE_333    | 2.90 | 2.08 | 15.80 |
| 3SE8.PDB | O, G_GLY_412   | N, G_GLY_335   | H, G_GLY_335    | 2.61 | 1.86 | 25.24 |
| 3SE8.PDB | OD1, G_ASN_334 | N, G_LYS_337   | H, G_LYS_337    | 2.85 | 2.02 | 13.75 |
| 3SE8.PDB | O, G_ASN_334   | N, G_TRP_338   | H, G_TRP_338    | 2.85 | 2.04 | 16.18 |
| 3SE8.PDB | O, G_LEU_390   | NE1, G_TRP_338 | HE1, G_TRP_338  | 2.58 | 1.76 | 15.13 |
| 3SE8.PDB | O, G_GLY_335   | N, G_ASN_339   | H, G_ASN_339    | 2.74 | 1.88 | 4.81  |
| 3SE8.PDB | O, G_TRP_338   | N, G_LEU_342   | H, G_LEU_342    | 2.77 | 1.94 | 11.71 |
| 3SE8.PDB | O, G_VAL_341   | N, G_VAL_345   | H, G_VAL_345    | 2.89 | 2.13 | 23.16 |
| 3SE8.PDB | O, G_LEU_342   | N, G_THR_346   | H, G_THR_346    | 2.94 | 2.12 | 14.67 |
| 3SE8.PDB | O, G_LYS_343   | OG1, G_THR_346 | HG1, G_THR_346  | 2.65 | 1.92 | 23.05 |
| 3SE8.PDB | O, G_LYS_343   | N, G_GLU_347   | H, G_GLU_347    | 3.00 | 2.22 | 21.50 |
| 3SE8.PDB | O, G_GLN_344   | N, G_LYS_348   | H, G_LYS_348    | 2.99 | 2.19 | 18.12 |
| 3SE8.PDB | OE2, G_GLU_269 | NZ, G_LYS_348  | HZ1, G_LYS_348  | 2.90 | 2.14 | 25.94 |
| 3SE8.PDB | OE1, G_GLU_351 | NZ, G_LYS_348  | HZ3, G_LYS_348  | 2.96 | 2.10 | 14.00 |
| 3SE8.PDB | O, G_VAL_345   | N, G_LEU_349   | H, G_LEU_349    | 2.94 | 2.12 | 15.13 |
| 3SE8.PDB | O, G_LYS_350   | N, G_ASN_355   | H, G_ASN_355    | 2.97 | 2.13 | 9.29  |
| 3SE8.PDB | O, G_PHE_353   | N, G_LYS_357   | H, G_LYS_357    | 2.81 | 1.95 | 2.88  |
| 3SE8.PDB | OD1, G_ASN_393 | N, G_PHE_361   | H, G_PHE_361    | 2.89 | 2.04 | 5.90  |
| 3SE8.PDB | O, G_PHE_468   | N, G_GLN_362   | H, G_GLN_362    | 2.83 | 2.01 | 15.06 |
| 3SE8.PDB | O, H_TRP_54    | N, G_ASP_368   | H, G_ASP_368    | 2.75 | 1.91 | 10.72 |
| 3SE8.PDB | O, G_LEU_369   | N, G_MET_373   | H, G_MET_373    | 3.00 | 2.23 | 22.44 |
| 3SE8.PDB | O, G_CYS_385   | N, G_HIS_374   | H, G_HIS_374    | 2.81 | 2.03 | 21.55 |
| 3SE8.PDB | O, G_THR_257   | ND1, G_HIS_374 | HD1, G_HIS_374  | 2.91 | 2.06 | 7.53  |
| 3SE8.PDB | O, G_PHE_383   | ND1, G_HIS_375 | HD1, G_HIS_375  | 2.96 | 2.19 | 22.53 |
| 3SE8.PDB | O, G_GLU_381   | N, G_CYS_378   | H, G_CYS_378    | 2.90 | 2.12 | 21.09 |
| 3SE8.PDB | O, G_CYS_378   | N, G_GLU_381   | H, G_GLU_381    | 2.88 | 2.03 | 7.72  |
| 3SE8.PDB | O, G_PHE_376   | N, G_PHE_383   | H, G_PHE_383    | 2.77 | 1.95 | 13.43 |
| 3SE8.PDB | O, G_HIS_374   | N, G_CYS_385   | H, G_CYS_385    | 2.80 | 1.98 | 13.95 |
| 3SE8.PDB | OD1, G_ASN_386 | N, G_THR_388   | H, G_THR_388    | 2.94 | 2.09 | 9.87  |
| 3SE8.PDB | O, G_THR_387   | N, G_LEU_390   | H, G_LEU_390    | 2.83 | 2.03 | 19.01 |
| 3SE8.PDB | O, G_PHE_361   | ND2, G_ASN_393 | HD22, G_ASN_393 | 2.82 | 1.99 | 12.21 |
| 3SE8.PDB | OD1, G_ASN_392 | N, G_THR_394   | H, G_THR_394    | 2.97 | 2.24 | 26.64 |
| 3SE8.PDB | O, G_ILE_333   | N, G_ILE_414   | H, G_ILE_414    | 2.79 | 2.00 | 18.93 |
| 3SE8.PDB | O, G_CYS_331   | N, G_LEU_416   | H, G_LEU_416    | 2.80 | 2.05 | 24.46 |

|          |                |                |                 |      |      |       |
|----------|----------------|----------------|-----------------|------|------|-------|
| 3SE8.PDB | O, G_ALA_329   | N, G_CYS_418   | H, G_CYS_418    | 2.89 | 2.04 | 8.98  |
| 3SE8.PDB | O, G_TYR_384   | N, G_LYS_419   | H, G_LYS_419    | 2.92 | 2.14 | 22.08 |
| 3SE8.PDB | O, G_ARG_327   | N, G_ILE_420   | H, G_ILE_420    | 2.82 | 2.00 | 14.23 |
| 3SE8.PDB | O, G_ALA_433   | N, G_ILE_424   | H, G_ILE_424    | 2.88 | 2.06 | 14.47 |
| 3SE8.PDB | OE2, G_GLU_370 | N, G_ASN_425   | H, G_ASN_425    | 2.74 | 1.89 | 6.23  |
| 3SE8.PDB | O, G_GLY_431   | N, G_MET_426   | H, G_MET_426    | 2.76 | 1.90 | 1.16  |
| 3SE8.PDB | O, G_MET_426   | N, G_GLY_429   | H, G_GLY_429    | 2.90 | 2.07 | 12.32 |
| 3SE8.PDB | O, G_ILE_424   | N, G_ALA_433   | H, G_ALA_433    | 2.84 | 2.01 | 13.80 |
| 3SE8.PDB | O, G_VAL_120   | N, G_MET_434   | H, G_MET_434    | 2.89 | 2.08 | 16.32 |
| 3SE8.PDB | O, G_GLN_422   | N, G_TYR_435   | H, G_TYR_435    | 2.70 | 1.89 | 15.98 |
| 3SE8.PDB | OD1, G_ASN_295 | ND2, G_ASN_444 | HD21, G_ASN_444 | 2.87 | 2.12 | 25.11 |
| 3SE8.PDB | OG1, G_THR_297 | ND2, G_ASN_444 | HD22, G_ASN_444 | 2.77 | 1.99 | 20.73 |
| 3SE8.PDB | O, G_ILE_294   | N, G_SER_447   | H, G_SER_447    | 2.93 | 2.10 | 11.64 |
| 3SE8.PDB | O, G_LEU_260   | N, G_THR_450   | H, G_THR_450    | 2.91 | 2.08 | 13.27 |
| 3SE8.PDB | O, G_VAL_286   | N, G_ILE_452   | H, G_ILE_452    | 3.00 | 2.20 | 19.52 |
| 3SE8.PDB | O, G_GLN_258   | N, G_LEU_453   | H, G_LEU_453    | 2.85 | 2.00 | 5.65  |
| 3SE8.PDB | O, G_ILE_284   | N, G_LEU_454   | H, G_LEU_454    | 2.99 | 2.16 | 13.70 |
| 3SE8.PDB | O, G_ARG_469   | N, G_THR_455   | H, G_THR_455    | 2.90 | 2.07 | 11.48 |
| 3SE8.PDB | O, G_THR_467   | N, G_ASP_457   | H, G_ASP_457    | 2.94 | 2.11 | 12.90 |
| 3SE8.PDB | OE2, L_GLU_96  | N, G_GLY_459   | H, G_GLY_459    | 2.81 | 1.99 | 15.35 |
| 3SE8.PDB | O, G_THR_358   | N, G_GLU_466   | H, G_GLU_466    | 2.85 | 2.09 | 22.90 |
| 3SE8.PDB | O, G_ILE_360   | N, G_PHE_468   | H, G_PHE_468    | 2.81 | 2.00 | 17.29 |
| 3SE8.PDB | O, G_THR_455   | N, G_ARG_469   | H, G_ARG_469    | 2.91 | 2.11 | 19.07 |
| 3SE8.PDB | OD2, G_ASP_457 | NE, G_ARG_469  | HE, G_ARG_469   | 2.90 | 2.06 | 8.93  |
| 3SE8.PDB | O, G_PRO_363   | NH1, G_ARG_469 | HH11, G_ARG_469 | 2.85 | 2.03 | 15.65 |
| 3SE8.PDB | OD1, G_ASP_457 | NH2, G_ARG_469 | HH21, G_ARG_469 | 2.93 | 2.11 | 16.29 |
| 3SE8.PDB | O, G_ASN_474   | N, G_ASP_477   | H, G_ASP_477    | 2.86 | 2.03 | 13.09 |
| 3SE8.PDB | OE1, G_GLN_105 | NE1, G_TRP_479 | HE1, G_TRP_479  | 2.68 | 1.92 | 22.70 |
| 3SE8.PDB | O, G_LYS_476   | N, G_ARG_480   | H, G_ARG_480    | 2.90 | 2.07 | 12.50 |
| 3SE8.PDB | O, G_ASP_477   | N, G_SER_481   | H, G_SER_481    | 2.99 | 2.24 | 26.03 |
| 3SE8.PDB | O, G_TRP_479   | N, G_LEU_483   | H, G_LEU_483    | 2.88 | 2.12 | 23.01 |
| 3SE8.PDB | O, G_LEU_226   | N, G_LYS_487   | H, G_LYS_487    | 2.94 | 2.15 | 19.58 |
| 3SE8.PDB | OE1, G_GLU_91  | NZ, G_LYS_487  | HZ1, G_LYS_487  | 2.58 | 1.77 | 20.55 |
| 3SE8.PDB | OD1, G_ASP_47  | NZ, G_LYS_487  | HZ2, G_LYS_487  | 2.90 | 2.08 | 19.02 |
| 3SE8.PDB | O, G_ASN_92    | NZ, G_LYS_487  | HZ3, G_LYS_487  | 2.95 | 2.08 | 10.80 |
| 3SE8.PDB | O, G_VAL_224   | N, G_VAL_489   | H, G_VAL_489    | 2.91 | 2.06 | 7.65  |
| 3SE8.PDB | O, G_LYS_46    | N, G_GLN_490   | H, G_GLN_490    | 2.88 | 2.05 | 12.76 |
| 3SE8.PDB | O, H_SER_25    | N, H_GLN_3     | H, H_GLN_3      | 2.90 | 2.11 | 20.10 |
| 3SE8.PDB | O, H_ARG_23    | N, H_VAL_5     | H, H_VAL_5      | 2.88 | 2.06 | 15.74 |
| 3SE8.PDB | OE1, H_GLN_105 | N, H_GLN_6     | H, H_GLN_6      | 2.87 | 2.02 | 5.14  |
| 3SE8.PDB | O, H_TYR_90    | NE2, H_GLN_6   | HE22, H_GLN_6   | 2.89 | 2.04 | 7.71  |
| 3SE8.PDB | O, H_VAL_110   | N, H_LYS_12    | H, H_LYS_12     | 2.75 | 1.91 | 10.56 |
| 3SE8.PDB | O, H_LEU_82C   | N, H_GLY_15    | H, H_GLY_15     | 2.89 | 2.09 | 17.72 |
| 3SE8.PDB | O, H_THR_13    | N, H_SER_16    | H, H_SER_16     | 2.97 | 2.16 | 15.50 |
| 3SE8.PDB | O, H_PHE_82    | N, H_VAL_18    | H, H_VAL_18     | 2.79 | 1.98 | 16.37 |
| 3SE8.PDB | O, H_MET_80    | N, H_ILE_20    | H, H_ILE_20     | 2.76 | 1.91 | 7.97  |
| 3SE8.PDB | O, H_ALA_78    | N, H_CYS_22    | H, H_CYS_22     | 2.72 | 2.02 | 29.24 |
| 3SE8.PDB | O, H_VAL_5     | N, H_ARG_23    | H, H_ARG_23     | 2.79 | 1.98 | 14.71 |
| 3SE8.PDB | O, H_GLY_76G   | N, H_ALA_24    | H, H_ALA_24     | 2.79 | 1.93 | 5.97  |
| 3SE8.PDB | O, H_GLN_3     | N, H_SER_25    | H, H_SER_25     | 2.94 | 2.16 | 21.94 |
| 3SE8.PDB | O, H_ASP_76E   | N, H_PHE_29    | H, H_PHE_29     | 2.78 | 1.95 | 13.33 |
| 3SE8.PDB | O, H_ILE_51    | N, H_ILE_34    | H, H_ILE_34     | 3.00 | 2.20 | 18.68 |
| 3SE8.PDB | O, H_VAL_93    | N, H_HIS_35    | H, H_HIS_35     | 2.89 | 2.07 | 13.75 |
| 3SE8.PDB | O, H_GLY_49    | N, H_TRP_36    | H, H_TRP_36     | 2.94 | 2.13 | 16.16 |
| 3SE8.PDB | O, H_PHE_91    | N, H_VAL_37    | H, H_VAL_37     | 2.86 | 2.04 | 15.75 |
| 3SE8.PDB | O, H_GLU_46    | N, H_ARG_38    | H, H_ARG_38     | 2.88 | 2.04 | 10.56 |
| 3SE8.PDB | OE1, H_GLU_46  | NH1, H_ARG_38  | HH11, H_ARG_38  | 2.64 | 1.78 | 1.94  |
| 3SE8.PDB | OH, H_TYR_90   | NH2, H_ARG_38  | HH21, H_ARG_38  | 2.79 | 1.95 | 9.66  |

|          |                |               |                |      |      |       |
|----------|----------------|---------------|----------------|------|------|-------|
| 3SE8.PDB | OD1, H_ASP_86  | NH2, H_ARG_38 | HH22, H_ARG_38 | 2.67 | 1.83 | 8.41  |
| 3SE8.PDB | O, H_GLU_89    | N, H_LEU_39   | H, H_LEU_39    | 2.83 | 1.99 | 10.37 |
| 3SE8.PDB | O, H_GLY_44    | N, H_ILE_40   | H, H_ILE_40    | 2.78 | 1.93 | 4.45  |
| 3SE8.PDB | O, H_ILE_40    | N, H_LYS_43   | H, H_LYS_43    | 2.97 | 2.13 | 10.43 |
| 3SE8.PDB | O, H_ILE_40    | N, H_GLY_44   | H, H_GLY_44    | 2.89 | 2.10 | 18.47 |
| 3SE8.PDB | O, H_ARG_38    | N, H_GLU_46   | H, H_GLU_46    | 2.75 | 1.95 | 18.36 |
| 3SE8.PDB | O, H_TRP_36    | N, H_ILE_48   | H, H_ILE_48    | 2.84 | 1.99 | 6.89  |
| 3SE8.PDB | O, H_SER_58    | N, H_TRP_50   | H, H_TRP_50    | 2.96 | 2.22 | 26.23 |
| 3SE8.PDB | OD1, G_ASN_280 | NE1, H_TRP_50 | HE1, H_TRP_50  | 3.00 | 2.21 | 20.49 |
| 3SE8.PDB | O, H_ILE_34    | N, H_ILE_51   | H, H_ILE_51    | 2.93 | 2.15 | 20.77 |
| 3SE8.PDB | O, H_ALA_56    | N, H_LYS_52   | H, H_LYS_52    | 2.80 | 1.97 | 14.43 |
| 3SE8.PDB | O, G_GLY_473   | NE1, H_TRP_54 | HE1, H_TRP_54  | 2.82 | 1.98 | 10.03 |
| 3SE8.PDB | O, H_ILE_48    | N, H_ALA_60   | H, H_ALA_60    | 2.88 | 2.02 | 4.64  |
| 3SE8.PDB | O, G_GLY_458   | N, H_ARG_61   | H, H_ARG_61    | 2.91 | 2.08 | 12.24 |
| 3SE8.PDB | OE2, H_GLU_46  | NE2, H_GLN_62 | HE21, H_GLN_62 | 2.91 | 2.06 | 7.60  |
| 3SE8.PDB | O, H_ALA_60    | N, H_LEU_63   | H, H_LEU_63    | 2.83 | 1.99 | 9.80  |
| 3SE8.PDB | OD1, G_ASP_457 | NE2, H_GLN_64 | HE22, H_GLN_64 | 2.94 | 2.12 | 14.23 |
| 3SE8.PDB | O, H_LEU_63    | N, H_ARG_66   | H, H_ARG_66    | 2.92 | 2.10 | 15.21 |
| 3SE8.PDB | OD2, H_ASP_86  | NH2, H_ARG_66 | HH22, H_ARG_66 | 2.60 | 1.84 | 23.72 |
| 3SE8.PDB | O, H_GLU_81    | N, H_SER_68   | H, H_SER_68    | 2.93 | 2.16 | 21.80 |
| 3SE8.PDB | OH, H_TYR_59   | N, H_MET_69   | H, H_MET_69    | 2.92 | 2.08 | 11.45 |
| 3SE8.PDB | O, H_PRO_52A   | NE, H_ARG_71  | HE, H_ARG_71   | 2.71 | 2.00 | 28.51 |
| 3SE8.PDB | OD2, G_ASP_368 | NH2, H_ARG_71 | HH22, H_ARG_71 | 2.91 | 2.05 | 6.24  |
| 3SE8.PDB | O, H_VAL_77    | N, H_GLN_72   | H, H_GLN_72    | 2.77 | 1.96 | 16.92 |
| 3SE8.PDB | O, H_ASP_76C   | OG, H_SER_74  | HG, H_SER_74   | 2.69 | 1.89 | 9.03  |
| 3SE8.PDB | O, H_GLN_72    | N, H_VAL_77   | H, H_VAL_77    | 2.77 | 1.94 | 13.20 |
| 3SE8.PDB | O, H_CYS_22    | N, H_ALA_78   | H, H_ALA_78    | 2.93 | 2.10 | 11.74 |
| 3SE8.PDB | O, H_THR_70    | N, H_TYR_79   | H, H_TYR_79    | 2.81 | 1.96 | 9.20  |
| 3SE8.PDB | O, H_ILE_20    | N, H_MET_80   | H, H_MET_80    | 2.83 | 2.02 | 15.19 |
| 3SE8.PDB | O, H_SER_68    | N, H_GLU_81   | H, H_GLU_81    | 2.84 | 2.00 | 11.16 |
| 3SE8.PDB | O, H_VAL_18    | N, H_PHE_82   | H, H_PHE_82    | 2.77 | 1.96 | 15.74 |
| 3SE8.PDB | O, H_ARG_66    | N, H_SER_82A  | H, H_SER_82A   | 2.80 | 2.01 | 18.90 |
| 3SE8.PDB | OD2, H_ASP_86  | N, H_THR_83   | H, H_THR_83    | 2.93 | 2.13 | 19.14 |
| 3SE8.PDB | O, H_THR_83    | N, H_ASP_86   | H, H_ASP_86    | 2.81 | 1.97 | 9.27  |
| 3SE8.PDB | O, H_PRO_84    | N, H_THR_87   | H, H_THR_87    | 2.98 | 2.14 | 8.29  |
| 3SE8.PDB | O, H_THR_107   | N, H_TYR_90   | H, H_TYR_90    | 2.78 | 1.92 | 6.22  |
| 3SE8.PDB | O, H_VAL_37    | N, H_PHE_91   | H, H_PHE_91    | 2.68 | 1.83 | 4.53  |
| 3SE8.PDB | O, H_HIS_35    | N, H_VAL_93   | H, H_VAL_93    | 2.86 | 2.07 | 20.12 |
| 3SE8.PDB | O, H_TYR_102   | N, H_ARG_94   | H, H_ARG_94    | 2.96 | 2.18 | 21.24 |
| 3SE8.PDB | O, H_ARG_95    | NE, H_ARG_94  | HE, H_ARG_94   | 2.79 | 1.97 | 14.73 |
| 3SE8.PDB | OH, L_TYR_36   | N, H_TRP_100F | H, H_TRP_100F  | 2.89 | 2.04 | 6.32  |
| 3SE8.PDB | O, H_CYS_92    | N, H_CYS_104  | H, H_CYS_104   | 2.93 | 2.08 | 5.94  |
| 3SE8.PDB | O, H_TYR_90    | N, H_THR_107  | H, H_THR_107   | 2.73 | 1.94 | 19.33 |
| 3SE8.PDB | O, H_ALA_88    | N, H_VAL_109  | H, H_VAL_109   | 2.95 | 2.10 | 5.90  |
| 3SE8.PDB | O, H_LYS_12    | N, H_SER_112  | H, H_SER_112   | 2.88 | 2.11 | 21.39 |
| 3SE8.PDB | OG, H_SER_112  | N, H_ALA_114  | H, H_ALA_114   | 2.93 | 2.08 | 8.21  |
| 3SE8.PDB | O, H_PHE_146   | N, H_LYS_117  | H, H_LYS_117   | 2.70 | 1.88 | 13.27 |
| 3SE8.PDB | O, H_ASP_144   | NZ, H_LYS_117 | HZ2, H_LYS_117 | 2.77 | 2.03 | 28.12 |
| 3SE8.PDB | O, H_LYS_143   | N, H_SER_120  | H, H_SER_120   | 2.76 | 1.96 | 18.99 |
| 3SE8.PDB | O, H_LEU_141   | N, H_PHE_122  | H, H_PHE_122   | 2.84 | 2.01 | 11.61 |
| 3SE8.PDB | O, H_GLY_139   | N, H_LEU_124  | H, H_LEU_124   | 2.75 | 1.90 | 4.08  |
| 3SE8.PDB | O, H_VAL_184   | N, H_ALA_136  | H, H_ALA_136   | 2.84 | 2.00 | 9.22  |
| 3SE8.PDB | O, H_LEU_124   | N, H_GLY_139  | H, H_GLY_139   | 2.85 | 2.13 | 28.46 |
| 3SE8.PDB | O, H_SER_180   | N, H_CYS_140  | H, H_CYS_140   | 2.74 | 1.94 | 18.37 |
| 3SE8.PDB | O, H_PHE_122   | N, H_LEU_141  | H, H_LEU_141   | 2.66 | 1.82 | 9.87  |
| 3SE8.PDB | O, H_LEU_178   | N, H_VAL_142  | H, H_VAL_142   | 2.68 | 1.85 | 13.60 |
| 3SE8.PDB | O, H_SER_120   | N, H_LYS_143  | H, H_LYS_143   | 2.76 | 1.90 | 5.34  |
| 3SE8.PDB | O, H_LYS_117   | N, H_PHE_146  | H, H_PHE_146   | 2.83 | 2.03 | 17.73 |

|          |                |                |                 |      |      |       |
|----------|----------------|----------------|-----------------|------|------|-------|
| 3SE8.PDB | O, H.ASN.199   | N, H.THR.151   | H, H.THR.151    | 2.89 | 2.07 | 15.54 |
| 3SE8.PDB | O, H.ASN.197   | N, H.SER.153   | H, H.SER.153    | 2.93 | 2.14 | 19.75 |
| 3SE8.PDB | OG, H.SER.180  | NE1, H.TRP.154 | HE1, H.TRP.154  | 2.94 | 2.09 | 7.62  |
| 3SE8.PDB | O, H.ILE.195   | N, H.ASN.155   | H, H.ASN.155    | 2.71 | 1.87 | 10.52 |
| 3SE8.PDB | OD1, H.ASN.197 | N, H.SER.156   | H, H.SER.156    | 2.66 | 1.83 | 13.48 |
| 3SE8.PDB | O, H.TRP.154   | N, H.GLY.157   | H, H.GLY.157    | 2.82 | 2.03 | 19.36 |
| 3SE8.PDB | O, H.VAL.181   | N, H.HIS.164   | H, H.HIS.164    | 2.78 | 1.96 | 13.60 |
| 3SE8.PDB | O, H.SER.179   | N, H.PHE.166   | H, H.PHE.166    | 2.99 | 2.15 | 9.97  |
| 3SE8.PDB | O, H.SER.177   | N, H.VAL.169   | H, H.VAL.169    | 2.82 | 1.98 | 12.77 |
| 3SE8.PDB | O, H.LEU.175   | N, H.GLN.171   | H, H.GLN.171    | 2.92 | 2.07 | 8.88  |
| 3SE8.PDB | OD1, H.ASP.144 | NE2, H.GLN.171 | HE22, H.GLN.171 | 2.79 | 1.98 | 16.20 |
| 3SE8.PDB | O, H.GLN.171   | N, H.GLY.174   | H, H.GLY.174    | 2.99 | 2.14 | 9.14  |
| 3SE8.PDB | O, H.TYR.145   | N, H.TYR.176   | H, H.TYR.176    | 2.78 | 1.96 | 14.03 |
| 3SE8.PDB | O, H.VAL.169   | N, H.SER.177   | H, H.SER.177    | 2.95 | 2.22 | 27.00 |
| 3SE8.PDB | O, H.VAL.142   | N, H.LEU.178   | H, H.LEU.178    | 2.89 | 2.07 | 14.62 |
| 3SE8.PDB | O, H.CYS.140   | N, H.SER.180   | H, H.SER.180    | 2.90 | 2.08 | 15.09 |
| 3SE8.PDB | O, H.HIS.164   | N, H.VAL.181   | H, H.VAL.181    | 2.92 | 2.09 | 11.34 |
| 3SE8.PDB | O, H.LEU.138   | N, H.VAL.182   | H, H.VAL.182    | 2.88 | 2.09 | 19.86 |
| 3SE8.PDB | O, H.ALA.136   | N, H.VAL.184   | H, H.VAL.184    | 2.91 | 2.10 | 16.13 |
| 3SE8.PDB | O, H.SER.188   | N, H.GLN.192   | H, H.GLN.192    | 2.74 | 1.90 | 10.09 |
| 3SE8.PDB | OD1, H.ASN.155 | N, H.ILE.195   | H, H.ILE.195    | 2.81 | 2.01 | 16.89 |
| 3SE8.PDB | O, H.LYS.209   | N, H.CYS.196   | H, H.CYS.196    | 2.96 | 2.16 | 17.85 |
| 3SE8.PDB | O, H.SER.153   | N, H.ASN.197   | H, H.ASN.197    | 2.75 | 1.91 | 9.58  |
| 3SE8.PDB | O, H.VAL.207   | N, H.VAL.198   | H, H.VAL.198    | 2.77 | 1.92 | 5.89  |
| 3SE8.PDB | O, H.THR.151   | N, H.ASN.199   | H, H.ASN.199    | 2.84 | 2.01 | 12.61 |
| 3SE8.PDB | O, H.THR.205   | N, H.HIS.200   | H, H.HIS.200    | 2.70 | 1.84 | 5.53  |
| 3SE8.PDB | OG, H.SER.203  | ND1, H.HIS.200 | HD1, H.HIS.200  | 2.45 | 1.61 | 10.75 |
| 3SE8.PDB | O, H.PRO.147   | NE2, H.HIS.200 | HE2, H.HIS.200  | 2.78 | 1.97 | 17.41 |
| 3SE8.PDB | O, H.LYS.201   | N, H.ASN.204   | H, H.ASN.204    | 2.85 | 2.06 | 18.91 |
| 3SE8.PDB | O, H.HIS.200   | N, H.THR.205   | H, H.THR.205    | 2.88 | 2.03 | 7.09  |
| 3SE8.PDB | O, H.VAL.198   | N, H.VAL.207   | H, H.VAL.207    | 2.80 | 1.98 | 15.00 |
| 3SE8.PDB | O, H.CYS.196   | N, H.LYS.209   | H, H.LYS.209    | 2.95 | 2.10 | 10.01 |
| 3SE8.PDB | O, H.TYR.194   | N, H.VAL.211   | H, H.VAL.211    | 2.83 | 1.97 | 6.68  |
| 3SE8.PDB | OG, L.SER.26   | N, L.VAL.3     | H, L.VAL.3      | 2.82 | 1.96 | 2.57  |
| 3SE8.PDB | O, L.LYS.24    | N, L.THR.5     | H, L.THR.5      | 2.89 | 2.05 | 11.05 |
| 3SE8.PDB | O, L.TYR.86    | NE2, L.GLN.6   | HE22, L.GLN.6   | 2.87 | 2.04 | 13.32 |
| 3SE8.PDB | O, L.GLU.103   | N, L.LEU.11    | H, L.LEU.11     | 2.80 | 1.97 | 11.47 |
| 3SE8.PDB | OE1, L.GLU.17  | N, L.SER.14    | H, L.SER.14     | 2.71 | 1.87 | 8.08  |
| 3SE8.PDB | O, L.LEU.78    | N, L.GLY.16    | H, L.GLY.16     | 2.93 | 2.19 | 25.85 |
| 3SE8.PDB | O, L.ILE.75    | N, L.ALA.19    | H, L.ALA.19     | 2.95 | 2.15 | 18.92 |
| 3SE8.PDB | O, L.LEU.73    | N, L.LEU.21    | H, L.LEU.21     | 2.86 | 2.04 | 13.81 |
| 3SE8.PDB | O, L.SER.7     | N, L.PHE.22    | H, L.PHE.22     | 2.87 | 2.02 | 8.84  |
| 3SE8.PDB | O, L.PHE.71    | N, L.CYS.23    | H, L.CYS.23     | 2.82 | 2.00 | 14.57 |
| 3SE8.PDB | O, L.THR.5     | N, L.LYS.24    | H, L.LYS.24     | 2.96 | 2.11 | 8.02  |
| 3SE8.PDB | OD1, L.ASP.70  | NZ, L.LYS.24   | HZ3, L.LYS.24   | 2.62 | 1.80 | 18.41 |
| 3SE8.PDB | O, L.THR.69    | N, L.ALA.25    | H, L.ALA.25     | 2.86 | 2.08 | 21.04 |
| 3SE8.PDB | OG1, L.THR.51  | N, L.MET.33    | H, L.MET.33     | 2.91 | 2.13 | 21.08 |
| 3SE8.PDB | O, L.ILE.48    | N, L.TRP.35    | H, L.TRP.35     | 2.90 | 2.11 | 18.66 |
| 3SE8.PDB | O, L.TYR.87    | N, L.TYR.36    | H, L.TYR.36     | 2.80 | 1.98 | 13.67 |
| 3SE8.PDB | O, L.ARG.45    | N, L.GLN.37    | H, L.GLN.37     | 2.76 | 1.94 | 13.35 |
| 3SE8.PDB | OH, L.TYR.86   | NE2, L.GLN.37  | HE21, L.GLN.37  | 2.98 | 2.15 | 12.85 |
| 3SE8.PDB | O, L.VAL.85    | N, L.LYS.38    | H, L.LYS.38     | 2.76 | 1.91 | 8.80  |
| 3SE8.PDB | O, L.ARG.39    | N, L.GLN.42    | H, L.GLN.42     | 2.97 | 2.15 | 14.92 |
| 3SE8.PDB | O, L.GLN.37    | N, L.ARG.45    | H, L.ARG.45     | 2.81 | 2.02 | 18.98 |
| 3SE8.PDB | O, L.TRP.35    | N, L.LEU.47    | H, L.LEU.47     | 2.85 | 1.99 | 4.76  |
| 3SE8.PDB | O, L.ARG.53    | N, L.TYR.49    | H, L.TYR.49     | 2.85 | 2.04 | 17.02 |
| 3SE8.PDB | O, L.MET.33    | N, L.THR.51    | H, L.THR.51     | 2.77 | 1.98 | 19.97 |
| 3SE8.PDB | O, L.ASP.50    | N, L.SER.52    | H, L.SER.52     | 2.85 | 2.14 | 29.05 |



|          |                |                |                 |      |      |       |
|----------|----------------|----------------|-----------------|------|------|-------|
| 3SE8.PDB | O, L.TYR_49    | N, L.ARG_53    | H, L.ARG_53     | 2.91 | 2.09 | 16.37 |
| 3SE8.PDB | OD2, L.ASP_50  | NE, L.ARG_53   | HE, L.ARG_53    | 2.87 | 2.02 | 8.47  |
| 3SE8.PDB | O, L.VAL_58    | NH1, L.ARG_54  | HH11, L.ARG_54  | 2.73 | 1.98 | 24.33 |
| 3SE8.PDB | O, L.LEU_47    | N, L.ALA_55    | H, L.ALA_55     | 2.80 | 1.97 | 13.40 |
| 3SE8.PDB | OE1, H.GLN_101 | N, L.SER_56    | H, L.SER_56     | 2.97 | 2.12 | 7.63  |
| 3SE8.PDB | OD2, L.ASP_82  | NE, L.ARG_61   | HE, L.ARG_61    | 2.91 | 2.18 | 26.35 |
| 3SE8.PDB | OD1, L.ASP_82  | NH2, L.ARG_61  | HH21, L.ARG_61  | 2.77 | 1.91 | 2.48  |
| 3SE8.PDB | O, L.THR_74    | N, L.VAL_63    | H, L.VAL_63     | 2.77 | 1.99 | 20.80 |
| 3SE8.PDB | O, L.ASP_70    | N, L.SER_67    | H, L.SER_67     | 2.93 | 2.14 | 19.36 |
| 3SE8.PDB | O, L.CYS_23    | N, L.PHE_71    | H, L.PHE_71     | 2.87 | 2.10 | 23.31 |
| 3SE8.PDB | O, L.SER_65    | N, L.PHE_72    | H, L.PHE_72     | 2.87 | 2.05 | 15.57 |
| 3SE8.PDB | O, L.LEU_21    | N, L.LEU_73    | H, L.LEU_73     | 2.88 | 2.10 | 20.44 |
| 3SE8.PDB | O, L.VAL_63    | N, L.THR_74    | H, L.THR_74     | 2.77 | 1.92 | 5.55  |
| 3SE8.PDB | O, L.ALA_19    | N, L.ILE_75    | H, L.ILE_75     | 2.87 | 2.05 | 14.86 |
| 3SE8.PDB | O, L.ARG_61    | N, L.ASN_76    | H, L.ASN_76     | 2.80 | 1.97 | 11.69 |
| 3SE8.PDB | O, L.GLU_17    | N, L.LEU_78    | H, L.LEU_78     | 2.85 | 2.02 | 13.66 |
| 3SE8.PDB | OD2, L.ASP_82  | N, L.ASP_79    | H, L.ASP_79     | 2.69 | 1.83 | 4.70  |
| 3SE8.PDB | OD2, L.ASP_79  | N, L.GLU_81    | H, L.GLU_81     | 2.90 | 2.04 | 2.10  |
| 3SE8.PDB | O, L.ASP_79    | N, L.ASP_82    | H, L.ASP_82     | 2.84 | 2.00 | 9.57  |
| 3SE8.PDB | O, L.SER_102   | N, L.TYR_86    | H, L.TYR_86     | 2.84 | 2.02 | 14.87 |
| 3SE8.PDB | O, L.TYR_36    | N, L.TYR_87    | H, L.TYR_87     | 2.95 | 2.14 | 16.13 |
| 3SE8.PDB | O, L.THR_34    | N, L.GLN_89    | H, L.GLN_89     | 2.91 | 2.20 | 29.11 |
| 3SE8.PDB | O, L.PHE_97    | N, L.GLN_90    | H, L.GLN_90     | 2.96 | 2.20 | 22.66 |
| 3SE8.PDB | O, L.GLN_90    | N, L.PHE_97    | H, L.PHE_97     | 2.91 | 2.07 | 11.26 |
| 3SE8.PDB | O, L.CYS_88    | N, L.GLY_99    | H, L.GLY_99     | 2.90 | 2.07 | 12.93 |
| 3SE8.PDB | OE1, L.GLN_6   | N, L.GLY_101   | H, L.GLY_101    | 2.82 | 2.11 | 29.29 |
| 3SE8.PDB | O, L.TYR_86    | N, L.SER_102   | H, L.SER_102    | 2.87 | 2.06 | 17.39 |
| 3SE8.PDB | O, L.GLY_9     | N, L.GLU_103   | H, L.GLU_103    | 2.90 | 2.06 | 7.87  |
| 3SE8.PDB | O, L.ALA_84    | N, L.LEU_104   | H, L.LEU_104    | 2.85 | 2.00 | 5.96  |
| 3SE8.PDB | O, L.LEU_11    | N, L.GLU_105   | H, L.GLU_105    | 2.77 | 1.92 | 5.93  |
| 3SE8.PDB | O, L.LEU_13    | N, L.HIS_107   | H, L.HIS_107    | 2.81 | 1.97 | 8.56  |
| 3SE8.PDB | O, L.THR_109   | NE, L.ARG_108  | HE, L.ARG_108   | 2.88 | 2.04 | 10.14 |
| 3SE8.PDB | O, L.ASP_170   | NH1, L.ARG_108 | HH11, L.ARG_108 | 2.96 | 2.12 | 9.70  |
| 3SE8.PDB | O, L.TYR_140   | N, L.ALA_111   | H, L.ALA_111    | 2.78 | 1.95 | 13.81 |
| 3SE8.PDB | O, L.LEU_135   | N, L.PHE_116   | H, L.PHE_116    | 2.96 | 2.16 | 19.15 |
| 3SE8.PDB | O, L.VAL_133   | N, L.PHE_118   | H, L.PHE_118    | 2.81 | 2.01 | 18.69 |
| 3SE8.PDB | OG, L.SER_131  | NE2, L.GLN_124 | HE22, L.GLN_124 | 2.53 | 1.70 | 11.07 |
| 3SE8.PDB | O, L.ASP_122   | N, L.LYS_126   | H, L.LYS_126    | 2.78 | 1.93 | 8.17  |
| 3SE8.PDB | O, L.GLN_124   | N, L.SER_127   | H, L.SER_127    | 2.84 | 2.04 | 18.54 |
| 3SE8.PDB | O, L.LEU_125   | N, L.GLY_128   | H, L.GLY_128    | 2.82 | 1.97 | 6.06  |
| 3SE8.PDB | O, L.LEU_181   | N, L.ALA_130   | H, L.ALA_130    | 2.63 | 1.79 | 9.50  |
| 3SE8.PDB | OE1, L.GLN_124 | N, L.SER_131   | H, L.SER_131    | 2.86 | 2.08 | 21.14 |
| 3SE8.PDB | O, L.LEU_179   | N, L.VAL_132   | H, L.VAL_132    | 2.81 | 1.96 | 9.07  |
| 3SE8.PDB | O, L.SER_177   | N, L.CYS_134   | H, L.CYS_134    | 2.82 | 1.99 | 11.76 |
| 3SE8.PDB | O, L.PHE_116   | N, L.LEU_135   | H, L.LEU_135    | 2.83 | 2.00 | 13.84 |
| 3SE8.PDB | O, L.LEU_175   | N, L.LEU_136   | H, L.LEU_136    | 2.76 | 1.91 | 3.24  |
| 3SE8.PDB | O, L.SER_114   | N, L.ASN_137   | H, L.ASN_137    | 2.82 | 1.98 | 11.18 |
| 3SE8.PDB | O, L.TYR_173   | N, L.PHE_139   | H, L.PHE_139    | 2.79 | 1.99 | 16.94 |
| 3SE8.PDB | O, L.ALA_111   | N, L.TYR_140   | H, L.TYR_140    | 2.99 | 2.17 | 14.53 |
| 3SE8.PDB | OE2, L.GLU_103 | NH2, L.ARG_142 | HH22, L.ARG_142 | 2.84 | 2.00 | 11.39 |
| 3SE8.PDB | O, L.THR_197   | N, L.LYS_145   | H, L.LYS_145    | 2.99 | 2.15 | 9.49  |
| 3SE8.PDB | O, L.GLU_195   | N, L.GLN_147   | H, L.GLN_147    | 2.92 | 2.09 | 11.46 |
| 3SE8.PDB | OE1, L.GLU_195 | NE2, L.GLN_147 | HE21, L.GLN_147 | 2.66 | 1.93 | 26.32 |
| 3SE8.PDB | OG, L.SER_177  | NE1, L.TRP_148 | HE1, L.TRP_148  | 2.88 | 2.08 | 18.18 |
| 3SE8.PDB | O, L.ALA_193   | N, L.LYS_149   | H, L.LYS_149    | 2.82 | 1.98 | 10.28 |
| 3SE8.PDB | O, L.ALA_153   | N, L.VAL_150   | H, L.VAL_150    | 2.96 | 2.16 | 18.37 |
| 3SE8.PDB | O, L.VAL_191   | N, L.ASP_151   | H, L.ASP_151    | 2.77 | 1.95 | 13.90 |
| 3SE8.PDB | O, L.TRP_148   | N, L.GLN_155   | H, L.GLN_155    | 2.82 | 1.99 | 12.31 |

|          |                |                |                 |      |      |       |
|----------|----------------|----------------|-----------------|------|------|-------|
| 3SE8.PDB | O, L_ALA_153   | NE2, L_GLN_155 | HE21, L_GLN_155 | 2.94 | 2.12 | 14.25 |
| 3SE8.PDB | O, L_SER_176   | N, L_SER_162   | H, L_SER_162    | 2.99 | 2.21 | 20.46 |
| 3SE8.PDB | O, H_PRO_167   | OG, L_SER_162  | HG, L_SER_162   | 2.71 | 1.98 | 23.05 |
| 3SE8.PDB | O, L_SER_174   | N, L_THR_164   | H, L_THR_164    | 2.92 | 2.10 | 13.88 |
| 3SE8.PDB | O, L_SER_171   | NE2, L_GLN_166 | HE21, L_GLN_166 | 2.94 | 2.11 | 13.32 |
| 3SE8.PDB | O, L_VAL_106   | NE2, L_GLN_166 | HE22, L_GLN_166 | 2.84 | 2.02 | 15.85 |
| 3SE8.PDB | O, L_THR_172   | N, L_ASP_167   | H, L_ASP_167    | 2.84 | 1.99 | 3.58  |
| 3SE8.PDB | OD2, L_ASP_167 | N, L_LYS_169   | H, L_LYS_169    | 2.88 | 2.07 | 16.82 |
| 3SE8.PDB | OD2, L_ASP_167 | N, L_ASP_170   | H, L_ASP_170    | 2.87 | 2.05 | 15.65 |
| 3SE8.PDB | OD1, L_ASP_170 | N, L_THR_172   | H, L_THR_172    | 2.93 | 2.11 | 15.74 |
| 3SE8.PDB | OD1, L_ASP_170 | OG1, L_THR_172 | HG1, L_THR_172  | 2.49 | 1.68 | 7.38  |
| 3SE8.PDB | O, L_PHE_139   | N, L_TYR_173   | H, L_TYR_173    | 2.84 | 2.00 | 11.94 |
| 3SE8.PDB | OG1, L_THR_164 | N, L_SER_174   | H, L_SER_174    | 2.99 | 2.17 | 15.57 |
| 3SE8.PDB | O, L_LEU_136   | N, L_LEU_175   | H, L_LEU_175    | 2.83 | 2.02 | 17.07 |
| 3SE8.PDB | O, L_SER_162   | N, L_SER_176   | H, L_SER_176    | 2.98 | 2.17 | 16.25 |
| 3SE8.PDB | O, L_CYS_134   | N, L_SER_177   | H, L_SER_177    | 2.87 | 2.05 | 14.69 |
| 3SE8.PDB | O, L_GLN_160   | N, L_THR_178   | H, L_THR_178    | 2.92 | 2.11 | 17.07 |
| 3SE8.PDB | O, L_VAL_132   | N, L_LEU_179   | H, L_LEU_179    | 2.77 | 2.01 | 22.55 |
| 3SE8.PDB | O, L_ASN_158   | N, L_THR_180   | H, L_THR_180    | 2.97 | 2.13 | 11.98 |
| 3SE8.PDB | O, L_ALA_130   | N, L_LEU_181   | H, L_LEU_181    | 2.83 | 1.98 | 9.00  |
| 3SE8.PDB | O, L_GLY_128   | N, L_LYS_183   | H, L_LYS_183    | 2.93 | 2.10 | 13.14 |
| 3SE8.PDB | O, L_SER_182   | N, L_TYR_186   | H, L_TYR_186    | 2.84 | 2.00 | 10.56 |
| 3SE8.PDB | O, L_LYS_183   | N, L_GLU_187   | H, L_GLU_187    | 2.94 | 2.13 | 17.20 |
| 3SE8.PDB | OD1, L_ASP_151 | N, L_VAL_191   | H, L_VAL_191    | 2.92 | 2.06 | 1.84  |
| 3SE8.PDB | O, L_PHE_209   | N, L_TYR_192   | H, L_TYR_192    | 2.97 | 2.12 | 6.17  |
| 3SE8.PDB | O, L_LYS_149   | N, L_ALA_193   | H, L_ALA_193    | 2.91 | 2.16 | 23.94 |
| 3SE8.PDB | O, L_LYS_207   | N, L_CYS_194   | H, L_CYS_194    | 2.97 | 2.16 | 16.78 |
| 3SE8.PDB | O, L_GLN_147   | N, L_GLU_195   | H, L_GLU_195    | 2.83 | 1.99 | 10.05 |
| 3SE8.PDB | O, L_VAL_205   | N, L_VAL_196   | H, L_VAL_196    | 2.74 | 1.90 | 10.53 |
| 3SE8.PDB | O, L_LYS_145   | N, L_THR_197   | H, L_THR_197    | 2.83 | 2.01 | 13.35 |
| 3SE8.PDB | O, L_PRO_141   | NE2, L_HIS_198 | HE2, L_HIS_198  | 2.98 | 2.16 | 13.12 |
| 3SE8.PDB | ND1, L_HIS_198 | N, L_GLY_200   | H, L_GLY_200    | 2.98 | 2.13 | 8.19  |
| 3SE8.PDB | O, L_HIS_198   | N, L_LEU_201   | H, L_LEU_201    | 2.88 | 2.03 | 8.01  |
| 3SE8.PDB | O, L_VAL_196   | N, L_VAL_205   | H, L_VAL_205    | 2.94 | 2.17 | 21.99 |
| 3SE8.PDB | O, L_TYR_192   | N, L_PHE_209   | H, L_PHE_209    | 2.99 | 2.20 | 20.60 |
| 3SE8.PDB | O, L_LYS_190   | N, L_ARG_211   | H, L_ARG_211    | 2.70 | 1.88 | 14.42 |
| 3SE8.PDB | O, L_HIS_189   | NE, L_ARG_211  | HE, L_ARG_211   | 2.74 | 1.90 | 11.40 |

Table 1681: 3SE8-specific side chain and main chain hydrogen bonding analysis. In this table, a PDB file is specified with a four-letter PDB ID, except that the names of the PDB files corresponding to the single NMR structural model split from the NMR ensemble is specified with a four-letter PDB ID in addition to a hyphen followed by the single NMR structural model numeric ID, the residue naming scheme is **Chain ID\_residue name\_residue number**,  $\angle ADH$  represents the angle formed by acceptor (A), donor (D) and hydrogen (H) ( $\angle ADH$ ).

| PDB      | Acceptor (A)   | Donor (D)      | Hydrogen (H)    | D-A (Å) | H-A (Å) | $\angle ADH(^{\circ})$ |
|----------|----------------|----------------|-----------------|---------|---------|------------------------|
| 3SE9.PDB | OE1, G_GLN_103 | N, G_LEU_52    | H, G_LEU_52     | 2.89    | 2.03    | 2.17                   |
| 3SE9.PDB | O, G_CYS_218   | N, G_PHE_53    | H, G_PHE_53     | 2.97    | 2.17    | 17.99                  |
| 3SE9.PDB | O, G_HIS_216   | N, G_ALA_55    | H, G_ALA_55     | 2.87    | 2.11    | 23.70                  |
| 3SE9.PDB | O, G_VAL_75    | N, G_SER_56    | H, G_SER_56     | 2.93    | 2.15    | 21.60                  |
| 3SE9.PDB | OG, G_SER_56   | N, G_ALA_58    | H, G_ALA_58     | 2.98    | 2.14    | 10.37                  |
| 3SE9.PDB | OD1, G_ASN_67  | N, G_LYS_59    | H, G_LYS_59     | 2.90    | 2.07    | 12.58                  |
| 3SE9.PDB | OE2, G_GLU_62  | N, G_GLU_64    | H, G_GLU_64     | 2.88    | 2.04    | 11.06                  |
| 3SE9.PDB | O, G_SER_209   | N, G_VAL_65    | H, G_VAL_65     | 2.97    | 2.18    | 19.43                  |
| 3SE9.PDB | OE2, G_GLU_64  | ND1, G_HIS_66  | HD1, G_HIS_66   | 2.73    | 1.88    | 8.47                   |
| 3SE9.PDB | OE1, G_GLU_64  | N, G_ASN_67    | H, G_ASN_67     | 2.81    | 1.99    | 14.35                  |
| 3SE9.PDB | OE1, G_GLU_64  | ND2, G_ASN_67  | HD21, G_ASN_67  | 2.83    | 2.01    | 14.03                  |
| 3SE9.PDB | O, G_VAL_65    | N, G_TRP_69    | H, G_TRP_69     | 2.98    | 2.13    | 9.76                   |
| 3SE9.PDB | O, G_HIS_66    | N, G_ALA_70    | H, G_ALA_70     | 2.90    | 2.08    | 14.89                  |
| 3SE9.PDB | O, G_ASN_67    | N, G_THR_71    | H, G_THR_71     | 2.96    | 2.22    | 26.00                  |
| 3SE9.PDB | O, G_TRP_69    | N, G_ALA_73    | H, G_ALA_73     | 2.87    | 2.02    | 9.06                   |
| 3SE9.PDB | O, G_ALA_70    | N, G_CYS_74    | H, G_CYS_74     | 2.89    | 2.10    | 19.93                  |
| 3SE9.PDB | O, G_CYS_54    | N, G_VAL_75    | H, G_VAL_75     | 2.97    | 2.15    | 14.48                  |
| 3SE9.PDB | OD2, G_ASP_78  | N, G_ASN_80    | H, G_ASN_80     | 2.89    | 2.12    | 23.01                  |
| 3SE9.PDB | O, G_SER_244   | N, G_ILE_84    | H, G_ILE_84     | 2.90    | 2.12    | 20.23                  |
| 3SE9.PDB | O, G_VAL_242   | N, G_LEU_86    | H, G_LEU_86     | 2.84    | 1.98    | 4.71                   |
| 3SE9.PDB | O, G_GLY_237   | N, G_PHE_93    | H, G_PHE_93     | 2.80    | 1.98    | 13.97                  |
| 3SE9.PDB | O, G_GLY_235   | N, G_MET_95    | H, G_MET_95     | 2.84    | 2.07    | 22.25                  |
| 3SE9.PDB | O, G_ASN_98    | N, G_VAL_101   | H, G_VAL_101    | 2.89    | 2.09    | 18.37                  |
| 3SE9.PDB | OD1, G_ASN_99  | NE2, G_GLN_103 | HE21, G_GLN_103 | 2.75    | 1.96    | 19.57                  |
| 3SE9.PDB | O, G_THR_50    | NE2, G_GLN_103 | HE22, G_GLN_103 | 2.73    | 1.94    | 19.46                  |
| 3SE9.PDB | O, G_VAL_101   | N, G_GLN_105   | H, G_GLN_105    | 2.94    | 2.12    | 13.43                  |
| 3SE9.PDB | O, G_MET_104   | N, G_VAL_108   | H, G_VAL_108    | 2.99    | 2.15    | 12.10                  |
| 3SE9.PDB | O, G_GLN_105   | N, G_ILE_109   | H, G_ILE_109    | 2.94    | 2.09    | 6.88                   |
| 3SE9.PDB | O, G_GLU_106   | N, G_SER_110   | H, G_SER_110    | 2.94    | 2.14    | 17.70                  |
| 3SE9.PDB | O, G_ASP_107   | N, G_LEU_111   | H, G_LEU_111    | 2.78    | 1.94    | 10.68                  |
| 3SE9.PDB | O, G_VAL_108   | N, G_TRP_112   | H, G_TRP_112    | 2.98    | 2.14    | 9.89                   |
| 3SE9.PDB | O, G_ILE_109   | N, G_ASP_113   | H, G_ASP_113    | 2.94    | 2.20    | 25.93                  |
| 3SE9.PDB | O, G_TRP_112   | N, G_LEU_116   | H, G_LEU_116    | 2.84    | 2.03    | 15.60                  |
| 3SE9.PDB | O, G_ILE_201   | N, G_LYS_121   | H, G_LYS_121    | 2.90    | 2.06    | 12.24                  |
| 3SE9.PDB | OE1, G_GLN_117 | NZ, G_LYS_121  | HZ3, G_LYS_121  | 2.58    | 1.83    | 27.32                  |
| 3SE9.PDB | O, G_GLN_432   | N, G_LEU_122   | H, G_LEU_122    | 2.88    | 2.03    | 6.48                   |
| 3SE9.PDB | O, G_LYS_121   | N, G_ILE_201   | H, G_ILE_201    | 2.95    | 2.11    | 10.92                  |
| 3SE9.PDB | O, G_PRO_437   | NZ, G_LYS_207  | HZ2, G_LYS_207  | 2.83    | 2.09    | 27.83                  |
| 3SE9.PDB | OE2, G_GLU_64  | N, G_ASP_211   | H, G_ASP_211    | 2.75    | 1.90    | 8.78                   |
| 3SE9.PDB | O, G_ILE_251   | N, G_ILE_215   | H, G_ILE_215    | 2.82    | 1.98    | 12.02                  |
| 3SE9.PDB | O, G_ALA_55    | N, G_HIS_216   | H, G_HIS_216    | 2.77    | 1.91    | 2.26                   |
| 3SE9.PDB | OG1, G_THR_248 | N, G_TYR_217   | H, G_TYR_217    | 2.95    | 2.09    | 2.54                   |
| 3SE9.PDB | O, G_PHE_53    | N, G_CYS_218   | H, G_CYS_218    | 2.85    | 2.07    | 20.62                  |
| 3SE9.PDB | O, G_VAL_489   | N, G_VAL_224   | H, G_VAL_224    | 2.98    | 2.16    | 15.19                  |
| 3SE9.PDB | O, G_LYS_487   | N, G_LEU_226   | H, G_LEU_226    | 2.88    | 2.08    | 18.00                  |
| 3SE9.PDB | O, G_SER_243   | N, G_LYS_227   | H, G_LYS_227    | 2.60    | 1.80    | 16.43                  |
| 3SE9.PDB | O, G_LYS_485   | N, G_CYS_228   | H, G_CYS_228    | 2.85    | 2.03    | 14.69                  |
| 3SE9.PDB | O, G_ASN_241   | N, G_ASN_229   | H, G_ASN_229    | 2.78    | 1.96    | 14.08                  |
| 3SE9.PDB | O, G_PHE_93    | N, G_GLY_237   | H, G_GLY_237    | 2.96    | 2.25    | 29.34                  |
| 3SE9.PDB | O, G_GLU_91    | N, G_CYS_239   | H, G_CYS_239    | 2.74    | 2.00    | 26.00                  |
| 3SE9.PDB | OD2, G_ASP_230 | N, G_LYS_240   | H, G_LYS_240    | 2.84    | 2.00    | 11.61                  |
| 3SE9.PDB | OD1, G_ASP_230 | N, G_ASN_241   | H, G_ASN_241    | 2.75    | 2.01    | 25.57                  |
| 3SE9.PDB | O, G_LYS_227   | N, G_SER_243   | H, G_SER_243    | 2.98    | 2.15    | 13.38                  |
| 3SE9.PDB | OE2, G_GLU_83  | OG, G_SER_243  | HG, G_SER_243   | 2.65    | 1.89    | 17.63                  |
| 3SE9.PDB | O, G_ILE_84    | N, G_SER_244   | H, G_SER_244    | 2.82    | 2.02    | 19.32                  |
| 3SE9.PDB | O, G_ILE_225   | N, G_VAL_245   | H, G_VAL_245    | 2.83    | 2.01    | 13.24                  |
| 3SE9.PDB | O, G_TYR_217   | N, G_THR_248   | H, G_THR_248    | 2.73    | 1.92    | 16.59                  |

|          |                |                |                 |      |      |       |
|----------|----------------|----------------|-----------------|------|------|-------|
| 3SE9.PDB | OH, G_TYR_486  | ND1, G_HIS_249 | HD1, G_HIS_249  | 2.73 | 1.91 | 13.84 |
| 3SE9.PDB | O, G_ILE_215   | N, G_ILE_251   | H, G_ILE_251    | 2.80 | 1.94 | 2.64  |
| 3SE9.PDB | O, G_LYS_252   | N, G_VAL_254   | H, G_VAL_254    | 2.91 | 2.20 | 29.72 |
| 3SE9.PDB | O, G_HIS_375   | N, G_THR_257   | H, G_THR_257    | 3.00 | 2.26 | 26.89 |
| 3SE9.PDB | O, G_GLU_370   | OG1, G_THR_257 | HG1, G_THR_257  | 2.66 | 1.88 | 15.46 |
| 3SE9.PDB | O, G_ILE_371   | NE2, G_GLN_258 | HE22, G_GLN_258 | 2.86 | 2.01 | 8.57  |
| 3SE9.PDB | O, G_THR_257   | N, G_LEU_259   | H, G_LEU_259    | 2.60 | 1.87 | 26.09 |
| 3SE9.PDB | O, G_GLY_451   | N, G_LEU_260   | H, G_LEU_260    | 2.95 | 2.15 | 18.25 |
| 3SE9.PDB | O, G_ASN_448   | N, G_ASN_262   | H, G_ASN_262    | 2.69 | 1.86 | 13.26 |
| 3SE9.PDB | OE2, G_GLU_482 | N, G_SER_264   | H, G_SER_264    | 2.65 | 1.82 | 11.12 |
| 3SE9.PDB | O, G_LEU_288   | N, G_ALA_266   | H, G_ALA_266    | 2.85 | 2.12 | 26.29 |
| 3SE9.PDB | O, G_ILE_285   | N, G_ARG_273   | H, G_ARG_273    | 2.81 | 2.03 | 21.22 |
| 3SE9.PDB | O, G_ASN_276   | N, G_ASN_279   | H, G_ASN_279    | 2.76 | 1.96 | 18.81 |
| 3SE9.PDB | OD1, G_ASN_279 | N, G_ALA_281   | H, G_ALA_281    | 2.99 | 2.19 | 18.54 |
| 3SE9.PDB | O, G_ASN_279   | N, G_LYS_282   | H, G_LYS_282    | 2.89 | 2.04 | 7.99  |
| 3SE9.PDB | O, G_LEU_454   | N, G_ILE_284   | H, G_ILE_284    | 2.90 | 2.04 | 2.40  |
| 3SE9.PDB | O, G_ARG_273   | N, G_ILE_285   | H, G_ILE_285    | 2.83 | 1.99 | 11.82 |
| 3SE9.PDB | O, G_ILE_452   | N, G_VAL_286   | H, G_VAL_286    | 2.83 | 1.98 | 5.93  |
| 3SE9.PDB | O, G_ILE_271   | N, G_HIS_287   | H, G_HIS_287    | 2.81 | 1.96 | 6.79  |
| 3SE9.PDB | O, G_SER_264   | NE2, G_HIS_287 | HE2, G_HIS_287  | 2.74 | 1.92 | 14.77 |
| 3SE9.PDB | O, G_THR_450   | N, G_LEU_288   | H, G_LEU_288    | 3.00 | 2.19 | 16.95 |
| 3SE9.PDB | O, G_SER_447   | N, G_ILE_294   | H, G_ILE_294    | 2.94 | 2.13 | 15.34 |
| 3SE9.PDB | O, G_GLU_332   | N, G_ASN_295   | H, G_ASN_295    | 2.88 | 2.07 | 17.19 |
| 3SE9.PDB | O, G_TYR_330   | N, G_THR_297   | H, G_THR_297    | 2.76 | 1.95 | 15.38 |
| 3SE9.PDB | O, G_ILE_443   | N, G_ARG_298   | H, G_ARG_298    | 2.81 | 1.99 | 16.03 |
| 3SE9.PDB | O, G_ILE_326   | NH1, G_ARG_298 | HH11, G_ARG_298 | 2.73 | 1.91 | 14.56 |
| 3SE9.PDB | O, G_GLY_441   | NH2, G_ARG_298 | HH21, G_ARG_298 | 2.64 | 1.78 | 1.00  |
| 3SE9.PDB | O, G_ILE_439   | NH2, G_ARG_298 | HH22, G_ARG_298 | 2.74 | 1.95 | 20.11 |
| 3SE9.PDB | OD1, G_ASP_325 | N, G_ARG_327   | H, G_ARG_327    | 2.97 | 2.13 | 12.25 |
| 3SE9.PDB | OE1, G_GLN_422 | NH1, G_ARG_327 | HH11, G_ARG_327 | 2.62 | 1.84 | 19.91 |
| 3SE9.PDB | O, G_THR_297   | N, G_TYR_330   | H, G_TYR_330    | 2.97 | 2.18 | 20.21 |
| 3SE9.PDB | O, G_LEU_416   | N, G_CYS_331   | H, G_CYS_331    | 2.98 | 2.20 | 20.74 |
| 3SE9.PDB | O, G_ASN_295   | N, G_GLU_332   | H, G_GLU_332    | 2.81 | 1.99 | 12.99 |
| 3SE9.PDB | O, G_ILE_414   | N, G_ILE_333   | H, G_ILE_333    | 2.98 | 2.19 | 19.45 |
| 3SE9.PDB | O, G_ASN_334   | N, G_TRP_338   | H, G_TRP_338    | 2.98 | 2.12 | 4.45  |
| 3SE9.PDB | O, G_LEU_390   | NE1, G_TRP_338 | HE1, G_TRP_338  | 2.40 | 1.59 | 15.54 |
| 3SE9.PDB | O, G_GLY_335   | N, G_ASN_339   | H, G_ASN_339    | 2.97 | 2.13 | 11.25 |
| 3SE9.PDB | O, G_TRP_338   | N, G_LEU_342   | H, G_LEU_342    | 2.95 | 2.13 | 14.49 |
| 3SE9.PDB | O, G_ASN_339   | N, G_LYS_343   | H, G_LYS_343    | 2.90 | 2.16 | 25.67 |
| 3SE9.PDB | O, G_VAL_341   | N, G_VAL_345   | H, G_VAL_345    | 2.84 | 2.07 | 22.06 |
| 3SE9.PDB | O, G_GLN_344   | N, G_LYS_348   | H, G_LYS_348    | 2.93 | 2.17 | 23.65 |
| 3SE9.PDB | O, G_VAL_345   | N, G_LEU_349   | H, G_LEU_349    | 2.90 | 2.08 | 13.64 |
| 3SE9.PDB | O, G_THR_346   | N, G_LYS_350   | H, G_LYS_350    | 2.84 | 2.03 | 16.44 |
| 3SE9.PDB | O, G_LEU_349   | N, G_HIS_352   | H, G_HIS_352    | 2.89 | 2.18 | 29.71 |
| 3SE9.PDB | O, G_LYS_350   | N, G_ASN_355   | H, G_ASN_355    | 2.78 | 1.99 | 18.73 |
| 3SE9.PDB | O, G_PHE_353   | N, G_LYS_357   | H, G_LYS_357    | 2.82 | 1.98 | 9.00  |
| 3SE9.PDB | O, G_GLU_466   | N, G_ILE_360   | H, G_ILE_360    | 2.86 | 2.07 | 19.89 |
| 3SE9.PDB | OD1, G_ASN_393 | N, G_PHE_361   | H, G_PHE_361    | 2.87 | 2.02 | 7.09  |
| 3SE9.PDB | O, G_PHE_468   | N, G_GLN_362   | H, G_GLN_362    | 2.86 | 2.06 | 18.17 |
| 3SE9.PDB | O, G_PHE_361   | NE2, G_GLN_362 | HE22, G_GLN_362 | 2.61 | 1.80 | 15.95 |
| 3SE9.PDB | O, H_THR_53    | N, G_ASP_368   | H, G_ASP_368    | 2.97 | 2.15 | 15.24 |
| 3SE9.PDB | O, G_ASP_368   | N, G_ILE_371   | H, G_ILE_371    | 2.96 | 2.14 | 15.47 |
| 3SE9.PDB | O, G_ASP_368   | N, G_THR_372   | H, G_THR_372    | 2.96 | 2.15 | 17.04 |
| 3SE9.PDB | O, G_CYS_385   | N, G_HIS_374   | H, G_HIS_374    | 2.80 | 2.04 | 23.10 |
| 3SE9.PDB | O, G_THR_257   | ND1, G_HIS_374 | HD1, G_HIS_374  | 2.94 | 2.14 | 18.49 |
| 3SE9.PDB | O, G_GLU_381   | N, G_CYS_378   | H, G_CYS_378    | 2.81 | 2.03 | 21.46 |
| 3SE9.PDB | O, G_CYS_378   | N, G_GLU_381   | H, G_GLU_381    | 2.91 | 2.07 | 11.74 |
| 3SE9.PDB | O, G_PHE_376   | N, G_PHE_383   | H, G_PHE_383    | 2.77 | 1.93 | 9.82  |

|          |                |                |                 |      |      |       |
|----------|----------------|----------------|-----------------|------|------|-------|
| 3SE9.PDB | O, G_LYS_419   | N, G_TYR_384   | H, G_TYR_384    | 2.88 | 2.12 | 23.39 |
| 3SE9.PDB | O, G_HIS_374   | N, G_CYS_385   | H, G_CYS_385    | 2.82 | 2.01 | 16.28 |
| 3SE9.PDB | OD1, G_ASN_386 | N, G_THR_388   | H, G_THR_388    | 2.98 | 2.13 | 7.03  |
| 3SE9.PDB | O, G_THR_415   | NE2, G_GLN_389 | HE21, G_GLN_389 | 2.67 | 1.89 | 20.77 |
| 3SE9.PDB | O, G_THR_387   | N, G_LEU_390   | H, G_LEU_390    | 2.79 | 2.00 | 19.51 |
| 3SE9.PDB | O, G_PHE_361   | ND2, G_ASN_393 | HD21, G_ASN_393 | 2.74 | 1.88 | 3.74  |
| 3SE9.PDB | O, G_ILE_333   | N, G_ILE_414   | H, G_ILE_414    | 2.79 | 1.93 | 6.04  |
| 3SE9.PDB | O, G_CYS_331   | N, G_LEU_416   | H, G_LEU_416    | 2.86 | 2.03 | 11.55 |
| 3SE9.PDB | O, G_ALA_329   | N, G_CYS_418   | H, G_CYS_418    | 2.84 | 2.00 | 9.75  |
| 3SE9.PDB | O, G_TYR_384   | N, G_LYS_419   | H, G_LYS_419    | 2.88 | 2.10 | 21.78 |
| 3SE9.PDB | O, G_ARG_327   | N, G_ILE_420   | H, G_ILE_420    | 2.87 | 2.06 | 16.89 |
| 3SE9.PDB | O, G_ALA_433   | N, G_ILE_424   | H, G_ILE_424    | 2.96 | 2.14 | 15.31 |
| 3SE9.PDB | OE2, G_GLU_370 | N, G_ASN_425   | H, G_ASN_425    | 2.82 | 1.97 | 7.07  |
| 3SE9.PDB | OE1, G_GLU_370 | ND2, G_ASN_425 | HD21, G_ASN_425 | 2.86 | 2.02 | 9.78  |
| 3SE9.PDB | O, G_GLY_431   | N, G_MET_426   | H, G_MET_426    | 2.79 | 1.93 | 2.68  |
| 3SE9.PDB | O, G_MET_426   | N, G_GLY_429   | H, G_GLY_429    | 2.72 | 1.88 | 8.66  |
| 3SE9.PDB | O, G_ILE_424   | N, G_ALA_433   | H, G_ALA_433    | 2.93 | 2.10 | 11.85 |
| 3SE9.PDB | O, G_VAL_120   | N, G_MET_434   | H, G_MET_434    | 2.93 | 2.19 | 26.00 |
| 3SE9.PDB | O, G_GLN_422   | N, G_TYR_435   | H, G_TYR_435    | 2.67 | 1.86 | 16.15 |
| 3SE9.PDB | O, G_ARG_298   | N, G_ILE_443   | H, G_ILE_443    | 2.97 | 2.13 | 10.43 |
| 3SE9.PDB | OD1, G_ASN_295 | ND2, G_ASN_444 | HD21, G_ASN_444 | 2.93 | 2.17 | 24.18 |
| 3SE9.PDB | OG1, G_THR_297 | ND2, G_ASN_444 | HD22, G_ASN_444 | 2.97 | 2.23 | 26.41 |
| 3SE9.PDB | O, G_ILE_294   | N, G_SER_447   | H, G_SER_447    | 2.99 | 2.16 | 12.03 |
| 3SE9.PDB | O, G_VAL_292   | N, G_ILE_449   | H, G_ILE_449    | 2.90 | 2.05 | 8.11  |
| 3SE9.PDB | O, G_VAL_286   | N, G_ILE_452   | H, G_ILE_452    | 2.96 | 2.20 | 22.66 |
| 3SE9.PDB | O, G_GLN_258   | N, G_LEU_453   | H, G_LEU_453    | 2.91 | 2.06 | 4.64  |
| 3SE9.PDB | O, G_ILE_284   | N, G_LEU_454   | H, G_LEU_454    | 2.88 | 2.08 | 17.98 |
| 3SE9.PDB | O, G_ARG_469   | N, G_THR_455   | H, G_THR_455    | 2.88 | 2.05 | 12.96 |
| 3SE9.PDB | OE2, G_GLU_466 | NH1, G_ARG_456 | HH11, G_ARG_456 | 2.71 | 1.88 | 12.87 |
| 3SE9.PDB | O, G_THR_467   | N, G_ASP_457   | H, G_ASP_457    | 2.81 | 1.96 | 8.69  |
| 3SE9.PDB | O, G_THR_358   | N, G_GLU_466   | H, G_GLU_466    | 2.63 | 1.83 | 17.35 |
| 3SE9.PDB | O, G_ILE_360   | N, G_PHE_468   | H, G_PHE_468    | 2.76 | 1.94 | 14.82 |
| 3SE9.PDB | O, G_THR_455   | N, G_ARG_469   | H, G_ARG_469    | 2.95 | 2.15 | 17.67 |
| 3SE9.PDB | O, G_LEU_453   | N, G_GLY_471   | H, G_GLY_471    | 2.80 | 2.02 | 20.51 |
| 3SE9.PDB | OE1, G_GLN_105 | NE1, G_TRP_479 | HE1, G_TRP_479  | 2.69 | 1.89 | 17.56 |
| 3SE9.PDB | O, G_LYS_476   | N, G_ARG_480   | H, G_ARG_480    | 2.94 | 2.14 | 18.76 |
| 3SE9.PDB | O, G_ASP_477   | N, G_SER_481   | H, G_SER_481    | 2.99 | 2.25 | 26.30 |
| 3SE9.PDB | O, G_TRP_479   | N, G_LEU_483   | H, G_LEU_483    | 2.82 | 2.04 | 21.47 |
| 3SE9.PDB | O, G_LEU_483   | N, G_TYR_486   | H, G_TYR_486    | 2.94 | 2.11 | 13.26 |
| 3SE9.PDB | O, G_ASN_92    | NZ, G_LYS_487  | HZ2, G_LYS_487  | 2.93 | 2.06 | 7.72  |
| 3SE9.PDB | OE1, G_GLU_91  | NZ, G_LYS_487  | HZ3, G_LYS_487  | 2.63 | 1.86 | 24.78 |
| 3SE9.PDB | O, G_VAL_224   | N, G_VAL_489   | H, G_VAL_489    | 2.96 | 2.10 | 4.39  |
| 3SE9.PDB | O, G_LYS_46    | N, G_GLN_490   | H, G_GLN_490    | 2.80 | 1.98 | 15.13 |
| 3SE9.PDB | O, G_GLY_222   | N, G_ILE_491   | H, G_ILE_491    | 2.99 | 2.20 | 21.02 |
| 3SE9.PDB | O, G_VAL_44    | N, G_GLU_492   | H, G_GLU_492    | 2.87 | 2.09 | 21.24 |
| 3SE9.PDB | O, H_TRP_23    | N, H_VAL_5     | H, H_VAL_5      | 2.93 | 2.09 | 11.74 |
| 3SE9.PDB | O, H_TYR_90    | NE2, H_GLN_6   | HE21, H_GLN_6   | 2.96 | 2.10 | 4.89  |
| 3SE9.PDB | O, H_LEU_108   | N, H_GLY_10    | H, H_GLY_10     | 2.94 | 2.16 | 21.74 |
| 3SE9.PDB | O, H_VAL_110   | N, H_LYS_12    | H, H_LYS_12     | 2.90 | 2.09 | 15.31 |
| 3SE9.PDB | O, H_LEU_82C   | N, H_GLY_15    | H, H_GLY_15     | 2.64 | 1.84 | 17.68 |
| 3SE9.PDB | O, H_ILE_82    | N, H_VAL_18    | H, H_VAL_18     | 2.83 | 2.05 | 20.43 |
| 3SE9.PDB | OD1, H_ASP_81  | NE, H_ARG_19   | HE, H_ARG_19    | 2.75 | 1.91 | 10.76 |
| 3SE9.PDB | O, H_MET_80    | N, H_VAL_20    | H, H_VAL_20     | 2.85 | 2.01 | 10.21 |
| 3SE9.PDB | OG, H_SER_7    | N, H_SER_21    | H, H_SER_21     | 2.77 | 1.92 | 7.84  |
| 3SE9.PDB | O, H_VAL_5     | N, H_TRP_23    | H, H_TRP_23     | 2.93 | 2.15 | 21.94 |
| 3SE9.PDB | O, H_SER_25    | N, H_PHE_29    | H, H_PHE_29     | 2.88 | 2.03 | 6.53  |
| 3SE9.PDB | O, H_GLU_26    | N, H_GLU_30    | H, H_GLU_30     | 2.87 | 2.05 | 15.53 |
| 3SE9.PDB | O, H_GLN_95    | N, H_GLU_33    | H, H_GLU_33     | 2.91 | 2.13 | 21.88 |

|          |                |                 |                  |      |      |       |
|----------|----------------|-----------------|------------------|------|------|-------|
| 3SE9.PDB | O, H_VAL_51    | N, H_ILE_35     | H, H_ILE_35      | 2.94 | 2.15 | 19.12 |
| 3SE9.PDB | O, H_ALA_93    | N, H_HIS_35A    | H, H_HIS_35A     | 2.77 | 1.93 | 10.56 |
| 3SE9.PDB | O, H_GLY_49    | N, H_TRP_36     | H, H_TRP_36      | 2.93 | 2.09 | 11.34 |
| 3SE9.PDB | O, H_PHE_91    | N, H_VAL_37     | H, H_VAL_37      | 2.94 | 2.12 | 14.35 |
| 3SE9.PDB | O, H_GLU_46    | N, H_ARG_38     | H, H_ARG_38      | 2.93 | 2.12 | 16.03 |
| 3SE9.PDB | OH, H_TYR_90   | NH1, H_ARG_38   | HH11, H_ARG_38   | 2.99 | 2.21 | 21.73 |
| 3SE9.PDB | OD1, H_ASP_86  | NH1, H_ARG_38   | HH12, H_ARG_38   | 2.86 | 2.03 | 12.66 |
| 3SE9.PDB | O, H_THR_89    | N, H_GLN_39     | H, H_GLN_39      | 2.91 | 2.10 | 16.25 |
| 3SE9.PDB | O, H_GLN_43    | NE2, H_GLN_39   | HE21, H_GLN_39   | 2.88 | 2.07 | 16.30 |
| 3SE9.PDB | O, H_ALA_40    | N, H_GLN_43     | H, H_GLN_43      | 2.88 | 2.07 | 16.77 |
| 3SE9.PDB | O, H_ARG_38    | N, H_GLU_46     | H, H_GLU_46      | 2.90 | 2.11 | 20.67 |
| 3SE9.PDB | O, H_TRP_36    | N, H_ILE_48     | H, H_ILE_48      | 2.76 | 1.91 | 8.76  |
| 3SE9.PDB | O, H_ASN_57    | N, H_TRP_50     | H, H_TRP_50      | 2.97 | 2.24 | 26.24 |
| 3SE9.PDB | OD1, G_ASN_280 | NE1, H_TRP_50   | HE1, H_TRP_50    | 2.86 | 2.03 | 11.46 |
| 3SE9.PDB | O, H_ALA_55    | N, H_LYS_52     | H, H_LYS_52      | 2.82 | 2.02 | 18.64 |
| 3SE9.PDB | O, H_GLU_33    | N, H_THR_52A    | H, H_THR_52A     | 2.97 | 2.15 | 15.80 |
| 3SE9.PDB | O, H_LYS_52    | N, H_GLY_54     | H, H_GLY_54      | 2.87 | 2.11 | 23.24 |
| 3SE9.PDB | O, G_ARG_456   | ND2, H_ASN_57   | HD22, H_ASN_57   | 2.82 | 1.98 | 10.42 |
| 3SE9.PDB | O, H_ILE_48    | N, H_GLY_59     | H, H_GLY_59      | 2.88 | 2.11 | 22.31 |
| 3SE9.PDB | O, H_SER_60    | N, H_ARG_64     | H, H_ARG_64      | 2.81 | 1.98 | 12.96 |
| 3SE9.PDB | OG, G_SER_365  | NH1, H_ARG_64   | HH11, H_ARG_64   | 2.81 | 2.04 | 21.79 |
| 3SE9.PDB | O, H_PRO_61    | N, H_GLN_65     | H, H_GLN_65      | 2.78 | 2.04 | 25.46 |
| 3SE9.PDB | O, H_ASP_62    | N, H_ARG_66     | H, H_ARG_66      | 2.94 | 2.23 | 28.48 |
| 3SE9.PDB | OD2, H_ASP_86  | NH2, H_ARG_66   | HH22, H_ARG_66   | 2.37 | 1.62 | 23.34 |
| 3SE9.PDB | O, H_PHE_63    | N, H_VAL_67     | H, H_VAL_67      | 2.84 | 2.04 | 18.39 |
| 3SE9.PDB | O, H_ASP_81    | N, H_SER_68     | H, H_SER_68      | 2.86 | 2.04 | 15.98 |
| 3SE9.PDB | O, H_THR_52A   | NE, H_ARG_71    | HE, H_ARG_71     | 2.71 | 1.89 | 14.64 |
| 3SE9.PDB | OD2, G_ASP_368 | NH1, H_ARG_71   | HH12, H_ARG_71   | 2.77 | 1.92 | 7.25  |
| 3SE9.PDB | O, H_THR_77    | N, H_ASP_72     | H, H_ASP_72      | 2.80 | 1.97 | 12.39 |
| 3SE9.PDB | O, G_GLY_429   | NH1, H_ARG_73   | HH12, H_ARG_73   | 2.99 | 2.23 | 23.32 |
| 3SE9.PDB | O, H_LEU_75    | OG1, H_THR_77   | HG1, H_THR_77    | 2.67 | 1.90 | 16.77 |
| 3SE9.PDB | O, H_CYS_22    | N, H_ALA_78     | H, H_ALA_78      | 2.72 | 1.89 | 13.13 |
| 3SE9.PDB | O, H_THR_70    | N, H_HIS_79     | H, H_HIS_79      | 2.97 | 2.14 | 11.35 |
| 3SE9.PDB | OG, H_SER_21   | ND1, H_HIS_79   | HD1, H_HIS_79    | 2.69 | 1.93 | 23.16 |
| 3SE9.PDB | O, H_VAL_20    | N, H_MET_80     | H, H_MET_80      | 2.71 | 1.86 | 8.21  |
| 3SE9.PDB | O, H_SER_68    | N, H_ASP_81     | H, H_ASP_81      | 2.93 | 2.09 | 10.84 |
| 3SE9.PDB | O, H_VAL_18    | N, H_ILE_82     | H, H_ILE_82      | 2.83 | 2.01 | 14.83 |
| 3SE9.PDB | OG, H_SER_68   | NH1, H_ARG_82A  | HH12, H_ARG_82A  | 2.84 | 2.02 | 15.25 |
| 3SE9.PDB | OD2, H_ASP_86  | N, H_THR_83     | H, H_THR_83      | 2.88 | 2.05 | 13.61 |
| 3SE9.PDB | O, H_THR_83    | N, H_ASP_86     | H, H_ASP_86      | 2.95 | 2.11 | 10.53 |
| 3SE9.PDB | O, H_GLN_39    | N, H_THR_89     | H, H_THR_89      | 2.98 | 2.19 | 19.31 |
| 3SE9.PDB | O, H_THR_107   | N, H_TYR_90     | H, H_TYR_90      | 2.82 | 1.97 | 6.56  |
| 3SE9.PDB | O, H_VAL_37    | N, H_PHE_91     | H, H_PHE_91      | 2.71 | 1.86 | 7.71  |
| 3SE9.PDB | OE1, H_GLN_6   | N, H_CYS_92     | H, H_CYS_92      | 2.90 | 2.06 | 12.06 |
| 3SE9.PDB | O, H_HIS_35A   | N, H_ALA_93     | H, H_ALA_93      | 2.82 | 2.09 | 27.40 |
| 3SE9.PDB | O, H_LEU_102   | N, H_ARG_94     | H, H_ARG_94      | 2.99 | 2.16 | 14.50 |
| 3SE9.PDB | OD1, H_ASP_101 | NH2, H_ARG_94   | HH21, H_ARG_94   | 2.74 | 1.90 | 10.49 |
| 3SE9.PDB | O, H_LEU_34    | N, H_GLN_95     | H, H_GLN_95      | 2.93 | 2.08 | 7.14  |
| 3SE9.PDB | OH, H_TYR_100E | NE2, H_GLN_100B | HE22, H_GLN_100B | 2.88 | 2.05 | 12.80 |
| 3SE9.PDB | OD1, G_ASN_279 | NE1, H_TRP_100D | HE1, H_TRP_100D  | 2.86 | 2.13 | 26.83 |
| 3SE9.PDB | OH, L_TYR_36   | N, H_PHE_100F   | H, H_PHE_100F    | 2.88 | 2.05 | 11.59 |
| 3SE9.PDB | O, H_CYS_92    | N, H_GLY_104    | H, H_GLY_104     | 2.87 | 2.02 | 7.22  |
| 3SE9.PDB | O, H_GLN_6     | NH2, H_ARG_105  | HH21, H_ARG_105  | 2.67 | 1.92 | 23.91 |
| 3SE9.PDB | O, H_TYR_90    | N, H_THR_107    | H, H_THR_107     | 2.73 | 1.92 | 16.56 |
| 3SE9.PDB | OG, H_SER_9    | N, H_LEU_108    | H, H_LEU_108     | 2.69 | 1.93 | 23.13 |
| 3SE9.PDB | O, H_ALA_88    | N, H_ILE_109    | H, H_ILE_109     | 2.93 | 2.07 | 6.87  |
| 3SE9.PDB | OG1, H_THR_87  | N, H_VAL_111    | H, H_VAL_111     | 2.93 | 2.08 | 7.05  |
| 3SE9.PDB | OG, H_SER_112  | N, H_ALA_114    | H, H_ALA_114     | 2.96 | 2.13 | 12.08 |

|          |                |                |                 |      |      |       |
|----------|----------------|----------------|-----------------|------|------|-------|
| 3SE9.PDB | O, H_PHE_146   | N, H_LYS_117   | H, H_LYS_117    | 2.71 | 1.88 | 12.05 |
| 3SE9.PDB | O, H_ASP_144   | NZ, H_LYS_117  | HZ2, H_LYS_117  | 2.71 | 1.95 | 26.51 |
| 3SE9.PDB | O, H_LYS_143   | N, H_SER_120   | H, H_SER_120    | 2.94 | 2.18 | 23.30 |
| 3SE9.PDB | O, H_LEU_141   | N, H_PHE_122   | H, H_PHE_122    | 2.83 | 1.99 | 10.34 |
| 3SE9.PDB | O, H_GLY_139   | N, H_LEU_124   | H, H_LEU_124    | 2.72 | 1.86 | 7.35  |
| 3SE9.PDB | O, H_VAL_184   | N, H_ALA_136   | H, H_ALA_136    | 2.58 | 1.73 | 7.05  |
| 3SE9.PDB | O, H_VAL_182   | N, H_LEU_138   | H, H_LEU_138    | 2.98 | 2.14 | 9.89  |
| 3SE9.PDB | O, H_SER_180   | N, H_CYS_140   | H, H_CYS_140    | 2.81 | 2.02 | 19.42 |
| 3SE9.PDB | O, H_PHE_122   | N, H_LEU_141   | H, H_LEU_141    | 2.71 | 1.87 | 9.85  |
| 3SE9.PDB | O, H_LEU_178   | N, H_VAL_142   | H, H_VAL_142    | 2.67 | 1.83 | 9.14  |
| 3SE9.PDB | O, H_SER_120   | N, H_LYS_143   | H, H_LYS_143    | 2.81 | 1.96 | 4.58  |
| 3SE9.PDB | O, H_LYS_117   | N, H_PHE_146   | H, H_PHE_146    | 2.83 | 2.04 | 19.01 |
| 3SE9.PDB | O, H_ASN_199   | N, H_THR_151   | H, H_THR_151    | 2.82 | 2.01 | 15.51 |
| 3SE9.PDB | OG, H_SER_180  | NE1, H_TRP_154 | HE1, H_TRP_154  | 2.83 | 2.00 | 12.34 |
| 3SE9.PDB | O, H_ILE_195   | N, H_ASN_155   | H, H_ASN_155    | 2.72 | 1.88 | 10.78 |
| 3SE9.PDB | OD1, H_ASN_197 | N, H_SER_156   | H, H_SER_156    | 2.63 | 1.82 | 16.31 |
| 3SE9.PDB | O, H_TRP_154   | N, H_GLY_157   | H, H_GLY_157    | 2.94 | 2.17 | 22.03 |
| 3SE9.PDB | O, H_VAL_181   | N, H_HIS_164   | H, H_HIS_164    | 2.79 | 1.95 | 10.78 |
| 3SE9.PDB | OD1, L_ASN_138 | NE2, H_HIS_164 | HE2, H_HIS_164  | 2.87 | 2.10 | 22.18 |
| 3SE9.PDB | O, H_SER_179   | N, H_PHE_166   | H, H_PHE_166    | 2.83 | 1.98 | 8.83  |
| 3SE9.PDB | O, H_SER_177   | N, H_VAL_169   | H, H_VAL_169    | 2.79 | 1.97 | 15.38 |
| 3SE9.PDB | O, H_LEU_175   | N, H_GLN_171   | H, H_GLN_171    | 2.88 | 2.03 | 9.89  |
| 3SE9.PDB | OD1, H_ASP_144 | NE2, H_GLN_171 | HE22, H_GLN_171 | 2.70 | 1.89 | 15.22 |
| 3SE9.PDB | O, H_GLN_171   | N, H_GLY_174   | H, H_GLY_174    | 2.82 | 1.98 | 10.33 |
| 3SE9.PDB | O, H_TYR_145   | N, H_TYR_176   | H, H_TYR_176    | 2.80 | 1.95 | 9.52  |
| 3SE9.PDB | O, H_VAL_169   | N, H_SER_177   | H, H_SER_177    | 2.92 | 2.11 | 17.68 |
| 3SE9.PDB | O, H_VAL_142   | N, H_LEU_178   | H, H_LEU_178    | 2.84 | 2.05 | 18.79 |
| 3SE9.PDB | O, H_HIS_164   | N, H_VAL_181   | H, H_VAL_181    | 2.77 | 1.93 | 11.77 |
| 3SE9.PDB | O, H_LEU_138   | N, H_VAL_182   | H, H_VAL_182    | 2.73 | 1.91 | 15.41 |
| 3SE9.PDB | O, H_ALA_136   | N, H_VAL_184   | H, H_VAL_184    | 2.65 | 1.82 | 11.73 |
| 3SE9.PDB | O, H_GLY_134   | N, H_SER_186   | H, H_SER_186    | 2.77 | 1.92 | 8.30  |
| 3SE9.PDB | O, H_PRO_185   | N, H_SER_188   | H, H_SER_188    | 2.84 | 2.03 | 16.03 |
| 3SE9.PDB | OD1, H_ASN_155 | N, H_ILE_195   | H, H_ILE_195    | 2.88 | 2.07 | 17.09 |
| 3SE9.PDB | O, H_SER_153   | N, H_ASN_197   | H, H_ASN_197    | 2.68 | 1.83 | 7.88  |
| 3SE9.PDB | OD1, H_ASP_208 | ND2, H_ASN_197 | HD21, H_ASN_197 | 2.90 | 2.07 | 13.74 |
| 3SE9.PDB | O, H_VAL_207   | N, H_VAL_198   | H, H_VAL_198    | 2.67 | 1.81 | 3.24  |
| 3SE9.PDB | O, H_THR_151   | N, H_ASN_199   | H, H_ASN_199    | 2.88 | 2.05 | 12.73 |
| 3SE9.PDB | O, H_THR_205   | N, H_HIS_200   | H, H_HIS_200    | 2.70 | 1.85 | 4.09  |
| 3SE9.PDB | OG, H_SER_203  | ND1, H_HIS_200 | HD1, H_HIS_200  | 2.68 | 1.84 | 9.59  |
| 3SE9.PDB | O, H_PRO_147   | NE2, H_HIS_200 | HE2, H_HIS_200  | 2.74 | 1.92 | 15.55 |
| 3SE9.PDB | O, H_LYS_201   | N, H_ASN_204   | H, H_ASN_204    | 2.85 | 2.04 | 15.88 |
| 3SE9.PDB | O, H_VAL_198   | N, H_VAL_207   | H, H_VAL_207    | 2.76 | 1.95 | 16.29 |
| 3SE9.PDB | O, H_CYS_196   | N, H_LYS_209   | H, H_LYS_209    | 2.96 | 2.13 | 12.56 |
| 3SE9.PDB | O, H_TYR_194   | N, H_VAL_211   | H, H_VAL_211    | 2.84 | 1.98 | 5.32  |
| 3SE9.PDB | OE1, L_GLN_100 | N, L_GLN_6     | H, L_GLN_6      | 2.87 | 2.05 | 13.27 |
| 3SE9.PDB | O, L_TYR_86    | NE2, L_GLN_6   | HE21, L_GLN_6   | 2.65 | 1.87 | 19.42 |
| 3SE9.PDB | O, L_SER_22    | N, L_SER_7     | H, L_SER_7      | 2.91 | 2.10 | 15.22 |
| 3SE9.PDB | O, L_ARG_103   | N, L_LEU_11    | H, L_LEU_11     | 2.81 | 2.03 | 20.07 |
| 3SE9.PDB | OE2, L_GLU_17  | N, L_SER_14    | H, L_SER_14     | 2.75 | 1.90 | 8.71  |
| 3SE9.PDB | O, L_MET_78    | N, L_GLY_16    | H, L_GLY_16     | 2.86 | 2.12 | 26.24 |
| 3SE9.PDB | O, L_SER_14    | N, L_GLU_17    | H, L_GLU_17     | 3.00 | 2.15 | 9.67  |
| 3SE9.PDB | O, L_ILE_75    | N, L_ALA_19    | H, L_ALA_19     | 2.75 | 1.95 | 18.77 |
| 3SE9.PDB | O, L_LEU_73    | N, L_LEU_21    | H, L_LEU_21     | 2.92 | 2.06 | 4.08  |
| 3SE9.PDB | O, L_SER_7     | N, L_SER_22    | H, L_SER_22     | 2.90 | 2.04 | 6.45  |
| 3SE9.PDB | O, L_TYR_71    | N, L_CYS_23    | H, L_CYS_23     | 2.61 | 1.79 | 13.38 |
| 3SE9.PDB | O, L_THR_5     | N, L_THR_24    | H, L_THR_24     | 2.87 | 2.04 | 10.61 |
| 3SE9.PDB | O, L_VAL_3     | N, L_ALA_26    | H, L_ALA_26     | 2.84 | 2.01 | 13.56 |
| 3SE9.PDB | OH, L_TYR_71   | N, L_GLY_31    | H, L_GLY_31     | 2.83 | 1.99 | 8.85  |

|          |                |                |                 |      |      |       |
|----------|----------------|----------------|-----------------|------|------|-------|
| 3SE9.PDB | O, L_GLN_89    | N, L_THR_34    | H, L_THR_34     | 2.89 | 2.12 | 22.07 |
| 3SE9.PDB | O, L_ILE_48    | N, L_TRP_35    | H, L_TRP_35     | 2.92 | 2.14 | 20.82 |
| 3SE9.PDB | O, L_TYR_87    | N, L_TYR_36    | H, L_TYR_36     | 2.80 | 1.96 | 11.38 |
| 3SE9.PDB | O, L_LYS_45    | N, L_GLN_37    | H, L_GLN_37     | 2.89 | 2.10 | 19.91 |
| 3SE9.PDB | O, L_ARG_85    | N, L_LYS_38    | H, L_LYS_38     | 2.86 | 2.11 | 24.20 |
| 3SE9.PDB | O, L_GLN_42    | NZ, L_LYS_38   | HZ2, L_LYS_38   | 2.69 | 1.95 | 28.64 |
| 3SE9.PDB | O, L_GLU_81    | NZ, L_LYS_39   | HZ3, L_LYS_39   | 2.86 | 2.10 | 26.41 |
| 3SE9.PDB | O, L_GLN_37    | N, L_LYS_45    | H, L_LYS_45     | 2.78 | 1.95 | 13.05 |
| 3SE9.PDB | O, L_TRP_35    | N, L_LEU_47    | H, L_LEU_47     | 2.87 | 2.05 | 13.50 |
| 3SE9.PDB | O, L_LYS_53    | N, L_PHE_49    | H, L_PHE_49     | 2.83 | 2.01 | 14.47 |
| 3SE9.PDB | O, L_MET_33    | N, L_THR_51    | H, L_THR_51     | 2.85 | 2.05 | 18.27 |
| 3SE9.PDB | O, L_ALA_50    | N, L_SER_52    | H, L_SER_52     | 2.77 | 2.03 | 26.37 |
| 3SE9.PDB | O, L_PHE_49    | N, L_LYS_53    | H, L_LYS_53     | 2.88 | 2.12 | 23.41 |
| 3SE9.PDB | O, L_THR_74    | N, L_SER_63    | H, L_SER_63     | 2.83 | 2.02 | 16.49 |
| 3SE9.PDB | O, L_GLY_68    | NE2, L_GLN_66  | HE21, L_GLN_66  | 2.85 | 2.01 | 10.87 |
| 3SE9.PDB | O, L_GLN_70    | N, L_PHE_67    | H, L_PHE_67     | 2.77 | 1.98 | 19.75 |
| 3SE9.PDB | O, L_PHE_67    | N, L_GLN_70    | H, L_GLN_70     | 2.81 | 1.99 | 14.85 |
| 3SE9.PDB | O, L_CYS_23    | N, L_TYR_71    | H, L_TYR_71     | 2.90 | 2.05 | 8.86  |
| 3SE9.PDB | O, L_SER_65    | N, L_THR_72    | H, L_THR_72     | 2.92 | 2.08 | 10.66 |
| 3SE9.PDB | O, L_LEU_21    | N, L_LEU_73    | H, L_LEU_73     | 2.70 | 1.90 | 17.14 |
| 3SE9.PDB | O, L_SER_63    | N, L_THR_74    | H, L_THR_74     | 2.72 | 1.87 | 5.98  |
| 3SE9.PDB | O, L_GLU_17    | N, L_MET_78    | H, L_MET_78     | 2.89 | 2.06 | 12.71 |
| 3SE9.PDB | OD2, L ASP_82  | N, L_GLU_79    | H, L_GLU_79     | 2.83 | 1.97 | 2.91  |
| 3SE9.PDB | O, L_GLU_79    | N, L ASP_82    | H, L ASP_82     | 2.98 | 2.15 | 13.63 |
| 3SE9.PDB | O, L_THR_102   | N, L_TYR_86    | H, L_TYR_86     | 2.81 | 2.08 | 27.06 |
| 3SE9.PDB | O, L_THR_34    | N, L_GLN_89    | H, L_GLN_89     | 2.81 | 2.01 | 18.78 |
| 3SE9.PDB | O, L_LEU_91    | NE2, L_GLN_89  | HE22, L_GLN_89  | 2.88 | 2.12 | 24.17 |
| 3SE9.PDB | O, L_PHE_97    | N, L_GLN_90    | H, L_GLN_90     | 2.90 | 2.18 | 28.93 |
| 3SE9.PDB | O, L_SER_27    | NE2, L_GLN_90  | HE21, L_GLN_90  | 2.99 | 2.17 | 16.35 |
| 3SE9.PDB | O, L_CYS_88    | N, L_GLY_99    | H, L_GLY_99     | 2.80 | 1.97 | 11.46 |
| 3SE9.PDB | O, L_TYR_86    | N, L_THR_102   | H, L_THR_102    | 2.76 | 1.99 | 22.12 |
| 3SE9.PDB | O, L_ALA_84    | N, L_LEU_104   | H, L_LEU_104    | 2.90 | 2.05 | 7.67  |
| 3SE9.PDB | O, L_LEU_11    | N, L_GLU_105   | H, L_GLU_105    | 2.83 | 2.02 | 16.12 |
| 3SE9.PDB | OE1, L_GLN_166 | N, L_ILE_106   | H, L_ILE_106    | 2.83 | 2.02 | 16.05 |
| 3SE9.PDB | O, L_LEU_13    | N, L_ARG_107   | H, L_ARG_107    | 2.82 | 1.98 | 9.67  |
| 3SE9.PDB | O, L_TYR_140   | N, L_ALA_111   | H, L_ALA_111    | 2.91 | 2.10 | 17.28 |
| 3SE9.PDB | O, L_VAL_133   | N, L_PHE_118   | H, L_PHE_118    | 2.77 | 1.97 | 18.18 |
| 3SE9.PDB | OG, L_SER_131  | NE2, L_GLN_124 | HE21, L_GLN_124 | 2.87 | 2.02 | 8.09  |
| 3SE9.PDB | O, L_GLN_124   | N, L_SER_127   | H, L_SER_127    | 2.85 | 2.11 | 25.81 |
| 3SE9.PDB | O, L_LEU_125   | N, L_GLY_128   | H, L_GLY_128    | 2.77 | 1.93 | 7.72  |
| 3SE9.PDB | O, L_LEU_181   | N, L_ALA_130   | H, L_ALA_130    | 2.85 | 2.00 | 6.88  |
| 3SE9.PDB | O, L_LEU_179   | N, L_VAL_132   | H, L_VAL_132    | 2.65 | 1.81 | 8.60  |
| 3SE9.PDB | O, L_SER_177   | N, L_CYS_134   | H, L_CYS_134    | 2.87 | 2.03 | 11.55 |
| 3SE9.PDB | O, L_PHE_116   | N, L_LEU_135   | H, L_LEU_135    | 2.83 | 2.01 | 13.22 |
| 3SE9.PDB | O, L_LEU_175   | N, L_LEU_136   | H, L_LEU_136    | 2.80 | 1.94 | 5.67  |
| 3SE9.PDB | O, L_SER_114   | N, L ASN_137   | H, L ASN_137    | 2.87 | 2.06 | 16.53 |
| 3SE9.PDB | OG, L_SER_174  | N, L ASN_138   | H, L ASN_138    | 2.87 | 2.02 | 6.61  |
| 3SE9.PDB | O, L_TYR_173   | N, L_PHE_139   | H, L_PHE_139    | 2.71 | 1.88 | 11.74 |
| 3SE9.PDB | O, L_ALA_111   | N, L_TYR_140   | H, L_TYR_140    | 2.97 | 2.14 | 13.63 |
| 3SE9.PDB | O, L_GLU_195   | N, L_GLN_147   | H, L_GLN_147    | 2.88 | 2.05 | 13.30 |
| 3SE9.PDB | OG, L_SER_177  | NE1, L_TRP_148 | HE1, L_TRP_148  | 2.88 | 2.05 | 13.01 |
| 3SE9.PDB | O, L_ALA_193   | N, L_LYS_149   | H, L_LYS_149    | 2.85 | 2.03 | 13.91 |
| 3SE9.PDB | O, L_ALA_153   | N, L_VAL_150   | H, L_VAL_150    | 2.92 | 2.10 | 13.17 |
| 3SE9.PDB | O, L_VAL_191   | N, L ASP_151   | H, L ASP_151    | 2.74 | 1.91 | 13.52 |
| 3SE9.PDB | O, L_VAL_150   | N, L_ALA_153   | H, L_ALA_153    | 2.87 | 2.02 | 9.15  |
| 3SE9.PDB | O, L_TRP_148   | N, L_GLN_155   | H, L_GLN_155    | 3.00 | 2.16 | 10.91 |
| 3SE9.PDB | O, L_THR_178   | N, L_GLN_160   | H, L_GLN_160    | 2.99 | 2.20 | 19.65 |
| 3SE9.PDB | O, L_SER_176   | N, L_SER_162   | H, L_SER_162    | 2.81 | 2.05 | 22.68 |



|          |                |                |                 |      |      |       |
|----------|----------------|----------------|-----------------|------|------|-------|
| 3SE9.PDB | O, H_PRO_167   | OG, L_SER_162  | HG, L_SER_162   | 2.60 | 1.89 | 25.20 |
| 3SE9.PDB | O, L_SER_174   | N, L_THR_164   | H, L_THR_164    | 2.97 | 2.14 | 12.76 |
| 3SE9.PDB | O, L_ILE_106   | NE2, L_GLN_166 | HE21, L_GLN_166 | 2.82 | 2.03 | 19.63 |
| 3SE9.PDB | O, L_SER_171   | NE2, L_GLN_166 | HE22, L_GLN_166 | 2.91 | 2.08 | 11.92 |
| 3SE9.PDB | O, L_THR_172   | N, L_ASP_167   | H, L_ASP_167    | 2.88 | 2.05 | 12.43 |
| 3SE9.PDB | OD2, L_ASP_167 | N, L_LYS_169   | H, L_LYS_169    | 2.73 | 1.98 | 24.54 |
| 3SE9.PDB | OD2, L_ASP_167 | N, L_ASP_170   | H, L_ASP_170    | 2.87 | 2.10 | 21.70 |
| 3SE9.PDB | OD1, L_ASP_170 | OG1, L_THR_172 | HG1, L_THR_172  | 2.48 | 1.71 | 16.29 |
| 3SE9.PDB | O, L_PHE_139   | N, L_TYR_173   | H, L_TYR_173    | 2.70 | 1.86 | 11.73 |
| 3SE9.PDB | O, L_LEU_136   | N, L_LEU_175   | H, L_LEU_175    | 2.79 | 1.97 | 15.48 |
| 3SE9.PDB | O, L_SER_162   | N, L_SER_176   | H, L_SER_176    | 2.85 | 2.02 | 11.18 |
| 3SE9.PDB | O, L_CYS_134   | N, L_SER_177   | H, L_SER_177    | 2.95 | 2.11 | 11.27 |
| 3SE9.PDB | O, L_GLN_160   | N, L_THR_178   | H, L_THR_178    | 2.80 | 1.96 | 9.46  |
| 3SE9.PDB | O, L_VAL_132   | N, L_LEU_179   | H, L_LEU_179    | 2.70 | 1.87 | 12.38 |
| 3SE9.PDB | O, L_ASN_158   | N, L_THR_180   | H, L_THR_180    | 3.00 | 2.16 | 11.07 |
| 3SE9.PDB | O, L_ALA_130   | N, L_LEU_181   | H, L_LEU_181    | 2.86 | 2.02 | 11.27 |
| 3SE9.PDB | O, L_GLY_128   | N, L_LYS_183   | H, L_LYS_183    | 2.82 | 2.01 | 15.80 |
| 3SE9.PDB | OE1, L_GLU_187 | NZ, L_LYS_183  | HZ3, L_LYS_183  | 2.82 | 2.09 | 29.82 |
| 3SE9.PDB | O, L_LYS_183   | N, L_GLU_187   | H, L_GLU_187    | 2.93 | 2.13 | 19.51 |
| 3SE9.PDB | OD2, L_ASP_151 | ND1, L_HIS_189 | HD1, L_HIS_189  | 2.89 | 2.18 | 29.99 |
| 3SE9.PDB | OD1, L_ASP_151 | N, L_VAL_191   | H, L_VAL_191    | 2.92 | 2.06 | 1.45  |
| 3SE9.PDB | O, L_PHE_209   | N, L_TYR_192   | H, L_TYR_192    | 2.96 | 2.10 | 3.54  |
| 3SE9.PDB | O, L_LYS_149   | N, L_ALA_193   | H, L_ALA_193    | 2.83 | 2.03 | 17.72 |
| 3SE9.PDB | O, L_LYS_207   | N, L_CYS_194   | H, L_CYS_194    | 2.79 | 1.94 | 6.54  |
| 3SE9.PDB | O, L_GLN_147   | N, L_GLU_195   | H, L_GLU_195    | 2.78 | 1.93 | 8.55  |
| 3SE9.PDB | O, L_VAL_205   | N, L_VAL_196   | H, L_VAL_196    | 2.74 | 1.90 | 9.26  |
| 3SE9.PDB | O, L_LYS_145   | N, L_THR_197   | H, L_THR_197    | 2.89 | 2.05 | 9.75  |
| 3SE9.PDB | ND1, L_HIS_198 | N, L_GLY_200   | H, L_GLY_200    | 3.00 | 2.16 | 11.89 |
| 3SE9.PDB | O, L_HIS_198   | N, L_LEU_201   | H, L_LEU_201    | 2.74 | 1.90 | 9.36  |
| 3SE9.PDB | O, L_VAL_196   | N, L_VAL_205   | H, L_VAL_205    | 2.96 | 2.24 | 27.95 |
| 3SE9.PDB | O, L_CYS_194   | N, L_LYS_207   | H, L_LYS_207    | 2.92 | 2.12 | 17.78 |
| 3SE9.PDB | O, L_TYR_192   | N, L_PHE_209   | H, L_PHE_209    | 2.89 | 2.14 | 24.10 |
| 3SE9.PDB | O, L_LYS_190   | N, L_ARG_211   | H, L_ARG_211    | 2.77 | 1.94 | 11.39 |

Table 1682: 3SE9-specific side chain and main chain hydrogen bonding analysis. In this table, a PDB file is specified with a four-letter PDB ID, except that the names of the PDB files corresponding to the single NMR structural model split from the NMR ensemble is specified with a four-letter PDB ID in addition to a hyphen followed by the single NMR structural model numeric ID, the residue naming scheme is **Chain ID\_residue name\_residue number**,  $\angle ADH$  represents the angle formed by acceptor (A), donor (D) and hydrogen (H) ( $\angle ADH$ ).

| PDB      | Acceptor (A)  | Donor (D)     | Hydrogen (H)   | D-A (Å) | H-A (Å) | $\angle ADH(^{\circ})$ |
|----------|---------------|---------------|----------------|---------|---------|------------------------|
| 3THM.PDB | N, L_VAL_3    | OG, L_SER_2   | HG, L_SER_2    | 2.83    | 2.12    | 25.75                  |
| 3THM.PDB | OG, L_SER_2   | N, L_LEU_4    | H, L_LEU_4     | 2.87    | 2.06    | 16.74                  |
| 3THM.PDB | O, L_SER_23   | N, L_THR_5    | H, L_THR_5     | 2.87    | 2.03    | 10.68                  |
| 3THM.PDB | O, L_TYR_87   | NE2, L_GLN_6  | HE21, L_GLN_6  | 2.88    | 2.03    | 6.32                   |
| 3THM.PDB | OE1, L_GLU_12 | N, L_ALA_13   | H, L_ALA_13    | 2.70    | 1.91    | 19.84                  |
| 3THM.PDB | O, L_LEU_79   | N, L_ARG_15   | H, L_ARG_15    | 2.74    | 1.88    | 4.28                   |
| 3THM.PDB | O, L_LEU_74   | N, L_ILE_20   | H, L_ILE_20    | 2.80    | 1.96    | 9.35                   |
| 3THM.PDB | O, L_THR_5    | N, L_SER_23   | H, L_SER_23    | 2.90    | 2.09    | 16.08                  |
| 3THM.PDB | O, L_THR_70   | N, L_GLY_24   | H, L_GLY_24    | 2.84    | 2.07    | 23.10                  |
| 3THM.PDB | OD1, L_ASN_28 | N, L_ASN_25   | H, L_ASN_25    | 2.96    | 2.18    | 18.32                  |
| 3THM.PDB | OD1, L_ASP_93 | ND2, L_ASN_28 | HD21, L_ASN_28 | 2.85    | 2.01    | 9.28                   |
| 3THM.PDB | OD1, L_ASN_28 | N, L_ILE_29   | H, L_ILE_29    | 2.67    | 1.87    | 18.36                  |
| 3THM.PDB | O, L_ASN_25   | N, L_GLY_30   | H, L_GLY_30    | 2.96    | 2.12    | 9.14                   |
| 3THM.PDB | O, L_ASN_28   | N, L_TYR_32   | H, L_TYR_32    | 2.89    | 2.11    | 20.74                  |
| 3THM.PDB | OD2, L_ASP_52 | N, L_VAL_34   | H, L_VAL_34    | 2.76    | 2.01    | 24.28                  |
| 3THM.PDB | O, L_SER_90   | N, L_ASN_35   | H, L_ASN_35    | 2.89    | 2.07    | 14.41                  |
| 3THM.PDB | O, H_ALA_117  | ND2, L_ASN_35 | HD21, L_ASN_35 | 2.77    | 1.97    | 17.79                  |
| 3THM.PDB | O, L_ILE_49   | N, L_TRP_36   | H, L_TRP_36    | 2.81    | 1.98    | 12.62                  |
| 3THM.PDB | O, L_TYR_88   | N, L_TYR_37   | H, L_TYR_37    | 2.84    | 2.02    | 14.79                  |
| 3THM.PDB | O, L_LYS_46   | N, L_GLN_38   | H, L_GLN_38    | 2.87    | 2.08    | 19.68                  |
| 3THM.PDB | OH, L_TYR_87  | NE2, L_GLN_38 | HE21, L_GLN_38 | 2.86    | 2.05    | 16.36                  |
| 3THM.PDB | O, L_ASP_86   | N, L_GLN_39   | H, L_GLN_39    | 2.67    | 1.81    | 4.75                   |
| 3THM.PDB | O, L_LEU_40   | N, L_LYS_43   | H, L_LYS_43    | 2.88    | 2.04    | 10.22                  |
| 3THM.PDB | O, L_GLN_38   | N, L_LYS_46   | H, L_LYS_46    | 2.84    | 2.05    | 18.96                  |
| 3THM.PDB | O, L_TRP_36   | N, L_LEU_48   | H, L_LEU_48    | 2.82    | 1.98    | 12.51                  |
| 3THM.PDB | O, L_LEU_54   | N, L_TYR_50   | H, L_TYR_50    | 2.87    | 2.06    | 17.25                  |
| 3THM.PDB | OD1, L_ASN_35 | N, L_SER_51   | H, L_SER_51    | 2.98    | 2.18    | 17.87                  |
| 3THM.PDB | O, L_VAL_34   | N, L_ASP_52   | H, L_ASP_52    | 2.82    | 1.98    | 11.63                  |
| 3THM.PDB | O, L_ASP_61   | NH2, L_ARG_55 | HH21, L_ARG_55 | 2.95    | 2.23    | 28.54                  |
| 3THM.PDB | OD1, L_ASP_83 | NE, L_ARG_62  | HE, L_ARG_62   | 2.86    | 2.03    | 12.52                  |
| 3THM.PDB | OD2, L_ASP_83 | NH2, L_ARG_62 | HH21, L_ARG_62 | 2.63    | 1.79    | 10.74                  |
| 3THM.PDB | O, L_ALA_75   | N, L_SER_64   | H, L_SER_64    | 2.96    | 2.14    | 13.06                  |
| 3THM.PDB | O, L_SER_73   | N, L_SER_66   | H, L_SER_66    | 2.95    | 2.17    | 20.65                  |
| 3THM.PDB | O, L_THR_71   | N, L_SER_68   | H, L_SER_68    | 2.93    | 2.09    | 7.96                   |
| 3THM.PDB | O, L_SER_68   | N, L_THR_71   | H, L_THR_71    | 2.94    | 2.09    | 5.15                   |
| 3THM.PDB | O, L_CYS_22   | N, L_ALA_72   | H, L_ALA_72    | 2.80    | 1.98    | 14.59                  |
| 3THM.PDB | O, L_SER_66   | N, L_SER_73   | H, L_SER_73    | 2.76    | 1.91    | 7.29                   |
| 3THM.PDB | O, L_ILE_20   | N, L_LEU_74   | H, L_LEU_74    | 2.97    | 2.15    | 14.37                  |
| 3THM.PDB | O, L_SER_64   | N, L_ALA_75   | H, L_ALA_75    | 2.82    | 2.00    | 15.44                  |
| 3THM.PDB | O, L_VAL_18   | N, L_ILE_76   | H, L_ILE_76    | 2.90    | 2.07    | 11.54                  |
| 3THM.PDB | OD2, L_ASP_78 | NH1, L_ARG_77 | HH11, L_ARG_77 | 2.79    | 2.00    | 19.01                  |
| 3THM.PDB | O, L_GLN_16   | N, L_LEU_79   | H, L_LEU_79    | 2.98    | 2.13    | 4.45                   |
| 3THM.PDB | OD1, L_ASP_83 | N, L_LEU_80   | H, L_LEU_80    | 2.94    | 2.09    | 0.76                   |
| 3THM.PDB | O, L_LEU_80   | N, L_ASP_83   | H, L_ASP_83    | 2.90    | 2.06    | 10.43                  |
| 3THM.PDB | O, L_GLN_39   | N, L_ASP_86   | H, L_ASP_86    | 2.98    | 2.17    | 16.25                  |
| 3THM.PDB | O, L_THR_105  | N, L_TYR_87   | H, L_TYR_87    | 2.83    | 2.01    | 15.92                  |
| 3THM.PDB | O, L_TYR_37   | N, L_TYR_88   | H, L_TYR_88    | 2.90    | 2.08    | 14.37                  |
| 3THM.PDB | O, L_SER_27   | N, L_ASP_94   | H, L_ASP_94    | 2.91    | 2.10    | 16.82                  |
| 3THM.PDB | OD2, L_ASP_93 | N, L_THR_95   | H, L_THR_95    | 2.93    | 2.14    | 20.81                  |
| 3THM.PDB | OD2, L_ASP_93 | N, L_LEU_96   | H, L_LEU_96    | 2.88    | 2.03    | 8.57                   |
| 3THM.PDB | O, L_THR_91   | N, L_VAL_100  | H, L_VAL_100   | 2.85    | 2.00    | 6.96                   |
| 3THM.PDB | O, L_CYS_89   | N, L_GLY_102  | H, L_GLY_102   | 2.91    | 2.09    | 13.69                  |
| 3THM.PDB | O, L_TYR_87   | N, L_THR_105  | H, L_THR_105   | 2.90    | 2.14    | 23.36                  |
| 3THM.PDB | O, L_PRO_8    | N, L_LYS_106  | H, L_LYS_106   | 2.93    | 2.09    | 11.49                  |
| 3THM.PDB | O, L_ALA_85   | N, L_VAL_107  | H, L_VAL_107   | 2.85    | 2.01    | 9.33                   |
| 3THM.PDB | OE1, L_GLU_84 | N, L_VAL_109  | H, L_VAL_109   | 2.88    | 2.08    | 17.71                  |
| 3THM.PDB | O, L_GLU_12   | N, L_LEU_110  | H, L_LEU_110   | 2.93    | 2.10    | 11.26                  |

|          |                |                |                 |      |      |       |
|----------|----------------|----------------|-----------------|------|------|-------|
| 3THM.PDB | OH, L_TYR_144  | N, L_GLY_111   | H, L_GLY_111    | 2.94 | 2.13 | 15.64 |
| 3THM.PDB | O, L_TYR_144   | N, L_ALA_115   | H, L_ALA_115    | 2.97 | 2.15 | 12.90 |
| 3THM.PDB | O, L_SER_141   | N, L_SER_118   | H, L_SER_118    | 2.88 | 2.05 | 12.08 |
| 3THM.PDB | O, L_LEU_139   | N, L_THR_120   | H, L_THR_120    | 2.88 | 2.06 | 14.03 |
| 3THM.PDB | O, L_VAL_137   | N, L_PHE_122   | H, L_PHE_122    | 2.87 | 2.03 | 12.38 |
| 3THM.PDB | O, L_LEU_129   | N, L_ASN_132   | H, L_ASN_132    | 2.78 | 1.99 | 19.66 |
| 3THM.PDB | OE1, L_GLU_128 | N, L_THR_135   | H, L_THR_135    | 2.71 | 1.92 | 18.59 |
| 3THM.PDB | O, L_LEU_182   | N, L_LEU_136   | H, L_LEU_136    | 2.87 | 2.02 | 9.82  |
| 3THM.PDB | O, L_SER_180   | N, L_CYS_138   | H, L_CYS_138    | 2.84 | 1.98 | 5.42  |
| 3THM.PDB | O, L_THR_120   | N, L_LEU_139   | H, L_LEU_139    | 2.76 | 1.90 | 6.56  |
| 3THM.PDB | O, L_ALA_178   | N, L_ILE_140   | H, L_ILE_140    | 2.89 | 2.15 | 25.14 |
| 3THM.PDB | O, L_SER_118   | N, L_SER_141   | H, L_SER_141    | 2.99 | 2.18 | 16.95 |
| 3THM.PDB | O, L_THR_200   | N, L_THR_149   | H, L_THR_149    | 2.96 | 2.13 | 13.40 |
| 3THM.PDB | O, L_GLN_198   | N, L_ALA_151   | H, L_ALA_151    | 2.90 | 2.07 | 13.36 |
| 3THM.PDB | OG, L_SER_180  | NE1, L_TRP_152 | HE1, L_TRP_152  | 2.84 | 1.99 | 7.64  |
| 3THM.PDB | O, L_SER_196   | N, L_LYS_153   | H, L_LYS_153    | 2.89 | 2.09 | 18.48 |
| 3THM.PDB | O, L_SER_157   | N, L_ALA_154   | H, L_ALA_154    | 2.77 | 1.99 | 21.42 |
| 3THM.PDB | O, L_SER_194   | N, L_ASP_155   | H, L_ASP_155    | 2.71 | 1.86 | 0.53  |
| 3THM.PDB | O, L_ALA_154   | N, L_SER_157   | H, L_SER_157    | 2.85 | 2.02 | 12.03 |
| 3THM.PDB | O, L_TYR_181   | N, L_GLU_164   | H, L_GLU_164    | 2.88 | 2.07 | 15.71 |
| 3THM.PDB | O, L_SER_179   | N, L_THR_166   | H, L_THR_166    | 2.84 | 2.02 | 13.98 |
| 3THM.PDB | O, L_ALA_177   | N, L_SER_169   | H, L_SER_169    | 2.84 | 2.02 | 15.98 |
| 3THM.PDB | O, L_LYS_175   | N, L_GLN_171   | H, L_GLN_171    | 2.63 | 1.80 | 12.05 |
| 3THM.PDB | OD1, L_ASP_142 | NE2, L_GLN_171 | HE22, L_GLN_171 | 2.87 | 2.03 | 8.80  |
| 3THM.PDB | O, L_GLN_171   | N, L_ASN_174   | H, L_ASN_174    | 2.95 | 2.14 | 16.29 |
| 3THM.PDB | OD1, L_ASN_173 | N, L_LYS_175   | H, L_LYS_175    | 2.86 | 2.05 | 16.58 |
| 3THM.PDB | O, L_SER_169   | N, L_ALA_177   | H, L_ALA_177    | 2.84 | 2.05 | 18.78 |
| 3THM.PDB | O, L_ILE_140   | N, L_ALA_178   | H, L_ALA_178    | 2.72 | 1.90 | 14.30 |
| 3THM.PDB | OG1, L_THR_166 | N, L_SER_179   | H, L_SER_179    | 2.86 | 2.02 | 12.53 |
| 3THM.PDB | O, L_CYS_138   | N, L_SER_180   | H, L_SER_180    | 2.89 | 2.07 | 15.30 |
| 3THM.PDB | O, L_GLU_164   | N, L_TYR_181   | H, L_TYR_181    | 2.72 | 1.88 | 12.14 |
| 3THM.PDB | O, L_GLY_162   | N, L_SER_183   | H, L_SER_183    | 2.89 | 2.05 | 9.19  |
| 3THM.PDB | O, L_ALA_134   | N, L_LEU_184   | H, L_LEU_184    | 2.75 | 1.90 | 5.72  |
| 3THM.PDB | OD1, L_ASP_155 | ND1, L_HIS_192 | HD1, L_HIS_192  | 2.84 | 1.98 | 0.83  |
| 3THM.PDB | O, L_LYS_153   | N, L_SER_196   | H, L_SER_196    | 2.82 | 2.02 | 17.68 |
| 3THM.PDB | O, L_LYS_208   | N, L_CYS_197   | H, L_CYS_197    | 2.89 | 2.14 | 23.69 |
| 3THM.PDB | O, L_ALA_151   | N, L_GLN_198   | H, L_GLN_198    | 2.69 | 1.85 | 10.52 |
| 3THM.PDB | O, L_VAL_206   | N, L_VAL_199   | H, L_VAL_199    | 2.87 | 2.03 | 11.90 |
| 3THM.PDB | O, L_THR_149   | N, L_THR_200   | H, L_THR_200    | 2.80 | 1.94 | 5.73  |
| 3THM.PDB | OG1, L_THR_205 | OG1, L_THR_200 | HG1, L_THR_200  | 2.83 | 2.04 | 14.40 |
| 3THM.PDB | O, L_SER_204   | N, L_HIS_201   | H, L_HIS_201    | 2.89 | 2.07 | 13.82 |
| 3THM.PDB | O, L_PRO_145   | NE2, L_HIS_201 | HE2, L_HIS_201  | 2.93 | 2.13 | 17.58 |
| 3THM.PDB | O, L_CYS_197   | N, L_LYS_208   | H, L_LYS_208    | 3.00 | 2.18 | 15.53 |
| 3THM.PDB | O, L_TYR_195   | N, L_VAL_210   | H, L_VAL_210    | 2.99 | 2.18 | 15.60 |
| 3THM.PDB | O, H_THR_21    | N, H_SER_7     | H, H_SER_7      | 2.99 | 2.26 | 26.55 |
| 3THM.PDB | O, H_PRO_9     | N, H_LEU_11    | H, H_LEU_11     | 2.71 | 1.97 | 25.47 |
| 3THM.PDB | O, H_THR_129   | N, H_VAL_12    | H, H_VAL_12     | 2.92 | 2.10 | 14.43 |
| 3THM.PDB | O, H_VAL_92    | N, H_SER_15    | H, H_SER_15     | 2.84 | 2.00 | 9.85  |
| 3THM.PDB | O, H_LEU_89    | N, H_LEU_18    | H, H_LEU_18     | 2.73 | 1.90 | 12.52 |
| 3THM.PDB | O, H_LEU_87    | N, H_LEU_20    | H, H_LEU_20     | 2.81 | 1.97 | 10.10 |
| 3THM.PDB | O, H_VAL_85    | N, H_CYS_22    | H, H_CYS_22     | 2.69 | 1.90 | 18.57 |
| 3THM.PDB | O, H_GLN_5     | N, H_THR_23    | H, H_THR_23     | 2.91 | 2.06 | 9.33  |
| 3THM.PDB | O, H_ASN_83    | N, H_VAL_24    | H, H_VAL_24     | 2.95 | 2.09 | 5.07  |
| 3THM.PDB | O, H_GLN_3     | N, H_SER_25    | H, H_SER_25     | 2.97 | 2.14 | 12.04 |
| 3THM.PDB | OD1, H_ASN_83  | N, H_ILE_29    | H, H_ILE_29     | 2.98 | 2.13 | 8.25  |
| 3THM.PDB | O, H_TYR_55    | N, H_TYR_34    | H, H_TYR_34     | 2.87 | 2.06 | 17.59 |
| 3THM.PDB | O, H_ILE_53    | N, H_GLY_36    | H, H_GLY_36     | 2.90 | 2.14 | 23.00 |
| 3THM.PDB | O, H_ALA_103   | N, H_VAL_37    | H, H_VAL_37     | 2.92 | 2.10 | 13.94 |

|          |                |                |                 |      |      |       |
|----------|----------------|----------------|-----------------|------|------|-------|
| 3THM.PDB | O, H_TYR_101   | N, H_VAL_39    | H, H_VAL_39     | 2.92 | 2.10 | 14.86 |
| 3THM.PDB | O, H_GLU_48    | N, H_ARG_40    | H, H_ARG_40     | 2.87 | 2.07 | 18.62 |
| 3THM.PDB | OE1, H_GLU_48  | NE, H_ARG_40   | HE, H_ARG_40    | 2.92 | 2.11 | 16.36 |
| 3THM.PDB | OD1, H_ASP_96  | NH1, H_ARG_40  | HH12, H_ARG_40  | 2.76 | 1.92 | 9.45  |
| 3THM.PDB | O, H_LEU_99    | N, H_GLN_41    | H, H_GLN_41     | 2.75 | 1.96 | 19.23 |
| 3THM.PDB | OE1, L_GLN_39  | NE2, H_GLN_41  | HE22, H_GLN_41  | 2.98 | 2.14 | 9.35  |
| 3THM.PDB | O, H_SER_42    | N, H_LYS_45    | H, H_LYS_45     | 2.83 | 2.00 | 12.10 |
| 3THM.PDB | O, H_ARG_40    | N, H_GLU_48    | H, H_GLU_48     | 2.98 | 2.23 | 24.84 |
| 3THM.PDB | OG, H_SER_52   | NE1, H_TRP_49  | HE1, H_TRP_49   | 2.98 | 2.27 | 29.23 |
| 3THM.PDB | O, H_TRP_38    | N, H_VAL_50    | H, H_VAL_50     | 2.78 | 1.93 | 5.54  |
| 3THM.PDB | O, H_GLY_36    | N, H_ILE_53    | H, H_ILE_53     | 2.92 | 2.11 | 15.71 |
| 3THM.PDB | O, H_SER_63    | N, H_ALA_54    | H, H_ALA_54     | 2.85 | 2.03 | 14.59 |
| 3THM.PDB | O, H_TYR_34    | N, H_TYR_55    | H, H_TYR_55     | 2.70 | 1.86 | 8.19  |
| 3THM.PDB | O, H_SER_61    | N, H_ARG_56    | H, H_ARG_56     | 2.79 | 1.94 | 3.04  |
| 3THM.PDB | O, H_TRP_49    | ND2, H_ASN_67  | HD21, H_ASN_67  | 2.99 | 2.17 | 14.54 |
| 3THM.PDB | OD1, H_ASN_67  | N, H_SER_69    | H, H_SER_69     | 2.88 | 2.04 | 9.73  |
| 3THM.PDB | O, H_PRO_68    | N, H_LYS_71    | H, H_LYS_71     | 2.99 | 2.15 | 9.73  |
| 3THM.PDB | O, H_LEU_70    | N, H_ARG_73    | H, H_ARG_73     | 2.98 | 2.17 | 16.28 |
| 3THM.PDB | O, H_THR_90    | NH1, H_ARG_73  | HH11, H_ARG_73  | 2.99 | 2.22 | 21.63 |
| 3THM.PDB | OD1, H_ASP_96  | NH2, H_ARG_73  | HH22, H_ARG_73  | 2.91 | 2.05 | 3.20  |
| 3THM.PDB | O, H_ARG_88    | N, H_THR_75    | H, H_THR_75     | 2.81 | 1.99 | 15.03 |
| 3THM.PDB | OH, H_TYR_66   | N, H_VAL_76    | H, H_VAL_76     | 2.75 | 1.94 | 15.65 |
| 3THM.PDB | O, H_GLN_84    | N, H_ASP_79    | H, H_ASP_79     | 2.81 | 1.97 | 8.52  |
| 3THM.PDB | O, H_ALA_27    | ND2, H_ASN_83  | HD21, H_ASN_83  | 2.72 | 1.92 | 17.02 |
| 3THM.PDB | O, H_VAL_24    | ND2, H_ASN_83  | HD22, H_ASN_83  | 2.73 | 1.93 | 16.56 |
| 3THM.PDB | O, H_CYS_22    | N, H_VAL_85    | H, H_VAL_85     | 2.95 | 2.13 | 13.75 |
| 3THM.PDB | O, H_SER_77    | N, H_SER_86    | H, H_SER_86     | 2.75 | 1.94 | 17.86 |
| 3THM.PDB | O, H_LEU_20    | N, H_LEU_87    | H, H_LEU_87     | 2.98 | 2.17 | 15.66 |
| 3THM.PDB | O, H_THR_75    | N, H_ARG_88    | H, H_ARG_88     | 2.85 | 2.03 | 14.81 |
| 3THM.PDB | O, H_LEU_18    | N, H_LEU_89    | H, H_LEU_89     | 2.80 | 2.02 | 20.86 |
| 3THM.PDB | O, H_ARG_73    | N, H_THR_90    | H, H_THR_90     | 2.97 | 2.15 | 16.37 |
| 3THM.PDB | OD2, H_ASP_96  | N, H_THR_93    | H, H_THR_93     | 2.92 | 2.12 | 16.99 |
| 3THM.PDB | O, H_THR_93    | N, H_ASP_96    | H, H_ASP_96     | 2.87 | 2.02 | 6.72  |
| 3THM.PDB | O, H_VAL_128   | N, H_ALA_98    | H, H_ALA_98     | 2.97 | 2.18 | 20.37 |
| 3THM.PDB | O, H_GLN_41    | N, H_LEU_99    | H, H_LEU_99     | 2.82 | 2.04 | 20.70 |
| 3THM.PDB | O, H_THR_126   | N, H_TYR_100   | H, H_TYR_100    | 2.79 | 1.94 | 6.57  |
| 3THM.PDB | O, H_VAL_39    | N, H_TYR_101   | H, H_TYR_101    | 2.82 | 1.97 | 6.69  |
| 3THM.PDB | OE2, H_GLU_6   | N, H_CYS_102   | H, H_CYS_102    | 2.91 | 2.11 | 17.93 |
| 3THM.PDB | O, H_VAL_37    | N, H_ALA_103   | H, H_ALA_103    | 2.92 | 2.15 | 22.20 |
| 3THM.PDB | O, H_VAL_121   | N, H_ARG_104   | H, H_ARG_104    | 2.93 | 2.16 | 22.36 |
| 3THM.PDB | OD1, H_ASP_120 | NE, H_ARG_104  | HE, H_ARG_104   | 2.94 | 2.10 | 9.96  |
| 3THM.PDB | OD2, H_ASP_120 | NH2, H_ARG_104 | HH21, H_ARG_104 | 2.75 | 2.00 | 25.31 |
| 3THM.PDB | O, H_TYR_35    | N, H_ARG_105   | H, H_ARG_105    | 2.94 | 2.12 | 13.20 |
| 3THM.PDB | O, F_CYS_43    | NH1, H_ARG_105 | HH12, H_ARG_105 | 2.85 | 2.05 | 18.46 |
| 3THM.PDB | O, H_ALA_118   | N, H_GLN_106   | H, H_GLN_106    | 2.92 | 2.09 | 11.12 |
| 3THM.PDB | O, H_TRP_116   | N, H_LEU_108   | H, H_LEU_108    | 2.87 | 2.01 | 4.97  |
| 3THM.PDB | O, H_TYR_114   | N, H_ASP_110   | H, H_ASP_110    | 2.97 | 2.20 | 22.11 |
| 3THM.PDB | OD2, H_ASP_110 | N, H_THR_112   | H, H_THR_112    | 2.71 | 1.90 | 15.44 |
| 3THM.PDB | OD2, H_ASP_110 | OG1, H_THR_112 | HG1, H_THR_112  | 2.76 | 1.95 | 7.38  |
| 3THM.PDB | OD1, H_ASP_109 | NE2, H_GLN_115 | HE21, H_GLN_115 | 2.80 | 1.96 | 11.40 |
| 3THM.PDB | O, H_CYS_102   | N, H_GLY_123   | H, H_GLY_123    | 2.94 | 2.12 | 14.27 |
| 3THM.PDB | OE1, H_GLU_6   | N, H_GLY_125   | H, H_GLY_125    | 2.63 | 1.81 | 15.46 |
| 3THM.PDB | O, H_TYR_100   | N, H_THR_126   | H, H_THR_126    | 2.88 | 2.07 | 16.47 |
| 3THM.PDB | O, H_ALA_98    | N, H_VAL_128   | H, H_VAL_128    | 2.86 | 2.04 | 14.39 |
| 3THM.PDB | O, H_GLY_10    | N, H_THR_129   | H, H_THR_129    | 2.91 | 2.10 | 17.08 |
| 3THM.PDB | OG1, H_THR_97  | N, H_VAL_130   | H, H_VAL_130    | 2.80 | 1.94 | 1.61  |
| 3THM.PDB | O, H_VAL_12    | N, H_SER_131   | H, H_SER_131    | 2.82 | 2.03 | 20.60 |
| 3THM.PDB | OG, H_SER_131  | N, H_ALA_133   | H, H_ALA_133    | 2.89 | 2.06 | 13.32 |

|          |                |                |                 |      |      |       |
|----------|----------------|----------------|-----------------|------|------|-------|
| 3THM.PDB | O, H_PHE.165   | N, H_LYS.136   | H, H_LYS.136    | 2.85 | 2.08 | 21.01 |
| 3THM.PDB | O, H_LYS.162   | N, H_SER.139   | H, H_SER.139    | 2.99 | 2.21 | 21.41 |
| 3THM.PDB | O, H_LEU.160   | N, H_PHE.141   | H, H_PHE.141    | 2.90 | 2.07 | 13.94 |
| 3THM.PDB | O, H_GLY.158   | N, H_LEU.143   | H, H_LEU.143    | 2.66 | 1.82 | 10.00 |
| 3THM.PDB | O, H_LEU.143   | N, H_GLY.158   | H, H_GLY.158    | 2.93 | 2.12 | 16.47 |
| 3THM.PDB | O, H_SER.199   | N, H_ACYS.159  | H, H_ACYS.159   | 2.87 | 2.09 | 19.75 |
| 3THM.PDB | O, H_SER.199   | N, H_BCYS.159  | H, H_BCYS.159   | 2.93 | 2.18 | 25.13 |
| 3THM.PDB | O, H_PHE.141   | N, H_LEU.160   | H, H_LEU.160    | 2.78 | 1.98 | 17.74 |
| 3THM.PDB | O, H_LEU.197   | N, H_VAL.161   | H, H_VAL.161    | 2.77 | 1.93 | 8.59  |
| 3THM.PDB | O, H_SER.139   | N, H_LYS.162   | H, H_LYS.162    | 2.85 | 2.00 | 5.79  |
| 3THM.PDB | OG, L_SER.183  | NZ, H_LYS.162  | HZ1, H_LYS.162  | 2.77 | 1.97 | 21.34 |
| 3THM.PDB | OG1, L_THR.135 | NZ, H_LYS.162  | HZ2, H_LYS.162  | 2.85 | 2.02 | 17.75 |
| 3THM.PDB | OG, H_SER.196  | N, H_ASP.163   | H, H_ASP.163    | 2.90 | 2.06 | 10.60 |
| 3THM.PDB | O, H_TYR.195   | N, H_TYR.164   | H, H_TYR.164    | 2.87 | 2.08 | 20.27 |
| 3THM.PDB | OG, H_SER.199  | NE1, H_TRP.173 | HE1, H_TRP.173  | 3.00 | 2.15 | 7.78  |
| 3THM.PDB | O, H_ILE.214   | N, H_ASN.174   | H, H_ASN.174    | 2.65 | 1.83 | 15.08 |
| 3THM.PDB | OD1, H_ASN.216 | N, H_SER.175   | H, H_SER.175    | 2.77 | 2.04 | 26.97 |
| 3THM.PDB | O, H_TRP.173   | N, H_GLY.176   | H, H_GLY.176    | 2.79 | 2.00 | 19.31 |
| 3THM.PDB | O, H_ASN.174   | N, H_ALA.177   | H, H_ALA.177    | 2.93 | 2.12 | 16.59 |
| 3THM.PDB | O, H_VAL.200   | N, H_HIS.183   | H, H_HIS.183    | 2.68 | 1.84 | 8.83  |
| 3THM.PDB | O, H_SER.198   | N, H_PHE.185   | H, H_PHE.185    | 2.88 | 2.05 | 11.29 |
| 3THM.PDB | O, H_SER.196   | N, H_VAL.188   | H, H_VAL.188    | 2.78 | 2.06 | 27.88 |
| 3THM.PDB | O, H_LEU.194   | N, H_GLN.190   | H, H_GLN.190    | 2.87 | 2.07 | 17.50 |
| 3THM.PDB | O, H_GLN.190   | N, H_GLY.193   | H, H_GLY.193    | 2.85 | 2.01 | 11.86 |
| 3THM.PDB | O, H_TYR.164   | N, H_TYR.195   | H, H_TYR.195    | 2.86 | 2.01 | 9.29  |
| 3THM.PDB | O, H_VAL.188   | N, H_SER.196   | H, H_SER.196    | 2.94 | 2.15 | 19.84 |
| 3THM.PDB | O, H_VAL.161   | N, H_LEU.197   | H, H_LEU.197    | 2.93 | 2.14 | 18.92 |
| 3THM.PDB | O, H_HIS.183   | N, H_VAL.200   | H, H_VAL.200    | 2.86 | 2.01 | 9.19  |
| 3THM.PDB | O, H_LEU.157   | N, H_VAL.201   | H, H_VAL.201    | 2.69 | 1.85 | 11.90 |
| 3THM.PDB | O, H_GLY.181   | N, H_THR.202   | H, H_THR.202    | 3.00 | 2.19 | 16.64 |
| 3THM.PDB | O, H_PRO.204   | N, H_SER.207   | H, H_SER.207    | 2.96 | 2.23 | 27.46 |
| 3THM.PDB | O, H_SER.207   | N, H_GLN.211   | H, H_GLN.211    | 2.68 | 1.84 | 9.21  |
| 3THM.PDB | OD1, H_ASN.174 | N, H_ILE.214   | H, H_ILE.214    | 2.87 | 2.13 | 26.27 |
| 3THM.PDB | O, H_LYS.228   | N, H_CYS.215   | H, H_CYS.215    | 2.84 | 2.07 | 22.53 |
| 3THM.PDB | O, H_SER.172   | N, H_ASN.216   | H, H_ASN.216    | 2.73 | 1.89 | 10.25 |
| 3THM.PDB | OD1, H_ASP.227 | ND2, H_ASN.216 | HD22, H_ASN.216 | 2.86 | 2.03 | 14.19 |
| 3THM.PDB | O, H_VAL.226   | N, H_VAL.217   | H, H_VAL.217    | 2.70 | 1.86 | 9.29  |
| 3THM.PDB | O, H_THR.170   | N, H_ASN.218   | H, H_ASN.218    | 2.97 | 2.15 | 14.77 |
| 3THM.PDB | O, H_THR.224   | N, H_HIS.219   | H, H_HIS.219    | 2.94 | 2.09 | 7.91  |
| 3THM.PDB | OG, H_SER.222  | ND1, H_HIS.219 | HD1, H_HIS.219  | 2.82 | 2.08 | 24.90 |
| 3THM.PDB | O, H_PRO.166   | NE2, H_HIS.219 | HE2, H_HIS.219  | 2.71 | 1.87 | 10.58 |
| 3THM.PDB | O, H_LYS.220   | N, H_ASN.223   | H, H_ASN.223    | 2.76 | 2.01 | 25.66 |
| 3THM.PDB | O, H_VAL.217   | N, H_VAL.226   | H, H_VAL.226    | 2.74 | 1.90 | 11.00 |
| 3THM.PDB | O, H_CYS.215   | N, H_LYS.228   | H, H_LYS.228    | 2.89 | 2.06 | 14.00 |
| 3THM.PDB | O, H_TYR.213   | N, H_VAL.230   | H, H_VAL.230    | 2.80 | 1.96 | 9.90  |
| 3THM.PDB | OD2, F_ASP.56  | ND1, F_HIS.38  | HD1, F_HIS.38   | 2.77 | 1.98 | 19.59 |
| 3THM.PDB | O, F_GLY.40    | N, F_CYS.43    | H, F_CYS.43     | 2.96 | 2.13 | 13.45 |
| 3THM.PDB | OE2, F_GLU.63  | N, F_HIS.44    | H, F_HIS.44     | 2.86 | 2.00 | 4.98  |
| 3THM.PDB | OH, H_TYR.35   | ND1, F_HIS.44  | HD1, F_HIS.44   | 2.69 | 1.83 | 5.98  |
| 3THM.PDB | OG, H_SER.63   | NE2, F_HIS.44  | HE2, F_HIS.44   | 2.83 | 2.07 | 23.36 |
| 3THM.PDB | OE1, F_GLU.63  | N, F_LYS.45    | H, F_LYS.45     | 2.81 | 1.99 | 14.79 |
| 3THM.PDB | O, F_HIS.80    | N, F_CYS.47    | H, F_CYS.47     | 2.76 | 1.92 | 10.08 |
| 3THM.PDB | OG1, F_THR.76  | N, F_GLY.50    | H, F_GLY.50     | 2.93 | 2.22 | 29.13 |
| 3THM.PDB | O, F_VAL.67    | N, F_ARG.52    | H, F_ARG.52     | 2.76 | 2.01 | 24.49 |
| 3THM.PDB | O, F_ASP.65    | N, F_ALA.54    | H, F_ALA.54     | 2.91 | 2.11 | 18.55 |
| 3THM.PDB | OG1, F_THR.58  | N, F_GLY.61    | H, F_GLY.61     | 2.96 | 2.22 | 26.61 |
| 3THM.PDB | O, F_ARG.52    | N, F_VAL.67    | H, F_VAL.67     | 2.78 | 1.94 | 11.01 |
| 3THM.PDB | O, F_GLY.50    | N, F_CYS.69    | H, F_CYS.69     | 2.95 | 2.13 | 14.13 |

|          |                |               |               |      |      |       |
|----------|----------------|---------------|---------------|------|------|-------|
| 3THM.PDB | O, F_GLN_70    | N, F_LYS_73   | H, F_LYS_73   | 2.88 | 2.05 | 12.43 |
| 3THM.PDB | O, F_GLN_70    | N, F_GLU_74   | H, F_GLU_74   | 2.89 | 2.05 | 11.11 |
| 3THM.PDB | O, F_ARG_86    | N, F_TYR_75   | H, F_TYR_75   | 2.78 | 2.03 | 24.45 |
| 3THM.PDB | O, F_ARG_105   | N, F_THR_76   | H, F_THR_76   | 2.94 | 2.15 | 19.85 |
| 3THM.PDB | O, L_SER_51    | NZ, F_LYS_78  | HZ2, F_LYS_78 | 3.00 | 2.15 | 15.09 |
| 3THM.PDB | O, F_GLU_51    | NE2, F_HIS_80 | HE2, F_HIS_80 | 2.76 | 1.91 | 6.66  |
| 3THM.PDB | O, F_TYR_75    | N, F_ARG_86   | H, F_ARG_86   | 2.77 | 1.94 | 13.51 |
| 3THM.PDB | O, F_LYS_73    | N, F_CYS_88   | H, F_CYS_88   | 2.79 | 1.94 | 5.08  |
| 3THM.PDB | OD1, F_ASN_108 | N, F_ARG_89   | H, F_ARG_89   | 2.64 | 1.87 | 22.68 |
| 3THM.PDB | O, F_GLN_107   | N, F_THR_104  | H, F_THR_104  | 2.82 | 1.99 | 12.71 |

Table 1683: 3THM-specific side chain and main chain hydrogen bonding analysis. In this table, a PDB file is specified with a four-letter PDB ID, except that the names of the PDB files corresponding to the single NMR structural model split from the NMR ensemble is specified with a four-letter PDB ID in addition to a hyphen followed by the single NMR structural model numeric ID, the residue naming scheme is **Chain ID\_residue name\_residue number**,  $\angle ADH$  represents the angle formed by acceptor (A), donor (D) and hydrogen (H) ( $\angle ADH$ ).

| PDB      | Acceptor (A)  | Donor (D)     | Hydrogen (H)   | D-A (Å) | H-A (Å) | $\angle ADH(^{\circ})$ |
|----------|---------------|---------------|----------------|---------|---------|------------------------|
| 3TJE.PDB | OG, L_SER_2   | N, L_LEU_4    | H, L_LEU_4     | 2.98    | 2.19    | 19.51                  |
| 3TJE.PDB | O, L_SER_23   | N, L_THR_5    | H, L_THR_5     | 2.89    | 2.05    | 11.59                  |
| 3TJE.PDB | O, L_TYR_87   | NE2, L_GLN_6  | HE21, L_GLN_6  | 2.84    | 2.01    | 11.61                  |
| 3TJE.PDB | O, L_LYS_106  | N, L_VAL_10   | H, L_VAL_10    | 2.95    | 2.15    | 17.08                  |
| 3TJE.PDB | OE1, L_GLU_12 | N, L_ALA_13   | H, L_ALA_13    | 2.73    | 1.95    | 20.14                  |
| 3TJE.PDB | O, L_LEU_79   | N, L_ARG_15   | H, L_ARG_15    | 2.84    | 2.01    | 13.10                  |
| 3TJE.PDB | O, L_LEU_74   | N, L_ILE_20   | H, L_ILE_20    | 2.71    | 1.88    | 13.42                  |
| 3TJE.PDB | O, L_THR_5    | N, L_SER_23   | H, L_SER_23    | 2.97    | 2.17    | 18.20                  |
| 3TJE.PDB | O, L_THR_70   | N, L_GLY_24   | H, L_GLY_24    | 2.81    | 1.98    | 12.07                  |
| 3TJE.PDB | OD1, L_ASN_28 | N, L_ASN_25   | H, L_ASN_25    | 2.88    | 2.06    | 15.65                  |
| 3TJE.PDB | OD1, L_ASN_25 | N, L_PHE_27   | H, L_PHE_27    | 2.67    | 1.88    | 19.71                  |
| 3TJE.PDB | OD1, L_ASP_93 | ND2, L_ASN_28 | HD21, L_ASN_28 | 2.73    | 1.89    | 10.95                  |
| 3TJE.PDB | OD1, L_ASN_28 | N, L_ILE_29   | H, L_ILE_29    | 2.67    | 1.87    | 18.78                  |
| 3TJE.PDB | O, L_ASN_25   | N, L_GLY_30   | H, L_GLY_30    | 2.98    | 2.19    | 18.64                  |
| 3TJE.PDB | O, L_ASN_28   | N, L_ARG_31   | H, L_ARG_31    | 2.87    | 2.03    | 11.14                  |
| 3TJE.PDB | OD1, L_ASP_94 | NH1, L_ARG_31 | HH11, L_ARG_31 | 2.81    | 2.04    | 22.49                  |
| 3TJE.PDB | O, L_ASN_28   | N, L_TYR_32   | H, L_TYR_32    | 2.86    | 2.10    | 23.81                  |
| 3TJE.PDB | OD1, L_ASN_52 | N, L_VAL_34   | H, L_VAL_34    | 2.85    | 2.02    | 12.87                  |
| 3TJE.PDB | O, L_SER_90   | N, L_ASN_35   | H, L_ASN_35    | 2.92    | 2.09    | 12.93                  |
| 3TJE.PDB | O, H_ALA_117  | ND2, L_ASN_35 | HD21, L_ASN_35 | 2.81    | 2.01    | 17.88                  |
| 3TJE.PDB | O, L_ILE_49   | N, L_TRP_36   | H, L_TRP_36    | 2.75    | 1.91    | 11.08                  |
| 3TJE.PDB | O, L_TYR_88   | N, L_TYR_37   | H, L_TYR_37    | 2.81    | 1.99    | 14.58                  |
| 3TJE.PDB | O, L_LYS_46   | N, L_GLN_38   | H, L_GLN_38    | 2.87    | 2.07    | 18.73                  |
| 3TJE.PDB | OH, L_TYR_87  | NE2, L_GLN_38 | HE21, L_GLN_38 | 2.91    | 2.10    | 17.00                  |
| 3TJE.PDB | O, L_ASP_86   | N, L_GLN_39   | H, L_GLN_39    | 2.75    | 1.92    | 11.44                  |
| 3TJE.PDB | O, L_LYS_43   | NE2, L_GLN_39 | HE21, L_GLN_39 | 2.96    | 2.17    | 20.11                  |
| 3TJE.PDB | O, L_LEU_40   | N, L_LYS_43   | H, L_LYS_43    | 2.81    | 1.96    | 7.60                   |
| 3TJE.PDB | O, L_GLN_38   | N, L_LYS_46   | H, L_LYS_46    | 2.89    | 2.11    | 21.83                  |
| 3TJE.PDB | O, L_TRP_36   | N, L_LEU_48   | H, L_LEU_48    | 2.96    | 2.15    | 16.44                  |
| 3TJE.PDB | O, L_LEU_54   | N, L_TYR_50   | H, L_TYR_50    | 2.88    | 2.07    | 15.46                  |
| 3TJE.PDB | O, L_VAL_34   | N, L_ASN_52   | H, L_ASN_52    | 2.84    | 2.00    | 11.32                  |
| 3TJE.PDB | O, L_TYR_51   | N, L_ASN_53   | H, L_ASN_53    | 2.85    | 2.14    | 29.08                  |
| 3TJE.PDB | O, L_TYR_50   | N, L_LEU_54   | H, L_LEU_54    | 2.99    | 2.17    | 16.15                  |
| 3TJE.PDB | O, L_PHE_63   | NH1, L_ARG_55 | HH11, L_ARG_55 | 2.88    | 2.12    | 23.88                  |
| 3TJE.PDB | OD2, L_ASP_83 | NH1, L_ARG_62 | HH12, L_ARG_62 | 2.77    | 1.98    | 19.25                  |
| 3TJE.PDB | OD1, L_ASP_83 | NH2, L_ARG_62 | HH22, L_ARG_62 | 2.87    | 2.01    | 3.19                   |
| 3TJE.PDB | O, L_ASP_73   | N, L_SER_66   | H, L_SER_66    | 2.91    | 2.14    | 21.13                  |
| 3TJE.PDB | O, L_BSER_73  | N, L_SER_66   | H, L_SER_66    | 2.91    | 2.13    | 20.97                  |
| 3TJE.PDB | O, L_TYR_32   | NZ, L_LYS_67  | HZ2, L_LYS_67  | 2.82    | 2.02    | 22.26                  |
| 3TJE.PDB | O, L_SER_71   | N, L_SER_68   | H, L_SER_68    | 2.88    | 2.03    | 8.39                   |
| 3TJE.PDB | O, L_SER_68   | N, L_SER_71   | H, L_SER_71    | 2.99    | 2.15    | 8.41                   |
| 3TJE.PDB | O, L_CYS_22   | N, L_ALA_72   | H, L_ALA_72    | 2.87    | 2.04    | 13.56                  |
| 3TJE.PDB | O, L_SER_66   | N, L_ASP_73   | H, L_ASP_73    | 2.83    | 2.04    | 18.54                  |
| 3TJE.PDB | O, L_SER_66   | N, L_BSER_73  | H, L_BSER_73   | 2.85    | 2.06    | 19.36                  |
| 3TJE.PDB | O, L_ILE_20   | N, L_LEU_74   | H, L_LEU_74    | 2.94    | 2.12    | 13.68                  |
| 3TJE.PDB | O, L_SER_64   | N, L_ALA_75   | H, L_ALA_75    | 2.88    | 2.03    | 9.17                   |
| 3TJE.PDB | O, L_VAL_18   | N, L_ILE_76   | H, L_ILE_76    | 2.93    | 2.11    | 14.42                  |
| 3TJE.PDB | OD2, L_ASP_78 | NH1, L_ARG_77 | HH11, L_ARG_77 | 2.74    | 1.93    | 16.91                  |
| 3TJE.PDB | O, L_GLN_16   | N, L_LEU_79   | H, L_LEU_79    | 2.98    | 2.14    | 10.89                  |
| 3TJE.PDB | OD2, L_ASP_83 | N, L_LEU_80   | H, L_LEU_80    | 2.81    | 1.96    | 7.20                   |
| 3TJE.PDB | O, L_LEU_80   | N, L_ASP_83   | H, L_ASP_83    | 2.88    | 2.03    | 9.91                   |
| 3TJE.PDB | O, L_THR_105  | N, L_TYR_87   | H, L_TYR_87    | 2.92    | 2.12    | 18.00                  |
| 3TJE.PDB | O, L_TYR_37   | N, L_TYR_88   | H, L_TYR_88    | 2.91    | 2.09    | 14.23                  |
| 3TJE.PDB | O, L_PRO_33   | OG1, L_THR_91 | HG1, L_THR_91  | 2.76    | 2.04    | 23.18                  |
| 3TJE.PDB | O, L_GLY_98   | N, L_ASP_93   | H, L_ASP_93    | 2.88    | 2.03    | 9.26                   |
| 3TJE.PDB | O, L_PHE_27   | N, L_ASP_94   | H, L_ASP_94    | 2.94    | 2.09    | 6.58                   |
| 3TJE.PDB | OD2, L_ASP_93 | N, L_LEU_96   | H, L_LEU_96    | 2.80    | 2.01    | 19.19                  |

|          |                |                |                 |      |      |       |
|----------|----------------|----------------|-----------------|------|------|-------|
| 3TJE.PDB | O, L_THR_91    | N, L_VAL_100   | H, L_VAL_100    | 2.77 | 1.92 | 9.60  |
| 3TJE.PDB | O, L_CYS_89    | N, L_GLY_102   | H, L_GLY_102    | 2.86 | 2.05 | 17.43 |
| 3TJE.PDB | O, L_TYR_87    | N, L_THR_105   | H, L_THR_105    | 2.85 | 2.08 | 21.91 |
| 3TJE.PDB | O, L_PRO_7     | OG1, L_THR_105 | HG1, L_THR_105  | 2.71 | 1.92 | 11.71 |
| 3TJE.PDB | O, L_PRO_8     | N, L_LYS_106   | H, L_LYS_106    | 2.83 | 1.98 | 10.06 |
| 3TJE.PDB | O, L_ALA_85    | N, L_VAL_107   | H, L_VAL_107    | 2.95 | 2.10 | 8.53  |
| 3TJE.PDB | OE2, L_GLU_84  | N, L_VAL_109   | H, L_VAL_109    | 2.88 | 2.05 | 12.54 |
| 3TJE.PDB | O, L_GLU_12    | N, L_LEU_110   | H, L_LEU_110    | 2.90 | 2.08 | 14.25 |
| 3TJE.PDB | OH, L_TYR_144  | N, L_GLY_111   | H, L_GLY_111    | 2.92 | 2.12 | 17.61 |
| 3TJE.PDB | O, L_TYR_144   | N, L_ALA_115   | H, L_ALA_115    | 2.80 | 2.00 | 16.96 |
| 3TJE.PDB | O, L_SER_141   | N, L_SER_118   | H, L_SER_118    | 2.91 | 2.14 | 22.45 |
| 3TJE.PDB | O, L_LEU_139   | N, L_THR_120   | H, L_THR_120    | 2.96 | 2.12 | 10.98 |
| 3TJE.PDB | O, L_VAL_137   | N, L_PHE_122   | H, L_PHE_122    | 2.77 | 1.92 | 8.56  |
| 3TJE.PDB | O, L_LEU_129   | N, L_ASN_132   | H, L_ASN_132    | 2.97 | 2.15 | 16.34 |
| 3TJE.PDB | OE2, L_GLU_128 | OG1, L_THR_135 | HG1, L_THR_135  | 2.52 | 1.76 | 18.95 |
| 3TJE.PDB | O, L_LEU_182   | N, L_LEU_136   | H, L_LEU_136    | 2.82 | 1.99 | 11.01 |
| 3TJE.PDB | O, L_SER_180   | N, L_CYS_138   | H, L_CYS_138    | 2.78 | 1.93 | 6.24  |
| 3TJE.PDB | O, L_THR_120   | N, L_LEU_139   | H, L_LEU_139    | 2.87 | 2.03 | 10.47 |
| 3TJE.PDB | O, L_ALA_178   | N, L_ILE_140   | H, L_ILE_140    | 2.83 | 2.07 | 23.88 |
| 3TJE.PDB | OE1, L_GLN_171 | N, L_ASP_142   | H, L_ASP_142    | 2.90 | 2.05 | 8.27  |
| 3TJE.PDB | O, L_ALA_115   | N, L_TYR_144   | H, L_TYR_144    | 2.95 | 2.16 | 19.36 |
| 3TJE.PDB | O, L_THR_200   | N, L_THR_149   | H, L_THR_149    | 2.90 | 2.10 | 17.11 |
| 3TJE.PDB | O, L_GLN_198   | N, L_ALA_151   | H, L_ALA_151    | 2.89 | 2.08 | 16.72 |
| 3TJE.PDB | OG, L_SER_180  | NE1, L_TRP_152 | HE1, L_TRP_152  | 2.95 | 2.10 | 8.91  |
| 3TJE.PDB | O, L_SER_157   | N, L_ALA_154   | H, L_ALA_154    | 2.87 | 2.03 | 11.03 |
| 3TJE.PDB | O, L_SER_194   | N, L_ASP_155   | H, L_ASP_155    | 2.88 | 2.03 | 6.45  |
| 3TJE.PDB | O, L_ALA_154   | N, L_SER_157   | H, L_SER_157    | 2.84 | 2.00 | 9.67  |
| 3TJE.PDB | O, L_SER_179   | N, L_THR_166   | H, L_THR_166    | 2.85 | 2.03 | 14.19 |
| 3TJE.PDB | O, L_ALA_177   | N, L_SER_169   | H, L_SER_169    | 2.80 | 1.99 | 16.63 |
| 3TJE.PDB | O, L_LYS_175   | N, L_GLN_171   | H, L_GLN_171    | 2.71 | 1.85 | 3.49  |
| 3TJE.PDB | OD1, L_ASP_142 | NE2, L_GLN_171 | HE21, L_GLN_171 | 2.80 | 1.98 | 15.09 |
| 3TJE.PDB | O, L_GLN_171   | N, L_ASN_174   | H, L_ASN_174    | 2.96 | 2.12 | 11.80 |
| 3TJE.PDB | OD1, L_ASN_173 | N, L_LYS_175   | H, L_LYS_175    | 2.90 | 2.05 | 7.85  |
| 3TJE.PDB | O, L_PHE_143   | N, L_TYR_176   | H, L_TYR_176    | 2.84 | 2.01 | 10.88 |
| 3TJE.PDB | O, L_SER_169   | N, L_ALA_177   | H, L_ALA_177    | 2.94 | 2.12 | 14.89 |
| 3TJE.PDB | O, L_ILE_140   | N, L_ALA_178   | H, L_ALA_178    | 2.67 | 1.87 | 18.00 |
| 3TJE.PDB | OG1, L_THR_166 | N, L_SER_179   | H, L_SER_179    | 2.90 | 2.10 | 18.20 |
| 3TJE.PDB | O, L_CYS_138   | N, L_SER_180   | H, L_SER_180    | 2.89 | 2.09 | 17.42 |
| 3TJE.PDB | O, L_GLU_164   | N, L_TYR_181   | H, L_TYR_181    | 2.81 | 1.99 | 15.18 |
| 3TJE.PDB | O, L_LEU_136   | N, L_LEU_182   | H, L_LEU_182    | 2.96 | 2.15 | 16.77 |
| 3TJE.PDB | O, L_GLY_162   | N, L_SER_183   | H, L_SER_183    | 2.95 | 2.11 | 9.60  |
| 3TJE.PDB | O, L_ALA_134   | N, L_LEU_184   | H, L_LEU_184    | 2.91 | 2.06 | 5.00  |
| 3TJE.PDB | OG1, L_THR_185 | N, L_GLN_188   | H, L_GLN_188    | 2.93 | 2.09 | 10.43 |
| 3TJE.PDB | O, L_THR_185   | N, L_TRP_189   | H, L_TRP_189    | 2.96 | 2.12 | 11.25 |
| 3TJE.PDB | O, L_VAL_210   | N, L_TYR_195   | H, L_TYR_195    | 2.89 | 2.08 | 15.12 |
| 3TJE.PDB | O, L_LYS_153   | N, L_SER_196   | H, L_SER_196    | 2.96 | 2.16 | 17.59 |
| 3TJE.PDB | O, L_LYS_208   | N, L_CYS_197   | H, L_CYS_197    | 2.95 | 2.14 | 16.29 |
| 3TJE.PDB | O, L_ALA_151   | N, L_GLN_198   | H, L_GLN_198    | 2.79 | 1.94 | 4.13  |
| 3TJE.PDB | O, L_VAL_206   | N, L_VAL_199   | H, L_VAL_199    | 2.84 | 2.01 | 12.78 |
| 3TJE.PDB | O, L_THR_149   | N, L_THR_200   | H, L_THR_200    | 2.81 | 1.96 | 9.64  |
| 3TJE.PDB | OG1, L_THR_205 | OG1, L_THR_200 | HG1, L_THR_200  | 2.75 | 1.97 | 15.90 |
| 3TJE.PDB | O, L_SER_204   | N, L_HIS_201   | H, L_HIS_201    | 2.96 | 2.13 | 12.24 |
| 3TJE.PDB | O, L_PRO_145   | NE2, L_HIS_201 | HE2, L_HIS_201  | 2.93 | 2.12 | 17.78 |
| 3TJE.PDB | O, L_TYR_195   | N, L_VAL_210   | H, L_VAL_210    | 2.98 | 2.16 | 15.92 |
| 3TJE.PDB | O, H_SER_25    | N, H_GLN_3     | H, H_GLN_3      | 2.88 | 2.06 | 14.24 |
| 3TJE.PDB | O, H_THR_21    | N, H_SER_7     | H, H_SER_7      | 2.87 | 2.11 | 23.93 |
| 3TJE.PDB | O, H_THR_129   | N, H_VAL_12    | H, H_VAL_12     | 2.84 | 2.01 | 13.76 |
| 3TJE.PDB | O, H_VAL_92    | N, H_SER_15    | H, H_SER_15     | 2.99 | 2.17 | 15.06 |



|          |                |                |                 |      |      |       |
|----------|----------------|----------------|-----------------|------|------|-------|
| 3TJE.PDB | O, H.LEU_89    | N, H.LEU_18    | H, H.LEU_18     | 2.80 | 1.97 | 12.54 |
| 3TJE.PDB | O, H.LEU_87    | N, H.LEU_20    | H, H.LEU_20     | 2.91 | 2.09 | 15.75 |
| 3TJE.PDB | O, H.SER_7     | N, H.THR_21    | H, H.THR_21     | 2.91 | 2.07 | 9.29  |
| 3TJE.PDB | O, H.VAL_85    | N, H.CYS_22    | H, H.CYS_22     | 2.64 | 1.80 | 12.14 |
| 3TJE.PDB | O, H.GLN_5     | N, H.THR_23    | H, H.THR_23     | 2.80 | 1.95 | 6.62  |
| 3TJE.PDB | O, H.ASN_83    | N, H.VAL_24    | H, H.VAL_24     | 2.83 | 1.97 | 5.09  |
| 3TJE.PDB | O, H.GLN_3     | N, H.SER_25    | H, H.SER_25     | 2.89 | 2.05 | 10.07 |
| 3TJE.PDB | OD1, H.ASN_83  | N, H.ILE_29    | H, H.ILE_29     | 2.95 | 2.10 | 5.57  |
| 3TJE.PDB | O, H.TYR_55    | N, H.TYR_34    | H, H.TYR_34     | 2.89 | 2.10 | 20.67 |
| 3TJE.PDB | O, H.ILE_53    | N, H.GLY_36    | H, H.GLY_36     | 2.94 | 2.15 | 19.40 |
| 3TJE.PDB | O, H.ALA_103   | N, H.VAL_37    | H, H.VAL_37     | 2.90 | 2.07 | 11.42 |
| 3TJE.PDB | O, H.TYR_101   | N, H.VAL_39    | H, H.VAL_39     | 2.86 | 2.03 | 12.06 |
| 3TJE.PDB | O, H.GLU_48    | N, H.ARG_40    | H, H.ARG_40     | 2.80 | 1.98 | 14.17 |
| 3TJE.PDB | OE1, H.GLU_48  | NE, H.ARG_40   | HE, H.ARG_40    | 2.72 | 1.90 | 14.58 |
| 3TJE.PDB | OD1, H.ASP_96  | NH1, H.ARG_40  | HH12, H.ARG_40  | 2.84 | 2.01 | 12.94 |
| 3TJE.PDB | O, H.LEU_99    | N, H.GLN_41    | H, H.GLN_41     | 2.86 | 2.14 | 27.68 |
| 3TJE.PDB | OE1, L.GLN_39  | NE2, H.GLN_41  | HE21, H.GLN_41  | 2.98 | 2.15 | 10.85 |
| 3TJE.PDB | O, H.LYS_45    | NE2, H.GLN_41  | HE22, H.GLN_41  | 2.99 | 2.23 | 24.37 |
| 3TJE.PDB | O, H.SER_42    | N, H.LYS_45    | H, H.LYS_45     | 2.68 | 1.88 | 17.77 |
| 3TJE.PDB | O, H.ARG_40    | N, H.GLU_48    | H, H.GLU_48     | 2.85 | 2.11 | 26.04 |
| 3TJE.PDB | O, H.TRP_38    | N, H.VAL_50    | H, H.VAL_50     | 2.78 | 1.93 | 6.45  |
| 3TJE.PDB | O, H.GLY_36    | N, H.ILE_53    | H, H.ILE_53     | 2.93 | 2.12 | 17.64 |
| 3TJE.PDB | O, H.SER_63    | N, H.ALA_54    | H, H.ALA_54     | 2.78 | 1.96 | 13.18 |
| 3TJE.PDB | O, H.TYR_34    | N, H.TYR_55    | H, H.TYR_55     | 2.89 | 2.08 | 16.16 |
| 3TJE.PDB | O, H.SER_61    | N, H.ARG_56    | H, H.ARG_56     | 2.85 | 1.99 | 1.86  |
| 3TJE.PDB | O, H.ALA_54    | N, H.SER_63    | H, H.SER_63     | 2.78 | 2.05 | 26.84 |
| 3TJE.PDB | O, H.VAL_50    | N, H.ASN_67    | H, H.ASN_67     | 2.97 | 2.11 | 4.12  |
| 3TJE.PDB | O, H.TRP_49    | ND2, H.ASN_67  | HD21, H.ASN_67  | 2.89 | 2.04 | 7.41  |
| 3TJE.PDB | OD1, H.ASN_67  | N, H.SER_69    | H, H.SER_69     | 2.97 | 2.12 | 5.43  |
| 3TJE.PDB | O, H.LEU_70    | N, H.ARG_73    | H, H.ARG_73     | 2.89 | 2.05 | 11.17 |
| 3TJE.PDB | OD2, H.ASP_96  | NH1, H.ARG_73  | HH12, H.ARG_73  | 2.84 | 2.09 | 24.31 |
| 3TJE.PDB | OD1, H.ASP_96  | NH2, H.ARG_73  | HH22, H.ARG_73  | 2.94 | 2.09 | 3.77  |
| 3TJE.PDB | O, H.ARG_88    | N, H.THR_75    | H, H.THR_75     | 2.86 | 2.06 | 17.69 |
| 3TJE.PDB | OH, H.TYR_66   | N, H.VAL_76    | H, H.VAL_76     | 2.78 | 1.97 | 16.41 |
| 3TJE.PDB | O, H.GLN_84    | N, H.ASP_79    | H, H.ASP_79     | 2.90 | 2.07 | 12.81 |
| 3TJE.PDB | OD2, H.ASP_79  | OG, H.SER_81   | HG, H.SER_81    | 2.85 | 2.15 | 27.35 |
| 3TJE.PDB | O, H.ALA_27    | ND2, H.ASN_83  | HD21, H.ASN_83  | 2.68 | 1.91 | 21.50 |
| 3TJE.PDB | O, H.VAL_24    | ND2, H.ASN_83  | HD22, H.ASN_83  | 2.83 | 2.02 | 14.94 |
| 3TJE.PDB | O, H.CYS_22    | N, H.VAL_85    | H, H.VAL_85     | 2.88 | 2.08 | 16.90 |
| 3TJE.PDB | O, H.SER_77    | N, H.SER_86    | H, H.SER_86     | 2.83 | 2.01 | 15.98 |
| 3TJE.PDB | O, H.LEU_20    | N, H.LEU_87    | H, H.LEU_87     | 2.94 | 2.13 | 16.25 |
| 3TJE.PDB | O, H.THR_75    | N, H.ARG_88    | H, H.ARG_88     | 2.86 | 2.03 | 13.96 |
| 3TJE.PDB | O, H.LEU_18    | N, H.LEU_89    | H, H.LEU_89     | 2.84 | 2.02 | 14.49 |
| 3TJE.PDB | O, H.ARG_73    | N, H.THR_90    | H, H.THR_90     | 2.85 | 2.04 | 16.07 |
| 3TJE.PDB | O, H.THR_93    | N, H.ASP_96    | H, H.ASP_96     | 2.94 | 2.10 | 9.54  |
| 3TJE.PDB | O, H.GLN_41    | N, H.LEU_99    | H, H.LEU_99     | 2.74 | 1.92 | 14.43 |
| 3TJE.PDB | O, H.THR_126   | N, H.TYR_100   | H, H.TYR_100    | 2.79 | 1.93 | 2.67  |
| 3TJE.PDB | O, H.VAL_39    | N, H.TYR_101   | H, H.TYR_101    | 2.77 | 1.93 | 10.43 |
| 3TJE.PDB | OE2, H.GLU_6   | N, H.CYS_102   | H, H.CYS_102    | 2.72 | 1.91 | 15.94 |
| 3TJE.PDB | O, H.VAL_121   | N, H.ARG_104   | H, H.ARG_104    | 2.91 | 2.13 | 21.28 |
| 3TJE.PDB | OD1, H.ASP_120 | NE, H.ARG_104  | HE, H.ARG_104   | 2.87 | 2.06 | 15.55 |
| 3TJE.PDB | OD2, H.ASP_120 | NH2, H.ARG_104 | HH21, H.ARG_104 | 2.68 | 1.96 | 27.63 |
| 3TJE.PDB | O, H.TYR_35    | N, H.ARG_105   | H, H.ARG_105    | 2.94 | 2.12 | 13.39 |
| 3TJE.PDB | O, F_CYS_43    | NH1, H.ARG_105 | HH12, H.ARG_105 | 2.85 | 2.08 | 23.11 |
| 3TJE.PDB | O, H.ALA_118   | N, H.GLN_106   | H, H.GLN_106    | 2.87 | 2.03 | 10.40 |
| 3TJE.PDB | O, H.TRP_116   | N, H.LEU_108   | H, H.LEU_108    | 2.87 | 2.02 | 4.86  |
| 3TJE.PDB | O, H.TYR_114   | N, H.ASP_110   | H, H.ASP_110    | 2.92 | 2.19 | 27.17 |
| 3TJE.PDB | OD2, H.ASP_110 | N, H.THR_112   | H, H.THR_112    | 3.00 | 2.17 | 12.16 |

|          |                |                |                 |      |      |       |
|----------|----------------|----------------|-----------------|------|------|-------|
| 3TJE.PDB | O, H_LEU_108   | N, H_TRP_116   | H, H_TRP_116    | 3.00 | 2.21 | 20.70 |
| 3TJE.PDB | OH, L_TYR_37   | N, H_PHE_119   | H, H_PHE_119    | 2.96 | 2.10 | 4.74  |
| 3TJE.PDB | O, H_CYS_102   | N, H_GLY_123   | H, H_GLY_123    | 2.82 | 2.01 | 17.20 |
| 3TJE.PDB | OE1, H_GLU_6   | N, H_GLY_125   | H, H_GLY_125    | 2.75 | 1.92 | 11.39 |
| 3TJE.PDB | O, H_TYR_100   | N, H_THR_126   | H, H_THR_126    | 2.90 | 2.10 | 17.97 |
| 3TJE.PDB | O, H_ALA_98    | N, H_VAL_128   | H, H_VAL_128    | 2.90 | 2.08 | 14.31 |
| 3TJE.PDB | O, H_GLY_10    | N, H_THR_129   | H, H_THR_129    | 2.80 | 1.96 | 9.76  |
| 3TJE.PDB | O, H_VAL_12    | N, H_SER_131   | H, H_SER_131    | 3.00 | 2.24 | 24.52 |
| 3TJE.PDB | O, H_PHE_165   | N, H_LYS_136   | H, H_LYS_136    | 2.83 | 2.02 | 16.58 |
| 3TJE.PDB | O, H_ASP_163   | NZ, H_LYS_136  | HZ2, H_LYS_136  | 2.77 | 1.97 | 20.93 |
| 3TJE.PDB | O, H_LEU_160   | N, H_PHE_141   | H, H_PHE_141    | 2.88 | 2.04 | 12.24 |
| 3TJE.PDB | O, H_GLY_158   | N, H_LEU_143   | H, H_LEU_143    | 2.57 | 1.72 | 7.54  |
| 3TJE.PDB | O, H_VAL_203   | N, H_ALA_155   | H, H_ALA_155    | 2.69 | 1.91 | 20.72 |
| 3TJE.PDB | O, H_LEU_143   | N, H_GLY_158   | H, H_GLY_158    | 2.85 | 2.05 | 18.58 |
| 3TJE.PDB | O, H_SER_199   | N, H_CYS_159   | H, H_CYS_159    | 2.99 | 2.22 | 22.42 |
| 3TJE.PDB | O, H_PHE_141   | N, H_LEU_160   | H, H_LEU_160    | 2.79 | 1.97 | 14.71 |
| 3TJE.PDB | O, H_LEU_197   | N, H_VAL_161   | H, H_VAL_161    | 2.81 | 1.97 | 8.46  |
| 3TJE.PDB | O, H_SER_139   | N, H_ALYS_162  | H, H_ALYS_162   | 2.77 | 1.93 | 9.67  |
| 3TJE.PDB | O, H_SER_139   | N, H_BLYS_162  | H, H_BLYS_162   | 2.78 | 1.95 | 10.83 |
| 3TJE.PDB | N, H_ALYS_162  | N, H_BLYS_162  | H, H_BLYS_162   | 0.01 | 0.85 | 29.33 |
| 3TJE.PDB | O, H_TYR_195   | N, H_TYR_164   | H, H_TYR_164    | 2.92 | 2.13 | 20.02 |
| 3TJE.PDB | OG, H_SER_199  | NE1, H_TRP_173 | HE1, H_TRP_173  | 2.95 | 2.10 | 8.21  |
| 3TJE.PDB | O, H_ILE_214   | N, H_ASN_174   | H, H_ASN_174    | 2.64 | 1.81 | 12.80 |
| 3TJE.PDB | O, H_THR_212   | ND2, H_ASN_174 | HD21, H_ASN_174 | 2.99 | 2.18 | 18.13 |
| 3TJE.PDB | OD1, H_ASN_216 | N, H_SER_175   | H, H_SER_175    | 2.79 | 2.01 | 20.02 |
| 3TJE.PDB | O, H_TRP_173   | N, H_GLY_176   | H, H_GLY_176    | 2.73 | 1.90 | 13.59 |
| 3TJE.PDB | O, H_VAL_200   | N, H_HIS_183   | H, H_HIS_183    | 2.76 | 1.93 | 13.04 |
| 3TJE.PDB | O, H_SER_198   | N, H_PHE_185   | H, H_PHE_185    | 2.93 | 2.09 | 11.93 |
| 3TJE.PDB | O, H_SER_196   | N, H_VAL_188   | H, H_VAL_188    | 2.92 | 2.13 | 19.94 |
| 3TJE.PDB | O, H_LEU_194   | N, H_GLN_190   | H, H_GLN_190    | 2.89 | 2.03 | 2.73  |
| 3TJE.PDB | OD1, H_ASP_163 | NE2, H_GLN_190 | HE21, H_GLN_190 | 2.74 | 1.93 | 16.43 |
| 3TJE.PDB | O, H_LEU_194   | NE2, H_GLN_190 | HE22, H_GLN_190 | 2.91 | 2.07 | 10.67 |
| 3TJE.PDB | O, H_GLN_190   | N, H_GLY_193   | H, H_GLY_193    | 2.82 | 1.99 | 10.97 |
| 3TJE.PDB | O, H_TYR_164   | N, H_TYR_195   | H, H_TYR_195    | 2.85 | 2.00 | 9.32  |
| 3TJE.PDB | O, H_HIS_183   | N, H_VAL_200   | H, H_VAL_200    | 2.82 | 2.00 | 16.33 |
| 3TJE.PDB | O, H_LEU_157   | N, H_VAL_201   | H, H_VAL_201    | 2.89 | 2.05 | 10.36 |
| 3TJE.PDB | O, H_ALA_155   | N, H_VAL_203   | H, H_VAL_203    | 2.94 | 2.10 | 10.75 |
| 3TJE.PDB | O, H_GLY_153   | N, H_SER_205   | H, H_SER_205    | 2.57 | 1.73 | 10.17 |
| 3TJE.PDB | OD1, H_ASN_174 | N, H_ILE_214   | H, H_ILE_214    | 2.72 | 1.92 | 17.15 |
| 3TJE.PDB | O, H_SER_172   | N, H_ASN_216   | H, H_ASN_216    | 2.85 | 2.03 | 15.86 |
| 3TJE.PDB | OD1, H_ASP_227 | ND2, H_ASN_216 | HD22, H_ASN_216 | 2.79 | 1.98 | 17.28 |
| 3TJE.PDB | O, H_VAL_226   | N, H_VAL_217   | H, H_VAL_217    | 2.75 | 1.89 | 4.56  |
| 3TJE.PDB | O, H_THR_170   | N, H_AASN_218  | H, H_AASN_218   | 2.99 | 2.16 | 12.40 |
| 3TJE.PDB | O, H_THR_170   | N, H_BASN_218  | H, H_BASN_218   | 2.97 | 2.14 | 13.28 |
| 3TJE.PDB | O, H_PRO_166   | NE2, H_HIS_219 | HE2, H_HIS_219  | 2.74 | 1.90 | 8.90  |
| 3TJE.PDB | O, H_LYS_220   | N, H_ASN_223   | H, H_ASN_223    | 2.92 | 2.10 | 14.79 |
| 3TJE.PDB | OG, H_SER_222  | OG1, H_THR_224 | HG1, H_THR_224  | 2.65 | 1.92 | 22.20 |
| 3TJE.PDB | O, H_VAL_217   | N, H_VAL_226   | H, H_VAL_226    | 2.85 | 2.02 | 13.83 |
| 3TJE.PDB | O, H_CYS_215   | N, H_LYS_228   | H, H_LYS_228    | 2.90 | 2.09 | 15.61 |
| 3TJE.PDB | O, H_TYR_213   | N, H_VAL_230   | H, H_VAL_230    | 2.88 | 2.03 | 8.45  |
| 3TJE.PDB | O, F_GLY_40    | N, F_CYS_43    | H, F_CYS_43     | 2.88 | 2.06 | 15.38 |
| 3TJE.PDB | OE2, F_GLU_63  | N, F_HIS_44    | H, F_HIS_44     | 2.91 | 2.05 | 1.72  |
| 3TJE.PDB | OH, H_TYR_35   | ND1, F_HIS_44  | HD1, F_HIS_44   | 2.56 | 1.70 | 3.69  |
| 3TJE.PDB | OE1, F_GLU_63  | N, F_LYS_45    | H, F_LYS_45     | 2.91 | 2.10 | 15.27 |
| 3TJE.PDB | O, F_HIS_80    | N, F_CYS_47    | H, F_CYS_47     | 2.82 | 1.98 | 10.44 |
| 3TJE.PDB | OG1, F_THR_76  | N, F_GLY_50    | H, F_GLY_50     | 2.74 | 2.01 | 27.76 |
| 3TJE.PDB | O, F_VAL_67    | N, F_ARG_52    | H, F_ARG_52     | 2.89 | 2.17 | 27.83 |
| 3TJE.PDB | O, F_SER_82    | N, F_LYS_53    | H, F_LYS_53     | 2.94 | 2.10 | 9.60  |

|          |                |               |               |      |      |       |
|----------|----------------|---------------|---------------|------|------|-------|
| 3TJE.PDB | O, F_ASP_65    | N, F_ALA_54   | H, F_ALA_54   | 2.88 | 2.07 | 15.43 |
| 3TJE.PDB | O, F_ARG_52    | N, F_VAL_67   | H, F_VAL_67   | 2.77 | 1.94 | 11.91 |
| 3TJE.PDB | O, F_GLY_50    | N, F_CYS_69   | H, F_CYS_69   | 2.96 | 2.12 | 10.65 |
| 3TJE.PDB | O, F_GLN_70    | N, F_LYS_73   | H, F_LYS_73   | 2.97 | 2.14 | 11.31 |
| 3TJE.PDB | O, F_GLN_70    | N, F_GLU_74   | H, F_GLU_74   | 2.91 | 2.06 | 7.91  |
| 3TJE.PDB | O, F_ARG_86    | N, F_TYR_75   | H, F_TYR_75   | 2.68 | 1.90 | 20.37 |
| 3TJE.PDB | O, F_ARG_105   | N, F_THR_76   | H, F_THR_76   | 2.92 | 2.12 | 18.47 |
| 3TJE.PDB | O, F_GLU_51    | NE2, F_HIS_80 | HE2, F_HIS_80 | 2.72 | 1.86 | 5.72  |
| 3TJE.PDB | O, F_TYR_75    | N, F_ARG_86   | H, F_ARG_86   | 2.68 | 1.83 | 6.97  |
| 3TJE.PDB | O, F_LYS_73    | N, F_CYS_88   | H, F_CYS_88   | 2.78 | 1.92 | 5.80  |
| 3TJE.PDB | OD1, F_ASN_108 | N, F_AARG_89  | H, F_AARG_89  | 2.87 | 2.04 | 11.64 |
| 3TJE.PDB | OD1, F_ASN_108 | N, F_BARG_89  | H, F_BARG_89  | 2.83 | 1.98 | 7.34  |
| 3TJE.PDB | OD1, F_ASP_92  | N, F_GLY_94   | H, F_GLY_94   | 2.84 | 2.05 | 19.77 |
| 3TJE.PDB | O, F_ASP_92    | N, F_HIS_95   | H, F_HIS_95   | 2.97 | 2.16 | 18.09 |
| 3TJE.PDB | O, F_GLU_93    | N, F_GLY_96   | H, F_GLY_96   | 2.71 | 1.88 | 12.35 |
| 3TJE.PDB | O, F_ARG_112   | N, F_GLU_98   | H, F_GLU_98   | 2.94 | 2.15 | 19.49 |
| 3TJE.PDB | O, F_LYS_110   | N, F_GLU_100  | H, F_GLU_100  | 2.61 | 1.76 | 9.32  |
| 3TJE.PDB | O, F_GLN_107   | N, F_THR_104  | H, F_THR_104  | 2.82 | 1.98 | 10.85 |
| 3TJE.PDB | O, F_ILE_101   | N, F_LYS_110  | H, F_LYS_110  | 2.83 | 1.99 | 9.81  |
| 3TJE.PDB | OE2, F_GLU_98  | NE, F_ARG_112 | HE, F_ARG_112 | 2.97 | 2.20 | 22.98 |
| 3TJE.PDB | O, F_GLY_96    | N, F_LYS_114  | H, F_LYS_114  | 2.92 | 2.14 | 21.07 |
| 3TJE.PDB | O, F_LYS_114   | N, F_PHE_117  | H, F_PHE_117  | 2.97 | 2.13 | 10.64 |
| 3TJE.PDB | O, F_ASP_128   | N, F_PHE_118  | H, F_PHE_118  | 2.93 | 2.18 | 24.79 |
| 3TJE.PDB | O, F_HIS_95    | N, F_CYS_127  | H, F_CYS_127  | 2.92 | 2.09 | 13.51 |

Table 1684: 3TJE-specific side chain and main chain hydrogen bonding analysis. In this table, a PDB file is specified with a four-letter PDB ID, except that the names of the PDB files corresponding to the single NMR structural model split from the NMR ensemble is specified with a four-letter PDB ID in addition to a hyphen followed by the single NMR structural model numeric ID, the residue naming scheme is **Chain ID\_residue name\_residue number**,  $\angle ADH$  represents the angle formed by acceptor (A), donor (D) and hydrogen (H) ( $\angle ADH$ ).

| PDB      | Acceptor (A)  | Donor (D)     | Hydrogen (H)   | D-A (Å) | H-A (Å) | $\angle ADH(^{\circ})$ |
|----------|---------------|---------------|----------------|---------|---------|------------------------|
| 3U2S.PDB | O, H.SER.25   | N, H.ARG.3    | H, H.ARG.3     | 2.89    | 2.07    | 15.49                  |
| 3U2S.PDB | O, H.SER.21   | N, H.SER.7    | H, H.SER.7     | 2.84    | 2.05    | 19.48                  |
| 3U2S.PDB | O, H.THR.110  | N, H.VAL.12   | H, H.VAL.12    | 2.86    | 2.03    | 11.16                  |
| 3U2S.PDB | O, H.LEU.82C  | N, H.GLY.15   | H, H.GLY.15    | 2.74    | 1.93    | 16.73                  |
| 3U2S.PDB | O, H.MET.82   | N, H.LEU.18   | H, H.LEU.18    | 2.81    | 2.03    | 20.52                  |
| 3U2S.PDB | O, H.LEU.80   | N, H.LEU.20   | H, H.LEU.20    | 2.85    | 2.03    | 14.92                  |
| 3U2S.PDB | O, H.SER.7    | N, H.SER.21   | H, H.SER.21    | 2.93    | 2.09    | 10.95                  |
| 3U2S.PDB | O, H.VAL.5    | N, H.ALA.23   | H, H.ALA.23    | 2.92    | 2.11    | 16.83                  |
| 3U2S.PDB | O, H.ASP.76   | N, H.ALA.24   | H, H.ALA.24    | 2.96    | 2.10    | 4.40                   |
| 3U2S.PDB | O, H.ASP.100L | NE, H.ARG.31  | HE, H.ARG.31   | 2.89    | 2.12    | 21.23                  |
| 3U2S.PDB | O, H.ASP.100L | NH2, H.ARG.31 | HH21, H.ARG.31 | 2.93    | 2.18    | 24.99                  |
| 3U2S.PDB | O, H.VAL.93   | N, H.HIS.35   | H, H.HIS.35    | 2.77    | 1.93    | 11.33                  |
| 3U2S.PDB | OE1, H.GLU.95 | NE2, H.HIS.35 | HE2, H.HIS.35  | 2.64    | 1.80    | 11.05                  |
| 3U2S.PDB | O, H.ALA.49   | N, H.TRP.36   | H, H.TRP.36    | 2.96    | 2.24    | 28.24                  |
| 3U2S.PDB | O, H.TYR.79   | NE1, H.TRP.36 | HE1, H.TRP.36  | 2.98    | 2.22    | 24.67                  |
| 3U2S.PDB | O, H.PHE.91   | N, H.VAL.37   | H, H.VAL.37    | 2.97    | 2.15    | 14.01                  |
| 3U2S.PDB | O, H.GLU.46   | N, H.ARG.38   | H, H.ARG.38    | 2.90    | 2.05    | 8.68                   |
| 3U2S.PDB | OE2, H.GLU.46 | NE, H.ARG.38  | HE, H.ARG.38   | 2.80    | 2.01    | 18.34                  |
| 3U2S.PDB | OD1, H.ASP.86 | NH1, H.ARG.38 | HH12, H.ARG.38 | 2.84    | 2.00    | 11.28                  |
| 3U2S.PDB | OE2, H.GLU.46 | NH2, H.ARG.38 | HH21, H.ARG.38 | 2.92    | 2.18    | 25.81                  |
| 3U2S.PDB | O, H.THR.89   | N, H.GLN.39   | H, H.GLN.39    | 2.85    | 2.11    | 25.60                  |
| 3U2S.PDB | OE1, H.GLN.38 | NE2, H.GLN.39 | HE22, H.GLN.39 | 2.89    | 2.04    | 8.55                   |
| 3U2S.PDB | O, H.ALA.40   | N, H.GLN.43   | H, H.GLN.43    | 2.91    | 2.10    | 16.74                  |
| 3U2S.PDB | O, H.ARG.38   | N, H.GLU.46   | H, H.GLU.46    | 2.82    | 2.01    | 17.41                  |
| 3U2S.PDB | O, H.TRP.36   | N, H.VAL.48   | H, H.VAL.48    | 2.95    | 2.12    | 14.22                  |
| 3U2S.PDB | O, H.TYR.58   | N, H.PHE.50   | H, H.PHE.50    | 2.96    | 2.16    | 17.41                  |
| 3U2S.PDB | O, H.MET.34   | N, H.ILE.51   | H, H.ILE.51    | 2.86    | 2.05    | 16.44                  |
| 3U2S.PDB | O, H.GLU.56   | N, H.LYS.52   | H, H.LYS.52    | 2.94    | 2.08    | 3.51                   |
| 3U2S.PDB | O, H.PHE.100J | OH, H.TYR.52A | HH, H.TYR.52A  | 2.62    | 1.87    | 20.61                  |
| 3U2S.PDB | O, H.LYS.52   | N, H.GLY.54   | H, H.GLY.54    | 2.83    | 2.01    | 14.33                  |
| 3U2S.PDB | O, H.PHE.50   | N, H.TYR.58   | H, H.TYR.58    | 2.91    | 2.10    | 17.46                  |
| 3U2S.PDB | O, H.VAL.48   | N, H.ALA.60   | H, H.ALA.60    | 2.97    | 2.15    | 15.16                  |
| 3U2S.PDB | OE1, H.GLU.46 | OG, H.SER.62  | HG, H.SER.62   | 2.75    | 1.94    | 7.42                   |
| 3U2S.PDB | O, H.VAL.63   | N, H.ARG.66   | H, H.ARG.66    | 2.80    | 2.00    | 17.44                  |
| 3U2S.PDB | OD2, H.ASP.86 | NH1, H.ARG.66 | HH12, H.ARG.66 | 2.53    | 1.74    | 19.65                  |
| 3U2S.PDB | OD1, H.ASP.86 | NH2, H.ARG.66 | HH22, H.ARG.66 | 2.93    | 2.08    | 7.53                   |
| 3U2S.PDB | O, H.VAL.63   | N, H.LEU.67   | H, H.LEU.67    | 2.93    | 2.08    | 6.74                   |
| 3U2S.PDB | O, H.GLN.81   | N, H.SER.68   | H, H.SER.68    | 2.87    | 2.07    | 17.94                  |
| 3U2S.PDB | OD1, H.ASN.73 | NE, H.ARG.71  | HE, H.ARG.71   | 2.77    | 1.98    | 19.66                  |
| 3U2S.PDB | O, H.GLN.32   | NH1, H.ARG.71 | HH12, H.ARG.71 | 2.91    | 2.17    | 26.10                  |
| 3U2S.PDB | O, H.THR.77   | N, H.ASP.72   | H, H.ASP.72    | 2.85    | 2.01    | 9.05                   |
| 3U2S.PDB | O, H.TYR.52A  | ND2, H.ASN.73 | HD22, H.ASN.73 | 2.99    | 2.13    | 6.14                   |
| 3U2S.PDB | O, H.LYS.75   | OG1, H.THR.77 | HG1, H.THR.77  | 2.81    | 2.01    | 11.82                  |
| 3U2S.PDB | O, H.CYS.22   | N, H.LEU.78   | H, H.LEU.78    | 2.95    | 2.13    | 14.49                  |
| 3U2S.PDB | O, H.SER.70   | N, H.TYR.79   | H, H.TYR.79    | 2.84    | 1.99    | 5.70                   |
| 3U2S.PDB | O, H.LEU.20   | N, H.LEU.80   | H, H.LEU.80    | 2.94    | 2.14    | 17.83                  |
| 3U2S.PDB | O, H.SER.68   | N, H.GLN.81   | H, H.GLN.81    | 2.80    | 1.98    | 14.94                  |
| 3U2S.PDB | O, H.LEU.18   | N, H.MET.82   | H, H.MET.82    | 2.77    | 1.95    | 13.17                  |
| 3U2S.PDB | O, H.ARG.66   | N, H.ASN.82A  | H, H.ASN.82A   | 2.84    | 2.00    | 7.73                   |
| 3U2S.PDB | OD2, H.ASP.86 | N, H.ARG.83   | H, H.ARG.83    | 2.90    | 2.08    | 14.43                  |
| 3U2S.PDB | O, H.ARG.83   | N, H.ASP.86   | H, H.ASP.86    | 2.86    | 2.02    | 10.14                  |
| 3U2S.PDB | O, H.VAL.84   | N, H.THR.87   | H, H.THR.87    | 2.92    | 2.08    | 10.30                  |
| 3U2S.PDB | O, H.VAL.109  | N, H.ALA.88   | H, H.ALA.88    | 2.93    | 2.20    | 26.51                  |
| 3U2S.PDB | O, H.GLN.39   | N, H.THR.89   | H, H.THR.89    | 2.92    | 2.16    | 23.30                  |
| 3U2S.PDB | O, H.THR.107  | N, H.TYR.90   | H, H.TYR.90    | 2.86    | 2.02    | 9.16                   |
| 3U2S.PDB | O, H.VAL.37   | N, H.PHE.91   | H, H.PHE.91    | 2.69    | 1.83    | 4.03                   |
| 3U2S.PDB | OE2, H.GLU.6  | N, H.CYS.92   | H, H.CYS.92    | 2.82    | 1.99    | 11.94                  |

|          |                 |                |                 |      |      |       |
|----------|-----------------|----------------|-----------------|------|------|-------|
| 3U2S.PDB | O, H.HIS_35     | N, H.VAL_93    | H, H.VAL_93     | 2.98 | 2.21 | 22.76 |
| 3U2S.PDB | O, H.VAL_102    | N, H.ARG_94    | H, H.ARG_94     | 2.86 | 2.04 | 14.82 |
| 3U2S.PDB | OD1, H.ASP_101  | NE, H.ARG_94   | HE, H.ARG_94    | 2.95 | 2.09 | 2.87  |
| 3U2S.PDB | OD2, H.ASP_101  | NH2, H.ARG_94  | HH21, H.ARG_94  | 2.85 | 2.03 | 14.60 |
| 3U2S.PDB | O, H.TYR_100S   | N, H.ALA_96    | H, H.ALA_96     | 2.80 | 1.96 | 10.51 |
| 3U2S.PDB | O, H.TYR_100E   | N, H.ARG_100B  | H, H.ARG_100B   | 2.95 | 2.16 | 20.33 |
| 3U2S.PDB | O, H.ARG_100B   | N, H.TYR_100E  | H, H.TYR_100E   | 2.87 | 2.03 | 10.02 |
| 3U2S.PDB | O, H.GLY_100M   | N, H.ASP_100I  | H, H.ASP_100I   | 2.85 | 2.06 | 18.58 |
| 3U2S.PDB | OD1, H.ASP_100I | N, H.PHE_100J  | H, H.PHE_100J   | 2.74 | 2.00 | 25.64 |
| 3U2S.PDB | O, H.ARG_31     | N, H.TYR_100N  | H, H.TYR_100N   | 2.93 | 2.08 | 7.40  |
| 3U2S.PDB | O, H.GLY_98     | N, H.TYR_100O  | H, H.TYR_100O   | 2.86 | 2.13 | 27.57 |
| 3U2S.PDB | O, H.ALA_96     | N, H.TYR_100Q  | H, H.TYR_100Q   | 2.80 | 1.95 | 7.01  |
| 3U2S.PDB | OH, L.TYR_36    | N, H.MET_100T  | H, H.MET_100T   | 2.95 | 2.15 | 18.41 |
| 3U2S.PDB | OE1, H.GLU_6    | N, H.GLY_106   | H, H.GLY_106    | 2.86 | 2.05 | 16.47 |
| 3U2S.PDB | O, H.TYR_90     | N, H.THR_107   | H, H.THR_107    | 2.97 | 2.17 | 19.03 |
| 3U2S.PDB | O, H.ALA_88     | N, H.VAL_109   | H, H.VAL_109    | 2.87 | 2.02 | 6.55  |
| 3U2S.PDB | O, H.GLY_10     | N, H.THR_110   | H, H.THR_110    | 2.97 | 2.13 | 11.00 |
| 3U2S.PDB | OG1, H.THR_87   | N, H.VAL_111   | H, H.VAL_111    | 2.85 | 1.99 | 5.74  |
| 3U2S.PDB | O, H.VAL_12     | N, H.SER_112   | H, H.SER_112    | 2.94 | 2.12 | 13.79 |
| 3U2S.PDB | OG, H.SER_112   | N, H.ALA_114   | H, H.ALA_114    | 2.87 | 2.03 | 9.67  |
| 3U2S.PDB | O, H.PHE_146    | N, H.LYS_117   | H, H.LYS_117    | 2.83 | 1.99 | 11.04 |
| 3U2S.PDB | O, H.ASP_144    | NZ, H.LYS_117  | HZ2, H.LYS_117  | 2.56 | 1.71 | 13.65 |
| 3U2S.PDB | O, H.LYS_143    | N, H.SER_120   | H, H.SER_120    | 2.85 | 2.04 | 16.72 |
| 3U2S.PDB | O, H.LEU_141    | N, H.PHE_122   | H, H.PHE_122    | 2.95 | 2.11 | 11.99 |
| 3U2S.PDB | O, H.GLY_139    | N, H.LEU_124   | H, H.LEU_124    | 2.81 | 1.97 | 10.93 |
| 3U2S.PDB | O, H.VAL_184    | N, H.ALA_136   | H, H.ALA_136    | 2.85 | 2.04 | 17.15 |
| 3U2S.PDB | O, H.SER_180    | N, H.CYS_140   | H, H.CYS_140    | 2.86 | 2.06 | 19.17 |
| 3U2S.PDB | O, H.PHE_122    | N, H.LEU_141   | H, H.LEU_141    | 2.84 | 2.00 | 10.39 |
| 3U2S.PDB | O, H.LEU_178    | N, H.VAL_142   | H, H.VAL_142    | 2.75 | 1.92 | 11.05 |
| 3U2S.PDB | O, H.SER_120    | N, H.LYS_143   | H, H.LYS_143    | 2.79 | 1.93 | 5.65  |
| 3U2S.PDB | O, H.LYS_117    | N, H.PHE_146   | H, H.PHE_146    | 2.94 | 2.13 | 15.74 |
| 3U2S.PDB | O, H.ASN_199    | N, H.THR_151   | H, H.THR_151    | 2.99 | 2.18 | 16.40 |
| 3U2S.PDB | O, H.ASN_197    | N, H.SER_153   | H, H.SER_153    | 2.95 | 2.14 | 16.70 |
| 3U2S.PDB | OG, H.SER_180   | NE1, H.TRP_154 | HE1, H.TRP_154  | 2.93 | 2.08 | 7.46  |
| 3U2S.PDB | O, H.ILE_195    | N, H.ASN_155   | H, H.ASN_155    | 2.79 | 1.95 | 11.05 |
| 3U2S.PDB | OD1, H.ASN_197  | N, H.SER_156   | H, H.SER_156    | 2.71 | 1.93 | 20.75 |
| 3U2S.PDB | O, H.TRP_154    | N, H.GLY_157   | H, H.GLY_157    | 2.86 | 2.13 | 26.48 |
| 3U2S.PDB | O, H.ASN_155    | N, H.ALA_158   | H, H.ALA_158    | 2.95 | 2.09 | 5.38  |
| 3U2S.PDB | O, H.VAL_181    | N, H.HIS_164   | H, H.HIS_164    | 2.77 | 1.95 | 14.28 |
| 3U2S.PDB | OG, L.SER_165   | NE2, H.HIS_164 | HE2, H.HIS_164  | 2.93 | 2.12 | 16.97 |
| 3U2S.PDB | O, H.SER_179    | N, H.PHE_166   | H, H.PHE_166    | 2.88 | 2.02 | 1.67  |
| 3U2S.PDB | O, H.SER_177    | N, H.VAL_169   | H, H.VAL_169    | 2.82 | 2.01 | 16.07 |
| 3U2S.PDB | O, H.LEU_175    | NE2, H.GLN_171 | HE21, H.GLN_171 | 2.97 | 2.11 | 6.21  |
| 3U2S.PDB | OD2, H.ASP_144  | NE2, H.GLN_171 | HE22, H.GLN_171 | 2.87 | 2.09 | 20.57 |
| 3U2S.PDB | O, H.GLN_171    | N, H.GLY_174   | H, H.GLY_174    | 2.90 | 2.05 | 6.90  |
| 3U2S.PDB | O, H.TYR_145    | N, H.TYR_176   | H, H.TYR_176    | 2.78 | 1.93 | 7.16  |
| 3U2S.PDB | O, H.VAL_169    | N, H.SER_177   | H, H.SER_177    | 2.99 | 2.22 | 22.23 |
| 3U2S.PDB | O, H.VAL_142    | N, H.LEU_178   | H, H.LEU_178    | 2.92 | 2.13 | 19.87 |
| 3U2S.PDB | O, H.CYS_140    | N, H.SER_180   | H, H.SER_180    | 2.96 | 2.15 | 15.32 |
| 3U2S.PDB | O, H.HIS_164    | N, H.VAL_181   | H, H.VAL_181    | 2.88 | 2.05 | 12.91 |
| 3U2S.PDB | O, H.LEU_138    | N, H.VAL_182   | H, H.VAL_182    | 2.85 | 2.03 | 14.42 |
| 3U2S.PDB | O, H.ALA_136    | N, H.VAL_184   | H, H.VAL_184    | 2.90 | 2.07 | 11.08 |
| 3U2S.PDB | O, H.PRO_185    | N, H.SER_188   | H, H.SER_188    | 2.91 | 2.12 | 19.48 |
| 3U2S.PDB | O, H.SER_188    | N, H.GLN_192   | H, H.GLN_192    | 2.76 | 1.90 | 4.37  |
| 3U2S.PDB | OD1, H.ASN_155  | N, H.ILE_195   | H, H.ILE_195    | 2.89 | 2.08 | 16.84 |
| 3U2S.PDB | O, H.LYS_209    | N, H.CYS_196   | H, H.CYS_196    | 2.96 | 2.19 | 21.56 |
| 3U2S.PDB | O, H.SER_153    | N, H.ASN_197   | H, H.ASN_197    | 2.74 | 1.90 | 9.86  |
| 3U2S.PDB | OD2, H.ASP_208  | ND2, H.ASN_197 | HD21, H.ASN_197 | 2.76 | 1.92 | 10.02 |

|          |                |                |                |      |      |       |
|----------|----------------|----------------|----------------|------|------|-------|
| 3U2S.PDB | O, H.VAL_207   | N, H.VAL_198   | H, H.VAL_198   | 2.74 | 1.88 | 1.51  |
| 3U2S.PDB | O, H.THR_151   | N, H.ASN_199   | H, H.ASN_199   | 2.98 | 2.15 | 13.83 |
| 3U2S.PDB | O, H.THR_205   | N, H.HIS_200   | H, H.HIS_200   | 2.86 | 2.01 | 7.91  |
| 3U2S.PDB | OG, H.SER_203  | ND1, H.HIS_200 | HD1, H.HIS_200 | 2.77 | 1.92 | 6.39  |
| 3U2S.PDB | O, H.PRO_147   | NE2, H.HIS_200 | HE2, H.HIS_200 | 2.63 | 1.80 | 12.76 |
| 3U2S.PDB | O, H.LYS_201   | N, H.ASN_204   | H, H.ASN_204   | 2.93 | 2.10 | 12.81 |
| 3U2S.PDB | O, H.VAL_198   | N, H.VAL_207   | H, H.VAL_207   | 2.81 | 1.98 | 12.69 |
| 3U2S.PDB | O, H.CYS_196   | N, H.LYS_209   | H, H.LYS_209   | 2.98 | 2.15 | 13.52 |
| 3U2S.PDB | O, H.TYR_194   | N, H.VAL_211   | H, H.VAL_211   | 2.76 | 1.91 | 7.74  |
| 3U2S.PDB | O, L.GLN_24    | N, L.THR_5     | H, L.THR_5     | 2.92 | 2.09 | 11.98 |
| 3U2S.PDB | O, L.TYR_86    | NE2, L.GLN_6   | HE22, L.GLN_6  | 2.90 | 2.07 | 12.85 |
| 3U2S.PDB | O, L.LYS_103   | N, L.VAL_11    | H, L.VAL_11    | 2.95 | 2.14 | 17.04 |
| 3U2S.PDB | O, L.LEU_78    | N, L.GLY_16    | H, L.GLY_16    | 2.87 | 2.09 | 21.13 |
| 3U2S.PDB | O, L.ILE_75    | N, L.ILE_19    | H, L.ILE_19    | 3.00 | 2.19 | 17.55 |
| 3U2S.PDB | OG1, L.THR_74  | OG1, L.THR_20  | HG1, L.THR_20  | 2.83 | 2.11 | 23.78 |
| 3U2S.PDB | O, L.LEU_73    | N, L.ILE_21    | H, L.ILE_21    | 2.80 | 1.99 | 15.96 |
| 3U2S.PDB | O, L.THR_5     | N, L.GLN_24    | H, L.GLN_24    | 2.89 | 2.07 | 13.09 |
| 3U2S.PDB | O, L.ASN_69    | N, L.GLY_25    | H, L.GLY_25    | 2.76 | 1.90 | 2.23  |
| 3U2S.PDB | OD1, L.ASP_27B | N, L.THR_26    | H, L.THR_26    | 2.75 | 1.92 | 10.72 |
| 3U2S.PDB | OD2, L.ASP_27B | OG1, L.THR_26  | HG1, L.THR_26  | 2.86 | 2.11 | 19.40 |
| 3U2S.PDB | OD1, L.ASP_27B | N, L.VAL_27C   | H, L.VAL_27C   | 2.60 | 1.80 | 17.74 |
| 3U2S.PDB | O, L.THR_26    | N, L.GLY_28    | H, L.GLY_28    | 2.91 | 2.07 | 11.04 |
| 3U2S.PDB | O, L.ASP_27B   | N, L.GLY_29    | H, L.GLY_29    | 2.99 | 2.17 | 15.01 |
| 3U2S.PDB | O, L.LYS_89    | N, L.SER_34    | H, L.SER_34    | 2.88 | 2.09 | 20.40 |
| 3U2S.PDB | O, L.ILE_48    | N, L.TRP_35    | H, L.TRP_35    | 2.79 | 1.99 | 17.98 |
| 3U2S.PDB | O, L.TYR_87    | N, L.TYR_36    | H, L.TYR_36    | 2.86 | 2.11 | 24.00 |
| 3U2S.PDB | O, L.LYS_45    | N, L.GLN_37    | H, L.GLN_37    | 2.86 | 2.04 | 13.48 |
| 3U2S.PDB | OH, L.TYR_86   | NE2, L.GLN_37  | HE21, L.GLN_37 | 2.82 | 1.97 | 2.95  |
| 3U2S.PDB | O, L.ASP_85    | N, L.GLN_38    | H, L.GLN_38    | 2.74 | 1.95 | 19.17 |
| 3U2S.PDB | O, L.LYS_42    | NE2, L.GLN_38  | HE21, L.GLN_38 | 2.89 | 2.06 | 12.72 |
| 3U2S.PDB | OE1, H.GLN_39  | NE2, L.GLN_38  | HE22, L.GLN_38 | 2.91 | 2.09 | 13.75 |
| 3U2S.PDB | O, L.GLN_37    | N, L.LYS_45    | H, L.LYS_45    | 2.88 | 2.16 | 27.52 |
| 3U2S.PDB | O, L.TRP_35    | N, L.VAL_47    | H, L.VAL_47    | 2.82 | 1.99 | 13.03 |
| 3U2S.PDB | O, L.LYS_53    | N, L.TYR_49    | H, L.TYR_49    | 2.89 | 2.08 | 17.33 |
| 3U2S.PDB | O, L.VAL_33    | N, L.VAL_51    | H, L.VAL_51    | 2.83 | 1.98 | 6.67  |
| 3U2S.PDB | O, L.ASP_50    | N, L.SER_52    | H, L.SER_52    | 2.90 | 2.20 | 29.99 |
| 3U2S.PDB | O, L.TYR_49    | N, L.LYS_53    | H, L.LYS_53    | 2.86 | 2.03 | 13.95 |
| 3U2S.PDB | OD2, L.ASP_50  | NZ, L.LYS_53   | HZ2, L.LYS_53  | 2.84 | 1.96 | 4.63  |
| 3U2S.PDB | O, L.PHE_62    | NH1, L.ARG_54  | HH11, L.ARG_54 | 2.99 | 2.19 | 18.54 |
| 3U2S.PDB | OD2, C.ASP_167 | ND2, L.ASN_60  | HD22, L.ASN_60 | 2.90 | 2.14 | 22.76 |
| 3U2S.PDB | OD2, L.ASP_82  | NH1, L.ARG_61  | HH12, L.ARG_61 | 2.86 | 2.09 | 21.77 |
| 3U2S.PDB | OD1, L.ASP_82  | NH2, L.ARG_61  | HH22, L.ARG_61 | 2.97 | 2.11 | 4.14  |
| 3U2S.PDB | O, L.THR_74    | N, L.SER_63    | H, L.SER_63    | 2.98 | 2.16 | 15.11 |
| 3U2S.PDB | O, L.SER_72    | N, L.SER_65    | H, L.SER_65    | 2.99 | 2.19 | 18.65 |
| 3U2S.PDB | OE2, L.GLU_31  | NZ, L.LYS_66   | HZ1, L.LYS_66  | 2.99 | 2.15 | 15.69 |
| 3U2S.PDB | O, L.VAL_27C   | NZ, L.LYS_66   | HZ3, L.LYS_66  | 2.87 | 2.07 | 20.96 |
| 3U2S.PDB | O, L.THR_70    | N, L.SER_67    | H, L.SER_67    | 2.98 | 2.14 | 11.28 |
| 3U2S.PDB | O, L.CYS_23    | N, L.ALA_71    | H, L.ALA_71    | 2.87 | 2.04 | 13.61 |
| 3U2S.PDB | O, L.SER_65    | N, L.SER_72    | H, L.SER_72    | 2.80 | 1.98 | 13.45 |
| 3U2S.PDB | O, L.ILE_21    | N, L.LEU_73    | H, L.LEU_73    | 2.88 | 2.06 | 14.21 |
| 3U2S.PDB | O, L.SER_63    | N, L.THR_74    | H, L.THR_74    | 2.87 | 2.03 | 10.26 |
| 3U2S.PDB | O, L.ILE_19    | N, L.ILE_75    | H, L.ILE_75    | 2.92 | 2.10 | 15.07 |
| 3U2S.PDB | O, L.GLN_17    | N, L.LEU_78    | H, L.LEU_78    | 2.99 | 2.15 | 10.36 |
| 3U2S.PDB | OD2, L.ASP_82  | N, L.GLN_79    | H, L.GLN_79    | 2.81 | 1.96 | 8.38  |
| 3U2S.PDB | O, L.GLN_79    | N, L.ASP_82    | H, L.ASP_82    | 2.92 | 2.07 | 8.13  |
| 3U2S.PDB | O, L.GLN_38    | N, L.ASP_85    | H, L.ASP_85    | 2.89 | 2.05 | 8.81  |
| 3U2S.PDB | O, L.THR_102   | N, L.TYR_86    | H, L.TYR_86    | 2.77 | 1.96 | 15.94 |
| 3U2S.PDB | OE1, L.GLN_6   | N, L.CYS_88    | H, L.CYS_88    | 2.99 | 2.16 | 12.72 |

|          |                |                |                 |      |      |       |
|----------|----------------|----------------|-----------------|------|------|-------|
| 3U2S.PDB | O, L-ARG_95A   | N, L-THR_92    | H, L-THR_92     | 2.99 | 2.23 | 24.29 |
| 3U2S.PDB | O, L-THR_92    | N, L-ARG_95    | H, L-ARG_95     | 2.97 | 2.16 | 16.66 |
| 3U2S.PDB | OD1, H-ASP_61  | NH2, L-ARG_95A | HH22, L-ARG_95A | 2.34 | 1.58 | 22.53 |
| 3U2S.PDB | OE2, H-GLU_95  | NH2, L-ARG_96  | HH21, L-ARG_96  | 2.87 | 2.05 | 15.72 |
| 3U2S.PDB | O, L-CYS_88    | N, L-GLY_99    | H, L-GLY_99     | 2.79 | 1.97 | 14.65 |
| 3U2S.PDB | O, L-TYR_86    | N, L-THR_102   | H, L-THR_102    | 2.76 | 2.00 | 23.00 |
| 3U2S.PDB | O, L-PRO_7     | OG1, L-THR_102 | HG1, L-THR_102  | 2.63 | 1.82 | 4.45  |
| 3U2S.PDB | O, L-ALA_8     | N, L-LYS_103   | H, L-LYS_103    | 2.97 | 2.12 | 6.71  |
| 3U2S.PDB | O, L-GLY_84    | N, L-LEU_104   | H, L-LEU_104    | 2.88 | 2.02 | 5.05  |
| 3U2S.PDB | O, L-VAL_11    | N, L-THR_105   | H, L-THR_105    | 2.95 | 2.13 | 14.49 |
| 3U2S.PDB | OE1, L-GLU_83  | N, L-VAL_106   | H, L-VAL_106    | 2.89 | 2.07 | 15.38 |
| 3U2S.PDB | O, L-GLY_13    | N, L-LEU_106A  | H, L-LEU_106A   | 2.94 | 2.12 | 14.62 |
| 3U2S.PDB | O, L-TYR_140   | N, L-ALA_111   | H, L-ALA_111    | 2.82 | 1.98 | 11.85 |
| 3U2S.PDB | O, L-SER_137   | N, L-SER_114   | H, L-SER_114    | 2.77 | 1.94 | 12.77 |
| 3U2S.PDB | O, L-LEU_135   | N, L-THR_116   | H, L-THR_116    | 2.87 | 2.04 | 11.07 |
| 3U2S.PDB | O, L-VAL_133   | N, L-PHE_118   | H, L-PHE_118    | 2.76 | 1.92 | 9.67  |
| 3U2S.PDB | O, L-SER_122   | N, L-GLN_126   | H, L-GLN_126    | 2.90 | 2.12 | 21.06 |
| 3U2S.PDB | O, L-GLU_124   | N, L-ALA_127   | H, L-ALA_127    | 2.91 | 2.17 | 26.56 |
| 3U2S.PDB | O, L-LEU_125   | N, L-ASN_128   | H, L-ASN_128    | 2.96 | 2.14 | 16.25 |
| 3U2S.PDB | OE2, L-GLU_124 | OG1, L-THR_131 | HG1, L-THR_131  | 2.54 | 1.83 | 25.31 |
| 3U2S.PDB | O, L-LEU_178   | N, L-LEU_132   | H, L-LEU_132    | 2.88 | 2.05 | 12.78 |
| 3U2S.PDB | O, L-SER_176   | N, L-CYS_134   | H, L-CYS_134    | 2.76 | 1.90 | 1.60  |
| 3U2S.PDB | O, L-THR_116   | N, L-LEU_135   | H, L-LEU_135    | 2.74 | 1.89 | 1.47  |
| 3U2S.PDB | O, L-ALA_174   | N, L-ILE_136   | H, L-ILE_136    | 2.84 | 2.02 | 15.96 |
| 3U2S.PDB | O, L-SER_114   | N, L-SER_137   | H, L-SER_137    | 2.84 | 2.03 | 17.34 |
| 3U2S.PDB | OE1, L-GLN_167 | N, L-ASP_138   | H, L-ASP_138    | 2.90 | 2.06 | 11.00 |
| 3U2S.PDB | O, L-ALA_111   | N, L-TYR_140   | H, L-TYR_140    | 2.92 | 2.12 | 18.95 |
| 3U2S.PDB | O, L-PRO_141   | N, L-ALA_143   | H, L-ALA_143    | 2.92 | 2.21 | 29.24 |
| 3U2S.PDB | O, L-THR_196   | N, L-THR_145   | H, L-THR_145    | 2.91 | 2.08 | 11.19 |
| 3U2S.PDB | O, L-GLN_194   | N, L-ALA_147   | H, L-ALA_147    | 2.84 | 2.02 | 14.58 |
| 3U2S.PDB | OG, L-SER_176  | NE1, L-TRP_148 | HE1, L-TRP_148  | 2.93 | 2.09 | 11.15 |
| 3U2S.PDB | O, L-SER_192   | N, L-LYS_149   | H, L-LYS_149    | 2.92 | 2.14 | 21.71 |
| 3U2S.PDB | O, L-SER_153   | N, L-ALA_150   | H, L-ALA_150    | 2.77 | 2.00 | 21.57 |
| 3U2S.PDB | O, L-SER_190   | N, L-ASP_151   | H, L-ASP_151    | 2.62 | 1.78 | 11.93 |
| 3U2S.PDB | O, L-TRP_148   | N, L-VAL_155   | H, L-VAL_155    | 2.98 | 2.16 | 15.40 |
| 3U2S.PDB | O, L-SER_175   | N, L-THR_162   | H, L-THR_162    | 2.82 | 2.00 | 14.91 |
| 3U2S.PDB | O, L-ALA_173   | N, L-SER_165   | H, L-SER_165    | 2.74 | 1.91 | 13.98 |
| 3U2S.PDB | O, L-LYS_171   | N, L-GLN_167   | H, L-GLN_167    | 2.73 | 1.88 | 8.55  |
| 3U2S.PDB | OD1, L-ASP_138 | NE2, L-GLN_167 | HE22, L-GLN_167 | 2.82 | 2.00 | 15.99 |
| 3U2S.PDB | OD1, L-ASP_138 | ND2, L-ASN_169 | HD22, L-ASN_169 | 2.92 | 2.10 | 15.30 |
| 3U2S.PDB | O, L-GLN_167   | N, L-ASN_170   | H, L-ASN_170    | 2.88 | 2.04 | 11.78 |
| 3U2S.PDB | OD1, L-ASN_169 | N, L-LYS_171   | H, L-LYS_171    | 2.91 | 2.07 | 8.70  |
| 3U2S.PDB | O, L-PHE_139   | N, L-TYR_172   | H, L-TYR_172    | 2.84 | 2.05 | 19.75 |
| 3U2S.PDB | O, L-SER_165   | N, L-ALA_173   | H, L-ALA_173    | 2.93 | 2.10 | 13.60 |
| 3U2S.PDB | O, L-ILE_136   | N, L-ALA_174   | H, L-ALA_174    | 2.74 | 1.97 | 22.21 |
| 3U2S.PDB | OG1, L-THR_162 | N, L-SER_175   | H, L-SER_175    | 2.92 | 2.13 | 19.21 |
| 3U2S.PDB | O, L-CYS_134   | N, L-SER_176   | H, L-SER_176    | 2.86 | 2.05 | 17.04 |
| 3U2S.PDB | O, L-GLU_160   | N, L-TYR_177   | H, L-TYR_177    | 2.73 | 1.94 | 18.58 |
| 3U2S.PDB | O, L-GLY_158   | N, L-SER_179   | H, L-SER_179    | 2.88 | 2.05 | 11.87 |
| 3U2S.PDB | O, L-ALA_130   | N, L-LEU_180   | H, L-LEU_180    | 2.86 | 2.01 | 7.38  |
| 3U2S.PDB | OE1, L-GLN_184 | N, L-THR_181   | H, L-THR_181    | 2.99 | 2.19 | 18.35 |
| 3U2S.PDB | O, L-VAL_206   | N, L-TYR_191   | H, L-TYR_191    | 2.95 | 2.11 | 11.29 |
| 3U2S.PDB | O, L-LYS_149   | N, L-SER_192   | H, L-SER_192    | 2.91 | 2.11 | 17.67 |
| 3U2S.PDB | O, L-ALA_147   | N, L-GLN_194   | H, L-GLN_194    | 2.75 | 1.91 | 11.28 |
| 3U2S.PDB | O, L-VAL_202   | N, L-VAL_195   | H, L-VAL_195    | 2.80 | 1.94 | 3.08  |
| 3U2S.PDB | O, L-THR_145   | N, L-THR_196   | H, L-THR_196    | 2.78 | 1.97 | 15.99 |
| 3U2S.PDB | OG1, L-THR_201 | OG1, L-THR_196 | HG1, L-THR_196  | 2.99 | 2.20 | 12.41 |
| 3U2S.PDB | O, L-SER_200   | N, L-HIS_197   | H, L-HIS_197    | 2.83 | 1.99 | 8.72  |

|          |                |                |                 |      |      |       |
|----------|----------------|----------------|-----------------|------|------|-------|
| 3U2S.PDB | O, L.PRO_141   | NE2, L.HIS_197 | HE2, L.HIS_197  | 2.95 | 2.17 | 20.02 |
| 3U2S.PDB | O, L.HIS_197   | N, L.SER_200   | H, L.SER_200    | 2.95 | 2.10 | 9.03  |
| 3U2S.PDB | O, L.VAL_195   | N, L.VAL_202   | H, L.VAL_202    | 2.82 | 1.99 | 11.70 |
| 3U2S.PDB | O, L.VAL_115   | NZ, L.LYS_204  | HZ2, L.LYS_204  | 2.85 | 2.09 | 26.22 |
| 3U2S.PDB | O, L.TYR_191   | N, L.VAL_206   | H, L.VAL_206    | 2.98 | 2.18 | 18.28 |
| 3U2S.PDB | O, G.THR_201   | N, G.PHE_121   | H, G.PHE_121    | 2.70 | 1.87 | 12.95 |
| 3U2S.PDB | O, G.PHE_235   | N, G.ALA_124   | H, G.ALA_124    | 2.87 | 2.04 | 12.10 |
| 3U2S.PDB | O, G.GLN_197   | N, G.ALA_125   | H, G.ALA_125    | 2.88 | 2.10 | 21.74 |
| 3U2S.PDB | O, G.VAL_237   | N, G.CYS_126   | H, G.CYS_126    | 2.73 | 1.95 | 20.04 |
| 3U2S.PDB | O, G.SER_195   | N, G.VAL_127   | H, G.VAL_127    | 2.86 | 2.06 | 17.61 |
| 3U2S.PDB | O, G.LEU_193   | N, G.LEU_129   | H, G.LEU_129    | 2.74 | 1.88 | 2.50  |
| 3U2S.PDB | O, G.TYR_191   | N, G.CYS_131   | H, G.CYS_131    | 2.75 | 1.91 | 8.80  |
| 3U2S.PDB | O, G.HIS_156   | N, G.THR_132   | H, G.THR_132    | 2.82 | 2.00 | 14.90 |
| 3U2S.PDB | O, G.PHE_176   | N, G.LYS_155   | H, G.LYS_155    | 2.81 | 1.97 | 9.94  |
| 3U2S.PDB | O, G.ALA_174   | N, G.CYS_157   | H, G.CYS_157    | 2.84 | 2.08 | 23.82 |
| 3U2S.PDB | O, G.GLN_170   | N, G.ILE_161   | H, G.ILE_161    | 2.99 | 2.16 | 11.12 |
| 3U2S.PDB | O, H.ASN_100F  | N, G.LYS_169   | H, G.LYS_169    | 2.84 | 1.99 | 7.68  |
| 3U2S.PDB | O, G.ILE_161   | N, G.GLN_170   | H, G.GLN_170    | 2.91 | 2.11 | 17.48 |
| 3U2S.PDB | O, G.PHE_159   | N, G.VAL_172   | H, G.VAL_172    | 2.63 | 1.79 | 10.86 |
| 3U2S.PDB | OH, H.TYR_100K | ND2, G.ASN_173 | HD21, G.ASN_173 | 2.97 | 2.13 | 8.87  |
| 3U2S.PDB | O, G.LYS_155   | N, G.PHE_176   | H, G.PHE_176    | 2.95 | 2.13 | 15.03 |
| 3U2S.PDB | O, G.CYS_131   | N, G.TYR_191   | H, G.TYR_191    | 2.70 | 1.86 | 8.47  |
| 3U2S.PDB | O, G.LEU_129   | N, G.LEU_193   | H, G.LEU_193    | 2.86 | 2.06 | 17.04 |
| 3U2S.PDB | O, G.VAL_127   | N, G.SER_195   | H, G.SER_195    | 2.90 | 2.06 | 10.61 |
| 3U2S.PDB | O, G.ALA_125   | N, G.GLN_197   | H, G.GLN_197    | 2.97 | 2.17 | 17.81 |
| 3U2S.PDB | O, G.ALA_209   | N, G.PHE_213   | H, G.PHE_213    | 2.92 | 2.06 | 4.30  |
| 3U2S.PDB | O, G.ALA_210   | N, G.LYS_214   | H, G.LYS_214    | 2.72 | 1.91 | 16.83 |
| 3U2S.PDB | O, G.VAL_212   | N, G.TYR_216   | H, G.TYR_216    | 2.98 | 2.15 | 13.12 |
| 3U2S.PDB | O, G.LYS_214   | N, G.ASN_218   | H, G.ASN_218    | 2.94 | 2.11 | 12.77 |
| 3U2S.PDB | O, G.GLN_215   | N, G.ASP_219   | H, G.ASP_219    | 2.86 | 2.06 | 18.20 |
| 3U2S.PDB | O, G.THR_232   | OG1, G.THR_234 | HG1, G.THR_234  | 2.83 | 2.05 | 16.75 |
| 3U2S.PDB | O, G.LYS_122   | N, G.PHE_235   | H, G.PHE_235    | 2.85 | 2.08 | 22.39 |
| 3U2S.PDB | O, G.THR_227   | N, G.THR_236   | H, G.THR_236    | 2.90 | 2.11 | 19.48 |
| 3U2S.PDB | O, G.ALA_124   | N, G.VAL_237   | H, G.VAL_237    | 2.94 | 2.12 | 15.29 |
| 3U2S.PDB | O, G.CYS_126   | N, G.GLU_239   | H, G.GLU_239    | 2.92 | 2.11 | 16.99 |
| 3U2S.PDB | O, A.SER_25    | N, A.ARG_3     | H, A.ARG_3      | 2.90 | 2.11 | 19.62 |
| 3U2S.PDB | O, A.ALA_23    | N, A.VAL_5     | H, A.VAL_5      | 2.99 | 2.20 | 19.87 |
| 3U2S.PDB | O, A.SER_21    | N, A.SER_7     | H, A.SER_7      | 2.83 | 2.05 | 20.30 |
| 3U2S.PDB | O, A.THR_110   | N, A.VAL_12    | H, A.VAL_12     | 2.89 | 2.06 | 13.20 |
| 3U2S.PDB | O, A.LEU_82C   | N, A.GLY_15    | H, A.GLY_15     | 2.82 | 2.05 | 22.09 |
| 3U2S.PDB | O, A.MET_82    | N, A.LEU_18    | H, A.LEU_18     | 2.86 | 2.07 | 19.99 |
| 3U2S.PDB | OE1, A.GLN_81  | NH1, A.ARG_19  | HH11, A.ARG_19  | 2.87 | 2.10 | 22.03 |
| 3U2S.PDB | O, A.LEU_80    | N, A.LEU_20    | H, A.LEU_20     | 2.84 | 2.01 | 14.35 |
| 3U2S.PDB | O, A.SER_7     | N, A.SER_21    | H, A.SER_21     | 2.96 | 2.12 | 10.61 |
| 3U2S.PDB | O, A.VAL_5     | N, A.ALA_23    | H, A.ALA_23     | 2.92 | 2.09 | 13.34 |
| 3U2S.PDB | O, A.ASP_76    | N, A.ALA_24    | H, A.ALA_24     | 2.97 | 2.11 | 3.15  |
| 3U2S.PDB | O, A.ARG_3     | N, A.SER_25    | H, A.SER_25     | 2.95 | 2.14 | 17.02 |
| 3U2S.PDB | O, A.ASP_100L  | NE, A.ARG_31   | HE, A.ARG_31    | 2.88 | 2.08 | 17.86 |
| 3U2S.PDB | O, A.VAL_93    | N, A.HIS_35    | H, A.HIS_35     | 2.73 | 1.90 | 11.49 |
| 3U2S.PDB | OE1, A.GLU_95  | NE2, A.HIS_35  | HE2, A.HIS_35   | 2.70 | 1.86 | 8.94  |
| 3U2S.PDB | O, A.ALA_49    | N, A.TRP_36    | H, A.TRP_36     | 3.00 | 2.25 | 25.82 |
| 3U2S.PDB | O, A.TYR_79    | NE1, A.TRP_36  | HE1, A.TRP_36   | 2.96 | 2.23 | 27.73 |
| 3U2S.PDB | O, A.PHE_91    | N, A.VAL_37    | H, A.VAL_37     | 2.92 | 2.09 | 14.10 |
| 3U2S.PDB | O, A.GLU_46    | N, A.ARG_38    | H, A.ARG_38     | 2.87 | 2.03 | 8.46  |
| 3U2S.PDB | OE2, A.GLU_46  | NE, A.ARG_38   | HE, A.ARG_38    | 2.74 | 1.98 | 23.65 |
| 3U2S.PDB | OH, A.TYR_90   | NH1, A.ARG_38  | HH11, A.ARG_38  | 2.88 | 2.07 | 17.44 |
| 3U2S.PDB | OD1, A.ASP_86  | NH1, A.ARG_38  | HH12, A.ARG_38  | 2.89 | 2.04 | 8.28  |
| 3U2S.PDB | OE2, A.GLU_46  | NH2, A.ARG_38  | HH21, A.ARG_38  | 2.90 | 2.18 | 27.83 |



|          |                 |               |                |      |      |       |
|----------|-----------------|---------------|----------------|------|------|-------|
| 3U2S.PDB | O, A_THR_89     | N, A_GLN_39   | H, A_GLN_39    | 2.91 | 2.16 | 24.75 |
| 3U2S.PDB | OE1, B_GLN_38   | NE2, A_GLN_39 | HE22, A_GLN_39 | 2.92 | 2.07 | 7.34  |
| 3U2S.PDB | O, A_ALA_40     | N, A_GLN_43   | H, A_GLN_43    | 2.87 | 2.06 | 15.56 |
| 3U2S.PDB | O, A_ARG_38     | N, A_GLU_46   | H, A_GLU_46    | 2.76 | 1.99 | 21.51 |
| 3U2S.PDB | O, A_TYR_58     | N, A_PHE_50   | H, A_PHE_50    | 2.89 | 2.09 | 18.19 |
| 3U2S.PDB | O, A_MET_34     | N, A_ILE_51   | H, A_ILE_51    | 2.92 | 2.12 | 18.53 |
| 3U2S.PDB | O, A_GLU_56     | N, A_LYS_52   | H, A_LYS_52    | 2.97 | 2.12 | 7.01  |
| 3U2S.PDB | O, A_PHE_100J   | OH, A_TYR_52A | HH, A_TYR_52A  | 2.59 | 1.88 | 24.42 |
| 3U2S.PDB | O, A_LYS_52     | N, A_GLY_54   | H, A_GLY_54    | 2.87 | 2.03 | 9.21  |
| 3U2S.PDB | OD2, A_ASP_53   | N, A_SER_55   | H, A_SER_55    | 2.98 | 2.16 | 14.39 |
| 3U2S.PDB | O, A_PHE_50     | N, A_TYR_58   | H, A_TYR_58    | 2.79 | 1.96 | 13.05 |
| 3U2S.PDB | O, A_VAL_48     | N, A_ALA_60   | H, A_ALA_60    | 2.95 | 2.13 | 13.20 |
| 3U2S.PDB | O, A_VAL_63     | N, A_ARG_66   | H, A_ARG_66    | 2.73 | 1.88 | 9.69  |
| 3U2S.PDB | OD2, A_ASP_86   | NH1, A_ARG_66 | HH12, A_ARG_66 | 2.48 | 1.66 | 13.42 |
| 3U2S.PDB | O, A_VAL_63     | N, A_LEU_67   | H, A_LEU_67    | 2.90 | 2.05 | 9.26  |
| 3U2S.PDB | O, A_GLN_81     | N, A_SER_68   | H, A_SER_68    | 2.85 | 2.08 | 21.35 |
| 3U2S.PDB | OD1, A_ASN_73   | NE, A_ARG_71  | HE, A_ARG_71   | 2.81 | 2.03 | 20.92 |
| 3U2S.PDB | O, A_GLN_32     | NH1, A_ARG_71 | HH12, A_ARG_71 | 2.95 | 2.21 | 26.35 |
| 3U2S.PDB | O, A_THR_77     | N, A_ASP_72   | H, A_ASP_72    | 2.91 | 2.06 | 7.19  |
| 3U2S.PDB | O, A_TYR_52A    | ND2, A_ASN_73 | HD22, A_ASN_73 | 2.92 | 2.06 | 5.19  |
| 3U2S.PDB | O, A_LYS_75     | OG1, A_THR_77 | HG1, A_THR_77  | 2.85 | 2.08 | 17.09 |
| 3U2S.PDB | O, A_CYS_22     | N, A_LEU_78   | H, A_LEU_78    | 2.91 | 2.12 | 18.34 |
| 3U2S.PDB | O, A_SER_70     | N, A_TYR_79   | H, A_TYR_79    | 2.82 | 1.97 | 5.95  |
| 3U2S.PDB | O, A_LEU_20     | N, A_LEU_80   | H, A_LEU_80    | 2.92 | 2.11 | 16.81 |
| 3U2S.PDB | O, A_SER_68     | N, A_GLN_81   | H, A_GLN_81    | 2.79 | 1.96 | 12.01 |
| 3U2S.PDB | O, A_LEU_18     | N, A_MET_82   | H, A_MET_82    | 2.72 | 1.90 | 13.43 |
| 3U2S.PDB | O, A_ARG_66     | N, A_ASN_82A  | H, A_ASN_82A   | 2.72 | 1.94 | 20.65 |
| 3U2S.PDB | OD2, A_ASP_86   | N, A_ARG_83   | H, A_ARG_83    | 2.76 | 1.95 | 16.59 |
| 3U2S.PDB | OE1, A_GLU_85   | NH1, A_ARG_83 | HH11, A_ARG_83 | 2.91 | 2.14 | 21.39 |
| 3U2S.PDB | O, A_ARG_83     | N, A_ASP_86   | H, A_ASP_86    | 2.84 | 2.01 | 13.57 |
| 3U2S.PDB | O, A_VAL_84     | N, A_THR_87   | H, A_THR_87    | 2.99 | 2.15 | 12.03 |
| 3U2S.PDB | O, A_VAL_84     | OG1, A_THR_87 | HG1, A_THR_87  | 2.79 | 2.12 | 29.92 |
| 3U2S.PDB | O, A_GLN_39     | N, A_THR_89   | H, A_THR_89    | 2.88 | 2.07 | 17.15 |
| 3U2S.PDB | O, A_THR_107    | N, A_TYR_90   | H, A_TYR_90    | 2.83 | 1.98 | 6.95  |
| 3U2S.PDB | O, A_VAL_37     | N, A_PHE_91   | H, A_PHE_91    | 2.67 | 1.82 | 6.67  |
| 3U2S.PDB | OE2, A_GLU_6    | N, A_CYS_92   | H, A_CYS_92    | 2.72 | 1.89 | 13.80 |
| 3U2S.PDB | O, A_HIS_35     | N, A_VAL_93   | H, A_VAL_93    | 2.96 | 2.18 | 20.19 |
| 3U2S.PDB | O, A_VAL_102    | N, A_ARG_94   | H, A_ARG_94    | 2.84 | 2.03 | 15.63 |
| 3U2S.PDB | OD1, A_ASP_101  | NE, A_ARG_94  | HE, A_ARG_94   | 2.84 | 1.98 | 4.74  |
| 3U2S.PDB | OD2, A_ASP_101  | NH2, A_ARG_94 | HH21, A_ARG_94 | 2.90 | 2.12 | 20.79 |
| 3U2S.PDB | O, A_TYR_100S   | N, A_ALA_96   | H, A_ALA_96    | 2.80 | 1.96 | 10.95 |
| 3U2S.PDB | O, A_TYR_100E   | N, A_ARG_100B | H, A_ARG_100B  | 2.98 | 2.15 | 11.35 |
| 3U2S.PDB | O, A_ARG_100B   | N, A_TYR_100E | H, A_TYR_100E  | 2.79 | 1.94 | 7.07  |
| 3U2S.PDB | O, C_ASP_167    | N, A_ASN_100F | H, A_ASN_100F  | 2.97 | 2.14 | 14.21 |
| 3U2S.PDB | O, A_GLY_100M   | N, A_ASP_100I | H, A_ASP_100I  | 2.82 | 1.97 | 9.87  |
| 3U2S.PDB | OD1, A_ASP_100I | N, A_PHE_100J | H, A_PHE_100J  | 2.78 | 2.05 | 27.11 |
| 3U2S.PDB | O, A_ARG_31     | N, A_TYR_100N | H, A_TYR_100N  | 2.94 | 2.09 | 8.42  |
| 3U2S.PDB | O, A_GLY_98     | N, A_TYR_100O | H, A_TYR_100O  | 2.92 | 2.19 | 26.39 |
| 3U2S.PDB | O, A_ALA_96     | N, A_TYR_100Q | H, A_TYR_100Q  | 2.75 | 1.90 | 9.19  |
| 3U2S.PDB | OE1, A_GLU_6    | N, A_GLY_106  | H, A_GLY_106   | 2.86 | 2.06 | 17.09 |
| 3U2S.PDB | O, A_TYR_90     | N, A_THR_107  | H, A_THR_107   | 2.98 | 2.19 | 19.53 |
| 3U2S.PDB | O, A_ALA_88     | N, A_VAL_109  | H, A_VAL_109   | 2.92 | 2.07 | 4.29  |
| 3U2S.PDB | O, A_GLY_10     | N, A_THR_110  | H, A_THR_110   | 2.86 | 2.01 | 7.11  |
| 3U2S.PDB | OG1, A_THR_87   | N, A_VAL_111  | H, A_VAL_111   | 2.87 | 2.02 | 8.59  |
| 3U2S.PDB | O, A_VAL_12     | N, A_SER_112  | H, A_SER_112   | 2.92 | 2.11 | 15.36 |
| 3U2S.PDB | O, A_PHE_146    | N, A_LYS_117  | H, A_LYS_117   | 2.83 | 2.02 | 16.74 |
| 3U2S.PDB | O, A_ASP_144    | NZ, A_LYS_117 | HZ2, A_LYS_117 | 2.78 | 2.05 | 29.01 |
| 3U2S.PDB | O, A_LYS_143    | N, A_SER_120  | H, A_SER_120   | 2.88 | 2.06 | 14.03 |

|          |                |                |                 |      |      |       |
|----------|----------------|----------------|-----------------|------|------|-------|
| 3U2S.PDB | O, A_GLY_139   | N, A_LEU_124   | H, A_LEU_124    | 2.65 | 1.84 | 16.74 |
| 3U2S.PDB | O, A_LEU_124   | N, A_GLY_139   | H, A_GLY_139    | 2.96 | 2.16 | 18.70 |
| 3U2S.PDB | O, A_SER_180   | N, A_CYS_140   | H, A_CYS_140    | 2.75 | 1.94 | 16.77 |
| 3U2S.PDB | O, A_PHE_122   | N, A_LEU_141   | H, A_LEU_141    | 2.88 | 2.03 | 7.64  |
| 3U2S.PDB | O, A_LEU_178   | N, A_VAL_142   | H, A_VAL_142    | 2.79 | 1.98 | 17.03 |
| 3U2S.PDB | O, A_SER_120   | N, A_LYS_143   | H, A_LYS_143    | 2.78 | 1.92 | 1.74  |
| 3U2S.PDB | OG1, B_THR_131 | NZ, A_LYS_143  | HZ2, A_LYS_143  | 2.41 | 1.67 | 27.35 |
| 3U2S.PDB | O, A_TYR_176   | N, A_TYR_145   | H, A_TYR_145    | 2.98 | 2.17 | 17.16 |
| 3U2S.PDB | O, A_LYS_117   | N, A_PHE_146   | H, A_PHE_146    | 2.95 | 2.17 | 21.41 |
| 3U2S.PDB | O, A_ASN_199   | N, A_THR_151   | H, A_THR_151    | 2.98 | 2.16 | 15.19 |
| 3U2S.PDB | O, A_ILE_195   | N, A_ASN_155   | H, A_ASN_155    | 2.78 | 1.93 | 7.52  |
| 3U2S.PDB | O, A_VAL_181   | N, A_HIS_164   | H, A_HIS_164    | 2.87 | 2.03 | 10.09 |
| 3U2S.PDB | O, A_SER_179   | N, A_PHE_166   | H, A_PHE_166    | 2.98 | 2.12 | 5.94  |
| 3U2S.PDB | O, A_SER_177   | N, A_VAL_169   | H, A_VAL_169    | 2.72 | 1.90 | 14.55 |
| 3U2S.PDB | OD2, A_ASP_144 | NE2, A_GLN_171 | HE22, A_GLN_171 | 2.82 | 1.98 | 10.06 |
| 3U2S.PDB | O, A_GLN_171   | N, A_GLY_174   | H, A_GLY_174    | 2.97 | 2.11 | 5.23  |
| 3U2S.PDB | O, A_TYR_145   | N, A_TYR_176   | H, A_TYR_176    | 2.71 | 1.86 | 5.46  |
| 3U2S.PDB | O, A_VAL_169   | N, A_SER_177   | H, A_SER_177    | 2.96 | 2.16 | 18.03 |
| 3U2S.PDB | O, A_VAL_142   | N, A_LEU_178   | H, A_LEU_178    | 2.98 | 2.19 | 18.64 |
| 3U2S.PDB | O, A_CYS_140   | N, A_SER_180   | H, A_SER_180    | 2.98 | 2.18 | 18.33 |
| 3U2S.PDB | O, A_LEU_138   | N, A_VAL_182   | H, A_VAL_182    | 2.84 | 2.04 | 17.50 |
| 3U2S.PDB | O, A_GLY_162   | N, A_THR_183   | H, A_THR_183    | 2.90 | 2.11 | 19.30 |
| 3U2S.PDB | O, A_SER_153   | N, A_ASN_197   | H, A_ASN_197    | 2.76 | 1.95 | 14.90 |
| 3U2S.PDB | O, A_VAL_207   | N, A_VAL_198   | H, A_VAL_198    | 2.76 | 1.93 | 12.35 |
| 3U2S.PDB | O, A_THR_151   | N, A_ASN_199   | H, A_ASN_199    | 2.98 | 2.16 | 15.76 |
| 3U2S.PDB | O, A_THR_205   | N, A_HIS_200   | H, A_HIS_200    | 2.74 | 1.90 | 9.41  |
| 3U2S.PDB | OG, A_SER_203  | ND1, A_HIS_200 | HD1, A_HIS_200  | 2.63 | 1.78 | 5.16  |
| 3U2S.PDB | O, A_PRO_147   | NE2, A_HIS_200 | HE2, A_HIS_200  | 2.75 | 1.94 | 15.51 |
| 3U2S.PDB | O, A_VAL_198   | N, A_VAL_207   | H, A_VAL_207    | 2.82 | 1.98 | 12.41 |
| 3U2S.PDB | O, A_TYR_194   | N, A_VAL_211   | H, A_VAL_211    | 2.94 | 2.09 | 7.62  |
| 3U2S.PDB | O, B_GLN_24    | N, B_THR_5     | H, B_THR_5      | 2.92 | 2.09 | 11.05 |
| 3U2S.PDB | O, B_TYR_86    | NE2, B_GLN_6   | HE22, B_GLN_6   | 2.85 | 2.02 | 13.19 |
| 3U2S.PDB | O, B_LYS_103   | N, B_VAL_11    | H, B_VAL_11     | 2.85 | 2.04 | 16.11 |
| 3U2S.PDB | OE1, B_GLN_17  | N, B_SER_14    | H, B_SER_14     | 2.92 | 2.13 | 20.55 |
| 3U2S.PDB | O, B_LEU_78    | N, B_GLY_16    | H, B_GLY_16     | 2.87 | 2.07 | 17.65 |
| 3U2S.PDB | O, B_ILE_75    | N, B_ILE_19    | H, B_ILE_19     | 2.93 | 2.15 | 21.26 |
| 3U2S.PDB | OG1, B_THR_74  | OG1, B_THR_20  | HG1, B_THR_20   | 2.88 | 2.16 | 24.36 |
| 3U2S.PDB | O, B_LEU_73    | N, B_ILE_21    | H, B_ILE_21     | 2.82 | 2.00 | 14.83 |
| 3U2S.PDB | O, B_THR_5     | N, B_GLN_24    | H, B_GLN_24     | 2.91 | 2.09 | 15.35 |
| 3U2S.PDB | O, B_ASN_69    | N, B_GLY_25    | H, B_GLY_25     | 2.73 | 1.88 | 3.63  |
| 3U2S.PDB | OD1, B_ASP_27B | N, B_THR_26    | H, B_THR_26     | 2.84 | 2.02 | 14.26 |
| 3U2S.PDB | OD2, B_ASP_27B | OG1, B_THR_26  | HG1, B_THR_26   | 2.89 | 2.14 | 20.81 |
| 3U2S.PDB | OD1, B_ASP_27B | N, B_VAL_27C   | H, B_VAL_27C    | 2.70 | 1.91 | 19.64 |
| 3U2S.PDB | O, B_THR_26    | N, B_GLY_28    | H, B_GLY_28     | 2.91 | 2.08 | 12.42 |
| 3U2S.PDB | O, B_ASP_27B   | N, B_GLY_29    | H, B_GLY_29     | 2.89 | 2.05 | 10.78 |
| 3U2S.PDB | O, B_LYS_89    | N, B_SER_34    | H, B_SER_34     | 2.84 | 2.04 | 18.48 |
| 3U2S.PDB | O, B_ILE_48    | N, B_TRP_35    | H, B_TRP_35     | 2.89 | 2.10 | 19.01 |
| 3U2S.PDB | O, B_TYR_87    | N, B_TYR_36    | H, B_TYR_36     | 2.89 | 2.14 | 24.66 |
| 3U2S.PDB | O, B_LYS_45    | N, B_GLN_37    | H, B_GLN_37     | 2.82 | 2.00 | 13.80 |
| 3U2S.PDB | OH, B_TYR_86   | NE2, B_GLN_37  | HE21, B_GLN_37  | 2.88 | 2.02 | 1.18  |
| 3U2S.PDB | O, B_ASP_85    | N, B_GLN_38    | H, B_GLN_38     | 2.78 | 1.98 | 17.35 |
| 3U2S.PDB | O, B_LYS_42    | NE2, B_GLN_38  | HE21, B_GLN_38  | 2.90 | 2.07 | 13.31 |
| 3U2S.PDB | OE1, A_GLN_39  | NE2, B_GLN_38  | HE22, B_GLN_38  | 2.92 | 2.08 | 10.61 |
| 3U2S.PDB | O, B_GLN_37    | N, B_LYS_45    | H, B_LYS_45     | 2.81 | 2.08 | 26.63 |
| 3U2S.PDB | O, B_TRP_35    | N, B_VAL_47    | H, B_VAL_47     | 2.86 | 2.02 | 10.13 |
| 3U2S.PDB | O, B_LYS_53    | N, B_TYR_49    | H, B_TYR_49     | 2.92 | 2.11 | 17.26 |
| 3U2S.PDB | O, B_VAL_33    | N, B_VAL_51    | H, B_VAL_51     | 2.86 | 2.01 | 7.74  |
| 3U2S.PDB | O, B_ASP_50    | N, B_SER_52    | H, B_SER_52     | 2.89 | 2.18 | 28.89 |

|          |                |                |                 |      |      |       |
|----------|----------------|----------------|-----------------|------|------|-------|
| 3U2S.PDB | O, B.TYR_49    | N, B.LYS_53    | H, B.LYS_53     | 2.90 | 2.09 | 16.83 |
| 3U2S.PDB | OD2, B.ASP_50  | NZ, B.LYS_53   | HZ2, B.LYS_53   | 2.75 | 1.88 | 8.80  |
| 3U2S.PDB | O, B.VAL_58    | NH1, B.ARG_54  | HH11, B.ARG_54  | 2.92 | 2.11 | 16.82 |
| 3U2S.PDB | O, B.SER_76    | NH1, B.ARG_61  | HH11, B.ARG_61  | 2.99 | 2.17 | 14.44 |
| 3U2S.PDB | OD2, B.ASP_82  | NH1, B.ARG_61  | HH12, B.ARG_61  | 2.78 | 1.98 | 19.10 |
| 3U2S.PDB | OD1, B.ASP_82  | NH2, B.ARG_61  | HH22, B.ARG_61  | 2.93 | 2.07 | 0.82  |
| 3U2S.PDB | O, B.VAL_27C   | NZ, B.LYS_66   | HZ3, B.LYS_66   | 2.85 | 2.03 | 18.40 |
| 3U2S.PDB | O, B.THR_70    | N, B.SER_67    | H, B.SER_67     | 2.96 | 2.13 | 11.57 |
| 3U2S.PDB | O, B.CYS_23    | N, B.ALA_71    | H, B.ALA_71     | 2.85 | 2.05 | 17.45 |
| 3U2S.PDB | O, B.SER_65    | N, B.SER_72    | H, B.SER_72     | 2.89 | 2.07 | 15.07 |
| 3U2S.PDB | O, B.ILE_21    | N, B.LEU_73    | H, B.LEU_73     | 2.90 | 2.08 | 14.34 |
| 3U2S.PDB | O, B.SER_63    | N, B.THR_74    | H, B.THR_74     | 2.87 | 2.04 | 12.52 |
| 3U2S.PDB | O, B.ILE_19    | N, B.ILE_75    | H, B.ILE_75     | 2.92 | 2.11 | 16.75 |
| 3U2S.PDB | O, B.ARG_61    | N, B.SER_76    | H, B.SER_76     | 2.95 | 2.11 | 12.03 |
| 3U2S.PDB | O, B.GLN_17    | N, B.LEU_78    | H, B.LEU_78     | 2.82 | 1.97 | 8.22  |
| 3U2S.PDB | OD2, B.ASP_82  | N, B.GLN_79    | H, B.GLN_79     | 2.84 | 2.01 | 11.59 |
| 3U2S.PDB | OG1, H.THR_160 | N, B.ALA_80    | H, B.ALA_80     | 2.90 | 2.08 | 14.44 |
| 3U2S.PDB | O, B.GLN_79    | N, B.ASP_82    | H, B.ASP_82     | 2.90 | 2.05 | 8.49  |
| 3U2S.PDB | O, B.ALA_80    | N, B.GLU_83    | H, B.GLU_83     | 2.99 | 2.13 | 4.82  |
| 3U2S.PDB | O, B.THR_102   | N, B.TYR_86    | H, B.TYR_86     | 2.83 | 2.04 | 18.67 |
| 3U2S.PDB | O, B.ARG_95A   | N, B.THR_92    | H, B.THR_92     | 2.98 | 2.24 | 26.76 |
| 3U2S.PDB | O, B.THR_92    | N, B.ARG_95    | H, B.ARG_95     | 2.98 | 2.15 | 13.06 |
| 3U2S.PDB | OD1, A.ASP_61  | NH1, B.ARG_95A | HH12, B.ARG_95A | 2.63 | 1.91 | 26.97 |
| 3U2S.PDB | OE2, A.GLU_95  | NH2, B.ARG_96  | HH21, B.ARG_96  | 2.98 | 2.16 | 13.77 |
| 3U2S.PDB | O, B.CYS_88    | N, B.GLY_99    | H, B.GLY_99     | 2.84 | 2.02 | 13.65 |
| 3U2S.PDB | O, B.TYR_86    | N, B.THR_102   | H, B.THR_102    | 2.88 | 2.13 | 24.78 |
| 3U2S.PDB | O, B.PRO_7     | OG1, B.THR_102 | HG1, B.THR_102  | 2.64 | 1.82 | 5.54  |
| 3U2S.PDB | O, B.GLY_84    | N, B.LEU_104   | H, B.LEU_104    | 2.79 | 1.94 | 4.02  |
| 3U2S.PDB | O, B.VAL_11    | N, B.THR_105   | H, B.THR_105    | 2.99 | 2.17 | 14.21 |
| 3U2S.PDB | OH, B.TYR_140  | N, B.GLY_107   | H, B.GLY_107    | 2.85 | 2.06 | 20.14 |
| 3U2S.PDB | O, B.TYR_140   | N, B.ALA_111   | H, B.ALA_111    | 2.98 | 2.14 | 10.58 |
| 3U2S.PDB | O, B.SER_137   | N, B.SER_114   | H, B.SER_114    | 2.93 | 2.10 | 13.38 |
| 3U2S.PDB | O, B.LEU_135   | N, B.THR_116   | H, B.THR_116    | 2.97 | 2.16 | 15.84 |
| 3U2S.PDB | O, B.VAL_133   | N, B.PHE_118   | H, B.PHE_118    | 2.87 | 2.04 | 12.26 |
| 3U2S.PDB | O, B.LEU_125   | N, B.ASN_128   | H, B.ASN_128    | 2.97 | 2.18 | 18.83 |
| 3U2S.PDB | O, B.SER_176   | N, B.CYS_134   | H, B.CYS_134    | 2.86 | 2.01 | 7.06  |
| 3U2S.PDB | O, B.THR_116   | N, B.LEU_135   | H, B.LEU_135    | 2.78 | 1.93 | 5.65  |
| 3U2S.PDB | O, B.ALA_174   | N, B.ILE_136   | H, B.ILE_136    | 2.93 | 2.14 | 18.97 |
| 3U2S.PDB | O, B.SER_114   | N, B.SER_137   | H, B.SER_137    | 2.99 | 2.19 | 18.33 |
| 3U2S.PDB | OE1, B.GLN_167 | N, B.ASP_138   | H, B.ASP_138    | 2.95 | 2.17 | 20.82 |
| 3U2S.PDB | O, B.ALA_111   | N, B.TYR_140   | H, B.TYR_140    | 2.94 | 2.14 | 17.27 |
| 3U2S.PDB | O, B.PRO_141   | N, B.ALA_143   | H, B.ALA_143    | 3.00 | 2.29 | 29.69 |
| 3U2S.PDB | O, B.GLN_194   | N, B.ALA_147   | H, B.ALA_147    | 2.93 | 2.10 | 11.92 |
| 3U2S.PDB | OG, B.SER_176  | NE1, B.TRP_148 | HE1, B.TRP_148  | 2.87 | 2.03 | 9.65  |
| 3U2S.PDB | O, B.SER_190   | N, B.ASP_151   | H, B.ASP_151    | 2.76 | 1.91 | 5.32  |
| 3U2S.PDB | O, B.TRP_148   | N, B.VAL_155   | H, B.VAL_155    | 2.92 | 2.16 | 22.91 |
| 3U2S.PDB | O, B.TYR_177   | N, B.GLU_160   | H, B.GLU_160    | 2.79 | 1.97 | 13.97 |
| 3U2S.PDB | O, B.SER_175   | N, B.THR_162   | H, B.THR_162    | 2.92 | 2.09 | 12.18 |
| 3U2S.PDB | O, B.ALA_173   | N, B.SER_165   | H, B.SER_165    | 2.94 | 2.13 | 16.38 |
| 3U2S.PDB | O, B.LYS_171   | N, B.GLN_167   | H, B.GLN_167    | 2.56 | 1.71 | 7.13  |
| 3U2S.PDB | OD1, B.ASN_169 | NE2, B.GLN_167 | HE21, B.GLN_167 | 2.93 | 2.16 | 22.14 |
| 3U2S.PDB | OD1, B.ASP_138 | NE2, B.GLN_167 | HE22, B.GLN_167 | 2.75 | 1.90 | 7.18  |
| 3U2S.PDB | OD1, B.ASN_169 | N, B.LYS_171   | H, B.LYS_171    | 2.90 | 2.06 | 11.66 |
| 3U2S.PDB | O, B.PHE_139   | N, B.TYR_172   | H, B.TYR_172    | 2.94 | 2.14 | 18.70 |
| 3U2S.PDB | O, B.SER_165   | N, B.ALA_173   | H, B.ALA_173    | 2.91 | 2.10 | 18.16 |
| 3U2S.PDB | O, B.ILE_136   | N, B.ALA_174   | H, B.ALA_174    | 2.80 | 1.97 | 12.77 |
| 3U2S.PDB | O, B.CYS_134   | N, B.SER_176   | H, B.SER_176    | 2.86 | 2.06 | 18.58 |
| 3U2S.PDB | O, B.GLU_160   | N, B.TYR_177   | H, B.TYR_177    | 2.64 | 1.81 | 12.56 |

|          |                |                |                |      |      |       |
|----------|----------------|----------------|----------------|------|------|-------|
| 3U2S.PDB | O, B_GLY_158   | N, B_SER_179   | H, B_SER_179   | 2.87 | 2.03 | 11.48 |
| 3U2S.PDB | O, B_ALA_130   | N, B_LEU_180   | H, B_LEU_180   | 2.96 | 2.11 | 5.53  |
| 3U2S.PDB | O, B_PRO_182   | N, B_LYS_186   | H, B_LYS_186   | 2.96 | 2.16 | 17.55 |
| 3U2S.PDB | OD1, B_ASP_151 | N, B_SER_190   | H, B_SER_190   | 2.97 | 2.20 | 22.59 |
| 3U2S.PDB | O, B_VAL_206   | N, B_TYR_191   | H, B_TYR_191   | 2.92 | 2.10 | 13.48 |
| 3U2S.PDB | O, B_LYS_149   | N, B_SER_192   | H, B_SER_192   | 2.99 | 2.21 | 20.57 |
| 3U2S.PDB | O, B_LYS_204   | N, B_CYS_193   | H, B_CYS_193   | 2.92 | 2.14 | 21.01 |
| 3U2S.PDB | O, B_ALA_147   | N, B_GLN_194   | H, B_GLN_194   | 2.80 | 1.97 | 13.29 |
| 3U2S.PDB | O, B_VAL_202   | N, B_VAL_195   | H, B_VAL_195   | 2.78 | 1.93 | 3.68  |
| 3U2S.PDB | O, B_THR_145   | N, B_THR_196   | H, B_THR_196   | 2.86 | 2.00 | 5.33  |
| 3U2S.PDB | OG1, B_THR_201 | OG1, B_THR_196 | HG1, B_THR_196 | 2.79 | 1.99 | 11.66 |
| 3U2S.PDB | O, B_SER_200   | N, B_HIS_197   | H, B_HIS_197   | 2.90 | 2.05 | 7.61  |
| 3U2S.PDB | O, B_PRO_141   | NE2, B_HIS_197 | HE2, B_HIS_197 | 2.83 | 2.07 | 23.66 |
| 3U2S.PDB | O, B_HIS_197   | N, B_SER_200   | H, B_SER_200   | 2.92 | 2.07 | 5.55  |
| 3U2S.PDB | O, B_VAL_195   | N, B_VAL_202   | H, B_VAL_202   | 2.72 | 1.88 | 10.92 |
| 3U2S.PDB | O, B_TYR_191   | N, B_VAL_206   | H, B_VAL_206   | 2.88 | 2.06 | 14.38 |
| 3U2S.PDB | O, C_THR_201   | N, C_PHE_121   | H, C_PHE_121   | 2.92 | 2.06 | 2.96  |
| 3U2S.PDB | O, C_LYS_233   | N, C_LYS_122   | H, C_LYS_122   | 2.76 | 1.94 | 13.22 |
| 3U2S.PDB | O, C_THR_199   | N, C_LEU_123   | H, C_LEU_123   | 2.83 | 2.01 | 15.42 |
| 3U2S.PDB | O, C_PHE_235   | N, C_ALA_124   | H, C_ALA_124   | 2.96 | 2.15 | 16.72 |
| 3U2S.PDB | O, C_GLN_197   | N, C_ALA_125   | H, C_ALA_125   | 2.97 | 2.18 | 19.36 |
| 3U2S.PDB | O, C_VAL_237   | N, C_CYS_126   | H, C_CYS_126   | 2.89 | 2.18 | 29.45 |
| 3U2S.PDB | O, C_SER_195   | N, C_VAL_127   | H, C_VAL_127   | 2.78 | 2.00 | 19.73 |
| 3U2S.PDB | O, C_LEU_193   | N, C_LEU_129   | H, C_LEU_129   | 2.58 | 1.72 | 4.21  |
| 3U2S.PDB | O, C_SER_158   | N, C_ALA_130   | H, C_ALA_130   | 2.91 | 2.07 | 10.47 |
| 3U2S.PDB | O, C_TYR_191   | N, C_CYS_131   | H, C_CYS_131   | 2.97 | 2.14 | 13.58 |
| 3U2S.PDB | O, C_HIS_156   | N, C_THR_132   | H, C_THR_132   | 2.87 | 2.10 | 22.75 |
| 3U2S.PDB | O, C_PHE_176   | N, C_LYS_155   | H, C_LYS_155   | 2.92 | 2.08 | 9.76  |
| 3U2S.PDB | O, C_ALA_174   | N, C_CYS_157   | H, C_CYS_157   | 2.85 | 2.01 | 11.36 |
| 3U2S.PDB | O, C_GLN_170   | N, C_ILE_161   | H, C_ILE_161   | 2.98 | 2.15 | 12.25 |
| 3U2S.PDB | OG1, C_THR_163 | N, C_VAL_165   | H, C_VAL_165   | 2.97 | 2.12 | 10.44 |
| 3U2S.PDB | O, A_ASN_100F  | N, C_LYS_169   | H, C_LYS_169   | 2.91 | 2.08 | 13.24 |
| 3U2S.PDB | O, C_ILE_161   | N, C_GLN_170   | H, C_GLN_170   | 2.89 | 2.09 | 17.25 |
| 3U2S.PDB | O, C_PHE_159   | N, C_VAL_172   | H, C_VAL_172   | 2.73 | 1.89 | 10.39 |
| 3U2S.PDB | O, C_LYS_155   | N, C_PHE_176   | H, C_PHE_176   | 2.99 | 2.16 | 12.58 |
| 3U2S.PDB | O, C_CYS_131   | N, C_TYR_191   | H, C_TYR_191   | 2.87 | 2.05 | 15.43 |
| 3U2S.PDB | O, C_LEU_129   | N, C_LEU_193   | H, C_LEU_193   | 2.96 | 2.21 | 25.28 |
| 3U2S.PDB | O, C_VAL_127   | N, C_SER_195   | H, C_SER_195   | 2.88 | 2.02 | 5.76  |
| 3U2S.PDB | O, C_ALA_125   | N, C_GLN_197   | H, C_GLN_197   | 2.93 | 2.12 | 15.95 |
| 3U2S.PDB | O, C_LEU_123   | N, C_THR_199   | H, C_THR_199   | 2.87 | 2.07 | 18.73 |
| 3U2S.PDB | O, C_ALA_206   | N, C_ALA_210   | H, C_ALA_210   | 2.93 | 2.14 | 20.34 |
| 3U2S.PDB | O, C_THR_232   | OG1, C_THR_234 | HG1, C_THR_234 | 2.76 | 1.97 | 14.48 |
| 3U2S.PDB | O, C_LYS_122   | N, C_PHE_235   | H, C_PHE_235   | 2.66 | 1.87 | 18.30 |
| 3U2S.PDB | O, C_THR_227   | N, C_THR_236   | H, C_THR_236   | 2.92 | 2.14 | 20.62 |
| 3U2S.PDB | O, C_ALA_124   | N, C_VAL_237   | H, C_VAL_237   | 2.99 | 2.14 | 7.85  |

Table 1685: 3U2S-specific side chain and main chain hydrogen bonding analysis. In this table, a PDB file is specified with a four-letter PDB ID, except that the names of the PDB files corresponding to the single NMR structural model split from the NMR ensemble is specified with a four-letter PDB ID in addition to a hyphen followed by the single NMR structural model numeric ID, the residue naming scheme is **Chain ID\_residue name\_residue number**,  $\angle ADH$  represents the angle formed by acceptor (A), donor (D) and hydrogen (H) ( $\angle ADH$ ).

| PDB      | Acceptor (A)   | Donor (D)     | Hydrogen (H)   | D-A (Å) | H-A (Å) | $\angle ADH(^{\circ})$ |
|----------|----------------|---------------|----------------|---------|---------|------------------------|
| 3UYR.PDB | O, H.THR.23    | N, H.VAL.5    | H, H.VAL.5     | 2.87    | 2.05    | 15.70                  |
| 3UYR.PDB | O, H.SER.21    | N, H.SER.7    | H, H.SER.7     | 2.82    | 2.03    | 20.07                  |
| 3UYR.PDB | O, H.THR.112   | N, H.GLY.10   | H, H.GLY.10    | 2.77    | 1.94    | 13.13                  |
| 3UYR.PDB | O, H.THR.114   | N, H.VAL.12   | H, H.VAL.12    | 2.88    | 2.07    | 16.54                  |
| 3UYR.PDB | O, H.LEU.86    | N, H.GLY.15   | H, H.GLY.15    | 2.68    | 1.86    | 14.42                  |
| 3UYR.PDB | O, H.MET.83    | N, H.MET.18   | H, H.MET.18    | 2.83    | 2.00    | 14.86                  |
| 3UYR.PDB | O, H.LEU.81    | N, H.LEU.20   | H, H.LEU.20    | 2.86    | 2.03    | 15.99                  |
| 3UYR.PDB | OG, H.SER.7    | N, H.SER.21   | H, H.SER.21    | 2.96    | 2.12    | 9.95                   |
| 3UYR.PDB | O, H.VAL.5     | N, H.THR.23   | H, H.THR.23    | 2.80    | 1.98    | 14.92                  |
| 3UYR.PDB | O, H.THR.28    | N, H.ASP.31   | H, H.ASP.31    | 2.78    | 1.97    | 17.10                  |
| 3UYR.PDB | O, H.ILE.51    | N, H.MET.34   | H, H.MET.34    | 2.92    | 2.09    | 17.05                  |
| 3UYR.PDB | O, H.ALA.97    | N, H.ALA.35   | H, H.ALA.35    | 2.83    | 2.02    | 16.97                  |
| 3UYR.PDB | O, H.ALA.49    | N, H.TRP.36   | H, H.TRP.36    | 2.81    | 2.00    | 15.63                  |
| 3UYR.PDB | O, H.TYR.95    | N, H.VAL.37   | H, H.VAL.37    | 2.95    | 2.10    | 10.85                  |
| 3UYR.PDB | O, H.GLU.46    | N, H.ARG.38   | H, H.ARG.38    | 2.89    | 2.05    | 12.16                  |
| 3UYR.PDB | OE1, H.GLU.46  | NE, H.ARG.38  | HE, H.ARG.38   | 2.84    | 2.03    | 16.92                  |
| 3UYR.PDB | O, H.THR.93    | N, H.GLN.39   | H, H.GLN.39    | 2.74    | 1.95    | 18.61                  |
| 3UYR.PDB | O, H.ARG.38    | N, H.GLU.46   | H, H.GLU.46    | 2.90    | 2.11    | 20.15                  |
| 3UYR.PDB | OD1, H.ASN.50  | NE1, H.TRP.47 | HE1, H.TRP.47  | 2.95    | 2.18    | 22.72                  |
| 3UYR.PDB | O, H.TRP.36    | N, H.VAL.48   | H, H.VAL.48    | 2.89    | 2.08    | 15.29                  |
| 3UYR.PDB | O, H.TYR.59    | N, H.ASN.50   | H, H.ASN.50    | 2.85    | 2.06    | 20.39                  |
| 3UYR.PDB | O, H.MET.34    | N, H.ILE.51   | H, H.ILE.51    | 2.84    | 2.04    | 20.05                  |
| 3UYR.PDB | OD1, H.ASP.54  | N, H.SER.56   | H, H.SER.56    | 3.00    | 2.18    | 14.88                  |
| 3UYR.PDB | O, H.ASN.50    | N, H.TYR.59   | H, H.TYR.59    | 2.85    | 2.02    | 13.64                  |
| 3UYR.PDB | O, H.VAL.48    | N, H.LEU.61   | H, H.LEU.61    | 2.98    | 2.13    | 7.86                   |
| 3UYR.PDB | O, H.ASP.62    | N, H.LYS.65   | H, H.LYS.65    | 2.99    | 2.13    | 4.39                   |
| 3UYR.PDB | O, H.LEU.64    | N, H.ARG.67   | H, H.ARG.67    | 2.98    | 2.13    | 8.99                   |
| 3UYR.PDB | O, H.SER.84    | NH1, H.ARG.67 | HH11, H.ARG.67 | 2.94    | 2.14    | 18.03                  |
| 3UYR.PDB | O, H.GLN.82    | N, H.ILE.69   | H, H.ILE.69    | 2.76    | 1.97    | 19.91                  |
| 3UYR.PDB | OH, H.TYR.60   | N, H.ILE.70   | H, H.ILE.70    | 2.89    | 2.08    | 16.21                  |
| 3UYR.PDB | O, H.TYR.32    | NH1, H.ARG.72 | HH12, H.ARG.72 | 2.89    | 2.11    | 20.18                  |
| 3UYR.PDB | O, H.ILE.78    | N, H.ASP.73   | H, H.ASP.73    | 2.70    | 1.96    | 26.09                  |
| 3UYR.PDB | OD1, H.ASP.73  | N, H.ALA.75   | H, H.ALA.75    | 3.00    | 2.29    | 29.64                  |
| 3UYR.PDB | O, H.ASP.73    | N, H.ILE.78   | H, H.ILE.78    | 2.94    | 2.08    | 11.87                  |
| 3UYR.PDB | O, H.CYS.22    | N, H.LEU.79   | H, H.LEU.79    | 2.83    | 1.98    | 6.29                   |
| 3UYR.PDB | O, H.SER.71    | N, H.TYR.80   | H, H.TYR.80    | 2.75    | 1.91    | 7.16                   |
| 3UYR.PDB | O, H.LEU.20    | N, H.LEU.81   | H, H.LEU.81    | 2.86    | 2.02    | 12.02                  |
| 3UYR.PDB | O, H.ILE.69    | N, H.GLN.82   | H, H.GLN.82    | 2.78    | 1.98    | 18.27                  |
| 3UYR.PDB | O, H.MET.18    | N, H.MET.83   | H, H.MET.83    | 2.76    | 1.93    | 11.89                  |
| 3UYR.PDB | O, H.SER.16    | N, H.LEU.86   | H, H.LEU.86    | 2.97    | 2.14    | 12.64                  |
| 3UYR.PDB | O, H.SER.85    | NH1, H.ARG.87 | HH11, H.ARG.87 | 2.82    | 2.10    | 28.67                  |
| 3UYR.PDB | O, H.ARG.87    | N, H.ASP.90   | H, H.ASP.90    | 2.99    | 2.14    | 6.54                   |
| 3UYR.PDB | O, H.VAL.113   | N, H.ALA.92   | H, H.ALA.92    | 2.99    | 2.22    | 22.62                  |
| 3UYR.PDB | O, H.GLN.39    | N, H.THR.93   | H, H.THR.93    | 2.87    | 2.02    | 7.65                   |
| 3UYR.PDB | O, H.THR.111   | N, H.TYR.94   | H, H.TYR.94    | 2.77    | 1.93    | 7.70                   |
| 3UYR.PDB | O, H.VAL.37    | N, H.TYR.95   | H, H.TYR.95    | 2.76    | 1.92    | 4.33                   |
| 3UYR.PDB | OE2, H.GLU.6   | N, H.CYS.96   | H, H.CYS.96    | 2.87    | 2.06    | 15.59                  |
| 3UYR.PDB | O, H.ALA.35    | N, H.ALA.97   | H, H.ALA.97    | 2.87    | 2.05    | 15.28                  |
| 3UYR.PDB | O, H.VAL.106   | N, H.ARG.98   | H, H.ARG.98    | 2.80    | 2.00    | 18.41                  |
| 3UYR.PDB | OD1, H.ASP.105 | NE, H.ARG.98  | HE, H.ARG.98   | 2.98    | 2.16    | 14.38                  |
| 3UYR.PDB | OD2, H.ASP.105 | NH2, H.ARG.98 | HH21, H.ARG.98 | 2.92    | 2.07    | 8.84                   |
| 3UYR.PDB | O, H.TYR.103   | N, H.THR.100  | H, H.THR.100   | 2.82    | 1.97    | 9.07                   |
| 3UYR.PDB | OE1, P_GLN.48  | N, H.ASN.101  | H, H.ASN.101   | 2.90    | 2.08    | 14.57                  |
| 3UYR.PDB | O, H.THR.100   | N, H.TYR.103  | H, H.TYR.103   | 2.94    | 2.08    | 4.35                   |
| 3UYR.PDB | OH, L.TYR.41   | N, H.LEU.104  | H, H.LEU.104   | 2.91    | 2.05    | 4.02                   |
| 3UYR.PDB | O, H.CYS.96    | N, H.GLY.108  | H, H.GLY.108   | 2.80    | 1.99    | 17.37                  |
| 3UYR.PDB | O, H.TYR.94    | N, H.THR.111  | H, H.THR.111   | 2.80    | 2.01    | 19.20                  |

|          |                |                |                 |      |      |       |
|----------|----------------|----------------|-----------------|------|------|-------|
| 3UYR.PDB | O, H_ALA_92    | N, H_VAL_113   | H, H_VAL_113    | 2.86 | 2.03 | 11.74 |
| 3UYR.PDB | O, H_GLY_10    | N, H_THR_114   | H, H_THR_114    | 2.91 | 2.06 | 9.85  |
| 3UYR.PDB | OG1, H_THR_91  | N, H_VAL_115   | H, H_VAL_115    | 2.95 | 2.09 | 4.97  |
| 3UYR.PDB | O, H_VAL_12    | N, H_SER_116   | H, H_SER_116    | 2.87 | 2.10 | 23.24 |
| 3UYR.PDB | O, H_PHE_150   | N, H_THR_121   | H, H_THR_121    | 2.88 | 2.05 | 13.74 |
| 3UYR.PDB | O, H_LYS_147   | N, H_SER_124   | H, H_SER_124    | 2.80 | 1.96 | 9.50  |
| 3UYR.PDB | O, H_LEU_145   | N, H_TYR_126   | H, H_TYR_126    | 2.81 | 1.98 | 12.02 |
| 3UYR.PDB | O, H_GLY_143   | N, H_LEU_128   | H, H_LEU_128    | 2.77 | 1.99 | 20.76 |
| 3UYR.PDB | O, H_VAL_187   | N, H_VAL_140   | H, H_VAL_140    | 2.79 | 1.98 | 16.70 |
| 3UYR.PDB | O, H_VAL_185   | N, H_LEU_142   | H, H_LEU_142    | 2.82 | 1.97 | 8.16  |
| 3UYR.PDB | O, H_LEU_128   | N, H_GLY_143   | H, H_GLY_143    | 2.84 | 2.04 | 17.93 |
| 3UYR.PDB | O, H_SER_183   | N, H_CYS_144   | H, H_CYS_144    | 2.83 | 2.03 | 18.84 |
| 3UYR.PDB | O, H_TYR_126   | N, H_LEU_145   | H, H_LEU_145    | 2.83 | 1.98 | 9.31  |
| 3UYR.PDB | O, H_MET_181   | N, H_VAL_146   | H, H_VAL_146    | 2.78 | 1.94 | 7.21  |
| 3UYR.PDB | O, H_SER_124   | N, H_LYS_147   | H, H_LYS_147    | 2.85 | 2.00 | 9.15  |
| 3UYR.PDB | O, H_THR_121   | N, H_PHE_150   | H, H_PHE_150    | 2.94 | 2.13 | 17.37 |
| 3UYR.PDB | O, H_ALA_202   | N, H_THR_155   | H, H_THR_155    | 2.91 | 2.09 | 17.68 |
| 3UYR.PDB | O, H_SER_200   | N, H_THR_157   | H, H_THR_157    | 2.85 | 2.03 | 15.50 |
| 3UYR.PDB | OG, H_SER_183  | NE1, H_TRP_158 | HE1, H_TRP_158  | 2.93 | 2.08 | 7.42  |
| 3UYR.PDB | O, H_THR_198   | N, H_ASN_159   | H, H_ASN_159    | 2.85 | 2.00 | 6.81  |
| 3UYR.PDB | O, H_THR_196   | ND2, H_ASN_159 | HD21, H_ASN_159 | 2.99 | 2.16 | 12.25 |
| 3UYR.PDB | O, H_SER_184   | N, H_HIS_168   | H, H_HIS_168    | 2.82 | 2.01 | 16.83 |
| 3UYR.PDB | O, H_SER_182   | N, H_PHE_170   | H, H_PHE_170    | 2.87 | 2.01 | 1.94  |
| 3UYR.PDB | O, H_THR_180   | N, H_LEU_173   | H, H_LEU_173    | 2.80 | 1.98 | 14.35 |
| 3UYR.PDB | O, H_LEU_178   | N, H_GLU_175   | H, H_GLU_175    | 2.86 | 2.02 | 11.60 |
| 3UYR.PDB | O, H_TYR_149   | N, H_TYR_179   | H, H_TYR_179    | 2.88 | 2.02 | 4.66  |
| 3UYR.PDB | O, H_LEU_173   | N, H_THR_180   | H, H_THR_180    | 2.85 | 2.02 | 14.69 |
| 3UYR.PDB | O, H_VAL_146   | N, H_MET_181   | H, H_MET_181    | 2.84 | 2.01 | 13.98 |
| 3UYR.PDB | O, H_CYS_144   | N, H_SER_183   | H, H_SER_183    | 2.93 | 2.11 | 17.38 |
| 3UYR.PDB | O, H_HIS_168   | N, H_SER_184   | H, H_SER_184    | 2.81 | 2.00 | 15.83 |
| 3UYR.PDB | O, H_LEU_142   | N, H_VAL_185   | H, H_VAL_185    | 2.88 | 2.04 | 12.88 |
| 3UYR.PDB | O, H_VAL_140   | N, H_VAL_187   | H, H_VAL_187    | 2.92 | 2.09 | 16.07 |
| 3UYR.PDB | O, H_SER_138   | N, H_SER_189   | H, H_SER_189    | 2.93 | 2.08 | 7.47  |
| 3UYR.PDB | O, H_THR_191   | N, H_GLN_195   | H, H_GLN_195    | 2.89 | 2.08 | 16.64 |
| 3UYR.PDB | OD1, H_ASN_159 | N, H_THR_198   | H, H_THR_198    | 2.89 | 2.14 | 25.42 |
| 3UYR.PDB | O, H_LYS_212   | N, H_CYS_199   | H, H_CYS_199    | 2.82 | 2.04 | 21.76 |
| 3UYR.PDB | O, H_THR_157   | N, H_SER_200   | H, H_SER_200    | 2.77 | 1.94 | 8.80  |
| 3UYR.PDB | O, H_VAL_210   | N, H_VAL_201   | H, H_VAL_201    | 2.74 | 1.93 | 14.32 |
| 3UYR.PDB | O, H_THR_155   | N, H_ALA_202   | H, H_ALA_202    | 2.84 | 2.00 | 11.25 |
| 3UYR.PDB | O, H_THR_208   | N, H_HIS_203   | H, H_HIS_203    | 2.84 | 2.01 | 11.63 |
| 3UYR.PDB | OG, H_SER_206  | ND1, H_HIS_203 | HD1, H_HIS_203  | 2.81 | 2.06 | 24.47 |
| 3UYR.PDB | O, H_PRO_151   | NE2, H_HIS_203 | HE2, H_HIS_203  | 2.78 | 1.95 | 12.82 |
| 3UYR.PDB | O, H_PRO_204   | N, H_SER_207   | H, H_SER_207    | 2.93 | 2.11 | 16.45 |
| 3UYR.PDB | O, H_SER_206   | OG1, H_THR_208 | HG1, H_THR_208  | 2.92 | 2.11 | 9.83  |
| 3UYR.PDB | O, H_VAL_201   | N, H_VAL_210   | H, H_VAL_210    | 2.82 | 2.01 | 15.56 |
| 3UYR.PDB | O, H_CYS_199   | N, H_LYS_212   | H, H_LYS_212    | 2.72 | 1.97 | 24.25 |
| 3UYR.PDB | OE2, L_GLU_127 | NZ, H_LYS_212  | HZ3, H_LYS_212  | 2.87 | 2.08 | 23.12 |
| 3UYR.PDB | O, H_VAL_197   | N, H_LEU_214   | H, H_LEU_214    | 2.84 | 1.98 | 4.90  |
| 3UYR.PDB | OG, L_SER_26   | N, L_VAL_3     | H, L_VAL_3      | 2.88 | 2.07 | 15.64 |
| 3UYR.PDB | O, L_ARG_24    | N, L_THR_5     | H, L_THR_5      | 2.82 | 1.98 | 11.17 |
| 3UYR.PDB | O, L_TYR_91    | NE2, L_GLN_6   | HE21, L_GLN_6   | 2.91 | 2.06 | 4.88  |
| 3UYR.PDB | O, L_SER_22    | N, L_THR_7     | H, L_THR_7      | 2.88 | 2.05 | 13.60 |
| 3UYR.PDB | O, L_LYS_107   | N, L_LEU_11    | H, L_LEU_11     | 2.78 | 1.95 | 12.54 |
| 3UYR.PDB | O, L_GLU_109   | N, L_VAL_13    | H, L_VAL_13     | 2.83 | 2.02 | 17.58 |
| 3UYR.PDB | O, L_VAL_83    | N, L_GLY_16    | H, L_GLY_16     | 2.85 | 2.01 | 12.40 |
| 3UYR.PDB | O, L_ILE_80    | N, L_ALA_19    | H, L_ALA_19     | 2.80 | 1.98 | 15.31 |
| 3UYR.PDB | O, L_LEU_78    | N, L_ILE_21    | H, L_ILE_21     | 2.80 | 1.97 | 13.25 |
| 3UYR.PDB | O, L_THR_7     | N, L_SER_22    | H, L_SER_22     | 2.80 | 1.95 | 7.59  |

|          |                |                |                 |      |      |       |
|----------|----------------|----------------|-----------------|------|------|-------|
| 3UYR.PDB | O, L_PHE_76    | N, L_CYS_23    | H, L_CYS_23     | 2.89 | 2.03 | 7.24  |
| 3UYR.PDB | O, L_THR_5     | N, L_ARG_24    | H, L_ARG_24     | 2.90 | 2.05 | 9.82  |
| 3UYR.PDB | O, L_THR_74    | N, L_SER_25    | H, L_SER_25     | 2.93 | 2.14 | 19.27 |
| 3UYR.PDB | O, L_GLY_73    | N, L_LEU_29    | H, L_LEU_29     | 2.94 | 2.10 | 10.63 |
| 3UYR.PDB | O, L_ASN_35    | N, L_HIS_31    | H, L_HIS_31     | 2.79 | 1.96 | 11.60 |
| 3UYR.PDB | O, P_PRO_50    | NE2, L_HIS_31  | HE2, L_HIS_31   | 2.91 | 2.13 | 21.00 |
| 3UYR.PDB | O, L_HIS_31    | N, L_GLY_34    | H, L_GLY_34     | 2.88 | 2.04 | 11.36 |
| 3UYR.PDB | OD1, L_ASN_33  | N, L_ASN_35    | H, L_ASN_35     | 2.92 | 2.06 | 4.57  |
| 3UYR.PDB | O, L_SER_94    | N, L_HIS_39    | H, L_HIS_39     | 2.84 | 2.01 | 14.97 |
| 3UYR.PDB | O, L_ILE_53    | N, L_TRP_40    | H, L_TRP_40     | 2.74 | 1.91 | 12.06 |
| 3UYR.PDB | O, L_PHE_92    | N, L_TYR_41    | H, L_TYR_41     | 2.85 | 1.99 | 7.67  |
| 3UYR.PDB | O, L_ASN_50    | N, L_LEU_42    | H, L_LEU_42     | 2.87 | 2.07 | 16.83 |
| 3UYR.PDB | O, L_VAL_90    | N, L_GLN_43    | H, L_GLN_43     | 2.80 | 1.95 | 5.26  |
| 3UYR.PDB | O, L_LEU_42    | N, L_ASN_50    | H, L_ASN_50     | 2.86 | 2.10 | 23.14 |
| 3UYR.PDB | O, L_TRP_40    | N, L_LEU_52    | H, L_LEU_52     | 2.84 | 2.01 | 12.79 |
| 3UYR.PDB | O, L_ASN_58    | N, L_TYR_54    | H, L_TYR_54     | 2.84 | 2.05 | 19.87 |
| 3UYR.PDB | O, L_LEU_38    | N, L_VAL_56    | H, L_VAL_56     | 2.77 | 1.91 | 6.14  |
| 3UYR.PDB | O, L_LYS_55    | N, L_SER_57    | H, L_SER_57     | 2.83 | 2.11 | 28.35 |
| 3UYR.PDB | O, L_TYR_54    | N, L_ASN_58    | H, L_ASN_58     | 3.00 | 2.19 | 16.78 |
| 3UYR.PDB | O, L_LEU_52    | N, L_PHE_60    | H, L_PHE_60     | 2.97 | 2.11 | 3.95  |
| 3UYR.PDB | O, L_PHE_60    | N, L_VAL_63    | H, L_VAL_63     | 2.97 | 2.12 | 9.01  |
| 3UYR.PDB | OD2, L_ASP_87  | NH1, L_ARG_66  | HH12, L_ARG_66  | 2.92 | 2.12 | 17.99 |
| 3UYR.PDB | O, L_LYS_79    | N, L_SER_68    | H, L_SER_68     | 2.85 | 2.02 | 11.95 |
| 3UYR.PDB | O, L_THR_77    | N, L_SER_70    | H, L_SER_70     | 2.85 | 2.05 | 19.01 |
| 3UYR.PDB | O, L_ASP_75    | N, L_SER_72    | H, L_SER_72     | 2.90 | 2.11 | 22.40 |
| 3UYR.PDB | O, L_SER_72    | N, L_ASP_75    | H, L_ASP_75     | 2.99 | 2.11 | 2.04  |
| 3UYR.PDB | O, L_CYS_23    | N, L_PHE_76    | H, L_PHE_76     | 2.88 | 2.06 | 17.75 |
| 3UYR.PDB | O, L_SER_70    | N, L_THR_77    | H, L_THR_77     | 2.91 | 2.06 | 11.18 |
| 3UYR.PDB | O, L_ILE_21    | N, L_LEU_78    | H, L_LEU_78     | 2.85 | 2.02 | 13.64 |
| 3UYR.PDB | O, L_SER_68    | N, L_LYS_79    | H, L_LYS_79     | 2.81 | 1.95 | 3.66  |
| 3UYR.PDB | O, L_ALA_19    | N, L_ILE_80    | H, L_ILE_80     | 2.83 | 2.00 | 12.62 |
| 3UYR.PDB | O, L_ARG_66    | N, L_SER_81    | H, L_SER_81     | 2.98 | 2.14 | 10.19 |
| 3UYR.PDB | O, L_ASP_17    | N, L_VAL_83    | H, L_VAL_83     | 2.95 | 2.10 | 8.86  |
| 3UYR.PDB | OD2, L_ASP_87  | N, L_GLU_84    | H, L_GLU_84     | 2.89 | 2.03 | 6.75  |
| 3UYR.PDB | O, L_GLU_84    | N, L_ASP_87    | H, L_ASP_87     | 2.87 | 2.03 | 9.35  |
| 3UYR.PDB | O, L_GLN_43    | N, L_VAL_90    | H, L_VAL_90     | 2.88 | 2.03 | 9.40  |
| 3UYR.PDB | O, L_THR_106   | N, L_TYR_91    | H, L_TYR_91     | 2.84 | 1.99 | 8.33  |
| 3UYR.PDB | O, L_TYR_41    | N, L_PHE_92    | H, L_PHE_92     | 2.86 | 2.03 | 13.68 |
| 3UYR.PDB | OE1, L_GLN_6   | N, L_CYS_93    | H, L_CYS_93     | 3.00 | 2.19 | 17.32 |
| 3UYR.PDB | O, L_HIS_39    | N, L_SER_94    | H, L_SER_94     | 2.83 | 2.06 | 23.28 |
| 3UYR.PDB | O, L_THR_101   | N, L_GLN_95    | H, L_GLN_95     | 2.94 | 2.12 | 15.68 |
| 3UYR.PDB | O, L_TYR_37    | N, L_SER_96    | H, L_SER_96     | 2.94 | 2.15 | 18.38 |
| 3UYR.PDB | OE1, L_GLN_95  | N, L_HIS_98    | H, L_HIS_98     | 2.95 | 2.09 | 2.48  |
| 3UYR.PDB | O, L_SER_28    | NE2, L_HIS_98  | HE2, L_HIS_98   | 2.88 | 2.05 | 12.63 |
| 3UYR.PDB | O, L_CYS_93    | N, L_GLY_103   | H, L_GLY_103    | 2.78 | 1.93 | 6.25  |
| 3UYR.PDB | O, L_TYR_91    | N, L_THR_106   | H, L_THR_106    | 2.84 | 2.03 | 18.62 |
| 3UYR.PDB | O, L_GLY_89    | N, L_LEU_108   | H, L_LEU_108    | 2.94 | 2.13 | 16.80 |
| 3UYR.PDB | O, L_LEU_11    | N, L_GLU_109   | H, L_GLU_109    | 2.82 | 1.97 | 7.29  |
| 3UYR.PDB | OE1, L_GLN_170 | N, L_ILE_110   | H, L_ILE_110    | 2.98 | 2.14 | 10.85 |
| 3UYR.PDB | O, L_VAL_13    | N, L_LYS_111   | H, L_LYS_111    | 2.91 | 2.06 | 8.31  |
| 3UYR.PDB | O, L_ALA_113   | NE, L_ARG_112  | HE, L_ARG_112   | 2.77 | 1.91 | 2.87  |
| 3UYR.PDB | O, L_ASP_174   | NH1, L_ARG_112 | HH11, L_ARG_112 | 2.84 | 2.02 | 14.52 |
| 3UYR.PDB | O, L_TYR_144   | N, L_ALA_115   | H, L_ALA_115    | 2.82 | 2.03 | 20.71 |
| 3UYR.PDB | O, L_ASN_141   | N, L_THR_118   | H, L_THR_118    | 2.86 | 2.01 | 9.08  |
| 3UYR.PDB | O, L_PHE_139   | N, L_SER_120   | H, L_SER_120    | 2.86 | 2.03 | 15.20 |
| 3UYR.PDB | O, L_VAL_137   | N, L_PHE_122   | H, L_PHE_122    | 2.78 | 2.00 | 21.33 |
| 3UYR.PDB | OG, L_SER_135  | NE2, L_GLN_128 | HE22, L_GLN_128 | 2.97 | 2.12 | 5.23  |
| 3UYR.PDB | O, L_SER_126   | N, L_THR_130   | H, L_THR_130    | 2.82 | 2.00 | 15.78 |

|          |                |                |                 |      |      |       |
|----------|----------------|----------------|-----------------|------|------|-------|
| 3UYR.PDB | O, L_GLN_128   | N, L_SER_131   | H, L_SER_131    | 2.96 | 2.14 | 14.42 |
| 3UYR.PDB | O, L_LEU_185   | N, L_ALA_134   | H, L_ALA_134    | 2.87 | 2.07 | 19.29 |
| 3UYR.PDB | OE1, L_GLN_128 | N, L_SER_135   | H, L_SER_135    | 2.90 | 2.07 | 13.80 |
| 3UYR.PDB | O, L_LEU_183   | N, L_VAL_136   | H, L_VAL_136    | 2.80 | 1.97 | 12.38 |
| 3UYR.PDB | O, L_PHE_122   | N, L_VAL_137   | H, L_VAL_137    | 2.95 | 2.10 | 12.15 |
| 3UYR.PDB | O, L_SER_181   | N, L_CYS_138   | H, L_CYS_138    | 2.83 | 1.98 | 8.48  |
| 3UYR.PDB | O, L_SER_120   | N, L_PHE_139   | H, L_PHE_139    | 2.80 | 2.03 | 23.03 |
| 3UYR.PDB | O, L_MET_179   | N, L_LEU_140   | H, L_LEU_140    | 2.85 | 1.99 | 0.89  |
| 3UYR.PDB | O, L_THR_118   | N, L_ASN_141   | H, L_ASN_141    | 2.83 | 1.99 | 11.90 |
| 3UYR.PDB | OG, L_SER_178  | N, L_ASN_142   | H, L_ASN_142    | 2.99 | 2.15 | 11.11 |
| 3UYR.PDB | O, L_TYR_177   | N, L_PHE_143   | H, L_PHE_143    | 2.85 | 2.04 | 16.59 |
| 3UYR.PDB | O, L_ALA_115   | N, L_TYR_144   | H, L_TYR_144    | 2.91 | 2.10 | 16.84 |
| 3UYR.PDB | O, L_THR_201   | N, L_ASN_149   | H, L_ASN_149    | 2.86 | 2.00 | 8.27  |
| 3UYR.PDB | O, L_GLU_199   | N, L_LYS_151   | H, L_LYS_151    | 2.82 | 2.00 | 15.42 |
| 3UYR.PDB | O, L_THR_197   | N, L_LYS_153   | H, L_LYS_153    | 2.84 | 2.01 | 13.66 |
| 3UYR.PDB | O, L_SER_157   | N, L_ILE_154   | H, L_ILE_154    | 2.87 | 2.03 | 11.53 |
| 3UYR.PDB | O, L_SER_195   | N, L_ASP_155   | H, L_ASP_155    | 2.87 | 2.05 | 15.34 |
| 3UYR.PDB | O, L_ILE_154   | N, L_SER_157   | H, L_SER_157    | 2.89 | 2.05 | 8.75  |
| 3UYR.PDB | O, L_THR_182   | N, L_LEU_164   | H, L_LEU_164    | 2.83 | 2.00 | 12.39 |
| 3UYR.PDB | O, L_SER_180   | N, L_SER_166   | H, L_SER_166    | 2.84 | 2.01 | 13.00 |
| 3UYR.PDB | O, H_PRO_171   | OG, L_SER_166  | HG, L_SER_166   | 2.72 | 1.97 | 20.46 |
| 3UYR.PDB | O, L_SER_178   | N, L_THR_168   | H, L_THR_168    | 2.87 | 2.04 | 12.69 |
| 3UYR.PDB | O, L_ILE_110   | NE2, L_GLN_170 | HE21, L_GLN_170 | 2.74 | 1.92 | 14.96 |
| 3UYR.PDB | O, L_SER_175   | NE2, L_GLN_170 | HE22, L_GLN_170 | 2.95 | 2.10 | 7.23  |
| 3UYR.PDB | O, L_THR_176   | N, L_ASP_171   | H, L_ASP_171    | 2.94 | 2.09 | 6.43  |
| 3UYR.PDB | OD1, L_ASP_174 | OG1, L_THR_176 | HG1, L_THR_176  | 2.78 | 1.97 | 7.90  |
| 3UYR.PDB | O, L_PHE_143   | N, L_TYR_177   | H, L_TYR_177    | 2.87 | 2.01 | 4.97  |
| 3UYR.PDB | O, L_LEU_140   | N, L_MET_179   | H, L_MET_179    | 2.90 | 2.09 | 17.57 |
| 3UYR.PDB | O, L_SER_166   | N, L_SER_180   | H, L_SER_180    | 2.83 | 2.01 | 15.72 |
| 3UYR.PDB | O, L_CYS_138   | N, L_SER_181   | H, L_SER_181    | 2.84 | 1.99 | 8.90  |
| 3UYR.PDB | O, L_LEU_164   | N, L_THR_182   | H, L_THR_182    | 2.82 | 1.99 | 13.16 |
| 3UYR.PDB | O, L_VAL_136   | N, L_LEU_183   | H, L_LEU_183    | 2.83 | 1.99 | 11.27 |
| 3UYR.PDB | O, L_ALA_134   | N, L_LEU_185   | H, L_LEU_185    | 2.79 | 1.94 | 5.06  |
| 3UYR.PDB | O, L_THR_186   | N, L_TYR_190   | H, L_TYR_190    | 2.96 | 2.12 | 12.41 |
| 3UYR.PDB | O, L_LYS_187   | N, L_GLU_191   | H, L_GLU_191    | 2.81 | 2.00 | 16.98 |
| 3UYR.PDB | OD2, L_ASP_155 | ND1, L_HIS_193 | HD1, L_HIS_193  | 2.93 | 2.16 | 21.52 |
| 3UYR.PDB | ND2, L_ASN_216 | ND2, L_ASN_194 | HD22, L_ASN_194 | 2.90 | 2.18 | 28.48 |
| 3UYR.PDB | O, L_PHE_213   | N, L_TYR_196   | H, L_TYR_196    | 2.86 | 2.00 | 4.60  |
| 3UYR.PDB | O, L_LYS_153   | N, L_THR_197   | H, L_THR_197    | 2.91 | 2.08 | 15.26 |
| 3UYR.PDB | O, L_LYS_211   | N, L_CYS_198   | H, L_CYS_198    | 2.83 | 2.02 | 16.54 |
| 3UYR.PDB | O, L_LYS_151   | N, L_GLU_199   | H, L_GLU_199    | 2.79 | 1.98 | 16.73 |
| 3UYR.PDB | O, L_ILE_209   | N, L_ALA_200   | H, L_ALA_200    | 2.74 | 1.92 | 13.71 |
| 3UYR.PDB | O, L_ASN_149   | N, L_THR_201   | H, L_THR_201    | 2.78 | 1.96 | 14.01 |
| 3UYR.PDB | OG1, L_THR_204 | ND1, L_HIS_202 | HD1, L_HIS_202  | 2.78 | 1.93 | 6.06  |
| 3UYR.PDB | O, L_ALA_200   | N, L_ILE_209   | H, L_ILE_209    | 2.92 | 2.18 | 25.89 |
| 3UYR.PDB | O, L_CYS_198   | N, L_LYS_211   | H, L_LYS_211    | 2.90 | 2.05 | 8.10  |
| 3UYR.PDB | O, L_TYR_196   | N, L_PHE_213   | H, L_PHE_213    | 2.87 | 2.05 | 16.74 |
| 3UYR.PDB | O, L_ASN_194   | N, L_ARG_215   | H, L_ARG_215    | 2.75 | 1.97 | 21.32 |
| 3UYR.PDB | O, L_HIS_193   | NE, L_ARG_215  | HE, L_ARG_215   | 2.87 | 2.04 | 12.99 |
| 3UYR.PDB | OD1, H_ASN_101 | NE2, P_GLN_48  | HE22, P_GLN_48  | 2.57 | 1.87 | 29.89 |



---

Table 1686: 3UYR-specific side chain and main chain hydrogen bonding analysis. In this table, a PDB file is specified with a four-letter PDB ID, except that the names of the PDB files corresponding to the single NMR structural model split from the NMR ensemble is specified with a four-letter PDB ID in addition to a hyphen followed by the single NMR structural model numeric ID, the residue naming scheme is **Chain ID\_residue name\_residue number**,  $\angle ADH$  represents the angle formed by acceptor (A), donor (D) and hydrogen (H) ( $\angle ADH$ ).

| PDB      | Acceptor (A)   | Donor (D)      | Hydrogen (H)    | D-A (Å) | H-A (Å) | $\angle ADH(^{\circ})$ |
|----------|----------------|----------------|-----------------|---------|---------|------------------------|
| 3X0E.PDB | O, A_PHE.198   | NZ, A_LYS.116  | HZ3, A_LYS.116  | 2.72    | 1.88    | 16.62                  |
| 3X0E.PDB | OD1, A_ASP.122 | NE2, A_GLN.118 | HE21, A_GLN.118 | 2.93    | 2.22    | 29.07                  |
| 3X0E.PDB | O, A_ASN.115   | N, A_ILE.119   | H, A_ILE.119    | 2.94    | 2.11    | 11.48                  |
| 3X0E.PDB | O, A_GLN.118   | N, A_ASP.122   | H, A_ASP.122    | 2.95    | 2.12    | 13.26                  |
| 3X0E.PDB | O, A_ILE.119   | N, A_VAL.123   | H, A_VAL.123    | 2.88    | 2.05    | 13.75                  |
| 3X0E.PDB | OD2, A_ASP.195 | NZ, A_LYS.124  | HZ1, A_LYS.124  | 3.00    | 2.19    | 21.32                  |
| 3X0E.PDB | O, A_ASP.122   | N, A_PHE.126   | H, A_PHE.126    | 2.90    | 2.08    | 15.30                  |
| 3X0E.PDB | O, A_VAL.123   | N, A_TYR.127   | H, A_TYR.127    | 2.95    | 2.12    | 11.57                  |
| 3X0E.PDB | O, A_LYS.124   | N, A_ASP.128   | H, A_ASP.128    | 2.92    | 2.07    | 7.55                   |
| 3X0E.PDB | O, A_GLN.125   | N, A_GLN.129   | H, A_GLN.129    | 2.88    | 2.03    | 7.18                   |
| 3X0E.PDB | O, A_TYR.127   | N, A_LEU.131   | H, A_LEU.131    | 2.82    | 2.00    | 14.74                  |
| 3X0E.PDB | O, A_ASP.128   | N, A_GLN.132   | H, A_GLN.132    | 2.95    | 2.12    | 11.27                  |
| 3X0E.PDB | O, A_ALA.130   | N, A_ALA.134   | H, A_ALA.134    | 2.77    | 1.95    | 14.29                  |
| 3X0E.PDB | O, A_GLN.133   | N, A_ASP.137   | H, A_ASP.137    | 2.92    | 2.17    | 25.03                  |
| 3X0E.PDB | O, A_ASN.141   | N, A_ALA.145   | H, A_ALA.145    | 2.97    | 2.17    | 18.25                  |
| 3X0E.PDB | O, A_ASN.142   | N, A_VAL.146   | H, A_VAL.146    | 2.81    | 1.98    | 12.77                  |
| 3X0E.PDB | O, A_LYS.144   | N, A_LYS.148   | H, A_LYS.148    | 2.95    | 2.10    | 7.95                   |
| 3X0E.PDB | O, A_ALA.145   | N, A_THR.149   | H, A_THR.149    | 2.85    | 2.06    | 19.27                  |
| 3X0E.PDB | O, A_VAL.146   | N, A_PHE.150   | H, A_PHE.150    | 2.92    | 2.09    | 13.09                  |
| 3X0E.PDB | O, A_VAL.147   | N, A_HIS.151   | H, A_HIS.151    | 2.86    | 2.05    | 17.72                  |
| 3X0E.PDB | O, A_LEU.174   | ND1, A_HIS.151 | HD1, A_HIS.151  | 2.63    | 1.79    | 9.32                   |
| 3X0E.PDB | O, A_THR.149   | N, A_THR.153   | H, A_THR.153    | 2.90    | 2.06    | 11.00                  |
| 3X0E.PDB | O, A_PHE.150   | N, A_LEU.154   | H, A_LEU.154    | 2.90    | 2.06    | 10.44                  |
| 3X0E.PDB | OD2, A_ASP.189 | N, A_SER.160   | H, A_SER.160    | 2.87    | 2.16    | 28.56                  |
| 3X0E.PDB | OD2, A_ASP.128 | OG1, A_THR.161 | HG1, A_THR.161  | 2.92    | 2.13    | 12.66                  |
| 3X0E.PDB | O, A_LEU.162   | N, A_LEU.165   | H, A_LEU.165    | 2.87    | 2.07    | 18.34                  |
| 3X0E.PDB | O, A_SER.168   | N, A_ASN.172   | H, A_ASN.172    | 2.80    | 2.05    | 24.69                  |
| 3X0E.PDB | O, A_SER.168   | ND2, A_ASN.172 | HD22, A_ASN.172 | 2.72    | 1.93    | 18.83                  |
| 3X0E.PDB | O, A_LEU.170   | N, A_ASN.173   | H, A_ASN.173    | 2.82    | 1.98    | 11.48                  |
| 3X0E.PDB | O, A_PRO.176   | N, A_SER.179   | H, A_SER.179    | 2.96    | 2.12    | 10.85                  |
| 3X0E.PDB | O, A_CYS.157   | ND2, A_ASN.184 | HD21, A_ASN.184 | 2.90    | 2.04    | 5.52                   |
| 3X0E.PDB | OD1, A_ASP.155 | NZ, A_LYS.187  | HZ1, A_LYS.187  | 2.84    | 2.07    | 26.10                  |
| 3X0E.PDB | OD2, A_ASP.189 | N, A_HIS.191   | H, A_HIS.191    | 2.94    | 2.18    | 22.64                  |
| 3X0E.PDB | O, A_CYS.190   | N, A_ILE.194   | H, A_ILE.194    | 2.84    | 2.02    | 14.86                  |
| 3X0E.PDB | O, A_HIS.191   | N, A_ASP.195   | H, A_ASP.195    | 2.95    | 2.12    | 12.91                  |
| 3X0E.PDB | O, A_GLN.192   | N, A_ASP.196   | H, A_ASP.196    | 2.86    | 2.06    | 18.82                  |
| 3X0E.PDB | O, A_ASP.196   | N, A_LYS.201   | H, A_LYS.201    | 2.89    | 2.07    | 14.52                  |
| 3X0E.PDB | OD1, B_ASN.115 | N, B_GLN.118   | H, B_GLN.118    | 2.83    | 2.07    | 23.69                  |
| 3X0E.PDB | O, B_LYS.116   | N, B_ALA.120   | H, B_ALA.120    | 2.96    | 2.13    | 11.70                  |
| 3X0E.PDB | O, B_GLN.118   | N, B_ASP.122   | H, B_ASP.122    | 2.91    | 2.08    | 11.40                  |
| 3X0E.PDB | O, B_ILE.119   | N, B_VAL.123   | H, B_VAL.123    | 2.88    | 2.07    | 15.19                  |
| 3X0E.PDB | O, B_ALA.120   | N, B_LYS.124   | H, B_LYS.124    | 2.98    | 2.18    | 17.57                  |
| 3X0E.PDB | OD1, B_ASP.195 | NZ, B_LYS.124  | HZ1, B_LYS.124  | 2.75    | 2.02    | 29.74                  |
| 3X0E.PDB | O, B_VAL.123   | N, B_TYR.127   | H, B_TYR.127    | 2.87    | 2.05    | 14.21                  |
| 3X0E.PDB | O, B_LYS.124   | N, B_ASP.128   | H, B_ASP.128    | 2.82    | 1.97    | 7.12                   |
| 3X0E.PDB | O, B_GLN.125   | N, B_GLN.129   | H, B_GLN.129    | 2.95    | 2.09    | 4.29                   |
| 3X0E.PDB | O, B_TYR.127   | N, B_LEU.131   | H, B_LEU.131    | 2.80    | 2.02    | 19.97                  |
| 3X0E.PDB | O, B_GLN.129   | N, B_GLN.133   | H, B_GLN.133    | 2.90    | 2.04    | 5.41                   |
| 3X0E.PDB | O, B_ALA.130   | N, B_ALA.134   | H, B_ALA.134    | 2.78    | 2.05    | 26.00                  |
| 3X0E.PDB | O, B_GLN.132   | N, B_VAL.136   | H, B_VAL.136    | 2.97    | 2.12    | 6.76                   |
| 3X0E.PDB | O, B_LYS.144   | N, B_LYS.148   | H, B_LYS.148    | 2.88    | 2.03    | 4.95                   |
| 3X0E.PDB | O, B_ALA.145   | N, B_THR.149   | H, B_THR.149    | 2.96    | 2.14    | 15.45                  |
| 3X0E.PDB | O, B_ALA.145   | OG1, B_THR.149 | HG1, B_THR.149  | 2.91    | 2.17    | 22.45                  |
| 3X0E.PDB | O, B_VAL.146   | N, B_PHE.150   | H, B_PHE.150    | 2.95    | 2.10    | 9.14                   |
| 3X0E.PDB | O, B_VAL.147   | N, B_HIS.151   | H, B_HIS.151    | 2.89    | 2.04    | 9.03                   |
| 3X0E.PDB | O, B_LEU.174   | ND1, B_HIS.151 | HD1, B_HIS.151  | 2.75    | 1.90    | 7.86                   |
| 3X0E.PDB | O, B_LYS.148   | N, B_GLU.152   | H, B_GLU.152    | 2.88    | 2.06    | 15.18                  |

|          |                |                |                |      |      |       |
|----------|----------------|----------------|----------------|------|------|-------|
| 3X0E.PDB | O, B_THR_149   | N, B_THR_153   | H, B_THR_153   | 2.82 | 1.98 | 10.07 |
| 3X0E.PDB | O, B_PHE_150   | N, B_LEU_154   | H, B_LEU_154   | 2.87 | 2.04 | 11.99 |
| 3X0E.PDB | OG1, B_THR_166 | N, B_SER_159   | H, B_SER_159   | 2.96 | 2.14 | 15.38 |
| 3X0E.PDB | OD2, B_ASP_189 | N, B_SER_160   | H, B_SER_160   | 2.78 | 1.93 | 3.69  |
| 3X0E.PDB | OG, B_SER_159  | OG1, B_THR_161 | HG1, B_THR_161 | 2.79 | 1.98 | 7.89  |
| 3X0E.PDB | O, B_SER_159   | N, B_LEU_162   | H, B_LEU_162   | 2.92 | 2.08 | 12.42 |
| 3X0E.PDB | O, B_LEU_162   | N, B_THR_166   | H, B_THR_166   | 2.94 | 2.18 | 23.20 |
| 3X0E.PDB | O, B_LEU_162   | OG1, B_THR_166 | HG1, B_THR_166 | 2.88 | 2.11 | 16.63 |
| 3X0E.PDB | O, B_THR_163   | N, B_THR_167   | H, B_THR_167   | 2.85 | 2.03 | 14.83 |
| 3X0E.PDB | O, B_LEU_165   | N, B_VAL_169   | H, B_VAL_169   | 2.94 | 2.17 | 21.85 |
| 3X0E.PDB | O, B_THR_166   | N, B_LEU_170   | H, B_LEU_170   | 2.95 | 2.19 | 24.26 |
| 3X0E.PDB | O, B_THR_167   | N, B_LYS_171   | H, B_LYS_171   | 2.99 | 2.15 | 11.05 |
| 3X0E.PDB | O, B_ASN_184   | N, B_GLU_188   | H, B_GLU_188   | 2.89 | 2.05 | 8.79  |
| 3X0E.PDB | OD1, B_ASP_128 | NE2, B_HIS_191 | HE2, B_HIS_191 | 2.68 | 1.83 | 6.07  |
| 3X0E.PDB | OD1, B_ASP_189 | N, B_GLN_192   | H, B_GLN_192   | 2.88 | 2.05 | 11.35 |
| 3X0E.PDB | O, B_ASP_189   | N, B_LYS_193   | H, B_LYS_193   | 2.99 | 2.20 | 19.70 |
| 3X0E.PDB | O, B_CYS_190   | N, B_ILE_194   | H, B_ILE_194   | 2.95 | 2.13 | 14.03 |
| 3X0E.PDB | O, B_GLN_192   | N, B_ASP_196   | H, B_ASP_196   | 2.94 | 2.14 | 18.40 |
| 3X0E.PDB | O, B_LYS_193   | N, B_LEU_197   | H, B_LEU_197   | 2.89 | 2.17 | 28.98 |
| 3X0E.PDB | O, B_ASP_196   | N, B_LYS_201   | H, B_LYS_201   | 2.91 | 2.09 | 15.23 |

Table 1687: 3X0E-specific side chain and main chain hydrogen bonding analysis. In this table, a PDB file is specified with a four-letter PDB ID, except that the names of the PDB files corresponding to the single NMR structural model split from the NMR ensemble is specified with a four-letter PDB ID in addition to a hyphen followed by the single NMR structural model numeric ID, the residue naming scheme is **Chain ID\_residue name\_residue number**,  $\angle ADH$  represents the angle formed by acceptor (A), donor (D) and hydrogen (H) ( $\angle ADH$ ).

| PDB      | Acceptor (A)   | Donor (D)      | Hydrogen (H)   | D-A (Å) | H-A (Å) | $\angle ADH(^{\circ})$ |
|----------|----------------|----------------|----------------|---------|---------|------------------------|
| 3X0F.PDB | OD1, A_ASN.115 | N, A_ASP.117   | H, A_ASP.117   | 2.76    | 2.05    | 29.22                  |
| 3X0F.PDB | O, A_LYS.116   | N, A_ALA.120   | H, A_ALA.120   | 2.96    | 2.10    | 6.18                   |
| 3X0F.PDB | O, A_GLN.118   | N, A_ASP.122   | H, A_ASP.122   | 2.90    | 2.09    | 15.79                  |
| 3X0F.PDB | O, A_ILE.119   | N, A_VAL.123   | H, A_VAL.123   | 2.92    | 2.11    | 16.68                  |
| 3X0F.PDB | O, A_ALA.120   | N, A_LYS.124   | H, A_LYS.124   | 2.96    | 2.13    | 12.80                  |
| 3X0F.PDB | OD1, A_ASP.195 | NZ, A_LYS.124  | HZ3, A_LYS.124 | 2.91    | 2.03    | 6.30                   |
| 3X0F.PDB | O, A_ASP.122   | N, A_PHE.126   | H, A_PHE.126   | 2.92    | 2.10    | 14.97                  |
| 3X0F.PDB | O, A_VAL.123   | N, A_TYR.127   | H, A_TYR.127   | 2.88    | 2.05    | 12.59                  |
| 3X0F.PDB | O, A_LYS.124   | N, A_ASP.128   | H, A_ASP.128   | 2.89    | 2.08    | 15.92                  |
| 3X0F.PDB | O, A_TYR.127   | N, A_LEU.131   | H, A_LEU.131   | 2.80    | 1.98    | 14.29                  |
| 3X0F.PDB | O, A_ALA.130   | N, A_ALA.134   | H, A_ALA.134   | 2.84    | 2.00    | 11.20                  |
| 3X0F.PDB | O, A_GLN.133   | N, A_ASP.137   | H, A_ASP.137   | 2.91    | 2.07    | 8.58                   |
| 3X0F.PDB | OD1, A_ASP.137 | N, A_ASP.139   | H, A_ASP.139   | 2.85    | 1.99    | 3.86                   |
| 3X0F.PDB | O, A_ALA.140   | N, A_LYS.144   | H, A_LYS.144   | 2.97    | 2.14    | 11.74                  |
| 3X0F.PDB | O, A_ALA.134   | NZ, A_LYS.144  | HZ3, A_LYS.144 | 2.61    | 1.87    | 27.66                  |
| 3X0F.PDB | O, A_ASN.142   | N, A_VAL.146   | H, A_VAL.146   | 2.93    | 2.09    | 11.09                  |
| 3X0F.PDB | O, A_ALA.143   | N, A_VAL.147   | H, A_VAL.147   | 2.89    | 2.04    | 7.77                   |
| 3X0F.PDB | O, A_LYS.144   | N, A_LYS.148   | H, A_LYS.148   | 2.90    | 2.05    | 7.59                   |
| 3X0F.PDB | O, A_SER.173   | NZ, A_LYS.148  | HZ3, A_LYS.148 | 2.88    | 2.00    | 7.58                   |
| 3X0F.PDB | O, A_ALA.145   | OG1, A_THR.149 | HG1, A_THR.149 | 2.91    | 2.14    | 15.86                  |
| 3X0F.PDB | O, A_VAL.147   | N, A_HIS.151   | H, A_HIS.151   | 2.90    | 2.06    | 9.89                   |
| 3X0F.PDB | O, A_LEU.174   | ND1, A_HIS.151 | HD1, A_HIS.151 | 2.77    | 1.98    | 20.06                  |
| 3X0F.PDB | O, A_LYS.148   | N, A_GLU.152   | H, A_GLU.152   | 2.93    | 2.09    | 11.11                  |
| 3X0F.PDB | O, A_THR.149   | N, A_THR.153   | H, A_THR.153   | 2.90    | 2.09    | 16.44                  |
| 3X0F.PDB | O, A_PHE.150   | N, A_LEU.154   | H, A_LEU.154   | 2.81    | 2.01    | 18.57                  |
| 3X0F.PDB | OG1, A_THR.163 | N, A_ASN.160   | H, A_ASN.160   | 2.95    | 2.21    | 26.42                  |
| 3X0F.PDB | OG, A_SER.159  | OG1, A_THR.163 | HG1, A_THR.163 | 2.77    | 1.96    | 7.35                   |
| 3X0F.PDB | O, A_ASN.160   | N, A_THR.164   | H, A_THR.164   | 2.88    | 2.07    | 16.97                  |
| 3X0F.PDB | O, A_ASN.160   | OG1, A_THR.164 | HG1, A_THR.164 | 2.73    | 2.01    | 24.68                  |
| 3X0F.PDB | O, A_LEU.162   | N, A_THR.166   | H, A_THR.166   | 2.92    | 2.10    | 13.93                  |
| 3X0F.PDB | O, A_THR.163   | OG1, A_THR.167 | HG1, A_THR.167 | 2.89    | 2.12    | 16.26                  |
| 3X0F.PDB | O, A_THR.166   | N, A_LEU.170   | H, A_LEU.170   | 2.90    | 2.06    | 12.50                  |
| 3X0F.PDB | O, A_THR.167   | N, A_ARG.171   | H, A_ARG.171   | 2.82    | 2.01    | 17.53                  |
| 3X0F.PDB | O, A_ARG.171   | N, A_LEU.174   | H, A_LEU.174   | 2.93    | 2.08    | 5.89                   |
| 3X0F.PDB | O, A_ASN.172   | N, A_CYS.175   | H, A_CYS.175   | 3.00    | 2.20    | 18.23                  |
| 3X0F.PDB | OG1, A_THR.183 | N, A_ASN.180   | H, A_ASN.180   | 2.96    | 2.18    | 19.92                  |
| 3X0F.PDB | OD1, A_ASN.180 | N, A_LEU.182   | H, A_LEU.182   | 2.45    | 1.71    | 25.25                  |
| 3X0F.PDB | O, A_THR.183   | N, A_LEU.186   | H, A_LEU.186   | 2.99    | 2.15    | 11.85                  |
| 3X0F.PDB | O, A_PRO.184   | N, A_GLN.187   | H, A_GLN.187   | 2.97    | 2.13    | 7.84                   |
| 3X0F.PDB | OE1, A_GLN.192 | N, A_ASP.189   | H, A_ASP.189   | 2.95    | 2.17    | 21.65                  |
| 3X0F.PDB | O, A_GLY.158   | N, A_CYS.190   | H, A_CYS.190   | 2.80    | 1.94    | 6.85                   |
| 3X0F.PDB | OD1, A_ASP.128 | NE2, A_HIS.191 | HE2, A_HIS.191 | 2.65    | 1.83    | 14.50                  |
| 3X0F.PDB | OD1, A_ASP.189 | N, A_GLN.192   | H, A_GLN.192   | 2.76    | 1.93    | 12.98                  |
| 3X0F.PDB | O, A_CYS.190   | N, A_ILE.194   | H, A_ILE.194   | 2.92    | 2.08    | 11.33                  |
| 3X0F.PDB | O, A_HIS.191   | N, A_ASP.195   | H, A_ASP.195   | 2.89    | 2.05    | 8.32                   |
| 3X0F.PDB | OD1, B_ASN.115 | N, B_ASP.117   | H, B_ASP.117   | 2.83    | 2.09    | 25.59                  |
| 3X0F.PDB | O, B_ILE.119   | N, B_VAL.123   | H, B_VAL.123   | 2.90    | 2.08    | 14.90                  |
| 3X0F.PDB | O, B_ALA.120   | N, B_LYS.124   | H, B_LYS.124   | 2.96    | 2.13    | 14.11                  |
| 3X0F.PDB | O, B_ASP.122   | N, B_PHE.126   | H, B_PHE.126   | 2.92    | 2.10    | 15.77                  |
| 3X0F.PDB | O, B_VAL.123   | N, B_TYR.127   | H, B_TYR.127   | 2.83    | 1.99    | 10.66                  |
| 3X0F.PDB | O, B_LYS.124   | N, B_ASP.128   | H, B_ASP.128   | 2.91    | 2.10    | 15.77                  |
| 3X0F.PDB | O, B_TYR.127   | N, B_LEU.131   | H, B_LEU.131   | 2.83    | 2.00    | 14.03                  |
| 3X0F.PDB | O, B_ASP.128   | N, B_GLN.132   | H, B_GLN.132   | 2.94    | 2.11    | 13.87                  |
| 3X0F.PDB | O, B_ALA.130   | N, B_ALA.134   | H, B_ALA.134   | 2.84    | 1.99    | 5.94                   |
| 3X0F.PDB | O, B_GLN.133   | N, B_ASP.137   | H, B_ASP.137   | 2.83    | 1.99    | 9.88                   |
| 3X0F.PDB | OD1, B_ASP.137 | N, B_ASP.139   | H, B_ASP.139   | 2.78    | 1.95    | 12.28                  |
| 3X0F.PDB | O, B_ASN.141   | N, B_ALA.145   | H, B_ALA.145   | 2.98    | 2.19    | 18.75                  |

|          |                |                |                |      |      |       |
|----------|----------------|----------------|----------------|------|------|-------|
| 3X0F.PDB | O, B_ASN_142   | N, B_VAL_146   | H, B_VAL_146   | 2.93 | 2.10 | 14.03 |
| 3X0F.PDB | O, B_ALA_143   | N, B_VAL_147   | H, B_VAL_147   | 2.90 | 2.05 | 8.67  |
| 3X0F.PDB | O, B_LYS_144   | N, B_LYS_148   | H, B_LYS_148   | 2.93 | 2.08 | 6.49  |
| 3X0F.PDB | O, B_ALA_145   | OG1, B_THR_149 | HG1, B_THR_149 | 2.77 | 1.99 | 16.05 |
| 3X0F.PDB | O, B_VAL_147   | N, B_HIS_151   | H, B_HIS_151   | 2.84 | 2.00 | 10.99 |
| 3X0F.PDB | O, B_LEU_174   | ND1, B_HIS_151 | HD1, B_HIS_151 | 2.65 | 1.84 | 15.99 |
| 3X0F.PDB | OH, B_TYR_127  | NE2, B_HIS_151 | HE2, B_HIS_151 | 2.81 | 2.02 | 19.67 |
| 3X0F.PDB | O, B_LYS_148   | N, B_GLU_152   | H, B_GLU_152   | 2.77 | 1.92 | 6.84  |
| 3X0F.PDB | O, B_THR_149   | N, B_THR_153   | H, B_THR_153   | 2.95 | 2.13 | 14.83 |
| 3X0F.PDB | O, B_PHE_150   | N, B_LEU_154   | H, B_LEU_154   | 2.85 | 2.04 | 17.17 |
| 3X0F.PDB | OG1, B_THR_163 | OG, B_SER_159  | HG, B_SER_159  | 2.96 | 2.16 | 10.94 |
| 3X0F.PDB | O, B_ASN_160   | OG1, B_THR_164 | HG1, B_THR_164 | 2.57 | 1.80 | 16.52 |
| 3X0F.PDB | O, B_LEU_162   | N, B_THR_166   | H, B_THR_166   | 2.76 | 1.93 | 11.31 |
| 3X0F.PDB | O, B_THR_163   | N, B_THR_167   | H, B_THR_167   | 2.99 | 2.18 | 15.60 |
| 3X0F.PDB | O, B_THR_166   | N, B_LEU_170   | H, B_LEU_170   | 2.87 | 2.06 | 18.01 |
| 3X0F.PDB | O, B_GLY_158   | N, B_CYS_190   | H, B_CYS_190   | 2.83 | 2.05 | 20.10 |
| 3X0F.PDB | OD1, B_ASP_128 | NE2, B_HIS_191 | HE2, B_HIS_191 | 2.69 | 1.83 | 1.74  |
| 3X0F.PDB | O, B_CYS_190   | N, B_ILE_194   | H, B_ILE_194   | 2.81 | 1.97 | 10.56 |
| 3X0F.PDB | O, B_GLN_192   | N, B_GLU_196   | H, B_GLU_196   | 2.96 | 2.13 | 13.52 |
| 3X0F.PDB | O, B_LYS_193   | N, B_LEU_197   | H, B_LEU_197   | 2.98 | 2.18 | 18.16 |
| 3X0F.PDB | O, B_ILE_194   | N, B_PHE_198   | H, B_PHE_198   | 2.87 | 2.06 | 16.88 |
| 3X0F.PDB | O, B_ASP_195   | N, B_SER_199   | H, B_SER_199   | 2.79 | 2.06 | 26.20 |

Table 1688: 3X0F-specific side chain and main chain hydrogen bonding analysis. In this table, a PDB file is specified with a four-letter PDB ID, except that the names of the PDB files corresponding to the single NMR structural model split from the NMR ensemble is specified with a four-letter PDB ID in addition to a hyphen followed by the single NMR structural model numeric ID, the residue naming scheme is **Chain ID\_residue name\_residue number**,  $\angle ADH$  represents the angle formed by acceptor (A), donor (D) and hydrogen (H) ( $\angle ADH$ ).

| PDB      | Acceptor (A)  | Donor (D)      | Hydrogen (H)   | D-A (Å) | H-A (Å) | $\angle ADH(^{\circ})$ |
|----------|---------------|----------------|----------------|---------|---------|------------------------|
| 4F33.PDB | OG, A.SER.27  | N, A.GLU.4     | H, A.GLU.4     | 2.93    | 2.12    | 15.90                  |
| 4F33.PDB | O, A.SER.25   | N, A.THR.6     | H, A.THR.6     | 2.82    | 1.97    | 4.01                   |
| 4F33.PDB | O, A.TYR.86   | NE2, A.GLN.7   | HE22, A.GLN.7  | 2.87    | 2.09    | 21.54                  |
| 4F33.PDB | O, A.THR.23   | N, A.SER.8     | H, A.SER.8     | 2.88    | 2.08    | 17.40                  |
| 4F33.PDB | O, A.LYS.103  | N, A.MET.12    | H, A.MET.12    | 2.89    | 2.08    | 17.33                  |
| 4F33.PDB | OE2, A.GLU.18 | N, A.SER.15    | H, A.SER.15    | 2.97    | 2.12    | 6.98                   |
| 4F33.PDB | O, A.VAL.78   | N, A.GLY.17    | H, A.GLY.17    | 2.85    | 2.06    | 20.41                  |
| 4F33.PDB | O, A.ILE.75   | N, A.VAL.20    | H, A.VAL.20    | 2.97    | 2.17    | 19.12                  |
| 4F33.PDB | O, A.LEU.73   | N, A.MET.22    | H, A.MET.22    | 2.86    | 2.02    | 10.29                  |
| 4F33.PDB | O, A.SER.8    | N, A.THR.23    | H, A.THR.23    | 2.78    | 1.93    | 7.24                   |
| 4F33.PDB | O, A.TYR.71   | N, A.CYS.24    | H, A.CYS.24    | 2.78    | 1.93    | 6.93                   |
| 4F33.PDB | O, A.THR.6    | N, A.SER.25    | H, A.SER.25    | 2.80    | 1.94    | 5.80                   |
| 4F33.PDB | O, A.ASN.69   | N, A.ALA.26    | H, A.ALA.26    | 2.83    | 1.99    | 8.87                   |
| 4F33.PDB | O, A.ILE.48   | N, A.TRP.35    | H, A.TRP.35    | 2.69    | 1.86    | 13.25                  |
| 4F33.PDB | O, A.TYR.87   | N, A.TYR.36    | H, A.TYR.36    | 2.79    | 1.98    | 16.56                  |
| 4F33.PDB | O, A.LYS.45   | N, A.GLN.37    | H, A.GLN.37    | 2.93    | 2.17    | 24.56                  |
| 4F33.PDB | O, A.THR.85   | N, A.GLN.38    | H, A.GLN.38    | 2.78    | 1.94    | 8.77                   |
| 4F33.PDB | O, A.THR.42   | NE2, A.GLN.38  | HE21, A.GLN.38 | 2.85    | 2.01    | 10.50                  |
| 4F33.PDB | OE1, B.GLN.39 | NE2, A.GLN.38  | HE22, A.GLN.38 | 2.96    | 2.13    | 12.75                  |
| 4F33.PDB | O, A.GLU.81   | NZ, A.LYS.39   | HZ1, A.LYS.39  | 2.81    | 1.96    | 14.34                  |
| 4F33.PDB | O, A.ASP.83   | NZ, A.LYS.39   | HZ3, A.LYS.39  | 2.88    | 2.10    | 24.06                  |
| 4F33.PDB | O, A.LYS.39   | OG1, A.THR.42  | HG1, A.THR.42  | 2.81    | 1.99    | 3.65                   |
| 4F33.PDB | O, B.GLY.110  | OG, A.SER.43   | HG, A.SER.43   | 2.65    | 1.95    | 25.99                  |
| 4F33.PDB | O, A.GLN.37   | N, A.LYS.45    | H, A.LYS.45    | 2.79    | 1.96    | 13.89                  |
| 4F33.PDB | O, B.ARG.104  | NH1, A.ARG.46  | HH11, A.ARG.46 | 2.62    | 1.83    | 18.99                  |
| 4F33.PDB | O, A.TRP.35   | N, A.TRP.47    | H, A.TRP.47    | 2.84    | 2.05    | 19.82                  |
| 4F33.PDB | O, A.LYS.53   | N, A.TYR.49    | H, A.TYR.49    | 2.79    | 1.99    | 16.95                  |
| 4F33.PDB | O, A.MET.33   | N, A.THR.51    | H, A.THR.51    | 2.74    | 1.92    | 15.06                  |
| 4F33.PDB | O, A.ASP.50   | N, A.SER.52    | H, A.SER.52    | 2.84    | 2.12    | 28.76                  |
| 4F33.PDB | O, A.TYR.49   | N, A.LYS.53    | H, A.LYS.53    | 2.87    | 2.05    | 15.09                  |
| 4F33.PDB | OD2, A.ASP.82 | NE, A.ARG.61   | HE, A.ARG.61   | 2.81    | 2.09    | 28.09                  |
| 4F33.PDB | OD1, A.ASP.82 | NH2, A.ARG.61  | HH21, A.ARG.61 | 2.71    | 1.85    | 4.82                   |
| 4F33.PDB | O, A.THR.74   | N, A.SER.63    | H, A.SER.63    | 2.91    | 2.14    | 22.09                  |
| 4F33.PDB | O, A.ALA.26   | ND2, A.ASN.69  | HD21, A.ASN.69 | 2.95    | 2.09    | 2.58                   |
| 4F33.PDB | O, A.SER.67   | N, A.SER.70    | H, A.SER.70    | 2.98    | 2.12    | 3.48                   |
| 4F33.PDB | O, A.CYS.24   | N, A.TYR.71    | H, A.TYR.71    | 2.94    | 2.09    | 7.81                   |
| 4F33.PDB | O, A.VAL.30   | OH, A.TYR.71   | HH, A.TYR.71   | 2.83    | 2.13    | 26.33                  |
| 4F33.PDB | O, A.SER.65   | N, A.SER.72    | H, A.SER.72    | 2.82    | 1.99    | 12.37                  |
| 4F33.PDB | O, A.MET.22   | N, A.LEU.73    | H, A.LEU.73    | 2.90    | 2.08    | 15.13                  |
| 4F33.PDB | O, A.SER.63   | N, A.THR.74    | H, A.THR.74    | 2.86    | 2.01    | 8.97                   |
| 4F33.PDB | OG1, A.THR.21 | OG1, A.THR.74  | HG1, A.THR.74  | 2.73    | 1.99    | 21.82                  |
| 4F33.PDB | O, A.VAL.20   | N, A.ILE.75    | H, A.ILE.75    | 2.86    | 2.05    | 16.70                  |
| 4F33.PDB | O, A.ARG.61   | N, A.SER.76    | H, A.SER.76    | 2.74    | 1.93    | 15.27                  |
| 4F33.PDB | O, A.GLU.18   | N, A.VAL.78    | H, A.VAL.78    | 2.98    | 2.22    | 23.09                  |
| 4F33.PDB | OD2, A.ASP.82 | N, A.GLU.79    | H, A.GLU.79    | 2.83    | 1.97    | 5.35                   |
| 4F33.PDB | O, A.GLU.79   | N, A.ASP.82    | H, A.ASP.82    | 2.82    | 1.98    | 10.48                  |
| 4F33.PDB | O, A.GLN.38   | N, A.THR.85    | H, A.THR.85    | 2.93    | 2.09    | 10.56                  |
| 4F33.PDB | O, A.THR.102  | N, A.TYR.86    | H, A.TYR.86    | 2.88    | 2.05    | 12.33                  |
| 4F33.PDB | O, A.TYR.36   | N, A.TYR.87    | H, A.TYR.87    | 2.86    | 2.04    | 15.05                  |
| 4F33.PDB | OG1, A.THR.97 | NE2, A.GLN.90  | HE21, A.GLN.90 | 2.97    | 2.15    | 14.62                  |
| 4F33.PDB | O, A.TYR.32   | NE1, A.TRP.91  | HE1, A.TRP.91  | 2.74    | 1.96    | 21.98                  |
| 4F33.PDB | O, A.ILE.3    | OG1, A.THR.97  | HG1, A.THR.97  | 2.86    | 2.07    | 13.11                  |
| 4F33.PDB | O, A.CYS.88   | N, A.GLY.99    | H, A.GLY.99    | 2.86    | 2.04    | 15.33                  |
| 4F33.PDB | OE1, A.GLN.7  | N, A.GLY.101   | H, A.GLY.101   | 2.83    | 2.06    | 22.47                  |
| 4F33.PDB | O, A.TYR.86   | N, A.THR.102   | H, A.THR.102   | 2.93    | 2.11    | 14.73                  |
| 4F33.PDB | O, A.PRO.9    | OG1, A.THR.102 | HG1, A.THR.102 | 2.73    | 1.96    | 15.99                  |
| 4F33.PDB | O, A.ALA.10   | N, A.LYS.103   | H, A.LYS.103   | 2.90    | 2.06    | 9.01                   |

|          |                |                |                 |      |      |       |
|----------|----------------|----------------|-----------------|------|------|-------|
| 4F33.PDB | O, A_ALA_84    | N, A_VAL_104   | H, A_VAL_104    | 2.88 | 2.03 | 4.65  |
| 4F33.PDB | O, A_MET_12    | N, A_GLU_105   | H, A_GLU_105    | 2.79 | 1.94 | 7.59  |
| 4F33.PDB | OE1, A_GLN_166 | N, A_ILE_106   | H, A_ILE_106    | 2.90 | 2.05 | 6.64  |
| 4F33.PDB | O, A_ALA_14    | N, A_LYS_107   | H, A_LYS_107    | 2.83 | 2.00 | 10.77 |
| 4F33.PDB | OG, A_SER_13   | NZ, A_LYS_107  | HZ3, A_LYS_107  | 2.94 | 2.07 | 9.78  |
| 4F33.PDB | O, A_THR_109   | NE, A_ARG_108  | HE, A_ARG_108   | 2.77 | 1.91 | 3.92  |
| 4F33.PDB | O, A_ASP_170   | NH1, A_ARG_108 | HH11, A_ARG_108 | 2.95 | 2.12 | 11.15 |
| 4F33.PDB | O, A_TYR_140   | N, A_ALA_111   | H, A_ALA_111    | 2.85 | 2.01 | 10.73 |
| 4F33.PDB | O, A_LEU_135   | N, A_PHE_116   | H, A_PHE_116    | 2.94 | 2.15 | 19.06 |
| 4F33.PDB | O, A_VAL_133   | N, A_PHE_118   | H, A_PHE_118    | 2.80 | 2.01 | 19.24 |
| 4F33.PDB | OG, A_SER_131  | NE2, A_GLN_124 | HE22, A_GLN_124 | 2.81 | 1.96 | 5.54  |
| 4F33.PDB | O, A_LEU_125   | N, A_GLY_128   | H, A_GLY_128    | 2.79 | 1.95 | 9.52  |
| 4F33.PDB | O, A_LEU_181   | N, A_ALA_130   | H, A_ALA_130    | 2.76 | 1.92 | 9.83  |
| 4F33.PDB | OE1, A_GLN_124 | N, A_SER_131   | H, A_SER_131    | 2.96 | 2.15 | 16.54 |
| 4F33.PDB | O, A_LEU_179   | N, A_VAL_132   | H, A_VAL_132    | 2.82 | 1.98 | 11.91 |
| 4F33.PDB | O, A_SER_177   | N, A_CYS_134   | H, A_CYS_134    | 2.86 | 2.01 | 7.49  |
| 4F33.PDB | O, A_PHE_116   | N, A_LEU_135   | H, A_LEU_135    | 2.76 | 1.92 | 8.98  |
| 4F33.PDB | O, A_LEU_175   | N, A_LEU_136   | H, A_LEU_136    | 2.76 | 1.90 | 4.04  |
| 4F33.PDB | O, A_SER_114   | N, A_ASN_137   | H, A_ASN_137    | 2.84 | 2.02 | 13.99 |
| 4F33.PDB | O, A_TYR_173   | N, A_PHE_139   | H, A_PHE_139    | 2.85 | 2.04 | 16.43 |
| 4F33.PDB | O, A_ALA_111   | N, A_TYR_140   | H, A_TYR_140    | 2.90 | 2.09 | 16.65 |
| 4F33.PDB | O, A_THR_197   | N, A_LYS_145   | H, A_LYS_145    | 2.98 | 2.16 | 14.92 |
| 4F33.PDB | O, A_GLU_195   | N, A_GLN_147   | H, A_GLN_147    | 2.86 | 2.02 | 11.34 |
| 4F33.PDB | OG, A_SER_177  | NE1, A_TRP_148 | HE1, A_TRP_148  | 2.91 | 2.09 | 14.52 |
| 4F33.PDB | O, A_ALA_193   | N, A_LYS_149   | H, A_LYS_149    | 2.87 | 2.03 | 10.60 |
| 4F33.PDB | OE1, A_GLU_195 | NZ, A_LYS_149  | HZ2, A_LYS_149  | 2.59 | 1.85 | 28.21 |
| 4F33.PDB | O, A_VAL_191   | N, A_ASP_151   | H, A_ASP_151    | 2.75 | 1.92 | 13.23 |
| 4F33.PDB | O, A_VAL_150   | N, A_ALA_153   | H, A_ALA_153    | 2.85 | 2.00 | 6.45  |
| 4F33.PDB | O, A_TRP_148   | N, A_GLN_155   | H, A_GLN_155    | 2.92 | 2.11 | 17.54 |
| 4F33.PDB | OE1, A_GLN_155 | ND2, A_ASN_158 | HD22, A_ASN_158 | 2.89 | 2.06 | 12.00 |
| 4F33.PDB | O, A_THR_178   | N, A_GLN_160   | H, A_GLN_160    | 2.98 | 2.22 | 22.84 |
| 4F33.PDB | O, A_SER_176   | N, A_SER_162   | H, A_SER_162    | 2.94 | 2.15 | 19.03 |
| 4F33.PDB | O, B_PRO_173   | OG, A_SER_162  | HG, A_SER_162   | 2.76 | 2.03 | 23.18 |
| 4F33.PDB | O, A_SER_174   | N, A_THR_164   | H, A_THR_164    | 2.92 | 2.09 | 12.25 |
| 4F33.PDB | O, A_SER_171   | NE2, A_GLN_166 | HE21, A_GLN_166 | 2.92 | 2.09 | 13.24 |
| 4F33.PDB | O, A_ILE_106   | NE2, A_GLN_166 | HE22, A_GLN_166 | 2.72 | 1.92 | 18.36 |
| 4F33.PDB | OD1, A_ASP_167 | N, A_LYS_169   | H, A_LYS_169    | 2.65 | 1.81 | 10.48 |
| 4F33.PDB | O, A_ASP_167   | N, A_SER_171   | H, A_SER_171    | 2.90 | 2.19 | 29.27 |
| 4F33.PDB | OD1, A_ASP_170 | N, A_THR_172   | H, A_THR_172    | 2.86 | 2.04 | 14.41 |
| 4F33.PDB | OD1, A_ASP_170 | OG1, A_THR_172 | HG1, A_THR_172  | 2.68 | 1.86 | 4.02  |
| 4F33.PDB | O, A_PHE_139   | N, A_TYR_173   | H, A_TYR_173    | 2.78 | 1.94 | 7.95  |
| 4F33.PDB | OG1, A_THR_164 | N, A_SER_174   | H, A_SER_174    | 2.96 | 2.13 | 11.32 |
| 4F33.PDB | O, A_LEU_136   | N, A_LEU_175   | H, A_LEU_175    | 2.82 | 2.01 | 16.11 |
| 4F33.PDB | O, A_SER_162   | N, A_SER_176   | H, A_SER_176    | 2.89 | 2.07 | 14.35 |
| 4F33.PDB | O, A_CYS_134   | N, A_SER_177   | H, A_SER_177    | 2.92 | 2.09 | 13.76 |
| 4F33.PDB | O, A_GLN_160   | N, A_THR_178   | H, A_THR_178    | 2.88 | 2.04 | 10.18 |
| 4F33.PDB | O, A_VAL_132   | N, A_LEU_179   | H, A_LEU_179    | 2.84 | 2.02 | 14.45 |
| 4F33.PDB | O, A_ASN_158   | N, A_THR_180   | H, A_THR_180    | 2.95 | 2.12 | 11.92 |
| 4F33.PDB | O, A_ALA_130   | N, A_LEU_181   | H, A_LEU_181    | 2.88 | 2.05 | 13.17 |
| 4F33.PDB | O, A_GLY_128   | N, A_LYS_183   | H, A_LYS_183    | 2.98 | 2.19 | 19.73 |
| 4F33.PDB | OG, A_SER_182  | N, A_ASP_185   | H, A_ASP_185    | 2.87 | 2.04 | 12.72 |
| 4F33.PDB | O, A_SER_182   | N, A_TYR_186   | H, A_TYR_186    | 2.80 | 1.98 | 14.27 |
| 4F33.PDB | O, A_LYS_183   | N, A_GLU_187   | H, A_GLU_187    | 2.86 | 2.04 | 14.84 |
| 4F33.PDB | OD2, A_ASP_151 | N, A_LYS_190   | H, A_LYS_190    | 2.95 | 2.15 | 18.90 |
| 4F33.PDB | OD1, A_ASP_151 | N, A_VAL_191   | H, A_VAL_191    | 2.83 | 1.98 | 4.63  |
| 4F33.PDB | O, A_PHE_209   | N, A_TYR_192   | H, A_TYR_192    | 2.96 | 2.11 | 7.57  |
| 4F33.PDB | O, A_LYS_149   | N, A_ALA_193   | H, A_ALA_193    | 2.92 | 2.11 | 16.79 |
| 4F33.PDB | O, A_LYS_207   | N, A_CYS_194   | H, A_CYS_194    | 2.99 | 2.20 | 20.51 |

|          |               |               |                |      |      |       |
|----------|---------------|---------------|----------------|------|------|-------|
| 4F33.PDB | O, A_GLN_147  | N, A_GLU_195  | H, A_GLU_195   | 2.80 | 1.96 | 10.16 |
| 4F33.PDB | O, A_VAL_205  | N, A_VAL_196  | H, A_VAL_196   | 2.72 | 1.89 | 12.89 |
| 4F33.PDB | O, A_LYS_145  | N, A_THR_197  | H, A_THR_197   | 2.87 | 2.04 | 14.20 |
| 4F33.PDB | O, A_HIS_198  | N, A_LEU_201  | H, A_LEU_201   | 2.83 | 1.98 | 4.49  |
| 4F33.PDB | O, A_VAL_196  | N, A_VAL_205  | H, A_VAL_205   | 2.93 | 2.11 | 14.32 |
| 4F33.PDB | O, A_TYR_192  | N, A_PHE_209  | H, A_PHE_209   | 2.97 | 2.19 | 21.09 |
| 4F33.PDB | O, A_LYS_190  | N, A_ARG_211  | H, A_ARG_211   | 2.77 | 1.94 | 10.87 |
| 4F33.PDB | O, A_HIS_189  | NE, A_ARG_211 | HE, A_ARG_211  | 2.95 | 2.11 | 10.88 |
| 4F33.PDB | O, B_LYS_23   | N, B_GLN_5    | H, B_GLN_5     | 2.89 | 2.04 | 6.23  |
| 4F33.PDB | O, B_TYR_94   | NE2, B_GLN_6  | HE22, B_GLN_6  | 2.91 | 2.10 | 17.22 |
| 4F33.PDB | O, B_SER_21   | N, B_SER_7    | H, B_SER_7     | 2.99 | 2.26 | 27.49 |
| 4F33.PDB | O, B_PRO_114  | N, B_GLU_10   | H, B_GLU_10    | 2.94 | 2.16 | 20.47 |
| 4F33.PDB | O, B_LEU_86   | N, B_GLY_15   | H, B_GLY_15    | 2.71 | 1.91 | 16.40 |
| 4F33.PDB | O, B_LEU_83   | N, B_VAL_18   | H, B_VAL_18    | 2.93 | 2.17 | 23.19 |
| 4F33.PDB | O, B_MET_81   | N, B_ILE_20   | H, B_ILE_20    | 2.82 | 1.99 | 11.32 |
| 4F33.PDB | OG, B_SER_7   | N, B_SER_21   | H, B_SER_21    | 2.96 | 2.11 | 7.69  |
| 4F33.PDB | O, B_ALA_79   | N, B_CYS_22   | H, B_CYS_22    | 2.82 | 2.06 | 23.47 |
| 4F33.PDB | O, B_GLN_5    | N, B_LYS_23   | H, B_LYS_23    | 2.73 | 1.90 | 11.88 |
| 4F33.PDB | O, B_SER_77   | N, B_ALA_24   | H, B_ALA_24    | 2.97 | 2.12 | 8.25  |
| 4F33.PDB | O, B_GLN_3    | N, B_SER_25   | H, B_SER_25    | 2.93 | 2.12 | 17.16 |
| 4F33.PDB | O, B_SER_28   | N, B_GLY_31   | H, B_GLY_31    | 2.98 | 2.12 | 6.95  |
| 4F33.PDB | O, B_GLY_99   | N, B_THR_33   | H, B_THR_33    | 2.98 | 2.22 | 23.44 |
| 4F33.PDB | O, B_ALA_97   | N, B_ASN_35   | H, B_ASN_35    | 2.80 | 1.95 | 8.88  |
| 4F33.PDB | O, B_PHE_95   | N, B_VAL_37   | H, B_VAL_37    | 2.85 | 2.06 | 19.95 |
| 4F33.PDB | O, B_GLU_46   | N, B_LYS_38   | H, B_LYS_38    | 2.82 | 2.01 | 16.68 |
| 4F33.PDB | O, B_GLU_89   | NZ, B_LYS_38  | HZ1, B_LYS_38  | 2.86 | 1.98 | 5.39  |
| 4F33.PDB | O, B_VAL_93   | N, B_GLN_39   | H, B_GLN_39    | 2.87 | 2.01 | 5.84  |
| 4F33.PDB | OE1, A_GLN_38 | NE2, B_GLN_39 | HE22, B_GLN_39 | 2.82 | 1.97 | 5.31  |
| 4F33.PDB | O, B_SER_40   | N, B_LYS_43   | H, B_LYS_43    | 2.88 | 2.06 | 15.26 |
| 4F33.PDB | O, B_LYS_38   | N, B_GLU_46   | H, B_GLU_46    | 2.87 | 2.06 | 16.90 |
| 4F33.PDB | O, B_TRP_36   | N, B_ILE_48   | H, B_ILE_48    | 2.80 | 1.95 | 7.15  |
| 4F33.PDB | O, B_SER_59   | N, B_LEU_50   | H, B_LEU_50    | 2.87 | 2.08 | 19.32 |
| 4F33.PDB | O, B_MET_34   | N, B_ILE_51   | H, B_ILE_51    | 2.89 | 2.09 | 18.35 |
| 4F33.PDB | O, B_ALA_57   | N, B_THR_52   | H, B_THR_52    | 2.92 | 2.09 | 13.37 |
| 4F33.PDB | O, B_THR_52   | N, B_GLY_56   | H, B_GLY_56    | 2.89 | 2.15 | 26.20 |
| 4F33.PDB | OD1, B_ASN_55 | N, B_ALA_57   | H, B_ALA_57    | 2.85 | 2.00 | 7.05  |
| 4F33.PDB | O, B_LEU_50   | N, B_SER_59   | H, B_SER_59    | 2.88 | 2.09 | 19.09 |
| 4F33.PDB | O, B_ILE_48   | N, B_ASN_61   | H, B_ASN_61    | 2.90 | 2.09 | 17.36 |
| 4F33.PDB | O, B_TRP_47   | ND2, B_ASN_61 | HD21, B_ASN_61 | 2.94 | 2.11 | 14.44 |
| 4F33.PDB | OE2, B_GLU_46 | NZ, B_LYS_63  | HZ3, B_LYS_63  | 2.70 | 1.89 | 19.35 |
| 4F33.PDB | O, B_ASN_61   | N, B_PHE_64   | H, B_PHE_64    | 2.77 | 1.93 | 12.05 |
| 4F33.PDB | OD2, B_ASP_90 | NZ, B_LYS_67  | HZ2, B_LYS_67  | 2.73 | 1.86 | 7.48  |
| 4F33.PDB | O, B_LEU_84   | NZ, B_LYS_67  | HZ3, B_LYS_67  | 2.85 | 2.01 | 15.38 |
| 4F33.PDB | O, B_PHE_64   | N, B_ALA_68   | H, B_ALA_68    | 2.93 | 2.14 | 19.80 |
| 4F33.PDB | O, B_ASP_82   | N, B_THR_69   | H, B_THR_69    | 2.92 | 2.16 | 23.54 |
| 4F33.PDB | OH, B_TYR_60  | N, B_LEU_70   | H, B_LEU_70    | 2.92 | 2.07 | 9.07  |
| 4F33.PDB | O, B_THR_78   | N, B_ASP_73   | H, B_ASP_73    | 2.75 | 1.91 | 10.75 |
| 4F33.PDB | O, B_CYS_22   | N, B_ALA_79   | H, B_ALA_79    | 2.91 | 2.08 | 13.58 |
| 4F33.PDB | O, B_THR_71   | N, B_TYR_80   | H, B_TYR_80    | 2.83 | 1.97 | 4.70  |
| 4F33.PDB | O, B_ILE_20   | N, B_MET_81   | H, B_MET_81    | 2.96 | 2.15 | 15.91 |
| 4F33.PDB | O, B_THR_69   | N, B_ASP_82   | H, B_ASP_82    | 2.88 | 2.06 | 13.69 |
| 4F33.PDB | O, B_VAL_18   | N, B_LEU_83   | H, B_LEU_83    | 2.80 | 1.96 | 11.41 |
| 4F33.PDB | O, B_LYS_67   | N, B_LEU_84   | H, B_LEU_84    | 2.92 | 2.11 | 17.58 |
| 4F33.PDB | O, B_ALA_16   | N, B_LEU_86   | H, B_LEU_86    | 2.87 | 2.02 | 6.19  |
| 4F33.PDB | OD2, B_ASP_90 | N, B_THR_87   | H, B_THR_87    | 2.83 | 2.02 | 16.35 |
| 4F33.PDB | O, B_THR_87   | N, B_ASP_90   | H, B_ASP_90    | 2.88 | 2.04 | 10.12 |
| 4F33.PDB | O, B_SER_88   | N, B_SER_91   | H, B_SER_91    | 2.97 | 2.12 | 6.19  |
| 4F33.PDB | O, B_VAL_115  | N, B_ALA_92   | H, B_ALA_92    | 2.98 | 2.25 | 27.22 |



|          |                |                |                 |      |      |       |
|----------|----------------|----------------|-----------------|------|------|-------|
| 4F33.PDB | O, B_GLN_39    | N, B_VAL_93    | H, B_VAL_93     | 2.95 | 2.11 | 9.70  |
| 4F33.PDB | O, B_THR_113   | N, B_TYR_94    | H, B_TYR_94     | 2.86 | 2.02 | 9.76  |
| 4F33.PDB | O, B_VAL_37    | N, B_PHE_95    | H, B_PHE_95     | 2.79 | 1.94 | 9.71  |
| 4F33.PDB | O, B_ASN_35    | N, B_ALA_97    | H, B_ALA_97     | 2.79 | 2.04 | 25.47 |
| 4F33.PDB | O, B_TYR_108   | N, B_ARG_98    | H, B_ARG_98     | 2.80 | 2.01 | 18.50 |
| 4F33.PDB | OD2, B_ASP_107 | NH2, B_ARG_98  | HH21, B_ARG_98  | 2.74 | 1.88 | 6.50  |
| 4F33.PDB | O, B_THR_33    | N, B_GLY_99    | H, B_GLY_99     | 2.94 | 2.10 | 10.07 |
| 4F33.PDB | OD1, B_ASP_102 | NE, B_ARG_104  | HE, B_ARG_104   | 2.87 | 2.03 | 8.81  |
| 4F33.PDB | OD2, B_ASP_107 | NH1, B_ARG_104 | HH11, B_ARG_104 | 2.78 | 1.96 | 13.74 |
| 4F33.PDB | OD2, B_ASP_102 | NH2, B_ARG_104 | HH21, B_ARG_104 | 2.87 | 2.08 | 19.19 |
| 4F33.PDB | OH, A_TYR_36   | N, B_PHE_106   | H, B_PHE_106    | 2.97 | 2.12 | 7.79  |
| 4F33.PDB | O, B_CYS_96    | N, B_GLY_110   | H, B_GLY_110    | 2.83 | 1.98 | 5.16  |
| 4F33.PDB | OE1, B_GLN_6   | N, B_GLY_112   | H, B_GLY_112    | 2.90 | 2.10 | 18.34 |
| 4F33.PDB | O, B_TYR_94    | N, B_THR_113   | H, B_THR_113    | 2.81 | 1.99 | 14.66 |
| 4F33.PDB | O, B_SER_7     | OG1, B_THR_113 | HG1, B_THR_113  | 2.83 | 2.05 | 14.68 |
| 4F33.PDB | O, B_ALA_92    | N, B_VAL_115   | H, B_VAL_115    | 2.84 | 1.99 | 7.09  |
| 4F33.PDB | OG, B_SER_91   | N, B_VAL_117   | H, B_VAL_117    | 2.86 | 2.01 | 9.50  |
| 4F33.PDB | O, B_GLU_12    | N, B_SER_118   | H, B_SER_118    | 2.87 | 2.07 | 16.95 |
| 4F33.PDB | O, B_PHE_152   | N, B_LYS_123   | H, B_LYS_123    | 2.81 | 1.98 | 13.03 |
| 4F33.PDB | O, B_ASP_150   | NZ, B_LYS_123  | HZ2, B_LYS_123  | 2.83 | 2.00 | 16.92 |
| 4F33.PDB | O, B_GLY_124   | NZ, B_LYS_123  | HZ3, B_LYS_123  | 2.99 | 2.25 | 28.99 |
| 4F33.PDB | OE2, G_GLU_123 | N, B_GLY_124   | H, B_GLY_124    | 2.73 | 1.87 | 2.75  |
| 4F33.PDB | O, B_LYS_149   | N, B_SER_126   | H, B_SER_126    | 2.95 | 2.16 | 19.58 |
| 4F33.PDB | O, B_LEU_147   | N, B_PHE_128   | H, B_PHE_128    | 2.87 | 2.05 | 14.02 |
| 4F33.PDB | O, B_GLY_145   | N, B_LEU_130   | H, B_LEU_130    | 2.71 | 1.85 | 5.41  |
| 4F33.PDB | OG, B_SER_136  | N, B_SER_133   | H, B_SER_133    | 2.90 | 2.08 | 15.18 |
| 4F33.PDB | OG, B_SER_133  | N, B_LYS_135   | H, B_LYS_135    | 2.89 | 2.11 | 19.85 |
| 4F33.PDB | O, B_SER_133   | OG1, B_THR_137 | HG1, B_THR_137  | 2.92 | 2.21 | 25.24 |
| 4F33.PDB | O, B_SER_138   | N, B_THR_141   | H, B_THR_141    | 2.82 | 1.98 | 11.03 |
| 4F33.PDB | O, B_VAL_190   | N, B_ALA_142   | H, B_ALA_142    | 2.81 | 1.95 | 3.27  |
| 4F33.PDB | O, B_SER_136   | N, B_ALA_143   | H, B_ALA_143    | 2.75 | 1.93 | 14.52 |
| 4F33.PDB | O, B_LEU_130   | N, B_GLY_145   | H, B_GLY_145    | 2.97 | 2.22 | 25.31 |
| 4F33.PDB | O, B_PHE_128   | N, B_LEU_147   | H, B_LEU_147    | 2.81 | 1.97 | 10.25 |
| 4F33.PDB | O, B_LEU_184   | N, B_VAL_148   | H, B_VAL_148    | 2.76 | 1.91 | 7.90  |
| 4F33.PDB | O, B_SER_126   | N, B_LYS_149   | H, B_LYS_149    | 2.79 | 1.93 | 4.11  |
| 4F33.PDB | O, B_LYS_123   | N, B_PHE_152   | H, B_PHE_152    | 2.89 | 2.09 | 18.27 |
| 4F33.PDB | O, B_ASN_203   | N, B_SER_159   | H, B_SER_159    | 2.96 | 2.15 | 17.06 |
| 4F33.PDB | OG, B_SER_186  | NE1, B_TRP_160 | HE1, B_TRP_160  | 2.97 | 2.13 | 10.43 |
| 4F33.PDB | O, B_ILE_201   | N, B_ASN_161   | H, B_ASN_161    | 2.81 | 1.97 | 10.56 |
| 4F33.PDB | OD1, B_ASN_203 | N, B_SER_162   | H, B_SER_162    | 2.81 | 2.00 | 15.00 |
| 4F33.PDB | O, B_TRP_160   | N, B_GLY_163   | H, B_GLY_163    | 2.93 | 2.14 | 20.08 |
| 4F33.PDB | O, B_VAL_187   | N, B_HIS_170   | H, B_HIS_170    | 2.81 | 1.98 | 12.68 |
| 4F33.PDB | O, B_SER_185   | N, B_PHE_172   | H, B_PHE_172    | 3.00 | 2.14 | 5.14  |
| 4F33.PDB | O, B_SER_183   | N, B_VAL_175   | H, B_VAL_175    | 2.90 | 2.08 | 14.90 |
| 4F33.PDB | O, B_LEU_181   | N, B_GLN_177   | H, B_GLN_177    | 2.81 | 1.96 | 6.18  |
| 4F33.PDB | OD1, B_ASP_150 | NE2, B_GLN_177 | HE22, B_GLN_177 | 2.84 | 2.07 | 21.15 |
| 4F33.PDB | O, B_TYR_151   | N, B_TYR_182   | H, B_TYR_182    | 2.85 | 2.02 | 11.23 |
| 4F33.PDB | O, B_VAL_148   | N, B_LEU_184   | H, B_LEU_184    | 2.91 | 2.10 | 17.00 |
| 4F33.PDB | O, B_CYS_146   | N, B_SER_186   | H, B_SER_186    | 2.97 | 2.15 | 14.23 |
| 4F33.PDB | O, B_HIS_170   | N, B_VAL_187   | H, B_VAL_187    | 2.83 | 1.99 | 10.23 |
| 4F33.PDB | O, B_LEU_144   | N, B_VAL_188   | H, B_VAL_188    | 2.83 | 2.04 | 19.81 |
| 4F33.PDB | O, B_ALA_142   | N, B_VAL_190   | H, B_VAL_190    | 2.79 | 1.97 | 14.47 |
| 4F33.PDB | O, B_GLY_140   | N, B_SER_192   | H, B_SER_192    | 2.87 | 2.03 | 10.06 |
| 4F33.PDB | O, B_PRO_191   | N, B_SER_194   | H, B_SER_194    | 2.87 | 2.02 | 9.35  |
| 4F33.PDB | O, B_SER_194   | N, B_GLN_198   | H, B_GLN_198    | 2.75 | 1.90 | 4.61  |
| 4F33.PDB | O, B_THR_199   | NE2, B_GLN_198 | HE21, B_GLN_198 | 2.96 | 2.10 | 2.10  |
| 4F33.PDB | OD1, B_ASN_161 | N, B_ILE_201   | H, B_ILE_201    | 2.82 | 2.00 | 13.45 |
| 4F33.PDB | O, B_LYS_215   | N, B_CYS_202   | H, B_CYS_202    | 2.94 | 2.15 | 19.46 |

|          |                |                |                 |      |      |       |
|----------|----------------|----------------|-----------------|------|------|-------|
| 4F33.PDB | O, B.SER_159   | N, B.ASN_203   | H, B.ASN_203    | 2.77 | 1.92 | 6.83  |
| 4F33.PDB | OD1, B.ASP_214 | ND2, B.ASN_203 | HD21, B.ASN_203 | 2.97 | 2.12 | 8.15  |
| 4F33.PDB | O, B.VAL_213   | N, B.VAL_204   | H, B.VAL_204    | 2.74 | 1.90 | 9.17  |
| 4F33.PDB | O, B.THR_157   | N, B.ASN_205   | H, B.ASN_205    | 2.86 | 2.01 | 7.37  |
| 4F33.PDB | O, B.THR_211   | N, B.HIS_206   | H, B.HIS_206    | 2.85 | 2.00 | 6.46  |
| 4F33.PDB | OG, B.SER_209  | ND1, B.HIS_206 | HD1, B.HIS_206  | 2.61 | 1.78 | 12.57 |
| 4F33.PDB | O, B.PRO_153   | NE2, B.HIS_206 | HE2, B.HIS_206  | 2.85 | 2.02 | 12.89 |
| 4F33.PDB | O, B.LYS_207   | N, B.ASN_210   | H, B.ASN_210    | 2.94 | 2.11 | 13.00 |
| 4F33.PDB | O, H.ASP_214   | N, B.LYS_212   | H, B.LYS_212    | 2.81 | 2.00 | 15.02 |
| 4F33.PDB | O, B.VAL_204   | N, B.VAL_213   | H, B.VAL_213    | 2.80 | 1.98 | 15.11 |
| 4F33.PDB | O, H.LYS_212   | N, B.ASP_214   | H, B.ASP_214    | 2.84 | 2.02 | 15.98 |
| 4F33.PDB | O, B.CYS_202   | N, B.LYS_215   | H, B.LYS_215    | 2.91 | 2.09 | 16.20 |
| 4F33.PDB | OE1, A.GLU_123 | NZ, B.LYS_215  | HZ1, B.LYS_215  | 2.68 | 1.82 | 12.44 |
| 4F33.PDB | OG1, H.THR_211 | NZ, B.LYS_215  | HZ2, B.LYS_215  | 2.83 | 1.95 | 7.37  |
| 4F33.PDB | O, B.TYR_200   | N, B.VAL_217   | H, B.VAL_217    | 2.89 | 2.04 | 8.29  |
| 4F33.PDB | OG, C.SER_27   | N, C.GLU_4     | H, C.GLU_4      | 2.91 | 2.10 | 15.68 |
| 4F33.PDB | O, C.SER_25    | N, C.THR_6     | H, C.THR_6      | 2.79 | 1.94 | 4.69  |
| 4F33.PDB | O, C.TYR_86    | NE2, C.GLN_7   | HE22, C.GLN_7   | 2.91 | 2.14 | 22.16 |
| 4F33.PDB | O, C.THR_23    | N, C.SER_8     | H, C.SER_8      | 2.94 | 2.13 | 16.69 |
| 4F33.PDB | O, C.LYS_103   | N, C.MET_12    | H, C.MET_12     | 2.88 | 2.06 | 16.35 |
| 4F33.PDB | OE2, C.GLU_18  | N, C.SER_15    | H, C.SER_15     | 2.79 | 1.94 | 9.08  |
| 4F33.PDB | O, C.VAL_78    | N, C.GLY_17    | H, C.GLY_17     | 2.81 | 2.02 | 19.83 |
| 4F33.PDB | O, C.LEU_73    | N, C.MET_22    | H, C.MET_22     | 2.85 | 2.01 | 10.93 |
| 4F33.PDB | O, C.SER_8     | N, C.THR_23    | H, C.THR_23     | 2.77 | 1.93 | 10.15 |
| 4F33.PDB | O, C.TYR_71    | N, C.CYS_24    | H, C.CYS_24     | 2.75 | 1.90 | 8.61  |
| 4F33.PDB | O, C.THR_6     | N, C.SER_25    | H, C.SER_25     | 2.79 | 1.94 | 6.02  |
| 4F33.PDB | O, C.ASN_69    | N, C.ALA_26    | H, C.ALA_26     | 2.82 | 1.97 | 9.46  |
| 4F33.PDB | O, C.GLN_89    | N, C.HIS_34    | H, C.HIS_34     | 2.95 | 2.09 | 1.08  |
| 4F33.PDB | O, C.ILE_48    | N, C.TRP_35    | H, C.TRP_35     | 2.66 | 1.84 | 15.50 |
| 4F33.PDB | O, C.TYR_87    | N, C.TYR_36    | H, C.TYR_36     | 2.75 | 1.94 | 16.72 |
| 4F33.PDB | O, C.LYS_45    | N, C.GLN_37    | H, C.GLN_37     | 2.94 | 2.17 | 21.42 |
| 4F33.PDB | O, C.THR_85    | N, C.GLN_38    | H, C.GLN_38     | 2.81 | 1.97 | 10.54 |
| 4F33.PDB | O, C.THR_42    | NE2, C.GLN_38  | HE21, C.GLN_38  | 2.84 | 2.00 | 10.36 |
| 4F33.PDB | O, C.GLU_81    | NZ, C.LYS_39   | HZ1, C.LYS_39   | 2.82 | 1.94 | 9.21  |
| 4F33.PDB | O, C.ASP_83    | NZ, C.LYS_39   | HZ3, C.LYS_39   | 2.78 | 1.95 | 17.23 |
| 4F33.PDB | O, C.LYS_39    | OG1, C.THR_42  | HG1, C.THR_42   | 2.80 | 1.99 | 2.97  |
| 4F33.PDB | O, D.GLY_110   | OG, C.SER_43   | HG, C.SER_43    | 2.70 | 1.98 | 23.76 |
| 4F33.PDB | O, C.GLN_37    | N, C.LYS_45    | H, C.LYS_45     | 2.82 | 2.00 | 13.68 |
| 4F33.PDB | O, D.ARG_104   | NH1, C.ARG_46  | HH11, C.ARG_46  | 2.70 | 1.92 | 20.25 |
| 4F33.PDB | O, C.TRP_35    | N, C.TRP_47    | H, C.TRP_47     | 2.85 | 2.05 | 17.44 |
| 4F33.PDB | O, C.LYS_53    | N, C.TYR_49    | H, C.TYR_49     | 2.78 | 1.99 | 18.60 |
| 4F33.PDB | O, C.MET_33    | N, C.THR_51    | H, C.THR_51     | 2.75 | 1.94 | 16.16 |
| 4F33.PDB | O, C.ASP_50    | N, C.SER_52    | H, C.SER_52     | 2.86 | 2.16 | 29.76 |
| 4F33.PDB | O, C.TYR_49    | N, C.LYS_53    | H, C.LYS_53     | 2.90 | 2.09 | 16.92 |
| 4F33.PDB | OD2, C.ASP_82  | NE, C.ARG_61   | HE, C.ARG_61    | 2.88 | 2.06 | 14.32 |
| 4F33.PDB | OD1, C.ASP_82  | NH2, C.ARG_61  | HH21, C.ARG_61  | 2.91 | 2.08 | 14.25 |
| 4F33.PDB | O, C.THR_74    | N, C.SER_63    | H, C.SER_63     | 2.94 | 2.17 | 23.62 |
| 4F33.PDB | O, C.ALA_26    | ND2, C.ASN_69  | HD21, C.ASN_69  | 2.94 | 2.09 | 4.35  |
| 4F33.PDB | O, C.CYS_24    | N, C.TYR_71    | H, C.TYR_71     | 2.98 | 2.13 | 6.28  |
| 4F33.PDB | O, C.VAL_30    | OH, C.TYR_71   | HH, C.TYR_71    | 2.83 | 2.11 | 24.09 |
| 4F33.PDB | O, C.SER_65    | N, C.SER_72    | H, C.SER_72     | 2.76 | 1.92 | 10.63 |
| 4F33.PDB | O, C.MET_22    | N, C.LEU_73    | H, C.LEU_73     | 2.91 | 2.10 | 15.81 |
| 4F33.PDB | O, C.SER_63    | N, C.THR_74    | H, C.THR_74     | 2.85 | 2.00 | 8.73  |
| 4F33.PDB | OG1, C.THR_21  | OG1, C.THR_74  | HG1, C.THR_74   | 2.68 | 1.93 | 19.90 |
| 4F33.PDB | O, C.VAL_20    | N, C.ILE_75    | H, C.ILE_75     | 2.88 | 2.07 | 17.51 |
| 4F33.PDB | O, C.ARG_61    | N, C.SER_76    | H, C.SER_76     | 2.77 | 1.94 | 14.06 |
| 4F33.PDB | O, C.GLU_18    | N, C.VAL_78    | H, C.VAL_78     | 2.97 | 2.17 | 18.03 |
| 4F33.PDB | OD2, C.ASP_82  | N, C.GLU_79    | H, C.GLU_79     | 2.86 | 2.02 | 10.29 |

|          |                |                |                 |      |      |       |
|----------|----------------|----------------|-----------------|------|------|-------|
| 4F33.PDB | O, C_GLU_79    | N, C_ASP_82    | H, C_ASP_82     | 2.89 | 2.04 | 7.80  |
| 4F33.PDB | O, C_GLN_38    | N, C_THR_85    | H, C_THR_85     | 2.95 | 2.11 | 9.52  |
| 4F33.PDB | O, C_THR_102   | N, C_TYR_86    | H, C_TYR_86     | 2.85 | 2.02 | 13.04 |
| 4F33.PDB | O, C_TYR_36    | N, C_TYR_87    | H, C_TYR_87     | 2.85 | 2.03 | 14.78 |
| 4F33.PDB | O, C_TYR_32    | NE1, C_TRP_91  | HE1, C_TRP_91   | 2.75 | 1.98 | 22.25 |
| 4F33.PDB | O, D_TYR_60    | NE2, C_HIS_94  | HE2, C_HIS_94   | 2.75 | 2.00 | 24.62 |
| 4F33.PDB | O, C_ILE_3     | OG1, C_THR_97  | HG1, C_THR_97   | 2.89 | 2.10 | 13.01 |
| 4F33.PDB | O, C_CYS_88    | N, C_GLY_99    | H, C_GLY_99     | 2.82 | 2.00 | 15.41 |
| 4F33.PDB | OE1, C_GLN_7   | N, C_GLY_101   | H, C_GLY_101    | 2.82 | 2.04 | 21.32 |
| 4F33.PDB | O, C_TYR_86    | N, C_THR_102   | H, C_THR_102    | 2.90 | 2.08 | 14.65 |
| 4F33.PDB | O, C_PRO_9     | OG1, C_THR_102 | HG1, C_THR_102  | 2.73 | 1.96 | 16.75 |
| 4F33.PDB | O, C_ALA_10    | N, C_LYS_103   | H, C_LYS_103    | 2.87 | 2.02 | 9.78  |
| 4F33.PDB | O, C_ALA_84    | N, C_VAL_104   | H, C_VAL_104    | 2.85 | 1.99 | 3.00  |
| 4F33.PDB | O, C_MET_12    | N, C_GLU_105   | H, C_GLU_105    | 2.79 | 1.94 | 5.03  |
| 4F33.PDB | OE1, C_GLN_166 | N, C_ILE_106   | H, C_ILE_106    | 2.86 | 2.01 | 8.73  |
| 4F33.PDB | O, C_ALA_14    | N, C_LYS_107   | H, C_LYS_107    | 2.76 | 1.93 | 12.89 |
| 4F33.PDB | OG, C_SER_13   | NZ, C_LYS_107  | HZ3, C_LYS_107  | 2.78 | 1.89 | 2.73  |
| 4F33.PDB | O, C_THR_109   | NE, C_ARG_108  | HE, C_ARG_108   | 2.78 | 1.92 | 5.15  |
| 4F33.PDB | O, C_ASP_170   | NH1, C_ARG_108 | HH11, C_ARG_108 | 2.94 | 2.11 | 12.58 |
| 4F33.PDB | O, C_TYR_140   | N, C_ALA_111   | H, C_ALA_111    | 2.88 | 2.05 | 12.17 |
| 4F33.PDB | O, C_LEU_135   | N, C_PHE_116   | H, C_PHE_116    | 2.88 | 2.08 | 18.08 |
| 4F33.PDB | O, C_VAL_133   | N, C_PHE_118   | H, C_PHE_118    | 2.80 | 1.99 | 16.53 |
| 4F33.PDB | OG, C_SER_131  | NE2, C_GLN_124 | HE22, C_GLN_124 | 2.83 | 1.97 | 4.97  |
| 4F33.PDB | O, C_GLN_124   | N, C_SER_127   | H, C_SER_127    | 2.84 | 2.05 | 19.55 |
| 4F33.PDB | O, C_LEU_125   | N, C_GLY_128   | H, C_GLY_128    | 2.88 | 2.04 | 11.07 |
| 4F33.PDB | O, C_LEU_181   | N, C_ALA_130   | H, C_ALA_130    | 2.79 | 1.95 | 9.71  |
| 4F33.PDB | OE1, C_GLN_124 | N, C_SER_131   | H, C_SER_131    | 2.98 | 2.18 | 18.03 |
| 4F33.PDB | O, C_LEU_179   | N, C_VAL_132   | H, C_VAL_132    | 2.83 | 2.00 | 12.70 |
| 4F33.PDB | O, C_SER_177   | N, C_CYS_134   | H, C_CYS_134    | 2.82 | 1.97 | 5.76  |
| 4F33.PDB | O, C_PHE_116   | N, C_LEU_135   | H, C_LEU_135    | 2.74 | 1.89 | 9.47  |
| 4F33.PDB | O, C_LEU_175   | N, C_LEU_136   | H, C_LEU_136    | 2.76 | 1.91 | 7.00  |
| 4F33.PDB | O, C_SER_114   | N, C_ASN_137   | H, C_ASN_137    | 2.81 | 1.98 | 13.13 |
| 4F33.PDB | O, C_TYR_173   | N, C_PHE_139   | H, C_PHE_139    | 2.86 | 2.04 | 15.11 |
| 4F33.PDB | O, C_ALA_111   | N, C_TYR_140   | H, C_TYR_140    | 2.92 | 2.12 | 17.57 |
| 4F33.PDB | O, C_GLU_195   | N, C_GLN_147   | H, C_GLN_147    | 2.86 | 2.02 | 11.56 |
| 4F33.PDB | OG, C_SER_177  | NE1, C_TRP_148 | HE1, C_TRP_148  | 2.93 | 2.10 | 14.22 |
| 4F33.PDB | O, C_ALA_193   | N, C_LYS_149   | H, C_LYS_149    | 2.87 | 2.03 | 10.70 |
| 4F33.PDB | OE1, C_GLU_195 | NZ, C_LYS_149  | HZ2, C_LYS_149  | 2.67 | 1.88 | 22.11 |
| 4F33.PDB | O, C_VAL_191   | N, C_ASP_151   | H, C_ASP_151    | 2.76 | 1.93 | 12.00 |
| 4F33.PDB | O, C_VAL_150   | N, C_ALA_153   | H, C_ALA_153    | 2.82 | 1.97 | 7.87  |
| 4F33.PDB | O, C_TRP_148   | N, C_GLN_155   | H, C_GLN_155    | 2.94 | 2.10 | 11.34 |
| 4F33.PDB | OE1, C_GLN_155 | ND2, C_ASN_158 | HD22, C_ASN_158 | 2.91 | 2.09 | 15.33 |
| 4F33.PDB | O, C_SER_176   | N, C_SER_162   | H, C_SER_162    | 2.97 | 2.18 | 19.59 |
| 4F33.PDB | O, D_PRO_173   | OG, C_SER_162  | HG, C_SER_162   | 2.78 | 2.07 | 25.83 |
| 4F33.PDB | O, C_SER_174   | N, C_THR_164   | H, C_THR_164    | 2.96 | 2.13 | 12.36 |
| 4F33.PDB | O, C_SER_171   | NE2, C_GLN_166 | HE21, C_GLN_166 | 2.98 | 2.16 | 14.32 |
| 4F33.PDB | O, C_ILE_106   | NE2, C_GLN_166 | HE22, C_GLN_166 | 2.67 | 1.89 | 20.30 |
| 4F33.PDB | O, C_THR_172   | N, C_ASP_167   | H, C_ASP_167    | 2.93 | 2.09 | 7.56  |
| 4F33.PDB | OD1, C_ASP_167 | N, C_LYS_169   | H, C_LYS_169    | 2.61 | 1.77 | 10.10 |
| 4F33.PDB | OD1, C_ASP_170 | N, C_THR_172   | H, C_THR_172    | 2.87 | 2.04 | 12.16 |
| 4F33.PDB | OD1, C_ASP_170 | OG1, C_THR_172 | HG1, C_THR_172  | 2.72 | 1.91 | 5.07  |
| 4F33.PDB | O, C_PHE_139   | N, C_TYR_173   | H, C_TYR_173    | 2.83 | 2.00 | 13.92 |
| 4F33.PDB | OG1, C_THR_164 | N, C_SER_174   | H, C_SER_174    | 2.96 | 2.12 | 9.60  |
| 4F33.PDB | O, C_LEU_136   | N, C_LEU_175   | H, C_LEU_175    | 2.83 | 2.02 | 15.79 |
| 4F33.PDB | O, C_SER_162   | N, C_SER_176   | H, C_SER_176    | 2.89 | 2.07 | 14.79 |
| 4F33.PDB | O, C_CYS_134   | N, C_SER_177   | H, C_SER_177    | 2.90 | 2.08 | 14.93 |
| 4F33.PDB | O, C_GLN_160   | N, C_THR_178   | H, C_THR_178    | 2.90 | 2.07 | 13.20 |
| 4F33.PDB | O, C_VAL_132   | N, C_LEU_179   | H, C_LEU_179    | 2.84 | 2.04 | 17.52 |

|          |                |               |                |      |      |       |
|----------|----------------|---------------|----------------|------|------|-------|
| 4F33.PDB | O, C.ASN_158   | N, C.THR_180  | H, C.THR_180   | 2.93 | 2.09 | 10.99 |
| 4F33.PDB | O, C.ALA_130   | N, C.LEU_181  | H, C.LEU_181   | 2.89 | 2.06 | 12.78 |
| 4F33.PDB | O, C.GLY_128   | N, C.LYS_183  | H, C.LYS_183   | 2.87 | 2.02 | 7.20  |
| 4F33.PDB | OG, C.SER_182  | N, C.ASP_185  | H, C.ASP_185   | 2.76 | 1.98 | 21.47 |
| 4F33.PDB | O, C.SER_182   | N, C.TYR_186  | H, C.TYR_186   | 2.81 | 1.98 | 11.89 |
| 4F33.PDB | OD2, C.ASP_151 | N, C.LYS_190  | H, C.LYS_190   | 2.88 | 2.06 | 14.40 |
| 4F33.PDB | OD1, C.ASP_151 | N, C.VAL_191  | H, C.VAL_191   | 2.83 | 1.97 | 2.95  |
| 4F33.PDB | O, C.PHE_209   | N, C.TYR_192  | H, C.TYR_192   | 2.95 | 2.11 | 11.22 |
| 4F33.PDB | O, C.LYS_149   | N, C.ALA_193  | H, C.ALA_193   | 2.88 | 2.09 | 19.06 |
| 4F33.PDB | O, C.LYS_207   | N, C.CYS_194  | H, C.CYS_194   | 2.93 | 2.15 | 21.61 |
| 4F33.PDB | O, C.GLN_147   | N, C.GLU_195  | H, C.GLU_195   | 2.81 | 1.98 | 11.88 |
| 4F33.PDB | O, C.VAL_205   | N, C.VAL_196  | H, C.VAL_196   | 2.70 | 1.88 | 13.56 |
| 4F33.PDB | O, C.LYS_145   | N, C.THR_197  | H, C.THR_197   | 2.85 | 2.02 | 13.13 |
| 4F33.PDB | O, C.HIS_198   | N, C.LEU_201  | H, C.LEU_201   | 2.84 | 1.98 | 4.52  |
| 4F33.PDB | O, C.VAL_196   | N, C.VAL_205  | H, C.VAL_205   | 2.89 | 2.08 | 16.55 |
| 4F33.PDB | O, C.TYR_192   | N, C.PHE_209  | H, C.PHE_209   | 2.97 | 2.18 | 20.47 |
| 4F33.PDB | O, C.LYS_190   | N, C.ARG_211  | H, C.ARG_211   | 2.85 | 2.00 | 9.23  |
| 4F33.PDB | O, C.HIS_189   | NE, C.ARG_211 | HE, C.ARG_211  | 2.85 | 2.00 | 3.91  |
| 4F33.PDB | O, D.SER_25    | N, D.GLN_3    | H, D.GLN_3     | 2.93 | 2.12 | 15.40 |
| 4F33.PDB | O, D.LYS_23    | N, D.GLN_5    | H, D.GLN_5     | 2.87 | 2.02 | 5.59  |
| 4F33.PDB | O, D.TYR_94    | NE2, D.GLN_6  | HE22, D.GLN_6  | 2.88 | 2.07 | 16.36 |
| 4F33.PDB | O, D.PRO_114   | N, D.GLU_10   | H, D.GLU_10    | 2.90 | 2.11 | 19.09 |
| 4F33.PDB | O, D.THR_116   | N, D.GLU_12   | H, D.GLU_12    | 2.98 | 2.19 | 19.88 |
| 4F33.PDB | O, D.LEU_86    | N, D.GLY_15   | H, D.GLY_15    | 2.74 | 1.92 | 14.74 |
| 4F33.PDB | O, D.LEU_83    | N, D.VAL_18   | H, D.VAL_18    | 2.96 | 2.19 | 22.61 |
| 4F33.PDB | O, D.MET_81    | N, D.ILE_20   | H, D.ILE_20    | 2.89 | 2.06 | 12.32 |
| 4F33.PDB | OG, D.SER_7    | N, D.SER_21   | H, D.SER_21    | 2.90 | 2.06 | 8.88  |
| 4F33.PDB | O, D.ALA_79    | N, D.CYS_22   | H, D.CYS_22    | 2.83 | 2.09 | 25.29 |
| 4F33.PDB | O, D.GLN_5     | N, D.LYS_23   | H, D.LYS_23    | 2.75 | 1.91 | 10.41 |
| 4F33.PDB | O, D.SER_77    | N, D.ALA_24   | H, D.ALA_24    | 2.92 | 2.07 | 4.90  |
| 4F33.PDB | O, D.GLN_3     | N, D.SER_25   | H, D.SER_25    | 2.94 | 2.12 | 15.81 |
| 4F33.PDB | O, D.SER_28    | N, D.GLY_31   | H, D.GLY_31    | 2.96 | 2.11 | 6.44  |
| 4F33.PDB | O, D.GLY_99    | N, D.THR_33   | H, D.THR_33    | 2.96 | 2.15 | 17.63 |
| 4F33.PDB | O, D.ALA_97    | N, D.ASN_35   | H, D.ASN_35    | 2.79 | 1.98 | 15.45 |
| 4F33.PDB | O, D.PHE_95    | N, D.VAL_37   | H, D.VAL_37    | 2.84 | 2.04 | 17.56 |
| 4F33.PDB | O, D.GLU_46    | N, D.LYS_38   | H, D.LYS_38    | 2.82 | 2.00 | 14.83 |
| 4F33.PDB | O, D.GLU_89    | NZ, D.LYS_38  | HZ1, D.LYS_38  | 2.95 | 2.06 | 6.08  |
| 4F33.PDB | O, D.VAL_93    | N, D.GLN_39   | H, D.GLN_39    | 2.83 | 1.98 | 3.65  |
| 4F33.PDB | OE1, C.GLN_38  | NE2, D.GLN_39 | HE22, D.GLN_39 | 2.89 | 2.03 | 5.23  |
| 4F33.PDB | O, D.SER_40    | N, D.LYS_43   | H, D.LYS_43    | 2.91 | 2.09 | 14.92 |
| 4F33.PDB | O, D.LYS_38    | N, D.GLU_46   | H, D.GLU_46    | 2.91 | 2.09 | 16.01 |
| 4F33.PDB | O, D.TRP_36    | N, D.ILE_48   | H, D.ILE_48    | 2.86 | 2.02 | 11.41 |
| 4F33.PDB | O, D.SER_59    | N, D.LEU_50   | H, D.LEU_50    | 2.88 | 2.10 | 20.07 |
| 4F33.PDB | O, D.MET_34    | N, D.ILE_51   | H, D.ILE_51    | 2.90 | 2.09 | 16.54 |
| 4F33.PDB | O, D.ALA_57    | N, D.THR_52   | H, D.THR_52    | 2.93 | 2.11 | 14.70 |
| 4F33.PDB | O, D.THR_52    | N, D.GLY_56   | H, D.GLY_56    | 2.90 | 2.15 | 24.29 |
| 4F33.PDB | OD1, D.ASN_55  | N, D.ALA_57   | H, D.ALA_57    | 2.90 | 2.05 | 6.42  |
| 4F33.PDB | O, D.LEU_50    | N, D.SER_59   | H, D.SER_59    | 2.88 | 2.07 | 17.59 |
| 4F33.PDB | O, D.ILE_48    | N, D.ASN_61   | H, D.ASN_61    | 2.92 | 2.10 | 15.21 |
| 4F33.PDB | O, D.TRP_47    | ND2, D.ASN_61 | HD21, D.ASN_61 | 2.96 | 2.14 | 14.14 |
| 4F33.PDB | OE2, D.GLU_46  | NZ, D.LYS_63  | HZ3, D.LYS_63  | 2.60 | 1.76 | 15.82 |
| 4F33.PDB | O, D.ASN_61    | N, D.PHE_64   | H, D.PHE_64    | 2.75 | 1.91 | 9.55  |
| 4F33.PDB | OD2, D.ASP_90  | NZ, D.LYS_67  | HZ2, D.LYS_67  | 2.76 | 2.03 | 29.11 |
| 4F33.PDB | O, D.PHE_64    | N, D.ALA_68   | H, D.ALA_68    | 2.91 | 2.10 | 17.71 |
| 4F33.PDB | O, D.ASP_82    | N, D.THR_69   | H, D.THR_69    | 2.88 | 2.12 | 23.04 |
| 4F33.PDB | OH, D.TYR_60   | N, D.LEU_70   | H, D.LEU_70    | 2.83 | 1.99 | 10.08 |
| 4F33.PDB | O, D.THR_78    | N, D.ASP_73   | H, D.ASP_73    | 2.75 | 1.92 | 11.81 |
| 4F33.PDB | O, D.CYS_22    | N, D.ALA_79   | H, D.ALA_79    | 2.88 | 2.07 | 15.38 |

|          |                |                |                 |      |      |       |
|----------|----------------|----------------|-----------------|------|------|-------|
| 4F33.PDB | O, D_THR_71    | N, D_TYR_80    | H, D_TYR_80     | 2.77 | 1.92 | 5.85  |
| 4F33.PDB | O, D_ILE_20    | N, D_MET_81    | H, D_MET_81     | 2.97 | 2.15 | 15.01 |
| 4F33.PDB | O, D_THR_69    | N, D_ASP_82    | H, D_ASP_82     | 2.90 | 2.08 | 13.98 |
| 4F33.PDB | O, D_VAL_18    | N, D_LEU_83    | H, D_LEU_83     | 2.77 | 1.94 | 12.96 |
| 4F33.PDB | O, D_LYS_67    | N, D_LEU_84    | H, D_LEU_84     | 2.92 | 2.10 | 15.11 |
| 4F33.PDB | O, D_ALA_16    | N, D_LEU_86    | H, D_LEU_86     | 2.90 | 2.05 | 7.92  |
| 4F33.PDB | OD2, D_ASP_90  | N, D_THR_87    | H, D_THR_87     | 2.84 | 2.02 | 15.18 |
| 4F33.PDB | O, D_THR_87    | N, D_ASP_90    | H, D_ASP_90     | 2.90 | 2.06 | 10.57 |
| 4F33.PDB | O, D_SER_88    | N, D_SER_91    | H, D_SER_91     | 2.97 | 2.12 | 5.73  |
| 4F33.PDB | O, D_VAL_115   | N, D_ALA_92    | H, D_ALA_92     | 2.97 | 2.21 | 24.68 |
| 4F33.PDB | O, D_THR_113   | N, D_TYR_94    | H, D_TYR_94     | 2.85 | 2.00 | 9.44  |
| 4F33.PDB | O, D_VAL_37    | N, D_PHE_95    | H, D_PHE_95     | 2.78 | 1.94 | 9.26  |
| 4F33.PDB | O, D_ASN_35    | N, D_ALA_97    | H, D_ALA_97     | 2.87 | 2.11 | 23.35 |
| 4F33.PDB | O, D_TYR_108   | N, D_ARG_98    | H, D_ARG_98     | 2.83 | 2.05 | 21.19 |
| 4F33.PDB | OD2, D_ASP_107 | NH2, D_ARG_98  | HH21, D_ARG_98  | 2.74 | 1.89 | 7.29  |
| 4F33.PDB | O, D_THR_33    | N, D_GLY_99    | H, D_GLY_99     | 2.93 | 2.09 | 9.33  |
| 4F33.PDB | OD1, D_ASP_102 | NE, D_ARG_104  | HE, D_ARG_104   | 2.89 | 2.05 | 10.59 |
| 4F33.PDB | OD2, D_ASP_107 | NH1, D_ARG_104 | HH11, D_ARG_104 | 2.83 | 2.01 | 15.77 |
| 4F33.PDB | OD2, D_ASP_102 | NH2, D_ARG_104 | HH21, D_ARG_104 | 2.91 | 2.10 | 15.53 |
| 4F33.PDB | O, D_CYS_96    | N, D_GLY_110   | H, D_GLY_110    | 2.76 | 1.90 | 5.93  |
| 4F33.PDB | OE1, D_GLN_6   | N, D_GLY_112   | H, D_GLY_112    | 2.92 | 2.15 | 21.82 |
| 4F33.PDB | O, D_TYR_94    | N, D_THR_113   | H, D_THR_113    | 2.83 | 2.03 | 18.15 |
| 4F33.PDB | O, D_SER_7     | OG1, D_THR_113 | HG1, D_THR_113  | 2.79 | 2.01 | 15.83 |
| 4F33.PDB | O, D_ALA_92    | N, D_VAL_115   | H, D_VAL_115    | 2.80 | 1.95 | 9.13  |
| 4F33.PDB | O, D_GLU_10    | N, D_THR_116   | H, D_THR_116    | 2.95 | 2.12 | 11.31 |
| 4F33.PDB | OG, D_SER_91   | N, D_VAL_117   | H, D_VAL_117    | 2.81 | 1.98 | 11.24 |
| 4F33.PDB | O, D_GLU_12    | N, D_SER_118   | H, D_SER_118    | 2.89 | 2.09 | 17.84 |
| 4F33.PDB | O, D_PHE_152   | N, D_LYS_123   | H, D_LYS_123    | 2.79 | 1.97 | 13.96 |
| 4F33.PDB | O, D_ASP_150   | NZ, D_LYS_123  | HZ2, D_LYS_123  | 2.85 | 2.02 | 18.34 |
| 4F33.PDB | OE2, E_GLU_123 | N, D_GLY_124   | H, D_GLY_124    | 2.84 | 1.99 | 7.85  |
| 4F33.PDB | O, D_LYS_149   | N, D_SER_126   | H, D_SER_126    | 2.92 | 2.12 | 17.54 |
| 4F33.PDB | O, D_LEU_147   | N, D_PHE_128   | H, D_PHE_128    | 2.91 | 2.07 | 11.82 |
| 4F33.PDB | O, D_GLY_145   | N, D_LEU_130   | H, D_LEU_130    | 2.69 | 1.84 | 6.30  |
| 4F33.PDB | OG, D_SER_136  | N, D_SER_133   | H, D_SER_133    | 2.93 | 2.12 | 15.23 |
| 4F33.PDB | OG, D_SER_133  | N, D_LYS_135   | H, D_LYS_135    | 2.86 | 2.06 | 18.00 |
| 4F33.PDB | O, D_SER_133   | OG1, D_THR_137 | HG1, D_THR_137  | 2.93 | 2.22 | 24.93 |
| 4F33.PDB | O, D_SER_138   | N, D_THR_141   | H, D_THR_141    | 2.86 | 2.02 | 10.67 |
| 4F33.PDB | O, D_VAL_190   | N, D_ALA_142   | H, D_ALA_142    | 2.79 | 1.94 | 3.93  |
| 4F33.PDB | O, D_SER_136   | N, D_ALA_143   | H, D_ALA_143    | 2.80 | 1.98 | 13.96 |
| 4F33.PDB | O, D_VAL_188   | N, D_LEU_144   | H, D_LEU_144    | 2.99 | 2.17 | 15.33 |
| 4F33.PDB | O, D_LEU_130   | N, D_GLY_145   | H, D_GLY_145    | 2.95 | 2.17 | 22.25 |
| 4F33.PDB | O, D_PHE_128   | N, D_LEU_147   | H, D_LEU_147    | 2.85 | 2.01 | 10.25 |
| 4F33.PDB | O, D_LEU_184   | N, D_VAL_148   | H, D_VAL_148    | 2.76 | 1.91 | 9.22  |
| 4F33.PDB | O, D_SER_126   | N, D_LYS_149   | H, D_LYS_149    | 2.79 | 1.93 | 3.93  |
| 4F33.PDB | O, D_LYS_123   | N, D_PHE_152   | H, D_PHE_152    | 2.96 | 2.17 | 18.86 |
| 4F33.PDB | O, D_ASN_203   | N, D_SER_159   | H, D_SER_159    | 2.92 | 2.12 | 18.15 |
| 4F33.PDB | OG, D_SER_186  | NE1, D_TRP_160 | HE1, D_TRP_160  | 3.00 | 2.15 | 9.78  |
| 4F33.PDB | O, D_ILE_201   | N, D_ASN_161   | H, D_ASN_161    | 2.81 | 1.96 | 10.06 |
| 4F33.PDB | OD1, D_ASN_203 | N, D_SER_162   | H, D_SER_162    | 2.79 | 1.98 | 16.60 |
| 4F33.PDB | O, D_TRP_160   | N, D_GLY_163   | H, D_GLY_163    | 2.90 | 2.14 | 23.00 |
| 4F33.PDB | O, D_VAL_187   | N, D_HIS_170   | H, D_HIS_170    | 2.79 | 1.95 | 11.73 |
| 4F33.PDB | O, D_SER_185   | N, D_PHE_172   | H, D_PHE_172    | 2.98 | 2.14 | 9.15  |
| 4F33.PDB | O, D_SER_183   | N, D_VAL_175   | H, D_VAL_175    | 2.91 | 2.09 | 14.44 |
| 4F33.PDB | O, D_LEU_181   | N, D_GLN_177   | H, D_GLN_177    | 2.85 | 2.00 | 7.10  |
| 4F33.PDB | OD1, D_ASP_150 | NE2, D_GLN_177 | HE22, D_GLN_177 | 2.86 | 2.09 | 21.57 |
| 4F33.PDB | O, D_TYR_151   | N, D_TYR_182   | H, D_TYR_182    | 2.82 | 1.97 | 7.39  |
| 4F33.PDB | O, D_VAL_148   | N, D_LEU_184   | H, D_LEU_184    | 2.89 | 2.08 | 17.21 |
| 4F33.PDB | O, D_CYS_146   | N, D_SER_186   | H, D_SER_186    | 2.93 | 2.11 | 15.37 |

|          |                |                |                |      |      |       |
|----------|----------------|----------------|----------------|------|------|-------|
| 4F33.PDB | O, D_HIS_170   | N, D_VAL_187   | H, D_VAL_187   | 2.83 | 2.00 | 11.95 |
| 4F33.PDB | O, D_LEU_144   | N, D_VAL_188   | H, D_VAL_188   | 2.81 | 2.00 | 17.23 |
| 4F33.PDB | O, D_ALA_142   | N, D_VAL_190   | H, D_VAL_190   | 2.77 | 1.95 | 14.72 |
| 4F33.PDB | O, D_GLY_140   | N, D_SER_192   | H, D_SER_192   | 2.86 | 2.02 | 8.26  |
| 4F33.PDB | O, D_PRO_191   | N, D_SER_194   | H, D_SER_194   | 2.92 | 2.08 | 9.17  |
| 4F33.PDB | O, D_SER_194   | N, D_GLN_198   | H, D_GLN_198   | 2.75 | 1.89 | 2.92  |
| 4F33.PDB | OD1, D_ASN_161 | N, D_ILE_201   | H, D_ILE_201   | 2.80 | 1.96 | 10.93 |
| 4F33.PDB | O, D_LYS_215   | N, D_CYS_202   | H, D_CYS_202   | 2.93 | 2.15 | 21.05 |
| 4F33.PDB | O, D_SER_159   | N, D_ASN_203   | H, D_ASN_203   | 2.77 | 1.92 | 5.28  |
| 4F33.PDB | O, D_VAL_213   | N, D_VAL_204   | H, D_VAL_204   | 2.77 | 1.93 | 9.54  |
| 4F33.PDB | O, D_THR_157   | N, D_ASN_205   | H, D_ASN_205   | 2.87 | 2.02 | 7.57  |
| 4F33.PDB | O, D_THR_211   | N, D_HIS_206   | H, D_HIS_206   | 2.84 | 1.99 | 6.89  |
| 4F33.PDB | O, D_PRO_153   | NE2, D_HIS_206 | HE2, D_HIS_206 | 2.81 | 1.97 | 10.37 |
| 4F33.PDB | O, D_LYS_207   | N, D_ASN_210   | H, D_ASN_210   | 2.91 | 2.08 | 12.71 |
| 4F33.PDB | O, F_ASP_214   | N, D_LYS_212   | H, D_LYS_212   | 2.98 | 2.15 | 12.10 |
| 4F33.PDB | O, D_VAL_204   | N, D_VAL_213   | H, D_VAL_213   | 2.79 | 1.97 | 13.65 |
| 4F33.PDB | O, F_LYS_212   | N, D_ASP_214   | H, D_ASP_214   | 2.85 | 2.03 | 14.94 |
| 4F33.PDB | O, D_CYS_202   | N, D_LYS_215   | H, D_LYS_215   | 2.96 | 2.16 | 17.33 |
| 4F33.PDB | OE1, C_GLU_123 | NZ, D_LYS_215  | HZ1, D_LYS_215 | 2.79 | 1.99 | 22.47 |
| 4F33.PDB | OG1, F_THR_211 | NZ, D_LYS_215  | HZ2, D_LYS_215 | 2.86 | 1.99 | 10.67 |
| 4F33.PDB | O, F_ASN_210   | N, D_LYS_216   | H, D_LYS_216   | 2.98 | 2.16 | 15.42 |
| 4F33.PDB | O, D_TYR_200   | N, D_VAL_217   | H, D_VAL_217   | 2.85 | 2.00 | 8.55  |
| 4F33.PDB | OG, E_SER_27   | N, E_GLU_4     | H, E_GLU_4     | 2.92 | 2.11 | 16.14 |
| 4F33.PDB | O, E_SER_25    | N, E_THR_6     | H, E_THR_6     | 2.78 | 1.92 | 4.96  |
| 4F33.PDB | O, E_TYR_86    | NE2, E_GLN_7   | HE22, E_GLN_7  | 2.94 | 2.17 | 22.59 |
| 4F33.PDB | O, E_THR_23    | N, E_SER_8     | H, E_SER_8     | 2.92 | 2.12 | 16.81 |
| 4F33.PDB | O, E_LYS_103   | N, E_MET_12    | H, E_MET_12    | 2.82 | 1.98 | 10.01 |
| 4F33.PDB | O, E_GLU_105   | N, E_ALA_14    | H, E_ALA_14    | 2.97 | 2.16 | 16.60 |
| 4F33.PDB | OE2, E_GLU_18  | N, E_SER_15    | H, E_SER_15    | 2.79 | 1.94 | 7.58  |
| 4F33.PDB | O, E_VAL_78    | N, E_GLY_17    | H, E_GLY_17    | 2.81 | 2.00 | 17.52 |
| 4F33.PDB | OG1, E_THR_74  | OG1, E_THR_21  | HG1, E_THR_21  | 2.80 | 2.03 | 17.05 |
| 4F33.PDB | O, E_LEU_73    | N, E_MET_22    | H, E_MET_22    | 2.92 | 2.09 | 12.31 |
| 4F33.PDB | O, E_SER_8     | N, E_THR_23    | H, E_THR_23    | 2.82 | 1.97 | 8.66  |
| 4F33.PDB | O, E_TYR_71    | N, E_CYS_24    | H, E_CYS_24    | 2.67 | 1.82 | 5.57  |
| 4F33.PDB | O, E_THR_6     | N, E_SER_25    | H, E_SER_25    | 2.85 | 2.00 | 8.30  |
| 4F33.PDB | O, E_ASN_69    | N, E_ALA_26    | H, E_ALA_26    | 2.80 | 1.95 | 9.70  |
| 4F33.PDB | O, E_GLN_89    | N, E_HIS_34    | H, E_HIS_34    | 2.94 | 2.08 | 4.58  |
| 4F33.PDB | O, E_ILE_48    | N, E_TRP_35    | H, E_TRP_35    | 2.69 | 1.88 | 16.85 |
| 4F33.PDB | O, E_TYR_87    | N, E_TYR_36    | H, E_TYR_36    | 2.80 | 1.97 | 13.97 |
| 4F33.PDB | O, E_LYS_45    | N, E_GLN_37    | H, E_GLN_37    | 2.87 | 2.09 | 20.05 |
| 4F33.PDB | O, E_THR_85    | N, E_GLN_38    | H, E_GLN_38    | 2.87 | 2.05 | 13.42 |
| 4F33.PDB | O, E_THR_42    | NE2, E_GLN_38  | HE21, E_GLN_38 | 2.90 | 2.07 | 12.17 |
| 4F33.PDB | O, E_GLU_81    | NZ, E_LYS_39   | HZ1, E_LYS_39  | 2.82 | 1.96 | 12.79 |
| 4F33.PDB | O, E_ASP_83    | NZ, E_LYS_39   | HZ3, E_LYS_39  | 2.75 | 1.95 | 21.71 |
| 4F33.PDB | O, E_LYS_39    | OG1, E_THR_42  | HG1, E_THR_42  | 2.99 | 2.17 | 4.21  |
| 4F33.PDB | O, F_GLY_110   | OG, E_SER_43   | HG, E_SER_43   | 2.52 | 1.83 | 27.97 |
| 4F33.PDB | O, E_GLN_37    | N, E_LYS_45    | H, E_LYS_45    | 2.74 | 1.96 | 19.86 |
| 4F33.PDB | O, F_ARG_104   | NH1, E_ARG_46  | HH11, E_ARG_46 | 2.85 | 2.03 | 15.38 |
| 4F33.PDB | O, E_TRP_35    | N, E_TRP_47    | H, E_TRP_47    | 2.82 | 2.04 | 19.57 |
| 4F33.PDB | O, E_LYS_53    | N, E_TYR_49    | H, E_TYR_49    | 2.74 | 1.93 | 17.49 |
| 4F33.PDB | O, E_MET_33    | N, E_THR_51    | H, E_THR_51    | 2.76 | 1.93 | 12.30 |
| 4F33.PDB | O, E_ASP_50    | N, E_SER_52    | H, E_SER_52    | 2.85 | 2.14 | 29.22 |
| 4F33.PDB | O, E_TYR_49    | N, E_LYS_53    | H, E_LYS_53    | 2.87 | 2.09 | 20.53 |
| 4F33.PDB | O, E_TRP_47    | N, E_ALA_55    | H, E_ALA_55    | 2.97 | 2.11 | 5.56  |
| 4F33.PDB | OD2, E_ASP_82  | NE, E_ARG_61   | HE, E_ARG_61   | 2.93 | 2.08 | 6.42  |
| 4F33.PDB | OD1, E_ASP_82  | NH2, E_ARG_61  | HH21, E_ARG_61 | 2.82 | 1.98 | 9.42  |
| 4F33.PDB | O, E_THR_74    | N, E_SER_63    | H, E_SER_63    | 2.96 | 2.20 | 24.19 |
| 4F33.PDB | O, E_ALA_26    | ND2, E_ASN_69  | HD21, E_ASN_69 | 2.90 | 2.05 | 3.08  |

|          |                |                |                 |      |      |       |
|----------|----------------|----------------|-----------------|------|------|-------|
| 4F33.PDB | O, E_CYS_24    | N, E_TYR_71    | H, E_TYR_71     | 2.86 | 2.02 | 8.43  |
| 4F33.PDB | O, E_VAL_30    | OH, E_TYR_71   | HH, E_TYR_71    | 2.89 | 2.18 | 25.55 |
| 4F33.PDB | O, E_SER_65    | N, E_SER_72    | H, E_SER_72     | 2.76 | 1.93 | 12.78 |
| 4F33.PDB | O, E_SER_63    | N, E_THR_74    | H, E_THR_74     | 2.80 | 1.96 | 11.27 |
| 4F33.PDB | O, E_VAL_20    | N, E_ILE_75    | H, E_ILE_75     | 2.91 | 2.09 | 15.96 |
| 4F33.PDB | O, E_ARG_61    | N, E_SER_76    | H, E_SER_76     | 2.77 | 1.96 | 15.82 |
| 4F33.PDB | O, E_GLU_18    | N, E_VAL_78    | H, E_VAL_78     | 2.84 | 2.06 | 21.38 |
| 4F33.PDB | OD2, E_ASP_82  | N, E_GLU_79    | H, E_GLU_79     | 2.86 | 2.00 | 3.08  |
| 4F33.PDB | O, E_GLU_79    | N, E_ASP_82    | H, E_ASP_82     | 2.87 | 2.03 | 9.88  |
| 4F33.PDB | O, E_GLN_38    | N, E_THR_85    | H, E_THR_85     | 2.88 | 2.04 | 8.55  |
| 4F33.PDB | O, E_THR_102   | N, E_TYR_86    | H, E_TYR_86     | 2.86 | 2.02 | 10.02 |
| 4F33.PDB | O, E_TYR_36    | N, E_TYR_87    | H, E_TYR_87     | 2.88 | 2.07 | 16.48 |
| 4F33.PDB | OG1, E_THR_97  | NE2, E_GLN_90  | HE21, E_GLN_90  | 2.99 | 2.17 | 14.98 |
| 4F33.PDB | O, E_TYR_32    | NE1, E_TRP_91  | HE1, E_TRP_91   | 2.73 | 1.95 | 21.71 |
| 4F33.PDB | O, E_ILE_3     | OG1, E_THR_97  | HG1, E_THR_97   | 2.76 | 1.96 | 11.49 |
| 4F33.PDB | O, E_CYS_88    | N, E_GLY_99    | H, E_GLY_99     | 2.76 | 1.93 | 12.97 |
| 4F33.PDB | OE1, E_GLN_7   | N, E_GLY_101   | H, E_GLY_101    | 2.77 | 2.01 | 24.02 |
| 4F33.PDB | O, E_TYR_86    | N, E_THR_102   | H, E_THR_102    | 2.88 | 2.06 | 14.06 |
| 4F33.PDB | O, E_PRO_9     | OG1, E_THR_102 | HG1, E_THR_102  | 2.74 | 1.97 | 16.27 |
| 4F33.PDB | O, E_ALA_10    | N, E_LYS_103   | H, E_LYS_103    | 2.83 | 1.99 | 8.80  |
| 4F33.PDB | O, E_ALA_84    | N, E_VAL_104   | H, E_VAL_104    | 2.84 | 1.98 | 6.54  |
| 4F33.PDB | O, E_MET_12    | N, E_GLU_105   | H, E_GLU_105    | 2.75 | 1.90 | 5.61  |
| 4F33.PDB | OE1, E_GLN_166 | N, E_ILE_106   | H, E_ILE_106    | 2.88 | 2.05 | 11.13 |
| 4F33.PDB | O, E_ALA_14    | N, E_LYS_107   | H, E_LYS_107    | 2.77 | 1.92 | 7.71  |
| 4F33.PDB | O, E_THR_109   | NE, E_ARG_108  | HE, E_ARG_108   | 2.78 | 1.92 | 2.02  |
| 4F33.PDB | O, E_ASP_170   | NH1, E_ARG_108 | HH11, E_ARG_108 | 2.88 | 2.05 | 12.27 |
| 4F33.PDB | O, E_TYR_140   | N, E_ALA_111   | H, E_ALA_111    | 2.93 | 2.09 | 9.90  |
| 4F33.PDB | O, E_LEU_135   | N, E_PHE_116   | H, E_PHE_116    | 2.88 | 2.07 | 17.28 |
| 4F33.PDB | O, E_VAL_133   | N, E_PHE_118   | H, E_PHE_118    | 2.80 | 2.05 | 23.65 |
| 4F33.PDB | OG, E_SER_131  | NE2, E_GLN_124 | HE22, E_GLN_124 | 2.81 | 1.95 | 4.17  |
| 4F33.PDB | O, E_GLN_124   | N, E_SER_127   | H, E_SER_127    | 2.86 | 2.13 | 27.30 |
| 4F33.PDB | O, E_LEU_125   | N, E_GLY_128   | H, E_GLY_128    | 2.83 | 1.98 | 9.86  |
| 4F33.PDB | O, E_LEU_181   | N, E_ALA_130   | H, E_ALA_130    | 2.74 | 1.89 | 8.05  |
| 4F33.PDB | O, E_LEU_179   | N, E_VAL_132   | H, E_VAL_132    | 2.80 | 1.98 | 14.92 |
| 4F33.PDB | O, E_SER_177   | N, E_CYS_134   | H, E_CYS_134    | 2.85 | 2.00 | 9.73  |
| 4F33.PDB | O, E_PHE_116   | N, E_LEU_135   | H, E_LEU_135    | 2.83 | 1.99 | 7.95  |
| 4F33.PDB | O, E_LEU_175   | N, E_LEU_136   | H, E_LEU_136    | 2.79 | 1.94 | 6.94  |
| 4F33.PDB | O, E_SER_114   | N, E_ASN_137   | H, E_ASN_137    | 2.80 | 1.99 | 16.39 |
| 4F33.PDB | O, E_TYR_173   | N, E_PHE_139   | H, E_PHE_139    | 2.88 | 2.07 | 16.01 |
| 4F33.PDB | O, E_ALA_111   | N, E_TYR_140   | H, E_TYR_140    | 2.90 | 2.10 | 17.94 |
| 4F33.PDB | O, E_GLU_195   | N, E_GLN_147   | H, E_GLN_147    | 2.86 | 2.03 | 12.56 |
| 4F33.PDB | OG, E_SER_177  | NE1, E_TRP_148 | HE1, E_TRP_148  | 2.88 | 2.05 | 13.86 |
| 4F33.PDB | O, E_ALA_193   | N, E_LYS_149   | H, E_LYS_149    | 2.81 | 1.97 | 9.94  |
| 4F33.PDB | OE1, E_GLU_195 | NZ, E_LYS_149  | HZ2, E_LYS_149  | 2.77 | 1.97 | 22.37 |
| 4F33.PDB | O, E_VAL_191   | N, E_ASP_151   | H, E_ASP_151    | 2.76 | 1.93 | 11.74 |
| 4F33.PDB | O, E_VAL_150   | N, E_ALA_153   | H, E_ALA_153    | 2.93 | 2.08 | 7.11  |
| 4F33.PDB | O, E_TRP_148   | N, E_GLN_155   | H, E_GLN_155    | 2.90 | 2.06 | 11.04 |
| 4F33.PDB | OE1, E_GLN_155 | ND2, E_ASN_158 | HD22, E_ASN_158 | 2.91 | 2.08 | 12.67 |
| 4F33.PDB | O, F_LEU_176   | NE2, E_GLN_160 | HE22, E_GLN_160 | 2.93 | 2.08 | 4.21  |
| 4F33.PDB | O, E_SER_176   | N, E_SER_162   | H, E_SER_162    | 2.99 | 2.20 | 20.78 |
| 4F33.PDB | O, F_PRO_173   | OG, E_SER_162  | HG, E_SER_162   | 2.63 | 1.89 | 21.98 |
| 4F33.PDB | O, E_SER_174   | N, E_THR_164   | H, E_THR_164    | 2.96 | 2.13 | 13.63 |
| 4F33.PDB | O, E_SER_171   | NE2, E_GLN_166 | HE21, E_GLN_166 | 2.92 | 2.10 | 16.16 |
| 4F33.PDB | O, E_ILE_106   | NE2, E_GLN_166 | HE22, E_GLN_166 | 2.70 | 1.91 | 18.56 |
| 4F33.PDB | O, E_THR_172   | N, E_ASP_167   | H, E_ASP_167    | 2.96 | 2.11 | 9.67  |
| 4F33.PDB | OD1, E_ASP_170 | N, E_THR_172   | H, E_THR_172    | 2.87 | 2.07 | 17.42 |
| 4F33.PDB | OD1, E_ASP_170 | OG1, E_THR_172 | HG1, E_THR_172  | 2.66 | 1.85 | 7.41  |
| 4F33.PDB | O, E_PHE_139   | N, E_TYR_173   | H, E_TYR_173    | 2.81 | 1.97 | 10.48 |

|          |                |               |                |      |      |       |
|----------|----------------|---------------|----------------|------|------|-------|
| 4F33.PDB | OG1, E_THR_164 | N, E_SER_174  | H, E_SER_174   | 3.00 | 2.15 | 8.96  |
| 4F33.PDB | O, E_LEU_136   | N, E_LEU_175  | H, E_LEU_175   | 2.88 | 2.07 | 16.14 |
| 4F33.PDB | O, E_SER_162   | N, E_SER_176  | H, E_SER_176   | 2.95 | 2.12 | 13.93 |
| 4F33.PDB | O, E_CYS_134   | N, E_SER_177  | H, E_SER_177   | 2.89 | 2.07 | 14.26 |
| 4F33.PDB | O, E_GLN_160   | N, E_THR_178  | H, E_THR_178   | 2.90 | 2.07 | 12.50 |
| 4F33.PDB | O, E_VAL_132   | N, E_LEU_179  | H, E_LEU_179   | 2.83 | 2.00 | 13.32 |
| 4F33.PDB | O, E_ASN_158   | N, E_THR_180  | H, E_THR_180   | 2.97 | 2.13 | 9.98  |
| 4F33.PDB | O, E_ALA_130   | N, E_LEU_181  | H, E_LEU_181   | 2.88 | 2.04 | 11.81 |
| 4F33.PDB | O, E_GLY_128   | N, E_LYS_183  | H, E_LYS_183   | 2.91 | 2.08 | 11.41 |
| 4F33.PDB | OG, E_SER_182  | N, E_ASP_185  | H, E_ASP_185   | 2.89 | 2.05 | 12.49 |
| 4F33.PDB | O, E_SER_182   | N, E_TYR_186  | H, E_TYR_186   | 2.82 | 2.00 | 13.68 |
| 4F33.PDB | O, E_LYS_183   | N, E_GLU_187  | H, E_GLU_187   | 2.88 | 2.09 | 19.35 |
| 4F33.PDB | OD1, E_ASP_151 | N, E_VAL_191  | H, E_VAL_191   | 2.77 | 1.93 | 8.77  |
| 4F33.PDB | O, E_PHE_209   | N, E_TYR_192  | H, E_TYR_192   | 2.98 | 2.13 | 8.15  |
| 4F33.PDB | O, E_LYS_149   | N, E_ALA_193  | H, E_ALA_193   | 2.88 | 2.08 | 18.56 |
| 4F33.PDB | O, E_LYS_207   | N, E_CYS_194  | H, E_CYS_194   | 2.96 | 2.17 | 20.79 |
| 4F33.PDB | O, E_GLN_147   | N, E_GLU_195  | H, E_GLU_195   | 2.74 | 1.90 | 10.88 |
| 4F33.PDB | O, E_VAL_205   | N, E_VAL_196  | H, E_VAL_196   | 2.72 | 1.89 | 12.46 |
| 4F33.PDB | ND1, E_HIS_198 | N, E_GLY_200  | H, E_GLY_200   | 2.98 | 2.12 | 5.22  |
| 4F33.PDB | O, E_HIS_198   | N, E_LEU_201  | H, E_LEU_201   | 2.84 | 1.99 | 5.31  |
| 4F33.PDB | O, E_VAL_196   | N, E_VAL_205  | H, E_VAL_205   | 2.92 | 2.09 | 13.32 |
| 4F33.PDB | O, E_TYR_192   | N, E_PHE_209  | H, E_PHE_209   | 2.94 | 2.17 | 22.18 |
| 4F33.PDB | O, E_LYS_190   | N, E_ARG_211  | H, E_ARG_211   | 2.74 | 1.94 | 17.57 |
| 4F33.PDB | O, E_HIS_189   | NE, E_ARG_211 | HE, E_ARG_211  | 2.92 | 2.09 | 14.00 |
| 4F33.PDB | O, F_SER_25    | N, F_GLN_3    | H, F_GLN_3     | 2.92 | 2.09 | 11.79 |
| 4F33.PDB | O, F_LYS_23    | N, F_GLN_5    | H, F_GLN_5     | 2.85 | 2.00 | 7.55  |
| 4F33.PDB | O, F_TYR_94    | NE2, F_GLN_6  | HE22, F_GLN_6  | 2.86 | 2.05 | 16.42 |
| 4F33.PDB | O, F_PRO_114   | N, F_GLU_10   | H, F_GLU_10    | 2.96 | 2.18 | 21.47 |
| 4F33.PDB | O, F_THR_116   | N, F_GLU_12   | H, F_GLU_12    | 2.95 | 2.15 | 17.10 |
| 4F33.PDB | O, F_LEU_86    | N, F_GLY_15   | H, F_GLY_15    | 2.68 | 1.85 | 13.71 |
| 4F33.PDB | O, F_LEU_83    | N, F_VAL_18   | H, F_VAL_18    | 2.99 | 2.22 | 23.08 |
| 4F33.PDB | O, F_MET_81    | N, F_ILE_20   | H, F_ILE_20    | 2.85 | 2.01 | 12.08 |
| 4F33.PDB | OG, F_SER_7    | N, F_SER_21   | H, F_SER_21    | 2.96 | 2.12 | 10.03 |
| 4F33.PDB | O, F_GLN_5     | N, F_LYS_23   | H, F_LYS_23    | 2.77 | 1.93 | 10.80 |
| 4F33.PDB | O, F_SER_77    | N, F_ALA_24   | H, F_ALA_24    | 2.90 | 2.05 | 6.06  |
| 4F33.PDB | O, F_GLN_3     | N, F_SER_25   | H, F_SER_25    | 2.87 | 2.06 | 15.90 |
| 4F33.PDB | O, A_GLY_60    | N, F_PHE_29   | H, F_PHE_29    | 2.97 | 2.18 | 20.00 |
| 4F33.PDB | O, F_GLY_99    | N, F_THR_33   | H, F_THR_33    | 2.87 | 2.06 | 15.66 |
| 4F33.PDB | O, F_ALA_97    | N, F_ASN_35   | H, F_ASN_35    | 2.80 | 1.96 | 10.72 |
| 4F33.PDB | O, F_PHE_95    | N, F_VAL_37   | H, F_VAL_37    | 2.82 | 2.02 | 18.07 |
| 4F33.PDB | O, F_GLU_46    | N, F_LYS_38   | H, F_LYS_38    | 2.79 | 1.98 | 16.31 |
| 4F33.PDB | O, F_GLU_89    | NZ, F_LYS_38  | HZ1, F_LYS_38  | 2.88 | 2.00 | 2.60  |
| 4F33.PDB | O, F_VAL_93    | N, F_GLN_39   | H, F_GLN_39    | 2.84 | 1.98 | 5.27  |
| 4F33.PDB | OE1, E_GLN_38  | NE2, F_GLN_39 | HE22, F_GLN_39 | 2.92 | 2.06 | 5.53  |
| 4F33.PDB | O, F_SER_40    | N, F_LYS_43   | H, F_LYS_43    | 2.90 | 2.09 | 15.21 |
| 4F33.PDB | O, F_LYS_38    | N, F_GLU_46   | H, F_GLU_46    | 2.89 | 2.10 | 18.91 |
| 4F33.PDB | O, F_TRP_36    | N, F_ILE_48   | H, F_ILE_48    | 2.82 | 1.97 | 6.48  |
| 4F33.PDB | O, F_SER_59    | N, F_LEU_50   | H, F_LEU_50    | 2.90 | 2.11 | 20.04 |
| 4F33.PDB | O, F_MET_34    | N, F_ILE_51   | H, F_ILE_51    | 2.90 | 2.10 | 17.75 |
| 4F33.PDB | O, F_ALA_57    | N, F_THR_52   | H, F_THR_52    | 2.97 | 2.15 | 14.94 |
| 4F33.PDB | O, F_THR_52    | N, F_GLY_56   | H, F_GLY_56    | 2.93 | 2.22 | 29.15 |
| 4F33.PDB | OD1, F_ASN_55  | N, F_ALA_57   | H, F_ALA_57    | 2.86 | 2.00 | 3.80  |
| 4F33.PDB | O, F_LEU_50    | N, F_SER_59   | H, F_SER_59    | 2.89 | 2.09 | 17.90 |
| 4F33.PDB | O, F_ILE_48    | N, F_ASN_61   | H, F_ASN_61    | 2.97 | 2.17 | 18.69 |
| 4F33.PDB | O, F_TRP_47    | ND2, F_ASN_61 | HD21, F_ASN_61 | 2.90 | 2.07 | 11.50 |
| 4F33.PDB | OE2, F_GLU_46  | NZ, F_LYS_63  | HZ3, F_LYS_63  | 2.68 | 1.79 | 3.79  |
| 4F33.PDB | O, F_ASN_61    | N, F_PHE_64   | H, F_PHE_64    | 2.81 | 1.98 | 12.75 |
| 4F33.PDB | OD2, F_ASP_90  | NZ, F_LYS_67  | HZ2, F_LYS_67  | 2.98 | 2.09 | 4.59  |



|          |                |                |                 |      |      |       |
|----------|----------------|----------------|-----------------|------|------|-------|
| 4F33.PDB | O, F_LEU_84    | NZ, F_LYS_67   | HZ3, F_LYS_67   | 2.88 | 2.01 | 9.79  |
| 4F33.PDB | O, F_PHE_64    | N, F_ALA_68    | H, F_ALA_68     | 2.89 | 2.09 | 17.94 |
| 4F33.PDB | O, F ASP_82    | N, F_THR_69    | H, F_THR_69     | 2.89 | 2.11 | 21.20 |
| 4F33.PDB | OH, F_TYR_60   | N, F_LEU_70    | H, F_LEU_70     | 2.85 | 2.00 | 7.63  |
| 4F33.PDB | O, F_THR_78    | N, F ASP_73    | H, F ASP_73     | 2.73 | 1.90 | 11.77 |
| 4F33.PDB | O, F_CYS_22    | N, F_ALA_79    | H, F_ALA_79     | 2.88 | 2.06 | 15.43 |
| 4F33.PDB | O, F_THR_71    | N, F_TYR_80    | H, F_TYR_80     | 2.81 | 1.96 | 9.04  |
| 4F33.PDB | O, F_ILE_20    | N, F_MET_81    | H, F_MET_81     | 2.93 | 2.11 | 15.35 |
| 4F33.PDB | O, F_THR_69    | N, F ASP_82    | H, F ASP_82     | 2.94 | 2.10 | 11.40 |
| 4F33.PDB | O, F_VAL_18    | N, F_LEU_83    | H, F_LEU_83     | 2.81 | 1.97 | 10.47 |
| 4F33.PDB | O, F_LYS_67    | N, F_LEU_84    | H, F_LEU_84     | 2.89 | 2.09 | 17.45 |
| 4F33.PDB | O, F_ALA_16    | N, F_LEU_86    | H, F_LEU_86     | 2.91 | 2.07 | 9.18  |
| 4F33.PDB | OD2, F ASP_90  | N, F_THR_87    | H, F_THR_87     | 2.85 | 2.02 | 12.72 |
| 4F33.PDB | O, F_THR_87    | N, F ASP_90    | H, F ASP_90     | 2.83 | 1.99 | 10.62 |
| 4F33.PDB | O, F_VAL_115   | N, F_ALA_92    | H, F_ALA_92     | 2.97 | 2.26 | 28.93 |
| 4F33.PDB | O, F_THR_113   | N, F_TYR_94    | H, F_TYR_94     | 2.92 | 2.08 | 8.53  |
| 4F33.PDB | O, F_VAL_37    | N, F_PHE_95    | H, F_PHE_95     | 2.78 | 1.94 | 9.71  |
| 4F33.PDB | O, F ASN_35    | N, F_ALA_97    | H, F_ALA_97     | 2.84 | 2.08 | 24.00 |
| 4F33.PDB | O, F_TYR_108   | N, F ARG_98    | H, F ARG_98     | 2.82 | 2.03 | 20.08 |
| 4F33.PDB | OD1, F ASP_107 | NE, F ARG_98   | HE, F ARG_98    | 2.99 | 2.13 | 4.74  |
| 4F33.PDB | OD2, F ASP_107 | NH2, F ARG_98  | HH21, F ARG_98  | 2.77 | 1.91 | 5.42  |
| 4F33.PDB | O, F_THR_33    | N, F_GLY_99    | H, F_GLY_99     | 2.97 | 2.13 | 11.08 |
| 4F33.PDB | OD1, F ASP_102 | NE, F ARG_104  | HE, F ARG_104   | 2.84 | 1.99 | 7.33  |
| 4F33.PDB | OD2, F ASP_107 | NH1, F ARG_104 | HH11, F ARG_104 | 2.84 | 2.02 | 14.35 |
| 4F33.PDB | OD2, F ASP_102 | NH2, F ARG_104 | HH21, F ARG_104 | 2.90 | 2.10 | 17.22 |
| 4F33.PDB | OH, E_TYR_36   | N, F_PHE_106   | H, F_PHE_106    | 2.80 | 1.96 | 9.30  |
| 4F33.PDB | O, F_CYS_96    | N, F_GLY_110   | H, F_GLY_110    | 2.75 | 1.90 | 3.11  |
| 4F33.PDB | OE1, F_GLN_6   | N, F_GLY_112   | H, F_GLY_112    | 2.83 | 2.05 | 20.58 |
| 4F33.PDB | O, F_THR_94    | N, F_THR_113   | H, F_THR_113    | 2.80 | 2.02 | 20.38 |
| 4F33.PDB | O, F_SER_7     | OG1, F_THR_113 | HG1, F_THR_113  | 2.84 | 2.08 | 18.41 |
| 4F33.PDB | O, F_ALA_92    | N, F_VAL_115   | H, F_VAL_115    | 2.82 | 1.98 | 10.24 |
| 4F33.PDB | OG, F_SER_91   | N, F_VAL_117   | H, F_VAL_117    | 2.84 | 2.00 | 11.18 |
| 4F33.PDB | O, F_GLU_12    | N, F_SER_118   | H, F_SER_118    | 2.89 | 2.09 | 17.44 |
| 4F33.PDB | O, F_PHE_152   | N, F_LYS_123   | H, F_LYS_123    | 2.81 | 1.98 | 13.07 |
| 4F33.PDB | O, F ASP_150   | NZ, F_LYS_123  | HZ2, F_LYS_123  | 2.85 | 2.01 | 15.13 |
| 4F33.PDB | OE2, C_GLU_123 | N, F_GLY_124   | H, F_GLY_124    | 2.81 | 1.96 | 5.00  |
| 4F33.PDB | O, F_LYS_149   | N, F_SER_126   | H, F_SER_126    | 2.90 | 2.09 | 15.48 |
| 4F33.PDB | O, F_LEU_147   | N, F_PHE_128   | H, F_PHE_128    | 2.87 | 2.04 | 12.96 |
| 4F33.PDB | O, F_GLY_145   | N, F_LEU_130   | H, F_LEU_130    | 2.73 | 1.88 | 6.31  |
| 4F33.PDB | OG, F_SER_136  | N, F_SER_133   | H, F_SER_133    | 2.95 | 2.13 | 15.24 |
| 4F33.PDB | OG, F_SER_133  | N, F_LYS_135   | H, F_LYS_135    | 2.90 | 2.11 | 20.53 |
| 4F33.PDB | O, F_SER_133   | OG1, F_THR_137 | HG1, F_THR_137  | 2.95 | 2.23 | 24.52 |
| 4F33.PDB | O, F_SER_138   | N, F_THR_141   | H, F_THR_141    | 2.81 | 1.97 | 11.04 |
| 4F33.PDB | O, F_VAL_190   | N, F_ALA_142   | H, F_ALA_142    | 2.77 | 1.91 | 4.10  |
| 4F33.PDB | O, F_SER_136   | N, F_ALA_143   | H, F_ALA_143    | 2.80 | 1.97 | 12.99 |
| 4F33.PDB | O, F_LEU_130   | N, F_GLY_145   | H, F_GLY_145    | 2.92 | 2.16 | 24.09 |
| 4F33.PDB | O, F_PHE_128   | N, F_LEU_147   | H, F_LEU_147    | 2.82 | 1.98 | 9.09  |
| 4F33.PDB | O, F_LEU_184   | N, F_VAL_148   | H, F_VAL_148    | 2.76 | 1.91 | 9.03  |
| 4F33.PDB | O, F_SER_126   | N, F_LYS_149   | H, F_LYS_149    | 2.76 | 1.90 | 3.32  |
| 4F33.PDB | O, F_LYS_123   | N, F_PHE_152   | H, F_PHE_152    | 2.93 | 2.12 | 17.02 |
| 4F33.PDB | O, F ASN_203   | N, F_SER_159   | H, F_SER_159    | 2.97 | 2.16 | 16.38 |
| 4F33.PDB | OG, F_SER_186  | NE1, F_TRP_160 | HE1, F_TRP_160  | 3.00 | 2.15 | 9.04  |
| 4F33.PDB | O, F_ILE_201   | N, F ASN_161   | H, F ASN_161    | 2.83 | 1.99 | 9.71  |
| 4F33.PDB | OD1, F ASN_203 | N, F_SER_162   | H, F_SER_162    | 2.79 | 1.98 | 16.87 |
| 4F33.PDB | O, F_TRP_160   | N, F_GLY_163   | H, F_GLY_163    | 2.90 | 2.14 | 23.82 |
| 4F33.PDB | O, F_VAL_187   | N, F_HIS_170   | H, F_HIS_170    | 2.79 | 1.95 | 11.88 |
| 4F33.PDB | O, F_SER_185   | N, F_PHE_172   | H, F_PHE_172    | 2.94 | 2.09 | 4.01  |
| 4F33.PDB | O, F_SER_183   | N, F_VAL_175   | H, F_VAL_175    | 2.90 | 2.08 | 14.72 |

|          |                |                |                 |      |      |       |
|----------|----------------|----------------|-----------------|------|------|-------|
| 4F33.PDB | O, F.LEU_181   | N, F.GLN_177   | H, F.GLN_177    | 2.83 | 1.98 | 7.25  |
| 4F33.PDB | OD1, F.ASP_150 | NE2, F.GLN_177 | HE22, F.GLN_177 | 2.82 | 2.02 | 17.76 |
| 4F33.PDB | O, F.TYR_151   | N, F.TYR_182   | H, F.TYR_182    | 2.79 | 1.93 | 3.62  |
| 4F33.PDB | O, F.VAL_148   | N, F.LEU_184   | H, F.LEU_184    | 2.91 | 2.11 | 17.32 |
| 4F33.PDB | O, F.CYS_146   | N, F.SER_186   | H, F.SER_186    | 2.97 | 2.15 | 15.30 |
| 4F33.PDB | O, F.HIS_170   | N, F.VAL_187   | H, F.VAL_187    | 2.89 | 2.06 | 12.38 |
| 4F33.PDB | O, F.LEU_144   | N, F.VAL_188   | H, F.VAL_188    | 2.81 | 2.01 | 17.82 |
| 4F33.PDB | O, F.ALA_142   | N, F.VAL_190   | H, F.VAL_190    | 2.77 | 1.95 | 15.08 |
| 4F33.PDB | O, F.GLY_140   | N, F.SER_192   | H, F.SER_192    | 2.89 | 2.04 | 8.47  |
| 4F33.PDB | O, F.PRO_191   | N, F.SER_194   | H, F.SER_194    | 2.94 | 2.10 | 10.73 |
| 4F33.PDB | O, F.SER_194   | N, F.GLN_198   | H, F.GLN_198    | 2.74 | 1.88 | 2.67  |
| 4F33.PDB | O, F.THR_199   | NE2, F.GLN_198 | HE21, F.GLN_198 | 2.92 | 2.06 | 2.83  |
| 4F33.PDB | OD1, F.ASN_161 | N, F.ILE_201   | H, F.ILE_201    | 2.77 | 1.94 | 13.18 |
| 4F33.PDB | O, F.LYS_215   | N, F.CYS_202   | H, F.CYS_202    | 2.93 | 2.14 | 19.72 |
| 4F33.PDB | O, F.SER_159   | N, F.ASN_203   | H, F.ASN_203    | 2.82 | 1.96 | 5.68  |
| 4F33.PDB | OD1, F.ASP_214 | ND2, F.ASN_203 | HD21, F.ASN_203 | 2.95 | 2.10 | 8.40  |
| 4F33.PDB | O, F.VAL_213   | N, F.VAL_204   | H, F.VAL_204    | 2.74 | 1.89 | 7.26  |
| 4F33.PDB | O, F.THR_157   | N, F.ASN_205   | H, F.ASN_205    | 2.87 | 2.02 | 8.95  |
| 4F33.PDB | O, F.THR_211   | N, F.HIS_206   | H, F.HIS_206    | 2.87 | 2.02 | 7.60  |
| 4F33.PDB | OG, F.SER_209  | ND1, F.HIS_206 | HD1, F.HIS_206  | 2.64 | 1.82 | 13.68 |
| 4F33.PDB | O, F.PRO_153   | NE2, F.HIS_206 | HE2, F.HIS_206  | 2.81 | 1.97 | 9.86  |
| 4F33.PDB | O, F.LYS_207   | N, F.ASN_210   | H, F.ASN_210    | 2.97 | 2.15 | 14.98 |
| 4F33.PDB | O, D.ASP_214   | N, F.LYS_212   | H, F.LYS_212    | 2.94 | 2.11 | 12.64 |
| 4F33.PDB | O, F.VAL_204   | N, F.VAL_213   | H, F.VAL_213    | 2.85 | 2.02 | 13.27 |
| 4F33.PDB | O, D.LYS_212   | N, F.ASP_214   | H, F.ASP_214    | 2.84 | 2.02 | 14.84 |
| 4F33.PDB | O, F.CYS_202   | N, F.LYS_215   | H, F.LYS_215    | 2.92 | 2.10 | 15.07 |
| 4F33.PDB | OE1, E.GLU_123 | NZ, F.LYS_215  | HZ1, F.LYS_215  | 2.61 | 1.84 | 24.34 |
| 4F33.PDB | OG1, D.THR_211 | NZ, F.LYS_215  | HZ2, F.LYS_215  | 2.92 | 2.04 | 7.71  |
| 4F33.PDB | O, F.TYR_200   | N, F.VAL_217   | H, F.VAL_217    | 2.89 | 2.04 | 9.32  |
| 4F33.PDB | OG, G.SER_27   | N, G.GLU_4     | H, G.GLU_4      | 2.95 | 2.12 | 14.03 |
| 4F33.PDB | O, G.SER_25    | N, G.THR_6     | H, G.THR_6      | 2.78 | 1.93 | 4.59  |
| 4F33.PDB | O, G.TYR_86    | NE2, G.GLN_7   | HE22, G.GLN_7   | 2.90 | 2.13 | 22.62 |
| 4F33.PDB | O, G.THR_23    | N, G.SER_8     | H, G.SER_8      | 2.90 | 2.09 | 16.80 |
| 4F33.PDB | O, G.LYS_103   | N, G.MET_12    | H, G.MET_12     | 2.76 | 1.93 | 13.02 |
| 4F33.PDB | O, G.GLU_105   | N, G.ALA_14    | H, G.ALA_14     | 2.97 | 2.16 | 16.65 |
| 4F33.PDB | OE2, G.GLU_18  | N, G.SER_15    | H, G.SER_15     | 2.71 | 1.86 | 9.24  |
| 4F33.PDB | O, G.VAL_78    | N, G.GLY_17    | H, G.GLY_17     | 2.81 | 2.01 | 18.15 |
| 4F33.PDB | O, G.ILE_75    | N, G.VAL_20    | H, G.VAL_20     | 2.96 | 2.19 | 21.57 |
| 4F33.PDB | OG1, G.THR_74  | OG1, G.THR_21  | HG1, G.THR_21   | 2.73 | 1.97 | 18.47 |
| 4F33.PDB | O, G.SER_8     | OG1, G.THR_23  | H, G.THR_23     | 2.83 | 1.99 | 8.78  |
| 4F33.PDB | O, G.TYR_71    | N, G.CYS_24    | H, G.CYS_24     | 2.68 | 1.82 | 4.01  |
| 4F33.PDB | O, G.THR_6     | N, G.SER_25    | H, G.SER_25     | 2.81 | 1.96 | 7.25  |
| 4F33.PDB | O, G.ASN_69    | N, G.ALA_26    | H, G.ALA_26     | 2.79 | 1.95 | 9.77  |
| 4F33.PDB | O, G.GLN_89    | N, G.HIS_34    | H, G.HIS_34     | 2.98 | 2.11 | 0.46  |
| 4F33.PDB | O, G.ILE_48    | N, G.TRP_35    | H, G.TRP_35     | 2.66 | 1.84 | 13.67 |
| 4F33.PDB | O, G.TYR_87    | N, G.TYR_36    | H, G.TYR_36     | 2.77 | 1.96 | 14.84 |
| 4F33.PDB | O, G.LYS_45    | N, G.GLN_37    | H, G.GLN_37     | 2.88 | 2.13 | 24.53 |
| 4F33.PDB | O, G.THR_85    | N, G.GLN_38    | H, G.GLN_38     | 2.82 | 1.98 | 9.18  |
| 4F33.PDB | O, G.THR_42    | NE2, G.GLN_38  | HE21, G.GLN_38  | 2.88 | 2.05 | 12.56 |
| 4F33.PDB | O, G.GLU_81    | NZ, G.LYS_39   | HZ1, G.LYS_39   | 2.81 | 1.93 | 9.10  |
| 4F33.PDB | O, G.ASP_83    | NZ, G.LYS_39   | HZ3, G.LYS_39   | 2.78 | 1.91 | 11.96 |
| 4F33.PDB | O, G.GLN_37    | N, G.LYS_45    | H, G.LYS_45     | 2.77 | 1.97 | 18.28 |
| 4F33.PDB | O, G.TRP_35    | N, G.TRP_47    | H, G.TRP_47     | 2.83 | 2.03 | 17.67 |
| 4F33.PDB | O, G.LYS_53    | N, G.TYR_49    | H, G.TYR_49     | 2.75 | 1.94 | 15.45 |
| 4F33.PDB | O, G.MET_33    | N, G.THR_51    | H, G.THR_51     | 2.73 | 1.90 | 12.70 |
| 4F33.PDB | O, G.ASP_50    | N, G.SER_52    | H, G.SER_52     | 2.85 | 2.13 | 28.17 |
| 4F33.PDB | O, G.TYR_49    | N, G.LYS_53    | H, G.LYS_53     | 2.86 | 2.08 | 20.69 |
| 4F33.PDB | O, G.TRP_47    | N, G.ALA_55    | H, G.ALA_55     | 2.97 | 2.12 | 4.41  |

|          |                |                |                 |      |      |       |
|----------|----------------|----------------|-----------------|------|------|-------|
| 4F33.PDB | OD1, G_ASP_82  | NH2, G_ARG_61  | HH21, G_ARG_61  | 2.73 | 1.89 | 8.68  |
| 4F33.PDB | OE2, G_GLU_81  | NH2, G_ARG_61  | HH22, G_ARG_61  | 2.96 | 2.16 | 17.92 |
| 4F33.PDB | O, G_THR_74    | N, G_SER_63    | H, G_SER_63     | 2.95 | 2.19 | 22.57 |
| 4F33.PDB | O, G_ALA_26    | ND2, G_ASN_69  | HD21, G_ASN_69  | 2.91 | 2.05 | 4.65  |
| 4F33.PDB | O, G_SER_67    | N, G_SER_70    | H, G_SER_70     | 2.98 | 2.13 | 6.01  |
| 4F33.PDB | O, G_CYS_24    | N, G_TYR_71    | H, G_TYR_71     | 2.90 | 2.05 | 8.92  |
| 4F33.PDB | O, G_VAL_30    | OH, G_TYR_71   | HH, G_TYR_71    | 2.88 | 2.15 | 24.02 |
| 4F33.PDB | O, G_SER_65    | N, G_SER_72    | H, G_SER_72     | 2.77 | 1.93 | 11.28 |
| 4F33.PDB | O, G_SER_63    | N, G_THR_74    | H, G_THR_74     | 2.79 | 1.96 | 12.22 |
| 4F33.PDB | O, G_VAL_20    | N, G_ILE_75    | H, G_ILE_75     | 2.92 | 2.11 | 16.41 |
| 4F33.PDB | O, G_ARG_61    | N, G_SER_76    | H, G_SER_76     | 2.80 | 1.98 | 14.52 |
| 4F33.PDB | O, G_GLU_18    | N, G_VAL_78    | H, G_VAL_78     | 2.74 | 1.99 | 24.30 |
| 4F33.PDB | OD2, G_ASP_82  | N, G_GLU_79    | H, G_GLU_79     | 2.87 | 2.02 | 5.18  |
| 4F33.PDB | O, G_GLU_79    | N, G_ASP_82    | H, G_ASP_82     | 2.87 | 2.04 | 11.79 |
| 4F33.PDB | O, G_GLN_38    | N, G_THR_85    | H, G_THR_85     | 2.89 | 2.05 | 11.10 |
| 4F33.PDB | O, G_THR_102   | N, G_TYR_86    | H, G_TYR_86     | 2.86 | 2.02 | 10.07 |
| 4F33.PDB | O, G_TYR_36    | N, G_TYR_87    | H, G_TYR_87     | 2.88 | 2.07 | 16.64 |
| 4F33.PDB | O, G_TYR_32    | NE1, G_TRP_91  | HE1, G_TRP_91   | 2.74 | 1.97 | 22.30 |
| 4F33.PDB | OE1, G_GLN_90  | N, G_LYS_93    | H, G_LYS_93     | 2.98 | 2.15 | 12.47 |
| 4F33.PDB | O, H_TYR_60    | NE2, G_HIS_94  | HE2, G_HIS_94   | 2.97 | 2.17 | 17.68 |
| 4F33.PDB | O, G_ILE_3     | OG1, G_THR_97  | HG1, G_THR_97   | 2.79 | 1.99 | 11.42 |
| 4F33.PDB | O, G_CYS_88    | N, G_GLY_99    | H, G_GLY_99     | 2.79 | 1.97 | 13.30 |
| 4F33.PDB | OE1, G_GLN_7   | N, G_GLY_101   | H, G_GLY_101    | 2.78 | 2.01 | 21.97 |
| 4F33.PDB | O, G_TYR_86    | N, G_THR_102   | H, G_THR_102    | 2.90 | 2.07 | 12.97 |
| 4F33.PDB | O, G_PRO_9     | OG1, G_THR_102 | HG1, G_THR_102  | 2.80 | 2.04 | 18.20 |
| 4F33.PDB | O, G_ALA_10    | N, G_LYS_103   | H, G_LYS_103    | 2.82 | 1.98 | 10.32 |
| 4F33.PDB | O, G_ALA_84    | N, G_VAL_104   | H, G_VAL_104    | 2.84 | 1.98 | 2.92  |
| 4F33.PDB | O, G_MET_12    | N, G_GLU_105   | H, G_GLU_105    | 2.77 | 1.92 | 6.46  |
| 4F33.PDB | OE1, G_GLN_166 | N, G_ILE_106   | H, G_ILE_106    | 2.88 | 2.04 | 11.50 |
| 4F33.PDB | O, G_ALA_14    | N, G_LYS_107   | H, G_LYS_107    | 2.80 | 1.96 | 9.94  |
| 4F33.PDB | O, G_THR_109   | NE, G_ARG_108  | HE, G_ARG_108   | 2.74 | 1.88 | 3.40  |
| 4F33.PDB | O, G_ASP_170   | NH1, G_ARG_108 | HH11, G_ARG_108 | 2.91 | 2.09 | 13.89 |
| 4F33.PDB | O, G_TYR_140   | N, G_ALA_111   | H, G_ALA_111    | 2.91 | 2.07 | 11.81 |
| 4F33.PDB | O, G_LEU_135   | N, G_PHE_116   | H, G_PHE_116    | 2.84 | 2.01 | 14.03 |
| 4F33.PDB | O, G_VAL_133   | N, G_PHE_118   | H, G_PHE_118    | 2.82 | 2.01 | 17.24 |
| 4F33.PDB | OG, G_SER_131  | NE2, G_GLN_124 | HE22, G_GLN_124 | 2.79 | 1.93 | 5.18  |
| 4F33.PDB | O, G_GLN_124   | N, G_SER_127   | H, G_SER_127    | 2.82 | 2.03 | 19.57 |
| 4F33.PDB | O, G_LEU_125   | N, G_GLY_128   | H, G_GLY_128    | 2.86 | 2.03 | 13.69 |
| 4F33.PDB | O, G_LEU_181   | N, G_ALA_130   | H, G_ALA_130    | 2.79 | 1.94 | 9.03  |
| 4F33.PDB | O, G_LEU_179   | N, G_VAL_132   | H, G_VAL_132    | 2.82 | 1.99 | 12.45 |
| 4F33.PDB | O, G_SER_177   | N, G_CYS_134   | H, G_CYS_134    | 2.82 | 1.98 | 10.53 |
| 4F33.PDB | O, G_PHE_116   | N, G_LEU_135   | H, G_LEU_135    | 2.78 | 1.93 | 9.33  |
| 4F33.PDB | O, G_LEU_175   | N, G_LEU_136   | H, G_LEU_136    | 2.79 | 1.94 | 5.85  |
| 4F33.PDB | O, G_SER_114   | N, G_ASN_137   | H, G_ASN_137    | 2.85 | 2.02 | 14.57 |
| 4F33.PDB | O, G_TYR_173   | N, G_PHE_139   | H, G_PHE_139    | 2.87 | 2.06 | 16.25 |
| 4F33.PDB | O, G_ALA_111   | N, G_TYR_140   | H, G_TYR_140    | 2.87 | 2.06 | 17.58 |
| 4F33.PDB | O, G_GLU_195   | N, G_GLN_147   | H, G_GLN_147    | 2.86 | 2.03 | 12.62 |
| 4F33.PDB | OG, G_SER_177  | NE1, G_TRP_148 | HE1, G_TRP_148  | 2.87 | 2.04 | 13.06 |
| 4F33.PDB | O, G_ALA_193   | N, G_LYS_149   | H, G_LYS_149    | 2.82 | 1.98 | 9.73  |
| 4F33.PDB | O, G_VAL_191   | N, G_ASP_151   | H, G_ASP_151    | 2.80 | 1.96 | 11.61 |
| 4F33.PDB | O, G_VAL_150   | N, G_ALA_153   | H, G_ALA_153    | 2.97 | 2.12 | 7.09  |
| 4F33.PDB | O, G_TRP_148   | N, G_GLN_155   | H, G_GLN_155    | 2.87 | 2.02 | 6.80  |
| 4F33.PDB | OE1, G_GLN_155 | ND2, G_ASN_158 | HD22, G_ASN_158 | 2.92 | 2.10 | 14.66 |
| 4F33.PDB | O, H_LEU_176   | NE2, G_GLN_160 | HE22, G_GLN_160 | 2.89 | 2.04 | 8.42  |
| 4F33.PDB | O, G_SER_176   | N, G_SER_162   | H, G_SER_162    | 2.99 | 2.22 | 21.55 |
| 4F33.PDB | O, H_PRO_173   | OG, G_SER_162  | HG, G_SER_162   | 2.65 | 1.94 | 25.59 |
| 4F33.PDB | O, G_SER_174   | N, G_THR_164   | H, G_THR_164    | 3.00 | 2.17 | 13.79 |
| 4F33.PDB | O, G_SER_171   | NE2, G_GLN_166 | HE21, G_GLN_166 | 2.92 | 2.09 | 14.25 |

|          |                |                |                 |      |      |       |
|----------|----------------|----------------|-----------------|------|------|-------|
| 4F33.PDB | O, G_ILE_106   | NE2, G_GLN_166 | HE22, G_GLN_166 | 2.78 | 2.00 | 21.03 |
| 4F33.PDB | O, G_THR_172   | N, G_ASP_167   | H, G_ASP_167    | 3.00 | 2.15 | 7.80  |
| 4F33.PDB | OD1, G_ASP_167 | N, G_LYS_169   | H, G_LYS_169    | 2.59 | 1.77 | 13.16 |
| 4F33.PDB | OD1, G_ASP_170 | N, G_THR_172   | H, G_THR_172    | 2.88 | 2.07 | 16.47 |
| 4F33.PDB | OD1, G_ASP_170 | OG1, G_THR_172 | HG1, G_THR_172  | 2.69 | 1.89 | 8.34  |
| 4F33.PDB | O, G_PHE_139   | N, G_TYR_173   | H, G_TYR_173    | 2.81 | 1.97 | 8.53  |
| 4F33.PDB | OG1, G_THR_164 | N, G_SER_174   | H, G_SER_174    | 2.96 | 2.14 | 13.32 |
| 4F33.PDB | O, G_LEU_136   | N, G_LEU_175   | H, G_LEU_175    | 2.80 | 1.99 | 16.36 |
| 4F33.PDB | O, G_SER_162   | N, G_SER_176   | H, G_SER_176    | 2.93 | 2.11 | 14.30 |
| 4F33.PDB | O, G_CYS_134   | N, G_SER_177   | H, G_SER_177    | 2.88 | 2.06 | 13.62 |
| 4F33.PDB | O, G_GLN_160   | N, G_THR_178   | H, G_THR_178    | 2.92 | 2.10 | 14.24 |
| 4F33.PDB | O, G_VAL_132   | N, G_LEU_179   | H, G_LEU_179    | 2.85 | 2.02 | 12.70 |
| 4F33.PDB | O, G_ASN_158   | N, G_THR_180   | H, G_THR_180    | 2.97 | 2.14 | 11.60 |
| 4F33.PDB | O, G_ALA_130   | N, G_LEU_181   | H, G_LEU_181    | 2.90 | 2.07 | 12.18 |
| 4F33.PDB | O, G_GLY_128   | N, G_LYS_183   | H, G_LYS_183    | 2.88 | 2.04 | 9.29  |
| 4F33.PDB | OG, G_SER_182  | N, G_ASP_185   | H, G_ASP_185    | 2.89 | 2.09 | 18.06 |
| 4F33.PDB | O, G_SER_182   | N, G_TYR_186   | H, G_TYR_186    | 2.85 | 2.00 | 5.00  |
| 4F33.PDB | O, G_LYS_183   | N, G_GLU_187   | H, G_GLU_187    | 2.98 | 2.20 | 20.06 |
| 4F33.PDB | O, G_ASP_185   | N, G_LYS_188   | H, G_LYS_188    | 2.67 | 1.90 | 21.28 |
| 4F33.PDB | OD2, G_ASP_151 | ND1, G_HIS_189 | HD1, G_HIS_189  | 2.86 | 2.09 | 22.44 |
| 4F33.PDB | OD1, G_ASP_151 | N, G_VAL_191   | H, G_VAL_191    | 2.83 | 1.98 | 7.69  |
| 4F33.PDB | O, G_PHE_209   | N, G_TYR_192   | H, G_TYR_192    | 2.93 | 2.08 | 7.39  |
| 4F33.PDB | O, G_LYS_149   | N, G_ALA_193   | H, G_ALA_193    | 2.92 | 2.11 | 16.65 |
| 4F33.PDB | O, G_LYS_207   | N, G_CYS_194   | H, G_CYS_194    | 2.88 | 2.10 | 20.64 |
| 4F33.PDB | O, G_GLN_147   | N, G_GLU_195   | H, G_GLU_195    | 2.75 | 1.91 | 11.05 |
| 4F33.PDB | O, G_VAL_205   | N, G_VAL_196   | H, G_VAL_196    | 2.75 | 1.92 | 11.23 |
| 4F33.PDB | ND1, G_HIS_198 | N, G_GLY_200   | H, G_GLY_200    | 2.95 | 2.10 | 7.40  |
| 4F33.PDB | O, G_HIS_198   | N, G_LEU_201   | H, G_LEU_201    | 2.95 | 2.09 | 6.07  |
| 4F33.PDB | O, G_VAL_196   | N, G_VAL_205   | H, G_VAL_205    | 2.94 | 2.12 | 15.56 |
| 4F33.PDB | O, G_TYR_192   | N, G_PHE_209   | H, G_PHE_209    | 2.97 | 2.19 | 21.65 |
| 4F33.PDB | O, G_LYS_190   | N, G_ARG_211   | H, G_ARG_211    | 2.69 | 1.87 | 14.60 |
| 4F33.PDB | O, G_HIS_189   | NE, G_ARG_211  | HE, G_ARG_211   | 2.61 | 1.80 | 15.33 |
| 4F33.PDB | O, H_SER_25    | N, H_GLN_3     | H, H_GLN_3      | 2.95 | 2.13 | 15.35 |
| 4F33.PDB | O, H_LYS_23    | N, H_GLN_5     | H, H_GLN_5      | 2.86 | 2.00 | 5.15  |
| 4F33.PDB | O, H_TYR_94    | NE2, H_GLN_6   | HE22, H_GLN_6   | 2.90 | 2.09 | 16.65 |
| 4F33.PDB | O, H_SER_21    | N, H_SER_7     | H, H_SER_7      | 2.94 | 2.20 | 26.21 |
| 4F33.PDB | O, H_PRO_114   | N, H_GLU_10    | H, H_GLU_10     | 2.90 | 2.11 | 19.39 |
| 4F33.PDB | O, H_LEU_86    | N, H_GLY_15    | H, H_GLY_15     | 2.71 | 1.88 | 13.48 |
| 4F33.PDB | O, H_LEU_83    | N, H_VAL_18    | H, H_VAL_18     | 2.99 | 2.23 | 23.20 |
| 4F33.PDB | O, H_MET_81    | N, H_ILE_20    | H, H_ILE_20     | 2.88 | 2.05 | 13.37 |
| 4F33.PDB | O, H_GLN_5     | N, H_LYS_23    | H, H_LYS_23     | 2.75 | 1.91 | 8.98  |
| 4F33.PDB | O, H_SER_77    | N, H_ALA_24    | H, H_ALA_24     | 2.91 | 2.05 | 3.04  |
| 4F33.PDB | O, H_GLN_3     | N, H_SER_25    | H, H_SER_25     | 2.89 | 2.07 | 15.25 |
| 4F33.PDB | O, C_GLY_60    | N, H_PHE_29    | H, H_PHE_29     | 2.96 | 2.15 | 17.00 |
| 4F33.PDB | O, H_SER_28    | N, H_GLY_31    | H, H_GLY_31     | 3.00 | 2.15 | 9.57  |
| 4F33.PDB | O, H_GLY_99    | N, H_THR_33    | H, H_THR_33     | 2.95 | 2.14 | 17.33 |
| 4F33.PDB | O, H_ALA_97    | N, H_ASN_35    | H, H_ASN_35     | 2.77 | 1.93 | 11.02 |
| 4F33.PDB | O, H_PHE_95    | N, H_VAL_37    | H, H_VAL_37     | 2.79 | 1.98 | 16.38 |
| 4F33.PDB | O, H_GLU_46    | N, H_LYS_38    | H, H_LYS_38     | 2.77 | 1.95 | 13.91 |
| 4F33.PDB | O, H_GLU_89    | NZ, H_LYS_38   | HZ1, H_LYS_38   | 2.83 | 1.95 | 4.26  |
| 4F33.PDB | O, H_VAL_93    | N, H_GLN_39    | H, H_GLN_39     | 2.79 | 1.93 | 3.64  |
| 4F33.PDB | O, H_SER_40    | N, H_LYS_43    | H, H_LYS_43     | 2.96 | 2.14 | 14.33 |
| 4F33.PDB | O, H_LYS_38    | N, H_GLU_46    | H, H_GLU_46     | 2.92 | 2.12 | 18.59 |
| 4F33.PDB | O, H_TRP_36    | N, H_ILE_48    | H, H_ILE_48     | 2.85 | 2.00 | 7.74  |
| 4F33.PDB | O, H_SER_59    | N, H_LEU_50    | H, H_LEU_50     | 2.90 | 2.12 | 20.46 |
| 4F33.PDB | O, H_MET_34    | N, H_ILE_51    | H, H_ILE_51     | 2.91 | 2.11 | 17.46 |
| 4F33.PDB | O, H_ALA_57    | N, H_THR_52    | H, H_THR_52     | 2.92 | 2.10 | 14.38 |
| 4F33.PDB | O, H_THR_52    | N, H_GLY_56    | H, H_GLY_56     | 2.89 | 2.18 | 28.64 |

|          |                |                |                 |      |      |       |
|----------|----------------|----------------|-----------------|------|------|-------|
| 4F33.PDB | OD1, H_ASN_55  | N, H_ALA_57    | H, H_ALA_57     | 2.90 | 2.05 | 3.80  |
| 4F33.PDB | O, H_LEU_50    | N, H_SER_59    | H, H_SER_59     | 2.92 | 2.11 | 17.14 |
| 4F33.PDB | O, H_ILE_48    | N, H_ASN_61    | H, H_ASN_61     | 2.88 | 2.05 | 13.78 |
| 4F33.PDB | O, H_TRP_47    | ND2, H_ASN_61  | HD21, H_ASN_61  | 2.94 | 2.11 | 13.13 |
| 4F33.PDB | OE2, H_GLU_46  | NZ, H_LYS_63   | HZ3, H_LYS_63   | 2.72 | 1.93 | 23.08 |
| 4F33.PDB | O, H_ASN_61    | N, H_PHE_64    | H, H_PHE_64     | 2.76 | 1.93 | 12.08 |
| 4F33.PDB | O, H_PHE_64    | N, H_LYS_67    | H, H_LYS_67     | 2.99 | 2.27 | 28.17 |
| 4F33.PDB | OD2, H_ASP_90  | NZ, H_LYS_67   | HZ2, H_LYS_67   | 2.82 | 1.98 | 16.29 |
| 4F33.PDB | O, H_LEU_84    | NZ, H_LYS_67   | HZ3, H_LYS_67   | 2.97 | 2.18 | 23.42 |
| 4F33.PDB | O, H_PHE_64    | N, H_ALA_68    | H, H_ALA_68     | 2.90 | 2.09 | 16.52 |
| 4F33.PDB | O, H_ASP_82    | N, H_THR_69    | H, H_THR_69     | 2.92 | 2.16 | 23.47 |
| 4F33.PDB | OH, H_TYR_60   | N, H_LEU_70    | H, H_LEU_70     | 2.87 | 2.03 | 9.16  |
| 4F33.PDB | O, H_THR_78    | N, H_ASP_73    | H, H_ASP_73     | 2.76 | 1.93 | 11.64 |
| 4F33.PDB | O, H_CYS_22    | N, H_ALA_79    | H, H_ALA_79     | 2.86 | 2.05 | 15.52 |
| 4F33.PDB | O, H_THR_71    | N, H_TYR_80    | H, H_TYR_80     | 2.82 | 1.96 | 4.65  |
| 4F33.PDB | O, H_ILE_20    | N, H_MET_81    | H, H_MET_81     | 2.94 | 2.11 | 14.01 |
| 4F33.PDB | O, H_THR_69    | N, H_ASP_82    | H, H_ASP_82     | 2.90 | 2.07 | 11.71 |
| 4F33.PDB | O, H_VAL_18    | N, H_LEU_83    | H, H_LEU_83     | 2.79 | 1.96 | 11.28 |
| 4F33.PDB | O, H_LYS_67    | N, H_LEU_84    | H, H_LEU_84     | 2.89 | 2.08 | 16.65 |
| 4F33.PDB | O, H_ALA_16    | N, H_LEU_86    | H, H_LEU_86     | 2.90 | 2.06 | 8.91  |
| 4F33.PDB | OD2, H_ASP_90  | N, H_THR_87    | H, H_THR_87     | 2.84 | 2.01 | 13.54 |
| 4F33.PDB | O, H_THR_87    | N, H_ASP_90    | H, H_ASP_90     | 2.82 | 1.98 | 9.38  |
| 4F33.PDB | O, H_SER_88    | N, H_SER_91    | H, H_SER_91     | 2.94 | 2.08 | 5.94  |
| 4F33.PDB | O, H_VAL_115   | N, H_ALA_92    | H, H_ALA_92     | 2.98 | 2.25 | 27.64 |
| 4F33.PDB | O, H_THR_113   | N, H_TYR_94    | H, H_TYR_94     | 2.93 | 2.08 | 7.56  |
| 4F33.PDB | O, H_VAL_37    | N, H_PHE_95    | H, H_PHE_95     | 2.76 | 1.92 | 9.09  |
| 4F33.PDB | O, H_ASN_35    | N, H_ALA_97    | H, H_ALA_97     | 2.85 | 2.09 | 23.41 |
| 4F33.PDB | O, H_TYR_108   | N, H_ARG_98    | H, H_ARG_98     | 2.84 | 2.07 | 21.36 |
| 4F33.PDB | OD1, H_ASP_107 | NE, H_ARG_98   | HE, H_ARG_98    | 2.95 | 2.15 | 18.92 |
| 4F33.PDB | OD2, H_ASP_107 | NH2, H_ARG_98  | HH21, H_ARG_98  | 2.79 | 1.95 | 8.93  |
| 4F33.PDB | O, H_THR_33    | N, H_GLY_99    | H, H_GLY_99     | 2.98 | 2.14 | 10.15 |
| 4F33.PDB | OD1, H_ASP_102 | NE, H_ARG_104  | HE, H_ARG_104   | 2.85 | 2.00 | 6.80  |
| 4F33.PDB | OD2, H_ASP_107 | NH1, H_ARG_104 | HH11, H_ARG_104 | 2.85 | 2.04 | 16.23 |
| 4F33.PDB | OD2, H_ASP_102 | NH2, H_ARG_104 | HH21, H_ARG_104 | 2.93 | 2.12 | 16.50 |
| 4F33.PDB | OH, G_TYR_36   | N, H_PHE_106   | H, H_PHE_106    | 2.74 | 1.89 | 7.07  |
| 4F33.PDB | O, H_CYS_96    | N, H_GLY_110   | H, H_GLY_110    | 2.73 | 1.87 | 4.66  |
| 4F33.PDB | OE1, H_GLN_6   | N, H_GLY_112   | H, H_GLY_112    | 2.84 | 2.08 | 23.08 |
| 4F33.PDB | O, H_TYR_94    | N, H_THR_113   | H, H_THR_113    | 2.79 | 2.00 | 19.33 |
| 4F33.PDB | O, H_SER_7     | OG1, H_THR_113 | HG1, H_THR_113  | 2.86 | 2.10 | 18.89 |
| 4F33.PDB | O, H_ALA_92    | N, H_VAL_115   | H, H_VAL_115    | 2.81 | 1.98 | 12.26 |
| 4F33.PDB | OG, H_SER_91   | N, H_VAL_117   | H, H_VAL_117    | 2.86 | 2.06 | 16.73 |
| 4F33.PDB | O, H_GLU_12    | N, H_SER_118   | H, H_SER_118    | 2.89 | 2.08 | 15.90 |
| 4F33.PDB | O, H_PHE_152   | N, H_LYS_123   | H, H_LYS_123    | 2.83 | 2.00 | 12.24 |
| 4F33.PDB | O, H_ASP_150   | NZ, H_LYS_123  | HZ2, H_LYS_123  | 2.81 | 1.95 | 12.86 |
| 4F33.PDB | OE2, A_GLU_123 | N, H_GLY_124   | H, H_GLY_124    | 2.97 | 2.12 | 7.35  |
| 4F33.PDB | O, H_LYS_149   | N, H_SER_126   | H, H_SER_126    | 2.87 | 2.05 | 14.54 |
| 4F33.PDB | O, H_LEU_147   | N, H_PHE_128   | H, H_PHE_128    | 2.88 | 2.06 | 14.55 |
| 4F33.PDB | O, H_GLY_145   | N, H_LEU_130   | H, H_LEU_130    | 2.75 | 1.90 | 6.63  |
| 4F33.PDB | OG, H_SER_136  | N, H_SER_133   | H, H_SER_133    | 2.96 | 2.15 | 16.37 |
| 4F33.PDB | OG, H_SER_133  | N, H_LYS_135   | H, H_LYS_135    | 2.86 | 2.08 | 20.02 |
| 4F33.PDB | O, G_SER_208   | NZ, H_LYS_135  | HZ3, H_LYS_135  | 2.85 | 1.99 | 13.05 |
| 4F33.PDB | O, H_SER_133   | OG1, H_THR_137 | HG1, H_THR_137  | 2.95 | 2.25 | 26.10 |
| 4F33.PDB | O, H_SER_138   | N, H_THR_141   | H, H_THR_141    | 2.82 | 1.99 | 10.59 |
| 4F33.PDB | O, H_VAL_190   | N, H_ALA_142   | H, H_ALA_142    | 2.80 | 1.95 | 4.86  |
| 4F33.PDB | O, H_SER_136   | N, H_ALA_143   | H, H_ALA_143    | 2.78 | 1.96 | 14.14 |
| 4F33.PDB | O, H_VAL_188   | N, H_LEU_144   | H, H_LEU_144    | 2.99 | 2.16 | 14.52 |
| 4F33.PDB | O, H_LEU_130   | N, H_GLY_145   | H, H_GLY_145    | 2.92 | 2.15 | 21.74 |
| 4F33.PDB | O, H_PHE_128   | N, H_LEU_147   | H, H_LEU_147    | 2.83 | 1.99 | 10.04 |

|          |                |                |                 |      |      |       |
|----------|----------------|----------------|-----------------|------|------|-------|
| 4F33.PDB | O, H.LEU.184   | N, H.VAL.148   | H, H.VAL.148    | 2.77 | 1.93 | 9.98  |
| 4F33.PDB | O, H.SER.126   | N, H.LYS.149   | H, H.LYS.149    | 2.81 | 1.96 | 4.12  |
| 4F33.PDB | O, H.LYS.123   | N, H.PHE.152   | H, H.PHE.152    | 2.92 | 2.12 | 18.54 |
| 4F33.PDB | OG, H.SER.186  | NE1, H.TRP.160 | HE1, H.TRP.160  | 2.99 | 2.15 | 10.12 |
| 4F33.PDB | O, H.ILE.201   | N, H.ASN.161   | H, H.ASN.161    | 2.75 | 1.91 | 10.53 |
| 4F33.PDB | OD1, H.ASN.203 | N, H.SER.162   | H, H.SER.162    | 2.80 | 1.99 | 16.84 |
| 4F33.PDB | O, H.TRP.160   | N, H.GLY.163   | H, H.GLY.163    | 2.91 | 2.16 | 25.30 |
| 4F33.PDB | O, H.ASN.161   | N, H.ALA.164   | H, H.ALA.164    | 2.99 | 2.13 | 5.75  |
| 4F33.PDB | O, H.VAL.187   | N, H.HIS.170   | H, H.HIS.170    | 2.76 | 1.93 | 12.16 |
| 4F33.PDB | O, H.SER.185   | N, H.PHE.172   | H, H.PHE.172    | 2.96 | 2.11 | 6.73  |
| 4F33.PDB | O, H.SER.183   | N, H.VAL.175   | H, H.VAL.175    | 2.88 | 2.06 | 12.99 |
| 4F33.PDB | O, H.LEU.181   | N, H.GLN.177   | H, H.GLN.177    | 2.85 | 2.00 | 6.78  |
| 4F33.PDB | OD1, H.ASP.150 | NE2, H.GLN.177 | HE22, H.GLN.177 | 2.83 | 2.04 | 19.22 |
| 4F33.PDB | O, H.GLN.177   | N, H.GLY.180   | H, H.GLY.180    | 2.96 | 2.10 | 4.33  |
| 4F33.PDB | O, H.TYR.151   | N, H.TYR.182   | H, H.TYR.182    | 2.83 | 1.98 | 4.16  |
| 4F33.PDB | O, H.VAL.148   | N, H.LEU.184   | H, H.LEU.184    | 2.93 | 2.14 | 19.17 |
| 4F33.PDB | O, H.CYS.146   | N, H.SER.186   | H, H.SER.186    | 2.99 | 2.19 | 16.98 |
| 4F33.PDB | O, H.HIS.170   | N, H.VAL.187   | H, H.VAL.187    | 2.86 | 2.03 | 12.28 |
| 4F33.PDB | O, H.LEU.144   | N, H.VAL.188   | H, H.VAL.188    | 2.79 | 1.98 | 17.58 |
| 4F33.PDB | O, H.ALA.142   | N, H.VAL.190   | H, H.VAL.190    | 2.80 | 1.99 | 14.89 |
| 4F33.PDB | O, H.GLY.140   | N, H.SER.192   | H, H.SER.192    | 2.85 | 2.00 | 7.56  |
| 4F33.PDB | O, H.SER.194   | N, H.GLN.198   | H, H.GLN.198    | 2.75 | 1.90 | 3.78  |
| 4F33.PDB | O, H.THR.199   | NE2, H.GLN.198 | HE21, H.GLN.198 | 2.90 | 2.04 | 2.16  |
| 4F33.PDB | OD1, H.ASN.161 | N, H.ILE.201   | H, H.ILE.201    | 2.74 | 1.91 | 10.89 |
| 4F33.PDB | O, H.LYS.215   | N, H.CYS.202   | H, H.CYS.202    | 2.98 | 2.20 | 21.56 |
| 4F33.PDB | O, H.SER.159   | N, H.ASN.203   | H, H.ASN.203    | 2.79 | 1.94 | 8.15  |
| 4F33.PDB | OD1, H.ASP.214 | ND2, H.ASN.203 | HD21, H.ASN.203 | 2.91 | 2.05 | 5.75  |
| 4F33.PDB | O, H.VAL.213   | N, H.VAL.204   | H, H.VAL.204    | 2.77 | 1.91 | 5.12  |
| 4F33.PDB | O, H.THR.157   | N, H.ASN.205   | H, H.ASN.205    | 2.86 | 2.02 | 8.69  |
| 4F33.PDB | O, H.THR.211   | N, H.HIS.206   | H, H.HIS.206    | 2.87 | 2.02 | 7.96  |
| 4F33.PDB | O, H.PRO.153   | NE2, H.HIS.206 | HE2, H.HIS.206  | 2.85 | 2.00 | 9.82  |
| 4F33.PDB | O, H.LYS.207   | N, H.ASN.210   | H, H.ASN.210    | 2.94 | 2.11 | 13.37 |
| 4F33.PDB | O, H.SER.209   | OG1, H.THR.211 | HG1, H.THR.211  | 2.98 | 2.28 | 27.00 |
| 4F33.PDB | O, H.VAL.204   | N, H.VAL.213   | H, H.VAL.213    | 2.84 | 2.02 | 14.41 |
| 4F33.PDB | O, B.LYS.212   | N, H.ASP.214   | H, H.ASP.214    | 2.71 | 1.89 | 15.00 |
| 4F33.PDB | O, H.CYS.202   | N, H.LYS.215   | H, H.LYS.215    | 2.98 | 2.18 | 17.82 |
| 4F33.PDB | OE1, G.GLU.123 | NZ, H.LYS.215  | HZ1, H.LYS.215  | 2.97 | 2.19 | 24.10 |
| 4F33.PDB | OG1, B.THR.211 | NZ, H.LYS.215  | HZ2, H.LYS.215  | 2.80 | 1.95 | 14.49 |
| 4F33.PDB | O, B.ASN.210   | N, H.LYS.216   | H, H.LYS.216    | 2.82 | 2.01 | 16.40 |
| 4F33.PDB | O, H.TYR.200   | N, H.VAL.217   | H, H.VAL.217    | 2.85 | 2.01 | 9.04  |

Table 1689: 4F33-specific side chain and main chain hydrogen bonding analysis. In this table, a PDB file is specified with a four-letter PDB ID, except that the names of the PDB files corresponding to the single NMR structural model split from the NMR ensemble is specified with a four-letter PDB ID in addition to a hyphen followed by the single NMR structural model numeric ID, the residue naming scheme is **Chain ID\_residue name\_residue number**,  $\angle ADH$  represents the angle formed by acceptor (A), donor (D) and hydrogen (H) ( $\angle ADH$ ).

| PDB      | Acceptor (A)   | Donor (D)      | Hydrogen (H)    | D-A (Å) | H-A (Å) | $\angle ADH(^{\circ})$ |
|----------|----------------|----------------|-----------------|---------|---------|------------------------|
| 4F3F.PDB | O, A_SER_25    | N, A_THR_6     | H, A_THR_6      | 2.85    | 2.00    | 8.09                   |
| 4F3F.PDB | O, A_THR_23    | N, A_SER_8     | H, A_SER_8      | 2.94    | 2.15    | 20.13                  |
| 4F3F.PDB | O, A_LYS_103   | N, A_MET_12    | H, A_MET_12     | 2.79    | 1.97    | 13.63                  |
| 4F3F.PDB | O, A_GLU_105   | N, A_ALA_14    | H, A_ALA_14     | 2.99    | 2.22    | 22.34                  |
| 4F3F.PDB | O, A_VAL_78    | N, A_GLY_17    | H, A_GLY_17     | 2.86    | 2.04    | 14.29                  |
| 4F3F.PDB | O, A_SER_15    | N, A_GLU_18    | H, A_GLU_18     | 3.00    | 2.16    | 11.55                  |
| 4F3F.PDB | O, A_ILE_75    | N, A_VAL_20    | H, A_VAL_20     | 2.94    | 2.13    | 15.17                  |
| 4F3F.PDB | O, A_LEU_73    | N, A_MET_22    | H, A_MET_22     | 2.83    | 2.00    | 12.74                  |
| 4F3F.PDB | O, A_SER_8     | N, A_THR_23    | H, A_THR_23     | 2.79    | 1.94    | 4.31                   |
| 4F3F.PDB | O, A_TYR_71    | N, A_CYS_24    | H, A_CYS_24     | 2.77    | 1.94    | 12.44                  |
| 4F3F.PDB | O, A_THR_6     | N, A_SER_25    | H, A_SER_25     | 2.94    | 2.11    | 13.40                  |
| 4F3F.PDB | O, A_ASN_69    | N, A_ALA_26    | H, A_ALA_26     | 2.80    | 1.96    | 8.83                   |
| 4F3F.PDB | O, A_GLU_4     | N, A_SER_27    | H, A_SER_27     | 2.90    | 2.18    | 27.52                  |
| 4F3F.PDB | O, A_GLN_89    | N, A_HIS_34    | H, A_HIS_34     | 2.93    | 2.11    | 13.52                  |
| 4F3F.PDB | O, A_ILE_48    | N, A_TRP_35    | H, A_TRP_35     | 2.83    | 2.01    | 14.96                  |
| 4F3F.PDB | O, A_TYR_87    | N, A_TYR_36    | H, A_TYR_36     | 2.88    | 2.12    | 23.08                  |
| 4F3F.PDB | O, A_LYS_45    | N, A_GLN_37    | H, A_GLN_37     | 2.83    | 2.04    | 20.59                  |
| 4F3F.PDB | O, A_THR_85    | N, A_GLN_38    | H, A_GLN_38     | 2.89    | 2.06    | 12.49                  |
| 4F3F.PDB | O, A_THR_42    | NE2, A_GLN_38  | HE21, A_GLN_38  | 2.97    | 2.19    | 20.06                  |
| 4F3F.PDB | OE1, B_GLN_39  | NE2, A_GLN_38  | HE22, A_GLN_38  | 2.88    | 2.04    | 8.75                   |
| 4F3F.PDB | O, A_GLU_81    | NZ, A_LYS_39   | HZ1, A_LYS_39   | 2.81    | 1.98    | 18.05                  |
| 4F3F.PDB | O, A_LYS_39    | OG1, A_THR_42  | HG1, A_THR_42   | 3.00    | 2.19    | 8.01                   |
| 4F3F.PDB | O, A_GLN_37    | N, A_LYS_45    | H, A_LYS_45     | 2.76    | 2.04    | 27.53                  |
| 4F3F.PDB | O, B_ARG_104   | NH1, A_ARG_46  | HH11, A_ARG_46  | 2.93    | 2.16    | 22.46                  |
| 4F3F.PDB | O, A_TRP_35    | N, A_TRP_47    | H, A_TRP_47     | 2.80    | 1.94    | 4.03                   |
| 4F3F.PDB | O, A_LYS_53    | N, A_TYR_49    | H, A_TYR_49     | 2.96    | 2.17    | 19.74                  |
| 4F3F.PDB | ND1, A_HIS_34  | N, A_ASP_50    | H, A_ASP_50     | 2.97    | 2.24    | 27.25                  |
| 4F3F.PDB | O, A_MET_33    | N, A_THR_51    | H, A_THR_51     | 2.64    | 1.85    | 18.18                  |
| 4F3F.PDB | OD1, A_ASP_82  | NH2, A_ARG_61  | HH21, A_ARG_61  | 2.60    | 1.79    | 16.27                  |
| 4F3F.PDB | OE2, A_GLU_81  | NH2, A_ARG_61  | HH22, A_ARG_61  | 2.95    | 2.12    | 13.66                  |
| 4F3F.PDB | O, A_THR_74    | N, A_SER_63    | H, A_SER_63     | 2.85    | 2.05    | 18.09                  |
| 4F3F.PDB | O, A_CYS_24    | N, A_TYR_71    | H, A_TYR_71     | 2.90    | 2.04    | 4.79                   |
| 4F3F.PDB | O, A_SER_65    | N, A_SER_72    | H, A_SER_72     | 2.82    | 1.98    | 10.66                  |
| 4F3F.PDB | O, A_MET_22    | N, A_LEU_73    | H, A_LEU_73     | 2.92    | 2.10    | 15.06                  |
| 4F3F.PDB | O, A_SER_63    | N, A_THR_74    | H, A_THR_74     | 2.88    | 2.03    | 8.55                   |
| 4F3F.PDB | OG1, A_THR_21  | OG1, A_THR_74  | HG1, A_THR_74   | 2.77    | 2.04    | 22.11                  |
| 4F3F.PDB | O, A_VAL_20    | N, A_ILE_75    | H, A_ILE_75     | 2.85    | 2.01    | 11.39                  |
| 4F3F.PDB | O, A_ARG_61    | N, A_SER_76    | H, A_SER_76     | 2.86    | 2.02    | 10.12                  |
| 4F3F.PDB | O, A_GLU_18    | N, A_VAL_78    | H, A_VAL_78     | 2.86    | 2.14    | 28.13                  |
| 4F3F.PDB | O, A_GLU_79    | N, A_ASP_82    | H, A_ASP_82     | 2.80    | 1.94    | 6.21                   |
| 4F3F.PDB | O, A_GLN_38    | N, A_THR_85    | H, A_THR_85     | 2.92    | 2.06    | 3.36                   |
| 4F3F.PDB | O, A_TYR_36    | N, A_TYR_87    | H, A_TYR_87     | 2.93    | 2.15    | 21.63                  |
| 4F3F.PDB | O, A_LYS_93    | NE2, A_GLN_90  | HE22, A_GLN_90  | 2.99    | 2.13    | 6.87                   |
| 4F3F.PDB | OE1, A_GLN_90  | N, A_LYS_93    | H, A_LYS_93     | 2.97    | 2.13    | 10.10                  |
| 4F3F.PDB | OG, B_SER_59   | NE2, A_HIS_94  | HE2, A_HIS_94   | 2.82    | 2.03    | 19.68                  |
| 4F3F.PDB | O, A_ILE_3     | OG1, A_THR_97  | HG1, A_THR_97   | 2.80    | 2.02    | 14.86                  |
| 4F3F.PDB | O, A_CYS_88    | N, A_GLY_99    | H, A_GLY_99     | 2.99    | 2.20    | 20.16                  |
| 4F3F.PDB | OE1, A_GLN_7   | N, A_GLY_101   | H, A_GLY_101    | 2.71    | 1.99    | 27.52                  |
| 4F3F.PDB | O, A_TYR_86    | N, A_THR_102   | H, A_THR_102    | 2.92    | 2.11    | 15.50                  |
| 4F3F.PDB | O, A_PRO_9     | OG1, A_THR_102 | HG1, A_THR_102  | 2.92    | 2.17    | 21.04                  |
| 4F3F.PDB | O, A_ALA_10    | N, A_LYS_103   | H, A_LYS_103    | 2.75    | 1.91    | 11.21                  |
| 4F3F.PDB | O, A_ALA_84    | N, A_VAL_104   | H, A_VAL_104    | 2.95    | 2.11    | 8.56                   |
| 4F3F.PDB | O, A_MET_12    | N, A_GLU_105   | H, A_GLU_105    | 2.87    | 2.10    | 22.23                  |
| 4F3F.PDB | OE1, A_GLN_166 | N, A_ILE_106   | H, A_ILE_106    | 2.99    | 2.18    | 16.49                  |
| 4F3F.PDB | O, A_ALA_14    | N, A_LYS_107   | H, A_LYS_107    | 2.82    | 1.98    | 10.57                  |
| 4F3F.PDB | O, A_THR_109   | NE, A_ARG_108  | HE, A_ARG_108   | 2.88    | 2.12    | 22.89                  |
| 4F3F.PDB | O, A_ASP_170   | NH1, A_ARG_108 | HH11, A_ARG_108 | 2.89    | 2.10    | 20.47                  |

|          |                |                |                 |      |      |       |
|----------|----------------|----------------|-----------------|------|------|-------|
| 4F3F.PDB | O, A_TYR_140   | N, A_ALA_111   | H, A_ALA_111    | 2.92 | 2.09 | 12.11 |
| 4F3F.PDB | O, A_LEU_135   | N, A_PHE_116   | H, A_PHE_116    | 2.90 | 2.08 | 13.90 |
| 4F3F.PDB | O, A_VAL_133   | N, A_PHE_118   | H, A_PHE_118    | 2.78 | 1.95 | 12.67 |
| 4F3F.PDB | OG, A_SER_131  | NE2, A_GLN_124 | HE22, A_GLN_124 | 2.84 | 2.05 | 19.05 |
| 4F3F.PDB | O, A_LEU_181   | N, A_ALA_130   | H, A_ALA_130    | 2.80 | 1.96 | 8.40  |
| 4F3F.PDB | O, A_LEU_179   | N, A_VAL_132   | H, A_VAL_132    | 2.96 | 2.17 | 19.13 |
| 4F3F.PDB | O, A_SER_177   | N, A_CYS_134   | H, A_CYS_134    | 2.84 | 2.04 | 17.70 |
| 4F3F.PDB | O, A_PHE_116   | N, A_LEU_135   | H, A_LEU_135    | 2.66 | 1.81 | 8.41  |
| 4F3F.PDB | O, A_LEU_175   | N, A_LEU_136   | H, A_LEU_136    | 2.88 | 2.03 | 5.32  |
| 4F3F.PDB | O, A_SER_114   | N, A_ASN_137   | H, A_ASN_137    | 2.75 | 1.89 | 4.10  |
| 4F3F.PDB | O, A_TYR_173   | N, A_PHE_139   | H, A_PHE_139    | 2.82 | 2.03 | 20.49 |
| 4F3F.PDB | O, A_ALA_111   | N, A_TYR_140   | H, A_TYR_140    | 2.95 | 2.18 | 22.48 |
| 4F3F.PDB | O, A_ALA_193   | N, A_LYS_149   | H, A_LYS_149    | 3.00 | 2.22 | 21.52 |
| 4F3F.PDB | O, A_VAL_191   | N, A_ASP_151   | H, A_ASP_151    | 2.71 | 1.88 | 11.67 |
| 4F3F.PDB | O, A_VAL_150   | N, A_ALA_153   | H, A_ALA_153    | 2.83 | 2.03 | 17.81 |
| 4F3F.PDB | O, A_TRP_148   | N, A_GLN_155   | H, A_GLN_155    | 2.92 | 2.17 | 25.11 |
| 4F3F.PDB | O, A_SER_176   | N, A_SER_162   | H, A_SER_162    | 2.98 | 2.24 | 25.07 |
| 4F3F.PDB | O, A_SER_174   | N, A_THR_164   | H, A_THR_164    | 2.92 | 2.10 | 15.13 |
| 4F3F.PDB | O, A_THR_172   | N, A_ASP_167   | H, A_ASP_167    | 2.94 | 2.11 | 11.83 |
| 4F3F.PDB | OD1, A_ASP_167 | N, A_LYS_169   | H, A_LYS_169    | 2.79 | 1.96 | 13.81 |
| 4F3F.PDB | OD1, A_ASP_170 | OG1, A_THR_172 | HG1, A_THR_172  | 2.85 | 2.05 | 10.97 |
| 4F3F.PDB | O, A_PHE_139   | N, A_TYR_173   | H, A_TYR_173    | 2.86 | 2.03 | 12.73 |
| 4F3F.PDB | O, A_SER_162   | N, A_SER_176   | H, A_SER_176    | 2.91 | 2.10 | 15.82 |
| 4F3F.PDB | O, A_CYS_134   | N, A_SER_177   | H, A_SER_177    | 2.93 | 2.13 | 19.09 |
| 4F3F.PDB | O, A_GLN_160   | N, A_THR_178   | H, A_THR_178    | 2.92 | 2.12 | 17.96 |
| 4F3F.PDB | O, A_VAL_132   | N, A_LEU_179   | H, A_LEU_179    | 2.93 | 2.14 | 19.16 |
| 4F3F.PDB | O, A_ALA_130   | N, A_LEU_181   | H, A_LEU_181    | 2.80 | 1.95 | 8.13  |
| 4F3F.PDB | O, A_SER_182   | N, A_TYR_186   | H, A_TYR_186    | 2.99 | 2.15 | 10.88 |
| 4F3F.PDB | OD1, A_ASP_151 | N, A_VAL_191   | H, A_VAL_191    | 2.94 | 2.11 | 13.49 |
| 4F3F.PDB | O, A_PHE_209   | N, A_TYR_192   | H, A_TYR_192    | 2.94 | 2.10 | 9.21  |
| 4F3F.PDB | O, A_GLN_147   | N, A_GLU_195   | H, A_GLU_195    | 2.80 | 1.99 | 16.60 |
| 4F3F.PDB | O, A_VAL_205   | N, A_VAL_196   | H, A_VAL_196    | 2.78 | 1.93 | 8.20  |
| 4F3F.PDB | ND1, A_HIS_198 | N, A_GLY_200   | H, A_GLY_200    | 2.95 | 2.12 | 12.01 |
| 4F3F.PDB | O, A_HIS_198   | N, A_LEU_201   | H, A_LEU_201    | 2.90 | 2.07 | 12.31 |
| 4F3F.PDB | O, B_TYR_94    | NE2, B_GLN_6   | HE22, B_GLN_6   | 2.92 | 2.11 | 17.10 |
| 4F3F.PDB | O, B_PRO_114   | N, B_GLU_10    | H, B_GLU_10     | 2.98 | 2.18 | 17.64 |
| 4F3F.PDB | O, B_LEU_86    | N, B_GLY_15    | H, B_GLY_15     | 2.56 | 1.75 | 16.93 |
| 4F3F.PDB | O, B_LYS_13    | N, B_ALA_16    | H, B_ALA_16     | 2.90 | 2.04 | 5.29  |
| 4F3F.PDB | O, B_LEU_83    | N, B_VAL_18    | H, B_VAL_18     | 2.95 | 2.18 | 22.39 |
| 4F3F.PDB | O, B_GLN_5     | N, B_LYS_23    | H, B_LYS_23     | 2.93 | 2.10 | 13.11 |
| 4F3F.PDB | O, B_SER_77    | N, B_ALA_24    | H, B_ALA_24     | 2.82 | 2.01 | 16.18 |
| 4F3F.PDB | O, B_GLN_3     | N, B_SER_25    | H, B_SER_25     | 3.00 | 2.19 | 16.92 |
| 4F3F.PDB | O, B_SER_28    | N, B_GLY_31    | H, B_GLY_31     | 2.71 | 1.95 | 22.79 |
| 4F3F.PDB | O, B_ALA_97    | N, B_ASN_35    | H, B_ASN_35     | 2.89 | 2.09 | 18.86 |
| 4F3F.PDB | O, B_GLY_49    | N, B_TRP_36    | H, B_TRP_36     | 3.00 | 2.19 | 17.54 |
| 4F3F.PDB | O, B_PHE_95    | N, B_VAL_37    | H, B_VAL_37     | 2.87 | 2.08 | 19.73 |
| 4F3F.PDB | O, B_GLU_46    | N, B_LYS_38    | H, B_LYS_38     | 2.87 | 2.05 | 15.48 |
| 4F3F.PDB | O, B_GLU_89    | NZ, B_LYS_38   | HZ1, B_LYS_38   | 2.93 | 2.08 | 14.15 |
| 4F3F.PDB | O, B_VAL_93    | N, B_GLN_39    | H, B_GLN_39     | 2.84 | 2.02 | 15.17 |
| 4F3F.PDB | OD1, B_ASN_35  | NE1, B_TRP_47  | HE1, B_TRP_47   | 2.99 | 2.19 | 19.59 |
| 4F3F.PDB | O, B_TRP_36    | N, B_ILE_48    | H, B_ILE_48     | 2.96 | 2.11 | 6.75  |
| 4F3F.PDB | O, B_SER_59    | N, B_LEU_50    | H, B_LEU_50     | 2.89 | 2.11 | 20.92 |
| 4F3F.PDB | O, B_MET_34    | N, B_ILE_51    | H, B_ILE_51     | 2.99 | 2.27 | 27.72 |
| 4F3F.PDB | O, B_THR_52    | N, B_GLY_56    | H, B_GLY_56     | 2.97 | 2.22 | 25.34 |
| 4F3F.PDB | OD1, B_ASN_55  | N, B_ALA_57    | H, B_ALA_57     | 2.90 | 2.06 | 10.30 |
| 4F3F.PDB | O, B_LEU_50    | N, B_SER_59    | H, B_SER_59     | 2.93 | 2.13 | 17.76 |
| 4F3F.PDB | O, B_ILE_48    | N, B_ASN_61    | H, B_ASN_61     | 2.87 | 2.04 | 12.30 |
| 4F3F.PDB | O, B_TRP_47    | ND2, B_ASN_61  | HD21, B_ASN_61  | 2.71 | 1.89 | 13.91 |



|          |                |                |                 |      |      |       |
|----------|----------------|----------------|-----------------|------|------|-------|
| 4F3F.PDB | O, B_ASN_61    | N, B_PHE_64    | H, B_PHE_64     | 2.78 | 1.97 | 15.06 |
| 4F3F.PDB | O, B_GLN_62    | N, B_ARG_65    | H, B_ARG_65     | 2.89 | 2.05 | 11.05 |
| 4F3F.PDB | OD2, B_ASP_90  | NZ, B_LYS_67   | HZ2, B_LYS_67   | 2.92 | 2.05 | 9.99  |
| 4F3F.PDB | O, B_PHE_64    | N, B_ALA_68    | H, B_ALA_68     | 2.96 | 2.20 | 23.34 |
| 4F3F.PDB | O, B_ASP_82    | N, B_THR_69    | H, B_THR_69     | 2.93 | 2.18 | 24.51 |
| 4F3F.PDB | O, B_THR_78    | N, B_ASP_73    | H, B_ASP_73     | 2.77 | 1.93 | 10.54 |
| 4F3F.PDB | O, B_TYR_54    | NZ, B_LYS_74   | HZ2, B_LYS_74   | 2.82 | 1.94 | 9.19  |
| 4F3F.PDB | O, B_LYS_74    | N, B_SER_77    | H, B_SER_77     | 2.92 | 2.08 | 10.24 |
| 4F3F.PDB | O, B_SER_76    | OG1, B_THR_78  | HG1, B_THR_78   | 2.88 | 2.12 | 18.89 |
| 4F3F.PDB | O, B_CYS_22    | N, B_ALA_79    | H, B_ALA_79     | 2.86 | 2.03 | 14.35 |
| 4F3F.PDB | O, B_THR_71    | N, B_TYR_80    | H, B_TYR_80     | 2.91 | 2.08 | 12.13 |
| 4F3F.PDB | O, B_ILE_20    | N, B_MET_81    | H, B_MET_81     | 2.89 | 2.08 | 15.65 |
| 4F3F.PDB | O, B_THR_69    | N, B_ASP_82    | H, B_ASP_82     | 2.91 | 2.07 | 10.66 |
| 4F3F.PDB | O, B_VAL_18    | N, B_LEU_83    | H, B_LEU_83     | 2.87 | 2.02 | 5.50  |
| 4F3F.PDB | O, B_LYS_67    | N, B_LEU_84    | H, B_LEU_84     | 2.90 | 2.07 | 12.20 |
| 4F3F.PDB | O, B_ALA_16    | N, B_LEU_86    | H, B_LEU_86     | 2.91 | 2.08 | 13.35 |
| 4F3F.PDB | OD2, B_ASP_90  | N, B_THR_87    | H, B_THR_87     | 2.74 | 1.92 | 13.61 |
| 4F3F.PDB | O, B_THR_87    | N, B_ASP_90    | H, B_ASP_90     | 2.93 | 2.08 | 9.70  |
| 4F3F.PDB | O, B_VAL_115   | N, B_ALA_92    | H, B_ALA_92     | 2.95 | 2.23 | 27.95 |
| 4F3F.PDB | O, B_THR_113   | N, B_TYR_94    | H, B_TYR_94     | 2.79 | 1.96 | 11.98 |
| 4F3F.PDB | O, B_VAL_37    | N, B_PHE_95    | H, B_PHE_95     | 2.81 | 2.00 | 16.62 |
| 4F3F.PDB | O, B_ASN_35    | N, B_ALA_97    | H, B_ALA_97     | 2.93 | 2.17 | 24.23 |
| 4F3F.PDB | O, B_TYR_108   | N, B_ARG_98    | H, B_ARG_98     | 2.77 | 2.02 | 24.77 |
| 4F3F.PDB | OD2, B_ASP_107 | NH2, B_ARG_98  | HH21, B_ARG_98  | 2.79 | 1.95 | 9.80  |
| 4F3F.PDB | O, B_GLY_105   | N, B_GLY_100   | H, B_GLY_100    | 2.89 | 2.13 | 23.94 |
| 4F3F.PDB | OE1, C_GLU_52  | N, B_ASP_102   | H, B_ASP_102    | 2.88 | 2.08 | 17.53 |
| 4F3F.PDB | O, B_GLY_103   | N, B_GLY_105   | H, B_GLY_105    | 2.80 | 2.09 | 28.59 |
| 4F3F.PDB | OH, A_TYR_36   | N, B_PHE_106   | H, B_PHE_106    | 2.71 | 1.88 | 12.56 |
| 4F3F.PDB | O, B_CYS_96    | N, B_GLY_110   | H, B_GLY_110    | 2.79 | 1.94 | 7.86  |
| 4F3F.PDB | OE1, B_GLN_6   | N, B_GLY_112   | H, B_GLY_112    | 2.83 | 2.12 | 28.70 |
| 4F3F.PDB | O, B_TYR_94    | N, B_THR_113   | H, B_THR_113    | 2.82 | 2.00 | 14.66 |
| 4F3F.PDB | O, B_SER_7     | OG1, B_THR_113 | HG1, B_THR_113  | 2.72 | 1.93 | 13.91 |
| 4F3F.PDB | O, B_ALA_92    | N, B_VAL_115   | H, B_VAL_115    | 2.81 | 1.96 | 5.43  |
| 4F3F.PDB | OG, B_SER_91   | N, B_VAL_117   | H, B_VAL_117    | 2.69 | 1.83 | 2.50  |
| 4F3F.PDB | OG, B_SER_118  | N, B_ALA_120   | H, B_ALA_120    | 2.75 | 2.02 | 26.82 |
| 4F3F.PDB | O, B_PHE_152   | N, B_LYS_123   | H, B_LYS_123    | 2.85 | 2.11 | 25.39 |
| 4F3F.PDB | O, B_LEU_147   | N, B_PHE_128   | H, B_PHE_128    | 2.79 | 2.01 | 20.40 |
| 4F3F.PDB | O, B_GLY_145   | N, B_LEU_130   | H, B_LEU_130    | 2.57 | 1.73 | 11.24 |
| 4F3F.PDB | O, B_LEU_130   | N, B_GLY_145   | H, B_GLY_145    | 2.80 | 2.01 | 19.86 |
| 4F3F.PDB | O, B_SER_186   | N, B_CYS_146   | H, B_CYS_146    | 2.73 | 1.98 | 24.62 |
| 4F3F.PDB | O, B_PHE_128   | N, B_LEU_147   | H, B_LEU_147    | 2.70 | 1.84 | 3.31  |
| 4F3F.PDB | O, B_LEU_184   | N, B_VAL_148   | H, B_VAL_148    | 2.84 | 2.01 | 12.24 |
| 4F3F.PDB | O, B_SER_126   | N, B_LYS_149   | H, B_LYS_149    | 2.81 | 2.00 | 15.44 |
| 4F3F.PDB | O, B_LYS_123   | N, B_PHE_152   | H, B_PHE_152    | 2.80 | 2.03 | 23.11 |
| 4F3F.PDB | O, B_ASN_205   | N, B_THR_157   | H, B_THR_157    | 2.70 | 1.85 | 8.13  |
| 4F3F.PDB | O, B_ILE_201   | N, B_ASN_161   | H, B_ASN_161    | 2.74 | 1.89 | 7.43  |
| 4F3F.PDB | O, B_ASN_161   | N, B_ALA_164   | H, B_ALA_164    | 2.98 | 2.15 | 14.27 |
| 4F3F.PDB | O, B_VAL_187   | N, B_HIS_170   | H, B_HIS_170    | 2.83 | 1.99 | 10.01 |
| 4F3F.PDB | OD1, A_ASN_138 | NE2, B_HIS_170 | HE2, B_HIS_170  | 2.82 | 2.05 | 21.56 |
| 4F3F.PDB | O, B_SER_185   | N, B_PHE_172   | H, B_PHE_172    | 2.99 | 2.14 | 4.25  |
| 4F3F.PDB | O, B_SER_183   | N, B_VAL_175   | H, B_VAL_175    | 2.79 | 1.99 | 18.03 |
| 4F3F.PDB | O, B_LEU_181   | N, B_GLN_177   | H, B_GLN_177    | 2.69 | 1.88 | 16.92 |
| 4F3F.PDB | OD1, B_ASP_150 | NE2, B_GLN_177 | HE22, B_GLN_177 | 2.87 | 2.13 | 25.54 |
| 4F3F.PDB | O, B_GLN_177   | N, B_GLY_180   | H, B_GLY_180    | 2.83 | 2.02 | 16.47 |
| 4F3F.PDB | O, B_TYR_151   | N, B_TYR_182   | H, B_TYR_182    | 2.87 | 2.02 | 3.69  |
| 4F3F.PDB | O, B_CYS_146   | N, B_SER_186   | H, B_SER_186    | 2.83 | 2.01 | 14.97 |
| 4F3F.PDB | O, B_HIS_170   | N, B_VAL_187   | H, B_VAL_187    | 2.77 | 1.93 | 9.44  |
| 4F3F.PDB | O, B_LEU_144   | N, B_VAL_188   | H, B_VAL_188    | 2.86 | 2.09 | 23.17 |

|          |                |                |                |      |      |       |
|----------|----------------|----------------|----------------|------|------|-------|
| 4F3F.PDB | O, B_ALA_142   | N, B_VAL_190   | H, B_VAL_190   | 2.86 | 2.06 | 18.75 |
| 4F3F.PDB | OD1, B_ASN_161 | N, B_ILE_201   | H, B_ILE_201   | 2.88 | 2.06 | 14.25 |
| 4F3F.PDB | O, B_SER_159   | N, B_ASN_203   | H, B_ASN_203   | 2.81 | 1.96 | 4.97  |
| 4F3F.PDB | O, B_VAL_213   | N, B_VAL_204   | H, B_VAL_204   | 2.70 | 1.90 | 17.22 |
| 4F3F.PDB | O, B_THR_211   | N, B_HIS_206   | H, B_HIS_206   | 2.82 | 2.01 | 16.21 |
| 4F3F.PDB | OG, B_SER_209  | ND1, B_HIS_206 | HD1, B_HIS_206 | 2.43 | 1.61 | 13.98 |
| 4F3F.PDB | O, B_PRO_153   | NE2, B_HIS_206 | HE2, B_HIS_206 | 2.65 | 1.82 | 11.74 |
| 4F3F.PDB | OE1, C_GLN_40  | N, C_ILE_16    | H, C_ILE_16    | 2.59 | 1.73 | 3.34  |
| 4F3F.PDB | OE1, C_GLU_27  | N, C_LYS_24    | H, C_LYS_24    | 2.86 | 2.05 | 15.66 |
| 4F3F.PDB | O, B_ASP_102   | NZ, C_LYS_24   | HZ2, C_LYS_24  | 2.85 | 2.03 | 18.08 |
| 4F3F.PDB | OD1, B_ASP_102 | N, C_LYS_25    | H, C_LYS_25    | 2.86 | 2.02 | 9.58  |
| 4F3F.PDB | OH, B_TYR_101  | NZ, C_LYS_25   | HZ3, C_LYS_25  | 2.87 | 2.11 | 26.18 |
| 4F3F.PDB | OH, A_TYR_32   | NE1, C_TRP_26  | HE1, C_TRP_26  | 2.97 | 2.17 | 18.16 |
| 4F3F.PDB | O, C_LYS_24    | N, C_LEU_28    | H, C_LEU_28    | 2.97 | 2.15 | 14.14 |
| 4F3F.PDB | O, C_LEU_28    | N, C_CYS_31    | H, C_CYS_31    | 2.99 | 2.25 | 25.66 |
| 4F3F.PDB | OD1, C_ASP_33  | N, C_LEU_36    | H, C_LEU_36    | 2.84 | 2.00 | 10.02 |
| 4F3F.PDB | O, C_ALA_34    | N, C_ALA_38    | H, C_ALA_38    | 2.78 | 1.99 | 18.86 |
| 4F3F.PDB | O, C_LEU_36    | OG1, C_THR_39  | HG1, C_THR_39  | 2.91 | 2.17 | 21.49 |
| 4F3F.PDB | OE2, C_GLU_15  | NH2, C_ARG_43  | HH21, C_ARG_43 | 2.88 | 2.04 | 9.30  |
| 4F3F.PDB | O, C_VAL_44    | N, C_ILE_47    | H, C_ILE_47    | 2.93 | 2.16 | 22.22 |
| 4F3F.PDB | O, C_ILE_47    | N, C_PHE_49    | H, C_PHE_49    | 2.71 | 1.99 | 27.94 |
| 4F3F.PDB | OE1, C_GLN_53  | N, C_THR_50    | H, C_THR_50    | 2.83 | 2.01 | 14.01 |
| 4F3F.PDB | O, C_TYR_23    | NE2, C_GLN_53  | HE21, C_GLN_53 | 2.91 | 2.11 | 17.04 |
| 4F3F.PDB | O, C_ILE_21    | NE2, C_GLN_53  | HE22, C_GLN_53 | 2.85 | 2.03 | 15.04 |
| 4F3F.PDB | O, C_THR_50    | N, C_LEU_54    | H, C_LEU_54    | 2.77 | 1.94 | 11.60 |
| 4F3F.PDB | O, C_TYR_51    | N, C_ASP_55    | H, C_ASP_55    | 2.90 | 2.12 | 22.28 |
| 4F3F.PDB | O, C_LEU_54    | N, C_LYS_58    | H, C_LYS_58    | 2.82 | 2.01 | 16.54 |
| 4F3F.PDB | O, C_ASP_55    | N, C_HIS_59    | H, C_HIS_59    | 2.98 | 2.22 | 24.03 |
| 4F3F.PDB | O, C_GLU_29    | NZ, C_LYS_60   | HZ1, C_LYS_60  | 2.68 | 1.83 | 14.40 |
| 4F3F.PDB | O, C_HIS_59    | N, C_ASP_62    | H, C_ASP_62    | 2.90 | 2.16 | 25.96 |
| 4F3F.PDB | O, C_HIS_59    | N, C_GLU_63    | H, C_GLU_63    | 2.98 | 2.18 | 17.58 |

Table 1690: 4F3F-specific side chain and main chain hydrogen bonding analysis. In this table, a PDB file is specified with a four-letter PDB ID, except that the names of the PDB files corresponding to the single NMR structural model split from the NMR ensemble is specified with a four-letter PDB ID in addition to a hyphen followed by the single NMR structural model numeric ID, the residue naming scheme is **Chain ID\_residue name\_residue number**,  $\angle ADH$  represents the angle formed by acceptor (A), donor (D) and hydrogen (H) ( $\angle ADH$ ).

| PDB      | Acceptor (A)  | Donor (D)     | Hydrogen (H)   | D-A (Å) | H-A (Å) | $\angle ADH(^{\circ})$ |
|----------|---------------|---------------|----------------|---------|---------|------------------------|
| 4JAM.PDB | O, H_SER_25   | N, H_GLN_3    | H, H_GLN_3     | 2.94    | 2.14    | 17.76                  |
| 4JAM.PDB | O, H_THR_23   | N, H_GLN_5    | H, H_GLN_5     | 3.00    | 2.20    | 17.90                  |
| 4JAM.PDB | O, H_THR_21   | N, H_SER_7    | H, H_SER_7     | 2.81    | 2.01    | 18.59                  |
| 4JAM.PDB | O, H_VAL_82C  | N, H_SER_15   | H, H_SER_15    | 2.81    | 1.98    | 12.83                  |
| 4JAM.PDB | O, H_LYS_13   | N, H_GLU_16   | H, H_GLU_16    | 3.00    | 2.20    | 18.36                  |
| 4JAM.PDB | O, H_LEU_82   | N, H_LEU_18   | H, H_LEU_18    | 2.84    | 2.06    | 21.67                  |
| 4JAM.PDB | O, H_LEU_80   | N, H_LEU_20   | H, H_LEU_20    | 2.89    | 2.05    | 11.57                  |
| 4JAM.PDB | O, H_PHE_78   | N, H_CYS_22   | H, H_CYS_22    | 2.73    | 1.91    | 13.99                  |
| 4JAM.PDB | O, H_GLN_5    | N, H_THR_23   | H, H_THR_23    | 2.84    | 2.01    | 12.14                  |
| 4JAM.PDB | O, H_ASP_76   | N, H_VAL_24   | H, H_VAL_24    | 2.88    | 2.03    | 6.27                   |
| 4JAM.PDB | O, H_GLN_3    | N, H_SER_25   | H, H_SER_25    | 2.95    | 2.17    | 20.66                  |
| 4JAM.PDB | O, H_GLY_30   | OG1, H_THR_32 | HG1, H_THR_32  | 2.84    | 2.06    | 16.49                  |
| 4JAM.PDB | O, H_LEU_95   | N, H_TYR_33   | H, H_TYR_33    | 2.76    | 1.93    | 13.12                  |
| 4JAM.PDB | O, H_ILE_51   | N, H_TRP_34   | H, H_TRP_34    | 2.84    | 2.05    | 18.90                  |
| 4JAM.PDB | O, H_MET_29   | NE1, H_TRP_34 | HE1, H_TRP_34  | 2.94    | 2.08    | 6.03                   |
| 4JAM.PDB | O, H_ALA_93   | N, H_SER_35   | H, H_SER_35    | 2.84    | 2.00    | 9.25                   |
| 4JAM.PDB | O, H_GLY_49   | N, H_TRP_36   | H, H_TRP_36    | 2.94    | 2.10    | 11.93                  |
| 4JAM.PDB | O, H_PHE_91   | N, H_LEU_37   | H, H_LEU_37    | 2.84    | 2.01    | 12.67                  |
| 4JAM.PDB | O, H_GLU_46   | N, H_ARG_38   | H, H_ARG_38    | 2.86    | 2.06    | 18.02                  |
| 4JAM.PDB | OE2, H_GLU_46 | NE, H_ARG_38  | HE, H_ARG_38   | 2.93    | 2.10    | 13.53                  |
| 4JAM.PDB | OH, H_TYR_90  | NH1, H_ARG_38 | HH11, H_ARG_38 | 2.92    | 2.12    | 17.99                  |
| 4JAM.PDB | OD1, H_ASP_86 | NH1, H_ARG_38 | HH12, H_ARG_38 | 2.91    | 2.07    | 10.41                  |
| 4JAM.PDB | O, H_VAL_89   | N, H_LEU_39   | H, H_LEU_39    | 2.84    | 2.08    | 24.06                  |
| 4JAM.PDB | O, H_ARG_38   | N, H_GLU_46   | H, H_GLU_46    | 2.84    | 2.01    | 13.22                  |
| 4JAM.PDB | O, H_TRP_36   | N, H_ILE_48   | H, H_ILE_48    | 2.87    | 2.03    | 11.32                  |
| 4JAM.PDB | O, H_ASN_58   | N, H_TYR_50   | H, H_TYR_50    | 2.84    | 2.06    | 20.47                  |
| 4JAM.PDB | O, H_TRP_34   | N, H_ILE_51   | H, H_ILE_51    | 2.88    | 2.15    | 26.94                  |
| 4JAM.PDB | O, H_GLU_56   | N, H_PHE_52   | H, H_PHE_52    | 2.96    | 2.12    | 11.30                  |
| 4JAM.PDB | O, H_PHE_52   | N, H_GLY_55   | H, H_GLY_55    | 2.76    | 1.91    | 7.28                   |
| 4JAM.PDB | O, H_TYR_50   | N, H_ASN_58   | H, H_ASN_58    | 2.98    | 2.17    | 16.49                  |
| 4JAM.PDB | O, H_ILE_48   | N, H_SER_60   | H, H_SER_60    | 2.89    | 2.04    | 4.59                   |
| 4JAM.PDB | O, H_LEU_63   | N, H_ARG_66   | H, H_ARG_66    | 2.96    | 2.10    | 3.45                   |
| 4JAM.PDB | O, H_ARG_82A  | NH1, H_ARG_66 | HH11, H_ARG_66 | 2.94    | 2.15    | 19.87                  |
| 4JAM.PDB | OD1, H_ASP_86 | NH2, H_ARG_66 | HH22, H_ARG_66 | 2.96    | 2.12    | 9.52                   |
| 4JAM.PDB | O, H_ARG_81   | N, H_SER_68   | H, H_SER_68    | 2.89    | 2.11    | 20.79                  |
| 4JAM.PDB | OH, H_TYR_59  | N, H_ILE_69   | H, H_ILE_69    | 2.96    | 2.15    | 16.37                  |
| 4JAM.PDB | O, H_GLN_77   | N, H_ASP_72   | H, H_ASP_72    | 2.79    | 1.94    | 5.32                   |
| 4JAM.PDB | OD1, H_ASP_72 | N, H_SER_74   | H, H_SER_74    | 2.98    | 2.20    | 21.77                  |
| 4JAM.PDB | OD1, H_ASP_72 | N, H_GLU_75   | H, H_GLU_75    | 2.97    | 2.14    | 12.50                  |
| 4JAM.PDB | O, H_CYS_22   | N, H_PHE_78   | H, H_PHE_78    | 2.92    | 2.11    | 17.57                  |
| 4JAM.PDB | O, H_SER_70   | N, H_SER_79   | H, H_SER_79    | 2.91    | 2.12    | 20.02                  |
| 4JAM.PDB | O, H_LEU_20   | N, H_LEU_80   | H, H_LEU_80    | 2.92    | 2.08    | 12.05                  |
| 4JAM.PDB | O, H_SER_68   | N, H_ARG_81   | H, H_ARG_81    | 2.90    | 2.07    | 12.47                  |
| 4JAM.PDB | O, H_LEU_18   | N, H_LEU_82   | H, H_LEU_82    | 2.90    | 2.10    | 17.80                  |
| 4JAM.PDB | O, H_ARG_66   | N, H_ARG_82A  | H, H_ARG_82A   | 2.87    | 2.03    | 10.53                  |
| 4JAM.PDB | OD2, H_ASP_86 | N, H_THR_83   | H, H_THR_83    | 2.93    | 2.14    | 18.89                  |
| 4JAM.PDB | O, H_THR_83   | N, H_ASP_86   | H, H_ASP_86    | 2.85    | 2.00    | 7.55                   |
| 4JAM.PDB | O, H_ALA_84   | N, H_THR_87   | H, H_THR_87    | 2.98    | 2.13    | 7.55                   |
| 4JAM.PDB | O, H_LEU_39   | N, H_VAL_89   | H, H_VAL_89    | 2.92    | 2.09    | 11.66                  |
| 4JAM.PDB | O, H_SER_107  | N, H_TYR_90   | H, H_TYR_90    | 2.92    | 2.07    | 8.56                   |
| 4JAM.PDB | O, H_LEU_37   | N, H_PHE_91   | H, H_PHE_91    | 2.79    | 1.93    | 6.64                   |
| 4JAM.PDB | O, H_SER_35   | N, H_ALA_93   | H, H_ALA_93    | 2.97    | 2.20    | 22.59                  |
| 4JAM.PDB | O, H_ARG_101  | N, H_SER_94   | H, H_SER_94    | 2.87    | 2.08    | 19.41                  |
| 4JAM.PDB | O, H_GLY_31   | N, H_ARG_97   | H, H_ARG_97    | 2.96    | 2.11    | 7.24                   |
| 4JAM.PDB | O, H_LEU_100  | N, H_ALA_100C | H, H_ALA_100C  | 3.00    | 2.15    | 9.56                   |
| 4JAM.PDB | OH, L_TYR_36  | N, H_PHE_100E | H, H_PHE_100E  | 2.85    | 2.03    | 15.20                  |
| 4JAM.PDB | O, H_SER_94   | N, H_ARG_101  | H, H_ARG_101   | 2.76    | 1.92    | 10.57                  |

|          |                |                |                |      |      |       |
|----------|----------------|----------------|----------------|------|------|-------|
| 4JAM.PDB | O, H_CYS_92    | N, H_GLY_104   | H, H_GLY_104   | 2.85 | 2.01 | 11.27 |
| 4JAM.PDB | O, H_TYR_90    | N, H_SER_107   | H, H_SER_107   | 2.95 | 2.16 | 20.47 |
| 4JAM.PDB | O, H_SER_7     | OG, H_SER_107  | HG, H_SER_107  | 2.70 | 1.93 | 17.20 |
| 4JAM.PDB | O, H_ALA_88    | N, H_VAL_109   | H, H_VAL_109   | 2.86 | 2.01 | 8.44  |
| 4JAM.PDB | OG1, H_THR_87  | N, H_VAL_111   | H, H_VAL_111   | 2.96 | 2.11 | 6.95  |
| 4JAM.PDB | O, H_PHE_146   | N, H_LYS_117   | H, H_LYS_117   | 2.84 | 2.00 | 10.63 |
| 4JAM.PDB | O, H_ASP_144   | NZ, H_LYS_117  | HZ2, H_LYS_117 | 2.90 | 2.10 | 21.43 |
| 4JAM.PDB | O, H_LYS_143   | N, H_SER_120   | H, H_SER_120   | 2.96 | 2.16 | 18.52 |
| 4JAM.PDB | O, H_LEU_141   | N, H_PHE_122   | H, H_PHE_122   | 2.88 | 2.04 | 12.44 |
| 4JAM.PDB | O, H_GLY_139   | N, H_LEU_124   | H, H_LEU_124   | 2.76 | 1.91 | 9.61  |
| 4JAM.PDB | OG, H_SER_127  | N, H_LYS_129   | H, H_LYS_129   | 2.99 | 2.25 | 26.12 |
| 4JAM.PDB | O, H_VAL_184   | N, H_ALA_136   | H, H_ALA_136   | 2.89 | 2.08 | 16.20 |
| 4JAM.PDB | O, H_LEU_124   | N, H_GLY_139   | H, H_GLY_139   | 2.92 | 2.13 | 20.18 |
| 4JAM.PDB | O, H_SER_180   | N, H_CYS_140   | H, H_CYS_140   | 2.84 | 2.07 | 21.53 |
| 4JAM.PDB | O, H_PHE_122   | N, H_LEU_141   | H, H_LEU_141   | 2.77 | 1.93 | 9.15  |
| 4JAM.PDB | O, H_LEU_178   | N, H_VAL_142   | H, H_VAL_142   | 2.76 | 1.91 | 9.10  |
| 4JAM.PDB | O, H_SER_120   | N, H_LYS_143   | H, H_LYS_143   | 2.77 | 1.92 | 7.28  |
| 4JAM.PDB | OD1, H_ASP_144 | NZ, H_LYS_143  | HZ2, H_LYS_143 | 3.00 | 2.12 | 8.81  |
| 4JAM.PDB | O, H_TYR_176   | N, H_TYR_145   | H, H_TYR_145   | 2.91 | 2.10 | 17.24 |
| 4JAM.PDB | O, H_LYS_117   | N, H_PHE_146   | H, H_PHE_146   | 2.94 | 2.14 | 18.10 |
| 4JAM.PDB | O, H_ASN_197   | N, H_SER_153   | H, H_SER_153   | 2.89 | 2.07 | 14.46 |
| 4JAM.PDB | OG, H_SER_180  | NE1, H_TRP_154 | HE1, H_TRP_154 | 2.95 | 2.10 | 8.20  |
| 4JAM.PDB | O, H_ILE_195   | N, H_ASN_155   | H, H_ASN_155   | 2.94 | 2.10 | 11.47 |
| 4JAM.PDB | OD1, H_ASN_197 | N, H_SER_156   | H, H_SER_156   | 2.74 | 1.93 | 17.72 |
| 4JAM.PDB | O, H_TRP_154   | N, H_GLY_157   | H, H_GLY_157   | 2.90 | 2.12 | 19.88 |
| 4JAM.PDB | O, H_VAL_181   | N, H_HIS_164   | H, H_HIS_164   | 2.85 | 2.02 | 12.88 |
| 4JAM.PDB | OG, H_SER_180  | OG1, H_THR_165 | HG1, H_THR_165 | 2.85 | 2.09 | 18.68 |
| 4JAM.PDB | O, H_SER_179   | N, H_PHE_166   | H, H_PHE_166   | 2.96 | 2.10 | 3.06  |
| 4JAM.PDB | O, H_SER_177   | N, H_VAL_169   | H, H_VAL_169   | 2.88 | 2.09 | 20.11 |
| 4JAM.PDB | O, H_LEU_175   | N, H_GLN_171   | H, H_GLN_171   | 2.88 | 2.02 | 6.22  |
| 4JAM.PDB | O, H_GLN_171   | N, H_GLY_174   | H, H_GLY_174   | 2.89 | 2.04 | 7.16  |
| 4JAM.PDB | O, H_TYR_145   | N, H_TYR_176   | H, H_TYR_176   | 2.77 | 1.92 | 3.97  |
| 4JAM.PDB | O, H_VAL_142   | N, H_LEU_178   | H, H_LEU_178   | 2.91 | 2.13 | 21.00 |
| 4JAM.PDB | O, H_CYS_140   | N, H_SER_180   | H, H_SER_180   | 3.00 | 2.18 | 15.61 |
| 4JAM.PDB | O, H_HIS_164   | N, H_VAL_181   | H, H_VAL_181   | 2.91 | 2.06 | 7.14  |
| 4JAM.PDB | O, H_LEU_138   | N, H_VAL_182   | H, H_VAL_182   | 2.78 | 1.95 | 12.87 |
| 4JAM.PDB | O, H_GLY_162   | N, H_THR_183   | H, H_THR_183   | 2.94 | 2.15 | 19.24 |
| 4JAM.PDB | O, H_GLY_134   | N, H_SER_186   | H, H_SER_186   | 2.99 | 2.13 | 1.16  |
| 4JAM.PDB | O, H_PRO_185   | N, H_SER_188   | H, H_SER_188   | 2.94 | 2.11 | 13.31 |
| 4JAM.PDB | O, H_SER_188   | N, H_GLN_192   | H, H_GLN_192   | 2.79 | 1.94 | 7.97  |
| 4JAM.PDB | OD1, H_ASN_155 | N, H_ILE_195   | H, H_ILE_195   | 2.97 | 2.17 | 18.26 |
| 4JAM.PDB | O, H_LYS_209   | N, H_CYS_196   | H, H_CYS_196   | 2.89 | 2.09 | 19.00 |
| 4JAM.PDB | O, H_SER_153   | N, H_ASN_197   | H, H_ASN_197   | 2.82 | 1.97 | 5.10  |
| 4JAM.PDB | O, H_VAL_207   | N, H_VAL_198   | H, H_VAL_198   | 2.79 | 1.94 | 6.21  |
| 4JAM.PDB | O, H_THR_151   | N, H_ASN_199   | H, H_ASN_199   | 2.92 | 2.08 | 11.31 |
| 4JAM.PDB | O, H_THR_205   | N, H_HIS_200   | H, H_HIS_200   | 2.85 | 1.99 | 2.37  |
| 4JAM.PDB | OG, H_SER_203  | ND1, H_HIS_200 | HD1, H_HIS_200 | 2.70 | 1.91 | 20.45 |
| 4JAM.PDB | O, H_PRO_147   | NE2, H_HIS_200 | HE2, H_HIS_200 | 2.80 | 1.96 | 10.13 |
| 4JAM.PDB | O, H_LYS_201   | N, H_ASN_204   | H, H_ASN_204   | 2.95 | 2.12 | 12.20 |
| 4JAM.PDB | O, H_VAL_198   | N, H_VAL_207   | H, H_VAL_207   | 2.89 | 2.08 | 17.27 |
| 4JAM.PDB | O, H_CYS_196   | N, H_LYS_209   | H, H_LYS_209   | 2.97 | 2.17 | 17.34 |
| 4JAM.PDB | O, H_TYR_194   | N, H_VAL_211   | H, H_VAL_211   | 2.86 | 2.01 | 8.16  |
| 4JAM.PDB | O, L_TYR_86    | NE2, L_GLN_6   | HE22, L_GLN_6  | 2.86 | 2.03 | 12.40 |
| 4JAM.PDB | O, L_GLN_103   | N, L_VAL_11    | H, L_VAL_11    | 2.91 | 2.06 | 8.42  |
| 4JAM.PDB | OE1, L_GLN_17  | N, L_SER_14    | H, L_SER_14    | 2.84 | 2.00 | 10.61 |
| 4JAM.PDB | O, L_ILE_75    | N, L_ALA_19    | H, L_ALA_19    | 2.99 | 2.17 | 15.72 |
| 4JAM.PDB | O, L_LEU_73    | N, L_ILE_21    | H, L_ILE_21    | 2.83 | 1.99 | 10.81 |
| 4JAM.PDB | O, L_ALA_71    | N, L_CYS_23    | H, L_CYS_23    | 2.74 | 2.01 | 26.68 |

|          |                 |                |                 |      |      |       |
|----------|-----------------|----------------|-----------------|------|------|-------|
| 4JAM.PDB | O, L_THR_5      | N, L_SER_24    | H, L_SER_24     | 2.92 | 2.08 | 11.35 |
| 4JAM.PDB | O, L_SER_69     | N, L_ALA_26    | H, L_ALA_26     | 2.89 | 2.06 | 12.83 |
| 4JAM.PDB | OD1, H_ASN_100B | ND2, L_ASN_32  | HD21, L_ASN_32  | 2.96 | 2.21 | 25.94 |
| 4JAM.PDB | OD1, L_ASN_51   | N, L_VAL_33    | H, L_VAL_33     | 2.88 | 2.05 | 13.33 |
| 4JAM.PDB | O, L_ILE_48     | N, L_TRP_35    | H, L_TRP_35     | 2.89 | 2.14 | 24.66 |
| 4JAM.PDB | O, L_TYR_87     | N, L_TYR_36    | H, L_TYR_36     | 2.84 | 2.01 | 12.44 |
| 4JAM.PDB | O, L_GLU_45     | N, L_GLN_37    | H, L_GLN_37     | 2.80 | 1.97 | 12.63 |
| 4JAM.PDB | OH, L_TYR_86    | NE2, L_GLN_37  | HE21, L_GLN_37  | 2.92 | 2.07 | 7.82  |
| 4JAM.PDB | O, L_ASP_85     | N, L_VAL_38    | H, L_VAL_38     | 2.71 | 1.87 | 12.07 |
| 4JAM.PDB | O, L_ILE_81     | NZ, L_LYS_39   | HZ3, L_LYS_39   | 2.71 | 1.89 | 18.99 |
| 4JAM.PDB | O, L_TRP_35     | N, L_VAL_47    | H, L_VAL_47     | 2.89 | 2.06 | 14.03 |
| 4JAM.PDB | O, L_LYS_53     | N, L_PHE_49    | H, L_PHE_49     | 2.86 | 2.03 | 12.66 |
| 4JAM.PDB | O, L_VAL_33     | N, L_ASN_51    | H, L_ASN_51     | 2.91 | 2.07 | 10.53 |
| 4JAM.PDB | O, L_GLU_50     | N, L_TYR_52    | H, L_TYR_52     | 2.89 | 2.17 | 28.38 |
| 4JAM.PDB | O, L_PHE_49     | N, L_LYS_53    | H, L_LYS_53     | 2.85 | 2.05 | 18.62 |
| 4JAM.PDB | OE1, L_GLU_50   | NZ, L_LYS_53   | HZ1, L_LYS_53   | 2.81 | 1.96 | 13.53 |
| 4JAM.PDB | OD2, L_ASP_82   | NE, L_ARG_61   | HE, L_ARG_61    | 2.81 | 2.02 | 19.36 |
| 4JAM.PDB | OD1, L_ASP_82   | NH2, L_ARG_61  | HH21, L_ARG_61  | 2.93 | 2.10 | 13.29 |
| 4JAM.PDB | O, L_THR_74     | N, L_SER_63    | H, L_SER_63     | 2.92 | 2.09 | 12.30 |
| 4JAM.PDB | O, L_ALA_26     | NZ, L_LYS_66   | HZ1, L_LYS_66   | 2.91 | 2.11 | 21.70 |
| 4JAM.PDB | O, L_GLY_68     | NZ, L_LYS_66   | HZ3, L_LYS_66   | 2.98 | 2.22 | 27.29 |
| 4JAM.PDB | O, L_CYS_23     | N, L_ALA_71    | H, L_ALA_71     | 2.82 | 2.01 | 15.87 |
| 4JAM.PDB | O, L_SER_65     | N, L_THR_72    | H, L_THR_72     | 2.77 | 1.93 | 11.94 |
| 4JAM.PDB | O, L_ILE_21     | N, L_LEU_73    | H, L_LEU_73     | 2.77 | 1.96 | 15.27 |
| 4JAM.PDB | O, L_SER_63     | N, L_THR_74    | H, L_THR_74     | 2.90 | 2.05 | 4.48  |
| 4JAM.PDB | O, L_ALA_19     | N, L_ILE_75    | H, L_ILE_75     | 2.91 | 2.09 | 14.28 |
| 4JAM.PDB | OD2, L_ASP_82   | N, L_GLN_79    | H, L_GLN_79     | 2.89 | 2.04 | 5.61  |
| 4JAM.PDB | O, L_GLN_79     | N, L_ASP_82    | H, L_ASP_82     | 2.89 | 2.09 | 18.18 |
| 4JAM.PDB | O, L_VAL_38     | N, L_ASP_85    | H, L_ASP_85     | 2.90 | 2.08 | 16.10 |
| 4JAM.PDB | O, L_THR_102    | N, L_TYR_86    | H, L_TYR_86     | 2.86 | 2.04 | 14.55 |
| 4JAM.PDB | O, L_TYR_36     | N, L_TYR_87    | H, L_TYR_87     | 2.99 | 2.18 | 17.93 |
| 4JAM.PDB | O, L_VAL_97     | N, L_VAL_90    | H, L_VAL_90     | 2.92 | 2.09 | 13.43 |
| 4JAM.PDB | O, L_THR_95A    | N, L_ASP_92    | H, L_ASP_92     | 2.92 | 2.16 | 23.57 |
| 4JAM.PDB | OD1, L_ASP_92   | N, L_PHE_94    | H, L_PHE_94     | 2.87 | 2.09 | 20.85 |
| 4JAM.PDB | OD1, L_ASP_92   | N, L_SER_95    | H, L_SER_95     | 2.87 | 2.05 | 13.98 |
| 4JAM.PDB | O, L_SER_95     | N, L_PHE_96    | H, L_PHE_96     | 2.80 | 2.09 | 28.58 |
| 4JAM.PDB | O, L_VAL_90     | N, L_VAL_97    | H, L_VAL_97     | 2.88 | 2.03 | 5.98  |
| 4JAM.PDB | O, L_CYS_88     | N, L_GLY_99    | H, L_GLY_99     | 2.82 | 1.99 | 13.21 |
| 4JAM.PDB | O, L_TYR_86     | N, L_THR_102   | H, L_THR_102    | 2.90 | 2.13 | 22.21 |
| 4JAM.PDB | O, L_PRO_7      | OG1, L_THR_102 | HG1, L_THR_102  | 2.58 | 1.77 | 7.88  |
| 4JAM.PDB | O, L_PRO_8      | N, L_GLN_103   | H, L_GLN_103    | 2.91 | 2.06 | 9.20  |
| 4JAM.PDB | O, L_ALA_84     | N, L_VAL_104   | H, L_VAL_104    | 2.83 | 1.97 | 5.25  |
| 4JAM.PDB | OE1, L_GLU_83   | N, L_VAL_106   | H, L_VAL_106    | 2.88 | 2.04 | 10.37 |
| 4JAM.PDB | O, L_VAL_13     | N, L_LEU_106A  | H, L_LEU_106A   | 2.89 | 2.06 | 12.78 |
| 4JAM.PDB | OH, L_TYR_172   | NH2, L_ARG_107 | HH22, L_ARG_107 | 2.87 | 2.14 | 27.08 |
| 4JAM.PDB | O, L_ASN_170    | NE2, L_GLN_108 | HE22, L_GLN_108 | 2.96 | 2.17 | 20.42 |
| 4JAM.PDB | OE1, L_GLU_198  | NZ, L_LYS_110  | HZ2, L_LYS_110  | 2.60 | 1.75 | 13.04 |
| 4JAM.PDB | O, L_TYR_140    | N, L_ALA_111   | H, L_ALA_111    | 2.92 | 2.08 | 10.21 |
| 4JAM.PDB | O, L_SER_137    | N, L_THR_114   | H, L_THR_114    | 2.88 | 2.05 | 12.38 |
| 4JAM.PDB | O, L_LEU_135    | N, L_THR_116   | H, L_THR_116    | 2.92 | 2.09 | 14.50 |
| 4JAM.PDB | O, L_VAL_133    | N, L_PHE_118   | H, L_PHE_118    | 2.86 | 2.02 | 11.47 |
| 4JAM.PDB | O, L_SER_122    | N, L_GLN_126   | H, L_GLN_126    | 2.95 | 2.16 | 20.22 |
| 4JAM.PDB | O, L_LEU_125    | N, L_ASN_128   | H, L_ASN_128    | 2.93 | 2.12 | 17.43 |
| 4JAM.PDB | OE2, L_GLU_124  | OG1, L_THR_131 | HG1, L_THR_131  | 2.56 | 1.86 | 25.46 |
| 4JAM.PDB | O, L_LEU_178    | N, L_LEU_132   | H, L_LEU_132    | 2.88 | 2.05 | 11.45 |
| 4JAM.PDB | O, L_SER_176    | N, L_CYS_134   | H, L_CYS_134    | 2.82 | 1.98 | 10.00 |
| 4JAM.PDB | O, L_THR_116    | N, L_LEU_135   | H, L_LEU_135    | 2.80 | 1.96 | 9.63  |
| 4JAM.PDB | O, L_ALA_174    | N, L_ILE_136   | H, L_ILE_136    | 2.86 | 2.07 | 20.07 |

|          |                |                |                |      |      |       |
|----------|----------------|----------------|----------------|------|------|-------|
| 4JAM.PDB | O, L_THR_114   | N, L_SER_137   | H, L_SER_137   | 2.99 | 2.19 | 17.72 |
| 4JAM.PDB | OE1, L_GLN_167 | N, L_ASP_138   | H, L_ASP_138   | 2.84 | 2.00 | 8.06  |
| 4JAM.PDB | O, L_ALA_111   | N, L_TYR_140   | H, L_TYR_140   | 2.99 | 2.16 | 14.54 |
| 4JAM.PDB | O, L_GLN_194   | N, L_ALA_147   | H, L_ALA_147   | 2.82 | 1.99 | 11.47 |
| 4JAM.PDB | OG, L_SER_176  | NE1, L_TRP_148 | HE1, L_TRP_148 | 2.87 | 2.03 | 8.58  |
| 4JAM.PDB | O, L_SER_192   | N, L_LYS_149   | H, L_LYS_149   | 2.97 | 2.15 | 15.62 |
| 4JAM.PDB | OE1, L_GLU_203 | NZ, L_LYS_149  | HZ2, L_LYS_149 | 2.76 | 1.94 | 19.38 |
| 4JAM.PDB | O, L_SER_153   | N, L_ALA_150   | H, L_ALA_150   | 2.77 | 1.99 | 21.36 |
| 4JAM.PDB | O, L_SER_190   | N, L_ASP_151   | H, L_ASP_151   | 2.76 | 1.91 | 6.56  |
| 4JAM.PDB | O, L_ALA_150   | N, L_SER_153   | H, L_SER_153   | 2.98 | 2.14 | 10.89 |
| 4JAM.PDB | O, L_TRP_148   | N, L_VAL_155   | H, L_VAL_155   | 2.93 | 2.10 | 14.25 |
| 4JAM.PDB | O, L_TYR_177   | N, L_GLU_160   | H, L_GLU_160   | 2.98 | 2.18 | 18.13 |
| 4JAM.PDB | O, L_SER_175   | N, L_THR_162   | H, L_THR_162   | 2.83 | 2.01 | 13.96 |
| 4JAM.PDB | O, L_ALA_173   | N, L_SER_165   | H, L_SER_165   | 2.87 | 2.08 | 18.46 |
| 4JAM.PDB | O, L_LYS_171   | N, L_GLN_167   | H, L_GLN_167   | 2.72 | 1.88 | 10.56 |
| 4JAM.PDB | OD1, L_ASN_169 | N, L_LYS_171   | H, L_LYS_171   | 2.95 | 2.10 | 8.57  |
| 4JAM.PDB | O, L_PHE_139   | N, L_TYR_172   | H, L_TYR_172   | 2.85 | 2.06 | 19.58 |
| 4JAM.PDB | O, L_SER_165   | N, L_ALA_173   | H, L_ALA_173   | 2.90 | 2.09 | 17.11 |
| 4JAM.PDB | O, L_ILE_136   | N, L_ALA_174   | H, L_ALA_174   | 2.73 | 1.92 | 17.17 |
| 4JAM.PDB | OG1, L_THR_162 | N, L_SER_175   | H, L_SER_175   | 2.85 | 2.04 | 16.03 |
| 4JAM.PDB | O, L_CYS_134   | N, L_SER_176   | H, L_SER_176   | 2.90 | 2.09 | 17.03 |
| 4JAM.PDB | O, L_GLU_160   | N, L_TYR_177   | H, L_TYR_177   | 2.83 | 2.06 | 21.58 |
| 4JAM.PDB | O, L_GLY_158   | N, L_SER_179   | H, L_SER_179   | 2.81 | 1.99 | 14.68 |
| 4JAM.PDB | OE1, L_GLN_184 | N, L_THR_181   | H, L_THR_181   | 2.99 | 2.16 | 13.42 |
| 4JAM.PDB | OG1, L_THR_181 | N, L_GLN_184   | H, L_GLN_184   | 2.98 | 2.15 | 12.48 |
| 4JAM.PDB | O, L_PRO_182   | N, L_LYS_186   | H, L_LYS_186   | 2.91 | 2.10 | 17.39 |
| 4JAM.PDB | O, L_GLN_184   | ND1, L_HIS_188 | HD1, L_HIS_188 | 2.79 | 1.96 | 11.98 |
| 4JAM.PDB | O, L_VAL_206   | N, L_TYR_191   | H, L_TYR_191   | 2.94 | 2.12 | 15.63 |
| 4JAM.PDB | O, L_LYS_149   | N, L_SER_192   | H, L_SER_192   | 2.93 | 2.14 | 19.54 |
| 4JAM.PDB | O, L_LYS_204   | N, L_CYS_193   | H, L_CYS_193   | 2.94 | 2.17 | 21.83 |
| 4JAM.PDB | O, L_ALA_147   | N, L_GLN_194   | H, L_GLN_194   | 2.78 | 1.94 | 10.07 |
| 4JAM.PDB | O, L_VAL_202   | N, L_VAL_195   | H, L_VAL_195   | 2.79 | 1.94 | 8.00  |
| 4JAM.PDB | O, L_THR_145   | N, L_THR_196   | H, L_THR_196   | 2.89 | 2.05 | 11.25 |
| 4JAM.PDB | O, L_SER_200   | N, L_HIS_197   | H, L_HIS_197   | 2.89 | 2.06 | 12.19 |
| 4JAM.PDB | O, L_PRO_141   | NE2, L_HIS_197 | HE2, L_HIS_197 | 2.88 | 2.09 | 19.08 |
| 4JAM.PDB | O, L_HIS_197   | N, L_SER_200   | H, L_SER_200   | 2.90 | 2.08 | 13.58 |
| 4JAM.PDB | O, B_THR_201   | N, L_THR_201   | H, L_THR_201   | 2.84 | 2.04 | 18.18 |
| 4JAM.PDB | O, L_VAL_195   | N, L_VAL_202   | H, L_VAL_202   | 2.85 | 2.05 | 16.95 |
| 4JAM.PDB | O, B_GLY_199   | N, L_GLU_203   | H, L_GLU_203   | 2.91 | 2.13 | 21.03 |
| 4JAM.PDB | O, L_CYS_193   | N, L_LYS_204   | H, L_LYS_204   | 2.98 | 2.16 | 14.76 |
| 4JAM.PDB | OG, L_SER_192  | OG1, L_THR_205 | HG1, L_THR_205 | 2.80 | 2.01 | 12.51 |
| 4JAM.PDB | O, L_TYR_191   | N, L_VAL_206   | H, L_VAL_206   | 2.94 | 2.11 | 11.22 |
| 4JAM.PDB | O, A_SER_25    | N, A_GLN_3     | H, A_GLN_3     | 2.94 | 2.10 | 9.95  |
| 4JAM.PDB | O, A_THR_23    | N, A_GLN_5     | H, A_GLN_5     | 2.89 | 2.07 | 13.60 |
| 4JAM.PDB | O, A_THR_21    | N, A_SER_7     | H, A_SER_7     | 2.82 | 2.01 | 14.85 |
| 4JAM.PDB | O, A_SER_110   | N, A_VAL_12    | H, A_VAL_12    | 2.99 | 2.19 | 18.50 |
| 4JAM.PDB | O, A_THR_112   | N, A_SER_14    | H, A_SER_14    | 2.90 | 2.06 | 9.18  |
| 4JAM.PDB | O, A_VAL_82C   | N, A_SER_15    | H, A_SER_15    | 2.89 | 2.08 | 16.29 |
| 4JAM.PDB | O, A_LEU_82    | N, A_LEU_18    | H, A_LEU_18    | 2.70 | 1.88 | 14.19 |
| 4JAM.PDB | O, A_LEU_80    | N, A_LEU_20    | H, A_LEU_20    | 2.81 | 1.98 | 11.56 |
| 4JAM.PDB | O, A_PHE_78    | N, A_CYS_22    | H, A_CYS_22    | 2.83 | 2.07 | 24.51 |
| 4JAM.PDB | O, A_GLN_5     | N, A_THR_23    | H, A_THR_23    | 2.83 | 1.99 | 10.35 |
| 4JAM.PDB | O, A_ASP_76    | N, A_VAL_24    | H, A_VAL_24    | 2.78 | 1.94 | 10.44 |
| 4JAM.PDB | O, A_GLN_3     | N, A_SER_25    | H, A_SER_25    | 2.88 | 2.06 | 13.90 |
| 4JAM.PDB | O, A_LEU_95    | N, A_TYR_33    | H, A_TYR_33    | 2.74 | 1.91 | 11.80 |
| 4JAM.PDB | O, A_ILE_51    | N, A_TRP_34    | H, A_TRP_34    | 2.90 | 2.16 | 25.25 |
| 4JAM.PDB | OE1, A_GLU_75  | NE1, A_TRP_34  | HE1, A_TRP_34  | 2.65 | 1.81 | 8.69  |
| 4JAM.PDB | O, A_ALA_93    | N, A_SER_35    | H, A_SER_35    | 2.81 | 1.97 | 10.90 |

|          |               |                |                |      |      |       |
|----------|---------------|----------------|----------------|------|------|-------|
| 4JAM.PDB | O, A_GLY_49   | N, A_TRP_36    | H, A_TRP_36    | 2.88 | 2.06 | 14.67 |
| 4JAM.PDB | O, A_PHE_91   | N, A_LEU_37    | H, A_LEU_37    | 2.78 | 1.96 | 15.17 |
| 4JAM.PDB | O, A_GLU_46   | N, A_ARG_38    | H, A_ARG_38    | 2.85 | 2.04 | 17.56 |
| 4JAM.PDB | OH, A_TYR_90  | NH1, A_ARG_38  | HH11, A_ARG_38 | 2.87 | 2.07 | 18.01 |
| 4JAM.PDB | OD1, A_ASP_86 | NH1, A_ARG_38  | HH12, A_ARG_38 | 2.79 | 1.96 | 13.17 |
| 4JAM.PDB | O, A_VAL_89   | N, A_LEU_39    | H, A_LEU_39    | 2.82 | 2.05 | 21.84 |
| 4JAM.PDB | OG, A_SER_40  | N, A_LYS_43    | H, A_LYS_43    | 2.68 | 1.90 | 20.68 |
| 4JAM.PDB | O, A_SER_40   | N, A_GLY_44    | H, A_GLY_44    | 2.72 | 2.01 | 28.80 |
| 4JAM.PDB | O, A_ARG_38   | N, A_GLU_46    | H, A_GLU_46    | 2.77 | 1.99 | 21.09 |
| 4JAM.PDB | O, A_TRP_36   | N, A_ILE_48    | H, A_ILE_48    | 2.90 | 2.07 | 12.30 |
| 4JAM.PDB | O, A_ASN_58   | N, A_TYR_50    | H, A_TYR_50    | 2.95 | 2.18 | 21.50 |
| 4JAM.PDB | O, A_TRP_34   | N, A_ILE_51    | H, A_ILE_51    | 2.90 | 2.16 | 25.67 |
| 4JAM.PDB | O, A_GLU_56   | N, A_PHE_52    | H, A_PHE_52    | 2.91 | 2.08 | 12.28 |
| 4JAM.PDB | O, A_PHE_52   | N, A_GLY_55    | H, A_GLY_55    | 2.79 | 1.95 | 9.90  |
| 4JAM.PDB | O, A_ILE_48   | N, A_SER_60    | H, A_SER_60    | 2.88 | 2.02 | 3.37  |
| 4JAM.PDB | O, A_SER_60   | N, A_LEU_63    | H, A_LEU_63    | 2.89 | 2.04 | 9.01  |
| 4JAM.PDB | O, A_ARG_82A  | NE, A_ARG_66   | HE, A_ARG_66   | 2.88 | 2.02 | 3.98  |
| 4JAM.PDB | OD2, A_ASP_86 | NH2, A_ARG_66  | HH22, A_ARG_66 | 2.34 | 1.63 | 27.75 |
| 4JAM.PDB | O, A_ARG_81   | N, A_SER_68    | H, A_SER_68    | 2.87 | 2.07 | 18.65 |
| 4JAM.PDB | OH, A_TYR_59  | N, A_ILE_69    | H, A_ILE_69    | 2.97 | 2.13 | 12.03 |
| 4JAM.PDB | O, A_ASP_72   | N, A_GLU_75    | H, A_GLU_75    | 2.93 | 2.09 | 9.42  |
| 4JAM.PDB | O, A_CYS_22   | N, A_PHE_78    | H, A_PHE_78    | 2.92 | 2.13 | 18.49 |
| 4JAM.PDB | O, A_SER_70   | N, A_SER_79    | H, A_SER_79    | 2.85 | 2.07 | 21.83 |
| 4JAM.PDB | O, A_LEU_20   | N, A_LEU_80    | H, A_LEU_80    | 2.84 | 2.00 | 11.63 |
| 4JAM.PDB | O, A_SER_68   | N, A_ARG_81    | H, A_ARG_81    | 2.88 | 2.05 | 14.04 |
| 4JAM.PDB | O, A_LEU_18   | N, A_LEU_82    | H, A_LEU_82    | 2.75 | 1.94 | 16.17 |
| 4JAM.PDB | O, A_ARG_66   | N, A_ARG_82A   | H, A_ARG_82A   | 2.95 | 2.11 | 11.99 |
| 4JAM.PDB | OD2, A_ASP_86 | N, A_THR_83    | H, A_THR_83    | 2.96 | 2.22 | 25.50 |
| 4JAM.PDB | O, A_THR_83   | N, A_ASP_86    | H, A_ASP_86    | 2.86 | 2.09 | 22.70 |
| 4JAM.PDB | O, A_SER_107  | N, A_TYR_90    | H, A_TYR_90    | 2.85 | 2.01 | 8.55  |
| 4JAM.PDB | O, A_LEU_37   | N, A_PHE_91    | H, A_PHE_91    | 2.75 | 1.90 | 5.20  |
| 4JAM.PDB | O, A_SER_35   | N, A_ALA_93    | H, A_ALA_93    | 2.93 | 2.20 | 27.04 |
| 4JAM.PDB | O, A_TYR_33   | N, A_LEU_95    | H, A_LEU_95    | 3.00 | 2.25 | 25.86 |
| 4JAM.PDB | O, A_GLY_31   | N, A_ARG_97    | H, A_ARG_97    | 2.91 | 2.06 | 7.51  |
| 4JAM.PDB | OH, B_TYR_36  | N, A_PHE_100E  | H, A_PHE_100E  | 2.90 | 2.09 | 16.41 |
| 4JAM.PDB | O, A_CYS_92   | N, A_GLY_104   | H, A_GLY_104   | 2.77 | 1.93 | 10.11 |
| 4JAM.PDB | O, A_TYR_90   | N, A_SER_107   | H, A_SER_107   | 2.89 | 2.11 | 20.38 |
| 4JAM.PDB | O, A_SER_7    | OG, A_SER_107  | HG, A_SER_107  | 2.54 | 1.76 | 15.69 |
| 4JAM.PDB | O, A_ALA_88   | N, A_VAL_109   | H, A_VAL_109   | 2.91 | 2.06 | 7.84  |
| 4JAM.PDB | O, A_GLY_10   | N, A_SER_110   | H, A_SER_110   | 2.93 | 2.15 | 20.41 |
| 4JAM.PDB | OG1, A_THR_87 | N, A_VAL_111   | H, A_VAL_111   | 2.97 | 2.12 | 7.94  |
| 4JAM.PDB | O, A_PHE_146  | N, A_LYS_117   | H, A_LYS_117   | 2.85 | 2.02 | 10.61 |
| 4JAM.PDB | O, A_ASP_144  | NZ, A_LYS_117  | HZ2, A_LYS_117 | 2.79 | 1.99 | 21.27 |
| 4JAM.PDB | O, A_LYS_143  | N, A_SER_120   | H, A_SER_120   | 2.98 | 2.15 | 12.51 |
| 4JAM.PDB | O, A_LEU_141  | N, A_PHE_122   | H, A_PHE_122   | 2.89 | 2.06 | 12.92 |
| 4JAM.PDB | O, A_GLY_139  | N, A_LEU_124   | H, A_LEU_124   | 2.77 | 1.92 | 5.35  |
| 4JAM.PDB | O, A_THR_131  | N, A_GLY_134   | H, A_GLY_134   | 2.80 | 2.06 | 25.22 |
| 4JAM.PDB | O, A_VAL_184  | N, A_ALA_136   | H, A_ALA_136   | 2.84 | 2.01 | 14.16 |
| 4JAM.PDB | O, A_LEU_124  | N, A_GLY_139   | H, A_GLY_139   | 2.85 | 2.09 | 22.70 |
| 4JAM.PDB | O, A_SER_180  | N, A_CYS_140   | H, A_CYS_140   | 2.87 | 2.09 | 20.45 |
| 4JAM.PDB | O, A_PHE_122  | N, A_LEU_141   | H, A_LEU_141   | 2.78 | 1.94 | 10.64 |
| 4JAM.PDB | O, A_LEU_178  | N, A_VAL_142   | H, A_VAL_142   | 2.76 | 1.91 | 7.10  |
| 4JAM.PDB | O, A_SER_120  | N, A_LYS_143   | H, A_LYS_143   | 2.81 | 1.96 | 7.64  |
| 4JAM.PDB | O, A_TYR_176  | N, A_TYR_145   | H, A_TYR_145   | 2.94 | 2.13 | 16.66 |
| 4JAM.PDB | O, A_LYS_117  | N, A_PHE_146   | H, A_PHE_146   | 2.87 | 2.06 | 16.70 |
| 4JAM.PDB | O, A_ASN_199  | N, A_THR_151   | H, A_THR_151   | 2.95 | 2.15 | 18.15 |
| 4JAM.PDB | O, A_ASN_197  | N, A_SER_153   | H, A_SER_153   | 2.87 | 2.06 | 16.36 |
| 4JAM.PDB | OG, A_SER_180 | NE1, A_TRP_154 | HE1, A_TRP_154 | 2.95 | 2.10 | 7.51  |

|          |                |                |                 |      |      |       |
|----------|----------------|----------------|-----------------|------|------|-------|
| 4JAM.PDB | O, A_ILE_195   | N, A_ASN_155   | H, A_ASN_155    | 2.80 | 1.97 | 12.29 |
| 4JAM.PDB | O, A_THR_193   | ND2, A_ASN_155 | HD22, A_ASN_155 | 2.86 | 2.05 | 16.16 |
| 4JAM.PDB | OD1, A_ASN_197 | N, A_SER_156   | H, A_SER_156    | 2.73 | 1.93 | 18.38 |
| 4JAM.PDB | O, A_TRP_154   | N, A_GLY_157   | H, A_GLY_157    | 2.96 | 2.18 | 20.46 |
| 4JAM.PDB | O, A_VAL_181   | N, A_HIS_164   | H, A_HIS_164    | 2.77 | 1.93 | 10.79 |
| 4JAM.PDB | O, A_SER_179   | N, A_PHE_166   | H, A_PHE_166    | 2.88 | 2.02 | 6.82  |
| 4JAM.PDB | O, A_SER_177   | N, A_VAL_169   | H, A_VAL_169    | 2.89 | 2.12 | 22.70 |
| 4JAM.PDB | O, A_LEU_175   | N, A_GLN_171   | H, A_GLN_171    | 2.93 | 2.09 | 10.51 |
| 4JAM.PDB | O, A_TYR_145   | N, A_TYR_176   | H, A_TYR_176    | 2.79 | 1.94 | 7.72  |
| 4JAM.PDB | O, A_VAL_142   | N, A_LEU_178   | H, A_LEU_178    | 2.85 | 2.07 | 20.92 |
| 4JAM.PDB | O, A_HIS_164   | N, A_VAL_181   | H, A_VAL_181    | 2.86 | 2.02 | 11.33 |
| 4JAM.PDB | O, A_LEU_138   | N, A_VAL_182   | H, A_VAL_182    | 2.71 | 1.88 | 13.50 |
| 4JAM.PDB | O, A_GLY_162   | N, A_THR_183   | H, A_THR_183    | 2.84 | 2.03 | 17.10 |
| 4JAM.PDB | O, A_ALA_136   | N, A_VAL_184   | H, A_VAL_184    | 2.93 | 2.09 | 11.23 |
| 4JAM.PDB | O, A_PRO_185   | N, A_SER_188   | H, A_SER_188    | 2.84 | 2.02 | 14.21 |
| 4JAM.PDB | O, A_SER_188   | N, A_GLN_192   | H, A_GLN_192    | 2.88 | 2.11 | 21.94 |
| 4JAM.PDB | OD1, A_ASN_155 | N, A_ILE_195   | H, A_ILE_195    | 2.80 | 2.00 | 18.20 |
| 4JAM.PDB | O, A_LYS_209   | N, A_CYS_196   | H, A_CYS_196    | 2.93 | 2.15 | 20.80 |
| 4JAM.PDB | O, A_SER_153   | N, A_ASN_197   | H, A_ASN_197    | 2.73 | 1.88 | 7.40  |
| 4JAM.PDB | OD1, A_ASP_208 | ND2, A_ASN_197 | HD21, A_ASN_197 | 2.90 | 2.10 | 17.20 |
| 4JAM.PDB | O, A_VAL_207   | N, A_VAL_198   | H, A_VAL_198    | 2.77 | 1.91 | 4.34  |
| 4JAM.PDB | O, A_THR_151   | N, A_ASN_199   | H, A_ASN_199    | 2.89 | 2.04 | 9.44  |
| 4JAM.PDB | O, A_THR_205   | N, A_HIS_200   | H, A_HIS_200    | 2.91 | 2.05 | 2.97  |
| 4JAM.PDB | OG, A_SER_203  | ND1, A_HIS_200 | HD1, A_HIS_200  | 2.74 | 1.92 | 14.00 |
| 4JAM.PDB | O, A_PRO_147   | NE2, A_HIS_200 | HE2, A_HIS_200  | 2.78 | 1.94 | 11.18 |
| 4JAM.PDB | O, A_LYS_201   | N, A_ASN_204   | H, A_ASN_204    | 2.92 | 2.09 | 11.42 |
| 4JAM.PDB | O, A_VAL_198   | N, A_VAL_207   | H, A_VAL_207    | 2.80 | 2.00 | 17.03 |
| 4JAM.PDB | O, A_TYR_194   | N, A_VAL_211   | H, A_VAL_211    | 2.81 | 1.96 | 8.45  |
| 4JAM.PDB | O, B_TYR_86    | NE2, B_GLN_6   | HE22, B_GLN_6   | 2.90 | 2.06 | 9.94  |
| 4JAM.PDB | O, B_GLN_103   | N, B_VAL_11    | H, B_VAL_11     | 2.89 | 2.06 | 12.76 |
| 4JAM.PDB | O, B_THR_105   | N, B_VAL_13    | H, B_VAL_13     | 2.98 | 2.16 | 14.79 |
| 4JAM.PDB | OE1, B_GLN_17  | N, B_SER_14    | H, B_SER_14     | 2.99 | 2.15 | 10.22 |
| 4JAM.PDB | O, B_THR_78    | N, B_GLY_16    | H, B_GLY_16     | 2.84 | 2.02 | 14.85 |
| 4JAM.PDB | O, B_ILE_75    | N, B_ALA_19    | H, B_ALA_19     | 2.87 | 2.07 | 18.88 |
| 4JAM.PDB | O, B_LEU_73    | N, B_ILE_21    | H, B_ILE_21     | 2.84 | 2.01 | 13.27 |
| 4JAM.PDB | O, B_ALA_71    | N, B_CYS_23    | H, B_CYS_23     | 2.84 | 2.13 | 29.21 |
| 4JAM.PDB | O, B_THR_5     | N, B_SER_24    | H, B_SER_24     | 2.89 | 2.07 | 16.00 |
| 4JAM.PDB | O, B_SER_69    | N, B_ALA_26    | H, B_ALA_26     | 2.97 | 2.15 | 14.49 |
| 4JAM.PDB | OD1, B_ASN_51  | N, B_VAL_33    | H, B_VAL_33     | 2.90 | 2.09 | 17.62 |
| 4JAM.PDB | O, B_ILE_48    | N, B_TRP_35    | H, B_TRP_35     | 2.87 | 2.06 | 17.28 |
| 4JAM.PDB | O, B_TYR_87    | N, B_TYR_36    | H, B_TYR_36     | 2.80 | 1.98 | 15.33 |
| 4JAM.PDB | O, B_GLU_45    | N, B_GLN_37    | H, B_GLN_37     | 2.84 | 2.00 | 10.11 |
| 4JAM.PDB | O, B_ASP_85    | N, B_VAL_38    | H, B_VAL_38     | 2.74 | 1.98 | 24.01 |
| 4JAM.PDB | O, B_TRP_35    | N, B_VAL_47    | H, B_VAL_47     | 2.91 | 2.08 | 11.41 |
| 4JAM.PDB | O, B_LYS_53    | N, B_PHE_49    | H, B_PHE_49     | 2.82 | 2.00 | 15.86 |
| 4JAM.PDB | O, B_VAL_33    | N, B_ASN_51    | H, B_ASN_51     | 2.89 | 2.05 | 8.66  |
| 4JAM.PDB | O, B_PHE_49    | N, B_LYS_53    | H, B_LYS_53     | 2.88 | 2.08 | 17.59 |
| 4JAM.PDB | OE1, B_GLU_50  | NZ, B_LYS_53   | HZ1, B_LYS_53   | 2.75 | 1.92 | 17.48 |
| 4JAM.PDB | OD2, B_ASP_82  | NE, B_ARG_61   | HE, B_ARG_61    | 2.84 | 2.00 | 9.73  |
| 4JAM.PDB | OD1, B_ASP_82  | NH2, B_ARG_61  | HH21, B_ARG_61  | 2.90 | 2.08 | 13.97 |
| 4JAM.PDB | O, B_THR_74    | N, B_SER_63    | H, B_SER_63     | 2.90 | 2.11 | 18.40 |
| 4JAM.PDB | O, B_THR_72    | N, B_SER_65    | H, B_SER_65     | 2.98 | 2.21 | 22.62 |
| 4JAM.PDB | O, B_GLY_68    | NZ, B_LYS_66   | HZ2, B_LYS_66   | 2.76 | 1.98 | 23.05 |
| 4JAM.PDB | O, B_ALA_26    | NZ, B_LYS_66   | HZ3, B_LYS_66   | 2.92 | 2.09 | 18.23 |
| 4JAM.PDB | O, B_THR_70    | N, B_SER_67    | H, B_SER_67     | 2.96 | 2.13 | 11.34 |
| 4JAM.PDB | O, B_CYS_23    | N, B_ALA_71    | H, B_ALA_71     | 2.82 | 1.99 | 11.72 |
| 4JAM.PDB | O, B_SER_65    | N, B_THR_72    | H, B_THR_72     | 2.73 | 1.91 | 13.48 |
| 4JAM.PDB | O, B_ILE_21    | N, B_LEU_73    | H, B_LEU_73     | 2.73 | 1.91 | 13.67 |



|          |                |                |                 |      |      |       |
|----------|----------------|----------------|-----------------|------|------|-------|
| 4JAM.PDB | O, B_SER_63    | N, B_THR_74    | H, B_THR_74     | 2.81 | 1.96 | 4.99  |
| 4JAM.PDB | O, B_ALA_19    | N, B_ILE_75    | H, B_ILE_75     | 2.81 | 1.98 | 12.21 |
| 4JAM.PDB | O, B_ARG_61    | N, B_ARG_76    | H, B_ARG_76     | 2.93 | 2.11 | 14.36 |
| 4JAM.PDB | O, B_GLN_17    | OG1, B_THR_78  | HG1, B_THR_78   | 2.80 | 2.08 | 24.26 |
| 4JAM.PDB | OD2, B_ASP_82  | N, B_GLN_79    | H, B_GLN_79     | 2.86 | 2.01 | 7.86  |
| 4JAM.PDB | O, B_GLN_79    | N, B_ASP_82    | H, B_ASP_82     | 2.76 | 1.93 | 12.45 |
| 4JAM.PDB | O, B_VAL_38    | N, B_ASP_85    | H, B_ASP_85     | 2.95 | 2.11 | 9.64  |
| 4JAM.PDB | O, B_THR_102   | N, B_TYR_86    | H, B_TYR_86     | 2.85 | 2.02 | 14.13 |
| 4JAM.PDB | O, B_TYR_36    | N, B_TYR_87    | H, B_TYR_87     | 2.90 | 2.10 | 18.08 |
| 4JAM.PDB | O, B_VAL_97    | N, B_VAL_90    | H, B_VAL_90     | 2.97 | 2.14 | 13.94 |
| 4JAM.PDB | O, B_THR_95A   | N, B_ASP_92    | H, B_ASP_92     | 2.89 | 2.11 | 20.40 |
| 4JAM.PDB | OD2, B_ASP_92  | N, B_PHE_94    | H, B_PHE_94     | 3.00 | 2.22 | 21.54 |
| 4JAM.PDB | OD2, B_ASP_92  | N, B_SER_95    | H, B_SER_95     | 2.88 | 2.04 | 10.50 |
| 4JAM.PDB | O, B_CYS_88    | N, B_GLY_99    | H, B_GLY_99     | 2.86 | 2.06 | 17.89 |
| 4JAM.PDB | O, B_TYR_86    | N, B_THR_102   | H, B_THR_102    | 2.89 | 2.09 | 19.07 |
| 4JAM.PDB | O, B_PRO_7     | OG1, B_THR_102 | HG1, B_THR_102  | 2.60 | 1.79 | 5.95  |
| 4JAM.PDB | O, B_PRO_8     | N, B_GLN_103   | H, B_GLN_103    | 2.92 | 2.06 | 5.49  |
| 4JAM.PDB | O, B_ALA_84    | N, B_VAL_104   | H, B_VAL_104    | 2.91 | 2.06 | 7.09  |
| 4JAM.PDB | O, B_VAL_11    | N, B_THR_105   | H, B_THR_105    | 2.91 | 2.10 | 16.07 |
| 4JAM.PDB | OE2, B_GLU_83  | N, B_VAL_106   | H, B_VAL_106    | 2.95 | 2.13 | 15.31 |
| 4JAM.PDB | O, B_VAL_13    | N, B_LEU_106A  | H, B_LEU_106A   | 2.82 | 1.99 | 13.48 |
| 4JAM.PDB | O, B_TYR_140   | N, B_ALA_111   | H, B_ALA_111    | 2.90 | 2.06 | 11.74 |
| 4JAM.PDB | O, B_SER_137   | N, B_THR_114   | H, B_THR_114    | 2.85 | 2.03 | 14.77 |
| 4JAM.PDB | O, B_LEU_135   | N, B_THR_116   | H, B_THR_116    | 2.92 | 2.10 | 15.29 |
| 4JAM.PDB | O, B_VAL_133   | N, B_PHE_118   | H, B_PHE_118    | 2.84 | 2.00 | 12.03 |
| 4JAM.PDB | O, B_SER_122   | N, B_GLN_126   | H, B_GLN_126    | 2.94 | 2.16 | 20.43 |
| 4JAM.PDB | O, B_LEU_125   | N, B_ASN_128   | H, B_ASN_128    | 2.88 | 2.08 | 18.55 |
| 4JAM.PDB | OE2, B_GLU_124 | OG1, B_THR_131 | HG1, B_THR_131  | 2.53 | 1.82 | 24.30 |
| 4JAM.PDB | O, B_LEU_178   | N, B_LEU_132   | H, B_LEU_132    | 2.89 | 2.06 | 12.17 |
| 4JAM.PDB | O, B_SER_176   | N, B_CYS_134   | H, B_CYS_134    | 2.78 | 1.93 | 7.29  |
| 4JAM.PDB | O, B_THR_116   | N, B_LEU_135   | H, B_LEU_135    | 2.79 | 1.95 | 9.74  |
| 4JAM.PDB | O, B_ALA_174   | N, B_ILE_136   | H, B_ILE_136    | 2.88 | 2.07 | 16.56 |
| 4JAM.PDB | O, B_THR_114   | N, B_SER_137   | H, B_SER_137    | 2.91 | 2.10 | 17.42 |
| 4JAM.PDB | OE1, B_GLN_167 | N, B_ASP_138   | H, B_ASP_138    | 2.91 | 2.10 | 16.41 |
| 4JAM.PDB | O, B_ALA_111   | N, B_TYR_140   | H, B_TYR_140    | 2.91 | 2.10 | 17.01 |
| 4JAM.PDB | O, B_PRO_141   | N, B_ALA_143   | H, B_ALA_143    | 2.99 | 2.27 | 28.43 |
| 4JAM.PDB | O, B_THR_196   | N, B_THR_145   | H, B_THR_145    | 2.96 | 2.12 | 11.72 |
| 4JAM.PDB | O, B_GLN_194   | N, B_ALA_147   | H, B_ALA_147    | 2.86 | 2.01 | 7.10  |
| 4JAM.PDB | OG, B_SER_176  | NE1, B_TRP_148 | HE1, B_TRP_148  | 2.84 | 1.99 | 9.50  |
| 4JAM.PDB | O, B_SER_192   | N, B_LYS_149   | H, B_LYS_149    | 2.91 | 2.11 | 17.98 |
| 4JAM.PDB | O, B_SER_153   | N, B_ALA_150   | H, B_ALA_150    | 2.77 | 1.99 | 21.31 |
| 4JAM.PDB | O, B_SER_190   | N, B_ASP_151   | H, B_ASP_151    | 2.80 | 1.95 | 5.68  |
| 4JAM.PDB | O, B_ALA_150   | N, B_SER_153   | H, B_SER_153    | 2.93 | 2.09 | 10.65 |
| 4JAM.PDB | O, B_TRP_148   | N, B_VAL_155   | H, B_VAL_155    | 2.88 | 2.08 | 19.02 |
| 4JAM.PDB | O, B_SER_175   | N, B_THR_162   | H, B_THR_162    | 2.91 | 2.09 | 13.86 |
| 4JAM.PDB | O, B_ALA_173   | N, B_SER_165   | H, B_SER_165    | 2.90 | 2.11 | 18.23 |
| 4JAM.PDB | O, B_LYS_171   | N, B_GLN_167   | H, B_GLN_167    | 2.72 | 1.89 | 12.32 |
| 4JAM.PDB | OD1, B_ASP_138 | ND2, B_ASN_169 | HD22, B_ASN_169 | 2.93 | 2.14 | 18.27 |
| 4JAM.PDB | O, B_GLN_167   | N, B_ASN_170   | H, B_ASN_170    | 2.86 | 2.04 | 15.66 |
| 4JAM.PDB | OD1, B_ASN_169 | N, B_LYS_171   | H, B_LYS_171    | 2.94 | 2.09 | 7.42  |
| 4JAM.PDB | O, B_PHE_139   | N, B_TYR_172   | H, B_TYR_172    | 2.86 | 2.05 | 16.14 |
| 4JAM.PDB | O, B_SER_165   | N, B_ALA_173   | H, B_ALA_173    | 2.83 | 2.03 | 18.01 |
| 4JAM.PDB | O, B_ILE_136   | N, B_ALA_174   | H, B_ALA_174    | 2.80 | 2.00 | 17.84 |
| 4JAM.PDB | OG1, B_THR_162 | N, B_SER_175   | H, B_SER_175    | 2.99 | 2.18 | 15.84 |
| 4JAM.PDB | O, B_CYS_134   | N, B_SER_176   | H, B_SER_176    | 2.83 | 2.04 | 19.01 |
| 4JAM.PDB | O, B_GLU_160   | N, B_TYR_177   | H, B_TYR_177    | 2.83 | 2.05 | 21.00 |
| 4JAM.PDB | O, B_GLY_158   | N, B_SER_179   | H, B_SER_179    | 2.85 | 2.02 | 11.54 |
| 4JAM.PDB | O, B_ALA_130   | N, B_LEU_180   | H, B_LEU_180    | 2.95 | 2.10 | 4.88  |

|          |                |                |                |      |      |       |
|----------|----------------|----------------|----------------|------|------|-------|
| 4JAM.PDB | OE1, B_GLN_184 | N, B_THR_181   | H, B_THR_181   | 2.84 | 2.01 | 11.32 |
| 4JAM.PDB | O, B_PRO_182   | N, B_LYS_186   | H, B_LYS_186   | 2.96 | 2.16 | 18.74 |
| 4JAM.PDB | O, B_GLN_184   | ND1, B_HIS_188 | HD1, B_HIS_188 | 2.78 | 1.95 | 11.73 |
| 4JAM.PDB | O, B_VAL_206   | N, B_TYR_191   | H, B_TYR_191   | 2.95 | 2.12 | 13.13 |
| 4JAM.PDB | O, B_LYS_149   | N, B_SER_192   | H, B_SER_192   | 2.94 | 2.14 | 18.61 |
| 4JAM.PDB | O, B_LYS_204   | N, B_CYS_193   | H, B_CYS_193   | 2.89 | 2.12 | 22.37 |
| 4JAM.PDB | O, B_ALA_147   | N, B_GLN_194   | H, B_GLN_194   | 2.78 | 1.93 | 7.25  |
| 4JAM.PDB | O, B_VAL_202   | N, B_VAL_195   | H, B_VAL_195   | 2.76 | 1.91 | 7.42  |
| 4JAM.PDB | O, B_THR_145   | N, B_THR_196   | H, B_THR_196   | 2.80 | 1.97 | 12.47 |
| 4JAM.PDB | O, B_SER_200   | N, B_HIS_197   | H, B_HIS_197   | 2.88 | 2.04 | 11.03 |
| 4JAM.PDB | O, B_ALA_143   | ND1, B_HIS_197 | HD1, B_HIS_197 | 2.86 | 2.07 | 19.34 |
| 4JAM.PDB | O, B_TYR_140   | NE2, B_HIS_197 | HE2, B_HIS_197 | 2.99 | 2.21 | 20.59 |
| 4JAM.PDB | O, L_THR_201   | N, B_THR_201   | H, B_THR_201   | 2.77 | 1.96 | 16.15 |
| 4JAM.PDB | O, B_VAL_195   | N, B_VAL_202   | H, B_VAL_202   | 2.88 | 2.09 | 18.94 |
| 4JAM.PDB | O, L_GLY_199   | N, B_GLU_203   | H, B_GLU_203   | 2.79 | 1.99 | 17.96 |
| 4JAM.PDB | O, B_CYS_193   | N, B_LYS_204   | H, B_LYS_204   | 2.99 | 2.16 | 13.66 |
| 4JAM.PDB | OG, B_SER_192  | OG1, B_THR_205 | HG1, B_THR_205 | 2.64 | 1.83 | 8.66  |
| 4JAM.PDB | O, B_TYR_191   | N, B_VAL_206   | H, B_VAL_206   | 2.87 | 2.04 | 12.78 |

Table 1691: 4JAM-specific side chain and main chain hydrogen bonding analysis. In this table, a PDB file is specified with a four-letter PDB ID, except that the names of the PDB files corresponding to the single NMR structural model split from the NMR ensemble is specified with a four-letter PDB ID in addition to a hyphen followed by the single NMR structural model numeric ID, the residue naming scheme is **Chain ID\_residue name\_residue number**,  $\angle ADH$  represents the angle formed by acceptor (A), donor (D) and hydrogen (H) ( $\angle ADH$ ).

| PDB      | Acceptor (A)   | Donor (D)      | Hydrogen (H)   | D-A (Å) | H-A (Å) | $\angle ADH(^{\circ})$ |
|----------|----------------|----------------|----------------|---------|---------|------------------------|
| 4JAN.PDB | O, G_LEU_369   | OG1, G_THR_373 | HG1, G_THR_373 | 2.74    | 1.94    | 9.78                   |
| 4JAN.PDB | OD2, G_ASP_457 | NE, G_ARG_469  | HE, G_ARG_469  | 2.84    | 2.10    | 25.29                  |
| 4JAN.PDB | O, H_LEU_82    | N, H_LEU_18    | H, H_LEU_18    | 2.99    | 2.15    | 11.38                  |
| 4JAN.PDB | O, H_LEU_80    | N, H_LEU_20    | H, H_LEU_20    | 2.91    | 2.08    | 12.99                  |
| 4JAN.PDB | O, H_PHE_78    | N, H_CYS_22    | H, H_CYS_22    | 2.95    | 2.11    | 8.83                   |
| 4JAN.PDB | O, H_LEU_95    | N, H_TYR_33    | H, H_TYR_33    | 2.93    | 2.08    | 3.54                   |
| 4JAN.PDB | O, H_ALA_93    | N, H_SER_35    | H, H_SER_35    | 2.92    | 2.06    | 5.78                   |
| 4JAN.PDB | O, H_GLY_49    | N, H_TRP_36    | H, H_TRP_36    | 2.83    | 2.01    | 15.38                  |
| 4JAN.PDB | OE1, H_GLU_46  | NE, H_ARG_38   | HE, H_ARG_38   | 2.76    | 1.94    | 14.56                  |
| 4JAN.PDB | O, H_GLU_56    | N, H_PHE_52    | H, H_PHE_52    | 2.90    | 2.07    | 12.88                  |
| 4JAN.PDB | O, H_ILE_48    | N, H_SER_60    | H, H_SER_60    | 2.96    | 2.18    | 20.49                  |
| 4JAN.PDB | O, H_ARG_81    | N, H_SER_68    | H, H_SER_68    | 2.97    | 2.23    | 25.47                  |
| 4JAN.PDB | O, H_SER_70    | N, H_SER_79    | H, H_SER_79    | 2.76    | 2.01    | 24.12                  |
| 4JAN.PDB | O, H_SER_68    | N, H_ARG_81    | H, H_ARG_81    | 2.78    | 1.96    | 15.76                  |
| 4JAN.PDB | O, H_LEU_18    | N, H_LEU_82    | H, H_LEU_82    | 2.84    | 2.03    | 16.49                  |
| 4JAN.PDB | O, H_ARG_66    | N, H_ARG_82A   | H, H_ARG_82A   | 2.86    | 2.03    | 11.31                  |
| 4JAN.PDB | OD2, H_ASP_86  | N, H_THR_83    | H, H_THR_83    | 2.81    | 2.03    | 20.96                  |
| 4JAN.PDB | O, H_LEU_39    | N, H_VAL_89    | H, H_VAL_89    | 2.99    | 2.16    | 12.27                  |
| 4JAN.PDB | O, H_LEU_37    | N, H_PHE_91    | H, H_PHE_91    | 2.53    | 1.78    | 23.52                  |
| 4JAN.PDB | O, H_SER_35    | N, H_ALA_93    | H, H_ALA_93    | 3.00    | 2.21    | 20.09                  |
| 4JAN.PDB | O, H_ARG_101   | N, H_SER_94    | H, H_SER_94    | 2.78    | 1.97    | 15.85                  |
| 4JAN.PDB | OH, L_TYR_36   | N, H_PHE_100E  | H, H_PHE_100E  | 2.91    | 2.16    | 24.28                  |
| 4JAN.PDB | O, H_GLY_10    | N, H_SER_110   | H, H_SER_110   | 2.97    | 2.13    | 11.49                  |
| 4JAN.PDB | OG1, H_THR_87  | N, H_VAL_111   | H, H_VAL_111   | 2.78    | 1.99    | 19.23                  |
| 4JAN.PDB | O, H_LYS_143   | N, H_SER_120   | H, H_SER_120   | 3.00    | 2.19    | 17.41                  |
| 4JAN.PDB | O, H_GLY_139   | N, H_LEU_124   | H, H_LEU_124   | 2.67    | 1.88    | 19.71                  |
| 4JAN.PDB | O, H_SER_180   | N, H_CYS_140   | H, H_CYS_140   | 2.89    | 2.12    | 21.89                  |
| 4JAN.PDB | O, H_PHE_122   | N, H_LEU_141   | H, H_LEU_141   | 2.69    | 1.97    | 27.64                  |
| 4JAN.PDB | O, H_LEU_178   | N, H_VAL_142   | H, H_VAL_142   | 2.93    | 2.19    | 25.68                  |
| 4JAN.PDB | O, H_SER_120   | N, H_LYS_143   | H, H_LYS_143   | 2.88    | 2.07    | 16.97                  |
| 4JAN.PDB | OG, H_SER_177  | N, H_ASP_144   | H, H_ASP_144   | 2.98    | 2.22    | 23.77                  |
| 4JAN.PDB | O, H_TYR_176   | N, H_TYR_145   | H, H_TYR_145   | 2.92    | 2.12    | 17.16                  |
| 4JAN.PDB | O, H_ASN_197   | N, H_SER_153   | H, H_SER_153   | 2.94    | 2.18    | 23.25                  |
| 4JAN.PDB | OG, H_SER_180  | NE1, H_TRP_154 | HE1, H_TRP_154 | 2.82    | 2.02    | 18.56                  |
| 4JAN.PDB | O, H_ILE_195   | N, H_ASN_155   | H, H_ASN_155   | 2.83    | 2.00    | 12.78                  |
| 4JAN.PDB | OD2, B_ASP_92  | OG, H_SER_156  | HG, H_SER_156  | 2.50    | 1.78    | 23.90                  |
| 4JAN.PDB | O, H_ASN_155   | N, H_ALA_158   | H, H_ALA_158   | 2.83    | 2.01    | 13.54                  |
| 4JAN.PDB | O, H_VAL_181   | N, H_HIS_164   | H, H_HIS_164   | 2.84    | 2.13    | 28.95                  |
| 4JAN.PDB | O, H_SER_179   | N, H_PHE_166   | H, H_PHE_166   | 2.95    | 2.11    | 10.08                  |
| 4JAN.PDB | O, H_SER_177   | N, H_VAL_169   | H, H_VAL_169   | 2.63    | 1.81    | 14.24                  |
| 4JAN.PDB | O, H_LEU_175   | N, H_GLN_171   | H, H_GLN_171   | 2.71    | 1.98    | 26.37                  |
| 4JAN.PDB | O, H_GLN_171   | N, H_GLY_174   | H, H_GLY_174   | 2.90    | 2.07    | 12.23                  |
| 4JAN.PDB | O, H_TYR_145   | N, H_TYR_176   | H, H_TYR_176   | 2.70    | 1.90    | 16.76                  |
| 4JAN.PDB | O, H_TYR_176   | OG, H_SER_177  | HG, H_SER_177  | 2.89    | 2.11    | 14.84                  |
| 4JAN.PDB | O, H_VAL_142   | N, H_LEU_178   | H, H_LEU_178   | 3.00    | 2.25    | 25.78                  |
| 4JAN.PDB | O, H_LEU_138   | N, H_VAL_182   | H, H_VAL_182   | 2.90    | 2.08    | 14.87                  |
| 4JAN.PDB | O, H_ALA_136   | N, H_VAL_184   | H, H_VAL_184   | 2.78    | 2.07    | 28.36                  |
| 4JAN.PDB | OD1, H_ASN_155 | N, H_ILE_195   | H, H_ILE_195   | 2.84    | 2.00    | 11.14                  |
| 4JAN.PDB | O, H_SER_153   | N, H_ASN_197   | H, H_ASN_197   | 2.60    | 1.74    | 3.05                   |
| 4JAN.PDB | O, H_VAL_207   | N, H_VAL_198   | H, H_VAL_198   | 2.76    | 1.92    | 8.31                   |
| 4JAN.PDB | O, H_THR_205   | N, H_HIS_200   | H, H_HIS_200   | 2.76    | 1.93    | 11.54                  |
| 4JAN.PDB | OG, H_SER_203  | ND1, H_HIS_200 | HD1, H_HIS_200 | 2.81    | 1.96    | 7.87                   |
| 4JAN.PDB | O, H_PRO_147   | NE2, H_HIS_200 | HE2, H_HIS_200 | 2.77    | 1.95    | 14.57                  |
| 4JAN.PDB | OD1, H_ASN_199 | NZ, H_LYS_201  | HZ2, H_LYS_201 | 2.90    | 2.05    | 14.58                  |
| 4JAN.PDB | O, H_LYS_201   | N, H_ASN_204   | H, H_ASN_204   | 2.80    | 1.95    | 7.81                   |
| 4JAN.PDB | OE1, L_GLU_123 | NZ, H_LYS_209  | HZ1, H_LYS_209 | 2.89    | 2.13    | 26.71                  |
| 4JAN.PDB | O, L_SER_24    | N, L_THR_5     | H, L_THR_5     | 2.90    | 2.04    | 2.68                   |

|          |                 |                |                |      |      |       |
|----------|-----------------|----------------|----------------|------|------|-------|
| 4JAN.PDB | OG1, L_THR_102  | NE2, L_GLN_6   | HE21, L_GLN_6  | 2.82 | 2.05 | 22.18 |
| 4JAN.PDB | O, L_THR_5      | N, L_SER_24    | H, L_SER_24    | 2.97 | 2.16 | 17.64 |
| 4JAN.PDB | OD1, H_ASN_100B | ND2, L_ASN_32  | HD21, L_ASN_32 | 2.76 | 1.91 | 6.44  |
| 4JAN.PDB | OD1, L_ASN_51   | N, L_VAL_33    | H, L_VAL_33    | 2.69 | 1.88 | 15.86 |
| 4JAN.PDB | O, L_ILE_48     | N, L_TRP_35    | H, L_TRP_35    | 2.76 | 1.98 | 21.52 |
| 4JAN.PDB | O, L_TYR_87     | N, L_TYR_36    | H, L_TYR_36    | 2.91 | 2.21 | 29.89 |
| 4JAN.PDB | N, L_GLU_45     | N, L_GLN_37    | H, L_GLN_37    | 2.95 | 2.11 | 10.30 |
| 4JAN.PDB | OH, L_TYR_86    | NE2, L_GLN_37  | HE21, L_GLN_37 | 2.95 | 2.09 | 6.42  |
| 4JAN.PDB | O, L_ASP_85     | N, L_VAL_38    | H, L_VAL_38    | 2.79 | 2.03 | 23.50 |
| 4JAN.PDB | O, L_LYS_53     | N, L_PHE_49    | H, L_PHE_49    | 2.88 | 2.09 | 19.26 |
| 4JAN.PDB | O, L_VAL_33     | N, L_ASN_51    | H, L_ASN_51    | 2.69 | 1.87 | 15.52 |
| 4JAN.PDB | O, L_GLU_50     | N, L_TYR_52    | H, L_TYR_52    | 2.84 | 2.11 | 27.26 |
| 4JAN.PDB | O, L_THR_70     | N, L_SER_67    | H, L_SER_67    | 3.00 | 2.15 | 8.93  |
| 4JAN.PDB | O, L_ILE_21     | N, L_LEU_73    | H, L_LEU_73    | 2.82 | 1.99 | 12.33 |
| 4JAN.PDB | O, L_THR_102    | N, L_TYR_86    | H, L_TYR_86    | 2.80 | 1.98 | 15.29 |
| 4JAN.PDB | O, L_TYR_36     | N, L_TYR_87    | H, L_TYR_87    | 2.98 | 2.17 | 16.36 |
| 4JAN.PDB | OE1, L_GLN_6    | N, L_CYS_88    | H, L_CYS_88    | 2.79 | 1.93 | 6.67  |
| 4JAN.PDB | O, L_CYS_34     | N, L_GLN_89    | H, L_GLN_89    | 2.97 | 2.18 | 19.32 |
| 4JAN.PDB | O, L_VAL_97     | N, L_VAL_90    | H, L_VAL_90    | 2.89 | 2.10 | 20.39 |
| 4JAN.PDB | OD2, L_ASP_92   | N, L_PHE_94    | H, L_PHE_94    | 2.63 | 1.85 | 20.98 |
| 4JAN.PDB | O, L_SER_95     | N, L_PHE_96    | H, L_PHE_96    | 2.69 | 1.97 | 28.39 |
| 4JAN.PDB | O, L_VAL_90     | N, L_VAL_97    | H, L_VAL_97    | 2.99 | 2.15 | 10.31 |
| 4JAN.PDB | O, L_CYS_88     | N, L_GLY_99    | H, L_GLY_99    | 2.82 | 2.06 | 23.88 |
| 4JAN.PDB | O, L_TYR_86     | N, L_THR_102   | H, L_THR_102   | 2.93 | 2.11 | 14.91 |
| 4JAN.PDB | O, L_PRO_7      | OG1, L_THR_102 | HG1, L_THR_102 | 2.82 | 2.04 | 15.16 |
| 4JAN.PDB | O, L_PRO_8      | N, L_GLN_103   | H, L_GLN_103   | 2.82 | 2.06 | 23.53 |
| 4JAN.PDB | O, L_TYR_140    | N, L_ALA_111   | H, L_ALA_111   | 2.97 | 2.14 | 13.46 |
| 4JAN.PDB | O, L_SER_137    | N, L_THR_114   | H, L_THR_114   | 2.99 | 2.13 | 3.09  |
| 4JAN.PDB | O, L_VAL_133    | N, L_PHE_118   | H, L_PHE_118   | 2.93 | 2.14 | 19.05 |
| 4JAN.PDB | O, L_LEU_125    | N, L_ASN_128   | H, L_ASN_128   | 2.78 | 1.96 | 14.81 |
| 4JAN.PDB | O, L_LEU_178    | N, L_LEU_132   | H, L_LEU_132   | 2.97 | 2.12 | 8.13  |
| 4JAN.PDB | O, L_SER_176    | N, L_CYS_134   | H, L_CYS_134   | 2.87 | 2.02 | 8.60  |
| 4JAN.PDB | O, L_THR_116    | N, L_LEU_135   | H, L_LEU_135   | 2.88 | 2.10 | 20.45 |
| 4JAN.PDB | O, L_ALA_174    | N, L_ILE_136   | H, L_ILE_136   | 2.97 | 2.14 | 12.22 |
| 4JAN.PDB | O, L_GLN_194    | N, L_ALA_147   | H, L_ALA_147   | 2.83 | 2.00 | 13.79 |
| 4JAN.PDB | OG, L_SER_176   | NE1, L_TRP_148 | HE1, L_TRP_148 | 2.88 | 2.04 | 9.05  |
| 4JAN.PDB | O, L_SER_192    | N, L_LYS_149   | H, L_LYS_149   | 2.99 | 2.18 | 15.44 |
| 4JAN.PDB | O, L_SER_153    | N, L_ALA_150   | H, L_ALA_150   | 2.78 | 2.08 | 29.85 |
| 4JAN.PDB | O, L_ALA_150    | N, L_SER_153   | H, L_SER_153   | 2.82 | 2.11 | 29.31 |
| 4JAN.PDB | O, L_TYR_177    | N, L_GLU_160   | H, L_GLU_160   | 2.87 | 2.05 | 14.31 |
| 4JAN.PDB | O, L_LYS_171    | N, L_GLN_167   | H, L_GLN_167   | 2.85 | 2.01 | 10.38 |
| 4JAN.PDB | O, L_ILE_136    | N, L_ALA_174   | H, L_ALA_174   | 2.73 | 1.95 | 20.72 |
| 4JAN.PDB | O, L_CYS_134    | N, L_SER_176   | H, L_SER_176   | 2.88 | 2.05 | 13.75 |
| 4JAN.PDB | O, L_GLU_160    | N, L_TYR_177   | H, L_TYR_177   | 2.73 | 1.90 | 14.38 |
| 4JAN.PDB | O, L_GLY_158    | N, L_SER_179   | H, L_SER_179   | 2.92 | 2.09 | 12.76 |
| 4JAN.PDB | O, L_ALA_130    | N, L_LEU_180   | H, L_LEU_180   | 2.75 | 1.90 | 5.66  |
| 4JAN.PDB | O, L_GLN_184    | ND1, L_HIS_188 | HD1, L_HIS_188 | 2.96 | 2.12 | 10.76 |
| 4JAN.PDB | OD1, L_ASP_151  | N, L_ARG_189   | H, L_ARG_189   | 3.00 | 2.16 | 11.57 |
| 4JAN.PDB | O, L_LYS_149    | N, L_SER_192   | H, L_SER_192   | 2.84 | 2.11 | 26.53 |
| 4JAN.PDB | O, L_LYS_204    | N, L_CYS_193   | H, L_CYS_193   | 2.87 | 2.03 | 10.09 |
| 4JAN.PDB | O, L_ALA_147    | N, L_GLN_194   | H, L_GLN_194   | 2.87 | 2.02 | 4.62  |
| 4JAN.PDB | O, L_VAL_202    | N, L_VAL_195   | H, L_VAL_195   | 2.90 | 2.06 | 10.52 |
| 4JAN.PDB | O, L_THR_145    | N, L_THR_196   | H, L_THR_196   | 2.87 | 2.04 | 12.50 |
| 4JAN.PDB | O, L_SER_200    | N, L_HIS_197   | H, L_HIS_197   | 2.86 | 2.00 | 3.42  |
| 4JAN.PDB | O, L_ASP_368    | OG1, L_THR_372 | HG1, L_THR_372 | 2.92 | 2.17 | 20.42 |
| 4JAN.PDB | O, A_THR_21     | N, A_SER_7     | H, A_SER_7     | 2.83 | 1.99 | 9.81  |
| 4JAN.PDB | O, A_THR_112    | N, A_SER_14    | H, A_SER_14    | 2.81 | 2.04 | 22.68 |
| 4JAN.PDB | O, A_LEU_80     | N, A_LEU_20    | H, A_LEU_20    | 2.96 | 2.16 | 17.44 |

|          |               |                |                |      |      |       |
|----------|---------------|----------------|----------------|------|------|-------|
| 4JAN.PDB | O, A_PHE_78   | N, A_CYS_22    | H, A_CYS_22    | 2.83 | 1.97 | 0.81  |
| 4JAN.PDB | O, A_GLN_5    | N, A_THR_23    | H, A_THR_23    | 2.99 | 2.16 | 14.12 |
| 4JAN.PDB | O, A_GLN_3    | N, A_SER_25    | H, A_SER_25    | 2.86 | 2.06 | 18.82 |
| 4JAN.PDB | O, A_LEU_95   | N, A_TYR_33    | H, A_TYR_33    | 2.88 | 2.02 | 1.62  |
| 4JAN.PDB | O, A_ILE_51   | N, A_TRP_34    | H, A_TRP_34    | 2.83 | 2.04 | 18.86 |
| 4JAN.PDB | O, A_MET_29   | NE1, A_TRP_34  | HE1, A_TRP_34  | 2.96 | 2.14 | 15.47 |
| 4JAN.PDB | O, A_ALA_93   | N, A_SER_35    | H, A_SER_35    | 2.87 | 2.01 | 0.65  |
| 4JAN.PDB | O, A_GLY_49   | N, A_TRP_36    | H, A_TRP_36    | 2.82 | 2.06 | 23.18 |
| 4JAN.PDB | O, A_GLY_44   | N, A_SER_40    | H, A_SER_40    | 2.94 | 2.14 | 17.50 |
| 4JAN.PDB | O, A_ARG_38   | N, A_GLU_46    | H, A_GLU_46    | 2.99 | 2.17 | 14.48 |
| 4JAN.PDB | O, A_TRP_36   | N, A_ILE_48    | H, A_ILE_48    | 2.86 | 2.04 | 16.32 |
| 4JAN.PDB | O, A_GLU_56   | N, A_PHE_52    | H, A_PHE_52    | 2.98 | 2.16 | 16.12 |
| 4JAN.PDB | O, A_ILE_48   | N, A_SER_60    | H, A_SER_60    | 2.99 | 2.18 | 16.95 |
| 4JAN.PDB | O, A_SER_60   | N, A_LEU_63    | H, A_LEU_63    | 2.80 | 1.99 | 16.81 |
| 4JAN.PDB | O, A_SER_68   | N, A_ARG_81    | H, A_ARG_81    | 2.93 | 2.10 | 13.34 |
| 4JAN.PDB | O, A_LEU_18   | N, A_LEU_82    | H, A_LEU_82    | 2.69 | 1.85 | 10.39 |
| 4JAN.PDB | O, A_GLU_16   | N, A_VAL_82C   | H, A_VAL_82C   | 3.00 | 2.21 | 20.36 |
| 4JAN.PDB | OD2, A_ASP_86 | N, A_THR_83    | H, A_THR_83    | 2.88 | 2.09 | 19.27 |
| 4JAN.PDB | O, A_THR_83   | N, A_ASP_86    | H, A_ASP_86    | 2.91 | 2.07 | 9.93  |
| 4JAN.PDB | O, A_SER_107  | N, A_TYR_90    | H, A_TYR_90    | 2.97 | 2.13 | 10.15 |
| 4JAN.PDB | O, A_LEU_37   | N, A_PHE_91    | H, A_PHE_91    | 2.69 | 1.88 | 17.21 |
| 4JAN.PDB | O, A_ARG_101  | N, A_SER_94    | H, A_SER_94    | 2.99 | 2.21 | 21.56 |
| 4JAN.PDB | OH, B_TYR_36  | N, A_PHE_100E  | H, A_PHE_100E  | 2.74 | 1.90 | 10.14 |
| 4JAN.PDB | OE1, A_GLU_6  | N, A_GLY_106   | H, A_GLY_106   | 2.61 | 1.75 | 6.59  |
| 4JAN.PDB | O, A_TYR_90   | N, A_SER_107   | H, A_SER_107   | 2.97 | 2.13 | 8.67  |
| 4JAN.PDB | O, A_ALA_88   | N, A_VAL_109   | H, A_VAL_109   | 2.99 | 2.18 | 17.96 |
| 4JAN.PDB | O, A_PHE_146  | N, A_LYS_117   | H, A_LYS_117   | 2.69 | 1.91 | 19.93 |
| 4JAN.PDB | O, A_LYS_143  | N, A_SER_120   | H, A_SER_120   | 2.98 | 2.15 | 12.62 |
| 4JAN.PDB | O, A_GLY_139  | N, A_LEU_124   | H, A_LEU_124   | 2.71 | 1.91 | 18.55 |
| 4JAN.PDB | O, A_SER_180  | N, A_CYS_140   | H, A_CYS_140   | 2.65 | 1.92 | 25.79 |
| 4JAN.PDB | O, A_PHE_122  | N, A_LEU_141   | H, A_LEU_141   | 2.77 | 1.98 | 18.97 |
| 4JAN.PDB | O, A_SER_120  | N, A_LYS_143   | H, A_LYS_143   | 2.80 | 1.94 | 2.87  |
| 4JAN.PDB | OG, A_SER_177 | N, A_ASP_144   | H, A_ASP_144   | 2.90 | 2.06 | 12.00 |
| 4JAN.PDB | O, A_LYS_117  | N, A_PHE_146   | H, A_PHE_146   | 2.99 | 2.19 | 18.95 |
| 4JAN.PDB | OG, A_SER_180 | NE1, A_TRP_154 | HE1, A_TRP_154 | 2.82 | 2.05 | 22.21 |
| 4JAN.PDB | O, A_ILE_195  | N, A_ASN_155   | H, A_ASN_155   | 2.74 | 1.91 | 12.38 |
| 4JAN.PDB | O, A_ASN_155  | N, A_ALA_158   | H, A_ALA_158   | 2.86 | 2.02 | 8.83  |
| 4JAN.PDB | O, A_THR_160  | N, A_VAL_163   | H, A_VAL_163   | 2.86 | 2.07 | 19.66 |
| 4JAN.PDB | O, A_VAL_181  | N, A_HIS_164   | H, A_HIS_164   | 2.90 | 2.04 | 3.65  |
| 4JAN.PDB | O, A_SER_177  | N, A_VAL_169   | H, A_VAL_169   | 2.73 | 1.92 | 17.07 |
| 4JAN.PDB | O, A_LEU_175  | N, A_GLN_171   | H, A_GLN_171   | 2.97 | 2.21 | 23.74 |
| 4JAN.PDB | O, A_TYR_145  | N, A_TYR_176   | H, A_TYR_176   | 2.83 | 2.03 | 16.73 |
| 4JAN.PDB | O, A_HIS_164  | N, A_VAL_181   | H, A_VAL_181   | 2.91 | 2.06 | 6.75  |
| 4JAN.PDB | O, A_LEU_138  | N, A_VAL_182   | H, A_VAL_182   | 2.71 | 1.89 | 15.22 |
| 4JAN.PDB | O, A_GLY_162  | N, A_THR_183   | H, A_THR_183   | 2.93 | 2.11 | 13.23 |
| 4JAN.PDB | O, A_SER_153  | N, A_ASN_197   | H, A_ASN_197   | 2.67 | 1.82 | 8.22  |
| 4JAN.PDB | O, A_VAL_207  | N, A_VAL_198   | H, A_VAL_198   | 2.88 | 2.07 | 16.65 |
| 4JAN.PDB | O, A_THR_205  | N, A_HIS_200   | H, A_HIS_200   | 2.71 | 1.87 | 10.96 |
| 4JAN.PDB | O, A_PRO_147  | NE2, A_HIS_200 | HE2, A_HIS_200 | 2.55 | 1.74 | 15.97 |
| 4JAN.PDB | O, A_LYS_201  | N, A_ASN_204   | H, A_ASN_204   | 2.88 | 2.07 | 15.76 |
| 4JAN.PDB | OG, B_SER_100 | N, B_GLN_6     | H, B_GLN_6     | 3.00 | 2.16 | 10.47 |
| 4JAN.PDB | O, B_TYR_86   | NE2, B_GLN_6   | HE22, B_GLN_6  | 2.99 | 2.19 | 18.54 |
| 4JAN.PDB | O, B_LEU_73   | N, B_ILE_21    | H, B_ILE_21    | 2.96 | 2.14 | 15.25 |
| 4JAN.PDB | O, B_SER_69   | N, B_GLY_25    | H, B_GLY_25    | 2.72 | 1.94 | 20.09 |
| 4JAN.PDB | O, I_GLY_458  | ND2, B_ASN_32  | HD22, B_ASN_32 | 2.86 | 2.11 | 24.85 |
| 4JAN.PDB | OD1, B_ASN_51 | N, B_VAL_33    | H, B_VAL_33    | 2.78 | 2.02 | 23.53 |
| 4JAN.PDB | O, B_ILE_48   | N, B_TRP_35    | H, B_TRP_35    | 2.62 | 1.79 | 12.25 |
| 4JAN.PDB | O, B_TYR_87   | N, B_TYR_36    | H, B_TYR_36    | 2.76 | 1.97 | 19.04 |

|          |                |                |                |      |      |       |
|----------|----------------|----------------|----------------|------|------|-------|
| 4JAN.PDB | O, B_GLU_45    | N, B_GLN_37    | H, B_GLN_37    | 2.98 | 2.12 | 6.36  |
| 4JAN.PDB | O, B_LYS_39    | N, B_GLN_42    | H, B_GLN_42    | 2.91 | 2.08 | 12.48 |
| 4JAN.PDB | O, B_GLN_37    | N, B_GLU_45    | H, B_GLU_45    | 2.95 | 2.21 | 25.79 |
| 4JAN.PDB | O, B_LYS_53    | N, B_PHE_49    | H, B_PHE_49    | 2.84 | 2.05 | 19.11 |
| 4JAN.PDB | O, B_VAL_33    | N, B_ASN_51    | H, B_ASN_51    | 2.74 | 1.89 | 7.92  |
| 4JAN.PDB | O, B_GLU_50    | N, B_TYR_52    | H, B_TYR_52    | 2.69 | 1.94 | 24.45 |
| 4JAN.PDB | O, B_ILE_58    | NH1, B_ARG_54  | HH11, B_ARG_54 | 2.92 | 2.17 | 24.41 |
| 4JAN.PDB | O, B_SER_65    | N, B_THR_72    | H, B_THR_72    | 2.86 | 2.07 | 20.13 |
| 4JAN.PDB | O, B_ILE_21    | N, B_LEU_73    | H, B_LEU_73    | 2.97 | 2.14 | 12.90 |
| 4JAN.PDB | O, B_SER_63    | N, B_THR_74    | H, B_THR_74    | 2.68 | 1.89 | 18.45 |
| 4JAN.PDB | O, B_ALA_19    | N, B_ILE_75    | H, B_ILE_75    | 2.83 | 1.99 | 8.89  |
| 4JAN.PDB | OD2, B_ASP_82  | N, B_GLN_79    | H, B_GLN_79    | 2.99 | 2.13 | 4.57  |
| 4JAN.PDB | O, B_GLY_77    | NE2, B_GLN_79  | HE21, B_GLN_79 | 2.96 | 2.14 | 15.90 |
| 4JAN.PDB | O, B_GLN_79    | N, B_ASP_82    | H, B_ASP_82    | 2.87 | 2.03 | 10.85 |
| 4JAN.PDB | O, B_THR_102   | N, B_TYR_86    | H, B_TYR_86    | 2.79 | 1.98 | 17.36 |
| 4JAN.PDB | O, B_TYR_36    | N, B_TYR_87    | H, B_TYR_87    | 2.95 | 2.16 | 19.18 |
| 4JAN.PDB | OE1, B_GLN_6   | N, B_CYS_88    | H, B_CYS_88    | 2.99 | 2.13 | 6.44  |
| 4JAN.PDB | O, B_VAL_97    | N, B_VAL_90    | H, B_VAL_90    | 2.92 | 2.10 | 15.26 |
| 4JAN.PDB | O, B_THR_95A   | N, B_ASP_92    | H, B_ASP_92    | 2.97 | 2.19 | 21.06 |
| 4JAN.PDB | OD1, B_ASP_92  | N, B_SER_95    | H, B_SER_95    | 2.95 | 2.11 | 10.76 |
| 4JAN.PDB | O, B_CYS_88    | N, B_GLY_99    | H, B_GLY_99    | 2.83 | 2.06 | 22.19 |
| 4JAN.PDB | O, B_PRO_7     | OG1, B_THR_102 | HG1, B_THR_102 | 2.80 | 2.02 | 16.54 |
| 4JAN.PDB | O, B_ALA_84    | N, B_VAL_104   | H, B_VAL_104   | 2.98 | 2.27 | 29.44 |
| 4JAN.PDB | O, B_SER_137   | N, B_THR_114   | H, B_THR_114   | 2.85 | 2.04 | 16.89 |
| 4JAN.PDB | O, B_LEU_135   | N, B_THR_116   | H, B_THR_116   | 2.95 | 2.14 | 16.39 |
| 4JAN.PDB | O, B_VAL_133   | N, B_PHE_118   | H, B_PHE_118   | 2.86 | 2.07 | 20.55 |
| 4JAN.PDB | O, B_LEU_125   | N, B_ASN_128   | H, B_ASN_128   | 2.72 | 1.91 | 16.63 |
| 4JAN.PDB | O, B_GLU_124   | N, B_LYS_129   | H, B_LYS_129   | 2.87 | 2.08 | 18.91 |
| 4JAN.PDB | OE2, B_GLU_124 | OG1, B_THR_131 | HG1, B_THR_131 | 2.64 | 1.97 | 29.01 |
| 4JAN.PDB | O, B_THR_116   | N, B_LEU_135   | H, B_LEU_135   | 2.75 | 1.97 | 21.41 |
| 4JAN.PDB | O, B_ALA_174   | N, B_ILE_136   | H, B_ILE_136   | 2.78 | 1.97 | 16.45 |
| 4JAN.PDB | OG, B_SER_176  | NE1, B_TRP_148 | HE1, B_TRP_148 | 2.83 | 1.98 | 7.29  |
| 4JAN.PDB | O, B_SER_192   | N, B_LYS_149   | H, B_LYS_149   | 2.90 | 2.11 | 19.36 |
| 4JAN.PDB | O, B_SER_190   | N, B_ASP_151   | H, B_ASP_151   | 2.88 | 2.10 | 21.97 |
| 4JAN.PDB | O, B_TRP_148   | N, B_VAL_155   | H, B_VAL_155   | 2.98 | 2.17 | 15.79 |
| 4JAN.PDB | O, B_SER_175   | N, B_THR_162   | H, B_THR_162   | 2.94 | 2.10 | 11.27 |
| 4JAN.PDB | O, B_ALA_173   | N, B_SER_165   | H, B_SER_165   | 2.74 | 1.89 | 5.66  |
| 4JAN.PDB | O, B_SER_165   | N, B_ALA_173   | H, B_ALA_173   | 2.84 | 2.14 | 29.64 |
| 4JAN.PDB | O, B_ILE_136   | N, B_ALA_174   | H, B_ALA_174   | 2.68 | 1.83 | 6.81  |
| 4JAN.PDB | OG1, B_THR_162 | N, B_SER_175   | H, B_SER_175   | 2.88 | 2.10 | 20.76 |
| 4JAN.PDB | O, B_CYS_134   | N, B_SER_176   | H, B_SER_176   | 2.98 | 2.17 | 16.97 |
| 4JAN.PDB | O, B_GLU_160   | N, B_TYR_177   | H, B_TYR_177   | 2.73 | 1.89 | 11.82 |
| 4JAN.PDB | O, B_GLY_158   | N, B_SER_179   | H, B_SER_179   | 2.67 | 1.83 | 10.89 |
| 4JAN.PDB | O, B_ALA_130   | N, B_LEU_180   | H, B_LEU_180   | 2.91 | 2.07 | 11.05 |
| 4JAN.PDB | O, B_GLN_184   | ND1, B_HIS_188 | HD1, B_HIS_188 | 2.88 | 2.12 | 24.08 |
| 4JAN.PDB | O, B_VAL_206   | N, B_TYR_191   | H, B_TYR_191   | 2.91 | 2.11 | 18.32 |
| 4JAN.PDB | O, B_LYS_149   | N, B_SER_192   | H, B_SER_192   | 2.92 | 2.08 | 10.84 |
| 4JAN.PDB | O, B_LYS_204   | N, B_CYS_193   | H, B_CYS_193   | 2.89 | 2.08 | 17.27 |
| 4JAN.PDB | O, B_THR_145   | N, B_THR_196   | H, B_THR_196   | 2.81 | 1.98 | 12.47 |
| 4JAN.PDB | O, B_TYR_191   | N, B_VAL_206   | H, B_VAL_206   | 2.97 | 2.16 | 15.65 |

---

Table 1692: 4JAN-specific side chain and main chain hydrogen bonding analysis. In this table, a PDB file is specified with a four-letter PDB ID, except that the names of the PDB files corresponding to the single NMR structural model split from the NMR ensemble is specified with a four-letter PDB ID in addition to a hyphen followed by the single NMR structural model numeric ID, the residue naming scheme is **Chain ID\_residue name\_residue number**,  $\angle ADH$  represents the angle formed by acceptor (A), donor (D) and hydrogen (H) ( $\angle ADH$ ).

| PDB      | Acceptor (A)   | Donor (D)      | Hydrogen (H)    | D-A (Å) | H-A (Å) | $\angle ADH(^{\circ})$ |
|----------|----------------|----------------|-----------------|---------|---------|------------------------|
| 4KRM.PDB | OG1, A_THR_339 | N, A_LYS_311   | H, A_LYS_311    | 2.92    | 2.20    | 28.58                  |
| 4KRM.PDB | O, A_SER_340   | N, A_CYS_313   | H, A_CYS_313    | 2.94    | 2.14    | 18.43                  |
| 4KRM.PDB | O, A_PHE_321   | N, A_GLY_317   | H, A_GLY_317    | 2.69    | 1.98    | 27.87                  |
| 4KRM.PDB | O, A_ILE_318   | N, A_PHE_321   | H, A_PHE_321    | 2.88    | 2.03    | 7.40                   |
| 4KRM.PDB | O, A_ILE_327   | OG, A_SER_326  | HG, A_SER_326   | 2.93    | 2.13    | 14.37                  |
| 4KRM.PDB | O, A_HIS_346   | N, A_ILE_327   | H, A_ILE_327    | 2.90    | 2.07    | 14.21                  |
| 4KRM.PDB | OD1, A_ASN_331 | N, A_ASN_328   | H, A_ASN_328    | 2.99    | 2.15    | 12.11                  |
| 4KRM.PDB | OD1, A_ASN_328 | N, A_ASN_331   | H, A_ASN_331    | 2.99    | 2.22    | 23.18                  |
| 4KRM.PDB | O, A_ASN_328   | N, A_ILE_332   | H, A_ILE_332    | 2.91    | 2.20    | 29.98                  |
| 4KRM.PDB | O, A_LYS_311   | N, A_THR_339   | H, A_THR_339    | 2.88    | 2.02    | 6.29                   |
| 4KRM.PDB | O, A_GLU_376   | N, A_ILE_341   | H, A_ILE_341    | 2.94    | 2.11    | 11.47                  |
| 4KRM.PDB | O, A_CYS_313   | N, A_SER_342   | H, A_SER_342    | 2.76    | 1.95    | 16.34                  |
| 4KRM.PDB | O, A_LEU_382   | N, A_ILE_347   | H, A_ILE_347    | 2.79    | 1.99    | 18.25                  |
| 4KRM.PDB | OG, A_SER_326  | N, A_LEU_348   | H, A_LEU_348    | 2.83    | 2.02    | 16.65                  |
| 4KRM.PDB | OE1, B_GLU_110 | NH1, A_ARG_353 | HH11, A_ARG_353 | 2.81    | 2.05    | 22.81                  |
| 4KRM.PDB | O, B_GLU_110   | NH1, A_ARG_353 | HH12, A_ARG_353 | 2.55    | 1.85    | 29.89                  |
| 4KRM.PDB | O, B_ALA_100   | NH2, A_ARG_353 | HH21, A_ARG_353 | 2.89    | 2.04    | 4.33                   |
| 4KRM.PDB | O, A_THR_360   | N, A_ASP_355   | H, A_ASP_355    | 2.66    | 1.81    | 5.35                   |
| 4KRM.PDB | OD2, A_ASP_355 | OG1, A_THR_358 | HG1, A_THR_358  | 2.65    | 1.94    | 26.40                  |
| 4KRM.PDB | O, A_SER_356   | N, A_HIS_359   | H, A_HIS_359    | 2.84    | 2.01    | 13.45                  |
| 4KRM.PDB | O, A_ASP_355   | N, A_THR_360   | H, A_THR_360    | 2.91    | 2.05    | 3.38                   |
| 4KRM.PDB | O, A_ALA_351   | N, A_LEU_363   | H, A_LEU_363    | 2.79    | 2.01    | 20.09                  |
| 4KRM.PDB | O, A_LEU_368   | N, A_LEU_371   | H, A_LEU_371    | 2.89    | 2.04    | 5.32                   |
| 4KRM.PDB | O, A_CYS_338   | OG1, A_THR_373 | HG1, A_THR_373  | 2.68    | 1.93    | 22.17                  |
| 4KRM.PDB | O, A_LEU_371   | N, A_VAL_374   | H, A_VAL_374    | 2.85    | 2.00    | 7.81                   |
| 4KRM.PDB | O, A_THR_339   | N, A_LYS_375   | H, A_LYS_375    | 2.66    | 1.83    | 11.99                  |
| 4KRM.PDB | O, A_ILE_401   | N, A_ILE_377   | H, A_ILE_377    | 2.94    | 2.18    | 24.17                  |
| 4KRM.PDB | OD1, A_ASP_344 | N, A_PHE_380   | H, A_PHE_380    | 2.98    | 2.20    | 21.02                  |
| 4KRM.PDB | O, A_SER_413   | N, A_LEU_381   | H, A_LEU_381    | 2.78    | 1.97    | 16.41                  |
| 4KRM.PDB | O, A_LEU_345   | N, A_LEU_382   | H, A_LEU_382    | 2.88    | 2.02    | 4.02                   |
| 4KRM.PDB | O, A_ALA_415   | N, A_ILE_383   | H, A_ILE_383    | 2.77    | 1.92    | 6.18                   |
| 4KRM.PDB | O, A_ILE_347   | N, A_GLN_384   | H, A_GLN_384    | 2.86    | 2.00    | 5.29                   |
| 4KRM.PDB | O, B_ASP_112   | NE2, A_GLN_384 | HE22, A_GLN_384 | 2.93    | 2.19    | 25.19                  |
| 4KRM.PDB | O, A_ASP_392   | NE1, A_TRP_386 | HE1, A_TRP_386  | 2.99    | 2.28    | 29.76                  |
| 4KRM.PDB | O, A_LEU_424   | N, A_LEU_393   | H, A_LEU_393    | 2.91    | 2.10    | 16.43                  |
| 4KRM.PDB | O, A_LEU_393   | N, A_PHE_396   | H, A_PHE_396    | 2.71    | 1.87    | 10.13                  |
| 4KRM.PDB | O, A_HIS_394   | N, A_GLU_397   | H, A_GLU_397    | 2.91    | 2.12    | 20.07                  |
| 4KRM.PDB | O, A_LYS_372   | ND2, A_ASN_398 | HD22, A_ASN_398 | 2.93    | 2.13    | 18.65                  |
| 4KRM.PDB | O, A_LYS_375   | N, A_GLU_400   | H, A_GLU_400    | 2.70    | 1.87    | 10.88                  |
| 4KRM.PDB | O, A_ILE_377   | N, A_ARG_403   | H, A_ARG_403    | 2.78    | 1.94    | 11.49                  |
| 4KRM.PDB | OE1, A_GLU_376 | NE, A_ARG_403  | HE, A_ARG_403   | 2.51    | 1.78    | 27.17                  |
| 4KRM.PDB | O, A_THR_378   | N, A_ARG_405   | H, A_ARG_405    | 2.85    | 2.00    | 9.02                   |
| 4KRM.PDB | OD1, A_ASP_434 | NZ, A_LYS_407  | HZ1, A_LYS_407  | 2.92    | 2.12    | 20.92                  |
| 4KRM.PDB | O, A_PHE_412   | N, A_GLN_408   | H, A_GLN_408    | 2.63    | 1.80    | 13.69                  |
| 4KRM.PDB | O, A_GLN_408   | N, A_GLN_411   | H, A_GLN_411    | 2.82    | 1.96    | 5.62                   |
| 4KRM.PDB | O, A_GLN_408   | N, A_PHE_412   | H, A_PHE_412    | 2.94    | 2.09    | 8.70                   |
| 4KRM.PDB | O, A_ASP_436   | N, A_SER_413   | H, A_SER_413    | 2.93    | 2.11    | 15.55                  |
| 4KRM.PDB | O, A_LEU_381   | N, A_ALA_415   | H, A_ALA_415    | 2.80    | 1.97    | 12.88                  |
| 4KRM.PDB | O, A_ILE_438   | N, A_VAL_416   | H, A_VAL_416    | 2.99    | 2.16    | 12.80                  |
| 4KRM.PDB | O, A_ILE_383   | N, A_VAL_417   | H, A_VAL_417    | 2.95    | 2.13    | 13.97                  |
| 4KRM.PDB | OD1, A_ASN_442 | N, A_LEU_419   | H, A_LEU_419    | 2.76    | 1.92    | 9.88                   |
| 4KRM.PDB | O, A_THR_391   | N, A_THR_422   | H, A_THR_422    | 2.81    | 2.00    | 16.60                  |
| 4KRM.PDB | O, A_GLU_400   | N, A_LYS_430   | H, A_LYS_430    | 2.90    | 2.04    | 3.76                   |
| 4KRM.PDB | O, A_LEU_456   | N, A_ILE_432   | H, A_ILE_432    | 2.57    | 1.76    | 16.64                  |
| 4KRM.PDB | O, A_ILE_402   | N, A_SER_433   | H, A_SER_433    | 2.90    | 2.16    | 25.97                  |
| 4KRM.PDB | OE2, A_GLU_431 | OG, A_SER_433  | HG, A_SER_433   | 2.82    | 2.09    | 25.22                  |
| 4KRM.PDB | O, A_GLN_411   | N, A_ASP_436   | H, A_ASP_436    | 2.93    | 2.08    | 7.26                   |



|          |                |                |                 |      |      |       |
|----------|----------------|----------------|-----------------|------|------|-------|
| 4KRM.PDB | O, A_LYS_465   | N, A_ILE_439   | H, A_ILE_439    | 2.96 | 2.14 | 14.27 |
| 4KRM.PDB | O, A_ASN_442   | N, A_LEU_445   | H, A_LEU_445    | 2.98 | 2.12 | 2.89  |
| 4KRM.PDB | O, A_THR_422   | N, A_CYS_446   | H, A_CYS_446    | 2.97 | 2.11 | 5.38  |
| 4KRM.PDB | O, A_TYR_447   | OG1, A_THR_450 | HG1, A_THR_450  | 2.75 | 1.92 | 8.55  |
| 4KRM.PDB | O, A_TRP_453   | N, A_LEU_456   | H, A_LEU_456    | 2.93 | 2.12 | 17.80 |
| 4KRM.PDB | OE1, A_GLN_462 | N, A_GLY_458   | H, A_GLY_458    | 2.69 | 1.84 | 7.86  |
| 4KRM.PDB | OE1, A_GLN_462 | N, A_THR_459   | H, A_THR_459    | 2.99 | 2.16 | 12.73 |
| 4KRM.PDB | O, A_GLY_435   | NE2, A_GLN_462 | HE21, A_GLN_462 | 2.63 | 1.77 | 3.27  |
| 4KRM.PDB | OD1, A_ASP_436 | N, A_LYS_463   | H, A_LYS_463    | 2.91 | 2.06 | 8.47  |
| 4KRM.PDB | O, A_VAL_437   | N, A_LYS_465   | H, A_LYS_465    | 2.78 | 2.01 | 22.88 |
| 4KRM.PDB | O, A_ILE_439   | ND2, A_ASN_469 | HD21, A_ASN_469 | 2.85 | 2.08 | 21.76 |
| 4KRM.PDB | O, A_GLY_471   | N, A_CYS_475   | H, A_CYS_475    | 2.79 | 2.04 | 24.90 |
| 4KRM.PDB | O, A_GLU_472   | N, A_LYS_476   | H, A_LYS_476    | 2.77 | 1.94 | 13.13 |
| 4KRM.PDB | O, A_ASN_473   | N, A_ALA_477   | H, A_ALA_477    | 2.66 | 1.88 | 21.43 |
| 4KRM.PDB | O, A_HIS_483   | N, A_CYS_486   | H, A_CYS_486    | 2.87 | 2.03 | 10.18 |
| 4KRM.PDB | O, A_SER_501   | N, A_SER_487   | H, A_SER_487    | 2.90 | 2.07 | 12.52 |
| 4KRM.PDB | OG, A_SER_487  | N, A_GLU_489   | H, A_GLU_489    | 2.96 | 2.14 | 13.27 |
| 4KRM.PDB | OG1, A_THR_450 | N, A_CYS_491   | H, A_CYS_491    | 2.91 | 2.10 | 16.18 |
| 4KRM.PDB | O, A_ASP_498   | N, A_TRP_492   | H, A_TRP_492    | 2.86 | 2.05 | 15.11 |
| 4KRM.PDB | O, A_GLU_495   | N, A_ASP_498   | H, A_ASP_498    | 2.80 | 2.03 | 22.83 |
| 4KRM.PDB | O, A_LEU_485   | N, A_ARG_503   | H, A_ARG_503    | 2.76 | 1.90 | 4.21  |
| 4KRM.PDB | O, B_SER_25    | N, B_LYS_3     | H, B_LYS_3      | 2.91 | 2.07 | 11.33 |
| 4KRM.PDB | O, B_ALA_23    | N, B_GLU_5     | H, B_GLU_5      | 2.96 | 2.22 | 26.70 |
| 4KRM.PDB | O, B_THR_21    | N, B_SER_7     | H, B_SER_7      | 2.88 | 2.10 | 21.31 |
| 4KRM.PDB | O, B_THR_121   | N, B_VAL_12    | H, B_VAL_12     | 2.77 | 2.07 | 29.25 |
| 4KRM.PDB | O, B_SER_123   | N, B_THR_14    | H, B_THR_14     | 2.68 | 1.96 | 28.32 |
| 4KRM.PDB | O, B_SER_123   | OG1, B_THR_14  | HG1, B_THR_14   | 2.82 | 1.99 | 5.72  |
| 4KRM.PDB | O, B_LEU_86    | N, B_GLY_15    | H, B_GLY_15     | 2.91 | 2.05 | 5.95  |
| 4KRM.PDB | O, B_GLN_13    | N, B_GLY_16    | H, B_GLY_16     | 2.98 | 2.16 | 15.73 |
| 4KRM.PDB | O, B_MET_83    | N, B_LEU_18    | H, B_LEU_18     | 2.71 | 1.92 | 20.37 |
| 4KRM.PDB | OD1, B_ASP_80  | NE, B_ARG_19   | HE, B_ARG_19    | 2.67 | 1.85 | 15.03 |
| 4KRM.PDB | O, B_SER_7     | N, B_THR_21    | H, B_THR_21     | 2.89 | 2.05 | 10.43 |
| 4KRM.PDB | O, B_VAL_79    | N, B_CYS_22    | H, B_CYS_22     | 2.79 | 2.06 | 26.42 |
| 4KRM.PDB | O, B_GLU_5     | N, B_ALA_23    | H, B_ALA_23     | 2.89 | 2.05 | 11.71 |
| 4KRM.PDB | O, B_LYS_3     | N, B_SER_25    | H, B_SER_25     | 2.88 | 2.12 | 23.79 |
| 4KRM.PDB | O, B_SER_31    | NH2, B_ARG_30  | HH21, B_ARG_30  | 2.67 | 1.86 | 15.52 |
| 4KRM.PDB | O, B_ILE_51    | N, B_MET_34    | H, B_MET_34     | 2.89 | 2.11 | 20.74 |
| 4KRM.PDB | O, B_ALA_97    | N, B_GLY_35    | H, B_GLY_35     | 2.89 | 2.06 | 13.98 |
| 4KRM.PDB | O, B_SER_49    | N, B_TRP_36    | H, B_TRP_36     | 2.64 | 1.81 | 13.98 |
| 4KRM.PDB | O, B_TYR_95    | N, B_PHE_37    | H, B_PHE_37     | 2.76 | 1.91 | 6.76  |
| 4KRM.PDB | O, B_GLU_46    | N, B_ARG_38    | H, B_ARG_38     | 2.99 | 2.20 | 20.36 |
| 4KRM.PDB | OH, B_TYR_94   | NH1, B_ARG_38  | HH11, B_ARG_38  | 2.87 | 2.05 | 14.24 |
| 4KRM.PDB | OD2, B_ASP_90  | NH1, B_ARG_38  | HH12, B_ARG_38  | 2.85 | 2.02 | 12.95 |
| 4KRM.PDB | O, B_ILE_93    | N, B_GLN_39    | H, B_GLN_39     | 2.92 | 2.13 | 20.36 |
| 4KRM.PDB | O, B_ARG_38    | N, B_GLU_46    | H, B_GLU_46     | 2.95 | 2.11 | 11.02 |
| 4KRM.PDB | O, B_TRP_36    | N, B_VAL_48    | H, B_VAL_48     | 2.79 | 1.99 | 17.02 |
| 4KRM.PDB | O, B_GLY_59    | OG, B_SER_49   | HG, B_SER_49    | 3.00 | 2.27 | 25.42 |
| 4KRM.PDB | O, B_GLY_59    | N, B_GLY_50    | H, B_GLY_50     | 2.98 | 2.19 | 19.85 |
| 4KRM.PDB | O, B_MET_34    | N, B_ILE_51    | H, B_ILE_51     | 2.75 | 1.95 | 18.18 |
| 4KRM.PDB | O, B_SER_57    | N, B_SER_52    | H, B_SER_52     | 2.88 | 2.11 | 21.64 |
| 4KRM.PDB | O, B_SER_102   | N, B_TRP_53    | H, B_TRP_53     | 2.88 | 2.06 | 15.16 |
| 4KRM.PDB | O, C_LYS_310   | N, B_THR_58    | H, B_THR_58     | 2.99 | 2.17 | 13.91 |
| 4KRM.PDB | O, B_GLY_50    | N, B_GLY_59    | H, B_GLY_59     | 2.89 | 2.09 | 18.08 |
| 4KRM.PDB | O, C_GLU_308   | N, B_TYR_60    | H, B_TYR_60     | 2.75 | 1.96 | 19.67 |
| 4KRM.PDB | O, B_VAL_48    | N, B_ALA_61    | H, B_ALA_61     | 2.97 | 2.14 | 11.48 |
| 4KRM.PDB | O, B_GLN_82    | N, B_THR_69    | H, B_THR_69     | 2.86 | 2.07 | 20.15 |
| 4KRM.PDB | OH, B_TYR_60   | N, B_ILE_70    | H, B_ILE_70     | 2.77 | 1.93 | 11.16 |
| 4KRM.PDB | O, B_TYR_32    | NH1, B_ARG_72  | HH12, B_ARG_72  | 2.74 | 1.92 | 15.98 |

|          |                |                |                 |      |      |       |
|----------|----------------|----------------|-----------------|------|------|-------|
| 4KRM.PDB | O, B_THR_78    | N, B_ASP_73    | H, B_ASP_73     | 2.94 | 2.13 | 15.69 |
| 4KRM.PDB | O, B_TRP_53    | ND2, B_ASN_74  | HD21, B_ASN_74  | 2.77 | 1.97 | 18.80 |
| 4KRM.PDB | OD2, B_ASP_73  | N, B_LYS_76    | H, B_LYS_76     | 2.99 | 2.16 | 13.15 |
| 4KRM.PDB | O, B_CYS_22    | N, B_VAL_79    | H, B_VAL_79     | 2.99 | 2.26 | 27.32 |
| 4KRM.PDB | O, B_SER_71    | N, B_ASP_80    | H, B_ASP_80     | 2.86 | 2.11 | 25.20 |
| 4KRM.PDB | O, B_LEU_20    | N, B_LEU_81    | H, B_LEU_81     | 2.80 | 1.98 | 15.20 |
| 4KRM.PDB | O, B_THR_69    | N, B_GLN_82    | H, B_GLN_82     | 2.74 | 1.94 | 17.70 |
| 4KRM.PDB | O, B_LEU_18    | N, B_MET_83    | H, B_MET_83     | 2.77 | 1.93 | 11.70 |
| 4KRM.PDB | OD1, B_ASP_90  | N, B_LYS_87    | H, B_LYS_87     | 2.76 | 1.93 | 11.52 |
| 4KRM.PDB | O, B_LYS_87    | N, B_ASP_90    | H, B_ASP_90     | 2.96 | 2.12 | 11.27 |
| 4KRM.PDB | O, B_THR_118   | N, B_TYR_94    | H, B_TYR_94     | 2.77 | 1.94 | 12.66 |
| 4KRM.PDB | O, B_ASP_90    | OH, B_TYR_94   | HH, B_TYR_94    | 2.84 | 2.02 | 10.29 |
| 4KRM.PDB | O, B_PHE_37    | N, B_TYR_95    | H, B_TYR_95     | 2.82 | 2.03 | 20.26 |
| 4KRM.PDB | OE2, B_GLU_6   | N, B_CYS_96    | H, B_CYS_96     | 2.72 | 1.87 | 8.28  |
| 4KRM.PDB | O, B_GLY_35    | N, B_ALA_97    | H, B_ALA_97     | 2.96 | 2.23 | 26.81 |
| 4KRM.PDB | O, B_TYR_113   | N, B_ALA_98    | H, B_ALA_98     | 2.91 | 2.10 | 17.25 |
| 4KRM.PDB | O, B_GLY_33    | N, B_ALA_99    | H, B_ALA_99     | 2.85 | 2.03 | 15.87 |
| 4KRM.PDB | OD2, B_ASP_112 | N, B_ALA_100   | H, B_ALA_100    | 2.80 | 1.99 | 16.77 |
| 4KRM.PDB | OH, B_TYR_111  | N, B_TYR_105   | H, B_TYR_105    | 2.90 | 2.06 | 10.42 |
| 4KRM.PDB | O, B_TYR_105   | OH, B_TYR_111  | HH, B_TYR_111   | 2.48 | 1.64 | 3.96  |
| 4KRM.PDB | O, B_ALA_98    | N, B_ASP_112   | H, B_ASP_112    | 2.84 | 2.11 | 26.99 |
| 4KRM.PDB | O, B_CYS_96    | N, B_GLY_115   | H, B_GLY_115    | 2.90 | 2.14 | 23.95 |
| 4KRM.PDB | OE1, B_GLU_6   | N, B_GLY_117   | H, B_GLY_117    | 2.78 | 1.97 | 15.53 |
| 4KRM.PDB | O, B_ALA_92    | N, B_VAL_120   | H, B_VAL_120    | 2.95 | 2.13 | 14.97 |
| 4KRM.PDB | O, B_GLY_10    | N, B_THR_121   | H, B_THR_121    | 2.89 | 2.05 | 10.22 |
| 4KRM.PDB | O, B_VAL_12    | N, B_SER_123   | H, B_SER_123    | 2.95 | 2.12 | 14.13 |
| 4KRM.PDB | O, B_TYR_60    | N, C_GLU_308   | H, C_GLU_308    | 2.91 | 2.19 | 28.33 |
| 4KRM.PDB | O, B_THR_58    | N, C_LYS_310   | H, C_LYS_310    | 2.88 | 2.06 | 14.23 |
| 4KRM.PDB | OG1, C_THR_339 | N, C_LYS_311   | H, C_LYS_311    | 2.77 | 2.04 | 26.62 |
| 4KRM.PDB | O, B_ASP_56    | N, C_VAL_312   | H, C_VAL_312    | 2.73 | 1.89 | 9.64  |
| 4KRM.PDB | O, C_SER_340   | N, C_CYS_313   | H, C_CYS_313    | 2.90 | 2.07 | 13.28 |
| 4KRM.PDB | O, C_PHE_321   | N, C_GLY_317   | H, C_GLY_317    | 2.70 | 1.87 | 11.98 |
| 4KRM.PDB | OD1, C_ASN_331 | N, C_ASN_328   | H, C_ASN_328    | 2.83 | 1.99 | 10.78 |
| 4KRM.PDB | O, C_ASN_328   | N, C_ILE_332   | H, C_ILE_332    | 3.00 | 2.27 | 27.38 |
| 4KRM.PDB | O, C_ILE_332   | N, C_PHE_335   | H, C_PHE_335    | 2.93 | 2.08 | 7.41  |
| 4KRM.PDB | O, C_LYS_311   | N, C_THR_339   | H, C_THR_339    | 2.74 | 1.92 | 14.57 |
| 4KRM.PDB | O, C_GLU_376   | N, C_ILE_341   | H, C_ILE_341    | 2.82 | 2.00 | 14.90 |
| 4KRM.PDB | O, C_CYS_313   | N, C_SER_342   | H, C_SER_342    | 2.83 | 2.04 | 19.53 |
| 4KRM.PDB | OG1, C_THR_378 | N, C_GLY_343   | H, C_GLY_343    | 2.77 | 2.01 | 23.25 |
| 4KRM.PDB | O, C_LEU_382   | N, C_ILE_347   | H, C_ILE_347    | 2.86 | 2.08 | 21.12 |
| 4KRM.PDB | O, C_LEU_348   | N, C_ALA_351   | H, C_ALA_351    | 2.96 | 2.12 | 10.17 |
| 4KRM.PDB | OE1, D_GLU_110 | NH1, C_ARG_353 | HH11, C_ARG_353 | 2.87 | 2.05 | 16.15 |
| 4KRM.PDB | O, D_ALA_100   | NH2, C_ARG_353 | HH21, C_ARG_353 | 2.80 | 2.00 | 16.96 |
| 4KRM.PDB | O, C_VAL_350   | N, C_GLY_354   | H, C_GLY_354    | 2.77 | 2.02 | 24.08 |
| 4KRM.PDB | O, C_THR_360   | N, C_ASP_355   | H, C_ASP_355    | 2.65 | 1.83 | 13.88 |
| 4KRM.PDB | OD2, C_ASP_355 | OG1, C_THR_358 | HG1, C_THR_358  | 2.75 | 2.00 | 22.12 |
| 4KRM.PDB | O, C_SER_356   | N, C_HIS_359   | H, C_HIS_359    | 2.67 | 1.84 | 12.90 |
| 4KRM.PDB | O, C_ASP_355   | N, C_THR_360   | H, C_THR_360    | 2.84 | 1.99 | 7.14  |
| 4KRM.PDB | O, C_ALA_351   | N, C_LEU_363   | H, C_LEU_363    | 2.78 | 2.07 | 28.76 |
| 4KRM.PDB | O, C_ASP_364   | N, C_GLU_367   | H, C_GLU_367    | 2.87 | 2.07 | 17.30 |
| 4KRM.PDB | O, C_CYS_338   | OG1, C_THR_373 | HG1, C_THR_373  | 2.60 | 1.90 | 27.53 |
| 4KRM.PDB | O, C_LEU_371   | N, C_VAL_374   | H, C_VAL_374    | 3.00 | 2.15 | 9.63  |
| 4KRM.PDB | O, C_THR_339   | N, C_LYS_375   | H, C_LYS_375    | 2.73 | 1.87 | 2.04  |
| 4KRM.PDB | O, C_ILE_401   | N, C_ILE_377   | H, C_ILE_377    | 2.94 | 2.12 | 15.55 |
| 4KRM.PDB | O, C_ILE_341   | N, C_THR_378   | H, C_THR_378    | 2.99 | 2.14 | 8.37  |
| 4KRM.PDB | O, C_GLY_343   | N, C_GLY_379   | H, C_GLY_379    | 2.96 | 2.24 | 28.09 |
| 4KRM.PDB | OD1, C_ASP_344 | N, C_PHE_380   | H, C_PHE_380    | 2.87 | 2.06 | 16.59 |
| 4KRM.PDB | O, C_SER_413   | N, C_LEU_381   | H, C_LEU_381    | 2.85 | 2.05 | 18.05 |

|          |                |                |                 |      |      |       |
|----------|----------------|----------------|-----------------|------|------|-------|
| 4KRM.PDB | O, C_LEU_345   | N, C_LEU_382   | H, C_LEU_382    | 2.85 | 2.00 | 6.50  |
| 4KRM.PDB | O, C_ALA_415   | N, C_ILE_383   | H, C_ILE_383    | 2.86 | 2.06 | 18.11 |
| 4KRM.PDB | O, C_ILE_347   | N, C_GLN_384   | H, C_GLN_384    | 2.79 | 2.00 | 19.39 |
| 4KRM.PDB | O, C_ASP_392   | NE1, C_TRP_386 | HE1, C_TRP_386  | 2.82 | 2.06 | 23.80 |
| 4KRM.PDB | O, C_LEU_424   | N, C_LEU_393   | H, C_LEU_393    | 2.90 | 2.09 | 16.80 |
| 4KRM.PDB | O, C_LEU_393   | N, C_PHE_396   | H, C_PHE_396    | 2.95 | 2.11 | 10.22 |
| 4KRM.PDB | O, C_HIS_394   | N, C_GLU_397   | H, C_GLU_397    | 2.85 | 2.06 | 19.79 |
| 4KRM.PDB | O, C_LYS_372   | ND2, C_ASN_398 | HD22, C_ASN_398 | 2.65 | 1.81 | 9.39  |
| 4KRM.PDB | O, C_LYS_375   | N, C_GLU_400   | H, C_GLU_400    | 2.97 | 2.13 | 10.86 |
| 4KRM.PDB | O, C_GLU_431   | N, C_ILE_402   | H, C_ILE_402    | 2.98 | 2.16 | 15.59 |
| 4KRM.PDB | O, C_ILE_377   | N, C_ARG_403   | H, C_ARG_403    | 2.88 | 2.07 | 17.91 |
| 4KRM.PDB | OE1, C_GLU_376 | NH1, C_ARG_403 | HH11, C_ARG_403 | 3.00 | 2.18 | 16.51 |
| 4KRM.PDB | O, C_THR_378   | N, C_ARG_405   | H, C_ARG_405    | 2.81 | 1.97 | 9.73  |
| 4KRM.PDB | O, C_PHE_412   | N, C_GLN_408   | H, C_GLN_408    | 2.69 | 1.89 | 18.44 |
| 4KRM.PDB | O, C_GLN_408   | N, C_GLN_411   | H, C_GLN_411    | 2.85 | 2.01 | 8.79  |
| 4KRM.PDB | O, C_GLN_408   | N, C_PHE_412   | H, C_PHE_412    | 2.93 | 2.08 | 8.35  |
| 4KRM.PDB | O, C_ASP_436   | N, C_SER_413   | H, C_SER_413    | 2.81 | 1.98 | 12.74 |
| 4KRM.PDB | O, C_LEU_381   | N, C_ALA_415   | H, C_ALA_415    | 2.86 | 2.01 | 6.79  |
| 4KRM.PDB | O, C_ILE_438   | N, C_VAL_416   | H, C_VAL_416    | 2.91 | 2.08 | 11.96 |
| 4KRM.PDB | OD1, C_ASN_442 | N, C_LEU_419   | H, C_LEU_419    | 2.87 | 2.05 | 14.54 |
| 4KRM.PDB | O, C_THR_391   | N, C_THR_422   | H, C_THR_422    | 2.92 | 2.14 | 20.64 |
| 4KRM.PDB | OD1, C_ASP_498 | NH2, C_ARG_427 | HH21, C_ARG_427 | 2.43 | 1.69 | 25.29 |
| 4KRM.PDB | O, C_GLU_400   | N, C_LYS_430   | H, C_LYS_430    | 2.87 | 2.01 | 1.36  |
| 4KRM.PDB | O, C_LEU_456   | N, C_ILE_432   | H, C_ILE_432    | 2.84 | 1.99 | 8.13  |
| 4KRM.PDB | O, C_ILE_402   | N, C_SER_433   | H, C_SER_433    | 2.88 | 2.13 | 25.53 |
| 4KRM.PDB | OE2, C_GLU_431 | OG, C_SER_433  | HG, C_SER_433   | 2.86 | 2.06 | 14.79 |
| 4KRM.PDB | O, C_GLN_411   | N, C_ASP_436   | H, C_ASP_436    | 2.86 | 2.00 | 4.00  |
| 4KRM.PDB | O, C_LEU_414   | N, C_ILE_438   | H, C_ILE_438    | 2.90 | 2.08 | 13.19 |
| 4KRM.PDB | O, C_LYS_465   | N, C_ILE_439   | H, C_ILE_439    | 2.99 | 2.17 | 14.81 |
| 4KRM.PDB | OD1, C_ASN_469 | N, C_ASN_442   | H, C_ASN_442    | 2.74 | 1.97 | 21.04 |
| 4KRM.PDB | O, C_ASN_442   | N, C_LEU_445   | H, C_LEU_445    | 2.89 | 2.04 | 5.71  |
| 4KRM.PDB | O, C_TYR_447   | N, C_THR_450   | H, C_THR_450    | 2.94 | 2.09 | 7.41  |
| 4KRM.PDB | O, C_TYR_447   | OG1, C_THR_450 | HG1, C_THR_450  | 2.78 | 1.97 | 12.32 |
| 4KRM.PDB | OE1, C_GLU_489 | NZ, C_LYS_455  | HZ2, C_LYS_455  | 2.73 | 1.95 | 24.04 |
| 4KRM.PDB | O, C_TRP_453   | N, C_LEU_456   | H, C_LEU_456    | 2.87 | 2.15 | 27.86 |
| 4KRM.PDB | OE1, C_GLN_462 | N, C_THR_459   | H, C_THR_459    | 2.63 | 1.78 | 3.39  |
| 4KRM.PDB | O, C_SER_433   | OG1, C_THR_459 | HG1, C_THR_459  | 2.93 | 2.13 | 15.18 |
| 4KRM.PDB | O, C_GLY_435   | NE2, C_GLN_462 | HE21, C_GLN_462 | 2.88 | 2.03 | 7.30  |
| 4KRM.PDB | O, C_ILE_432   | NE2, C_GLN_462 | HE22, C_GLN_462 | 2.87 | 2.04 | 12.71 |
| 4KRM.PDB | OD1, C_ASP_436 | N, C_LYS_463   | H, C_LYS_463    | 2.83 | 1.97 | 7.15  |
| 4KRM.PDB | O, C_VAL_437   | N, C_LYS_465   | H, C_LYS_465    | 2.86 | 2.07 | 19.53 |
| 4KRM.PDB | O, C_ILE_439   | ND2, C_ASN_469 | HD21, C_ASN_469 | 2.82 | 2.06 | 23.01 |
| 4KRM.PDB | O, C_GLY_471   | N, C_CYS_475   | H, C_CYS_475    | 2.80 | 1.97 | 13.89 |
| 4KRM.PDB | O, C_GLU_472   | N, C_LYS_476   | H, C_LYS_476    | 2.76 | 1.96 | 18.66 |
| 4KRM.PDB | O, C_SER_501   | N, C_SER_487   | H, C_SER_487    | 2.90 | 2.08 | 13.40 |
| 4KRM.PDB | O, C_ASP_498   | N, C_TRP_492   | H, C_TRP_492    | 2.81 | 1.98 | 12.84 |
| 4KRM.PDB | O, C_PRO_496   | N, C_CYS_499   | H, C_CYS_499    | 2.91 | 2.08 | 13.02 |
| 4KRM.PDB | O, C_ALA_484   | NE, C_ARG_503  | HE, C_ARG_503   | 2.52 | 1.76 | 22.72 |
| 4KRM.PDB | O, D_SER_25    | N, D_LYS_3     | H, D_LYS_3      | 2.82 | 1.97 | 7.73  |
| 4KRM.PDB | O, D_ALA_23    | N, D_GLU_5     | H, D_GLU_5      | 2.92 | 2.10 | 13.79 |
| 4KRM.PDB | O, D_THR_121   | N, D_VAL_12    | H, D_VAL_12     | 2.95 | 2.18 | 23.16 |
| 4KRM.PDB | O, D_LEU_86    | N, D_GLY_15    | H, D_GLY_15     | 2.70 | 1.87 | 11.51 |
| 4KRM.PDB | O, D_GLN_13    | N, D_GLY_16    | H, D_GLY_16     | 2.72 | 1.98 | 26.19 |
| 4KRM.PDB | O, D_MET_83    | N, D_LEU_18    | H, D_LEU_18     | 3.00 | 2.20 | 18.58 |
| 4KRM.PDB | OE1, D_GLN_82  | NH1, D_ARG_19  | HH11, D_ARG_19  | 2.94 | 2.12 | 14.24 |
| 4KRM.PDB | O, D_LEU_81    | N, D_LEU_20    | H, D_LEU_20     | 2.98 | 2.19 | 20.30 |
| 4KRM.PDB | O, D_SER_7     | N, D_THR_21    | H, D_THR_21     | 2.83 | 1.99 | 11.71 |
| 4KRM.PDB | O, D_VAL_79    | N, D_CYS_22    | H, D_CYS_22     | 2.91 | 2.16 | 23.74 |

|          |                |               |                |      |      |       |
|----------|----------------|---------------|----------------|------|------|-------|
| 4KRM.PDB | O, D_GLU_5     | N, D_ALA_23   | H, D_ALA_23    | 2.86 | 2.02 | 10.32 |
| 4KRM.PDB | O, D_LYS_3     | N, D_SER_25   | H, D_SER_25    | 2.93 | 2.11 | 14.36 |
| 4KRM.PDB | OD2, C_ASP_355 | NH1, D_ARG_30 | HH12, D_ARG_30 | 2.45 | 1.63 | 13.53 |
| 4KRM.PDB | O, D_ALA_99    | N, D_GLY_33   | H, D_GLY_33    | 2.93 | 2.16 | 22.74 |
| 4KRM.PDB | O, D_ALA_97    | N, D_GLY_35   | H, D_GLY_35    | 2.86 | 2.06 | 17.94 |
| 4KRM.PDB | O, D_SER_49    | N, D_TRP_36   | H, D_TRP_36    | 2.77 | 1.94 | 12.95 |
| 4KRM.PDB | O, D_TYR_95    | N, D_PHE_37   | H, D_PHE_37    | 2.83 | 2.00 | 11.67 |
| 4KRM.PDB | O, D_GLU_46    | N, D_ARG_38   | H, D_ARG_38    | 2.89 | 2.09 | 17.91 |
| 4KRM.PDB | OE1, D_GLU_46  | NE, D_ARG_38  | HE, D_ARG_38   | 2.79 | 1.96 | 12.48 |
| 4KRM.PDB | O, D_ILE_93    | N, D_GLN_39   | H, D_GLN_39    | 2.91 | 2.12 | 19.63 |
| 4KRM.PDB | O, D_ARG_38    | N, D_GLU_46   | H, D_GLU_46    | 2.85 | 2.02 | 11.19 |
| 4KRM.PDB | O, D_TRP_36    | N, D_VAL_48   | H, D_VAL_48    | 2.93 | 2.16 | 21.89 |
| 4KRM.PDB | O, D_GLY_59    | OG, D_SER_49  | HG, D_SER_49   | 2.87 | 2.17 | 28.65 |
| 4KRM.PDB | O, D_GLY_59    | N, D_GLY_50   | H, D_GLY_50    | 2.97 | 2.17 | 17.64 |
| 4KRM.PDB | O, D_MET_34    | N, D_ILE_51   | H, D_ILE_51    | 2.91 | 2.12 | 20.05 |
| 4KRM.PDB | O, D_SER_102   | N, D_TRP_53   | H, D_TRP_53    | 2.83 | 2.01 | 14.56 |
| 4KRM.PDB | O, D_GLY_50    | N, D_GLY_59   | H, D_GLY_59    | 2.80 | 2.03 | 22.40 |
| 4KRM.PDB | O, E_GLU_308   | N, D_TYR_60   | H, D_TYR_60    | 2.82 | 2.08 | 26.84 |
| 4KRM.PDB | O, D_VAL_48    | N, D_ALA_61   | H, D_ALA_61    | 2.93 | 2.14 | 18.86 |
| 4KRM.PDB | O, D_GLN_82    | N, D_THR_69   | H, D_THR_69    | 2.93 | 2.16 | 22.84 |
| 4KRM.PDB | OH, D_TYR_60   | N, D_ILE_70   | H, D_ILE_70    | 2.85 | 2.02 | 13.28 |
| 4KRM.PDB | O, D_TYR_32    | NH2, D_ARG_72 | HH22, D_ARG_72 | 2.68 | 1.86 | 14.70 |
| 4KRM.PDB | O, D_TRP_53    | ND2, D_ASN_74 | HD21, D_ASN_74 | 2.93 | 2.13 | 17.25 |
| 4KRM.PDB | O, D_SER_71    | N, D_ASP_80   | H, D_ASP_80    | 2.68 | 1.90 | 20.52 |
| 4KRM.PDB | O, D_LEU_20    | N, D_LEU_81   | H, D_LEU_81    | 2.87 | 2.07 | 19.11 |
| 4KRM.PDB | O, D_THR_69    | N, D_GLN_82   | H, D_GLN_82    | 2.77 | 1.93 | 7.52  |
| 4KRM.PDB | O, D_LEU_18    | N, D_MET_83   | H, D_MET_83    | 2.74 | 1.89 | 9.04  |
| 4KRM.PDB | OD1, D_ASP_90  | N, D_LYS_87   | H, D_LYS_87    | 2.86 | 2.02 | 10.59 |
| 4KRM.PDB | O, D_THR_118   | N, D_TYR_94   | H, D_TYR_94    | 2.80 | 1.95 | 8.02  |
| 4KRM.PDB | O, D_ASP_90    | OH, D_TYR_94  | HH, D_TYR_94   | 2.74 | 1.90 | 2.03  |
| 4KRM.PDB | O, D_PHE_37    | N, D_TYR_95   | H, D_TYR_95    | 2.75 | 1.94 | 16.71 |
| 4KRM.PDB | OE2, D_GLU_6   | N, D_CYS_96   | H, D_CYS_96    | 2.74 | 1.90 | 11.31 |
| 4KRM.PDB | O, D_TYR_113   | N, D_ALA_98   | H, D_ALA_98    | 2.88 | 2.08 | 18.17 |
| 4KRM.PDB | O, D_GLY_33    | N, D_ALA_99   | H, D_ALA_99    | 2.73 | 1.90 | 13.15 |
| 4KRM.PDB | OD2, D_ASP_112 | N, D_ALA_100  | H, D_ALA_100   | 2.90 | 2.08 | 15.09 |
| 4KRM.PDB | O, D_SER_31    | N, D_GLY_101  | H, D_GLY_101   | 2.79 | 1.93 | 3.06  |
| 4KRM.PDB | O, D_TYR_105   | OH, D_TYR_111 | HH, D_TYR_111  | 2.68 | 1.86 | 10.32 |
| 4KRM.PDB | O, D_ALA_98    | N, D_ASP_112  | H, D_ASP_112   | 2.84 | 2.03 | 16.97 |
| 4KRM.PDB | O, D_ALA_92    | N, D_VAL_120  | H, D_VAL_120   | 2.94 | 2.12 | 14.83 |
| 4KRM.PDB | O, D_GLY_10    | N, D_THR_121  | H, D_THR_121   | 2.87 | 2.04 | 11.88 |
| 4KRM.PDB | OG1, D_THR_91  | N, D_VAL_122  | H, D_VAL_122   | 2.88 | 2.06 | 14.21 |
| 4KRM.PDB | O, D_THR_58    | N, E_LYS_310  | H, E_LYS_310   | 2.79 | 2.02 | 22.01 |
| 4KRM.PDB | O, E_SER_340   | N, E_CYS_313  | H, E_CYS_313   | 2.94 | 2.14 | 19.13 |
| 4KRM.PDB | O, E_PHE_321   | N, E_GLY_317  | H, E_GLY_317   | 2.77 | 1.95 | 14.36 |
| 4KRM.PDB | O, E_GLY_319   | N, E_LYS_322  | H, E_LYS_322   | 2.82 | 2.09 | 27.17 |
| 4KRM.PDB | O, E_ILE_327   | OG, E_SER_326 | HG, E_SER_326  | 2.91 | 2.09 | 10.66 |
| 4KRM.PDB | O, E_HIS_346   | N, E_ILE_327  | H, E_ILE_327   | 2.96 | 2.13 | 12.07 |
| 4KRM.PDB | OD1, E_ASN_331 | N, E_ASN_328  | H, E_ASN_328   | 2.92 | 2.08 | 11.06 |
| 4KRM.PDB | OD1, E_ASN_328 | N, E_ASN_331  | H, E_ASN_331   | 2.76 | 1.96 | 17.47 |
| 4KRM.PDB | O, E_LYS_311   | N, E_THR_339  | H, E_THR_339   | 2.88 | 2.04 | 8.53  |
| 4KRM.PDB | O, E_GLU_376   | N, E_ILE_341  | H, E_ILE_341   | 2.83 | 1.99 | 10.53 |
| 4KRM.PDB | O, E_CYS_313   | N, E_SER_342  | H, E_SER_342   | 2.81 | 2.01 | 18.67 |
| 4KRM.PDB | OG1, E_THR_378 | N, E_GLY_343  | H, E_GLY_343   | 2.67 | 1.96 | 28.18 |
| 4KRM.PDB | O, E_PHE_380   | N, E_LEU_345  | H, E_LEU_345   | 2.98 | 2.16 | 13.52 |
| 4KRM.PDB | O, E_LEU_382   | N, E_ILE_347  | H, E_ILE_347   | 2.93 | 2.15 | 21.34 |
| 4KRM.PDB | OG, E_SER_326  | N, E_LEU_348  | H, E_LEU_348   | 2.89 | 2.06 | 13.76 |
| 4KRM.PDB | O, E_LEU_348   | N, E_ALA_351  | H, E_ALA_351   | 2.93 | 2.15 | 20.83 |
| 4KRM.PDB | O, E_PRO_349   | N, E_ARG_353  | H, E_ARG_353   | 2.97 | 2.21 | 24.57 |

|          |                |                |                 |      |      |       |
|----------|----------------|----------------|-----------------|------|------|-------|
| 4KRM.PDB | OE1, F_GLU_110 | NH1, E_ARG_353 | HH11, E_ARG_353 | 2.85 | 2.03 | 14.34 |
| 4KRM.PDB | O, F_GLU_110   | NH1, E_ARG_353 | HH12, E_ARG_353 | 2.46 | 1.72 | 24.77 |
| 4KRM.PDB | O, F_ALA_100   | NH2, E_ARG_353 | HH21, E_ARG_353 | 2.81 | 1.99 | 15.85 |
| 4KRM.PDB | OD2, F_ASP_112 | NH2, E_ARG_353 | HH22, E_ARG_353 | 2.96 | 2.18 | 20.33 |
| 4KRM.PDB | O, E_VAL_350   | N, E_GLY_354   | H, E_GLY_354    | 2.78 | 1.95 | 14.18 |
| 4KRM.PDB | O, E_THR_360   | N, E_ASP_355   | H, E_ASP_355    | 2.77 | 1.92 | 5.02  |
| 4KRM.PDB | OD2, E_ASP_355 | OG1, E_THR_358 | HG1, E_THR_358  | 2.55 | 1.85 | 27.90 |
| 4KRM.PDB | O, E_SER_356   | N, E_HIS_359   | H, E_HIS_359    | 2.96 | 2.14 | 15.14 |
| 4KRM.PDB | O, E_ASP_355   | N, E_THR_360   | H, E_THR_360    | 2.89 | 2.04 | 8.71  |
| 4KRM.PDB | O, E_LEU_368   | N, E_LEU_371   | H, E_LEU_371    | 2.96 | 2.11 | 6.62  |
| 4KRM.PDB | O, E_CYS_338   | OG1, E_THR_373 | HG1, E_THR_373  | 2.65 | 1.89 | 21.62 |
| 4KRM.PDB | O, E_LEU_371   | N, E_VAL_374   | H, E_VAL_374    | 2.87 | 2.03 | 11.52 |
| 4KRM.PDB | O, E_THR_339   | N, E_LYS_375   | H, E_LYS_375    | 2.80 | 1.95 | 3.65  |
| 4KRM.PDB | O, E_ILE_341   | N, E_THR_378   | H, E_THR_378    | 2.99 | 2.16 | 11.77 |
| 4KRM.PDB | O, E_GLY_343   | N, E_GLY_379   | H, E_GLY_379    | 2.96 | 2.26 | 29.80 |
| 4KRM.PDB | O, E_SER_413   | N, E_LEU_381   | H, E_LEU_381    | 2.89 | 2.08 | 16.67 |
| 4KRM.PDB | O, E_LEU_345   | N, E_LEU_382   | H, E_LEU_382    | 2.95 | 2.10 | 8.54  |
| 4KRM.PDB | O, E_ALA_415   | N, E_ILE_383   | H, E_ILE_383    | 2.79 | 1.94 | 5.21  |
| 4KRM.PDB | O, F_ASP_112   | NE2, E_GLN_384 | HE22, E_GLN_384 | 2.82 | 2.10 | 28.13 |
| 4KRM.PDB | O, E_LEU_424   | N, E_LEU_393   | H, E_LEU_393    | 2.88 | 2.06 | 14.51 |
| 4KRM.PDB | O, E_LEU_393   | N, E_PHE_396   | H, E_PHE_396    | 2.99 | 2.16 | 13.86 |
| 4KRM.PDB | O, E_HIS_394   | N, E_GLU_397   | H, E_GLU_397    | 2.82 | 2.04 | 20.64 |
| 4KRM.PDB | O, E_LYS_372   | ND2, E_ASN_398 | HD22, E_ASN_398 | 2.92 | 2.11 | 15.20 |
| 4KRM.PDB | O, E_LYS_375   | N, E_GLU_400   | H, E_GLU_400    | 2.81 | 1.96 | 8.49  |
| 4KRM.PDB | O, E_ILE_377   | N, E_ARG_403   | H, E_ARG_403    | 2.94 | 2.11 | 13.50 |
| 4KRM.PDB | O, E_THR_378   | N, E_ARG_405   | H, E_ARG_405    | 2.98 | 2.15 | 12.71 |
| 4KRM.PDB | OD1, E_ASP_434 | NZ, E_LYS_407  | HZ1, E_LYS_407  | 2.65 | 1.88 | 23.95 |
| 4KRM.PDB | O, E_PHE_412   | N, E_GLN_408   | H, E_GLN_408    | 2.79 | 1.99 | 17.99 |
| 4KRM.PDB | O, E_LYS_407   | N, E_GLY_410   | H, E_GLY_410    | 2.97 | 2.18 | 18.85 |
| 4KRM.PDB | O, E_GLN_408   | N, E_GLN_411   | H, E_GLN_411    | 2.93 | 2.08 | 6.71  |
| 4KRM.PDB | O, E_ASP_436   | N, E_SER_413   | H, E_SER_413    | 2.91 | 2.10 | 16.30 |
| 4KRM.PDB | O, E_LEU_381   | N, E_ALA_415   | H, E_ALA_415    | 2.85 | 2.12 | 26.97 |
| 4KRM.PDB | O, E_ILE_383   | N, E_VAL_417   | H, E_VAL_417    | 2.90 | 2.05 | 7.33  |
| 4KRM.PDB | O, E_SER_440   | N, E_SER_418   | H, E_SER_418    | 2.92 | 2.12 | 18.48 |
| 4KRM.PDB | OD1, E_ASN_442 | N, E_LEU_419   | H, E_LEU_419    | 2.67 | 1.86 | 14.59 |
| 4KRM.PDB | O, E_THR_391   | N, E_THR_422   | H, E_THR_422    | 2.80 | 2.00 | 17.36 |
| 4KRM.PDB | O, E_LEU_456   | N, E_ILE_432   | H, E_ILE_432    | 2.68 | 1.84 | 9.53  |
| 4KRM.PDB | O, E_ILE_402   | N, E_SER_433   | H, E_SER_433    | 2.93 | 2.19 | 25.97 |
| 4KRM.PDB | OE2, E_GLU_431 | OG, E_SER_433  | HG, E_SER_433   | 2.91 | 2.17 | 23.57 |
| 4KRM.PDB | O, E_GLN_411   | N, E_ASP_436   | H, E_ASP_436    | 2.85 | 1.99 | 3.30  |
| 4KRM.PDB | O, E_LYS_465   | N, E_ILE_439   | H, E_ILE_439    | 2.87 | 2.04 | 13.60 |
| 4KRM.PDB | O, E_ASN_442   | N, E_LEU_445   | H, E_LEU_445    | 2.93 | 2.08 | 7.42  |
| 4KRM.PDB | O, E_THR_422   | N, E_CYS_446   | H, E_CYS_446    | 2.91 | 2.06 | 4.97  |
| 4KRM.PDB | O, E_TYR_447   | N, E_THR_450   | H, E_THR_450    | 2.98 | 2.15 | 11.59 |
| 4KRM.PDB | O, E_TYR_447   | OG1, E_THR_450 | HG1, E_THR_450  | 2.73 | 1.91 | 9.86  |
| 4KRM.PDB | O, E_GLU_489   | N, E_ASN_452   | H, E_ASN_452    | 2.85 | 2.08 | 22.47 |
| 4KRM.PDB | OE1, E_GLN_462 | N, E_GLY_458   | H, E_GLY_458    | 2.67 | 1.84 | 13.21 |
| 4KRM.PDB | OE1, E_GLN_462 | N, E_THR_459   | H, E_THR_459    | 2.93 | 2.08 | 6.67  |
| 4KRM.PDB | O, E_GLY_435   | NE2, E_GLN_462 | HE21, E_GLN_462 | 2.81 | 1.97 | 10.34 |
| 4KRM.PDB | OD1, E_ASP_436 | N, E_LYS_463   | H, E_LYS_463    | 2.74 | 1.90 | 10.82 |
| 4KRM.PDB | O, E_VAL_437   | N, E_LYS_465   | H, E_LYS_465    | 2.73 | 1.90 | 11.45 |
| 4KRM.PDB | O, E_ILE_439   | ND2, E_ASN_469 | HD21, E_ASN_469 | 2.99 | 2.18 | 18.20 |
| 4KRM.PDB | O, E_GLY_471   | N, E_CYS_475   | H, E_CYS_475    | 2.86 | 2.02 | 8.70  |
| 4KRM.PDB | O, E_GLU_472   | N, E_LYS_476   | H, E_LYS_476    | 2.70 | 1.86 | 10.04 |
| 4KRM.PDB | O, E_SER_501   | N, E_SER_487   | H, E_SER_487    | 2.92 | 2.08 | 12.18 |
| 4KRM.PDB | OG, E_SER_487  | N, E_GLU_489   | H, E_GLU_489    | 2.96 | 2.14 | 14.73 |
| 4KRM.PDB | OG1, E_THR_450 | N, E_CYS_491   | H, E_CYS_491    | 2.93 | 2.14 | 19.72 |
| 4KRM.PDB | O, E_ASP_498   | N, E_TRP_492   | H, E_TRP_492    | 2.80 | 1.98 | 14.94 |

|          |                |                |                 |      |      |       |
|----------|----------------|----------------|-----------------|------|------|-------|
| 4KRM.PDB | OD2, E_ASP.498 | N, E_GLU.495   | H, E_GLU.495    | 2.92 | 2.09 | 11.64 |
| 4KRM.PDB | O, E_GLU.495   | N, E_ASP.498   | H, E_ASP.498    | 2.98 | 2.18 | 17.73 |
| 4KRM.PDB | O, E_LEU.485   | N, E_ARG.503   | H, E_ARG.503    | 2.88 | 2.12 | 23.79 |
| 4KRM.PDB | O, F_SER.25    | N, F_LYS.3     | H, F_LYS.3      | 2.86 | 2.05 | 17.09 |
| 4KRM.PDB | O, F_THR.21    | N, F_SER.7     | H, F_SER.7      | 2.95 | 2.13 | 15.30 |
| 4KRM.PDB | O, F_SER.7     | N, F_THR.21    | H, F_THR.21     | 2.73 | 1.87 | 2.52  |
| 4KRM.PDB | O, F_LYS.3     | N, F_SER.25    | H, F_SER.25     | 2.98 | 2.15 | 11.96 |
| 4KRM.PDB | O, F_SER.31    | NH2, F_ARG.30  | HH21, F_ARG.30  | 2.61 | 1.79 | 15.83 |
| 4KRM.PDB | O, F_ALA.99    | N, F_GLY.33    | H, F_GLY.33     | 2.82 | 2.07 | 24.40 |
| 4KRM.PDB | O, F_ILE.51    | N, F_MET.34    | H, F_MET.34     | 2.93 | 2.11 | 15.70 |
| 4KRM.PDB | O, F_ALA.97    | N, F_GLY.35    | H, F_GLY.35     | 2.80 | 1.97 | 12.17 |
| 4KRM.PDB | O, F_SER.49    | N, F_TRP.36    | H, F_TRP.36     | 2.73 | 1.89 | 10.21 |
| 4KRM.PDB | O, F_TYR.95    | N, F_PHE.37    | H, F_PHE.37     | 2.81 | 1.97 | 10.88 |
| 4KRM.PDB | O, F_GLU.46    | N, F_ARG.38    | H, F_ARG.38     | 2.90 | 2.09 | 16.96 |
| 4KRM.PDB | OE1, F_GLU.46  | NE, F_ARG.38   | HE, F_ARG.38    | 2.74 | 1.95 | 18.99 |
| 4KRM.PDB | OD2, F_ASP.90  | NH1, F_ARG.38  | HH12, F_ARG.38  | 2.95 | 2.22 | 27.79 |
| 4KRM.PDB | OE1, F_GLU.46  | NH2, F_ARG.38  | HH21, F_ARG.38  | 2.97 | 2.26 | 28.90 |
| 4KRM.PDB | O, F_ILE.93    | N, F_GLN.39    | H, F_GLN.39     | 2.82 | 2.04 | 20.98 |
| 4KRM.PDB | O, F_ARG.38    | N, F_GLU.46    | H, F_GLU.46     | 2.90 | 2.06 | 10.12 |
| 4KRM.PDB | O, F_TRP.36    | N, F_VAL.48    | H, F_VAL.48     | 2.88 | 2.06 | 14.02 |
| 4KRM.PDB | O, F_GLY.59    | OG, F_SER.49   | HG, F_SER.49    | 2.88 | 2.11 | 18.96 |
| 4KRM.PDB | O, F_MET.34    | N, F_ILE.51    | H, F_ILE.51     | 2.74 | 1.95 | 19.38 |
| 4KRM.PDB | O, F_SER.57    | N, F_SER.52    | H, F_SER.52     | 2.97 | 2.18 | 19.50 |
| 4KRM.PDB | O, F_SER.102   | N, F_TRP.53    | H, F_TRP.53     | 2.81 | 2.02 | 19.56 |
| 4KRM.PDB | O, F_GLY.50    | N, F_GLY.59    | H, F_GLY.59     | 2.97 | 2.21 | 23.47 |
| 4KRM.PDB | O, F_VAL.48    | N, F_ALA.61    | H, F_ALA.61     | 2.76 | 1.97 | 19.40 |
| 4KRM.PDB | O, F_ALA.61    | N, F_VAL.64    | H, F_VAL.64     | 2.98 | 2.13 | 8.69  |
| 4KRM.PDB | O, F_GLN.82    | N, F_THR.69    | H, F_THR.69     | 2.91 | 2.11 | 18.52 |
| 4KRM.PDB | OH, F_TYR.60   | N, F_ILE.70    | H, F_ILE.70     | 2.89 | 2.06 | 11.48 |
| 4KRM.PDB | O, F_TYR.32    | NH2, F_ARG.72  | HH22, F_ARG.72  | 2.78 | 1.95 | 12.55 |
| 4KRM.PDB | O, F_THR.78    | N, F_ASP.73    | H, F_ASP.73     | 2.80 | 1.97 | 13.02 |
| 4KRM.PDB | O, F_TRP.53    | ND2, F_ASN.74  | HD21, F_ASN.74  | 2.93 | 2.12 | 16.19 |
| 4KRM.PDB | O, F_SER.71    | N, F_ASP.80    | H, F_ASP.80     | 2.70 | 1.92 | 21.61 |
| 4KRM.PDB | O, F_LEU.20    | N, F_LEU.81    | H, F_LEU.81     | 2.76 | 1.99 | 22.17 |
| 4KRM.PDB | O, F_THR.69    | N, F_GLN.82    | H, F_GLN.82     | 2.76 | 1.97 | 19.23 |
| 4KRM.PDB | O, F_LEU.18    | N, F_MET.83    | H, F_MET.83     | 2.64 | 1.79 | 6.89  |
| 4KRM.PDB | O, F_LYS.87    | N, F_ASP.90    | H, F_ASP.90     | 2.98 | 2.21 | 22.29 |
| 4KRM.PDB | O, F_VAL.120   | N, F_ALA.92    | H, F_ALA.92     | 2.97 | 2.23 | 25.76 |
| 4KRM.PDB | O, F_GLN.39    | N, F_ILE.93    | H, F_ILE.93     | 2.94 | 2.10 | 11.68 |
| 4KRM.PDB | O, F_THR.118   | N, F_TYR.94    | H, F_TYR.94     | 2.68 | 1.91 | 22.25 |
| 4KRM.PDB | O, F_PHE.37    | N, F_TYR.95    | H, F_TYR.95     | 2.61 | 1.83 | 20.76 |
| 4KRM.PDB | OE2, F_GLU.6   | N, F_CYS.96    | H, F_CYS.96     | 2.70 | 1.85 | 6.40  |
| 4KRM.PDB | O, F_TYR.113   | N, F_ALA.98    | H, F_ALA.98     | 2.93 | 2.11 | 13.82 |
| 4KRM.PDB | O, F_GLY.33    | N, F_ALA.99    | H, F_ALA.99     | 2.73 | 1.91 | 15.09 |
| 4KRM.PDB | OD2, F_ASP.112 | N, F_ALA.100   | H, F_ALA.100    | 2.76 | 1.94 | 15.63 |
| 4KRM.PDB | O, F_SER.31    | N, F_GLY.101   | H, F_GLY.101    | 2.75 | 1.91 | 9.93  |
| 4KRM.PDB | OG, F_SER.57   | NE1, F_TRP.104 | HE1, F_TRP.104  | 3.00 | 2.20 | 18.23 |
| 4KRM.PDB | OH, F_TYR.111  | N, F_TYR.105   | H, F_TYR.105    | 2.96 | 2.11 | 6.28  |
| 4KRM.PDB | O, F_TYR.105   | OH, F_TYR.111  | HH, F_TYR.111   | 2.59 | 1.76 | 7.82  |
| 4KRM.PDB | O, F_ALA.98    | N, F_ASP.112   | H, F_ASP.112    | 2.76 | 1.97 | 19.53 |
| 4KRM.PDB | O, F_ALA.92    | N, F_VAL.120   | H, F_VAL.120    | 2.87 | 2.04 | 13.51 |
| 4KRM.PDB | O, J_THR.58    | N, G_LYS.310   | H, G_LYS.310    | 2.73 | 1.87 | 4.39  |
| 4KRM.PDB | OG1, G_THR.339 | N, G_LYS.311   | H, G_LYS.311    | 2.65 | 1.81 | 9.30  |
| 4KRM.PDB | O, J_ASP.56    | N, G_VAL.312   | H, G_VAL.312    | 2.86 | 2.02 | 9.25  |
| 4KRM.PDB | O, G_SER.340   | N, G_CYS.313   | H, G_CYS.313    | 2.95 | 2.13 | 14.37 |
| 4KRM.PDB | OE2, G_GLU.320 | ND2, G_ASN.314 | HD22, G_ASN.314 | 2.93 | 2.08 | 7.68  |
| 4KRM.PDB | O, G_PHE.321   | N, G_GLY.317   | H, G_GLY.317    | 2.53 | 1.78 | 24.02 |
| 4KRM.PDB | O, G_ILE.318   | N, G_PHE.321   | H, G_PHE.321    | 2.93 | 2.11 | 15.10 |

|          |                |                |                 |      |      |       |
|----------|----------------|----------------|-----------------|------|------|-------|
| 4KRM.PDB | O, G_ILE_327   | OG, G_SER_326  | HG, G_SER_326   | 2.75 | 1.93 | 11.46 |
| 4KRM.PDB | OD1, G_ASN_331 | N, G_ASN_328   | H, G_ASN_328    | 2.74 | 1.90 | 10.28 |
| 4KRM.PDB | OD1, G_ASN_328 | N, G_THR_330   | H, G_THR_330    | 2.95 | 2.20 | 24.53 |
| 4KRM.PDB | O, G_LYS_311   | N, G_THR_339   | H, G_THR_339    | 2.89 | 2.05 | 9.34  |
| 4KRM.PDB | O, G_GLU_376   | N, G_ILE_341   | H, G_ILE_341    | 2.80 | 1.96 | 11.60 |
| 4KRM.PDB | O, G_CYS_313   | N, G_SER_342   | H, G_SER_342    | 2.82 | 1.98 | 11.49 |
| 4KRM.PDB | O, G_PHE_380   | N, G_LEU_345   | H, G_LEU_345    | 2.93 | 2.10 | 13.53 |
| 4KRM.PDB | O, G_LEU_382   | N, G_ILE_347   | H, G_ILE_347    | 2.70 | 1.92 | 20.05 |
| 4KRM.PDB | OD1, H_ASP_112 | N, G_VAL_350   | H, G_VAL_350    | 2.96 | 2.25 | 28.54 |
| 4KRM.PDB | O, H_GLU_110   | NH1, G_ARG_353 | HH12, G_ARG_353 | 2.56 | 1.83 | 26.87 |
| 4KRM.PDB | O, H_ALA_100   | NH2, G_ARG_353 | HH21, G_ARG_353 | 2.51 | 1.75 | 22.59 |
| 4KRM.PDB | O, G_THR_360   | N, G_ASP_355   | H, G_ASP_355    | 2.70 | 1.88 | 14.64 |
| 4KRM.PDB | OD2, G_ASP_355 | OG1, G_THR_358 | HG1, G_THR_358  | 2.44 | 1.73 | 26.83 |
| 4KRM.PDB | O, G_SER_356   | N, G_HIS_359   | H, G_HIS_359    | 2.93 | 2.09 | 11.16 |
| 4KRM.PDB | O, G_ASP_355   | N, G_THR_360   | H, G_THR_360    | 2.97 | 2.12 | 5.02  |
| 4KRM.PDB | O, G_ALA_351   | N, G_LEU_363   | H, G_LEU_363    | 2.76 | 1.95 | 17.12 |
| 4KRM.PDB | O, G_ASP_364   | N, G_GLU_367   | H, G_GLU_367    | 2.88 | 2.09 | 19.30 |
| 4KRM.PDB | O, G_CYS_338   | OG1, G_THR_373 | HG1, G_THR_373  | 2.73 | 2.02 | 27.50 |
| 4KRM.PDB | O, G_LEU_371   | N, G_VAL_374   | H, G_VAL_374    | 2.85 | 2.01 | 8.31  |
| 4KRM.PDB | O, G_THR_339   | N, G_LYS_375   | H, G_LYS_375    | 2.65 | 1.80 | 5.93  |
| 4KRM.PDB | O, G_ILE_401   | N, G_ILE_377   | H, G_ILE_377    | 2.87 | 2.09 | 20.96 |
| 4KRM.PDB | O, G_ILE_341   | N, G_THR_378   | H, G_THR_378    | 2.88 | 2.03 | 7.65  |
| 4KRM.PDB | O, G_GLY_343   | N, G_GLY_379   | H, G_GLY_379    | 2.80 | 2.07 | 27.17 |
| 4KRM.PDB | O, G_SER_413   | N, G_LEU_381   | H, G_LEU_381    | 2.90 | 2.12 | 21.15 |
| 4KRM.PDB | O, G_LEU_345   | N, G_LEU_382   | H, G_LEU_382    | 2.83 | 1.99 | 8.73  |
| 4KRM.PDB | O, G_ALA_415   | N, G_ILE_383   | H, G_ILE_383    | 2.86 | 2.01 | 8.40  |
| 4KRM.PDB | O, G_ILE_347   | N, G_GLN_384   | H, G_GLN_384    | 2.81 | 1.95 | 0.88  |
| 4KRM.PDB | O, G_LEU_424   | N, G_LEU_393   | H, G_LEU_393    | 2.77 | 1.94 | 12.00 |
| 4KRM.PDB | O, G_ASP_392   | N, G_HIS_394   | H, G_HIS_394    | 2.93 | 2.22 | 28.78 |
| 4KRM.PDB | O, G_LEU_393   | N, G_PHE_396   | H, G_PHE_396    | 2.92 | 2.10 | 14.77 |
| 4KRM.PDB | O, G_HIS_394   | N, G_GLU_397   | H, G_GLU_397    | 2.97 | 2.19 | 21.14 |
| 4KRM.PDB | O, G_LYS_372   | ND2, G_ASN_398 | HD22, G_ASN_398 | 2.84 | 2.00 | 11.57 |
| 4KRM.PDB | O, G_LYS_375   | N, G_GLU_400   | H, G_GLU_400    | 2.78 | 1.96 | 14.21 |
| 4KRM.PDB | O, G_LYS_375   | N, G_ILE_401   | H, G_ILE_401    | 2.99 | 2.20 | 20.10 |
| 4KRM.PDB | O, G_GLU_431   | N, G_ILE_402   | H, G_ILE_402    | 2.97 | 2.14 | 13.48 |
| 4KRM.PDB | O, G_ILE_377   | N, G_ARG_403   | H, G_ARG_403    | 2.93 | 2.11 | 14.81 |
| 4KRM.PDB | OE2, B_GLU_5   | NZ, G_LYS_407  | HZ1, G_LYS_407  | 2.98 | 2.17 | 20.60 |
| 4KRM.PDB | O, G_PHE_412   | N, G_GLN_408   | H, G_GLN_408    | 2.76 | 2.01 | 23.83 |
| 4KRM.PDB | O, G_LYS_407   | N, G_GLY_410   | H, G_GLY_410    | 2.94 | 2.22 | 27.68 |
| 4KRM.PDB | O, G_GLN_408   | N, G_GLN_411   | H, G_GLN_411    | 2.79 | 2.01 | 20.58 |
| 4KRM.PDB | O, G_ASP_436   | N, G_SER_413   | H, G_SER_413    | 2.85 | 2.07 | 21.98 |
| 4KRM.PDB | O, G_LEU_381   | N, G_ALA_415   | H, G_ALA_415    | 2.89 | 2.06 | 13.22 |
| 4KRM.PDB | O, G_ILE_438   | N, G_VAL_416   | H, G_VAL_416    | 2.96 | 2.13 | 13.42 |
| 4KRM.PDB | O, G_ILE_383   | N, G_VAL_417   | H, G_VAL_417    | 2.92 | 2.07 | 10.01 |
| 4KRM.PDB | O, G_SER_440   | N, G_SER_418   | H, G_SER_418    | 2.92 | 2.13 | 19.69 |
| 4KRM.PDB | OD1, G_ASN_442 | N, G_LEU_419   | H, G_LEU_419    | 2.75 | 1.90 | 7.74  |
| 4KRM.PDB | O, G_THR_391   | N, G_THR_422   | H, G_THR_422    | 2.76 | 1.99 | 22.35 |
| 4KRM.PDB | OD1, G_ASP_498 | NE, G_ARG_427  | HE, G_ARG_427   | 2.63 | 1.82 | 16.62 |
| 4KRM.PDB | O, G_GLU_400   | N, G_LYS_430   | H, G_LYS_430    | 2.83 | 2.00 | 11.28 |
| 4KRM.PDB | O, G_LEU_456   | N, G_ILE_432   | H, G_ILE_432    | 2.61 | 1.79 | 15.19 |
| 4KRM.PDB | O, G_ILE_402   | N, G_SER_433   | H, G_SER_433    | 2.83 | 2.10 | 26.95 |
| 4KRM.PDB | OE2, G_GLU_431 | OG, G_SER_433  | HG, G_SER_433   | 2.90 | 2.13 | 19.38 |
| 4KRM.PDB | O, G_GLN_411   | N, G_ASP_436   | H, G_ASP_436    | 2.84 | 1.99 | 7.12  |
| 4KRM.PDB | O, G_LEU_414   | N, G_ILE_438   | H, G_ILE_438    | 2.99 | 2.16 | 12.24 |
| 4KRM.PDB | O, G_LYS_465   | N, G_ILE_439   | H, G_ILE_439    | 2.85 | 2.05 | 16.86 |
| 4KRM.PDB | O, G_THR_422   | N, G_CYS_446   | H, G_CYS_446    | 2.95 | 2.09 | 5.98  |
| 4KRM.PDB | O, G_TYR_447   | OG1, G_THR_450 | HG1, G_THR_450  | 2.91 | 2.12 | 17.41 |
| 4KRM.PDB | O, G_TRP_453   | N, G_LEU_456   | H, G_LEU_456    | 2.82 | 2.02 | 18.78 |

|          |                |                |                 |      |      |       |
|----------|----------------|----------------|-----------------|------|------|-------|
| 4KRM.PDB | OE1, G_GLN_462 | N, G_GLY_458   | H, G_GLY_458    | 2.58 | 1.75 | 11.60 |
| 4KRM.PDB | OE1, G_GLN_462 | N, G_THR_459   | H, G_THR_459    | 2.66 | 1.85 | 16.39 |
| 4KRM.PDB | O, G_ILE_432   | NE2, G_GLN_462 | HE22, G_GLN_462 | 2.98 | 2.14 | 10.37 |
| 4KRM.PDB | OD2, G_ASP_436 | NZ, G_LYS_463  | HZ3, G_LYS_463  | 2.68 | 1.83 | 13.12 |
| 4KRM.PDB | O, G_VAL_437   | N, G_LYS_465   | H, G_LYS_465    | 2.68 | 1.91 | 21.58 |
| 4KRM.PDB | O, G_ILE_439   | ND2, G_ASN_469 | HD21, G_ASN_469 | 2.98 | 2.19 | 20.07 |
| 4KRM.PDB | O, G_GLY_479   | N, G_VAL_481   | H, G_VAL_481    | 2.78 | 2.05 | 26.86 |
| 4KRM.PDB | O, G_HIS_483   | N, G_CYS_486   | H, G_CYS_486    | 2.82 | 1.98 | 11.71 |
| 4KRM.PDB | O, G_SER_501   | N, G_SER_487   | H, G_SER_487    | 2.97 | 2.12 | 8.14  |
| 4KRM.PDB | OG1, G_THR_450 | N, G_CYS_491   | H, G_CYS_491    | 2.97 | 2.16 | 16.33 |
| 4KRM.PDB | O, G_ASP_498   | N, G_TRP_492   | H, G_TRP_492    | 2.74 | 1.91 | 11.68 |
| 4KRM.PDB | OD2, G_ASP_498 | N, G_GLU_495   | H, G_GLU_495    | 2.95 | 2.14 | 15.12 |
| 4KRM.PDB | O, G_GLU_495   | N, G_ASP_498   | H, G_ASP_498    | 2.86 | 2.09 | 21.75 |
| 4KRM.PDB | O, H_SER_25    | N, H_LYS_3     | H, H_LYS_3      | 2.79 | 1.95 | 8.78  |
| 4KRM.PDB | O, H_THR_121   | N, H_VAL_12    | H, H_VAL_12     | 2.78 | 2.06 | 27.37 |
| 4KRM.PDB | O, H_LEU_86    | N, H_GLY_15    | H, H_GLY_15     | 2.81 | 1.97 | 8.46  |
| 4KRM.PDB | O, H_GLN_13    | N, H_GLY_16    | H, H_GLY_16     | 2.88 | 2.10 | 20.19 |
| 4KRM.PDB | O, H_MET_83    | N, H_LEU_18    | H, H_LEU_18     | 2.86 | 2.12 | 25.13 |
| 4KRM.PDB | O, H_LEU_81    | N, H_LEU_20    | H, H_LEU_20     | 2.99 | 2.19 | 18.49 |
| 4KRM.PDB | O, H_SER_7     | N, H_THR_21    | H, H_THR_21     | 2.95 | 2.12 | 12.95 |
| 4KRM.PDB | OD1, H_ASP_80  | OG1, H_THR_21  | HG1, H_THR_21   | 2.86 | 2.06 | 13.63 |
| 4KRM.PDB | O, H_VAL_79    | N, H_CYS_22    | H, H_CYS_22     | 2.70 | 1.88 | 14.06 |
| 4KRM.PDB | O, H_GLU_5     | N, H_ALA_23    | H, H_ALA_23     | 2.89 | 2.06 | 12.94 |
| 4KRM.PDB | O, H_LYS_3     | N, H_SER_25    | H, H_SER_25     | 2.91 | 2.09 | 13.71 |
| 4KRM.PDB | O, H_GLN_1     | N, H_ARG_27    | H, H_ARG_27     | 2.48 | 1.77 | 28.35 |
| 4KRM.PDB | OD2, G_ASP_355 | NH1, H_ARG_30  | HH12, H_ARG_30  | 2.45 | 1.69 | 23.45 |
| 4KRM.PDB | O, H_SER_31    | NH2, H_ARG_30  | HH21, H_ARG_30  | 2.78 | 1.93 | 7.41  |
| 4KRM.PDB | O, H_ALA_99    | N, H_GLY_33    | H, H_GLY_33     | 2.86 | 2.05 | 16.44 |
| 4KRM.PDB | O, H_ALA_97    | N, H_GLY_35    | H, H_GLY_35     | 2.94 | 2.11 | 13.58 |
| 4KRM.PDB | O, H_SER_49    | N, H_TRP_36    | H, H_TRP_36     | 2.62 | 1.77 | 8.75  |
| 4KRM.PDB | O, H_TYR_95    | N, H_PHE_37    | H, H_PHE_37     | 2.89 | 2.05 | 9.66  |
| 4KRM.PDB | O, H_GLU_46    | N, H_ARG_38    | H, H_ARG_38     | 2.94 | 2.12 | 14.51 |
| 4KRM.PDB | OH, H_TYR_94   | NH1, H_ARG_38  | HH11, H_ARG_38  | 2.96 | 2.15 | 17.21 |
| 4KRM.PDB | OD2, H_ASP_90  | NH1, H_ARG_38  | HH12, H_ARG_38  | 2.78 | 1.94 | 11.87 |
| 4KRM.PDB | O, H_ILE_93    | N, H_GLN_39    | H, H_GLN_39     | 2.82 | 2.05 | 22.91 |
| 4KRM.PDB | O, H_ARG_38    | N, H_GLU_46    | H, H_GLU_46     | 2.85 | 2.00 | 7.03  |
| 4KRM.PDB | O, H_TRP_36    | N, H_VAL_48    | H, H_VAL_48     | 2.89 | 2.09 | 19.35 |
| 4KRM.PDB | O, H_GLY_59    | OG, H_SER_49   | HG, H_SER_49    | 2.79 | 2.01 | 17.53 |
| 4KRM.PDB | O, H_SER_57    | N, H_SER_52    | H, H_SER_52     | 2.91 | 2.10 | 15.97 |
| 4KRM.PDB | O, H_SER_102   | N, H_TRP_53    | H, H_TRP_53     | 2.86 | 2.06 | 18.40 |
| 4KRM.PDB | O, H_GLY_50    | N, H_GLY_59    | H, H_GLY_59     | 2.99 | 2.18 | 17.15 |
| 4KRM.PDB | O, H_VAL_48    | N, H_ALA_61    | H, H_ALA_61     | 2.83 | 2.04 | 18.74 |
| 4KRM.PDB | O, H_GLN_82    | N, H_THR_69    | H, H_THR_69     | 2.90 | 2.15 | 24.65 |
| 4KRM.PDB | OH, H_TYR_60   | N, H_ILE_70    | H, H_ILE_70     | 2.79 | 1.97 | 14.83 |
| 4KRM.PDB | O, H_ASP_80    | N, H_SER_71    | H, H_SER_71     | 3.00 | 2.23 | 22.57 |
| 4KRM.PDB | O, H_TRP_53    | ND2, H_ASN_74  | HD21, H_ASN_74  | 2.76 | 1.95 | 15.85 |
| 4KRM.PDB | OD2, H_ASP_73  | N, H_LYS_76    | H, H_LYS_76     | 2.90 | 2.09 | 16.51 |
| 4KRM.PDB | O, H_CYS_22    | N, H_VAL_79    | H, H_VAL_79     | 2.88 | 2.15 | 26.91 |
| 4KRM.PDB | O, H_SER_71    | N, H_ASP_80    | H, H_ASP_80     | 2.65 | 1.83 | 14.09 |
| 4KRM.PDB | O, H_LEU_20    | N, H_LEU_81    | H, H_LEU_81     | 2.81 | 2.00 | 15.97 |
| 4KRM.PDB | O, H_THR_69    | N, H_GLN_82    | H, H_GLN_82     | 2.88 | 2.06 | 13.12 |
| 4KRM.PDB | O, H_LEU_18    | N, H_MET_83    | H, H_MET_83     | 2.85 | 2.06 | 18.92 |
| 4KRM.PDB | OD1, H_ASP_90  | N, H_LYS_87    | H, H_LYS_87     | 2.94 | 2.18 | 22.86 |
| 4KRM.PDB | O, H_LYS_87    | N, H_ASP_90    | H, H_ASP_90     | 2.96 | 2.13 | 11.70 |
| 4KRM.PDB | O, H_VAL_120   | N, H_ALA_92    | H, H_ALA_92     | 2.96 | 2.18 | 20.64 |
| 4KRM.PDB | O, H_THR_118   | N, H_TYR_94    | H, H_TYR_94     | 2.81 | 1.97 | 10.96 |
| 4KRM.PDB | O, H_ASP_90    | OH, H_TYR_94   | HH, H_TYR_94    | 2.70 | 1.86 | 4.54  |
| 4KRM.PDB | O, H_PHE_37    | N, H_TYR_95    | H, H_TYR_95     | 2.58 | 1.73 | 7.75  |



|          |                |                |                 |      |      |       |
|----------|----------------|----------------|-----------------|------|------|-------|
| 4KRM.PDB | OE2, H_GLU_6   | N, H_CYS_96    | H, H_CYS_96     | 2.89 | 2.06 | 12.97 |
| 4KRM.PDB | O, H_TYR_113   | N, H_ALA_98    | H, H_ALA_98     | 2.83 | 2.01 | 14.92 |
| 4KRM.PDB | O, H_GLY_33    | N, H_ALA_99    | H, H_ALA_99     | 2.76 | 1.95 | 17.06 |
| 4KRM.PDB | OD2, H_ASP_112 | N, H_ALA_100   | H, H_ALA_100    | 2.90 | 2.11 | 20.56 |
| 4KRM.PDB | OH, H_TYR_111  | N, H_TYR_105   | H, H_TYR_105    | 3.00 | 2.17 | 13.07 |
| 4KRM.PDB | O, H_TYR_105   | OH, H_TYR_111  | HH, H_TYR_111   | 2.65 | 1.82 | 7.16  |
| 4KRM.PDB | O, H_ALA_98    | N, H_ASP_112   | H, H_ASP_112    | 2.68 | 1.89 | 19.59 |
| 4KRM.PDB | O, H_CYS_96    | N, H_GLY_115   | H, H_GLY_115    | 2.91 | 2.11 | 18.40 |
| 4KRM.PDB | O, H_ALA_92    | N, H_VAL_120   | H, H_VAL_120    | 2.84 | 1.98 | 5.98  |
| 4KRM.PDB | O, H_GLY_10    | N, H_THR_121   | H, H_THR_121    | 2.98 | 2.20 | 20.73 |
| 4KRM.PDB | O, H_VAL_12    | N, H_SER_123   | H, H_SER_123    | 2.98 | 2.16 | 13.88 |
| 4KRM.PDB | O, L_TYR_60    | N, L_GLU_308   | H, L_GLU_308    | 2.69 | 1.88 | 16.25 |
| 4KRM.PDB | O, L_THR_58    | N, L_LYS_310   | H, L_LYS_310    | 2.70 | 1.84 | 3.45  |
| 4KRM.PDB | OG1, L_THR_339 | N, L_LYS_311   | H, L_LYS_311    | 2.88 | 2.03 | 10.00 |
| 4KRM.PDB | O, L_ASP_56    | N, L_VAL_312   | H, L_VAL_312    | 2.83 | 1.98 | 8.53  |
| 4KRM.PDB | O, L_SER_340   | N, L_CYS_313   | H, L_CYS_313    | 2.89 | 2.06 | 11.76 |
| 4KRM.PDB | O, L_ASP_344   | N, L_ILE_316   | H, L_ILE_316    | 2.80 | 2.09 | 29.01 |
| 4KRM.PDB | O, L_PHE_321   | N, L_GLY_317   | H, L_GLY_317    | 2.73 | 1.96 | 22.99 |
| 4KRM.PDB | O, L_ILE_318   | N, L_PHE_321   | H, L_PHE_321    | 2.93 | 2.10 | 12.75 |
| 4KRM.PDB | O, L_ILE_327   | OG, L_SER_326  | HG, L_SER_326   | 2.89 | 2.08 | 11.44 |
| 4KRM.PDB | OD1, L_ASN_331 | N, L_ASN_328   | H, L_ASN_328    | 2.82 | 1.98 | 9.33  |
| 4KRM.PDB | OD1, L_ASN_328 | N, L_ASN_331   | H, L_ASN_331    | 2.99 | 2.20 | 19.62 |
| 4KRM.PDB | O, L_SER_326   | ND2, L_ASN_331 | HD21, L_ASN_331 | 2.92 | 2.07 | 8.49  |
| 4KRM.PDB | O, L_ILE_332   | N, L_PHE_335   | H, L_PHE_335    | 2.95 | 2.11 | 11.07 |
| 4KRM.PDB | O, L_LYS_311   | N, L_THR_339   | H, L_THR_339    | 2.90 | 2.09 | 16.73 |
| 4KRM.PDB | O, L_GLU_376   | N, L_ILE_341   | H, L_ILE_341    | 2.71 | 1.87 | 11.39 |
| 4KRM.PDB | O, L_CYS_313   | N, L_SER_342   | H, L_SER_342    | 2.80 | 1.99 | 16.11 |
| 4KRM.PDB | OD1, J_ASP_112 | N, L_VAL_350   | H, L_VAL_350    | 2.88 | 2.05 | 13.27 |
| 4KRM.PDB | O, L_PRO_349   | N, L_PHE_352   | H, L_PHE_352    | 2.95 | 2.25 | 30.00 |
| 4KRM.PDB | OE1, J_GLU_110 | NH1, L_ARG_353 | HH11, L_ARG_353 | 2.86 | 2.07 | 18.90 |
| 4KRM.PDB | O, J_ALA_100   | NH2, L_ARG_353 | HH21, L_ARG_353 | 2.97 | 2.14 | 13.62 |
| 4KRM.PDB | OD2, J_ASP_112 | NH2, L_ARG_353 | HH22, L_ARG_353 | 3.00 | 2.19 | 17.61 |
| 4KRM.PDB | O, L_VAL_350   | N, L_GLY_354   | H, L_GLY_354    | 2.71 | 1.89 | 14.51 |
| 4KRM.PDB | O, L_THR_360   | N, L_ASP_355   | H, L_ASP_355    | 2.71 | 1.86 | 7.14  |
| 4KRM.PDB | O, L_SER_356   | N, L_HIS_359   | H, L_HIS_359    | 2.93 | 2.08 | 7.30  |
| 4KRM.PDB | O, L_ASP_355   | N, L_THR_360   | H, L_THR_360    | 2.86 | 2.01 | 5.45  |
| 4KRM.PDB | O, L_ALA_351   | N, L_LEU_363   | H, L_LEU_363    | 2.78 | 1.95 | 13.31 |
| 4KRM.PDB | O, L_ASP_364   | N, L_GLU_367   | H, L_GLU_367    | 2.93 | 2.21 | 27.86 |
| 4KRM.PDB | O, L_GLN_366   | N, L_ASP_369   | H, L_ASP_369    | 2.86 | 2.00 | 2.35  |
| 4KRM.PDB | O, L_CYS_338   | OG1, L_THR_373 | HG1, L_THR_373  | 2.82 | 2.09 | 25.50 |
| 4KRM.PDB | O, L_THR_339   | N, L_LYS_375   | H, L_LYS_375    | 2.71 | 1.85 | 3.93  |
| 4KRM.PDB | O, L_ILE_401   | N, L_ILE_377   | H, L_ILE_377    | 2.89 | 2.07 | 14.58 |
| 4KRM.PDB | O, L_ILE_341   | N, L_THR_378   | H, L_THR_378    | 2.93 | 2.08 | 9.23  |
| 4KRM.PDB | O, L_SER_413   | N, L_LEU_381   | H, L_LEU_381    | 2.75 | 1.94 | 16.75 |
| 4KRM.PDB | O, L_LEU_345   | N, L_LEU_382   | H, L_LEU_382    | 2.90 | 2.05 | 7.20  |
| 4KRM.PDB | O, L_ALA_415   | N, L_ILE_383   | H, L_ILE_383    | 2.86 | 2.06 | 17.70 |
| 4KRM.PDB | O, L_ILE_347   | N, L_GLN_384   | H, L_GLN_384    | 2.86 | 2.01 | 5.31  |
| 4KRM.PDB | O, L_ASP_392   | NE1, L_TRP_386 | HE1, L_TRP_386  | 2.95 | 2.22 | 27.18 |
| 4KRM.PDB | O, L_LEU_424   | N, L_LEU_393   | H, L_LEU_393    | 2.95 | 2.14 | 17.35 |
| 4KRM.PDB | O, L_LEU_393   | N, L_PHE_396   | H, L_PHE_396    | 2.98 | 2.13 | 9.44  |
| 4KRM.PDB | O, L_HIS_394   | N, L_GLU_397   | H, L_GLU_397    | 2.79 | 2.02 | 21.70 |
| 4KRM.PDB | O, L_LYS_372   | ND2, L_ASN_398 | HD22, L_ASN_398 | 2.66 | 1.85 | 16.79 |
| 4KRM.PDB | O, L_GLU_431   | N, L_ILE_402   | H, L_ILE_402    | 2.98 | 2.16 | 14.32 |
| 4KRM.PDB | O, L_ILE_377   | N, L_ARG_403   | H, L_ARG_403    | 2.74 | 1.92 | 14.23 |
| 4KRM.PDB | OE1, L_GLU_376 | NH1, L_ARG_403 | HH11, L_ARG_403 | 2.44 | 1.73 | 28.52 |
| 4KRM.PDB | O, L_THR_378   | N, L_ARG_405   | H, L_ARG_405    | 2.76 | 1.91 | 6.37  |
| 4KRM.PDB | O, L_PHE_412   | N, L_GLN_408   | H, L_GLN_408    | 2.70 | 1.95 | 24.36 |
| 4KRM.PDB | O, L_GLN_408   | N, L_GLN_411   | H, L_GLN_411    | 2.99 | 2.13 | 5.39  |

|          |                |                |                 |      |      |       |
|----------|----------------|----------------|-----------------|------|------|-------|
| 4KRM.PDB | O, I_GLN_408   | N, I_PHE_412   | H, I_PHE_412    | 2.93 | 2.08 | 4.67  |
| 4KRM.PDB | O, I_ASP_436   | N, I_SER_413   | H, I_SER_413    | 2.86 | 2.02 | 12.03 |
| 4KRM.PDB | O, I_LEU_381   | N, I_ALA_415   | H, I_ALA_415    | 2.85 | 2.03 | 14.56 |
| 4KRM.PDB | O, I_ILE_438   | N, I_VAL_416   | H, I_VAL_416    | 2.89 | 2.05 | 11.42 |
| 4KRM.PDB | O, I_ILE_383   | N, I_VAL_417   | H, I_VAL_417    | 2.89 | 2.03 | 5.24  |
| 4KRM.PDB | OD1, I_ASN_442 | N, I_LEU_419   | H, I_LEU_419    | 2.81 | 1.99 | 14.43 |
| 4KRM.PDB | O, I_THR_391   | N, I_THR_422   | H, I_THR_422    | 2.89 | 2.08 | 17.87 |
| 4KRM.PDB | O, I_GLU_400   | N, I_LYS_430   | H, I_LYS_430    | 2.98 | 2.13 | 8.06  |
| 4KRM.PDB | O, I_LEU_456   | N, I_ILE_432   | H, I_ILE_432    | 2.75 | 1.92 | 11.71 |
| 4KRM.PDB | O, I_ILE_402   | N, I_SER_433   | H, I_SER_433    | 2.89 | 2.14 | 24.79 |
| 4KRM.PDB | OE2, I_GLU_431 | OG, I_SER_433  | HG, I_SER_433   | 2.91 | 2.09 | 9.73  |
| 4KRM.PDB | OD1, I_ASP_434 | N, I_GLY_435   | H, I_GLY_435    | 2.61 | 1.88 | 26.82 |
| 4KRM.PDB | O, I_GLN_411   | N, I_ASP_436   | H, I_ASP_436    | 2.81 | 1.95 | 4.03  |
| 4KRM.PDB | O, I_LEU_414   | N, I_ILE_438   | H, I_ILE_438    | 2.94 | 2.11 | 13.80 |
| 4KRM.PDB | OD1, I_ASN_469 | ND2, I_ASN_442 | HD22, I_ASN_442 | 2.76 | 1.93 | 12.03 |
| 4KRM.PDB | O, I_THR_422   | N, I_CYS_446   | H, I_CYS_446    | 2.73 | 1.88 | 7.27  |
| 4KRM.PDB | O, I_TYR_447   | OG1, I_THR_450 | HG1, I_THR_450  | 2.88 | 2.08 | 15.87 |
| 4KRM.PDB | OE1, I_GLN_462 | N, I_GLY_458   | H, I_GLY_458    | 2.63 | 1.77 | 6.16  |
| 4KRM.PDB | OE1, I_GLN_462 | N, I_THR_459   | H, I_THR_459    | 2.73 | 1.99 | 24.99 |
| 4KRM.PDB | O, I_ILE_432   | NE2, I_GLN_462 | HE22, I_GLN_462 | 2.64 | 1.79 | 3.75  |
| 4KRM.PDB | O, I_VAL_437   | N, I_LYS_465   | H, I_LYS_465    | 2.80 | 2.00 | 17.16 |
| 4KRM.PDB | O, I_ILE_439   | ND2, I_ASN_469 | HD21, I_ASN_469 | 2.82 | 2.04 | 21.05 |
| 4KRM.PDB | OD1, I_ASN_473 | OG, I_SER_474  | HG, I_SER_474   | 2.73 | 1.91 | 11.26 |
| 4KRM.PDB | O, I_GLY_479   | N, I_VAL_481   | H, I_VAL_481    | 2.96 | 2.25 | 29.56 |
| 4KRM.PDB | OG1, I_THR_450 | N, I_CYS_491   | H, I_CYS_491    | 2.81 | 1.99 | 15.75 |
| 4KRM.PDB | O, I_ASP_498   | N, I_TRP_492   | H, I_TRP_492    | 2.78 | 1.96 | 14.16 |
| 4KRM.PDB | O, I_PRO_496   | N, I_CYS_499   | H, I_CYS_499    | 2.92 | 2.09 | 12.35 |
| 4KRM.PDB | O, J_SER_25    | N, J_LYS_3     | H, J_LYS_3      | 2.85 | 2.01 | 8.57  |
| 4KRM.PDB | O, J_ALA_23    | N, J_GLU_5     | H, J_GLU_5      | 2.99 | 2.16 | 13.86 |
| 4KRM.PDB | O, J_THR_121   | N, J_VAL_12    | H, J_VAL_12     | 3.00 | 2.24 | 24.14 |
| 4KRM.PDB | O, J_LEU_86    | N, J_GLY_15    | H, J_GLY_15     | 2.66 | 1.81 | 6.69  |
| 4KRM.PDB | O, J_GLN_13    | N, J_GLY_16    | H, J_GLY_16     | 2.94 | 2.17 | 21.17 |
| 4KRM.PDB | OD1, J_ASP_80  | NE, J_ARG_19   | HE, J_ARG_19    | 2.78 | 1.97 | 16.74 |
| 4KRM.PDB | O, J_LEU_81    | N, J_LEU_20    | H, J_LEU_20     | 2.96 | 2.15 | 16.27 |
| 4KRM.PDB | O, J_SER_7     | N, J_THR_21    | H, J_THR_21     | 2.87 | 2.05 | 15.09 |
| 4KRM.PDB | O, J_VAL_79    | N, J_CYS_22    | H, J_CYS_22     | 2.95 | 2.23 | 28.38 |
| 4KRM.PDB | O, J_GLU_5     | N, J_ALA_23    | H, J_ALA_23     | 2.89 | 2.08 | 15.16 |
| 4KRM.PDB | O, J_GLN_1     | N, J_ARG_27    | H, J_ARG_27     | 2.63 | 1.91 | 27.25 |
| 4KRM.PDB | O, J_THR_28    | N, J_ARG_30    | H, J_ARG_30     | 2.80 | 2.09 | 29.22 |
| 4KRM.PDB | O, J_SER_31    | NH2, J_ARG_30  | HH21, J_ARG_30  | 2.53 | 1.73 | 17.55 |
| 4KRM.PDB | O, J_ALA_99    | N, J_GLY_33    | H, J_GLY_33     | 2.86 | 2.12 | 25.08 |
| 4KRM.PDB | O, J_ILE_51    | N, J_MET_34    | H, J_MET_34     | 2.99 | 2.28 | 29.29 |
| 4KRM.PDB | O, J_ALA_97    | N, J_GLY_35    | H, J_GLY_35     | 2.84 | 2.04 | 17.40 |
| 4KRM.PDB | O, J_SER_49    | N, J_TRP_36    | H, J_TRP_36     | 2.70 | 1.86 | 9.65  |
| 4KRM.PDB | O, J_TYR_95    | N, J_PHE_37    | H, J_PHE_37     | 2.82 | 1.99 | 12.49 |
| 4KRM.PDB | O, J_GLU_46    | N, J_ARG_38    | H, J_ARG_38     | 2.92 | 2.10 | 15.90 |
| 4KRM.PDB | OH, J_TYR_94   | NH1, J_ARG_38  | HH11, J_ARG_38  | 2.85 | 2.02 | 12.10 |
| 4KRM.PDB | OD2, J_ASP_90  | NH1, J_ARG_38  | HH12, J_ARG_38  | 2.97 | 2.15 | 14.05 |
| 4KRM.PDB | O, J_ILE_93    | N, J_GLN_39    | H, J_GLN_39     | 2.89 | 2.11 | 20.97 |
| 4KRM.PDB | O, J_ARG_38    | N, J_GLU_46    | H, J_GLU_46     | 2.86 | 2.02 | 11.35 |
| 4KRM.PDB | O, J_TRP_36    | N, J_VAL_48    | H, J_VAL_48     | 2.89 | 2.09 | 18.44 |
| 4KRM.PDB | O, J_MET_34    | N, J_ILE_51    | H, J_ILE_51     | 2.84 | 2.02 | 15.75 |
| 4KRM.PDB | O, J_SER_57    | N, J_SER_52    | H, J_SER_52     | 2.88 | 2.10 | 20.91 |
| 4KRM.PDB | O, J_SER_102   | N, J_TRP_53    | H, J_TRP_53     | 2.92 | 2.12 | 18.19 |
| 4KRM.PDB | O, J_GLY_50    | N, J_GLY_59    | H, J_GLY_59     | 2.99 | 2.18 | 16.04 |
| 4KRM.PDB | O, G_GLU_308   | N, J_TYR_60    | H, J_TYR_60     | 2.74 | 1.97 | 22.05 |
| 4KRM.PDB | O, J_VAL_48    | N, J_ALA_61    | H, J_ALA_61     | 2.78 | 1.94 | 11.47 |
| 4KRM.PDB | O, J_SER_63    | NH1, J_ARG_67  | HH11, J_ARG_67  | 2.71 | 1.87 | 10.55 |

|          |                |                |                 |      |      |       |
|----------|----------------|----------------|-----------------|------|------|-------|
| 4KRM.PDB | OD1, J_ASP_90  | NH2, J_ARG_67  | HH22, J_ARG_67  | 2.61 | 1.77 | 10.49 |
| 4KRM.PDB | O, J_GLN_82    | N, J_THR_69    | H, J_THR_69     | 2.92 | 2.13 | 20.56 |
| 4KRM.PDB | OH, J_TYR_60   | N, J_ILE_70    | H, J_ILE_70     | 2.83 | 2.01 | 15.28 |
| 4KRM.PDB | OD1, J_ASN_74  | NE, J_ARG_72   | HE, J_ARG_72    | 2.67 | 1.87 | 16.97 |
| 4KRM.PDB | O, J_TYR_32    | NH1, J_ARG_72  | HH12, J_ARG_72  | 2.75 | 1.96 | 19.64 |
| 4KRM.PDB | O, J_TYR_32    | NH2, J_ARG_72  | HH22, J_ARG_72  | 2.98 | 2.27 | 29.63 |
| 4KRM.PDB | O, J_TRP_53    | ND2, J_ASN_74  | HD21, J_ASN_74  | 2.64 | 1.92 | 27.41 |
| 4KRM.PDB | O, J_SER_71    | N, J_ASP_80    | H, J_ASP_80     | 2.70 | 1.90 | 17.63 |
| 4KRM.PDB | O, J_LEU_20    | N, J_LEU_81    | H, J_LEU_81     | 2.84 | 2.06 | 20.27 |
| 4KRM.PDB | O, J_THR_69    | N, J_GLN_82    | H, J_GLN_82     | 2.78 | 1.99 | 19.54 |
| 4KRM.PDB | O, J_LEU_18    | N, J_MET_83    | H, J_MET_83     | 2.71 | 1.90 | 15.45 |
| 4KRM.PDB | OD1, J_ASP_90  | N, J_LYS_87    | H, J_LYS_87     | 2.95 | 2.13 | 13.64 |
| 4KRM.PDB | O, J_LYS_87    | N, J_ASP_90    | H, J_ASP_90     | 2.61 | 1.76 | 7.15  |
| 4KRM.PDB | O, J_ASP_90    | OH, J_TYR_94   | HH, J_TYR_94    | 2.63 | 1.80 | 7.10  |
| 4KRM.PDB | O, J_PHE_37    | N, J_TYR_95    | H, J_TYR_95     | 2.62 | 1.79 | 12.04 |
| 4KRM.PDB | OE2, J_GLU_6   | N, J_CYS_96    | H, J_CYS_96     | 2.75 | 1.91 | 8.89  |
| 4KRM.PDB | O, J_TYR_113   | N, J_ALA_98    | H, J_ALA_98     | 3.00 | 2.20 | 18.29 |
| 4KRM.PDB | O, J_GLY_33    | N, J_ALA_99    | H, J_ALA_99     | 2.77 | 1.94 | 13.41 |
| 4KRM.PDB | OD2, J_ASP_112 | N, J_ALA_100   | H, J_ALA_100    | 2.99 | 2.17 | 16.23 |
| 4KRM.PDB | O, J_SER_31    | N, J_GLY_101   | H, J_GLY_101    | 2.93 | 2.08 | 6.19  |
| 4KRM.PDB | OG, J_SER_57   | NE1, J_TRP_104 | HE1, J_TRP_104  | 2.98 | 2.26 | 28.43 |
| 4KRM.PDB | OH, J_TYR_111  | N, J_TYR_105   | H, J_TYR_105    | 2.99 | 2.14 | 8.48  |
| 4KRM.PDB | O, J_TYR_105   | OH, J_TYR_111  | HH, J_TYR_111   | 2.76 | 1.92 | 3.09  |
| 4KRM.PDB | O, J_ALA_98    | N, J_ASP_112   | H, J_ASP_112    | 2.80 | 2.02 | 20.50 |
| 4KRM.PDB | OE1, J_GLU_6   | N, J_GLY_117   | H, J_GLY_117    | 2.88 | 2.04 | 11.43 |
| 4KRM.PDB | O, J_ALA_92    | N, J_VAL_120   | H, J_VAL_120    | 2.87 | 2.03 | 9.32  |
| 4KRM.PDB | O, J_GLY_10    | N, J_THR_121   | H, J_THR_121    | 2.81 | 1.98 | 11.54 |
| 4KRM.PDB | OG1, J_THR_91  | N, J_VAL_122   | H, J_VAL_122    | 2.77 | 1.92 | 7.72  |
| 4KRM.PDB | O, K_SER_340   | N, K_CYS_313   | H, K_CYS_313    | 2.84 | 2.01 | 12.83 |
| 4KRM.PDB | O, K_ASP_344   | N, K_ILE_316   | H, K_ILE_316    | 3.00 | 2.29 | 29.47 |
| 4KRM.PDB | O, K_PHE_321   | N, K_GLY_317   | H, K_GLY_317    | 2.69 | 1.90 | 19.46 |
| 4KRM.PDB | OD1, K_ASN_331 | N, K_ASN_328   | H, K_ASN_328    | 2.83 | 1.99 | 11.57 |
| 4KRM.PDB | OD1, K_ASN_328 | N, K_THR_330   | H, K_THR_330    | 2.89 | 2.17 | 28.13 |
| 4KRM.PDB | O, K_SER_326   | ND2, K_ASN_331 | HD21, K_ASN_331 | 2.93 | 2.14 | 20.17 |
| 4KRM.PDB | O, K_LYS_311   | N, K_THR_339   | H, K_THR_339    | 2.88 | 2.03 | 7.02  |
| 4KRM.PDB | O, K_GLU_376   | N, K_ILE_341   | H, K_ILE_341    | 2.75 | 1.92 | 10.64 |
| 4KRM.PDB | O, K_CYS_313   | N, K_SER_342   | H, K_SER_342    | 2.81 | 1.98 | 11.90 |
| 4KRM.PDB | O, K_PHE_380   | N, K_LEU_345   | H, K_LEU_345    | 2.95 | 2.14 | 16.87 |
| 4KRM.PDB | O, K_LEU_382   | N, K_ILE_347   | H, K_ILE_347    | 2.87 | 2.09 | 20.57 |
| 4KRM.PDB | OD1, L_ASP_112 | N, K_VAL_350   | H, K_VAL_350    | 2.89 | 2.07 | 15.44 |
| 4KRM.PDB | O, K_LEU_348   | N, K_ALA_351   | H, K_ALA_351    | 2.98 | 2.18 | 17.67 |
| 4KRM.PDB | O, K_PRO_349   | N, K_PHE_352   | H, K_PHE_352    | 2.94 | 2.16 | 21.68 |
| 4KRM.PDB | OE1, L_GLU_110 | NH1, K_ARG_353 | HH11, K_ARG_353 | 2.89 | 2.06 | 12.41 |
| 4KRM.PDB | O, L_GLU_110   | NH1, K_ARG_353 | HH12, K_ARG_353 | 2.54 | 1.80 | 24.42 |
| 4KRM.PDB | O, L_ALA_100   | NH2, K_ARG_353 | HH21, K_ARG_353 | 2.92 | 2.14 | 20.95 |
| 4KRM.PDB | OD2, L_ASP_112 | NH2, K_ARG_353 | HH22, K_ARG_353 | 2.89 | 2.07 | 13.96 |
| 4KRM.PDB | O, K_VAL_350   | N, K_GLY_354   | H, K_GLY_354    | 2.71 | 1.91 | 17.56 |
| 4KRM.PDB | O, K_THR_360   | N, K_ASP_355   | H, K_ASP_355    | 2.67 | 1.85 | 14.28 |
| 4KRM.PDB | O, K_ASP_355   | N, K_THR_358   | H, K_THR_358    | 2.95 | 2.19 | 22.97 |
| 4KRM.PDB | OD2, K_ASP_355 | OG1, K_THR_358 | HG1, K_THR_358  | 2.91 | 2.21 | 28.73 |
| 4KRM.PDB | O, K_ASP_355   | N, K_THR_360   | H, K_THR_360    | 2.96 | 2.12 | 9.53  |
| 4KRM.PDB | O, K_ALA_351   | N, K_LEU_363   | H, K_LEU_363    | 2.66 | 1.89 | 22.52 |
| 4KRM.PDB | O, K_ASP_364   | N, K_GLU_367   | H, K_GLU_367    | 2.81 | 1.97 | 10.44 |
| 4KRM.PDB | O, K_LEU_368   | N, K_LEU_371   | H, K_LEU_371    | 2.97 | 2.12 | 7.39  |
| 4KRM.PDB | O, K_THR_339   | N, K_LYS_375   | H, K_LYS_375    | 2.86 | 2.00 | 4.75  |
| 4KRM.PDB | O, K_ILE_401   | N, K_ILE_377   | H, K_ILE_377    | 2.86 | 2.06 | 18.35 |
| 4KRM.PDB | O, K_SER_413   | N, K_LEU_381   | H, K_LEU_381    | 2.86 | 2.05 | 17.20 |
| 4KRM.PDB | O, K_LEU_345   | N, K_LEU_382   | H, K_LEU_382    | 2.82 | 1.96 | 1.57  |

|          |                |                |                 |      |      |       |
|----------|----------------|----------------|-----------------|------|------|-------|
| 4KRM.PDB | O, K_ALA_415   | N, K_ILE_383   | H, K_ILE_383    | 2.80 | 1.95 | 7.54  |
| 4KRM.PDB | O, K_ILE_347   | N, K_GLN_384   | H, K_GLN_384    | 2.96 | 2.17 | 19.38 |
| 4KRM.PDB | O, K_LYS_375   | N, K_GLU_400   | H, K_GLU_400    | 2.90 | 2.08 | 14.24 |
| 4KRM.PDB | O, K_LYS_375   | N, K_ILE_401   | H, K_ILE_401    | 2.95 | 2.14 | 17.68 |
| 4KRM.PDB | O, K_ILE_377   | N, K_ARG_403   | H, K_ARG_403    | 2.74 | 1.95 | 18.26 |
| 4KRM.PDB | O, K_THR_378   | N, K_ARG_405   | H, K_ARG_405    | 2.74 | 1.91 | 12.90 |
| 4KRM.PDB | O, K_PHE_412   | N, K_GLN_408   | H, K_GLN_408    | 2.74 | 1.94 | 17.95 |
| 4KRM.PDB | O, K_ASP_436   | N, K_SER_413   | H, K_SER_413    | 2.84 | 2.02 | 13.83 |
| 4KRM.PDB | O, K_LEU_381   | N, K_ALA_415   | H, K_ALA_415    | 2.89 | 2.12 | 21.80 |
| 4KRM.PDB | O, K_SER_440   | N, K_SER_418   | H, K_SER_418    | 2.83 | 1.99 | 11.88 |
| 4KRM.PDB | O, K_THR_391   | N, K_THR_422   | H, K_THR_422    | 2.85 | 2.06 | 19.39 |
| 4KRM.PDB | O, K_GLU_400   | N, K_LYS_430   | H, K_LYS_430    | 2.91 | 2.08 | 12.04 |
| 4KRM.PDB | O, K_LEU_456   | N, K_ILE_432   | H, K_ILE_432    | 2.65 | 1.80 | 6.86  |
| 4KRM.PDB | OD2, K_ASP_434 | N, K_GLY_435   | H, K_GLY_435    | 2.55 | 1.82 | 26.56 |
| 4KRM.PDB | O, K_GLN_411   | N, K_ASP_436   | H, K_ASP_436    | 2.63 | 1.81 | 13.73 |
| 4KRM.PDB | O, K_LYS_465   | N, K_ILE_439   | H, K_ILE_439    | 2.92 | 2.09 | 12.95 |
| 4KRM.PDB | OD1, K_ASN_469 | N, K_ASN_442   | H, K_ASN_442    | 2.83 | 2.07 | 23.19 |
| 4KRM.PDB | O, K_THR_422   | N, K_CYS_446   | H, K_CYS_446    | 2.91 | 2.07 | 11.69 |
| 4KRM.PDB | O, K_TYR_447   | OG1, K_THR_450 | HG1, K_THR_450  | 2.66 | 1.87 | 18.01 |
| 4KRM.PDB | OE1, K_GLN_462 | N, K_GLY_458   | H, K_GLY_458    | 2.63 | 1.78 | 7.92  |
| 4KRM.PDB | OE1, K_GLN_462 | N, K_THR_459   | H, K_THR_459    | 2.89 | 2.13 | 24.15 |
| 4KRM.PDB | O, K_GLY_435   | NE2, K_GLN_462 | HE21, K_GLN_462 | 2.96 | 2.10 | 5.79  |
| 4KRM.PDB | O, K_ILE_432   | NE2, K_GLN_462 | HE22, K_GLN_462 | 2.88 | 2.05 | 10.71 |
| 4KRM.PDB | OD1, K_ASP_436 | N, K_LYS_463   | H, K_LYS_463    | 2.88 | 2.03 | 6.44  |
| 4KRM.PDB | O, K_VAL_437   | N, K_LYS_465   | H, K_LYS_465    | 2.84 | 2.14 | 29.81 |
| 4KRM.PDB | O, K_ILE_439   | ND2, K_ASN_469 | HD21, K_ASN_469 | 2.65 | 1.81 | 9.31  |
| 4KRM.PDB | O, K_HIS_483   | N, K_CYS_486   | H, K_CYS_486    | 2.95 | 2.11 | 10.23 |
| 4KRM.PDB | O, K_SER_501   | N, K_SER_487   | H, K_SER_487    | 2.75 | 1.90 | 8.02  |
| 4KRM.PDB | O, K_ASP_498   | N, K_TRP_492   | H, K_TRP_492    | 2.71 | 1.86 | 9.15  |
| 4KRM.PDB | OD2, K_ASP_498 | N, K_GLU_495   | H, K_GLU_495    | 2.88 | 2.09 | 20.84 |
| 4KRM.PDB | O, K_GLU_495   | N, K_ASP_498   | H, K_ASP_498    | 2.85 | 2.04 | 15.93 |
| 4KRM.PDB | O, L_SER_25    | N, L_LYS_3     | H, L_LYS_3      | 2.83 | 2.01 | 14.97 |
| 4KRM.PDB | O, L_THR_121   | N, L_VAL_12    | H, L_VAL_12     | 2.91 | 2.16 | 24.48 |
| 4KRM.PDB | O, L_SER_123   | OG1, L_THR_14  | HG1, L_THR_14   | 2.67 | 1.86 | 12.28 |
| 4KRM.PDB | O, L_LEU_86    | N, L_GLY_15    | H, L_GLY_15     | 2.91 | 2.05 | 2.74  |
| 4KRM.PDB | O, L_GLN_13    | N, L_GLY_16    | H, L_GLY_16     | 2.82 | 2.02 | 18.09 |
| 4KRM.PDB | O, L_MET_83    | N, L_LEU_18    | H, L_LEU_18     | 2.78 | 1.98 | 18.62 |
| 4KRM.PDB | OD1, L_ASP_80  | NE, L_ARG_19   | HE, L_ARG_19    | 2.96 | 2.10 | 5.59  |
| 4KRM.PDB | O, L_SER_7     | N, L_THR_21    | H, L_THR_21     | 2.74 | 1.90 | 9.36  |
| 4KRM.PDB | O, L_GLN_1     | N, L_ARG_27    | H, L_ARG_27     | 2.68 | 1.97 | 28.48 |
| 4KRM.PDB | OD2, K_ASP_355 | NH1, L_ARG_30  | HH12, L_ARG_30  | 2.44 | 1.65 | 18.93 |
| 4KRM.PDB | O, L_SER_31    | NH2, L_ARG_30  | HH21, L_ARG_30  | 2.82 | 1.99 | 12.91 |
| 4KRM.PDB | O, L_ALA_99    | N, L_GLY_33    | H, L_GLY_33     | 2.77 | 2.03 | 25.95 |
| 4KRM.PDB | O, L_ILE_51    | N, L_MET_34    | H, L_MET_34     | 2.99 | 2.20 | 19.18 |
| 4KRM.PDB | O, L_SER_49    | N, L_TRP_36    | H, L_TRP_36     | 2.68 | 1.84 | 10.36 |
| 4KRM.PDB | O, L_TYR_95    | N, L_PHE_37    | H, L_PHE_37     | 2.91 | 2.07 | 10.93 |
| 4KRM.PDB | O, L_GLU_46    | N, L_ARG_38    | H, L_ARG_38     | 2.90 | 2.07 | 13.98 |
| 4KRM.PDB | OE1, L_GLU_46  | NE, L_ARG_38   | HE, L_ARG_38    | 2.86 | 2.01 | 10.17 |
| 4KRM.PDB | O, L_ARG_38    | N, L_GLU_46    | H, L_GLU_46     | 2.74 | 1.90 | 10.16 |
| 4KRM.PDB | O, L_GLY_59    | OG, L_SER_49   | HG, L_SER_49    | 2.90 | 2.14 | 20.97 |
| 4KRM.PDB | O, L_MET_34    | N, L_ILE_51    | H, L_ILE_51     | 2.78 | 1.94 | 10.92 |
| 4KRM.PDB | O, L_SER_57    | N, L_SER_52    | H, L_SER_52     | 2.96 | 2.15 | 16.80 |
| 4KRM.PDB | O, L_SER_102   | N, L_TRP_53    | H, L_TRP_53     | 3.00 | 2.20 | 17.87 |
| 4KRM.PDB | O, L_LYS_310   | N, L_THR_58    | H, L_THR_58     | 2.98 | 2.15 | 12.69 |
| 4KRM.PDB | O, L_GLY_50    | N, L_GLY_59    | H, L_GLY_59     | 2.79 | 1.99 | 18.05 |
| 4KRM.PDB | O, L_GLU_308   | N, L_TYR_60    | H, L_TYR_60     | 2.75 | 2.02 | 27.31 |
| 4KRM.PDB | O, L_VAL_48    | N, L_ALA_61    | H, L_ALA_61     | 2.83 | 1.98 | 9.16  |
| 4KRM.PDB | O, L_VAL_64    | N, L_ARG_67    | H, L_ARG_67     | 3.00 | 2.22 | 21.09 |

|          |               |               |                |      |      |       |
|----------|---------------|---------------|----------------|------|------|-------|
| 4KRM.PDB | O, L_SER_63   | NH1, L_ARG_67 | HH11, L_ARG_67 | 2.44 | 1.68 | 23.68 |
| 4KRM.PDB | OD1, L_ASP_90 | NH2, L_ARG_67 | HH22, L_ARG_67 | 2.60 | 1.80 | 17.17 |
| 4KRM.PDB | O, L_GLN_82   | N, L_THR_69   | H, L_THR_69    | 2.84 | 2.07 | 22.44 |
| 4KRM.PDB | OH, L_TYR_60  | N, L_ILE_70   | H, L_ILE_70    | 2.86 | 2.03 | 11.87 |
| 4KRM.PDB | O, L_SER_71   | N, L_ASP_80   | H, L_ASP_80    | 2.67 | 1.93 | 24.67 |
| 4KRM.PDB | O, L_LEU_20   | N, L_LEU_81   | H, L_LEU_81    | 2.93 | 2.20 | 26.65 |
| 4KRM.PDB | O, L_THR_69   | N, L_GLN_82   | H, L_GLN_82    | 2.79 | 2.06 | 26.22 |
| 4KRM.PDB | O, L_LEU_18   | N, L_MET_83   | H, L_MET_83    | 2.64 | 1.78 | 5.27  |
| 4KRM.PDB | OD1, L_ASP_90 | N, L_LYS_87   | H, L_LYS_87    | 2.83 | 2.05 | 20.17 |
| 4KRM.PDB | O, L_LYS_87   | N, L_ASP_90   | H, L_ASP_90    | 2.74 | 1.91 | 10.51 |
| 4KRM.PDB | O, L_VAL_120  | N, L_ALA_92   | H, L_ALA_92    | 2.86 | 2.07 | 19.77 |
| 4KRM.PDB | O, L_THR_118  | N, L_TYR_94   | H, L_TYR_94    | 2.84 | 2.02 | 14.78 |
| 4KRM.PDB | O, L_ASP_90   | OH, L_TYR_94  | HH, L_TYR_94   | 2.64 | 1.81 | 6.78  |
| 4KRM.PDB | O, L_PHE_37   | N, L_TYR_95   | H, L_TYR_95    | 2.71 | 1.89 | 15.70 |
| 4KRM.PDB | OE2, L_GLU_6  | N, L_CYS_96   | H, L_CYS_96    | 2.72 | 1.88 | 9.52  |
| 4KRM.PDB | O, L_TYR_113  | N, L_ALA_98   | H, L_ALA_98    | 2.86 | 2.11 | 25.39 |
| 4KRM.PDB | O, L_GLY_33   | N, L_ALA_99   | H, L_ALA_99    | 2.67 | 1.81 | 5.83  |
| 4KRM.PDB | O, L_SER_31   | N, L_GLY_101  | H, L_GLY_101   | 2.99 | 2.14 | 7.82  |
| 4KRM.PDB | O, L_TYR_105  | OH, L_TYR_111 | HH, L_TYR_111  | 2.61 | 1.77 | 5.19  |
| 4KRM.PDB | O, L_ALA_98   | N, L_ASP_112  | H, L_ASP_112   | 2.77 | 2.00 | 22.02 |
| 4KRM.PDB | O, L_ALA_92   | N, L_VAL_120  | H, L_VAL_120   | 2.77 | 1.92 | 3.01  |
| 4KRM.PDB | O, L_GLY_10   | N, L_THR_121  | H, L_THR_121   | 2.92 | 2.12 | 18.79 |
| 4KRM.PDB | OG1, L_THR_91 | N, L_VAL_122  | H, L_VAL_122   | 2.76 | 1.92 | 9.29  |

Table 1693: 4KRM-specific side chain and main chain hydrogen bonding analysis. In this table, a PDB file is specified with a four-letter PDB ID, except that the names of the PDB files corresponding to the single NMR structural model split from the NMR ensemble is specified with a four-letter PDB ID in addition to a hyphen followed by the single NMR structural model numeric ID, the residue naming scheme is **Chain ID\_residue name\_residue number**,  $\angle ADH$  represents the angle formed by acceptor (A), donor (D) and hydrogen (H) ( $\angle ADH$ ).

| PDB      | Acceptor (A)   | Donor (D)      | Hydrogen (H)    | D-A (Å) | H-A (Å) | $\angle ADH(^{\circ})$ |
|----------|----------------|----------------|-----------------|---------|---------|------------------------|
| 4KRO.PDB | O, A_LYS_5     | N, A_GLU_35    | H, A_GLU_35     | 2.92    | 2.11    | 16.47                  |
| 4KRO.PDB | O, A_VAL_268   | N, A_TYR_261   | H, A_TYR_261    | 2.78    | 2.04    | 26.05                  |
| 4KRO.PDB | O, A_VAL_284   | N, A_VAL_276   | H, A_VAL_276    | 2.65    | 1.87    | 20.75                  |
| 4KRO.PDB | O, A_SER_282   | N, A_THR_278   | H, A_THR_278    | 2.79    | 1.96    | 11.51                  |
| 4KRO.PDB | OG1, A_THR_278 | OG, A_SER_282  | HG, A_SER_282   | 2.99    | 2.27    | 26.50                  |
| 4KRO.PDB | O, A_SER_262   | N, A_CYS_283   | H, A_CYS_283    | 2.82    | 2.04    | 21.13                  |
| 4KRO.PDB | O, A_VAL_276   | N, A_VAL_284   | H, A_VAL_284    | 2.74    | 2.03    | 29.17                  |
| 4KRO.PDB | O, A_LYS_303   | N, A_TYR_292   | H, A_TYR_292    | 2.85    | 1.99    | 3.19                   |
| 4KRO.PDB | O, A_LYS_301   | N, A_MET_294   | H, A_MET_294    | 2.78    | 1.96    | 14.61                  |
| 4KRO.PDB | OE2, A_GLU_376 | NH2, A_ARG_310 | HH21, A_ARG_310 | 2.98    | 2.18    | 18.33                  |
| 4KRO.PDB | OG1, A_THR_339 | N, A_LYS_311   | H, A_LYS_311    | 2.69    | 1.85    | 11.41                  |
| 4KRO.PDB | O, A_LYS_336   | NZ, A_LYS_311  | HZ2, A_LYS_311  | 2.69    | 1.83    | 12.56                  |
| 4KRO.PDB | O, A_ASP_344   | N, A_ILE_316   | H, A_ILE_316    | 2.97    | 2.17    | 18.52                  |
| 4KRO.PDB | O, A_ILE_318   | N, A_PHE_321   | H, A_PHE_321    | 2.93    | 2.07    | 5.85                   |
| 4KRO.PDB | OD1, A_ASN_331 | N, A_ASN_328   | H, A_ASN_328    | 2.73    | 1.96    | 22.23                  |
| 4KRO.PDB | OD1, A_ASN_328 | N, A_ASN_331   | H, A_ASN_331    | 2.87    | 2.05    | 14.42                  |
| 4KRO.PDB | O, A_ASN_331   | N, A_HIS_334   | H, A_HIS_334    | 2.89    | 2.11    | 21.52                  |
| 4KRO.PDB | O, A_LYS_311   | N, A_THR_339   | H, A_THR_339    | 2.87    | 2.02    | 7.89                   |
| 4KRO.PDB | O, A_CYS_313   | N, A_SER_342   | H, A_SER_342    | 2.88    | 2.10    | 20.40                  |
| 4KRO.PDB | OG1, A_THR_378 | N, A_GLY_343   | H, A_GLY_343    | 2.79    | 1.97    | 15.18                  |
| 4KRO.PDB | O, A_PHE_380   | N, A_LEU_345   | H, A_LEU_345    | 2.94    | 2.19    | 25.43                  |
| 4KRO.PDB | O, A_LEU_382   | N, A_ILE_347   | H, A_ILE_347    | 2.91    | 2.17    | 26.62                  |
| 4KRO.PDB | O, D_GLY_54    | NH1, A_ARG_353 | HH12, A_ARG_353 | 2.81    | 1.97    | 9.47                   |
| 4KRO.PDB | O, A_VAL_350   | N, A_GLY_354   | H, A_GLY_354    | 2.70    | 1.97    | 26.74                  |
| 4KRO.PDB | O, A_THR_360   | N, A_ASP_355   | H, A_ASP_355    | 2.94    | 2.16    | 20.76                  |
| 4KRO.PDB | OD2, A_ASP_355 | OG1, A_THR_358 | HG1, A_THR_358  | 2.98    | 2.18    | 14.96                  |
| 4KRO.PDB | O, A_SER_356   | N, A_HIS_359   | H, A_HIS_359    | 2.50    | 1.76    | 24.87                  |
| 4KRO.PDB | O, A_ALA_351   | N, A_LEU_363   | H, A_LEU_363    | 2.64    | 1.78    | 3.26                   |
| 4KRO.PDB | O, A_ASP_364   | N, A_GLU_367   | H, A_GLU_367    | 2.99    | 2.20    | 18.77                  |
| 4KRO.PDB | O, A_LEU_368   | N, A_LEU_371   | H, A_LEU_371    | 2.92    | 2.07    | 9.49                   |
| 4KRO.PDB | O, A_ASP_369   | N, A_LYS_372   | H, A_LYS_372    | 2.82    | 1.98    | 9.49                   |
| 4KRO.PDB | O, A_CYS_338   | OG1, A_THR_373 | HG1, A_THR_373  | 2.91    | 2.20    | 27.34                  |
| 4KRO.PDB | O, A_THR_339   | N, A_LYS_375   | H, A_LYS_375    | 2.64    | 1.78    | 1.90                   |
| 4KRO.PDB | OG, B_SER_103  | NZ, A_LYS_375  | HZ2, A_LYS_375  | 2.61    | 1.76    | 15.34                  |
| 4KRO.PDB | O, A_ILE_401   | N, A_ILE_377   | H, A_ILE_377    | 2.94    | 2.13    | 16.36                  |
| 4KRO.PDB | OD1, A_ASP_344 | N, A_PHE_380   | H, A_PHE_380    | 2.92    | 2.14    | 21.56                  |
| 4KRO.PDB | O, A_SER_413   | N, A_LEU_381   | H, A_LEU_381    | 2.80    | 2.00    | 16.89                  |
| 4KRO.PDB | O, A_LEU_345   | N, A_LEU_382   | H, A_LEU_382    | 2.86    | 2.00    | 3.58                   |
| 4KRO.PDB | O, A_ALA_415   | N, A_ILE_383   | H, A_ILE_383    | 2.88    | 2.04    | 11.10                  |
| 4KRO.PDB | O, A_ILE_347   | N, A_GLN_384   | H, A_GLN_384    | 2.90    | 2.16    | 25.76                  |
| 4KRO.PDB | OH, D_TYR_102  | NE2, A_GLN_384 | HE21, A_GLN_384 | 2.87    | 2.16    | 29.24                  |
| 4KRO.PDB | O, A_LEU_424   | N, A_LEU_393   | H, A_LEU_393    | 2.79    | 1.95    | 10.09                  |
| 4KRO.PDB | O, A_ASP_392   | N, A_HIS_394   | H, A_HIS_394    | 2.67    | 1.93    | 25.23                  |
| 4KRO.PDB | O, A_LEU_393   | N, A_PHE_396   | H, A_PHE_396    | 2.83    | 1.98    | 8.97                   |
| 4KRO.PDB | O, A_HIS_394   | N, A_GLU_397   | H, A_GLU_397    | 2.93    | 2.19    | 26.10                  |
| 4KRO.PDB | O, A_LYS_375   | N, A_GLU_400   | H, A_GLU_400    | 2.79    | 1.95    | 10.25                  |
| 4KRO.PDB | O, A_GLU_431   | N, A_ILE_402   | H, A_ILE_402    | 2.98    | 2.18    | 17.20                  |
| 4KRO.PDB | O, A_ILE_377   | N, A_ARG_403   | H, A_ARG_403    | 2.73    | 1.91    | 14.33                  |
| 4KRO.PDB | O, B_TYR_100   | NH2, A_ARG_403 | HH22, A_ARG_403 | 2.57    | 1.73    | 11.63                  |
| 4KRO.PDB | O, A_GLY_379   | N, A_GLY_404   | H, A_GLY_404    | 2.93    | 2.20    | 27.61                  |
| 4KRO.PDB | O, A_THR_378   | N, A_ARG_405   | H, A_ARG_405    | 2.90    | 2.05    | 8.12                   |
| 4KRO.PDB | OD1, B_ASP_118 | NE, A_ARG_405  | HE, A_ARG_405   | 2.72    | 1.93    | 19.48                  |
| 4KRO.PDB | O, A_PHE_412   | N, A_GLN_408   | H, A_GLN_408    | 2.80    | 2.00    | 17.98                  |
| 4KRO.PDB | O, A_GLN_408   | N, A_GLN_411   | H, A_GLN_411    | 2.81    | 2.01    | 18.21                  |
| 4KRO.PDB | O, A_GLN_408   | N, A_PHE_412   | H, A_PHE_412    | 2.97    | 2.14    | 13.47                  |
| 4KRO.PDB | O, A_ASP_436   | N, A_SER_413   | H, A_SER_413    | 2.98    | 2.23    | 25.46                  |
| 4KRO.PDB | O, A_ILE_438   | N, A_VAL_416   | H, A_VAL_416    | 2.84    | 2.03    | 15.03                  |

|          |                |                |                 |      |      |       |
|----------|----------------|----------------|-----------------|------|------|-------|
| 4KRO.PDB | O, A_SER_440   | N, A_SER_418   | H, A_SER_418    | 2.77 | 2.00 | 21.19 |
| 4KRO.PDB | OD1, A_ASN_442 | N, A_LEU_419   | H, A_LEU_419    | 2.67 | 1.82 | 7.73  |
| 4KRO.PDB | O, A_THR_391   | N, A_THR_422   | H, A_THR_422    | 2.54 | 1.70 | 10.95 |
| 4KRO.PDB | OD1, A_ASP_498 | NH2, A_ARG_427 | HH21, A_ARG_427 | 2.62 | 1.82 | 18.67 |
| 4KRO.PDB | O, A_GLU_400   | N, A_LYS_430   | H, A_LYS_430    | 2.73 | 1.88 | 4.94  |
| 4KRO.PDB | O, A_GLN_411   | N, A_ASP_436   | H, A_ASP_436    | 2.89 | 2.06 | 12.84 |
| 4KRO.PDB | O, A_LEU_414   | N, A_ILE_438   | H, A_ILE_438    | 2.87 | 2.04 | 13.24 |
| 4KRO.PDB | O, A_LYS_465   | N, A_ILE_439   | H, A_ILE_439    | 2.84 | 1.99 | 6.10  |
| 4KRO.PDB | OD1, A_ASN_469 | ND2, A_ASN_442 | HD22, A_ASN_442 | 2.75 | 1.96 | 18.83 |
| 4KRO.PDB | O, A_THR_422   | N, A_CYS_446   | H, A_CYS_446    | 2.88 | 2.05 | 14.08 |
| 4KRO.PDB | O, A_TRP_453   | N, A_LEU_456   | H, A_LEU_456    | 2.81 | 2.03 | 20.74 |
| 4KRO.PDB | O, A_SER_433   | OG1, A_THR_459 | HG1, A_THR_459  | 2.64 | 1.93 | 27.14 |
| 4KRO.PDB | O, A_GLY_435   | NE2, A_GLN_462 | HE21, A_GLN_462 | 2.56 | 1.71 | 6.56  |
| 4KRO.PDB | OD1, A_ASP_436 | N, A_LYS_463   | H, A_LYS_463    | 2.76 | 1.91 | 6.26  |
| 4KRO.PDB | O, A_VAL_437   | N, A_LYS_465   | H, A_LYS_465    | 2.89 | 2.08 | 15.96 |
| 4KRO.PDB | O, A_ILE_439   | N, A_ILE_467   | H, A_ILE_467    | 2.90 | 2.11 | 19.76 |
| 4KRO.PDB | O, A_GLU_472   | N, A_LYS_476   | H, A_LYS_476    | 2.82 | 2.01 | 16.80 |
| 4KRO.PDB | O, A_HIS_483   | N, A_CYS_486   | H, A_CYS_486    | 3.00 | 2.18 | 14.93 |
| 4KRO.PDB | O, A_SER_501   | N, A_SER_487   | H, A_SER_487    | 2.94 | 2.09 | 7.57  |
| 4KRO.PDB | OG, A_SER_501  | OG, A_SER_487  | HG, A_SER_487   | 2.37 | 1.68 | 29.03 |
| 4KRO.PDB | OG, A_SER_487  | N, A_GLU_489   | H, A_GLU_489    | 2.96 | 2.12 | 10.12 |
| 4KRO.PDB | O, A_ASP_498   | N, A_TRP_492   | H, A_TRP_492    | 2.74 | 1.90 | 10.17 |
| 4KRO.PDB | O, A_GLY_490   | N, A_VAL_500   | H, A_VAL_500    | 2.91 | 2.13 | 19.89 |
| 4KRO.PDB | O, A_LEU_485   | N, A_ARG_503   | H, A_ARG_503    | 2.90 | 2.06 | 9.38  |
| 4KRO.PDB | OD1, A_ASN_504 | NH1, A_ARG_503 | HH11, A_ARG_503 | 2.52 | 1.76 | 23.61 |
| 4KRO.PDB | O, A_VAL_505   | N, A_VAL_512   | H, A_VAL_512    | 2.94 | 2.11 | 13.63 |
| 4KRO.PDB | OE1, A_GLU_524 | N, A_ASN_516   | H, A_ASN_516    | 2.81 | 1.95 | 3.86  |
| 4KRO.PDB | O, A_CYS_515   | N, A_LEU_517   | H, A_LEU_517    | 2.67 | 1.93 | 26.36 |
| 4KRO.PDB | O, A_LEU_517   | N, A_GLU_519   | H, A_GLU_519    | 2.78 | 2.04 | 26.41 |
| 4KRO.PDB | O, A_GLY_520   | NH1, A_ARG_523 | HH11, A_ARG_523 | 2.75 | 2.02 | 27.17 |
| 4KRO.PDB | O, A_ILE_532   | N, A_PHE_525   | H, A_PHE_525    | 2.85 | 2.07 | 20.01 |
| 4KRO.PDB | O, A_PHE_525   | N, A_ILE_532   | H, A_ILE_532    | 2.90 | 2.06 | 11.44 |
| 4KRO.PDB | O, A_ARG_523   | N, A_CYS_534   | H, A_CYS_534    | 2.64 | 1.78 | 1.35  |
| 4KRO.PDB | O, A_PRO_536   | N, A_CYS_538   | H, A_CYS_538    | 2.84 | 2.10 | 26.42 |
| 4KRO.PDB | O, A_GLN_557   | N, A_LEU_539   | H, A_LEU_539    | 2.89 | 2.11 | 20.92 |
| 4KRO.PDB | O, A_LEU_539   | NE2, A_GLN_541 | HE21, A_GLN_541 | 2.61 | 1.79 | 15.38 |
| 4KRO.PDB | O, A_ASN_554   | N, A_THR_548   | H, A_THR_548    | 2.75 | 1.93 | 14.66 |
| 4KRO.PDB | OG1, A_THR_548 | ND2, A_ASN_554 | HD22, A_ASN_554 | 2.92 | 2.13 | 19.09 |
| 4KRO.PDB | O, A_VAL_568   | N, A_TYR_561   | H, A_TYR_561    | 2.97 | 2.17 | 17.83 |
| 4KRO.PDB | O, A_GLY_458   | N, B_VAL_2     | H, B_VAL_2      | 2.76 | 1.93 | 12.61 |
| 4KRO.PDB | O, B_SER_25    | N, B_GLN_3     | H, B_GLN_3      | 2.75 | 1.92 | 13.69 |
| 4KRO.PDB | O, B_THR_77    | N, B_ALA_24    | H, B_ALA_24     | 2.76 | 1.99 | 21.77 |
| 4KRO.PDB | O, B_THR_99    | N, B_ALA_33    | H, B_ALA_33     | 2.78 | 2.00 | 21.37 |
| 4KRO.PDB | O, B_ILE_51    | N, B_MET_34    | H, B_MET_34     | 2.93 | 2.11 | 14.97 |
| 4KRO.PDB | O, B_GLY_55    | N, B_TYR_57    | H, B_TYR_57     | 2.52 | 1.78 | 25.18 |
| 4KRO.PDB | O, B_TYR_119   | N, B_ALA_98    | H, B_ALA_98     | 2.93 | 2.19 | 26.24 |
| 4KRO.PDB | O, B_SER_31    | N, B_LEU_101   | H, B_LEU_101    | 2.95 | 2.17 | 21.67 |
| 4KRO.PDB | O, B_SER_102   | N, B_TYR_105   | H, B_TYR_105    | 2.87 | 2.05 | 13.73 |
| 4KRO.PDB | O, B_PRO_114   | N, B_TYR_117   | H, B_TYR_117    | 2.95 | 2.10 | 5.45  |
| 4KRO.PDB | O, B_PRO_111   | OH, B_TYR_117  | HH, B_TYR_117   | 2.59 | 1.81 | 17.04 |
| 4KRO.PDB | O, C_ARG_24    | N, C_THR_5     | H, C_THR_5      | 2.91 | 2.15 | 23.49 |
| 4KRO.PDB | O, C_GLU_105   | N, C_VAL_13    | H, C_VAL_13     | 3.00 | 2.29 | 29.53 |
| 4KRO.PDB | O, C_LEU_73    | N, C_PHE_21    | H, C_PHE_21     | 2.68 | 1.86 | 14.19 |
| 4KRO.PDB | O, C_PHE_71    | N, C_CYS_23    | H, C_CYS_23     | 2.97 | 2.13 | 10.71 |
| 4KRO.PDB | O, C_THR_5     | N, C_ARG_24    | H, C_ARG_24     | 2.88 | 2.05 | 12.65 |
| 4KRO.PDB | O, C_THR_69    | N, C_ALA_25    | H, C_ALA_25     | 2.78 | 1.97 | 17.42 |
| 4KRO.PDB | O, C_GLY_68    | N, C_ILE_29    | H, C_ILE_29     | 2.76 | 1.93 | 13.88 |
| 4KRO.PDB | O, C_THR_31    | N, C_ILE_33    | H, C_ILE_33     | 2.83 | 2.11 | 27.53 |

|          |                |                |                 |      |      |       |
|----------|----------------|----------------|-----------------|------|------|-------|
| 4KRO.PDB | O, C_GLN_89    | N, C_HIS_34    | H, C_HIS_34     | 2.73 | 1.95 | 19.98 |
| 4KRO.PDB | O, C_ILE_48    | N, C_TRP_35    | H, C_TRP_35     | 2.83 | 2.00 | 11.93 |
| 4KRO.PDB | O, C_TYR_87    | N, C_TYR_36    | H, C_TYR_36     | 2.69 | 1.90 | 19.38 |
| 4KRO.PDB | OE1, C_GLN_89  | OH, C_TYR_36   | HH, C_TYR_36    | 2.63 | 1.80 | 6.46  |
| 4KRO.PDB | O, C_ARG_45    | N, C_GLN_37    | H, C_GLN_37     | 2.62 | 1.80 | 13.58 |
| 4KRO.PDB | OH, C_TYR_86   | NE2, C_GLN_37  | HE21, C_GLN_37  | 2.94 | 2.13 | 16.57 |
| 4KRO.PDB | O, C_ASP_85    | N, C_GLN_38    | H, C_GLN_38     | 2.68 | 1.83 | 9.02  |
| 4KRO.PDB | OE1, D_GLN_39  | NE2, C_GLN_38  | HE22, C_GLN_38  | 2.85 | 2.00 | 7.50  |
| 4KRO.PDB | O, C_GLN_37    | N, C_ARG_45    | H, C_ARG_45     | 2.41 | 1.69 | 27.50 |
| 4KRO.PDB | O, C_TRP_35    | N, C_LEU_47    | H, C_LEU_47     | 2.85 | 1.99 | 3.81  |
| 4KRO.PDB | O, C_GLU_53    | N, C_LYS_49    | H, C_LYS_49     | 2.98 | 2.17 | 16.10 |
| 4KRO.PDB | OD2, D_ASP_103 | OH, C_TYR_50   | HH, C_TYR_50    | 2.49 | 1.72 | 20.15 |
| 4KRO.PDB | O, C_ILE_33    | N, C_ALA_51    | H, C_ALA_51     | 2.88 | 2.14 | 26.02 |
| 4KRO.PDB | OD1, C_ASP_82  | NH2, C_ARG_61  | HH21, C_ARG_61  | 2.64 | 1.81 | 12.76 |
| 4KRO.PDB | O, C_GLY_30    | N, C_GLY_68    | H, C_GLY_68     | 2.70 | 1.96 | 25.34 |
| 4KRO.PDB | O, C_CYS_23    | N, C_PHE_71    | H, C_PHE_71     | 2.97 | 2.22 | 24.26 |
| 4KRO.PDB | O, C_SER_63    | N, C_SER_74    | H, C_SER_74     | 2.78 | 1.94 | 9.14  |
| 4KRO.PDB | O, C_VAL_19    | N, C_ILE_75    | H, C_ILE_75     | 2.80 | 2.05 | 24.74 |
| 4KRO.PDB | OD2, C_ASP_82  | N, C_GLU_79    | H, C_GLU_79     | 2.59 | 1.74 | 8.25  |
| 4KRO.PDB | O, C_GLU_79    | N, C_ASP_82    | H, C_ASP_82     | 2.82 | 1.98 | 10.41 |
| 4KRO.PDB | O, C_GLN_38    | N, C_ASP_85    | H, C_ASP_85     | 2.89 | 2.07 | 15.87 |
| 4KRO.PDB | O, C_THR_102   | N, C_TYR_86    | H, C_TYR_86     | 2.96 | 2.19 | 22.34 |
| 4KRO.PDB | O, C_ASP_82    | OH, C_TYR_86   | HH, C_TYR_86    | 2.61 | 1.78 | 7.16  |
| 4KRO.PDB | O, C_TYR_36    | N, C_TYR_87    | H, C_TYR_87     | 2.90 | 2.11 | 19.86 |
| 4KRO.PDB | O, D_TYR_104   | NE2, C_GLN_89  | HE22, C_GLN_89  | 3.00 | 2.19 | 16.80 |
| 4KRO.PDB | OD1, D_ASP_103 | ND2, C_ASN_91  | HD21, C_ASN_91  | 2.93 | 2.12 | 16.18 |
| 4KRO.PDB | OE1, C_GLN_90  | N, C_ASN_92    | H, C_ASN_92     | 2.89 | 2.15 | 26.36 |
| 4KRO.PDB | OD1, C_ASN_32  | ND2, C_ASN_92  | HD22, C_ASN_92  | 2.97 | 2.20 | 23.59 |
| 4KRO.PDB | O, A_ASN_469   | N, C_TRP_94    | H, C_TRP_94     | 2.75 | 1.95 | 19.24 |
| 4KRO.PDB | OD2, D_ASP_58  | NE1, C_TRP_94  | HE1, C_TRP_94   | 2.80 | 2.10 | 29.15 |
| 4KRO.PDB | O, C_CYS_88    | N, C_GLY_99    | H, C_GLY_99     | 2.89 | 2.12 | 21.60 |
| 4KRO.PDB | OE1, C_GLN_6   | N, C_GLY_101   | H, C_GLY_101    | 2.92 | 2.21 | 28.54 |
| 4KRO.PDB | O, C_TYR_86    | N, C_THR_102   | H, C_THR_102    | 2.97 | 2.19 | 21.52 |
| 4KRO.PDB | O, C_PRO_8     | OG1, C_THR_102 | HG1, C_THR_102  | 2.68 | 1.90 | 18.51 |
| 4KRO.PDB | O, C_VAL_9     | N, C_LYS_103   | H, C_LYS_103    | 2.98 | 2.14 | 9.34  |
| 4KRO.PDB | O, C_VAL_13    | N, C_LYS_107   | H, C_LYS_107    | 2.95 | 2.13 | 15.77 |
| 4KRO.PDB | O, C_TYR_140   | N, C_ALA_111   | H, C_ALA_111    | 2.89 | 2.03 | 3.33  |
| 4KRO.PDB | O, C_LEU_135   | N, C_PHE_116   | H, C_PHE_116    | 2.87 | 2.15 | 27.51 |
| 4KRO.PDB | O, C_VAL_133   | N, C_PHE_118   | H, C_PHE_118    | 2.79 | 2.04 | 24.19 |
| 4KRO.PDB | OG, C_SER_121  | N, C_GLN_124   | H, C_GLN_124    | 2.92 | 2.16 | 22.95 |
| 4KRO.PDB | OG, C_SER_131  | NE2, C_GLN_124 | HE22, C_GLN_124 | 2.85 | 2.00 | 6.78  |
| 4KRO.PDB | OE1, C_GLN_124 | N, C_SER_131   | H, C_SER_131    | 2.94 | 2.16 | 21.66 |
| 4KRO.PDB | O, C_LEU_179   | N, C_VAL_132   | H, C_VAL_132    | 2.76 | 1.90 | 3.17  |
| 4KRO.PDB | O, C_SER_177   | N, C_CYS_134   | H, C_CYS_134    | 2.88 | 2.05 | 12.39 |
| 4KRO.PDB | O, C_PHE_116   | N, C_LEU_135   | H, C_LEU_135    | 2.91 | 2.11 | 17.23 |
| 4KRO.PDB | O, C_LEU_175   | N, C_LEU_136   | H, C_LEU_136    | 2.87 | 2.05 | 14.62 |
| 4KRO.PDB | O, C_SER_114   | N, C_ASN_137   | H, C_ASN_137    | 2.91 | 2.13 | 21.13 |
| 4KRO.PDB | O, C_TYR_173   | N, C_PHE_139   | H, C_PHE_139    | 2.69 | 1.92 | 21.18 |
| 4KRO.PDB | O, C_ALA_111   | N, C_TYR_140   | H, C_TYR_140    | 2.84 | 1.99 | 7.77  |
| 4KRO.PDB | O, C_GLU_195   | N, C_GLN_147   | H, C_GLN_147    | 2.74 | 1.94 | 17.18 |
| 4KRO.PDB | OG, C_SER_177  | NE1, C_TRP_148 | HE1, C_TRP_148  | 2.83 | 2.01 | 15.90 |
| 4KRO.PDB | O, C_VAL_150   | N, C_ALA_153   | H, C_ALA_153    | 3.00 | 2.29 | 29.91 |
| 4KRO.PDB | O, C_TRP_148   | N, C_GLN_155   | H, C_GLN_155    | 2.90 | 2.07 | 11.42 |
| 4KRO.PDB | OE1, C_GLN_155 | ND2, C_ASN_158 | HD21, C_ASN_158 | 2.72 | 1.97 | 24.54 |
| 4KRO.PDB | O, D_LEU_176   | NE2, C_GLN_160 | HE22, C_GLN_160 | 2.74 | 1.92 | 15.89 |
| 4KRO.PDB | O, C_SER_174   | N, C_THR_164   | H, C_THR_164    | 2.94 | 2.12 | 15.62 |
| 4KRO.PDB | O, C_LEU_106   | NE2, C_GLN_166 | HE22, C_GLN_166 | 2.49 | 1.66 | 13.43 |
| 4KRO.PDB | OD1, C_ASP_167 | N, C_LYS_169   | H, C_LYS_169    | 2.54 | 1.73 | 16.83 |



|          |                |                |                |      |      |       |
|----------|----------------|----------------|----------------|------|------|-------|
| 4KRO.PDB | OD1, C_ASP_167 | N, C_ASP_170   | H, C_ASP_170   | 2.97 | 2.21 | 22.78 |
| 4KRO.PDB | OD1, C_ASP_170 | OG1, C_THR_172 | HG1, C_THR_172 | 2.68 | 1.86 | 11.97 |
| 4KRO.PDB | O, C_PHE_139   | N, C_TYR_173   | H, C_TYR_173   | 2.66 | 1.84 | 12.86 |
| 4KRO.PDB | O, C_LEU_136   | N, C_LEU_175   | H, C_LEU_175   | 2.88 | 2.06 | 14.51 |
| 4KRO.PDB | O, C_SER_162   | N, C_SER_176   | H, C_SER_176   | 2.82 | 2.00 | 14.99 |
| 4KRO.PDB | O, C_GLN_160   | N, C_THR_178   | H, C_THR_178   | 2.80 | 2.08 | 27.64 |
| 4KRO.PDB | O, C_VAL_132   | N, C_LEU_179   | H, C_LEU_179   | 2.78 | 2.01 | 22.37 |
| 4KRO.PDB | OG, C_SER_182  | N, C_ASP_185   | H, C_ASP_185   | 2.76 | 1.91 | 3.71  |
| 4KRO.PDB | O, C_SER_182   | N, C_TYR_186   | H, C_TYR_186   | 2.63 | 1.82 | 15.93 |
| 4KRO.PDB | O, C_LYS_183   | N, C_GLU_187   | H, C_GLU_187   | 2.89 | 2.10 | 19.45 |
| 4KRO.PDB | O, C_ASP_185   | ND1, C_HIS_189 | HD1, C_HIS_189 | 2.98 | 2.14 | 11.48 |
| 4KRO.PDB | O, C_TYR_186   | OH, C_TYR_192  | HH, C_TYR_192  | 2.55 | 1.84 | 27.09 |
| 4KRO.PDB | O, C_LYS_149   | N, C_ALA_193   | H, C_ALA_193   | 2.99 | 2.27 | 28.68 |
| 4KRO.PDB | O, C_GLN_147   | N, C_GLU_195   | H, C_GLU_195   | 2.80 | 2.05 | 25.03 |
| 4KRO.PDB | O, C_PRO_141   | NE2, C_HIS_198 | HE2, C_HIS_198 | 2.93 | 2.09 | 10.93 |
| 4KRO.PDB | O, D_SER_25    | N, D_GLN_3     | H, D_GLN_3     | 2.73 | 1.89 | 10.77 |
| 4KRO.PDB | O, D_THR_23    | N, D_LYS_5     | H, D_LYS_5     | 2.94 | 2.08 | 5.53  |
| 4KRO.PDB | OE1, D_GLN_111 | N, D_GLN_6     | H, D_GLN_6     | 2.70 | 1.86 | 8.92  |
| 4KRO.PDB | O, D_TYR_93    | NE2, D_GLN_6   | HE22, D_GLN_6  | 2.93 | 2.12 | 16.83 |
| 4KRO.PDB | O, D_THR_116   | N, D_VAL_12    | H, D_VAL_12    | 2.92 | 2.09 | 13.60 |
| 4KRO.PDB | O, D_LEU_85    | N, D_SER_15    | H, D_SER_15    | 2.92 | 2.10 | 15.76 |
| 4KRO.PDB | O, D_MET_82    | N, D_LEU_18    | H, D_LEU_18    | 2.86 | 2.03 | 12.27 |
| 4KRO.PDB | O, D_SER_7     | N, D_THR_21    | H, D_THR_21    | 2.91 | 2.14 | 22.32 |
| 4KRO.PDB | O, D_VAL_78    | N, D_CYS_22    | H, D_CYS_22    | 2.84 | 2.11 | 27.17 |
| 4KRO.PDB | O, D_LYS_5     | N, D_THR_23    | H, D_THR_23    | 2.75 | 1.97 | 20.91 |
| 4KRO.PDB | O, D_SER_76    | N, D_VAL_24    | H, D_VAL_24    | 2.87 | 2.01 | 5.71  |
| 4KRO.PDB | O, D_GLN_3     | N, D_SER_25    | H, D_SER_25    | 2.95 | 2.20 | 25.22 |
| 4KRO.PDB | OG, D_SER_28   | N, D_THR_30    | H, D_THR_30    | 2.84 | 2.00 | 11.38 |
| 4KRO.PDB | O, D_ALA_96    | N, D_HIS_35    | H, D_HIS_35    | 2.82 | 2.00 | 14.36 |
| 4KRO.PDB | O, D_GLY_49    | N, D_TRP_36    | H, D_TRP_36    | 2.85 | 2.06 | 19.08 |
| 4KRO.PDB | O, D_GLU_46    | N, D_ARG_38    | H, D_ARG_38    | 2.89 | 2.07 | 15.74 |
| 4KRO.PDB | OE1, D_GLU_46  | NE, D_ARG_38   | HE, D_ARG_38   | 3.00 | 2.22 | 20.92 |
| 4KRO.PDB | OH, D_TYR_93   | NH1, D_ARG_38  | HH11, D_ARG_38 | 2.92 | 2.15 | 22.16 |
| 4KRO.PDB | OE1, D_GLU_46  | NH2, D_ARG_38  | HH21, D_ARG_38 | 2.98 | 2.22 | 22.99 |
| 4KRO.PDB | O, D_ILE_92    | N, D_GLN_39    | H, D_GLN_39    | 2.94 | 2.21 | 27.13 |
| 4KRO.PDB | OE1, C_GLN_38  | NE2, D_GLN_39  | HE22, D_GLN_39 | 2.80 | 1.94 | 4.32  |
| 4KRO.PDB | OG, D_SER_40   | N, D_GLY_42    | H, D_GLY_42    | 2.92 | 2.07 | 6.19  |
| 4KRO.PDB | OG, D_SER_40   | N, D_LYS_43    | H, D_LYS_43    | 2.94 | 2.09 | 7.22  |
| 4KRO.PDB | O, D_ARG_38    | N, D_GLU_46    | H, D_GLU_46    | 2.75 | 1.90 | 6.17  |
| 4KRO.PDB | O, D_TRP_36    | N, D_LEU_48    | H, D_LEU_48    | 2.73 | 1.89 | 10.02 |
| 4KRO.PDB | O, D_ASP_58    | N, D_VAL_50    | H, D_VAL_50    | 2.87 | 2.09 | 21.92 |
| 4KRO.PDB | O, D_ASN_56    | N, D_TRP_52    | H, D_TRP_52    | 2.99 | 2.23 | 23.03 |
| 4KRO.PDB | O, D_TRP_52    | N, D_GLY_55    | H, D_GLY_55    | 2.93 | 2.09 | 9.77  |
| 4KRO.PDB | OH, D_TYR_59   | OG1, D_THR_57  | HG1, D_THR_57  | 2.96 | 2.15 | 12.78 |
| 4KRO.PDB | O, D_LEU_48    | N, D_ASN_60    | H, D_ASN_60    | 2.85 | 2.00 | 4.84  |
| 4KRO.PDB | O, D_TRP_47    | ND2, D_ASN_60  | HD22, D_ASN_60 | 2.96 | 2.11 | 6.97  |
| 4KRO.PDB | O, D_ASN_60    | N, D_PHE_63    | H, D_PHE_63    | 2.78 | 2.00 | 21.76 |
| 4KRO.PDB | O, D_ASN_83    | NH1, D_ARG_66  | HH11, D_ARG_66 | 2.85 | 2.14 | 29.21 |
| 4KRO.PDB | O, D_LYS_81    | N, D_SER_68    | H, D_SER_68    | 2.97 | 2.25 | 28.54 |
| 4KRO.PDB | OH, D_TYR_59   | N, D_ILE_69    | H, D_ILE_69    | 2.89 | 2.06 | 12.12 |
| 4KRO.PDB | O, D_SER_53    | NZ, D_LYS_71   | HZ1, D_LYS_71  | 2.91 | 2.02 | 5.81  |
| 4KRO.PDB | O, D_GLN_77    | N, D_ASP_72    | H, D_ASP_72    | 2.90 | 2.08 | 14.73 |
| 4KRO.PDB | OD1, D_ASP_72  | N, D_LYS_75    | H, D_LYS_75    | 2.48 | 1.64 | 10.83 |
| 4KRO.PDB | O, D_CYS_22    | N, D_VAL_78    | H, D_VAL_78    | 2.93 | 2.12 | 17.21 |
| 4KRO.PDB | O, D_ASN_70    | N, D_PHE_79    | H, D_PHE_79    | 2.77 | 1.91 | 3.73  |
| 4KRO.PDB | O, D_ILE_20    | N, D_PHE_80    | H, D_PHE_80    | 2.90 | 2.07 | 13.53 |
| 4KRO.PDB | O, D_ARG_66    | N, D_ASN_83    | H, D_ASN_83    | 2.97 | 2.16 | 16.89 |
| 4KRO.PDB | O, D_GLN_16    | N, D_LEU_85    | H, D_LEU_85    | 2.55 | 1.73 | 12.99 |

|          |                |                |                 |      |      |       |
|----------|----------------|----------------|-----------------|------|------|-------|
| 4KRO.PDB | OD2, D_ASP_89  | N, D_GLN_86    | H, D_GLN_86     | 2.43 | 1.70 | 25.84 |
| 4KRO.PDB | O, D_GLN_86    | N, D_ASP_89    | H, D_ASP_89     | 2.86 | 2.03 | 12.89 |
| 4KRO.PDB | O, D_SER_87    | N, D_THR_90    | H, D_THR_90     | 2.89 | 2.04 | 5.88  |
| 4KRO.PDB | O, D_SER_87    | OG1, D_THR_90  | HG1, D_THR_90   | 2.62 | 1.82 | 14.65 |
| 4KRO.PDB | O, D_THR_113   | N, D_TYR_93    | H, D_TYR_93     | 2.85 | 2.02 | 14.16 |
| 4KRO.PDB | O, D_ASP_89    | OH, D_TYR_93   | HH, D_TYR_93    | 2.82 | 1.98 | 1.28  |
| 4KRO.PDB | O, D_VAL_37    | N, D_TYR_94    | H, D_TYR_94     | 2.63 | 1.78 | 8.56  |
| 4KRO.PDB | OE1, D_GLN_6   | N, D_CYS_95    | H, D_CYS_95     | 2.92 | 2.20 | 28.43 |
| 4KRO.PDB | O, D_HIS_35    | N, D_ALA_96    | H, D_ALA_96     | 2.91 | 2.11 | 17.80 |
| 4KRO.PDB | O, D_TYR_108   | N, D_ARG_97    | H, D_ARG_97     | 2.79 | 1.98 | 15.74 |
| 4KRO.PDB | O, D_ALA_98    | NE, D_ARG_97   | HE, D_ARG_97    | 2.79 | 2.01 | 20.72 |
| 4KRO.PDB | O, D_ALA_98    | NH2, D_ARG_97  | HH21, D_ARG_97  | 2.94 | 2.23 | 29.79 |
| 4KRO.PDB | O, D_GLU_105   | N, D_LEU_99    | H, D_LEU_99     | 2.85 | 2.03 | 14.43 |
| 4KRO.PDB | OE1, A_GLN_408 | OH, D_TYR_102  | HH, D_TYR_102   | 2.75 | 1.97 | 18.39 |
| 4KRO.PDB | OD1, D_ASP_103 | N, D_TYR_104   | H, D_TYR_104    | 2.55 | 1.84 | 28.26 |
| 4KRO.PDB | OH, C_TYR_36   | N, D_PHE_106   | H, D_PHE_106    | 2.93 | 2.08 | 9.34  |
| 4KRO.PDB | O, D_CYS_95    | N, D_GLY_110   | H, D_GLY_110    | 2.62 | 1.82 | 17.46 |
| 4KRO.PDB | O, D_GLN_6     | NE2, D_GLN_111 | HE22, D_GLN_111 | 2.78 | 2.02 | 23.66 |
| 4KRO.PDB | O, D_TYR_93    | N, D_THR_113   | H, D_THR_113    | 2.89 | 2.15 | 25.46 |
| 4KRO.PDB | O, D_ALA_91    | N, D_VAL_115   | H, D_VAL_115    | 2.99 | 2.15 | 11.01 |
| 4KRO.PDB | OG, D_SER_118  | N, D_ALA_120   | H, D_ALA_120    | 2.76 | 1.99 | 21.72 |
| 4KRO.PDB | O, D_PHE_152   | N, D_LYS_123   | H, D_LYS_123    | 2.82 | 1.99 | 13.07 |
| 4KRO.PDB | O, D_LEU_147   | N, D_PHE_128   | H, D_PHE_128    | 2.92 | 2.17 | 24.83 |
| 4KRO.PDB | O, D_GLY_145   | N, D_LEU_130   | H, D_LEU_130    | 2.69 | 1.85 | 11.60 |
| 4KRO.PDB | O, D_VAL_190   | N, D_ALA_142   | H, D_ALA_142    | 2.67 | 1.84 | 12.02 |
| 4KRO.PDB | O, D_SER_186   | N, D_CYS_146   | H, D_CYS_146    | 2.74 | 1.92 | 15.98 |
| 4KRO.PDB | O, D_PHE_128   | N, D_LEU_147   | H, D_LEU_147    | 2.84 | 2.06 | 20.81 |
| 4KRO.PDB | O, D_LEU_184   | N, D_VAL_148   | H, D_VAL_148    | 2.86 | 2.09 | 22.97 |
| 4KRO.PDB | O, D_SER_126   | N, D_LYS_149   | H, D_LYS_149    | 2.93 | 2.10 | 12.69 |
| 4KRO.PDB | O, D_TYR_182   | N, D_TYR_151   | H, D_TYR_151    | 2.83 | 2.02 | 15.76 |
| 4KRO.PDB | O, D_LYS_123   | N, D_PHE_152   | H, D_PHE_152    | 2.93 | 2.11 | 15.98 |
| 4KRO.PDB | O, D_ASN_203   | N, D_SER_159   | H, D_SER_159    | 2.92 | 2.10 | 15.23 |
| 4KRO.PDB | O, D_ILE_201   | N, D_ASN_161   | H, D_ASN_161    | 2.76 | 1.94 | 14.37 |
| 4KRO.PDB | O, D_ASN_161   | N, D_ALA_164   | H, D_ALA_164    | 2.84 | 2.02 | 14.35 |
| 4KRO.PDB | O, D_VAL_187   | N, D_HIS_170   | H, D_HIS_170    | 2.69 | 1.86 | 10.95 |
| 4KRO.PDB | O, D_SER_185   | N, D_PHE_172   | H, D_PHE_172    | 2.85 | 2.00 | 6.56  |
| 4KRO.PDB | O, D_SER_183   | N, D_VAL_175   | H, D_VAL_175    | 2.75 | 1.89 | 4.87  |
| 4KRO.PDB | O, D_LEU_181   | N, D_GLN_177   | H, D_GLN_177    | 2.93 | 2.08 | 7.13  |
| 4KRO.PDB | O, D_TYR_151   | N, D_TYR_182   | H, D_TYR_182    | 2.50 | 1.65 | 4.99  |
| 4KRO.PDB | O, D_VAL_148   | N, D_LEU_184   | H, D_LEU_184    | 2.76 | 1.92 | 11.80 |
| 4KRO.PDB | O, D_HIS_170   | N, D_VAL_187   | H, D_VAL_187    | 2.73 | 1.92 | 16.55 |
| 4KRO.PDB | O, D_LEU_144   | N, D_VAL_188   | H, D_VAL_188    | 2.75 | 1.91 | 11.62 |
| 4KRO.PDB | O, D_ALA_142   | N, D_VAL_190   | H, D_VAL_190    | 2.86 | 2.04 | 15.25 |
| 4KRO.PDB | O, D_PRO_191   | N, D_SER_194   | H, D_SER_194    | 2.76 | 1.94 | 14.19 |
| 4KRO.PDB | O, D_PRO_191   | OG, D_SER_194  | HG, D_SER_194   | 2.46 | 1.63 | 8.00  |
| 4KRO.PDB | O, D_SER_194   | N, D_GLN_198   | H, D_GLN_198    | 2.58 | 1.74 | 10.02 |
| 4KRO.PDB | OD1, D_ASN_161 | N, D_ILE_201   | H, D_ILE_201    | 2.82 | 1.96 | 5.92  |
| 4KRO.PDB | O, D_SER_159   | N, D_ASN_203   | H, D_ASN_203    | 2.69 | 1.89 | 17.41 |
| 4KRO.PDB | O, D_VAL_213   | N, D_VAL_204   | H, D_VAL_204    | 2.66 | 1.81 | 8.41  |
| 4KRO.PDB | O, D_THR_211   | N, D_HIS_206   | H, D_HIS_206    | 2.94 | 2.10 | 11.11 |
| 4KRO.PDB | OG, D_SER_209  | ND1, D_HIS_206 | HD1, D_HIS_206  | 2.71 | 1.87 | 9.56  |
| 4KRO.PDB | O, D_PRO_153   | NE2, D_HIS_206 | HE2, D_HIS_206  | 2.79 | 1.99 | 18.14 |
| 4KRO.PDB | O, D_LYS_207   | N, D_ASN_210   | H, D_ASN_210    | 2.94 | 2.16 | 21.67 |
| 4KRO.PDB | O, D_VAL_204   | N, D_VAL_213   | H, D_VAL_213    | 2.73 | 1.93 | 18.78 |
| 4KRO.PDB | O, D_TYR_200   | N, D_VAL_217   | H, D_VAL_217    | 2.94 | 2.10 | 7.76  |

---

Table 1694: 4KRO-specific side chain and main chain hydrogen bonding analysis. In this table, a PDB file is specified with a four-letter PDB ID, except that the names of the PDB files corresponding to the single NMR structural model split from the NMR ensemble is specified with a four-letter PDB ID in addition to a hyphen followed by the single NMR structural model numeric ID, the residue naming scheme is **Chain ID\_residue name\_residue number**,  $\angle ADH$  represents the angle formed by acceptor (A), donor (D) and hydrogen (H) ( $\angle ADH$ ).

| PDB      | Acceptor (A)   | Donor (D)      | Hydrogen (H)    | D-A (Å) | H-A (Å) | $\angle ADH(^{\circ})$ |
|----------|----------------|----------------|-----------------|---------|---------|------------------------|
| 4KRP.PDB | OE2, A_GLU_376 | NH2, A_ARG_310 | HH21, A_ARG_310 | 2.93    | 2.09    | 9.81                   |
| 4KRP.PDB | OG1, A_THR_339 | N, A_LYS_311   | H, A_LYS_311    | 2.83    | 2.07    | 23.53                  |
| 4KRP.PDB | O, A_SER_340   | N, A_CYS_313   | H, A_CYS_313    | 2.79    | 2.04    | 24.55                  |
| 4KRP.PDB | O, A_ILE_318   | N, A_PHE_321   | H, A_PHE_321    | 2.70    | 1.86    | 11.77                  |
| 4KRP.PDB | OD1, A_ASN_331 | N, A_ASN_328   | H, A_ASN_328    | 2.72    | 1.98    | 25.49                  |
| 4KRP.PDB | OD1, A_ASN_328 | N, A_ASN_331   | H, A_ASN_331    | 2.86    | 2.01    | 7.83                   |
| 4KRP.PDB | O, A_SER_326   | ND2, A_ASN_331 | HD21, A_ASN_331 | 2.94    | 2.16    | 20.31                  |
| 4KRP.PDB | O, A_LYS_311   | N, A_THR_339   | H, A_THR_339    | 2.82    | 1.97    | 9.55                   |
| 4KRP.PDB | O, A_CYS_313   | N, A_SER_342   | H, A_SER_342    | 2.72    | 1.88    | 10.06                  |
| 4KRP.PDB | O, A_PHE_380   | N, A_LEU_345   | H, A_LEU_345    | 3.00    | 2.26    | 26.76                  |
| 4KRP.PDB | O, A_LEU_382   | N, A_ILE_347   | H, A_ILE_347    | 2.72    | 1.92    | 18.37                  |
| 4KRP.PDB | O, A_PRO_349   | N, A_PHE_352   | H, A_PHE_352    | 2.78    | 2.03    | 24.55                  |
| 4KRP.PDB | O, D_GLY_54    | NH2, A_ARG_353 | HH22, A_ARG_353 | 2.83    | 1.98    | 6.79                   |
| 4KRP.PDB | O, A_VAL_350   | N, A_GLY_354   | H, A_GLY_354    | 2.64    | 1.84    | 18.31                  |
| 4KRP.PDB | O, A_SER_356   | N, A_HIS_359   | H, A_HIS_359    | 2.65    | 1.82    | 11.74                  |
| 4KRP.PDB | O, A_ASP_355   | N, A_THR_360   | H, A_THR_360    | 2.92    | 2.06    | 3.09                   |
| 4KRP.PDB | O, A_ALA_351   | N, A_LEU_363   | H, A_LEU_363    | 2.92    | 2.16    | 23.72                  |
| 4KRP.PDB | O, A_ASP_364   | N, A_GLU_367   | H, A_GLU_367    | 2.97    | 2.11    | 4.06                   |
| 4KRP.PDB | O, A_LEU_368   | N, A_LEU_371   | H, A_LEU_371    | 2.87    | 2.01    | 5.39                   |
| 4KRP.PDB | O, A_ASP_369   | N, A_LYS_372   | H, A_LYS_372    | 2.94    | 2.10    | 8.68                   |
| 4KRP.PDB | O, A_LEU_371   | N, A_VAL_374   | H, A_VAL_374    | 2.92    | 2.07    | 7.73                   |
| 4KRP.PDB | O, A_THR_339   | N, A_LYS_375   | H, A_LYS_375    | 2.78    | 1.92    | 1.18                   |
| 4KRP.PDB | O, A_GLY_343   | N, A_GLY_379   | H, A_GLY_379    | 2.76    | 2.04    | 28.24                  |
| 4KRP.PDB | O, A_SER_413   | N, A_LEU_381   | H, A_LEU_381    | 2.81    | 2.01    | 17.34                  |
| 4KRP.PDB | O, A_LEU_345   | N, A_LEU_382   | H, A_LEU_382    | 2.80    | 1.94    | 4.00                   |
| 4KRP.PDB | O, A_ILE_347   | N, A_GLN_384   | H, A_GLN_384    | 2.84    | 2.01    | 12.43                  |
| 4KRP.PDB | O, A_LEU_424   | N, A_LEU_393   | H, A_LEU_393    | 2.97    | 2.16    | 16.10                  |
| 4KRP.PDB | O, A_HIS_394   | N, A_GLU_397   | H, A_GLU_397    | 2.88    | 2.13    | 24.87                  |
| 4KRP.PDB | O, A_LYS_375   | N, A_GLU_400   | H, A_GLU_400    | 2.71    | 1.87    | 9.05                   |
| 4KRP.PDB | O, A_ILE_377   | N, A_ARG_403   | H, A_ARG_403    | 2.92    | 2.09    | 14.20                  |
| 4KRP.PDB | O, A_THR_378   | N, A_ARG_405   | H, A_ARG_405    | 2.67    | 1.81    | 2.52                   |
| 4KRP.PDB | OD1, B_ASP_115 | NH2, A_ARG_405 | HH21, A_ARG_405 | 2.63    | 1.81    | 15.48                  |
| 4KRP.PDB | O, A_PHE_412   | N, A_GLN_408   | H, A_GLN_408    | 2.79    | 2.03    | 23.31                  |
| 4KRP.PDB | O, A_LYS_407   | N, A_GLY_410   | H, A_GLY_410    | 2.86    | 2.05    | 17.53                  |
| 4KRP.PDB | O, A_GLN_408   | N, A_GLN_411   | H, A_GLN_411    | 2.78    | 2.00    | 20.78                  |
| 4KRP.PDB | O, A_ASP_436   | N, A_SER_413   | H, A_SER_413    | 2.87    | 2.07    | 17.71                  |
| 4KRP.PDB | O, A_ILE_438   | N, A_VAL_416   | H, A_VAL_416    | 2.90    | 2.08    | 16.39                  |
| 4KRP.PDB | O, A_SER_440   | N, A_SER_418   | H, A_SER_418    | 2.95    | 2.20    | 24.18                  |
| 4KRP.PDB | OD1, A_ASN_442 | N, A_LEU_419   | H, A_LEU_419    | 2.73    | 1.91    | 15.19                  |
| 4KRP.PDB | O, A_THR_391   | N, A_THR_422   | H, A_THR_422    | 2.73    | 1.88    | 8.32                   |
| 4KRP.PDB | OD1, A_ASP_498 | NE, A_ARG_427  | HE, A_ARG_427   | 2.55    | 1.82    | 26.18                  |
| 4KRP.PDB | OD1, A_ASP_498 | NH2, A_ARG_427 | HH21, A_ARG_427 | 2.59    | 1.89    | 29.61                  |
| 4KRP.PDB | O, A_LEU_426   | N, A_LEU_429   | H, A_LEU_429    | 3.00    | 2.18    | 15.49                  |
| 4KRP.PDB | O, A_GLU_400   | N, A_LYS_430   | H, A_LYS_430    | 2.88    | 2.03    | 9.97                   |
| 4KRP.PDB | O, A_LEU_456   | N, A_ILE_432   | H, A_ILE_432    | 2.71    | 1.86    | 9.38                   |
| 4KRP.PDB | OE2, A_GLU_431 | OG, A_SER_433  | HG, A_SER_433   | 2.69    | 1.90    | 15.48                  |
| 4KRP.PDB | O, A_GLN_411   | N, A_ASP_436   | H, A_ASP_436    | 2.90    | 2.06    | 8.63                   |
| 4KRP.PDB | O, A_LEU_414   | N, A_ILE_438   | H, A_ILE_438    | 2.88    | 2.06    | 16.00                  |
| 4KRP.PDB | O, A_LYS_465   | N, A_ILE_439   | H, A_ILE_439    | 2.90    | 2.09    | 17.29                  |
| 4KRP.PDB | O, A_VAL_416   | N, A_SER_440   | H, A_SER_440    | 2.97    | 2.14    | 13.77                  |
| 4KRP.PDB | O, D_TYR_102   | OG, A_SER_440  | HG, A_SER_440   | 2.65    | 1.82    | 4.10                   |
| 4KRP.PDB | OD1, A_ASN_469 | N, A_ASN_442   | H, A_ASN_442    | 2.97    | 2.19    | 20.16                  |
| 4KRP.PDB | OD1, A_ASN_469 | ND2, A_ASN_442 | HD22, A_ASN_442 | 2.94    | 2.17    | 23.18                  |
| 4KRP.PDB | OD1, D_ASP_58  | NZ, A_LYS_443  | HZ1, A_LYS_443  | 2.65    | 1.82    | 17.69                  |
| 4KRP.PDB | O, A_ASN_442   | N, A_LEU_445   | H, A_LEU_445    | 2.90    | 2.04    | 7.12                   |
| 4KRP.PDB | O, A_THR_422   | N, A_CYS_446   | H, A_CYS_446    | 2.71    | 1.90    | 15.25                  |
| 4KRP.PDB | O, A_TYR_447   | N, A_ASN_449   | H, A_ASN_449    | 2.43    | 1.66    | 21.82                  |

|          |                |                |                 |      |      |       |
|----------|----------------|----------------|-----------------|------|------|-------|
| 4KRP.PDB | OE1, A_GLU_489 | NZ, A_LYS_455  | HZ2, A_LYS_455  | 2.95 | 2.19 | 25.72 |
| 4KRP.PDB | O, A_TRP_453   | N, A_LEU_456   | H, A_LEU_456    | 2.87 | 2.09 | 20.64 |
| 4KRP.PDB | OE1, A_GLN_462 | N, A_THR_459   | H, A_THR_459    | 2.95 | 2.18 | 22.01 |
| 4KRP.PDB | O, A_SER_433   | OG1, A_THR_459 | HG1, A_THR_459  | 2.66 | 1.97 | 29.29 |
| 4KRP.PDB | O, A_GLY_435   | NE2, A_GLN_462 | HE21, A_GLN_462 | 2.76 | 1.90 | 2.70  |
| 4KRP.PDB | O, A_ILE_432   | NE2, A_GLN_462 | HE22, A_GLN_462 | 2.97 | 2.15 | 14.48 |
| 4KRP.PDB | O, A_VAL_437   | N, A_LYS_465   | H, A_LYS_465    | 2.75 | 1.95 | 18.20 |
| 4KRP.PDB | OD2, D_ASP_103 | NZ, A_LYS_465  | HZ2, A_LYS_465  | 2.93 | 2.05 | 5.06  |
| 4KRP.PDB | O, A_ILE_439   | N, A_ILE_467   | H, A_ILE_467    | 2.93 | 2.10 | 12.53 |
| 4KRP.PDB | OG, A_SER_474  | NE, A_ARG_470  | HE, A_ARG_470   | 2.76 | 1.96 | 18.13 |
| 4KRP.PDB | O, A_LYS_476   | N, A_GLY_479   | H, A_GLY_479    | 2.71 | 1.88 | 12.77 |
| 4KRP.PDB | O, A_CYS_475   | N, A_GLN_480   | H, A_GLN_480    | 2.77 | 1.95 | 13.73 |
| 4KRP.PDB | O, A_SER_501   | N, A_SER_487   | H, A_SER_487    | 2.89 | 2.04 | 7.18  |
| 4KRP.PDB | OG, A_SER_501  | OG, A_SER_487  | HG, A_SER_487   | 2.45 | 1.66 | 16.67 |
| 4KRP.PDB | O, A_ASP_498   | N, A_TRP_492   | H, A_TRP_492    | 2.79 | 1.96 | 13.24 |
| 4KRP.PDB | OE1, A_GLU_495 | NE, A_ARG_497  | HE, A_ARG_497   | 2.60 | 1.79 | 14.71 |
| 4KRP.PDB | O, A_GLU_495   | N, A_ASP_498   | H, A_ASP_498    | 2.96 | 2.15 | 17.44 |
| 4KRP.PDB | O, A_GLY_490   | N, A_VAL_500   | H, A_VAL_500    | 2.88 | 2.04 | 9.24  |
| 4KRP.PDB | O, A_LEU_485   | N, A_ARG_503   | H, A_ARG_503    | 2.76 | 1.97 | 19.17 |
| 4KRP.PDB | O, A_GLU_510   | N, A_ARG_507   | H, A_ARG_507    | 2.85 | 2.07 | 20.90 |
| 4KRP.PDB | OE1, A_GLU_524 | NE, A_ARG_507  | HE, A_ARG_507   | 2.83 | 2.04 | 19.78 |
| 4KRP.PDB | O, A_VAL_505   | N, A_VAL_512   | H, A_VAL_512    | 2.78 | 1.98 | 18.78 |
| 4KRP.PDB | O, A_GLY_520   | NH1, A_ARG_523 | HH11, A_ARG_523 | 2.96 | 2.22 | 25.33 |
| 4KRP.PDB | O, A_ASN_516   | N, A_GLU_524   | H, A_GLU_524    | 2.98 | 2.17 | 17.27 |
| 4KRP.PDB | O, A_ILE_532   | N, A_PHE_525   | H, A_PHE_525    | 2.83 | 2.06 | 21.15 |
| 4KRP.PDB | O, A_GLU_530   | N, A_GLU_527   | H, A_GLU_527    | 2.83 | 2.00 | 14.02 |
| 4KRP.PDB | O, A_SER_506   | N, A_CYS_531   | H, A_CYS_531    | 2.79 | 1.96 | 12.76 |
| 4KRP.PDB | O, A_PHE_525   | N, A_ILE_532   | H, A_ILE_532    | 2.70 | 1.90 | 17.86 |
| 4KRP.PDB | O, A_ARG_523   | N, A_CYS_534   | H, A_CYS_534    | 2.73 | 1.90 | 12.34 |
| 4KRP.PDB | O, A_HIS_535   | N, A_CYS_538   | H, A_CYS_538    | 2.99 | 2.17 | 14.86 |
| 4KRP.PDB | O, A_GLN_557   | N, A_LEU_539   | H, A_LEU_539    | 2.68 | 1.97 | 29.21 |
| 4KRP.PDB | O, A_LEU_539   | NE2, A_GLN_541 | HE21, A_GLN_541 | 2.85 | 2.01 | 8.93  |
| 4KRP.PDB | OD1, A_ASN_544 | N, A_ILE_545   | H, A_ILE_545    | 2.79 | 2.04 | 25.27 |
| 4KRP.PDB | OE2, A_GLU_527 | NH2, A_ARG_550 | HH22, A_ARG_550 | 2.54 | 1.76 | 21.10 |
| 4KRP.PDB | O, A_GLU_537   | N, A_ALA_559   | H, A_ALA_559    | 2.74 | 1.88 | 1.56  |
| 4KRP.PDB | O, A_ALA_559   | ND1, A_HIS_560 | HD1, A_HIS_560  | 2.61 | 1.91 | 29.44 |
| 4KRP.PDB | O, A_HIS_566   | N, A_ASP_563   | H, A_ASP_563    | 2.73 | 1.89 | 10.58 |
| 4KRP.PDB | O, A_TYR_561   | N, A_VAL_568   | H, A_VAL_568    | 2.97 | 2.14 | 13.62 |
| 4KRP.PDB | OG, C_SER_26   | N, C_LEU_3     | H, C_LEU_3      | 2.98 | 2.13 | 7.00  |
| 4KRP.PDB | O, C_ARG_24    | N, C_THR_5     | H, C_THR_5      | 2.78 | 1.93 | 4.32  |
| 4KRP.PDB | O, C_TYR_86    | NE2, C_GLN_6   | HE22, C_GLN_6   | 2.90 | 2.07 | 11.06 |
| 4KRP.PDB | O, C_SER_22    | N, C_SER_7     | H, C_SER_7      | 2.93 | 2.12 | 15.95 |
| 4KRP.PDB | O, C_LYS_103   | N, C_LEU_11    | H, C_LEU_11     | 2.74 | 2.00 | 25.88 |
| 4KRP.PDB | OE1, C_GLU_17  | N, C_SER_14    | H, C_SER_14     | 2.90 | 2.05 | 7.83  |
| 4KRP.PDB | O, C_VAL_78    | N, C_GLY_16    | H, C_GLY_16     | 2.86 | 2.04 | 14.86 |
| 4KRP.PDB | O, C_ILE_75    | N, C_VAL_19    | H, C_VAL_19     | 2.92 | 2.12 | 19.12 |
| 4KRP.PDB | O, C_LEU_73    | N, C_PHE_21    | H, C_PHE_21     | 2.85 | 2.02 | 11.22 |
| 4KRP.PDB | O, C_SER_7     | N, C_SER_22    | H, C_SER_22     | 2.96 | 2.13 | 12.93 |
| 4KRP.PDB | O, C_THR_5     | N, C_ARG_24    | H, C_ARG_24     | 2.76 | 1.98 | 20.70 |
| 4KRP.PDB | O, C_THR_69    | N, C_ALA_25    | H, C_ALA_25     | 2.58 | 1.76 | 13.74 |
| 4KRP.PDB | O, C_LEU_3     | N, C_SER_26    | H, C_SER_26     | 2.90 | 2.10 | 18.68 |
| 4KRP.PDB | O, C_GLY_68    | N, C_ILE_29    | H, C_ILE_29     | 2.84 | 2.01 | 12.74 |
| 4KRP.PDB | OD1, C_ASN_92  | ND2, C_ASN_32  | HD22, C_ASN_32  | 2.85 | 2.14 | 29.38 |
| 4KRP.PDB | O, C_THR_31    | N, C_ILE_33    | H, C_ILE_33     | 2.75 | 2.02 | 26.66 |
| 4KRP.PDB | O, C_GLN_89    | N, C_HIS_34    | H, C_HIS_34     | 2.86 | 2.05 | 15.92 |
| 4KRP.PDB | O, C_ILE_48    | N, C_TRP_35    | H, C_TRP_35     | 2.96 | 2.13 | 11.92 |
| 4KRP.PDB | O, C_TYR_87    | N, C_TYR_36    | H, C_TYR_36     | 2.77 | 1.96 | 16.47 |
| 4KRP.PDB | OE1, C_GLN_89  | OH, C_TYR_36   | HH, C_TYR_36    | 2.33 | 1.50 | 6.36  |

|          |                |                |                 |      |      |       |
|----------|----------------|----------------|-----------------|------|------|-------|
| 4KRP.PDB | O, C_ARG_45    | N, C_GLN_37    | H, C_GLN_37     | 2.82 | 2.00 | 14.50 |
| 4KRP.PDB | OH, C_TYR_86   | NE2, C_GLN_37  | HE21, C_GLN_37  | 2.85 | 2.02 | 13.51 |
| 4KRP.PDB | O, C_ASP_85    | N, C_GLN_38    | H, C_GLN_38     | 2.84 | 2.04 | 18.23 |
| 4KRP.PDB | OE1, D_GLN_39  | NE2, C_GLN_38  | HE22, C_GLN_38  | 2.70 | 1.84 | 6.09  |
| 4KRP.PDB | O, C_ARG_39    | N, C_GLY_42    | H, C_GLY_42     | 2.94 | 2.19 | 25.37 |
| 4KRP.PDB | O, C_GLN_37    | N, C_ARG_45    | H, C_ARG_45     | 2.51 | 1.81 | 29.63 |
| 4KRP.PDB | O, C_TRP_35    | N, C_LEU_47    | H, C_LEU_47     | 2.88 | 2.04 | 8.47  |
| 4KRP.PDB | O, C_GLU_53    | N, C_LYS_49    | H, C_LYS_49     | 2.92 | 2.08 | 11.40 |
| 4KRP.PDB | OE1, C_GLU_53  | NZ, C_LYS_49   | HZ3, C_LYS_49   | 2.81 | 1.93 | 8.64  |
| 4KRP.PDB | OD2, D_ASP_103 | OH, C_TYR_50   | HH, C_TYR_50    | 2.43 | 1.66 | 18.96 |
| 4KRP.PDB | O, C_ILE_33    | N, C_ALA_51    | H, C_ALA_51     | 2.69 | 1.90 | 19.00 |
| 4KRP.PDB | OD1, C_ASP_82  | NH2, C_ARG_61  | HH21, C_ARG_61  | 2.79 | 1.98 | 15.39 |
| 4KRP.PDB | O, C_SER_74    | N, C_SER_63    | H, C_SER_63     | 2.89 | 2.12 | 22.33 |
| 4KRP.PDB | O, C_THR_72    | N, C_SER_65    | H, C_SER_65     | 2.82 | 2.03 | 19.74 |
| 4KRP.PDB | O, C_GLY_30    | N, C_GLY_68    | H, C_GLY_68     | 2.65 | 1.84 | 16.72 |
| 4KRP.PDB | O, C_CYS_23    | N, C_PHE_71    | H, C_PHE_71     | 2.92 | 2.13 | 19.47 |
| 4KRP.PDB | O, C_SER_65    | N, C_THR_72    | H, C_THR_72     | 2.85 | 2.06 | 18.53 |
| 4KRP.PDB | O, C_SER_63    | N, C_SER_74    | H, C_SER_74     | 2.53 | 1.70 | 12.96 |
| 4KRP.PDB | O, C_VAL_19    | N, C_ILE_75    | H, C_ILE_75     | 2.98 | 2.18 | 17.84 |
| 4KRP.PDB | OD2, C_ASP_82  | N, C_GLU_79    | H, C_GLU_79     | 2.97 | 2.11 | 4.01  |
| 4KRP.PDB | O, C_GLN_38    | N, C_ASP_85    | H, C_ASP_85     | 2.96 | 2.14 | 13.68 |
| 4KRP.PDB | O, C_THR_102   | N, C_TYR_86    | H, C_TYR_86     | 2.85 | 2.05 | 17.70 |
| 4KRP.PDB | O, C_ASP_82    | OH, C_TYR_86   | HH, C_TYR_86    | 2.56 | 1.73 | 8.98  |
| 4KRP.PDB | O, C_HIS_34    | N, C_GLN_89    | H, C_GLN_89     | 2.79 | 2.03 | 23.96 |
| 4KRP.PDB | OG1, C_THR_96  | NE2, C_GLN_89  | HE21, C_GLN_89  | 2.69 | 1.93 | 23.74 |
| 4KRP.PDB | O, C_ASN_93    | NE2, C_GLN_90  | HE22, C_GLN_90  | 2.65 | 1.80 | 8.11  |
| 4KRP.PDB | O, C_ASN_32    | N, C_ASN_91    | H, C_ASN_91     | 2.95 | 2.16 | 18.97 |
| 4KRP.PDB | OD1, D_ASP_103 | ND2, C_ASN_91  | HD21, C_ASN_91  | 2.77 | 1.91 | 6.24  |
| 4KRP.PDB | OD1, C_ASN_93  | ND2, C_ASN_92  | HD22, C_ASN_92  | 2.69 | 1.97 | 27.74 |
| 4KRP.PDB | OE1, C_GLN_90  | N, C_ASN_93    | H, C_ASN_93     | 2.83 | 2.02 | 15.94 |
| 4KRP.PDB | O, A_ASN_469   | N, C_TRP_94    | H, C_TRP_94     | 2.68 | 1.89 | 19.97 |
| 4KRP.PDB | OD2, D_ASP_58  | NE1, C_TRP_94  | HE1, C_TRP_94   | 2.98 | 2.17 | 17.26 |
| 4KRP.PDB | O, C_GLN_90    | OG1, C_THR_96  | HG1, C_THR_96   | 2.81 | 1.98 | 6.89  |
| 4KRP.PDB | O, C_CYS_88    | N, C_GLY_99    | H, C_GLY_99     | 2.82 | 1.98 | 10.72 |
| 4KRP.PDB | OE1, C_GLN_6   | N, C_GLY_101   | H, C_GLY_101    | 2.99 | 2.26 | 27.03 |
| 4KRP.PDB | O, C_TYR_86    | N, C_THR_102   | H, C_THR_102    | 2.99 | 2.27 | 27.64 |
| 4KRP.PDB | O, C_PRO_8     | OG1, C_THR_102 | HG1, C_THR_102  | 2.64 | 1.87 | 19.11 |
| 4KRP.PDB | O, C_VAL_9     | N, C_LYS_103   | H, C_LYS_103    | 2.82 | 2.01 | 15.16 |
| 4KRP.PDB | OE2, C_GLU_105 | NZ, C_LYS_103  | HZ1, C_LYS_103  | 2.82 | 2.05 | 25.15 |
| 4KRP.PDB | O, C_ALA_84    | N, C_LEU_104   | H, C_LEU_104    | 2.94 | 2.09 | 2.60  |
| 4KRP.PDB | O, C_VAL_13    | N, C_LYS_107   | H, C_LYS_107    | 2.79 | 1.98 | 15.54 |
| 4KRP.PDB | O, C_TYR_140   | N, C_ALA_111   | H, C_ALA_111    | 2.77 | 1.92 | 7.65  |
| 4KRP.PDB | O, C_LEU_135   | N, C_PHE_116   | H, C_PHE_116    | 2.88 | 2.06 | 15.19 |
| 4KRP.PDB | O, C_VAL_133   | N, C_PHE_118   | H, C_PHE_118    | 2.72 | 1.89 | 12.07 |
| 4KRP.PDB | OG, C_SER_131  | NE2, C_GLN_124 | HE22, C_GLN_124 | 2.89 | 2.10 | 19.98 |
| 4KRP.PDB | O, C_GLN_124   | N, C_SER_127   | H, C_SER_127    | 2.75 | 2.03 | 27.79 |
| 4KRP.PDB | O, C_LEU_125   | N, C_GLY_128   | H, C_GLY_128    | 2.99 | 2.19 | 18.71 |
| 4KRP.PDB | O, C_LEU_179   | N, C_VAL_132   | H, C_VAL_132    | 2.64 | 1.85 | 19.72 |
| 4KRP.PDB | O, C_SER_177   | N, C_CYS_134   | H, C_CYS_134    | 2.73 | 1.88 | 7.44  |
| 4KRP.PDB | O, C_PHE_116   | N, C_LEU_135   | H, C_LEU_135    | 2.66 | 1.81 | 8.16  |
| 4KRP.PDB | O, C_LEU_175   | N, C_LEU_136   | H, C_LEU_136    | 2.74 | 1.88 | 6.29  |
| 4KRP.PDB | O, C_SER_114   | N, C_ASN_137   | H, C_ASN_137    | 2.81 | 1.97 | 10.83 |
| 4KRP.PDB | OG, C_SER_174  | N, C_ASN_138   | H, C_ASN_138    | 2.97 | 2.11 | 3.04  |
| 4KRP.PDB | O, C_TYR_173   | N, C_PHE_139   | H, C_PHE_139    | 2.73 | 1.95 | 19.51 |
| 4KRP.PDB | O, C_ALA_111   | N, C_TYR_140   | H, C_TYR_140    | 2.91 | 2.08 | 13.77 |
| 4KRP.PDB | O, C_THR_197   | N, C_LYS_145   | H, C_LYS_145    | 2.91 | 2.06 | 4.69  |
| 4KRP.PDB | O, C_GLU_195   | N, C_GLN_147   | H, C_GLN_147    | 2.81 | 1.96 | 9.38  |
| 4KRP.PDB | O, C_ALA_193   | N, C_LYS_149   | H, C_LYS_149    | 2.85 | 2.05 | 18.63 |

|          |                |                |                 |      |      |       |
|----------|----------------|----------------|-----------------|------|------|-------|
| 4KRP.PDB | O, C_ALA_153   | NE2, C_GLN_155 | HE21, C_GLN_155 | 2.95 | 2.09 | 2.78  |
| 4KRP.PDB | OE1, C_GLN_155 | ND2, C_ASN_158 | HD21, C_ASN_158 | 2.83 | 2.12 | 29.23 |
| 4KRP.PDB | O, D_LEU_176   | NE2, C_GLN_160 | HE22, C_GLN_160 | 2.56 | 1.80 | 22.58 |
| 4KRP.PDB | O, C_SER_176   | N, C_SER_162   | H, C_SER_162    | 2.90 | 2.19 | 29.40 |
| 4KRP.PDB | O, D_PRO_173   | OG, C_SER_162  | HG, C_SER_162   | 2.80 | 2.10 | 28.74 |
| 4KRP.PDB | O, C_SER_174   | N, C_THR_164   | H, C_THR_164    | 2.91 | 2.07 | 10.69 |
| 4KRP.PDB | O, C_LEU_106   | NE2, C_GLN_166 | HE22, C_GLN_166 | 2.63 | 1.89 | 25.54 |
| 4KRP.PDB | OD2, C_ASP_167 | N, C_LYS_169   | H, C_LYS_169    | 2.96 | 2.14 | 15.63 |
| 4KRP.PDB | OD1, C_ASP_170 | N, C_THR_172   | H, C_THR_172    | 2.88 | 2.10 | 20.13 |
| 4KRP.PDB | OD1, C_ASP_170 | OG1, C_THR_172 | HG1, C_THR_172  | 2.53 | 1.69 | 5.91  |
| 4KRP.PDB | O, C_PHE_139   | N, C_TYR_173   | H, C_TYR_173    | 2.71 | 1.87 | 11.75 |
| 4KRP.PDB | O, C_LEU_136   | N, C_LEU_175   | H, C_LEU_175    | 2.80 | 2.00 | 17.17 |
| 4KRP.PDB | O, C_SER_162   | N, C_SER_176   | H, C_SER_176    | 2.91 | 2.09 | 14.35 |
| 4KRP.PDB | O, C_CYS_134   | N, C_SER_177   | H, C_SER_177    | 2.80 | 1.97 | 12.12 |
| 4KRP.PDB | O, C_GLN_160   | N, C_THR_178   | H, C_THR_178    | 2.94 | 2.21 | 26.85 |
| 4KRP.PDB | O, C_VAL_132   | N, C_LEU_179   | H, C_LEU_179    | 2.74 | 1.93 | 15.89 |
| 4KRP.PDB | O, C_ALA_130   | N, C_LEU_181   | H, C_LEU_181    | 2.98 | 2.18 | 18.35 |
| 4KRP.PDB | O, C_SER_182   | N, C_TYR_186   | H, C_TYR_186    | 2.78 | 1.98 | 17.36 |
| 4KRP.PDB | O, C_LYS_183   | N, C_GLU_187   | H, C_GLU_187    | 2.89 | 2.07 | 14.82 |
| 4KRP.PDB | O, C_ASP_185   | ND1, C_HIS_189 | HD1, C_HIS_189  | 2.74 | 1.90 | 11.57 |
| 4KRP.PDB | OD1, C_ASP_151 | N, C_VAL_191   | H, C_VAL_191    | 2.89 | 2.04 | 6.74  |
| 4KRP.PDB | O, C_TYR_186   | OH, C_TYR_192  | HH, C_TYR_192   | 2.61 | 1.88 | 24.84 |
| 4KRP.PDB | O, C_LYS_149   | N, C_ALA_193   | H, C_ALA_193    | 2.84 | 2.08 | 22.88 |
| 4KRP.PDB | O, C_LYS_207   | N, C_CYS_194   | H, C_CYS_194    | 2.89 | 2.06 | 14.21 |
| 4KRP.PDB | O, C_GLN_147   | N, C_GLU_195   | H, C_GLU_195    | 2.73 | 1.87 | 5.27  |
| 4KRP.PDB | O, C_VAL_205   | N, C_VAL_196   | H, C_VAL_196    | 2.64 | 1.80 | 9.51  |
| 4KRP.PDB | O, C_LYS_145   | N, C_THR_197   | H, C_THR_197    | 2.81 | 1.98 | 11.85 |
| 4KRP.PDB | O, C_PRO_141   | NE2, C_HIS_198 | HE2, C_HIS_198  | 2.87 | 2.02 | 6.17  |
| 4KRP.PDB | O, C_LYS_190   | N, C_ARG_211   | H, C_ARG_211    | 2.85 | 2.03 | 15.20 |
| 4KRP.PDB | O, C_HIS_189   | NE, C_ARG_211  | HE, C_ARG_211   | 2.71 | 1.90 | 16.56 |
| 4KRP.PDB | O, D_SER_25    | N, D_GLN_3     | H, D_GLN_3      | 2.74 | 1.91 | 10.35 |
| 4KRP.PDB | O, D_THR_23    | N, D_LYS_5     | H, D_LYS_5      | 2.97 | 2.12 | 3.88  |
| 4KRP.PDB | OE1, D_GLN_111 | N, D_GLN_6     | H, D_GLN_6      | 2.91 | 2.08 | 12.88 |
| 4KRP.PDB | OG1, D_THR_113 | NE2, D_GLN_6   | HE21, D_GLN_6   | 2.88 | 2.03 | 4.76  |
| 4KRP.PDB | O, D_TYR_93    | NE2, D_GLN_6   | HE22, D_GLN_6   | 2.91 | 2.18 | 26.39 |
| 4KRP.PDB | O, D_THR_21    | N, D_SER_7     | H, D_SER_7      | 2.78 | 1.98 | 17.63 |
| 4KRP.PDB | O, D_LEU_85    | N, D_SER_15    | H, D_SER_15     | 2.66 | 1.85 | 14.89 |
| 4KRP.PDB | O, D_GLN_13    | N, D_GLN_16    | H, D_GLN_16     | 2.90 | 2.10 | 17.19 |
| 4KRP.PDB | O, D_MET_82    | N, D_LEU_18    | H, D_LEU_18     | 2.72 | 1.90 | 13.60 |
| 4KRP.PDB | O, D_SER_7     | N, D_THR_21    | H, D_THR_21     | 2.80 | 1.94 | 2.06  |
| 4KRP.PDB | O, D_VAL_78    | N, D_CYS_22    | H, D_CYS_22     | 2.79 | 1.97 | 15.13 |
| 4KRP.PDB | O, D_LYS_5     | N, D_THR_23    | H, D_THR_23     | 2.64 | 1.81 | 12.04 |
| 4KRP.PDB | O, D_SER_76    | N, D_VAL_24    | H, D_VAL_24     | 2.93 | 2.08 | 8.52  |
| 4KRP.PDB | OG, D_SER_28   | N, D_THR_30    | H, D_THR_30     | 2.95 | 2.11 | 10.64 |
| 4KRP.PDB | O, D_ALA_96    | N, D_HIS_35    | H, D_HIS_35     | 2.75 | 1.91 | 9.74  |
| 4KRP.PDB | O, D_GLY_49    | N, D_TRP_36    | H, D_TRP_36     | 2.84 | 2.06 | 19.69 |
| 4KRP.PDB | O, D_TYR_94    | N, D_VAL_37    | H, D_VAL_37     | 2.90 | 2.08 | 13.15 |
| 4KRP.PDB | O, D_GLU_46    | N, D_ARG_38    | H, D_ARG_38     | 2.87 | 2.05 | 14.44 |
| 4KRP.PDB | OH, D_TYR_93   | NH1, D_ARG_38  | HH11, D_ARG_38  | 2.96 | 2.18 | 20.80 |
| 4KRP.PDB | OD1, D_ASP_89  | NH1, D_ARG_38  | HH12, D_ARG_38  | 2.91 | 2.06 | 7.49  |
| 4KRP.PDB | OE1, C_GLN_38  | NE2, D_GLN_39  | HE22, D_GLN_39  | 2.72 | 1.87 | 5.47  |
| 4KRP.PDB | O, D_ARG_38    | N, D_GLU_46    | H, D_GLU_46     | 2.84 | 2.01 | 12.31 |
| 4KRP.PDB | O, D_TRP_36    | N, D_LEU_48    | H, D_LEU_48     | 2.81 | 1.97 | 10.41 |
| 4KRP.PDB | O, D_ASP_58    | N, D_VAL_50    | H, D_VAL_50     | 2.83 | 2.10 | 26.44 |
| 4KRP.PDB | O, D_ASN_56    | N, D_TRP_52    | H, D_TRP_52     | 2.85 | 2.04 | 16.32 |
| 4KRP.PDB | O, D_LEU_48    | N, D_ASN_60    | H, D_ASN_60     | 2.81 | 1.96 | 6.79  |
| 4KRP.PDB | O, D_TRP_47    | ND2, D_ASN_60  | HD22, D_ASN_60  | 2.84 | 2.05 | 19.17 |
| 4KRP.PDB | O, D_ASN_60    | N, D_PHE_63    | H, D_PHE_63     | 2.99 | 2.23 | 24.51 |

|          |                |                |                 |      |      |       |
|----------|----------------|----------------|-----------------|------|------|-------|
| 4KRP.PDB | OD1, D_ASP_89  | NH2, D_ARG_66  | HH22, D_ARG_66  | 2.59 | 1.74 | 9.60  |
| 4KRP.PDB | O, D_LYS_81    | N, D_SER_68    | H, D_SER_68     | 2.89 | 2.07 | 14.89 |
| 4KRP.PDB | OH, D_TYR_59   | N, D_ILE_69    | H, D_ILE_69     | 2.90 | 2.09 | 15.54 |
| 4KRP.PDB | O, D_CYS_22    | N, D_VAL_78    | H, D_VAL_78     | 2.72 | 1.92 | 18.23 |
| 4KRP.PDB | O, D_ASN_70    | N, D_PHE_79    | H, D_PHE_79     | 2.97 | 2.12 | 3.62  |
| 4KRP.PDB | O, D_ILE_20    | N, D_PHE_80    | H, D_PHE_80     | 2.75 | 1.92 | 12.16 |
| 4KRP.PDB | O, D_ARG_66    | N, D_ASN_83    | H, D_ASN_83     | 2.96 | 2.20 | 23.47 |
| 4KRP.PDB | O, D_GLN_16    | N, D_LEU_85    | H, D_LEU_85     | 2.88 | 2.04 | 9.71  |
| 4KRP.PDB | O, D_GLN_86    | N, D_ASP_89    | H, D_ASP_89     | 2.99 | 2.19 | 16.67 |
| 4KRP.PDB | O, D_SER_87    | N, D_THR_90    | H, D_THR_90     | 2.99 | 2.16 | 13.47 |
| 4KRP.PDB | O, D_SER_87    | OG1, D_THR_90  | HG1, D_THR_90   | 2.81 | 2.08 | 24.26 |
| 4KRP.PDB | O, D_ASP_89    | OH, D_TYR_93   | HH, D_TYR_93    | 2.65 | 1.83 | 9.74  |
| 4KRP.PDB | O, D_VAL_37    | N, D_TYR_94    | H, D_TYR_94     | 2.57 | 1.74 | 12.70 |
| 4KRP.PDB | O, D_HIS_35    | N, D_ALA_96    | H, D_ALA_96     | 2.75 | 1.98 | 21.78 |
| 4KRP.PDB | O, D_TYR_108   | N, D_ARG_97    | H, D_ARG_97     | 2.89 | 2.07 | 13.85 |
| 4KRP.PDB | O, D_ALA_98    | NE, D_ARG_97   | HE, D_ARG_97    | 2.79 | 1.94 | 9.03  |
| 4KRP.PDB | OE1, A_GLN_408 | OH, D_TYR_102  | HH, D_TYR_102   | 2.56 | 1.74 | 10.00 |
| 4KRP.PDB | OD1, D_ASP_103 | N, D_TYR_104   | H, D_TYR_104    | 2.53 | 1.80 | 26.58 |
| 4KRP.PDB | OG, A_SER_440  | OH, D_TYR_104  | HH, D_TYR_104   | 2.94 | 2.22 | 25.72 |
| 4KRP.PDB | OH, C_TYR_36   | N, D_PHE_106   | H, D_PHE_106    | 2.89 | 2.11 | 20.61 |
| 4KRP.PDB | O, D_PHE_106   | NE1, D_TRP_109 | HE1, D_TRP_109  | 2.74 | 2.02 | 27.52 |
| 4KRP.PDB | O, D_CYS_95    | N, D_GLY_110   | H, D_GLY_110    | 2.83 | 1.97 | 4.87  |
| 4KRP.PDB | O, D_TYR_93    | N, D_THR_113   | H, D_THR_113    | 2.79 | 2.00 | 19.35 |
| 4KRP.PDB | O, D_ALA_91    | N, D_VAL_115   | H, D_VAL_115    | 2.94 | 2.21 | 27.64 |
| 4KRP.PDB | O, D_GLY_10    | N, D_THR_116   | H, D_THR_116    | 2.48 | 1.64 | 10.06 |
| 4KRP.PDB | OG, D_SER_118  | N, D_ALA_120   | H, D_ALA_120    | 2.80 | 1.99 | 15.68 |
| 4KRP.PDB | O, D_PHE_152   | N, D_LYS_123   | H, D_LYS_123    | 2.61 | 1.84 | 21.89 |
| 4KRP.PDB | O, D_ASP_150   | NZ, D_LYS_123  | HZ2, D_LYS_123  | 2.97 | 2.10 | 10.97 |
| 4KRP.PDB | O, D_LYS_149   | N, D_SER_126   | H, D_SER_126    | 2.93 | 2.09 | 12.06 |
| 4KRP.PDB | O, D_LEU_147   | N, D_PHE_128   | H, D_PHE_128    | 2.93 | 2.14 | 18.89 |
| 4KRP.PDB | O, D_GLY_145   | N, D_LEU_130   | H, D_LEU_130    | 2.60 | 1.75 | 6.78  |
| 4KRP.PDB | O, D_VAL_190   | N, D_ALA_142   | H, D_ALA_142    | 2.58 | 1.73 | 8.25  |
| 4KRP.PDB | O, D_LEU_130   | N, D_GLY_145   | H, D_GLY_145    | 2.97 | 2.21 | 23.33 |
| 4KRP.PDB | O, D_SER_186   | N, D_CYS_146   | H, D_CYS_146    | 2.72 | 1.92 | 18.42 |
| 4KRP.PDB | O, D_PHE_128   | N, D_LEU_147   | H, D_LEU_147    | 2.61 | 1.77 | 10.44 |
| 4KRP.PDB | O, D_LEU_184   | N, D_VAL_148   | H, D_VAL_148    | 2.60 | 1.80 | 18.24 |
| 4KRP.PDB | O, D_TYR_182   | N, D_TYR_151   | H, D_TYR_151    | 2.99 | 2.17 | 14.93 |
| 4KRP.PDB | O, D_LYS_123   | N, D_PHE_152   | H, D_PHE_152    | 2.86 | 2.03 | 12.67 |
| 4KRP.PDB | O, D_ASN_205   | N, D_THR_157   | H, D_THR_157    | 2.80 | 1.97 | 11.71 |
| 4KRP.PDB | O, D_ILE_201   | N, D_ASN_161   | H, D_ASN_161    | 2.77 | 1.93 | 9.15  |
| 4KRP.PDB | OD1, D_ASN_203 | N, D_SER_162   | H, D_SER_162    | 2.69 | 1.90 | 19.84 |
| 4KRP.PDB | O, D_VAL_187   | N, D_HIS_170   | H, D_HIS_170    | 2.77 | 1.95 | 15.10 |
| 4KRP.PDB | O, D_SER_185   | N, D_PHE_172   | H, D_PHE_172    | 2.95 | 2.10 | 7.75  |
| 4KRP.PDB | O, D_LEU_181   | N, D_GLN_177   | H, D_GLN_177    | 2.91 | 2.07 | 9.36  |
| 4KRP.PDB | O, D_GLN_177   | N, D_GLY_180   | H, D_GLY_180    | 2.74 | 1.90 | 10.27 |
| 4KRP.PDB | OG, D_SER_179  | N, D_LEU_181   | H, D_LEU_181    | 2.98 | 2.17 | 16.32 |
| 4KRP.PDB | O, D_TYR_151   | N, D_TYR_182   | H, D_TYR_182    | 2.66 | 1.81 | 7.88  |
| 4KRP.PDB | O, D_VAL_148   | N, D_LEU_184   | H, D_LEU_184    | 2.65 | 1.91 | 24.40 |
| 4KRP.PDB | O, D_CYS_146   | N, D_SER_186   | H, D_SER_186    | 2.92 | 2.10 | 15.79 |
| 4KRP.PDB | O, D_HIS_170   | N, D_VAL_187   | H, D_VAL_187    | 2.99 | 2.16 | 13.15 |
| 4KRP.PDB | O, D_LEU_144   | N, D_VAL_188   | H, D_VAL_188    | 2.79 | 2.00 | 19.05 |
| 4KRP.PDB | O, D_ALA_142   | N, D_VAL_190   | H, D_VAL_190    | 2.74 | 1.92 | 13.51 |
| 4KRP.PDB | O, D_SER_192   | N, D_SER_194   | H, D_SER_194    | 2.72 | 1.97 | 24.52 |
| 4KRP.PDB | O, D_SER_194   | N, D_THR_197   | H, D_THR_197    | 2.83 | 2.02 | 16.59 |
| 4KRP.PDB | O, D_SER_194   | N, D_GLN_198   | H, D_GLN_198    | 2.63 | 1.78 | 8.20  |
| 4KRP.PDB | O, D_SER_159   | N, D_ASN_203   | H, D_ASN_203    | 2.84 | 2.01 | 11.39 |
| 4KRP.PDB | OD1, D_ASP_214 | ND2, D_ASN_203 | HD22, D_ASN_203 | 2.70 | 1.84 | 4.78  |
| 4KRP.PDB | O, D_VAL_213   | N, D_VAL_204   | H, D_VAL_204    | 2.74 | 1.92 | 15.13 |



|          |                |                |                |      |      |       |
|----------|----------------|----------------|----------------|------|------|-------|
| 4KRP.PDB | O, D_THR_157   | N, D_ASN_205   | H, D_ASN_205   | 2.79 | 1.96 | 11.86 |
| 4KRP.PDB | O, D_THR_211   | N, D_HIS_206   | H, D_HIS_206   | 2.93 | 2.14 | 19.62 |
| 4KRP.PDB | OG, D_SER_209  | ND1, D_HIS_206 | HD1, D_HIS_206 | 2.94 | 2.08 | 3.63  |
| 4KRP.PDB | O, D_PRO_153   | NE2, D_HIS_206 | HE2, D_HIS_206 | 2.75 | 1.91 | 8.08  |
| 4KRP.PDB | O, D_LYS_207   | N, D_ASN_210   | H, D_ASN_210   | 2.60 | 1.84 | 22.95 |
| 4KRP.PDB | OG, D_SER_209  | OG1, D_THR_211 | HG1, D_THR_211 | 2.56 | 1.87 | 28.78 |
| 4KRP.PDB | O, D_VAL_204   | N, D_VAL_213   | H, D_VAL_213   | 2.73 | 1.88 | 7.94  |
| 4KRP.PDB | O, D_TYR_200   | N, D_VAL_217   | H, D_VAL_217   | 2.90 | 2.06 | 11.80 |
| 4KRP.PDB | O, B_SER_25    | N, B_GLN_3     | H, B_GLN_3     | 2.91 | 2.07 | 9.08  |
| 4KRP.PDB | O, B_ALA_23    | N, B_VAL_5     | H, B_VAL_5     | 2.88 | 2.02 | 5.91  |
| 4KRP.PDB | OE1, A_GLU_431 | OH, B_TYR_32   | HH, B_TYR_32   | 2.59 | 1.78 | 7.49  |
| 4KRP.PDB | O, B_GLY_99    | N, B_ALA_33    | H, B_ALA_33    | 2.82 | 2.06 | 24.31 |
| 4KRP.PDB | O, B_MET_34    | N, B_ILE_51    | H, B_ILE_51    | 2.92 | 2.20 | 27.79 |
| 4KRP.PDB | O, B_SER_104   | ND2, B_ASN_52  | HD21, B_ASN_52 | 2.66 | 1.89 | 21.34 |
| 4KRP.PDB | O, B_ALA_50    | N, B_TYR_59    | H, B_TYR_59    | 2.95 | 2.11 | 9.44  |
| 4KRP.PDB | O, B_TYR_116   | N, B_ALA_98    | H, B_ALA_98    | 2.91 | 2.18 | 26.96 |
| 4KRP.PDB | OE1, A_GLU_400 | OH, B_TYR_100  | HH, B_TYR_100  | 2.94 | 2.13 | 13.29 |
| 4KRP.PDB | OE2, A_GLU_431 | OH, B_TYR_116  | HH, B_TYR_116  | 2.43 | 1.75 | 29.09 |

Table 1695: 4KRP-specific side chain and main chain hydrogen bonding analysis. In this table, a PDB file is specified with a four-letter PDB ID, except that the names of the PDB files corresponding to the single NMR structural model split from the NMR ensemble is specified with a four-letter PDB ID in addition to a hyphen followed by the single NMR structural model numeric ID, the residue naming scheme is **Chain ID\_residue name\_residue number**,  $\angle ADH$  represents the angle formed by acceptor (A), donor (D) and hydrogen (H) ( $\angle ADH$ ).

| PDB      | Acceptor (A)   | Donor (D)     | Hydrogen (H)   | D-A (Å) | H-A (Å) | $\angle ADH(^{\circ})$ |
|----------|----------------|---------------|----------------|---------|---------|------------------------|
| 4NZR.PDB | O, H.SER.25    | N, H.GLN.3    | H, H.GLN.3     | 2.88    | 2.05    | 13.11                  |
| 4NZR.PDB | O, H.THR.23    | N, H.GLN.5    | H, H.GLN.5     | 2.98    | 2.24    | 25.71                  |
| 4NZR.PDB | O, H.SER.21    | N, H.SER.7    | H, H.SER.7     | 2.82    | 2.05    | 20.97                  |
| 4NZR.PDB | O, H.THR.110   | N, H.VAL.12   | H, H.VAL.12    | 2.90    | 2.11    | 18.80                  |
| 4NZR.PDB | OE1, H.GLU.16  | N, H.LYS.13   | H, H.LYS.13    | 2.94    | 2.09    | 8.37                   |
| 4NZR.PDB | O, H.VAL.82C   | N, H.SER.15   | H, H.SER.15    | 2.76    | 1.92    | 10.81                  |
| 4NZR.PDB | O, H.LEU.82    | N, H.LEU.18   | H, H.LEU.18    | 2.85    | 2.05    | 16.86                  |
| 4NZR.PDB | O, H.LEU.80    | N, H.LEU.20   | H, H.LEU.20    | 2.86    | 2.03    | 13.74                  |
| 4NZR.PDB | O, H.PHE.78    | N, H.CYS.22   | H, H.CYS.22    | 2.79    | 1.97    | 15.99                  |
| 4NZR.PDB | O, H.GLN.5     | N, H.THR.23   | H, H.THR.23    | 2.93    | 2.12    | 16.85                  |
| 4NZR.PDB | O, H.ASN.76    | N, H.VAL.24   | H, H.VAL.24    | 2.94    | 2.10    | 8.87                   |
| 4NZR.PDB | O, H.GLN.3     | N, H.SER.25   | H, H.SER.25    | 2.82    | 1.99    | 12.13                  |
| 4NZR.PDB | OD1, H.ASN.76  | N, H.ILE.29   | H, H.ILE.29    | 2.97    | 2.16    | 16.56                  |
| 4NZR.PDB | O, H.ASP.31E   | N, H.GLY.31A  | H, H.GLY.31A   | 2.95    | 2.12    | 14.61                  |
| 4NZR.PDB | O, H.GLU.31B   | N, H.ASP.31E  | H, H.ASP.31E   | 2.99    | 2.13    | 1.38                   |
| 4NZR.PDB | O, H.ALA.93    | N, H.GLY.35   | H, H.GLY.35    | 2.82    | 1.96    | 6.32                   |
| 4NZR.PDB | O, H.GLY.49    | N, H.TRP.36   | H, H.TRP.36    | 2.93    | 2.18    | 24.86                  |
| 4NZR.PDB | O, H.PHE.91    | N, H.VAL.37   | H, H.VAL.37    | 2.89    | 2.07    | 13.63                  |
| 4NZR.PDB | O, H.GLU.46    | N, H.ARG.38   | H, H.ARG.38    | 2.82    | 2.00    | 14.96                  |
| 4NZR.PDB | OE1, H.GLU.46  | NE, H.ARG.38  | HE, H.ARG.38   | 2.83    | 2.07    | 23.07                  |
| 4NZR.PDB | OH, H.TYR.90   | NH1, H.ARG.38 | HH11, H.ARG.38 | 2.96    | 2.16    | 17.91                  |
| 4NZR.PDB | OD1, H.ASP.86  | NH1, H.ARG.38 | HH12, H.ARG.38 | 2.73    | 1.88    | 7.20                   |
| 4NZR.PDB | OE1, H.GLU.46  | NH2, H.ARG.38 | HH21, H.ARG.38 | 2.78    | 2.02    | 22.98                  |
| 4NZR.PDB | O, H.VAL.89    | N, H.HIS.39   | H, H.HIS.39    | 2.78    | 1.96    | 14.92                  |
| 4NZR.PDB | O, H.SER.40    | N, H.LYS.43   | H, H.LYS.43    | 2.77    | 1.94    | 13.14                  |
| 4NZR.PDB | O, H.ARG.38    | N, H.GLU.46   | H, H.GLU.46    | 2.92    | 2.12    | 17.91                  |
| 4NZR.PDB | OG, H.SER.50   | NE1, H.TRP.47 | HE1, H.TRP.47  | 2.87    | 2.03    | 11.63                  |
| 4NZR.PDB | O, H.TRP.36    | N, H.ILE.48   | H, H.ILE.48    | 2.93    | 2.07    | 4.55                   |
| 4NZR.PDB | O, H.HIS.58    | N, H.SER.50   | H, H.SER.50    | 2.85    | 2.04    | 14.94                  |
| 4NZR.PDB | O, H.TRP.34    | N, H.ILE.51   | H, H.ILE.51    | 2.79    | 1.98    | 16.48                  |
| 4NZR.PDB | O, H.THR.56    | N, H.HIS.52   | H, H.HIS.52    | 2.85    | 2.01    | 9.46                   |
| 4NZR.PDB | OD1, H.ASP.31G | NE2, H.HIS.52 | HE2, H.HIS.52  | 2.60    | 1.83    | 22.01                  |
| 4NZR.PDB | OD1, H.ASP.31G | NE1, H.TRP.53 | HE1, H.TRP.53  | 2.92    | 2.20    | 28.43                  |
| 4NZR.PDB | O, H.HIS.52    | N, H.GLY.55   | H, H.GLY.55    | 2.84    | 2.03    | 16.32                  |
| 4NZR.PDB | O, H.SER.50    | N, H.HIS.58   | H, H.HIS.58    | 2.89    | 2.05    | 10.67                  |
| 4NZR.PDB | O, H.ILE.48    | N, H.LYS.60   | H, H.LYS.60    | 2.87    | 2.02    | 5.64                   |
| 4NZR.PDB | O, H.LYS.60    | N, H.LEU.63   | H, H.LEU.63    | 2.86    | 2.08    | 20.68                  |
| 4NZR.PDB | O, H.LEU.63    | N, H.ARG.66   | H, H.ARG.66    | 2.78    | 1.94    | 10.08                  |
| 4NZR.PDB | O, H.ALA.82A   | NH1, H.ARG.66 | HH11, H.ARG.66 | 2.95    | 2.12    | 13.91                  |
| 4NZR.PDB | OD2, H.ASP.86  | NH1, H.ARG.66 | HH12, H.ARG.66 | 2.98    | 2.20    | 21.88                  |
| 4NZR.PDB | O, H.ARG.81    | N, H.SER.68   | H, H.SER.68    | 2.95    | 2.16    | 19.71                  |
| 4NZR.PDB | O, H.TRP.77    | N, H.ASP.72   | H, H.ASP.72    | 2.90    | 2.05    | 4.26                   |
| 4NZR.PDB | O, H.ASP.27    | ND2, H.ASN.76 | HD21, H.ASN.76 | 2.81    | 2.01    | 17.45                  |
| 4NZR.PDB | O, H.VAL.24    | ND2, H.ASN.76 | HD22, H.ASN.76 | 2.87    | 2.02    | 7.45                   |
| 4NZR.PDB | O, H.SER.70    | N, H.SER.79   | H, H.SER.79    | 2.92    | 2.13    | 19.56                  |
| 4NZR.PDB | O, H.LEU.20    | N, H.LEU.80   | H, H.LEU.80    | 2.88    | 2.05    | 13.30                  |
| 4NZR.PDB | O, H.SER.68    | N, H.ARG.81   | H, H.ARG.81    | 2.79    | 1.94    | 8.27                   |
| 4NZR.PDB | O, H.LEU.18    | N, H.LEU.82   | H, H.LEU.82    | 2.82    | 2.00    | 14.32                  |
| 4NZR.PDB | O, H.ARG.66    | N, H.ALA.82A  | H, H.ALA.82A   | 2.75    | 1.90    | 8.50                   |
| 4NZR.PDB | O, H.THR.83    | N, H.ASP.86   | H, H.ASP.86    | 2.82    | 1.97    | 8.78                   |
| 4NZR.PDB | O, H.ALA.84    | N, H.THR.87   | H, H.THR.87    | 2.95    | 2.10    | 9.57                   |
| 4NZR.PDB | O, H.HIS.39    | N, H.VAL.89   | H, H.VAL.89    | 2.90    | 2.08    | 15.32                  |
| 4NZR.PDB | O, H.VAL.107   | N, H.TYR.90   | H, H.TYR.90    | 2.84    | 2.00    | 11.61                  |
| 4NZR.PDB | O, H.VAL.37    | N, H.PHE.91   | H, H.PHE.91    | 2.75    | 1.91    | 10.12                  |
| 4NZR.PDB | OE2, H.GLU.6   | N, H.CYS.92   | H, H.CYS.92    | 2.87    | 2.06    | 15.61                  |
| 4NZR.PDB | O, H.GLY.35    | N, H.ALA.93   | H, H.ALA.93    | 2.84    | 2.09    | 24.53                  |
| 4NZR.PDB | O, H.VAL.102   | N, H.ARG.94   | H, H.ARG.94    | 2.90    | 2.15    | 25.02                  |

|          |                |                |                 |      |      |       |
|----------|----------------|----------------|-----------------|------|------|-------|
| 4NZR.PDB | OD1, H_ASP_101 | NE, H_ARG_94   | HE, H_ARG_94    | 2.90 | 2.05 | 5.79  |
| 4NZR.PDB | OD2, H_ASP_101 | NH2, H_ARG_94  | HH21, H_ARG_94  | 2.73 | 1.90 | 13.79 |
| 4NZR.PDB | O, H_HIS_33    | N, H_HIS_95    | H, H_HIS_95     | 2.85 | 2.00 | 2.84  |
| 4NZR.PDB | OG, H_SER_50   | ND1, H_HIS_95  | HD1, H_HIS_95   | 2.67 | 1.84 | 11.69 |
| 4NZR.PDB | O, H_GLY_100H  | NE2, H_HIS_95  | HE2, H_HIS_95   | 2.92 | 2.20 | 27.79 |
| 4NZR.PDB | O, H_TRP_100I  | N, H_ARG_96    | H, H_ARG_96     | 2.84 | 2.03 | 17.11 |
| 4NZR.PDB | O, H_ARG_96    | N, H_GLY_100H  | H, H_GLY_100H   | 2.83 | 2.09 | 26.32 |
| 4NZR.PDB | O, H_ARG_96    | N, H_TRP_100I  | H, H_TRP_100I   | 2.87 | 2.13 | 26.51 |
| 4NZR.PDB | OH, L_TYR_36   | N, H_PHE_100J  | H, H_PHE_100J   | 2.96 | 2.11 | 8.14  |
| 4NZR.PDB | O, H_PHE_100J  | NE1, H_TRP_103 | HE1, H_TRP_103  | 2.95 | 2.19 | 23.88 |
| 4NZR.PDB | O, H_CYS_92    | N, H_GLY_104   | H, H_GLY_104    | 2.86 | 2.04 | 15.44 |
| 4NZR.PDB | OE1, H_GLU_6   | N, H_GLY_106   | H, H_GLY_106    | 2.82 | 2.04 | 21.27 |
| 4NZR.PDB | O, H_TYR_90    | N, H_VAL_107   | H, H_VAL_107    | 2.93 | 2.12 | 16.92 |
| 4NZR.PDB | O, H_ALA_88    | N, H_VAL_109   | H, H_VAL_109    | 2.86 | 2.00 | 1.82  |
| 4NZR.PDB | O, H_GLY_10    | N, H_THR_110   | H, H_THR_110    | 2.80 | 1.95 | 8.91  |
| 4NZR.PDB | OG1, H_THR_87  | N, H_VAL_111   | H, H_VAL_111    | 2.87 | 2.02 | 10.02 |
| 4NZR.PDB | O, H_VAL_12    | N, H_SER_112   | H, H_SER_112    | 2.92 | 2.12 | 18.68 |
| 4NZR.PDB | O, H_PHE_148   | N, H_LYS_117   | H, H_LYS_117    | 2.83 | 1.99 | 10.22 |
| 4NZR.PDB | O, H_ASP_146   | NZ, H_LYS_117  | HZ2, H_LYS_117  | 2.85 | 2.05 | 22.38 |
| 4NZR.PDB | O, H_LYS_145   | N, H_SER_120   | H, H_SER_120    | 2.88 | 2.07 | 16.11 |
| 4NZR.PDB | O, H_LEU_143   | N, H_PHE_122   | H, H_PHE_122    | 2.83 | 2.00 | 12.46 |
| 4NZR.PDB | O, H_GLY_141   | N, H_LEU_124   | H, H_LEU_124    | 2.75 | 1.90 | 5.12  |
| 4NZR.PDB | O, H_VAL_193   | N, H_ALA_138   | H, H_ALA_138    | 2.76 | 1.91 | 7.40  |
| 4NZR.PDB | O, H_VAL_191   | N, H_LEU_140   | H, H_LEU_140    | 2.93 | 2.10 | 13.85 |
| 4NZR.PDB | O, H_LEU_124   | N, H_GLY_141   | H, H_GLY_141    | 2.91 | 2.17 | 26.54 |
| 4NZR.PDB | O, H_SER_189   | N, H_CYS_142   | H, H_CYS_142    | 2.86 | 2.07 | 19.75 |
| 4NZR.PDB | O, H_PHE_122   | N, H_LEU_143   | H, H_LEU_143    | 2.77 | 1.93 | 12.58 |
| 4NZR.PDB | O, H_LEU_187   | N, H_VAL_144   | H, H_VAL_144    | 2.76 | 1.91 | 5.81  |
| 4NZR.PDB | O, H_SER_120   | N, H_LYS_145   | H, H_LYS_145    | 2.83 | 1.98 | 8.06  |
| 4NZR.PDB | O, H_LYS_117   | N, H_PHE_148   | H, H_PHE_148    | 2.88 | 2.08 | 18.10 |
| 4NZR.PDB | O, H_ASN_211   | N, H_THR_153   | H, H_THR_153    | 2.86 | 2.04 | 14.37 |
| 4NZR.PDB | O, H_ASN_209   | N, H_SER_156   | H, H_SER_156    | 2.93 | 2.11 | 14.90 |
| 4NZR.PDB | O, H_ILE_207   | N, H_ASN_162   | H, H_ASN_162    | 2.83 | 1.99 | 8.33  |
| 4NZR.PDB | OD1, H_ASN_209 | N, H_SER_163   | H, H_SER_163    | 2.78 | 2.01 | 22.06 |
| 4NZR.PDB | O, H_VAL_190   | N, H_HIS_172   | H, H_HIS_172    | 2.89 | 2.06 | 13.96 |
| 4NZR.PDB | O, H_SER_188   | N, H_PHE_174   | H, H_PHE_174    | 2.98 | 2.13 | 5.13  |
| 4NZR.PDB | O, H_SER_186   | N, H_VAL_177   | H, H_VAL_177    | 2.84 | 2.01 | 12.47 |
| 4NZR.PDB | O, H_LEU_184   | N, H_GLN_179   | H, H_GLN_179    | 2.83 | 1.98 | 4.97  |
| 4NZR.PDB | OD1, H_ASP_146 | NE2, H_GLN_179 | HE22, H_GLN_179 | 2.89 | 2.12 | 22.14 |
| 4NZR.PDB | O, H_GLN_179   | N, H_GLY_183   | H, H_GLY_183    | 2.81 | 1.99 | 13.79 |
| 4NZR.PDB | O, H_TYR_147   | N, H_TYR_185   | H, H_TYR_185    | 2.76 | 1.91 | 6.87  |
| 4NZR.PDB | O, H_VAL_177   | N, H_SER_186   | H, H_SER_186    | 2.92 | 2.15 | 22.72 |
| 4NZR.PDB | O, H_VAL_144   | N, H_LEU_187   | H, H_LEU_187    | 2.86 | 2.05 | 15.45 |
| 4NZR.PDB | OG, L_SER_176  | OG, H_SER_188  | HG, H_SER_188   | 2.88 | 2.16 | 24.46 |
| 4NZR.PDB | O, H_CYS_142   | N, H_SER_189   | H, H_SER_189    | 2.99 | 2.16 | 13.39 |
| 4NZR.PDB | O, H_HIS_172   | N, H_VAL_190   | H, H_VAL_190    | 2.81 | 1.98 | 14.14 |
| 4NZR.PDB | O, H_LEU_140   | N, H_VAL_191   | H, H_VAL_191    | 2.76 | 1.94 | 15.00 |
| 4NZR.PDB | O, H_ALA_138   | N, H_VAL_193   | H, H_VAL_193    | 2.76 | 1.96 | 16.51 |
| 4NZR.PDB | O, H_GLY_136   | N, H_SER_195   | H, H_SER_195    | 2.71 | 1.87 | 10.73 |
| 4NZR.PDB | O, H_PRO_194   | N, H_SER_197   | H, H_SER_197    | 2.94 | 2.08 | 6.12  |
| 4NZR.PDB | O, H_SER_197   | N, H_GLN_203   | H, H_GLN_203    | 2.86 | 2.05 | 15.22 |
| 4NZR.PDB | OD1, H_ASN_162 | N, H_ILE_207   | H, H_ILE_207    | 2.78 | 1.97 | 16.55 |
| 4NZR.PDB | O, H_SER_156   | N, H_ASN_209   | H, H_ASN_209    | 2.81 | 1.96 | 7.21  |
| 4NZR.PDB | OD1, H_ASP_220 | ND2, H_ASN_209 | HD22, H_ASN_209 | 2.89 | 2.06 | 12.07 |
| 4NZR.PDB | O, H_VAL_219   | N, H_VAL_210   | H, H_VAL_210    | 2.75 | 1.90 | 7.71  |
| 4NZR.PDB | O, H_THR_153   | N, H_ASN_211   | H, H_ASN_211    | 2.89 | 2.07 | 14.75 |
| 4NZR.PDB | OG, H_SER_215  | ND1, H_HIS_212 | HD1, H_HIS_212  | 2.80 | 1.99 | 17.07 |
| 4NZR.PDB | O, H_PRO_149   | NE2, H_HIS_212 | HE2, H_HIS_212  | 2.62 | 1.78 | 7.68  |

|          |                |               |                |      |      |       |
|----------|----------------|---------------|----------------|------|------|-------|
| 4NZR.PDB | O, H.LYS_213   | N, H.ASN_216  | H, H.ASN_216   | 2.95 | 2.12 | 11.20 |
| 4NZR.PDB | O, H.VAL_210   | N, H.VAL_219  | H, H.VAL_219   | 2.94 | 2.10 | 10.72 |
| 4NZR.PDB | O, H.CYS_208   | N, H.LYS_221  | H, H.LYS_221   | 2.90 | 2.08 | 14.73 |
| 4NZR.PDB | OE2, L.GLU_123 | NZ, H.LYS_221 | HZ2, H.LYS_221 | 2.99 | 2.10 | 2.00  |
| 4NZR.PDB | OE2, H.GLU_226 | NE, H.ARG_222 | HE, H.ARG_222  | 2.65 | 1.93 | 27.41 |
| 4NZR.PDB | O, H.TYR_206   | N, H.VAL_225  | H, H.VAL_225   | 2.90 | 2.05 | 6.78  |
| 4NZR.PDB | OG, L.SER_26   | N, L.VAL_3    | H, L.VAL_3     | 2.89 | 2.07 | 14.71 |
| 4NZR.PDB | O, L.ARG_24    | N, L.THR_5    | H, L.THR_5     | 2.79 | 1.95 | 10.02 |
| 4NZR.PDB | OE1, L.GLN_100 | N, L.GLN_6    | H, L.GLN_6     | 2.88 | 2.02 | 5.19  |
| 4NZR.PDB | O, L.TYR_86    | NE2, L.GLN_6  | HE22, L.GLN_6  | 2.88 | 2.05 | 12.91 |
| 4NZR.PDB | O, L.LYS_103   | N, L.LEU_11   | H, L.LEU_11    | 2.85 | 2.09 | 23.33 |
| 4NZR.PDB | OE2, L.GLU_17  | N, L.SER_14   | H, L.SER_14    | 2.82 | 1.98 | 9.91  |
| 4NZR.PDB | O, M.PRO_119   | OG, L.SER_14  | HG, L.SER_14   | 2.76 | 2.00 | 18.37 |
| 4NZR.PDB | O, L.MET_78    | N, L.GLY_16   | H, L.GLY_16    | 2.77 | 1.93 | 12.23 |
| 4NZR.PDB | OG1, M.THR_110 | N, L.THR_18   | H, L.THR_18    | 2.82 | 2.00 | 15.23 |
| 4NZR.PDB | O, L.ILE_75    | N, L.VAL_19   | H, L.VAL_19    | 2.83 | 2.05 | 21.72 |
| 4NZR.PDB | O, L.LEU_73    | N, L.LEU_21   | H, L.LEU_21    | 2.87 | 2.02 | 8.50  |
| 4NZR.PDB | O, L.SER_7     | N, L.SER_22   | H, L.SER_22    | 2.89 | 2.05 | 9.28  |
| 4NZR.PDB | O, L.PHE_71    | N, L.CYS_23   | H, L.CYS_23    | 2.92 | 2.12 | 16.99 |
| 4NZR.PDB | O, L.THR_5     | N, L.ARG_24   | H, L.ARG_24    | 2.83 | 2.01 | 13.32 |
| 4NZR.PDB | O, L.THR_69    | N, L.ALA_25   | H, L.ALA_25    | 2.94 | 2.14 | 18.04 |
| 4NZR.PDB | O, L.GLY_68    | N, L.ILE_29   | H, L.ILE_29    | 2.91 | 2.06 | 8.12  |
| 4NZR.PDB | OD1, L.ASN_28  | N, L.ASN_30   | H, L.ASN_30    | 2.80 | 1.97 | 11.83 |
| 4NZR.PDB | OE1, L.GLU_92  | ND2, L.ASN_30 | HD22, L.ASN_30 | 2.94 | 2.10 | 10.05 |
| 4NZR.PDB | OH, L.TYR_52   | NZ, L.LYS_31  | HZ1, L.LYS_31  | 2.57 | 1.77 | 21.34 |
| 4NZR.PDB | O, L.ILE_29    | N, L.ASN_32   | H, L.ASN_32    | 2.86 | 2.02 | 10.39 |
| 4NZR.PDB | O, L.GLN_89    | N, L.ALA_34   | H, L.ALA_34    | 2.87 | 2.04 | 11.97 |
| 4NZR.PDB | O, L.ILE_48    | N, L.TRP_35   | H, L.TRP_35    | 2.93 | 2.13 | 19.22 |
| 4NZR.PDB | O, L.TYR_87    | N, L.TYR_36   | H, L.TYR_36    | 2.69 | 1.88 | 17.31 |
| 4NZR.PDB | O, L.ARG_45    | N, L.GLN_37   | H, L.GLN_37    | 2.90 | 2.09 | 17.34 |
| 4NZR.PDB | OH, L.TYR_86   | NE2, L.GLN_37 | HE21, L.GLN_37 | 2.96 | 2.11 | 9.58  |
| 4NZR.PDB | O, L.VAL_85    | N, L.TYR_38   | H, L.TYR_38    | 2.76 | 1.97 | 19.78 |
| 4NZR.PDB | O, L.GLN_37    | N, L.ARG_45   | H, L.ARG_45    | 2.86 | 2.09 | 21.39 |
| 4NZR.PDB | O, L.TRP_35    | N, L.VAL_47   | H, L.VAL_47    | 2.91 | 2.05 | 2.37  |
| 4NZR.PDB | O, L.SER_53    | N, L.PHE_49   | H, L.PHE_49    | 2.86 | 2.07 | 19.76 |
| 4NZR.PDB | OH, L.TYR_91   | N, L.GLU_50   | H, L.GLU_50    | 2.96 | 2.25 | 29.60 |
| 4NZR.PDB | O, L.LEU_33    | N, L.THR_51   | H, L.THR_51    | 2.80 | 1.96 | 10.12 |
| 4NZR.PDB | O, L.LYS_31    | OG1, L.THR_51 | HG1, L.THR_51  | 2.80 | 2.02 | 13.30 |
| 4NZR.PDB | O, L.GLU_50    | N, L.TYR_52   | H, L.TYR_52    | 2.75 | 2.01 | 25.67 |
| 4NZR.PDB | O, L.PHE_49    | N, L.SER_53   | H, L.SER_53    | 2.90 | 2.12 | 21.06 |
| 4NZR.PDB | OH, M.TYR_444  | N, L.LYS_54   | H, L.LYS_54    | 2.91 | 2.06 | 4.85  |
| 4NZR.PDB | OD2, L.ASP_82  | NH1, L.ARG_61 | HH12, L.ARG_61 | 2.70 | 1.89 | 15.31 |
| 4NZR.PDB | O, M.ALA_391   | NH2, L.ARG_61 | HH21, L.ARG_61 | 2.90 | 2.11 | 19.46 |
| 4NZR.PDB | OD1, L.ASP_82  | NH2, L.ARG_61 | HH22, L.ARG_61 | 2.85 | 2.01 | 9.02  |
| 4NZR.PDB | O, L.THR_74    | N, L.VAL_63   | H, L.VAL_63    | 2.91 | 2.08 | 12.21 |
| 4NZR.PDB | O, L.THR_72    | N, L.SER_65   | H, L.SER_65    | 2.90 | 2.08 | 15.21 |
| 4NZR.PDB | O, L.GLU_70    | N, L.SER_67   | H, L.SER_67    | 2.94 | 2.16 | 20.85 |
| 4NZR.PDB | O, L.CYS_23    | N, L.PHE_71   | H, L.PHE_71    | 2.88 | 2.14 | 25.90 |
| 4NZR.PDB | O, L.SER_65    | N, L.THR_72   | H, L.THR_72    | 2.94 | 2.11 | 12.62 |
| 4NZR.PDB | O, L.LEU_21    | N, L.LEU_73   | H, L.LEU_73    | 2.84 | 2.03 | 16.61 |
| 4NZR.PDB | O, L.VAL_63    | N, L.THR_74   | H, L.THR_74    | 2.76 | 1.90 | 4.94  |
| 4NZR.PDB | O, L.VAL_19    | N, L.ILE_75   | H, L.ILE_75    | 2.77 | 1.98 | 19.82 |
| 4NZR.PDB | O, L.ARG_61    | ND2, L.ASN_76 | HD22, L.ASN_76 | 2.96 | 2.12 | 12.10 |
| 4NZR.PDB | OG, M.SER_106  | N, L.ASN_77   | H, L.ASN_77    | 2.86 | 2.01 | 5.30  |
| 4NZR.PDB | O, L.GLU_17    | N, L.MET_78   | H, L.MET_78    | 2.92 | 2.06 | 6.39  |
| 4NZR.PDB | OD2, L.ASP_82  | N, L.GLN_79   | H, L.GLN_79    | 2.85 | 2.01 | 8.63  |
| 4NZR.PDB | O, L.ASN_77    | NE2, L.GLN_79 | HE21, L.GLN_79 | 2.79 | 1.94 | 9.45  |
| 4NZR.PDB | O, L.GLN_79    | N, L.ASP_82   | H, L.ASP_82    | 2.93 | 2.08 | 8.91  |

|          |                |                |                 |      |      |       |
|----------|----------------|----------------|-----------------|------|------|-------|
| 4NZR.PDB | O, L_TYR_38    | N, L_VAL_85    | H, L_VAL_85     | 2.95 | 2.10 | 5.38  |
| 4NZR.PDB | O, L_THR_102   | N, L_TYR_86    | H, L_TYR_86     | 2.91 | 2.07 | 11.72 |
| 4NZR.PDB | O, L_TYR_36    | N, L_TYR_87    | H, L_TYR_87     | 2.86 | 2.04 | 15.92 |
| 4NZR.PDB | O, L_THR_97    | N, L_GLN_90    | H, L_GLN_90     | 2.96 | 2.18 | 20.60 |
| 4NZR.PDB | O, H_ALA_100G  | NE, L_ARG_96   | HE, L_ARG_96    | 2.83 | 2.08 | 23.79 |
| 4NZR.PDB | O, L_GLU_93    | NH1, L_ARG_96  | HH11, L_ARG_96  | 2.92 | 2.18 | 26.23 |
| 4NZR.PDB | O, H_ALA_100G  | NH2, L_ARG_96  | HH21, L_ARG_96  | 2.80 | 2.05 | 24.03 |
| 4NZR.PDB | O, L_ILE_2     | OG1, L_THR_97  | HG1, L_THR_97   | 2.76 | 1.95 | 5.21  |
| 4NZR.PDB | O, L_CYS_88    | N, L_GLY_99    | H, L_GLY_99     | 2.96 | 2.18 | 21.78 |
| 4NZR.PDB | O, L_GLN_6     | NE2, L_GLN_100 | HE22, L_GLN_100 | 2.65 | 1.87 | 20.23 |
| 4NZR.PDB | OE1, L_GLN_6   | N, L_GLY_101   | H, L_GLY_101    | 2.96 | 2.20 | 24.19 |
| 4NZR.PDB | O, L_TYR_86    | N, L_THR_102   | H, L_THR_102    | 2.92 | 2.12 | 16.99 |
| 4NZR.PDB | O, L_PRO_8     | OG1, L_THR_102 | HG1, L_THR_102  | 2.71 | 2.03 | 28.62 |
| 4NZR.PDB | O, L ASP_9     | N, L_LYS_103   | H, L_LYS_103    | 2.97 | 2.17 | 18.66 |
| 4NZR.PDB | O, L_ALA_84    | N, L_VAL_104   | H, L_VAL_104    | 2.92 | 2.09 | 11.20 |
| 4NZR.PDB | O, L_LEU_11    | N, L ASP_105   | H, L ASP_105    | 2.92 | 2.08 | 10.70 |
| 4NZR.PDB | O, L_VAL_13    | N, L_LYS_107   | H, L_LYS_107    | 2.87 | 2.06 | 16.88 |
| 4NZR.PDB | O, L_THR_109   | NE, L_ARG_108  | HE, L_ARG_108   | 2.88 | 2.03 | 6.39  |
| 4NZR.PDB | O, L ASP_170   | NH1, L_ARG_108 | HH11, L_ARG_108 | 2.85 | 2.01 | 10.32 |
| 4NZR.PDB | O, M ASN_177   | NH2, L_ARG_108 | HH22, L_ARG_108 | 2.82 | 2.05 | 22.21 |
| 4NZR.PDB | O, M_GLY_178   | N, L_THR_109   | H, L_THR_109    | 2.92 | 2.07 | 5.99  |
| 4NZR.PDB | O, M_GLY_178   | OG1, L_THR_109 | HG1, L_THR_109  | 2.88 | 2.17 | 26.23 |
| 4NZR.PDB | O, M ASP_117   | N, L_VAL_110   | H, L_VAL_110    | 2.96 | 2.14 | 15.09 |
| 4NZR.PDB | O, L_TYR_140   | N, L_ALA_111   | H, L_ALA_111    | 2.82 | 1.99 | 12.32 |
| 4NZR.PDB | O, L_LEU_135   | N, L_PHE_116   | H, L_PHE_116    | 2.94 | 2.12 | 15.43 |
| 4NZR.PDB | O, L_VAL_133   | N, L_PHE_118   | H, L_PHE_118    | 2.81 | 1.99 | 14.02 |
| 4NZR.PDB | OG, L_SER_121  | N, L_GLN_124   | H, L_GLN_124    | 2.99 | 2.17 | 16.25 |
| 4NZR.PDB | OG, L_SER_131  | NE2, L_GLN_124 | HE22, L_GLN_124 | 2.90 | 2.04 | 4.21  |
| 4NZR.PDB | O, L_GLN_124   | N, L_SER_127   | H, L_SER_127    | 2.85 | 2.12 | 26.70 |
| 4NZR.PDB | O, L_LEU_125   | N, L_GLY_128   | H, L_GLY_128    | 2.99 | 2.18 | 17.68 |
| 4NZR.PDB | O, L_LEU_181   | N, L_ALA_130   | H, L_ALA_130    | 2.81 | 2.02 | 18.51 |
| 4NZR.PDB | OE1, L_GLN_124 | N, L_SER_131   | H, L_SER_131    | 2.91 | 2.10 | 17.17 |
| 4NZR.PDB | O, L_LEU_179   | N, L_VAL_132   | H, L_VAL_132    | 2.79 | 1.95 | 10.51 |
| 4NZR.PDB | O, L_SER_177   | N, L_CYS_134   | H, L_CYS_134    | 2.78 | 1.94 | 10.51 |
| 4NZR.PDB | O, L_PHE_116   | N, L_LEU_135   | H, L_LEU_135    | 2.78 | 1.93 | 7.68  |
| 4NZR.PDB | O, L_LEU_175   | N, L_LEU_136   | H, L_LEU_136    | 2.79 | 1.93 | 3.71  |
| 4NZR.PDB | O, L_SER_114   | N, L ASN_137   | H, L ASN_137    | 2.76 | 1.93 | 13.32 |
| 4NZR.PDB | OG, L_SER_174  | N, L ASN_138   | H, L ASN_138    | 2.97 | 2.12 | 9.18  |
| 4NZR.PDB | O, L_TYR_173   | N, L_PHE_139   | H, L_PHE_139    | 2.80 | 1.98 | 13.87 |
| 4NZR.PDB | O, L_ALA_111   | N, L_TYR_140   | H, L_TYR_140    | 2.94 | 2.14 | 17.85 |
| 4NZR.PDB | O, L_GLU_195   | N, L_GLN_147   | H, L_GLN_147    | 2.85 | 2.04 | 15.79 |
| 4NZR.PDB | OG, L_SER_177  | NE1, L_TRP_148 | HE1, L_TRP_148  | 2.91 | 2.07 | 10.59 |
| 4NZR.PDB | O, L_ALA_193   | N, L_LYS_149   | H, L_LYS_149    | 2.88 | 2.05 | 12.05 |
| 4NZR.PDB | O, L_VAL_191   | N, L ASP_151   | H, L ASP_151    | 2.81 | 1.98 | 13.22 |
| 4NZR.PDB | O, L_VAL_150   | N, L_ALA_153   | H, L_ALA_153    | 2.92 | 2.07 | 7.66  |
| 4NZR.PDB | O, L_TRP_148   | N, L_GLN_155   | H, L_GLN_155    | 2.84 | 2.00 | 9.48  |
| 4NZR.PDB | O, L_ALA_153   | NE2, L_GLN_155 | HE21, L_GLN_155 | 2.97 | 2.11 | 2.73  |
| 4NZR.PDB | OE1, L_GLN_155 | ND2, L ASN_158 | HD21, L ASN_158 | 2.96 | 2.11 | 9.14  |
| 4NZR.PDB | O, H_LEU_178   | NE2, L_GLN_160 | HE22, L_GLN_160 | 2.86 | 2.01 | 7.83  |
| 4NZR.PDB | O, L_SER_176   | N, L_SER_162   | H, L_SER_162    | 2.96 | 2.18 | 20.83 |
| 4NZR.PDB | O, H_PRO_175   | OG, L_SER_162  | HG, L_SER_162   | 2.79 | 1.98 | 7.14  |
| 4NZR.PDB | O, L_SER_174   | N, L_THR_164   | H, L_THR_164    | 2.96 | 2.15 | 15.87 |
| 4NZR.PDB | O, L_SER_171   | NE2, L_GLN_166 | HE21, L_GLN_166 | 2.93 | 2.09 | 7.84  |
| 4NZR.PDB | O, L_ILE_106   | NE2, L_GLN_166 | HE22, L_GLN_166 | 2.71 | 1.88 | 13.12 |
| 4NZR.PDB | O, L_THR_172   | N, L ASP_167   | H, L ASP_167    | 2.77 | 1.92 | 9.43  |
| 4NZR.PDB | OD1, L ASP_167 | N, L_LYS_169   | H, L_LYS_169    | 2.86 | 2.01 | 8.70  |
| 4NZR.PDB | O, L ASP_167   | N, L_SER_171   | H, L_SER_171    | 2.75 | 2.00 | 24.50 |
| 4NZR.PDB | OD1, L ASP_170 | OG1, L_THR_172 | HG1, L_THR_172  | 2.70 | 1.89 | 6.41  |

|          |                |                |                 |      |      |       |
|----------|----------------|----------------|-----------------|------|------|-------|
| 4NZR.PDB | O, L_PHE_139   | N, L_TYR_173   | H, L_TYR_173    | 2.82 | 1.99 | 11.40 |
| 4NZR.PDB | OG1, L_THR_164 | N, L_SER_174   | H, L_SER_174    | 2.94 | 2.15 | 19.12 |
| 4NZR.PDB | O, L_LEU_136   | N, L_LEU_175   | H, L_LEU_175    | 2.89 | 2.12 | 21.67 |
| 4NZR.PDB | O, L_SER_162   | N, L_SER_176   | H, L_SER_176    | 2.97 | 2.14 | 13.36 |
| 4NZR.PDB | OG, H_SER_188  | OG, L_SER_176  | HG, L_SER_176   | 2.88 | 2.09 | 13.66 |
| 4NZR.PDB | O, L_CYS_134   | N, L_SER_177   | H, L_SER_177    | 2.86 | 2.02 | 10.25 |
| 4NZR.PDB | O, L_GLN_160   | N, L_THR_178   | H, L_THR_178    | 2.83 | 2.00 | 11.32 |
| 4NZR.PDB | O, L_VAL_132   | N, L_LEU_179   | H, L_LEU_179    | 2.78 | 1.96 | 14.30 |
| 4NZR.PDB | O, L_ASN_158   | N, L_THR_180   | H, L_THR_180    | 2.97 | 2.13 | 10.64 |
| 4NZR.PDB | O, L_ALA_130   | N, L_LEU_181   | H, L_LEU_181    | 2.88 | 2.04 | 10.13 |
| 4NZR.PDB | O, L_GLY_128   | N, L_LYS_183   | H, L_LYS_183    | 2.93 | 2.11 | 14.95 |
| 4NZR.PDB | O, L_SER_182   | N, L_TYR_186   | H, L_TYR_186    | 2.96 | 2.11 | 6.64  |
| 4NZR.PDB | O, L_LYS_183   | N, L_GLU_187   | H, L_GLU_187    | 3.00 | 2.19 | 17.62 |
| 4NZR.PDB | O, L_ASP_185   | N, L_LYS_188   | H, L_LYS_188    | 2.95 | 2.13 | 13.06 |
| 4NZR.PDB | OD2, L_ASP_151 | ND1, L_HIS_189 | HD1, L_HIS_189  | 2.85 | 2.11 | 26.53 |
| 4NZR.PDB | OD1, L_ASP_151 | N, L_VAL_191   | H, L_VAL_191    | 2.94 | 2.08 | 3.42  |
| 4NZR.PDB | O, L_PHE_209   | N, L_TYR_192   | H, L_TYR_192    | 2.93 | 2.08 | 7.61  |
| 4NZR.PDB | O, L_LYS_149   | N, L_ALA_193   | H, L_ALA_193    | 2.88 | 2.09 | 18.86 |
| 4NZR.PDB | O, L_LYS_207   | N, L_CYS_194   | H, L_CYS_194    | 2.85 | 2.01 | 12.39 |
| 4NZR.PDB | O, L_VAL_205   | N, L_VAL_196   | H, L_VAL_196    | 2.71 | 1.89 | 14.56 |
| 4NZR.PDB | O, L_LYS_145   | N, L_THR_197   | H, L_THR_197    | 2.92 | 2.09 | 11.99 |
| 4NZR.PDB | O, L_PRO_141   | NE2, L_HIS_198 | HE2, L_HIS_198  | 2.90 | 2.07 | 12.26 |
| 4NZR.PDB | ND1, L_HIS_198 | N, L_GLY_200   | H, L_GLY_200    | 2.94 | 2.09 | 6.73  |
| 4NZR.PDB | O, L_HIS_198   | N, L_LEU_201   | H, L_LEU_201    | 2.89 | 2.04 | 8.10  |
| 4NZR.PDB | O, L_VAL_196   | N, L_VAL_205   | H, L_VAL_205    | 2.92 | 2.14 | 20.36 |
| 4NZR.PDB | O, L_CYS_194   | N, L_LYS_207   | H, L_LYS_207    | 2.92 | 2.14 | 21.11 |
| 4NZR.PDB | O, L_TYR_192   | N, L_PHE_209   | H, L_PHE_209    | 2.96 | 2.19 | 21.79 |
| 4NZR.PDB | O, L_LYS_190   | N, L_ARG_211   | H, L_ARG_211    | 2.70 | 1.87 | 12.15 |
| 4NZR.PDB | O, L_HIS_189   | NE, L_ARG_211  | HE, L_ARG_211   | 2.80 | 2.03 | 21.60 |
| 4NZR.PDB | O, M_GLU_124   | N, M_TYR_82    | H, M_TYR_82     | 2.96 | 2.13 | 13.02 |
| 4NZR.PDB | O, M_SER_126   | N, M_SER_84    | H, M_SER_84     | 2.98 | 2.15 | 13.57 |
| 4NZR.PDB | O, M_LEU_128   | N, M_ILE_86    | H, M_ILE_86     | 2.86 | 2.05 | 17.30 |
| 4NZR.PDB | O, M_LYS_130   | N, M_LEU_88    | H, M_LEU_88     | 2.84 | 1.99 | 7.85  |
| 4NZR.PDB | OD1, M_ASP_87  | N, M_SER_89    | H, M_SER_89     | 2.86 | 2.02 | 8.48  |
| 4NZR.PDB | OD1, M_ASN_378 | NH1, M_ARG_95  | HH12, M_ARG_95  | 2.71 | 1.91 | 18.53 |
| 4NZR.PDB | O, M_PHE_94    | N, M_PHE_98    | H, M_PHE_98     | 2.87 | 2.04 | 11.19 |
| 4NZR.PDB | O, M_ARG_95    | N, M_ARG_99    | H, M_ARG_99     | 2.91 | 2.10 | 16.79 |
| 4NZR.PDB | O, M_PHE_98    | N, M_ALA_102   | H, M_ALA_102    | 2.82 | 1.99 | 13.59 |
| 4NZR.PDB | O, M_ARG_99    | N, M_ASN_103   | H, M_ASN_103    | 2.77 | 1.95 | 14.29 |
| 4NZR.PDB | O, M_ALA_102   | N, M_SER_106   | H, M_SER_106    | 2.84 | 2.02 | 14.09 |
| 4NZR.PDB | O, M_ASN_103   | N, M_GLU_107   | H, M_GLU_107    | 2.90 | 2.10 | 17.39 |
| 4NZR.PDB | O, M_GLU_104   | N, M_ALA_108   | H, M_ALA_108    | 2.97 | 2.17 | 17.15 |
| 4NZR.PDB | O, M_LEU_105   | N, M_ILE_109   | H, M_ILE_109    | 2.94 | 2.17 | 22.50 |
| 4NZR.PDB | O, M_SER_106   | N, M_THR_110   | H, M_THR_110    | 2.95 | 2.12 | 14.11 |
| 4NZR.PDB | O, M_SER_106   | OG1, M_THR_110 | HG1, M_THR_110  | 2.74 | 1.95 | 13.19 |
| 4NZR.PDB | O, M_GLU_107   | N, M_ASN_111   | H, M_ASN_111    | 2.94 | 2.16 | 21.46 |
| 4NZR.PDB | O, M_SER_112   | NZ, M_LYS_114  | HZ1, M_LYS_114  | 2.69 | 1.82 | 10.18 |
| 4NZR.PDB | O, M_VAL_120   | N, M_GLY_115   | H, M_GLY_115    | 2.93 | 2.17 | 24.30 |
| 4NZR.PDB | O, M_SER_156   | NE, M_ARG_118  | HE, M_ARG_118   | 3.00 | 2.25 | 25.81 |
| 4NZR.PDB | O, M_SER_156   | NH2, M_ARG_118 | HH21, M_ARG_118 | 2.85 | 2.07 | 20.58 |
| 4NZR.PDB | O, M_ARG_118   | N, M_VAL_120   | H, M_VAL_120    | 2.76 | 2.02 | 26.00 |
| 4NZR.PDB | O, M_TYR_144   | N, M_ILE_125   | H, M_ILE_125    | 2.88 | 2.09 | 19.38 |
| 4NZR.PDB | O, M_TYR_82    | N, M_SER_126   | H, M_SER_126    | 2.89 | 2.07 | 14.81 |
| 4NZR.PDB | OE2, M_GLU_124 | OG, M_SER_126  | HG, M_SER_126   | 2.49 | 1.81 | 27.79 |
| 4NZR.PDB | O, M_ALA_142   | N, M_GLY_127   | H, M_GLY_127    | 2.88 | 2.07 | 15.98 |
| 4NZR.PDB | O, M_SER_84    | N, M_LEU_128   | H, M_LEU_128    | 2.81 | 1.97 | 11.35 |
| 4NZR.PDB | O, M_PHE_140   | N, M_ILE_129   | H, M_ILE_129    | 2.77 | 1.91 | 2.60  |
| 4NZR.PDB | O, M_ILE_86    | N, M_LYS_130   | H, M_LYS_130    | 2.86 | 2.00 | 2.42  |

|          |                |                |                 |      |      |       |
|----------|----------------|----------------|-----------------|------|------|-------|
| 4NZR.PDB | O, M_THR_137   | OG1, M_THR_131 | HG1, M_THR_131  | 2.69 | 1.93 | 17.31 |
| 4NZR.PDB | O, M_TYR_379   | N, M_ILE_136   | H, M_ILE_136    | 2.91 | 2.08 | 13.78 |
| 4NZR.PDB | O, M_ILE_129   | N, M_PHE_140   | H, M_PHE_140    | 2.99 | 2.21 | 21.20 |
| 4NZR.PDB | OE2, M_GLU_124 | NZ, M_LYS_141  | HZ2, M_LYS_141  | 2.96 | 2.15 | 21.57 |
| 4NZR.PDB | O, M_GLY_127   | N, M_ALA_142   | H, M_ALA_142    | 2.80 | 1.95 | 6.73  |
| 4NZR.PDB | O, M_GLN_159   | N, M_GLY_143   | H, M_GLY_143    | 2.82 | 2.00 | 13.14 |
| 4NZR.PDB | O, M_ILE_125   | N, M_TYR_144   | H, M_TYR_144    | 2.80 | 2.04 | 23.22 |
| 4NZR.PDB | O, M_LEU_155   | N, M_HIS_147   | H, M_HIS_147    | 2.85 | 2.01 | 10.85 |
| 4NZR.PDB | O, M_SER_153   | N, M_ALA_149   | H, M_ALA_149    | 2.76 | 1.91 | 5.90  |
| 4NZR.PDB | O, M_ALA_149   | N, M_GLY_152   | H, M_GLY_152    | 2.79 | 1.94 | 8.29  |
| 4NZR.PDB | O, M_LEU_180   | N, M_TYR_158   | H, M_TYR_158    | 2.83 | 1.99 | 9.68  |
| 4NZR.PDB | O, M_GLY_143   | N, M_GLN_159   | H, M_GLN_159    | 2.87 | 2.04 | 13.27 |
| 4NZR.PDB | O, M_PHE_382   | N, M_PHE_164   | H, M_PHE_164    | 2.85 | 2.03 | 14.98 |
| 4NZR.PDB | O, M_TYR_338   | ND2, M_ASN_165 | HD21, M_ASN_165 | 2.81 | 2.03 | 20.49 |
| 4NZR.PDB | O, M_ASN_183   | ND2, M_ASN_165 | HD22, M_ASN_165 | 2.99 | 2.16 | 11.12 |
| 4NZR.PDB | OD1, M_ASN_335 | ND2, M_ASN_166 | HD22, M_ASN_166 | 2.95 | 2.13 | 14.03 |
| 4NZR.PDB | OD1, M_ASN_183 | NE, M_ARG_167  | HE, M_ARG_167   | 2.87 | 2.09 | 20.21 |
| 4NZR.PDB | OD1, M_ASP_339 | NH2, M_ARG_167 | HH22, M_ARG_167 | 2.84 | 2.05 | 19.40 |
| 4NZR.PDB | OE2, M_GLU_311 | N, M_LEU_169   | H, M_LEU_169    | 2.70 | 1.87 | 11.59 |
| 4NZR.PDB | OE2, M_GLU_311 | N, M_MET_170   | H, M_MET_170    | 2.91 | 2.07 | 11.26 |
| 4NZR.PDB | O, M_SER_198   | N, M_LEU_173   | H, M_LEU_173    | 2.95 | 2.10 | 5.86  |
| 4NZR.PDB | OD1, M_ASN_177 | N, M_THR_179   | H, M_THR_179    | 2.81 | 1.95 | 3.90  |
| 4NZR.PDB | OD1, M_ASN_177 | OG1, M_THR_179 | HG1, M_THR_179  | 2.75 | 1.94 | 6.81  |
| 4NZR.PDB | O, M_TYR_158   | N, M_ALA_182   | H, M_ALA_182    | 2.88 | 2.03 | 6.05  |
| 4NZR.PDB | OE1, M_GLN_174 | N, M_ASN_183   | H, M_ASN_183    | 2.83 | 2.00 | 12.26 |
| 4NZR.PDB | O, M_ASN_165   | ND2, M_ASN_183 | HD21, M_ASN_183 | 2.83 | 2.00 | 11.27 |
| 4NZR.PDB | O, M_TYR_187   | N, M_PHE_191   | H, M_PHE_191    | 2.90 | 2.07 | 12.39 |
| 4NZR.PDB | O, M_ASP_189   | N, M_SER_196   | H, M_SER_196    | 2.84 | 2.04 | 18.29 |
| 4NZR.PDB | O, M_PHE_197   | N, M_TRP_200   | H, M_TRP_200    | 2.82 | 1.97 | 10.31 |
| 4NZR.PDB | O, M_PRO_171   | NE1, M_TRP_200 | HE1, M_TRP_200  | 2.83 | 1.99 | 8.99  |
| 4NZR.PDB | O, M_PHE_222   | N, M_SER_201   | H, M_SER_201    | 2.78 | 1.94 | 12.33 |
| 4NZR.PDB | O, M_THR_203   | ND2, M_ASN_202 | HD22, M_ASN_202 | 2.86 | 2.06 | 17.05 |
| 4NZR.PDB | O, M_THR_220   | N, M_THR_203   | H, M_THR_203    | 2.86 | 2.05 | 16.26 |
| 4NZR.PDB | OD1, M_ASP_217 | OG1, M_THR_207 | HG1, M_THR_207  | 2.72 | 1.90 | 1.28  |
| 4NZR.PDB | O, M_TYR_216   | N, M_VAL_208   | H, M_VAL_208    | 2.71 | 1.87 | 8.33  |
| 4NZR.PDB | O, M_LEU_214   | N, M_THR_210   | H, M_THR_210    | 2.96 | 2.14 | 13.71 |
| 4NZR.PDB | O, M_ALA_245   | N, M_ASP_217   | H, M_ASP_217    | 2.93 | 2.09 | 9.77  |
| 4NZR.PDB | O, M_THR_206   | N, M_LYS_218   | H, M_LYS_218    | 2.92 | 2.13 | 20.21 |
| 4NZR.PDB | OG1, M_THR_203 | N, M_THR_220   | H, M_THR_220    | 2.85 | 2.05 | 18.11 |
| 4NZR.PDB | O, M_VAL_241   | N, M_TYR_221   | H, M_TYR_221    | 2.93 | 2.11 | 14.30 |
| 4NZR.PDB | O, M_SER_201   | N, M_PHE_222   | H, M_PHE_222    | 2.88 | 2.09 | 19.39 |
| 4NZR.PDB | O, M_ALA_224   | N, M_SER_227   | H, M_SER_227    | 2.86 | 2.03 | 13.10 |
| 4NZR.PDB | O, M_PRO_228   | N, M_SER_232   | H, M_SER_232    | 2.88 | 2.10 | 20.88 |
| 4NZR.PDB | O, M_LEU_229   | N, M_TYR_233   | H, M_TYR_233    | 2.92 | 2.16 | 23.55 |
| 4NZR.PDB | O, M_TYR_221   | N, M_VAL_241   | H, M_VAL_241    | 2.87 | 2.02 | 7.27  |
| 4NZR.PDB | OE1, M_GLU_261 | NZ, M_LYS_242  | HZ1, M_LYS_242  | 2.96 | 2.22 | 28.06 |
| 4NZR.PDB | O, M_GLU_261   | NZ, M_LYS_242  | HZ3, M_LYS_242  | 2.55 | 1.69 | 11.67 |
| 4NZR.PDB | O, M_TRP_219   | N, M_THR_243   | H, M_THR_243    | 2.79 | 1.95 | 10.59 |
| 4NZR.PDB | O, M_ASP_217   | N, M_ALA_245   | H, M_ALA_245    | 2.89 | 2.07 | 14.41 |
| 4NZR.PDB | O, M_ILE_267   | N, M_ILE_246   | H, M_ILE_246    | 2.96 | 2.14 | 14.76 |
| 4NZR.PDB | O, M_ARG_269   | N, M_ALA_248   | H, M_ALA_248    | 2.78 | 1.96 | 15.32 |
| 4NZR.PDB | OD1, M_ASP_247 | N, M_LYS_249   | H, M_LYS_249    | 2.95 | 2.10 | 5.78  |
| 4NZR.PDB | OD1, M_ASP_250 | NZ, M_LYS_249  | HZ2, M_LYS_249  | 2.93 | 2.05 | 7.77  |
| 4NZR.PDB | O, M_ASP_247   | N, M_ASP_250   | H, M_ASP_250    | 2.94 | 2.10 | 10.81 |
| 4NZR.PDB | O, M_ASP_250   | N, M_LEU_254   | H, M_LEU_254    | 2.89 | 2.16 | 27.92 |
| 4NZR.PDB | NE2, M_GLN_282 | NZ, M_LYS_255  | HZ2, M_LYS_255  | 2.97 | 2.08 | 5.26  |
| 4NZR.PDB | O, M_LEU_254   | N, M_ILE_258   | H, M_ILE_258    | 2.84 | 1.99 | 9.84  |
| 4NZR.PDB | O, M_THR_257   | N, M_GLU_261   | H, M_GLU_261    | 2.89 | 2.08 | 16.34 |

|          |                |                |                 |      |      |       |
|----------|----------------|----------------|-----------------|------|------|-------|
| 4NZR.PDB | O, M.ILE.258   | N, M.LYS.262   | H, M.LYS.262    | 2.89 | 2.11 | 21.82 |
| 4NZR.PDB | O, M.LYS.289   | N, M.LEU.266   | H, M.LEU.266    | 2.92 | 2.10 | 13.96 |
| 4NZR.PDB | O, M.LEU.244   | N, M.ILE.267   | H, M.ILE.267    | 2.88 | 2.03 | 7.52  |
| 4NZR.PDB | O, M.SER.291   | N, M.ILE.268   | H, M.ILE.268    | 2.95 | 2.09 | 5.10  |
| 4NZR.PDB | O, M.ILE.246   | N, M.ARG.269   | H, M.ARG.269    | 2.83 | 1.98 | 9.70  |
| 4NZR.PDB | OD2, M.ASP.217 | NH1, M.ARG.269 | HH12, M.ARG.269 | 2.82 | 1.99 | 14.04 |
| 4NZR.PDB | O, M.GLN.193   | NH2, M.ARG.269 | HH21, M.ARG.269 | 2.90 | 2.20 | 29.55 |
| 4NZR.PDB | O, M.TYR.293   | N, M.LEU.271   | H, M.LEU.271    | 2.91 | 2.07 | 10.40 |
| 4NZR.PDB | O, M.GLY.275   | N, M.LEU.278   | H, M.LEU.278    | 2.93 | 2.08 | 6.63  |
| 4NZR.PDB | O, M.SER.276   | N, M.ASN.279   | H, M.ASN.279    | 2.87 | 2.04 | 13.20 |
| 4NZR.PDB | O, M.LEU.278   | N, M.LEU.281   | H, M.LEU.281    | 3.00 | 2.14 | 5.40  |
| 4NZR.PDB | O, M.THR.264   | N, M.LYS.288   | H, M.LYS.288    | 2.79 | 2.01 | 19.89 |
| 4NZR.PDB | OE2, M.GLU.313 | NZ, M.LYS.289  | HZ1, M.LYS.289  | 2.70 | 1.96 | 27.41 |
| 4NZR.PDB | OE1, M.GLU.311 | NZ, M.LYS.289  | HZ3, M.LYS.289  | 2.89 | 2.00 | 2.29  |
| 4NZR.PDB | O, M.GLU.313   | N, M.LEU.292   | H, M.LEU.292    | 2.92 | 2.08 | 9.41  |
| 4NZR.PDB | O, M.ILE.268   | N, M.TYR.293   | H, M.TYR.293    | 2.81 | 1.96 | 5.69  |
| 4NZR.PDB | O, M.GLY.273   | N, M.THR.297   | H, M.THR.297    | 2.74 | 1.93 | 16.92 |
| 4NZR.PDB | O, M.ASN.274   | N, M.ASN.300   | H, M.ASN.300    | 2.77 | 1.96 | 17.19 |
| 4NZR.PDB | O, M.LEU.330   | NE2, M.GLN.304 | HE21, M.GLN.304 | 2.93 | 2.09 | 8.97  |
| 4NZR.PDB | O, M.VAL.329   | N, M.PHE.306   | H, M.PHE.306    | 2.92 | 2.13 | 19.27 |
| 4NZR.PDB | O, M.LYS.288   | N, M.VAL.310   | H, M.VAL.310    | 2.73 | 1.91 | 14.16 |
| 4NZR.PDB | O, M.ASN.335   | N, M.LEU.312   | H, M.LEU.312    | 2.83 | 2.09 | 26.31 |
| 4NZR.PDB | O, M.LEU.292   | N, M.TYR.315   | H, M.TYR.315    | 2.81 | 2.05 | 23.22 |
| 4NZR.PDB | O, M.GLY.294   | N, M.THR.317   | H, M.THR.317    | 2.77 | 1.95 | 15.24 |
| 4NZR.PDB | O, M.VAL.299   | N, M.ASN.326   | H, M.ASN.326    | 2.99 | 2.14 | 6.61  |
| 4NZR.PDB | O, M.VAL.309   | OG1, M.THR.334 | HG1, M.THR.334  | 2.89 | 2.12 | 15.85 |
| 4NZR.PDB | O, M.VAL.310   | N, M.ASN.335   | H, M.ASN.335    | 2.95 | 2.14 | 16.98 |
| 4NZR.PDB | O, M.VAL.310   | ND2, M.ASN.335 | HD22, M.ASN.335 | 2.97 | 2.16 | 17.87 |
| 4NZR.PDB | OE2, M.GLU.383 | N, M.VAL.336   | H, M.VAL.336    | 2.87 | 2.03 | 8.95  |
| 4NZR.PDB | O, M.LEU.312   | N, M.ILE.337   | H, M.ILE.337    | 2.90 | 2.08 | 14.00 |
| 4NZR.PDB | OD1, M.ASN.165 | N, M.TYR.338   | H, M.TYR.338    | 2.85 | 2.02 | 11.20 |
| 4NZR.PDB | OG, M.SER.343  | N, M.ASP.339   | H, M.ASP.339    | 2.88 | 2.05 | 13.57 |
| 4NZR.PDB | OD1, M.ASN.184 | N, M.LEU.340   | H, M.LEU.340    | 2.86 | 2.02 | 9.90  |
| 4NZR.PDB | O, M.ASP.339   | N, M.SER.343   | H, M.SER.343    | 2.85 | 2.02 | 12.90 |
| 4NZR.PDB | O, M.ALA.320   | NZ, M.LYS.344  | HZ1, M.LYS.344  | 2.76 | 1.89 | 11.48 |
| 4NZR.PDB | O, M.SER.318   | NZ, M.LYS.344  | HZ3, M.LYS.344  | 2.90 | 2.04 | 12.02 |
| 4NZR.PDB | O, M.PHE.323   | N, M.THR.347   | H, M.THR.347    | 2.86 | 2.04 | 13.38 |
| 4NZR.PDB | O, M.PHE.325   | N, M.ASP.350   | H, M.ASP.350    | 2.77 | 1.92 | 5.83  |
| 4NZR.PDB | O, M.LEU.399   | N, M.LEU.351   | H, M.LEU.351    | 2.77 | 1.98 | 19.72 |
| 4NZR.PDB | OD1, M.ASP.350 | N, M.THR.352   | H, M.THR.352    | 2.94 | 2.11 | 11.48 |
| 4NZR.PDB | OD1, M.ASP.350 | OG1, M.THR.352 | HG1, M.THR.352  | 2.69 | 1.93 | 19.00 |
| 4NZR.PDB | O, M.LEU.351   | N, M.VAL.354   | H, M.VAL.354    | 2.99 | 2.17 | 14.74 |
| 4NZR.PDB | O, M.ALA.363   | N, M.ASN.358   | H, M.ASN.358    | 2.83 | 2.00 | 12.67 |
| 4NZR.PDB | O, M.LEU.356   | N, M.ASP.365   | H, M.ASP.365    | 2.81 | 1.96 | 8.63  |
| 4NZR.PDB | O, M.GLN.357   | NZ, M.LYS.368  | HZ2, M.LYS.368  | 2.90 | 2.01 | 4.14  |
| 4NZR.PDB | O, M.ALA.366   | N, M.LYS.370   | H, M.LYS.370    | 2.94 | 2.09 | 7.76  |
| 4NZR.PDB | OE1, M.GLU.420 | NZ, M.LYS.370  | HZ2, M.LYS.370  | 2.61 | 1.80 | 20.02 |
| 4NZR.PDB | O, M.ASN.367   | N, M.GLN.371   | H, M.GLN.371    | 2.96 | 2.16 | 18.23 |
| 4NZR.PDB | OD1, M.ASP.375 | NE2, M.GLN.371 | HE21, M.GLN.371 | 2.92 | 2.12 | 18.76 |
| 4NZR.PDB | O, M.LEU.369   | N, M.VAL.373   | H, M.VAL.373    | 2.99 | 2.14 | 9.69  |
| 4NZR.PDB | O, M.LYS.370   | N, M.GLY.374   | H, M.GLY.374    | 2.80 | 1.98 | 14.26 |
| 4NZR.PDB | O, M.GLN.371   | N, M.ASP.375   | H, M.ASP.375    | 2.91 | 2.15 | 24.37 |
| 4NZR.PDB | O, M.VAL.373   | N, M.ILE.376   | H, M.ILE.376    | 2.99 | 2.25 | 26.03 |
| 4NZR.PDB | O, M.VAL.373   | N, M.TYR.377   | H, M.TYR.377    | 2.78 | 1.92 | 4.41  |
| 4NZR.PDB | O, M.GLY.374   | N, M.ASN.378   | H, M.ASN.378    | 2.88 | 2.07 | 16.83 |
| 4NZR.PDB | O, M.GLY.374   | N, M.TYR.379   | H, M.TYR.379    | 2.99 | 2.17 | 15.14 |
| 4NZR.PDB | OE1, M.GLU.383 | NH1, M.ARG.380 | HH11, M.ARG.380 | 2.65 | 1.84 | 14.74 |
| 4NZR.PDB | O, M.THR.334   | NH1, M.ARG.380 | HH12, M.ARG.380 | 2.93 | 2.14 | 19.06 |



|          |                |                |                 |      |      |       |
|----------|----------------|----------------|-----------------|------|------|-------|
| 4NZR.PDB | O, M_GLU_162   | NH1, M_ARG_381 | HH12, M_ARG_381 | 2.93 | 2.20 | 26.71 |
| 4NZR.PDB | OE1, M_GLU_162 | NH2, M_ARG_381 | HH22, M_ARG_381 | 3.00 | 2.22 | 21.24 |
| 4NZR.PDB | OE1, L_GLU_81  | NE, M_ARG_384  | HE, M_ARG_384   | 2.93 | 2.09 | 10.37 |
| 4NZR.PDB | O, M_GLY_388   | NH1, M_ARG_384 | HH12, M_ARG_384 | 2.81 | 2.01 | 18.07 |
| 4NZR.PDB | O, M_LYS_344   | NE2, M_GLN_385 | HE22, M_GLN_385 | 2.71 | 1.92 | 19.06 |
| 4NZR.PDB | O, M_GLU_383   | N, M_PHE_386   | H, M_PHE_386    | 2.99 | 2.17 | 16.23 |
| 4NZR.PDB | O, M_ARG_384   | N, M_GLN_387   | H, M_GLN_387    | 2.98 | 2.13 | 8.94  |
| 4NZR.PDB | O, M_ARG_381   | NE2, M_GLN_387 | HE21, M_GLN_387 | 2.77 | 1.96 | 17.54 |
| 4NZR.PDB | O, M_GLU_162   | NE2, M_GLN_387 | HE22, M_GLN_387 | 2.83 | 2.04 | 18.31 |
| 4NZR.PDB | OE1, M_GLN_387 | N, M_GLY_392   | H, M_GLY_392    | 2.78 | 1.95 | 10.56 |
| 4NZR.PDB | O, M_PHE_390   | N, M_GLY_393   | H, M_GLY_393    | 2.93 | 2.13 | 18.34 |
| 4NZR.PDB | OD1, M_ASP_396 | NZ, M_LYS_397  | HZ1, M_LYS_397  | 2.90 | 2.03 | 10.85 |
| 4NZR.PDB | O, M_TYR_437   | N, M_TYR_398   | H, M_TYR_398    | 2.93 | 2.11 | 14.24 |
| 4NZR.PDB | O, M_ILE_349   | N, M_LEU_399   | H, M_LEU_399    | 2.84 | 2.00 | 10.68 |
| 4NZR.PDB | O, M_THR_435   | N, M_VAL_400   | H, M_VAL_400    | 2.89 | 2.06 | 12.03 |
| 4NZR.PDB | OD2, M_ASP_410 | ND2, M_ASN_402 | HD22, M_ASN_402 | 2.93 | 2.14 | 18.97 |
| 4NZR.PDB | OD2, M_ASP_410 | N, M_VAL_403   | H, M_VAL_403    | 2.81 | 2.04 | 21.61 |
| 4NZR.PDB | OD1, M_ASN_404 | N, M_ASN_406   | H, M_ASN_406    | 2.87 | 2.04 | 12.77 |
| 4NZR.PDB | O, M_LYS_407   | N, M_ASP_411   | H, M_ASP_411    | 2.97 | 2.15 | 15.64 |
| 4NZR.PDB | O, M_ASP_408   | N, M_ASP_412   | H, M_ASP_412    | 2.92 | 2.12 | 19.03 |
| 4NZR.PDB | O, M_SER_409   | N, M_LEU_413   | H, M_LEU_413    | 2.93 | 2.10 | 12.24 |
| 4NZR.PDB | O, M_ASP_410   | N, M_VAL_414   | H, M_VAL_414    | 2.89 | 2.06 | 12.64 |
| 4NZR.PDB | O, M_ASP_411   | N, M_TYR_415   | H, M_TYR_415    | 2.83 | 1.98 | 9.53  |
| 4NZR.PDB | O, M_ASP_412   | N, M_ARG_416   | H, M_ARG_416    | 2.86 | 2.01 | 9.04  |
| 4NZR.PDB | OE2, M_GLU_464 | NH1, M_ARG_416 | HH12, M_ARG_416 | 2.68 | 1.83 | 5.86  |
| 4NZR.PDB | OE1, M_GLU_464 | NH2, M_ARG_416 | HH22, M_ARG_416 | 2.88 | 2.03 | 6.77  |
| 4NZR.PDB | O, M_LEU_413   | N, M_SER_417   | H, M_SER_417    | 2.88 | 2.05 | 11.51 |
| 4NZR.PDB | O, M_VAL_414   | N, M_LEU_418   | H, M_LEU_418    | 2.92 | 2.09 | 12.46 |
| 4NZR.PDB | O, M_LEU_418   | N, M_LEU_421   | H, M_LEU_421    | 2.84 | 2.06 | 20.21 |
| 4NZR.PDB | O, M_LYS_419   | N, M_ASN_422   | H, M_ASN_422    | 2.91 | 2.11 | 18.90 |
| 4NZR.PDB | O, M_LEU_418   | N, M_LEU_423   | H, M_LEU_423    | 2.97 | 2.13 | 11.14 |
| 4NZR.PDB | O, M_ASN_440   | N, M_HIS_424   | H, M_HIS_424    | 2.82 | 2.03 | 19.83 |
| 4NZR.PDB | O, M_ARG_438   | N, M_GLU_426   | H, M_GLU_426    | 2.73 | 1.89 | 8.53  |
| 4NZR.PDB | O, M_TYR_436   | N, M_TYR_429   | H, M_TYR_429    | 2.86 | 2.01 | 8.90  |
| 4NZR.PDB | OD1, M_ASP_411 | NH1, M_ARG_430 | HH12, M_ARG_430 | 2.84 | 2.06 | 21.86 |
| 4NZR.PDB | O, M_ASN_434   | N, M_GLU_431   | H, M_GLU_431    | 2.87 | 2.02 | 8.65  |
| 4NZR.PDB | O, M_VAL_400   | N, M_THR_435   | H, M_THR_435    | 2.80 | 1.99 | 16.75 |
| 4NZR.PDB | OD1, M_ASN_402 | OG1, M_THR_435 | HG1, M_THR_435  | 2.74 | 1.98 | 18.44 |
| 4NZR.PDB | O, M_TYR_429   | N, M_TYR_436   | H, M_TYR_436    | 2.75 | 1.91 | 12.60 |
| 4NZR.PDB | O, M_TYR_398   | N, M_TYR_437   | H, M_TYR_437    | 2.80 | 1.95 | 5.61  |
| 4NZR.PDB | O, M_GLU_427   | N, M_ARG_438   | H, M_ARG_438    | 2.92 | 2.08 | 10.71 |
| 4NZR.PDB | OD2, M_ASP_396 | NE, M_ARG_438  | HE, M_ARG_438   | 2.86 | 2.00 | 5.29  |
| 4NZR.PDB | O, M_ASP_396   | N, M_VAL_439   | H, M_VAL_439    | 2.78 | 2.00 | 20.99 |
| 4NZR.PDB | O, M_HIS_424   | N, M_ASN_440   | H, M_ASN_440    | 2.91 | 2.07 | 11.96 |
| 4NZR.PDB | OE2, M_GLU_426 | ND2, M_ASN_440 | HD22, M_ASN_440 | 2.87 | 2.05 | 14.71 |
| 4NZR.PDB | OH, M_TYR_394  | N, M_GLU_441   | H, M_GLU_441    | 2.91 | 2.08 | 11.38 |
| 4NZR.PDB | OD1, M_ASN_440 | N, M_ASN_442   | H, M_ASN_442    | 2.86 | 2.01 | 10.00 |
| 4NZR.PDB | O, M_GLU_426   | N, M_TYR_450   | H, M_TYR_450    | 2.94 | 2.10 | 8.91  |
| 4NZR.PDB | OG, M_SER_448  | N, M_GLU_451   | H, M_GLU_451    | 3.00 | 2.15 | 7.42  |
| 4NZR.PDB | O, M_SER_448   | N, M_ASN_452   | H, M_ASN_452    | 2.99 | 2.16 | 12.61 |
| 4NZR.PDB | O, M_GLY_446   | ND2, M_ASN_452 | HD22, M_ASN_452 | 2.95 | 2.14 | 17.61 |
| 4NZR.PDB | O, M_ILE_449   | N, M_GLU_453   | H, M_GLU_453    | 2.90 | 2.04 | 6.17  |
| 4NZR.PDB | OD1, M_ASP_412 | NH1, M_ARG_454 | HH12, M_ARG_454 | 2.79 | 1.98 | 15.66 |
| 4NZR.PDB | O, M_GLU_451   | N, M_ALA_455   | H, M_ALA_455    | 2.80 | 1.96 | 11.85 |
| 4NZR.PDB | O, M_GLU_453   | NH1, M_ARG_457 | HH11, M_ARG_457 | 2.87 | 2.09 | 20.01 |
| 4NZR.PDB | OD1, H_ASP_31E | NH1, M_ARG_457 | HH12, M_ARG_457 | 2.96 | 2.12 | 11.27 |
| 4NZR.PDB | OD2, H_ASP_31E | NH2, M_ARG_457 | HH22, M_ARG_457 | 2.55 | 1.75 | 17.03 |
| 4NZR.PDB | O, M_ARG_454   | N, M_ASP_458   | H, M_ASP_458    | 2.91 | 2.20 | 29.30 |

|          |              |              |              |      |      |       |
|----------|--------------|--------------|--------------|------|------|-------|
| 4NZR.PDB | O, M_ASP_458 | N, M_GLN_462 | H, M_GLN_462 | 2.90 | 2.06 | 11.58 |
| 4NZR.PDB | O, M_SER_459 | N, M_ASN_463 | H, M_ASN_463 | 2.97 | 2.15 | 14.56 |
| 4NZR.PDB | O, M_GLU_460 | N, M_GLU_464 | H, M_GLU_464 | 2.94 | 2.12 | 14.76 |
| 4NZR.PDB | O, M_PHE_461 | N, M_ILE_465 | H, M_ILE_465 | 2.92 | 2.11 | 16.00 |
| 4NZR.PDB | O, M_ASN_463 | N, M_LYS_467 | H, M_LYS_467 | 2.98 | 2.13 | 6.16  |
| 4NZR.PDB | O, M_GLU_464 | N, M_ARG_468 | H, M_ARG_468 | 2.90 | 2.06 | 11.94 |

Table 1696: 4NZR-specific side chain and main chain hydrogen bonding analysis. In this table, a PDB file is specified with a four-letter PDB ID, except that the names of the PDB files corresponding to the single NMR structural model split from the NMR ensemble is specified with a four-letter PDB ID in addition to a hyphen followed by the single NMR structural model numeric ID, the residue naming scheme is **Chain ID\_residue name\_residue number**,  $\angle ADH$  represents the angle formed by acceptor (A), donor (D) and hydrogen (H) ( $\angle ADH$ ).

| PDB      | Acceptor (A)   | Donor (D)      | Hydrogen (H)    | D-A (Å) | H-A (Å) | $\angle ADH(^{\circ})$ |
|----------|----------------|----------------|-----------------|---------|---------|------------------------|
| 4NZU.PDB | OG, L.SER.26   | N, L.GLU.3     | H, L.GLU.3      | 2.85    | 2.00    | 7.06                   |
| 4NZU.PDB | O, L.GLN.24    | N, L.THR.5     | H, L.THR.5      | 2.89    | 2.06    | 12.85                  |
| 4NZU.PDB | O, L.LYS.103   | N, L.LEU.11    | H, L.LEU.11     | 2.89    | 2.11    | 20.24                  |
| 4NZU.PDB | O, L.GLU.105   | N, L.ALA.13    | H, L.ALA.13     | 2.97    | 2.15    | 15.91                  |
| 4NZU.PDB | OD2, L.ASP.17  | N, L.SER.14    | H, L.SER.14     | 2.85    | 2.00    | 6.08                   |
| 4NZU.PDB | O, L.LEU.78    | N, L.GLY.16    | H, L.GLY.16     | 2.75    | 1.92    | 11.17                  |
| 4NZU.PDB | O, L.ILE.75    | N, L.VAL.19    | H, L.VAL.19     | 2.93    | 2.10    | 12.37                  |
| 4NZU.PDB | O, L.PHE.73    | N, L.ILE.21    | H, L.ILE.21     | 2.89    | 2.06    | 11.61                  |
| 4NZU.PDB | O, L.SER.7     | N, L.THR.22    | H, L.THR.22     | 2.86    | 2.01    | 5.56                   |
| 4NZU.PDB | O, L.PHE.71    | N, L.CYS.23    | H, L.CYS.23     | 2.91    | 2.09    | 15.17                  |
| 4NZU.PDB | O, L.THR.5     | N, L.GLN.24    | H, L.GLN.24     | 2.88    | 2.07    | 16.80                  |
| 4NZU.PDB | O, L.THR.69    | N, L.ALA.25    | H, L.ALA.25     | 2.86    | 2.06    | 18.12                  |
| 4NZU.PDB | O, L.GLY.68    | N, L.ILE.29    | H, L.ILE.29     | 2.87    | 2.02    | 6.63                   |
| 4NZU.PDB | O, L.ILE.29    | N, L.PHE.32    | H, L.PHE.32     | 2.88    | 2.03    | 7.32                   |
| 4NZU.PDB | O, L.GLN.89    | N, L.ASP.34    | H, L.ASP.34     | 2.88    | 2.05    | 12.07                  |
| 4NZU.PDB | O, L.ILE.48    | N, L.TRP.35    | H, L.TRP.35     | 2.86    | 2.02    | 11.26                  |
| 4NZU.PDB | O, L.TYR.87    | N, L.TYR.36    | H, L.TYR.36     | 2.84    | 2.02    | 14.90                  |
| 4NZU.PDB | O, L.LYS.45    | N, L.GLN.37    | H, L.GLN.37     | 2.88    | 2.06    | 16.18                  |
| 4NZU.PDB | O, L.VAL.85    | N, L.GLN.38    | H, L.GLN.38     | 2.81    | 2.00    | 16.84                  |
| 4NZU.PDB | O, L.GLU.81    | NE, L.ARG.39   | HE, L.ARG.39    | 2.82    | 1.89    | 12.62                  |
| 4NZU.PDB | O, L.ARG.39    | N, L.LYS.42    | H, L.LYS.42     | 2.98    | 2.17    | 16.62                  |
| 4NZU.PDB | O, L.GLN.37    | N, L.LYS.45    | H, L.LYS.45     | 2.86    | 2.08    | 21.32                  |
| 4NZU.PDB | O, L.TRP.35    | N, L.LEU.47    | H, L.LEU.47     | 2.90    | 2.05    | 4.96                   |
| 4NZU.PDB | O, L.ASN.53    | N, L.TYR.49    | H, L.TYR.49     | 2.92    | 2.13    | 19.67                  |
| 4NZU.PDB | O, L.LEU.33    | N, L.ALA.51    | H, L.ALA.51     | 2.73    | 1.91    | 14.91                  |
| 4NZU.PDB | O, L.ASP.50    | N, L.SER.52    | H, L.SER.52     | 2.85    | 2.15    | 29.96                  |
| 4NZU.PDB | O, L.TYR.49    | N, L.ASN.53    | H, L.ASN.53     | 2.95    | 2.12    | 14.12                  |
| 4NZU.PDB | O, L.LEU.47    | N, L.ALA.55    | H, L.ALA.55     | 2.95    | 2.09    | 3.99                   |
| 4NZU.PDB | OD2, L.ASP.82  | NE, L.ARG.61   | HE, L.ARG.61    | 2.83    | 2.03    | 27.68                  |
| 4NZU.PDB | OD1, L.ASP.82  | NH2, L.ARG.61  | HH21, L.ARG.61  | 2.85    | 2.00    | 7.18                   |
| 4NZU.PDB | O, L.THR.72    | N, L.SER.65    | H, L.SER.65     | 2.93    | 2.14    | 18.79                  |
| 4NZU.PDB | O, L.ALA.30    | N, L.GLY.68    | H, L.GLY.68     | 2.88    | 2.07    | 17.47                  |
| 4NZU.PDB | O, L.CYS.23    | N, L.PHE.71    | H, L.PHE.71     | 2.88    | 2.07    | 16.98                  |
| 4NZU.PDB | O, L.SER.65    | N, L.THR.72    | H, L.THR.72     | 2.92    | 2.09    | 12.57                  |
| 4NZU.PDB | O, L.ILE.21    | N, L.PHE.73    | H, L.PHE.73     | 2.91    | 2.08    | 12.35                  |
| 4NZU.PDB | O, L.THR.63    | N, L.THR.74    | H, L.THR.74     | 2.88    | 2.05    | 11.92                  |
| 4NZU.PDB | O, L.VAL.19    | N, L.ILE.75    | H, L.ILE.75     | 2.89    | 2.09    | 18.00                  |
| 4NZU.PDB | O, L.ARG.61    | N, L.SER.76    | H, L.SER.76     | 2.83    | 2.03    | 17.44                  |
| 4NZU.PDB | O, L.ASP.17    | N, L.LEU.78    | H, L.LEU.78     | 2.83    | 2.04    | 19.06                  |
| 4NZU.PDB | OD2, L.ASP.82  | N, L.GLN.79    | H, L.GLN.79     | 2.91    | 2.07    | 9.01                   |
| 4NZU.PDB | O, L.GLN.79    | N, L.ASP.82    | H, L.ASP.82     | 2.86    | 2.03    | 11.16                  |
| 4NZU.PDB | O, L.THR.102   | N, L.TYR.86    | H, L.TYR.86     | 2.95    | 2.13    | 15.14                  |
| 4NZU.PDB | O, L.TYR.36    | N, L.TYR.87    | H, L.TYR.87     | 2.92    | 2.11    | 16.96                  |
| 4NZU.PDB | O, L.PHE.32    | N, L.TYR.91    | H, L.TYR.91     | 2.96    | 2.16    | 17.93                  |
| 4NZU.PDB | O, L.CYS.88    | N, L.GLY.99    | H, L.GLY.99     | 2.83    | 2.03    | 18.33                  |
| 4NZU.PDB | OE1, L.GLN.6   | N, L.GLY.101   | H, L.GLY.101    | 2.96    | 2.20    | 24.47                  |
| 4NZU.PDB | O, L.TYR.86    | N, L.THR.102   | H, L.THR.102    | 2.91    | 2.10    | 16.25                  |
| 4NZU.PDB | O, L.ALA.84    | N, L.LEU.104   | H, L.LEU.104    | 2.96    | 2.10    | 5.58                   |
| 4NZU.PDB | O, L.LEU.11    | N, L.GLU.105   | H, L.GLU.105    | 2.96    | 2.15    | 17.50                  |
| 4NZU.PDB | OE1, L.GLN.166 | N, L.THR.106   | H, L.THR.106    | 2.83    | 1.99    | 8.58                   |
| 4NZU.PDB | O, L.ALA.13    | N, L.LYS.107   | H, L.LYS.107    | 2.88    | 2.05    | 13.69                  |
| 4NZU.PDB | O, L.THR.109   | NE, L.ARG.108  | HE, L.ARG.108   | 2.81    | 1.86    | 9.52                   |
| 4NZU.PDB | O, L.ASP.170   | NH1, L.ARG.108 | HH11, L.ARG.108 | 2.81    | 1.98    | 12.07                  |
| 4NZU.PDB | O, L.TYR.140   | N, L.ALA.111   | H, L.ALA.111    | 2.88    | 2.04    | 11.37                  |
| 4NZU.PDB | O, L.LEU.135   | N, L.PHE.116   | H, L.PHE.116    | 2.95    | 2.18    | 22.98                  |
| 4NZU.PDB | O, L.VAL.133   | N, L.PHE.118   | H, L.PHE.118    | 2.80    | 2.00    | 18.01                  |
| 4NZU.PDB | OG, L.SER.121  | N, L.GLN.124   | H, L.GLN.124    | 2.94    | 2.11    | 13.38                  |

|          |                |                |                |      |      |       |
|----------|----------------|----------------|----------------|------|------|-------|
| 4NZU.PDB | O, L_LEU_181   | N, L_ALA_130   | H, L_ALA_130   | 2.90 | 2.05 | 9.45  |
| 4NZU.PDB | NE2, L_GLN_124 | N, L_SER_131   | H, L_SER_131   | 2.97 | 2.20 | 21.35 |
| 4NZU.PDB | O, L_LEU_179   | N, L_VAL_132   | H, L_VAL_132   | 2.90 | 2.07 | 11.76 |
| 4NZU.PDB | O, L_SER_177   | N, L_CYS_134   | H, L_CYS_134   | 2.87 | 2.04 | 13.69 |
| 4NZU.PDB | O, L_PHE_116   | N, L_LEU_135   | H, L_LEU_135   | 2.83 | 2.00 | 10.89 |
| 4NZU.PDB | O, L_LEU_175   | N, L_LEU_136   | H, L_LEU_136   | 2.84 | 1.99 | 6.57  |
| 4NZU.PDB | O, L_SER_114   | N, L_ASN_137   | H, L_ASN_137   | 2.79 | 1.96 | 12.42 |
| 4NZU.PDB | O, L_TYR_173   | N, L_PHE_139   | H, L_PHE_139   | 2.81 | 1.98 | 12.12 |
| 4NZU.PDB | O, L_ALA_111   | N, L_TYR_140   | H, L_TYR_140   | 2.98 | 2.17 | 16.59 |
| 4NZU.PDB | O, L_GLU_195   | N, L_GLN_147   | H, L_GLN_147   | 2.80 | 1.97 | 12.05 |
| 4NZU.PDB | OG, L_SER_177  | NE1, L_TRP_148 | HE1, L_TRP_148 | 2.90 | 1.89 | 11.12 |
| 4NZU.PDB | O, L_ALA_193   | N, L_LYS_149   | H, L_LYS_149   | 2.86 | 2.04 | 14.54 |
| 4NZU.PDB | O, L_VAL_191   | N, L_ASP_151   | H, L_ASP_151   | 2.81 | 1.98 | 13.30 |
| 4NZU.PDB | O, L_VAL_150   | N, L_ALA_153   | H, L_ALA_153   | 2.89 | 2.05 | 9.67  |
| 4NZU.PDB | O, L_TRP_148   | N, L_GLN_155   | H, L_GLN_155   | 2.91 | 2.07 | 10.18 |
| 4NZU.PDB | O, L_SER_176   | N, L_SER_162   | H, L_SER_162   | 2.96 | 2.18 | 20.50 |
| 4NZU.PDB | O, L_SER_174   | N, L_THR_164   | H, L_THR_164   | 2.99 | 2.18 | 16.93 |
| 4NZU.PDB | O, L_THR_172   | N, L_ASP_167   | H, L_ASP_167   | 2.80 | 1.96 | 8.83  |
| 4NZU.PDB | OD2, L_ASP_167 | N, L_LYS_169   | H, L_LYS_169   | 2.96 | 2.24 | 28.01 |
| 4NZU.PDB | OD2, L_ASP_167 | N, L_ASP_170   | H, L_ASP_170   | 2.95 | 2.13 | 14.40 |
| 4NZU.PDB | O, L_ASP_167   | N, L_SER_171   | H, L_SER_171   | 2.96 | 2.22 | 25.63 |
| 4NZU.PDB | OD1, L_ASP_170 | N, L_THR_172   | H, L_THR_172   | 2.94 | 2.13 | 16.20 |
| 4NZU.PDB | O, L_PHE_139   | N, L_TYR_173   | H, L_TYR_173   | 2.83 | 1.98 | 8.20  |
| 4NZU.PDB | O, L_LEU_136   | N, L_LEU_175   | H, L_LEU_175   | 2.85 | 2.05 | 17.53 |
| 4NZU.PDB | O, L_SER_162   | N, L_SER_176   | H, L_SER_176   | 2.96 | 2.14 | 14.63 |
| 4NZU.PDB | O, L_CYS_134   | N, L_SER_177   | H, L_SER_177   | 2.92 | 2.08 | 12.73 |
| 4NZU.PDB | O, L_GLN_160   | N, L_THR_178   | H, L_THR_178   | 2.85 | 2.02 | 12.21 |
| 4NZU.PDB | O, L_VAL_132   | N, L_LEU_179   | H, L_LEU_179   | 2.78 | 1.95 | 11.28 |
| 4NZU.PDB | O, L_ASN_158   | N, L_THR_180   | H, L_THR_180   | 2.89 | 2.04 | 7.97  |
| 4NZU.PDB | O, L_ALA_130   | N, L_LEU_181   | H, L_LEU_181   | 2.89 | 2.03 | 5.02  |
| 4NZU.PDB | O, L_GLY_128   | N, L_LYS_183   | H, L_LYS_183   | 2.93 | 2.08 | 7.57  |
| 4NZU.PDB | OG, L_SER_182  | N, L_ASP_185   | H, L_ASP_185   | 2.98 | 2.15 | 12.85 |
| 4NZU.PDB | O, L_SER_182   | N, L_TYR_186   | H, L_TYR_186   | 2.98 | 2.14 | 10.93 |
| 4NZU.PDB | O, L_LYS_183   | N, L_GLU_187   | H, L_GLU_187   | 2.86 | 2.03 | 12.51 |
| 4NZU.PDB | OD1, L_ASP_151 | N, L_LYS_190   | H, L_LYS_190   | 2.93 | 2.09 | 10.09 |
| 4NZU.PDB | OD1, L_ASP_151 | N, L_VAL_191   | H, L_VAL_191   | 2.97 | 2.13 | 9.29  |
| 4NZU.PDB | O, L_PHE_209   | N, L_TYR_192   | H, L_TYR_192   | 2.93 | 2.08 | 5.07  |
| 4NZU.PDB | O, L_LYS_149   | N, L_ALA_193   | H, L_ALA_193   | 2.96 | 2.16 | 18.28 |
| 4NZU.PDB | O, L_LYS_207   | N, L_CYS_194   | H, L_CYS_194   | 2.90 | 2.07 | 13.44 |
| 4NZU.PDB | O, L_GLN_147   | N, L_GLU_195   | H, L_GLU_195   | 2.85 | 2.00 | 7.85  |
| 4NZU.PDB | O, L_VAL_205   | N, L_VAL_196   | H, L_VAL_196   | 2.76 | 1.93 | 12.73 |
| 4NZU.PDB | O, L_LYS_145   | N, L_THR_197   | H, L_THR_197   | 2.96 | 2.14 | 13.76 |
| 4NZU.PDB | ND1, L_HIS_198 | N, L_GLY_200   | H, L_GLY_200   | 2.95 | 2.10 | 4.09  |
| 4NZU.PDB | O, L_HIS_198   | N, L_LEU_201   | H, L_LEU_201   | 2.91 | 2.06 | 7.34  |
| 4NZU.PDB | O, L_VAL_196   | N, L_VAL_205   | H, L_VAL_205   | 2.97 | 2.18 | 19.82 |
| 4NZU.PDB | O, L_TYR_192   | N, L_PHE_209   | H, L_PHE_209   | 2.95 | 2.17 | 20.95 |
| 4NZU.PDB | O, L_LYS_190   | N, L_ARG_211   | H, L_ARG_211   | 2.79 | 1.96 | 13.34 |
| 4NZU.PDB | O, L_HIS_189   | NE, L_ARG_211  | HE, L_ARG_211  | 2.83 | 1.95 | 20.09 |
| 4NZU.PDB | O, H_SER_25    | N, H_SER_3     | H, H_SER_3     | 2.94 | 2.15 | 18.68 |
| 4NZU.PDB | O, H_ALA_23    | N, H_VAL_5     | H, H_VAL_5     | 2.94 | 2.11 | 12.25 |
| 4NZU.PDB | OE1, H_GLN_105 | N, H_GLU_6     | H, H_GLU_6     | 2.88 | 2.02 | 2.55  |
| 4NZU.PDB | O, H_SER_21    | N, H_SER_7     | H, H_SER_7     | 2.91 | 2.11 | 18.23 |
| 4NZU.PDB | O, H_THR_110   | N, H_VAL_12    | H, H_VAL_12    | 2.93 | 2.20 | 26.91 |
| 4NZU.PDB | O, H_LEU_82C   | N, H_GLY_15    | H, H_GLY_15    | 2.72 | 1.86 | 1.10  |
| 4NZU.PDB | O, H_MET_82    | N, H_LEU_18    | H, H_LEU_18    | 2.87 | 2.07 | 18.95 |
| 4NZU.PDB | O, H_LEU_80    | N, H_LEU_20    | H, H_LEU_20    | 2.89 | 2.06 | 11.46 |
| 4NZU.PDB | O, H_SER_7     | N, H_SER_21    | H, H_SER_21    | 2.98 | 2.14 | 9.55  |
| 4NZU.PDB | O, H_LEU_78    | N, H_CYS_22    | H, H_CYS_22    | 2.82 | 2.04 | 21.59 |

|          |               |                |                |      |      |       |
|----------|---------------|----------------|----------------|------|------|-------|
| 4NZU.PDB | O, H_VAL_5    | N, H_ALA_23    | H, H_ALA_23    | 2.82 | 1.97 | 8.42  |
| 4NZU.PDB | O, H_ASN_76   | N, H_ALA_24    | H, H_ALA_24    | 2.93 | 2.07 | 4.56  |
| 4NZU.PDB | O, H_SER_3    | N, H_SER_25    | H, H_SER_25    | 2.99 | 2.20 | 20.90 |
| 4NZU.PDB | O, H_ALA_93   | N, H_HIS_35    | H, H_HIS_35    | 2.93 | 2.12 | 16.07 |
| 4NZU.PDB | O, H_ALA_49   | N, H_TRP_36    | H, H_TRP_36    | 2.92 | 2.14 | 21.04 |
| 4NZU.PDB | O, H_TYR_91   | N, H_VAL_37    | H, H_VAL_37    | 2.88 | 2.05 | 13.75 |
| 4NZU.PDB | O, H_GLU_46   | N, H_ARG_38    | H, H_ARG_38    | 2.81 | 1.97 | 10.17 |
| 4NZU.PDB | OE2, H_GLU_46 | NE, H_ARG_38   | HE, H_ARG_38   | 2.81 | 1.92 | 18.37 |
| 4NZU.PDB | OD1, H_ASP_86 | NH1, H_ARG_38  | HH12, H_ARG_38 | 2.87 | 2.03 | 8.91  |
| 4NZU.PDB | O, H_VAL_89   | N, H_GLN_39    | H, H_GLN_39    | 2.85 | 2.12 | 26.56 |
| 4NZU.PDB | O, H_ALA_40   | N, H_ASP_43    | H, H_ASP_43    | 2.95 | 2.13 | 14.09 |
| 4NZU.PDB | O, H_ARG_38   | N, H_GLU_46    | H, H_GLU_46    | 2.83 | 2.07 | 24.02 |
| 4NZU.PDB | O, H_TRP_36   | N, H_VAL_48    | H, H_VAL_48    | 2.86 | 2.04 | 15.06 |
| 4NZU.PDB | O, H_TYR_58   | N, H_PHE_50    | H, H_PHE_50    | 2.88 | 2.08 | 16.89 |
| 4NZU.PDB | O, H_PHE_34   | N, H_ILE_51    | H, H_ILE_51    | 2.88 | 2.05 | 13.34 |
| 4NZU.PDB | O, H_SER_56   | N, H_SER_52    | H, H_SER_52    | 2.92 | 2.10 | 13.95 |
| 4NZU.PDB | O, H_SER_52   | N, H_GLY_54    | H, H_GLY_54    | 2.94 | 2.14 | 17.16 |
| 4NZU.PDB | O, H_VAL_48   | N, H_ALA_60    | H, H_ALA_60    | 2.91 | 2.08 | 13.02 |
| 4NZU.PDB | O, H_SER_82B  | NH1, H_ARG_66  | HH11, H_ARG_66 | 2.99 | 2.16 | 13.59 |
| 4NZU.PDB | OD2, H_ASP_86 | NH1, H_ARG_66  | HH12, H_ARG_66 | 2.80 | 1.94 | 3.46  |
| 4NZU.PDB | O, H_GLN_81   | N, H_THR_68    | H, H_THR_68    | 2.85 | 2.05 | 17.96 |
| 4NZU.PDB | OH, H_TYR_59  | N, H_ILE_69    | H, H_ILE_69    | 2.96 | 2.13 | 12.69 |
| 4NZU.PDB | O, H_TYR_32   | NH1, H_ARG_71  | HH12, H_ARG_71 | 2.89 | 2.14 | 25.08 |
| 4NZU.PDB | O, H_TYR_32   | NH2, H_ARG_71  | HH22, H_ARG_71 | 2.94 | 2.22 | 27.85 |
| 4NZU.PDB | O, H_THR_77   | N, H_ASP_72    | H, H_ASP_72    | 2.87 | 2.04 | 12.43 |
| 4NZU.PDB | O, H_CYS_22   | N, H_LEU_78    | H, H_LEU_78    | 2.86 | 2.03 | 13.04 |
| 4NZU.PDB | O, H_SER_70   | N, H_SER_79    | H, H_SER_79    | 2.89 | 2.05 | 11.36 |
| 4NZU.PDB | O, H_LEU_20   | N, H_LEU_80    | H, H_LEU_80    | 2.94 | 2.13 | 15.87 |
| 4NZU.PDB | O, H_THR_68   | N, H_GLN_81    | H, H_GLN_81    | 2.89 | 2.05 | 10.75 |
| 4NZU.PDB | O, H_LEU_18   | N, H_MET_82    | H, H_MET_82    | 2.85 | 2.01 | 9.41  |
| 4NZU.PDB | O, H_ARG_66   | N, H_ASN_82A   | H, H_ASN_82A   | 2.85 | 2.04 | 16.30 |
| 4NZU.PDB | OD2, H_ASP_86 | N, H_LYS_83    | H, H_LYS_83    | 2.86 | 2.03 | 12.94 |
| 4NZU.PDB | O, H_LYS_83   | N, H_ASP_86    | H, H_ASP_86    | 2.84 | 2.02 | 13.61 |
| 4NZU.PDB | O, H_GLN_39   | N, H_VAL_89    | H, H_VAL_89    | 2.90 | 2.11 | 18.38 |
| 4NZU.PDB | O, H_THR_107  | N, H_TYR_90    | H, H_TYR_90    | 2.88 | 2.04 | 8.85  |
| 4NZU.PDB | O, H_VAL_37   | N, H_TYR_91    | H, H_TYR_91    | 2.73 | 1.88 | 6.70  |
| 4NZU.PDB | O, H_HIS_35   | N, H_ALA_93    | H, H_ALA_93    | 2.90 | 2.19 | 28.63 |
| 4NZU.PDB | O, H_TYR_102  | N, H_ARG_94    | H, H_ARG_94    | 2.97 | 2.19 | 21.23 |
| 4NZU.PDB | O, H_ALA_95   | NE, H_ARG_94   | HE, H_ARG_94   | 2.86 | 2.03 | 25.77 |
| 4NZU.PDB | O, H_ALA_95   | NH2, H_ARG_94  | HH21, H_ARG_94 | 2.85 | 2.09 | 22.83 |
| 4NZU.PDB | OD1, H_ASP_97 | NH2, H_ARG_94  | HH22, H_ARG_94 | 2.85 | 2.02 | 14.02 |
| 4NZU.PDB | O, H_SER_31   | N, H_CYS_100C  | H, H_CYS_100C  | 2.76 | 1.91 | 5.59  |
| 4NZU.PDB | O, H_LYS_100E | N, H_ALA_100G  | H, H_ALA_100G  | 2.86 | 2.15 | 29.42 |
| 4NZU.PDB | OH, L_TYR_36  | N, H_PHE_100H  | H, H_PHE_100H  | 2.86 | 2.04 | 13.13 |
| 4NZU.PDB | O, H_PHE_100H | NE1, H_TRP_103 | HE1, H_TRP_103 | 2.88 | 2.03 | 28.43 |
| 4NZU.PDB | O, H_CYS_92   | N, H_GLY_104   | H, H_GLY_104   | 2.88 | 2.05 | 13.50 |
| 4NZU.PDB | OE2, H_GLU_6  | N, H_GLY_106   | H, H_GLY_106   | 2.99 | 2.21 | 21.44 |
| 4NZU.PDB | O, H_ALA_88   | N, H_VAL_109   | H, H_VAL_109   | 2.91 | 2.05 | 3.91  |
| 4NZU.PDB | OG1, H_THR_87 | N, H_VAL_111   | H, H_VAL_111   | 2.93 | 2.07 | 3.36  |
| 4NZU.PDB | O, H_VAL_12   | N, H_SER_112   | H, H_SER_112   | 2.95 | 2.14 | 16.38 |
| 4NZU.PDB | OG, H_SER_112 | N, H_ALA_114   | H, H_ALA_114   | 2.91 | 2.06 | 8.79  |
| 4NZU.PDB | O, H_PHE_148  | N, H_LYS_117   | H, H_LYS_117   | 2.88 | 2.05 | 12.81 |
| 4NZU.PDB | O, H_LYS_145  | N, H_SER_120   | H, H_SER_120   | 2.90 | 2.12 | 21.09 |
| 4NZU.PDB | O, H_LEU_143  | N, H_PHE_122   | H, H_PHE_122   | 2.87 | 2.03 | 9.52  |
| 4NZU.PDB | O, H_GLY_141  | N, H_LEU_124   | H, H_LEU_124   | 2.81 | 1.96 | 5.22  |
| 4NZU.PDB | OG, H_SER_195 | N, H_GLY_135   | H, H_GLY_135   | 2.91 | 2.20 | 29.13 |
| 4NZU.PDB | O, H_VAL_193  | N, H_ALA_138   | H, H_ALA_138   | 2.83 | 2.01 | 14.25 |
| 4NZU.PDB | O, H_VAL_191  | N, H_LEU_140   | H, H_LEU_140   | 2.93 | 2.10 | 13.71 |

|          |                |                |                |      |      |       |
|----------|----------------|----------------|----------------|------|------|-------|
| 4NZU.PDB | O, H_LEU_124   | N, H_GLY_141   | H, H_GLY_141   | 2.82 | 2.09 | 26.80 |
| 4NZU.PDB | O, H_SER_189   | N, H_CYS_142   | H, H_CYS_142   | 2.85 | 2.07 | 19.90 |
| 4NZU.PDB | O, H_PHE_122   | N, H_LEU_143   | H, H_LEU_143   | 2.81 | 1.97 | 11.58 |
| 4NZU.PDB | O, H_LEU_187   | N, H_VAL_144   | H, H_VAL_144   | 2.71 | 1.85 | 5.98  |
| 4NZU.PDB | O, H_SER_120   | N, H_LYS_145   | H, H_LYS_145   | 2.81 | 1.96 | 5.69  |
| 4NZU.PDB | O, H_LYS_117   | N, H_PHE_148   | H, H_PHE_148   | 2.88 | 2.08 | 17.45 |
| 4NZU.PDB | O, H_ASN_209   | N, H_SER_156   | H, H_SER_156   | 2.95 | 2.15 | 17.06 |
| 4NZU.PDB | OG, H_SER_189  | NE1, H_TRP_157 | HE1, H_TRP_157 | 2.92 | 1.90 | 9.04  |
| 4NZU.PDB | O, H_ILE_207   | N, H_ASN_162   | H, H_ASN_162   | 2.83 | 1.99 | 9.99  |
| 4NZU.PDB | OD1, H_ASN_209 | N, H_SER_163   | H, H_SER_163   | 2.80 | 1.99 | 15.68 |
| 4NZU.PDB | O, H_TRP_157   | N, H_GLY_164   | H, H_GLY_164   | 2.93 | 2.20 | 26.82 |
| 4NZU.PDB | O, H_VAL_190   | N, H_HIS_172   | H, H_HIS_172   | 2.83 | 2.02 | 16.48 |
| 4NZU.PDB | O, H_SER_188   | N, H_PHE_174   | H, H_PHE_174   | 2.92 | 2.06 | 3.04  |
| 4NZU.PDB | O, H_SER_186   | N, H_VAL_177   | H, H_VAL_177   | 2.90 | 2.09 | 15.20 |
| 4NZU.PDB | O, H_LEU_184   | N, H_GLN_179   | H, H_GLN_179   | 2.86 | 2.01 | 8.15  |
| 4NZU.PDB | O, H_GLN_179   | N, H_GLY_183   | H, H_GLY_183   | 2.91 | 2.06 | 7.56  |
| 4NZU.PDB | O, H_TYR_147   | N, H_TYR_185   | H, H_TYR_185   | 2.80 | 1.95 | 8.98  |
| 4NZU.PDB | O, H_VAL_144   | N, H_LEU_187   | H, H_LEU_187   | 2.87 | 2.07 | 16.93 |
| 4NZU.PDB | O, H_CYS_142   | N, H_SER_189   | H, H_SER_189   | 2.99 | 2.16 | 14.04 |
| 4NZU.PDB | O, H_HIS_172   | N, H_VAL_190   | H, H_VAL_190   | 2.85 | 2.02 | 12.23 |
| 4NZU.PDB | O, H_LEU_140   | N, H_VAL_191   | H, H_VAL_191   | 2.86 | 2.05 | 16.60 |
| 4NZU.PDB | O, H_ALA_138   | N, H_VAL_193   | H, H_VAL_193   | 2.91 | 2.09 | 14.81 |
| 4NZU.PDB | O, H_GLY_136   | N, H_SER_195   | H, H_SER_195   | 2.96 | 2.15 | 15.58 |
| 4NZU.PDB | O, H_PRO_194   | N, H_SER_197   | H, H_SER_197   | 2.90 | 2.09 | 16.91 |
| 4NZU.PDB | OH, H_TYR_206  | OG, H_BSER_197 | HG, H_BSER_197 | 2.82 | 2.05 | 15.42 |
| 4NZU.PDB | O, H_SER_197   | N, H_GLN_203   | H, H_GLN_203   | 2.89 | 2.06 | 13.09 |
| 4NZU.PDB | OD1, H_ASN_162 | N, H_ILE_207   | H, H_ILE_207   | 2.90 | 2.10 | 18.98 |
| 4NZU.PDB | O, H_LYS_221   | N, H_CYS_208   | H, H_CYS_208   | 2.94 | 2.14 | 18.10 |
| 4NZU.PDB | O, H_SER_156   | N, H_ASN_209   | H, H_ASN_209   | 2.80 | 1.94 | 7.24  |
| 4NZU.PDB | O, H_VAL_219   | N, H_VAL_210   | H, H_VAL_210   | 2.79 | 1.93 | 4.11  |
| 4NZU.PDB | O, H_THR_153   | N, H_ASN_211   | H, H_ASN_211   | 2.98 | 2.16 | 14.35 |
| 4NZU.PDB | O, H_THR_217   | N, H_HIS_212   | H, H_HIS_212   | 2.78 | 1.93 | 6.91  |
| 4NZU.PDB | O, H_VAL_210   | N, H_VAL_219   | H, H_VAL_219   | 2.89 | 2.07 | 13.72 |
| 4NZU.PDB | O, H_CYS_208   | N, H_LYS_221   | H, H_LYS_221   | 2.90 | 2.08 | 13.19 |
| 4NZU.PDB | O, H_TYR_206   | N, H_VAL_223   | H, H_VAL_223   | 2.82 | 1.97 | 6.85  |

Table 1697: 4NZU-specific side chain and main chain hydrogen bonding analysis. In this table, a PDB file is specified with a four-letter PDB ID, except that the names of the PDB files corresponding to the single NMR structural model split from the NMR ensemble is specified with a four-letter PDB ID in addition to a hyphen followed by the single NMR structural model numeric ID, the residue naming scheme is **Chain ID\_residue name\_residue number**,  $\angle ADH$  represents the angle formed by acceptor (A), donor (D) and hydrogen (H) ( $\angle ADH$ ).

| PDB      | Acceptor (A)   | Donor (D)      | Hydrogen (H)    | D-A (Å) | H-A (Å) | $\angle ADH(^{\circ})$ |
|----------|----------------|----------------|-----------------|---------|---------|------------------------|
| 4QEX.PDB | OD2, A_ASP_414 | NH2, A_ARG_349 | HH21, A_ARG_349 | 3.00    | 2.26    | 27.00                  |
| 4QEX.PDB | O, A_PHE_316   | N, A_ASN_356   | H, A_ASN_356    | 2.87    | 2.04    | 13.53                  |
| 4QEX.PDB | O, H_ALA_78    | N, H_CYS_22    | H, H_CYS_22     | 2.89    | 2.13    | 23.77                  |
| 4QEX.PDB | O, H_ILE_51    | N, H_MET_34    | H, H_MET_34     | 2.99    | 2.24    | 24.56                  |
| 4QEX.PDB | O, H_MET_34    | N, H_ILE_51    | H, H_ILE_51     | 2.88    | 2.12    | 24.11                  |
| 4QEX.PDB | O, H_VAL_37    | N, H_TYR_91    | H, H_TYR_91     | 2.94    | 2.16    | 21.47                  |
| 4QEX.PDB | OD2, B_ASP_414 | NH2, B_ARG_349 | HH21, B_ARG_349 | 2.99    | 2.26    | 27.25                  |
| 4QEX.PDB | O, B_PHE_316   | N, B_ASN_356   | H, B_ASN_356    | 2.87    | 2.04    | 13.77                  |
| 4QEX.PDB | O, I_ALA_78    | N, I_CYS_22    | H, I_CYS_22     | 2.89    | 2.13    | 24.05                  |
| 4QEX.PDB | O, I_ILE_51    | N, I_MET_34    | H, I_MET_34     | 2.98    | 2.23    | 24.63                  |
| 4QEX.PDB | O, I_TYR_91    | N, I_VAL_37    | H, I_VAL_37     | 3.00    | 2.18    | 14.72                  |
| 4QEX.PDB | O, I_MET_34    | N, I_ILE_51    | H, I_ILE_51     | 2.88    | 2.13    | 24.11                  |
| 4QEX.PDB | O, I_VAL_37    | N, I_TYR_91    | H, I_TYR_91     | 2.96    | 2.15    | 17.39                  |

Table 1698: 4QEX-specific side chain and main chain hydrogen bonding analysis. In this table, a PDB file is specified with a four-letter PDB ID, except that the names of the PDB files corresponding to the single NMR structural model split from the NMR ensemble is specified with a four-letter PDB ID in addition to a hyphen followed by the single NMR structural model numeric ID, the residue naming scheme is **Chain ID\_residue name\_residue number**,  $\angle ADH$  represents the angle formed by acceptor (A), donor (D) and hydrogen (H) ( $\angle ADH$ ).

| PDB      | Acceptor (A)   | Donor (D)     | Hydrogen (H)   | D-A (Å) | H-A (Å) | $\angle ADH(^{\circ})$ |
|----------|----------------|---------------|----------------|---------|---------|------------------------|
| 4WUU.PDB | OD2, A_ASP_29  | ND1, A_HIS_3  | HD1, A_HIS_3   | 2.93    | 2.13    | 17.75                  |
| 4WUU.PDB | O, A_TYR_99    | N, A_TYR_7    | H, A_TYR_7     | 2.76    | 1.92    | 10.35                  |
| 4WUU.PDB | O, A_VAL_25    | N, A_PHE_8    | H, A_PHE_8     | 2.96    | 2.14    | 14.63                  |
| 4WUU.PDB | O, A_ARG_97    | N, A_PHE_9    | H, A_PHE_9     | 2.76    | 2.00    | 23.12                  |
| 4WUU.PDB | O, A_ILE_23    | N, A_THR_10   | H, A_THR_10    | 2.77    | 1.94    | 11.62                  |
| 4WUU.PDB | O, A_HIS_93    | N, A_SER_13   | H, A_SER_13    | 2.94    | 2.18    | 22.69                  |
| 4WUU.PDB | OG, A_SER_38   | N, A_PHE_22   | H, A_PHE_22    | 2.99    | 2.28    | 28.95                  |
| 4WUU.PDB | O, A_THR_10    | N, A_ILE_23   | H, A_ILE_23    | 2.73    | 1.91    | 14.53                  |
| 4WUU.PDB | O, A_PHE_36    | N, A_ALA_24   | H, A_ALA_24    | 2.98    | 2.17    | 16.88                  |
| 4WUU.PDB | O, A_PHE_8     | N, A_VAL_25   | H, A_VAL_25    | 2.92    | 2.13    | 19.23                  |
| 4WUU.PDB | O, A_ARG_6     | N, A_TYR_27   | H, A_TYR_27    | 2.91    | 2.07    | 7.74                   |
| 4WUU.PDB | O, A_THR_31    | N, A_VAL_28   | H, A_VAL_28    | 2.84    | 2.03    | 16.38                  |
| 4WUU.PDB | O, A_SER_4     | N, A_ASP_29   | H, A_ASP_29    | 2.78    | 1.95    | 12.60                  |
| 4WUU.PDB | O, A_VAL_28    | N, A_THR_31   | H, A_THR_31    | 2.84    | 1.99    | 7.07                   |
| 4WUU.PDB | OE1, A_GLU_46  | NE, A_ARG_35  | HE, A_ARG_35   | 2.77    | 1.96    | 15.11                  |
| 4WUU.PDB | O, A_ALA_24    | N, A_PHE_36   | H, A_PHE_36    | 2.92    | 2.14    | 20.69                  |
| 4WUU.PDB | O, A_PHE_22    | N, A_SER_38   | H, A_SER_38    | 2.95    | 2.16    | 19.48                  |
| 4WUU.PDB | OD1, A_ASP_37  | N, A_ASP_39   | H, A_ASP_39    | 2.77    | 1.98    | 19.65                  |
| 4WUU.PDB | OE2, A_GLU_46  | OG, A_SER_42  | HG, A_SER_42   | 2.85    | 2.07    | 18.95                  |
| 4WUU.PDB | O, A_ARG_35    | N, A_GLU_46   | H, A_GLU_46    | 2.99    | 2.17    | 14.81                  |
| 4WUU.PDB | O, A_PHE_33    | N, A_ARG_48   | H, A_ARG_48    | 2.89    | 2.07    | 14.83                  |
| 4WUU.PDB | OD2, B_ASP_53  | NE, A_ARG_48  | HE, A_ARG_48   | 2.84    | 2.13    | 29.12                  |
| 4WUU.PDB | OH, A_TYR_171  | OH, A_TYR_59  | HH, A_TYR_59   | 2.71    | 1.89    | 11.34                  |
| 4WUU.PDB | O, A_PRO_57    | N, A_ASP_61   | H, A_ASP_61    | 2.71    | 1.85    | 6.09                   |
| 4WUU.PDB | O, A_GLU_58    | N, A_GLY_62   | H, A_GLY_62    | 2.94    | 2.16    | 20.28                  |
| 4WUU.PDB | O, A_TYR_59    | N, A_GLU_63   | H, A_GLU_63    | 2.86    | 2.00    | 6.81                   |
| 4WUU.PDB | O, A_TRP_60    | N, A_THR_64   | H, A_THR_64    | 2.90    | 2.08    | 14.57                  |
| 4WUU.PDB | OH, E_TYR_104  | NZ, A_LYS_66  | HZ3, A_LYS_66  | 2.89    | 2.02    | 10.84                  |
| 4WUU.PDB | O, A_GLU_63    | N, A_VAL_67   | H, A_VAL_67    | 2.84    | 2.02    | 14.98                  |
| 4WUU.PDB | O, A_ARG_65    | N, A_ALA_69   | H, A_ALA_69    | 3.00    | 2.14    | 3.72                   |
| 4WUU.PDB | O, A_LYS_68    | OG, A_SER_71  | HG, A_SER_71   | 2.82    | 2.03    | 15.69                  |
| 4WUU.PDB | O, A_ALA_69    | OG1, A_THR_73 | HG1, A_THR_73  | 3.00    | 2.20    | 14.54                  |
| 4WUU.PDB | O, A_HIS_70    | N, A_HIS_74   | H, A_HIS_74    | 2.95    | 2.14    | 15.71                  |
| 4WUU.PDB | O, A_SER_71    | N, A_ARG_75   | H, A_ARG_75    | 2.82    | 2.00    | 14.92                  |
| 4WUU.PDB | O, A_THR_73    | N, A_ASP_77   | H, A_ASP_77    | 2.79    | 1.98    | 16.13                  |
| 4WUU.PDB | O, A_VAL_76    | N, A_THR_80   | H, A_THR_80    | 2.88    | 2.08    | 19.21                  |
| 4WUU.PDB | O, A_ASP_77    | N, A_LEU_81   | H, A_LEU_81    | 2.80    | 2.01    | 18.94                  |
| 4WUU.PDB | OXT, C_LEU_9   | OH, A_TYR_84  | HH, A_TYR_84   | 2.64    | 1.82    | 12.17                  |
| 4WUU.PDB | OD2, A_ASP_137 | OH, A_TYR_85  | HH, A_TYR_85   | 2.79    | 1.98    | 13.39                  |
| 4WUU.PDB | O, A_SER_13    | OG, A_SER_92  | HG, A_SER_92   | 2.55    | 1.73    | 10.54                  |
| 4WUU.PDB | OG, A_SER_13   | N, A_HIS_93   | H, A_HIS_93    | 2.78    | 1.95    | 13.85                  |
| 4WUU.PDB | OD1, A_ASP_119 | N, A_THR_94   | H, A_THR_94    | 2.87    | 2.10    | 22.46                  |
| 4WUU.PDB | O, A_SER_11    | N, A_VAL_95   | H, A_VAL_95    | 2.78    | 1.96    | 15.83                  |
| 4WUU.PDB | O, A_ALA_117   | N, A_GLN_96   | H, A_GLN_96    | 2.85    | 2.05    | 18.30                  |
| 4WUU.PDB | O, B_TRP_60    | NE2, A_GLN_96 | HE22, A_GLN_96 | 2.78    | 1.93    | 8.81                   |
| 4WUU.PDB | O, A_PHE_9     | N, A_ARG_97   | H, A_ARG_97    | 2.92    | 2.14    | 20.57                  |
| 4WUU.PDB | O, A_GLN_115   | N, A_MET_98   | H, A_MET_98    | 2.92    | 2.09    | 12.67                  |
| 4WUU.PDB | O, A_MET_5     | N, A_CYS_101  | H, A_CYS_101   | 2.91    | 2.19    | 28.90                  |
| 4WUU.PDB | O, A_ARG_111   | N, A_ASP_102  | H, A_ASP_102   | 2.81    | 1.99    | 13.14                  |
| 4WUU.PDB | O, A_HIS_3     | N, A_VAL_103  | H, A_VAL_103   | 2.85    | 2.00    | 5.54                   |
| 4WUU.PDB | O, A_ARG_108   | N, A_GLY_104  | H, A_GLY_104   | 2.96    | 2.19    | 22.29                  |
| 4WUU.PDB | O, A_GLY_104   | N, A_TRP_107  | H, A_TRP_107   | 2.80    | 2.02    | 20.77                  |
| 4WUU.PDB | O, A_ASP_102   | N, A_LEU_110  | H, A_LEU_110   | 2.72    | 1.90    | 14.82                  |
| 4WUU.PDB | O, A_MET_98    | N, A_GLN_115  | H, A_GLN_115   | 2.70    | 1.87    | 13.07                  |
| 4WUU.PDB | O, A_ILE_124   | N, A_TYR_116  | H, A_TYR_116   | 2.79    | 1.93    | 4.70                   |
| 4WUU.PDB | OE1, A_GLN_87  | OH, A_TYR_118 | HH, A_TYR_118  | 2.94    | 2.13    | 11.47                  |
| 4WUU.PDB | O, A_THR_94    | N, A_ASP_119  | H, A_ASP_119   | 2.71    | 1.87    | 9.67                   |



|          |                |                |                 |      |      |       |
|----------|----------------|----------------|-----------------|------|------|-------|
| 4WUU.PDB | OG1, A_THR_143 | OH, A_TYR_123  | HH, A_TYR_123   | 2.74 | 1.95 | 17.32 |
| 4WUU.PDB | O, A_THR_134   | N, A_ALA_125   | H, A_ALA_125    | 2.79 | 2.07 | 26.99 |
| 4WUU.PDB | O, A_ALA_125   | N, A_THR_134   | H, A_THR_134    | 2.73 | 1.89 | 10.54 |
| 4WUU.PDB | O, A_ALA_140   | N, A_LYS_144   | H, A_LYS_144    | 2.66 | 1.82 | 11.78 |
| 4WUU.PDB | O, C_LEU_9     | NZ, A_LYS_146  | HZ3, A_LYS_146  | 2.76 | 1.90 | 13.68 |
| 4WUU.PDB | O, C_TYR_8     | NE1, A_TRP_147 | HE1, A_TRP_147  | 2.81 | 1.99 | 15.97 |
| 4WUU.PDB | O, A_LYS_146   | N, A_ALA_150   | H, A_ALA_150    | 2.92 | 2.13 | 20.13 |
| 4WUU.PDB | O, A_TRP_147   | N, A_VAL_152   | H, A_VAL_152    | 2.94 | 2.08 | 3.18  |
| 4WUU.PDB | O, A_VAL_152   | N, A_LEU_156   | H, A_LEU_156    | 2.97 | 2.15 | 15.29 |
| 4WUU.PDB | O, A_ALA_153   | N, A_ARG_157   | H, A_ARG_157    | 2.89 | 2.04 | 9.86  |
| 4WUU.PDB | O, C_ARG_1     | OH, A_TYR_159  | HH, A_TYR_159   | 2.86 | 2.02 | 6.39  |
| 4WUU.PDB | O, A_LEU_156   | N, A_LEU_160   | H, A_LEU_160    | 2.72 | 1.88 | 9.29  |
| 4WUU.PDB | O, A_TYR_159   | N, A_CYS_164   | H, A_CYS_164    | 2.62 | 1.77 | 6.61  |
| 4WUU.PDB | O, A_CYS_164   | N, A_LEU_168   | H, A_LEU_168    | 2.93 | 2.10 | 13.84 |
| 4WUU.PDB | O, A_VAL_165   | N, A_ARG_169   | H, A_ARG_169    | 2.89 | 2.05 | 8.58  |
| 4WUU.PDB | O, A_TRP_107   | NE, A_ARG_169  | HE, A_ARG_169   | 2.99 | 2.28 | 29.58 |
| 4WUU.PDB | O, A_TRP_107   | NH2, A_ARG_169 | HH21, A_ARG_169 | 2.90 | 2.19 | 28.46 |
| 4WUU.PDB | OE2, A_GLU_55  | NE, A_ARG_170  | HE, A_ARG_170   | 2.89 | 2.03 | 3.82  |
| 4WUU.PDB | O, A_TRP_167   | N, A_TYR_171   | H, A_TYR_171    | 2.90 | 2.05 | 5.21  |
| 4WUU.PDB | O, A_LEU_168   | N, A_LEU_172   | H, A_LEU_172    | 2.90 | 2.13 | 22.30 |
| 4WUU.PDB | O, A_ARG_170   | N, A_ASN_174   | H, A_ASN_174    | 2.98 | 2.15 | 11.94 |
| 4WUU.PDB | O, A_TYR_171   | N, A_GLY_175   | H, A_GLY_175    | 2.88 | 2.04 | 8.17  |
| 4WUU.PDB | O, A_GLY_175   | N, A_LEU_179   | H, A_LEU_179    | 2.67 | 1.82 | 8.19  |
| 4WUU.PDB | O, A_THR_178   | NH2, A_ARG_181 | HH21, A_ARG_181 | 2.71 | 1.91 | 17.26 |
| 4WUU.PDB | O, A_HIS_188   | N, A_TRP_204   | H, A_TRP_204    | 2.78 | 1.93 | 9.00  |
| 4WUU.PDB | O, A_LYS_186   | N, A_LEU_206   | H, A_LEU_206    | 2.86 | 2.04 | 15.38 |
| 4WUU.PDB | O, A_ASP_183   | N, A_TYR_209   | H, A_TYR_209    | 2.76 | 1.98 | 20.63 |
| 4WUU.PDB | O, A_ALA_245   | NE1, A_TRP_217 | HE1, A_TRP_217  | 2.84 | 2.09 | 23.84 |
| 4WUU.PDB | O, A_GLN_242   | N, A_ARG_234   | H, A_ARG_234    | 2.84 | 2.02 | 15.28 |
| 4WUU.PDB | OE1, B_GLN_8   | NH1, A_ARG_234 | HH11, A_ARG_234 | 2.79 | 2.07 | 27.49 |
| 4WUU.PDB | OE1, A_GLN_242 | NH2, A_ARG_234 | HH21, A_ARG_234 | 3.00 | 2.27 | 27.42 |
| 4WUU.PDB | O, A_THR_240   | N, A_ALA_236   | H, A_ALA_236    | 2.92 | 2.07 | 7.39  |
| 4WUU.PDB | OD1, A_ASP_238 | OG1, A_THR_240 | HG1, A_THR_240  | 2.61 | 1.79 | 8.96  |
| 4WUU.PDB | O, A_ARG_234   | N, A_GLN_242   | H, A_GLN_242    | 2.75 | 1.97 | 20.96 |
| 4WUU.PDB | O, B_HIS_31    | N, B_ARG_3     | H, B_ARG_3      | 2.86 | 2.03 | 11.56 |
| 4WUU.PDB | OG1, B_THR_86  | OG1, B_THR_4   | HG1, B_THR_4    | 2.90 | 2.14 | 21.40 |
| 4WUU.PDB | O, B_SER_28    | N, B_LYS_6     | H, B_LYS_6      | 2.87 | 2.05 | 15.60 |
| 4WUU.PDB | O, A_PRO_235   | OH, B_TYR_10   | HH, B_TYR_10    | 2.61 | 1.79 | 11.75 |
| 4WUU.PDB | O, B_PHE_22    | N, B_ARG_12    | H, B_ARG_12     | 2.79 | 2.03 | 23.74 |
| 4WUU.PDB | OD1, B_ASN_21  | N, B_HIS_13    | H, B_HIS_13     | 2.89 | 2.04 | 5.58  |
| 4WUU.PDB | O, B_PRO_72    | N, B_GLY_18    | H, B_GLY_18     | 2.92 | 2.11 | 17.66 |
| 4WUU.PDB | O, B_GLU_16    | N, B_LYS_19    | H, B_LYS_19     | 2.97 | 2.20 | 22.07 |
| 4WUU.PDB | O, B_PHE_70    | N, B_ASN_21    | H, B_ASN_21     | 2.81 | 2.00 | 16.15 |
| 4WUU.PDB | O, B_HIS_13    | ND2, B_ASN_21  | HD21, B_ASN_21  | 2.56 | 1.73 | 12.09 |
| 4WUU.PDB | OD1, B_ASN_21  | N, B_PHE_22    | H, B_PHE_22     | 2.97 | 2.25 | 28.82 |
| 4WUU.PDB | O, B_THR_68    | N, B_LEU_23    | H, B_LEU_23     | 2.82 | 1.98 | 11.92 |
| 4WUU.PDB | O, B_TYR_10    | N, B_ASN_24    | H, B_ASN_24     | 2.72 | 1.90 | 14.68 |
| 4WUU.PDB | O, A_ALA_236   | ND2, B_ASN_24  | HD21, B_ASN_24  | 2.81 | 2.05 | 22.96 |
| 4WUU.PDB | O, B_TYR_66    | N, B_CYS_25    | H, B_CYS_25     | 2.71 | 1.87 | 10.19 |
| 4WUU.PDB | O, B_GLN_8     | N, B_TYR_26    | H, B_TYR_26     | 2.86 | 2.05 | 15.75 |
| 4WUU.PDB | OE1, A_GLU_232 | OH, B_TYR_26   | HH, B_TYR_26    | 2.95 | 2.14 | 13.27 |
| 4WUU.PDB | O, B_LEU_64    | N, B_VAL_27    | H, B_VAL_27     | 2.92 | 2.11 | 17.06 |
| 4WUU.PDB | O, B_LYS_6     | N, B_SER_28    | H, B_SER_28     | 2.97 | 2.17 | 19.07 |
| 4WUU.PDB | O, B_ARG_3     | N, B_HIS_31    | H, B_HIS_31     | 2.97 | 2.16 | 15.90 |
| 4WUU.PDB | O, B_GLU_44    | N, B_LYS_41    | H, B_LYS_41     | 2.88 | 2.07 | 16.59 |
| 4WUU.PDB | O, B_GLU_77    | N, B_ASN_42    | H, B_ASN_42     | 2.51 | 1.66 | 6.56  |
| 4WUU.PDB | OD1, B_ASP_38  | NE, B_ARG_45   | HE, B_ARG_45    | 2.54 | 1.82 | 27.34 |
| 4WUU.PDB | O, B_LEU_65    | N, B_SER_52    | H, B_SER_52     | 2.79 | 2.01 | 20.88 |

|          |                |                |                |      |      |       |
|----------|----------------|----------------|----------------|------|------|-------|
| 4WUU.PDB | O, B.SER_61    | N, B.SER_57    | H, B.SER_57    | 2.89 | 2.12 | 21.85 |
| 4WUU.PDB | O, B.SER_57    | N, B.TRP_60    | H, B.TRP_60    | 2.99 | 2.16 | 14.14 |
| 4WUU.PDB | O, B.PHE_30    | N, B.PHE_62    | H, B.PHE_62    | 2.98 | 2.14 | 10.04 |
| 4WUU.PDB | OG, B.SER_52   | N, B.LEU_65    | H, B.LEU_65    | 2.96 | 2.16 | 18.95 |
| 4WUU.PDB | O, B.CYS_25    | N, B.TYR_66    | H, B.TYR_66    | 2.90 | 2.12 | 19.74 |
| 4WUU.PDB | OD1, B.ASN_42  | N, B.GLU_77    | H, B.GLU_77    | 2.71 | 1.88 | 11.42 |
| 4WUU.PDB | O, B.ASP_38    | N, B.ARG_81    | H, B.ARG_81    | 2.83 | 1.98 | 5.14  |
| 4WUU.PDB | O, B.LYS_91    | N, B.VAL_82    | H, B.VAL_82    | 2.78 | 1.94 | 11.03 |
| 4WUU.PDB | O, B.GLU_36    | N, B.ASN_83    | H, B.ASN_83    | 2.81 | 1.99 | 15.23 |
| 4WUU.PDB | O, B.PRO_32    | NE2, B.HIS_84  | HE2, B.HIS_84  | 2.79 | 1.94 | 7.34  |
| 4WUU.PDB | ND1, B.HIS_84  | OG1, B.THR_86  | HG1, B.THR_86  | 2.95 | 2.20 | 22.57 |
| 4WUU.PDB | O, B.CYS_80    | N, B.VAL_93    | H, B.VAL_93    | 2.90 | 2.07 | 14.26 |
| 4WUU.PDB | O, B.TYR_78    | N, B.TRP_95    | H, B.TRP_95    | 2.84 | 2.01 | 11.88 |
| 4WUU.PDB | OH, A.TYR_171  | N, C.ARG_1     | H1, C.ARG_1    | 2.79 | 2.03 | 25.96 |
| 4WUU.PDB | OE2, A.GLU_63  | N, C.MET_2     | H, C.MET_2     | 2.90 | 2.09 | 16.21 |
| 4WUU.PDB | O, D.TYR_87    | NE2, D.GLN_6   | HE22, D.GLN_6  | 2.71 | 1.90 | 15.76 |
| 4WUU.PDB | O, D.LYS_106   | N, D.ALA_10    | H, D.ALA_10    | 2.90 | 2.14 | 24.22 |
| 4WUU.PDB | OE1, D.GLN_16  | N, D.THR_13    | H, D.THR_13    | 2.67 | 1.88 | 19.99 |
| 4WUU.PDB | O, D.LEU_74    | N, D.ILE_20    | H, D.ILE_20    | 2.74 | 1.99 | 24.99 |
| 4WUU.PDB | O, D.THR_5     | N, D.SER_23    | H, D.SER_23    | 2.85 | 2.04 | 15.21 |
| 4WUU.PDB | O, D.THR_70    | N, D.GLY_24    | H, D.GLY_24    | 2.81 | 1.97 | 11.14 |
| 4WUU.PDB | OD1, D.ASN_28  | N, D.SER_25    | H, D.SER_25    | 2.82 | 2.03 | 19.32 |
| 4WUU.PDB | OD1, D.ASN_28  | N, D.ILE_29    | H, D.ILE_29    | 2.67 | 1.86 | 15.71 |
| 4WUU.PDB | O, D.SER_25    | N, D.GLY_30    | H, D.GLY_30    | 2.74 | 2.02 | 28.00 |
| 4WUU.PDB | OD1, D.ASN_52  | N, D.VAL_34    | H, D.VAL_34    | 2.65 | 1.82 | 10.44 |
| 4WUU.PDB | O, D.ILE_49    | N, D.TRP_36    | H, D.TRP_36    | 2.74 | 1.90 | 10.94 |
| 4WUU.PDB | O, D.TYR_88    | N, D.TYR_37    | H, D.TYR_37    | 2.74 | 1.93 | 16.60 |
| 4WUU.PDB | O, D.LYS_46    | N, D.GLN_38    | H, D.GLN_38    | 2.85 | 2.06 | 19.88 |
| 4WUU.PDB | O, D.ASP_86    | N, D.GLN_39    | H, D.GLN_39    | 2.86 | 2.07 | 20.09 |
| 4WUU.PDB | OE1, E.GLN_39  | NE2, D.GLN_39  | HE22, D.GLN_39 | 2.94 | 2.18 | 23.53 |
| 4WUU.PDB | O, D.GLN_38    | N, D.LYS_46    | H, D.LYS_46    | 2.66 | 1.91 | 24.48 |
| 4WUU.PDB | O, D.TRP_36    | N, D.LEU_48    | H, D.LEU_48    | 2.81 | 1.96 | 9.20  |
| 4WUU.PDB | O, D.VAL_34    | N, D.ASN_52    | H, D.ASN_52    | 2.71 | 1.91 | 17.51 |
| 4WUU.PDB | O, D.TYR_50    | N, D.GLN_54    | H, D.GLN_54    | 2.84 | 2.03 | 17.63 |
| 4WUU.PDB | OD2, D.ASP_83  | NE, D.ARG_62   | HE, D.ARG_62   | 2.79 | 2.08 | 28.83 |
| 4WUU.PDB | OD1, D.ASP_83  | NH2, D.ARG_62  | HH21, D.ARG_62 | 2.86 | 2.00 | 2.74  |
| 4WUU.PDB | O, D.SER_73    | N, D.SER_66    | H, D.SER_66    | 2.98 | 2.20 | 21.24 |
| 4WUU.PDB | O, D.SER_71    | N, D.SER_68    | H, D.SER_68    | 2.91 | 2.13 | 20.74 |
| 4WUU.PDB | O, D.CYS_22    | N, D.ALA_72    | H, D.ALA_72    | 2.80 | 1.97 | 12.36 |
| 4WUU.PDB | O, D.SER_64    | N, D.ALA_75    | H, D.ALA_75    | 2.67 | 1.84 | 13.24 |
| 4WUU.PDB | O, D.ARG_62    | N, D.SER_77    | H, D.SER_77    | 2.87 | 2.05 | 15.21 |
| 4WUU.PDB | O, D.GLN_16    | N, D.GLY_78    | H, D.GLY_78    | 2.83 | 2.06 | 22.13 |
| 4WUU.PDB | O, D.GLN_16    | N, D.LEU_79    | H, D.LEU_79    | 2.99 | 2.26 | 27.65 |
| 4WUU.PDB | O, D.GLY_78    | NE2, D.GLN_80  | HE21, D.GLN_80 | 2.75 | 1.96 | 20.10 |
| 4WUU.PDB | O, D.THR_105   | N, D.TYR_87    | H, D.TYR_87    | 2.90 | 2.13 | 23.52 |
| 4WUU.PDB | O, D.ASP_83    | OH, D.TYR_87   | HH, D.TYR_87   | 2.68 | 1.84 | 6.34  |
| 4WUU.PDB | O, D.TYR_37    | N, D.TYR_88    | H, D.TYR_88    | 2.89 | 2.07 | 13.58 |
| 4WUU.PDB | OE1, D.GLN_6   | N, D.CYS_89    | H, D.CYS_89    | 2.99 | 2.19 | 19.58 |
| 4WUU.PDB | O, D.GLY_98    | N, D.ASP_93    | H, D.ASP_93    | 2.75 | 1.89 | 0.36  |
| 4WUU.PDB | OD1, E.ASP_106 | NE1, D.TRP_99  | HE1, D.TRP_99  | 2.95 | 2.19 | 24.35 |
| 4WUU.PDB | O, D.ALA_91    | N, D.VAL_100   | H, D.VAL_100   | 2.97 | 2.13 | 10.77 |
| 4WUU.PDB | O, D.TYR_87    | N, D.THR_105   | H, D.THR_105   | 2.86 | 2.16 | 29.98 |
| 4WUU.PDB | O, D.PRO_7     | OG1, D.THR_105 | HG1, D.THR_105 | 2.43 | 1.60 | 5.47  |
| 4WUU.PDB | O, D.PRO_8     | N, D.LYS_106   | H, D.LYS_106   | 2.54 | 1.73 | 16.46 |
| 4WUU.PDB | O, D.ALA_10    | N, D.THR_108   | H, D.THR_108   | 2.87 | 2.05 | 14.29 |
| 4WUU.PDB | O, D.VAL_137   | N, D.PHE_122   | H, D.PHE_122   | 2.93 | 2.13 | 18.73 |
| 4WUU.PDB | O, D.ILE_140   | OG, D.SER_141  | HG, D.SER_141  | 2.39 | 1.64 | 20.74 |
| 4WUU.PDB | O, D.CYS_138   | N, D.SER_180   | H, D.SER_180   | 2.83 | 2.03 | 17.76 |

|          |                |                |                |      |      |       |
|----------|----------------|----------------|----------------|------|------|-------|
| 4WUU.PDB | OG1, D_THR_165 | OG, D_SER_180  | HG, D_SER_180  | 3.00 | 2.24 | 22.62 |
| 4WUU.PDB | O, D_GLU_164   | N, D_TYR_181   | H, D_TYR_181   | 2.94 | 2.09 | 6.97  |
| 4WUU.PDB | O, E_LYS_23    | N, E_VAL_5     | H, E_VAL_5     | 2.91 | 2.08 | 12.06 |
| 4WUU.PDB | O, E_TYR_94    | NE2, E_GLN_6   | HE22, E_GLN_6  | 2.66 | 1.82 | 10.49 |
| 4WUU.PDB | O, E_LEU_116   | N, E_GLU_10    | H, E_GLU_10    | 2.74 | 1.93 | 15.88 |
| 4WUU.PDB | O, E_THR_118   | N, E_LYS_12    | H, E_LYS_12    | 2.72 | 1.97 | 24.94 |
| 4WUU.PDB | O, E_LEU_81    | N, E_ILE_20    | H, E_ILE_20    | 2.99 | 2.27 | 27.77 |
| 4WUU.PDB | O, E_ALA_79    | N, E_CYS_22    | H, E_CYS_22    | 2.79 | 2.05 | 26.43 |
| 4WUU.PDB | O, E_VAL_5     | N, E_LYS_23    | H, E_LYS_23    | 2.85 | 2.00 | 7.51  |
| 4WUU.PDB | O, E_SER_77    | N, E_GLY_24    | H, E_GLY_24    | 2.96 | 2.13 | 14.07 |
| 4WUU.PDB | O, E_ALA_97    | N, E_SER_35    | H, E_SER_35    | 2.86 | 2.01 | 6.50  |
| 4WUU.PDB | O, E_TYR_95    | N, E_VAL_37    | H, E_VAL_37    | 2.60 | 1.79 | 15.34 |
| 4WUU.PDB | O, E_GLU_46    | N, E_ARG_38    | H, E_ARG_38    | 2.74 | 1.93 | 15.84 |
| 4WUU.PDB | O, E_MET_93    | N, E_GLN_39    | H, E_GLN_39    | 2.93 | 2.14 | 19.90 |
| 4WUU.PDB | OE1, D_GLN_39  | NE2, E_GLN_39  | HE22, E_GLN_39 | 2.55 | 1.73 | 14.29 |
| 4WUU.PDB | O, E_MET_40    | N, E_LYS_43    | H, E_LYS_43    | 2.92 | 2.08 | 8.65  |
| 4WUU.PDB | O, E_ARG_38    | N, E_GLU_46    | H, E_GLU_46    | 2.81 | 2.04 | 21.42 |
| 4WUU.PDB | O, E_TRP_36    | N, E_MET_48    | H, E_MET_48    | 2.85 | 2.01 | 9.52  |
| 4WUU.PDB | O, E_THR_59    | N, E_ARG_50    | H, E_ARG_50    | 2.92 | 2.11 | 16.22 |
| 4WUU.PDB | OE2, A_GLU_166 | NH2, E_ARG_50  | HH22, E_ARG_50 | 2.67 | 1.88 | 18.69 |
| 4WUU.PDB | O, E_ILE_34    | N, E_VAL_51    | H, E_VAL_51    | 2.91 | 2.10 | 17.37 |
| 4WUU.PDB | O, E_TYR_57    | N, E_ASP_52    | H, E_ASP_52    | 2.77 | 1.94 | 11.78 |
| 4WUU.PDB | OD1, E_ASP_52  | N, E_GLY_54    | H, E_GLY_54    | 2.93 | 2.22 | 29.55 |
| 4WUU.PDB | O, E_ILE_70    | OG, E_SER_58   | HG, E_SER_58   | 2.56 | 1.77 | 16.65 |
| 4WUU.PDB | O, E_MET_48    | N, E_SER_61    | H, E_SER_61    | 3.00 | 2.19 | 16.66 |
| 4WUU.PDB | O, E_SER_61    | N, E_PHE_64    | H, E_PHE_64    | 2.90 | 2.08 | 14.75 |
| 4WUU.PDB | O, E_GLN_82    | N, E_THR_69    | H, E_THR_69    | 2.86 | 2.06 | 17.27 |
| 4WUU.PDB | OH, E_TYR_60   | N, E_ILE_70    | H, E_ILE_70    | 2.95 | 2.13 | 13.50 |
| 4WUU.PDB | O, E_THR_78    | N, E_ASP_73    | H, E_ASP_73    | 2.72 | 1.95 | 22.66 |
| 4WUU.PDB | OD1, E_ASP_73  | OG, E_SER_75   | HG, E_SER_75   | 2.93 | 2.16 | 19.72 |
| 4WUU.PDB | O, E_CYS_22    | N, E_ALA_79    | H, E_ALA_79    | 2.74 | 1.89 | 8.78  |
| 4WUU.PDB | O, E_SER_71    | N, E_TYR_80    | H, E_TYR_80    | 2.97 | 2.17 | 17.59 |
| 4WUU.PDB | O, E_THR_69    | N, E_GLN_82    | H, E_GLN_82    | 2.93 | 2.22 | 28.66 |
| 4WUU.PDB | O, E_LEU_18    | N, E_TRP_83    | H, E_TRP_83    | 2.80 | 1.95 | 10.15 |
| 4WUU.PDB | OD2, E_ASP_90  | N, E_LYS_87    | H, E_LYS_87    | 2.81 | 1.97 | 9.45  |
| 4WUU.PDB | O, E_THR_115   | N, E_TYR_94    | H, E_TYR_94    | 2.93 | 2.16 | 22.48 |
| 4WUU.PDB | O, E_ASP_90    | OH, E_TYR_94   | HH, E_TYR_94   | 2.62 | 1.78 | 4.11  |
| 4WUU.PDB | O, E_VAL_37    | N, E_TYR_95    | H, E_TYR_95    | 2.78 | 2.01 | 21.75 |
| 4WUU.PDB | O, E_PRO_110   | N, E_ARG_98    | H, E_ARG_98    | 2.98 | 2.16 | 15.09 |
| 4WUU.PDB | OE1, A_GLU_63  | OH, E_TYR_104  | HH, E_TYR_104  | 2.59 | 1.76 | 7.82  |
| 4WUU.PDB | OE1, A_GLU_58  | N, E_TYR_105   | H, E_TYR_105   | 2.88 | 2.05 | 12.40 |
| 4WUU.PDB | OE1, A_GLU_55  | OH, E_TYR_105  | HH, E_TYR_105  | 2.47 | 1.79 | 29.86 |
| 4WUU.PDB | O, E_CYS_96    | N, E_GLY_112   | H, E_GLY_112   | 2.73 | 1.88 | 6.91  |
| 4WUU.PDB | O, E_SER_7     | OG1, E_THR_115 | HG1, E_THR_115 | 2.87 | 2.12 | 21.80 |
| 4WUU.PDB | O, E_ALA_92    | N, E_VAL_117   | H, E_VAL_117   | 2.94 | 2.09 | 9.12  |
| 4WUU.PDB | O, E_GLU_10    | N, E_THR_118   | H, E_THR_118   | 2.81 | 2.08 | 26.12 |
| 4WUU.PDB | OG1, E_THR_91  | N, E_VAL_119   | H, E_VAL_119   | 2.69 | 1.92 | 22.07 |
| 4WUU.PDB | O, E_SER_188   | N, E_CYS_148   | H, E_CYS_148   | 2.84 | 2.07 | 21.15 |
| 4WUU.PDB | O, E_PHE_130   | N, E_LEU_149   | H, E_LEU_149   | 2.81 | 2.09 | 28.03 |
| 4WUU.PDB | O, E_TYR_184   | N, E_TYR_153   | H, E_TYR_153   | 2.99 | 2.17 | 14.59 |
| 4WUU.PDB | OE1, E_GLU_156 | OH, E_TYR_153  | HH, E_TYR_153  | 2.97 | 2.18 | 16.08 |
| 4WUU.PDB | O, E_LYS_125   | N, E_PHE_154   | H, E_PHE_154   | 2.79 | 1.96 | 12.82 |
| 4WUU.PDB | O, E_TYR_153   | N, E_TYR_184   | H, E_TYR_184   | 2.70 | 1.85 | 7.96  |

---

Table 1699: 4WUU-specific side chain and main chain hydrogen bonding analysis. In this table, a PDB file is specified with a four-letter PDB ID, except that the names of the PDB files corresponding to the single NMR structural model split from the NMR ensemble is specified with a four-letter PDB ID in addition to a hyphen followed by the single NMR structural model numeric ID, the residue naming scheme is **Chain ID\_residue name\_residue number**,  $\angle ADH$  represents the angle formed by acceptor (A), donor (D) and hydrogen (H) ( $\angle ADH$ ).

| PDB      | Acceptor (A)   | Donor (D)      | Hydrogen (H)   | D-A (Å) | H-A (Å) | $\angle ADH(^{\circ})$ |
|----------|----------------|----------------|----------------|---------|---------|------------------------|
| 4Z0X.PDB | O, A.ASP_25    | OH, A.TYR_2    | HH, A.TYR_2    | 2.80    | 1.97    | 6.75                   |
| 4Z0X.PDB | O, A.SER_23    | N, A.THR_5     | H, A.THR_5     | 2.85    | 2.02    | 14.04                  |
| 4Z0X.PDB | OG1, A.THR_101 | NE2, A.GLN_6   | HE21, A.GLN_6  | 2.98    | 2.23    | 24.64                  |
| 4Z0X.PDB | O, A.TYR_85    | NE2, A.GLN_6   | HE22, A.GLN_6  | 2.80    | 1.95    | 8.09                   |
| 4Z0X.PDB | O, A.THR_104   | N, A.VAL_12    | H, A.VAL_12    | 2.52    | 1.67    | 7.35                   |
| 4Z0X.PDB | OG1, A.THR_77  | N, A.GLY_15    | H, A.GLY_15    | 2.67    | 1.88    | 19.17                  |
| 4Z0X.PDB | OE1, A.GLN_16  | OG1, A.THR_17  | HG1, A.THR_17  | 2.97    | 2.23    | 24.46                  |
| 4Z0X.PDB | O, A.LEU_72    | N, A.ILE_20    | H, A.ILE_20    | 2.77    | 1.96    | 17.57                  |
| 4Z0X.PDB | O, A.ALA_70    | N, A.CYS_22    | H, A.CYS_22    | 2.77    | 1.99    | 21.67                  |
| 4Z0X.PDB | O, A.THR_5     | N, A.SER_23    | H, A.SER_23    | 2.81    | 2.00    | 16.58                  |
| 4Z0X.PDB | O, A.ASN_68    | N, A.GLY_24    | H, A.GLY_24    | 2.89    | 2.08    | 17.57                  |
| 4Z0X.PDB | O, A.LEU_27    | N, A.LYS_30    | H, A.LYS_30    | 2.84    | 2.00    | 9.85                   |
| 4Z0X.PDB | OD1, A.ASP_50  | N, A.VAL_32    | H, A.VAL_32    | 2.87    | 2.04    | 13.49                  |
| 4Z0X.PDB | O, A.LEU_47    | N, A.TRP_34    | H, A.TRP_34    | 2.79    | 1.98    | 15.57                  |
| 4Z0X.PDB | O, A.TYR_86    | N, A.TYR_35    | H, A.TYR_35    | 2.82    | 2.01    | 16.09                  |
| 4Z0X.PDB | OE1, A.GLN_88  | OH, A.TYR_35   | HH, A.TYR_35   | 2.99    | 2.19    | 16.02                  |
| 4Z0X.PDB | O, A.VAL_44    | N, A.GLN_36    | H, A.GLN_36    | 2.60    | 1.77    | 13.39                  |
| 4Z0X.PDB | O, A.ASP_84    | N, A.GLN_37    | H, A.GLN_37    | 2.88    | 2.08    | 17.37                  |
| 4Z0X.PDB | OE1, B.GLN_64  | NE2, A.GLN_37  | HE22, A.GLN_37 | 2.75    | 1.99    | 23.41                  |
| 4Z0X.PDB | O, A.GLN_36    | N, A.VAL_44    | H, A.VAL_44    | 2.70    | 1.89    | 16.44                  |
| 4Z0X.PDB | O, A.TRP_34    | N, A.VAL_46    | H, A.VAL_46    | 2.99    | 2.14    | 7.42                   |
| 4Z0X.PDB | O, A.LYS_52    | N, A.TYR_48    | H, A.TYR_48    | 2.81    | 1.99    | 14.31                  |
| 4Z0X.PDB | O, A.VAL_32    | N, A.ASP_50    | H, A.ASP_50    | 2.74    | 1.91    | 13.42                  |
| 4Z0X.PDB | O, A.GLN_49    | N, A.SER_51    | H, A.SER_51    | 2.75    | 2.01    | 26.59                  |
| 4Z0X.PDB | O, A.TYR_48    | N, A.LYS_52    | H, A.LYS_52    | 2.96    | 2.19    | 22.52                  |
| 4Z0X.PDB | O, A.PHE_61    | NE, A.ARG_53   | HE, A.ARG_53   | 2.38    | 1.60    | 20.12                  |
| 4Z0X.PDB | OD2, A.ASP_81  | NH1, A.ARG_60  | HH12, A.ARG_60 | 2.72    | 1.91    | 16.22                  |
| 4Z0X.PDB | O, A.THR_73    | N, A.SER_62    | H, A.SER_62    | 2.83    | 2.01    | 14.05                  |
| 4Z0X.PDB | O, A.THR_69    | N, A.SER_66    | H, A.SER_66    | 2.92    | 2.06    | 6.16                   |
| 4Z0X.PDB | O, A.SER_66    | N, A.THR_69    | H, A.THR_69    | 2.80    | 1.94    | 3.16                   |
| 4Z0X.PDB | OD1, A.ASN_68  | OG1, A.THR_69  | HG1, A.THR_69  | 2.91    | 2.09    | 9.92                   |
| 4Z0X.PDB | O, A.CYS_22    | N, A.ALA_70    | H, A.ALA_70    | 2.78    | 1.96    | 14.70                  |
| 4Z0X.PDB | O, A.SER_64    | N, A.THR_71    | H, A.THR_71    | 2.92    | 2.10    | 14.49                  |
| 4Z0X.PDB | O, A.ILE_20    | N, A.LEU_72    | H, A.LEU_72    | 2.78    | 1.96    | 14.72                  |
| 4Z0X.PDB | O, A.SER_62    | N, A.THR_73    | H, A.THR_73    | 2.73    | 1.87    | 2.53                   |
| 4Z0X.PDB | O, A.ALA_18    | N, A.ILE_74    | H, A.ILE_74    | 2.71    | 1.87    | 12.36                  |
| 4Z0X.PDB | O, A.ARG_60    | N, A.SER_75    | H, A.SER_75    | 2.66    | 1.92    | 25.71                  |
| 4Z0X.PDB | O, A.GLN_78    | N, A.ASP_81    | H, A.ASP_81    | 2.82    | 2.02    | 19.19                  |
| 4Z0X.PDB | O, A.GLN_37    | N, A.ASP_84    | H, A.ASP_84    | 2.80    | 1.95    | 9.61                   |
| 4Z0X.PDB | O, A.THR_101   | N, A.TYR_85    | H, A.TYR_85    | 2.95    | 2.11    | 9.72                   |
| 4Z0X.PDB | O, A.ASP_81    | OH, A.TYR_85   | HH, A.TYR_85   | 2.69    | 1.90    | 17.09                  |
| 4Z0X.PDB | O, B.GLY_129   | NE2, A.GLN_88  | HE22, A.GLN_88 | 2.63    | 1.87    | 22.97                  |
| 4Z0X.PDB | O, B.GLY_129   | NE1, A.TRP_90  | HE1, A.TRP_90  | 2.96    | 2.14    | 15.73                  |
| 4Z0X.PDB | O, A.ALA_94    | N, A.ASP_91    | H, A.ASP_91    | 2.88    | 2.04    | 11.61                  |
| 4Z0X.PDB | OH, C.TYR_443  | N, A.SER_93    | H, A.SER_93    | 2.99    | 2.17    | 13.42                  |
| 4Z0X.PDB | O, A.ALA_89    | N, A.VAL_96    | H, A.VAL_96    | 2.88    | 2.05    | 11.58                  |
| 4Z0X.PDB | O, A.CYS_87    | N, A.GLY_98    | H, A.GLY_98    | 2.99    | 2.16    | 12.80                  |
| 4Z0X.PDB | O, A.TYR_85    | N, A.THR_101   | H, A.THR_101   | 2.96    | 2.16    | 18.49                  |
| 4Z0X.PDB | O, A.PRO_7     | OG1, A.THR_101 | HG1, A.THR_101 | 2.61    | 1.78    | 9.78                   |
| 4Z0X.PDB | O, A.PRO_8     | N, A.LYS_102   | H, A.LYS_102   | 2.94    | 2.08    | 5.27                   |
| 4Z0X.PDB | O, A.ALA_83    | N, A.LEU_103   | H, A.LEU_103   | 2.90    | 2.08    | 13.84                  |
| 4Z0X.PDB | O, A.VAL_10    | N, A.THR_104   | H, A.THR_104   | 2.88    | 2.05    | 13.22                  |
| 4Z0X.PDB | O, A.VAL_12    | N, A.LEU_106   | H, A.LEU_106   | 2.44    | 1.64    | 16.67                  |
| 4Z0X.PDB | O, B.LEU_139   | N, B.GLU_35    | H, B.GLU_35    | 2.78    | 1.95    | 12.53                  |
| 4Z0X.PDB | O, B.LEU_111   | N, B.GLY_40    | H, B.GLY_40    | 2.87    | 2.06    | 15.69                  |
| 4Z0X.PDB | O, B.LYS_38    | N, B.SER_41    | H, B.SER_41    | 2.91    | 2.07    | 11.45                  |
| 4Z0X.PDB | O, B.LYS_38    | OG, B.SER_41   | HG, B.SER_41   | 2.46    | 1.70    | 19.33                  |

|          |                |                |                |      |      |       |
|----------|----------------|----------------|----------------|------|------|-------|
| 4Z0X.PDB | OE2, B_GLU_107 | OG, B_SER_42   | HG, B_SER_42   | 2.96 | 2.17 | 17.40 |
| 4Z0X.PDB | O, B_MET_106   | N, B_VAL_45    | H, B_VAL_45    | 2.73 | 1.90 | 11.31 |
| 4Z0X.PDB | OE1, B_GLN_31  | N, B_SER_46    | H, B_SER_46    | 2.95 | 2.11 | 10.80 |
| 4Z0X.PDB | OE1, B_GLN_31  | OG, B_SER_46   | HG, B_SER_46   | 2.75 | 1.93 | 11.18 |
| 4Z0X.PDB | O, B_ALA_104   | N, B_CYS_47    | H, B_CYS_47    | 2.48 | 1.72 | 23.24 |
| 4Z0X.PDB | O, B_PHE_76    | N, B_ILE_59    | H, B_ILE_59    | 2.75 | 1.91 | 10.64 |
| 4Z0X.PDB | O, B_ALA_122   | N, B_THR_60    | H, B_THR_60    | 2.78 | 2.00 | 20.86 |
| 4Z0X.PDB | O, B_GLY_74    | N, B_TRP_61    | H, B_TRP_61    | 2.88 | 2.03 | 5.31  |
| 4Z0X.PDB | O, B_TYR_120   | N, B_VAL_62    | H, B_VAL_62    | 2.96 | 2.12 | 9.50  |
| 4Z0X.PDB | OE2, B_GLU_71  | NE, B_ARG_63   | HE, B_ARG_63   | 2.78 | 1.94 | 9.25  |
| 4Z0X.PDB | OD1, B_ASP_115 | NH1, B_ARG_63  | HH12, B_ARG_63 | 3.00 | 2.15 | 8.77  |
| 4Z0X.PDB | O, B_VAL_118   | N, B_GLN_64    | H, B_GLN_64    | 2.70 | 1.91 | 18.82 |
| 4Z0X.PDB | O, B_TRP_61    | N, B_MET_73    | H, B_MET_73    | 2.89 | 2.05 | 11.27 |
| 4Z0X.PDB | O, B_MET_84    | N, B_GLY_75    | H, B_GLY_75    | 2.80 | 2.00 | 19.09 |
| 4Z0X.PDB | O, B_ILE_59    | N, B_PHE_76    | H, B_PHE_76    | 2.84 | 2.02 | 13.51 |
| 4Z0X.PDB | O, B_GLY_75    | N, B_MET_84    | H, B_MET_84    | 2.91 | 2.08 | 13.54 |
| 4Z0X.PDB | OE1, B_GLN_90  | NE, B_ARG_92   | HE, B_ARG_92   | 2.75 | 1.97 | 21.20 |
| 4Z0X.PDB | OD2, B_ASP_115 | NH1, B_ARG_92  | HH12, B_ARG_92 | 2.90 | 2.09 | 15.11 |
| 4Z0X.PDB | OD1, B_ASP_115 | NH2, B_ARG_92  | HH22, B_ARG_92 | 2.68 | 1.87 | 17.08 |
| 4Z0X.PDB | O, B_GLU_107   | N, B_THR_94    | H, B_THR_94    | 2.93 | 2.14 | 19.73 |
| 4Z0X.PDB | O, B_TYR_105   | N, B_THR_96    | H, B_THR_96    | 2.98 | 2.17 | 16.27 |
| 4Z0X.PDB | O, B_SER_100   | OG, B_SER_102  | HG, B_SER_102  | 2.77 | 1.99 | 18.26 |
| 4Z0X.PDB | O, B_THR_96    | N, B_TYR_105   | H, B_TYR_105   | 2.64 | 1.82 | 13.50 |
| 4Z0X.PDB | O, B_VAL_45    | N, B_MET_106   | H, B_MET_106   | 2.83 | 1.98 | 6.79  |
| 4Z0X.PDB | O, B_THR_94    | N, B_GLU_107   | H, B_GLU_107   | 2.90 | 2.05 | 7.24  |
| 4Z0X.PDB | O, B_VAL_43    | N, B_LEU_108   | H, B_LEU_108   | 2.96 | 2.14 | 15.47 |
| 4Z0X.PDB | O, B_ARG_92    | N, B_THR_109   | H, B_THR_109   | 2.97 | 2.14 | 11.99 |
| 4Z0X.PDB | O, B_SER_41    | N, B_LEU_111   | H, B_LEU_111   | 2.94 | 2.09 | 6.29  |
| 4Z0X.PDB | OD2, B_ASP_115 | N, B_ARG_112   | H, B_ARG_112   | 2.72 | 1.96 | 22.70 |
| 4Z0X.PDB | O, B_ARG_112   | N, B_ASP_115   | H, B_ASP_115   | 2.66 | 1.82 | 10.17 |
| 4Z0X.PDB | O, B_THR_138   | N, B_TYR_119   | H, B_TYR_119   | 2.87 | 2.02 | 7.83  |
| 4Z0X.PDB | O, B_ASP_115   | OH, B_TYR_119  | HH, B_TYR_119  | 2.68 | 1.89 | 16.10 |
| 4Z0X.PDB | O, B_VAL_62    | N, B_TYR_120   | H, B_TYR_120   | 2.59 | 1.74 | 8.64  |
| 4Z0X.PDB | OE1, B_GLN_64  | OH, B_TYR_120  | HH, B_TYR_120  | 2.91 | 2.08 | 8.45  |
| 4Z0X.PDB | O, B_THR_60    | N, B_ALA_122   | H, B_ALA_122   | 2.71 | 1.91 | 17.66 |
| 4Z0X.PDB | O, B_TYR_133   | N, B_ARG_123   | H, B_ARG_123   | 2.79 | 1.95 | 10.77 |
| 4Z0X.PDB | O, B_VAL_27    | NE, B_ARG_123  | HE, B_ARG_123  | 2.62 | 1.82 | 18.21 |
| 4Z0X.PDB | O, C_LEU_441   | N, B_SER_127   | H, B_SER_127   | 2.61 | 1.82 | 19.78 |
| 4Z0X.PDB | OH, A_TYR_35   | N, B_TYR_131   | H, B_TYR_131   | 2.85 | 2.09 | 23.16 |
| 4Z0X.PDB | O, B_SER_32    | OG1, B_THR_138 | HG1, B_THR_138 | 2.51 | 1.69 | 7.93  |
| 4Z0X.PDB | O, B_ALA_117   | N, B_VAL_140   | H, B_VAL_140   | 2.85 | 1.99 | 6.27  |
| 4Z0X.PDB | O, B_GLU_35    | N, B_THR_141   | H, B_THR_141   | 2.88 | 2.05 | 13.44 |
| 4Z0X.PDB | O, C_ALA_439   | N, C_TYR_443   | H, C_TYR_443   | 2.86 | 2.01 | 7.86  |

Table 1700: 4Z0X-specific side chain and main chain hydrogen bonding analysis. In this table, a PDB file is specified with a four-letter PDB ID, except that the names of the PDB files corresponding to the single NMR structural model split from the NMR ensemble is specified with a four-letter PDB ID in addition to a hyphen followed by the single NMR structural model numeric ID, the residue naming scheme is **Chain ID\_residue name\_residue number**,  $\angle ADH$  represents the angle formed by acceptor (A), donor (D) and hydrogen (H) ( $\angle ADH$ ).

| PDB      | Acceptor (A)   | Donor (D)      | Hydrogen (H)   | D-A (Å) | H-A (Å) | $\angle ADH(^{\circ})$ |
|----------|----------------|----------------|----------------|---------|---------|------------------------|
| 5I76.PDB | OG, A_SER.26   | N, A_LEU.3     | H, A_LEU.3     | 2.93    | 2.11    | 13.63                  |
| 5I76.PDB | O, A_ARG.24    | N, A_THR.5     | H, A_THR.5     | 2.85    | 2.02    | 11.85                  |
| 5I76.PDB | O, A_TYR.86    | NE2, A_GLN.6   | HE22, A_GLN.6  | 2.97    | 2.18    | 18.78                  |
| 5I76.PDB | O, A_LYS.103   | N, A_LEU.11    | H, A_LEU.11    | 2.81    | 1.99    | 15.02                  |
| 5I76.PDB | O, A_VAL.78    | N, A_GLY.16    | H, A_GLY.16    | 2.83    | 1.97    | 5.42                   |
| 5I76.PDB | OD1, A_ASN.76  | NH1, A_ARG.18  | HH11, A_ARG.18 | 2.77    | 1.94    | 12.53                  |
| 5I76.PDB | O, A_ILE.75    | N, A_VAL.19    | H, A_VAL.19    | 2.92    | 2.11    | 15.94                  |
| 5I76.PDB | O, A_LEU.73    | N, A_PHE.21    | H, A_PHE.21    | 2.75    | 1.92    | 12.31                  |
| 5I76.PDB | O, A_PHE.71    | N, A_CYS.23    | H, A_CYS.23    | 2.97    | 2.12    | 7.46                   |
| 5I76.PDB | O, A_THR.5     | N, A_ARG.24    | H, A_ARG.24    | 2.95    | 2.13    | 14.78                  |
| 5I76.PDB | O, A_THR.69    | N, A_ALA.25    | H, A_ALA.25    | 2.95    | 2.17    | 21.21                  |
| 5I76.PDB | O, A_GLY.68    | N, A_ILE.29    | H, A_ILE.29    | 2.89    | 2.05    | 11.68                  |
| 5I76.PDB | O, A_ILE.29    | N, A_ASN.32    | H, A_ASN.32    | 2.93    | 2.08    | 6.67                   |
| 5I76.PDB | O, A_THR.31    | N, A_ILE.33    | H, A_ILE.33    | 2.92    | 2.20    | 28.68                  |
| 5I76.PDB | O, A_GLN.89    | N, A_HIS.34    | H, A_HIS.34    | 2.81    | 1.99    | 14.63                  |
| 5I76.PDB | O, A_ILE.48    | N, A_TRP.35    | H, A_TRP.35    | 2.92    | 2.10    | 13.82                  |
| 5I76.PDB | O, A_TYR.87    | N, A_TYR.36    | H, A_TYR.36    | 2.81    | 2.01    | 17.84                  |
| 5I76.PDB | OE1, A_GLN.89  | OH, A_TYR.36   | HH, A_TYR.36   | 2.60    | 1.77    | 6.74                   |
| 5I76.PDB | O, A_ARG.45    | N, A_GLN.37    | H, A_GLN.37    | 2.91    | 2.08    | 14.58                  |
| 5I76.PDB | OH, A_TYR.86   | NE2, A_GLN.37  | HE21, A_GLN.37 | 2.93    | 2.09    | 10.63                  |
| 5I76.PDB | O, A_ASP.85    | N, A_GLN.38    | H, A_GLN.38    | 2.79    | 1.98    | 15.97                  |
| 5I76.PDB | OE1, B_GLN.39  | NE2, A_GLN.38  | HE22, A_GLN.38 | 2.94    | 2.10    | 10.68                  |
| 5I76.PDB | O, A_ARG.39    | N, A_GLY.42    | H, A_GLY.42    | 2.91    | 2.09    | 15.47                  |
| 5I76.PDB | O, B_GLY.110   | OG, A_SER.43   | HG, A_SER.43   | 2.73    | 2.02    | 27.09                  |
| 5I76.PDB | O, A_TRP.35    | N, A_LEU.47    | H, A_LEU.47    | 2.79    | 1.93    | 2.43                   |
| 5I76.PDB | OE1, A_GLU.53  | NZ, A_LYS.49   | HZ2, A_LYS.49  | 2.94    | 2.09    | 13.35                  |
| 5I76.PDB | OD2, B_ASP.103 | OH, A_TYR.50   | HH, A_TYR.50   | 2.64    | 1.88    | 21.01                  |
| 5I76.PDB | O, A_ILE.33    | N, A_ALA.51    | H, A_ALA.51    | 2.67    | 1.85    | 13.57                  |
| 5I76.PDB | O, A_TYR.50    | N, A_SER.52    | H, A_SER.52    | 2.77    | 2.05    | 27.32                  |
| 5I76.PDB | O, A_LYS.49    | N, A_GLU.53    | H, A_GLU.53    | 2.80    | 2.00    | 17.59                  |
| 5I76.PDB | OD1, A_ASP.82  | NH2, A_ARG.61  | HH21, A_ARG.61 | 2.77    | 1.93    | 10.41                  |
| 5I76.PDB | OE2, A_GLU.81  | NH2, A_ARG.61  | HH22, A_ARG.61 | 2.77    | 1.92    | 8.54                   |
| 5I76.PDB | O, A_SER.74    | N, A_SER.63    | H, A_SER.63    | 2.94    | 2.14    | 18.34                  |
| 5I76.PDB | O, A_THR.72    | N, A_SER.65    | H, A_SER.65    | 2.92    | 2.10    | 15.80                  |
| 5I76.PDB | O, A_GLY.30    | N, A_GLY.68    | H, A_GLY.68    | 2.79    | 2.04    | 24.26                  |
| 5I76.PDB | O, A_SER.65    | N, A_THR.72    | H, A_THR.72    | 2.94    | 2.12    | 13.74                  |
| 5I76.PDB | O, A_PHE.21    | N, A_LEU.73    | H, A_LEU.73    | 3.00    | 2.22    | 21.96                  |
| 5I76.PDB | O, A_SER.63    | N, A_SER.74    | H, A_SER.74    | 2.85    | 1.99    | 4.51                   |
| 5I76.PDB | O, A_VAL.19    | N, A_ILE.75    | H, A_ILE.75    | 2.85    | 2.03    | 15.69                  |
| 5I76.PDB | O, A_ARG.61    | N, A_ASN.76    | H, A_ASN.76    | 2.79    | 1.97    | 14.79                  |
| 5I76.PDB | O, A_GLU.17    | N, A_VAL.78    | H, A_VAL.78    | 2.96    | 2.12    | 10.44                  |
| 5I76.PDB | OD2, A_ASP.82  | N, A_GLU.79    | H, A_GLU.79    | 2.95    | 2.11    | 11.60                  |
| 5I76.PDB | O, A_GLU.79    | N, A_ASP.82    | H, A_ASP.82    | 2.78    | 1.95    | 11.07                  |
| 5I76.PDB | O, A_GLN.38    | N, A_ASP.85    | H, A_ASP.85    | 2.93    | 2.13    | 17.77                  |
| 5I76.PDB | O, A_THR.102   | N, A_TYR.86    | H, A_TYR.86    | 2.91    | 2.14    | 23.37                  |
| 5I76.PDB | O, A_ASP.82    | OH, A_TYR.86   | HH, A_TYR.86   | 2.55    | 1.72    | 9.51                   |
| 5I76.PDB | O, A_TYR.36    | N, A_TYR.87    | H, A_TYR.87    | 2.89    | 2.08    | 16.03                  |
| 5I76.PDB | OG1, A_THR.96  | NE2, A_GLN.89  | HE21, A_GLN.89 | 2.89    | 2.08    | 16.62                  |
| 5I76.PDB | O, A_THR.97    | N, A_GLN.90    | H, A_GLN.90    | 2.93    | 2.15    | 21.05                  |
| 5I76.PDB | OD1, A_ASN.93  | ND2, A_ASN.92  | HD22, A_ASN.92 | 2.89    | 2.06    | 14.53                  |
| 5I76.PDB | O, A_GLN.90    | OG1, A_THR.96  | HG1, A_THR.96  | 2.66    | 1.94    | 25.05                  |
| 5I76.PDB | O, A_ILE.2     | OG1, A_THR.97  | HG1, A_THR.97  | 2.88    | 2.08    | 14.12                  |
| 5I76.PDB | O, A_CYS.88    | N, A_GLY.99    | H, A_GLY.99    | 2.80    | 1.99    | 16.49                  |
| 5I76.PDB | OE1, A_GLN.6   | N, A_GLY.101   | H, A_GLY.101   | 2.95    | 2.25    | 29.58                  |
| 5I76.PDB | O, A_TYR.86    | N, A_THR.102   | H, A_THR.102   | 2.91    | 2.11    | 17.28                  |
| 5I76.PDB | O, A_PRO.8     | OG1, A_THR.102 | HG1, A_THR.102 | 2.77    | 2.04    | 24.64                  |
| 5I76.PDB | O, A_VAL.9     | N, A_LYS.103   | H, A_LYS.103   | 2.97    | 2.12    | 8.09                   |

|          |                |                |                 |      |      |       |
|----------|----------------|----------------|-----------------|------|------|-------|
| 5I76.PDB | O, A_ALA_84    | N, A_LEU_104   | H, A_LEU_104    | 2.94 | 2.08 | 1.76  |
| 5I76.PDB | O, A_LEU_11    | N, A_GLU_105   | H, A_GLU_105    | 2.78 | 1.93 | 6.87  |
| 5I76.PDB | O, A_VAL_13    | N, A_LYS_107   | H, A_LYS_107    | 2.80 | 1.97 | 11.70 |
| 5I76.PDB | OG, A_SER_12   | NZ, A_LYS_107  | HZ3, A_LYS_107  | 2.75 | 1.89 | 12.15 |
| 5I76.PDB | O, A_TYR_140   | N, A_ALA_111   | H, A_ALA_111    | 2.82 | 2.00 | 15.73 |
| 5I76.PDB | O, A_LEU_135   | N, A_PHE_116   | H, A_PHE_116    | 2.95 | 2.18 | 23.57 |
| 5I76.PDB | O, A_VAL_133   | N, A_PHE_118   | H, A_PHE_118    | 2.81 | 2.04 | 21.46 |
| 5I76.PDB | OG, A_SER_131  | NE2, A_GLN_124 | HE22, A_GLN_124 | 2.78 | 1.92 | 5.16  |
| 5I76.PDB | O, A_GLN_124   | N, A_SER_127   | H, A_SER_127    | 2.80 | 1.97 | 11.43 |
| 5I76.PDB | O, A_GLN_124   | OG, A_SER_127  | HG, A_SER_127   | 2.76 | 1.92 | 5.99  |
| 5I76.PDB | O, A_LEU_181   | N, A_ALA_130   | H, A_ALA_130    | 2.88 | 2.06 | 14.29 |
| 5I76.PDB | OE1, A_GLN_124 | N, A_SER_131   | H, A_SER_131    | 2.93 | 2.12 | 16.06 |
| 5I76.PDB | O, A_LEU_179   | N, A_VAL_132   | H, A_VAL_132    | 2.86 | 2.02 | 10.93 |
| 5I76.PDB | O, A_SER_177   | N, A_CYS_134   | H, A_CYS_134    | 2.84 | 1.99 | 8.38  |
| 5I76.PDB | O, A_PHE_116   | N, A_LEU_135   | H, A_LEU_135    | 2.80 | 1.96 | 8.13  |
| 5I76.PDB | O, A_LEU_175   | N, A_LEU_136   | H, A_LEU_136    | 2.86 | 2.01 | 4.38  |
| 5I76.PDB | O, A_SER_114   | N, A_ASN_137   | H, A_ASN_137    | 2.78 | 1.96 | 14.88 |
| 5I76.PDB | OG, A_SER_174  | N, A_ASN_138   | H, A_ASN_138    | 2.99 | 2.15 | 10.62 |
| 5I76.PDB | O, A_TYR_173   | N, A_PHE_139   | H, A_PHE_139    | 2.85 | 2.03 | 14.64 |
| 5I76.PDB | O, A_ALA_111   | N, A_TYR_140   | H, A_TYR_140    | 2.84 | 2.04 | 18.07 |
| 5I76.PDB | OE2, A_GLU_143 | NZ, A_LYS_145  | HZ3, A_LYS_145  | 2.87 | 2.06 | 20.39 |
| 5I76.PDB | O, A_GLU_195   | N, A_GLN_147   | H, A_GLN_147    | 2.83 | 2.01 | 15.29 |
| 5I76.PDB | OG, A_SER_177  | NE1, A_TRP_148 | HE1, A_TRP_148  | 2.97 | 2.15 | 13.90 |
| 5I76.PDB | O, A_ALA_193   | N, A_LYS_149   | H, A_LYS_149    | 2.89 | 2.04 | 9.43  |
| 5I76.PDB | O, A_VAL_191   | N, A_ASP_151   | H, A_ASP_151    | 2.77 | 1.94 | 12.86 |
| 5I76.PDB | O, A_TRP_148   | N, A_GLN_155   | H, A_GLN_155    | 2.81 | 1.97 | 9.99  |
| 5I76.PDB | O, A_ALA_153   | NE2, A_GLN_155 | HE21, A_GLN_155 | 2.93 | 2.08 | 7.12  |
| 5I76.PDB | O, A_THR_178   | N, A_GLN_160   | H, A_GLN_160    | 2.97 | 2.20 | 22.65 |
| 5I76.PDB | O, A_SER_176   | N, A_SER_162   | H, A_SER_162    | 2.82 | 2.02 | 18.15 |
| 5I76.PDB | O, B_PRO_173   | OG, A_SER_162  | HG, A_SER_162   | 2.48 | 1.79 | 28.75 |
| 5I76.PDB | O, A_SER_174   | N, A_THR_164   | H, A_THR_164    | 2.85 | 2.02 | 12.10 |
| 5I76.PDB | O, A_SER_171   | NE2, A_GLN_166 | HE21, A_GLN_166 | 2.90 | 2.05 | 6.30  |
| 5I76.PDB | O, A_LEU_106   | NE2, A_GLN_166 | HE22, A_GLN_166 | 2.72 | 1.91 | 17.00 |
| 5I76.PDB | O, A_THR_172   | N, A_ASP_167   | H, A_ASP_167    | 2.78 | 1.95 | 11.68 |
| 5I76.PDB | OD1, A_ASP_167 | N, A_LYS_169   | H, A_LYS_169    | 2.67 | 1.87 | 18.00 |
| 5I76.PDB | O, A_ASP_167   | N, A_SER_171   | H, A_SER_171    | 2.85 | 2.10 | 24.64 |
| 5I76.PDB | OD1, A_ASP_170 | OG1, A_THR_172 | HG1, A_THR_172  | 2.65 | 1.83 | 9.24  |
| 5I76.PDB | O, A_PHE_139   | N, A_TYR_173   | H, A_TYR_173    | 2.85 | 2.00 | 5.15  |
| 5I76.PDB | OE2, A_GLU_105 | OH, A_TYR_173  | HH, A_TYR_173   | 2.42 | 1.66 | 21.73 |
| 5I76.PDB | OG1, A_THR_164 | N, A_SER_174   | H, A_SER_174    | 2.83 | 2.01 | 15.67 |
| 5I76.PDB | O, A_LEU_136   | N, A_LEU_175   | H, A_LEU_175    | 2.85 | 2.05 | 17.34 |
| 5I76.PDB | O, A_SER_162   | N, A_SER_176   | H, A_SER_176    | 2.84 | 2.01 | 11.93 |
| 5I76.PDB | O, A_CYS_134   | N, A_SER_177   | H, A_SER_177    | 2.92 | 2.08 | 10.24 |
| 5I76.PDB | O, A_GLN_160   | N, A_THR_178   | H, A_THR_178    | 2.84 | 2.01 | 11.67 |
| 5I76.PDB | O, A_VAL_132   | N, A_LEU_179   | H, A_LEU_179    | 2.88 | 2.05 | 12.69 |
| 5I76.PDB | O, A_ALA_130   | N, A_LEU_181   | H, A_LEU_181    | 2.89 | 2.05 | 10.41 |
| 5I76.PDB | O, A_GLY_128   | N, A_LYS_183   | H, A_LYS_183    | 2.99 | 2.14 | 6.01  |
| 5I76.PDB | OG, A_SER_182  | N, A_ASP_185   | H, A_ASP_185    | 2.96 | 2.11 | 8.88  |
| 5I76.PDB | O, A_SER_182   | N, A_TYR_186   | H, A_TYR_186    | 2.77 | 1.92 | 7.00  |
| 5I76.PDB | O, A_LYS_183   | N, A_GLU_187   | H, A_GLU_187    | 2.88 | 2.08 | 18.36 |
| 5I76.PDB | O, A_ASP_185   | N, A_LYS_188   | H, A_LYS_188    | 2.97 | 2.19 | 21.73 |
| 5I76.PDB | OD1, A_ASP_151 | N, A_VAL_191   | H, A_VAL_191    | 2.98 | 2.13 | 9.38  |
| 5I76.PDB | O, A_PHE_209   | N, A_TYR_192   | H, A_TYR_192    | 2.92 | 2.08 | 9.60  |
| 5I76.PDB | O, A_LYS_149   | N, A_ALA_193   | H, A_ALA_193    | 2.91 | 2.19 | 28.01 |
| 5I76.PDB | O, A_LYS_207   | N, A_CYS_194   | H, A_CYS_194    | 2.85 | 2.00 | 8.12  |
| 5I76.PDB | O, A_GLN_147   | N, A_GLU_195   | H, A_GLU_195    | 2.84 | 1.99 | 7.10  |
| 5I76.PDB | O, A_VAL_205   | N, A_VAL_196   | H, A_VAL_196    | 2.79 | 2.00 | 20.45 |
| 5I76.PDB | O, A_LYS_145   | N, A_THR_197   | H, A_THR_197    | 2.98 | 2.16 | 15.25 |



|          |                |                |                |      |      |       |
|----------|----------------|----------------|----------------|------|------|-------|
| 5I76.PDB | O, A_PRO.141   | NE2, A_HIS.198 | HE2, A_HIS.198 | 2.94 | 2.11 | 12.28 |
| 5I76.PDB | ND1, A_HIS.198 | N, A_GLY.200   | H, A_GLY.200   | 2.85 | 1.99 | 1.58  |
| 5I76.PDB | O, A_HIS.198   | N, A_LEU.201   | H, A_LEU.201   | 2.86 | 2.01 | 7.02  |
| 5I76.PDB | O, A_CYS.194   | N, A_LYS.207   | H, A_LYS.207   | 2.92 | 2.10 | 16.09 |
| 5I76.PDB | O, A_TYR.192   | N, A_PHE.209   | H, A_PHE.209   | 2.90 | 2.13 | 22.49 |
| 5I76.PDB | O, A_LYS.190   | N, A_ARG.211   | H, A_ARG.211   | 2.76 | 1.93 | 12.12 |
| 5I76.PDB | O, A_HIS.189   | NE, A_ARG.211  | HE, A_ARG.211  | 2.68 | 1.86 | 13.91 |
| 5I76.PDB | O, B_SER.25    | N, B_GLN.3     | H, B_GLN.3     | 2.91 | 2.09 | 13.09 |
| 5I76.PDB | O, B_THR.23    | N, B_LYS.5     | H, B_LYS.5     | 2.90 | 2.14 | 23.54 |
| 5I76.PDB | OE1, B_GLN.111 | N, B_GLN.6     | H, B_GLN.6     | 2.83 | 2.01 | 14.84 |
| 5I76.PDB | O, B_TYR.93    | NE2, B_GLN.6   | HE22, B_GLN.6  | 2.84 | 1.99 | 7.48  |
| 5I76.PDB | O, B_THR.21    | N, B_SER.7     | H, B_SER.7     | 2.98 | 2.22 | 22.91 |
| 5I76.PDB | O, B_THR.116   | N, B_VAL.12    | H, B_VAL.12    | 2.86 | 2.03 | 11.02 |
| 5I76.PDB | O, B_LEU.85    | N, B_SER.15    | H, B_SER.15    | 2.72 | 1.87 | 6.27  |
| 5I76.PDB | O, B_PRO.14    | OG, B_SER.15   | HG, B_SER.15   | 2.58 | 1.82 | 21.55 |
| 5I76.PDB | O, B_GLN.13    | N, B_GLN.16    | H, B_GLN.16    | 2.98 | 2.13 | 9.97  |
| 5I76.PDB | O, B_MET.82    | N, B_LEU.18    | H, B_LEU.18    | 2.89 | 2.08 | 17.80 |
| 5I76.PDB | O, B_PHE.80    | N, B_ILE.20    | H, B_ILE.20    | 2.83 | 2.01 | 14.78 |
| 5I76.PDB | OG, B_SER.7    | N, B_THR.21    | H, B_THR.21    | 2.99 | 2.15 | 11.92 |
| 5I76.PDB | O, B_VAL.78    | N, B_CYS.22    | H, B_CYS.22    | 2.85 | 2.00 | 8.90  |
| 5I76.PDB | O, B_LYS.5     | N, B_THR.23    | H, B_THR.23    | 2.85 | 2.00 | 7.48  |
| 5I76.PDB | O, B_SER.76    | N, B_VAL.24    | H, B_VAL.24    | 2.97 | 2.13 | 10.77 |
| 5I76.PDB | O, B_GLN.3     | N, B_SER.25    | H, B_SER.25    | 2.89 | 2.10 | 18.84 |
| 5I76.PDB | O, B_SER.28    | N, B_ASN.31    | H, B_ASN.31    | 2.98 | 2.14 | 8.72  |
| 5I76.PDB | O, B_ILE.51    | N, B_VAL.34    | H, B_VAL.34    | 2.93 | 2.14 | 19.88 |
| 5I76.PDB | O, B_ALA.96    | N, B_HIS.35    | H, B_HIS.35    | 2.88 | 2.03 | 7.93  |
| 5I76.PDB | O, B_GLY.49    | N, B_TRP.36    | H, B_TRP.36    | 2.91 | 2.12 | 19.85 |
| 5I76.PDB | O, B_TYR.94    | N, B_VAL.37    | H, B_VAL.37    | 2.91 | 2.08 | 14.52 |
| 5I76.PDB | O, B_GLU.46    | N, B_ARG.38    | H, B_ARG.38    | 2.84 | 2.03 | 16.24 |
| 5I76.PDB | OD1, B_ASP.89  | NH1, B_ARG.38  | HH12, B_ARG.38 | 2.81 | 1.96 | 5.27  |
| 5I76.PDB | O, B_ILE.92    | N, B_GLN.39    | H, B_GLN.39    | 2.86 | 2.11 | 24.85 |
| 5I76.PDB | OE1, A_GLN.38  | NE2, B_GLN.39  | HE22, B_GLN.39 | 2.80 | 1.95 | 6.66  |
| 5I76.PDB | O, B_ARG.38    | N, B_GLU.46    | H, B_GLU.46    | 2.80 | 2.03 | 22.07 |
| 5I76.PDB | O, B_TRP.36    | N, B_LEU.48    | H, B_LEU.48    | 2.83 | 1.97 | 5.22  |
| 5I76.PDB | O, B_ASP.58    | N, B_VAL.50    | H, B_VAL.50    | 2.90 | 2.16 | 26.66 |
| 5I76.PDB | O, B_VAL.34    | N, B_ILE.51    | H, B_ILE.51    | 2.98 | 2.17 | 16.74 |
| 5I76.PDB | O, B_ASN.56    | N, B_TRP.52    | H, B_TRP.52    | 2.85 | 1.99 | 5.55  |
| 5I76.PDB | OD2, B_ASP.58  | NE1, B_TRP.52  | HE1, B_TRP.52  | 2.79 | 1.94 | 5.91  |
| 5I76.PDB | O, B_TRP.52    | N, B_GLY.55    | H, B_GLY.55    | 2.86 | 2.04 | 14.33 |
| 5I76.PDB | O, B_LEU.48    | N, B_ASN.60    | H, B_ASN.60    | 2.81 | 1.96 | 6.22  |
| 5I76.PDB | O, B_TRP.47    | ND2, B_ASN.60  | HD22, B_ASN.60 | 2.78 | 1.99 | 18.30 |
| 5I76.PDB | O, B_ASN.60    | N, B_PHE.63    | H, B_PHE.63    | 2.84 | 1.99 | 7.17  |
| 5I76.PDB | OD2, B_ASP.89  | NH1, B_ARG.66  | HH12, B_ARG.66 | 2.96 | 2.17 | 19.36 |
| 5I76.PDB | OD1, B_ASP.89  | NH2, B_ARG.66  | HH22, B_ARG.66 | 2.84 | 1.99 | 7.50  |
| 5I76.PDB | O, B_LYS.81    | N, B_SER.68    | H, B_SER.68    | 2.86 | 2.02 | 9.98  |
| 5I76.PDB | OH, B_TYR.59   | N, B_ILE.69    | H, B_ILE.69    | 3.00 | 2.17 | 14.31 |
| 5I76.PDB | O, B_SER.53    | NZ, B_LYS.71   | HZ1, B_LYS.71  | 2.77 | 1.91 | 12.10 |
| 5I76.PDB | O, B_GLN.77    | N, B_ASP.72    | H, B_ASP.72    | 2.80 | 1.95 | 9.05  |
| 5I76.PDB | OD1, B_ASP.72  | OG, B_SER.74   | HG, B_SER.74   | 2.49 | 1.80 | 29.35 |
| 5I76.PDB | O, B_CYS.22    | N, B_VAL.78    | H, B_VAL.78    | 2.83 | 1.99 | 12.58 |
| 5I76.PDB | O, B_ASN.70    | N, B_PHE.79    | H, B_PHE.79    | 2.80 | 1.94 | 1.15  |
| 5I76.PDB | O, B_ILE.20    | N, B_PHE.80    | H, B_PHE.80    | 2.88 | 2.02 | 3.13  |
| 5I76.PDB | O, B_SER.68    | N, B_LYS.81    | H, B_LYS.81    | 2.91 | 2.14 | 22.98 |
| 5I76.PDB | O, B_LEU.18    | N, B_MET.82    | H, B_MET.82    | 2.97 | 2.19 | 21.42 |
| 5I76.PDB | O, B_ARG.66    | N, B_ASN.83    | H, B_ASN.83    | 2.85 | 2.05 | 18.95 |
| 5I76.PDB | OD2, B_ASP.89  | N, B_GLN.86    | H, B_GLN.86    | 2.84 | 2.01 | 11.92 |
| 5I76.PDB | O, B_GLN.86    | N, B_ASP.89    | H, B_ASP.89    | 2.79 | 1.94 | 8.58  |
| 5I76.PDB | O, B_SER.87    | N, B_THR.90    | H, B_THR.90    | 2.93 | 2.07 | 2.10  |

|          |                |                |                 |      |      |       |
|----------|----------------|----------------|-----------------|------|------|-------|
| 5I76.PDB | O, B_GLN_39    | N, B_ILE_92    | H, B_ILE_92     | 2.94 | 2.12 | 13.61 |
| 5I76.PDB | O, B_THR_113   | N, B_TYR_93    | H, B_TYR_93     | 2.91 | 2.07 | 10.02 |
| 5I76.PDB | O, B_ASP_89    | OH, B_TYR_93   | HH, B_TYR_93    | 2.75 | 1.94 | 12.69 |
| 5I76.PDB | O, B_VAL_37    | N, B_TYR_94    | H, B_TYR_94     | 2.72 | 1.88 | 9.49  |
| 5I76.PDB | O, B_TYR_108   | N, B_ARG_97    | H, B_ARG_97     | 2.86 | 2.06 | 17.77 |
| 5I76.PDB | O, B_ALA_98    | NH1, B_ARG_97  | HH11, B_ARG_97  | 2.98 | 2.16 | 15.13 |
| 5I76.PDB | OD1, B_ASP_103 | N, B_TYR_104   | H, B_TYR_104    | 2.65 | 1.89 | 23.73 |
| 5I76.PDB | O, B_PHE_106   | NE1, B_TRP_109 | HE1, B_TRP_109  | 2.83 | 2.11 | 27.98 |
| 5I76.PDB | O, B_CYS_95    | N, B_GLY_110   | H, B_GLY_110    | 2.95 | 2.10 | 8.84  |
| 5I76.PDB | O, B_GLN_6     | NE2, B_GLN_111 | HE22, B_GLN_111 | 2.97 | 2.18 | 20.05 |
| 5I76.PDB | O, B_TYR_93    | N, B_THR_113   | H, B_THR_113    | 2.81 | 2.08 | 26.53 |
| 5I76.PDB | O, B_ALA_91    | N, B_VAL_115   | H, B_VAL_115    | 2.97 | 2.13 | 9.34  |
| 5I76.PDB | OG1, B_THR_90  | N, B_VAL_117   | H, B_VAL_117    | 2.78 | 1.93 | 4.58  |
| 5I76.PDB | O, B_PHE_152   | N, B_LYS_123   | H, B_LYS_123    | 2.83 | 1.99 | 11.39 |
| 5I76.PDB | O, B_ASP_150   | NZ, B_LYS_123  | HZ2, B_LYS_123  | 2.87 | 2.07 | 21.60 |
| 5I76.PDB | O, B_LYS_149   | N, B_SER_126   | H, B_SER_126    | 2.91 | 2.10 | 15.91 |
| 5I76.PDB | O, B_LEU_147   | N, B_PHE_128   | H, B_PHE_128    | 2.88 | 2.05 | 13.67 |
| 5I76.PDB | O, B_GLY_145   | N, B_LEU_130   | H, B_LEU_130    | 2.86 | 2.03 | 13.19 |
| 5I76.PDB | O, B_SER_134   | OG1, B_THR_137 | HG1, B_THR_137  | 2.81 | 2.01 | 14.63 |
| 5I76.PDB | O, B_VAL_190   | N, B_ALA_142   | H, B_ALA_142    | 2.82 | 1.97 | 8.01  |
| 5I76.PDB | O, B_LEU_130   | N, B_GLY_145   | H, B_GLY_145    | 2.93 | 2.14 | 20.40 |
| 5I76.PDB | O, B_SER_186   | N, B_CYS_146   | H, B_CYS_146    | 2.85 | 2.05 | 18.23 |
| 5I76.PDB | O, B_PHE_128   | N, B_LEU_147   | H, B_LEU_147    | 2.85 | 2.03 | 14.76 |
| 5I76.PDB | O, B_LEU_184   | N, B_VAL_148   | H, B_VAL_148    | 2.78 | 1.93 | 4.33  |
| 5I76.PDB | O, B_SER_126   | N, B_LYS_149   | H, B_LYS_149    | 2.80 | 1.95 | 7.51  |
| 5I76.PDB | O, B_LYS_123   | N, B_PHE_152   | H, B_PHE_152    | 2.84 | 2.02 | 15.64 |
| 5I76.PDB | O, B_ASN_205   | N, B_THR_157   | H, B_THR_157    | 2.93 | 2.11 | 15.41 |
| 5I76.PDB | O, B_ASN_203   | N, B_SER_159   | H, B_SER_159    | 2.90 | 2.10 | 17.76 |
| 5I76.PDB | OD1, B_ASN_203 | OG, B_SER_159  | HG, B_SER_159   | 2.82 | 2.04 | 17.93 |
| 5I76.PDB | OG, B_SER_186  | NE1, B_TRP_160 | HE1, B_TRP_160  | 2.99 | 2.15 | 11.06 |
| 5I76.PDB | O, B_ILE_201   | N, B_ASN_161   | H, B_ASN_161    | 2.78 | 1.93 | 9.08  |
| 5I76.PDB | OD1, B_ASN_203 | N, B_SER_162   | H, B_SER_162    | 2.79 | 2.01 | 21.54 |
| 5I76.PDB | O, B_TRP_160   | N, B_GLY_163   | H, B_GLY_163    | 2.88 | 2.13 | 24.26 |
| 5I76.PDB | O, B_ASN_161   | N, B_ALA_164   | H, B_ALA_164    | 2.99 | 2.14 | 8.06  |
| 5I76.PDB | O, B_VAL_187   | N, B_HIS_170   | H, B_HIS_170    | 2.79 | 1.96 | 12.00 |
| 5I76.PDB | O, B_SER_185   | N, B_PHE_172   | H, B_PHE_172    | 2.91 | 2.06 | 5.99  |
| 5I76.PDB | O, B_SER_183   | N, B_VAL_175   | H, B_VAL_175    | 2.87 | 2.03 | 11.83 |
| 5I76.PDB | O, B_LEU_181   | N, B_GLN_177   | H, B_GLN_177    | 2.84 | 2.00 | 8.84  |
| 5I76.PDB | OD1, B_ASP_150 | NE2, B_GLN_177 | HE22, B_GLN_177 | 2.79 | 2.00 | 19.18 |
| 5I76.PDB | O, B_GLN_177   | N, B_GLY_180   | H, B_GLY_180    | 2.82 | 1.98 | 9.91  |
| 5I76.PDB | O, B_TYR_151   | N, B_TYR_182   | H, B_TYR_182    | 2.72 | 1.88 | 9.69  |
| 5I76.PDB | O, B_VAL_148   | N, B_LEU_184   | H, B_LEU_184    | 2.84 | 2.03 | 15.91 |
| 5I76.PDB | OG, A_SER_176  | OG, B_SER_185  | HG, B_SER_185   | 2.89 | 2.15 | 23.05 |
| 5I76.PDB | O, B_CYS_146   | N, B_SER_186   | H, B_SER_186    | 2.93 | 2.10 | 13.63 |
| 5I76.PDB | O, B_HIS_170   | N, B_VAL_187   | H, B_VAL_187    | 2.94 | 2.11 | 13.31 |
| 5I76.PDB | O, B_LEU_144   | N, B_VAL_188   | H, B_VAL_188    | 2.83 | 2.02 | 16.59 |
| 5I76.PDB | O, B_ALA_142   | N, B_VAL_190   | H, B_VAL_190    | 2.85 | 2.05 | 17.07 |
| 5I76.PDB | O, B_GLY_140   | N, B_SER_192   | H, B_SER_192    | 2.92 | 2.09 | 13.75 |
| 5I76.PDB | O, B_PRO_191   | OG, B_SER_194  | HG, B_SER_194   | 2.91 | 2.11 | 15.99 |
| 5I76.PDB | O, B_SER_194   | N, B_GLN_198   | H, B_GLN_198    | 2.93 | 2.07 | 2.43  |
| 5I76.PDB | OG, B_SER_194  | OH, B_TYR_200  | HH, B_TYR_200   | 2.81 | 2.03 | 18.26 |
| 5I76.PDB | OD1, B_ASN_161 | N, B_ILE_201   | H, B_ILE_201    | 2.82 | 2.02 | 18.20 |
| 5I76.PDB | O, B_LYS_215   | N, B_CYS_202   | H, B_CYS_202    | 2.96 | 2.17 | 19.90 |
| 5I76.PDB | O, B_SER_159   | N, B_ASN_203   | H, B_ASN_203    | 2.80 | 1.94 | 5.79  |
| 5I76.PDB | OD1, B_ASP_214 | ND2, B_ASN_203 | HD22, B_ASN_203 | 2.90 | 2.11 | 19.71 |
| 5I76.PDB | O, B_VAL_213   | N, B_VAL_204   | H, B_VAL_204    | 2.78 | 1.92 | 4.35  |
| 5I76.PDB | O, B_THR_157   | N, B_ASN_205   | H, B_ASN_205    | 2.91 | 2.08 | 13.35 |
| 5I76.PDB | O, B_THR_211   | N, B_HIS_206   | H, B_HIS_206    | 2.85 | 2.00 | 6.66  |

|          |                |                |                 |      |      |       |
|----------|----------------|----------------|-----------------|------|------|-------|
| 5I76.PDB | O, B.LYS_207   | N, B.ASN_210   | H, B.ASN_210    | 2.96 | 2.11 | 7.92  |
| 5I76.PDB | O, B.VAL_204   | N, B.VAL_213   | H, B.VAL_213    | 2.87 | 2.05 | 15.17 |
| 5I76.PDB | O, B.CYS_202   | N, B.LYS_215   | H, B.LYS_215    | 2.91 | 2.13 | 20.69 |
| 5I76.PDB | OE1, A.GLU_123 | NZ, B.LYS_215  | HZ1, B.LYS_215  | 2.73 | 1.96 | 24.68 |
| 5I76.PDB | OE2, A.GLU_123 | NZ, B.LYS_215  | HZ1, B.LYS_215  | 2.89 | 2.11 | 24.69 |
| 5I76.PDB | OE1, B.GLU_218 | NE, B.ARG_216  | HE, B.ARG_216   | 2.64 | 1.90 | 25.25 |
| 5I76.PDB | OE1, B.GLU_218 | NH2, B.ARG_216 | HH21, B.ARG_216 | 2.69 | 1.98 | 29.12 |
| 5I76.PDB | O, B.TYR_200   | N, B.VAL_217   | H, B.VAL_217    | 2.83 | 1.99 | 10.82 |
| 5I76.PDB | O, C.ARG_24    | N, C.THR_5     | H, C.THR_5      | 2.87 | 2.03 | 8.25  |
| 5I76.PDB | O, C.TYR_86    | NE2, C.GLN_6   | HE22, C.GLN_6   | 2.86 | 2.05 | 16.89 |
| 5I76.PDB | O, C.LYS_103   | N, C.LEU_11    | H, C.LEU_11     | 2.75 | 1.91 | 12.00 |
| 5I76.PDB | O, C.GLU_105   | N, C.VAL_13    | H, C.VAL_13     | 2.98 | 2.20 | 22.09 |
| 5I76.PDB | OE1, C.GLU_17  | N, C.SER_14    | H, C.SER_14     | 3.00 | 2.15 | 7.87  |
| 5I76.PDB | O, C.VAL_78    | N, C.GLY_16    | H, C.GLY_16     | 2.98 | 2.12 | 1.61  |
| 5I76.PDB | O, C.ILE_75    | N, C.VAL_19    | H, C.VAL_19     | 2.86 | 2.02 | 11.04 |
| 5I76.PDB | O, C.LEU_73    | N, C.PHE_21    | H, C.PHE_21     | 2.77 | 1.93 | 10.26 |
| 5I76.PDB | O, C.PHE_71    | N, C.CYS_23    | H, C.CYS_23     | 2.95 | 2.11 | 10.08 |
| 5I76.PDB | O, C.THR_5     | N, C.ARG_24    | H, C.ARG_24     | 2.99 | 2.18 | 17.88 |
| 5I76.PDB | OD2, A.ASP_70  | NH1, C.ARG_24  | HH12, C.ARG_24  | 2.95 | 2.23 | 28.81 |
| 5I76.PDB | O, C.THR_69    | N, C.ALA_25    | H, C.ALA_25     | 2.74 | 1.96 | 20.09 |
| 5I76.PDB | O, C.GLY_68    | N, C.ILE_29    | H, C.ILE_29     | 2.91 | 2.08 | 12.56 |
| 5I76.PDB | O, C.ILE_29    | N, C.ASN_32    | H, C.ASN_32     | 2.96 | 2.11 | 6.37  |
| 5I76.PDB | O, C.THR_31    | N, C.ILE_33    | H, C.ILE_33     | 2.97 | 2.26 | 29.60 |
| 5I76.PDB | O, C.GLN_89    | N, C.HIS_34    | H, C.HIS_34     | 2.87 | 2.06 | 16.27 |
| 5I76.PDB | O, C.ILE_48    | N, C.TRP_35    | H, C.TRP_35     | 2.95 | 2.13 | 14.67 |
| 5I76.PDB | O, C.TYR_87    | N, C.TYR_36    | H, C.TYR_36     | 2.85 | 2.04 | 16.51 |
| 5I76.PDB | OE1, C.GLN_89  | OH, C.TYR_36   | HH, C.TYR_36    | 2.73 | 1.90 | 7.00  |
| 5I76.PDB | O, C.ARG_45    | N, C.GLN_37    | H, C.GLN_37     | 2.82 | 2.01 | 17.23 |
| 5I76.PDB | OH, C.TYR_86   | NE2, C.GLN_37  | HE21, C.GLN_37  | 2.93 | 2.09 | 9.49  |
| 5I76.PDB | O, C.ASP_85    | N, C.GLN_38    | H, C.GLN_38     | 2.82 | 1.99 | 13.89 |
| 5I76.PDB | O, C.GLY_42    | NE2, C.GLN_38  | HE21, C.GLN_38  | 3.00 | 2.24 | 24.26 |
| 5I76.PDB | O, C.ARG_39    | N, C.GLY_42    | H, C.GLY_42     | 2.88 | 2.09 | 19.43 |
| 5I76.PDB | O, D.GLY_110   | OG, C.SER_43   | HG, C.SER_43    | 2.84 | 2.15 | 29.22 |
| 5I76.PDB | O, C.GLN_37    | N, C.ARG_45    | H, C.ARG_45     | 2.65 | 1.95 | 29.24 |
| 5I76.PDB | OE1, C.GLN_37  | NH1, C.ARG_45  | HH11, C.ARG_45  | 2.96 | 2.15 | 17.42 |
| 5I76.PDB | O, C.TRP_35    | N, C.LEU_47    | H, C.LEU_47     | 2.79 | 1.93 | 2.36  |
| 5I76.PDB | O, C.GLU_53    | N, C.LYS_49    | H, C.LYS_49     | 2.99 | 2.18 | 15.56 |
| 5I76.PDB | OE1, C.GLU_53  | NZ, C.LYS_49   | HZ2, C.LYS_49   | 2.64 | 1.79 | 13.55 |
| 5I76.PDB | OD2, D.ASP_103 | OH, C.TYR_50   | HH, C.TYR_50    | 2.76 | 1.95 | 12.40 |
| 5I76.PDB | O, C.ILE_33    | N, C.ALA_51    | H, C.ALA_51     | 2.70 | 1.88 | 13.82 |
| 5I76.PDB | O, C.TYR_50    | N, C.SER_52    | H, C.SER_52     | 2.78 | 2.06 | 27.37 |
| 5I76.PDB | O, C.LYS_49    | N, C.GLU_53    | H, C.GLU_53     | 2.82 | 2.02 | 19.04 |
| 5I76.PDB | OD1, C.ASP_82  | NH2, C.ARG_61  | HH21, C.ARG_61  | 2.76 | 1.93 | 11.41 |
| 5I76.PDB | OE2, C.GLU_81  | NH2, C.ARG_61  | HH22, C.ARG_61  | 2.83 | 2.01 | 16.02 |
| 5I76.PDB | O, C.SER_74    | N, C.SER_63    | H, C.SER_63     | 2.93 | 2.13 | 17.96 |
| 5I76.PDB | O, C.THR_72    | N, C.SER_65    | H, C.SER_65     | 2.91 | 2.11 | 19.14 |
| 5I76.PDB | O, C.GLY_30    | N, C.GLY_68    | H, C.GLY_68     | 2.72 | 1.97 | 23.76 |
| 5I76.PDB | O, C.CYS_23    | N, C.PHE_71    | H, C.PHE_71     | 2.89 | 2.16 | 27.04 |
| 5I76.PDB | O, C.SER_65    | N, C.THR_72    | H, C.THR_72     | 2.94 | 2.10 | 11.42 |
| 5I76.PDB | O, C.PHE_21    | N, C.LEU_73    | H, C.LEU_73     | 2.99 | 2.22 | 23.12 |
| 5I76.PDB | O, C.SER_63    | N, C.SER_74    | H, C.SER_74     | 2.84 | 1.98 | 5.34  |
| 5I76.PDB | O, C.VAL_19    | N, C.ILE_75    | H, C.ILE_75     | 2.92 | 2.11 | 17.51 |
| 5I76.PDB | O, C.ARG_61    | N, C.ASN_76    | H, C.ASN_76     | 2.86 | 2.03 | 12.61 |
| 5I76.PDB | O, C.GLU_17    | N, C.VAL_78    | H, C.VAL_78     | 2.96 | 2.15 | 17.03 |
| 5I76.PDB | OD2, C.ASP_82  | N, C.GLU_79    | H, C.GLU_79     | 2.90 | 2.06 | 11.12 |
| 5I76.PDB | OG, C.SER_171  | OG, C.SER_80   | HG, C.SER_80    | 2.59 | 1.79 | 14.57 |
| 5I76.PDB | O, C.GLU_79    | N, C.ASP_82    | H, C.ASP_82     | 2.91 | 2.09 | 15.61 |
| 5I76.PDB | O, C.GLN_38    | N, C.ASP_85    | H, C.ASP_85     | 2.95 | 2.16 | 19.54 |

|          |                |                |                 |      |      |       |
|----------|----------------|----------------|-----------------|------|------|-------|
| 5I76.PDB | O, C.THR.102   | N, C.TYR.86    | H, C.TYR.86     | 2.85 | 2.08 | 22.66 |
| 5I76.PDB | O, C.ASP.82    | OH, C.TYR.86   | HH, C.TYR.86    | 2.60 | 1.79 | 11.86 |
| 5I76.PDB | O, C.TYR.36    | N, C.TYR.87    | H, C.TYR.87     | 2.91 | 2.10 | 16.52 |
| 5I76.PDB | OG1, C.THR.96  | NE2, C.GLN.89  | HE21, C.GLN.89  | 2.74 | 1.92 | 15.47 |
| 5I76.PDB | O, C.THR.97    | N, C.GLN.90    | H, C.GLN.90     | 2.85 | 2.07 | 20.66 |
| 5I76.PDB | O, C.ASN.93    | NE2, C.GLN.90  | HE22, C.GLN.90  | 2.93 | 2.08 | 7.37  |
| 5I76.PDB | OD1, C.ASN.93  | ND2, C.ASN.92  | HD22, C.ASN.92  | 2.84 | 2.03 | 16.29 |
| 5I76.PDB | O, C.GLN.90    | OG1, C.THR.96  | HG1, C.THR.96   | 2.71 | 1.98 | 25.42 |
| 5I76.PDB | O, C.ILE.2     | OG1, C.THR.97  | HG1, C.THR.97   | 2.79 | 1.98 | 12.72 |
| 5I76.PDB | O, C.CYS.88    | N, C.GLY.99    | H, C.GLY.99     | 2.86 | 2.07 | 19.65 |
| 5I76.PDB | O, C.TYR.86    | N, C.THR.102   | H, C.THR.102    | 2.98 | 2.17 | 16.60 |
| 5I76.PDB | O, C.PRO.8     | OG1, C.THR.102 | HG1, C.THR.102  | 2.70 | 1.91 | 16.81 |
| 5I76.PDB | O, C.VAL.9     | N, C.LYS.103   | H, C.LYS.103    | 2.92 | 2.08 | 9.07  |
| 5I76.PDB | O, C.ALA.84    | N, C.LEU.104   | H, C.LEU.104    | 3.00 | 2.14 | 2.26  |
| 5I76.PDB | O, C.LEU.11    | N, C.GLU.105   | H, C.GLU.105    | 2.83 | 1.99 | 8.86  |
| 5I76.PDB | O, C.VAL.13    | N, C.LYS.107   | H, C.LYS.107    | 2.70 | 1.85 | 8.61  |
| 5I76.PDB | O, C.THR.109   | NE, C.ARG.108  | HE, C.ARG.108   | 2.76 | 1.94 | 14.16 |
| 5I76.PDB | O, C.ASP.170   | NH1, C.ARG.108 | HH11, C.ARG.108 | 2.86 | 2.03 | 13.35 |
| 5I76.PDB | O, C.TYR.140   | N, C.ALA.111   | H, C.ALA.111    | 2.87 | 2.03 | 11.62 |
| 5I76.PDB | O, C.LEU.135   | N, C.PHE.116   | H, C.PHE.116    | 2.94 | 2.17 | 22.55 |
| 5I76.PDB | O, C.VAL.133   | N, C.PHE.118   | H, C.PHE.118    | 2.80 | 1.99 | 16.08 |
| 5I76.PDB | OG, C.SER.131  | NE2, C.GLN.124 | HE22, C.GLN.124 | 2.87 | 2.02 | 5.94  |
| 5I76.PDB | O, C.ASP.122   | N, C.LYS.126   | H, C.LYS.126    | 2.96 | 2.16 | 17.90 |
| 5I76.PDB | O, C.GLN.124   | N, C.SER.127   | H, C.SER.127    | 2.86 | 2.07 | 20.07 |
| 5I76.PDB | O, C.GLN.124   | OG, C.SER.127  | HG, C.SER.127   | 2.65 | 1.87 | 17.60 |
| 5I76.PDB | O, C.LEU.125   | N, C.GLY.128   | H, C.GLY.128    | 2.88 | 2.03 | 8.22  |
| 5I76.PDB | O, C.LEU.181   | N, C.ALA.130   | H, C.ALA.130    | 2.83 | 2.02 | 16.04 |
| 5I76.PDB | OE1, C.GLN.124 | N, C.SER.131   | H, C.SER.131    | 2.91 | 2.10 | 16.13 |
| 5I76.PDB | OG1, C.THR.180 | OG, C.SER.131  | HG, C.SER.131   | 2.93 | 2.13 | 14.64 |
| 5I76.PDB | O, C.LEU.179   | N, C.VAL.132   | H, C.VAL.132    | 2.79 | 1.93 | 4.92  |
| 5I76.PDB | O, C.SER.177   | N, C.CYS.134   | H, C.CYS.134    | 2.78 | 1.93 | 7.78  |
| 5I76.PDB | O, C.PHE.116   | N, C.LEU.135   | H, C.LEU.135    | 2.83 | 1.98 | 7.23  |
| 5I76.PDB | O, C.LEU.175   | N, C.LEU.136   | H, C.LEU.136    | 2.87 | 2.03 | 8.14  |
| 5I76.PDB | O, C.SER.114   | N, C.ASN.137   | H, C.ASN.137    | 2.83 | 1.99 | 9.65  |
| 5I76.PDB | O, C.TYR.173   | N, C.PHE.139   | H, C.PHE.139    | 2.81 | 1.98 | 14.22 |
| 5I76.PDB | O, C.ALA.111   | N, C.TYR.140   | H, C.TYR.140    | 2.97 | 2.16 | 16.55 |
| 5I76.PDB | OE1, C.GLU.105 | OH, C.TYR.140  | HH, C.TYR.140   | 2.89 | 2.14 | 22.51 |
| 5I76.PDB | O, C.THR.197   | N, C.LYS.145   | H, C.LYS.145    | 2.98 | 2.14 | 9.58  |
| 5I76.PDB | O, C.GLU.195   | N, C.GLN.147   | H, C.GLN.147    | 2.87 | 2.05 | 14.85 |
| 5I76.PDB | O, A.SER.202   | NE2, C.GLN.147 | HE22, C.GLN.147 | 2.78 | 1.96 | 13.33 |
| 5I76.PDB | OG, C.SER.177  | NE1, C.TRP.148 | HE1, C.TRP.148  | 2.90 | 2.11 | 19.54 |
| 5I76.PDB | O, C.ALA.193   | N, C.LYS.149   | H, C.LYS.149    | 2.90 | 2.07 | 12.57 |
| 5I76.PDB | O, C.ALA.153   | N, C.VAL.150   | H, C.VAL.150    | 2.94 | 2.13 | 15.93 |
| 5I76.PDB | O, C.VAL.191   | N, C.ASP.151   | H, C.ASP.151    | 2.91 | 2.07 | 12.19 |
| 5I76.PDB | O, C.VAL.150   | N, C.ALA.153   | H, C.ALA.153    | 2.82 | 1.97 | 8.28  |
| 5I76.PDB | O, C.TRP.148   | N, C.GLN.155   | H, C.GLN.155    | 2.85 | 2.01 | 11.31 |
| 5I76.PDB | O, C.ALA.153   | NE2, C.GLN.155 | HE21, C.GLN.155 | 2.94 | 2.09 | 9.82  |
| 5I76.PDB | OE1, C.GLN.155 | ND2, C.ASN.158 | HD22, C.ASN.158 | 2.96 | 2.21 | 25.95 |
| 5I76.PDB | O, C.THR.178   | N, C.GLN.160   | H, C.GLN.160    | 2.96 | 2.16 | 17.81 |
| 5I76.PDB | O, C.SER.176   | N, C.SER.162   | H, C.SER.162    | 2.87 | 2.08 | 18.90 |
| 5I76.PDB | O, C.SER.174   | N, C.THR.164   | H, C.THR.164    | 2.96 | 2.12 | 9.89  |
| 5I76.PDB | O, C.SER.171   | NE2, C.GLN.166 | HE21, C.GLN.166 | 2.93 | 2.09 | 11.05 |
| 5I76.PDB | O, C.LEU.106   | NE2, C.GLN.166 | HE22, C.GLN.166 | 2.76 | 1.97 | 19.15 |
| 5I76.PDB | O, C.THR.172   | N, C.ASP.167   | H, C.ASP.167    | 2.84 | 2.05 | 19.17 |
| 5I76.PDB | OD2, C.ASP.167 | N, C.LYS.169   | H, C.LYS.169    | 2.81 | 2.03 | 20.18 |
| 5I76.PDB | OD2, C.ASP.167 | N, C.ASP.170   | H, C.ASP.170    | 2.96 | 2.19 | 22.65 |
| 5I76.PDB | O, C.ASP.167   | N, C.SER.171   | H, C.SER.171    | 2.79 | 2.03 | 23.14 |
| 5I76.PDB | OD1, C.ASP.170 | N, C.THR.172   | H, C.THR.172    | 2.98 | 2.17 | 15.09 |

|          |                |                |                |      |      |       |
|----------|----------------|----------------|----------------|------|------|-------|
| 5I76.PDB | OD1, C_ASP_170 | OG1, C_THR_172 | HG1, C_THR_172 | 2.79 | 1.97 | 11.52 |
| 5I76.PDB | O, C_PHE_139   | N, C_TYR_173   | H, C_TYR_173   | 2.84 | 1.99 | 6.46  |
| 5I76.PDB | OE2, C_GLU_105 | OH, C_TYR_173  | HH, C_TYR_173  | 2.72 | 1.89 | 6.26  |
| 5I76.PDB | O, C_LEU_136   | N, C_LEU_175   | H, C_LEU_175   | 2.89 | 2.11 | 21.04 |
| 5I76.PDB | O, C_SER_162   | N, C_SER_176   | H, C_SER_176   | 2.87 | 2.04 | 12.82 |
| 5I76.PDB | O, C_CYS_134   | N, C_SER_177   | H, C_SER_177   | 2.86 | 2.04 | 15.37 |
| 5I76.PDB | O, C_GLN_160   | N, C_THR_178   | H, C_THR_178   | 2.89 | 2.09 | 17.26 |
| 5I76.PDB | O, C_VAL_132   | N, C_LEU_179   | H, C_LEU_179   | 2.86 | 2.02 | 11.05 |
| 5I76.PDB | O, C_ALA_130   | N, C_LEU_181   | H, C_LEU_181   | 2.86 | 2.03 | 12.11 |
| 5I76.PDB | O, C_SER_182   | N, C_TYR_186   | H, C_TYR_186   | 2.80 | 1.95 | 6.73  |
| 5I76.PDB | O, C_LYS_183   | N, C_GLU_187   | H, C_GLU_187   | 2.92 | 2.12 | 19.05 |
| 5I76.PDB | O, C_ASP_185   | N, C_LYS_188   | H, C_LYS_188   | 2.99 | 2.16 | 13.62 |
| 5I76.PDB | OD2, C_ASP_151 | ND1, C_HIS_189 | HD1, C_HIS_189 | 2.35 | 1.61 | 24.33 |
| 5I76.PDB | OD1, C_ASP_151 | N, C_VAL_191   | H, C_VAL_191   | 2.92 | 2.09 | 11.65 |
| 5I76.PDB | O, C_PHE_209   | N, C_TYR_192   | H, C_TYR_192   | 2.96 | 2.11 | 8.01  |
| 5I76.PDB | O, C_LYS_149   | N, C_ALA_193   | H, C_ALA_193   | 2.98 | 2.25 | 27.79 |
| 5I76.PDB | O, C_LYS_207   | N, C_CYS_194   | H, C_CYS_194   | 2.84 | 1.98 | 5.34  |
| 5I76.PDB | O, C_GLN_147   | N, C_GLU_195   | H, C_GLU_195   | 2.83 | 1.99 | 10.59 |
| 5I76.PDB | O, C_VAL_205   | N, C_VAL_196   | H, C_VAL_196   | 2.75 | 1.95 | 18.04 |
| 5I76.PDB | O, C_LYS_145   | N, C_THR_197   | H, C_THR_197   | 2.93 | 2.12 | 16.49 |
| 5I76.PDB | ND1, C_HIS_198 | N, C_GLY_200   | H, C_GLY_200   | 2.94 | 2.08 | 6.54  |
| 5I76.PDB | O, C_HIS_198   | N, C_LEU_201   | H, C_LEU_201   | 2.84 | 1.98 | 6.14  |
| 5I76.PDB | O, C_VAL_196   | N, C_VAL_205   | H, C_VAL_205   | 2.92 | 2.11 | 16.84 |
| 5I76.PDB | O, C_CYS_194   | N, C_LYS_207   | H, C_LYS_207   | 2.90 | 2.08 | 15.23 |
| 5I76.PDB | O, C_TYR_192   | N, C_PHE_209   | H, C_PHE_209   | 2.92 | 2.14 | 20.73 |
| 5I76.PDB | O, C_LYS_190   | N, C_ARG_211   | H, C_ARG_211   | 2.72 | 1.88 | 9.66  |
| 5I76.PDB | O, C_HIS_189   | NE, C_ARG_211  | HE, C_ARG_211  | 2.72 | 1.86 | 2.35  |
| 5I76.PDB | O, D_SER_25    | N, D_GLN_3     | H, D_GLN_3     | 2.94 | 2.11 | 12.93 |
| 5I76.PDB | O, D_THR_23    | N, D_LYS_5     | H, D_LYS_5     | 2.88 | 2.10 | 20.15 |
| 5I76.PDB | OE1, D_GLN_111 | N, D_GLN_6     | H, D_GLN_6     | 2.88 | 2.06 | 13.61 |
| 5I76.PDB | O, D_TYR_93    | NE2, D_GLN_6   | HE22, D_GLN_6  | 2.83 | 1.97 | 5.03  |
| 5I76.PDB | O, D_THR_21    | N, D_SER_7     | H, D_SER_7     | 2.93 | 2.18 | 24.73 |
| 5I76.PDB | O, D_THR_116   | N, D_VAL_12    | H, D_VAL_12    | 2.82 | 1.99 | 13.27 |
| 5I76.PDB | O, D_LEU_85    | N, D_SER_15    | H, D_SER_15    | 2.74 | 1.90 | 9.28  |
| 5I76.PDB | O, D_GLN_13    | N, D_GLN_16    | H, D_GLN_16    | 2.92 | 2.10 | 15.02 |
| 5I76.PDB | O, D_MET_82    | N, D_LEU_18    | H, D_LEU_18    | 2.87 | 2.04 | 11.26 |
| 5I76.PDB | O, D_PHE_80    | N, D_ILE_20    | H, D_ILE_20    | 2.93 | 2.12 | 15.50 |
| 5I76.PDB | O, D_VAL_78    | N, D_CYS_22    | H, D_CYS_22    | 2.82 | 1.97 | 8.74  |
| 5I76.PDB | O, D_LYS_5     | N, D_THR_23    | H, D_THR_23    | 2.84 | 2.00 | 7.60  |
| 5I76.PDB | O, D_SER_76    | N, D_VAL_24    | H, D_VAL_24    | 2.91 | 2.08 | 12.63 |
| 5I76.PDB | O, D_GLN_3     | N, D_SER_25    | H, D_SER_25    | 2.93 | 2.11 | 15.90 |
| 5I76.PDB | OG, D_SER_28   | OG1, D_THR_30  | HG1, D_THR_30  | 2.71 | 1.88 | 5.11  |
| 5I76.PDB | O, D_SER_28    | N, D_ASN_31    | H, D_ASN_31    | 2.99 | 2.14 | 9.76  |
| 5I76.PDB | O, D_ILE_51    | N, D_VAL_34    | H, D_VAL_34    | 2.92 | 2.14 | 20.26 |
| 5I76.PDB | O, D_ALA_96    | N, D_HIS_35    | H, D_HIS_35    | 2.85 | 2.01 | 8.24  |
| 5I76.PDB | O, D_GLY_49    | N, D_TRP_36    | H, D_TRP_36    | 2.85 | 2.04 | 16.83 |
| 5I76.PDB | O, D_TYR_94    | N, D_VAL_37    | H, D_VAL_37    | 2.97 | 2.15 | 14.15 |
| 5I76.PDB | O, D_GLU_46    | N, D_ARG_38    | H, D_ARG_38    | 2.89 | 2.08 | 16.88 |
| 5I76.PDB | OD1, D_ASP_89  | NH1, D_ARG_38  | HH12, D_ARG_38 | 2.88 | 2.03 | 7.89  |
| 5I76.PDB | O, D_ILE_92    | N, D_GLN_39    | H, D_GLN_39    | 2.87 | 2.14 | 26.90 |
| 5I76.PDB | OE1, C_GLN_38  | NE2, D_GLN_39  | HE22, D_GLN_39 | 2.85 | 2.01 | 10.98 |
| 5I76.PDB | O, D_ARG_38    | N, D_GLU_46    | H, D_GLU_46    | 2.89 | 2.10 | 19.77 |
| 5I76.PDB | O, D_TRP_36    | N, D_LEU_48    | H, D_LEU_48    | 2.71 | 1.86 | 7.08  |
| 5I76.PDB | O, D_ASP_58    | N, D_VAL_50    | H, D_VAL_50    | 2.87 | 2.11 | 23.52 |
| 5I76.PDB | O, D_VAL_34    | N, D_ILE_51    | H, D_ILE_51    | 3.00 | 2.19 | 16.46 |
| 5I76.PDB | O, D_ASN_56    | N, D_TRP_52    | H, D_TRP_52    | 2.87 | 2.02 | 5.92  |
| 5I76.PDB | OD2, D_ASP_58  | NE1, D_TRP_52  | HE1, D_TRP_52  | 2.82 | 1.96 | 3.64  |
| 5I76.PDB | O, D_TRP_52    | N, D_GLY_55    | H, D_GLY_55    | 2.86 | 2.03 | 12.93 |

|          |                |                |                 |      |      |       |
|----------|----------------|----------------|-----------------|------|------|-------|
| 5I76.PDB | O, D_VAL_50    | N, D_ASP_58    | H, D_ASP_58     | 2.98 | 2.17 | 16.49 |
| 5I76.PDB | O, D_LEU_48    | N, D_ASN_60    | H, D_ASN_60     | 2.77 | 1.91 | 2.03  |
| 5I76.PDB | O, D_TRP_47    | ND2, D_ASN_60  | HD22, D_ASN_60  | 2.84 | 2.02 | 13.85 |
| 5I76.PDB | O, D_ASN_60    | N, D_PHE_63    | H, D_PHE_63     | 2.84 | 1.99 | 9.46  |
| 5I76.PDB | OD2, D_ASP_89  | NH1, D_ARG_66  | HH12, D_ARG_66  | 2.85 | 2.02 | 11.59 |
| 5I76.PDB | OD1, D_ASP_89  | NH2, D_ARG_66  | HH22, D_ARG_66  | 2.74 | 1.89 | 8.51  |
| 5I76.PDB | O, D_LYS_81    | N, D_SER_68    | H, D_SER_68     | 2.88 | 2.06 | 12.89 |
| 5I76.PDB | OH, D_TYR_59   | N, D_ILE_69    | H, D_ILE_69     | 2.95 | 2.13 | 14.70 |
| 5I76.PDB | O, D_PHE_79    | N, D_ASN_70    | H, D_ASN_70     | 2.95 | 2.13 | 15.10 |
| 5I76.PDB | O, D_SER_53    | NZ, D_LYS_71   | HZ1, D_LYS_71   | 2.72 | 1.85 | 9.25  |
| 5I76.PDB | O, D_GLN_77    | N, D_ASP_72    | H, D_ASP_72     | 2.82 | 1.99 | 12.40 |
| 5I76.PDB | OD1, D_ASP_72  | OG, D_SER_74   | HG, D_SER_74    | 2.71 | 2.00 | 26.33 |
| 5I76.PDB | O, D_CYS_22    | N, D_VAL_78    | H, D_VAL_78     | 2.81 | 1.98 | 14.10 |
| 5I76.PDB | O, D_ASN_70    | N, D_PHE_79    | H, D_PHE_79     | 2.80 | 1.95 | 6.90  |
| 5I76.PDB | O, D_ILE_20    | N, D_PHE_80    | H, D_PHE_80     | 2.86 | 2.01 | 4.93  |
| 5I76.PDB | O, D_SER_68    | N, D_LYS_81    | H, D_LYS_81     | 2.90 | 2.09 | 17.14 |
| 5I76.PDB | O, D_LEU_18    | N, D_MET_82    | H, D_MET_82     | 2.95 | 2.17 | 20.62 |
| 5I76.PDB | O, D_ARG_66    | N, D_ASN_83    | H, D_ASN_83     | 2.77 | 1.99 | 20.75 |
| 5I76.PDB | OD2, D_ASP_89  | N, D_GLN_86    | H, D_GLN_86     | 2.92 | 2.09 | 12.09 |
| 5I76.PDB | O, D_GLN_86    | N, D_ASP_89    | H, D_ASP_89     | 2.77 | 1.93 | 7.75  |
| 5I76.PDB | O, D_SER_87    | N, D_THR_90    | H, D_THR_90     | 3.00 | 2.14 | 2.55  |
| 5I76.PDB | O, D_GLN_39    | N, D_ILE_92    | H, D_ILE_92     | 2.92 | 2.12 | 17.89 |
| 5I76.PDB | O, D_THR_113   | N, D_TYR_93    | H, D_TYR_93     | 2.90 | 2.07 | 10.93 |
| 5I76.PDB | O, D_ASP_89    | OH, D_TYR_93   | HH, D_TYR_93    | 2.67 | 1.84 | 7.84  |
| 5I76.PDB | O, D_VAL_37    | N, D_TYR_94    | H, D_TYR_94     | 2.74 | 1.91 | 13.14 |
| 5I76.PDB | O, D_TYR_108   | N, D_ARG_97    | H, D_ARG_97     | 2.84 | 2.04 | 16.66 |
| 5I76.PDB | O, D_GLU_105   | N, D_LEU_99    | H, D_LEU_99     | 2.74 | 1.99 | 24.80 |
| 5I76.PDB | OD1, D_ASP_103 | N, D_TYR_104   | H, D_TYR_104    | 2.78 | 2.02 | 23.34 |
| 5I76.PDB | OH, C_TYR_36   | N, D_PHE_106   | H, D_PHE_106    | 2.93 | 2.09 | 12.40 |
| 5I76.PDB | O, D_PHE_106   | NE1, D_TRP_109 | HE1, D_TRP_109  | 2.87 | 2.14 | 26.78 |
| 5I76.PDB | O, D_CYS_95    | N, D_GLY_110   | H, D_GLY_110    | 2.79 | 1.94 | 6.99  |
| 5I76.PDB | O, D_GLN_6     | NE2, D_GLN_111 | HE22, D_GLN_111 | 2.93 | 2.16 | 22.33 |
| 5I76.PDB | O, D_TYR_93    | N, D_THR_113   | H, D_THR_113    | 2.81 | 2.09 | 27.66 |
| 5I76.PDB | O, D_SER_7     | OG1, D_THR_113 | HG1, D_THR_113  | 2.96 | 2.26 | 28.05 |
| 5I76.PDB | O, D_ALA_91    | N, D_VAL_115   | H, D_VAL_115    | 2.92 | 2.06 | 1.61  |
| 5I76.PDB | OG1, D_THR_90  | N, D_VAL_117   | H, D_VAL_117    | 2.98 | 2.15 | 13.35 |
| 5I76.PDB | O, D_PHE_152   | N, D_LYS_123   | H, D_LYS_123    | 2.78 | 1.94 | 11.09 |
| 5I76.PDB | O, D_ASP_150   | NZ, D_LYS_123  | HZ2, D_LYS_123  | 2.95 | 2.13 | 19.50 |
| 5I76.PDB | O, D_LYS_149   | N, D_SER_126   | H, D_SER_126    | 2.93 | 2.12 | 16.07 |
| 5I76.PDB | O, D_LEU_147   | N, D_PHE_128   | H, D_PHE_128    | 2.86 | 2.04 | 14.01 |
| 5I76.PDB | O, D_GLY_145   | N, D_LEU_130   | H, D_LEU_130    | 2.76 | 1.93 | 12.37 |
| 5I76.PDB | O, D_VAL_190   | N, D_ALA_142   | H, D_ALA_142    | 2.84 | 1.99 | 7.81  |
| 5I76.PDB | O, D_VAL_188   | N, D_LEU_144   | H, D_LEU_144    | 2.94 | 2.11 | 12.57 |
| 5I76.PDB | O, D_LEU_130   | N, D_GLY_145   | H, D_GLY_145    | 2.87 | 2.09 | 20.87 |
| 5I76.PDB | O, D_SER_186   | N, D_CYS_146   | H, D_CYS_146    | 2.86 | 2.06 | 18.05 |
| 5I76.PDB | O, D_PHE_128   | N, D_LEU_147   | H, D_LEU_147    | 2.79 | 1.96 | 12.46 |
| 5I76.PDB | O, D_LEU_184   | N, D_VAL_148   | H, D_VAL_148    | 2.78 | 1.92 | 3.60  |
| 5I76.PDB | O, D_SER_126   | N, D_LYS_149   | H, D_LYS_149    | 2.86 | 2.01 | 8.73  |
| 5I76.PDB | OD1, D_ASP_150 | NZ, D_LYS_149  | HZ3, D_LYS_149  | 2.86 | 2.03 | 16.70 |
| 5I76.PDB | OE1, D_GLU_154 | OH, D_TYR_151  | HH, D_TYR_151   | 2.91 | 2.09 | 9.17  |
| 5I76.PDB | O, D_LYS_123   | N, D_PHE_152   | H, D_PHE_152    | 2.92 | 2.10 | 15.60 |
| 5I76.PDB | O, D_ASN_205   | N, D_THR_157   | H, D_THR_157    | 2.93 | 2.10 | 13.79 |
| 5I76.PDB | O, D_ASN_203   | N, D_SER_159   | H, D_SER_159    | 2.90 | 2.10 | 17.79 |
| 5I76.PDB | OD1, D_ASN_203 | OG, D_SER_159  | HG, D_SER_159   | 2.84 | 2.05 | 16.99 |
| 5I76.PDB | OG, D_SER_186  | NE1, D_TRP_160 | HE1, D_TRP_160  | 2.92 | 2.08 | 9.81  |
| 5I76.PDB | O, D_ILE_201   | N, D_ASN_161   | H, D_ASN_161    | 2.80 | 1.97 | 10.81 |
| 5I76.PDB | OD1, D_ASN_203 | N, D_SER_162   | H, D_SER_162    | 2.77 | 1.99 | 21.35 |
| 5I76.PDB | O, D_TRP_160   | N, D_GLY_163   | H, D_GLY_163    | 2.92 | 2.16 | 23.49 |

|          |                |                |                 |      |      |       |
|----------|----------------|----------------|-----------------|------|------|-------|
| 5I76.PDB | O, D_ASN_161   | N, D_ALA_164   | H, D_ALA_164    | 2.96 | 2.12 | 9.30  |
| 5I76.PDB | O, D_VAL_187   | N, D_HIS_170   | H, D_HIS_170    | 2.80 | 1.97 | 11.03 |
| 5I76.PDB | O, D_SER_185   | N, D_PHE_172   | H, D_PHE_172    | 2.92 | 2.07 | 3.58  |
| 5I76.PDB | O, D_LEU_181   | N, D_GLN_177   | H, D_GLN_177    | 2.88 | 2.03 | 5.94  |
| 5I76.PDB | OD1, D_ASP_150 | NE2, D_GLN_177 | HE22, D_GLN_177 | 2.71 | 1.92 | 19.90 |
| 5I76.PDB | O, D_GLN_177   | N, D_GLY_180   | H, D_GLY_180    | 2.92 | 2.07 | 7.88  |
| 5I76.PDB | O, D_TYR_151   | N, D_TYR_182   | H, D_TYR_182    | 2.70 | 1.85 | 9.44  |
| 5I76.PDB | O, D_VAL_148   | N, D_LEU_184   | H, D_LEU_184    | 2.93 | 2.12 | 16.08 |
| 5I76.PDB | O, D_CYS_146   | N, D_SER_186   | H, D_SER_186    | 2.93 | 2.10 | 13.35 |
| 5I76.PDB | O, D_HIS_170   | N, D_VAL_187   | H, D_VAL_187    | 2.85 | 2.02 | 13.58 |
| 5I76.PDB | O, D_LEU_144   | N, D_VAL_188   | H, D_VAL_188    | 2.84 | 2.04 | 18.13 |
| 5I76.PDB | O, D_ALA_142   | N, D_VAL_190   | H, D_VAL_190    | 2.88 | 2.06 | 15.90 |
| 5I76.PDB | O, D_GLY_140   | N, D_SER_192   | H, D_SER_192    | 2.66 | 1.82 | 10.87 |
| 5I76.PDB | O, D_PRO_191   | N, D_SER_194   | H, D_SER_194    | 2.93 | 2.12 | 17.62 |
| 5I76.PDB | O, D_PRO_191   | OG, D_SER_194  | HG, D_SER_194   | 2.78 | 2.01 | 19.83 |
| 5I76.PDB | O, D_SER_194   | N, D_GLN_198   | H, D_GLN_198    | 2.92 | 2.06 | 3.85  |
| 5I76.PDB | O, D_THR_199   | NE2, D_GLN_198 | HE21, D_GLN_198 | 2.86 | 2.01 | 0.69  |
| 5I76.PDB | OG, D_SER_194  | OH, D_TYR_200  | HH, D_TYR_200   | 2.69 | 1.90 | 16.49 |
| 5I76.PDB | OD1, D_ASN_161 | N, D_ILE_201   | H, D_ILE_201    | 2.91 | 2.08 | 13.96 |
| 5I76.PDB | O, D_LYS_215   | N, D_CYS_202   | H, D_CYS_202    | 2.93 | 2.15 | 21.14 |
| 5I76.PDB | O, D_SER_159   | N, D_ASN_203   | H, D_ASN_203    | 2.82 | 1.98 | 10.06 |
| 5I76.PDB | O, D_VAL_213   | N, D_VAL_204   | H, D_VAL_204    | 2.81 | 1.96 | 3.09  |
| 5I76.PDB | O, D_THR_157   | N, D_ASN_205   | H, D_ASN_205    | 2.91 | 2.08 | 12.09 |
| 5I76.PDB | O, D_THR_211   | N, D_HIS_206   | H, D_HIS_206    | 2.80 | 1.95 | 4.50  |
| 5I76.PDB | O, D_PRO_153   | NE2, D_HIS_206 | HE2, D_HIS_206  | 2.83 | 1.99 | 8.92  |
| 5I76.PDB | O, D_LYS_207   | N, D_ASN_210   | H, D_ASN_210    | 2.86 | 2.01 | 9.18  |
| 5I76.PDB | O, D_VAL_204   | N, D_VAL_213   | H, D_VAL_213    | 2.96 | 2.15 | 16.50 |
| 5I76.PDB | O, D_CYS_202   | N, D_LYS_215   | H, D_LYS_215    | 2.92 | 2.10 | 13.71 |
| 5I76.PDB | OE1, C_GLU_123 | NZ, D_LYS_215  | HZ1, D_LYS_215  | 2.60 | 1.73 | 11.40 |
| 5I76.PDB | O, D_TYR_200   | N, D_VAL_217   | H, D_VAL_217    | 2.83 | 1.98 | 9.45  |

Table 1701: 5I76-specific side chain and main chain hydrogen bonding analysis. In this table, a PDB file is specified with a four-letter PDB ID, except that the names of the PDB files corresponding to the single NMR structural model split from the NMR ensemble is specified with a four-letter PDB ID in addition to a hyphen followed by the single NMR structural model numeric ID, the residue naming scheme is **Chain ID\_residue name\_residue number**,  $\angle ADH$  represents the angle formed by acceptor (A), donor (D) and hydrogen (H) ( $\angle ADH$ ).

| PDB      | Acceptor (A)    | Donor (D)     | Hydrogen (H)   | D-A (Å) | H-A (Å) | $\angle ADH(^{\circ})$ |
|----------|-----------------|---------------|----------------|---------|---------|------------------------|
| 5JO5.PDB | O, H.SER_25     | N, H.GLN_3    | H, H.GLN_3     | 2.86    | 2.02    | 10.87                  |
| 5JO5.PDB | O, H.ALA_23     | N, H.VAL_5    | H, H.VAL_5     | 2.97    | 2.20    | 22.57                  |
| 5JO5.PDB | O, H.SER_21     | N, H.SER_7    | H, H.SER_7     | 2.83    | 2.06    | 22.33                  |
| 5JO5.PDB | OG1, H.THR_107  | N, H.GLY_9    | H, H.GLY_9     | 2.92    | 2.18    | 25.94                  |
| 5JO5.PDB | O, H.THR_110    | N, H.VAL_12   | H, H.VAL_12    | 2.95    | 2.16    | 19.95                  |
| 5JO5.PDB | O, H.LEU_82C    | N, H.GLY_15   | H, H.GLY_15    | 2.87    | 2.03    | 10.84                  |
| 5JO5.PDB | O, H.LYS_13     | N, H.GLY_16   | H, H.GLY_16    | 2.89    | 2.08    | 16.43                  |
| 5JO5.PDB | O, H.MET_82     | N, H.LEU_18   | H, H.LEU_18    | 2.85    | 2.08    | 21.54                  |
| 5JO5.PDB | O, H.LEU_80     | N, H.LEU_20   | H, H.LEU_20    | 2.83    | 1.98    | 7.63                   |
| 5JO5.PDB | O, H.SER_7      | N, H.SER_21   | H, H.SER_21    | 2.95    | 2.11    | 11.17                  |
| 5JO5.PDB | O, H.LEU_78     | N, H.CYS_22   | H, H.CYS_22    | 2.71    | 1.93    | 21.85                  |
| 5JO5.PDB | O, H.ASN_76     | N, H.ALA_24   | H, H.ALA_24    | 2.98    | 2.24    | 25.87                  |
| 5JO5.PDB | O, H.GLN_3      | N, H.SER_25   | H, H.SER_25    | 2.97    | 2.18    | 20.13                  |
| 5JO5.PDB | OD2, H.ASP_53   | NE1, H.TRP_33 | HE1, H.TRP_33  | 2.93    | 2.17    | 24.23                  |
| 5JO5.PDB | O, H.ALA_93     | N, H.SER_35   | H, H.SER_35    | 2.89    | 2.05    | 12.04                  |
| 5JO5.PDB | OG1, H.THR_95   | OG, H.SER_35  | HG, H.SER_35   | 2.68    | 1.99    | 28.91                  |
| 5JO5.PDB | O, H.GLY_49     | N, H.TRP_36   | H, H.TRP_36    | 2.91    | 2.11    | 18.39                  |
| 5JO5.PDB | O, H.TYR_91     | N, H.VAL_37   | H, H.VAL_37    | 2.87    | 2.05    | 15.23                  |
| 5JO5.PDB | O, H.GLU_46     | N, H.ARG_38   | H, H.ARG_38    | 2.84    | 1.99    | 8.78                   |
| 5JO5.PDB | OE1, H.GLU_46   | NE, H.ARG_38  | HE, H.ARG_38   | 2.82    | 2.00    | 14.74                  |
| 5JO5.PDB | OH, H.TYR_90    | NH1, H.ARG_38 | HH11, H.ARG_38 | 2.91    | 2.09    | 14.97                  |
| 5JO5.PDB | OD1, H.ASP_86   | NH1, H.ARG_38 | HH12, H.ARG_38 | 2.87    | 2.05    | 14.25                  |
| 5JO5.PDB | O, H.VAL_89     | N, H.GLN_39   | H, H.GLN_39    | 2.85    | 2.14    | 29.27                  |
| 5JO5.PDB | O, H.LYS_43     | NE2, H.GLN_39 | HE21, H.GLN_39 | 2.97    | 2.25    | 28.76                  |
| 5JO5.PDB | OE1, H.GLN_38   | NE2, H.GLN_39 | HE22, H.GLN_39 | 2.84    | 2.00    | 9.38                   |
| 5JO5.PDB | O, H.ALA_40     | N, H.LYS_43   | H, H.LYS_43    | 2.90    | 2.09    | 16.35                  |
| 5JO5.PDB | O, H.ARG_38     | N, H.GLU_46   | H, H.GLU_46    | 2.79    | 2.02    | 21.68                  |
| 5JO5.PDB | O, H.TRP_36     | N, H.VAL_48   | H, H.VAL_48    | 2.94    | 2.11    | 12.31                  |
| 5JO5.PDB | OE1, H.GLU_100J | NE, H.ARG_50  | HE, H.ARG_50   | 2.77    | 2.00    | 22.35                  |
| 5JO5.PDB | OD2, H.ASP_58   | NH2, H.ARG_50 | HH22, H.ARG_50 | 2.84    | 2.00    | 11.12                  |
| 5JO5.PDB | O, H.MET_34     | N, H.ILE_51   | H, H.ILE_51    | 2.83    | 2.00    | 12.12                  |
| 5JO5.PDB | O, H.THR_56     | N, H.LYS_52   | H, H.LYS_52    | 2.88    | 2.07    | 15.53                  |
| 5JO5.PDB | O, H.LYS_52B    | N, H.GLY_54   | H, H.GLY_54    | 2.98    | 2.13    | 6.95                   |
| 5JO5.PDB | O, H.SER_52A    | N, H.GLY_55   | H, H.GLY_55    | 2.78    | 2.06    | 28.32                  |
| 5JO5.PDB | O, H.VAL_48     | N, H.ALA_60   | H, H.ALA_60    | 2.93    | 2.08    | 7.36                   |
| 5JO5.PDB | O, H.VAL_63     | N, H.ARG_66   | H, H.ARG_66    | 2.94    | 2.10    | 10.09                  |
| 5JO5.PDB | OD2, H.ASP_86   | NH1, H.ARG_66 | HH12, H.ARG_66 | 2.78    | 1.94    | 11.10                  |
| 5JO5.PDB | O, H.PRO_62     | NH2, H.ARG_66 | HH21, H.ARG_66 | 2.88    | 2.03    | 7.86                   |
| 5JO5.PDB | O, H.GLN_81     | N, H.THR_68   | H, H.THR_68    | 2.80    | 1.99    | 17.53                  |
| 5JO5.PDB | OH, H.TYR_59    | N, H.ILE_69   | H, H.ILE_69    | 2.86    | 2.01    | 7.98                   |
| 5JO5.PDB | OD1, H.ASP_73   | NE, H.ARG_71  | HE, H.ARG_71   | 2.85    | 2.05    | 17.58                  |
| 5JO5.PDB | O, H.ALA_32     | NH1, H.ARG_71 | HH12, H.ARG_71 | 2.86    | 2.11    | 24.42                  |
| 5JO5.PDB | O, H.ALA_32     | NH2, H.ARG_71 | HH22, H.ARG_71 | 2.83    | 2.07    | 23.03                  |
| 5JO5.PDB | O, H.THR_77     | N, H.ASP_72   | H, H.ASP_72    | 2.89    | 2.04    | 7.72                   |
| 5JO5.PDB | OD1, H.ASP_72   | OG, H.SER_74  | HG, H.SER_74   | 2.59    | 1.76    | 4.73                   |
| 5JO5.PDB | O, H.LYS_75     | OG1, H.THR_77 | HG1, H.THR_77  | 2.84    | 2.04    | 15.24                  |
| 5JO5.PDB | O, H.CYS_22     | N, H.LEU_78   | H, H.LEU_78    | 2.85    | 2.02    | 12.40                  |
| 5JO5.PDB | O, H.SER_70     | N, H.TYR_79   | H, H.TYR_79    | 2.84    | 2.00    | 10.37                  |
| 5JO5.PDB | O, H.LEU_20     | N, H.LEU_80   | H, H.LEU_80    | 2.99    | 2.17    | 15.30                  |
| 5JO5.PDB | O, H.THR_68     | N, H.GLN_81   | H, H.GLN_81    | 2.80    | 1.97    | 11.82                  |
| 5JO5.PDB | O, H.LEU_18     | N, H.MET_82   | H, H.MET_82    | 2.68    | 1.83    | 6.72                   |
| 5JO5.PDB | O, H.ARG_66     | N, H.ASN_82A  | H, H.ASN_82A   | 2.89    | 2.08    | 16.66                  |
| 5JO5.PDB | OD2, H.ASP_86   | N, H.LYS_83   | H, H.LYS_83    | 2.83    | 2.01    | 15.00                  |
| 5JO5.PDB | O, H.LYS_83     | N, H.ASP_86   | H, H.ASP_86    | 2.89    | 2.04    | 9.43                   |
| 5JO5.PDB | O, H.VAL_109    | N, H.ALA_88   | H, H.ALA_88    | 2.98    | 2.20    | 21.19                  |
| 5JO5.PDB | O, H.GLN_39     | N, H.VAL_89   | H, H.VAL_89    | 2.91    | 2.12    | 19.27                  |
| 5JO5.PDB | O, H.THR_107    | N, H.TYR_90   | H, H.TYR_90    | 2.80    | 1.96    | 8.92                   |



|          |                |                |                 |      |      |       |
|----------|----------------|----------------|-----------------|------|------|-------|
| 5JO5.PDB | O, H_ASP_86    | OH, H_TYR_90   | HH, H_TYR_90    | 2.72 | 1.89 | 9.52  |
| 5JO5.PDB | O, H_VAL_37    | N, H_TYR_91    | H, H_TYR_91     | 2.60 | 1.74 | 3.84  |
| 5JO5.PDB | OE2, H_GLU_6   | N, H_CYS_92    | H, H_CYS_92     | 2.73 | 1.88 | 6.94  |
| 5JO5.PDB | O, H_SER_35    | N, H_ALA_93    | H, H_ALA_93     | 2.87 | 2.09 | 21.23 |
| 5JO5.PDB | OD2, H_ASP_102 | NE, H_ARG_94   | HE, H_ARG_94    | 2.81 | 2.07 | 25.27 |
| 5JO5.PDB | OD2, H_ASP_102 | NH1, H_ARG_94  | HH11, H_ARG_94  | 2.70 | 1.93 | 22.67 |
| 5JO5.PDB | O, H_TRP_33    | N, H_THR_95    | H, H_THR_95     | 2.84 | 2.02 | 13.21 |
| 5JO5.PDB | O, H_TYR_100K  | N, H_GLY_96    | H, H_GLY_96     | 2.75 | 2.04 | 28.69 |
| 5JO5.PDB | OH, L_TYR_36   | N, H_PHE_100L  | H, H_PHE_100L   | 2.79 | 1.96 | 12.88 |
| 5JO5.PDB | O, H_ARG_94    | N, H_GLN_101   | H, H_GLN_101    | 2.75 | 2.02 | 27.16 |
| 5JO5.PDB | O, H_CYS_92    | N, H_GLY_104   | H, H_GLY_104    | 2.98 | 2.18 | 17.80 |
| 5JO5.PDB | O, L_GLY_41    | NH2, H_ARG_105 | HH22, H_ARG_105 | 2.85 | 2.05 | 18.48 |
| 5JO5.PDB | OE1, H_GLU_6   | N, H_GLY_106   | H, H_GLY_106    | 2.83 | 1.97 | 2.31  |
| 5JO5.PDB | O, H_ALA_88    | N, H_VAL_109   | H, H_VAL_109    | 2.90 | 2.04 | 1.74  |
| 5JO5.PDB | OG1, H_THR_87  | N, H_VAL_111   | H, H_VAL_111    | 2.87 | 2.02 | 7.41  |
| 5JO5.PDB | O, H_PHE_146   | N, H_LYS_117   | H, H_LYS_117    | 2.78 | 1.95 | 14.10 |
| 5JO5.PDB | O, H_ASP_144   | NZ, H_LYS_117  | HZ2, H_LYS_117  | 2.88 | 2.15 | 29.08 |
| 5JO5.PDB | O, H_LEU_141   | N, H_PHE_122   | H, H_PHE_122    | 2.87 | 2.06 | 15.46 |
| 5JO5.PDB | O, H_GLY_139   | N, H_LEU_124   | H, H_LEU_124    | 2.83 | 1.98 | 8.83  |
| 5JO5.PDB | O, H_THR_135   | N, H_SER_132   | H, H_SER_132    | 2.79 | 2.00 | 20.13 |
| 5JO5.PDB | O, H_VAL_184   | N, H_ALA_136   | H, H_ALA_136    | 2.77 | 1.96 | 15.59 |
| 5JO5.PDB | O, H_LEU_124   | N, H_GLY_139   | H, H_GLY_139    | 2.94 | 2.17 | 22.16 |
| 5JO5.PDB | O, H_SER_180   | N, H_CYS_140   | H, H_CYS_140    | 2.79 | 2.01 | 20.41 |
| 5JO5.PDB | O, H_PHE_122   | N, H_LEU_141   | H, H_LEU_141    | 2.81 | 1.96 | 8.37  |
| 5JO5.PDB | O, H_LEU_178   | N, H_VAL_142   | H, H_VAL_142    | 2.78 | 1.93 | 4.91  |
| 5JO5.PDB | O, H_SER_120   | N, H_LYS_143   | H, H_LYS_143    | 2.78 | 1.93 | 7.38  |
| 5JO5.PDB | OE2, L_GLU_124 | NZ, H_LYS_143  | HZ2, H_LYS_143  | 2.46 | 1.63 | 17.05 |
| 5JO5.PDB | O, H_TYR_176   | N, H_TYR_145   | H, H_TYR_145    | 2.93 | 2.12 | 18.01 |
| 5JO5.PDB | O, H_LYS_117   | N, H_PHE_146   | H, H_PHE_146    | 2.91 | 2.11 | 18.36 |
| 5JO5.PDB | O, H_ASN_197   | N, H_SER_153   | H, H_SER_153    | 2.98 | 2.17 | 17.36 |
| 5JO5.PDB | OD1, H_ASN_197 | OG, H_SER_153  | HG, H_SER_153   | 2.83 | 2.04 | 17.75 |
| 5JO5.PDB | OG, H_SER_180  | NE1, H_TRP_154 | HE1, H_TRP_154  | 2.93 | 2.09 | 10.13 |
| 5JO5.PDB | O, H_ILE_195   | N, H_ASN_155   | H, H_ASN_155    | 2.79 | 1.95 | 11.56 |
| 5JO5.PDB | OD1, H_ASN_197 | N, H_SER_156   | H, H_SER_156    | 2.79 | 1.98 | 16.54 |
| 5JO5.PDB | O, H_VAL_181   | N, H_HIS_164   | H, H_HIS_164    | 2.87 | 2.04 | 11.88 |
| 5JO5.PDB | O, H_SER_179   | N, H_PHE_166   | H, H_PHE_166    | 2.94 | 2.09 | 7.03  |
| 5JO5.PDB | O, H_SER_177   | N, H_VAL_169   | H, H_VAL_169    | 2.82 | 1.99 | 13.61 |
| 5JO5.PDB | O, H_LEU_175   | N, H_GLN_171   | H, H_GLN_171    | 2.90 | 2.04 | 2.90  |
| 5JO5.PDB | OD1, H_ASP_144 | NE2, H_GLN_171 | HE22, H_GLN_171 | 2.85 | 2.05 | 18.06 |
| 5JO5.PDB | O, H_GLN_171   | N, H_GLY_174   | H, H_GLY_174    | 2.76 | 1.91 | 7.94  |
| 5JO5.PDB | O, H_TYR_145   | N, H_TYR_176   | H, H_TYR_176    | 2.87 | 2.01 | 3.19  |
| 5JO5.PDB | O, H_VAL_142   | N, H_LEU_178   | H, H_LEU_178    | 2.88 | 2.10 | 20.17 |
| 5JO5.PDB | OH, L_TYR_177  | OG, H_SER_179  | HG, H_SER_179   | 2.73 | 2.00 | 25.96 |
| 5JO5.PDB | O, H_CYS_140   | N, H_SER_180   | H, H_SER_180    | 2.97 | 2.15 | 16.14 |
| 5JO5.PDB | O, H_HIS_164   | N, H_VAL_181   | H, H_VAL_181    | 2.90 | 2.05 | 10.33 |
| 5JO5.PDB | O, H_LEU_138   | N, H_VAL_182   | H, H_VAL_182    | 2.81 | 1.98 | 13.21 |
| 5JO5.PDB | O, H_ALA_136   | N, H_VAL_184   | H, H_VAL_184    | 2.93 | 2.09 | 11.13 |
| 5JO5.PDB | O, H_GLY_134   | N, H_SER_186   | H, H_SER_186    | 2.74 | 1.90 | 11.33 |
| 5JO5.PDB | O, H_PRO_185   | N, H_SER_188   | H, H_SER_188    | 2.93 | 2.12 | 16.10 |
| 5JO5.PDB | O, H_PRO_185   | OG, H_SER_188  | HG, H_SER_188   | 2.69 | 1.85 | 3.24  |
| 5JO5.PDB | O, H_SER_188   | N, H_GLN_192   | H, H_GLN_192    | 2.64 | 1.80 | 8.80  |
| 5JO5.PDB | O, H_THR_193   | NE2, H_GLN_192 | HE21, H_GLN_192 | 2.95 | 2.13 | 13.81 |
| 5JO5.PDB | OG, H_SER_188  | OH, H_TYR_194  | HH, H_TYR_194   | 2.61 | 1.85 | 20.74 |
| 5JO5.PDB | OD1, H_ASN_155 | N, H_ILE_195   | H, H_ILE_195    | 2.90 | 2.09 | 16.29 |
| 5JO5.PDB | O, H_LYS_209   | N, H_CYS_196   | H, H_CYS_196    | 2.98 | 2.20 | 20.49 |
| 5JO5.PDB | O, H_SER_153   | N, H_ASN_197   | H, H_ASN_197    | 2.76 | 1.91 | 7.31  |
| 5JO5.PDB | OD1, H_ASP_208 | ND2, H_ASN_197 | HD22, H_ASN_197 | 2.91 | 2.06 | 7.04  |
| 5JO5.PDB | O, H_VAL_207   | N, H_VAL_198   | H, H_VAL_198    | 2.73 | 1.88 | 4.89  |

|          |                 |                |                |      |      |       |
|----------|-----------------|----------------|----------------|------|------|-------|
| 5JO5.PDB | O, H_THR_205    | N, H_HIS_200   | H, H_HIS_200   | 2.87 | 2.01 | 1.84  |
| 5JO5.PDB | O, H_PRO_147    | NE2, H_HIS_200 | HE2, H_HIS_200 | 2.76 | 1.91 | 9.60  |
| 5JO5.PDB | O, H_LYS_201    | N, H_ASN_204   | H, H_ASN_204   | 2.99 | 2.16 | 10.85 |
| 5JO5.PDB | O, H_VAL_198    | N, H_VAL_207   | H, H_VAL_207   | 2.80 | 1.98 | 14.15 |
| 5JO5.PDB | O, H_TYR_194    | N, H_VAL_211   | H, H_VAL_211   | 2.90 | 2.06 | 10.21 |
| 5JO5.PDB | O, L_GLN_24     | N, L_THR_5     | H, L_THR_5     | 2.86 | 2.04 | 14.84 |
| 5JO5.PDB | O, L_TYR_86     | NE2, L_GLN_6   | HE22, L_GLN_6  | 2.96 | 2.12 | 10.37 |
| 5JO5.PDB | O, L_LYS_103    | N, L_VAL_11    | H, L_VAL_11    | 2.96 | 2.14 | 15.21 |
| 5JO5.PDB | O, L_THR_105    | N, L_VAL_13    | H, L_VAL_13    | 2.96 | 2.22 | 26.22 |
| 5JO5.PDB | O, L_ALA_78     | N, L_GLY_16    | H, L_GLY_16    | 2.86 | 2.00 | 4.99  |
| 5JO5.PDB | O, L_ILE_75     | N, L_VAL_19    | H, L_VAL_19    | 2.97 | 2.17 | 18.95 |
| 5JO5.PDB | O, L_LEU_73     | N, L_ILE_21    | H, L_ILE_21    | 2.80 | 1.96 | 10.07 |
| 5JO5.PDB | O, L_ALA_71     | N, L_CYS_23    | H, L_CYS_23    | 2.65 | 1.81 | 9.51  |
| 5JO5.PDB | O, L_THR_5      | N, L_GLN_24    | H, L_GLN_24    | 2.94 | 2.18 | 24.54 |
| 5JO5.PDB | O, L_ASN_69     | N, L_GLY_25    | H, L_GLY_25    | 2.97 | 2.14 | 12.74 |
| 5JO5.PDB | O, L_ARG_91     | OG, L_SER_27   | HG, L_SER_27   | 2.58 | 1.79 | 15.77 |
| 5JO5.PDB | OE1, D_GLN_24   | OG, L_SER_30   | HG, L_SER_30   | 2.84 | 2.07 | 18.45 |
| 5JO5.PDB | O, L_SER_89     | N, L_SER_34    | H, L_SER_34    | 2.96 | 2.20 | 23.71 |
| 5JO5.PDB | O, L_ILE_48     | N, L_TRP_35    | H, L_TRP_35    | 2.92 | 2.12 | 18.40 |
| 5JO5.PDB | O, L_TYR_87     | N, L_TYR_36    | H, L_TYR_36    | 2.82 | 2.06 | 23.68 |
| 5JO5.PDB | O, L_VAL_45     | N, L_GLN_37    | H, L_GLN_37    | 2.90 | 2.07 | 14.26 |
| 5JO5.PDB | OH, L_TYR_86    | NE2, L_GLN_37  | HE21, L_GLN_37 | 2.94 | 2.08 | 4.10  |
| 5JO5.PDB | O, L_ASP_85     | N, L_GLN_38    | H, L_GLN_38    | 2.78 | 1.99 | 19.05 |
| 5JO5.PDB | OE1, H_GLN_39   | NE2, L_GLN_38  | HE22, L_GLN_38 | 2.83 | 2.00 | 13.03 |
| 5JO5.PDB | O, L_LYS_39     | N, L_GLN_42    | H, L_GLN_42    | 2.99 | 2.18 | 16.76 |
| 5JO5.PDB | O, L_GLN_37     | N, L_VAL_45    | H, L_VAL_45    | 2.86 | 2.09 | 22.29 |
| 5JO5.PDB | O, L_TRP_35     | N, L_VAL_47    | H, L_VAL_47    | 2.87 | 2.01 | 3.07  |
| 5JO5.PDB | OD1, L_ASN_52   | NE, L_ARG_54   | HE, L_ARG_54   | 2.95 | 2.15 | 18.15 |
| 5JO5.PDB | OD1, L_ASP_82   | NH2, L_ARG_61  | HH21, L_ARG_61 | 2.75 | 1.92 | 13.56 |
| 5JO5.PDB | OE2, L_GLU_81   | NH2, L_ARG_61  | HH22, L_ARG_61 | 2.98 | 2.17 | 16.30 |
| 5JO5.PDB | O, L_THR_74     | N, L_SER_63    | H, L_SER_63    | 2.91 | 2.14 | 22.21 |
| 5JO5.PDB | OD1, L_ASN_52   | N, L_GLY_64    | H, L_GLY_64    | 2.74 | 1.93 | 16.44 |
| 5JO5.PDB | O, L_SER_72     | N, L_SER_65    | H, L_SER_65    | 2.99 | 2.21 | 21.03 |
| 5JO5.PDB | O, L_THR_70     | N, L_SER_67    | H, L_SER_67    | 2.96 | 2.13 | 12.51 |
| 5JO5.PDB | O, L_SER_67     | N, L_THR_70    | H, L_THR_70    | 2.95 | 2.13 | 15.77 |
| 5JO5.PDB | O, L_SER_67     | OG1, L_THR_70  | HG1, L_THR_70  | 2.76 | 1.95 | 12.31 |
| 5JO5.PDB | O, L_CYS_23     | N, L_ALA_71    | H, L_ALA_71    | 2.78 | 1.96 | 15.50 |
| 5JO5.PDB | O, L_SER_65     | N, L_SER_72    | H, L_SER_72    | 2.85 | 2.01 | 11.19 |
| 5JO5.PDB | O, L_ILE_21     | N, L_LEU_73    | H, L_LEU_73    | 2.77 | 1.95 | 14.84 |
| 5JO5.PDB | O, L_SER_63     | N, L_THR_74    | H, L_THR_74    | 2.81 | 1.96 | 6.34  |
| 5JO5.PDB | O, L_VAL_19     | N, L_ILE_75    | H, L_ILE_75    | 2.92 | 2.10 | 14.23 |
| 5JO5.PDB | O, L_ARG_61     | N, L_THR_76    | H, L_THR_76    | 3.00 | 2.18 | 15.65 |
| 5JO5.PDB | O, L_GLN_17     | N, L_ALA_78    | H, L_ALA_78    | 2.90 | 2.06 | 10.41 |
| 5JO5.PDB | OD2, L_ASP_82   | N, L_GLN_79    | H, L_GLN_79    | 2.88 | 2.03 | 7.63  |
| 5JO5.PDB | O, L_GLN_79     | N, L_ASP_82    | H, L_ASP_82    | 2.84 | 1.99 | 8.17  |
| 5JO5.PDB | O, L_GLN_38     | N, L_ASP_85    | H, L_ASP_85    | 2.85 | 2.02 | 13.72 |
| 5JO5.PDB | O, L_THR_102    | N, L_TYR_86    | H, L_TYR_86    | 2.82 | 2.00 | 14.85 |
| 5JO5.PDB | O, L_ASP_82     | OH, L_TYR_86   | HH, L_TYR_86   | 2.63 | 1.81 | 7.96  |
| 5JO5.PDB | O, L_TYR_36     | N, L_TYR_87    | H, L_TYR_87    | 2.95 | 2.15 | 18.69 |
| 5JO5.PDB | O, L_SER_34     | N, L_SER_89    | H, L_SER_89    | 2.88 | 2.15 | 26.79 |
| 5JO5.PDB | O, L_VAL_97     | OG, L_SER_89   | HG, L_SER_89   | 2.82 | 2.06 | 20.46 |
| 5JO5.PDB | OE2, H_GLU_100J | NH2, L_ARG_91  | HH22, L_ARG_91 | 2.69 | 1.84 | 7.26  |
| 5JO5.PDB | OH, L_TYR_31    | N, L_GLY_95    | H, L_GLY_95    | 2.78 | 1.95 | 11.57 |
| 5JO5.PDB | OD1, L_ASP_92   | OG, L_SER_95A  | HG, L_SER_95A  | 2.53 | 1.76 | 19.87 |
| 5JO5.PDB | OD1, H_ASP_58   | NE, L_ARG_95B  | HE, L_ARG_95B  | 2.95 | 2.13 | 14.76 |
| 5JO5.PDB | OG, L_SER_95A   | N, L_LEU_95C   | H, L_LEU_95C   | 2.90 | 2.07 | 11.01 |
| 5JO5.PDB | O, L_SER_90     | N, L_VAL_97    | H, L_VAL_97    | 2.91 | 2.08 | 13.54 |
| 5JO5.PDB | O, L_CYS_88     | N, L_GLY_99    | H, L_GLY_99    | 2.86 | 2.04 | 15.85 |

|          |                |                |                 |      |      |       |
|----------|----------------|----------------|-----------------|------|------|-------|
| 5JO5.PDB | OE1, L_GLN_6   | N, L_GLY_101   | H, L_GLY_101    | 2.93 | 2.15 | 20.63 |
| 5JO5.PDB | O, L_TYR_86    | N, L_THR_102   | H, L_THR_102    | 2.83 | 2.05 | 21.30 |
| 5JO5.PDB | O, L ASP_7     | OG1, L_THR_102 | HG1, L_THR_102  | 2.55 | 1.71 | 2.52  |
| 5JO5.PDB | O, L_PRO_8     | N, L_LYS_103   | H, L_LYS_103    | 2.89 | 2.05 | 8.92  |
| 5JO5.PDB | O, L_ALA_84    | N, L_LEU_104   | H, L_LEU_104    | 2.87 | 2.03 | 9.56  |
| 5JO5.PDB | OE2, L_GLU_83  | N, L_VAL_106   | H, L_VAL_106    | 2.95 | 2.18 | 22.86 |
| 5JO5.PDB | O, L_VAL_13    | N, L_LEU_106A  | H, L_LEU_106A   | 2.88 | 2.04 | 12.25 |
| 5JO5.PDB | OH, L_TYR_140  | N, L_SER_107   | H, L_SER_107    | 2.96 | 2.15 | 15.96 |
| 5JO5.PDB | OE1, L_GLU_198 | NZ, L_LYS_110  | HZ3, L_LYS_110  | 2.94 | 2.09 | 14.01 |
| 5JO5.PDB | O, L_TYR_140   | N, L_ALA_111   | H, L_ALA_111    | 2.75 | 1.91 | 11.65 |
| 5JO5.PDB | O, L_SER_137   | N, L_SER_114   | H, L_SER_114    | 2.88 | 2.08 | 18.09 |
| 5JO5.PDB | O, L_LEU_135   | N, L_THR_116   | H, L_THR_116    | 2.97 | 2.14 | 11.76 |
| 5JO5.PDB | O, L_VAL_133   | N, L_PHE_118   | H, L_PHE_118    | 2.81 | 1.95 | 5.47  |
| 5JO5.PDB | OE2, L_GLU_124 | OG1, L_THR_131 | HG1, L_THR_131  | 2.52 | 1.80 | 26.33 |
| 5JO5.PDB | O, L_LEU_178   | N, L_LEU_132   | H, L_LEU_132    | 2.86 | 2.05 | 15.80 |
| 5JO5.PDB | O, L_SER_176   | N, L_CYS_134   | H, L_CYS_134    | 2.82 | 1.97 | 8.12  |
| 5JO5.PDB | O, L_THR_116   | N, L_LEU_135   | H, L_LEU_135    | 2.90 | 2.05 | 8.63  |
| 5JO5.PDB | O, L_ALA_174   | N, L_ILE_136   | H, L_ILE_136    | 2.88 | 2.10 | 21.82 |
| 5JO5.PDB | O, L_SER_114   | N, L_SER_137   | H, L_SER_137    | 2.94 | 2.15 | 19.51 |
| 5JO5.PDB | OE1, L_GLN_167 | N, L ASP_138   | H, L ASP_138    | 2.79 | 2.02 | 21.93 |
| 5JO5.PDB | O, L_PRO_141   | N, L_ALA_143   | H, L_ALA_143    | 2.87 | 2.16 | 29.13 |
| 5JO5.PDB | O, L_GLN_194   | N, L_ALA_147   | H, L_ALA_147    | 2.86 | 2.03 | 12.40 |
| 5JO5.PDB | OG, L_SER_176  | NE1, L_TRP_148 | HE1, L_TRP_148  | 2.93 | 2.09 | 9.40  |
| 5JO5.PDB | O, L_SER_192   | N, L_LYS_149   | H, L_LYS_149    | 2.97 | 2.16 | 17.57 |
| 5JO5.PDB | O, L_SER_153   | N, L_ALA_150   | H, L_ALA_150    | 2.83 | 2.05 | 20.73 |
| 5JO5.PDB | O, L_TRP_148   | N, L_VAL_155   | H, L_VAL_155    | 2.95 | 2.13 | 15.00 |
| 5JO5.PDB | O, L_SER_175   | N, L_THR_162   | H, L_THR_162    | 2.86 | 2.04 | 15.42 |
| 5JO5.PDB | O, H_GLY_42    | OG1, L_THR_163 | HG1, L_THR_163  | 2.52 | 1.79 | 25.04 |
| 5JO5.PDB | O, L_LYS_171   | N, L_GLN_167   | H, L_GLN_167    | 2.64 | 1.79 | 5.56  |
| 5JO5.PDB | OD1, L ASN_169 | NE2, L_GLN_167 | HE21, L_GLN_167 | 2.89 | 2.12 | 21.54 |
| 5JO5.PDB | O, L_PHE_139   | N, L_TYR_172   | H, L_TYR_172    | 2.91 | 2.12 | 19.98 |
| 5JO5.PDB | O, L_SER_165   | N, L_ALA_173   | H, L_ALA_173    | 2.99 | 2.18 | 16.79 |
| 5JO5.PDB | O, L_ILE_136   | N, L_ALA_174   | H, L_ALA_174    | 2.74 | 1.94 | 17.43 |
| 5JO5.PDB | OG1, L_THR_162 | OG, L_SER_175  | HG, L_SER_175   | 2.94 | 2.19 | 22.64 |
| 5JO5.PDB | O, L_CYS_134   | N, L_SER_176   | H, L_SER_176    | 2.92 | 2.13 | 20.19 |
| 5JO5.PDB | OG1, L_THR_161 | OG, L_SER_176  | HG, L_SER_176   | 2.79 | 2.07 | 26.34 |
| 5JO5.PDB | O, L_GLU_160   | N, L_TYR_177   | H, L_TYR_177    | 2.76 | 1.95 | 17.14 |
| 5JO5.PDB | O, L_LEU_132   | N, L_LEU_178   | H, L_LEU_178    | 2.97 | 2.16 | 15.14 |
| 5JO5.PDB | O, L_GLY_158   | N, L_SER_179   | H, L_SER_179    | 2.93 | 2.10 | 12.81 |
| 5JO5.PDB | O, L_ALA_130   | N, L_LEU_180   | H, L_LEU_180    | 2.74 | 1.88 | 1.66  |
| 5JO5.PDB | OE1, L_GLN_184 | N, L_THR_181   | H, L_THR_181    | 2.79 | 1.96 | 12.16 |
| 5JO5.PDB | O, L_LYS_149   | N, L_SER_192   | H, L_SER_192    | 2.91 | 2.12 | 19.77 |
| 5JO5.PDB | OG1, L_THR_205 | OG, L_SER_192  | HG, L_SER_192   | 2.82 | 2.12 | 28.14 |
| 5JO5.PDB | O, L_LYS_204   | N, L_CYS_193   | H, L_CYS_193    | 2.89 | 2.08 | 16.55 |
| 5JO5.PDB | O, L_ALA_147   | N, L_GLN_194   | H, L_GLN_194    | 2.74 | 1.89 | 6.08  |
| 5JO5.PDB | O, L_VAL_202   | N, L_VAL_195   | H, L_VAL_195    | 2.92 | 2.09 | 13.64 |
| 5JO5.PDB | O, L_THR_145   | N, L_THR_196   | H, L_THR_196    | 2.99 | 2.14 | 7.48  |
| 5JO5.PDB | O, L_SER_200   | N, L_HIS_197   | H, L_HIS_197    | 2.70 | 1.87 | 12.42 |
| 5JO5.PDB | O, L_PRO_141   | NE2, L_HIS_197 | HE2, L_HIS_197  | 2.84 | 2.04 | 18.51 |
| 5JO5.PDB | O, L_HIS_197   | N, L_SER_200   | H, L_SER_200    | 2.99 | 2.16 | 11.48 |
| 5JO5.PDB | OG1, L_THR_196 | OG1, L_THR_201 | HG1, L_THR_201  | 2.95 | 2.20 | 22.04 |
| 5JO5.PDB | O, L_VAL_195   | N, L_VAL_202   | H, L_VAL_202    | 2.93 | 2.11 | 14.66 |
| 5JO5.PDB | O, L_TYR_191   | N, L_VAL_206   | H, L_VAL_206    | 2.84 | 2.01 | 13.12 |
| 5JO5.PDB | O, A_SER_25    | N, A_GLN_3     | H, A_GLN_3      | 2.86 | 2.01 | 9.97  |
| 5JO5.PDB | O, A_ALA_23    | N, A_VAL_5     | H, A_VAL_5      | 3.00 | 2.23 | 23.15 |
| 5JO5.PDB | O, A_SER_21    | N, A_SER_7     | H, A_SER_7      | 2.80 | 2.01 | 19.59 |
| 5JO5.PDB | OG1, A_THR_107 | N, A_GLY_9     | H, A_GLY_9      | 2.93 | 2.20 | 27.02 |
| 5JO5.PDB | O, A_THR_110   | N, A_VAL_12    | H, A_VAL_12     | 2.89 | 2.09 | 18.23 |

|          |                 |               |                |      |      |       |
|----------|-----------------|---------------|----------------|------|------|-------|
| 5JO5.PDB | O, A_LEU_82C    | N, A_GLY_15   | H, A_GLY_15    | 2.79 | 1.96 | 12.62 |
| 5JO5.PDB | O, A_LYS_13     | N, A_GLY_16   | H, A_GLY_16    | 2.95 | 2.13 | 15.67 |
| 5JO5.PDB | O, A_MET_82     | N, A_LEU_18   | H, A_LEU_18    | 2.94 | 2.14 | 18.28 |
| 5JO5.PDB | O, A_LEU_80     | N, A_LEU_20   | H, A_LEU_20    | 2.82 | 2.00 | 14.35 |
| 5JO5.PDB | O, A_SER_7      | N, A_SER_21   | H, A_SER_21    | 2.92 | 2.08 | 11.20 |
| 5JO5.PDB | O, A_LEU_78     | N, A_CYS_22   | H, A_CYS_22    | 2.77 | 2.01 | 23.44 |
| 5JO5.PDB | O, A_VAL_5      | N, A_ALA_23   | H, A_ALA_23    | 2.96 | 2.14 | 16.35 |
| 5JO5.PDB | O, A_PHE_29     | N, A_ALA_32   | H, A_ALA_32    | 2.94 | 2.09 | 3.75  |
| 5JO5.PDB | OD2, A_ASP_53   | NE1, A_TRP_33 | HE1, A_TRP_33  | 2.82 | 2.05 | 21.67 |
| 5JO5.PDB | O, A_ALA_93     | N, A_SER_35   | H, A_SER_35    | 2.92 | 2.09 | 13.78 |
| 5JO5.PDB | O, A_GLY_49     | N, A_TRP_36   | H, A_TRP_36    | 2.89 | 2.08 | 17.21 |
| 5JO5.PDB | O, A_TYR_91     | N, A_VAL_37   | H, A_VAL_37    | 2.83 | 2.00 | 13.43 |
| 5JO5.PDB | O, A_GLU_46     | N, A_ARG_38   | H, A_ARG_38    | 2.87 | 2.02 | 9.33  |
| 5JO5.PDB | OE1, A_GLU_46   | NE, A_ARG_38  | HE, A_ARG_38   | 2.78 | 1.97 | 16.63 |
| 5JO5.PDB | OD1, A_ASP_86   | NH1, A_ARG_38 | HH12, A_ARG_38 | 2.83 | 2.01 | 14.60 |
| 5JO5.PDB | OE1, B_GLN_38   | NE2, A_GLN_39 | HE22, A_GLN_39 | 2.87 | 2.02 | 8.31  |
| 5JO5.PDB | O, A_ALA_40     | N, A_LYS_43   | H, A_LYS_43    | 2.86 | 2.03 | 13.20 |
| 5JO5.PDB | O, A_ARG_38     | N, A_GLU_46   | H, A_GLU_46    | 2.79 | 2.01 | 20.62 |
| 5JO5.PDB | O, A_TRP_36     | N, A_VAL_48   | H, A_VAL_48    | 2.91 | 2.08 | 13.09 |
| 5JO5.PDB | OE1, A_GLU_100J | NE, A_ARG_50  | HE, A_ARG_50   | 2.88 | 2.11 | 22.13 |
| 5JO5.PDB | OE2, A_GLU_100J | NH1, A_ARG_50 | HH11, A_ARG_50 | 2.91 | 2.07 | 11.34 |
| 5JO5.PDB | OD2, A_ASP_58   | NH2, A_ARG_50 | HH22, A_ARG_50 | 2.88 | 2.05 | 13.39 |
| 5JO5.PDB | O, A_MET_34     | N, A_ILE_51   | H, A_ILE_51    | 2.86 | 2.02 | 11.89 |
| 5JO5.PDB | O, A_THR_56     | N, A_LYS_52   | H, A_LYS_52    | 2.85 | 2.02 | 13.45 |
| 5JO5.PDB | O, A_LYS_52B    | N, A_GLY_54   | H, A_GLY_54    | 2.90 | 2.06 | 8.56  |
| 5JO5.PDB | O, A_SER_52A    | N, A_GLY_55   | H, A_GLY_55    | 2.85 | 2.06 | 18.80 |
| 5JO5.PDB | O, A_VAL_48     | N, A_ALA_60   | H, A_ALA_60    | 2.97 | 2.12 | 7.83  |
| 5JO5.PDB | O, A_VAL_63     | N, A_ARG_66   | H, A_ARG_66    | 2.94 | 2.11 | 11.71 |
| 5JO5.PDB | O, A_SER_82B    | NH1, A_ARG_66 | HH11, A_ARG_66 | 2.94 | 2.23 | 29.90 |
| 5JO5.PDB | OD2, A_ASP_86   | NH1, A_ARG_66 | HH12, A_ARG_66 | 2.80 | 1.98 | 14.11 |
| 5JO5.PDB | O, A_PRO_62     | NH2, A_ARG_66 | HH21, A_ARG_66 | 2.96 | 2.10 | 6.17  |
| 5JO5.PDB | O, A_GLN_81     | N, A_THR_68   | H, A_THR_68    | 2.83 | 2.01 | 13.97 |
| 5JO5.PDB | OH, A_TYR_59    | N, A_ILE_69   | H, A_ILE_69    | 2.85 | 2.01 | 8.90  |
| 5JO5.PDB | OD1, A_ASP_73   | NE, A_ARG_71  | HE, A_ARG_71   | 2.86 | 2.09 | 22.09 |
| 5JO5.PDB | O, A_ALA_32     | NH1, A_ARG_71 | HH12, A_ARG_71 | 2.93 | 2.18 | 24.18 |
| 5JO5.PDB | O, A_ALA_32     | NH2, A_ARG_71 | HH22, A_ARG_71 | 2.90 | 2.14 | 22.88 |
| 5JO5.PDB | O, A_THR_77     | N, A_ASP_72   | H, A_ASP_72    | 2.96 | 2.10 | 6.62  |
| 5JO5.PDB | OD1, A_ASP_72   | OG, A_SER_74  | HG, A_SER_74   | 2.54 | 1.80 | 22.83 |
| 5JO5.PDB | O, A_LYS_75     | OG1, A_THR_77 | HG1, A_THR_77  | 2.92 | 2.11 | 13.47 |
| 5JO5.PDB | O, A_CYS_22     | N, A_LEU_78   | H, A_LEU_78    | 2.92 | 2.08 | 10.42 |
| 5JO5.PDB | O, A_SER_70     | N, A_TYR_79   | H, A_TYR_79    | 2.88 | 2.05 | 13.41 |
| 5JO5.PDB | O, A_THR_68     | N, A_GLN_81   | H, A_GLN_81    | 2.75 | 1.92 | 12.07 |
| 5JO5.PDB | O, A_LEU_18     | N, A_MET_82   | H, A_MET_82    | 2.76 | 1.91 | 7.81  |
| 5JO5.PDB | OD2, A_ASP_86   | N, A_LYS_83   | H, A_LYS_83    | 2.81 | 1.98 | 13.27 |
| 5JO5.PDB | O, A_LYS_83     | N, A_ASP_86   | H, A_ASP_86    | 2.81 | 1.98 | 12.37 |
| 5JO5.PDB | O, A_GLN_39     | N, A_VAL_89   | H, A_VAL_89    | 2.91 | 2.12 | 19.76 |
| 5JO5.PDB | O, A_THR_107    | N, A_TYR_90   | H, A_TYR_90    | 2.80 | 1.95 | 9.44  |
| 5JO5.PDB | O, A_ASP_86     | OH, A_TYR_90  | HH, A_TYR_90   | 2.68 | 1.87 | 12.71 |
| 5JO5.PDB | O, A_VAL_37     | N, A_TYR_91   | H, A_TYR_91    | 2.64 | 1.78 | 2.28  |
| 5JO5.PDB | OE2, A_GLU_6    | N, A_CYS_92   | H, A_CYS_92    | 2.84 | 2.03 | 15.70 |
| 5JO5.PDB | O, A_SER_35     | N, A_ALA_93   | H, A_ALA_93    | 2.90 | 2.14 | 23.25 |
| 5JO5.PDB | OD2, A_ASP_102  | NE, A_ARG_94  | HE, A_ARG_94   | 2.86 | 2.14 | 28.73 |
| 5JO5.PDB | OD2, A_ASP_102  | NH1, A_ARG_94 | HH11, A_ARG_94 | 2.58 | 1.79 | 19.06 |
| 5JO5.PDB | O, A_TRP_33     | N, A_THR_95   | H, A_THR_95    | 2.83 | 2.01 | 14.93 |
| 5JO5.PDB | O, A_TYR_100K   | N, A_GLY_96   | H, A_GLY_96    | 2.84 | 2.07 | 22.90 |
| 5JO5.PDB | O, A_GLU_100I   | N, A_TYR_98   | H, A_TYR_98    | 2.88 | 2.03 | 8.11  |
| 5JO5.PDB | O, A_GLY_96     | N, A_TYR_100K | H, A_TYR_100K  | 2.90 | 2.10 | 17.32 |
| 5JO5.PDB | OH, B_TYR_36    | N, A_PHE_100L | H, A_PHE_100L  | 2.86 | 2.06 | 18.12 |

|          |                |                |                 |      |      |       |
|----------|----------------|----------------|-----------------|------|------|-------|
| 5JO5.PDB | O, A_ARG_94    | N, A_GLN_101   | H, A_GLN_101    | 2.84 | 2.09 | 25.14 |
| 5JO5.PDB | O, B_GLY_41    | NH1, A_ARG_105 | HH12, A_ARG_105 | 2.66 | 1.82 | 9.49  |
| 5JO5.PDB | OE1, A_GLU_6   | N, A_GLY_106   | H, A_GLY_106    | 2.88 | 2.02 | 1.10  |
| 5JO5.PDB | O, A_ALA_88    | N, A_VAL_109   | H, A_VAL_109    | 2.93 | 2.07 | 3.98  |
| 5JO5.PDB | OG1, A_THR_87  | N, A_VAL_111   | H, A_VAL_111    | 2.98 | 2.14 | 10.40 |
| 5JO5.PDB | O, A_PHE_146   | N, A_LYS_117   | H, A_LYS_117    | 2.76 | 1.96 | 17.53 |
| 5JO5.PDB | O, A_ASP_144   | NZ, A_LYS_117  | HZ2, A_LYS_117  | 2.76 | 2.02 | 28.39 |
| 5JO5.PDB | O, A_LEU_141   | N, A_PHE_122   | H, A_PHE_122    | 2.89 | 2.09 | 16.71 |
| 5JO5.PDB | O, A_GLY_139   | N, A_LEU_124   | H, A_LEU_124    | 2.85 | 2.00 | 8.87  |
| 5JO5.PDB | O, A_SER_132   | N, A_THR_135   | H, A_THR_135    | 3.00 | 2.15 | 8.03  |
| 5JO5.PDB | O, A_VAL_184   | N, A_ALA_136   | H, A_ALA_136    | 2.76 | 1.95 | 16.74 |
| 5JO5.PDB | O, A_SER_180   | N, A_CYS_140   | H, A_CYS_140    | 2.83 | 2.05 | 19.65 |
| 5JO5.PDB | O, A_PHE_122   | N, A_LEU_141   | H, A_LEU_141    | 2.83 | 1.98 | 7.04  |
| 5JO5.PDB | O, A_LEU_178   | N, A_VAL_142   | H, A_VAL_142    | 2.79 | 1.93 | 5.86  |
| 5JO5.PDB | O, A_SER_120   | N, A_LYS_143   | H, A_LYS_143    | 2.78 | 1.93 | 6.54  |
| 5JO5.PDB | OE2, B_GLU_124 | NZ, A_LYS_143  | HZ2, A_LYS_143  | 2.62 | 1.83 | 23.29 |
| 5JO5.PDB | O, A_TYR_176   | N, A_TYR_145   | H, A_TYR_145    | 2.91 | 2.11 | 17.73 |
| 5JO5.PDB | O, A_LYS_117   | N, A_PHE_146   | H, A_PHE_146    | 2.93 | 2.13 | 18.00 |
| 5JO5.PDB | O, A_ASN_197   | N, A_SER_153   | H, A_SER_153    | 2.99 | 2.18 | 16.28 |
| 5JO5.PDB | OD1, A_ASN_197 | OG, A_SER_153  | HG, A_SER_153   | 2.78 | 2.00 | 18.34 |
| 5JO5.PDB | OG, A_SER_180  | NE1, A_TRP_154 | HE1, A_TRP_154  | 2.89 | 2.05 | 11.45 |
| 5JO5.PDB | O, A_ILE_195   | N, A_ASN_155   | H, A_ASN_155    | 2.78 | 1.95 | 12.63 |
| 5JO5.PDB | OD1, A_ASN_197 | N, A_SER_156   | H, A_SER_156    | 2.75 | 1.94 | 16.25 |
| 5JO5.PDB | O, A_TRP_154   | N, A_GLY_157   | H, A_GLY_157    | 2.98 | 2.18 | 18.25 |
| 5JO5.PDB | O, A_VAL_181   | N, A_HIS_164   | H, A_HIS_164    | 2.84 | 2.01 | 12.57 |
| 5JO5.PDB | O, A_SER_179   | N, A_PHE_166   | H, A_PHE_166    | 2.92 | 2.07 | 5.08  |
| 5JO5.PDB | O, A_SER_177   | N, A_VAL_169   | H, A_VAL_169    | 2.79 | 1.96 | 14.12 |
| 5JO5.PDB | O, A_LEU_175   | N, A_GLN_171   | H, A_GLN_171    | 2.92 | 2.06 | 3.13  |
| 5JO5.PDB | OD1, A_ASP_144 | NE2, A_GLN_171 | HE22, A_GLN_171 | 2.80 | 2.01 | 18.53 |
| 5JO5.PDB | O, A_GLN_171   | N, A_GLY_174   | H, A_GLY_174    | 2.84 | 1.99 | 4.07  |
| 5JO5.PDB | O, A_TYR_145   | N, A_TYR_176   | H, A_TYR_176    | 2.86 | 2.00 | 3.44  |
| 5JO5.PDB | O, A_VAL_142   | N, A_LEU_178   | H, A_LEU_178    | 2.89 | 2.11 | 20.35 |
| 5JO5.PDB | OH, B_TYR_177  | OG, A_SER_179  | HG, A_SER_179   | 2.83 | 2.10 | 25.21 |
| 5JO5.PDB | O, A_CYS_140   | N, A_SER_180   | H, A_SER_180    | 2.96 | 2.14 | 14.89 |
| 5JO5.PDB | O, A_HIS_164   | N, A_VAL_181   | H, A_VAL_181    | 2.88 | 2.06 | 14.86 |
| 5JO5.PDB | O, A_LEU_138   | N, A_VAL_182   | H, A_VAL_182    | 2.81 | 1.98 | 12.72 |
| 5JO5.PDB | O, A_ALA_136   | N, A_VAL_184   | H, A_VAL_184    | 2.85 | 2.03 | 14.13 |
| 5JO5.PDB | O, A_GLY_134   | N, A_SER_186   | H, A_SER_186    | 2.73 | 1.88 | 8.68  |
| 5JO5.PDB | O, A_PRO_185   | N, A_SER_188   | H, A_SER_188    | 2.87 | 2.11 | 23.16 |
| 5JO5.PDB | O, A_PRO_185   | OG, A_SER_188  | HG, A_SER_188   | 2.64 | 1.81 | 7.89  |
| 5JO5.PDB | O, A_SER_188   | N, A_THR_191   | H, A_THR_191    | 2.98 | 2.17 | 16.73 |
| 5JO5.PDB | O, A_SER_188   | N, A_GLN_192   | H, A_GLN_192    | 2.81 | 1.96 | 9.04  |
| 5JO5.PDB | OG, A_SER_188  | OH, A_TYR_194  | HH, A_TYR_194   | 2.69 | 1.94 | 22.27 |
| 5JO5.PDB | OD1, A_ASN_155 | N, A_ILE_195   | H, A_ILE_195    | 2.85 | 2.04 | 16.46 |
| 5JO5.PDB | O, A_LYS_209   | N, A_CYS_196   | H, A_CYS_196    | 2.97 | 2.19 | 19.93 |
| 5JO5.PDB | O, A_SER_153   | N, A_ASN_197   | H, A_ASN_197    | 2.77 | 1.92 | 7.59  |
| 5JO5.PDB | O, A_VAL_207   | N, A_VAL_198   | H, A_VAL_198    | 2.69 | 1.83 | 4.66  |
| 5JO5.PDB | OG, A_SER_203  | ND1, A_HIS_200 | HD1, A_HIS_200  | 2.79 | 2.03 | 23.43 |
| 5JO5.PDB | O, A_PRO_147   | NE2, A_HIS_200 | HE2, A_HIS_200  | 2.73 | 1.88 | 6.85  |
| 5JO5.PDB | O, A_SER_203   | OG1, A_THR_205 | HG1, A_THR_205  | 2.95 | 2.24 | 27.28 |
| 5JO5.PDB | O, A_VAL_198   | N, A_VAL_207   | H, A_VAL_207    | 2.77 | 1.95 | 15.31 |
| 5JO5.PDB | O, A_CYS_196   | N, A_LYS_209   | H, A_LYS_209    | 2.98 | 2.17 | 16.36 |
| 5JO5.PDB | OE2, B_GLU_123 | NZ, A_LYS_209  | HZ1, A_LYS_209  | 2.55 | 1.68 | 10.64 |
| 5JO5.PDB | O, A_TYR_194   | N, A_VAL_211   | H, A_VAL_211    | 2.93 | 2.09 | 10.38 |
| 5JO5.PDB | O, B_GLN_24    | N, B_THR_5     | H, B_THR_5      | 2.82 | 1.99 | 13.54 |
| 5JO5.PDB | O, B_TYR_86    | NE2, B_GLN_6   | HE22, B_GLN_6   | 2.95 | 2.13 | 14.24 |
| 5JO5.PDB | O, B_LYS_103   | N, B_VAL_11    | H, B_VAL_11     | 2.99 | 2.17 | 14.79 |
| 5JO5.PDB | O, B_THR_105   | N, B_VAL_13    | H, B_VAL_13     | 2.91 | 2.14 | 21.54 |

|          |               |                |                |      |      |       |
|----------|---------------|----------------|----------------|------|------|-------|
| 5JO5.PDB | O, B.ALA.78   | N, B.GLY.16    | H, B.GLY.16    | 2.80 | 1.95 | 6.96  |
| 5JO5.PDB | O, B.ALA.14   | N, B.GLN.17    | H, B.GLN.17    | 3.00 | 2.14 | 6.45  |
| 5JO5.PDB | O, B.ILE.75   | N, B.VAL.19    | H, B.VAL.19    | 2.94 | 2.13 | 16.92 |
| 5JO5.PDB | O, B.LEU.73   | N, B.ILE.21    | H, B.ILE.21    | 2.77 | 1.92 | 7.42  |
| 5JO5.PDB | O, B.ALA.71   | N, B.CYS.23    | H, B.CYS.23    | 2.73 | 1.95 | 21.25 |
| 5JO5.PDB | O, B.THR.5    | N, B.GLN.24    | H, B.GLN.24    | 2.88 | 2.15 | 26.17 |
| 5JO5.PDB | O, B.ASN.69   | N, B.GLY.25    | H, B.GLY.25    | 2.95 | 2.12 | 12.16 |
| 5JO5.PDB | O, B.ARG.91   | OG, B.SER.27   | HG, B.SER.27   | 2.69 | 1.95 | 23.94 |
| 5JO5.PDB | O, B.GLY.25   | N, B.LEU.28    | H, B.LEU.28    | 2.92 | 2.12 | 17.50 |
| 5JO5.PDB | O, B.SER.27   | N, B.SER.30    | H, B.SER.30    | 2.94 | 2.12 | 14.59 |
| 5JO5.PDB | O, B.SER.89   | N, B.SER.34    | H, B.SER.34    | 2.95 | 2.14 | 17.48 |
| 5JO5.PDB | O, B.ILE.48   | N, B.TRP.35    | H, B.TRP.35    | 2.82 | 2.01 | 17.71 |
| 5JO5.PDB | O, B.TYR.87   | N, B.TYR.36    | H, B.TYR.36    | 2.80 | 2.06 | 24.94 |
| 5JO5.PDB | O, B.VAL.45   | N, B.GLN.37    | H, B.GLN.37    | 2.88 | 2.07 | 16.60 |
| 5JO5.PDB | OH, B.TYR.86  | NE2, B.GLN.37  | HE21, B.GLN.37 | 2.95 | 2.09 | 5.48  |
| 5JO5.PDB | O, B.ASP.85   | N, B.GLN.38    | H, B.GLN.38    | 2.79 | 2.00 | 18.67 |
| 5JO5.PDB | OE1, A.GLN.39 | NE2, B.GLN.38  | HE22, B.GLN.38 | 2.90 | 2.07 | 12.43 |
| 5JO5.PDB | O, B.GLN.37   | N, B.VAL.45    | H, B.VAL.45    | 2.85 | 2.08 | 22.23 |
| 5JO5.PDB | O, B.TRP.35   | N, B.VAL.47    | H, B.VAL.47    | 2.80 | 1.94 | 1.50  |
| 5JO5.PDB | O, B.ASN.53   | N, B.TYR.49    | H, B.TYR.49    | 2.95 | 2.14 | 16.79 |
| 5JO5.PDB | O, B.ASP.60   | NH1, B.ARG.54  | HH12, B.ARG.54 | 2.83 | 2.07 | 22.75 |
| 5JO5.PDB | OD1, B.ASP.82 | NH2, B.ARG.61  | HH21, B.ARG.61 | 2.66 | 1.83 | 11.88 |
| 5JO5.PDB | O, B.THR.74   | N, B.SER.63    | H, B.SER.63    | 2.95 | 2.17 | 20.44 |
| 5JO5.PDB | OD1, B.ASN.52 | N, B.GLY.64    | H, B.GLY.64    | 2.76 | 1.93 | 12.24 |
| 5JO5.PDB | O, F.ARG.29   | ND2, B.ASN.69  | HD21, B.ASN.69 | 2.80 | 1.99 | 16.03 |
| 5JO5.PDB | O, B.SER.67   | N, B.THR.70    | H, B.THR.70    | 2.93 | 2.12 | 15.05 |
| 5JO5.PDB | O, B.SER.67   | OG1, B.THR.70  | HG1, B.THR.70  | 2.62 | 1.83 | 17.02 |
| 5JO5.PDB | O, B.CYS.23   | N, B.ALA.71    | H, B.ALA.71    | 2.77 | 1.96 | 16.51 |
| 5JO5.PDB | O, B.SER.65   | N, B.SER.72    | H, B.SER.72    | 2.94 | 2.10 | 12.05 |
| 5JO5.PDB | O, B.ILE.21   | N, B.LEU.73    | H, B.LEU.73    | 2.80 | 2.00 | 18.00 |
| 5JO5.PDB | O, B.SER.63   | N, B.THR.74    | H, B.THR.74    | 2.83 | 1.99 | 8.11  |
| 5JO5.PDB | O, B.VAL.19   | N, B.ILE.75    | H, B.ILE.75    | 2.88 | 2.05 | 12.36 |
| 5JO5.PDB | O, B.GLN.17   | N, B.ALA.78    | H, B.ALA.78    | 2.88 | 2.04 | 9.27  |
| 5JO5.PDB | OD2, B.ASP.82 | N, B.GLN.79    | H, B.GLN.79    | 2.90 | 2.05 | 7.32  |
| 5JO5.PDB | O, B.GLN.79   | N, B.ASP.82    | H, B.ASP.82    | 2.86 | 2.02 | 10.30 |
| 5JO5.PDB | O, B.GLN.38   | N, B.ASP.85    | H, B.ASP.85    | 2.90 | 2.08 | 13.72 |
| 5JO5.PDB | O, B.THR.102  | N, B.TYR.86    | H, B.TYR.86    | 2.83 | 2.01 | 15.48 |
| 5JO5.PDB | O, B.ASP.82   | OH, B.TYR.86   | HH, B.TYR.86   | 2.63 | 1.81 | 9.87  |
| 5JO5.PDB | O, B.TYR.36   | N, B.TYR.87    | H, B.TYR.87    | 2.92 | 2.12 | 17.35 |
| 5JO5.PDB | O, B.SER.34   | N, B.SER.89    | H, B.SER.89    | 2.90 | 2.16 | 26.65 |
| 5JO5.PDB | O, B.VAL.97   | OG, B.SER.89   | HG, B.SER.89   | 2.80 | 2.03 | 20.14 |
| 5JO5.PDB | O, A.GLY.100H | NE, B.ARG.91   | HE, B.ARG.91   | 2.94 | 2.09 | 9.41  |
| 5JO5.PDB | OH, B.TYR.31  | N, B.GLY.95    | H, B.GLY.95    | 2.85 | 2.01 | 11.73 |
| 5JO5.PDB | OD1, B.ASP.92 | OG, B.SER.95A  | HG, B.SER.95A  | 2.47 | 1.67 | 15.14 |
| 5JO5.PDB | OG, B.SER.95A | N, B.LEU.95C   | H, B.LEU.95C   | 2.98 | 2.13 | 6.04  |
| 5JO5.PDB | O, B.SER.90   | N, B.VAL.97    | H, B.VAL.97    | 2.93 | 2.11 | 13.52 |
| 5JO5.PDB | O, B.CYS.88   | N, B.GLY.99    | H, B.GLY.99    | 2.87 | 2.07 | 18.58 |
| 5JO5.PDB | O, B.TYR.86   | N, B.THR.102   | H, B.THR.102   | 2.85 | 2.06 | 19.16 |
| 5JO5.PDB | O, B.ASP.7    | OG1, B.THR.102 | HG1, B.THR.102 | 2.67 | 1.84 | 6.53  |
| 5JO5.PDB | O, B.PRO.8    | N, B.LYS.103   | H, B.LYS.103   | 2.86 | 2.01 | 7.04  |
| 5JO5.PDB | O, B.ALA.84   | N, B.LEU.104   | H, B.LEU.104   | 2.88 | 2.04 | 10.34 |
| 5JO5.PDB | O, B.VAL.11   | N, B.THR.105   | H, B.THR.105   | 2.98 | 2.17 | 16.12 |
| 5JO5.PDB | OE2, B.GLU.83 | N, B.VAL.106   | H, B.VAL.106   | 2.94 | 2.17 | 22.79 |
| 5JO5.PDB | O, B.VAL.13   | N, B.LEU.106A  | H, B.LEU.106A  | 2.84 | 2.01 | 13.15 |
| 5JO5.PDB | OH, B.TYR.140 | N, B.SER.107   | H, B.SER.107   | 2.96 | 2.17 | 18.24 |
| 5JO5.PDB | O, B.TYR.140  | N, B.ALA.111   | H, B.ALA.111   | 2.79 | 1.96 | 11.97 |
| 5JO5.PDB | O, B.SER.137  | N, B.SER.114   | H, B.SER.114   | 2.91 | 2.11 | 17.49 |
| 5JO5.PDB | O, B.LEU.135  | N, B.THR.116   | H, B.THR.116   | 2.96 | 2.13 | 12.67 |

|          |                |                |                 |      |      |       |
|----------|----------------|----------------|-----------------|------|------|-------|
| 5JO5.PDB | O, B.VAL_133   | N, B.PHE_118   | H, B.PHE_118    | 2.80 | 1.94 | 5.22  |
| 5JO5.PDB | O, B.LEU_125   | N, B.ASN_128   | H, B.ASN_128    | 2.88 | 2.06 | 15.38 |
| 5JO5.PDB | OE1, B.GLU_124 | N, B.THR_131   | H, B.THR_131    | 2.94 | 2.22 | 28.36 |
| 5JO5.PDB | OE2, B.GLU_124 | OG1, B.THR_131 | HG1, B.THR_131  | 2.59 | 1.86 | 24.88 |
| 5JO5.PDB | O, B.LEU_178   | N, B.LEU_132   | H, B.LEU_132    | 2.93 | 2.11 | 15.51 |
| 5JO5.PDB | O, B.SER_176   | N, B.CYS_134   | H, B.CYS_134    | 2.82 | 1.97 | 4.20  |
| 5JO5.PDB | O, B.THR_116   | N, B.LEU_135   | H, B.LEU_135    | 2.91 | 2.08 | 12.22 |
| 5JO5.PDB | O, B.ALA_174   | N, B.ILE_136   | H, B.ILE_136    | 2.90 | 2.13 | 23.29 |
| 5JO5.PDB | O, B.SER_114   | N, B.SER_137   | H, B.SER_137    | 2.93 | 2.15 | 21.86 |
| 5JO5.PDB | OE1, B.GLN_167 | N, B.ASP_138   | H, B.ASP_138    | 2.85 | 2.08 | 22.86 |
| 5JO5.PDB | O, B.ALA_111   | N, B.TYR_140   | H, B.TYR_140    | 2.99 | 2.17 | 16.28 |
| 5JO5.PDB | O, B.GLN_194   | N, B.ALA_147   | H, B.ALA_147    | 2.88 | 2.05 | 13.99 |
| 5JO5.PDB | OG, B.SER_176  | NE1, B.TRP_148 | HE1, B.TRP_148  | 2.89 | 2.05 | 10.46 |
| 5JO5.PDB | O, B.SER_192   | N, B.LYS_149   | H, B.LYS_149    | 2.94 | 2.16 | 21.00 |
| 5JO5.PDB | O, B.SER_153   | N, B.ALA_150   | H, B.ALA_150    | 2.80 | 1.98 | 15.92 |
| 5JO5.PDB | O, B.SER_190   | N, B.ASP_151   | H, B.ASP_151    | 2.96 | 2.12 | 10.60 |
| 5JO5.PDB | O, B.ALA_150   | N, B.SER_153   | H, B.SER_153    | 2.85 | 2.01 | 8.39  |
| 5JO5.PDB | O, B.TYR_177   | N, B.GLU_160   | H, B.GLU_160    | 2.99 | 2.19 | 18.42 |
| 5JO5.PDB | O, B.SER_175   | N, B.THR_162   | H, B.THR_162    | 2.83 | 2.00 | 12.84 |
| 5JO5.PDB | O, A.GLY_42    | OG1, B.THR_163 | HG1, B.THR_163  | 2.48 | 1.73 | 21.87 |
| 5JO5.PDB | O, B.LYS_171   | N, B.GLN_167   | H, B.GLN_167    | 2.72 | 1.87 | 6.72  |
| 5JO5.PDB | OD1, B.ASN_169 | NE2, B.GLN_167 | HE21, B.GLN_167 | 2.98 | 2.24 | 26.40 |
| 5JO5.PDB | OD1, B.ASP_138 | NE2, B.GLN_167 | HE22, B.GLN_167 | 2.99 | 2.14 | 6.65  |
| 5JO5.PDB | O, B.PHE_139   | N, B.TYR_172   | H, B.TYR_172    | 2.89 | 2.09 | 16.64 |
| 5JO5.PDB | O, B.ILE_136   | N, B.ALA_174   | H, B.ALA_174    | 2.78 | 1.99 | 18.28 |
| 5JO5.PDB | OG1, B.THR_162 | N, B.SER_175   | H, B.SER_175    | 2.97 | 2.18 | 20.62 |
| 5JO5.PDB | OG1, B.THR_162 | OG, B.SER_175  | HG, B.SER_175   | 2.87 | 2.11 | 21.53 |
| 5JO5.PDB | O, B.CYS_134   | N, B.SER_176   | H, B.SER_176    | 2.89 | 2.09 | 18.62 |
| 5JO5.PDB | OG1, B.THR_161 | OG, B.SER_176  | HG, B.SER_176   | 2.78 | 2.05 | 24.57 |
| 5JO5.PDB | O, B.GLU_160   | N, B.TYR_177   | H, B.TYR_177    | 2.74 | 1.95 | 18.78 |
| 5JO5.PDB | O, B.LEU_132   | N, B.LEU_178   | H, B.LEU_178    | 2.98 | 2.16 | 14.96 |
| 5JO5.PDB | O, B.GLY_158   | N, B.SER_179   | H, B.SER_179    | 2.79 | 1.95 | 12.09 |
| 5JO5.PDB | O, B.ALA_130   | N, B.LEU_180   | H, B.LEU_180    | 2.84 | 1.98 | 3.06  |
| 5JO5.PDB | OE1, B.GLN_184 | N, B.THR_181   | H, B.THR_181    | 2.98 | 2.15 | 11.97 |
| 5JO5.PDB | O, B.GLN_184   | OG, B.SER_187  | HG, B.SER_187   | 2.84 | 2.02 | 9.83  |
| 5JO5.PDB | OD1, B.ASP_151 | N, B.ARG_189   | H, B.ARG_189    | 2.77 | 1.99 | 21.06 |
| 5JO5.PDB | O, B.VAL_206   | N, B.TYR_191   | H, B.TYR_191    | 2.97 | 2.14 | 12.35 |
| 5JO5.PDB | O, B.LYS_149   | N, B.SER_192   | H, B.SER_192    | 2.94 | 2.15 | 19.79 |
| 5JO5.PDB | OG1, B.THR_205 | OG, B.SER_192  | HG, B.SER_192   | 2.59 | 1.90 | 29.12 |
| 5JO5.PDB | O, B.LYS_204   | N, B.CYS_193   | H, B.CYS_193    | 2.85 | 2.06 | 19.97 |
| 5JO5.PDB | O, B.ALA_147   | N, B.GLN_194   | H, B.GLN_194    | 2.76 | 1.91 | 8.07  |
| 5JO5.PDB | OE2, B.GLU_203 | NE2, B.GLN_194 | HE21, B.GLN_194 | 2.60 | 1.77 | 11.97 |
| 5JO5.PDB | O, B.VAL_202   | N, B.VAL_195   | H, B.VAL_195    | 2.87 | 2.03 | 10.67 |
| 5JO5.PDB | O, B.THR_145   | N, B.THR_196   | H, B.THR_196    | 2.94 | 2.09 | 7.84  |
| 5JO5.PDB | O, B.SER_200   | N, B.HIS_197   | H, B.HIS_197    | 2.84 | 2.00 | 11.99 |
| 5JO5.PDB | O, B.PRO_141   | NE2, B.HIS_197 | HE2, B.HIS_197  | 2.91 | 2.14 | 22.84 |
| 5JO5.PDB | OG1, B.THR_196 | OG1, B.THR_201 | HG1, B.THR_201  | 2.97 | 2.21 | 22.11 |
| 5JO5.PDB | O, B.VAL_195   | N, B.VAL_202   | H, B.VAL_202    | 2.91 | 2.09 | 14.85 |
| 5JO5.PDB | O, B.TYR_191   | N, B.VAL_206   | H, B.VAL_206    | 2.88 | 2.07 | 15.96 |
| 5JO5.PDB | O, C.SER_25    | N, C.GLN_3     | H, C.GLN_3      | 2.95 | 2.10 | 9.50  |
| 5JO5.PDB | O, C.SER_21    | N, C.SER_7     | H, C.SER_7      | 2.80 | 2.03 | 21.56 |
| 5JO5.PDB | OG1, C.THR_107 | N, C.GLY_9     | H, C.GLY_9      | 2.94 | 2.21 | 27.65 |
| 5JO5.PDB | O, C.THR_110   | N, C.VAL_12    | H, C.VAL_12     | 2.90 | 2.11 | 19.33 |
| 5JO5.PDB | O, C.LEU_82C   | N, C.GLY_15    | H, C.GLY_15     | 2.77 | 1.95 | 13.95 |
| 5JO5.PDB | O, C.LYS_13    | N, C.GLY_16    | H, C.GLY_16     | 2.93 | 2.13 | 17.72 |
| 5JO5.PDB | O, C.MET_82    | N, C.LEU_18    | H, C.LEU_18     | 2.90 | 2.11 | 18.94 |
| 5JO5.PDB | O, C.LEU_80    | N, C.LEU_20    | H, C.LEU_20     | 2.76 | 1.94 | 13.93 |
| 5JO5.PDB | O, C.SER_7     | N, C.SER_21    | H, C.SER_21     | 2.94 | 2.10 | 10.42 |

|          |                 |               |                |      |      |       |
|----------|-----------------|---------------|----------------|------|------|-------|
| 5JO5.PDB | O, C.LEU_78     | N, C.CYS_22   | H, C.CYS_22    | 2.73 | 1.95 | 21.22 |
| 5JO5.PDB | O, C.VAL_5      | N, C.ALA_23   | H, C.ALA_23    | 2.95 | 2.13 | 13.78 |
| 5JO5.PDB | O, C.PHE_29     | N, C.ALA_32   | H, C.ALA_32    | 2.90 | 2.05 | 5.82  |
| 5JO5.PDB | OD2, C.ASP_53   | NE1, C.TRP_33 | HE1, C.TRP_33  | 2.84 | 2.06 | 21.35 |
| 5JO5.PDB | O, C.ALA_93     | N, C.SER_35   | H, C.SER_35    | 2.93 | 2.11 | 13.64 |
| 5JO5.PDB | O, C.GLY_49     | N, C.TRP_36   | H, C.TRP_36    | 2.89 | 2.07 | 16.12 |
| 5JO5.PDB | O, C.TYR_91     | N, C.VAL_37   | H, C.VAL_37    | 2.87 | 2.05 | 13.46 |
| 5JO5.PDB | O, C.GLU_46     | N, C.ARG_38   | H, C.ARG_38    | 2.87 | 2.03 | 9.28  |
| 5JO5.PDB | OE1, C.GLU_46   | NE, C.ARG_38  | HE, C.ARG_38   | 2.77 | 1.97 | 17.97 |
| 5JO5.PDB | OH, C.TYR_90    | NH1, C.ARG_38 | HH11, C.ARG_38 | 3.00 | 2.18 | 14.70 |
| 5JO5.PDB | OD1, C.ASP_86   | NH1, C.ARG_38 | HH12, C.ARG_38 | 2.85 | 2.02 | 13.98 |
| 5JO5.PDB | OE1, D.GLN_38   | NE2, C.GLN_39 | HE22, C.GLN_39 | 2.86 | 2.02 | 9.45  |
| 5JO5.PDB | O, C.ALA_40     | N, C.LYS_43   | H, C.LYS_43    | 2.88 | 2.04 | 10.48 |
| 5JO5.PDB | O, C.ARG_38     | N, C.GLU_46   | H, C.GLU_46    | 2.77 | 1.99 | 20.78 |
| 5JO5.PDB | O, C.TRP_36     | N, C.VAL_48   | H, C.VAL_48    | 2.90 | 2.07 | 13.17 |
| 5JO5.PDB | OE1, C.GLU_100J | NE, C.ARG_50  | HE, C.ARG_50   | 2.87 | 2.09 | 20.20 |
| 5JO5.PDB | OD2, C.ASP_58   | NH1, C.ARG_50 | HH12, C.ARG_50 | 2.77 | 1.94 | 11.94 |
| 5JO5.PDB | OE2, C.GLU_100J | NH2, C.ARG_50 | HH21, C.ARG_50 | 2.86 | 2.02 | 10.69 |
| 5JO5.PDB | O, C.MET_34     | N, C.ILE_51   | H, C.ILE_51    | 2.83 | 1.99 | 11.56 |
| 5JO5.PDB | O, C.THR_56     | N, C.LYS_52   | H, C.LYS_52    | 2.95 | 2.12 | 13.78 |
| 5JO5.PDB | O, C.SER_52A    | N, C.ASP_53   | H, C.ASP_53    | 2.94 | 2.23 | 29.56 |
| 5JO5.PDB | O, C.LYS_52B    | N, C.GLY_54   | H, C.GLY_54    | 3.00 | 2.15 | 9.38  |
| 5JO5.PDB | O, C.SER_52A    | N, C.GLY_55   | H, C.GLY_55    | 2.78 | 2.00 | 20.47 |
| 5JO5.PDB | O, C.VAL_48     | N, C.ALA_60   | H, C.ALA_60    | 2.89 | 2.04 | 7.94  |
| 5JO5.PDB | O, C.VAL_63     | N, C.ARG_66   | H, C.ARG_66    | 2.93 | 2.09 | 10.54 |
| 5JO5.PDB | OD2, C.ASP_86   | NH1, C.ARG_66 | HH12, C.ARG_66 | 2.83 | 2.01 | 15.29 |
| 5JO5.PDB | O, C.PRO_62     | NH2, C.ARG_66 | HH21, C.ARG_66 | 2.87 | 2.02 | 7.14  |
| 5JO5.PDB | O, C.GLN_81     | N, C.THR_68   | H, C.THR_68    | 2.82 | 2.00 | 14.42 |
| 5JO5.PDB | OH, C.TYR_59    | N, C.ILE_69   | H, C.ILE_69    | 2.82 | 1.97 | 9.17  |
| 5JO5.PDB | OD1, C.ASP_73   | NE, C.ARG_71  | HE, C.ARG_71   | 2.90 | 2.12 | 21.25 |
| 5JO5.PDB | O, C.ALA_32     | NH1, C.ARG_71 | HH12, C.ARG_71 | 2.94 | 2.19 | 24.89 |
| 5JO5.PDB | O, C.ALA_32     | NH2, C.ARG_71 | HH22, C.ARG_71 | 2.89 | 2.13 | 22.77 |
| 5JO5.PDB | O, C.THR_77     | N, C.ASP_72   | H, C.ASP_72    | 2.91 | 2.06 | 7.23  |
| 5JO5.PDB | OD1, C.ASP_72   | OG, C.SER_74  | HG, C.SER_74   | 2.61 | 1.84 | 20.06 |
| 5JO5.PDB | O, C.CYS_22     | N, C.LEU_78   | H, C.LEU_78    | 2.88 | 2.05 | 11.40 |
| 5JO5.PDB | O, C.SER_70     | N, C.TYR_79   | H, C.TYR_79    | 2.85 | 2.00 | 9.09  |
| 5JO5.PDB | O, C.THR_68     | N, C.GLN_81   | H, C.GLN_81    | 2.76 | 1.93 | 12.88 |
| 5JO5.PDB | OD2, C.ASP_86   | N, C.LYS_83   | H, C.LYS_83    | 2.79 | 1.97 | 14.63 |
| 5JO5.PDB | O, C.LYS_83     | N, C.ASP_86   | H, C.ASP_86    | 2.83 | 2.00 | 13.05 |
| 5JO5.PDB | O, C.VAL_109    | N, C.ALA_88   | H, C.ALA_88    | 2.97 | 2.19 | 21.73 |
| 5JO5.PDB | O, C.GLN_39     | N, C.VAL_89   | H, C.VAL_89    | 2.92 | 2.12 | 17.72 |
| 5JO5.PDB | O, C.THR_107    | N, C.TYR_90   | H, C.TYR_90    | 2.82 | 1.97 | 9.30  |
| 5JO5.PDB | O, C.ASP_86     | OH, C.TYR_90  | HH, C.TYR_90   | 2.68 | 1.88 | 13.76 |
| 5JO5.PDB | O, C.VAL_37     | N, C.TYR_91   | H, C.TYR_91    | 2.60 | 1.74 | 2.45  |
| 5JO5.PDB | OE2, C.GLU_6    | N, C.CYS_92   | H, C.CYS_92    | 2.75 | 1.90 | 6.95  |
| 5JO5.PDB | O, C.SER_35     | N, C.ALA_93   | H, C.ALA_93    | 2.91 | 2.13 | 21.34 |
| 5JO5.PDB | OD2, C.ASP_102  | NE, C.ARG_94  | HE, C.ARG_94   | 2.79 | 2.08 | 28.98 |
| 5JO5.PDB | OD2, C.ASP_102  | NH1, C.ARG_94 | HH11, C.ARG_94 | 2.55 | 1.78 | 21.18 |
| 5JO5.PDB | O, C.TYR_100K   | N, C.GLY_96   | H, C.GLY_96    | 2.82 | 2.05 | 21.49 |
| 5JO5.PDB | O, C.GLU_100I   | N, C.TYR_98   | H, C.TYR_98    | 2.79 | 1.95 | 9.02  |
| 5JO5.PDB | O, C.GLY_96     | N, C.TYR_100K | H, C.TYR_100K  | 2.91 | 2.11 | 17.91 |
| 5JO5.PDB | OH, D.TYR_36    | N, C.PHE_100L | H, C.PHE_100L  | 2.87 | 2.08 | 19.05 |
| 5JO5.PDB | O, C.ARG_94     | N, C.GLN_101  | H, C.GLN_101   | 2.81 | 2.06 | 25.18 |
| 5JO5.PDB | O, C.CYS_92     | N, C.GLY_104  | H, C.GLY_104   | 2.86 | 2.05 | 16.43 |
| 5JO5.PDB | OE1, C.GLU_6    | N, C.ARG_105  | H, C.ARG_105   | 2.82 | 2.06 | 23.52 |
| 5JO5.PDB | OE1, C.GLU_6    | N, C.GLY_106  | H, C.GLY_106   | 2.82 | 1.96 | 3.31  |
| 5JO5.PDB | O, C.ALA_88     | N, C.VAL_109  | H, C.VAL_109   | 2.90 | 2.04 | 2.47  |
| 5JO5.PDB | OG1, C.THR_87   | N, C.VAL_111  | H, C.VAL_111   | 2.92 | 2.08 | 9.87  |



|          |                |                |                 |      |      |       |
|----------|----------------|----------------|-----------------|------|------|-------|
| 5JO5.PDB | O, C_PHE.146   | N, C_LYS.117   | H, C_LYS.117    | 2.76 | 1.94 | 13.75 |
| 5JO5.PDB | O, C_ASP.144   | NZ, C_LYS.117  | HZ2, C_LYS.117  | 2.78 | 2.05 | 29.84 |
| 5JO5.PDB | O, C_LEU.141   | N, C_PHE.122   | H, C_PHE.122    | 2.86 | 2.03 | 12.84 |
| 5JO5.PDB | O, C_GLY.139   | N, C_LEU.124   | H, C_LEU.124    | 2.85 | 2.00 | 9.59  |
| 5JO5.PDB | O, C_VAL.184   | N, C_ALA.136   | H, C_ALA.136    | 2.67 | 1.87 | 17.12 |
| 5JO5.PDB | O, C_VAL.182   | N, C_LEU.138   | H, C_LEU.138    | 2.99 | 2.15 | 10.96 |
| 5JO5.PDB | O, C_SER.180   | N, C_CYS.140   | H, C_CYS.140    | 2.84 | 2.06 | 20.26 |
| 5JO5.PDB | O, C_PHE.122   | N, C_LEU.141   | H, C_LEU.141    | 2.78 | 1.93 | 7.78  |
| 5JO5.PDB | O, C_LEU.178   | N, C_VAL.142   | H, C_VAL.142    | 2.81 | 1.96 | 6.47  |
| 5JO5.PDB | O, C_SER.120   | N, C_LYS.143   | H, C_LYS.143    | 2.82 | 1.98 | 11.11 |
| 5JO5.PDB | OE2, D_GLU.124 | NZ, C_LYS.143  | HZ2, C_LYS.143  | 2.79 | 1.92 | 10.71 |
| 5JO5.PDB | O, C_TYR.176   | N, C_TYR.145   | H, C_TYR.145    | 2.94 | 2.13 | 17.07 |
| 5JO5.PDB | O, C_LYS.117   | N, C_PHE.146   | H, C_PHE.146    | 2.94 | 2.13 | 16.66 |
| 5JO5.PDB | OD1, C_ASN.197 | OG, C_SER.153  | HG, C_SER.153   | 2.81 | 2.01 | 15.61 |
| 5JO5.PDB | OG, C_SER.180  | NE1, C_TRP.154 | HE1, C_TRP.154  | 2.96 | 2.13 | 11.76 |
| 5JO5.PDB | O, C_ILE.195   | N, C_ASN.155   | H, C_ASN.155    | 2.75 | 1.92 | 12.18 |
| 5JO5.PDB | OD1, C_ASN.197 | N, C_SER.156   | H, C_SER.156    | 2.79 | 1.97 | 14.38 |
| 5JO5.PDB | O, C_VAL.181   | N, C_HIS.164   | H, C_HIS.164    | 2.89 | 2.06 | 13.61 |
| 5JO5.PDB | O, C_SER.179   | N, C_PHE.166   | H, C_PHE.166    | 2.91 | 2.06 | 6.29  |
| 5JO5.PDB | OD1, C_ASP.144 | NE2, C_GLN.171 | HE22, C_GLN.171 | 2.92 | 2.12 | 18.22 |
| 5JO5.PDB | O, C_GLN.171   | N, C_GLY.174   | H, C_GLY.174    | 2.78 | 1.92 | 5.07  |
| 5JO5.PDB | O, C_TYR.145   | N, C_TYR.176   | H, C_TYR.176    | 2.90 | 2.05 | 5.55  |
| 5JO5.PDB | O, C_VAL.142   | N, C_LEU.178   | H, C_LEU.178    | 2.87 | 2.09 | 20.32 |
| 5JO5.PDB | OH, D_TYR.177  | OG, C_SER.179  | HG, C_SER.179   | 2.71 | 1.97 | 23.23 |
| 5JO5.PDB | O, C_HIS.164   | N, C_VAL.181   | H, C_VAL.181    | 2.89 | 2.06 | 14.17 |
| 5JO5.PDB | O, C_LEU.138   | N, C_VAL.182   | H, C_VAL.182    | 2.77 | 1.94 | 12.20 |
| 5JO5.PDB | O, C_ALA.136   | N, C_VAL.184   | H, C_VAL.184    | 2.81 | 1.98 | 13.68 |
| 5JO5.PDB | O, C_GLY.134   | N, C_SER.186   | H, C_SER.186    | 2.64 | 1.80 | 9.61  |
| 5JO5.PDB | O, C_PRO.185   | OG, C_SER.188  | HG, C_SER.188   | 2.73 | 1.93 | 15.82 |
| 5JO5.PDB | OG, C_SER.188  | OH, C_TYR.194  | HH, C_TYR.194   | 2.62 | 1.86 | 20.70 |
| 5JO5.PDB | OD1, C_ASN.155 | N, C_ILE.195   | H, C_ILE.195    | 2.85 | 2.02 | 13.84 |
| 5JO5.PDB | O, C_LYS.209   | N, C_CYS.196   | H, C_CYS.196    | 2.96 | 2.18 | 21.34 |
| 5JO5.PDB | O, C_SER.153   | N, C_ASN.197   | H, C_ASN.197    | 2.74 | 1.89 | 6.97  |
| 5JO5.PDB | OD1, C_ASP.208 | ND2, C_ASN.197 | HD22, C_ASN.197 | 2.98 | 2.12 | 6.27  |
| 5JO5.PDB | O, C_VAL.207   | N, C_VAL.198   | H, C_VAL.198    | 2.78 | 1.92 | 1.89  |
| 5JO5.PDB | OG, C_SER.203  | ND1, C_HIS.200 | HD1, C_HIS.200  | 2.85 | 2.10 | 24.59 |
| 5JO5.PDB | O, C_PRO.147   | NE2, C_HIS.200 | HE2, C_HIS.200  | 2.76 | 1.92 | 8.00  |
| 5JO5.PDB | O, C_LYS.201   | N, C_ASN.204   | H, C_ASN.204    | 2.96 | 2.12 | 10.38 |
| 5JO5.PDB | O, C_SER.203   | OG1, C_THR.205 | HG1, C_THR.205  | 2.94 | 2.25 | 29.40 |
| 5JO5.PDB | O, C_VAL.198   | N, C_VAL.207   | H, C_VAL.207    | 2.82 | 2.00 | 14.71 |
| 5JO5.PDB | O, C_CYS.196   | N, C_LYS.209   | H, C_LYS.209    | 3.00 | 2.20 | 18.19 |
| 5JO5.PDB | OE2, D_GLU.123 | NZ, C_LYS.209  | HZ1, C_LYS.209  | 2.58 | 1.72 | 11.28 |
| 5JO5.PDB | O, C_TYR.194   | N, C_VAL.211   | H, C_VAL.211    | 2.92 | 2.08 | 10.11 |
| 5JO5.PDB | O, D_LEU.4     | OG, D_SER.2    | HG, D_SER.2     | 2.63 | 1.95 | 29.82 |
| 5JO5.PDB | O, D_GLN.24    | N, D_THR.5     | H, D_THR.5      | 2.84 | 2.03 | 16.14 |
| 5JO5.PDB | O, D_TYR.86    | NE2, D_GLN.6   | HE22, D_GLN.6   | 3.00 | 2.19 | 16.22 |
| 5JO5.PDB | O, D_LYS.103   | N, D_VAL.11    | H, D_VAL.11     | 2.98 | 2.16 | 13.76 |
| 5JO5.PDB | O, D_THR.105   | N, D_VAL.13    | H, D_VAL.13     | 2.89 | 2.13 | 23.23 |
| 5JO5.PDB | O, D_ALA.78    | N, D_GLY.16    | H, D_GLY.16     | 2.84 | 1.98 | 3.58  |
| 5JO5.PDB | O, D_ILE.75    | N, D_VAL.19    | H, D_VAL.19     | 2.97 | 2.17 | 17.08 |
| 5JO5.PDB | O, D_LEU.73    | N, D_ILE.21    | H, D_ILE.21     | 2.92 | 2.07 | 8.03  |
| 5JO5.PDB | O, D_ALA.71    | N, D_CYS.23    | H, D_CYS.23     | 2.70 | 1.92 | 20.84 |
| 5JO5.PDB | O, D_THR.5     | N, D_GLN.24    | H, D_GLN.24     | 2.92 | 2.17 | 25.43 |
| 5JO5.PDB | O, D_ASN.69    | N, D_GLY.25    | H, D_GLY.25     | 2.96 | 2.12 | 12.19 |
| 5JO5.PDB | O, D_ARG.91    | OG, D_SER.27   | HG, D_SER.27    | 2.66 | 1.91 | 22.45 |
| 5JO5.PDB | O, D_GLY.25    | N, D_LEU.28    | H, D_LEU.28     | 2.92 | 2.11 | 17.85 |
| 5JO5.PDB | O, D_SER.27    | N, D_SER.30    | H, D_SER.30     | 2.96 | 2.14 | 14.55 |
| 5JO5.PDB | O, D_SER.89    | N, D_SER.34    | H, D_SER.34     | 2.92 | 2.12 | 18.05 |

|          |                |                |                |      |      |       |
|----------|----------------|----------------|----------------|------|------|-------|
| 5JO5.PDB | O, D_ILE_48    | N, D_TRP_35    | H, D_TRP_35    | 2.78 | 1.99 | 19.58 |
| 5JO5.PDB | O, D_TYR_87    | N, D_TYR_36    | H, D_TYR_36    | 2.78 | 2.03 | 24.47 |
| 5JO5.PDB | OG, D_SER_34   | OH, D_TYR_36   | HH, D_TYR_36   | 2.76 | 2.07 | 29.85 |
| 5JO5.PDB | O, D_VAL_45    | N, D_GLN_37    | H, D_GLN_37    | 2.86 | 2.04 | 14.87 |
| 5JO5.PDB | OH, D_TYR_86   | NE2, D_GLN_37  | HE21, D_GLN_37 | 2.93 | 2.09 | 8.87  |
| 5JO5.PDB | O, D_ASP_85    | N, D_GLN_38    | H, D_GLN_38    | 2.81 | 2.02 | 20.05 |
| 5JO5.PDB | OE1, C_GLN_39  | NE2, D_GLN_38  | HE22, D_GLN_38 | 2.92 | 2.09 | 12.72 |
| 5JO5.PDB | O, D_GLN_37    | N, D_VAL_45    | H, D_VAL_45    | 2.80 | 2.03 | 21.65 |
| 5JO5.PDB | O, D_TRP_35    | N, D_VAL_47    | H, D_VAL_47    | 2.89 | 2.03 | 2.23  |
| 5JO5.PDB | O, D_ASN_53    | N, D_TYR_49    | H, D_TYR_49    | 2.99 | 2.18 | 15.70 |
| 5JO5.PDB | OD1, D_ASP_82  | NH2, D_ARG_61  | HH21, D_ARG_61 | 2.88 | 2.03 | 6.97  |
| 5JO5.PDB | O, D_THR_74    | N, D_SER_63    | H, D_SER_63    | 2.94 | 2.16 | 21.20 |
| 5JO5.PDB | OD1, D_ASN_52  | N, D_GLY_64    | H, D_GLY_64    | 2.96 | 2.14 | 14.40 |
| 5JO5.PDB | O, D_SER_72    | N, D_SER_65    | H, D_SER_65    | 2.95 | 2.18 | 22.43 |
| 5JO5.PDB | O, L_ARG_29    | ND2, D_ASN_69  | HD21, D_ASN_69 | 2.86 | 2.03 | 13.06 |
| 5JO5.PDB | O, D_SER_67    | N, D_THR_70    | H, D_THR_70    | 2.94 | 2.12 | 15.68 |
| 5JO5.PDB | O, D_SER_67    | OG1, D_THR_70  | HG1, D_THR_70  | 2.67 | 1.87 | 14.98 |
| 5JO5.PDB | O, D_CYS_23    | N, D_ALA_71    | H, D_ALA_71    | 2.75 | 1.94 | 16.72 |
| 5JO5.PDB | O, D_SER_65    | N, D_SER_72    | H, D_SER_72    | 2.85 | 2.02 | 12.10 |
| 5JO5.PDB | O, D_ILE_21    | N, D_LEU_73    | H, D_LEU_73    | 2.82 | 2.05 | 22.07 |
| 5JO5.PDB | O, D_SER_63    | N, D_THR_74    | H, D_THR_74    | 2.79 | 1.94 | 10.27 |
| 5JO5.PDB | O, D_VAL_19    | N, D_ILE_75    | H, D_ILE_75    | 2.89 | 2.06 | 12.55 |
| 5JO5.PDB | O, D_GLN_17    | N, D_ALA_78    | H, D_ALA_78    | 2.90 | 2.06 | 11.54 |
| 5JO5.PDB | OD2, D_ASP_82  | N, D_GLN_79    | H, D_GLN_79    | 2.86 | 2.00 | 5.70  |
| 5JO5.PDB | O, D_GLN_79    | N, D_ASP_82    | H, D_ASP_82    | 2.84 | 2.00 | 10.08 |
| 5JO5.PDB | O, D_GLN_38    | N, D_ASP_85    | H, D_ASP_85    | 2.92 | 2.10 | 13.46 |
| 5JO5.PDB | O, D_THR_102   | N, D_TYR_86    | H, D_TYR_86    | 2.83 | 2.01 | 15.81 |
| 5JO5.PDB | O, D_ASP_82    | OH, D_TYR_86   | HH, D_TYR_86   | 2.68 | 1.86 | 10.68 |
| 5JO5.PDB | O, D_TYR_36    | N, D_TYR_87    | H, D_TYR_87    | 2.93 | 2.13 | 17.76 |
| 5JO5.PDB | O, D_SER_34    | N, D_SER_89    | H, D_SER_89    | 2.89 | 2.16 | 27.05 |
| 5JO5.PDB | O, D_VAL_97    | OG, D_SER_89   | HG, D_SER_89   | 2.81 | 2.05 | 20.40 |
| 5JO5.PDB | OH, D_TYR_31   | N, D_GLY_95    | H, D_GLY_95    | 2.87 | 2.05 | 14.54 |
| 5JO5.PDB | OD1, D_ASP_92  | OG, D_SER_95A  | HG, D_SER_95A  | 2.53 | 1.74 | 15.88 |
| 5JO5.PDB | OD1, C_ASP_58  | NE, D_ARG_95B  | HE, D_ARG_95B  | 2.94 | 2.10 | 11.64 |
| 5JO5.PDB | OG, D_SER_95A  | N, D_LEU_95C   | H, D_LEU_95C   | 2.96 | 2.11 | 7.06  |
| 5JO5.PDB | O, D_SER_90    | N, D_VAL_97    | H, D_VAL_97    | 2.96 | 2.13 | 12.85 |
| 5JO5.PDB | O, D_CYS_88    | N, D_GLY_99    | H, D_GLY_99    | 2.87 | 2.08 | 18.28 |
| 5JO5.PDB | O, D_TYR_86    | N, D_THR_102   | H, D_THR_102   | 2.86 | 2.06 | 18.86 |
| 5JO5.PDB | O, D_ASP_7     | OG1, D_THR_102 | HG1, D_THR_102 | 2.66 | 1.83 | 6.75  |
| 5JO5.PDB | O, D_PRO_8     | N, D_LYS_103   | H, D_LYS_103   | 2.88 | 2.03 | 8.03  |
| 5JO5.PDB | O, D_ALA_84    | N, D_LEU_104   | H, D_LEU_104   | 2.86 | 2.02 | 9.74  |
| 5JO5.PDB | O, D_VAL_11    | N, D_THR_105   | H, D_THR_105   | 2.94 | 2.13 | 15.68 |
| 5JO5.PDB | OE2, D_GLU_83  | N, D_VAL_106   | H, D_VAL_106   | 2.99 | 2.26 | 27.16 |
| 5JO5.PDB | O, D_VAL_13    | N, D_LEU_106A  | H, D_LEU_106A  | 2.85 | 2.03 | 13.72 |
| 5JO5.PDB | OH, D_TYR_140  | N, D_SER_107   | H, D_SER_107   | 2.99 | 2.19 | 18.62 |
| 5JO5.PDB | O, D_TYR_140   | N, D_ALA_111   | H, D_ALA_111   | 2.83 | 2.00 | 12.24 |
| 5JO5.PDB | O, D_SER_137   | N, D_SER_114   | H, D_SER_114   | 2.93 | 2.12 | 17.17 |
| 5JO5.PDB | O, D_LEU_135   | N, D_THR_116   | H, D_THR_116   | 2.99 | 2.15 | 12.62 |
| 5JO5.PDB | O, D_VAL_133   | N, D_PHE_118   | H, D_PHE_118   | 2.76 | 1.91 | 6.01  |
| 5JO5.PDB | O, D_LEU_125   | N, D_ASN_128   | H, D_ASN_128   | 3.00 | 2.17 | 13.92 |
| 5JO5.PDB | OE1, D_GLU_124 | N, D_THR_131   | H, D_THR_131   | 2.94 | 2.20 | 26.30 |
| 5JO5.PDB | OE2, D_GLU_124 | OG1, D_THR_131 | HG1, D_THR_131 | 2.53 | 1.79 | 22.99 |
| 5JO5.PDB | O, D_LEU_178   | N, D_LEU_132   | H, D_LEU_132   | 2.92 | 2.11 | 16.22 |
| 5JO5.PDB | O, D_SER_176   | N, D_CYS_134   | H, D_CYS_134   | 2.87 | 2.02 | 3.73  |
| 5JO5.PDB | O, D_THR_116   | N, D_LEU_135   | H, D_LEU_135   | 2.89 | 2.05 | 10.60 |
| 5JO5.PDB | O, D_ALA_174   | N, D_ILE_136   | H, D_ILE_136   | 2.85 | 2.08 | 22.19 |
| 5JO5.PDB | O, D_SER_114   | N, D_SER_137   | H, D_SER_137   | 2.94 | 2.16 | 20.21 |
| 5JO5.PDB | OE1, D_GLN_167 | N, D_ASP_138   | H, D_ASP_138   | 2.90 | 2.13 | 21.66 |

|          |                |                |                 |      |      |       |
|----------|----------------|----------------|-----------------|------|------|-------|
| 5JO5.PDB | O, D_ALA_111   | N, D_TYR_140   | H, D_TYR_140    | 2.95 | 2.14 | 16.49 |
| 5JO5.PDB | O, D_PRO_141   | N, D_ALA_143   | H, D_ALA_143    | 2.91 | 2.20 | 29.22 |
| 5JO5.PDB | O, D_GLN_194   | N, D_ALA_147   | H, D_ALA_147    | 2.87 | 2.05 | 14.86 |
| 5JO5.PDB | OG, D_SER_176  | NE1, D_TRP_148 | HE1, D_TRP_148  | 2.85 | 2.01 | 9.98  |
| 5JO5.PDB | O, D_SER_153   | N, D_ALA_150   | H, D_ALA_150    | 2.82 | 2.02 | 17.16 |
| 5JO5.PDB | O, D_SER_190   | N, D_ASP_151   | H, D_ASP_151    | 2.91 | 2.08 | 10.80 |
| 5JO5.PDB | O, D_ALA_150   | N, D_SER_153   | H, D_SER_153    | 2.91 | 2.07 | 9.74  |
| 5JO5.PDB | O, D_TYR_177   | N, D_GLU_160   | H, D_GLU_160    | 2.99 | 2.19 | 18.70 |
| 5JO5.PDB | O, D_SER_175   | N, D_THR_162   | H, D_THR_162    | 2.86 | 2.03 | 12.76 |
| 5JO5.PDB | O, C_GLY_42    | OG1, D_THR_163 | HG1, D_THR_163  | 2.56 | 1.81 | 22.64 |
| 5JO5.PDB | O, D_LYS_171   | N, D_GLN_167   | H, D_GLN_167    | 2.61 | 1.77 | 8.91  |
| 5JO5.PDB | OD1, D_ASN_169 | NE2, D_GLN_167 | HE21, D_GLN_167 | 2.91 | 2.12 | 19.40 |
| 5JO5.PDB | OD1, D_ASP_138 | NE2, D_GLN_167 | HE22, D_GLN_167 | 2.88 | 2.03 | 6.31  |
| 5JO5.PDB | O, D_GLN_167   | N, D_ASN_170   | H, D_ASN_170    | 2.90 | 2.07 | 12.77 |
| 5JO5.PDB | O, D_PHE_139   | N, D_TYR_172   | H, D_TYR_172    | 2.94 | 2.13 | 17.51 |
| 5JO5.PDB | O, D_ILE_136   | N, D_ALA_174   | H, D_ALA_174    | 2.70 | 1.89 | 16.69 |
| 5JO5.PDB | OG1, D_THR_162 | N, D_SER_175   | H, D_SER_175    | 2.99 | 2.19 | 18.15 |
| 5JO5.PDB | O, D_CYS_134   | N, D_SER_176   | H, D_SER_176    | 2.88 | 2.10 | 20.17 |
| 5JO5.PDB | OG1, D_THR_161 | OG, D_SER_176  | HG, D_SER_176   | 2.78 | 2.01 | 20.04 |
| 5JO5.PDB | O, D_GLU_160   | N, D_TYR_177   | H, D_TYR_177    | 2.73 | 1.94 | 18.28 |
| 5JO5.PDB | O, D_LEU_132   | N, D_LEU_178   | H, D_LEU_178    | 3.00 | 2.17 | 13.80 |
| 5JO5.PDB | O, D_GLY_158   | N, D_SER_179   | H, D_SER_179    | 2.79 | 1.96 | 12.81 |
| 5JO5.PDB | O, D_ALA_130   | N, D_LEU_180   | H, D_LEU_180    | 2.83 | 1.97 | 3.34  |
| 5JO5.PDB | OD2, D_ASP_151 | ND1, D_HIS_188 | HD1, D_HIS_188  | 2.67 | 1.86 | 16.19 |
| 5JO5.PDB | O, D_VAL_206   | N, D_TYR_191   | H, D_TYR_191    | 2.99 | 2.16 | 11.55 |
| 5JO5.PDB | O, D_GLN_184   | OH, D_TYR_191  | HH, D_TYR_191   | 2.98 | 2.21 | 19.53 |
| 5JO5.PDB | O, D_LYS_149   | N, D_SER_192   | H, D_SER_192    | 2.91 | 2.12 | 19.04 |
| 5JO5.PDB | OG1, D_THR_205 | OG, D_SER_192  | HG, D_SER_192   | 2.76 | 2.06 | 27.74 |
| 5JO5.PDB | O, D_LYS_204   | N, D_CYS_193   | H, D_CYS_193    | 2.83 | 2.03 | 16.94 |
| 5JO5.PDB | O, D_ALA_147   | N, D_GLN_194   | H, D_GLN_194    | 2.79 | 1.95 | 9.12  |
| 5JO5.PDB | OE2, D_GLU_203 | NE2, D_GLN_194 | HE21, D_GLN_194 | 2.41 | 1.67 | 25.54 |
| 5JO5.PDB | O, D_VAL_202   | N, D_VAL_195   | H, D_VAL_195    | 2.84 | 2.00 | 11.51 |
| 5JO5.PDB | O, D_THR_145   | N, D_THR_196   | H, D_THR_196    | 2.90 | 2.05 | 9.26  |
| 5JO5.PDB | O, D_SER_200   | N, D_HIS_197   | H, D_HIS_197    | 2.74 | 1.91 | 13.29 |
| 5JO5.PDB | O, D_PRO_141   | NE2, D_HIS_197 | HE2, D_HIS_197  | 2.94 | 2.17 | 22.03 |
| 5JO5.PDB | O, D_HIS_197   | N, D_SER_200   | H, D_SER_200    | 2.99 | 2.14 | 6.86  |
| 5JO5.PDB | O, D_VAL_195   | N, D_VAL_202   | H, D_VAL_202    | 2.92 | 2.09 | 14.26 |
| 5JO5.PDB | O, D_TYR_191   | N, D_VAL_206   | H, D_VAL_206    | 2.89 | 2.07 | 14.82 |
| 5JO5.PDB | O, E_SER_25    | N, E_GLN_3     | H, E_GLN_3      | 2.86 | 2.02 | 10.81 |
| 5JO5.PDB | O, E_SER_21    | N, E_SER_7     | H, E_SER_7      | 2.79 | 2.01 | 21.43 |
| 5JO5.PDB | OG1, E_THR_107 | N, E_GLY_9     | H, E_GLY_9      | 2.94 | 2.20 | 26.14 |
| 5JO5.PDB | O, E_THR_110   | N, E_VAL_12    | H, E_VAL_12     | 2.91 | 2.13 | 20.76 |
| 5JO5.PDB | O, E_LEU_82C   | N, E_GLY_15    | H, E_GLY_15     | 2.84 | 2.01 | 12.49 |
| 5JO5.PDB | O, E_LYS_13    | N, E_GLY_16    | H, E_GLY_16     | 2.85 | 2.02 | 13.81 |
| 5JO5.PDB | O, E_MET_82    | N, E_LEU_18    | H, E_LEU_18     | 2.89 | 2.11 | 20.71 |
| 5JO5.PDB | O, E_LEU_80    | N, E_LEU_20    | H, E_LEU_20     | 2.82 | 1.97 | 8.28  |
| 5JO5.PDB | O, E_SER_7     | N, E_SER_21    | H, E_SER_21     | 2.95 | 2.12 | 12.48 |
| 5JO5.PDB | O, E_LEU_78    | N, E_CYS_22    | H, E_CYS_22     | 2.73 | 1.97 | 22.79 |
| 5JO5.PDB | O, E_ASN_76    | N, E_ALA_24    | H, E_ALA_24     | 2.94 | 2.16 | 21.70 |
| 5JO5.PDB | O, E_GLN_3     | N, E_SER_25    | H, E_SER_25     | 2.98 | 2.18 | 19.36 |
| 5JO5.PDB | OD2, E_ASP_53  | NE1, E_TRP_33  | HE1, E_TRP_33   | 2.89 | 2.14 | 24.08 |
| 5JO5.PDB | O, E_ALA_93    | N, E_SER_35    | H, E_SER_35     | 2.93 | 2.11 | 14.57 |
| 5JO5.PDB | OG1, E_THR_95  | OG, E_SER_35   | HG, E_SER_35    | 2.65 | 1.97 | 29.96 |
| 5JO5.PDB | O, E_GLY_49    | N, E_TRP_36    | H, E_TRP_36     | 2.88 | 2.07 | 17.60 |
| 5JO5.PDB | O, E_TYR_91    | N, E_VAL_37    | H, E_VAL_37     | 2.87 | 2.04 | 13.44 |
| 5JO5.PDB | O, E_GLU_46    | N, E_ARG_38    | H, E_ARG_38     | 2.86 | 2.02 | 8.76  |
| 5JO5.PDB | OE1, E_GLU_46  | NE, E_ARG_38   | HE, E_ARG_38    | 2.75 | 1.95 | 17.65 |
| 5JO5.PDB | OH, E_TYR_90   | NH1, E_ARG_38  | HH11, E_ARG_38  | 2.94 | 2.11 | 14.05 |

|          |                 |                |                 |      |      |       |
|----------|-----------------|----------------|-----------------|------|------|-------|
| 5JO5.PDB | OD1, E_ASP_86   | NH1, E_ARG_38  | HH12, E_ARG_38  | 2.82 | 2.00 | 15.16 |
| 5JO5.PDB | O, E_LYS_43     | NE2, E_GLN_39  | HE21, E_GLN_39  | 2.97 | 2.27 | 29.74 |
| 5JO5.PDB | OE1, F_GLN_38   | NE2, E_GLN_39  | HE22, E_GLN_39  | 2.90 | 2.06 | 10.70 |
| 5JO5.PDB | O, E_ALA_40     | N, E_LYS_43    | H, E_LYS_43     | 2.91 | 2.07 | 11.48 |
| 5JO5.PDB | O, E_ARG_38     | N, E_GLU_46    | H, E_GLU_46     | 2.82 | 2.03 | 20.58 |
| 5JO5.PDB | O, E_TRP_36     | N, E_VAL_48    | H, E_VAL_48     | 2.91 | 2.08 | 12.92 |
| 5JO5.PDB | OE1, E_GLU_100J | NE, E_ARG_50   | HE, E_ARG_50    | 2.82 | 2.06 | 22.79 |
| 5JO5.PDB | OD2, E_ASP_58   | NH1, E_ARG_50  | HH12, E_ARG_50  | 2.78 | 1.94 | 10.17 |
| 5JO5.PDB | OE2, E_GLU_100J | NH2, E_ARG_50  | HH21, E_ARG_50  | 2.98 | 2.13 | 7.82  |
| 5JO5.PDB | O, E_MET_34     | N, E_ILE_51    | H, E_ILE_51     | 2.82 | 1.99 | 12.16 |
| 5JO5.PDB | O, E_THR_56     | N, E_LYS_52    | H, E_LYS_52     | 2.88 | 2.06 | 15.44 |
| 5JO5.PDB | O, E_SER_52A    | N, E_GLY_55    | H, E_GLY_55     | 2.77 | 2.05 | 28.25 |
| 5JO5.PDB | O, E_VAL_48     | N, E_ALA_60    | H, E_ALA_60     | 2.92 | 2.07 | 6.71  |
| 5JO5.PDB | O, E_VAL_63     | N, E_ARG_66    | H, E_ARG_66     | 2.94 | 2.10 | 9.43  |
| 5JO5.PDB | OD2, E_ASP_86   | NH1, E_ARG_66  | HH12, E_ARG_66  | 2.75 | 1.91 | 9.04  |
| 5JO5.PDB | O, E_PRO_62     | NH2, E_ARG_66  | HH21, E_ARG_66  | 2.89 | 2.04 | 7.82  |
| 5JO5.PDB | O, E_GLN_81     | N, E_THR_68    | H, E_THR_68     | 2.78 | 1.96 | 15.96 |
| 5JO5.PDB | OH, E_TYR_59    | N, E_ILE_69    | H, E_ILE_69     | 2.86 | 2.02 | 8.94  |
| 5JO5.PDB | OD1, E_ASP_73   | NE, E_ARG_71   | HE, E_ARG_71    | 2.89 | 2.11 | 20.53 |
| 5JO5.PDB | O, E_ALA_32     | NH1, E_ARG_71  | HH12, E_ARG_71  | 2.87 | 2.12 | 24.62 |
| 5JO5.PDB | O, E_ALA_32     | NH2, E_ARG_71  | HH22, E_ARG_71  | 2.83 | 2.06 | 22.60 |
| 5JO5.PDB | O, E_THR_77     | N, E_ASP_72    | H, E_ASP_72     | 2.94 | 2.10 | 9.13  |
| 5JO5.PDB | OD1, E_ASP_72   | OG, E_SER_74   | HG, E_SER_74    | 2.60 | 1.77 | 6.90  |
| 5JO5.PDB | O, E_ASP_72     | N, E_LYS_75    | H, E_LYS_75     | 2.92 | 2.11 | 15.84 |
| 5JO5.PDB | O, E_LYS_75     | OG1, E_THR_77  | HG1, E_THR_77   | 2.87 | 2.06 | 11.81 |
| 5JO5.PDB | O, E_CYS_22     | N, E_LEU_78    | H, E_LEU_78     | 2.84 | 2.01 | 12.18 |
| 5JO5.PDB | O, E_SER_70     | N, E_TYR_79    | H, E_TYR_79     | 2.79 | 1.96 | 14.25 |
| 5JO5.PDB | O, E_LEU_20     | N, E_LEU_80    | H, E_LEU_80     | 2.96 | 2.14 | 14.05 |
| 5JO5.PDB | O, E_THR_68     | N, E_GLN_81    | H, E_GLN_81     | 2.80 | 1.97 | 12.32 |
| 5JO5.PDB | O, E_LEU_18     | N, E_MET_82    | H, E_MET_82     | 2.73 | 1.87 | 5.04  |
| 5JO5.PDB | O, E_ARG_66     | N, E_ASN_82A   | H, E_ASN_82A    | 2.93 | 2.10 | 12.92 |
| 5JO5.PDB | OD2, E_ASP_86   | N, E_LYS_83    | H, E_LYS_83     | 2.87 | 2.04 | 12.63 |
| 5JO5.PDB | O, E_LYS_83     | N, E_ASP_86    | H, E_ASP_86     | 2.88 | 2.03 | 9.99  |
| 5JO5.PDB | O, E_VAL_109    | N, E_ALA_88    | H, E_ALA_88     | 3.00 | 2.22 | 22.40 |
| 5JO5.PDB | O, E_GLN_39     | N, E_VAL_89    | H, E_VAL_89     | 2.94 | 2.14 | 17.80 |
| 5JO5.PDB | O, E_THR_107    | N, E_TYR_90    | H, E_TYR_90     | 2.81 | 1.97 | 10.34 |
| 5JO5.PDB | O, E_ASP_86     | OH, E_TYR_90   | HH, E_TYR_90    | 2.76 | 1.94 | 9.78  |
| 5JO5.PDB | O, E_VAL_37     | N, E_TYR_91    | H, E_TYR_91     | 2.62 | 1.76 | 3.70  |
| 5JO5.PDB | OE2, E_GLU_6    | N, E_CYS_92    | H, E_CYS_92     | 2.83 | 2.01 | 14.83 |
| 5JO5.PDB | O, E_SER_35     | N, E_ALA_93    | H, E_ALA_93     | 2.90 | 2.13 | 22.60 |
| 5JO5.PDB | OD2, E_ASP_102  | NE, E_ARG_94   | HE, E_ARG_94    | 2.83 | 2.08 | 25.07 |
| 5JO5.PDB | OD2, E_ASP_102  | NH2, E_ARG_94  | HH21, E_ARG_94  | 2.73 | 1.97 | 23.25 |
| 5JO5.PDB | O, E_TRP_33     | N, E_THR_95    | H, E_THR_95     | 2.81 | 1.99 | 14.28 |
| 5JO5.PDB | O, E_TYR_100K   | N, E_GLY_96    | H, E_GLY_96     | 2.75 | 2.03 | 27.94 |
| 5JO5.PDB | O, E_GLY_96     | N, E_TYR_100K  | H, E_TYR_100K   | 2.92 | 2.10 | 14.59 |
| 5JO5.PDB | OH, F_TYR_36    | N, E_PHE_100L  | H, E_PHE_100L   | 2.79 | 1.96 | 13.04 |
| 5JO5.PDB | O, E_ARG_94     | N, E_GLN_101   | H, E_GLN_101    | 2.75 | 2.03 | 27.51 |
| 5JO5.PDB | O, F_GLY_41     | NH2, E_ARG_105 | HH22, E_ARG_105 | 2.92 | 2.13 | 19.96 |
| 5JO5.PDB | OE1, E_GLU_6    | N, E_GLY_106   | H, E_GLY_106    | 2.88 | 2.02 | 0.89  |
| 5JO5.PDB | O, E_ALA_88     | N, E_VAL_109   | H, E_VAL_109    | 2.88 | 2.03 | 1.87  |
| 5JO5.PDB | OG1, E_THR_87   | N, E_VAL_111   | H, E_VAL_111    | 2.92 | 2.06 | 5.86  |
| 5JO5.PDB | O, E_VAL_12     | N, E_SER_112   | H, E_SER_112    | 2.97 | 2.21 | 23.58 |
| 5JO5.PDB | O, E_PHE_146    | N, E_LYS_117   | H, E_LYS_117    | 2.75 | 1.93 | 13.93 |
| 5JO5.PDB | O, E_ASP_144    | NZ, E_LYS_117  | HZ2, E_LYS_117  | 2.91 | 2.14 | 25.25 |
| 5JO5.PDB | O, E_LEU_141    | N, E_PHE_122   | H, E_PHE_122    | 2.90 | 2.08 | 14.62 |
| 5JO5.PDB | O, E_GLY_139    | N, E_LEU_124   | H, E_LEU_124    | 2.87 | 2.02 | 7.60  |
| 5JO5.PDB | O, E_VAL_184    | N, E_ALA_136   | H, E_ALA_136    | 2.71 | 1.90 | 16.68 |
| 5JO5.PDB | O, E_LEU_124    | N, E_GLY_139   | H, E_GLY_139    | 2.98 | 2.20 | 21.04 |

|          |                |                |                 |      |      |       |
|----------|----------------|----------------|-----------------|------|------|-------|
| 5JO5.PDB | O, E_SER.180   | N, E_CYS.140   | H, E_CYS.140    | 2.80 | 2.01 | 20.63 |
| 5JO5.PDB | O, E_PHE.122   | N, E_LEU.141   | H, E_LEU.141    | 2.82 | 1.97 | 5.54  |
| 5JO5.PDB | O, E_LEU.178   | N, E_VAL.142   | H, E_VAL.142    | 2.80 | 1.95 | 6.99  |
| 5JO5.PDB | O, E_SER.120   | N, E_LYS.143   | H, E_LYS.143    | 2.77 | 1.93 | 10.34 |
| 5JO5.PDB | OE2, F_GLU.124 | NZ, E_LYS.143  | HZ2, E_LYS.143  | 2.55 | 1.75 | 21.57 |
| 5JO5.PDB | O, E_TYR.176   | N, E_TYR.145   | H, E_TYR.145    | 2.90 | 2.11 | 20.23 |
| 5JO5.PDB | O, E_LYS.117   | N, E_PHE.146   | H, E_PHE.146    | 2.89 | 2.08 | 16.85 |
| 5JO5.PDB | O, E_ASN.197   | N, E_SER.153   | H, E_SER.153    | 2.97 | 2.16 | 17.92 |
| 5JO5.PDB | OD1, E_ASN.197 | OG, E_SER.153  | HG, E_SER.153   | 2.80 | 2.02 | 18.49 |
| 5JO5.PDB | OG, E_SER.180  | NE1, E_TRP.154 | HE1, E_TRP.154  | 2.96 | 2.13 | 12.27 |
| 5JO5.PDB | O, E_ILE.195   | N, E_ASN.155   | H, E_ASN.155    | 2.72 | 1.89 | 11.94 |
| 5JO5.PDB | OD1, E_ASN.197 | N, E_SER.156   | H, E_SER.156    | 2.66 | 1.84 | 15.32 |
| 5JO5.PDB | O, E_VAL.181   | N, E_HIS.164   | H, E_HIS.164    | 2.85 | 2.02 | 11.29 |
| 5JO5.PDB | O, E_SER.179   | N, E_PHE.166   | H, E_PHE.166    | 2.89 | 2.04 | 5.07  |
| 5JO5.PDB | O, E_SER.177   | N, E_VAL.169   | H, E_VAL.169    | 2.81 | 2.02 | 19.59 |
| 5JO5.PDB | OD1, E_ASP.144 | NE2, E_GLN.171 | HE22, E_GLN.171 | 2.83 | 2.02 | 16.42 |
| 5JO5.PDB | O, E_GLN.171   | N, E_GLY.174   | H, E_GLY.174    | 2.76 | 1.91 | 5.26  |
| 5JO5.PDB | O, E_TYR.145   | N, E_TYR.176   | H, E_TYR.176    | 2.86 | 2.00 | 3.93  |
| 5JO5.PDB | O, E_VAL.142   | N, E_LEU.178   | H, E_LEU.178    | 2.85 | 2.07 | 21.31 |
| 5JO5.PDB | OH, F_TYR.177  | OG, E_SER.179  | HG, E_SER.179   | 2.58 | 1.87 | 27.02 |
| 5JO5.PDB | O, E_CYS.140   | N, E_SER.180   | H, E_SER.180    | 2.98 | 2.17 | 15.74 |
| 5JO5.PDB | O, E_HIS.164   | N, E_VAL.181   | H, E_VAL.181    | 2.86 | 2.02 | 9.16  |
| 5JO5.PDB | O, E_LEU.138   | N, E_VAL.182   | H, E_VAL.182    | 2.76 | 1.93 | 11.92 |
| 5JO5.PDB | O, E_ALA.136   | N, E_VAL.184   | H, E_VAL.184    | 2.83 | 2.00 | 12.03 |
| 5JO5.PDB | O, E_GLY.134   | N, E_SER.186   | H, E_SER.186    | 2.88 | 2.03 | 8.01  |
| 5JO5.PDB | O, E_GLY.133   | OG, E_SER.186  | HG, E_SER.186   | 2.97 | 2.22 | 21.72 |
| 5JO5.PDB | O, E_PRO.185   | N, E_SER.188   | H, E_SER.188    | 2.97 | 2.20 | 23.16 |
| 5JO5.PDB | O, E_PRO.185   | OG, E_SER.188  | HG, E_SER.188   | 2.59 | 1.76 | 5.13  |
| 5JO5.PDB | O, E_SER.188   | N, E_THR.191   | H, E_THR.191    | 2.90 | 2.15 | 24.49 |
| 5JO5.PDB | O, E_SER.188   | N, E_GLN.192   | H, E_GLN.192    | 2.68 | 1.83 | 7.38  |
| 5JO5.PDB | OG, E_SER.188  | OH, E_TYR.194  | HH, E_TYR.194   | 2.65 | 1.91 | 23.44 |
| 5JO5.PDB | OD1, E_ASN.155 | N, E_ILE.195   | H, E_ILE.195    | 2.79 | 1.96 | 12.66 |
| 5JO5.PDB | O, E_LYS.209   | N, E_CYS.196   | H, E_CYS.196    | 2.95 | 2.16 | 19.80 |
| 5JO5.PDB | O, E_SER.153   | N, E_ASN.197   | H, E_ASN.197    | 2.69 | 1.84 | 6.11  |
| 5JO5.PDB | OD1, E_ASP.208 | ND2, E_ASN.197 | HD22, E_ASN.197 | 2.93 | 2.08 | 6.74  |
| 5JO5.PDB | O, E_VAL.207   | N, E_VAL.198   | H, E_VAL.198    | 2.75 | 1.89 | 4.70  |
| 5JO5.PDB | O, E_THR.151   | N, E_ASN.199   | H, E_ASN.199    | 2.87 | 2.02 | 5.85  |
| 5JO5.PDB | O, E_THR.205   | N, E_HIS.200   | H, E_HIS.200    | 2.87 | 2.01 | 4.48  |
| 5JO5.PDB | O, E_PRO.147   | NE2, E_HIS.200 | HE2, E_HIS.200  | 2.80 | 1.96 | 10.29 |
| 5JO5.PDB | O, E_LYS.201   | N, E_ASN.204   | H, E_ASN.204    | 2.97 | 2.13 | 10.21 |
| 5JO5.PDB | O, E_SER.203   | OG1, E_THR.205 | HG1, E_THR.205  | 2.99 | 2.30 | 29.09 |
| 5JO5.PDB | O, E_VAL.198   | N, E_VAL.207   | H, E_VAL.207    | 2.77 | 1.95 | 14.33 |
| 5JO5.PDB | OE2, F_GLU.123 | NZ, E_LYS.209  | HZ1, E_LYS.209  | 2.57 | 1.74 | 17.62 |
| 5JO5.PDB | O, E_TYR.194   | N, E_VAL.211   | H, E_VAL.211    | 2.91 | 2.07 | 9.99  |
| 5JO5.PDB | O, F_GLN.24    | N, F_THR.5     | H, F_THR.5      | 2.85 | 2.04 | 16.07 |
| 5JO5.PDB | O, F_TYR.86    | NE2, F_GLN.6   | HE22, F_GLN.6   | 2.95 | 2.11 | 10.68 |
| 5JO5.PDB | O, F_LYS.103   | N, F_VAL.11    | H, F_VAL.11     | 2.95 | 2.12 | 12.95 |
| 5JO5.PDB | O, F_THR.105   | N, F_VAL.13    | H, F_VAL.13     | 2.93 | 2.19 | 26.75 |
| 5JO5.PDB | O, F_ALA.78    | N, F_GLY.16    | H, F_GLY.16     | 2.88 | 2.02 | 3.27  |
| 5JO5.PDB | O, F_ALA.14    | N, F_GLN.17    | H, F_GLN.17     | 2.98 | 2.13 | 8.18  |
| 5JO5.PDB | O, F_ILE.75    | N, F_VAL.19    | H, F_VAL.19     | 2.97 | 2.17 | 17.62 |
| 5JO5.PDB | O, F_LEU.73    | N, F_ILE.21    | H, F_ILE.21     | 2.79 | 1.95 | 9.82  |
| 5JO5.PDB | O, F_ALA.71    | N, F_CYS.23    | H, F_CYS.23     | 2.65 | 1.81 | 10.82 |
| 5JO5.PDB | O, F_THR.5     | N, F_GLN.24    | H, F_GLN.24     | 2.96 | 2.22 | 25.96 |
| 5JO5.PDB | O, F_ASN.69    | N, F_GLY.25    | H, F_GLY.25     | 2.99 | 2.16 | 12.96 |
| 5JO5.PDB | O, F_ARG.91    | OG, F_SER.27   | HG, F_SER.27    | 2.61 | 1.83 | 18.13 |
| 5JO5.PDB | O, F_SER.27    | N, F_SER.30    | H, F_SER.30     | 2.99 | 2.17 | 15.08 |
| 5JO5.PDB | OE1, B_GLN.24  | OG, F_SER.30   | HG, F_SER.30    | 2.88 | 2.11 | 20.15 |

|          |                 |                |                |      |      |       |
|----------|-----------------|----------------|----------------|------|------|-------|
| 5JO5.PDB | O, F_SER.89     | N, F_SER.34    | H, F_SER.34    | 2.96 | 2.19 | 21.82 |
| 5JO5.PDB | O, F_ILE.48     | N, F_TRP.35    | H, F_TRP.35    | 2.86 | 2.07 | 19.30 |
| 5JO5.PDB | O, F_TYR.87     | N, F_TYR.36    | H, F_TYR.36    | 2.85 | 2.11 | 26.39 |
| 5JO5.PDB | O, F_VAL.45     | N, F_GLN.37    | H, F_GLN.37    | 2.90 | 2.07 | 14.11 |
| 5JO5.PDB | OH, F_TYR.86    | NE2, F_GLN.37  | HE21, F_GLN.37 | 2.98 | 2.12 | 5.01  |
| 5JO5.PDB | O, F_ASP.85     | N, F_GLN.38    | H, F_GLN.38    | 2.82 | 2.06 | 22.85 |
| 5JO5.PDB | OE1, E_GLN.39   | NE2, F_GLN.38  | HE22, F_GLN.38 | 2.85 | 2.02 | 12.75 |
| 5JO5.PDB | O, F_GLN.37     | N, F_VAL.45    | H, F_VAL.45    | 2.82 | 2.05 | 21.93 |
| 5JO5.PDB | OD2, F_ASP.82   | NE, F_ARG.61   | HE, F_ARG.61   | 2.99 | 2.15 | 12.18 |
| 5JO5.PDB | OD1, F_ASP.82   | NH2, F_ARG.61  | HH21, F_ARG.61 | 2.81 | 1.97 | 11.97 |
| 5JO5.PDB | O, F_THR.74     | N, F_SER.63    | H, F_SER.63    | 2.98 | 2.21 | 22.42 |
| 5JO5.PDB | OD1, F_ASN.52   | N, F_GLY.64    | H, F_GLY.64    | 2.75 | 1.92 | 12.61 |
| 5JO5.PDB | O, F_SER.72     | N, F_SER.65    | H, F_SER.65    | 2.99 | 2.19 | 19.46 |
| 5JO5.PDB | O, F_THR.70     | N, F_SER.67    | H, F_SER.67    | 2.97 | 2.14 | 12.81 |
| 5JO5.PDB | O, F_SER.67     | N, F_THR.70    | H, F_THR.70    | 2.94 | 2.14 | 18.28 |
| 5JO5.PDB | O, F_SER.67     | OG1, F_THR.70  | HG1, F_THR.70  | 2.69 | 1.87 | 11.09 |
| 5JO5.PDB | O, F_CYS.23     | N, F_ALA.71    | H, F_ALA.71    | 2.78 | 1.96 | 15.69 |
| 5JO5.PDB | O, F_SER.65     | N, F_SER.72    | H, F_SER.72    | 2.89 | 2.05 | 10.31 |
| 5JO5.PDB | O, F_ILE.21     | N, F_LEU.73    | H, F_LEU.73    | 2.79 | 1.97 | 15.26 |
| 5JO5.PDB | O, F_SER.63     | N, F_THR.74    | H, F_THR.74    | 2.85 | 2.00 | 6.83  |
| 5JO5.PDB | O, F_VAL.19     | N, F_ILE.75    | H, F_ILE.75    | 2.91 | 2.08 | 12.77 |
| 5JO5.PDB | O, F_GLN.17     | N, F_ALA.78    | H, F_ALA.78    | 2.92 | 2.08 | 9.70  |
| 5JO5.PDB | OD2, F_ASP.82   | N, F_GLN.79    | H, F_GLN.79    | 2.94 | 2.10 | 8.41  |
| 5JO5.PDB | O, F_GLN.79     | N, F_ASP.82    | H, F_ASP.82    | 2.82 | 1.98 | 9.27  |
| 5JO5.PDB | O, F_GLN.38     | N, F_ASP.85    | H, F_ASP.85    | 2.86 | 2.02 | 11.88 |
| 5JO5.PDB | O, F_THR.102    | N, F_TYR.86    | H, F_TYR.86    | 2.82 | 2.01 | 15.14 |
| 5JO5.PDB | O, F_ASP.82     | OH, F_TYR.86   | HH, F_TYR.86   | 2.63 | 1.82 | 11.29 |
| 5JO5.PDB | O, F_TYR.36     | N, F_TYR.87    | H, F_TYR.87    | 2.95 | 2.15 | 18.80 |
| 5JO5.PDB | O, F_SER.34     | N, F_SER.89    | H, F_SER.89    | 2.90 | 2.17 | 27.32 |
| 5JO5.PDB | O, F_VAL.97     | OG, F_SER.89   | HG, F_SER.89   | 2.78 | 2.02 | 20.17 |
| 5JO5.PDB | OE2, E_GLU.100J | NH2, F_ARG.91  | HH22, F_ARG.91 | 2.72 | 1.87 | 5.99  |
| 5JO5.PDB | OH, F_TYR.31    | N, F_GLY.95    | H, F_GLY.95    | 2.74 | 1.89 | 6.32  |
| 5JO5.PDB | OD1, F_ASP.92   | OG, F_SER.95A  | HG, F_SER.95A  | 2.58 | 1.83 | 23.06 |
| 5JO5.PDB | OD1, E_ASP.58   | NE, F_ARG.95B  | HE, F_ARG.95B  | 2.92 | 2.09 | 12.47 |
| 5JO5.PDB | OG, F_SER.95A   | N, F_LEU.95C   | H, F_LEU.95C   | 2.90 | 2.05 | 9.93  |
| 5JO5.PDB | O, F_SER.90     | N, F_VAL.97    | H, F_VAL.97    | 2.91 | 2.09 | 15.13 |
| 5JO5.PDB | O, F_CYS.88     | N, F_GLY.99    | H, F_GLY.99    | 2.87 | 2.06 | 15.92 |
| 5JO5.PDB | OE1, F_GLN.6    | N, F_GLY.101   | H, F_GLY.101   | 2.94 | 2.16 | 20.91 |
| 5JO5.PDB | O, F_TYR.86     | N, F_THR.102   | H, F_THR.102   | 2.82 | 2.02 | 18.81 |
| 5JO5.PDB | O, F_ASP.7      | OG1, F_THR.102 | HG1, F_THR.102 | 2.62 | 1.78 | 2.80  |
| 5JO5.PDB | O, F_PRO.8      | N, F_LYS.103   | H, F_LYS.103   | 2.89 | 2.04 | 8.00  |
| 5JO5.PDB | O, F_ALA.84     | N, F_LEU.104   | H, F_LEU.104   | 2.87 | 2.02 | 9.37  |
| 5JO5.PDB | O, F_VAL.11     | N, F_THR.105   | H, F_THR.105   | 2.99 | 2.16 | 14.54 |
| 5JO5.PDB | OE2, F_GLU.83   | N, F_VAL.106   | H, F_VAL.106   | 3.00 | 2.24 | 24.21 |
| 5JO5.PDB | O, F_VAL.13     | N, F_LEU.106A  | H, F_LEU.106A  | 2.87 | 2.04 | 14.03 |
| 5JO5.PDB | OH, F_TYR.140   | N, F_SER.107   | H, F_SER.107   | 2.93 | 2.11 | 14.82 |
| 5JO5.PDB | OE1, F_GLU.198  | NZ, F_LYS.110  | HZ3, F_LYS.110 | 2.97 | 2.11 | 10.79 |
| 5JO5.PDB | O, F_TYR.140    | N, F_ALA.111   | H, F_ALA.111   | 2.81 | 1.99 | 13.38 |
| 5JO5.PDB | O, F_SER.137    | N, F_SER.114   | H, F_SER.114   | 2.87 | 2.06 | 17.12 |
| 5JO5.PDB | O, F_LEU.135    | N, F_THR.116   | H, F_THR.116   | 2.97 | 2.14 | 11.95 |
| 5JO5.PDB | O, F_VAL.133    | N, F_PHE.118   | H, F_PHE.118   | 2.79 | 1.95 | 9.20  |
| 5JO5.PDB | O, F_LEU.125    | N, F_ASN.128   | H, F_ASN.128   | 2.88 | 2.07 | 17.11 |
| 5JO5.PDB | OE1, F_GLU.124  | N, F_THR.131   | H, F_THR.131   | 2.94 | 2.22 | 28.54 |
| 5JO5.PDB | OE2, F_GLU.124  | OG1, F_THR.131 | HG1, F_THR.131 | 2.49 | 1.76 | 24.10 |
| 5JO5.PDB | O, F_LEU.178    | N, F_LEU.132   | H, F_LEU.132   | 2.91 | 2.08 | 13.23 |
| 5JO5.PDB | O, F_SER.176    | N, F_CYS.134   | H, F_CYS.134   | 2.83 | 1.97 | 3.69  |
| 5JO5.PDB | O, F_THR.116    | N, F_LEU.135   | H, F_LEU.135   | 2.88 | 2.04 | 11.11 |
| 5JO5.PDB | O, F_ALA.174    | N, F_ILE.136   | H, F_ILE.136   | 2.89 | 2.10 | 19.87 |

|          |                |                |                 |      |      |       |
|----------|----------------|----------------|-----------------|------|------|-------|
| 5JO5.PDB | O, F_SER_114   | N, F_SER_137   | H, F_SER_137    | 2.91 | 2.12 | 19.22 |
| 5JO5.PDB | OE1, F_GLN_167 | N, F_ASP_138   | H, F_ASP_138    | 2.81 | 2.05 | 22.81 |
| 5JO5.PDB | O, F_PRO_141   | N, F_ALA_143   | H, F_ALA_143    | 2.90 | 2.19 | 29.08 |
| 5JO5.PDB | O, F_GLN_194   | N, F_ALA_147   | H, F_ALA_147    | 2.81 | 1.99 | 13.22 |
| 5JO5.PDB | OG, F_SER_176  | NE1, F_TRP_148 | HE1, F_TRP_148  | 2.88 | 2.03 | 9.94  |
| 5JO5.PDB | O, F_SER_192   | N, F_LYS_149   | H, F_LYS_149    | 2.88 | 2.06 | 15.62 |
| 5JO5.PDB | O, F_SER_153   | N, F_ALA_150   | H, F_ALA_150    | 2.80 | 1.99 | 15.96 |
| 5JO5.PDB | O, F_SER_190   | N, F_ASP_151   | H, F_ASP_151    | 2.90 | 2.06 | 10.54 |
| 5JO5.PDB | O, F_TRP_148   | N, F_VAL_155   | H, F_VAL_155    | 2.94 | 2.14 | 18.31 |
| 5JO5.PDB | O, F_TYR_177   | N, F_GLU_160   | H, F_GLU_160    | 2.97 | 2.17 | 17.39 |
| 5JO5.PDB | O, F_SER_175   | N, F_THR_162   | H, F_THR_162    | 2.87 | 2.04 | 13.17 |
| 5JO5.PDB | O, E_GLY_42    | OG1, F_THR_163 | HG1, F_THR_163  | 2.55 | 1.80 | 22.10 |
| 5JO5.PDB | O, F_ALA_173   | N, F_SER_165   | H, F_SER_165    | 2.89 | 2.07 | 14.19 |
| 5JO5.PDB | O, F_LYS_171   | N, F_GLN_167   | H, F_GLN_167    | 2.66 | 1.81 | 8.80  |
| 5JO5.PDB | OD1, F_ASN_169 | NE2, F_GLN_167 | HE21, F_GLN_167 | 2.87 | 2.13 | 25.80 |
| 5JO5.PDB | OD1, F_ASP_138 | NE2, F_GLN_167 | HE22, F_GLN_167 | 2.86 | 2.01 | 8.07  |
| 5JO5.PDB | OD1, F_ASN_169 | N, F_LYS_171   | H, F_LYS_171    | 2.94 | 2.09 | 6.57  |
| 5JO5.PDB | O, F_PHE_139   | N, F_TYR_172   | H, F_TYR_172    | 2.89 | 2.07 | 14.51 |
| 5JO5.PDB | O, F_SER_165   | N, F_ALA_173   | H, F_ALA_173    | 2.87 | 2.08 | 18.80 |
| 5JO5.PDB | O, F_ILE_136   | N, F_ALA_174   | H, F_ALA_174    | 2.75 | 1.95 | 16.67 |
| 5JO5.PDB | O, F_CYS_134   | N, F_SER_176   | H, F_SER_176    | 2.88 | 2.10 | 19.67 |
| 5JO5.PDB | OG1, F_THR_161 | OG, F_SER_176  | HG, F_SER_176   | 2.84 | 2.06 | 17.97 |
| 5JO5.PDB | O, F_GLU_160   | N, F_TYR_177   | H, F_TYR_177    | 2.70 | 1.88 | 14.68 |
| 5JO5.PDB | O, F_LEU_132   | N, F_LEU_178   | H, F_LEU_178    | 2.95 | 2.12 | 12.77 |
| 5JO5.PDB | O, F_GLY_158   | N, F_SER_179   | H, F_SER_179    | 2.85 | 2.02 | 11.91 |
| 5JO5.PDB | O, F_ALA_130   | N, F_LEU_180   | H, F_LEU_180    | 2.77 | 1.91 | 5.50  |
| 5JO5.PDB | OE1, F_GLN_184 | N, F_THR_181   | H, F_THR_181    | 2.91 | 2.08 | 13.75 |
| 5JO5.PDB | OG1, F_THR_181 | N, F_GLN_184   | H, F_GLN_184    | 2.92 | 2.09 | 12.10 |
| 5JO5.PDB | O, F_THR_181   | N, F_TRP_185   | H, F_TRP_185    | 2.95 | 2.13 | 14.97 |
| 5JO5.PDB | O, F_GLN_184   | OG, F_SER_187  | HG, F_SER_187   | 2.92 | 2.14 | 19.66 |
| 5JO5.PDB | OD1, F_ASP_151 | N, F_ARG_189   | H, F_ARG_189    | 2.70 | 1.97 | 26.16 |
| 5JO5.PDB | O, F_VAL_206   | N, F_TYR_191   | H, F_TYR_191    | 2.98 | 2.14 | 9.84  |
| 5JO5.PDB | O, F_GLN_184   | OH, F_TYR_191  | HH, F_TYR_191   | 2.85 | 2.14 | 27.44 |
| 5JO5.PDB | O, F_LYS_149   | N, F_SER_192   | H, F_SER_192    | 2.93 | 2.14 | 18.88 |
| 5JO5.PDB | O, F_LYS_204   | N, F_CYS_193   | H, F_CYS_193    | 2.94 | 2.14 | 19.38 |
| 5JO5.PDB | O, F_ALA_147   | N, F_GLN_194   | H, F_GLN_194    | 2.69 | 1.84 | 5.08  |
| 5JO5.PDB | OE2, F_GLU_203 | NE2, F_GLN_194 | HE21, F_GLN_194 | 2.48 | 1.75 | 26.23 |
| 5JO5.PDB | O, F_VAL_202   | N, F_VAL_195   | H, F_VAL_195    | 2.88 | 2.05 | 13.06 |
| 5JO5.PDB | O, F_THR_145   | N, F_THR_196   | H, F_THR_196    | 2.95 | 2.10 | 7.48  |
| 5JO5.PDB | O, F_SER_200   | N, F_HIS_197   | H, F_HIS_197    | 2.74 | 1.91 | 11.69 |
| 5JO5.PDB | O, F_PRO_141   | NE2, F_HIS_197 | HE2, F_HIS_197  | 2.87 | 2.10 | 22.42 |
| 5JO5.PDB | O, F_HIS_197   | N, F_SER_200   | H, F_SER_200    | 2.97 | 2.13 | 8.27  |
| 5JO5.PDB | O, F_VAL_195   | N, F_VAL_202   | H, F_VAL_202    | 2.91 | 2.07 | 12.06 |
| 5JO5.PDB | O, F_TYR_191   | N, F_VAL_206   | H, F_VAL_206    | 2.91 | 2.09 | 15.37 |

Table 1702: 5JO5-specific side chain and main chain hydrogen bonding analysis. In this table, a PDB file is specified with a four-letter PDB ID, except that the names of the PDB files corresponding to the single NMR structural model split from the NMR ensemble is specified with a four-letter PDB ID in addition to a hyphen followed by the single NMR structural model numeric ID, the residue naming scheme is **Chain ID\_residue name\_residue number**,  $\angle ADH$  represents the angle formed by acceptor (A), donor (D) and hydrogen (H) ( $\angle ADH$ ).

| PDB      | Acceptor (A)  | Donor (D)     | Hydrogen (H)   | D-A (Å) | H-A (Å) | $\angle ADH(^{\circ})$ |
|----------|---------------|---------------|----------------|---------|---------|------------------------|
| 5JR1.PDB | O, H_SER_21   | N, H_SER_7    | H, H_SER_7     | 2.87    | 2.09    | 21.13                  |
| 5JR1.PDB | O, H_THR_110  | N, H_VAL_12   | H, H_VAL_12    | 2.96    | 2.15    | 17.17                  |
| 5JR1.PDB | O, H_LEU_82C  | N, H_GLY_15   | H, H_GLY_15    | 2.79    | 1.94    | 9.64                   |
| 5JR1.PDB | O, H_LYS_13   | N, H_GLY_16   | H, H_GLY_16    | 2.88    | 2.07    | 16.51                  |
| 5JR1.PDB | O, H_MET_82   | N, H_LEU_18   | H, H_LEU_18    | 2.78    | 2.00    | 19.93                  |
| 5JR1.PDB | O, H_LEU_80   | N, H_LEU_20   | H, H_LEU_20    | 2.79    | 1.95    | 10.03                  |
| 5JR1.PDB | O, H_LEU_78   | N, H_CYS_22   | H, H_CYS_22    | 2.73    | 2.00    | 26.48                  |
| 5JR1.PDB | O, H_ASN_76   | N, H_ALA_24   | H, H_ALA_24    | 2.94    | 2.10    | 11.00                  |
| 5JR1.PDB | O, H_PHE_29   | N, H_ALA_32   | H, H_ALA_32    | 2.90    | 2.05    | 7.28                   |
| 5JR1.PDB | O, H_ALA_93   | N, H_SER_35   | H, H_SER_35    | 2.81    | 1.99    | 14.30                  |
| 5JR1.PDB | O, H_GLY_49   | N, H_TRP_36   | H, H_TRP_36    | 2.95    | 2.15    | 18.51                  |
| 5JR1.PDB | O, H_TYR_91   | N, H_VAL_37   | H, H_VAL_37    | 2.90    | 2.08    | 14.88                  |
| 5JR1.PDB | O, H_GLU_46   | N, H_ARG_38   | H, H_ARG_38    | 2.79    | 1.96    | 12.39                  |
| 5JR1.PDB | OE2, H_GLU_46 | NE, H_ARG_38  | HE, H_ARG_38   | 2.66    | 1.91    | 24.18                  |
| 5JR1.PDB | OH, H_TYR_90  | NH1, H_ARG_38 | HH11, H_ARG_38 | 2.93    | 2.12    | 16.05                  |
| 5JR1.PDB | OD1, H_ASP_86 | NH1, H_ARG_38 | HH12, H_ARG_38 | 2.94    | 2.11    | 12.77                  |
| 5JR1.PDB | OE2, H_GLU_46 | NH2, H_ARG_38 | HH21, H_ARG_38 | 2.68    | 1.95    | 27.48                  |
| 5JR1.PDB | O, H_VAL_89   | N, H_GLN_39   | H, H_GLN_39    | 2.80    | 2.04    | 23.21                  |
| 5JR1.PDB | O, H_ALA_40   | N, H_LYS_43   | H, H_LYS_43    | 2.97    | 2.14    | 12.77                  |
| 5JR1.PDB | O, H_TRP_36   | N, H_VAL_48   | H, H_VAL_48    | 2.78    | 1.94    | 10.30                  |
| 5JR1.PDB | O, H_ASP_58   | N, H_ARG_50   | H, H_ARG_50    | 2.97    | 2.19    | 21.36                  |
| 5JR1.PDB | O, H_MET_34   | N, H_ILE_51   | H, H_ILE_51    | 2.89    | 2.08    | 16.37                  |
| 5JR1.PDB | O, H_THR_56   | N, H_LYS_52   | H, H_LYS_52    | 2.98    | 2.15    | 12.98                  |
| 5JR1.PDB | OD1, H_ASP_53 | N, H_GLY_54   | H, H_GLY_54    | 2.21    | 1.48    | 25.64                  |
| 5JR1.PDB | O, H_VAL_48   | N, H_ALA_60   | H, H_ALA_60    | 2.91    | 2.06    | 6.87                   |
| 5JR1.PDB | OD2, H_ASP_86 | NH1, H_ARG_66 | HH12, H_ARG_66 | 2.72    | 1.87    | 9.50                   |
| 5JR1.PDB | O, H_PRO_62   | NH2, H_ARG_66 | HH21, H_ARG_66 | 2.78    | 1.93    | 7.41                   |
| 5JR1.PDB | O, H_GLN_81   | N, H_THR_68   | H, H_THR_68    | 2.82    | 2.01    | 16.76                  |
| 5JR1.PDB | OH, H_TYR_59  | N, H_ILE_69   | H, H_ILE_69    | 2.78    | 1.93    | 7.40                   |
| 5JR1.PDB | OD1, H_ASP_73 | NE, H_ARG_71  | HE, H_ARG_71   | 2.99    | 2.20    | 19.01                  |
| 5JR1.PDB | O, H_ALA_32   | NH1, H_ARG_71 | HH12, H_ARG_71 | 2.98    | 2.22    | 23.48                  |
| 5JR1.PDB | O, H_ALA_32   | NH2, H_ARG_71 | HH22, H_ARG_71 | 2.99    | 2.24    | 24.05                  |
| 5JR1.PDB | O, H_THR_77   | N, H_ASP_72   | H, H_ASP_72    | 2.92    | 2.10    | 14.47                  |
| 5JR1.PDB | OD1, H_ASP_72 | OG, H_SER_74  | HG, H_SER_74   | 2.50    | 1.70    | 14.47                  |
| 5JR1.PDB | O, H_LYS_75   | OG1, H_THR_77 | HG1, H_THR_77  | 2.91    | 2.09    | 10.97                  |
| 5JR1.PDB | O, H_CYS_22   | N, H_LEU_78   | H, H_LEU_78    | 2.87    | 2.04    | 11.82                  |
| 5JR1.PDB | O, H_SER_70   | N, H_TYR_79   | H, H_TYR_79    | 2.85    | 2.00    | 9.75                   |
| 5JR1.PDB | O, H_LEU_20   | N, H_LEU_80   | H, H_LEU_80    | 2.93    | 2.12    | 16.09                  |
| 5JR1.PDB | O, H_THR_68   | N, H_GLN_81   | H, H_GLN_81    | 2.82    | 1.98    | 10.53                  |
| 5JR1.PDB | O, H_LEU_18   | N, H_MET_82   | H, H_MET_82    | 2.76    | 1.92    | 9.12                   |
| 5JR1.PDB | OD2, H_ASP_86 | N, H_LYS_83   | H, H_LYS_83    | 2.82    | 1.96    | 6.84                   |
| 5JR1.PDB | O, H_LYS_83   | N, H_ASP_86   | H, H_ASP_86    | 2.64    | 1.79    | 6.68                   |
| 5JR1.PDB | O, H_VAL_109  | N, H_ALA_88   | H, H_ALA_88    | 2.98    | 2.19    | 19.05                  |
| 5JR1.PDB | O, H_GLN_39   | N, H_VAL_89   | H, H_VAL_89    | 2.83    | 2.04    | 19.63                  |
| 5JR1.PDB | O, H_THR_107  | N, H_TYR_90   | H, H_TYR_90    | 2.85    | 2.00    | 7.31                   |
| 5JR1.PDB | O, H_ASP_86   | OH, H_TYR_90  | HH, H_TYR_90   | 2.69    | 1.86    | 8.47                   |
| 5JR1.PDB | O, H_VAL_37   | N, H_TYR_91   | H, H_TYR_91    | 2.66    | 1.80    | 1.80                   |
| 5JR1.PDB | OE2, H_GLU_6  | N, H_CYS_92   | H, H_CYS_92    | 2.70    | 1.87    | 12.64                  |
| 5JR1.PDB | O, H_SER_35   | N, H_ALA_93   | H, H_ALA_93    | 2.93    | 2.15    | 21.88                  |
| 5JR1.PDB | O, H_ASP_102  | N, H_ARG_94   | H, H_ARG_94    | 2.91    | 2.18    | 27.54                  |
| 5JR1.PDB | O, H_TRP_33   | N, H_THR_95   | H, H_THR_95    | 2.98    | 2.15    | 11.92                  |
| 5JR1.PDB | O, H_TYR_100K | N, H_GLY_96   | H, H_GLY_96    | 2.88    | 2.07    | 15.19                  |
| 5JR1.PDB | O, H_GLU_100I | N, H_TYR_98   | H, H_TYR_98    | 2.97    | 2.17    | 18.39                  |
| 5JR1.PDB | O, H_TYR_98   | N, H_GLU_100I | H, H_GLU_100I  | 2.76    | 1.96    | 17.68                  |
| 5JR1.PDB | O, H_GLY_96   | N, H_TYR_100K | H, H_TYR_100K  | 2.85    | 2.09    | 23.20                  |
| 5JR1.PDB | OH, L_TYR_36  | N, H_PHE_100L | H, H_PHE_100L  | 2.93    | 2.14    | 18.24                  |
| 5JR1.PDB | O, H_ARG_94   | N, H_GLN_101  | H, H_GLN_101   | 2.77    | 2.05    | 27.74                  |



|          |                |                |                 |      |      |       |
|----------|----------------|----------------|-----------------|------|------|-------|
| 5JR1.PDB | O, L_GLY_41    | NH1, H_ARG_105 | HH11, H_ARG_105 | 2.58 | 1.82 | 23.25 |
| 5JR1.PDB | OE1, H_GLU_6   | N, H_GLY_106   | H, H_GLY_106    | 2.84 | 2.01 | 12.28 |
| 5JR1.PDB | O, H_TYR_90    | N, H_THR_107   | H, H_THR_107    | 2.99 | 2.28 | 29.77 |
| 5JR1.PDB | O, H_ALA_88    | N, H_VAL_109   | H, H_VAL_109    | 2.92 | 2.07 | 7.11  |
| 5JR1.PDB | OG1, H_THR_87  | N, H_BVAL_111  | H, H_BVAL_111   | 3.00 | 2.15 | 5.58  |
| 5JR1.PDB | O, H_PHE_146   | N, H_LYS_117   | H, H_LYS_117    | 2.82 | 1.99 | 13.52 |
| 5JR1.PDB | O, H_ASP_144   | NZ, H_LYS_117  | HZ2, H_LYS_117  | 2.92 | 2.10 | 18.09 |
| 5JR1.PDB | O, H_LYS_143   | N, H_SER_120   | H, H_SER_120    | 2.94 | 2.13 | 15.86 |
| 5JR1.PDB | O, H_LEU_141   | N, H_PHE_122   | H, H_PHE_122    | 2.88 | 2.05 | 12.08 |
| 5JR1.PDB | O, H_GLY_139   | N, H_LEU_124   | H, H_LEU_124    | 2.79 | 1.94 | 8.07  |
| 5JR1.PDB | O, H_VAL_184   | N, H_ALA_136   | H, H_ALA_136    | 2.78 | 1.96 | 15.67 |
| 5JR1.PDB | O, H_LEU_124   | N, H_GLY_139   | H, H_GLY_139    | 2.92 | 2.11 | 16.29 |
| 5JR1.PDB | O, H_SER_180   | N, H_CYS_140   | H, H_CYS_140    | 2.94 | 2.15 | 19.79 |
| 5JR1.PDB | O, H_PHE_122   | N, H_LEU_141   | H, H_LEU_141    | 2.84 | 1.99 | 9.59  |
| 5JR1.PDB | O, H_LEU_178   | N, H_VAL_142   | H, H_VAL_142    | 2.76 | 1.90 | 4.75  |
| 5JR1.PDB | O, H_SER_120   | N, H_LYS_143   | H, H_LYS_143    | 2.77 | 1.93 | 8.90  |
| 5JR1.PDB | O, H_TYR_176   | N, H_TYR_145   | H, H_TYR_145    | 2.95 | 2.14 | 16.52 |
| 5JR1.PDB | O, H_LYS_117   | N, H_PHE_146   | H, H_PHE_146    | 2.89 | 2.08 | 16.28 |
| 5JR1.PDB | O, H_ASN_199   | N, H_THR_151   | H, H_THR_151    | 2.93 | 2.09 | 11.48 |
| 5JR1.PDB | O, H_ASN_197   | N, H_SER_153   | H, H_SER_153    | 2.90 | 2.09 | 17.08 |
| 5JR1.PDB | OD1, H_ASN_197 | OG, H_SER_153  | HG, H_SER_153   | 2.85 | 2.04 | 12.85 |
| 5JR1.PDB | OG, H_SER_180  | NE1, H_TRP_154 | HE1, H_TRP_154  | 2.87 | 2.02 | 7.55  |
| 5JR1.PDB | O, H_ILE_195   | N, H_ASN_155   | H, H_ASN_155    | 2.82 | 1.98 | 10.05 |
| 5JR1.PDB | OD1, H_ASN_197 | N, H_SER_156   | H, H_SER_156    | 2.76 | 1.96 | 17.23 |
| 5JR1.PDB | O, H_VAL_181   | N, H_HIS_164   | H, H_HIS_164    | 2.82 | 1.99 | 11.94 |
| 5JR1.PDB | O, H_SER_179   | N, H_PHE_166   | H, H_PHE_166    | 2.91 | 2.06 | 3.95  |
| 5JR1.PDB | O, H_SER_177   | N, H_VAL_169   | H, H_VAL_169    | 2.84 | 2.03 | 16.11 |
| 5JR1.PDB | O, H_LEU_175   | N, H_GLN_171   | H, H_GLN_171    | 2.92 | 2.06 | 5.15  |
| 5JR1.PDB | OD1, H_ASP_144 | NE2, H_GLN_171 | HE22, H_GLN_171 | 2.73 | 1.95 | 20.99 |
| 5JR1.PDB | O, H_GLN_171   | N, H_GLY_174   | H, H_GLY_174    | 2.88 | 2.05 | 12.35 |
| 5JR1.PDB | O, H_TYR_145   | N, H_TYR_176   | H, H_TYR_176    | 2.81 | 1.96 | 8.57  |
| 5JR1.PDB | OE1, H_GLN_171 | OG, H_SER_177  | HG, H_SER_177   | 2.71 | 1.98 | 25.79 |
| 5JR1.PDB | O, H_VAL_142   | N, H_LEU_178   | H, H_LEU_178    | 2.91 | 2.11 | 17.70 |
| 5JR1.PDB | OH, L_TYR_178  | OG, H_SER_179  | HG, H_SER_179   | 2.83 | 2.03 | 15.88 |
| 5JR1.PDB | O, H_HIS_164   | N, H_VAL_181   | H, H_VAL_181    | 2.79 | 1.96 | 12.10 |
| 5JR1.PDB | O, H_LEU_138   | N, H_VAL_182   | H, H_VAL_182    | 2.82 | 2.00 | 14.39 |
| 5JR1.PDB | O, H_ALA_136   | N, H_VAL_184   | H, H_VAL_184    | 2.80 | 1.97 | 12.21 |
| 5JR1.PDB | O, H_GLY_134   | N, H_SER_186   | H, H_SER_186    | 2.82 | 1.97 | 7.53  |
| 5JR1.PDB | O, H_PRO_185   | OG, H_SER_188  | HG, H_SER_188   | 2.70 | 1.86 | 3.21  |
| 5JR1.PDB | O, H_SER_188   | N, H_GLN_192   | H, H_GLN_192    | 2.88 | 2.04 | 10.77 |
| 5JR1.PDB | OG, H_SER_188  | OH, H_TYR_194  | HH, H_TYR_194   | 2.70 | 1.94 | 20.59 |
| 5JR1.PDB | OD1, H_ASN_155 | N, H_ILE_195   | H, H_ILE_195    | 2.86 | 2.03 | 13.39 |
| 5JR1.PDB | O, H_LYS_209   | N, H_CYS_196   | H, H_CYS_196    | 2.96 | 2.17 | 19.83 |
| 5JR1.PDB | O, H_SER_153   | N, H_ASN_197   | H, H_ASN_197    | 2.79 | 1.95 | 7.76  |
| 5JR1.PDB | O, H_VAL_207   | N, H_VAL_198   | H, H_VAL_198    | 2.80 | 1.97 | 13.81 |
| 5JR1.PDB | O, H_THR_151   | N, H_ASN_199   | H, H_ASN_199    | 2.88 | 2.05 | 14.08 |
| 5JR1.PDB | O, H_THR_205   | N, H_HIS_200   | H, H_HIS_200    | 2.87 | 2.03 | 10.85 |
| 5JR1.PDB | O, H_PRO_147   | NE2, H_HIS_200 | HE2, H_HIS_200  | 2.86 | 2.02 | 11.05 |
| 5JR1.PDB | O, H_LYS_201   | N, H_ASN_204   | H, H_ASN_204    | 2.97 | 2.13 | 9.90  |
| 5JR1.PDB | O, H_VAL_198   | N, H_VAL_207   | H, H_VAL_207    | 2.90 | 2.09 | 16.74 |
| 5JR1.PDB | O, H_CYS_196   | N, H_LYS_209   | H, H_LYS_209    | 2.83 | 2.04 | 19.23 |
| 5JR1.PDB | OE2, H_GLU_212 | NE, H_BARG_210 | HE, H_BARG_210  | 2.40 | 1.64 | 22.83 |
| 5JR1.PDB | O, H_TYR_194   | N, H_VAL_211   | H, H_VAL_211    | 2.98 | 2.15 | 13.77 |
| 5JR1.PDB | O, L_ARG_24    | N, L_THR_5     | H, L_THR_5      | 2.88 | 2.05 | 12.05 |
| 5JR1.PDB | O, L_TYR_86    | NE2, L_GLN_6   | HE22, L_GLN_6   | 2.95 | 2.16 | 19.38 |
| 5JR1.PDB | O, L_LYS_103   | N, L_VAL_11    | H, L_VAL_11     | 2.92 | 2.11 | 16.33 |
| 5JR1.PDB | O, L_ALA_78    | N, L_GLY_16    | H, L_GLY_16     | 2.86 | 2.01 | 7.27  |
| 5JR1.PDB | O, L_LEU_73    | N, L_ILE_21    | H, L_ILE_21     | 2.79 | 1.95 | 10.20 |

|          |                |                |                 |      |      |       |
|----------|----------------|----------------|-----------------|------|------|-------|
| 5JR1.PDB | O, L_ALA_71    | N, L_CYS_23    | H, L_CYS_23     | 2.79 | 1.94 | 9.36  |
| 5JR1.PDB | O, L_THR_5     | N, L_ARG_24    | H, L_ARG_24     | 2.91 | 2.12 | 20.30 |
| 5JR1.PDB | O, L_GLY_25    | N, L_LEU_28    | H, L_LEU_28     | 2.91 | 2.14 | 22.06 |
| 5JR1.PDB | O, L_SER_89    | N, L_SER_34    | H, L_SER_34     | 2.85 | 2.04 | 16.48 |
| 5JR1.PDB | O, L_PHE_48    | N, L_TRP_35    | H, L_TRP_35     | 2.89 | 2.09 | 17.65 |
| 5JR1.PDB | O, L_TYR_87    | N, L_TYR_36    | H, L_TYR_36     | 2.89 | 2.07 | 15.48 |
| 5JR1.PDB | N, H_PHE_100L  | OH, L_TYR_36   | HH, L_TYR_36    | 2.93 | 2.21 | 26.41 |
| 5JR1.PDB | O, L_ILE_45    | N, L_GLN_37    | H, L_GLN_37     | 2.91 | 2.11 | 18.13 |
| 5JR1.PDB | OH, L_TYR_86   | NE2, L_GLN_37  | HE21, L_GLN_37  | 2.92 | 2.08 | 10.60 |
| 5JR1.PDB | O, L_GLU_85    | N, L_LYS_38    | H, L_LYS_38     | 2.75 | 1.91 | 11.42 |
| 5JR1.PDB | O, L_GLN_37    | N, L_ILE_45    | H, L_ILE_45     | 2.81 | 1.99 | 14.72 |
| 5JR1.PDB | O, L_TRP_35    | N, L_LEU_47    | H, L_LEU_47     | 2.80 | 1.95 | 7.57  |
| 5JR1.PDB | O, L_ASN_53    | N, L_TYR_49    | H, L_TYR_49     | 2.89 | 2.10 | 19.62 |
| 5JR1.PDB | O, L_PHE_62    | NE, L_ARG_54   | HE, L_ARG_54    | 2.79 | 2.02 | 21.45 |
| 5JR1.PDB | O, L_PHE_62    | NH2, L_ARG_54  | HH21, L_ARG_54  | 2.91 | 2.19 | 28.02 |
| 5JR1.PDB | OD2, L_ASP_82  | NE, L_ARG_61   | HE, L_ARG_61    | 2.81 | 2.00 | 15.72 |
| 5JR1.PDB | OD1, L_ASP_82  | NH2, L_ARG_61  | HH21, L_ARG_61  | 2.74 | 1.90 | 11.09 |
| 5JR1.PDB | O, L_THR_74    | N, L_SER_63    | H, L_SER_63     | 2.98 | 2.19 | 19.40 |
| 5JR1.PDB | O, L_SER_72    | N, L_SER_65    | H, L_SER_65     | 2.90 | 2.12 | 21.18 |
| 5JR1.PDB | O, L_SER_67    | N, L_ARG_70    | H, L_ARG_70     | 2.86 | 2.02 | 9.85  |
| 5JR1.PDB | O, L_CYS_23    | N, L_ALA_71    | H, L_ALA_71     | 2.91 | 2.10 | 16.23 |
| 5JR1.PDB | O, L_SER_65    | N, L_SER_72    | H, L_SER_72     | 2.84 | 2.01 | 12.34 |
| 5JR1.PDB | O, L_ILE_21    | N, L_LEU_73    | H, L_LEU_73     | 2.78 | 1.95 | 12.54 |
| 5JR1.PDB | O, L_SER_63    | N, L_THR_74    | H, L_THR_74     | 2.78 | 1.93 | 7.21  |
| 5JR1.PDB | OG1, L_THR_20  | OG1, L_THR_74  | HG1, L_THR_74   | 2.96 | 2.15 | 13.12 |
| 5JR1.PDB | O, L_VAL_19    | N, L_ILE_75    | H, L_ILE_75     | 2.80 | 1.99 | 13.64 |
| 5JR1.PDB | O, L_ARG_61    | N, L_SER_76    | H, L_SER_76     | 2.98 | 2.17 | 14.63 |
| 5JR1.PDB | O, L_ARG_17    | N, L_ALA_78    | H, L_ALA_78     | 2.83 | 2.04 | 17.38 |
| 5JR1.PDB | OD2, L_ASP_82  | N, L_GLN_79    | H, L_GLN_79     | 2.91 | 2.06 | 9.01  |
| 5JR1.PDB | O, L_GLN_79    | N, L_ASP_82    | H, L_ASP_82     | 2.90 | 2.05 | 8.33  |
| 5JR1.PDB | O, L_LYS_38    | N, L_GLU_85    | H, L_GLU_85     | 2.91 | 2.07 | 8.57  |
| 5JR1.PDB | O, L_THR_102   | N, L_TYR_86    | H, L_TYR_86     | 2.84 | 2.05 | 20.14 |
| 5JR1.PDB | O, L_ASP_82    | OH, L_TYR_86   | HH, L_TYR_86    | 2.65 | 1.82 | 8.64  |
| 5JR1.PDB | O, L_TYR_36    | N, L_TYR_87    | H, L_TYR_87     | 2.94 | 2.12 | 15.76 |
| 5JR1.PDB | O, L_VAL_97    | OG, L_SER_89   | HG, L_SER_89    | 2.81 | 2.07 | 23.50 |
| 5JR1.PDB | O, L_TYR_32    | OG, L_SER_90   | HG, L_SER_90    | 2.84 | 2.07 | 19.10 |
| 5JR1.PDB | O, L_SER_95A   | NE, L_ARG_91   | HE, L_ARG_91    | 2.92 | 2.13 | 19.73 |
| 5JR1.PDB | O, L_GLY_95    | NH1, L_ARG_91  | HH11, L_ARG_91  | 2.58 | 1.80 | 19.50 |
| 5JR1.PDB | O, H_PRO_100F  | NH1, L_ARG_91  | HH12, L_ARG_91  | 2.89 | 2.18 | 29.36 |
| 5JR1.PDB | O, H_PRO_100F  | NH2, L_ARG_91  | HH22, L_ARG_91  | 2.82 | 2.09 | 26.91 |
| 5JR1.PDB | O, L_LEU_95C   | N, L_ASP_92    | H, L_ASP_92     | 2.85 | 2.03 | 14.49 |
| 5JR1.PDB | OD2, L_ASP_92  | N, L_SER_94    | H, L_SER_94     | 2.66 | 1.84 | 13.82 |
| 5JR1.PDB | OD2, L_ASP_92  | OG, L_SER_94   | HG, L_SER_94    | 2.41 | 1.66 | 21.72 |
| 5JR1.PDB | O, L_ASP_92    | N, L_GLY_95    | H, L_GLY_95     | 2.95 | 2.09 | 5.43  |
| 5JR1.PDB | OD2, L_ASP_58  | NH2, L_ARG_95B | HH22, L_ARG_95B | 2.47 | 1.67 | 16.99 |
| 5JR1.PDB | O, L_SER_90    | N, L_VAL_97    | H, L_VAL_97     | 2.83 | 1.98 | 7.91  |
| 5JR1.PDB | O, L_CYS_88    | N, L_GLY_99    | H, L_GLY_99     | 2.88 | 2.08 | 16.95 |
| 5JR1.PDB | O, L_TYR_86    | N, L_THR_102   | H, L_THR_102    | 2.89 | 2.09 | 17.99 |
| 5JR1.PDB | O, L_GLU_7     | OG1, L_THR_102 | HG1, L_THR_102  | 2.75 | 1.92 | 9.86  |
| 5JR1.PDB | O, L_THR_8     | N, L_LYS_103   | H, L_LYS_103    | 2.87 | 2.02 | 7.49  |
| 5JR1.PDB | O, L_ALA_84    | N, L_LEU_104   | H, L_LEU_104    | 2.86 | 2.02 | 10.37 |
| 5JR1.PDB | O, L_VAL_11    | N, L_THR_105   | H, L_THR_105    | 2.95 | 2.12 | 13.22 |
| 5JR1.PDB | OD1, L_ASP_83  | N, L_VAL_106   | H, L_VAL_106    | 2.52 | 1.67 | 7.56  |
| 5JR1.PDB | O, L_VAL_13    | N, L_LEU_106A  | H, L_LEU_106A   | 2.86 | 2.04 | 13.99 |
| 5JR1.PDB | OH, L_TYR_141  | N, L_SER_107   | H, L_SER_107    | 2.98 | 2.19 | 19.63 |
| 5JR1.PDB | OE1, L_GLU_199 | NZ, L_LYS_110  | HZ3, L_LYS_110  | 2.77 | 1.91 | 11.53 |
| 5JR1.PDB | O, L_TYR_141   | N, L_ALA_111   | H, L_ALA_111    | 2.82 | 1.98 | 10.35 |
| 5JR1.PDB | O, L_SER_138   | N, L_SER_114   | H, L_SER_114    | 2.83 | 1.98 | 5.37  |

|          |                |                |                 |      |      |       |
|----------|----------------|----------------|-----------------|------|------|-------|
| 5JR1.PDB | O, L_LEU_136   | N, L_THR_116   | H, L_THR_116    | 2.93 | 2.12 | 15.66 |
| 5JR1.PDB | O, L_VAL_134   | N, L_PHE_118   | H, L_PHE_118    | 2.82 | 1.99 | 11.01 |
| 5JR1.PDB | O, L_SER_122   | N, L_LEU_126   | H, L_LEU_126    | 2.98 | 2.14 | 8.64  |
| 5JR1.PDB | O, L_LEU_126   | N, L_ASN_129   | H, L_ASN_129    | 2.85 | 2.04 | 16.99 |
| 5JR1.PDB | OE2, L_GLU_125 | OG1, L_THR_132 | HG1, L_THR_132  | 2.53 | 1.79 | 23.02 |
| 5JR1.PDB | O, L_LEU_179   | N, L_LEU_133   | H, L_LEU_133    | 2.87 | 2.06 | 17.19 |
| 5JR1.PDB | O, L_SER_177   | N, L_CYS_135   | H, L_CYS_135    | 2.87 | 2.01 | 4.08  |
| 5JR1.PDB | O, L_THR_116   | N, L_LEU_136   | H, L_LEU_136    | 2.82 | 1.96 | 6.02  |
| 5JR1.PDB | O, L_ALA_175   | N, L_ILE_137   | H, L_ILE_137    | 2.93 | 2.15 | 21.12 |
| 5JR1.PDB | O, L_SER_114   | N, L_SER_138   | H, L_SER_138    | 2.87 | 2.07 | 19.40 |
| 5JR1.PDB | OE1, L_GLN_168 | N, L_ASP_139   | H, L_ASP_139    | 2.93 | 2.12 | 16.63 |
| 5JR1.PDB | O, L_ALA_111   | N, L_TYR_141   | H, L_TYR_141    | 2.90 | 2.08 | 15.02 |
| 5JR1.PDB | O, L_GLN_195   | N, L_ALA_148   | H, L_ALA_148    | 2.93 | 2.11 | 16.11 |
| 5JR1.PDB | OG, L_SER_177  | NE1, L_TRP_149 | HE1, L_TRP_149  | 2.84 | 1.99 | 9.64  |
| 5JR1.PDB | O, L_SER_193   | N, L_LYS_150   | H, L_LYS_150    | 2.91 | 2.10 | 16.78 |
| 5JR1.PDB | OE1, L_GLN_195 | NZ, L_LYS_150  | HZ3, L_LYS_150  | 2.79 | 1.91 | 7.52  |
| 5JR1.PDB | O, L_SER_154   | N, L_ALA_151   | H, L_ALA_151    | 2.97 | 2.15 | 14.89 |
| 5JR1.PDB | O, L_ALA_151   | N, L_SER_154   | H, L_SER_154    | 2.85 | 2.01 | 8.48  |
| 5JR1.PDB | O, L_TRP_149   | N, L_VAL_156   | H, L_VAL_156    | 2.98 | 2.14 | 8.84  |
| 5JR1.PDB | O, L_TYR_178   | N, L_GLU_161   | H, L_GLU_161    | 2.96 | 2.15 | 17.71 |
| 5JR1.PDB | O, L_SER_176   | N, L_THR_163   | H, L_THR_163    | 2.91 | 2.08 | 11.01 |
| 5JR1.PDB | O, L_ALA_174   | N, L_SER_166   | H, L_SER_166    | 2.98 | 2.16 | 14.11 |
| 5JR1.PDB | O, L_LYS_172   | N, L_GLN_168   | H, L_GLN_168    | 2.54 | 1.68 | 1.19  |
| 5JR1.PDB | OD1, L_ASN_170 | NE2, L_GLN_168 | HE21, L_GLN_168 | 2.60 | 1.77 | 13.13 |
| 5JR1.PDB | OD1, L_ASP_139 | NE2, L_GLN_168 | HE22, L_GLN_168 | 2.73 | 1.87 | 5.77  |
| 5JR1.PDB | O, L_GLN_168   | N, L_ASN_171   | H, L_ASN_171    | 2.91 | 2.08 | 14.01 |
| 5JR1.PDB | O, L_PHE_140   | N, L_TYR_173   | H, L_TYR_173    | 2.88 | 2.05 | 13.43 |
| 5JR1.PDB | O, L_SER_166   | N, L_ALA_174   | H, L_ALA_174    | 2.94 | 2.15 | 19.09 |
| 5JR1.PDB | O, L_ILE_137   | N, L_ALA_175   | H, L_ALA_175    | 2.81 | 2.00 | 16.74 |
| 5JR1.PDB | O, L_CYS_135   | N, L_SER_177   | H, L_SER_177    | 2.92 | 2.12 | 17.27 |
| 5JR1.PDB | O, L_GLU_161   | N, L_TYR_178   | H, L_TYR_178    | 2.78 | 1.97 | 16.16 |
| 5JR1.PDB | O, L_LEU_133   | N, L_LEU_179   | H, L_LEU_179    | 2.98 | 2.17 | 15.29 |
| 5JR1.PDB | O, L_GLY_159   | N, L_SER_180   | H, L_SER_180    | 2.73 | 1.89 | 11.54 |
| 5JR1.PDB | O, L_ALA_131   | N, L_LEU_181   | H, L_LEU_181    | 2.95 | 2.10 | 6.67  |
| 5JR1.PDB | OE1, L_GLN_185 | N, L_THR_182   | H, L_THR_182    | 2.93 | 2.10 | 11.07 |
| 5JR1.PDB | OG1, L_THR_182 | N, L_GLN_185   | H, L_GLN_185    | 2.88 | 2.04 | 12.03 |
| 5JR1.PDB | O, L_THR_182   | N, L_TRP_186   | H, L_TRP_186    | 2.96 | 2.13 | 12.66 |
| 5JR1.PDB | O, L_VAL_207   | N, L_TYR_192   | H, L_TYR_192    | 2.92 | 2.08 | 9.44  |
| 5JR1.PDB | O, L_LYS_150   | N, L_SER_193   | H, L_SER_193    | 2.81 | 1.99 | 15.01 |
| 5JR1.PDB | O, L_LYS_205   | N, L_CYS_194   | H, L_CYS_194    | 2.96 | 2.17 | 19.17 |
| 5JR1.PDB | O, L_ALA_148   | N, L_GLN_195   | H, L_GLN_195    | 2.75 | 1.89 | 4.07  |
| 5JR1.PDB | OE2, L_GLU_204 | NE2, L_GLN_195 | HE21, L_GLN_195 | 2.95 | 2.12 | 11.81 |
| 5JR1.PDB | O, L_VAL_203   | N, L_VAL_196   | H, L_VAL_196    | 2.75 | 1.89 | 4.95  |
| 5JR1.PDB | O, L_THR_146   | N, L_THR_197   | H, L_THR_197    | 2.80 | 1.96 | 10.45 |
| 5JR1.PDB | O, L_SER_201   | N, L_HIS_198   | H, L_HIS_198    | 2.87 | 2.03 | 9.19  |
| 5JR1.PDB | O, L_PRO_142   | NE2, L_HIS_198 | HE2, L_HIS_198  | 2.88 | 2.11 | 21.70 |
| 5JR1.PDB | O, L_HIS_198   | N, L_SER_201   | H, L_SER_201    | 2.99 | 2.18 | 15.98 |
| 5JR1.PDB | OG1, L_THR_197 | OG1, L_THR_202 | HG1, L_THR_202  | 2.77 | 1.97 | 14.73 |
| 5JR1.PDB | O, L_VAL_196   | N, L_VAL_203   | H, L_VAL_203    | 2.77 | 1.92 | 8.70  |
| 5JR1.PDB | O, L_TYR_192   | N, L_VAL_207   | H, L_VAL_207    | 2.92 | 2.11 | 16.47 |

---

Table 1703: 5JR1-specific side chain and main chain hydrogen bonding analysis. In this table, a PDB file is specified with a four-letter PDB ID, except that the names of the PDB files corresponding to the single NMR structural model split from the NMR ensemble is specified with a four-letter PDB ID in addition to a hyphen followed by the single NMR structural model numeric ID, the residue naming scheme is **Chain ID\_residue name\_residue number**,  $\angle ADH$  represents the angle formed by acceptor (A), donor (D) and hydrogen (H) ( $\angle ADH$ ).

| PDB      | Acceptor (A)   | Donor (D)      | Hydrogen (H)   | D-A (Å) | H-A (Å) | $\angle ADH(^{\circ})$ |
|----------|----------------|----------------|----------------|---------|---------|------------------------|
| 5JUE.PDB | OG, L_SER_26   | N, L_VAL_3     | H, L_VAL_3     | 2.98    | 2.17    | 16.79                  |
| 5JUE.PDB | O, L_ARG_24    | N, L_THR_5     | H, L_THR_5     | 2.79    | 1.95    | 8.65                   |
| 5JUE.PDB | O, L_TYR_86    | NE2, L_GLN_6   | HE22, L_GLN_6  | 2.67    | 1.82    | 7.14                   |
| 5JUE.PDB | O, L_LYS_103   | N, L_LEU_11    | H, L_LEU_11    | 2.83    | 2.02    | 15.60                  |
| 5JUE.PDB | O, L_ASP_105   | N, L_VAL_13    | H, L_VAL_13    | 2.59    | 1.84    | 24.65                  |
| 5JUE.PDB | O, L_VAL_78    | N, L_GLY_16    | H, L_GLY_16    | 2.91    | 2.08    | 13.41                  |
| 5JUE.PDB | O, L_ILE_75    | N, L_ALA_19    | H, L_ALA_19    | 2.83    | 2.04    | 19.69                  |
| 5JUE.PDB | O, L_LEU_73    | N, L_ILE_21    | H, L_ILE_21    | 2.80    | 1.97    | 12.30                  |
| 5JUE.PDB | O, L_PHE_71    | N, L_CYS_23    | H, L_CYS_23    | 2.87    | 2.07    | 17.94                  |
| 5JUE.PDB | O, L_THR_5     | N, L_ARG_24    | H, L_ARG_24    | 2.84    | 2.02    | 16.32                  |
| 5JUE.PDB | O, L_THR_69    | N, L_SER_25    | H, L_SER_25    | 2.87    | 2.09    | 20.67                  |
| 5JUE.PDB | O, L_GLY_68    | N, L_LEU_27B   | H, L_LEU_27B   | 2.95    | 2.09    | 6.56                   |
| 5JUE.PDB | O, L_ASN_30    | N, L_HIS_27D   | H, L_HIS_27D   | 2.78    | 1.95    | 11.98                  |
| 5JUE.PDB | O, L_HIS_27D   | N, L_GLY_29    | H, L_GLY_29    | 2.92    | 2.07    | 9.18                   |
| 5JUE.PDB | OD1, L_ASN_28  | N, L_ASN_30    | H, L_ASN_30    | 2.82    | 1.98    | 7.63                   |
| 5JUE.PDB | O, L_SER_89    | N, L_HIS_34    | H, L_HIS_34    | 2.90    | 2.08    | 14.05                  |
| 5JUE.PDB | O, L_ILE_48    | N, L_TRP_35    | H, L_TRP_35    | 2.88    | 2.05    | 13.75                  |
| 5JUE.PDB | O, L_PHE_87    | N, L_TYR_36    | H, L_TYR_36    | 2.82    | 2.02    | 18.65                  |
| 5JUE.PDB | O, H_MET_100E  | OH, L_TYR_36   | HH, L_TYR_36   | 2.57    | 1.73    | 1.94                   |
| 5JUE.PDB | O, L_LYS_45    | N, L_LEU_37    | H, L_LEU_37    | 2.94    | 2.13    | 17.21                  |
| 5JUE.PDB | O, L_VAL_85    | N, L_GLN_38    | H, L_GLN_38    | 2.76    | 1.91    | 8.75                   |
| 5JUE.PDB | OH, H_TYR_91   | NE2, L_GLN_38  | HE22, L_GLN_38 | 2.57    | 1.77    | 17.09                  |
| 5JUE.PDB | O, L_LEU_37    | N, L_LYS_45    | H, L_LYS_45    | 2.82    | 2.01    | 16.77                  |
| 5JUE.PDB | O, L_TRP_35    | N, L_LEU_47    | H, L_LEU_47    | 2.92    | 2.07    | 6.45                   |
| 5JUE.PDB | O, L_ASN_53    | N, L_TYR_49    | H, L_TYR_49    | 2.77    | 1.96    | 16.15                  |
| 5JUE.PDB | O, L_LEU_33    | N, L_VAL_51    | H, L_VAL_51    | 2.73    | 1.88    | 3.35                   |
| 5JUE.PDB | O, L_LYS_50    | N, L_SER_52    | H, L_SER_52    | 2.82    | 2.09    | 27.26                  |
| 5JUE.PDB | O, L_TYR_49    | N, L_ASN_53    | H, L_ASN_53    | 2.91    | 2.09    | 15.10                  |
| 5JUE.PDB | O, L_LEU_47    | N, L_PHE_55    | H, L_PHE_55    | 2.94    | 2.09    | 7.35                   |
| 5JUE.PDB | OD1, L_ASP_82  | NH1, L_ARG_61  | HH12, L_ARG_61 | 2.84    | 1.98    | 1.66                   |
| 5JUE.PDB | OD2, L_ASP_82  | NH2, L_ARG_61  | HH22, L_ARG_61 | 2.58    | 1.76    | 15.54                  |
| 5JUE.PDB | O, L_LYS_74    | N, L_SER_63    | H, L_SER_63    | 2.99    | 2.17    | 15.39                  |
| 5JUE.PDB | O, L_THR_72    | N, L_SER_65    | H, L_SER_65    | 2.99    | 2.19    | 17.98                  |
| 5JUE.PDB | O, L_CYS_23    | N, L_PHE_71    | H, L_PHE_71    | 2.91    | 2.13    | 20.93                  |
| 5JUE.PDB | O, L_SER_65    | N, L_THR_72    | H, L_THR_72    | 3.00    | 2.17    | 13.38                  |
| 5JUE.PDB | O, L_ILE_21    | N, L_LEU_73    | H, L_LEU_73    | 2.72    | 1.90    | 13.66                  |
| 5JUE.PDB | O, L_SER_63    | N, L_LYS_74    | H, L_LYS_74    | 2.85    | 1.99    | 5.09                   |
| 5JUE.PDB | O, L_ALA_19    | N, L_ILE_75    | H, L_ILE_75    | 2.85    | 2.02    | 11.67                  |
| 5JUE.PDB | O, L_ARG_61    | N, L_SER_76    | H, L_SER_76    | 2.90    | 2.06    | 8.87                   |
| 5JUE.PDB | OD2, L_ASP_82  | N, L_GLU_79    | H, L_GLU_79    | 2.91    | 2.07    | 10.58                  |
| 5JUE.PDB | O, L_GLN_38    | N, L_VAL_85    | H, L_VAL_85    | 2.89    | 2.03    | 2.65                   |
| 5JUE.PDB | O, L_THR_102   | N, L_TYR_86    | H, L_TYR_86    | 2.84    | 1.99    | 9.23                   |
| 5JUE.PDB | O, L_ASP_82    | OH, L_TYR_86   | HH, L_TYR_86   | 2.44    | 1.73    | 27.01                  |
| 5JUE.PDB | O, L_HIS_34    | N, L_SER_89    | H, L_SER_89    | 2.89    | 2.13    | 24.06                  |
| 5JUE.PDB | O, L_HIS_93    | NE2, L_GLN_90  | HE22, L_GLN_90 | 2.99    | 2.13    | 3.59                   |
| 5JUE.PDB | O, L_LEU_27B   | OG1, L_THR_92  | HG1, L_THR_92  | 2.74    | 1.96    | 18.74                  |
| 5JUE.PDB | OE1, L_GLN_90  | N, L_HIS_93    | H, L_HIS_93    | 2.98    | 2.13    | 5.06                   |
| 5JUE.PDB | O, L_VAL_2     | OG1, L_THR_97  | HG1, L_THR_97  | 2.62    | 1.84    | 18.25                  |
| 5JUE.PDB | O, L_CYS_88    | N, L_GLY_99    | H, L_GLY_99    | 2.87    | 2.05    | 14.91                  |
| 5JUE.PDB | OE1, L_GLN_6   | N, L_GLY_101   | H, L_GLY_101   | 2.93    | 2.15    | 21.08                  |
| 5JUE.PDB | O, L_TYR_86    | N, L_THR_102   | H, L_THR_102   | 2.79    | 2.00    | 18.87                  |
| 5JUE.PDB | O, L_PRO_8     | OG1, L_THR_102 | HG1, L_THR_102 | 2.72    | 1.95    | 19.56                  |
| 5JUE.PDB | O, L_LEU_9     | N, L_LYS_103   | H, L_LYS_103   | 2.97    | 2.12    | 8.91                   |
| 5JUE.PDB | O, L_LEU_11    | N, L_ASP_105   | H, L_ASP_105   | 2.72    | 1.89    | 12.81                  |
| 5JUE.PDB | OE1, L_GLN_166 | N, L_ILE_106   | H, L_ILE_106   | 2.97    | 2.13    | 9.61                   |
| 5JUE.PDB | O, L_VAL_13    | N, L_LYS_107   | H, L_LYS_107   | 2.92    | 2.11    | 17.64                  |
| 5JUE.PDB | O, L_ALA_109   | NE, L_ARG_108  | HE, L_ARG_108  | 2.71    | 1.88    | 11.79                  |

|          |                |                |                 |      |      |       |
|----------|----------------|----------------|-----------------|------|------|-------|
| 5JUE.PDB | O, L_ASP_170   | NH1, L_ARG_108 | HH11, L_ARG_108 | 2.89 | 2.05 | 10.58 |
| 5JUE.PDB | O, L_TYR_140   | N, L_ALA_111   | H, L_ALA_111    | 2.90 | 2.07 | 11.29 |
| 5JUE.PDB | O, L_ASN_137   | N, L_THR_114   | H, L_THR_114    | 2.87 | 2.02 | 7.17  |
| 5JUE.PDB | O, L_VAL_133   | N, L_PHE_118   | H, L_PHE_118    | 2.73 | 1.99 | 26.03 |
| 5JUE.PDB | OG, L_SER_121  | N, L_GLN_124   | H, L_GLN_124    | 2.96 | 2.13 | 13.41 |
| 5JUE.PDB | OG, L_SER_131  | NE2, L_GLN_124 | HE22, L_GLN_124 | 2.87 | 2.01 | 1.74  |
| 5JUE.PDB | O, L_SER_122   | N, L_THR_126   | H, L_THR_126    | 2.98 | 2.17 | 17.04 |
| 5JUE.PDB | OE1, L_GLN_124 | N, L_SER_131   | H, L_SER_131    | 2.85 | 2.11 | 26.16 |
| 5JUE.PDB | O, L_LEU_179   | N, L_VAL_132   | H, L_VAL_132    | 2.77 | 1.93 | 11.31 |
| 5JUE.PDB | O, L_SER_177   | N, L_CYS_134   | H, L_CYS_134    | 2.80 | 1.98 | 14.40 |
| 5JUE.PDB | O, L_SER_116   | N, L_PHE_135   | H, L_PHE_135    | 2.88 | 2.09 | 19.24 |
| 5JUE.PDB | O, L_MET_175   | N, L_LEU_136   | H, L_LEU_136    | 2.81 | 1.96 | 4.25  |
| 5JUE.PDB | O, L_THR_114   | N, L_ASN_137   | H, L_ASN_137    | 2.86 | 2.04 | 14.67 |
| 5JUE.PDB | O, L_TYR_173   | N, L_PHE_139   | H, L_PHE_139    | 2.85 | 2.03 | 14.35 |
| 5JUE.PDB | OD2, L_ASP_105 | OH, L_TYR_140  | HH, L_TYR_140   | 2.73 | 1.90 | 9.39  |
| 5JUE.PDB | O, L_GLU_195   | N, L_LYS_147   | H, L_LYS_147    | 2.84 | 2.04 | 18.72 |
| 5JUE.PDB | OG, L_SER_177  | NE1, L_TRP_148 | HE1, L_TRP_148  | 2.84 | 1.99 | 8.07  |
| 5JUE.PDB | O, L_THR_193   | N, L_LYS_149   | H, L_LYS_149    | 2.96 | 2.16 | 18.02 |
| 5JUE.PDB | OE2, L_GLU_195 | NZ, L_LYS_149  | HZ1, L_LYS_149  | 2.94 | 2.11 | 18.07 |
| 5JUE.PDB | O, L_SER_153   | N, L_ILE_150   | H, L_ILE_150    | 2.87 | 2.09 | 21.73 |
| 5JUE.PDB | O, L_SER_191   | N, L_ASP_151   | H, L_ASP_151    | 2.80 | 1.96 | 9.61  |
| 5JUE.PDB | O, L_ILE_150   | N, L_SER_153   | H, L_SER_153    | 2.88 | 2.02 | 3.01  |
| 5JUE.PDB | O, L_TRP_148   | N, L_ARG_155   | H, L_ARG_155    | 2.83 | 2.02 | 17.08 |
| 5JUE.PDB | OE1, L_GLU_185 | NH1, L_ARG_155 | HH12, L_ARG_155 | 2.98 | 2.13 | 8.18  |
| 5JUE.PDB | O, L_THR_178   | N, L_LEU_160   | H, L_LEU_160    | 2.89 | 2.07 | 14.30 |
| 5JUE.PDB | O, L_SER_176   | N, L_SER_162   | H, L_SER_162    | 2.89 | 2.09 | 18.60 |
| 5JUE.PDB | O, H_PRO_167   | OG, L_SER_162  | HG, L_SER_162   | 2.70 | 1.95 | 22.84 |
| 5JUE.PDB | O, L_SER_174   | N, L_THR_164   | H, L_THR_164    | 2.96 | 2.13 | 11.82 |
| 5JUE.PDB | O, L_ILE_106   | NE2, L_GLN_166 | HE22, L_GLN_166 | 2.89 | 2.10 | 19.76 |
| 5JUE.PDB | O, L_THR_172   | N, L_ASP_167   | H, L_ASP_167    | 2.82 | 1.99 | 14.34 |
| 5JUE.PDB | OD2, L_ASP_167 | N, L_ASP_170   | H, L_ASP_170    | 2.89 | 2.09 | 18.48 |
| 5JUE.PDB | O, L_ASP_167   | N, L_SER_171   | H, L_SER_171    | 2.91 | 2.19 | 28.73 |
| 5JUE.PDB | OD1, L_ASP_170 | N, L_THR_172   | H, L_THR_172    | 2.88 | 2.05 | 13.18 |
| 5JUE.PDB | OD1, L_ASP_170 | OG1, L_THR_172 | HG1, L_THR_172  | 2.65 | 1.84 | 10.43 |
| 5JUE.PDB | O, L_PHE_139   | N, L_TYR_173   | H, L_TYR_173    | 2.81 | 1.98 | 12.09 |
| 5JUE.PDB | OD1, L_ASP_105 | OH, L_TYR_173  | HH, L_TYR_173   | 2.53 | 1.79 | 22.81 |
| 5JUE.PDB | O, L_LEU_136   | N, L_MET_175   | H, L_MET_175    | 2.80 | 2.04 | 23.93 |
| 5JUE.PDB | O, L_SER_162   | N, L_SER_176   | H, L_SER_176    | 2.85 | 2.01 | 10.71 |
| 5JUE.PDB | OG, H_SER_178  | OG, L_SER_176  | HG, L_SER_176   | 2.78 | 1.94 | 3.13  |
| 5JUE.PDB | O, L_CYS_134   | N, L_SER_177   | H, L_SER_177    | 2.87 | 2.03 | 11.31 |
| 5JUE.PDB | OD1, L_ASN_161 | OG, L_SER_177  | HG, L_SER_177   | 2.61 | 1.88 | 24.46 |
| 5JUE.PDB | O, L_LEU_160   | N, L_THR_178   | H, L_THR_178    | 2.82 | 1.98 | 12.12 |
| 5JUE.PDB | O, L_VAL_132   | N, L_LEU_179   | H, L_LEU_179    | 2.82 | 2.00 | 15.30 |
| 5JUE.PDB | O, L_GLY_158   | N, L_THR_180   | H, L_THR_180    | 2.90 | 2.06 | 10.37 |
| 5JUE.PDB | O, L_ALA_130   | N, L_LEU_181   | H, L_LEU_181    | 2.87 | 2.02 | 8.71  |
| 5JUE.PDB | OG1, L_THR_182 | N, L_GLU_185   | H, L_GLU_185    | 2.89 | 2.08 | 16.50 |
| 5JUE.PDB | O, L_THR_182   | N, L_TYR_186   | H, L_TYR_186    | 2.88 | 2.04 | 12.09 |
| 5JUE.PDB | O, L_LYS_183   | N, L_GLU_187   | H, L_GLU_187    | 2.97 | 2.16 | 17.18 |
| 5JUE.PDB | OD1, L_ASP_184 | NE, L_ARG_188  | HE, L_ARG_188   | 2.70 | 1.93 | 22.77 |
| 5JUE.PDB | OD1, L_ASP_151 | N, L_SER_191   | H, L_SER_191    | 2.84 | 1.99 | 8.55  |
| 5JUE.PDB | OG, L_SER_208  | OG1, L_THR_193 | HG1, L_THR_193  | 2.92 | 2.19 | 25.67 |
| 5JUE.PDB | O, L_LYS_207   | N, L_CYS_194   | H, L_CYS_194    | 2.90 | 2.07 | 13.15 |
| 5JUE.PDB | O, L_LYS_147   | N, L_GLU_195   | H, L_GLU_195    | 2.80 | 2.03 | 21.10 |
| 5JUE.PDB | O, L_ILE_205   | N, L_ALA_196   | H, L_ALA_196    | 2.77 | 1.93 | 11.01 |
| 5JUE.PDB | O, L_ASN_145   | N, L_THR_197   | H, L_THR_197    | 2.81 | 1.97 | 10.17 |
| 5JUE.PDB | ND1, L_HIS_198 | OG1, L_THR_200 | HG1, L_THR_200  | 2.88 | 2.17 | 27.29 |
| 5JUE.PDB | O, L_HIS_198   | N, L_SER_201   | H, L_SER_201    | 2.99 | 2.13 | 4.28  |
| 5JUE.PDB | O, L_ALA_196   | N, L_ILE_205   | H, L_ILE_205    | 2.89 | 2.16 | 26.61 |

|          |                |                |                 |      |      |       |
|----------|----------------|----------------|-----------------|------|------|-------|
| 5JUE.PDB | O, L_CYS_194   | N, L_LYS_207   | H, L_LYS_207    | 2.98 | 2.13 | 8.08  |
| 5JUE.PDB | O, L_TYR_192   | OG, L_SER_208  | HG, L_SER_208   | 2.94 | 2.25 | 29.37 |
| 5JUE.PDB | O, L_TYR_192   | N, L_PHE_209   | H, L_PHE_209    | 2.97 | 2.18 | 20.14 |
| 5JUE.PDB | O, L_ASN_190   | N, L_ARG_211   | H, L_ARG_211    | 2.82 | 2.02 | 17.54 |
| 5JUE.PDB | O, L_HIS_189   | NH1, L_ARG_211 | HH11, L_ARG_211 | 2.81 | 2.00 | 16.77 |
| 5JUE.PDB | O, H_LYS_23    | N, H_GLN_5     | H, H_GLN_5      | 2.85 | 2.00 | 7.87  |
| 5JUE.PDB | OE1, H_GLN_105 | N, H_GLU_6     | H, H_GLU_6      | 2.79 | 1.93 | 4.85  |
| 5JUE.PDB | O, H_THR_108   | N, H_GLU_10    | H, H_GLU_10     | 2.90 | 2.06 | 10.22 |
| 5JUE.PDB | O, H_THR_110   | N, H_VAL_12    | H, H_VAL_12     | 2.87 | 2.05 | 14.20 |
| 5JUE.PDB | O, H_LEU_82C   | N, H_GLY_15    | H, H_GLY_15     | 2.69 | 1.84 | 3.78  |
| 5JUE.PDB | O, H_PHE_82    | N, H_VAL_18    | H, H_VAL_18     | 2.89 | 2.15 | 25.49 |
| 5JUE.PDB | O, H_MET_80    | N, H_ILE_20    | H, H_ILE_20     | 2.88 | 2.05 | 14.33 |
| 5JUE.PDB | OG, H_SER_7    | N, H_SER_21    | H, H_SER_21     | 2.95 | 2.10 | 6.39  |
| 5JUE.PDB | O, H_GLN_5     | N, H_LYS_23    | H, H_LYS_23     | 2.86 | 2.01 | 5.12  |
| 5JUE.PDB | O, H_SER_76    | N, H_ALA_24    | H, H_ALA_24     | 2.79 | 1.93 | 3.59  |
| 5JUE.PDB | O, H_LEU_95    | N, H_TYR_33    | H, H_TYR_33     | 2.75 | 1.97 | 21.10 |
| 5JUE.PDB | O, H_ILE_51    | N, H_ILE_34    | H, H_ILE_34     | 2.95 | 2.13 | 14.74 |
| 5JUE.PDB | O, H_ALA_93    | N, H_HIS_35    | H, H_HIS_35     | 2.70 | 1.87 | 12.64 |
| 5JUE.PDB | O, H_GLY_49    | N, H_TRP_36    | H, H_TRP_36     | 2.96 | 2.14 | 14.80 |
| 5JUE.PDB | O, H_TYR_91    | N, H_VAL_37    | H, H_VAL_37     | 2.90 | 2.12 | 21.72 |
| 5JUE.PDB | O, H_GLU_46    | N, H_LYS_38    | H, H_LYS_38     | 2.77 | 1.91 | 6.07  |
| 5JUE.PDB | O, H_GLU_85    | NZ, H_LYS_38   | HZ3, H_LYS_38   | 2.96 | 2.18 | 24.16 |
| 5JUE.PDB | O, H_VAL_89    | N, H_GLN_39    | H, H_GLN_39     | 2.71 | 1.95 | 22.82 |
| 5JUE.PDB | O, H_LYS_38    | N, H_GLU_46    | H, H_GLU_46     | 2.82 | 2.03 | 19.41 |
| 5JUE.PDB | ND1, H_HIS_35  | NE1, H_TRP_47  | HE1, H_TRP_47   | 2.93 | 2.15 | 20.72 |
| 5JUE.PDB | O, H_TRP_36    | N, H_ILE_48    | H, H_ILE_48     | 2.82 | 1.97 | 8.50  |
| 5JUE.PDB | O, H_PHE_58    | N, H_PHE_50    | H, H_PHE_50     | 2.95 | 2.18 | 21.32 |
| 5JUE.PDB | O, H_ILE_34    | N, H_ILE_51    | H, H_ILE_51     | 2.91 | 2.08 | 13.15 |
| 5JUE.PDB | O, H_ALA_56    | N, H_SER_52    | H, H_SER_52     | 2.80 | 1.98 | 14.65 |
| 5JUE.PDB | O, H_TYR_32    | N, H_CYS_52A   | H, H_CYS_52A    | 2.96 | 2.15 | 16.57 |
| 5JUE.PDB | O, H_SER_52    | N, H_GLY_55    | H, H_GLY_55     | 2.82 | 2.07 | 24.44 |
| 5JUE.PDB | O, H_ILE_48    | N, H_ASN_60    | H, H_ASN_60     | 2.84 | 2.02 | 15.39 |
| 5JUE.PDB | O, H_TRP_47    | ND2, H_ASN_60  | HD22, H_ASN_60  | 2.96 | 2.15 | 16.53 |
| 5JUE.PDB | O, H_ASN_60    | N, H_PHE_63    | H, H_PHE_63     | 2.69 | 1.86 | 13.05 |
| 5JUE.PDB | O, H_PHE_63    | N, H_LYS_66    | H, H_LYS_66     | 2.88 | 2.11 | 21.18 |
| 5JUE.PDB | OD2, H_ASP_86  | NZ, H_LYS_66   | HZ1, H_LYS_66   | 2.76 | 1.87 | 4.19  |
| 5JUE.PDB | O, H_LYS_81    | N, H_THR_68    | H, H_THR_68     | 2.79 | 2.01 | 20.33 |
| 5JUE.PDB | OH, H_TYR_59   | N, H_PHE_69    | H, H_PHE_69     | 2.85 | 2.00 | 6.71  |
| 5JUE.PDB | O, H_THR_77    | N, H_ASP_72    | H, H_ASP_72     | 2.79 | 1.96 | 13.59 |
| 5JUE.PDB | O, H_SER_75    | OG1, H_THR_77  | HG1, H_THR_77   | 2.86 | 2.10 | 21.30 |
| 5JUE.PDB | O, H_CYS_22    | N, H_ALA_78    | H, H_ALA_78     | 2.84 | 2.01 | 12.71 |
| 5JUE.PDB | O, H_THR_70    | N, H_TYR_79    | H, H_TYR_79     | 2.81 | 1.97 | 11.04 |
| 5JUE.PDB | O, H_ILE_20    | N, H_MET_80    | H, H_MET_80     | 2.90 | 2.08 | 15.24 |
| 5JUE.PDB | O, H_THR_68    | N, H_LYS_81    | H, H_LYS_81     | 2.77 | 1.92 | 8.40  |
| 5JUE.PDB | O, H_VAL_18    | N, H_PHE_82    | H, H_PHE_82     | 2.76 | 1.93 | 11.48 |
| 5JUE.PDB | O, H_ALA_16    | N, H_LEU_82C   | H, H_LEU_82C    | 2.95 | 2.10 | 6.09  |
| 5JUE.PDB | OD2, H_ASP_86  | N, H_THR_83    | H, H_THR_83     | 2.87 | 2.09 | 20.55 |
| 5JUE.PDB | O, H_THR_83    | N, H_ASP_86    | H, H_ASP_86     | 2.75 | 1.95 | 17.05 |
| 5JUE.PDB | O, H_PHE_84    | N, H_SER_87    | H, H_SER_87     | 2.98 | 2.14 | 9.08  |
| 5JUE.PDB | O, H_GLN_39    | N, H_VAL_89    | H, H_VAL_89     | 2.93 | 2.09 | 11.76 |
| 5JUE.PDB | O, H_THR_107   | N, H_TYR_90    | H, H_TYR_90     | 2.88 | 2.04 | 10.67 |
| 5JUE.PDB | O, H_ASP_86    | OH, H_TYR_90   | HH, H_TYR_90    | 2.63 | 1.81 | 11.12 |
| 5JUE.PDB | O, H_VAL_37    | N, H_TYR_91    | H, H_TYR_91     | 2.79 | 1.95 | 9.11  |
| 5JUE.PDB | OE1, H_GLN_39  | OH, H_TYR_91   | HH, H_TYR_91    | 2.83 | 2.02 | 11.19 |
| 5JUE.PDB | O, H_HIS_35    | N, H_ALA_93    | H, H_ALA_93     | 2.84 | 2.10 | 26.47 |
| 5JUE.PDB | O, H_TYR_102   | N, H_ARG_94    | H, H_ARG_94     | 2.91 | 2.11 | 17.26 |
| 5JUE.PDB | OD1, H_ASP_101 | NE, H_ARG_94   | HE, H_ARG_94    | 2.72 | 1.88 | 8.15  |
| 5JUE.PDB | OD2, H_ASP_101 | NH2, H_ARG_94  | HH21, H_ARG_94  | 2.85 | 2.02 | 12.42 |

|          |                |                |                 |      |      |       |
|----------|----------------|----------------|-----------------|------|------|-------|
| 5JUE.PDB | O, H_TYR_33    | N, H_LEU_95    | H, H_LEU_95     | 2.78 | 2.01 | 21.79 |
| 5JUE.PDB | O, H_CYS_92    | N, H_GLY_104   | H, H_GLY_104    | 2.87 | 2.02 | 8.85  |
| 5JUE.PDB | O, H_GLU_6     | NE2, H_GLN_105 | HE22, H_GLN_105 | 2.95 | 2.22 | 27.22 |
| 5JUE.PDB | OE1, H_GLU_6   | N, H_GLY_106   | H, H_GLY_106    | 2.94 | 2.16 | 21.03 |
| 5JUE.PDB | O, H_TYR_90    | N, H_THR_107   | H, H_THR_107    | 2.85 | 2.05 | 17.16 |
| 5JUE.PDB | O, H_SER_7     | OG1, H_THR_107 | HG1, H_THR_107  | 2.75 | 1.97 | 19.56 |
| 5JUE.PDB | O, H_ALA_88    | N, H_VAL_109   | H, H_VAL_109    | 2.87 | 2.01 | 4.42  |
| 5JUE.PDB | O, H_GLU_10    | N, H_THR_110   | H, H_THR_110    | 2.93 | 2.09 | 10.96 |
| 5JUE.PDB | OG, H_SER_87   | N, H_VAL_111   | H, H_VAL_111    | 2.90 | 2.07 | 12.94 |
| 5JUE.PDB | OG, H_SER_112  | N, H_ALA_114   | H, H_ALA_114    | 2.93 | 2.07 | 5.78  |
| 5JUE.PDB | O, H_PHE_146   | N, H_THR_117   | H, H_THR_117    | 2.86 | 2.04 | 14.00 |
| 5JUE.PDB | O, H_LYS_115   | OG1, H_THR_117 | HG1, H_THR_117  | 2.86 | 2.06 | 13.74 |
| 5JUE.PDB | O, H_LYS_143   | N, H_SER_120   | H, H_SER_120    | 2.92 | 2.10 | 14.44 |
| 5JUE.PDB | O, H_LEU_141   | N, H_TYR_122   | H, H_TYR_122    | 2.78 | 1.95 | 12.46 |
| 5JUE.PDB | O, H_GLY_139   | N, H_LEU_124   | H, H_LEU_124    | 2.76 | 1.94 | 15.50 |
| 5JUE.PDB | O, H_VAL_183   | N, H_VAL_136   | H, H_VAL_136    | 2.78 | 1.97 | 15.84 |
| 5JUE.PDB | O, H_VAL_181   | N, H_LEU_138   | H, H_LEU_138    | 2.83 | 1.98 | 9.69  |
| 5JUE.PDB | O, H_LEU_124   | N, H_GLY_139   | H, H_GLY_139    | 2.92 | 2.12 | 17.53 |
| 5JUE.PDB | O, H_SER_179   | N, H_CYS_140   | H, H_CYS_140    | 2.90 | 2.16 | 25.88 |
| 5JUE.PDB | O, H_TYR_122   | N, H_LEU_141   | H, H_LEU_141    | 2.90 | 2.05 | 9.18  |
| 5JUE.PDB | O, H_LEU_177   | N, H_VAL_142   | H, H_VAL_142    | 2.80 | 1.96 | 9.80  |
| 5JUE.PDB | O, H_SER_120   | N, H_LYS_143   | H, H_LYS_143    | 2.83 | 1.99 | 8.41  |
| 5JUE.PDB | OE2, H_GLU_148 | OH, H_TYR_145  | HH, H_TYR_145   | 2.72 | 1.89 | 3.03  |
| 5JUE.PDB | O, H_THR_117   | N, H_PHE_146   | H, H_PHE_146    | 2.99 | 2.19 | 18.30 |
| 5JUE.PDB | O, H_ALA_198   | N, H_THR_151   | H, H_THR_151    | 2.83 | 2.01 | 15.90 |
| 5JUE.PDB | O, H_ASN_196   | N, H_THR_153   | H, H_THR_153    | 2.83 | 2.02 | 15.46 |
| 5JUE.PDB | OD1, H_ASN_196 | OG1, H_THR_153 | HG1, H_THR_153  | 2.74 | 1.98 | 20.12 |
| 5JUE.PDB | O, H_THR_194   | N, H_ASN_155   | H, H_ASN_155    | 2.82 | 1.98 | 9.66  |
| 5JUE.PDB | OD1, H_ASN_196 | N, H_SER_156   | H, H_SER_156    | 2.76 | 1.93 | 12.37 |
| 5JUE.PDB | O, H_ASN_155   | N, H_SER_158   | H, H_SER_158    | 2.96 | 2.12 | 11.60 |
| 5JUE.PDB | O, H_SER_180   | N, H_HIS_164   | H, H_HIS_164    | 2.88 | 2.06 | 15.45 |
| 5JUE.PDB | O, H_SER_178   | N, H_PHE_166   | H, H_PHE_166    | 2.91 | 2.05 | 0.92  |
| 5JUE.PDB | O, H_THR_176   | N, H_VAL_169   | H, H_VAL_169    | 2.91 | 2.09 | 14.10 |
| 5JUE.PDB | O, H_LEU_174   | N, H_GLN_171   | H, H_GLN_171    | 2.86 | 2.02 | 11.81 |
| 5JUE.PDB | O, H_TYR_145   | N, H_TYR_175   | H, H_TYR_175    | 2.78 | 1.92 | 3.54  |
| 5JUE.PDB | O, H_VAL_169   | N, H_THR_176   | H, H_THR_176    | 2.91 | 2.13 | 21.19 |
| 5JUE.PDB | O, H_VAL_142   | N, H_LEU_177   | H, H_LEU_177    | 2.89 | 2.07 | 15.29 |
| 5JUE.PDB | O, H_CYS_140   | N, H_SER_179   | H, H_SER_179    | 2.96 | 2.18 | 21.41 |
| 5JUE.PDB | O, H_HIS_164   | N, H_SER_180   | H, H_SER_180    | 2.77 | 1.97 | 17.64 |
| 5JUE.PDB | O, H_LEU_138   | N, H_VAL_181   | H, H_VAL_181    | 2.85 | 2.04 | 16.39 |
| 5JUE.PDB | O, H_GLY_162   | N, H_THR_182   | H, H_THR_182    | 2.95 | 2.18 | 23.27 |
| 5JUE.PDB | OG1, H_THR_137 | OG1, H_THR_182 | HG1, H_THR_182  | 2.77 | 2.00 | 20.14 |
| 5JUE.PDB | O, H_VAL_136   | N, H_VAL_183   | H, H_VAL_183    | 2.99 | 2.18 | 15.82 |
| 5JUE.PDB | O, H_SER_134   | N, H_SER_185   | H, H_SER_185    | 2.84 | 2.01 | 11.66 |
| 5JUE.PDB | O, H_THR_184   | N, H_THR_187   | H, H_THR_187    | 2.89 | 2.07 | 14.43 |
| 5JUE.PDB | OG1, H_THR_184 | OG1, H_THR_187 | HG1, H_THR_187  | 2.67 | 1.90 | 19.94 |
| 5JUE.PDB | O, H_THR_187   | N, H_GLN_191   | H, H_GLN_191    | 2.84 | 2.07 | 22.35 |
| 5JUE.PDB | OD1, H_ASN_155 | N, H_THR_194   | H, H_THR_194    | 2.84 | 2.06 | 20.75 |
| 5JUE.PDB | O, H_LYS_208   | N, H_CYS_195   | H, H_CYS_195    | 2.98 | 2.17 | 16.43 |
| 5JUE.PDB | O, H_THR_153   | N, H_ASN_196   | H, H_ASN_196    | 2.77 | 1.92 | 6.43  |
| 5JUE.PDB | O, H_VAL_206   | N, H_VAL_197   | H, H_VAL_197    | 2.87 | 2.03 | 11.32 |
| 5JUE.PDB | O, H_THR_151   | N, H_ALA_198   | H, H_ALA_198    | 2.82 | 2.00 | 15.03 |
| 5JUE.PDB | ND1, H_HIS_199 | OG, H_SER_202  | HG, H_SER_202   | 2.87 | 2.13 | 24.10 |
| 5JUE.PDB | O, H_PRO_200   | N, H_SER_203   | H, H_SER_203    | 2.74 | 1.98 | 23.65 |
| 5JUE.PDB | O, H_VAL_197   | N, H_VAL_206   | H, H_VAL_206    | 2.85 | 2.02 | 12.25 |
| 5JUE.PDB | O, H_CYS_195   | N, H_LYS_208   | H, H_LYS_208    | 2.96 | 2.13 | 13.25 |
| 5JUE.PDB | OE1, L_GLU_123 | NZ, H_LYS_208  | HZ1, H_LYS_208  | 2.81 | 1.98 | 17.66 |
| 5JUE.PDB | O, H_ILE_193   | N, H_ILE_210   | H, H_ILE_210    | 2.91 | 2.05 | 5.10  |



|          |              |                |                 |      |      |       |
|----------|--------------|----------------|-----------------|------|------|-------|
| 5JUE.PDB | O, H_ALA_125 | NE, H_ARG_213  | HE, H_ARG_213   | 2.97 | 2.21 | 22.96 |
| 5JUE.PDB | O, H_ALA_125 | NH1, H_ARG_213 | HH11, H_ARG_213 | 2.91 | 2.14 | 23.09 |
| 5JUE.PDB | O, L_PRO_119 | NH1, H_ARG_213 | HH12, H_ARG_213 | 2.84 | 2.13 | 29.21 |
| 5JUE.PDB | O, L_PRO_120 | NH2, H_ARG_213 | HH22, H_ARG_213 | 2.94 | 2.13 | 15.93 |

Table 1704: 5JUE-specific side chain and main chain hydrogen bonding analysis. In this table, a PDB file is specified with a four-letter PDB ID, except that the names of the PDB files corresponding to the single NMR structural model split from the NMR ensemble is specified with a four-letter PDB ID in addition to a hyphen followed by the single NMR structural model numeric ID, the residue naming scheme is **Chain ID\_residue name\_residue number**,  $\angle ADH$  represents the angle formed by acceptor (A), donor (D) and hydrogen (H) ( $\angle ADH$ ).

| PDB      | Acceptor (A)   | Donor (D)      | Hydrogen (H)   | D-A (Å) | H-A (Å) | $\angle ADH(^{\circ})$ |
|----------|----------------|----------------|----------------|---------|---------|------------------------|
| 5JXA.PDB | OE1, H_GLN_105 | N, H_GLN_6     | H, H_GLN_6     | 2.84    | 1.98    | 2.17                   |
| 5JXA.PDB | O, H_TYR_90    | NE2, H_GLN_6   | HE22, H_GLN_6  | 2.90    | 2.05    | 7.37                   |
| 5JXA.PDB | O, H_VAL_110   | N, H_LYS_12    | H, H_LYS_12    | 2.83    | 2.00    | 13.73                  |
| 5JXA.PDB | O, H_LEU_82C   | N, H_GLY_15    | H, H_GLY_15    | 2.72    | 1.89    | 11.76                  |
| 5JXA.PDB | O, H_THR_13    | OG, H_SER_16   | HG, H_SER_16   | 2.64    | 1.85    | 16.20                  |
| 5JXA.PDB | O, H_PHE_82    | N, H_VAL_18    | H, H_VAL_18    | 3.00    | 2.19    | 17.49                  |
| 5JXA.PDB | O, H_MET_80    | N, H_ILE_20    | H, H_ILE_20    | 2.90    | 2.05    | 7.33                   |
| 5JXA.PDB | O, H_ALA_78    | N, H_CYS_22    | H, H_CYS_22    | 2.76    | 2.06    | 29.69                  |
| 5JXA.PDB | O, H_GLY_76G   | N, H_ALA_24    | H, H_ALA_24    | 2.81    | 1.96    | 7.69                   |
| 5JXA.PDB | OD1, H_ASN_28  | N, H_ARG_30    | H, H_ARG_30    | 2.98    | 2.23    | 24.67                  |
| 5JXA.PDB | O, H_SER_74    | NH2, H_ARG_30  | HH22, H_ARG_30 | 2.90    | 2.07    | 12.90                  |
| 5JXA.PDB | O, H_ASN_28    | N, H_ASP_31    | H, H_ASP_31    | 2.98    | 2.13    | 8.21                   |
| 5JXA.PDB | O, H_ILE_51    | N, H_ILE_34    | H, H_ILE_34    | 2.89    | 2.08    | 16.53                  |
| 5JXA.PDB | O, H_GLY_49    | N, H_TRP_36    | H, H_TRP_36    | 2.93    | 2.16    | 21.63                  |
| 5JXA.PDB | O, H_PHE_91    | N, H_VAL_37    | H, H_VAL_37    | 3.00    | 2.19    | 17.03                  |
| 5JXA.PDB | O, H_GLU_46    | N, H_ARG_38    | H, H_ARG_38    | 2.95    | 2.12    | 11.49                  |
| 5JXA.PDB | OE1, H_GLU_46  | NE, H_ARG_38   | HE, H_ARG_38   | 2.80    | 2.04    | 23.29                  |
| 5JXA.PDB | OD1, H_ASP_86  | NH1, H_ARG_38  | HH12, H_ARG_38 | 2.74    | 1.88    | 4.26                   |
| 5JXA.PDB | OE1, H_GLU_46  | NH2, H_ARG_38  | HH21, H_ARG_38 | 2.76    | 2.00    | 23.95                  |
| 5JXA.PDB | O, H_GLU_89    | N, H_LEU_39    | H, H_LEU_39    | 2.77    | 1.93    | 11.85                  |
| 5JXA.PDB | O, H_GLY_44    | N, H_ILE_40    | H, H_ILE_40    | 2.91    | 2.05    | 5.76                   |
| 5JXA.PDB | O, H_ILE_40    | N, H_GLY_44    | H, H_GLY_44    | 2.97    | 2.17    | 18.25                  |
| 5JXA.PDB | O, H_ARG_38    | N, H_GLU_46    | H, H_GLU_46    | 2.79    | 2.00    | 19.09                  |
| 5JXA.PDB | O, H_TRP_36    | N, H_ILE_48    | H, H_ILE_48    | 2.83    | 1.98    | 7.19                   |
| 5JXA.PDB | O, H_SER_58    | N, H_TRP_50    | H, H_TRP_50    | 2.83    | 2.05    | 20.31                  |
| 5JXA.PDB | O, H_ILE_34    | N, H_ILE_51    | H, H_ILE_51    | 2.86    | 2.05    | 16.90                  |
| 5JXA.PDB | O, H_ALA_56    | N, H_LYS_52    | H, H_LYS_52    | 2.85    | 2.02    | 13.26                  |
| 5JXA.PDB | O, H_TRP_50    | N, H_SER_58    | H, H_SER_58    | 2.99    | 2.19    | 18.18                  |
| 5JXA.PDB | O, H_ILE_48    | N, H_ALA_60    | H, H_ALA_60    | 2.91    | 2.07    | 7.65                   |
| 5JXA.PDB | OE2, H_GLU_46  | NE2, H_GLN_62  | HE21, H_GLN_62 | 2.86    | 2.00    | 1.72                   |
| 5JXA.PDB | O, H_ALA_60    | N, H_LEU_63    | H, H_LEU_63    | 2.91    | 2.10    | 16.09                  |
| 5JXA.PDB | O, H_LEU_63    | N, H_ARG_66    | H, H_ARG_66    | 2.89    | 2.06    | 11.35                  |
| 5JXA.PDB | OD1, H_ASP_86  | NH2, H_ARG_66  | HH22, H_ARG_66 | 2.96    | 2.11    | 6.31                   |
| 5JXA.PDB | O, H_GLU_81    | N, H_SER_68    | H, H_SER_68    | 2.87    | 2.09    | 21.34                  |
| 5JXA.PDB | OH, H_TYR_59   | N, H_MET_69    | H, H_MET_69    | 2.89    | 2.04    | 7.98                   |
| 5JXA.PDB | O, H_PRO_52A   | NE, H_ARG_71   | HE, H_ARG_71   | 2.75    | 1.92    | 12.12                  |
| 5JXA.PDB | O, H_ASP_76C   | OG, H_SER_74   | HG, H_SER_74   | 2.75    | 1.97    | 16.95                  |
| 5JXA.PDB | OD1, H_ASP_76  | N, H_ASP_76B   | H, H_ASP_76B   | 2.44    | 1.62    | 14.02                  |
| 5JXA.PDB | O, H_ASP_76    | N, H_ASP_76C   | H, H_ASP_76C   | 2.97    | 2.14    | 13.17                  |
| 5JXA.PDB | OD2, H_ASP_76C | NE1, H_TRP_76F | HE1, H_TRP_76F | 2.87    | 2.15    | 28.04                  |
| 5JXA.PDB | O, H_CYS_22    | N, H_ALA_78    | H, H_ALA_78    | 2.89    | 2.05    | 10.11                  |
| 5JXA.PDB | O, H_THR_70    | N, H_TYR_79    | H, H_TYR_79    | 2.80    | 1.95    | 8.03                   |
| 5JXA.PDB | O, H_SER_68    | N, H_GLU_81    | H, H_GLU_81    | 2.76    | 1.90    | 6.10                   |
| 5JXA.PDB | O, H_VAL_18    | N, H_PHE_82    | H, H_PHE_82    | 2.84    | 2.03    | 16.50                  |
| 5JXA.PDB | O, H_ARG_66    | N, H_SER_82A   | H, H_SER_82A   | 2.80    | 1.99    | 17.15                  |
| 5JXA.PDB | OD2, H_ASP_86  | N, H_THR_83    | H, H_THR_83    | 2.91    | 2.10    | 15.72                  |
| 5JXA.PDB | O, H_THR_83    | N, H_ASP_86    | H, H_ASP_86    | 2.85    | 2.00    | 7.33                   |
| 5JXA.PDB | O, H_THR_107   | N, H_TYR_90    | H, H_TYR_90    | 2.86    | 2.00    | 7.75                   |
| 5JXA.PDB | O, H_VAL_37    | N, H_PHE_91    | H, H_PHE_91    | 2.82    | 1.95    | 8.59                   |
| 5JXA.PDB | O, H_HIS_35    | N, H_VAL_93    | H, H_VAL_93    | 2.91    | 2.05    | 12.82                  |
| 5JXA.PDB | O, H_TYR_102   | N, H_ARG_94    | H, H_ARG_94    | 2.93    | 2.09    | 18.47                  |
| 5JXA.PDB | O, H_GLY_96    | NE, H_ARG_95   | HE, H_ARG_95   | 2.87    | 2.08    | 18.29                  |
| 5JXA.PDB | O, H_GLY_96    | NH2, H_ARG_95  | HH21, H_ARG_95 | 2.95    | 2.20    | 24.49                  |
| 5JXA.PDB | OD1, H_ASP_99  | NH2, H_ARG_95  | HH22, H_ARG_95 | 2.95    | 2.09    | 5.23                   |
| 5JXA.PDB | OD2, L_ASP_50  | OH, H_TYR_100  | HH, H_TYR_100  | 2.57    | 1.75    | 11.76                  |
| 5JXA.PDB | OH, L_TYR_36   | N, H_TRP_100F  | H, H_TRP_100F  | 2.85    | 2.00    | 7.52                   |
| 5JXA.PDB | O, H_CYS_92    | N, H_GLY_104   | H, H_GLY_104   | 2.82    | 1.96    | 4.16                   |

|          |                |                |                 |      |      |       |
|----------|----------------|----------------|-----------------|------|------|-------|
| 5JXA.PDB | O, H_GLN_6     | NE2, H_GLN_105 | HE22, H_GLN_105 | 2.97 | 2.19 | 21.71 |
| 5JXA.PDB | O, H_TYR_90    | N, H_THR_107   | H, H_THR_107    | 2.79 | 2.05 | 25.50 |
| 5JXA.PDB | O, H_SER_7     | OG1, H_THR_107 | HG1, H_THR_107  | 2.82 | 2.10 | 26.24 |
| 5JXA.PDB | O, H_ALA_88    | N, H_VAL_109   | H, H_VAL_109    | 2.99 | 2.13 | 5.29  |
| 5JXA.PDB | OG1, H_THR_87  | N, H_VAL_111   | H, H_VAL_111    | 2.97 | 2.11 | 2.98  |
| 5JXA.PDB | O, H_LYS_12    | N, H_SER_112   | H, H_SER_112    | 2.81 | 2.01 | 17.72 |
| 5JXA.PDB | OG, H_SER_112  | N, H_ALA_114   | H, H_ALA_114    | 2.92 | 2.06 | 5.24  |
| 5JXA.PDB | O, H_PHE_146   | N, H_LYS_117   | H, H_LYS_117    | 2.81 | 2.00 | 15.52 |
| 5JXA.PDB | O, H_ASP_144   | NZ, H_LYS_117  | HZ2, H_LYS_117  | 2.76 | 2.00 | 26.54 |
| 5JXA.PDB | O, H_LYS_143   | N, H_SER_120   | H, H_SER_120    | 2.88 | 2.02 | 13.76 |
| 5JXA.PDB | O, H_LEU_141   | N, H_PHE_122   | H, H_PHE_122    | 2.87 | 2.05 | 13.14 |
| 5JXA.PDB | O, H_GLY_139   | N, H_LEU_124   | H, H_LEU_124    | 2.78 | 1.93 | 6.72  |
| 5JXA.PDB | O, H_VAL_184   | N, H_ALA_136   | H, H_ALA_136    | 2.62 | 1.77 | 9.09  |
| 5JXA.PDB | O, H_LEU_124   | N, H_GLY_139   | H, H_GLY_139    | 2.90 | 2.16 | 25.91 |
| 5JXA.PDB | O, H_SER_180   | N, H_CYS_140   | H, H_CYS_140    | 2.84 | 2.03 | 17.78 |
| 5JXA.PDB | O, H_PHE_122   | N, H_LEU_141   | H, H_LEU_141    | 2.80 | 1.96 | 10.45 |
| 5JXA.PDB | O, H_LEU_178   | N, H_VAL_142   | H, H_VAL_142    | 2.71 | 1.86 | 8.75  |
| 5JXA.PDB | O, H_SER_120   | N, H_LYS_143   | H, H_LYS_143    | 2.86 | 2.01 | 6.05  |
| 5JXA.PDB | OD1, H_ASP_144 | NZ, H_LYS_143  | HZ3, H_LYS_143  | 2.92 | 2.12 | 22.30 |
| 5JXA.PDB | O, H_LYS_117   | N, H_PHE_146   | H, H_PHE_146    | 2.93 | 2.11 | 14.00 |
| 5JXA.PDB | O, H_ASN_199   | N, H_THR_151   | H, H_THR_151    | 2.95 | 2.12 | 13.67 |
| 5JXA.PDB | O, H_ASN_197   | N, H_SER_153   | H, H_SER_153    | 2.94 | 2.13 | 16.37 |
| 5JXA.PDB | OD1, H_ASN_197 | OG, H_SER_153  | HG, H_SER_153   | 2.75 | 1.96 | 17.62 |
| 5JXA.PDB | OG, H_SER_180  | NE1, H_TRP_154 | HE1, H_TRP_154  | 2.96 | 2.12 | 10.70 |
| 5JXA.PDB | O, H_ILE_195   | N, H_ASN_155   | H, H_ASN_155    | 2.75 | 1.91 | 9.52  |
| 5JXA.PDB | OD1, H_ASN_197 | N, H_SER_156   | H, H_SER_156    | 2.77 | 1.96 | 16.97 |
| 5JXA.PDB | O, H_VAL_181   | N, H_HIS_164   | H, H_HIS_164    | 2.83 | 2.00 | 13.86 |
| 5JXA.PDB | O, H_SER_179   | N, H_PHE_166   | H, H_PHE_166    | 3.00 | 2.16 | 10.32 |
| 5JXA.PDB | O, H_SER_177   | N, H_VAL_169   | H, H_VAL_169    | 2.97 | 2.15 | 15.76 |
| 5JXA.PDB | O, H_LEU_175   | N, H_GLN_171   | H, H_GLN_171    | 2.96 | 2.12 | 8.09  |
| 5JXA.PDB | O, H_LEU_175   | NE2, H_GLN_171 | HE21, H_GLN_171 | 2.90 | 2.06 | 9.29  |
| 5JXA.PDB | OD1, H_ASP_144 | NE2, H_GLN_171 | HE22, H_GLN_171 | 2.86 | 2.05 | 16.31 |
| 5JXA.PDB | O, H_GLN_171   | N, H_GLY_174   | H, H_GLY_174    | 2.95 | 2.10 | 7.88  |
| 5JXA.PDB | O, H_TYR_145   | N, H_TYR_176   | H, H_TYR_176    | 2.75 | 1.91 | 10.32 |
| 5JXA.PDB | O, H_VAL_142   | N, H_LEU_178   | H, H_LEU_178    | 2.89 | 2.08 | 16.18 |
| 5JXA.PDB | O, H_CYS_140   | N, H_SER_180   | H, H_SER_180    | 2.89 | 2.07 | 14.12 |
| 5JXA.PDB | O, H_HIS_164   | N, H_VAL_181   | H, H_VAL_181    | 2.89 | 2.06 | 12.60 |
| 5JXA.PDB | O, H_LEU_138   | N, H_VAL_182   | H, H_VAL_182    | 2.88 | 2.09 | 18.88 |
| 5JXA.PDB | O, H_ALA_136   | N, H_VAL_184   | H, H_VAL_184    | 2.85 | 2.04 | 16.24 |
| 5JXA.PDB | O, H_GLY_134   | N, H_SER_186   | H, H_SER_186    | 2.13 | 1.27 | 5.45  |
| 5JXA.PDB | O, H_PRO_185   | OG, H_SER_188  | HG, H_SER_188   | 2.58 | 1.75 | 4.20  |
| 5JXA.PDB | O, H_SER_188   | N, H_GLN_192   | H, H_GLN_192    | 2.82 | 1.97 | 8.59  |
| 5JXA.PDB | O, H_THR_193   | NE2, H_GLN_192 | HE21, H_GLN_192 | 2.91 | 2.09 | 13.40 |
| 5JXA.PDB | OG, H_SER_188  | OH, H_TYR_194  | HH, H_TYR_194   | 2.92 | 2.22 | 28.67 |
| 5JXA.PDB | OD1, H_ASN_155 | N, H_ILE_195   | H, H_ILE_195    | 2.81 | 2.00 | 16.75 |
| 5JXA.PDB | O, H_LYS_209   | N, H_CYS_196   | H, H_CYS_196    | 2.97 | 2.21 | 23.72 |
| 5JXA.PDB | O, H_SER_153   | N, H_ASN_197   | H, H_ASN_197    | 2.71 | 1.87 | 7.78  |
| 5JXA.PDB | O, H_VAL_207   | N, H_VAL_198   | H, H_VAL_198    | 2.72 | 1.86 | 4.76  |
| 5JXA.PDB | O, H_THR_151   | N, H_ASN_199   | H, H_ASN_199    | 2.95 | 2.11 | 11.96 |
| 5JXA.PDB | O, H_THR_205   | N, H_HIS_200   | H, H_HIS_200    | 2.85 | 2.00 | 9.64  |
| 5JXA.PDB | O, H_PRO_147   | NE2, H_HIS_200 | HE2, H_HIS_200  | 2.71 | 1.87 | 10.25 |
| 5JXA.PDB | ND1, H_HIS_200 | OG, H_SER_203  | HG, H_SER_203   | 2.82 | 2.10 | 26.44 |
| 5JXA.PDB | O, H_LYS_201   | N, H_ASN_204   | H, H_ASN_204    | 2.83 | 2.01 | 13.96 |
| 5JXA.PDB | O, H_VAL_198   | N, H_VAL_207   | H, H_VAL_207    | 2.84 | 2.02 | 14.35 |
| 5JXA.PDB | O, H_CYS_196   | N, H_LYS_209   | H, H_LYS_209    | 2.96 | 2.14 | 15.80 |
| 5JXA.PDB | O, H_TYR_194   | N, H_VAL_211   | H, H_VAL_211    | 2.90 | 2.05 | 6.52  |
| 5JXA.PDB | OG, L_SER_26   | N, L_VAL_3     | H, L_VAL_3      | 2.90 | 2.06 | 10.44 |
| 5JXA.PDB | O, L_LYS_24    | N, L_THR_5     | H, L_THR_5      | 2.81 | 1.98 | 12.20 |

|          |                |               |                |      |      |       |
|----------|----------------|---------------|----------------|------|------|-------|
| 5JXA.PDB | O, L_TYR_86    | NE2, L_GLN_6  | HE22, L_GLN_6  | 2.89 | 2.07 | 15.63 |
| 5JXA.PDB | O, L_GLU_103   | N, L_LEU_11   | H, L_LEU_11    | 2.77 | 1.93 | 11.05 |
| 5JXA.PDB | OE1, L_GLU_17  | N, L_SER_14   | H, L_SER_14    | 2.78 | 1.95 | 10.28 |
| 5JXA.PDB | O, L_LEU_78    | N, L_GLY_16   | H, L_GLY_16    | 2.83 | 2.05 | 20.59 |
| 5JXA.PDB | O, L_SER_14    | N, L_GLU_17   | H, L_GLU_17    | 2.99 | 2.14 | 6.52  |
| 5JXA.PDB | O, L_ILE_75    | N, L_ALA_19   | H, L_ALA_19    | 2.95 | 2.13 | 15.15 |
| 5JXA.PDB | O, L_LEU_73    | N, L_LEU_21   | H, L_LEU_21    | 2.85 | 2.01 | 11.82 |
| 5JXA.PDB | O, L_SER_7     | N, L_PHE_22   | H, L_PHE_22    | 2.93 | 2.08 | 9.65  |
| 5JXA.PDB | O, L_PHE_71    | N, L_CYS_23   | H, L_CYS_23    | 2.86 | 2.02 | 10.81 |
| 5JXA.PDB | O, L_THR_5     | N, L_LYS_24   | H, L_LYS_24    | 2.95 | 2.10 | 7.38  |
| 5JXA.PDB | O, L_THR_69    | N, L_ALA_25   | H, L_ALA_25    | 2.83 | 2.00 | 12.63 |
| 5JXA.PDB | O, L_ILE_48    | N, L_TRP_35   | H, L_TRP_35    | 2.93 | 2.10 | 13.22 |
| 5JXA.PDB | O, L_TYR_87    | N, L_TYR_36   | H, L_TYR_36    | 2.78 | 1.95 | 13.00 |
| 5JXA.PDB | OE1, L_GLN_89  | OH, L_TYR_36  | HH, L_TYR_36   | 2.71 | 1.91 | 14.07 |
| 5JXA.PDB | O, L_ARG_45    | N, L_GLN_37   | H, L_GLN_37    | 2.89 | 2.06 | 13.47 |
| 5JXA.PDB | OH, L_TYR_86   | NE2, L_GLN_37 | HE21, L_GLN_37 | 2.99 | 2.15 | 10.29 |
| 5JXA.PDB | O, L_VAL_85    | N, L_LYS_38   | H, L_LYS_38    | 2.75 | 1.89 | 4.40  |
| 5JXA.PDB | O, L_GLN_42    | NZ, L_LYS_38  | HZ3, L_LYS_38  | 2.71 | 1.90 | 27.32 |
| 5JXA.PDB | O, L_GLU_81    | NE, L_ARG_39  | HE, L_ARG_39   | 2.78 | 1.86 | 16.81 |
| 5JXA.PDB | O, L_ARG_39    | N, L_GLN_42   | H, L_GLN_42    | 2.96 | 2.14 | 14.42 |
| 5JXA.PDB | O, L_GLN_37    | N, L_ARG_45   | H, L_ARG_45    | 2.85 | 2.09 | 23.31 |
| 5JXA.PDB | O, L_TRP_35    | N, L_LEU_47   | H, L_LEU_47    | 2.90 | 2.06 | 9.03  |
| 5JXA.PDB | O, L_ARG_53    | N, L_TYR_49   | H, L_TYR_49    | 2.87 | 2.07 | 17.25 |
| 5JXA.PDB | O, L_MET_33    | N, L_THR_51   | H, L_THR_51    | 2.75 | 1.91 | 11.49 |
| 5JXA.PDB | O, L_TYR_49    | N, L_ARG_53   | H, L_ARG_53    | 2.88 | 2.10 | 22.06 |
| 5JXA.PDB | OH, H_TYR_100  | NH2, L_ARG_53 | HH21, L_ARG_53 | 2.89 | 2.07 | 18.12 |
| 5JXA.PDB | O, L_LEU_47    | N, L_ALA_55   | H, L_ALA_55    | 2.99 | 2.14 | 7.32  |
| 5JXA.PDB | OD2, L_ASP_82  | NE, L_ARG_61  | HE, L_ARG_61   | 2.88 | 2.15 | 27.19 |
| 5JXA.PDB | OD1, L_ASP_82  | NH2, L_ARG_61 | HH21, L_ARG_61 | 2.84 | 1.98 | 2.45  |
| 5JXA.PDB | O, L_THR_74    | N, L_VAL_63   | H, L_VAL_63    | 2.82 | 1.99 | 13.39 |
| 5JXA.PDB | O, L_PHE_72    | N, L_SER_65   | H, L_SER_65    | 2.91 | 2.10 | 15.27 |
| 5JXA.PDB | OD1, L_ASP_70  | OG1, L_THR_69 | HG1, L_THR_69  | 2.92 | 2.09 | 7.50  |
| 5JXA.PDB | O, L_CYS_23    | N, L_PHE_71   | H, L_PHE_71    | 2.96 | 2.17 | 20.10 |
| 5JXA.PDB | O, L_SER_65    | N, L_PHE_72   | H, L_PHE_72    | 2.92 | 2.09 | 12.41 |
| 5JXA.PDB | O, L_LEU_21    | N, L_LEU_73   | H, L_LEU_73    | 2.92 | 2.12 | 19.36 |
| 5JXA.PDB | O, L_VAL_63    | N, L_THR_74   | H, L_THR_74    | 2.86 | 2.00 | 5.29  |
| 5JXA.PDB | O, L_ALA_19    | N, L_ILE_75   | H, L_ILE_75    | 2.87 | 2.05 | 14.95 |
| 5JXA.PDB | O, L_ARG_61    | N, L_ASN_76   | H, L_ASN_76    | 2.88 | 2.03 | 8.54  |
| 5JXA.PDB | O, L_GLU_17    | N, L_LEU_78   | H, L_LEU_78    | 2.83 | 2.01 | 13.81 |
| 5JXA.PDB | OD2, L_ASP_82  | N, L_ASP_79   | H, L_ASP_79    | 2.65 | 1.79 | 5.80  |
| 5JXA.PDB | OD2, L_ASP_79  | N, L_GLU_81   | H, L_GLU_81    | 2.94 | 2.08 | 2.69  |
| 5JXA.PDB | O, L_ASP_79    | N, L_ASP_82   | H, L_ASP_82    | 2.79 | 1.95 | 7.93  |
| 5JXA.PDB | O, L_SER_102   | N, L_TYR_86   | H, L_TYR_86    | 2.86 | 2.03 | 12.51 |
| 5JXA.PDB | O, L_ASP_82    | OH, L_TYR_86  | HH, L_TYR_86   | 2.60 | 1.79 | 10.99 |
| 5JXA.PDB | O, L_TYR_36    | N, L_TYR_87   | H, L_TYR_87    | 2.95 | 2.13 | 15.47 |
| 5JXA.PDB | O, L_THR_34    | N, L_GLN_89   | H, L_GLN_89    | 2.89 | 2.18 | 29.17 |
| 5JXA.PDB | O, L_PHE_97    | N, L_GLN_90   | H, L_GLN_90    | 2.95 | 2.17 | 21.39 |
| 5JXA.PDB | O, L_GLN_90    | N, L_PHE_97   | H, L_PHE_97    | 2.85 | 2.03 | 15.63 |
| 5JXA.PDB | O, L_CYS_88    | N, L_GLY_99   | H, L_GLY_99    | 2.94 | 2.12 | 17.39 |
| 5JXA.PDB | OE1, L_GLN_6   | N, L_GLY_101  | H, L_GLY_101   | 2.89 | 2.15 | 26.61 |
| 5JXA.PDB | O, L_TYR_86    | N, L_SER_102  | H, L_SER_102   | 2.89 | 2.08 | 16.76 |
| 5JXA.PDB | O, L_PRO_8     | OG, L_SER_102 | HG, L_SER_102  | 2.69 | 2.00 | 29.55 |
| 5JXA.PDB | O, L_GLY_9     | N, L_GLU_103  | H, L_GLU_103   | 2.89 | 2.04 | 6.77  |
| 5JXA.PDB | O, L_ALA_84    | N, L_LEU_104  | H, L_LEU_104   | 2.88 | 2.04 | 11.59 |
| 5JXA.PDB | O, L_LEU_11    | N, L_GLU_105  | H, L_GLU_105   | 2.90 | 2.07 | 12.41 |
| 5JXA.PDB | OE1, L_GLN_166 | N, L_VAL_106  | H, L_VAL_106   | 2.98 | 2.12 | 4.21  |
| 5JXA.PDB | O, L_LEU_13    | N, L_HIS_107  | H, L_HIS_107   | 2.92 | 2.09 | 12.00 |
| 5JXA.PDB | O, L_THR_109   | NE, L_ARG_108 | HE, L_ARG_108  | 2.85 | 2.02 | 11.20 |

|          |                |                |                 |      |      |       |
|----------|----------------|----------------|-----------------|------|------|-------|
| 5JXA.PDB | O, L_ASP_170   | NH1, L_ARG_108 | HH11, L_ARG_108 | 2.90 | 2.05 | 7.50  |
| 5JXA.PDB | O, L_TYR_140   | N, L_ALA_111   | H, L_ALA_111    | 2.88 | 2.04 | 11.67 |
| 5JXA.PDB | O, L_LEU_135   | N, L_PHE_116   | H, L_PHE_116    | 2.95 | 2.16 | 18.98 |
| 5JXA.PDB | O, L_VAL_133   | N, L_PHE_118   | H, L_PHE_118    | 2.79 | 1.99 | 17.84 |
| 5JXA.PDB | OG, L_SER_131  | NE2, L_GLN_124 | HE22, L_GLN_124 | 2.80 | 1.95 | 4.80  |
| 5JXA.PDB | O, L_GLN_124   | N, L_SER_127   | H, L_SER_127    | 2.78 | 1.98 | 17.11 |
| 5JXA.PDB | O, L_LEU_125   | N, L_GLY_128   | H, L_GLY_128    | 2.90 | 2.04 | 5.48  |
| 5JXA.PDB | O, L_LEU_181   | N, L_ALA_130   | H, L_ALA_130    | 2.76 | 1.92 | 10.28 |
| 5JXA.PDB | OE1, L_GLN_124 | N, L_SER_131   | H, L_SER_131    | 3.00 | 2.18 | 14.97 |
| 5JXA.PDB | O, L_LEU_179   | N, L_VAL_132   | H, L_VAL_132    | 2.83 | 1.99 | 9.70  |
| 5JXA.PDB | O, L_SER_177   | N, L_CYS_134   | H, L_CYS_134    | 2.84 | 2.01 | 12.61 |
| 5JXA.PDB | O, L_PHE_116   | N, L_LEU_135   | H, L_LEU_135    | 2.76 | 1.91 | 8.80  |
| 5JXA.PDB | O, L_LEU_175   | N, L_LEU_136   | H, L_LEU_136    | 2.76 | 1.91 | 4.29  |
| 5JXA.PDB | O, L_SER_114   | N, L_ASN_137   | H, L_ASN_137    | 2.86 | 2.06 | 16.81 |
| 5JXA.PDB | O, L_TYR_173   | N, L_PHE_139   | H, L_PHE_139    | 2.83 | 2.00 | 12.08 |
| 5JXA.PDB | O, L_ALA_111   | N, L_TYR_140   | H, L_TYR_140    | 2.95 | 2.14 | 16.31 |
| 5JXA.PDB | OE1, L_GLU_105 | OH, L_TYR_140  | HH, L_TYR_140   | 2.43 | 1.65 | 17.73 |
| 5JXA.PDB | OE1, L_GLU_103 | NH1, L_ARG_142 | HH12, L_ARG_142 | 2.87 | 2.05 | 14.46 |
| 5JXA.PDB | OH, L_TYR_173  | NH2, L_ARG_142 | HH21, L_ARG_142 | 2.84 | 2.07 | 21.88 |
| 5JXA.PDB | OE2, L_GLU_103 | NH2, L_ARG_142 | HH22, L_ARG_142 | 2.79 | 1.94 | 8.50  |
| 5JXA.PDB | O, L_THR_197   | N, L_LYS_145   | H, L_LYS_145    | 2.95 | 2.11 | 9.81  |
| 5JXA.PDB | O, L_GLU_195   | N, L_GLN_147   | H, L_GLN_147    | 2.80 | 1.97 | 13.47 |
| 5JXA.PDB | O, L_TRP_148   | NE2, L_GLN_147 | HE21, L_GLN_147 | 2.90 | 2.05 | 7.67  |
| 5JXA.PDB | OG, L_SER_177  | NE1, L_TRP_148 | HE1, L_TRP_148  | 2.86 | 2.05 | 17.07 |
| 5JXA.PDB | O, L_ALA_193   | N, L_LYS_149   | H, L_LYS_149    | 2.88 | 2.05 | 13.32 |
| 5JXA.PDB | O, L_ALA_153   | N, L_VAL_150   | H, L_VAL_150    | 3.00 | 2.18 | 15.98 |
| 5JXA.PDB | O, L_VAL_191   | N, L_ASP_151   | H, L_ASP_151    | 2.79 | 1.95 | 10.19 |
| 5JXA.PDB | O, L_VAL_150   | N, L_ALA_153   | H, L_ALA_153    | 2.90 | 2.07 | 13.09 |
| 5JXA.PDB | O, L_TRP_148   | N, L_GLN_155   | H, L_GLN_155    | 2.93 | 2.09 | 9.40  |
| 5JXA.PDB | OE1, L_GLN_155 | ND2, L_ASN_158 | HD21, L_ASN_158 | 2.94 | 2.10 | 10.59 |
| 5JXA.PDB | O, H_LEU_170   | NE2, L_GLN_160 | HE22, L_GLN_160 | 2.84 | 1.99 | 4.55  |
| 5JXA.PDB | O, L_SER_176   | N, L_SER_162   | H, L_SER_162    | 2.98 | 2.19 | 20.08 |
| 5JXA.PDB | O, H_PRO_167   | OG, L_SER_162  | HG, L_SER_162   | 2.69 | 1.94 | 23.37 |
| 5JXA.PDB | O, L_SER_171   | NE2, L_GLN_166 | HE21, L_GLN_166 | 2.90 | 2.05 | 9.75  |
| 5JXA.PDB | O, L_VAL_106   | NE2, L_GLN_166 | HE22, L_GLN_166 | 2.89 | 2.10 | 19.46 |
| 5JXA.PDB | O, L_THR_172   | N, L_ASP_167   | H, L_ASP_167    | 2.83 | 2.01 | 13.03 |
| 5JXA.PDB | OD2, L_ASP_167 | N, L_LYS_169   | H, L_LYS_169    | 2.81 | 2.02 | 19.97 |
| 5JXA.PDB | OD2, L_ASP_167 | N, L_ASP_170   | H, L_ASP_170    | 2.85 | 2.02 | 14.37 |
| 5JXA.PDB | O, L_ASP_167   | N, L_SER_171   | H, L_SER_171    | 2.99 | 2.25 | 26.24 |
| 5JXA.PDB | OD1, L_ASP_170 | N, L_THR_172   | H, L_THR_172    | 2.91 | 2.07 | 10.06 |
| 5JXA.PDB | OD1, L_ASP_170 | OG1, L_THR_172 | HG1, L_THR_172  | 2.69 | 1.87 | 10.60 |
| 5JXA.PDB | O, L_PHE_139   | N, L_TYR_173   | H, L_TYR_173    | 2.81 | 1.97 | 11.11 |
| 5JXA.PDB | OE2, L_GLU_105 | OH, L_TYR_173  | HH, L_TYR_173   | 2.63 | 1.83 | 14.46 |
| 5JXA.PDB | OG1, L_THR_164 | N, L_SER_174   | H, L_SER_174    | 2.99 | 2.15 | 10.27 |
| 5JXA.PDB | O, L_LEU_136   | N, L_LEU_175   | H, L_LEU_175    | 2.81 | 2.01 | 18.94 |
| 5JXA.PDB | O, L_SER_162   | N, L_SER_176   | H, L_SER_176    | 2.93 | 2.11 | 14.73 |
| 5JXA.PDB | O, L_CYS_134   | N, L_SER_177   | H, L_SER_177    | 2.85 | 2.03 | 14.72 |
| 5JXA.PDB | O, L_GLN_160   | N, L_THR_178   | H, L_THR_178    | 2.87 | 2.05 | 14.07 |
| 5JXA.PDB | O, L_VAL_132   | N, L_LEU_179   | H, L_LEU_179    | 2.77 | 1.94 | 12.42 |
| 5JXA.PDB | O, L_ALA_130   | N, L_LEU_181   | H, L_LEU_181    | 2.90 | 2.06 | 10.98 |
| 5JXA.PDB | O, L_GLY_128   | N, L_LYS_183   | H, L_LYS_183    | 2.84 | 2.03 | 16.09 |
| 5JXA.PDB | O, L_SER_182   | N, L_TYR_186   | H, L_TYR_186    | 2.88 | 2.05 | 12.31 |
| 5JXA.PDB | O, L_LYS_183   | N, L_GLU_187   | H, L_GLU_187    | 2.94 | 2.15 | 20.11 |
| 5JXA.PDB | OD1, L_ASP_185 | NZ, L_LYS_188  | HZ2, L_LYS_188  | 2.85 | 2.03 | 19.98 |
| 5JXA.PDB | OD1, L_ASP_151 | N, L_VAL_191   | H, L_VAL_191    | 2.74 | 1.89 | 7.60  |
| 5JXA.PDB | O, L_PHE_209   | N, L_TYR_192   | H, L_TYR_192    | 2.93 | 2.07 | 4.78  |
| 5JXA.PDB | O, L_LYS_149   | N, L_ALA_193   | H, L_ALA_193    | 2.95 | 2.14 | 18.10 |
| 5JXA.PDB | O, L_LYS_207   | N, L_CYS_194   | H, L_CYS_194    | 2.83 | 1.98 | 9.36  |

|          |                |                |                 |      |      |       |
|----------|----------------|----------------|-----------------|------|------|-------|
| 5JXA.PDB | O, L_GLN_147   | N, L_GLU_195   | H, L_GLU_195    | 2.80 | 1.95 | 6.91  |
| 5JXA.PDB | O, L_VAL_205   | N, L_VAL_196   | H, L_VAL_196    | 2.78 | 1.95 | 10.55 |
| 5JXA.PDB | O, L_LYS_145   | N, L_THR_197   | H, L_THR_197    | 2.82 | 1.99 | 11.86 |
| 5JXA.PDB | O, L_PRO_141   | NE2, L_HIS_198 | HE2, L_HIS_198  | 2.88 | 2.05 | 12.53 |
| 5JXA.PDB | ND1, L_HIS_198 | N, L_GLY_200   | H, L_GLY_200    | 2.95 | 2.09 | 3.68  |
| 5JXA.PDB | O, L_HIS_198   | N, L_LEU_201   | H, L_LEU_201    | 2.92 | 2.08 | 9.11  |
| 5JXA.PDB | O, L_TYR_192   | N, L_PHE_209   | H, L_PHE_209    | 2.96 | 2.19 | 22.81 |
| 5JXA.PDB | OE2, L_GLU_213 | ND2, L_ASN_210 | HD22, L_ASN_210 | 2.76 | 1.93 | 12.84 |
| 5JXA.PDB | O, L_LYS_190   | N, L_ARG_211   | H, L_ARG_211    | 2.77 | 1.93 | 11.49 |
| 5JXA.PDB | O, L_HIS_189   | NE, L_ARG_211  | HE, L_ARG_211   | 2.81 | 1.95 | 5.90  |
| 5JXA.PDB | O, L_ASN_210   | N, L_GLU_213   | H, L_GLU_213    | 2.99 | 2.18 | 16.84 |

Table 1705: 5JXA-specific side chain and main chain hydrogen bonding analysis. In this table, a PDB file is specified with a four-letter PDB ID, except that the names of the PDB files corresponding to the single NMR structural model split from the NMR ensemble is specified with a four-letter PDB ID in addition to a hyphen followed by the single NMR structural model numeric ID, the residue naming scheme is **Chain ID\_residue name\_residue number**,  $\angle ADH$  represents the angle formed by acceptor (A), donor (D) and hydrogen (H) ( $\angle ADH$ ).

| PDB      | Acceptor (A)   | Donor (D)      | Hydrogen (H)    | D-A (Å) | H-A (Å) | $\angle ADH(^{\circ})$ |
|----------|----------------|----------------|-----------------|---------|---------|------------------------|
| 5M2C.PDB | OD1, A_ASN.115 | N, A_GLN.118   | H, A_GLN.118    | 2.65    | 1.88    | 23.04                  |
| 5M2C.PDB | O, A_LYS.116   | N, A_ALA.120   | H, A_ALA.120    | 2.80    | 1.94    | 5.96                   |
| 5M2C.PDB | O, A_ASP.117   | N, A_LYS.121   | H, A_LYS.121    | 2.93    | 2.08    | 6.70                   |
| 5M2C.PDB | O, A_GLN.118   | N, A_ASP.122   | H, A_ASP.122    | 2.87    | 2.05    | 16.09                  |
| 5M2C.PDB | O, A_ILE.119   | N, A_VAL.123   | H, A_VAL.123    | 2.90    | 2.07    | 12.20                  |
| 5M2C.PDB | O, A_ALA.120   | N, A_LYS.124   | H, A_LYS.124    | 2.89    | 2.06    | 12.17                  |
| 5M2C.PDB | OD1, A_ASP.195 | NZ, A_LYS.124  | HZ1, A_LYS.124  | 2.99    | 2.26    | 29.03                  |
| 5M2C.PDB | O, A_LYS.121   | N, A_GLN.125   | H, A_GLN.125    | 2.83    | 2.00    | 12.74                  |
| 5M2C.PDB | O, A_ASP.122   | N, A_PHE.126   | H, A_PHE.126    | 2.85    | 2.04    | 15.29                  |
| 5M2C.PDB | O, A_VAL.123   | N, A_TYR.127   | H, A_TYR.127    | 2.79    | 1.94    | 7.39                   |
| 5M2C.PDB | O, A_LYS.124   | N, A_ASP.128   | H, A_ASP.128    | 2.86    | 2.06    | 18.46                  |
| 5M2C.PDB | O, A_TYR.127   | N, A_LEU.131   | H, A_LEU.131    | 2.86    | 2.03    | 12.22                  |
| 5M2C.PDB | O, A_ALA.130   | N, A_ALA.134   | H, A_ALA.134    | 2.83    | 2.04    | 19.67                  |
| 5M2C.PDB | O, A_ASN.142   | N, A_VAL.146   | H, A_VAL.146    | 2.94    | 2.13    | 15.93                  |
| 5M2C.PDB | O, A_ALA.143   | N, A_VAL.147   | H, A_VAL.147    | 2.90    | 2.05    | 6.08                   |
| 5M2C.PDB | O, A_LYS.144   | N, A_LYS.148   | H, A_LYS.148    | 2.93    | 2.10    | 12.46                  |
| 5M2C.PDB | O, A_VAL.146   | N, A_PHE.150   | H, A_PHE.150    | 2.92    | 2.07    | 6.77                   |
| 5M2C.PDB | O, A_VAL.147   | N, A_HIS.151   | H, A_HIS.151    | 2.88    | 2.04    | 10.85                  |
| 5M2C.PDB | O, A_LEU.174   | ND1, A_HIS.151 | HD1, A_HIS.151  | 2.73    | 1.92    | 15.82                  |
| 5M2C.PDB | OH, A_TYR.127  | NE2, A_HIS.151 | HE2, A_HIS.151  | 2.61    | 1.77    | 12.06                  |
| 5M2C.PDB | O, A_LYS.148   | N, A_GLU.152   | H, A_GLU.152    | 2.86    | 2.05    | 15.70                  |
| 5M2C.PDB | O, A_THR.149   | N, A_THR.153   | H, A_THR.153    | 2.91    | 2.10    | 16.77                  |
| 5M2C.PDB | O, A_THR.149   | OG1, A_THR.153 | HG1, A_THR.153  | 2.64    | 1.94    | 28.18                  |
| 5M2C.PDB | O, A_PHE.150   | N, A_LEU.154   | H, A_LEU.154    | 2.87    | 2.06    | 17.25                  |
| 5M2C.PDB | OG1, A_THR.163 | N, A_SER.160   | H, A_SER.160    | 2.95    | 2.16    | 19.89                  |
| 5M2C.PDB | OG, A_SER.159  | OG1, A_THR.163 | HG1, A_THR.163  | 2.88    | 2.07    | 13.51                  |
| 5M2C.PDB | O, A_SER.160   | N, A_ALA.164   | H, A_ALA.164    | 2.88    | 2.08    | 17.84                  |
| 5M2C.PDB | O, A_THR.163   | N, A_THR.167   | H, A_THR.167    | 3.00    | 2.16    | 10.84                  |
| 5M2C.PDB | O, A_THR.163   | OG1, A_THR.167 | HG1, A_THR.167  | 2.60    | 1.83    | 18.83                  |
| 5M2C.PDB | O, A_ALA.164   | N, A_SER.168   | H, A_SER.168    | 2.91    | 2.11    | 17.88                  |
| 5M2C.PDB | O, A_LEU.165   | N, A_VAL.169   | H, A_VAL.169    | 2.99    | 2.26    | 28.05                  |
| 5M2C.PDB | O, A_THR.166   | N, A_LEU.170   | H, A_LEU.170    | 2.75    | 1.89    | 5.46                   |
| 5M2C.PDB | O, A_THR.167   | N, A_LYS.171   | H, A_LYS.171    | 2.68    | 1.86    | 14.38                  |
| 5M2C.PDB | O, A_LYS.171   | N, A_LEU.174   | H, A_LEU.174    | 2.89    | 2.03    | 5.60                   |
| 5M2C.PDB | O, A_ASN.172   | N, A_CYS.175   | H, A_CYS.175    | 2.92    | 2.11    | 15.91                  |
| 5M2C.PDB | O, A_PRO.176   | N, A_SER.179   | H, A_SER.179    | 2.98    | 2.16    | 15.63                  |
| 5M2C.PDB | O, A_PRO.176   | OG, A_SER.179  | HG, A_SER.179   | 2.63    | 1.93    | 27.89                  |
| 5M2C.PDB | OG, A_SER.183  | N, A_ASN.180   | H, A_ASN.180    | 2.83    | 2.08    | 25.30                  |
| 5M2C.PDB | O, A_ASN.180   | N, A_ASN.184   | H, A_ASN.184    | 2.95    | 2.10    | 7.28                   |
| 5M2C.PDB | OG, A_SER.179  | ND2, A_ASN.184 | HD21, A_ASN.184 | 2.93    | 2.13    | 18.24                  |
| 5M2C.PDB | O, A_SER.183   | N, A_PHE.186   | H, A_PHE.186    | 2.77    | 1.95    | 13.31                  |
| 5M2C.PDB | O, A_GLY.158   | N, A_CYS.190   | H, A_CYS.190    | 2.73    | 1.87    | 5.91                   |
| 5M2C.PDB | OD2, A_ASP.128 | NE2, A_HIS.191 | HE2, A_HIS.191  | 2.69    | 1.84    | 6.13                   |
| 5M2C.PDB | OD2, A_ASP.189 | N, A_GLN.192   | H, A_GLN.192    | 2.84    | 2.00    | 11.08                  |
| 5M2C.PDB | O, A_CYS.190   | N, A_ILE.194   | H, A_ILE.194    | 2.93    | 2.11    | 15.42                  |
| 5M2C.PDB | O, A_HIS.191   | N, A_ASP.195   | H, A_ASP.195    | 2.87    | 2.03    | 10.69                  |
| 5M2C.PDB | O, A_GLN.192   | N, A_ASP.196   | H, A_ASP.196    | 2.80    | 2.05    | 24.04                  |
| 5M2C.PDB | O, A_LYS.193   | N, A_LEU.197   | H, A_LEU.197    | 2.95    | 2.18    | 21.85                  |
| 5M2C.PDB | O, A_ASP.195   | OG, A_SER.199  | HG, A_SER.199   | 2.79    | 2.04    | 23.21                  |
| 5M2C.PDB | O, A_ASP.196   | N, A_LYS.201   | H, A_LYS.201    | 2.85    | 2.04    | 17.50                  |
| 5M2C.PDB | OD1, B_ASN.115 | N, B_GLN.118   | H, B_GLN.118    | 2.50    | 1.70    | 17.47                  |
| 5M2C.PDB | O, B_LYS.116   | N, B_ALA.120   | H, B_ALA.120    | 2.85    | 2.00    | 7.33                   |
| 5M2C.PDB | O, B_ASP.117   | N, B_LYS.121   | H, B_LYS.121    | 2.86    | 2.01    | 8.98                   |
| 5M2C.PDB | O, B_GLN.118   | N, B_ASP.122   | H, B_ASP.122    | 2.84    | 2.03    | 16.46                  |
| 5M2C.PDB | O, B_ILE.119   | N, B_VAL.123   | H, B_VAL.123    | 2.89    | 2.07    | 14.86                  |
| 5M2C.PDB | O, B_ALA.120   | N, B_LYS.124   | H, B_LYS.124    | 2.93    | 2.08    | 10.04                  |
| 5M2C.PDB | O, B_LYS.121   | N, B_GLN.125   | H, B_GLN.125    | 2.84    | 2.01    | 12.48                  |

|          |                |                |                 |      |      |       |
|----------|----------------|----------------|-----------------|------|------|-------|
| 5M2C.PDB | O, B_ASP_122   | N, B_PHE_126   | H, B_PHE_126    | 2.86 | 2.06 | 18.89 |
| 5M2C.PDB | O, B_VAL_123   | N, B_TYR_127   | H, B_TYR_127    | 2.81 | 1.97 | 10.19 |
| 5M2C.PDB | O, B_LYS_124   | N, B_ASP_128   | H, B_ASP_128    | 2.88 | 2.10 | 21.63 |
| 5M2C.PDB | O, B_TYR_127   | N, B_LEU_131   | H, B_LEU_131    | 2.85 | 2.02 | 11.94 |
| 5M2C.PDB | O, B_ALA_130   | N, B_ALA_134   | H, B_ALA_134    | 2.90 | 2.12 | 20.23 |
| 5M2C.PDB | O, B_ASN_142   | N, B_VAL_146   | H, B_VAL_146    | 2.99 | 2.15 | 11.45 |
| 5M2C.PDB | O, B_ALA_143   | N, B_VAL_147   | H, B_VAL_147    | 2.91 | 2.05 | 3.26  |
| 5M2C.PDB | O, B_LYS_144   | N, B_LYS_148   | H, B_LYS_148    | 2.96 | 2.14 | 15.99 |
| 5M2C.PDB | O, B_ALA_145   | N, B_THR_149   | H, B_THR_149    | 2.98 | 2.21 | 21.80 |
| 5M2C.PDB | O, B_ALA_145   | OG1, B_THR_149 | HG1, B_THR_149  | 2.78 | 1.99 | 18.17 |
| 5M2C.PDB | O, B_VAL_146   | N, B_PHE_150   | H, B_PHE_150    | 2.91 | 2.07 | 8.81  |
| 5M2C.PDB | O, B_VAL_147   | N, B_HIS_151   | H, B_HIS_151    | 2.89 | 2.07 | 14.41 |
| 5M2C.PDB | O, B_LEU_174   | ND1, B_HIS_151 | HD1, B_HIS_151  | 2.73 | 1.93 | 16.98 |
| 5M2C.PDB | OH, B_TYR_127  | NE2, B_HIS_151 | HE2, B_HIS_151  | 2.61 | 1.78 | 13.01 |
| 5M2C.PDB | O, B_LYS_148   | N, B_GLU_152   | H, B_GLU_152    | 2.84 | 2.02 | 14.19 |
| 5M2C.PDB | O, B_THR_149   | N, B_THR_153   | H, B_THR_153    | 2.90 | 2.09 | 15.77 |
| 5M2C.PDB | O, B_PHE_150   | N, B_LEU_154   | H, B_LEU_154    | 2.88 | 2.08 | 18.38 |
| 5M2C.PDB | O, B_SER_160   | N, B_ALA_164   | H, B_ALA_164    | 2.89 | 2.09 | 18.03 |
| 5M2C.PDB | O, B_THR_163   | N, B_THR_167   | H, B_THR_167    | 2.99 | 2.16 | 11.49 |
| 5M2C.PDB | O, B_THR_163   | OG1, B_THR_167 | HG1, B_THR_167  | 2.57 | 1.79 | 17.65 |
| 5M2C.PDB | O, B_ALA_164   | N, B_SER_168   | H, B_SER_168    | 2.89 | 2.09 | 18.74 |
| 5M2C.PDB | O, B_LEU_165   | N, B_VAL_169   | H, B_VAL_169    | 2.94 | 2.15 | 19.39 |
| 5M2C.PDB | O, B_THR_166   | N, B_LEU_170   | H, B_LEU_170    | 2.77 | 1.92 | 7.49  |
| 5M2C.PDB | O, B_THR_167   | N, B_LYS_171   | H, B_LYS_171    | 2.70 | 1.89 | 16.35 |
| 5M2C.PDB | O, B_LYS_171   | N, B_LEU_174   | H, B_LEU_174    | 2.94 | 2.09 | 4.41  |
| 5M2C.PDB | O, B_ASN_172   | N, B_CYS_175   | H, B_CYS_175    | 2.97 | 2.15 | 14.80 |
| 5M2C.PDB | O, B_PRO_176   | OG, B_SER_179  | HG, B_SER_179   | 2.63 | 1.92 | 26.26 |
| 5M2C.PDB | OG, B_SER_183  | N, B_ASN_180   | H, B_ASN_180    | 2.76 | 1.98 | 21.29 |
| 5M2C.PDB | O, B_ASN_180   | N, B_ASN_184   | H, B_ASN_184    | 2.89 | 2.04 | 8.95  |
| 5M2C.PDB | OG, B_SER_179  | ND2, B_ASN_184 | HD21, B_ASN_184 | 2.89 | 2.10 | 19.97 |
| 5M2C.PDB | O, B_SER_183   | N, B_PHE_186   | H, B_PHE_186    | 2.92 | 2.09 | 13.99 |
| 5M2C.PDB | O, B_GLY_158   | N, B_CYS_190   | H, B_CYS_190    | 2.71 | 1.85 | 3.39  |
| 5M2C.PDB | OD2, B_ASP_128 | NE2, B_HIS_191 | HE2, B_HIS_191  | 2.71 | 1.86 | 7.63  |
| 5M2C.PDB | OD2, B_ASP_189 | N, B_GLN_192   | H, B_GLN_192    | 2.90 | 2.07 | 13.53 |
| 5M2C.PDB | O, B_CYS_190   | N, B_ILE_194   | H, B_ILE_194    | 2.91 | 2.10 | 17.50 |
| 5M2C.PDB | O, B_HIS_191   | N, B_ASP_195   | H, B_ASP_195    | 2.87 | 2.03 | 11.04 |
| 5M2C.PDB | O, B_GLN_192   | N, B_ASP_196   | H, B_ASP_196    | 2.81 | 2.05 | 23.43 |
| 5M2C.PDB | O, B_ASP_195   | N, B_SER_199   | H, B_SER_199    | 2.98 | 2.26 | 28.48 |
| 5M2C.PDB | O, B_ASP_195   | OG, B_SER_199  | HG, B_SER_199   | 2.85 | 2.13 | 27.00 |
| 5M2C.PDB | O, B_ASP_196   | N, B_LYS_201   | H, B_LYS_201    | 2.97 | 2.16 | 15.75 |

Table 1706: 5M2C-specific side chain and main chain hydrogen bonding analysis. In this table, a PDB file is specified with a four-letter PDB ID, except that the names of the PDB files corresponding to the single NMR structural model split from the NMR ensemble is specified with a four-letter PDB ID in addition to a hyphen followed by the single NMR structural model numeric ID, the residue naming scheme is **Chain ID\_residue name\_residue number**,  $\angle ADH$  represents the angle formed by acceptor (A), donor (D) and hydrogen (H) ( $\angle ADH$ ).



| PDB      | Acceptor (A)   | Donor (D)      | Hydrogen (H)    | D-A (Å) | H-A (Å) | $\angle ADH(^{\circ})$ |
|----------|----------------|----------------|-----------------|---------|---------|------------------------|
| 5M33.PDB | O, A_GLU_110   | N, A_PHE_113   | H, A_PHE_113    | 2.89    | 2.13    | 23.34                  |
| 5M33.PDB | OD1, A_ASN_115 | N, A_GLN_118   | H, A_GLN_118    | 2.87    | 2.05    | 15.86                  |
| 5M33.PDB | OD1, A_ASP_122 | NE2, A_GLN_118 | HE21, A_GLN_118 | 2.92    | 2.20    | 28.21                  |
| 5M33.PDB | O, A_GLN_118   | N, A_ASP_122   | H, A_ASP_122    | 2.91    | 2.09    | 14.98                  |
| 5M33.PDB | O, A_ILE_119   | N, A_VAL_123   | H, A_VAL_123    | 2.90    | 2.08    | 14.75                  |
| 5M33.PDB | O, A_ALA_120   | N, A_LYS_124   | H, A_LYS_124    | 2.97    | 2.13    | 9.03                   |
| 5M33.PDB | OD1, A_ASP_195 | NZ, A_LYS_124  | HZ3, A_LYS_124  | 2.81    | 2.00    | 20.18                  |
| 5M33.PDB | O, A_LYS_121   | N, A_GLN_125   | H, A_GLN_125    | 2.95    | 2.14    | 15.95                  |
| 5M33.PDB | O, A_ASP_122   | N, A_PHE_126   | H, A_PHE_126    | 2.85    | 2.02    | 12.96                  |
| 5M33.PDB | O, A_VAL_123   | N, A_TYR_127   | H, A_TYR_127    | 2.90    | 2.06    | 8.97                   |
| 5M33.PDB | NE2, A_HIS_151 | OH, A_TYR_127  | HH, A_TYR_127   | 2.74    | 1.90    | 5.54                   |
| 5M33.PDB | O, A_LYS_124   | N, A_ASP_128   | H, A_ASP_128    | 2.96    | 2.14    | 15.35                  |
| 5M33.PDB | O, A_GLN_125   | N, A_GLN_129   | H, A_GLN_129    | 2.89    | 2.05    | 10.97                  |
| 5M33.PDB | O, A_TYR_127   | N, A_LEU_131   | H, A_LEU_131    | 2.85    | 2.03    | 13.94                  |
| 5M33.PDB | O, A_ALA_130   | N, A_ALA_134   | H, A_ALA_134    | 2.84    | 2.03    | 15.90                  |
| 5M33.PDB | O, A_GLN_133   | N, A_ASP_137   | H, A_ASP_137    | 2.89    | 2.12    | 21.46                  |
| 5M33.PDB | O, A_ASP_139   | N, A_ASN_141   | H, A_ASN_141    | 2.85    | 2.12    | 27.58                  |
| 5M33.PDB | O, A_ALA_140   | N, A_LYS_144   | H, A_LYS_144    | 2.99    | 2.14    | 7.21                   |
| 5M33.PDB | O, A_ALA_134   | NZ, A_LYS_144  | HZ1, A_LYS_144  | 2.63    | 1.88    | 27.02                  |
| 5M33.PDB | O, A_ASN_142   | N, A_VAL_146   | H, A_VAL_146    | 2.83    | 2.01    | 15.56                  |
| 5M33.PDB | O, A_LYS_144   | N, A_LYS_148   | H, A_LYS_148    | 2.98    | 2.13    | 8.41                   |
| 5M33.PDB | O, A_ALA_145   | N, A_THR_149   | H, A_THR_149    | 2.97    | 2.14    | 13.99                  |
| 5M33.PDB | O, A_ALA_145   | OG1, A_THR_149 | HG1, A_THR_149  | 2.90    | 2.10    | 14.64                  |
| 5M33.PDB | O, A_VAL_146   | N, A_PHE_150   | H, A_PHE_150    | 2.90    | 2.07    | 12.70                  |
| 5M33.PDB | O, A_VAL_147   | N, A_HIS_151   | H, A_HIS_151    | 2.86    | 2.03    | 12.68                  |
| 5M33.PDB | O, A_LEU_174   | ND1, A_HIS_151 | HD1, A_HIS_151  | 2.74    | 1.89    | 6.51                   |
| 5M33.PDB | O, A_LYS_148   | N, A_GLU_152   | H, A_GLU_152    | 2.94    | 2.12    | 14.44                  |
| 5M33.PDB | O, A_THR_149   | N, A_THR_153   | H, A_THR_153    | 2.89    | 2.04    | 7.79                   |
| 5M33.PDB | O, A_PHE_150   | N, A_LEU_154   | H, A_LEU_154    | 2.88    | 2.05    | 10.83                  |
| 5M33.PDB | OD2, A_ASP_189 | N, A_SER_160   | H, A_SER_160    | 2.83    | 2.06    | 21.68                  |
| 5M33.PDB | O, A_LEU_162   | N, A_LEU_165   | H, A_LEU_165    | 2.91    | 2.09    | 16.07                  |
| 5M33.PDB | O, A_LEU_165   | N, A_VAL_169   | H, A_VAL_169    | 2.92    | 2.13    | 19.68                  |
| 5M33.PDB | O, A_THR_166   | N, A_LEU_170   | H, A_LEU_170    | 2.91    | 2.09    | 13.68                  |
| 5M33.PDB | O, A_PRO_176   | N, A_SER_179   | H, A_SER_179    | 2.93    | 2.10    | 12.30                  |
| 5M33.PDB | O, A_ASN_180   | N, A_ASN_184   | H, A_ASN_184    | 2.90    | 2.08    | 14.21                  |
| 5M33.PDB | O, A_CYS_157   | ND2, A_ASN_184 | HD21, A_ASN_184 | 2.88    | 2.04    | 11.64                  |
| 5M33.PDB | OD1, A_ASP_155 | NZ, A_LYS_187  | HZ1, A_LYS_187  | 2.82    | 1.95    | 10.61                  |
| 5M33.PDB | O, A_GLY_158   | N, A_CYS_190   | H, A_CYS_190    | 2.93    | 2.07    | 4.56                   |
| 5M33.PDB | OD2, A_ASP_189 | N, A_HIS_191   | H, A_HIS_191    | 2.98    | 2.19    | 19.93                  |
| 5M33.PDB | OD2, A_ASP_128 | NE2, A_HIS_191 | HE2, A_HIS_191  | 2.76    | 2.00    | 23.16                  |
| 5M33.PDB | OD1, A_ASP_196 | NE2, A_GLN_192 | HE21, A_GLN_192 | 2.98    | 2.18    | 18.41                  |
| 5M33.PDB | OE1, A_GLU_188 | NZ, A_LYS_193  | HZ2, A_LYS_193  | 2.93    | 2.07    | 12.47                  |
| 5M33.PDB | O, A_CYS_190   | N, A_ILE_194   | H, A_ILE_194    | 2.89    | 2.07    | 15.58                  |
| 5M33.PDB | O, A_HIS_191   | N, A_ASP_195   | H, A_ASP_195    | 2.97    | 2.13    | 8.98                   |
| 5M33.PDB | O, A_GLN_192   | N, A_ASP_196   | H, A_ASP_196    | 2.88    | 2.06    | 14.98                  |
| 5M33.PDB | O, A_ASP_195   | N, A_SER_199   | H, A_SER_199    | 2.93    | 2.19    | 25.46                  |
| 5M33.PDB | O, A_ASP_196   | N, A_LYS_201   | H, A_LYS_201    | 2.86    | 2.03    | 14.10                  |
| 5M33.PDB | OE1, A_GLN_129 | N, B_VAL_114   | H, B_VAL_114    | 2.67    | 1.84    | 13.32                  |
| 5M33.PDB | OD1, B_ASN_115 | N, B_GLN_118   | H, B_GLN_118    | 2.98    | 2.19    | 19.82                  |
| 5M33.PDB | OD1, B_ASP_122 | NE2, B_GLN_118 | HE21, B_GLN_118 | 2.96    | 2.19    | 23.61                  |
| 5M33.PDB | O, B_GLN_118   | N, B_ASP_122   | H, B_ASP_122    | 2.94    | 2.12    | 14.74                  |
| 5M33.PDB | O, B_ILE_119   | N, B_VAL_123   | H, B_VAL_123    | 2.92    | 2.09    | 14.21                  |
| 5M33.PDB | O, B_ALA_120   | N, B_LYS_124   | H, B_LYS_124    | 2.95    | 2.13    | 13.05                  |
| 5M33.PDB | O, B_LYS_121   | N, B_GLN_125   | H, B_GLN_125    | 2.97    | 2.15    | 14.67                  |
| 5M33.PDB | O, B_ASP_122   | N, B_PHE_126   | H, B_PHE_126    | 2.83    | 2.02    | 16.58                  |
| 5M33.PDB | O, B_VAL_123   | N, B_TYR_127   | H, B_TYR_127    | 2.90    | 2.05    | 7.34                   |
| 5M33.PDB | NE2, B_HIS_151 | OH, B_TYR_127  | HH, B_TYR_127   | 2.78    | 1.94    | 5.42                   |

|          |                |                |                 |      |      |       |
|----------|----------------|----------------|-----------------|------|------|-------|
| 5M33.PDB | O, B_LYS_124   | N, B_ASP_128   | H, B_ASP_128    | 2.88 | 2.07 | 15.69 |
| 5M33.PDB | O, B_GLN_125   | N, B_GLN_129   | H, B_GLN_129    | 3.00 | 2.18 | 15.70 |
| 5M33.PDB | OE1, B_GLN_133 | NE2, B_GLN_129 | HE22, B_GLN_129 | 2.83 | 2.06 | 21.87 |
| 5M33.PDB | O, B_TYR_127   | N, B_LEU_131   | H, B_LEU_131    | 2.88 | 2.05 | 11.48 |
| 5M33.PDB | O, B_GLN_129   | N, B_GLN_133   | H, B_GLN_133    | 2.98 | 2.15 | 12.11 |
| 5M33.PDB | O, B_ALA_130   | N, B_ALA_134   | H, B_ALA_134    | 2.83 | 2.07 | 24.03 |
| 5M33.PDB | O, B_ALA_134   | NZ, B_LYS_144  | HZ2, B_LYS_144  | 2.73 | 1.99 | 28.33 |
| 5M33.PDB | O, B_ALA_143   | N, B_VAL_147   | H, B_VAL_147    | 2.84 | 1.99 | 5.95  |
| 5M33.PDB | O, B_LYS_144   | N, B_LYS_148   | H, B_LYS_148    | 2.93 | 2.08 | 9.25  |
| 5M33.PDB | O, B_ALA_145   | N, B_THR_149   | H, B_THR_149    | 2.93 | 2.11 | 14.19 |
| 5M33.PDB | O, B_ALA_145   | OG1, B_THR_149 | HG1, B_THR_149  | 2.85 | 2.11 | 23.29 |
| 5M33.PDB | O, B_VAL_146   | N, B_PHE_150   | H, B_PHE_150    | 2.93 | 2.09 | 9.45  |
| 5M33.PDB | O, B_VAL_147   | N, B_HIS_151   | H, B_HIS_151    | 2.93 | 2.09 | 11.38 |
| 5M33.PDB | O, B_LEU_174   | ND1, B_HIS_151 | HD1, B_HIS_151  | 2.74 | 1.90 | 9.06  |
| 5M33.PDB | O, B_LYS_148   | N, B_GLU_152   | H, B_GLU_152    | 2.91 | 2.08 | 12.10 |
| 5M33.PDB | O, B_THR_149   | N, B_THR_153   | H, B_THR_153    | 2.90 | 2.07 | 12.38 |
| 5M33.PDB | O, B_PHE_150   | N, B_LEU_154   | H, B_LEU_154    | 2.87 | 2.02 | 7.88  |
| 5M33.PDB | OD1, B_ASP_189 | N, B_SER_160   | H, B_SER_160    | 2.83 | 1.97 | 1.56  |
| 5M33.PDB | OD1, B_ASP_189 | OG, B_SER_160  | HG, B_SER_160   | 2.86 | 2.13 | 25.03 |
| 5M33.PDB | O, B_SER_159   | N, B_LEU_162   | H, B_LEU_162    | 2.96 | 2.12 | 9.23  |
| 5M33.PDB | O, B_LEU_162   | OG1, B_THR_166 | HG1, B_THR_166  | 2.89 | 2.08 | 13.11 |
| 5M33.PDB | O, B_THR_163   | N, B_THR_167   | H, B_THR_167    | 2.93 | 2.11 | 14.74 |
| 5M33.PDB | O, B_LEU_165   | N, B_VAL_169   | H, B_VAL_169    | 2.98 | 2.16 | 14.43 |
| 5M33.PDB | O, B_THR_167   | N, B_LYS_171   | H, B_LYS_171    | 2.99 | 2.26 | 27.58 |
| 5M33.PDB | O, B_SER_179   | N, B_SER_183   | H, B_SER_183    | 2.82 | 1.97 | 7.48  |
| 5M33.PDB | O, B_GLY_158   | N, B_CYS_190   | H, B_CYS_190    | 2.96 | 2.12 | 9.28  |
| 5M33.PDB | OD2, B_ASP_128 | NE2, B_HIS_191 | HE2, B_HIS_191  | 2.69 | 1.83 | 4.41  |
| 5M33.PDB | OD2, B_ASP_189 | N, B_GLN_192   | H, B_GLN_192    | 2.97 | 2.16 | 16.91 |
| 5M33.PDB | OD1, B_ASP_196 | NE2, B_GLN_192 | HE21, B_GLN_192 | 2.92 | 2.12 | 17.81 |
| 5M33.PDB | O, B_CYS_190   | N, B_ILE_194   | H, B_ILE_194    | 2.95 | 2.13 | 14.36 |
| 5M33.PDB | O, B_HIS_191   | N, B_ASP_195   | H, B_ASP_195    | 2.95 | 2.10 | 7.27  |
| 5M33.PDB | O, B_GLN_192   | N, B_ASP_196   | H, B_ASP_196    | 2.83 | 2.01 | 15.81 |
| 5M33.PDB | O, B_LYS_193   | N, B_LEU_197   | H, B_LEU_197    | 2.94 | 2.16 | 20.67 |
| 5M33.PDB | O, B_ASP_195   | N, B_SER_199   | H, B_SER_199    | 2.93 | 2.22 | 28.83 |
| 5M33.PDB | O, B_ASP_196   | N, B_LYS_201   | H, B_LYS_201    | 2.98 | 2.26 | 27.91 |

Table 1707: 5M33-specific side chain and main chain hydrogen bonding analysis. In this table, a PDB file is specified with a four-letter PDB ID, except that the names of the PDB files corresponding to the single NMR structural model split from the NMR ensemble is specified with a four-letter PDB ID in addition to a hyphen followed by the single NMR structural model numeric ID, the residue naming scheme is **Chain ID\_residue name\_residue number**,  $\angle ADH$  represents the angle formed by acceptor (A), donor (D) and hydrogen (H) ( $\angle ADH$ ).

| PDB      | Acceptor (A)   | Donor (D)      | Hydrogen (H)   | D-A (Å) | H-A (Å) | $\angle ADH(^{\circ})$ |
|----------|----------------|----------------|----------------|---------|---------|------------------------|
| 5M3D.PDB | O, A.ASP.117   | N, A.LYS.121   | H, A.LYS.121   | 2.91    | 2.07    | 9.22                   |
| 5M3D.PDB | O, A.GLN.118   | N, A.ASP.122   | H, A.ASP.122   | 2.83    | 1.99    | 10.35                  |
| 5M3D.PDB | O, A.ILE.119   | N, A.VAL.123   | H, A.VAL.123   | 2.80    | 2.00    | 16.75                  |
| 5M3D.PDB | O, A.ALA.120   | N, A.LYS.124   | H, A.LYS.124   | 2.87    | 2.02    | 7.87                   |
| 5M3D.PDB | OD2, A.ASP.195 | NZ, A.LYS.124  | HZ1, A.LYS.124 | 2.68    | 1.86    | 18.64                  |
| 5M3D.PDB | O, A.LYS.121   | N, A.GLN.125   | H, A.GLN.125   | 2.82    | 1.99    | 11.95                  |
| 5M3D.PDB | O, A.ASP.122   | N, A.PHE.126   | H, A.PHE.126   | 2.97    | 2.13    | 10.05                  |
| 5M3D.PDB | O, A.VAL.123   | N, A.TYR.127   | H, A.TYR.127   | 2.86    | 2.04    | 15.68                  |
| 5M3D.PDB | NE2, A.HIS.151 | OH, A.TYR.127  | HH, A.TYR.127  | 2.90    | 2.07    | 7.76                   |
| 5M3D.PDB | O, A.LYS.124   | N, A.ASP.128   | H, A.ASP.128   | 2.81    | 1.97    | 10.20                  |
| 5M3D.PDB | O, A.TYR.127   | N, A.LEU.131   | H, A.LEU.131   | 2.85    | 2.06    | 19.33                  |
| 5M3D.PDB | O, A.ASP.128   | N, A.GLN.132   | H, A.GLN.132   | 2.90    | 2.05    | 6.60                   |
| 5M3D.PDB | O, A.ALA.130   | N, A.ALA.134   | H, A.ALA.134   | 2.87    | 2.13    | 25.45                  |
| 5M3D.PDB | O, A.LEU.131   | N, A.VAL.135   | H, A.VAL.135   | 2.91    | 2.18    | 26.93                  |
| 5M3D.PDB | O, A.ALA.143   | N, A.VAL.147   | H, A.VAL.147   | 2.83    | 1.97    | 0.49                   |
| 5M3D.PDB | O, A.LYS.144   | N, A.LYS.148   | H, A.LYS.148   | 2.78    | 1.93    | 2.97                   |
| 5M3D.PDB | O, A.ALA.145   | N, A.THR.149   | H, A.THR.149   | 2.94    | 2.20    | 26.27                  |
| 5M3D.PDB | O, A.VAL.146   | N, A.PHE.150   | H, A.PHE.150   | 2.81    | 1.96    | 8.90                   |
| 5M3D.PDB | O, A.VAL.147   | N, A.HIS.151   | H, A.HIS.151   | 2.83    | 2.03    | 18.07                  |
| 5M3D.PDB | O, A.LEU.174   | ND1, A.HIS.151 | HD1, A.HIS.151 | 2.54    | 1.70    | 10.32                  |
| 5M3D.PDB | O, A.LYS.148   | N, A.GLU.152   | H, A.GLU.152   | 2.91    | 2.05    | 3.90                   |
| 5M3D.PDB | O, A.THR.149   | N, A.THR.153   | H, A.THR.153   | 2.94    | 2.14    | 17.42                  |
| 5M3D.PDB | O, A.THR.149   | OG1, A.THR.153 | HG1, A.THR.153 | 2.71    | 1.99    | 26.30                  |
| 5M3D.PDB | O, A.PHE.150   | N, A.LEU.154   | H, A.LEU.154   | 2.82    | 2.01    | 16.30                  |
| 5M3D.PDB | OG1, A.THR.163 | N, A.SER.160   | H, A.SER.160   | 2.68    | 1.93    | 24.41                  |
| 5M3D.PDB | OG, A.SER.159  | OG1, A.THR.163 | HG1, A.THR.163 | 2.65    | 1.81    | 3.28                   |
| 5M3D.PDB | O, A.SER.160   | N, A.ALA.164   | H, A.ALA.164   | 2.68    | 1.86    | 13.35                  |
| 5M3D.PDB | O, A.LEU.162   | N, A.THR.166   | H, A.THR.166   | 2.92    | 2.11    | 17.03                  |
| 5M3D.PDB | O, A.THR.163   | N, A.THR.167   | H, A.THR.167   | 2.80    | 1.97    | 12.32                  |
| 5M3D.PDB | O, A.THR.163   | OG1, A.THR.167 | HG1, A.THR.167 | 2.52    | 1.70    | 11.15                  |
| 5M3D.PDB | O, A.ALA.164   | N, A.SER.168   | H, A.SER.168   | 2.89    | 2.05    | 8.46                   |
| 5M3D.PDB | O, A.LEU.165   | OG, A.SER.168  | HG, A.SER.168  | 2.61    | 1.86    | 22.97                  |
| 5M3D.PDB | O, A.THR.166   | N, A.LEU.170   | H, A.LEU.170   | 2.78    | 1.95    | 12.52                  |
| 5M3D.PDB | O, A.THR.167   | N, A.LYS.171   | H, A.LYS.171   | 2.87    | 2.05    | 15.75                  |
| 5M3D.PDB | O, A.ASN.172   | N, A.CYS.175   | H, A.CYS.175   | 2.95    | 2.10    | 9.28                   |
| 5M3D.PDB | OE2, A.GLU.152 | N, A.SER.177   | H, A.SER.177   | 2.77    | 2.02    | 24.92                  |
| 5M3D.PDB | O, A.PRO.176   | N, A.SER.179   | H, A.SER.179   | 2.91    | 2.14    | 22.27                  |
| 5M3D.PDB | O, A.GLY.158   | N, A.CYS.190   | H, A.CYS.190   | 2.75    | 1.91    | 12.01                  |
| 5M3D.PDB | OD2, A.ASP.128 | NE2, A.HIS.191 | HE2, A.HIS.191 | 2.68    | 1.84    | 10.19                  |
| 5M3D.PDB | OD2, A.ASP.189 | N, A.GLN.192   | H, A.GLN.192   | 2.94    | 2.11    | 13.24                  |
| 5M3D.PDB | O, A.CYS.190   | N, A.ILE.194   | H, A.ILE.194   | 2.85    | 2.02    | 12.94                  |
| 5M3D.PDB | O, A.GLN.192   | N, A.ASP.196   | H, A.ASP.196   | 2.98    | 2.19    | 20.53                  |
| 5M3D.PDB | O, A.LYS.193   | N, A.LEU.197   | H, A.LEU.197   | 2.95    | 2.19    | 23.68                  |
| 5M3D.PDB | O, A.ASP.196   | N, A.GLY.200   | H, A.GLY.200   | 2.84    | 2.13    | 29.15                  |
| 5M3D.PDB | O, A.ASP.196   | N, A.LYS.201   | H, A.LYS.201   | 2.79    | 1.95    | 11.59                  |
| 5M3D.PDB | O, B.ASP.117   | N, B.LYS.121   | H, B.LYS.121   | 2.91    | 2.06    | 7.49                   |
| 5M3D.PDB | O, B.GLN.118   | N, B.ASP.122   | H, B.ASP.122   | 2.85    | 2.04    | 15.98                  |
| 5M3D.PDB | O, B.ILE.119   | N, B.VAL.123   | H, B.VAL.123   | 2.79    | 2.02    | 22.71                  |
| 5M3D.PDB | O, B.ALA.120   | N, B.LYS.124   | H, B.LYS.124   | 2.98    | 2.14    | 9.81                   |
| 5M3D.PDB | O, B.LYS.121   | N, B.GLN.125   | H, B.GLN.125   | 2.85    | 2.02    | 12.96                  |
| 5M3D.PDB | O, B.VAL.123   | N, B.TYR.127   | H, B.TYR.127   | 2.75    | 1.92    | 13.65                  |
| 5M3D.PDB | O, B.LYS.124   | N, B.ASP.128   | H, B.ASP.128   | 2.78    | 1.96    | 14.20                  |
| 5M3D.PDB | O, B.TYR.127   | N, B.LEU.131   | H, B.LEU.131   | 2.91    | 2.12    | 19.44                  |
| 5M3D.PDB | O, B.ASP.128   | N, B.GLN.132   | H, B.GLN.132   | 2.94    | 2.09    | 6.13                   |
| 5M3D.PDB | O, B.LEU.131   | N, B.VAL.135   | H, B.VAL.135   | 2.87    | 2.11    | 24.04                  |
| 5M3D.PDB | O, B.GLN.133   | N, B.ASP.137   | H, B.ASP.137   | 2.97    | 2.23    | 25.98                  |
| 5M3D.PDB | O, B.ALA.140   | N, B.LYS.144   | H, B.LYS.144   | 2.98    | 2.14    | 8.88                   |

|          |                |                |                |      |      |       |
|----------|----------------|----------------|----------------|------|------|-------|
| 5M3D.PDB | O, B.ALA.143   | N, B.VAL.147   | H, B.VAL.147   | 2.86 | 2.01 | 7.67  |
| 5M3D.PDB | O, B.LYS.144   | N, B.LYS.148   | H, B.LYS.148   | 2.88 | 2.04 | 10.53 |
| 5M3D.PDB | O, B.ALA.145   | N, B.THR.149   | H, B.THR.149   | 2.92 | 2.16 | 24.76 |
| 5M3D.PDB | O, B.ALA.145   | OG1, B.THR.149 | HG1, B.THR.149 | 2.92 | 2.10 | 9.10  |
| 5M3D.PDB | O, B.VAL.146   | N, B.PHE.150   | H, B.PHE.150   | 2.87 | 2.03 | 11.14 |
| 5M3D.PDB | O, B.VAL.147   | N, B.HIS.151   | H, B.HIS.151   | 2.90 | 2.05 | 8.21  |
| 5M3D.PDB | O, B.LEU.174   | ND1, B.HIS.151 | HD1, B.HIS.151 | 2.69 | 1.87 | 15.29 |
| 5M3D.PDB | O, B.LYS.148   | N, B.GLU.152   | H, B.GLU.152   | 2.90 | 2.06 | 9.45  |
| 5M3D.PDB | O, B.THR.149   | N, B.THR.153   | H, B.THR.153   | 2.76 | 1.95 | 16.27 |
| 5M3D.PDB | O, B.THR.149   | OG1, B.THR.153 | HG1, B.THR.153 | 2.68 | 1.93 | 21.92 |
| 5M3D.PDB | O, B.PHE.150   | N, B.LEU.154   | H, B.LEU.154   | 2.72 | 1.93 | 19.17 |
| 5M3D.PDB | OG1, B.THR.163 | N, B.SER.160   | H, B.SER.160   | 2.60 | 1.81 | 18.90 |
| 5M3D.PDB | O, B.SER.160   | N, B.ALA.164   | H, B.ALA.164   | 2.64 | 1.86 | 20.55 |
| 5M3D.PDB | O, B.LEU.162   | N, B.THR.166   | H, B.THR.166   | 2.88 | 2.06 | 14.51 |
| 5M3D.PDB | O, B.THR.163   | N, B.THR.167   | H, B.THR.167   | 2.95 | 2.11 | 9.70  |
| 5M3D.PDB | O, B.THR.163   | OG1, B.THR.167 | HG1, B.THR.167 | 2.62 | 1.82 | 14.83 |
| 5M3D.PDB | O, B.ALA.164   | N, B.SER.168   | H, B.SER.168   | 2.95 | 2.12 | 11.19 |
| 5M3D.PDB | O, B.LEU.165   | N, B.VAL.169   | H, B.VAL.169   | 2.95 | 2.20 | 25.38 |
| 5M3D.PDB | O, B.THR.166   | N, B.LEU.170   | H, B.LEU.170   | 2.72 | 1.93 | 19.91 |
| 5M3D.PDB | O, B.THR.167   | N, B.LYS.171   | H, B.LYS.171   | 2.71 | 1.87 | 9.68  |
| 5M3D.PDB | O, B.LYS.171   | N, B.LEU.174   | H, B.LEU.174   | 2.95 | 2.14 | 16.60 |
| 5M3D.PDB | O, B.PRO.176   | OG, B.SER.179  | HG, B.SER.179  | 2.60 | 1.81 | 16.72 |
| 5M3D.PDB | O, B.ILE.181   | N, B.ASN.184   | H, B.ASN.184   | 2.99 | 2.21 | 20.02 |
| 5M3D.PDB | O, B.ILE.182   | N, B.LEU.185   | H, B.LEU.185   | 2.82 | 1.98 | 10.54 |
| 5M3D.PDB | O, B.GLY.158   | N, B.CYS.190   | H, B.CYS.190   | 2.80 | 1.94 | 4.10  |
| 5M3D.PDB | OD2, B.ASP.128 | NE2, B.HIS.191 | HE2, B.HIS.191 | 2.60 | 1.78 | 15.29 |
| 5M3D.PDB | OD2, B.ASP.189 | N, B.GLN.192   | H, B.GLN.192   | 2.93 | 2.11 | 13.82 |
| 5M3D.PDB | O, B.CYS.190   | N, B.ILE.194   | H, B.ILE.194   | 2.95 | 2.12 | 12.39 |
| 5M3D.PDB | O, B.GLN.192   | N, B.ASP.196   | H, B.ASP.196   | 2.84 | 2.02 | 14.80 |
| 5M3D.PDB | O, B.LYS.193   | N, B.LEU.197   | H, B.LEU.197   | 2.93 | 2.17 | 22.99 |
| 5M3D.PDB | O, B.ASP.195   | N, B.SER.199   | H, B.SER.199   | 2.86 | 2.15 | 29.72 |
| 5M3D.PDB | O, B.ASP.195   | OG, B.SER.199  | HG, B.SER.199  | 2.55 | 1.74 | 13.09 |
| 5M3D.PDB | O, B.ASP.196   | N, B.LYS.201   | H, B.LYS.201   | 2.86 | 2.06 | 19.17 |
| 5M3D.PDB | OD1, C.ASN.115 | N, C.ASP.117   | H, C.ASP.117   | 2.96 | 2.17 | 19.69 |
| 5M3D.PDB | O, C.ILE.119   | N, C.VAL.123   | H, C.VAL.123   | 2.94 | 2.22 | 28.48 |
| 5M3D.PDB | O, C.ALA.120   | N, C.LYS.124   | H, C.LYS.124   | 2.91 | 2.07 | 9.91  |
| 5M3D.PDB | O, C.LYS.121   | N, C.GLN.125   | H, C.GLN.125   | 2.85 | 2.05 | 17.95 |
| 5M3D.PDB | O, C.VAL.123   | N, C.TYR.127   | H, C.TYR.127   | 2.85 | 2.00 | 5.96  |
| 5M3D.PDB | O, C.LYS.124   | N, C.ASP.128   | H, C.ASP.128   | 2.86 | 2.05 | 16.00 |
| 5M3D.PDB | O, C.GLN.125   | N, C.GLN.129   | H, C.GLN.129   | 2.82 | 2.03 | 19.59 |
| 5M3D.PDB | O, C.TYR.127   | N, C.LEU.131   | H, C.LEU.131   | 2.81 | 1.98 | 13.11 |
| 5M3D.PDB | O, C.ASP.128   | N, C.GLN.132   | H, C.GLN.132   | 2.89 | 2.04 | 7.47  |
| 5M3D.PDB | O, C.ALA.130   | N, C.ALA.134   | H, C.ALA.134   | 2.74 | 1.97 | 21.94 |
| 5M3D.PDB | O, C.LEU.131   | N, C.VAL.135   | H, C.VAL.135   | 2.89 | 2.05 | 11.04 |
| 5M3D.PDB | O, C.ALA.134   | N, C.ASP.137   | H, C.ASP.137   | 2.88 | 2.05 | 12.98 |
| 5M3D.PDB | O, C.ASP.139   | N, C.ASN.142   | H, C.ASN.142   | 2.98 | 2.16 | 15.52 |
| 5M3D.PDB | O, C.ALA.143   | N, C.VAL.147   | H, C.VAL.147   | 2.88 | 2.05 | 12.04 |
| 5M3D.PDB | O, C.ALA.145   | N, C.THR.149   | H, C.THR.149   | 2.76 | 1.97 | 19.10 |
| 5M3D.PDB | O, C.ALA.145   | OG1, C.THR.149 | HG1, C.THR.149 | 2.85 | 2.04 | 10.77 |
| 5M3D.PDB | O, C.VAL.146   | N, C.PHE.150   | H, C.PHE.150   | 2.86 | 2.02 | 10.98 |
| 5M3D.PDB | O, C.VAL.147   | N, C.HIS.151   | H, C.HIS.151   | 2.93 | 2.10 | 13.09 |
| 5M3D.PDB | O, C.LEU.174   | ND1, C.HIS.151 | HD1, C.HIS.151 | 2.77 | 1.93 | 9.75  |
| 5M3D.PDB | OH, C.TYR.127  | NE2, C.HIS.151 | HE2, C.HIS.151 | 2.47 | 1.64 | 11.96 |
| 5M3D.PDB | O, C.LYS.148   | N, C.GLU.152   | H, C.GLU.152   | 2.93 | 2.07 | 6.86  |
| 5M3D.PDB | O, C.THR.149   | N, C.THR.153   | H, C.THR.153   | 2.90 | 2.09 | 16.64 |
| 5M3D.PDB | O, C.THR.149   | OG1, C.THR.153 | HG1, C.THR.153 | 2.82 | 2.11 | 26.57 |
| 5M3D.PDB | O, C.PHE.150   | N, C.LEU.154   | H, C.LEU.154   | 2.84 | 2.09 | 25.26 |
| 5M3D.PDB | O, C.SER.160   | N, C.ALA.164   | H, C.ALA.164   | 2.77 | 1.96 | 15.47 |

|          |                |                |                |      |      |       |
|----------|----------------|----------------|----------------|------|------|-------|
| 5M3D.PDB | O, C.THR.161   | N, C.LEU.165   | H, C.LEU.165   | 2.92 | 2.11 | 16.78 |
| 5M3D.PDB | O, C.LEU.162   | N, C.THR.166   | H, C.THR.166   | 2.96 | 2.13 | 14.34 |
| 5M3D.PDB | O, C.LEU.162   | OG1, C.THR.166 | HG1, C.THR.166 | 2.66 | 1.88 | 17.50 |
| 5M3D.PDB | O, C.THR.163   | N, C.THR.167   | H, C.THR.167   | 2.83 | 2.02 | 16.33 |
| 5M3D.PDB | O, C.ALA.164   | N, C.SER.168   | H, C.SER.168   | 2.89 | 2.05 | 9.74  |
| 5M3D.PDB | O, C.LEU.165   | N, C.VAL.169   | H, C.VAL.169   | 2.92 | 2.16 | 23.23 |
| 5M3D.PDB | O, C.THR.166   | N, C.LEU.170   | H, C.LEU.170   | 2.78 | 2.00 | 20.88 |
| 5M3D.PDB | O, C.THR.167   | N, C.LYS.171   | H, C.LYS.171   | 2.57 | 1.75 | 15.04 |
| 5M3D.PDB | O, C.LYS.171   | N, C.LEU.174   | H, C.LEU.174   | 2.84 | 1.99 | 6.87  |
| 5M3D.PDB | OE2, C.GLU.152 | N, C.SER.177   | H, C.SER.177   | 2.69 | 1.86 | 11.04 |
| 5M3D.PDB | O, C.PRO.176   | N, C.SER.179   | H, C.SER.179   | 2.93 | 2.13 | 18.85 |
| 5M3D.PDB | O, C.SER.183   | N, C.LYS.187   | H, C.LYS.187   | 2.80 | 1.94 | 3.39  |
| 5M3D.PDB | O, C.GLY.158   | N, C.CYS.190   | H, C.CYS.190   | 2.73 | 1.88 | 7.85  |
| 5M3D.PDB | OD2, C.ASP.128 | NE2, C.HIS.191 | HE2, C.HIS.191 | 2.54 | 1.74 | 17.73 |
| 5M3D.PDB | OD2, C.ASP.189 | N, C.GLN.192   | H, C.GLN.192   | 2.80 | 1.97 | 13.12 |
| 5M3D.PDB | O, C.CYS.190   | N, C.ILE.194   | H, C.ILE.194   | 2.91 | 2.07 | 10.39 |
| 5M3D.PDB | O, C.GLN.192   | N, C.ASP.196   | H, C.ASP.196   | 3.00 | 2.18 | 15.71 |
| 5M3D.PDB | O, C.LYS.193   | N, C.LEU.197   | H, C.LEU.197   | 2.84 | 2.09 | 24.23 |
| 5M3D.PDB | O, C.ILE.194   | N, C.PHE.198   | H, C.PHE.198   | 2.99 | 2.20 | 19.69 |
| 5M3D.PDB | O, C.ASP.195   | N, C.SER.199   | H, C.SER.199   | 2.70 | 2.00 | 29.60 |
| 5M3D.PDB | O, C.ASP.196   | N, C.GLY.200   | H, C.GLY.200   | 2.91 | 2.19 | 27.12 |
| 5M3D.PDB | O, C.ASP.196   | N, C.LYS.201   | H, C.LYS.201   | 2.94 | 2.12 | 15.69 |
| 5M3D.PDB | O, D.LYS.116   | N, D.ALA.120   | H, D.ALA.120   | 2.96 | 2.12 | 9.84  |
| 5M3D.PDB | O, D.ASP.117   | N, D.LYS.121   | H, D.LYS.121   | 2.91 | 2.07 | 10.71 |
| 5M3D.PDB | O, D.GLN.118   | N, D.ASP.122   | H, D.ASP.122   | 2.91 | 2.16 | 24.90 |
| 5M3D.PDB | O, D.ILE.119   | N, D.VAL.123   | H, D.VAL.123   | 2.93 | 2.21 | 28.37 |
| 5M3D.PDB | O, D.LYS.121   | N, D.GLN.125   | H, D.GLN.125   | 2.91 | 2.11 | 17.36 |
| 5M3D.PDB | O, D.ASP.122   | N, D.PHE.126   | H, D.PHE.126   | 2.97 | 2.18 | 20.39 |
| 5M3D.PDB | O, D.VAL.123   | N, D.TYR.127   | H, D.TYR.127   | 2.77 | 1.93 | 9.04  |
| 5M3D.PDB | O, D.LYS.124   | N, D.ASP.128   | H, D.ASP.128   | 2.88 | 2.02 | 2.98  |
| 5M3D.PDB | O, D.GLN.125   | N, D.GLN.129   | H, D.GLN.129   | 2.86 | 2.07 | 19.17 |
| 5M3D.PDB | O, D.TYR.127   | N, D.LEU.131   | H, D.LEU.131   | 2.78 | 1.93 | 8.17  |
| 5M3D.PDB | O, D.ASP.128   | N, D.GLN.132   | H, D.GLN.132   | 2.90 | 2.06 | 10.99 |
| 5M3D.PDB | O, D.ALA.130   | N, D.ALA.134   | H, D.ALA.134   | 2.62 | 1.92 | 29.22 |
| 5M3D.PDB | O, D.ALA.134   | N, D.ASP.137   | H, D.ASP.137   | 2.77 | 1.92 | 5.77  |
| 5M3D.PDB | OD1, D.ASP.139 | N, D.LYS.144   | H, D.LYS.144   | 2.75 | 1.89 | 6.98  |
| 5M3D.PDB | O, D.ALA.143   | N, D.VAL.147   | H, D.VAL.147   | 2.90 | 2.06 | 10.59 |
| 5M3D.PDB | O, D.ALA.145   | N, D.THR.149   | H, D.THR.149   | 2.80 | 2.05 | 24.05 |
| 5M3D.PDB | O, D.ALA.145   | OG1, D.THR.149 | HG1, D.THR.149 | 2.76 | 1.96 | 14.72 |
| 5M3D.PDB | O, D.VAL.146   | N, D.PHE.150   | H, D.PHE.150   | 2.91 | 2.07 | 9.79  |
| 5M3D.PDB | O, D.VAL.147   | N, D.HIS.151   | H, D.HIS.151   | 2.81 | 1.99 | 13.17 |
| 5M3D.PDB | O, D.LEU.174   | ND1, D.HIS.151 | HD1, D.HIS.151 | 2.86 | 2.05 | 15.14 |
| 5M3D.PDB | O, D.THR.149   | N, D.THR.153   | H, D.THR.153   | 2.95 | 2.11 | 9.66  |
| 5M3D.PDB | O, D.THR.149   | OG1, D.THR.153 | HG1, D.THR.153 | 2.80 | 2.08 | 26.61 |
| 5M3D.PDB | O, D.PHE.150   | N, D.LEU.154   | H, D.LEU.154   | 2.86 | 2.05 | 16.07 |
| 5M3D.PDB | O, D.SER.160   | N, D.ALA.164   | H, D.ALA.164   | 2.69 | 1.86 | 12.75 |
| 5M3D.PDB | O, D.THR.161   | N, D.LEU.165   | H, D.LEU.165   | 2.89 | 2.08 | 15.84 |
| 5M3D.PDB | O, D.LEU.162   | N, D.THR.166   | H, D.THR.166   | 2.90 | 2.06 | 10.23 |
| 5M3D.PDB | O, D.THR.163   | N, D.THR.167   | H, D.THR.167   | 2.74 | 1.91 | 11.96 |
| 5M3D.PDB | O, D.THR.163   | OG1, D.THR.167 | HG1, D.THR.167 | 2.95 | 2.24 | 27.05 |
| 5M3D.PDB | O, D.ALA.164   | N, D.SER.168   | H, D.SER.168   | 2.84 | 2.03 | 16.52 |
| 5M3D.PDB | O, D.LEU.165   | N, D.VAL.169   | H, D.VAL.169   | 2.95 | 2.18 | 22.42 |
| 5M3D.PDB | O, D.THR.166   | N, D.LEU.170   | H, D.LEU.170   | 2.84 | 2.04 | 17.12 |
| 5M3D.PDB | O, D.THR.167   | N, D.LYS.171   | H, D.LYS.171   | 2.56 | 1.77 | 19.83 |
| 5M3D.PDB | O, D.LYS.171   | N, D.LEU.174   | H, D.LEU.174   | 2.77 | 1.92 | 4.36  |
| 5M3D.PDB | O, D.PRO.176   | OG, D.SER.179  | HG, D.SER.179  | 2.66 | 1.84 | 11.66 |
| 5M3D.PDB | O, D.ASN.180   | OG, D.SER.183  | HG, D.SER.183  | 2.86 | 2.12 | 23.28 |
| 5M3D.PDB | O, D.ILE.182   | N, D.LEU.185   | H, D.LEU.185   | 2.97 | 2.13 | 11.47 |

|          |                |                |                |      |      |       |
|----------|----------------|----------------|----------------|------|------|-------|
| 5M3D.PDB | O, D_SER_183   | N, D_LYS_187   | H, D_LYS_187   | 2.96 | 2.10 | 3.55  |
| 5M3D.PDB | OE1, D_GLN_192 | N, D_ASP_189   | H, D_ASP_189   | 2.76 | 1.94 | 13.89 |
| 5M3D.PDB | O, D_GLY_158   | N, D_CYS_190   | H, D_CYS_190   | 2.79 | 1.94 | 7.19  |
| 5M3D.PDB | OD2, D_ASP_128 | NE2, D_HIS_191 | HE2, D_HIS_191 | 2.53 | 1.71 | 14.84 |
| 5M3D.PDB | OD2, D_ASP_189 | N, D_GLN_192   | H, D_GLN_192   | 2.82 | 1.99 | 12.15 |
| 5M3D.PDB | O, D_CYS_190   | N, D_ILE_194   | H, D_ILE_194   | 2.85 | 2.03 | 13.91 |
| 5M3D.PDB | O, D_GLN_192   | N, D_ASP_196   | H, D_ASP_196   | 2.90 | 2.15 | 24.84 |
| 5M3D.PDB | O, D_LYS_193   | N, D_LEU_197   | H, D_LEU_197   | 2.84 | 2.06 | 21.13 |
| 5M3D.PDB | O, D_ASP_196   | N, D_GLY_200   | H, D_GLY_200   | 2.79 | 2.05 | 26.33 |
| 5M3D.PDB | O, D_ASP_196   | N, D_LYS_201   | H, D_LYS_201   | 2.96 | 2.14 | 14.32 |

Table 1708: 5M3D-specific side chain and main chain hydrogen bonding analysis. In this table, a PDB file is specified with a four-letter PDB ID, except that the names of the PDB files corresponding to the single NMR structural model split from the NMR ensemble is specified with a four-letter PDB ID in addition to a hyphen followed by the single NMR structural model numeric ID, the residue naming scheme is **Chain ID\_residue name\_residue number**,  $\angle ADH$  represents the angle formed by acceptor (A), donor (D) and hydrogen (H) ( $\angle ADH$ ).

| PDB      | Acceptor (A)   | Donor (D)      | Hydrogen (H)   | D-A (Å) | H-A (Å) | $\angle ADH(^{\circ})$ |
|----------|----------------|----------------|----------------|---------|---------|------------------------|
| 5M3T.PDB | O, A.ASN.115   | N, A.ILE.119   | H, A.ILE.119   | 2.94    | 2.13    | 16.30                  |
| 5M3T.PDB | O, A.GLN.118   | N, A.ASP.122   | H, A.ASP.122   | 2.97    | 2.19    | 21.02                  |
| 5M3T.PDB | O, A.ILE.119   | N, A.VAL.123   | H, A.VAL.123   | 2.95    | 2.14    | 16.63                  |
| 5M3T.PDB | O, A.ASP.122   | N, A.PHE.126   | H, A.PHE.126   | 2.88    | 2.06    | 13.64                  |
| 5M3T.PDB | O, A.VAL.123   | N, A.TYR.127   | H, A.TYR.127   | 2.88    | 2.09    | 19.10                  |
| 5M3T.PDB | NE2, A.HIS.151 | OH, A.TYR.127  | HH, A.TYR.127  | 2.73    | 1.92    | 14.40                  |
| 5M3T.PDB | O, A.LYS.124   | N, A.ASP.128   | H, A.ASP.128   | 2.86    | 2.07    | 18.62                  |
| 5M3T.PDB | O, A.GLN.125   | N, A.GLN.129   | H, A.GLN.129   | 2.97    | 2.16    | 16.06                  |
| 5M3T.PDB | O, A.TYR.127   | N, A.LEU.131   | H, A.LEU.131   | 2.89    | 2.07    | 15.58                  |
| 5M3T.PDB | O, A.ALA.130   | N, A.ALA.134   | H, A.ALA.134   | 2.77    | 2.03    | 25.75                  |
| 5M3T.PDB | O, A.ALA.140   | N, A.LYS.144   | H, A.LYS.144   | 2.98    | 2.17    | 17.68                  |
| 5M3T.PDB | O, A.ASN.142   | N, A.VAL.146   | H, A.VAL.146   | 2.80    | 1.98    | 15.12                  |
| 5M3T.PDB | O, A.ALA.143   | N, A.VAL.147   | H, A.VAL.147   | 2.84    | 1.99    | 7.75                   |
| 5M3T.PDB | O, A.LYS.144   | N, A.LYS.148   | H, A.LYS.148   | 2.91    | 2.07    | 11.07                  |
| 5M3T.PDB | O, A.ALA.145   | N, A.THR.149   | H, A.THR.149   | 2.85    | 2.06    | 19.94                  |
| 5M3T.PDB | O, A.ALA.145   | OG1, A.THR.149 | HG1, A.THR.149 | 2.69    | 1.91    | 17.48                  |
| 5M3T.PDB | O, A.VAL.146   | N, A.PHE.150   | H, A.PHE.150   | 2.91    | 2.08    | 11.96                  |
| 5M3T.PDB | O, A.VAL.147   | N, A.HIS.151   | H, A.HIS.151   | 2.93    | 2.10    | 13.01                  |
| 5M3T.PDB | O, A.LEU.174   | ND1, A.HIS.151 | HD1, A.HIS.151 | 2.75    | 1.93    | 15.38                  |
| 5M3T.PDB | O, A.LYS.148   | N, A.GLU.152   | H, A.GLU.152   | 2.97    | 2.16    | 17.30                  |
| 5M3T.PDB | O, A.THR.149   | N, A.THR.153   | H, A.THR.153   | 2.89    | 2.07    | 15.13                  |
| 5M3T.PDB | O, A.THR.149   | OG1, A.THR.153 | HG1, A.THR.153 | 2.85    | 2.15    | 27.69                  |
| 5M3T.PDB | O, A.GLU.188   | N, A.CYS.157   | H, A.CYS.157   | 2.99    | 2.17    | 14.35                  |
| 5M3T.PDB | OD2, A.ASP.189 | N, A.SER.160   | H, A.SER.160   | 2.80    | 1.94    | 2.42                   |
| 5M3T.PDB | OG, A.SER.159  | OG1, A.THR.161 | HG1, A.THR.161 | 2.93    | 2.10    | 8.83                   |
| 5M3T.PDB | O, A.SER.159   | N, A.LEU.162   | H, A.LEU.162   | 3.00    | 2.15    | 8.92                   |
| 5M3T.PDB | O, A.LEU.162   | N, A.THR.166   | H, A.THR.166   | 2.96    | 2.13    | 13.96                  |
| 5M3T.PDB | O, A.LEU.162   | OG1, A.THR.166 | HG1, A.THR.166 | 2.89    | 2.11    | 19.45                  |
| 5M3T.PDB | O, A.THR.163   | N, A.THR.167   | H, A.THR.167   | 2.97    | 2.15    | 13.47                  |
| 5M3T.PDB | O, A.LEU.165   | N, A.VAL.169   | H, A.VAL.169   | 2.96    | 2.14    | 13.88                  |
| 5M3T.PDB | O, A.THR.166   | N, A.LEU.170   | H, A.LEU.170   | 2.99    | 2.16    | 12.64                  |
| 5M3T.PDB | O, A.VAL.169   | N, A.LEU.174   | H, A.LEU.174   | 2.96    | 2.11    | 5.74                   |
| 5M3T.PDB | O, A.ILE.182   | N, A.PHE.186   | H, A.PHE.186   | 2.70    | 1.92    | 20.08                  |
| 5M3T.PDB | O, A.GLY.158   | N, A.CYS.190   | H, A.CYS.190   | 2.89    | 2.03    | 5.47                   |
| 5M3T.PDB | OD1, A.ASP.189 | N, A.HIS.191   | H, A.HIS.191   | 2.81    | 2.03    | 20.34                  |
| 5M3T.PDB | OD1, A.ASP.128 | NE2, A.HIS.191 | HE2, A.HIS.191 | 2.70    | 1.84    | 4.47                   |
| 5M3T.PDB | O, A.ASP.189   | N, A.LYS.193   | H, A.LYS.193   | 3.00    | 2.19    | 17.82                  |
| 5M3T.PDB | O, A.ASP.155   | NZ, A.LYS.193  | HZ1, A.LYS.193 | 2.94    | 2.21    | 29.02                  |
| 5M3T.PDB | O, A.CYS.190   | N, A.ILE.194   | H, A.ILE.194   | 2.88    | 2.04    | 11.45                  |
| 5M3T.PDB | O, A.HIS.191   | N, A.ASP.195   | H, A.ASP.195   | 2.95    | 2.12    | 14.00                  |
| 5M3T.PDB | O, A.GLN.192   | N, A.ASP.196   | H, A.ASP.196   | 2.79    | 2.00    | 19.02                  |
| 5M3T.PDB | O, A.LYS.193   | N, A.LEU.197   | H, A.LEU.197   | 2.95    | 2.23    | 28.39                  |
| 5M3T.PDB | O, B.ILE.119   | N, B.VAL.123   | H, B.VAL.123   | 2.98    | 2.18    | 17.74                  |
| 5M3T.PDB | OD2, B.ASP.195 | NZ, B.LYS.124  | HZ1, B.LYS.124 | 2.94    | 2.15    | 23.24                  |
| 5M3T.PDB | O, B.ASP.122   | N, B.PHE.126   | H, B.PHE.126   | 2.88    | 2.07    | 16.55                  |
| 5M3T.PDB | O, B.VAL.123   | N, B.TYR.127   | H, B.TYR.127   | 2.81    | 1.99    | 15.05                  |
| 5M3T.PDB | NE2, B.HIS.151 | OH, B.TYR.127  | HH, B.TYR.127  | 2.86    | 2.03    | 6.62                   |
| 5M3T.PDB | O, B.LYS.124   | N, B.ASP.128   | H, B.ASP.128   | 2.79    | 1.96    | 14.44                  |
| 5M3T.PDB | O, B.TYR.127   | N, B.LEU.131   | H, B.LEU.131   | 2.74    | 1.91    | 11.63                  |
| 5M3T.PDB | O, B.ASP.128   | N, B.GLN.132   | H, B.GLN.132   | 2.93    | 2.08    | 4.43                   |
| 5M3T.PDB | O, B.ALA.130   | N, B.ALA.134   | H, B.ALA.134   | 2.82    | 2.01    | 17.03                  |
| 5M3T.PDB | O, B.LEU.131   | N, B.VAL.135   | H, B.VAL.135   | 2.93    | 2.13    | 18.76                  |
| 5M3T.PDB | O, B.ALA.140   | N, B.LYS.144   | H, B.LYS.144   | 2.99    | 2.13    | 5.84                   |
| 5M3T.PDB | O, B.ASN.142   | N, B.VAL.146   | H, B.VAL.146   | 2.82    | 1.98    | 10.01                  |
| 5M3T.PDB | O, B.ALA.143   | N, B.VAL.147   | H, B.VAL.147   | 2.79    | 1.96    | 12.14                  |
| 5M3T.PDB | O, B.LYS.144   | N, B.LYS.148   | H, B.LYS.148   | 2.86    | 2.03    | 12.94                  |
| 5M3T.PDB | O, B.CYS.175   | NZ, B.LYS.148  | HZ1, B.LYS.148 | 2.54    | 1.78    | 25.33                  |

|          |                |                |                 |      |      |       |
|----------|----------------|----------------|-----------------|------|------|-------|
| 5M3T.PDB | O, B_ASN_173   | NZ, B_LYS_148  | HZ2, B_LYS_148  | 2.88 | 2.03 | 13.59 |
| 5M3T.PDB | O, B_ALA_145   | N, B_THR_149   | H, B_THR_149    | 2.96 | 2.15 | 16.07 |
| 5M3T.PDB | O, B_ALA_145   | OG1, B_THR_149 | HG1, B_THR_149  | 2.88 | 2.12 | 22.32 |
| 5M3T.PDB | O, B_VAL_146   | N, B_PHE_150   | H, B_PHE_150    | 2.92 | 2.09 | 12.17 |
| 5M3T.PDB | O, B_VAL_147   | N, B_HIS_151   | H, B_HIS_151    | 2.86 | 2.03 | 12.60 |
| 5M3T.PDB | O, B_LEU_174   | ND1, B_HIS_151 | HD1, B_HIS_151  | 2.62 | 1.77 | 9.06  |
| 5M3T.PDB | O, B_LYS_148   | N, B_GLU_152   | H, B_GLU_152    | 2.91 | 2.09 | 13.59 |
| 5M3T.PDB | O, B_THR_149   | N, B_THR_153   | H, B_THR_153    | 2.94 | 2.11 | 13.14 |
| 5M3T.PDB | O, B_THR_149   | OG1, B_THR_153 | HG1, B_THR_153  | 2.80 | 2.10 | 28.85 |
| 5M3T.PDB | O, B_PHE_150   | N, B_LEU_154   | H, B_LEU_154    | 2.95 | 2.15 | 17.32 |
| 5M3T.PDB | OG1, B_THR_163 | N, B_SER_160   | H, B_SER_160    | 2.86 | 2.05 | 16.20 |
| 5M3T.PDB | O, B_SER_160   | N, B_ALA_164   | H, B_ALA_164    | 2.90 | 2.11 | 19.32 |
| 5M3T.PDB | O, B_THR_161   | N, B_LEU_165   | H, B_LEU_165    | 2.94 | 2.12 | 14.02 |
| 5M3T.PDB | O, B_LEU_162   | N, B_THR_166   | H, B_THR_166    | 2.99 | 2.17 | 13.93 |
| 5M3T.PDB | O, B_LEU_162   | OG1, B_THR_166 | HG1, B_THR_166  | 2.94 | 2.16 | 18.55 |
| 5M3T.PDB | O, B_THR_163   | N, B_THR_167   | H, B_THR_167    | 2.90 | 2.06 | 9.78  |
| 5M3T.PDB | O, B_THR_163   | OG1, B_THR_167 | HG1, B_THR_167  | 2.66 | 1.89 | 19.90 |
| 5M3T.PDB | O, B_ALA_164   | N, B_SER_168   | H, B_SER_168    | 2.96 | 2.19 | 22.50 |
| 5M3T.PDB | O, B_LEU_165   | OG, B_SER_168  | HG, B_SER_168   | 2.85 | 2.06 | 16.49 |
| 5M3T.PDB | O, B_THR_166   | N, B_LEU_170   | H, B_LEU_170    | 2.88 | 2.10 | 19.82 |
| 5M3T.PDB | O, B_THR_167   | N, B_LYS_171   | H, B_LYS_171    | 2.76 | 1.95 | 17.26 |
| 5M3T.PDB | O, B_SER_168   | ND2, B_ASN_172 | HD21, B_ASN_172 | 2.93 | 2.11 | 14.38 |
| 5M3T.PDB | O, B_ASN_172   | N, B_CYS_175   | H, B_CYS_175    | 2.85 | 2.01 | 8.34  |
| 5M3T.PDB | O, B_ILE_181   | N, B_ASN_184   | H, B_ASN_184    | 2.85 | 2.05 | 18.46 |
| 5M3T.PDB | O, B_SER_183   | N, B_LYS_187   | H, B_LYS_187    | 2.83 | 2.00 | 12.69 |
| 5M3T.PDB | OE1, B_GLN_192 | N, B_ASP_189   | H, B_ASP_189    | 2.94 | 2.14 | 17.48 |
| 5M3T.PDB | O, B_GLY_158   | N, B_CYS_190   | H, B_CYS_190    | 2.83 | 1.97 | 6.16  |
| 5M3T.PDB | OD1, B_ASP_128 | NE2, B_HIS_191 | HE2, B_HIS_191  | 2.76 | 1.92 | 11.16 |
| 5M3T.PDB | OD1, B_ASP_189 | N, B_GLN_192   | H, B_GLN_192    | 2.85 | 2.02 | 14.15 |
| 5M3T.PDB | O, B_LEU_154   | NZ, B_LYS_193  | HZ2, B_LYS_193  | 2.66 | 1.92 | 28.24 |
| 5M3T.PDB | O, B_CYS_190   | N, B_ILE_194   | H, B_ILE_194    | 2.86 | 2.09 | 22.77 |
| 5M3T.PDB | O, B_HIS_191   | N, B_ASP_195   | H, B_ASP_195    | 2.99 | 2.18 | 15.97 |
| 5M3T.PDB | O, B_GLN_192   | N, B_ASP_196   | H, B_ASP_196    | 2.98 | 2.18 | 17.63 |
| 5M3T.PDB | O, B_ASP_195   | OG, B_SER_199  | HG, B_SER_199   | 2.82 | 2.09 | 24.74 |

Table 1709: 5M3T-specific side chain and main chain hydrogen bonding analysis. In this table, a PDB file is specified with a four-letter PDB ID, except that the names of the PDB files corresponding to the single NMR structural model split from the NMR ensemble is specified with a four-letter PDB ID in addition to a hyphen followed by the single NMR structural model numeric ID, the residue naming scheme is **Chain ID\_residue name\_residue number**,  $\angle ADH$  represents the angle formed by acceptor (A), donor (D) and hydrogen (H) ( $\angle ADH$ ).



| PDB      | Acceptor (A)   | Donor (D)      | Hydrogen (H)   | D-A (Å) | H-A (Å) | $\angle ADH(^{\circ})$ |
|----------|----------------|----------------|----------------|---------|---------|------------------------|
| 5M4R.PDB | OG1, A_THR_163 | N, A_SER_160   | H, A_SER_160   | 2.97    | 2.12    | 8.70                   |
| 5M4R.PDB | OG, A_SER_159  | OG1, A_THR_163 | HG1, A_THR_163 | 2.93    | 2.14    | 15.31                  |
| 5M4R.PDB | O, A_SER_160   | N, A_ALA_164   | H, A_ALA_164   | 2.56    | 1.75    | 15.32                  |
| 5M4R.PDB | O, A_GLY_158   | N, A_CYS_190   | H, A_CYS_190   | 2.82    | 1.96    | 5.83                   |
| 5M4R.PDB | OD2, A_ASP_128 | NE2, A_HIS_191 | HE2, A_HIS_191 | 2.54    | 1.73    | 17.27                  |
| 5M4R.PDB | O, A_CYS_190   | N, A_ILE_194   | H, A_ILE_194   | 2.79    | 2.00    | 18.71                  |
| 5M4R.PDB | O, A_HIS_191   | N, A_ASP_195   | H, A_ASP_195   | 2.85    | 2.00    | 5.80                   |
| 5M4R.PDB | O, B_LYS_121   | N, B_GLN_125   | H, B_GLN_125   | 2.88    | 2.03    | 8.53                   |
| 5M4R.PDB | O, B_LYS_124   | N, B_ASP_128   | H, B_ASP_128   | 2.83    | 1.99    | 10.44                  |
| 5M4R.PDB | O, B_VAL_146   | N, B_PHE_150   | H, B_PHE_150   | 2.87    | 2.04    | 11.41                  |
| 5M4R.PDB | O, B_VAL_147   | N, B_HIS_151   | H, B_HIS_151   | 2.85    | 2.02    | 12.74                  |
| 5M4R.PDB | O, B_LYS_148   | N, B_GLU_152   | H, B_GLU_152   | 2.83    | 2.00    | 11.22                  |
| 5M4R.PDB | O, B_THR_149   | N, B_THR_153   | H, B_THR_153   | 2.76    | 1.93    | 11.52                  |
| 5M4R.PDB | O, B_THR_149   | OG1, B_THR_153 | HG1, B_THR_153 | 2.73    | 2.03    | 28.15                  |
| 5M4R.PDB | OG1, B_THR_163 | N, B_SER_160   | H, B_SER_160   | 2.82    | 2.01    | 15.84                  |
| 5M4R.PDB | OG, B_SER_159  | OG1, B_THR_163 | HG1, B_THR_163 | 2.85    | 2.02    | 5.63                   |
| 5M4R.PDB | O, B_SER_160   | N, B_ALA_164   | H, B_ALA_164   | 2.76    | 2.02    | 25.53                  |
| 5M4R.PDB | O, B_THR_161   | N, B_LEU_165   | H, B_LEU_165   | 2.85    | 2.00    | 9.07                   |
| 5M4R.PDB | O, B_LEU_162   | N, B_THR_166   | H, B_THR_166   | 2.80    | 1.95    | 8.30                   |
| 5M4R.PDB | O, B_LEU_162   | OG1, B_THR_166 | HG1, B_THR_166 | 2.92    | 2.11    | 12.23                  |
| 5M4R.PDB | O, B_THR_163   | N, B_THR_167   | H, B_THR_167   | 2.81    | 1.99    | 13.82                  |
| 5M4R.PDB | O, B_ALA_164   | N, B_SER_168   | H, B_SER_168   | 2.85    | 2.04    | 17.78                  |
| 5M4R.PDB | O, B_LEU_165   | N, B_VAL_169   | H, B_VAL_169   | 2.67    | 1.97    | 29.59                  |
| 5M4R.PDB | O, C_ASP_117   | N, C_LYS_121   | H, C_LYS_121   | 2.88    | 2.04    | 8.52                   |
| 5M4R.PDB | O, C_ALA_120   | N, C_LYS_124   | H, C_LYS_124   | 2.90    | 2.05    | 8.18                   |
| 5M4R.PDB | O, C_LYS_121   | N, C_GLN_125   | H, C_GLN_125   | 2.88    | 2.04    | 12.44                  |
| 5M4R.PDB | O, C_ASP_122   | N, C_PHE_126   | H, C_PHE_126   | 2.84    | 1.99    | 7.74                   |
| 5M4R.PDB | O, C_VAL_123   | N, C_TYR_127   | H, C_TYR_127   | 2.85    | 2.01    | 7.89                   |
| 5M4R.PDB | O, C_LYS_124   | N, C_ASP_128   | H, C_ASP_128   | 2.85    | 2.01    | 11.99                  |
| 5M4R.PDB | O, C_GLN_125   | N, C_GLN_129   | H, C_GLN_129   | 2.90    | 2.06    | 10.04                  |
| 5M4R.PDB | O, C_PHE_126   | N, C_ALA_130   | H, C_ALA_130   | 2.92    | 2.07    | 6.44                   |
| 5M4R.PDB | O, C_TYR_127   | N, C_LEU_131   | H, C_LEU_131   | 2.76    | 1.97    | 18.98                  |
| 5M4R.PDB | O, C_ASP_128   | N, C_GLN_132   | H, C_GLN_132   | 2.86    | 2.01    | 6.65                   |
| 5M4R.PDB | O, C_LEU_131   | N, C_VAL_135   | H, C_VAL_135   | 2.86    | 2.02    | 10.05                  |
| 5M4R.PDB | O, C_ALA_143   | N, C_VAL_147   | H, C_VAL_147   | 2.83    | 1.98    | 7.24                   |
| 5M4R.PDB | O, C_ALA_145   | N, C_THR_149   | H, C_THR_149   | 2.85    | 2.02    | 12.51                  |
| 5M4R.PDB | O, C_VAL_146   | N, C_PHE_150   | H, C_PHE_150   | 2.86    | 2.02    | 10.77                  |
| 5M4R.PDB | O, C_VAL_147   | N, C_HIS_151   | H, C_HIS_151   | 2.82    | 2.00    | 14.15                  |
| 5M4R.PDB | O, C_THR_149   | OG1, C_THR_153 | HG1, C_THR_153 | 2.74    | 2.04    | 29.05                  |
| 5M4R.PDB | O, C_PHE_150   | N, C_LEU_154   | H, C_LEU_154   | 2.89    | 2.07    | 13.98                  |
| 5M4R.PDB | OG1, C_THR_163 | N, C_SER_160   | H, C_SER_160   | 2.80    | 1.95    | 7.20                   |
| 5M4R.PDB | OG, C_SER_159  | OG1, C_THR_163 | HG1, C_THR_163 | 2.95    | 2.12    | 7.91                   |
| 5M4R.PDB | O, C_SER_160   | N, C_ALA_164   | H, C_ALA_164   | 2.84    | 2.04    | 18.04                  |
| 5M4R.PDB | O, C_THR_161   | N, C_LEU_165   | H, C_LEU_165   | 2.77    | 1.94    | 14.09                  |
| 5M4R.PDB | O, C_LEU_162   | OG1, C_THR_166 | HG1, C_THR_166 | 2.73    | 1.97    | 21.05                  |
| 5M4R.PDB | O, C_THR_163   | N, C_THR_167   | H, C_THR_167   | 2.86    | 2.02    | 10.18                  |
| 5M4R.PDB | O, C_THR_163   | OG1, C_THR_167 | HG1, C_THR_167 | 2.56    | 1.86    | 28.52                  |
| 5M4R.PDB | O, C_LEU_165   | N, C_VAL_169   | H, C_VAL_169   | 2.81    | 2.04    | 22.87                  |
| 5M4R.PDB | OD2, C_ASP_189 | N, C_GLN_192   | H, C_GLN_192   | 2.75    | 1.90    | 7.52                   |
| 5M4R.PDB | O, C_CYS_190   | N, C_ILE_194   | H, C_ILE_194   | 2.79    | 1.99    | 17.52                  |
| 5M4R.PDB | O, C_HIS_191   | N, C_ASP_195   | H, C_ASP_195   | 2.83    | 1.98    | 6.12                   |
| 5M4R.PDB | O, C_GLN_192   | N, C_ASP_196   | H, C_ASP_196   | 2.81    | 1.97    | 12.51                  |
| 5M4R.PDB | O, C_LYS_193   | N, C_LEU_197   | H, C_LEU_197   | 2.74    | 1.99    | 24.89                  |
| 5M4R.PDB | O, D_THR_149   | N, D_THR_153   | H, D_THR_153   | 2.76    | 1.94    | 13.90                  |
| 5M4R.PDB | O, D_CYS_190   | N, D_ILE_194   | H, D_ILE_194   | 2.80    | 1.98    | 16.24                  |
| 5M4R.PDB | O, D_ILE_194   | N, D_PHE_198   | H, D_PHE_198   | 2.90    | 2.07    | 14.01                  |
| 5M4R.PDB | O, E_ALA_145   | N, E_THR_149   | H, E_THR_149   | 2.84    | 2.01    | 12.20                  |

|          |                |                |                |      |      |       |
|----------|----------------|----------------|----------------|------|------|-------|
| 5M4R.PDB | O, E_VAL_147   | N, E_HIS_151   | H, E_HIS_151   | 2.82 | 1.99 | 11.67 |
| 5M4R.PDB | O, E_LYS_148   | N, E_GLU_152   | H, E_GLU_152   | 2.81 | 1.99 | 14.86 |
| 5M4R.PDB | O, E_THR_149   | N, E_THR_153   | H, E_THR_153   | 2.77 | 1.95 | 13.19 |
| 5M4R.PDB | O, E_THR_149   | OG1, E_THR_153 | HG1, E_THR_153 | 2.73 | 2.03 | 28.19 |
| 5M4R.PDB | O, E_PHE_150   | N, E_LEU_154   | H, E_LEU_154   | 2.88 | 2.06 | 14.16 |
| 5M4R.PDB | OG1, E_THR_163 | N, E_SER_160   | H, E_SER_160   | 2.70 | 1.88 | 13.56 |
| 5M4R.PDB | O, E_SER_160   | N, E_ALA_164   | H, E_ALA_164   | 2.73 | 1.96 | 22.03 |
| 5M4R.PDB | OD2, E_ASP_128 | NE2, E_HIS_191 | HE2, E_HIS_191 | 2.53 | 1.73 | 17.17 |
| 5M4R.PDB | O, E_CYS_190   | N, E_ILE_194   | H, E_ILE_194   | 2.78 | 1.97 | 15.37 |

Table 1710: 5M4R-specific side chain and main chain hydrogen bonding analysis. In this table, a PDB file is specified with a four-letter PDB ID, except that the names of the PDB files corresponding to the single NMR structural model split from the NMR ensemble is specified with a four-letter PDB ID in addition to a hyphen followed by the single NMR structural model numeric ID, the residue naming scheme is **Chain ID\_residue name\_residue number**,  $\angle ADH$  represents the angle formed by acceptor (A), donor (D) and hydrogen (H) ( $\angle ADH$ ).

| PDB      | Acceptor (A)  | Donor (D)      | Hydrogen (H)   | D-A (Å) | H-A (Å) | $\angle ADH(^{\circ})$ |
|----------|---------------|----------------|----------------|---------|---------|------------------------|
| 5T6P.PDB | OG, A_SER.26  | N, A_LEU.3     | H, A_LEU.3     | 2.84    | 1.99    | 5.70                   |
| 5T6P.PDB | O, A_ARG.24   | N, A_THR.5     | H, A_THR.5     | 2.80    | 1.96    | 9.75                   |
| 5T6P.PDB | O, A_TYR.91   | NE2, A_GLN.6   | HE22, A_GLN.6  | 2.77    | 1.91    | 5.02                   |
| 5T6P.PDB | O, A_SER.22   | N, A_THR.7     | H, A_THR.7     | 2.80    | 1.98    | 15.63                  |
| 5T6P.PDB | O, A_LYS.108  | N, A_LEU.11    | H, A_LEU.11    | 2.86    | 2.14    | 28.05                  |
| 5T6P.PDB | O, A_GLU.110  | N, A_VAL.13    | H, A_VAL.13    | 2.92    | 2.18    | 25.74                  |
| 5T6P.PDB | O, A_ILE.80   | N, A_ALA.19    | H, A_ALA.19    | 2.98    | 2.15    | 13.33                  |
| 5T6P.PDB | O, A_LEU.78   | N, A_ILE.21    | H, A_ILE.21    | 2.78    | 1.94    | 11.87                  |
| 5T6P.PDB | O, A_THR.7    | N, A_SER.22    | H, A_SER.22    | 2.67    | 1.82    | 5.62                   |
| 5T6P.PDB | O, A_PHE.76   | N, A_CYS.23    | H, A_CYS.23    | 2.67    | 1.84    | 13.46                  |
| 5T6P.PDB | O, A_THR.5    | N, A_ARG.24    | H, A_ARG.24    | 2.81    | 2.01    | 17.15                  |
| 5T6P.PDB | OD1, A_ASP.75 | NE, A_ARG.24   | HE, A_ARG.24   | 2.87    | 2.06    | 16.15                  |
| 5T6P.PDB | O, A_THR.74   | N, A_SER.25    | H, A_SER.25    | 2.92    | 2.15    | 21.71                  |
| 5T6P.PDB | O, A_LYS.35   | N, A_HIS.31    | H, A_HIS.31    | 2.71    | 1.85    | 5.88                   |
| 5T6P.PDB | O, A_HIS.31   | N, A_GLY.34    | H, A_GLY.34    | 2.72    | 1.87    | 7.51                   |
| 5T6P.PDB | OD1, A_ASN.33 | N, A_LYS.35    | H, A_LYS.35    | 2.79    | 1.96    | 11.94                  |
| 5T6P.PDB | O, A_PHE.94   | N, A_GLU.39    | H, A_GLU.39    | 2.82    | 1.99    | 13.41                  |
| 5T6P.PDB | O, A_ILE.53   | N, A_TRP.40    | H, A_TRP.40    | 2.93    | 2.13    | 18.35                  |
| 5T6P.PDB | O, A_TYR.92   | N, A_TYR.41    | H, A_TYR.41    | 2.73    | 1.89    | 11.55                  |
| 5T6P.PDB | O, A_LYS.50   | N, A_LEU.42    | H, A_LEU.42    | 2.88    | 2.08    | 18.93                  |
| 5T6P.PDB | O, A_VAL.90   | N, A_GLN.43    | H, A_GLN.43    | 2.78    | 1.94    | 8.75                   |
| 5T6P.PDB | O, A_GLN.47   | NE2, A_GLN.43  | HE21, A_GLN.43 | 2.91    | 2.07    | 10.44                  |
| 5T6P.PDB | O, B_GLY.107  | OG, A_SER.48   | HG, A_SER.48   | 2.52    | 1.72    | 14.73                  |
| 5T6P.PDB | O, A_LEU.42   | N, A_LYS.50    | H, A_LYS.50    | 2.76    | 2.01    | 25.02                  |
| 5T6P.PDB | O, A_TRP.40   | N, A_LEU.52    | H, A_LEU.52    | 2.89    | 2.04    | 6.78                   |
| 5T6P.PDB | O, A_LYS.58   | N, A_TYR.54    | H, A_TYR.54    | 2.88    | 2.08    | 17.82                  |
| 5T6P.PDB | O, A_ILE.36   | NE, A_ARG.55   | HE, A_ARG.55   | 2.95    | 2.12    | 13.12                  |
| 5T6P.PDB | O, A_LEU.38   | N, A_VAL.56    | H, A_VAL.56    | 2.81    | 1.97    | 8.99                   |
| 5T6P.PDB | O, A_ARG.55   | N, A_SER.57    | H, A_SER.57    | 2.79    | 2.06    | 26.54                  |
| 5T6P.PDB | O, A_TYR.54   | N, A_LYS.58    | H, A_LYS.58    | 2.92    | 2.13    | 19.37                  |
| 5T6P.PDB | O, A_LEU.52   | N, A_PHE.60    | H, A_PHE.60    | 2.86    | 2.00    | 6.63                   |
| 5T6P.PDB | OD1, A_ASP.87 | NH2, A_ARG.66  | HH22, A_ARG.66 | 2.87    | 2.03    | 10.92                  |
| 5T6P.PDB | O, A_LYS.79   | N, A_SER.68    | H, A_SER.68    | 2.87    | 2.04    | 13.46                  |
| 5T6P.PDB | O, A_CYS.23   | N, A_PHE.76    | H, A_PHE.76    | 2.81    | 1.99    | 14.73                  |
| 5T6P.PDB | O, A_SER.70   | N, A_THR.77    | H, A_THR.77    | 2.96    | 2.14    | 16.18                  |
| 5T6P.PDB | O, A_ILE.21   | N, A_LEU.78    | H, A_LEU.78    | 2.87    | 2.08    | 19.36                  |
| 5T6P.PDB | O, A_SER.68   | N, A_LYS.79    | H, A_LYS.79    | 2.72    | 1.88    | 9.62                   |
| 5T6P.PDB | O, A_ALA.19   | N, A_ILE.80    | H, A_ILE.80    | 2.82    | 1.98    | 10.03                  |
| 5T6P.PDB | O, A_GLN.43   | N, A_VAL.90    | H, A_VAL.90    | 2.99    | 2.16    | 12.00                  |
| 5T6P.PDB | O, A_THR.107  | N, A_TYR.91    | H, A_TYR.91    | 2.97    | 2.12    | 9.83                   |
| 5T6P.PDB | O, A_ASP.87   | OH, A_TYR.91   | HH, A_TYR.91   | 2.67    | 1.98    | 29.62                  |
| 5T6P.PDB | O, A_TYR.41   | N, A_TYR.92    | H, A_TYR.92    | 2.76    | 1.93    | 13.16                  |
| 5T6P.PDB | OE1, A_GLN.6  | N, A_CYS.93    | H, A_CYS.93    | 2.94    | 2.12    | 14.92                  |
| 5T6P.PDB | O, A_THR.102  | N, A_GLN.95    | H, A_GLN.95    | 2.94    | 2.13    | 17.40                  |
| 5T6P.PDB | O, A_HIS.98   | NE2, A_GLN.95  | HE22, A_GLN.95 | 2.68    | 1.87    | 14.95                  |
| 5T6P.PDB | O, A_TYR.37   | N, A_GLY.96    | H, A_GLY.96    | 2.73    | 1.90    | 11.23                  |
| 5T6P.PDB | O, A_ILE.29   | OG, A_SER.97   | HG, A_SER.97   | 2.65    | 1.82    | 7.55                   |
| 5T6P.PDB | OE1, A_GLN.95 | N, A_HIS.98    | H, A_HIS.98    | 2.88    | 2.02    | 3.19                   |
| 5T6P.PDB | O, A_VAL.2    | OG1, A_THR.102 | HG1, A_THR.102 | 2.83    | 2.02    | 12.78                  |
| 5T6P.PDB | O, A_CYS.93   | N, A_GLY.104   | H, A_GLY.104   | 2.64    | 1.79    | 9.16                   |
| 5T6P.PDB | O, A_TYR.91   | N, A_THR.107   | H, A_THR.107   | 2.98    | 2.24    | 26.12                  |
| 5T6P.PDB | O, A_PRO.8    | OG1, A_THR.107 | HG1, A_THR.107 | 2.63    | 1.91    | 24.93                  |
| 5T6P.PDB | O, A_GLY.89   | N, A_LEU.109   | H, A_LEU.109   | 2.81    | 1.95    | 2.82                   |
| 5T6P.PDB | O, A_VAL.13   | N, A_LYS.112   | H, A_LYS.112   | 2.81    | 1.97    | 10.01                  |
| 5T6P.PDB | O, A_TYR.145  | N, A_ALA.116   | H, A_ALA.116   | 2.79    | 1.99    | 17.20                  |
| 5T6P.PDB | O, A_ASN.142  | N, A_THR.119   | H, A_THR.119   | 2.97    | 2.14    | 12.03                  |
| 5T6P.PDB | O, A_VAL.138  | N, A_PHE.123   | H, A_PHE.123   | 2.88    | 2.11    | 21.78                  |

|          |                |                |                 |      |      |       |
|----------|----------------|----------------|-----------------|------|------|-------|
| 5T6P.PDB | OG, A_SER.136  | NE2, A_GLN.129 | HE22, A_GLN.129 | 2.81 | 1.96 | 6.44  |
| 5T6P.PDB | O, A_GLN.129   | OG, A_SER.132  | HG, A_SER.132   | 2.72 | 1.92 | 13.31 |
| 5T6P.PDB | O, A_LEU.130   | N, A_GLY.133   | H, A_GLY.133    | 2.98 | 2.20 | 21.49 |
| 5T6P.PDB | OE1, A_GLN.129 | N, A_SER.136   | H, A_SER.136    | 2.79 | 1.94 | 7.05  |
| 5T6P.PDB | O, A_LEU.184   | N, A_VAL.137   | H, A_VAL.137    | 2.71 | 1.87 | 10.57 |
| 5T6P.PDB | O, A_SER.182   | N, A_CYS.139   | H, A_CYS.139    | 2.76 | 2.04 | 28.21 |
| 5T6P.PDB | O, A_SER.121   | N, A_PHE.140   | H, A_PHE.140    | 2.76 | 1.97 | 19.62 |
| 5T6P.PDB | O, A_MET.180   | N, A_LEU.141   | H, A_LEU.141    | 2.79 | 1.94 | 5.89  |
| 5T6P.PDB | OG, A_SER.179  | N, A_ASN.143   | H, A_ASN.143    | 2.90 | 2.08 | 15.40 |
| 5T6P.PDB | O, A_TYR.178   | N, A_PHE.144   | H, A_PHE.144    | 2.81 | 1.97 | 9.66  |
| 5T6P.PDB | O, A_ALA.116   | N, A_TYR.145   | H, A_TYR.145    | 2.97 | 2.15 | 15.15 |
| 5T6P.PDB | O, A_GLU.200   | N, A_LYS.152   | H, A_LYS.152    | 2.97 | 2.17 | 16.98 |
| 5T6P.PDB | OG, A_SER.182  | NE1, A_TRP.153 | HE1, A_TRP.153  | 2.84 | 2.00 | 11.05 |
| 5T6P.PDB | O, A_THR.198   | N, A_LYS.154   | H, A_LYS.154    | 2.71 | 1.93 | 21.47 |
| 5T6P.PDB | O, A_SER.196   | N, A_ASP.156   | H, A_ASP.156    | 2.70 | 1.86 | 10.47 |
| 5T6P.PDB | O, A_TRP.153   | N, A_ARG.160   | H, A_ARG.160    | 2.85 | 2.08 | 22.60 |
| 5T6P.PDB | O, A_SER.181   | N, A_SER.167   | H, A_SER.167    | 2.92 | 2.15 | 23.07 |
| 5T6P.PDB | O, B_PRO.170   | OG, A_SER.167  | HG, A_SER.167   | 2.98 | 2.14 | 3.80  |
| 5T6P.PDB | O, A_LYS.147   | NE1, A_TRP.168 | HE1, A_TRP.168  | 2.99 | 2.28 | 29.51 |
| 5T6P.PDB | O, A_SER.179   | N, A_THR.169   | H, A_THR.169    | 2.77 | 1.93 | 8.31  |
| 5T6P.PDB | O, A_ASP.170   | OG1, A_THR.169 | HG1, A_THR.169  | 2.93 | 2.19 | 24.31 |
| 5T6P.PDB | O, A_THR.177   | N, A_ASP.172   | H, A_ASP.172    | 2.83 | 2.02 | 16.18 |
| 5T6P.PDB | OD1, A_ASP.172 | N, A_LYS.174   | H, A_LYS.174    | 2.80 | 1.97 | 12.91 |
| 5T6P.PDB | O, A_ASP.172   | N, A_SER.176   | H, A_SER.176    | 2.74 | 2.02 | 27.29 |
| 5T6P.PDB | OD1, A_ASP.175 | OG1, A_THR.177 | HG1, A_THR.177  | 2.59 | 1.78 | 13.64 |
| 5T6P.PDB | O, A_PHE.144   | N, A_TYR.178   | H, A_TYR.178    | 2.77 | 1.93 | 7.97  |
| 5T6P.PDB | O, A_LEU.141   | N, A_MET.180   | H, A_MET.180    | 2.77 | 1.96 | 16.22 |
| 5T6P.PDB | O, A_SER.167   | N, A_SER.181   | H, A_SER.181    | 2.83 | 2.04 | 19.51 |
| 5T6P.PDB | O, A_CYS.139   | N, A_SER.182   | H, A_SER.182    | 2.79 | 1.96 | 11.39 |
| 5T6P.PDB | OD1, A_ASN.166 | OG, A_SER.182  | HG, A_SER.182   | 2.54 | 1.72 | 9.61  |
| 5T6P.PDB | O, A_LEU.165   | N, A_THR.183   | H, A_THR.183    | 2.87 | 2.06 | 15.52 |
| 5T6P.PDB | O, A_VAL.137   | N, A_LEU.184   | H, A_LEU.184    | 2.77 | 1.97 | 18.32 |
| 5T6P.PDB | O, A_GLY.163   | N, A_THR.185   | H, A_THR.185    | 2.97 | 2.14 | 12.81 |
| 5T6P.PDB | O, A_ALA.135   | N, A_LEU.186   | H, A_LEU.186    | 2.78 | 1.96 | 13.71 |
| 5T6P.PDB | O, A_GLY.133   | N, A_LYS.188   | H, A_LYS.188    | 2.86 | 2.01 | 2.28  |
| 5T6P.PDB | OG1, A_THR.187 | N, A_GLU.190   | H, A_GLU.190    | 2.92 | 2.08 | 10.76 |
| 5T6P.PDB | O, A_THR.187   | N, A_TYR.191   | H, A_TYR.191    | 2.82 | 1.98 | 9.18  |
| 5T6P.PDB | OD1, A_ASP.156 | N, A_SER.196   | H, A_SER.196    | 2.91 | 2.06 | 3.81  |
| 5T6P.PDB | O, A_LYS.152   | N, A_GLU.200   | H, A_GLU.200    | 2.95 | 2.17 | 21.10 |
| 5T6P.PDB | O, A_ILE.210   | N, A_ALA.201   | H, A_ALA.201    | 2.76 | 1.98 | 21.19 |
| 5T6P.PDB | O, A_ASN.150   | N, A_THR.202   | H, A_THR.202    | 2.73 | 1.90 | 13.59 |
| 5T6P.PDB | OG, A_SER.206  | N, A_SER.208   | H, A_SER.208    | 2.93 | 2.13 | 18.20 |
| 5T6P.PDB | O, A_ALA.201   | N, A_ILE.210   | H, A_ILE.210    | 2.83 | 2.04 | 19.01 |
| 5T6P.PDB | O, B_SER.25    | N, B_LYS.3     | H, B_LYS.3      | 2.92 | 2.08 | 9.95  |
| 5T6P.PDB | O, B_ALA.23    | N, B_VAL.5     | H, B_VAL.5      | 2.98 | 2.21 | 22.28 |
| 5T6P.PDB | O, B_SER.21    | N, B_SER.7     | H, B_SER.7      | 2.97 | 2.22 | 25.31 |
| 5T6P.PDB | O, B_THR.113   | N, B_VAL.12    | H, B_VAL.12     | 2.78 | 2.02 | 23.72 |
| 5T6P.PDB | O, B_LEU.86    | N, B_GLY.15    | H, B_GLY.15     | 2.71 | 1.85 | 6.92  |
| 5T6P.PDB | O, B_ALA.13    | N, B_GLY.16    | H, B_GLY.16     | 2.97 | 2.19 | 21.44 |
| 5T6P.PDB | O, B_LEU.81    | N, B_LEU.20    | H, B_LEU.20     | 2.89 | 2.07 | 14.31 |
| 5T6P.PDB | O, B_VAL.5     | N, B_ALA.23    | H, B_ALA.23     | 2.70 | 1.89 | 15.98 |
| 5T6P.PDB | O, B_LYS.3     | N, B_SER.25    | H, B_SER.25     | 2.98 | 2.28 | 29.57 |
| 5T6P.PDB | O, B_ILE.51    | N, B_MET.34    | H, B_MET.34     | 2.95 | 2.13 | 15.81 |
| 5T6P.PDB | O, B_ALA.49    | N, B_TRP.36    | H, B_TRP.36     | 2.99 | 2.18 | 18.20 |
| 5T6P.PDB | O, B_GLU.46    | N, B_ARG.38    | H, B_ARG.38     | 2.93 | 2.09 | 10.53 |
| 5T6P.PDB | OE1, B_GLU.46  | NE, B_ARG.38   | HE, B_ARG.38    | 2.70 | 1.96 | 26.33 |
| 5T6P.PDB | O, B_ILE.93    | N, B_GLN.39    | H, B_GLN.39     | 2.73 | 1.94 | 18.82 |
| 5T6P.PDB | OE1, A_GLN.43  | NE2, B_GLN.39  | HE22, B_GLN.39  | 2.71 | 1.86 | 5.14  |

|          |                |                |                |      |      |       |
|----------|----------------|----------------|----------------|------|------|-------|
| 5T6P.PDB | O, B_ARG_44    | N, B_THR_40    | H, B_THR_40    | 2.94 | 2.13 | 17.68 |
| 5T6P.PDB | O, B_THR_40    | N, B_LYS_43    | H, B_LYS_43    | 2.81 | 1.99 | 15.16 |
| 5T6P.PDB | O, B_ARG_38    | N, B_GLU_46    | H, B_GLU_46    | 2.91 | 2.09 | 13.32 |
| 5T6P.PDB | O, B_TYR_59    | N, B_TYR_50    | H, B_TYR_50    | 2.85 | 2.14 | 28.28 |
| 5T6P.PDB | O, B_MET_34    | N, B_ILE_51    | H, B_ILE_51    | 3.00 | 2.23 | 23.58 |
| 5T6P.PDB | O, B_GLY_56    | N, B_ASN_52    | H, B_ASN_52    | 2.85 | 1.99 | 5.44  |
| 5T6P.PDB | O, B_ASN_52    | N, B_GLY_55    | H, B_GLY_55    | 2.99 | 2.14 | 4.85  |
| 5T6P.PDB | OD1, B_ASN_52  | N, B_GLY_56    | H, B_GLY_56    | 2.63 | 1.80 | 11.54 |
| 5T6P.PDB | O, F_PRO_8     | ND2, B_ASN_57  | HD21, B_ASN_57 | 2.91 | 2.07 | 9.74  |
| 5T6P.PDB | O, B_TYR_50    | N, B_TYR_59    | H, B_TYR_59    | 2.93 | 2.14 | 20.03 |
| 5T6P.PDB | O, B_GLN_82    | N, B_THR_69    | H, B_THR_69    | 2.67 | 1.94 | 26.83 |
| 5T6P.PDB | OD1, B_ASN_74  | NE, B_ARG_72   | HE, B_ARG_72   | 2.87 | 2.14 | 26.22 |
| 5T6P.PDB | O, B_THR_78    | N, B_ASP_73    | H, B_ASP_73    | 2.91 | 2.10 | 15.58 |
| 5T6P.PDB | O, B_LYS_76    | OG1, B_THR_78  | HG1, B_THR_78  | 2.86 | 2.09 | 20.72 |
| 5T6P.PDB | O, B_SER_71    | N, B_TYR_80    | H, B_TYR_80    | 2.84 | 1.99 | 6.51  |
| 5T6P.PDB | O, B_THR_69    | N, B_GLN_82    | H, B_GLN_82    | 2.81 | 1.97 | 9.07  |
| 5T6P.PDB | O, B_LEU_18    | N, B_MET_83    | H, B_MET_83    | 2.79 | 1.99 | 17.97 |
| 5T6P.PDB | O, B_ARG_67    | OG, B_SER_84   | HG, B_SER_84   | 2.97 | 2.16 | 13.27 |
| 5T6P.PDB | O, B_GLN_39    | N, B_ILE_93    | H, B_ILE_93    | 2.90 | 2.11 | 19.97 |
| 5T6P.PDB | O, B_THR_110   | N, B_TYR_94    | H, B_TYR_94    | 2.94 | 2.08 | 2.28  |
| 5T6P.PDB | O, B_ASP_90    | OH, B_TYR_94   | HH, B_TYR_94   | 2.68 | 1.86 | 11.38 |
| 5T6P.PDB | O, B_VAL_37    | N, B_TYR_95    | H, B_TYR_95    | 2.64 | 1.79 | 3.58  |
| 5T6P.PDB | O, B_PRO_33    | N, B_GLN_99    | H, B_GLN_99    | 2.96 | 2.14 | 14.24 |
| 5T6P.PDB | O, B_GLY_102   | N, B_TYR_100   | H, B_TYR_100   | 2.99 | 2.25 | 25.89 |
| 5T6P.PDB | OD1, B_ASP_104 | N, B_GLY_102   | H, B_GLY_102   | 2.80 | 1.95 | 8.41  |
| 5T6P.PDB | O, B_PHE_103   | NE1, B_TRP_106 | HE1, B_TRP_106 | 2.96 | 2.22 | 25.91 |
| 5T6P.PDB | O, B_CYS_96    | N, B_GLY_107   | H, B_GLY_107   | 2.84 | 2.03 | 15.83 |
| 5T6P.PDB | OE1, B_GLU_6   | N, B_GLY_109   | H, B_GLY_109   | 2.80 | 1.98 | 13.61 |
| 5T6P.PDB | O, B_ALA_92    | N, B_LEU_112   | H, B_LEU_112   | 2.89 | 2.04 | 9.43  |
| 5T6P.PDB | O, B_GLY_10    | N, B_THR_113   | H, B_THR_113   | 2.91 | 2.09 | 14.72 |
| 5T6P.PDB | O, B_VAL_12    | N, B_SER_115   | H, B_SER_115   | 2.80 | 2.05 | 24.92 |
| 5T6P.PDB | O, B_PHE_149   | N, B_THR_120   | H, B_THR_120   | 2.75 | 1.91 | 11.84 |
| 5T6P.PDB | O, B_LEU_144   | N, B_TYR_125   | H, B_TYR_125   | 2.91 | 2.10 | 16.22 |
| 5T6P.PDB | O, B_VAL_186   | N, B_VAL_139   | H, B_VAL_139   | 2.78 | 1.95 | 11.66 |
| 5T6P.PDB | O, B_VAL_184   | N, B_LEU_141   | H, B_LEU_141   | 2.63 | 1.79 | 9.20  |
| 5T6P.PDB | O, B_SER_182   | N, B_CYS_143   | H, B_CYS_143   | 2.65 | 1.86 | 19.42 |
| 5T6P.PDB | O, B_TYR_125   | N, B_LEU_144   | H, B_LEU_144   | 2.95 | 2.09 | 2.74  |
| 5T6P.PDB | O, B_LEU_180   | N, B_VAL_145   | H, B_VAL_145   | 2.75 | 1.91 | 7.82  |
| 5T6P.PDB | O, B_TYR_178   | N, B_TYR_148   | H, B_TYR_148   | 2.98 | 2.19 | 19.53 |
| 5T6P.PDB | O, B_THR_120   | N, B_PHE_149   | H, B_PHE_149   | 2.83 | 2.02 | 15.93 |
| 5T6P.PDB | O, B_ALA_201   | N, B_THR_154   | H, B_THR_154   | 2.97 | 2.17 | 18.38 |
| 5T6P.PDB | O, B_ASN_199   | N, B_THR_156   | H, B_THR_156   | 2.88 | 2.07 | 16.23 |
| 5T6P.PDB | O, B_THR_197   | N, B_ASN_158   | H, B_ASN_158   | 2.90 | 2.09 | 16.11 |
| 5T6P.PDB | O, B_SER_181   | N, B_PHE_169   | H, B_PHE_169   | 2.91 | 2.06 | 6.94  |
| 5T6P.PDB | O, B_LEU_177   | N, B_GLN_174   | H, B_GLN_174   | 2.84 | 1.98 | 4.57  |
| 5T6P.PDB | O, B_GLN_174   | N, B_LEU_177   | H, B_LEU_177   | 2.93 | 2.14 | 19.22 |
| 5T6P.PDB | O, B_TYR_148   | N, B_TYR_178   | H, B_TYR_178   | 2.71 | 1.85 | 6.27  |
| 5T6P.PDB | O, B_VAL_145   | N, B_LEU_180   | H, B_LEU_180   | 2.86 | 2.04 | 15.49 |
| 5T6P.PDB | O, B_CYS_143   | N, B_SER_182   | H, B_SER_182   | 2.70 | 1.91 | 18.91 |
| 5T6P.PDB | O, B_LEU_141   | N, B_VAL_184   | H, B_VAL_184   | 2.73 | 1.88 | 7.12  |
| 5T6P.PDB | O, B_VAL_139   | N, B_VAL_186   | H, B_VAL_186   | 2.85 | 2.02 | 12.50 |
| 5T6P.PDB | OD1, B_ASN_158 | N, B_THR_197   | H, B_THR_197   | 2.89 | 2.12 | 22.97 |
| 5T6P.PDB | O, B_LYS_211   | N, B_CYS_198   | H, B_CYS_198   | 2.83 | 2.00 | 11.79 |
| 5T6P.PDB | O, B_THR_156   | N, B_ASN_199   | H, B_ASN_199   | 2.83 | 1.97 | 3.18  |
| 5T6P.PDB | O, B_VAL_209   | N, B_VAL_200   | H, B_VAL_200   | 2.85 | 2.02 | 12.35 |
| 5T6P.PDB | O, B_THR_154   | N, B_ALA_201   | H, B_ALA_201   | 2.90 | 2.12 | 21.54 |
| 5T6P.PDB | O, B_PRO_150   | NE2, B_HIS_202 | HE2, B_HIS_202 | 2.71 | 1.86 | 4.81  |
| 5T6P.PDB | O, B_VAL_200   | N, B_VAL_209   | H, B_VAL_209   | 2.85 | 2.04 | 16.15 |

|          |                |                |                 |      |      |       |
|----------|----------------|----------------|-----------------|------|------|-------|
| 5T6P.PDB | O, B_CYS_198   | N, B_LYS_211   | H, B_LYS_211    | 2.86 | 2.05 | 16.75 |
| 5T6P.PDB | O, B_VAL_196   | N, B_ILE_213   | H, B_ILE_213    | 2.82 | 1.97 | 6.68  |
| 5T6P.PDB | OG, C_SER_26   | N, C_LEU_3     | H, C_LEU_3      | 2.79 | 1.93 | 4.03  |
| 5T6P.PDB | O, C_ARG_24    | N, C_THR_5     | H, C_THR_5      | 2.86 | 2.03 | 11.46 |
| 5T6P.PDB | O, C_TYR_91    | NE2, C_GLN_6   | HE22, C_GLN_6   | 2.75 | 1.89 | 3.04  |
| 5T6P.PDB | O, C_SER_22    | N, C_THR_7     | H, C_THR_7      | 2.88 | 2.06 | 14.16 |
| 5T6P.PDB | O, C_LYS_108   | N, C_LEU_11    | H, C_LEU_11     | 2.88 | 2.16 | 28.19 |
| 5T6P.PDB | O, C_GLU_110   | N, C_VAL_13    | H, C_VAL_13     | 2.97 | 2.24 | 26.82 |
| 5T6P.PDB | O, C_ILE_80    | N, C_ALA_19    | H, C_ALA_19     | 3.00 | 2.17 | 14.18 |
| 5T6P.PDB | O, C_LEU_78    | N, C_ILE_21    | H, C_ILE_21     | 2.76 | 1.92 | 12.06 |
| 5T6P.PDB | O, C_THR_7     | N, C_SER_22    | H, C_SER_22     | 2.70 | 1.85 | 6.95  |
| 5T6P.PDB | O, C_PHE_76    | N, C_CYS_23    | H, C_CYS_23     | 2.70 | 1.86 | 10.98 |
| 5T6P.PDB | O, C_THR_5     | N, C_ARG_24    | H, C_ARG_24     | 2.81 | 2.00 | 15.67 |
| 5T6P.PDB | OD1, C_ASP_75  | NE, C_ARG_24   | HE, C_ARG_24    | 2.92 | 2.14 | 20.59 |
| 5T6P.PDB | OD1, C_ASP_75  | NH2, C_ARG_24  | HH21, C_ARG_24  | 2.94 | 2.18 | 23.70 |
| 5T6P.PDB | O, C_HIS_31    | N, C_GLY_34    | H, C_GLY_34     | 2.90 | 2.04 | 3.71  |
| 5T6P.PDB | OD1, C_ASN_33  | N, C_LYS_35    | H, C_LYS_35     | 2.76 | 1.93 | 12.01 |
| 5T6P.PDB | O, C_PHE_94    | N, C_GLU_39    | H, C_GLU_39     | 2.84 | 2.01 | 13.22 |
| 5T6P.PDB | O, C_ILE_53    | N, C_TRP_40    | H, C_TRP_40     | 2.81 | 2.01 | 18.58 |
| 5T6P.PDB | O, C_TYR_92    | N, C_TYR_41    | H, C_TYR_41     | 2.76 | 1.92 | 9.44  |
| 5T6P.PDB | O, C_LYS_50    | N, C_LEU_42    | H, C_LEU_42     | 2.99 | 2.19 | 18.71 |
| 5T6P.PDB | O, C_VAL_90    | N, C_GLN_43    | H, C_GLN_43     | 2.75 | 1.90 | 8.01  |
| 5T6P.PDB | OE1, D_GLN_39  | NE2, C_GLN_43  | HE22, C_GLN_43  | 3.00 | 2.17 | 12.88 |
| 5T6P.PDB | O, D_GLY_107   | OG, C_SER_48   | HG, C_SER_48    | 2.66 | 1.94 | 25.38 |
| 5T6P.PDB | O, C_LEU_42    | N, C_LYS_50    | H, C_LYS_50     | 2.87 | 2.11 | 23.73 |
| 5T6P.PDB | O, C_TRP_40    | N, C_LEU_52    | H, C_LEU_52     | 2.81 | 1.96 | 6.06  |
| 5T6P.PDB | O, C_LYS_58    | N, C_TYR_54    | H, C_TYR_54     | 2.92 | 2.10 | 15.01 |
| 5T6P.PDB | O, C_LEU_38    | N, C_VAL_56    | H, C_VAL_56     | 2.88 | 2.04 | 8.48  |
| 5T6P.PDB | O, C_ARG_55    | N, C_SER_57    | H, C_SER_57     | 2.66 | 1.91 | 24.23 |
| 5T6P.PDB | O, C_TYR_54    | N, C_LYS_58    | H, C_LYS_58     | 2.91 | 2.14 | 22.42 |
| 5T6P.PDB | O, C_LEU_52    | N, C_PHE_60    | H, C_PHE_60     | 2.93 | 2.07 | 3.44  |
| 5T6P.PDB | O, C_LYS_79    | N, C_SER_68    | H, C_SER_68     | 2.83 | 1.99 | 10.51 |
| 5T6P.PDB | O, C_CYS_23    | N, C_PHE_76    | H, C_PHE_76     | 2.93 | 2.11 | 14.43 |
| 5T6P.PDB | O, C_ILE_21    | N, C_LEU_78    | H, C_LEU_78     | 2.76 | 1.99 | 21.57 |
| 5T6P.PDB | O, C_SER_68    | N, C_LYS_79    | H, C_LYS_79     | 2.78 | 1.92 | 4.56  |
| 5T6P.PDB | O, C_ALA_19    | N, C_ILE_80    | H, C_ILE_80     | 2.92 | 2.08 | 10.76 |
| 5T6P.PDB | O, C_GLN_43    | N, C_VAL_90    | H, C_VAL_90     | 2.95 | 2.12 | 13.12 |
| 5T6P.PDB | O, C_THR_107   | N, C_TYR_91    | H, C_TYR_91     | 2.80 | 1.96 | 9.61  |
| 5T6P.PDB | O, C_TYR_41    | N, C_TYR_92    | H, C_TYR_92     | 2.74 | 1.93 | 15.61 |
| 5T6P.PDB | O, C_HIS_98    | NE2, C_GLN_95  | HE22, C_GLN_95  | 2.72 | 1.90 | 15.32 |
| 5T6P.PDB | O, C_TYR_37    | N, C_GLY_96    | H, C_GLY_96     | 2.80 | 1.96 | 11.65 |
| 5T6P.PDB | O, C_ILE_29    | OG, C_SER_97   | HG, C_SER_97    | 2.80 | 1.98 | 12.04 |
| 5T6P.PDB | OE1, C_GLN_95  | N, C_HIS_98    | H, C_HIS_98     | 2.87 | 2.02 | 5.84  |
| 5T6P.PDB | O, C_VAL_2     | OG1, C_THR_102 | HG1, C_THR_102  | 2.71 | 1.89 | 10.27 |
| 5T6P.PDB | O, C_CYS_93    | N, C_GLY_104   | H, C_GLY_104    | 2.76 | 1.92 | 10.56 |
| 5T6P.PDB | OE1, C_GLN_6   | N, C_GLY_106   | H, C_GLY_106    | 2.99 | 2.28 | 28.82 |
| 5T6P.PDB | O, C_TYR_91    | N, C_THR_107   | H, C_THR_107    | 2.87 | 2.11 | 24.01 |
| 5T6P.PDB | O, C_PRO_8     | OG1, C_THR_107 | HG1, C_THR_107  | 2.74 | 2.02 | 25.98 |
| 5T6P.PDB | O, C_GLY_89    | N, C_LEU_109   | H, C_LEU_109    | 2.77 | 1.92 | 5.68  |
| 5T6P.PDB | OE1, C_GLN_171 | N, C_ILE_111   | H, C_ILE_111    | 2.98 | 2.15 | 12.64 |
| 5T6P.PDB | O, C_VAL_13    | N, C_LYS_112   | H, C_LYS_112    | 2.85 | 2.02 | 11.60 |
| 5T6P.PDB | O, C_ASP_175   | NE, C_ARG_113  | HE, C_ARG_113   | 2.48 | 1.76 | 27.03 |
| 5T6P.PDB | O, C_TYR_145   | N, C_ALA_116   | H, C_ALA_116    | 2.84 | 2.04 | 18.21 |
| 5T6P.PDB | O, C_ASN_142   | N, C_THR_119   | H, C_THR_119    | 2.93 | 2.10 | 12.42 |
| 5T6P.PDB | O, C_VAL_138   | N, C_PHE_123   | H, C_PHE_123    | 2.72 | 1.95 | 21.08 |
| 5T6P.PDB | OG, C_SER_136  | NE2, C_GLN_129 | HE22, C_GLN_129 | 2.79 | 1.95 | 11.34 |
| 5T6P.PDB | O, C_SER_127   | N, C_THR_131   | H, C_THR_131    | 2.98 | 2.17 | 16.75 |
| 5T6P.PDB | O, C_SER_127   | OG1, C_THR_131 | HG1, C_THR_131  | 2.92 | 2.09 | 7.67  |

|          |                |                |                 |      |      |       |
|----------|----------------|----------------|-----------------|------|------|-------|
| 5T6P.PDB | O, C_GLN_129   | OG, C_SER_132  | HG, C_SER_132   | 2.59 | 1.78 | 13.08 |
| 5T6P.PDB | O, C_LEU_130   | N, C_GLY_133   | H, C_GLY_133    | 2.95 | 2.18 | 22.40 |
| 5T6P.PDB | O, C_LEU_184   | N, C_VAL_137   | H, C_VAL_137    | 2.75 | 1.91 | 11.06 |
| 5T6P.PDB | O, C_SER_182   | N, C_CYS_139   | H, C_CYS_139    | 2.88 | 2.16 | 27.24 |
| 5T6P.PDB | O, C_SER_121   | N, C_PHE_140   | H, C_PHE_140    | 2.80 | 2.02 | 21.09 |
| 5T6P.PDB | O, C_MET_180   | N, C_LEU_141   | H, C_LEU_141    | 2.85 | 2.01 | 8.82  |
| 5T6P.PDB | OG, C_SER_179  | N, C_ASN_143   | H, C_ASN_143    | 2.94 | 2.10 | 9.85  |
| 5T6P.PDB | O, C_TYR_178   | N, C_PHE_144   | H, C_PHE_144    | 2.77 | 1.92 | 8.13  |
| 5T6P.PDB | OG, C_SER_182  | NE1, C_TRP_153 | HE1, C_TRP_153  | 2.89 | 2.07 | 15.50 |
| 5T6P.PDB | O, C_THR_198   | N, C_LYS_154   | H, C_LYS_154    | 2.75 | 1.96 | 18.48 |
| 5T6P.PDB | O, C_SER_196   | N, C_ASP_156   | H, C_ASP_156    | 2.70 | 1.86 | 10.78 |
| 5T6P.PDB | O, C_TRP_153   | N, C_ARG_160   | H, C_ARG_160    | 2.72 | 1.94 | 21.43 |
| 5T6P.PDB | O, C_SER_181   | N, C_SER_167   | H, C_SER_167    | 2.91 | 2.15 | 22.92 |
| 5T6P.PDB | O, C_LYS_147   | NE1, C_TRP_168 | HE1, C_TRP_168  | 3.00 | 2.28 | 28.07 |
| 5T6P.PDB | O, C_SER_179   | N, C_THR_169   | H, C_THR_169    | 2.70 | 1.86 | 8.97  |
| 5T6P.PDB | O, C_ASP_170   | OG1, C_THR_169 | HG1, C_THR_169  | 2.94 | 2.20 | 24.83 |
| 5T6P.PDB | O, C_SER_176   | NE2, C_GLN_171 | HE21, C_GLN_171 | 2.89 | 2.05 | 12.01 |
| 5T6P.PDB | O, C_ILE_111   | NE2, C_GLN_171 | HE22, C_GLN_171 | 2.85 | 2.04 | 15.54 |
| 5T6P.PDB | O, C_THR_177   | N, C_ASP_172   | H, C_ASP_172    | 2.94 | 2.12 | 14.22 |
| 5T6P.PDB | OD1, C_ASP_172 | N, C_LYS_174   | H, C_LYS_174    | 2.89 | 2.05 | 10.44 |
| 5T6P.PDB | O, C_ASP_172   | N, C_SER_176   | H, C_SER_176    | 2.80 | 2.08 | 27.25 |
| 5T6P.PDB | OD1, C_ASP_175 | N, C_THR_177   | H, C_THR_177    | 2.99 | 2.17 | 14.08 |
| 5T6P.PDB | OD1, C_ASP_175 | OG1, C_THR_177 | HG1, C_THR_177  | 2.69 | 1.86 | 7.21  |
| 5T6P.PDB | O, C_PHE_144   | N, C_TYR_178   | H, C_TYR_178    | 2.70 | 1.84 | 4.46  |
| 5T6P.PDB | O, C_LEU_141   | N, C_MET_180   | H, C_MET_180    | 2.84 | 2.02 | 15.41 |
| 5T6P.PDB | O, C_SER_167   | N, C_SER_181   | H, C_SER_181    | 2.79 | 2.00 | 19.18 |
| 5T6P.PDB | O, C_CYS_139   | N, C_SER_182   | H, C_SER_182    | 2.88 | 2.03 | 8.59  |
| 5T6P.PDB | OD1, C_ASN_166 | OG, C_SER_182  | HG, C_SER_182   | 2.45 | 1.64 | 11.11 |
| 5T6P.PDB | O, C_VAL_137   | N, C_LEU_184   | H, C_LEU_184    | 2.79 | 1.98 | 16.51 |
| 5T6P.PDB | O, C_ALA_135   | N, C_LEU_186   | H, C_LEU_186    | 2.93 | 2.10 | 13.93 |
| 5T6P.PDB | O, C_GLY_133   | N, C_LYS_188   | H, C_LYS_188    | 2.95 | 2.12 | 12.53 |
| 5T6P.PDB | O, C_THR_187   | N, C_TYR_191   | H, C_TYR_191    | 2.98 | 2.13 | 6.59  |
| 5T6P.PDB | OD1, C_ASP_156 | N, C_SER_196   | H, C_SER_196    | 2.87 | 2.02 | 6.00  |
| 5T6P.PDB | OG, C_SER_213  | OG1, C_THR_198 | HG1, C_THR_198  | 3.00 | 2.20 | 14.46 |
| 5T6P.PDB | O, C_ILE_210   | N, C_ALA_201   | H, C_ALA_201    | 2.94 | 2.14 | 17.24 |
| 5T6P.PDB | O, C_ASN_150   | N, C_THR_202   | H, C_THR_202    | 2.84 | 2.03 | 16.39 |
| 5T6P.PDB | O, C_ALA_201   | N, C_ILE_210   | H, C_ILE_210    | 2.99 | 2.24 | 25.62 |
| 5T6P.PDB | O, D_SER_25    | N, D_LYS_3     | H, D_LYS_3      | 2.88 | 2.06 | 14.17 |
| 5T6P.PDB | O, D_THR_113   | N, D_VAL_12    | H, D_VAL_12     | 2.73 | 1.95 | 21.29 |
| 5T6P.PDB | O, D_LEU_86    | N, D_GLY_15    | H, D_GLY_15     | 2.72 | 1.86 | 4.08  |
| 5T6P.PDB | O, D_ALA_13    | N, D_GLY_16    | H, D_GLY_16     | 2.92 | 2.16 | 22.99 |
| 5T6P.PDB | O, D_MET_83    | N, D_LEU_18    | H, D_LEU_18     | 2.98 | 2.18 | 18.81 |
| 5T6P.PDB | O, D_LEU_81    | N, D_LEU_20    | H, D_LEU_20     | 2.99 | 2.15 | 11.31 |
| 5T6P.PDB | O, D_VAL_5     | N, D_ALA_23    | H, D_ALA_23     | 2.75 | 1.94 | 16.20 |
| 5T6P.PDB | O, D_LYS_3     | N, D_SER_25    | H, D_SER_25     | 2.97 | 2.23 | 25.58 |
| 5T6P.PDB | O, D_ILE_51    | N, D_MET_34    | H, D_MET_34     | 2.96 | 2.14 | 15.76 |
| 5T6P.PDB | O, D_GLU_46    | N, D_ARG_38    | H, D_ARG_38     | 2.85 | 2.01 | 11.39 |
| 5T6P.PDB | O, D_ILE_93    | N, D_GLN_39    | H, D_GLN_39     | 2.72 | 1.93 | 19.22 |
| 5T6P.PDB | OE1, C_GLN_43  | NE2, D_GLN_39  | HE22, D_GLN_39  | 2.79 | 1.94 | 7.20  |
| 5T6P.PDB | O, D_THR_40    | N, D_LYS_43    | H, D_LYS_43     | 2.74 | 1.92 | 14.91 |
| 5T6P.PDB | O, D_ARG_38    | N, D_GLU_46    | H, D_GLU_46     | 2.87 | 2.03 | 9.75  |
| 5T6P.PDB | O, D_GLY_56    | N, D_ASN_52    | H, D_ASN_52     | 2.87 | 2.01 | 5.61  |
| 5T6P.PDB | OD1, D_ASN_52  | N, D_GLY_56    | H, D_GLY_56     | 2.70 | 1.88 | 14.82 |
| 5T6P.PDB | O, D_VAL_64    | N, D_ARG_67    | H, D_ARG_67     | 2.94 | 2.10 | 10.62 |
| 5T6P.PDB | O, D_GLN_82    | N, D_THR_69    | H, D_THR_69     | 2.84 | 2.13 | 29.43 |
| 5T6P.PDB | OD1, D_ASN_74  | NE, D_ARG_72   | HE, D_ARG_72    | 2.79 | 2.07 | 27.15 |
| 5T6P.PDB | O, D_TYR_32    | NH2, D_ARG_72  | HH22, D_ARG_72  | 3.00 | 2.24 | 24.48 |
| 5T6P.PDB | O, D_THR_78    | N, D_ASP_73    | H, D_ASP_73     | 2.80 | 1.97 | 14.04 |

|          |                |                |                |      |      |       |
|----------|----------------|----------------|----------------|------|------|-------|
| 5T6P.PDB | O, D_ASN_53    | ND2, D_ASN_74  | HD21, D_ASN_74 | 3.00 | 2.17 | 13.41 |
| 5T6P.PDB | O, D_LYS_76    | OG1, D_THR_78  | HG1, D_THR_78  | 2.82 | 2.06 | 20.07 |
| 5T6P.PDB | O, D_SER_71    | N, D_TYR_80    | H, D_TYR_80    | 2.80 | 1.95 | 7.50  |
| 5T6P.PDB | O, D_THR_69    | N, D_GLN_82    | H, D_GLN_82    | 2.94 | 2.10 | 10.42 |
| 5T6P.PDB | O, D_LEU_18    | N, D_MET_83    | H, D_MET_83    | 2.78 | 1.94 | 10.80 |
| 5T6P.PDB | O, D_ARG_67    | OG, D_SER_84   | HG, D_SER_84   | 2.89 | 2.11 | 18.15 |
| 5T6P.PDB | O, D_GLN_39    | N, D_ILE_93    | H, D_ILE_93    | 2.95 | 2.17 | 20.82 |
| 5T6P.PDB | O, D_ASP_90    | OH, D_TYR_94   | HH, D_TYR_94   | 2.82 | 2.01 | 12.26 |
| 5T6P.PDB | O, D_VAL_37    | N, D_TYR_95    | H, D_TYR_95    | 2.61 | 1.75 | 6.47  |
| 5T6P.PDB | O, D_TYR_105   | N, D_ARG_98    | H, D_ARG_98    | 2.94 | 2.21 | 27.44 |
| 5T6P.PDB | OD1, D_ASP_104 | N, D_GLY_102   | H, D_GLY_102   | 2.73 | 1.88 | 6.65  |
| 5T6P.PDB | OH, C_TYR_41   | N, D_PHE_103   | H, D_PHE_103   | 2.95 | 2.09 | 5.85  |
| 5T6P.PDB | O, D_PHE_103   | NE1, D_TRP_106 | HE1, D_TRP_106 | 2.89 | 2.15 | 26.36 |
| 5T6P.PDB | O, D_CYS_96    | N, D_GLY_107   | H, D_GLY_107   | 2.78 | 1.98 | 18.45 |
| 5T6P.PDB | OE1, D_GLU_6   | N, D_GLY_109   | H, D_GLY_109   | 2.82 | 1.98 | 11.29 |
| 5T6P.PDB | O, D_ALA_92    | N, D_LEU_112   | H, D_LEU_112   | 2.91 | 2.08 | 13.48 |
| 5T6P.PDB | O, D_GLY_10    | N, D_THR_113   | H, D_THR_113   | 2.98 | 2.16 | 15.81 |
| 5T6P.PDB | O, D_VAL_12    | N, D_SER_115   | H, D_SER_115   | 2.63 | 1.84 | 18.22 |
| 5T6P.PDB | OG, D_SER_115  | N, D_ALA_117   | H, D_ALA_117   | 2.99 | 2.16 | 13.20 |
| 5T6P.PDB | O, D_PHE_149   | N, D_THR_120   | H, D_THR_120   | 2.64 | 1.82 | 13.09 |
| 5T6P.PDB | O, D_LEU_144   | N, D_TYR_125   | H, D_TYR_125   | 2.84 | 2.03 | 17.31 |
| 5T6P.PDB | O, D_GLY_142   | N, D_LEU_127   | H, D_LEU_127   | 2.66 | 1.91 | 24.44 |
| 5T6P.PDB | O, D_VAL_184   | N, D_LEU_141   | H, D_LEU_141   | 2.71 | 1.86 | 8.53  |
| 5T6P.PDB | O, D_LEU_127   | N, D_GLY_142   | H, D_GLY_142   | 2.95 | 2.21 | 25.85 |
| 5T6P.PDB | O, D_SER_182   | N, D_CYS_143   | H, D_CYS_143   | 2.92 | 2.13 | 19.17 |
| 5T6P.PDB | O, D_TYR_125   | N, D_LEU_144   | H, D_LEU_144   | 2.68 | 1.83 | 6.73  |
| 5T6P.PDB | O, D_LEU_180   | N, D_VAL_145   | H, D_VAL_145   | 2.89 | 2.05 | 11.52 |
| 5T6P.PDB | O, D_TYR_178   | N, D_GLY_147   | H, D_GLY_147   | 2.78 | 2.07 | 29.34 |
| 5T6P.PDB | O, D_THR_120   | N, D_PHE_149   | H, D_PHE_149   | 2.69 | 1.86 | 13.14 |
| 5T6P.PDB | O, D_ASN_199   | N, D_THR_156   | H, D_THR_156   | 2.86 | 2.04 | 16.17 |
| 5T6P.PDB | OG, D_SER_182  | NE1, D_TRP_157 | HE1, D_TRP_157 | 2.97 | 2.13 | 11.56 |
| 5T6P.PDB | O, D_THR_197   | N, D_ASN_158   | H, D_ASN_158   | 2.80 | 1.97 | 13.62 |
| 5T6P.PDB | OD1, D_ASN_199 | N, D_SER_159   | H, D_SER_159   | 2.76 | 1.93 | 12.39 |
| 5T6P.PDB | O, D_SER_181   | N, D_PHE_169   | H, D_PHE_169   | 2.92 | 2.06 | 6.74  |
| 5T6P.PDB | O, D_LEU_177   | N, D_GLN_174   | H, D_GLN_174   | 2.90 | 2.05 | 9.77  |
| 5T6P.PDB | O, D_VAL_145   | N, D_LEU_180   | H, D_LEU_180   | 2.92 | 2.09 | 12.70 |
| 5T6P.PDB | O, D_CYS_143   | N, D_SER_182   | H, D_SER_182   | 2.99 | 2.18 | 17.49 |
| 5T6P.PDB | O, D_LEU_141   | N, D_VAL_184   | H, D_VAL_184   | 2.83 | 2.00 | 11.08 |
| 5T6P.PDB | O, D_VAL_139   | N, D_VAL_186   | H, D_VAL_186   | 2.98 | 2.17 | 17.79 |
| 5T6P.PDB | N, D_MET_138   | OG, D_SER_188  | HG, D_SER_188  | 2.81 | 2.08 | 24.12 |
| 5T6P.PDB | O, D_LYS_211   | N, D_CYS_198   | H, D_CYS_198   | 2.89 | 2.04 | 10.05 |
| 5T6P.PDB | O, D_THR_156   | N, D_ASN_199   | H, D_ASN_199   | 2.84 | 1.98 | 3.08  |
| 5T6P.PDB | O, D_THR_207   | N, D_HIS_202   | H, D_HIS_202   | 2.87 | 2.08 | 19.72 |
| 5T6P.PDB | O, D_PRO_150   | NE2, D_HIS_202 | HE2, D_HIS_202 | 2.50 | 1.66 | 9.39  |
| 5T6P.PDB | O, D_PRO_203   | N, D_SER_206   | H, D_SER_206   | 3.00 | 2.24 | 23.51 |
| 5T6P.PDB | O, D_HIS_202   | N, D_THR_207   | H, D_THR_207   | 2.78 | 1.92 | 6.54  |
| 5T6P.PDB | O, D_VAL_200   | N, D_VAL_209   | H, D_VAL_209   | 2.88 | 2.09 | 19.68 |
| 5T6P.PDB | O, D_CYS_198   | N, D_LYS_211   | H, D_LYS_211   | 2.87 | 2.05 | 13.61 |
| 5T6P.PDB | OE1, C_GLU_39  | NE, E_ARG_5    | HE, E_ARG_5    | 2.86 | 2.02 | 10.72 |



---

Table 1711: 5T6P-specific side chain and main chain hydrogen bonding analysis. In this table, a PDB file is specified with a four-letter PDB ID, except that the names of the PDB files corresponding to the single NMR structural model split from the NMR ensemble is specified with a four-letter PDB ID in addition to a hyphen followed by the single NMR structural model numeric ID, the residue naming scheme is **Chain ID\_residue name\_residue number**,  $\angle ADH$  represents the angle formed by acceptor (A), donor (D) and hydrogen (H) ( $\angle ADH$ ).

| PDB      | Acceptor (A)   | Donor (D)      | Hydrogen (H)   | D-A (Å) | H-A (Å) | $\angle ADH(^{\circ})$ |
|----------|----------------|----------------|----------------|---------|---------|------------------------|
| 5T78.PDB | OD1, C.ASN.150 | N, A.ASP.1     | H1, A.ASP.1    | 2.85    | 2.07    | 23.76                  |
| 5T78.PDB | OG, A.SER.26   | N, A.LEU.3     | H, A.LEU.3     | 2.77    | 1.92    | 5.16                   |
| 5T78.PDB | O, A.ARG.24    | N, A.THR.5     | H, A.THR.5     | 2.76    | 1.94    | 14.03                  |
| 5T78.PDB | O, A.SER.22    | N, A.THR.7     | H, A.THR.7     | 2.99    | 2.18    | 17.34                  |
| 5T78.PDB | O, A.LYS.108   | N, A.LEU.11    | H, A.LEU.11    | 2.88    | 2.17    | 29.09                  |
| 5T78.PDB | O, A.VAL.83    | N, A.GLY.16    | H, A.GLY.16    | 2.89    | 2.04    | 7.22                   |
| 5T78.PDB | O, A.LEU.78    | N, A.ILE.21    | H, A.ILE.21    | 2.93    | 2.10    | 12.51                  |
| 5T78.PDB | O, A.THR.7     | N, A.SER.22    | H, A.SER.22    | 2.70    | 1.84    | 3.93                   |
| 5T78.PDB | O, A.PHE.76    | N, A.CYS.23    | H, A.CYS.23    | 2.77    | 1.99    | 20.04                  |
| 5T78.PDB | O, A.THR.5     | N, A.ARG.24    | H, A.ARG.24    | 2.73    | 1.95    | 21.00                  |
| 5T78.PDB | O, A.THR.74    | N, A.SER.25    | H, A.SER.25    | 2.93    | 2.13    | 18.34                  |
| 5T78.PDB | O, A.LYS.35    | N, A.HIS.31    | H, A.HIS.31    | 2.86    | 2.05    | 16.92                  |
| 5T78.PDB | O, A.HIS.31    | N, A.GLY.34    | H, A.GLY.34    | 2.98    | 2.13    | 5.88                   |
| 5T78.PDB | OD1, A.ASN.33  | N, A.LYS.35    | H, A.LYS.35    | 2.95    | 2.11    | 11.40                  |
| 5T78.PDB | O, A.PHE.94    | N, A.GLU.39    | H, A.GLU.39    | 2.67    | 1.85    | 14.17                  |
| 5T78.PDB | O, A.ILE.53    | N, A.TRP.40    | H, A.TRP.40    | 2.80    | 1.98    | 14.47                  |
| 5T78.PDB | O, A.TYR.92    | N, A.TYR.41    | H, A.TYR.41    | 2.83    | 2.00    | 12.62                  |
| 5T78.PDB | O, A.LYS.50    | N, A.LEU.42    | H, A.LEU.42    | 2.94    | 2.12    | 15.79                  |
| 5T78.PDB | O, A.VAL.90    | N, A.GLN.43    | H, A.GLN.43    | 2.75    | 1.91    | 9.96                   |
| 5T78.PDB | O, A.GLN.47    | NE2, A.GLN.43  | HE21, A.GLN.43 | 2.87    | 2.05    | 14.69                  |
| 5T78.PDB | OE1, B.GLN.39  | NE2, A.GLN.43  | HE22, A.GLN.43 | 2.92    | 2.08    | 9.79                   |
| 5T78.PDB | O, A.LYS.44    | N, A.GLN.47    | H, A.GLN.47    | 2.88    | 2.11    | 22.48                  |
| 5T78.PDB | O, B.GLY.107   | OG, A.SER.48   | HG, A.SER.48   | 2.44    | 1.64    | 14.53                  |
| 5T78.PDB | O, A.LEU.42    | N, A.LYS.50    | H, A.LYS.50    | 2.92    | 2.18    | 25.97                  |
| 5T78.PDB | O, A.TRP.40    | N, A.LEU.52    | H, A.LEU.52    | 2.90    | 2.04    | 3.31                   |
| 5T78.PDB | O, A.LYS.58    | N, A.TYR.54    | H, A.TYR.54    | 2.94    | 2.12    | 16.14                  |
| 5T78.PDB | O, A.LEU.38    | N, A.VAL.56    | H, A.VAL.56    | 2.99    | 2.14    | 9.64                   |
| 5T78.PDB | O, A.ARG.55    | N, A.SER.57    | H, A.SER.57    | 2.65    | 1.91    | 25.85                  |
| 5T78.PDB | O, A.TYR.54    | N, A.LYS.58    | H, A.LYS.58    | 2.90    | 2.09    | 16.26                  |
| 5T78.PDB | O, A.LEU.52    | N, A.PHE.60    | H, A.PHE.60    | 2.85    | 2.03    | 15.54                  |
| 5T78.PDB | OD2, A.ASP.87  | NH1, A.ARG.66  | HH12, A.ARG.66 | 2.55    | 1.80    | 24.29                  |
| 5T78.PDB | OD1, A.ASP.87  | NH2, A.ARG.66  | HH22, A.ARG.66 | 2.87    | 2.03    | 11.23                  |
| 5T78.PDB | O, A.LYS.79    | N, A.SER.68    | H, A.SER.68    | 2.94    | 2.13    | 16.71                  |
| 5T78.PDB | O, A.THR.77    | N, A.SER.70    | H, A.SER.70    | 2.85    | 2.11    | 25.59                  |
| 5T78.PDB | O, A.CYS.23    | N, A.PHE.76    | H, A.PHE.76    | 2.95    | 2.11    | 10.95                  |
| 5T78.PDB | O, A.SER.70    | N, A.THR.77    | H, A.THR.77    | 2.83    | 2.03    | 18.36                  |
| 5T78.PDB | O, A.ILE.21    | N, A.LEU.78    | H, A.LEU.78    | 2.90    | 2.07    | 13.51                  |
| 5T78.PDB | O, A.SER.68    | N, A.LYS.79    | H, A.LYS.79    | 2.71    | 1.87    | 11.82                  |
| 5T78.PDB | O, A.ALA.19    | N, A.ILE.80    | H, A.ILE.80    | 2.96    | 2.14    | 14.84                  |
| 5T78.PDB | OD2, A.ASP.87  | N, A.GLU.84    | H, A.GLU.84    | 2.82    | 1.98    | 8.50                   |
| 5T78.PDB | O, A.GLU.84    | N, A.ASP.87    | H, A.ASP.87    | 2.85    | 2.00    | 6.16                   |
| 5T78.PDB | O, A.GLN.43    | N, A.VAL.90    | H, A.VAL.90    | 2.81    | 1.97    | 10.43                  |
| 5T78.PDB | O, A.THR.107   | N, A.TYR.91    | H, A.TYR.91    | 2.77    | 1.92    | 8.36                   |
| 5T78.PDB | O, A.ASP.87    | OH, A.TYR.91   | HH, A.TYR.91   | 2.69    | 1.98    | 27.33                  |
| 5T78.PDB | O, A.TYR.41    | N, A.TYR.92    | H, A.TYR.92    | 2.75    | 1.92    | 13.82                  |
| 5T78.PDB | O, B.LYS.43    | OH, A.TYR.92   | HH, A.TYR.92   | 2.74    | 2.03    | 27.20                  |
| 5T78.PDB | O, A.HIS.98    | NE2, A.GLN.95  | HE22, A.GLN.95 | 2.92    | 2.12    | 18.53                  |
| 5T78.PDB | O, A.TYR.37    | N, A.GLY.96    | H, A.GLY.96    | 2.69    | 1.89    | 17.50                  |
| 5T78.PDB | O, A.ILE.29    | OG, A.SER.97   | HG, A.SER.97   | 2.60    | 1.77    | 8.73                   |
| 5T78.PDB | OE1, A.GLN.95  | N, A.HIS.98    | H, A.HIS.98    | 2.98    | 2.13    | 5.45                   |
| 5T78.PDB | O, A.VAL.2     | OG1, A.THR.102 | HG1, A.THR.102 | 2.90    | 2.09    | 13.47                  |
| 5T78.PDB | O, A.CYS.93    | N, A.GLY.104   | H, A.GLY.104   | 2.80    | 1.97    | 11.96                  |
| 5T78.PDB | O, A.TYR.91    | N, A.THR.107   | H, A.THR.107   | 2.90    | 2.14    | 23.68                  |
| 5T78.PDB | O, A.PRO.8     | OG1, A.THR.107 | HG1, A.THR.107 | 2.83    | 2.13    | 28.32                  |
| 5T78.PDB | O, A.GLY.89    | N, A.LEU.109   | H, A.LEU.109   | 2.84    | 2.00    | 8.45                   |
| 5T78.PDB | O, A.LEU.11    | N, A.GLU.110   | H, A.GLU.110   | 2.89    | 2.03    | 4.85                   |
| 5T78.PDB | OE1, A.GLN.171 | N, A.ILE.111   | H, A.ILE.111   | 2.97    | 2.14    | 12.35                  |

|          |                |                |                 |      |      |       |
|----------|----------------|----------------|-----------------|------|------|-------|
| 5T78.PDB | O, A_VAL_13    | N, A_LYS_112   | H, A_LYS_112    | 2.85 | 2.01 | 10.13 |
| 5T78.PDB | O, A_ASP_175   | NE, A_ARG_113  | HE, A_ARG_113   | 2.74 | 2.03 | 29.28 |
| 5T78.PDB | O, A_TYR_145   | N, A_ALA_116   | H, A_ALA_116    | 2.81 | 1.98 | 12.42 |
| 5T78.PDB | O, A_ASN_142   | N, A_THR_119   | H, A_THR_119    | 2.97 | 2.16 | 15.94 |
| 5T78.PDB | O, A_VAL_138   | N, A_PHE_123   | H, A_PHE_123    | 2.72 | 1.95 | 21.36 |
| 5T78.PDB | OG, A_SER_136  | NE2, A_GLN_129 | HE22, A_GLN_129 | 2.86 | 2.01 | 3.70  |
| 5T78.PDB | OE1, A_GLN_129 | N, A_SER_136   | H, A_SER_136    | 2.91 | 2.06 | 8.11  |
| 5T78.PDB | O, A_LEU_184   | N, A_VAL_137   | H, A_VAL_137    | 2.77 | 1.93 | 11.05 |
| 5T78.PDB | O, A_SER_182   | N, A_CYS_139   | H, A_CYS_139    | 2.88 | 2.10 | 21.11 |
| 5T78.PDB | O, A_SER_121   | N, A_PHE_140   | H, A_PHE_140    | 2.83 | 2.07 | 23.10 |
| 5T78.PDB | O, A_MET_180   | N, A_LEU_141   | H, A_LEU_141    | 2.79 | 1.93 | 5.17  |
| 5T78.PDB | OG, A_SER_179  | N, A_ASN_143   | H, A_ASN_143    | 2.98 | 2.18 | 18.51 |
| 5T78.PDB | O, A_TYR_178   | N, A_PHE_144   | H, A_PHE_144    | 2.83 | 2.00 | 10.95 |
| 5T78.PDB | O, A_GLU_200   | N, A_LYS_152   | H, A_LYS_152    | 2.93 | 2.13 | 17.83 |
| 5T78.PDB | OG, A_SER_182  | NE1, A_TRP_153 | HE1, A_TRP_153  | 2.68 | 1.86 | 12.79 |
| 5T78.PDB | O, A_THR_198   | N, A_LYS_154   | H, A_LYS_154    | 2.86 | 2.06 | 17.77 |
| 5T78.PDB | O, A_SER_158   | N, A_ILE_155   | H, A_ILE_155    | 2.71 | 1.89 | 15.55 |
| 5T78.PDB | O, A_SER_196   | N, A_ASP_156   | H, A_ASP_156    | 2.87 | 2.03 | 11.28 |
| 5T78.PDB | O, A_THR_183   | N, A_LEU_165   | H, A_LEU_165    | 2.87 | 2.15 | 28.15 |
| 5T78.PDB | O, A_SER_181   | N, A_SER_167   | H, A_SER_167    | 2.88 | 2.13 | 24.95 |
| 5T78.PDB | O, B_PRO_170   | OG, A_SER_167  | HG, A_SER_167   | 2.91 | 2.11 | 14.54 |
| 5T78.PDB | O, A_SER_179   | N, A_THR_169   | H, A_THR_169    | 2.90 | 2.06 | 10.39 |
| 5T78.PDB | O, A_ASP_170   | OG1, A_THR_169 | HG1, A_THR_169  | 2.92 | 2.23 | 29.63 |
| 5T78.PDB | O, A_ILE_111   | NE2, A_GLN_171 | HE22, A_GLN_171 | 2.73 | 1.91 | 15.69 |
| 5T78.PDB | O, A_THR_177   | N, A_ASP_172   | H, A_ASP_172    | 2.80 | 1.95 | 9.74  |
| 5T78.PDB | OD1, A_ASP_172 | N, A_LYS_174   | H, A_LYS_174    | 2.78 | 1.98 | 17.25 |
| 5T78.PDB | OD1, A_ASP_175 | N, A_THR_177   | H, A_THR_177    | 2.96 | 2.13 | 13.21 |
| 5T78.PDB | OD1, A_ASP_175 | OG1, A_THR_177 | HG1, A_THR_177  | 2.57 | 1.74 | 7.68  |
| 5T78.PDB | O, A_PHE_144   | N, A_TYR_178   | H, A_TYR_178    | 2.78 | 1.93 | 4.54  |
| 5T78.PDB | O, A_LEU_141   | N, A_MET_180   | H, A_MET_180    | 2.83 | 2.03 | 17.69 |
| 5T78.PDB | O, A_SER_167   | N, A_SER_181   | H, A_SER_181    | 2.92 | 2.13 | 19.33 |
| 5T78.PDB | O, A_CYS_139   | N, A_SER_182   | H, A_SER_182    | 2.91 | 2.07 | 11.51 |
| 5T78.PDB | OD1, A_ASN_166 | OG, A_SER_182  | HG, A_SER_182   | 2.63 | 1.89 | 23.17 |
| 5T78.PDB | O, A_LEU_165   | N, A_THR_183   | H, A_THR_183    | 2.82 | 2.01 | 15.88 |
| 5T78.PDB | O, A_VAL_137   | N, A_LEU_184   | H, A_LEU_184    | 2.80 | 1.99 | 16.92 |
| 5T78.PDB | O, A_GLY_163   | N, A_THR_185   | H, A_THR_185    | 2.94 | 2.10 | 11.69 |
| 5T78.PDB | O, A_ALA_135   | N, A_LEU_186   | H, A_LEU_186    | 2.79 | 1.97 | 14.73 |
| 5T78.PDB | O, A_GLY_133   | N, A_LYS_188   | H, A_LYS_188    | 2.91 | 2.08 | 12.09 |
| 5T78.PDB | OD2, A_ASP_156 | ND1, A_HIS_194 | HD1, A_HIS_194  | 2.73 | 1.92 | 16.43 |
| 5T78.PDB | O, A_LYS_154   | N, A_THR_198   | H, A_THR_198    | 2.92 | 2.19 | 26.56 |
| 5T78.PDB | O, A_LYS_152   | N, A_GLU_200   | H, A_GLU_200    | 2.90 | 2.08 | 15.52 |
| 5T78.PDB | O, A_ILE_210   | N, A_ALA_201   | H, A_ALA_201    | 2.96 | 2.16 | 17.21 |
| 5T78.PDB | O, A_ASN_150   | N, A_THR_202   | H, A_THR_202    | 2.72 | 1.89 | 13.21 |
| 5T78.PDB | ND1, A_HIS_203 | OG1, A_THR_205 | HG1, A_THR_205  | 2.99 | 2.26 | 25.09 |
| 5T78.PDB | O, A_ALA_201   | N, A_ILE_210   | H, A_ILE_210    | 2.84 | 2.02 | 14.61 |
| 5T78.PDB | OG1, A_THR_198 | OG, A_SER_213  | HG, A_SER_213   | 2.76 | 1.99 | 20.46 |
| 5T78.PDB | O, B_SER_21    | N, B_SER_7     | H, B_SER_7      | 2.89 | 2.16 | 26.40 |
| 5T78.PDB | O, B_THR_113   | N, B_VAL_12    | H, B_VAL_12     | 2.88 | 2.08 | 18.22 |
| 5T78.PDB | O, B_LEU_86    | N, B_GLY_15    | H, B_GLY_15     | 2.82 | 1.98 | 8.23  |
| 5T78.PDB | O, B_LEU_81    | N, B_LEU_20    | H, B_LEU_20     | 2.77 | 1.95 | 14.38 |
| 5T78.PDB | O, B_VAL_5     | N, B_ALA_23    | H, B_ALA_23     | 2.79 | 1.96 | 12.99 |
| 5T78.PDB | O, B_ASN_77    | N, B_ALA_24    | H, B_ALA_24     | 2.95 | 2.10 | 5.61  |
| 5T78.PDB | O, B_ILE_97    | N, B_SER_35    | H, B_SER_35     | 3.00 | 2.17 | 14.65 |
| 5T78.PDB | O, B_ALA_49    | N, B_TRP_36    | H, B_TRP_36     | 2.97 | 2.18 | 20.26 |
| 5T78.PDB | O, B_GLU_46    | N, B_ARG_38    | H, B_ARG_38     | 2.72 | 1.88 | 9.22  |
| 5T78.PDB | OE1, B_GLU_46  | NE, B_ARG_38   | HE, B_ARG_38    | 2.94 | 2.16 | 20.63 |
| 5T78.PDB | OH, B_TYR_94   | NH1, B_ARG_38  | HH11, B_ARG_38  | 2.90 | 2.09 | 15.42 |
| 5T78.PDB | OD1, B_ASP_90  | NH1, B_ARG_38  | HH12, B_ARG_38  | 2.89 | 2.09 | 17.62 |

|          |                |                |                |      |      |       |
|----------|----------------|----------------|----------------|------|------|-------|
| 5T78.PDB | O, B_ILE.93    | N, B_GLN.39    | H, B_GLN.39    | 2.78 | 1.98 | 17.72 |
| 5T78.PDB | OE1, A_GLN.43  | NE2, B_GLN.39  | HE22, B_GLN.39 | 2.63 | 1.78 | 5.56  |
| 5T78.PDB | O, B_THR.40    | N, B_LYS.43    | H, B_LYS.43    | 2.64 | 1.83 | 15.69 |
| 5T78.PDB | O, B_ARG.38    | N, B_GLU.46    | H, B_GLU.46    | 2.78 | 1.95 | 11.59 |
| 5T78.PDB | O, B_TRP.36    | N, B_VAL.48    | H, B_VAL.48    | 2.96 | 2.11 | 4.39  |
| 5T78.PDB | O, B_GLN.82    | N, B_THR.69    | H, B_THR.69    | 2.84 | 2.05 | 19.71 |
| 5T78.PDB | OH, B_TYR.60   | N, B_ILE.70    | H, B_ILE.70    | 2.81 | 2.01 | 18.63 |
| 5T78.PDB | OD1, B_ASN.74  | NE, B_ARG.72   | HE, B_ARG.72   | 2.69 | 1.95 | 25.68 |
| 5T78.PDB | O, B_THR.78    | N, B_ASP.73    | H, B_ASP.73    | 3.00 | 2.15 | 8.98  |
| 5T78.PDB | O, B_CYS.22    | N, B_LEU.79    | H, B_LEU.79    | 2.95 | 2.15 | 18.76 |
| 5T78.PDB | O, B_SER.71    | N, B_TYR.80    | H, B_TYR.80    | 2.82 | 1.97 | 8.86  |
| 5T78.PDB | O, B_LEU.20    | N, B_LEU.81    | H, B_LEU.81    | 2.97 | 2.19 | 21.07 |
| 5T78.PDB | O, B_THR.69    | N, B_GLN.82    | H, B_GLN.82    | 2.85 | 2.05 | 17.58 |
| 5T78.PDB | O, B_LEU.18    | N, B_MET.83    | H, B_MET.83    | 2.74 | 1.98 | 23.26 |
| 5T78.PDB | OD2, B_ASP.90  | N, B_LYS.87    | H, B_LYS.87    | 2.78 | 1.92 | 2.04  |
| 5T78.PDB | O, B_GLN.39    | N, B_ILE.93    | H, B_ILE.93    | 2.84 | 2.04 | 18.32 |
| 5T78.PDB | O, B_THR.110   | N, B_TYR.94    | H, B_TYR.94    | 2.77 | 1.91 | 3.39  |
| 5T78.PDB | O, B_ASP.90    | OH, B_TYR.94   | HH, B_TYR.94   | 2.74 | 1.93 | 12.66 |
| 5T78.PDB | O, B_VAL.37    | N, B_TYR.95    | H, B_TYR.95    | 2.67 | 1.82 | 4.17  |
| 5T78.PDB | OE1, B_GLN.39  | OH, B_TYR.95   | HH, B_TYR.95   | 2.91 | 2.11 | 14.46 |
| 5T78.PDB | OE2, B_GLU.6   | N, B_CYS.96    | H, B_CYS.96    | 2.65 | 1.81 | 8.49  |
| 5T78.PDB | OD1, B_ASP.104 | N, B_GLY.102   | H, B_GLY.102   | 2.93 | 2.09 | 9.46  |
| 5T78.PDB | OH, A_TYR.41   | N, B_PHE.103   | H, B_PHE.103   | 2.85 | 2.00 | 5.24  |
| 5T78.PDB | O, B_PHE.103   | NE1, B_TRP.106 | HE1, B_TRP.106 | 2.89 | 2.16 | 27.37 |
| 5T78.PDB | O, B_CYS.96    | N, B_GLY.107   | H, B_GLY.107   | 2.88 | 2.05 | 11.81 |
| 5T78.PDB | O, B_ALA.92    | N, B_LEU.112   | H, B_LEU.112   | 2.91 | 2.10 | 16.63 |
| 5T78.PDB | OG1, B_THR.91  | N, B_VAL.114   | H, B_VAL.114   | 2.84 | 1.98 | 4.39  |
| 5T78.PDB | O, B_PHE.149   | N, B_THR.120   | H, B_THR.120   | 2.84 | 2.00 | 10.54 |
| 5T78.PDB | O, B_LYS.146   | N, B_SER.123   | H, B_SER.123   | 2.99 | 2.18 | 17.27 |
| 5T78.PDB | O, B_LEU.144   | N, B_TYR.125   | H, B_TYR.125   | 2.88 | 2.07 | 16.65 |
| 5T78.PDB | O, B_GLY.142   | N, B_LEU.127   | H, B_LEU.127   | 2.85 | 2.06 | 19.67 |
| 5T78.PDB | O, B_VAL.186   | N, B_VAL.139   | H, B_VAL.139   | 2.76 | 1.90 | 4.98  |
| 5T78.PDB | OG1, B_THR.185 | OG1, B_THR.140 | HG1, B_THR.140 | 2.97 | 2.14 | 5.19  |
| 5T78.PDB | O, B_VAL.184   | N, B_LEU.141   | H, B_LEU.141   | 2.73 | 1.89 | 10.61 |
| 5T78.PDB | O, B_SER.182   | N, B_CYS.143   | H, B_CYS.143   | 2.99 | 2.23 | 23.48 |
| 5T78.PDB | O, B_TYR.125   | N, B_LEU.144   | H, B_LEU.144   | 2.79 | 1.95 | 10.28 |
| 5T78.PDB | O, B_LEU.180   | N, B_VAL.145   | H, B_VAL.145   | 2.91 | 2.07 | 9.52  |
| 5T78.PDB | O, B_SER.123   | N, B_LYS.146   | H, B_LYS.146   | 2.85 | 2.01 | 7.84  |
| 5T78.PDB | O, B_THR.120   | N, B_PHE.149   | H, B_PHE.149   | 2.90 | 2.09 | 17.04 |
| 5T78.PDB | O, B_ALA.201   | N, B_THR.154   | H, B_THR.154   | 3.00 | 2.21 | 19.88 |
| 5T78.PDB | O, B_ASN.199   | N, B_THR.156   | H, B_THR.156   | 2.81 | 1.98 | 11.68 |
| 5T78.PDB | O, B_THR.197   | N, B_ASN.158   | H, B_ASN.158   | 2.82 | 1.98 | 10.92 |
| 5T78.PDB | OD1, B_ASN.199 | N, B_SER.159   | H, B_SER.159   | 2.70 | 1.89 | 14.93 |
| 5T78.PDB | O, B_TRP.157   | N, B_GLY.160   | H, B_GLY.160   | 2.98 | 2.17 | 16.73 |
| 5T78.PDB | O, B_SER.181   | N, B_PHE.169   | H, B_PHE.169   | 2.81 | 1.96 | 6.40  |
| 5T78.PDB | O, B_LEU.177   | N, B_GLN.174   | H, B_GLN.174   | 2.94 | 2.10 | 10.35 |
| 5T78.PDB | O, B_TYR.148   | N, B_TYR.178   | H, B_TYR.178   | 2.83 | 1.97 | 1.07  |
| 5T78.PDB | O, B_VAL.172   | N, B_THR.179   | H, B_THR.179   | 2.95 | 2.19 | 24.45 |
| 5T78.PDB | O, B_VAL.145   | N, B_LEU.180   | H, B_LEU.180   | 2.94 | 2.12 | 15.28 |
| 5T78.PDB | O, B_HIS.167   | N, B_SER.183   | H, B_SER.183   | 2.99 | 2.13 | 4.09  |
| 5T78.PDB | O, B_LEU.141   | N, B_VAL.184   | H, B_VAL.184   | 2.95 | 2.11 | 9.47  |
| 5T78.PDB | O, B_GLY.165   | N, B_THR.185   | H, B_THR.185   | 2.86 | 2.16 | 29.53 |
| 5T78.PDB | O, B_VAL.139   | N, B_VAL.186   | H, B_VAL.186   | 2.86 | 2.08 | 20.52 |
| 5T78.PDB | OD1, B_ASN.158 | N, B_THR.197   | H, B_THR.197   | 2.72 | 1.93 | 18.91 |
| 5T78.PDB | O, B_LYS.211   | N, B_CYS.198   | H, B_CYS.198   | 2.79 | 1.94 | 3.58  |
| 5T78.PDB | O, B_THR.156   | N, B_ASN.199   | H, B_ASN.199   | 2.75 | 1.89 | 4.63  |
| 5T78.PDB | O, B_VAL.209   | N, B_VAL.200   | H, B_VAL.200   | 2.85 | 2.01 | 8.95  |
| 5T78.PDB | O, B_THR.154   | N, B_ALA.201   | H, B_ALA.201   | 2.91 | 2.08 | 12.90 |

|          |               |                |                |      |      |       |
|----------|---------------|----------------|----------------|------|------|-------|
| 5T78.PDB | O, B_THR_207  | N, B_HIS_202   | H, B_HIS_202   | 2.79 | 1.94 | 7.70  |
| 5T78.PDB | O, B_PRO_150  | NE2, B_HIS_202 | HE2, B_HIS_202 | 2.74 | 1.92 | 14.58 |
| 5T78.PDB | O, B_PRO_203  | N, B_SER_206   | H, B_SER_206   | 2.79 | 2.01 | 21.34 |
| 5T78.PDB | O, B_VAL_200  | N, B_VAL_209   | H, B_VAL_209   | 2.83 | 2.00 | 12.26 |
| 5T78.PDB | O, B_CYS_198  | N, B_LYS_211   | H, B_LYS_211   | 2.91 | 2.09 | 14.58 |
| 5T78.PDB | O, B_VAL_196  | N, B_ILE_213   | H, B_ILE_213   | 2.98 | 2.13 | 8.16  |
| 5T78.PDB | OE1, A_GLU_39 | NH1, F_ARG_5   | HH11, F_ARG_5  | 2.68 | 1.83 | 9.33  |
| 5T78.PDB | OG, C_SER_26  | N, C_LEU_3     | H, C_LEU_3     | 2.73 | 1.88 | 4.61  |
| 5T78.PDB | O, C_ARG_24   | N, C_THR_5     | H, C_THR_5     | 2.78 | 1.95 | 10.72 |
| 5T78.PDB | O, C_TYR_91   | NE2, C_GLN_6   | HE22, C_GLN_6  | 2.96 | 2.13 | 12.54 |
| 5T78.PDB | O, C_SER_22   | N, C_THR_7     | H, C_THR_7     | 2.88 | 2.10 | 19.87 |
| 5T78.PDB | O, C_LYS_108  | N, C_LEU_11    | H, C_LEU_11    | 2.84 | 2.11 | 26.95 |
| 5T78.PDB | O, C_VAL_83   | N, C_GLY_16    | H, C_GLY_16    | 2.91 | 2.06 | 6.60  |
| 5T78.PDB | O, C_ILE_80   | N, C_ALA_19    | H, C_ALA_19    | 2.84 | 2.03 | 15.95 |
| 5T78.PDB | O, C_LEU_78   | N, C_ILE_21    | H, C_ILE_21    | 2.99 | 2.16 | 13.69 |
| 5T78.PDB | O, C_THR_7    | N, C_SER_22    | H, C_SER_22    | 2.73 | 1.88 | 3.18  |
| 5T78.PDB | O, C_PHE_76   | N, C_CYS_23    | H, C_CYS_23    | 2.75 | 1.96 | 19.40 |
| 5T78.PDB | O, C_THR_5    | N, C_ARG_24    | H, C_ARG_24    | 2.63 | 1.83 | 18.67 |
| 5T78.PDB | OD1, C_ASP_75 | NE, C_ARG_24   | HE, C_ARG_24   | 2.96 | 2.16 | 17.61 |
| 5T78.PDB | O, C_THR_74   | N, C_SER_25    | H, C_SER_25    | 2.94 | 2.15 | 19.26 |
| 5T78.PDB | O, C_LYS_35   | N, C_HIS_31    | H, C_HIS_31    | 2.92 | 2.13 | 19.70 |
| 5T78.PDB | OH, C_TYR_37  | ND2, C_ASN_33  | HD21, C_ASN_33 | 2.96 | 2.18 | 21.06 |
| 5T78.PDB | O, C_HIS_31   | N, C_GLY_34    | H, C_GLY_34    | 3.00 | 2.15 | 8.88  |
| 5T78.PDB | OD1, C_ASN_33 | N, C_LYS_35    | H, C_LYS_35    | 2.89 | 2.07 | 15.44 |
| 5T78.PDB | O, C_PHE_94   | N, C_GLU_39    | H, C_GLU_39    | 2.80 | 1.97 | 13.19 |
| 5T78.PDB | O, C_ILE_53   | N, C_TRP_40    | H, C_TRP_40    | 2.85 | 2.04 | 17.58 |
| 5T78.PDB | O, C_TYR_92   | N, C_TYR_41    | H, C_TYR_41    | 2.86 | 2.04 | 13.58 |
| 5T78.PDB | O, C_LYS_50   | N, C_LEU_42    | H, C_LEU_42    | 2.96 | 2.15 | 16.18 |
| 5T78.PDB | O, C_VAL_90   | N, C_GLN_43    | H, C_GLN_43    | 2.84 | 2.01 | 10.96 |
| 5T78.PDB | O, C_LYS_44   | N, C_GLN_47    | H, C_GLN_47    | 2.91 | 2.11 | 19.11 |
| 5T78.PDB | O, D_GLY_107  | OG, C_SER_48   | HG, C_SER_48   | 2.59 | 1.80 | 15.22 |
| 5T78.PDB | O, C_LEU_42   | N, C_LYS_50    | H, C_LYS_50    | 2.85 | 2.10 | 25.26 |
| 5T78.PDB | O, C_TRP_40   | N, C_LEU_52    | H, C_LEU_52    | 2.91 | 2.06 | 6.20  |
| 5T78.PDB | O, C_LYS_58   | N, C_TYR_54    | H, C_TYR_54    | 2.95 | 2.13 | 15.51 |
| 5T78.PDB | O, C_LEU_38   | N, C_VAL_56    | H, C_VAL_56    | 2.84 | 1.99 | 9.09  |
| 5T78.PDB | O, C_ARG_55   | N, C_SER_57    | H, C_SER_57    | 2.67 | 1.95 | 28.00 |
| 5T78.PDB | O, C_TYR_54   | N, C_LYS_58    | H, C_LYS_58    | 2.92 | 2.10 | 14.52 |
| 5T78.PDB | O, C_LEU_52   | N, C_PHE_60    | H, C_PHE_60    | 2.96 | 2.14 | 14.24 |
| 5T78.PDB | OD2, C_ASP_87 | NH1, C_ARG_66  | HH12, C_ARG_66 | 2.35 | 1.56 | 19.31 |
| 5T78.PDB | O, C_LYS_79   | N, C_SER_68    | H, C_SER_68    | 2.84 | 2.06 | 20.21 |
| 5T78.PDB | O, C_THR_77   | N, C_SER_70    | H, C_SER_70    | 2.99 | 2.25 | 25.43 |
| 5T78.PDB | O, C_CYS_23   | N, C_PHE_76    | H, C_PHE_76    | 2.98 | 2.15 | 10.91 |
| 5T78.PDB | O, C_SER_70   | N, C_THR_77    | H, C_THR_77    | 2.95 | 2.14 | 16.22 |
| 5T78.PDB | O, C_ILE_21   | N, C_LEU_78    | H, C_LEU_78    | 2.92 | 2.09 | 12.26 |
| 5T78.PDB | O, C_SER_68   | N, C_LYS_79    | H, C_LYS_79    | 2.69 | 1.86 | 12.12 |
| 5T78.PDB | O, C_ALA_19   | N, C_ILE_80    | H, C_ILE_80    | 2.92 | 2.10 | 14.89 |
| 5T78.PDB | O, C_ASP_17   | N, C_VAL_83    | H, C_VAL_83    | 2.96 | 2.10 | 6.35  |
| 5T78.PDB | O, C_GLU_84   | N, C_ASP_87    | H, C_ASP_87    | 2.96 | 2.11 | 8.35  |
| 5T78.PDB | O, C_GLN_43   | N, C_VAL_90    | H, C_VAL_90    | 2.89 | 2.05 | 10.76 |
| 5T78.PDB | O, C_THR_107  | N, C_TYR_91    | H, C_TYR_91    | 2.71 | 1.86 | 8.50  |
| 5T78.PDB | O, C_ASP_87   | OH, C_TYR_91   | HH, C_TYR_91   | 2.69 | 1.94 | 21.91 |
| 5T78.PDB | O, C_TYR_41   | N, C_TYR_92    | H, C_TYR_92    | 2.85 | 2.03 | 14.75 |
| 5T78.PDB | O, D_LYS_43   | OH, C_TYR_92   | HH, C_TYR_92   | 2.90 | 2.21 | 29.37 |
| 5T78.PDB | O, C_HIS_98   | NE2, C_GLN_95  | HE22, C_GLN_95 | 2.74 | 1.90 | 10.22 |
| 5T78.PDB | O, C_TYR_37   | N, C_GLY_96    | H, C_GLY_96    | 2.72 | 1.93 | 19.30 |
| 5T78.PDB | O, C_ILE_29   | OG, C_SER_97   | HG, C_SER_97   | 2.56 | 1.73 | 9.58  |
| 5T78.PDB | O, C_VAL_2    | OG1, C_THR_102 | HG1, C_THR_102 | 2.90 | 2.09 | 14.58 |
| 5T78.PDB | O, C_CYS_93   | N, C_GLY_104   | H, C_GLY_104   | 2.78 | 1.94 | 9.79  |

|          |                |                |                 |      |      |       |
|----------|----------------|----------------|-----------------|------|------|-------|
| 5T78.PDB | O, C_TYR_91    | N, C_THR_107   | H, C_THR_107    | 2.86 | 2.08 | 22.08 |
| 5T78.PDB | O, C_PRO_8     | OG1, C_THR_107 | HG1, C_THR_107  | 2.85 | 2.11 | 24.36 |
| 5T78.PDB | O, C_GLY_89    | N, C_LEU_109   | H, C_LEU_109    | 2.72 | 1.88 | 8.68  |
| 5T78.PDB | O, C_LEU_11    | N, C_GLU_110   | H, C_GLU_110    | 2.94 | 2.09 | 6.48  |
| 5T78.PDB | OE1, C_GLN_171 | N, C_ILE_111   | H, C_ILE_111    | 2.92 | 2.08 | 10.11 |
| 5T78.PDB | O, C_VAL_13    | N, C_LYS_112   | H, C_LYS_112    | 2.91 | 2.09 | 13.64 |
| 5T78.PDB | O, C_ASP_175   | NE, C_ARG_113  | HE, C_ARG_113   | 2.82 | 2.03 | 19.01 |
| 5T78.PDB | O, C_TYR_145   | N, C_ALA_116   | H, C_ALA_116    | 2.82 | 1.99 | 13.51 |
| 5T78.PDB | O, C_ASN_142   | N, C_THR_119   | H, C_THR_119    | 2.98 | 2.18 | 17.98 |
| 5T78.PDB | O, C_VAL_138   | N, C_PHE_123   | H, C_PHE_123    | 2.72 | 1.94 | 20.98 |
| 5T78.PDB | O, C_GLN_129   | OG, C_SER_132  | HG, C_SER_132   | 2.70 | 1.96 | 24.09 |
| 5T78.PDB | OE1, C_GLN_129 | N, C_SER_136   | H, C_SER_136    | 2.96 | 2.13 | 13.97 |
| 5T78.PDB | O, C_LEU_184   | N, C_VAL_137   | H, C_VAL_137    | 2.85 | 2.01 | 9.76  |
| 5T78.PDB | O, C_SER_182   | N, C_CYS_139   | H, C_CYS_139    | 2.88 | 2.10 | 20.35 |
| 5T78.PDB | O, C_SER_121   | N, C_PHE_140   | H, C_PHE_140    | 2.89 | 2.10 | 20.29 |
| 5T78.PDB | O, C_MET_180   | N, C_LEU_141   | H, C_LEU_141    | 2.83 | 1.97 | 5.00  |
| 5T78.PDB | OG, C_SER_179  | N, C_ASN_143   | H, C_ASN_143    | 2.76 | 1.98 | 21.20 |
| 5T78.PDB | O, C_TYR_178   | N, C_PHE_144   | H, C_PHE_144    | 2.82 | 2.00 | 13.31 |
| 5T78.PDB | OG, C_SER_182  | NE1, C_TRP_153 | HE1, C_TRP_153  | 2.84 | 2.01 | 13.01 |
| 5T78.PDB | O, C_THR_198   | N, C_LYS_154   | H, C_LYS_154    | 2.79 | 1.99 | 17.84 |
| 5T78.PDB | O, C_SER_158   | N, C_ILE_155   | H, C_ILE_155    | 2.77 | 1.97 | 16.65 |
| 5T78.PDB | O, C_SER_196   | N, C_ASP_156   | H, C_ASP_156    | 2.85 | 2.02 | 12.83 |
| 5T78.PDB | O, A_SER_26    | N, C_ASN_166   | H, C_ASN_166    | 2.63 | 1.86 | 20.95 |
| 5T78.PDB | O, D_PRO_170   | OG, C_SER_167  | HG, C_SER_167   | 2.87 | 2.05 | 10.83 |
| 5T78.PDB | O, C_LYS_147   | NE1, C_TRP_168 | HE1, C_TRP_168  | 2.87 | 2.16 | 29.23 |
| 5T78.PDB | O, C_SER_179   | N, C_THR_169   | H, C_THR_169    | 2.97 | 2.13 | 10.91 |
| 5T78.PDB | O, C_ILE_111   | NE2, C_GLN_171 | HE22, C_GLN_171 | 2.61 | 1.79 | 14.42 |
| 5T78.PDB | O, C_THR_177   | N, C_ASP_172   | H, C_ASP_172    | 2.84 | 2.00 | 11.78 |
| 5T78.PDB | OD1, C_ASP_175 | OG1, C_THR_177 | HG1, C_THR_177  | 2.53 | 1.70 | 9.09  |
| 5T78.PDB | O, C_PHE_144   | N, C_TYR_178   | H, C_TYR_178    | 2.83 | 1.97 | 6.87  |
| 5T78.PDB | O, C_LEU_141   | N, C_MET_180   | H, C_MET_180    | 2.81 | 2.01 | 18.22 |
| 5T78.PDB | O, C_SER_167   | N, C_SER_181   | H, C_SER_181    | 3.00 | 2.20 | 18.36 |
| 5T78.PDB | O, C_CYS_139   | N, C_SER_182   | H, C_SER_182    | 2.90 | 2.06 | 10.20 |
| 5T78.PDB | OD1, C_ASN_166 | OG, C_SER_182  | HG, C_SER_182   | 2.85 | 2.09 | 21.73 |
| 5T78.PDB | O, C_LEU_165   | N, C_THR_183   | H, C_THR_183    | 2.96 | 2.12 | 11.56 |
| 5T78.PDB | O, C_VAL_137   | N, C_LEU_184   | H, C_LEU_184    | 2.88 | 2.07 | 16.37 |
| 5T78.PDB | O, C_ALA_135   | N, C_LEU_186   | H, C_LEU_186    | 2.77 | 1.93 | 10.86 |
| 5T78.PDB | O, C_GLY_133   | N, C_LYS_188   | H, C_LYS_188    | 2.96 | 2.15 | 17.19 |
| 5T78.PDB | OG1, C_THR_187 | N, C_GLU_190   | H, C_GLU_190    | 2.96 | 2.14 | 14.63 |
| 5T78.PDB | OD2, C_ASP_156 | ND1, C_HIS_194 | HD1, C_HIS_194  | 2.58 | 1.78 | 18.23 |
| 5T78.PDB | O, C_LYS_152   | N, C_GLU_200   | H, C_GLU_200    | 2.99 | 2.19 | 18.60 |
| 5T78.PDB | O, C_ILE_210   | N, C_ALA_201   | H, C_ALA_201    | 2.91 | 2.11 | 18.88 |
| 5T78.PDB | O, C_ASN_150   | N, C_THR_202   | H, C_THR_202    | 2.79 | 1.96 | 11.41 |
| 5T78.PDB | O, C_PRO_146   | NE2, C_HIS_203 | HE2, C_HIS_203  | 2.99 | 2.15 | 9.93  |
| 5T78.PDB | ND1, C_HIS_203 | OG1, C_THR_205 | HG1, C_THR_205  | 3.00 | 2.26 | 23.83 |
| 5T78.PDB | O, C_ALA_201   | N, C_ILE_210   | H, C_ILE_210    | 2.84 | 2.01 | 13.72 |
| 5T78.PDB | O, C_ASN_195   | N, C_ARG_216   | H, C_ARG_216    | 2.82 | 2.00 | 14.32 |
| 5T78.PDB | O, D_SER_25    | N, D_LYS_3     | H, D_LYS_3      | 2.88 | 2.06 | 16.00 |
| 5T78.PDB | O, D_SER_21    | N, D_SER_7     | H, D_SER_7      | 2.77 | 2.07 | 29.94 |
| 5T78.PDB | O, D_THR_113   | N, D_VAL_12    | H, D_VAL_12     | 2.94 | 2.15 | 19.31 |
| 5T78.PDB | O, D_LEU_86    | N, D_GLY_15    | H, D_GLY_15     | 2.80 | 1.95 | 6.77  |
| 5T78.PDB | O, D_ALA_13    | N, D_GLY_16    | H, D_GLY_16     | 2.96 | 2.14 | 15.77 |
| 5T78.PDB | O, D_MET_83    | N, D_LEU_18    | H, D_LEU_18     | 2.98 | 2.18 | 18.13 |
| 5T78.PDB | O, D_LEU_81    | N, D_LEU_20    | H, D_LEU_20     | 2.82 | 2.00 | 15.18 |
| 5T78.PDB | O, D_VAL_5     | N, D_ALA_23    | H, D_ALA_23     | 2.89 | 2.09 | 16.85 |
| 5T78.PDB | O, D_ASN_77    | N, D_ALA_24    | H, D_ALA_24     | 2.81 | 1.96 | 7.81  |
| 5T78.PDB | O, D_ILE_97    | N, D_SER_35    | H, D_SER_35     | 2.90 | 2.09 | 16.41 |
| 5T78.PDB | O, D_ALA_49    | N, D_TRP_36    | H, D_TRP_36     | 2.96 | 2.19 | 21.68 |

|          |                |                |                |      |      |       |
|----------|----------------|----------------|----------------|------|------|-------|
| 5T78.PDB | O, D_GLU_46    | N, D_ARG_38    | H, D_ARG_38    | 2.84 | 1.99 | 7.93  |
| 5T78.PDB | OE1, D_GLU_46  | NE, D_ARG_38   | HE, D_ARG_38   | 2.65 | 1.91 | 25.36 |
| 5T78.PDB | OH, D_TYR_94   | NH1, D_ARG_38  | HH11, D_ARG_38 | 2.88 | 2.06 | 14.14 |
| 5T78.PDB | OD1, D_ASP_90  | NH1, D_ARG_38  | HH12, D_ARG_38 | 2.85 | 2.05 | 16.93 |
| 5T78.PDB | O, D_ILE_93    | N, D_GLN_39    | H, D_GLN_39    | 2.73 | 1.94 | 19.04 |
| 5T78.PDB | OE1, C_GLN_43  | NE2, D_GLN_39  | HE22, D_GLN_39 | 2.72 | 1.87 | 5.23  |
| 5T78.PDB | O, D_ARG_44    | N, D_THR_40    | H, D_THR_40    | 2.98 | 2.18 | 19.30 |
| 5T78.PDB | O, D_THR_40    | N, D_LYS_43    | H, D_LYS_43    | 2.67 | 1.84 | 13.85 |
| 5T78.PDB | O, D_ARG_38    | N, D_GLU_46    | H, D_GLU_46    | 2.84 | 2.01 | 12.67 |
| 5T78.PDB | O, D_TRP_36    | N, D_VAL_48    | H, D_VAL_48    | 2.98 | 2.12 | 3.28  |
| 5T78.PDB | O, D_MET_34    | N, D_ILE_51    | H, D_ILE_51    | 2.95 | 2.17 | 21.24 |
| 5T78.PDB | OD1, D_ASN_52  | N, D_GLY_56    | H, D_GLY_56    | 2.75 | 1.95 | 18.27 |
| 5T78.PDB | O, D_GLN_82    | N, D_THR_69    | H, D_THR_69    | 2.80 | 2.05 | 24.68 |
| 5T78.PDB | OH, D_TYR_60   | N, D_ILE_70    | H, D_ILE_70    | 2.81 | 2.01 | 18.25 |
| 5T78.PDB | OD1, D_ASN_74  | NE, D_ARG_72   | HE, D_ARG_72   | 2.71 | 2.01 | 29.42 |
| 5T78.PDB | O, D_TYR_32    | NH1, D_ARG_72  | HH12, D_ARG_72 | 2.98 | 2.17 | 17.20 |
| 5T78.PDB | O, D_CYS_22    | N, D_LEU_79    | H, D_LEU_79    | 2.88 | 2.07 | 17.29 |
| 5T78.PDB | O, D_SER_71    | N, D_TYR_80    | H, D_TYR_80    | 2.89 | 2.04 | 9.91  |
| 5T78.PDB | O, D_LEU_20    | N, D_LEU_81    | H, D_LEU_81    | 2.95 | 2.20 | 24.69 |
| 5T78.PDB | O, D_THR_69    | N, D_GLN_82    | H, D_GLN_82    | 2.94 | 2.12 | 15.46 |
| 5T78.PDB | O, D_LEU_18    | N, D_MET_83    | H, D_MET_83    | 2.79 | 2.00 | 20.15 |
| 5T78.PDB | OD2, D_ASP_90  | N, D_LYS_87    | H, D_LYS_87    | 2.89 | 2.04 | 6.02  |
| 5T78.PDB | O, D_LEU_112   | N, D_ALA_92    | H, D_ALA_92    | 2.85 | 2.07 | 20.10 |
| 5T78.PDB | O, D_GLN_39    | N, D_ILE_93    | H, D_ILE_93    | 2.93 | 2.16 | 22.14 |
| 5T78.PDB | O, D_THR_110   | N, D_TYR_94    | H, D_TYR_94    | 2.81 | 1.96 | 2.19  |
| 5T78.PDB | O, D_ASP_90    | OH, D_TYR_94   | HH, D_TYR_94   | 2.65 | 1.83 | 8.83  |
| 5T78.PDB | O, D_VAL_37    | N, D_TYR_95    | H, D_TYR_95    | 2.63 | 1.78 | 4.62  |
| 5T78.PDB | OE1, D_GLN_39  | OH, D_TYR_95   | HH, D_TYR_95   | 2.98 | 2.17 | 11.35 |
| 5T78.PDB | OE2, D_GLU_6   | N, D_CYS_96    | H, D_CYS_96    | 2.78 | 1.93 | 7.90  |
| 5T78.PDB | OD1, D_ASP_104 | N, D_GLY_102   | H, D_GLY_102   | 2.77 | 1.92 | 7.47  |
| 5T78.PDB | OH, C_TYR_41   | N, D_PHE_103   | H, D_PHE_103   | 2.85 | 2.00 | 7.54  |
| 5T78.PDB | O, D_CYS_96    | N, D_GLY_107   | H, D_GLY_107   | 2.94 | 2.10 | 10.44 |
| 5T78.PDB | OE1, D_GLU_6   | N, D_GLY_109   | H, D_GLY_109   | 2.82 | 1.99 | 12.53 |
| 5T78.PDB | O, D_ALA_92    | N, D_LEU_112   | H, D_LEU_112   | 2.76 | 1.94 | 15.02 |
| 5T78.PDB | OG1, D_THR_91  | N, D_VAL_114   | H, D_VAL_114   | 2.86 | 2.01 | 6.88  |
| 5T78.PDB | O, D_PHE_149   | N, D_THR_120   | H, D_THR_120   | 2.81 | 1.96 | 9.17  |
| 5T78.PDB | O, D_LYS_146   | N, D_SER_123   | H, D_SER_123   | 2.97 | 2.17 | 17.75 |
| 5T78.PDB | O, D_LEU_144   | N, D_TYR_125   | H, D_TYR_125   | 2.89 | 2.08 | 16.53 |
| 5T78.PDB | O, D_GLY_142   | N, D_LEU_127   | H, D_LEU_127   | 2.90 | 2.13 | 23.33 |
| 5T78.PDB | O, D_VAL_186   | N, D_VAL_139   | H, D_VAL_139   | 2.83 | 1.97 | 3.34  |
| 5T78.PDB | O, D_VAL_184   | N, D_LEU_141   | H, D_LEU_141   | 2.81 | 1.99 | 15.70 |
| 5T78.PDB | O, D_SER_182   | N, D_CYS_143   | H, D_CYS_143   | 2.95 | 2.18 | 22.37 |
| 5T78.PDB | O, D_TYR_125   | N, D_LEU_144   | H, D_LEU_144   | 2.93 | 2.09 | 9.92  |
| 5T78.PDB | O, D_LEU_180   | N, D_VAL_145   | H, D_VAL_145   | 2.81 | 1.97 | 7.59  |
| 5T78.PDB | O, D_SER_123   | N, D_LYS_146   | H, D_LYS_146   | 2.94 | 2.10 | 9.29  |
| 5T78.PDB | O, D_THR_120   | N, D_PHE_149   | H, D_PHE_149   | 2.90 | 2.10 | 18.43 |
| 5T78.PDB | O, D_ASN_199   | N, D_THR_156   | H, D_THR_156   | 2.94 | 2.10 | 10.47 |
| 5T78.PDB | OG, D_SER_182  | NE1, D_TRP_157 | HE1, D_TRP_157 | 2.99 | 2.19 | 18.03 |
| 5T78.PDB | O, D_THR_197   | N, D_ASN_158   | H, D_ASN_158   | 2.89 | 2.04 | 8.58  |
| 5T78.PDB | OD1, D_ASN_199 | N, D_SER_159   | H, D_SER_159   | 2.73 | 1.89 | 10.93 |
| 5T78.PDB | O, D_TRP_157   | N, D_GLY_160   | H, D_GLY_160   | 2.79 | 1.98 | 17.29 |
| 5T78.PDB | OD1, C_ASN_142 | NE2, D_HIS_167 | HE2, D_HIS_167 | 2.85 | 2.00 | 9.68  |
| 5T78.PDB | O, D_SER_181   | N, D_PHE_169   | H, D_PHE_169   | 2.91 | 2.06 | 5.50  |
| 5T78.PDB | O, D_THR_179   | N, D_VAL_172   | H, D_VAL_172   | 2.97 | 2.16 | 16.66 |
| 5T78.PDB | O, D_LEU_177   | N, D_GLN_174   | H, D_GLN_174   | 2.91 | 2.06 | 7.53  |
| 5T78.PDB | OD2, A_ASP_75  | N, D_SER_175   | H, D_SER_175   | 2.84 | 2.00 | 10.93 |
| 5T78.PDB | O, D_TYR_148   | N, D_TYR_178   | H, D_TYR_178   | 2.82 | 1.96 | 2.75  |
| 5T78.PDB | O, D_VAL_172   | N, D_THR_179   | H, D_THR_179   | 2.97 | 2.22 | 24.34 |

|          |                |                |                |      |      |       |
|----------|----------------|----------------|----------------|------|------|-------|
| 5T78.PDB | O, D_VAL_145   | N, D_LEU_180   | H, D_LEU_180   | 2.85 | 2.03 | 14.78 |
| 5T78.PDB | O, D_CYS_143   | N, D_SER_182   | H, D_SER_182   | 2.99 | 2.19 | 18.10 |
| 5T78.PDB | O, D_HIS_167   | N, D_SER_183   | H, D_SER_183   | 2.87 | 2.01 | 1.62  |
| 5T78.PDB | O, D_LEU_141   | N, D_VAL_184   | H, D_VAL_184   | 2.93 | 2.08 | 8.26  |
| 5T78.PDB | O, D_VAL_139   | N, D_VAL_186   | H, D_VAL_186   | 2.97 | 2.19 | 20.48 |
| 5T78.PDB | OD1, D_ASN_158 | N, D_THR_197   | H, D_THR_197   | 2.81 | 2.01 | 18.23 |
| 5T78.PDB | O, D_LYS_211   | N, D_CYS_198   | H, D_CYS_198   | 2.82 | 1.96 | 5.03  |
| 5T78.PDB | O, D_THR_156   | N, D_ASN_199   | H, D_ASN_199   | 2.88 | 2.02 | 1.38  |
| 5T78.PDB | O, D_VAL_209   | N, D_VAL_200   | H, D_VAL_200   | 2.81 | 1.96 | 8.46  |
| 5T78.PDB | O, D_THR_154   | N, D_ALA_201   | H, D_ALA_201   | 2.98 | 2.16 | 13.25 |
| 5T78.PDB | O, D_THR_207   | N, D_HIS_202   | H, D_HIS_202   | 2.80 | 1.95 | 7.22  |
| 5T78.PDB | O, D_PRO_150   | NE2, D_HIS_202 | HE2, D_HIS_202 | 2.66 | 1.84 | 14.06 |
| 5T78.PDB | O, D_PRO_203   | N, D_SER_206   | H, D_SER_206   | 2.91 | 2.12 | 19.46 |
| 5T78.PDB | O, D_VAL_200   | N, D_VAL_209   | H, D_VAL_209   | 2.85 | 2.03 | 14.24 |
| 5T78.PDB | O, D_CYS_198   | N, D_LYS_211   | H, D_LYS_211   | 2.85 | 2.05 | 18.38 |
| 5T78.PDB | OE1, C_GLU_39  | NH1, E_ARG_5   | HH11, E_ARG_5  | 2.69 | 1.87 | 13.16 |

Table 1712: 5T78-specific side chain and main chain hydrogen bonding analysis. In this table, a PDB file is specified with a four-letter PDB ID, except that the names of the PDB files corresponding to the single NMR structural model split from the NMR ensemble is specified with a four-letter PDB ID in addition to a hyphen followed by the single NMR structural model numeric ID, the residue naming scheme is **Chain ID\_residue name\_residue number**,  $\angle ADH$  represents the angle formed by acceptor (A), donor (D) and hydrogen (H) ( $\angle ADH$ ).



| PDB      | Acceptor (A)  | Donor (D)      | Hydrogen (H)   | D-A (Å) | H-A (Å) | $\angle ADH(^{\circ})$ |
|----------|---------------|----------------|----------------|---------|---------|------------------------|
| 5U3J.PDB | O, H.LEU.82C  | N, H.GLY.15    | H, H.GLY.15    | 2.68    | 1.83    | 3.74                   |
| 5U3J.PDB | O, H.LYS.13   | N, H.GLY.16    | H, H.GLY.16    | 2.99    | 2.15    | 12.62                  |
| 5U3J.PDB | O, H.MET.82   | N, H.LEU.18    | H, H.LEU.18    | 2.68    | 1.88    | 17.05                  |
| 5U3J.PDB | OE1, H.GLN.81 | NE, H.ARG.19   | HE, H.ARG.19   | 2.98    | 2.21    | 22.79                  |
| 5U3J.PDB | O, H.LEU.80   | N, H.LEU.20    | H, H.LEU.20    | 2.96    | 2.14    | 16.12                  |
| 5U3J.PDB | O, H.LEU.78   | N, H.CYS.22    | H, H.CYS.22    | 2.77    | 1.97    | 17.66                  |
| 5U3J.PDB | O, H.THR.28   | OG1, H.THR.32  | HG1, H.THR.32  | 2.71    | 2.00    | 27.44                  |
| 5U3J.PDB | OD2, H.ASP.53 | NE1, H.TRP.33  | HE1, H.TRP.33  | 2.97    | 2.22    | 24.73                  |
| 5U3J.PDB | O, H.THR.93   | N, H.SER.35    | H, H.SER.35    | 2.87    | 2.05    | 14.77                  |
| 5U3J.PDB | O, H.GLY.49   | N, H.TRP.36    | H, H.TRP.36    | 2.81    | 1.99    | 15.09                  |
| 5U3J.PDB | O, H.PHE.91   | N, H.VAL.37    | H, H.VAL.37    | 2.90    | 2.06    | 9.69                   |
| 5U3J.PDB | OE1, H.GLU.46 | NE, H.ARG.38   | HE, H.ARG.38   | 2.88    | 2.05    | 13.82                  |
| 5U3J.PDB | OD1, H.ASP.86 | NH1, H.ARG.38  | HH12, H.ARG.38 | 2.85    | 2.09    | 23.00                  |
| 5U3J.PDB | OG, H.SER.35  | NE1, H.TRP.47  | HE1, H.TRP.47  | 2.44    | 1.73    | 27.73                  |
| 5U3J.PDB | O, H.TRP.36   | N, H.VAL.48    | H, H.VAL.48    | 2.91    | 2.09    | 13.49                  |
| 5U3J.PDB | O, H.GLU.58   | N, H.ARG.50    | H, H.ARG.50    | 2.88    | 2.07    | 16.55                  |
| 5U3J.PDB | OE1, H.GLU.58 | NE, H.ARG.50   | HE, H.ARG.50   | 2.83    | 2.12    | 29.07                  |
| 5U3J.PDB | OE1, H.GLU.58 | NH2, H.ARG.50  | HH21, H.ARG.50 | 2.79    | 2.08    | 29.38                  |
| 5U3J.PDB | O, H.MET.34   | N, H.ILE.51    | H, H.ILE.51    | 2.70    | 1.90    | 17.80                  |
| 5U3J.PDB | O, H.ASN.52B  | N, H.GLY.54    | H, H.GLY.54    | 2.97    | 2.17    | 18.44                  |
| 5U3J.PDB | O, H.VAL.48   | N, H.ALA.60    | H, H.ALA.60    | 2.71    | 1.92    | 19.22                  |
| 5U3J.PDB | O, H.VAL.63   | N, H.ARG.66    | H, H.ARG.66    | 2.99    | 2.15    | 10.50                  |
| 5U3J.PDB | OD2, H.ASP.86 | NH1, H.ARG.66  | HH12, H.ARG.66 | 2.57    | 1.73    | 9.26                   |
| 5U3J.PDB | OD1, H.ASP.86 | NH2, H.ARG.66  | HH22, H.ARG.66 | 2.89    | 2.04    | 5.32                   |
| 5U3J.PDB | O, H.GLN.81   | N, H.THR.68    | H, H.THR.68    | 2.98    | 2.27    | 28.87                  |
| 5U3J.PDB | OH, H.TYR.59  | N, H.ILE.69    | H, H.ILE.69    | 2.88    | 2.05    | 11.11                  |
| 5U3J.PDB | O, H.THR.32   | NH1, H.ARG.71  | HH12, H.ARG.71 | 2.85    | 2.04    | 17.00                  |
| 5U3J.PDB | O, H.THR.77   | N, H.ASP.72    | H, H.ASP.72    | 2.83    | 2.04    | 19.14                  |
| 5U3J.PDB | O, H.ASP.72   | N, H.ARG.75    | H, H.ARG.75    | 2.96    | 2.12    | 10.52                  |
| 5U3J.PDB | O, H.ARG.75   | OG1, H.THR.77  | HG1, H.THR.77  | 2.85    | 2.06    | 17.00                  |
| 5U3J.PDB | O, H.CYS.22   | N, H.LEU.78    | H, H.LEU.78    | 2.84    | 2.02    | 14.17                  |
| 5U3J.PDB | O, H.SER.70   | N, H.TYR.79    | H, H.TYR.79    | 2.89    | 2.05    | 10.03                  |
| 5U3J.PDB | O, H.THR.68   | N, H.GLN.81    | H, H.GLN.81    | 2.76    | 1.91    | 9.85                   |
| 5U3J.PDB | O, H.LEU.18   | N, H.MET.82    | H, H.MET.82    | 2.72    | 1.89    | 13.44                  |
| 5U3J.PDB | O, H.ARG.66   | OG1, H.THR.82A | HG1, H.THR.82A | 2.74    | 1.94    | 14.02                  |
| 5U3J.PDB | O, H.GLY.16   | N, H.LEU.82C   | H, H.LEU.82C   | 2.98    | 2.20    | 20.11                  |
| 5U3J.PDB | OD2, H.ASP.86 | N, H.LYS.83    | H, H.LYS.83    | 2.93    | 2.08    | 5.84                   |
| 5U3J.PDB | O, H.GLN.39   | N, H.ARG.89    | H, H.ARG.89    | 2.74    | 1.90    | 10.05                  |
| 5U3J.PDB | O, H.THR.107  | N, H.TYR.90    | H, H.TYR.90    | 2.95    | 2.11    | 11.30                  |
| 5U3J.PDB | O, H.ASP.86   | OH, H.TYR.90   | HH, H.TYR.90   | 2.53    | 1.71    | 8.74                   |
| 5U3J.PDB | O, H.VAL.37   | N, H.PHE.91    | H, H.PHE.91    | 2.51    | 1.68    | 10.84                  |
| 5U3J.PDB | OE2, H.GLU.6  | N, H.CYS.92    | H, H.CYS.92    | 2.75    | 1.89    | 6.53                   |
| 5U3J.PDB | O, H.TRP.33   | N, H.ASP.95    | H, H.ASP.95    | 2.77    | 1.92    | 6.84                   |
| 5U3J.PDB | O, H.TYR.100K | N, H.GLU.98    | H, H.GLU.98    | 2.94    | 2.22    | 28.79                  |
| 5U3J.PDB | O, H.PHE.100D | N, H.TRP.100G  | H, H.TRP.100G  | 2.86    | 2.01    | 6.48                   |
| 5U3J.PDB | O, H.GLU.100F | OG, H.SER.100I | HG, H.SER.100I | 2.76    | 1.95    | 12.70                  |
| 5U3J.PDB | O, H.GLU.98   | N, H.TYR.100K  | H, H.TYR.100K  | 2.86    | 2.12    | 25.47                  |
| 5U3J.PDB | OD1, L.ASP.31 | OH, H.TYR.100K | HH, H.TYR.100K | 2.88    | 2.04    | 5.22                   |
| 5U3J.PDB | OH, L.TYR.36  | N, H.MET.100N  | H, H.MET.100N  | 2.75    | 1.92    | 13.09                  |
| 5U3J.PDB | OE1, H.GLU.6  | N, H.GLY.106   | H, H.GLY.106   | 2.94    | 2.10    | 10.69                  |
| 5U3J.PDB | O, H.GLY.88   | N, H.VAL.109   | H, H.VAL.109   | 2.80    | 1.95    | 8.22                   |
| 5U3J.PDB | O, H.GLY.10   | N, H.THR.110   | H, H.THR.110   | 2.98    | 2.17    | 17.31                  |
| 5U3J.PDB | OG, H.SER.87  | N, H.VAL.111   | H, H.VAL.111   | 2.79    | 1.95    | 7.31                   |
| 5U3J.PDB | O, H.PHE.146  | N, H.LYS.117   | H, H.LYS.117   | 2.94    | 2.12    | 14.80                  |
| 5U3J.PDB | O, H.LYS.143  | N, H.SER.120   | H, H.SER.120   | 2.97    | 2.12    | 7.20                   |
| 5U3J.PDB | O, H.LEU.141  | N, H.PHE.122   | H, H.PHE.122   | 2.79    | 2.02    | 22.59                  |
| 5U3J.PDB | O, H.GLY.139  | N, H.LEU.124   | H, H.LEU.124   | 2.74    | 1.98    | 23.31                  |

|          |                 |                |                 |      |      |       |
|----------|-----------------|----------------|-----------------|------|------|-------|
| 5U3J.PDB | O, H.SER.130    | N, H.ALA.137   | H, H.ALA.137    | 2.87 | 2.16 | 29.44 |
| 5U3J.PDB | O, H.SER.180    | N, H.CYS.140   | H, H.CYS.140    | 2.63 | 1.85 | 19.83 |
| 5U3J.PDB | O, H.PHE.122    | N, H.LEU.141   | H, H.LEU.141    | 2.71 | 1.86 | 7.01  |
| 5U3J.PDB | O, H.LEU.178    | N, H.VAL.142   | H, H.VAL.142    | 2.96 | 2.22 | 26.19 |
| 5U3J.PDB | O, H.LYS.117    | N, H.PHE.146   | H, H.PHE.146    | 2.97 | 2.25 | 28.41 |
| 5U3J.PDB | O, H.ASN.197    | N, H.SER.153   | H, H.SER.153    | 2.96 | 2.15 | 16.40 |
| 5U3J.PDB | OG, H.SER.180   | NE1, H.TRP.154 | HE1, H.TRP.154  | 2.98 | 2.15 | 12.85 |
| 5U3J.PDB | O, H.SER.177    | N, H.VAL.169   | H, H.VAL.169    | 2.87 | 2.08 | 18.96 |
| 5U3J.PDB | O, H.LEU.175    | N, H.GLN.171   | H, H.GLN.171    | 2.85 | 2.01 | 9.90  |
| 5U3J.PDB | O, H.GLN.171    | N, H.GLY.174   | H, H.GLY.174    | 2.81 | 1.98 | 10.98 |
| 5U3J.PDB | O, H.TYR.145    | N, H.TYR.176   | H, H.TYR.176    | 2.90 | 2.05 | 6.56  |
| 5U3J.PDB | O, H.VAL.142    | N, H.LEU.178   | H, H.LEU.178    | 2.95 | 2.16 | 18.81 |
| 5U3J.PDB | O, H.HIS.164    | N, H.VAL.181   | H, H.VAL.181    | 2.91 | 2.08 | 14.09 |
| 5U3J.PDB | O, H.LEU.138    | N, H.VAL.182   | H, H.VAL.182    | 2.66 | 1.85 | 17.24 |
| 5U3J.PDB | OD1, H.ASN.155  | N, H.ILE.195   | H, H.ILE.195    | 2.70 | 1.88 | 13.20 |
| 5U3J.PDB | O, H.SER.153    | N, H.ASN.197   | H, H.ASN.197    | 2.90 | 2.15 | 24.53 |
| 5U3J.PDB | O, H.VAL.207    | N, H.VAL.198   | H, H.VAL.198    | 2.82 | 1.98 | 9.42  |
| 5U3J.PDB | O, H.PRO.147    | NE2, H.HIS.200 | HE2, H.HIS.200  | 2.98 | 2.14 | 11.71 |
| 5U3J.PDB | O, H.VAL.198    | N, H.VAL.207   | H, H.VAL.207    | 2.90 | 2.10 | 17.28 |
| 5U3J.PDB | O, L.TYR.86     | NE2, L.GLN.6   | HE22, L.GLN.6   | 2.61 | 1.91 | 29.28 |
| 5U3J.PDB | O, L.ILE.29     | N, L.TYR.32    | H, L.TYR.32     | 2.94 | 2.08 | 3.56  |
| 5U3J.PDB | OE1, H.GLU.100F | OH, L.TYR.32   | HH, L.TYR.32    | 2.62 | 1.91 | 27.84 |
| 5U3J.PDB | O, L.ILE.48     | N, L.TRP.35    | H, L.TRP.35     | 2.59 | 1.80 | 18.85 |
| 5U3J.PDB | O, L.TYR.87     | N, L.TYR.36    | H, L.TYR.36     | 2.81 | 2.00 | 16.97 |
| 5U3J.PDB | OE1, L.GLN.89   | OH, L.TYR.36   | HH, L.TYR.36    | 2.74 | 1.93 | 13.79 |
| 5U3J.PDB | O, L.LYS.45     | N, L.GLN.37    | H, L.GLN.37     | 2.91 | 2.10 | 17.84 |
| 5U3J.PDB | OE1, H.GLN.39   | NE2, L.GLN.38  | HE22, L.GLN.38  | 2.66 | 1.83 | 12.57 |
| 5U3J.PDB | O, L.GLN.37     | N, L.LYS.45    | H, L.LYS.45     | 2.58 | 1.77 | 16.56 |
| 5U3J.PDB | O, L.LYS.53     | N, L.TYR.49    | H, L.TYR.49     | 2.83 | 2.07 | 23.24 |
| 5U3J.PDB | O, L.ASP.82     | OH, L.TYR.86   | HH, L.TYR.86    | 2.92 | 2.16 | 22.19 |
| 5U3J.PDB | O, L.ASN.34     | N, L.GLN.89    | H, L.GLN.89     | 2.94 | 2.19 | 25.35 |
| 5U3J.PDB | O, L.VAL.133    | N, L.PHE.118   | H, L.PHE.118    | 2.97 | 2.15 | 14.78 |
| 5U3J.PDB | OG, L.SER.131   | NE2, L.GLN.124 | HE22, L.GLN.124 | 2.67 | 1.82 | 7.69  |
| 5U3J.PDB | O, L.LEU.181    | N, L.ALA.130   | H, L.ALA.130    | 2.68 | 1.95 | 26.74 |
| 5U3J.PDB | O, L.LEU.179    | N, L.VAL.132   | H, L.VAL.132    | 2.84 | 2.01 | 12.36 |
| 5U3J.PDB | O, L.GLU.195    | N, L.GLN.147   | H, L.GLN.147    | 2.91 | 2.06 | 7.51  |
| 5U3J.PDB | OG, L.SER.177   | NE1, L.TRP.148 | HE1, L.TRP.148  | 2.81 | 2.02 | 19.92 |
| 5U3J.PDB | O, L.TRP.148    | N, L.GLN.155   | H, L.GLN.155    | 2.85 | 2.01 | 10.26 |
| 5U3J.PDB | O, H.PRO.167    | OG, L.SER.162  | HG, L.SER.162   | 2.90 | 2.16 | 24.21 |
| 5U3J.PDB | O, L.LEU.136    | N, L.LEU.175   | H, L.LEU.175    | 2.78 | 2.04 | 25.99 |
| 5U3J.PDB | O, L.SER.162    | N, L.SER.176   | H, L.SER.176    | 2.81 | 2.07 | 25.43 |
| 5U3J.PDB | O, L.GLN.160    | N, L.THR.178   | H, L.THR.178    | 2.90 | 2.05 | 9.65  |
| 5U3J.PDB | O, L.VAL.132    | N, L.LEU.179   | H, L.LEU.179    | 2.58 | 1.74 | 8.42  |
| 5U3J.PDB | O, L.ALA.130    | N, L.LEU.181   | H, L.LEU.181    | 2.90 | 2.18 | 27.62 |
| 5U3J.PDB | O, L.SER.182    | N, L.TYR.186   | H, L.TYR.186    | 2.73 | 1.97 | 23.20 |
| 5U3J.PDB | O, L.LYS.183    | N, L.GLU.187   | H, L.GLU.187    | 2.87 | 2.13 | 25.64 |
| 5U3J.PDB | O, L.VAL.205    | N, L.VAL.196   | H, L.VAL.196    | 2.92 | 2.06 | 3.44  |
| 5U3J.PDB | O, A.PHE.673    | OG1, A.THR.676 | HG1, A.THR.676  | 2.55 | 1.85 | 27.32 |
| 5U3J.PDB | O, A.ASP.674    | N, A.TRP.678   | H, A.TRP.678    | 2.96 | 2.23 | 26.81 |
| 5U3J.PDB | O, A.ILE.675    | N, A.LEU.679   | H, A.LEU.679    | 2.98 | 2.15 | 11.89 |
| 5U3J.PDB | O, A.THR.676    | N, A.TRP.680   | H, A.TRP.680    | 2.90 | 2.12 | 20.48 |
| 5U3J.PDB | O, A.ASN.677    | N, A.TYR.681   | H, A.TYR.681    | 2.74 | 1.96 | 21.09 |
| 5U3J.PDB | O, A.TRP.678    | N, A.ILE.682   | H, A.ILE.682    | 2.63 | 1.81 | 13.86 |

---

Table 1713: 5U3J-specific side chain and main chain hydrogen bonding analysis. In this table, a PDB file is specified with a four-letter PDB ID, except that the names of the PDB files corresponding to the single NMR structural model split from the NMR ensemble is specified with a four-letter PDB ID in addition to a hyphen followed by the single NMR structural model numeric ID, the residue naming scheme is **Chain ID\_residue name\_residue number**,  $\angle ADH$  represents the angle formed by acceptor (A), donor (D) and hydrogen (H) ( $\angle ADH$ ).

| PDB      | Acceptor (A)    | Donor (D)       | Hydrogen (H)     | D-A (Å) | H-A (Å) | $\angle ADH(^{\circ})$ |
|----------|-----------------|-----------------|------------------|---------|---------|------------------------|
| 5U3N.PDB | O, H_VAL_23     | N, H_VAL_5      | H, H_VAL_5       | 2.91    | 2.06    | 7.34                   |
| 5U3N.PDB | O, H_TYR_90     | NE2, H_GLN_6    | HE22, H_GLN_6    | 2.83    | 2.00    | 12.08                  |
| 5U3N.PDB | O, H_LEU_82C    | N, H_GLY_15     | H, H_GLY_15      | 2.69    | 1.84    | 5.70                   |
| 5U3N.PDB | O, H_LYS_13     | N, H_GLY_16     | H, H_GLY_16      | 2.84    | 2.03    | 16.66                  |
| 5U3N.PDB | O, H_MET_82     | N, H_LEU_18     | H, H_LEU_18      | 2.86    | 2.07    | 19.50                  |
| 5U3N.PDB | OG, H_SER_7     | N, H_SER_21     | H, H_SER_21      | 2.86    | 2.03    | 12.74                  |
| 5U3N.PDB | O, H_VAL_5      | N, H_VAL_23     | H, H_VAL_23      | 2.81    | 1.99    | 14.35                  |
| 5U3N.PDB | O, H_ASN_76     | N, H_THR_24     | H, H_THR_24      | 2.94    | 2.15    | 18.71                  |
| 5U3N.PDB | O, H_GLN_3      | N, H_SER_25     | H, H_SER_25      | 2.99    | 2.20    | 19.07                  |
| 5U3N.PDB | O, H_THR_28     | OG1, H_THR_32   | HG1, H_THR_32    | 2.86    | 2.15    | 27.61                  |
| 5U3N.PDB | O, H_ILE_51     | N, H_MET_34     | H, H_MET_34      | 2.95    | 2.12    | 13.00                  |
| 5U3N.PDB | O, H_ALA_49     | N, H_TRP_36     | H, H_TRP_36      | 2.81    | 2.02    | 19.03                  |
| 5U3N.PDB | O, H_TYR_91     | N, H_VAL_37     | H, H_VAL_37      | 2.87    | 2.04    | 12.29                  |
| 5U3N.PDB | O, H_GLU_46     | N, H_ARG_38     | H, H_ARG_38      | 2.84    | 1.99    | 7.64                   |
| 5U3N.PDB | OE1, H_GLU_46   | NE, H_ARG_38    | HE, H_ARG_38     | 2.91    | 2.07    | 9.07                   |
| 5U3N.PDB | OH, H_TYR_90    | NH1, H_ARG_38   | HH11, H_ARG_38   | 3.00    | 2.21    | 20.04                  |
| 5U3N.PDB | O, H_VAL_89     | N, H_GLN_39     | H, H_GLN_39      | 2.83    | 2.04    | 20.47                  |
| 5U3N.PDB | O, H_ARG_38     | N, H_GLU_46     | H, H_GLU_46      | 2.85    | 2.12    | 27.26                  |
| 5U3N.PDB | O, H_TRP_36     | N, H_VAL_48     | H, H_VAL_48      | 2.79    | 1.97    | 13.99                  |
| 5U3N.PDB | OD2, H_ASP_58   | NE, H_ARG_50    | HE, H_ARG_50     | 2.78    | 1.98    | 18.36                  |
| 5U3N.PDB | O, H_MET_34     | N, H_ILE_51     | H, H_ILE_51      | 2.79    | 1.99    | 18.29                  |
| 5U3N.PDB | O, H_ILE_56     | N, H_SER_52     | H, H_SER_52      | 2.99    | 2.26    | 27.62                  |
| 5U3N.PDB | OD2, H_ASP_674  | NH1, H_ARG_52A  | HH12, H_ARG_52A  | 3.00    | 2.24    | 24.41                  |
| 5U3N.PDB | OD1, H_ASP_53   | NH2, H_ARG_52A  | HH21, H_ARG_52A  | 2.93    | 2.18    | 25.35                  |
| 5U3N.PDB | O, H_ARG_52A    | N, H_ASP_53     | H, H_ASP_53      | 2.99    | 2.21    | 21.52                  |
| 5U3N.PDB | OG, H_SER_52    | N, H_ILE_56     | H, H_ILE_56      | 2.80    | 2.06    | 25.80                  |
| 5U3N.PDB | O, H_VAL_48     | N, H_ALA_60     | H, H_ALA_60      | 2.80    | 1.95    | 7.61                   |
| 5U3N.PDB | O, H_VAL_63     | N, H_ARG_66     | H, H_ARG_66      | 3.00    | 2.17    | 13.97                  |
| 5U3N.PDB | OD2, H_ASP_86   | NH1, H_ARG_66   | HH12, H_ARG_66   | 2.73    | 1.91    | 14.46                  |
| 5U3N.PDB | O, H_PRO_62     | NH2, H_ARG_66   | HH21, H_ARG_66   | 2.95    | 2.10    | 7.27                   |
| 5U3N.PDB | O, H_HIS_81     | N, H_ILE_68     | H, H_ILE_68      | 2.90    | 2.10    | 18.72                  |
| 5U3N.PDB | OH, H_TYR_59    | N, H_ILE_69     | H, H_ILE_69      | 2.92    | 2.12    | 19.11                  |
| 5U3N.PDB | OD1, H_ASP_73   | NE, H_ARG_71    | HE, H_ARG_71     | 2.93    | 2.13    | 17.92                  |
| 5U3N.PDB | O, H_THR_32     | NH1, H_ARG_71   | HH12, H_ARG_71   | 2.85    | 2.04    | 16.27                  |
| 5U3N.PDB | O, H_THR_77     | N, H_ASP_72     | H, H_ASP_72      | 2.83    | 1.99    | 11.84                  |
| 5U3N.PDB | O, H_CYS_22     | N, H_LEU_78     | H, H_LEU_78      | 2.84    | 2.00    | 10.39                  |
| 5U3N.PDB | O, H_SER_70     | N, H_PHE_79     | H, H_PHE_79      | 2.80    | 1.94    | 3.12                   |
| 5U3N.PDB | O, H_ILE_68     | N, H_HIS_81     | H, H_HIS_81      | 2.75    | 1.95    | 17.72                  |
| 5U3N.PDB | O, H_LEU_18     | N, H_MET_82     | H, H_MET_82      | 2.59    | 1.75    | 10.08                  |
| 5U3N.PDB | OD2, H_ASP_86   | N, H_LYS_83     | H, H_LYS_83      | 2.93    | 2.12    | 15.88                  |
| 5U3N.PDB | O, H_LYS_83     | N, H_ASP_86     | H, H_ASP_86      | 2.78    | 1.94    | 11.41                  |
| 5U3N.PDB | O, H_THR_107    | N, H_TYR_90     | H, H_TYR_90      | 2.72    | 1.88    | 9.30                   |
| 5U3N.PDB | O, H_ASP_86     | OH, H_TYR_90    | HH, H_TYR_90     | 2.67    | 1.88    | 16.73                  |
| 5U3N.PDB | O, H_VAL_37     | N, H_TYR_91     | H, H_TYR_91      | 2.62    | 1.77    | 5.09                   |
| 5U3N.PDB | O, H_SER_35     | N, H_THR_93     | H, H_THR_93      | 2.88    | 2.10    | 21.23                  |
| 5U3N.PDB | O, H_TRP_33     | N, H_ASP_95     | H, H_ASP_95      | 2.83    | 1.98    | 5.13                   |
| 5U3N.PDB | O, H_TYR_100L   | N, H_GLU_96     | H, H_GLU_96      | 2.96    | 2.15    | 16.42                  |
| 5U3N.PDB | O, H_ASN_100J   | N, H_ALA_98     | H, H_ALA_98      | 2.86    | 2.02    | 10.29                  |
| 5U3N.PDB | OE1, H_GLU_100E | NE, H_ARG_100B  | HE, H_ARG_100B   | 2.83    | 1.97    | 4.42                   |
| 5U3N.PDB | OE2, H_GLU_100E | NH2, H_ARG_100B | HH21, H_ARG_100B | 2.91    | 2.08    | 12.18                  |
| 5U3N.PDB | OD1, L_ASP_31   | NH2, H_ARG_100B | HH22, H_ARG_100B | 2.97    | 2.15    | 14.50                  |
| 5U3N.PDB | O, H_ARG_100B   | N, H_GLU_100E   | H, H_GLU_100E    | 2.83    | 2.05    | 20.60                  |
| 5U3N.PDB | O, H_PHE_100C   | N, H_TRP_100F   | H, H_TRP_100F    | 2.93    | 2.08    | 6.81                   |
| 5U3N.PDB | O, H_LEU_100A   | NE1, H_TRP_100F | HE1, H_TRP_100F  | 2.88    | 2.10    | 19.92                  |
| 5U3N.PDB | O, H_GLU_100E   | N, H_TYR_100H   | H, H_TYR_100H    | 2.96    | 2.12    | 9.41                   |
| 5U3N.PDB | O, H_ALA_98     | N, H_ASN_100J   | H, H_ASN_100J    | 2.93    | 2.10    | 13.13                  |
| 5U3N.PDB | OD1, L_ASN_34   | ND2, H_ASN_100J | HD21, H_ASN_100J | 2.72    | 1.86    | 2.61                   |

|          |                |                |                 |      |      |       |
|----------|----------------|----------------|-----------------|------|------|-------|
| 5U3N.PDB | O, H_GLU_96    | N, H_TYR_100L  | H, H_TYR_100L   | 2.88 | 2.05 | 12.56 |
| 5U3N.PDB | OH, L_TYR_36   | N, H_MET_100M  | H, H_MET_100M   | 2.99 | 2.13 | 5.54  |
| 5U3N.PDB | O, H_ALA_94    | N, H_ASP_101   | H, H_ASP_101    | 2.74 | 1.99 | 25.37 |
| 5U3N.PDB | O, H_CYS_92    | N, H_GLY_104   | H, H_GLY_104    | 2.82 | 1.98 | 9.77  |
| 5U3N.PDB | OE1, H_GLN_6   | N, H_GLY_106   | H, H_GLY_106    | 2.96 | 2.22 | 25.98 |
| 5U3N.PDB | O, H_TYR_90    | N, H_THR_107   | H, H_THR_107    | 2.85 | 2.08 | 22.78 |
| 5U3N.PDB | O, H_ALA_88    | N, H_VAL_109   | H, H_VAL_109    | 2.88 | 2.03 | 6.16  |
| 5U3N.PDB | O, H_GLY_10    | N, H_ILE_110   | H, H_ILE_110    | 2.94 | 2.09 | 6.89  |
| 5U3N.PDB | OG1, H_THR_87  | N, H_VAL_111   | H, H_VAL_111    | 2.89 | 2.03 | 4.98  |
| 5U3N.PDB | O, H_VAL_12    | N, H_SER_112   | H, H_SER_112    | 2.98 | 2.17 | 17.21 |
| 5U3N.PDB | O, H_PHE_146   | N, H_LYS_117   | H, H_LYS_117    | 2.78 | 1.97 | 16.03 |
| 5U3N.PDB | O, H_GLY_139   | N, H_LEU_124   | H, H_LEU_124    | 2.86 | 2.00 | 5.63  |
| 5U3N.PDB | O, H_VAL_184   | N, H_ALA_136   | H, H_ALA_136    | 2.84 | 1.99 | 5.94  |
| 5U3N.PDB | O, H_LEU_124   | N, H_GLY_139   | H, H_GLY_139    | 3.00 | 2.25 | 25.48 |
| 5U3N.PDB | O, H_SER_180   | N, H_CYS_140   | H, H_CYS_140    | 2.82 | 2.02 | 17.61 |
| 5U3N.PDB | O, H_PHE_122   | N, H_LEU_141   | H, H_LEU_141    | 2.79 | 1.95 | 10.76 |
| 5U3N.PDB | O, H_LEU_178   | N, H_VAL_142   | H, H_VAL_142    | 2.71 | 1.86 | 7.20  |
| 5U3N.PDB | O, H_SER_120   | N, H_LYS_143   | H, H_LYS_143    | 2.84 | 1.99 | 7.21  |
| 5U3N.PDB | O, H_LYS_117   | N, H_PHE_146   | H, H_PHE_146    | 2.94 | 2.13 | 16.41 |
| 5U3N.PDB | O, H_ASN_199   | N, H_THR_151   | H, H_THR_151    | 3.00 | 2.17 | 12.79 |
| 5U3N.PDB | OG, H_SER_180  | NE1, H_TRP_154 | HE1, H_TRP_154  | 2.95 | 2.11 | 9.10  |
| 5U3N.PDB | O, H_ILE_195   | N, H_ASN_155   | H, H_ASN_155    | 2.79 | 1.95 | 11.06 |
| 5U3N.PDB | OD1, H_ASN_197 | N, H_SER_156   | H, H_SER_156    | 2.62 | 1.82 | 17.28 |
| 5U3N.PDB | O, H_TRP_154   | N, H_GLY_157   | H, H_GLY_157    | 2.98 | 2.26 | 27.93 |
| 5U3N.PDB | OD1, L_ASN_138 | NE2, H_HIS_164 | HE2, H_HIS_164  | 2.92 | 2.21 | 29.54 |
| 5U3N.PDB | O, H_SER_179   | N, H_PHE_166   | H, H_PHE_166    | 2.96 | 2.11 | 6.98  |
| 5U3N.PDB | O, H_SER_177   | N, H_VAL_169   | H, H_VAL_169    | 2.89 | 2.05 | 12.11 |
| 5U3N.PDB | O, H_LEU_175   | N, H_GLN_171   | H, H_GLN_171    | 2.79 | 1.96 | 11.18 |
| 5U3N.PDB | O, H_LEU_175   | NE2, H_GLN_171 | HE21, H_GLN_171 | 2.95 | 2.10 | 7.82  |
| 5U3N.PDB | OD1, H_ASP_144 | NE2, H_GLN_171 | HE22, H_GLN_171 | 2.99 | 2.19 | 18.08 |
| 5U3N.PDB | O, H_GLN_171   | N, H_GLY_174   | H, H_GLY_174    | 2.89 | 2.04 | 7.78  |
| 5U3N.PDB | O, H_TYR_145   | N, H_TYR_176   | H, H_TYR_176    | 2.81 | 1.96 | 5.90  |
| 5U3N.PDB | O, H_VAL_169   | N, H_SER_177   | H, H_SER_177    | 2.98 | 2.23 | 24.19 |
| 5U3N.PDB | O, H_VAL_142   | N, H_LEU_178   | H, H_LEU_178    | 2.86 | 2.04 | 15.63 |
| 5U3N.PDB | O, H_HIS_164   | N, H_VAL_181   | H, H_VAL_181    | 2.83 | 1.99 | 10.90 |
| 5U3N.PDB | O, H_LEU_138   | N, H_VAL_182   | H, H_VAL_182    | 2.84 | 2.03 | 16.03 |
| 5U3N.PDB | O, H_ALA_136   | N, H_VAL_184   | H, H_VAL_184    | 2.89 | 2.08 | 16.51 |
| 5U3N.PDB | O, H_GLY_134   | N, H_SER_186   | H, H_SER_186    | 2.89 | 2.05 | 9.68  |
| 5U3N.PDB | O, H_PRO_185   | N, H_SER_188   | H, H_SER_188    | 2.86 | 2.07 | 20.15 |
| 5U3N.PDB | O, H_SER_188   | N, H_GLN_192   | H, H_GLN_192    | 2.98 | 2.15 | 13.47 |
| 5U3N.PDB | OD1, H_ASN_155 | N, H_ILE_195   | H, H_ILE_195    | 2.89 | 2.08 | 15.15 |
| 5U3N.PDB | O, H_LYS_209   | N, H_CYS_196   | H, H_CYS_196    | 2.96 | 2.17 | 20.77 |
| 5U3N.PDB | O, H_SER_153   | N, H_ASN_197   | H, H_ASN_197    | 2.66 | 1.82 | 9.65  |
| 5U3N.PDB | O, H_VAL_207   | N, H_VAL_198   | H, H_VAL_198    | 2.77 | 1.91 | 0.90  |
| 5U3N.PDB | O, H_THR_205   | N, H_HIS_200   | H, H_HIS_200    | 2.79 | 1.93 | 4.87  |
| 5U3N.PDB | O, H_PRO_147   | NE2, H_HIS_200 | HE2, H_HIS_200  | 2.62 | 1.78 | 9.36  |
| 5U3N.PDB | O, H_VAL_198   | N, H_VAL_207   | H, H_VAL_207    | 2.91 | 2.08 | 14.15 |
| 5U3N.PDB | O, H_TYR_194   | N, H_AVAL_211  | H, H_AVAL_211   | 2.89 | 2.05 | 9.34  |
| 5U3N.PDB | O, H_TYR_194   | N, H_BVAL_211  | H, H_BVAL_211   | 2.89 | 2.05 | 9.13  |
| 5U3N.PDB | O, H_PRO_126   | N, H_LYS_214   | H, H_LYS_214    | 2.98 | 2.16 | 14.79 |
| 5U3N.PDB | OG, L_SER_26   | N, L_ARG_3     | H, L_ARG_3      | 2.86 | 2.02 | 10.52 |
| 5U3N.PDB | O, L_ARG_24    | N, L_THR_5     | H, L_THR_5      | 2.80 | 1.98 | 16.09 |
| 5U3N.PDB | O, L_TYR_86    | NE2, L_GLN_6   | HE22, L_GLN_6   | 2.86 | 2.00 | 3.53  |
| 5U3N.PDB | O, L_LYS_103   | N, L_LEU_11    | H, L_LEU_11     | 2.90 | 2.11 | 18.99 |
| 5U3N.PDB | OH, L_TYR_140  | OG, L_SER_12   | HG, L_SER_12    | 2.60 | 1.87 | 23.71 |
| 5U3N.PDB | O, L_ASP_105   | N, L_ALA_13    | H, L_ALA_13     | 2.97 | 2.13 | 11.36 |
| 5U3N.PDB | OD2, L_ASP_17  | N, L_SER_14    | H, L_SER_14     | 2.75 | 1.96 | 18.71 |
| 5U3N.PDB | O, L_LEU_78    | N, L_GLY_16    | H, L_GLY_16     | 2.68 | 1.90 | 20.67 |

|          |                |                |                 |      |      |       |
|----------|----------------|----------------|-----------------|------|------|-------|
| 5U3N.PDB | O, L_ILE_75    | N, L_ILE_19    | H, L_ILE_19     | 2.79 | 1.95 | 9.47  |
| 5U3N.PDB | O, L_LEU_73    | N, L_ILE_21    | H, L_ILE_21     | 2.95 | 2.11 | 10.95 |
| 5U3N.PDB | O, L_PHE_71    | N, L_CYS_23    | H, L_CYS_23     | 2.87 | 2.04 | 13.33 |
| 5U3N.PDB | O, L_THR_5     | N, L_ARG_24    | H, L_ARG_24     | 2.75 | 1.90 | 7.83  |
| 5U3N.PDB | O, L_SER_69    | N, L_ALA_25    | H, L_ALA_25     | 2.85 | 2.03 | 14.92 |
| 5U3N.PDB | O, L_ARG_3     | N, L_SER_26    | H, L_SER_26     | 2.91 | 2.13 | 20.77 |
| 5U3N.PDB | O, L_GLY_68    | N, L_ILE_29    | H, L_ILE_29     | 2.69 | 1.85 | 10.61 |
| 5U3N.PDB | O, L_ILE_29    | N, L_TYR_32    | H, L_TYR_32     | 2.96 | 2.12 | 12.33 |
| 5U3N.PDB | O, L_ASP_31    | N, L_LEU_33    | H, L_LEU_33     | 2.77 | 2.05 | 28.04 |
| 5U3N.PDB | O, L_GLN_89    | N, L_ASN_34    | H, L_ASN_34     | 2.83 | 2.03 | 18.28 |
| 5U3N.PDB | OE1, L_GLN_89  | ND2, L_ASN_34  | HD22, L_ASN_34  | 2.99 | 2.18 | 18.14 |
| 5U3N.PDB | O, L_ILE_48    | N, L_TRP_35    | H, L_TRP_35     | 2.81 | 1.99 | 14.14 |
| 5U3N.PDB | O, L_TYR_87    | N, L_TYR_36    | H, L_TYR_36     | 2.79 | 1.96 | 13.76 |
| 5U3N.PDB | OE1, L_GLN_89  | OH, L_TYR_36   | HH, L_TYR_36    | 2.64 | 1.80 | 1.88  |
| 5U3N.PDB | O, L_LYS_45    | N, L_LYS_37    | H, L_LYS_37     | 2.84 | 2.01 | 13.10 |
| 5U3N.PDB | O, L_THR_85    | N, L_HIS_38    | H, L_HIS_38     | 2.80 | 2.03 | 21.49 |
| 5U3N.PDB | O, L_LYS_37    | N, L_LYS_45    | H, L_LYS_45     | 2.88 | 2.10 | 20.13 |
| 5U3N.PDB | O, L_TRP_35    | N, L_LEU_47    | H, L_LEU_47     | 2.79 | 1.93 | 3.84  |
| 5U3N.PDB | O, L_LYS_53    | N, L_TYR_49    | H, L_TYR_49     | 2.82 | 2.01 | 15.81 |
| 5U3N.PDB | OD1, L_ASN_34  | N, L_SER_50    | H, L_SER_50     | 2.96 | 2.18 | 21.09 |
| 5U3N.PDB | O, L_LEU_33    | N, L_ALA_51    | H, L_ALA_51     | 2.71 | 1.90 | 16.24 |
| 5U3N.PDB | O, L_TYR_49    | N, L_LYS_53    | H, L_LYS_53     | 2.83 | 2.03 | 18.60 |
| 5U3N.PDB | O, L_THR_72    | N, L_SER_65    | H, L_SER_65     | 2.95 | 2.15 | 18.23 |
| 5U3N.PDB | O, L_LYS_30    | N, L_GLY_68    | H, L_GLY_68     | 2.91 | 2.07 | 11.47 |
| 5U3N.PDB | O, L_CYS_23    | N, L_PHE_71    | H, L_PHE_71     | 2.92 | 2.08 | 10.20 |
| 5U3N.PDB | O, L_SER_65    | N, L_THR_72    | H, L_THR_72     | 2.89 | 2.07 | 15.08 |
| 5U3N.PDB | O, L_ILE_21    | N, L_LEU_73    | H, L_LEU_73     | 2.84 | 2.01 | 12.13 |
| 5U3N.PDB | O, L_SER_63    | N, L_THR_74    | H, L_THR_74     | 2.80 | 1.97 | 11.07 |
| 5U3N.PDB | O, L_ILE_19    | N, L_ILE_75    | H, L_ILE_75     | 2.86 | 2.08 | 19.78 |
| 5U3N.PDB | O, L_ARG_61    | N, L_SER_76    | H, L_SER_76     | 2.96 | 2.19 | 23.24 |
| 5U3N.PDB | O, L_ASP_17    | N, L_LEU_78    | H, L_LEU_78     | 2.72 | 1.92 | 19.04 |
| 5U3N.PDB | OD2, L_ASP_82  | N, L_GLN_79    | H, L_GLN_79     | 3.00 | 2.14 | 4.35  |
| 5U3N.PDB | O, L_GLN_79    | N, L_ASP_82    | H, L_ASP_82     | 2.83 | 1.99 | 10.16 |
| 5U3N.PDB | O, L_THR_102   | N, L_TYR_86    | H, L_TYR_86     | 2.90 | 2.10 | 17.67 |
| 5U3N.PDB | O, L_ASP_82    | OH, L_TYR_86   | HH, L_TYR_86    | 2.60 | 1.78 | 10.78 |
| 5U3N.PDB | O, L_TYR_36    | N, L_TYR_87    | H, L_TYR_87     | 2.92 | 2.10 | 15.56 |
| 5U3N.PDB | OE2, L_GLU_90  | N, L_TYR_92    | H, L_TYR_92     | 2.85 | 2.02 | 13.73 |
| 5U3N.PDB | O, L_CYS_88    | N, L_GLY_99    | H, L_GLY_99     | 2.82 | 2.02 | 16.99 |
| 5U3N.PDB | O, L_TYR_86    | N, L_THR_102   | H, L_THR_102    | 2.93 | 2.13 | 18.82 |
| 5U3N.PDB | O, L_PRO_8     | OG1, L_THR_102 | HG1, L_THR_102  | 2.67 | 1.96 | 27.26 |
| 5U3N.PDB | O, L_ALA_84    | N, L_VAL_104   | H, L_VAL_104    | 2.83 | 1.97 | 3.89  |
| 5U3N.PDB | O, L_LEU_11    | N, L_ASP_105   | H, L_ASP_105    | 2.98 | 2.15 | 13.92 |
| 5U3N.PDB | O, L_ALA_13    | N, L_LYS_107   | H, L_LYS_107    | 2.81 | 1.99 | 14.79 |
| 5U3N.PDB | O, L_THR_109   | NE, L_ARG_108  | HE, L_ARG_108   | 2.80 | 1.97 | 12.49 |
| 5U3N.PDB | O, L_ASP_170   | NH1, L_ARG_108 | HH11, L_ARG_108 | 2.97 | 2.15 | 15.13 |
| 5U3N.PDB | O, L_TYR_140   | N, L_ALA_111   | H, L_ALA_111    | 2.86 | 2.03 | 12.00 |
| 5U3N.PDB | O, L_LEU_135   | N, L_PHE_116   | H, L_PHE_116    | 2.88 | 2.09 | 19.79 |
| 5U3N.PDB | O, L_VAL_133   | N, L_PHE_118   | H, L_PHE_118    | 2.74 | 1.97 | 21.45 |
| 5U3N.PDB | OG, L_SER_131  | NE2, L_GLN_124 | HE22, L_GLN_124 | 2.80 | 1.94 | 3.81  |
| 5U3N.PDB | O, L_GLN_124   | N, L_SER_127   | H, L_SER_127    | 2.78 | 1.95 | 13.25 |
| 5U3N.PDB | O, L_GLN_124   | OG, L_SER_127  | HG, L_SER_127   | 2.63 | 1.79 | 4.63  |
| 5U3N.PDB | O, L_LEU_181   | N, L_ALA_130   | H, L_ALA_130    | 2.78 | 1.96 | 14.77 |
| 5U3N.PDB | OE1, L_GLN_124 | N, L_SER_131   | H, L_SER_131    | 2.94 | 2.15 | 18.69 |
| 5U3N.PDB | O, L_LEU_179   | N, L_VAL_132   | H, L_VAL_132    | 2.83 | 2.00 | 12.34 |
| 5U3N.PDB | O, L_SER_177   | N, L_CYS_134   | H, L_CYS_134    | 2.80 | 1.96 | 9.76  |
| 5U3N.PDB | O, L_PHE_116   | N, L_LEU_135   | H, L_LEU_135    | 2.72 | 1.88 | 11.53 |
| 5U3N.PDB | O, L_LEU_175   | N, L_LEU_136   | H, L_LEU_136    | 2.80 | 1.95 | 6.87  |
| 5U3N.PDB | O, L_SER_114   | N, L_ASN_137   | H, L_ASN_137    | 2.88 | 2.07 | 16.62 |

|          |                |                |                 |      |      |       |
|----------|----------------|----------------|-----------------|------|------|-------|
| 5U3N.PDB | OG, L.SER.174  | N, L.ASN.138   | H, L.ASN.138    | 2.99 | 2.16 | 12.45 |
| 5U3N.PDB | O, L.TYR.173   | N, L.PHE.139   | H, L.PHE.139    | 2.79 | 1.97 | 14.75 |
| 5U3N.PDB | O, L.ALA.111   | N, L.TYR.140   | H, L.TYR.140    | 2.87 | 2.08 | 18.95 |
| 5U3N.PDB | OD1, L.ASP.105 | OH, L.TYR.140  | HH, L.TYR.140   | 2.61 | 1.87 | 24.55 |
| 5U3N.PDB | O, L.GLU.195   | N, L.GLN.147   | H, L.GLN.147    | 2.84 | 2.01 | 12.00 |
| 5U3N.PDB | OG, L.SER.177  | NE1, L.TRP.148 | HE1, L.TRP.148  | 2.84 | 2.01 | 13.43 |
| 5U3N.PDB | O, L.ALA.193   | N, L.LYS.149   | H, L.LYS.149    | 2.84 | 2.00 | 9.94  |
| 5U3N.PDB | O, L.ALA.153   | N, L.VAL.150   | H, L.VAL.150    | 2.99 | 2.18 | 15.96 |
| 5U3N.PDB | O, L.AVAL.191  | N, L.ASP.151   | H, L.ASP.151    | 2.86 | 2.04 | 14.13 |
| 5U3N.PDB | O, L.BVAL.191  | N, L.ASP.151   | H, L.ASP.151    | 2.89 | 2.08 | 16.42 |
| 5U3N.PDB | O, L.VAL.150   | N, L.ALA.153   | H, L.ALA.153    | 2.90 | 2.05 | 8.35  |
| 5U3N.PDB | O, L.TRP.148   | N, L.GLN.155   | H, L.GLN.155    | 2.90 | 2.06 | 8.61  |
| 5U3N.PDB | O, L.ALA.153   | NE2, L.GLN.155 | HE21, L.GLN.155 | 2.97 | 2.12 | 8.23  |
| 5U3N.PDB | O, L.SER.176   | N, L.SER.162   | H, L.SER.162    | 2.95 | 2.15 | 17.97 |
| 5U3N.PDB | O, H.PRO.167   | OG, L.SER.162  | HG, L.SER.162   | 2.77 | 1.98 | 17.29 |
| 5U3N.PDB | O, L.SER.174   | N, L.THR.164   | H, L.THR.164    | 2.94 | 2.11 | 13.10 |
| 5U3N.PDB | O, L.SER.171   | NE2, L.GLN.166 | HE21, L.GLN.166 | 2.97 | 2.12 | 7.09  |
| 5U3N.PDB | O, L.LEU.106   | NE2, L.GLN.166 | HE22, L.GLN.166 | 2.79 | 2.02 | 22.69 |
| 5U3N.PDB | O, L.THR.172   | N, L.ASP.167   | H, L.ASP.167    | 2.90 | 2.10 | 16.69 |
| 5U3N.PDB | OD1, L.ASP.170 | N, L.THR.172   | H, L.THR.172    | 2.98 | 2.17 | 16.32 |
| 5U3N.PDB | OD1, L.ASP.170 | OG1, L.THR.172 | HG1, L.THR.172  | 2.63 | 1.80 | 7.71  |
| 5U3N.PDB | O, L.PHE.139   | N, L.TYR.173   | H, L.TYR.173    | 2.80 | 1.96 | 11.34 |
| 5U3N.PDB | OD2, L.ASP.105 | OH, L.TYR.173  | HH, L.TYR.173   | 2.66 | 1.88 | 16.93 |
| 5U3N.PDB | OG1, L.THR.164 | N, L.SER.174   | H, L.SER.174    | 2.99 | 2.17 | 14.48 |
| 5U3N.PDB | O, L.LEU.136   | N, L.LEU.175   | H, L.LEU.175    | 2.82 | 2.02 | 18.65 |
| 5U3N.PDB | O, L.SER.162   | N, L.SER.176   | H, L.SER.176    | 2.90 | 2.07 | 13.04 |
| 5U3N.PDB | O, L.CYS.134   | N, L.SER.177   | H, L.SER.177    | 2.88 | 2.05 | 10.58 |
| 5U3N.PDB | O, L.GLN.160   | N, L.THR.178   | H, L.THR.178    | 2.93 | 2.10 | 13.26 |
| 5U3N.PDB | O, L.VAL.132   | N, L.LEU.179   | H, L.LEU.179    | 2.72 | 1.91 | 15.62 |
| 5U3N.PDB | O, L.ASN.158   | N, L.ATHR.180  | H, L.ATHR.180   | 2.96 | 2.10 | 5.76  |
| 5U3N.PDB | O, L.ASN.158   | N, L.BTHR.180  | H, L.BTHR.180   | 2.98 | 2.13 | 8.23  |
| 5U3N.PDB | O, L.GLY.128   | N, L.LYS.183   | H, L.LYS.183    | 2.89 | 2.05 | 8.75  |
| 5U3N.PDB | O, L.SER.182   | N, L.TYR.186   | H, L.TYR.186    | 2.90 | 2.05 | 6.90  |
| 5U3N.PDB | O, L.LYS.183   | N, L.GLU.187   | H, L.GLU.187    | 2.91 | 2.12 | 19.43 |
| 5U3N.PDB | O, L.ASP.185   | ND1, L.HIS.189 | HD1, L.HIS.189  | 2.98 | 2.23 | 25.25 |
| 5U3N.PDB | OD1, L.ASP.151 | N, L.BVAL.191  | H, L.BVAL.191   | 3.00 | 2.14 | 6.33  |
| 5U3N.PDB | O, L.LYS.149   | N, L.ALA.193   | H, L.ALA.193    | 2.88 | 2.14 | 25.73 |
| 5U3N.PDB | O, L.LYS.207   | N, L.CYS.194   | H, L.CYS.194    | 2.96 | 2.16 | 18.86 |
| 5U3N.PDB | O, L.GLN.147   | N, L.GLU.195   | H, L.GLU.195    | 2.72 | 1.89 | 12.68 |
| 5U3N.PDB | O, L.VAL.205   | N, L.VAL.196   | H, L.VAL.196    | 2.76 | 1.95 | 15.71 |
| 5U3N.PDB | O, L.PRO.141   | NE2, L.HIS.198 | HE2, L.HIS.198  | 2.82 | 1.99 | 12.93 |
| 5U3N.PDB | O, L.HIS.198   | N, L.LEU.201   | H, L.LEU.201    | 2.79 | 1.94 | 8.84  |
| 5U3N.PDB | O, L.VAL.196   | N, L.VAL.205   | H, L.VAL.205    | 2.95 | 2.17 | 20.32 |
| 5U3N.PDB | O, L.TYR.192   | N, L.PHE.209   | H, L.PHE.209    | 2.95 | 2.17 | 22.09 |
| 5U3N.PDB | O, L.LYS.190   | N, L.ARG.211   | H, L.ARG.211    | 2.79 | 1.98 | 15.41 |
| 5U3N.PDB | O, L.HIS.189   | NE, L.ARG.211  | HE, L.ARG.211   | 2.72 | 1.88 | 11.65 |
| 5U3N.PDB | OD1, A.ASP.664 | N, A.TRP.666   | H, A.TRP.666    | 2.85 | 1.99 | 5.09  |
| 5U3N.PDB | OD2, A.ASP.674 | N, A.ASN.671   | H, A.ASN.671    | 2.89 | 2.10 | 19.70 |
| 5U3N.PDB | O, A.ASP.674   | N, A.TRP.678   | H, A.TRP.678    | 2.91 | 2.12 | 19.94 |
| 5U3N.PDB | O, A.ILE.675   | N, A.LEU.679   | H, A.LEU.679    | 2.85 | 2.02 | 12.95 |
| 5U3N.PDB | O, A.THR.676   | N, A.TRP.680   | H, A.TRP.680    | 2.88 | 2.03 | 5.54  |
| 5U3N.PDB | O, A.ASN.677   | N, A.TYR.681   | H, A.TYR.681    | 2.92 | 2.08 | 9.34  |
| 5U3N.PDB | O, A.TRP.678   | N, A.ILE.682   | H, A.ILE.682    | 2.84 | 2.11 | 26.86 |
| 5U3N.PDB | O, A.TRP.680   | N, A.LYS.684   | H, A.LYS.684    | 2.96 | 2.10 | 3.54  |

---

Table 1714: 5U3N-specific side chain and main chain hydrogen bonding analysis. In this table, a PDB file is specified with a four-letter PDB ID, except that the names of the PDB files corresponding to the single NMR structural model split from the NMR ensemble is specified with a four-letter PDB ID in addition to a hyphen followed by the single NMR structural model numeric ID, the residue naming scheme is **Chain ID\_residue name\_residue number**,  $\angle ADH$  represents the angle formed by acceptor (A), donor (D) and hydrogen (H) ( $\angle ADH$ ).



| PDB      | Acceptor (A)  | Donor (D)     | Hydrogen (H)   | D-A (Å) | H-A (Å) | $\angle ADH(^{\circ})$ |
|----------|---------------|---------------|----------------|---------|---------|------------------------|
| 5UCB.PDB | O, H.SER_25   | N, H.GLN_3    | H, H.GLN_3     | 2.99    | 2.18    | 16.58                  |
| 5UCB.PDB | O, H.SER_21   | N, H.SER_7    | H, H.SER_7     | 2.88    | 2.10    | 20.32                  |
| 5UCB.PDB | O, H.THR_110  | N, H.VAL_12   | H, H.VAL_12    | 2.93    | 2.15    | 21.18                  |
| 5UCB.PDB | O, H.LEU_82C  | N, H.GLY_15   | H, H.GLY_15    | 2.80    | 1.96    | 10.79                  |
| 5UCB.PDB | O, H.GLN_13   | N, H.GLY_16   | H, H.GLY_16    | 2.96    | 2.13    | 13.46                  |
| 5UCB.PDB | O, H.MET_82   | N, H.LEU_18   | H, H.LEU_18    | 2.96    | 2.17    | 20.10                  |
| 5UCB.PDB | O, H.LEU_80   | N, H.LEU_20   | H, H.LEU_20    | 2.83    | 2.01    | 13.56                  |
| 5UCB.PDB | O, H.SER_7    | N, H.SER_21   | H, H.SER_21    | 2.92    | 2.09    | 11.91                  |
| 5UCB.PDB | O, H.ALA_78   | N, H.CYS_22   | H, H.CYS_22    | 2.76    | 2.02    | 25.89                  |
| 5UCB.PDB | O, H.VAL_5    | N, H.ALA_23   | H, H.ALA_23    | 2.98    | 2.15    | 12.17                  |
| 5UCB.PDB | O, H.GLN_3    | N, H.SER_25   | H, H.SER_25    | 2.87    | 2.02    | 8.54                   |
| 5UCB.PDB | OD1, H.ASN_76 | N, H.VAL_29   | H, H.VAL_29    | 2.79    | 1.95    | 9.36                   |
| 5UCB.PDB | OD1, H.ASN_28 | N, H.SER_30   | H, H.SER_30    | 2.95    | 2.10    | 6.39                   |
| 5UCB.PDB | O, H.ALA_93   | N, H.HIS_35   | H, H.HIS_35    | 2.87    | 2.12    | 24.96                  |
| 5UCB.PDB | OG, H.SER_33  | NE2, H.HIS_35 | HE2, H.HIS_35  | 2.88    | 2.09    | 19.50                  |
| 5UCB.PDB | O, H.ALA_49   | N, H.TRP_36   | H, H.TRP_36    | 2.86    | 2.03    | 11.66                  |
| 5UCB.PDB | O, H.TYR_91   | N, H.VAL_37   | H, H.VAL_37    | 2.92    | 2.10    | 13.93                  |
| 5UCB.PDB | O, H.GLU_46   | N, H.ARG_38   | H, H.ARG_38    | 2.80    | 1.96    | 9.03                   |
| 5UCB.PDB | OE1, H.GLU_46 | NE, H.ARG_38  | HE, H.ARG_38   | 2.85    | 2.03    | 15.54                  |
| 5UCB.PDB | OH, H.TYR_90  | NH1, H.ARG_38 | HH11, H.ARG_38 | 2.94    | 2.12    | 15.88                  |
| 5UCB.PDB | OD1, H.ASP_86 | NH1, H.ARG_38 | HH12, H.ARG_38 | 2.88    | 2.08    | 18.54                  |
| 5UCB.PDB | O, H.VAL_89   | N, H.GLN_39   | H, H.GLN_39    | 2.83    | 2.10    | 26.74                  |
| 5UCB.PDB | O, H.LYS_43   | NE2, H.GLN_39 | HE21, H.GLN_39 | 2.97    | 2.21    | 23.38                  |
| 5UCB.PDB | OE1, L.GLN_38 | NE2, H.GLN_39 | HE22, H.GLN_39 | 2.96    | 2.12    | 9.92                   |
| 5UCB.PDB | O, H.ALA_40   | N, H.LYS_43   | H, H.LYS_43    | 2.94    | 2.10    | 10.79                  |
| 5UCB.PDB | O, H.ARG_38   | N, H.GLU_46   | H, H.GLU_46    | 2.82    | 2.01    | 15.90                  |
| 5UCB.PDB | OG, H.SER_50  | NE1, H.TRP_47 | HE1, H.TRP_47  | 2.72    | 1.98    | 25.90                  |
| 5UCB.PDB | O, H.TRP_36   | N, H.VAL_48   | H, H.VAL_48    | 2.90    | 2.07    | 12.31                  |
| 5UCB.PDB | O, H.SER_58   | N, H.SER_50   | H, H.SER_50    | 2.91    | 2.11    | 18.26                  |
| 5UCB.PDB | O, H.ILE_34   | N, H.ILE_51   | H, H.ILE_51    | 2.92    | 2.10    | 14.85                  |
| 5UCB.PDB | O, H.SER_56   | N, H.TYR_52   | H, H.TYR_52    | 2.91    | 2.14    | 22.03                  |
| 5UCB.PDB | O, B.LEU_5    | OH, H.TYR_53  | HH, H.TYR_53   | 2.73    | 1.99    | 23.03                  |
| 5UCB.PDB | O, H.PRO_52A  | N, H.TYR_54   | H, H.TYR_54    | 2.76    | 2.01    | 24.37                  |
| 5UCB.PDB | O, H.SER_50   | N, H.SER_58   | H, H.SER_58    | 2.97    | 2.16    | 17.28                  |
| 5UCB.PDB | O, H.VAL_48   | N, H.ALA_60   | H, H.ALA_60    | 2.97    | 2.12    | 8.58                   |
| 5UCB.PDB | O, H.VAL_63   | N, H.ARG_66   | H, H.ARG_66    | 2.93    | 2.10    | 10.67                  |
| 5UCB.PDB | O, H.SER_82B  | NH1, H.ARG_66 | HH11, H.ARG_66 | 2.96    | 2.19    | 22.84                  |
| 5UCB.PDB | OD2, H.ASP_86 | NH1, H.ARG_66 | HH12, H.ARG_66 | 2.75    | 1.90    | 5.99                   |
| 5UCB.PDB | O, H.SER_62   | NH2, H.ARG_66 | HH21, H.ARG_66 | 2.91    | 2.06    | 4.12                   |
| 5UCB.PDB | O, H.GLN_81   | N, H.THR_68   | H, H.THR_68    | 2.89    | 2.10    | 19.31                  |
| 5UCB.PDB | OH, H.TYR_59  | N, H.ILE_69   | H, H.ILE_69    | 2.89    | 2.08    | 15.94                  |
| 5UCB.PDB | O, H.THR_77   | N, H.ASP_72   | H, H.ASP_72    | 2.91    | 2.07    | 9.90                   |
| 5UCB.PDB | OD1, H.ASP_72 | OG, H.SER_74  | HG, H.SER_74   | 2.60    | 1.83    | 20.07                  |
| 5UCB.PDB | O, H.PHE_27   | ND2, H.ASN_76 | HD21, H.ASN_76 | 2.86    | 2.00    | 2.63                   |
| 5UCB.PDB | O, H.LYS_75   | OG1, H.THR_77 | HG1, H.THR_77  | 2.96    | 2.13    | 8.72                   |
| 5UCB.PDB | O, H.CYS_22   | N, H.ALA_78   | H, H.ALA_78    | 2.91    | 2.09    | 14.01                  |
| 5UCB.PDB | O, H.SER_70   | N, H.TYR_79   | H, H.TYR_79    | 2.82    | 2.01    | 17.30                  |
| 5UCB.PDB | O, H.LEU_20   | N, H.LEU_80   | H, H.LEU_80    | 2.93    | 2.12    | 15.92                  |
| 5UCB.PDB | O, H.THR_68   | N, H.GLN_81   | H, H.GLN_81    | 2.85    | 2.03    | 14.25                  |
| 5UCB.PDB | O, H.LEU_18   | N, H.MET_82   | H, H.MET_82    | 2.76    | 1.91    | 5.48                   |
| 5UCB.PDB | OD2, H.ASP_86 | N, H.ARG_83   | H, H.ARG_83    | 2.84    | 2.02    | 15.13                  |
| 5UCB.PDB | O, H.ARG_83   | N, H.ASP_86   | H, H.ASP_86    | 2.85    | 2.00    | 6.49                   |
| 5UCB.PDB | O, H.GLN_39   | N, H.VAL_89   | H, H.VAL_89    | 2.94    | 2.15    | 19.65                  |
| 5UCB.PDB | O, H.THR_107  | N, H.TYR_90   | H, H.TYR_90    | 2.82    | 1.97    | 6.43                   |
| 5UCB.PDB | O, H.ASP_86   | OH, H.TYR_90  | HH, H.TYR_90   | 2.71    | 1.87    | 3.56                   |
| 5UCB.PDB | O, H.VAL_37   | N, H.TYR_91   | H, H.TYR_91    | 2.75    | 1.90    | 8.79                   |
| 5UCB.PDB | OE2, H.GLU_6  | N, H.CYS_92   | H, H.CYS_92    | 2.86    | 2.03    | 11.54                  |

|          |                |                |                 |      |      |       |
|----------|----------------|----------------|-----------------|------|------|-------|
| 5UCB.PDB | O, H_HIS_35    | N, H_ALA_93    | H, H_ALA_93     | 2.82 | 2.03 | 19.85 |
| 5UCB.PDB | O, H_TYR_102   | N, H_ARG_94    | H, H_ARG_94     | 2.90 | 2.09 | 15.76 |
| 5UCB.PDB | O, H_SER_33    | N, H_GLY_95    | H, H_GLY_95     | 2.82 | 1.97 | 6.39  |
| 5UCB.PDB | O, H_ALA_99    | N, H_TYR_96    | H, H_TYR_96     | 2.79 | 1.94 | 8.94  |
| 5UCB.PDB | O, B_VAL_145   | N, H_GLY_97    | H, H_GLY_97     | 2.90 | 2.05 | 8.98  |
| 5UCB.PDB | O, H_TYR_96    | N, H_ALA_99    | H, H_ALA_99     | 2.86 | 2.03 | 11.06 |
| 5UCB.PDB | O, H_ARG_94    | N, H_ASP_101   | H, H_ASP_101    | 2.97 | 2.22 | 25.01 |
| 5UCB.PDB | O, H_CYS_92    | N, H_GLY_104   | H, H_GLY_104    | 2.92 | 2.08 | 11.62 |
| 5UCB.PDB | OE1, H_GLU_6   | N, H_GLY_106   | H, H_GLY_106    | 2.84 | 2.01 | 12.83 |
| 5UCB.PDB | O, H_TYR_90    | N, H_THR_107   | H, H_THR_107    | 2.95 | 2.15 | 17.03 |
| 5UCB.PDB | O, H_ALA_88    | N, H_VAL_109   | H, H_VAL_109    | 2.93 | 2.08 | 2.47  |
| 5UCB.PDB | OG1, H_THR_87  | N, H_VAL_111   | H, H_VAL_111    | 2.96 | 2.11 | 5.78  |
| 5UCB.PDB | O, H_VAL_12    | N, H_PHE_112   | H, H_PHE_112    | 2.91 | 2.15 | 23.15 |
| 5UCB.PDB | O, H_PHE_146   | N, H_LYS_116   | H, H_LYS_116    | 2.86 | 2.03 | 11.25 |
| 5UCB.PDB | O, H_LYS_143   | N, H_SER_120   | H, H_SER_120    | 2.97 | 2.14 | 12.13 |
| 5UCB.PDB | O, H_LEU_141   | N, H_PHE_122   | H, H_PHE_122    | 2.87 | 2.04 | 11.40 |
| 5UCB.PDB | O, H_GLY_139   | N, H_LEU_124   | H, H_LEU_124    | 2.78 | 1.92 | 6.23  |
| 5UCB.PDB | OG, H_SER_127  | N, H_LYS_129   | H, H_LYS_129    | 2.96 | 2.13 | 12.32 |
| 5UCB.PDB | O, L_SER_208   | NZ, H_LYS_129  | HZ2, H_LYS_129  | 2.83 | 2.06 | 25.53 |
| 5UCB.PDB | O, H_SER_127   | N, H_SER_130   | H, H_SER_130    | 2.91 | 2.06 | 7.11  |
| 5UCB.PDB | O, H_SER_132   | N, H_THR_135   | H, H_THR_135    | 2.95 | 2.10 | 8.67  |
| 5UCB.PDB | O, H_VAL_184   | N, H_ALA_136   | H, H_ALA_136    | 2.78 | 1.98 | 18.51 |
| 5UCB.PDB | O, H_SER_130   | N, H_ALA_137   | H, H_ALA_137    | 2.85 | 2.03 | 15.53 |
| 5UCB.PDB | O, H_VAL_182   | N, H_LEU_138   | H, H_LEU_138    | 2.99 | 2.18 | 16.62 |
| 5UCB.PDB | O, H_LEU_124   | N, H_GLY_139   | H, H_GLY_139    | 2.94 | 2.17 | 22.56 |
| 5UCB.PDB | O, H_SER_180   | N, H_CYS_140   | H, H_CYS_140    | 2.83 | 2.03 | 18.28 |
| 5UCB.PDB | O, H_PHE_122   | N, H_LEU_141   | H, H_LEU_141    | 2.79 | 1.94 | 8.33  |
| 5UCB.PDB | O, H_LEU_178   | N, H_VAL_142   | H, H_VAL_142    | 2.74 | 1.88 | 4.14  |
| 5UCB.PDB | O, H_SER_120   | N, H_LYS_143   | H, H_LYS_143    | 2.78 | 1.93 | 5.09  |
| 5UCB.PDB | O, H_LYS_116   | N, H_PHE_146   | H, H_PHE_146    | 2.95 | 2.14 | 16.58 |
| 5UCB.PDB | O, H_ASN_199   | N, H_THR_151   | H, H_THR_151    | 2.98 | 2.16 | 14.61 |
| 5UCB.PDB | O, H_ASN_197   | N, H_SER_153   | H, H_SER_153    | 2.95 | 2.14 | 16.54 |
| 5UCB.PDB | OD1, H_ASN_197 | OG, H_SER_153  | HG, H_SER_153   | 2.85 | 2.06 | 15.76 |
| 5UCB.PDB | OG, H_SER_180  | NE1, H_TRP_154 | HE1, H_TRP_154  | 2.92 | 2.07 | 7.16  |
| 5UCB.PDB | O, H_ILE_195   | N, H_ASN_155   | H, H_ASN_155    | 2.78 | 1.94 | 9.76  |
| 5UCB.PDB | OD1, H_ASN_197 | N, H_SER_156   | H, H_SER_156    | 2.74 | 1.94 | 17.37 |
| 5UCB.PDB | O, H_TRP_154   | N, H_GLY_157   | H, H_GLY_157    | 2.95 | 2.22 | 27.37 |
| 5UCB.PDB | O, H_VAL_181   | N, H_HIS_164   | H, H_HIS_164    | 2.82 | 1.99 | 13.79 |
| 5UCB.PDB | O, H_SER_179   | N, H_PHE_166   | H, H_PHE_166    | 2.94 | 2.09 | 6.35  |
| 5UCB.PDB | O, H_SER_177   | N, H_VAL_169   | H, H_VAL_169    | 2.90 | 2.07 | 11.28 |
| 5UCB.PDB | O, H_LEU_175   | N, H_GLN_171   | H, H_GLN_171    | 2.90 | 2.06 | 8.51  |
| 5UCB.PDB | OD1, H_ASP_144 | NE2, H_GLN_171 | HE22, H_GLN_171 | 2.78 | 1.99 | 18.86 |
| 5UCB.PDB | O, H_GLN_171   | N, H_GLY_174   | H, H_GLY_174    | 2.86 | 2.01 | 8.15  |
| 5UCB.PDB | O, H_TYR_145   | N, H_TYR_176   | H, H_TYR_176    | 2.86 | 2.01 | 5.39  |
| 5UCB.PDB | O, H_VAL_142   | N, H_LEU_178   | H, H_LEU_178    | 2.87 | 2.06 | 16.64 |
| 5UCB.PDB | O, H_HIS_164   | N, H_VAL_181   | H, H_VAL_181    | 2.87 | 2.03 | 11.87 |
| 5UCB.PDB | O, H_LEU_138   | N, H_VAL_182   | H, H_VAL_182    | 2.82 | 2.02 | 16.97 |
| 5UCB.PDB | O, H_ALA_136   | N, H_VAL_184   | H, H_VAL_184    | 2.90 | 2.07 | 12.53 |
| 5UCB.PDB | O, H_GLY_134   | N, H_SER_186   | H, H_SER_186    | 2.94 | 2.10 | 11.37 |
| 5UCB.PDB | O, H_PRO_185   | N, H_SER_188   | H, H_SER_188    | 2.97 | 2.14 | 13.02 |
| 5UCB.PDB | O, H_PRO_185   | OG, H_SER_188  | HG, H_SER_188   | 2.68 | 1.85 | 4.71  |
| 5UCB.PDB | O, H_THR_193   | NE2, H_GLN_192 | HE21, H_GLN_192 | 2.94 | 2.08 | 2.24  |
| 5UCB.PDB | OG, H_SER_188  | OH, H_TYR_194  | HH, H_TYR_194   | 2.72 | 1.90 | 9.93  |
| 5UCB.PDB | OD1, H_ASN_155 | N, H_ILE_195   | H, H_ILE_195    | 2.82 | 2.03 | 19.24 |
| 5UCB.PDB | O, H_LYS_209   | N, H_CYS_196   | H, H_CYS_196    | 2.98 | 2.19 | 20.71 |
| 5UCB.PDB | O, H_SER_153   | N, H_ASN_197   | H, H_ASN_197    | 2.75 | 1.90 | 8.02  |
| 5UCB.PDB | OD1, H_ASP_208 | ND2, H_ASN_197 | HD22, H_ASN_197 | 2.80 | 1.95 | 7.44  |
| 5UCB.PDB | O, H_VAL_207   | N, H_VAL_198   | H, H_VAL_198    | 2.80 | 1.95 | 7.37  |

|          |               |                |                |      |      |       |
|----------|---------------|----------------|----------------|------|------|-------|
| 5UCB.PDB | O, H.THR.151  | N, H.ASN.199   | H, H.ASN.199   | 2.96 | 2.13 | 12.40 |
| 5UCB.PDB | O, H.THR.205  | N, H.HIS.200   | H, H.HIS.200   | 2.86 | 2.02 | 9.86  |
| 5UCB.PDB | O, H.PRO.147  | NE2, H.HIS.200 | HE2, H.HIS.200 | 2.80 | 1.97 | 12.02 |
| 5UCB.PDB | O, H.VAL.198  | N, H.VAL.207   | H, H.VAL.207   | 2.86 | 2.03 | 11.55 |
| 5UCB.PDB | O, H.CYS.196  | N, H.LYS.209   | H, H.LYS.209   | 2.99 | 2.16 | 13.99 |
| 5UCB.PDB | O, H.TYR.194  | N, H.VAL.211   | H, H.VAL.211   | 2.90 | 2.04 | 4.78  |
| 5UCB.PDB | O, L.TYR.86   | NE2, L.GLN.6   | HE22, L.GLN.6  | 2.81 | 2.01 | 17.50 |
| 5UCB.PDB | O, L.LYS.103  | N, L.LEU.11    | H, L.LEU.11    | 2.85 | 2.05 | 18.74 |
| 5UCB.PDB | O, L.GLU.105  | N, L.ALA.13    | H, L.ALA.13    | 2.91 | 2.12 | 19.40 |
| 5UCB.PDB | OD2, L.ASP.17 | N, L.SER.14    | H, L.SER.14    | 2.85 | 2.00 | 7.52  |
| 5UCB.PDB | O, L.LEU.78   | N, L.GLY.16    | H, L.GLY.16    | 2.86 | 2.04 | 14.88 |
| 5UCB.PDB | O, L.SER.14   | N, L.ASP.17    | H, L.ASP.17    | 2.92 | 2.09 | 12.95 |
| 5UCB.PDB | O, L.LEU.73   | N, L.ILE.21    | H, L.ILE.21    | 2.89 | 2.08 | 16.55 |
| 5UCB.PDB | O, L.TYR.71   | N, L.CYS.23    | H, L.CYS.23    | 2.80 | 1.98 | 13.36 |
| 5UCB.PDB | O, L.THR.5    | N, L.ARG.24    | H, L.ARG.24    | 2.82 | 2.03 | 19.90 |
| 5UCB.PDB | O, L.THR.69   | N, L.ALA.25    | H, L.ALA.25    | 2.83 | 1.98 | 7.34  |
| 5UCB.PDB | OE1, L.GLN.3  | OG, L.SER.26   | HG, L.SER.26   | 2.61 | 1.78 | 7.17  |
| 5UCB.PDB | OD2, B.ASP.51 | OG, L.SER.30   | HG, L.SER.30   | 2.58 | 1.81 | 20.19 |
| 5UCB.PDB | O, L.ILE.48   | N, L.TRP.35    | H, L.TRP.35    | 2.89 | 2.09 | 17.06 |
| 5UCB.PDB | O, L.TYR.87   | N, L.TYR.36    | H, L.TYR.36    | 2.82 | 2.03 | 19.85 |
| 5UCB.PDB | OE1, L.GLN.89 | OH, L.TYR.36   | HH, L.TYR.36   | 2.64 | 1.84 | 15.57 |
| 5UCB.PDB | O, L.LYS.45   | N, L.GLN.37    | H, L.GLN.37    | 2.91 | 2.09 | 14.54 |
| 5UCB.PDB | OH, L.TYR.86  | NE2, L.GLN.37  | HE21, L.GLN.37 | 2.99 | 2.15 | 9.80  |
| 5UCB.PDB | O, L.THR.85   | N, L.GLN.38    | H, L.GLN.38    | 2.74 | 1.93 | 16.51 |
| 5UCB.PDB | O, L.LYS.42   | NE2, L.GLN.38  | HE21, L.GLN.38 | 2.88 | 2.08 | 17.97 |
| 5UCB.PDB | OE1, H.GLN.39 | NE2, L.GLN.38  | HE22, L.GLN.38 | 2.95 | 2.13 | 14.86 |
| 5UCB.PDB | O, L.GLU.81   | NZ, L.LYS.39   | HZ1, L.LYS.39  | 2.69 | 1.90 | 22.19 |
| 5UCB.PDB | O, L.GLN.37   | N, L.LYS.45    | H, L.LYS.45    | 2.84 | 2.05 | 19.57 |
| 5UCB.PDB | O, L.TRP.35   | N, L.LEU.47    | H, L.LEU.47    | 2.82 | 1.97 | 5.85  |
| 5UCB.PDB | O, L.SER.53   | N, L.TYR.49    | H, L.TYR.49    | 2.87 | 2.07 | 17.59 |
| 5UCB.PDB | O, L.VAL.33   | N, L.ALA.51    | H, L.ALA.51    | 2.85 | 2.02 | 11.41 |
| 5UCB.PDB | O, L.TYR.49   | N, L.SER.53    | H, L.SER.53    | 2.93 | 2.12 | 15.91 |
| 5UCB.PDB | O, L.LEU.47   | N, L.TYR.55    | H, L.TYR.55    | 2.94 | 2.08 | 2.44  |
| 5UCB.PDB | OD2, L.ASP.82 | NE, L.ARG.61   | HE, L.ARG.61   | 2.82 | 2.01 | 16.79 |
| 5UCB.PDB | OD1, L.ASP.82 | NH2, L.ARG.61  | HH21, L.ARG.61 | 2.85 | 1.99 | 4.65  |
| 5UCB.PDB | O, L.THR.74   | N, L.SER.63    | H, L.SER.63    | 2.97 | 2.19 | 19.92 |
| 5UCB.PDB | O, L.THR.72   | N, L.SER.65    | H, L.SER.65    | 2.97 | 2.20 | 22.80 |
| 5UCB.PDB | O, B.SER.47   | NH1, L.ARG.66  | HH12, L.ARG.66 | 2.77 | 1.99 | 21.64 |
| 5UCB.PDB | O, B.SER.47   | NH2, L.ARG.66  | HH22, L.ARG.66 | 2.89 | 2.16 | 27.12 |
| 5UCB.PDB | O, L.ASP.70   | N, L.SER.67    | H, L.SER.67    | 2.84 | 2.01 | 11.95 |
| 5UCB.PDB | O, B.ARG.48   | N, L.GLY.68    | H, L.GLY.68    | 2.79 | 1.95 | 9.02  |
| 5UCB.PDB | O, L.SER.67   | N, L.ASP.70    | H, L.ASP.70    | 2.95 | 2.11 | 10.96 |
| 5UCB.PDB | O, L.CYS.23   | N, L.TYR.71    | H, L.TYR.71    | 2.85 | 2.00 | 7.89  |
| 5UCB.PDB | O, L.SER.65   | N, L.THR.72    | H, L.THR.72    | 2.92 | 2.09 | 12.93 |
| 5UCB.PDB | OG1, L.THR.22 | OG1, L.THR.72  | HG1, L.THR.72  | 2.96 | 2.18 | 19.19 |
| 5UCB.PDB | O, L.ILE.21   | N, L.LEU.73    | H, L.LEU.73    | 2.82 | 2.02 | 18.31 |
| 5UCB.PDB | O, L.SER.63   | N, L.THR.74    | H, L.THR.74    | 2.88 | 2.03 | 7.94  |
| 5UCB.PDB | O, L.VAL.19   | N, L.ILE.75    | H, L.ILE.75    | 2.85 | 2.02 | 13.35 |
| 5UCB.PDB | O, L.ARG.61   | N, L.SER.76    | H, L.SER.76    | 2.93 | 2.12 | 17.13 |
| 5UCB.PDB | O, L.ASP.17   | N, L.LEU.78    | H, L.LEU.78    | 2.83 | 2.04 | 19.24 |
| 5UCB.PDB | OD2, L.ASP.82 | N, L.GLN.79    | H, L.GLN.79    | 2.81 | 1.95 | 4.90  |
| 5UCB.PDB | O, L.GLN.79   | N, L.ASP.82    | H, L.ASP.82    | 2.94 | 2.09 | 7.96  |
| 5UCB.PDB | O, L.GLN.38   | N, L.THR.85    | H, L.THR.85    | 2.95 | 2.11 | 8.28  |
| 5UCB.PDB | O, L.THR.102  | N, L.TYR.86    | H, L.TYR.86    | 2.88 | 2.06 | 15.79 |
| 5UCB.PDB | O, L.ASP.82   | OH, L.TYR.86   | HH, L.TYR.86   | 2.68 | 1.86 | 10.64 |
| 5UCB.PDB | O, L.TYR.36   | N, L.TYR.87    | H, L.TYR.87    | 2.88 | 2.06 | 15.19 |
| 5UCB.PDB | O, L.ALA.32   | N, L.ASP.91    | H, L.ASP.91    | 2.84 | 1.99 | 7.27  |
| 5UCB.PDB | O, L.LEU.95   | N, L.GLY.92    | H, L.GLY.92    | 2.81 | 2.01 | 17.89 |

|          |                |                |                 |      |      |       |
|----------|----------------|----------------|-----------------|------|------|-------|
| 5UCB.PDB | O, L_GLN_90    | N, L_THR_97    | H, L_THR_97     | 2.89 | 2.07 | 13.99 |
| 5UCB.PDB | O, L_CYS_88    | N, L_GLY_99    | H, L_GLY_99     | 2.87 | 2.06 | 16.05 |
| 5UCB.PDB | O, L_GLN_6     | NE2, L_GLN_100 | HE21, L_GLN_100 | 2.96 | 2.10 | 3.33  |
| 5UCB.PDB | O, L_TYR_86    | N, L_THR_102   | H, L_THR_102    | 2.91 | 2.11 | 19.06 |
| 5UCB.PDB | O, L_PRO_8     | OG1, L_THR_102 | HG1, L_THR_102  | 2.64 | 1.82 | 9.17  |
| 5UCB.PDB | O, L_SER_9     | N, L_LYS_103   | H, L_LYS_103    | 2.86 | 2.02 | 9.83  |
| 5UCB.PDB | OE1, L_GLU_165 | NZ, L_LYS_103  | HZ3, L_LYS_103  | 2.77 | 1.90 | 9.89  |
| 5UCB.PDB | O, L_ALA_84    | N, L_VAL_104   | H, L_VAL_104    | 2.92 | 2.06 | 4.48  |
| 5UCB.PDB | O, L_LEU_11    | N, L_GLU_105   | H, L_GLU_105    | 2.83 | 1.98 | 7.22  |
| 5UCB.PDB | OE1, L_GLN_166 | N, L_ILE_106   | H, L_ILE_106    | 2.97 | 2.14 | 12.29 |
| 5UCB.PDB | O, L_ALA_13    | N, L_LYS_107   | H, L_LYS_107    | 2.94 | 2.14 | 17.97 |
| 5UCB.PDB | O, L_THR_109   | NE, L_ARG_108  | HE, L_ARG_108   | 2.81 | 1.98 | 12.46 |
| 5UCB.PDB | O, L_ASP_170   | NH1, L_ARG_108 | HH11, L_ARG_108 | 2.96 | 2.13 | 10.72 |
| 5UCB.PDB | O, L_TYR_140   | N, L_ALA_111   | H, L_ALA_111    | 2.86 | 2.03 | 12.05 |
| 5UCB.PDB | O, L_LEU_135   | N, L_PHE_116   | H, L_PHE_116    | 2.91 | 2.10 | 16.52 |
| 5UCB.PDB | O, L_VAL_133   | N, L_PHE_118   | H, L_PHE_118    | 2.84 | 2.06 | 20.95 |
| 5UCB.PDB | OG, L_SER_131  | NE2, L_GLN_124 | HE22, L_GLN_124 | 2.73 | 1.87 | 2.66  |
| 5UCB.PDB | O, L_GLN_124   | N, L_SER_127   | H, L_SER_127    | 2.84 | 2.11 | 27.03 |
| 5UCB.PDB | O, L_GLN_124   | OG, L_SER_127  | HG, L_SER_127   | 2.54 | 1.72 | 9.22  |
| 5UCB.PDB | O, L_LEU_125   | N, L_GLY_128   | H, L_GLY_128    | 2.90 | 2.09 | 16.29 |
| 5UCB.PDB | O, L_LEU_181   | N, L_ALA_130   | H, L_ALA_130    | 2.86 | 2.04 | 14.78 |
| 5UCB.PDB | OE1, L_GLN_124 | N, L_SER_131   | H, L_SER_131    | 2.91 | 2.10 | 16.27 |
| 5UCB.PDB | O, L_LEU_179   | N, L_VAL_132   | H, L_VAL_132    | 2.80 | 1.95 | 9.72  |
| 5UCB.PDB | O, L_SER_177   | N, L_CYS_134   | H, L_CYS_134    | 2.81 | 1.97 | 8.89  |
| 5UCB.PDB | O, L_PHE_116   | N, L_LEU_135   | H, L_LEU_135    | 2.84 | 2.00 | 9.91  |
| 5UCB.PDB | O, L_LEU_175   | N, L_LEU_136   | H, L_LEU_136    | 2.82 | 1.97 | 6.91  |
| 5UCB.PDB | O, L_SER_114   | N, L_ASN_137   | H, L_ASN_137    | 2.82 | 2.00 | 13.64 |
| 5UCB.PDB | OG, L_SER_174  | N, L_ASN_138   | H, L_ASN_138    | 3.00 | 2.18 | 14.73 |
| 5UCB.PDB | O, L_TYR_173   | N, L_PHE_139   | H, L_PHE_139    | 2.80 | 1.98 | 15.50 |
| 5UCB.PDB | O, L_ALA_111   | N, L_TYR_140   | H, L_TYR_140    | 2.92 | 2.11 | 16.50 |
| 5UCB.PDB | O, L_GLU_195   | N, L_GLN_147   | H, L_GLN_147    | 2.87 | 2.02 | 9.88  |
| 5UCB.PDB | OG, L_SER_177  | NE1, L_TRP_148 | HE1, L_TRP_148  | 2.92 | 2.09 | 12.30 |
| 5UCB.PDB | O, L_ALA_193   | N, L_LYS_149   | H, L_LYS_149    | 2.92 | 2.09 | 12.63 |
| 5UCB.PDB | O, L_ALA_153   | N, L_VAL_150   | H, L_VAL_150    | 2.98 | 2.16 | 16.04 |
| 5UCB.PDB | O, L_VAL_191   | N, L_ASP_151   | H, L_ASP_151    | 2.74 | 1.90 | 10.65 |
| 5UCB.PDB | O, L_VAL_150   | N, L_ALA_153   | H, L_ALA_153    | 2.91 | 2.06 | 8.01  |
| 5UCB.PDB | O, L_TRP_148   | N, L_GLN_155   | H, L_GLN_155    | 2.94 | 2.12 | 14.17 |
| 5UCB.PDB | O, L_ALA_153   | NE2, L_GLN_155 | HE21, L_GLN_155 | 2.97 | 2.12 | 7.54  |
| 5UCB.PDB | OE1, L_GLN_155 | ND2, L_ASN_158 | HD21, L_ASN_158 | 2.98 | 2.15 | 12.35 |
| 5UCB.PDB | O, L_LEU_170   | NE2, L_GLN_160 | HE22, L_GLN_160 | 2.99 | 2.13 | 5.75  |
| 5UCB.PDB | O, L_SER_176   | N, L_SER_162   | H, L_SER_162    | 2.95 | 2.16 | 19.90 |
| 5UCB.PDB | O, H_PRO_167   | OG, L_SER_162  | HG, L_SER_162   | 2.68 | 1.94 | 24.13 |
| 5UCB.PDB | O, L_SER_174   | N, L_THR_164   | H, L_THR_164    | 2.94 | 2.12 | 14.57 |
| 5UCB.PDB | O, L_SER_171   | NE2, L_GLN_166 | HE21, L_GLN_166 | 2.94 | 2.17 | 23.45 |
| 5UCB.PDB | O, L_ILE_106   | NE2, L_GLN_166 | HE22, L_GLN_166 | 2.80 | 1.96 | 9.36  |
| 5UCB.PDB | O, L_THR_172   | N, L_ASP_167   | H, L_ASP_167    | 2.83 | 2.01 | 14.08 |
| 5UCB.PDB | OD2, L_ASP_167 | N, L_ASP_170   | H, L_ASP_170    | 2.95 | 2.15 | 18.34 |
| 5UCB.PDB | O, L_ASP_167   | N, L_SER_171   | H, L_SER_171    | 2.83 | 2.10 | 27.38 |
| 5UCB.PDB | OD1, L_ASP_170 | N, L_THR_172   | H, L_THR_172    | 2.93 | 2.09 | 9.94  |
| 5UCB.PDB | OD1, L_ASP_170 | OG1, L_THR_172 | HG1, L_THR_172  | 2.71 | 1.89 | 8.99  |
| 5UCB.PDB | O, L_PHE_139   | N, L_TYR_173   | H, L_TYR_173    | 2.82 | 1.97 | 6.86  |
| 5UCB.PDB | OE2, L_GLU_105 | OH, L_TYR_173  | HH, L_TYR_173   | 2.61 | 1.81 | 15.35 |
| 5UCB.PDB | O, L_LEU_136   | N, L_LEU_175   | H, L_LEU_175    | 2.88 | 2.08 | 17.16 |
| 5UCB.PDB | O, L_SER_162   | N, L_SER_176   | H, L_SER_176    | 2.94 | 2.12 | 15.24 |
| 5UCB.PDB | O, L_CYS_134   | N, L_SER_177   | H, L_SER_177    | 2.86 | 2.02 | 11.18 |
| 5UCB.PDB | O, L_GLN_160   | N, L_THR_178   | H, L_THR_178    | 2.87 | 2.04 | 12.63 |
| 5UCB.PDB | O, L_VAL_132   | N, L_LEU_179   | H, L_LEU_179    | 2.79 | 1.97 | 14.56 |
| 5UCB.PDB | O, L_ASN_158   | N, L_THR_180   | H, L_THR_180    | 2.97 | 2.12 | 9.36  |

|          |                |                |                |      |      |       |
|----------|----------------|----------------|----------------|------|------|-------|
| 5UCB.PDB | O, L_ALA_130   | N, L_LEU_181   | H, L_LEU_181   | 2.88 | 2.04 | 9.45  |
| 5UCB.PDB | OG, L_SER_182  | N, L_ASP_185   | H, L_ASP_185   | 3.00 | 2.15 | 7.40  |
| 5UCB.PDB | O, L_SER_182   | N, L_TYR_186   | H, L_TYR_186   | 2.90 | 2.06 | 11.13 |
| 5UCB.PDB | O, L_LYS_183   | N, L_GLU_187   | H, L_GLU_187   | 2.89 | 2.04 | 6.84  |
| 5UCB.PDB | OD1, L_ASP_151 | N, L_VAL_191   | H, L_VAL_191   | 2.90 | 2.05 | 6.39  |
| 5UCB.PDB | O, L_PHE_209   | N, L_TYR_192   | H, L_TYR_192   | 2.96 | 2.11 | 7.95  |
| 5UCB.PDB | O, L_LYS_149   | N, L_ALA_193   | H, L_ALA_193   | 2.91 | 2.10 | 16.38 |
| 5UCB.PDB | O, L_LYS_207   | N, L_CYS_194   | H, L_CYS_194   | 2.82 | 1.97 | 8.63  |
| 5UCB.PDB | O, L_GLN_147   | N, L_GLU_195   | H, L_GLU_195   | 2.82 | 1.97 | 7.58  |
| 5UCB.PDB | O, L_VAL_205   | N, L_VAL_196   | H, L_VAL_196   | 2.73 | 1.91 | 15.27 |
| 5UCB.PDB | O, L_LYS_145   | N, L_THR_197   | H, L_THR_197   | 2.87 | 2.03 | 10.61 |
| 5UCB.PDB | O, L_PRO_141   | NE2, L_HIS_198 | HE2, L_HIS_198 | 2.90 | 2.07 | 14.06 |
| 5UCB.PDB | ND1, L_HIS_198 | N, L_GLY_200   | H, L_GLY_200   | 2.97 | 2.11 | 4.92  |
| 5UCB.PDB | O, L_HIS_198   | N, L_LEU_201   | H, L_LEU_201   | 2.92 | 2.08 | 10.11 |
| 5UCB.PDB | O, L_VAL_196   | N, L_VAL_205   | H, L_VAL_205   | 2.94 | 2.22 | 28.63 |
| 5UCB.PDB | O, L_CYS_194   | N, L_LYS_207   | H, L_LYS_207   | 2.89 | 2.07 | 14.81 |
| 5UCB.PDB | O, L_TYR_192   | N, L_PHE_209   | H, L_PHE_209   | 2.96 | 2.17 | 21.00 |
| 5UCB.PDB | O, L_LYS_190   | N, L_ARG_211   | H, L_ARG_211   | 2.83 | 2.11 | 27.52 |
| 5UCB.PDB | O, B_GLU_28    | N, B_SER_4     | H, B_SER_4     | 2.92 | 2.10 | 13.37 |
| 5UCB.PDB | O, B_THR_26    | N, B_LEU_6     | H, B_LEU_6     | 2.81 | 1.99 | 15.67 |
| 5UCB.PDB | O, B_GLU_24    | N, B_LYS_9     | H, B_LYS_9     | 2.95 | 2.17 | 21.44 |
| 5UCB.PDB | O, B_GLU_22    | N, B_LEU_11    | H, B_LEU_11    | 2.84 | 1.99 | 8.95  |
| 5UCB.PDB | O, B_PRO_20    | ND2, B_ASN_12  | HD21, B_ASN_12 | 2.86 | 2.03 | 12.12 |
| 5UCB.PDB | O, B_ILE_138   | ND2, B_ASN_13  | HD21, B_ASN_13 | 2.86 | 2.13 | 26.24 |
| 5UCB.PDB | O, B_ARG_136   | N, B_ALA_15    | H, B_ALA_15    | 3.00 | 2.19 | 16.91 |
| 5UCB.PDB | OD1, B_ASP_132 | NZ, B_LYS_16   | HZ1, B_LYS_16  | 2.90 | 2.15 | 27.66 |
| 5UCB.PDB | O, B_ILE_134   | N, B_PHE_17    | H, B_PHE_17    | 2.94 | 2.10 | 10.85 |
| 5UCB.PDB | O, B_LYS_16    | N, B_ASP_19    | H, B_ASP_19    | 2.97 | 2.13 | 10.34 |
| 5UCB.PDB | O, B_ALA_75    | N, B_TYR_21    | H, B_TYR_21    | 2.82 | 2.02 | 17.42 |
| 5UCB.PDB | O, B_PHE_73    | N, B_PHE_23    | H, B_PHE_23    | 2.94 | 2.09 | 7.26  |
| 5UCB.PDB | O, B_LYS_9     | N, B_GLU_24    | H, B_GLU_24    | 2.80 | 1.98 | 14.46 |
| 5UCB.PDB | O, B_PHE_71    | N, B_ILE_25    | H, B_ILE_25    | 2.84 | 1.99 | 6.56  |
| 5UCB.PDB | O, B_GLY_7     | N, B_THR_26    | H, B_THR_26    | 2.95 | 2.10 | 4.53  |
| 5UCB.PDB | O, B_ASN_69    | N, B_PHE_27    | H, B_PHE_27    | 2.94 | 2.11 | 13.13 |
| 5UCB.PDB | O, B_SER_4     | N, B_GLU_28    | H, B_GLU_28    | 2.91 | 2.10 | 17.54 |
| 5UCB.PDB | O, B_GLY_67    | N, B_CYS_29    | H, B_CYS_29    | 2.96 | 2.14 | 15.57 |
| 5UCB.PDB | O, B_ILE_2     | N, B_LEU_30    | H, B_LEU_30    | 2.83 | 2.00 | 11.91 |
| 5UCB.PDB | OD2, B_ASP_153 | N, B_LYS_34    | H, B_LYS_34    | 2.94 | 2.14 | 18.44 |
| 5UCB.PDB | OH, B_TYR_100  | N, B_HIS_35    | H, B_HIS_35    | 2.93 | 2.15 | 21.81 |
| 5UCB.PDB | O, B_VAL_61    | N, B_LEU_37    | H, B_LEU_37    | 2.93 | 2.13 | 18.65 |
| 5UCB.PDB | O, B_ILE_59    | N, B_TRP_39    | H, B_TRP_39    | 2.91 | 2.12 | 19.76 |
| 5UCB.PDB | O, B_SER_97    | N, B_LYS_40    | H, B_LYS_40    | 2.88 | 2.06 | 15.75 |
| 5UCB.PDB | O, B_LEU_95    | N, B_THR_42    | H, B_THR_42    | 2.88 | 2.09 | 19.90 |
| 5UCB.PDB | O, B_GLN_54    | N, B_TYR_43    | H, B_TYR_43    | 2.83 | 2.01 | 14.02 |
| 5UCB.PDB | OE2, B_GLU_87  | OH, B_TYR_43   | HH, B_TYR_43   | 2.72 | 1.91 | 12.68 |
| 5UCB.PDB | O, B_VAL_93    | N, B_VAL_44    | H, B_VAL_44    | 2.93 | 2.08 | 6.15  |
| 5UCB.PDB | O, B_HIS_52    | N, B_GLY_45    | H, B_GLY_45    | 2.82 | 1.98 | 9.81  |
| 5UCB.PDB | OD1, B_ASP_51  | OG, B_SER_46   | HG, B_SER_46   | 2.83 | 2.02 | 12.78 |
| 5UCB.PDB | O, B_LEU_50    | N, B_SER_47    | H, B_SER_47    | 2.94 | 2.21 | 27.12 |
| 5UCB.PDB | OE1, B_GLU_87  | OG, B_SER_47   | HG, B_SER_47   | 2.62 | 1.82 | 14.05 |
| 5UCB.PDB | O, B_GLY_45    | N, B_HIS_52    | H, B_HIS_52    | 2.75 | 1.95 | 17.98 |
| 5UCB.PDB | O, B_TYR_43    | N, B_GLN_54    | H, B_GLN_54    | 2.99 | 2.21 | 20.44 |
| 5UCB.PDB | O, B_LEU_41    | N, B_LEU_56    | H, B_LEU_56    | 2.80 | 2.03 | 22.15 |
| 5UCB.PDB | O, B_TRP_39    | N, B_ILE_59    | H, B_ILE_59    | 2.85 | 2.07 | 20.70 |
| 5UCB.PDB | O, B_LEU_37    | N, B_VAL_61    | H, B_VAL_61    | 2.83 | 1.99 | 11.73 |
| 5UCB.PDB | O, B_CYS_29    | N, B_GLY_67    | H, B_GLY_67    | 2.83 | 1.97 | 6.62  |
| 5UCB.PDB | O, B_PHE_27    | N, B_ASN_69    | H, B_ASN_69    | 2.76 | 1.99 | 22.57 |
| 5UCB.PDB | O, B_PHE_23    | N, B_PHE_73    | H, B_PHE_73    | 2.79 | 1.98 | 16.10 |

|          |                |                |                 |      |      |       |
|----------|----------------|----------------|-----------------|------|------|-------|
| 5UCB.PDB | O, B_TYR_21    | N, B_ALA_75    | H, B_ALA_75     | 2.81 | 1.98 | 12.45 |
| 5UCB.PDB | OD2, B_ASP_57  | N, B_ASP_76    | H, B_ASP_76     | 2.88 | 2.07 | 15.78 |
| 5UCB.PDB | OE1, B_GLN_54  | N, B_SER_79    | H, B_SER_79     | 2.94 | 2.10 | 11.73 |
| 5UCB.PDB | O, B_ALA_80    | N, B_ILE_83    | H, B_ILE_83     | 3.00 | 2.16 | 12.13 |
| 5UCB.PDB | O, B_PRO_84    | N, B_GLU_87    | H, B_GLU_87     | 2.81 | 2.08 | 26.69 |
| 5UCB.PDB | O, B_GLU_87    | OG, B_SER_90   | HG, B_SER_90    | 2.87 | 2.04 | 8.25  |
| 5UCB.PDB | O, B_VAL_112   | N, B_THR_92    | H, B_THR_92     | 2.86 | 2.03 | 12.64 |
| 5UCB.PDB | O, B_THR_42    | N, B_LEU_95    | H, B_LEU_95     | 2.81 | 2.01 | 16.51 |
| 5UCB.PDB | O, B_VAL_108   | N, B_LEU_96    | H, B_LEU_96     | 2.80 | 1.97 | 10.47 |
| 5UCB.PDB | O, B_LYS_40    | N, B_SER_97    | H, B_SER_97     | 2.90 | 2.07 | 12.23 |
| 5UCB.PDB | O, B_GLU_38    | N, B_SER_99    | H, B_SER_99     | 2.90 | 2.12 | 21.40 |
| 5UCB.PDB | O, B_ARG_103   | N, B_TYR_100   | H, B_TYR_100    | 2.86 | 2.06 | 17.81 |
| 5UCB.PDB | OD1, B_ASP_153 | OH, B_TYR_100  | HH, B_TYR_100   | 2.55 | 1.73 | 8.75  |
| 5UCB.PDB | O, B_TYR_100   | N, B_ARG_103   | H, B_ARG_103    | 2.90 | 2.08 | 14.68 |
| 5UCB.PDB | O, B_VAL_151   | NE, B_ARG_103  | HE, B_ARG_103   | 2.81 | 2.01 | 18.23 |
| 5UCB.PDB | OD2, B_ASP_101 | NH1, B_ARG_103 | HH12, B_ARG_103 | 2.89 | 2.11 | 20.47 |
| 5UCB.PDB | O, B_THR_146   | N, B_ARG_107   | H, B_ARG_107    | 2.85 | 2.07 | 20.33 |
| 5UCB.PDB | OE2, B_GLU_104 | NE, B_ARG_107  | HE, B_ARG_107   | 2.91 | 2.05 | 4.26  |
| 5UCB.PDB | O, B_LEU_96    | N, B_VAL_108   | H, B_VAL_108    | 2.68 | 1.84 | 10.31 |
| 5UCB.PDB | O, B_ARG_144   | N, B_GLY_109   | H, B_GLY_109    | 2.80 | 1.96 | 9.36  |
| 5UCB.PDB | O, B_ILE_94    | N, B_TYR_110   | H, B_TYR_110    | 2.92 | 2.13 | 18.74 |
| 5UCB.PDB | O, L_ASP_91    | OH, B_TYR_111  | HH, B_TYR_111   | 2.57 | 1.75 | 11.11 |
| 5UCB.PDB | O, B_THR_92    | N, B_VAL_112   | H, B_VAL_112    | 2.87 | 2.09 | 21.11 |
| 5UCB.PDB | O, B_ASN_137   | N, B_ASN_113   | H, B_ASN_113    | 2.89 | 2.05 | 9.00  |
| 5UCB.PDB | O, B_SER_90    | ND2, B_ASN_114 | HD22, B_ASN_114 | 2.97 | 2.13 | 9.19  |
| 5UCB.PDB | O, B_GLU_118   | N, B_ARG_122   | H, B_ARG_122    | 2.99 | 2.17 | 14.84 |
| 5UCB.PDB | O, B_TYR_116   | NH1, B_ARG_122 | HH11, B_ARG_122 | 2.93 | 2.10 | 12.81 |
| 5UCB.PDB | O, B_GLU_120   | N, B_ASN_124   | H, B_ASN_124    | 2.98 | 2.27 | 29.44 |
| 5UCB.PDB | O, B_VAL_129   | NZ, B_LYS_128  | HZ2, B_LYS_128  | 2.82 | 1.95 | 9.37  |
| 5UCB.PDB | O, B_GLN_130   | N, B_HIS_133   | H, B_HIS_133    | 2.98 | 2.14 | 9.05  |
| 5UCB.PDB | OD1, B_ASP_117 | ND1, B_HIS_133 | HD1, B_HIS_133  | 2.95 | 2.15 | 18.23 |
| 5UCB.PDB | O, B_GLU_115   | N, B_VAL_135   | H, B_VAL_135    | 2.83 | 1.97 | 4.10  |
| 5UCB.PDB | O, B_ALA_15    | N, B_ARG_136   | H, B_ARG_136    | 2.79 | 1.98 | 17.55 |
| 5UCB.PDB | O, B_ASP_19    | NH1, B_ARG_136 | HH12, B_ARG_136 | 2.88 | 2.07 | 16.59 |
| 5UCB.PDB | O, B_ASN_113   | N, B_ASN_137   | H, B_ASN_137    | 2.81 | 2.02 | 19.05 |
| 5UCB.PDB | OD1, B_ASN_13  | N, B_ILE_138   | H, B_ILE_138    | 2.88 | 2.04 | 12.14 |
| 5UCB.PDB | O, B_TYR_111   | N, B_LEU_139   | H, B_LEU_139    | 2.86 | 2.01 | 7.51  |
| 5UCB.PDB | OG, H_SER_58   | NZ, B_LYS_142  | HZ3, B_LYS_142  | 2.83 | 1.96 | 8.82  |
| 5UCB.PDB | O, B_GLY_109   | N, B_ARG_144   | H, B_ARG_144    | 2.81 | 1.96 | 8.55  |
| 5UCB.PDB | O, B_LYS_142   | NH1, B_ARG_144 | HH11, B_ARG_144 | 2.91 | 2.12 | 19.24 |
| 5UCB.PDB | OD1, L_ASP_91  | NH2, B_ARG_144 | HH21, B_ARG_144 | 2.84 | 2.03 | 16.18 |
| 5UCB.PDB | O, B_ARG_107   | N, B_THR_146   | H, B_THR_146    | 2.81 | 1.98 | 11.97 |
| 5UCB.PDB | O, B_PHE_105   | N, B_PHE_148   | H, B_PHE_148    | 2.97 | 2.13 | 9.82  |

Table 1715: 5UCB-specific side chain and main chain hydrogen bonding analysis. In this table, a PDB file is specified with a four-letter PDB ID, except that the names of the PDB files corresponding to the single NMR structural model split from the NMR ensemble is specified with a four-letter PDB ID in addition to a hyphen followed by the single NMR structural model numeric ID, the residue naming scheme is **Chain ID\_residue name\_residue number**,  $\angle ADH$  represents the angle formed by acceptor (A), donor (D) and hydrogen (H) ( $\angle ADH$ ).

| PDB      | Acceptor (A)   | Donor (D)    | Hydrogen (H) | D-A (Å) | H-A (Å) | $\angle ADH(^{\circ})$ |
|----------|----------------|--------------|--------------|---------|---------|------------------------|
| 5UJZ.PDB | OD2, B.ASP.612 | N, B.PHE.503 | H, B.PHE.503 | 2.82    | 1.98    | 9.98                   |
| 5UJZ.PDB | OE1, B.GLU.574 | N, B.ASN.571 | H, B.ASN.571 | 2.73    | 1.96    | 22.10                  |
| 5UJZ.PDB | OD1, B.ASN.571 | N, B.LEU.573 | H, B.LEU.573 | 2.86    | 2.10    | 22.42                  |
| 5UJZ.PDB | O, B.ARG.575   | N, B.ASN.579 | H, B.ASN.579 | 2.92    | 2.06    | 2.26                   |
| 5UJZ.PDB | O, B.ARG.576   | N, B.LEU.580 | H, B.LEU.580 | 2.88    | 2.06    | 14.57                  |
| 5UJZ.PDB | O, B.MET.577   | N, B.ASN.581 | H, B.ASN.581 | 2.87    | 2.02    | 8.14                   |
| 5UJZ.PDB | O, B.GLU.578   | N, B.LYS.582 | H, B.LYS.582 | 2.88    | 2.03    | 6.05                   |
| 5UJZ.PDB | O, B.ASN.579   | N, B.LYS.583 | H, B.LYS.583 | 2.96    | 2.20    | 23.30                  |
| 5UJZ.PDB | O, B.LEU.580   | N, B.VAL.584 | H, B.VAL.584 | 2.77    | 1.95    | 12.45                  |
| 5UJZ.PDB | O, B.LYS.583   | N, B.GLY.587 | H, B.GLY.587 | 2.90    | 2.12    | 21.34                  |
| 5UJZ.PDB | O, B.VAL.584   | N, B.PHE.588 | H, B.PHE.588 | 2.97    | 2.16    | 15.91                  |
| 5UJZ.PDB | O, B.PHE.588   | N, B.TRP.592 | H, B.TRP.592 | 2.95    | 2.10    | 7.22                   |
| 5UJZ.PDB | O, B.ASP.590   | N, B.TYR.594 | H, B.TYR.594 | 2.86    | 2.06    | 18.30                  |
| 5UJZ.PDB | O, B.ILE.591   | N, B.ASN.595 | H, B.ASN.595 | 2.96    | 2.11    | 4.50                   |
| 5UJZ.PDB | O, B.TRP.592   | N, B.ALA.596 | H, B.ALA.596 | 2.92    | 2.09    | 14.14                  |
| 5UJZ.PDB | O, B.THR.593   | N, B.GLU.597 | H, B.GLU.597 | 2.94    | 2.13    | 17.13                  |
| 5UJZ.PDB | O, B.ASN.595   | N, B.LEU.599 | H, B.LEU.599 | 2.92    | 2.21    | 29.47                  |
| 5UJZ.PDB | O, B.ALA.596   | N, B.VAL.600 | H, B.VAL.600 | 2.90    | 2.16    | 25.76                  |
| 5UJZ.PDB | O, B.LEU.598   | N, B.LEU.602 | H, B.LEU.602 | 2.89    | 2.04    | 6.88                   |
| 5UJZ.PDB | O, B.LEU.599   | N, B.GLU.603 | H, B.GLU.603 | 2.89    | 2.05    | 10.08                  |
| 5UJZ.PDB | O, B.VAL.600   | N, B.ASN.604 | H, B.ASN.604 | 2.99    | 2.17    | 14.45                  |
| 5UJZ.PDB | O, B.LEU.602   | N, B.ARG.606 | H, B.ARG.606 | 2.86    | 2.03    | 11.15                  |
| 5UJZ.PDB | O, B.ASN.604   | N, B.LEU.608 | H, B.LEU.608 | 2.98    | 2.16    | 15.31                  |
| 5UJZ.PDB | O, B.LEU.608   | N, B.ASP.612 | H, B.ASP.612 | 2.95    | 2.10    | 4.89                   |
| 5UJZ.PDB | OE1, D.GLU.574 | N, D.ASN.571 | H, D.ASN.571 | 2.73    | 1.96    | 22.20                  |
| 5UJZ.PDB | OD1, D.ASN.571 | N, D.LEU.573 | H, D.LEU.573 | 2.86    | 2.10    | 22.20                  |
| 5UJZ.PDB | O, D.ARG.575   | N, D.ASN.579 | H, D.ASN.579 | 2.92    | 2.06    | 2.09                   |
| 5UJZ.PDB | O, D.ARG.576   | N, D.LEU.580 | H, D.LEU.580 | 2.88    | 2.06    | 14.50                  |
| 5UJZ.PDB | O, D.MET.577   | N, D.ASN.581 | H, D.ASN.581 | 2.87    | 2.02    | 7.86                   |
| 5UJZ.PDB | O, D.GLU.578   | N, D.LYS.582 | H, D.LYS.582 | 2.88    | 2.03    | 5.99                   |
| 5UJZ.PDB | O, D.ASN.579   | N, D.LYS.583 | H, D.LYS.583 | 2.96    | 2.20    | 23.42                  |
| 5UJZ.PDB | O, D.LEU.580   | N, D.VAL.584 | H, D.VAL.584 | 2.77    | 1.95    | 12.36                  |
| 5UJZ.PDB | O, D.ASN.581   | N, D.ASP.585 | H, D.ASP.585 | 2.93    | 2.09    | 8.97                   |
| 5UJZ.PDB | O, D.LYS.583   | N, D.GLY.587 | H, D.GLY.587 | 2.90    | 2.12    | 21.44                  |
| 5UJZ.PDB | O, D.VAL.584   | N, D.PHE.588 | H, D.PHE.588 | 2.97    | 2.16    | 15.92                  |
| 5UJZ.PDB | O, D.ASP.585   | N, D.ILE.589 | H, D.ILE.589 | 2.87    | 2.03    | 9.83                   |
| 5UJZ.PDB | O, D.PHE.588   | N, D.TRP.592 | H, D.TRP.592 | 2.95    | 2.10    | 7.33                   |
| 5UJZ.PDB | O, D.TRP.592   | N, D.ALA.596 | H, D.ALA.596 | 2.92    | 2.09    | 14.04                  |
| 5UJZ.PDB | O, D.ASN.595   | N, D.LEU.599 | H, D.LEU.599 | 2.91    | 2.21    | 29.48                  |
| 5UJZ.PDB | OE1, F.GLU.574 | N, F.ASN.571 | H, F.ASN.571 | 2.73    | 1.96    | 22.15                  |
| 5UJZ.PDB | OD1, F.ASN.571 | N, F.LEU.573 | H, F.LEU.573 | 2.86    | 2.10    | 22.13                  |
| 5UJZ.PDB | O, F.ARG.575   | N, F.ASN.579 | H, F.ASN.579 | 2.92    | 2.05    | 1.88                   |
| 5UJZ.PDB | O, F.ARG.576   | N, F.LEU.580 | H, F.LEU.580 | 2.88    | 2.06    | 14.64                  |
| 5UJZ.PDB | O, F.MET.577   | N, F.ASN.581 | H, F.ASN.581 | 2.87    | 2.02    | 7.56                   |
| 5UJZ.PDB | O, F.GLU.578   | N, F.LYS.582 | H, F.LYS.582 | 2.88    | 2.03    | 5.84                   |
| 5UJZ.PDB | O, F.ASN.579   | N, F.LYS.583 | H, F.LYS.583 | 2.96    | 2.20    | 23.60                  |
| 5UJZ.PDB | O, F.LEU.580   | N, F.VAL.584 | H, F.VAL.584 | 2.77    | 1.95    | 12.39                  |
| 5UJZ.PDB | O, F.ASN.581   | N, F.ASP.585 | H, F.ASP.585 | 2.93    | 2.09    | 8.86                   |
| 5UJZ.PDB | O, F.LYS.582   | N, F.ASP.586 | H, F.ASP.586 | 2.90    | 2.06    | 8.24                   |
| 5UJZ.PDB | O, F.LYS.583   | N, F.GLY.587 | H, F.GLY.587 | 2.90    | 2.12    | 21.41                  |
| 5UJZ.PDB | O, F.VAL.584   | N, F.PHE.588 | H, F.PHE.588 | 2.97    | 2.16    | 15.90                  |
| 5UJZ.PDB | O, F.ASP.585   | N, F.ILE.589 | H, F.ILE.589 | 2.87    | 2.03    | 9.71                   |
| 5UJZ.PDB | O, F.ASP.586   | N, F.ASP.590 | H, F.ASP.590 | 2.94    | 2.13    | 16.67                  |
| 5UJZ.PDB | O, F.PHE.588   | N, F.TRP.592 | H, F.TRP.592 | 2.95    | 2.10    | 7.36                   |
| 5UJZ.PDB | O, F.ILE.589   | N, F.THR.593 | H, F.THR.593 | 2.94    | 2.15    | 21.05                  |
| 5UJZ.PDB | O, F.ASP.590   | N, F.TYR.594 | H, F.TYR.594 | 2.86    | 2.06    | 18.69                  |
| 5UJZ.PDB | O, F.ILE.591   | N, F.ASN.595 | H, F.ASN.595 | 2.96    | 2.11    | 4.41                   |

|          |              |              |              |      |      |       |
|----------|--------------|--------------|--------------|------|------|-------|
| 5UJZ.PDB | O, F_TRP_592 | N, F_ALA_596 | H, F_ALA_596 | 2.92 | 2.09 | 13.92 |
|----------|--------------|--------------|--------------|------|------|-------|

Table 1716: 5UJZ-specific side chain and main chain hydrogen bonding analysis. In this table, a PDB file is specified with a four-letter PDB ID, except that the names of the PDB files corresponding to the single NMR structural model split from the NMR ensemble is specified with a four-letter PDB ID in addition to a hyphen followed by the single NMR structural model numeric ID, the residue naming scheme is **Chain ID\_residue name\_residue number**,  $\angle ADH$  represents the angle formed by acceptor (A), donor (D) and hydrogen (H) ( $\angle ADH$ ).



| PDB      | Acceptor (A)   | Donor (D)      | Hydrogen (H)    | D-A (Å) | H-A (Å) | $\angle ADH(^{\circ})$ |
|----------|----------------|----------------|-----------------|---------|---------|------------------------|
| 5UK0.PDB | O, A_THR_235   | N, A_VAL_178   | H, A_VAL_178    | 3.00    | 2.15    | 9.10                   |
| 5UK0.PDB | O, A_TYR_233   | N, A_TRP_180   | H, A_TRP_180    | 2.83    | 2.06    | 22.85                  |
| 5UK0.PDB | O, A_HIS_98    | N, A_TYR_232   | H, A_TYR_232    | 2.76    | 1.93    | 13.46                  |
| 5UK0.PDB | O, A_TRP_180   | N, A_TYR_233   | H, A_TYR_233    | 2.86    | 2.01    | 7.16                   |
| 5UK0.PDB | O, A_ALA_100   | NE1, A_TRP_234 | HE1, A_TRP_234  | 2.75    | 1.95    | 17.16                  |
| 5UK0.PDB | O, A_VAL_178   | N, A_THR_235   | H, A_THR_235    | 2.96    | 2.15    | 14.92                  |
| 5UK0.PDB | OD2, B_ASP_612 | N, B_PHE_503   | H, B_PHE_503    | 2.70    | 1.87    | 11.32                  |
| 5UK0.PDB | O, B_ALA_505   | N, B_GLY_508   | H, B_GLY_508    | 2.62    | 1.89    | 25.83                  |
| 5UK0.PDB | O, B_GLY_504   | N, B_PHE_509   | H, B_PHE_509    | 2.72    | 1.93    | 19.32                  |
| 5UK0.PDB | O, B_ALA_535   | N, B_TYR_524   | H, B_TYR_524    | 2.87    | 2.06    | 16.06                  |
| 5UK0.PDB | O, B_GLY_533   | N, B_HIS_526   | H, B_HIS_526    | 2.86    | 2.15    | 29.56                  |
| 5UK0.PDB | O, B_TYR_524   | N, B_ALA_535   | H, B_ALA_535    | 2.96    | 2.18    | 21.03                  |
| 5UK0.PDB | O, B_TYR_522   | N, B_ASP_537   | H, B_ASP_537    | 2.88    | 2.08    | 16.70                  |
| 5UK0.PDB | O, B_GLN_538   | N, B_GLN_542   | H, B_GLN_542    | 2.87    | 2.06    | 16.85                  |
| 5UK0.PDB | O, B_LYS_539   | N, B_ASN_543   | H, B_ASN_543    | 2.98    | 2.18    | 18.23                  |
| 5UK0.PDB | O, B_SER_540   | N, B_ALA_544   | H, B_ALA_544    | 2.92    | 2.10    | 14.62                  |
| 5UK0.PDB | O, B_THR_541   | N, B_ILE_545   | H, B_ILE_545    | 2.93    | 2.14    | 18.92                  |
| 5UK0.PDB | O, B_GLN_542   | N, B_ASN_546   | H, B_ASN_546    | 2.90    | 2.07    | 13.85                  |
| 5UK0.PDB | O, B_ILE_545   | N, B_THR_549   | H, B_THR_549    | 2.91    | 2.09    | 13.10                  |
| 5UK0.PDB | O, B_ASN_546   | N, B_ASN_550   | H, B_ASN_550    | 2.97    | 2.16    | 16.74                  |
| 5UK0.PDB | O, B_GLY_547   | N, B_LYS_551   | H, B_LYS_551    | 2.90    | 2.15    | 24.65                  |
| 5UK0.PDB | O, B_ILE_548   | N, B_VAL_552   | H, B_VAL_552    | 2.98    | 2.14    | 11.61                  |
| 5UK0.PDB | O, B_THR_549   | N, B_ASN_553   | H, B_ASN_553    | 2.96    | 2.10    | 2.11                   |
| 5UK0.PDB | O, B_ASN_550   | N, B_SER_554   | H, B_SER_554    | 2.98    | 2.23    | 25.37                  |
| 5UK0.PDB | O, B_VAL_552   | N, B_ILE_556   | H, B_ILE_556    | 2.99    | 2.17    | 15.52                  |
| 5UK0.PDB | OD1, F_ASP_590 | ND2, B_ASN_560 | HD22, B_ASN_560 | 2.72    | 1.94    | 19.72                  |
| 5UK0.PDB | O, B_GLU_574   | N, B_GLU_578   | H, B_GLU_578    | 2.95    | 2.23    | 28.27                  |
| 5UK0.PDB | O, B_ARG_575   | N, B_ASN_579   | H, B_ASN_579    | 2.86    | 2.00    | 5.28                   |
| 5UK0.PDB | O, B_ARG_576   | N, B_LEU_580   | H, B_LEU_580    | 2.90    | 2.08    | 14.14                  |
| 5UK0.PDB | O, B_MET_577   | N, B_ASN_581   | H, B_ASN_581    | 2.90    | 2.05    | 9.42                   |
| 5UK0.PDB | O, B_GLU_578   | N, B_LYS_582   | H, B_LYS_582    | 2.89    | 2.04    | 6.59                   |
| 5UK0.PDB | O, B_ASN_579   | N, B_LYS_583   | H, B_LYS_583    | 2.99    | 2.19    | 17.96                  |
| 5UK0.PDB | O, B_LEU_580   | N, B_VAL_584   | H, B_VAL_584    | 2.79    | 1.97    | 14.76                  |
| 5UK0.PDB | O, B_ASN_581   | N, B_ASP_585   | H, B_ASP_585    | 2.96    | 2.12    | 8.51                   |
| 5UK0.PDB | O, B_LYS_582   | N, B_ASP_586   | H, B_ASP_586    | 2.88    | 2.03    | 6.06                   |
| 5UK0.PDB | O, B_LYS_583   | N, B_GLY_587   | H, B_GLY_587    | 2.88    | 2.11    | 21.69                  |
| 5UK0.PDB | O, B_ASP_585   | N, B_ILE_589   | H, B_ILE_589    | 2.91    | 2.09    | 14.38                  |
| 5UK0.PDB | O, B_ASP_586   | N, B_ASP_590   | H, B_ASP_590    | 2.91    | 2.09    | 14.55                  |
| 5UK0.PDB | O, B_PHE_588   | N, B_TRP_592   | H, B_TRP_592    | 2.93    | 2.08    | 6.61                   |
| 5UK0.PDB | O, B_ILE_589   | N, B_THR_593   | H, B_THR_593    | 2.96    | 2.20    | 24.14                  |
| 5UK0.PDB | O, B_ASP_590   | N, B_TYR_594   | H, B_TYR_594    | 2.90    | 2.12    | 20.32                  |
| 5UK0.PDB | O, B_ILE_591   | N, B_ASN_595   | H, B_ASN_595    | 2.98    | 2.13    | 3.96                   |
| 5UK0.PDB | O, B_TRP_592   | N, B_ALA_596   | H, B_ALA_596    | 2.89    | 2.07    | 14.01                  |
| 5UK0.PDB | O, B_THR_593   | N, B_GLU_597   | H, B_GLU_597    | 2.94    | 2.15    | 19.17                  |
| 5UK0.PDB | O, B_ASN_595   | N, B_LEU_599   | H, B_LEU_599    | 2.94    | 2.22    | 27.64                  |
| 5UK0.PDB | O, B_ALA_596   | N, B_VAL_600   | H, B_VAL_600    | 2.93    | 2.19    | 26.06                  |
| 5UK0.PDB | O, B_LEU_598   | N, B_LEU_602   | H, B_LEU_602    | 2.93    | 2.09    | 10.30                  |
| 5UK0.PDB | O, B_LEU_599   | N, B_GLU_603   | H, B_GLU_603    | 2.87    | 2.04    | 13.58                  |
| 5UK0.PDB | O, B_VAL_600   | N, B_ASN_604   | H, B_ASN_604    | 2.99    | 2.17    | 14.76                  |
| 5UK0.PDB | O, B_LEU_601   | N, B_GLU_605   | H, B_GLU_605    | 2.98    | 2.18    | 18.00                  |
| 5UK0.PDB | O, B_LEU_602   | N, B_ARG_606   | H, B_ARG_606    | 2.85    | 2.01    | 10.65                  |
| 5UK0.PDB | O, B_ASN_604   | N, B_LEU_608   | H, B_LEU_608    | 2.96    | 2.16    | 17.86                  |
| 5UK0.PDB | O, B_GLU_605   | N, B_ASP_609   | H, B_ASP_609    | 2.94    | 2.14    | 18.33                  |
| 5UK0.PDB | O, B_THR_607   | N, B_HIS_611   | H, B_HIS_611    | 2.95    | 2.15    | 17.84                  |
| 5UK0.PDB | O, B_LEU_608   | N, B_ASP_612   | H, B_ASP_612    | 2.94    | 2.09    | 8.40                   |
| 5UK0.PDB | O, B_ASP_609   | N, B_SER_613   | H, B_SER_613    | 2.89    | 2.09    | 18.36                  |
| 5UK0.PDB | O, B_HIS_611   | N, B_VAL_615   | H, B_VAL_615    | 2.99    | 2.17    | 12.43                  |

|          |                |                |                 |      |      |       |
|----------|----------------|----------------|-----------------|------|------|-------|
| 5UK0.PDB | O, B_SER_613   | N, B_ASN_617   | H, B_ASN_617    | 2.86 | 2.04 | 15.11 |
| 5UK0.PDB | O, F_LEU_502   | ND2, B_ASN_617 | HD22, B_ASN_617 | 2.60 | 1.80 | 16.74 |
| 5UK0.PDB | O, B_ASN_614   | N, B_LEU_618   | H, B_LEU_618    | 2.97 | 2.17 | 18.23 |
| 5UK0.PDB | O, B_VAL_615   | N, B_TYR_619   | H, B_TYR_619    | 2.89 | 2.08 | 17.73 |
| 5UK0.PDB | O, B_ASN_617   | N, B_LYS_621   | H, B_LYS_621    | 2.91 | 2.19 | 28.31 |
| 5UK0.PDB | O, B_LEU_618   | N, B_VAL_622   | H, B_VAL_622    | 2.91 | 2.12 | 20.36 |
| 5UK0.PDB | O, B_TYR_619   | N, B_LYS_623   | H, B_LYS_623    | 2.95 | 2.14 | 15.77 |
| 5UK0.PDB | O, B_GLU_639   | N, B_LYS_631   | H, B_LYS_631    | 2.93 | 2.13 | 17.90 |
| 5UK0.PDB | OD1, C_ASN_231 | N, C_HIS_98    | H, C_HIS_98     | 2.89 | 2.08 | 15.31 |
| 5UK0.PDB | O, C_ASP_101   | N, C_LEU_105   | H, C_LEU_105    | 2.95 | 2.14 | 16.91 |
| 5UK0.PDB | O, C_LEU_105   | N, C_LEU_109   | H, C_LEU_109    | 2.87 | 2.07 | 17.71 |
| 5UK0.PDB | O, C_THR_131   | N, C_THR_155   | H, C_THR_155    | 2.70 | 1.87 | 11.80 |
| 5UK0.PDB | O, C_THR_235   | N, C_VAL_178   | H, C_VAL_178    | 2.99 | 2.15 | 8.93  |
| 5UK0.PDB | O, C_TYR_233   | N, C_TRP_180   | H, C_TRP_180    | 2.83 | 2.06 | 22.92 |
| 5UK0.PDB | O, C_ILE_252   | N, C_GLY_181   | H, C_GLY_181    | 2.96 | 2.20 | 23.53 |
| 5UK0.PDB | O, C_ASN_231   | N, C_VAL_182   | H, C_VAL_182    | 2.94 | 2.21 | 26.92 |
| 5UK0.PDB | O, C_ASN_250   | N, C_HIS_183   | H, C_HIS_183    | 2.90 | 2.10 | 17.87 |
| 5UK0.PDB | O, C_HIS_98    | N, C_TYR_232   | H, C_TYR_232    | 2.75 | 1.93 | 13.38 |
| 5UK0.PDB | O, C_TRP_180   | N, C_TYR_233   | H, C_TYR_233    | 2.86 | 2.01 | 7.20  |
| 5UK0.PDB | O, C_ALA_100   | NE1, C_TRP_234 | HE1, C_TRP_234  | 2.75 | 1.95 | 17.15 |
| 5UK0.PDB | O, C_VAL_178   | N, C_THR_235   | H, C_THR_235    | 2.96 | 2.15 | 14.97 |
| 5UK0.PDB | O, C_VAL_176   | N, C_LEU_237   | H, C_LEU_237    | 2.90 | 2.14 | 23.70 |
| 5UK0.PDB | O, C_GLY_181   | N, C_ILE_252   | H, C_ILE_252    | 2.86 | 2.07 | 19.19 |
| 5UK0.PDB | OD1, D_ASP_586 | NH2, C_ARG_311 | HH22, C_ARG_311 | 2.98 | 2.20 | 18.56 |
| 5UK0.PDB | OD2, D_ASP_612 | N, D_PHE_503   | H, D_PHE_503    | 2.70 | 1.87 | 11.03 |
| 5UK0.PDB | O, D_ALA_505   | N, D_GLY_508   | H, D_GLY_508    | 2.63 | 1.89 | 25.56 |
| 5UK0.PDB | O, D_GLY_504   | N, D_PHE_509   | H, D_PHE_509    | 2.72 | 1.93 | 19.19 |
| 5UK0.PDB | O, D_ALA_535   | N, D_TYR_524   | H, D_TYR_524    | 2.87 | 2.06 | 15.73 |
| 5UK0.PDB | O, D_TYR_524   | N, D_ALA_535   | H, D_ALA_535    | 2.96 | 2.18 | 21.51 |
| 5UK0.PDB | O, D_TYR_522   | N, D_ASP_537   | H, D_ASP_537    | 2.88 | 2.07 | 16.56 |
| 5UK0.PDB | O, D_GLN_538   | N, D_GLN_542   | H, D_GLN_542    | 2.87 | 2.06 | 16.50 |
| 5UK0.PDB | O, D_LYS_539   | N, D_ASN_543   | H, D_ASN_543    | 2.98 | 2.18 | 18.20 |
| 5UK0.PDB | O, D_SER_540   | N, D_ALA_544   | H, D_ALA_544    | 2.93 | 2.11 | 14.85 |
| 5UK0.PDB | O, D_THR_541   | N, D_ILE_545   | H, D_ILE_545    | 2.93 | 2.14 | 18.87 |
| 5UK0.PDB | O, D_GLN_542   | N, D_ASN_546   | H, D_ASN_546    | 2.90 | 2.07 | 13.58 |
| 5UK0.PDB | O, D_ILE_545   | N, D_THR_549   | H, D_THR_549    | 2.91 | 2.09 | 12.94 |
| 5UK0.PDB | O, D_ASN_546   | N, D_ASN_550   | H, D_ASN_550    | 2.97 | 2.16 | 16.37 |
| 5UK0.PDB | O, D_GLY_547   | N, D_LYS_551   | H, D_LYS_551    | 2.90 | 2.15 | 24.73 |
| 5UK0.PDB | O, D_ILE_548   | N, D_VAL_552   | H, D_VAL_552    | 2.98 | 2.14 | 11.77 |
| 5UK0.PDB | O, D_THR_549   | N, D_ASN_553   | H, D_ASN_553    | 2.96 | 2.10 | 2.11  |
| 5UK0.PDB | O, D_ASN_550   | N, D_SER_554   | H, D_SER_554    | 2.98 | 2.23 | 25.34 |
| 5UK0.PDB | O, D_VAL_552   | N, D_ILE_556   | H, D_ILE_556    | 2.99 | 2.17 | 15.75 |
| 5UK0.PDB | OD1, B_ASP_590 | ND2, D_ASN_560 | HD22, D_ASN_560 | 2.73 | 1.95 | 20.06 |
| 5UK0.PDB | O, D_GLU_574   | N, D_GLU_578   | H, D_GLU_578    | 2.95 | 2.23 | 28.68 |
| 5UK0.PDB | O, D_ARG_575   | N, D_ASN_579   | H, D_ASN_579    | 2.86 | 2.00 | 3.72  |
| 5UK0.PDB | O, D_ARG_576   | N, D_LEU_580   | H, D_LEU_580    | 2.90 | 2.07 | 13.93 |
| 5UK0.PDB | O, D_MET_577   | N, D_ASN_581   | H, D_ASN_581    | 2.90 | 2.05 | 9.24  |
| 5UK0.PDB | O, D_GLU_578   | N, D_LYS_582   | H, D_LYS_582    | 2.89 | 2.04 | 7.42  |
| 5UK0.PDB | O, D_ASN_579   | N, D_LYS_583   | H, D_LYS_583    | 2.99 | 2.19 | 18.48 |
| 5UK0.PDB | O, D_LEU_580   | N, D_VAL_584   | H, D_VAL_584    | 2.79 | 1.97 | 14.60 |
| 5UK0.PDB | O, D_ASN_581   | N, D_ASP_585   | H, D_ASP_585    | 2.96 | 2.12 | 8.30  |
| 5UK0.PDB | O, D_LYS_582   | N, D_ASP_586   | H, D_ASP_586    | 2.88 | 2.03 | 7.07  |
| 5UK0.PDB | O, D_LYS_583   | N, D_GLY_587   | H, D_GLY_587    | 2.88 | 2.11 | 21.76 |
| 5UK0.PDB | O, D_ASP_585   | N, D_ILE_589   | H, D_ILE_589    | 2.91 | 2.09 | 14.41 |
| 5UK0.PDB | O, D_ASP_586   | N, D_ASP_590   | H, D_ASP_590    | 2.91 | 2.09 | 15.63 |
| 5UK0.PDB | O, D_PHE_588   | N, D_TRP_592   | H, D_TRP_592    | 2.93 | 2.08 | 6.27  |
| 5UK0.PDB | O, D_ILE_589   | N, D_THR_593   | H, D_THR_593    | 2.96 | 2.21 | 24.62 |
| 5UK0.PDB | O, D_ASP_590   | N, D_TYR_594   | H, D_TYR_594    | 2.90 | 2.12 | 21.14 |

|          |                |                |                 |      |      |       |
|----------|----------------|----------------|-----------------|------|------|-------|
| 5UK0.PDB | O, D_ILE_591   | N, D_ASN_595   | H, D_ASN_595    | 2.98 | 2.12 | 3.15  |
| 5UK0.PDB | O, D_TRP_592   | N, D_ALA_596   | H, D_ALA_596    | 2.89 | 2.07 | 14.15 |
| 5UK0.PDB | O, D_THR_593   | N, D_GLU_597   | H, D_GLU_597    | 2.94 | 2.15 | 19.89 |
| 5UK0.PDB | O, D_ASN_595   | N, D_LEU_599   | H, D_LEU_599    | 2.94 | 2.21 | 26.82 |
| 5UK0.PDB | O, D_ALA_596   | N, D_VAL_600   | H, D_VAL_600    | 2.93 | 2.19 | 25.78 |
| 5UK0.PDB | O, D_LEU_598   | N, D_LEU_602   | H, D_LEU_602    | 2.93 | 2.09 | 10.12 |
| 5UK0.PDB | O, D_LEU_599   | N, D_GLU_603   | H, D_GLU_603    | 2.86 | 2.04 | 13.30 |
| 5UK0.PDB | O, D_VAL_600   | N, D_ASN_604   | H, D_ASN_604    | 2.99 | 2.17 | 15.08 |
| 5UK0.PDB | O, D_LEU_601   | N, D_GLU_605   | H, D_GLU_605    | 2.98 | 2.18 | 18.56 |
| 5UK0.PDB | O, D_LEU_602   | N, D_ARG_606   | H, D_ARG_606    | 2.85 | 2.01 | 10.50 |
| 5UK0.PDB | O, D_ASN_604   | N, D_LEU_608   | H, D_LEU_608    | 2.96 | 2.16 | 18.11 |
| 5UK0.PDB | O, D_GLU_605   | N, D_ASP_609   | H, D_ASP_609    | 2.94 | 2.14 | 18.44 |
| 5UK0.PDB | O, D_THR_607   | N, D_HIS_611   | H, D_HIS_611    | 2.95 | 2.15 | 17.74 |
| 5UK0.PDB | O, D_LEU_608   | N, D_ASP_612   | H, D_ASP_612    | 2.94 | 2.09 | 8.59  |
| 5UK0.PDB | O, D_ASP_609   | N, D_SER_613   | H, D_SER_613    | 2.89 | 2.09 | 18.51 |
| 5UK0.PDB | O, D_HIS_611   | N, D_VAL_615   | H, D_VAL_615    | 2.99 | 2.17 | 12.24 |
| 5UK0.PDB | O, D_SER_613   | N, D_ASN_617   | H, D_ASN_617    | 2.86 | 2.05 | 15.31 |
| 5UK0.PDB | O, B_LEU_502   | ND2, D_ASN_617 | HD22, D_ASN_617 | 2.62 | 1.80 | 13.03 |
| 5UK0.PDB | O, D_ASN_614   | N, D_LEU_618   | H, D_LEU_618    | 2.97 | 2.17 | 17.99 |
| 5UK0.PDB | O, D_VAL_615   | N, D_TYR_619   | H, D_TYR_619    | 2.89 | 2.08 | 17.58 |
| 5UK0.PDB | O, D_ASN_617   | N, D_LYS_621   | H, D_LYS_621    | 2.91 | 2.19 | 28.69 |
| 5UK0.PDB | O, D_LEU_618   | N, D_VAL_622   | H, D_VAL_622    | 2.91 | 2.12 | 19.99 |
| 5UK0.PDB | O, D_TYR_619   | N, D_LYS_623   | H, D_LYS_623    | 2.95 | 2.14 | 15.66 |
| 5UK0.PDB | OH, D_TYR_659  | ND2, D_ASN_628 | HD22, D_ASN_628 | 2.78 | 1.98 | 17.11 |
| 5UK0.PDB | O, D_GLU_639   | N, D_LYS_631   | H, D_LYS_631    | 2.93 | 2.13 | 17.74 |
| 5UK0.PDB | OD1, E_ASN_231 | N, E_HIS_98    | H, E_HIS_98     | 2.89 | 2.08 | 15.58 |
| 5UK0.PDB | O, E_ASP_101   | N, E_LEU_105   | H, E_LEU_105    | 2.95 | 2.14 | 17.24 |
| 5UK0.PDB | O, E_ALA_253   | N, E_LEU_152   | H, E_LEU_152    | 2.92 | 2.19 | 27.06 |
| 5UK0.PDB | O, E_THR_235   | N, E_VAL_178   | H, E_VAL_178    | 2.99 | 2.15 | 9.16  |
| 5UK0.PDB | O, E_TYR_233   | N, E_TRP_180   | H, E_TRP_180    | 2.83 | 2.07 | 23.11 |
| 5UK0.PDB | O, E_ILE_252   | N, E_GLY_181   | H, E_GLY_181    | 2.96 | 2.20 | 23.58 |
| 5UK0.PDB | O, E_ASN_231   | N, E_VAL_182   | H, E_VAL_182    | 2.94 | 2.21 | 26.82 |
| 5UK0.PDB | O, E_ASN_250   | N, E_HIS_183   | H, E_HIS_183    | 2.90 | 2.10 | 17.70 |
| 5UK0.PDB | O, E_HIS_98    | N, E_TYR_232   | H, E_TYR_232    | 2.75 | 1.93 | 13.43 |
| 5UK0.PDB | O, E_TRP_180   | N, E_TYR_233   | H, E_TYR_233    | 2.86 | 2.01 | 7.32  |
| 5UK0.PDB | O, E_ALA_100   | NE1, E_TRP_234 | HE1, E_TRP_234  | 2.75 | 1.95 | 17.13 |
| 5UK0.PDB | O, E_VAL_178   | N, E_THR_235   | H, E_THR_235    | 2.96 | 2.15 | 14.95 |
| 5UK0.PDB | O, E_GLY_181   | N, E_ILE_252   | H, E_ILE_252    | 2.86 | 2.06 | 19.00 |
| 5UK0.PDB | O, E_LEU_152   | N, E_ALA_253   | H, E_ALA_253    | 2.98 | 2.15 | 13.22 |
| 5UK0.PDB | OD2, F_ASP_612 | N, F_PHE_503   | H, F_PHE_503    | 2.70 | 1.87 | 11.30 |
| 5UK0.PDB | O, F_ALA_505   | N, F_GLY_508   | H, F_GLY_508    | 2.62 | 1.89 | 25.82 |
| 5UK0.PDB | O, F_GLY_504   | N, F_PHE_509   | H, F_PHE_509    | 2.72 | 1.93 | 19.29 |
| 5UK0.PDB | O, F_TYR_522   | N, F_ASP_537   | H, F_ASP_537    | 2.88 | 2.08 | 16.77 |
| 5UK0.PDB | O, F_GLN_538   | N, F_GLN_542   | H, F_GLN_542    | 2.87 | 2.06 | 16.85 |
| 5UK0.PDB | O, F_LYS_539   | N, F_ASN_543   | H, F_ASN_543    | 2.98 | 2.18 | 18.15 |
| 5UK0.PDB | O, F_SER_540   | N, F_ALA_544   | H, F_ALA_544    | 2.92 | 2.10 | 14.52 |
| 5UK0.PDB | O, F_THR_541   | N, F_ILE_545   | H, F_ILE_545    | 2.93 | 2.14 | 19.01 |
| 5UK0.PDB | O, F_GLN_542   | N, F_ASN_546   | H, F_ASN_546    | 2.90 | 2.07 | 13.91 |
| 5UK0.PDB | O, F_ILE_545   | N, F_THR_549   | H, F_THR_549    | 2.91 | 2.09 | 13.20 |
| 5UK0.PDB | O, F_GLY_547   | N, F_LYS_551   | H, F_LYS_551    | 2.90 | 2.15 | 24.70 |
| 5UK0.PDB | O, F_ILE_548   | N, F_VAL_552   | H, F_VAL_552    | 2.98 | 2.14 | 11.60 |
| 5UK0.PDB | O, F_THR_549   | N, F_ASN_553   | H, F_ASN_553    | 2.96 | 2.10 | 2.17  |
| 5UK0.PDB | O, F_GLU_574   | N, F_GLU_578   | H, F_GLU_578    | 2.95 | 2.23 | 28.18 |
| 5UK0.PDB | O, F_ARG_575   | N, F_ASN_579   | H, F_ASN_579    | 2.86 | 2.00 | 5.11  |
| 5UK0.PDB | O, F_ARG_576   | N, F_LEU_580   | H, F_LEU_580    | 2.90 | 2.08 | 14.08 |
| 5UK0.PDB | O, F_MET_577   | N, F_ASN_581   | H, F_ASN_581    | 2.90 | 2.05 | 9.26  |
| 5UK0.PDB | O, F_GLU_578   | N, F_LYS_582   | H, F_LYS_582    | 2.89 | 2.04 | 6.55  |
| 5UK0.PDB | O, F_ASN_579   | N, F_LYS_583   | H, F_LYS_583    | 2.99 | 2.19 | 17.94 |

|          |              |                |                 |      |      |       |
|----------|--------------|----------------|-----------------|------|------|-------|
| 5UK0.PDB | O, F_LEU_580 | N, F_VAL_584   | H, F_VAL_584    | 2.79 | 1.97 | 14.87 |
| 5UK0.PDB | O, F_ASN_581 | N, F_ASP_585   | H, F_ASP_585    | 2.96 | 2.12 | 8.36  |
| 5UK0.PDB | O, F_LYS_582 | N, F_ASP_586   | H, F_ASP_586    | 2.88 | 2.03 | 6.16  |
| 5UK0.PDB | O, F_LYS_583 | N, F_GLY_587   | H, F_GLY_587    | 2.88 | 2.11 | 21.80 |
| 5UK0.PDB | O, F_ASP_585 | N, F_ILE_589   | H, F_ILE_589    | 2.91 | 2.09 | 14.50 |
| 5UK0.PDB | O, F_ASP_586 | N, F_ASP_590   | H, F_ASP_590    | 2.91 | 2.09 | 14.81 |
| 5UK0.PDB | O, F_PHE_588 | N, F_TRP_592   | H, F_TRP_592    | 2.93 | 2.08 | 6.51  |
| 5UK0.PDB | O, F_ILE_589 | N, F_THR_593   | H, F_THR_593    | 2.96 | 2.20 | 24.02 |
| 5UK0.PDB | O, F_ASP_590 | N, F_TYR_594   | H, F_TYR_594    | 2.90 | 2.12 | 20.53 |
| 5UK0.PDB | O, F_ILE_591 | N, F_ASN_595   | H, F_ASN_595    | 2.98 | 2.13 | 3.84  |
| 5UK0.PDB | O, F_TRP_592 | N, F_ALA_596   | H, F_ALA_596    | 2.89 | 2.07 | 13.98 |
| 5UK0.PDB | O, F_THR_593 | N, F_GLU_597   | H, F_GLU_597    | 2.94 | 2.15 | 19.04 |
| 5UK0.PDB | O, F_ASN_595 | N, F_LEU_599   | H, F_LEU_599    | 2.94 | 2.22 | 27.60 |
| 5UK0.PDB | O, F_ALA_596 | N, F_VAL_600   | H, F_VAL_600    | 2.93 | 2.19 | 26.00 |
| 5UK0.PDB | O, F_LEU_598 | N, F_LEU_602   | H, F_LEU_602    | 2.93 | 2.09 | 10.36 |
| 5UK0.PDB | O, F_LEU_599 | N, F_GLU_603   | H, F_GLU_603    | 2.87 | 2.04 | 13.60 |
| 5UK0.PDB | O, F_VAL_600 | N, F_ASN_604   | H, F_ASN_604    | 2.99 | 2.17 | 14.81 |
| 5UK0.PDB | O, F_LEU_601 | N, F_GLU_605   | H, F_GLU_605    | 2.98 | 2.18 | 18.18 |
| 5UK0.PDB | O, F_LEU_602 | N, F_ARG_606   | H, F_ARG_606    | 2.84 | 2.01 | 10.64 |
| 5UK0.PDB | O, F_ASN_604 | N, F_LEU_608   | H, F_LEU_608    | 2.96 | 2.16 | 17.90 |
| 5UK0.PDB | O, F_GLU_605 | N, F_ASP_609   | H, F_ASP_609    | 2.94 | 2.14 | 18.42 |
| 5UK0.PDB | O, F_THR_607 | N, F_HIS_611   | H, F_HIS_611    | 2.95 | 2.15 | 17.79 |
| 5UK0.PDB | O, F_LEU_608 | N, F_ASP_612   | H, F_ASP_612    | 2.94 | 2.09 | 8.54  |
| 5UK0.PDB | O, F_ASP_609 | N, F_SER_613   | H, F_SER_613    | 2.89 | 2.09 | 18.54 |
| 5UK0.PDB | O, F_HIS_611 | N, F_VAL_615   | H, F_VAL_615    | 2.99 | 2.17 | 12.51 |
| 5UK0.PDB | O, F_SER_613 | N, F_ASN_617   | H, F_ASN_617    | 2.86 | 2.04 | 15.17 |
| 5UK0.PDB | O, D_LEU_502 | ND2, F_ASN_617 | HD22, F_ASN_617 | 2.71 | 1.89 | 14.40 |
| 5UK0.PDB | O, F_ASN_614 | N, F_LEU_618   | H, F_LEU_618    | 2.97 | 2.17 | 18.13 |
| 5UK0.PDB | O, F_VAL_615 | N, F_TYR_619   | H, F_TYR_619    | 2.89 | 2.08 | 17.81 |
| 5UK0.PDB | O, F_ASN_617 | N, F_LYS_621   | H, F_LYS_621    | 2.91 | 2.19 | 28.37 |
| 5UK0.PDB | O, F_LEU_618 | N, F_VAL_622   | H, F_VAL_622    | 2.91 | 2.12 | 20.33 |
| 5UK0.PDB | O, F_TYR_619 | N, F_LYS_623   | H, F_LYS_623    | 2.95 | 2.14 | 15.82 |

Table 1717: 5UK0-specific side chain and main chain hydrogen bonding analysis. In this table, a PDB file is specified with a four-letter PDB ID, except that the names of the PDB files corresponding to the single NMR structural model split from the NMR ensemble is specified with a four-letter PDB ID in addition to a hyphen followed by the single NMR structural model numeric ID, the residue naming scheme is **Chain ID\_residue name\_residue number**,  $\angle ADH$  represents the angle formed by acceptor (A), donor (D) and hydrogen (H) ( $\angle ADH$ ).

| PDB      | Acceptor (A)   | Donor (D)    | Hydrogen (H) | D-A (Å) | H-A (Å) | $\angle ADH(^{\circ})$ |
|----------|----------------|--------------|--------------|---------|---------|------------------------|
| 5UK1.PDB | O, D_VAL_552   | N, D_ILE_556 | H, D_ILE_556 | 2.96    | 2.12    | 11.93                  |
| 5UK1.PDB | OE1, F_GLU_574 | N, F_ASN_571 | H, F_ASN_571 | 2.86    | 2.03    | 13.31                  |
| 5UK1.PDB | O, F_GLU_574   | N, F_GLU_578 | H, F_GLU_578 | 2.94    | 2.20    | 25.93                  |
| 5UK1.PDB | O, F_ARG_575   | N, F_ASN_579 | H, F_ASN_579 | 2.86    | 2.00    | 2.72                   |
| 5UK1.PDB | O, F_ARG_576   | N, F_LEU_580 | H, F_LEU_580 | 2.81    | 1.99    | 13.05                  |
| 5UK1.PDB | O, F_MET_577   | N, F_ASN_581 | H, F_ASN_581 | 2.86    | 2.02    | 9.83                   |
| 5UK1.PDB | O, F_GLU_578   | N, F_LYS_582 | H, F_LYS_582 | 2.87    | 2.01    | 5.13                   |
| 5UK1.PDB | O, F_ASN_579   | N, F_LYS_583 | H, F_LYS_583 | 2.94    | 2.18    | 22.71                  |
| 5UK1.PDB | O, F_LEU_580   | N, F_VAL_584 | H, F_VAL_584 | 2.76    | 1.97    | 18.59                  |
| 5UK1.PDB | O, F_ASN_581   | N, F_ASP_585 | H, F_ASP_585 | 2.97    | 2.13    | 10.07                  |
| 5UK1.PDB | O, F_VAL_584   | N, F_PHE_588 | H, F_PHE_588 | 2.96    | 2.20    | 23.32                  |

Table 1718: 5UK1-specific side chain and main chain hydrogen bonding analysis. In this table, a PDB file is specified with a four-letter PDB ID, except that the names of the PDB files corresponding to the single NMR structural model split from the NMR ensemble is specified with a four-letter PDB ID in addition to a hyphen followed by the single NMR structural model numeric ID, the residue naming scheme is **Chain ID\_residue name\_residue number**,  $\angle ADH$  represents the angle formed by acceptor (A), donor (D) and hydrogen (H) ( $\angle ADH$ ).

| PDB      | Acceptor (A)   | Donor (D)      | Hydrogen (H)   | D-A (Å) | H-A (Å) | $\angle ADH(^{\circ})$ |
|----------|----------------|----------------|----------------|---------|---------|------------------------|
| 5UK2.PDB | O, A_ALA_100   | NE1, A_TRP_234 | HE1, A_TRP_234 | 2.78    | 1.96    | 13.46                  |
| 5UK2.PDB | OE1, B_GLU_574 | N, B_ASN_571   | H, B_ASN_571   | 2.96    | 2.16    | 19.53                  |
| 5UK2.PDB | OD1, B_ASN_571 | N, B_LEU_573   | H, B_LEU_573   | 2.85    | 2.08    | 22.03                  |
| 5UK2.PDB | O, B_ARG_575   | N, B_ASN_579   | H, B_ASN_579   | 2.99    | 2.13    | 2.73                   |
| 5UK2.PDB | O, B_ARG_576   | N, B_LEU_580   | H, B_LEU_580   | 2.91    | 2.11    | 18.12                  |
| 5UK2.PDB | O, B_MET_577   | N, B_ASN_581   | H, B_ASN_581   | 2.88    | 2.04    | 8.65                   |
| 5UK2.PDB | O, B_GLU_578   | N, B_LYS_582   | H, B_LYS_582   | 2.97    | 2.11    | 2.97                   |
| 5UK2.PDB | O, B_ASN_579   | N, B_LYS_583   | H, B_LYS_583   | 2.97    | 2.22    | 23.65                  |
| 5UK2.PDB | O, B_LEU_580   | N, B_VAL_584   | H, B_VAL_584   | 2.78    | 1.98    | 15.70                  |
| 5UK2.PDB | O, B_ASN_581   | N, B_ASP_585   | H, B_ASP_585   | 2.99    | 2.14    | 7.89                   |
| 5UK2.PDB | O, B_LYS_583   | N, B_GLY_587   | H, B_GLY_587   | 2.91    | 2.15    | 22.85                  |
| 5UK2.PDB | O, B_VAL_584   | N, B_PHE_588   | H, B_PHE_588   | 2.97    | 2.15    | 13.63                  |
| 5UK2.PDB | O, B_ASP_585   | N, B_ILE_589   | H, B_ILE_589   | 2.86    | 2.03    | 12.99                  |
| 5UK2.PDB | O, B_PHE_588   | N, B_TRP_592   | H, B_TRP_592   | 2.95    | 2.11    | 9.98                   |
| 5UK2.PDB | O, B_ILE_589   | N, B_THR_593   | H, B_THR_593   | 2.97    | 2.20    | 23.17                  |
| 5UK2.PDB | O, B_ASP_590   | N, B_TYR_594   | H, B_TYR_594   | 2.88    | 2.12    | 22.46                  |
| 5UK2.PDB | O, B_ILE_591   | N, B_ASN_595   | H, B_ASN_595   | 2.96    | 2.11    | 4.99                   |
| 5UK2.PDB | O, B_TRP_592   | N, B_ALA_596   | H, B_ALA_596   | 2.93    | 2.11    | 15.16                  |
| 5UK2.PDB | OE1, F_GLU_574 | N, F_ASN_571   | H, F_ASN_571   | 2.96    | 2.16    | 19.49                  |
| 5UK2.PDB | OD1, F_ASN_571 | N, F_LEU_573   | H, F_LEU_573   | 2.85    | 2.08    | 21.74                  |
| 5UK2.PDB | O, F_ARG_575   | N, F_ASN_579   | H, F_ASN_579   | 2.99    | 2.13    | 2.69                   |
| 5UK2.PDB | O, F_ARG_576   | N, F_LEU_580   | H, F_LEU_580   | 2.91    | 2.11    | 18.05                  |
| 5UK2.PDB | O, F_MET_577   | N, F_ASN_581   | H, F_ASN_581   | 2.88    | 2.04    | 8.63                   |
| 5UK2.PDB | O, F_ASN_579   | N, F_LYS_583   | H, F_LYS_583   | 2.97    | 2.22    | 23.60                  |
| 5UK2.PDB | O, F_LEU_580   | N, F_VAL_584   | H, F_VAL_584   | 2.78    | 1.98    | 15.73                  |
| 5UK2.PDB | O, F_VAL_584   | N, F_PHE_588   | H, F_PHE_588   | 2.97    | 2.15    | 13.56                  |

Table 1719: 5UK2-specific side chain and main chain hydrogen bonding analysis. In this table, a PDB file is specified with a four-letter PDB ID, except that the names of the PDB files corresponding to the single NMR structural model split from the NMR ensemble is specified with a four-letter PDB ID in addition to a hyphen followed by the single NMR structural model numeric ID, the residue naming scheme is **Chain ID\_residue name\_residue number**,  $\angle ADH$  represents the angle formed by acceptor (A), donor (D) and hydrogen (H) ( $\angle ADH$ ).

| PDB      | Acceptor (A)   | Donor (D)      | Hydrogen (H)    | D-A (Å) | H-A (Å) | $\angle ADH(^{\circ})$ |
|----------|----------------|----------------|-----------------|---------|---------|------------------------|
| 5VXJ.PDB | O, A_VAL.41    | N, A_THR.45    | H, A_THR.45     | 2.85    | 2.03    | 14.33                  |
| 5VXJ.PDB | O, A_SER.43    | N, A_LEU.47    | H, A_LEU.47     | 2.92    | 2.09    | 14.12                  |
| 5VXJ.PDB | O, A_MET.46    | N, A_THR.50    | H, A_THR.50     | 2.71    | 1.87    | 10.48                  |
| 5VXJ.PDB | O, A_MET.46    | OG1, A_THR.50  | HG1, A_THR.50   | 2.73    | 1.96    | 20.05                  |
| 5VXJ.PDB | O, A_LEU.47    | N, A_LEU.51    | H, A_LEU.51     | 2.75    | 1.90    | 3.64                   |
| 5VXJ.PDB | OD2, A_ASP.309 | NH2, A_ARG.55  | HH21, A_ARG.55  | 2.90    | 2.12    | 21.39                  |
| 5VXJ.PDB | O, A_ASN.53    | N, A_THR.57    | H, A_THR.57     | 2.92    | 2.09    | 13.03                  |
| 5VXJ.PDB | O, A_ILE.54    | N, A_ASN.58    | H, A_ASN.58     | 2.76    | 1.94    | 14.78                  |
| 5VXJ.PDB | O, A_THR.57    | N, A_LEU.61    | H, A_LEU.61     | 2.95    | 2.16    | 20.24                  |
| 5VXJ.PDB | O, A_ASN.58    | N, A_LYS.62    | H, A_LYS.62     | 2.92    | 2.08    | 10.15                  |
| 5VXJ.PDB | OG, A_SER.302  | NZ, A_LYS.62   | HZ2, A_LYS.62   | 2.77    | 1.91    | 12.44                  |
| 5VXJ.PDB | OG, A_SER.306  | NZ, A_LYS.62   | HZ3, A_LYS.62   | 2.75    | 1.92    | 16.95                  |
| 5VXJ.PDB | O, A_LEU.61    | N, A_LEU.65    | H, A_LEU.65     | 2.88    | 2.04    | 11.05                  |
| 5VXJ.PDB | O, A_THR.73    | N, A_GLU.77    | H, A_GLU.77     | 2.92    | 2.15    | 21.99                  |
| 5VXJ.PDB | O, A_SER.74    | N, A_ILE.78    | H, A_ILE.78     | 2.84    | 1.99    | 6.65                   |
| 5VXJ.PDB | O, A_GLU.77    | N, A_HIS.81    | H, A_HIS.81     | 2.96    | 2.12    | 10.84                  |
| 5VXJ.PDB | O, A_ILE.78    | N, A_SER.82    | H, A_SER.82     | 2.74    | 1.89    | 4.58                   |
| 5VXJ.PDB | O, A_ALA.79    | N, A_SER.83    | H, A_SER.83     | 2.95    | 2.13    | 16.02                  |
| 5VXJ.PDB | O, A_LEU.80    | N, A_GLN.84    | H, A_GLN.84     | 2.97    | 2.17    | 18.25                  |
| 5VXJ.PDB | O, A_HIS.81    | N, A_ILE.85    | H, A_ILE.85     | 2.84    | 2.00    | 10.73                  |
| 5VXJ.PDB | O, A_SER.82    | N, A_SER.86    | H, A_SER.86     | 2.95    | 2.09    | 3.63                   |
| 5VXJ.PDB | O, A_SER.83    | N, A_MET.87    | H, A_MET.87     | 2.90    | 2.08    | 16.45                  |
| 5VXJ.PDB | O, A_ILE.85    | N, A_VAL.89    | H, A_VAL.89     | 2.68    | 1.83    | 6.60                   |
| 5VXJ.PDB | O, A_SER.86    | N, A_ASN.90    | H, A_ASN.90     | 2.83    | 2.04    | 19.63                  |
| 5VXJ.PDB | O, A_ASP.88    | N, A_SER.92    | H, A_SER.92     | 2.88    | 2.03    | 7.69                   |
| 5VXJ.PDB | O, A_VAL.89    | N, A_ALA.93    | H, A_ALA.93     | 2.95    | 2.14    | 16.09                  |
| 5VXJ.PDB | O, A_LYS.91    | N, A_LEU.95    | H, A_LEU.95     | 2.93    | 2.12    | 16.80                  |
| 5VXJ.PDB | O, A_SER.92    | N, A_LEU.96    | H, A_LEU.96     | 2.83    | 1.97    | 3.74                   |
| 5VXJ.PDB | O, A_ALA.93    | N, A_ASP.97    | H, A_ASP.97     | 2.81    | 2.03    | 20.86                  |
| 5VXJ.PDB | O, A_LEU.96    | N, A_SER.100   | H, A_SER.100    | 2.98    | 2.27    | 29.77                  |
| 5VXJ.PDB | O, A_ARG.132   | OG, A_SER.100  | HG, A_SER.100   | 2.62    | 1.84    | 18.43                  |
| 5VXJ.PDB | OD2, A_ASP.97  | NE, A_ARG.101  | HE, A_ARG.101   | 2.80    | 1.97    | 13.39                  |
| 5VXJ.PDB | O, A_ILE.98    | N, A_ASN.102   | H, A_ASN.102    | 2.95    | 2.11    | 10.28                  |
| 5VXJ.PDB | O, A_SER.100   | N, A_GLU.103   | H, A_GLU.103    | 2.99    | 2.22    | 22.55                  |
| 5VXJ.PDB | O, A_LEU.99    | N, A_TYR.104   | H, A_TYR.104    | 2.95    | 2.14    | 17.03                  |
| 5VXJ.PDB | O, A_ILE.129   | NH1, A_ARG.111 | HH12, A_ARG.111 | 2.61    | 1.80    | 16.87                  |
| 5VXJ.PDB | O, A_LEU.113   | N, A_SER.116   | H, A_SER.116    | 2.99    | 2.17    | 13.81                  |
| 5VXJ.PDB | O, A_LEU.114   | N, A_ALA.117   | H, A_ALA.117    | 2.91    | 2.07    | 9.65                   |
| 5VXJ.PDB | O, A_LYS.119   | N, A_GLU.122   | H, A_GLU.122    | 2.96    | 2.17    | 19.32                  |
| 5VXJ.PDB | O, A_SER.130   | N, A_LEU.134   | H, A_LEU.134    | 2.99    | 2.20    | 18.86                  |
| 5VXJ.PDB | O, A_TYR.104   | NE1, A_TRP.135 | HE1, A_TRP.135  | 2.84    | 2.08    | 23.47                  |
| 5VXJ.PDB | O, A_GLU.133   | N, A_LYS.137   | H, A_LYS.137    | 2.97    | 2.16    | 17.73                  |
| 5VXJ.PDB | O, A_LEU.134   | N, A_ILE.138   | H, A_ILE.138    | 2.93    | 2.16    | 21.74                  |
| 5VXJ.PDB | O, A_TRP.135   | N, A_ALA.139   | H, A_ALA.139    | 2.99    | 2.16    | 12.41                  |
| 5VXJ.PDB | O, A_ALA.136   | N, A_ASN.140   | H, A_ASN.140    | 2.89    | 2.04    | 5.99                   |
| 5VXJ.PDB | O, A_LYS.137   | N, A_SER.141   | H, A_SER.141    | 2.86    | 2.11    | 24.60                  |
| 5VXJ.PDB | O, A_ALA.121   | OG, A_SER.141  | HG, A_SER.141   | 2.90    | 2.17    | 24.63                  |
| 5VXJ.PDB | O, A_ILE.138   | N, A_ILE.142   | H, A_ILE.142    | 2.98    | 2.14    | 10.65                  |
| 5VXJ.PDB | O, A_ASN.140   | N, A_ASP.144   | H, A_ASP.144    | 2.74    | 1.94    | 18.04                  |
| 5VXJ.PDB | O, A_SER.141   | N, A_ILE.145   | H, A_ILE.145    | 2.97    | 2.12    | 7.63                   |
| 5VXJ.PDB | O, A_ASP.144   | N, A_GLN.148   | H, A_GLN.148    | 2.73    | 1.88    | 8.38                   |
| 5VXJ.PDB | O, A_ILE.145   | N, A_LEU.150   | H, A_LEU.150    | 2.96    | 2.11    | 7.42                   |
| 5VXJ.PDB | O, A_ASN.146   | N, A_LYS.151   | H, A_LYS.151    | 2.96    | 2.16    | 18.68                  |
| 5VXJ.PDB | OE2, A_GLU.229 | OH, A_TYR.153  | HH, A_TYR.153   | 2.70    | 1.94    | 21.05                  |
| 5VXJ.PDB | O, A_GLU.154   | N, A_SER.158   | H, A_SER.158    | 2.90    | 2.09    | 15.89                  |
| 5VXJ.PDB | O, A_HIS.155   | N, A_SER.159   | H, A_SER.159    | 2.80    | 1.96    | 9.42                   |
| 5VXJ.PDB | O, A_VAL.157   | N, A_THR.161   | H, A_THR.161    | 2.82    | 1.98    | 11.00                  |

|          |                |                |                 |      |      |       |
|----------|----------------|----------------|-----------------|------|------|-------|
| 5VXJ.PDB | O, A_VAL_157   | OG1, A_THR_161 | HG1, A_THR_161  | 2.60 | 1.90 | 27.90 |
| 5VXJ.PDB | O, A_TYR_160   | N, A_TYR_164   | H, A_TYR_164    | 2.91 | 2.09 | 14.34 |
| 5VXJ.PDB | OD1, A_ASP_287 | OH, A_TYR_164  | HH, A_TYR_164   | 2.72 | 1.96 | 22.05 |
| 5VXJ.PDB | O, A_THR_161   | N, A_GLN_165   | H, A_GLN_165    | 2.84 | 2.05 | 19.22 |
| 5VXJ.PDB | O, A_GLN_162   | N, A_ASP_166   | H, A_ASP_166    | 2.94 | 2.09 | 8.93  |
| 5VXJ.PDB | O, A_MET_163   | N, A_PHE_167   | H, A_PHE_167    | 2.91 | 2.10 | 17.54 |
| 5VXJ.PDB | O, A_TYR_164   | N, A_SER_168   | H, A_SER_168    | 2.81 | 2.03 | 20.85 |
| 5VXJ.PDB | O, A_TYR_164   | OG, A_SER_168  | HG, A_SER_168   | 2.89 | 2.09 | 13.52 |
| 5VXJ.PDB | O, A_SER_168   | N, A_SER_172   | H, A_SER_172    | 2.98 | 2.21 | 21.86 |
| 5VXJ.PDB | O, A_LEU_174   | N, A_TRP_177   | H, A_TRP_177    | 2.99 | 2.26 | 27.17 |
| 5VXJ.PDB | OD1, A_ASP_184 | N, A_ASN_186   | H, A_ASN_186    | 2.76 | 1.91 | 7.29  |
| 5VXJ.PDB | O, A_LEU_271   | N, A_VAL_188   | H, A_VAL_188    | 2.87 | 2.09 | 19.88 |
| 5VXJ.PDB | O, A_SER_179   | N, A_LYS_189   | H, A_LYS_189    | 2.61 | 1.75 | 6.27  |
| 5VXJ.PDB | O, A_VAL_269   | N, A_LEU_190   | H, A_LEU_190    | 2.84 | 2.02 | 14.05 |
| 5VXJ.PDB | O, A_TRP_177   | N, A_GLN_191   | H, A_GLN_191    | 2.95 | 2.15 | 19.06 |
| 5VXJ.PDB | OE2, A_GLU_268 | NE2, A_GLN_191 | HE22, A_GLN_191 | 2.93 | 2.12 | 16.99 |
| 5VXJ.PDB | O, A_VAL_192   | N, A_LYS_196   | H, A_LYS_196    | 2.67 | 1.82 | 7.56  |
| 5VXJ.PDB | O, A_ASN_193   | N, A_LYS_197   | H, A_LYS_197    | 2.75 | 1.93 | 14.74 |
| 5VXJ.PDB | O, A_LYS_196   | N, A_GLU_200   | H, A_GLU_200    | 2.98 | 2.16 | 13.97 |
| 5VXJ.PDB | O, A_ALA_198   | N, A_LEU_202   | H, A_LEU_202    | 2.92 | 2.14 | 21.59 |
| 5VXJ.PDB | OD1, A_ASP_254 | NZ, A_LYS_203  | HZ2, A_LYS_203  | 2.48 | 1.62 | 10.37 |
| 5VXJ.PDB | O, A_GLU_201   | N, A_LYS_205   | H, A_LYS_205    | 2.84 | 2.05 | 19.85 |
| 5VXJ.PDB | OD2, A_ASP_166 | NZ, A_LYS_205  | HZ2, A_LYS_205  | 2.60 | 1.73 | 10.82 |
| 5VXJ.PDB | OD2, A_ASP_166 | OH, A_TYR_206  | HH, A_TYR_206   | 2.59 | 1.78 | 13.29 |
| 5VXJ.PDB | O, A_TYR_244   | N, A_VAL_218   | H, A_VAL_218    | 2.97 | 2.15 | 14.20 |
| 5VXJ.PDB | OG, A_SER_219  | N, A_GLN_222   | H, A_GLN_222    | 2.99 | 2.14 | 8.32  |
| 5VXJ.PDB | O, A_SER_219   | N, A_ALA_223   | H, A_ALA_223    | 2.98 | 2.15 | 10.83 |
| 5VXJ.PDB | O, A_GLN_220   | N, A_ASN_224   | H, A_ASN_224    | 2.96 | 2.18 | 20.88 |
| 5VXJ.PDB | O, A_ALA_223   | N, A_LEU_227   | H, A_LEU_227    | 2.92 | 2.16 | 24.23 |
| 5VXJ.PDB | O, A_TRP_226   | N, A_LEU_230   | H, A_LEU_230    | 2.82 | 1.96 | 5.43  |
| 5VXJ.PDB | O, A_LEU_227   | N, A_GLY_231   | H, A_GLY_231    | 2.79 | 1.94 | 7.11  |
| 5VXJ.PDB | O, A_VAL_245   | N, A_SER_238   | H, A_SER_238    | 2.93 | 2.14 | 18.31 |
| 5VXJ.PDB | O, A_SER_238   | N, A_VAL_245   | H, A_VAL_245    | 2.90 | 2.09 | 17.18 |
| 5VXJ.PDB | O, A_TYR_212   | N, A_VAL_246   | H, A_VAL_246    | 2.63 | 1.77 | 2.37  |
| 5VXJ.PDB | O, A_LYS_236   | N, A_SER_247   | H, A_SER_247    | 2.73 | 1.99 | 25.54 |
| 5VXJ.PDB | O, A_ILE_234   | N, A_ASN_249   | H, A_ASN_249    | 2.99 | 2.14 | 5.52  |
| 5VXJ.PDB | OD1, A_ASN_249 | N, A_THR_251   | H, A_THR_251    | 2.98 | 2.14 | 12.09 |
| 5VXJ.PDB | OD1, A_ASN_249 | OG1, A_THR_251 | HG1, A_THR_251  | 2.61 | 1.88 | 24.99 |
| 5VXJ.PDB | O, A_THR_251   | N, A_ASN_255   | H, A_ASN_255    | 2.72 | 1.90 | 15.38 |
| 5VXJ.PDB | O, A_PRO_252   | N, A_MET_256   | H, A_MET_256    | 2.93 | 2.09 | 10.06 |
| 5VXJ.PDB | O, A_ILE_253   | N, A_LEU_257   | H, A_LEU_257    | 2.89 | 2.11 | 21.11 |
| 5VXJ.PDB | O, A_ASP_254   | N, A_LYS_258   | H, A_LYS_258    | 2.89 | 2.05 | 10.53 |
| 5VXJ.PDB | O, A_ASN_255   | N, A_SER_259   | H, A_SER_259    | 2.85 | 2.05 | 18.21 |
| 5VXJ.PDB | O, A_MET_256   | N, A_LEU_260   | H, A_LEU_260    | 2.88 | 2.06 | 15.58 |
| 5VXJ.PDB | O, A_LEU_260   | N, A_LEU_263   | H, A_LEU_263    | 2.93 | 2.08 | 8.28  |
| 5VXJ.PDB | O, A_VAL_188   | N, A_LEU_271   | H, A_LEU_271    | 2.79 | 1.96 | 13.97 |
| 5VXJ.PDB | OD1, A_ASP_272 | N, A_LYS_275   | H, A_LYS_275    | 2.71 | 1.87 | 8.42  |
| 5VXJ.PDB | O, A_ASP_272   | N, A_TYR_276   | H, A_TYR_276    | 2.96 | 2.18 | 20.66 |
| 5VXJ.PDB | O, A_ASN_273   | N, A_GLN_277   | H, A_GLN_277    | 2.93 | 2.09 | 9.71  |
| 5VXJ.PDB | O, A_ALA_274   | N, A_ALA_278   | H, A_ALA_278    | 2.97 | 2.14 | 12.65 |
| 5VXJ.PDB | O, A_TYR_276   | N, A_ASN_280   | H, A_ASN_280    | 2.81 | 1.95 | 2.97  |
| 5VXJ.PDB | O, A_GLN_277   | N, A_ALA_281   | H, A_ALA_281    | 2.86 | 2.07 | 19.09 |
| 5VXJ.PDB | O, A_TRP_279   | N, A_PHE_283   | H, A_PHE_283    | 2.88 | 2.07 | 15.81 |
| 5VXJ.PDB | O, A_ASN_280   | N, A_SER_284   | H, A_SER_284    | 2.76 | 1.91 | 8.04  |
| 5VXJ.PDB | O, A_ASN_280   | OG, A_SER_284  | HG, A_SER_284   | 2.99 | 2.26 | 24.82 |
| 5VXJ.PDB | O, A_ALA_281   | N, A_ALA_285   | H, A_ALA_285    | 2.96 | 2.19 | 22.09 |
| 5VXJ.PDB | O, A_SER_284   | N, A_GLU_288   | H, A_GLU_288    | 2.97 | 2.15 | 15.81 |
| 5VXJ.PDB | O, A_ALA_285   | N, A_THR_289   | H, A_THR_289    | 2.87 | 2.12 | 24.45 |



|          |                |                |                 |      |      |       |
|----------|----------------|----------------|-----------------|------|------|-------|
| 5VXJ.PDB | O, A_ALA_285   | OG1, A_THR_289 | HG1, A_THR_289  | 2.86 | 2.03 | 7.57  |
| 5VXJ.PDB | O, A_ASP_287   | N, A_LYS_291   | H, A_LYS_291    | 2.93 | 2.09 | 9.56  |
| 5VXJ.PDB | O, A_GLU_288   | N, A_ASN_292   | H, A_ASN_292    | 2.87 | 2.05 | 14.52 |
| 5VXJ.PDB | O, A_THR_289   | N, A_ASN_293   | H, A_ASN_293    | 2.90 | 2.09 | 17.21 |
| 5VXJ.PDB | O, A_MET_290   | N, A_LEU_294   | H, A_LEU_294    | 2.92 | 2.07 | 7.82  |
| 5VXJ.PDB | O, A_LYS_291   | N, A_GLN_295   | H, A_GLN_295    | 2.99 | 2.14 | 9.97  |
| 5VXJ.PDB | O, A_ASN_292   | N, A_THR_296   | H, A_THR_296    | 2.84 | 2.08 | 24.09 |
| 5VXJ.PDB | O, A_LEU_294   | N, A_VAL_298   | H, A_VAL_298    | 2.91 | 2.08 | 13.79 |
| 5VXJ.PDB | O, A_LEU_297   | N, A_TYR_301   | H, A_TYR_301    | 2.90 | 2.05 | 7.11  |
| 5VXJ.PDB | O, A_VAL_298   | N, A_SER_302   | H, A_SER_302    | 2.79 | 1.95 | 9.28  |
| 5VXJ.PDB | O, A_GLN_299   | N, A_ASN_303   | H, A_ASN_303    | 2.74 | 1.90 | 10.18 |
| 5VXJ.PDB | O, A_LYS_300   | N, A_ALA_304   | H, A_ALA_304    | 2.86 | 2.05 | 16.63 |
| 5VXJ.PDB | O, A_TYR_301   | N, A_ASN_305   | H, A_ASN_305    | 2.97 | 2.18 | 19.72 |
| 5VXJ.PDB | OD1, A_ASN_58  | ND2, A_ASN_305 | HD21, A_ASN_305 | 2.96 | 2.14 | 16.38 |
| 5VXJ.PDB | O, A_ALA_304   | N, A_PHE_308   | H, A_PHE_308    | 2.88 | 2.04 | 10.22 |
| 5VXJ.PDB | O, A_ASN_305   | N, A_ASP_309   | H, A_ASP_309    | 2.74 | 1.94 | 18.74 |
| 5VXJ.PDB | O, A_SER_306   | N, A_ASN_310   | H, A_ASN_310    | 2.77 | 1.99 | 20.96 |
| 5VXJ.PDB | O, A_ASP_309   | N, A_LYS_313   | H, A_LYS_313    | 2.88 | 2.04 | 10.21 |
| 5VXJ.PDB | O, A_ASN_310   | N, A_VAL_314   | H, A_VAL_314    | 2.93 | 2.11 | 13.42 |
| 5VXJ.PDB | O, A_LEU_311   | N, A_LEU_315   | H, A_LEU_315    | 2.74 | 1.89 | 8.56  |
| 5VXJ.PDB | O, A_VAL_312   | N, A_SER_316   | H, A_SER_316    | 2.85 | 2.04 | 14.90 |
| 5VXJ.PDB | O, A_VAL_314   | OG1, A_THR_318 | HG1, A_THR_318  | 2.99 | 2.16 | 6.68  |
| 5VXJ.PDB | O, A_LEU_315   | N, A_ILE_319   | H, A_ILE_319    | 2.97 | 2.18 | 20.05 |
| 5VXJ.PDB | O, A_SER_316   | N, A_SER_320   | H, A_SER_320    | 3.00 | 2.17 | 14.20 |
| 5VXJ.PDB | O, A_THR_318   | OG, A_SER_322  | HG, A_SER_322   | 2.97 | 2.21 | 21.62 |
| 5VXJ.PDB | O, B_SER_25    | N, B_GLN_3     | H, B_GLN_3      | 2.86 | 2.03 | 13.37 |
| 5VXJ.PDB | O, B_ALA_23    | N, B_ALA_5     | H, B_ALA_5      | 2.95 | 2.16 | 20.65 |
| 5VXJ.PDB | O, B_GLN_114   | N, B_GLY_10    | H, B_GLY_10     | 2.78 | 1.93 | 4.26  |
| 5VXJ.PDB | O, B_THR_116   | N, B_ALA_12    | H, B_ALA_12     | 2.97 | 2.27 | 29.86 |
| 5VXJ.PDB | O, B_LEU_86    | N, B_GLY_15    | H, B_GLY_15     | 2.80 | 1.97 | 12.25 |
| 5VXJ.PDB | O, B_GLN_13    | N, B_GLY_16    | H, B_GLY_16     | 2.89 | 2.07 | 14.89 |
| 5VXJ.PDB | O, B_MET_83    | N, B_LEU_18    | H, B_LEU_18     | 2.81 | 2.01 | 18.59 |
| 5VXJ.PDB | OE1, B_GLN_82  | NE, B_ARG_19   | HE, B_ARG_19    | 2.47 | 1.66 | 15.76 |
| 5VXJ.PDB | O, B_THR_7     | N, B_SER_21    | H, B_SER_21     | 2.89 | 2.13 | 23.79 |
| 5VXJ.PDB | O, B_VAL_79    | N, B_CYS_22    | H, B_CYS_22     | 2.97 | 2.22 | 24.17 |
| 5VXJ.PDB | O, B_ALA_5     | N, B_ALA_23    | H, B_ALA_23     | 2.85 | 2.01 | 10.80 |
| 5VXJ.PDB | O, B_ASN_77    | N, B_ALA_24    | H, B_ALA_24     | 2.89 | 2.04 | 8.57  |
| 5VXJ.PDB | O, B_THR_28    | N, B_ARG_31    | H, B_ARG_31     | 2.95 | 2.13 | 14.81 |
| 5VXJ.PDB | O, B_GLY_99    | N, B_VAL_33    | H, B_VAL_33     | 2.85 | 2.06 | 20.75 |
| 5VXJ.PDB | O, B_ASN_97    | N, B_ASN_35    | H, B_ASN_35     | 2.73 | 1.92 | 16.35 |
| 5VXJ.PDB | O, B_VAL_95    | N, B_TYR_37    | H, B_TYR_37     | 2.74 | 1.89 | 6.02  |
| 5VXJ.PDB | OE2, B_GLU_46  | NE, B_ARG_38   | HE, B_ARG_38    | 2.93 | 2.12 | 17.64 |
| 5VXJ.PDB | OH, B_TYR_94   | NH1, B_ARG_38  | HH11, B_ARG_38  | 2.80 | 1.98 | 13.19 |
| 5VXJ.PDB | OD1, B_ASP_90  | NH1, B_ARG_38  | HH12, B_ARG_38  | 2.76 | 1.91 | 7.08  |
| 5VXJ.PDB | O, B_ARG_38    | N, B_GLU_46    | H, B_GLU_46     | 2.92 | 2.08 | 10.18 |
| 5VXJ.PDB | O, B_TRP_36    | N, B_VAL_48    | H, B_VAL_48     | 2.83 | 2.04 | 19.58 |
| 5VXJ.PDB | OD1, B_ASN_35  | NE, B_ARG_50   | HE, B_ARG_50    | 2.65 | 1.82 | 11.22 |
| 5VXJ.PDB | OE1, I_GLU_200 | NH1, B_ARG_50  | HH12, B_ARG_50  | 2.92 | 2.07 | 7.25  |
| 5VXJ.PDB | O, B_SER_30    | OH, B_TYR_52   | HH, B_TYR_52    | 2.72 | 1.93 | 15.55 |
| 5VXJ.PDB | OD1, B_ASP_53  | N, B_GLY_55    | H, B_GLY_55     | 2.72 | 1.91 | 16.35 |
| 5VXJ.PDB | O, B_ARG_50    | N, B_SER_59    | H, B_SER_59     | 2.55 | 1.72 | 12.05 |
| 5VXJ.PDB | O, B_VAL_48    | N, B_ALA_61    | H, B_ALA_61     | 2.78 | 1.92 | 5.65  |
| 5VXJ.PDB | OD2, B_ASP_90  | NH1, B_ARG_67  | HH12, B_ARG_67  | 2.82 | 2.01 | 16.67 |
| 5VXJ.PDB | OD1, B_ASP_90  | NH2, B_ARG_67  | HH22, B_ARG_67  | 2.96 | 2.12 | 11.06 |
| 5VXJ.PDB | O, B_VAL_64    | N, B_PHE_68    | H, B_PHE_68     | 2.90 | 2.06 | 11.49 |
| 5VXJ.PDB | O, B_GLN_82    | N, B_THR_69    | H, B_THR_69     | 2.99 | 2.19 | 17.88 |
| 5VXJ.PDB | O, B_HIS_80    | N, B_SER_71    | H, B_SER_71     | 2.98 | 2.19 | 19.14 |
| 5VXJ.PDB | O, B_ALA_32    | NH2, B_ARG_72  | HH22, B_ARG_72  | 2.73 | 1.87 | 6.16  |

|          |                |                |                |      |      |       |
|----------|----------------|----------------|----------------|------|------|-------|
| 5VXJ.PDB | O, B_THR_78    | N, B_ASP_73    | H, B_ASP_73    | 2.88 | 2.03 | 8.84  |
| 5VXJ.PDB | O, B_SER_71    | N, B_HIS_80    | H, B_HIS_80    | 2.94 | 2.16 | 21.65 |
| 5VXJ.PDB | O, B_LEU_20    | N, B_LEU_81    | H, B_LEU_81    | 2.93 | 2.12 | 17.56 |
| 5VXJ.PDB | O, B_THR_69    | N, B_GLN_82    | H, B_GLN_82    | 2.77 | 2.03 | 25.51 |
| 5VXJ.PDB | OD1, B_ASN_84  | NE2, B_GLN_82  | HE21, B_GLN_82 | 2.95 | 2.09 | 2.81  |
| 5VXJ.PDB | O, B_LEU_18    | N, B_MET_83    | H, B_MET_83    | 2.63 | 1.77 | 6.35  |
| 5VXJ.PDB | O, B_LYS_87    | N, B_ASP_90    | H, B_ASP_90    | 2.82 | 2.01 | 16.00 |
| 5VXJ.PDB | O, B_THR_113   | N, B_TYR_94    | H, B_TYR_94    | 2.87 | 2.08 | 19.12 |
| 5VXJ.PDB | O, B_ASP_90    | OH, B_TYR_94   | HH, B_TYR_94   | 2.68 | 1.86 | 10.06 |
| 5VXJ.PDB | O, B_TYR_37    | N, B_VAL_95    | H, B_VAL_95    | 3.00 | 2.17 | 13.97 |
| 5VXJ.PDB | O, B_ASN_35    | N, B_ASN_97    | H, B_ASN_97    | 2.80 | 2.07 | 26.52 |
| 5VXJ.PDB | OG1, B_THR_107 | ND2, B_ASN_97  | HD21, B_ASN_97 | 2.64 | 1.86 | 19.39 |
| 5VXJ.PDB | O, B_VAL_33    | N, B_GLY_99    | H, B_GLY_99    | 2.75 | 1.91 | 8.60  |
| 5VXJ.PDB | O, B_ARG_106   | N, B_ILE_100   | H, B_ILE_100   | 2.81 | 1.95 | 1.78  |
| 5VXJ.PDB | O, B_ASN_104   | N, B_ASP_102   | H, B_ASP_102   | 2.92 | 2.07 | 4.41  |
| 5VXJ.PDB | OE1, I_GLU_201 | OH, B_TYR_105  | HH, B_TYR_105  | 2.51 | 1.70 | 12.69 |
| 5VXJ.PDB | O, B_ALA_98    | OG1, B_THR_107 | HG1, B_THR_107 | 2.89 | 2.18 | 28.04 |
| 5VXJ.PDB | OE1, B_GLU_6   | N, B_GLY_112   | H, B_GLY_112   | 2.87 | 2.05 | 14.11 |
| 5VXJ.PDB | O, B_TYR_94    | N, B_THR_113   | H, B_THR_113   | 2.58 | 1.76 | 13.84 |
| 5VXJ.PDB | O, B_GLY_10    | N, B_THR_116   | H, B_THR_116   | 2.97 | 2.14 | 11.68 |
| 5VXJ.PDB | O, C_THR_45    | N, C_ASP_49    | H, C_ASP_49    | 3.00 | 2.16 | 11.23 |
| 5VXJ.PDB | O, C_MET_46    | N, C_THR_50    | H, C_THR_50    | 2.75 | 1.93 | 15.42 |
| 5VXJ.PDB | O, C_MET_46    | OG1, C_THR_50  | HG1, C_THR_50  | 2.84 | 2.05 | 16.87 |
| 5VXJ.PDB | O, C_LEU_47    | N, C_LEU_51    | H, C_LEU_51    | 2.66 | 1.82 | 9.17  |
| 5VXJ.PDB | OD2, C_ASP_309 | NH2, C_ARG_55  | HH21, C_ARG_55 | 2.97 | 2.17 | 18.00 |
| 5VXJ.PDB | O, C_HIS_52    | N, C_THR_56    | H, C_THR_56    | 2.83 | 2.00 | 14.10 |
| 5VXJ.PDB | O, C_ASN_53    | N, C_THR_57    | H, C_THR_57    | 2.88 | 2.05 | 12.91 |
| 5VXJ.PDB | O, C_ILE_54    | N, C_ASN_58    | H, C_ASN_58    | 2.78 | 2.03 | 23.87 |
| 5VXJ.PDB | O, C_THR_57    | N, C_LEU_61    | H, C_LEU_61    | 2.97 | 2.16 | 17.22 |
| 5VXJ.PDB | O, C_ASN_58    | N, C_LYS_62    | H, C_LYS_62    | 2.91 | 2.07 | 10.71 |
| 5VXJ.PDB | OG, C_SER_302  | NZ, C_LYS_62   | HZ2, C_LYS_62  | 2.61 | 1.73 | 6.54  |
| 5VXJ.PDB | O, C_THR_73    | N, C_GLU_77    | H, C_GLU_77    | 2.89 | 2.05 | 10.72 |
| 5VXJ.PDB | O, C_SER_74    | N, C_ILE_78    | H, C_ILE_78    | 2.75 | 1.91 | 9.49  |
| 5VXJ.PDB | O, C_LEU_75    | N, C_ALA_79    | H, C_ALA_79    | 2.88 | 2.03 | 7.76  |
| 5VXJ.PDB | O, C_GLU_76    | N, C_LEU_80    | H, C_LEU_80    | 2.83 | 1.99 | 11.70 |
| 5VXJ.PDB | O, C_GLU_77    | N, C_HIS_81    | H, C_HIS_81    | 2.88 | 2.03 | 8.46  |
| 5VXJ.PDB | O, C_ILE_78    | N, C_SER_82    | H, C_SER_82    | 2.83 | 2.00 | 12.85 |
| 5VXJ.PDB | OE2, C_GLU_154 | OG, C_SER_82   | HG, C_SER_82   | 2.58 | 1.81 | 19.25 |
| 5VXJ.PDB | O, C_ALA_79    | N, C_SER_83    | H, C_SER_83    | 2.82 | 1.99 | 12.64 |
| 5VXJ.PDB | O, C_HIS_81    | N, C_ILE_85    | H, C_ILE_85    | 2.92 | 2.10 | 14.49 |
| 5VXJ.PDB | O, C_SER_82    | N, C_SER_86    | H, C_SER_86    | 2.94 | 2.09 | 6.22  |
| 5VXJ.PDB | O, C_SER_83    | N, C_MET_87    | H, C_MET_87    | 2.90 | 2.13 | 22.48 |
| 5VXJ.PDB | O, C_ILE_85    | N, C_VAL_89    | H, C_VAL_89    | 2.71 | 1.95 | 23.99 |
| 5VXJ.PDB | O, C_SER_86    | N, C_ASN_90    | H, C_ASN_90    | 2.95 | 2.14 | 17.73 |
| 5VXJ.PDB | O, C_ASP_88    | OG, C_SER_92   | HG, C_SER_92   | 2.81 | 2.10 | 26.84 |
| 5VXJ.PDB | O, C_VAL_89    | N, C_ALA_93    | H, C_ALA_93    | 2.99 | 2.18 | 16.35 |
| 5VXJ.PDB | O, C_ASN_90    | N, C_GLN_94    | H, C_GLN_94    | 2.93 | 2.09 | 10.71 |
| 5VXJ.PDB | O, C_LYS_91    | N, C_LEU_95    | H, C_LEU_95    | 2.99 | 2.16 | 11.86 |
| 5VXJ.PDB | O, C_SER_92    | N, C_LEU_96    | H, C_LEU_96    | 2.76 | 1.91 | 4.52  |
| 5VXJ.PDB | O, C_ALA_93    | N, C_ASP_97    | H, C_ASP_97    | 2.67 | 1.87 | 17.34 |
| 5VXJ.PDB | O, C_GLN_94    | N, C_ILE_98    | H, C_ILE_98    | 2.93 | 2.20 | 27.48 |
| 5VXJ.PDB | O, C_LEU_95    | N, C_LEU_99    | H, C_LEU_99    | 2.86 | 2.06 | 16.81 |
| 5VXJ.PDB | O, C_LEU_96    | N, C_SER_100   | H, C_SER_100   | 2.97 | 2.19 | 20.79 |
| 5VXJ.PDB | O, C_ARG_132   | OG, C_SER_100  | HG, C_SER_100  | 2.62 | 1.83 | 15.07 |
| 5VXJ.PDB | OD2, C_ASP_97  | NE, C_ARG_101  | HE, C_ARG_101  | 2.84 | 2.03 | 16.71 |
| 5VXJ.PDB | O, C_ILE_98    | N, C_ASN_102   | H, C_ASN_102   | 2.93 | 2.10 | 11.46 |
| 5VXJ.PDB | OD1, C_ASN_107 | N, C_ALA_110   | H, C_ALA_110   | 2.74 | 1.90 | 11.07 |
| 5VXJ.PDB | O, C_ILE_106   | NE, C_ARG_111  | HE, C_ARG_111  | 2.84 | 2.08 | 23.05 |

|          |                |                |                 |      |      |       |
|----------|----------------|----------------|-----------------|------|------|-------|
| 5VXJ.PDB | O, C_ILE_129   | NH1, C_ARG_111 | HH12, C_ARG_111 | 2.70 | 1.99 | 28.89 |
| 5VXJ.PDB | O, C_ILE_129   | NH2, C_ARG_111 | HH22, C_ARG_111 | 2.67 | 1.95 | 27.54 |
| 5VXJ.PDB | O, C_LEU_113   | N, C_SER_116   | H, C_SER_116    | 2.74 | 1.92 | 13.94 |
| 5VXJ.PDB | O, C_PRO_118   | N, C_ALA_121   | H, C_ALA_121    | 2.93 | 2.09 | 9.05  |
| 5VXJ.PDB | O, C_LYS_119   | N, C_GLU_122   | H, C_GLU_122    | 2.93 | 2.12 | 17.73 |
| 5VXJ.PDB | O, D_GLY_56    | NH2, C_ARG_132 | HH22, C_ARG_132 | 2.97 | 2.20 | 22.55 |
| 5VXJ.PDB | O, C_SER_130   | N, C_LEU_134   | H, C_LEU_134    | 2.95 | 2.18 | 22.13 |
| 5VXJ.PDB | O, C_HIS_131   | N, C_TRP_135   | H, C_TRP_135    | 2.90 | 2.05 | 5.85  |
| 5VXJ.PDB | O, C_TYR_104   | NE1, C_TRP_135 | HE1, C_TRP_135  | 2.72 | 1.92 | 17.01 |
| 5VXJ.PDB | O, C_TRP_135   | N, C_ALA_139   | H, C_ALA_139    | 2.83 | 1.99 | 9.11  |
| 5VXJ.PDB | O, C_ALA_136   | N, C_ASN_140   | H, C_ASN_140    | 2.88 | 2.08 | 18.03 |
| 5VXJ.PDB | O, C_LYS_137   | N, C_SER_141   | H, C_SER_141    | 2.84 | 2.09 | 25.00 |
| 5VXJ.PDB | O, C_ALA_121   | OG, C_SER_141  | HG, C_SER_141   | 2.69 | 1.99 | 27.96 |
| 5VXJ.PDB | O, C_ASN_140   | N, C_ASP_144   | H, C_ASP_144    | 2.68 | 1.84 | 11.11 |
| 5VXJ.PDB | O, C_SER_141   | N, C_ILE_145   | H, C_ILE_145    | 2.98 | 2.16 | 13.90 |
| 5VXJ.PDB | O, C_ASP_144   | N, C_GLN_148   | H, C_GLN_148    | 2.81 | 1.97 | 10.25 |
| 5VXJ.PDB | O, C_ILE_145   | N, C_LEU_150   | H, C_LEU_150    | 2.99 | 2.16 | 11.96 |
| 5VXJ.PDB | O, C_ASN_146   | N, C_LYS_151   | H, C_LYS_151    | 2.89 | 2.07 | 15.50 |
| 5VXJ.PDB | O, C_TYR_153   | N, C_VAL_157   | H, C_VAL_157    | 2.98 | 2.14 | 11.48 |
| 5VXJ.PDB | O, C_GLU_154   | N, C_SER_158   | H, C_SER_158    | 2.91 | 2.10 | 16.58 |
| 5VXJ.PDB | O, C_HIS_155   | N, C_SER_159   | H, C_SER_159    | 2.84 | 2.04 | 18.93 |
| 5VXJ.PDB | O, C_VAL_157   | N, C_THR_161   | H, C_THR_161    | 2.84 | 2.01 | 12.19 |
| 5VXJ.PDB | O, C_TYR_160   | N, C_TYR_164   | H, C_TYR_164    | 2.88 | 2.06 | 13.58 |
| 5VXJ.PDB | OD1, C_ASP_287 | OH, C_TYR_164  | HH, C_TYR_164   | 2.77 | 1.96 | 12.03 |
| 5VXJ.PDB | O, C_THR_161   | N, C_GLN_165   | H, C_GLN_165    | 2.79 | 1.97 | 15.66 |
| 5VXJ.PDB | O, C_TYR_164   | N, C_SER_168   | H, C_SER_168    | 2.76 | 1.95 | 16.85 |
| 5VXJ.PDB | O, C_TYR_164   | OG, C_SER_168  | HG, C_SER_168   | 2.78 | 1.96 | 10.71 |
| 5VXJ.PDB | O, C_PHE_167   | N, C_LEU_171   | H, C_LEU_171    | 2.81 | 2.03 | 19.93 |
| 5VXJ.PDB | O, C_SER_168   | N, C_SER_172   | H, C_SER_172    | 2.88 | 2.13 | 25.56 |
| 5VXJ.PDB | O, C_LEU_271   | N, C_VAL_188   | H, C_VAL_188    | 2.99 | 2.14 | 7.19  |
| 5VXJ.PDB | O, C_SER_179   | N, C_LYS_189   | H, C_LYS_189    | 2.75 | 1.90 | 6.70  |
| 5VXJ.PDB | O, C_VAL_269   | N, C_LEU_190   | H, C_LEU_190    | 2.85 | 2.06 | 18.77 |
| 5VXJ.PDB | O, C_TRP_177   | N, C_GLN_191   | H, C_GLN_191    | 2.92 | 2.10 | 14.50 |
| 5VXJ.PDB | OE2, C_GLU_268 | NE2, C_GLN_191 | HE22, C_GLN_191 | 2.80 | 1.97 | 12.09 |
| 5VXJ.PDB | O, C_VAL_192   | N, C_LYS_196   | H, C_LYS_196    | 2.64 | 1.80 | 8.82  |
| 5VXJ.PDB | O, C_ASN_193   | N, C_LYS_197   | H, C_LYS_197    | 2.77 | 1.95 | 14.40 |
| 5VXJ.PDB | OE1, C_GLU_201 | NZ, C_LYS_197  | HZ3, C_LYS_197  | 2.59 | 1.85 | 27.46 |
| 5VXJ.PDB | O, C_LYS_196   | N, C_GLU_200   | H, C_GLU_200    | 2.98 | 2.14 | 10.98 |
| 5VXJ.PDB | O, C_ALA_198   | N, C_LEU_202   | H, C_LEU_202    | 2.84 | 2.10 | 25.29 |
| 5VXJ.PDB | OD1, C_ASP_254 | NZ, C_LYS_203  | HZ2, C_LYS_203  | 2.69 | 1.87 | 19.49 |
| 5VXJ.PDB | O, C_GLU_201   | N, C_LYS_205   | H, C_LYS_205    | 2.93 | 2.15 | 21.77 |
| 5VXJ.PDB | OD2, C_ASP_166 | NZ, C_LYS_205  | HZ2, C_LYS_205  | 2.85 | 1.99 | 12.15 |
| 5VXJ.PDB | OD2, C_ASP_166 | OH, C_TYR_206  | HH, C_TYR_206   | 2.58 | 1.76 | 10.37 |
| 5VXJ.PDB | O, C_TYR_244   | N, C_VAL_218   | H, C_VAL_218    | 2.89 | 2.05 | 9.55  |
| 5VXJ.PDB | O, C_SER_219   | N, C_ALA_223   | H, C_ALA_223    | 2.91 | 2.08 | 14.53 |
| 5VXJ.PDB | O, C_GLN_220   | N, C_ASN_224   | H, C_ASN_224    | 2.98 | 2.12 | 5.55  |
| 5VXJ.PDB | O, C_GLN_220   | ND2, C_ASN_224 | HD22, C_ASN_224 | 2.76 | 2.00 | 23.07 |
| 5VXJ.PDB | O, C_GLU_221   | N, C_LYS_225   | H, C_LYS_225    | 2.88 | 2.10 | 20.87 |
| 5VXJ.PDB | O, C_ALA_223   | N, C_LEU_227   | H, C_LEU_227    | 2.84 | 2.04 | 17.85 |
| 5VXJ.PDB | O, C_TRP_226   | N, C_LEU_230   | H, C_LEU_230    | 2.93 | 2.16 | 22.32 |
| 5VXJ.PDB | O, C_LEU_227   | N, C_GLY_231   | H, C_GLY_231    | 2.79 | 1.97 | 15.24 |
| 5VXJ.PDB | O, C_SER_247   | N, C_LYS_236   | H, C_LYS_236    | 2.90 | 2.15 | 23.83 |
| 5VXJ.PDB | O, C_VAL_245   | N, C_SER_238   | H, C_SER_238    | 2.96 | 2.16 | 18.06 |
| 5VXJ.PDB | O, C_SER_238   | N, C_VAL_245   | H, C_VAL_245    | 2.79 | 1.99 | 18.55 |
| 5VXJ.PDB | O, C_TYR_212   | N, C_VAL_246   | H, C_VAL_246    | 2.73 | 1.88 | 6.99  |
| 5VXJ.PDB | O, C_ILE_234   | N, C_ASN_249   | H, C_ASN_249    | 2.93 | 2.08 | 8.15  |
| 5VXJ.PDB | OD1, C_ASN_249 | N, C_THR_251   | H, C_THR_251    | 2.83 | 2.01 | 13.51 |
| 5VXJ.PDB | OD1, C_ASN_249 | OG1, C_THR_251 | HG1, C_THR_251  | 2.56 | 1.78 | 18.84 |

|          |                |                |                 |      |      |       |
|----------|----------------|----------------|-----------------|------|------|-------|
| 5VXJ.PDB | O, C_MET_250   | N, C_ASP_254   | H, C_ASP_254    | 2.97 | 2.14 | 14.27 |
| 5VXJ.PDB | O, C_THR_251   | N, C_ASN_255   | H, C_ASN_255    | 2.90 | 2.11 | 19.57 |
| 5VXJ.PDB | O, C_ASN_255   | N, C_SER_259   | H, C_SER_259    | 2.82 | 1.98 | 10.57 |
| 5VXJ.PDB | O, C_LEU_257   | N, C_ASP_261   | H, C_ASP_261    | 2.89 | 2.05 | 9.73  |
| 5VXJ.PDB | O, C_VAL_188   | N, C_LEU_271   | H, C_LEU_271    | 2.72 | 1.88 | 10.23 |
| 5VXJ.PDB | OD1, C_ASP_272 | N, C_LYS_275   | H, C_LYS_275    | 2.76 | 1.96 | 18.08 |
| 5VXJ.PDB | O, C_ASP_272   | N, C_TYR_276   | H, C_TYR_276    | 2.98 | 2.15 | 12.87 |
| 5VXJ.PDB | O, C_ASN_273   | N, C_GLN_277   | H, C_GLN_277    | 2.97 | 2.12 | 5.77  |
| 5VXJ.PDB | O, C_LYS_275   | N, C_TRP_279   | H, C_TRP_279    | 3.00 | 2.19 | 17.09 |
| 5VXJ.PDB | O, C_TYR_276   | N, C_ASN_280   | H, C_ASN_280    | 2.84 | 2.00 | 8.68  |
| 5VXJ.PDB | O, C_GLN_277   | N, C_ALA_281   | H, C_ALA_281    | 2.95 | 2.16 | 19.58 |
| 5VXJ.PDB | O, C_TRP_279   | N, C_PHE_283   | H, C_PHE_283    | 2.80 | 1.97 | 11.54 |
| 5VXJ.PDB | O, C_ASN_280   | N, C_SER_284   | H, C_SER_284    | 2.86 | 2.05 | 17.29 |
| 5VXJ.PDB | O, C_ALA_281   | N, C_ALA_285   | H, C_ALA_285    | 2.97 | 2.22 | 25.52 |
| 5VXJ.PDB | O, C_SER_284   | N, C_GLU_288   | H, C_GLU_288    | 2.90 | 2.09 | 16.06 |
| 5VXJ.PDB | O, C_ASP_287   | N, C_LYS_291   | H, C_LYS_291    | 2.96 | 2.16 | 17.42 |
| 5VXJ.PDB | O, C_GLU_288   | N, C_ASN_292   | H, C_ASN_292    | 2.78 | 1.93 | 7.30  |
| 5VXJ.PDB | O, C_MET_290   | N, C_LEU_294   | H, C_LEU_294    | 2.96 | 2.14 | 14.65 |
| 5VXJ.PDB | O, C_LYS_291   | N, C_GLN_295   | H, C_GLN_295    | 2.93 | 2.08 | 7.49  |
| 5VXJ.PDB | O, C_ASN_292   | N, C_THR_296   | H, C_THR_296    | 2.81 | 1.96 | 6.25  |
| 5VXJ.PDB | O, C_ASN_293   | N, C_LEU_297   | H, C_LEU_297    | 2.87 | 2.03 | 9.84  |
| 5VXJ.PDB | O, C_LEU_294   | N, C_VAL_298   | H, C_VAL_298    | 2.89 | 2.07 | 16.24 |
| 5VXJ.PDB | O, C_GLN_295   | N, C_GLN_299   | H, C_GLN_299    | 2.96 | 2.18 | 20.39 |
| 5VXJ.PDB | O, C_THR_296   | N, C_LYS_300   | H, C_LYS_300    | 2.95 | 2.12 | 12.60 |
| 5VXJ.PDB | O, C_VAL_298   | N, C_SER_302   | H, C_SER_302    | 2.91 | 2.17 | 26.05 |
| 5VXJ.PDB | O, C_GLN_299   | N, C_ASN_303   | H, C_ASN_303    | 2.83 | 2.01 | 12.96 |
| 5VXJ.PDB | O, C_LYS_300   | N, C_ALA_304   | H, C_ALA_304    | 2.95 | 2.16 | 19.44 |
| 5VXJ.PDB | OD1, C_ASN_58  | ND2, C_ASN_305 | HD21, C_ASN_305 | 2.84 | 2.04 | 17.79 |
| 5VXJ.PDB | O, C_ALA_304   | N, C_PHE_308   | H, C_PHE_308    | 2.91 | 2.07 | 9.64  |
| 5VXJ.PDB | O, C_ASN_305   | N, C_ASP_309   | H, C_ASP_309    | 2.81 | 2.07 | 26.01 |
| 5VXJ.PDB | O, C_SER_306   | N, C_ASN_310   | H, C_ASN_310    | 2.67 | 1.91 | 23.54 |
| 5VXJ.PDB | O, C_ASP_309   | N, C_LYS_313   | H, C_LYS_313    | 2.90 | 2.07 | 12.85 |
| 5VXJ.PDB | O, C_ASN_310   | N, C_VAL_314   | H, C_VAL_314    | 2.90 | 2.06 | 10.88 |
| 5VXJ.PDB | O, C_LEU_311   | N, C_LEU_315   | H, C_LEU_315    | 2.75 | 1.90 | 6.64  |
| 5VXJ.PDB | O, C_VAL_312   | N, C_SER_316   | H, C_SER_316    | 2.93 | 2.11 | 14.92 |
| 5VXJ.PDB | O, C_VAL_314   | OG, C_SER_317  | HG, C_SER_317   | 2.65 | 1.90 | 22.58 |
| 5VXJ.PDB | O, C_LEU_315   | OG1, C_THR_318 | HG1, C_THR_318  | 2.63 | 1.83 | 14.36 |
| 5VXJ.PDB | O, D_SER_25    | N, D_GLN_3     | H, D_GLN_3      | 2.83 | 2.04 | 19.53 |
| 5VXJ.PDB | O, D_ALA_23    | N, D_ALA_5     | H, D_ALA_5      | 2.92 | 2.12 | 17.92 |
| 5VXJ.PDB | O, D_SER_21    | N, D_THR_7     | H, D_THR_7      | 2.92 | 2.12 | 17.84 |
| 5VXJ.PDB | O, D_GLN_114   | N, D_GLY_10    | H, D_GLY_10     | 2.92 | 2.10 | 13.53 |
| 5VXJ.PDB | O, D_THR_116   | N, D_ALA_12    | H, D_ALA_12     | 2.90 | 2.14 | 23.36 |
| 5VXJ.PDB | O, D_LEU_86    | N, D_GLY_15    | H, D_GLY_15     | 2.64 | 1.81 | 11.28 |
| 5VXJ.PDB | O, D_GLN_13    | N, D_GLY_16    | H, D_GLY_16     | 2.82 | 2.06 | 23.83 |
| 5VXJ.PDB | O, D_MET_83    | N, D_LEU_18    | H, D_LEU_18     | 2.89 | 2.09 | 18.27 |
| 5VXJ.PDB | OD1, C_ASN_140 | NE, D_ARG_19   | HE, D_ARG_19    | 2.55 | 1.80 | 23.66 |
| 5VXJ.PDB | OE1, D_GLN_82  | NH1, D_ARG_19  | HH11, D_ARG_19  | 2.94 | 2.14 | 18.04 |
| 5VXJ.PDB | O, D_THR_7     | N, D_SER_21    | H, D_SER_21     | 2.99 | 2.14 | 7.08  |
| 5VXJ.PDB | O, D_ALA_5     | N, D_ALA_23    | H, D_ALA_23     | 2.87 | 2.03 | 10.49 |
| 5VXJ.PDB | O, D_ASN_77    | N, D_ALA_24    | H, D_ALA_24     | 2.92 | 2.08 | 9.76  |
| 5VXJ.PDB | O, D_THR_28    | N, D_ARG_31    | H, D_ARG_31     | 2.98 | 2.15 | 11.20 |
| 5VXJ.PDB | O, D_GLY_99    | N, D_VAL_33    | H, D_VAL_33     | 2.95 | 2.15 | 17.67 |
| 5VXJ.PDB | O, D_ASN_97    | N, D_ASN_35    | H, D_ASN_35     | 2.69 | 1.87 | 14.00 |
| 5VXJ.PDB | O, D_VAL_95    | N, D_TYR_37    | H, D_TYR_37     | 2.62 | 1.77 | 8.93  |
| 5VXJ.PDB | O, D_GLU_46    | N, D_ARG_38    | H, D_ARG_38     | 2.97 | 2.17 | 18.09 |
| 5VXJ.PDB | OE2, D_GLU_46  | NE, D_ARG_38   | HE, D_ARG_38    | 2.46 | 1.69 | 20.96 |
| 5VXJ.PDB | OD1, D_ASP_90  | NH1, D_ARG_38  | HH12, D_ARG_38  | 2.86 | 2.04 | 15.32 |
| 5VXJ.PDB | O, D_ARG_38    | N, D_GLU_46    | H, D_GLU_46     | 2.89 | 2.05 | 10.29 |

|          |                |                |                |      |      |       |
|----------|----------------|----------------|----------------|------|------|-------|
| 5VXJ.PDB | O, D_TRP_36    | N, D_VAL_48    | H, D_VAL_48    | 2.77 | 1.94 | 12.94 |
| 5VXJ.PDB | OD1, D_ASN_35  | NE, D_ARG_50   | HE, D_ARG_50   | 2.89 | 2.08 | 17.01 |
| 5VXJ.PDB | O, D_SER_30    | OH, D_TYR_52   | HH, D_TYR_52   | 2.65 | 1.82 | 6.70  |
| 5VXJ.PDB | OD1, D_ASP_53  | N, D_GLY_55    | H, D_GLY_55    | 2.89 | 2.10 | 19.66 |
| 5VXJ.PDB | O, D_ASP_53    | N, D_GLY_56    | H, D_GLY_56    | 2.97 | 2.13 | 9.23  |
| 5VXJ.PDB | O, D_ARG_50    | N, D_SER_59    | H, D_SER_59    | 2.64 | 1.81 | 11.93 |
| 5VXJ.PDB | O, D_VAL_48    | N, D_ALA_61    | H, D_ALA_61    | 2.74 | 1.98 | 23.42 |
| 5VXJ.PDB | OD2, D_ASP_90  | NH1, D_ARG_67  | HH12, D_ARG_67 | 2.76 | 1.94 | 14.49 |
| 5VXJ.PDB | OD1, D_ASP_90  | NH2, D_ARG_67  | HH22, D_ARG_67 | 2.92 | 2.07 | 6.62  |
| 5VXJ.PDB | O, D_VAL_64    | N, D_PHE_68    | H, D_PHE_68    | 2.99 | 2.19 | 16.85 |
| 5VXJ.PDB | O, D_GLN_82    | N, D_THR_69    | H, D_THR_69    | 2.99 | 2.18 | 16.88 |
| 5VXJ.PDB | O, D_HIS_80    | N, D_SER_71    | H, D_SER_71    | 2.95 | 2.13 | 13.86 |
| 5VXJ.PDB | OD1, D_ASN_74  | NE, D_ARG_72   | HE, D_ARG_72   | 2.76 | 1.91 | 6.10  |
| 5VXJ.PDB | O, D_THR_78    | N, D_ASP_73    | H, D_ASP_73    | 2.97 | 2.14 | 12.70 |
| 5VXJ.PDB | OD1, D_ASP_73  | N, D_LYS_76    | H, D_LYS_76    | 2.99 | 2.16 | 13.54 |
| 5VXJ.PDB | O, D_LEU_20    | N, D_LEU_81    | H, D_LEU_81    | 2.96 | 2.19 | 22.26 |
| 5VXJ.PDB | OD1, D_ASN_84  | NE2, D_GLN_82  | HE21, D_GLN_82 | 2.80 | 1.94 | 4.20  |
| 5VXJ.PDB | O, D_LEU_18    | N, D_MET_83    | H, D_MET_83    | 2.68 | 1.83 | 7.86  |
| 5VXJ.PDB | O, D_ARG_67    | N, D_ASN_84    | H, D_ASN_84    | 2.94 | 2.13 | 15.75 |
| 5VXJ.PDB | O, D_LYS_87    | N, D_ASP_90    | H, D_ASP_90    | 2.78 | 1.93 | 7.73  |
| 5VXJ.PDB | O, D_VAL_115   | N, D_ALA_92    | H, D_ALA_92    | 2.97 | 2.20 | 22.44 |
| 5VXJ.PDB | O, D_THR_113   | N, D_TYR_94    | H, D_TYR_94    | 2.96 | 2.15 | 16.57 |
| 5VXJ.PDB | O, D_ASP_90    | OH, D_TYR_94   | HH, D_TYR_94   | 2.94 | 2.12 | 10.43 |
| 5VXJ.PDB | O, D_TYR_37    | N, D_VAL_95    | H, D_VAL_95    | 2.83 | 2.02 | 15.84 |
| 5VXJ.PDB | O, D_ASN_35    | N, D_ASN_97    | H, D_ASN_97    | 2.86 | 2.07 | 19.41 |
| 5VXJ.PDB | OG1, D_THR_107 | ND2, D_ASN_97  | HD21, D_ASN_97 | 2.71 | 1.91 | 17.78 |
| 5VXJ.PDB | O, D_VAL_33    | N, D_GLY_99    | H, D_GLY_99    | 2.78 | 1.95 | 12.57 |
| 5VXJ.PDB | O, D_ARG_106   | N, D_ILE_100   | H, D_ILE_100   | 2.91 | 2.05 | 5.49  |
| 5VXJ.PDB | O, D_ARG_31    | N, D_PHE_101   | H, D_PHE_101   | 2.74 | 1.90 | 10.09 |
| 5VXJ.PDB | OE1, E_GLU_201 | OH, D_TYR_105  | HH, D_TYR_105  | 2.53 | 1.70 | 8.84  |
| 5VXJ.PDB | O, D_ALA_98    | OG1, D_THR_107 | HG1, D_THR_107 | 2.97 | 2.23 | 23.46 |
| 5VXJ.PDB | O, D_TYR_94    | N, D_THR_113   | H, D_THR_113   | 2.79 | 1.97 | 15.52 |
| 5VXJ.PDB | O, D_GLY_8     | OG1, D_THR_113 | HG1, D_THR_113 | 2.58 | 1.83 | 22.66 |
| 5VXJ.PDB | O, D_ALA_92    | N, D_VAL_115   | H, D_VAL_115   | 2.94 | 2.08 | 3.33  |
| 5VXJ.PDB | O, D_ALA_12    | N, D_SER_118   | H, D_SER_118   | 2.88 | 2.09 | 19.39 |
| 5VXJ.PDB | O, E_SER_42    | OG1, E_THR_45  | HG1, E_THR_45  | 2.81 | 2.08 | 25.17 |
| 5VXJ.PDB | O, E_SER_43    | N, E_LEU_47    | H, E_LEU_47    | 2.99 | 2.22 | 22.05 |
| 5VXJ.PDB | O, E_LEU_44    | N, E_ASN_48    | H, E_ASN_48    | 2.99 | 2.18 | 16.94 |
| 5VXJ.PDB | O, E_LEU_47    | N, E_LEU_51    | H, E_LEU_51    | 2.95 | 2.10 | 6.68  |
| 5VXJ.PDB | O, E_ASP_49    | N, E_ASN_53    | H, E_ASN_53    | 2.84 | 2.02 | 14.73 |
| 5VXJ.PDB | O, E_THR_50    | N, E_ILE_54    | H, E_ILE_54    | 2.90 | 2.13 | 22.19 |
| 5VXJ.PDB | OD2, E_ASP_309 | NH2, E_ARG_55  | HH21, E_ARG_55 | 2.82 | 2.06 | 24.28 |
| 5VXJ.PDB | O, E_HIS_52    | N, E_THR_56    | H, E_THR_56    | 2.95 | 2.14 | 17.58 |
| 5VXJ.PDB | O, E_ILE_54    | N, E_ASN_58    | H, E_ASN_58    | 2.86 | 2.04 | 14.78 |
| 5VXJ.PDB | O, E_THR_57    | N, E_LEU_61    | H, E_LEU_61    | 2.88 | 2.07 | 15.00 |
| 5VXJ.PDB | O, E_ASN_58    | N, E_LYS_62    | H, E_LYS_62    | 2.72 | 1.87 | 6.56  |
| 5VXJ.PDB | OG, E_SER_306  | NZ, E_LYS_62   | HZ1, E_LYS_62  | 2.46 | 1.61 | 13.80 |
| 5VXJ.PDB | O, E_GLN_59    | N, E_LYS_63    | H, E_LYS_63    | 2.92 | 2.13 | 20.33 |
| 5VXJ.PDB | OG, E_SER_74   | N, E_THR_71    | H, E_THR_71    | 2.92 | 2.17 | 24.42 |
| 5VXJ.PDB | O, E_THR_73    | N, E_GLU_77    | H, E_GLU_77    | 2.99 | 2.15 | 11.35 |
| 5VXJ.PDB | O, E_LEU_75    | N, E_ALA_79    | H, E_ALA_79    | 2.96 | 2.12 | 10.44 |
| 5VXJ.PDB | O, E_GLU_76    | N, E_LEU_80    | H, E_LEU_80    | 2.99 | 2.17 | 14.62 |
| 5VXJ.PDB | O, E_GLU_77    | N, E_HIS_81    | H, E_HIS_81    | 2.87 | 2.01 | 3.03  |
| 5VXJ.PDB | O, E_ILE_78    | N, E_SER_82    | H, E_SER_82    | 2.71 | 1.88 | 13.72 |
| 5VXJ.PDB | O, E_ALA_79    | N, E_SER_83    | H, E_SER_83    | 2.74 | 1.90 | 10.07 |
| 5VXJ.PDB | O, E_LEU_80    | N, E_GLN_84    | H, E_GLN_84    | 2.86 | 2.13 | 27.19 |
| 5VXJ.PDB | O, E_HIS_81    | N, E_ILE_85    | H, E_ILE_85    | 2.94 | 2.14 | 18.50 |
| 5VXJ.PDB | O, E_ILE_85    | N, E_VAL_89    | H, E_VAL_89    | 2.68 | 1.84 | 9.90  |

|          |                |                |                 |      |      |       |
|----------|----------------|----------------|-----------------|------|------|-------|
| 5VXJ.PDB | O, E_SER_86    | N, E_ASN_90    | H, E_ASN_90     | 2.92 | 2.12 | 17.55 |
| 5VXJ.PDB | O, E_ASP_88    | N, E_SER_92    | H, E_SER_92     | 2.75 | 1.92 | 13.99 |
| 5VXJ.PDB | O, E_VAL_89    | N, E_ALA_93    | H, E_ALA_93     | 2.83 | 2.00 | 12.43 |
| 5VXJ.PDB | O, E_ASN_90    | N, E_GLN_94    | H, E_GLN_94     | 2.83 | 2.00 | 12.46 |
| 5VXJ.PDB | O, E_LYS_91    | N, E_LEU_95    | H, E_LEU_95     | 2.99 | 2.16 | 12.05 |
| 5VXJ.PDB | O, E_SER_92    | N, E_LEU_96    | H, E_LEU_96     | 2.76 | 1.90 | 1.16  |
| 5VXJ.PDB | O, E_ALA_93    | N, E_ASP_97    | H, E_ASP_97     | 2.76 | 2.00 | 23.32 |
| 5VXJ.PDB | O, E_ARG_132   | OG, E_SER_100  | HG, E_SER_100   | 2.69 | 1.91 | 17.95 |
| 5VXJ.PDB | O, E_ILE_98    | N, E_ASN_102   | H, E_ASN_102    | 2.86 | 2.01 | 8.88  |
| 5VXJ.PDB | O, E_SER_100   | N, E_GLU_103   | H, E_GLU_103    | 2.97 | 2.19 | 21.11 |
| 5VXJ.PDB | O, E_LEU_99    | N, E_TYR_104   | H, E_TYR_104    | 2.98 | 2.17 | 15.50 |
| 5VXJ.PDB | OD1, E_ASN_107 | N, E_ALA_110   | H, E_ALA_110    | 2.69 | 1.84 | 7.11  |
| 5VXJ.PDB | O, E_ILE_106   | NE, E_ARG_111  | HE, E_ARG_111   | 2.78 | 2.02 | 23.50 |
| 5VXJ.PDB | O, E_LEU_113   | OG, E_SER_116  | HG, E_SER_116   | 2.58 | 1.78 | 13.78 |
| 5VXJ.PDB | O, E_LEU_114   | N, E_ALA_117   | H, E_ALA_117    | 2.86 | 2.02 | 11.54 |
| 5VXJ.PDB | O, E_PRO_118   | N, E_ALA_121   | H, E_ALA_121    | 2.98 | 2.15 | 11.22 |
| 5VXJ.PDB | O, E_LYS_119   | N, E_GLU_122   | H, E_GLU_122    | 2.92 | 2.14 | 21.73 |
| 5VXJ.PDB | O, E_TYR_104   | NE1, E_TRP_135 | HE1, E_TRP_135  | 2.71 | 1.94 | 22.95 |
| 5VXJ.PDB | O, E_GLU_133   | N, E_LYS_137   | H, E_LYS_137    | 2.86 | 2.07 | 19.63 |
| 5VXJ.PDB | OD2, F_ASP_73  | NZ, E_LYS_137  | HZ2, E_LYS_137  | 2.77 | 1.96 | 20.15 |
| 5VXJ.PDB | O, E_LEU_134   | N, E_ILE_138   | H, E_ILE_138    | 2.98 | 2.17 | 17.01 |
| 5VXJ.PDB | O, E_TRP_135   | N, E_ALA_139   | H, E_ALA_139    | 2.97 | 2.13 | 10.92 |
| 5VXJ.PDB | O, E_ALA_136   | N, E_ASN_140   | H, E_ASN_140    | 2.93 | 2.08 | 7.93  |
| 5VXJ.PDB | O, E_LYS_137   | N, E_SER_141   | H, E_SER_141    | 2.81 | 2.07 | 25.81 |
| 5VXJ.PDB | O, E_ALA_121   | OG, E_SER_141  | HG, E_SER_141   | 2.98 | 2.28 | 28.49 |
| 5VXJ.PDB | O, E_ASN_140   | N, E_ASP_144   | H, E_ASP_144    | 2.69 | 1.88 | 16.68 |
| 5VXJ.PDB | O, E_SER_141   | N, E_ILE_145   | H, E_ILE_145    | 2.84 | 2.00 | 9.07  |
| 5VXJ.PDB | O, E_ASP_144   | N, E_GLN_148   | H, E_GLN_148    | 2.78 | 1.95 | 12.00 |
| 5VXJ.PDB | O, E_ILE_145   | N, E_LEU_150   | H, E_LEU_150    | 2.93 | 2.08 | 9.20  |
| 5VXJ.PDB | O, E_ASN_146   | N, E_LYS_151   | H, E_LYS_151    | 2.91 | 2.08 | 12.08 |
| 5VXJ.PDB | O, E_TYR_153   | N, E_VAL_157   | H, E_VAL_157    | 2.91 | 2.06 | 8.11  |
| 5VXJ.PDB | O, E_GLU_154   | N, E_SER_158   | H, E_SER_158    | 2.80 | 1.95 | 8.74  |
| 5VXJ.PDB | O, E_HIS_155   | N, E_SER_159   | H, E_SER_159    | 2.71 | 1.87 | 11.62 |
| 5VXJ.PDB | O, E_ALA_156   | N, E_TYR_160   | H, E_TYR_160    | 2.93 | 2.08 | 7.60  |
| 5VXJ.PDB | O, E_VAL_157   | N, E_THR_161   | H, E_THR_161    | 2.81 | 1.98 | 13.79 |
| 5VXJ.PDB | O, E_VAL_157   | OG1, E_THR_161 | HG1, E_THR_161  | 2.55 | 1.80 | 22.47 |
| 5VXJ.PDB | O, E_TYR_160   | N, E_TYR_164   | H, E_TYR_164    | 3.00 | 2.18 | 15.88 |
| 5VXJ.PDB | OD1, E_ASP_287 | OH, E_TYR_164  | HH, E_TYR_164   | 2.85 | 2.09 | 21.13 |
| 5VXJ.PDB | O, E_THR_161   | N, E_GLN_165   | H, E_GLN_165    | 2.75 | 1.91 | 9.80  |
| 5VXJ.PDB | O, E_LEU_70    | NE2, E_GLN_165 | HE21, E_GLN_165 | 2.84 | 2.05 | 19.77 |
| 5VXJ.PDB | O, E_GLN_162   | N, E_ASP_166   | H, E_ASP_166    | 2.97 | 2.14 | 14.36 |
| 5VXJ.PDB | O, E_MET_163   | N, E_PHE_167   | H, E_PHE_167    | 2.92 | 2.13 | 18.67 |
| 5VXJ.PDB | O, E_TYR_164   | N, E_SER_168   | H, E_SER_168    | 2.77 | 1.96 | 15.85 |
| 5VXJ.PDB | O, E_TYR_164   | OG, E_SER_168  | HG, E_SER_168   | 2.89 | 2.07 | 10.15 |
| 5VXJ.PDB | O, E_PHE_167   | N, E_LEU_171   | H, E_LEU_171    | 2.80 | 2.00 | 18.45 |
| 5VXJ.PDB | O, E_SER_168   | N, E_SER_172   | H, E_SER_172    | 2.82 | 2.04 | 21.33 |
| 5VXJ.PDB | O, D_TYR_105   | OG, E_SER_173  | HG, E_SER_173   | 2.87 | 2.17 | 28.40 |
| 5VXJ.PDB | O, E_LEU_271   | N, E_VAL_188   | H, E_VAL_188    | 2.72 | 1.89 | 11.17 |
| 5VXJ.PDB | O, E_SER_179   | N, E_LYS_189   | H, E_LYS_189    | 2.74 | 1.89 | 6.16  |
| 5VXJ.PDB | O, E_VAL_269   | N, E_LEU_190   | H, E_LEU_190    | 2.84 | 2.05 | 20.49 |
| 5VXJ.PDB | O, E_TRP_177   | N, E_GLN_191   | H, E_GLN_191    | 2.94 | 2.12 | 14.86 |
| 5VXJ.PDB | O, E_VAL_192   | N, E_LYS_196   | H, E_LYS_196    | 2.75 | 1.91 | 8.80  |
| 5VXJ.PDB | O, E_ASN_193   | N, E_LYS_197   | H, E_LYS_197    | 2.71 | 1.85 | 6.12  |
| 5VXJ.PDB | OD1, D_ASN_97  | NZ, E_LYS_197  | HZ1, E_LYS_197  | 2.80 | 1.95 | 14.72 |
| 5VXJ.PDB | OE2, E_GLU_201 | NZ, E_LYS_197  | HZ3, E_LYS_197  | 2.47 | 1.71 | 25.42 |
| 5VXJ.PDB | O, E_LEU_195   | N, E_LEU_199   | H, E_LEU_199    | 3.00 | 2.17 | 13.11 |
| 5VXJ.PDB | O, E_LYS_196   | N, E_GLU_200   | H, E_GLU_200    | 2.76 | 1.92 | 10.71 |
| 5VXJ.PDB | O, E_ALA_198   | N, E_LEU_202   | H, E_LEU_202    | 2.95 | 2.17 | 21.29 |

|          |                |                |                 |      |      |       |
|----------|----------------|----------------|-----------------|------|------|-------|
| 5VXJ.PDB | OD1, E_ASP_254 | NZ, E_LYS_203  | HZ2, E_LYS_203  | 2.55 | 1.67 | 5.69  |
| 5VXJ.PDB | O, E_GLU_201   | N, E_LYS_205   | H, E_LYS_205    | 2.76 | 2.01 | 23.93 |
| 5VXJ.PDB | OD2, E_ASP_166 | NZ, E_LYS_205  | HZ2, E_LYS_205  | 2.79 | 1.95 | 15.80 |
| 5VXJ.PDB | OD2, E_ASP_166 | OH, E_TYR_206  | HH, E_TYR_206   | 2.80 | 1.99 | 13.17 |
| 5VXJ.PDB | O, F_GLY_112   | ND2, E_ASN_216 | HD21, E_ASN_216 | 2.68 | 1.91 | 21.74 |
| 5VXJ.PDB | O, E_TYR_244   | N, E_VAL_218   | H, E_VAL_218    | 2.90 | 2.07 | 12.38 |
| 5VXJ.PDB | O, E_SER_219   | N, E_ALA_223   | H, E_ALA_223    | 2.85 | 2.02 | 12.36 |
| 5VXJ.PDB | O, E_GLN_220   | N, E_ASN_224   | H, E_ASN_224    | 2.92 | 2.12 | 17.22 |
| 5VXJ.PDB | O, E_GLU_221   | N, E_LYS_225   | H, E_LYS_225    | 2.83 | 2.07 | 23.55 |
| 5VXJ.PDB | O, E_ALA_223   | N, E_LEU_227   | H, E_LEU_227    | 2.90 | 2.08 | 14.99 |
| 5VXJ.PDB | O, E_TRP_226   | N, E_LEU_230   | H, E_LEU_230    | 2.79 | 1.93 | 5.43  |
| 5VXJ.PDB | O, E_SER_247   | N, E_LYS_236   | H, E_LYS_236    | 2.89 | 2.18 | 29.32 |
| 5VXJ.PDB | O, E_GLY_243   | N, E_LYS_240   | H, E_LYS_240    | 2.92 | 2.06 | 6.86  |
| 5VXJ.PDB | O, E_VAL_218   | N, E_TYR_244   | H, E_TYR_244    | 2.83 | 2.10 | 27.72 |
| 5VXJ.PDB | O, E_SER_238   | N, E_VAL_245   | H, E_VAL_245    | 2.99 | 2.17 | 14.78 |
| 5VXJ.PDB | O, E_TYR_212   | N, E_VAL_246   | H, E_VAL_246    | 2.78 | 1.92 | 1.28  |
| 5VXJ.PDB | O, E_ILE_234   | N, E_ASN_249   | H, E_ASN_249    | 2.95 | 2.10 | 8.04  |
| 5VXJ.PDB | OD1, E_ASN_249 | N, E_THR_251   | H, E_THR_251    | 2.92 | 2.09 | 11.77 |
| 5VXJ.PDB | OD1, E_ASN_249 | OG1, E_THR_251 | HG1, E_THR_251  | 2.55 | 1.84 | 26.63 |
| 5VXJ.PDB | O, E_MET_250   | N, E_ASP_254   | H, E_ASP_254    | 2.99 | 2.17 | 15.41 |
| 5VXJ.PDB | O, E_THR_251   | N, E_ASN_255   | H, E_ASN_255    | 2.75 | 1.94 | 15.61 |
| 5VXJ.PDB | O, E_MET_256   | N, E_LEU_260   | H, E_LEU_260    | 2.96 | 2.20 | 24.13 |
| 5VXJ.PDB | O, E_LYS_258   | N, E_ASN_262   | H, E_ASN_262    | 2.93 | 2.19 | 25.85 |
| 5VXJ.PDB | O, E_VAL_188   | N, E_LEU_271   | H, E_LEU_271    | 2.71 | 1.86 | 9.01  |
| 5VXJ.PDB | O, E_ASN_273   | N, E_GLN_277   | H, E_GLN_277    | 2.93 | 2.08 | 8.17  |
| 5VXJ.PDB | O, E_LYS_275   | N, E_TRP_279   | H, E_TRP_279    | 2.94 | 2.10 | 8.60  |
| 5VXJ.PDB | O, E_TYR_276   | N, E_ASN_280   | H, E_ASN_280    | 2.69 | 1.83 | 1.86  |
| 5VXJ.PDB | O, E_TRP_279   | N, E_PHE_283   | H, E_PHE_283    | 2.90 | 2.06 | 8.44  |
| 5VXJ.PDB | O, E_GLU_288   | N, E_ASN_292   | H, E_ASN_292    | 2.93 | 2.09 | 10.24 |
| 5VXJ.PDB | O, E_THR_289   | N, E_ASN_293   | H, E_ASN_293    | 2.93 | 2.09 | 10.01 |
| 5VXJ.PDB | O, E_MET_290   | N, E_LEU_294   | H, E_LEU_294    | 2.94 | 2.11 | 13.11 |
| 5VXJ.PDB | O, E_LYS_291   | N, E_GLN_295   | H, E_GLN_295    | 2.83 | 1.98 | 7.53  |
| 5VXJ.PDB | O, E_ASN_292   | N, E_THR_296   | H, E_THR_296    | 2.78 | 2.01 | 22.46 |
| 5VXJ.PDB | O, E_LEU_294   | N, E_VAL_298   | H, E_VAL_298    | 2.95 | 2.10 | 6.64  |
| 5VXJ.PDB | O, E_THR_296   | N, E_LYS_300   | H, E_LYS_300    | 2.96 | 2.14 | 14.74 |
| 5VXJ.PDB | O, E_LEU_297   | N, E_TYR_301   | H, E_TYR_301    | 2.79 | 1.94 | 8.70  |
| 5VXJ.PDB | O, E_VAL_298   | N, E_SER_302   | H, E_SER_302    | 2.84 | 2.02 | 14.64 |
| 5VXJ.PDB | O, E_GLN_299   | N, E_ASN_303   | H, E_ASN_303    | 2.93 | 2.07 | 5.66  |
| 5VXJ.PDB | O, E_LYS_300   | N, E_ALA_304   | H, E_ALA_304    | 2.85 | 2.08 | 22.30 |
| 5VXJ.PDB | OD1, E_ASN_58  | ND2, E_ASN_305 | HD21, E_ASN_305 | 2.80 | 1.98 | 14.83 |
| 5VXJ.PDB | O, E_ALA_304   | N, E_PHE_308   | H, E_PHE_308    | 2.93 | 2.09 | 11.91 |
| 5VXJ.PDB | O, E_ASN_305   | N, E_ASP_309   | H, E_ASP_309    | 2.75 | 1.92 | 13.10 |
| 5VXJ.PDB | O, E_SER_306   | N, E_ASN_310   | H, E_ASN_310    | 2.83 | 2.05 | 20.17 |
| 5VXJ.PDB | O, E_LEU_311   | N, E_LEU_315   | H, E_LEU_315    | 2.80 | 1.98 | 13.54 |
| 5VXJ.PDB | O, E_VAL_312   | N, E_SER_316   | H, E_SER_316    | 2.92 | 2.08 | 10.70 |
| 5VXJ.PDB | O, E_LYS_313   | OG, E_SER_316  | HG, E_SER_316   | 2.95 | 2.17 | 17.14 |
| 5VXJ.PDB | O, E_VAL_314   | N, E_THR_318   | H, E_THR_318    | 2.84 | 2.03 | 16.20 |
| 5VXJ.PDB | O, E_LEU_315   | N, E_ILE_319   | H, E_ILE_319    | 2.87 | 2.09 | 21.51 |
| 5VXJ.PDB | O, E_SER_316   | OG, E_SER_320  | HG, E_SER_320   | 2.93 | 2.11 | 9.97  |
| 5VXJ.PDB | O, F_SER_25    | N, F_GLN_3     | H, F_GLN_3      | 2.86 | 2.05 | 17.85 |
| 5VXJ.PDB | O, F_ALA_23    | N, F_ALA_5     | H, F_ALA_5      | 2.98 | 2.24 | 26.74 |
| 5VXJ.PDB | O, F_SER_21    | N, F_THR_7     | H, F_THR_7      | 2.94 | 2.17 | 21.96 |
| 5VXJ.PDB | O, F_GLN_114   | N, F_GLY_10    | H, F_GLY_10     | 2.72 | 1.87 | 6.47  |
| 5VXJ.PDB | O, F_THR_116   | N, F_ALA_12    | H, F_ALA_12     | 2.88 | 2.15 | 27.23 |
| 5VXJ.PDB | O, F_LEU_86    | N, F_GLY_15    | H, F_GLY_15     | 2.89 | 2.06 | 12.09 |
| 5VXJ.PDB | O, F_GLN_13    | N, F_GLY_16    | H, F_GLY_16     | 2.90 | 2.06 | 10.07 |
| 5VXJ.PDB | O, F_MET_83    | N, F_LEU_18    | H, F_LEU_18     | 2.85 | 2.06 | 20.12 |
| 5VXJ.PDB | OE1, F_GLN_82  | NE, F_ARG_19   | HE, F_ARG_19    | 2.82 | 1.96 | 3.39  |

|          |                |                |                 |      |      |       |
|----------|----------------|----------------|-----------------|------|------|-------|
| 5VXJ.PDB | O, F_THR_7     | N, F_SER_21    | H, F_SER_21     | 2.85 | 2.05 | 18.37 |
| 5VXJ.PDB | O, F_VAL_79    | N, F_CYS_22    | H, F_CYS_22     | 2.95 | 2.15 | 19.55 |
| 5VXJ.PDB | O, F_ALA_5     | N, F_ALA_23    | H, F_ALA_23     | 2.80 | 1.96 | 10.17 |
| 5VXJ.PDB | O, F_ASN_77    | N, F_ALA_24    | H, F_ALA_24     | 2.80 | 1.95 | 4.41  |
| 5VXJ.PDB | O, F_GLY_99    | N, F_VAL_33    | H, F_VAL_33     | 2.72 | 1.90 | 15.23 |
| 5VXJ.PDB | O, F_ASN_97    | N, F_ASN_35    | H, F_ASN_35     | 2.71 | 1.87 | 10.04 |
| 5VXJ.PDB | OD1, F_ASN_97  | ND2, F_ASN_35  | HD22, F_ASN_35  | 2.86 | 2.08 | 21.21 |
| 5VXJ.PDB | O, F_ALA_49    | N, F_TRP_36    | H, F_TRP_36     | 2.90 | 2.07 | 13.72 |
| 5VXJ.PDB | O, F_VAL_95    | N, F_TYR_37    | H, F_TYR_37     | 2.88 | 2.02 | 2.78  |
| 5VXJ.PDB | OD1, F_ASP_90  | NH1, F_ARG_38  | HH12, F_ARG_38  | 2.92 | 2.20 | 28.14 |
| 5VXJ.PDB | OE2, F_GLU_46  | NH2, F_ARG_38  | HH21, F_ARG_38  | 2.73 | 1.93 | 18.99 |
| 5VXJ.PDB | OE1, F_GLU_44  | N, F_ARG_45    | H, F_ARG_45     | 2.62 | 1.85 | 20.92 |
| 5VXJ.PDB | O, F_ARG_38    | N, F_GLU_46    | H, F_GLU_46     | 2.92 | 2.09 | 11.31 |
| 5VXJ.PDB | O, F_TRP_36    | N, F_VAL_48    | H, F_VAL_48     | 2.74 | 1.91 | 14.11 |
| 5VXJ.PDB | O, F_SER_59    | N, F_ARG_50    | H, F_ARG_50     | 2.88 | 2.09 | 20.53 |
| 5VXJ.PDB | OE1, G_GLU_200 | NH2, F_ARG_50  | HH22, F_ARG_50  | 2.70 | 1.89 | 15.49 |
| 5VXJ.PDB | O, F_SER_30    | OH, F_TYR_52   | HH, F_TYR_52    | 2.69 | 1.86 | 8.38  |
| 5VXJ.PDB | OD1, F_ASP_53  | N, F_GLY_55    | H, F_GLY_55     | 2.61 | 1.87 | 25.39 |
| 5VXJ.PDB | O, F_ARG_50    | N, F_SER_59    | H, F_SER_59     | 2.82 | 2.00 | 14.71 |
| 5VXJ.PDB | O, F_SER_85    | NH1, F_ARG_67  | HH11, F_ARG_67  | 2.83 | 2.08 | 24.34 |
| 5VXJ.PDB | OD2, F_ASP_90  | NH1, F_ARG_67  | HH12, F_ARG_67  | 2.83 | 1.99 | 10.41 |
| 5VXJ.PDB | OD1, F_ASN_74  | NE, F_ARG_72   | HE, F_ARG_72    | 2.72 | 1.88 | 10.50 |
| 5VXJ.PDB | O, F_ALA_32    | NH1, F_ARG_72  | HH12, F_ARG_72  | 2.99 | 2.18 | 16.73 |
| 5VXJ.PDB | O, F_LEU_18    | N, F_MET_83    | H, F_MET_83     | 2.56 | 1.71 | 7.06  |
| 5VXJ.PDB | OD2, F_ASP_90  | N, F_LYS_87    | H, F_LYS_87     | 2.92 | 2.15 | 21.40 |
| 5VXJ.PDB | O, F_LYS_87    | N, F_ASP_90    | H, F_ASP_90     | 2.85 | 2.01 | 12.44 |
| 5VXJ.PDB | O, F_PRO_88    | N, F_THR_91    | H, F_THR_91     | 2.99 | 2.14 | 6.98  |
| 5VXJ.PDB | O, F_VAL_115   | N, F_ALA_92    | H, F_ALA_92     | 2.99 | 2.23 | 23.19 |
| 5VXJ.PDB | O, F_GLN_39    | N, F_MET_93    | H, F_MET_93     | 2.76 | 1.90 | 4.39  |
| 5VXJ.PDB | O, F_THR_113   | N, F_TYR_94    | H, F_TYR_94     | 2.89 | 2.09 | 17.19 |
| 5VXJ.PDB | O, F_ASP_90    | OH, F_TYR_94   | HH, F_TYR_94    | 2.65 | 1.83 | 9.35  |
| 5VXJ.PDB | OE2, F_GLU_6   | N, F_CYS_96    | H, F_CYS_96     | 2.48 | 1.64 | 10.12 |
| 5VXJ.PDB | O, F_ASN_35    | N, F_ASN_97    | H, F_ASN_97     | 2.96 | 2.17 | 18.94 |
| 5VXJ.PDB | OG1, F_THR_107 | ND2, F_ASN_97  | HD21, F_ASN_97  | 2.73 | 1.95 | 21.26 |
| 5VXJ.PDB | O, F_VAL_33    | N, F_GLY_99    | H, F_GLY_99     | 2.77 | 1.92 | 6.76  |
| 5VXJ.PDB | O, F_ARG_106   | N, F_ILE_100   | H, F_ILE_100    | 2.81 | 1.97 | 10.04 |
| 5VXJ.PDB | O, F_ARG_31    | N, F_PHE_101   | H, F_PHE_101    | 2.72 | 1.87 | 8.92  |
| 5VXJ.PDB | OE1, G_GLU_201 | OH, F_TYR_105  | HH, F_TYR_105   | 2.57 | 1.75 | 11.97 |
| 5VXJ.PDB | O, F_CYS_96    | N, F_GLY_110   | H, F_GLY_110    | 2.87 | 2.09 | 20.49 |
| 5VXJ.PDB | O, E_THR_217   | NE2, F_GLN_111 | HE22, F_GLN_111 | 2.98 | 2.12 | 6.26  |
| 5VXJ.PDB | OE1, F_GLU_6   | N, F_GLY_112   | H, F_GLY_112    | 2.49 | 1.66 | 12.35 |
| 5VXJ.PDB | O, F_TYR_94    | N, F_THR_113   | H, F_THR_113    | 2.80 | 1.99 | 17.44 |
| 5VXJ.PDB | O, F_ALA_92    | N, F_VAL_115   | H, F_VAL_115    | 2.94 | 2.08 | 6.59  |
| 5VXJ.PDB | OG1, F_THR_91  | N, F_VAL_117   | H, F_VAL_117    | 2.91 | 2.05 | 1.59  |
| 5VXJ.PDB | O, G_LEU_47    | N, G_LEU_51    | H, G_LEU_51     | 2.82 | 2.00 | 14.56 |
| 5VXJ.PDB | O, G_ASP_49    | N, G_ASN_53    | H, G_ASN_53     | 2.43 | 1.60 | 12.48 |
| 5VXJ.PDB | O, G_HIS_52    | N, G_THR_56    | H, G_THR_56     | 2.92 | 2.09 | 13.87 |
| 5VXJ.PDB | O, G_ARG_55    | N, G_THR_57    | H, G_THR_57     | 2.92 | 2.19 | 26.60 |
| 5VXJ.PDB | O, G_THR_57    | N, G_LEU_61    | H, G_LEU_61     | 2.82 | 1.99 | 11.74 |
| 5VXJ.PDB | O, G_ASN_58    | N, G_LYS_62    | H, G_LYS_62     | 2.82 | 1.97 | 8.16  |
| 5VXJ.PDB | O, G_LEU_61    | N, G_LEU_65    | H, G_LEU_65     | 2.93 | 2.16 | 22.32 |
| 5VXJ.PDB | O, G_LYS_62    | OG, G_SER_66   | HG, G_SER_66    | 2.76 | 1.97 | 15.54 |
| 5VXJ.PDB | O, G_ALA_79    | N, G_SER_83    | H, G_SER_83     | 2.87 | 2.11 | 23.33 |
| 5VXJ.PDB | O, G_LEU_80    | N, G_GLN_84    | H, G_GLN_84     | 2.88 | 2.12 | 24.02 |
| 5VXJ.PDB | O, G_HIS_81    | N, G_ILE_85    | H, G_ILE_85     | 2.98 | 2.19 | 19.61 |
| 5VXJ.PDB | O, G_ILE_85    | N, G_VAL_89    | H, G_VAL_89     | 2.81 | 2.00 | 16.83 |
| 5VXJ.PDB | O, G_ASP_88    | N, G_SER_92    | H, G_SER_92     | 2.63 | 1.80 | 11.22 |
| 5VXJ.PDB | O, G_ASP_88    | OG, G_SER_92   | HG, G_SER_92    | 2.83 | 2.07 | 20.88 |



|          |                |                |                 |      |      |       |
|----------|----------------|----------------|-----------------|------|------|-------|
| 5VXJ.PDB | O, G_VAL_89    | N, G_ALA_93    | H, G_ALA_93     | 2.81 | 1.99 | 14.69 |
| 5VXJ.PDB | O, G_SER_92    | N, G_LEU_96    | H, G_LEU_96     | 2.87 | 2.02 | 7.93  |
| 5VXJ.PDB | O, G_ALA_93    | N, G_ASP_97    | H, G_ASP_97     | 2.78 | 1.96 | 13.95 |
| 5VXJ.PDB | O, G_GLN_94    | N, G_ILE_98    | H, G_ILE_98     | 2.75 | 1.95 | 17.07 |
| 5VXJ.PDB | O, G_LEU_95    | N, G_LEU_99    | H, G_LEU_99     | 2.95 | 2.15 | 17.03 |
| 5VXJ.PDB | O, G_LEU_96    | N, G_SER_100   | H, G_SER_100    | 2.90 | 2.14 | 23.00 |
| 5VXJ.PDB | O, G_ARG_132   | OG, G_SER_100  | HG, G_SER_100   | 2.76 | 1.96 | 15.44 |
| 5VXJ.PDB | O, G_ASP_97    | N, G_ARG_101   | H, G_ARG_101    | 2.92 | 2.09 | 13.45 |
| 5VXJ.PDB | OD2, G_ASP_97  | NE, G_ARG_101  | HE, G_ARG_101   | 2.67 | 1.82 | 7.54  |
| 5VXJ.PDB | O, G_ILE_98    | N, G_ASN_102   | H, G_ASN_102    | 2.95 | 2.14 | 17.00 |
| 5VXJ.PDB | O, G_LEU_113   | OG, G_SER_116  | HG, G_SER_116   | 2.49 | 1.72 | 19.82 |
| 5VXJ.PDB | O, G_PRO_118   | N, G_ALA_121   | H, G_ALA_121    | 2.99 | 2.21 | 20.79 |
| 5VXJ.PDB | O, G_LYS_119   | N, G_GLU_122   | H, G_GLU_122    | 2.97 | 2.13 | 11.69 |
| 5VXJ.PDB | O, H_GLY_56    | NH2, G_ARG_132 | HH22, G_ARG_132 | 2.94 | 2.20 | 26.37 |
| 5VXJ.PDB | O, G_TYR_104   | NE1, G_TRP_135 | HE1, G_TRP_135  | 2.73 | 1.97 | 23.31 |
| 5VXJ.PDB | O, G_GLU_133   | N, G_LYS_137   | H, G_LYS_137    | 2.98 | 2.20 | 21.62 |
| 5VXJ.PDB | O, G_LEU_134   | N, G_ILE_138   | H, G_ILE_138    | 2.96 | 2.21 | 25.46 |
| 5VXJ.PDB | O, G_TRP_135   | N, G_ALA_139   | H, G_ALA_139    | 2.77 | 1.93 | 7.72  |
| 5VXJ.PDB | O, G_ALA_136   | N, G_ASN_140   | H, G_ASN_140    | 2.82 | 1.97 | 8.22  |
| 5VXJ.PDB | O, G_LYS_137   | N, G_SER_141   | H, G_SER_141    | 3.00 | 2.27 | 27.08 |
| 5VXJ.PDB | O, G_ALA_121   | OG, G_SER_141  | HG, G_SER_141   | 2.84 | 2.05 | 16.77 |
| 5VXJ.PDB | O, G_ASN_140   | N, G_ASP_144   | H, G_ASP_144    | 2.65 | 1.83 | 15.34 |
| 5VXJ.PDB | O, G_SER_141   | N, G_ILE_145   | H, G_ILE_145    | 2.98 | 2.15 | 13.01 |
| 5VXJ.PDB | O, G_ASP_144   | N, G_GLN_148   | H, G_GLN_148    | 2.87 | 2.03 | 9.64  |
| 5VXJ.PDB | O, G_ILE_145   | N, G_LEU_150   | H, G_LEU_150    | 2.93 | 2.09 | 11.15 |
| 5VXJ.PDB | O, G_ASN_146   | N, G_LYS_151   | H, G_LYS_151    | 2.69 | 1.86 | 11.46 |
| 5VXJ.PDB | O, G_LYS_151   | N, G_HIS_155   | H, G_HIS_155    | 2.94 | 2.14 | 18.38 |
| 5VXJ.PDB | O, G_VAL_152   | N, G_ALA_156   | H, G_ALA_156    | 2.99 | 2.15 | 9.93  |
| 5VXJ.PDB | O, G_TYR_153   | N, G_VAL_157   | H, G_VAL_157    | 2.97 | 2.12 | 8.52  |
| 5VXJ.PDB | O, G_GLU_154   | N, G_SER_158   | H, G_SER_158    | 2.89 | 2.07 | 14.41 |
| 5VXJ.PDB | O, G_HIS_155   | N, G_SER_159   | H, G_SER_159    | 2.67 | 1.82 | 8.29  |
| 5VXJ.PDB | O, G_ALA_156   | N, G_TYR_160   | H, G_TYR_160    | 2.95 | 2.09 | 4.91  |
| 5VXJ.PDB | O, G_VAL_157   | N, G_THR_161   | H, G_THR_161    | 2.89 | 2.06 | 12.73 |
| 5VXJ.PDB | O, G_VAL_157   | OG1, G_THR_161 | HG1, G_THR_161  | 2.73 | 2.03 | 28.26 |
| 5VXJ.PDB | O, G_TYR_160   | N, G_TYR_164   | H, G_TYR_164    | 2.94 | 2.13 | 15.80 |
| 5VXJ.PDB | OD1, G_ASP_287 | OH, G_TYR_164  | HH, G_TYR_164   | 2.79 | 1.99 | 15.03 |
| 5VXJ.PDB | O, G_THR_161   | N, G_GLN_165   | H, G_GLN_165    | 2.71 | 1.89 | 15.11 |
| 5VXJ.PDB | O, G_GLN_162   | N, G_ASP_166   | H, G_ASP_166    | 2.86 | 2.02 | 10.34 |
| 5VXJ.PDB | O, G_MET_163   | N, G_PHE_167   | H, G_PHE_167    | 2.94 | 2.13 | 15.85 |
| 5VXJ.PDB | O, G_TYR_164   | N, G_SER_168   | H, G_SER_168    | 2.76 | 1.96 | 17.74 |
| 5VXJ.PDB | O, G_PHE_167   | N, G_LEU_171   | H, G_LEU_171    | 2.92 | 2.14 | 21.89 |
| 5VXJ.PDB | O, F_TYR_105   | OG, G_SER_173  | HG, G_SER_173   | 2.88 | 2.16 | 26.33 |
| 5VXJ.PDB | OD1, I_ASN_292 | N, G_GLY_176   | H, G_GLY_176    | 2.76 | 2.01 | 25.37 |
| 5VXJ.PDB | O, G_LYS_189   | N, G_SER_179   | H, G_SER_179    | 2.93 | 2.15 | 21.27 |
| 5VXJ.PDB | O, G_SER_187   | N, G_GLY_181   | H, G_GLY_181    | 2.82 | 1.96 | 3.25  |
| 5VXJ.PDB | O, G_LEU_271   | N, G_VAL_188   | H, G_VAL_188    | 2.64 | 1.80 | 10.40 |
| 5VXJ.PDB | O, G_SER_179   | N, G_LYS_189   | H, G_LYS_189    | 2.74 | 1.88 | 0.48  |
| 5VXJ.PDB | O, G_VAL_269   | N, G_LEU_190   | H, G_LEU_190    | 2.94 | 2.10 | 11.59 |
| 5VXJ.PDB | O, G_TRP_177   | N, G_GLN_191   | H, G_GLN_191    | 2.89 | 2.06 | 12.28 |
| 5VXJ.PDB | O, G_VAL_192   | N, G_LYS_196   | H, G_LYS_196    | 2.73 | 1.88 | 6.19  |
| 5VXJ.PDB | O, G_ASN_193   | N, G_LYS_197   | H, G_LYS_197    | 2.77 | 1.93 | 12.03 |
| 5VXJ.PDB | OE2, G_GLU_201 | NZ, G_LYS_197  | HZ3, G_LYS_197  | 2.59 | 1.86 | 28.64 |
| 5VXJ.PDB | O, G_LYS_196   | N, G_GLU_200   | H, G_GLU_200    | 2.89 | 2.03 | 3.65  |
| 5VXJ.PDB | O, G_ALA_198   | N, G_LEU_202   | H, G_LEU_202    | 2.82 | 2.06 | 23.29 |
| 5VXJ.PDB | OD1, G_ASP_254 | NZ, G_LYS_203  | HZ2, G_LYS_203  | 2.49 | 1.62 | 9.92  |
| 5VXJ.PDB | O, G_GLU_201   | N, G_LYS_205   | H, G_LYS_205    | 2.90 | 2.17 | 27.16 |
| 5VXJ.PDB | OD2, G_ASP_166 | NZ, G_LYS_205  | HZ2, G_LYS_205  | 2.82 | 1.96 | 12.05 |
| 5VXJ.PDB | OD2, G_ASP_166 | OH, G_TYR_206  | HH, G_TYR_206   | 2.52 | 1.70 | 11.57 |

|          |                |                |                |      |      |       |
|----------|----------------|----------------|----------------|------|------|-------|
| 5VXJ.PDB | OE1, H_GLN_111 | OG1, G_THR_217 | HG1, G_THR_217 | 2.86 | 2.17 | 29.58 |
| 5VXJ.PDB | O, G_TYR_244   | N, G_VAL_218   | H, G_VAL_218   | 2.86 | 2.06 | 17.78 |
| 5VXJ.PDB | O, G_SER_219   | N, G_ALA_223   | H, G_ALA_223   | 2.97 | 2.15 | 15.26 |
| 5VXJ.PDB | O, G_ALA_223   | N, G_LEU_227   | H, G_LEU_227   | 2.91 | 2.13 | 21.40 |
| 5VXJ.PDB | O, G_ASN_224   | N, G_THR_228   | H, G_THR_228   | 2.94 | 2.09 | 5.59  |
| 5VXJ.PDB | O, G_TRP_226   | N, G_LEU_230   | H, G_LEU_230   | 2.80 | 1.99 | 15.37 |
| 5VXJ.PDB | O, G_SER_247   | N, G_LYS_236   | H, G_LYS_236   | 2.91 | 2.21 | 29.46 |
| 5VXJ.PDB | O, G_GLY_243   | N, G_LYS_240   | H, G_LYS_240   | 2.93 | 2.08 | 7.36  |
| 5VXJ.PDB | O, G_VAL_218   | N, G_TYR_244   | H, G_TYR_244   | 2.68 | 1.96 | 27.92 |
| 5VXJ.PDB | O, G_TYR_212   | N, G_VAL_246   | H, G_VAL_246   | 2.69 | 1.84 | 4.47  |
| 5VXJ.PDB | O, G_ILE_234   | N, G_ASN_249   | H, G_ASN_249   | 2.98 | 2.13 | 6.76  |
| 5VXJ.PDB | OD1, G_ASN_249 | N, G_THR_251   | H, G_THR_251   | 2.80 | 1.95 | 8.59  |
| 5VXJ.PDB | O, G_MET_250   | N, G_ASP_254   | H, G_ASP_254   | 2.98 | 2.15 | 13.88 |
| 5VXJ.PDB | O, G_THR_251   | N, G_ASN_255   | H, G_ASN_255   | 2.80 | 1.98 | 15.19 |
| 5VXJ.PDB | O, G_ILE_253   | N, G_LEU_257   | H, G_LEU_257   | 2.98 | 2.19 | 19.77 |
| 5VXJ.PDB | O, G_ASP_254   | N, G_LYS_258   | H, G_LYS_258   | 2.96 | 2.13 | 13.32 |
| 5VXJ.PDB | O, G_ASN_255   | N, G_SER_259   | H, G_SER_259   | 2.97 | 2.13 | 11.23 |
| 5VXJ.PDB | O, G_MET_256   | N, G_LEU_260   | H, G_LEU_260   | 2.98 | 2.17 | 16.38 |
| 5VXJ.PDB | O, G_LEU_257   | N, G_ASP_261   | H, G_ASP_261   | 2.95 | 2.11 | 10.36 |
| 5VXJ.PDB | O, G_VAL_188   | N, G_LEU_271   | H, G_LEU_271   | 2.72 | 1.88 | 11.49 |
| 5VXJ.PDB | OD1, G_ASP_272 | N, G_LYS_275   | H, G_LYS_275   | 2.67 | 1.82 | 9.36  |
| 5VXJ.PDB | O, G_ASN_273   | N, G_GLN_277   | H, G_GLN_277   | 2.90 | 2.04 | 4.56  |
| 5VXJ.PDB | O, G_TYR_276   | N, G_ASN_280   | H, G_ASN_280   | 2.80 | 1.95 | 8.62  |
| 5VXJ.PDB | O, G_TRP_279   | N, G_PHE_283   | H, G_PHE_283   | 2.87 | 2.07 | 17.67 |
| 5VXJ.PDB | O, G_ASN_280   | N, G_SER_284   | H, G_SER_284   | 2.95 | 2.13 | 14.24 |
| 5VXJ.PDB | O, G_ASN_280   | OG, G_SER_284  | HG, G_SER_284  | 2.97 | 2.24 | 25.76 |
| 5VXJ.PDB | O, G_SER_284   | N, G_GLU_288   | H, G_GLU_288   | 2.91 | 2.15 | 23.37 |
| 5VXJ.PDB | O, G_GLU_288   | N, G_ASN_292   | H, G_ASN_292   | 2.83 | 1.99 | 8.91  |
| 5VXJ.PDB | O, G_THR_289   | N, G_ASN_293   | H, G_ASN_293   | 2.94 | 2.09 | 6.63  |
| 5VXJ.PDB | O, G_LYS_291   | N, G_GLN_295   | H, G_GLN_295   | 2.97 | 2.14 | 12.50 |
| 5VXJ.PDB | O, G_ASN_292   | N, G_THR_296   | H, G_THR_296   | 2.78 | 1.97 | 17.22 |
| 5VXJ.PDB | O, G_ASN_293   | N, G_LEU_297   | H, G_LEU_297   | 2.97 | 2.15 | 14.27 |
| 5VXJ.PDB | O, G_LEU_294   | N, G_VAL_298   | H, G_VAL_298   | 2.94 | 2.10 | 8.59  |
| 5VXJ.PDB | O, G_THR_296   | N, G_LYS_300   | H, G_LYS_300   | 2.93 | 2.11 | 14.54 |
| 5VXJ.PDB | O, G_LEU_297   | N, G_TYR_301   | H, G_TYR_301   | 2.79 | 1.93 | 5.96  |
| 5VXJ.PDB | O, G_VAL_298   | N, G_SER_302   | H, G_SER_302   | 2.92 | 2.18 | 25.79 |
| 5VXJ.PDB | O, G_GLN_299   | N, G_ASN_303   | H, G_ASN_303   | 2.89 | 2.06 | 11.76 |
| 5VXJ.PDB | O, G_LYS_300   | N, G_ALA_304   | H, G_ALA_304   | 2.91 | 2.09 | 15.09 |
| 5VXJ.PDB | O, G_ASN_305   | N, G_ASP_309   | H, G_ASP_309   | 2.86 | 2.10 | 23.50 |
| 5VXJ.PDB | O, G_ASN_310   | N, G_VAL_314   | H, G_VAL_314   | 2.93 | 2.09 | 9.81  |
| 5VXJ.PDB | O, G_LEU_311   | N, G_LEU_315   | H, G_LEU_315   | 2.80 | 1.98 | 14.79 |
| 5VXJ.PDB | O, G_VAL_312   | N, G_SER_316   | H, G_SER_316   | 2.85 | 2.00 | 7.85  |
| 5VXJ.PDB | O, G_VAL_314   | OG, G_SER_317  | HG, G_SER_317  | 2.91 | 2.15 | 20.46 |
| 5VXJ.PDB | OE1, H_GLN_1   | N, H_VAL_2     | H, H_VAL_2     | 2.95 | 2.22 | 27.04 |
| 5VXJ.PDB | O, H_SER_25    | N, H_GLN_3     | H, H_GLN_3     | 2.91 | 2.09 | 16.25 |
| 5VXJ.PDB | O, H_ALA_23    | N, H_ALA_5     | H, H_ALA_5     | 2.99 | 2.18 | 17.17 |
| 5VXJ.PDB | O, H_SER_21    | N, H_THR_7     | H, H_THR_7     | 2.88 | 2.14 | 25.14 |
| 5VXJ.PDB | O, H_GLN_114   | N, H_GLY_10    | H, H_GLY_10    | 2.91 | 2.07 | 10.18 |
| 5VXJ.PDB | O, H_THR_116   | N, H_ALA_12    | H, H_ALA_12    | 2.81 | 2.11 | 29.16 |
| 5VXJ.PDB | O, H_LEU_86    | N, H_GLY_15    | H, H_GLY_15    | 2.89 | 2.09 | 19.18 |
| 5VXJ.PDB | O, H_GLN_13    | N, H_GLY_16    | H, H_GLY_16    | 2.90 | 2.08 | 13.33 |
| 5VXJ.PDB | O, H_MET_83    | N, H_LEU_18    | H, H_LEU_18    | 2.94 | 2.15 | 20.85 |
| 5VXJ.PDB | OE1, H_GLN_82  | NE, H_ARG_19   | HE, H_ARG_19   | 2.76 | 1.91 | 8.69  |
| 5VXJ.PDB | O, H_LEU_81    | N, H_LEU_20    | H, H_LEU_20    | 2.81 | 2.00 | 16.24 |
| 5VXJ.PDB | O, H_THR_7     | N, H_SER_21    | H, H_SER_21    | 2.81 | 2.01 | 17.25 |
| 5VXJ.PDB | O, H_VAL_79    | N, H_CYS_22    | H, H_CYS_22    | 2.93 | 2.10 | 13.46 |
| 5VXJ.PDB | O, H_ALA_5     | N, H_ALA_23    | H, H_ALA_23    | 2.89 | 2.09 | 18.03 |
| 5VXJ.PDB | O, H_ASN_77    | N, H_ALA_24    | H, H_ALA_24    | 2.87 | 2.01 | 2.06  |

|          |                |                |                |      |      |       |
|----------|----------------|----------------|----------------|------|------|-------|
| 5VXJ.PDB | O, H_THR_28    | N, H_ARG_31    | H, H_ARG_31    | 2.95 | 2.12 | 13.87 |
| 5VXJ.PDB | O, H_GLY_99    | N, H_VAL_33    | H, H_VAL_33    | 2.75 | 1.93 | 14.82 |
| 5VXJ.PDB | O, H_ASN_97    | N, H_ASN_35    | H, H_ASN_35    | 2.70 | 1.89 | 16.43 |
| 5VXJ.PDB | OD1, H_ASN_97  | ND2, H_ASN_35  | HD22, H_ASN_35 | 2.85 | 2.10 | 23.91 |
| 5VXJ.PDB | O, H_ALA_49    | N, H_TRP_36    | H, H_TRP_36    | 2.96 | 2.13 | 12.43 |
| 5VXJ.PDB | O, H_VAL_95    | N, H_TYR_37    | H, H_TYR_37    | 2.93 | 2.07 | 4.40  |
| 5VXJ.PDB | O, H_GLU_46    | N, H_ARG_38    | H, H_ARG_38    | 3.00 | 2.20 | 19.46 |
| 5VXJ.PDB | OD1, H_ASP_90  | NH1, H_ARG_38  | HH12, H_ARG_38 | 3.00 | 2.16 | 12.34 |
| 5VXJ.PDB | O, H_LYS_43    | NE2, H_GLN_39  | HE21, H_GLN_39 | 2.90 | 2.07 | 12.82 |
| 5VXJ.PDB | O, H_ALA_40    | N, H_LYS_43    | H, H_LYS_43    | 2.85 | 2.05 | 18.19 |
| 5VXJ.PDB | O, H_TRP_36    | N, H_VAL_48    | H, H_VAL_48    | 2.81 | 1.99 | 14.82 |
| 5VXJ.PDB | OD1, H_ASN_35  | NE, H_ARG_50   | HE, H_ARG_50   | 2.75 | 1.93 | 14.53 |
| 5VXJ.PDB | O, H_SER_30    | OH, H_TYR_52   | HH, H_TYR_52   | 2.54 | 1.73 | 12.01 |
| 5VXJ.PDB | O, H_ARG_50    | N, H_SER_59    | H, H_SER_59    | 2.65 | 1.83 | 14.48 |
| 5VXJ.PDB | O, H_VAL_48    | N, H_ALA_61    | H, H_ALA_61    | 2.92 | 2.06 | 6.45  |
| 5VXJ.PDB | OD2, H_ASP_90  | NH1, H_ARG_67  | HH12, H_ARG_67 | 2.89 | 2.05 | 9.62  |
| 5VXJ.PDB | O, H_VAL_64    | N, H_PHE_68    | H, H_PHE_68    | 2.94 | 2.11 | 12.01 |
| 5VXJ.PDB | O, H_GLN_82    | N, H_THR_69    | H, H_THR_69    | 2.98 | 2.17 | 16.65 |
| 5VXJ.PDB | O, H_HIS_80    | N, H_SER_71    | H, H_SER_71    | 2.96 | 2.17 | 19.86 |
| 5VXJ.PDB | OD1, H_ASN_74  | NE, H_ARG_72   | HE, H_ARG_72   | 2.76 | 1.95 | 17.61 |
| 5VXJ.PDB | O, H_THR_78    | N, H_ASP_73    | H, H_ASP_73    | 2.94 | 2.10 | 8.61  |
| 5VXJ.PDB | OD1, H_ASP_73  | N, H_ALA_75    | H, H_ALA_75    | 2.98 | 2.24 | 26.47 |
| 5VXJ.PDB | O, H_LEU_20    | N, H_LEU_81    | H, H_LEU_81    | 2.92 | 2.17 | 25.39 |
| 5VXJ.PDB | O, H_THR_69    | N, H_GLN_82    | H, H_GLN_82    | 2.80 | 2.01 | 19.49 |
| 5VXJ.PDB | OD1, H_ASN_84  | NE2, H_GLN_82  | HE21, H_GLN_82 | 2.86 | 2.05 | 16.57 |
| 5VXJ.PDB | O, H_LEU_18    | N, H_MET_83    | H, H_MET_83    | 2.73 | 1.88 | 6.75  |
| 5VXJ.PDB | OD2, H_ASP_90  | N, H_LYS_87    | H, H_LYS_87    | 2.78 | 1.93 | 8.81  |
| 5VXJ.PDB | O, H_LYS_87    | N, H_ASP_90    | H, H_ASP_90    | 2.91 | 2.12 | 18.68 |
| 5VXJ.PDB | O, H_PRO_88    | OG1, H_THR_91  | HG1, H_THR_91  | 2.87 | 2.17 | 28.10 |
| 5VXJ.PDB | O, H_GLN_39    | N, H_MET_93    | H, H_MET_93    | 2.94 | 2.08 | 2.62  |
| 5VXJ.PDB | O, H_THR_113   | N, H_TYR_94    | H, H_TYR_94    | 2.90 | 2.08 | 15.59 |
| 5VXJ.PDB | O, H_ASP_90    | OH, H_TYR_94   | HH, H_TYR_94   | 2.76 | 1.93 | 4.55  |
| 5VXJ.PDB | OE2, H_GLU_6   | N, H_CYS_96    | H, H_CYS_96    | 2.77 | 1.93 | 11.06 |
| 5VXJ.PDB | O, H_ASN_35    | N, H_ASN_97    | H, H_ASN_97    | 3.00 | 2.18 | 14.80 |
| 5VXJ.PDB | OG1, H_THR_107 | ND2, H_ASN_97  | HD21, H_ASN_97 | 2.53 | 1.81 | 26.67 |
| 5VXJ.PDB | O, H_VAL_33    | N, H_GLY_99    | H, H_GLY_99    | 2.83 | 1.97 | 3.41  |
| 5VXJ.PDB | O, H_ARG_31    | N, H_PHE_101   | H, H_PHE_101   | 2.92 | 2.07 | 4.69  |
| 5VXJ.PDB | O, H_ALA_98    | OG1, H_THR_107 | HG1, H_THR_107 | 2.78 | 2.00 | 18.25 |
| 5VXJ.PDB | O, H_TYR_94    | N, H_THR_113   | H, H_THR_113   | 2.71 | 1.88 | 13.43 |
| 5VXJ.PDB | O, H_ALA_92    | N, H_VAL_115   | H, H_VAL_115   | 2.99 | 2.14 | 8.76  |
| 5VXJ.PDB | O, I_HIS_52    | N, I_THR_56    | H, I_THR_56    | 3.00 | 2.25 | 25.56 |
| 5VXJ.PDB | O, I_ILE_54    | N, I_ASN_58    | H, I_ASN_58    | 2.85 | 2.04 | 16.92 |
| 5VXJ.PDB | OD1, I_ASP_309 | ND2, I_ASN_58  | HD22, I_ASN_58 | 2.73 | 1.88 | 5.94  |
| 5VXJ.PDB | O, I_THR_57    | N, I_LEU_61    | H, I_LEU_61    | 2.75 | 1.93 | 14.25 |
| 5VXJ.PDB | O, I_SER_74    | N, I_ILE_78    | H, I_ILE_78    | 2.96 | 2.17 | 19.05 |
| 5VXJ.PDB | O, I_ILE_78    | N, I_SER_82    | H, I_SER_82    | 2.89 | 2.03 | 4.23  |
| 5VXJ.PDB | OE1, I_GLU_154 | OG, I_SER_82   | HG, I_SER_82   | 2.52 | 1.79 | 24.33 |
| 5VXJ.PDB | O, I_ALA_79    | N, I_SER_83    | H, I_SER_83    | 2.97 | 2.17 | 18.99 |
| 5VXJ.PDB | O, I_LEU_80    | N, I_GLN_84    | H, I_GLN_84    | 2.85 | 2.09 | 23.46 |
| 5VXJ.PDB | O, I_HIS_81    | N, I_ILE_85    | H, I_ILE_85    | 2.91 | 2.07 | 9.50  |
| 5VXJ.PDB | O, I_SER_82    | N, I_SER_86    | H, I_SER_86    | 2.96 | 2.13 | 13.40 |
| 5VXJ.PDB | O, I_ILE_85    | N, I_VAL_89    | H, I_VAL_89    | 2.75 | 1.92 | 11.99 |
| 5VXJ.PDB | O, I_SER_86    | N, I_ASN_90    | H, I_ASN_90    | 2.87 | 2.05 | 14.01 |
| 5VXJ.PDB | O, I_ASP_88    | N, I_SER_92    | H, I_SER_92    | 2.88 | 2.08 | 18.99 |
| 5VXJ.PDB | O, I_VAL_89    | N, I_ALA_93    | H, I_ALA_93    | 2.77 | 1.96 | 17.15 |
| 5VXJ.PDB | O, I_SER_92    | N, I_LEU_96    | H, I_LEU_96    | 2.85 | 1.99 | 1.66  |
| 5VXJ.PDB | O, I_ALA_93    | N, I_ASP_97    | H, I_ASP_97    | 2.73 | 1.95 | 20.17 |
| 5VXJ.PDB | O, I_ARG_132   | OG, I_SER_100  | HG, I_SER_100  | 2.62 | 1.86 | 20.59 |

|          |                |                |                 |      |      |       |
|----------|----------------|----------------|-----------------|------|------|-------|
| 5VXJ.PDB | OD2, I_ASP_97  | NE, I_ARG_101  | HE, I_ARG_101   | 2.83 | 2.07 | 23.56 |
| 5VXJ.PDB | O, I_ILE_98    | N, I_ASN_102   | H, I_ASN_102    | 2.91 | 2.10 | 16.45 |
| 5VXJ.PDB | O, I_ILE_129   | NH2, I_ARG_111 | HH22, I_ARG_111 | 2.55 | 1.83 | 26.80 |
| 5VXJ.PDB | O, I_GLU_112   | N, I_HIS_115   | H, I_HIS_115    | 2.95 | 2.18 | 22.09 |
| 5VXJ.PDB | O, I_LEU_113   | N, I_SER_116   | H, I_SER_116    | 2.82 | 1.99 | 12.68 |
| 5VXJ.PDB | O, I_LEU_114   | N, I_ALA_117   | H, I_ALA_117    | 2.81 | 1.96 | 7.97  |
| 5VXJ.PDB | O, I_HIS_131   | N, I_TRP_135   | H, I_TRP_135    | 2.86 | 2.01 | 6.63  |
| 5VXJ.PDB | O, I_TYR_104   | NE1, I_TRP_135 | HE1, I_TRP_135  | 2.77 | 2.01 | 23.99 |
| 5VXJ.PDB | OD2, J_ASP_73  | NZ, I_LYS_137  | HZ3, I_LYS_137  | 2.90 | 2.17 | 29.52 |
| 5VXJ.PDB | O, I_TRP_135   | N, I_ALA_139   | H, I_ALA_139    | 2.88 | 2.02 | 5.33  |
| 5VXJ.PDB | O, I_ALA_136   | N, I_ASN_140   | H, I_ASN_140    | 2.79 | 1.94 | 7.31  |
| 5VXJ.PDB | O, I_ASN_140   | N, I_ASP_144   | H, I_ASP_144    | 2.67 | 1.82 | 9.22  |
| 5VXJ.PDB | O, I_SER_141   | N, I_ILE_145   | H, I_ILE_145    | 2.92 | 2.09 | 14.16 |
| 5VXJ.PDB | O, I_ASP_144   | N, I_GLN_148   | H, I_GLN_148    | 2.87 | 2.03 | 10.58 |
| 5VXJ.PDB | O, I_ASN_146   | N, I_LYS_151   | H, I_LYS_151    | 2.96 | 2.13 | 13.63 |
| 5VXJ.PDB | O, I_GLU_154   | N, I_SER_158   | H, I_SER_158    | 2.91 | 2.08 | 12.92 |
| 5VXJ.PDB | O, I_HIS_155   | N, I_SER_159   | H, I_SER_159    | 2.86 | 2.02 | 8.08  |
| 5VXJ.PDB | O, I_VAL_157   | N, I_THR_161   | H, I_THR_161    | 2.74 | 1.90 | 11.36 |
| 5VXJ.PDB | O, I_SER_158   | N, I_GLN_162   | H, I_GLN_162    | 2.99 | 2.14 | 8.77  |
| 5VXJ.PDB | O, I_TYR_160   | N, I_TYR_164   | H, I_TYR_164    | 2.94 | 2.12 | 14.36 |
| 5VXJ.PDB | OD1, I_ASP_287 | OH, I_TYR_164  | HH, I_TYR_164   | 2.95 | 2.16 | 17.45 |
| 5VXJ.PDB | O, I_THR_161   | N, I_GLN_165   | H, I_GLN_165    | 2.73 | 1.92 | 16.54 |
| 5VXJ.PDB | O, I_GLN_162   | N, I_ASP_166   | H, I_ASP_166    | 2.98 | 2.15 | 13.40 |
| 5VXJ.PDB | O, I_MET_163   | N, I_PHE_167   | H, I_PHE_167    | 2.92 | 2.10 | 14.46 |
| 5VXJ.PDB | O, I_TYR_164   | N, I_SER_168   | H, I_SER_168    | 2.79 | 1.99 | 18.69 |
| 5VXJ.PDB | O, I_TYR_164   | OG, I_SER_168  | HG, I_SER_168   | 2.84 | 2.02 | 10.56 |
| 5VXJ.PDB | O, I_PHE_167   | N, I_LEU_171   | H, I_LEU_171    | 2.88 | 2.09 | 18.97 |
| 5VXJ.PDB | O, I_SER_168   | N, I_SER_172   | H, I_SER_172    | 2.93 | 2.14 | 20.32 |
| 5VXJ.PDB | O, I_LEU_171   | N, I_LEU_174   | H, I_LEU_174    | 2.98 | 2.15 | 13.51 |
| 5VXJ.PDB | O, I_LYS_189   | N, I_SER_179   | H, I_SER_179    | 2.95 | 2.20 | 24.93 |
| 5VXJ.PDB | O, I_SER_187   | N, I_GLY_181   | H, I_GLY_181    | 2.71 | 1.95 | 23.30 |
| 5VXJ.PDB | O, I_LEU_271   | N, I_VAL_188   | H, I_VAL_188    | 2.51 | 1.65 | 3.63  |
| 5VXJ.PDB | O, I_SER_179   | N, I_LYS_189   | H, I_LYS_189    | 2.57 | 1.72 | 7.44  |
| 5VXJ.PDB | O, I_VAL_269   | N, I_LEU_190   | H, I_LEU_190    | 2.88 | 2.08 | 17.76 |
| 5VXJ.PDB | O, I_TRP_177   | N, I_GLN_191   | H, I_GLN_191    | 2.84 | 2.00 | 11.79 |
| 5VXJ.PDB | O, I_VAL_192   | N, I_LYS_196   | H, I_LYS_196    | 2.80 | 1.94 | 4.24  |
| 5VXJ.PDB | O, I_ASN_193   | N, I_LYS_197   | H, I_LYS_197    | 2.85 | 2.02 | 13.07 |
| 5VXJ.PDB | OD1, B_ASN_97  | NZ, I_LYS_197  | HZ1, I_LYS_197  | 2.68 | 1.88 | 21.92 |
| 5VXJ.PDB | O, I_LEU_195   | N, I_LEU_199   | H, I_LEU_199    | 3.00 | 2.18 | 15.17 |
| 5VXJ.PDB | O, I_LYS_196   | N, I_GLU_200   | H, I_GLU_200    | 2.81 | 1.96 | 9.14  |
| 5VXJ.PDB | O, I_LYS_197   | N, I_GLU_201   | H, I_GLU_201    | 2.97 | 2.16 | 16.25 |
| 5VXJ.PDB | O, I_ALA_198   | N, I_LEU_202   | H, I_LEU_202    | 3.00 | 2.21 | 19.76 |
| 5VXJ.PDB | OD1, I_ASP_254 | NZ, I_LYS_203  | HZ2, I_LYS_203  | 2.60 | 1.74 | 12.72 |
| 5VXJ.PDB | O, I_GLU_201   | N, I_LYS_205   | H, I_LYS_205    | 2.75 | 1.96 | 18.48 |
| 5VXJ.PDB | OD2, I_ASP_166 | NZ, I_LYS_205  | HZ2, I_LYS_205  | 2.77 | 1.91 | 10.79 |
| 5VXJ.PDB | OD2, I_ASP_166 | OH, I_TYR_206  | HH, I_TYR_206   | 2.50 | 1.67 | 8.28  |
| 5VXJ.PDB | O, I_VAL_246   | N, I_LEU_211   | H, I_LEU_211    | 2.81 | 2.10 | 28.98 |
| 5VXJ.PDB | O, I_SER_219   | N, I_ALA_223   | H, I_ALA_223    | 2.88 | 2.07 | 17.36 |
| 5VXJ.PDB | O, I_GLN_220   | N, I_ASN_224   | H, I_ASN_224    | 2.91 | 2.06 | 6.82  |
| 5VXJ.PDB | O, I_GLU_221   | N, I_LYS_225   | H, I_LYS_225    | 2.94 | 2.21 | 26.90 |
| 5VXJ.PDB | O, I_ALA_223   | N, I_LEU_227   | H, I_LEU_227    | 2.90 | 2.08 | 14.48 |
| 5VXJ.PDB | O, I_TRP_226   | N, I_LEU_230   | H, I_LEU_230    | 2.81 | 1.97 | 9.92  |
| 5VXJ.PDB | O, I_GLY_231   | N, I_ILE_234   | H, I_ILE_234    | 2.96 | 2.14 | 14.73 |
| 5VXJ.PDB | O, I_VAL_245   | N, I_SER_238   | H, I_SER_238    | 2.98 | 2.16 | 15.04 |
| 5VXJ.PDB | O, I_TYR_212   | N, I_VAL_246   | H, I_VAL_246    | 2.76 | 1.90 | 2.08  |
| 5VXJ.PDB | O, I_ILE_234   | N, I_ASN_249   | H, I_ASN_249    | 2.85 | 2.02 | 12.88 |
| 5VXJ.PDB | OD1, I_ASN_249 | N, I_THR_251   | H, I_THR_251    | 2.98 | 2.14 | 10.78 |
| 5VXJ.PDB | OD1, I_ASN_249 | OG1, I_THR_251 | HG1, I_THR_251  | 2.69 | 1.98 | 27.82 |

|          |               |                |                |      |      |       |
|----------|---------------|----------------|----------------|------|------|-------|
| 5VXJ.PDB | O, I_THR_251  | N, I_ASN_255   | H, I_ASN_255   | 2.72 | 1.91 | 16.03 |
| 5VXJ.PDB | O, I_PRO_252  | N, I_MET_256   | H, I_MET_256   | 2.98 | 2.15 | 12.95 |
| 5VXJ.PDB | O, I_ILE_253  | N, I_LEU_257   | H, I_LEU_257   | 2.86 | 2.03 | 13.56 |
| 5VXJ.PDB | O, I_ASP_254  | N, I_LYS_258   | H, I_LYS_258   | 2.91 | 2.07 | 10.53 |
| 5VXJ.PDB | O, I_ASN_255  | N, I_SER_259   | H, I_SER_259   | 2.91 | 2.10 | 16.35 |
| 5VXJ.PDB | O, I_MET_256  | N, I_LEU_260   | H, I_LEU_260   | 2.77 | 2.06 | 28.49 |
| 5VXJ.PDB | O, I_LEU_257  | N, I_ASP_261   | H, I_ASP_261   | 2.89 | 2.05 | 10.23 |
| 5VXJ.PDB | O, I_VAL_188  | N, I_LEU_271   | H, I_LEU_271   | 2.63 | 1.80 | 11.88 |
| 5VXJ.PDB | O, I_LYS_275  | N, I_TRP_279   | H, I_TRP_279   | 2.89 | 2.08 | 15.60 |
| 5VXJ.PDB | O, I_TYR_276  | N, I_ASN_280   | H, I_ASN_280   | 2.72 | 1.88 | 10.70 |
| 5VXJ.PDB | O, I_TRP_279  | N, I_PHE_283   | H, I_PHE_283   | 2.84 | 1.99 | 5.52  |
| 5VXJ.PDB | O, I_ASN_280  | N, I_SER_284   | H, I_SER_284   | 2.88 | 2.09 | 19.38 |
| 5VXJ.PDB | O, I_ASN_280  | OG, I_SER_284  | HG, I_SER_284  | 2.54 | 1.77 | 19.23 |
| 5VXJ.PDB | O, I_ALA_281  | N, I_ALA_285   | H, I_ALA_285   | 2.96 | 2.25 | 29.29 |
| 5VXJ.PDB | O, I_SER_284  | N, I_GLU_288   | H, I_GLU_288   | 2.89 | 2.11 | 20.80 |
| 5VXJ.PDB | O, I_THR_289  | N, I_ASN_293   | H, I_ASN_293   | 2.83 | 2.00 | 11.34 |
| 5VXJ.PDB | O, I_MET_290  | N, I_LEU_294   | H, I_LEU_294   | 2.91 | 2.07 | 11.98 |
| 5VXJ.PDB | O, I_ASN_292  | N, I_THR_296   | H, I_THR_296   | 2.91 | 2.10 | 15.19 |
| 5VXJ.PDB | O, I_LEU_294  | N, I_VAL_298   | H, I_VAL_298   | 2.97 | 2.13 | 11.40 |
| 5VXJ.PDB | O, I_GLN_295  | N, I_GLN_299   | H, I_GLN_299   | 2.67 | 1.83 | 9.61  |
| 5VXJ.PDB | O, I_THR_296  | N, I_LYS_300   | H, I_LYS_300   | 2.79 | 1.96 | 13.56 |
| 5VXJ.PDB | O, I_LEU_297  | N, I_TYR_301   | H, I_TYR_301   | 2.86 | 2.02 | 11.85 |
| 5VXJ.PDB | O, I_VAL_298  | N, I_SER_302   | H, I_SER_302   | 2.89 | 2.10 | 19.67 |
| 5VXJ.PDB | O, I_ASN_303  | N, I_ILE_307   | H, I_ILE_307   | 2.99 | 2.15 | 10.86 |
| 5VXJ.PDB | O, I_ALA_304  | N, I_PHE_308   | H, I_PHE_308   | 2.90 | 2.15 | 24.75 |
| 5VXJ.PDB | O, I_ASN_305  | N, I_ASP_309   | H, I_ASP_309   | 2.79 | 2.00 | 19.69 |
| 5VXJ.PDB | O, I_SER_306  | N, I_ASN_310   | H, I_ASN_310   | 2.75 | 1.93 | 13.59 |
| 5VXJ.PDB | O, I_ASP_309  | N, I_LYS_313   | H, I_LYS_313   | 2.84 | 2.05 | 19.66 |
| 5VXJ.PDB | O, I_LEU_311  | N, I_LEU_315   | H, I_LEU_315   | 2.80 | 1.96 | 10.49 |
| 5VXJ.PDB | O, I_VAL_312  | N, I_SER_316   | H, I_SER_316   | 3.00 | 2.19 | 16.29 |
| 5VXJ.PDB | O, I_LEU_315  | OG1, I_THR_318 | HG1, I_THR_318 | 2.75 | 2.04 | 26.52 |
| 5VXJ.PDB | O, I_LEU_315  | N, I_ILE_319   | H, I_ILE_319   | 2.98 | 2.22 | 23.66 |
| 5VXJ.PDB | O, J_SER_25   | N, J_GLN_3     | H, J_GLN_3     | 2.93 | 2.12 | 17.29 |
| 5VXJ.PDB | O, J_ALA_23   | N, J_ALA_5     | H, J_ALA_5     | 2.99 | 2.25 | 25.24 |
| 5VXJ.PDB | O, J_SER_21   | N, J_THR_7     | H, J_THR_7     | 2.92 | 2.17 | 25.75 |
| 5VXJ.PDB | O, J_GLN_114  | N, J_GLY_10    | H, J_GLY_10    | 2.89 | 2.04 | 6.92  |
| 5VXJ.PDB | O, J_THR_116  | N, J_ALA_12    | H, J_ALA_12    | 2.87 | 2.12 | 24.55 |
| 5VXJ.PDB | O, J_LEU_86   | N, J_GLY_15    | H, J_GLY_15    | 2.84 | 2.02 | 14.92 |
| 5VXJ.PDB | O, J_GLN_13   | N, J_GLY_16    | H, J_GLY_16    | 2.95 | 2.13 | 13.71 |
| 5VXJ.PDB | O, J_MET_83   | N, J_LEU_18    | H, J_LEU_18    | 2.83 | 2.07 | 23.77 |
| 5VXJ.PDB | OE1, J_GLN_82 | NE, J_ARG_19   | HE, J_ARG_19   | 2.52 | 1.72 | 17.43 |
| 5VXJ.PDB | O, J_THR_7    | N, J_SER_21    | H, J_SER_21    | 2.88 | 2.09 | 20.19 |
| 5VXJ.PDB | O, J_ASN_77   | N, J_ALA_24    | H, J_ALA_24    | 2.97 | 2.12 | 7.90  |
| 5VXJ.PDB | O, J_GLY_99   | N, J_VAL_33    | H, J_VAL_33    | 2.92 | 2.10 | 15.57 |
| 5VXJ.PDB | O, J_ASN_97   | N, J_ASN_35    | H, J_ASN_35    | 2.70 | 1.87 | 12.63 |
| 5VXJ.PDB | OD1, J_ASN_97 | ND2, J_ASN_35  | HD22, J_ASN_35 | 3.00 | 2.21 | 19.94 |
| 5VXJ.PDB | O, J_ALA_49   | N, J_TRP_36    | H, J_TRP_36    | 2.88 | 2.04 | 12.12 |
| 5VXJ.PDB | O, J_VAL_95   | N, J_TYR_37    | H, J_TYR_37    | 2.66 | 1.81 | 6.37  |
| 5VXJ.PDB | OD1, J_ASP_90 | NH1, J_ARG_38  | HH12, J_ARG_38 | 2.89 | 2.13 | 23.59 |
| 5VXJ.PDB | OE2, J_GLU_46 | NH2, J_ARG_38  | HH21, J_ARG_38 | 2.77 | 1.96 | 16.80 |
| 5VXJ.PDB | O, J_ARG_38   | N, J_GLU_46    | H, J_GLU_46    | 2.68 | 1.85 | 12.20 |
| 5VXJ.PDB | O, J_TRP_36   | N, J_VAL_48    | H, J_VAL_48    | 2.83 | 2.01 | 13.87 |
| 5VXJ.PDB | O, J_SER_59   | N, J_ARG_50    | H, J_ARG_50    | 2.92 | 2.18 | 25.84 |
| 5VXJ.PDB | OD1, J_ASN_35 | NE, J_ARG_50   | HE, J_ARG_50   | 2.74 | 1.91 | 11.68 |
| 5VXJ.PDB | O, J_SER_30   | OH, J_TYR_52   | HH, J_TYR_52   | 2.67 | 1.83 | 3.11  |
| 5VXJ.PDB | OD1, J_ASP_53 | N, J_GLY_55    | H, J_GLY_55    | 2.81 | 1.99 | 15.68 |
| 5VXJ.PDB | O, J_ARG_50   | N, J_SER_59    | H, J_SER_59    | 2.68 | 1.87 | 16.27 |
| 5VXJ.PDB | O, J_VAL_48   | N, J_ALA_61    | H, J_ALA_61    | 2.84 | 2.03 | 16.19 |

|          |                |                |                 |      |      |       |
|----------|----------------|----------------|-----------------|------|------|-------|
| 5VXJ.PDB | O, J_VAL_64    | N, J_ARG_67    | H, J_ARG_67     | 2.97 | 2.13 | 10.41 |
| 5VXJ.PDB | O, J_SER_85    | NH1, J_ARG_67  | HH11, J_ARG_67  | 2.90 | 2.16 | 26.24 |
| 5VXJ.PDB | OD2, J_ASP_90  | NH1, J_ARG_67  | HH12, J_ARG_67  | 2.55 | 1.74 | 16.72 |
| 5VXJ.PDB | OD1, J_ASP_90  | NH2, J_ARG_67  | HH22, J_ARG_67  | 2.84 | 1.98 | 5.11  |
| 5VXJ.PDB | O, J_VAL_64    | N, J_PHE_68    | H, J_PHE_68     | 2.99 | 2.15 | 10.61 |
| 5VXJ.PDB | O, J_HIS_80    | N, J_SER_71    | H, J_SER_71     | 2.98 | 2.20 | 21.12 |
| 5VXJ.PDB | O, J_ALA_32    | NH2, J_ARG_72  | HH22, J_ARG_72  | 2.52 | 1.69 | 13.12 |
| 5VXJ.PDB | O, J_THR_78    | N, J_ASP_73    | H, J_ASP_73     | 2.84 | 2.00 | 9.78  |
| 5VXJ.PDB | O, J_SER_71    | N, J_HIS_80    | H, J_HIS_80     | 2.97 | 2.18 | 20.55 |
| 5VXJ.PDB | O, J_THR_69    | N, J_GLN_82    | H, J_GLN_82     | 2.81 | 2.10 | 29.71 |
| 5VXJ.PDB | OD1, J_ASN_84  | NE2, J_GLN_82  | HE21, J_GLN_82  | 2.94 | 2.08 | 3.32  |
| 5VXJ.PDB | O, J_LEU_18    | N, J_MET_83    | H, J_MET_83     | 2.68 | 1.83 | 7.41  |
| 5VXJ.PDB | OD2, J_ASP_90  | N, J_LYS_87    | H, J_LYS_87     | 2.89 | 2.11 | 21.60 |
| 5VXJ.PDB | O, J_GLN_39    | N, J_MET_93    | H, J_MET_93     | 2.84 | 2.02 | 15.68 |
| 5VXJ.PDB | O, J_THR_113   | N, J_TYR_94    | H, J_TYR_94     | 2.95 | 2.11 | 9.77  |
| 5VXJ.PDB | O, J_ASP_90    | OH, J_TYR_94   | HH, J_TYR_94    | 2.90 | 2.08 | 7.74  |
| 5VXJ.PDB | O, J_ASN_35    | N, J_ASN_97    | H, J_ASN_97     | 2.69 | 1.93 | 22.73 |
| 5VXJ.PDB | OG1, J_THR_107 | ND2, J_ASN_97  | HD21, J_ASN_97  | 2.57 | 1.77 | 17.56 |
| 5VXJ.PDB | O, J_VAL_33    | N, J_GLY_99    | H, J_GLY_99     | 2.77 | 1.92 | 8.58  |
| 5VXJ.PDB | O, J_ARG_106   | N, J_ILE_100   | H, J_ILE_100    | 2.88 | 2.03 | 4.95  |
| 5VXJ.PDB | O, J_ARG_31    | N, J_PHE_101   | H, J_PHE_101    | 2.81 | 1.97 | 10.82 |
| 5VXJ.PDB | O, J_ALA_98    | OG1, J_THR_107 | HG1, J_THR_107  | 2.84 | 2.12 | 25.86 |
| 5VXJ.PDB | O, I_THR_217   | NE2, J_GLN_111 | HE22, J_GLN_111 | 2.92 | 2.11 | 16.33 |
| 5VXJ.PDB | OE1, J_GLU_6   | N, J_GLY_112   | H, J_GLY_112    | 2.94 | 2.09 | 6.96  |
| 5VXJ.PDB | O, J_TYR_94    | N, J_THR_113   | H, J_THR_113    | 2.80 | 1.97 | 13.72 |
| 5VXJ.PDB | OG1, J_THR_91  | N, J_VAL_117   | H, J_VAL_117    | 2.75 | 1.90 | 8.09  |

Table 1720: 5VXJ-specific side chain and main chain hydrogen bonding analysis. In this table, a PDB file is specified with a four-letter PDB ID, except that the names of the PDB files corresponding to the single NMR structural model split from the NMR ensemble is specified with a four-letter PDB ID in addition to a hyphen followed by the single NMR structural model numeric ID, the residue naming scheme is **Chain ID\_residue name\_residue number**,  $\angle ADH$  represents the angle formed by acceptor (A), donor (D) and hydrogen (H) ( $\angle ADH$ ).

| PDB      | Acceptor (A)   | Donor (D)      | Hydrogen (H)    | D-A (Å) | H-A (Å) | $\angle ADH(^{\circ})$ |
|----------|----------------|----------------|-----------------|---------|---------|------------------------|
| 5VXK.PDB | O, B_SER_21    | N, B_SER_7     | H, B_SER_7      | 2.86    | 2.13    | 26.17                  |
| 5VXK.PDB | O, B_GLN_13    | N, B_GLY_16    | H, B_GLY_16     | 2.95    | 2.16    | 18.88                  |
| 5VXK.PDB | O, B_MET_83    | N, B_LEU_18    | H, B_LEU_18     | 2.96    | 2.15    | 15.77                  |
| 5VXK.PDB | O, B_LEU_81    | N, B_LEU_20    | H, B_LEU_20     | 2.96    | 2.23    | 26.63                  |
| 5VXK.PDB | O, B_VAL_79    | N, B_CYS_22    | H, B_CYS_22     | 2.62    | 1.80    | 13.05                  |
| 5VXK.PDB | O, B_VAL_5     | N, B_ALA_23    | H, B_ALA_23     | 2.80    | 1.94    | 5.13                   |
| 5VXK.PDB | OD1, B_ASN_77  | N, B_LEU_29    | H, B_LEU_29     | 2.87    | 2.10    | 22.34                  |
| 5VXK.PDB | O, B_SER_49    | N, B_TRP_36    | H, B_TRP_36     | 2.81    | 1.99    | 12.98                  |
| 5VXK.PDB | O, B_TYR_95    | N, B_PHE_37    | H, B_PHE_37     | 2.70    | 1.90    | 18.05                  |
| 5VXK.PDB | O, B_GLU_46    | N, B_ARG_38    | H, B_ARG_38     | 2.93    | 2.12    | 16.27                  |
| 5VXK.PDB | O, B_ARG_38    | N, B_GLU_46    | H, B_GLU_46     | 2.99    | 2.14    | 5.94                   |
| 5VXK.PDB | O, B_TRP_36    | N, B_VAL_48    | H, B_VAL_48     | 2.67    | 1.86    | 15.37                  |
| 5VXK.PDB | O, B_SER_59    | N, B_CYS_50    | H, B_CYS_50     | 2.88    | 2.12    | 22.90                  |
| 5VXK.PDB | O, B_ILE_34    | N, B_ILE_51    | H, B_ILE_51     | 2.91    | 2.11    | 17.59                  |
| 5VXK.PDB | O, B_THR_57    | N, B_SER_52    | H, B_SER_52     | 2.96    | 2.19    | 22.56                  |
| 5VXK.PDB | O, B_GLN_106   | OG1, B_THR_57  | HG1, B_THR_57   | 2.72    | 2.03    | 28.93                  |
| 5VXK.PDB | O, B_CYS_50    | N, B_SER_59    | H, B_SER_59     | 2.94    | 2.13    | 16.19                  |
| 5VXK.PDB | O, B_VAL_48    | N, B_SER_61    | H, B_SER_61     | 2.73    | 1.90    | 12.27                  |
| 5VXK.PDB | OD2, B_ASP_90  | NH2, B_ARG_67  | HH22, B_ARG_67  | 2.27    | 1.58    | 28.79                  |
| 5VXK.PDB | OH, B_TYR_60   | N, B_ILE_70    | H, B_ILE_70     | 2.93    | 2.10    | 13.23                  |
| 5VXK.PDB | O, B_SER_52    | NH1, B_ARG_72  | HH11, B_ARG_72  | 2.49    | 1.76    | 25.78                  |
| 5VXK.PDB | O, B_ARG_78    | N, B_ASP_73    | H, B_ASP_73     | 2.58    | 1.73    | 6.46                   |
| 5VXK.PDB | O, B_ASP_73    | N, B_ARG_78    | H, B_ARG_78     | 2.89    | 2.11    | 20.69                  |
| 5VXK.PDB | O, B_CYS_22    | N, B_VAL_79    | H, B_VAL_79     | 2.94    | 2.14    | 17.09                  |
| 5VXK.PDB | O, B_LEU_20    | N, B_LEU_81    | H, B_LEU_81     | 2.95    | 2.13    | 15.57                  |
| 5VXK.PDB | O, B_THR_69    | N, B_GLN_82    | H, B_GLN_82     | 2.72    | 1.89    | 13.34                  |
| 5VXK.PDB | O, B_LEU_18    | N, B_MET_83    | H, B_MET_83     | 2.84    | 2.03    | 16.84                  |
| 5VXK.PDB | O, B_VAL_124   | N, B_ALA_92    | H, B_ALA_92     | 2.95    | 2.21    | 25.44                  |
| 5VXK.PDB | O, B_PHE_37    | N, B_TYR_95    | H, B_TYR_95     | 2.71    | 1.89    | 14.49                  |
| 5VXK.PDB | O, B_ALA_35    | N, B_ALA_97    | H, B_ALA_97     | 2.83    | 2.02    | 15.30                  |
| 5VXK.PDB | O, B_VAL_117   | N, B_ALA_98    | H, B_ALA_98     | 2.99    | 2.21    | 21.08                  |
| 5VXK.PDB | OD1, A_ASN_280 | N, B_SER_103   | H, B_SER_103    | 2.64    | 1.78    | 2.03                   |
| 5VXK.PDB | OD1, A_ASN_280 | N, B_VAL_104   | H, B_VAL_104    | 2.84    | 2.01    | 12.48                  |
| 5VXK.PDB | OG, A_SER_168  | NE2, B_GLN_106 | HE21, B_GLN_106 | 2.99    | 2.23    | 24.43                  |
| 5VXK.PDB | OD2, A_ASP_287 | NE2, B_GLN_106 | HE22, B_GLN_106 | 2.77    | 1.94    | 12.81                  |
| 5VXK.PDB | O, B_ILE_111   | ND1, B_HIS_115 | HD1, B_HIS_115  | 2.77    | 2.01    | 23.21                  |
| 5VXK.PDB | O, B_GLY_113   | NE, B_ARG_116  | HE, B_ARG_116   | 2.86    | 2.06    | 17.67                  |
| 5VXK.PDB | O, B_HIS_115   | NE1, B_TRP_118 | HE1, B_TRP_118  | 2.75    | 1.99    | 22.39                  |
| 5VXK.PDB | OE1, B_GLU_6   | N, B_GLY_121   | H, B_GLY_121    | 2.76    | 1.92    | 11.78                  |
| 5VXK.PDB | O, B_ALA_92    | N, B_VAL_124   | H, B_VAL_124    | 2.96    | 2.14    | 13.72                  |
| 5VXK.PDB | OG1, B_THR_91  | N, B_VAL_126   | H, B_VAL_126    | 2.92    | 2.13    | 18.63                  |
| 5VXK.PDB | O, A_LEU_44    | N, A_ASN_48    | H, A_ASN_48     | 2.73    | 1.91    | 14.91                  |
| 5VXK.PDB | O, A_MET_46    | N, A_THR_50    | H, A_THR_50     | 2.82    | 1.97    | 7.12                   |
| 5VXK.PDB | O, A_MET_46    | OG1, A_THR_50  | HG1, A_THR_50   | 2.68    | 1.85    | 7.57                   |
| 5VXK.PDB | O, A_LEU_47    | N, A_LEU_51    | H, A_LEU_51     | 2.82    | 2.05    | 22.07                  |
| 5VXK.PDB | O, A_ASP_49    | N, A_ASN_53    | H, A_ASN_53     | 2.90    | 2.05    | 9.25                   |
| 5VXK.PDB | O, A_ASN_53    | OG1, A_THR_57  | HG1, A_THR_57   | 2.98    | 2.23    | 23.33                  |
| 5VXK.PDB | O, A_ILE_54    | N, A_ASN_58    | H, A_ASN_58     | 2.93    | 2.11    | 14.43                  |
| 5VXK.PDB | O, A_THR_56    | N, A_ALA_60    | H, A_ALA_60     | 2.98    | 2.15    | 13.11                  |
| 5VXK.PDB | O, A_THR_57    | N, A_LEU_61    | H, A_LEU_61     | 2.94    | 2.13    | 16.68                  |
| 5VXK.PDB | O, A_THR_71    | N, A_LEU_75    | H, A_LEU_75     | 2.95    | 2.14    | 16.00                  |
| 5VXK.PDB | O, A_SER_74    | N, A_ILE_78    | H, A_ILE_78     | 2.92    | 2.06    | 5.83                   |
| 5VXK.PDB | O, A_LEU_75    | N, A_ALA_79    | H, A_ALA_79     | 2.85    | 2.04    | 15.25                  |
| 5VXK.PDB | O, A_GLU_77    | N, A_HIS_81    | H, A_HIS_81     | 2.98    | 2.14    | 8.61                   |
| 5VXK.PDB | O, A_HIS_81    | N, A_ILE_85    | H, A_ILE_85     | 2.94    | 2.14    | 17.36                  |
| 5VXK.PDB | O, A_SER_82    | N, A_SER_86    | H, A_SER_86     | 2.95    | 2.11    | 11.27                  |
| 5VXK.PDB | O, A_SER_83    | N, A_MET_87    | H, A_MET_87     | 2.97    | 2.19    | 21.87                  |

|          |                |                |                 |      |      |       |
|----------|----------------|----------------|-----------------|------|------|-------|
| 5VXK.PDB | O, A_ILE_85    | N, A_VAL_89    | H, A_VAL_89     | 2.79 | 2.01 | 20.21 |
| 5VXK.PDB | O, A_SER_86    | N, A_ASN_90    | H, A_ASN_90     | 2.99 | 2.14 | 5.84  |
| 5VXK.PDB | O, A_ASP_88    | N, A_SER_92    | H, A_SER_92     | 2.74 | 1.93 | 15.12 |
| 5VXK.PDB | O, A_ASP_88    | OG, A_SER_92   | HG, A_SER_92    | 3.00 | 2.29 | 28.37 |
| 5VXK.PDB | O, A_VAL_89    | N, A_ALA_93    | H, A_ALA_93     | 2.64 | 1.84 | 17.64 |
| 5VXK.PDB | O, A_SER_92    | N, A_LEU_96    | H, A_LEU_96     | 2.92 | 2.12 | 17.09 |
| 5VXK.PDB | O, A_LEU_96    | N, A_SER_100   | H, A_SER_100    | 2.70 | 1.93 | 21.92 |
| 5VXK.PDB | O, A_ARG_132   | OG, A_SER_100  | HG, A_SER_100   | 2.56 | 1.76 | 14.48 |
| 5VXK.PDB | O, A_ILE_98    | N, A_ASN_102   | H, A_ASN_102    | 2.91 | 2.05 | 5.88  |
| 5VXK.PDB | O, A_ILE_129   | NH1, A_ARG_111 | HH12, A_ARG_111 | 2.59 | 1.79 | 17.96 |
| 5VXK.PDB | O, A_ARG_111   | N, A_LEU_114   | H, A_LEU_114    | 2.85 | 2.05 | 18.01 |
| 5VXK.PDB | O, A_LEU_114   | N, A_ALA_117   | H, A_ALA_117    | 2.88 | 2.04 | 10.22 |
| 5VXK.PDB | O, A_TYR_104   | NE1, A_TRP_135 | HE1, A_TRP_135  | 2.54 | 1.70 | 9.79  |
| 5VXK.PDB | O, A_GLU_133   | N, A_LYS_137   | H, A_LYS_137    | 2.56 | 1.75 | 16.84 |
| 5VXK.PDB | O, A_LEU_134   | N, A_ILE_138   | H, A_ILE_138    | 2.73 | 1.96 | 22.76 |
| 5VXK.PDB | O, A_ALA_136   | N, A_ASN_140   | H, A_ASN_140    | 2.97 | 2.13 | 10.71 |
| 5VXK.PDB | O, A_ASN_140   | N, A_ASP_144   | H, A_ASP_144    | 2.65 | 1.81 | 8.85  |
| 5VXK.PDB | O, A_ASN_143   | N, A_GLU_147   | H, A_GLU_147    | 2.75 | 1.98 | 21.76 |
| 5VXK.PDB | O, A_ASP_144   | N, A_GLN_148   | H, A_GLN_148    | 2.72 | 1.87 | 4.64  |
| 5VXK.PDB | O, A_ASN_146   | N, A_LYS_151   | H, A_LYS_151    | 2.89 | 2.03 | 2.48  |
| 5VXK.PDB | O, A_LEU_150   | N, A_GLU_154   | H, A_GLU_154    | 2.80 | 1.99 | 16.19 |
| 5VXK.PDB | O, A_TYR_153   | N, A_VAL_157   | H, A_VAL_157    | 2.98 | 2.12 | 4.91  |
| 5VXK.PDB | O, A_HIS_155   | N, A_SER_159   | H, A_SER_159    | 2.74 | 1.89 | 9.23  |
| 5VXK.PDB | O, A_ALA_156   | N, A_TYR_160   | H, A_TYR_160    | 2.93 | 2.08 | 2.62  |
| 5VXK.PDB | O, A_VAL_157   | N, A_THR_161   | H, A_THR_161    | 2.80 | 1.98 | 15.42 |
| 5VXK.PDB | O, A_VAL_157   | OG1, A_THR_161 | HG1, A_THR_161  | 2.57 | 1.86 | 27.02 |
| 5VXK.PDB | O, A_SER_158   | N, A_GLN_162   | H, A_GLN_162    | 2.99 | 2.13 | 2.67  |
| 5VXK.PDB | O, A_TYR_160   | N, A_TYR_164   | H, A_TYR_164    | 2.84 | 2.00 | 11.73 |
| 5VXK.PDB | OD2, A_ASP_287 | OH, A_TYR_164  | HH, A_TYR_164   | 2.91 | 2.21 | 28.15 |
| 5VXK.PDB | O, A_THR_161   | N, A_GLN_165   | H, A_GLN_165    | 2.79 | 1.96 | 12.75 |
| 5VXK.PDB | O, A_MET_163   | N, A_PHE_167   | H, A_PHE_167    | 2.79 | 1.98 | 16.43 |
| 5VXK.PDB | O, A_TYR_164   | N, A_SER_168   | H, A_SER_168    | 2.63 | 1.79 | 8.68  |
| 5VXK.PDB | O, A_GLN_165   | N, A_ALA_169   | H, A_ALA_169    | 2.96 | 2.21 | 24.63 |
| 5VXK.PDB | O, A_SER_168   | N, A_SER_172   | H, A_SER_172    | 2.96 | 2.20 | 23.46 |
| 5VXK.PDB | O, A_LYS_189   | N, A_SER_179   | H, A_SER_179    | 2.81 | 2.06 | 25.54 |
| 5VXK.PDB | O, A_LEU_271   | N, A_VAL_188   | H, A_VAL_188    | 2.72 | 1.94 | 20.48 |
| 5VXK.PDB | O, A_SER_179   | N, A_LYS_189   | H, A_LYS_189    | 2.77 | 1.93 | 11.30 |
| 5VXK.PDB | O, A_VAL_269   | N, A_LEU_190   | H, A_LEU_190    | 2.98 | 2.14 | 11.69 |
| 5VXK.PDB | O, A_TRP_177   | N, A_GLN_191   | H, A_GLN_191    | 2.79 | 1.96 | 11.53 |
| 5VXK.PDB | O, A_GLN_191   | N, A_LEU_195   | H, A_LEU_195    | 2.98 | 2.12 | 0.40  |
| 5VXK.PDB | O, A_VAL_192   | N, A_LYS_196   | H, A_LYS_196    | 2.70 | 1.92 | 21.14 |
| 5VXK.PDB | OD2, A_ASP_261 | NZ, A_LYS_196  | HZ3, A_LYS_196  | 2.74 | 1.87 | 9.57  |
| 5VXK.PDB | O, A_ASN_193   | N, A_LYS_197   | H, A_LYS_197    | 2.84 | 1.99 | 8.82  |
| 5VXK.PDB | O, A_SER_194   | N, A_ALA_198   | H, A_ALA_198    | 2.95 | 2.12 | 13.78 |
| 5VXK.PDB | O, A_LYS_196   | N, A_GLU_200   | H, A_GLU_200    | 2.92 | 2.18 | 26.73 |
| 5VXK.PDB | O, A_LYS_197   | N, A_GLU_201   | H, A_GLU_201    | 2.99 | 2.17 | 14.72 |
| 5VXK.PDB | O, A_GLU_200   | N, A_GLU_204   | H, A_GLU_204    | 2.87 | 2.03 | 10.71 |
| 5VXK.PDB | O, A_VAL_246   | N, A_LEU_211   | H, A_LEU_211    | 2.69 | 1.92 | 21.70 |
| 5VXK.PDB | O, A_SER_219   | N, A_ALA_223   | H, A_ALA_223    | 2.87 | 2.01 | 6.41  |
| 5VXK.PDB | O, A_GLN_222   | N, A_TRP_226   | H, A_TRP_226    | 2.85 | 2.07 | 21.25 |
| 5VXK.PDB | O, A_ASN_224   | N, A_THR_228   | H, A_THR_228    | 2.67 | 1.85 | 13.34 |
| 5VXK.PDB | O, A_GLY_231   | N, A_THR_233   | H, A_THR_233    | 2.55 | 1.79 | 23.98 |
| 5VXK.PDB | O, A_SER_247   | N, A_LYS_236   | H, A_LYS_236    | 2.76 | 1.98 | 20.26 |
| 5VXK.PDB | O, A_VAL_245   | N, A_SER_238   | H, A_SER_238    | 2.92 | 2.13 | 19.88 |
| 5VXK.PDB | O, A_TYR_212   | N, A_VAL_246   | H, A_VAL_246    | 2.83 | 1.98 | 7.21  |
| 5VXK.PDB | O, A_LYS_236   | N, A_SER_247   | H, A_SER_247    | 2.77 | 1.95 | 15.51 |
| 5VXK.PDB | O, A_ILE_234   | N, A_ASN_249   | H, A_ASN_249    | 2.90 | 2.07 | 12.40 |
| 5VXK.PDB | OD1, A_ASN_249 | N, A_THR_251   | H, A_THR_251    | 2.95 | 2.10 | 9.19  |



|          |                |                |                 |      |      |       |
|----------|----------------|----------------|-----------------|------|------|-------|
| 5VXK.PDB | O, A_MET.250   | N, A_ASP.254   | H, A_ASP.254    | 2.78 | 1.96 | 13.63 |
| 5VXK.PDB | O, A_THR.251   | N, A_ASN.255   | H, A_ASN.255    | 2.70 | 1.89 | 17.04 |
| 5VXK.PDB | O, A_ASP.254   | N, A_LYS.258   | H, A_LYS.258    | 2.95 | 2.18 | 22.11 |
| 5VXK.PDB | O, A_ASN.255   | N, A_SER.259   | H, A_SER.259    | 2.99 | 2.21 | 21.36 |
| 5VXK.PDB | O, A_MET.256   | OG, A_SER.259  | HG, A_SER.259   | 2.72 | 1.88 | 2.53  |
| 5VXK.PDB | O, A_LEU.257   | N, A_ASP.261   | H, A_ASP.261    | 2.96 | 2.15 | 15.35 |
| 5VXK.PDB | O, A_LYS.258   | N, A_ASN.262   | H, A_ASN.262    | 3.00 | 2.20 | 18.58 |
| 5VXK.PDB | O, A_VAL.188   | N, A_LEU.271   | H, A_LEU.271    | 2.82 | 1.97 | 7.95  |
| 5VXK.PDB | O, A_ASN.186   | N, A_ASN.273   | H, A_ASN.273    | 2.88 | 2.14 | 26.01 |
| 5VXK.PDB | O, A_ASP.272   | N, A_TYR.276   | H, A_TYR.276    | 2.84 | 2.01 | 12.24 |
| 5VXK.PDB | OG1, B_THR.102 | OH, A_TYR.276  | HH, A_TYR.276   | 2.57 | 1.73 | 6.50  |
| 5VXK.PDB | O, A_ASN.273   | N, A_GLN.277   | H, A_GLN.277    | 2.84 | 2.02 | 14.45 |
| 5VXK.PDB | O, A_LYS.275   | N, A_TRP.279   | H, A_TRP.279    | 2.92 | 2.06 | 3.36  |
| 5VXK.PDB | O, A_TYR.276   | N, A_ASN.280   | H, A_ASN.280    | 2.71 | 1.86 | 7.15  |
| 5VXK.PDB | O, A_GLN.277   | N, A_ALA.281   | H, A_ALA.281    | 2.91 | 2.11 | 18.24 |
| 5VXK.PDB | O, A_ALA.281   | N, A_ALA.285   | H, A_ALA.285    | 2.89 | 2.13 | 23.89 |
| 5VXK.PDB | O, A_ASP.287   | N, A_LYS.291   | H, A_LYS.291    | 2.81 | 1.95 | 4.20  |
| 5VXK.PDB | O, A_GLU.288   | N, A_ASN.292   | H, A_ASN.292    | 2.77 | 1.96 | 17.31 |
| 5VXK.PDB | O, A_THR.289   | N, A_ASN.293   | H, A_ASN.293    | 2.79 | 1.96 | 12.40 |
| 5VXK.PDB | OH, A_TYR.160  | ND2, A_ASN.293 | HD22, A_ASN.293 | 2.77 | 1.97 | 18.05 |
| 5VXK.PDB | O, A_MET.290   | N, A_LEU.294   | H, A_LEU.294    | 2.88 | 2.05 | 13.48 |
| 5VXK.PDB | O, A_ASN.292   | N, A_THR.296   | H, A_THR.296    | 2.98 | 2.19 | 19.74 |
| 5VXK.PDB | O, A_LEU.294   | N, A_VAL.298   | H, A_VAL.298    | 2.93 | 2.09 | 11.47 |
| 5VXK.PDB | O, A_GLN.295   | N, A_GLN.299   | H, A_GLN.299    | 2.92 | 2.19 | 26.68 |
| 5VXK.PDB | O, A_THR.296   | N, A_LYS.300   | H, A_LYS.300    | 2.95 | 2.12 | 13.38 |
| 5VXK.PDB | O, A_LEU.297   | N, A_TYR.301   | H, A_TYR.301    | 2.89 | 2.06 | 12.10 |
| 5VXK.PDB | O, A_VAL.298   | N, A_SER.302   | H, A_SER.302    | 2.77 | 1.95 | 14.37 |
| 5VXK.PDB | O, A_GLN.299   | N, A_ASN.303   | H, A_ASN.303    | 2.69 | 1.84 | 7.73  |
| 5VXK.PDB | O, A_ALA.304   | N, A_PHE.308   | H, A_PHE.308    | 2.91 | 2.07 | 9.74  |
| 5VXK.PDB | O, A_ASN.305   | N, A_ASP.309   | H, A_ASP.309    | 2.69 | 1.83 | 5.55  |
| 5VXK.PDB | O, A_SER.306   | N, A_ASN.310   | H, A_ASN.310    | 2.96 | 2.11 | 5.89  |
| 5VXK.PDB | O, A_PHE.308   | N, A_VAL.312   | H, A_VAL.312    | 2.89 | 2.04 | 4.79  |
| 5VXK.PDB | O, A_ASP.309   | N, A_LYS.313   | H, A_LYS.313    | 2.99 | 2.14 | 4.76  |
| 5VXK.PDB | O, A_LEU.311   | N, A_LEU.315   | H, A_LEU.315    | 2.77 | 1.95 | 15.34 |
| 5VXK.PDB | O, A_VAL.312   | N, A_SER.316   | H, A_SER.316    | 2.86 | 2.04 | 13.60 |
| 5VXK.PDB | O, A_VAL.314   | N, A_THR.318   | H, A_THR.318    | 2.93 | 2.12 | 16.50 |
| 5VXK.PDB | O, A_LEU.315   | N, A_ILE.319   | H, A_ILE.319    | 2.77 | 1.92 | 6.38  |
| 5VXK.PDB | O, A_SER.316   | N, A_SER.320   | H, A_SER.320    | 2.83 | 1.98 | 7.77  |
| 5VXK.PDB | O, A_SER.316   | OG, A_SER.320  | HG, A_SER.320   | 2.92 | 2.19 | 24.37 |
| 5VXK.PDB | O, A_SER.317   | OG, A_SER.321  | HG, A_SER.321   | 2.91 | 2.13 | 18.92 |

Table 1721: 5VXK-specific side chain and main chain hydrogen bonding analysis. In this table, a PDB file is specified with a four-letter PDB ID, except that the names of the PDB files corresponding to the single NMR structural model split from the NMR ensemble is specified with a four-letter PDB ID in addition to a hyphen followed by the single NMR structural model numeric ID, the residue naming scheme is **Chain ID\_residue name\_residue number**,  $\angle ADH$  represents the angle formed by acceptor (A), donor (D) and hydrogen (H) ( $\angle ADH$ ).

| PDB      | Acceptor (A)   | Donor (D)      | Hydrogen (H)    | D-A (Å) | H-A (Å) | $\angle ADH(^{\circ})$ |
|----------|----------------|----------------|-----------------|---------|---------|------------------------|
| 5VXL.PDB | O, A_SER_42    | N, A_MET_46    | H, A_MET_46     | 2.87    | 2.01    | 3.50                   |
| 5VXL.PDB | O, A_LEU_44    | N, A_ASN_48    | H, A_ASN_48     | 2.76    | 1.92    | 10.16                  |
| 5VXL.PDB | O, A_THR_45    | N, A_ASP_49    | H, A_ASP_49     | 2.99    | 2.15    | 12.53                  |
| 5VXL.PDB | O, A_MET_46    | OG1, A_THR_50  | HG1, A_THR_50   | 2.62    | 1.82    | 14.28                  |
| 5VXL.PDB | O, A_LEU_47    | N, A_LEU_51    | H, A_LEU_51     | 2.90    | 2.10    | 17.57                  |
| 5VXL.PDB | O, A_HIS_52    | N, A_THR_56    | H, A_THR_56     | 2.90    | 2.15    | 24.51                  |
| 5VXL.PDB | O, A_ILE_54    | N, A_ASN_58    | H, A_ASN_58     | 2.71    | 1.88    | 13.56                  |
| 5VXL.PDB | OD1, A_ASP_309 | ND2, A_ASN_58  | HD22, A_ASN_58  | 2.92    | 2.09    | 13.70                  |
| 5VXL.PDB | O, A_THR_57    | N, A_LEU_61    | H, A_LEU_61     | 2.89    | 2.12    | 22.63                  |
| 5VXL.PDB | O, A_THR_73    | N, A_GLU_77    | H, A_GLU_77     | 2.82    | 2.00    | 14.04                  |
| 5VXL.PDB | O, A_SER_74    | N, A_ILE_78    | H, A_ILE_78     | 2.96    | 2.13    | 11.95                  |
| 5VXL.PDB | OE1, A_GLU_154 | OG, A_SER_82   | HG, A_SER_82    | 2.52    | 1.77    | 21.68                  |
| 5VXL.PDB | O, A_ALA_79    | N, A_SER_83    | H, A_SER_83     | 2.92    | 2.10    | 15.30                  |
| 5VXL.PDB | O, A_LEU_80    | N, A_GLN_84    | H, A_GLN_84     | 2.91    | 2.12    | 19.31                  |
| 5VXL.PDB | OD2, A_ASP_88  | NE2, A_GLN_84  | HE21, A_GLN_84  | 2.89    | 2.16    | 27.92                  |
| 5VXL.PDB | O, A_HIS_81    | N, A_ILE_85    | H, A_ILE_85     | 2.85    | 2.01    | 10.10                  |
| 5VXL.PDB | O, A_SER_82    | N, A_SER_86    | H, A_SER_86     | 2.94    | 2.14    | 18.49                  |
| 5VXL.PDB | O, A_SER_82    | OG, A_SER_86   | HG, A_SER_86    | 2.79    | 1.98    | 12.76                  |
| 5VXL.PDB | O, A_GLN_84    | N, A_ASP_88    | H, A_ASP_88     | 2.93    | 2.10    | 13.48                  |
| 5VXL.PDB | O, A_ILE_85    | N, A_VAL_89    | H, A_VAL_89     | 2.78    | 1.95    | 11.84                  |
| 5VXL.PDB | O, A_ASP_88    | N, A_SER_92    | H, A_SER_92     | 2.92    | 2.08    | 10.89                  |
| 5VXL.PDB | O, A_ASP_88    | OG, A_SER_92   | HG, A_SER_92    | 2.87    | 2.05    | 11.00                  |
| 5VXL.PDB | O, A_VAL_89    | N, A_ALA_93    | H, A_ALA_93     | 2.95    | 2.11    | 11.37                  |
| 5VXL.PDB | O, A_LYS_91    | N, A_LEU_95    | H, A_LEU_95     | 2.97    | 2.17    | 17.92                  |
| 5VXL.PDB | O, A_SER_92    | N, A_LEU_96    | H, A_LEU_96     | 2.63    | 1.78    | 7.72                   |
| 5VXL.PDB | O, A_ALA_93    | N, A_ASP_97    | H, A_ASP_97     | 2.67    | 1.89    | 19.80                  |
| 5VXL.PDB | O, A_SER_100   | N, A_GLU_103   | H, A_GLU_103    | 2.79    | 2.00    | 19.85                  |
| 5VXL.PDB | O, A_PRO_118   | N, A_ALA_121   | H, A_ALA_121    | 2.84    | 2.03    | 15.32                  |
| 5VXL.PDB | O, A_TYR_104   | NE1, A_TRP_135 | HE1, A_TRP_135  | 2.90    | 2.05    | 6.79                   |
| 5VXL.PDB | O, A_GLU_133   | N, A_LYS_137   | H, A_LYS_137    | 2.91    | 2.15    | 23.30                  |
| 5VXL.PDB | O, A_ALA_136   | ND2, A_ASN_140 | HD22, A_ASN_140 | 2.52    | 1.69    | 13.57                  |
| 5VXL.PDB | O, A_ILE_138   | N, A_ILE_142   | H, A_ILE_142    | 2.68    | 1.84    | 10.96                  |
| 5VXL.PDB | O, A_ASN_140   | N, A_ASP_144   | H, A_ASP_144    | 2.65    | 1.82    | 12.29                  |
| 5VXL.PDB | O, A_SER_141   | N, A_ILE_145   | H, A_ILE_145    | 2.85    | 2.02    | 11.93                  |
| 5VXL.PDB | O, A_ILE_145   | N, A_LEU_150   | H, A_LEU_150    | 2.86    | 2.08    | 21.09                  |
| 5VXL.PDB | O, A_ASN_146   | N, A_LYS_151   | H, A_LYS_151    | 2.72    | 1.87    | 8.33                   |
| 5VXL.PDB | O, A_TYR_153   | N, A_VAL_157   | H, A_VAL_157    | 2.99    | 2.14    | 9.15                   |
| 5VXL.PDB | O, A_HIS_155   | OG, A_SER_158  | HG, A_SER_158   | 2.93    | 2.15    | 19.18                  |
| 5VXL.PDB | O, A_HIS_155   | N, A_SER_159   | H, A_SER_159    | 2.66    | 1.80    | 3.85                   |
| 5VXL.PDB | O, A_HIS_155   | OG, A_SER_159  | HG, A_SER_159   | 2.90    | 2.17    | 24.99                  |
| 5VXL.PDB | O, A_ALA_156   | N, A_TYR_160   | H, A_TYR_160    | 2.93    | 2.09    | 8.00                   |
| 5VXL.PDB | O, A_VAL_157   | N, A_THR_161   | H, A_THR_161    | 2.60    | 1.78    | 15.33                  |
| 5VXL.PDB | O, A_VAL_157   | OG1, A_THR_161 | HG1, A_THR_161  | 2.46    | 1.70    | 20.64                  |
| 5VXL.PDB | O, A_SER_158   | N, A_GLN_162   | H, A_GLN_162    | 2.84    | 1.98    | 1.63                   |
| 5VXL.PDB | O, A_TYR_160   | N, A_TYR_164   | H, A_TYR_164    | 2.84    | 2.00    | 8.81                   |
| 5VXL.PDB | O, A_THR_161   | N, A_GLN_165   | H, A_GLN_165    | 2.72    | 1.90    | 14.74                  |
| 5VXL.PDB | O, A_TYR_164   | N, A_SER_168   | H, A_SER_168    | 2.87    | 2.04    | 11.91                  |
| 5VXL.PDB | O, A_TYR_164   | OG, A_SER_168  | HG, A_SER_168   | 2.96    | 2.15    | 13.58                  |
| 5VXL.PDB | O, A_PHE_167   | N, A_LEU_171   | H, A_LEU_171    | 2.92    | 2.16    | 23.19                  |
| 5VXL.PDB | O, A_SER_168   | N, A_SER_172   | H, A_SER_172    | 2.92    | 2.12    | 18.79                  |
| 5VXL.PDB | O, A_LYS_189   | N, A_SER_179   | H, A_SER_179    | 2.93    | 2.11    | 16.24                  |
| 5VXL.PDB | O, A_SER_187   | N, A_GLY_181   | H, A_GLY_181    | 2.88    | 2.06    | 15.19                  |
| 5VXL.PDB | O, A_SER_179   | N, A_LYS_189   | H, A_LYS_189    | 2.63    | 1.86    | 21.36                  |
| 5VXL.PDB | O, A_VAL_269   | N, A_LEU_190   | H, A_LEU_190    | 2.66    | 1.92    | 26.28                  |
| 5VXL.PDB | O, A_TRP_177   | N, A_GLN_191   | H, A_GLN_191    | 2.89    | 2.06    | 12.45                  |
| 5VXL.PDB | O, A_VAL_192   | N, A_LYS_196   | H, A_LYS_196    | 2.82    | 1.98    | 9.06                   |
| 5VXL.PDB | O, A_ASN_193   | N, A_LYS_197   | H, A_LYS_197    | 2.99    | 2.13    | 1.38                   |

|          |                |                |                 |      |      |       |
|----------|----------------|----------------|-----------------|------|------|-------|
| 5VXL.PDB | O, A_LEU_195   | N, A_LEU_199   | H, A_LEU_199    | 2.96 | 2.13 | 13.84 |
| 5VXL.PDB | O, A_LYS_196   | N, A_GLU_200   | H, A_GLU_200    | 2.68 | 1.83 | 8.42  |
| 5VXL.PDB | O, A_LYS_197   | N, A_GLU_201   | H, A_GLU_201    | 2.99 | 2.18 | 15.98 |
| 5VXL.PDB | OD1, A ASP_254 | NZ, A_LYS_203  | HZ3, A_LYS_203  | 2.55 | 1.71 | 15.49 |
| 5VXL.PDB | O, A_GLU_201   | N, A_LYS_205   | H, A_LYS_205    | 2.94 | 2.16 | 21.06 |
| 5VXL.PDB | OD2, B ASP_52  | NZ, A_LYS_205  | HZ1, A_LYS_205  | 3.00 | 2.13 | 10.69 |
| 5VXL.PDB | OD2, A ASP_166 | OH, A_TYR_206  | HH, A_TYR_206   | 2.43 | 1.61 | 11.33 |
| 5VXL.PDB | O, A_SER_219   | N, A_ALA_223   | H, A_ALA_223    | 2.65 | 1.81 | 10.36 |
| 5VXL.PDB | O, A_GLN_220   | N, A_ASN_224   | H, A_ASN_224    | 2.69 | 1.83 | 3.86  |
| 5VXL.PDB | OE1, A_GLN_148 | NE1, A_TRP_226 | HE1, A_TRP_226  | 2.87 | 2.02 | 9.28  |
| 5VXL.PDB | O, A_ALA_223   | N, A_LEU_227   | H, A_LEU_227    | 2.81 | 2.00 | 17.07 |
| 5VXL.PDB | O, A_TRP_226   | N, A_LEU_230   | H, A_LEU_230    | 2.94 | 2.11 | 10.97 |
| 5VXL.PDB | O, A_LEU_227   | N, A_GLY_231   | H, A_GLY_231    | 2.69 | 1.85 | 9.90  |
| 5VXL.PDB | O, A_GLY_243   | N, A_LYS_240   | H, A_LYS_240    | 2.98 | 2.14 | 10.92 |
| 5VXL.PDB | O, A_VAL_218   | N, A_TYR_244   | H, A_TYR_244    | 2.96 | 2.11 | 6.92  |
| 5VXL.PDB | O, A_SER_238   | N, A_VAL_245   | H, A_VAL_245    | 2.99 | 2.26 | 27.20 |
| 5VXL.PDB | O, A_TYR_212   | N, A_VAL_246   | H, A_VAL_246    | 2.52 | 1.74 | 20.61 |
| 5VXL.PDB | O, A_ILE_234   | N, A_ASN_249   | H, A_ASN_249    | 2.93 | 2.09 | 9.83  |
| 5VXL.PDB | OD1, A_ASN_249 | N, A_THR_251   | H, A_THR_251    | 2.75 | 1.91 | 9.14  |
| 5VXL.PDB | O, A_MET_250   | N, A ASP_254   | H, A ASP_254    | 2.85 | 2.02 | 11.68 |
| 5VXL.PDB | O, A_THR_251   | N, A_ASN_255   | H, A_ASN_255    | 2.77 | 1.94 | 13.53 |
| 5VXL.PDB | OE2, A_GLU_286 | ND2, A_ASN_255 | HD22, A_ASN_255 | 2.74 | 1.94 | 17.54 |
| 5VXL.PDB | O, A_ILE_253   | N, A_LEU_257   | H, A_LEU_257    | 2.98 | 2.15 | 14.50 |
| 5VXL.PDB | O, A ASP_254   | N, A_LYS_258   | H, A_LYS_258    | 2.99 | 2.17 | 14.91 |
| 5VXL.PDB | O, A_ASN_255   | N, A_SER_259   | H, A_SER_259    | 2.97 | 2.14 | 13.88 |
| 5VXL.PDB | O, A_MET_256   | N, A_LEU_260   | H, A_LEU_260    | 2.88 | 2.07 | 16.61 |
| 5VXL.PDB | O, A_LEU_257   | N, A ASP_261   | H, A ASP_261    | 2.97 | 2.13 | 9.61  |
| 5VXL.PDB | O, A_LEU_260   | N, A_LEU_263   | H, A_LEU_263    | 2.99 | 2.27 | 28.32 |
| 5VXL.PDB | O, A_LEU_190   | N, A_VAL_269   | H, A_VAL_269    | 2.90 | 2.08 | 13.99 |
| 5VXL.PDB | O, A_VAL_188   | N, A_LEU_271   | H, A_LEU_271    | 2.85 | 2.02 | 11.38 |
| 5VXL.PDB | OD1, A ASP_272 | N, A_ASN_273   | H, A_ASN_273    | 2.65 | 1.95 | 29.16 |
| 5VXL.PDB | O, A_TYR_276   | N, A_ASN_280   | H, A_ASN_280    | 2.86 | 2.01 | 4.96  |
| 5VXL.PDB | O, A_TRP_279   | N, A_PHE_283   | H, A_PHE_283    | 2.89 | 2.08 | 16.09 |
| 5VXL.PDB | O, A_ASN_280   | N, A_SER_284   | H, A_SER_284    | 2.73 | 1.94 | 20.02 |
| 5VXL.PDB | O, A_ASN_280   | OG, A_SER_284  | HG, A_SER_284   | 2.71 | 1.94 | 20.16 |
| 5VXL.PDB | O, A_ALA_281   | N, A_ALA_285   | H, A_ALA_285    | 2.78 | 2.01 | 22.25 |
| 5VXL.PDB | O, A_ALA_285   | N, A_THR_289   | H, A_THR_289    | 2.98 | 2.16 | 14.81 |
| 5VXL.PDB | O, A ASP_287   | N, A_LYS_291   | H, A_LYS_291    | 2.89 | 2.06 | 14.03 |
| 5VXL.PDB | O, A_GLU_288   | N, A_ASN_292   | H, A_ASN_292    | 2.65 | 1.85 | 17.95 |
| 5VXL.PDB | O, A_THR_289   | N, A_ASN_293   | H, A_ASN_293    | 2.72 | 1.88 | 9.66  |
| 5VXL.PDB | O, A_MET_290   | N, A_LEU_294   | H, A_LEU_294    | 2.92 | 2.12 | 18.98 |
| 5VXL.PDB | O, A_ASN_292   | N, A_THR_296   | H, A_THR_296    | 2.80 | 2.02 | 20.58 |
| 5VXL.PDB | O, A_ASN_292   | OG1, A_THR_296 | HG1, A_THR_296  | 2.92 | 2.11 | 12.62 |
| 5VXL.PDB | O, A_LEU_294   | N, A_VAL_298   | H, A_VAL_298    | 2.97 | 2.14 | 12.75 |
| 5VXL.PDB | O, A_THR_296   | N, A_LYS_300   | H, A_LYS_300    | 2.96 | 2.11 | 7.04  |
| 5VXL.PDB | O, A_LEU_297   | N, A_TYR_301   | H, A_TYR_301    | 2.75 | 2.04 | 28.78 |
| 5VXL.PDB | O, A_VAL_298   | N, A_SER_302   | H, A_SER_302    | 2.75 | 1.91 | 8.45  |
| 5VXL.PDB | O, A_GLN_299   | N, A_ASN_303   | H, A_ASN_303    | 2.84 | 2.01 | 12.17 |
| 5VXL.PDB | O, A_TYR_301   | N, A_ASN_305   | H, A_ASN_305    | 2.82 | 2.10 | 28.03 |
| 5VXL.PDB | O, A_SER_302   | N, A_SER_306   | H, A_SER_306    | 2.92 | 2.14 | 21.23 |
| 5VXL.PDB | O, A_ASN_303   | N, A_ILE_307   | H, A_ILE_307    | 2.92 | 2.13 | 18.78 |
| 5VXL.PDB | O, A_ASN_305   | N, A ASP_309   | H, A ASP_309    | 2.71 | 1.93 | 21.31 |
| 5VXL.PDB | O, A_ILE_307   | N, A_LEU_311   | H, A_LEU_311    | 2.89 | 2.07 | 14.43 |
| 5VXL.PDB | O, A ASP_309   | N, A_LYS_313   | H, A_LYS_313    | 2.80 | 1.99 | 16.36 |
| 5VXL.PDB | O, A_ASN_310   | N, A_VAL_314   | H, A_VAL_314    | 2.86 | 2.01 | 5.31  |
| 5VXL.PDB | O, A_VAL_312   | N, A_SER_316   | H, A_SER_316    | 2.63 | 1.77 | 5.33  |
| 5VXL.PDB | O, A_VAL_314   | OG1, A_THR_318 | HG1, A_THR_318  | 2.55 | 1.72 | 7.64  |
| 5VXL.PDB | O, B_SER_25    | N, B_GLN_3     | H, B_GLN_3      | 2.70 | 1.85 | 6.65  |

|          |                |                |                 |      |      |       |
|----------|----------------|----------------|-----------------|------|------|-------|
| 5VXL.PDB | O, B_SER_21    | N, B_SER_7     | H, B_SER_7      | 2.62 | 1.81 | 16.40 |
| 5VXL.PDB | O, B_THR_114   | N, B_VAL_12    | H, B_VAL_12     | 2.86 | 2.04 | 13.69 |
| 5VXL.PDB | O, B_LEU_87    | N, B_GLY_15    | H, B_GLY_15     | 2.66 | 1.82 | 8.14  |
| 5VXL.PDB | O, B_GLN_13    | N, B_GLY_16    | H, B_GLY_16     | 2.79 | 1.96 | 12.54 |
| 5VXL.PDB | O, B_MET_84    | N, B_LEU_18    | H, B_LEU_18     | 2.84 | 2.08 | 22.47 |
| 5VXL.PDB | O, B_LEU_18    | NH1, B_ARG_19  | HH11, B_ARG_19  | 2.76 | 1.99 | 23.14 |
| 5VXL.PDB | O, B_SER_7     | N, B_SER_21    | H, B_SER_21     | 2.79 | 1.97 | 15.64 |
| 5VXL.PDB | O, B_VAL_80    | N, B_CYS_22    | H, B_CYS_22     | 2.67 | 1.84 | 12.31 |
| 5VXL.PDB | O, B_GLN_3     | N, B_SER_25    | H, B_SER_25     | 2.94 | 2.16 | 21.35 |
| 5VXL.PDB | O, B_ILE_51    | N, B_MET_34    | H, B_MET_34     | 2.85 | 2.13 | 28.16 |
| 5VXL.PDB | O, B_ASN_98    | N, B_GLY_35    | H, B_GLY_35     | 2.93 | 2.19 | 27.03 |
| 5VXL.PDB | O, B_TYR_96    | N, B_TYR_37    | H, B_TYR_37     | 2.76 | 1.92 | 10.99 |
| 5VXL.PDB | O, B_GLU_46    | N, B_ARG_38    | H, B_ARG_38     | 2.91 | 2.11 | 17.69 |
| 5VXL.PDB | OD1, B_ASP_91  | NH1, B_ARG_38  | HH12, B_ARG_38  | 2.97 | 2.23 | 26.01 |
| 5VXL.PDB | O, B_MET_34    | N, B_ILE_51    | H, B_ILE_51     | 2.82 | 1.98 | 9.96  |
| 5VXL.PDB | O, B_ILE_30    | N, B_TYR_54    | H, B_TYR_54     | 2.87 | 2.10 | 22.14 |
| 5VXL.PDB | O, A_ALA_198   | OH, B_TYR_54   | HH, B_TYR_54    | 2.38 | 1.67 | 27.03 |
| 5VXL.PDB | OD1, A_ASP_166 | N, B_SER_55    | H, B_SER_55     | 2.91 | 2.18 | 28.04 |
| 5VXL.PDB | OD1, A_ASP_166 | OG, B_SER_55   | HG, B_SER_55    | 2.56 | 1.73 | 4.68  |
| 5VXL.PDB | O, B_ALA_62    | N, B_VAL_65    | H, B_VAL_65     | 2.93 | 2.21 | 29.05 |
| 5VXL.PDB | OD2, B_ASP_91  | NH1, B_ARG_68  | HH12, B_ARG_68  | 2.83 | 2.06 | 22.74 |
| 5VXL.PDB | O, B_SER_64    | NH2, B_ARG_68  | HH21, B_ARG_68  | 2.89 | 2.07 | 15.16 |
| 5VXL.PDB | OD1, B_ASN_75  | NE, B_ARG_73   | HE, B_ARG_73    | 2.98 | 2.26 | 28.00 |
| 5VXL.PDB | O, B_TYR_32    | NH1, B_ARG_73  | HH12, B_ARG_73  | 2.99 | 2.21 | 21.42 |
| 5VXL.PDB | O, B_ARG_79    | N, B_ASP_74    | H, B_ASP_74     | 2.83 | 1.98 | 9.00  |
| 5VXL.PDB | OH, B_TYR_81   | NE, B_ARG_79   | HE, B_ARG_79    | 2.96 | 2.14 | 13.15 |
| 5VXL.PDB | O, B_CYS_22    | N, B_VAL_80    | H, B_VAL_80     | 2.66 | 1.84 | 14.02 |
| 5VXL.PDB | O, B_SER_72    | N, B_TYR_81    | H, B_TYR_81     | 2.82 | 1.97 | 3.12  |
| 5VXL.PDB | O, B_LEU_20    | N, B_LEU_82    | H, B_LEU_82     | 2.80 | 2.00 | 19.11 |
| 5VXL.PDB | O, B_LEU_18    | N, B_MET_84    | H, B_MET_84     | 2.92 | 2.06 | 5.88  |
| 5VXL.PDB | O, B_ARG_68    | N, B_ASN_85    | H, B_ASN_85     | 2.99 | 2.16 | 13.78 |
| 5VXL.PDB | O, B_GLY_16    | N, B_LEU_87    | H, B_LEU_87     | 2.89 | 2.07 | 14.28 |
| 5VXL.PDB | OD2, B_ASP_91  | N, B_LYS_88    | H, B_LYS_88     | 2.92 | 2.07 | 3.13  |
| 5VXL.PDB | O, B_LYS_88    | N, B_ASP_91    | H, B_ASP_91     | 2.90 | 2.09 | 15.76 |
| 5VXL.PDB | O, B_PRO_89    | N, B_THR_92    | H, B_THR_92     | 2.97 | 2.23 | 25.58 |
| 5VXL.PDB | O, B_VAL_113   | N, B_ALA_93    | H, B_ALA_93     | 2.99 | 2.24 | 25.85 |
| 5VXL.PDB | O, B_THR_111   | N, B_TYR_95    | H, B_TYR_95     | 2.79 | 2.00 | 19.66 |
| 5VXL.PDB | O, B_ASP_91    | OH, B_TYR_95   | HH, B_TYR_95    | 2.70 | 1.86 | 0.59  |
| 5VXL.PDB | O, B_TYR_37    | N, B_TYR_96    | H, B_TYR_96     | 2.76 | 2.02 | 25.56 |
| 5VXL.PDB | OE2, B_GLU_6   | N, B_CYS_97    | H, B_CYS_97     | 2.88 | 2.07 | 15.37 |
| 5VXL.PDB | O, B_GLY_35    | N, B_ASN_98    | H, B_ASN_98     | 2.73 | 1.91 | 13.08 |
| 5VXL.PDB | O, B_TYR_106   | N, B_ALA_99    | H, B_ALA_99     | 2.92 | 2.09 | 12.87 |
| 5VXL.PDB | O, B_ASN_33    | N, B_ASN_100   | H, B_ASN_100    | 2.79 | 2.01 | 20.69 |
| 5VXL.PDB | O, B_ASN_104   | N, B_LEU_101   | H, B_LEU_101    | 2.93 | 2.12 | 16.88 |
| 5VXL.PDB | OE2, A_GLU_201 | NH2, B_ARG_102 | HH22, B_ARG_102 | 2.87 | 2.08 | 20.03 |
| 5VXL.PDB | O, B_LEU_101   | N, B_ASN_104   | H, B_ASN_104    | 2.99 | 2.18 | 16.70 |
| 5VXL.PDB | O, B_ALA_99    | N, B_TYR_106   | H, B_TYR_106    | 2.85 | 2.08 | 22.40 |
| 5VXL.PDB | OE1, B_GLU_6   | N, B_GLY_110   | H, B_GLY_110    | 2.56 | 1.79 | 21.05 |
| 5VXL.PDB | O, B_ALA_93    | N, B_VAL_113   | H, B_VAL_113    | 2.86 | 2.05 | 16.79 |

---

Table 1722: 5VXL-specific side chain and main chain hydrogen bonding analysis. In this table, a PDB file is specified with a four-letter PDB ID, except that the names of the PDB files corresponding to the single NMR structural model split from the NMR ensemble is specified with a four-letter PDB ID in addition to a hyphen followed by the single NMR structural model numeric ID, the residue naming scheme is **Chain ID\_residue name\_residue number**,  $\angle ADH$  represents the angle formed by acceptor (A), donor (D) and hydrogen (H) ( $\angle ADH$ ).

| PDB      | Acceptor (A)   | Donor (D)      | Hydrogen (H)    | D-A (Å) | H-A (Å) | $\angle ADH(^{\circ})$ |
|----------|----------------|----------------|-----------------|---------|---------|------------------------|
| 5VXM.PDB | O, A.SER.43    | N, A.LEU.47    | H, A.LEU.47     | 2.98    | 2.17    | 15.99                  |
| 5VXM.PDB | O, A.THR.45    | N, A.ASP.49    | H, A.ASP.49     | 2.87    | 2.12    | 24.84                  |
| 5VXM.PDB | O, A.LEU.47    | N, A.LEU.51    | H, A.LEU.51     | 2.78    | 1.93    | 8.20                   |
| 5VXM.PDB | O, A.ASN.48    | N, A.HIS.52    | H, A.HIS.52     | 2.97    | 2.22    | 25.09                  |
| 5VXM.PDB | O, A.HIS.52    | OG1, A.THR.56  | HG1, A.THR.56   | 2.93    | 2.14    | 17.08                  |
| 5VXM.PDB | O, A.ILE.54    | N, A.ASN.58    | H, A.ASN.58     | 2.67    | 1.83    | 11.82                  |
| 5VXM.PDB | OD1, A.ASP.309 | ND2, A.ASN.58  | HD22, A.ASN.58  | 2.74    | 1.89    | 5.63                   |
| 5VXM.PDB | O, A.ARG.55    | N, A.GLN.59    | H, A.GLN.59     | 2.87    | 2.11    | 23.42                  |
| 5VXM.PDB | O, A.THR.57    | N, A.LEU.61    | H, A.LEU.61     | 2.81    | 1.96    | 8.36                   |
| 5VXM.PDB | O, A.ASN.58    | N, A.LYS.62    | H, A.LYS.62     | 2.92    | 2.12    | 18.24                  |
| 5VXM.PDB | O, A.LYS.63    | OG, A.SER.66   | HG, A.SER.66    | 2.80    | 2.08    | 26.74                  |
| 5VXM.PDB | O, A.THR.71    | N, A.LEU.75    | H, A.LEU.75     | 2.95    | 2.16    | 20.11                  |
| 5VXM.PDB | O, A.SER.74    | N, A.ILE.78    | H, A.ILE.78     | 2.99    | 2.18    | 16.60                  |
| 5VXM.PDB | O, A.LEU.75    | N, A.ALA.79    | H, A.ALA.79     | 2.89    | 2.06    | 11.29                  |
| 5VXM.PDB | O, A.ILE.78    | N, A.SER.82    | H, A.SER.82     | 2.98    | 2.13    | 10.08                  |
| 5VXM.PDB | O, A.ILE.78    | OG, A.SER.82   | HG, A.SER.82    | 2.83    | 2.02    | 14.46                  |
| 5VXM.PDB | O, A.ALA.79    | N, A.SER.83    | H, A.SER.83     | 2.84    | 2.05    | 18.67                  |
| 5VXM.PDB | O, A.LEU.80    | N, A.GLN.84    | H, A.GLN.84     | 2.64    | 1.80    | 8.82                   |
| 5VXM.PDB | OD1, A.ASP.88  | NE2, A.GLN.84  | HE21, A.GLN.84  | 2.60    | 1.75    | 9.62                   |
| 5VXM.PDB | O, A.HIS.81    | N, A.ILE.85    | H, A.ILE.85     | 2.65    | 1.82    | 12.85                  |
| 5VXM.PDB | O, A.SER.82    | OG, A.SER.86   | HG, A.SER.86    | 2.97    | 2.14    | 6.66                   |
| 5VXM.PDB | O, A.ILE.85    | N, A.VAL.89    | H, A.VAL.89     | 2.86    | 2.05    | 15.94                  |
| 5VXM.PDB | O, A.MET.87    | N, A.LYS.91    | H, A.LYS.91     | 2.99    | 2.19    | 17.82                  |
| 5VXM.PDB | O, A.ASP.88    | N, A.SER.92    | H, A.SER.92     | 2.77    | 1.94    | 12.57                  |
| 5VXM.PDB | O, A.ILE.145   | N, A.LEU.150   | H, A.LEU.150    | 2.92    | 2.12    | 18.38                  |
| 5VXM.PDB | O, A.ASN.146   | N, A.LYS.151   | H, A.LYS.151    | 2.86    | 2.02    | 9.54                   |
| 5VXM.PDB | O, A.LEU.150   | N, A.GLU.154   | H, A.GLU.154    | 2.97    | 2.16    | 16.91                  |
| 5VXM.PDB | O, A.VAL.152   | N, A.ALA.156   | H, A.ALA.156    | 2.98    | 2.13    | 8.33                   |
| 5VXM.PDB | O, A.TYR.153   | N, A.VAL.157   | H, A.VAL.157    | 2.93    | 2.11    | 15.35                  |
| 5VXM.PDB | O, A.GLU.154   | N, A.SER.158   | H, A.SER.158    | 2.98    | 2.18    | 17.97                  |
| 5VXM.PDB | O, A.HIS.155   | N, A.SER.159   | H, A.SER.159    | 2.95    | 2.10    | 8.74                   |
| 5VXM.PDB | O, A.VAL.157   | N, A.THR.161   | H, A.THR.161    | 2.89    | 2.06    | 13.47                  |
| 5VXM.PDB | O, A.VAL.157   | OG1, A.THR.161 | HG1, A.THR.161  | 2.43    | 1.69    | 23.26                  |
| 5VXM.PDB | O, A.SER.158   | N, A.GLN.162   | H, A.GLN.162    | 2.97    | 2.13    | 9.45                   |
| 5VXM.PDB | O, A.SER.159   | N, A.MET.163   | H, A.MET.163    | 2.98    | 2.14    | 9.28                   |
| 5VXM.PDB | O, A.TYR.160   | N, A.TYR.164   | H, A.TYR.164    | 2.84    | 2.00    | 11.12                  |
| 5VXM.PDB | OD1, A.ASP.287 | OH, A.TYR.164  | HH, A.TYR.164   | 2.66    | 1.84    | 11.86                  |
| 5VXM.PDB | O, A.THR.161   | N, A.GLN.165   | H, A.GLN.165    | 2.81    | 1.96    | 8.47                   |
| 5VXM.PDB | O, A.LEU.70    | NE2, A.GLN.165 | HE21, A.GLN.165 | 2.72    | 1.96    | 23.75                  |
| 5VXM.PDB | O, A.GLN.162   | N, A.ASP.166   | H, A.ASP.166    | 2.96    | 2.12    | 10.69                  |
| 5VXM.PDB | O, A.MET.163   | N, A.PHE.167   | H, A.PHE.167    | 2.81    | 2.01    | 18.58                  |
| 5VXM.PDB | O, A.TYR.164   | N, A.SER.168   | H, A.SER.168    | 2.79    | 2.00    | 19.99                  |
| 5VXM.PDB | O, A.TYR.164   | OG, A.SER.168  | HG, A.SER.168   | 2.87    | 2.02    | 0.77                   |
| 5VXM.PDB | O, A.SER.168   | N, A.SER.172   | H, A.SER.172    | 2.86    | 2.05    | 16.01                  |
| 5VXM.PDB | O, A.LEU.171   | N, A.LEU.174   | H, A.LEU.174    | 2.94    | 2.11    | 13.11                  |
| 5VXM.PDB | O, A.LEU.174   | N, A.TRP.177   | H, A.TRP.177    | 2.78    | 1.95    | 10.80                  |
| 5VXM.PDB | OE2, B.GLU.111 | NE1, A.TRP.177 | HE1, A.TRP.177  | 2.76    | 1.97    | 19.61                  |
| 5VXM.PDB | O, A.SER.187   | N, A.GLY.181   | H, A.GLY.181    | 2.97    | 2.17    | 18.19                  |
| 5VXM.PDB | O, A.LEU.271   | N, A.VAL.188   | H, A.VAL.188    | 2.81    | 1.98    | 12.86                  |
| 5VXM.PDB | O, A.SER.179   | N, A.LYS.189   | H, A.LYS.189    | 2.57    | 1.73    | 10.12                  |
| 5VXM.PDB | O, A.VAL.269   | N, A.LEU.190   | H, A.LEU.190    | 2.87    | 2.05    | 15.09                  |
| 5VXM.PDB | O, A.TRP.177   | N, A.GLN.191   | H, A.GLN.191    | 2.93    | 2.13    | 18.42                  |
| 5VXM.PDB | O, A.VAL.192   | N, A.LYS.196   | H, A.LYS.196    | 2.81    | 1.97    | 10.63                  |
| 5VXM.PDB | O, A.ASN.193   | N, A.LYS.197   | H, A.LYS.197    | 2.96    | 2.10    | 4.46                   |
| 5VXM.PDB | O, A.LYS.196   | N, A.GLU.200   | H, A.GLU.200    | 2.84    | 2.04    | 17.32                  |
| 5VXM.PDB | O, A.LEU.199   | N, A.LYS.203   | H, A.LYS.203    | 2.98    | 2.17    | 15.17                  |
| 5VXM.PDB | O, A.GLU.200   | N, A.GLU.204   | H, A.GLU.204    | 2.89    | 2.04    | 8.12                   |

|          |                |                |                 |      |      |       |
|----------|----------------|----------------|-----------------|------|------|-------|
| 5VXM.PDB | O, A_GLU_201   | N, A_LYS_205   | H, A_LYS_205    | 2.81 | 2.04 | 22.11 |
| 5VXM.PDB | OD2, A_ASP_166 | NZ, A_LYS_205  | HZ3, A_LYS_205  | 2.79 | 1.92 | 8.41  |
| 5VXM.PDB | OD2, A_ASP_166 | OH, A_TYR_206  | HH, A_TYR_206   | 2.53 | 1.73 | 14.26 |
| 5VXM.PDB | O, A_TYR_244   | N, A_VAL_218   | H, A_VAL_218    | 2.98 | 2.15 | 13.66 |
| 5VXM.PDB | O, A_SER_219   | N, A_ALA_223   | H, A_ALA_223    | 2.76 | 1.93 | 12.38 |
| 5VXM.PDB | O, A_GLN_220   | ND2, A_ASN_224 | HD22, A_ASN_224 | 2.78 | 1.96 | 13.87 |
| 5VXM.PDB | O, A_GLU_221   | N, A_LYS_225   | H, A_LYS_225    | 2.92 | 2.09 | 12.89 |
| 5VXM.PDB | O, A_ALA_223   | N, A_LEU_227   | H, A_LEU_227    | 2.97 | 2.23 | 26.22 |
| 5VXM.PDB | O, A_TRP_226   | N, A_LEU_230   | H, A_LEU_230    | 2.84 | 2.13 | 28.15 |
| 5VXM.PDB | O, A_LEU_227   | N, A_GLY_231   | H, A_GLY_231    | 2.67 | 1.83 | 9.65  |
| 5VXM.PDB | O, A_SER_247   | N, A_LYS_236   | H, A_LYS_236    | 2.94 | 2.17 | 23.09 |
| 5VXM.PDB | O, A_VAL_245   | N, A_SER_238   | H, A_SER_238    | 2.82 | 2.00 | 14.23 |
| 5VXM.PDB | O, A_GLY_243   | N, A_LYS_240   | H, A_LYS_240    | 2.90 | 2.05 | 7.30  |
| 5VXM.PDB | O, A_VAL_218   | N, A_TYR_244   | H, A_TYR_244    | 2.94 | 2.13 | 17.51 |
| 5VXM.PDB | O, A_TYR_212   | N, A_VAL_246   | H, A_VAL_246    | 2.67 | 1.83 | 9.46  |
| 5VXM.PDB | O, A_LYS_236   | N, A_SER_247   | H, A_SER_247    | 2.73 | 1.97 | 23.18 |
| 5VXM.PDB | O, A_ILE_234   | N, A_ASN_249   | H, A_ASN_249    | 2.66 | 1.81 | 8.12  |
| 5VXM.PDB | O, A_GLY_232   | ND2, A_ASN_249 | HD22, A_ASN_249 | 2.93 | 2.16 | 22.59 |
| 5VXM.PDB | OD1, A_ASN_249 | N, A_THR_251   | H, A_THR_251    | 2.92 | 2.07 | 8.88  |
| 5VXM.PDB | O, A_MET_250   | N, A_ASP_254   | H, A_ASP_254    | 2.82 | 1.99 | 10.70 |
| 5VXM.PDB | O, A_THR_251   | N, A_ASN_255   | H, A_ASN_255    | 2.65 | 1.83 | 15.00 |
| 5VXM.PDB | O, A_ILE_253   | N, A_LEU_257   | H, A_LEU_257    | 2.90 | 2.05 | 9.48  |
| 5VXM.PDB | O, A_ASP_254   | N, A_LYS_258   | H, A_LYS_258    | 2.93 | 2.08 | 4.06  |
| 5VXM.PDB | O, A_ASN_255   | OG, A_SER_259  | HG, A_SER_259   | 2.90 | 2.14 | 20.43 |
| 5VXM.PDB | O, A_MET_256   | N, A_LEU_260   | H, A_LEU_260    | 2.87 | 2.06 | 16.67 |
| 5VXM.PDB | O, A_LEU_257   | N, A_ASP_261   | H, A_ASP_261    | 2.90 | 2.07 | 12.51 |
| 5VXM.PDB | O, A_VAL_188   | N, A_LEU_271   | H, A_LEU_271    | 2.70 | 1.86 | 11.12 |
| 5VXM.PDB | O, A_TYR_276   | N, A_ASN_280   | H, A_ASN_280    | 2.79 | 1.94 | 7.45  |
| 5VXM.PDB | O, A_ALA_278   | N, A_GLY_282   | H, A_GLY_282    | 2.93 | 2.21 | 27.83 |
| 5VXM.PDB | O, A_TRP_279   | N, A_PHE_283   | H, A_PHE_283    | 2.71 | 1.90 | 16.14 |
| 5VXM.PDB | O, A_ALA_281   | N, A_ALA_285   | H, A_ALA_285    | 2.95 | 2.16 | 20.45 |
| 5VXM.PDB | O, A_GLY_282   | N, A_GLU_286   | H, A_GLU_286    | 2.89 | 2.04 | 9.37  |
| 5VXM.PDB | O, A_ALA_285   | N, A_THR_289   | H, A_THR_289    | 2.85 | 2.02 | 13.32 |
| 5VXM.PDB | O, A_GLU_286   | N, A_MET_290   | H, A_MET_290    | 2.99 | 2.16 | 12.67 |
| 5VXM.PDB | O, A_ASP_287   | N, A_LYS_291   | H, A_LYS_291    | 2.81 | 1.96 | 6.90  |
| 5VXM.PDB | OE2, A_GLU_288 | NZ, A_LYS_291  | HZ1, A_LYS_291  | 2.70 | 1.90 | 22.27 |
| 5VXM.PDB | O, A_GLU_288   | N, A_ASN_292   | H, A_ASN_292    | 2.85 | 2.03 | 14.40 |
| 5VXM.PDB | O, A_THR_289   | N, A_ASN_293   | H, A_ASN_293    | 2.86 | 2.04 | 14.91 |
| 5VXM.PDB | O, A_MET_290   | N, A_LEU_294   | H, A_LEU_294    | 2.98 | 2.18 | 17.50 |
| 5VXM.PDB | O, A_LYS_291   | N, A_GLN_295   | H, A_GLN_295    | 2.91 | 2.06 | 10.25 |
| 5VXM.PDB | O, A_ASN_292   | N, A_THR_296   | H, A_THR_296    | 2.99 | 2.15 | 11.78 |
| 5VXM.PDB | O, A_ASN_292   | OG1, A_THR_296 | HG1, A_THR_296  | 2.95 | 2.17 | 19.47 |
| 5VXM.PDB | O, A_LEU_294   | N, A_VAL_298   | H, A_VAL_298    | 2.79 | 1.95 | 9.51  |
| 5VXM.PDB | O, A_GLN_295   | N, A_GLN_299   | H, A_GLN_299    | 2.83 | 2.05 | 20.38 |
| 5VXM.PDB | O, A_VAL_298   | N, A_SER_302   | H, A_SER_302    | 2.97 | 2.12 | 8.83  |
| 5VXM.PDB | O, A_GLN_299   | N, A_ASN_303   | H, A_ASN_303    | 2.91 | 2.08 | 12.38 |
| 5VXM.PDB | O, A_LYS_300   | N, A_ALA_304   | H, A_ALA_304    | 2.94 | 2.10 | 8.88  |
| 5VXM.PDB | O, A_TYR_301   | N, A_ASN_305   | H, A_ASN_305    | 2.83 | 2.00 | 12.81 |
| 5VXM.PDB | O, A_SER_302   | N, A_SER_306   | H, A_SER_306    | 2.82 | 2.09 | 26.84 |
| 5VXM.PDB | O, A_ASN_303   | N, A_ILE_307   | H, A_ILE_307    | 2.93 | 2.12 | 16.79 |
| 5VXM.PDB | O, A_ALA_304   | N, A_PHE_308   | H, A_PHE_308    | 2.85 | 2.02 | 14.30 |
| 5VXM.PDB | O, A_ASN_305   | N, A_ASP_309   | H, A_ASP_309    | 2.84 | 2.05 | 19.19 |
| 5VXM.PDB | O, A_ASP_309   | N, A_LYS_313   | H, A_LYS_313    | 2.76 | 1.93 | 13.42 |
| 5VXM.PDB | O, B_SER_25    | N, B_GLN_3     | H, B_GLN_3      | 2.54 | 1.70 | 8.57  |
| 5VXM.PDB | O, B_SER_21    | N, B_SER_7     | H, B_SER_7      | 2.84 | 2.04 | 16.92 |
| 5VXM.PDB | O, B_LEU_86    | N, B_GLY_15    | H, B_GLY_15     | 2.69 | 1.85 | 9.47  |
| 5VXM.PDB | O, B_GLN_13    | N, B_GLY_16    | H, B_GLY_16     | 2.77 | 1.93 | 10.62 |
| 5VXM.PDB | O, B_MET_83    | N, B_LEU_18    | H, B_LEU_18     | 2.79 | 2.00 | 18.93 |

|          |                |                |                |      |      |       |
|----------|----------------|----------------|----------------|------|------|-------|
| 5VXM.PDB | O, B.LEU_81    | N, B.LEU_20    | H, B.LEU_20    | 2.91 | 2.09 | 14.06 |
| 5VXM.PDB | O, B.SER_7     | N, B.SER_21    | H, B.SER_21    | 2.77 | 1.94 | 13.53 |
| 5VXM.PDB | O, B.VAL_79    | N, B.CYS_22    | H, B.CYS_22    | 2.80 | 2.05 | 25.06 |
| 5VXM.PDB | O, B.VAL_5     | N, B.ALA_23    | H, B.ALA_23    | 2.85 | 2.03 | 14.23 |
| 5VXM.PDB | O, B.ASN_77    | N, B.VAL_24    | H, B.VAL_24    | 2.90 | 2.04 | 1.76  |
| 5VXM.PDB | O, B.GLN_3     | N, B.SER_25    | H, B.SER_25    | 2.84 | 2.00 | 10.15 |
| 5VXM.PDB | O, B.ALA_97    | N, B.GLY_35    | H, B.GLY_35    | 2.79 | 1.95 | 10.70 |
| 5VXM.PDB | O, B.SER_49    | N, B.TRP_36    | H, B.TRP_36    | 2.71 | 1.90 | 16.74 |
| 5VXM.PDB | O, B.PHE_95    | N, B.PHE_37    | H, B.PHE_37    | 2.88 | 2.07 | 17.02 |
| 5VXM.PDB | O, B.GLU_46    | N, B.ARG_38    | H, B.ARG_38    | 2.87 | 2.06 | 16.90 |
| 5VXM.PDB | OH, B.TYR_94   | NH1, B.ARG_38  | HH11, B.ARG_38 | 2.95 | 2.12 | 12.47 |
| 5VXM.PDB | OD1, B.ASP_90  | NH1, B.ARG_38  | HH12, B.ARG_38 | 2.77 | 1.97 | 17.13 |
| 5VXM.PDB | O, B.VAL_93    | N, B.GLN_39    | H, B.GLN_39    | 2.84 | 2.06 | 21.66 |
| 5VXM.PDB | O, B.ARG_38    | N, B.GLU_46    | H, B.GLU_46    | 2.82 | 2.11 | 29.28 |
| 5VXM.PDB | O, B.TRP_36    | N, B.VAL_48    | H, B.VAL_48    | 2.81 | 2.02 | 19.40 |
| 5VXM.PDB | O, B.ARG_59    | OG, B.SER_49   | HG, B.SER_49   | 2.90 | 2.19 | 27.71 |
| 5VXM.PDB | O, B.ARG_59    | N, B.CYS_50    | H, B.CYS_50    | 2.95 | 2.17 | 21.36 |
| 5VXM.PDB | O, B.ILE_34    | N, B.ILE_51    | H, B.ILE_51    | 2.96 | 2.19 | 22.03 |
| 5VXM.PDB | O, B.ASN_52    | N, B.GLY_55    | H, B.GLY_55    | 2.92 | 2.12 | 17.73 |
| 5VXM.PDB | OD1, B.ASP_54  | OG, B.SER_56   | HG, B.SER_56   | 2.63 | 1.84 | 17.09 |
| 5VXM.PDB | O, B.CYS_50    | N, B.ARG_59    | H, B.ARG_59    | 2.78 | 1.95 | 11.90 |
| 5VXM.PDB | O, B.VAL_48    | N, B.ALA_61    | H, B.ALA_61    | 2.94 | 2.11 | 11.33 |
| 5VXM.PDB | O, B.ALA_61    | N, B.VAL_64    | H, B.VAL_64    | 2.99 | 2.14 | 7.44  |
| 5VXM.PDB | OD2, B.ASP_90  | NH1, B.ARG_67  | HH12, B.ARG_67 | 2.75 | 1.92 | 11.95 |
| 5VXM.PDB | O, B.SER_63    | NH2, B.ARG_67  | HH21, B.ARG_67 | 2.79 | 1.93 | 1.60  |
| 5VXM.PDB | O, B.GLN_82    | N, B.THR_69    | H, B.THR_69    | 2.89 | 2.14 | 25.06 |
| 5VXM.PDB | OH, B.TYR_60   | N, B.ILE_70    | H, B.ILE_70    | 2.83 | 1.99 | 10.74 |
| 5VXM.PDB | O, B.THR_78    | N, B.ASP_73    | H, B.ASP_73    | 2.82 | 1.98 | 10.27 |
| 5VXM.PDB | O, B.LYS_76    | OG1, B.THR_78  | HG1, B.THR_78  | 2.89 | 2.13 | 21.00 |
| 5VXM.PDB | O, B.SER_71    | N, B.TYR_80    | H, B.TYR_80    | 2.70 | 1.86 | 9.68  |
| 5VXM.PDB | O, B.LEU_20    | N, B.LEU_81    | H, B.LEU_81    | 2.93 | 2.11 | 15.49 |
| 5VXM.PDB | O, B.THR_69    | N, B.GLN_82    | H, B.GLN_82    | 2.76 | 1.95 | 17.35 |
| 5VXM.PDB | OD1, B.ASN_84  | NE2, B.GLN_82  | HE21, B.GLN_82 | 2.81 | 1.97 | 10.38 |
| 5VXM.PDB | O, B.LEU_18    | N, B.MET_83    | H, B.MET_83    | 2.67 | 1.83 | 10.89 |
| 5VXM.PDB | OD2, B.ASP_90  | N, B.LYS_87    | H, B.LYS_87    | 2.82 | 1.98 | 12.23 |
| 5VXM.PDB | O, B.LYS_87    | N, B.ASP_90    | H, B.ASP_90    | 2.83 | 2.00 | 13.54 |
| 5VXM.PDB | O, B.VAL_121   | N, B.ALA_92    | H, B.ALA_92    | 2.97 | 2.16 | 16.91 |
| 5VXM.PDB | O, B.THR_119   | N, B.TYR_94    | H, B.TYR_94    | 2.86 | 2.01 | 6.10  |
| 5VXM.PDB | O, B.ASP_90    | OH, B.TYR_94   | HH, B.TYR_94   | 2.85 | 2.04 | 12.05 |
| 5VXM.PDB | O, B.PHE_37    | N, B.PHE_95    | H, B.PHE_95    | 2.68 | 1.84 | 10.79 |
| 5VXM.PDB | OE2, B.GLU_6   | N, B.CYS_96    | H, B.CYS_96    | 2.76 | 1.91 | 7.11  |
| 5VXM.PDB | O, B.GLY_35    | N, B.ALA_97    | H, B.ALA_97    | 2.99 | 2.18 | 17.54 |
| 5VXM.PDB | O, B.SER_114   | N, B.ALA_98    | H, B.ALA_98    | 2.98 | 2.19 | 20.00 |
| 5VXM.PDB | O, B.ALA_33    | N, B.LYS_99    | H, B.LYS_99    | 2.92 | 2.09 | 12.04 |
| 5VXM.PDB | O, B.CYS_104   | NZ, B.LYS_99   | HZ2, B.LYS_99  | 2.88 | 2.13 | 28.17 |
| 5VXM.PDB | O, B.PHE_103   | NZ, B.LYS_99   | HZ3, B.LYS_99  | 2.88 | 2.06 | 19.18 |
| 5VXM.PDB | O, A.ASP_166   | NE1, B.TRP_102 | HE1, B.TRP_102 | 2.92 | 2.09 | 13.88 |
| 5VXM.PDB | OE2, A.GLU_201 | N, B.CYS_104   | H, B.CYS_104   | 2.85 | 2.02 | 10.45 |
| 5VXM.PDB | OE1, A.GLU_201 | N, B.SER_105   | H, B.SER_105   | 2.58 | 1.74 | 9.22  |
| 5VXM.PDB | O, B.ALA_98    | N, B.ASN_113   | H, B.ASN_113   | 2.61 | 1.89 | 26.80 |
| 5VXM.PDB | O, B.CYS_96    | N, B.GLY_116   | H, B.GLY_116   | 2.83 | 2.02 | 17.26 |
| 5VXM.PDB | O, B.TYR_94    | N, B.THR_119   | H, B.THR_119   | 2.94 | 2.16 | 20.89 |
| 5VXM.PDB | O, B.ALA_92    | N, B.VAL_121   | H, B.VAL_121   | 2.99 | 2.14 | 5.92  |
| 5VXM.PDB | O, B.GLY_10    | N, B.THR_122   | H, B.THR_122   | 2.99 | 2.17 | 15.52 |
| 5VXM.PDB | OG1, B.THR_91  | N, B.VAL_123   | H, B.VAL_123   | 2.86 | 2.00 | 4.07  |



---

Table 1723: 5VXM-specific side chain and main chain hydrogen bonding analysis. In this table, a PDB file is specified with a four-letter PDB ID, except that the names of the PDB files corresponding to the single NMR structural model split from the NMR ensemble is specified with a four-letter PDB ID in addition to a hyphen followed by the single NMR structural model numeric ID, the residue naming scheme is **Chain ID\_residue name\_residue number**,  $\angle ADH$  represents the angle formed by acceptor (A), donor (D) and hydrogen (H) ( $\angle ADH$ ).

| PDB      | Acceptor (A)   | Donor (D)     | Hydrogen (H)   | D-A (Å) | H-A (Å) | $\angle ADH(^{\circ})$ |
|----------|----------------|---------------|----------------|---------|---------|------------------------|
| 5VXR.PDB | O, H_THR_25    | N, H_GLN_3    | H, H_GLN_3     | 2.92    | 1.95    | 14.37                  |
| 5VXR.PDB | O, H_THR_21    | N, H_SER_7    | H, H_SER_7     | 2.88    | 2.02    | 26.36                  |
| 5VXR.PDB | O, H_THR_116   | N, H_VAL_12   | H, H_VAL_12    | 2.94    | 2.01    | 19.87                  |
| 5VXR.PDB | O, H_VAL_85    | N, H_SER_15   | H, H_SER_15    | 2.75    | 1.75    | 7.98                   |
| 5VXR.PDB | O, H_LEU_82    | N, H_LEU_18   | H, H_LEU_18    | 2.86    | 1.91    | 16.47                  |
| 5VXR.PDB | O, H_LEU_80    | N, H_LEU_20   | H, H_LEU_20    | 2.86    | 1.87    | 11.91                  |
| 5VXR.PDB | O, H_SER_7     | N, H_THR_21   | H, H_THR_21    | 2.94    | 1.94    | 9.22                   |
| 5VXR.PDB | O, H_TYR_78    | N, H_CYS_22   | H, H_CYS_22    | 2.74    | 1.74    | 4.96                   |
| 5VXR.PDB | O, H_GLN_5     | N, H_SER_23   | H, H_SER_23    | 2.92    | 1.94    | 11.80                  |
| 5VXR.PDB | O, H_GLN_3     | N, H_THR_25   | H, H_THR_25    | 2.97    | 2.00    | 12.94                  |
| 5VXR.PDB | OD1, H_ASN_76  | N, H_ILE_29   | H, H_ILE_29    | 2.90    | 1.95    | 16.89                  |
| 5VXR.PDB | OH, H_TYR_100  | N, H_GLY_32   | H, H_GLY_32    | 2.89    | 1.92    | 12.65                  |
| 5VXR.PDB | O, H_MET_98    | N, H_TYR_33   | H, H_TYR_33    | 2.88    | 1.88    | 9.69                   |
| 5VXR.PDB | O, H_ILE_51    | N, H_TRP_34   | H, H_TRP_34    | 2.94    | 1.99    | 17.07                  |
| 5VXR.PDB | O, H_SER_31    | NE1, H_TRP_34 | HE1, H_TRP_34  | 2.87    | 2.00    | 25.22                  |
| 5VXR.PDB | O, H_ALA_96    | N, H_ASN_35   | H, H_ASN_35    | 2.84    | 1.89    | 16.00                  |
| 5VXR.PDB | O, H_ALA_96    | ND2, H_ASN_35 | HD22, H_ASN_35 | 2.93    | 1.96    | 14.02                  |
| 5VXR.PDB | O, H_GLY_49    | N, H_TRP_36   | H, H_TRP_36    | 2.83    | 1.89    | 18.36                  |
| 5VXR.PDB | O, H_TYR_94    | N, H_ILE_37   | H, H_ILE_37    | 2.90    | 1.96    | 17.84                  |
| 5VXR.PDB | O, H_GLU_46    | N, H_ARG_38   | H, H_ARG_38    | 2.92    | 1.95    | 13.24                  |
| 5VXR.PDB | OE1, H_GLU_46  | NE, H_ARG_38  | HE, H_ARG_38   | 2.74    | 1.86    | 23.26                  |
| 5VXR.PDB | OH, H_TYR_93   | NH1, H_ARG_38 | HH11, H_ARG_38 | 2.95    | 1.99    | 15.54                  |
| 5VXR.PDB | OD1, H_ASP_89  | NH1, H_ARG_38 | HH12, H_ARG_38 | 2.81    | 1.80    | 4.81                   |
| 5VXR.PDB | OE1, H_GLU_46  | NH2, H_ARG_38 | HH21, H_ARG_38 | 2.83    | 2.01    | 29.32                  |
| 5VXR.PDB | O, H_THR_92    | N, H_LYS_39   | H, H_LYS_39    | 2.79    | 1.85    | 17.39                  |
| 5VXR.PDB | OE1, L_GLN_38  | NZ, H_LYS_39  | HZ2, H_LYS_39  | 2.72    | 1.76    | 14.94                  |
| 5VXR.PDB | O, H_LYS_44    | N, H_PHE_40   | H, H_PHE_40    | 2.95    | 2.01    | 17.78                  |
| 5VXR.PDB | O, H_ARG_38    | N, H_GLU_46   | H, H_GLU_46    | 2.82    | 1.86    | 15.19                  |
| 5VXR.PDB | OD1, H_ASN_35  | OH, H_TYR_47  | HH, H_TYR_47   | 2.72    | 1.74    | 8.88                   |
| 5VXR.PDB | O, H_TRP_36    | N, H_VAL_48   | H, H_VAL_48    | 2.92    | 1.97    | 16.43                  |
| 5VXR.PDB | O, H_TYR_58    | N, H_TYR_50   | H, H_TYR_50    | 2.82    | 1.91    | 21.30                  |
| 5VXR.PDB | OD1, P_ASN_415 | OH, H_TYR_50  | HH, H_TYR_50   | 2.71    | 1.82    | 21.79                  |
| 5VXR.PDB | O, H_TRP_34    | N, H_ILE_51   | H, H_ILE_51    | 2.89    | 1.95    | 17.36                  |
| 5VXR.PDB | O, H_ASP_56    | N, H_SER_52   | H, H_SER_52    | 2.72    | 1.75    | 13.95                  |
| 5VXR.PDB | O, H_SER_52    | N, H_GLY_55   | H, H_GLY_55    | 2.89    | 1.89    | 5.97                   |
| 5VXR.PDB | O, H_VAL_48    | N, H_ASN_60   | H, H_ASN_60    | 2.87    | 1.86    | 4.40                   |
| 5VXR.PDB | O, H_TYR_47    | ND2, H_ASN_60 | HD22, H_ASN_60 | 2.79    | 1.80    | 10.72                  |
| 5VXR.PDB | OD1, H_ASN_60  | N, H_SER_62   | H, H_SER_62    | 2.94    | 2.03    | 22.09                  |
| 5VXR.PDB | O, H_ASN_60    | N, H_LEU_63   | H, H_LEU_63    | 2.95    | 1.98    | 13.61                  |
| 5VXR.PDB | O, H_LEU_63    | N, H_ARG_66   | H, H_ARG_66    | 2.91    | 1.93    | 12.44                  |
| 5VXR.PDB | O, H_ASN_83    | NH1, H_ARG_66 | HH11, H_ARG_66 | 2.95    | 1.98    | 13.74                  |
| 5VXR.PDB | OD1, H_ASP_89  | NH2, H_ARG_66 | HH22, H_ARG_66 | 2.99    | 1.98    | 4.54                   |
| 5VXR.PDB | O, H_GLN_81    | N, H_SER_68   | H, H_SER_68    | 2.99    | 2.08    | 21.53                  |
| 5VXR.PDB | O, H_TYR_53    | NH1, H_ARG_71 | HH12, H_ARG_71 | 2.89    | 2.01    | 24.28                  |
| 5VXR.PDB | O, H_GLN_77    | N, H_ASP_72   | H, H_ASP_72    | 2.86    | 1.87    | 9.03                   |
| 5VXR.PDB | O, H_ASP_27    | ND2, H_ASN_76 | HD21, H_ASN_76 | 2.65    | 1.73    | 19.67                  |
| 5VXR.PDB | O, H_ASN_35    | OH, H_TYR_78  | HH, H_TYR_78   | 2.85    | 1.87    | 7.07                   |
| 5VXR.PDB | O, H_THR_70    | N, H_TYR_79   | H, H_TYR_79    | 2.84    | 1.90    | 18.23                  |
| 5VXR.PDB | OE1, H_GLN_77  | OH, H_TYR_79  | HH, H_TYR_79   | 2.72    | 1.76    | 12.10                  |
| 5VXR.PDB | O, H_LEU_20    | N, H_LEU_80   | H, H_LEU_80    | 2.93    | 1.97    | 15.68                  |
| 5VXR.PDB | O, H_SER_68    | N, H_GLN_81   | H, H_GLN_81    | 2.89    | 1.91    | 12.77                  |
| 5VXR.PDB | O, H_LEU_18    | N, H_LEU_82   | H, H_LEU_82    | 2.90    | 1.93    | 13.50                  |
| 5VXR.PDB | O, H_ARG_66    | N, H_ASN_83   | H, H_ASN_83    | 2.85    | 1.86    | 10.37                  |
| 5VXR.PDB | O, H_THR_86    | N, H_ASP_89   | H, H_ASP_89    | 2.84    | 1.84    | 7.21                   |
| 5VXR.PDB | O, H_LYS_39    | N, H_THR_92   | H, H_THR_92    | 2.80    | 1.83    | 13.98                  |
| 5VXR.PDB | O, H_THR_113   | N, H_TYR_93   | H, H_TYR_93    | 2.85    | 1.85    | 8.50                   |
| 5VXR.PDB | O, H_ASP_89    | OH, H_TYR_93  | HH, H_TYR_93   | 2.69    | 1.71    | 5.93                   |

|          |                |                |                |      |      |       |
|----------|----------------|----------------|----------------|------|------|-------|
| 5VXR.PDB | O, H_ILE_37    | N, H_TYR_94    | H, H_TYR_94    | 2.75 | 1.75 | 6.84  |
| 5VXR.PDB | OE2, H_GLU_6   | N, H_CYS_95    | H, H_CYS_95    | 2.78 | 1.84 | 17.15 |
| 5VXR.PDB | O, H_SER_108   | N, H_ARG_97    | H, H_ARG_97    | 2.83 | 1.90 | 18.04 |
| 5VXR.PDB | O, H_TYR_33    | N, H_MET_98    | H, H_MET_98    | 2.92 | 1.95 | 14.04 |
| 5VXR.PDB | O, H_TYR_100   | N, H_GLN_103   | H, H_GLN_103   | 2.92 | 2.02 | 21.61 |
| 5VXR.PDB | OH, L_TYR_36   | N, H_PHE_106   | H, H_PHE_106   | 2.92 | 1.92 | 7.59  |
| 5VXR.PDB | O, H_CYS_95    | N, H_GLY_110   | H, H_GLY_110   | 2.91 | 1.93 | 12.29 |
| 5VXR.PDB | OE1, H_GLU_6   | N, H_GLY_112   | H, H_GLY_112   | 2.87 | 1.90 | 13.05 |
| 5VXR.PDB | O, H_TYR_93    | N, H_THR_113   | H, H_THR_113   | 2.95 | 2.02 | 20.05 |
| 5VXR.PDB | O, H_ALA_91    | N, H_VAL_115   | H, H_VAL_115   | 2.97 | 1.97 | 6.59  |
| 5VXR.PDB | O, H_SER_10    | N, H_THR_116   | H, H_THR_116   | 2.95 | 1.96 | 9.99  |
| 5VXR.PDB | OG1, H_THR_90  | N, H_VAL_117   | H, H_VAL_117   | 2.94 | 1.93 | 5.04  |
| 5VXR.PDB | O, H_VAL_12    | N, H_SER_118   | H, H_SER_118   | 2.98 | 2.10 | 24.14 |
| 5VXR.PDB | OG, H_SER_118  | N, H_ALA_120   | H, H_ALA_120   | 2.97 | 2.00 | 14.42 |
| 5VXR.PDB | O, H_PHE_152   | N, H_THR_123   | H, H_THR_123   | 2.88 | 1.92 | 15.25 |
| 5VXR.PDB | O, H_LYS_149   | N, H_SER_126   | H, H_SER_126   | 2.81 | 1.84 | 13.35 |
| 5VXR.PDB | O, H_LEU_147   | N, H_TYR_128   | H, H_TYR_128   | 2.83 | 1.83 | 9.66  |
| 5VXR.PDB | O, H_GLY_145   | N, H_LEU_130   | H, H_LEU_130   | 2.83 | 1.90 | 19.03 |
| 5VXR.PDB | O, H_VAL_189   | N, H_VAL_142   | H, H_VAL_142   | 2.94 | 1.98 | 15.04 |
| 5VXR.PDB | O, H_VAL_187   | N, H_LEU_144   | H, H_LEU_144   | 2.89 | 1.92 | 13.91 |
| 5VXR.PDB | O, H_LEU_130   | N, H_GLY_145   | H, H_GLY_145   | 2.93 | 2.02 | 21.14 |
| 5VXR.PDB | O, H_SER_185   | N, H_CYS_146   | H, H_CYS_146   | 2.89 | 1.97 | 20.23 |
| 5VXR.PDB | O, H_TYR_128   | N, H_LEU_147   | H, H_LEU_147   | 2.91 | 1.92 | 10.17 |
| 5VXR.PDB | O, H_MET_183   | N, H_VAL_148   | H, H_VAL_148   | 2.86 | 1.85 | 4.57  |
| 5VXR.PDB | O, H_SER_126   | N, H_LYS_149   | H, H_LYS_149   | 2.87 | 1.88 | 10.16 |
| 5VXR.PDB | OE2, H_GLU_154 | OH, H_TYR_151  | HH, H_TYR_151  | 2.81 | 1.83 | 6.84  |
| 5VXR.PDB | O, H_THR_123   | N, H_PHE_152   | H, H_PHE_152   | 2.98 | 2.05 | 18.35 |
| 5VXR.PDB | O, H_SER_202   | N, H_THR_159   | H, H_THR_159   | 2.91 | 1.94 | 14.94 |
| 5VXR.PDB | OG, H_SER_185  | NE1, H_TRP_160 | HE1, H_TRP_160 | 2.93 | 1.93 | 7.21  |
| 5VXR.PDB | O, H_THR_188   | OG, H_SER_168  | HG, H_SER_168  | 2.72 | 1.82 | 20.67 |
| 5VXR.PDB | O, H_SER_186   | N, H_HIS_170   | H, H_HIS_170   | 2.94 | 2.01 | 18.18 |
| 5VXR.PDB | OD1, L_ASN_138 | NE2, H_HIS_170 | HE2, H_HIS_170 | 2.89 | 1.98 | 20.57 |
| 5VXR.PDB | O, H_SER_184   | N, H_PHE_172   | H, H_PHE_172   | 2.89 | 1.89 | 7.85  |
| 5VXR.PDB | O, H_THR_182   | N, H_LEU_175   | H, H_LEU_175   | 2.96 | 2.01 | 16.29 |
| 5VXR.PDB | O, H_GLN_177   | OG, H_SER_178  | HG, H_SER_178  | 2.93 | 2.03 | 20.61 |
| 5VXR.PDB | O, H_TYR_151   | N, H_TYR_181   | H, H_TYR_181   | 2.81 | 1.80 | 4.32  |
| 5VXR.PDB | O, H_VAL_148   | N, H_MET_183   | H, H_MET_183   | 2.89 | 1.92 | 13.39 |
| 5VXR.PDB | O, H_LEU_144   | N, H_VAL_187   | H, H_VAL_187   | 2.82 | 1.86 | 14.30 |
| 5VXR.PDB | OG1, H_THR_143 | OG1, H_THR_188 | HG1, H_THR_188 | 2.81 | 1.84 | 10.15 |
| 5VXR.PDB | O, H_GLY_139   | OG, H_SER_191  | HG, H_SER_191  | 2.77 | 1.88 | 20.92 |
| 5VXR.PDB | O, H_GLY_139   | OG, H_BSER_191 | HG, H_BSER_191 | 2.77 | 1.86 | 19.71 |
| 5VXR.PDB | O, H_PRO_190   | N, H_THR_193   | H, H_THR_193   | 2.87 | 1.87 | 5.97  |
| 5VXR.PDB | O, H_THR_193   | N, H_GLN_197   | H, H_GLN_197   | 2.93 | 2.07 | 26.39 |
| 5VXR.PDB | OD1, H_ASN_161 | N, H_THR_200   | H, H_THR_200   | 2.97 | 2.02 | 17.18 |
| 5VXR.PDB | O, H_THR_159   | N, H_SER_202   | H, H_SER_202   | 2.75 | 1.75 | 5.74  |
| 5VXR.PDB | O, H_VAL_212   | N, H_VAL_203   | H, H_VAL_203   | 2.81 | 1.81 | 7.96  |
| 5VXR.PDB | O, H_THR_157   | N, H_ALA_204   | H, H_ALA_204   | 2.86 | 1.90 | 13.85 |
| 5VXR.PDB | O, H_THR_210   | N, H_HIS_205   | H, H_HIS_205   | 2.82 | 1.84 | 11.68 |
| 5VXR.PDB | O, H_PRO_153   | NE2, H_HIS_205 | HE2, H_HIS_205 | 2.81 | 1.82 | 9.76  |
| 5VXR.PDB | O, H_PRO_206   | N, H_SER_209   | H, H_SER_209   | 2.98 | 2.02 | 13.76 |
| 5VXR.PDB | O, H_SER_208   | OG1, H_THR_210 | HG1, H_THR_210 | 2.87 | 2.03 | 26.51 |
| 5VXR.PDB | O, H_VAL_203   | N, H_VAL_212   | H, H_VAL_212   | 2.95 | 2.00 | 16.98 |
| 5VXR.PDB | O, H_CYS_201   | N, H_LYS_214   | H, H_LYS_214   | 2.91 | 2.01 | 22.37 |
| 5VXR.PDB | OE2, L_GLU_123 | NZ, H_LYS_214  | HZ1, H_LYS_214 | 2.93 | 1.98 | 15.97 |
| 5VXR.PDB | O, H_VAL_199   | N, H_LEU_216   | H, H_LEU_216   | 2.90 | 1.89 | 4.43  |
| 5VXR.PDB | OG, L_SER_26   | N, L_VAL_3     | H, L_VAL_3     | 2.91 | 1.91 | 7.32  |
| 5VXR.PDB | O, L_ARG_24    | N, L_THR_5     | H, L_THR_5     | 2.78 | 1.77 | 4.90  |
| 5VXR.PDB | O, L_TYR_86    | NE2, L_GLN_6   | HE22, L_GLN_6  | 2.89 | 1.89 | 8.04  |

|          |                |                |                |      |      |       |
|----------|----------------|----------------|----------------|------|------|-------|
| 5VXR.PDB | O, L_SER_22    | N, L_SER_7     | H, L_SER_7     | 2.95 | 2.03 | 19.63 |
| 5VXR.PDB | O, L_LYS_103   | N, L_LEU_11    | H, L_LEU_11    | 2.93 | 2.01 | 19.94 |
| 5VXR.PDB | O, L_GLU_105   | N, L_VAL_13    | H, L_VAL_13    | 2.91 | 1.98 | 18.79 |
| 5VXR.PDB | O, L_VAL_78    | N, L_GLY_16    | H, L_GLY_16    | 2.93 | 1.93 | 8.01  |
| 5VXR.PDB | O, L_ILE_75    | N, L_ALA_19    | H, L_ALA_19    | 2.83 | 1.83 | 8.13  |
| 5VXR.PDB | O, L_SER_7     | N, L_SER_22    | H, L_SER_22    | 2.84 | 1.82 | 1.96  |
| 5VXR.PDB | O, L_PHE_71    | N, L_CYS_23    | H, L_CYS_23    | 2.89 | 1.92 | 13.55 |
| 5VXR.PDB | O, L_THR_5     | N, L_ARG_24    | H, L_ARG_24    | 2.90 | 1.89 | 4.93  |
| 5VXR.PDB | OD1, L_ASP_70  | NE, L_ARG_24   | HE, L_ARG_24   | 2.94 | 2.08 | 26.80 |
| 5VXR.PDB | O, L_THR_69    | N, L_ALA_25    | H, L_ALA_25    | 2.84 | 1.89 | 15.97 |
| 5VXR.PDB | O, L_LYS_30    | N, L_SER_27D   | H, L_SER_27D   | 2.97 | 2.06 | 21.07 |
| 5VXR.PDB | OD1, L_ASN_92  | OG, L_SER_27D  | HG, L_SER_27D  | 2.79 | 1.83 | 11.69 |
| 5VXR.PDB | O, L_SER_27D   | N, L_LYS_30    | H, L_LYS_30    | 3.00 | 2.02 | 13.12 |
| 5VXR.PDB | O, H_GLY_101   | NZ, L_LYS_30   | HZ1, L_LYS_30  | 2.83 | 1.85 | 13.06 |
| 5VXR.PDB | O, L_GLN_89    | N, L_HIS_34    | H, L_HIS_34    | 2.88 | 1.90 | 13.39 |
| 5VXR.PDB | OD1, L_ASN_91  | NE2, L_HIS_34  | HE2, L_HIS_34  | 2.77 | 1.79 | 12.93 |
| 5VXR.PDB | O, L_ILE_48    | N, L_TRP_35    | H, L_TRP_35    | 2.81 | 1.84 | 13.58 |
| 5VXR.PDB | O, L_TYR_87    | N, L_TYR_36    | H, L_TYR_36    | 2.86 | 1.93 | 18.12 |
| 5VXR.PDB | OE1, L_GLN_89  | OH, L_TYR_36   | HH, L_TYR_36   | 2.69 | 1.74 | 13.43 |
| 5VXR.PDB | O, L_LYS_45    | N, L_GLN_37    | H, L_GLN_37    | 2.88 | 1.93 | 17.34 |
| 5VXR.PDB | OH, L_TYR_86   | NE2, L_GLN_37  | HE21, L_GLN_37 | 2.98 | 1.98 | 9.70  |
| 5VXR.PDB | O, L_THR_85    | N, L_GLN_38    | H, L_GLN_38    | 2.78 | 1.82 | 15.10 |
| 5VXR.PDB | O, L_GLN_42    | NE2, L_GLN_38  | HE21, L_GLN_38 | 2.91 | 1.92 | 11.28 |
| 5VXR.PDB | O, L_ASP_81    | NZ, L_LYS_39   | HZ3, L_LYS_39  | 2.63 | 1.68 | 15.29 |
| 5VXR.PDB | O, L_GLN_37    | N, L_LYS_45    | H, L_LYS_45    | 2.79 | 1.86 | 19.53 |
| 5VXR.PDB | O, L_TRP_35    | N, L_LEU_47    | H, L_LEU_47    | 2.83 | 1.83 | 6.37  |
| 5VXR.PDB | O, L_ASN_53    | N, L_TYR_49    | H, L_TYR_49    | 2.88 | 1.93 | 17.74 |
| 5VXR.PDB | O, L_LEU_33    | N, L_ALA_51    | H, L_ALA_51    | 2.80 | 1.87 | 18.75 |
| 5VXR.PDB | O, L_TYR_49    | N, L_ASN_53    | H, L_ASN_53    | 2.90 | 1.93 | 14.40 |
| 5VXR.PDB | O, L_LEU_47    | N, L_GLU_55    | H, L_GLU_55    | 2.95 | 1.94 | 3.22  |
| 5VXR.PDB | O, L_PRO_59    | N, L_ARG_61    | H, L_ARG_61    | 2.78 | 1.96 | 29.25 |
| 5VXR.PDB | O, L_PRO_77    | NH1, L_ARG_61  | HH11, L_ARG_61 | 2.81 | 1.92 | 23.49 |
| 5VXR.PDB | OD2, L_ASP_82  | NH1, L_ARG_61  | HH12, L_ARG_61 | 2.75 | 1.79 | 15.16 |
| 5VXR.PDB | OD1, L_ASP_82  | NH2, L_ARG_61  | HH22, L_ARG_61 | 2.82 | 1.82 | 7.27  |
| 5VXR.PDB | O, L_THR_74    | N, L_SER_63    | H, L_SER_63    | 2.98 | 2.05 | 19.15 |
| 5VXR.PDB | O, L_THR_72    | N, L_SER_65    | H, L_SER_65    | 2.96 | 2.02 | 18.59 |
| 5VXR.PDB | OD1, L_ASP_27C | N, L_ARG_68    | H, L_ARG_68    | 2.98 | 2.08 | 21.58 |
| 5VXR.PDB | O, L_CYS_23    | N, L_PHE_71    | H, L_PHE_71    | 2.90 | 2.01 | 23.31 |
| 5VXR.PDB | O, L_SER_65    | N, L_THR_72    | H, L_THR_72    | 2.91 | 1.95 | 14.63 |
| 5VXR.PDB | O, L_ILE_21    | N, L_LEU_73    | H, L_LEU_73    | 2.86 | 1.89 | 14.64 |
| 5VXR.PDB | O, L_SER_63    | N, L_THR_74    | H, L_THR_74    | 2.84 | 1.84 | 5.95  |
| 5VXR.PDB | O, L_ALA_19    | N, L_ILE_75    | H, L_ILE_75    | 2.86 | 1.89 | 14.39 |
| 5VXR.PDB | O, L_ARG_61    | N, L_ASP_76    | H, L_ASP_76    | 2.76 | 1.80 | 14.69 |
| 5VXR.PDB | O, L_GLN_17    | N, L_VAL_78    | H, L_VAL_78    | 2.93 | 1.95 | 13.22 |
| 5VXR.PDB | OD2, L_ASP_82  | N, L_GLU_79    | H, L_GLU_79    | 2.85 | 1.85 | 8.34  |
| 5VXR.PDB | O, L_GLU_79    | N, L_ASP_82    | H, L_ASP_82    | 2.97 | 1.97 | 6.55  |
| 5VXR.PDB | O, L_THR_102   | N, L_TYR_86    | H, L_TYR_86    | 2.91 | 1.93 | 13.41 |
| 5VXR.PDB | O, L_ASP_82    | OH, L_TYR_86   | HH, L_TYR_86   | 2.70 | 1.78 | 16.73 |
| 5VXR.PDB | O, L_TYR_36    | N, L_TYR_87    | H, L_TYR_87    | 2.90 | 1.95 | 16.78 |
| 5VXR.PDB | O, L_THR_97    | N, L_HIS_90    | H, L_HIS_90    | 2.99 | 2.05 | 18.83 |
| 5VXR.PDB | O, P_GLY_418   | NE1, L_TRP_96  | HE1, L_TRP_96  | 2.88 | 1.87 | 5.74  |
| 5VXR.PDB | O, L_ILE_2     | OG1, L_THR_97  | HG1, L_THR_97  | 2.97 | 2.02 | 14.29 |
| 5VXR.PDB | O, L_CYS_88    | N, L_GLY_99    | H, L_GLY_99    | 2.83 | 1.83 | 7.30  |
| 5VXR.PDB | O, L_TYR_86    | N, L_THR_102   | H, L_THR_102   | 2.94 | 2.03 | 21.75 |
| 5VXR.PDB | O, L_PRO_8     | OG1, L_THR_102 | HG1, L_THR_102 | 2.75 | 1.79 | 11.72 |
| 5VXR.PDB | O, L_ALA_84    | N, L_LEU_104   | H, L_LEU_104   | 2.91 | 1.89 | 2.60  |
| 5VXR.PDB | OE1, L_GLN_166 | N, L_ILE_106   | H, L_ILE_106   | 2.84 | 1.85 | 9.18  |
| 5VXR.PDB | O, L_VAL_13    | N, L_LYS_107   | H, L_LYS_107   | 2.81 | 1.82 | 9.46  |

|          |                |                |                 |      |      |       |
|----------|----------------|----------------|-----------------|------|------|-------|
| 5VXR.PDB | O, L_ALA_109   | NE, L_ARG_108  | HE, L_ARG_108   | 2.87 | 1.86 | 6.94  |
| 5VXR.PDB | O, L_ASP_170   | NH1, L_ARG_108 | HH11, L_ARG_108 | 2.81 | 1.81 | 8.28  |
| 5VXR.PDB | O, L_TYR_140   | N, L_ALA_111   | H, L_ALA_111    | 2.89 | 1.90 | 8.41  |
| 5VXR.PDB | O, L_ASN_137   | N, L_THR_114   | H, L_THR_114    | 2.87 | 1.88 | 8.25  |
| 5VXR.PDB | O, L_PHE_135   | N, L_SER_116   | H, L_SER_116    | 2.96 | 2.02 | 17.37 |
| 5VXR.PDB | O, L_VAL_133   | N, L_PHE_118   | H, L_PHE_118    | 2.78 | 1.90 | 24.38 |
| 5VXR.PDB | OG, L_SER_131  | NE2, L_GLN_124 | HE22, L_GLN_124 | 2.92 | 1.91 | 5.03  |
| 5VXR.PDB | O, L_SER_122   | N, L_THR_126   | H, L_THR_126    | 2.91 | 1.96 | 16.41 |
| 5VXR.PDB | O, L_GLN_124   | OG, L_SER_127  | HG, L_SER_127   | 2.77 | 1.86 | 18.69 |
| 5VXR.PDB | O, L_LEU_181   | N, L_ALA_130   | H, L_ALA_130    | 2.92 | 2.02 | 22.78 |
| 5VXR.PDB | OE1, L_GLN_124 | N, L_SER_131   | H, L_SER_131    | 2.86 | 1.94 | 21.02 |
| 5VXR.PDB | O, L_LEU_179   | N, L_VAL_132   | H, L_VAL_132    | 2.84 | 1.88 | 14.58 |
| 5VXR.PDB | O, L_SER_116   | N, L_PHE_135   | H, L_PHE_135    | 2.89 | 1.98 | 20.99 |
| 5VXR.PDB | O, L_MET_175   | N, L_LEU_136   | H, L_LEU_136    | 2.88 | 1.87 | 5.63  |
| 5VXR.PDB | O, L_THR_114   | N, L_ASN_137   | H, L_ASN_137    | 2.89 | 1.90 | 10.32 |
| 5VXR.PDB | OG, L_SER_174  | N, L_ASN_138   | H, L_ASN_138    | 2.95 | 1.98 | 14.50 |
| 5VXR.PDB | O, L_TYR_173   | N, L_PHE_139   | H, L_PHE_139    | 2.83 | 1.84 | 11.10 |
| 5VXR.PDB | O, L_ALA_111   | N, L_TYR_140   | H, L_TYR_140    | 2.94 | 1.98 | 15.41 |
| 5VXR.PDB | O, L_GLU_195   | N, L_LYS_147   | H, L_LYS_147    | 2.93 | 1.98 | 16.97 |
| 5VXR.PDB | OG, L_SER_177  | NE1, L_TRP_148 | HE1, L_TRP_148  | 2.80 | 1.85 | 16.41 |
| 5VXR.PDB | O, L_THR_193   | N, L_LYS_149   | H, L_LYS_149    | 2.85 | 1.88 | 14.14 |
| 5VXR.PDB | O, L_SER_153   | N, L_ILE_150   | H, L_ILE_150    | 2.93 | 1.98 | 15.57 |
| 5VXR.PDB | O, L_SER_191   | N, L_ASP_151   | H, L_ASP_151    | 2.78 | 1.80 | 12.18 |
| 5VXR.PDB | O, L_ILE_150   | N, L_SER_153   | H, L_SER_153    | 2.99 | 1.99 | 4.98  |
| 5VXR.PDB | O, L_TRP_148   | N, L_ARG_155   | H, L_ARG_155    | 2.93 | 1.99 | 17.51 |
| 5VXR.PDB | O, L_THR_178   | N, L_LEU_160   | H, L_LEU_160    | 2.91 | 1.98 | 18.71 |
| 5VXR.PDB | O, L_SER_176   | N, L_SER_162   | H, L_SER_162    | 2.83 | 1.87 | 15.71 |
| 5VXR.PDB | O, L_SER_174   | N, L_THR_164   | H, L_THR_164    | 2.88 | 1.88 | 8.76  |
| 5VXR.PDB | O, L_SER_171   | NE2, L_GLN_166 | HE21, L_GLN_166 | 2.83 | 1.86 | 12.46 |
| 5VXR.PDB | O, L_ILE_106   | NE2, L_GLN_166 | HE22, L_GLN_166 | 2.77 | 1.85 | 20.51 |
| 5VXR.PDB | O, L_THR_172   | N, L_ASP_167   | H, L_ASP_167    | 2.85 | 1.85 | 9.35  |
| 5VXR.PDB | OD2, L_ASP_167 | N, L_LYS_169   | H, L_LYS_169    | 2.90 | 1.99 | 21.19 |
| 5VXR.PDB | OD2, L_ASP_167 | N, L_ASP_170   | H, L_ASP_170    | 2.84 | 1.89 | 16.19 |
| 5VXR.PDB | OD1, L_ASP_170 | N, L_THR_172   | H, L_THR_172    | 2.96 | 2.00 | 16.34 |
| 5VXR.PDB | OD1, L_ASP_170 | OG1, L_THR_172 | HG1, L_THR_172  | 2.70 | 1.76 | 15.44 |
| 5VXR.PDB | O, L_PHE_139   | N, L_TYR_173   | H, L_TYR_173    | 2.85 | 1.84 | 7.73  |
| 5VXR.PDB | O, L_LEU_136   | N, L_MET_175   | H, L_MET_175    | 2.84 | 1.91 | 18.20 |
| 5VXR.PDB | O, L_SER_162   | N, L_SER_176   | H, L_SER_176    | 2.88 | 1.94 | 17.54 |
| 5VXR.PDB | OG, H_SER_184  | OG, L_SER_176  | HG, L_SER_176   | 2.79 | 1.86 | 17.30 |
| 5VXR.PDB | O, L_CYS_134   | N, L_SER_177   | H, L_SER_177    | 2.91 | 1.91 | 10.22 |
| 5VXR.PDB | OD1, L_ASN_161 | OG, L_SER_177  | HG, L_SER_177   | 2.64 | 1.73 | 19.24 |
| 5VXR.PDB | O, L_LEU_160   | N, L_THR_178   | H, L_THR_178    | 2.85 | 1.91 | 18.48 |
| 5VXR.PDB | O, L_VAL_132   | N, L_LEU_179   | H, L_LEU_179    | 2.78 | 1.81 | 13.39 |
| 5VXR.PDB | O, L_GLY_158   | N, L_THR_180   | H, L_THR_180    | 2.83 | 1.86 | 14.32 |
| 5VXR.PDB | OG, L_SER_131  | OG1, L_THR_180 | HG1, L_THR_180  | 2.88 | 2.00 | 21.77 |
| 5VXR.PDB | O, L_ALA_130   | N, L_LEU_181   | H, L_LEU_181    | 2.83 | 1.84 | 9.97  |
| 5VXR.PDB | O, L_GLY_128   | N, L_LYS_183   | H, L_LYS_183    | 2.94 | 1.97 | 12.73 |
| 5VXR.PDB | O, L_THR_182   | N, L_TYR_186   | H, L_TYR_186    | 2.95 | 1.95 | 8.11  |
| 5VXR.PDB | O, L_LYS_183   | N, L_GLU_187   | H, L_GLU_187    | 3.00 | 2.08 | 21.03 |
| 5VXR.PDB | OD2, L_ASP_151 | ND1, L_HIS_189 | HD1, L_HIS_189  | 2.73 | 1.79 | 17.03 |
| 5VXR.PDB | OD1, L_ASP_151 | N, L_SER_191   | H, L_SER_191    | 2.90 | 1.90 | 6.70  |
| 5VXR.PDB | O, L_PHE_209   | N, L_TYR_192   | H, L_TYR_192    | 2.97 | 1.97 | 6.50  |
| 5VXR.PDB | O, L_LYS_149   | N, L_THR_193   | H, L_THR_193    | 2.96 | 2.06 | 22.36 |
| 5VXR.PDB | O, L_LYS_147   | N, L_GLU_195   | H, L_GLU_195    | 2.79 | 1.85 | 17.75 |
| 5VXR.PDB | O, L_ILE_205   | N, L_ALA_196   | H, L_ALA_196    | 2.78 | 1.81 | 13.90 |
| 5VXR.PDB | O, L_ASN_145   | N, L_THR_197   | H, L_THR_197    | 2.84 | 1.85 | 9.75  |
| 5VXR.PDB | O, L_PRO_141   | NE2, L_HIS_198 | HE2, L_HIS_198  | 2.90 | 1.90 | 7.27  |
| 5VXR.PDB | ND1, L_HIS_198 | OG1, L_THR_200 | HG1, L_THR_200  | 2.74 | 1.84 | 20.28 |

|          |                |                |                |      |      |       |
|----------|----------------|----------------|----------------|------|------|-------|
| 5VXR.PDB | O, L_SER_203   | OG, L_SER_201  | HG, L_SER_201  | 2.73 | 1.78 | 13.42 |
| 5VXR.PDB | O, L_ALA_196   | N, L_ILE_205   | H, L_ILE_205   | 2.98 | 2.07 | 22.00 |
| 5VXR.PDB | O, L_ASN_190   | N, L_ARG_211   | H, L_ARG_211   | 2.77 | 1.80 | 14.86 |
| 5VXR.PDB | O, L_HIS_189   | NE, L_ARG_211  | HE, L_ARG_211  | 2.85 | 1.85 | 8.53  |
| 5VXR.PDB | O, P_HIS_421   | N, P_ILE_414   | H, P_ILE_414   | 2.99 | 2.01 | 11.82 |
| 5VXR.PDB | OH, H_TYR_33   | N, P_ASN_415   | H, P_ASN_415   | 2.82 | 1.94 | 24.20 |
| 5VXR.PDB | O, P_SER_419   | N, P_THR_416   | H, P_THR_416   | 2.88 | 1.93 | 15.75 |
| 5VXR.PDB | NE2, P_HIS_421 | OG1, P_THR_416 | HG1, P_THR_416 | 2.72 | 1.87 | 24.94 |
| 5VXR.PDB | O, L_ASN_91    | NE1, P_TRP_420 | HE1, P_TRP_420 | 2.80 | 1.97 | 28.78 |
| 5VXR.PDB | O, P_ILE_414   | N, P_HIS_421   | H, P_HIS_421   | 2.91 | 2.04 | 25.40 |

Table 1724: 5VXR-specific side chain and main chain hydrogen bonding analysis. In this table, a PDB file is specified with a four-letter PDB ID, except that the names of the PDB files corresponding to the single NMR structural model split from the NMR ensemble is specified with a four-letter PDB ID in addition to a hyphen followed by the single NMR structural model numeric ID, the residue naming scheme is **Chain ID\_residue name\_residue number**,  $\angle ADH$  represents the angle formed by acceptor (A), donor (D) and hydrogen (H) ( $\angle ADH$ ).

| PDB      | Acceptor (A)   | Donor (D)      | Hydrogen (H)    | D-A (Å) | H-A (Å) | $\angle ADH(^{\circ})$ |
|----------|----------------|----------------|-----------------|---------|---------|------------------------|
| 5WKQ.PDB | O, A.ASN.74    | N, A.GLN.78    | H, A.GLN.78     | 2.98    | 2.14    | 9.16                   |
| 5WKQ.PDB | O, A.ALA.75    | N, A.LEU.79    | H, A.LEU.79     | 2.93    | 2.08    | 8.87                   |
| 5WKQ.PDB | O, A.SER.76    | OG1, A.THR.80  | HG1, A.THR.80   | 2.93    | 2.13    | 16.27                  |
| 5WKQ.PDB | O, A.GLN.78    | N, A.LEU.82    | H, A.LEU.82     | 2.82    | 2.00    | 15.52                  |
| 5WKQ.PDB | O, A.LEU.79    | N, A.ILE.83    | H, A.ILE.83     | 2.90    | 2.05    | 7.59                   |
| 5WKQ.PDB | O, A.LEU.81    | N, A.ASN.85    | H, A.ASN.85     | 2.92    | 2.07    | 7.63                   |
| 5WKQ.PDB | O, A.ILE.83    | N, A.ILE.87    | H, A.ILE.87     | 2.92    | 2.08    | 9.62                   |
| 5WKQ.PDB | O, A.LEU.86    | N, A.LEU.90    | H, A.LEU.90     | 2.92    | 2.07    | 6.38                   |
| 5WKQ.PDB | O, A.ILE.87    | N, A.GLY.91    | H, A.GLY.91     | 2.97    | 2.16    | 15.88                  |
| 5WKQ.PDB | O, A.GLY.91    | OG, A.SER.94   | HG, A.SER.94    | 2.98    | 2.17    | 13.97                  |
| 5WKQ.PDB | O, A.LEU.95    | N, A.THR.99    | H, A.THR.99     | 2.87    | 2.01    | 5.83                   |
| 5WKQ.PDB | O, A.THR.96    | N, A.ASN.100   | H, A.ASN.100    | 2.93    | 2.14    | 18.75                  |
| 5WKQ.PDB | O, A.LEU.98    | N, A.ILE.102   | H, A.ILE.102    | 2.87    | 2.09    | 20.92                  |
| 5WKQ.PDB | O, A.THR.99    | N, A.THR.103   | H, A.THR.103    | 2.97    | 2.15    | 15.29                  |
| 5WKQ.PDB | O, A.LYS.101   | N, A.TRP.105   | H, A.TRP.105    | 2.97    | 2.17    | 18.38                  |
| 5WKQ.PDB | OG1, A.THR.80  | NZ, A.LYS.106  | HZ1, A.LYS.106  | 2.47    | 1.72    | 27.03                  |
| 5WKQ.PDB | O, A.ALA.104   | N, A.GLN.108   | H, A.GLN.108    | 2.95    | 2.11    | 11.57                  |
| 5WKQ.PDB | O, A.TRP.105   | N, A.GLN.109   | H, A.GLN.109    | 2.89    | 2.04    | 3.84                   |
| 5WKQ.PDB | O, A.LYS.106   | N, A.GLN.110   | H, A.GLN.110    | 2.89    | 2.05    | 11.19                  |
| 5WKQ.PDB | O, A.SER.107   | N, A.ALA.111   | H, A.ALA.111    | 3.00    | 2.17    | 13.35                  |
| 5WKQ.PDB | O, A.GLN.108   | N, A.ARG.112   | H, A.ARG.112    | 2.98    | 2.16    | 14.92                  |
| 5WKQ.PDB | O, A.GLN.109   | N, A.GLN.113   | H, A.GLN.113    | 2.94    | 2.10    | 9.80                   |
| 5WKQ.PDB | O, A.ARG.112   | N, A.ASN.116   | H, A.ASN.116    | 2.83    | 1.99    | 11.00                  |
| 5WKQ.PDB | O, A.GLN.113   | N, A.LEU.117   | H, A.LEU.117    | 2.99    | 2.18    | 16.36                  |
| 5WKQ.PDB | O, A.LYS.115   | N, A.PHE.119   | H, A.PHE.119    | 2.80    | 1.98    | 13.76                  |
| 5WKQ.PDB | O, A.ASN.116   | N, A.SER.120   | H, A.SER.120    | 2.81    | 1.97    | 9.85                   |
| 5WKQ.PDB | O, A.PHE.119   | N, A.ILE.123   | H, A.ILE.123    | 2.99    | 2.14    | 9.43                   |
| 5WKQ.PDB | O, A.SER.120   | N, A.ASN.124   | H, A.ASN.124    | 2.97    | 2.14    | 13.74                  |
| 5WKQ.PDB | O, A.ILE.123   | N, A.LEU.127   | H, A.LEU.127    | 2.86    | 2.03    | 12.46                  |
| 5WKQ.PDB | O, A.THR.125   | N, A.GLU.129   | H, A.GLU.129    | 2.89    | 2.06    | 14.27                  |
| 5WKQ.PDB | O, A.LEU.126   | N, A.THR.130   | H, A.THR.130    | 2.85    | 2.02    | 13.06                  |
| 5WKQ.PDB | O, A.LEU.127   | N, A.GLU.131   | H, A.GLU.131    | 2.91    | 2.07    | 8.81                   |
| 5WKQ.PDB | O, A.SER.128   | N, A.GLY.132   | H, A.GLY.132    | 2.95    | 2.11    | 11.67                  |
| 5WKQ.PDB | O, A.THR.130   | N, A.THR.134   | H, A.THR.134    | 2.86    | 2.03    | 13.70                  |
| 5WKQ.PDB | O, A.THR.130   | OG1, A.THR.134 | HG1, A.THR.134  | 2.90    | 2.17    | 24.55                  |
| 5WKQ.PDB | O, A.GLU.131   | N, A.ARG.135   | H, A.ARG.135    | 2.96    | 2.15    | 15.46                  |
| 5WKQ.PDB | OG, B.SER.208  | NH2, A.ARG.135 | HH21, A.ARG.135 | 2.89    | 2.06    | 11.87                  |
| 5WKQ.PDB | O, A.LEU.133   | N, A.TYR.137   | H, A.TYR.137    | 2.86    | 2.07    | 19.86                  |
| 5WKQ.PDB | O, A.THR.134   | N, A.GLU.138   | H, A.GLU.138    | 2.82    | 1.98    | 11.30                  |
| 5WKQ.PDB | O, A.TYR.137   | N, A.ILE.141   | H, A.ILE.141    | 2.92    | 2.07    | 6.24                   |
| 5WKQ.PDB | O, A.GLN.140   | N, A.LEU.144   | H, A.LEU.144    | 2.76    | 1.98    | 19.80                  |
| 5WKQ.PDB | O, A.ILE.141   | N, A.LYS.145   | H, A.LYS.145    | 2.95    | 2.17    | 21.49                  |
| 5WKQ.PDB | O, A.LYS.143   | N, A.ALA.147   | H, A.ALA.147    | 2.98    | 2.17    | 16.58                  |
| 5WKQ.PDB | O, A.LEU.144   | N, A.ASP.148   | H, A.ASP.148    | 2.92    | 2.09    | 13.80                  |
| 5WKQ.PDB | O, A.ALA.147   | N, A.ILE.151   | H, A.ILE.151    | 3.00    | 2.18    | 14.31                  |
| 5WKQ.PDB | O, A.SER.149   | N, A.ASP.153   | H, A.ASP.153    | 2.97    | 2.14    | 11.92                  |
| 5WKQ.PDB | O, A.ILE.151   | N, A.GLU.155   | H, A.GLU.155    | 2.91    | 2.05    | 3.54                   |
| 5WKQ.PDB | O, A.LYS.152   | N, A.ASN.156   | H, A.ASN.156    | 2.94    | 2.16    | 21.59                  |
| 5WKQ.PDB | O, A.ASP.153   | N, A.LYS.157   | H, A.LYS.157    | 2.91    | 2.13    | 20.82                  |
| 5WKQ.PDB | O, A.LEU.154   | N, A.ILE.158   | H, A.ILE.158    | 2.88    | 2.06    | 14.11                  |
| 5WKQ.PDB | O, A.GLU.155   | N, A.ASN.159   | H, A.ASN.159    | 2.95    | 2.11    | 10.87                  |
| 5WKQ.PDB | O, A.LYS.157   | N, A.ILE.161   | H, A.ILE.161    | 2.96    | 2.13    | 11.39                  |
| 5WKQ.PDB | O, A.ILE.158   | N, A.GLN.162   | H, A.GLN.162    | 2.96    | 2.16    | 19.47                  |
| 5WKQ.PDB | OE2, A.GLU.182 | NE2, A.GLN.162 | HE21, A.GLN.162 | 2.71    | 1.89    | 15.15                  |
| 5WKQ.PDB | O, A.ILE.161   | N, A.LEU.165   | H, A.LEU.165    | 2.83    | 2.01    | 14.76                  |
| 5WKQ.PDB | O, A.THR.163   | OG, A.SER.166  | HG, A.SER.166   | 2.82    | 1.99    | 6.15                   |
| 5WKQ.PDB | O, A.ARG.164   | N, A.GLU.167   | H, A.GLU.167    | 2.98    | 2.16    | 15.01                  |

|          |              |                |                 |      |      |       |
|----------|--------------|----------------|-----------------|------|------|-------|
| 5WKQ.PDB | O, A_LYS_175 | N, A_SER_179   | H, A_SER_179    | 2.81 | 1.95 | 0.77  |
| 5WKQ.PDB | O, A_LYS_177 | N, A_GLU_181   | H, A_GLU_181    | 2.97 | 2.17 | 18.02 |
| 5WKQ.PDB | O, A_LEU_178 | N, A_GLU_182   | H, A_GLU_182    | 2.79 | 1.97 | 15.96 |
| 5WKQ.PDB | O, A_SER_179 | N, A_ILE_183   | H, A_ILE_183    | 2.86 | 2.03 | 12.39 |
| 5WKQ.PDB | O, A_GLU_182 | N, A_THR_186   | H, A_THR_186    | 2.96 | 2.16 | 17.62 |
| 5WKQ.PDB | O, A_GLU_182 | OG1, A_THR_186 | HG1, A_THR_186  | 2.95 | 2.25 | 28.98 |
| 5WKQ.PDB | O, A_LEU_185 | N, A_LYS_189   | H, A_LYS_189    | 2.81 | 2.00 | 16.47 |
| 5WKQ.PDB | O, A_THR_186 | N, A_ASP_190   | H, A_ASP_190    | 2.80 | 1.95 | 5.67  |
| 5WKQ.PDB | O, A_LYS_188 | N, A_ALA_192   | H, A_ALA_192    | 2.92 | 2.13 | 19.91 |
| 5WKQ.PDB | O, A_LYS_189 | N, A_VAL_193   | H, A_VAL_193    | 2.85 | 2.05 | 18.34 |
| 5WKQ.PDB | O, A_ALA_192 | N, A_ARG_196   | H, A_ARG_196    | 2.85 | 2.00 | 8.33  |
| 5WKQ.PDB | O, A_ASP_195 | N, A_ILE_199   | H, A_ILE_199    | 2.97 | 2.14 | 13.27 |
| 5WKQ.PDB | O, A_ARG_196 | N, A_GLU_200   | H, A_GLU_200    | 2.87 | 2.01 | 4.50  |
| 5WKQ.PDB | O, A_LEU_198 | N, A_LYS_202   | H, A_LYS_202    | 2.90 | 2.10 | 18.39 |
| 5WKQ.PDB | O, A_ILE_199 | N, A_THR_203   | H, A_THR_203    | 2.80 | 1.96 | 10.08 |
| 5WKQ.PDB | O, A_ILE_199 | OG1, A_THR_203 | HG1, A_THR_203  | 2.97 | 2.24 | 25.20 |
| 5WKQ.PDB | O, A_LEU_204 | N, A_SER_208   | H, A_SER_208    | 2.96 | 2.20 | 23.33 |
| 5WKQ.PDB | O, A_ILE_206 | N, A_LEU_210   | H, A_LEU_210    | 2.92 | 2.12 | 17.69 |
| 5WKQ.PDB | O, A_HIS_207 | N, A_THR_211   | H, A_THR_211    | 3.00 | 2.23 | 23.43 |
| 5WKQ.PDB | O, A_SER_208 | N, A_ASP_212   | H, A_ASP_212    | 2.86 | 2.05 | 16.07 |
| 5WKQ.PDB | O, A_LYS_209 | N, A_LYS_213   | H, A_LYS_213    | 2.99 | 2.21 | 20.73 |
| 5WKQ.PDB | O, A_LEU_210 | N, A_SER_214   | H, A_SER_214    | 2.99 | 2.17 | 15.42 |
| 5WKQ.PDB | O, A_THR_211 | OG, A_SER_214  | HG, A_SER_214   | 2.74 | 1.93 | 13.01 |
| 5WKQ.PDB | O, A_ASP_212 | N, A_GLN_216   | H, A_GLN_216    | 2.85 | 2.04 | 17.18 |
| 5WKQ.PDB | O, A_LYS_213 | N, A_LEU_217   | H, A_LEU_217    | 2.82 | 1.99 | 14.07 |
| 5WKQ.PDB | O, A_MET_215 | N, A_LYS_219   | H, A_LYS_219    | 2.99 | 2.17 | 15.70 |
| 5WKQ.PDB | O, A_LEU_217 | N, A_ILE_221   | H, A_ILE_221    | 3.00 | 2.19 | 17.23 |
| 5WKQ.PDB | O, A_GLU_218 | N, A_ASP_222   | H, A_ASP_222    | 2.93 | 2.08 | 8.56  |
| 5WKQ.PDB | O, A_LYS_219 | N, A_SER_223   | H, A_SER_223    | 2.82 | 2.02 | 17.93 |
| 5WKQ.PDB | O, A_GLU_220 | N, A_PHE_224   | H, A_PHE_224    | 2.96 | 2.16 | 19.24 |
| 5WKQ.PDB | O, A_ILE_221 | N, A_SER_225   | H, A_SER_225    | 2.98 | 2.15 | 11.85 |
| 5WKQ.PDB | O, A_ASP_222 | N, A_ALA_226   | H, A_ALA_226    | 2.92 | 2.10 | 14.82 |
| 5WKQ.PDB | O, A_PHE_224 | N, A_SER_228   | H, A_SER_228    | 2.81 | 1.98 | 13.22 |
| 5WKQ.PDB | O, A_SER_225 | N, A_ASN_229   | H, A_ASN_229    | 2.97 | 2.17 | 18.32 |
| 5WKQ.PDB | O, A_ALA_226 | OG1, A_THR_230 | HG1, A_THR_230  | 3.00 | 2.17 | 9.26  |
| 5WKQ.PDB | O, A_SER_228 | NE2, A_GLN_235 | HE22, A_GLN_235 | 2.83 | 2.08 | 24.75 |
| 5WKQ.PDB | O, B_ALA_75  | N, B_LEU_79    | H, B_LEU_79     | 2.76 | 1.93 | 13.13 |
| 5WKQ.PDB | O, B_SER_76  | N, B_THR_80    | H, B_THR_80     | 3.00 | 2.21 | 19.48 |
| 5WKQ.PDB | O, B_GLN_78  | N, B_LEU_82    | H, B_LEU_82     | 2.90 | 2.10 | 19.38 |
| 5WKQ.PDB | O, B_LEU_79  | N, B_ILE_83    | H, B_ILE_83     | 2.90 | 2.06 | 11.95 |
| 5WKQ.PDB | O, B_LEU_81  | N, B_ASN_85    | H, B_ASN_85     | 2.99 | 2.16 | 14.14 |
| 5WKQ.PDB | O, B_LEU_82  | N, B_LEU_86    | H, B_LEU_86     | 2.93 | 2.11 | 15.27 |
| 5WKQ.PDB | O, B_ILE_83  | N, B_ILE_87    | H, B_ILE_87     | 2.80 | 1.97 | 13.54 |
| 5WKQ.PDB | O, B_GLY_84  | N, B_GLN_88    | H, B_GLN_88     | 2.92 | 2.15 | 21.64 |
| 5WKQ.PDB | O, B_LEU_86  | N, B_LEU_90    | H, B_LEU_90     | 2.83 | 1.98 | 8.98  |
| 5WKQ.PDB | O, B_ILE_87  | N, B_GLY_91    | H, B_GLY_91     | 2.92 | 2.09 | 13.90 |
| 5WKQ.PDB | O, B_LEU_95  | N, B_THR_99    | H, B_THR_99     | 2.78 | 1.92 | 3.48  |
| 5WKQ.PDB | O, B_THR_96  | N, B_ASN_100   | H, B_ASN_100    | 2.89 | 2.06 | 14.47 |
| 5WKQ.PDB | O, B_ALA_97  | N, B_LYS_101   | H, B_LYS_101    | 2.94 | 2.10 | 8.27  |
| 5WKQ.PDB | O, B_LEU_98  | N, B_ILE_102   | H, B_ILE_102    | 2.87 | 2.10 | 23.41 |
| 5WKQ.PDB | O, B_THR_99  | N, B_THR_103   | H, B_THR_103    | 2.98 | 2.14 | 12.40 |
| 5WKQ.PDB | O, B_LYS_101 | N, B_TRP_105   | H, B_TRP_105    | 2.85 | 2.02 | 12.87 |
| 5WKQ.PDB | O, B_ILE_102 | N, B_LYS_106   | H, B_LYS_106    | 2.89 | 2.08 | 17.14 |
| 5WKQ.PDB | O, B_TRP_105 | N, B_GLN_109   | H, B_GLN_109    | 2.93 | 2.12 | 16.73 |
| 5WKQ.PDB | O, B_LYS_106 | N, B_GLN_110   | H, B_GLN_110    | 2.89 | 2.09 | 18.27 |
| 5WKQ.PDB | O, B_SER_107 | N, B_ALA_111   | H, B_ALA_111    | 2.92 | 2.12 | 17.32 |
| 5WKQ.PDB | O, B_GLN_108 | N, B_ARG_112   | H, B_ARG_112    | 2.99 | 2.14 | 6.98  |
| 5WKQ.PDB | O, B_GLN_109 | N, B_GLN_113   | H, B_GLN_113    | 2.90 | 2.09 | 16.25 |



|          |                |                |                 |      |      |       |
|----------|----------------|----------------|-----------------|------|------|-------|
| 5WKQ.PDB | O, B_GLN_110   | N, B_GLN_114   | H, B_GLN_114    | 2.91 | 2.09 | 15.83 |
| 5WKQ.PDB | O, B_ALA_111   | N, B_LYS_115   | H, B_LYS_115    | 2.90 | 2.07 | 13.13 |
| 5WKQ.PDB | O, B_ARG_112   | N, B_ASN_116   | H, B_ASN_116    | 2.85 | 2.03 | 15.38 |
| 5WKQ.PDB | O, B_GLN_114   | N, B_GLU_118   | H, B_GLU_118    | 2.95 | 2.12 | 11.18 |
| 5WKQ.PDB | O, B_LYS_115   | N, B_PHE_119   | H, B_PHE_119    | 2.93 | 2.08 | 7.47  |
| 5WKQ.PDB | O, B_ASN_116   | N, B_SER_120   | H, B_SER_120    | 2.96 | 2.11 | 7.40  |
| 5WKQ.PDB | O, B_LEU_117   | N, B_ASP_121   | H, B_ASP_121    | 2.93 | 2.09 | 10.56 |
| 5WKQ.PDB | O, B_GLU_118   | N, B_LYS_122   | H, B_LYS_122    | 2.95 | 2.15 | 18.53 |
| 5WKQ.PDB | O, B_PHE_119   | N, B_ILE_123   | H, B_ILE_123    | 2.84 | 2.00 | 11.79 |
| 5WKQ.PDB | O, B_LYS_122   | N, B_LEU_126   | H, B_LEU_126    | 2.94 | 2.08 | 4.26  |
| 5WKQ.PDB | O, B_ILE_123   | N, B_LEU_127   | H, B_LEU_127    | 2.80 | 2.00 | 17.69 |
| 5WKQ.PDB | O, B_THR_125   | N, B_GLU_129   | H, B_GLU_129    | 2.91 | 2.08 | 11.09 |
| 5WKQ.PDB | O, B_LEU_126   | N, B_THR_130   | H, B_THR_130    | 2.83 | 2.00 | 12.55 |
| 5WKQ.PDB | O, B_LEU_127   | N, B_GLU_131   | H, B_GLU_131    | 2.89 | 2.05 | 10.95 |
| 5WKQ.PDB | O, B_THR_130   | N, B_THR_134   | H, B_THR_134    | 2.79 | 1.98 | 16.24 |
| 5WKQ.PDB | O, B_THR_130   | OG1, B_THR_134 | HG1, B_THR_134  | 2.99 | 2.22 | 19.25 |
| 5WKQ.PDB | O, B_GLY_132   | N, B_ASP_136   | H, B_ASP_136    | 2.99 | 2.18 | 16.20 |
| 5WKQ.PDB | O, B_LEU_133   | N, B_TYR_137   | H, B_TYR_137    | 2.84 | 2.01 | 13.19 |
| 5WKQ.PDB | O, B_THR_134   | N, B_GLU_138   | H, B_GLU_138    | 2.98 | 2.16 | 14.73 |
| 5WKQ.PDB | O, B_TYR_137   | N, B_ILE_141   | H, B_ILE_141    | 2.98 | 2.19 | 19.03 |
| 5WKQ.PDB | O, B_GLN_140   | N, B_LEU_144   | H, B_LEU_144    | 2.86 | 2.11 | 25.33 |
| 5WKQ.PDB | O, B_ILE_141   | N, B_LYS_145   | H, B_LYS_145    | 2.89 | 2.08 | 15.46 |
| 5WKQ.PDB | O, B_LYS_143   | N, B_ALA_147   | H, B_ALA_147    | 2.95 | 2.16 | 20.04 |
| 5WKQ.PDB | O, B_LEU_144   | N, B_ASP_148   | H, B_ASP_148    | 2.84 | 1.99 | 5.61  |
| 5WKQ.PDB | O, B_LYS_145   | N, B_SER_149   | H, B_SER_149    | 2.97 | 2.17 | 18.50 |
| 5WKQ.PDB | O, B_ASN_146   | N, B_LYS_150   | H, B_LYS_150    | 2.94 | 2.13 | 17.77 |
| 5WKQ.PDB | O, B_ALA_147   | N, B_ILE_151   | H, B_ILE_151    | 2.98 | 2.16 | 14.66 |
| 5WKQ.PDB | O, B_ASP_148   | N, B_LYS_152   | H, B_LYS_152    | 2.91 | 2.07 | 10.46 |
| 5WKQ.PDB | O, B_ILE_151   | N, B_GLU_155   | H, B_GLU_155    | 2.85 | 2.01 | 9.24  |
| 5WKQ.PDB | O, B_LYS_152   | N, B_ASN_156   | H, B_ASN_156    | 2.87 | 2.10 | 22.12 |
| 5WKQ.PDB | O, B_LEU_154   | N, B_ILE_158   | H, B_ILE_158    | 2.84 | 2.00 | 9.55  |
| 5WKQ.PDB | O, B_ASN_156   | N, B_GLN_160   | H, B_GLN_160    | 2.98 | 2.15 | 12.59 |
| 5WKQ.PDB | O, B_LYS_157   | N, B_ILE_161   | H, B_ILE_161    | 2.99 | 2.17 | 15.50 |
| 5WKQ.PDB | OE2, B_GLU_182 | NE2, B_GLN_162 | HE21, B_GLN_162 | 2.63 | 1.85 | 20.38 |
| 5WKQ.PDB | O, B_ASN_159   | N, B_THR_163   | H, B_THR_163    | 2.97 | 2.13 | 11.47 |
| 5WKQ.PDB | O, B_GLN_160   | N, B_ARG_164   | H, B_ARG_164    | 2.79 | 1.95 | 8.04  |
| 5WKQ.PDB | O, B_ILE_161   | N, B_LEU_165   | H, B_LEU_165    | 2.73 | 1.95 | 20.16 |
| 5WKQ.PDB | O, B_THR_163   | OG, B_SER_166  | HG, B_SER_166   | 2.84 | 2.00 | 2.60  |
| 5WKQ.PDB | O, B_GLU_182   | N, B_THR_186   | H, B_THR_186    | 2.91 | 2.09 | 14.89 |
| 5WKQ.PDB | O, B_LEU_185   | N, B_LYS_189   | H, B_LYS_189    | 2.88 | 2.10 | 21.13 |
| 5WKQ.PDB | O, B_THR_186   | N, B_ASP_190   | H, B_ASP_190    | 2.94 | 2.09 | 7.09  |
| 5WKQ.PDB | O, B_LYS_189   | N, B_VAL_193   | H, B_VAL_193    | 2.86 | 2.07 | 19.28 |
| 5WKQ.PDB | O, B_ALA_191   | N, B_ASP_195   | H, B_ASP_195    | 2.76 | 1.92 | 9.36  |
| 5WKQ.PDB | O, B_ALA_192   | N, B_ARG_196   | H, B_ARG_196    | 2.80 | 2.02 | 20.33 |
| 5WKQ.PDB | OD1, B_ASP_148 | NH1, B_ARG_196 | HH11, B_ARG_196 | 2.87 | 2.13 | 25.83 |
| 5WKQ.PDB | O, B_VAL_193   | N, B_THR_197   | H, B_THR_197    | 2.86 | 2.02 | 10.23 |
| 5WKQ.PDB | O, B_ARG_196   | N, B_GLU_200   | H, B_GLU_200    | 2.88 | 2.05 | 12.74 |
| 5WKQ.PDB | O, B_THR_197   | N, B_GLN_201   | H, B_GLN_201    | 2.89 | 2.05 | 8.57  |
| 5WKQ.PDB | O, B_ILE_199   | N, B_THR_203   | H, B_THR_203    | 2.92 | 2.14 | 20.25 |
| 5WKQ.PDB | O, B_ILE_199   | OG1, B_THR_203 | HG1, B_THR_203  | 2.75 | 2.02 | 24.53 |
| 5WKQ.PDB | O, B_GLU_200   | N, B_LEU_204   | H, B_LEU_204    | 2.93 | 2.09 | 11.16 |
| 5WKQ.PDB | O, B_THR_203   | N, B_HIS_207   | H, B_HIS_207    | 2.92 | 2.07 | 7.74  |
| 5WKQ.PDB | OE2, A_GLU_131 | ND1, B_HIS_207 | HD1, B_HIS_207  | 2.65 | 1.88 | 22.26 |
| 5WKQ.PDB | O, B_LEU_204   | N, B_SER_208   | H, B_SER_208    | 2.87 | 2.08 | 18.92 |
| 5WKQ.PDB | O, B_SER_205   | N, B_LYS_209   | H, B_LYS_209    | 2.90 | 2.09 | 16.81 |
| 5WKQ.PDB | O, B_ILE_206   | N, B_LEU_210   | H, B_LEU_210    | 2.88 | 2.10 | 21.93 |
| 5WKQ.PDB | O, B_HIS_207   | N, B_THR_211   | H, B_THR_211    | 2.88 | 2.05 | 12.96 |
| 5WKQ.PDB | OE1, A_GLU_131 | OG1, B_THR_211 | HG1, B_THR_211  | 2.63 | 1.86 | 19.68 |

|          |              |               |               |      |      |       |
|----------|--------------|---------------|---------------|------|------|-------|
| 5WKQ.PDB | O, B.SER_208 | N, B.ASP_212  | H, B.ASP_212  | 2.88 | 2.08 | 18.34 |
| 5WKQ.PDB | O, B.LYS_209 | N, B.LYS_213  | H, B.LYS_213  | 2.97 | 2.19 | 21.54 |
| 5WKQ.PDB | O, B.THR_211 | OG, B.SER_214 | HG, B.SER_214 | 2.63 | 1.88 | 22.05 |
| 5WKQ.PDB | O, B.ASP_212 | N, B.GLN_216  | H, B.GLN_216  | 2.92 | 2.09 | 13.17 |
| 5WKQ.PDB | O, B.LYS_213 | N, B.LEU_217  | H, B.LEU_217  | 2.89 | 2.06 | 14.20 |
| 5WKQ.PDB | O, B.MET_215 | N, B.LYS_219  | H, B.LYS_219  | 2.89 | 2.07 | 14.81 |
| 5WKQ.PDB | O, B.GLN_216 | N, B.GLU_220  | H, B.GLU_220  | 2.97 | 2.15 | 14.12 |
| 5WKQ.PDB | O, B.LEU_217 | N, B.ILE_221  | H, B.ILE_221  | 2.90 | 2.10 | 17.72 |
| 5WKQ.PDB | O, B.GLU_218 | N, B.ASP_222  | H, B.ASP_222  | 2.89 | 2.07 | 14.28 |
| 5WKQ.PDB | O, B.LYS_219 | N, B.SER_223  | H, B.SER_223  | 2.87 | 2.04 | 11.53 |
| 5WKQ.PDB | O, B.ASP_222 | N, B.ALA_226  | H, B.ALA_226  | 2.87 | 2.09 | 21.47 |
| 5WKQ.PDB | O, B.SER_223 | N, B.PHE_227  | H, B.PHE_227  | 2.88 | 2.09 | 20.68 |

Table 1725: 5WKQ-specific side chain and main chain hydrogen bonding analysis. In this table, a PDB file is specified with a four-letter PDB ID, except that the names of the PDB files corresponding to the single NMR structural model split from the NMR ensemble is specified with a four-letter PDB ID in addition to a hyphen followed by the single NMR structural model numeric ID, the residue naming scheme is **Chain ID\_residue name\_residue number**,  $\angle ADH$  represents the angle formed by acceptor (A), donor (D) and hydrogen (H) ( $\angle ADH$ ).

| PDB      | Acceptor (A)   | Donor (D)     | Hydrogen (H)   | D-A (Å) | H-A (Å) | $\angle ADH(^{\circ})$ |
|----------|----------------|---------------|----------------|---------|---------|------------------------|
| 5WN9.PDB | OE1, H_GLN_1   | NE2, H_GLN_3  | HE21, H_GLN_3  | 2.70    | 1.88    | 14.43                  |
| 5WN9.PDB | O, H_LYS_23    | N, H_VAL_5    | H, H_VAL_5     | 2.93    | 2.10    | 13.33                  |
| 5WN9.PDB | OE1, H_GLN_116 | N, H_GLN_6    | H, H_GLN_6     | 2.83    | 1.97    | 4.77                   |
| 5WN9.PDB | O, H_TYR_94    | NE2, H_GLN_6  | HE22, H_GLN_6  | 2.87    | 2.09    | 20.35                  |
| 5WN9.PDB | O, H_LEU_119   | N, H_GLU_10   | H, H_GLU_10    | 2.95    | 2.12    | 13.96                  |
| 5WN9.PDB | O, H_THR_121   | N, H_LYS_12   | H, H_LYS_12    | 2.90    | 2.09    | 16.60                  |
| 5WN9.PDB | O, H_LEU_86    | N, H_GLY_15   | H, H_GLY_15    | 2.76    | 1.92    | 11.25                  |
| 5WN9.PDB | O, H_LEU_83    | N, H_VAL_18   | H, H_VAL_18    | 2.97    | 2.16    | 16.04                  |
| 5WN9.PDB | O, H_MET_81    | N, H_LEU_20   | H, H_LEU_20    | 2.76    | 1.92    | 9.07                   |
| 5WN9.PDB | O, H_VAL_5     | N, H_LYS_23   | H, H_LYS_23    | 2.84    | 1.99    | 8.74                   |
| 5WN9.PDB | O, H_ASN_77    | N, H_ALA_24   | H, H_ALA_24    | 2.85    | 2.00    | 2.73                   |
| 5WN9.PDB | O, H_GLN_3     | N, H_SER_25   | H, H_SER_25    | 2.91    | 2.11    | 19.22                  |
| 5WN9.PDB | O, H_GLY_97    | N, H_SER_35   | H, H_SER_35    | 2.98    | 2.16    | 11.85                  |
| 5WN9.PDB | O, H_TYR_95    | N, H_VAL_37   | H, H_VAL_37    | 2.89    | 2.08    | 15.19                  |
| 5WN9.PDB | O, H_GLU_46    | N, H_ARG_38   | H, H_ARG_38    | 2.88    | 2.07    | 17.27                  |
| 5WN9.PDB | OE1, H_GLU_46  | NE, H_ARG_38  | HE, H_ARG_38   | 2.78    | 2.00    | 20.76                  |
| 5WN9.PDB | OH, H_TYR_94   | NH2, H_ARG_38 | HH21, H_ARG_38 | 2.96    | 2.17    | 18.48                  |
| 5WN9.PDB | OD1, H_ASP_90  | NH2, H_ARG_38 | HH22, H_ARG_38 | 2.91    | 2.07    | 9.36                   |
| 5WN9.PDB | O, H_VAL_93    | N, H_GLN_39   | H, H_GLN_39    | 2.85    | 2.11    | 25.52                  |
| 5WN9.PDB | OE1, H_GLN_182 | NE2, H_GLN_39 | HE22, H_GLN_39 | 2.96    | 2.11    | 8.81                   |
| 5WN9.PDB | O, H_ARG_38    | N, H_GLU_46   | H, H_GLU_46    | 2.90    | 2.11    | 19.48                  |
| 5WN9.PDB | O, H_TRP_36    | N, H_MET_48   | H, H_MET_48    | 2.86    | 2.02    | 9.08                   |
| 5WN9.PDB | O, H_TYR_59    | N, H_TRP_50   | H, H_TRP_50    | 2.87    | 2.08    | 18.82                  |
| 5WN9.PDB | O, H_ALA_106   | NE1, H_TRP_50 | HE1, H_TRP_50  | 2.91    | 2.13    | 20.34                  |
| 5WN9.PDB | O, H_VAL_34    | N, H_SER_51   | H, H_SER_51    | 2.88    | 2.09    | 18.45                  |
| 5WN9.PDB | O, H_VAL_34    | OG, H_SER_51  | HG, H_SER_51   | 2.85    | 2.13    | 25.31                  |
| 5WN9.PDB | O, H_ASN_57    | N, H_SER_52   | H, H_SER_52    | 2.90    | 2.09    | 17.84                  |
| 5WN9.PDB | O, H_SER_52    | N, H_GLY_56   | H, H_GLY_56    | 2.91    | 2.13    | 21.69                  |
| 5WN9.PDB | OD1, H_ASN_55  | N, H_ASN_57   | H, H_ASN_57    | 2.95    | 2.11    | 6.76                   |
| 5WN9.PDB | O, H_TRP_50    | N, H_TYR_59   | H, H_TYR_59    | 2.96    | 2.17    | 19.00                  |
| 5WN9.PDB | O, H_MET_48    | N, H_ALA_61   | H, H_ALA_61    | 2.91    | 2.07    | 8.09                   |
| 5WN9.PDB | O, H_ALA_61    | N, H_LEU_64   | H, H_LEU_64    | 2.94    | 2.13    | 15.81                  |
| 5WN9.PDB | O, H_LEU_64    | N, H_ARG_67   | H, H_ARG_67    | 2.91    | 2.19    | 28.27                  |
| 5WN9.PDB | OD2, H_ASP_90  | NH1, H_ARG_67 | HH12, H_ARG_67 | 2.27    | 1.51    | 22.67                  |
| 5WN9.PDB | O, H_GLU_82    | N, H_THR_69   | H, H_THR_69    | 2.97    | 2.19    | 21.04                  |
| 5WN9.PDB | OH, H_TYR_60   | N, H_MET_70   | H, H_MET_70    | 2.89    | 2.04    | 9.93                   |
| 5WN9.PDB | O, H_THR_78    | N, H_ASP_73   | H, H_ASP_73    | 2.77    | 1.94    | 12.50                  |
| 5WN9.PDB | OD1, H_ASP_73  | N, H_SER_75   | H, H_SER_75    | 2.97    | 2.21    | 23.09                  |
| 5WN9.PDB | OD1, H_ASP_73  | OG, H_SER_75  | HG, H_SER_75   | 2.58    | 1.79    | 16.04                  |
| 5WN9.PDB | O, H_CYS_22    | N, H_ALA_79   | H, H_ALA_79    | 2.83    | 1.99    | 10.49                  |
| 5WN9.PDB | O, H_THR_71    | N, H_TYR_80   | H, H_TYR_80    | 2.85    | 2.01    | 11.64                  |
| 5WN9.PDB | O, H_LEU_20    | N, H_MET_81   | H, H_MET_81    | 2.95    | 2.14    | 16.70                  |
| 5WN9.PDB | O, H_THR_69    | N, H_GLU_82   | H, H_GLU_82    | 2.85    | 2.02    | 12.09                  |
| 5WN9.PDB | O, H_VAL_18    | N, H_LEU_83   | H, H_LEU_83    | 2.91    | 2.12    | 19.85                  |
| 5WN9.PDB | O, H_ARG_67    | N, H_ARG_84   | H, H_ARG_84    | 2.80    | 1.98    | 15.10                  |
| 5WN9.PDB | OG1, H_THR_69  | NH1, H_ARG_84 | HH12, H_ARG_84 | 2.83    | 2.06    | 21.62                  |
| 5WN9.PDB | O, H_ALA_66    | NH2, H_ARG_84 | HH21, H_ARG_84 | 2.99    | 2.24    | 24.04                  |
| 5WN9.PDB | O, H_ALA_16    | N, H_LEU_86   | H, H_LEU_86    | 2.99    | 2.14    | 2.07                   |
| 5WN9.PDB | OD2, H_ASP_90  | N, H_ARG_87   | H, H_ARG_87    | 2.89    | 2.10    | 17.07                  |
| 5WN9.PDB | O, H_SER_85    | NH1, H_ARG_87 | HH11, H_ARG_87 | 2.78    | 2.03    | 24.21                  |
| 5WN9.PDB | O, H_ARG_87    | N, H_ASP_90   | H, H_ASP_90    | 2.92    | 2.07    | 9.16                   |
| 5WN9.PDB | O, H_GLN_39    | N, H_VAL_93   | H, H_VAL_93    | 2.93    | 2.14    | 19.95                  |
| 5WN9.PDB | O, H_THR_118   | N, H_TYR_94   | H, H_TYR_94    | 2.77    | 1.92    | 7.11                   |
| 5WN9.PDB | O, H_ASP_90    | OH, H_TYR_94  | HH, H_TYR_94   | 2.64    | 1.81    | 7.80                   |
| 5WN9.PDB | O, H_VAL_37    | N, H_TYR_95   | H, H_TYR_95    | 2.71    | 1.86    | 4.49                   |
| 5WN9.PDB | O, H_SER_35    | N, H_GLY_97   | H, H_GLY_97    | 2.90    | 2.14    | 23.59                  |
| 5WN9.PDB | O, H_SER_113   | N, H_ARG_98   | H, H_ARG_98    | 2.91    | 2.10    | 16.03                  |

|          |                |                |                 |      |      |       |
|----------|----------------|----------------|-----------------|------|------|-------|
| 5WN9.PDB | OD1, H_ASP_112 | NE, H_ARG_98   | HE, H_ARG_98    | 2.94 | 2.13 | 15.87 |
| 5WN9.PDB | OD2, H_ASP_112 | NH1, H_ARG_98  | HH11, H_ARG_98  | 2.84 | 2.01 | 13.12 |
| 5WN9.PDB | O, H_PRO_110   | N, H_MET_100   | H, H_MET_100    | 2.87 | 2.05 | 15.00 |
| 5WN9.PDB | OD1, H_ASP_99  | N, H_GLY_109   | H, H_GLY_109    | 2.84 | 2.01 | 13.27 |
| 5WN9.PDB | OH, H_TYR_180  | N, H_PHE_111   | H, H_PHE_111    | 2.98 | 2.20 | 19.41 |
| 5WN9.PDB | O, H_CYS_96    | N, H_GLY_115   | H, H_GLY_115    | 2.86 | 2.02 | 9.77  |
| 5WN9.PDB | O, H_GLN_6     | NE2, H_GLN_116 | HE22, H_GLN_116 | 2.88 | 2.05 | 14.44 |
| 5WN9.PDB | OE1, H_GLN_6   | N, H_GLY_117   | H, H_GLY_117    | 2.99 | 2.25 | 25.16 |
| 5WN9.PDB | O, H_TYR_94    | N, H_THR_118   | H, H_THR_118    | 2.78 | 1.97 | 14.98 |
| 5WN9.PDB | O, H_SER_7     | OG1, H_THR_118 | HG1, H_THR_118  | 2.77 | 2.03 | 24.19 |
| 5WN9.PDB | O, H_ALA_92    | N, H_VAL_120   | H, H_VAL_120    | 2.95 | 2.10 | 8.42  |
| 5WN9.PDB | O, H_GLU_10    | N, H_THR_121   | H, H_THR_121    | 2.91 | 2.06 | 8.28  |
| 5WN9.PDB | OG1, H_THR_91  | N, H_VAL_122   | H, H_VAL_122    | 2.90 | 2.05 | 5.63  |
| 5WN9.PDB | O, H_LYS_12    | N, H_SER_123   | H, H_SER_123    | 2.75 | 1.94 | 16.31 |
| 5WN9.PDB | O, H_ARG_168   | N, H_THR_149   | H, H_THR_149    | 2.97 | 2.13 | 11.46 |
| 5WN9.PDB | O, H_TYR_230   | NE2, H_GLN_150 | HE22, H_GLN_150 | 2.99 | 2.13 | 4.72  |
| 5WN9.PDB | O, H_SER_166   | N, H_SER_151   | H, H_SER_151    | 2.95 | 2.15 | 17.82 |
| 5WN9.PDB | O, H_LYS_247   | N, H_VAL_155   | H, H_VAL_155    | 2.96 | 2.17 | 20.07 |
| 5WN9.PDB | O, H_GLU_249   | N, H_ALA_157   | H, H_ALA_157    | 2.97 | 2.20 | 22.22 |
| 5WN9.PDB | OD2, H_ASP_161 | N, H_SER_158   | H, H_SER_158    | 2.85 | 2.00 | 7.54  |
| 5WN9.PDB | O, H_LEU_222   | N, H_GLY_160   | H, H_GLY_160    | 2.71 | 1.90 | 15.63 |
| 5WN9.PDB | OG1, H_THR_218 | NH2, H_ARG_162 | HH21, H_ARG_162 | 2.83 | 2.04 | 19.79 |
| 5WN9.PDB | O, H_LEU_217   | N, H_ILE_165   | H, H_ILE_165    | 2.79 | 1.95 | 8.96  |
| 5WN9.PDB | O, H_SER_151   | N, H_SER_166   | H, H_SER_166    | 2.82 | 1.97 | 7.02  |
| 5WN9.PDB | O, H_PHE_215   | N, H_CYS_167   | H, H_CYS_167    | 2.89 | 2.04 | 8.23  |
| 5WN9.PDB | O, H_THR_149   | N, H_ARG_168   | H, H_ARG_168    | 2.89 | 2.06 | 13.39 |
| 5WN9.PDB | O, H_THR_213   | N, H_ALA_169   | H, H_ALA_169    | 2.83 | 2.01 | 14.31 |
| 5WN9.PDB | O, H_GLY_212   | N, H_ILE_173   | H, H_ILE_173    | 2.92 | 2.09 | 10.87 |
| 5WN9.PDB | O, H_ILE_173   | N, H_SER_176   | H, H_SER_176    | 2.94 | 2.08 | 5.22  |
| 5WN9.PDB | O, H_GLN_233   | N, H_ALA_178   | H, H_ALA_178    | 2.89 | 2.06 | 12.90 |
| 5WN9.PDB | O, H_ILE_192   | N, H_TRP_179   | H, H_TRP_179    | 2.88 | 2.07 | 16.13 |
| 5WN9.PDB | O, H_TYR_231   | N, H_TYR_180   | H, H_TYR_180    | 2.81 | 2.00 | 16.41 |
| 5WN9.PDB | OE1, H_GLN_233 | OH, H_TYR_180  | HH, H_TYR_180   | 2.70 | 1.87 | 8.37  |
| 5WN9.PDB | O, H_GLN_189   | N, H_GLN_181   | H, H_GLN_181    | 2.87 | 2.05 | 15.50 |
| 5WN9.PDB | O, H_THR_229   | N, H_GLN_182   | H, H_GLN_182    | 2.73 | 1.91 | 15.73 |
| 5WN9.PDB | O, H_LYS_186   | NE2, H_GLN_182 | HE21, H_GLN_182 | 2.95 | 2.15 | 17.69 |
| 5WN9.PDB | OE1, H_GLN_39  | NE2, H_GLN_182 | HE22, H_GLN_182 | 2.85 | 2.00 | 9.41  |
| 5WN9.PDB | O, H_GLN_181   | N, H_GLN_189   | H, H_GLN_189    | 2.76 | 1.98 | 20.74 |
| 5WN9.PDB | O, H_TRP_179   | N, H_LEU_191   | H, H_LEU_191    | 2.80 | 1.95 | 5.76  |
| 5WN9.PDB | O, H_SER_197   | N, H_TYR_193   | H, H_TYR_193    | 2.93 | 2.13 | 18.06 |
| 5WN9.PDB | O, H_LEU_177   | N, H_ALA_195   | H, H_ALA_195    | 2.82 | 2.00 | 13.79 |
| 5WN9.PDB | O, H_GLY_208   | OG, H_BSER_196 | HG, H_BSER_196  | 2.95 | 2.19 | 21.28 |
| 5WN9.PDB | O, H_TYR_193   | N, H_SER_197   | H, H_SER_197    | 2.88 | 2.08 | 19.19 |
| 5WN9.PDB | O, H_LEU_191   | N, H_GLN_199   | H, H_GLN_199    | 2.93 | 2.07 | 0.47  |
| 5WN9.PDB | OD2, H_ASP_226 | NE, H_ARG_205  | HE, H_ARG_205   | 2.80 | 1.99 | 17.36 |
| 5WN9.PDB | OD1, H_ASP_226 | NH1, H_ARG_205 | HH11, H_ARG_205 | 2.89 | 2.03 | 4.48  |
| 5WN9.PDB | O, H_THR_216   | N, H_SER_209   | H, H_SER_209    | 3.00 | 2.21 | 19.73 |
| 5WN9.PDB | O, H_SER_174   | N, H_GLY_212   | H, H_GLY_212    | 2.91 | 2.07 | 9.42  |
| 5WN9.PDB | O, H_CYS_167   | N, H_PHE_215   | H, H_PHE_215    | 2.93 | 2.12 | 15.69 |
| 5WN9.PDB | O, H_ILE_165   | N, H_LEU_217   | H, H_LEU_217    | 2.91 | 2.09 | 15.07 |
| 5WN9.PDB | O, H_SER_207   | N, H_THR_218   | H, H_THR_218    | 2.92 | 2.08 | 10.72 |
| 5WN9.PDB | OG1, H_THR_164 | OG1, H_THR_218 | HG1, H_THR_218  | 2.96 | 2.26 | 28.62 |
| 5WN9.PDB | O, H_VAL_163   | N, H_ILE_219   | H, H_ILE_219    | 2.79 | 1.97 | 14.91 |
| 5WN9.PDB | O, H_ARG_205   | N, H_SER_220   | H, H_SER_220    | 2.99 | 2.21 | 20.02 |
| 5WN9.PDB | O, H_ASP_161   | N, H_LEU_222   | H, H_LEU_222    | 2.76 | 1.97 | 18.80 |
| 5WN9.PDB | OD2, H_ASP_226 | N, H_GLN_223   | H, H_GLN_223    | 2.93 | 2.08 | 7.95  |
| 5WN9.PDB | O, H_GLN_223   | N, H_ASP_226   | H, H_ASP_226    | 2.82 | 1.98 | 8.91  |
| 5WN9.PDB | O, H_THR_246   | N, H_TYR_230   | H, H_TYR_230    | 2.87 | 2.06 | 16.33 |

|          |               |                |                |      |      |       |
|----------|---------------|----------------|----------------|------|------|-------|
| 5WN9.PDB | O, H_ASP_226  | OH, H_TYR_230  | HH, H_TYR_230  | 2.62 | 1.80 | 10.05 |
| 5WN9.PDB | O, H_TYR_180  | N, H_TYR_231   | H, H_TYR_231   | 2.93 | 2.12 | 16.57 |
| 5WN9.PDB | O, H_THR_241  | N, H_GLN_234   | H, H_GLN_234   | 2.95 | 2.18 | 23.47 |
| 5WN9.PDB | O, H_THR_146  | OG1, H_THR_241 | HG1, H_THR_241 | 2.72 | 1.91 | 13.19 |
| 5WN9.PDB | O, H_CYS_232  | N, H_GLY_243   | H, H_GLY_243   | 2.91 | 2.11 | 17.20 |
| 5WN9.PDB | O, H_TYR_230  | N, H_THR_246   | H, H_THR_246   | 2.86 | 2.08 | 20.56 |
| 5WN9.PDB | O, H_PRO_152  | OG1, H_THR_246 | HG1, H_THR_246 | 2.65 | 1.95 | 28.58 |
| 5WN9.PDB | O, H_SER_153  | N, H_LYS_247   | H, H_LYS_247   | 2.96 | 2.15 | 15.87 |
| 5WN9.PDB | O, H_ALA_228  | N, H_VAL_248   | H, H_VAL_248   | 2.90 | 2.04 | 3.82  |
| 5WN9.PDB | O, H_VAL_155  | N, H_GLU_249   | H, H_GLU_249   | 2.87 | 2.03 | 10.19 |
| 5WN9.PDB | O, A_LYS_187  | N, A_CYS_173   | H, A_CYS_173   | 2.97 | 2.18 | 19.66 |
| 5WN9.PDB | O, A_CYS_176  | N, A_ASN_179   | H, A_ASN_179   | 2.99 | 2.15 | 7.83  |
| 5WN9.PDB | O, A_SER_177  | NE1, A_TRP_183 | HE1, A_TRP_183 | 2.88 | 2.03 | 4.80  |
| 5WN9.PDB | O, A_VAL_171  | N, A_LYS_187   | H, A_LYS_187   | 2.85 | 2.04 | 15.74 |
| 5WN9.PDB | OD1, H_ASN_57 | NE, A_ARG_188  | HE, A_ARG_188  | 2.58 | 1.61 | 2.15  |

Table 1726: 5WN9-specific side chain and main chain hydrogen bonding analysis. In this table, a PDB file is specified with a four-letter PDB ID, except that the names of the PDB files corresponding to the single NMR structural model split from the NMR ensemble is specified with a four-letter PDB ID in addition to a hyphen followed by the single NMR structural model numeric ID, the residue naming scheme is **Chain ID\_residue name\_residue number**,  $\angle ADH$  represents the angle formed by acceptor (A), donor (D) and hydrogen (H) ( $\angle ADH$ ).

| PDB      | Acceptor (A)   | Donor (D)     | Hydrogen (H)   | D-A (Å) | H-A (Å) | $\angle ADH(^{\circ})$ |
|----------|----------------|---------------|----------------|---------|---------|------------------------|
| 1A14.PDB | OG, H_SER_25   | NE2, H_GLN_5  | HE21, H_GLN_5  | 2.94    | 2.02    | 15.87                  |
| 1A14.PDB | OE1, L_GLN_38  | NE2, H_GLN_39 | HE21, H_GLN_39 | 2.62    | 1.69    | 9.24                   |
| 1A14.PDB | OG1, H_THR_77  | OG, H_SER_75  | HG, H_SER_75   | 2.86    | 2.04    | 27.11                  |
| 1A14.PDB | OE2, H_GLU_85  | OG, H_SER_84  | HG, H_SER_84   | 2.91    | 1.99    | 12.42                  |
| 1A14.PDB | OD2, H_ASP_101 | NH2, H_ARG_94 | HH21, H_ARG_94 | 2.75    | 1.83    | 16.91                  |

Table 1727: 1A14-specific side chain hydrogen bonding analysis. In this table, a PDB file is specified with a four-letter PDB ID, except that the names of the PDB files corresponding to the single NMR structural model split from the NMR ensemble is specified with a four-letter PDB ID in addition to a hyphen followed by the single NMR structural model numeric ID, the residue naming scheme is **Chain ID\_residue name\_residue number**,  $\angle ADH$  represents the angle formed by acceptor (A), donor (D) and hydrogen (H) ( $\angle ADH$ ).

| PDB      | Acceptor (A)  | Donor (D)      | Hydrogen (H)    | D-A (Å) | H-A (Å) | $\angle ADH(^{\circ})$ |
|----------|---------------|----------------|-----------------|---------|---------|------------------------|
| 1E6J.PDB | OH, L-TYR_85  | NE2, L-GLN_36  | HE21, L-GLN_36  | 2.83    | 1.87    | 8.49                   |
| 1E6J.PDB | OE1, H-GLN_39 | NE2, L-GLN_37  | HE22, L-GLN_37  | 2.69    | 1.84    | 23.98                  |
| 1E6J.PDB | OG, L-SER_129 | NE2, L-GLN_122 | HE22, L-GLN_122 | 2.94    | 2.00    | 13.76                  |

Table 1728: 1E6J-specific side chain hydrogen bonding analysis. In this table, a PDB file is specified with a four-letter PDB ID, except that the names of the PDB files corresponding to the single NMR structural model split from the NMR ensemble is specified with a four-letter PDB ID in addition to a hyphen followed by the single NMR structural model numeric ID, the residue naming scheme is **Chain ID\_residue name\_residue number**,  $\angle ADH$  represents the angle formed by acceptor (A), donor (D) and hydrogen (H) ( $\angle ADH$ ).

| PDB      | Acceptor (A)   | Donor (D)      | Hydrogen (H)    | D-A (Å) | H-A (Å) | $\angle ADH(^{\circ})$ |
|----------|----------------|----------------|-----------------|---------|---------|------------------------|
| 1F3R.PDB | OD1, B_ASN_83  | OG1, B_THR_17  | HG1, B_THR_17   | 2.73    | 1.80    | 13.32                  |
| 1F3R.PDB | NE1, A_TRP_67  | OG, B_SER_61   | HG, B_SER_61    | 2.86    | 1.89    | 6.31                   |
| 1F3R.PDB | OG1, B_THR_212 | OG1, B_THR_158 | HG1, B_THR_158  | 2.80    | 1.87    | 11.10                  |
| 1F3R.PDB | OD1, B_ASP_220 | NH1, B_ARG_199 | HH12, B_ARG_199 | 2.89    | 1.98    | 22.15                  |
| 1F3R.PDB | OE1, B_GLN_217 | OG, B_SER_215  | HG, B_SER_215   | 2.66    | 1.72    | 13.57                  |
| 1F3R.PDB | NE1, B_TRP_47  | OH, B_TYR_227  | HH, B_TYR_227   | 2.99    | 2.20    | 29.73                  |
| 1F3R.PDB | OD1, B_ASN_188 | OH, B_TYR_229  | HH, B_TYR_229   | 2.66    | 1.70    | 7.44                   |

Table 1729: 1F3R-specific side chain hydrogen bonding analysis. In this table, a PDB file is specified with a four-letter PDB ID, except that the names of the PDB files corresponding to the single NMR structural model split from the NMR ensemble is specified with a four-letter PDB ID in addition to a hyphen followed by the single NMR structural model numeric ID, the residue naming scheme is **Chain ID\_residue name\_residue number**,  $\angle ADH$  represents the angle formed by acceptor (A), donor (D) and hydrogen (H) ( $\angle ADH$ ).



| PDB      | Acceptor (A)  | Donor (D)     | Hydrogen (H)   | D-A (Å) | H-A (Å) | $\angle ADH(^{\circ})$ |
|----------|---------------|---------------|----------------|---------|---------|------------------------|
| 1HCV.PDB | OE2, A_GLU_46 | NE, A_ARG_38  | HE, A_ARG_38   | 2.98    | 2.01    | 4.47                   |
| 1HCV.PDB | OH, A_TYR_90  | NH1, A_ARG_38 | HH11, A_ARG_38 | 2.93    | 1.98    | 14.34                  |
| 1HCV.PDB | OD1, A_ASP_86 | NH1, A_ARG_38 | HH12, A_ARG_38 | 2.86    | 1.90    | 11.61                  |

Table 1730: 1HCV-specific side chain hydrogen bonding analysis. In this table, a PDB file is specified with a four-letter PDB ID, except that the names of the PDB files corresponding to the single NMR structural model split from the NMR ensemble is specified with a four-letter PDB ID in addition to a hyphen followed by the single NMR structural model numeric ID, the residue naming scheme is **Chain ID\_residue name\_residue number**,  $\angle ADH$  represents the angle formed by acceptor (A), donor (D) and hydrogen (H) ( $\angle ADH$ ).

| PDB      | Acceptor (A)   | Donor (D)      | Hydrogen (H)    | D-A (Å) | H-A (Å) | $\angle ADH(^{\circ})$ |
|----------|----------------|----------------|-----------------|---------|---------|------------------------|
| 1HGD.PDB | OE2, B_GLU_97  | NZ, A_LYS_27   | HZ1, A_LYS_27   | 2.80    | 1.78    | 9.95                   |
| 1HGD.PDB | OD2, A_ASP_275 | NZ, A_LYS_50   | HZ1, A_LYS_50   | 2.70    | 1.79    | 23.99                  |
| 1HGD.PDB | OD1, A_ASP_73  | ND1, A_HIS_75  | HD1, A_HIS_75   | 2.82    | 1.92    | 19.21                  |
| 1HGD.PDB | OD1, A_ASP_60  | NE, A_ARG_90   | HE, A_ARG_90    | 2.88    | 1.91    | 7.55                   |
| 1HGD.PDB | OD2, A_ASP_60  | NH2, A_ARG_90  | HH21, A_ARG_90  | 2.80    | 1.82    | 10.07                  |
| 1HGD.PDB | OD1, A_ASP_271 | OG, A_SER_91   | HG, A_SER_91    | 2.93    | 2.12    | 28.00                  |
| 1HGD.PDB | OD2, A_ASP_271 | OG, A_SER_91   | HG, A_SER_91    | 2.81    | 1.91    | 17.78                  |
| 1HGD.PDB | OD2, A_ASP_68  | OG, A_SER_95   | HG, A_SER_95    | 2.92    | 1.99    | 16.11                  |
| 1HGD.PDB | OD1, A_ASP_68  | OH, A_TYR_100  | HH, A_TYR_100   | 2.88    | 1.90    | 0.98                   |
| 1HGD.PDB | OD2, A_ASP_104 | OG, A_SER_107  | HG, A_SER_107   | 2.86    | 1.96    | 19.52                  |
| 1HGD.PDB | OE2, B_GLU_67  | NH2, A_ARG_109 | HH21, A_ARG_109 | 2.83    | 1.84    | 13.41                  |
| 1HGD.PDB | OD2, F_ASP_79  | OG, A_SER_110  | HG, A_SER_110   | 2.92    | 1.96    | 11.03                  |
| 1HGD.PDB | OE2, A_GLU_119 | OG1, A_THR_117 | HG1, A_THR_117  | 2.87    | 1.92    | 9.92                   |
| 1HGD.PDB | OD1, A_ASN_137 | NZ, A_LYS_140  | HZ2, A_LYS_140  | 2.76    | 1.82    | 19.96                  |
| 1HGD.PDB | OD2, A_ASP_77  | NE, A_ARG_141  | HE, A_ARG_141   | 2.80    | 1.97    | 26.87                  |
| 1HGD.PDB | OD1, A_ASP_77  | NH2, A_ARG_141 | HH21, A_ARG_141 | 2.86    | 1.95    | 21.98                  |
| 1HGD.PDB | OD2, A_ASP_77  | NH2, A_ARG_141 | HH21, A_ARG_141 | 2.74    | 1.86    | 23.87                  |
| 1HGD.PDB | OH, A_TYR_195  | NE1, A_TRP_153 | HE1, A_TRP_153  | 2.81    | 1.92    | 20.45                  |
| 1HGD.PDB | OE2, A_GLU_123 | NZ, A_LYS_176  | HZ2, A_LYS_176  | 2.69    | 1.80    | 25.20                  |
| 1HGD.PDB | OE1, A_GLU_123 | OH, A_TYR_178  | HH, A_TYR_178   | 2.75    | 1.82    | 12.48                  |
| 1HGD.PDB | OG1, A_THR_235 | NE1, A_TRP_180 | HE1, A_TRP_180  | 2.94    | 1.95    | 4.39                   |
| 1HGD.PDB | OG, A_SER_231  | NE2, A_HIS_184 | HE2, A_HIS_184  | 2.78    | 1.93    | 25.06                  |
| 1HGD.PDB | OD1, A_ASN_246 | NH2, A_ARG_201 | HH21, A_ARG_201 | 2.59    | 1.75    | 26.83                  |
| 1HGD.PDB | OG1, A_THR_206 | OG, A_SER_209  | HG, A_SER_209   | 2.90    | 1.96    | 11.12                  |
| 1HGD.PDB | OD1, E_ASP_101 | NE2, A_GLN_210 | HE22, A_GLN_210 | 3.00    | 2.15    | 26.33                  |
| 1HGD.PDB | OG1, A_THR_203 | OG1, A_THR_212 | HG1, A_THR_212  | 2.90    | 1.94    | 6.68                   |
| 1HGD.PDB | OE1, C_GLN_210 | NH2, A_ARG_220 | HH21, A_ARG_220 | 2.78    | 1.86    | 19.99                  |
| 1HGD.PDB | OE2, A_GLU_190 | OG, A_SER_228  | HG, A_SER_228   | 2.98    | 2.00    | 5.61                   |
| 1HGD.PDB | OD1, A_ASP_101 | OG, A_SER_231  | HG, A_SER_231   | 2.84    | 1.88    | 8.92                   |
| 1HGD.PDB | OE1, F_GLU_72  | NZ, A_LYS_238  | HZ3, A_LYS_238  | 2.93    | 1.92    | 13.44                  |
| 1HGD.PDB | OD1, A_ASN_165 | ND2, A_ASN_246 | HD22, A_ASN_246 | 2.92    | 1.97    | 12.69                  |
| 1HGD.PDB | OE1, A_GLN_191 | ND2, A_ASN_250 | HD21, A_ASN_250 | 2.94    | 1.98    | 9.96                   |
| 1HGD.PDB | OD1, A_ASN_133 | NH2, A_ARG_255 | HH22, A_ARG_255 | 2.53    | 1.69    | 26.82                  |
| 1HGD.PDB | OE2, A_GLU_119 | NH1, A_ARG_261 | HH12, A_ARG_261 | 2.65    | 1.81    | 27.93                  |
| 1HGD.PDB | OE1, A_GLU_119 | NH2, A_ARG_261 | HH22, A_ARG_261 | 2.88    | 1.97    | 22.77                  |
| 1HGD.PDB | OD2, A_ASP_85  | NZ, A_LYS_264  | HZ3, A_LYS_264  | 2.85    | 1.86    | 16.67                  |
| 1HGD.PDB | OE1, A_GLN_44  | NZ, A_LYS_292  | HZ1, A_LYS_292  | 2.71    | 1.70    | 11.58                  |
| 1HGD.PDB | OD2, A_ASP_291 | NZ, A_LYS_292  | HZ3, A_LYS_292  | 2.78    | 1.85    | 22.68                  |
| 1HGD.PDB | OD1, A_ASN_285 | ND2, A_ASN_298 | HD22, A_ASN_298 | 2.98    | 2.04    | 13.52                  |
| 1HGD.PDB | OE1, A_GLU_41  | NZ, A_LYS_315  | HZ3, A_LYS_315  | 2.76    | 1.81    | 20.40                  |
| 1HGD.PDB | OE2, A_GLU_35  | ND2, A_ASN_322 | HD22, A_ASN_322 | 2.84    | 1.97    | 23.40                  |
| 1HGD.PDB | OE1, B_GLN_34  | NE, B_ARG_25   | HE, B_ARG_25    | 2.65    | 1.77    | 20.51                  |
| 1HGD.PDB | OD1, B_ASP_46  | NE2, B_GLN_42  | HE22, B_GLN_42  | 2.84    | 1.95    | 20.63                  |
| 1HGD.PDB | OG1, B_THR_107 | NZ, B_LYS_51   | HZ1, B_LYS_51   | 2.96    | 1.97    | 16.32                  |
| 1HGD.PDB | OE1, B_GLU_103 | NZ, B_LYS_51   | HZ2, B_LYS_51   | 2.73    | 1.71    | 9.93                   |
| 1HGD.PDB | ND1, B_HIS_106 | NZ, B_LYS_51   | HZ3, B_LYS_51   | 2.75    | 1.79    | 17.84                  |
| 1HGD.PDB | OE1, B_GLU_57  | NH1, B_ARG_54  | HH11, B_ARG_54  | 2.86    | 1.87    | 11.55                  |
| 1HGD.PDB | OE2, F_GLU_97  | NH2, B_ARG_54  | HH22, B_ARG_54  | 2.77    | 1.80    | 12.79                  |
| 1HGD.PDB | OE2, B_GLU_61  | NZ, B_LYS_58   | HZ2, B_LYS_58   | 2.91    | 1.88    | 11.49                  |
| 1HGD.PDB | OD2, F_ASP_86  | NZ, B_LYS_62   | HZ1, B_LYS_62   | 2.61    | 1.78    | 29.53                  |
| 1HGD.PDB | OD2, F_ASP_90  | NZ, B_LYS_62   | HZ3, B_LYS_62   | 2.73    | 1.84    | 25.56                  |
| 1HGD.PDB | OG, A_SER_110  | NE2, B_HIS_64  | HE2, B_HIS_64   | 2.96    | 2.01    | 12.34                  |
| 1HGD.PDB | OE2, B_GLU_85  | NZ, B_LYS_68   | HZ2, B_LYS_68   | 2.76    | 1.74    | 9.73                   |
| 1HGD.PDB | OE2, D_GLU_81  | NE, B_ARG_76   | HE, B_ARG_76    | 2.88    | 1.91    | 8.67                   |
| 1HGD.PDB | OE2, D_GLU_74  | NH1, B_ARG_76  | HH12, B_ARG_76  | 2.84    | 1.82    | 2.51                   |
| 1HGD.PDB | OE1, D_GLU_81  | NH2, B_ARG_76  | HH21, B_ARG_76  | 2.71    | 1.71    | 6.80                   |
| 1HGD.PDB | OE1, D_GLU_74  | NH2, B_ARG_76  | HH22, B_ARG_76  | 2.75    | 1.75    | 3.21                   |

|          |                |                |                 |      |      |       |
|----------|----------------|----------------|-----------------|------|------|-------|
| 1HGD.PDB | OE1, B_GLU_74  | NE2, B_GLN_78  | HE22, B_GLN_78  | 2.92 | 1.97 | 11.55 |
| 1HGD.PDB | OE1, D_GLU_85  | OH, B_TYR_83   | HH, B_TYR_83    | 2.65 | 1.81 | 23.27 |
| 1HGD.PDB | OH, F_TYR_83   | NZ, B_LYS_88   | HZ1, B_LYS_88   | 2.76 | 1.72 | 5.59  |
| 1HGD.PDB | OE2, B_GLU_120 | NH1, B_ARG_123 | HH11, B_ARG_123 | 2.79 | 1.91 | 24.17 |
| 1HGD.PDB | OE1, F_GLU_132 | NE, B_ARG_124  | HE, B_ARG_124   | 2.83 | 2.02 | 28.17 |
| 1HGD.PDB | OE2, F_GLU_132 | NE, B_ARG_124  | HE, B_ARG_124   | 2.88 | 2.01 | 22.00 |
| 1HGD.PDB | OH, B_TYR_157  | ND2, B_ASN_129 | HD22, B_ASN_129 | 2.78 | 1.83 | 11.22 |
| 1HGD.PDB | OE2, B_GLU_150 | ND2, B_ASN_154 | HD21, B_ASN_154 | 2.98 | 2.09 | 22.34 |
| 1HGD.PDB | OD1, B_ASN_154 | OG1, B_THR_156 | HG1, B_THR_156  | 2.75 | 1.84 | 16.14 |
| 1HGD.PDB | OE2, B_GLU_131 | NH1, B_ARG_170 | HH11, B_ARG_170 | 2.78 | 1.79 | 7.42  |
| 1HGD.PDB | OE2, D_GLU_97  | NZ, C_LYS_27   | HZ1, C_LYS_27   | 2.80 | 1.77 | 7.54  |
| 1HGD.PDB | OD2, C_ASP_275 | NZ, C_LYS_50   | HZ1, C_LYS_50   | 2.66 | 1.78 | 25.77 |
| 1HGD.PDB | OD1, C_ASP_73  | ND1, C_HIS_75  | HD1, C_HIS_75   | 2.77 | 1.87 | 19.67 |
| 1HGD.PDB | OD1, C_ASP_60  | NE, C_ARG_90   | HE, C_ARG_90    | 2.86 | 1.89 | 9.66  |
| 1HGD.PDB | OD2, C_ASP_60  | NH2, C_ARG_90  | HH21, C_ARG_90  | 2.78 | 1.79 | 10.49 |
| 1HGD.PDB | OD1, C_ASP_271 | OG, C_SER_91   | HG, C_SER_91    | 2.93 | 2.11 | 26.93 |
| 1HGD.PDB | OD2, C_ASP_271 | OG, C_SER_91   | HG, C_SER_91    | 2.86 | 1.96 | 18.80 |
| 1HGD.PDB | OD2, C_ASP_68  | OG, C_SER_95   | HG, C_SER_95    | 2.88 | 1.96 | 15.18 |
| 1HGD.PDB | OD1, C_ASP_68  | OH, C_TYR_100  | HH, C_TYR_100   | 2.89 | 1.96 | 14.39 |
| 1HGD.PDB | OD2, C_ASP_104 | OG, C_SER_107  | HG, C_SER_107   | 2.91 | 2.00 | 17.92 |
| 1HGD.PDB | OE2, D_GLU_67  | NH2, C_ARG_109 | HH21, C_ARG_109 | 2.87 | 1.88 | 13.44 |
| 1HGD.PDB | OD2, B_ASP_79  | OG, C_SER_110  | HG, C_SER_110   | 2.73 | 1.84 | 19.59 |
| 1HGD.PDB | OE2, C_GLU_119 | OG1, C_THR_117 | HG1, C_THR_117  | 2.86 | 1.93 | 10.42 |
| 1HGD.PDB | OD1, C_ASN_137 | NZ, C_LYS_140  | HZ2, C_LYS_140  | 2.78 | 1.84 | 20.52 |
| 1HGD.PDB | OD2, C_ASP_77  | NE, C_ARG_141  | HE, C_ARG_141   | 2.80 | 1.97 | 27.06 |
| 1HGD.PDB | OD1, C_ASP_77  | NH2, C_ARG_141 | HH21, C_ARG_141 | 2.87 | 1.96 | 21.76 |
| 1HGD.PDB | OD2, C_ASP_77  | NH2, C_ARG_141 | HH21, C_ARG_141 | 2.75 | 1.86 | 23.93 |
| 1HGD.PDB | OD1, C_ASN_137 | OG, C_SER_145  | HG, C_SER_145   | 2.98 | 2.13 | 22.87 |
| 1HGD.PDB | OH, C_TYR_195  | NE1, C_TRP_153 | HE1, C_TRP_153  | 2.80 | 1.95 | 24.25 |
| 1HGD.PDB | OE2, C_GLU_123 | NZ, C_LYS_176  | HZ2, C_LYS_176  | 2.69 | 1.80 | 25.35 |
| 1HGD.PDB | OE1, C_GLU_123 | OH, C_TYR_178  | HH, C_TYR_178   | 2.73 | 1.80 | 13.21 |
| 1HGD.PDB | OG1, C_THR_235 | NE1, C_TRP_180 | HE1, C_TRP_180  | 2.91 | 1.93 | 2.97  |
| 1HGD.PDB | OG, C_SER_231  | NE2, C_HIS_184 | HE2, C_HIS_184  | 2.75 | 1.91 | 25.20 |
| 1HGD.PDB | OD1, C_ASN_250 | NE2, C_GLN_191 | HE21, C_GLN_191 | 2.98 | 2.02 | 9.43  |
| 1HGD.PDB | OD1, C_ASN_246 | NH2, C_ARG_201 | HH21, C_ARG_201 | 2.60 | 1.77 | 27.30 |
| 1HGD.PDB | OG1, C_THR_212 | OG1, C_THR_203 | HG1, C_THR_203  | 2.89 | 1.96 | 13.30 |
| 1HGD.PDB | OD2, C_ASP_241 | NE, C_ARG_208  | HE, C_ARG_208   | 2.97 | 2.08 | 21.42 |
| 1HGD.PDB | OG1, C_THR_206 | OG, C_SER_209  | HG, C_SER_209   | 2.92 | 1.98 | 10.99 |
| 1HGD.PDB | OD1, A_ASP_101 | NE2, C_GLN_210 | HE22, C_GLN_210 | 2.97 | 2.13 | 27.21 |
| 1HGD.PDB | OE1, E_GLN_210 | NH2, C_ARG_220 | HH21, C_ARG_220 | 2.69 | 1.80 | 23.00 |
| 1HGD.PDB | OE2, C_GLU_190 | OG, C_SER_228  | HG, C_SER_228   | 3.00 | 2.02 | 4.69  |
| 1HGD.PDB | OD1, C_ASP_101 | OG, C_SER_231  | HG, C_SER_231   | 2.87 | 1.90 | 8.39  |
| 1HGD.PDB | OE1, B_GLU_72  | NZ, C_LYS_238  | HZ1, C_LYS_238  | 2.80 | 1.83 | 17.68 |
| 1HGD.PDB | OD1, C_ASN_165 | ND2, C_ASN_246 | HD22, C_ASN_246 | 2.91 | 1.96 | 13.56 |
| 1HGD.PDB | OE1, C_GLN_191 | ND2, C_ASN_250 | HD21, C_ASN_250 | 2.90 | 1.95 | 10.99 |
| 1HGD.PDB | OD1, C_ASN_133 | NH2, C_ARG_255 | HH22, C_ARG_255 | 2.52 | 1.69 | 27.35 |
| 1HGD.PDB | OE2, C_GLU_119 | NH1, C_ARG_261 | HH12, C_ARG_261 | 2.66 | 1.83 | 27.96 |
| 1HGD.PDB | OE1, C_GLU_119 | NH2, C_ARG_261 | HH22, C_ARG_261 | 2.90 | 2.00 | 23.32 |
| 1HGD.PDB | OD2, C_ASP_85  | NZ, C_LYS_264  | HZ3, C_LYS_264  | 2.82 | 1.84 | 16.88 |
| 1HGD.PDB | OE1, C_GLN_44  | NZ, C_LYS_292  | HZ1, C_LYS_292  | 2.73 | 1.73 | 12.00 |
| 1HGD.PDB | OD2, C_ASP_291 | NZ, C_LYS_292  | HZ3, C_LYS_292  | 2.79 | 1.88 | 23.81 |
| 1HGD.PDB | OD1, C_ASN_285 | ND2, C_ASN_298 | HD22, C_ASN_298 | 2.96 | 2.02 | 13.09 |
| 1HGD.PDB | OE1, C_GLU_41  | NZ, C_LYS_315  | HZ3, C_LYS_315  | 2.78 | 1.84 | 20.99 |
| 1HGD.PDB | OE2, C_GLU_35  | ND2, C_ASN_322 | HD22, C_ASN_322 | 2.83 | 1.94 | 21.17 |
| 1HGD.PDB | OE1, D_GLU_15  | NZ, C_LYS_326  | HZ1, C_LYS_326  | 2.78 | 1.77 | 11.96 |
| 1HGD.PDB | OXT, C_THR_328 | NE2, C_GLN_327 | HE22, C_GLN_327 | 2.97 | 2.03 | 15.01 |
| 1HGD.PDB | OE1, D_GLN_34  | NE, D_ARG_25   | HE, D_ARG_25    | 2.61 | 1.77 | 24.43 |
| 1HGD.PDB | OD1, D_ASN_146 | ND2, D_ASN_28  | HD21, D_ASN_28  | 3.00 | 2.03 | 9.16  |

|          |                |                |                 |      |      |       |
|----------|----------------|----------------|-----------------|------|------|-------|
| 1HGD.PDB | OD2, D_ASP_37  | OG, D_SER_40   | HG, D_SER_40    | 2.86 | 1.96 | 18.80 |
| 1HGD.PDB | OD1, D_ASP_46  | NE2, D_GLN_42  | HE22, D_GLN_42  | 2.84 | 1.95 | 20.82 |
| 1HGD.PDB | OG1, D_THR_107 | NZ, D_LYS_51   | HZ1, D_LYS_51   | 2.96 | 1.98 | 16.97 |
| 1HGD.PDB | OE1, D_GLU_103 | NZ, D_LYS_51   | HZ2, D_LYS_51   | 2.74 | 1.72 | 8.47  |
| 1HGD.PDB | ND1, D_HIS_106 | NZ, D_LYS_51   | HZ3, D_LYS_51   | 2.74 | 1.78 | 16.91 |
| 1HGD.PDB | OE1, D_GLU_57  | NH1, D_ARG_54  | HH11, D_ARG_54  | 2.85 | 1.86 | 12.06 |
| 1HGD.PDB | OE2, B_GLU_97  | NH2, D_ARG_54  | HH22, D_ARG_54  | 2.79 | 1.82 | 13.03 |
| 1HGD.PDB | OE2, D_GLU_61  | NZ, D_LYS_58   | HZ2, D_LYS_58   | 2.90 | 1.87 | 10.86 |
| 1HGD.PDB | OD2, B_ASP_90  | NZ, D_LYS_62   | HZ3, D_LYS_62   | 2.62 | 1.79 | 29.99 |
| 1HGD.PDB | OG, C_SER_110  | NE2, D_HIS_64  | HE2, D_HIS_64   | 2.96 | 1.98 | 5.65  |
| 1HGD.PDB | OE2, D_GLU_85  | NZ, D_LYS_68   | HZ2, D_LYS_68   | 2.78 | 1.76 | 10.92 |
| 1HGD.PDB | OE2, F_GLU_81  | NE, D_ARG_76   | HE, D_ARG_76    | 2.83 | 1.87 | 10.56 |
| 1HGD.PDB | OE2, F_GLU_74  | NH1, D_ARG_76  | HH12, D_ARG_76  | 2.78 | 1.77 | 3.14  |
| 1HGD.PDB | OE1, F_GLU_81  | NH2, D_ARG_76  | HH21, D_ARG_76  | 2.65 | 1.67 | 9.42  |
| 1HGD.PDB | OE1, F_GLU_74  | NH2, D_ARG_76  | HH22, D_ARG_76  | 2.69 | 1.70 | 6.24  |
| 1HGD.PDB | OE1, D_GLU_74  | NE2, D_GLN_78  | HE22, D_GLN_78  | 2.94 | 1.97 | 10.43 |
| 1HGD.PDB | OE1, F_GLU_85  | OH, D_TYR_83   | HH, D_TYR_83    | 2.57 | 1.79 | 29.87 |
| 1HGD.PDB | OH, B_TYR_83   | NZ, D_LYS_88   | HZ1, D_LYS_88   | 2.76 | 1.72 | 5.75  |
| 1HGD.PDB | OE2, D_GLU_120 | NH1, D_ARG_123 | HH11, D_ARG_123 | 2.80 | 1.92 | 24.08 |
| 1HGD.PDB | OE1, B_GLU_132 | NE, D_ARG_124  | HE, D_ARG_124   | 2.80 | 2.01 | 29.31 |
| 1HGD.PDB | OE2, B_GLU_132 | NE, D_ARG_124  | HE, D_ARG_124   | 2.82 | 1.95 | 21.73 |
| 1HGD.PDB | OH, D_TYR_157  | ND2, D_ASN_129 | HD22, D_ASN_129 | 2.79 | 1.82 | 6.93  |
| 1HGD.PDB | OE2, D_GLU_150 | ND2, D_ASN_154 | HD21, D_ASN_154 | 2.88 | 2.05 | 27.54 |
| 1HGD.PDB | OD1, D_ASN_154 | OG1, D_THR_156 | HG1, D_THR_156  | 2.79 | 1.83 | 8.53  |
| 1HGD.PDB | NE2, D_HIS_142 | OH, D_TYR_157  | HH, D_TYR_157   | 2.78 | 1.89 | 18.65 |
| 1HGD.PDB | OE2, D_GLU_131 | NH1, D_ARG_170 | HH11, D_ARG_170 | 2.77 | 1.78 | 7.65  |
| 1HGD.PDB | OE2, F_GLU_97  | NZ, E_LYS_27   | HZ1, E_LYS_27   | 2.79 | 1.77 | 8.77  |
| 1HGD.PDB | OD2, E_ASP_275 | NZ, E_LYS_50   | HZ1, E_LYS_50   | 2.69 | 1.80 | 25.14 |
| 1HGD.PDB | OD1, E_ASP_73  | ND1, E_HIS_75  | HD1, E_HIS_75   | 2.79 | 1.88 | 18.25 |
| 1HGD.PDB | OD1, E_ASP_60  | NE, E_ARG_90   | HE, E_ARG_90    | 2.88 | 1.91 | 7.90  |
| 1HGD.PDB | OD2, E_ASP_60  | NH2, E_ARG_90  | HH21, E_ARG_90  | 2.82 | 1.83 | 10.15 |
| 1HGD.PDB | OD1, E_ASP_271 | OG, E_SER_91   | HG, E_SER_91    | 2.94 | 2.13 | 28.39 |
| 1HGD.PDB | OD2, E_ASP_271 | OG, E_SER_91   | HG, E_SER_91    | 2.84 | 1.93 | 17.47 |
| 1HGD.PDB | OD2, E_ASP_68  | OG, E_SER_95   | HG, E_SER_95    | 2.91 | 1.98 | 14.66 |
| 1HGD.PDB | OD1, E_ASP_68  | OH, E_TYR_100  | HH, E_TYR_100   | 2.86 | 1.93 | 14.06 |
| 1HGD.PDB | OD2, E_ASP_104 | OG, E_SER_107  | HG, E_SER_107   | 2.90 | 1.98 | 16.44 |
| 1HGD.PDB | OE2, F_GLU_67  | NH2, E_ARG_109 | HH21, E_ARG_109 | 2.82 | 1.85 | 14.73 |
| 1HGD.PDB | OD2, D_ASP_79  | OG, E_SER_110  | HG, E_SER_110   | 2.81 | 1.89 | 15.50 |
| 1HGD.PDB | OE2, E_GLU_119 | OG1, E_THR_117 | HG1, E_THR_117  | 2.90 | 1.95 | 9.79  |
| 1HGD.PDB | OD1, E_ASN_137 | NZ, E_LYS_140  | HZ2, E_LYS_140  | 2.79 | 1.84 | 19.51 |
| 1HGD.PDB | OD2, E_ASP_77  | NE, E_ARG_141  | HE, E_ARG_141   | 2.82 | 1.98 | 26.95 |
| 1HGD.PDB | OD1, E_ASP_77  | NH2, E_ARG_141 | HH21, E_ARG_141 | 2.88 | 1.95 | 21.13 |
| 1HGD.PDB | OD2, E_ASP_77  | NH2, E_ARG_141 | HH21, E_ARG_141 | 2.75 | 1.86 | 24.62 |
| 1HGD.PDB | OH, E_TYR_195  | NE1, E_TRP_153 | HE1, E_TRP_153  | 2.82 | 1.91 | 19.17 |
| 1HGD.PDB | OE2, E_GLU_123 | NZ, E_LYS_176  | HZ2, E_LYS_176  | 2.69 | 1.80 | 25.12 |
| 1HGD.PDB | OE1, E_GLU_123 | OH, E_TYR_178  | HH, E_TYR_178   | 2.75 | 1.83 | 13.46 |
| 1HGD.PDB | OG1, E_THR_235 | NE1, E_TRP_180 | HE1, E_TRP_180  | 2.93 | 1.94 | 3.75  |
| 1HGD.PDB | OG, E_SER_231  | NE2, E_HIS_184 | HE2, E_HIS_184  | 2.80 | 1.95 | 25.42 |
| 1HGD.PDB | OD1, E_ASN_246 | NH2, E_ARG_201 | HH21, E_ARG_201 | 2.60 | 1.77 | 27.54 |
| 1HGD.PDB | OG1, E_THR_212 | OG1, E_THR_203 | HG1, E_THR_203  | 2.93 | 1.99 | 12.22 |
| 1HGD.PDB | OG1, E_THR_206 | OG, E_SER_209  | HG, E_SER_209   | 2.91 | 1.97 | 11.26 |
| 1HGD.PDB | OD1, C_ASP_101 | NE2, E_GLN_210 | HE22, E_GLN_210 | 2.98 | 2.14 | 27.07 |
| 1HGD.PDB | OE1, A_GLN_210 | NH2, E_ARG_220 | HH21, E_ARG_220 | 2.77 | 1.90 | 25.11 |
| 1HGD.PDB | OE2, E_GLU_190 | OG, E_SER_228  | HG, E_SER_228   | 2.96 | 1.98 | 4.78  |
| 1HGD.PDB | OD1, E_ASP_101 | OG, E_SER_231  | HG, E_SER_231   | 2.85 | 1.91 | 13.25 |
| 1HGD.PDB | OE1, D_GLU_72  | NZ, E_LYS_238  | HZ3, E_LYS_238  | 2.87 | 1.86 | 13.40 |
| 1HGD.PDB | OD1, E_ASN_165 | ND2, E_ASN_246 | HD22, E_ASN_246 | 2.91 | 1.96 | 12.66 |
| 1HGD.PDB | OE1, E_GLN_191 | ND2, E_ASN_250 | HD21, E_ASN_250 | 2.95 | 1.99 | 9.92  |

|          |                |                |                 |      |      |       |
|----------|----------------|----------------|-----------------|------|------|-------|
| 1HGD.PDB | OD1, E_ASN_133 | NH2, E_ARG_255 | HH22, E_ARG_255 | 2.52 | 1.69 | 27.28 |
| 1HGD.PDB | OE2, E_GLU_119 | NH1, E_ARG_261 | HH12, E_ARG_261 | 2.64 | 1.81 | 27.92 |
| 1HGD.PDB | OE1, E_GLU_119 | NH2, E_ARG_261 | HH22, E_ARG_261 | 2.88 | 1.97 | 22.94 |
| 1HGD.PDB | OD2, E_ASP_85  | NZ, E_LYS_264  | HZ3, E_LYS_264  | 2.87 | 1.88 | 16.50 |
| 1HGD.PDB | OE1, E_GLN_44  | NZ, E_LYS_292  | HZ1, E_LYS_292  | 2.70 | 1.70 | 12.87 |
| 1HGD.PDB | OD2, E_ASP_291 | NZ, E_LYS_292  | HZ3, E_LYS_292  | 2.83 | 1.91 | 23.60 |
| 1HGD.PDB | OD1, E_ASN_285 | ND2, E_ASN_298 | HD22, E_ASN_298 | 2.95 | 2.01 | 14.15 |
| 1HGD.PDB | OE1, E_GLU_41  | NZ, E_LYS_315  | HZ3, E_LYS_315  | 2.76 | 1.83 | 22.10 |
| 1HGD.PDB | OE2, E_GLU_35  | ND2, E_ASN_322 | HD22, E_ASN_322 | 2.82 | 1.95 | 23.13 |
| 1HGD.PDB | OE1, F_GLU_15  | NZ, E_LYS_326  | HZ3, E_LYS_326  | 2.97 | 1.97 | 16.19 |
| 1HGD.PDB | OE1, F_GLN_34  | NE, F_ARG_25   | HE, F_ARG_25    | 2.93 | 2.07 | 24.69 |
| 1HGD.PDB | OE1, F_GLN_34  | NH2, F_ARG_25  | HH21, F_ARG_25  | 2.80 | 1.89 | 20.31 |
| 1HGD.PDB | OD1, F_ASN_146 | ND2, F_ASN_28  | HD21, F_ASN_28  | 2.81 | 1.89 | 15.27 |
| 1HGD.PDB | OD2, F_ASP_37  | OG, F_SER_40   | HG, F_SER_40    | 2.84 | 1.98 | 23.42 |
| 1HGD.PDB | OD1, F_ASP_46  | NE2, F_GLN_42  | HE22, F_GLN_42  | 2.83 | 1.94 | 21.51 |
| 1HGD.PDB | OE1, F_GLU_103 | NZ, F_LYS_51   | HZ2, F_LYS_51   | 2.72 | 1.70 | 8.28  |
| 1HGD.PDB | ND1, F_HIS_106 | NZ, F_LYS_51   | HZ3, F_LYS_51   | 2.73 | 1.76 | 16.89 |
| 1HGD.PDB | OE1, F_GLU_57  | NH1, F_ARG_54  | HH11, F_ARG_54  | 2.86 | 1.85 | 10.37 |
| 1HGD.PDB | OE2, D_GLU_97  | NH2, F_ARG_54  | HH22, F_ARG_54  | 2.72 | 1.75 | 12.85 |
| 1HGD.PDB | OE2, F_GLU_61  | NZ, F_LYS_58   | HZ2, F_LYS_58   | 2.92 | 1.89 | 10.22 |
| 1HGD.PDB | OD2, D_ASP_90  | NZ, F_LYS_62   | HZ3, F_LYS_62   | 2.71 | 1.86 | 28.09 |
| 1HGD.PDB | OG, E_SER_110  | NE2, F_HIS_64  | HE2, F_HIS_64   | 2.95 | 1.98 | 9.92  |
| 1HGD.PDB | OE2, F_GLU_85  | NZ, F_LYS_68   | HZ2, F_LYS_68   | 2.72 | 1.77 | 19.94 |
| 1HGD.PDB | OE2, B_GLU_81  | NE, F_ARG_76   | HE, F_ARG_76    | 2.86 | 1.90 | 10.66 |
| 1HGD.PDB | OE2, B_GLU_74  | NH1, F_ARG_76  | HH12, F_ARG_76  | 2.77 | 1.75 | 1.42  |
| 1HGD.PDB | OE1, B_GLU_81  | NH2, F_ARG_76  | HH21, F_ARG_76  | 2.64 | 1.65 | 5.37  |
| 1HGD.PDB | OE1, B_GLU_74  | NH2, F_ARG_76  | HH22, F_ARG_76  | 2.71 | 1.72 | 7.42  |
| 1HGD.PDB | OE1, F_GLU_74  | NE2, F_GLN_78  | HE22, F_GLN_78  | 2.96 | 1.99 | 9.91  |
| 1HGD.PDB | OE1, B_GLU_85  | OH, F_TYR_83   | HH, F_TYR_83    | 2.53 | 1.75 | 27.84 |
| 1HGD.PDB | OH, D_TYR_83   | NZ, F_LYS_88   | HZ1, F_LYS_88   | 2.67 | 1.66 | 8.83  |
| 1HGD.PDB | OE2, F_GLU_120 | NH1, F_ARG_123 | HH11, F_ARG_123 | 2.77 | 1.88 | 23.82 |
| 1HGD.PDB | OE1, D_GLU_132 | NE, F_ARG_124  | HE, F_ARG_124   | 2.96 | 2.14 | 28.71 |
| 1HGD.PDB | OE2, D_GLU_132 | NE, F_ARG_124  | HE, F_ARG_124   | 2.94 | 2.05 | 20.84 |
| 1HGD.PDB | OH, F_TYR_157  | ND2, F_ASN_129 | HD22, F_ASN_129 | 2.80 | 1.85 | 12.13 |
| 1HGD.PDB | OE2, F_GLU_131 | NH1, F_ARG_170 | HH11, F_ARG_170 | 2.76 | 1.77 | 6.97  |

Table 1731: 1HGD-specific side chain hydrogen bonding analysis. In this table, a PDB file is specified with a four-letter PDB ID, except that the names of the PDB files corresponding to the single NMR structural model split from the NMR ensemble is specified with a four-letter PDB ID in addition to a hyphen followed by the single NMR structural model numeric ID, the residue naming scheme is **Chain ID\_residue name\_residue number**,  $\angle ADH$  represents the angle formed by acceptor (A), donor (D) and hydrogen (H) ( $\angle ADH$ ).

| PDB      | Acceptor (A)   | Donor (D)      | Hydrogen (H)    | D-A (Å) | H-A (Å) | $\angle ADH(^{\circ})$ |
|----------|----------------|----------------|-----------------|---------|---------|------------------------|
| 1HGE.PDB | OE2, B.GLU.97  | NZ, A.LYS.27   | HZ1, A.LYS.27   | 2.80    | 1.78    | 10.14                  |
| 1HGE.PDB | OD2, A.ASP.275 | NZ, A.LYS.50   | HZ1, A.LYS.50   | 2.75    | 1.80    | 21.09                  |
| 1HGE.PDB | OD1, A.ASP.73  | ND1, A.HIS.75  | HD1, A.HIS.75   | 2.80    | 1.89    | 17.62                  |
| 1HGE.PDB | OD1, A.ASP.60  | NE, A.ARG.90   | HE, A.ARG.90    | 2.85    | 1.89    | 7.94                   |
| 1HGE.PDB | OD2, A.ASP.60  | NH2, A.ARG.90  | HH21, A.ARG.90  | 2.79    | 1.80    | 8.90                   |
| 1HGE.PDB | OD2, A.ASP.271 | OG, A.SER.91   | HG, A.SER.91    | 2.81    | 1.90    | 18.10                  |
| 1HGE.PDB | OD2, A.ASP.68  | OG, A.SER.95   | HG, A.SER.95    | 2.90    | 1.97    | 15.50                  |
| 1HGE.PDB | OD1, A.ASP.68  | OH, A.TYR.100  | HH, A.TYR.100   | 2.91    | 1.93    | 2.88                   |
| 1HGE.PDB | OD2, A.ASP.104 | OG, A.SER.107  | HG, A.SER.107   | 2.86    | 1.94    | 16.59                  |
| 1HGE.PDB | OE2, B.GLU.67  | NH2, A.ARG.109 | HH21, A.ARG.109 | 2.74    | 1.75    | 12.19                  |
| 1HGE.PDB | OD2, F.ASP.79  | OG, A.SER.110  | HG, A.SER.110   | 2.90    | 1.95    | 11.19                  |
| 1HGE.PDB | OE2, A.GLU.119 | OG1, A.THR.117 | HG1, A.THR.117  | 2.90    | 1.95    | 8.88                   |
| 1HGE.PDB | OD1, A.ASN.137 | NZ, A.LYS.140  | HZ2, A.LYS.140  | 2.81    | 1.83    | 16.67                  |
| 1HGE.PDB | OD2, A.ASP.77  | NE, A.ARG.141  | HE, A.ARG.141   | 2.81    | 1.97    | 26.71                  |
| 1HGE.PDB | OD1, A.ASP.77  | NH2, A.ARG.141 | HH21, A.ARG.141 | 2.89    | 1.98    | 21.76                  |
| 1HGE.PDB | OD2, A.ASP.77  | NH2, A.ARG.141 | HH21, A.ARG.141 | 2.75    | 1.86    | 23.90                  |
| 1HGE.PDB | OH, A.TYR.195  | NE1, A.TRP.153 | HE1, A.TRP.153  | 2.88    | 1.99    | 20.14                  |
| 1HGE.PDB | OE2, A.GLU.123 | NZ, A.LYS.176  | HZ1, A.LYS.176  | 2.71    | 1.79    | 22.78                  |
| 1HGE.PDB | OE1, A.GLU.123 | OH, A.TYR.178  | HH, A.TYR.178   | 2.75    | 1.82    | 10.80                  |
| 1HGE.PDB | OG1, A.THR.235 | NE1, A.TRP.180 | HE1, A.TRP.180  | 2.92    | 1.93    | 3.33                   |
| 1HGE.PDB | OG, A.SER.231  | NE2, A.HIS.184 | HE2, A.HIS.184  | 2.72    | 1.88    | 25.40                  |
| 1HGE.PDB | OD1, A.ASN.246 | NH2, A.ARG.201 | HH21, A.ARG.201 | 2.60    | 1.73    | 24.24                  |
| 1HGE.PDB | OG1, A.THR.206 | OG, A.SER.209  | HG, A.SER.209   | 2.97    | 2.03    | 10.25                  |
| 1HGE.PDB | OD1, E.ASP.101 | NE2, A.GLN.210 | HE22, A.GLN.210 | 2.91    | 2.05    | 24.48                  |
| 1HGE.PDB | OG1, A.THR.203 | OG1, A.THR.212 | HG1, A.THR.212  | 2.85    | 1.89    | 3.04                   |
| 1HGE.PDB | OE1, C.GLN.210 | NH2, A.ARG.220 | HH21, A.ARG.220 | 2.71    | 1.78    | 19.14                  |
| 1HGE.PDB | OD1, A.ASP.101 | OG, A.SER.231  | HG, A.SER.231   | 2.85    | 1.89    | 7.16                   |
| 1HGE.PDB | OE1, F.GLU.72  | NZ, A.LYS.238  | HZ3, A.LYS.238  | 2.91    | 1.89    | 11.73                  |
| 1HGE.PDB | OD1, A.ASN.165 | ND2, A.ASN.246 | HD22, A.ASN.246 | 2.88    | 1.94    | 13.15                  |
| 1HGE.PDB | OE1, A.GLN.191 | ND2, A.ASN.250 | HD21, A.ASN.250 | 2.94    | 1.97    | 8.25                   |
| 1HGE.PDB | OD1, A.ASN.133 | NH2, A.ARG.255 | HH22, A.ARG.255 | 2.48    | 1.67    | 28.93                  |
| 1HGE.PDB | OE2, A.GLU.119 | NH1, A.ARG.261 | HH12, A.ARG.261 | 2.64    | 1.81    | 27.97                  |
| 1HGE.PDB | OE1, A.GLU.119 | NH2, A.ARG.261 | HH22, A.ARG.261 | 2.84    | 1.95    | 24.23                  |
| 1HGE.PDB | OD2, A.ASP.85  | NZ, A.LYS.264  | HZ3, A.LYS.264  | 2.77    | 1.79    | 16.96                  |
| 1HGE.PDB | OE1, A.GLN.44  | NZ, A.LYS.292  | HZ1, A.LYS.292  | 2.69    | 1.69    | 12.67                  |
| 1HGE.PDB | OD2, A.ASP.291 | NZ, A.LYS.292  | HZ3, A.LYS.292  | 2.82    | 1.86    | 19.03                  |
| 1HGE.PDB | OE1, A.GLU.41  | NZ, A.LYS.315  | HZ3, A.LYS.315  | 2.82    | 1.87    | 21.00                  |
| 1HGE.PDB | OE2, A.GLU.35  | ND2, A.ASN.322 | HD22, A.ASN.322 | 2.88    | 1.99    | 21.26                  |
| 1HGE.PDB | OE1, A.GLU.325 | NZ, A.LYS.326  | HZ3, A.LYS.326  | 2.85    | 1.86    | 15.04                  |
| 1HGE.PDB | OE1, B.GLN.34  | NE, B.ARG.25   | HE, B.ARG.25    | 2.59    | 1.77    | 25.60                  |
| 1HGE.PDB | OG1, B.THR.32  | NE2, B.GLN.27  | HE22, B.GLN.27  | 2.99    | 2.08    | 18.28                  |
| 1HGE.PDB | OD1, B.ASP.46  | NE2, B.GLN.42  | HE22, B.GLN.42  | 2.87    | 1.96    | 19.05                  |
| 1HGE.PDB | OG1, B.THR.107 | NZ, B.LYS.51   | HZ1, B.LYS.51   | 2.97    | 1.99    | 17.16                  |
| 1HGE.PDB | OE1, B.GLU.103 | NZ, B.LYS.51   | HZ2, B.LYS.51   | 2.76    | 1.73    | 6.92                   |
| 1HGE.PDB | ND1, B.HIS.106 | NZ, B.LYS.51   | HZ3, B.LYS.51   | 2.73    | 1.78    | 18.14                  |
| 1HGE.PDB | OE1, B.GLU.57  | NH1, B.ARG.54  | HH11, B.ARG.54  | 2.83    | 1.84    | 12.19                  |
| 1HGE.PDB | OE2, F.GLU.97  | NH2, B.ARG.54  | HH22, B.ARG.54  | 2.84    | 1.86    | 12.76                  |
| 1HGE.PDB | OD2, F.ASP.86  | NZ, B.LYS.62   | HZ1, B.LYS.62   | 2.60    | 1.76    | 28.82                  |
| 1HGE.PDB | OD2, F.ASP.90  | NZ, B.LYS.62   | HZ3, B.LYS.62   | 2.69    | 1.82    | 26.81                  |
| 1HGE.PDB | OG, A.SER.110  | NE2, B.HIS.64  | HE2, B.HIS.64   | 2.97    | 2.02    | 12.36                  |
| 1HGE.PDB | OE2, B.GLU.85  | NZ, B.LYS.68   | HZ2, B.LYS.68   | 2.78    | 1.76    | 9.50                   |
| 1HGE.PDB | OE2, D.GLU.81  | NE, B.ARG.76   | HE, B.ARG.76    | 2.87    | 1.91    | 11.56                  |
| 1HGE.PDB | OE2, D.GLU.74  | NH1, B.ARG.76  | HH12, B.ARG.76  | 2.84    | 1.83    | 5.81                   |
| 1HGE.PDB | OE1, D.GLU.81  | NH2, B.ARG.76  | HH21, B.ARG.76  | 2.70    | 1.70    | 6.45                   |
| 1HGE.PDB | OE1, D.GLU.74  | NH2, B.ARG.76  | HH22, B.ARG.76  | 2.79    | 1.79    | 3.91                   |
| 1HGE.PDB | OE1, B.GLU.74  | NE2, B.GLN.78  | HE22, B.GLN.78  | 2.97    | 2.00    | 7.88                   |
| 1HGE.PDB | OE1, D.GLU.85  | OH, B.TYR.83   | HH, B.TYR.83    | 2.65    | 1.81    | 24.86                  |

|          |                |                |                 |      |      |       |
|----------|----------------|----------------|-----------------|------|------|-------|
| 1HGE.PDB | OH, F_TYR_83   | NZ, B_LYS_88   | HZ1, B_LYS_88   | 2.75 | 1.71 | 5.62  |
| 1HGE.PDB | OE2, B_GLU_120 | NH1, B_ARG_123 | HH11, B_ARG_123 | 2.84 | 1.95 | 23.29 |
| 1HGE.PDB | OE1, F_GLU_132 | NE, B_ARG_124  | HE, B_ARG_124   | 2.80 | 1.98 | 27.36 |
| 1HGE.PDB | OE2, F_GLU_132 | NE, B_ARG_124  | HE, B_ARG_124   | 2.94 | 2.06 | 21.65 |
| 1HGE.PDB | OH, B_TYR_157  | ND2, B_ASN_129 | HD22, B_ASN_129 | 2.79 | 1.85 | 12.68 |
| 1HGE.PDB | OD2, B_ASP_145 | NZ, B_LYS_143  | HZ1, B_LYS_143  | 2.79 | 1.94 | 29.42 |
| 1HGE.PDB | OE2, B_GLU_150 | ND2, B_ASN_154 | HD21, B_ASN_154 | 2.93 | 2.05 | 22.48 |
| 1HGE.PDB | OD1, B_ASN_154 | OG1, B_THR_156 | HG1, B_THR_156  | 2.71 | 1.82 | 17.99 |
| 1HGE.PDB | OE2, B_GLU_131 | NH1, B_ARG_170 | HH11, B_ARG_170 | 2.80 | 1.80 | 6.47  |
| 1HGE.PDB | OE2, D_GLU_97  | NZ, C_LYS_27   | HZ1, C_LYS_27   | 2.79 | 1.77 | 8.74  |
| 1HGE.PDB | OD2, C_ASP_275 | NZ, C_LYS_50   | HZ1, C_LYS_50   | 2.70 | 1.77 | 22.15 |
| 1HGE.PDB | OD1, C_ASP_73  | ND1, C_HIS_75  | HD1, C_HIS_75   | 2.76 | 1.85 | 18.20 |
| 1HGE.PDB | OD1, C_ASP_60  | NE, C_ARG_90   | HE, C_ARG_90    | 2.84 | 1.88 | 10.34 |
| 1HGE.PDB | OD2, C_ASP_60  | NH2, C_ARG_90  | HH21, C_ARG_90  | 2.77 | 1.78 | 9.61  |
| 1HGE.PDB | OD2, C_ASP_271 | OG, C_SER_91   | HG, C_SER_91    | 2.80 | 1.91 | 19.19 |
| 1HGE.PDB | OD2, C_ASP_68  | OG, C_SER_95   | HG, C_SER_95    | 2.88 | 1.95 | 14.90 |
| 1HGE.PDB | OD1, C_ASP_68  | OH, C_TYR_100  | HH, C_TYR_100   | 2.89 | 1.97 | 15.01 |
| 1HGE.PDB | OD2, C_ASP_104 | OG, C_SER_107  | HG, C_SER_107   | 2.88 | 1.96 | 15.70 |
| 1HGE.PDB | OE2, D_GLU_67  | NH2, C_ARG_109 | HH21, C_ARG_109 | 2.78 | 1.79 | 11.19 |
| 1HGE.PDB | OD2, B_ASP_79  | OG, C_SER_110  | HG, C_SER_110   | 2.78 | 1.86 | 15.09 |
| 1HGE.PDB | OE2, C_GLU_119 | OG1, C_THR_117 | HG1, C_THR_117  | 2.89 | 1.94 | 9.29  |
| 1HGE.PDB | OD1, C_ASN_137 | NZ, C_LYS_140  | HZ2, C_LYS_140  | 2.83 | 1.86 | 16.66 |
| 1HGE.PDB | OD2, C_ASP_77  | NE, C_ARG_141  | HE, C_ARG_141   | 2.80 | 1.97 | 26.96 |
| 1HGE.PDB | OD1, C_ASP_77  | NH2, C_ARG_141 | HH21, C_ARG_141 | 2.88 | 1.96 | 21.42 |
| 1HGE.PDB | OD2, C_ASP_77  | NH2, C_ARG_141 | HH21, C_ARG_141 | 2.74 | 1.86 | 24.30 |
| 1HGE.PDB | OH, C_TYR_195  | NE1, C_TRP_153 | HE1, C_TRP_153  | 2.85 | 1.98 | 22.78 |
| 1HGE.PDB | OE2, C_GLU_123 | NZ, C_LYS_176  | HZ1, C_LYS_176  | 2.71 | 1.80 | 23.44 |
| 1HGE.PDB | OE1, C_GLU_123 | OH, C_TYR_178  | HH, C_TYR_178   | 2.73 | 1.80 | 12.29 |
| 1HGE.PDB | OG1, C_THR_235 | NE1, C_TRP_180 | HE1, C_TRP_180  | 2.92 | 1.93 | 1.68  |
| 1HGE.PDB | OG, C_SER_231  | NE2, C_HIS_184 | HE2, C_HIS_184  | 2.71 | 1.87 | 25.48 |
| 1HGE.PDB | OD1, C_ASN_250 | NE2, C_GLN_191 | HE21, C_GLN_191 | 3.00 | 2.03 | 7.73  |
| 1HGE.PDB | OD1, C_ASN_246 | NH2, C_ARG_201 | HH21, C_ARG_201 | 2.62 | 1.75 | 24.53 |
| 1HGE.PDB | OG1, C_THR_212 | OG1, C_THR_203 | HG1, C_THR_203  | 2.89 | 1.94 | 9.07  |
| 1HGE.PDB | OG1, C_THR_206 | OG, C_SER_209  | HG, C_SER_209   | 2.98 | 2.03 | 9.68  |
| 1HGE.PDB | OD1, A_ASP_101 | NE2, C_GLN_210 | HE22, C_GLN_210 | 2.93 | 2.07 | 24.92 |
| 1HGE.PDB | OE1, E_GLN_210 | NH2, C_ARG_220 | HH21, C_ARG_220 | 2.64 | 1.76 | 23.09 |
| 1HGE.PDB | OD1, C_ASP_101 | OG, C_SER_231  | HG, C_SER_231   | 2.89 | 1.93 | 7.03  |
| 1HGE.PDB | OE1, B_GLU_72  | NZ, C_LYS_238  | HZ1, C_LYS_238  | 2.78 | 1.80 | 16.75 |
| 1HGE.PDB | OD1, C_ASN_165 | ND2, C_ASN_246 | HD22, C_ASN_246 | 2.89 | 1.94 | 13.09 |
| 1HGE.PDB | OE1, C_GLN_191 | ND2, C_ASN_250 | HD21, C_ASN_250 | 2.89 | 1.93 | 9.19  |
| 1HGE.PDB | OD1, C_ASN_133 | NH2, C_ARG_255 | HH22, C_ARG_255 | 2.48 | 1.68 | 29.46 |
| 1HGE.PDB | OE2, C_GLU_119 | NH1, C_ARG_261 | HH12, C_ARG_261 | 2.65 | 1.82 | 27.69 |
| 1HGE.PDB | OE1, C_GLU_119 | NH2, C_ARG_261 | HH22, C_ARG_261 | 2.84 | 1.95 | 24.41 |
| 1HGE.PDB | OD2, C_ASP_85  | NZ, C_LYS_264  | HZ3, C_LYS_264  | 2.77 | 1.79 | 16.79 |
| 1HGE.PDB | OE1, C_GLN_44  | NZ, C_LYS_292  | HZ1, C_LYS_292  | 2.72 | 1.72 | 12.77 |
| 1HGE.PDB | OD2, C_ASP_291 | NZ, C_LYS_292  | HZ3, C_LYS_292  | 2.84 | 1.88 | 19.72 |
| 1HGE.PDB | OD1, C_ASN_285 | ND2, C_ASN_298 | HD22, C_ASN_298 | 2.99 | 2.05 | 12.60 |
| 1HGE.PDB | OE1, C_GLU_41  | NZ, C_LYS_315  | HZ3, C_LYS_315  | 2.82 | 1.88 | 21.70 |
| 1HGE.PDB | OE2, C_GLU_35  | ND2, C_ASN_322 | HD22, C_ASN_322 | 2.89 | 2.00 | 20.86 |
| 1HGE.PDB | OE1, D_GLU_15  | NZ, C_LYS_326  | HZ1, C_LYS_326  | 2.74 | 1.73 | 12.73 |
| 1HGE.PDB | OXT, C_THR_328 | NE2, C_GLN_327 | HE22, C_GLN_327 | 2.97 | 2.01 | 12.27 |
| 1HGE.PDB | OE1, D_GLN_34  | NE, D_ARG_25   | HE, D_ARG_25    | 2.56 | 1.76 | 28.50 |
| 1HGE.PDB | OD2, D_ASP_37  | OG, D_SER_40   | HG, D_SER_40    | 2.78 | 1.93 | 24.10 |
| 1HGE.PDB | OD1, D_ASP_46  | NE2, D_GLN_42  | HE22, D_GLN_42  | 2.87 | 1.96 | 19.33 |
| 1HGE.PDB | OE2, D_GLU_114 | NE2, D_GLN_47  | HE21, D_GLN_47  | 2.99 | 2.06 | 16.53 |
| 1HGE.PDB | OG1, D_THR_107 | NZ, D_LYS_51   | HZ1, D_LYS_51   | 2.96 | 1.98 | 16.83 |
| 1HGE.PDB | OE1, D_GLU_103 | NZ, D_LYS_51   | HZ2, D_LYS_51   | 2.76 | 1.73 | 6.47  |
| 1HGE.PDB | ND1, D_HIS_106 | NZ, D_LYS_51   | HZ3, D_LYS_51   | 2.77 | 1.82 | 18.39 |

|          |                |                |                 |      |      |       |
|----------|----------------|----------------|-----------------|------|------|-------|
| 1HGE.PDB | OE1, D_GLU_57  | NH1, D_ARG_54  | HH11, D_ARG_54  | 2.82 | 1.84 | 12.42 |
| 1HGE.PDB | OE2, B_GLU_97  | NH2, D_ARG_54  | HH22, D_ARG_54  | 2.87 | 1.89 | 12.82 |
| 1HGE.PDB | OG, C_SER_110  | NE2, D_HIS_64  | HE2, D_HIS_64   | 2.96 | 1.98 | 6.23  |
| 1HGE.PDB | OE2, D_GLU_85  | NZ, D_LYS_68   | HZ2, D_LYS_68   | 2.80 | 1.78 | 10.75 |
| 1HGE.PDB | OE2, F_GLU_81  | NE, D_ARG_76   | HE, D_ARG_76    | 2.79 | 1.85 | 14.06 |
| 1HGE.PDB | OE2, F_GLU_74  | NH1, D_ARG_76  | HH12, D_ARG_76  | 2.78 | 1.78 | 7.91  |
| 1HGE.PDB | OE1, F_GLU_81  | NH2, D_ARG_76  | HH21, D_ARG_76  | 2.63 | 1.67 | 11.36 |
| 1HGE.PDB | OE1, F_GLU_74  | NH2, D_ARG_76  | HH22, D_ARG_76  | 2.74 | 1.75 | 7.04  |
| 1HGE.PDB | OE1, D_GLU_74  | NE2, D_GLN_78  | HE22, D_GLN_78  | 2.96 | 1.99 | 8.03  |
| 1HGE.PDB | OE1, F_GLU_85  | OH, D_TYR_83   | HH, D_TYR_83    | 2.58 | 1.80 | 29.40 |
| 1HGE.PDB | OH, B_TYR_83   | NZ, D_LYS_88   | HZ1, D_LYS_88   | 2.71 | 1.68 | 6.52  |
| 1HGE.PDB | OE2, D_GLU_120 | NH1, D_ARG_123 | HH11, D_ARG_123 | 2.83 | 1.93 | 23.01 |
| 1HGE.PDB | OE1, B_GLU_132 | NE, D_ARG_124  | HE, D_ARG_124   | 2.78 | 1.98 | 28.90 |
| 1HGE.PDB | OE2, B_GLU_132 | NE, D_ARG_124  | HE, D_ARG_124   | 2.90 | 2.01 | 20.41 |
| 1HGE.PDB | OH, D_TYR_157  | ND2, D_ASN_129 | HD22, D_ASN_129 | 2.81 | 1.85 | 9.24  |
| 1HGE.PDB | OD1, D_ASN_154 | OG1, D_THR_156 | HG1, D_THR_156  | 2.74 | 1.81 | 12.51 |
| 1HGE.PDB | NE2, D_HIS_142 | OH, D_TYR_157  | HH, D_TYR_157   | 2.73 | 1.86 | 21.01 |
| 1HGE.PDB | OE2, D_GLU_131 | NH1, D_ARG_170 | HH11, D_ARG_170 | 2.79 | 1.79 | 6.83  |
| 1HGE.PDB | OE2, F_GLU_97  | NZ, E_LYS_27   | HZ1, E_LYS_27   | 2.79 | 1.77 | 9.75  |
| 1HGE.PDB | OD2, E_ASP_275 | NZ, E_LYS_50   | HZ1, E_LYS_50   | 2.73 | 1.80 | 21.86 |
| 1HGE.PDB | OD1, E_ASP_73  | ND1, E_HIS_75  | HD1, E_HIS_75   | 2.77 | 1.85 | 16.90 |
| 1HGE.PDB | OD1, E_ASP_60  | NE, E_ARG_90   | HE, E_ARG_90    | 2.88 | 1.91 | 8.59  |
| 1HGE.PDB | OD2, E_ASP_60  | NH2, E_ARG_90  | HH21, E_ARG_90  | 2.80 | 1.80 | 8.94  |
| 1HGE.PDB | OD2, E_ASP_271 | OG, E_SER_91   | HG, E_SER_91    | 2.83 | 1.92 | 17.26 |
| 1HGE.PDB | OD2, E_ASP_68  | OG, E_SER_95   | HG, E_SER_95    | 2.91 | 1.97 | 13.28 |
| 1HGE.PDB | OD1, E_ASP_68  | OH, E_TYR_100  | HH, E_TYR_100   | 2.88 | 1.95 | 14.25 |
| 1HGE.PDB | OD2, E_ASP_104 | OG, E_SER_107  | HG, E_SER_107   | 2.86 | 1.93 | 15.15 |
| 1HGE.PDB | OE2, F_GLU_67  | NH2, E_ARG_109 | HH21, E_ARG_109 | 2.78 | 1.79 | 11.63 |
| 1HGE.PDB | OD2, D_ASP_79  | OG, E_SER_110  | HG, E_SER_110   | 2.82 | 1.89 | 14.19 |
| 1HGE.PDB | OE2, E_GLU_119 | OG1, E_THR_117 | HG1, E_THR_117  | 2.93 | 1.97 | 8.29  |
| 1HGE.PDB | OD1, E_ASN_137 | NZ, E_LYS_140  | HZ2, E_LYS_140  | 2.84 | 1.86 | 16.83 |
| 1HGE.PDB | OD2, E_ASP_77  | NE, E_ARG_141  | HE, E_ARG_141   | 2.80 | 1.96 | 26.48 |
| 1HGE.PDB | OD1, E_ASP_77  | NH2, E_ARG_141 | HH21, E_ARG_141 | 2.91 | 2.00 | 21.55 |
| 1HGE.PDB | OD2, E_ASP_77  | NH2, E_ARG_141 | HH21, E_ARG_141 | 2.75 | 1.87 | 24.36 |
| 1HGE.PDB | OD1, E_ASP_77  | OG, E_SER_149  | HG, E_SER_149   | 2.99 | 2.14 | 24.93 |
| 1HGE.PDB | OH, E_TYR_195  | NE1, E_TRP_153 | HE1, E_TRP_153  | 2.90 | 1.99 | 18.82 |
| 1HGE.PDB | OE2, E_GLU_123 | NZ, E_LYS_176  | HZ1, E_LYS_176  | 2.73 | 1.81 | 23.24 |
| 1HGE.PDB | OE1, E_GLU_123 | OH, E_TYR_178  | HH, E_TYR_178   | 2.75 | 1.82 | 12.06 |
| 1HGE.PDB | OG1, E_THR_235 | NE1, E_TRP_180 | HE1, E_TRP_180  | 2.93 | 1.94 | 2.48  |
| 1HGE.PDB | OG, E_SER_231  | NE2, E_HIS_184 | HE2, E_HIS_184  | 2.75 | 1.91 | 25.72 |
| 1HGE.PDB | OD1, E_ASN_246 | NH2, E_ARG_201 | HH21, E_ARG_201 | 2.61 | 1.75 | 25.36 |
| 1HGE.PDB | OG1, E_THR_212 | OG1, E_THR_203 | HG1, E_THR_203  | 2.89 | 1.95 | 10.14 |
| 1HGE.PDB | OG1, E_THR_206 | OG, E_SER_209  | HG, E_SER_209   | 2.98 | 2.04 | 10.06 |
| 1HGE.PDB | OD1, C_ASP_101 | NE2, E_GLN_210 | HE22, E_GLN_210 | 2.89 | 2.04 | 25.02 |
| 1HGE.PDB | OE1, A_GLN_210 | NH2, E_ARG_220 | HH21, E_ARG_220 | 2.74 | 1.87 | 25.04 |
| 1HGE.PDB | OD1, E_ASP_101 | OG, E_SER_231  | HG, E_SER_231   | 2.87 | 1.92 | 12.10 |
| 1HGE.PDB | OE1, D_GLU_72  | NZ, E_LYS_238  | HZ3, E_LYS_238  | 2.85 | 1.84 | 12.25 |
| 1HGE.PDB | OD1, E_ASN_165 | ND2, E_ASN_246 | HD22, E_ASN_246 | 2.88 | 1.93 | 12.25 |
| 1HGE.PDB | OE1, E_GLN_191 | ND2, E_ASN_250 | HD21, E_ASN_250 | 2.94 | 1.97 | 8.28  |
| 1HGE.PDB | OD1, E_ASN_133 | NH2, E_ARG_255 | HH22, E_ARG_255 | 2.49 | 1.68 | 28.65 |
| 1HGE.PDB | OE2, E_GLU_119 | NH1, E_ARG_261 | HH12, E_ARG_261 | 2.65 | 1.81 | 27.82 |
| 1HGE.PDB | OE1, E_GLU_119 | NH2, E_ARG_261 | HH22, E_ARG_261 | 2.83 | 1.95 | 24.52 |
| 1HGE.PDB | OD2, E_ASP_85  | NZ, E_LYS_264  | HZ3, E_LYS_264  | 2.81 | 1.83 | 16.30 |
| 1HGE.PDB | OE1, E_GLN_44  | NZ, E_LYS_292  | HZ1, E_LYS_292  | 2.72 | 1.72 | 11.93 |
| 1HGE.PDB | OD2, E_ASP_291 | NZ, E_LYS_292  | HZ3, E_LYS_292  | 2.84 | 1.89 | 19.87 |
| 1HGE.PDB | OD1, E_ASN_285 | ND2, E_ASN_298 | HD22, E_ASN_298 | 2.98 | 2.04 | 13.10 |
| 1HGE.PDB | OD1, F_ASP_86  | NZ, E_LYS_310  | HZ3, E_LYS_310  | 2.86 | 2.02 | 29.64 |
| 1HGE.PDB | OE1, E_GLU_41  | NZ, E_LYS_315  | HZ3, E_LYS_315  | 2.80 | 1.87 | 22.54 |



|          |                |                |                 |      |      |       |
|----------|----------------|----------------|-----------------|------|------|-------|
| 1HGE.PDB | OE2, E_GLU_35  | ND2, E_ASN_322 | HD22, E_ASN_322 | 2.87 | 1.98 | 21.90 |
| 1HGE.PDB | OE1, F_GLU_15  | NZ, E_LYS_326  | HZ3, E_LYS_326  | 2.99 | 2.00 | 17.08 |
| 1HGE.PDB | OE1, F_GLN_34  | NE, F_ARG_25   | HE, F_ARG_25    | 2.92 | 2.07 | 24.83 |
| 1HGE.PDB | OE1, F_GLN_34  | NH2, F_ARG_25  | HH21, F_ARG_25  | 2.81 | 1.90 | 20.25 |
| 1HGE.PDB | OD1, F_ASN_146 | ND2, F_ASN_28  | HD21, F_ASN_28  | 2.81 | 1.89 | 15.75 |
| 1HGE.PDB | OD2, F_ASP_37  | OG, F_SER_40   | HG, F_SER_40    | 2.76 | 1.94 | 26.96 |
| 1HGE.PDB | OD1, F_ASP_46  | NE2, F_GLN_42  | HE22, F_GLN_42  | 2.86 | 1.96 | 19.38 |
| 1HGE.PDB | OE2, F_GLU_114 | NE2, F_GLN_47  | HE21, F_GLN_47  | 3.00 | 2.09 | 17.78 |
| 1HGE.PDB | OG1, F_THR_107 | NZ, F_LYS_51   | HZ1, F_LYS_51   | 2.97 | 2.00 | 18.12 |
| 1HGE.PDB | OE1, F_GLU_103 | NZ, F_LYS_51   | HZ2, F_LYS_51   | 2.77 | 1.74 | 6.40  |
| 1HGE.PDB | ND1, F_HIS_106 | NZ, F_LYS_51   | HZ3, F_LYS_51   | 2.74 | 1.79 | 17.89 |
| 1HGE.PDB | OE1, F_GLU_57  | NH1, F_ARG_54  | HH11, F_ARG_54  | 2.82 | 1.83 | 11.59 |
| 1HGE.PDB | OE2, D_GLU_97  | NH2, F_ARG_54  | HH22, F_ARG_54  | 2.80 | 1.82 | 12.52 |
| 1HGE.PDB | OD2, D_ASP_90  | NZ, F_LYS_62   | HZ2, F_LYS_62   | 2.67 | 1.83 | 29.15 |
| 1HGE.PDB | OG, E_SER_110  | NE2, F_HIS_64  | HE2, F_HIS_64   | 2.94 | 1.97 | 9.11  |
| 1HGE.PDB | OE2, F_GLU_85  | NZ, F_LYS_68   | HZ2, F_LYS_68   | 2.75 | 1.78 | 18.51 |
| 1HGE.PDB | OE2, B_GLU_81  | NE, F_ARG_76   | HE, F_ARG_76    | 2.85 | 1.89 | 11.64 |
| 1HGE.PDB | OE2, B_GLU_74  | NH1, F_ARG_76  | HH12, F_ARG_76  | 2.73 | 1.73 | 6.19  |
| 1HGE.PDB | OE1, B_GLU_81  | NH2, F_ARG_76  | HH21, F_ARG_76  | 2.65 | 1.66 | 5.51  |
| 1HGE.PDB | OE1, B_GLU_74  | NH2, F_ARG_76  | HH22, F_ARG_76  | 2.70 | 1.73 | 9.07  |
| 1HGE.PDB | OE1, F_GLU_74  | NE2, F_GLN_78  | HE22, F_GLN_78  | 2.96 | 1.99 | 8.87  |
| 1HGE.PDB | OE1, B_GLU_85  | OH, F_TYR_83   | HH, F_TYR_83    | 2.51 | 1.76 | 30.00 |
| 1HGE.PDB | OH, D_TYR_83   | NZ, F_LYS_88   | HZ1, F_LYS_88   | 2.67 | 1.65 | 8.34  |
| 1HGE.PDB | OE2, F_GLU_120 | NH1, F_ARG_123 | HH11, F_ARG_123 | 2.81 | 1.92 | 23.28 |
| 1HGE.PDB | OE1, D_GLU_132 | NE, F_ARG_124  | HE, F_ARG_124   | 2.92 | 2.09 | 27.36 |
| 1HGE.PDB | OH, F_TYR_157  | ND2, F_ASN_129 | HD22, F_ASN_129 | 2.80 | 1.87 | 15.30 |
| 1HGE.PDB | OE2, F_GLU_131 | NH1, F_ARG_170 | HH11, F_ARG_170 | 2.78 | 1.79 | 6.04  |

Table 1732: 1HGE-specific side chain hydrogen bonding analysis. In this table, a PDB file is specified with a four-letter PDB ID, except that the names of the PDB files corresponding to the single NMR structural model split from the NMR ensemble is specified with a four-letter PDB ID in addition to a hyphen followed by the single NMR structural model numeric ID, the residue naming scheme is **Chain ID\_residue name\_residue number**,  $\angle ADH$  represents the angle formed by acceptor (A), donor (D) and hydrogen (H) ( $\angle ADH$ ).

| PDB      | Acceptor (A)   | Donor (D)      | Hydrogen (H)    | D-A (Å) | H-A (Å) | $\angle ADH(^{\circ})$ |
|----------|----------------|----------------|-----------------|---------|---------|------------------------|
| 1HGF.PDB | OE2, B_GLU_97  | NZ, A_LYS_27   | HZ1, A_LYS_27   | 2.79    | 1.86    | 21.55                  |
| 1HGF.PDB | OD2, A_ASP_275 | NZ, A_LYS_50   | HZ2, A_LYS_50   | 2.91    | 1.91    | 15.13                  |
| 1HGF.PDB | OD1, A_ASP_73  | ND1, A_HIS_75  | HD1, A_HIS_75   | 2.84    | 1.91    | 15.59                  |
| 1HGF.PDB | OD1, A_ASP_60  | NE, A_ARG_90   | HE, A_ARG_90    | 2.77    | 1.85    | 16.11                  |
| 1HGF.PDB | OD2, A_ASP_60  | NH2, A_ARG_90  | HH21, A_ARG_90  | 2.84    | 1.84    | 8.73                   |
| 1HGF.PDB | OD2, A_ASP_271 | OG, A_SER_91   | HG, A_SER_91    | 2.85    | 1.91    | 12.59                  |
| 1HGF.PDB | OD2, A_ASP_104 | OG, A_SER_107  | HG, A_SER_107   | 2.89    | 1.97    | 16.55                  |
| 1HGF.PDB | OE2, B_GLU_67  | NH2, A_ARG_109 | HH21, A_ARG_109 | 2.92    | 1.92    | 10.51                  |
| 1HGF.PDB | OD2, F_ASP_79  | OG, A_SER_110  | HG, A_SER_110   | 2.82    | 1.90    | 15.87                  |
| 1HGF.PDB | OE2, A_GLU_119 | OG1, A_THR_117 | HG1, A_THR_117  | 2.95    | 1.98    | 3.95                   |
| 1HGF.PDB | ND2, A_ASN_152 | NE2, A_GLN_132 | HE21, A_GLN_132 | 2.94    | 2.00    | 10.26                  |
| 1HGF.PDB | OD2, A_ASP_77  | NE, A_ARG_141  | HE, A_ARG_141   | 2.91    | 2.06    | 25.46                  |
| 1HGF.PDB | OD1, A_ASP_77  | NH2, A_ARG_141 | HH21, A_ARG_141 | 2.84    | 1.97    | 26.05                  |
| 1HGF.PDB | OD2, A_ASP_77  | NH2, A_ARG_141 | HH21, A_ARG_141 | 2.78    | 1.86    | 20.91                  |
| 1HGF.PDB | OH, A_TYR_195  | NE1, A_TRP_153 | HE1, A_TRP_153  | 2.84    | 1.90    | 13.02                  |
| 1HGF.PDB | OE2, A_GLU_123 | NZ, A_LYS_176  | HZ1, A_LYS_176  | 2.72    | 1.80    | 23.85                  |
| 1HGF.PDB | OG1, A_THR_235 | NE1, A_TRP_180 | HE1, A_TRP_180  | 2.87    | 1.89    | 5.46                   |
| 1HGF.PDB | OH, A_TYR_98   | NE2, A_HIS_183 | HE2, A_HIS_183  | 2.90    | 1.98    | 15.32                  |
| 1HGF.PDB | OG, A_SER_231  | NE2, A_HIS_184 | HE2, A_HIS_184  | 2.68    | 1.88    | 29.05                  |
| 1HGF.PDB | OD1, A_ASN_250 | NE2, A_GLN_191 | HE22, A_GLN_191 | 2.90    | 1.94    | 8.27                   |
| 1HGF.PDB | OG1, A_THR_203 | OG1, A_THR_212 | HG1, A_THR_212  | 2.83    | 1.91    | 15.11                  |
| 1HGF.PDB | OE1, C_GLN_210 | NH2, A_ARG_220 | HH21, A_ARG_220 | 2.64    | 1.76    | 23.62                  |
| 1HGF.PDB | OD1, A_ASP_101 | OG, A_SER_231  | HG, A_SER_231   | 2.83    | 1.87    | 7.29                   |
| 1HGF.PDB | OE1, F_GLU_72  | NZ, A_LYS_238  | HZ2, A_LYS_238  | 2.85    | 1.85    | 14.58                  |
| 1HGF.PDB | OD1, A_ASN_165 | ND2, A_ASN_246 | HD21, A_ASN_246 | 2.93    | 2.03    | 19.92                  |
| 1HGF.PDB | OE1, A_GLN_191 | ND2, A_ASN_250 | HD22, A_ASN_250 | 2.86    | 1.90    | 9.57                   |
| 1HGF.PDB | OD1, A_ASN_133 | NH2, A_ARG_255 | HH22, A_ARG_255 | 2.49    | 1.67    | 28.52                  |
| 1HGF.PDB | OE1, A_GLU_119 | NH2, A_ARG_261 | HH22, A_ARG_261 | 2.74    | 1.90    | 27.76                  |
| 1HGF.PDB | OE1, A_GLN_44  | NZ, A_LYS_292  | HZ1, A_LYS_292  | 2.87    | 1.83    | 0.68                   |
| 1HGF.PDB | OD1, A_ASP_291 | NZ, A_LYS_292  | HZ2, A_LYS_292  | 2.86    | 1.83    | 8.47                   |
| 1HGF.PDB | OE1, A_GLU_41  | OG1, A_THR_313 | HG1, A_THR_313  | 2.68    | 1.87    | 27.57                  |
| 1HGF.PDB | OG1, A_THR_313 | NZ, A_LYS_315  | HZ2, A_LYS_315  | 2.95    | 2.00    | 20.61                  |
| 1HGF.PDB | OE2, A_GLU_35  | ND2, A_ASN_322 | HD21, A_ASN_322 | 2.76    | 1.93    | 26.44                  |
| 1HGF.PDB | OE1, B_GLN_34  | NE, B_ARG_25   | HE, B_ARG_25    | 2.64    | 1.77    | 20.89                  |
| 1HGF.PDB | OE1, B_GLN_34  | NH2, B_ARG_25  | HH21, B_ARG_25  | 2.81    | 1.99    | 28.67                  |
| 1HGF.PDB | OE2, A_GLU_325 | NH2, B_ARG_25  | HH22, B_ARG_25  | 2.99    | 2.04    | 16.52                  |
| 1HGF.PDB | OD1, B_ASP_46  | NE2, B_GLN_42  | HE21, B_GLN_42  | 2.87    | 1.99    | 22.40                  |
| 1HGF.PDB | OE1, B_GLU_103 | NZ, B_LYS_51   | HZ1, B_LYS_51   | 2.74    | 1.70    | 5.26                   |
| 1HGF.PDB | ND1, B_HIS_106 | NZ, B_LYS_51   | HZ3, B_LYS_51   | 2.67    | 1.72    | 18.38                  |
| 1HGF.PDB | OE2, F_GLU_97  | NH2, B_ARG_54  | HH22, B_ARG_54  | 2.83    | 1.86    | 13.50                  |
| 1HGF.PDB | OD2, F_ASP_86  | NZ, B_LYS_62   | HZ2, B_LYS_62   | 2.71    | 1.70    | 11.44                  |
| 1HGF.PDB | OD2, F_ASP_90  | NZ, B_LYS_62   | HZ3, B_LYS_62   | 2.77    | 1.82    | 20.37                  |
| 1HGF.PDB | OG, A_SER_266  | ND1, B_HIS_64  | HD1, B_HIS_64   | 2.66    | 1.79    | 20.68                  |
| 1HGF.PDB | OG, A_SER_110  | NE2, B_HIS_64  | HE2, B_HIS_64   | 2.89    | 1.92    | 10.70                  |
| 1HGF.PDB | OE2, B_GLU_85  | NZ, B_LYS_68   | HZ1, B_LYS_68   | 2.67    | 1.75    | 22.44                  |
| 1HGF.PDB | OE2, D_GLU_81  | NE, B_ARG_76   | HE, B_ARG_76    | 2.92    | 1.92    | 2.47                   |
| 1HGF.PDB | OE1, D_GLU_74  | NH1, B_ARG_76  | HH12, B_ARG_76  | 2.86    | 1.84    | 3.80                   |
| 1HGF.PDB | OE1, D_GLU_81  | NH2, B_ARG_76  | HH21, B_ARG_76  | 2.73    | 1.74    | 10.29                  |
| 1HGF.PDB | OE2, D_GLU_74  | NH2, B_ARG_76  | HH22, B_ARG_76  | 2.75    | 1.74    | 3.91                   |
| 1HGF.PDB | OE1, D_GLU_85  | OH, B_TYR_83   | HH, B_TYR_83    | 2.57    | 1.80    | 29.66                  |
| 1HGF.PDB | OH, F_TYR_83   | NZ, B_LYS_88   | HZ1, B_LYS_88   | 2.72    | 1.70    | 9.91                   |
| 1HGF.PDB | OE2, B_GLU_120 | NH1, B_ARG_123 | HH11, B_ARG_123 | 2.78    | 1.93    | 26.74                  |
| 1HGF.PDB | OE1, F_GLU_132 | NE, B_ARG_124  | HE, B_ARG_124   | 2.80    | 1.86    | 13.00                  |
| 1HGF.PDB | OH, B_TYR_157  | ND2, B_ASN_129 | HD21, B_ASN_129 | 2.81    | 1.86    | 11.58                  |
| 1HGF.PDB | OD1, B_ASN_154 | OG1, B_THR_156 | HG1, B_THR_156  | 2.68    | 1.80    | 19.09                  |
| 1HGF.PDB | OE1, F_GLU_131 | NH2, B_ARG_163 | HH21, B_ARG_163 | 2.74    | 1.86    | 24.20                  |
| 1HGF.PDB | OE2, B_GLU_131 | NH1, B_ARG_170 | HH11, B_ARG_170 | 2.84    | 1.84    | 5.96                   |

|          |                |                |                 |      |      |       |
|----------|----------------|----------------|-----------------|------|------|-------|
| 1HGF.PDB | OE2, D_GLU_97  | NZ, C_LYS_27   | HZ1, C_LYS_27   | 2.81 | 1.85 | 19.93 |
| 1HGF.PDB | OD2, C_ASP_275 | NZ, C_LYS_50   | HZ2, C_LYS_50   | 2.88 | 1.87 | 13.71 |
| 1HGF.PDB | OD1, C_ASP_73  | ND1, C_HIS_75  | HD1, C_HIS_75   | 2.84 | 1.90 | 12.73 |
| 1HGF.PDB | OD1, C_ASP_60  | NE, C_ARG_90   | HE, C_ARG_90    | 2.76 | 1.85 | 16.46 |
| 1HGF.PDB | OD2, C_ASP_60  | NH2, C_ARG_90  | HH21, C_ARG_90  | 2.84 | 1.85 | 9.99  |
| 1HGF.PDB | OD1, C_ASP_271 | OG, C_SER_91   | HG, C_SER_91    | 2.91 | 2.11 | 29.01 |
| 1HGF.PDB | OD2, C_ASP_271 | OG, C_SER_91   | HG, C_SER_91    | 2.86 | 1.95 | 16.65 |
| 1HGF.PDB | OD1, C_ASP_68  | OH, C_TYR_100  | HH, C_TYR_100   | 2.97 | 2.03 | 12.15 |
| 1HGF.PDB | OD2, C_ASP_104 | OG, C_SER_107  | HG, C_SER_107   | 2.91 | 1.98 | 14.76 |
| 1HGF.PDB | OE2, D_GLU_67  | NH2, C_ARG_109 | HH21, C_ARG_109 | 2.91 | 1.92 | 11.49 |
| 1HGF.PDB | OD2, B_ASP_79  | OG, C_SER_110  | HG, C_SER_110   | 2.69 | 1.85 | 25.37 |
| 1HGF.PDB | OE2, C_GLU_119 | OG1, C_THR_117 | HG1, C_THR_117  | 2.97 | 2.00 | 2.16  |
| 1HGF.PDB | ND2, C_ASN_152 | NE2, C_GLN_132 | HE21, C_GLN_132 | 2.94 | 2.00 | 12.42 |
| 1HGF.PDB | OD2, C_ASP_77  | NE, C_ARG_141  | HE, C_ARG_141   | 2.91 | 2.05 | 25.56 |
| 1HGF.PDB | OD1, C_ASP_77  | NH2, C_ARG_141 | HH21, C_ARG_141 | 2.84 | 1.98 | 26.48 |
| 1HGF.PDB | OD2, C_ASP_77  | NH2, C_ARG_141 | HH21, C_ARG_141 | 2.79 | 1.86 | 20.63 |
| 1HGF.PDB | OH, C_TYR_195  | NE1, C_TRP_153 | HE1, C_TRP_153  | 2.82 | 1.92 | 18.47 |
| 1HGF.PDB | OE2, C_GLU_123 | NZ, C_LYS_176  | HZ1, C_LYS_176  | 2.72 | 1.80 | 22.47 |
| 1HGF.PDB | OG1, C_THR_235 | NE1, C_TRP_180 | HE1, C_TRP_180  | 2.86 | 1.88 | 3.91  |
| 1HGF.PDB | OH, C_TYR_98   | NE2, C_HIS_183 | HE2, C_HIS_183  | 2.89 | 1.99 | 18.89 |
| 1HGF.PDB | OG, C_SER_231  | NE2, C_HIS_184 | HE2, C_HIS_184  | 2.67 | 1.86 | 27.83 |
| 1HGF.PDB | OD1, C_ASN_250 | NE2, C_GLN_191 | HE22, C_GLN_191 | 2.91 | 1.94 | 7.66  |
| 1HGF.PDB | OG1, C_THR_212 | OG1, C_THR_203 | HG1, C_THR_203  | 2.82 | 1.90 | 14.76 |
| 1HGF.PDB | OE1, E_GLN_210 | NH2, C_ARG_220 | HH21, C_ARG_220 | 2.56 | 1.72 | 26.72 |
| 1HGF.PDB | OD1, C_ASP_101 | OG, C_SER_231  | HG, C_SER_231   | 2.86 | 1.89 | 4.34  |
| 1HGF.PDB | OE1, B_GLU_72  | NZ, C_LYS_238  | HZ2, C_LYS_238  | 2.75 | 1.78 | 18.48 |
| 1HGF.PDB | OD1, C_ASN_165 | ND2, C_ASN_246 | HD21, C_ASN_246 | 2.93 | 2.04 | 21.38 |
| 1HGF.PDB | OE1, C_GLN_191 | ND2, C_ASN_250 | HD22, C_ASN_250 | 2.84 | 1.89 | 10.62 |
| 1HGF.PDB | OD1, C_ASN_133 | NH2, C_ARG_255 | HH22, C_ARG_255 | 2.47 | 1.67 | 28.90 |
| 1HGF.PDB | OE1, C_GLU_119 | NH2, C_ARG_261 | HH22, C_ARG_261 | 2.72 | 1.88 | 28.14 |
| 1HGF.PDB | OE1, C_GLN_44  | NZ, C_LYS_292  | HZ1, C_LYS_292  | 2.89 | 1.84 | 2.00  |
| 1HGF.PDB | OD1, C_ASP_291 | NZ, C_LYS_292  | HZ2, C_LYS_292  | 2.88 | 1.85 | 8.89  |
| 1HGF.PDB | OE1, C_GLU_41  | OG1, C_THR_313 | HG1, C_THR_313  | 2.66 | 1.87 | 29.10 |
| 1HGF.PDB | OG1, C_THR_313 | NZ, C_LYS_315  | HZ2, C_LYS_315  | 2.92 | 1.98 | 21.54 |
| 1HGF.PDB | OE2, C_GLU_35  | ND2, C_ASN_322 | HD21, C_ASN_322 | 2.77 | 1.93 | 25.57 |
| 1HGF.PDB | OXT, C_THR_328 | NE2, C_GLN_327 | HE21, C_GLN_327 | 2.93 | 2.09 | 26.28 |
| 1HGF.PDB | OE1, D_GLN_34  | NE, D_ARG_25   | HE, D_ARG_25    | 2.69 | 1.78 | 17.17 |
| 1HGF.PDB | OD1, D_ASN_146 | ND2, D_ASN_28  | HD22, D_ASN_28  | 2.89 | 1.97 | 17.31 |
| 1HGF.PDB | OD2, D_ASP_37  | OG, D_SER_40   | HG, D_SER_40    | 2.85 | 1.95 | 18.29 |
| 1HGF.PDB | OD1, D_ASP_46  | NE2, D_GLN_42  | HE21, D_GLN_42  | 2.85 | 1.97 | 22.40 |
| 1HGF.PDB | OE1, D_GLU_103 | NZ, D_LYS_51   | HZ1, D_LYS_51   | 2.74 | 1.71 | 5.53  |
| 1HGF.PDB | ND1, D_HIS_106 | NZ, D_LYS_51   | HZ3, D_LYS_51   | 2.69 | 1.73 | 17.89 |
| 1HGF.PDB | OE2, B_GLU_97  | NH2, D_ARG_54  | HH22, D_ARG_54  | 2.84 | 1.86 | 12.74 |
| 1HGF.PDB | OD2, B_ASP_86  | NZ, D_LYS_62   | HZ2, D_LYS_62   | 2.69 | 1.69 | 13.49 |
| 1HGF.PDB | OD2, B_ASP_90  | NZ, D_LYS_62   | HZ3, D_LYS_62   | 2.68 | 1.77 | 22.81 |
| 1HGF.PDB | OG, C_SER_266  | ND1, D_HIS_64  | HD1, D_HIS_64   | 2.64 | 1.83 | 27.58 |
| 1HGF.PDB | OG, C_SER_110  | NE2, D_HIS_64  | HE2, D_HIS_64   | 2.90 | 1.92 | 7.33  |
| 1HGF.PDB | OE2, D_GLU_85  | NZ, D_LYS_68   | HZ1, D_LYS_68   | 2.73 | 1.78 | 19.48 |
| 1HGF.PDB | OE2, F_GLU_81  | NE, D_ARG_76   | HE, D_ARG_76    | 2.82 | 1.85 | 5.34  |
| 1HGF.PDB | OE1, F_GLU_74  | NH1, D_ARG_76  | HH12, D_ARG_76  | 2.79 | 1.78 | 3.81  |
| 1HGF.PDB | OE1, F_GLU_81  | NH2, D_ARG_76  | HH21, D_ARG_76  | 2.64 | 1.68 | 12.43 |
| 1HGF.PDB | OE2, F_GLU_74  | NH2, D_ARG_76  | HH22, D_ARG_76  | 2.70 | 1.71 | 7.38  |
| 1HGF.PDB | OE1, F_GLU_85  | OH, D_TYR_83   | HH, D_TYR_83    | 2.58 | 1.80 | 29.87 |
| 1HGF.PDB | OH, B_TYR_83   | NZ, D_LYS_88   | HZ1, D_LYS_88   | 2.68 | 1.69 | 13.85 |
| 1HGF.PDB | OE2, D_GLU_120 | NH1, D_ARG_123 | HH11, D_ARG_123 | 2.79 | 1.92 | 25.71 |
| 1HGF.PDB | OE1, B_GLU_132 | NE, D_ARG_124  | HE, D_ARG_124   | 2.79 | 1.88 | 16.40 |
| 1HGF.PDB | OH, D_TYR_157  | ND2, D_ASN_129 | HD21, D_ASN_129 | 2.81 | 1.84 | 5.39  |
| 1HGF.PDB | OG, D_SER_29   | NZ, D_LYS_143  | HZ1, D_LYS_143  | 2.83 | 1.89 | 20.16 |

|          |                |                |                 |      |      |       |
|----------|----------------|----------------|-----------------|------|------|-------|
| 1HGF.PDB | OD1, D_ASN.154 | OG1, D_THR.156 | HG1, D_THR.156  | 2.72 | 1.80 | 12.72 |
| 1HGF.PDB | NE2, D_HIS.142 | OH, D_TYR.157  | HH, D_TYR.157   | 2.72 | 1.85 | 19.75 |
| 1HGF.PDB | OE1, B_GLU.131 | NH2, D_ARG.163 | HH21, D_ARG.163 | 2.70 | 1.83 | 24.43 |
| 1HGF.PDB | OE2, D_GLU.131 | NH1, D_ARG.170 | HH11, D_ARG.170 | 2.84 | 1.84 | 5.29  |
| 1HGF.PDB | OE2, F_GLU.97  | NZ, E_LYS.27   | HZ1, E_LYS.27   | 2.75 | 1.83 | 22.30 |
| 1HGF.PDB | OD2, E_ASP.275 | NZ, E_LYS.50   | HZ2, E_LYS.50   | 2.90 | 1.90 | 14.56 |
| 1HGF.PDB | OD1, E_ASP.73  | ND1, E_HIS.75  | HD1, E_HIS.75   | 2.85 | 1.91 | 12.17 |
| 1HGF.PDB | OD1, E_ASP.60  | NE, E_ARG.90   | HE, E_ARG.90    | 2.80 | 1.85 | 10.51 |
| 1HGF.PDB | OD2, E_ASP.60  | NH2, E_ARG.90  | HH21, E_ARG.90  | 2.88 | 1.89 | 10.22 |
| 1HGF.PDB | OD2, E_ASP.104 | OG, E_SER.107  | HG, E_SER.107   | 2.88 | 1.94 | 12.45 |
| 1HGF.PDB | OE2, F_GLU.67  | NH2, E_ARG.109 | HH21, E_ARG.109 | 2.88 | 1.88 | 11.28 |
| 1HGF.PDB | OD2, D_ASP.79  | OG, E_SER.110  | HG, E_SER.110   | 2.78 | 1.90 | 21.69 |
| 1HGF.PDB | OE2, E_GLU.119 | OG1, E_THR.117 | HG1, E_THR.117  | 2.96 | 1.99 | 6.08  |
| 1HGF.PDB | ND2, E_ASN.152 | NE2, E_GLN.132 | HE21, E_GLN.132 | 2.95 | 2.01 | 11.55 |
| 1HGF.PDB | OD2, E_ASP.77  | NE, E_ARG.141  | HE, E_ARG.141   | 2.92 | 2.06 | 25.46 |
| 1HGF.PDB | OD1, E_ASP.77  | NH2, E_ARG.141 | HH21, E_ARG.141 | 2.83 | 1.96 | 25.41 |
| 1HGF.PDB | OD2, E_ASP.77  | NH2, E_ARG.141 | HH21, E_ARG.141 | 2.77 | 1.86 | 21.24 |
| 1HGF.PDB | OH, E_TYR.195  | NE1, E_TRP.153 | HE1, E_TRP.153  | 2.83 | 1.89 | 12.15 |
| 1HGF.PDB | OE2, E_GLU.123 | NZ, E_LYS.176  | HZ1, E_LYS.176  | 2.76 | 1.80 | 18.44 |
| 1HGF.PDB | OE1, E_GLU.123 | OH, E_TYR.178  | HH, E_TYR.178   | 2.88 | 1.93 | 11.71 |
| 1HGF.PDB | OG1, E_THR.235 | NE1, E_TRP.180 | HE1, E_TRP.180  | 2.85 | 1.87 | 2.94  |
| 1HGF.PDB | OH, E_TYR.98   | NE2, E_HIS.183 | HE2, E_HIS.183  | 2.91 | 1.99 | 15.99 |
| 1HGF.PDB | OG, E_SER.231  | NE2, E_HIS.184 | HE2, E_HIS.184  | 2.70 | 1.89 | 28.56 |
| 1HGF.PDB | OD1, E_ASN.250 | NE2, E_GLN.191 | HE22, E_GLN.191 | 2.96 | 1.99 | 7.90  |
| 1HGF.PDB | OG1, E_THR.212 | OG1, E_THR.203 | HG1, E_THR.203  | 2.89 | 1.95 | 9.70  |
| 1HGF.PDB | OE1, A_GLN.210 | NH2, E_ARG.220 | HH21, E_ARG.220 | 2.65 | 1.79 | 25.97 |
| 1HGF.PDB | OD1, E_ASP.101 | OG, E_SER.231  | HG, E_SER.231   | 2.82 | 1.90 | 15.36 |
| 1HGF.PDB | OE1, D_GLU.72  | NZ, E_LYS.238  | HZ2, E_LYS.238  | 2.83 | 1.84 | 16.42 |
| 1HGF.PDB | OD1, E_ASN.165 | ND2, E_ASN.246 | HD21, E_ASN.246 | 2.93 | 2.02 | 19.67 |
| 1HGF.PDB | OE1, E_GLN.191 | ND2, E_ASN.250 | HD22, E_ASN.250 | 2.87 | 1.91 | 8.14  |
| 1HGF.PDB | OD1, E_ASN.133 | NH2, E_ARG.255 | HH22, E_ARG.255 | 2.47 | 1.67 | 29.09 |
| 1HGF.PDB | OE1, E_GLU.119 | NH2, E_ARG.261 | HH22, E_ARG.261 | 2.73 | 1.89 | 28.16 |
| 1HGF.PDB | OE1, E_GLN.44  | NZ, E_LYS.292  | HZ1, E_LYS.292  | 2.90 | 1.86 | 1.40  |
| 1HGF.PDB | OD1, E_ASP.291 | NZ, E_LYS.292  | HZ2, E_LYS.292  | 2.87 | 1.84 | 9.03  |
| 1HGF.PDB | OE1, E_GLU.41  | OG1, E_THR.313 | HG1, E_THR.313  | 2.68 | 1.89 | 29.15 |
| 1HGF.PDB | OG1, E_THR.313 | NZ, E_LYS.315  | HZ2, E_LYS.315  | 2.94 | 2.00 | 21.30 |
| 1HGF.PDB | OE2, E_GLU.35  | ND2, E_ASN.322 | HD21, E_ASN.322 | 2.77 | 1.93 | 26.11 |
| 1HGF.PDB | OE1, F_GLN.34  | NE, F_ARG.25   | HE, F_ARG.25    | 2.89 | 2.02 | 23.18 |
| 1HGF.PDB | OE1, F_GLN.34  | NH2, F_ARG.25  | HH21, F_ARG.25  | 2.91 | 2.03 | 24.46 |
| 1HGF.PDB | OD1, F_ASN.146 | ND2, F_ASN.28  | HD22, F_ASN.28  | 2.88 | 2.02 | 23.75 |
| 1HGF.PDB | OD1, F_ASP.46  | NE2, F_GLN.42  | HE21, F_GLN.42  | 2.86 | 1.99 | 23.71 |
| 1HGF.PDB | OE1, F_GLU.103 | NZ, F_LYS.51   | HZ1, F_LYS.51   | 2.72 | 1.69 | 6.79  |
| 1HGF.PDB | ND1, F_HIS.106 | NZ, F_LYS.51   | HZ3, F_LYS.51   | 2.66 | 1.70 | 17.89 |
| 1HGF.PDB | OE2, D_GLU.97  | NH2, F_ARG.54  | HH22, F_ARG.54  | 2.79 | 1.81 | 11.74 |
| 1HGF.PDB | OD2, D_ASP.86  | NZ, F_LYS.62   | HZ2, F_LYS.62   | 2.67 | 1.68 | 13.64 |
| 1HGF.PDB | OD2, D_ASP.90  | NZ, F_LYS.62   | HZ3, F_LYS.62   | 2.75 | 1.81 | 20.23 |
| 1HGF.PDB | OG, E_SER.266  | ND1, F_HIS.64  | HD1, F_HIS.64   | 2.65 | 1.77 | 20.25 |
| 1HGF.PDB | OG, E_SER.110  | NE2, F_HIS.64  | HE2, F_HIS.64   | 2.89 | 1.92 | 9.46  |
| 1HGF.PDB | OE2, F_GLU.85  | NZ, F_LYS.68   | HZ1, F_LYS.68   | 2.64 | 1.77 | 26.62 |
| 1HGF.PDB | OE2, B_GLU.81  | NE, F_ARG.76   | HE, F_ARG.76    | 2.86 | 1.88 | 5.84  |
| 1HGF.PDB | OE1, B_GLU.74  | NH1, F_ARG.76  | HH12, F_ARG.76  | 2.78 | 1.77 | 1.59  |
| 1HGF.PDB | OE1, B_GLU.81  | NH2, F_ARG.76  | HH21, F_ARG.76  | 2.69 | 1.70 | 7.61  |
| 1HGF.PDB | OE2, B_GLU.74  | NH2, F_ARG.76  | HH22, F_ARG.76  | 2.71 | 1.73 | 8.88  |
| 1HGF.PDB | OH, D_TYR.83   | NZ, F_LYS.88   | HZ1, F_LYS.88   | 2.55 | 1.63 | 21.75 |
| 1HGF.PDB | OE2, F_GLU.120 | NH1, F_ARG.123 | HH11, F_ARG.123 | 2.79 | 1.92 | 25.30 |
| 1HGF.PDB | OE1, D_GLU.132 | NE, F_ARG.124  | HE, F_ARG.124   | 2.90 | 1.96 | 15.73 |
| 1HGF.PDB | OH, F_TYR.157  | ND2, F_ASN.129 | HD21, F_ASN.129 | 2.83 | 1.89 | 13.44 |
| 1HGF.PDB | OE1, D_GLU.131 | NH2, F_ARG.163 | HH21, F_ARG.163 | 2.69 | 1.84 | 27.00 |

|          |                |                |                 |      |      |      |
|----------|----------------|----------------|-----------------|------|------|------|
| 1HGF.PDB | OE2, F_GLU_131 | NH1, F_ARG_170 | HH11, F_ARG_170 | 2.85 | 1.84 | 3.96 |
|----------|----------------|----------------|-----------------|------|------|------|

Table 1733: 1HGF-specific side chain hydrogen bonding analysis. In this table, a PDB file is specified with a four-letter PDB ID, except that the names of the PDB files corresponding to the single NMR structural model split from the NMR ensemble is specified with a four-letter PDB ID in addition to a hyphen followed by the single NMR structural model numeric ID, the residue naming scheme is **Chain ID\_residue name\_residue number**,  $\angle ADH$  represents the angle formed by acceptor (A), donor (D) and hydrogen (H) ( $\angle ADH$ ).

| PDB      | Acceptor (A)   | Donor (D)      | Hydrogen (H)    | D-A (Å) | H-A (Å) | $\angle ADH(^{\circ})$ |
|----------|----------------|----------------|-----------------|---------|---------|------------------------|
| 1HGG.PDB | OE2, B_GLU_97  | NZ, A_LYS_27   | HZ1, A_LYS_27   | 2.90    | 1.87    | 9.15                   |
| 1HGG.PDB | OD2, A_ASP_275 | NZ, A_LYS_50   | HZ1, A_LYS_50   | 2.71    | 1.78    | 22.40                  |
| 1HGG.PDB | OD1, A_ASP_73  | ND1, A_HIS_75  | HD1, A_HIS_75   | 2.77    | 1.87    | 17.99                  |
| 1HGG.PDB | OD1, A_ASP_60  | NE, A_ARG_90   | HE, A_ARG_90    | 2.94    | 1.96    | 6.92                   |
| 1HGG.PDB | OD2, A_ASP_60  | NH2, A_ARG_90  | HH21, A_ARG_90  | 2.79    | 1.81    | 10.63                  |
| 1HGG.PDB | OD1, A_ASP_271 | OG, A_SER_91   | HG, A_SER_91    | 2.86    | 2.03    | 25.78                  |
| 1HGG.PDB | OD2, A_ASP_271 | OG, A_SER_91   | HG, A_SER_91    | 2.85    | 1.97    | 21.46                  |
| 1HGG.PDB | OD2, A_ASP_68  | OG, A_SER_95   | HG, A_SER_95    | 2.94    | 1.99    | 11.26                  |
| 1HGG.PDB | OD1, A_ASP_68  | OH, A_TYR_100  | HH, A_TYR_100   | 2.94    | 1.99    | 11.28                  |
| 1HGG.PDB | OD2, A_ASP_104 | OG, A_SER_107  | HG, A_SER_107   | 2.84    | 1.92    | 16.45                  |
| 1HGG.PDB | OE2, B_GLU_67  | NH2, A_ARG_109 | HH21, A_ARG_109 | 2.84    | 1.86    | 14.43                  |
| 1HGG.PDB | OD2, F_ASP_79  | OG, A_SER_110  | HG, A_SER_110   | 2.88    | 1.95    | 14.29                  |
| 1HGG.PDB | OE2, A_GLU_119 | OG1, A_THR_117 | HG1, A_THR_117  | 2.88    | 1.93    | 9.58                   |
| 1HGG.PDB | OD1, A_ASN_137 | NZ, A_LYS_140  | HZ2, A_LYS_140  | 2.76    | 1.76    | 13.87                  |
| 1HGG.PDB | OD2, A_ASP_77  | NE, A_ARG_141  | HE, A_ARG_141   | 2.89    | 2.07    | 28.91                  |
| 1HGG.PDB | OD1, A_ASP_77  | NH2, A_ARG_141 | HH21, A_ARG_141 | 2.76    | 1.85    | 22.03                  |
| 1HGG.PDB | OD2, A_ASP_77  | NH2, A_ARG_141 | HH21, A_ARG_141 | 2.76    | 1.87    | 24.00                  |
| 1HGG.PDB | OH, A_TYR_195  | NE1, A_TRP_153 | HE1, A_TRP_153  | 2.91    | 1.96    | 13.96                  |
| 1HGG.PDB | OE2, A_GLU_123 | NZ, A_LYS_176  | HZ1, A_LYS_176  | 2.65    | 1.77    | 25.92                  |
| 1HGG.PDB | OE1, A_GLU_123 | OH, A_TYR_178  | HH, A_TYR_178   | 2.78    | 1.83    | 8.16                   |
| 1HGG.PDB | OG1, A_THR_235 | NE1, A_TRP_180 | HE1, A_TRP_180  | 2.92    | 1.93    | 2.35                   |
| 1HGG.PDB | OG, A_SER_231  | NE2, A_HIS_184 | HE2, A_HIS_184  | 2.80    | 1.92    | 21.87                  |
| 1HGG.PDB | OD1, A_ASN_246 | NH2, A_ARG_201 | HH21, A_ARG_201 | 2.65    | 1.72    | 18.81                  |
| 1HGG.PDB | OD2, A_ASP_241 | NE, A_ARG_208  | HE, A_ARG_208   | 2.96    | 2.06    | 20.34                  |
| 1HGG.PDB | OG1, A_THR_206 | OG, A_SER_209  | HG, A_SER_209   | 2.95    | 2.03    | 14.98                  |
| 1HGG.PDB | OD1, E_ASP_101 | NE2, A_GLN_210 | HE22, A_GLN_210 | 2.99    | 2.07    | 17.95                  |
| 1HGG.PDB | OG1, A_THR_203 | OG1, A_THR_212 | HG1, A_THR_212  | 2.88    | 1.92    | 6.20                   |
| 1HGG.PDB | OE1, C_GLN_210 | NH2, A_ARG_220 | HH21, A_ARG_220 | 2.73    | 1.78    | 15.93                  |
| 1HGG.PDB | OD1, A_ASP_101 | OG, A_SER_231  | HG, A_SER_231   | 2.88    | 1.92    | 8.82                   |
| 1HGG.PDB | OE1, F_GLU_72  | NZ, A_LYS_238  | HZ3, A_LYS_238  | 2.93    | 1.93    | 14.31                  |
| 1HGG.PDB | OE2, F_GLU_72  | NZ, A_LYS_238  | HZ3, A_LYS_238  | 2.74    | 1.91    | 29.92                  |
| 1HGG.PDB | OD1, A_ASN_165 | ND2, A_ASN_246 | HD22, A_ASN_246 | 2.90    | 1.98    | 17.02                  |
| 1HGG.PDB | OE1, A_GLN_191 | ND2, A_ASN_250 | HD21, A_ASN_250 | 2.92    | 1.96    | 11.11                  |
| 1HGG.PDB | OD1, A_ASN_133 | NH2, A_ARG_255 | HH22, A_ARG_255 | 2.52    | 1.66    | 24.50                  |
| 1HGG.PDB | OE2, A_GLU_119 | NH1, A_ARG_261 | HH12, A_ARG_261 | 2.68    | 1.87    | 29.79                  |
| 1HGG.PDB | OE1, A_GLU_119 | NH2, A_ARG_261 | HH22, A_ARG_261 | 2.74    | 1.88    | 26.75                  |
| 1HGG.PDB | OH, A_TYR_302  | NZ, A_LYS_264  | HZ1, A_LYS_264  | 2.93    | 1.98    | 19.58                  |
| 1HGG.PDB | ND1, A_HIS_56  | NZ, A_LYS_264  | HZ2, A_LYS_264  | 2.66    | 1.73    | 19.87                  |
| 1HGG.PDB | OD2, A_ASP_85  | NZ, A_LYS_264  | HZ3, A_LYS_264  | 2.83    | 1.83    | 12.74                  |
| 1HGG.PDB | OE1, B_GLU_67  | NH1, A_ARG_269 | HH12, A_ARG_269 | 2.69    | 1.86    | 28.34                  |
| 1HGG.PDB | OE1, A_GLN_44  | NZ, A_LYS_292  | HZ1, A_LYS_292  | 2.74    | 1.73    | 11.51                  |
| 1HGG.PDB | OD2, A_ASP_291 | NZ, A_LYS_292  | HZ3, A_LYS_292  | 2.77    | 1.90    | 27.56                  |
| 1HGG.PDB | OD1, A_ASN_285 | ND2, A_ASN_298 | HD22, A_ASN_298 | 2.97    | 2.01    | 11.28                  |
| 1HGG.PDB | OD1, B_ASP_90  | NZ, A_LYS_310  | HZ2, A_LYS_310  | 2.70    | 1.74    | 18.08                  |
| 1HGG.PDB | OE1, A_GLU_41  | NZ, A_LYS_315  | HZ3, A_LYS_315  | 2.73    | 1.81    | 23.14                  |
| 1HGG.PDB | OE2, A_GLU_35  | ND2, A_ASN_322 | HD22, A_ASN_322 | 2.81    | 1.95    | 25.01                  |
| 1HGG.PDB | OE2, B_GLU_15  | NZ, A_LYS_326  | HZ1, A_LYS_326  | 2.83    | 1.89    | 21.04                  |
| 1HGG.PDB | OE1, A_GLU_325 | NZ, A_LYS_326  | HZ3, A_LYS_326  | 2.82    | 1.86    | 18.51                  |
| 1HGG.PDB | OE1, B_GLN_34  | NE, B_ARG_25   | HE, B_ARG_25    | 2.80    | 1.89    | 18.36                  |
| 1HGG.PDB | OE1, B_GLN_34  | NH2, B_ARG_25  | HH21, B_ARG_25  | 2.91    | 2.04    | 24.97                  |
| 1HGG.PDB | OE2, A_GLU_325 | NH2, B_ARG_25  | HH22, B_ARG_25  | 2.94    | 1.96    | 12.23                  |
| 1HGG.PDB | OD2, B_ASP_37  | OG, B_SER_40   | HG, B_SER_40    | 2.80    | 1.93    | 21.69                  |
| 1HGG.PDB | OD1, B_ASP_46  | NE2, B_GLN_42  | HE22, B_GLN_42  | 2.83    | 1.95    | 21.37                  |
| 1HGG.PDB | OE2, B_GLU_114 | NE2, B_GLN_47  | HE21, B_GLN_47  | 2.96    | 2.05    | 17.92                  |
| 1HGG.PDB | OG1, B_THR_107 | NZ, B_LYS_51   | HZ1, B_LYS_51   | 2.97    | 2.00    | 18.19                  |
| 1HGG.PDB | OE1, B_GLU_103 | NZ, B_LYS_51   | HZ2, B_LYS_51   | 2.76    | 1.73    | 5.86                   |
| 1HGG.PDB | ND1, B_HIS_106 | NZ, B_LYS_51   | HZ3, B_LYS_51   | 2.77    | 1.79    | 14.96                  |

|          |                |                |                 |      |      |       |
|----------|----------------|----------------|-----------------|------|------|-------|
| 1HGG.PDB | OE1, B_GLU.57  | NH1, B_ARG.54  | HH11, B_ARG.54  | 2.86 | 1.86 | 11.23 |
| 1HGG.PDB | OE2, F_GLU.97  | NH2, B_ARG.54  | HH22, B_ARG.54  | 2.75 | 1.76 | 9.96  |
| 1HGG.PDB | OE2, B_GLU.61  | NZ, B_LYS.58   | HZ3, B_LYS.58   | 2.94 | 1.92 | 12.53 |
| 1HGG.PDB | OD2, F_ASP.90  | NZ, B_LYS.62   | HZ2, B_LYS.62   | 2.65 | 1.82 | 29.87 |
| 1HGG.PDB | OD2, F_ASP.86  | NZ, B_LYS.62   | HZ3, B_LYS.62   | 2.64 | 1.73 | 23.35 |
| 1HGG.PDB | OG, A_SER.110  | NE2, B_HIS.64  | HE2, B_HIS.64   | 2.90 | 1.96 | 14.63 |
| 1HGG.PDB | OE2, B_GLU.85  | NZ, B_LYS.68   | HZ2, B_LYS.68   | 2.75 | 1.72 | 7.06  |
| 1HGG.PDB | OE2, B_GLU.72  | OG, B_SER.71   | HG, B_SER.71    | 2.84 | 2.03 | 27.31 |
| 1HGG.PDB | OE2, D_GLU.81  | NE, B_ARG.76   | HE, B_ARG.76    | 2.94 | 1.96 | 10.47 |
| 1HGG.PDB | OE1, D_GLU.74  | NH1, B_ARG.76  | HH12, B_ARG.76  | 2.88 | 1.89 | 10.69 |
| 1HGG.PDB | OE1, D_GLU.81  | NH2, B_ARG.76  | HH21, B_ARG.76  | 2.73 | 1.73 | 5.91  |
| 1HGG.PDB | OE2, D_GLU.74  | NH2, B_ARG.76  | HH22, B_ARG.76  | 2.82 | 1.82 | 7.26  |
| 1HGG.PDB | OE1, D_GLU.85  | OH, B_TYR.83   | HH, B_TYR.83    | 2.68 | 1.80 | 19.99 |
| 1HGG.PDB | OH, F_TYR.83   | NZ, B_LYS.88   | HZ1, B_LYS.88   | 2.77 | 1.73 | 5.14  |
| 1HGG.PDB | OE2, B_GLU.120 | NH1, B_ARG.123 | HH11, B_ARG.123 | 2.73 | 1.87 | 25.50 |
| 1HGG.PDB | OE1, F_GLU.132 | NE, B_ARG.124  | HE, B_ARG.124   | 2.84 | 1.98 | 22.96 |
| 1HGG.PDB | OE2, F_GLU.132 | NE, B_ARG.124  | HE, B_ARG.124   | 2.81 | 1.98 | 25.54 |
| 1HGG.PDB | OH, B_TYR.157  | ND2, B_ASN.129 | HD22, B_ASN.129 | 2.80 | 1.86 | 13.18 |
| 1HGG.PDB | OD1, B_ASN.154 | OG1, B_THR.156 | HG1, B_THR.156  | 2.71 | 1.81 | 17.64 |
| 1HGG.PDB | OE2, B_GLU.131 | NH1, B_ARG.170 | HH11, B_ARG.170 | 2.85 | 1.85 | 6.28  |
| 1HGG.PDB | OE2, D_GLU.97  | NZ, C_LYS.27   | HZ1, C_LYS.27   | 2.94 | 1.91 | 8.28  |
| 1HGG.PDB | OD2, C_ASP.275 | NZ, C_LYS.50   | HZ1, C_LYS.50   | 2.68 | 1.77 | 23.74 |
| 1HGG.PDB | OE1, C_GLU.82  | NH2, C_ARG.57  | HH21, C_ARG.57  | 2.59 | 1.77 | 28.22 |
| 1HGG.PDB | OD1, C_ASP.73  | ND1, C_HIS.75  | HD1, C_HIS.75   | 2.72 | 1.84 | 20.87 |
| 1HGG.PDB | OD1, C_ASP.60  | NE, C_ARG.90   | HE, C_ARG.90    | 2.93 | 1.95 | 8.71  |
| 1HGG.PDB | OD2, C_ASP.60  | NH2, C_ARG.90  | HH21, C_ARG.90  | 2.79 | 1.80 | 9.72  |
| 1HGG.PDB | OD1, C_ASP.271 | OG, C_SER.91   | HG, C_SER.91    | 2.89 | 2.06 | 25.85 |
| 1HGG.PDB | OD2, C_ASP.271 | OG, C_SER.91   | HG, C_SER.91    | 2.90 | 2.02 | 21.44 |
| 1HGG.PDB | OD2, C_ASP.68  | OG, C_SER.95   | HG, C_SER.95    | 2.90 | 1.95 | 11.80 |
| 1HGG.PDB | OD1, C_ASP.68  | OH, C_TYR.100  | HH, C_TYR.100   | 2.93 | 1.98 | 11.50 |
| 1HGG.PDB | OD2, C_ASP.104 | OG, C_SER.107  | HG, C_SER.107   | 2.88 | 1.95 | 15.82 |
| 1HGG.PDB | OE2, D_GLU.67  | NH2, C_ARG.109 | HH21, C_ARG.109 | 2.85 | 1.88 | 14.56 |
| 1HGG.PDB | OD2, B_ASP.79  | OG, C_SER.110  | HG, C_SER.110   | 2.76 | 1.86 | 17.83 |
| 1HGG.PDB | OE2, C_GLU.119 | OG1, C_THR.117 | HG1, C_THR.117  | 2.92 | 1.97 | 8.69  |
| 1HGG.PDB | OD1, C_ASN.137 | NZ, C_LYS.140  | HZ2, C_LYS.140  | 2.78 | 1.78 | 13.21 |
| 1HGG.PDB | OD2, C_ASP.77  | NE, C_ARG.141  | HE, C_ARG.141   | 2.87 | 2.06 | 29.23 |
| 1HGG.PDB | OD1, C_ASP.77  | NH2, C_ARG.141 | HH21, C_ARG.141 | 2.76 | 1.85 | 22.10 |
| 1HGG.PDB | OD2, C_ASP.77  | NH2, C_ARG.141 | HH21, C_ARG.141 | 2.74 | 1.86 | 24.28 |
| 1HGG.PDB | OD1, C_ASN.137 | OG, C_SER.145  | HG, C_SER.145   | 2.90 | 2.03 | 20.82 |
| 1HGG.PDB | OH, C_TYR.195  | NE1, C_TRP.153 | HE1, C_TRP.153  | 2.90 | 1.98 | 17.08 |
| 1HGG.PDB | OE2, C_GLU.123 | NZ, C_LYS.176  | HZ1, C_LYS.176  | 2.63 | 1.76 | 26.89 |
| 1HGG.PDB | OE1, C_GLU.123 | OH, C_TYR.178  | HH, C_TYR.178   | 2.78 | 1.82 | 5.18  |
| 1HGG.PDB | OG1, C_THR.235 | NE1, C_TRP.180 | HE1, C_TRP.180  | 2.92 | 1.93 | 1.99  |
| 1HGG.PDB | OG, C_SER.231  | NE2, C_HIS.184 | HE2, C_HIS.184  | 2.79 | 1.91 | 21.48 |
| 1HGG.PDB | OD1, C_ASN.250 | NE2, C_GLN.191 | HE21, C_GLN.191 | 2.95 | 1.99 | 11.16 |
| 1HGG.PDB | OD1, C_ASN.246 | NH2, C_ARG.201 | HH21, C_ARG.201 | 2.66 | 1.74 | 19.39 |
| 1HGG.PDB | OG1, C_THR.212 | OG1, C_THR.203 | HG1, C_THR.203  | 2.83 | 1.91 | 13.70 |
| 1HGG.PDB | OD2, C_ASP.241 | NE, C_ARG.208  | HE, C_ARG.208   | 2.93 | 2.03 | 20.59 |
| 1HGG.PDB | OG1, C_THR.206 | OG, C_SER.209  | HG, C_SER.209   | 2.99 | 2.06 | 14.06 |
| 1HGG.PDB | OE1, E_GLN.210 | NH2, C_ARG.220 | HH21, C_ARG.220 | 2.61 | 1.71 | 21.26 |
| 1HGG.PDB | OD1, C_ASP.101 | OG, C_SER.231  | HG, C_SER.231   | 2.91 | 1.95 | 9.20  |
| 1HGG.PDB | OE1, B_GLU.72  | NZ, C_LYS.238  | HZ1, C_LYS.238  | 2.83 | 1.86 | 17.18 |
| 1HGG.PDB | OE2, B_GLU.72  | NZ, C_LYS.238  | HZ1, C_LYS.238  | 2.70 | 1.87 | 29.85 |
| 1HGG.PDB | OD1, C_ASN.165 | ND2, C_ASN.246 | HD22, C_ASN.246 | 2.88 | 1.97 | 17.94 |
| 1HGG.PDB | OE1, C_GLN.191 | ND2, C_ASN.250 | HD21, C_ASN.250 | 2.88 | 1.93 | 11.32 |
| 1HGG.PDB | OD1, C_ASN.133 | NH2, C_ARG.255 | HH22, C_ARG.255 | 2.54 | 1.68 | 24.43 |
| 1HGG.PDB | OE2, C_GLU.119 | NH1, C_ARG.261 | HH12, C_ARG.261 | 2.67 | 1.86 | 29.79 |
| 1HGG.PDB | OE1, C_GLU.119 | NH2, C_ARG.261 | HH22, C_ARG.261 | 2.73 | 1.87 | 26.76 |

|          |                |                |                 |      |      |       |
|----------|----------------|----------------|-----------------|------|------|-------|
| 1HGG.PDB | OH, C_TYR_302  | NZ, C_LYS_264  | HZ1, C_LYS_264  | 2.88 | 1.92 | 18.77 |
| 1HGG.PDB | ND1, C_HIS_56  | NZ, C_LYS_264  | HZ2, C_LYS_264  | 2.66 | 1.73 | 19.57 |
| 1HGG.PDB | OD2, C_ASP_85  | NZ, C_LYS_264  | HZ3, C_LYS_264  | 2.85 | 1.83 | 11.83 |
| 1HGG.PDB | OE1, D_GLU_67  | NH1, C_ARG_269 | HH12, C_ARG_269 | 2.69 | 1.85 | 27.75 |
| 1HGG.PDB | OE1, C_GLN_44  | NZ, C_LYS_292  | HZ1, C_LYS_292  | 2.77 | 1.76 | 11.69 |
| 1HGG.PDB | OD2, C_ASP_291 | NZ, C_LYS_292  | HZ3, C_LYS_292  | 2.78 | 1.91 | 27.51 |
| 1HGG.PDB | OD1, C_ASN_285 | ND2, C_ASN_298 | HD22, C_ASN_298 | 2.95 | 2.00 | 10.88 |
| 1HGG.PDB | OD1, D_ASP_90  | NZ, C_LYS_310  | HZ2, C_LYS_310  | 2.65 | 1.73 | 21.74 |
| 1HGG.PDB | OE1, C_GLU_41  | NZ, C_LYS_315  | HZ3, C_LYS_315  | 2.73 | 1.82 | 23.48 |
| 1HGG.PDB | OE2, C_GLU_35  | ND2, C_ASN_322 | HD22, C_ASN_322 | 2.82 | 1.96 | 24.18 |
| 1HGG.PDB | OXT, C_THR_328 | NE2, C_GLN_327 | HE22, C_GLN_327 | 2.99 | 2.05 | 16.22 |
| 1HGG.PDB | OE1, D_GLN_34  | NE, D_ARG_25   | HE, D_ARG_25    | 2.69 | 1.81 | 20.51 |
| 1HGG.PDB | OE1, D_GLN_34  | NH2, D_ARG_25  | HH21, D_ARG_25  | 2.92 | 2.08 | 27.66 |
| 1HGG.PDB | OD1, D_ASN_146 | ND2, D_ASN_28  | HD21, D_ASN_28  | 2.95 | 1.98 | 8.75  |
| 1HGG.PDB | OD2, D_ASP_37  | OG, D_SER_40   | HG, D_SER_40    | 2.77 | 1.93 | 24.58 |
| 1HGG.PDB | OD1, D_ASP_46  | NE2, D_GLN_42  | HE22, D_GLN_42  | 2.85 | 1.96 | 21.08 |
| 1HGG.PDB | OE2, D_GLU_114 | NE2, D_GLN_47  | HE21, D_GLN_47  | 2.97 | 2.05 | 17.17 |
| 1HGG.PDB | OG1, D_THR_107 | NZ, D_LYS_51   | HZ1, D_LYS_51   | 2.98 | 2.00 | 17.66 |
| 1HGG.PDB | OE1, D_GLU_103 | NZ, D_LYS_51   | HZ2, D_LYS_51   | 2.77 | 1.73 | 6.39  |
| 1HGG.PDB | ND1, D_HIS_106 | NZ, D_LYS_51   | HZ3, D_LYS_51   | 2.76 | 1.78 | 15.09 |
| 1HGG.PDB | OE1, D_GLU_57  | NH1, D_ARG_54  | HH11, D_ARG_54  | 2.86 | 1.86 | 11.12 |
| 1HGG.PDB | OE2, B_GLU_97  | NH2, D_ARG_54  | HH22, D_ARG_54  | 2.76 | 1.78 | 10.56 |
| 1HGG.PDB | OE2, D_GLU_61  | NZ, D_LYS_58   | HZ3, D_LYS_58   | 2.91 | 1.89 | 12.30 |
| 1HGG.PDB | OG, C_SER_110  | NE2, D_HIS_64  | HE2, D_HIS_64   | 2.86 | 1.90 | 9.42  |
| 1HGG.PDB | OE2, D_GLU_85  | NZ, D_LYS_68   | HZ2, D_LYS_68   | 2.77 | 1.74 | 6.59  |
| 1HGG.PDB | OE2, D_GLU_72  | OG, D_SER_71   | HG, D_SER_71    | 2.82 | 2.00 | 26.77 |
| 1HGG.PDB | OE2, F_GLU_81  | NE, D_ARG_76   | HE, D_ARG_76    | 2.86 | 1.89 | 9.57  |
| 1HGG.PDB | OE1, F_GLU_74  | NH1, D_ARG_76  | HH12, D_ARG_76  | 2.78 | 1.80 | 12.10 |
| 1HGG.PDB | OE1, F_GLU_81  | NH2, D_ARG_76  | HH21, D_ARG_76  | 2.67 | 1.68 | 6.66  |
| 1HGG.PDB | OE2, F_GLU_74  | NH2, D_ARG_76  | HH22, D_ARG_76  | 2.74 | 1.75 | 9.29  |
| 1HGG.PDB | OE1, F_GLU_85  | OH, D_TYR_83   | HH, D_TYR_83    | 2.59 | 1.78 | 26.83 |
| 1HGG.PDB | OH, B_TYR_83   | NZ, D_LYS_88   | HZ1, D_LYS_88   | 2.73 | 1.70 | 8.35  |
| 1HGG.PDB | OE2, D_GLU_120 | NH1, D_ARG_123 | HH11, D_ARG_123 | 2.73 | 1.87 | 25.59 |
| 1HGG.PDB | OE1, B_GLU_132 | NE, D_ARG_124  | HE, D_ARG_124   | 2.86 | 2.00 | 22.57 |
| 1HGG.PDB | OE2, B_GLU_132 | NE, D_ARG_124  | HE, D_ARG_124   | 2.78 | 1.96 | 26.12 |
| 1HGG.PDB | OH, D_TYR_157  | ND2, D_ASN_129 | HD22, D_ASN_129 | 2.80 | 1.84 | 10.50 |
| 1HGG.PDB | OD1, D_ASN_154 | OG1, D_THR_156 | HG1, D_THR_156  | 2.73 | 1.82 | 15.46 |
| 1HGG.PDB | NE2, D_HIS_142 | OH, D_TYR_157  | HH, D_TYR_157   | 2.72 | 1.85 | 20.87 |
| 1HGG.PDB | OE2, D_GLU_131 | NH1, D_ARG_170 | HH11, D_ARG_170 | 2.85 | 1.86 | 6.70  |
| 1HGG.PDB | OE2, F_GLU_97  | NZ, E_LYS_27   | HZ1, E_LYS_27   | 2.91 | 1.88 | 8.89  |
| 1HGG.PDB | OD2, E_ASP_275 | NZ, E_LYS_50   | HZ1, E_LYS_50   | 2.68 | 1.77 | 24.10 |
| 1HGG.PDB | OD1, E_ASP_73  | ND1, E_HIS_75  | HD1, E_HIS_75   | 2.75 | 1.85 | 17.34 |
| 1HGG.PDB | OD1, E_ASP_60  | NE, E_ARG_90   | HE, E_ARG_90    | 2.91 | 1.94 | 9.27  |
| 1HGG.PDB | OD2, E_ASP_60  | NH2, E_ARG_90  | HH21, E_ARG_90  | 2.83 | 1.84 | 9.64  |
| 1HGG.PDB | OD1, E_ASP_271 | OG, E_SER_91   | HG, E_SER_91    | 2.92 | 2.07 | 24.79 |
| 1HGG.PDB | OD2, E_ASP_271 | OG, E_SER_91   | HG, E_SER_91    | 2.93 | 2.06 | 22.08 |
| 1HGG.PDB | OD2, E_ASP_68  | OG, E_SER_95   | HG, E_SER_95    | 2.93 | 1.98 | 13.19 |
| 1HGG.PDB | OD1, E_ASP_68  | OH, E_TYR_100  | HH, E_TYR_100   | 2.92 | 1.96 | 10.90 |
| 1HGG.PDB | OD2, E_ASP_104 | OG, E_SER_107  | HG, E_SER_107   | 2.85 | 1.93 | 15.56 |
| 1HGG.PDB | OE2, F_GLU_67  | NH2, E_ARG_109 | HH21, E_ARG_109 | 2.88 | 1.90 | 14.20 |
| 1HGG.PDB | OD2, D_ASP_79  | OG, E_SER_110  | HG, E_SER_110   | 2.79 | 1.88 | 16.48 |
| 1HGG.PDB | OE2, E_GLU_119 | OG1, E_THR_117 | HG1, E_THR_117  | 2.95 | 1.99 | 7.33  |
| 1HGG.PDB | OD1, E_ASN_137 | NZ, E_LYS_140  | HZ2, E_LYS_140  | 2.76 | 1.76 | 13.40 |
| 1HGG.PDB | OD2, E_ASP_77  | NE, E_ARG_141  | HE, E_ARG_141   | 2.90 | 2.09 | 29.10 |
| 1HGG.PDB | OD1, E_ASP_77  | NH2, E_ARG_141 | HH21, E_ARG_141 | 2.80 | 1.90 | 22.17 |
| 1HGG.PDB | OD2, E_ASP_77  | NH2, E_ARG_141 | HH21, E_ARG_141 | 2.74 | 1.86 | 23.74 |
| 1HGG.PDB | OD1, E_ASN_137 | OG, E_SER_145  | HG, E_SER_145   | 2.95 | 2.08 | 20.42 |
| 1HGG.PDB | OH, E_TYR_195  | NE1, E_TRP_153 | HE1, E_TRP_153  | 2.91 | 1.97 | 14.69 |



|          |                |                |                 |      |      |       |
|----------|----------------|----------------|-----------------|------|------|-------|
| 1HGG.PDB | OE2, E_GLU_123 | NZ, E_LYS_176  | HZ1, E_LYS_176  | 2.65 | 1.78 | 26.50 |
| 1HGG.PDB | OE1, E_GLU_123 | OH, E_TYR_178  | HH, E_TYR_178   | 2.80 | 1.84 | 8.47  |
| 1HGG.PDB | OG1, E_THR_235 | NE1, E_TRP_180 | HE1, E_TRP_180  | 2.93 | 1.94 | 2.01  |
| 1HGG.PDB | OG, E_SER_231  | NE2, E_HIS_184 | HE2, E_HIS_184  | 2.81 | 1.94 | 22.49 |
| 1HGG.PDB | OD1, E_ASN_246 | NH2, E_ARG_201 | HH21, E_ARG_201 | 2.66 | 1.74 | 20.08 |
| 1HGG.PDB | OG1, E_THR_212 | OG1, E_THR_203 | HG1, E_THR_203  | 2.88 | 1.95 | 13.34 |
| 1HGG.PDB | OD2, E_ASP_241 | NE, E_ARG_208  | HE, E_ARG_208   | 2.96 | 2.05 | 19.90 |
| 1HGG.PDB | OG1, E_THR_206 | OG, E_SER_209  | HG, E_SER_209   | 2.99 | 2.07 | 14.54 |
| 1HGG.PDB | OD1, C_ASP_101 | NE2, E_GLN_210 | HE22, E_GLN_210 | 2.96 | 2.04 | 17.70 |
| 1HGG.PDB | OE1, A_GLN_210 | NH2, E_ARG_220 | HH21, E_ARG_220 | 2.72 | 1.80 | 20.26 |
| 1HGG.PDB | OD1, E_ASP_101 | OG, E_SER_231  | HG, E_SER_231   | 2.91 | 1.96 | 10.31 |
| 1HGG.PDB | OE1, D_GLU_72  | NZ, E_LYS_238  | HZ1, E_LYS_238  | 2.89 | 1.89 | 13.93 |
| 1HGG.PDB | OD1, E_ASN_165 | ND2, E_ASN_246 | HD22, E_ASN_246 | 2.88 | 1.96 | 17.66 |
| 1HGG.PDB | OE1, E_GLN_191 | ND2, E_ASN_250 | HD21, E_ASN_250 | 2.89 | 1.94 | 10.20 |
| 1HGG.PDB | OD1, E_ASN_133 | NH2, E_ARG_255 | HH22, E_ARG_255 | 2.55 | 1.68 | 24.24 |
| 1HGG.PDB | OE2, E_GLU_119 | NH1, E_ARG_261 | HH12, E_ARG_261 | 2.69 | 1.87 | 29.29 |
| 1HGG.PDB | OE1, E_GLU_119 | NH2, E_ARG_261 | HH22, E_ARG_261 | 2.74 | 1.88 | 26.67 |
| 1HGG.PDB | OH, E_TYR_302  | NZ, E_LYS_264  | HZ1, E_LYS_264  | 2.90 | 1.93 | 18.14 |
| 1HGG.PDB | ND1, E_HIS_56  | NZ, E_LYS_264  | HZ2, E_LYS_264  | 2.66 | 1.73 | 20.09 |
| 1HGG.PDB | OD2, E_ASP_85  | NZ, E_LYS_264  | HZ3, E_LYS_264  | 2.85 | 1.83 | 11.84 |
| 1HGG.PDB | OE1, F_GLU_67  | NH1, E_ARG_269 | HH12, E_ARG_269 | 2.69 | 1.85 | 27.32 |
| 1HGG.PDB | OE1, E_GLN_44  | NZ, E_LYS_292  | HZ1, E_LYS_292  | 2.77 | 1.75 | 10.61 |
| 1HGG.PDB | OD2, E_ASP_291 | NZ, E_LYS_292  | HZ3, E_LYS_292  | 2.76 | 1.90 | 27.94 |
| 1HGG.PDB | OD1, E_ASN_285 | ND2, E_ASN_298 | HD22, E_ASN_298 | 2.95 | 2.00 | 11.31 |
| 1HGG.PDB | OD1, F_ASP_90  | NZ, E_LYS_310  | HZ2, E_LYS_310  | 2.64 | 1.72 | 22.12 |
| 1HGG.PDB | OE1, E_GLU_41  | NZ, E_LYS_315  | HZ3, E_LYS_315  | 2.68 | 1.80 | 26.22 |
| 1HGG.PDB | OE2, E_GLU_35  | ND2, E_ASN_322 | HD22, E_ASN_322 | 2.79 | 1.94 | 25.02 |
| 1HGG.PDB | OE1, F_GLU_15  | NZ, E_LYS_326  | HZ3, E_LYS_326  | 2.98 | 1.97 | 15.13 |
| 1HGG.PDB | OD2, F_ASP_37  | OG, F_SER_40   | HG, F_SER_40    | 2.74 | 1.92 | 26.19 |
| 1HGG.PDB | OD1, F_ASP_46  | NE2, F_GLN_42  | HE22, F_GLN_42  | 2.82 | 1.94 | 21.99 |
| 1HGG.PDB | OE2, F_GLU_114 | NE2, F_GLN_47  | HE21, F_GLN_47  | 2.97 | 2.06 | 18.05 |
| 1HGG.PDB | OG1, F_THR_107 | NZ, F_LYS_51   | HZ1, F_LYS_51   | 2.98 | 2.02 | 18.55 |
| 1HGG.PDB | OE1, F_GLU_103 | NZ, F_LYS_51   | HZ2, F_LYS_51   | 2.79 | 1.76 | 6.25  |
| 1HGG.PDB | ND1, F_HIS_106 | NZ, F_LYS_51   | HZ3, F_LYS_51   | 2.72 | 1.74 | 15.22 |
| 1HGG.PDB | OE1, F_GLU_57  | NH1, F_ARG_54  | HH11, F_ARG_54  | 2.85 | 1.85 | 10.83 |
| 1HGG.PDB | OE2, D_GLU_97  | NH2, F_ARG_54  | HH22, F_ARG_54  | 2.73 | 1.74 | 10.16 |
| 1HGG.PDB | OE2, F_GLU_61  | NZ, F_LYS_58   | HZ3, F_LYS_58   | 2.94 | 1.92 | 12.48 |
| 1HGG.PDB | OD2, D_ASP_86  | NZ, F_LYS_62   | HZ3, F_LYS_62   | 2.58 | 1.75 | 29.01 |
| 1HGG.PDB | OG, E_SER_110  | NE2, F_HIS_64  | HE2, F_HIS_64   | 2.87 | 1.91 | 10.03 |
| 1HGG.PDB | OE2, F_GLU_85  | NZ, F_LYS_68   | HZ2, F_LYS_68   | 2.75 | 1.74 | 10.05 |
| 1HGG.PDB | OE2, F_GLU_72  | OG, F_SER_71   | HG, F_SER_71    | 2.86 | 2.03 | 26.49 |
| 1HGG.PDB | OE2, B_GLU_81  | NE, F_ARG_76   | HE, F_ARG_76    | 2.88 | 1.92 | 11.44 |
| 1HGG.PDB | OE1, B_GLU_74  | NH1, F_ARG_76  | HH12, F_ARG_76  | 2.75 | 1.76 | 9.13  |
| 1HGG.PDB | OE1, B_GLU_81  | NH2, F_ARG_76  | HH21, F_ARG_76  | 2.67 | 1.68 | 1.99  |
| 1HGG.PDB | OE2, B_GLU_74  | NH2, F_ARG_76  | HH22, F_ARG_76  | 2.79 | 1.81 | 10.64 |
| 1HGG.PDB | OH, D_TYR_83   | NZ, F_LYS_88   | HZ1, F_LYS_88   | 2.68 | 1.67 | 10.46 |
| 1HGG.PDB | OE2, F_GLU_120 | NH1, F_ARG_123 | HH11, F_ARG_123 | 2.72 | 1.86 | 25.68 |
| 1HGG.PDB | OE1, D_GLU_132 | NE, F_ARG_124  | HE, F_ARG_124   | 2.96 | 2.09 | 22.59 |
| 1HGG.PDB | OE2, D_GLU_132 | NE, F_ARG_124  | HE, F_ARG_124   | 2.87 | 2.01 | 24.00 |
| 1HGG.PDB | OH, F_TYR_157  | ND2, F_ASN_129 | HD22, F_ASN_129 | 2.79 | 1.86 | 14.20 |
| 1HGG.PDB | OE2, F_GLU_131 | NH1, F_ARG_170 | HH11, F_ARG_170 | 2.84 | 1.84 | 6.38  |

---

Table 1734: 1HGG-specific side chain hydrogen bonding analysis. In this table, a PDB file is specified with a four-letter PDB ID, except that the names of the PDB files corresponding to the single NMR structural model split from the NMR ensemble is specified with a four-letter PDB ID in addition to a hyphen followed by the single NMR structural model numeric ID, the residue naming scheme is **Chain ID\_residue name\_residue number**,  $\angle ADH$  represents the angle formed by acceptor (A), donor (D) and hydrogen (H) ( $\angle ADH$ ).

| PDB      | Acceptor (A)   | Donor (D)      | Hydrogen (H)    | D-A (Å) | H-A (Å) | $\angle ADH(^{\circ})$ |
|----------|----------------|----------------|-----------------|---------|---------|------------------------|
| 1HGH.PDB | OE2, B_GLU_97  | NZ, A_LYS_27   | HZ1, A_LYS_27   | 2.78    | 1.76    | 9.03                   |
| 1HGH.PDB | OD2, A_ASP_275 | NZ, A_LYS_50   | HZ1, A_LYS_50   | 2.79    | 1.83    | 19.36                  |
| 1HGH.PDB | OD1, A_ASP_73  | ND1, A_HIS_75  | HD1, A_HIS_75   | 2.74    | 1.85    | 19.20                  |
| 1HGH.PDB | OD1, A_ASP_60  | NE, A_ARG_90   | HE, A_ARG_90    | 2.85    | 1.88    | 8.50                   |
| 1HGH.PDB | OD2, A_ASP_60  | NH2, A_ARG_90  | HH21, A_ARG_90  | 2.79    | 1.80    | 9.33                   |
| 1HGH.PDB | OD2, A_ASP_271 | OG, A_SER_91   | HG, A_SER_91    | 2.76    | 1.89    | 21.30                  |
| 1HGH.PDB | OD2, A_ASP_68  | OG, A_SER_95   | HG, A_SER_95    | 2.83    | 1.95    | 21.96                  |
| 1HGH.PDB | OD1, A_ASP_68  | OH, A_TYR_100  | HH, A_TYR_100   | 2.95    | 2.07    | 21.37                  |
| 1HGH.PDB | OD2, A_ASP_104 | OG, A_SER_107  | HG, A_SER_107   | 2.88    | 1.94    | 14.34                  |
| 1HGH.PDB | OE2, B_GLU_67  | NH2, A_ARG_109 | HH21, A_ARG_109 | 2.86    | 1.88    | 13.48                  |
| 1HGH.PDB | OD2, F_ASP_79  | OG, A_SER_110  | HG, A_SER_110   | 2.97    | 2.01    | 11.65                  |
| 1HGH.PDB | OE2, A_GLU_119 | OG1, A_THR_117 | HG1, A_THR_117  | 2.86    | 1.91    | 8.00                   |
| 1HGH.PDB | OD1, A_ASN_137 | NZ, A_LYS_140  | HZ2, A_LYS_140  | 2.74    | 1.73    | 12.09                  |
| 1HGH.PDB | OD2, A_ASP_77  | NE, A_ARG_141  | HE, A_ARG_141   | 2.85    | 2.03    | 27.72                  |
| 1HGH.PDB | OD1, A_ASP_77  | NH2, A_ARG_141 | HH21, A_ARG_141 | 2.86    | 1.95    | 21.78                  |
| 1HGH.PDB | OD2, A_ASP_77  | NH2, A_ARG_141 | HH21, A_ARG_141 | 2.74    | 1.85    | 23.60                  |
| 1HGH.PDB | OH, A_TYR_195  | NE1, A_TRP_153 | HE1, A_TRP_153  | 2.96    | 2.05    | 18.96                  |
| 1HGH.PDB | OE2, A_GLU_123 | NZ, A_LYS_176  | HZ1, A_LYS_176  | 2.68    | 1.79    | 24.70                  |
| 1HGH.PDB | OE1, A_GLU_123 | OH, A_TYR_178  | HH, A_TYR_178   | 2.75    | 1.81    | 10.37                  |
| 1HGH.PDB | OG1, A_THR_235 | NE1, A_TRP_180 | HE1, A_TRP_180  | 2.89    | 1.90    | 1.65                   |
| 1HGH.PDB | OG, A_SER_231  | NE2, A_HIS_184 | HE2, A_HIS_184  | 2.74    | 1.90    | 25.48                  |
| 1HGH.PDB | OD1, A_ASN_250 | NE2, A_GLN_191 | HE21, A_GLN_191 | 2.96    | 2.00    | 8.72                   |
| 1HGH.PDB | OD1, A_ASN_246 | NH2, A_ARG_201 | HH21, A_ARG_201 | 2.63    | 1.71    | 19.32                  |
| 1HGH.PDB | OG1, A_THR_206 | OG, A_SER_209  | HG, A_SER_209   | 2.93    | 1.98    | 8.14                   |
| 1HGH.PDB | OD1, E_ASP_101 | NE2, A_GLN_210 | HE22, A_GLN_210 | 2.97    | 2.14    | 27.61                  |
| 1HGH.PDB | OG1, A_THR_203 | OG1, A_THR_212 | HG1, A_THR_212  | 2.93    | 1.98    | 7.92                   |
| 1HGH.PDB | OE1, C_GLN_210 | NH2, A_ARG_220 | HH21, A_ARG_220 | 2.66    | 1.73    | 18.15                  |
| 1HGH.PDB | OD1, A_ASP_101 | OG, A_SER_231  | HG, A_SER_231   | 2.86    | 1.91    | 11.01                  |
| 1HGH.PDB | OE1, F_GLU_72  | NZ, A_LYS_238  | HZ3, A_LYS_238  | 2.92    | 1.93    | 15.64                  |
| 1HGH.PDB | OD1, A_ASN_165 | ND2, A_ASN_246 | HD22, A_ASN_246 | 2.95    | 1.98    | 10.57                  |
| 1HGH.PDB | OE1, A_GLN_191 | ND2, A_ASN_250 | HD21, A_ASN_250 | 2.87    | 1.90    | 5.96                   |
| 1HGH.PDB | OE2, A_GLU_119 | NH1, A_ARG_261 | HH12, A_ARG_261 | 2.62    | 1.81    | 29.53                  |
| 1HGH.PDB | OE1, A_GLU_119 | NH2, A_ARG_261 | HH22, A_ARG_261 | 2.87    | 1.97    | 23.64                  |
| 1HGH.PDB | OD2, A_ASP_85  | NZ, A_LYS_264  | HZ3, A_LYS_264  | 2.81    | 1.82    | 15.33                  |
| 1HGH.PDB | OE1, A_GLN_44  | NZ, A_LYS_292  | HZ1, A_LYS_292  | 2.68    | 1.67    | 11.56                  |
| 1HGH.PDB | OD2, A_ASP_291 | NZ, A_LYS_292  | HZ3, A_LYS_292  | 2.82    | 1.85    | 18.01                  |
| 1HGH.PDB | OD1, B_ASP_86  | NZ, A_LYS_310  | HZ2, A_LYS_310  | 2.71    | 1.84    | 27.09                  |
| 1HGH.PDB | OE1, A_GLU_41  | NZ, A_LYS_315  | HZ3, A_LYS_315  | 2.87    | 1.90    | 18.83                  |
| 1HGH.PDB | OE2, A_GLU_35  | ND2, A_ASN_322 | HD22, A_ASN_322 | 2.83    | 1.93    | 20.02                  |
| 1HGH.PDB | OE1, A_GLU_325 | NZ, A_LYS_326  | HZ3, A_LYS_326  | 2.84    | 1.87    | 17.61                  |
| 1HGH.PDB | OE1, B_GLN_34  | NE, B_ARG_25   | HE, B_ARG_25    | 2.67    | 1.79    | 21.37                  |
| 1HGH.PDB | OE1, B_GLN_34  | NH2, B_ARG_25  | HH21, B_ARG_25  | 2.91    | 2.10    | 29.24                  |
| 1HGH.PDB | OD1, B_ASP_46  | NE2, B_GLN_42  | HE22, B_GLN_42  | 2.86    | 1.97    | 20.47                  |
| 1HGH.PDB | OE1, B_GLU_103 | NZ, B_LYS_51   | HZ1, B_LYS_51   | 2.79    | 1.76    | 7.63                   |
| 1HGH.PDB | ND1, B_HIS_106 | NZ, B_LYS_51   | HZ2, B_LYS_51   | 2.80    | 1.85    | 18.51                  |
| 1HGH.PDB | OG1, B_THR_107 | NZ, B_LYS_51   | HZ3, B_LYS_51   | 2.89    | 1.91    | 15.99                  |
| 1HGH.PDB | OE1, B_GLU_57  | NH1, B_ARG_54  | HH11, B_ARG_54  | 2.86    | 1.87    | 11.36                  |
| 1HGH.PDB | OE2, F_GLU_97  | NH2, B_ARG_54  | HH22, B_ARG_54  | 2.82    | 1.86    | 15.60                  |
| 1HGH.PDB | OD2, F_ASP_86  | NZ, B_LYS_62   | HZ1, B_LYS_62   | 2.66    | 1.80    | 27.71                  |
| 1HGH.PDB | OD2, F_ASP_90  | NZ, B_LYS_62   | HZ3, B_LYS_62   | 2.68    | 1.82    | 27.13                  |
| 1HGH.PDB | OG, A_SER_110  | NE2, B_HIS_64  | HE2, B_HIS_64   | 2.87    | 1.91    | 11.96                  |
| 1HGH.PDB | OE2, B_GLU_85  | NZ, B_LYS_68   | HZ2, B_LYS_68   | 2.73    | 1.71    | 6.94                   |
| 1HGH.PDB | OE2, D_GLU_81  | NE, B_ARG_76   | HE, B_ARG_76    | 2.87    | 1.90    | 9.70                   |
| 1HGH.PDB | OE2, D_GLU_74  | NH1, B_ARG_76  | HH12, B_ARG_76  | 2.91    | 1.90    | 8.45                   |
| 1HGH.PDB | OE1, D_GLU_81  | NH2, B_ARG_76  | HH21, B_ARG_76  | 2.77    | 1.76    | 5.47                   |
| 1HGH.PDB | OE1, D_GLU_74  | NH2, B_ARG_76  | HH22, B_ARG_76  | 2.89    | 1.87    | 2.83                   |
| 1HGH.PDB | OE1, B_GLU_74  | NE2, B_GLN_78  | HE22, B_GLN_78  | 2.91    | 1.95    | 10.12                  |

|          |                |                |                 |      |      |       |
|----------|----------------|----------------|-----------------|------|------|-------|
| 1HGH.PDB | OE1, D_GLU_85  | OH, B_TYR_83   | HH, B_TYR_83    | 2.69 | 1.84 | 23.96 |
| 1HGH.PDB | OH, F_TYR_83   | NZ, B_LYS_88   | HZ1, B_LYS_88   | 2.74 | 1.71 | 7.44  |
| 1HGH.PDB | OE2, B_GLU_120 | NH1, B_ARG_123 | HH11, B_ARG_123 | 2.74 | 1.85 | 22.74 |
| 1HGH.PDB | OE1, F_GLU_132 | NE, B_ARG_124  | HE, B_ARG_124   | 2.76 | 1.94 | 26.47 |
| 1HGH.PDB | OE2, F_GLU_132 | NE, B_ARG_124  | HE, B_ARG_124   | 2.83 | 1.98 | 23.62 |
| 1HGH.PDB | OH, B_TYR_157  | ND2, B_ASN_129 | HD22, B_ASN_129 | 2.83 | 1.87 | 11.09 |
| 1HGH.PDB | OE2, B_GLU_150 | ND2, B_ASN_154 | HD21, B_ASN_154 | 2.97 | 2.10 | 23.74 |
| 1HGH.PDB | OD1, B_ASN_154 | OG1, B_THR_156 | HG1, B_THR_156  | 2.66 | 1.78 | 19.28 |
| 1HGH.PDB | OE2, B_GLU_131 | NH1, B_ARG_170 | HH11, B_ARG_170 | 2.83 | 1.83 | 5.81  |
| 1HGH.PDB | OE2, D_GLU_97  | NZ, C_LYS_27   | HZ1, C_LYS_27   | 2.82 | 1.78 | 7.61  |
| 1HGH.PDB | OD2, C_ASP_275 | NZ, C_LYS_50   | HZ1, C_LYS_50   | 2.77 | 1.81 | 19.74 |
| 1HGH.PDB | OD1, C_ASP_73  | ND1, C_HIS_75  | HD1, C_HIS_75   | 2.71 | 1.84 | 22.23 |
| 1HGH.PDB | OD1, C_ASP_60  | NE, C_ARG_90   | HE, C_ARG_90    | 2.80 | 1.87 | 15.44 |
| 1HGH.PDB | OD2, C_ASP_60  | NH2, C_ARG_90  | HH21, C_ARG_90  | 2.76 | 1.77 | 8.79  |
| 1HGH.PDB | OD2, C_ASP_271 | OG, C_SER_91   | HG, C_SER_91    | 2.80 | 1.87 | 12.62 |
| 1HGH.PDB | OD2, C_ASP_68  | OG, C_SER_95   | HG, C_SER_95    | 2.83 | 1.92 | 18.04 |
| 1HGH.PDB | OD1, C_ASP_68  | OH, C_TYR_100  | HH, C_TYR_100   | 2.94 | 2.01 | 15.20 |
| 1HGH.PDB | OD2, C_ASP_104 | OG, C_SER_107  | HG, C_SER_107   | 2.88 | 1.96 | 17.02 |
| 1HGH.PDB | OE2, D_GLU_67  | NH2, C_ARG_109 | HH21, C_ARG_109 | 2.86 | 1.88 | 13.66 |
| 1HGH.PDB | OD2, B_ASP_79  | OG, C_SER_110  | HG, C_SER_110   | 2.78 | 1.85 | 13.87 |
| 1HGH.PDB | OE2, C_GLU_119 | OG1, C_THR_117 | HG1, C_THR_117  | 2.87 | 1.92 | 8.14  |
| 1HGH.PDB | OD1, C_ASN_137 | NZ, C_LYS_140  | HZ2, C_LYS_140  | 2.76 | 1.74 | 10.11 |
| 1HGH.PDB | OD2, C_ASP_77  | NE, C_ARG_141  | HE, C_ARG_141   | 2.85 | 2.02 | 26.86 |
| 1HGH.PDB | OD1, C_ASP_77  | NH2, C_ARG_141 | HH21, C_ARG_141 | 2.88 | 1.98 | 22.59 |
| 1HGH.PDB | OD2, C_ASP_77  | NH2, C_ARG_141 | HH21, C_ARG_141 | 2.75 | 1.86 | 23.43 |
| 1HGH.PDB | OD1, C_ASN_137 | OG, C_SER_145  | HG, C_SER_145   | 2.89 | 2.04 | 23.42 |
| 1HGH.PDB | OH, C_TYR_195  | NE1, C_TRP_153 | HE1, C_TRP_153  | 2.92 | 2.00 | 17.94 |
| 1HGH.PDB | OE2, C_GLU_123 | NZ, C_LYS_176  | HZ1, C_LYS_176  | 2.65 | 1.80 | 28.51 |
| 1HGH.PDB | OE1, C_GLU_123 | OH, C_TYR_178  | HH, C_TYR_178   | 2.74 | 1.81 | 11.36 |
| 1HGH.PDB | OG1, C_THR_235 | NE1, C_TRP_180 | HE1, C_TRP_180  | 2.88 | 1.89 | 0.71  |
| 1HGH.PDB | OG, C_SER_231  | NE2, C_HIS_184 | HE2, C_HIS_184  | 2.77 | 1.92 | 24.69 |
| 1HGH.PDB | OD1, C_ASN_250 | NE2, C_GLN_191 | HE21, C_GLN_191 | 2.95 | 1.99 | 9.46  |
| 1HGH.PDB | OD1, C_ASN_246 | NH2, C_ARG_201 | HH21, C_ARG_201 | 2.65 | 1.73 | 20.02 |
| 1HGH.PDB | OG1, C_THR_212 | OG1, C_THR_203 | HG1, C_THR_203  | 2.92 | 1.98 | 11.43 |
| 1HGH.PDB | OD2, C_ASP_241 | NE, C_ARG_208  | HE, C_ARG_208   | 2.97 | 2.08 | 22.63 |
| 1HGH.PDB | OG1, C_THR_206 | OG, C_SER_209  | HG, C_SER_209   | 2.95 | 2.00 | 8.11  |
| 1HGH.PDB | OD1, A_ASP_101 | NE2, C_GLN_210 | HE22, C_GLN_210 | 2.93 | 2.07 | 24.87 |
| 1HGH.PDB | OE1, E_GLN_210 | NH2, C_ARG_220 | HH21, C_ARG_220 | 2.57 | 1.72 | 26.03 |
| 1HGH.PDB | OD1, C_ASP_101 | OG, C_SER_231  | HG, C_SER_231   | 2.86 | 1.92 | 12.68 |
| 1HGH.PDB | OE1, B_GLU_72  | NZ, C_LYS_238  | HZ1, C_LYS_238  | 2.71 | 1.80 | 22.72 |
| 1HGH.PDB | OD1, C_ASN_165 | ND2, C_ASN_246 | HD22, C_ASN_246 | 2.97 | 2.00 | 10.03 |
| 1HGH.PDB | OE1, C_GLN_191 | ND2, C_ASN_250 | HD21, C_ASN_250 | 2.86 | 1.89 | 6.98  |
| 1HGH.PDB | OE2, C_GLU_119 | NH1, C_ARG_261 | HH12, C_ARG_261 | 2.64 | 1.82 | 29.37 |
| 1HGH.PDB | OE1, C_GLU_119 | NH2, C_ARG_261 | HH22, C_ARG_261 | 2.85 | 1.97 | 24.44 |
| 1HGH.PDB | OD2, C_ASP_85  | NZ, C_LYS_264  | HZ3, C_LYS_264  | 2.79 | 1.81 | 15.90 |
| 1HGH.PDB | OE1, C_GLN_44  | NZ, C_LYS_292  | HZ1, C_LYS_292  | 2.68 | 1.68 | 11.00 |
| 1HGH.PDB | OD2, C_ASP_291 | NZ, C_LYS_292  | HZ3, C_LYS_292  | 2.82 | 1.84 | 17.38 |
| 1HGH.PDB | OD1, C_ASN_285 | ND2, C_ASN_298 | HD22, C_ASN_298 | 2.99 | 2.06 | 14.92 |
| 1HGH.PDB | OD1, D_ASP_86  | NZ, C_LYS_310  | HZ2, C_LYS_310  | 2.73 | 1.85 | 26.20 |
| 1HGH.PDB | OE1, C_GLU_41  | NZ, C_LYS_315  | HZ3, C_LYS_315  | 2.87 | 1.91 | 19.47 |
| 1HGH.PDB | OE2, C_GLU_35  | ND2, C_ASN_322 | HD22, C_ASN_322 | 2.82 | 1.91 | 18.57 |
| 1HGH.PDB | OE1, D_GLU_15  | NZ, C_LYS_326  | HZ1, C_LYS_326  | 2.77 | 1.75 | 11.00 |
| 1HGH.PDB | OXT, C_THR_328 | NE2, C_GLN_327 | HE22, C_GLN_327 | 2.93 | 1.99 | 14.57 |
| 1HGH.PDB | OE1, D_GLN_34  | NE, D_ARG_25   | HE, D_ARG_25    | 2.91 | 1.96 | 12.36 |
| 1HGH.PDB | OD2, D_ASP_37  | OG, D_SER_40   | HG, D_SER_40    | 2.74 | 1.93 | 27.28 |
| 1HGH.PDB | OD1, D_ASP_46  | NE2, D_GLN_42  | HE22, D_GLN_42  | 2.87 | 1.96 | 19.71 |
| 1HGH.PDB | OE1, D_GLU_103 | NZ, D_LYS_51   | HZ1, D_LYS_51   | 2.74 | 1.72 | 7.43  |
| 1HGH.PDB | ND1, D_HIS_106 | NZ, D_LYS_51   | HZ2, D_LYS_51   | 2.80 | 1.84 | 18.41 |

|          |                |                |                 |      |      |       |
|----------|----------------|----------------|-----------------|------|------|-------|
| 1HGH.PDB | OG1, D_THR_107 | NZ, D_LYS_51   | HZ3, D_LYS_51   | 2.90 | 1.93 | 16.98 |
| 1HGH.PDB | OE1, D_GLU_57  | NH1, D_ARG_54  | HH11, D_ARG_54  | 2.86 | 1.86 | 11.45 |
| 1HGH.PDB | OE2, B_GLU_97  | NH2, D_ARG_54  | HH22, D_ARG_54  | 2.80 | 1.85 | 16.64 |
| 1HGH.PDB | OG, C_SER_110  | NE2, D_HIS_64  | HE2, D_HIS_64   | 2.84 | 1.88 | 10.18 |
| 1HGH.PDB | OE2, D_GLU_85  | NZ, D_LYS_68   | HZ2, D_LYS_68   | 2.75 | 1.73 | 9.37  |
| 1HGH.PDB | OE2, F_GLU_81  | NE, D_ARG_76   | HE, D_ARG_76    | 2.79 | 1.84 | 10.45 |
| 1HGH.PDB | OE2, F_GLU_74  | NH1, D_ARG_76  | HH12, D_ARG_76  | 2.77 | 1.77 | 10.38 |
| 1HGH.PDB | OE1, F_GLU_81  | NH2, D_ARG_76  | HH21, D_ARG_76  | 2.70 | 1.70 | 6.41  |
| 1HGH.PDB | OE1, F_GLU_74  | NH2, D_ARG_76  | HH22, D_ARG_76  | 2.75 | 1.75 | 5.88  |
| 1HGH.PDB | OE1, D_GLU_74  | NE2, D_GLN_78  | HE22, D_GLN_78  | 2.92 | 1.96 | 9.79  |
| 1HGH.PDB | OE1, F_GLU_85  | OH, D_TYR_83   | HH, D_TYR_83    | 2.59 | 1.81 | 29.86 |
| 1HGH.PDB | OH, B_TYR_83   | NZ, D_LYS_88   | HZ1, D_LYS_88   | 2.66 | 1.64 | 7.83  |
| 1HGH.PDB | OE2, D_GLU_120 | NH1, D_ARG_123 | HH11, D_ARG_123 | 2.77 | 1.87 | 22.36 |
| 1HGH.PDB | OE1, B_GLU_132 | NE, D_ARG_124  | HE, D_ARG_124   | 2.80 | 1.98 | 26.35 |
| 1HGH.PDB | OE2, B_GLU_132 | NE, D_ARG_124  | HE, D_ARG_124   | 2.84 | 1.99 | 23.38 |
| 1HGH.PDB | OH, D_TYR_157  | ND2, D_ASN_129 | HD22, D_ASN_129 | 2.83 | 1.87 | 7.67  |
| 1HGH.PDB | OD1, D_ASN_154 | OG1, D_THR_156 | HG1, D_THR_156  | 2.69 | 1.80 | 16.96 |
| 1HGH.PDB | NE2, D_HIS_142 | OH, D_TYR_157  | HH, D_TYR_157   | 2.68 | 1.87 | 26.02 |
| 1HGH.PDB | OE2, D_GLU_131 | NH1, D_ARG_170 | HH11, D_ARG_170 | 2.83 | 1.83 | 5.85  |
| 1HGH.PDB | OE2, F_GLU_97  | NZ, E_LYS_27   | HZ1, E_LYS_27   | 2.77 | 1.74 | 8.08  |
| 1HGH.PDB | OD2, E_ASP_275 | NZ, E_LYS_50   | HZ1, E_LYS_50   | 2.78 | 1.83 | 20.38 |
| 1HGH.PDB | OD1, E_ASP_73  | ND1, E_HIS_75  | HD1, E_HIS_75   | 2.70 | 1.83 | 21.52 |
| 1HGH.PDB | OD1, E_ASP_60  | NE, E_ARG_90   | HE, E_ARG_90    | 2.82 | 1.87 | 13.57 |
| 1HGH.PDB | OD2, E_ASP_60  | NH2, E_ARG_90  | HH21, E_ARG_90  | 2.82 | 1.82 | 8.69  |
| 1HGH.PDB | OD2, E_ASP_271 | OG, E_SER_91   | HG, E_SER_91    | 2.81 | 1.88 | 14.87 |
| 1HGH.PDB | OD2, E_ASP_68  | OG, E_SER_95   | HG, E_SER_95    | 2.88 | 1.94 | 13.28 |
| 1HGH.PDB | OD1, E_ASP_68  | OH, E_TYR_100  | HH, E_TYR_100   | 2.91 | 1.97 | 12.96 |
| 1HGH.PDB | OD2, E_ASP_104 | OG, E_SER_107  | HG, E_SER_107   | 2.88 | 1.97 | 18.12 |
| 1HGH.PDB | OE2, F_GLU_67  | NH2, E_ARG_109 | HH21, E_ARG_109 | 2.88 | 1.90 | 13.56 |
| 1HGH.PDB | OD2, D_ASP_79  | OG, E_SER_110  | HG, E_SER_110   | 2.90 | 1.94 | 9.49  |
| 1HGH.PDB | OE2, E_GLU_119 | OG1, E_THR_117 | HG1, E_THR_117  | 2.88 | 1.94 | 11.16 |
| 1HGH.PDB | OD1, E_ASN_137 | NZ, E_LYS_140  | HZ2, E_LYS_140  | 2.75 | 1.75 | 11.91 |
| 1HGH.PDB | OD2, E_ASP_77  | NE, E_ARG_141  | HE, E_ARG_141   | 2.85 | 2.01 | 27.16 |
| 1HGH.PDB | OD1, E_ASP_77  | NH2, E_ARG_141 | HH21, E_ARG_141 | 2.89 | 1.99 | 22.46 |
| 1HGH.PDB | OD2, E_ASP_77  | NH2, E_ARG_141 | HH21, E_ARG_141 | 2.74 | 1.84 | 23.25 |
| 1HGH.PDB | OD1, E_ASN_137 | OG, E_SER_145  | HG, E_SER_145   | 2.98 | 2.07 | 15.03 |
| 1HGH.PDB | OH, E_TYR_195  | NE1, E_TRP_153 | HE1, E_TRP_153  | 2.94 | 2.03 | 18.49 |
| 1HGH.PDB | OE2, E_GLU_123 | NZ, E_LYS_176  | HZ1, E_LYS_176  | 2.69 | 1.82 | 26.87 |
| 1HGH.PDB | OE1, E_GLU_123 | OH, E_TYR_178  | HH, E_TYR_178   | 2.77 | 1.82 | 8.79  |
| 1HGH.PDB | OG1, E_THR_235 | NE1, E_TRP_180 | HE1, E_TRP_180  | 2.88 | 1.89 | 0.99  |
| 1HGH.PDB | OG, E_SER_231  | NE2, E_HIS_184 | HE2, E_HIS_184  | 2.78 | 1.93 | 25.10 |
| 1HGH.PDB | OD1, E_ASN_250 | NE2, E_GLN_191 | HE21, E_GLN_191 | 2.99 | 2.02 | 8.22  |
| 1HGH.PDB | OD1, E_ASN_246 | NH2, E_ARG_201 | HH21, E_ARG_201 | 2.64 | 1.73 | 21.41 |
| 1HGH.PDB | OG1, E_THR_212 | OG1, E_THR_203 | HG1, E_THR_203  | 2.98 | 2.08 | 17.30 |
| 1HGH.PDB | OG1, E_THR_206 | OG, E_SER_209  | HG, E_SER_209   | 2.95 | 2.00 | 8.64  |
| 1HGH.PDB | OD1, C_ASP_101 | NE2, E_GLN_210 | HE22, E_GLN_210 | 2.95 | 2.09 | 25.33 |
| 1HGH.PDB | OE1, A_GLN_210 | NH2, E_ARG_220 | HH21, E_ARG_220 | 2.68 | 1.79 | 22.30 |
| 1HGH.PDB | OD1, E_ASP_101 | OG, E_SER_231  | HG, E_SER_231   | 2.86 | 1.91 | 11.78 |
| 1HGH.PDB | OE1, D_GLU_72  | NZ, E_LYS_238  | HZ3, E_LYS_238  | 2.87 | 1.88 | 15.42 |
| 1HGH.PDB | OD1, E_ASN_165 | ND2, E_ASN_246 | HD22, E_ASN_246 | 2.98 | 2.01 | 10.13 |
| 1HGH.PDB | OE1, E_GLN_191 | ND2, E_ASN_250 | HD21, E_ASN_250 | 2.89 | 1.92 | 6.88  |
| 1HGH.PDB | OE2, E_GLU_119 | NH1, E_ARG_261 | HH12, E_ARG_261 | 2.63 | 1.81 | 29.30 |
| 1HGH.PDB | OE1, E_GLU_119 | NH2, E_ARG_261 | HH22, E_ARG_261 | 2.85 | 1.96 | 24.42 |
| 1HGH.PDB | OD2, E_ASP_85  | NZ, E_LYS_264  | HZ3, E_LYS_264  | 2.81 | 1.82 | 14.94 |
| 1HGH.PDB | OE1, F_GLU_67  | NH1, E_ARG_269 | HH12, E_ARG_269 | 2.71 | 1.88 | 29.19 |
| 1HGH.PDB | OE1, E_GLN_44  | NZ, E_LYS_292  | HZ1, E_LYS_292  | 2.67 | 1.66 | 10.24 |
| 1HGH.PDB | OD2, E_ASP_291 | NZ, E_LYS_292  | HZ3, E_LYS_292  | 2.84 | 1.86 | 17.36 |
| 1HGH.PDB | OD1, F_ASP_86  | NZ, E_LYS_310  | HZ2, E_LYS_310  | 2.74 | 1.87 | 26.77 |

|          |                |                |                 |      |      |       |
|----------|----------------|----------------|-----------------|------|------|-------|
| 1HGH.PDB | OE1, E_GLU_41  | NZ, E_LYS_315  | HZ3, E_LYS_315  | 2.85 | 1.89 | 19.70 |
| 1HGH.PDB | OE2, E_GLU_35  | ND2, E_ASN_322 | HD22, E_ASN_322 | 2.80 | 1.90 | 19.14 |
| 1HGH.PDB | OE1, F_GLU_15  | NZ, E_LYS_326  | HZ3, E_LYS_326  | 2.90 | 1.89 | 12.96 |
| 1HGH.PDB | OE1, F_GLN_34  | NH2, F_ARG_25  | HH21, F_ARG_25  | 2.92 | 2.03 | 23.48 |
| 1HGH.PDB | OD1, F_ASN_146 | ND2, F_ASN_28  | HD21, F_ASN_28  | 2.91 | 1.96 | 12.69 |
| 1HGH.PDB | OD2, F_ASP_37  | OG, F_SER_40   | HG, F_SER_40    | 2.73 | 1.92 | 26.94 |
| 1HGH.PDB | OD1, F_ASP_46  | NE2, F_GLN_42  | HE22, F_GLN_42  | 2.85 | 1.95 | 20.25 |
| 1HGH.PDB | OE2, F_GLU_114 | NE2, F_GLN_47  | HE21, F_GLN_47  | 2.99 | 2.08 | 19.28 |
| 1HGH.PDB | OE1, F_GLU_103 | NZ, F_LYS_51   | HZ1, F_LYS_51   | 2.75 | 1.72 | 7.02  |
| 1HGH.PDB | ND1, F_HIS_106 | NZ, F_LYS_51   | HZ2, F_LYS_51   | 2.77 | 1.82 | 19.11 |
| 1HGH.PDB | OG1, F_THR_107 | NZ, F_LYS_51   | HZ3, F_LYS_51   | 2.93 | 1.96 | 17.40 |
| 1HGH.PDB | OE1, F_GLU_57  | NH1, F_ARG_54  | HH11, F_ARG_54  | 2.88 | 1.88 | 10.86 |
| 1HGH.PDB | OE2, D_GLU_97  | NH2, F_ARG_54  | HH22, F_ARG_54  | 2.72 | 1.77 | 15.67 |
| 1HGH.PDB | OD2, D_ASP_90  | NZ, F_LYS_62   | HZ2, F_LYS_62   | 2.68 | 1.83 | 28.02 |
| 1HGH.PDB | OG, E_SER_110  | NE2, F_HIS_64  | HE2, F_HIS_64   | 2.87 | 1.91 | 9.23  |
| 1HGH.PDB | OE2, F_GLU_85  | NZ, F_LYS_68   | HZ2, F_LYS_68   | 2.73 | 1.74 | 15.07 |
| 1HGH.PDB | OE2, B_GLU_81  | NE, F_ARG_76   | HE, F_ARG_76    | 2.84 | 1.87 | 10.72 |
| 1HGH.PDB | OE2, B_GLU_74  | NH1, F_ARG_76  | HH12, F_ARG_76  | 2.73 | 1.73 | 5.34  |
| 1HGH.PDB | OE1, B_GLU_81  | NH2, F_ARG_76  | HH21, F_ARG_76  | 2.71 | 1.70 | 1.21  |
| 1HGH.PDB | OE1, B_GLU_74  | NH2, F_ARG_76  | HH22, F_ARG_76  | 2.78 | 1.78 | 7.19  |
| 1HGH.PDB | OE1, F_GLU_74  | NE2, F_GLN_78  | HE22, F_GLN_78  | 2.92 | 1.95 | 8.97  |
| 1HGH.PDB | OE1, B_GLU_85  | OH, F_TYR_83   | HH, F_TYR_83    | 2.53 | 1.74 | 27.23 |
| 1HGH.PDB | OH, D_TYR_83   | NZ, F_LYS_88   | HZ1, F_LYS_88   | 2.65 | 1.63 | 9.88  |
| 1HGH.PDB | OE2, F_GLU_120 | NH1, F_ARG_123 | HH11, F_ARG_123 | 2.74 | 1.84 | 22.63 |
| 1HGH.PDB | OE1, D_GLU_132 | NE, F_ARG_124  | HE, F_ARG_124   | 2.89 | 2.06 | 26.55 |
| 1HGH.PDB | OE2, D_GLU_132 | NE, F_ARG_124  | HE, F_ARG_124   | 2.92 | 2.03 | 21.52 |
| 1HGH.PDB | OH, F_TYR_157  | ND2, F_ASN_129 | HD22, F_ASN_129 | 2.82 | 1.88 | 14.11 |
| 1HGH.PDB | OE2, F_GLU_131 | NH1, F_ARG_170 | HH11, F_ARG_170 | 2.84 | 1.84 | 5.40  |

Table 1735: 1HGH-specific side chain hydrogen bonding analysis. In this table, a PDB file is specified with a four-letter PDB ID, except that the names of the PDB files corresponding to the single NMR structural model split from the NMR ensemble is specified with a four-letter PDB ID in addition to a hyphen followed by the single NMR structural model numeric ID, the residue naming scheme is **Chain ID\_residue name\_residue number**,  $\angle ADH$  represents the angle formed by acceptor (A), donor (D) and hydrogen (H) ( $\angle ADH$ ).

| PDB      | Acceptor (A)   | Donor (D)      | Hydrogen (H)    | D-A (Å) | H-A (Å) | $\angle ADH(^{\circ})$ |
|----------|----------------|----------------|-----------------|---------|---------|------------------------|
| 1HGI.PDB | OE2, B_GLU_97  | NZ, A_LYS_27   | HZ1, A_LYS_27   | 2.90    | 1.86    | 7.66                   |
| 1HGI.PDB | OD2, A_ASP_275 | NZ, A_LYS_50   | HZ1, A_LYS_50   | 2.71    | 1.78    | 22.79                  |
| 1HGI.PDB | OD1, A_ASP_73  | ND1, A_HIS_75  | HD1, A_HIS_75   | 2.90    | 1.96    | 15.34                  |
| 1HGI.PDB | OD1, A_ASP_60  | NE, A_ARG_90   | HE, A_ARG_90    | 2.89    | 1.91    | 4.93                   |
| 1HGI.PDB | OD2, A_ASP_60  | NH2, A_ARG_90  | HH21, A_ARG_90  | 2.83    | 1.85    | 11.60                  |
| 1HGI.PDB | OD1, A_ASP_271 | OG, A_SER_91   | HG, A_SER_91    | 2.93    | 2.10    | 25.86                  |
| 1HGI.PDB | OD2, A_ASP_271 | OG, A_SER_91   | HG, A_SER_91    | 2.80    | 1.92    | 20.51                  |
| 1HGI.PDB | OD2, A_ASP_68  | OG, A_SER_95   | HG, A_SER_95    | 2.89    | 1.96    | 14.00                  |
| 1HGI.PDB | OD1, A_ASP_68  | OH, A_TYR_100  | HH, A_TYR_100   | 2.99    | 2.05    | 13.08                  |
| 1HGI.PDB | OD2, A_ASP_104 | OG, A_SER_107  | HG, A_SER_107   | 2.89    | 1.96    | 15.23                  |
| 1HGI.PDB | OE2, B_GLU_67  | NH2, A_ARG_109 | HH21, A_ARG_109 | 2.80    | 1.81    | 13.24                  |
| 1HGI.PDB | OE2, A_GLU_119 | OG1, A_THR_117 | HG1, A_THR_117  | 2.93    | 2.01    | 15.43                  |
| 1HGI.PDB | OD1, A_ASN_137 | NZ, A_LYS_140  | HZ2, A_LYS_140  | 2.79    | 1.79    | 13.01                  |
| 1HGI.PDB | OD2, A_ASP_77  | NE, A_ARG_141  | HE, A_ARG_141   | 2.82    | 2.01    | 29.43                  |
| 1HGI.PDB | OD1, A_ASP_77  | NH2, A_ARG_141 | HH21, A_ARG_141 | 2.93    | 2.01    | 20.43                  |
| 1HGI.PDB | OD2, A_ASP_77  | NH2, A_ARG_141 | HH21, A_ARG_141 | 2.69    | 1.82    | 24.99                  |
| 1HGI.PDB | OH, A_TYR_195  | NE1, A_TRP_153 | HE1, A_TRP_153  | 2.87    | 1.98    | 21.02                  |
| 1HGI.PDB | OG1, A_THR_131 | OG, A_SER_157  | HG, A_SER_157   | 2.97    | 2.02    | 9.12                   |
| 1HGI.PDB | OE2, A_GLU_123 | NZ, A_LYS_176  | HZ1, A_LYS_176  | 2.68    | 1.79    | 25.50                  |
| 1HGI.PDB | OE1, A_GLU_123 | OH, A_TYR_178  | HH, A_TYR_178   | 2.78    | 1.82    | 7.33                   |
| 1HGI.PDB | OG1, A_THR_235 | NE1, A_TRP_180 | HE1, A_TRP_180  | 2.85    | 1.87    | 3.02                   |
| 1HGI.PDB | OG, A_SER_231  | NE2, A_HIS_184 | HE2, A_HIS_184  | 2.81    | 1.93    | 22.19                  |
| 1HGI.PDB | OD1, A_ASN_250 | NE2, A_GLN_191 | HE21, A_GLN_191 | 2.93    | 1.97    | 11.19                  |
| 1HGI.PDB | OD1, A_ASN_246 | NH2, A_ARG_201 | HH21, A_ARG_201 | 2.54    | 1.71    | 26.99                  |
| 1HGI.PDB | OD2, A_ASP_241 | NE, A_ARG_208  | HE, A_ARG_208   | 2.96    | 2.05    | 19.55                  |
| 1HGI.PDB | OG1, A_THR_203 | OG1, A_THR_212 | HG1, A_THR_212  | 2.96    | 2.00    | 2.15                   |
| 1HGI.PDB | OE1, C_GLN_210 | NH2, A_ARG_220 | HH21, A_ARG_220 | 2.65    | 1.73    | 18.55                  |
| 1HGI.PDB | OD1, A_ASP_101 | OG, A_SER_231  | HG, A_SER_231   | 2.96    | 2.01    | 11.74                  |
| 1HGI.PDB | OE1, F_GLU_72  | NZ, A_LYS_238  | HZ3, A_LYS_238  | 2.85    | 1.85    | 15.00                  |
| 1HGI.PDB | OE1, A_GLN_191 | ND2, A_ASN_250 | HD21, A_ASN_250 | 2.89    | 1.93    | 10.00                  |
| 1HGI.PDB | OE2, A_GLU_119 | NH1, A_ARG_261 | HH12, A_ARG_261 | 2.66    | 1.83    | 28.46                  |
| 1HGI.PDB | OE1, A_GLU_119 | NH2, A_ARG_261 | HH22, A_ARG_261 | 2.85    | 1.99    | 27.12                  |
| 1HGI.PDB | OD2, A_ASP_85  | NZ, A_LYS_264  | HZ3, A_LYS_264  | 2.82    | 1.85    | 17.23                  |
| 1HGI.PDB | OE1, A_GLN_44  | NZ, A_LYS_292  | HZ1, A_LYS_292  | 2.74    | 1.74    | 11.73                  |
| 1HGI.PDB | OD2, A_ASP_291 | NZ, A_LYS_292  | HZ3, A_LYS_292  | 2.81    | 1.89    | 23.33                  |
| 1HGI.PDB | OD1, B_ASP_86  | NZ, A_LYS_310  | HZ3, A_LYS_310  | 2.76    | 1.92    | 29.34                  |
| 1HGI.PDB | OE1, A_GLU_41  | NZ, A_LYS_315  | HZ3, A_LYS_315  | 2.77    | 1.82    | 19.86                  |
| 1HGI.PDB | OE2, A_GLU_35  | ND2, A_ASN_322 | HD22, A_ASN_322 | 2.93    | 1.97    | 12.34                  |
| 1HGI.PDB | OE2, B_GLU_15  | NZ, A_LYS_326  | HZ1, A_LYS_326  | 2.79    | 1.93    | 27.33                  |
| 1HGI.PDB | OE1, A_GLU_325 | NZ, A_LYS_326  | HZ3, A_LYS_326  | 2.91    | 1.94    | 17.77                  |
| 1HGI.PDB | OE1, B_GLN_34  | NE, B_ARG_25   | HE, B_ARG_25    | 2.60    | 1.78    | 26.17                  |
| 1HGI.PDB | OE1, B_GLN_34  | NH2, B_ARG_25  | HH21, B_ARG_25  | 2.75    | 1.92    | 27.98                  |
| 1HGI.PDB | OE2, A_GLU_325 | NH2, B_ARG_25  | HH22, B_ARG_25  | 2.93    | 1.95    | 13.46                  |
| 1HGI.PDB | OD1, B_ASP_46  | NE2, B_GLN_42  | HE22, B_GLN_42  | 2.89    | 2.02    | 23.36                  |
| 1HGI.PDB | OG1, B_THR_107 | NZ, B_LYS_51   | HZ1, B_LYS_51   | 2.96    | 1.97    | 15.88                  |
| 1HGI.PDB | OE1, B_GLU_103 | NZ, B_LYS_51   | HZ2, B_LYS_51   | 2.82    | 1.78    | 6.88                   |
| 1HGI.PDB | ND1, B_HIS_106 | NZ, B_LYS_51   | HZ3, B_LYS_51   | 2.81    | 1.87    | 19.52                  |
| 1HGI.PDB | OE1, B_GLU_57  | NH1, B_ARG_54  | HH11, B_ARG_54  | 2.86    | 1.87    | 11.02                  |
| 1HGI.PDB | OE2, F_GLU_97  | NH2, B_ARG_54  | HH22, B_ARG_54  | 2.81    | 1.84    | 14.63                  |
| 1HGI.PDB | OD2, F_ASP_86  | NZ, B_LYS_62   | HZ1, B_LYS_62   | 2.67    | 1.78    | 25.75                  |
| 1HGI.PDB | OG, A_SER_110  | NE2, B_HIS_64  | HE2, B_HIS_64   | 2.87    | 1.89    | 8.13                   |
| 1HGI.PDB | OE2, B_GLU_85  | NZ, B_LYS_68   | HZ2, B_LYS_68   | 2.79    | 1.75    | 2.13                   |
| 1HGI.PDB | OE2, D_GLU_81  | NE, B_ARG_76   | HE, B_ARG_76    | 2.86    | 1.89    | 7.04                   |
| 1HGI.PDB | OE2, D_GLU_74  | NH1, B_ARG_76  | HH12, B_ARG_76  | 2.92    | 1.89    | 1.72                   |
| 1HGI.PDB | OE1, D_GLU_81  | NH2, B_ARG_76  | HH21, B_ARG_76  | 2.71    | 1.72    | 8.42                   |
| 1HGI.PDB | OE1, D_GLU_74  | NH2, B_ARG_76  | HH22, B_ARG_76  | 2.86    | 1.86    | 6.93                   |
| 1HGI.PDB | OE1, B_GLU_74  | NE2, B_GLN_78  | HE22, B_GLN_78  | 2.94    | 1.97    | 8.23                   |

|          |                |                |                 |      |      |       |
|----------|----------------|----------------|-----------------|------|------|-------|
| 1HGI.PDB | OE1, D_GLU_85  | OH, B_TYR_83   | HH, B_TYR_83    | 2.78 | 1.84 | 13.46 |
| 1HGI.PDB | OH, F_TYR_83   | NZ, B_LYS_88   | HZ1, B_LYS_88   | 2.65 | 1.64 | 9.94  |
| 1HGI.PDB | OE2, B_GLU_120 | NH1, B_ARG_123 | HH11, B_ARG_123 | 2.84 | 1.97 | 25.22 |
| 1HGI.PDB | OE1, F_GLU_132 | NE, B_ARG_124  | HE, B_ARG_124   | 2.81 | 1.96 | 23.50 |
| 1HGI.PDB | OE2, F_GLU_132 | NE, B_ARG_124  | HE, B_ARG_124   | 2.86 | 2.02 | 24.92 |
| 1HGI.PDB | OH, B_TYR_157  | ND2, B_ASN_129 | HD22, B_ASN_129 | 2.81 | 1.86 | 9.72  |
| 1HGI.PDB | OE2, B_GLU_150 | ND2, B_ASN_154 | HD21, B_ASN_154 | 2.84 | 2.01 | 27.47 |
| 1HGI.PDB | OD1, B_ASN_154 | OG1, B_THR_156 | HG1, B_THR_156  | 2.64 | 1.78 | 21.15 |
| 1HGI.PDB | OE2, B_GLU_131 | NH1, B_ARG_170 | HH11, B_ARG_170 | 2.77 | 1.77 | 6.54  |
| 1HGI.PDB | OE2, D_GLU_97  | NZ, C_LYS_27   | HZ1, C_LYS_27   | 2.88 | 1.83 | 6.58  |
| 1HGI.PDB | OD2, C_ASP_275 | NZ, C_LYS_50   | HZ1, C_LYS_50   | 2.68 | 1.77 | 23.91 |
| 1HGI.PDB | OD1, C_ASP_73  | ND1, C_HIS_75  | HD1, C_HIS_75   | 2.88 | 1.94 | 15.46 |
| 1HGI.PDB | OD1, C_ASP_60  | NE, C_ARG_90   | HE, C_ARG_90    | 2.83 | 1.88 | 11.13 |
| 1HGI.PDB | OD2, C_ASP_60  | NH2, C_ARG_90  | HH21, C_ARG_90  | 2.77 | 1.79 | 11.02 |
| 1HGI.PDB | OD1, C_ASP_271 | OG, C_SER_91   | HG, C_SER_91    | 2.95 | 2.13 | 27.22 |
| 1HGI.PDB | OD2, C_ASP_271 | OG, C_SER_91   | HG, C_SER_91    | 2.83 | 1.94 | 19.64 |
| 1HGI.PDB | OD2, C_ASP_68  | OG, C_SER_95   | HG, C_SER_95    | 2.89 | 1.96 | 14.85 |
| 1HGI.PDB | OD1, C_ASP_68  | OH, C_TYR_100  | HH, C_TYR_100   | 2.94 | 1.99 | 10.92 |
| 1HGI.PDB | OD2, C_ASP_104 | OG, C_SER_107  | HG, C_SER_107   | 2.90 | 1.96 | 13.90 |
| 1HGI.PDB | OE2, D_GLU_67  | NH2, C_ARG_109 | HH21, C_ARG_109 | 2.82 | 1.84 | 15.02 |
| 1HGI.PDB | OD2, B_ASP_79  | OG, C_SER_110  | HG, C_SER_110   | 2.85 | 1.90 | 11.29 |
| 1HGI.PDB | OE2, C_GLU_119 | OG1, C_THR_117 | HG1, C_THR_117  | 2.95 | 2.03 | 14.67 |
| 1HGI.PDB | OD1, C_ASN_137 | NZ, C_LYS_140  | HZ2, C_LYS_140  | 2.83 | 1.83 | 12.62 |
| 1HGI.PDB | OD2, C_ASP_77  | NE, C_ARG_141  | HE, C_ARG_141   | 2.83 | 2.02 | 29.40 |
| 1HGI.PDB | OD1, C_ASP_77  | NH2, C_ARG_141 | HH21, C_ARG_141 | 2.93 | 2.01 | 20.50 |
| 1HGI.PDB | OD2, C_ASP_77  | NH2, C_ARG_141 | HH21, C_ARG_141 | 2.70 | 1.83 | 25.10 |
| 1HGI.PDB | OH, C_TYR_195  | NE1, C_TRP_153 | HE1, C_TRP_153  | 2.82 | 1.96 | 22.98 |
| 1HGI.PDB | OE2, C_GLU_123 | NZ, C_LYS_176  | HZ1, C_LYS_176  | 2.68 | 1.80 | 26.11 |
| 1HGI.PDB | OE1, C_GLU_123 | OH, C_TYR_178  | HH, C_TYR_178   | 2.75 | 1.80 | 7.25  |
| 1HGI.PDB | OG1, C_THR_235 | NE1, C_TRP_180 | HE1, C_TRP_180  | 2.84 | 1.86 | 3.22  |
| 1HGI.PDB | OG, C_SER_231  | NE2, C_HIS_184 | HE2, C_HIS_184  | 2.81 | 1.93 | 22.34 |
| 1HGI.PDB | OD1, C_ASN_250 | NE2, C_GLN_191 | HE21, C_GLN_191 | 2.86 | 1.91 | 10.94 |
| 1HGI.PDB | OD1, C_ASN_246 | NH2, C_ARG_201 | HH21, C_ARG_201 | 2.55 | 1.72 | 27.61 |
| 1HGI.PDB | OG1, C_THR_212 | OG1, C_THR_203 | HG1, C_THR_203  | 2.94 | 2.00 | 11.06 |
| 1HGI.PDB | OD2, C_ASP_241 | NE, C_ARG_208  | HE, C_ARG_208   | 2.92 | 2.01 | 19.66 |
| 1HGI.PDB | OE1, E_GLN_210 | NH2, C_ARG_220 | HH21, C_ARG_220 | 2.62 | 1.75 | 23.70 |
| 1HGI.PDB | OD1, C_ASP_101 | OG, C_SER_231  | HG, C_SER_231   | 2.97 | 2.02 | 12.14 |
| 1HGI.PDB | OE1, B_GLU_72  | NZ, C_LYS_238  | HZ1, C_LYS_238  | 2.67 | 1.77 | 23.68 |
| 1HGI.PDB | OE1, C_GLN_191 | ND2, C_ASN_250 | HD21, C_ASN_250 | 2.87 | 1.92 | 11.00 |
| 1HGI.PDB | OE2, C_GLU_119 | NH1, C_ARG_261 | HH12, C_ARG_261 | 2.66 | 1.84 | 29.01 |
| 1HGI.PDB | OE1, C_GLU_119 | NH2, C_ARG_261 | HH22, C_ARG_261 | 2.84 | 1.99 | 27.78 |
| 1HGI.PDB | OD2, C_ASP_85  | NZ, C_LYS_264  | HZ3, C_LYS_264  | 2.83 | 1.86 | 17.28 |
| 1HGI.PDB | OE1, C_GLN_44  | NZ, C_LYS_292  | HZ1, C_LYS_292  | 2.75 | 1.75 | 12.02 |
| 1HGI.PDB | OD2, C_ASP_291 | NZ, C_LYS_292  | HZ3, C_LYS_292  | 2.82 | 1.90 | 23.36 |
| 1HGI.PDB | OD1, C_ASN_285 | ND2, C_ASN_298 | HD22, C_ASN_298 | 3.00 | 2.03 | 7.73  |
| 1HGI.PDB | OD1, D_ASP_86  | NZ, C_LYS_310  | HZ3, C_LYS_310  | 2.77 | 1.93 | 29.51 |
| 1HGI.PDB | OE1, C_GLU_41  | NZ, C_LYS_315  | HZ3, C_LYS_315  | 2.75 | 1.80 | 20.43 |
| 1HGI.PDB | OE2, C_GLU_35  | ND2, C_ASN_322 | HD22, C_ASN_322 | 2.90 | 1.95 | 11.70 |
| 1HGI.PDB | OE1, D_GLU_15  | NZ, C_LYS_326  | HZ1, C_LYS_326  | 2.83 | 1.84 | 16.25 |
| 1HGI.PDB | OE1, D_GLN_34  | NE, D_ARG_25   | HE, D_ARG_25    | 2.62 | 1.78 | 23.70 |
| 1HGI.PDB | OD1, D_ASN_146 | ND2, D_ASN_28  | HD21, D_ASN_28  | 2.93 | 1.98 | 12.39 |
| 1HGI.PDB | OD2, D_ASP_37  | OG, D_SER_40   | HG, D_SER_40    | 2.78 | 1.93 | 23.19 |
| 1HGI.PDB | OD1, D_ASP_46  | NE2, D_GLN_42  | HE22, D_GLN_42  | 2.88 | 2.01 | 23.38 |
| 1HGI.PDB | OE1, D_GLU_103 | NZ, D_LYS_51   | HZ2, D_LYS_51   | 2.81 | 1.77 | 5.89  |
| 1HGI.PDB | ND1, D_HIS_106 | NZ, D_LYS_51   | HZ3, D_LYS_51   | 2.78 | 1.83 | 18.78 |
| 1HGI.PDB | OE1, D_GLU_57  | NH1, D_ARG_54  | HH11, D_ARG_54  | 2.85 | 1.86 | 11.80 |
| 1HGI.PDB | OE2, B_GLU_97  | NH2, D_ARG_54  | HH22, D_ARG_54  | 2.81 | 1.85 | 15.40 |
| 1HGI.PDB | OE2, D_GLU_61  | NZ, D_LYS_58   | HZ2, D_LYS_58   | 3.00 | 2.01 | 17.14 |



|          |                |                |                 |      |      |       |
|----------|----------------|----------------|-----------------|------|------|-------|
| 1HGI.PDB | OG, C_SER.110  | NE2, D_HIS.64  | HE2, D_HIS.64   | 2.83 | 1.85 | 2.78  |
| 1HGI.PDB | OE2, D_GLU.85  | NZ, D_LYS.68   | HZ2, D_LYS.68   | 2.81 | 1.76 | 2.16  |
| 1HGI.PDB | OE2, F_GLU.81  | NE, D_ARG.76   | HE, D_ARG.76    | 2.80 | 1.82 | 5.40  |
| 1HGI.PDB | OE2, F_GLU.74  | NH1, D_ARG.76  | HH12, D_ARG.76  | 2.78 | 1.76 | 4.18  |
| 1HGI.PDB | OE1, F_GLU.81  | NH2, D_ARG.76  | HH21, D_ARG.76  | 2.61 | 1.67 | 15.38 |
| 1HGI.PDB | OE1, F_GLU.74  | NH2, D_ARG.76  | HH22, D_ARG.76  | 2.76 | 1.77 | 8.75  |
| 1HGI.PDB | OE1, D_GLU.74  | NE2, D_GLN.78  | HE22, D_GLN.78  | 2.92 | 1.95 | 8.47  |
| 1HGI.PDB | OE1, F_GLU.85  | OH, D_TYR.83   | HH, D_TYR.83    | 2.69 | 1.81 | 20.41 |
| 1HGI.PDB | OH, B_TYR.83   | NZ, D_LYS.88   | HZ1, D_LYS.88   | 2.66 | 1.64 | 7.30  |
| 1HGI.PDB | OE2, D_GLU.120 | NH1, D_ARG.123 | HH11, D_ARG.123 | 2.83 | 1.97 | 25.69 |
| 1HGI.PDB | OE1, B_GLU.132 | NE, D_ARG.124  | HE, D_ARG.124   | 2.84 | 1.98 | 23.95 |
| 1HGI.PDB | OE2, B_GLU.132 | NE, D_ARG.124  | HE, D_ARG.124   | 2.88 | 2.03 | 24.96 |
| 1HGI.PDB | OH, D_TYR.157  | ND2, D_ASN.129 | HD22, D_ASN.129 | 2.81 | 1.84 | 5.40  |
| 1HGI.PDB | OD1, D_ASN.154 | OG1, D_THR.156 | HG1, D_THR.156  | 2.68 | 1.79 | 17.62 |
| 1HGI.PDB | NE2, D_HIS.142 | OH, D_TYR.157  | HH, D_TYR.157   | 2.72 | 1.85 | 20.80 |
| 1HGI.PDB | OE2, D_GLU.131 | NH1, D_ARG.170 | HH11, D_ARG.170 | 2.77 | 1.78 | 6.80  |
| 1HGI.PDB | OE2, F_GLU.97  | NZ, E_LYS.27   | HZ1, E_LYS.27   | 2.86 | 1.82 | 7.44  |
| 1HGI.PDB | OD2, E_ASP.275 | NZ, E_LYS.50   | HZ1, E_LYS.50   | 2.70 | 1.78 | 22.89 |
| 1HGI.PDB | OD1, E_ASP.73  | ND1, E_HIS.75  | HD1, E_HIS.75   | 2.87 | 1.94 | 15.26 |
| 1HGI.PDB | OD1, E_ASP.60  | NE, E_ARG.90   | HE, E_ARG.90    | 2.89 | 1.92 | 8.33  |
| 1HGI.PDB | OD2, E_ASP.60  | NH2, E_ARG.90  | HH21, E_ARG.90  | 2.84 | 1.85 | 10.04 |
| 1HGI.PDB | OD1, E_ASP.271 | OG, E_SER.91   | HG, E_SER.91    | 2.94 | 2.11 | 26.21 |
| 1HGI.PDB | OD2, E_ASP.271 | OG, E_SER.91   | HG, E_SER.91    | 2.82 | 1.93 | 20.43 |
| 1HGI.PDB | OD2, E_ASP.68  | OG, E_SER.95   | HG, E_SER.95    | 2.90 | 1.96 | 13.54 |
| 1HGI.PDB | OD1, E_ASP.68  | OH, E_TYR.100  | HH, E_TYR.100   | 2.94 | 1.98 | 8.32  |
| 1HGI.PDB | OD2, E_ASP.104 | OG, E_SER.107  | HG, E_SER.107   | 2.91 | 1.98 | 14.52 |
| 1HGI.PDB | OE2, F_GLU.67  | NH2, E_ARG.109 | HH21, E_ARG.109 | 2.78 | 1.80 | 14.37 |
| 1HGI.PDB | OD2, D_ASP.79  | OG, E_SER.110  | HG, E_SER.110   | 2.90 | 1.94 | 10.08 |
| 1HGI.PDB | OE2, E_GLU.119 | OG1, E_THR.117 | HG1, E_THR.117  | 2.98 | 2.05 | 12.54 |
| 1HGI.PDB | OD1, E_ASN.137 | NZ, E_LYS.140  | HZ2, E_LYS.140  | 2.83 | 1.82 | 12.93 |
| 1HGI.PDB | OD2, E_ASP.77  | NE, E_ARG.141  | HE, E_ARG.141   | 2.83 | 2.01 | 29.05 |
| 1HGI.PDB | OD1, E_ASP.77  | NH2, E_ARG.141 | HH21, E_ARG.141 | 2.94 | 2.01 | 20.45 |
| 1HGI.PDB | OD2, E_ASP.77  | NH2, E_ARG.141 | HH21, E_ARG.141 | 2.70 | 1.83 | 24.80 |
| 1HGI.PDB | OD1, E_ASN.137 | OG, E_SER.145  | HG, E_SER.145   | 2.92 | 2.15 | 29.94 |
| 1HGI.PDB | OH, E_TYR.195  | NE1, E_TRP.153 | HE1, E_TRP.153  | 2.87 | 1.98 | 20.67 |
| 1HGI.PDB | OE2, E_GLU.123 | NZ, E_LYS.176  | HZ1, E_LYS.176  | 2.69 | 1.80 | 25.89 |
| 1HGI.PDB | OE1, E_GLU.123 | OH, E_TYR.178  | HH, E_TYR.178   | 2.77 | 1.82 | 8.27  |
| 1HGI.PDB | OG1, E_THR.235 | NE1, E_TRP.180 | HE1, E_TRP.180  | 2.85 | 1.87 | 2.03  |
| 1HGI.PDB | OG, E_SER.231  | NE2, E_HIS.184 | HE2, E_HIS.184  | 2.81 | 1.95 | 23.57 |
| 1HGI.PDB | OD1, E_ASN.250 | NE2, E_GLN.191 | HE21, E_GLN.191 | 2.93 | 1.97 | 10.64 |
| 1HGI.PDB | OD1, E_ASN.246 | NH2, E_ARG.201 | HH21, E_ARG.201 | 2.57 | 1.74 | 27.51 |
| 1HGI.PDB | OD2, E_ASP.241 | NE, E_ARG.208  | HE, E_ARG.208   | 2.98 | 2.07 | 19.52 |
| 1HGI.PDB | OE1, A_GLN.210 | NH2, E_ARG.220 | HH21, E_ARG.220 | 2.69 | 1.80 | 23.03 |
| 1HGI.PDB | OD1, E_ASP.101 | OG, E_SER.231  | HG, E_SER.231   | 2.99 | 2.05 | 12.53 |
| 1HGI.PDB | OE1, D_GLU.72  | NZ, E_LYS.238  | HZ3, E_LYS.238  | 2.80 | 1.81 | 15.90 |
| 1HGI.PDB | OE1, E_GLN.191 | ND2, E_ASN.250 | HD21, E_ASN.250 | 2.90 | 1.94 | 10.02 |
| 1HGI.PDB | OE2, E_GLU.119 | NH1, E_ARG.261 | HH12, E_ARG.261 | 2.65 | 1.83 | 28.50 |
| 1HGI.PDB | OE1, E_GLU.119 | NH2, E_ARG.261 | HH22, E_ARG.261 | 2.84 | 1.99 | 27.52 |
| 1HGI.PDB | OD2, E_ASP.85  | NZ, E_LYS.264  | HZ3, E_LYS.264  | 2.86 | 1.87 | 16.39 |
| 1HGI.PDB | OE1, E_GLN.44  | NZ, E_LYS.292  | HZ1, E_LYS.292  | 2.73 | 1.72 | 12.13 |
| 1HGI.PDB | OD2, E_ASP.291 | NZ, E_LYS.292  | HZ3, E_LYS.292  | 2.87 | 1.94 | 23.09 |
| 1HGI.PDB | OD1, E_ASN.285 | ND2, E_ASN.298 | HD22, E_ASN.298 | 2.97 | 2.00 | 7.97  |
| 1HGI.PDB | OD1, F_ASP.86  | NZ, E_LYS.310  | HZ3, E_LYS.310  | 2.76 | 1.91 | 29.16 |
| 1HGI.PDB | OE1, E_GLU.41  | NZ, E_LYS.315  | HZ3, E_LYS.315  | 2.74 | 1.81 | 21.50 |
| 1HGI.PDB | OE2, E_GLU.35  | ND2, E_ASN.322 | HD22, E_ASN.322 | 2.92 | 1.96 | 12.59 |
| 1HGI.PDB | OE1, F_GLU.15  | NZ, E_LYS.326  | HZ3, E_LYS.326  | 2.88 | 1.86 | 11.05 |
| 1HGI.PDB | OE1, F_GLN.34  | NH2, F_ARG.25  | HH21, F_ARG.25  | 2.91 | 1.98 | 18.85 |
| 1HGI.PDB | OD1, F_ASN.146 | ND2, F_ASN.28  | HD21, F_ASN.28  | 2.93 | 2.01 | 16.48 |

|          |                |                |                 |      |      |       |
|----------|----------------|----------------|-----------------|------|------|-------|
| 1HGI.PDB | OD2, F_ASP_37  | OG, F_SER_40   | HG, F_SER_40    | 2.76 | 1.92 | 24.70 |
| 1HGI.PDB | OD1, F_ASP_46  | NE2, F_GLN_42  | HE22, F_GLN_42  | 2.86 | 1.99 | 23.93 |
| 1HGI.PDB | OE1, F_GLU_103 | NZ, F_LYS_51   | HZ2, F_LYS_51   | 2.80 | 1.76 | 5.82  |
| 1HGI.PDB | ND1, F_HIS_106 | NZ, F_LYS_51   | HZ3, F_LYS_51   | 2.75 | 1.80 | 19.60 |
| 1HGI.PDB | OE1, F_GLU_57  | NH1, F_ARG_54  | HH11, F_ARG_54  | 2.83 | 1.84 | 11.68 |
| 1HGI.PDB | OE2, D_GLU_97  | NH2, F_ARG_54  | HH22, F_ARG_54  | 2.75 | 1.79 | 14.82 |
| 1HGI.PDB | OG, E_SER_110  | NE2, F_HIS_64  | HE2, F_HIS_64   | 2.84 | 1.87 | 3.62  |
| 1HGI.PDB | OE2, F_GLU_85  | NZ, F_LYS_68   | HZ2, F_LYS_68   | 2.74 | 1.72 | 8.70  |
| 1HGI.PDB | OE2, B_GLU_81  | NE, F_ARG_76   | HE, F_ARG_76    | 2.85 | 1.88 | 7.37  |
| 1HGI.PDB | OE2, B_GLU_74  | NH1, F_ARG_76  | HH12, F_ARG_76  | 2.77 | 1.76 | 3.93  |
| 1HGI.PDB | OE1, B_GLU_81  | NH2, F_ARG_76  | HH21, F_ARG_76  | 2.64 | 1.66 | 4.79  |
| 1HGI.PDB | OE1, B_GLU_74  | NH2, F_ARG_76  | HH22, F_ARG_76  | 2.76 | 1.78 | 10.40 |
| 1HGI.PDB | OE1, F_GLU_74  | NE2, F_GLN_78  | HE22, F_GLN_78  | 2.95 | 1.98 | 8.40  |
| 1HGI.PDB | OE1, B_GLU_85  | OH, F_TYR_83   | HH, F_TYR_83    | 2.58 | 1.75 | 24.06 |
| 1HGI.PDB | OH, D_TYR_83   | NZ, F_LYS_88   | HZ1, F_LYS_88   | 2.61 | 1.62 | 12.49 |
| 1HGI.PDB | OE2, F_GLU_120 | NH1, F_ARG_123 | HH11, F_ARG_123 | 2.81 | 1.95 | 25.91 |
| 1HGI.PDB | OE1, D_GLU_132 | NE, F_ARG_124  | HE, F_ARG_124   | 2.96 | 2.09 | 23.50 |
| 1HGI.PDB | OE2, D_GLU_132 | NE, F_ARG_124  | HE, F_ARG_124   | 2.96 | 2.09 | 23.34 |
| 1HGI.PDB | OH, F_TYR_157  | ND2, F_ASN_129 | HD22, F_ASN_129 | 2.81 | 1.86 | 11.53 |
| 1HGI.PDB | OE2, D_GLU_131 | NH2, F_ARG_163 | HH22, F_ARG_163 | 2.69 | 1.85 | 26.81 |
| 1HGI.PDB | OE2, F_GLU_131 | NH1, F_ARG_170 | HH11, F_ARG_170 | 2.75 | 1.76 | 6.67  |

Table 1736: 1HGI-specific side chain hydrogen bonding analysis. In this table, a PDB file is specified with a four-letter PDB ID, except that the names of the PDB files corresponding to the single NMR structural model split from the NMR ensemble is specified with a four-letter PDB ID in addition to a hyphen followed by the single NMR structural model numeric ID, the residue naming scheme is **Chain ID\_residue name\_residue number**,  $\angle ADH$  represents the angle formed by acceptor (A), donor (D) and hydrogen (H) ( $\angle ADH$ ).

| PDB      | Acceptor (A)   | Donor (D)      | Hydrogen (H)    | D-A (Å) | H-A (Å) | $\angle ADH(^{\circ})$ |
|----------|----------------|----------------|-----------------|---------|---------|------------------------|
| 1HGJ.PDB | OE2, B_GLU_97  | NZ, A_LYS_27   | HZ1, A_LYS_27   | 2.81    | 1.78    | 9.30                   |
| 1HGJ.PDB | OD2, A_ASP_275 | NZ, A_LYS_50   | HZ1, A_LYS_50   | 2.74    | 1.82    | 22.91                  |
| 1HGJ.PDB | OD1, A_ASP_73  | ND1, A_HIS_75  | HD1, A_HIS_75   | 2.83    | 1.91    | 17.40                  |
| 1HGJ.PDB | OD1, A_ASP_60  | NE, A_ARG_90   | HE, A_ARG_90    | 2.88    | 1.91    | 7.56                   |
| 1HGJ.PDB | OD2, A_ASP_60  | NH2, A_ARG_90  | HH21, A_ARG_90  | 2.81    | 1.82    | 10.05                  |
| 1HGJ.PDB | OD1, A_ASP_271 | OG, A_SER_91   | HG, A_SER_91    | 2.98    | 2.13    | 24.27                  |
| 1HGJ.PDB | OD2, A_ASP_271 | OG, A_SER_91   | HG, A_SER_91    | 2.78    | 1.90    | 20.01                  |
| 1HGJ.PDB | OD2, A_ASP_68  | OG, A_SER_95   | HG, A_SER_95    | 2.95    | 2.05    | 19.19                  |
| 1HGJ.PDB | OD2, A_ASP_104 | OG, A_SER_107  | HG, A_SER_107   | 2.84    | 1.95    | 18.85                  |
| 1HGJ.PDB | OE2, B_GLU_67  | NH2, A_ARG_109 | HH21, A_ARG_109 | 2.75    | 1.77    | 12.07                  |
| 1HGJ.PDB | OD2, F_ASP_79  | OG, A_SER_110  | HG, A_SER_110   | 2.94    | 1.98    | 10.39                  |
| 1HGJ.PDB | OE2, A_GLU_119 | OG1, A_THR_117 | HG1, A_THR_117  | 2.87    | 1.94    | 12.44                  |
| 1HGJ.PDB | OD1, A_ASN_137 | NZ, A_LYS_140  | HZ2, A_LYS_140  | 2.70    | 1.70    | 13.62                  |
| 1HGJ.PDB | OD2, A_ASP_77  | NE, A_ARG_141  | HE, A_ARG_141   | 2.82    | 1.99    | 27.09                  |
| 1HGJ.PDB | OD1, A_ASP_77  | NH2, A_ARG_141 | HH21, A_ARG_141 | 2.82    | 1.90    | 21.48                  |
| 1HGJ.PDB | OD2, A_ASP_77  | NH2, A_ARG_141 | HH21, A_ARG_141 | 2.75    | 1.86    | 24.28                  |
| 1HGJ.PDB | OH, A_TYR_195  | NE1, A_TRP_153 | HE1, A_TRP_153  | 2.85    | 1.94    | 18.91                  |
| 1HGJ.PDB | OE2, A_GLU_123 | NZ, A_LYS_176  | HZ1, A_LYS_176  | 2.68    | 1.78    | 24.65                  |
| 1HGJ.PDB | OE1, A_GLU_123 | OH, A_TYR_178  | HH, A_TYR_178   | 2.79    | 1.84    | 8.91                   |
| 1HGJ.PDB | OG1, A_THR_235 | NE1, A_TRP_180 | HE1, A_TRP_180  | 2.92    | 1.93    | 4.44                   |
| 1HGJ.PDB | OG, A_SER_231  | NE2, A_HIS_184 | HE2, A_HIS_184  | 2.75    | 1.92    | 26.36                  |
| 1HGJ.PDB | OD1, A_ASN_246 | NH2, A_ARG_201 | HH21, A_ARG_201 | 2.58    | 1.73    | 25.49                  |
| 1HGJ.PDB | OG1, A_THR_206 | OG, A_SER_209  | HG, A_SER_209   | 3.00    | 2.04    | 8.15                   |
| 1HGJ.PDB | OG1, A_THR_203 | OG1, A_THR_212 | HG1, A_THR_212  | 2.89    | 1.93    | 3.12                   |
| 1HGJ.PDB | OE1, C_GLN_210 | NH2, A_ARG_220 | HH21, A_ARG_220 | 2.67    | 1.78    | 22.50                  |
| 1HGJ.PDB | OD1, A_ASP_101 | OG, A_SER_231  | HG, A_SER_231   | 2.87    | 1.91    | 9.73                   |
| 1HGJ.PDB | OE1, F_GLU_72  | NZ, A_LYS_238  | HZ3, A_LYS_238  | 2.90    | 1.90    | 13.91                  |
| 1HGJ.PDB | OD1, A_ASN_165 | ND2, A_ASN_246 | HD22, A_ASN_246 | 2.91    | 1.95    | 11.26                  |
| 1HGJ.PDB | OD1, A_ASN_133 | NH2, A_ARG_255 | HH22, A_ARG_255 | 2.53    | 1.70    | 27.52                  |
| 1HGJ.PDB | OE2, A_GLU_119 | NH1, A_ARG_261 | HH12, A_ARG_261 | 2.65    | 1.82    | 28.35                  |
| 1HGJ.PDB | OE1, A_GLU_119 | NH2, A_ARG_261 | HH22, A_ARG_261 | 2.90    | 1.99    | 23.18                  |
| 1HGJ.PDB | OD2, A_ASP_85  | NZ, A_LYS_264  | HZ3, A_LYS_264  | 2.84    | 1.85    | 15.53                  |
| 1HGJ.PDB | OE1, A_GLN_44  | NZ, A_LYS_292  | HZ1, A_LYS_292  | 2.71    | 1.70    | 11.30                  |
| 1HGJ.PDB | OD2, A_ASP_291 | NZ, A_LYS_292  | HZ3, A_LYS_292  | 2.80    | 1.82    | 17.27                  |
| 1HGJ.PDB | OE1, A_GLU_41  | NZ, A_LYS_315  | HZ3, A_LYS_315  | 2.85    | 1.90    | 20.12                  |
| 1HGJ.PDB | OE2, A_GLU_35  | ND2, A_ASN_322 | HD22, A_ASN_322 | 2.88    | 1.99    | 20.96                  |
| 1HGJ.PDB | OE1, A_GLU_325 | NZ, A_LYS_326  | HZ3, A_LYS_326  | 2.92    | 1.93    | 15.95                  |
| 1HGJ.PDB | OE1, B_GLN_34  | NE, B_ARG_25   | HE, B_ARG_25    | 2.57    | 1.79    | 29.34                  |
| 1HGJ.PDB | OE2, A_GLU_325 | NH2, B_ARG_25  | HH22, B_ARG_25  | 2.97    | 2.01    | 15.94                  |
| 1HGJ.PDB | OD1, B_ASP_46  | NE2, B_GLN_42  | HE22, B_GLN_42  | 2.81    | 1.92    | 21.14                  |
| 1HGJ.PDB | OE2, B_GLU_114 | NE2, B_GLN_47  | HE21, B_GLN_47  | 2.96    | 2.05    | 17.93                  |
| 1HGJ.PDB | OG1, B_THR_107 | NZ, B_LYS_51   | HZ1, B_LYS_51   | 2.96    | 1.99    | 17.76                  |
| 1HGJ.PDB | OE1, B_GLU_103 | NZ, B_LYS_51   | HZ2, B_LYS_51   | 2.78    | 1.74    | 6.16                   |
| 1HGJ.PDB | ND1, B_HIS_106 | NZ, B_LYS_51   | HZ3, B_LYS_51   | 2.79    | 1.82    | 16.46                  |
| 1HGJ.PDB | OE1, B_GLU_57  | NH1, B_ARG_54  | HH11, B_ARG_54  | 2.87    | 1.87    | 9.43                   |
| 1HGJ.PDB | OE2, F_GLU_97  | NH2, B_ARG_54  | HH22, B_ARG_54  | 2.77    | 1.81    | 15.09                  |
| 1HGJ.PDB | OD2, F_ASP_86  | NZ, B_LYS_62   | HZ1, B_LYS_62   | 2.65    | 1.75    | 23.55                  |
| 1HGJ.PDB | OD2, F_ASP_90  | NZ, B_LYS_62   | HZ3, B_LYS_62   | 2.74    | 1.89    | 28.52                  |
| 1HGJ.PDB | OG, A_SER_110  | NE2, B_HIS_64  | HE2, B_HIS_64   | 2.89    | 1.93    | 11.21                  |
| 1HGJ.PDB | OE2, B_GLU_85  | NZ, B_LYS_68   | HZ2, B_LYS_68   | 2.78    | 1.76    | 8.72                   |
| 1HGJ.PDB | OE2, D_GLU_81  | NE, B_ARG_76   | HE, B_ARG_76    | 2.90    | 1.93    | 10.80                  |
| 1HGJ.PDB | OE2, D_GLU_74  | NH1, B_ARG_76  | HH12, B_ARG_76  | 2.88    | 1.87    | 5.28                   |
| 1HGJ.PDB | OE1, D_GLU_81  | NH2, B_ARG_76  | HH21, B_ARG_76  | 2.72    | 1.72    | 3.64                   |
| 1HGJ.PDB | OE1, D_GLU_74  | NH2, B_ARG_76  | HH22, B_ARG_76  | 2.85    | 1.84    | 3.19                   |
| 1HGJ.PDB | OE1, B_GLU_74  | NE2, B_GLN_78  | HE22, B_GLN_78  | 2.90    | 1.95    | 12.93                  |
| 1HGJ.PDB | OE1, D_GLU_85  | OH, B_TYR_83   | HH, B_TYR_83    | 2.67    | 1.83    | 24.12                  |
| 1HGJ.PDB | OH, F_TYR_83   | NZ, B_LYS_88   | HZ1, B_LYS_88   | 2.78    | 1.75    | 7.42                   |

|          |                |                |                 |      |      |       |
|----------|----------------|----------------|-----------------|------|------|-------|
| 1HGJ.PDB | OE2, B_GLU_120 | NH1, B_ARG_123 | HH11, B_ARG_123 | 2.74 | 1.86 | 23.95 |
| 1HGJ.PDB | OE1, F_GLU_132 | NE, B_ARG_124  | HE, B_ARG_124   | 2.82 | 2.00 | 27.29 |
| 1HGJ.PDB | OE2, F_GLU_132 | NE, B_ARG_124  | HE, B_ARG_124   | 2.91 | 2.02 | 20.91 |
| 1HGJ.PDB | OH, B_TYR_157  | ND2, B_ASN_129 | HD22, B_ASN_129 | 2.77 | 1.84 | 15.18 |
| 1HGJ.PDB | OE2, B_GLU_150 | ND2, B_ASN_154 | HD21, B_ASN_154 | 2.81 | 2.00 | 28.55 |
| 1HGJ.PDB | OD1, B_ASN_154 | OG1, B_THR_156 | HG1, B_THR_156  | 2.67 | 1.80 | 19.98 |
| 1HGJ.PDB | OE2, B_GLU_131 | NH1, B_ARG_170 | HH11, B_ARG_170 | 2.80 | 1.80 | 6.39  |
| 1HGJ.PDB | OE2, D_GLU_97  | NZ, C_LYS_27   | HZ1, C_LYS_27   | 2.82 | 1.80 | 8.63  |
| 1HGJ.PDB | OD2, C_ASP_275 | NZ, C_LYS_50   | HZ1, C_LYS_50   | 2.74 | 1.82 | 22.76 |
| 1HGJ.PDB | OD1, C_ASP_73  | ND1, C_HIS_75  | HD1, C_HIS_75   | 2.80 | 1.89 | 17.49 |
| 1HGJ.PDB | OD1, C_ASP_60  | NE, C_ARG_90   | HE, C_ARG_90    | 2.88 | 1.91 | 9.03  |
| 1HGJ.PDB | OD2, C_ASP_60  | NH2, C_ARG_90  | HH21, C_ARG_90  | 2.78 | 1.79 | 9.66  |
| 1HGJ.PDB | OD1, C_ASP_271 | OG, C_SER_91   | HG, C_SER_91    | 2.99 | 2.16 | 26.38 |
| 1HGJ.PDB | OD2, C_ASP_271 | OG, C_SER_91   | HG, C_SER_91    | 2.81 | 1.92 | 18.67 |
| 1HGJ.PDB | OD2, C_ASP_68  | OG, C_SER_95   | HG, C_SER_95    | 2.93 | 1.99 | 14.68 |
| 1HGJ.PDB | OD1, C_ASP_68  | OH, C_TYR_100  | HH, C_TYR_100   | 2.88 | 1.95 | 14.58 |
| 1HGJ.PDB | OD2, C_ASP_104 | OG, C_SER_107  | HG, C_SER_107   | 2.90 | 1.99 | 17.96 |
| 1HGJ.PDB | OE2, D_GLU_67  | NH2, C_ARG_109 | HH21, C_ARG_109 | 2.76 | 1.78 | 13.33 |
| 1HGJ.PDB | OD2, B_ASP_79  | OG, C_SER_110  | HG, C_SER_110   | 2.79 | 1.87 | 14.95 |
| 1HGJ.PDB | OE2, C_GLU_119 | OG1, C_THR_117 | HG1, C_THR_117  | 2.88 | 1.94 | 11.85 |
| 1HGJ.PDB | OD1, C_ASN_137 | NZ, C_LYS_140  | HZ2, C_LYS_140  | 2.71 | 1.72 | 13.24 |
| 1HGJ.PDB | OD2, C_ASP_77  | NE, C_ARG_141  | HE, C_ARG_141   | 2.82 | 1.99 | 27.42 |
| 1HGJ.PDB | OD1, C_ASP_77  | NH2, C_ARG_141 | HH21, C_ARG_141 | 2.81 | 1.89 | 21.37 |
| 1HGJ.PDB | OD2, C_ASP_77  | NH2, C_ARG_141 | HH21, C_ARG_141 | 2.74 | 1.86 | 24.47 |
| 1HGJ.PDB | OD1, C_ASN_137 | OG, C_SER_145  | HG, C_SER_145   | 2.92 | 2.08 | 24.33 |
| 1HGJ.PDB | OH, C_TYR_195  | NE1, C_TRP_153 | HE1, C_TRP_153  | 2.84 | 1.96 | 21.72 |
| 1HGJ.PDB | OE2, C_GLU_123 | NZ, C_LYS_176  | HZ1, C_LYS_176  | 2.69 | 1.80 | 24.96 |
| 1HGJ.PDB | OE1, C_GLU_123 | OH, C_TYR_178  | HH, C_TYR_178   | 2.77 | 1.82 | 8.51  |
| 1HGJ.PDB | OG1, C_THR_235 | NE1, C_TRP_180 | HE1, C_TRP_180  | 2.91 | 1.92 | 4.72  |
| 1HGJ.PDB | OG, C_SER_231  | NE2, C_HIS_184 | HE2, C_HIS_184  | 2.74 | 1.91 | 26.34 |
| 1HGJ.PDB | OD1, C_ASN_250 | NE2, C_GLN_191 | HE21, C_GLN_191 | 2.99 | 2.02 | 8.22  |
| 1HGJ.PDB | OD1, C_ASN_246 | NH2, C_ARG_201 | HH21, C_ARG_201 | 2.59 | 1.74 | 25.86 |
| 1HGJ.PDB | OG1, C_THR_212 | OG1, C_THR_203 | HG1, C_THR_203  | 2.89 | 1.94 | 9.95  |
| 1HGJ.PDB | OE1, E_GLN_210 | NH2, C_ARG_220 | HH21, C_ARG_220 | 2.66 | 1.82 | 26.85 |
| 1HGJ.PDB | OD1, C_ASP_101 | OG, C_SER_231  | HG, C_SER_231   | 2.91 | 1.95 | 9.37  |
| 1HGJ.PDB | OE1, B_GLU_72  | NZ, C_LYS_238  | HZ1, C_LYS_238  | 2.75 | 1.79 | 18.67 |
| 1HGJ.PDB | OD1, C_ASN_165 | ND2, C_ASN_246 | HD22, C_ASN_246 | 2.89 | 1.93 | 12.15 |
| 1HGJ.PDB | OD1, C_ASN_133 | NH2, C_ARG_255 | HH22, C_ARG_255 | 2.54 | 1.71 | 27.08 |
| 1HGJ.PDB | OE2, C_GLU_119 | NH1, C_ARG_261 | HH12, C_ARG_261 | 2.65 | 1.83 | 28.56 |
| 1HGJ.PDB | OE1, C_GLU_119 | NH2, C_ARG_261 | HH22, C_ARG_261 | 2.92 | 2.03 | 23.97 |
| 1HGJ.PDB | OD2, C_ASP_85  | NZ, C_LYS_264  | HZ3, C_LYS_264  | 2.82 | 1.83 | 14.94 |
| 1HGJ.PDB | OE1, C_GLN_44  | NZ, C_LYS_292  | HZ1, C_LYS_292  | 2.73 | 1.72 | 10.59 |
| 1HGJ.PDB | OD2, C_ASP_291 | NZ, C_LYS_292  | HZ3, C_LYS_292  | 2.82 | 1.84 | 16.66 |
| 1HGJ.PDB | OD1, D_ASP_86  | NZ, C_LYS_310  | HZ3, C_LYS_310  | 2.94 | 2.10 | 29.37 |
| 1HGJ.PDB | OE1, C_GLU_41  | NZ, C_LYS_315  | HZ3, C_LYS_315  | 2.86 | 1.91 | 20.22 |
| 1HGJ.PDB | OE2, C_GLU_35  | ND2, C_ASN_322 | HD22, C_ASN_322 | 2.88 | 1.97 | 19.99 |
| 1HGJ.PDB | OE1, D_GLU_15  | NZ, C_LYS_326  | HZ1, C_LYS_326  | 2.91 | 1.86 | 5.48  |
| 1HGJ.PDB | OE1, D_GLN_34  | NE, D_ARG_25   | HE, D_ARG_25    | 2.65 | 1.80 | 23.08 |
| 1HGJ.PDB | OD1, D_ASN_146 | ND2, D_ASN_28  | HD21, D_ASN_28  | 2.98 | 2.03 | 11.81 |
| 1HGJ.PDB | OD2, D_ASP_37  | OG, D_SER_40   | HG, D_SER_40    | 2.82 | 1.96 | 22.49 |
| 1HGJ.PDB | OD1, D_ASP_46  | NE2, D_GLN_42  | HE22, D_GLN_42  | 2.81 | 1.92 | 21.12 |
| 1HGJ.PDB | OE2, D_GLU_114 | NE2, D_GLN_47  | HE21, D_GLN_47  | 2.94 | 2.03 | 18.44 |
| 1HGJ.PDB | OG1, D_THR_107 | NZ, D_LYS_51   | HZ1, D_LYS_51   | 2.97 | 1.99 | 16.18 |
| 1HGJ.PDB | OE1, D_GLU_103 | NZ, D_LYS_51   | HZ2, D_LYS_51   | 2.80 | 1.76 | 6.89  |
| 1HGJ.PDB | ND1, D_HIS_106 | NZ, D_LYS_51   | HZ3, D_LYS_51   | 2.79 | 1.82 | 16.80 |
| 1HGJ.PDB | OE1, D_GLU_57  | NH1, D_ARG_54  | HH11, D_ARG_54  | 2.87 | 1.86 | 9.17  |
| 1HGJ.PDB | OE2, B_GLU_97  | NH2, D_ARG_54  | HH22, D_ARG_54  | 2.84 | 1.88 | 15.58 |
| 1HGJ.PDB | OG, C_SER_110  | NE2, D_HIS_64  | HE2, D_HIS_64   | 2.89 | 1.91 | 5.59  |

|          |                |                |                 |      |      |       |
|----------|----------------|----------------|-----------------|------|------|-------|
| 1HGJ.PDB | OE2, D_GLU_85  | NZ, D_LYS_68   | HZ2, D_LYS_68   | 2.82 | 1.80 | 11.23 |
| 1HGJ.PDB | OE2, F_GLU_81  | NE, D_ARG_76   | HE, D_ARG_76    | 2.85 | 1.89 | 10.87 |
| 1HGJ.PDB | OE2, F_GLU_74  | NH1, D_ARG_76  | HH12, D_ARG_76  | 2.76 | 1.76 | 7.89  |
| 1HGJ.PDB | OE1, F_GLU_81  | NH2, D_ARG_76  | HH21, D_ARG_76  | 2.68 | 1.69 | 5.65  |
| 1HGJ.PDB | OE1, F_GLU_74  | NH2, D_ARG_76  | HH22, D_ARG_76  | 2.71 | 1.72 | 5.59  |
| 1HGJ.PDB | OE1, D_GLU_74  | NE2, D_GLN_78  | HE22, D_GLN_78  | 2.88 | 1.94 | 14.79 |
| 1HGJ.PDB | OE1, F_GLU_85  | OH, D_TYR_83   | HH, D_TYR_83    | 2.63 | 1.81 | 25.72 |
| 1HGJ.PDB | OH, B_TYR_83   | NZ, D_LYS_88   | HZ1, D_LYS_88   | 2.75 | 1.72 | 7.31  |
| 1HGJ.PDB | OE2, D_GLU_120 | NH1, D_ARG_123 | HH11, D_ARG_123 | 2.74 | 1.85 | 23.39 |
| 1HGJ.PDB | OE1, B_GLU_132 | NE, D_ARG_124  | HE, D_ARG_124   | 2.80 | 1.98 | 27.33 |
| 1HGJ.PDB | OE2, B_GLU_132 | NE, D_ARG_124  | HE, D_ARG_124   | 2.87 | 2.00 | 21.99 |
| 1HGJ.PDB | OH, B_TYR_141  | NH1, D_ARG_127 | HH12, D_ARG_127 | 2.99 | 2.02 | 12.89 |
| 1HGJ.PDB | OH, D_TYR_157  | ND2, D_ASN_129 | HD22, D_ASN_129 | 2.79 | 1.84 | 10.20 |
| 1HGJ.PDB | OD1, D_ASN_154 | OG1, D_THR_156 | HG1, D_THR_156  | 2.71 | 1.81 | 16.75 |
| 1HGJ.PDB | NE2, D_HIS_142 | OH, D_TYR_157  | HH, D_TYR_157   | 2.78 | 1.88 | 18.06 |
| 1HGJ.PDB | OE2, D_GLU_131 | NH1, D_ARG_170 | HH11, D_ARG_170 | 2.79 | 1.80 | 6.55  |
| 1HGJ.PDB | OE2, F_GLU_97  | NZ, E_LYS_27   | HZ1, E_LYS_27   | 2.81 | 1.79 | 8.50  |
| 1HGJ.PDB | OD2, E_ASP_275 | NZ, E_LYS_50   | HZ1, E_LYS_50   | 2.74 | 1.82 | 22.90 |
| 1HGJ.PDB | OD1, E_ASP_73  | ND1, E_HIS_75  | HD1, E_HIS_75   | 2.80 | 1.88 | 17.19 |
| 1HGJ.PDB | OD1, E_ASP_60  | NE, E_ARG_90   | HE, E_ARG_90    | 2.91 | 1.94 | 8.87  |
| 1HGJ.PDB | OD2, E_ASP_60  | NH2, E_ARG_90  | HH21, E_ARG_90  | 2.83 | 1.83 | 8.62  |
| 1HGJ.PDB | OD1, E_ASP_271 | OG, E_SER_91   | HG, E_SER_91    | 2.99 | 2.15 | 25.95 |
| 1HGJ.PDB | OD2, E_ASP_271 | OG, E_SER_91   | HG, E_SER_91    | 2.82 | 1.92 | 18.47 |
| 1HGJ.PDB | OD2, E_ASP_68  | OG, E_SER_95   | HG, E_SER_95    | 2.94 | 2.00 | 13.81 |
| 1HGJ.PDB | OD1, E_ASP_68  | OH, E_TYR_100  | HH, E_TYR_100   | 2.88 | 1.94 | 12.28 |
| 1HGJ.PDB | OD2, E_ASP_104 | OG, E_SER_107  | HG, E_SER_107   | 2.85 | 1.94 | 18.67 |
| 1HGJ.PDB | OE2, F_GLU_67  | NH2, E_ARG_109 | HH21, E_ARG_109 | 2.76 | 1.77 | 12.82 |
| 1HGJ.PDB | OD2, D_ASP_79  | OG, E_SER_110  | HG, E_SER_110   | 2.79 | 1.87 | 15.96 |
| 1HGJ.PDB | OE2, E_GLU_119 | OG1, E_THR_117 | HG1, E_THR_117  | 2.91 | 1.96 | 10.96 |
| 1HGJ.PDB | OD1, E_ASN_137 | NZ, E_LYS_140  | HZ2, E_LYS_140  | 2.71 | 1.72 | 13.56 |
| 1HGJ.PDB | OD2, E_ASP_77  | NE, E_ARG_141  | HE, E_ARG_141   | 2.84 | 2.00 | 27.31 |
| 1HGJ.PDB | OD1, E_ASP_77  | NH2, E_ARG_141 | HH21, E_ARG_141 | 2.84 | 1.92 | 21.35 |
| 1HGJ.PDB | OD2, E_ASP_77  | NH2, E_ARG_141 | HH21, E_ARG_141 | 2.75 | 1.86 | 24.32 |
| 1HGJ.PDB | OD1, E_ASN_137 | OG, E_SER_145  | HG, E_SER_145   | 2.96 | 2.12 | 24.46 |
| 1HGJ.PDB | OH, E_TYR_195  | NE1, E_TRP_153 | HE1, E_TRP_153  | 2.83 | 1.93 | 19.26 |
| 1HGJ.PDB | OE2, E_GLU_123 | NZ, E_LYS_176  | HZ1, E_LYS_176  | 2.69 | 1.80 | 25.95 |
| 1HGJ.PDB | OE1, E_GLU_123 | OH, E_TYR_178  | HH, E_TYR_178   | 2.77 | 1.83 | 11.08 |
| 1HGJ.PDB | OG1, E_THR_235 | NE1, E_TRP_180 | HE1, E_TRP_180  | 2.94 | 1.96 | 4.45  |
| 1HGJ.PDB | OG, E_SER_231  | NE2, E_HIS_184 | HE2, E_HIS_184  | 2.75 | 1.92 | 26.56 |
| 1HGJ.PDB | OD1, E_ASN_246 | NH2, E_ARG_201 | HH21, E_ARG_201 | 2.59 | 1.74 | 26.30 |
| 1HGJ.PDB | OG1, E_THR_212 | OG1, E_THR_203 | HG1, E_THR_203  | 2.93 | 1.99 | 12.00 |
| 1HGJ.PDB | OD1, C_ASP_101 | NE2, E_GLN_210 | HE22, E_GLN_210 | 2.94 | 2.10 | 26.45 |
| 1HGJ.PDB | OE1, A_GLN_210 | NH2, E_ARG_220 | HH21, E_ARG_220 | 2.69 | 1.86 | 28.41 |
| 1HGJ.PDB | OD1, E_ASP_101 | OG, E_SER_231  | HG, E_SER_231   | 2.90 | 1.95 | 11.36 |
| 1HGJ.PDB | OE1, D_GLU_72  | NZ, E_LYS_238  | HZ3, E_LYS_238  | 2.87 | 1.86 | 13.82 |
| 1HGJ.PDB | OD1, E_ASN_165 | ND2, E_ASN_246 | HD22, E_ASN_246 | 2.89 | 1.94 | 11.88 |
| 1HGJ.PDB | OD1, E_ASN_133 | NH2, E_ARG_255 | HH22, E_ARG_255 | 2.55 | 1.71 | 26.62 |
| 1HGJ.PDB | OE2, E_GLU_119 | NH1, E_ARG_261 | HH12, E_ARG_261 | 2.65 | 1.82 | 28.15 |
| 1HGJ.PDB | OE1, E_GLU_119 | NH2, E_ARG_261 | HH22, E_ARG_261 | 2.91 | 2.01 | 23.66 |
| 1HGJ.PDB | OD2, E_ASP_85  | NZ, E_LYS_264  | HZ3, E_LYS_264  | 2.86 | 1.86 | 15.01 |
| 1HGJ.PDB | OE1, E_GLN_44  | NZ, E_LYS_292  | HZ1, E_LYS_292  | 2.72 | 1.70 | 10.33 |
| 1HGJ.PDB | OD2, E_ASP_291 | NZ, E_LYS_292  | HZ3, E_LYS_292  | 2.83 | 1.86 | 17.49 |
| 1HGJ.PDB | OD1, F_ASP_86  | NZ, E_LYS_310  | HZ3, E_LYS_310  | 2.93 | 2.08 | 29.22 |
| 1HGJ.PDB | OE1, E_GLU_41  | NZ, E_LYS_315  | HZ3, E_LYS_315  | 2.86 | 1.91 | 20.65 |
| 1HGJ.PDB | OE2, E_GLU_35  | ND2, E_ASN_322 | HD22, E_ASN_322 | 2.86 | 1.96 | 20.74 |
| 1HGJ.PDB | OE1, F_GLU_15  | NZ, E_LYS_326  | HZ3, E_LYS_326  | 2.87 | 1.86 | 12.83 |
| 1HGJ.PDB | OE1, F_GLN_34  | NE, F_ARG_25   | HE, F_ARG_25    | 2.86 | 2.05 | 28.42 |
| 1HGJ.PDB | OE1, F_GLN_34  | NH2, F_ARG_25  | HH21, F_ARG_25  | 2.64 | 1.73 | 20.69 |

|          |                |                |                 |      |      |       |
|----------|----------------|----------------|-----------------|------|------|-------|
| 1HGJ.PDB | OD1, F_ASN_146 | ND2, F_ASN_28  | HD21, F_ASN_28  | 2.81 | 1.89 | 16.64 |
| 1HGJ.PDB | OD2, F_ASP_37  | OG, F_SER_40   | HG, F_SER_40    | 2.80 | 1.95 | 24.06 |
| 1HGJ.PDB | OD1, F_ASP_46  | NE2, F_GLN_42  | HE22, F_GLN_42  | 2.80 | 1.92 | 21.18 |
| 1HGJ.PDB | OE2, F_GLU_114 | NE2, F_GLN_47  | HE21, F_GLN_47  | 2.95 | 2.04 | 18.06 |
| 1HGJ.PDB | OE1, F_GLU_103 | NZ, F_LYS_51   | HZ2, F_LYS_51   | 2.79 | 1.75 | 5.77  |
| 1HGJ.PDB | ND1, F_HIS_106 | NZ, F_LYS_51   | HZ3, F_LYS_51   | 2.75 | 1.79 | 17.21 |
| 1HGJ.PDB | OE1, F_GLU_57  | NH1, F_ARG_54  | HH11, F_ARG_54  | 2.86 | 1.86 | 9.70  |
| 1HGJ.PDB | OE2, D_GLU_97  | NH2, F_ARG_54  | HH22, F_ARG_54  | 2.77 | 1.81 | 14.54 |
| 1HGJ.PDB | OG, E_SER_110  | NE2, F_HIS_64  | HE2, F_HIS_64   | 2.90 | 1.93 | 7.02  |
| 1HGJ.PDB | OE2, F_GLU_85  | NZ, F_LYS_68   | HZ2, F_LYS_68   | 2.74 | 1.77 | 18.09 |
| 1HGJ.PDB | OE2, B_GLU_81  | NE, F_ARG_76   | HE, F_ARG_76    | 2.85 | 1.89 | 12.57 |
| 1HGJ.PDB | OE2, B_GLU_74  | NH1, F_ARG_76  | HH12, F_ARG_76  | 2.70 | 1.70 | 4.55  |
| 1HGJ.PDB | OE1, B_GLU_81  | NH2, F_ARG_76  | HH21, F_ARG_76  | 2.65 | 1.66 | 2.84  |
| 1HGJ.PDB | OE1, B_GLU_74  | NH2, F_ARG_76  | HH22, F_ARG_76  | 2.72 | 1.73 | 7.95  |
| 1HGJ.PDB | OE1, F_GLU_74  | NE2, F_GLN_78  | HE22, F_GLN_78  | 2.92 | 1.97 | 13.10 |
| 1HGJ.PDB | OE1, B_GLU_85  | OH, F_TYR_83   | HH, F_TYR_83    | 2.53 | 1.75 | 28.54 |
| 1HGJ.PDB | OH, D_TYR_83   | NZ, F_LYS_88   | HZ1, F_LYS_88   | 2.70 | 1.68 | 8.19  |
| 1HGJ.PDB | OE2, F_GLU_120 | NH1, F_ARG_123 | HH11, F_ARG_123 | 2.73 | 1.86 | 24.44 |
| 1HGJ.PDB | OE1, D_GLU_132 | NE, F_ARG_124  | HE, F_ARG_124   | 2.92 | 2.09 | 27.65 |
| 1HGJ.PDB | OE2, D_GLU_132 | NE, F_ARG_124  | HE, F_ARG_124   | 2.96 | 2.06 | 20.98 |
| 1HGJ.PDB | OH, F_TYR_157  | ND2, F_ASN_129 | HD22, F_ASN_129 | 2.75 | 1.85 | 17.65 |
| 1HGJ.PDB | OE2, F_GLU_131 | NH1, F_ARG_170 | HH11, F_ARG_170 | 2.79 | 1.80 | 6.77  |

Table 1737: 1HGJ-specific side chain hydrogen bonding analysis. In this table, a PDB file is specified with a four-letter PDB ID, except that the names of the PDB files corresponding to the single NMR structural model split from the NMR ensemble is specified with a four-letter PDB ID in addition to a hyphen followed by the single NMR structural model numeric ID, the residue naming scheme is **Chain ID\_residue name\_residue number**,  $\angle ADH$  represents the angle formed by acceptor (A), donor (D) and hydrogen (H) ( $\angle ADH$ ).

| PDB      | Acceptor (A)   | Donor (D)      | Hydrogen (H)    | D-A (Å) | H-A (Å) | $\angle ADH(^{\circ})$ |
|----------|----------------|----------------|-----------------|---------|---------|------------------------|
| 1OSP.PDB | OE1, L_GLN_89  | OH, L_TYR_36   | HH, L_TYR_36    | 2.81    | 1.86    | 10.05                  |
| 1OSP.PDB | OG1, L_THR_97  | NE2, L_GLN_90  | HE22, L_GLN_90  | 3.00    | 2.06    | 15.72                  |
| 1OSP.PDB | OE1, L_GLU_105 | OH, L_TYR_140  | HH, L_TYR_140   | 2.90    | 2.03    | 21.23                  |
| 1OSP.PDB | OG, L_SER_177  | NE1, L_TRP_148 | HE1, L_TRP_148  | 2.94    | 1.97    | 6.03                   |
| 1OSP.PDB | OG, L_SER_131  | OG1, L_THR_180 | HG1, L_THR_180  | 2.85    | 1.92    | 11.66                  |
| 1OSP.PDB | OD2, L_ASP_110 | NZ, L_LYS_199  | HZ3, L_LYS_199  | 2.64    | 1.82    | 29.88                  |
| 1OSP.PDB | OD1, H_ASN_83  | OG1, H_THR_17  | HG1, H_THR_17   | 2.79    | 1.95    | 24.49                  |
| 1OSP.PDB | OE1, H_GLU_46  | NH1, H_ARG_38  | HH11, H_ARG_38  | 2.77    | 1.80    | 9.20                   |
| 1OSP.PDB | OH, H_TYR_93   | NH2, H_ARG_38  | HH21, H_ARG_38  | 2.83    | 1.87    | 12.82                  |
| 1OSP.PDB | OD1, H_ASP_89  | NH2, H_ARG_38  | HH22, H_ARG_38  | 2.83    | 1.91    | 19.07                  |
| 1OSP.PDB | OD2, L_ASP_1   | OG, H_SER_62   | HG, H_SER_62    | 2.98    | 2.17    | 26.53                  |
| 1OSP.PDB | OG, H_SER_186  | NE1, H_TRP_161 | HE1, H_TRP_161  | 2.94    | 1.96    | 6.92                   |
| 1OSP.PDB | OG, L_SER_176  | OG, H_SER_185  | HG, H_SER_185   | 2.74    | 1.91    | 24.72                  |
| 1OSP.PDB | OG, H_SER_209  | ND1, H_HIS_206 | HD1, H_HIS_206  | 2.73    | 1.88    | 25.05                  |
| 1OSP.PDB | OE1, L_GLU_123 | NZ, H_LYS_215  | HZ2, H_LYS_215  | 2.78    | 1.85    | 20.53                  |
| 1OSP.PDB | OD1, O_ASP_33  | NZ, O_LYS_39   | HZ2, O_LYS_39   | 2.81    | 1.85    | 17.76                  |
| 1OSP.PDB | OG1, O_THR_143 | NH1, O_ARG_139 | HH11, O_ARG_139 | 2.73    | 1.78    | 14.74                  |
| 1OSP.PDB | OE2, O_GLU_160 | NH2, O_ARG_139 | HH22, O_ARG_139 | 2.96    | 2.05    | 19.95                  |
| 1OSP.PDB | OE1, O_GLU_160 | NZ, O_LYS_189  | HZ1, O_LYS_189  | 2.95    | 1.93    | 9.44                   |
| 1OSP.PDB | OG, O_SER_198  | ND2, O_ASN_190 | HD22, O_ASN_190 | 2.97    | 2.02    | 11.75                  |
| 1OSP.PDB | OD1, O_ASP_234 | OG1, O_THR_224 | HG1, O_THR_224  | 2.71    | 1.92    | 27.50                  |
| 1OSP.PDB | OD1, O_ASP_234 | OH, O_TYR_248  | HH, O_TYR_248   | 2.73    | 1.90    | 24.06                  |

Table 1738: 1OSP-specific side chain hydrogen bonding analysis. In this table, a PDB file is specified with a four-letter PDB ID, except that the names of the PDB files corresponding to the single NMR structural model split from the NMR ensemble is specified with a four-letter PDB ID in addition to a hyphen followed by the single NMR structural model numeric ID, the residue naming scheme is **Chain ID\_residue name\_residue number**,  $\angle ADH$  represents the angle formed by acceptor (A), donor (D) and hydrogen (H) ( $\angle ADH$ ).

| PDB      | Acceptor (A)   | Donor (D)      | Hydrogen (H)   | D-A (Å) | H-A (Å) | $\angle ADH(^{\circ})$ |
|----------|----------------|----------------|----------------|---------|---------|------------------------|
| 1PSK.PDB | OG, L_SER_176  | NE1, L_TRP_147 | HE1, L_TRP_147 | 2.73    | 1.78    | 10.14                  |
| 1PSK.PDB | OD1, L_ASN_160 | OG, L_SER_176  | HG, L_SER_176  | 2.79    | 1.87    | 14.99                  |
| 1PSK.PDB | NE1, H_TRP_47  | ND1, H_HIS_35  | HD1, H_HIS_35  | 2.92    | 2.03    | 20.19                  |
| 1PSK.PDB | OG1, H_THR_78  | OG, H_SER_76   | HG, H_SER_76   | 2.94    | 2.03    | 16.27                  |
| 1PSK.PDB | OH, H_TYR_27   | OG, H_SER_98   | HG, H_SER_98   | 2.95    | 2.06    | 19.06                  |

Table 1739: 1PSK-specific side chain hydrogen bonding analysis. In this table, a PDB file is specified with a four-letter PDB ID, except that the names of the PDB files corresponding to the single NMR structural model split from the NMR ensemble is specified with a four-letter PDB ID in addition to a hyphen followed by the single NMR structural model numeric ID, the residue naming scheme is **Chain ID\_residue name\_residue number**,  $\angle ADH$  represents the angle formed by acceptor (A), donor (D) and hydrogen (H) ( $\angle ADH$ ).



| PDB         | Acceptor (A)   | Donor (D)     | Hydrogen (H)   | D-A (Å) | H-A (Å) | $\angle ADH(^{\circ})$ |
|-------------|----------------|---------------|----------------|---------|---------|------------------------|
| 1R21-1.PDB  | OG1, A_THR_69  | ND2, A_ASN_62 | HD21, A_ASN_62 | 2.86    | 1.99    | 21.79                  |
| 1R21-10.PDB | OG1, A_THR_69  | ND2, A_ASN_62 | HD21, A_ASN_62 | 2.90    | 2.06    | 25.22                  |
| 1R21-11.PDB | OG, A_SER_64   | ND2, A_ASN_62 | HD22, A_ASN_62 | 2.35    | 1.48    | 21.77                  |
| 1R21-12.PDB | OD1, A_ASN_67  | OG1, A_THR_66 | HG1, A_THR_66  | 2.34    | 1.38    | 3.67                   |
| 1R21-13.PDB | OG1, A_THR_69  | ND2, A_ASN_62 | HD22, A_ASN_62 | 2.50    | 1.62    | 19.65                  |
| 1R21-13.PDB | OH, A_TYR_97   | ND2, A_ASN_99 | HD21, A_ASN_99 | 2.51    | 1.54    | 7.69                   |
| 1R21-14.PDB | OG1, A_THR_69  | ND2, A_ASN_62 | HD21, A_ASN_62 | 2.52    | 1.57    | 12.09                  |
| 1R21-14.PDB | OE1, A_GLU_57  | NE, A_ARG_81  | HE, A_ARG_81   | 2.82    | 2.02    | 29.06                  |
| 1R21-14.PDB | OE2, A_GLU_57  | NH2, A_ARG_81 | HH21, A_ARG_81 | 2.46    | 1.50    | 12.90                  |
| 1R21-14.PDB | OH, A_TYR_97   | ND2, A_ASN_99 | HD22, A_ASN_99 | 2.66    | 1.70    | 8.32                   |
| 1R21-16.PDB | OE1, A_GLU_57  | NE, A_ARG_81  | HE, A_ARG_81   | 2.43    | 1.60    | 25.79                  |
| 1R21-17.PDB | ND2, A_ASN_99  | NE, A_ARG_5   | HE, A_ARG_5    | 2.79    | 1.84    | 10.87                  |
| 1R21-17.PDB | OG, A_SER_94   | OG1, A_THR_89 | HG1, A_THR_89  | 2.85    | 1.94    | 16.35                  |
| 1R21-18.PDB | OD1, A_ASN_67  | OG1, A_THR_66 | HG1, A_THR_66  | 2.60    | 1.66    | 10.07                  |
| 1R21-18.PDB | OE2, A_GLU_100 | NE2, A_HIS_84 | HE2, A_HIS_84  | 2.44    | 1.60    | 25.14                  |
| 1R21-19.PDB | OE2, A_GLU_34  | NE2, A_GLN_47 | HE21, A_GLN_47 | 2.80    | 1.93    | 22.82                  |
| 1R21-19.PDB | OG1, A_THR_69  | ND2, A_ASN_62 | HD21, A_ASN_62 | 2.83    | 2.03    | 29.57                  |
| 1R21-2.PDB  | OE2, A_GLU_34  | NE2, A_GLN_47 | HE21, A_GLN_47 | 2.62    | 1.65    | 7.42                   |
| 1R21-2.PDB  | OG1, A_THR_69  | ND2, A_ASN_62 | HD21, A_ASN_62 | 2.81    | 1.92    | 20.56                  |
| 1R21-2.PDB  | OG, A_SER_64   | ND2, A_ASN_62 | HD22, A_ASN_62 | 2.42    | 1.53    | 18.22                  |
| 1R21-2.PDB  | OG, A_SER_94   | OG1, A_THR_89 | HG1, A_THR_89  | 2.98    | 2.02    | 6.58                   |
| 1R21-2.PDB  | OD2, A_ASP_16  | NH1, A_ARG_96 | HH12, A_ARG_96 | 2.71    | 1.87    | 26.03                  |
| 1R21-22.PDB | OG, A_SER_64   | ND2, A_ASN_62 | HD22, A_ASN_62 | 2.37    | 1.45    | 16.21                  |
| 1R21-23.PDB | OE1, A_GLU_57  | NE, A_ARG_81  | HE, A_ARG_81   | 2.65    | 1.70    | 11.54                  |
| 1R21-3.PDB  | OD1, A_ASP_16  | NE2, A_HIS_19 | HE2, A_HIS_19  | 2.71    | 1.85    | 23.51                  |
| 1R21-3.PDB  | OE2, A_GLU_34  | NE2, A_GLN_47 | HE22, A_GLN_47 | 2.72    | 1.92    | 29.24                  |
| 1R21-3.PDB  | OG1, A_THR_69  | ND2, A_ASN_62 | HD21, A_ASN_62 | 2.87    | 2.01    | 23.40                  |
| 1R21-4.PDB  | OD1, A_ASN_67  | OG1, A_THR_66 | HG1, A_THR_66  | 2.40    | 1.45    | 5.76                   |
| 1R21-4.PDB  | OE1, A_GLU_57  | NE, A_ARG_81  | HE, A_ARG_81   | 2.76    | 1.87    | 19.46                  |
| 1R21-4.PDB  | OE1, A_GLU_57  | NH2, A_ARG_81 | HH21, A_ARG_81 | 2.93    | 2.10    | 27.48                  |
| 1R21-5.PDB  | OG1, A_THR_69  | ND2, A_ASN_62 | HD22, A_ASN_62 | 2.62    | 1.75    | 21.48                  |
| 1R21-6.PDB  | OG1, A_THR_69  | ND2, A_ASN_62 | HD21, A_ASN_62 | 2.81    | 1.95    | 22.23                  |
| 1R21-6.PDB  | OD1, A_ASN_67  | OG1, A_THR_66 | HG1, A_THR_66  | 2.30    | 1.42    | 18.29                  |
| 1R21-7.PDB  | OD1, A_ASN_67  | OG1, A_THR_66 | HG1, A_THR_66  | 2.91    | 2.05    | 21.54                  |
| 1R21-9.PDB  | OG1, A_THR_69  | ND2, A_ASN_62 | HD21, A_ASN_62 | 2.59    | 1.65    | 13.02                  |

Table 1740: 1R21-specific side chain hydrogen bonding analysis. In this table, a PDB file is specified with a four-letter PDB ID, except that the names of the PDB files corresponding to the single NMR structural model split from the NMR ensemble is specified with a four-letter PDB ID in addition to a hyphen followed by the single NMR structural model numeric ID, the residue naming scheme is **Chain ID\_residue name\_residue number**,  $\angle ADH$  represents the angle formed by acceptor (A), donor (D) and hydrogen (H) ( $\angle ADH$ ).

| PDB      | Acceptor (A)   | Donor (D)      | Hydrogen (H)    | D-A (Å) | H-A (Å) | $\angle ADH(^{\circ})$ |
|----------|----------------|----------------|-----------------|---------|---------|------------------------|
| 1VFB.PDB | OE1, A_GLN_89  | OH, A_TYR_36   | HH, A_TYR_36    | 2.84    | 2.00    | 25.31                  |
| 1VFB.PDB | OD2, A_ASP_82  | NE, A_ARG_61   | HE, A_ARG_61    | 2.88    | 1.96    | 15.15                  |
| 1VFB.PDB | OD1, A_ASP_82  | NH2, A_ARG_61  | HH21, A_ARG_61  | 2.85    | 1.87    | 9.42                   |
| 1VFB.PDB | OE1, B_GLU_98  | NH1, A_ARG_96  | HH12, A_ARG_96  | 2.82    | 1.84    | 8.38                   |
| 1VFB.PDB | OE2, B_GLU_98  | NH2, A_ARG_96  | HH22, A_ARG_96  | 2.81    | 1.85    | 10.74                  |
| 1VFB.PDB | OG, B_SER_28   | OG1, B_THR_30  | HG1, B_THR_30   | 2.97    | 2.08    | 19.82                  |
| 1VFB.PDB | OE1, B_GLU_98  | ND2, B_ASN_35  | HD21, B_ASN_35  | 2.85    | 2.00    | 23.37                  |
| 1VFB.PDB | OD1, B_ASP_89  | NH1, B_ARG_38  | HH12, B_ARG_38  | 3.00    | 2.07    | 17.31                  |
| 1VFB.PDB | OE1, A_GLN_38  | NE2, B_GLN_39  | HE21, B_GLN_39  | 2.95    | 1.98    | 8.04                   |
| 1VFB.PDB | OD1, B_ASN_35  | NE1, B_TRP_47  | HE1, B_TRP_47   | 2.80    | 1.83    | 5.78                   |
| 1VFB.PDB | OD2, B_ASP_89  | NH1, B_ARG_66  | HH12, B_ARG_66  | 2.89    | 1.97    | 19.13                  |
| 1VFB.PDB | OD1, B_ASP_89  | NH2, B_ARG_66  | HH22, B_ARG_66  | 2.93    | 1.93    | 3.85                   |
| 1VFB.PDB | OD1, B_ASN_73  | NZ, B_LYS_71   | HZ1, B_LYS_71   | 2.93    | 2.08    | 28.65                  |
| 1VFB.PDB | OG, B_SER_70   | NZ, B_LYS_81   | HZ2, B_LYS_81   | 2.92    | 2.05    | 26.58                  |
| 1VFB.PDB | OD1, B_ASN_83  | OG, B_SER_84   | HG, B_SER_84    | 2.99    | 2.04    | 8.51                   |
| 1VFB.PDB | OD1, B_ASP_104 | NE, B_ARG_97   | HE, B_ARG_97    | 2.99    | 2.02    | 4.50                   |
| 1VFB.PDB | OD2, B_ASP_104 | NH2, B_ARG_97  | HH21, B_ARG_97  | 2.86    | 1.87    | 3.52                   |
| 1VFB.PDB | OG1, C_THR_89  | NE2, C_HIS_15  | HE2, C_HIS_15   | 2.84    | 1.94    | 19.37                  |
| 1VFB.PDB | OE1, C_GLN_41  | OG1, C_THR_40  | HG1, C_THR_40   | 2.88    | 1.98    | 18.75                  |
| 1VFB.PDB | OG1, C_THR_69  | OG, C_SER_60   | HG, C_SER_60    | 2.78    | 1.84    | 10.98                  |
| 1VFB.PDB | OD1, C_ASN_27  | NE1, C_TRP_111 | HE1, C_TRP_111  | 2.95    | 2.01    | 14.04                  |
| 1VFB.PDB | OE1, C_GLN_121 | NH1, C_ARG_125 | HH11, C_ARG_125 | 2.96    | 2.02    | 16.36                  |

Table 1741: 1VFB-specific side chain hydrogen bonding analysis. In this table, a PDB file is specified with a four-letter PDB ID, except that the names of the PDB files corresponding to the single NMR structural model split from the NMR ensemble is specified with a four-letter PDB ID in addition to a hyphen followed by the single NMR structural model numeric ID, the residue naming scheme is **Chain ID\_residue name\_residue number**,  $\angle ADH$  represents the angle formed by acceptor (A), donor (D) and hydrogen (H) ( $\angle ADH$ ).

| PDB         | Acceptor (A)   | Donor (D)     | Hydrogen (H)   | D-A (Å) | H-A (Å) | $\angle ADH(^{\circ})$ |
|-------------|----------------|---------------|----------------|---------|---------|------------------------|
| 2MKL-1.PDB  | OXT, C_ALA_105 | NZ, C_LYS_13  | HZ3, C_LYS_13  | 2.65    | 1.63    | 10.83                  |
| 2MKL-1.PDB  | OD1, C_ASP_80  | OG1, C_THR_21 | HG1, C_THR_21  | 2.65    | 1.79    | 22.35                  |
| 2MKL-1.PDB  | OD2, C_ASP_80  | NE2, C_GLN_22 | HE21, C_GLN_22 | 2.86    | 1.96    | 18.61                  |
| 2MKL-1.PDB  | OG, C_SER_34   | NZ, C_LYS_65  | HZ2, C_LYS_65  | 2.81    | 1.84    | 16.47                  |
| 2MKL-1.PDB  | OE1, C_GLU_78  | OG1, C_THR_83 | HG1, C_THR_83  | 2.66    | 1.70    | 8.48                   |
| 2MKL-1.PDB  | OD1, C_ASP_80  | NZ, C_LYS_104 | HZ1, C_LYS_104 | 2.72    | 1.78    | 20.43                  |
| 2MKL-10.PDB | OE2, C_GLU_90  | NZ, C_LYS_40  | HZ2, C_LYS_40  | 2.58    | 1.67    | 23.06                  |
| 2MKL-10.PDB | OG, C_SER_62   | OG1, C_THR_67 | HG1, C_THR_67  | 2.83    | 1.88    | 6.13                   |
| 2MKL-10.PDB | OXT, C_ALA_105 | NZ, C_LYS_104 | HZ3, C_LYS_104 | 2.68    | 1.72    | 17.77                  |
| 2MKL-2.PDB  | OXT, C_ALA_105 | NZ, C_LYS_13  | HZ3, C_LYS_13  | 2.61    | 1.67    | 20.57                  |
| 2MKL-2.PDB  | OD1, C_ASP_35  | OG, C_SER_34  | HG, C_SER_34   | 2.77    | 1.81    | 5.76                   |
| 2MKL-2.PDB  | OH, C_TYR_85   | NH1, C_ARG_50 | HH11, C_ARG_50 | 2.66    | 1.70    | 14.67                  |
| 2MKL-2.PDB  | OE2, C_GLU_78  | NH1, C_ARG_50 | HH12, C_ARG_50 | 2.73    | 1.79    | 17.34                  |
| 2MKL-2.PDB  | OE1, C_GLU_55  | NZ, C_LYS_71  | HZ1, C_LYS_71  | 2.72    | 1.71    | 11.97                  |
| 2MKL-2.PDB  | OD1, C_ASN_46  | OG1, C_THR_83 | HG1, C_THR_83  | 2.72    | 1.91    | 26.52                  |
| 2MKL-3.PDB  | OE1, C_GLU_93  | NH1, C_ARG_3  | HH12, C_ARG_3  | 2.68    | 1.70    | 11.24                  |
| 2MKL-3.PDB  | OXT, C_ALA_105 | NZ, C_LYS_13  | HZ1, C_LYS_13  | 2.67    | 1.72    | 19.52                  |
| 2MKL-3.PDB  | OG, C_SER_34   | NZ, C_LYS_65  | HZ3, C_LYS_65  | 2.80    | 1.76    | 6.92                   |
| 2MKL-3.PDB  | OE2, C_GLU_55  | NZ, C_LYS_71  | HZ1, C_LYS_71  | 2.64    | 1.59    | 1.73                   |
| 2MKL-3.PDB  | OG1, C_THR_26  | NZ, C_LYS_71  | HZ3, C_LYS_71  | 2.86    | 1.95    | 23.23                  |
| 2MKL-3.PDB  | OD1, C_ASN_46  | OG1, C_THR_83 | HG1, C_THR_83  | 2.91    | 1.97    | 11.57                  |
| 2MKL-3.PDB  | OD1, C_ASP_80  | NZ, C_LYS_104 | HZ2, C_LYS_104 | 2.61    | 1.56    | 1.39                   |
| 2MKL-4.PDB  | OE1, C_GLU_17  | NE1, C_TRP_20 | HE1, C_TRP_20  | 2.69    | 1.70    | 6.61                   |
| 2MKL-4.PDB  | OE1, C_GLU_37  | ND2, C_ASN_38 | HD21, C_ASN_38 | 2.75    | 1.84    | 18.89                  |
| 2MKL-4.PDB  | OE1, C_GLU_84  | ND2, C_ASN_46 | HD21, C_ASN_46 | 2.79    | 1.87    | 17.49                  |
| 2MKL-4.PDB  | OH, C_TYR_85   | NE, C_ARG_50  | HE, C_ARG_50   | 2.95    | 2.07    | 22.98                  |
| 2MKL-4.PDB  | OE1, C_GLU_78  | NH2, C_ARG_50 | HH21, C_ARG_50 | 2.70    | 1.74    | 15.78                  |
| 2MKL-4.PDB  | OE2, C_GLU_55  | NZ, C_LYS_71  | HZ1, C_LYS_71  | 2.65    | 1.66    | 15.29                  |
| 2MKL-5.PDB  | OG1, C_THR_5   | NE2, C_GLN_4  | HE21, C_GLN_4  | 2.80    | 1.92    | 21.71                  |
| 2MKL-5.PDB  | OD1, C_ASP_35  | OG, C_SER_34  | HG, C_SER_34   | 2.85    | 1.91    | 12.30                  |
| 2MKL-5.PDB  | OE1, C_GLU_78  | NH2, C_ARG_50 | HH22, C_ARG_50 | 2.76    | 1.81    | 16.18                  |
| 2MKL-5.PDB  | OD2, C_ASP_6   | NZ, C_LYS_65  | HZ2, C_LYS_65  | 2.68    | 1.69    | 14.66                  |
| 2MKL-5.PDB  | OE2, C_GLU_78  | OG1, C_THR_83 | HG1, C_THR_83  | 2.81    | 1.87    | 12.01                  |
| 2MKL-5.PDB  | OXT, C_ALA_105 | NZ, C_LYS_104 | HZ2, C_LYS_104 | 2.74    | 1.74    | 13.81                  |
| 2MKL-6.PDB  | OXT, C_ALA_105 | NZ, C_LYS_13  | HZ2, C_LYS_13  | 2.64    | 1.69    | 18.78                  |
| 2MKL-6.PDB  | OE2, C_GLU_17  | NZ, C_LYS_13  | HZ3, C_LYS_13  | 2.63    | 1.59    | 5.83                   |
| 2MKL-6.PDB  | OE1, C_GLU_84  | ND2, C_ASN_46 | HD21, C_ASN_46 | 2.90    | 1.97    | 15.36                  |
| 2MKL-6.PDB  | OE2, C_GLU_78  | NH2, C_ARG_50 | HH22, C_ARG_50 | 2.72    | 1.70    | 3.73                   |
| 2MKL-6.PDB  | OD2, C_ASP_6   | NZ, C_LYS_65  | HZ3, C_LYS_65  | 2.59    | 1.63    | 17.95                  |
| 2MKL-6.PDB  | OE2, C_GLU_55  | NZ, C_LYS_71  | HZ1, C_LYS_71  | 2.70    | 1.72    | 16.34                  |
| 2MKL-6.PDB  | OD1, C_ASN_46  | OG1, C_THR_83 | HG1, C_THR_83  | 2.65    | 1.71    | 11.83                  |
| 2MKL-6.PDB  | OD1, C_ASP_80  | NZ, C_LYS_104 | HZ1, C_LYS_104 | 2.64    | 1.71    | 20.84                  |
| 2MKL-7.PDB  | OD1, C_ASP_6   | NE, C_ARG_3   | HE, C_ARG_3    | 2.80    | 1.90    | 20.83                  |
| 2MKL-7.PDB  | OD2, C_ASP_6   | NE, C_ARG_3   | HE, C_ARG_3    | 2.95    | 2.13    | 27.86                  |
| 2MKL-7.PDB  | OD2, C_ASP_6   | NH2, C_ARG_3  | HH21, C_ARG_3  | 2.72    | 1.79    | 18.49                  |
| 2MKL-7.PDB  | OD1, C_ASP_6   | NZ, C_LYS_65  | HZ2, C_LYS_65  | 2.61    | 1.57    | 4.07                   |
| 2MKL-7.PDB  | OG1, C_THR_24  | NZ, C_LYS_73  | HZ1, C_LYS_73  | 2.79    | 1.84    | 19.74                  |
| 2MKL-7.PDB  | OE2, C_GLU_78  | OG1, C_THR_83 | HG1, C_THR_83  | 2.59    | 1.64    | 9.74                   |
| 2MKL-8.PDB  | OG, C_SER_70   | NE1, C_TRP_43 | HE1, C_TRP_43  | 2.82    | 1.83    | 2.10                   |
| 2MKL-8.PDB  | OE2, C_GLU_78  | NH1, C_ARG_50 | HH12, C_ARG_50 | 2.63    | 1.62    | 3.58                   |
| 2MKL-8.PDB  | OD2, C_ASP_6   | NZ, C_LYS_65  | HZ3, C_LYS_65  | 2.64    | 1.68    | 18.41                  |
| 2MKL-8.PDB  | OD1, C_ASP_80  | NZ, C_LYS_104 | HZ1, C_LYS_104 | 2.61    | 1.59    | 9.01                   |
| 2MKL-9.PDB  | OE2, C_GLU_78  | NH2, C_ARG_50 | HH22, C_ARG_50 | 2.68    | 1.69    | 8.63                   |
| 2MKL-9.PDB  | OD2, C_ASP_6   | NZ, C_LYS_65  | HZ2, C_LYS_65  | 2.75    | 1.71    | 7.05                   |
| 2MKL-9.PDB  | OE2, C_GLU_37  | OG, C_SER_92  | HG, C_SER_92   | 3.00    | 2.20    | 28.49                  |

---

Table 1742: 2MKL-specific side chain hydrogen bonding analysis. In this table, a PDB file is specified with a four-letter PDB ID, except that the names of the PDB files corresponding to the single NMR structural model split from the NMR ensemble is specified with a four-letter PDB ID in addition to a hyphen followed by the single NMR structural model numeric ID, the residue naming scheme is **Chain ID\_residue name\_residue number**,  $\angle ADH$  represents the angle formed by acceptor (A), donor (D) and hydrogen (H) ( $\angle ADH$ ).

| PDB      | Acceptor (A)   | Donor (D)      | Hydrogen (H)    | D-A (Å) | H-A (Å) | $\angle ADH(^{\circ})$ |
|----------|----------------|----------------|-----------------|---------|---------|------------------------|
| 3SE8.PDB | OE2, G_GLU_91  | NE1, G_TRP_45  | HE1, G_TRP_45   | 2.78    | 2.03    | 24.08                  |
| 3SE8.PDB | OE2, G_GLU_64  | ND1, G_HIS_66  | HD1, G_HIS_66   | 2.82    | 1.98    | 11.41                  |
| 3SE8.PDB | OE1, G_GLU_64  | ND2, G_ASN_67  | HD22, G_ASN_67  | 2.82    | 2.00    | 14.84                  |
| 3SE8.PDB | OD1, G_ASN_99  | NE2, G_GLN_103 | HE22, G_GLN_103 | 2.99    | 2.17    | 14.68                  |
| 3SE8.PDB | OE2, G_GLU_381 | NZ, G_LYS_207  | HZ2, G_LYS_207  | 2.74    | 1.86    | 4.82                   |
| 3SE8.PDB | OE2, G_GLU_83  | OG, G_SER_243  | HG, G_SER_243   | 2.64    | 1.83    | 7.57                   |
| 3SE8.PDB | OH, G_TYR_486  | ND1, G_HIS_249 | HD1, G_HIS_249  | 2.64    | 1.81    | 12.83                  |
| 3SE8.PDB | OE1, G_GLU_482 | NE2, G_HIS_249 | HE2, G_HIS_249  | 3.00    | 2.16    | 9.93                   |
| 3SE8.PDB | OE2, G_GLU_269 | NZ, G_LYS_348  | HZ1, G_LYS_348  | 2.90    | 2.14    | 25.94                  |
| 3SE8.PDB | OE1, G_GLU_351 | NZ, G_LYS_348  | HZ3, G_LYS_348  | 2.96    | 2.10    | 14.00                  |
| 3SE8.PDB | OD1, G_ASN_295 | ND2, G_ASN_444 | HD21, G_ASN_444 | 2.87    | 2.12    | 25.11                  |
| 3SE8.PDB | OG1, G_THR_297 | ND2, G_ASN_444 | HD22, G_ASN_444 | 2.77    | 1.99    | 20.73                  |
| 3SE8.PDB | OD2, G_ASP_457 | NE, G_ARG_469  | HE, G_ARG_469   | 2.90    | 2.06    | 8.93                   |
| 3SE8.PDB | OD1, G_ASP_457 | NH2, G_ARG_469 | HH21, G_ARG_469 | 2.93    | 2.11    | 16.29                  |
| 3SE8.PDB | OE1, G_GLN_105 | NE1, G_TRP_479 | HE1, G_TRP_479  | 2.68    | 1.92    | 22.70                  |
| 3SE8.PDB | OE1, G_GLU_91  | NZ, G_LYS_487  | HZ1, G_LYS_487  | 2.58    | 1.77    | 20.55                  |
| 3SE8.PDB | OD1, G_ASP_47  | NZ, G_LYS_487  | HZ2, G_LYS_487  | 2.90    | 2.08    | 19.02                  |
| 3SE8.PDB | OE1, H_GLU_46  | NH1, H_ARG_38  | HH11, H_ARG_38  | 2.64    | 1.78    | 1.94                   |
| 3SE8.PDB | OH, H_TYR_90   | NH2, H_ARG_38  | HH21, H_ARG_38  | 2.79    | 1.95    | 9.66                   |
| 3SE8.PDB | OD1, H_ASP_86  | NH2, H_ARG_38  | HH22, H_ARG_38  | 2.67    | 1.83    | 8.41                   |
| 3SE8.PDB | OD1, G_ASN_280 | NE1, H_TRP_50  | HE1, H_TRP_50   | 3.00    | 2.21    | 20.49                  |
| 3SE8.PDB | OE2, H_GLU_46  | NE2, H_GLN_62  | HE21, H_GLN_62  | 2.91    | 2.06    | 7.60                   |
| 3SE8.PDB | OD1, G_ASP_457 | NE2, H_GLN_64  | HE22, H_GLN_64  | 2.94    | 2.12    | 14.23                  |
| 3SE8.PDB | OD2, H_ASP_86  | NH2, H_ARG_66  | HH22, H_ARG_66  | 2.60    | 1.84    | 23.72                  |
| 3SE8.PDB | OD2, G_ASP_368 | NH2, H_ARG_71  | HH22, H_ARG_71  | 2.91    | 2.05    | 6.24                   |
| 3SE8.PDB | OG, H_SER_180  | NE1, H_TRP_154 | HE1, H_TRP_154  | 2.94    | 2.09    | 7.62                   |
| 3SE8.PDB | OD1, H_ASP_144 | NE2, H_GLN_171 | HE22, H_GLN_171 | 2.79    | 1.98    | 16.20                  |
| 3SE8.PDB | OG, H_SER_203  | ND1, H_HIS_200 | HD1, H_HIS_200  | 2.45    | 1.61    | 10.75                  |
| 3SE8.PDB | OD1, L_ASP_70  | NZ, L_LYS_24   | HZ3, L_LYS_24   | 2.62    | 1.80    | 18.41                  |
| 3SE8.PDB | OH, L_TYR_86   | NE2, L_GLN_37  | HE21, L_GLN_37  | 2.98    | 2.15    | 12.85                  |
| 3SE8.PDB | OD2, L_ASP_50  | NE, L_ARG_53   | HE, L_ARG_53    | 2.87    | 2.02    | 8.47                   |
| 3SE8.PDB | OD2, L_ASP_82  | NE, L_ARG_61   | HE, L_ARG_61    | 2.91    | 2.18    | 26.35                  |
| 3SE8.PDB | OD1, L_ASP_82  | NH2, L_ARG_61  | HH21, L_ARG_61  | 2.77    | 1.91    | 2.48                   |
| 3SE8.PDB | OG, L_SER_131  | NE2, L_GLN_124 | HE22, L_GLN_124 | 2.53    | 1.70    | 11.07                  |
| 3SE8.PDB | OE2, L_GLU_103 | NH2, L_ARG_142 | HH22, L_ARG_142 | 2.84    | 2.00    | 11.39                  |
| 3SE8.PDB | OE1, L_GLU_195 | NE2, L_GLN_147 | HE21, L_GLN_147 | 2.66    | 1.93    | 26.32                  |
| 3SE8.PDB | OG, L_SER_177  | NE1, L_TRP_148 | HE1, L_TRP_148  | 2.88    | 2.08    | 18.18                  |
| 3SE8.PDB | OD1, L_ASP_170 | OG1, L_THR_172 | HG1, L_THR_172  | 2.49    | 1.68    | 7.38                   |

Table 1743: 3SE8-specific side chain hydrogen bonding analysis. In this table, a PDB file is specified with a four-letter PDB ID, except that the names of the PDB files corresponding to the single NMR structural model split from the NMR ensemble is specified with a four-letter PDB ID in addition to a hyphen followed by the single NMR structural model numeric ID, the residue naming scheme is **Chain ID\_residue name\_residue number**,  $\angle ADH$  represents the angle formed by acceptor (A), donor (D) and hydrogen (H) ( $\angle ADH$ ).

| PDB      | Acceptor (A)   | Donor (D)       | Hydrogen (H)     | D-A (Å) | H-A (Å) | $\angle ADH(^{\circ})$ |
|----------|----------------|-----------------|------------------|---------|---------|------------------------|
| 3SE9.PDB | OE2, G_GLU_64  | ND1, G_HIS_66   | HD1, G_HIS_66    | 2.73    | 1.88    | 8.47                   |
| 3SE9.PDB | OE1, G_GLU_64  | ND2, G_ASN_67   | HD21, G_ASN_67   | 2.83    | 2.01    | 14.03                  |
| 3SE9.PDB | OD1, G_ASN_99  | NE2, G_GLN_103  | HE21, G_GLN_103  | 2.75    | 1.96    | 19.57                  |
| 3SE9.PDB | OE1, G_GLN_117 | NZ, G_LYS_121   | HZ3, G_LYS_121   | 2.58    | 1.83    | 27.32                  |
| 3SE9.PDB | OE2, G_GLU_83  | OG, G_SER_243   | HG, G_SER_243    | 2.65    | 1.89    | 17.63                  |
| 3SE9.PDB | OH, G_TYR_486  | ND1, G_HIS_249  | HD1, G_HIS_249   | 2.73    | 1.91    | 13.84                  |
| 3SE9.PDB | OE1, G_GLN_422 | NH1, G_ARG_327  | HH11, G_ARG_327  | 2.62    | 1.84    | 19.91                  |
| 3SE9.PDB | OE1, G_GLU_370 | ND2, G_ASN_425  | HD21, G_ASN_425  | 2.86    | 2.02    | 9.78                   |
| 3SE9.PDB | OD1, G_ASN_295 | ND2, G_ASN_444  | HD21, G_ASN_444  | 2.93    | 2.17    | 24.18                  |
| 3SE9.PDB | OG1, G_THR_297 | ND2, G_ASN_444  | HD22, G_ASN_444  | 2.97    | 2.23    | 26.41                  |
| 3SE9.PDB | OE2, G_GLU_466 | NH1, G_ARG_456  | HH11, G_ARG_456  | 2.71    | 1.88    | 12.87                  |
| 3SE9.PDB | OE1, G_GLN_105 | NE1, G_TRP_479  | HE1, G_TRP_479   | 2.69    | 1.89    | 17.56                  |
| 3SE9.PDB | OE1, G_GLU_91  | NZ, G_LYS_487   | HZ3, G_LYS_487   | 2.63    | 1.86    | 24.78                  |
| 3SE9.PDB | OD1, H_ASP_81  | NE, H_ARG_19    | HE, H_ARG_19     | 2.75    | 1.91    | 10.76                  |
| 3SE9.PDB | OH, H_TYR_90   | NH1, H_ARG_38   | HH11, H_ARG_38   | 2.99    | 2.21    | 21.73                  |
| 3SE9.PDB | OD1, H_ASP_86  | NH1, H_ARG_38   | HH12, H_ARG_38   | 2.86    | 2.03    | 12.66                  |
| 3SE9.PDB | OD1, G_ASN_280 | NE1, H_TRP_50   | HE1, H_TRP_50    | 2.86    | 2.03    | 11.46                  |
| 3SE9.PDB | OG, G_SER_365  | NH1, H_ARG_64   | HH11, H_ARG_64   | 2.81    | 2.04    | 21.79                  |
| 3SE9.PDB | OD2, H_ASP_86  | NH2, H_ARG_66   | HH22, H_ARG_66   | 2.37    | 1.62    | 23.34                  |
| 3SE9.PDB | OD2, G_ASP_368 | NH1, H_ARG_71   | HH12, H_ARG_71   | 2.77    | 1.92    | 7.25                   |
| 3SE9.PDB | OG, H_SER_21   | ND1, H_HIS_79   | HD1, H_HIS_79    | 2.69    | 1.93    | 23.16                  |
| 3SE9.PDB | OG, H_SER_68   | NH1, H_ARG_82A  | HH12, H_ARG_82A  | 2.84    | 2.02    | 15.25                  |
| 3SE9.PDB | OD1, H_ASP_101 | NH2, H_ARG_94   | HH21, H_ARG_94   | 2.74    | 1.90    | 10.49                  |
| 3SE9.PDB | OH, H_TYR_100E | NE2, H_GLN_100B | HE22, H_GLN_100B | 2.88    | 2.05    | 12.80                  |
| 3SE9.PDB | OD1, G_ASN_279 | NE1, H_TRP_100D | HE1, H_TRP_100D  | 2.86    | 2.13    | 26.83                  |
| 3SE9.PDB | OG, H_SER_180  | NE1, H_TRP_154  | HE1, H_TRP_154   | 2.83    | 2.00    | 12.34                  |
| 3SE9.PDB | OD1, L_ASN_138 | NE2, H_HIS_164  | HE2, H_HIS_164   | 2.87    | 2.10    | 22.18                  |
| 3SE9.PDB | OD1, H_ASP_144 | NE2, H_GLN_171  | HE22, H_GLN_171  | 2.70    | 1.89    | 15.22                  |
| 3SE9.PDB | OD1, H_ASP_208 | ND2, H_ASN_197  | HD21, H_ASN_197  | 2.90    | 2.07    | 13.74                  |
| 3SE9.PDB | OG, H_SER_203  | ND1, H_HIS_200  | HD1, H_HIS_200   | 2.68    | 1.84    | 9.59                   |
| 3SE9.PDB | OG, L_SER_131  | NE2, L_GLN_124  | HE21, L_GLN_124  | 2.87    | 2.02    | 8.09                   |
| 3SE9.PDB | OG, L_SER_177  | NE1, L_TRP_148  | HE1, L_TRP_148   | 2.88    | 2.05    | 13.01                  |
| 3SE9.PDB | OD1, L_ASP_170 | OG1, L_THR_172  | HG1, L_THR_172   | 2.48    | 1.71    | 16.29                  |
| 3SE9.PDB | OE1, L_GLU_187 | NZ, L_LYS_183   | HZ3, L_LYS_183   | 2.82    | 2.09    | 29.82                  |
| 3SE9.PDB | OD2, L_ASP_151 | ND1, L_HIS_189  | HD1, L_HIS_189   | 2.89    | 2.18    | 29.99                  |

Table 1744: 3SE9-specific side chain hydrogen bonding analysis. In this table, a PDB file is specified with a four-letter PDB ID, except that the names of the PDB files corresponding to the single NMR structural model split from the NMR ensemble is specified with a four-letter PDB ID in addition to a hyphen followed by the single NMR structural model numeric ID, the residue naming scheme is **Chain ID\_residue name\_residue number**,  $\angle ADH$  represents the angle formed by acceptor (A), donor (D) and hydrogen (H) ( $\angle ADH$ ).

| PDB      | Acceptor (A)   | Donor (D)      | Hydrogen (H)    | D-A (Å) | H-A (Å) | $\angle ADH(^{\circ})$ |
|----------|----------------|----------------|-----------------|---------|---------|------------------------|
| 3THM.PDB | OD1, L_ASP_93  | ND2, L_ASN_28  | HD21, L_ASN_28  | 2.85    | 2.01    | 9.28                   |
| 3THM.PDB | OH, L_TYR_87   | NE2, L_GLN_38  | HE21, L_GLN_38  | 2.86    | 2.05    | 16.36                  |
| 3THM.PDB | OD1, L_ASP_83  | NE, L_ARG_62   | HE, L_ARG_62    | 2.86    | 2.03    | 12.52                  |
| 3THM.PDB | OD2, L_ASP_83  | NH2, L_ARG_62  | HH21, L_ARG_62  | 2.63    | 1.79    | 10.74                  |
| 3THM.PDB | OD2, L_ASP_78  | NH1, L_ARG_77  | HH11, L_ARG_77  | 2.79    | 2.00    | 19.01                  |
| 3THM.PDB | OG, L_SER_180  | NE1, L_TRP_152 | HE1, L_TRP_152  | 2.84    | 1.99    | 7.64                   |
| 3THM.PDB | OD1, L_ASP_142 | NE2, L_GLN_171 | HE22, L_GLN_171 | 2.87    | 2.03    | 8.80                   |
| 3THM.PDB | OD1, L_ASP_155 | ND1, L_HIS_192 | HD1, L_HIS_192  | 2.84    | 1.98    | 0.83                   |
| 3THM.PDB | OG1, L_THR_205 | OG1, L_THR_200 | HG1, L_THR_200  | 2.83    | 2.04    | 14.40                  |
| 3THM.PDB | OE1, H_GLU_48  | NE, H_ARG_40   | HE, H_ARG_40    | 2.92    | 2.11    | 16.36                  |
| 3THM.PDB | OD1, H_ASP_96  | NH1, H_ARG_40  | HH12, H_ARG_40  | 2.76    | 1.92    | 9.45                   |
| 3THM.PDB | OE1, L_GLN_39  | NE2, H_GLN_41  | HE22, H_GLN_41  | 2.98    | 2.14    | 9.35                   |
| 3THM.PDB | OG, H_SER_52   | NE1, H_TRP_49  | HE1, H_TRP_49   | 2.98    | 2.27    | 29.23                  |
| 3THM.PDB | OD1, H_ASP_96  | NH2, H_ARG_73  | HH22, H_ARG_73  | 2.91    | 2.05    | 3.20                   |
| 3THM.PDB | OD1, H_ASP_120 | NE, H_ARG_104  | HE, H_ARG_104   | 2.94    | 2.10    | 9.96                   |
| 3THM.PDB | OD2, H_ASP_120 | NH2, H_ARG_104 | HH21, H_ARG_104 | 2.75    | 2.00    | 25.31                  |
| 3THM.PDB | OD2, H_ASP_110 | OG1, H_THR_112 | HG1, H_THR_112  | 2.76    | 1.95    | 7.38                   |
| 3THM.PDB | OD1, H_ASP_109 | NE2, H_GLN_115 | HE21, H_GLN_115 | 2.80    | 1.96    | 11.40                  |
| 3THM.PDB | OG, L_SER_183  | NZ, H_LYS_162  | HZ1, H_LYS_162  | 2.77    | 1.97    | 21.34                  |
| 3THM.PDB | OG1, L_THR_135 | NZ, H_LYS_162  | HZ2, H_LYS_162  | 2.85    | 2.02    | 17.75                  |
| 3THM.PDB | OG, H_SER_199  | NE1, H_TRP_173 | HE1, H_TRP_173  | 3.00    | 2.15    | 7.78                   |
| 3THM.PDB | OD1, H_ASP_227 | ND2, H_ASN_216 | HD22, H_ASN_216 | 2.86    | 2.03    | 14.19                  |
| 3THM.PDB | OG, H_SER_222  | ND1, H_HIS_219 | HD1, H_HIS_219  | 2.82    | 2.08    | 24.90                  |
| 3THM.PDB | OD2, F_ASP_56  | ND1, F_HIS_38  | HD1, F_HIS_38   | 2.77    | 1.98    | 19.59                  |
| 3THM.PDB | OH, H_TYR_35   | ND1, F_HIS_44  | HD1, F_HIS_44   | 2.69    | 1.83    | 5.98                   |
| 3THM.PDB | OG, H_SER_63   | NE2, F_HIS_44  | HE2, F_HIS_44   | 2.83    | 2.07    | 23.36                  |

Table 1745: 3THM-specific side chain hydrogen bonding analysis. In this table, a PDB file is specified with a four-letter PDB ID, except that the names of the PDB files corresponding to the single NMR structural model split from the NMR ensemble is specified with a four-letter PDB ID in addition to a hyphen followed by the single NMR structural model numeric ID, the residue naming scheme is **Chain ID\_residue name\_residue number**,  $\angle ADH$  represents the angle formed by acceptor (A), donor (D) and hydrogen (H) ( $\angle ADH$ ).

| PDB      | Acceptor (A)   | Donor (D)      | Hydrogen (H)    | D-A (Å) | H-A (Å) | $\angle ADH(^{\circ})$ |
|----------|----------------|----------------|-----------------|---------|---------|------------------------|
| 3TJE.PDB | OD1, L_ASP_93  | ND2, L_ASN_28  | HD21, L_ASN_28  | 2.73    | 1.89    | 10.95                  |
| 3TJE.PDB | OD1, L_ASP_94  | NH1, L_ARG_31  | HH11, L_ARG_31  | 2.81    | 2.04    | 22.49                  |
| 3TJE.PDB | OH, L_TYR_87   | NE2, L_GLN_38  | HE21, L_GLN_38  | 2.91    | 2.10    | 17.00                  |
| 3TJE.PDB | OD2, L_ASP_83  | NH1, L_ARG_62  | HH12, L_ARG_62  | 2.77    | 1.98    | 19.25                  |
| 3TJE.PDB | OD1, L_ASP_83  | NH2, L_ARG_62  | HH22, L_ARG_62  | 2.87    | 2.01    | 3.19                   |
| 3TJE.PDB | OD2, L_ASP_78  | NH1, L_ARG_77  | HH11, L_ARG_77  | 2.74    | 1.93    | 16.91                  |
| 3TJE.PDB | OE2, L_GLU_128 | OG1, L_THR_135 | HG1, L_THR_135  | 2.52    | 1.76    | 18.95                  |
| 3TJE.PDB | OG, L_SER_180  | NE1, L_TRP_152 | HE1, L_TRP_152  | 2.95    | 2.10    | 8.91                   |
| 3TJE.PDB | OD1, L_ASP_142 | NE2, L_GLN_171 | HE21, L_GLN_171 | 2.80    | 1.98    | 15.09                  |
| 3TJE.PDB | OG1, L_THR_205 | OG1, L_THR_200 | HG1, L_THR_200  | 2.75    | 1.97    | 15.90                  |
| 3TJE.PDB | OE1, H_GLU_48  | NE, H_ARG_40   | HE, H_ARG_40    | 2.72    | 1.90    | 14.58                  |
| 3TJE.PDB | OD1, H_ASP_96  | NH1, H_ARG_40  | HH12, H_ARG_40  | 2.84    | 2.01    | 12.94                  |
| 3TJE.PDB | OE1, L_GLN_39  | NE2, H_GLN_41  | HE21, H_GLN_41  | 2.98    | 2.15    | 10.85                  |
| 3TJE.PDB | OD2, H_ASP_96  | NH1, H_ARG_73  | HH12, H_ARG_73  | 2.84    | 2.09    | 24.31                  |
| 3TJE.PDB | OD1, H_ASP_96  | NH2, H_ARG_73  | HH22, H_ARG_73  | 2.94    | 2.09    | 3.77                   |
| 3TJE.PDB | OD2, H_ASP_79  | OG, H_SER_81   | HG, H_SER_81    | 2.85    | 2.15    | 27.35                  |
| 3TJE.PDB | OD1, H_ASP_120 | NE, H_ARG_104  | HE, H_ARG_104   | 2.87    | 2.06    | 15.55                  |
| 3TJE.PDB | OD2, H_ASP_120 | NH2, H_ARG_104 | HH21, H_ARG_104 | 2.68    | 1.96    | 27.63                  |
| 3TJE.PDB | OG, H_SER_199  | NE1, H_TRP_173 | HE1, H_TRP_173  | 2.95    | 2.10    | 8.21                   |
| 3TJE.PDB | OD1, H_ASP_163 | NE2, H_GLN_190 | HE21, H_GLN_190 | 2.74    | 1.93    | 16.43                  |
| 3TJE.PDB | OD1, H_ASP_227 | ND2, H_ASN_216 | HD22, H_ASN_216 | 2.79    | 1.98    | 17.28                  |
| 3TJE.PDB | OG, H_SER_222  | OG1, H_THR_224 | HG1, H_THR_224  | 2.65    | 1.92    | 22.20                  |
| 3TJE.PDB | OH, H_TYR_35   | ND1, F_HIS_44  | HD1, F_HIS_44   | 2.56    | 1.70    | 3.69                   |
| 3TJE.PDB | OE2, F_GLU_98  | NE, F_ARG_112  | HE, F_ARG_112   | 2.97    | 2.20    | 22.98                  |

Table 1746: 3TJE-specific side chain hydrogen bonding analysis. In this table, a PDB file is specified with a four-letter PDB ID, except that the names of the PDB files corresponding to the single NMR structural model split from the NMR ensemble is specified with a four-letter PDB ID in addition to a hyphen followed by the single NMR structural model numeric ID, the residue naming scheme is **Chain ID\_residue name\_residue number**,  $\angle ADH$  represents the angle formed by acceptor (A), donor (D) and hydrogen (H) ( $\angle ADH$ ).



| PDB      | Acceptor (A)   | Donor (D)      | Hydrogen (H)    | D-A (Å) | H-A (Å) | $\angle ADH(^{\circ})$ |
|----------|----------------|----------------|-----------------|---------|---------|------------------------|
| 3U2S.PDB | OE1, H_GLU_95  | NE2, H_HIS_35  | HE2, H_HIS_35   | 2.64    | 1.80    | 11.05                  |
| 3U2S.PDB | OE2, H_GLU_46  | NE, H_ARG_38   | HE, H_ARG_38    | 2.80    | 2.01    | 18.34                  |
| 3U2S.PDB | OD1, H_ASP_86  | NH1, H_ARG_38  | HH12, H_ARG_38  | 2.84    | 2.00    | 11.28                  |
| 3U2S.PDB | OE2, H_GLU_46  | NH2, H_ARG_38  | HH21, H_ARG_38  | 2.92    | 2.18    | 25.81                  |
| 3U2S.PDB | OE1, L_GLN_38  | NE2, H_GLN_39  | HE22, H_GLN_39  | 2.89    | 2.04    | 8.55                   |
| 3U2S.PDB | OE1, H_GLU_46  | OG, H_SER_62   | HG, H_SER_62    | 2.75    | 1.94    | 7.42                   |
| 3U2S.PDB | OD2, H_ASP_86  | NH1, H_ARG_66  | HH12, H_ARG_66  | 2.53    | 1.74    | 19.65                  |
| 3U2S.PDB | OD1, H_ASP_86  | NH2, H_ARG_66  | HH22, H_ARG_66  | 2.93    | 2.08    | 7.53                   |
| 3U2S.PDB | OD1, H_ASN_73  | NE, H_ARG_71   | HE, H_ARG_71    | 2.77    | 1.98    | 19.66                  |
| 3U2S.PDB | OD1, H_ASP_101 | NE, H_ARG_94   | HE, H_ARG_94    | 2.95    | 2.09    | 2.87                   |
| 3U2S.PDB | OD2, H_ASP_101 | NH2, H_ARG_94  | HH21, H_ARG_94  | 2.85    | 2.03    | 14.60                  |
| 3U2S.PDB | OG, H_SER_180  | NE1, H_TRP_154 | HE1, H_TRP_154  | 2.93    | 2.08    | 7.46                   |
| 3U2S.PDB | OG, L_SER_165  | NE2, H_HIS_164 | HE2, H_HIS_164  | 2.93    | 2.12    | 16.97                  |
| 3U2S.PDB | OD2, H_ASP_144 | NE2, H_GLN_171 | HE22, H_GLN_171 | 2.87    | 2.09    | 20.57                  |
| 3U2S.PDB | OD2, H_ASP_208 | ND2, H_ASN_197 | HD21, H_ASN_197 | 2.76    | 1.92    | 10.02                  |
| 3U2S.PDB | OG, H_SER_203  | ND1, H_HIS_200 | HD1, H_HIS_200  | 2.77    | 1.92    | 6.39                   |
| 3U2S.PDB | OG1, L_THR_74  | OG1, L_THR_20  | HG1, L_THR_20   | 2.83    | 2.11    | 23.78                  |
| 3U2S.PDB | OD2, L_ASP_27B | OG1, L_THR_26  | HG1, L_THR_26   | 2.86    | 2.11    | 19.40                  |
| 3U2S.PDB | OH, L_TYR_86   | NE2, L_GLN_37  | HE21, L_GLN_37  | 2.82    | 1.97    | 2.95                   |
| 3U2S.PDB | OE1, H_GLN_39  | NE2, L_GLN_38  | HE22, L_GLN_38  | 2.91    | 2.09    | 13.75                  |
| 3U2S.PDB | OD2, L_ASP_50  | NZ, L_LYS_53   | HZ2, L_LYS_53   | 2.84    | 1.96    | 4.63                   |
| 3U2S.PDB | OD2, C_ASP_167 | ND2, L_ASN_60  | HD22, L_ASN_60  | 2.90    | 2.14    | 22.76                  |
| 3U2S.PDB | OD2, L_ASP_82  | NH1, L_ARG_61  | HH12, L_ARG_61  | 2.86    | 2.09    | 21.77                  |
| 3U2S.PDB | OD1, L_ASP_82  | NH2, L_ARG_61  | HH22, L_ARG_61  | 2.97    | 2.11    | 4.14                   |
| 3U2S.PDB | OE2, L_GLU_31  | NZ, L_LYS_66   | HZ1, L_LYS_66   | 2.99    | 2.15    | 15.69                  |
| 3U2S.PDB | OD1, H_ASP_61  | NH2, L_ARG_95A | HH22, L_ARG_95A | 2.34    | 1.58    | 22.53                  |
| 3U2S.PDB | OE2, H_GLU_95  | NH2, L_ARG_96  | HH21, L_ARG_96  | 2.87    | 2.05    | 15.72                  |
| 3U2S.PDB | OE2, L_GLU_124 | OG1, L_THR_131 | HG1, L_THR_131  | 2.54    | 1.83    | 25.31                  |
| 3U2S.PDB | OG, L_SER_176  | NE1, L_TRP_148 | HE1, L_TRP_148  | 2.93    | 2.09    | 11.15                  |
| 3U2S.PDB | OD1, L_ASP_138 | NE2, L_GLN_167 | HE22, L_GLN_167 | 2.82    | 2.00    | 15.99                  |
| 3U2S.PDB | OD1, L_ASP_138 | ND2, L_ASN_169 | HD22, L_ASN_169 | 2.92    | 2.10    | 15.30                  |
| 3U2S.PDB | OG1, L_THR_201 | OG1, L_THR_196 | HG1, L_THR_196  | 2.99    | 2.20    | 12.41                  |
| 3U2S.PDB | OH, H_TYR_100K | ND2, G_ASN_173 | HD21, G_ASN_173 | 2.97    | 2.13    | 8.87                   |
| 3U2S.PDB | OE1, A_GLN_81  | NH1, A_ARG_19  | HH11, A_ARG_19  | 2.87    | 2.10    | 22.03                  |
| 3U2S.PDB | OE1, A_GLU_95  | NE2, A_HIS_35  | HE2, A_HIS_35   | 2.70    | 1.86    | 8.94                   |
| 3U2S.PDB | OE2, A_GLU_46  | NE, A_ARG_38   | HE, A_ARG_38    | 2.74    | 1.98    | 23.65                  |
| 3U2S.PDB | OH, A_TYR_90   | NH1, A_ARG_38  | HH11, A_ARG_38  | 2.88    | 2.07    | 17.44                  |
| 3U2S.PDB | OD1, A_ASP_86  | NH1, A_ARG_38  | HH12, A_ARG_38  | 2.89    | 2.04    | 8.28                   |
| 3U2S.PDB | OE2, A_GLU_46  | NH2, A_ARG_38  | HH21, A_ARG_38  | 2.90    | 2.18    | 27.83                  |
| 3U2S.PDB | OE1, B_GLN_38  | NE2, A_GLN_39  | HE22, A_GLN_39  | 2.92    | 2.07    | 7.34                   |
| 3U2S.PDB | OD2, A_ASP_86  | NH1, A_ARG_66  | HH12, A_ARG_66  | 2.48    | 1.66    | 13.42                  |
| 3U2S.PDB | OD1, A_ASN_73  | NE, A_ARG_71   | HE, A_ARG_71    | 2.81    | 2.03    | 20.92                  |
| 3U2S.PDB | OE1, A_GLU_85  | NH1, A_ARG_83  | HH11, A_ARG_83  | 2.91    | 2.14    | 21.39                  |
| 3U2S.PDB | OD1, A_ASP_101 | NE, A_ARG_94   | HE, A_ARG_94    | 2.84    | 1.98    | 4.74                   |
| 3U2S.PDB | OD2, A_ASP_101 | NH2, A_ARG_94  | HH21, A_ARG_94  | 2.90    | 2.12    | 20.79                  |
| 3U2S.PDB | OG1, B_THR_131 | NZ, A_LYS_143  | HZ2, A_LYS_143  | 2.41    | 1.67    | 27.35                  |
| 3U2S.PDB | OD2, A_ASP_144 | NE2, A_GLN_171 | HE22, A_GLN_171 | 2.82    | 1.98    | 10.06                  |
| 3U2S.PDB | OG, A_SER_203  | ND1, A_HIS_200 | HD1, A_HIS_200  | 2.63    | 1.78    | 5.16                   |
| 3U2S.PDB | OG1, B_THR_74  | OG1, B_THR_20  | HG1, B_THR_20   | 2.88    | 2.16    | 24.36                  |
| 3U2S.PDB | OD2, B_ASP_27B | OG1, B_THR_26  | HG1, B_THR_26   | 2.89    | 2.14    | 20.81                  |
| 3U2S.PDB | OH, B_TYR_86   | NE2, B_GLN_37  | HE21, B_GLN_37  | 2.88    | 2.02    | 1.18                   |
| 3U2S.PDB | OE1, A_GLN_39  | NE2, B_GLN_38  | HE22, B_GLN_38  | 2.92    | 2.08    | 10.61                  |
| 3U2S.PDB | OD2, B_ASP_50  | NZ, B_LYS_53   | HZ2, B_LYS_53   | 2.75    | 1.88    | 8.80                   |
| 3U2S.PDB | OD2, B_ASP_82  | NH1, B_ARG_61  | HH12, B_ARG_61  | 2.78    | 1.98    | 19.10                  |
| 3U2S.PDB | OD1, B_ASP_82  | NH2, B_ARG_61  | HH22, B_ARG_61  | 2.93    | 2.07    | 0.82                   |
| 3U2S.PDB | OD1, A_ASP_61  | NH1, B_ARG_95A | HH12, B_ARG_95A | 2.63    | 1.91    | 26.97                  |
| 3U2S.PDB | OE2, A_GLU_95  | NH2, B_ARG_96  | HH21, B_ARG_96  | 2.98    | 2.16    | 13.77                  |

|          |                |                |                 |      |      |       |
|----------|----------------|----------------|-----------------|------|------|-------|
| 3U2S.PDB | OG, B_SER_176  | NE1, B_TRP_148 | HE1, B_TRP_148  | 2.87 | 2.03 | 9.65  |
| 3U2S.PDB | OD1, B_ASN_169 | NE2, B_GLN_167 | HE21, B_GLN_167 | 2.93 | 2.16 | 22.14 |
| 3U2S.PDB | OD1, B_ASP_138 | NE2, B_GLN_167 | HE22, B_GLN_167 | 2.75 | 1.90 | 7.18  |
| 3U2S.PDB | OG1, B_THR_201 | OG1, B_THR_196 | HG1, B_THR_196  | 2.79 | 1.99 | 11.66 |

Table 1747: 3U2S-specific side chain hydrogen bonding analysis. In this table, a PDB file is specified with a four-letter PDB ID, except that the names of the PDB files corresponding to the single NMR structural model split from the NMR ensemble is specified with a four-letter PDB ID in addition to a hyphen followed by the single NMR structural model numeric ID, the residue naming scheme is **Chain ID\_residue name\_residue number**,  $\angle ADH$  represents the angle formed by acceptor (A), donor (D) and hydrogen (H) ( $\angle ADH$ ).

| PDB      | Acceptor (A)   | Donor (D)      | Hydrogen (H)    | D-A (Å) | H-A (Å) | $\angle ADH(^{\circ})$ |
|----------|----------------|----------------|-----------------|---------|---------|------------------------|
| 3UYR.PDB | OE1, H_GLU_46  | NE, H_ARG_38   | HE, H_ARG_38    | 2.84    | 2.03    | 16.92                  |
| 3UYR.PDB | OD1, H_ASN_50  | NE1, H_TRP_47  | HE1, H_TRP_47   | 2.95    | 2.18    | 22.72                  |
| 3UYR.PDB | OD1, H_ASP_105 | NE, H_ARG_98   | HE, H_ARG_98    | 2.98    | 2.16    | 14.38                  |
| 3UYR.PDB | OD2, H_ASP_105 | NH2, H_ARG_98  | HH21, H_ARG_98  | 2.92    | 2.07    | 8.84                   |
| 3UYR.PDB | OG, H_SER_183  | NE1, H_TRP_158 | HE1, H_TRP_158  | 2.93    | 2.08    | 7.42                   |
| 3UYR.PDB | OG, H_SER_206  | ND1, H_HIS_203 | HD1, H_HIS_203  | 2.81    | 2.06    | 24.47                  |
| 3UYR.PDB | OE2, L_GLU_127 | NZ, H_LYS_212  | HZ3, H_LYS_212  | 2.87    | 2.08    | 23.12                  |
| 3UYR.PDB | OD2, L_ASP_87  | NH1, L_ARG_66  | HH12, L_ARG_66  | 2.92    | 2.12    | 17.99                  |
| 3UYR.PDB | OG, L_SER_135  | NE2, L_GLN_128 | HE22, L_GLN_128 | 2.97    | 2.12    | 5.23                   |
| 3UYR.PDB | OD1, L_ASP_174 | OG1, L_THR_176 | HG1, L_THR_176  | 2.78    | 1.97    | 7.90                   |
| 3UYR.PDB | OD2, L_ASP_155 | ND1, L_HIS_193 | HD1, L_HIS_193  | 2.93    | 2.16    | 21.52                  |
| 3UYR.PDB | ND2, L_ASN_216 | ND2, L_ASN_194 | HD22, L_ASN_194 | 2.90    | 2.18    | 28.48                  |
| 3UYR.PDB | OG1, L_THR_204 | ND1, L_HIS_202 | HD1, L_HIS_202  | 2.78    | 1.93    | 6.06                   |
| 3UYR.PDB | OD1, H_ASN_101 | NE2, P_GLN_48  | HE22, P_GLN_48  | 2.57    | 1.87    | 29.89                  |

Table 1748: 3UYR-specific side chain hydrogen bonding analysis. In this table, a PDB file is specified with a four-letter PDB ID, except that the names of the PDB files corresponding to the single NMR structural model split from the NMR ensemble is specified with a four-letter PDB ID in addition to a hyphen followed by the single NMR structural model numeric ID, the residue naming scheme is **Chain ID\_residue name\_residue number**,  $\angle ADH$  represents the angle formed by acceptor (A), donor (D) and hydrogen (H) ( $\angle ADH$ ).

| PDB      | Acceptor (A)   | Donor (D)      | Hydrogen (H)    | D-A (Å) | H-A (Å) | $\angle ADH(^{\circ})$ |
|----------|----------------|----------------|-----------------|---------|---------|------------------------|
| 3X0E.PDB | OD1, A_ASP_122 | NE2, A_GLN_118 | HE21, A_GLN_118 | 2.93    | 2.22    | 29.07                  |
| 3X0E.PDB | OD2, A_ASP_195 | NZ, A_LYS_124  | HZ1, A_LYS_124  | 3.00    | 2.19    | 21.32                  |
| 3X0E.PDB | OD2, A_ASP_128 | OG1, A_THR_161 | HG1, A_THR_161  | 2.92    | 2.13    | 12.66                  |
| 3X0E.PDB | OD1, A_ASP_155 | NZ, A_LYS_187  | HZ1, A_LYS_187  | 2.84    | 2.07    | 26.10                  |
| 3X0E.PDB | OD1, B_ASP_195 | NZ, B_LYS_124  | HZ1, B_LYS_124  | 2.75    | 2.02    | 29.74                  |
| 3X0E.PDB | OG, B_SER_159  | OG1, B_THR_161 | HG1, B_THR_161  | 2.79    | 1.98    | 7.89                   |
| 3X0E.PDB | OD1, B_ASP_128 | NE2, B_HIS_191 | HE2, B_HIS_191  | 2.68    | 1.83    | 6.07                   |

Table 1749: 3X0E-specific side chain hydrogen bonding analysis. In this table, a PDB file is specified with a four-letter PDB ID, except that the names of the PDB files corresponding to the single NMR structural model split from the NMR ensemble is specified with a four-letter PDB ID in addition to a hyphen followed by the single NMR structural model numeric ID, the residue naming scheme is **Chain ID\_residue name\_residue number**,  $\angle ADH$  represents the angle formed by acceptor (A), donor (D) and hydrogen (H) ( $\angle ADH$ ).

| PDB      | Acceptor (A)   | Donor (D)      | Hydrogen (H)   | D-A (Å) | H-A (Å) | $\angle ADH(^{\circ})$ |
|----------|----------------|----------------|----------------|---------|---------|------------------------|
| 3X0F.PDB | OD1, A_ASP_195 | NZ, A_LYS_124  | HZ3, A_LYS_124 | 2.91    | 2.03    | 6.30                   |
| 3X0F.PDB | OG, A_SER_159  | OG1, A_THR_163 | HG1, A_THR_163 | 2.77    | 1.96    | 7.35                   |
| 3X0F.PDB | OD1, A_ASP_128 | NE2, A_HIS_191 | HE2, A_HIS_191 | 2.65    | 1.83    | 14.50                  |
| 3X0F.PDB | OH, B_TYR_127  | NE2, B_HIS_151 | HE2, B_HIS_151 | 2.81    | 2.02    | 19.67                  |
| 3X0F.PDB | OG1, B_THR_163 | OG, B_SER_159  | HG, B_SER_159  | 2.96    | 2.16    | 10.94                  |
| 3X0F.PDB | OD1, B_ASP_128 | NE2, B_HIS_191 | HE2, B_HIS_191 | 2.69    | 1.83    | 1.74                   |

Table 1750: 3X0F-specific side chain hydrogen bonding analysis. In this table, a PDB file is specified with a four-letter PDB ID, except that the names of the PDB files corresponding to the single NMR structural model split from the NMR ensemble is specified with a four-letter PDB ID in addition to a hyphen followed by the single NMR structural model numeric ID, the residue naming scheme is **Chain ID\_residue name\_residue number**,  $\angle ADH$  represents the angle formed by acceptor (A), donor (D) and hydrogen (H) ( $\angle ADH$ ).

| PDB      | Acceptor (A)   | Donor (D)      | Hydrogen (H)    | D-A (Å) | H-A (Å) | $\angle ADH(^{\circ})$ |
|----------|----------------|----------------|-----------------|---------|---------|------------------------|
| 4F33.PDB | OE1, B_GLN_39  | NE2, A_GLN_38  | HE22, A_GLN_38  | 2.96    | 2.13    | 12.75                  |
| 4F33.PDB | OD2, A_ASP_82  | NE, A_ARG_61   | HE, A_ARG_61    | 2.81    | 2.09    | 28.09                  |
| 4F33.PDB | OD1, A_ASP_82  | NH2, A_ARG_61  | HH21, A_ARG_61  | 2.71    | 1.85    | 4.82                   |
| 4F33.PDB | OG1, A_THR_21  | OG1, A_THR_74  | HG1, A_THR_74   | 2.73    | 1.99    | 21.82                  |
| 4F33.PDB | OG1, A_THR_97  | NE2, A_GLN_90  | HE21, A_GLN_90  | 2.97    | 2.15    | 14.62                  |
| 4F33.PDB | OG, A_SER_13   | NZ, A_LYS_107  | HZ3, A_LYS_107  | 2.94    | 2.07    | 9.78                   |
| 4F33.PDB | OG, A_SER_131  | NE2, A_GLN_124 | HE22, A_GLN_124 | 2.81    | 1.96    | 5.54                   |
| 4F33.PDB | OG, A_SER_177  | NE1, A_TRP_148 | HE1, A_TRP_148  | 2.91    | 2.09    | 14.52                  |
| 4F33.PDB | OE1, A_GLU_195 | NZ, A_LYS_149  | HZ2, A_LYS_149  | 2.59    | 1.85    | 28.21                  |
| 4F33.PDB | OE1, A_GLN_155 | ND2, A_ASN_158 | HD22, A_ASN_158 | 2.89    | 2.06    | 12.00                  |
| 4F33.PDB | OD1, A_ASP_170 | OG1, A_THR_172 | HG1, A_THR_172  | 2.68    | 1.86    | 4.02                   |
| 4F33.PDB | OE1, A_GLN_38  | NE2, B_GLN_39  | HE22, B_GLN_39  | 2.82    | 1.97    | 5.31                   |
| 4F33.PDB | OE2, B_GLU_46  | NZ, B_LYS_63   | HZ3, B_LYS_63   | 2.70    | 1.89    | 19.35                  |
| 4F33.PDB | OD2, B_ASP_90  | NZ, B_LYS_67   | HZ2, B_LYS_67   | 2.73    | 1.86    | 7.48                   |
| 4F33.PDB | OD2, B_ASP_107 | NH2, B_ARG_98  | HH21, B_ARG_98  | 2.74    | 1.88    | 6.50                   |
| 4F33.PDB | OD1, B_ASP_102 | NE, B_ARG_104  | HE, B_ARG_104   | 2.87    | 2.03    | 8.81                   |
| 4F33.PDB | OD2, B_ASP_107 | NH1, B_ARG_104 | HH11, B_ARG_104 | 2.78    | 1.96    | 13.74                  |
| 4F33.PDB | OD2, B_ASP_102 | NH2, B_ARG_104 | HH21, B_ARG_104 | 2.87    | 2.08    | 19.19                  |
| 4F33.PDB | OG, B_SER_186  | NE1, B_TRP_160 | HE1, B_TRP_160  | 2.97    | 2.13    | 10.43                  |
| 4F33.PDB | OD1, B_ASP_150 | NE2, B_GLN_177 | HE22, B_GLN_177 | 2.84    | 2.07    | 21.15                  |
| 4F33.PDB | OD1, B_ASP_214 | ND2, B_ASN_203 | HD21, B_ASN_203 | 2.97    | 2.12    | 8.15                   |
| 4F33.PDB | OG, B_SER_209  | ND1, B_HIS_206 | HD1, B_HIS_206  | 2.61    | 1.78    | 12.57                  |
| 4F33.PDB | OE1, A_GLU_123 | NZ, B_LYS_215  | HZ1, B_LYS_215  | 2.68    | 1.82    | 12.44                  |
| 4F33.PDB | OG1, H_THR_211 | NZ, B_LYS_215  | HZ2, B_LYS_215  | 2.83    | 1.95    | 7.37                   |
| 4F33.PDB | OD2, C_ASP_82  | NE, C_ARG_61   | HE, C_ARG_61    | 2.88    | 2.06    | 14.32                  |
| 4F33.PDB | OD1, C_ASP_82  | NH2, C_ARG_61  | HH21, C_ARG_61  | 2.91    | 2.08    | 14.25                  |
| 4F33.PDB | OG1, C_THR_21  | OG1, C_THR_74  | HG1, C_THR_74   | 2.68    | 1.93    | 19.90                  |
| 4F33.PDB | OG, C_SER_13   | OG, C_LYS_107  | HZ3, C_LYS_107  | 2.78    | 1.89    | 2.73                   |
| 4F33.PDB | OG, C_SER_131  | NE2, C_GLN_124 | HE22, C_GLN_124 | 2.83    | 1.97    | 4.97                   |
| 4F33.PDB | OG, C_SER_177  | NE1, C_TRP_148 | HE1, C_TRP_148  | 2.93    | 2.10    | 14.22                  |
| 4F33.PDB | OE1, C_GLU_195 | NZ, C_LYS_149  | HZ2, C_LYS_149  | 2.67    | 1.88    | 22.11                  |
| 4F33.PDB | OE1, C_GLN_155 | ND2, C_ASN_158 | HD22, C_ASN_158 | 2.91    | 2.09    | 15.33                  |
| 4F33.PDB | OD1, C_ASP_170 | OG1, C_THR_172 | HG1, C_THR_172  | 2.72    | 1.91    | 5.07                   |
| 4F33.PDB | OE1, C_GLN_38  | NE2, D_GLN_39  | HE22, D_GLN_39  | 2.89    | 2.03    | 5.23                   |
| 4F33.PDB | OE2, D_GLU_46  | NZ, D_LYS_63   | HZ3, D_LYS_63   | 2.60    | 1.76    | 15.82                  |
| 4F33.PDB | OD2, D_ASP_90  | NZ, D_LYS_67   | HZ2, D_LYS_67   | 2.76    | 2.03    | 29.11                  |
| 4F33.PDB | OD2, D_ASP_107 | NH2, D_ARG_98  | HH21, D_ARG_98  | 2.74    | 1.89    | 7.29                   |
| 4F33.PDB | OD1, D_ASP_102 | NE, D_ARG_104  | HE, D_ARG_104   | 2.89    | 2.05    | 10.59                  |
| 4F33.PDB | OD2, D_ASP_107 | NH1, D_ARG_104 | HH11, D_ARG_104 | 2.83    | 2.01    | 15.77                  |
| 4F33.PDB | OD2, D_ASP_102 | NH2, D_ARG_104 | HH21, D_ARG_104 | 2.91    | 2.10    | 15.53                  |
| 4F33.PDB | OG, D_SER_186  | NE1, D_TRP_160 | HE1, D_TRP_160  | 3.00    | 2.15    | 9.78                   |
| 4F33.PDB | OD1, D_ASP_150 | NE2, D_GLN_177 | HE22, D_GLN_177 | 2.86    | 2.09    | 21.57                  |
| 4F33.PDB | OE1, C_GLU_123 | NZ, D_LYS_215  | HZ1, D_LYS_215  | 2.79    | 1.99    | 22.47                  |
| 4F33.PDB | OG1, F_THR_211 | NZ, D_LYS_215  | HZ2, D_LYS_215  | 2.86    | 1.99    | 10.67                  |
| 4F33.PDB | OG1, E_THR_74  | OG1, E_THR_21  | HG1, E_THR_21   | 2.80    | 2.03    | 17.05                  |
| 4F33.PDB | OD2, E_ASP_82  | NE, E_ARG_61   | HE, E_ARG_61    | 2.93    | 2.08    | 6.42                   |
| 4F33.PDB | OD1, E_ASP_82  | NH2, E_ARG_61  | HH21, E_ARG_61  | 2.82    | 1.98    | 9.42                   |
| 4F33.PDB | OG1, E_THR_97  | NE2, E_GLN_90  | HE21, E_GLN_90  | 2.99    | 2.17    | 14.98                  |
| 4F33.PDB | OG, E_SER_131  | NE2, E_GLN_124 | HE22, E_GLN_124 | 2.81    | 1.95    | 4.17                   |
| 4F33.PDB | OG, E_SER_177  | NE1, E_TRP_148 | HE1, E_TRP_148  | 2.88    | 2.05    | 13.86                  |
| 4F33.PDB | OE1, E_GLU_195 | NZ, E_LYS_149  | HZ2, E_LYS_149  | 2.77    | 1.97    | 22.37                  |
| 4F33.PDB | OE1, E_GLN_155 | ND2, E_ASN_158 | HD22, E_ASN_158 | 2.91    | 2.08    | 12.67                  |
| 4F33.PDB | OD1, E_ASP_170 | OG1, E_THR_172 | HG1, E_THR_172  | 2.66    | 1.85    | 7.41                   |
| 4F33.PDB | OE1, E_GLN_38  | NE2, F_GLN_39  | HE22, F_GLN_39  | 2.92    | 2.06    | 5.53                   |
| 4F33.PDB | OE2, F_GLU_46  | NZ, F_LYS_63   | HZ3, F_LYS_63   | 2.68    | 1.79    | 3.79                   |
| 4F33.PDB | OD2, F_ASP_90  | NZ, F_LYS_67   | HZ2, F_LYS_67   | 2.98    | 2.09    | 4.59                   |
| 4F33.PDB | OD1, F_ASP_107 | NE, F_ARG_98   | HE, F_ARG_98    | 2.99    | 2.13    | 4.74                   |

|          |                |                |                 |      |      |       |
|----------|----------------|----------------|-----------------|------|------|-------|
| 4F33.PDB | OD2, F_ASP_107 | NH2, F_ARG_98  | HH21, F_ARG_98  | 2.77 | 1.91 | 5.42  |
| 4F33.PDB | OD1, F_ASP_102 | NE, F_ARG_104  | HE, F_ARG_104   | 2.84 | 1.99 | 7.33  |
| 4F33.PDB | OD2, F_ASP_107 | NH1, F_ARG_104 | HH11, F_ARG_104 | 2.84 | 2.02 | 14.35 |
| 4F33.PDB | OD2, F_ASP_102 | NH2, F_ARG_104 | HH21, F_ARG_104 | 2.90 | 2.10 | 17.22 |
| 4F33.PDB | OG, F_SER_186  | NE1, F_TRP_160 | HE1, F_TRP_160  | 3.00 | 2.15 | 9.04  |
| 4F33.PDB | OD1, F_ASP_150 | NE2, F_GLN_177 | HE22, F_GLN_177 | 2.82 | 2.02 | 17.76 |
| 4F33.PDB | OD1, F_ASP_214 | ND2, F_ASN_203 | HD21, F_ASN_203 | 2.95 | 2.10 | 8.40  |
| 4F33.PDB | OG, F_SER_209  | ND1, F_HIS_206 | HD1, F_HIS_206  | 2.64 | 1.82 | 13.68 |
| 4F33.PDB | OE1, E_GLU_123 | NZ, F_LYS_215  | HZ1, F_LYS_215  | 2.61 | 1.84 | 24.34 |
| 4F33.PDB | OG1, D_THR_211 | NZ, F_LYS_215  | HZ2, F_LYS_215  | 2.92 | 2.04 | 7.71  |
| 4F33.PDB | OG1, G_THR_74  | OG1, G_THR_21  | HG1, G_THR_21   | 2.73 | 1.97 | 18.47 |
| 4F33.PDB | OD1, G_ASP_82  | NH2, G_ARG_61  | HH21, G_ARG_61  | 2.73 | 1.89 | 8.68  |
| 4F33.PDB | OE2, G_GLU_81  | NH2, G_ARG_61  | HH22, G_ARG_61  | 2.96 | 2.16 | 17.92 |
| 4F33.PDB | OG, G_SER_131  | NE2, G_GLN_124 | HE22, G_GLN_124 | 2.79 | 1.93 | 5.18  |
| 4F33.PDB | OG, G_SER_177  | NE1, G_TRP_148 | HE1, G_TRP_148  | 2.87 | 2.04 | 13.06 |
| 4F33.PDB | OE1, G_GLN_155 | ND2, G_ASN_158 | HD22, G_ASN_158 | 2.92 | 2.10 | 14.66 |
| 4F33.PDB | OD1, G_ASP_170 | OG1, G_THR_172 | HG1, G_THR_172  | 2.69 | 1.89 | 8.34  |
| 4F33.PDB | OD2, G_ASP_151 | ND1, G_HIS_189 | HD1, G_HIS_189  | 2.86 | 2.09 | 22.44 |
| 4F33.PDB | OE2, H_GLU_46  | NZ, H_LYS_63   | HZ3, H_LYS_63   | 2.72 | 1.93 | 23.08 |
| 4F33.PDB | OD2, H_ASP_90  | NZ, H_LYS_67   | HZ2, H_LYS_67   | 2.82 | 1.98 | 16.29 |
| 4F33.PDB | OD1, H_ASP_107 | NE, H_ARG_98   | HE, H_ARG_98    | 2.95 | 2.15 | 18.92 |
| 4F33.PDB | OD2, H_ASP_107 | NH2, H_ARG_98  | HH21, H_ARG_98  | 2.79 | 1.95 | 8.93  |
| 4F33.PDB | OD1, H_ASP_102 | NE, H_ARG_104  | HE, H_ARG_104   | 2.85 | 2.00 | 6.80  |
| 4F33.PDB | OD2, H_ASP_107 | NH1, H_ARG_104 | HH11, H_ARG_104 | 2.85 | 2.04 | 16.23 |
| 4F33.PDB | OD2, H_ASP_102 | NH2, H_ARG_104 | HH21, H_ARG_104 | 2.93 | 2.12 | 16.50 |
| 4F33.PDB | OG, H_SER_186  | NE1, H_TRP_160 | HE1, H_TRP_160  | 2.99 | 2.15 | 10.12 |
| 4F33.PDB | OD1, H_ASP_150 | NE2, H_GLN_177 | HE22, H_GLN_177 | 2.83 | 2.04 | 19.22 |
| 4F33.PDB | OD1, H_ASP_214 | ND2, H_ASN_203 | HD21, H_ASN_203 | 2.91 | 2.05 | 5.75  |
| 4F33.PDB | OE1, G_GLU_123 | NZ, H_LYS_215  | HZ1, H_LYS_215  | 2.97 | 2.19 | 24.10 |
| 4F33.PDB | OG1, B_THR_211 | NZ, H_LYS_215  | HZ2, H_LYS_215  | 2.80 | 1.95 | 14.49 |

Table 1751: 4F33-specific side chain hydrogen bonding analysis. In this table, a PDB file is specified with a four-letter PDB ID, except that the names of the PDB files corresponding to the single NMR structural model split from the NMR ensemble is specified with a four-letter PDB ID in addition to a hyphen followed by the single NMR structural model numeric ID, the residue naming scheme is **Chain ID\_residue name\_residue number**,  $\angle ADH$  represents the angle formed by acceptor (A), donor (D) and hydrogen (H) ( $\angle ADH$ ).

| PDB      | Acceptor (A)   | Donor (D)      | Hydrogen (H)    | D-A (Å) | H-A (Å) | $\angle ADH(^{\circ})$ |
|----------|----------------|----------------|-----------------|---------|---------|------------------------|
| 4F3F.PDB | OE1, B_GLN_39  | NE2, A_GLN_38  | HE22, A_GLN_38  | 2.88    | 2.04    | 8.75                   |
| 4F3F.PDB | OD1, A_ASP_82  | NH2, A_ARG_61  | HH21, A_ARG_61  | 2.60    | 1.79    | 16.27                  |
| 4F3F.PDB | OE2, A_GLU_81  | NH2, A_ARG_61  | HH22, A_ARG_61  | 2.95    | 2.12    | 13.66                  |
| 4F3F.PDB | OG1, A_THR_21  | OG1, A_THR_74  | HG1, A_THR_74   | 2.77    | 2.04    | 22.11                  |
| 4F3F.PDB | OG, B_SER_59   | NE2, A_HIS_94  | HE2, A_HIS_94   | 2.82    | 2.03    | 19.68                  |
| 4F3F.PDB | OG, A_SER_131  | NE2, A_GLN_124 | HE22, A_GLN_124 | 2.84    | 2.05    | 19.05                  |
| 4F3F.PDB | OD1, A_ASP_170 | OG1, A_THR_172 | HG1, A_THR_172  | 2.85    | 2.05    | 10.97                  |
| 4F3F.PDB | OD1, B_ASN_35  | NE1, B_TRP_47  | HE1, B_TRP_47   | 2.99    | 2.19    | 19.59                  |
| 4F3F.PDB | OD2, B_ASP_90  | NZ, B_LYS_67   | HZ2, B_LYS_67   | 2.92    | 2.05    | 9.99                   |
| 4F3F.PDB | OD2, B_ASP_107 | NH2, B_ARG_98  | HH21, B_ARG_98  | 2.79    | 1.95    | 9.80                   |
| 4F3F.PDB | OD1, A_ASN_138 | NE2, B_HIS_170 | HE2, B_HIS_170  | 2.82    | 2.05    | 21.56                  |
| 4F3F.PDB | OD1, B_ASP_150 | NE2, B_GLN_177 | HE22, B_GLN_177 | 2.87    | 2.13    | 25.54                  |
| 4F3F.PDB | OG, B_SER_209  | ND1, B_HIS_206 | HD1, B_HIS_206  | 2.43    | 1.61    | 13.98                  |
| 4F3F.PDB | OH, B_TYR_101  | NZ, C_LYS_25   | HZ3, C_LYS_25   | 2.87    | 2.11    | 26.18                  |
| 4F3F.PDB | OH, A_TYR_32   | NE1, C_TRP_26  | HE1, C_TRP_26   | 2.97    | 2.17    | 18.16                  |
| 4F3F.PDB | OE2, C_GLU_15  | NH2, C_ARG_43  | HH21, C_ARG_43  | 2.88    | 2.04    | 9.30                   |

Table 1752: 4F3F-specific side chain hydrogen bonding analysis. In this table, a PDB file is specified with a four-letter PDB ID, except that the names of the PDB files corresponding to the single NMR structural model split from the NMR ensemble is specified with a four-letter PDB ID in addition to a hyphen followed by the single NMR structural model numeric ID, the residue naming scheme is **Chain ID\_residue name\_residue number**,  $\angle ADH$  represents the angle formed by acceptor (A), donor (D) and hydrogen (H) ( $\angle ADH$ ).



| PDB      | Acceptor (A)    | Donor (D)      | Hydrogen (H)    | D-A (Å) | H-A (Å) | $\angle ADH(^{\circ})$ |
|----------|-----------------|----------------|-----------------|---------|---------|------------------------|
| 4JAM.PDB | OE2, H_GLU_46   | NE, H_ARG_38   | HE, H_ARG_38    | 2.93    | 2.10    | 13.53                  |
| 4JAM.PDB | OH, H_TYR_90    | NH1, H_ARG_38  | HH11, H_ARG_38  | 2.92    | 2.12    | 17.99                  |
| 4JAM.PDB | OD1, H_ASP_86   | NH1, H_ARG_38  | HH12, H_ARG_38  | 2.91    | 2.07    | 10.41                  |
| 4JAM.PDB | OD1, H_ASP_86   | NH2, H_ARG_66  | HH22, H_ARG_66  | 2.96    | 2.12    | 9.52                   |
| 4JAM.PDB | OD1, H_ASP_144  | NZ, H_LYS_143  | HZ2, H_LYS_143  | 3.00    | 2.12    | 8.81                   |
| 4JAM.PDB | OG, H_SER_180   | NE1, H_TRP_154 | HE1, H_TRP_154  | 2.95    | 2.10    | 8.20                   |
| 4JAM.PDB | OG, H_SER_180   | OG1, H_THR_165 | HG1, H_THR_165  | 2.85    | 2.09    | 18.68                  |
| 4JAM.PDB | OG, H_SER_203   | ND1, H_HIS_200 | HD1, H_HIS_200  | 2.70    | 1.91    | 20.45                  |
| 4JAM.PDB | OD1, H_ASN_100B | ND2, L_ASN_32  | HD21, L_ASN_32  | 2.96    | 2.21    | 25.94                  |
| 4JAM.PDB | OH, L_TYR_86    | NE2, L_GLN_37  | HE21, L_GLN_37  | 2.92    | 2.07    | 7.82                   |
| 4JAM.PDB | OE1, L_GLU_50   | NZ, L_LYS_53   | HZ1, L_LYS_53   | 2.81    | 1.96    | 13.53                  |
| 4JAM.PDB | OD2, L_ASP_82   | NE, L_ARG_61   | HE, L_ARG_61    | 2.81    | 2.02    | 19.36                  |
| 4JAM.PDB | OD1, L_ASP_82   | NH2, L_ARG_61  | HH21, L_ARG_61  | 2.93    | 2.10    | 13.29                  |
| 4JAM.PDB | OH, L_TYR_172   | NH2, L_ARG_107 | HH22, L_ARG_107 | 2.87    | 2.14    | 27.08                  |
| 4JAM.PDB | OE1, L_GLU_198  | NZ, L_LYS_110  | HZ2, L_LYS_110  | 2.60    | 1.75    | 13.04                  |
| 4JAM.PDB | OE2, L_GLU_124  | OG1, L_THR_131 | HG1, L_THR_131  | 2.56    | 1.86    | 25.46                  |
| 4JAM.PDB | OG, L_SER_176   | NE1, L_TRP_148 | HE1, L_TRP_148  | 2.87    | 2.03    | 8.58                   |
| 4JAM.PDB | OE1, L_GLU_203  | NZ, L_LYS_149  | HZ2, L_LYS_149  | 2.76    | 1.94    | 19.38                  |
| 4JAM.PDB | OG, L_SER_192   | OG1, L_THR_205 | HG1, L_THR_205  | 2.80    | 2.01    | 12.51                  |
| 4JAM.PDB | OE1, A_GLU_75   | NE1, A_TRP_34  | HE1, A_TRP_34   | 2.65    | 1.81    | 8.69                   |
| 4JAM.PDB | OH, A_TYR_90    | NH1, A_ARG_38  | HH11, A_ARG_38  | 2.87    | 2.07    | 18.01                  |
| 4JAM.PDB | OD1, A_ASP_86   | NH1, A_ARG_38  | HH12, A_ARG_38  | 2.79    | 1.96    | 13.17                  |
| 4JAM.PDB | OD2, A_ASP_86   | NH2, A_ARG_66  | HH22, A_ARG_66  | 2.34    | 1.63    | 27.75                  |
| 4JAM.PDB | OG, A_SER_180   | NE1, A_TRP_154 | HE1, A_TRP_154  | 2.95    | 2.10    | 7.51                   |
| 4JAM.PDB | OD1, A_ASP_208  | ND2, A_ASN_197 | HD21, A_ASN_197 | 2.90    | 2.10    | 17.20                  |
| 4JAM.PDB | OG, A_SER_203   | ND1, A_HIS_200 | HD1, A_HIS_200  | 2.74    | 1.92    | 14.00                  |
| 4JAM.PDB | OE1, B_GLU_50   | NZ, B_LYS_53   | HZ1, B_LYS_53   | 2.75    | 1.92    | 17.48                  |
| 4JAM.PDB | OD2, B_ASP_82   | NE, B_ARG_61   | HE, B_ARG_61    | 2.84    | 2.00    | 9.73                   |
| 4JAM.PDB | OD1, B_ASP_82   | NH2, B_ARG_61  | HH21, B_ARG_61  | 2.90    | 2.08    | 13.97                  |
| 4JAM.PDB | OE2, B_GLU_124  | OG1, B_THR_131 | HG1, B_THR_131  | 2.53    | 1.82    | 24.30                  |
| 4JAM.PDB | OG, B_SER_176   | NE1, B_TRP_148 | HE1, B_TRP_148  | 2.84    | 1.99    | 9.50                   |
| 4JAM.PDB | OD1, B_ASP_138  | ND2, B_ASN_169 | HD22, B_ASN_169 | 2.93    | 2.14    | 18.27                  |
| 4JAM.PDB | OG, B_SER_192   | OG1, B_THR_205 | HG1, B_THR_205  | 2.64    | 1.83    | 8.66                   |

Table 1753: 4JAM-specific side chain hydrogen bonding analysis. In this table, a PDB file is specified with a four-letter PDB ID, except that the names of the PDB files corresponding to the single NMR structural model split from the NMR ensemble is specified with a four-letter PDB ID in addition to a hyphen followed by the single NMR structural model numeric ID, the residue naming scheme is **Chain ID\_residue name\_residue number**,  $\angle ADH$  represents the angle formed by acceptor (A), donor (D) and hydrogen (H) ( $\angle ADH$ ).

| PDB      | Acceptor (A)    | Donor (D)      | Hydrogen (H)   | D-A (Å) | H-A (Å) | $\angle ADH(^{\circ})$ |
|----------|-----------------|----------------|----------------|---------|---------|------------------------|
| 4JAN.PDB | OD2, G_ASP_457  | NE, G_ARG_469  | HE, G_ARG_469  | 2.84    | 2.10    | 25.29                  |
| 4JAN.PDB | OE1, H_GLU_46   | NE, H_ARG_38   | HE, H_ARG_38   | 2.76    | 1.94    | 14.56                  |
| 4JAN.PDB | OG, H_SER_180   | NE1, H_TRP_154 | HE1, H_TRP_154 | 2.82    | 2.02    | 18.56                  |
| 4JAN.PDB | OD2, B_ASP_92   | OG, H_SER_156  | HG, H_SER_156  | 2.50    | 1.78    | 23.90                  |
| 4JAN.PDB | OG, H_SER_203   | ND1, H_HIS_200 | HD1, H_HIS_200 | 2.81    | 1.96    | 7.87                   |
| 4JAN.PDB | OD1, H_ASN_199  | NZ, H_LYS_201  | HZ2, H_LYS_201 | 2.90    | 2.05    | 14.58                  |
| 4JAN.PDB | OE1, L_GLU_123  | NZ, H_LYS_209  | HZ1, H_LYS_209 | 2.89    | 2.13    | 26.71                  |
| 4JAN.PDB | OG1, L_THR_102  | NE2, L_GLN_6   | HE21, L_GLN_6  | 2.82    | 2.05    | 22.18                  |
| 4JAN.PDB | OD1, H_ASN_100B | ND2, L_ASN_32  | HD21, L_ASN_32 | 2.76    | 1.91    | 6.44                   |
| 4JAN.PDB | OH, L_TYR_86    | NE2, L_GLN_37  | HE21, L_GLN_37 | 2.95    | 2.09    | 6.42                   |
| 4JAN.PDB | OG, L_SER_176   | NE1, L_TRP_148 | HE1, L_TRP_148 | 2.88    | 2.04    | 9.05                   |
| 4JAN.PDB | OG, A_SER_180   | NE1, A_TRP_154 | HE1, A_TRP_154 | 2.82    | 2.05    | 22.21                  |
| 4JAN.PDB | OE2, B_GLU_124  | OG1, B_THR_131 | HG1, B_THR_131 | 2.64    | 1.97    | 29.01                  |
| 4JAN.PDB | OG, B_SER_176   | NE1, B_TRP_148 | HE1, B_TRP_148 | 2.83    | 1.98    | 7.29                   |

Table 1754: 4JAN-specific side chain hydrogen bonding analysis. In this table, a PDB file is specified with a four-letter PDB ID, except that the names of the PDB files corresponding to the single NMR structural model split from the NMR ensemble is specified with a four-letter PDB ID in addition to a hyphen followed by the single NMR structural model numeric ID, the residue naming scheme is **Chain ID\_residue name\_residue number**,  $\angle ADH$  represents the angle formed by acceptor (A), donor (D) and hydrogen (H) ( $\angle ADH$ ).

| PDB      | Acceptor (A)   | Donor (D)      | Hydrogen (H)    | D-A (Å) | H-A (Å) | $\angle ADH(^{\circ})$ |
|----------|----------------|----------------|-----------------|---------|---------|------------------------|
| 4KRM.PDB | OE1, B_GLU_110 | NH1, A_ARG_353 | HH11, A_ARG_353 | 2.81    | 2.05    | 22.81                  |
| 4KRM.PDB | OD2, A_ASP_355 | OG1, A_THR_358 | HG1, A_THR_358  | 2.65    | 1.94    | 26.40                  |
| 4KRM.PDB | OE1, A_GLU_376 | NE, A_ARG_403  | HE, A_ARG_403   | 2.51    | 1.78    | 27.17                  |
| 4KRM.PDB | OD1, A_ASP_434 | NZ, A_LYS_407  | HZ1, A_LYS_407  | 2.92    | 2.12    | 20.92                  |
| 4KRM.PDB | OE2, A_GLU_431 | OG, A_SER_433  | HG, A_SER_433   | 2.82    | 2.09    | 25.22                  |
| 4KRM.PDB | OD1, B_ASP_80  | NE, B_ARG_19   | HE, B_ARG_19    | 2.67    | 1.85    | 15.03                  |
| 4KRM.PDB | OH, B_TYR_94   | NH1, B_ARG_38  | HH11, B_ARG_38  | 2.87    | 2.05    | 14.24                  |
| 4KRM.PDB | OD2, B_ASP_90  | NH1, B_ARG_38  | HH12, B_ARG_38  | 2.85    | 2.02    | 12.95                  |
| 4KRM.PDB | OE1, D_GLU_110 | NH1, C_ARG_353 | HH11, C_ARG_353 | 2.87    | 2.05    | 16.15                  |
| 4KRM.PDB | OD2, C_ASP_355 | OG1, C_THR_358 | HG1, C_THR_358  | 2.75    | 2.00    | 22.12                  |
| 4KRM.PDB | OE1, C_GLU_376 | NH1, C_ARG_403 | HH11, C_ARG_403 | 3.00    | 2.18    | 16.51                  |
| 4KRM.PDB | OD1, C_ASP_498 | NH2, C_ARG_427 | HH21, C_ARG_427 | 2.43    | 1.69    | 25.29                  |
| 4KRM.PDB | OE2, C_GLU_431 | OG, C_SER_433  | HG, C_SER_433   | 2.86    | 2.06    | 14.79                  |
| 4KRM.PDB | OE1, C_GLU_489 | NZ, C_LYS_455  | HZ2, C_LYS_455  | 2.73    | 1.95    | 24.04                  |
| 4KRM.PDB | OE1, D_GLN_82  | NH1, D_ARG_19  | HH11, D_ARG_19  | 2.94    | 2.12    | 14.24                  |
| 4KRM.PDB | OD2, C_ASP_355 | NH1, D_ARG_30  | HH12, D_ARG_30  | 2.45    | 1.63    | 13.53                  |
| 4KRM.PDB | OE1, D_GLU_46  | NE, D_ARG_38   | HE, D_ARG_38    | 2.79    | 1.96    | 12.48                  |
| 4KRM.PDB | OE1, F_GLU_110 | NH1, E_ARG_353 | HH11, E_ARG_353 | 2.85    | 2.03    | 14.34                  |
| 4KRM.PDB | OD2, F_ASP_112 | NH2, E_ARG_353 | HH22, E_ARG_353 | 2.96    | 2.18    | 20.33                  |
| 4KRM.PDB | OD2, E_ASP_355 | OG1, E_THR_358 | HG1, E_THR_358  | 2.55    | 1.85    | 27.90                  |
| 4KRM.PDB | OD1, E_ASP_434 | NZ, E_LYS_407  | HZ1, E_LYS_407  | 2.65    | 1.88    | 23.95                  |
| 4KRM.PDB | OE2, E_GLU_431 | OG, E_SER_433  | HG, E_SER_433   | 2.91    | 2.17    | 23.57                  |
| 4KRM.PDB | OE1, F_GLU_46  | NE, F_ARG_38   | HE, F_ARG_38    | 2.74    | 1.95    | 18.99                  |
| 4KRM.PDB | OD2, F_ASP_90  | NH1, F_ARG_38  | HH12, F_ARG_38  | 2.95    | 2.22    | 27.79                  |
| 4KRM.PDB | OE1, F_GLU_46  | NH2, F_ARG_38  | HH21, F_ARG_38  | 2.97    | 2.26    | 28.90                  |
| 4KRM.PDB | OG, F_SER_57   | NE1, F_TRP_104 | HE1, F_TRP_104  | 3.00    | 2.20    | 18.23                  |
| 4KRM.PDB | OE2, G_GLU_320 | ND2, G_ASN_314 | HD22, G_ASN_314 | 2.93    | 2.08    | 7.68                   |
| 4KRM.PDB | OD2, G_ASP_355 | OG1, G_THR_358 | HG1, G_THR_358  | 2.44    | 1.73    | 26.83                  |
| 4KRM.PDB | OE2, B_GLU_5   | NZ, G_LYS_407  | HZ1, G_LYS_407  | 2.98    | 2.17    | 20.60                  |
| 4KRM.PDB | OD1, G_ASP_498 | NE, G_ARG_427  | HE, G_ARG_427   | 2.63    | 1.82    | 16.62                  |
| 4KRM.PDB | OE2, G_GLU_431 | OG, G_SER_433  | HG, G_SER_433   | 2.90    | 2.13    | 19.38                  |
| 4KRM.PDB | OD2, G_ASP_436 | NZ, G_LYS_463  | HZ3, G_LYS_463  | 2.68    | 1.83    | 13.12                  |
| 4KRM.PDB | OD1, H_ASP_80  | OG1, H_THR_21  | HG1, H_THR_21   | 2.86    | 2.06    | 13.63                  |
| 4KRM.PDB | OD2, G_ASP_355 | NH1, H_ARG_30  | HH12, H_ARG_30  | 2.45    | 1.69    | 23.45                  |
| 4KRM.PDB | OH, H_TYR_94   | NH1, H_ARG_38  | HH11, H_ARG_38  | 2.96    | 2.15    | 17.21                  |
| 4KRM.PDB | OD2, H_ASP_90  | NH1, H_ARG_38  | HH12, H_ARG_38  | 2.78    | 1.94    | 11.87                  |
| 4KRM.PDB | OE1, J_GLU_110 | NH1, I_ARG_353 | HH11, I_ARG_353 | 2.86    | 2.07    | 18.90                  |
| 4KRM.PDB | OD2, J_ASP_112 | NH2, I_ARG_353 | HH22, I_ARG_353 | 3.00    | 2.19    | 17.61                  |
| 4KRM.PDB | OE1, I_GLU_376 | NH1, I_ARG_403 | HH11, I_ARG_403 | 2.44    | 1.73    | 28.52                  |
| 4KRM.PDB | OE2, I_GLU_431 | OG, I_SER_433  | HG, I_SER_433   | 2.91    | 2.09    | 9.73                   |
| 4KRM.PDB | OD1, I_ASN_469 | ND2, I_ASN_442 | HD22, I_ASN_442 | 2.76    | 1.93    | 12.03                  |
| 4KRM.PDB | OD1, I_ASN_473 | OG, I_SER_474  | HG, I_SER_474   | 2.73    | 1.91    | 11.26                  |
| 4KRM.PDB | OD1, J_ASP_80  | NE, J_ARG_19   | HE, J_ARG_19    | 2.78    | 1.97    | 16.74                  |
| 4KRM.PDB | OH, J_TYR_94   | NH1, J_ARG_38  | HH11, J_ARG_38  | 2.85    | 2.02    | 12.10                  |
| 4KRM.PDB | OD2, J_ASP_90  | NH1, J_ARG_38  | HH12, J_ARG_38  | 2.97    | 2.15    | 14.05                  |
| 4KRM.PDB | OD1, J_ASP_90  | NH2, J_ARG_67  | HH22, J_ARG_67  | 2.61    | 1.77    | 10.49                  |
| 4KRM.PDB | OD1, J_ASN_74  | NE, J_ARG_72   | HE, J_ARG_72    | 2.67    | 1.87    | 16.97                  |
| 4KRM.PDB | OG, J_SER_57   | NE1, J_TRP_104 | HE1, J_TRP_104  | 2.98    | 2.26    | 28.43                  |
| 4KRM.PDB | OE1, L_GLU_110 | NH1, K_ARG_353 | HH11, K_ARG_353 | 2.89    | 2.06    | 12.41                  |
| 4KRM.PDB | OD2, L_ASP_112 | NH2, K_ARG_353 | HH22, K_ARG_353 | 2.89    | 2.07    | 13.96                  |
| 4KRM.PDB | OD2, K_ASP_355 | OG1, K_THR_358 | HG1, K_THR_358  | 2.91    | 2.21    | 28.73                  |
| 4KRM.PDB | OD1, L_ASP_80  | NE, L_ARG_19   | HE, L_ARG_19    | 2.96    | 2.10    | 5.59                   |
| 4KRM.PDB | OD2, K_ASP_355 | NH1, L_ARG_30  | HH12, L_ARG_30  | 2.44    | 1.65    | 18.93                  |
| 4KRM.PDB | OE1, L_GLU_46  | NE, L_ARG_38   | HE, L_ARG_38    | 2.86    | 2.01    | 10.17                  |
| 4KRM.PDB | OD1, L_ASP_90  | NH2, L_ARG_67  | HH22, L_ARG_67  | 2.60    | 1.80    | 17.17                  |

---

Table 1755: 4KRM-specific side chain hydrogen bonding analysis. In this table, a PDB file is specified with a four-letter PDB ID, except that the names of the PDB files corresponding to the single NMR structural model split from the NMR ensemble is specified with a four-letter PDB ID in addition to a hyphen followed by the single NMR structural model numeric ID, the residue naming scheme is **Chain ID\_residue name\_residue number**,  $\angle ADH$  represents the angle formed by acceptor (A), donor (D) and hydrogen (H) ( $\angle ADH$ ).

| PDB      | Acceptor (A)   | Donor (D)      | Hydrogen (H)    | D-A (Å) | H-A (Å) | $\angle ADH(^{\circ})$ |
|----------|----------------|----------------|-----------------|---------|---------|------------------------|
| 4KRO.PDB | OG1, A_THR_278 | OG, A_SER_282  | HG, A_SER_282   | 2.99    | 2.27    | 26.50                  |
| 4KRO.PDB | OE2, A_GLU_376 | NH2, A_ARG_310 | HH21, A_ARG_310 | 2.98    | 2.18    | 18.33                  |
| 4KRO.PDB | OD2, A_ASP_355 | OG1, A_THR_358 | HG1, A_THR_358  | 2.98    | 2.18    | 14.96                  |
| 4KRO.PDB | OG, B_SER_103  | NZ, A_LYS_375  | HZ2, A_LYS_375  | 2.61    | 1.76    | 15.34                  |
| 4KRO.PDB | OH, D_TYR_102  | NE2, A_GLN_384 | HE21, A_GLN_384 | 2.87    | 2.16    | 29.24                  |
| 4KRO.PDB | OD1, B_ASP_118 | NE, A_ARG_405  | HE, A_ARG_405   | 2.72    | 1.93    | 19.48                  |
| 4KRO.PDB | OD1, A_ASP_498 | NH2, A_ARG_427 | HH21, A_ARG_427 | 2.62    | 1.82    | 18.67                  |
| 4KRO.PDB | OD1, A_ASN_469 | ND2, A_ASN_442 | HD22, A_ASN_442 | 2.75    | 1.96    | 18.83                  |
| 4KRO.PDB | OG, A_SER_501  | OG, A_SER_487  | HG, A_SER_487   | 2.37    | 1.68    | 29.03                  |
| 4KRO.PDB | OD1, A_ASN_504 | NH1, A_ARG_503 | HH11, A_ARG_503 | 2.52    | 1.76    | 23.61                  |
| 4KRO.PDB | OG1, A_THR_548 | ND2, A_ASN_554 | HD22, A_ASN_554 | 2.92    | 2.13    | 19.09                  |
| 4KRO.PDB | OE1, C_GLN_89  | OH, C_TYR_36   | HH, C_TYR_36    | 2.63    | 1.80    | 6.46                   |
| 4KRO.PDB | OH, C_TYR_86   | NE2, C_GLN_37  | HE21, C_GLN_37  | 2.94    | 2.13    | 16.57                  |
| 4KRO.PDB | OE1, D_GLN_39  | NE2, C_GLN_38  | HE22, C_GLN_38  | 2.85    | 2.00    | 7.50                   |
| 4KRO.PDB | OD2, D_ASP_103 | OH, C_TYR_50   | HH, C_TYR_50    | 2.49    | 1.72    | 20.15                  |
| 4KRO.PDB | OD1, C_ASP_82  | NH2, C_ARG_61  | HH21, C_ARG_61  | 2.64    | 1.81    | 12.76                  |
| 4KRO.PDB | OD1, D_ASP_103 | ND2, C_ASN_91  | HD21, C_ASN_91  | 2.93    | 2.12    | 16.18                  |
| 4KRO.PDB | OD1, C_ASN_32  | ND2, C_ASN_92  | HD22, C_ASN_92  | 2.97    | 2.20    | 23.59                  |
| 4KRO.PDB | OD2, D_ASP_58  | NE1, C_TRP_94  | HE1, C_TRP_94   | 2.80    | 2.10    | 29.15                  |
| 4KRO.PDB | OG, C_SER_131  | NE2, C_GLN_124 | HE22, C_GLN_124 | 2.85    | 2.00    | 6.78                   |
| 4KRO.PDB | OG, C_SER_177  | NE1, C_TRP_148 | HE1, C_TRP_148  | 2.83    | 2.01    | 15.90                  |
| 4KRO.PDB | OE1, C_GLN_155 | ND2, C_ASN_158 | HD21, C_ASN_158 | 2.72    | 1.97    | 24.54                  |
| 4KRO.PDB | OD1, C_ASP_170 | OG1, C_THR_172 | HG1, C_THR_172  | 2.68    | 1.86    | 11.97                  |
| 4KRO.PDB | OE1, D_GLU_46  | NE, D_ARG_38   | HE, D_ARG_38    | 3.00    | 2.22    | 20.92                  |
| 4KRO.PDB | OH, D_TYR_93   | NH1, D_ARG_38  | HH11, D_ARG_38  | 2.92    | 2.15    | 22.16                  |
| 4KRO.PDB | OE1, D_GLU_46  | NH2, D_ARG_38  | HH21, D_ARG_38  | 2.98    | 2.22    | 22.99                  |
| 4KRO.PDB | OE1, C_GLN_38  | NE2, D_GLN_39  | HE22, D_GLN_39  | 2.80    | 1.94    | 4.32                   |
| 4KRO.PDB | OH, D_TYR_59   | OG1, D_THR_57  | HG1, D_THR_57   | 2.96    | 2.15    | 12.78                  |
| 4KRO.PDB | OE1, A_GLN_408 | OH, D_TYR_102  | HH, D_TYR_102   | 2.75    | 1.97    | 18.39                  |
| 4KRO.PDB | OG, D_SER_209  | ND1, D_HIS_206 | HD1, D_HIS_206  | 2.71    | 1.87    | 9.56                   |

Table 1756: 4KRO-specific side chain hydrogen bonding analysis. In this table, a PDB file is specified with a four-letter PDB ID, except that the names of the PDB files corresponding to the single NMR structural model split from the NMR ensemble is specified with a four-letter PDB ID in addition to a hyphen followed by the single NMR structural model numeric ID, the residue naming scheme is **Chain ID\_residue name\_residue number**,  $\angle ADH$  represents the angle formed by acceptor (A), donor (D) and hydrogen (H) ( $\angle ADH$ ).

| PDB      | Acceptor (A)   | Donor (D)      | Hydrogen (H)    | D-A (Å) | H-A (Å) | $\angle ADH(^{\circ})$ |
|----------|----------------|----------------|-----------------|---------|---------|------------------------|
| 4KRP.PDB | OE2, A_GLU_376 | NH2, A_ARG_310 | HH21, A_ARG_310 | 2.93    | 2.09    | 9.81                   |
| 4KRP.PDB | OD1, B_ASP_115 | NH2, A_ARG_405 | HH21, A_ARG_405 | 2.63    | 1.81    | 15.48                  |
| 4KRP.PDB | OD1, A_ASP_498 | NE, A_ARG_427  | HE, A_ARG_427   | 2.55    | 1.82    | 26.18                  |
| 4KRP.PDB | OD1, A_ASP_498 | NH2, A_ARG_427 | HH21, A_ARG_427 | 2.59    | 1.89    | 29.61                  |
| 4KRP.PDB | OE2, A_GLU_431 | OG, A_SER_433  | HG, A_SER_433   | 2.69    | 1.90    | 15.48                  |
| 4KRP.PDB | OD1, A_ASN_469 | ND2, A_ASN_442 | HD22, A_ASN_442 | 2.94    | 2.17    | 23.18                  |
| 4KRP.PDB | OD1, D_ASP_58  | NZ, A_LYS_443  | HZ1, A_LYS_443  | 2.65    | 1.82    | 17.69                  |
| 4KRP.PDB | OE1, A_GLU_489 | NZ, A_LYS_455  | HZ2, A_LYS_455  | 2.95    | 2.19    | 25.72                  |
| 4KRP.PDB | OD2, D_ASP_103 | NZ, A_LYS_465  | HZ2, A_LYS_465  | 2.93    | 2.05    | 5.06                   |
| 4KRP.PDB | OG, A_SER_474  | NE, A_ARG_470  | HE, A_ARG_470   | 2.76    | 1.96    | 18.13                  |
| 4KRP.PDB | OG, A_SER_501  | OG, A_SER_487  | HG, A_SER_487   | 2.45    | 1.66    | 16.67                  |
| 4KRP.PDB | OE1, A_GLU_495 | NE, A_ARG_497  | HE, A_ARG_497   | 2.60    | 1.79    | 14.71                  |
| 4KRP.PDB | OE1, A_GLU_524 | NE, A_ARG_507  | HE, A_ARG_507   | 2.83    | 2.04    | 19.78                  |
| 4KRP.PDB | OE2, A_GLU_527 | NH2, A_ARG_550 | HH22, A_ARG_550 | 2.54    | 1.76    | 21.10                  |
| 4KRP.PDB | OD1, C_ASN_92  | ND2, C_ASN_32  | HD22, C_ASN_32  | 2.85    | 2.14    | 29.38                  |
| 4KRP.PDB | OE1, C_GLN_89  | OH, C_TYR_36   | HH, C_TYR_36    | 2.33    | 1.50    | 6.36                   |
| 4KRP.PDB | OH, C_TYR_86   | NE2, C_GLN_37  | HE21, C_GLN_37  | 2.85    | 2.02    | 13.51                  |
| 4KRP.PDB | OE1, D_GLN_39  | NE2, C_GLN_38  | HE22, C_GLN_38  | 2.70    | 1.84    | 6.09                   |
| 4KRP.PDB | OE1, C_GLU_53  | NZ, C_LYS_49   | HZ3, C_LYS_49   | 2.81    | 1.93    | 8.64                   |
| 4KRP.PDB | OD2, D_ASP_103 | OH, C_TYR_50   | HH, C_TYR_50    | 2.43    | 1.66    | 18.96                  |
| 4KRP.PDB | OD1, C_ASP_82  | NH2, C_ARG_61  | HH21, C_ARG_61  | 2.79    | 1.98    | 15.39                  |
| 4KRP.PDB | OG1, C_THR_96  | NE2, C_GLN_89  | HE21, C_GLN_89  | 2.69    | 1.93    | 23.74                  |
| 4KRP.PDB | OD1, D_ASP_103 | ND2, C_ASN_91  | HD21, C_ASN_91  | 2.77    | 1.91    | 6.24                   |
| 4KRP.PDB | OD1, C_ASN_93  | ND2, C_ASN_92  | HD22, C_ASN_92  | 2.69    | 1.97    | 27.74                  |
| 4KRP.PDB | OD2, D_ASP_58  | NE1, C_TRP_94  | HE1, C_TRP_94   | 2.98    | 2.17    | 17.26                  |
| 4KRP.PDB | OE2, C_GLU_105 | NZ, C_LYS_103  | HZ1, C_LYS_103  | 2.82    | 2.05    | 25.15                  |
| 4KRP.PDB | OG, C_SER_131  | NE2, C_GLN_124 | HE22, C_GLN_124 | 2.89    | 2.10    | 19.98                  |
| 4KRP.PDB | OE1, C_GLN_155 | ND2, C_ASN_158 | HD21, C_ASN_158 | 2.83    | 2.12    | 29.23                  |
| 4KRP.PDB | OD1, C_ASP_170 | OG1, C_THR_172 | HG1, C_THR_172  | 2.53    | 1.69    | 5.91                   |
| 4KRP.PDB | OG1, D_THR_113 | NE2, D_GLN_6   | HE21, D_GLN_6   | 2.88    | 2.03    | 4.76                   |
| 4KRP.PDB | OH, D_TYR_93   | NH1, D_ARG_38  | HH11, D_ARG_38  | 2.96    | 2.18    | 20.80                  |
| 4KRP.PDB | OD1, D_ASP_89  | NH1, D_ARG_38  | HH12, D_ARG_38  | 2.91    | 2.06    | 7.49                   |
| 4KRP.PDB | OE1, C_GLN_38  | NE2, D_GLN_39  | HE22, D_GLN_39  | 2.72    | 1.87    | 5.47                   |
| 4KRP.PDB | OD1, D_ASP_89  | NH2, D_ARG_66  | HH22, D_ARG_66  | 2.59    | 1.74    | 9.60                   |
| 4KRP.PDB | OE1, A_GLN_408 | OH, D_TYR_102  | HH, D_TYR_102   | 2.56    | 1.74    | 10.00                  |
| 4KRP.PDB | OG, A_SER_440  | OH, D_TYR_104  | HH, D_TYR_104   | 2.94    | 2.22    | 25.72                  |
| 4KRP.PDB | OD1, D_ASP_214 | ND2, D_ASN_203 | HD22, D_ASN_203 | 2.70    | 1.84    | 4.78                   |
| 4KRP.PDB | OG, D_SER_209  | ND1, D_HIS_206 | HD1, D_HIS_206  | 2.94    | 2.08    | 3.63                   |
| 4KRP.PDB | OG, D_SER_209  | OG1, D_THR_211 | HG1, D_THR_211  | 2.56    | 1.87    | 28.78                  |
| 4KRP.PDB | OE1, A_GLU_431 | OH, B_TYR_32   | HH, B_TYR_32    | 2.59    | 1.78    | 7.49                   |
| 4KRP.PDB | OE1, A_GLU_400 | OH, B_TYR_100  | HH, B_TYR_100   | 2.94    | 2.13    | 13.29                  |
| 4KRP.PDB | OE2, A_GLU_431 | OH, B_TYR_116  | HH, B_TYR_116   | 2.43    | 1.75    | 29.09                  |

Table 1757: 4KRP-specific side chain hydrogen bonding analysis. In this table, a PDB file is specified with a four-letter PDB ID, except that the names of the PDB files corresponding to the single NMR structural model split from the NMR ensemble is specified with a four-letter PDB ID in addition to a hyphen followed by the single NMR structural model numeric ID, the residue naming scheme is **Chain ID\_residue name\_residue number**,  $\angle ADH$  represents the angle formed by acceptor (A), donor (D) and hydrogen (H) ( $\angle ADH$ ).

| PDB      | Acceptor (A)   | Donor (D)      | Hydrogen (H)    | D-A (Å) | H-A (Å) | $\angle ADH(^{\circ})$ |
|----------|----------------|----------------|-----------------|---------|---------|------------------------|
| 4NZR.PDB | OE1, H_GLU_46  | NE, H_ARG_38   | HE, H_ARG_38    | 2.83    | 2.07    | 23.07                  |
| 4NZR.PDB | OH, H_TYR_90   | NH1, H_ARG_38  | HH11, H_ARG_38  | 2.96    | 2.16    | 17.91                  |
| 4NZR.PDB | OD1, H_ASP_86  | NH1, H_ARG_38  | HH12, H_ARG_38  | 2.73    | 1.88    | 7.20                   |
| 4NZR.PDB | OE1, H_GLU_46  | NH2, H_ARG_38  | HH21, H_ARG_38  | 2.78    | 2.02    | 22.98                  |
| 4NZR.PDB | OG, H_SER_50   | NE1, H_TRP_47  | HE1, H_TRP_47   | 2.87    | 2.03    | 11.63                  |
| 4NZR.PDB | OD1, H_ASP_31G | NE2, H_HIS_52  | HE2, H_HIS_52   | 2.60    | 1.83    | 22.01                  |
| 4NZR.PDB | OD1, H_ASP_31G | NE1, H_TRP_53  | HE1, H_TRP_53   | 2.92    | 2.20    | 28.43                  |
| 4NZR.PDB | OD2, H_ASP_86  | NH1, H_ARG_66  | HH12, H_ARG_66  | 2.98    | 2.20    | 21.88                  |
| 4NZR.PDB | OD1, H_ASP_101 | NE, H_ARG_94   | HE, H_ARG_94    | 2.90    | 2.05    | 5.79                   |
| 4NZR.PDB | OD2, H_ASP_101 | NH2, H_ARG_94  | HH21, H_ARG_94  | 2.73    | 1.90    | 13.79                  |
| 4NZR.PDB | OG, H_SER_50   | ND1, H_HIS_95  | HD1, H_HIS_95   | 2.67    | 1.84    | 11.69                  |
| 4NZR.PDB | OD1, H_ASP_146 | NE2, H_GLN_179 | HE22, H_GLN_179 | 2.89    | 2.12    | 22.14                  |
| 4NZR.PDB | OG, L_SER_176  | OG, H_SER_188  | HG, H_SER_188   | 2.88    | 2.16    | 24.46                  |
| 4NZR.PDB | OD1, H_ASP_220 | ND2, H_ASN_209 | HD22, H_ASN_209 | 2.89    | 2.06    | 12.07                  |
| 4NZR.PDB | OG, H_SER_215  | ND1, H_HIS_212 | HD1, H_HIS_212  | 2.80    | 1.99    | 17.07                  |
| 4NZR.PDB | OE2, L_GLU_123 | NZ, H_LYS_221  | HZ2, H_LYS_221  | 2.99    | 2.10    | 2.00                   |
| 4NZR.PDB | OE2, H_GLU_226 | NE, H_ARG_222  | HE, H_ARG_222   | 2.65    | 1.93    | 27.41                  |
| 4NZR.PDB | OE1, L_GLU_92  | ND2, L_ASN_30  | HD22, L_ASN_30  | 2.94    | 2.10    | 10.05                  |
| 4NZR.PDB | OH, L_TYR_52   | NZ, L_LYS_31   | HZ1, L_LYS_31   | 2.57    | 1.77    | 21.34                  |
| 4NZR.PDB | OH, L_TYR_86   | NE2, L_GLN_37  | HE21, L_GLN_37  | 2.96    | 2.11    | 9.58                   |
| 4NZR.PDB | OD2, L_ASP_82  | NH1, L_ARG_61  | HH12, L_ARG_61  | 2.70    | 1.89    | 15.31                  |
| 4NZR.PDB | OD1, L_ASP_82  | NH2, L_ARG_61  | HH22, L_ARG_61  | 2.85    | 2.01    | 9.02                   |
| 4NZR.PDB | OG, L_SER_131  | NE2, L_GLN_124 | HE22, L_GLN_124 | 2.90    | 2.04    | 4.21                   |
| 4NZR.PDB | OG, L_SER_177  | NE1, L_TRP_148 | HE1, L_TRP_148  | 2.91    | 2.07    | 10.59                  |
| 4NZR.PDB | OE1, L_GLN_155 | ND2, L_ASN_158 | HD21, L_ASN_158 | 2.96    | 2.11    | 9.14                   |
| 4NZR.PDB | OD1, L_ASP_170 | OG1, L_THR_172 | HG1, L_THR_172  | 2.70    | 1.89    | 6.41                   |
| 4NZR.PDB | OG, H_SER_188  | OG, L_SER_176  | HG, L_SER_176   | 2.88    | 2.09    | 13.66                  |
| 4NZR.PDB | OD2, L_ASP_151 | ND1, L_HIS_189 | HD1, L_HIS_189  | 2.85    | 2.11    | 26.53                  |
| 4NZR.PDB | OD1, M_ASN_378 | NH1, M_ARG_95  | HH12, M_ARG_95  | 2.71    | 1.91    | 18.53                  |
| 4NZR.PDB | OE2, M_GLU_124 | OG, M_SER_126  | HG, M_SER_126   | 2.49    | 1.81    | 27.79                  |
| 4NZR.PDB | OE2, M_GLU_124 | NZ, M_LYS_141  | HZ2, M_LYS_141  | 2.96    | 2.15    | 21.57                  |
| 4NZR.PDB | OD1, M_ASN_335 | ND2, M_ASN_166 | HD22, M_ASN_166 | 2.95    | 2.13    | 14.03                  |
| 4NZR.PDB | OD1, M_ASN_183 | NE, M_ARG_167  | HE, M_ARG_167   | 2.87    | 2.09    | 20.21                  |
| 4NZR.PDB | OD1, M_ASP_339 | NH2, M_ARG_167 | HH22, M_ARG_167 | 2.84    | 2.05    | 19.40                  |
| 4NZR.PDB | OD1, M_ASN_177 | OG1, M_THR_179 | HG1, M_THR_179  | 2.75    | 1.94    | 6.81                   |
| 4NZR.PDB | OD1, M_ASP_217 | OG1, M_THR_207 | HG1, M_THR_207  | 2.72    | 1.90    | 1.28                   |
| 4NZR.PDB | OE1, M_GLU_261 | NZ, M_LYS_242  | HZ1, M_LYS_242  | 2.96    | 2.22    | 28.06                  |
| 4NZR.PDB | OD1, M_ASP_250 | NZ, M_LYS_249  | HZ2, M_LYS_249  | 2.93    | 2.05    | 7.77                   |
| 4NZR.PDB | NE2, M_GLN_282 | NZ, M_LYS_255  | HZ2, M_LYS_255  | 2.97    | 2.08    | 5.26                   |
| 4NZR.PDB | OD2, M_ASP_217 | NH1, M_ARG_269 | HH12, M_ARG_269 | 2.82    | 1.99    | 14.04                  |
| 4NZR.PDB | OE2, M_GLU_313 | NZ, M_LYS_289  | HZ1, M_LYS_289  | 2.70    | 1.96    | 27.41                  |
| 4NZR.PDB | OE1, M_GLU_311 | NZ, M_LYS_289  | HZ3, M_LYS_289  | 2.89    | 2.00    | 2.29                   |
| 4NZR.PDB | OD1, M_ASP_350 | OG1, M_THR_352 | HG1, M_THR_352  | 2.69    | 1.93    | 19.00                  |
| 4NZR.PDB | OE1, M_GLU_420 | NZ, M_LYS_370  | HZ2, M_LYS_370  | 2.61    | 1.80    | 20.02                  |
| 4NZR.PDB | OD1, M_ASP_375 | NE2, M_GLN_371 | HE21, M_GLN_371 | 2.92    | 2.12    | 18.76                  |
| 4NZR.PDB | OE1, M_GLU_383 | NH1, M_ARG_380 | HH11, M_ARG_380 | 2.65    | 1.84    | 14.74                  |
| 4NZR.PDB | OE1, M_GLU_162 | NH2, M_ARG_381 | HH22, M_ARG_381 | 3.00    | 2.22    | 21.24                  |
| 4NZR.PDB | OE1, L_GLU_81  | NE, M_ARG_384  | HE, M_ARG_384   | 2.93    | 2.09    | 10.37                  |
| 4NZR.PDB | OD1, M_ASP_396 | NZ, M_LYS_397  | HZ1, M_LYS_397  | 2.90    | 2.03    | 10.85                  |
| 4NZR.PDB | OD2, M_ASP_410 | ND2, M_ASN_402 | HD22, M_ASN_402 | 2.93    | 2.14    | 18.97                  |
| 4NZR.PDB | OE2, M_GLU_464 | NH1, M_ARG_416 | HH12, M_ARG_416 | 2.68    | 1.83    | 5.86                   |
| 4NZR.PDB | OE1, M_GLU_464 | NH2, M_ARG_416 | HH22, M_ARG_416 | 2.88    | 2.03    | 6.77                   |
| 4NZR.PDB | OD1, M_ASP_411 | NH1, M_ARG_430 | HH12, M_ARG_430 | 2.84    | 2.06    | 21.86                  |
| 4NZR.PDB | OD1, M_ASN_402 | OG1, M_THR_435 | HG1, M_THR_435  | 2.74    | 1.98    | 18.44                  |
| 4NZR.PDB | OD2, M_ASP_396 | NE, M_ARG_438  | HE, M_ARG_438   | 2.86    | 2.00    | 5.29                   |
| 4NZR.PDB | OE2, M_GLU_426 | ND2, M_ASN_440 | HD22, M_ASN_440 | 2.87    | 2.05    | 14.71                  |
| 4NZR.PDB | OD1, M_ASP_412 | NH1, M_ARG_454 | HH12, M_ARG_454 | 2.79    | 1.98    | 15.66                  |

|          |                |                |                 |      |      |       |
|----------|----------------|----------------|-----------------|------|------|-------|
| 4NZR.PDB | OD1, H_ASP_31E | NH1, M_ARG_457 | HH12, M_ARG_457 | 2.96 | 2.12 | 11.27 |
| 4NZR.PDB | OD2, H_ASP_31E | NH2, M_ARG_457 | HH22, M_ARG_457 | 2.55 | 1.75 | 17.03 |

Table 1758: 4NZR-specific side chain hydrogen bonding analysis. In this table, a PDB file is specified with a four-letter PDB ID, except that the names of the PDB files corresponding to the single NMR structural model split from the NMR ensemble is specified with a four-letter PDB ID in addition to a hyphen followed by the single NMR structural model numeric ID, the residue naming scheme is **Chain ID\_residue name\_residue number**,  $\angle ADH$  represents the angle formed by acceptor (A), donor (D) and hydrogen (H) ( $\angle ADH$ ).



| PDB      | Acceptor (A)  | Donor (D)      | Hydrogen (H)   | D-A (Å) | H-A (Å) | $\angle ADH(^{\circ})$ |
|----------|---------------|----------------|----------------|---------|---------|------------------------|
| 4NZU.PDB | OD2, L_ASP_82 | NE, L_ARG_61   | HE, L_ARG_61   | 2.83    | 2.03    | 27.68                  |
| 4NZU.PDB | OD1, L_ASP_82 | NH2, L_ARG_61  | HH21, L_ARG_61 | 2.85    | 2.00    | 7.18                   |
| 4NZU.PDB | OG, L_SER_177 | NE1, L_TRP_148 | HE1, L_TRP_148 | 2.90    | 1.89    | 11.12                  |
| 4NZU.PDB | OE2, H_GLU_46 | NE, H_ARG_38   | HE, H_ARG_38   | 2.81    | 1.92    | 18.37                  |
| 4NZU.PDB | OD1, H_ASP_86 | NH1, H_ARG_38  | HH12, H_ARG_38 | 2.87    | 2.03    | 8.91                   |
| 4NZU.PDB | OD2, H_ASP_86 | NH1, H_ARG_66  | HH12, H_ARG_66 | 2.80    | 1.94    | 3.46                   |
| 4NZU.PDB | OD1, H_ASP_97 | NH2, H_ARG_94  | HH22, H_ARG_94 | 2.85    | 2.02    | 14.02                  |
| 4NZU.PDB | OG, H_SER_189 | NE1, H_TRP_157 | HE1, H_TRP_157 | 2.92    | 1.90    | 9.04                   |
| 4NZU.PDB | OH, H_TYR_206 | OG, H_BSER_197 | HG, H_BSER_197 | 2.82    | 2.05    | 15.42                  |

Table 1759: 4NZU-specific side chain hydrogen bonding analysis. In this table, a PDB file is specified with a four-letter PDB ID, except that the names of the PDB files corresponding to the single NMR structural model split from the NMR ensemble is specified with a four-letter PDB ID in addition to a hyphen followed by the single NMR structural model numeric ID, the residue naming scheme is **Chain ID\_residue name\_residue number**,  $\angle ADH$  represents the angle formed by acceptor (A), donor (D) and hydrogen (H) ( $\angle ADH$ ).

| PDB      | Acceptor (A)   | Donor (D)      | Hydrogen (H)    | D-A (Å) | H-A (Å) | $\angle ADH(^{\circ})$ |
|----------|----------------|----------------|-----------------|---------|---------|------------------------|
| 4QEX.PDB | OD2, A_ASP_414 | NH2, A_ARG_349 | HH21, A_ARG_349 | 3.00    | 2.26    | 27.00                  |
| 4QEX.PDB | OD2, B_ASP_414 | NH2, B_ARG_349 | HH21, B_ARG_349 | 2.99    | 2.26    | 27.25                  |

Table 1760: 4QEX-specific side chain hydrogen bonding analysis. In this table, a PDB file is specified with a four-letter PDB ID, except that the names of the PDB files corresponding to the single NMR structural model split from the NMR ensemble is specified with a four-letter PDB ID in addition to a hyphen followed by the single NMR structural model numeric ID, the residue naming scheme is **Chain ID\_residue name\_residue number**,  $\angle ADH$  represents the angle formed by acceptor (A), donor (D) and hydrogen (H) ( $\angle ADH$ ).

| PDB      | Acceptor (A)   | Donor (D)      | Hydrogen (H)    | D-A (Å) | H-A (Å) | $\angle ADH(^{\circ})$ |
|----------|----------------|----------------|-----------------|---------|---------|------------------------|
| 4WUU.PDB | OD2, A_ASP_29  | ND1, A_HIS_3   | HD1, A_HIS_3    | 2.93    | 2.13    | 17.75                  |
| 4WUU.PDB | OE1, A_GLU_46  | NE, A_ARG_35   | HE, A_ARG_35    | 2.77    | 1.96    | 15.11                  |
| 4WUU.PDB | OE2, A_GLU_46  | OG, A_SER_42   | HG, A_SER_42    | 2.85    | 2.07    | 18.95                  |
| 4WUU.PDB | OD2, B_ASP_53  | NE, A_ARG_48   | HE, A_ARG_48    | 2.84    | 2.13    | 29.12                  |
| 4WUU.PDB | OH, A_TYR_171  | OH, A_TYR_59   | HH, A_TYR_59    | 2.71    | 1.89    | 11.34                  |
| 4WUU.PDB | OH, E_TYR_104  | NZ, A_LYS_66   | HZ3, A_LYS_66   | 2.89    | 2.02    | 10.84                  |
| 4WUU.PDB | OXT, C_LEU_9   | OH, A_TYR_84   | HH, A_TYR_84    | 2.64    | 1.82    | 12.17                  |
| 4WUU.PDB | OD2, A_ASP_137 | OH, A_TYR_85   | HH, A_TYR_85    | 2.79    | 1.98    | 13.39                  |
| 4WUU.PDB | OE1, A_GLN_87  | OH, A_TYR_118  | HH, A_TYR_118   | 2.94    | 2.13    | 11.47                  |
| 4WUU.PDB | OG1, A_THR_143 | OH, A_TYR_123  | HH, A_TYR_123   | 2.74    | 1.95    | 17.32                  |
| 4WUU.PDB | OE2, A_GLU_55  | NE, A_ARG_170  | HE, A_ARG_170   | 2.89    | 2.03    | 3.82                   |
| 4WUU.PDB | OE1, B_GLN_8   | NH1, A_ARG_234 | HH11, A_ARG_234 | 2.79    | 2.07    | 27.49                  |
| 4WUU.PDB | OE1, A_GLN_242 | NH2, A_ARG_234 | HH21, A_ARG_234 | 3.00    | 2.27    | 27.42                  |
| 4WUU.PDB | OD1, A_ASP_238 | OG1, A_THR_240 | HG1, A_THR_240  | 2.61    | 1.79    | 8.96                   |
| 4WUU.PDB | OG1, B_THR_86  | OG1, B_THR_4   | HG1, B_THR_4    | 2.90    | 2.14    | 21.40                  |
| 4WUU.PDB | OE1, A_GLU_232 | OH, B_TYR_26   | HH, B_TYR_26    | 2.95    | 2.14    | 13.27                  |
| 4WUU.PDB | OD1, B_ASP_38  | NE, B_ARG_45   | HE, B_ARG_45    | 2.54    | 1.82    | 27.34                  |
| 4WUU.PDB | ND1, B_HIS_84  | OG1, B_THR_86  | HG1, B_THR_86   | 2.95    | 2.20    | 22.57                  |
| 4WUU.PDB | OE1, E_GLN_39  | NE2, D_GLN_39  | HE22, D_GLN_39  | 2.94    | 2.18    | 23.53                  |
| 4WUU.PDB | OD2, D_ASP_83  | NE, D_ARG_62   | HE, D_ARG_62    | 2.79    | 2.08    | 28.83                  |
| 4WUU.PDB | OD1, D_ASP_83  | NH2, D_ARG_62  | HH21, D_ARG_62  | 2.86    | 2.00    | 2.74                   |
| 4WUU.PDB | OD1, E_ASP_106 | NE1, D_TRP_99  | HE1, D_TRP_99   | 2.95    | 2.19    | 24.35                  |
| 4WUU.PDB | OG1, D_THR_165 | OG, D_SER_180  | HG, D_SER_180   | 3.00    | 2.24    | 22.62                  |
| 4WUU.PDB | OE1, D_GLN_39  | NE2, E_GLN_39  | HE22, E_GLN_39  | 2.55    | 1.73    | 14.29                  |
| 4WUU.PDB | OE2, A_GLU_166 | NH2, E_ARG_50  | HH22, E_ARG_50  | 2.67    | 1.88    | 18.69                  |
| 4WUU.PDB | OD1, E_ASP_73  | OG, E_SER_75   | HG, E_SER_75    | 2.93    | 2.16    | 19.72                  |
| 4WUU.PDB | OE1, A_GLU_63  | OH, E_TYR_104  | HH, E_TYR_104   | 2.59    | 1.76    | 7.82                   |
| 4WUU.PDB | OE1, A_GLU_55  | OH, E_TYR_105  | HH, E_TYR_105   | 2.47    | 1.79    | 29.86                  |
| 4WUU.PDB | OE1, E_GLU_156 | OH, E_TYR_153  | HH, E_TYR_153   | 2.97    | 2.18    | 16.08                  |

Table 1761: 4WUU-specific side chain hydrogen bonding analysis. In this table, a PDB file is specified with a four-letter PDB ID, except that the names of the PDB files corresponding to the single NMR structural model split from the NMR ensemble is specified with a four-letter PDB ID in addition to a hyphen followed by the single NMR structural model numeric ID, the residue naming scheme is **Chain ID\_residue name\_residue number**,  $\angle ADH$  represents the angle formed by acceptor (A), donor (D) and hydrogen (H) ( $\angle ADH$ ).

| PDB      | Acceptor (A)   | Donor (D)     | Hydrogen (H)   | D-A (Å) | H-A (Å) | $\angle ADH(^{\circ})$ |
|----------|----------------|---------------|----------------|---------|---------|------------------------|
| 4Z0X.PDB | OG1, A_THR_101 | NE2, A_GLN_6  | HE21, A_GLN_6  | 2.98    | 2.23    | 24.64                  |
| 4Z0X.PDB | OE1, A_GLN_16  | OG1, A_THR_17 | HG1, A_THR_17  | 2.97    | 2.23    | 24.46                  |
| 4Z0X.PDB | OE1, A_GLN_88  | OH, A_TYR_35  | HH, A_TYR_35   | 2.99    | 2.19    | 16.02                  |
| 4Z0X.PDB | OE1, B_GLN_64  | NE2, A_GLN_37 | HE22, A_GLN_37 | 2.75    | 1.99    | 23.41                  |
| 4Z0X.PDB | OD2, A_ASP_81  | NH1, A_ARG_60 | HH12, A_ARG_60 | 2.72    | 1.91    | 16.22                  |
| 4Z0X.PDB | OD1, A_ASN_68  | OG1, A_THR_69 | HG1, A_THR_69  | 2.91    | 2.09    | 9.92                   |
| 4Z0X.PDB | OE2, B_GLU_107 | OG, B_SER_42  | HG, B_SER_42   | 2.96    | 2.17    | 17.40                  |
| 4Z0X.PDB | OE1, B_GLN_31  | OG, B_SER_46  | HG, B_SER_46   | 2.75    | 1.93    | 11.18                  |
| 4Z0X.PDB | OE2, B_GLU_71  | NE, B_ARG_63  | HE, B_ARG_63   | 2.78    | 1.94    | 9.25                   |
| 4Z0X.PDB | OD1, B_ASP_115 | NH1, B_ARG_63 | HH12, B_ARG_63 | 3.00    | 2.15    | 8.77                   |
| 4Z0X.PDB | OE1, B_GLN_90  | NE, B_ARG_92  | HE, B_ARG_92   | 2.75    | 1.97    | 21.20                  |
| 4Z0X.PDB | OD2, B_ASP_115 | NH1, B_ARG_92 | HH12, B_ARG_92 | 2.90    | 2.09    | 15.11                  |
| 4Z0X.PDB | OD1, B_ASP_115 | NH2, B_ARG_92 | HH22, B_ARG_92 | 2.68    | 1.87    | 17.08                  |
| 4Z0X.PDB | OE1, B_GLN_64  | OH, B_TYR_120 | HH, B_TYR_120  | 2.91    | 2.08    | 8.45                   |

Table 1762: 4Z0X-specific side chain hydrogen bonding analysis. In this table, a PDB file is specified with a four-letter PDB ID, except that the names of the PDB files corresponding to the single NMR structural model split from the NMR ensemble is specified with a four-letter PDB ID in addition to a hyphen followed by the single NMR structural model numeric ID, the residue naming scheme is **Chain ID\_residue name\_residue number**,  $\angle ADH$  represents the angle formed by acceptor (A), donor (D) and hydrogen (H) ( $\angle ADH$ ).

| PDB      | Acceptor (A)   | Donor (D)      | Hydrogen (H)    | D-A (Å) | H-A (Å) | $\angle ADH(^{\circ})$ |
|----------|----------------|----------------|-----------------|---------|---------|------------------------|
| 5I76.PDB | OD1, A_ASN_76  | NH1, A_ARG_18  | HH11, A_ARG_18  | 2.77    | 1.94    | 12.53                  |
| 5I76.PDB | OE1, A_GLN_89  | OH, A_TYR_36   | HH, A_TYR_36    | 2.60    | 1.77    | 6.74                   |
| 5I76.PDB | OH, A_TYR_86   | NE2, A_GLN_37  | HE21, A_GLN_37  | 2.93    | 2.09    | 10.63                  |
| 5I76.PDB | OE1, B_GLN_39  | NE2, A_GLN_38  | HE22, A_GLN_38  | 2.94    | 2.10    | 10.68                  |
| 5I76.PDB | OE1, A_GLU_53  | NZ, A_LYS_49   | HZ2, A_LYS_49   | 2.94    | 2.09    | 13.35                  |
| 5I76.PDB | OD2, B_ASP_103 | OH, A_TYR_50   | HH, A_TYR_50    | 2.64    | 1.88    | 21.01                  |
| 5I76.PDB | OD1, A_ASP_82  | NH2, A_ARG_61  | HH21, A_ARG_61  | 2.77    | 1.93    | 10.41                  |
| 5I76.PDB | OE2, A_GLU_81  | NH2, A_ARG_61  | HH22, A_ARG_61  | 2.77    | 1.92    | 8.54                   |
| 5I76.PDB | OG1, A_THR_96  | NE2, A_GLN_89  | HE21, A_GLN_89  | 2.89    | 2.08    | 16.62                  |
| 5I76.PDB | OD1, A_ASN_93  | ND2, A_ASN_92  | HD22, A_ASN_92  | 2.89    | 2.06    | 14.53                  |
| 5I76.PDB | OG, A_SER_12   | NZ, A_LYS_107  | HZ3, A_LYS_107  | 2.75    | 1.89    | 12.15                  |
| 5I76.PDB | OG, A_SER_131  | NE2, A_GLN_124 | HE22, A_GLN_124 | 2.78    | 1.92    | 5.16                   |
| 5I76.PDB | OE2, A_GLU_143 | NZ, A_LYS_145  | HZ3, A_LYS_145  | 2.87    | 2.06    | 20.39                  |
| 5I76.PDB | OG, A_SER_177  | NE1, A_TRP_148 | HE1, A_TRP_148  | 2.97    | 2.15    | 13.90                  |
| 5I76.PDB | OD1, A_ASP_170 | OG1, A_THR_172 | HG1, A_THR_172  | 2.65    | 1.83    | 9.24                   |
| 5I76.PDB | OE2, A_GLU_105 | OH, A_TYR_173  | HH, A_TYR_173   | 2.42    | 1.66    | 21.73                  |
| 5I76.PDB | OD1, B_ARG_89  | NH1, B_ARG_38  | HH12, B_ARG_38  | 2.81    | 1.96    | 5.27                   |
| 5I76.PDB | OE1, A_GLN_38  | NE2, B_GLN_39  | HE22, B_GLN_39  | 2.80    | 1.95    | 6.66                   |
| 5I76.PDB | OD2, B_ASP_58  | NE1, B_TRP_52  | HE1, B_TRP_52   | 2.79    | 1.94    | 5.91                   |
| 5I76.PDB | OD2, B_ASP_89  | NH1, B_ARG_66  | HH12, B_ARG_66  | 2.96    | 2.17    | 19.36                  |
| 5I76.PDB | OD1, B_ASP_89  | NH2, B_ARG_66  | HH22, B_ARG_66  | 2.84    | 1.99    | 7.50                   |
| 5I76.PDB | OD1, B_ASP_72  | OG, B_SER_74   | HG, B_SER_74    | 2.49    | 1.80    | 29.35                  |
| 5I76.PDB | OD1, B_ASN_203 | OG, B_SER_159  | HG, B_SER_159   | 2.82    | 2.04    | 17.93                  |
| 5I76.PDB | OG, B_SER_186  | NE1, B_TRP_160 | HE1, B_TRP_160  | 2.99    | 2.15    | 11.06                  |
| 5I76.PDB | OD1, B_ASP_150 | NE2, B_GLN_177 | HE22, B_GLN_177 | 2.79    | 2.00    | 19.18                  |
| 5I76.PDB | OG, A_SER_176  | OG, B_SER_185  | HG, B_SER_185   | 2.89    | 2.15    | 23.05                  |
| 5I76.PDB | OG, B_SER_194  | OH, B_TYR_200  | HH, B_TYR_200   | 2.81    | 2.03    | 18.26                  |
| 5I76.PDB | OD1, B_ASP_214 | ND2, B_ASN_203 | HD22, B_ASN_203 | 2.90    | 2.11    | 19.71                  |
| 5I76.PDB | OE1, A_GLU_123 | NZ, B_LYS_215  | HZ1, B_LYS_215  | 2.73    | 1.96    | 24.68                  |
| 5I76.PDB | OE2, A_GLU_123 | NZ, B_LYS_215  | HZ1, B_LYS_215  | 2.89    | 2.11    | 24.69                  |
| 5I76.PDB | OE1, B_GLU_218 | NE, B_ARG_216  | HE, B_ARG_216   | 2.64    | 1.90    | 25.25                  |
| 5I76.PDB | OE1, B_GLU_218 | NH2, B_ARG_216 | HH21, B_ARG_216 | 2.69    | 1.98    | 29.12                  |
| 5I76.PDB | OD2, A_ASP_70  | NH1, C_ARG_24  | HH12, C_ARG_24  | 2.95    | 2.23    | 28.81                  |
| 5I76.PDB | OE1, C_GLN_89  | OH, C_TYR_36   | HH, C_TYR_36    | 2.73    | 1.90    | 7.00                   |
| 5I76.PDB | OH, C_TYR_86   | NE2, C_GLN_37  | HE21, C_GLN_37  | 2.93    | 2.09    | 9.49                   |
| 5I76.PDB | OE1, C_GLN_37  | NH1, C_ARG_45  | HH11, C_ARG_45  | 2.96    | 2.15    | 17.42                  |
| 5I76.PDB | OE1, C_GLU_53  | NZ, C_LYS_49   | HZ2, C_LYS_49   | 2.64    | 1.79    | 13.55                  |
| 5I76.PDB | OD2, D_ASP_103 | OH, C_TYR_50   | HH, C_TYR_50    | 2.76    | 1.95    | 12.40                  |
| 5I76.PDB | OD1, C_ASP_82  | NH2, C_ARG_61  | HH21, C_ARG_61  | 2.76    | 1.93    | 11.41                  |
| 5I76.PDB | OE2, C_GLU_81  | NH2, C_ARG_61  | HH22, C_ARG_61  | 2.83    | 2.01    | 16.02                  |
| 5I76.PDB | OG, C_SER_171  | OG, C_SER_80   | HG, C_SER_80    | 2.59    | 1.79    | 14.57                  |
| 5I76.PDB | OG1, C_THR_96  | NE2, C_GLN_89  | HE21, C_GLN_89  | 2.74    | 1.92    | 15.47                  |
| 5I76.PDB | OD1, C_ASN_93  | ND2, C_ASN_92  | HD22, C_ASN_92  | 2.84    | 2.03    | 16.29                  |
| 5I76.PDB | OG, C_SER_131  | NE2, C_GLN_124 | HE22, C_GLN_124 | 2.87    | 2.02    | 5.94                   |
| 5I76.PDB | OG1, C_THR_180 | OG, C_SER_131  | HG, C_SER_131   | 2.93    | 2.13    | 14.64                  |
| 5I76.PDB | OE1, C_GLU_105 | OH, C_TYR_140  | HH, C_TYR_140   | 2.89    | 2.14    | 22.51                  |
| 5I76.PDB | OG, C_SER_177  | NE1, C_TRP_148 | HE1, C_TRP_148  | 2.90    | 2.11    | 19.54                  |
| 5I76.PDB | OE1, C_GLN_155 | ND2, C_ASN_158 | HD22, C_ASN_158 | 2.96    | 2.21    | 25.95                  |
| 5I76.PDB | OD1, C_ASP_170 | OG1, C_THR_172 | HG1, C_THR_172  | 2.79    | 1.97    | 11.52                  |
| 5I76.PDB | OE2, C_GLU_105 | OH, C_TYR_173  | HH, C_TYR_173   | 2.72    | 1.89    | 6.26                   |
| 5I76.PDB | OD2, C_ASP_151 | ND1, C_HIS_189 | HD1, C_HIS_189  | 2.35    | 1.61    | 24.33                  |
| 5I76.PDB | OG, D_SER_28   | OG1, D_THR_30  | HG1, D_THR_30   | 2.71    | 1.88    | 5.11                   |
| 5I76.PDB | OD1, D_ASP_89  | NH1, D_ARG_38  | HH12, D_ARG_38  | 2.88    | 2.03    | 7.89                   |
| 5I76.PDB | OE1, C_GLN_38  | NE2, D_GLN_39  | HE22, D_GLN_39  | 2.85    | 2.01    | 10.98                  |
| 5I76.PDB | OD2, D_ASP_58  | NE1, D_TRP_52  | HE1, D_TRP_52   | 2.82    | 1.96    | 3.64                   |
| 5I76.PDB | OD2, D_ASP_89  | NH1, D_ARG_66  | HH12, D_ARG_66  | 2.85    | 2.02    | 11.59                  |
| 5I76.PDB | OD1, D_ASP_89  | NH2, D_ARG_66  | HH22, D_ARG_66  | 2.74    | 1.89    | 8.51                   |

|          |                |                |                 |      |      |       |
|----------|----------------|----------------|-----------------|------|------|-------|
| 5I76.PDB | OD1, D_ASP_72  | OG, D_SER_74   | HG, D_SER_74    | 2.71 | 2.00 | 26.33 |
| 5I76.PDB | OD1, D_ASP_150 | NZ, D_LYS_149  | HZ3, D_LYS_149  | 2.86 | 2.03 | 16.70 |
| 5I76.PDB | OE1, D_GLU_154 | OH, D_TYR_151  | HH, D_TYR_151   | 2.91 | 2.09 | 9.17  |
| 5I76.PDB | OD1, D_ASN_203 | OG, D_SER_159  | HG, D_SER_159   | 2.84 | 2.05 | 16.99 |
| 5I76.PDB | OG, D_SER_186  | NE1, D_TRP_160 | HE1, D_TRP_160  | 2.92 | 2.08 | 9.81  |
| 5I76.PDB | OD1, D_ASP_150 | NE2, D_GLN_177 | HE22, D_GLN_177 | 2.71 | 1.92 | 19.90 |
| 5I76.PDB | OG, D_SER_194  | OH, D_TYR_200  | HH, D_TYR_200   | 2.69 | 1.90 | 16.49 |
| 5I76.PDB | OE1, C_GLU_123 | NZ, D_LYS_215  | HZ1, D_LYS_215  | 2.60 | 1.73 | 11.40 |

Table 1763: 5I76-specific side chain hydrogen bonding analysis. In this table, a PDB file is specified with a four-letter PDB ID, except that the names of the PDB files corresponding to the single NMR structural model split from the NMR ensemble is specified with a four-letter PDB ID in addition to a hyphen followed by the single NMR structural model numeric ID, the residue naming scheme is **Chain ID\_residue name\_residue number**,  $\angle ADH$  represents the angle formed by acceptor (A), donor (D) and hydrogen (H) ( $\angle ADH$ ).

| PDB      | Acceptor (A)    | Donor (D)      | Hydrogen (H)    | D-A (Å) | H-A (Å) | $\angle ADH(^{\circ})$ |
|----------|-----------------|----------------|-----------------|---------|---------|------------------------|
| 5JO5.PDB | OD2, H_ASP_53   | NE1, H_TRP_33  | HE1, H_TRP_33   | 2.93    | 2.17    | 24.23                  |
| 5JO5.PDB | OG1, H_THR_95   | OG, H_SER_35   | HG, H_SER_35    | 2.68    | 1.99    | 28.91                  |
| 5JO5.PDB | OE1, H_GLU_46   | NE, H_ARG_38   | HE, H_ARG_38    | 2.82    | 2.00    | 14.74                  |
| 5JO5.PDB | OH, H_TYR_90    | NH1, H_ARG_38  | HH11, H_ARG_38  | 2.91    | 2.09    | 14.97                  |
| 5JO5.PDB | OD1, H_ASP_86   | NH1, H_ARG_38  | HH12, H_ARG_38  | 2.87    | 2.05    | 14.25                  |
| 5JO5.PDB | OE1, L_GLN_38   | NE2, H_GLN_39  | HE22, H_GLN_39  | 2.84    | 2.00    | 9.38                   |
| 5JO5.PDB | OE1, H_GLU_100J | NE, H_ARG_50   | HE, H_ARG_50    | 2.77    | 2.00    | 22.35                  |
| 5JO5.PDB | OD2, H_ASP_58   | NH2, H_ARG_50  | HH22, H_ARG_50  | 2.84    | 2.00    | 11.12                  |
| 5JO5.PDB | OD2, H_ASP_86   | NH1, H_ARG_66  | HH12, H_ARG_66  | 2.78    | 1.94    | 11.10                  |
| 5JO5.PDB | OD1, H_ASP_73   | NE, H_ARG_71   | HE, H_ARG_71    | 2.85    | 2.05    | 17.58                  |
| 5JO5.PDB | OD1, H_ASP_72   | OG, H_SER_74   | HG, H_SER_74    | 2.59    | 1.76    | 4.73                   |
| 5JO5.PDB | OD2, H_ASP_102  | NE, H_ARG_94   | HE, H_ARG_94    | 2.81    | 2.07    | 25.27                  |
| 5JO5.PDB | OD2, H_ASP_102  | NH1, H_ARG_94  | HH11, H_ARG_94  | 2.70    | 1.93    | 22.67                  |
| 5JO5.PDB | OE2, L_GLU_124  | NZ, H_LYS_143  | HZ2, H_LYS_143  | 2.46    | 1.63    | 17.05                  |
| 5JO5.PDB | OD1, H_ASN_197  | OG, H_SER_153  | HG, H_SER_153   | 2.83    | 2.04    | 17.75                  |
| 5JO5.PDB | OG, H_SER_180   | NE1, H_TRP_154 | HE1, H_TRP_154  | 2.93    | 2.09    | 10.13                  |
| 5JO5.PDB | OD1, H_ASP_144  | NE2, H_GLN_171 | HE22, H_GLN_171 | 2.85    | 2.05    | 18.06                  |
| 5JO5.PDB | OH, L_TYR_177   | OG, H_SER_179  | HG, H_SER_179   | 2.73    | 2.00    | 25.96                  |
| 5JO5.PDB | OG, H_SER_188   | OH, H_TYR_194  | HH, H_TYR_194   | 2.61    | 1.85    | 20.74                  |
| 5JO5.PDB | OD1, H_ASP_208  | ND2, H_ASN_197 | HD22, H_ASN_197 | 2.91    | 2.06    | 7.04                   |
| 5JO5.PDB | OE1, D_GLN_24   | OG, L_SER_30   | HG, L_SER_30    | 2.84    | 2.07    | 18.45                  |
| 5JO5.PDB | OH, L_TYR_86    | NE2, L_GLN_37  | HE21, L_GLN_37  | 2.94    | 2.08    | 4.10                   |
| 5JO5.PDB | OE1, H_GLN_39   | NE2, L_GLN_38  | HE22, L_GLN_38  | 2.83    | 2.00    | 13.03                  |
| 5JO5.PDB | OD1, L_ASN_52   | NE, L_ARG_54   | HE, L_ARG_54    | 2.95    | 2.15    | 18.15                  |
| 5JO5.PDB | OD1, L_ASP_82   | NH2, L_ARG_61  | HH21, L_ARG_61  | 2.75    | 1.92    | 13.56                  |
| 5JO5.PDB | OE2, L_GLU_81   | NH2, L_ARG_61  | HH22, L_ARG_61  | 2.98    | 2.17    | 16.30                  |
| 5JO5.PDB | OE2, H_GLU_100J | NH2, L_ARG_91  | HH22, L_ARG_91  | 2.69    | 1.84    | 7.26                   |
| 5JO5.PDB | OD1, L_ASP_92   | OG, L_SER_95A  | HG, L_SER_95A   | 2.53    | 1.76    | 19.87                  |
| 5JO5.PDB | OD1, H_ASP_58   | NE, L_ARG_95B  | HE, L_ARG_95B   | 2.95    | 2.13    | 14.76                  |
| 5JO5.PDB | OE1, L_GLU_198  | NZ, L_LYS_110  | HZ3, L_LYS_110  | 2.94    | 2.09    | 14.01                  |
| 5JO5.PDB | OE2, L_GLU_124  | OG1, L_THR_131 | HG1, L_THR_131  | 2.52    | 1.80    | 26.33                  |
| 5JO5.PDB | OG, L_SER_176   | NE1, L_TRP_148 | HE1, L_TRP_148  | 2.93    | 2.09    | 9.40                   |
| 5JO5.PDB | OD1, L_ASN_169  | NE2, L_GLN_167 | HE21, L_GLN_167 | 2.89    | 2.12    | 21.54                  |
| 5JO5.PDB | OG1, L_THR_162  | OG, L_SER_175  | HG, L_SER_175   | 2.94    | 2.19    | 22.64                  |
| 5JO5.PDB | OG1, L_THR_161  | OG, L_SER_176  | HG, L_SER_176   | 2.79    | 2.07    | 26.34                  |
| 5JO5.PDB | OG1, L_THR_205  | OG, L_SER_192  | HG, L_SER_192   | 2.82    | 2.12    | 28.14                  |
| 5JO5.PDB | OG1, L_THR_196  | OG1, L_THR_201 | HG1, L_THR_201  | 2.95    | 2.20    | 22.04                  |
| 5JO5.PDB | OD2, A_ASP_53   | NE1, A_TRP_33  | HE1, A_TRP_33   | 2.82    | 2.05    | 21.67                  |
| 5JO5.PDB | OE1, A_GLU_46   | NE, A_ARG_38   | HE, A_ARG_38    | 2.78    | 1.97    | 16.63                  |
| 5JO5.PDB | OD1, A_ASP_86   | NH1, A_ARG_38  | HH12, A_ARG_38  | 2.83    | 2.01    | 14.60                  |
| 5JO5.PDB | OE1, B_GLN_38   | NE2, A_GLN_39  | HE22, A_GLN_39  | 2.87    | 2.02    | 8.31                   |
| 5JO5.PDB | OE1, A_GLU_100J | NE, A_ARG_50   | HE, A_ARG_50    | 2.88    | 2.11    | 22.13                  |
| 5JO5.PDB | OE2, A_GLU_100J | NH1, A_ARG_50  | HH11, A_ARG_50  | 2.91    | 2.07    | 11.34                  |
| 5JO5.PDB | OD2, A_ASP_58   | NH2, A_ARG_50  | HH22, A_ARG_50  | 2.88    | 2.05    | 13.39                  |
| 5JO5.PDB | OD2, A_ASP_86   | NH1, A_ARG_66  | HH12, A_ARG_66  | 2.80    | 1.98    | 14.11                  |
| 5JO5.PDB | OD1, A_ASP_73   | NE, A_ARG_71   | HE, A_ARG_71    | 2.86    | 2.09    | 22.09                  |
| 5JO5.PDB | OD1, A_ASP_72   | OG, A_SER_74   | HG, A_SER_74    | 2.54    | 1.80    | 22.83                  |
| 5JO5.PDB | OD2, A_ASP_102  | NE, A_ARG_94   | HE, A_ARG_94    | 2.86    | 2.14    | 28.73                  |
| 5JO5.PDB | OD2, A_ASP_102  | NH1, A_ARG_94  | HH11, A_ARG_94  | 2.58    | 1.79    | 19.06                  |
| 5JO5.PDB | OE2, B_GLU_124  | NZ, A_LYS_143  | HZ2, A_LYS_143  | 2.62    | 1.83    | 23.29                  |
| 5JO5.PDB | OD1, A_ASN_197  | OG, A_SER_153  | HG, A_SER_153   | 2.78    | 2.00    | 18.34                  |
| 5JO5.PDB | OG, A_SER_180   | NE1, A_TRP_154 | HE1, A_TRP_154  | 2.89    | 2.05    | 11.45                  |
| 5JO5.PDB | OD1, A_ASP_144  | NE2, A_GLN_171 | HE22, A_GLN_171 | 2.80    | 2.01    | 18.53                  |
| 5JO5.PDB | OH, B_TYR_177   | OG, A_SER_179  | HG, A_SER_179   | 2.83    | 2.10    | 25.21                  |
| 5JO5.PDB | OG, A_SER_188   | OH, A_TYR_194  | HH, A_TYR_194   | 2.69    | 1.94    | 22.27                  |
| 5JO5.PDB | OG, A_SER_203   | ND1, A_HIS_200 | HD1, A_HIS_200  | 2.79    | 2.03    | 23.43                  |
| 5JO5.PDB | OE2, B_GLU_123  | NZ, A_LYS_209  | HZ1, A_LYS_209  | 2.55    | 1.68    | 10.64                  |

|          |                 |                |                 |      |      |       |
|----------|-----------------|----------------|-----------------|------|------|-------|
| 5JO5.PDB | OH, B_TYR_86    | NE2, B_GLN_37  | HE21, B_GLN_37  | 2.95 | 2.09 | 5.48  |
| 5JO5.PDB | OE1, A_GLN_39   | NE2, B_GLN_38  | HE22, B_GLN_38  | 2.90 | 2.07 | 12.43 |
| 5JO5.PDB | OD1, B_ASP_82   | NH2, B_ARG_61  | HH21, B_ARG_61  | 2.66 | 1.83 | 11.88 |
| 5JO5.PDB | OD1, B_ASP_92   | OG, B_SER_95A  | HG, B_SER_95A   | 2.47 | 1.67 | 15.14 |
| 5JO5.PDB | OE2, B_GLU_124  | OG1, B_THR_131 | HG1, B_THR_131  | 2.59 | 1.86 | 24.88 |
| 5JO5.PDB | OG, B_SER_176   | NE1, B_TRP_148 | HE1, B_TRP_148  | 2.89 | 2.05 | 10.46 |
| 5JO5.PDB | OD1, B_ASN_169  | NE2, B_GLN_167 | HE21, B_GLN_167 | 2.98 | 2.24 | 26.40 |
| 5JO5.PDB | OD1, B_ASP_138  | NE2, B_GLN_167 | HE22, B_GLN_167 | 2.99 | 2.14 | 6.65  |
| 5JO5.PDB | OG1, B_THR_162  | OG, B_SER_175  | HG, B_SER_175   | 2.87 | 2.11 | 21.53 |
| 5JO5.PDB | OG1, B_THR_161  | OG, B_SER_176  | HG, B_SER_176   | 2.78 | 2.05 | 24.57 |
| 5JO5.PDB | OG1, B_THR_205  | OG, B_SER_192  | HG, B_SER_192   | 2.59 | 1.90 | 29.12 |
| 5JO5.PDB | OE2, B_GLU_203  | NE2, B_GLN_194 | HE21, B_GLN_194 | 2.60 | 1.77 | 11.97 |
| 5JO5.PDB | OG1, B_THR_196  | OG1, B_THR_201 | HG1, B_THR_201  | 2.97 | 2.21 | 22.11 |
| 5JO5.PDB | OD2, C_ASP_53   | NE1, C_TRP_33  | HE1, C_TRP_33   | 2.84 | 2.06 | 21.35 |
| 5JO5.PDB | OE1, C_GLU_46   | NE, C_ARG_38   | HE, C_ARG_38    | 2.77 | 1.97 | 17.97 |
| 5JO5.PDB | OH, C_TYR_90    | NH1, C_ARG_38  | HH11, C_ARG_38  | 3.00 | 2.18 | 14.70 |
| 5JO5.PDB | OD1, C_ASP_86   | NH1, C_ARG_38  | HH12, C_ARG_38  | 2.85 | 2.02 | 13.98 |
| 5JO5.PDB | OE1, D_GLN_38   | NE2, C_GLN_39  | HE22, C_GLN_39  | 2.86 | 2.02 | 9.45  |
| 5JO5.PDB | OE1, C_GLU_100J | NE, C_ARG_50   | HE, C_ARG_50    | 2.87 | 2.09 | 20.20 |
| 5JO5.PDB | OD2, C_ASP_58   | NH1, C_ARG_50  | HH12, C_ARG_50  | 2.77 | 1.94 | 11.94 |
| 5JO5.PDB | OE2, C_GLU_100J | NH2, C_ARG_50  | HH21, C_ARG_50  | 2.86 | 2.02 | 10.69 |
| 5JO5.PDB | OD2, C_ASP_86   | NH1, C_ARG_66  | HH12, C_ARG_66  | 2.83 | 2.01 | 15.29 |
| 5JO5.PDB | OD1, C_ASP_73   | NE, C_ARG_71   | HE, C_ARG_71    | 2.90 | 2.12 | 21.25 |
| 5JO5.PDB | OD1, C_ASP_72   | OG, C_SER_74   | HG, C_SER_74    | 2.61 | 1.84 | 20.06 |
| 5JO5.PDB | OD2, C_ASP_102  | NE, C_ARG_94   | HE, C_ARG_94    | 2.79 | 2.08 | 28.98 |
| 5JO5.PDB | OD2, C_ASP_102  | NH1, C_ARG_94  | HH11, C_ARG_94  | 2.55 | 1.78 | 21.18 |
| 5JO5.PDB | OE2, D_GLU_124  | NZ, C_LYS_143  | HZ2, C_LYS_143  | 2.79 | 1.92 | 10.71 |
| 5JO5.PDB | OD1, C_ASN_197  | OG, C_SER_153  | HG, C_SER_153   | 2.81 | 2.01 | 15.61 |
| 5JO5.PDB | OG, C_SER_180   | NE1, C_TRP_154 | HE1, C_TRP_154  | 2.96 | 2.13 | 11.76 |
| 5JO5.PDB | OD1, C_ASP_144  | NE2, C_GLN_171 | HE22, C_GLN_171 | 2.92 | 2.12 | 18.22 |
| 5JO5.PDB | OH, D_TYR_177   | OG, C_SER_179  | HG, C_SER_179   | 2.71 | 1.97 | 23.23 |
| 5JO5.PDB | OG, C_SER_188   | OH, C_TYR_194  | HH, C_TYR_194   | 2.62 | 1.86 | 20.70 |
| 5JO5.PDB | OD1, C_ASP_208  | ND2, C_ASN_197 | HD22, C_ASN_197 | 2.98 | 2.12 | 6.27  |
| 5JO5.PDB | OG, C_SER_203   | ND1, C_HIS_200 | HD1, C_HIS_200  | 2.85 | 2.10 | 24.59 |
| 5JO5.PDB | OE2, D_GLU_123  | NZ, C_LYS_209  | HZ1, C_LYS_209  | 2.58 | 1.72 | 11.28 |
| 5JO5.PDB | OG, D_SER_34    | OH, D_TYR_36   | HH, D_TYR_36    | 2.76 | 2.07 | 29.85 |
| 5JO5.PDB | OH, D_TYR_86    | NE2, D_GLN_37  | HE21, D_GLN_37  | 2.93 | 2.09 | 8.87  |
| 5JO5.PDB | OE1, C_GLN_39   | NE2, D_GLN_38  | HE22, D_GLN_38  | 2.92 | 2.09 | 12.72 |
| 5JO5.PDB | OD1, D_ASP_82   | NH2, D_ARG_61  | HH21, D_ARG_61  | 2.88 | 2.03 | 6.97  |
| 5JO5.PDB | OD1, D_ASP_92   | OG, D_SER_95A  | HG, D_SER_95A   | 2.53 | 1.74 | 15.88 |
| 5JO5.PDB | OD1, C_ASP_58   | NE, D_ARG_95B  | HE, D_ARG_95B   | 2.94 | 2.10 | 11.64 |
| 5JO5.PDB | OE2, D_GLU_124  | OG1, D_THR_131 | HG1, D_THR_131  | 2.53 | 1.79 | 22.99 |
| 5JO5.PDB | OG, D_SER_176   | NE1, D_TRP_148 | HE1, D_TRP_148  | 2.85 | 2.01 | 9.98  |
| 5JO5.PDB | OD1, D_ASN_169  | NE2, D_GLN_167 | HE21, D_GLN_167 | 2.91 | 2.12 | 19.40 |
| 5JO5.PDB | OD1, D_ASP_138  | NE2, D_GLN_167 | HE22, D_GLN_167 | 2.88 | 2.03 | 6.31  |
| 5JO5.PDB | OG1, D_THR_161  | OG, D_SER_176  | HG, D_SER_176   | 2.78 | 2.01 | 20.04 |
| 5JO5.PDB | OD2, D_ASP_151  | ND1, D_HIS_188 | HD1, D_HIS_188  | 2.67 | 1.86 | 16.19 |
| 5JO5.PDB | OG1, D_THR_205  | OG, D_SER_192  | HG, D_SER_192   | 2.76 | 2.06 | 27.74 |
| 5JO5.PDB | OE2, D_GLU_203  | NE2, D_GLN_194 | HE21, D_GLN_194 | 2.41 | 1.67 | 25.54 |
| 5JO5.PDB | OD2, E_ASP_53   | NE1, E_TRP_33  | HE1, E_TRP_33   | 2.89 | 2.14 | 24.08 |
| 5JO5.PDB | OG1, E_THR_95   | OG, E_SER_35   | HG, E_SER_35    | 2.65 | 1.97 | 29.96 |
| 5JO5.PDB | OE1, E_GLU_46   | NE, E_ARG_38   | HE, E_ARG_38    | 2.75 | 1.95 | 17.65 |
| 5JO5.PDB | OH, E_TYR_90    | NH1, E_ARG_38  | HH11, E_ARG_38  | 2.94 | 2.11 | 14.05 |
| 5JO5.PDB | OD1, E_ASP_86   | NH1, E_ARG_38  | HH12, E_ARG_38  | 2.82 | 2.00 | 15.16 |
| 5JO5.PDB | OE1, F_GLN_38   | NE2, E_GLN_39  | HE22, E_GLN_39  | 2.90 | 2.06 | 10.70 |
| 5JO5.PDB | OE1, E_GLU_100J | NE, E_ARG_50   | HE, E_ARG_50    | 2.82 | 2.06 | 22.79 |
| 5JO5.PDB | OD2, E_ASP_58   | NH1, E_ARG_50  | HH12, E_ARG_50  | 2.78 | 1.94 | 10.17 |
| 5JO5.PDB | OE2, E_GLU_100J | NH2, E_ARG_50  | HH21, E_ARG_50  | 2.98 | 2.13 | 7.82  |



|          |                 |                |                 |      |      |       |
|----------|-----------------|----------------|-----------------|------|------|-------|
| 5JO5.PDB | OD2, E_ASP_86   | NH1, E_ARG_66  | HH12, E_ARG_66  | 2.75 | 1.91 | 9.04  |
| 5JO5.PDB | OD1, E_ASP_73   | NE, E_ARG_71   | HE, E_ARG_71    | 2.89 | 2.11 | 20.53 |
| 5JO5.PDB | OD1, E_ASP_72   | OG, E_SER_74   | HG, E_SER_74    | 2.60 | 1.77 | 6.90  |
| 5JO5.PDB | OD2, E_ASP_102  | NE, E_ARG_94   | HE, E_ARG_94    | 2.83 | 2.08 | 25.07 |
| 5JO5.PDB | OD2, E_ASP_102  | NH2, E_ARG_94  | HH21, E_ARG_94  | 2.73 | 1.97 | 23.25 |
| 5JO5.PDB | OE2, F_GLU_124  | NZ, E_LYS_143  | HZ2, E_LYS_143  | 2.55 | 1.75 | 21.57 |
| 5JO5.PDB | OD1, E_ASN_197  | OG, E_SER_153  | HG, E_SER_153   | 2.80 | 2.02 | 18.49 |
| 5JO5.PDB | OG, E_SER_180   | NE1, E_TRP_154 | HE1, E_TRP_154  | 2.96 | 2.13 | 12.27 |
| 5JO5.PDB | OD1, E_ASP_144  | NE2, E_GLN_171 | HE22, E_GLN_171 | 2.83 | 2.02 | 16.42 |
| 5JO5.PDB | OH, F_TYR_177   | OG, E_SER_179  | HG, E_SER_179   | 2.58 | 1.87 | 27.02 |
| 5JO5.PDB | OG, E_SER_188   | OH, E_TYR_194  | HH, E_TYR_194   | 2.65 | 1.91 | 23.44 |
| 5JO5.PDB | OD1, E_ASP_208  | ND2, E_ASN_197 | HD22, E_ASN_197 | 2.93 | 2.08 | 6.74  |
| 5JO5.PDB | OE2, F_GLU_123  | NZ, E_LYS_209  | HZ1, E_LYS_209  | 2.57 | 1.74 | 17.62 |
| 5JO5.PDB | OE1, B_GLN_24   | OG, F_SER_30   | HG, F_SER_30    | 2.88 | 2.11 | 20.15 |
| 5JO5.PDB | OH, F_TYR_86    | NE2, F_GLN_37  | HE21, F_GLN_37  | 2.98 | 2.12 | 5.01  |
| 5JO5.PDB | OE1, E_GLN_39   | NE2, F_GLN_38  | HE22, F_GLN_38  | 2.85 | 2.02 | 12.75 |
| 5JO5.PDB | OD2, F_ASP_82   | NE, F_ARG_61   | HE, F_ARG_61    | 2.99 | 2.15 | 12.18 |
| 5JO5.PDB | OD1, F_ASP_82   | NH2, F_ARG_61  | HH21, F_ARG_61  | 2.81 | 1.97 | 11.97 |
| 5JO5.PDB | OE2, E_GLU_100J | NH2, F_ARG_91  | HH22, F_ARG_91  | 2.72 | 1.87 | 5.99  |
| 5JO5.PDB | OD1, F_ASP_92   | OG, F_SER_95A  | HG, F_SER_95A   | 2.58 | 1.83 | 23.06 |
| 5JO5.PDB | OD1, E_ASP_58   | NE, F_ARG_95B  | HE, F_ARG_95B   | 2.92 | 2.09 | 12.47 |
| 5JO5.PDB | OE1, F_GLU_198  | NZ, F_LYS_110  | HZ3, F_LYS_110  | 2.97 | 2.11 | 10.79 |
| 5JO5.PDB | OE2, F_GLU_124  | OG1, F_THR_131 | HG1, F_THR_131  | 2.49 | 1.76 | 24.10 |
| 5JO5.PDB | OG, F_SER_176   | NE1, F_TRP_148 | HE1, F_TRP_148  | 2.88 | 2.03 | 9.94  |
| 5JO5.PDB | OD1, F_ASN_169  | NE2, F_GLN_167 | HE21, F_GLN_167 | 2.87 | 2.13 | 25.80 |
| 5JO5.PDB | OD1, F_ASP_138  | NE2, F_GLN_167 | HE22, F_GLN_167 | 2.86 | 2.01 | 8.07  |
| 5JO5.PDB | OG1, F_THR_161  | OG, F_SER_176  | HG, F_SER_176   | 2.84 | 2.06 | 17.97 |
| 5JO5.PDB | OE2, F_GLU_203  | NE2, F_GLN_194 | HE21, F_GLN_194 | 2.48 | 1.75 | 26.23 |

Table 1764: 5JO5-specific side chain hydrogen bonding analysis. In this table, a PDB file is specified with a four-letter PDB ID, except that the names of the PDB files corresponding to the single NMR structural model split from the NMR ensemble is specified with a four-letter PDB ID in addition to a hyphen followed by the single NMR structural model numeric ID, the residue naming scheme is **Chain ID\_residue name\_residue number**,  $\angle ADH$  represents the angle formed by acceptor (A), donor (D) and hydrogen (H) ( $\angle ADH$ ).

| PDB      | Acceptor (A)   | Donor (D)      | Hydrogen (H)    | D-A (Å) | H-A (Å) | $\angle ADH(^{\circ})$ |
|----------|----------------|----------------|-----------------|---------|---------|------------------------|
| 5JR1.PDB | OE2, H_GLU_46  | NE, H_ARG_38   | HE, H_ARG_38    | 2.66    | 1.91    | 24.18                  |
| 5JR1.PDB | OH, H_TYR_90   | NH1, H_ARG_38  | HH11, H_ARG_38  | 2.93    | 2.12    | 16.05                  |
| 5JR1.PDB | OD1, H_ASP_86  | NH1, H_ARG_38  | HH12, H_ARG_38  | 2.94    | 2.11    | 12.77                  |
| 5JR1.PDB | OE2, H_GLU_46  | NH2, H_ARG_38  | HH21, H_ARG_38  | 2.68    | 1.95    | 27.48                  |
| 5JR1.PDB | OD2, H_ASP_86  | NH1, H_ARG_66  | HH12, H_ARG_66  | 2.72    | 1.87    | 9.50                   |
| 5JR1.PDB | OD1, H_ASP_73  | NE, H_ARG_71   | HE, H_ARG_71    | 2.99    | 2.20    | 19.01                  |
| 5JR1.PDB | OD1, H_ASP_72  | OG, H_SER_74   | HG, H_SER_74    | 2.50    | 1.70    | 14.47                  |
| 5JR1.PDB | OD1, H_ASN_197 | OG, H_SER_153  | HG, H_SER_153   | 2.85    | 2.04    | 12.85                  |
| 5JR1.PDB | OG, H_SER_180  | NE1, H_TRP_154 | HE1, H_TRP_154  | 2.87    | 2.02    | 7.55                   |
| 5JR1.PDB | OD1, H_ASP_144 | NE2, H_GLN_171 | HE22, H_GLN_171 | 2.73    | 1.95    | 20.99                  |
| 5JR1.PDB | OE1, H_GLN_171 | OG, H_SER_177  | HG, H_SER_177   | 2.71    | 1.98    | 25.79                  |
| 5JR1.PDB | OH, L_TYR_178  | OG, H_SER_179  | HG, H_SER_179   | 2.83    | 2.03    | 15.88                  |
| 5JR1.PDB | OG, H_SER_188  | OH, H_TYR_194  | HH, H_TYR_194   | 2.70    | 1.94    | 20.59                  |
| 5JR1.PDB | OE2, H_GLU_212 | NE, H_BARG_210 | HE, H_BARG_210  | 2.40    | 1.64    | 22.83                  |
| 5JR1.PDB | OH, L_TYR_86   | NE2, L_GLN_37  | HE21, L_GLN_37  | 2.92    | 2.08    | 10.60                  |
| 5JR1.PDB | OD2, L_ASP_82  | NE, L_ARG_61   | HE, L_ARG_61    | 2.81    | 2.00    | 15.72                  |
| 5JR1.PDB | OD1, L_ASP_82  | NH2, L_ARG_61  | HH21, L_ARG_61  | 2.74    | 1.90    | 11.09                  |
| 5JR1.PDB | OG1, L_THR_20  | OG1, L_THR_74  | HG1, L_THR_74   | 2.96    | 2.15    | 13.12                  |
| 5JR1.PDB | OD2, L_ASP_92  | OG, L_SER_94   | HG, L_SER_94    | 2.41    | 1.66    | 21.72                  |
| 5JR1.PDB | OD2, H_ASP_58  | NH2, L_ARG_95B | HH22, L_ARG_95B | 2.47    | 1.67    | 16.99                  |
| 5JR1.PDB | OE1, L_GLU_199 | NZ, L_LYS_110  | HZ3, L_LYS_110  | 2.77    | 1.91    | 11.53                  |
| 5JR1.PDB | OE2, L_GLU_125 | OG1, L_THR_132 | HG1, L_THR_132  | 2.53    | 1.79    | 23.02                  |
| 5JR1.PDB | OG, L_SER_177  | NE1, L_TRP_149 | HE1, L_TRP_149  | 2.84    | 1.99    | 9.64                   |
| 5JR1.PDB | OE1, L_GLN_195 | NZ, L_LYS_150  | HZ3, L_LYS_150  | 2.79    | 1.91    | 7.52                   |
| 5JR1.PDB | OD1, L_ASN_170 | NE2, L_GLN_168 | HE21, L_GLN_168 | 2.60    | 1.77    | 13.13                  |
| 5JR1.PDB | OD1, L_ASP_139 | NE2, L_GLN_168 | HE22, L_GLN_168 | 2.73    | 1.87    | 5.77                   |
| 5JR1.PDB | OE2, L_GLU_204 | NE2, L_GLN_195 | HE21, L_GLN_195 | 2.95    | 2.12    | 11.81                  |
| 5JR1.PDB | OG1, L_THR_197 | OG1, L_THR_202 | HG1, L_THR_202  | 2.77    | 1.97    | 14.73                  |

Table 1765: 5JR1-specific side chain hydrogen bonding analysis. In this table, a PDB file is specified with a four-letter PDB ID, except that the names of the PDB files corresponding to the single NMR structural model split from the NMR ensemble is specified with a four-letter PDB ID in addition to a hyphen followed by the single NMR structural model numeric ID, the residue naming scheme is **Chain ID\_residue name\_residue number**,  $\angle ADH$  represents the angle formed by acceptor (A), donor (D) and hydrogen (H) ( $\angle ADH$ ).

| PDB      | Acceptor (A)   | Donor (D)      | Hydrogen (H)    | D-A (Å) | H-A (Å) | $\angle ADH(^{\circ})$ |
|----------|----------------|----------------|-----------------|---------|---------|------------------------|
| 5JUE.PDB | OH, H_TYR_91   | NE2, L_GLN_38  | HE22, L_GLN_38  | 2.57    | 1.77    | 17.09                  |
| 5JUE.PDB | OD1, L_ASP_82  | NH1, L_ARG_61  | HH12, L_ARG_61  | 2.84    | 1.98    | 1.66                   |
| 5JUE.PDB | OD2, L_ASP_82  | NH2, L_ARG_61  | HH22, L_ARG_61  | 2.58    | 1.76    | 15.54                  |
| 5JUE.PDB | OG, L_SER_131  | NE2, L_GLN_124 | HE22, L_GLN_124 | 2.87    | 2.01    | 1.74                   |
| 5JUE.PDB | OD2, L_ASP_105 | OH, L_TYR_140  | HH, L_TYR_140   | 2.73    | 1.90    | 9.39                   |
| 5JUE.PDB | OG, L_SER_177  | NE1, L_TRP_148 | HE1, L_TRP_148  | 2.84    | 1.99    | 8.07                   |
| 5JUE.PDB | OE2, L_GLU_195 | NZ, L_LYS_149  | HZ1, L_LYS_149  | 2.94    | 2.11    | 18.07                  |
| 5JUE.PDB | OE1, L_GLU_185 | NH1, L_ARG_155 | HH12, L_ARG_155 | 2.98    | 2.13    | 8.18                   |
| 5JUE.PDB | OD1, L_ASP_170 | OG1, L_THR_172 | HG1, L_THR_172  | 2.65    | 1.84    | 10.43                  |
| 5JUE.PDB | OD1, L_ASP_105 | OH, L_TYR_173  | HH, L_TYR_173   | 2.53    | 1.79    | 22.81                  |
| 5JUE.PDB | OG, H_SER_178  | OG, L_SER_176  | HG, L_SER_176   | 2.78    | 1.94    | 3.13                   |
| 5JUE.PDB | OD1, L_ASN_161 | OG, L_SER_177  | HG, L_SER_177   | 2.61    | 1.88    | 24.46                  |
| 5JUE.PDB | OD1, L_ASP_184 | NE, L_ARG_188  | HE, L_ARG_188   | 2.70    | 1.93    | 22.77                  |
| 5JUE.PDB | OG, L_SER_208  | OG1, L_THR_193 | HG1, L_THR_193  | 2.92    | 2.19    | 25.67                  |
| 5JUE.PDB | ND1, L_HIS_198 | OG1, L_THR_200 | HG1, L_THR_200  | 2.88    | 2.17    | 27.29                  |
| 5JUE.PDB | ND1, H_HIS_35  | NE1, H_TRP_47  | HE1, H_TRP_47   | 2.93    | 2.15    | 20.72                  |
| 5JUE.PDB | OD2, H_ASP_86  | NZ, H_LYS_66   | HZ1, H_LYS_66   | 2.76    | 1.87    | 4.19                   |
| 5JUE.PDB | OE1, H_GLN_39  | OH, H_TYR_91   | HH, H_TYR_91    | 2.83    | 2.02    | 11.19                  |
| 5JUE.PDB | OD1, H_ASP_101 | NE, H_ARG_94   | HE, H_ARG_94    | 2.72    | 1.88    | 8.15                   |
| 5JUE.PDB | OD2, H_ASP_101 | NH2, H_ARG_94  | HH21, H_ARG_94  | 2.85    | 2.02    | 12.42                  |
| 5JUE.PDB | OE2, H_GLU_148 | OH, H_TYR_145  | HH, H_TYR_145   | 2.72    | 1.89    | 3.03                   |
| 5JUE.PDB | OD1, H_ASN_196 | OG1, H_THR_153 | HG1, H_THR_153  | 2.74    | 1.98    | 20.12                  |
| 5JUE.PDB | OG1, H_THR_137 | OG1, H_THR_182 | HG1, H_THR_182  | 2.77    | 2.00    | 20.14                  |
| 5JUE.PDB | OG1, H_THR_184 | OG1, H_THR_187 | HG1, H_THR_187  | 2.67    | 1.90    | 19.94                  |
| 5JUE.PDB | ND1, H_HIS_199 | OG, H_SER_202  | HG, H_SER_202   | 2.87    | 2.13    | 24.10                  |
| 5JUE.PDB | OE1, L_GLU_123 | NZ, H_LYS_208  | HZ1, H_LYS_208  | 2.81    | 1.98    | 17.66                  |

Table 1766: 5JUE-specific side chain hydrogen bonding analysis. In this table, a PDB file is specified with a four-letter PDB ID, except that the names of the PDB files corresponding to the single NMR structural model split from the NMR ensemble is specified with a four-letter PDB ID in addition to a hyphen followed by the single NMR structural model numeric ID, the residue naming scheme is **Chain ID\_residue name\_residue number**,  $\angle ADH$  represents the angle formed by acceptor (A), donor (D) and hydrogen (H) ( $\angle ADH$ ).

| PDB      | Acceptor (A)   | Donor (D)      | Hydrogen (H)    | D-A (Å) | H-A (Å) | $\angle ADH(^{\circ})$ |
|----------|----------------|----------------|-----------------|---------|---------|------------------------|
| 5JXA.PDB | OE1, H_GLU_46  | NE, H_ARG_38   | HE, H_ARG_38    | 2.80    | 2.04    | 23.29                  |
| 5JXA.PDB | OD1, H_ASP_86  | NH1, H_ARG_38  | HH12, H_ARG_38  | 2.74    | 1.88    | 4.26                   |
| 5JXA.PDB | OE1, H_GLU_46  | NH2, H_ARG_38  | HH21, H_ARG_38  | 2.76    | 2.00    | 23.95                  |
| 5JXA.PDB | OE2, H_GLU_46  | NE2, H_GLN_62  | HE21, H_GLN_62  | 2.86    | 2.00    | 1.72                   |
| 5JXA.PDB | OD1, H_ASP_86  | NH2, H_ARG_66  | HH22, H_ARG_66  | 2.96    | 2.11    | 6.31                   |
| 5JXA.PDB | OD2, H_ASP_76C | NE1, H_TRP_76F | HE1, H_TRP_76F  | 2.87    | 2.15    | 28.04                  |
| 5JXA.PDB | OD1, H_ASP_99  | NH2, H_ARG_95  | HH22, H_ARG_95  | 2.95    | 2.09    | 5.23                   |
| 5JXA.PDB | OD2, L_ASP_50  | OH, H_TYR_100  | HH, H_TYR_100   | 2.57    | 1.75    | 11.76                  |
| 5JXA.PDB | OD1, H_ASP_144 | NZ, H_LYS_143  | HZ3, H_LYS_143  | 2.92    | 2.12    | 22.30                  |
| 5JXA.PDB | OD1, H_ASN_197 | OG, H_SER_153  | HG, H_SER_153   | 2.75    | 1.96    | 17.62                  |
| 5JXA.PDB | OG, H_SER_180  | NE1, H_TRP_154 | HE1, H_TRP_154  | 2.96    | 2.12    | 10.70                  |
| 5JXA.PDB | OD1, H_ASP_144 | NE2, H_GLN_171 | HE22, H_GLN_171 | 2.86    | 2.05    | 16.31                  |
| 5JXA.PDB | OG, H_SER_188  | OH, H_TYR_194  | HH, H_TYR_194   | 2.92    | 2.22    | 28.67                  |
| 5JXA.PDB | ND1, H_HIS_200 | OG, H_SER_203  | HG, H_SER_203   | 2.82    | 2.10    | 26.44                  |
| 5JXA.PDB | OE1, L_GLN_89  | OH, L_TYR_36   | HH, L_TYR_36    | 2.71    | 1.91    | 14.07                  |
| 5JXA.PDB | OH, L_TYR_86   | NE2, L_GLN_37  | HE21, L_GLN_37  | 2.99    | 2.15    | 10.29                  |
| 5JXA.PDB | OH, H_TYR_100  | NH2, L_ARG_53  | HH21, L_ARG_53  | 2.89    | 2.07    | 18.12                  |
| 5JXA.PDB | OD2, L_ASP_82  | NE, L_ARG_61   | HE, L_ARG_61    | 2.88    | 2.15    | 27.19                  |
| 5JXA.PDB | OD1, L_ASP_82  | NH2, L_ARG_61  | HH21, L_ARG_61  | 2.84    | 1.98    | 2.45                   |
| 5JXA.PDB | OD1, L_ASP_70  | OG1, L_THR_69  | HG1, L_THR_69   | 2.92    | 2.09    | 7.50                   |
| 5JXA.PDB | OG, L_SER_131  | NE2, L_GLN_124 | HE22, L_GLN_124 | 2.80    | 1.95    | 4.80                   |
| 5JXA.PDB | OE1, L_GLU_105 | OH, L_TYR_140  | HH, L_TYR_140   | 2.43    | 1.65    | 17.73                  |
| 5JXA.PDB | OE1, L_GLU_103 | NH1, L_ARG_142 | HH12, L_ARG_142 | 2.87    | 2.05    | 14.46                  |
| 5JXA.PDB | OH, L_TYR_173  | NH2, L_ARG_142 | HH21, L_ARG_142 | 2.84    | 2.07    | 21.88                  |
| 5JXA.PDB | OE2, L_GLU_103 | NH2, L_ARG_142 | HH22, L_ARG_142 | 2.79    | 1.94    | 8.50                   |
| 5JXA.PDB | OG, L_SER_177  | NE1, L_TRP_148 | HE1, L_TRP_148  | 2.86    | 2.05    | 17.07                  |
| 5JXA.PDB | OE1, L_GLN_155 | ND2, L_ASN_158 | HD21, L_ASN_158 | 2.94    | 2.10    | 10.59                  |
| 5JXA.PDB | OD1, L_ASP_170 | OG1, L_THR_172 | HG1, L_THR_172  | 2.69    | 1.87    | 10.60                  |
| 5JXA.PDB | OE2, L_GLU_105 | OH, L_TYR_173  | HH, L_TYR_173   | 2.63    | 1.83    | 14.46                  |
| 5JXA.PDB | OD1, L_ASP_185 | NZ, L_LYS_188  | HZ2, L_LYS_188  | 2.85    | 2.03    | 19.98                  |
| 5JXA.PDB | OE2, L_GLU_213 | ND2, L_ASN_210 | HD22, L_ASN_210 | 2.76    | 1.93    | 12.84                  |

Table 1767: 5JXA-specific side chain hydrogen bonding analysis. In this table, a PDB file is specified with a four-letter PDB ID, except that the names of the PDB files corresponding to the single NMR structural model split from the NMR ensemble is specified with a four-letter PDB ID in addition to a hyphen followed by the single NMR structural model numeric ID, the residue naming scheme is **Chain ID\_residue name\_residue number**,  $\angle ADH$  represents the angle formed by acceptor (A), donor (D) and hydrogen (H) ( $\angle ADH$ ).

| PDB      | Acceptor (A)   | Donor (D)      | Hydrogen (H)    | D-A (Å) | H-A (Å) | $\angle ADH(^{\circ})$ |
|----------|----------------|----------------|-----------------|---------|---------|------------------------|
| 5M2C.PDB | OD1, A_ASP_195 | NZ, A_LYS_124  | HZ1, A_LYS_124  | 2.99    | 2.26    | 29.03                  |
| 5M2C.PDB | OH, A_TYR_127  | NE2, A_HIS_151 | HE2, A_HIS_151  | 2.61    | 1.77    | 12.06                  |
| 5M2C.PDB | OG, A_SER_159  | OG1, A_THR_163 | HG1, A_THR_163  | 2.88    | 2.07    | 13.51                  |
| 5M2C.PDB | OG, A_SER_179  | ND2, A_ASN_184 | HD21, A_ASN_184 | 2.93    | 2.13    | 18.24                  |
| 5M2C.PDB | OD2, A_ASP_128 | NE2, A_HIS_191 | HE2, A_HIS_191  | 2.69    | 1.84    | 6.13                   |
| 5M2C.PDB | OH, B_TYR_127  | NE2, B_HIS_151 | HE2, B_HIS_151  | 2.61    | 1.78    | 13.01                  |
| 5M2C.PDB | OG, B_SER_179  | ND2, B_ASN_184 | HD21, B_ASN_184 | 2.89    | 2.10    | 19.97                  |
| 5M2C.PDB | OD2, B_ASP_128 | NE2, B_HIS_191 | HE2, B_HIS_191  | 2.71    | 1.86    | 7.63                   |

Table 1768: 5M2C-specific side chain hydrogen bonding analysis. In this table, a PDB file is specified with a four-letter PDB ID, except that the names of the PDB files corresponding to the single NMR structural model split from the NMR ensemble is specified with a four-letter PDB ID in addition to a hyphen followed by the single NMR structural model numeric ID, the residue naming scheme is **Chain ID\_residue name\_residue number**,  $\angle ADH$  represents the angle formed by acceptor (A), donor (D) and hydrogen (H) ( $\angle ADH$ ).

| PDB      | Acceptor (A)   | Donor (D)      | Hydrogen (H)    | D-A (Å) | H-A (Å) | $\angle ADH(^{\circ})$ |
|----------|----------------|----------------|-----------------|---------|---------|------------------------|
| 5M33.PDB | OD1, A_ASP_122 | NE2, A_GLN_118 | HE21, A_GLN_118 | 2.92    | 2.20    | 28.21                  |
| 5M33.PDB | OD1, A_ASP_195 | NZ, A_LYS_124  | HZ3, A_LYS_124  | 2.81    | 2.00    | 20.18                  |
| 5M33.PDB | NE2, A_HIS_151 | OH, A_TYR_127  | HH, A_TYR_127   | 2.74    | 1.90    | 5.54                   |
| 5M33.PDB | OD1, A_ASP_155 | NZ, A_LYS_187  | HZ1, A_LYS_187  | 2.82    | 1.95    | 10.61                  |
| 5M33.PDB | OD2, A_ASP_128 | NE2, A_HIS_191 | HE2, A_HIS_191  | 2.76    | 2.00    | 23.16                  |
| 5M33.PDB | OD1, A_ASP_196 | NE2, A_GLN_192 | HE21, A_GLN_192 | 2.98    | 2.18    | 18.41                  |
| 5M33.PDB | OE1, A_GLU_188 | NZ, A_LYS_193  | HZ2, A_LYS_193  | 2.93    | 2.07    | 12.47                  |
| 5M33.PDB | OD1, B_ASP_122 | NE2, B_GLN_118 | HE21, B_GLN_118 | 2.96    | 2.19    | 23.61                  |
| 5M33.PDB | NE2, B_HIS_151 | OH, B_TYR_127  | HH, B_TYR_127   | 2.78    | 1.94    | 5.42                   |
| 5M33.PDB | OE1, B_GLN_133 | NE2, B_GLN_129 | HE22, B_GLN_129 | 2.83    | 2.06    | 21.87                  |
| 5M33.PDB | OD1, B_ASP_189 | OG, B_SER_160  | HG, B_SER_160   | 2.86    | 2.13    | 25.03                  |
| 5M33.PDB | OD2, B_ASP_128 | NE2, B_HIS_191 | HE2, B_HIS_191  | 2.69    | 1.83    | 4.41                   |
| 5M33.PDB | OD1, B_ASP_196 | NE2, B_GLN_192 | HE21, B_GLN_192 | 2.92    | 2.12    | 17.81                  |

Table 1769: 5M33-specific side chain hydrogen bonding analysis. In this table, a PDB file is specified with a four-letter PDB ID, except that the names of the PDB files corresponding to the single NMR structural model split from the NMR ensemble is specified with a four-letter PDB ID in addition to a hyphen followed by the single NMR structural model numeric ID, the residue naming scheme is **Chain ID\_residue name\_residue number**,  $\angle ADH$  represents the angle formed by acceptor (A), donor (D) and hydrogen (H) ( $\angle ADH$ ).

| PDB      | Acceptor (A)   | Donor (D)      | Hydrogen (H)   | D-A (Å) | H-A (Å) | $\angle ADH(^{\circ})$ |
|----------|----------------|----------------|----------------|---------|---------|------------------------|
| 5M3D.PDB | OD2, A_ASP_195 | NZ, A_LYS_124  | HZ1, A_LYS_124 | 2.68    | 1.86    | 18.64                  |
| 5M3D.PDB | NE2, A_HIS_151 | OH, A_TYR_127  | HH, A_TYR_127  | 2.90    | 2.07    | 7.76                   |
| 5M3D.PDB | OG1, A_SER_159 | OG1, A_THR_163 | HG1, A_THR_163 | 2.65    | 1.81    | 3.28                   |
| 5M3D.PDB | OD2, A_ASP_128 | NE2, A_HIS_191 | HE2, A_HIS_191 | 2.68    | 1.84    | 10.19                  |
| 5M3D.PDB | OD2, B_ASP_128 | NE2, B_HIS_191 | HE2, B_HIS_191 | 2.60    | 1.78    | 15.29                  |
| 5M3D.PDB | OH, C_TYR_127  | NE2, C_HIS_151 | HE2, C_HIS_151 | 2.47    | 1.64    | 11.96                  |
| 5M3D.PDB | OD2, C_ASP_128 | NE2, C_HIS_191 | HE2, C_HIS_191 | 2.54    | 1.74    | 17.73                  |
| 5M3D.PDB | OD2, D_ASP_128 | NE2, D_HIS_191 | HE2, D_HIS_191 | 2.53    | 1.71    | 14.84                  |

Table 1770: 5M3D-specific side chain hydrogen bonding analysis. In this table, a PDB file is specified with a four-letter PDB ID, except that the names of the PDB files corresponding to the single NMR structural model split from the NMR ensemble is specified with a four-letter PDB ID in addition to a hyphen followed by the single NMR structural model numeric ID, the residue naming scheme is **Chain ID\_residue name\_residue number**,  $\angle ADH$  represents the angle formed by acceptor (A), donor (D) and hydrogen (H) ( $\angle ADH$ ).

| PDB      | Acceptor (A)   | Donor (D)      | Hydrogen (H)   | D-A (Å) | H-A (Å) | $\angle ADH(^{\circ})$ |
|----------|----------------|----------------|----------------|---------|---------|------------------------|
| 5M3T.PDB | NE2, A_HIS_151 | OH, A_TYR_127  | HH, A_TYR_127  | 2.73    | 1.92    | 14.40                  |
| 5M3T.PDB | OG, A_SER_159  | OG1, A_THR_161 | HG1, A_THR_161 | 2.93    | 2.10    | 8.83                   |
| 5M3T.PDB | OD1, A_ASP_128 | NE2, A_HIS_191 | HE2, A_HIS_191 | 2.70    | 1.84    | 4.47                   |
| 5M3T.PDB | OD2, B_ASP_195 | NZ, B_LYS_124  | HZ1, B_LYS_124 | 2.94    | 2.15    | 23.24                  |
| 5M3T.PDB | NE2, B_HIS_151 | OH, B_TYR_127  | HH, B_TYR_127  | 2.86    | 2.03    | 6.62                   |
| 5M3T.PDB | OD1, B_ASP_128 | NE2, B_HIS_191 | HE2, B_HIS_191 | 2.76    | 1.92    | 11.16                  |

Table 1771: 5M3T-specific side chain hydrogen bonding analysis. In this table, a PDB file is specified with a four-letter PDB ID, except that the names of the PDB files corresponding to the single NMR structural model split from the NMR ensemble is specified with a four-letter PDB ID in addition to a hyphen followed by the single NMR structural model numeric ID, the residue naming scheme is **Chain ID\_residue name\_residue number**,  $\angle ADH$  represents the angle formed by acceptor (A), donor (D) and hydrogen (H) ( $\angle ADH$ ).



| PDB      | Acceptor (A)   | Donor (D)      | Hydrogen (H)   | D-A (Å) | H-A (Å) | $\angle ADH(^{\circ})$ |
|----------|----------------|----------------|----------------|---------|---------|------------------------|
| 5M4R.PDB | OG, A_SER_159  | OG1, A_THR_163 | HG1, A_THR_163 | 2.93    | 2.14    | 15.31                  |
| 5M4R.PDB | OD2, A_ASP_128 | NE2, A_HIS_191 | HE2, A_HIS_191 | 2.54    | 1.73    | 17.27                  |
| 5M4R.PDB | OG, B_SER_159  | OG1, B_THR_163 | HG1, B_THR_163 | 2.85    | 2.02    | 5.63                   |
| 5M4R.PDB | OG, C_SER_159  | OG1, C_THR_163 | HG1, C_THR_163 | 2.95    | 2.12    | 7.91                   |
| 5M4R.PDB | OD2, E_ASP_128 | NE2, E_HIS_191 | HE2, E_HIS_191 | 2.53    | 1.73    | 17.17                  |

Table 1772: 5M4R-specific side chain hydrogen bonding analysis. In this table, a PDB file is specified with a four-letter PDB ID, except that the names of the PDB files corresponding to the single NMR structural model split from the NMR ensemble is specified with a four-letter PDB ID in addition to a hyphen followed by the single NMR structural model numeric ID, the residue naming scheme is **Chain ID\_residue name\_residue number**,  $\angle ADH$  represents the angle formed by acceptor (A), donor (D) and hydrogen (H) ( $\angle ADH$ ).

| PDB      | Acceptor (A)   | Donor (D)      | Hydrogen (H)    | D-A (Å) | H-A (Å) | $\angle ADH(^{\circ})$ |
|----------|----------------|----------------|-----------------|---------|---------|------------------------|
| 5T6P.PDB | OD1, A_ASP_75  | NE, A_ARG_24   | HE, A_ARG_24    | 2.87    | 2.06    | 16.15                  |
| 5T6P.PDB | OD1, A_ASP_87  | NH2, A_ARG_66  | HH22, A_ARG_66  | 2.87    | 2.03    | 10.92                  |
| 5T6P.PDB | OG, A_SER_136  | NE2, A_GLN_129 | HE22, A_GLN_129 | 2.81    | 1.96    | 6.44                   |
| 5T6P.PDB | OG, A_SER_182  | NE1, A_TRP_153 | HE1, A_TRP_153  | 2.84    | 2.00    | 11.05                  |
| 5T6P.PDB | OD1, A_ASP_175 | OG1, A_THR_177 | HG1, A_THR_177  | 2.59    | 1.78    | 13.64                  |
| 5T6P.PDB | OD1, A_ASN_166 | OG, A_SER_182  | HG, A_SER_182   | 2.54    | 1.72    | 9.61                   |
| 5T6P.PDB | OE1, B_GLU_46  | NE, B_ARG_38   | HE, B_ARG_38    | 2.70    | 1.96    | 26.33                  |
| 5T6P.PDB | OE1, A_GLN_43  | NE2, B_GLN_39  | HE22, B_GLN_39  | 2.71    | 1.86    | 5.14                   |
| 5T6P.PDB | OD1, B_ASN_74  | NE, B_ARG_72   | HE, B_ARG_72    | 2.87    | 2.14    | 26.22                  |
| 5T6P.PDB | OD1, C_ASP_75  | NE, C_ARG_24   | HE, C_ARG_24    | 2.92    | 2.14    | 20.59                  |
| 5T6P.PDB | OD1, C_ASP_75  | NH2, C_ARG_24  | HH21, C_ARG_24  | 2.94    | 2.18    | 23.70                  |
| 5T6P.PDB | OE1, D_GLN_39  | NE2, C_GLN_43  | HE22, C_GLN_43  | 3.00    | 2.17    | 12.88                  |
| 5T6P.PDB | OG, C_SER_136  | NE2, C_GLN_129 | HE22, C_GLN_129 | 2.79    | 1.95    | 11.34                  |
| 5T6P.PDB | OG, C_SER_182  | NE1, C_TRP_153 | HE1, C_TRP_153  | 2.89    | 2.07    | 15.50                  |
| 5T6P.PDB | OD1, C_ASP_175 | OG1, C_THR_177 | HG1, C_THR_177  | 2.69    | 1.86    | 7.21                   |
| 5T6P.PDB | OD1, C_ASN_166 | OG, C_SER_182  | HG, C_SER_182   | 2.45    | 1.64    | 11.11                  |
| 5T6P.PDB | OG, C_SER_213  | OG1, C_THR_198 | HG1, C_THR_198  | 3.00    | 2.20    | 14.46                  |
| 5T6P.PDB | OE1, C_GLN_43  | NE2, D_GLN_39  | HE22, D_GLN_39  | 2.79    | 1.94    | 7.20                   |
| 5T6P.PDB | OD1, D_ASN_74  | NE, D_ARG_72   | HE, D_ARG_72    | 2.79    | 2.07    | 27.15                  |
| 5T6P.PDB | OG, D_SER_182  | NE1, D_TRP_157 | HE1, D_TRP_157  | 2.97    | 2.13    | 11.56                  |
| 5T6P.PDB | OE1, C_GLU_39  | NE, E_ARG_5    | HE, E_ARG_5     | 2.86    | 2.02    | 10.72                  |

Table 1773: 5T6P-specific side chain hydrogen bonding analysis. In this table, a PDB file is specified with a four-letter PDB ID, except that the names of the PDB files corresponding to the single NMR structural model split from the NMR ensemble is specified with a four-letter PDB ID in addition to a hyphen followed by the single NMR structural model numeric ID, the residue naming scheme is **Chain ID\_residue name\_residue number**,  $\angle ADH$  represents the angle formed by acceptor (A), donor (D) and hydrogen (H) ( $\angle ADH$ ).

| PDB      | Acceptor (A)   | Donor (D)      | Hydrogen (H)    | D-A (Å) | H-A (Å) | $\angle ADH(^{\circ})$ |
|----------|----------------|----------------|-----------------|---------|---------|------------------------|
| 5T78.PDB | OE1, B_GLN_39  | NE2, A_GLN_43  | HE22, A_GLN_43  | 2.92    | 2.08    | 9.79                   |
| 5T78.PDB | OD2, A_ASP_87  | NH1, A_ARG_66  | HH12, A_ARG_66  | 2.55    | 1.80    | 24.29                  |
| 5T78.PDB | OD1, A_ASP_87  | NH2, A_ARG_66  | HH22, A_ARG_66  | 2.87    | 2.03    | 11.23                  |
| 5T78.PDB | OG, A_SER_136  | NE2, A_GLN_129 | HE22, A_GLN_129 | 2.86    | 2.01    | 3.70                   |
| 5T78.PDB | OG, A_SER_182  | NE1, A_TRP_153 | HE1, A_TRP_153  | 2.68    | 1.86    | 12.79                  |
| 5T78.PDB | OD1, A_ASP_175 | OG1, A_THR_177 | HG1, A_THR_177  | 2.57    | 1.74    | 7.68                   |
| 5T78.PDB | OD1, A_ASN_166 | OG, A_SER_182  | HG, A_SER_182   | 2.63    | 1.89    | 23.17                  |
| 5T78.PDB | OD2, A_ASP_156 | ND1, A_HIS_194 | HD1, A_HIS_194  | 2.73    | 1.92    | 16.43                  |
| 5T78.PDB | ND1, A_HIS_203 | OG1, A_THR_205 | HG1, A_THR_205  | 2.99    | 2.26    | 25.09                  |
| 5T78.PDB | OG1, A_THR_198 | OG, A_SER_213  | HG, A_SER_213   | 2.76    | 1.99    | 20.46                  |
| 5T78.PDB | OE1, B_GLU_46  | NE, B_ARG_38   | HE, B_ARG_38    | 2.94    | 2.16    | 20.63                  |
| 5T78.PDB | OH, B_TYR_94   | NH1, B_ARG_38  | HH11, B_ARG_38  | 2.90    | 2.09    | 15.42                  |
| 5T78.PDB | OD1, B_ASP_90  | NH1, B_ARG_38  | HH12, B_ARG_38  | 2.89    | 2.09    | 17.62                  |
| 5T78.PDB | OE1, A_GLN_43  | NE2, B_GLN_39  | HE22, B_GLN_39  | 2.63    | 1.78    | 5.56                   |
| 5T78.PDB | OD1, B_ASN_74  | NE, B_ARG_72   | HE, B_ARG_72    | 2.69    | 1.95    | 25.68                  |
| 5T78.PDB | OE1, B_GLN_39  | OH, B_TYR_95   | HH, B_TYR_95    | 2.91    | 2.11    | 14.46                  |
| 5T78.PDB | OG1, B_THR_185 | OG1, B_THR_140 | HG1, B_THR_140  | 2.97    | 2.14    | 5.19                   |
| 5T78.PDB | OE1, A_GLU_39  | NH1, F_ARG_5   | HH11, F_ARG_5   | 2.68    | 1.83    | 9.33                   |
| 5T78.PDB | OD1, C_ASP_75  | NE, C_ARG_24   | HE, C_ARG_24    | 2.96    | 2.16    | 17.61                  |
| 5T78.PDB | OH, C_TYR_37   | ND2, C_ASN_33  | HD21, C_ASN_33  | 2.96    | 2.18    | 21.06                  |
| 5T78.PDB | OD2, C_ASP_87  | NH1, C_ARG_66  | HH12, C_ARG_66  | 2.35    | 1.56    | 19.31                  |
| 5T78.PDB | OG, C_SER_182  | NE1, C_TRP_153 | HE1, C_TRP_153  | 2.84    | 2.01    | 13.01                  |
| 5T78.PDB | OD1, C_ASP_175 | OG1, C_THR_177 | HG1, C_THR_177  | 2.53    | 1.70    | 9.09                   |
| 5T78.PDB | OD1, C_ASN_166 | OG, C_SER_182  | HG, C_SER_182   | 2.85    | 2.09    | 21.73                  |
| 5T78.PDB | OD2, C_ASP_156 | ND1, C_HIS_194 | HD1, C_HIS_194  | 2.58    | 1.78    | 18.23                  |
| 5T78.PDB | ND1, C_HIS_203 | OG1, C_THR_205 | HG1, C_THR_205  | 3.00    | 2.26    | 23.83                  |
| 5T78.PDB | OE1, D_GLU_46  | NE, D_ARG_38   | HE, D_ARG_38    | 2.65    | 1.91    | 25.36                  |
| 5T78.PDB | OH, D_TYR_94   | NH1, D_ARG_38  | HH11, D_ARG_38  | 2.88    | 2.06    | 14.14                  |
| 5T78.PDB | OD1, D_ASP_90  | NH1, D_ARG_38  | HH12, D_ARG_38  | 2.85    | 2.05    | 16.93                  |
| 5T78.PDB | OE1, C_GLN_43  | NE2, D_GLN_39  | HE22, D_GLN_39  | 2.72    | 1.87    | 5.23                   |
| 5T78.PDB | OD1, D_ASN_74  | NE, D_ARG_72   | HE, D_ARG_72    | 2.71    | 2.01    | 29.42                  |
| 5T78.PDB | OE1, D_GLN_39  | OH, D_TYR_95   | HH, D_TYR_95    | 2.98    | 2.17    | 11.35                  |
| 5T78.PDB | OG, D_SER_182  | NE1, D_TRP_157 | HE1, D_TRP_157  | 2.99    | 2.19    | 18.03                  |
| 5T78.PDB | OD1, C_ASN_142 | NE2, D_HIS_167 | HE2, D_HIS_167  | 2.85    | 2.00    | 9.68                   |
| 5T78.PDB | OE1, C_GLU_39  | NH1, E_ARG_5   | HH11, E_ARG_5   | 2.69    | 1.87    | 13.16                  |

Table 1774: 5T78-specific side chain hydrogen bonding analysis. In this table, a PDB file is specified with a four-letter PDB ID, except that the names of the PDB files corresponding to the single NMR structural model split from the NMR ensemble is specified with a four-letter PDB ID in addition to a hyphen followed by the single NMR structural model numeric ID, the residue naming scheme is **Chain ID\_residue name\_residue number**,  $\angle ADH$  represents the angle formed by acceptor (A), donor (D) and hydrogen (H) ( $\angle ADH$ ).

| PDB      | Acceptor (A)    | Donor (D)      | Hydrogen (H)    | D-A (Å) | H-A (Å) | $\angle ADH(^{\circ})$ |
|----------|-----------------|----------------|-----------------|---------|---------|------------------------|
| 5U3J.PDB | OE1, H_GLN_81   | NE, H_ARG_19   | HE, H_ARG_19    | 2.98    | 2.21    | 22.79                  |
| 5U3J.PDB | OD2, H_ASP_53   | NE1, H_TRP_33  | HE1, H_TRP_33   | 2.97    | 2.22    | 24.73                  |
| 5U3J.PDB | OE1, H_GLU_46   | NE, H_ARG_38   | HE, H_ARG_38    | 2.88    | 2.05    | 13.82                  |
| 5U3J.PDB | OD1, H_ASP_86   | NH1, H_ARG_38  | HH12, H_ARG_38  | 2.85    | 2.09    | 23.00                  |
| 5U3J.PDB | OG, H_SER_35    | NE1, H_TRP_47  | HE1, H_TRP_47   | 2.44    | 1.73    | 27.73                  |
| 5U3J.PDB | OE1, H_GLU_58   | NE, H_ARG_50   | HE, H_ARG_50    | 2.83    | 2.12    | 29.07                  |
| 5U3J.PDB | OE1, H_GLU_58   | NH2, H_ARG_50  | HH21, H_ARG_50  | 2.79    | 2.08    | 29.38                  |
| 5U3J.PDB | OD2, H_ASP_86   | NH1, H_ARG_66  | HH12, H_ARG_66  | 2.57    | 1.73    | 9.26                   |
| 5U3J.PDB | OD1, H_ASP_86   | NH2, H_ARG_66  | HH22, H_ARG_66  | 2.89    | 2.04    | 5.32                   |
| 5U3J.PDB | OD1, L_ASP_31   | OH, H_TYR_100K | HH, H_TYR_100K  | 2.88    | 2.04    | 5.22                   |
| 5U3J.PDB | OG, H_SER_180   | NE1, H_TRP_154 | HE1, H_TRP_154  | 2.98    | 2.15    | 12.85                  |
| 5U3J.PDB | OE1, H_GLU_100F | OH, L_TYR_32   | HH, L_TYR_32    | 2.62    | 1.91    | 27.84                  |
| 5U3J.PDB | OE1, L_GLN_89   | OH, L_TYR_36   | HH, L_TYR_36    | 2.74    | 1.93    | 13.79                  |
| 5U3J.PDB | OE1, H_GLN_39   | NE2, L_GLN_38  | HE22, L_GLN_38  | 2.66    | 1.83    | 12.57                  |
| 5U3J.PDB | OG, L_SER_131   | NE2, L_GLN_124 | HE22, L_GLN_124 | 2.67    | 1.82    | 7.69                   |
| 5U3J.PDB | OG, L_SER_177   | NE1, L_TRP_148 | HE1, L_TRP_148  | 2.81    | 2.02    | 19.92                  |

Table 1775: 5U3J-specific side chain hydrogen bonding analysis. In this table, a PDB file is specified with a four-letter PDB ID, except that the names of the PDB files corresponding to the single NMR structural model split from the NMR ensemble is specified with a four-letter PDB ID in addition to a hyphen followed by the single NMR structural model numeric ID, the residue naming scheme is **Chain ID\_residue name\_residue number**,  $\angle ADH$  represents the angle formed by acceptor (A), donor (D) and hydrogen (H) ( $\angle ADH$ ).

| PDB      | Acceptor (A)    | Donor (D)       | Hydrogen (H)     | D-A (Å) | H-A (Å) | $\angle ADH(^{\circ})$ |
|----------|-----------------|-----------------|------------------|---------|---------|------------------------|
| 5U3N.PDB | OE1, H_GLU_46   | NE, H_ARG_38    | HE, H_ARG_38     | 2.91    | 2.07    | 9.07                   |
| 5U3N.PDB | OH, H_TYR_90    | NH1, H_ARG_38   | HH11, H_ARG_38   | 3.00    | 2.21    | 20.04                  |
| 5U3N.PDB | OD2, H_ASP_58   | NE, H_ARG_50    | HE, H_ARG_50     | 2.78    | 1.98    | 18.36                  |
| 5U3N.PDB | OD2, A_ASP_674  | NH1, H_ARG_52A  | HH12, H_ARG_52A  | 3.00    | 2.24    | 24.41                  |
| 5U3N.PDB | OD1, H_ASP_53   | NH2, H_ARG_52A  | HH21, H_ARG_52A  | 2.93    | 2.18    | 25.35                  |
| 5U3N.PDB | OD2, H_ASP_86   | NH1, H_ARG_66   | HH12, H_ARG_66   | 2.73    | 1.91    | 14.46                  |
| 5U3N.PDB | OD1, H_ASP_73   | NE, H_ARG_71    | HE, H_ARG_71     | 2.93    | 2.13    | 17.92                  |
| 5U3N.PDB | OE1, H_GLU_100E | NE, H_ARG_100B  | HE, H_ARG_100B   | 2.83    | 1.97    | 4.42                   |
| 5U3N.PDB | OE2, H_GLU_100E | NH2, H_ARG_100B | HH21, H_ARG_100B | 2.91    | 2.08    | 12.18                  |
| 5U3N.PDB | OD1, L_ASP_31   | NH2, H_ARG_100B | HH22, H_ARG_100B | 2.97    | 2.15    | 14.50                  |
| 5U3N.PDB | OD1, L_ASN_34   | ND2, H_ASN_100J | HD21, H_ASN_100J | 2.72    | 1.86    | 2.61                   |
| 5U3N.PDB | OG, H_SER_180   | NE1, H_TRP_154  | HE1, H_TRP_154   | 2.95    | 2.11    | 9.10                   |
| 5U3N.PDB | OD1, L_ASN_138  | NE2, H_HIS_164  | HE2, H_HIS_164   | 2.92    | 2.21    | 29.54                  |
| 5U3N.PDB | OD1, H_ASP_144  | NE2, H_GLN_171  | HE22, H_GLN_171  | 2.99    | 2.19    | 18.08                  |
| 5U3N.PDB | OH, L_TYR_140   | OG, L_SER_12    | HG, L_SER_12     | 2.60    | 1.87    | 23.71                  |
| 5U3N.PDB | OE1, L_GLN_89   | ND2, L_ASN_34   | HD22, L_ASN_34   | 2.99    | 2.18    | 18.14                  |
| 5U3N.PDB | OE1, L_GLN_89   | OH, L_TYR_36    | HH, L_TYR_36     | 2.64    | 1.80    | 1.88                   |
| 5U3N.PDB | OG, L_SER_131   | NE2, L_GLN_124  | HE22, L_GLN_124  | 2.80    | 1.94    | 3.81                   |
| 5U3N.PDB | OD1, L_ASP_105  | OH, L_TYR_140   | HH, L_TYR_140    | 2.61    | 1.87    | 24.55                  |
| 5U3N.PDB | OG, L_SER_177   | NE1, L_TRP_148  | HE1, L_TRP_148   | 2.84    | 2.01    | 13.43                  |
| 5U3N.PDB | OD1, L_ASP_170  | OG1, L_THR_172  | HG1, L_THR_172   | 2.63    | 1.80    | 7.71                   |
| 5U3N.PDB | OD2, L_ASP_105  | OH, L_TYR_173   | HH, L_TYR_173    | 2.66    | 1.88    | 16.93                  |

Table 1776: 5U3N-specific side chain hydrogen bonding analysis. In this table, a PDB file is specified with a four-letter PDB ID, except that the names of the PDB files corresponding to the single NMR structural model split from the NMR ensemble is specified with a four-letter PDB ID in addition to a hyphen followed by the single NMR structural model numeric ID, the residue naming scheme is **Chain ID\_residue name\_residue number**,  $\angle ADH$  represents the angle formed by acceptor (A), donor (D) and hydrogen (H) ( $\angle ADH$ ).

| PDB      | Acceptor (A)   | Donor (D)      | Hydrogen (H)    | D-A (Å) | H-A (Å) | $\angle ADH(^{\circ})$ |
|----------|----------------|----------------|-----------------|---------|---------|------------------------|
| 5UCB.PDB | OG, H_SER_33   | NE2, H_HIS_35  | HE2, H_HIS_35   | 2.88    | 2.09    | 19.50                  |
| 5UCB.PDB | OE1, H_GLU_46  | NE, H_ARG_38   | HE, H_ARG_38    | 2.85    | 2.03    | 15.54                  |
| 5UCB.PDB | OH, H_TYR_90   | NH1, H_ARG_38  | HH11, H_ARG_38  | 2.94    | 2.12    | 15.88                  |
| 5UCB.PDB | OD1, H_ASP_86  | NH1, H_ARG_38  | HH12, H_ARG_38  | 2.88    | 2.08    | 18.54                  |
| 5UCB.PDB | OE1, L_GLN_38  | NE2, H_GLN_39  | HE22, H_GLN_39  | 2.96    | 2.12    | 9.92                   |
| 5UCB.PDB | OG, H_SER_50   | NE1, H_TRP_47  | HE1, H_TRP_47   | 2.72    | 1.98    | 25.90                  |
| 5UCB.PDB | OD2, H_ASP_86  | NH1, H_ARG_66  | HH12, H_ARG_66  | 2.75    | 1.90    | 5.99                   |
| 5UCB.PDB | OD1, H_ASP_72  | OG, H_SER_74   | HG, H_SER_74    | 2.60    | 1.83    | 20.07                  |
| 5UCB.PDB | OD1, H_ASN_197 | OG, H_SER_153  | HG, H_SER_153   | 2.85    | 2.06    | 15.76                  |
| 5UCB.PDB | OG, H_SER_180  | NE1, H_TRP_154 | HE1, H_TRP_154  | 2.92    | 2.07    | 7.16                   |
| 5UCB.PDB | OD1, H_ASP_144 | NE2, H_GLN_171 | HE22, H_GLN_171 | 2.78    | 1.99    | 18.86                  |
| 5UCB.PDB | OG, H_SER_188  | OH, H_TYR_194  | HH, H_TYR_194   | 2.72    | 1.90    | 9.93                   |
| 5UCB.PDB | OD1, H_ASP_208 | ND2, H_ASN_197 | HD22, H_ASN_197 | 2.80    | 1.95    | 7.44                   |
| 5UCB.PDB | OE1, L_GLN_3   | OG, L_SER_26   | HG, L_SER_26    | 2.61    | 1.78    | 7.17                   |
| 5UCB.PDB | OD2, B_ASP_51  | OG, L_SER_30   | HG, L_SER_30    | 2.58    | 1.81    | 20.19                  |
| 5UCB.PDB | OE1, L_GLN_89  | OH, L_TYR_36   | HH, L_TYR_36    | 2.64    | 1.84    | 15.57                  |
| 5UCB.PDB | OH, L_TYR_86   | NE2, L_GLN_37  | HE21, L_GLN_37  | 2.99    | 2.15    | 9.80                   |
| 5UCB.PDB | OE1, H_GLN_39  | NE2, L_GLN_38  | HE22, L_GLN_38  | 2.95    | 2.13    | 14.86                  |
| 5UCB.PDB | OD2, L_ASP_82  | NE, L_ARG_61   | HE, L_ARG_61    | 2.82    | 2.01    | 16.79                  |
| 5UCB.PDB | OD1, L_ASP_82  | NH2, L_ARG_61  | HH21, L_ARG_61  | 2.85    | 1.99    | 4.65                   |
| 5UCB.PDB | OG1, L_THR_22  | OG1, L_THR_72  | HG1, L_THR_72   | 2.96    | 2.18    | 19.19                  |
| 5UCB.PDB | OE1, L_GLU_165 | NZ, L_LYS_103  | HZ3, L_LYS_103  | 2.77    | 1.90    | 9.89                   |
| 5UCB.PDB | OG, L_SER_131  | NE2, L_GLN_124 | HE22, L_GLN_124 | 2.73    | 1.87    | 2.66                   |
| 5UCB.PDB | OG, L_SER_177  | NE1, L_TRP_148 | HE1, L_TRP_148  | 2.92    | 2.09    | 12.30                  |
| 5UCB.PDB | OE1, L_GLN_155 | ND2, L_ASN_158 | HD21, L_ASN_158 | 2.98    | 2.15    | 12.35                  |
| 5UCB.PDB | OD1, L_ASP_170 | OG1, L_THR_172 | HG1, L_THR_172  | 2.71    | 1.89    | 8.99                   |
| 5UCB.PDB | OE2, L_GLU_105 | OH, L_TYR_173  | HH, L_TYR_173   | 2.61    | 1.81    | 15.35                  |
| 5UCB.PDB | OD1, B_ASP_132 | NZ, B_LYS_16   | HZ1, B_LYS_16   | 2.90    | 2.15    | 27.66                  |
| 5UCB.PDB | OE2, B_GLU_87  | OH, B_TYR_43   | HH, B_TYR_43    | 2.72    | 1.91    | 12.68                  |
| 5UCB.PDB | OD1, B_ASP_51  | OG, B_SER_46   | HG, B_SER_46    | 2.83    | 2.02    | 12.78                  |
| 5UCB.PDB | OE1, B_GLU_87  | OG, B_SER_47   | HG, B_SER_47    | 2.62    | 1.82    | 14.05                  |
| 5UCB.PDB | OD1, B_ASP_153 | OH, B_TYR_100  | HH, B_TYR_100   | 2.55    | 1.73    | 8.75                   |
| 5UCB.PDB | OD2, B_ASP_101 | NH1, B_ARG_103 | HH12, B_ARG_103 | 2.89    | 2.11    | 20.47                  |
| 5UCB.PDB | OE2, B_GLU_104 | NE, B_ARG_107  | HE, B_ARG_107   | 2.91    | 2.05    | 4.26                   |
| 5UCB.PDB | OD1, B_ASP_117 | ND1, B_HIS_133 | HD1, B_HIS_133  | 2.95    | 2.15    | 18.23                  |
| 5UCB.PDB | OG, H_SER_58   | NZ, B_LYS_142  | HZ3, B_LYS_142  | 2.83    | 1.96    | 8.82                   |
| 5UCB.PDB | OD1, L_ASP_91  | NH2, B_ARG_144 | HH21, B_ARG_144 | 2.84    | 2.03    | 16.18                  |

Table 1777: 5UCB-specific side chain hydrogen bonding analysis. In this table, a PDB file is specified with a four-letter PDB ID, except that the names of the PDB files corresponding to the single NMR structural model split from the NMR ensemble is specified with a four-letter PDB ID in addition to a hyphen followed by the single NMR structural model numeric ID, the residue naming scheme is **Chain ID\_residue name\_residue number**,  $\angle ADH$  represents the angle formed by acceptor (A), donor (D) and hydrogen (H) ( $\angle ADH$ ).

| PDB      | Acceptor (A)   | Donor (D)      | Hydrogen (H)    | D-A (Å) | H-A (Å) | $\angle ADH(^{\circ})$ |
|----------|----------------|----------------|-----------------|---------|---------|------------------------|
| 5UK0.PDB | OD1, F_ASP_590 | ND2, B_ASN_560 | HD22, B_ASN_560 | 2.72    | 1.94    | 19.72                  |
| 5UK0.PDB | OD1, D_ASP_586 | NH2, C_ARG_311 | HH22, C_ARG_311 | 2.98    | 2.20    | 18.56                  |
| 5UK0.PDB | OD1, B_ASP_590 | ND2, D_ASN_560 | HD22, D_ASN_560 | 2.73    | 1.95    | 20.06                  |
| 5UK0.PDB | OH, D_TYR_659  | ND2, D_ASN_628 | HD22, D_ASN_628 | 2.78    | 1.98    | 17.11                  |

Table 1778: 5UK0-specific side chain hydrogen bonding analysis. In this table, a PDB file is specified with a four-letter PDB ID, except that the names of the PDB files corresponding to the single NMR structural model split from the NMR ensemble is specified with a four-letter PDB ID in addition to a hyphen followed by the single NMR structural model numeric ID, the residue naming scheme is **Chain ID\_residue name\_residue number**,  $\angle ADH$  represents the angle formed by acceptor (A), donor (D) and hydrogen (H) ( $\angle ADH$ ).

| PDB      | Acceptor (A)   | Donor (D)      | Hydrogen (H)    | D-A (Å) | H-A (Å) | $\angle ADH(^{\circ})$ |
|----------|----------------|----------------|-----------------|---------|---------|------------------------|
| 5VXJ.PDB | OD2, A_ASP_309 | NH2, A_ARG_55  | HH21, A_ARG_55  | 2.90    | 2.12    | 21.39                  |
| 5VXJ.PDB | OG, A_SER_302  | NZ, A_LYS_62   | HZ2, A_LYS_62   | 2.77    | 1.91    | 12.44                  |
| 5VXJ.PDB | OG, A_SER_306  | NZ, A_LYS_62   | HZ3, A_LYS_62   | 2.75    | 1.92    | 16.95                  |
| 5VXJ.PDB | OD2, A_ASP_97  | NE, A_ARG_101  | HE, A_ARG_101   | 2.80    | 1.97    | 13.39                  |
| 5VXJ.PDB | OE2, A_GLU_229 | OH, A_TYR_153  | HH, A_TYR_153   | 2.70    | 1.94    | 21.05                  |
| 5VXJ.PDB | OD1, A_ASP_287 | OH, A_TYR_164  | HH, A_TYR_164   | 2.72    | 1.96    | 22.05                  |
| 5VXJ.PDB | OE2, A_GLU_268 | NE2, A_GLN_191 | HE22, A_GLN_191 | 2.93    | 2.12    | 16.99                  |
| 5VXJ.PDB | OD1, A_ASP_254 | NZ, A_LYS_203  | HZ2, A_LYS_203  | 2.48    | 1.62    | 10.37                  |
| 5VXJ.PDB | OD2, A_ASP_166 | NZ, A_LYS_205  | HZ2, A_LYS_205  | 2.60    | 1.73    | 10.82                  |
| 5VXJ.PDB | OD2, A_ASP_166 | OH, A_TYR_206  | HH, A_TYR_206   | 2.59    | 1.78    | 13.29                  |
| 5VXJ.PDB | OD1, A_ASN_249 | OG1, A_THR_251 | HG1, A_THR_251  | 2.61    | 1.88    | 24.99                  |
| 5VXJ.PDB | OD1, A_ASN_58  | ND2, A_ASN_305 | HD21, A_ASN_305 | 2.96    | 2.14    | 16.38                  |
| 5VXJ.PDB | OE1, B_GLN_82  | NE, B_ARG_19   | HE, B_ARG_19    | 2.47    | 1.66    | 15.76                  |
| 5VXJ.PDB | OE2, B_GLU_46  | NE, B_ARG_38   | HE, B_ARG_38    | 2.93    | 2.12    | 17.64                  |
| 5VXJ.PDB | OH, B_TYR_94   | NH1, B_ARG_38  | HH11, B_ARG_38  | 2.80    | 1.98    | 13.19                  |
| 5VXJ.PDB | OD1, B_ASP_90  | NH1, B_ARG_38  | HH12, B_ARG_38  | 2.76    | 1.91    | 7.08                   |
| 5VXJ.PDB | OD1, B_ASN_35  | NE, B_ARG_50   | HE, B_ARG_50    | 2.65    | 1.82    | 11.22                  |
| 5VXJ.PDB | OE1, I_GLU_200 | NH1, B_ARG_50  | HH12, B_ARG_50  | 2.92    | 2.07    | 7.25                   |
| 5VXJ.PDB | OD2, B_ASP_90  | NH1, B_ARG_67  | HH12, B_ARG_67  | 2.82    | 2.01    | 16.67                  |
| 5VXJ.PDB | OD1, B_ASP_90  | NH2, B_ARG_67  | HH22, B_ARG_67  | 2.96    | 2.12    | 11.06                  |
| 5VXJ.PDB | OD1, B_ASN_84  | NE2, B_GLN_82  | HE21, B_GLN_82  | 2.95    | 2.09    | 2.81                   |
| 5VXJ.PDB | OG1, B_THR_107 | ND2, B_ASN_97  | HD21, B_ASN_97  | 2.64    | 1.86    | 19.39                  |
| 5VXJ.PDB | OE1, I_GLU_201 | OH, B_TYR_105  | HH, B_TYR_105   | 2.51    | 1.70    | 12.69                  |
| 5VXJ.PDB | OD2, C_ASP_309 | NH2, C_ARG_55  | HH21, C_ARG_55  | 2.97    | 2.17    | 18.00                  |
| 5VXJ.PDB | OG, C_SER_302  | NZ, C_LYS_62   | HZ2, C_LYS_62   | 2.61    | 1.73    | 6.54                   |
| 5VXJ.PDB | OE2, C_GLU_154 | OG, C_SER_82   | HG, C_SER_82    | 2.58    | 1.81    | 19.25                  |
| 5VXJ.PDB | OD2, C_ASP_97  | NE, C_ARG_101  | HE, C_ARG_101   | 2.84    | 2.03    | 16.71                  |
| 5VXJ.PDB | OD1, C_ASP_287 | OH, C_TYR_164  | HH, C_TYR_164   | 2.77    | 1.96    | 12.03                  |
| 5VXJ.PDB | OE2, C_GLU_268 | NE2, C_GLN_191 | HE22, C_GLN_191 | 2.80    | 1.97    | 12.09                  |
| 5VXJ.PDB | OE1, C_GLU_201 | NZ, C_LYS_197  | HZ3, C_LYS_197  | 2.59    | 1.85    | 27.46                  |
| 5VXJ.PDB | OD1, C_ASP_254 | NZ, C_LYS_203  | HZ2, C_LYS_203  | 2.69    | 1.87    | 19.49                  |
| 5VXJ.PDB | OD2, C_ASP_166 | NZ, C_LYS_205  | HZ2, C_LYS_205  | 2.85    | 1.99    | 12.15                  |
| 5VXJ.PDB | OD2, C_ASP_166 | OH, C_TYR_206  | HH, C_TYR_206   | 2.58    | 1.76    | 10.37                  |
| 5VXJ.PDB | OD1, C_ASN_249 | OG1, C_THR_251 | HG1, C_THR_251  | 2.56    | 1.78    | 18.84                  |
| 5VXJ.PDB | OD1, C_ASN_58  | ND2, C_ASN_305 | HD21, C_ASN_305 | 2.84    | 2.04    | 17.79                  |
| 5VXJ.PDB | OD1, C_ASN_140 | NE, D_ARG_19   | HE, D_ARG_19    | 2.55    | 1.80    | 23.66                  |
| 5VXJ.PDB | OE1, D_GLN_82  | NH1, D_ARG_19  | HH11, D_ARG_19  | 2.94    | 2.14    | 18.04                  |
| 5VXJ.PDB | OE2, D_GLU_46  | NE, D_ARG_38   | HE, D_ARG_38    | 2.46    | 1.69    | 20.96                  |
| 5VXJ.PDB | OD1, D_ASP_90  | NH1, D_ARG_38  | HH12, D_ARG_38  | 2.86    | 2.04    | 15.32                  |
| 5VXJ.PDB | OD1, D_ASN_35  | NE, D_ARG_50   | HE, D_ARG_50    | 2.89    | 2.08    | 17.01                  |
| 5VXJ.PDB | OD2, D_ASP_90  | NH1, D_ARG_67  | HH12, D_ARG_67  | 2.76    | 1.94    | 14.49                  |
| 5VXJ.PDB | OD1, D_ASP_90  | NH2, D_ARG_67  | HH22, D_ARG_67  | 2.92    | 2.07    | 6.62                   |
| 5VXJ.PDB | OD1, D_ASN_74  | NE, D_ARG_72   | HE, D_ARG_72    | 2.76    | 1.91    | 6.10                   |
| 5VXJ.PDB | OD1, D_ASN_84  | NE2, D_GLN_82  | HE21, D_GLN_82  | 2.80    | 1.94    | 4.20                   |
| 5VXJ.PDB | OG1, D_THR_107 | ND2, D_ASN_97  | HD21, D_ASN_97  | 2.71    | 1.91    | 17.78                  |
| 5VXJ.PDB | OE1, E_GLU_201 | OH, D_TYR_105  | HH, D_TYR_105   | 2.53    | 1.70    | 8.84                   |
| 5VXJ.PDB | OD2, E_ASP_309 | NH2, E_ARG_55  | HH21, E_ARG_55  | 2.82    | 2.06    | 24.28                  |
| 5VXJ.PDB | OG, E_SER_306  | NZ, E_LYS_62   | HZ1, E_LYS_62   | 2.46    | 1.61    | 13.80                  |
| 5VXJ.PDB | OD2, F_ASP_73  | NZ, E_LYS_137  | HZ2, E_LYS_137  | 2.77    | 1.96    | 20.15                  |
| 5VXJ.PDB | OD1, E_ASP_287 | OH, E_TYR_164  | HH, E_TYR_164   | 2.85    | 2.09    | 21.13                  |
| 5VXJ.PDB | OD1, D_ASN_97  | NZ, E_LYS_197  | HZ1, E_LYS_197  | 2.80    | 1.95    | 14.72                  |
| 5VXJ.PDB | OE2, E_GLU_201 | NZ, E_LYS_197  | HZ3, E_LYS_197  | 2.47    | 1.71    | 25.42                  |
| 5VXJ.PDB | OD1, E_ASP_254 | NZ, E_LYS_203  | HZ2, E_LYS_203  | 2.55    | 1.67    | 5.69                   |
| 5VXJ.PDB | OD2, E_ASP_166 | NZ, E_LYS_205  | HZ2, E_LYS_205  | 2.79    | 1.95    | 15.80                  |
| 5VXJ.PDB | OD2, E_ASP_166 | OH, E_TYR_206  | HH, E_TYR_206   | 2.80    | 1.99    | 13.17                  |
| 5VXJ.PDB | OD1, E_ASN_249 | OG1, E_THR_251 | HG1, E_THR_251  | 2.55    | 1.84    | 26.63                  |
| 5VXJ.PDB | OD1, E_ASN_58  | ND2, E_ASN_305 | HD21, E_ASN_305 | 2.80    | 1.98    | 14.83                  |



|          |                |                |                |      |      |       |
|----------|----------------|----------------|----------------|------|------|-------|
| 5VXJ.PDB | OE1, F_GLN_82  | NE, F_ARG_19   | HE, F_ARG_19   | 2.82 | 1.96 | 3.39  |
| 5VXJ.PDB | OD1, F_ASN_97  | ND2, F_ASN_35  | HD22, F_ASN_35 | 2.86 | 2.08 | 21.21 |
| 5VXJ.PDB | OD1, F_ASP_90  | NH1, F_ARG_38  | HH12, F_ARG_38 | 2.92 | 2.20 | 28.14 |
| 5VXJ.PDB | OE2, F_GLU_46  | NH2, F_ARG_38  | HH21, F_ARG_38 | 2.73 | 1.93 | 18.99 |
| 5VXJ.PDB | OE1, G_GLU_200 | NH2, F_ARG_50  | HH22, F_ARG_50 | 2.70 | 1.89 | 15.49 |
| 5VXJ.PDB | OD2, F_ASP_90  | NH1, F_ARG_67  | HH12, F_ARG_67 | 2.83 | 1.99 | 10.41 |
| 5VXJ.PDB | OD1, F_ASN_74  | NE, F_ARG_72   | HE, F_ARG_72   | 2.72 | 1.88 | 10.50 |
| 5VXJ.PDB | OG1, F_THR_107 | ND2, F_ASN_97  | HD21, F_ASN_97 | 2.73 | 1.95 | 21.26 |
| 5VXJ.PDB | OE1, G_GLU_201 | OH, F_TYR_105  | HH, F_TYR_105  | 2.57 | 1.75 | 11.97 |
| 5VXJ.PDB | OD2, G_ASP_97  | NE, G_ARG_101  | HE, G_ARG_101  | 2.67 | 1.82 | 7.54  |
| 5VXJ.PDB | OD1, G_ASP_287 | OH, G_TYR_164  | HH, G_TYR_164  | 2.79 | 1.99 | 15.03 |
| 5VXJ.PDB | OE2, G_GLU_201 | NZ, G_LYS_197  | HZ3, G_LYS_197 | 2.59 | 1.86 | 28.64 |
| 5VXJ.PDB | OD1, G_ASP_254 | NZ, G_LYS_203  | HZ2, G_LYS_203 | 2.49 | 1.62 | 9.92  |
| 5VXJ.PDB | OD2, G_ASP_166 | NZ, G_LYS_205  | HZ2, G_LYS_205 | 2.82 | 1.96 | 12.05 |
| 5VXJ.PDB | OD2, G_ASP_166 | OH, G_TYR_206  | HH, G_TYR_206  | 2.52 | 1.70 | 11.57 |
| 5VXJ.PDB | OE1, H_GLN_111 | OG1, G_THR_217 | HG1, G_THR_217 | 2.86 | 2.17 | 29.58 |
| 5VXJ.PDB | OE1, H_GLN_82  | NE, H_ARG_19   | HE, H_ARG_19   | 2.76 | 1.91 | 8.69  |
| 5VXJ.PDB | OD1, H_ASN_97  | ND2, H_ASN_35  | HD22, H_ASN_35 | 2.85 | 2.10 | 23.91 |
| 5VXJ.PDB | OD1, H_ASP_90  | NH1, H_ARG_38  | HH12, H_ARG_38 | 3.00 | 2.16 | 12.34 |
| 5VXJ.PDB | OD1, H_ASN_35  | NE, H_ARG_50   | HE, H_ARG_50   | 2.75 | 1.93 | 14.53 |
| 5VXJ.PDB | OD2, H_ASP_90  | NH1, H_ARG_67  | HH12, H_ARG_67 | 2.89 | 2.05 | 9.62  |
| 5VXJ.PDB | OD1, H_ASN_74  | NE, H_ARG_72   | HE, H_ARG_72   | 2.76 | 1.95 | 17.61 |
| 5VXJ.PDB | OD1, H_ASN_84  | NE2, H_GLN_82  | HE21, H_GLN_82 | 2.86 | 2.05 | 16.57 |
| 5VXJ.PDB | OG1, H_THR_107 | ND2, H_ASN_97  | HD21, H_ASN_97 | 2.53 | 1.81 | 26.67 |
| 5VXJ.PDB | OD1, I_ASP_309 | ND2, I_ASN_58  | HD22, I_ASN_58 | 2.73 | 1.88 | 5.94  |
| 5VXJ.PDB | OE1, I_GLU_154 | OG, I_SER_82   | HG, I_SER_82   | 2.52 | 1.79 | 24.33 |
| 5VXJ.PDB | OD2, I_ASP_97  | NE, I_ARG_101  | HE, I_ARG_101  | 2.83 | 2.07 | 23.56 |
| 5VXJ.PDB | OD2, J_ASP_73  | NZ, I_LYS_137  | HZ3, I_LYS_137 | 2.90 | 2.17 | 29.52 |
| 5VXJ.PDB | OD1, I_ASP_287 | OH, I_TYR_164  | HH, I_TYR_164  | 2.95 | 2.16 | 17.45 |
| 5VXJ.PDB | OD1, B_ASN_97  | NZ, I_LYS_197  | HZ1, I_LYS_197 | 2.68 | 1.88 | 21.92 |
| 5VXJ.PDB | OD1, I_ASP_254 | NZ, I_LYS_203  | HZ2, I_LYS_203 | 2.60 | 1.74 | 12.72 |
| 5VXJ.PDB | OD2, I_ASP_166 | NZ, I_LYS_205  | HZ2, I_LYS_205 | 2.77 | 1.91 | 10.79 |
| 5VXJ.PDB | OD2, I_ASP_166 | OH, I_TYR_206  | HH, I_TYR_206  | 2.50 | 1.67 | 8.28  |
| 5VXJ.PDB | OD1, I_ASN_249 | OG1, I_THR_251 | HG1, I_THR_251 | 2.69 | 1.98 | 27.82 |
| 5VXJ.PDB | OE1, J_GLN_82  | NE, J_ARG_19   | HE, J_ARG_19   | 2.52 | 1.72 | 17.43 |
| 5VXJ.PDB | OD1, J_ASN_97  | ND2, J_ASN_35  | HD22, J_ASN_35 | 3.00 | 2.21 | 19.94 |
| 5VXJ.PDB | OD1, J_ASP_90  | NH1, J_ARG_38  | HH12, J_ARG_38 | 2.89 | 2.13 | 23.59 |
| 5VXJ.PDB | OE2, J_GLU_46  | NH2, J_ARG_38  | HH21, J_ARG_38 | 2.77 | 1.96 | 16.80 |
| 5VXJ.PDB | OD1, J_ASN_35  | NE, J_ARG_50   | HE, J_ARG_50   | 2.74 | 1.91 | 11.68 |
| 5VXJ.PDB | OD2, J_ASP_90  | NH1, J_ARG_67  | HH12, J_ARG_67 | 2.55 | 1.74 | 16.72 |
| 5VXJ.PDB | OD1, J_ASP_90  | NH2, J_ARG_67  | HH22, J_ARG_67 | 2.84 | 1.98 | 5.11  |
| 5VXJ.PDB | OD1, J_ASN_84  | NE2, J_GLN_82  | HE21, J_GLN_82 | 2.94 | 2.08 | 3.32  |
| 5VXJ.PDB | OG1, J_THR_107 | ND2, J_ASN_97  | HD21, J_ASN_97 | 2.57 | 1.77 | 17.56 |

Table 1779: 5VXJ-specific side chain hydrogen bonding analysis. In this table, a PDB file is specified with a four-letter PDB ID, except that the names of the PDB files corresponding to the single NMR structural model split from the NMR ensemble is specified with a four-letter PDB ID in addition to a hyphen followed by the single NMR structural model numeric ID, the residue naming scheme is **Chain ID\_residue name\_residue number**,  $\angle ADH$  represents the angle formed by acceptor (A), donor (D) and hydrogen (H) ( $\angle ADH$ ).

| PDB      | Acceptor (A)   | Donor (D)      | Hydrogen (H)    | D-A (Å) | H-A (Å) | $\angle ADH(^{\circ})$ |
|----------|----------------|----------------|-----------------|---------|---------|------------------------|
| 5VXK.PDB | OD2, B_ASP_90  | NH2, B_ARG_67  | HH22, B_ARG_67  | 2.27    | 1.58    | 28.79                  |
| 5VXK.PDB | OG, A_SER_168  | NE2, B_GLN_106 | HE21, B_GLN_106 | 2.99    | 2.23    | 24.43                  |
| 5VXK.PDB | OD2, A_ASP_287 | NE2, B_GLN_106 | HE22, B_GLN_106 | 2.77    | 1.94    | 12.81                  |
| 5VXK.PDB | OD2, A_ASP_287 | OH, A_TYR_164  | HH, A_TYR_164   | 2.91    | 2.21    | 28.15                  |
| 5VXK.PDB | OD2, A_ASP_261 | NZ, A_LYS_196  | HZ3, A_LYS_196  | 2.74    | 1.87    | 9.57                   |
| 5VXK.PDB | OG1, B_THR_102 | OH, A_TYR_276  | HH, A_TYR_276   | 2.57    | 1.73    | 6.50                   |
| 5VXK.PDB | OH, A_TYR_160  | ND2, A_ASN_293 | HD22, A_ASN_293 | 2.77    | 1.97    | 18.05                  |

Table 1780: 5VXK-specific side chain hydrogen bonding analysis. In this table, a PDB file is specified with a four-letter PDB ID, except that the names of the PDB files corresponding to the single NMR structural model split from the NMR ensemble is specified with a four-letter PDB ID in addition to a hyphen followed by the single NMR structural model numeric ID, the residue naming scheme is **Chain ID\_residue name\_residue number**,  $\angle ADH$  represents the angle formed by acceptor (A), donor (D) and hydrogen (H) ( $\angle ADH$ ).

| PDB      | Acceptor (A)   | Donor (D)      | Hydrogen (H)    | D-A (Å) | H-A (Å) | $\angle ADH(^{\circ})$ |
|----------|----------------|----------------|-----------------|---------|---------|------------------------|
| 5VXL.PDB | OD1, A_ASP_309 | ND2, A_ASN_58  | HD22, A_ASN_58  | 2.92    | 2.09    | 13.70                  |
| 5VXL.PDB | OE1, A_GLU_154 | OG, A_SER_82   | HG, A_SER_82    | 2.52    | 1.77    | 21.68                  |
| 5VXL.PDB | OD2, A_ASP_88  | NE2, A_GLN_84  | HE21, A_GLN_84  | 2.89    | 2.16    | 27.92                  |
| 5VXL.PDB | OD1, A_ASP_254 | NZ, A_LYS_203  | HZ3, A_LYS_203  | 2.55    | 1.71    | 15.49                  |
| 5VXL.PDB | OD2, B_ASP_52  | NZ, A_LYS_205  | HZ1, A_LYS_205  | 3.00    | 2.13    | 10.69                  |
| 5VXL.PDB | OD2, A_ASP_166 | OH, A_TYR_206  | HH, A_TYR_206   | 2.43    | 1.61    | 11.33                  |
| 5VXL.PDB | OE1, A_GLN_148 | NE1, A_TRP_226 | HE1, A_TRP_226  | 2.87    | 2.02    | 9.28                   |
| 5VXL.PDB | OE2, A_GLU_286 | ND2, A_ASN_255 | HD22, A_ASN_255 | 2.74    | 1.94    | 17.54                  |
| 5VXL.PDB | OD1, B_ASP_91  | NH1, B_ARG_38  | HH12, B_ARG_38  | 2.97    | 2.23    | 26.01                  |
| 5VXL.PDB | OD1, A_ASP_166 | OG, B_SER_55   | HG, B_SER_55    | 2.56    | 1.73    | 4.68                   |
| 5VXL.PDB | OD2, B_ASP_91  | NH1, B_ARG_68  | HH12, B_ARG_68  | 2.83    | 2.06    | 22.74                  |
| 5VXL.PDB | OD1, B_ASN_75  | NE, B_ARG_73   | HE, B_ARG_73    | 2.98    | 2.26    | 28.00                  |
| 5VXL.PDB | OH, B_TYR_81   | NE, B_ARG_79   | HE, B_ARG_79    | 2.96    | 2.14    | 13.15                  |
| 5VXL.PDB | OE2, A_GLU_201 | NH2, B_ARG_102 | HH22, B_ARG_102 | 2.87    | 2.08    | 20.03                  |

Table 1781: 5VXL-specific side chain hydrogen bonding analysis. In this table, a PDB file is specified with a four-letter PDB ID, except that the names of the PDB files corresponding to the single NMR structural model split from the NMR ensemble is specified with a four-letter PDB ID in addition to a hyphen followed by the single NMR structural model numeric ID, the residue naming scheme is **Chain ID\_residue name\_residue number**,  $\angle ADH$  represents the angle formed by acceptor (A), donor (D) and hydrogen (H) ( $\angle ADH$ ).

| PDB      | Acceptor (A)   | Donor (D)      | Hydrogen (H)   | D-A (Å) | H-A (Å) | $\angle ADH(^{\circ})$ |
|----------|----------------|----------------|----------------|---------|---------|------------------------|
| 5VXM.PDB | OD1, A_ASP_309 | ND2, A_ASN_58  | HD22, A_ASN_58 | 2.74    | 1.89    | 5.63                   |
| 5VXM.PDB | OD1, A_ASP_88  | NE2, A_GLN_84  | HE21, A_GLN_84 | 2.60    | 1.75    | 9.62                   |
| 5VXM.PDB | OD1, A_ASP_287 | OH, A_TYR_164  | HH, A_TYR_164  | 2.66    | 1.84    | 11.86                  |
| 5VXM.PDB | OE2, B_GLU_111 | NE1, A_TRP_177 | HE1, A_TRP_177 | 2.76    | 1.97    | 19.61                  |
| 5VXM.PDB | OD2, A_ASP_166 | NZ, A_LYS_205  | HZ3, A_LYS_205 | 2.79    | 1.92    | 8.41                   |
| 5VXM.PDB | OD2, A_ASP_166 | OH, A_TYR_206  | HH, A_TYR_206  | 2.53    | 1.73    | 14.26                  |
| 5VXM.PDB | OE2, A_GLU_288 | NZ, A_LYS_291  | HZ1, A_LYS_291 | 2.70    | 1.90    | 22.27                  |
| 5VXM.PDB | OH, B_TYR_94   | NH1, B_ARG_38  | HH11, B_ARG_38 | 2.95    | 2.12    | 12.47                  |
| 5VXM.PDB | OD1, B_ASP_90  | NH1, B_ARG_38  | HH12, B_ARG_38 | 2.77    | 1.97    | 17.13                  |
| 5VXM.PDB | OD1, B_ASP_54  | OG, B_SER_56   | HG, B_SER_56   | 2.63    | 1.84    | 17.09                  |
| 5VXM.PDB | OD2, B_ASP_90  | NH1, B_ARG_67  | HH12, B_ARG_67 | 2.75    | 1.92    | 11.95                  |
| 5VXM.PDB | OD1, B_ASN_84  | NE2, B_GLN_82  | HE21, B_GLN_82 | 2.81    | 1.97    | 10.38                  |

Table 1782: 5VXM-specific side chain hydrogen bonding analysis. In this table, a PDB file is specified with a four-letter PDB ID, except that the names of the PDB files corresponding to the single NMR structural model split from the NMR ensemble is specified with a four-letter PDB ID in addition to a hyphen followed by the single NMR structural model numeric ID, the residue naming scheme is **Chain ID residue name residue number**,  $\angle ADH$  represents the angle formed by acceptor (A), donor (D) and hydrogen (H) ( $\angle ADH$ ).

| PDB      | Acceptor (A)   | Donor (D)      | Hydrogen (H)    | D-A (Å) | H-A (Å) | $\angle ADH(^{\circ})$ |
|----------|----------------|----------------|-----------------|---------|---------|------------------------|
| 5VXR.PDB | OE1, H_GLU_46  | NE, H_ARG_38   | HE, H_ARG_38    | 2.74    | 1.86    | 23.26                  |
| 5VXR.PDB | OH, H_TYR_93   | NH1, H_ARG_38  | HH11, H_ARG_38  | 2.95    | 1.99    | 15.54                  |
| 5VXR.PDB | OD1, H_ASP_89  | NH1, H_ARG_38  | HH12, H_ARG_38  | 2.81    | 1.80    | 4.81                   |
| 5VXR.PDB | OE1, H_GLU_46  | NH2, H_ARG_38  | HH21, H_ARG_38  | 2.83    | 2.01    | 29.32                  |
| 5VXR.PDB | OE1, L_GLN_38  | NZ, H_LYS_39   | HZ2, H_LYS_39   | 2.72    | 1.76    | 14.94                  |
| 5VXR.PDB | OD1, H_ASN_35  | OH, H_TYR_47   | HH, H_TYR_47    | 2.72    | 1.74    | 8.88                   |
| 5VXR.PDB | OD1, P_ASN_415 | OH, H_TYR_50   | HH, H_TYR_50    | 2.71    | 1.82    | 21.79                  |
| 5VXR.PDB | OD1, H_ASP_89  | NH2, H_ARG_66  | HH22, H_ARG_66  | 2.99    | 1.98    | 4.54                   |
| 5VXR.PDB | OE1, H_GLN_77  | OH, H_TYR_79   | HH, H_TYR_79    | 2.72    | 1.76    | 12.10                  |
| 5VXR.PDB | OE2, H_GLU_154 | OH, H_TYR_151  | HH, H_TYR_151   | 2.81    | 1.83    | 6.84                   |
| 5VXR.PDB | OG, H_SER_185  | NE1, H_TRP_160 | HE1, H_TRP_160  | 2.93    | 1.93    | 7.21                   |
| 5VXR.PDB | OD1, L_ASN_138 | NE2, H_HIS_170 | HE2, H_HIS_170  | 2.89    | 1.98    | 20.57                  |
| 5VXR.PDB | OG1, H_THR_143 | OG1, H_THR_188 | HG1, H_THR_188  | 2.81    | 1.84    | 10.15                  |
| 5VXR.PDB | OE2, L_GLU_123 | NZ, H_LYS_214  | HZ1, H_LYS_214  | 2.93    | 1.98    | 15.97                  |
| 5VXR.PDB | OD1, L_ASP_70  | NE, L_ARG_24   | HE, L_ARG_24    | 2.94    | 2.08    | 26.80                  |
| 5VXR.PDB | OD1, L_ASN_92  | OG, L_SER_27D  | HG, L_SER_27D   | 2.79    | 1.83    | 11.69                  |
| 5VXR.PDB | OD1, L_ASN_91  | NE2, L_HIS_34  | HE2, L_HIS_34   | 2.77    | 1.79    | 12.93                  |
| 5VXR.PDB | OE1, L_GLN_89  | OH, L_TYR_36   | HH, L_TYR_36    | 2.69    | 1.74    | 13.43                  |
| 5VXR.PDB | OH, L_TYR_86   | NE2, L_GLN_37  | HE21, L_GLN_37  | 2.98    | 1.98    | 9.70                   |
| 5VXR.PDB | OD2, L_ASP_82  | NH1, L_ARG_61  | HH12, L_ARG_61  | 2.75    | 1.79    | 15.16                  |
| 5VXR.PDB | OD1, L_ASP_82  | NH2, L_ARG_61  | HH22, L_ARG_61  | 2.82    | 1.82    | 7.27                   |
| 5VXR.PDB | OG, L_SER_131  | NE2, L_GLN_124 | HE22, L_GLN_124 | 2.92    | 1.91    | 5.03                   |
| 5VXR.PDB | OG, L_SER_177  | NE1, L_TRP_148 | HE1, L_TRP_148  | 2.80    | 1.85    | 16.41                  |
| 5VXR.PDB | OD1, L_ASP_170 | OG1, L_THR_172 | HG1, L_THR_172  | 2.70    | 1.76    | 15.44                  |
| 5VXR.PDB | OG, H_SER_184  | OG, L_SER_176  | HG, L_SER_176   | 2.79    | 1.86    | 17.30                  |
| 5VXR.PDB | OD1, L_ASN_161 | OG, L_SER_177  | HG, L_SER_177   | 2.64    | 1.73    | 19.24                  |
| 5VXR.PDB | OG, L_SER_131  | OG1, L_THR_180 | HG1, L_THR_180  | 2.88    | 2.00    | 21.77                  |
| 5VXR.PDB | OD2, L_ASP_151 | ND1, L_HIS_189 | HD1, L_HIS_189  | 2.73    | 1.79    | 17.03                  |
| 5VXR.PDB | ND1, L_HIS_198 | OG1, L_THR_200 | HG1, L_THR_200  | 2.74    | 1.84    | 20.28                  |
| 5VXR.PDB | NE2, P_HIS_421 | OG1, P_THR_416 | HG1, P_THR_416  | 2.72    | 1.87    | 24.94                  |

Table 1783: 5VXR-specific side chain hydrogen bonding analysis. In this table, a PDB file is specified with a four-letter PDB ID, except that the names of the PDB files corresponding to the single NMR structural model split from the NMR ensemble is specified with a four-letter PDB ID in addition to a hyphen followed by the single NMR structural model numeric ID, the residue naming scheme is **Chain ID\_residue name\_residue number**,  $\angle ADH$  represents the angle formed by acceptor (A), donor (D) and hydrogen (H) ( $\angle ADH$ ).

| PDB      | Acceptor (A)   | Donor (D)      | Hydrogen (H)    | D-A (Å) | H-A (Å) | $\angle ADH(^{\circ})$ |
|----------|----------------|----------------|-----------------|---------|---------|------------------------|
| 5WKQ.PDB | OG1, A_THR_80  | NZ, A_LYS_106  | HZ1, A_LYS_106  | 2.47    | 1.72    | 27.03                  |
| 5WKQ.PDB | OG, B_SER_208  | NH2, A_ARG_135 | HH21, A_ARG_135 | 2.89    | 2.06    | 11.87                  |
| 5WKQ.PDB | OE2, A_GLU_182 | NE2, A_GLN_162 | HE21, A_GLN_162 | 2.71    | 1.89    | 15.15                  |
| 5WKQ.PDB | OE2, B_GLU_182 | NE2, B_GLN_162 | HE21, B_GLN_162 | 2.63    | 1.85    | 20.38                  |
| 5WKQ.PDB | OD1, B_ASP_148 | NH1, B_ARG_196 | HH11, B_ARG_196 | 2.87    | 2.13    | 25.83                  |
| 5WKQ.PDB | OE2, A_GLU_131 | ND1, B_HIS_207 | HD1, B_HIS_207  | 2.65    | 1.88    | 22.26                  |
| 5WKQ.PDB | OE1, A_GLU_131 | OG1, B_THR_211 | HG1, B_THR_211  | 2.63    | 1.86    | 19.68                  |

Table 1784: 5WKQ-specific side chain hydrogen bonding analysis. In this table, a PDB file is specified with a four-letter PDB ID, except that the names of the PDB files corresponding to the single NMR structural model split from the NMR ensemble is specified with a four-letter PDB ID in addition to a hyphen followed by the single NMR structural model numeric ID, the residue naming scheme is **Chain ID\_residue name\_residue number**,  $\angle ADH$  represents the angle formed by acceptor (A), donor (D) and hydrogen (H) ( $\angle ADH$ ).

| PDB      | Acceptor (A)   | Donor (D)      | Hydrogen (H)    | D-A (Å) | H-A (Å) | $\angle ADH(^{\circ})$ |
|----------|----------------|----------------|-----------------|---------|---------|------------------------|
| 5WN9.PDB | OE1, H_GLN_1   | NE2, H_GLN_3   | HE21, H_GLN_3   | 2.70    | 1.88    | 14.43                  |
| 5WN9.PDB | OE1, H_GLU_46  | NE, H_ARG_38   | HE, H_ARG_38    | 2.78    | 2.00    | 20.76                  |
| 5WN9.PDB | OH, H_TYR_94   | NH2, H_ARG_38  | HH21, H_ARG_38  | 2.96    | 2.17    | 18.48                  |
| 5WN9.PDB | OD1, H_ASP_90  | NH2, H_ARG_38  | HH22, H_ARG_38  | 2.91    | 2.07    | 9.36                   |
| 5WN9.PDB | OE1, H_GLN_182 | NE2, H_GLN_39  | HE22, H_GLN_39  | 2.96    | 2.11    | 8.81                   |
| 5WN9.PDB | OD2, H_ASP_90  | NH1, H_ARG_67  | HH12, H_ARG_67  | 2.27    | 1.51    | 22.67                  |
| 5WN9.PDB | OD1, H_ASP_73  | OG, H_SER_75   | HG, H_SER_75    | 2.58    | 1.79    | 16.04                  |
| 5WN9.PDB | OG1, H_THR_69  | NH1, H_ARG_84  | HH12, H_ARG_84  | 2.83    | 2.06    | 21.62                  |
| 5WN9.PDB | OD1, H_ASP_112 | NE, H_ARG_98   | HE, H_ARG_98    | 2.94    | 2.13    | 15.87                  |
| 5WN9.PDB | OD2, H_ASP_112 | NH1, H_ARG_98  | HH11, H_ARG_98  | 2.84    | 2.01    | 13.12                  |
| 5WN9.PDB | OG1, H_THR_218 | NH2, H_ARG_162 | HH21, H_ARG_162 | 2.83    | 2.04    | 19.79                  |
| 5WN9.PDB | OE1, H_GLN_233 | OH, H_TYR_180  | HH, H_TYR_180   | 2.70    | 1.87    | 8.37                   |
| 5WN9.PDB | OE1, H_GLN_39  | NE2, H_GLN_182 | HE22, H_GLN_182 | 2.85    | 2.00    | 9.41                   |
| 5WN9.PDB | OD2, H_ASP_226 | NE, H_ARG_205  | HE, H_ARG_205   | 2.80    | 1.99    | 17.36                  |
| 5WN9.PDB | OD1, H_ASP_226 | NH1, H_ARG_205 | HH11, H_ARG_205 | 2.89    | 2.03    | 4.48                   |
| 5WN9.PDB | OG1, H_THR_164 | OG1, H_THR_218 | HG1, H_THR_218  | 2.96    | 2.26    | 28.62                  |
| 5WN9.PDB | OD1, H_ASN_57  | NE, A_ARG_188  | HE, A_ARG_188   | 2.58    | 1.61    | 2.15                   |

Table 1785: 5WN9-specific side chain hydrogen bonding analysis. In this table, a PDB file is specified with a four-letter PDB ID, except that the names of the PDB files corresponding to the single NMR structural model split from the NMR ensemble is specified with a four-letter PDB ID in addition to a hyphen followed by the single NMR structural model numeric ID, the residue naming scheme is **Chain ID\_residue name\_residue number**,  $\angle ADH$  represents the angle formed by acceptor (A), donor (D) and hydrogen (H) ( $\angle ADH$ ).

| PDB      | Acceptor (A)  | Donor (D)     | Hydrogen (H)   | D-A (Å) | H-A (Å) | $\angle ADH(^{\circ})$ |
|----------|---------------|---------------|----------------|---------|---------|------------------------|
| 1A14.PDB | OE1, L_GLN_38 | NE2, H_GLN_39 | HE21, H_GLN_39 | 2.62    | 1.69    | 9.24                   |
| 1A14.PDB | OH, L_TYR_36  | N, H_PHE_100E | H, H_PHE_100E  | 2.73    | 1.81    | 13.85                  |

Table 1786: Interfacial 1A14-specific side chain and main chain hydrogen bonding analysis. In this table, a PDB file is specified with a four-letter PDB ID, except that the names of the PDB files corresponding to the single NMR structural model split from the NMR ensemble is specified with a four-letter PDB ID in addition to a hyphen followed by the single NMR structural model numeric ID, the residue naming scheme is **Chain ID\_residue name\_residue number**,  $\angle ADH$  represents the angle formed by acceptor (A), donor (D) and hydrogen (H) ( $\angle ADH$ ).



| PDB      | Acceptor (A)  | Donor (D)     | Hydrogen (H)   | D-A (Å) | H-A (Å) | $\angle ADH(^{\circ})$ |
|----------|---------------|---------------|----------------|---------|---------|------------------------|
| 1E6J.PDB | OE1, H_GLN_39 | NE2, L_GLN_37 | HE22, L_GLN_37 | 2.69    | 1.84    | 23.98                  |

Table 1787: Interfacial 1E6J-specific side chain and main chain hydrogen bonding analysis. In this table, a PDB file is specified with a four-letter PDB ID, except that the names of the PDB files corresponding to the single NMR structural model split from the NMR ensemble is specified with a four-letter PDB ID in addition to a hyphen followed by the single NMR structural model numeric ID, the residue naming scheme is **Chain ID\_residue name\_residue number**,  $\angle ADH$  represents the angle formed by acceptor (A), donor (D) and hydrogen (H) ( $\angle ADH$ ).

| PDB      | Acceptor (A)  | Donor (D)     | Hydrogen (H)   | D-A (Å) | H-A (Å) | $\angle ADH(^{\circ})$ |
|----------|---------------|---------------|----------------|---------|---------|------------------------|
| 1F3R.PDB | O, B_ASN_230  | OH, A_TYR_72  | HH, A_TYR_72   | 2.67    | 1.70    | 2.56                   |
| 1F3R.PDB | O, A_GLY_70   | NH2, B_ARG_50 | HH21, B_ARG_50 | 2.81    | 1.79    | 6.29                   |
| 1F3R.PDB | NE1, A_TRP_67 | OG, B_SER_61  | HG, B_SER_61   | 2.86    | 1.89    | 6.31                   |
| 1F3R.PDB | O, A_ILE_75   | OH, B_TYR_170 | HH, B_TYR_170  | 2.72    | 1.77    | 10.88                  |
| 1F3R.PDB | O, A_ASP_71   | OH, B_TYR_233 | HH, B_TYR_233  | 2.71    | 1.89    | 25.38                  |

Table 1788: Interfacial 1F3R-specific side chain and main chain hydrogen bonding analysis. In this table, a PDB file is specified with a four-letter PDB ID, except that the names of the PDB files corresponding to the single NMR structural model split from the NMR ensemble is specified with a four-letter PDB ID in addition to a hyphen followed by the single NMR structural model numeric ID, the residue naming scheme is **Chain ID\_residue name\_residue number**,  $\angle ADH$  represents the angle formed by acceptor (A), donor (D) and hydrogen (H) ( $\angle ADH$ ).

| PDB      | Acceptor (A)   | Donor (D)      | Hydrogen (H)    | D-A (Å) | H-A (Å) | $\angle ADH(^{\circ})$ |
|----------|----------------|----------------|-----------------|---------|---------|------------------------|
| 1HGD.PDB | O, B.ILE.140   | N, A.ALA.11    | H, A.ALA.11     | 2.90    | 2.03    | 23.17                  |
| 1HGD.PDB | O, B.PHE.138   | N, A.LEU.13    | H, A.LEU.13     | 2.95    | 2.00    | 13.08                  |
| 1HGD.PDB | O, B.ARG.25    | N, A.CYS.14    | H, A.CYS.14     | 2.89    | 1.92    | 6.63                   |
| 1HGD.PDB | O, B.GLY.136   | N, A.LEU.15    | H, A.LEU.15     | 2.87    | 1.90    | 8.68                   |
| 1HGD.PDB | O, B.GLY.23    | N, A.GLY.16    | H, A.GLY.16     | 2.93    | 2.02    | 18.64                  |
| 1HGD.PDB | O, B.TRP.21    | N, A.HIS.18    | H, A.HIS.18     | 2.86    | 2.01    | 24.44                  |
| 1HGD.PDB | OE2, B.GLU.97  | NZ, A.LYS.27   | HZ1, A.LYS.27   | 2.80    | 1.78    | 9.95                   |
| 1HGD.PDB | OE2, B.GLU.67  | NH2, A.ARG.109 | HH21, A.ARG.109 | 2.83    | 1.84    | 13.41                  |
| 1HGD.PDB | OD2, F.ASP.79  | OG, A.SER.110  | HG, A.SER.110   | 2.92    | 1.96    | 11.03                  |
| 1HGD.PDB | OD1, E.ASP.101 | NE2, A.GLN.210 | HE22, A.GLN.210 | 3.00    | 2.15    | 26.33                  |
| 1HGD.PDB | OE1, C.GLN.210 | NH2, A.ARG.220 | HH21, A.ARG.220 | 2.78    | 1.86    | 19.99                  |
| 1HGD.PDB | O, F.SER.71    | NZ, A.LYS.238  | HZ2, A.LYS.238  | 2.63    | 1.73    | 23.20                  |
| 1HGD.PDB | OE1, F.GLU.72  | NZ, A.LYS.238  | HZ3, A.LYS.238  | 2.93    | 1.92    | 13.44                  |
| 1HGD.PDB | O, B.LYS.68    | NZ, A.LYS.299  | HZ2, A.LYS.299  | 2.96    | 1.95    | 12.60                  |
| 1HGD.PDB | O, B.LYS.62    | N, A.GLY.303   | H, A.GLY.303    | 2.91    | 1.96    | 9.72                   |
| 1HGD.PDB | OG, B.SER.93   | N, A.LYS.310   | H, A.LYS.310    | 2.92    | 1.97    | 11.29                  |
| 1HGD.PDB | OD1, B.ASN.104 | N, A.ALA.317   | H, A.ALA.317    | 2.78    | 1.85    | 14.55                  |
| 1HGD.PDB | O, A.VAL.323   | N, B.GLY.13    | H, B.GLY.13     | 2.71    | 1.77    | 11.58                  |
| 1HGD.PDB | O, A.HIS.17    | N, B.TRP.14    | H, B.TRP.14     | 2.85    | 1.93    | 15.85                  |
| 1HGD.PDB | O, A.GLY.16    | N, B.GLY.23    | H, B.GLY.23     | 2.92    | 1.99    | 15.76                  |
| 1HGD.PDB | O, A.CYS.14    | N, B.ARG.25    | H, B.ARG.25     | 2.96    | 2.02    | 13.01                  |
| 1HGD.PDB | OE2, F.GLU.97  | NH2, B.ARG.54  | HH22, B.ARG.54  | 2.77    | 1.80    | 12.79                  |
| 1HGD.PDB | OD2, F.ASP.86  | NZ, B.LYS.62   | HZ1, B.LYS.62   | 2.61    | 1.78    | 29.53                  |
| 1HGD.PDB | OD2, F.ASP.90  | NZ, B.LYS.62   | HZ3, B.LYS.62   | 2.73    | 1.84    | 25.56                  |
| 1HGD.PDB | OG, A.SER.110  | NE2, B.HIS.64  | HE2, B.HIS.64   | 2.96    | 2.01    | 12.34                  |
| 1HGD.PDB | O, A.LYS.299   | NZ, B.LYS.68   | HZ1, B.LYS.68   | 2.92    | 1.90    | 10.17                  |
| 1HGD.PDB | OG, C.SER.107  | N, B.ARG.76    | H, B.ARG.76     | 2.80    | 1.86    | 12.47                  |
| 1HGD.PDB | OE2, D.GLU.81  | NE, B.ARG.76   | HE, B.ARG.76    | 2.88    | 1.91    | 8.67                   |
| 1HGD.PDB | OE2, D.GLU.74  | NH1, B.ARG.76  | HH12, B.ARG.76  | 2.84    | 1.82    | 2.51                   |
| 1HGD.PDB | OE1, D.GLU.81  | NH2, B.ARG.76  | HH21, B.ARG.76  | 2.71    | 1.71    | 6.80                   |
| 1HGD.PDB | OE1, D.GLU.74  | NH2, B.ARG.76  | HH22, B.ARG.76  | 2.75    | 1.75    | 3.21                   |
| 1HGD.PDB | OE1, D.GLU.85  | OH, B.TYR.83   | HH, B.TYR.83    | 2.65    | 1.81    | 23.27                  |
| 1HGD.PDB | OH, F.TYR.83   | NZ, B.LYS.88   | HZ1, B.LYS.88   | 2.76    | 1.72    | 5.59                   |
| 1HGD.PDB | O, A.LYS.27    | ND2, B.ASN.104 | HD22, B.ASN.104 | 2.94    | 1.98    | 9.01                   |
| 1HGD.PDB | O, F.LEU.2     | OG, B.SER.113  | HG, B.SER.113   | 2.69    | 1.91    | 29.59                  |
| 1HGD.PDB | OE1, F.GLU.132 | NE, B.ARG.124  | HE, B.ARG.124   | 2.83    | 2.02    | 28.17                  |
| 1HGD.PDB | OE2, F.GLU.132 | NE, B.ARG.124  | HE, B.ARG.124   | 2.88    | 2.01    | 22.00                  |
| 1HGD.PDB | O, A.LEU.13    | N, B.PHE.138   | H, B.PHE.138    | 2.71    | 1.82    | 20.20                  |
| 1HGD.PDB | O, A.ALA.11    | N, B.ILE.140   | H, B.ILE.140    | 2.81    | 1.89    | 16.38                  |
| 1HGD.PDB | O, F.ARG.170   | NH1, B.ARG.163 | HH12, B.ARG.163 | 2.75    | 1.79    | 14.15                  |
| 1HGD.PDB | O, D.ILE.140   | N, C.ALA.11    | H, C.ALA.11     | 2.91    | 2.01    | 19.96                  |
| 1HGD.PDB | O, D.GLN.27    | N, C.THR.12    | H, C.THR.12     | 2.92    | 1.96    | 10.52                  |
| 1HGD.PDB | O, D.PHE.138   | N, C.LEU.13    | H, C.LEU.13     | 2.98    | 2.02    | 9.60                   |
| 1HGD.PDB | O, D.ARG.25    | N, C.CYS.14    | H, C.CYS.14     | 2.74    | 1.84    | 19.68                  |
| 1HGD.PDB | O, D.GLY.136   | N, C.LEU.15    | H, C.LEU.15     | 2.88    | 1.91    | 5.44                   |
| 1HGD.PDB | O, D.GLY.23    | N, C.GLY.16    | H, C.GLY.16     | 2.97    | 2.07    | 19.04                  |
| 1HGD.PDB | O, D.TRP.21    | N, C.HIS.18    | H, C.HIS.18     | 2.85    | 1.99    | 23.00                  |
| 1HGD.PDB | OE2, D.GLU.97  | NZ, C.LYS.27   | HZ1, C.LYS.27   | 2.80    | 1.77    | 7.54                   |
| 1HGD.PDB | OE2, D.GLU.67  | NH2, C.ARG.109 | HH21, C.ARG.109 | 2.87    | 1.88    | 13.44                  |
| 1HGD.PDB | OD2, B.ASP.79  | OG, C.SER.110  | HG, C.SER.110   | 2.73    | 1.84    | 19.59                  |
| 1HGD.PDB | OD1, A.ASP.101 | NE2, C.GLN.210 | HE22, C.GLN.210 | 2.97    | 2.13    | 27.21                  |
| 1HGD.PDB | OE1, E.GLN.210 | NH2, C.ARG.220 | HH21, C.ARG.220 | 2.69    | 1.80    | 23.00                  |
| 1HGD.PDB | OE1, B.GLU.72  | NZ, C.LYS.238  | HZ1, C.LYS.238  | 2.80    | 1.83    | 17.68                  |
| 1HGD.PDB | O, B.SER.71    | NZ, C.LYS.238  | HZ3, C.LYS.238  | 2.57    | 1.67    | 23.33                  |
| 1HGD.PDB | O, D.LYS.68    | NZ, C.LYS.299  | HZ2, C.LYS.299  | 2.97    | 1.97    | 13.11                  |
| 1HGD.PDB | O, D.LYS.62    | N, C.GLY.303   | H, C.GLY.303    | 2.92    | 1.97    | 11.11                  |
| 1HGD.PDB | OG, D.SER.93   | N, C.LYS.310   | H, C.LYS.310    | 2.96    | 2.01    | 12.70                  |

|          |                |                |                 |      |      |       |
|----------|----------------|----------------|-----------------|------|------|-------|
| 1HGD.PDB | OD1, D_ASN_104 | N, C_ALA_317   | H, C_ALA_317    | 2.76 | 1.81 | 11.23 |
| 1HGD.PDB | OE1, D_GLU_15  | NZ, C_LYS_326  | HZ1, C_LYS_326  | 2.78 | 1.77 | 11.96 |
| 1HGD.PDB | O, C_VAL_323   | N, D_GLY_13    | H, D_GLY_13     | 2.70 | 1.78 | 14.49 |
| 1HGD.PDB | O, C_HIS_17    | N, D_TRP_14    | H, D_TRP_14     | 2.85 | 1.91 | 13.36 |
| 1HGD.PDB | O, C_GLY_16    | N, D_GLY_23    | H, D_GLY_23     | 2.93 | 2.01 | 16.45 |
| 1HGD.PDB | O, C_CYS_14    | N, D_ARG_25    | H, D_ARG_25     | 2.91 | 1.95 | 9.92  |
| 1HGD.PDB | O, C_THR_12    | N, D_GLN_27    | H, D_GLN_27     | 2.91 | 1.98 | 16.00 |
| 1HGD.PDB | O, A_THR_28    | NE, D_ARG_54   | HE, D_ARG_54    | 3.00 | 2.06 | 13.94 |
| 1HGD.PDB | OE2, B_GLU_97  | NH2, D_ARG_54  | HH22, D_ARG_54  | 2.79 | 1.82 | 13.03 |
| 1HGD.PDB | OD2, B_ASP_90  | NZ, D_LYS_62   | HZ3, D_LYS_62   | 2.62 | 1.79 | 29.99 |
| 1HGD.PDB | OG, C_SER_110  | NE2, D_HIS_64  | HE2, D_HIS_64   | 2.96 | 1.98 | 5.65  |
| 1HGD.PDB | O, C_LYS_299   | NZ, D_LYS_68   | HZ1, D_LYS_68   | 2.93 | 1.92 | 12.36 |
| 1HGD.PDB | OG, E_SER_107  | N, D_ARG_76    | H, D_ARG_76     | 2.86 | 1.90 | 9.40  |
| 1HGD.PDB | OE2, F_GLU_81  | NE, D_ARG_76   | HE, D_ARG_76    | 2.83 | 1.87 | 10.56 |
| 1HGD.PDB | OE2, F_GLU_74  | NH1, D_ARG_76  | HH12, D_ARG_76  | 2.78 | 1.77 | 3.14  |
| 1HGD.PDB | OE1, F_GLU_81  | NH2, D_ARG_76  | HH21, D_ARG_76  | 2.65 | 1.67 | 9.42  |
| 1HGD.PDB | OE1, F_GLU_74  | NH2, D_ARG_76  | HH22, D_ARG_76  | 2.69 | 1.70 | 6.24  |
| 1HGD.PDB | OE1, F_GLU_85  | OH, D_TYR_83   | HH, D_TYR_83    | 2.57 | 1.79 | 29.87 |
| 1HGD.PDB | OH, B_TYR_83   | NZ, D_LYS_88   | HZ1, D_LYS_88   | 2.76 | 1.72 | 5.75  |
| 1HGD.PDB | O, C_LYS_27    | ND2, D_ASN_104 | HD22, D_ASN_104 | 2.96 | 2.00 | 10.74 |
| 1HGD.PDB | OE1, B_GLU_132 | NE, D_ARG_124  | HE, D_ARG_124   | 2.80 | 2.01 | 29.31 |
| 1HGD.PDB | OE2, B_GLU_132 | NE, D_ARG_124  | HE, D_ARG_124   | 2.82 | 1.95 | 21.73 |
| 1HGD.PDB | O, C_LEU_13    | N, D_PHE_138   | H, D_PHE_138    | 2.74 | 1.85 | 19.25 |
| 1HGD.PDB | O, C_ALA_11    | N, D_ILE_140   | H, D_ILE_140    | 2.85 | 1.94 | 17.95 |
| 1HGD.PDB | O, B_ARG_170   | NH1, D_ARG_163 | HH12, D_ARG_163 | 2.77 | 1.79 | 12.64 |
| 1HGD.PDB | O, F_ILE_140   | N, E_ALA_11    | H, E_ALA_11     | 2.92 | 2.03 | 20.36 |
| 1HGD.PDB | O, F_GLN_27    | N, E_THR_12    | H, E_THR_12     | 2.97 | 2.03 | 14.03 |
| 1HGD.PDB | O, F_PHE_138   | N, E_LEU_13    | H, E_LEU_13     | 2.98 | 2.02 | 11.10 |
| 1HGD.PDB | O, F_ARG_25    | N, E_CYS_14    | H, E_CYS_14     | 2.65 | 1.79 | 21.42 |
| 1HGD.PDB | O, F_GLY_136   | N, E_LEU_15    | H, E_LEU_15     | 2.85 | 1.88 | 5.88  |
| 1HGD.PDB | O, F_GLY_23    | N, E_GLY_16    | H, E_GLY_16     | 2.93 | 2.04 | 20.98 |
| 1HGD.PDB | O, F_TRP_21    | N, E_HIS_18    | H, E_HIS_18     | 2.83 | 1.98 | 25.03 |
| 1HGD.PDB | OE2, F_GLU_97  | NZ, E_LYS_27   | HZ1, E_LYS_27   | 2.79 | 1.77 | 8.77  |
| 1HGD.PDB | OE2, F_GLU_67  | NH2, E_ARG_109 | HH21, E_ARG_109 | 2.82 | 1.85 | 14.73 |
| 1HGD.PDB | OD2, D_ASP_79  | OG, E_SER_110  | HG, E_SER_110   | 2.81 | 1.89 | 15.50 |
| 1HGD.PDB | OD1, C_ASP_101 | NE2, E_GLN_210 | HE22, E_GLN_210 | 2.98 | 2.14 | 27.07 |
| 1HGD.PDB | OE1, A_GLN_210 | NH2, E_ARG_220 | HH21, E_ARG_220 | 2.77 | 1.90 | 25.11 |
| 1HGD.PDB | O, D_SER_71    | NZ, E_LYS_238  | HZ2, E_LYS_238  | 2.73 | 1.80 | 21.39 |
| 1HGD.PDB | OE1, D_GLU_72  | NZ, E_LYS_238  | HZ3, E_LYS_238  | 2.87 | 1.86 | 13.40 |
| 1HGD.PDB | O, F_LYS_68    | NZ, E_LYS_299  | HZ1, E_LYS_299  | 2.98 | 1.98 | 14.54 |
| 1HGD.PDB | O, F_LYS_62    | N, E_GLY_303   | H, E_GLY_303    | 2.94 | 1.98 | 8.87  |
| 1HGD.PDB | OG, F_SER_93   | N, E_LYS_310   | H, E_LYS_310    | 2.95 | 2.00 | 12.05 |
| 1HGD.PDB | OD1, F_ASN_104 | N, E_ALA_317   | H, E_ALA_317    | 2.79 | 1.84 | 10.01 |
| 1HGD.PDB | OE2, F_GLU_15  | N, E_GLU_325   | H, E_GLU_325    | 2.91 | 2.10 | 28.29 |
| 1HGD.PDB | OE1, F_GLU_15  | NZ, E_LYS_326  | HZ3, E_LYS_326  | 2.97 | 1.97 | 16.19 |
| 1HGD.PDB | O, E_VAL_323   | N, F_GLY_13    | H, F_GLY_13     | 2.71 | 1.79 | 15.38 |
| 1HGD.PDB | O, E_HIS_17    | N, F_TRP_14    | H, F_TRP_14     | 2.87 | 1.92 | 12.04 |
| 1HGD.PDB | O, E_GLY_16    | N, F_GLY_23    | H, F_GLY_23     | 2.91 | 2.00 | 17.89 |
| 1HGD.PDB | O, E_CYS_14    | N, F_ARG_25    | H, F_ARG_25     | 2.88 | 1.94 | 13.26 |
| 1HGD.PDB | O, E_THR_12    | N, F_GLN_27    | H, F_GLN_27     | 2.97 | 2.04 | 16.25 |
| 1HGD.PDB | OE2, D_GLU_97  | NH2, F_ARG_54  | HH22, F_ARG_54  | 2.72 | 1.75 | 12.85 |
| 1HGD.PDB | OD2, D_ASP_90  | NZ, F_LYS_62   | HZ3, F_LYS_62   | 2.71 | 1.86 | 28.09 |
| 1HGD.PDB | OG, E_SER_110  | NE2, F_HIS_64  | HE2, F_HIS_64   | 2.95 | 1.98 | 9.92  |
| 1HGD.PDB | O, E_LYS_299   | NZ, F_LYS_68   | HZ1, F_LYS_68   | 2.97 | 1.94 | 5.85  |
| 1HGD.PDB | OG, A_SER_107  | N, F_ARG_76    | H, F_ARG_76     | 2.82 | 1.86 | 9.34  |
| 1HGD.PDB | OE2, B_GLU_81  | NE, F_ARG_76   | HE, F_ARG_76    | 2.86 | 1.90 | 10.66 |
| 1HGD.PDB | OE2, B_GLU_74  | NH1, F_ARG_76  | HH12, F_ARG_76  | 2.77 | 1.75 | 1.42  |
| 1HGD.PDB | OE1, B_GLU_81  | NH2, F_ARG_76  | HH21, F_ARG_76  | 2.64 | 1.65 | 5.37  |

|          |                |                |                 |      |      |       |
|----------|----------------|----------------|-----------------|------|------|-------|
| 1HGD.PDB | OE1, B_GLU_74  | NH2, F_ARG_76  | HH22, F_ARG_76  | 2.71 | 1.72 | 7.42  |
| 1HGD.PDB | OE1, B_GLU_85  | OH, F_TYR_83   | HH, F_TYR_83    | 2.53 | 1.75 | 27.84 |
| 1HGD.PDB | OH, D_TYR_83   | NZ, F_LYS_88   | HZ1, F_LYS_88   | 2.67 | 1.66 | 8.83  |
| 1HGD.PDB | O, E_LYS_27    | ND2, F_ASN_104 | HD22, F_ASN_104 | 2.95 | 1.99 | 8.95  |
| 1HGD.PDB | O, D_LEU_2     | OG, F_SER_113  | HG, F_SER_113   | 2.74 | 1.91 | 25.98 |
| 1HGD.PDB | OE1, D_GLU_132 | NE, F_ARG_124  | HE, F_ARG_124   | 2.96 | 2.14 | 28.71 |
| 1HGD.PDB | OE2, D_GLU_132 | NE, F_ARG_124  | HE, F_ARG_124   | 2.94 | 2.05 | 20.84 |
| 1HGD.PDB | O, E_LEU_13    | N, F_PHE_138   | H, F_PHE_138    | 2.72 | 1.85 | 21.62 |
| 1HGD.PDB | O, E_ALA_11    | N, F_ILE_140   | H, F_ILE_140    | 2.82 | 1.92 | 18.45 |
| 1HGD.PDB | O, D_ARG_170   | NH1, F_ARG_163 | HH12, F_ARG_163 | 2.94 | 1.98 | 14.11 |

Table 1789: Interfacial 1HGD-specific side chain and main chain hydrogen bonding analysis. In this table, a PDB file is specified with a four-letter PDB ID, except that the names of the PDB files corresponding to the single NMR structural model split from the NMR ensemble is specified with a four-letter PDB ID in addition to a hyphen followed by the single NMR structural model numeric ID, the residue naming scheme is **Chain ID\_residue name\_residue number**,  $\angle ADH$  represents the angle formed by acceptor (A), donor (D) and hydrogen (H) ( $\angle ADH$ ).

| PDB      | Acceptor (A)   | Donor (D)      | Hydrogen (H)    | D-A (Å) | H-A (Å) | $\angle ADH(^{\circ})$ |
|----------|----------------|----------------|-----------------|---------|---------|------------------------|
| 1HGE.PDB | O, B.ILE.140   | N, A.ALA.11    | H, A.ALA.11     | 2.81    | 1.93    | 21.75                  |
| 1HGE.PDB | O, B.PHE.138   | N, A.LEU.13    | H, A.LEU.13     | 2.99    | 2.04    | 13.41                  |
| 1HGE.PDB | O, B.ARG.25    | N, A.CYS.14    | H, A.CYS.14     | 2.88    | 1.92    | 6.83                   |
| 1HGE.PDB | O, B.GLY.136   | N, A.LEU.15    | H, A.LEU.15     | 2.86    | 1.90    | 7.71                   |
| 1HGE.PDB | O, B.GLY.23    | N, A.GLY.16    | H, A.GLY.16     | 2.95    | 2.03    | 17.76                  |
| 1HGE.PDB | O, B.TRP.21    | N, A.HIS.18    | H, A.HIS.18     | 2.85    | 1.97    | 21.20                  |
| 1HGE.PDB | OE2, B.GLU.97  | NZ, A.LYS.27   | HZ1, A.LYS.27   | 2.80    | 1.78    | 10.14                  |
| 1HGE.PDB | OE2, B.GLU.67  | NH2, A.ARG.109 | HH21, A.ARG.109 | 2.74    | 1.75    | 12.19                  |
| 1HGE.PDB | OD2, F.ASP.79  | OG, A.SER.110  | HG, A.SER.110   | 2.90    | 1.95    | 11.19                  |
| 1HGE.PDB | OD1, E.ASP.101 | NE2, A.GLN.210 | HE22, A.GLN.210 | 2.91    | 2.05    | 24.48                  |
| 1HGE.PDB | OE1, C.GLN.210 | NH2, A.ARG.220 | HH21, A.ARG.220 | 2.71    | 1.78    | 19.14                  |
| 1HGE.PDB | O, F.SER.71    | NZ, A.LYS.238  | HZ2, A.LYS.238  | 2.67    | 1.73    | 19.84                  |
| 1HGE.PDB | OE1, F.GLU.72  | NZ, A.LYS.238  | HZ3, A.LYS.238  | 2.91    | 1.89    | 11.73                  |
| 1HGE.PDB | O, B.LYS.68    | NZ, A.LYS.299  | HZ2, A.LYS.299  | 2.95    | 1.93    | 10.27                  |
| 1HGE.PDB | O, B.LYS.62    | N, A.GLY.303   | H, A.GLY.303    | 2.95    | 1.98    | 8.88                   |
| 1HGE.PDB | OG, B.SER.93   | N, A.LYS.310   | H, A.LYS.310    | 2.91    | 1.95    | 10.06                  |
| 1HGE.PDB | OD1, B.ASN.104 | N, A.ALA.317   | H, A.ALA.317    | 2.72    | 1.81    | 16.15                  |
| 1HGE.PDB | O, A.VAL.323   | N, B.GLY.13    | H, B.GLY.13     | 2.72    | 1.79    | 12.30                  |
| 1HGE.PDB | O, A.HIS.17    | N, B.TRP.14    | H, B.TRP.14     | 2.85    | 1.92    | 15.18                  |
| 1HGE.PDB | O, A.GLY.16    | N, B.GLY.23    | H, B.GLY.23     | 2.92    | 2.01    | 18.67                  |
| 1HGE.PDB | O, A.CYS.14    | N, B.ARG.25    | H, B.ARG.25     | 3.00    | 2.06    | 13.87                  |
| 1HGE.PDB | OE2, F.GLU.97  | NH2, B.ARG.54  | HH22, B.ARG.54  | 2.84    | 1.86    | 12.76                  |
| 1HGE.PDB | OD2, F.ASP.86  | NZ, B.LYS.62   | HZ1, B.LYS.62   | 2.60    | 1.76    | 28.82                  |
| 1HGE.PDB | OD2, F.ASP.90  | NZ, B.LYS.62   | HZ3, B.LYS.62   | 2.69    | 1.82    | 26.81                  |
| 1HGE.PDB | OG, A.SER.110  | NE2, B.HIS.64  | HE2, B.HIS.64   | 2.97    | 2.02    | 12.36                  |
| 1HGE.PDB | O, A.LYS.299   | NZ, B.LYS.68   | HZ1, B.LYS.68   | 2.93    | 1.92    | 11.15                  |
| 1HGE.PDB | OG, C.SER.107  | N, B.ARG.76    | H, B.ARG.76     | 2.82    | 1.86    | 9.28                   |
| 1HGE.PDB | OE2, D.GLU.81  | NE, B.ARG.76   | HE, B.ARG.76    | 2.87    | 1.91    | 11.56                  |
| 1HGE.PDB | OE2, D.GLU.74  | NH1, B.ARG.76  | HH12, B.ARG.76  | 2.84    | 1.83    | 5.81                   |
| 1HGE.PDB | OE1, D.GLU.81  | NH2, B.ARG.76  | HH21, B.ARG.76  | 2.70    | 1.70    | 6.45                   |
| 1HGE.PDB | OE1, D.GLU.74  | NH2, B.ARG.76  | HH22, B.ARG.76  | 2.79    | 1.79    | 3.91                   |
| 1HGE.PDB | OE1, D.GLU.85  | OH, B.TYR.83   | HH, B.TYR.83    | 2.65    | 1.81    | 24.86                  |
| 1HGE.PDB | OH, F.TYR.83   | NZ, B.LYS.88   | HZ1, B.LYS.88   | 2.75    | 1.71    | 5.62                   |
| 1HGE.PDB | O, A.LYS.27    | ND2, B.ASN.104 | HD22, B.ASN.104 | 2.93    | 1.97    | 10.25                  |
| 1HGE.PDB | OE1, F.GLU.132 | NE, B.ARG.124  | HE, B.ARG.124   | 2.80    | 1.98    | 27.36                  |
| 1HGE.PDB | OE2, F.GLU.132 | NE, B.ARG.124  | HE, B.ARG.124   | 2.94    | 2.06    | 21.65                  |
| 1HGE.PDB | O, A.LEU.13    | N, B.PHE.138   | H, B.PHE.138    | 2.71    | 1.84    | 21.33                  |
| 1HGE.PDB | O, A.ALA.11    | N, B.ILE.140   | H, B.ILE.140    | 2.75    | 1.86    | 18.72                  |
| 1HGE.PDB | O, F.ARG.170   | NH1, B.ARG.163 | HH12, B.ARG.163 | 2.78    | 1.81    | 13.88                  |
| 1HGE.PDB | O, D.ILE.140   | N, C.ALA.11    | H, C.ALA.11     | 2.80    | 1.91    | 19.98                  |
| 1HGE.PDB | O, D.PHE.138   | N, C.LEU.13    | H, C.LEU.13     | 2.99    | 2.04    | 12.20                  |
| 1HGE.PDB | O, D.ARG.25    | N, C.CYS.14    | H, C.CYS.14     | 2.73    | 1.82    | 16.85                  |
| 1HGE.PDB | O, D.GLY.136   | N, C.LEU.15    | H, C.LEU.15     | 2.89    | 1.92    | 5.03                   |
| 1HGE.PDB | O, D.GLY.23    | N, C.GLY.16    | H, C.GLY.16     | 2.98    | 2.07    | 18.60                  |
| 1HGE.PDB | O, D.TRP.21    | N, C.HIS.18    | H, C.HIS.18     | 2.85    | 1.96    | 19.89                  |
| 1HGE.PDB | OE2, D.GLU.97  | NZ, C.LYS.27   | HZ1, C.LYS.27   | 2.79    | 1.77    | 8.74                   |
| 1HGE.PDB | OE2, D.GLU.67  | NH2, C.ARG.109 | HH21, C.ARG.109 | 2.78    | 1.79    | 11.19                  |
| 1HGE.PDB | OD2, B.ASP.79  | OG, C.SER.110  | HG, C.SER.110   | 2.78    | 1.86    | 15.09                  |
| 1HGE.PDB | OD1, A.ASP.101 | NE2, C.GLN.210 | HE22, C.GLN.210 | 2.93    | 2.07    | 24.92                  |
| 1HGE.PDB | OE1, E.GLN.210 | NH2, C.ARG.220 | HH21, C.ARG.220 | 2.64    | 1.76    | 23.09                  |
| 1HGE.PDB | OE1, B.GLU.72  | NZ, C.LYS.238  | HZ1, C.LYS.238  | 2.78    | 1.80    | 16.75                  |
| 1HGE.PDB | O, B.SER.71    | NZ, C.LYS.238  | HZ3, C.LYS.238  | 2.65    | 1.71    | 19.56                  |
| 1HGE.PDB | O, D.LYS.68    | NZ, C.LYS.299  | HZ2, C.LYS.299  | 2.96    | 1.94    | 10.83                  |
| 1HGE.PDB | O, D.LYS.62    | N, C.GLY.303   | H, C.GLY.303    | 2.94    | 1.98    | 10.89                  |
| 1HGE.PDB | OG, D.SER.93   | N, C.LYS.310   | H, C.LYS.310    | 2.92    | 1.96    | 11.23                  |
| 1HGE.PDB | OD1, D.ASN.104 | N, C.ALA.317   | H, C.ALA.317    | 2.73    | 1.80    | 14.37                  |
| 1HGE.PDB | OE1, D.GLU.15  | NZ, C.LYS.326  | HZ1, C.LYS.326  | 2.74    | 1.73    | 12.73                  |

|          |                |                |                 |      |      |       |
|----------|----------------|----------------|-----------------|------|------|-------|
| 1HGE.PDB | O, C_VAL_323   | N, D_GLY_13    | H, D_GLY_13     | 2.71 | 1.79 | 14.79 |
| 1HGE.PDB | O, C_HIS_17    | N, D_TRP_14    | H, D_TRP_14     | 2.88 | 1.94 | 13.07 |
| 1HGE.PDB | O, C_GLY_16    | N, D_GLY_23    | H, D_GLY_23     | 2.94 | 2.04 | 19.95 |
| 1HGE.PDB | O, C_CYS_14    | N, D_ARG_25    | H, D_ARG_25     | 2.94 | 1.98 | 9.40  |
| 1HGE.PDB | O, C_THR_12    | N, D_GLN_27    | H, D_GLN_27     | 2.86 | 1.95 | 18.04 |
| 1HGE.PDB | OE2, B_GLU_97  | NH2, D_ARG_54  | HH22, D_ARG_54  | 2.87 | 1.89 | 12.82 |
| 1HGE.PDB | OG, C_SER_110  | NE2, D_HIS_64  | HE2, D_HIS_64   | 2.96 | 1.98 | 6.23  |
| 1HGE.PDB | O, C_LYS_299   | NZ, D_LYS_68   | HZ1, D_LYS_68   | 2.92 | 1.91 | 12.00 |
| 1HGE.PDB | OG, E_SER_107  | N, D_ARG_76    | H, D_ARG_76     | 2.87 | 1.90 | 6.58  |
| 1HGE.PDB | OE2, F_GLU_81  | NE, D_ARG_76   | HE, D_ARG_76    | 2.79 | 1.85 | 14.06 |
| 1HGE.PDB | OE2, F_GLU_74  | NH1, D_ARG_76  | HH12, D_ARG_76  | 2.78 | 1.78 | 7.91  |
| 1HGE.PDB | OE1, F_GLU_81  | NH2, D_ARG_76  | HH21, D_ARG_76  | 2.63 | 1.67 | 11.36 |
| 1HGE.PDB | OE1, F_GLU_74  | NH2, D_ARG_76  | HH22, D_ARG_76  | 2.74 | 1.75 | 7.04  |
| 1HGE.PDB | OE1, F_GLU_85  | OH, D_TYR_83   | HH, D_TYR_83    | 2.58 | 1.80 | 29.40 |
| 1HGE.PDB | OH, B_TYR_83   | NZ, D_LYS_88   | HZ1, D_LYS_88   | 2.71 | 1.68 | 6.52  |
| 1HGE.PDB | O, C_LYS_27    | ND2, D_ASN_104 | HD22, D_ASN_104 | 2.96 | 2.00 | 10.88 |
| 1HGE.PDB | OE1, B_GLU_132 | NE, D_ARG_124  | HE, D_ARG_124   | 2.78 | 1.98 | 28.90 |
| 1HGE.PDB | OE2, B_GLU_132 | NE, D_ARG_124  | HE, D_ARG_124   | 2.90 | 2.01 | 20.41 |
| 1HGE.PDB | O, C_LEU_13    | N, D_PHE_138   | H, D_PHE_138    | 2.74 | 1.87 | 21.30 |
| 1HGE.PDB | O, C_ALA_11    | N, D_ILE_140   | H, D_ILE_140    | 2.78 | 1.88 | 18.97 |
| 1HGE.PDB | O, B_ARG_170   | NH1, D_ARG_163 | HH12, D_ARG_163 | 2.79 | 1.82 | 14.16 |
| 1HGE.PDB | O, F_ILE_140   | N, E_ALA_11    | H, E_ALA_11     | 2.82 | 1.93 | 19.79 |
| 1HGE.PDB | O, F_GLN_27    | N, E_THR_12    | H, E_THR_12     | 2.91 | 1.97 | 12.43 |
| 1HGE.PDB | O, F_PHE_138   | N, E_LEU_13    | H, E_LEU_13     | 2.98 | 2.03 | 12.93 |
| 1HGE.PDB | O, F_ARG_25    | N, E_CYS_14    | H, E_CYS_14     | 2.61 | 1.80 | 26.88 |
| 1HGE.PDB | O, F_GLY_136   | N, E_LEU_15    | H, E_LEU_15     | 2.88 | 1.90 | 5.56  |
| 1HGE.PDB | O, F_GLY_23    | N, E_GLY_16    | H, E_GLY_16     | 2.95 | 2.06 | 19.95 |
| 1HGE.PDB | O, F_TRP_21    | N, E_HIS_18    | H, E_HIS_18     | 2.85 | 1.97 | 21.43 |
| 1HGE.PDB | OE2, F_GLU_97  | NZ, E_LYS_27   | HZ1, E_LYS_27   | 2.79 | 1.77 | 9.75  |
| 1HGE.PDB | OE2, F_GLU_67  | NH2, E_ARG_109 | HH21, E_ARG_109 | 2.78 | 1.79 | 11.63 |
| 1HGE.PDB | OD2, D_ASP_79  | OG, E_SER_110  | HG, E_SER_110   | 2.82 | 1.89 | 14.19 |
| 1HGE.PDB | OD1, C_ASP_101 | NE2, E_GLN_210 | HE22, E_GLN_210 | 2.89 | 2.04 | 25.02 |
| 1HGE.PDB | OE1, A_GLN_210 | NH2, E_ARG_220 | HH21, E_ARG_220 | 2.74 | 1.87 | 25.04 |
| 1HGE.PDB | O, D_SER_71    | NZ, E_LYS_238  | HZ2, E_LYS_238  | 2.75 | 1.79 | 18.19 |
| 1HGE.PDB | OE1, D_GLU_72  | NZ, E_LYS_238  | HZ3, E_LYS_238  | 2.85 | 1.84 | 12.25 |
| 1HGE.PDB | O, F_LYS_68    | NZ, E_LYS_299  | HZ2, E_LYS_299  | 2.95 | 1.93 | 11.73 |
| 1HGE.PDB | O, F_LYS_62    | N, E_GLY_303   | H, E_GLY_303    | 2.95 | 1.98 | 8.29  |
| 1HGE.PDB | OG, F_SER_93   | N, E_LYS_310   | H, E_LYS_310    | 2.93 | 1.97 | 10.15 |
| 1HGE.PDB | OD1, F_ASP_86  | NZ, E_LYS_310  | HZ3, E_LYS_310  | 2.86 | 2.02 | 29.64 |
| 1HGE.PDB | OD1, F_ASN_104 | N, E_ALA_317   | H, E_ALA_317    | 2.73 | 1.80 | 13.22 |
| 1HGE.PDB | OE1, F_GLU_15  | NZ, E_LYS_326  | HZ3, E_LYS_326  | 2.99 | 2.00 | 17.08 |
| 1HGE.PDB | O, E_VAL_323   | N, F_GLY_13    | H, F_GLY_13     | 2.72 | 1.79 | 12.93 |
| 1HGE.PDB | O, E_HIS_17    | N, F_TRP_14    | H, F_TRP_14     | 2.85 | 1.91 | 12.63 |
| 1HGE.PDB | O, E_GLY_16    | N, F_GLY_23    | H, F_GLY_23     | 2.91 | 2.01 | 19.90 |
| 1HGE.PDB | O, E_CYS_14    | N, F_ARG_25    | H, F_ARG_25     | 2.88 | 1.93 | 12.79 |
| 1HGE.PDB | O, E_THR_12    | N, F_GLN_27    | H, F_GLN_27     | 2.82 | 1.90 | 16.16 |
| 1HGE.PDB | OE2, D_GLU_97  | NH2, F_ARG_54  | HH22, F_ARG_54  | 2.80 | 1.82 | 12.52 |
| 1HGE.PDB | OD2, D_ASP_90  | NZ, F_LYS_62   | HZ2, F_LYS_62   | 2.67 | 1.83 | 29.15 |
| 1HGE.PDB | OG, E_SER_110  | NE2, F_HIS_64  | HE2, F_HIS_64   | 2.94 | 1.97 | 9.11  |
| 1HGE.PDB | O, E_LYS_299   | NZ, F_LYS_68   | HZ1, F_LYS_68   | 2.97 | 1.93 | 4.62  |
| 1HGE.PDB | OG, A_SER_107  | N, F_ARG_76    | H, F_ARG_76     | 2.81 | 1.83 | 4.38  |
| 1HGE.PDB | OE2, B_GLU_81  | NE, F_ARG_76   | HE, F_ARG_76    | 2.85 | 1.89 | 11.64 |
| 1HGE.PDB | OE2, B_GLU_74  | NH1, F_ARG_76  | HH12, F_ARG_76  | 2.73 | 1.73 | 6.19  |
| 1HGE.PDB | OE1, B_GLU_81  | NH2, F_ARG_76  | HH21, F_ARG_76  | 2.65 | 1.66 | 5.51  |
| 1HGE.PDB | OE1, B_GLU_74  | NH2, F_ARG_76  | HH22, F_ARG_76  | 2.70 | 1.73 | 9.07  |
| 1HGE.PDB | OE1, B_GLU_85  | OH, F_TYR_83   | HH, F_TYR_83    | 2.51 | 1.76 | 30.00 |
| 1HGE.PDB | OH, D_TYR_83   | NZ, F_LYS_88   | HZ1, F_LYS_88   | 2.67 | 1.65 | 8.34  |
| 1HGE.PDB | O, E_LYS_27    | ND2, F_ASN_104 | HD22, F_ASN_104 | 2.94 | 1.99 | 10.01 |

|          |                |                |                 |      |      |       |
|----------|----------------|----------------|-----------------|------|------|-------|
| 1HGE.PDB | OE1, D_GLU_132 | NE, F_ARG_124  | HE, F_ARG_124   | 2.92 | 2.09 | 27.36 |
| 1HGE.PDB | O, E_LEU_13    | N, F_PHE_138   | H, F_PHE_138    | 2.73 | 1.86 | 22.03 |
| 1HGE.PDB | O, E_ALA_11    | N, F_ILE_140   | H, F_ILE_140    | 2.75 | 1.87 | 19.65 |
| 1HGE.PDB | O, D_ARG_170   | NH1, F_ARG_163 | HH12, F_ARG_163 | 2.95 | 1.99 | 14.32 |

Table 1790: Interfacial 1HGE-specific side chain and main chain hydrogen bonding analysis.

In this table, a PDB file is specified with a four-letter PDB ID, except that the names of the PDB files corresponding to the single NMR structural model split from the NMR ensemble is specified with a four-letter PDB ID in addition to a hyphen followed by the single NMR structural model numeric ID, the residue naming scheme is **Chain ID\_residue name\_residue number**,  $\angle ADH$  represents the angle formed by acceptor (A), donor (D) and hydrogen (H) ( $\angle ADH$ ).



| PDB      | Acceptor (A)   | Donor (D)      | Hydrogen (H)    | D-A (Å) | H-A (Å) | $\angle ADH(^{\circ})$ |
|----------|----------------|----------------|-----------------|---------|---------|------------------------|
| 1HGF.PDB | O, B.ILE.140   | N, A.ALA.11    | H, A.ALA.11     | 2.90    | 2.03    | 22.48                  |
| 1HGF.PDB | O, B.PHE.138   | N, A.LEU.13    | H, A.LEU.13     | 2.96    | 1.99    | 8.07                   |
| 1HGF.PDB | O, B.ARG.25    | N, A.CYS.14    | H, A.CYS.14     | 2.98    | 2.02    | 8.89                   |
| 1HGF.PDB | O, B.GLY.136   | N, A.LEU.15    | H, A.LEU.15     | 2.92    | 1.95    | 7.83                   |
| 1HGF.PDB | O, B.GLY.23    | N, A.GLY.16    | H, A.GLY.16     | 2.92    | 2.03    | 19.80                  |
| 1HGF.PDB | O, B.TRP.21    | N, A.HIS.18    | H, A.HIS.18     | 2.92    | 2.01    | 18.08                  |
| 1HGF.PDB | OE2, B.GLU.97  | NZ, A.LYS.27   | HZ1, A.LYS.27   | 2.79    | 1.86    | 21.55                  |
| 1HGF.PDB | OE2, B.GLU.67  | NH2, A.ARG.109 | HH21, A.ARG.109 | 2.92    | 1.92    | 10.51                  |
| 1HGF.PDB | OD2, F.ASP.79  | OG, A.SER.110  | HG, A.SER.110   | 2.82    | 1.90    | 15.87                  |
| 1HGF.PDB | OE1, C.GLN.210 | NH2, A.ARG.220 | HH21, A.ARG.220 | 2.64    | 1.76    | 23.62                  |
| 1HGF.PDB | OE1, F.GLU.72  | NZ, A.LYS.238  | HZ2, A.LYS.238  | 2.85    | 1.85    | 14.58                  |
| 1HGF.PDB | O, F.SER.71    | NZ, A.LYS.238  | HZ3, A.LYS.238  | 2.63    | 1.67    | 16.71                  |
| 1HGF.PDB | O, B.LYS.62    | N, A.GLY.303   | H, A.GLY.303    | 2.90    | 1.93    | 4.88                   |
| 1HGF.PDB | OG, B.SER.93   | N, A.LYS.310   | H, A.LYS.310    | 2.89    | 1.97    | 16.03                  |
| 1HGF.PDB | OD1, B.ASN.104 | N, A.ALA.317   | H, A.ALA.317    | 2.74    | 1.82    | 15.07                  |
| 1HGF.PDB | O, A.VAL.323   | N, B.GLY.13    | H, B.GLY.13     | 2.74    | 1.86    | 21.47                  |
| 1HGF.PDB | O, A.HIS.17    | N, B.TRP.14    | H, B.TRP.14     | 2.87    | 1.97    | 19.18                  |
| 1HGF.PDB | O, A.CYS.14    | N, B.ARG.25    | H, B.ARG.25     | 2.97    | 2.03    | 13.73                  |
| 1HGF.PDB | OE2, A.GLU.325 | NH2, B.ARG.25  | HH22, B.ARG.25  | 2.99    | 2.04    | 16.52                  |
| 1HGF.PDB | O, E.THR.28    | NE, B.ARG.54   | HE, B.ARG.54    | 2.92    | 1.94    | 6.13                   |
| 1HGF.PDB | OE2, F.GLU.97  | NH2, B.ARG.54  | HH22, B.ARG.54  | 2.83    | 1.86    | 13.50                  |
| 1HGF.PDB | OD2, F.ASP.86  | NZ, B.LYS.62   | HZ2, B.LYS.62   | 2.71    | 1.70    | 11.44                  |
| 1HGF.PDB | OD2, F.ASP.90  | NZ, B.LYS.62   | HZ3, B.LYS.62   | 2.77    | 1.82    | 20.37                  |
| 1HGF.PDB | OG, A.SER.266  | ND1, B.HIS.64  | HD1, B.HIS.64   | 2.66    | 1.79    | 20.68                  |
| 1HGF.PDB | OG, A.SER.110  | NE2, B.HIS.64  | HE2, B.HIS.64   | 2.89    | 1.92    | 10.70                  |
| 1HGF.PDB | O, A.LYS.299   | NZ, B.LYS.68   | HZ2, B.LYS.68   | 2.93    | 1.89    | 4.53                   |
| 1HGF.PDB | OG, C.SER.107  | N, B.ARG.76    | H, B.ARG.76     | 2.84    | 1.90    | 13.38                  |
| 1HGF.PDB | OE2, D.GLU.81  | NE, B.ARG.76   | HE, B.ARG.76    | 2.92    | 1.92    | 2.47                   |
| 1HGF.PDB | OE1, D.GLU.74  | NH1, B.ARG.76  | HH12, B.ARG.76  | 2.86    | 1.84    | 3.80                   |
| 1HGF.PDB | OE1, D.GLU.81  | NH2, B.ARG.76  | HH21, B.ARG.76  | 2.73    | 1.74    | 10.29                  |
| 1HGF.PDB | OE2, D.GLU.74  | NH2, B.ARG.76  | HH22, B.ARG.76  | 2.75    | 1.74    | 3.91                   |
| 1HGF.PDB | OE1, D.GLU.85  | OH, B.TYR.83   | HH, B.TYR.83    | 2.57    | 1.80    | 29.66                  |
| 1HGF.PDB | OH, F.TYR.83   | NZ, B.LYS.88   | HZ1, B.LYS.88   | 2.72    | 1.70    | 9.91                   |
| 1HGF.PDB | O, A.LYS.27    | ND2, B.ASN.104 | HD21, B.ASN.104 | 2.88    | 1.94    | 13.97                  |
| 1HGF.PDB | O, F.LEU.2     | OG, B.SER.113  | HG, B.SER.113   | 2.68    | 1.90    | 29.80                  |
| 1HGF.PDB | OE1, F.GLU.132 | NE, B.ARG.124  | HE, B.ARG.124   | 2.80    | 1.86    | 13.00                  |
| 1HGF.PDB | O, A.LEU.13    | N, B.PHE.138   | H, B.PHE.138    | 2.73    | 1.88    | 23.58                  |
| 1HGF.PDB | O, A.ALA.11    | N, B.ILE.140   | H, B.ILE.140    | 2.80    | 1.87    | 14.66                  |
| 1HGF.PDB | O, F.ARG.170   | NH1, B.ARG.163 | HH12, B.ARG.163 | 2.79    | 1.78    | 1.27                   |
| 1HGF.PDB | OE1, F.GLU.131 | NH2, B.ARG.163 | HH21, B.ARG.163 | 2.74    | 1.86    | 24.20                  |
| 1HGF.PDB | O, D.ILE.140   | N, C.ALA.11    | H, C.ALA.11     | 2.89    | 2.00    | 20.42                  |
| 1HGF.PDB | O, D.GLN.27    | N, C.THR.12    | H, C.THR.12     | 2.90    | 1.96    | 12.68                  |
| 1HGF.PDB | O, D.PHE.138   | N, C.LEU.13    | H, C.LEU.13     | 2.97    | 1.99    | 7.01                   |
| 1HGF.PDB | O, D.ARG.25    | N, C.CYS.14    | H, C.CYS.14     | 2.79    | 1.86    | 15.57                  |
| 1HGF.PDB | O, D.GLY.136   | N, C.LEU.15    | H, C.LEU.15     | 2.95    | 1.97    | 3.72                   |
| 1HGF.PDB | O, D.GLY.23    | N, C.GLY.16    | H, C.GLY.16     | 2.95    | 2.05    | 18.06                  |
| 1HGF.PDB | O, D.TRP.21    | N, C.HIS.18    | H, C.HIS.18     | 2.91    | 2.01    | 18.40                  |
| 1HGF.PDB | OE2, D.GLU.97  | NZ, C.LYS.27   | HZ1, C.LYS.27   | 2.81    | 1.85    | 19.93                  |
| 1HGF.PDB | OE2, D.GLU.67  | NH2, C.ARG.109 | HH21, C.ARG.109 | 2.91    | 1.92    | 11.49                  |
| 1HGF.PDB | OD2, B.ASP.79  | OG, C.SER.110  | HG, C.SER.110   | 2.69    | 1.85    | 25.37                  |
| 1HGF.PDB | OE1, E.GLN.210 | NH2, C.ARG.220 | HH21, C.ARG.220 | 2.56    | 1.72    | 26.72                  |
| 1HGF.PDB | OE1, B.GLU.72  | NZ, C.LYS.238  | HZ2, C.LYS.238  | 2.75    | 1.78    | 18.48                  |
| 1HGF.PDB | O, B.SER.71    | NZ, C.LYS.238  | HZ3, C.LYS.238  | 2.61    | 1.62    | 12.67                  |
| 1HGF.PDB | O, D.LYS.62    | N, C.GLY.303   | H, C.GLY.303    | 2.91    | 1.95    | 8.09                   |
| 1HGF.PDB | OG, D.SER.93   | N, C.LYS.310   | H, C.LYS.310    | 2.89    | 1.98    | 17.69                  |
| 1HGF.PDB | OD1, D.ASN.104 | N, C.ALA.317   | H, C.ALA.317    | 2.78    | 1.83    | 11.25                  |
| 1HGF.PDB | O, C.VAL.323   | N, D.GLY.13    | H, D.GLY.13     | 2.72    | 1.85    | 21.39                  |

|          |                |                |                 |      |      |       |
|----------|----------------|----------------|-----------------|------|------|-------|
| 1HGF.PDB | O, C_HIS_17    | N, D_TRP_14    | H, D_TRP_14     | 2.87 | 1.96 | 16.75 |
| 1HGF.PDB | O, C_CYS_14    | N, D_ARG_25    | H, D_ARG_25     | 2.90 | 1.93 | 7.59  |
| 1HGF.PDB | O, C_THR_12    | N, D_GLN_27    | H, D_GLN_27     | 2.86 | 1.94 | 17.23 |
| 1HGF.PDB | O, A_THR_28    | NE, D_ARG_54   | HE, D_ARG_54    | 2.88 | 1.90 | 8.46  |
| 1HGF.PDB | OE2, B_GLU_97  | NH2, D_ARG_54  | HH22, D_ARG_54  | 2.84 | 1.86 | 12.74 |
| 1HGF.PDB | OD2, B_ASP_86  | NZ, D_LYS_62   | HZ2, D_LYS_62   | 2.69 | 1.69 | 13.49 |
| 1HGF.PDB | OD2, B_ASP_90  | NZ, D_LYS_62   | HZ3, D_LYS_62   | 2.68 | 1.77 | 22.81 |
| 1HGF.PDB | OG, C_SER_266  | ND1, D_HIS_64  | HD1, D_HIS_64   | 2.64 | 1.83 | 27.58 |
| 1HGF.PDB | OG, C_SER_110  | NE2, D_HIS_64  | HE2, D_HIS_64   | 2.90 | 1.92 | 7.33  |
| 1HGF.PDB | O, C_LYS_299   | NZ, D_LYS_68   | HZ2, D_LYS_68   | 2.93 | 1.89 | 4.98  |
| 1HGF.PDB | OG, E_SER_107  | N, D_ARG_76    | H, D_ARG_76     | 2.91 | 1.94 | 7.76  |
| 1HGF.PDB | OE2, F_GLU_81  | NE, D_ARG_76   | HE, D_ARG_76    | 2.82 | 1.85 | 5.34  |
| 1HGF.PDB | OE1, F_GLU_74  | NH1, D_ARG_76  | HH12, D_ARG_76  | 2.79 | 1.78 | 3.81  |
| 1HGF.PDB | OE1, F_GLU_81  | NH2, D_ARG_76  | HH21, D_ARG_76  | 2.64 | 1.68 | 12.43 |
| 1HGF.PDB | OE2, F_GLU_74  | NH2, D_ARG_76  | HH22, D_ARG_76  | 2.70 | 1.71 | 7.38  |
| 1HGF.PDB | OE1, F_GLU_85  | OH, D_TYR_83   | HH, D_TYR_83    | 2.58 | 1.80 | 29.87 |
| 1HGF.PDB | OH, B_TYR_83   | NZ, D_LYS_88   | HZ1, D_LYS_88   | 2.68 | 1.69 | 13.85 |
| 1HGF.PDB | O, C_LYS_27    | ND2, D_ASN_104 | HD21, D_ASN_104 | 2.89 | 1.96 | 15.72 |
| 1HGF.PDB | OE1, B_GLU_132 | NE, D_ARG_124  | HE, D_ARG_124   | 2.79 | 1.88 | 16.40 |
| 1HGF.PDB | O, C_LEU_13    | N, D_PHE_138   | H, D_PHE_138    | 2.75 | 1.91 | 24.76 |
| 1HGF.PDB | O, C_ALA_11    | N, D_ILE_140   | H, D_ILE_140    | 2.82 | 1.90 | 15.68 |
| 1HGF.PDB | O, B_ARG_170   | NH1, D_ARG_163 | HH12, D_ARG_163 | 2.84 | 1.83 | 3.71  |
| 1HGF.PDB | OE1, B_GLU_131 | NH2, D_ARG_163 | HH21, D_ARG_163 | 2.70 | 1.83 | 24.43 |
| 1HGF.PDB | O, F_ILE_140   | N, E_ALA_11    | H, E_ALA_11     | 2.95 | 2.06 | 20.63 |
| 1HGF.PDB | O, F_GLN_27    | N, E_THR_12    | H, E_THR_12     | 2.87 | 1.93 | 12.24 |
| 1HGF.PDB | O, F_PHE_138   | N, E_LEU_13    | H, E_LEU_13     | 2.96 | 1.99 | 8.43  |
| 1HGF.PDB | O, F_ARG_25    | N, E_CYS_14    | H, E_CYS_14     | 2.65 | 1.83 | 26.13 |
| 1HGF.PDB | O, F_GLY_136   | N, E_LEU_15    | H, E_LEU_15     | 2.91 | 1.93 | 3.45  |
| 1HGF.PDB | O, F_GLY_23    | N, E_GLY_16    | H, E_GLY_16     | 2.94 | 2.06 | 22.45 |
| 1HGF.PDB | O, F_TRP_21    | N, E_HIS_18    | H, E_HIS_18     | 2.91 | 2.00 | 17.81 |
| 1HGF.PDB | OE2, F_GLU_97  | NZ, E_LYS_27   | HZ1, E_LYS_27   | 2.75 | 1.83 | 22.30 |
| 1HGF.PDB | OE2, F_GLU_67  | NH2, E_ARG_109 | HH21, E_ARG_109 | 2.88 | 1.88 | 11.28 |
| 1HGF.PDB | OD2, D_ASP_79  | OG, E_SER_110  | HG, E_SER_110   | 2.78 | 1.90 | 21.69 |
| 1HGF.PDB | OE1, A_GLN_210 | NH2, E_ARG_220 | HH21, E_ARG_220 | 2.65 | 1.79 | 25.97 |
| 1HGF.PDB | OE1, D_GLU_72  | NZ, E_LYS_238  | HZ2, E_LYS_238  | 2.83 | 1.84 | 16.42 |
| 1HGF.PDB | O, D_SER_71    | NZ, E_LYS_238  | HZ3, E_LYS_238  | 2.74 | 1.75 | 13.85 |
| 1HGF.PDB | O, F_LYS_62    | N, E_GLY_303   | H, E_GLY_303    | 2.90 | 1.93 | 6.18  |
| 1HGF.PDB | OG, F_SER_93   | N, E_LYS_310   | H, E_LYS_310    | 2.86 | 1.93 | 14.59 |
| 1HGF.PDB | OD1, F_ASN_104 | N, E_ALA_317   | H, E_ALA_317    | 2.72 | 1.78 | 10.77 |
| 1HGF.PDB | O, E_VAL_323   | N, F_GLY_13    | H, F_GLY_13     | 2.75 | 1.85 | 19.07 |
| 1HGF.PDB | O, E_HIS_17    | N, F_TRP_14    | H, F_TRP_14     | 2.87 | 1.96 | 16.52 |
| 1HGF.PDB | O, E_CYS_14    | N, F_ARG_25    | H, F_ARG_25     | 2.91 | 1.94 | 8.25  |
| 1HGF.PDB | O, E_THR_12    | N, F_GLN_27    | H, F_GLN_27     | 3.00 | 2.08 | 17.91 |
| 1HGF.PDB | OE2, D_GLU_97  | NH2, F_ARG_54  | HH22, F_ARG_54  | 2.79 | 1.81 | 11.74 |
| 1HGF.PDB | OD2, D_ASP_86  | NZ, F_LYS_62   | HZ2, F_LYS_62   | 2.67 | 1.68 | 13.64 |
| 1HGF.PDB | OD2, D_ASP_90  | NZ, F_LYS_62   | HZ3, F_LYS_62   | 2.75 | 1.81 | 20.23 |
| 1HGF.PDB | OG, E_SER_266  | ND1, F_HIS_64  | HD1, F_HIS_64   | 2.65 | 1.77 | 20.25 |
| 1HGF.PDB | OG, E_SER_110  | NE2, F_HIS_64  | HE2, F_HIS_64   | 2.89 | 1.92 | 9.46  |
| 1HGF.PDB | O, E_LYS_299   | NZ, F_LYS_68   | HZ2, F_LYS_68   | 2.97 | 1.95 | 8.70  |
| 1HGF.PDB | OG, A_SER_107  | N, F_ARG_76    | H, F_ARG_76     | 2.83 | 1.87 | 9.12  |
| 1HGF.PDB | OE2, B_GLU_81  | NE, F_ARG_76   | HE, F_ARG_76    | 2.86 | 1.88 | 5.84  |
| 1HGF.PDB | OE1, B_GLU_74  | NH1, F_ARG_76  | HH12, F_ARG_76  | 2.78 | 1.77 | 1.59  |
| 1HGF.PDB | OE1, B_GLU_81  | NH2, F_ARG_76  | HH21, F_ARG_76  | 2.69 | 1.70 | 7.61  |
| 1HGF.PDB | OE2, B_GLU_74  | NH2, F_ARG_76  | HH22, F_ARG_76  | 2.71 | 1.73 | 8.88  |
| 1HGF.PDB | OH, D_TYR_83   | NZ, F_LYS_88   | HZ1, F_LYS_88   | 2.55 | 1.63 | 21.75 |
| 1HGF.PDB | O, E_LYS_27    | ND2, F_ASN_104 | HD21, F_ASN_104 | 2.91 | 1.99 | 15.12 |
| 1HGF.PDB | O, D_LEU_2     | OG, F_SER_113  | HG, F_SER_113   | 2.73 | 1.92 | 27.40 |
| 1HGF.PDB | OE1, D_GLU_132 | NE, F_ARG_124  | HE, F_ARG_124   | 2.90 | 1.96 | 15.73 |

|          |                |                |                 |      |      |       |
|----------|----------------|----------------|-----------------|------|------|-------|
| 1HGF.PDB | O, E_LEU_13    | N, F_PHE_138   | H, F_PHE_138    | 2.75 | 1.92 | 26.04 |
| 1HGF.PDB | O, E_ALA_11    | N, F_ILE_140   | H, F_ILE_140    | 2.82 | 1.90 | 16.36 |
| 1HGF.PDB | OE1, D_GLU_131 | NH2, F_ARG_163 | HH21, F_ARG_163 | 2.69 | 1.84 | 27.00 |

Table 1791: Interfacial 1HGF-specific side chain and main chain hydrogen bonding analysis. In this table, a PDB file is specified with a four-letter PDB ID, except that the names of the PDB files corresponding to the single NMR structural model split from the NMR ensemble is specified with a four-letter PDB ID in addition to a hyphen followed by the single NMR structural model numeric ID, the residue naming scheme is **Chain ID\_residue name\_residue number**,  $\angle ADH$  represents the angle formed by acceptor (A), donor (D) and hydrogen (H) ( $\angle ADH$ ).

| PDB      | Acceptor (A)   | Donor (D)      | Hydrogen (H)    | D-A (Å) | H-A (Å) | $\angle ADH(^{\circ})$ |
|----------|----------------|----------------|-----------------|---------|---------|------------------------|
| 1HGG.PDB | O, B.ILE.140   | N, A.ALA.11    | H, A.ALA.11     | 2.90    | 1.98    | 16.87                  |
| 1HGG.PDB | O, B.PHE.138   | N, A.LEU.13    | H, A.LEU.13     | 2.97    | 2.01    | 10.10                  |
| 1HGG.PDB | O, B.ARG.25    | N, A.CYS.14    | H, A.CYS.14     | 2.92    | 1.97    | 11.02                  |
| 1HGG.PDB | O, B.GLY.136   | N, A.LEU.15    | H, A.LEU.15     | 2.86    | 1.89    | 7.78                   |
| 1HGG.PDB | O, B.GLY.23    | N, A.GLY.16    | H, A.GLY.16     | 2.90    | 2.00    | 20.11                  |
| 1HGG.PDB | O, B.TRP.21    | N, A.HIS.18    | H, A.HIS.18     | 2.90    | 1.99    | 17.50                  |
| 1HGG.PDB | OE2, B.GLU.97  | NZ, A.LYS.27   | HZ1, A.LYS.27   | 2.90    | 1.87    | 9.15                   |
| 1HGG.PDB | OE2, B.GLU.67  | NH2, A.ARG.109 | HH21, A.ARG.109 | 2.84    | 1.86    | 14.43                  |
| 1HGG.PDB | OD2, F.ASP.79  | OG, A.SER.110  | HG, A.SER.110   | 2.88    | 1.95    | 14.29                  |
| 1HGG.PDB | OD1, E.ASP.101 | NE2, A.GLN.210 | HE22, A.GLN.210 | 2.99    | 2.07    | 17.95                  |
| 1HGG.PDB | OE1, C.GLN.210 | NH2, A.ARG.220 | HH21, A.ARG.220 | 2.73    | 1.78    | 15.93                  |
| 1HGG.PDB | O, F.SER.71    | NZ, A.LYS.238  | HZ2, A.LYS.238  | 2.70    | 1.77    | 20.55                  |
| 1HGG.PDB | OE1, F.GLU.72  | NZ, A.LYS.238  | HZ3, A.LYS.238  | 2.93    | 1.93    | 14.31                  |
| 1HGG.PDB | OE2, F.GLU.72  | NZ, A.LYS.238  | HZ3, A.LYS.238  | 2.74    | 1.91    | 29.92                  |
| 1HGG.PDB | OE1, B.GLU.67  | NH1, A.ARG.269 | HH12, A.ARG.269 | 2.69    | 1.86    | 28.34                  |
| 1HGG.PDB | O, B.LYS.68    | NZ, A.LYS.299  | HZ1, A.LYS.299  | 2.91    | 1.88    | 9.16                   |
| 1HGG.PDB | O, B.LYS.62    | N, A.GLY.303   | H, A.GLY.303    | 2.91    | 1.94    | 6.06                   |
| 1HGG.PDB | OG, B.SER.93   | N, A.LYS.310   | H, A.LYS.310    | 2.89    | 1.96    | 14.59                  |
| 1HGG.PDB | OD1, B.ASP.90  | NZ, A.LYS.310  | HZ2, A.LYS.310  | 2.70    | 1.74    | 18.08                  |
| 1HGG.PDB | OD1, B.ASN.104 | N, A.ALA.317   | H, A.ALA.317    | 2.79    | 1.88    | 16.20                  |
| 1HGG.PDB | OE2, B.GLU.15  | NZ, A.LYS.326  | HZ1, A.LYS.326  | 2.83    | 1.89    | 21.04                  |
| 1HGG.PDB | O, A.VAL.323   | N, B.GLY.13    | H, B.GLY.13     | 2.71    | 1.78    | 13.00                  |
| 1HGG.PDB | O, A.HIS.17    | N, B.TRP.14    | H, B.TRP.14     | 2.79    | 1.88    | 17.76                  |
| 1HGG.PDB | O, A.GLY.16    | N, B.GLY.23    | H, B.GLY.23     | 2.99    | 2.09    | 20.32                  |
| 1HGG.PDB | OE2, A.GLU.325 | NH2, B.ARG.25  | HH22, B.ARG.25  | 2.94    | 1.96    | 12.23                  |
| 1HGG.PDB | O, E.THR.28    | NE, B.ARG.54   | HE, B.ARG.54    | 2.94    | 1.97    | 7.82                   |
| 1HGG.PDB | OE2, F.GLU.97  | NH2, B.ARG.54  | HH22, B.ARG.54  | 2.75    | 1.76    | 9.96                   |
| 1HGG.PDB | OD2, F.ASP.90  | NZ, B.LYS.62   | HZ2, B.LYS.62   | 2.65    | 1.82    | 29.87                  |
| 1HGG.PDB | OD2, F.ASP.86  | NZ, B.LYS.62   | HZ3, B.LYS.62   | 2.64    | 1.73    | 23.35                  |
| 1HGG.PDB | OG, A.SER.110  | NE2, B.HIS.64  | HE2, B.HIS.64   | 2.90    | 1.96    | 14.63                  |
| 1HGG.PDB | O, A.LYS.299   | NZ, B.LYS.68   | HZ1, B.LYS.68   | 2.86    | 1.83    | 9.73                   |
| 1HGG.PDB | OG, C.SER.107  | N, B.ARG.76    | H, B.ARG.76     | 2.77    | 1.82    | 10.45                  |
| 1HGG.PDB | OE2, D.GLU.81  | NE, B.ARG.76   | HE, B.ARG.76    | 2.94    | 1.96    | 10.47                  |
| 1HGG.PDB | OE1, D.GLU.74  | NH1, B.ARG.76  | HH12, B.ARG.76  | 2.88    | 1.89    | 10.69                  |
| 1HGG.PDB | OE1, D.GLU.81  | NH2, B.ARG.76  | HH21, B.ARG.76  | 2.73    | 1.73    | 5.91                   |
| 1HGG.PDB | OE2, D.GLU.74  | NH2, B.ARG.76  | HH22, B.ARG.76  | 2.82    | 1.82    | 7.26                   |
| 1HGG.PDB | OE1, D.GLU.85  | OH, B.TYR.83   | HH, B.TYR.83    | 2.68    | 1.80    | 19.99                  |
| 1HGG.PDB | OH, F.TYR.83   | NZ, B.LYS.88   | HZ1, B.LYS.88   | 2.77    | 1.73    | 5.14                   |
| 1HGG.PDB | O, A.LYS.27    | ND2, B.ASN.104 | HD22, B.ASN.104 | 2.88    | 1.95    | 14.60                  |
| 1HGG.PDB | OE1, F.GLU.132 | NE, B.ARG.124  | HE, B.ARG.124   | 2.84    | 1.98    | 22.96                  |
| 1HGG.PDB | OE2, F.GLU.132 | NE, B.ARG.124  | HE, B.ARG.124   | 2.81    | 1.98    | 25.54                  |
| 1HGG.PDB | O, A.LEU.13    | N, B.PHE.138   | H, B.PHE.138    | 2.70    | 1.86    | 24.49                  |
| 1HGG.PDB | O, A.ALA.11    | N, B.ILE.140   | H, B.ILE.140    | 2.77    | 1.86    | 18.05                  |
| 1HGG.PDB | O, F.ARG.170   | NH1, B.ARG.163 | HH12, B.ARG.163 | 2.76    | 1.82    | 18.13                  |
| 1HGG.PDB | O, D.ILE.140   | N, C.ALA.11    | H, C.ALA.11     | 2.88    | 1.96    | 16.67                  |
| 1HGG.PDB | O, D.PHE.138   | N, C.LEU.13    | H, C.LEU.13     | 3.00    | 2.04    | 10.72                  |
| 1HGG.PDB | O, D.ARG.25    | N, C.CYS.14    | H, C.CYS.14     | 2.73    | 1.80    | 13.70                  |
| 1HGG.PDB | O, D.GLY.136   | N, C.LEU.15    | H, C.LEU.15     | 2.90    | 1.94    | 8.49                   |
| 1HGG.PDB | O, D.GLY.23    | N, C.GLY.16    | H, C.GLY.16     | 2.91    | 2.01    | 20.14                  |
| 1HGG.PDB | O, D.TRP.21    | N, C.HIS.18    | H, C.HIS.18     | 2.90    | 2.00    | 17.75                  |
| 1HGG.PDB | OE2, D.GLU.97  | NZ, C.LYS.27   | HZ1, C.LYS.27   | 2.94    | 1.91    | 8.28                   |
| 1HGG.PDB | OE2, D.GLU.67  | NH2, C.ARG.109 | HH21, C.ARG.109 | 2.85    | 1.88    | 14.56                  |
| 1HGG.PDB | OD2, B.ASP.79  | OG, C.SER.110  | HG, C.SER.110   | 2.76    | 1.86    | 17.83                  |
| 1HGG.PDB | OE1, E.GLN.210 | NH2, C.ARG.220 | HH21, C.ARG.220 | 2.61    | 1.71    | 21.26                  |
| 1HGG.PDB | OE1, B.GLU.72  | NZ, C.LYS.238  | HZ1, C.LYS.238  | 2.83    | 1.86    | 17.18                  |
| 1HGG.PDB | OE2, B.GLU.72  | NZ, C.LYS.238  | HZ1, C.LYS.238  | 2.70    | 1.87    | 29.85                  |
| 1HGG.PDB | O, B.SER.71    | NZ, C.LYS.238  | HZ3, C.LYS.238  | 2.64    | 1.71    | 20.39                  |

|          |                |                |                 |      |      |       |
|----------|----------------|----------------|-----------------|------|------|-------|
| 1HGG.PDB | OE1, D_GLU_67  | NH1, C_ARG_269 | HH12, C_ARG_269 | 2.69 | 1.85 | 27.75 |
| 1HGG.PDB | O, D_LYS_68    | NZ, C_LYS_299  | HZ1, C_LYS_299  | 2.94 | 1.91 | 9.55  |
| 1HGG.PDB | O, D_LYS_62    | N, C_GLY_303   | H, C_GLY_303    | 2.91 | 1.94 | 5.10  |
| 1HGG.PDB | OG, D_SER_93   | N, C_LYS_310   | H, C_LYS_310    | 2.89 | 1.96 | 14.95 |
| 1HGG.PDB | OD1, D_ASP_90  | NZ, C_LYS_310  | HZ2, C_LYS_310  | 2.65 | 1.73 | 21.74 |
| 1HGG.PDB | OD1, D_ASN_104 | N, C_ALA_317   | H, C_ALA_317    | 2.78 | 1.87 | 17.02 |
| 1HGG.PDB | O, C_VAL_323   | N, D_GLY_13    | H, D_GLY_13     | 2.71 | 1.79 | 13.39 |
| 1HGG.PDB | O, C_HIS_17    | N, D_TRP_14    | H, D_TRP_14     | 2.80 | 1.89 | 17.21 |
| 1HGG.PDB | O, C_GLY_16    | N, D_GLY_23    | H, D_GLY_23     | 2.99 | 2.09 | 20.18 |
| 1HGG.PDB | O, C_CYS_14    | N, D_ARG_25    | H, D_ARG_25     | 2.94 | 1.98 | 8.24  |
| 1HGG.PDB | O, A_THR_28    | NE, D_ARG_54   | HE, D_ARG_54    | 2.88 | 1.91 | 8.15  |
| 1HGG.PDB | OE2, B_GLU_97  | NH2, D_ARG_54  | HH22, D_ARG_54  | 2.76 | 1.78 | 10.56 |
| 1HGG.PDB | OG, C_SER_110  | NE2, D_HIS_64  | HE2, D_HIS_64   | 2.86 | 1.90 | 9.42  |
| 1HGG.PDB | O, C_LYS_299   | NZ, D_LYS_68   | HZ1, D_LYS_68   | 2.84 | 1.83 | 12.46 |
| 1HGG.PDB | OG, E_SER_107  | N, D_ARG_76    | H, D_ARG_76     | 2.84 | 1.88 | 7.98  |
| 1HGG.PDB | OE2, F_GLU_81  | NE, D_ARG_76   | HE, D_ARG_76    | 2.86 | 1.89 | 9.57  |
| 1HGG.PDB | OE1, F_GLU_74  | NH1, D_ARG_76  | HH12, D_ARG_76  | 2.78 | 1.80 | 12.10 |
| 1HGG.PDB | OE1, F_GLU_81  | NH2, D_ARG_76  | HH21, D_ARG_76  | 2.67 | 1.68 | 6.66  |
| 1HGG.PDB | OE2, F_GLU_74  | NH2, D_ARG_76  | HH22, D_ARG_76  | 2.74 | 1.75 | 9.29  |
| 1HGG.PDB | OE1, F_GLU_85  | OH, D_TYR_83   | HH, D_TYR_83    | 2.59 | 1.78 | 26.83 |
| 1HGG.PDB | OH, B_TYR_83   | NZ, D_LYS_88   | HZ1, D_LYS_88   | 2.73 | 1.70 | 8.35  |
| 1HGG.PDB | O, C_LYS_27    | ND2, D_ASN_104 | HD22, D_ASN_104 | 2.86 | 1.93 | 13.53 |
| 1HGG.PDB | OE1, B_GLU_132 | NE, D_ARG_124  | HE, D_ARG_124   | 2.86 | 2.00 | 22.57 |
| 1HGG.PDB | OE2, B_GLU_132 | NE, D_ARG_124  | HE, D_ARG_124   | 2.78 | 1.96 | 26.12 |
| 1HGG.PDB | O, C_LEU_13    | N, D_PHE_138   | H, D_PHE_138    | 2.73 | 1.88 | 23.87 |
| 1HGG.PDB | O, C_ALA_11    | N, D_ILE_140   | H, D_ILE_140    | 2.80 | 1.89 | 17.21 |
| 1HGG.PDB | O, B_ARG_170   | NH1, D_ARG_163 | HH12, D_ARG_163 | 2.79 | 1.85 | 17.60 |
| 1HGG.PDB | O, F_ILE_140   | N, E_ALA_11    | H, E_ALA_11     | 2.91 | 1.98 | 15.76 |
| 1HGG.PDB | O, F_GLN_27    | N, E_THR_12    | H, E_THR_12     | 2.92 | 1.99 | 15.18 |
| 1HGG.PDB | O, F_PHE_138   | N, E_LEU_13    | H, E_LEU_13     | 2.97 | 2.01 | 11.10 |
| 1HGG.PDB | O, F_ARG_25    | N, E_CYS_14    | H, E_CYS_14     | 2.71 | 1.83 | 19.57 |
| 1HGG.PDB | O, F_GLY_136   | N, E_LEU_15    | H, E_LEU_15     | 2.87 | 1.90 | 6.84  |
| 1HGG.PDB | O, F_GLY_23    | N, E_GLY_16    | H, E_GLY_16     | 2.91 | 2.01 | 19.19 |
| 1HGG.PDB | O, F_TRP_21    | N, E_HIS_18    | H, E_HIS_18     | 2.89 | 1.99 | 18.05 |
| 1HGG.PDB | OE2, F_GLU_97  | NZ, E_LYS_27   | HZ1, E_LYS_27   | 2.91 | 1.88 | 8.89  |
| 1HGG.PDB | OE2, F_GLU_67  | NH2, E_ARG_109 | HH21, E_ARG_109 | 2.88 | 1.90 | 14.20 |
| 1HGG.PDB | OD2, D_ASP_79  | OG, E_SER_110  | HG, E_SER_110   | 2.79 | 1.88 | 16.48 |
| 1HGG.PDB | OD1, C_ASP_101 | NE2, E_GLN_210 | HE22, E_GLN_210 | 2.96 | 2.04 | 17.70 |
| 1HGG.PDB | OE1, A_GLN_210 | NH2, E_ARG_220 | HH21, E_ARG_220 | 2.72 | 1.80 | 20.26 |
| 1HGG.PDB | OE1, D_GLU_72  | NZ, E_LYS_238  | HZ1, E_LYS_238  | 2.89 | 1.89 | 13.93 |
| 1HGG.PDB | O, D_SER_71    | NZ, E_LYS_238  | HZ3, E_LYS_238  | 2.80 | 1.86 | 20.00 |
| 1HGG.PDB | OE1, F_GLU_67  | NH1, E_ARG_269 | HH12, E_ARG_269 | 2.69 | 1.85 | 27.32 |
| 1HGG.PDB | O, F_LYS_68    | NZ, E_LYS_299  | HZ1, E_LYS_299  | 2.93 | 1.91 | 9.86  |
| 1HGG.PDB | O, F_LYS_62    | N, E_GLY_303   | H, E_GLY_303    | 2.92 | 1.95 | 6.71  |
| 1HGG.PDB | OG, F_SER_93   | N, E_LYS_310   | H, E_LYS_310    | 2.89 | 1.95 | 15.34 |
| 1HGG.PDB | OD1, F_ASP_90  | NZ, E_LYS_310  | HZ2, E_LYS_310  | 2.64 | 1.72 | 22.12 |
| 1HGG.PDB | OD1, F_ASN_104 | N, E_ALA_317   | H, E_ALA_317    | 2.80 | 1.89 | 16.99 |
| 1HGG.PDB | OE2, F_GLU_15  | N, E_GLU_325   | H, E_GLU_325    | 2.88 | 2.08 | 28.79 |
| 1HGG.PDB | OE1, F_GLU_15  | NZ, E_LYS_326  | HZ3, E_LYS_326  | 2.98 | 1.97 | 15.13 |
| 1HGG.PDB | O, E_VAL_323   | N, F_GLY_13    | H, F_GLY_13     | 2.73 | 1.78 | 9.21  |
| 1HGG.PDB | O, E_HIS_17    | N, F_TRP_14    | H, F_TRP_14     | 2.81 | 1.90 | 18.17 |
| 1HGG.PDB | O, E_GLY_16    | N, F_GLY_23    | H, F_GLY_23     | 2.97 | 2.08 | 20.37 |
| 1HGG.PDB | O, E_CYS_14    | N, F_ARG_25    | H, F_ARG_25     | 2.99 | 2.04 | 12.72 |
| 1HGG.PDB | O, E_THR_12    | N, F_GLN_27    | H, F_GLN_27     | 2.98 | 2.05 | 15.41 |
| 1HGG.PDB | OE2, D_GLU_97  | NH2, F_ARG_54  | HH22, F_ARG_54  | 2.73 | 1.74 | 10.16 |
| 1HGG.PDB | OD2, D_ASP_86  | NZ, F_LYS_62   | HZ3, F_LYS_62   | 2.58 | 1.75 | 29.01 |
| 1HGG.PDB | OG, E_SER_110  | NE2, F_HIS_64  | HE2, F_HIS_64   | 2.87 | 1.91 | 10.03 |
| 1HGG.PDB | O, E_LYS_299   | NZ, F_LYS_68   | HZ1, F_LYS_68   | 2.85 | 1.83 | 8.63  |

|          |                |                |                 |      |      |       |
|----------|----------------|----------------|-----------------|------|------|-------|
| 1HGG.PDB | OG, A_SER_107  | N, F_ARG_76    | H, F_ARG_76     | 2.79 | 1.82 | 4.90  |
| 1HGG.PDB | OE2, B_GLU_81  | NE, F_ARG_76   | HE, F_ARG_76    | 2.88 | 1.92 | 11.44 |
| 1HGG.PDB | OE1, B_GLU_74  | NH1, F_ARG_76  | HH12, F_ARG_76  | 2.75 | 1.76 | 9.13  |
| 1HGG.PDB | OE1, B_GLU_81  | NH2, F_ARG_76  | HH21, F_ARG_76  | 2.67 | 1.68 | 1.99  |
| 1HGG.PDB | OE2, B_GLU_74  | NH2, F_ARG_76  | HH22, F_ARG_76  | 2.79 | 1.81 | 10.64 |
| 1HGG.PDB | OH, D_TYR_83   | NZ, F_LYS_88   | HZ1, F_LYS_88   | 2.68 | 1.67 | 10.46 |
| 1HGG.PDB | O, E_LYS_27    | ND2, F_ASN_104 | HD22, F_ASN_104 | 2.91 | 1.98 | 14.98 |
| 1HGG.PDB | OE1, D_GLU_132 | NE, F_ARG_124  | HE, F_ARG_124   | 2.96 | 2.09 | 22.59 |
| 1HGG.PDB | OE2, D_GLU_132 | NE, F_ARG_124  | HE, F_ARG_124   | 2.87 | 2.01 | 24.00 |
| 1HGG.PDB | O, E_LEU_13    | N, F_PHE_138   | H, F_PHE_138    | 2.72 | 1.87 | 23.38 |
| 1HGG.PDB | O, E_ALA_11    | N, F_ILE_140   | H, F_ILE_140    | 2.79 | 1.89 | 17.86 |
| 1HGG.PDB | O, D_ARG_170   | NH1, F_ARG_163 | HH12, F_ARG_163 | 2.94 | 2.00 | 17.69 |

Table 1792: Interfacial 1HGG-specific side chain and main chain hydrogen bonding analysis. In this table, a PDB file is specified with a four-letter PDB ID, except that the names of the PDB files corresponding to the single NMR structural model split from the NMR ensemble is specified with a four-letter PDB ID in addition to a hyphen followed by the single NMR structural model numeric ID, the residue naming scheme is **Chain ID\_residue name\_residue number**,  $\angle ADH$  represents the angle formed by acceptor (A), donor (D) and hydrogen (H) ( $\angle ADH$ ).

| PDB      | Acceptor (A)   | Donor (D)      | Hydrogen (H)    | D-A (Å) | H-A (Å) | $\angle ADH(^{\circ})$ |
|----------|----------------|----------------|-----------------|---------|---------|------------------------|
| 1HGH.PDB | O, B.ILE.140   | N, A.ALA.11    | H, A.ALA.11     | 2.91    | 2.03    | 21.75                  |
| 1HGH.PDB | O, B.PHE.138   | N, A.LEU.13    | H, A.LEU.13     | 2.96    | 1.99    | 9.24                   |
| 1HGH.PDB | O, B.ARG.25    | N, A.CYS.14    | H, A.CYS.14     | 2.90    | 1.93    | 6.13                   |
| 1HGH.PDB | O, B.GLY.136   | N, A.LEU.15    | H, A.LEU.15     | 2.89    | 1.92    | 5.59                   |
| 1HGH.PDB | O, B.GLY.23    | N, A.GLY.16    | H, A.GLY.16     | 2.92    | 2.07    | 24.71                  |
| 1HGH.PDB | O, B.TRP.21    | N, A.HIS.18    | H, A.HIS.18     | 2.92    | 2.03    | 20.10                  |
| 1HGH.PDB | OE2, B.GLU.97  | NZ, A.LYS.27   | HZ1, A.LYS.27   | 2.78    | 1.76    | 9.03                   |
| 1HGH.PDB | OE2, B.GLU.67  | NH2, A.ARG.109 | HH21, A.ARG.109 | 2.86    | 1.88    | 13.48                  |
| 1HGH.PDB | OD2, F.ASP.79  | OG, A.SER.110  | HG, A.SER.110   | 2.97    | 2.01    | 11.65                  |
| 1HGH.PDB | OD1, E.ASP.101 | NE2, A.GLN.210 | HE22, A.GLN.210 | 2.97    | 2.14    | 27.61                  |
| 1HGH.PDB | OE1, C.GLN.210 | NH2, A.ARG.220 | HH21, A.ARG.220 | 2.66    | 1.73    | 18.15                  |
| 1HGH.PDB | O, F.SER.71    | NZ, A.LYS.238  | HZ2, A.LYS.238  | 2.69    | 1.74    | 19.56                  |
| 1HGH.PDB | OE1, F.GLU.72  | NZ, A.LYS.238  | HZ3, A.LYS.238  | 2.92    | 1.93    | 15.64                  |
| 1HGH.PDB | O, B.LYS.68    | NZ, A.LYS.299  | HZ1, A.LYS.299  | 2.98    | 1.97    | 13.59                  |
| 1HGH.PDB | O, B.LYS.62    | N, A.GLY.303   | H, A.GLY.303    | 3.00    | 2.03    | 6.35                   |
| 1HGH.PDB | OG, B.SER.93   | N, A.LYS.310   | H, A.LYS.310    | 2.90    | 1.94    | 8.41                   |
| 1HGH.PDB | OD1, B.ASP.86  | NZ, A.LYS.310  | HZ2, A.LYS.310  | 2.71    | 1.84    | 27.09                  |
| 1HGH.PDB | OD1, B.ASN.104 | N, A.ALA.317   | H, A.ALA.317    | 2.74    | 1.80    | 10.38                  |
| 1HGH.PDB | O, A.VAL.323   | N, B.GLY.13    | H, B.GLY.13     | 2.69    | 1.78    | 16.40                  |
| 1HGH.PDB | O, A.HIS.17    | N, B.TRP.14    | H, B.TRP.14     | 2.80    | 1.87    | 14.18                  |
| 1HGH.PDB | O, A.GLY.16    | N, B.GLY.23    | H, B.GLY.23     | 2.92    | 2.01    | 18.42                  |
| 1HGH.PDB | O, A.CYS.14    | N, B.ARG.25    | H, B.ARG.25     | 2.97    | 2.02    | 12.29                  |
| 1HGH.PDB | OE2, F.GLU.97  | NH2, B.ARG.54  | HH22, B.ARG.54  | 2.82    | 1.86    | 15.60                  |
| 1HGH.PDB | OD2, F.ASP.86  | NZ, B.LYS.62   | HZ1, B.LYS.62   | 2.66    | 1.80    | 27.71                  |
| 1HGH.PDB | OD2, F.ASP.90  | NZ, B.LYS.62   | HZ3, B.LYS.62   | 2.68    | 1.82    | 27.13                  |
| 1HGH.PDB | OG, A.SER.110  | NE2, B.HIS.64  | HE2, B.HIS.64   | 2.87    | 1.91    | 11.96                  |
| 1HGH.PDB | O, A.LYS.299   | NZ, B.LYS.68   | HZ1, B.LYS.68   | 2.89    | 1.86    | 6.42                   |
| 1HGH.PDB | OG, C.SER.107  | N, B.ARG.76    | H, B.ARG.76     | 2.88    | 1.92    | 9.13                   |
| 1HGH.PDB | OE2, D.GLU.81  | NE, B.ARG.76   | HE, B.ARG.76    | 2.87    | 1.90    | 9.70                   |
| 1HGH.PDB | OE2, D.GLU.74  | NH1, B.ARG.76  | HH12, B.ARG.76  | 2.91    | 1.90    | 8.45                   |
| 1HGH.PDB | OE1, D.GLU.81  | NH2, B.ARG.76  | HH21, B.ARG.76  | 2.77    | 1.76    | 5.47                   |
| 1HGH.PDB | OE1, D.GLU.74  | NH2, B.ARG.76  | HH22, B.ARG.76  | 2.89    | 1.87    | 2.83                   |
| 1HGH.PDB | OE1, D.GLU.85  | OH, B.TYR.83   | HH, B.TYR.83    | 2.69    | 1.84    | 23.96                  |
| 1HGH.PDB | OH, F.TYR.83   | NZ, B.LYS.88   | HZ1, B.LYS.88   | 2.74    | 1.71    | 7.44                   |
| 1HGH.PDB | O, A.LYS.27    | ND2, B.ASN.104 | HD22, B.ASN.104 | 2.88    | 1.93    | 11.07                  |
| 1HGH.PDB | OE1, F.GLU.132 | NE, B.ARG.124  | HE, B.ARG.124   | 2.76    | 1.94    | 26.47                  |
| 1HGH.PDB | OE2, F.GLU.132 | NE, B.ARG.124  | HE, B.ARG.124   | 2.83    | 1.98    | 23.62                  |
| 1HGH.PDB | O, A.LEU.13    | N, B.PHE.138   | H, B.PHE.138    | 2.71    | 1.82    | 19.17                  |
| 1HGH.PDB | O, A.ALA.11    | N, B.ILE.140   | H, B.ILE.140    | 2.77    | 1.85    | 16.34                  |
| 1HGH.PDB | O, F.ARG.170   | NH1, B.ARG.163 | HH12, B.ARG.163 | 2.69    | 1.71    | 10.72                  |
| 1HGH.PDB | O, D.ILE.140   | N, C.ALA.11    | H, C.ALA.11     | 2.90    | 2.02    | 21.17                  |
| 1HGH.PDB | O, D.GLN.27    | N, C.THR.12    | H, C.THR.12     | 2.94    | 1.99    | 10.37                  |
| 1HGH.PDB | O, D.PHE.138   | N, C.LEU.13    | H, C.LEU.13     | 2.98    | 2.01    | 8.63                   |
| 1HGH.PDB | O, D.ARG.25    | N, C.CYS.14    | H, C.CYS.14     | 2.74    | 1.80    | 11.01                  |
| 1HGH.PDB | O, D.GLY.136   | N, C.LEU.15    | H, C.LEU.15     | 2.92    | 1.95    | 6.34                   |
| 1HGH.PDB | O, D.GLY.23    | N, C.GLY.16    | H, C.GLY.16     | 2.95    | 2.08    | 23.40                  |
| 1HGH.PDB | O, D.TRP.21    | N, C.HIS.18    | H, C.HIS.18     | 2.93    | 2.04    | 20.66                  |
| 1HGH.PDB | OE2, D.GLU.97  | NZ, C.LYS.27   | HZ1, C.LYS.27   | 2.82    | 1.78    | 7.61                   |
| 1HGH.PDB | OE2, D.GLU.67  | NH2, C.ARG.109 | HH21, C.ARG.109 | 2.86    | 1.88    | 13.66                  |
| 1HGH.PDB | OD2, B.ASP.79  | OG, C.SER.110  | HG, C.SER.110   | 2.78    | 1.85    | 13.87                  |
| 1HGH.PDB | OD1, A.ASP.101 | NE2, C.GLN.210 | HE22, C.GLN.210 | 2.93    | 2.07    | 24.87                  |
| 1HGH.PDB | OE1, E.GLN.210 | NH2, C.ARG.220 | HH21, C.ARG.220 | 2.57    | 1.72    | 26.03                  |
| 1HGH.PDB | OE1, B.GLU.72  | NZ, C.LYS.238  | HZ1, C.LYS.238  | 2.71    | 1.80    | 22.72                  |
| 1HGH.PDB | O, B.SER.71    | NZ, C.LYS.238  | HZ3, C.LYS.238  | 2.68    | 1.75    | 20.57                  |
| 1HGH.PDB | OG, D.SER.93   | N, C.LYS.310   | H, C.LYS.310    | 2.93    | 1.96    | 8.29                   |
| 1HGH.PDB | OD1, D.ASP.86  | NZ, C.LYS.310  | HZ2, C.LYS.310  | 2.73    | 1.85    | 26.20                  |
| 1HGH.PDB | OD1, D.ASN.104 | N, C.ALA.317   | H, C.ALA.317    | 2.74    | 1.81    | 14.42                  |

|          |                |                |                 |      |      |       |
|----------|----------------|----------------|-----------------|------|------|-------|
| 1HGH.PDB | OE1, D_GLU_15  | NZ, C_LYS_326  | HZ1, C_LYS_326  | 2.77 | 1.75 | 11.00 |
| 1HGH.PDB | O, C_VAL_323   | N, D_GLY_13    | H, D_GLY_13     | 2.68 | 1.77 | 15.36 |
| 1HGH.PDB | O, C_HIS_17    | N, D_TRP_14    | H, D_TRP_14     | 2.80 | 1.87 | 13.64 |
| 1HGH.PDB | O, C_GLY_16    | N, D_GLY_23    | H, D_GLY_23     | 2.92 | 2.01 | 18.18 |
| 1HGH.PDB | O, C_CYS_14    | N, D_ARG_25    | H, D_ARG_25     | 2.90 | 1.94 | 10.42 |
| 1HGH.PDB | O, C_THR_12    | N, D_GLN_27    | H, D_GLN_27     | 2.91 | 1.98 | 14.85 |
| 1HGH.PDB | O, A_THR_28    | NE, D_ARG_54   | HE, D_ARG_54    | 2.96 | 1.98 | 3.97  |
| 1HGH.PDB | OE2, B_GLU_97  | NH2, D_ARG_54  | HH22, D_ARG_54  | 2.80 | 1.85 | 16.64 |
| 1HGH.PDB | OG, C_SER_110  | NE2, D_HIS_64  | HE2, D_HIS_64   | 2.84 | 1.88 | 10.18 |
| 1HGH.PDB | O, C_LYS_299   | NZ, D_LYS_68   | HZ1, D_LYS_68   | 2.88 | 1.85 | 6.67  |
| 1HGH.PDB | OG, E_SER_107  | N, D_ARG_76    | H, D_ARG_76     | 2.91 | 1.94 | 8.23  |
| 1HGH.PDB | OE2, F_GLU_81  | NE, D_ARG_76   | HE, D_ARG_76    | 2.79 | 1.84 | 10.45 |
| 1HGH.PDB | OE2, F_GLU_74  | NH1, D_ARG_76  | HH12, D_ARG_76  | 2.77 | 1.77 | 10.38 |
| 1HGH.PDB | OE1, F_GLU_81  | NH2, D_ARG_76  | HH21, D_ARG_76  | 2.70 | 1.70 | 6.41  |
| 1HGH.PDB | OE1, F_GLU_74  | NH2, D_ARG_76  | HH22, D_ARG_76  | 2.75 | 1.75 | 5.88  |
| 1HGH.PDB | OE1, F_GLU_85  | OH, D_TYR_83   | HH, D_TYR_83    | 2.59 | 1.81 | 29.86 |
| 1HGH.PDB | OH, B_TYR_83   | NZ, D_LYS_88   | HZ1, D_LYS_88   | 2.66 | 1.64 | 7.83  |
| 1HGH.PDB | O, C_LYS_27    | ND2, D_ASN_104 | HD22, D_ASN_104 | 2.89 | 1.94 | 11.70 |
| 1HGH.PDB | OE1, B_GLU_132 | NE, D_ARG_124  | HE, D_ARG_124   | 2.80 | 1.98 | 26.35 |
| 1HGH.PDB | OE2, B_GLU_132 | NE, D_ARG_124  | HE, D_ARG_124   | 2.84 | 1.99 | 23.38 |
| 1HGH.PDB | O, C_LEU_13    | N, D_PHE_138   | H, D_PHE_138    | 2.75 | 1.85 | 18.05 |
| 1HGH.PDB | O, C_ALA_11    | N, D_ILE_140   | H, D_ILE_140    | 2.83 | 1.90 | 15.57 |
| 1HGH.PDB | O, B_ARG_170   | NH1, D_ARG_163 | HH12, D_ARG_163 | 2.75 | 1.77 | 10.76 |
| 1HGH.PDB | O, F_ILE_140   | N, E_ALA_11    | H, E_ALA_11     | 2.92 | 2.02 | 19.53 |
| 1HGH.PDB | O, F_PHE_138   | N, E_LEU_13    | H, E_LEU_13     | 2.96 | 1.99 | 9.34  |
| 1HGH.PDB | O, F_ARG_25    | N, E_CYS_14    | H, E_CYS_14     | 2.64 | 1.78 | 21.59 |
| 1HGH.PDB | O, F_GLY_136   | N, E_LEU_15    | H, E_LEU_15     | 2.90 | 1.93 | 5.74  |
| 1HGH.PDB | O, F_GLY_23    | N, E_GLY_16    | H, E_GLY_16     | 2.92 | 2.05 | 22.72 |
| 1HGH.PDB | O, F_TRP_21    | N, E_HIS_18    | H, E_HIS_18     | 2.92 | 2.03 | 19.54 |
| 1HGH.PDB | OE2, F_GLU_97  | NZ, E_LYS_27   | HZ1, E_LYS_27   | 2.77 | 1.74 | 8.08  |
| 1HGH.PDB | OE2, F_GLU_67  | NH2, E_ARG_109 | HH21, E_ARG_109 | 2.88 | 1.90 | 13.56 |
| 1HGH.PDB | OD2, D_ASP_79  | OG, E_SER_110  | HG, E_SER_110   | 2.90 | 1.94 | 9.49  |
| 1HGH.PDB | OD1, C_ASP_101 | NE2, E_GLN_210 | HE22, E_GLN_210 | 2.95 | 2.09 | 25.33 |
| 1HGH.PDB | OE1, A_GLN_210 | NH2, E_ARG_220 | HH21, E_ARG_220 | 2.68 | 1.79 | 22.30 |
| 1HGH.PDB | O, D_SER_71    | NZ, E_LYS_238  | HZ2, E_LYS_238  | 2.84 | 1.88 | 19.22 |
| 1HGH.PDB | OE1, D_GLU_72  | NZ, E_LYS_238  | HZ3, E_LYS_238  | 2.87 | 1.88 | 15.42 |
| 1HGH.PDB | OE1, F_GLU_67  | NH1, E_ARG_269 | HH12, E_ARG_269 | 2.71 | 1.88 | 29.19 |
| 1HGH.PDB | O, F_LYS_62    | N, E_GLY_303   | H, E_GLY_303    | 2.98 | 2.01 | 7.92  |
| 1HGH.PDB | OG, F_SER_93   | N, E_LYS_310   | H, E_LYS_310    | 2.93 | 1.97 | 10.42 |
| 1HGH.PDB | OD1, F_ASP_86  | NZ, E_LYS_310  | HZ2, E_LYS_310  | 2.74 | 1.87 | 26.77 |
| 1HGH.PDB | O, F_SER_93    | NE2, E_GLN_311 | HE21, E_GLN_311 | 2.99 | 2.02 | 4.65  |
| 1HGH.PDB | OD1, F_ASN_104 | N, E_ALA_317   | H, E_ALA_317    | 2.75 | 1.81 | 11.69 |
| 1HGH.PDB | OE2, F_GLU_15  | N, E_GLU_325   | H, E_GLU_325    | 2.97 | 2.16 | 28.37 |
| 1HGH.PDB | OE1, F_GLU_15  | NZ, E_LYS_326  | HZ3, E_LYS_326  | 2.90 | 1.89 | 12.96 |
| 1HGH.PDB | O, E_VAL_323   | N, F_GLY_13    | H, F_GLY_13     | 2.70 | 1.77 | 11.97 |
| 1HGH.PDB | O, E_HIS_17    | N, F_TRP_14    | H, F_TRP_14     | 2.81 | 1.87 | 12.50 |
| 1HGH.PDB | O, E_GLY_16    | N, F_GLY_23    | H, F_GLY_23     | 2.91 | 2.00 | 17.53 |
| 1HGH.PDB | O, E_CYS_14    | N, F_ARG_25    | H, F_ARG_25     | 2.90 | 1.98 | 16.77 |
| 1HGH.PDB | O, E_THR_12    | N, F_GLN_27    | H, F_GLN_27     | 2.91 | 2.03 | 20.46 |
| 1HGH.PDB | OE2, D_GLU_97  | NH2, F_ARG_54  | HH22, F_ARG_54  | 2.72 | 1.77 | 15.67 |
| 1HGH.PDB | OD2, D_ASP_90  | NZ, F_LYS_62   | HZ2, F_LYS_62   | 2.68 | 1.83 | 28.02 |
| 1HGH.PDB | OG, E_SER_110  | NE2, F_HIS_64  | HE2, F_HIS_64   | 2.87 | 1.91 | 9.23  |
| 1HGH.PDB | O, E_LYS_299   | NZ, F_LYS_68   | HZ1, F_LYS_68   | 2.91 | 1.87 | 1.37  |
| 1HGH.PDB | OG, A_SER_107  | N, F_ARG_76    | H, F_ARG_76     | 2.80 | 1.83 | 4.45  |
| 1HGH.PDB | OE2, B_GLU_81  | NE, F_ARG_76   | HE, F_ARG_76    | 2.84 | 1.87 | 10.72 |
| 1HGH.PDB | OE2, B_GLU_74  | NH1, F_ARG_76  | HH12, F_ARG_76  | 2.73 | 1.73 | 5.34  |
| 1HGH.PDB | OE1, B_GLU_81  | NH2, F_ARG_76  | HH21, F_ARG_76  | 2.71 | 1.70 | 1.21  |
| 1HGH.PDB | OE1, B_GLU_74  | NH2, F_ARG_76  | HH22, F_ARG_76  | 2.78 | 1.78 | 7.19  |



|          |                |                |                 |      |      |       |
|----------|----------------|----------------|-----------------|------|------|-------|
| 1HGH.PDB | OE1, B_GLU_85  | OH, F_TYR_83   | HH, F_TYR_83    | 2.53 | 1.74 | 27.23 |
| 1HGH.PDB | OH, D_TYR_83   | NZ, F_LYS_88   | HZ1, F_LYS_88   | 2.65 | 1.63 | 9.88  |
| 1HGH.PDB | O, E_LYS_27    | ND2, F_ASN_104 | HD22, F_ASN_104 | 2.90 | 1.95 | 12.28 |
| 1HGH.PDB | OE1, D_GLU_132 | NE, F_ARG_124  | HE, F_ARG_124   | 2.89 | 2.06 | 26.55 |
| 1HGH.PDB | OE2, D_GLU_132 | NE, F_ARG_124  | HE, F_ARG_124   | 2.92 | 2.03 | 21.52 |
| 1HGH.PDB | O, E_LEU_13    | N, F_PHE_138   | H, F_PHE_138    | 2.71 | 1.82 | 18.02 |
| 1HGH.PDB | O, E_ALA_11    | N, F_ILE_140   | H, F_ILE_140    | 2.79 | 1.87 | 15.45 |
| 1HGH.PDB | O, D_ARG_170   | NH1, F_ARG_163 | HH12, F_ARG_163 | 2.89 | 1.90 | 10.67 |

Table 1793: Interfacial 1HGH-specific side chain and main chain hydrogen bonding analysis. In this table, a PDB file is specified with a four-letter PDB ID, except that the names of the PDB files corresponding to the single NMR structural model split from the NMR ensemble is specified with a four-letter PDB ID in addition to a hyphen followed by the single NMR structural model numeric ID, the residue naming scheme is **Chain ID\_residue name\_residue number**,  $\angle ADH$  represents the angle formed by acceptor (A), donor (D) and hydrogen (H) ( $\angle ADH$ ).

| PDB      | Acceptor (A)   | Donor (D)      | Hydrogen (H)    | D-A (Å) | H-A (Å) | $\angle ADH(^{\circ})$ |
|----------|----------------|----------------|-----------------|---------|---------|------------------------|
| 1HGI.PDB | O, B_ILE_140   | N, A_ALA_11    | H, A_ALA_11     | 2.84    | 1.92    | 15.59                  |
| 1HGI.PDB | O, B_PHE_138   | N, A_LEU_13    | H, A_LEU_13     | 3.00    | 2.03    | 9.98                   |
| 1HGI.PDB | O, B_ARG_25    | N, A_CYS_14    | H, A_CYS_14     | 2.96    | 2.03    | 15.50                  |
| 1HGI.PDB | O, B_GLY_136   | N, A_LEU_15    | H, A_LEU_15     | 2.93    | 1.96    | 7.25                   |
| 1HGI.PDB | O, B_GLY_23    | N, A_GLY_16    | H, A_GLY_16     | 2.98    | 2.12    | 23.40                  |
| 1HGI.PDB | O, B_TRP_21    | N, A_HIS_18    | H, A_HIS_18     | 2.89    | 1.98    | 18.40                  |
| 1HGI.PDB | OE2, B_GLU_97  | NZ, A_LYS_27   | HZ1, A_LYS_27   | 2.90    | 1.86    | 7.66                   |
| 1HGI.PDB | OE2, B_GLU_67  | NH2, A_ARG_109 | HH21, A_ARG_109 | 2.80    | 1.81    | 13.24                  |
| 1HGI.PDB | OE1, C_GLN_210 | NH2, A_ARG_220 | HH21, A_ARG_220 | 2.65    | 1.73    | 18.55                  |
| 1HGI.PDB | O, F_SER_71    | NZ, A_LYS_238  | HZ2, A_LYS_238  | 2.65    | 1.80    | 28.67                  |
| 1HGI.PDB | OE1, F_GLU_72  | NZ, A_LYS_238  | HZ3, A_LYS_238  | 2.85    | 1.85    | 15.00                  |
| 1HGI.PDB | O, B_LYS_62    | N, A_GLY_303   | H, A_GLY_303    | 2.96    | 1.99    | 7.07                   |
| 1HGI.PDB | OG, B_SER_93   | N, A_LYS_310   | H, A_LYS_310    | 2.98    | 2.05    | 15.58                  |
| 1HGI.PDB | OD1, B_ASP_86  | NZ, A_LYS_310  | HZ3, A_LYS_310  | 2.76    | 1.92    | 29.34                  |
| 1HGI.PDB | OD1, B_ASN_104 | N, A_ALA_317   | H, A_ALA_317    | 2.74    | 1.83    | 15.76                  |
| 1HGI.PDB | OE2, B_GLU_15  | NZ, A_LYS_326  | HZ1, A_LYS_326  | 2.79    | 1.93    | 27.33                  |
| 1HGI.PDB | OE1, B_GLU_15  | N, A_THR_328   | H, A_THR_328    | 2.87    | 1.93    | 12.65                  |
| 1HGI.PDB | O, A_VAL_323   | N, B_GLY_13    | H, B_GLY_13     | 2.68    | 1.79    | 18.45                  |
| 1HGI.PDB | O, A_HIS_17    | N, B_TRP_14    | H, B_TRP_14     | 2.78    | 1.88    | 17.65                  |
| 1HGI.PDB | O, A_GLY_16    | N, B_GLY_23    | H, B_GLY_23     | 2.97    | 2.06    | 17.58                  |
| 1HGI.PDB | OE2, A_GLU_325 | NH2, B_ARG_25  | HH22, B_ARG_25  | 2.93    | 1.95    | 13.46                  |
| 1HGI.PDB | O, E_THR_28    | NE, B_ARG_54   | HE, B_ARG_54    | 2.88    | 1.92    | 10.21                  |
| 1HGI.PDB | OE2, F_GLU_97  | NH2, B_ARG_54  | HH22, B_ARG_54  | 2.81    | 1.84    | 14.63                  |
| 1HGI.PDB | OD2, F_ASP_86  | NZ, B_LYS_62   | HZ1, B_LYS_62   | 2.67    | 1.78    | 25.75                  |
| 1HGI.PDB | OG, A_SER_110  | NE2, B_HIS_64  | HE2, B_HIS_64   | 2.87    | 1.89    | 8.13                   |
| 1HGI.PDB | O, A_LYS_299   | NZ, B_LYS_68   | HZ1, B_LYS_68   | 2.81    | 1.78    | 9.15                   |
| 1HGI.PDB | OG, C_SER_107  | N, B_ARG_76    | H, B_ARG_76     | 2.85    | 1.90    | 10.66                  |
| 1HGI.PDB | OE2, D_GLU_81  | NE, B_ARG_76   | HE, B_ARG_76    | 2.86    | 1.89    | 7.04                   |
| 1HGI.PDB | OE2, D_GLU_74  | NH1, B_ARG_76  | HH12, B_ARG_76  | 2.92    | 1.89    | 1.72                   |
| 1HGI.PDB | OE1, D_GLU_81  | NH2, B_ARG_76  | HH21, B_ARG_76  | 2.71    | 1.72    | 8.42                   |
| 1HGI.PDB | OE1, D_GLU_74  | NH2, B_ARG_76  | HH22, B_ARG_76  | 2.86    | 1.86    | 6.93                   |
| 1HGI.PDB | OE1, D_GLU_85  | OH, B_TYR_83   | HH, B_TYR_83    | 2.78    | 1.84    | 13.46                  |
| 1HGI.PDB | OH, F_TYR_83   | NZ, B_LYS_88   | HZ1, B_LYS_88   | 2.65    | 1.64    | 9.94                   |
| 1HGI.PDB | O, A_LYS_27    | ND2, B_ASN_104 | HD22, B_ASN_104 | 2.86    | 1.90    | 10.00                  |
| 1HGI.PDB | O, F_LEU_2     | OG, B_SER_113  | HG, B_SER_113   | 2.77    | 1.90    | 22.05                  |
| 1HGI.PDB | OE1, F_GLU_132 | NE, B_ARG_124  | HE, B_ARG_124   | 2.81    | 1.96    | 23.50                  |
| 1HGI.PDB | OE2, F_GLU_132 | NE, B_ARG_124  | HE, B_ARG_124   | 2.86    | 2.02    | 24.92                  |
| 1HGI.PDB | O, A_LEU_13    | N, B_PHE_138   | H, B_PHE_138    | 2.74    | 1.89    | 23.78                  |
| 1HGI.PDB | O, A_ALA_11    | N, B_ILE_140   | H, B_ILE_140    | 2.77    | 1.87    | 18.46                  |
| 1HGI.PDB | O, F_ARG_170   | NH1, B_ARG_163 | HH12, B_ARG_163 | 2.73    | 1.76    | 13.86                  |
| 1HGI.PDB | O, D_ILE_140   | N, C_ALA_11    | H, C_ALA_11     | 2.86    | 1.93    | 15.33                  |
| 1HGI.PDB | O, D_GLN_27    | N, C_THR_12    | H, C_THR_12     | 2.98    | 2.01    | 4.69                   |
| 1HGI.PDB | O, D_PHE_138   | N, C_LEU_13    | H, C_LEU_13     | 2.99    | 2.03    | 9.93                   |
| 1HGI.PDB | O, D_ARG_25    | N, C_CYS_14    | H, C_CYS_14     | 2.67    | 1.83    | 24.75                  |
| 1HGI.PDB | O, D_GLY_136   | N, C_LEU_15    | H, C_LEU_15     | 2.95    | 1.98    | 7.51                   |
| 1HGI.PDB | O, D_GLY_23    | N, C_GLY_16    | H, C_GLY_16     | 2.99    | 2.12    | 22.96                  |
| 1HGI.PDB | O, D_TRP_21    | N, C_HIS_18    | H, C_HIS_18     | 2.88    | 1.97    | 18.12                  |
| 1HGI.PDB | OE2, D_GLU_97  | NZ, C_LYS_27   | HZ1, C_LYS_27   | 2.88    | 1.83    | 6.58                   |
| 1HGI.PDB | OE2, D_GLU_67  | NH2, C_ARG_109 | HH21, C_ARG_109 | 2.82    | 1.84    | 15.02                  |
| 1HGI.PDB | OD2, B_ASP_79  | OG, C_SER_110  | HG, C_SER_110   | 2.85    | 1.90    | 11.29                  |
| 1HGI.PDB | OE1, E_GLN_210 | NH2, C_ARG_220 | HH21, C_ARG_220 | 2.62    | 1.75    | 23.70                  |
| 1HGI.PDB | OE1, B_GLU_72  | NZ, C_LYS_238  | HZ1, C_LYS_238  | 2.67    | 1.77    | 23.68                  |
| 1HGI.PDB | O, B_SER_71    | NZ, C_LYS_238  | HZ3, C_LYS_238  | 2.57    | 1.73    | 28.43                  |
| 1HGI.PDB | O, D_LYS_62    | N, C_GLY_303   | H, C_GLY_303    | 2.97    | 2.00    | 7.92                   |
| 1HGI.PDB | OD1, D_ASP_86  | NZ, C_LYS_310  | HZ3, C_LYS_310  | 2.77    | 1.93    | 29.51                  |
| 1HGI.PDB | OD1, D_ASN_104 | N, C_ALA_317   | H, C_ALA_317    | 2.74    | 1.83    | 16.29                  |
| 1HGI.PDB | OE1, D_GLU_15  | NZ, C_LYS_326  | HZ1, C_LYS_326  | 2.83    | 1.84    | 16.25                  |

|          |                |                |                 |      |      |       |
|----------|----------------|----------------|-----------------|------|------|-------|
| 1HGI.PDB | O, C_VAL.323   | N, D_GLY.13    | H, D_GLY.13     | 2.65 | 1.77 | 19.23 |
| 1HGI.PDB | O, C_HIS.17    | N, D_TRP.14    | H, D_TRP.14     | 2.83 | 1.92 | 16.86 |
| 1HGI.PDB | O, C_GLY.16    | N, D_GLY.23    | H, D_GLY.23     | 2.94 | 2.02 | 16.89 |
| 1HGI.PDB | O, C_CYS.14    | N, D_ARG.25    | H, D_ARG.25     | 2.88 | 1.94 | 13.44 |
| 1HGI.PDB | O, C_THR.12    | N, D_GLN.27    | H, D_GLN.27     | 2.95 | 2.00 | 13.47 |
| 1HGI.PDB | O, A_THR.28    | NE, D_ARG.54   | HE, D_ARG.54    | 2.83 | 1.87 | 10.21 |
| 1HGI.PDB | OE2, B_GLU.97  | NH2, D_ARG.54  | HH22, D_ARG.54  | 2.81 | 1.85 | 15.40 |
| 1HGI.PDB | OG, C_SER.110  | NE2, D_HIS.64  | HE2, D_HIS.64   | 2.83 | 1.85 | 2.78  |
| 1HGI.PDB | O, C_LYS.299   | NZ, D_LYS.68   | HZ1, D_LYS.68   | 2.79 | 1.78 | 10.55 |
| 1HGI.PDB | OG, E_SER.107  | N, D_ARG.76    | H, D_ARG.76     | 2.89 | 1.92 | 9.17  |
| 1HGI.PDB | OE2, F_GLU.81  | NE, D_ARG.76   | HE, D_ARG.76    | 2.80 | 1.82 | 5.40  |
| 1HGI.PDB | OE2, F_GLU.74  | NH1, D_ARG.76  | HH12, D_ARG.76  | 2.78 | 1.76 | 4.18  |
| 1HGI.PDB | OE1, F_GLU.81  | NH2, D_ARG.76  | HH21, D_ARG.76  | 2.61 | 1.67 | 15.38 |
| 1HGI.PDB | OE1, F_GLU.74  | NH2, D_ARG.76  | HH22, D_ARG.76  | 2.76 | 1.77 | 8.75  |
| 1HGI.PDB | OE1, F_GLU.85  | OH, D_TYR.83   | HH, D_TYR.83    | 2.69 | 1.81 | 20.41 |
| 1HGI.PDB | OH, B_TYR.83   | NZ, D_LYS.88   | HZ1, D_LYS.88   | 2.66 | 1.64 | 7.30  |
| 1HGI.PDB | O, C_LYS.27    | ND2, D_ASN.104 | HD22, D_ASN.104 | 2.83 | 1.88 | 11.60 |
| 1HGI.PDB | O, B_LEU.2     | OG, D_SER.113  | HG, D_SER.113   | 2.77 | 1.91 | 22.96 |
| 1HGI.PDB | OE1, B_GLU.132 | NE, D_ARG.124  | HE, D_ARG.124   | 2.84 | 1.98 | 23.95 |
| 1HGI.PDB | OE2, B_GLU.132 | NE, D_ARG.124  | HE, D_ARG.124   | 2.88 | 2.03 | 24.96 |
| 1HGI.PDB | O, C_LEU.13    | N, D_PHE.138   | H, D_PHE.138    | 2.79 | 1.92 | 22.46 |
| 1HGI.PDB | O, C_ALA.11    | N, D_ILE.140   | H, D_ILE.140    | 2.81 | 1.91 | 18.30 |
| 1HGI.PDB | O, B_ARG.170   | NH1, D_ARG.163 | HH12, D_ARG.163 | 2.80 | 1.83 | 13.94 |
| 1HGI.PDB | O, F_ILE.140   | N, E_ALA.11    | H, E_ALA.11     | 2.89 | 1.95 | 14.83 |
| 1HGI.PDB | O, F_GLN.27    | N, E_THR.12    | H, E_THR.12     | 2.94 | 2.00 | 13.31 |
| 1HGI.PDB | O, F_PHE.138   | N, E_LEU.13    | H, E_LEU.13     | 2.97 | 2.02 | 11.46 |
| 1HGI.PDB | O, F_ARG.25    | N, E_CYS.14    | H, E_CYS.14     | 2.66 | 1.84 | 26.53 |
| 1HGI.PDB | O, F_GLY.136   | N, E_LEU.15    | H, E_LEU.15     | 2.92 | 1.95 | 6.28  |
| 1HGI.PDB | O, F_GLY.23    | N, E_GLY.16    | H, E_GLY.16     | 2.99 | 2.12 | 22.78 |
| 1HGI.PDB | O, F_TRP.21    | N, E_HIS.18    | H, E_HIS.18     | 2.89 | 1.99 | 19.14 |
| 1HGI.PDB | OE2, F_GLU.97  | NZ, E_LYS.27   | HZ1, E_LYS.27   | 2.86 | 1.82 | 7.44  |
| 1HGI.PDB | OE2, F_GLU.67  | NH2, E_ARG.109 | HH21, E_ARG.109 | 2.78 | 1.80 | 14.37 |
| 1HGI.PDB | OD2, D_ASP.79  | OG, E_SER.110  | HG, E_SER.110   | 2.90 | 1.94 | 10.08 |
| 1HGI.PDB | OE1, A_GLN.210 | NH2, E_ARG.220 | HH21, E_ARG.220 | 2.69 | 1.80 | 23.03 |
| 1HGI.PDB | O, D_SER.71    | NZ, E_LYS.238  | HZ2, E_LYS.238  | 2.75 | 1.87 | 26.62 |
| 1HGI.PDB | OE1, D_GLU.72  | NZ, E_LYS.238  | HZ3, E_LYS.238  | 2.80 | 1.81 | 15.90 |
| 1HGI.PDB | O, F_LYS.62    | N, E_GLY.303   | H, E_GLY.303    | 2.93 | 1.96 | 6.65  |
| 1HGI.PDB | OG, F_SER.93   | N, E_LYS.310   | H, E_LYS.310    | 2.99 | 2.05 | 13.79 |
| 1HGI.PDB | OD1, F_ASP.86  | NZ, E_LYS.310  | HZ3, E_LYS.310  | 2.76 | 1.91 | 29.16 |
| 1HGI.PDB | OD1, F_ASN.104 | N, E_ALA.317   | H, E_ALA.317    | 2.72 | 1.81 | 15.78 |
| 1HGI.PDB | OE1, F_GLU.15  | NZ, E_LYS.326  | HZ3, E_LYS.326  | 2.88 | 1.86 | 11.05 |
| 1HGI.PDB | O, E_VAL.323   | N, F_GLY.13    | H, F_GLY.13     | 2.66 | 1.77 | 18.62 |
| 1HGI.PDB | O, E_HIS.17    | N, F_TRP.14    | H, F_TRP.14     | 2.84 | 1.93 | 16.42 |
| 1HGI.PDB | O, E_GLY.16    | N, F_GLY.23    | H, F_GLY.23     | 2.97 | 2.05 | 16.89 |
| 1HGI.PDB | O, E_CYS.14    | N, F_ARG.25    | H, F_ARG.25     | 2.91 | 2.04 | 22.96 |
| 1HGI.PDB | O, E_THR.12    | N, F_GLN.27    | H, F_GLN.27     | 2.93 | 1.99 | 14.92 |
| 1HGI.PDB | O, C_THR.28    | NE, F_ARG.54   | HE, F_ARG.54    | 2.95 | 1.99 | 9.70  |
| 1HGI.PDB | OE2, D_GLU.97  | NH2, F_ARG.54  | HH22, F_ARG.54  | 2.75 | 1.79 | 14.82 |
| 1HGI.PDB | OG, E_SER.110  | NE2, F_HIS.64  | HE2, F_HIS.64   | 2.84 | 1.87 | 3.62  |
| 1HGI.PDB | O, E_LYS.299   | NZ, F_LYS.68   | HZ1, F_LYS.68   | 2.80 | 1.76 | 2.37  |
| 1HGI.PDB | OG, A_SER.107  | N, F_ARG.76    | H, F_ARG.76     | 2.79 | 1.83 | 7.22  |
| 1HGI.PDB | OE2, B_GLU.81  | NE, F_ARG.76   | HE, F_ARG.76    | 2.85 | 1.88 | 7.37  |
| 1HGI.PDB | OE2, B_GLU.74  | NH1, F_ARG.76  | HH12, F_ARG.76  | 2.77 | 1.76 | 3.93  |
| 1HGI.PDB | OE1, B_GLU.81  | NH2, F_ARG.76  | HH21, F_ARG.76  | 2.64 | 1.66 | 4.79  |
| 1HGI.PDB | OE1, B_GLU.74  | NH2, F_ARG.76  | HH22, F_ARG.76  | 2.76 | 1.78 | 10.40 |
| 1HGI.PDB | OE1, B_GLU.85  | OH, F_TYR.83   | HH, F_TYR.83    | 2.58 | 1.75 | 24.06 |
| 1HGI.PDB | OH, D_TYR.83   | NZ, F_LYS.88   | HZ1, F_LYS.88   | 2.61 | 1.62 | 12.49 |
| 1HGI.PDB | O, E_LYS.27    | ND2, F_ASN.104 | HD22, F_ASN.104 | 2.88 | 1.93 | 10.77 |

|          |                |                |                 |      |      |       |
|----------|----------------|----------------|-----------------|------|------|-------|
| 1HGI.PDB | O, D_LEU_2     | OG, F_SER_113  | HG, F_SER_113   | 2.78 | 1.94 | 24.17 |
| 1HGI.PDB | OE1, D_GLU_132 | NE, F_ARG_124  | HE, F_ARG_124   | 2.96 | 2.09 | 23.50 |
| 1HGI.PDB | OE2, D_GLU_132 | NE, F_ARG_124  | HE, F_ARG_124   | 2.96 | 2.09 | 23.34 |
| 1HGI.PDB | O, E_LEU_13    | N, F_PHE_138   | H, F_PHE_138    | 2.75 | 1.89 | 22.82 |
| 1HGI.PDB | O, E_ALA_11    | N, F_ILE_140   | H, F_ILE_140    | 2.78 | 1.89 | 18.92 |
| 1HGI.PDB | O, D_ARG_170   | NH1, F_ARG_163 | HH12, F_ARG_163 | 2.92 | 1.95 | 13.55 |
| 1HGI.PDB | OE2, D_GLU_131 | NH2, F_ARG_163 | HH22, F_ARG_163 | 2.69 | 1.85 | 26.81 |

Table 1794: Interfacial 1HGI-specific side chain and main chain hydrogen bonding analysis. In this table, a PDB file is specified with a four-letter PDB ID, except that the names of the PDB files corresponding to the single NMR structural model split from the NMR ensemble is specified with a four-letter PDB ID in addition to a hyphen followed by the single NMR structural model numeric ID, the residue naming scheme is **Chain ID\_residue name\_residue number**,  $\angle ADH$  represents the angle formed by acceptor (A), donor (D) and hydrogen (H) ( $\angle ADH$ ).

| PDB      | Acceptor (A)   | Donor (D)      | Hydrogen (H)    | D-A (Å) | H-A (Å) | $\angle ADH(^{\circ})$ |
|----------|----------------|----------------|-----------------|---------|---------|------------------------|
| 1HGJ.PDB | O, B.ILE.140   | N, A.ALA.11    | H, A.ALA.11     | 2.85    | 1.95    | 18.97                  |
| 1HGJ.PDB | O, B.PHE.138   | N, A.LEU.13    | H, A.LEU.13     | 2.97    | 2.00    | 8.62                   |
| 1HGJ.PDB | O, B.ARG.25    | N, A.CYS.14    | H, A.CYS.14     | 2.88    | 1.94    | 12.89                  |
| 1HGJ.PDB | O, B.GLY.136   | N, A.LEU.15    | H, A.LEU.15     | 2.93    | 1.95    | 2.37                   |
| 1HGJ.PDB | O, B.GLY.23    | N, A.GLY.16    | H, A.GLY.16     | 2.86    | 1.96    | 18.97                  |
| 1HGJ.PDB | O, B.TRP.21    | N, A.HIS.18    | H, A.HIS.18     | 2.85    | 1.98    | 21.54                  |
| 1HGJ.PDB | OE2, B.GLU.97  | NZ, A.LYS.27   | HZ1, A.LYS.27   | 2.81    | 1.78    | 9.30                   |
| 1HGJ.PDB | OE2, B.GLU.67  | NH2, A.ARG.109 | HH21, A.ARG.109 | 2.75    | 1.77    | 12.07                  |
| 1HGJ.PDB | OD2, F.ASP.79  | OG, A.SER.110  | HG, A.SER.110   | 2.94    | 1.98    | 10.39                  |
| 1HGJ.PDB | OE1, C.GLN.210 | NH2, A.ARG.220 | HH21, A.ARG.220 | 2.67    | 1.78    | 22.50                  |
| 1HGJ.PDB | O, F.SER.71    | NZ, A.LYS.238  | HZ2, A.LYS.238  | 2.62    | 1.72    | 23.44                  |
| 1HGJ.PDB | OE1, F.GLU.72  | NZ, A.LYS.238  | HZ3, A.LYS.238  | 2.90    | 1.90    | 13.91                  |
| 1HGJ.PDB | O, B.LYS.68    | NZ, A.LYS.299  | HZ2, A.LYS.299  | 2.95    | 1.96    | 14.91                  |
| 1HGJ.PDB | O, B.LYS.62    | N, A.GLY.303   | H, A.GLY.303    | 2.93    | 1.97    | 8.41                   |
| 1HGJ.PDB | OD1, B.ASN.104 | N, A.ALA.317   | H, A.ALA.317    | 2.74    | 1.81    | 13.01                  |
| 1HGJ.PDB | OE1, B.GLU.15  | N, A.THR.328   | H, A.THR.328    | 2.99    | 2.03    | 9.44                   |
| 1HGJ.PDB | O, A.VAL.323   | N, B.GLY.13    | H, B.GLY.13     | 2.69    | 1.76    | 11.68                  |
| 1HGJ.PDB | O, A.HIS.17    | N, B.TRP.14    | H, B.TRP.14     | 2.84    | 1.89    | 12.22                  |
| 1HGJ.PDB | O, A.GLY.16    | N, B.GLY.23    | H, B.GLY.23     | 2.94    | 2.02    | 17.07                  |
| 1HGJ.PDB | O, A.CYS.14    | N, B.ARG.25    | H, B.ARG.25     | 2.98    | 2.05    | 15.51                  |
| 1HGJ.PDB | OE2, A.GLU.325 | NH2, B.ARG.25  | HH22, B.ARG.25  | 2.97    | 2.01    | 15.94                  |
| 1HGJ.PDB | O, E.THR.28    | NE, B.ARG.54   | HE, B.ARG.54    | 3.00    | 2.04    | 10.82                  |
| 1HGJ.PDB | OE2, F.GLU.97  | NH2, B.ARG.54  | HH22, B.ARG.54  | 2.77    | 1.81    | 15.09                  |
| 1HGJ.PDB | OD2, F.ASP.86  | NZ, B.LYS.62   | HZ1, B.LYS.62   | 2.65    | 1.75    | 23.55                  |
| 1HGJ.PDB | OD2, F.ASP.90  | NZ, B.LYS.62   | HZ3, B.LYS.62   | 2.74    | 1.89    | 28.52                  |
| 1HGJ.PDB | OG, A.SER.110  | NE2, B.HIS.64  | HE2, B.HIS.64   | 2.89    | 1.93    | 11.21                  |
| 1HGJ.PDB | O, A.LYS.299   | NZ, B.LYS.68   | HZ1, B.LYS.68   | 2.90    | 1.89    | 11.39                  |
| 1HGJ.PDB | OG, C.SER.107  | N, B.ARG.76    | H, B.ARG.76     | 2.84    | 1.89    | 10.24                  |
| 1HGJ.PDB | OE2, D.GLU.81  | NE, B.ARG.76   | HE, B.ARG.76    | 2.90    | 1.93    | 10.80                  |
| 1HGJ.PDB | OE2, D.GLU.74  | NH1, B.ARG.76  | HH12, B.ARG.76  | 2.88    | 1.87    | 5.28                   |
| 1HGJ.PDB | OE1, D.GLU.81  | NH2, B.ARG.76  | HH21, B.ARG.76  | 2.72    | 1.72    | 3.64                   |
| 1HGJ.PDB | OE1, D.GLU.74  | NH2, B.ARG.76  | HH22, B.ARG.76  | 2.85    | 1.84    | 3.19                   |
| 1HGJ.PDB | OE1, D.GLU.85  | OH, B.TYR.83   | HH, B.TYR.83    | 2.67    | 1.83    | 24.12                  |
| 1HGJ.PDB | OH, F.TYR.83   | NZ, B.LYS.88   | HZ1, B.LYS.88   | 2.78    | 1.75    | 7.42                   |
| 1HGJ.PDB | O, A.LYS.27    | ND2, B.ASN.104 | HD22, B.ASN.104 | 2.89    | 1.94    | 10.52                  |
| 1HGJ.PDB | O, F.LEU.2     | OG, B.SER.113  | HG, B.SER.113   | 2.74    | 1.91    | 25.16                  |
| 1HGJ.PDB | OE1, F.GLU.132 | NE, B.ARG.124  | HE, B.ARG.124   | 2.82    | 2.00    | 27.29                  |
| 1HGJ.PDB | OE2, F.GLU.132 | NE, B.ARG.124  | HE, B.ARG.124   | 2.91    | 2.02    | 20.91                  |
| 1HGJ.PDB | O, A.LEU.13    | N, B.PHE.138   | H, B.PHE.138    | 2.71    | 1.86    | 23.78                  |
| 1HGJ.PDB | O, A.ALA.11    | N, B.ILE.140   | H, B.ILE.140    | 2.77    | 1.86    | 16.77                  |
| 1HGJ.PDB | O, F.ARG.170   | NH1, B.ARG.163 | HH12, B.ARG.163 | 2.72    | 1.75    | 12.61                  |
| 1HGJ.PDB | O, D.ILE.140   | N, C.ALA.11    | H, C.ALA.11     | 2.85    | 1.95    | 19.06                  |
| 1HGJ.PDB | O, D.GLN.27    | N, C.THR.12    | H, C.THR.12     | 2.99    | 2.03    | 8.05                   |
| 1HGJ.PDB | O, D.PHE.138   | N, C.LEU.13    | H, C.LEU.13     | 2.99    | 2.02    | 7.89                   |
| 1HGJ.PDB | O, D.ARG.25    | N, C.CYS.14    | H, C.CYS.14     | 2.76    | 1.85    | 16.80                  |
| 1HGJ.PDB | O, D.GLY.136   | N, C.LEU.15    | H, C.LEU.15     | 2.95    | 1.97    | 3.95                   |
| 1HGJ.PDB | O, D.GLY.23    | N, C.GLY.16    | H, C.GLY.16     | 2.89    | 1.98    | 18.54                  |
| 1HGJ.PDB | O, D.TRP.21    | N, C.HIS.18    | H, C.HIS.18     | 2.86    | 1.97    | 20.63                  |
| 1HGJ.PDB | OE2, D.GLU.97  | NZ, C.LYS.27   | HZ1, C.LYS.27   | 2.82    | 1.80    | 8.63                   |
| 1HGJ.PDB | OE2, D.GLU.67  | NH2, C.ARG.109 | HH21, C.ARG.109 | 2.76    | 1.78    | 13.33                  |
| 1HGJ.PDB | OD2, B.ASP.79  | OG, C.SER.110  | HG, C.SER.110   | 2.79    | 1.87    | 14.95                  |
| 1HGJ.PDB | OE1, E.GLN.210 | NH2, C.ARG.220 | HH21, C.ARG.220 | 2.66    | 1.82    | 26.85                  |
| 1HGJ.PDB | OE1, B.GLU.72  | NZ, C.LYS.238  | HZ1, C.LYS.238  | 2.75    | 1.79    | 18.67                  |
| 1HGJ.PDB | O, B.SER.71    | NZ, C.LYS.238  | HZ3, C.LYS.238  | 2.55    | 1.67    | 24.42                  |
| 1HGJ.PDB | O, D.LYS.68    | NZ, C.LYS.299  | HZ2, C.LYS.299  | 2.96    | 1.96    | 14.80                  |
| 1HGJ.PDB | O, D.LYS.62    | N, C.GLY.303   | H, C.GLY.303    | 2.93    | 1.98    | 10.54                  |
| 1HGJ.PDB | OG, D.SER.93   | N, C.LYS.310   | H, C.LYS.310    | 3.00    | 2.04    | 11.61                  |

|          |                |                |                 |      |      |       |
|----------|----------------|----------------|-----------------|------|------|-------|
| 1HGJ.PDB | OD1, D-ASP.86  | NZ, C-LYS.310  | HZ3, C-LYS.310  | 2.94 | 2.10 | 29.37 |
| 1HGJ.PDB | OD1, D-ASN.104 | N, C-ALA.317   | H, C-ALA.317    | 2.74 | 1.82 | 13.77 |
| 1HGJ.PDB | OE1, D-GLU.15  | NZ, C-LYS.326  | HZ1, C-LYS.326  | 2.91 | 1.86 | 5.48  |
| 1HGJ.PDB | O, C-VAL.323   | N, D-GLY.13    | H, D-GLY.13     | 2.70 | 1.77 | 13.01 |
| 1HGJ.PDB | O, C-HIS.17    | N, D-TRP.14    | H, D-TRP.14     | 2.84 | 1.88 | 10.47 |
| 1HGJ.PDB | O, C-GLY.16    | N, D-GLY.23    | H, D-GLY.23     | 2.95 | 2.03 | 16.60 |
| 1HGJ.PDB | O, C-CYS.14    | N, D-ARG.25    | H, D-ARG.25     | 2.96 | 2.03 | 15.69 |
| 1HGJ.PDB | O, C-THR.12    | N, D-GLN.27    | H, D-GLN.27     | 2.96 | 2.04 | 16.68 |
| 1HGJ.PDB | O, A-THR.28    | NE, D-ARG.54   | HE, D-ARG.54    | 2.94 | 1.98 | 10.71 |
| 1HGJ.PDB | OE2, B-GLU.97  | NH2, D-ARG.54  | HH22, D-ARG.54  | 2.84 | 1.88 | 15.58 |
| 1HGJ.PDB | OG, C-SER.110  | NE2, D-HIS.64  | HE2, D-HIS.64   | 2.89 | 1.91 | 5.59  |
| 1HGJ.PDB | O, C-LYS.299   | NZ, D-LYS.68   | HZ1, D-LYS.68   | 2.93 | 1.91 | 11.63 |
| 1HGJ.PDB | OG, E-SER.107  | N, D-ARG.76    | H, D-ARG.76     | 2.86 | 1.90 | 9.67  |
| 1HGJ.PDB | OE2, F-GLU.81  | NE, D-ARG.76   | HE, D-ARG.76    | 2.85 | 1.89 | 10.87 |
| 1HGJ.PDB | OE2, F-GLU.74  | NH1, D-ARG.76  | HH12, D-ARG.76  | 2.76 | 1.76 | 7.89  |
| 1HGJ.PDB | OE1, F-GLU.81  | NH2, D-ARG.76  | HH21, D-ARG.76  | 2.68 | 1.69 | 5.65  |
| 1HGJ.PDB | OE1, F-GLU.74  | NH2, D-ARG.76  | HH22, D-ARG.76  | 2.71 | 1.72 | 5.59  |
| 1HGJ.PDB | OE1, F-GLU.85  | OH, D-TYR.83   | HH, D-TYR.83    | 2.63 | 1.81 | 25.72 |
| 1HGJ.PDB | OH, B-TYR.83   | NZ, D-LYS.88   | HZ1, D-LYS.88   | 2.75 | 1.72 | 7.31  |
| 1HGJ.PDB | O, C-LYS.27    | ND2, D-ASN.104 | HD22, D-ASN.104 | 2.90 | 1.94 | 10.67 |
| 1HGJ.PDB | O, B-LEU.2     | OG, D-SER.113  | HG, D-SER.113   | 2.68 | 1.87 | 27.58 |
| 1HGJ.PDB | OE1, B-GLU.132 | NE, D-ARG.124  | HE, D-ARG.124   | 2.80 | 1.98 | 27.33 |
| 1HGJ.PDB | OE2, B-GLU.132 | NE, D-ARG.124  | HE, D-ARG.124   | 2.87 | 2.00 | 21.99 |
| 1HGJ.PDB | OH, B-TYR.141  | NH1, D-ARG.127 | HH12, D-ARG.127 | 2.99 | 2.02 | 12.89 |
| 1HGJ.PDB | O, C-LEU.13    | N, D-PHE.138   | H, D-PHE.138    | 2.74 | 1.87 | 22.25 |
| 1HGJ.PDB | O, C-ALA.11    | N, D-ILE.140   | H, D-ILE.140    | 2.80 | 1.87 | 15.19 |
| 1HGJ.PDB | O, B-ARG.170   | NH1, D-ARG.163 | HH12, D-ARG.163 | 2.74 | 1.76 | 11.80 |
| 1HGJ.PDB | O, F-ILE.140   | N, E-ALA.11    | H, E-ALA.11     | 2.86 | 1.96 | 18.18 |
| 1HGJ.PDB | O, F-GLN.27    | N, E-THR.12    | H, E-THR.12     | 2.93 | 2.00 | 15.55 |
| 1HGJ.PDB | O, F-PHE.138   | N, E-LEU.13    | H, E-LEU.13     | 2.96 | 1.99 | 8.56  |
| 1HGJ.PDB | O, F-ARG.25    | N, E-CYS.14    | H, E-CYS.14     | 2.66 | 1.82 | 24.90 |
| 1HGJ.PDB | O, F-GLY.136   | N, E-LEU.15    | H, E-LEU.15     | 2.91 | 1.94 | 3.68  |
| 1HGJ.PDB | O, F-GLY.23    | N, E-GLY.16    | H, E-GLY.16     | 2.87 | 1.96 | 18.32 |
| 1HGJ.PDB | O, F-TRP.21    | N, E-HIS.18    | H, E-HIS.18     | 2.83 | 1.96 | 22.19 |
| 1HGJ.PDB | OE2, F-GLU.97  | NZ, E-LYS.27   | HZ1, E-LYS.27   | 2.81 | 1.79 | 8.50  |
| 1HGJ.PDB | OE2, F-GLU.67  | NH2, E-ARG.109 | HH21, E-ARG.109 | 2.76 | 1.77 | 12.82 |
| 1HGJ.PDB | OD2, D-ASP.79  | OG, E-SER.110  | HG, E-SER.110   | 2.79 | 1.87 | 15.96 |
| 1HGJ.PDB | OD1, C-ASP.101 | NE2, E-GLN.210 | HE22, E-GLN.210 | 2.94 | 2.10 | 26.45 |
| 1HGJ.PDB | OE1, A-GLN.210 | NH2, E-ARG.220 | HH21, E-ARG.220 | 2.69 | 1.86 | 28.41 |
| 1HGJ.PDB | O, D-SER.71    | NZ, E-LYS.238  | HZ2, E-LYS.238  | 2.65 | 1.73 | 22.71 |
| 1HGJ.PDB | OE1, D-GLU.72  | NZ, E-LYS.238  | HZ3, E-LYS.238  | 2.87 | 1.86 | 13.82 |
| 1HGJ.PDB | O, F-LYS.68    | NZ, E-LYS.299  | HZ1, E-LYS.299  | 2.94 | 1.95 | 15.31 |
| 1HGJ.PDB | O, F-LYS.62    | N, E-GLY.303   | H, E-GLY.303    | 2.92 | 1.96 | 9.12  |
| 1HGJ.PDB | OG, F-SER.93   | N, E-LYS.310   | H, E-LYS.310    | 2.99 | 2.03 | 10.38 |
| 1HGJ.PDB | OD1, F-ASP.86  | NZ, E-LYS.310  | HZ3, E-LYS.310  | 2.93 | 2.08 | 29.22 |
| 1HGJ.PDB | OD1, F-ASN.104 | N, E-ALA.317   | H, E-ALA.317    | 2.73 | 1.80 | 11.35 |
| 1HGJ.PDB | OE2, F-GLU.15  | N, E-GLU.325   | H, E-GLU.325    | 2.88 | 2.08 | 29.65 |
| 1HGJ.PDB | OE1, F-GLU.15  | NZ, E-LYS.326  | HZ3, E-LYS.326  | 2.87 | 1.86 | 12.83 |
| 1HGJ.PDB | O, E-VAL.323   | N, F-GLY.13    | H, F-GLY.13     | 2.69 | 1.76 | 10.96 |
| 1HGJ.PDB | O, E-HIS.17    | N, F-TRP.14    | H, F-TRP.14     | 2.84 | 1.89 | 11.67 |
| 1HGJ.PDB | O, E-GLY.16    | N, F-GLY.23    | H, F-GLY.23     | 2.93 | 2.01 | 16.90 |
| 1HGJ.PDB | O, E-CYS.14    | N, F-ARG.25    | H, F-ARG.25     | 2.87 | 1.99 | 20.85 |
| 1HGJ.PDB | O, E-THR.12    | N, F-GLN.27    | H, F-GLN.27     | 2.89 | 1.97 | 15.73 |
| 1HGJ.PDB | OE2, D-GLU.97  | NH2, F-ARG.54  | HH22, F-ARG.54  | 2.77 | 1.81 | 14.54 |
| 1HGJ.PDB | OG, E-SER.110  | NE2, F-HIS.64  | HE2, F-HIS.64   | 2.90 | 1.93 | 7.02  |
| 1HGJ.PDB | O, E-LYS.299   | NZ, F-LYS.68   | HZ1, F-LYS.68   | 2.93 | 1.90 | 4.77  |
| 1HGJ.PDB | OG, A-SER.107  | N, F-ARG.76    | H, F-ARG.76     | 2.85 | 1.88 | 6.29  |
| 1HGJ.PDB | OE2, B-GLU.81  | NE, F-ARG.76   | HE, F-ARG.76    | 2.85 | 1.89 | 12.57 |

|          |                |                |                 |      |      |       |
|----------|----------------|----------------|-----------------|------|------|-------|
| 1HGJ.PDB | OE2, B_GLU_74  | NH1, F_ARG_76  | HH12, F_ARG_76  | 2.70 | 1.70 | 4.55  |
| 1HGJ.PDB | OE1, B_GLU_81  | NH2, F_ARG_76  | HH21, F_ARG_76  | 2.65 | 1.66 | 2.84  |
| 1HGJ.PDB | OE1, B_GLU_74  | NH2, F_ARG_76  | HH22, F_ARG_76  | 2.72 | 1.73 | 7.95  |
| 1HGJ.PDB | OE1, B_GLU_85  | OH, F_TYR_83   | HH, F_TYR_83    | 2.53 | 1.75 | 28.54 |
| 1HGJ.PDB | OH, D_TYR_83   | NZ, F_LYS_88   | HZ1, F_LYS_88   | 2.70 | 1.68 | 8.19  |
| 1HGJ.PDB | O, E_LYS_27    | ND2, F_ASN_104 | HD22, F_ASN_104 | 2.91 | 1.96 | 11.78 |
| 1HGJ.PDB | O, D_LEU_2     | OG, F_SER_113  | HG, F_SER_113   | 2.74 | 1.92 | 26.51 |
| 1HGJ.PDB | OE1, D_GLU_132 | NE, F_ARG_124  | HE, F_ARG_124   | 2.92 | 2.09 | 27.65 |
| 1HGJ.PDB | OE2, D_GLU_132 | NE, F_ARG_124  | HE, F_ARG_124   | 2.96 | 2.06 | 20.98 |
| 1HGJ.PDB | O, E_LEU_13    | N, F_PHE_138   | H, F_PHE_138    | 2.73 | 1.87 | 22.18 |
| 1HGJ.PDB | O, E_ALA_11    | N, F_ILE_140   | H, F_ILE_140    | 2.78 | 1.87 | 17.89 |
| 1HGJ.PDB | O, D_ARG_170   | NH1, F_ARG_163 | HH12, F_ARG_163 | 2.89 | 1.91 | 11.37 |

Table 1795: Interfacial 1HGJ-specific side chain and main chain hydrogen bonding analysis. In this table, a PDB file is specified with a four-letter PDB ID, except that the names of the PDB files corresponding to the single NMR structural model split from the NMR ensemble is specified with a four-letter PDB ID in addition to a hyphen followed by the single NMR structural model numeric ID, the residue naming scheme is **Chain ID\_residue name\_residue number**,  $\angle ADH$  represents the angle formed by acceptor (A), donor (D) and hydrogen (H) ( $\angle ADH$ ).

| PDB      | Acceptor (A)   | Donor (D)     | Hydrogen (H)   | D-A (Å) | H-A (Å) | $\angle ADH(^{\circ})$ |
|----------|----------------|---------------|----------------|---------|---------|------------------------|
| 1OSP.PDB | O, O_LYS_44    | NH1, L_ARG_32 | HH12, L_ARG_32 | 2.98    | 2.09    | 22.73                  |
| 1OSP.PDB | O, O_SER_43    | NH2, L_ARG_32 | HH22, L_ARG_32 | 2.91    | 1.93    | 9.19                   |
| 1OSP.PDB | OD2, L_ASP_1   | OG, H_SER_62  | HG, H_SER_62   | 2.98    | 2.17    | 26.53                  |
| 1OSP.PDB | O, O_ASP_93    | N, H_TYR_101  | H, H_TYR_101   | 2.96    | 2.00    | 9.88                   |
| 1OSP.PDB | OH, L_TYR_36   | N, H_PHE_107  | H, H_PHE_107   | 2.90    | 1.92    | 4.68                   |
| 1OSP.PDB | OG, L_SER_176  | OG, H_SER_185 | HG, H_SER_185  | 2.74    | 1.91    | 24.72                  |
| 1OSP.PDB | OE1, L_GLU_123 | NZ, H_LYS_215 | HZ2, H_LYS_215 | 2.78    | 1.85    | 20.53                  |

Table 1796: Interfacial 1OSP-specific side chain and main chain hydrogen bonding analysis. In this table, a PDB file is specified with a four-letter PDB ID, except that the names of the PDB files corresponding to the single NMR structural model split from the NMR ensemble is specified with a four-letter PDB ID in addition to a hyphen followed by the single NMR structural model numeric ID, the residue naming scheme is **Chain ID\_residue name\_residue number**,  $\angle ADH$  represents the angle formed by acceptor (A), donor (D) and hydrogen (H) ( $\angle ADH$ ).



| PDB      | Acceptor (A) | Donor (D)     | Hydrogen (H)  | D-A (Å) | H-A (Å) | $\angle ADH(^{\circ})$ |
|----------|--------------|---------------|---------------|---------|---------|------------------------|
| 1PSK.PDB | O, H_PRO_168 | OG, L_SER_161 | HG, L_SER_161 | 2.76    | 1.90    | 22.64                  |

Table 1797: Interfacial 1PSK-specific side chain and main chain hydrogen bonding analysis. In this table, a PDB file is specified with a four-letter PDB ID, except that the names of the PDB files corresponding to the single NMR structural model split from the NMR ensemble is specified with a four-letter PDB ID in addition to a hyphen followed by the single NMR structural model numeric ID, the residue naming scheme is **Chain ID\_residue name\_residue number**,  $\angle ADH$  represents the angle formed by acceptor (A), donor (D) and hydrogen (H) ( $\angle ADH$ ).

| PDB      | Acceptor (A)   | Donor (D)      | Hydrogen (H)    | D-A (Å) | H-A (Å) | $\angle ADH(^{\circ})$ |
|----------|----------------|----------------|-----------------|---------|---------|------------------------|
| 1VFB.PDB | OE1, C_GLN_121 | N, A_SER_93    | H, A_SER_93     | 2.89    | 1.92    | 8.17                   |
| 1VFB.PDB | OE1, B_GLU_98  | NH1, A_ARG_96  | HH12, A_ARG_96  | 2.82    | 1.84    | 8.38                   |
| 1VFB.PDB | OE2, B_GLU_98  | NH2, A_ARG_96  | HH22, A_ARG_96  | 2.81    | 1.85    | 10.74                  |
| 1VFB.PDB | OE1, A_GLN_38  | NE2, B_GLN_39  | HE21, B_GLN_39  | 2.95    | 1.98    | 8.04                   |
| 1VFB.PDB | O, C_GLY_22    | NH1, B_ARG_102 | HH12, B_ARG_102 | 2.82    | 1.90    | 18.81                  |
| 1VFB.PDB | OD2, B_ASP_100 | N, C_SER_24    | H, C_SER_24     | 2.91    | 2.09    | 27.47                  |
| 1VFB.PDB | O, A_PHE_91    | NE2, C_GLN_121 | HE21, C_GLN_121 | 2.82    | 1.88    | 14.37                  |

Table 1798: Interfacial 1VFB-specific side chain and main chain hydrogen bonding analysis. In this table, a PDB file is specified with a four-letter PDB ID, except that the names of the PDB files corresponding to the single NMR structural model split from the NMR ensemble is specified with a four-letter PDB ID in addition to a hyphen followed by the single NMR structural model numeric ID, the residue naming scheme is **Chain ID\_residue name\_residue number**,  $\angle ADH$  represents the angle formed by acceptor (A), donor (D) and hydrogen (H) ( $\angle ADH$ ).

| PDB      | Acceptor (A)   | Donor (D)     | Hydrogen (H)   | D-A (Å) | H-A (Å) | $\angle ADH(^{\circ})$ |
|----------|----------------|---------------|----------------|---------|---------|------------------------|
| 3SE8.PDB | O, H_TRP_54    | N, G_ASP_368  | H, G_ASP_368   | 2.75    | 1.91    | 10.72                  |
| 3SE8.PDB | OE2, L_GLU_96  | N, G_GLY_459  | H, G_GLY_459   | 2.81    | 1.99    | 15.35                  |
| 3SE8.PDB | OD1, G_ASN_280 | NE1, H_TRP_50 | HE1, H_TRP_50  | 3.00    | 2.21    | 20.49                  |
| 3SE8.PDB | O, G_GLY_473   | NE1, H_TRP_54 | HE1, H_TRP_54  | 2.82    | 1.98    | 10.03                  |
| 3SE8.PDB | O, G_GLY_458   | N, H_ARG_61   | H, H_ARG_61    | 2.91    | 2.08    | 12.24                  |
| 3SE8.PDB | OD1, G_ASP_457 | NE2, H_GLN_64 | HE22, H_GLN_64 | 2.94    | 2.12    | 14.23                  |
| 3SE8.PDB | OD2, G_ASP_368 | NH2, H_ARG_71 | HH22, H_ARG_71 | 2.91    | 2.05    | 6.24                   |
| 3SE8.PDB | OH, L_TYR_36   | N, H_TRP_100F | H, H_TRP_100F  | 2.89    | 2.04    | 6.32                   |
| 3SE8.PDB | OE1, H_GLN_101 | N, L_SER_56   | H, L_SER_56    | 2.97    | 2.12    | 7.63                   |
| 3SE8.PDB | O, H_PRO_167   | OG, L_SER_162 | HG, L_SER_162  | 2.71    | 1.98    | 23.05                  |

Table 1799: Interfacial 3SE8-specific side chain and main chain hydrogen bonding analysis. In this table, a PDB file is specified with a four-letter PDB ID, except that the names of the PDB files corresponding to the single NMR structural model split from the NMR ensemble is specified with a four-letter PDB ID in addition to a hyphen followed by the single NMR structural model numeric ID, the residue naming scheme is **Chain ID\_residue name\_residue number**,  $\angle ADH$  represents the angle formed by acceptor (A), donor (D) and hydrogen (H) ( $\angle ADH$ ).

| PDB      | Acceptor (A)   | Donor (D)       | Hydrogen (H)    | D-A (Å) | H-A (Å) | $\angle ADH(^{\circ})$ |
|----------|----------------|-----------------|-----------------|---------|---------|------------------------|
| 3SE9.PDB | O, H_THR_53    | N, G_ASP_368    | H, G_ASP_368    | 2.97    | 2.15    | 15.24                  |
| 3SE9.PDB | OD1, G_ASN_280 | NE1, H_TRP_50   | HE1, H_TRP_50   | 2.86    | 2.03    | 11.46                  |
| 3SE9.PDB | O, G_ARG_456   | ND2, H_ASN_57   | HD22, H_ASN_57  | 2.82    | 1.98    | 10.42                  |
| 3SE9.PDB | OG, G_SER_365  | NH1, H_ARG_64   | HH11, H_ARG_64  | 2.81    | 2.04    | 21.79                  |
| 3SE9.PDB | OD2, G_ASP_368 | NH1, H_ARG_71   | HH12, H_ARG_71  | 2.77    | 1.92    | 7.25                   |
| 3SE9.PDB | O, G_GLY_429   | NH1, H_ARG_73   | HH12, H_ARG_73  | 2.99    | 2.23    | 23.32                  |
| 3SE9.PDB | OD1, G_ASN_279 | NE1, H_TRP_100D | HE1, H_TRP_100D | 2.86    | 2.13    | 26.83                  |
| 3SE9.PDB | OH, L_TYR_36   | N, H_PHE_100F   | H, H_PHE_100F   | 2.88    | 2.05    | 11.59                  |
| 3SE9.PDB | OD1, L_ASN_138 | NE2, H_HIS_164  | HE2, H_HIS_164  | 2.87    | 2.10    | 22.18                  |
| 3SE9.PDB | O, H_PRO_167   | OG, L_SER_162   | HG, L_SER_162   | 2.60    | 1.89    | 25.20                  |

Table 1800: Interfacial 3SE9-specific side chain and main chain hydrogen bonding analysis. In this table, a PDB file is specified with a four-letter PDB ID, except that the names of the PDB files corresponding to the single NMR structural model split from the NMR ensemble is specified with a four-letter PDB ID in addition to a hyphen followed by the single NMR structural model numeric ID, the residue naming scheme is **Chain ID\_residue name\_residue number**,  $\angle ADH$  represents the angle formed by acceptor (A), donor (D) and hydrogen (H) ( $\angle ADH$ ).

| PDB      | Acceptor (A)   | Donor (D)      | Hydrogen (H)    | D-A (Å) | H-A (Å) | $\angle ADH(^{\circ})$ |
|----------|----------------|----------------|-----------------|---------|---------|------------------------|
| 3THM.PDB | O, H.ALA.117   | ND2, L.ASN.35  | HD21, L.ASN.35  | 2.77    | 1.97    | 17.79                  |
| 3THM.PDB | OE1, L.GLN.39  | NE2, H.GLN.41  | HE22, H.GLN.41  | 2.98    | 2.14    | 9.35                   |
| 3THM.PDB | O, F.CYS.43    | NH1, H.ARG.105 | HH12, H.ARG.105 | 2.85    | 2.05    | 18.46                  |
| 3THM.PDB | OG, L.SER.183  | NZ, H.LYS.162  | HZ1, H.LYS.162  | 2.77    | 1.97    | 21.34                  |
| 3THM.PDB | OG1, L.THR.135 | NZ, H.LYS.162  | HZ2, H.LYS.162  | 2.85    | 2.02    | 17.75                  |
| 3THM.PDB | OH, H.TYR.35   | ND1, F.HIS.44  | HD1, F.HIS.44   | 2.69    | 1.83    | 5.98                   |
| 3THM.PDB | OG, H.SER.63   | NE2, F.HIS.44  | HE2, F.HIS.44   | 2.83    | 2.07    | 23.36                  |
| 3THM.PDB | O, L.SER.51    | NZ, F.LYS.78   | HZ2, F.LYS.78   | 3.00    | 2.15    | 15.09                  |

Table 1801: Interfacial 3THM-specific side chain and main chain hydrogen bonding analysis. In this table, a PDB file is specified with a four-letter PDB ID, except that the names of the PDB files corresponding to the single NMR structural model split from the NMR ensemble is specified with a four-letter PDB ID in addition to a hyphen followed by the single NMR structural model numeric ID, the residue naming scheme is **Chain ID\_residue name\_residue number**,  $\angle ADH$  represents the angle formed by acceptor (A), donor (D) and hydrogen (H) ( $\angle ADH$ ).

| PDB      | Acceptor (A)  | Donor (D)      | Hydrogen (H)    | D-A (Å) | H-A (Å) | $\angle ADH(^{\circ})$ |
|----------|---------------|----------------|-----------------|---------|---------|------------------------|
| 3TJE.PDB | O, H.ALA.117  | ND2, L.ASN.35  | HD21, L.ASN.35  | 2.81    | 2.01    | 17.88                  |
| 3TJE.PDB | OE1, L.GLN.39 | NE2, H.GLN.41  | HE21, H.GLN.41  | 2.98    | 2.15    | 10.85                  |
| 3TJE.PDB | O, F.CYS.43   | NH1, H.ARG.105 | HH12, H.ARG.105 | 2.85    | 2.08    | 23.11                  |
| 3TJE.PDB | OH, L.TYR.37  | N, H.PHE.119   | H, H.PHE.119    | 2.96    | 2.10    | 4.74                   |
| 3TJE.PDB | OH, H.TYR.35  | ND1, F.HIS.44  | HD1, F.HIS.44   | 2.56    | 1.70    | 3.69                   |

Table 1802: Interfacial 3TJE-specific side chain and main chain hydrogen bonding analysis. In this table, a PDB file is specified with a four-letter PDB ID, except that the names of the PDB files corresponding to the single NMR structural model split from the NMR ensemble is specified with a four-letter PDB ID in addition to a hyphen followed by the single NMR structural model numeric ID, the residue naming scheme is **Chain ID\_residue name\_residue number**,  $\angle ADH$  represents the angle formed by acceptor (A), donor (D) and hydrogen (H) ( $\angle ADH$ ).

| PDB      | Acceptor (A)   | Donor (D)      | Hydrogen (H)    | D-A (Å) | H-A (Å) | $\angle ADH(^{\circ})$ |
|----------|----------------|----------------|-----------------|---------|---------|------------------------|
| 3U2S.PDB | OE1, L_GLN_38  | NE2, H_GLN_39  | HE22, H_GLN_39  | 2.89    | 2.04    | 8.55                   |
| 3U2S.PDB | OH, L_TYR_36   | N, H_MET_100T  | H, H_MET_100T   | 2.95    | 2.15    | 18.41                  |
| 3U2S.PDB | OG, L_SER_165  | NE2, H_HIS_164 | HE2, H_HIS_164  | 2.93    | 2.12    | 16.97                  |
| 3U2S.PDB | OE1, H_GLN_39  | NE2, L_GLN_38  | HE22, L_GLN_38  | 2.91    | 2.09    | 13.75                  |
| 3U2S.PDB | OD2, C_ASP_167 | ND2, L_ASN_60  | HD22, L_ASN_60  | 2.90    | 2.14    | 22.76                  |
| 3U2S.PDB | OD1, H_ASP_61  | NH2, L_ARG_95A | HH22, L_ARG_95A | 2.34    | 1.58    | 22.53                  |
| 3U2S.PDB | OE2, H_GLU_95  | NH2, L_ARG_96  | HH21, L_ARG_96  | 2.87    | 2.05    | 15.72                  |
| 3U2S.PDB | O, H_ASN_100F  | N, G_LYS_169   | H, G_LYS_169    | 2.84    | 1.99    | 7.68                   |
| 3U2S.PDB | OH, H_TYR_100K | ND2, G_ASN_173 | HD21, G_ASN_173 | 2.97    | 2.13    | 8.87                   |
| 3U2S.PDB | OE1, B_GLN_38  | NE2, A_GLN_39  | HE22, A_GLN_39  | 2.92    | 2.07    | 7.34                   |
| 3U2S.PDB | O, C_ASP_167   | N, A_ASN_100F  | H, A_ASN_100F   | 2.97    | 2.14    | 14.21                  |
| 3U2S.PDB | OG1, B_THR_131 | NZ, A_LYS_143  | HZ2, A_LYS_143  | 2.41    | 1.67    | 27.35                  |
| 3U2S.PDB | OE1, A_GLN_39  | NE2, B_GLN_38  | HE22, B_GLN_38  | 2.92    | 2.08    | 10.61                  |
| 3U2S.PDB | OG1, H_THR_160 | N, B_ALA_80    | H, B_ALA_80     | 2.90    | 2.08    | 14.44                  |
| 3U2S.PDB | OD1, A_ASP_61  | NH1, B_ARG_95A | HH12, B_ARG_95A | 2.63    | 1.91    | 26.97                  |
| 3U2S.PDB | OE2, A_GLU_95  | NH2, B_ARG_96  | HH21, B_ARG_96  | 2.98    | 2.16    | 13.77                  |
| 3U2S.PDB | O, A_ASN_100F  | N, C_LYS_169   | H, C_LYS_169    | 2.91    | 2.08    | 13.24                  |

Table 1803: Interfacial 3U2S-specific side chain and main chain hydrogen bonding analysis. In this table, a PDB file is specified with a four-letter PDB ID, except that the names of the PDB files corresponding to the single NMR structural model split from the NMR ensemble is specified with a four-letter PDB ID in addition to a hyphen followed by the single NMR structural model numeric ID, the residue naming scheme is **Chain ID\_residue name\_residue number**,  $\angle ADH$  represents the angle formed by acceptor (A), donor (D) and hydrogen (H) ( $\angle ADH$ ).

| PDB      | Acceptor (A)   | Donor (D)     | Hydrogen (H)   | D-A (Å) | H-A (Å) | $\angle ADH(^{\circ})$ |
|----------|----------------|---------------|----------------|---------|---------|------------------------|
| 3UYR.PDB | OE1, P_GLN_48  | N, H_ASN_101  | H, H_ASN_101   | 2.90    | 2.08    | 14.57                  |
| 3UYR.PDB | OH, L_TYR_41   | N, H_LEU_104  | H, H_LEU_104   | 2.91    | 2.05    | 4.02                   |
| 3UYR.PDB | OE2, L_GLU_127 | NZ, H_LYS_212 | HZ3, H_LYS_212 | 2.87    | 2.08    | 23.12                  |
| 3UYR.PDB | O, P_PRO_50    | NE2, L_HIS_31 | HE2, L_HIS_31  | 2.91    | 2.13    | 21.00                  |
| 3UYR.PDB | O, H_PRO_171   | OG, L_SER_166 | HG, L_SER_166  | 2.72    | 1.97    | 20.46                  |
| 3UYR.PDB | OD1, H_ASN_101 | NE2, P_GLN_48 | HE22, P_GLN_48 | 2.57    | 1.87    | 29.89                  |

Table 1804: Interfacial 3UYR-specific side chain and main chain hydrogen bonding analysis. In this table, a PDB file is specified with a four-letter PDB ID, except that the names of the PDB files corresponding to the single NMR structural model split from the NMR ensemble is specified with a four-letter PDB ID in addition to a hyphen followed by the single NMR structural model numeric ID, the residue naming scheme is **Chain ID\_residue name\_residue number**,  $\angle ADH$  represents the angle formed by acceptor (A), donor (D) and hydrogen (H) ( $\angle ADH$ ).



| PDB      | Acceptor (A)   | Donor (D)      | Hydrogen (H)    | D-A (Å) | H-A (Å) | $\angle ADH(^{\circ})$ |
|----------|----------------|----------------|-----------------|---------|---------|------------------------|
| 4F33.PDB | OE1, B_GLN_39  | NE2, A_GLN_38  | HE22, A_GLN_38  | 2.96    | 2.13    | 12.75                  |
| 4F33.PDB | O, B_GLY_110   | OG, A_SER_43   | HG, A_SER_43    | 2.65    | 1.95    | 25.99                  |
| 4F33.PDB | O, B_ARG_104   | NH1, A_ARG_46  | HH11, A_ARG_46  | 2.62    | 1.83    | 18.99                  |
| 4F33.PDB | O, B_PRO_173   | OG, A_SER_162  | HG, A_SER_162   | 2.76    | 2.03    | 23.18                  |
| 4F33.PDB | OE1, A_GLN_38  | NE2, B_GLN_39  | HE22, B_GLN_39  | 2.82    | 1.97    | 5.31                   |
| 4F33.PDB | OH, A_TYR_36   | N, B_PHE_106   | H, B_PHE_106    | 2.97    | 2.12    | 7.79                   |
| 4F33.PDB | OE2, G_GLU_123 | N, B_GLY_124   | H, B_GLY_124    | 2.73    | 1.87    | 2.75                   |
| 4F33.PDB | O, H_ASP_214   | N, B_LYS_212   | H, B_LYS_212    | 2.81    | 2.00    | 15.02                  |
| 4F33.PDB | O, H_LYS_212   | N, B_ASP_214   | H, B_ASP_214    | 2.84    | 2.02    | 15.98                  |
| 4F33.PDB | OE1, A_GLU_123 | NZ, B_LYS_215  | HZ1, B_LYS_215  | 2.68    | 1.82    | 12.44                  |
| 4F33.PDB | OG1, H_THR_211 | NZ, B_LYS_215  | HZ2, B_LYS_215  | 2.83    | 1.95    | 7.37                   |
| 4F33.PDB | O, D_GLY_110   | OG, C_SER_43   | HG, C_SER_43    | 2.70    | 1.98    | 23.76                  |
| 4F33.PDB | O, D_ARG_104   | NH1, C_ARG_46  | HH11, C_ARG_46  | 2.70    | 1.92    | 20.25                  |
| 4F33.PDB | O, D_TYR_60    | NE2, C_HIS_94  | HE2, C_HIS_94   | 2.75    | 2.00    | 24.62                  |
| 4F33.PDB | O, D_PRO_173   | OG, C_SER_162  | HG, C_SER_162   | 2.78    | 2.07    | 25.83                  |
| 4F33.PDB | OE1, C_GLN_38  | NE2, D_GLN_39  | HE22, D_GLN_39  | 2.89    | 2.03    | 5.23                   |
| 4F33.PDB | OE2, E_GLU_123 | N, D_GLY_124   | H, D_GLY_124    | 2.84    | 1.99    | 7.85                   |
| 4F33.PDB | O, F_ASP_214   | N, D_LYS_212   | H, D_LYS_212    | 2.98    | 2.15    | 12.10                  |
| 4F33.PDB | O, F_LYS_212   | N, D_ASP_214   | H, D_ASP_214    | 2.85    | 2.03    | 14.94                  |
| 4F33.PDB | OE1, C_GLU_123 | NZ, D_LYS_215  | HZ1, D_LYS_215  | 2.79    | 1.99    | 22.47                  |
| 4F33.PDB | OG1, F_THR_211 | NZ, D_LYS_215  | HZ2, D_LYS_215  | 2.86    | 1.99    | 10.67                  |
| 4F33.PDB | O, F_ASN_210   | N, D_LYS_216   | H, D_LYS_216    | 2.98    | 2.16    | 15.42                  |
| 4F33.PDB | O, F_GLY_110   | OG, E_SER_43   | HG, E_SER_43    | 2.52    | 1.83    | 27.97                  |
| 4F33.PDB | O, F_ARG_104   | NH1, E_ARG_46  | HH11, E_ARG_46  | 2.85    | 2.03    | 15.38                  |
| 4F33.PDB | O, F_LEU_176   | NE2, E_GLN_160 | HE22, E_GLN_160 | 2.93    | 2.08    | 4.21                   |
| 4F33.PDB | O, F_PRO_173   | OG, E_SER_162  | HG, E_SER_162   | 2.63    | 1.89    | 21.98                  |
| 4F33.PDB | O, A_GLY_60    | N, F_PHE_29    | H, F_PHE_29     | 2.97    | 2.18    | 20.00                  |
| 4F33.PDB | OE1, E_GLN_38  | NE2, F_GLN_39  | HE22, F_GLN_39  | 2.92    | 2.06    | 5.53                   |
| 4F33.PDB | OH, E_TYR_36   | N, F_PHE_106   | H, F_PHE_106    | 2.80    | 1.96    | 9.30                   |
| 4F33.PDB | OE2, C_GLU_123 | N, F_GLY_124   | H, F_GLY_124    | 2.81    | 1.96    | 5.00                   |
| 4F33.PDB | O, D_ASP_214   | N, F_LYS_212   | H, F_LYS_212    | 2.94    | 2.11    | 12.64                  |
| 4F33.PDB | O, D_LYS_212   | N, F_ASP_214   | H, F_ASP_214    | 2.84    | 2.02    | 14.84                  |
| 4F33.PDB | OE1, E_GLU_123 | NZ, F_LYS_215  | HZ1, F_LYS_215  | 2.61    | 1.84    | 24.34                  |
| 4F33.PDB | OG1, D_THR_211 | NZ, F_LYS_215  | HZ2, F_LYS_215  | 2.92    | 2.04    | 7.71                   |
| 4F33.PDB | O, H_TYR_60    | NE2, G_HIS_94  | HE2, G_HIS_94   | 2.97    | 2.17    | 17.68                  |
| 4F33.PDB | O, H_LEU_176   | NE2, G_GLN_160 | HE22, G_GLN_160 | 2.89    | 2.04    | 8.42                   |
| 4F33.PDB | O, H_PRO_173   | OG, G_SER_162  | HG, G_SER_162   | 2.65    | 1.94    | 25.59                  |
| 4F33.PDB | O, C_GLY_60    | N, H_PHE_29    | H, H_PHE_29     | 2.96    | 2.15    | 17.00                  |
| 4F33.PDB | OH, G_TYR_36   | N, H_PHE_106   | H, H_PHE_106    | 2.74    | 1.89    | 7.07                   |
| 4F33.PDB | OE2, A_GLU_123 | N, H_GLY_124   | H, H_GLY_124    | 2.97    | 2.12    | 7.35                   |
| 4F33.PDB | O, G_SER_208   | NZ, H_LYS_135  | HZ3, H_LYS_135  | 2.85    | 1.99    | 13.05                  |
| 4F33.PDB | O, B_LYS_212   | N, H_ASP_214   | H, H_ASP_214    | 2.71    | 1.89    | 15.00                  |
| 4F33.PDB | OE1, G_GLU_123 | NZ, H_LYS_215  | HZ1, H_LYS_215  | 2.97    | 2.19    | 24.10                  |
| 4F33.PDB | OG1, B_THR_211 | NZ, H_LYS_215  | HZ2, H_LYS_215  | 2.80    | 1.95    | 14.49                  |
| 4F33.PDB | O, B_ASN_210   | N, H_LYS_216   | H, H_LYS_216    | 2.82    | 2.01    | 16.40                  |

---

Table 1805: Interfacial 4F33-specific side chain and main chain hydrogen bonding analysis. In this table, a PDB file is specified with a four-letter PDB ID, except that the names of the PDB files corresponding to the single NMR structural model split from the NMR ensemble is specified with a four-letter PDB ID in addition to a hyphen followed by the single NMR structural model numeric ID, the residue naming scheme is **Chain ID\_residue name\_residue number**,  $\angle ADH$  represents the angle formed by acceptor (A), donor (D) and hydrogen (H) ( $\angle ADH$ ).

| PDB      | Acceptor (A)   | Donor (D)      | Hydrogen (H)   | D-A (Å) | H-A (Å) | $\angle ADH(^{\circ})$ |
|----------|----------------|----------------|----------------|---------|---------|------------------------|
| 4F3F.PDB | OE1, B_GLN_39  | NE2, A_GLN_38  | HE22, A_GLN_38 | 2.88    | 2.04    | 8.75                   |
| 4F3F.PDB | O, B_ARG_104   | NH1, A_ARG_46  | HH11, A_ARG_46 | 2.93    | 2.16    | 22.46                  |
| 4F3F.PDB | OG, B_SER_59   | NE2, A_HIS_94  | HE2, A_HIS_94  | 2.82    | 2.03    | 19.68                  |
| 4F3F.PDB | OE1, C_GLU_52  | N, B_ASP_102   | H, B_ASP_102   | 2.88    | 2.08    | 17.53                  |
| 4F3F.PDB | OH, A_TYR_36   | N, B_PHE_106   | H, B_PHE_106   | 2.71    | 1.88    | 12.56                  |
| 4F3F.PDB | OD1, A_ASN_138 | NE2, B_HIS_170 | HE2, B_HIS_170 | 2.82    | 2.05    | 21.56                  |
| 4F3F.PDB | O, B_ASP_102   | NZ, C_LYS_24   | HZ2, C_LYS_24  | 2.85    | 2.03    | 18.08                  |
| 4F3F.PDB | OD1, B_ASP_102 | N, C_LYS_25    | H, C_LYS_25    | 2.86    | 2.02    | 9.58                   |
| 4F3F.PDB | OH, B_TYR_101  | NZ, C_LYS_25   | HZ3, C_LYS_25  | 2.87    | 2.11    | 26.18                  |
| 4F3F.PDB | OH, A_TYR_32   | NE1, C_TRP_26  | HE1, C_TRP_26  | 2.97    | 2.17    | 18.16                  |

Table 1806: Interfacial 4F3F-specific side chain and main chain hydrogen bonding analysis. In this table, a PDB file is specified with a four-letter PDB ID, except that the names of the PDB files corresponding to the single NMR structural model split from the NMR ensemble is specified with a four-letter PDB ID in addition to a hyphen followed by the single NMR structural model numeric ID, the residue naming scheme is **Chain ID\_residue name\_residue number**,  $\angle ADH$  represents the angle formed by acceptor (A), donor (D) and hydrogen (H) ( $\angle ADH$ ).

| PDB      | Acceptor (A)    | Donor (D)     | Hydrogen (H)   | D-A (Å) | H-A (Å) | $\angle ADH(^{\circ})$ |
|----------|-----------------|---------------|----------------|---------|---------|------------------------|
| 4JAM.PDB | OH, L_TYR_36    | N, H_PHE_100E | H, H_PHE_100E  | 2.85    | 2.03    | 15.20                  |
| 4JAM.PDB | OD1, H_ASN_100B | ND2, L_ASN_32 | HD21, L_ASN_32 | 2.96    | 2.21    | 25.94                  |
| 4JAM.PDB | O, B_THR_201    | N, L_THR_201  | H, L_THR_201   | 2.84    | 2.04    | 18.18                  |
| 4JAM.PDB | O, B_GLY_199    | N, L_GLU_203  | H, L_GLU_203   | 2.91    | 2.13    | 21.03                  |
| 4JAM.PDB | OH, B_TYR_36    | N, A_PHE_100E | H, A_PHE_100E  | 2.90    | 2.09    | 16.41                  |
| 4JAM.PDB | O, L_THR_201    | N, B_THR_201  | H, B_THR_201   | 2.77    | 1.96    | 16.15                  |
| 4JAM.PDB | O, L_GLY_199    | N, B_GLU_203  | H, B_GLU_203   | 2.79    | 1.99    | 17.96                  |

Table 1807: Interfacial 4JAM-specific side chain and main chain hydrogen bonding analysis. In this table, a PDB file is specified with a four-letter PDB ID, except that the names of the PDB files corresponding to the single NMR structural model split from the NMR ensemble is specified with a four-letter PDB ID in addition to a hyphen followed by the single NMR structural model numeric ID, the residue naming scheme is **Chain ID\_residue name\_residue number**,  $\angle ADH$  represents the angle formed by acceptor (A), donor (D) and hydrogen (H) ( $\angle ADH$ ).

| PDB      | Acceptor (A)    | Donor (D)     | Hydrogen (H)   | D-A (Å) | H-A (Å) | $\angle ADH(^{\circ})$ |
|----------|-----------------|---------------|----------------|---------|---------|------------------------|
| 4JAN.PDB | OH, L.TYR_36    | N, H.PHE_100E | H, H.PHE_100E  | 2.91    | 2.16    | 24.28                  |
| 4JAN.PDB | OD2, B.ASP_92   | OG, H.SER_156 | HG, H.SER_156  | 2.50    | 1.78    | 23.90                  |
| 4JAN.PDB | OE1, L.GLU_123  | NZ, H.LYS_209 | HZ1, H.LYS_209 | 2.89    | 2.13    | 26.71                  |
| 4JAN.PDB | OD1, H.ASN_100B | ND2, L.ASN_32 | HD21, L.ASN_32 | 2.76    | 1.91    | 6.44                   |
| 4JAN.PDB | OH, B.TYR_36    | N, A.PHE_100E | H, A.PHE_100E  | 2.74    | 1.90    | 10.14                  |
| 4JAN.PDB | O, L.GLY_458    | ND2, B.ASN_32 | HD22, B.ASN_32 | 2.86    | 2.11    | 24.85                  |

Table 1808: Interfacial 4JAN-specific side chain and main chain hydrogen bonding analysis. In this table, a PDB file is specified with a four-letter PDB ID, except that the names of the PDB files corresponding to the single NMR structural model split from the NMR ensemble is specified with a four-letter PDB ID in addition to a hyphen followed by the single NMR structural model numeric ID, the residue naming scheme is **Chain ID\_residue name\_residue number**,  $\angle ADH$  represents the angle formed by acceptor (A), donor (D) and hydrogen (H) ( $\angle ADH$ ).

| PDB      | Acceptor (A)   | Donor (D)      | Hydrogen (H)    | D-A (Å) | H-A (Å) | $\angle ADH(^{\circ})$ |
|----------|----------------|----------------|-----------------|---------|---------|------------------------|
| 4KRM.PDB | OE1, B_GLU_110 | NH1, A_ARG_353 | HH11, A_ARG_353 | 2.81    | 2.05    | 22.81                  |
| 4KRM.PDB | O, B_GLU_110   | NH1, A_ARG_353 | HH12, A_ARG_353 | 2.55    | 1.85    | 29.89                  |
| 4KRM.PDB | O, B_ALA_100   | NH2, A_ARG_353 | HH21, A_ARG_353 | 2.89    | 2.04    | 4.33                   |
| 4KRM.PDB | O, B ASP_112   | NE2, A_GLN_384 | HE22, A_GLN_384 | 2.93    | 2.19    | 25.19                  |
| 4KRM.PDB | O, C_LYS_310   | N, B_THR_58    | H, B_THR_58     | 2.99    | 2.17    | 13.91                  |
| 4KRM.PDB | O, C_GLU_308   | N, B_TYR_60    | H, B_TYR_60     | 2.75    | 1.96    | 19.67                  |
| 4KRM.PDB | O, B_TYR_60    | N, C_GLU_308   | H, C_GLU_308    | 2.91    | 2.19    | 28.33                  |
| 4KRM.PDB | O, B_THR_58    | N, C_LYS_310   | H, C_LYS_310    | 2.88    | 2.06    | 14.23                  |
| 4KRM.PDB | O, B ASP_56    | N, C_VAL_312   | H, C_VAL_312    | 2.73    | 1.89    | 9.64                   |
| 4KRM.PDB | OE1, D_GLU_110 | NH1, C_ARG_353 | HH11, C_ARG_353 | 2.87    | 2.05    | 16.15                  |
| 4KRM.PDB | O, D_ALA_100   | NH2, C_ARG_353 | HH21, C_ARG_353 | 2.80    | 2.00    | 16.96                  |
| 4KRM.PDB | OD2, C ASP_355 | NH1, D_ARG_30  | HH12, D_ARG_30  | 2.45    | 1.63    | 13.53                  |
| 4KRM.PDB | O, E_GLU_308   | N, D_TYR_60    | H, D_TYR_60     | 2.82    | 2.08    | 26.84                  |
| 4KRM.PDB | O, D_THR_58    | N, E_LYS_310   | H, E_LYS_310    | 2.79    | 2.02    | 22.01                  |
| 4KRM.PDB | OE1, F_GLU_110 | NH1, E_ARG_353 | HH11, E_ARG_353 | 2.85    | 2.03    | 14.34                  |
| 4KRM.PDB | O, F_GLU_110   | NH1, E_ARG_353 | HH12, E_ARG_353 | 2.46    | 1.72    | 24.77                  |
| 4KRM.PDB | O, F_ALA_100   | NH2, E_ARG_353 | HH21, E_ARG_353 | 2.81    | 1.99    | 15.85                  |
| 4KRM.PDB | OD2, F ASP_112 | NH2, E_ARG_353 | HH22, E_ARG_353 | 2.96    | 2.18    | 20.33                  |
| 4KRM.PDB | O, F ASP_112   | NE2, E_GLN_384 | HE22, E_GLN_384 | 2.82    | 2.10    | 28.13                  |
| 4KRM.PDB | O, J_THR_58    | N, G_LYS_310   | H, G_LYS_310    | 2.73    | 1.87    | 4.39                   |
| 4KRM.PDB | O, J ASP_56    | N, G_VAL_312   | H, G_VAL_312    | 2.86    | 2.02    | 9.25                   |
| 4KRM.PDB | OD1, H ASP_112 | N, G_VAL_350   | H, G_VAL_350    | 2.96    | 2.25    | 28.54                  |
| 4KRM.PDB | O, H_GLU_110   | NH1, G_ARG_353 | HH12, G_ARG_353 | 2.56    | 1.83    | 26.87                  |
| 4KRM.PDB | O, H_ALA_100   | NH2, G_ARG_353 | HH21, G_ARG_353 | 2.51    | 1.75    | 22.59                  |
| 4KRM.PDB | OE2, B_GLU_5   | NZ, G_LYS_407  | HZ1, G_LYS_407  | 2.98    | 2.17    | 20.60                  |
| 4KRM.PDB | OD2, G ASP_355 | NH1, H_ARG_30  | HH12, H_ARG_30  | 2.45    | 1.69    | 23.45                  |
| 4KRM.PDB | O, L_TYR_60    | N, I_GLU_308   | H, I_GLU_308    | 2.69    | 1.88    | 16.25                  |
| 4KRM.PDB | O, L_THR_58    | N, I_LYS_310   | H, I_LYS_310    | 2.70    | 1.84    | 3.45                   |
| 4KRM.PDB | O, L ASP_56    | N, I_VAL_312   | H, I_VAL_312    | 2.83    | 1.98    | 8.53                   |
| 4KRM.PDB | OD1, J ASP_112 | N, I_VAL_350   | H, I_VAL_350    | 2.88    | 2.05    | 13.27                  |
| 4KRM.PDB | OE1, J_GLU_110 | NH1, I_ARG_353 | HH11, I_ARG_353 | 2.86    | 2.07    | 18.90                  |
| 4KRM.PDB | O, J_ALA_100   | NH2, I_ARG_353 | HH21, I_ARG_353 | 2.97    | 2.14    | 13.62                  |
| 4KRM.PDB | OD2, J ASP_112 | NH2, I_ARG_353 | HH22, I_ARG_353 | 3.00    | 2.19    | 17.61                  |
| 4KRM.PDB | O, G_GLU_308   | N, J_TYR_60    | H, J_TYR_60     | 2.74    | 1.97    | 22.05                  |
| 4KRM.PDB | OD1, L ASP_112 | N, K_VAL_350   | H, K_VAL_350    | 2.89    | 2.07    | 15.44                  |
| 4KRM.PDB | OE1, L_GLU_110 | NH1, K_ARG_353 | HH11, K_ARG_353 | 2.89    | 2.06    | 12.41                  |
| 4KRM.PDB | O, L_GLU_110   | NH1, K_ARG_353 | HH12, K_ARG_353 | 2.54    | 1.80    | 24.42                  |
| 4KRM.PDB | O, L_ALA_100   | NH2, K_ARG_353 | HH21, K_ARG_353 | 2.92    | 2.14    | 20.95                  |
| 4KRM.PDB | OD2, L ASP_112 | NH2, K_ARG_353 | HH22, K_ARG_353 | 2.89    | 2.07    | 13.96                  |
| 4KRM.PDB | OD2, K ASP_355 | NH1, L_ARG_30  | HH12, L_ARG_30  | 2.44    | 1.65    | 18.93                  |
| 4KRM.PDB | O, I_LYS_310   | N, L_THR_58    | H, L_THR_58     | 2.98    | 2.15    | 12.69                  |
| 4KRM.PDB | O, I_GLU_308   | N, L_TYR_60    | H, L_TYR_60     | 2.75    | 2.02    | 27.31                  |

Table 1809: Interfacial 4KRM-specific side chain and main chain hydrogen bonding analysis. In this table, a PDB file is specified with a four-letter PDB ID, except that the names of the PDB files corresponding to the single NMR structural model split from the NMR ensemble is specified with a four-letter PDB ID in addition to a hyphen followed by the single NMR structural model numeric ID, the residue naming scheme is **Chain ID\_residue name\_residue number**,  $\angle ADH$  represents the angle formed by acceptor (A), donor (D) and hydrogen (H) ( $\angle ADH$ ).

| PDB      | Acceptor (A)   | Donor (D)      | Hydrogen (H)    | D-A (Å) | H-A (Å) | $\angle ADH(^{\circ})$ |
|----------|----------------|----------------|-----------------|---------|---------|------------------------|
| 4KRO.PDB | O, D_GLY_54    | NH1, A_ARG_353 | HH12, A_ARG_353 | 2.81    | 1.97    | 9.47                   |
| 4KRO.PDB | OG, B_SER_103  | NZ, A_LYS_375  | HZ2, A_LYS_375  | 2.61    | 1.76    | 15.34                  |
| 4KRO.PDB | OH, D_TYR_102  | NE2, A_GLN_384 | HE21, A_GLN_384 | 2.87    | 2.16    | 29.24                  |
| 4KRO.PDB | O, B_TYR_100   | NH2, A_ARG_403 | HH22, A_ARG_403 | 2.57    | 1.73    | 11.63                  |
| 4KRO.PDB | OD1, B_ASP_118 | NE, A_ARG_405  | HE, A_ARG_405   | 2.72    | 1.93    | 19.48                  |
| 4KRO.PDB | O, A_GLY_458   | N, B_VAL_2     | H, B_VAL_2      | 2.76    | 1.93    | 12.61                  |
| 4KRO.PDB | OE1, D_GLN_39  | NE2, C_GLN_38  | HE22, C_GLN_38  | 2.85    | 2.00    | 7.50                   |
| 4KRO.PDB | OD2, D_ASP_103 | OH, C_TYR_50   | HH, C_TYR_50    | 2.49    | 1.72    | 20.15                  |
| 4KRO.PDB | O, D_TYR_104   | NE2, C_GLN_89  | HE22, C_GLN_89  | 3.00    | 2.19    | 16.80                  |
| 4KRO.PDB | OD1, D_ASP_103 | ND2, C_ASN_91  | HD21, C_ASN_91  | 2.93    | 2.12    | 16.18                  |
| 4KRO.PDB | O, A_ASN_469   | N, C_TRP_94    | H, C_TRP_94     | 2.75    | 1.95    | 19.24                  |
| 4KRO.PDB | OD2, D_ASP_58  | NE1, C_TRP_94  | HE1, C_TRP_94   | 2.80    | 2.10    | 29.15                  |
| 4KRO.PDB | O, D_LEU_176   | NE2, C_GLN_160 | HE22, C_GLN_160 | 2.74    | 1.92    | 15.89                  |
| 4KRO.PDB | OE1, C_GLN_38  | NE2, D_GLN_39  | HE22, D_GLN_39  | 2.80    | 1.94    | 4.32                   |
| 4KRO.PDB | OE1, A_GLN_408 | OH, D_TYR_102  | HH, D_TYR_102   | 2.75    | 1.97    | 18.39                  |
| 4KRO.PDB | OH, C_TYR_36   | N, D_PHE_106   | H, D_PHE_106    | 2.93    | 2.08    | 9.34                   |

Table 1810: Interfacial 4KRO-specific side chain and main chain hydrogen bonding analysis. In this table, a PDB file is specified with a four-letter PDB ID, except that the names of the PDB files corresponding to the single NMR structural model split from the NMR ensemble is specified with a four-letter PDB ID in addition to a hyphen followed by the single NMR structural model numeric ID, the residue naming scheme is **Chain ID\_residue name\_residue number**,  $\angle ADH$  represents the angle formed by acceptor (A), donor (D) and hydrogen (H) ( $\angle ADH$ ).

| PDB      | Acceptor (A)   | Donor (D)      | Hydrogen (H)    | D-A (Å) | H-A (Å) | $\angle ADH(^{\circ})$ |
|----------|----------------|----------------|-----------------|---------|---------|------------------------|
| 4KRP.PDB | O, D_GLY_54    | NH2, A_ARG_353 | HH22, A_ARG_353 | 2.83    | 1.98    | 6.79                   |
| 4KRP.PDB | OD1, B_ASP_115 | NH2, A_ARG_405 | HH21, A_ARG_405 | 2.63    | 1.81    | 15.48                  |
| 4KRP.PDB | O, D_TYR_102   | OG, A_SER_440  | HG, A_SER_440   | 2.65    | 1.82    | 4.10                   |
| 4KRP.PDB | OD1, D_ASP_58  | NZ, A_LYS_443  | HZ1, A_LYS_443  | 2.65    | 1.82    | 17.69                  |
| 4KRP.PDB | OD2, D_ASP_103 | NZ, A_LYS_465  | HZ2, A_LYS_465  | 2.93    | 2.05    | 5.06                   |
| 4KRP.PDB | OE1, D_GLN_39  | NE2, C_GLN_38  | HE22, C_GLN_38  | 2.70    | 1.84    | 6.09                   |
| 4KRP.PDB | OD2, D_ASP_103 | OH, C_TYR_50   | HH, C_TYR_50    | 2.43    | 1.66    | 18.96                  |
| 4KRP.PDB | OD1, D_ASP_103 | ND2, C_ASN_91  | HD21, C_ASN_91  | 2.77    | 1.91    | 6.24                   |
| 4KRP.PDB | O, A_ASN_469   | N, C_TRP_94    | H, C_TRP_94     | 2.68    | 1.89    | 19.97                  |
| 4KRP.PDB | OD2, D_ASP_58  | NE1, C_TRP_94  | HE1, C_TRP_94   | 2.98    | 2.17    | 17.26                  |
| 4KRP.PDB | O, D_LEU_176   | NE2, C_GLN_160 | HE22, C_GLN_160 | 2.56    | 1.80    | 22.58                  |
| 4KRP.PDB | O, D_PRO_173   | OG, C_SER_162  | HG, C_SER_162   | 2.80    | 2.10    | 28.74                  |
| 4KRP.PDB | OE1, C_GLN_38  | NE2, D_GLN_39  | HE22, D_GLN_39  | 2.72    | 1.87    | 5.47                   |
| 4KRP.PDB | OE1, A_GLN_408 | OH, D_TYR_102  | HH, D_TYR_102   | 2.56    | 1.74    | 10.00                  |
| 4KRP.PDB | OG, A_SER_440  | OH, D_TYR_104  | HH, D_TYR_104   | 2.94    | 2.22    | 25.72                  |
| 4KRP.PDB | OH, C_TYR_36   | N, D_PHE_106   | H, D_PHE_106    | 2.89    | 2.11    | 20.61                  |
| 4KRP.PDB | OE1, A_GLU_431 | OH, B_TYR_32   | HH, B_TYR_32    | 2.59    | 1.78    | 7.49                   |
| 4KRP.PDB | OE1, A_GLU_400 | OH, B_TYR_100  | HH, B_TYR_100   | 2.94    | 2.13    | 13.29                  |
| 4KRP.PDB | OE2, A_GLU_431 | OH, B_TYR_116  | HH, B_TYR_116   | 2.43    | 1.75    | 29.09                  |

Table 1811: Interfacial 4KRP-specific side chain and main chain hydrogen bonding analysis.

In this table, a PDB file is specified with a four-letter PDB ID, except that the names of the PDB files corresponding to the single NMR structural model split from the NMR ensemble is specified with a four-letter PDB ID in addition to a hyphen followed by the single NMR structural model numeric ID, the residue naming scheme is **Chain ID\_residue name\_residue number**,  $\angle ADH$  represents the angle formed by acceptor (A), donor (D) and hydrogen (H) ( $\angle ADH$ ).



| PDB      | Acceptor (A)   | Donor (D)      | Hydrogen (H)    | D-A (Å) | H-A (Å) | $\angle ADH(^{\circ})$ |
|----------|----------------|----------------|-----------------|---------|---------|------------------------|
| 4NZR.PDB | OH, L_TYR_36   | N, H_PHE_100J  | H, H_PHE_100J   | 2.96    | 2.11    | 8.14                   |
| 4NZR.PDB | OG, L_SER_176  | OG, H_SER_188  | HG, H_SER_188   | 2.88    | 2.16    | 24.46                  |
| 4NZR.PDB | OE2, L_GLU_123 | NZ, H_LYS_221  | HZ2, H_LYS_221  | 2.99    | 2.10    | 2.00                   |
| 4NZR.PDB | O, M_PRO_119   | OG, L_SER_14   | HG, L_SER_14    | 2.76    | 2.00    | 18.37                  |
| 4NZR.PDB | OG1, M_THR_110 | N, L_THR_18    | H, L_THR_18     | 2.82    | 2.00    | 15.23                  |
| 4NZR.PDB | OH, M_TYR_444  | N, L_LYS_54    | H, L_LYS_54     | 2.91    | 2.06    | 4.85                   |
| 4NZR.PDB | O, M_ALA_391   | NH2, L_ARG_61  | HH21, L_ARG_61  | 2.90    | 2.11    | 19.46                  |
| 4NZR.PDB | OG, M_SER_106  | N, L_ASN_77    | H, L_ASN_77     | 2.86    | 2.01    | 5.30                   |
| 4NZR.PDB | O, H_ALA_100G  | NE, L_ARG_96   | HE, L_ARG_96    | 2.83    | 2.08    | 23.79                  |
| 4NZR.PDB | O, H_ALA_100G  | NH2, L_ARG_96  | HH21, L_ARG_96  | 2.80    | 2.05    | 24.03                  |
| 4NZR.PDB | O, M_ASN_177   | NH2, L_ARG_108 | HH22, L_ARG_108 | 2.82    | 2.05    | 22.21                  |
| 4NZR.PDB | O, M_GLY_178   | N, L_THR_109   | H, L_THR_109    | 2.92    | 2.07    | 5.99                   |
| 4NZR.PDB | O, M_GLY_178   | OG1, L_THR_109 | HG1, L_THR_109  | 2.88    | 2.17    | 26.23                  |
| 4NZR.PDB | O, M_ASP_117   | N, L_VAL_110   | H, L_VAL_110    | 2.96    | 2.14    | 15.09                  |
| 4NZR.PDB | O, H_LEU_178   | NE2, L_GLN_160 | HE22, L_GLN_160 | 2.86    | 2.01    | 7.83                   |
| 4NZR.PDB | O, H_PRO_175   | OG, L_SER_162  | HG, L_SER_162   | 2.79    | 1.98    | 7.14                   |
| 4NZR.PDB | OG, H_SER_188  | OG, L_SER_176  | HG, L_SER_176   | 2.88    | 2.09    | 13.66                  |
| 4NZR.PDB | OE1, L_GLU_81  | NE, M_ARG_384  | HE, M_ARG_384   | 2.93    | 2.09    | 10.37                  |
| 4NZR.PDB | OD1, H_ASP_31E | NH1, M_ARG_457 | HH12, M_ARG_457 | 2.96    | 2.12    | 11.27                  |
| 4NZR.PDB | OD2, H_ASP_31E | NH2, M_ARG_457 | HH22, M_ARG_457 | 2.55    | 1.75    | 17.03                  |

Table 1812: Interfacial 4NZR-specific side chain and main chain hydrogen bonding analysis. In this table, a PDB file is specified with a four-letter PDB ID, except that the names of the PDB files corresponding to the single NMR structural model split from the NMR ensemble is specified with a four-letter PDB ID in addition to a hyphen followed by the single NMR structural model numeric ID, the residue naming scheme is **Chain ID\_residue name\_residue number**,  $\angle ADH$  represents the angle formed by acceptor (A), donor (D) and hydrogen (H) ( $\angle ADH$ ).

| PDB      | Acceptor (A) | Donor (D)     | Hydrogen (H)  | D-A (Å) | H-A (Å) | $\angle ADH(^{\circ})$ |
|----------|--------------|---------------|---------------|---------|---------|------------------------|
| 4NZU.PDB | OH, L_TYR_36 | N, H_PHE_100H | H, H_PHE_100H | 2.86    | 2.04    | 13.13                  |

Table 1813: Interfacial 4NZU-specific side chain and main chain hydrogen bonding analysis. In this table, a PDB file is specified with a four-letter PDB ID, except that the names of the PDB files corresponding to the single NMR structural model split from the NMR ensemble is specified with a four-letter PDB ID in addition to a hyphen followed by the single NMR structural model numeric ID, the residue naming scheme is **Chain ID\_residue name\_residue number**,  $\angle ADH$  represents the angle formed by acceptor (A), donor (D) and hydrogen (H) ( $\angle ADH$ ).

| PDB      | Acceptor (A)   | Donor (D)      | Hydrogen (H)    | D-A (Å) | H-A (Å) | $\angle ADH(^{\circ})$ |
|----------|----------------|----------------|-----------------|---------|---------|------------------------|
| 4WUU.PDB | OD2, B_ASP_53  | NE, A_ARG_48   | HE, A_ARG_48    | 2.84    | 2.13    | 29.12                  |
| 4WUU.PDB | OH, E_TYR_104  | NZ, A_LYS_66   | HZ3, A_LYS_66   | 2.89    | 2.02    | 10.84                  |
| 4WUU.PDB | OXT, C_LEU_9   | OH, A_TYR_84   | HH, A_TYR_84    | 2.64    | 1.82    | 12.17                  |
| 4WUU.PDB | O, B_TRP_60    | NE2, A_GLN_96  | HE22, A_GLN_96  | 2.78    | 1.93    | 8.81                   |
| 4WUU.PDB | O, C_LEU_9     | NZ, A_LYS_146  | HZ3, A_LYS_146  | 2.76    | 1.90    | 13.68                  |
| 4WUU.PDB | O, C_TYR_8     | NE1, A_TRP_147 | HE1, A_TRP_147  | 2.81    | 1.99    | 15.97                  |
| 4WUU.PDB | O, C_ARG_1     | OH, A_TYR_159  | HH, A_TYR_159   | 2.86    | 2.02    | 6.39                   |
| 4WUU.PDB | OE1, B_GLN_8   | NH1, A_ARG_234 | HH11, A_ARG_234 | 2.79    | 2.07    | 27.49                  |
| 4WUU.PDB | O, A_PRO_235   | OH, B_TYR_10   | HH, B_TYR_10    | 2.61    | 1.79    | 11.75                  |
| 4WUU.PDB | O, A_ALA_236   | ND2, B_ASN_24  | HD21, B_ASN_24  | 2.81    | 2.05    | 22.96                  |
| 4WUU.PDB | OE1, A_GLU_232 | OH, B_TYR_26   | HH, B_TYR_26    | 2.95    | 2.14    | 13.27                  |
| 4WUU.PDB | OH, A_TYR_171  | N, C_ARG_1     | H1, C_ARG_1     | 2.79    | 2.03    | 25.96                  |
| 4WUU.PDB | OE2, A_GLU_63  | N, C_MET_2     | H, C_MET_2      | 2.90    | 2.09    | 16.21                  |
| 4WUU.PDB | OE1, E_GLN_39  | NE2, D_GLN_39  | HE22, D_GLN_39  | 2.94    | 2.18    | 23.53                  |
| 4WUU.PDB | OD1, E_ASP_106 | NE1, D_TRP_99  | HE1, D_TRP_99   | 2.95    | 2.19    | 24.35                  |
| 4WUU.PDB | OE1, D_GLN_39  | NE2, E_GLN_39  | HE22, E_GLN_39  | 2.55    | 1.73    | 14.29                  |
| 4WUU.PDB | OE2, A_GLU_166 | NH2, E_ARG_50  | HH22, E_ARG_50  | 2.67    | 1.88    | 18.69                  |
| 4WUU.PDB | OE1, A_GLU_63  | OH, E_TYR_104  | HH, E_TYR_104   | 2.59    | 1.76    | 7.82                   |
| 4WUU.PDB | OE1, A_GLU_58  | N, E_TYR_105   | H, E_TYR_105    | 2.88    | 2.05    | 12.40                  |
| 4WUU.PDB | OE1, A_GLU_55  | OH, E_TYR_105  | HH, E_TYR_105   | 2.47    | 1.79    | 29.86                  |

Table 1814: Interfacial 4WUU-specific side chain and main chain hydrogen bonding analysis. In this table, a PDB file is specified with a four-letter PDB ID, except that the names of the PDB files corresponding to the single NMR structural model split from the NMR ensemble is specified with a four-letter PDB ID in addition to a hyphen followed by the single NMR structural model numeric ID, the residue naming scheme is **Chain ID\_residue name\_residue number**,  $\angle ADH$  represents the angle formed by acceptor (A), donor (D) and hydrogen (H) ( $\angle ADH$ ).

| PDB      | Acceptor (A)  | Donor (D)     | Hydrogen (H)   | D-A (Å) | H-A (Å) | $\angle ADH(^{\circ})$ |
|----------|---------------|---------------|----------------|---------|---------|------------------------|
| 4Z0X.PDB | OE1, B_GLN_64 | NE2, A_GLN_37 | HE22, A_GLN_37 | 2.75    | 1.99    | 23.41                  |
| 4Z0X.PDB | O, B_GLY_129  | NE2, A_GLN_88 | HE22, A_GLN_88 | 2.63    | 1.87    | 22.97                  |
| 4Z0X.PDB | O, B_GLY_129  | NE1, A_TRP_90 | HE1, A_TRP_90  | 2.96    | 2.14    | 15.73                  |
| 4Z0X.PDB | OH, C_TYR_443 | N, A_SER_93   | H, A_SER_93    | 2.99    | 2.17    | 13.42                  |
| 4Z0X.PDB | O, C_LEU_441  | N, B_SER_127  | H, B_SER_127   | 2.61    | 1.82    | 19.78                  |
| 4Z0X.PDB | OH, A_TYR_35  | N, B_TYR_131  | H, B_TYR_131   | 2.85    | 2.09    | 23.16                  |

Table 1815: Interfacial 4Z0X-specific side chain and main chain hydrogen bonding analysis. In this table, a PDB file is specified with a four-letter PDB ID, except that the names of the PDB files corresponding to the single NMR structural model split from the NMR ensemble is specified with a four-letter PDB ID in addition to a hyphen followed by the single NMR structural model numeric ID, the residue naming scheme is **Chain ID\_residue name\_residue number**,  $\angle ADH$  represents the angle formed by acceptor (A), donor (D) and hydrogen (H) ( $\angle ADH$ ).

| PDB      | Acceptor (A)   | Donor (D)      | Hydrogen (H)    | D-A (Å) | H-A (Å) | $\angle ADH(^{\circ})$ |
|----------|----------------|----------------|-----------------|---------|---------|------------------------|
| 5I76.PDB | OE1, B_GLN_39  | NE2, A_GLN_38  | HE22, A_GLN_38  | 2.94    | 2.10    | 10.68                  |
| 5I76.PDB | O, B_GLY_110   | OG, A_SER_43   | HG, A_SER_43    | 2.73    | 2.02    | 27.09                  |
| 5I76.PDB | OD2, B_ASP_103 | OH, A_TYR_50   | HH, A_TYR_50    | 2.64    | 1.88    | 21.01                  |
| 5I76.PDB | O, B_PRO_173   | OG, A_SER_162  | HG, A_SER_162   | 2.48    | 1.79    | 28.75                  |
| 5I76.PDB | OE1, A_GLN_38  | NE2, B_GLN_39  | HE22, B_GLN_39  | 2.80    | 1.95    | 6.66                   |
| 5I76.PDB | OG, A_SER_176  | OG, B_SER_185  | HG, B_SER_185   | 2.89    | 2.15    | 23.05                  |
| 5I76.PDB | OE1, A_GLU_123 | NZ, B_LYS_215  | HZ1, B_LYS_215  | 2.73    | 1.96    | 24.68                  |
| 5I76.PDB | OE2, A_GLU_123 | NZ, B_LYS_215  | HZ1, B_LYS_215  | 2.89    | 2.11    | 24.69                  |
| 5I76.PDB | OD2, A_ASP_70  | NH1, C_ARG_24  | HH12, C_ARG_24  | 2.95    | 2.23    | 28.81                  |
| 5I76.PDB | O, D_GLY_110   | OG, C_SER_43   | HG, C_SER_43    | 2.84    | 2.15    | 29.22                  |
| 5I76.PDB | OD2, D_ASP_103 | OH, C_TYR_50   | HH, C_TYR_50    | 2.76    | 1.95    | 12.40                  |
| 5I76.PDB | O, A_SER_202   | NE2, C_GLN_147 | HE22, C_GLN_147 | 2.78    | 1.96    | 13.33                  |
| 5I76.PDB | OE1, C_GLN_38  | NE2, D_GLN_39  | HE22, D_GLN_39  | 2.85    | 2.01    | 10.98                  |
| 5I76.PDB | OH, C_TYR_36   | N, D_PHE_106   | H, D_PHE_106    | 2.93    | 2.09    | 12.40                  |
| 5I76.PDB | OE1, C_GLU_123 | NZ, D_LYS_215  | HZ1, D_LYS_215  | 2.60    | 1.73    | 11.40                  |

Table 1816: Interfacial 5I76-specific side chain and main chain hydrogen bonding analysis. In this table, a PDB file is specified with a four-letter PDB ID, except that the names of the PDB files corresponding to the single NMR structural model split from the NMR ensemble is specified with a four-letter PDB ID in addition to a hyphen followed by the single NMR structural model numeric ID, the residue naming scheme is **Chain ID\_residue name\_residue number**,  $\angle ADH$  represents the angle formed by acceptor (A), donor (D) and hydrogen (H) ( $\angle ADH$ ).

| PDB      | Acceptor (A)    | Donor (D)      | Hydrogen (H)    | D-A (Å) | H-A (Å) | $\angle ADH(^{\circ})$ |
|----------|-----------------|----------------|-----------------|---------|---------|------------------------|
| 5JO5.PDB | OE1, L_GLN_38   | NE2, H_GLN_39  | HE22, H_GLN_39  | 2.84    | 2.00    | 9.38                   |
| 5JO5.PDB | OH, L_TYR_36    | N, H_PHE_100L  | H, H_PHE_100L   | 2.79    | 1.96    | 12.88                  |
| 5JO5.PDB | O, L_GLY_41     | NH2, H_ARG_105 | HH22, H_ARG_105 | 2.85    | 2.05    | 18.48                  |
| 5JO5.PDB | OE2, L_GLU_124  | NZ, H_LYS_143  | HZ2, H_LYS_143  | 2.46    | 1.63    | 17.05                  |
| 5JO5.PDB | OH, L_TYR_177   | OG, H_SER_179  | HG, H_SER_179   | 2.73    | 2.00    | 25.96                  |
| 5JO5.PDB | OE1, D_GLN_24   | OG, L_SER_30   | HG, L_SER_30    | 2.84    | 2.07    | 18.45                  |
| 5JO5.PDB | OE1, H_GLN_39   | NE2, L_GLN_38  | HE22, L_GLN_38  | 2.83    | 2.00    | 13.03                  |
| 5JO5.PDB | OE2, H_GLU_100J | NH2, L_ARG_91  | HH22, L_ARG_91  | 2.69    | 1.84    | 7.26                   |
| 5JO5.PDB | OD1, H_ASP_58   | NE, L_ARG_95B  | HE, L_ARG_95B   | 2.95    | 2.13    | 14.76                  |
| 5JO5.PDB | O, H_GLY_42     | OG1, L_THR_163 | HG1, L_THR_163  | 2.52    | 1.79    | 25.04                  |
| 5JO5.PDB | OE1, B_GLN_38   | NE2, A_GLN_39  | HE22, A_GLN_39  | 2.87    | 2.02    | 8.31                   |
| 5JO5.PDB | OH, B_TYR_36    | N, A_PHE_100L  | H, A_PHE_100L   | 2.86    | 2.06    | 18.12                  |
| 5JO5.PDB | O, B_GLY_41     | NH1, A_ARG_105 | HH12, A_ARG_105 | 2.66    | 1.82    | 9.49                   |
| 5JO5.PDB | OE2, B_GLU_124  | NZ, A_LYS_143  | HZ2, A_LYS_143  | 2.62    | 1.83    | 23.29                  |
| 5JO5.PDB | OH, B_TYR_177   | OG, A_SER_179  | HG, A_SER_179   | 2.83    | 2.10    | 25.21                  |
| 5JO5.PDB | OE2, B_GLU_123  | NZ, A_LYS_209  | HZ1, A_LYS_209  | 2.55    | 1.68    | 10.64                  |
| 5JO5.PDB | OE1, A_GLN_39   | NE2, B_GLN_38  | HE22, B_GLN_38  | 2.90    | 2.07    | 12.43                  |
| 5JO5.PDB | O, F_ARG_29     | ND2, B_ASN_69  | HD21, B_ASN_69  | 2.80    | 1.99    | 16.03                  |
| 5JO5.PDB | O, A_GLY_100H   | NE, B_ARG_91   | HE, B_ARG_91    | 2.94    | 2.09    | 9.41                   |
| 5JO5.PDB | O, A_GLY_42     | OG1, B_THR_163 | HG1, B_THR_163  | 2.48    | 1.73    | 21.87                  |
| 5JO5.PDB | OE1, D_GLN_38   | NE2, C_GLN_39  | HE22, C_GLN_39  | 2.86    | 2.02    | 9.45                   |
| 5JO5.PDB | OH, D_TYR_36    | N, C_PHE_100L  | H, C_PHE_100L   | 2.87    | 2.08    | 19.05                  |
| 5JO5.PDB | OE2, D_GLU_124  | NZ, C_LYS_143  | HZ2, C_LYS_143  | 2.79    | 1.92    | 10.71                  |
| 5JO5.PDB | OH, D_TYR_177   | OG, C_SER_179  | HG, C_SER_179   | 2.71    | 1.97    | 23.23                  |
| 5JO5.PDB | OE2, D_GLU_123  | NZ, C_LYS_209  | HZ1, C_LYS_209  | 2.58    | 1.72    | 11.28                  |
| 5JO5.PDB | OE1, C_GLN_39   | NE2, D_GLN_38  | HE22, D_GLN_38  | 2.92    | 2.09    | 12.72                  |
| 5JO5.PDB | O, L_ARG_29     | ND2, D_ASN_69  | HD21, D_ASN_69  | 2.86    | 2.03    | 13.06                  |
| 5JO5.PDB | OD1, C_ASP_58   | NE, D_ARG_95B  | HE, D_ARG_95B   | 2.94    | 2.10    | 11.64                  |
| 5JO5.PDB | O, C_GLY_42     | OG1, D_THR_163 | HG1, D_THR_163  | 2.56    | 1.81    | 22.64                  |
| 5JO5.PDB | OE1, F_GLN_38   | NE2, E_GLN_39  | HE22, E_GLN_39  | 2.90    | 2.06    | 10.70                  |
| 5JO5.PDB | OH, F_TYR_36    | N, E_PHE_100L  | H, E_PHE_100L   | 2.79    | 1.96    | 13.04                  |
| 5JO5.PDB | O, F_GLY_41     | NH2, E_ARG_105 | HH22, E_ARG_105 | 2.92    | 2.13    | 19.96                  |
| 5JO5.PDB | OE2, F_GLU_124  | NZ, E_LYS_143  | HZ2, E_LYS_143  | 2.55    | 1.75    | 21.57                  |
| 5JO5.PDB | OH, F_TYR_177   | OG, E_SER_179  | HG, E_SER_179   | 2.58    | 1.87    | 27.02                  |
| 5JO5.PDB | OE2, F_GLU_123  | NZ, E_LYS_209  | HZ1, E_LYS_209  | 2.57    | 1.74    | 17.62                  |
| 5JO5.PDB | OE1, B_GLN_24   | OG, F_SER_30   | HG, F_SER_30    | 2.88    | 2.11    | 20.15                  |
| 5JO5.PDB | OE1, E_GLN_39   | NE2, F_GLN_38  | HE22, F_GLN_38  | 2.85    | 2.02    | 12.75                  |
| 5JO5.PDB | OE2, E_GLU_100J | NH2, F_ARG_91  | HH22, F_ARG_91  | 2.72    | 1.87    | 5.99                   |
| 5JO5.PDB | OD1, E_ASP_58   | NE, F_ARG_95B  | HE, F_ARG_95B   | 2.92    | 2.09    | 12.47                  |
| 5JO5.PDB | O, E_GLY_42     | OG1, F_THR_163 | HG1, F_THR_163  | 2.55    | 1.80    | 22.10                  |

Table 1817: Interfacial 5JO5-specific side chain and main chain hydrogen bonding analysis. In this table, a PDB file is specified with a four-letter PDB ID, except that the names of the PDB files corresponding to the single NMR structural model split from the NMR ensemble is specified with a four-letter PDB ID in addition to a hyphen followed by the single NMR structural model numeric ID, the residue naming scheme is **Chain ID\_residue name\_residue number**,  $\angle ADH$  represents the angle formed by acceptor (A), donor (D) and hydrogen (H) ( $\angle ADH$ ).

| PDB      | Acceptor (A)  | Donor (D)      | Hydrogen (H)    | D-A (Å) | H-A (Å) | $\angle ADH(^{\circ})$ |
|----------|---------------|----------------|-----------------|---------|---------|------------------------|
| 5JR1.PDB | OH, L-TYR_36  | N, H-PHE_100L  | H, H-PHE_100L   | 2.93    | 2.14    | 18.24                  |
| 5JR1.PDB | O, L-GLY_41   | NH1, H-ARG_105 | HH11, H-ARG_105 | 2.58    | 1.82    | 23.25                  |
| 5JR1.PDB | OH, L-TYR_178 | OG, H-SER_179  | HG, H-SER_179   | 2.83    | 2.03    | 15.88                  |
| 5JR1.PDB | N, H-PHE_100L | OH, L-TYR_36   | HH, L-TYR_36    | 2.93    | 2.21    | 26.41                  |
| 5JR1.PDB | O, H-PRO_100F | NH1, L-ARG_91  | HH12, L-ARG_91  | 2.89    | 2.18    | 29.36                  |
| 5JR1.PDB | O, H-PRO_100F | NH2, L-ARG_91  | HH22, L-ARG_91  | 2.82    | 2.09    | 26.91                  |
| 5JR1.PDB | OD2, H-ASP_58 | NH2, L-ARG_95B | HH22, L-ARG_95B | 2.47    | 1.67    | 16.99                  |

Table 1818: Interfacial 5JR1-specific side chain and main chain hydrogen bonding analysis. In this table, a PDB file is specified with a four-letter PDB ID, except that the names of the PDB files corresponding to the single NMR structural model split from the NMR ensemble is specified with a four-letter PDB ID in addition to a hyphen followed by the single NMR structural model numeric ID, the residue naming scheme is **Chain ID\_residue name\_residue number**,  $\angle ADH$  represents the angle formed by acceptor (A), donor (D) and hydrogen (H) ( $\angle ADH$ ).

| PDB      | Acceptor (A)   | Donor (D)      | Hydrogen (H)    | D-A (Å) | H-A (Å) | $\angle ADH(^{\circ})$ |
|----------|----------------|----------------|-----------------|---------|---------|------------------------|
| 5JUE.PDB | O, H_MET_100E  | OH, L_TYR_36   | HH, L_TYR_36    | 2.57    | 1.73    | 1.94                   |
| 5JUE.PDB | OH, H_TYR_91   | NE2, L_GLN_38  | HE22, L_GLN_38  | 2.57    | 1.77    | 17.09                  |
| 5JUE.PDB | O, H_PRO_167   | OG, L_SER_162  | HG, L_SER_162   | 2.70    | 1.95    | 22.84                  |
| 5JUE.PDB | OG, H_SER_178  | OG, L_SER_176  | HG, L_SER_176   | 2.78    | 1.94    | 3.13                   |
| 5JUE.PDB | OE1, L_GLU_123 | NZ, H_LYS_208  | HZ1, H_LYS_208  | 2.81    | 1.98    | 17.66                  |
| 5JUE.PDB | O, L_PRO_119   | NH1, H_ARG_213 | HH12, H_ARG_213 | 2.84    | 2.13    | 29.21                  |
| 5JUE.PDB | O, L_PRO_120   | NH2, H_ARG_213 | HH22, H_ARG_213 | 2.94    | 2.13    | 15.93                  |

Table 1819: Interfacial 5JUE-specific side chain and main chain hydrogen bonding analysis. In this table, a PDB file is specified with a four-letter PDB ID, except that the names of the PDB files corresponding to the single NMR structural model split from the NMR ensemble is specified with a four-letter PDB ID in addition to a hyphen followed by the single NMR structural model numeric ID, the residue naming scheme is **Chain ID\_residue name\_residue number**,  $\angle ADH$  represents the angle formed by acceptor (A), donor (D) and hydrogen (H) ( $\angle ADH$ ).



| PDB      | Acceptor (A)  | Donor (D)      | Hydrogen (H)    | D-A (Å) | H-A (Å) | $\angle ADH(^{\circ})$ |
|----------|---------------|----------------|-----------------|---------|---------|------------------------|
| 5JXA.PDB | OD2, L_ASP_50 | OH, H_TYR_100  | HH, H_TYR_100   | 2.57    | 1.75    | 11.76                  |
| 5JXA.PDB | OH, L_TYR_36  | N, H_TRP_100F  | H, H_TRP_100F   | 2.85    | 2.00    | 7.52                   |
| 5JXA.PDB | OH, H_TYR_100 | NH2, L_ARG_53  | HH21, L_ARG_53  | 2.89    | 2.07    | 18.12                  |
| 5JXA.PDB | O, H_LEU_170  | NE2, L_GLN_160 | HE22, L_GLN_160 | 2.84    | 1.99    | 4.55                   |
| 5JXA.PDB | O, H_PRO_167  | OG, L_SER_162  | HG, L_SER_162   | 2.69    | 1.94    | 23.37                  |

Table 1820: Interfacial 5JXA-specific side chain and main chain hydrogen bonding analysis. In this table, a PDB file is specified with a four-letter PDB ID, except that the names of the PDB files corresponding to the single NMR structural model split from the NMR ensemble is specified with a four-letter PDB ID in addition to a hyphen followed by the single NMR structural model numeric ID, the residue naming scheme is **Chain ID\_residue name\_residue number**,  $\angle ADH$  represents the angle formed by acceptor (A), donor (D) and hydrogen (H) ( $\angle ADH$ ).

| PDB      | Acceptor (A)   | Donor (D)    | Hydrogen (H) | D-A (Å) | H-A (Å) | $\angle ADH(^{\circ})$ |
|----------|----------------|--------------|--------------|---------|---------|------------------------|
| 5M33.PDB | OE1, A_GLN_129 | N, B_VAL_114 | H, B_VAL_114 | 2.67    | 1.84    | 13.32                  |

Table 1821: Interfacial 5M33-specific side chain and main chain hydrogen bonding analysis. In this table, a PDB file is specified with a four-letter PDB ID, except that the names of the PDB files corresponding to the single NMR structural model split from the NMR ensemble is specified with a four-letter PDB ID in addition to a hyphen followed by the single NMR structural model numeric ID, the residue naming scheme is **Chain ID\_residue name\_residue number**,  $\angle ADH$  represents the angle formed by acceptor (A), donor (D) and hydrogen (H) ( $\angle ADH$ ).

| PDB      | Acceptor (A)  | Donor (D)     | Hydrogen (H)   | D-A (Å) | H-A (Å) | $\angle ADH(^{\circ})$ |
|----------|---------------|---------------|----------------|---------|---------|------------------------|
| 5T6P.PDB | O, B_GLY_107  | OG, A_SER_48  | HG, A_SER_48   | 2.52    | 1.72    | 14.73                  |
| 5T6P.PDB | O, B_PRO_170  | OG, A_SER_167 | HG, A_SER_167  | 2.98    | 2.14    | 3.80                   |
| 5T6P.PDB | OE1, A_GLN_43 | NE2, B_GLN_39 | HE22, B_GLN_39 | 2.71    | 1.86    | 5.14                   |
| 5T6P.PDB | O, F_PRO_8    | ND2, B_ASN_57 | HD21, B_ASN_57 | 2.91    | 2.07    | 9.74                   |
| 5T6P.PDB | OE1, D_GLN_39 | NE2, C_GLN_43 | HE22, C_GLN_43 | 3.00    | 2.17    | 12.88                  |
| 5T6P.PDB | O, D_GLY_107  | OG, C_SER_48  | HG, C_SER_48   | 2.66    | 1.94    | 25.38                  |
| 5T6P.PDB | OE1, C_GLN_43 | NE2, D_GLN_39 | HE22, D_GLN_39 | 2.79    | 1.94    | 7.20                   |
| 5T6P.PDB | OH, C_TYR_41  | N, D_PHE_103  | H, D_PHE_103   | 2.95    | 2.09    | 5.85                   |
| 5T6P.PDB | OE1, C_GLU_39 | NE, E_ARG_5   | HE, E_ARG_5    | 2.86    | 2.02    | 10.72                  |

Table 1822: Interfacial 5T6P-specific side chain and main chain hydrogen bonding analysis. In this table, a PDB file is specified with a four-letter PDB ID, except that the names of the PDB files corresponding to the single NMR structural model split from the NMR ensemble is specified with a four-letter PDB ID in addition to a hyphen followed by the single NMR structural model numeric ID, the residue naming scheme is **Chain ID\_residue name\_residue number**,  $\angle ADH$  represents the angle formed by acceptor (A), donor (D) and hydrogen (H) ( $\angle ADH$ ).

| PDB      | Acceptor (A)   | Donor (D)      | Hydrogen (H)   | D-A (Å) | H-A (Å) | $\angle ADH(^{\circ})$ |
|----------|----------------|----------------|----------------|---------|---------|------------------------|
| 5T78.PDB | OD1, C_ASN_150 | N, A_ASP_1     | H1, A_ASP_1    | 2.85    | 2.07    | 23.76                  |
| 5T78.PDB | OE1, B_GLN_39  | NE2, A_GLN_43  | HE22, A_GLN_43 | 2.92    | 2.08    | 9.79                   |
| 5T78.PDB | O, B_GLY_107   | OG, A_SER_48   | HG, A_SER_48   | 2.44    | 1.64    | 14.53                  |
| 5T78.PDB | O, B_LYS_43    | OH, A_TYR_92   | HH, A_TYR_92   | 2.74    | 2.03    | 27.20                  |
| 5T78.PDB | O, B_PRO_170   | OG, A_SER_167  | HG, A_SER_167  | 2.91    | 2.11    | 14.54                  |
| 5T78.PDB | OE1, A_GLN_43  | NE2, B_GLN_39  | HE22, B_GLN_39 | 2.63    | 1.78    | 5.56                   |
| 5T78.PDB | OH, A_TYR_41   | N, B_PHE_103   | H, B_PHE_103   | 2.85    | 2.00    | 5.24                   |
| 5T78.PDB | OE1, A_GLU_39  | NH1, F_ARG_5   | HH11, F_ARG_5  | 2.68    | 1.83    | 9.33                   |
| 5T78.PDB | O, D_GLY_107   | OG, C_SER_48   | HG, C_SER_48   | 2.59    | 1.80    | 15.22                  |
| 5T78.PDB | O, D_LYS_43    | OH, C_TYR_92   | HH, C_TYR_92   | 2.90    | 2.21    | 29.37                  |
| 5T78.PDB | O, A_SER_26    | N, C_ASN_166   | H, C_ASN_166   | 2.63    | 1.86    | 20.95                  |
| 5T78.PDB | O, D_PRO_170   | OG, C_SER_167  | HG, C_SER_167  | 2.87    | 2.05    | 10.83                  |
| 5T78.PDB | OE1, C_GLN_43  | NE2, D_GLN_39  | HE22, D_GLN_39 | 2.72    | 1.87    | 5.23                   |
| 5T78.PDB | OH, C_TYR_41   | N, D_PHE_103   | H, D_PHE_103   | 2.85    | 2.00    | 7.54                   |
| 5T78.PDB | OD1, C_ASN_142 | NE2, D_HIS_167 | HE2, D_HIS_167 | 2.85    | 2.00    | 9.68                   |
| 5T78.PDB | OD2, A_ASP_75  | N, D_SER_175   | H, D_SER_175   | 2.84    | 2.00    | 10.93                  |
| 5T78.PDB | OE1, C_GLU_39  | NH1, E_ARG_5   | HH11, E_ARG_5  | 2.69    | 1.87    | 13.16                  |

Table 1823: Interfacial 5T78-specific side chain and main chain hydrogen bonding analysis. In this table, a PDB file is specified with a four-letter PDB ID, except that the names of the PDB files corresponding to the single NMR structural model split from the NMR ensemble is specified with a four-letter PDB ID in addition to a hyphen followed by the single NMR structural model numeric ID, the residue naming scheme is **Chain ID\_residue name\_residue number**,  $\angle ADH$  represents the angle formed by acceptor (A), donor (D) and hydrogen (H) ( $\angle ADH$ ).

| PDB      | Acceptor (A)    | Donor (D)      | Hydrogen (H)   | D-A (Å) | H-A (Å) | $\angle ADH(^{\circ})$ |
|----------|-----------------|----------------|----------------|---------|---------|------------------------|
| 5U3J.PDB | OD1, L_ASP_31   | OH, H_TYR_100K | HH, H_TYR_100K | 2.88    | 2.04    | 5.22                   |
| 5U3J.PDB | OH, L_TYR_36    | N, H_MET_100N  | H, H_MET_100N  | 2.75    | 1.92    | 13.09                  |
| 5U3J.PDB | OE1, H_GLU_100F | OH, L_TYR_32   | HH, L_TYR_32   | 2.62    | 1.91    | 27.84                  |
| 5U3J.PDB | OE1, H_GLN_39   | NE2, L_GLN_38  | HE22, L_GLN_38 | 2.66    | 1.83    | 12.57                  |
| 5U3J.PDB | O, H_PRO_167    | OG, L_SER_162  | HG, L_SER_162  | 2.90    | 2.16    | 24.21                  |

Table 1824: Interfacial 5U3J-specific side chain and main chain hydrogen bonding analysis. In this table, a PDB file is specified with a four-letter PDB ID, except that the names of the PDB files corresponding to the single NMR structural model split from the NMR ensemble is specified with a four-letter PDB ID in addition to a hyphen followed by the single NMR structural model numeric ID, the residue naming scheme is **Chain ID\_residue name\_residue number**,  $\angle ADH$  represents the angle formed by acceptor (A), donor (D) and hydrogen (H) ( $\angle ADH$ ).

| PDB      | Acceptor (A)   | Donor (D)       | Hydrogen (H)     | D-A (Å) | H-A (Å) | $\angle ADH(^{\circ})$ |
|----------|----------------|-----------------|------------------|---------|---------|------------------------|
| 5U3N.PDB | OD2, A_ASP_674 | NH1, H_ARG_52A  | HH12, H_ARG_52A  | 3.00    | 2.24    | 24.41                  |
| 5U3N.PDB | OD1, L_ASP_31  | NH2, H_ARG_100B | HH22, H_ARG_100B | 2.97    | 2.15    | 14.50                  |
| 5U3N.PDB | OD1, L_ASN_34  | ND2, H_ASN_100J | HD21, H_ASN_100J | 2.72    | 1.86    | 2.61                   |
| 5U3N.PDB | OH, L_TYR_36   | N, H_MET_100M   | H, H_MET_100M    | 2.99    | 2.13    | 5.54                   |
| 5U3N.PDB | OD1, L_ASN_138 | NE2, H_HIS_164  | HE2, H_HIS_164   | 2.92    | 2.21    | 29.54                  |
| 5U3N.PDB | O, H_PRO_167   | OG, L_SER_162   | HG, L_SER_162    | 2.77    | 1.98    | 17.29                  |

Table 1825: Interfacial 5U3N-specific side chain and main chain hydrogen bonding analysis. In this table, a PDB file is specified with a four-letter PDB ID, except that the names of the PDB files corresponding to the single NMR structural model split from the NMR ensemble is specified with a four-letter PDB ID in addition to a hyphen followed by the single NMR structural model numeric ID, the residue naming scheme is **Chain ID\_residue name\_residue number**,  $\angle ADH$  represents the angle formed by acceptor (A), donor (D) and hydrogen (H) ( $\angle ADH$ ).

| PDB      | Acceptor (A)  | Donor (D)      | Hydrogen (H)    | D-A (Å) | H-A (Å) | $\angle ADH(^{\circ})$ |
|----------|---------------|----------------|-----------------|---------|---------|------------------------|
| 5UCB.PDB | OE1, L_GLN_38 | NE2, H_GLN_39  | HE22, H_GLN_39  | 2.96    | 2.12    | 9.92                   |
| 5UCB.PDB | O, B_LEU_5    | OH, H_TYR_53   | HH, H_TYR_53    | 2.73    | 1.99    | 23.03                  |
| 5UCB.PDB | O, B_VAL_145  | N, H_GLY_97    | H, H_GLY_97     | 2.90    | 2.05    | 8.98                   |
| 5UCB.PDB | O, L_SER_208  | NZ, H_LYS_129  | HZ2, H_LYS_129  | 2.83    | 2.06    | 25.53                  |
| 5UCB.PDB | OD2, B_ASP_51 | OG, L_SER_30   | HG, L_SER_30    | 2.58    | 1.81    | 20.19                  |
| 5UCB.PDB | OE1, H_GLN_39 | NE2, L_GLN_38  | HE22, L_GLN_38  | 2.95    | 2.13    | 14.86                  |
| 5UCB.PDB | O, B_SER_47   | NH1, L_ARG_66  | HH12, L_ARG_66  | 2.77    | 1.99    | 21.64                  |
| 5UCB.PDB | O, B_SER_47   | NH2, L_ARG_66  | HH22, L_ARG_66  | 2.89    | 2.16    | 27.12                  |
| 5UCB.PDB | O, B_ARG_48   | N, L_GLY_68    | H, L_GLY_68     | 2.79    | 1.95    | 9.02                   |
| 5UCB.PDB | O, H_LEU_170  | NE2, L_GLN_160 | HE22, L_GLN_160 | 2.99    | 2.13    | 5.75                   |
| 5UCB.PDB | O, H_PRO_167  | OG, L_SER_162  | HG, L_SER_162   | 2.68    | 1.94    | 24.13                  |
| 5UCB.PDB | O, L_ASP_91   | OH, B_TYR_111  | HH, B_TYR_111   | 2.57    | 1.75    | 11.11                  |
| 5UCB.PDB | OG, H_SER_58  | NZ, B_LYS_142  | HZ3, B_LYS_142  | 2.83    | 1.96    | 8.82                   |
| 5UCB.PDB | OD1, L_ASP_91 | NH2, B_ARG_144 | HH21, B_ARG_144 | 2.84    | 2.03    | 16.18                  |

Table 1826: Interfacial 5UCB-specific side chain and main chain hydrogen bonding analysis. In this table, a PDB file is specified with a four-letter PDB ID, except that the names of the PDB files corresponding to the single NMR structural model split from the NMR ensemble is specified with a four-letter PDB ID in addition to a hyphen followed by the single NMR structural model numeric ID, the residue naming scheme is **Chain ID\_residue name\_residue number**,  $\angle ADH$  represents the angle formed by acceptor (A), donor (D) and hydrogen (H) ( $\angle ADH$ ).

| PDB      | Acceptor (A)   | Donor (D)      | Hydrogen (H)    | D-A (Å) | H-A (Å) | $\angle ADH(^{\circ})$ |
|----------|----------------|----------------|-----------------|---------|---------|------------------------|
| 5UK0.PDB | OD1, F_ASP_590 | ND2, B_ASN_560 | HD22, B_ASN_560 | 2.72    | 1.94    | 19.72                  |
| 5UK0.PDB | O, F_LEU_502   | ND2, B_ASN_617 | HD22, B_ASN_617 | 2.60    | 1.80    | 16.74                  |
| 5UK0.PDB | OD1, D_ASP_586 | NH2, C_ARG_311 | HH22, C_ARG_311 | 2.98    | 2.20    | 18.56                  |
| 5UK0.PDB | OD1, B_ASP_590 | ND2, D_ASN_560 | HD22, D_ASN_560 | 2.73    | 1.95    | 20.06                  |
| 5UK0.PDB | O, B_LEU_502   | ND2, D_ASN_617 | HD22, D_ASN_617 | 2.62    | 1.80    | 13.03                  |
| 5UK0.PDB | O, D_LEU_502   | ND2, F_ASN_617 | HD22, F_ASN_617 | 2.71    | 1.89    | 14.40                  |

Table 1827: Interfacial 5UK0-specific side chain and main chain hydrogen bonding analysis. In this table, a PDB file is specified with a four-letter PDB ID, except that the names of the PDB files corresponding to the single NMR structural model split from the NMR ensemble is specified with a four-letter PDB ID in addition to a hyphen followed by the single NMR structural model numeric ID, the residue naming scheme is **Chain ID\_residue name\_residue number**,  $\angle ADH$  represents the angle formed by acceptor (A), donor (D) and hydrogen (H) ( $\angle ADH$ ).



| PDB      | Acceptor (A)   | Donor (D)      | Hydrogen (H)    | D-A (Å) | H-A (Å) | $\angle ADH(^{\circ})$ |
|----------|----------------|----------------|-----------------|---------|---------|------------------------|
| 5VXJ.PDB | OE1, I_GLU_200 | NH1, B_ARG_50  | HH12, B_ARG_50  | 2.92    | 2.07    | 7.25                   |
| 5VXJ.PDB | OE1, I_GLU_201 | OH, B_TYR_105  | HH, B_TYR_105   | 2.51    | 1.70    | 12.69                  |
| 5VXJ.PDB | O, D_GLY_56    | NH2, C_ARG_132 | HH22, C_ARG_132 | 2.97    | 2.20    | 22.55                  |
| 5VXJ.PDB | OD1, C_ASN_140 | NE, D_ARG_19   | HE, D_ARG_19    | 2.55    | 1.80    | 23.66                  |
| 5VXJ.PDB | OE1, E_GLU_201 | OH, D_TYR_105  | HH, D_TYR_105   | 2.53    | 1.70    | 8.84                   |
| 5VXJ.PDB | OD2, F_ASP_73  | NZ, E_LYS_137  | HZ2, E_LYS_137  | 2.77    | 1.96    | 20.15                  |
| 5VXJ.PDB | O, D_TYR_105   | OG, E_SER_173  | HG, E_SER_173   | 2.87    | 2.17    | 28.40                  |
| 5VXJ.PDB | OD1, D_ASN_97  | NZ, E_LYS_197  | HZ1, E_LYS_197  | 2.80    | 1.95    | 14.72                  |
| 5VXJ.PDB | O, F_GLY_112   | ND2, E_ASN_216 | HD21, E_ASN_216 | 2.68    | 1.91    | 21.74                  |
| 5VXJ.PDB | OE1, G_GLU_200 | NH2, F_ARG_50  | HH22, F_ARG_50  | 2.70    | 1.89    | 15.49                  |
| 5VXJ.PDB | OE1, G_GLU_201 | OH, F_TYR_105  | HH, F_TYR_105   | 2.57    | 1.75    | 11.97                  |
| 5VXJ.PDB | O, E_THR_217   | NE2, F_GLN_111 | HE22, F_GLN_111 | 2.98    | 2.12    | 6.26                   |
| 5VXJ.PDB | O, H_GLY_56    | NH2, G_ARG_132 | HH22, G_ARG_132 | 2.94    | 2.20    | 26.37                  |
| 5VXJ.PDB | O, F_TYR_105   | OG, G_SER_173  | HG, G_SER_173   | 2.88    | 2.16    | 26.33                  |
| 5VXJ.PDB | OD1, I_ASN_292 | N, G_GLY_176   | H, G_GLY_176    | 2.76    | 2.01    | 25.37                  |
| 5VXJ.PDB | OE1, H_GLN_111 | OG1, G_THR_217 | HG1, G_THR_217  | 2.86    | 2.17    | 29.58                  |
| 5VXJ.PDB | OD2, J_ASP_73  | NZ, I_LYS_137  | HZ3, I_LYS_137  | 2.90    | 2.17    | 29.52                  |
| 5VXJ.PDB | OD1, B_ASN_97  | NZ, I_LYS_197  | HZ1, I_LYS_197  | 2.68    | 1.88    | 21.92                  |
| 5VXJ.PDB | O, I_THR_217   | NE2, J_GLN_111 | HE22, J_GLN_111 | 2.92    | 2.11    | 16.33                  |

Table 1828: Interfacial 5VXJ-specific side chain and main chain hydrogen bonding analysis.

In this table, a PDB file is specified with a four-letter PDB ID, except that the names of the PDB files corresponding to the single NMR structural model split from the NMR ensemble is specified with a four-letter PDB ID in addition to a hyphen followed by the single NMR structural model numeric ID, the residue naming scheme is **Chain ID\_residue name\_residue number**,  $\angle ADH$  represents the angle formed by acceptor (A), donor (D) and hydrogen (H) ( $\angle ADH$ ).

| PDB      | Acceptor (A)   | Donor (D)      | Hydrogen (H)    | D-A (Å) | H-A (Å) | $\angle ADH(^{\circ})$ |
|----------|----------------|----------------|-----------------|---------|---------|------------------------|
| 5VXK.PDB | OD1, A_ASN_280 | N, B_SER_103   | H, B_SER_103    | 2.64    | 1.78    | 2.03                   |
| 5VXK.PDB | OD1, A_ASN_280 | N, B_VAL_104   | H, B_VAL_104    | 2.84    | 2.01    | 12.48                  |
| 5VXK.PDB | OG, A_SER_168  | NE2, B_GLN_106 | HE21, B_GLN_106 | 2.99    | 2.23    | 24.43                  |
| 5VXK.PDB | OD2, A_ASP_287 | NE2, B_GLN_106 | HE22, B_GLN_106 | 2.77    | 1.94    | 12.81                  |
| 5VXK.PDB | OG1, B_THR_102 | OH, A_TYR_276  | HH, A_TYR_276   | 2.57    | 1.73    | 6.50                   |

Table 1829: Interfacial 5VXK-specific side chain and main chain hydrogen bonding analysis. In this table, a PDB file is specified with a four-letter PDB ID, except that the names of the PDB files corresponding to the single NMR structural model split from the NMR ensemble is specified with a four-letter PDB ID in addition to a hyphen followed by the single NMR structural model numeric ID, the residue naming scheme is **Chain ID\_residue name\_residue number**,  $\angle ADH$  represents the angle formed by acceptor (A), donor (D) and hydrogen (H) ( $\angle ADH$ ).

| PDB      | Acceptor (A)   | Donor (D)      | Hydrogen (H)    | D-A (Å) | H-A (Å) | $\angle ADH(^{\circ})$ |
|----------|----------------|----------------|-----------------|---------|---------|------------------------|
| 5VXL.PDB | OD2, B_ASP_52  | NZ, A_LYS_205  | HZ1, A_LYS_205  | 3.00    | 2.13    | 10.69                  |
| 5VXL.PDB | O, A_ALA_198   | OH, B_TYR_54   | HH, B_TYR_54    | 2.38    | 1.67    | 27.03                  |
| 5VXL.PDB | OD1, A_ASP_166 | N, B_SER_55    | H, B_SER_55     | 2.91    | 2.18    | 28.04                  |
| 5VXL.PDB | OD1, A_ASP_166 | OG, B_SER_55   | HG, B_SER_55    | 2.56    | 1.73    | 4.68                   |
| 5VXL.PDB | OE2, A_GLU_201 | NH2, B_ARG_102 | HH22, B_ARG_102 | 2.87    | 2.08    | 20.03                  |

Table 1830: Interfacial 5VXL-specific side chain and main chain hydrogen bonding analysis. In this table, a PDB file is specified with a four-letter PDB ID, except that the names of the PDB files corresponding to the single NMR structural model split from the NMR ensemble is specified with a four-letter PDB ID in addition to a hyphen followed by the single NMR structural model numeric ID, the residue naming scheme is **Chain ID\_residue name\_residue number**,  $\angle ADH$  represents the angle formed by acceptor (A), donor (D) and hydrogen (H) ( $\angle ADH$ ).

| PDB      | Acceptor (A)   | Donor (D)      | Hydrogen (H)   | D-A (Å) | H-A (Å) | $\angle ADH(^{\circ})$ |
|----------|----------------|----------------|----------------|---------|---------|------------------------|
| 5VXM.PDB | OE2, B.GLU_111 | NE1, A.TRP_177 | HE1, A.TRP_177 | 2.76    | 1.97    | 19.61                  |
| 5VXM.PDB | O, A.ASP_166   | NE1, B.TRP_102 | HE1, B.TRP_102 | 2.92    | 2.09    | 13.88                  |
| 5VXM.PDB | OE2, A.GLU_201 | N, B.CYS_104   | H, B.CYS_104   | 2.85    | 2.02    | 10.45                  |
| 5VXM.PDB | OE1, A.GLU_201 | N, B.SER_105   | H, B.SER_105   | 2.58    | 1.74    | 9.22                   |

Table 1831: Interfacial 5VXM-specific side chain and main chain hydrogen bonding analysis. In this table, a PDB file is specified with a four-letter PDB ID, except that the names of the PDB files corresponding to the single NMR structural model split from the NMR ensemble is specified with a four-letter PDB ID in addition to a hyphen followed by the single NMR structural model numeric ID, the residue naming scheme is **Chain ID\_residue name\_residue number**,  $\angle ADH$  represents the angle formed by acceptor (A), donor (D) and hydrogen (H) ( $\angle ADH$ ).

| PDB      | Acceptor (A)   | Donor (D)      | Hydrogen (H)   | D-A (Å) | H-A (Å) | $\angle ADH(^{\circ})$ |
|----------|----------------|----------------|----------------|---------|---------|------------------------|
| 5VXR.PDB | OE1, L_GLN_38  | NZ, H_LYS_39   | HZ2, H_LYS_39  | 2.72    | 1.76    | 14.94                  |
| 5VXR.PDB | OD1, P_ASN_415 | OH, H_TYR_50   | HH, H_TYR_50   | 2.71    | 1.82    | 21.79                  |
| 5VXR.PDB | OH, L_TYR_36   | N, H_PHE_106   | H, H_PHE_106   | 2.92    | 1.92    | 7.59                   |
| 5VXR.PDB | OD1, L_ASN_138 | NE2, H_HIS_170 | HE2, H_HIS_170 | 2.89    | 1.98    | 20.57                  |
| 5VXR.PDB | OE2, L_GLU_123 | NZ, H_LYS_214  | HZ1, H_LYS_214 | 2.93    | 1.98    | 15.97                  |
| 5VXR.PDB | O, H_GLY_101   | NZ, L_LYS_30   | HZ1, L_LYS_30  | 2.83    | 1.85    | 13.06                  |
| 5VXR.PDB | O, P_GLY_418   | NE1, L_TRP_96  | HE1, L_TRP_96  | 2.88    | 1.87    | 5.74                   |
| 5VXR.PDB | OG, H_SER_184  | OG, L_SER_176  | HG, L_SER_176  | 2.79    | 1.86    | 17.30                  |
| 5VXR.PDB | OH, H_TYR_33   | N, P_ASN_415   | H, P_ASN_415   | 2.82    | 1.94    | 24.20                  |
| 5VXR.PDB | O, L_ASN_91    | NE1, P_TRP_420 | HE1, P_TRP_420 | 2.80    | 1.97    | 28.78                  |

Table 1832: Interfacial 5VXR-specific side chain and main chain hydrogen bonding analysis. In this table, a PDB file is specified with a four-letter PDB ID, except that the names of the PDB files corresponding to the single NMR structural model split from the NMR ensemble is specified with a four-letter PDB ID in addition to a hyphen followed by the single NMR structural model numeric ID, the residue naming scheme is **Chain ID\_residue name\_residue number**,  $\angle ADH$  represents the angle formed by acceptor (A), donor (D) and hydrogen (H) ( $\angle ADH$ ).

| PDB      | Acceptor (A)   | Donor (D)      | Hydrogen (H)    | D-A (Å) | H-A (Å) | $\angle ADH(^{\circ})$ |
|----------|----------------|----------------|-----------------|---------|---------|------------------------|
| 5WKQ.PDB | OG, B.SER_208  | NH2, A.ARG_135 | HH21, A.ARG_135 | 2.89    | 2.06    | 11.87                  |
| 5WKQ.PDB | OE2, A.GLU_131 | ND1, B.HIS_207 | HD1, B.HIS_207  | 2.65    | 1.88    | 22.26                  |
| 5WKQ.PDB | OE1, A.GLU_131 | OG1, B.THR_211 | HG1, B.THR_211  | 2.63    | 1.86    | 19.68                  |

Table 1833: Interfacial 5WKQ-specific side chain and main chain hydrogen bonding analysis. In this table, a PDB file is specified with a four-letter PDB ID, except that the names of the PDB files corresponding to the single NMR structural model split from the NMR ensemble is specified with a four-letter PDB ID in addition to a hyphen followed by the single NMR structural model numeric ID, the residue naming scheme is **Chain ID\_residue name\_residue number**,  $\angle ADH$  represents the angle formed by acceptor (A), donor (D) and hydrogen (H) ( $\angle ADH$ ).

| PDB      | Acceptor (A)  | Donor (D)     | Hydrogen (H)  | D-A (Å) | H-A (Å) | $\angle ADH(^{\circ})$ |
|----------|---------------|---------------|---------------|---------|---------|------------------------|
| 5WN9.PDB | OD1, H_ASN_57 | NE, A_ARG_188 | HE, A_ARG_188 | 2.58    | 1.61    | 2.15                   |

Table 1834: Interfacial 5WN9-specific side chain and main chain hydrogen bonding analysis. In this table, a PDB file is specified with a four-letter PDB ID, except that the names of the PDB files corresponding to the single NMR structural model split from the NMR ensemble is specified with a four-letter PDB ID in addition to a hyphen followed by the single NMR structural model numeric ID, the residue naming scheme is **Chain ID\_residue name\_residue number**,  $\angle ADH$  represents the angle formed by acceptor (A), donor (D) and hydrogen (H) ( $\angle ADH$ ).

| PDB      | Acceptor (A)  | Donor (D)     | Hydrogen (H)   | D-A (Å) | H-A (Å) | $\angle ADH(^{\circ})$ |
|----------|---------------|---------------|----------------|---------|---------|------------------------|
| 1A14.PDB | OE1, L_GLN_38 | NE2, H_GLN_39 | HE21, H_GLN_39 | 2.62    | 1.69    | 9.24                   |

Table 1835: 1A14-specific interfacial side chain hydrogen bonding analysis. In this table, a PDB file is specified with a four-letter PDB ID, except that the names of the PDB files corresponding to the single NMR structural model split from the NMR ensemble is specified with a four-letter PDB ID in addition to a hyphen followed by the single NMR structural model numeric ID, the residue naming scheme is **Chain ID\_residue name\_residue number**,  $\angle ADH$  represents the angle formed by acceptor (A), donor (D) and hydrogen (H) ( $\angle ADH$ ).



| PDB      | Acceptor (A)  | Donor (D)     | Hydrogen (H)   | D-A (Å) | H-A (Å) | $\angle ADH(^{\circ})$ |
|----------|---------------|---------------|----------------|---------|---------|------------------------|
| 1E6J.PDB | OE1, H_GLN_39 | NE2, L_GLN_37 | HE22, L_GLN_37 | 2.69    | 1.84    | 23.98                  |

Table 1836: 1E6J-specific interfacial side chain hydrogen bonding analysis. In this table, a PDB file is specified with a four-letter PDB ID, except that the names of the PDB files corresponding to the single NMR structural model split from the NMR ensemble is specified with a four-letter PDB ID in addition to a hyphen followed by the single NMR structural model numeric ID, the residue naming scheme is **Chain ID\_residue name\_residue number**,  $\angle ADH$  represents the angle formed by acceptor (A), donor (D) and hydrogen (H) ( $\angle ADH$ ).

| PDB      | Acceptor (A)  | Donor (D)    | Hydrogen (H) | D-A (Å) | H-A (Å) | $\angle ADH(^{\circ})$ |
|----------|---------------|--------------|--------------|---------|---------|------------------------|
| 1F3R.PDB | NE1, A_TRP_67 | OG, B_SER_61 | HG, B_SER_61 | 2.86    | 1.89    | 6.31                   |

Table 1837: 1F3R-specific interfacial side chain hydrogen bonding analysis. In this table, a PDB file is specified with a four-letter PDB ID, except that the names of the PDB files corresponding to the single NMR structural model split from the NMR ensemble is specified with a four-letter PDB ID in addition to a hyphen followed by the single NMR structural model numeric ID, the residue naming scheme is **Chain ID\_residue name\_residue number**,  $\angle ADH$  represents the angle formed by acceptor (A), donor (D) and hydrogen (H) ( $\angle ADH$ ).

| PDB      | Acceptor (A)   | Donor (D)      | Hydrogen (H)    | D-A (Å) | H-A (Å) | $\angle ADH(^{\circ})$ |
|----------|----------------|----------------|-----------------|---------|---------|------------------------|
| 1HGD.PDB | OE2, B_GLU_97  | NZ, A_LYS_27   | HZ1, A_LYS_27   | 2.80    | 1.78    | 9.95                   |
| 1HGD.PDB | OE2, B_GLU_67  | NH2, A_ARG_109 | HH21, A_ARG_109 | 2.83    | 1.84    | 13.41                  |
| 1HGD.PDB | OD2, F_ASP_79  | OG, A_SER_110  | HG, A_SER_110   | 2.92    | 1.96    | 11.03                  |
| 1HGD.PDB | OD1, E_ASP_101 | NE2, A_GLN_210 | HE22, A_GLN_210 | 3.00    | 2.15    | 26.33                  |
| 1HGD.PDB | OE1, C_GLN_210 | NH2, A_ARG_220 | HH21, A_ARG_220 | 2.78    | 1.86    | 19.99                  |
| 1HGD.PDB | OE1, F_GLU_72  | NZ, A_LYS_238  | HZ3, A_LYS_238  | 2.93    | 1.92    | 13.44                  |
| 1HGD.PDB | OE2, F_GLU_97  | NH2, B_ARG_54  | HH22, B_ARG_54  | 2.77    | 1.80    | 12.79                  |
| 1HGD.PDB | OD2, F_ASP_86  | NZ, B_LYS_62   | HZ1, B_LYS_62   | 2.61    | 1.78    | 29.53                  |
| 1HGD.PDB | OD2, F_ASP_90  | NZ, B_LYS_62   | HZ3, B_LYS_62   | 2.73    | 1.84    | 25.56                  |
| 1HGD.PDB | OG, A_SER_110  | NE2, B_HIS_64  | HE2, B_HIS_64   | 2.96    | 2.01    | 12.34                  |
| 1HGD.PDB | OE2, D_GLU_81  | NE, B_ARG_76   | HE, B_ARG_76    | 2.88    | 1.91    | 8.67                   |
| 1HGD.PDB | OE2, D_GLU_74  | NH1, B_ARG_76  | HH12, B_ARG_76  | 2.84    | 1.82    | 2.51                   |
| 1HGD.PDB | OE1, D_GLU_81  | NH2, B_ARG_76  | HH21, B_ARG_76  | 2.71    | 1.71    | 6.80                   |
| 1HGD.PDB | OE1, D_GLU_74  | NH2, B_ARG_76  | HH22, B_ARG_76  | 2.75    | 1.75    | 3.21                   |
| 1HGD.PDB | OE1, D_GLU_85  | OH, B_TYR_83   | HH, B_TYR_83    | 2.65    | 1.81    | 23.27                  |
| 1HGD.PDB | OH, F_TYR_83   | NZ, B_LYS_88   | HZ1, B_LYS_88   | 2.76    | 1.72    | 5.59                   |
| 1HGD.PDB | OE1, F_GLU_132 | NE, B_ARG_124  | HE, B_ARG_124   | 2.83    | 2.02    | 28.17                  |
| 1HGD.PDB | OE2, F_GLU_132 | NE, B_ARG_124  | HE, B_ARG_124   | 2.88    | 2.01    | 22.00                  |
| 1HGD.PDB | OE2, D_GLU_97  | NZ, C_LYS_27   | HZ1, C_LYS_27   | 2.80    | 1.77    | 7.54                   |
| 1HGD.PDB | OE2, D_GLU_67  | NH2, C_ARG_109 | HH21, C_ARG_109 | 2.87    | 1.88    | 13.44                  |
| 1HGD.PDB | OD2, B_ASP_79  | OG, C_SER_110  | HG, C_SER_110   | 2.73    | 1.84    | 19.59                  |
| 1HGD.PDB | OD1, A_ASP_101 | NE2, C_GLN_210 | HE22, C_GLN_210 | 2.97    | 2.13    | 27.21                  |
| 1HGD.PDB | OE1, E_GLN_210 | NH2, C_ARG_220 | HH21, C_ARG_220 | 2.69    | 1.80    | 23.00                  |
| 1HGD.PDB | OE1, B_GLU_72  | NZ, C_LYS_238  | HZ1, C_LYS_238  | 2.80    | 1.83    | 17.68                  |
| 1HGD.PDB | OE1, D_GLU_15  | NZ, C_LYS_326  | HZ1, C_LYS_326  | 2.78    | 1.77    | 11.96                  |
| 1HGD.PDB | OE2, B_GLU_97  | NH2, D_ARG_54  | HH22, D_ARG_54  | 2.79    | 1.82    | 13.03                  |
| 1HGD.PDB | OD2, B_ASP_90  | NZ, D_LYS_62   | HZ3, D_LYS_62   | 2.62    | 1.79    | 29.99                  |
| 1HGD.PDB | OG, C_SER_110  | NE2, D_HIS_64  | HE2, D_HIS_64   | 2.96    | 1.98    | 5.65                   |
| 1HGD.PDB | OE2, F_GLU_81  | NE, D_ARG_76   | HE, D_ARG_76    | 2.83    | 1.87    | 10.56                  |
| 1HGD.PDB | OE2, F_GLU_74  | NH1, D_ARG_76  | HH12, D_ARG_76  | 2.78    | 1.77    | 3.14                   |
| 1HGD.PDB | OE1, F_GLU_81  | NH2, D_ARG_76  | HH21, D_ARG_76  | 2.65    | 1.67    | 9.42                   |
| 1HGD.PDB | OE1, F_GLU_74  | NH2, D_ARG_76  | HH22, D_ARG_76  | 2.69    | 1.70    | 6.24                   |
| 1HGD.PDB | OE1, F_GLU_85  | OH, D_TYR_83   | HH, D_TYR_83    | 2.57    | 1.79    | 29.87                  |
| 1HGD.PDB | OH, B_TYR_83   | NZ, D_LYS_88   | HZ1, D_LYS_88   | 2.76    | 1.72    | 5.75                   |
| 1HGD.PDB | OE1, B_GLU_132 | NE, D_ARG_124  | HE, D_ARG_124   | 2.80    | 2.01    | 29.31                  |
| 1HGD.PDB | OE2, B_GLU_132 | NE, D_ARG_124  | HE, D_ARG_124   | 2.82    | 1.95    | 21.73                  |
| 1HGD.PDB | OE2, F_GLU_97  | NZ, E_LYS_27   | HZ1, E_LYS_27   | 2.79    | 1.77    | 8.77                   |
| 1HGD.PDB | OE2, F_GLU_67  | NH2, E_ARG_109 | HH21, E_ARG_109 | 2.82    | 1.85    | 14.73                  |
| 1HGD.PDB | OD2, D_ASP_79  | OG, E_SER_110  | HG, E_SER_110   | 2.81    | 1.89    | 15.50                  |
| 1HGD.PDB | OD1, C_ASP_101 | NE2, E_GLN_210 | HE22, E_GLN_210 | 2.98    | 2.14    | 27.07                  |
| 1HGD.PDB | OE1, A_GLN_210 | NH2, E_ARG_220 | HH21, E_ARG_220 | 2.77    | 1.90    | 25.11                  |
| 1HGD.PDB | OE1, D_GLU_72  | NZ, E_LYS_238  | HZ3, E_LYS_238  | 2.87    | 1.86    | 13.40                  |
| 1HGD.PDB | OE1, F_GLU_15  | NZ, E_LYS_326  | HZ3, E_LYS_326  | 2.97    | 1.97    | 16.19                  |
| 1HGD.PDB | OE2, D_GLU_97  | NH2, F_ARG_54  | HH22, F_ARG_54  | 2.72    | 1.75    | 12.85                  |
| 1HGD.PDB | OD2, D_ASP_90  | NZ, F_LYS_62   | HZ3, F_LYS_62   | 2.71    | 1.86    | 28.09                  |
| 1HGD.PDB | OG, E_SER_110  | NE2, F_HIS_64  | HE2, F_HIS_64   | 2.95    | 1.98    | 9.92                   |
| 1HGD.PDB | OE2, B_GLU_81  | NE, F_ARG_76   | HE, F_ARG_76    | 2.86    | 1.90    | 10.66                  |
| 1HGD.PDB | OE2, B_GLU_74  | NH1, F_ARG_76  | HH12, F_ARG_76  | 2.77    | 1.75    | 1.42                   |
| 1HGD.PDB | OE1, B_GLU_81  | NH2, F_ARG_76  | HH21, F_ARG_76  | 2.64    | 1.65    | 5.37                   |
| 1HGD.PDB | OE1, B_GLU_74  | NH2, F_ARG_76  | HH22, F_ARG_76  | 2.71    | 1.72    | 7.42                   |
| 1HGD.PDB | OE1, B_GLU_85  | OH, F_TYR_83   | HH, F_TYR_83    | 2.53    | 1.75    | 27.84                  |
| 1HGD.PDB | OH, D_TYR_83   | NZ, F_LYS_88   | HZ1, F_LYS_88   | 2.67    | 1.66    | 8.83                   |
| 1HGD.PDB | OE1, D_GLU_132 | NE, F_ARG_124  | HE, F_ARG_124   | 2.96    | 2.14    | 28.71                  |
| 1HGD.PDB | OE2, D_GLU_132 | NE, F_ARG_124  | HE, F_ARG_124   | 2.94    | 2.05    | 20.84                  |

---

Table 1838: 1HGD-specific interfacial side chain hydrogen bonding analysis. In this table, a PDB file is specified with a four-letter PDB ID, except that the names of the PDB files corresponding to the single NMR structural model split from the NMR ensemble is specified with a four-letter PDB ID in addition to a hyphen followed by the single NMR structural model numeric ID, the residue naming scheme is **Chain ID\_residue name\_residue number**,  $\angle ADH$  represents the angle formed by acceptor (A), donor (D) and hydrogen (H) ( $\angle ADH$ ).

| PDB      | Acceptor (A)   | Donor (D)      | Hydrogen (H)    | D-A (Å) | H-A (Å) | $\angle ADH(^{\circ})$ |
|----------|----------------|----------------|-----------------|---------|---------|------------------------|
| 1HGE.PDB | OE2, B_GLU_97  | NZ, A_LYS_27   | HZ1, A_LYS_27   | 2.80    | 1.78    | 10.14                  |
| 1HGE.PDB | OE2, B_GLU_67  | NH2, A_ARG_109 | HH21, A_ARG_109 | 2.74    | 1.75    | 12.19                  |
| 1HGE.PDB | OD2, F_ASP_79  | OG, A_SER_110  | HG, A_SER_110   | 2.90    | 1.95    | 11.19                  |
| 1HGE.PDB | OD1, E_ASP_101 | NE2, A_GLN_210 | HE22, A_GLN_210 | 2.91    | 2.05    | 24.48                  |
| 1HGE.PDB | OE1, C_GLN_210 | NH2, A_ARG_220 | HH21, A_ARG_220 | 2.71    | 1.78    | 19.14                  |
| 1HGE.PDB | OE1, F_GLU_72  | NZ, A_LYS_238  | HZ3, A_LYS_238  | 2.91    | 1.89    | 11.73                  |
| 1HGE.PDB | OE2, F_GLU_97  | NH2, B_ARG_54  | HH22, B_ARG_54  | 2.84    | 1.86    | 12.76                  |
| 1HGE.PDB | OD2, F_ASP_86  | NZ, B_LYS_62   | HZ1, B_LYS_62   | 2.60    | 1.76    | 28.82                  |
| 1HGE.PDB | OD2, F_ASP_90  | NZ, B_LYS_62   | HZ3, B_LYS_62   | 2.69    | 1.82    | 26.81                  |
| 1HGE.PDB | OG, A_SER_110  | NE2, B_HIS_64  | HE2, B_HIS_64   | 2.97    | 2.02    | 12.36                  |
| 1HGE.PDB | OE2, D_GLU_81  | NE, B_ARG_76   | HE, B_ARG_76    | 2.87    | 1.91    | 11.56                  |
| 1HGE.PDB | OE2, D_GLU_74  | NH1, B_ARG_76  | HH12, B_ARG_76  | 2.84    | 1.83    | 5.81                   |
| 1HGE.PDB | OE1, D_GLU_81  | NH2, B_ARG_76  | HH21, B_ARG_76  | 2.70    | 1.70    | 6.45                   |
| 1HGE.PDB | OE1, D_GLU_74  | NH2, B_ARG_76  | HH22, B_ARG_76  | 2.79    | 1.79    | 3.91                   |
| 1HGE.PDB | OE1, D_GLU_85  | OH, B_TYR_83   | HH, B_TYR_83    | 2.65    | 1.81    | 24.86                  |
| 1HGE.PDB | OH, F_TYR_83   | NZ, B_LYS_88   | HZ1, B_LYS_88   | 2.75    | 1.71    | 5.62                   |
| 1HGE.PDB | OE1, F_GLU_132 | NE, B_ARG_124  | HE, B_ARG_124   | 2.80    | 1.98    | 27.36                  |
| 1HGE.PDB | OE2, F_GLU_132 | NE, B_ARG_124  | HE, B_ARG_124   | 2.94    | 2.06    | 21.65                  |
| 1HGE.PDB | OE2, D_GLU_97  | NZ, C_LYS_27   | HZ1, C_LYS_27   | 2.79    | 1.77    | 8.74                   |
| 1HGE.PDB | OE2, D_GLU_67  | NH2, C_ARG_109 | HH21, C_ARG_109 | 2.78    | 1.79    | 11.19                  |
| 1HGE.PDB | OD2, B_ASP_79  | OG, C_SER_110  | HG, C_SER_110   | 2.78    | 1.86    | 15.09                  |
| 1HGE.PDB | OD1, A_ASP_101 | NE2, C_GLN_210 | HE22, C_GLN_210 | 2.93    | 2.07    | 24.92                  |
| 1HGE.PDB | OE1, E_GLN_210 | NH2, C_ARG_220 | HH21, C_ARG_220 | 2.64    | 1.76    | 23.09                  |
| 1HGE.PDB | OE1, B_GLU_72  | NZ, C_LYS_238  | HZ1, C_LYS_238  | 2.78    | 1.80    | 16.75                  |
| 1HGE.PDB | OE1, D_GLU_15  | NZ, C_LYS_326  | HZ1, C_LYS_326  | 2.74    | 1.73    | 12.73                  |
| 1HGE.PDB | OE2, B_GLU_97  | NH2, D_ARG_54  | HH22, D_ARG_54  | 2.87    | 1.89    | 12.82                  |
| 1HGE.PDB | OG, C_SER_110  | NE2, D_HIS_64  | HE2, D_HIS_64   | 2.96    | 1.98    | 6.23                   |
| 1HGE.PDB | OE2, F_GLU_81  | NE, D_ARG_76   | HE, D_ARG_76    | 2.79    | 1.85    | 14.06                  |
| 1HGE.PDB | OE2, F_GLU_74  | NH1, D_ARG_76  | HH12, D_ARG_76  | 2.78    | 1.78    | 7.91                   |
| 1HGE.PDB | OE1, F_GLU_81  | NH2, D_ARG_76  | HH21, D_ARG_76  | 2.63    | 1.67    | 11.36                  |
| 1HGE.PDB | OE1, F_GLU_74  | NH2, D_ARG_76  | HH22, D_ARG_76  | 2.74    | 1.75    | 7.04                   |
| 1HGE.PDB | OE1, F_GLU_85  | OH, D_TYR_83   | HH, D_TYR_83    | 2.58    | 1.80    | 29.40                  |
| 1HGE.PDB | OH, B_TYR_83   | NZ, D_LYS_88   | HZ1, D_LYS_88   | 2.71    | 1.68    | 6.52                   |
| 1HGE.PDB | OE1, B_GLU_132 | NE, D_ARG_124  | HE, D_ARG_124   | 2.78    | 1.98    | 28.90                  |
| 1HGE.PDB | OE2, B_GLU_132 | NE, D_ARG_124  | HE, D_ARG_124   | 2.90    | 2.01    | 20.41                  |
| 1HGE.PDB | OE2, F_GLU_97  | NZ, E_LYS_27   | HZ1, E_LYS_27   | 2.79    | 1.77    | 9.75                   |
| 1HGE.PDB | OE2, F_GLU_67  | NH2, E_ARG_109 | HH21, E_ARG_109 | 2.78    | 1.79    | 11.63                  |
| 1HGE.PDB | OD2, D_ASP_79  | OG, E_SER_110  | HG, E_SER_110   | 2.82    | 1.89    | 14.19                  |
| 1HGE.PDB | OD1, C_ASP_101 | NE2, E_GLN_210 | HE22, E_GLN_210 | 2.89    | 2.04    | 25.02                  |
| 1HGE.PDB | OE1, A_GLN_210 | NH2, E_ARG_220 | HH21, E_ARG_220 | 2.74    | 1.87    | 25.04                  |
| 1HGE.PDB | OE1, D_GLU_72  | NZ, E_LYS_238  | HZ3, E_LYS_238  | 2.85    | 1.84    | 12.25                  |
| 1HGE.PDB | OD1, F_ASP_86  | NZ, E_LYS_310  | HZ3, E_LYS_310  | 2.86    | 2.02    | 29.64                  |
| 1HGE.PDB | OE1, F_GLU_15  | NZ, E_LYS_326  | HZ3, E_LYS_326  | 2.99    | 2.00    | 17.08                  |
| 1HGE.PDB | OE2, D_GLU_97  | NH2, F_ARG_54  | HH22, F_ARG_54  | 2.80    | 1.82    | 12.52                  |
| 1HGE.PDB | OD2, D_ASP_90  | NZ, F_LYS_62   | HZ2, F_LYS_62   | 2.67    | 1.83    | 29.15                  |
| 1HGE.PDB | OG, E_SER_110  | NE2, F_HIS_64  | HE2, F_HIS_64   | 2.94    | 1.97    | 9.11                   |
| 1HGE.PDB | OE2, B_GLU_81  | NE, F_ARG_76   | HE, F_ARG_76    | 2.85    | 1.89    | 11.64                  |
| 1HGE.PDB | OE2, B_GLU_74  | NH1, F_ARG_76  | HH12, F_ARG_76  | 2.73    | 1.73    | 6.19                   |
| 1HGE.PDB | OE1, B_GLU_81  | NH2, F_ARG_76  | HH21, F_ARG_76  | 2.65    | 1.66    | 5.51                   |
| 1HGE.PDB | OE1, B_GLU_74  | NH2, F_ARG_76  | HH22, F_ARG_76  | 2.70    | 1.73    | 9.07                   |
| 1HGE.PDB | OE1, B_GLU_85  | OH, F_TYR_83   | HH, F_TYR_83    | 2.51    | 1.76    | 30.00                  |
| 1HGE.PDB | OH, D_TYR_83   | NZ, F_LYS_88   | HZ1, F_LYS_88   | 2.67    | 1.65    | 8.34                   |
| 1HGE.PDB | OE1, D_GLU_132 | NE, F_ARG_124  | HE, F_ARG_124   | 2.92    | 2.09    | 27.36                  |

---

Table 1839: 1HGE-specific interfacial side chain hydrogen bonding analysis. In this table, a PDB file is specified with a four-letter PDB ID, except that the names of the PDB files corresponding to the single NMR structural model split from the NMR ensemble is specified with a four-letter PDB ID in addition to a hyphen followed by the single NMR structural model numeric ID, the residue naming scheme is **Chain ID\_residue name\_residue number**,  $\angle ADH$  represents the angle formed by acceptor (A), donor (D) and hydrogen (H) ( $\angle ADH$ ).

| PDB      | Acceptor (A)   | Donor (D)      | Hydrogen (H)    | D-A (Å) | H-A (Å) | $\angle ADH(^{\circ})$ |
|----------|----------------|----------------|-----------------|---------|---------|------------------------|
| 1HGF.PDB | OE2, B_GLU_97  | NZ, A_LYS_27   | HZ1, A_LYS_27   | 2.79    | 1.86    | 21.55                  |
| 1HGF.PDB | OE2, B_GLU_67  | NH2, A_ARG_109 | HH21, A_ARG_109 | 2.92    | 1.92    | 10.51                  |
| 1HGF.PDB | OD2, F_ASP_79  | OG, A_SER_110  | HG, A_SER_110   | 2.82    | 1.90    | 15.87                  |
| 1HGF.PDB | OE1, C_GLN_210 | NH2, A_ARG_220 | HH21, A_ARG_220 | 2.64    | 1.76    | 23.62                  |
| 1HGF.PDB | OE1, F_GLU_72  | NZ, A_LYS_238  | HZ2, A_LYS_238  | 2.85    | 1.85    | 14.58                  |
| 1HGF.PDB | OE2, A_GLU_325 | NH2, B_ARG_25  | HH22, B_ARG_25  | 2.99    | 2.04    | 16.52                  |
| 1HGF.PDB | OE2, F_GLU_97  | NH2, B_ARG_54  | HH22, B_ARG_54  | 2.83    | 1.86    | 13.50                  |
| 1HGF.PDB | OD2, F_ASP_86  | NZ, B_LYS_62   | HZ2, B_LYS_62   | 2.71    | 1.70    | 11.44                  |
| 1HGF.PDB | OD2, F_ASP_90  | NZ, B_LYS_62   | HZ3, B_LYS_62   | 2.77    | 1.82    | 20.37                  |
| 1HGF.PDB | OG, A_SER_266  | ND1, B_HIS_64  | HD1, B_HIS_64   | 2.66    | 1.79    | 20.68                  |
| 1HGF.PDB | OG, A_SER_110  | NE2, B_HIS_64  | HE2, B_HIS_64   | 2.89    | 1.92    | 10.70                  |
| 1HGF.PDB | OE2, D_GLU_81  | NE, B_ARG_76   | HE, B_ARG_76    | 2.92    | 1.92    | 2.47                   |
| 1HGF.PDB | OE1, D_GLU_74  | NH1, B_ARG_76  | HH12, B_ARG_76  | 2.86    | 1.84    | 3.80                   |
| 1HGF.PDB | OE1, D_GLU_81  | NH2, B_ARG_76  | HH21, B_ARG_76  | 2.73    | 1.74    | 10.29                  |
| 1HGF.PDB | OE2, D_GLU_74  | NH2, B_ARG_76  | HH22, B_ARG_76  | 2.75    | 1.74    | 3.91                   |
| 1HGF.PDB | OE1, D_GLU_85  | OH, B_TYR_83   | HH, B_TYR_83    | 2.57    | 1.80    | 29.66                  |
| 1HGF.PDB | OH, F_TYR_83   | NZ, B_LYS_88   | HZ1, B_LYS_88   | 2.72    | 1.70    | 9.91                   |
| 1HGF.PDB | OE1, F_GLU_132 | NE, B_ARG_124  | HE, B_ARG_124   | 2.80    | 1.86    | 13.00                  |
| 1HGF.PDB | OE1, F_GLU_131 | NH2, B_ARG_163 | HH21, B_ARG_163 | 2.74    | 1.86    | 24.20                  |
| 1HGF.PDB | OE2, D_GLU_97  | NZ, C_LYS_27   | HZ1, C_LYS_27   | 2.81    | 1.85    | 19.93                  |
| 1HGF.PDB | OE2, D_GLU_67  | NH2, C_ARG_109 | HH21, C_ARG_109 | 2.91    | 1.92    | 11.49                  |
| 1HGF.PDB | OD2, B_ASP_79  | OG, C_SER_110  | HG, C_SER_110   | 2.69    | 1.85    | 25.37                  |
| 1HGF.PDB | OE1, E_GLN_210 | NH2, C_ARG_220 | HH21, C_ARG_220 | 2.56    | 1.72    | 26.72                  |
| 1HGF.PDB | OE1, B_GLU_72  | NZ, C_LYS_238  | HZ2, C_LYS_238  | 2.75    | 1.78    | 18.48                  |
| 1HGF.PDB | OE2, B_GLU_97  | NH2, D_ARG_54  | HH22, D_ARG_54  | 2.84    | 1.86    | 12.74                  |
| 1HGF.PDB | OD2, B_ASP_86  | NZ, D_LYS_62   | HZ2, D_LYS_62   | 2.69    | 1.69    | 13.49                  |
| 1HGF.PDB | OD2, B_ASP_90  | NZ, D_LYS_62   | HZ3, D_LYS_62   | 2.68    | 1.77    | 22.81                  |
| 1HGF.PDB | OG, C_SER_266  | ND1, D_HIS_64  | HD1, D_HIS_64   | 2.64    | 1.83    | 27.58                  |
| 1HGF.PDB | OG, C_SER_110  | NE2, D_HIS_64  | HE2, D_HIS_64   | 2.90    | 1.92    | 7.33                   |
| 1HGF.PDB | OE2, F_GLU_81  | NE, D_ARG_76   | HE, D_ARG_76    | 2.82    | 1.85    | 5.34                   |
| 1HGF.PDB | OE1, F_GLU_74  | NH1, D_ARG_76  | HH12, D_ARG_76  | 2.79    | 1.78    | 3.81                   |
| 1HGF.PDB | OE1, F_GLU_81  | NH2, D_ARG_76  | HH21, D_ARG_76  | 2.64    | 1.68    | 12.43                  |
| 1HGF.PDB | OE2, F_GLU_74  | NH2, D_ARG_76  | HH22, D_ARG_76  | 2.70    | 1.71    | 7.38                   |
| 1HGF.PDB | OE1, F_GLU_85  | OH, D_TYR_83   | HH, D_TYR_83    | 2.58    | 1.80    | 29.87                  |
| 1HGF.PDB | OH, B_TYR_83   | NZ, D_LYS_88   | HZ1, D_LYS_88   | 2.68    | 1.69    | 13.85                  |
| 1HGF.PDB | OE1, B_GLU_132 | NE, D_ARG_124  | HE, D_ARG_124   | 2.79    | 1.88    | 16.40                  |
| 1HGF.PDB | OE1, B_GLU_131 | NH2, D_ARG_163 | HH21, D_ARG_163 | 2.70    | 1.83    | 24.43                  |
| 1HGF.PDB | OE2, F_GLU_97  | NZ, E_LYS_27   | HZ1, E_LYS_27   | 2.75    | 1.83    | 22.30                  |
| 1HGF.PDB | OE2, F_GLU_67  | NH2, E_ARG_109 | HH21, E_ARG_109 | 2.88    | 1.88    | 11.28                  |
| 1HGF.PDB | OD2, D_ASP_79  | OG, E_SER_110  | HG, E_SER_110   | 2.78    | 1.90    | 21.69                  |
| 1HGF.PDB | OE1, A_GLN_210 | NH2, E_ARG_220 | HH21, E_ARG_220 | 2.65    | 1.79    | 25.97                  |
| 1HGF.PDB | OE1, D_GLU_72  | NZ, E_LYS_238  | HZ2, E_LYS_238  | 2.83    | 1.84    | 16.42                  |
| 1HGF.PDB | OE2, D_GLU_97  | NH2, F_ARG_54  | HH22, F_ARG_54  | 2.79    | 1.81    | 11.74                  |
| 1HGF.PDB | OD2, D_ASP_86  | NZ, F_LYS_62   | HZ2, F_LYS_62   | 2.67    | 1.68    | 13.64                  |
| 1HGF.PDB | OD2, D_ASP_90  | NZ, F_LYS_62   | HZ3, F_LYS_62   | 2.75    | 1.81    | 20.23                  |
| 1HGF.PDB | OG, E_SER_266  | ND1, F_HIS_64  | HD1, F_HIS_64   | 2.65    | 1.77    | 20.25                  |
| 1HGF.PDB | OG, E_SER_110  | NE2, F_HIS_64  | HE2, F_HIS_64   | 2.89    | 1.92    | 9.46                   |
| 1HGF.PDB | OE2, B_GLU_81  | NE, F_ARG_76   | HE, F_ARG_76    | 2.86    | 1.88    | 5.84                   |
| 1HGF.PDB | OE1, B_GLU_74  | NH1, F_ARG_76  | HH12, F_ARG_76  | 2.78    | 1.77    | 1.59                   |
| 1HGF.PDB | OE1, B_GLU_81  | NH2, F_ARG_76  | HH21, F_ARG_76  | 2.69    | 1.70    | 7.61                   |
| 1HGF.PDB | OE2, B_GLU_74  | NH2, F_ARG_76  | HH22, F_ARG_76  | 2.71    | 1.73    | 8.88                   |
| 1HGF.PDB | OH, D_TYR_83   | NZ, F_LYS_88   | HZ1, F_LYS_88   | 2.55    | 1.63    | 21.75                  |
| 1HGF.PDB | OE1, D_GLU_132 | NE, F_ARG_124  | HE, F_ARG_124   | 2.90    | 1.96    | 15.73                  |
| 1HGF.PDB | OE1, D_GLU_131 | NH2, F_ARG_163 | HH21, F_ARG_163 | 2.69    | 1.84    | 27.00                  |

---

Table 1840: 1HGF-specific interfacial side chain hydrogen bonding analysis. In this table, a PDB file is specified with a four-letter PDB ID, except that the names of the PDB files corresponding to the single NMR structural model split from the NMR ensemble is specified with a four-letter PDB ID in addition to a hyphen followed by the single NMR structural model numeric ID, the residue naming scheme is **Chain ID\_residue name\_residue number**,  $\angle ADH$  represents the angle formed by acceptor (A), donor (D) and hydrogen (H) ( $\angle ADH$ ).



| PDB      | Acceptor (A)   | Donor (D)      | Hydrogen (H)    | D-A (Å) | H-A (Å) | $\angle ADH(^{\circ})$ |
|----------|----------------|----------------|-----------------|---------|---------|------------------------|
| 1HGG.PDB | OE2, B_GLU_97  | NZ, A_LYS_27   | HZ1, A_LYS_27   | 2.90    | 1.87    | 9.15                   |
| 1HGG.PDB | OE2, B_GLU_67  | NH2, A_ARG_109 | HH21, A_ARG_109 | 2.84    | 1.86    | 14.43                  |
| 1HGG.PDB | OD2, F_ASP_79  | OG, A_SER_110  | HG, A_SER_110   | 2.88    | 1.95    | 14.29                  |
| 1HGG.PDB | OD1, E_ASP_101 | NE2, A_GLN_210 | HE22, A_GLN_210 | 2.99    | 2.07    | 17.95                  |
| 1HGG.PDB | OE1, C_GLN_210 | NH2, A_ARG_220 | HH21, A_ARG_220 | 2.73    | 1.78    | 15.93                  |
| 1HGG.PDB | OE1, F_GLU_72  | NZ, A_LYS_238  | HZ3, A_LYS_238  | 2.93    | 1.93    | 14.31                  |
| 1HGG.PDB | OE2, F_GLU_72  | NZ, A_LYS_238  | HZ3, A_LYS_238  | 2.74    | 1.91    | 29.92                  |
| 1HGG.PDB | OE1, B_GLU_67  | NH1, A_ARG_269 | HH12, A_ARG_269 | 2.69    | 1.86    | 28.34                  |
| 1HGG.PDB | OD1, B_ASP_90  | NZ, A_LYS_310  | HZ2, A_LYS_310  | 2.70    | 1.74    | 18.08                  |
| 1HGG.PDB | OE2, B_GLU_15  | NZ, A_LYS_326  | HZ1, A_LYS_326  | 2.83    | 1.89    | 21.04                  |
| 1HGG.PDB | OE2, A_GLU_325 | NH2, B_ARG_25  | HH22, B_ARG_25  | 2.94    | 1.96    | 12.23                  |
| 1HGG.PDB | OE2, F_GLU_97  | NH2, B_ARG_54  | HH22, B_ARG_54  | 2.75    | 1.76    | 9.96                   |
| 1HGG.PDB | OD2, F_ASP_90  | NZ, B_LYS_62   | HZ2, B_LYS_62   | 2.65    | 1.82    | 29.87                  |
| 1HGG.PDB | OD2, F_ASP_86  | NZ, B_LYS_62   | HZ3, B_LYS_62   | 2.64    | 1.73    | 23.35                  |
| 1HGG.PDB | OG, A_SER_110  | NE2, B_HIS_64  | HE2, B_HIS_64   | 2.90    | 1.96    | 14.63                  |
| 1HGG.PDB | OE2, D_GLU_81  | NE, B_ARG_76   | HE, B_ARG_76    | 2.94    | 1.96    | 10.47                  |
| 1HGG.PDB | OE1, D_GLU_74  | NH1, B_ARG_76  | HH12, B_ARG_76  | 2.88    | 1.89    | 10.69                  |
| 1HGG.PDB | OE1, D_GLU_81  | NH2, B_ARG_76  | HH21, B_ARG_76  | 2.73    | 1.73    | 5.91                   |
| 1HGG.PDB | OE2, D_GLU_74  | NH2, B_ARG_76  | HH22, B_ARG_76  | 2.82    | 1.82    | 7.26                   |
| 1HGG.PDB | OE1, D_GLU_85  | OH, B_TYR_83   | HH, B_TYR_83    | 2.68    | 1.80    | 19.99                  |
| 1HGG.PDB | OH, F_TYR_83   | NZ, B_LYS_88   | HZ1, B_LYS_88   | 2.77    | 1.73    | 5.14                   |
| 1HGG.PDB | OE1, F_GLU_132 | NE, B_ARG_124  | HE, B_ARG_124   | 2.84    | 1.98    | 22.96                  |
| 1HGG.PDB | OE2, F_GLU_132 | NE, B_ARG_124  | HE, B_ARG_124   | 2.81    | 1.98    | 25.54                  |
| 1HGG.PDB | OE2, D_GLU_97  | NZ, C_LYS_27   | HZ1, C_LYS_27   | 2.94    | 1.91    | 8.28                   |
| 1HGG.PDB | OE2, D_GLU_67  | NH2, C_ARG_109 | HH21, C_ARG_109 | 2.85    | 1.88    | 14.56                  |
| 1HGG.PDB | OD2, B_ASP_79  | OG, C_SER_110  | HG, C_SER_110   | 2.76    | 1.86    | 17.83                  |
| 1HGG.PDB | OE1, E_GLN_210 | NH2, C_ARG_220 | HH21, C_ARG_220 | 2.61    | 1.71    | 21.26                  |
| 1HGG.PDB | OE1, B_GLU_72  | NZ, C_LYS_238  | HZ1, C_LYS_238  | 2.83    | 1.86    | 17.18                  |
| 1HGG.PDB | OE2, B_GLU_72  | NZ, C_LYS_238  | HZ1, C_LYS_238  | 2.70    | 1.87    | 29.85                  |
| 1HGG.PDB | OE1, D_GLU_67  | NH1, C_ARG_269 | HH12, C_ARG_269 | 2.69    | 1.85    | 27.75                  |
| 1HGG.PDB | OD1, D_ASP_90  | NZ, C_LYS_310  | HZ2, C_LYS_310  | 2.65    | 1.73    | 21.74                  |
| 1HGG.PDB | OE2, B_GLU_97  | NH2, D_ARG_54  | HH22, D_ARG_54  | 2.76    | 1.78    | 10.56                  |
| 1HGG.PDB | OG, C_SER_110  | NE2, D_HIS_64  | HE2, D_HIS_64   | 2.86    | 1.90    | 9.42                   |
| 1HGG.PDB | OE2, F_GLU_81  | NE, D_ARG_76   | HE, D_ARG_76    | 2.86    | 1.89    | 9.57                   |
| 1HGG.PDB | OE1, F_GLU_74  | NH1, D_ARG_76  | HH12, D_ARG_76  | 2.78    | 1.80    | 12.10                  |
| 1HGG.PDB | OE1, F_GLU_81  | NH2, D_ARG_76  | HH21, D_ARG_76  | 2.67    | 1.68    | 6.66                   |
| 1HGG.PDB | OE2, F_GLU_74  | NH2, D_ARG_76  | HH22, D_ARG_76  | 2.74    | 1.75    | 9.29                   |
| 1HGG.PDB | OE1, F_GLU_85  | OH, D_TYR_83   | HH, D_TYR_83    | 2.59    | 1.78    | 26.83                  |
| 1HGG.PDB | OH, B_TYR_83   | NZ, D_LYS_88   | HZ1, D_LYS_88   | 2.73    | 1.70    | 8.35                   |
| 1HGG.PDB | OE1, B_GLU_132 | NE, D_ARG_124  | HE, D_ARG_124   | 2.86    | 2.00    | 22.57                  |
| 1HGG.PDB | OE2, B_GLU_132 | NE, D_ARG_124  | HE, D_ARG_124   | 2.78    | 1.96    | 26.12                  |
| 1HGG.PDB | OE2, F_GLU_97  | NZ, E_LYS_27   | HZ1, E_LYS_27   | 2.91    | 1.88    | 8.89                   |
| 1HGG.PDB | OE2, F_GLU_67  | NH2, E_ARG_109 | HH21, E_ARG_109 | 2.88    | 1.90    | 14.20                  |
| 1HGG.PDB | OD2, D_ASP_79  | OG, E_SER_110  | HG, E_SER_110   | 2.79    | 1.88    | 16.48                  |
| 1HGG.PDB | OD1, C_ASP_101 | NE2, E_GLN_210 | HE22, E_GLN_210 | 2.96    | 2.04    | 17.70                  |
| 1HGG.PDB | OE1, A_GLN_210 | NH2, E_ARG_220 | HH21, E_ARG_220 | 2.72    | 1.80    | 20.26                  |
| 1HGG.PDB | OE1, D_GLU_72  | NZ, E_LYS_238  | HZ1, E_LYS_238  | 2.89    | 1.89    | 13.93                  |
| 1HGG.PDB | OE1, F_GLU_67  | NH1, E_ARG_269 | HH12, E_ARG_269 | 2.69    | 1.85    | 27.32                  |
| 1HGG.PDB | OD1, F_ASP_90  | NZ, E_LYS_310  | HZ2, E_LYS_310  | 2.64    | 1.72    | 22.12                  |
| 1HGG.PDB | OE1, F_GLU_15  | NZ, E_LYS_326  | HZ3, E_LYS_326  | 2.98    | 1.97    | 15.13                  |
| 1HGG.PDB | OE2, D_GLU_97  | NH2, F_ARG_54  | HH22, F_ARG_54  | 2.73    | 1.74    | 10.16                  |
| 1HGG.PDB | OD2, D_ASP_86  | NZ, F_LYS_62   | HZ3, F_LYS_62   | 2.58    | 1.75    | 29.01                  |
| 1HGG.PDB | OG, E_SER_110  | NE2, F_HIS_64  | HE2, F_HIS_64   | 2.87    | 1.91    | 10.03                  |
| 1HGG.PDB | OE2, B_GLU_81  | NE, F_ARG_76   | HE, F_ARG_76    | 2.88    | 1.92    | 11.44                  |
| 1HGG.PDB | OE1, B_GLU_74  | NH1, F_ARG_76  | HH12, F_ARG_76  | 2.75    | 1.76    | 9.13                   |
| 1HGG.PDB | OE1, B_GLU_81  | NH2, F_ARG_76  | HH21, F_ARG_76  | 2.67    | 1.68    | 1.99                   |
| 1HGG.PDB | OE2, B_GLU_74  | NH2, F_ARG_76  | HH22, F_ARG_76  | 2.79    | 1.81    | 10.64                  |

|          |                |               |               |      |      |       |
|----------|----------------|---------------|---------------|------|------|-------|
| 1HGG.PDB | OH, D_TYR_83   | NZ, F_LYS_88  | HZ1, F_LYS_88 | 2.68 | 1.67 | 10.46 |
| 1HGG.PDB | OE1, D_GLU_132 | NE, F_ARG_124 | HE, F_ARG_124 | 2.96 | 2.09 | 22.59 |
| 1HGG.PDB | OE2, D_GLU_132 | NE, F_ARG_124 | HE, F_ARG_124 | 2.87 | 2.01 | 24.00 |

Table 1841: 1HGG-specific interfacial side chain hydrogen bonding analysis. In this table, a PDB file is specified with a four-letter PDB ID, except that the names of the PDB files corresponding to the single NMR structural model split from the NMR ensemble is specified with a four-letter PDB ID in addition to a hyphen followed by the single NMR structural model numeric ID, the residue naming scheme is **Chain ID\_residue name\_residue number**,  $\angle ADH$  represents the angle formed by acceptor (A), donor (D) and hydrogen (H) ( $\angle ADH$ ).

| PDB      | Acceptor (A)   | Donor (D)      | Hydrogen (H)    | D-A (Å) | H-A (Å) | $\angle ADH(^{\circ})$ |
|----------|----------------|----------------|-----------------|---------|---------|------------------------|
| 1HGH.PDB | OE2, B_GLU_97  | NZ, A_LYS_27   | HZ1, A_LYS_27   | 2.78    | 1.76    | 9.03                   |
| 1HGH.PDB | OE2, B_GLU_67  | NH2, A_ARG_109 | HH21, A_ARG_109 | 2.86    | 1.88    | 13.48                  |
| 1HGH.PDB | OD2, F_ASP_79  | OG, A_SER_110  | HG, A_SER_110   | 2.97    | 2.01    | 11.65                  |
| 1HGH.PDB | OD1, E_ASP_101 | NE2, A_GLN_210 | HE22, A_GLN_210 | 2.97    | 2.14    | 27.61                  |
| 1HGH.PDB | OE1, C_GLN_210 | NH2, A_ARG_220 | HH21, A_ARG_220 | 2.66    | 1.73    | 18.15                  |
| 1HGH.PDB | OE1, F_GLU_72  | NZ, A_LYS_238  | HZ3, A_LYS_238  | 2.92    | 1.93    | 15.64                  |
| 1HGH.PDB | OD1, B_ASP_86  | NZ, A_LYS_310  | HZ2, A_LYS_310  | 2.71    | 1.84    | 27.09                  |
| 1HGH.PDB | OE2, F_GLU_97  | NH2, B_ARG_54  | HH22, B_ARG_54  | 2.82    | 1.86    | 15.60                  |
| 1HGH.PDB | OD2, F_ASP_86  | NZ, B_LYS_62   | HZ1, B_LYS_62   | 2.66    | 1.80    | 27.71                  |
| 1HGH.PDB | OD2, F_ASP_90  | NZ, B_LYS_62   | HZ3, B_LYS_62   | 2.68    | 1.82    | 27.13                  |
| 1HGH.PDB | OG, A_SER_110  | NE2, B_HIS_64  | HE2, B_HIS_64   | 2.87    | 1.91    | 11.96                  |
| 1HGH.PDB | OE2, D_GLU_81  | NE, B_ARG_76   | HE, B_ARG_76    | 2.87    | 1.90    | 9.70                   |
| 1HGH.PDB | OE2, D_GLU_74  | NH1, B_ARG_76  | HH12, B_ARG_76  | 2.91    | 1.90    | 8.45                   |
| 1HGH.PDB | OE1, D_GLU_81  | NH2, B_ARG_76  | HH21, B_ARG_76  | 2.77    | 1.76    | 5.47                   |
| 1HGH.PDB | OE1, D_GLU_74  | NH2, B_ARG_76  | HH22, B_ARG_76  | 2.89    | 1.87    | 2.83                   |
| 1HGH.PDB | OE1, D_GLU_85  | OH, B_TYR_83   | HH, B_TYR_83    | 2.69    | 1.84    | 23.96                  |
| 1HGH.PDB | OH, F_TYR_83   | NZ, B_LYS_88   | HZ1, B_LYS_88   | 2.74    | 1.71    | 7.44                   |
| 1HGH.PDB | OE1, F_GLU_132 | NE, B_ARG_124  | HE, B_ARG_124   | 2.76    | 1.94    | 26.47                  |
| 1HGH.PDB | OE2, F_GLU_132 | NE, B_ARG_124  | HE, B_ARG_124   | 2.83    | 1.98    | 23.62                  |
| 1HGH.PDB | OE2, D_GLU_97  | NZ, C_LYS_27   | HZ1, C_LYS_27   | 2.82    | 1.78    | 7.61                   |
| 1HGH.PDB | OE2, D_GLU_67  | NH2, C_ARG_109 | HH21, C_ARG_109 | 2.86    | 1.88    | 13.66                  |
| 1HGH.PDB | OD2, B_ASP_79  | OG, C_SER_110  | HG, C_SER_110   | 2.78    | 1.85    | 13.87                  |
| 1HGH.PDB | OD1, A_ASP_101 | NE2, C_GLN_210 | HE22, C_GLN_210 | 2.93    | 2.07    | 24.87                  |
| 1HGH.PDB | OE1, E_GLN_210 | NH2, C_ARG_220 | HH21, C_ARG_220 | 2.57    | 1.72    | 26.03                  |
| 1HGH.PDB | OE1, B_GLU_72  | NZ, C_LYS_238  | HZ1, C_LYS_238  | 2.71    | 1.80    | 22.72                  |
| 1HGH.PDB | OD1, D_ASP_86  | NZ, C_LYS_310  | HZ2, C_LYS_310  | 2.73    | 1.85    | 26.20                  |
| 1HGH.PDB | OE1, D_GLU_15  | NZ, C_LYS_326  | HZ1, C_LYS_326  | 2.77    | 1.75    | 11.00                  |
| 1HGH.PDB | OE2, B_GLU_97  | NH2, D_ARG_54  | HH22, D_ARG_54  | 2.80    | 1.85    | 16.64                  |
| 1HGH.PDB | OG, C_SER_110  | NE2, D_HIS_64  | HE2, D_HIS_64   | 2.84    | 1.88    | 10.18                  |
| 1HGH.PDB | OE2, F_GLU_81  | NE, D_ARG_76   | HE, D_ARG_76    | 2.79    | 1.84    | 10.45                  |
| 1HGH.PDB | OE2, F_GLU_74  | NH1, D_ARG_76  | HH12, D_ARG_76  | 2.77    | 1.77    | 10.38                  |
| 1HGH.PDB | OE1, F_GLU_81  | NH2, D_ARG_76  | HH21, D_ARG_76  | 2.70    | 1.70    | 6.41                   |
| 1HGH.PDB | OE1, F_GLU_74  | NH2, D_ARG_76  | HH22, D_ARG_76  | 2.75    | 1.75    | 5.88                   |
| 1HGH.PDB | OE1, F_GLU_85  | OH, D_TYR_83   | HH, D_TYR_83    | 2.59    | 1.81    | 29.86                  |
| 1HGH.PDB | OH, B_TYR_83   | NZ, D_LYS_88   | HZ1, D_LYS_88   | 2.66    | 1.64    | 7.83                   |
| 1HGH.PDB | OE1, B_GLU_132 | NE, D_ARG_124  | HE, D_ARG_124   | 2.80    | 1.98    | 26.35                  |
| 1HGH.PDB | OE2, B_GLU_132 | NE, D_ARG_124  | HE, D_ARG_124   | 2.84    | 1.99    | 23.38                  |
| 1HGH.PDB | OE2, F_GLU_97  | NZ, E_LYS_27   | HZ1, E_LYS_27   | 2.77    | 1.74    | 8.08                   |
| 1HGH.PDB | OE2, F_GLU_67  | NH2, E_ARG_109 | HH21, E_ARG_109 | 2.88    | 1.90    | 13.56                  |
| 1HGH.PDB | OD2, D_ASP_79  | OG, E_SER_110  | HG, E_SER_110   | 2.90    | 1.94    | 9.49                   |
| 1HGH.PDB | OD1, C_ASP_101 | NE2, E_GLN_210 | HE22, E_GLN_210 | 2.95    | 2.09    | 25.33                  |
| 1HGH.PDB | OE1, A_GLN_210 | NH2, E_ARG_220 | HH21, E_ARG_220 | 2.68    | 1.79    | 22.30                  |
| 1HGH.PDB | OE1, D_GLU_72  | NZ, E_LYS_238  | HZ3, E_LYS_238  | 2.87    | 1.88    | 15.42                  |
| 1HGH.PDB | OE1, F_GLU_67  | NH1, E_ARG_269 | HH12, E_ARG_269 | 2.71    | 1.88    | 29.19                  |
| 1HGH.PDB | OD1, F_ASP_86  | NZ, E_LYS_310  | HZ2, E_LYS_310  | 2.74    | 1.87    | 26.77                  |
| 1HGH.PDB | OE1, F_GLU_15  | NZ, E_LYS_326  | HZ3, E_LYS_326  | 2.90    | 1.89    | 12.96                  |
| 1HGH.PDB | OE2, D_GLU_97  | NH2, F_ARG_54  | HH22, F_ARG_54  | 2.72    | 1.77    | 15.67                  |
| 1HGH.PDB | OD2, D_ASP_90  | NZ, F_LYS_62   | HZ2, F_LYS_62   | 2.68    | 1.83    | 28.02                  |
| 1HGH.PDB | OG, E_SER_110  | NE2, F_HIS_64  | HE2, F_HIS_64   | 2.87    | 1.91    | 9.23                   |
| 1HGH.PDB | OE2, B_GLU_81  | NE, F_ARG_76   | HE, F_ARG_76    | 2.84    | 1.87    | 10.72                  |
| 1HGH.PDB | OE2, B_GLU_74  | NH1, F_ARG_76  | HH12, F_ARG_76  | 2.73    | 1.73    | 5.34                   |
| 1HGH.PDB | OE1, B_GLU_81  | NH2, F_ARG_76  | HH21, F_ARG_76  | 2.71    | 1.70    | 1.21                   |
| 1HGH.PDB | OE1, B_GLU_74  | NH2, F_ARG_76  | HH22, F_ARG_76  | 2.78    | 1.78    | 7.19                   |
| 1HGH.PDB | OE1, B_GLU_85  | OH, F_TYR_83   | HH, F_TYR_83    | 2.53    | 1.74    | 27.23                  |
| 1HGH.PDB | OH, D_TYR_83   | NZ, F_LYS_88   | HZ1, F_LYS_88   | 2.65    | 1.63    | 9.88                   |
| 1HGH.PDB | OE1, D_GLU_132 | NE, F_ARG_124  | HE, F_ARG_124   | 2.89    | 2.06    | 26.55                  |
| 1HGH.PDB | OE2, D_GLU_132 | NE, F_ARG_124  | HE, F_ARG_124   | 2.92    | 2.03    | 21.52                  |

---

Table 1842: 1HGH-specific interfacial side chain hydrogen bonding analysis. In this table, a PDB file is specified with a four-letter PDB ID, except that the names of the PDB files corresponding to the single NMR structural model split from the NMR ensemble is specified with a four-letter PDB ID in addition to a hyphen followed by the single NMR structural model numeric ID, the residue naming scheme is **Chain ID\_residue name\_residue number**,  $\angle ADH$  represents the angle formed by acceptor (A), donor (D) and hydrogen (H) ( $\angle ADH$ ).

| PDB      | Acceptor (A)   | Donor (D)      | Hydrogen (H)    | D-A (Å) | H-A (Å) | $\angle ADH(^{\circ})$ |
|----------|----------------|----------------|-----------------|---------|---------|------------------------|
| 1HGI.PDB | OE2, B_GLU_97  | NZ, A_LYS_27   | HZ1, A_LYS_27   | 2.90    | 1.86    | 7.66                   |
| 1HGI.PDB | OE2, B_GLU_67  | NH2, A_ARG_109 | HH21, A_ARG_109 | 2.80    | 1.81    | 13.24                  |
| 1HGI.PDB | OE1, C_GLN_210 | NH2, A_ARG_220 | HH21, A_ARG_220 | 2.65    | 1.73    | 18.55                  |
| 1HGI.PDB | OE1, F_GLU_72  | NZ, A_LYS_238  | HZ3, A_LYS_238  | 2.85    | 1.85    | 15.00                  |
| 1HGI.PDB | OD1, B_ASP_86  | NZ, A_LYS_310  | HZ3, A_LYS_310  | 2.76    | 1.92    | 29.34                  |
| 1HGI.PDB | OE2, B_GLU_15  | NZ, A_LYS_326  | HZ1, A_LYS_326  | 2.79    | 1.93    | 27.33                  |
| 1HGI.PDB | OE2, A_GLU_325 | NH2, B_ARG_25  | HH22, B_ARG_25  | 2.93    | 1.95    | 13.46                  |
| 1HGI.PDB | OE2, F_GLU_97  | NH2, B_ARG_54  | HH22, B_ARG_54  | 2.81    | 1.84    | 14.63                  |
| 1HGI.PDB | OD2, F_ASP_86  | NZ, B_LYS_62   | HZ1, B_LYS_62   | 2.67    | 1.78    | 25.75                  |
| 1HGI.PDB | OG, A_SER_110  | NE2, B_HIS_64  | HE2, B_HIS_64   | 2.87    | 1.89    | 8.13                   |
| 1HGI.PDB | OE2, D_GLU_81  | NE, B_ARG_76   | HE, B_ARG_76    | 2.86    | 1.89    | 7.04                   |
| 1HGI.PDB | OE2, D_GLU_74  | NH1, B_ARG_76  | HH12, B_ARG_76  | 2.92    | 1.89    | 1.72                   |
| 1HGI.PDB | OE1, D_GLU_81  | NH2, B_ARG_76  | HH21, B_ARG_76  | 2.71    | 1.72    | 8.42                   |
| 1HGI.PDB | OE1, D_GLU_74  | NH2, B_ARG_76  | HH22, B_ARG_76  | 2.86    | 1.86    | 6.93                   |
| 1HGI.PDB | OE1, D_GLU_85  | OH, B_TYR_83   | HH, B_TYR_83    | 2.78    | 1.84    | 13.46                  |
| 1HGI.PDB | OH, F_TYR_83   | NZ, B_LYS_88   | HZ1, B_LYS_88   | 2.65    | 1.64    | 9.94                   |
| 1HGI.PDB | OE1, F_GLU_132 | NE, B_ARG_124  | HE, B_ARG_124   | 2.81    | 1.96    | 23.50                  |
| 1HGI.PDB | OE2, F_GLU_132 | NE, B_ARG_124  | HE, B_ARG_124   | 2.86    | 2.02    | 24.92                  |
| 1HGI.PDB | OE2, D_GLU_97  | NZ, C_LYS_27   | HZ1, C_LYS_27   | 2.88    | 1.83    | 6.58                   |
| 1HGI.PDB | OE2, D_GLU_67  | NH2, C_ARG_109 | HH21, C_ARG_109 | 2.82    | 1.84    | 15.02                  |
| 1HGI.PDB | OD2, B_ASP_79  | OG, C_SER_110  | HG, C_SER_110   | 2.85    | 1.90    | 11.29                  |
| 1HGI.PDB | OE1, E_GLN_210 | NH2, C_ARG_220 | HH21, C_ARG_220 | 2.62    | 1.75    | 23.70                  |
| 1HGI.PDB | OE1, B_GLU_72  | NZ, C_LYS_238  | HZ1, C_LYS_238  | 2.67    | 1.77    | 23.68                  |
| 1HGI.PDB | OD1, D_ASP_86  | NZ, C_LYS_310  | HZ3, C_LYS_310  | 2.77    | 1.93    | 29.51                  |
| 1HGI.PDB | OE1, D_GLU_15  | NZ, C_LYS_326  | HZ1, C_LYS_326  | 2.83    | 1.84    | 16.25                  |
| 1HGI.PDB | OE2, B_GLU_97  | NH2, D_ARG_54  | HH22, D_ARG_54  | 2.81    | 1.85    | 15.40                  |
| 1HGI.PDB | OG, C_SER_110  | NE2, D_HIS_64  | HE2, D_HIS_64   | 2.83    | 1.85    | 2.78                   |
| 1HGI.PDB | OE2, F_GLU_81  | NE, D_ARG_76   | HE, D_ARG_76    | 2.80    | 1.82    | 5.40                   |
| 1HGI.PDB | OE2, F_GLU_74  | NH1, D_ARG_76  | HH12, D_ARG_76  | 2.78    | 1.76    | 4.18                   |
| 1HGI.PDB | OE1, F_GLU_81  | NH2, D_ARG_76  | HH21, D_ARG_76  | 2.61    | 1.67    | 15.38                  |
| 1HGI.PDB | OE1, F_GLU_74  | NH2, D_ARG_76  | HH22, D_ARG_76  | 2.76    | 1.77    | 8.75                   |
| 1HGI.PDB | OE1, F_GLU_85  | OH, D_TYR_83   | HH, D_TYR_83    | 2.69    | 1.81    | 20.41                  |
| 1HGI.PDB | OH, B_TYR_83   | NZ, D_LYS_88   | HZ1, D_LYS_88   | 2.66    | 1.64    | 7.30                   |
| 1HGI.PDB | OE1, B_GLU_132 | NE, D_ARG_124  | HE, D_ARG_124   | 2.84    | 1.98    | 23.95                  |
| 1HGI.PDB | OE2, B_GLU_132 | NE, D_ARG_124  | HE, D_ARG_124   | 2.88    | 2.03    | 24.96                  |
| 1HGI.PDB | OE2, F_GLU_97  | NZ, E_LYS_27   | HZ1, E_LYS_27   | 2.86    | 1.82    | 7.44                   |
| 1HGI.PDB | OE2, F_GLU_67  | NH2, E_ARG_109 | HH21, E_ARG_109 | 2.78    | 1.80    | 14.37                  |
| 1HGI.PDB | OD2, D_ASP_79  | OG, E_SER_110  | HG, E_SER_110   | 2.90    | 1.94    | 10.08                  |
| 1HGI.PDB | OE1, A_GLN_210 | NH2, E_ARG_220 | HH21, E_ARG_220 | 2.69    | 1.80    | 23.03                  |
| 1HGI.PDB | OE1, D_GLU_72  | NZ, E_LYS_238  | HZ3, E_LYS_238  | 2.80    | 1.81    | 15.90                  |
| 1HGI.PDB | OD1, F_ASP_86  | NZ, E_LYS_310  | HZ3, E_LYS_310  | 2.76    | 1.91    | 29.16                  |
| 1HGI.PDB | OE1, F_GLU_15  | NZ, E_LYS_326  | HZ3, E_LYS_326  | 2.88    | 1.86    | 11.05                  |
| 1HGI.PDB | OE2, D_GLU_97  | NH2, F_ARG_54  | HH22, F_ARG_54  | 2.75    | 1.79    | 14.82                  |
| 1HGI.PDB | OG, E_SER_110  | NE2, F_HIS_64  | HE2, F_HIS_64   | 2.84    | 1.87    | 3.62                   |
| 1HGI.PDB | OE2, B_GLU_81  | NE, F_ARG_76   | HE, F_ARG_76    | 2.85    | 1.88    | 7.37                   |
| 1HGI.PDB | OE2, B_GLU_74  | NH1, F_ARG_76  | HH12, F_ARG_76  | 2.77    | 1.76    | 3.93                   |
| 1HGI.PDB | OE1, B_GLU_81  | NH2, F_ARG_76  | HH21, F_ARG_76  | 2.64    | 1.66    | 4.79                   |
| 1HGI.PDB | OE1, B_GLU_74  | NH2, F_ARG_76  | HH22, F_ARG_76  | 2.76    | 1.78    | 10.40                  |
| 1HGI.PDB | OE1, B_GLU_85  | OH, F_TYR_83   | HH, F_TYR_83    | 2.58    | 1.75    | 24.06                  |
| 1HGI.PDB | OH, D_TYR_83   | NZ, F_LYS_88   | HZ1, F_LYS_88   | 2.61    | 1.62    | 12.49                  |
| 1HGI.PDB | OE1, D_GLU_132 | NE, F_ARG_124  | HE, F_ARG_124   | 2.96    | 2.09    | 23.50                  |
| 1HGI.PDB | OE2, D_GLU_132 | NE, F_ARG_124  | HE, F_ARG_124   | 2.96    | 2.09    | 23.34                  |
| 1HGI.PDB | OE2, D_GLU_131 | NH2, F_ARG_163 | HH22, F_ARG_163 | 2.69    | 1.85    | 26.81                  |

---

Table 1843: 1HGI-specific interfacial side chain hydrogen bonding analysis. In this table, a PDB file is specified with a four-letter PDB ID, except that the names of the PDB files corresponding to the single NMR structural model split from the NMR ensemble is specified with a four-letter PDB ID in addition to a hyphen followed by the single NMR structural model numeric ID, the residue naming scheme is **Chain ID\_residue name\_residue number**,  $\angle ADH$  represents the angle formed by acceptor (A), donor (D) and hydrogen (H) ( $\angle ADH$ ).

| PDB      | Acceptor (A)   | Donor (D)      | Hydrogen (H)    | D-A (Å) | H-A (Å) | $\angle ADH(^{\circ})$ |
|----------|----------------|----------------|-----------------|---------|---------|------------------------|
| 1HGJ.PDB | OE2, B_GLU_97  | NZ, A_LYS_27   | HZ1, A_LYS_27   | 2.81    | 1.78    | 9.30                   |
| 1HGJ.PDB | OE2, B_GLU_67  | NH2, A_ARG_109 | HH21, A_ARG_109 | 2.75    | 1.77    | 12.07                  |
| 1HGJ.PDB | OD2, F_ASP_79  | OG, A_SER_110  | HG, A_SER_110   | 2.94    | 1.98    | 10.39                  |
| 1HGJ.PDB | OE1, C_GLN_210 | NH2, A_ARG_220 | HH21, A_ARG_220 | 2.67    | 1.78    | 22.50                  |
| 1HGJ.PDB | OE1, F_GLU_72  | NZ, A_LYS_238  | HZ3, A_LYS_238  | 2.90    | 1.90    | 13.91                  |
| 1HGJ.PDB | OE2, A_GLU_325 | NH2, B_ARG_25  | HH22, B_ARG_25  | 2.97    | 2.01    | 15.94                  |
| 1HGJ.PDB | OE2, F_GLU_97  | NH2, B_ARG_54  | HH22, B_ARG_54  | 2.77    | 1.81    | 15.09                  |
| 1HGJ.PDB | OD2, F_ASP_86  | NZ, B_LYS_62   | HZ1, B_LYS_62   | 2.65    | 1.75    | 23.55                  |
| 1HGJ.PDB | OD2, F_ASP_90  | NZ, B_LYS_62   | HZ3, B_LYS_62   | 2.74    | 1.89    | 28.52                  |
| 1HGJ.PDB | OG, A_SER_110  | NE2, B_HIS_64  | HE2, B_HIS_64   | 2.89    | 1.93    | 11.21                  |
| 1HGJ.PDB | OE2, D_GLU_81  | NE, B_ARG_76   | HE, B_ARG_76    | 2.90    | 1.93    | 10.80                  |
| 1HGJ.PDB | OE2, D_GLU_74  | NH1, B_ARG_76  | HH12, B_ARG_76  | 2.88    | 1.87    | 5.28                   |
| 1HGJ.PDB | OE1, D_GLU_81  | NH2, B_ARG_76  | HH21, B_ARG_76  | 2.72    | 1.72    | 3.64                   |
| 1HGJ.PDB | OE1, D_GLU_74  | NH2, B_ARG_76  | HH22, B_ARG_76  | 2.85    | 1.84    | 3.19                   |
| 1HGJ.PDB | OE1, D_GLU_85  | OH, B_TYR_83   | HH, B_TYR_83    | 2.67    | 1.83    | 24.12                  |
| 1HGJ.PDB | OH, F_TYR_83   | NZ, B_LYS_88   | HZ1, B_LYS_88   | 2.78    | 1.75    | 7.42                   |
| 1HGJ.PDB | OE1, F_GLU_132 | NE, B_ARG_124  | HE, B_ARG_124   | 2.82    | 2.00    | 27.29                  |
| 1HGJ.PDB | OE2, F_GLU_132 | NE, B_ARG_124  | HE, B_ARG_124   | 2.91    | 2.02    | 20.91                  |
| 1HGJ.PDB | OE2, D_GLU_97  | NZ, C_LYS_27   | HZ1, C_LYS_27   | 2.82    | 1.80    | 8.63                   |
| 1HGJ.PDB | OE2, D_GLU_67  | NH2, C_ARG_109 | HH21, C_ARG_109 | 2.76    | 1.78    | 13.33                  |
| 1HGJ.PDB | OD2, B_ASP_79  | OG, C_SER_110  | HG, C_SER_110   | 2.79    | 1.87    | 14.95                  |
| 1HGJ.PDB | OE1, E_GLN_210 | NH2, C_ARG_220 | HH21, C_ARG_220 | 2.66    | 1.82    | 26.85                  |
| 1HGJ.PDB | OE1, B_GLU_72  | NZ, C_LYS_238  | HZ1, C_LYS_238  | 2.75    | 1.79    | 18.67                  |
| 1HGJ.PDB | OD1, D_ASP_86  | NZ, C_LYS_310  | HZ3, C_LYS_310  | 2.94    | 2.10    | 29.37                  |
| 1HGJ.PDB | OE1, D_GLU_15  | NZ, C_LYS_326  | HZ1, C_LYS_326  | 2.91    | 1.86    | 5.48                   |
| 1HGJ.PDB | OE2, B_GLU_97  | NH2, D_ARG_54  | HH22, D_ARG_54  | 2.84    | 1.88    | 15.58                  |
| 1HGJ.PDB | OG, C_SER_110  | NE2, D_HIS_64  | HE2, D_HIS_64   | 2.89    | 1.91    | 5.59                   |
| 1HGJ.PDB | OE2, F_GLU_81  | NE, D_ARG_76   | HE, D_ARG_76    | 2.85    | 1.89    | 10.87                  |
| 1HGJ.PDB | OE2, F_GLU_74  | NH1, D_ARG_76  | HH12, D_ARG_76  | 2.76    | 1.76    | 7.89                   |
| 1HGJ.PDB | OE1, F_GLU_81  | NH2, D_ARG_76  | HH21, D_ARG_76  | 2.68    | 1.69    | 5.65                   |
| 1HGJ.PDB | OE1, F_GLU_74  | NH2, D_ARG_76  | HH22, D_ARG_76  | 2.71    | 1.72    | 5.59                   |
| 1HGJ.PDB | OE1, F_GLU_85  | OH, D_TYR_83   | HH, D_TYR_83    | 2.63    | 1.81    | 25.72                  |
| 1HGJ.PDB | OH, B_TYR_83   | NZ, D_LYS_88   | HZ1, D_LYS_88   | 2.75    | 1.72    | 7.31                   |
| 1HGJ.PDB | OE1, B_GLU_132 | NE, D_ARG_124  | HE, D_ARG_124   | 2.80    | 1.98    | 27.33                  |
| 1HGJ.PDB | OE2, B_GLU_132 | NE, D_ARG_124  | HE, D_ARG_124   | 2.87    | 2.00    | 21.99                  |
| 1HGJ.PDB | OH, B_TYR_141  | NH1, D_ARG_127 | HH12, D_ARG_127 | 2.99    | 2.02    | 12.89                  |
| 1HGJ.PDB | OE2, F_GLU_97  | NZ, E_LYS_27   | HZ1, E_LYS_27   | 2.81    | 1.79    | 8.50                   |
| 1HGJ.PDB | OE2, F_GLU_67  | NH2, E_ARG_109 | HH21, E_ARG_109 | 2.76    | 1.77    | 12.82                  |
| 1HGJ.PDB | OD2, D_ASP_79  | OG, E_SER_110  | HG, E_SER_110   | 2.79    | 1.87    | 15.96                  |
| 1HGJ.PDB | OD1, C_ASP_101 | NE2, E_GLN_210 | HE22, E_GLN_210 | 2.94    | 2.10    | 26.45                  |
| 1HGJ.PDB | OE1, A_GLN_210 | NH2, E_ARG_220 | HH21, E_ARG_220 | 2.69    | 1.86    | 28.41                  |
| 1HGJ.PDB | OE1, D_GLU_72  | NZ, E_LYS_238  | HZ3, E_LYS_238  | 2.87    | 1.86    | 13.82                  |
| 1HGJ.PDB | OD1, F_ASP_86  | NZ, E_LYS_310  | HZ3, E_LYS_310  | 2.93    | 2.08    | 29.22                  |
| 1HGJ.PDB | OE1, F_GLU_15  | NZ, E_LYS_326  | HZ3, E_LYS_326  | 2.87    | 1.86    | 12.83                  |
| 1HGJ.PDB | OE2, D_GLU_97  | NH2, F_ARG_54  | HH22, F_ARG_54  | 2.77    | 1.81    | 14.54                  |
| 1HGJ.PDB | OG, E_SER_110  | NE2, F_HIS_64  | HE2, F_HIS_64   | 2.90    | 1.93    | 7.02                   |
| 1HGJ.PDB | OE2, B_GLU_81  | NE, F_ARG_76   | HE, F_ARG_76    | 2.85    | 1.89    | 12.57                  |
| 1HGJ.PDB | OE2, B_GLU_74  | NH1, F_ARG_76  | HH12, F_ARG_76  | 2.70    | 1.70    | 4.55                   |
| 1HGJ.PDB | OE1, B_GLU_81  | NH2, F_ARG_76  | HH21, F_ARG_76  | 2.65    | 1.66    | 2.84                   |
| 1HGJ.PDB | OE1, B_GLU_74  | NH2, F_ARG_76  | HH22, F_ARG_76  | 2.72    | 1.73    | 7.95                   |
| 1HGJ.PDB | OE1, B_GLU_85  | OH, F_TYR_83   | HH, F_TYR_83    | 2.53    | 1.75    | 28.54                  |
| 1HGJ.PDB | OH, D_TYR_83   | NZ, F_LYS_88   | HZ1, F_LYS_88   | 2.70    | 1.68    | 8.19                   |
| 1HGJ.PDB | OE1, D_GLU_132 | NE, F_ARG_124  | HE, F_ARG_124   | 2.92    | 2.09    | 27.65                  |
| 1HGJ.PDB | OE2, D_GLU_132 | NE, F_ARG_124  | HE, F_ARG_124   | 2.96    | 2.06    | 20.98                  |

---

Table 1844: 1HGJ-specific interfacial side chain hydrogen bonding analysis. In this table, a PDB file is specified with a four-letter PDB ID, except that the names of the PDB files corresponding to the single NMR structural model split from the NMR ensemble is specified with a four-letter PDB ID in addition to a hyphen followed by the single NMR structural model numeric ID, the residue naming scheme is **Chain ID\_residue name\_residue number**,  $\angle ADH$  represents the angle formed by acceptor (A), donor (D) and hydrogen (H) ( $\angle ADH$ ).



| PDB      | Acceptor (A)   | Donor (D)     | Hydrogen (H)   | D-A (Å) | H-A (Å) | $\angle ADH(^{\circ})$ |
|----------|----------------|---------------|----------------|---------|---------|------------------------|
| 1OSP.PDB | OD2, L_ASP_1   | OG, H_SER_62  | HG, H_SER_62   | 2.98    | 2.17    | 26.53                  |
| 1OSP.PDB | OG, L_SER_176  | OG, H_SER_185 | HG, H_SER_185  | 2.74    | 1.91    | 24.72                  |
| 1OSP.PDB | OE1, L_GLU_123 | NZ, H_LYS_215 | HZ2, H_LYS_215 | 2.78    | 1.85    | 20.53                  |

Table 1845: 1OSP-specific interfacial side chain hydrogen bonding analysis. In this table, a PDB file is specified with a four-letter PDB ID, except that the names of the PDB files corresponding to the single NMR structural model split from the NMR ensemble is specified with a four-letter PDB ID in addition to a hyphen followed by the single NMR structural model numeric ID, the residue naming scheme is **Chain ID\_residue name\_residue number**,  $\angle ADH$  represents the angle formed by acceptor (A), donor (D) and hydrogen (H) ( $\angle ADH$ ).

| PDB      | Acceptor (A)  | Donor (D)     | Hydrogen (H)   | D-A (Å) | H-A (Å) | $\angle ADH(^{\circ})$ |
|----------|---------------|---------------|----------------|---------|---------|------------------------|
| 1VFB.PDB | OE1, B_GLU_98 | NH1, A_ARG_96 | HH12, A_ARG_96 | 2.82    | 1.84    | 8.38                   |
| 1VFB.PDB | OE2, B_GLU_98 | NH2, A_ARG_96 | HH22, A_ARG_96 | 2.81    | 1.85    | 10.74                  |
| 1VFB.PDB | OE1, A_GLN_38 | NE2, B_GLN_39 | HE21, B_GLN_39 | 2.95    | 1.98    | 8.04                   |

Table 1846: 1VFB-specific interfacial side chain hydrogen bonding analysis. In this table, a PDB file is specified with a four-letter PDB ID, except that the names of the PDB files corresponding to the single NMR structural model split from the NMR ensemble is specified with a four-letter PDB ID in addition to a hyphen followed by the single NMR structural model numeric ID, the residue naming scheme is **Chain ID\_residue name\_residue number**,  $\angle ADH$  represents the angle formed by acceptor (A), donor (D) and hydrogen (H) ( $\angle ADH$ ).

| PDB      | Acceptor (A)   | Donor (D)     | Hydrogen (H)   | D-A (Å) | H-A (Å) | $\angle ADH(^{\circ})$ |
|----------|----------------|---------------|----------------|---------|---------|------------------------|
| 3SE8.PDB | OD1, G_ASN_280 | NE1, H_TRP_50 | HE1, H_TRP_50  | 3.00    | 2.21    | 20.49                  |
| 3SE8.PDB | OD1, G_ASP_457 | NE2, H_GLN_64 | HE22, H_GLN_64 | 2.94    | 2.12    | 14.23                  |
| 3SE8.PDB | OD2, G_ASP_368 | NH2, H_ARG_71 | HH22, H_ARG_71 | 2.91    | 2.05    | 6.24                   |

Table 1847: 3SE8-specific interfacial side chain hydrogen bonding analysis. In this table, a PDB file is specified with a four-letter PDB ID, except that the names of the PDB files corresponding to the single NMR structural model split from the NMR ensemble is specified with a four-letter PDB ID in addition to a hyphen followed by the single NMR structural model numeric ID, the residue naming scheme is **Chain ID\_residue name\_residue number**,  $\angle ADH$  represents the angle formed by acceptor (A), donor (D) and hydrogen (H) ( $\angle ADH$ ).

| PDB      | Acceptor (A)   | Donor (D)       | Hydrogen (H)    | D-A (Å) | H-A (Å) | $\angle ADH(^{\circ})$ |
|----------|----------------|-----------------|-----------------|---------|---------|------------------------|
| 3SE9.PDB | OD1, G_ASN_280 | NE1, H_TRP_50   | HE1, H_TRP_50   | 2.86    | 2.03    | 11.46                  |
| 3SE9.PDB | OG, G_SER_365  | NH1, H_ARG_64   | HH11, H_ARG_64  | 2.81    | 2.04    | 21.79                  |
| 3SE9.PDB | OD2, G_ASP_368 | NH1, H_ARG_71   | HH12, H_ARG_71  | 2.77    | 1.92    | 7.25                   |
| 3SE9.PDB | OD1, G_ASN_279 | NE1, H_TRP_100D | HE1, H_TRP_100D | 2.86    | 2.13    | 26.83                  |
| 3SE9.PDB | OD1, L_ASN_138 | NE2, H_HIS_164  | HE2, H_HIS_164  | 2.87    | 2.10    | 22.18                  |

Table 1848: 3SE9-specific interfacial side chain hydrogen bonding analysis. In this table, a PDB file is specified with a four-letter PDB ID, except that the names of the PDB files corresponding to the single NMR structural model split from the NMR ensemble is specified with a four-letter PDB ID in addition to a hyphen followed by the single NMR structural model numeric ID, the residue naming scheme is **Chain ID\_residue name\_residue number**,  $\angle ADH$  represents the angle formed by acceptor (A), donor (D) and hydrogen (H) ( $\angle ADH$ ).

| PDB      | Acceptor (A)   | Donor (D)     | Hydrogen (H)   | D-A (Å) | H-A (Å) | $\angle ADH(^{\circ})$ |
|----------|----------------|---------------|----------------|---------|---------|------------------------|
| 3THM.PDB | OE1, L_GLN_39  | NE2, H_GLN_41 | HE22, H_GLN_41 | 2.98    | 2.14    | 9.35                   |
| 3THM.PDB | OG, L_SER_183  | NZ, H_LYS_162 | HZ1, H_LYS_162 | 2.77    | 1.97    | 21.34                  |
| 3THM.PDB | OG1, L_THR_135 | NZ, H_LYS_162 | HZ2, H_LYS_162 | 2.85    | 2.02    | 17.75                  |
| 3THM.PDB | OH, H_TYR_35   | ND1, F_HIS_44 | HD1, F_HIS_44  | 2.69    | 1.83    | 5.98                   |
| 3THM.PDB | OG, H_SER_63   | NE2, F_HIS_44 | HE2, F_HIS_44  | 2.83    | 2.07    | 23.36                  |

Table 1849: 3THM-specific interfacial side chain hydrogen bonding analysis. In this table, a PDB file is specified with a four-letter PDB ID, except that the names of the PDB files corresponding to the single NMR structural model split from the NMR ensemble is specified with a four-letter PDB ID in addition to a hyphen followed by the single NMR structural model numeric ID, the residue naming scheme is **Chain ID\_residue name\_residue number**,  $\angle ADH$  represents the angle formed by acceptor (A), donor (D) and hydrogen (H) ( $\angle ADH$ ).

| PDB      | Acceptor (A)  | Donor (D)     | Hydrogen (H)   | D-A (Å) | H-A (Å) | $\angle ADH(^{\circ})$ |
|----------|---------------|---------------|----------------|---------|---------|------------------------|
| 3TJE.PDB | OE1, L_GLN_39 | NE2, H_GLN_41 | HE21, H_GLN_41 | 2.98    | 2.15    | 10.85                  |
| 3TJE.PDB | OH, H_TYR_35  | ND1, F_HIS_44 | HD1, F_HIS_44  | 2.56    | 1.70    | 3.69                   |

Table 1850: 3TJE-specific interfacial side chain hydrogen bonding analysis. In this table, a PDB file is specified with a four-letter PDB ID, except that the names of the PDB files corresponding to the single NMR structural model split from the NMR ensemble is specified with a four-letter PDB ID in addition to a hyphen followed by the single NMR structural model numeric ID, the residue naming scheme is **Chain ID\_residue name\_residue number**,  $\angle ADH$  represents the angle formed by acceptor (A), donor (D) and hydrogen (H) ( $\angle ADH$ ).

| PDB      | Acceptor (A)   | Donor (D)      | Hydrogen (H)    | D-A (Å) | H-A (Å) | $\angle ADH(^{\circ})$ |
|----------|----------------|----------------|-----------------|---------|---------|------------------------|
| 3U2S.PDB | OE1, L_GLN_38  | NE2, H_GLN_39  | HE22, H_GLN_39  | 2.89    | 2.04    | 8.55                   |
| 3U2S.PDB | OG, L_SER_165  | NE2, H_HIS_164 | HE2, H_HIS_164  | 2.93    | 2.12    | 16.97                  |
| 3U2S.PDB | OE1, H_GLN_39  | NE2, L_GLN_38  | HE22, L_GLN_38  | 2.91    | 2.09    | 13.75                  |
| 3U2S.PDB | OD2, C_ASP_167 | ND2, L_ASN_60  | HD22, L_ASN_60  | 2.90    | 2.14    | 22.76                  |
| 3U2S.PDB | OD1, H_ASP_61  | NH2, L_ARG_95A | HH22, L_ARG_95A | 2.34    | 1.58    | 22.53                  |
| 3U2S.PDB | OE2, H_GLU_95  | NH2, L_ARG_96  | HH21, L_ARG_96  | 2.87    | 2.05    | 15.72                  |
| 3U2S.PDB | OH, H_TYR_100K | ND2, G_ASN_173 | HD21, G_ASN_173 | 2.97    | 2.13    | 8.87                   |
| 3U2S.PDB | OE1, B_GLN_38  | NE2, A_GLN_39  | HE22, A_GLN_39  | 2.92    | 2.07    | 7.34                   |
| 3U2S.PDB | OG1, B_THR_131 | NZ, A_LYS_143  | HZ2, A_LYS_143  | 2.41    | 1.67    | 27.35                  |
| 3U2S.PDB | OE1, A_GLN_39  | NE2, B_GLN_38  | HE22, B_GLN_38  | 2.92    | 2.08    | 10.61                  |
| 3U2S.PDB | OD1, A_ASP_61  | NH1, B_ARG_95A | HH12, B_ARG_95A | 2.63    | 1.91    | 26.97                  |
| 3U2S.PDB | OE2, A_GLU_95  | NH2, B_ARG_96  | HH21, B_ARG_96  | 2.98    | 2.16    | 13.77                  |

Table 1851: 3U2S-specific interfacial side chain hydrogen bonding analysis. In this table, a PDB file is specified with a four-letter PDB ID, except that the names of the PDB files corresponding to the single NMR structural model split from the NMR ensemble is specified with a four-letter PDB ID in addition to a hyphen followed by the single NMR structural model numeric ID, the residue naming scheme is **Chain ID\_residue name\_residue number**,  $\angle ADH$  represents the angle formed by acceptor (A), donor (D) and hydrogen (H) ( $\angle ADH$ ).

| PDB      | Acceptor (A)   | Donor (D)     | Hydrogen (H)   | D-A (Å) | H-A (Å) | $\angle ADH(^{\circ})$ |
|----------|----------------|---------------|----------------|---------|---------|------------------------|
| 3UYR.PDB | OE2, L_GLU_127 | NZ, H_LYS_212 | HZ3, H_LYS_212 | 2.87    | 2.08    | 23.12                  |
| 3UYR.PDB | OD1, H_ASN_101 | NE2, P_GLN_48 | HE22, P_GLN_48 | 2.57    | 1.87    | 29.89                  |

Table 1852: 3UYR-specific interfacial side chain hydrogen bonding analysis. In this table, a PDB file is specified with a four-letter PDB ID, except that the names of the PDB files corresponding to the single NMR structural model split from the NMR ensemble is specified with a four-letter PDB ID in addition to a hyphen followed by the single NMR structural model numeric ID, the residue naming scheme is **Chain ID\_residue name\_residue number**,  $\angle ADH$  represents the angle formed by acceptor (A), donor (D) and hydrogen (H) ( $\angle ADH$ ).



| PDB      | Acceptor (A)   | Donor (D)     | Hydrogen (H)   | D-A (Å) | H-A (Å) | $\angle ADH(^{\circ})$ |
|----------|----------------|---------------|----------------|---------|---------|------------------------|
| 4F33.PDB | OE1, B_GLN_39  | NE2, A_GLN_38 | HE22, A_GLN_38 | 2.96    | 2.13    | 12.75                  |
| 4F33.PDB | OE1, A_GLN_38  | NE2, B_GLN_39 | HE22, B_GLN_39 | 2.82    | 1.97    | 5.31                   |
| 4F33.PDB | OE1, A_GLU_123 | NZ, B_LYS_215 | HZ1, B_LYS_215 | 2.68    | 1.82    | 12.44                  |
| 4F33.PDB | OG1, H_THR_211 | NZ, B_LYS_215 | HZ2, B_LYS_215 | 2.83    | 1.95    | 7.37                   |
| 4F33.PDB | OE1, C_GLN_38  | NE2, D_GLN_39 | HE22, D_GLN_39 | 2.89    | 2.03    | 5.23                   |
| 4F33.PDB | OE1, C_GLU_123 | NZ, D_LYS_215 | HZ1, D_LYS_215 | 2.79    | 1.99    | 22.47                  |
| 4F33.PDB | OG1, F_THR_211 | NZ, D_LYS_215 | HZ2, D_LYS_215 | 2.86    | 1.99    | 10.67                  |
| 4F33.PDB | OE1, E_GLN_38  | NE2, F_GLN_39 | HE22, F_GLN_39 | 2.92    | 2.06    | 5.53                   |
| 4F33.PDB | OE1, E_GLU_123 | NZ, F_LYS_215 | HZ1, F_LYS_215 | 2.61    | 1.84    | 24.34                  |
| 4F33.PDB | OG1, D_THR_211 | NZ, F_LYS_215 | HZ2, F_LYS_215 | 2.92    | 2.04    | 7.71                   |
| 4F33.PDB | OE1, G_GLU_123 | NZ, H_LYS_215 | HZ1, H_LYS_215 | 2.97    | 2.19    | 24.10                  |
| 4F33.PDB | OG1, B_THR_211 | NZ, H_LYS_215 | HZ2, H_LYS_215 | 2.80    | 1.95    | 14.49                  |

Table 1853: 4F33-specific interfacial side chain hydrogen bonding analysis. In this table, a PDB file is specified with a four-letter PDB ID, except that the names of the PDB files corresponding to the single NMR structural model split from the NMR ensemble is specified with a four-letter PDB ID in addition to a hyphen followed by the single NMR structural model numeric ID, the residue naming scheme is **Chain ID\_residue name\_residue number**,  $\angle ADH$  represents the angle formed by acceptor (A), donor (D) and hydrogen (H) ( $\angle ADH$ ).

| PDB      | Acceptor (A)   | Donor (D)      | Hydrogen (H)   | D-A (Å) | H-A (Å) | $\angle ADH(^{\circ})$ |
|----------|----------------|----------------|----------------|---------|---------|------------------------|
| 4F3F.PDB | OE1, B_GLN_39  | NE2, A_GLN_38  | HE22, A_GLN_38 | 2.88    | 2.04    | 8.75                   |
| 4F3F.PDB | OG, B_SER_59   | NE2, A_HIS_94  | HE2, A_HIS_94  | 2.82    | 2.03    | 19.68                  |
| 4F3F.PDB | OD1, A_ASN_138 | NE2, B_HIS_170 | HE2, B_HIS_170 | 2.82    | 2.05    | 21.56                  |
| 4F3F.PDB | OH, B_TYR_101  | NZ, C_LYS_25   | HZ3, C_LYS_25  | 2.87    | 2.11    | 26.18                  |
| 4F3F.PDB | OH, A_TYR_32   | NE1, C_TRP_26  | HE1, C_TRP_26  | 2.97    | 2.17    | 18.16                  |

Table 1854: 4F3F-specific interfacial side chain hydrogen bonding analysis. In this table, a PDB file is specified with a four-letter PDB ID, except that the names of the PDB files corresponding to the single NMR structural model split from the NMR ensemble is specified with a four-letter PDB ID in addition to a hyphen followed by the single NMR structural model numeric ID, the residue naming scheme is **Chain ID\_residue name\_residue number**,  $\angle ADH$  represents the angle formed by acceptor (A), donor (D) and hydrogen (H) ( $\angle ADH$ ).

| PDB      | Acceptor (A)    | Donor (D)     | Hydrogen (H)   | D-A (Å) | H-A (Å) | $\angle ADH(^{\circ})$ |
|----------|-----------------|---------------|----------------|---------|---------|------------------------|
| 4JAM.PDB | OD1, H_ASN_100B | ND2, L_ASN_32 | HD21, L_ASN_32 | 2.96    | 2.21    | 25.94                  |

Table 1855: 4JAM-specific interfacial side chain hydrogen bonding analysis. In this table, a PDB file is specified with a four-letter PDB ID, except that the names of the PDB files corresponding to the single NMR structural model split from the NMR ensemble is specified with a four-letter PDB ID in addition to a hyphen followed by the single NMR structural model numeric ID, the residue naming scheme is **Chain ID\_residue name\_residue number**,  $\angle ADH$  represents the angle formed by acceptor (A), donor (D) and hydrogen (H) ( $\angle ADH$ ).

| PDB      | Acceptor (A)    | Donor (D)     | Hydrogen (H)   | D-A (Å) | H-A (Å) | $\angle ADH(^{\circ})$ |
|----------|-----------------|---------------|----------------|---------|---------|------------------------|
| 4JAN.PDB | OD2, B_ASP_92   | OG, H_SER_156 | HG, H_SER_156  | 2.50    | 1.78    | 23.90                  |
| 4JAN.PDB | OE1, L_GLU_123  | NZ, H_LYS_209 | HZ1, H_LYS_209 | 2.89    | 2.13    | 26.71                  |
| 4JAN.PDB | OD1, H_ASN_100B | ND2, L_ASN_32 | HD21, L_ASN_32 | 2.76    | 1.91    | 6.44                   |

Table 1856: 4JAN-specific interfacial side chain hydrogen bonding analysis. In this table, a PDB file is specified with a four-letter PDB ID, except that the names of the PDB files corresponding to the single NMR structural model split from the NMR ensemble is specified with a four-letter PDB ID in addition to a hyphen followed by the single NMR structural model numeric ID, the residue naming scheme is **Chain ID\_residue name\_residue number**,  $\angle ADH$  represents the angle formed by acceptor (A), donor (D) and hydrogen (H) ( $\angle ADH$ ).

| PDB      | Acceptor (A)   | Donor (D)      | Hydrogen (H)    | D-A (Å) | H-A (Å) | $\angle ADH(^{\circ})$ |
|----------|----------------|----------------|-----------------|---------|---------|------------------------|
| 4KRM.PDB | OE1, B_GLU_110 | NH1, A_ARG_353 | HH11, A_ARG_353 | 2.81    | 2.05    | 22.81                  |
| 4KRM.PDB | OE1, D_GLU_110 | NH1, C_ARG_353 | HH11, C_ARG_353 | 2.87    | 2.05    | 16.15                  |
| 4KRM.PDB | OD2, C_ASP_355 | NH1, D_ARG_30  | HH12, D_ARG_30  | 2.45    | 1.63    | 13.53                  |
| 4KRM.PDB | OE1, F_GLU_110 | NH1, E_ARG_353 | HH11, E_ARG_353 | 2.85    | 2.03    | 14.34                  |
| 4KRM.PDB | OD2, F_ASP_112 | NH2, E_ARG_353 | HH22, E_ARG_353 | 2.96    | 2.18    | 20.33                  |
| 4KRM.PDB | OE2, B_GLU_5   | NZ, G_LYS_407  | HZ1, G_LYS_407  | 2.98    | 2.17    | 20.60                  |
| 4KRM.PDB | OD2, G_ASP_355 | NH1, H_ARG_30  | HH12, H_ARG_30  | 2.45    | 1.69    | 23.45                  |
| 4KRM.PDB | OE1, J_GLU_110 | NH1, I_ARG_353 | HH11, I_ARG_353 | 2.86    | 2.07    | 18.90                  |
| 4KRM.PDB | OD2, J_ASP_112 | NH2, I_ARG_353 | HH22, I_ARG_353 | 3.00    | 2.19    | 17.61                  |
| 4KRM.PDB | OE1, L_GLU_110 | NH1, K_ARG_353 | HH11, K_ARG_353 | 2.89    | 2.06    | 12.41                  |
| 4KRM.PDB | OD2, L_ASP_112 | NH2, K_ARG_353 | HH22, K_ARG_353 | 2.89    | 2.07    | 13.96                  |
| 4KRM.PDB | OD2, K_ASP_355 | NH1, L_ARG_30  | HH12, L_ARG_30  | 2.44    | 1.65    | 18.93                  |

Table 1857: 4KRM-specific interfacial side chain hydrogen bonding analysis. In this table, a PDB file is specified with a four-letter PDB ID, except that the names of the PDB files corresponding to the single NMR structural model split from the NMR ensemble is specified with a four-letter PDB ID in addition to a hyphen followed by the single NMR structural model numeric ID, the residue naming scheme is **Chain ID\_residue name\_residue number**,  $\angle ADH$  represents the angle formed by acceptor (A), donor (D) and hydrogen (H) ( $\angle ADH$ ).

| PDB      | Acceptor (A)   | Donor (D)      | Hydrogen (H)    | D-A (Å) | H-A (Å) | $\angle ADH(^{\circ})$ |
|----------|----------------|----------------|-----------------|---------|---------|------------------------|
| 4KRO.PDB | OG, B.SER_103  | NZ, A.LYS_375  | HZ2, A.LYS_375  | 2.61    | 1.76    | 15.34                  |
| 4KRO.PDB | OH, D.TYR_102  | NE2, A.GLN_384 | HE21, A.GLN_384 | 2.87    | 2.16    | 29.24                  |
| 4KRO.PDB | OD1, B.ASP_118 | NE, A.ARG_405  | HE, A.ARG_405   | 2.72    | 1.93    | 19.48                  |
| 4KRO.PDB | OE1, D.GLN_39  | NE2, C.GLN_38  | HE22, C.GLN_38  | 2.85    | 2.00    | 7.50                   |
| 4KRO.PDB | OD2, D.ASP_103 | OH, C.TYR_50   | HH, C.TYR_50    | 2.49    | 1.72    | 20.15                  |
| 4KRO.PDB | OD1, D.ASP_103 | ND2, C.ASN_91  | HD21, C.ASN_91  | 2.93    | 2.12    | 16.18                  |
| 4KRO.PDB | OD2, D.ASP_58  | NE1, C.TRP_94  | HE1, C.TRP_94   | 2.80    | 2.10    | 29.15                  |
| 4KRO.PDB | OE1, C.GLN_38  | NE2, D.GLN_39  | HE22, D.GLN_39  | 2.80    | 1.94    | 4.32                   |
| 4KRO.PDB | OE1, A.GLN_408 | OH, D.TYR_102  | HH, D.TYR_102   | 2.75    | 1.97    | 18.39                  |

Table 1858: 4KRO-specific interfacial side chain hydrogen bonding analysis. In this table, a PDB file is specified with a four-letter PDB ID, except that the names of the PDB files corresponding to the single NMR structural model split from the NMR ensemble is specified with a four-letter PDB ID in addition to a hyphen followed by the single NMR structural model numeric ID, the residue naming scheme is **Chain ID\_residue name\_residue number**,  $\angle ADH$  represents the angle formed by acceptor (A), donor (D) and hydrogen (H) ( $\angle ADH$ ).

| PDB      | Acceptor (A)   | Donor (D)      | Hydrogen (H)    | D-A (Å) | H-A (Å) | $\angle ADH(^{\circ})$ |
|----------|----------------|----------------|-----------------|---------|---------|------------------------|
| 4KRP.PDB | OD1, B_ASP_115 | NH2, A_ARG_405 | HH21, A_ARG_405 | 2.63    | 1.81    | 15.48                  |
| 4KRP.PDB | OD1, D_ASP_58  | NZ, A_LYS_443  | HZ1, A_LYS_443  | 2.65    | 1.82    | 17.69                  |
| 4KRP.PDB | OD2, D_ASP_103 | NZ, A_LYS_465  | HZ2, A_LYS_465  | 2.93    | 2.05    | 5.06                   |
| 4KRP.PDB | OE1, D_GLN_39  | NE2, C_GLN_38  | HE22, C_GLN_38  | 2.70    | 1.84    | 6.09                   |
| 4KRP.PDB | OD2, D_ASP_103 | OH, C_TYR_50   | HH, C_TYR_50    | 2.43    | 1.66    | 18.96                  |
| 4KRP.PDB | OD1, D_ASP_103 | ND2, C_ASN_91  | HD21, C_ASN_91  | 2.77    | 1.91    | 6.24                   |
| 4KRP.PDB | OD2, D_ASP_58  | NE1, C_TRP_94  | HE1, C_TRP_94   | 2.98    | 2.17    | 17.26                  |
| 4KRP.PDB | OE1, C_GLN_38  | NE2, D_GLN_39  | HE22, D_GLN_39  | 2.72    | 1.87    | 5.47                   |
| 4KRP.PDB | OE1, A_GLN_408 | OH, D_TYR_102  | HH, D_TYR_102   | 2.56    | 1.74    | 10.00                  |
| 4KRP.PDB | OG, A_SER_440  | OH, D_TYR_104  | HH, D_TYR_104   | 2.94    | 2.22    | 25.72                  |
| 4KRP.PDB | OE1, A_GLU_431 | OH, B_TYR_32   | HH, B_TYR_32    | 2.59    | 1.78    | 7.49                   |
| 4KRP.PDB | OE1, A_GLU_400 | OH, B_TYR_100  | HH, B_TYR_100   | 2.94    | 2.13    | 13.29                  |
| 4KRP.PDB | OE2, A_GLU_431 | OH, B_TYR_116  | HH, B_TYR_116   | 2.43    | 1.75    | 29.09                  |

Table 1859: 4KRP-specific interfacial side chain hydrogen bonding analysis. In this table, a PDB file is specified with a four-letter PDB ID, except that the names of the PDB files corresponding to the single NMR structural model split from the NMR ensemble is specified with a four-letter PDB ID in addition to a hyphen followed by the single NMR structural model numeric ID, the residue naming scheme is **Chain ID\_residue name\_residue number**,  $\angle ADH$  represents the angle formed by acceptor (A), donor (D) and hydrogen (H) ( $\angle ADH$ ).

| PDB      | Acceptor (A)   | Donor (D)      | Hydrogen (H)    | D-A (Å) | H-A (Å) | $\angle ADH(^{\circ})$ |
|----------|----------------|----------------|-----------------|---------|---------|------------------------|
| 4NZR.PDB | OG, L.SER_176  | OG, H.SER_188  | HG, H.SER_188   | 2.88    | 2.16    | 24.46                  |
| 4NZR.PDB | OE2, L.GLU_123 | NZ, H.LYS_221  | HZ2, H.LYS_221  | 2.99    | 2.10    | 2.00                   |
| 4NZR.PDB | OG, H.SER_188  | OG, L.SER_176  | HG, L.SER_176   | 2.88    | 2.09    | 13.66                  |
| 4NZR.PDB | OE1, L.GLU_81  | NE, M.ARG_384  | HE, M.ARG_384   | 2.93    | 2.09    | 10.37                  |
| 4NZR.PDB | OD1, H.ASP_31E | NH1, M.ARG_457 | HH12, M.ARG_457 | 2.96    | 2.12    | 11.27                  |
| 4NZR.PDB | OD2, H.ASP_31E | NH2, M.ARG_457 | HH22, M.ARG_457 | 2.55    | 1.75    | 17.03                  |

Table 1860: 4NZR-specific interfacial side chain hydrogen bonding analysis. In this table, a PDB file is specified with a four-letter PDB ID, except that the names of the PDB files corresponding to the single NMR structural model split from the NMR ensemble is specified with a four-letter PDB ID in addition to a hyphen followed by the single NMR structural model numeric ID, the residue naming scheme is **Chain ID\_residue name\_residue number**,  $\angle ADH$  represents the angle formed by acceptor (A), donor (D) and hydrogen (H) ( $\angle ADH$ ).



| PDB      | Acceptor (A)   | Donor (D)      | Hydrogen (H)    | D-A (Å) | H-A (Å) | $\angle ADH(^{\circ})$ |
|----------|----------------|----------------|-----------------|---------|---------|------------------------|
| 4WUU.PDB | OD2, B_ASP_53  | NE, A_ARG_48   | HE, A_ARG_48    | 2.84    | 2.13    | 29.12                  |
| 4WUU.PDB | OH, E_TYR_104  | NZ, A_LYS_66   | HZ3, A_LYS_66   | 2.89    | 2.02    | 10.84                  |
| 4WUU.PDB | OXT, C_LEU_9   | OH, A_TYR_84   | HH, A_TYR_84    | 2.64    | 1.82    | 12.17                  |
| 4WUU.PDB | OE1, B_GLN_8   | NH1, A_ARG_234 | HH11, A_ARG_234 | 2.79    | 2.07    | 27.49                  |
| 4WUU.PDB | OE1, A_GLU_232 | OH, B_TYR_26   | HH, B_TYR_26    | 2.95    | 2.14    | 13.27                  |
| 4WUU.PDB | OE1, E_GLN_39  | NE2, D_GLN_39  | HE22, D_GLN_39  | 2.94    | 2.18    | 23.53                  |
| 4WUU.PDB | OD1, E_ASP_106 | NE1, D_TRP_99  | HE1, D_TRP_99   | 2.95    | 2.19    | 24.35                  |
| 4WUU.PDB | OE1, D_GLN_39  | NE2, E_GLN_39  | HE22, E_GLN_39  | 2.55    | 1.73    | 14.29                  |
| 4WUU.PDB | OE2, A_GLU_166 | NH2, E_ARG_50  | HH22, E_ARG_50  | 2.67    | 1.88    | 18.69                  |
| 4WUU.PDB | OE1, A_GLU_63  | OH, E_TYR_104  | HH, E_TYR_104   | 2.59    | 1.76    | 7.82                   |
| 4WUU.PDB | OE1, A_GLU_55  | OH, E_TYR_105  | HH, E_TYR_105   | 2.47    | 1.79    | 29.86                  |

Table 1861: 4WUU-specific interfacial side chain hydrogen bonding analysis. In this table, a PDB file is specified with a four-letter PDB ID, except that the names of the PDB files corresponding to the single NMR structural model split from the NMR ensemble is specified with a four-letter PDB ID in addition to a hyphen followed by the single NMR structural model numeric ID, the residue naming scheme is **Chain ID\_residue name\_residue number**,  $\angle ADH$  represents the angle formed by acceptor (A), donor (D) and hydrogen (H) ( $\angle ADH$ ).

| PDB      | Acceptor (A)  | Donor (D)     | Hydrogen (H)   | D-A (Å) | H-A (Å) | $\angle ADH(^{\circ})$ |
|----------|---------------|---------------|----------------|---------|---------|------------------------|
| 4Z0X.PDB | OE1, B_GLN_64 | NE2, A_GLN_37 | HE22, A_GLN_37 | 2.75    | 1.99    | 23.41                  |

Table 1862: 4Z0X-specific interfacial side chain hydrogen bonding analysis. In this table, a PDB file is specified with a four-letter PDB ID, except that the names of the PDB files corresponding to the single NMR structural model split from the NMR ensemble is specified with a four-letter PDB ID in addition to a hyphen followed by the single NMR structural model numeric ID, the residue naming scheme is **Chain ID\_residue name\_residue number**,  $\angle ADH$  represents the angle formed by acceptor (A), donor (D) and hydrogen (H) ( $\angle ADH$ ).

| PDB      | Acceptor (A)   | Donor (D)     | Hydrogen (H)   | D-A (Å) | H-A (Å) | $\angle ADH(^{\circ})$ |
|----------|----------------|---------------|----------------|---------|---------|------------------------|
| 5I76.PDB | OE1, B_GLN_39  | NE2, A_GLN_38 | HE22, A_GLN_38 | 2.94    | 2.10    | 10.68                  |
| 5I76.PDB | OD2, B_ASP_103 | OH, A_TYR_50  | HH, A_TYR_50   | 2.64    | 1.88    | 21.01                  |
| 5I76.PDB | OE1, A_GLN_38  | NE2, B_GLN_39 | HE22, B_GLN_39 | 2.80    | 1.95    | 6.66                   |
| 5I76.PDB | OG, A_SER_176  | OG, B_SER_185 | HG, B_SER_185  | 2.89    | 2.15    | 23.05                  |
| 5I76.PDB | OE1, A_GLU_123 | NZ, B_LYS_215 | HZ1, B_LYS_215 | 2.73    | 1.96    | 24.68                  |
| 5I76.PDB | OE2, A_GLU_123 | NZ, B_LYS_215 | HZ1, B_LYS_215 | 2.89    | 2.11    | 24.69                  |
| 5I76.PDB | OD2, A_ASP_70  | NH1, C_ARG_24 | HH12, C_ARG_24 | 2.95    | 2.23    | 28.81                  |
| 5I76.PDB | OD2, D_ASP_103 | OH, C_TYR_50  | HH, C_TYR_50   | 2.76    | 1.95    | 12.40                  |
| 5I76.PDB | OE1, C_GLN_38  | NE2, D_GLN_39 | HE22, D_GLN_39 | 2.85    | 2.01    | 10.98                  |
| 5I76.PDB | OE1, C_GLU_123 | NZ, D_LYS_215 | HZ1, D_LYS_215 | 2.60    | 1.73    | 11.40                  |

Table 1863: 5I76-specific interfacial side chain hydrogen bonding analysis. In this table, a PDB file is specified with a four-letter PDB ID, except that the names of the PDB files corresponding to the single NMR structural model split from the NMR ensemble is specified with a four-letter PDB ID in addition to a hyphen followed by the single NMR structural model numeric ID, the residue naming scheme is **Chain ID\_residue name\_residue number**,  $\angle ADH$  represents the angle formed by acceptor (A), donor (D) and hydrogen (H) ( $\angle ADH$ ).

| PDB      | Acceptor (A)    | Donor (D)     | Hydrogen (H)   | D-A (Å) | H-A (Å) | $\angle ADH(^{\circ})$ |
|----------|-----------------|---------------|----------------|---------|---------|------------------------|
| 5JO5.PDB | OE1, L_GLN_38   | NE2, H_GLN_39 | HE22, H_GLN_39 | 2.84    | 2.00    | 9.38                   |
| 5JO5.PDB | OE2, L_GLU_124  | NZ, H_LYS_143 | HZ2, H_LYS_143 | 2.46    | 1.63    | 17.05                  |
| 5JO5.PDB | OH, L_TYR_177   | OG, H_SER_179 | HG, H_SER_179  | 2.73    | 2.00    | 25.96                  |
| 5JO5.PDB | OE1, D_GLN_24   | OG, L_SER_30  | HG, L_SER_30   | 2.84    | 2.07    | 18.45                  |
| 5JO5.PDB | OE1, H_GLN_39   | NE2, L_GLN_38 | HE22, L_GLN_38 | 2.83    | 2.00    | 13.03                  |
| 5JO5.PDB | OE2, H_GLU_100J | NH2, L_ARG_91 | HH22, L_ARG_91 | 2.69    | 1.84    | 7.26                   |
| 5JO5.PDB | OD1, H_ASP_58   | NE, L_ARG_95B | HE, L_ARG_95B  | 2.95    | 2.13    | 14.76                  |
| 5JO5.PDB | OE1, B_GLN_38   | NE2, A_GLN_39 | HE22, A_GLN_39 | 2.87    | 2.02    | 8.31                   |
| 5JO5.PDB | OE2, B_GLU_124  | NZ, A_LYS_143 | HZ2, A_LYS_143 | 2.62    | 1.83    | 23.29                  |
| 5JO5.PDB | OH, B_TYR_177   | OG, A_SER_179 | HG, A_SER_179  | 2.83    | 2.10    | 25.21                  |
| 5JO5.PDB | OE2, B_GLU_123  | NZ, A_LYS_209 | HZ1, A_LYS_209 | 2.55    | 1.68    | 10.64                  |
| 5JO5.PDB | OE1, A_GLN_39   | NE2, B_GLN_38 | HE22, B_GLN_38 | 2.90    | 2.07    | 12.43                  |
| 5JO5.PDB | OE1, D_GLN_38   | NE2, C_GLN_39 | HE22, C_GLN_39 | 2.86    | 2.02    | 9.45                   |
| 5JO5.PDB | OE2, D_GLU_124  | NZ, C_LYS_143 | HZ2, C_LYS_143 | 2.79    | 1.92    | 10.71                  |
| 5JO5.PDB | OH, D_TYR_177   | OG, C_SER_179 | HG, C_SER_179  | 2.71    | 1.97    | 23.23                  |
| 5JO5.PDB | OE2, D_GLU_123  | NZ, C_LYS_209 | HZ1, C_LYS_209 | 2.58    | 1.72    | 11.28                  |
| 5JO5.PDB | OE1, C_GLN_39   | NE2, D_GLN_38 | HE22, D_GLN_38 | 2.92    | 2.09    | 12.72                  |
| 5JO5.PDB | OD1, C_ASP_58   | NE, D_ARG_95B | HE, D_ARG_95B  | 2.94    | 2.10    | 11.64                  |
| 5JO5.PDB | OE1, F_GLN_38   | NE2, E_GLN_39 | HE22, E_GLN_39 | 2.90    | 2.06    | 10.70                  |
| 5JO5.PDB | OE2, F_GLU_124  | NZ, E_LYS_143 | HZ2, E_LYS_143 | 2.55    | 1.75    | 21.57                  |
| 5JO5.PDB | OH, F_TYR_177   | OG, E_SER_179 | HG, E_SER_179  | 2.58    | 1.87    | 27.02                  |
| 5JO5.PDB | OE2, F_GLU_123  | NZ, E_LYS_209 | HZ1, E_LYS_209 | 2.57    | 1.74    | 17.62                  |
| 5JO5.PDB | OE1, B_GLN_24   | OG, F_SER_30  | HG, F_SER_30   | 2.88    | 2.11    | 20.15                  |
| 5JO5.PDB | OE1, E_GLN_39   | NE2, F_GLN_38 | HE22, F_GLN_38 | 2.85    | 2.02    | 12.75                  |
| 5JO5.PDB | OE2, E_GLU_100J | NH2, F_ARG_91 | HH22, F_ARG_91 | 2.72    | 1.87    | 5.99                   |
| 5JO5.PDB | OD1, E_ASP_58   | NE, F_ARG_95B | HE, F_ARG_95B  | 2.92    | 2.09    | 12.47                  |

Table 1864: 5JO5-specific interfacial side chain hydrogen bonding analysis. In this table, a PDB file is specified with a four-letter PDB ID, except that the names of the PDB files corresponding to the single NMR structural model split from the NMR ensemble is specified with a four-letter PDB ID in addition to a hyphen followed by the single NMR structural model numeric ID, the residue naming scheme is **Chain ID\_residue name\_residue number**,  $\angle ADH$  represents the angle formed by acceptor (A), donor (D) and hydrogen (H) ( $\angle ADH$ ).

| PDB      | Acceptor (A)  | Donor (D)      | Hydrogen (H)    | D-A (Å) | H-A (Å) | $\angle ADH(^{\circ})$ |
|----------|---------------|----------------|-----------------|---------|---------|------------------------|
| 5JR1.PDB | OH, L_TYR_178 | OG, H_SER_179  | HG, H_SER_179   | 2.83    | 2.03    | 15.88                  |
| 5JR1.PDB | OD2, H_ASP_58 | NH2, L_ARG_95B | HH22, L_ARG_95B | 2.47    | 1.67    | 16.99                  |

Table 1865: 5JR1-specific interfacial side chain hydrogen bonding analysis. In this table, a PDB file is specified with a four-letter PDB ID, except that the names of the PDB files corresponding to the single NMR structural model split from the NMR ensemble is specified with a four-letter PDB ID in addition to a hyphen followed by the single NMR structural model numeric ID, the residue naming scheme is **Chain ID\_residue name\_residue number**,  $\angle ADH$  represents the angle formed by acceptor (A), donor (D) and hydrogen (H) ( $\angle ADH$ ).

| PDB      | Acceptor (A)   | Donor (D)     | Hydrogen (H)   | D-A (Å) | H-A (Å) | $\angle ADH(^{\circ})$ |
|----------|----------------|---------------|----------------|---------|---------|------------------------|
| 5JUE.PDB | OH, H-TYR_91   | NE2, L-GLN_38 | HE22, L-GLN_38 | 2.57    | 1.77    | 17.09                  |
| 5JUE.PDB | OG, H-SER_178  | OG, L-SER_176 | HG, L-SER_176  | 2.78    | 1.94    | 3.13                   |
| 5JUE.PDB | OE1, L-GLU_123 | NZ, H-LYS_208 | HZ1, H-LYS_208 | 2.81    | 1.98    | 17.66                  |

Table 1866: 5JUE-specific interfacial side chain hydrogen bonding analysis. In this table, a PDB file is specified with a four-letter PDB ID, except that the names of the PDB files corresponding to the single NMR structural model split from the NMR ensemble is specified with a four-letter PDB ID in addition to a hyphen followed by the single NMR structural model numeric ID, the residue naming scheme is **Chain ID\_residue name\_residue number**,  $\angle ADH$  represents the angle formed by acceptor (A), donor (D) and hydrogen (H) ( $\angle ADH$ ).

| PDB      | Acceptor (A)  | Donor (D)     | Hydrogen (H)   | D-A (Å) | H-A (Å) | $\angle ADH(^{\circ})$ |
|----------|---------------|---------------|----------------|---------|---------|------------------------|
| 5JXA.PDB | OD2, L_ASP_50 | OH, H_TYR_100 | HH, H_TYR_100  | 2.57    | 1.75    | 11.76                  |
| 5JXA.PDB | OH, H_TYR_100 | NH2, L_ARG_53 | HH21, L_ARG_53 | 2.89    | 2.07    | 18.12                  |

Table 1867: 5JXA-specific interfacial side chain hydrogen bonding analysis. In this table, a PDB file is specified with a four-letter PDB ID, except that the names of the PDB files corresponding to the single NMR structural model split from the NMR ensemble is specified with a four-letter PDB ID in addition to a hyphen followed by the single NMR structural model numeric ID, the residue naming scheme is **Chain ID\_residue name\_residue number**,  $\angle ADH$  represents the angle formed by acceptor (A), donor (D) and hydrogen (H) ( $\angle ADH$ ).

| PDB      | Acceptor (A)  | Donor (D)     | Hydrogen (H)   | D-A (Å) | H-A (Å) | $\angle ADH(^{\circ})$ |
|----------|---------------|---------------|----------------|---------|---------|------------------------|
| 5T6P.PDB | OE1, A_GLN_43 | NE2, B_GLN_39 | HE22, B_GLN_39 | 2.71    | 1.86    | 5.14                   |
| 5T6P.PDB | OE1, D_GLN_39 | NE2, C_GLN_43 | HE22, C_GLN_43 | 3.00    | 2.17    | 12.88                  |
| 5T6P.PDB | OE1, C_GLN_43 | NE2, D_GLN_39 | HE22, D_GLN_39 | 2.79    | 1.94    | 7.20                   |
| 5T6P.PDB | OE1, C_GLU_39 | NE, E_ARG_5   | HE, E_ARG_5    | 2.86    | 2.02    | 10.72                  |

Table 1868: 5T6P-specific interfacial side chain hydrogen bonding analysis. In this table, a PDB file is specified with a four-letter PDB ID, except that the names of the PDB files corresponding to the single NMR structural model split from the NMR ensemble is specified with a four-letter PDB ID in addition to a hyphen followed by the single NMR structural model numeric ID, the residue naming scheme is **Chain ID\_residue name\_residue number**,  $\angle ADH$  represents the angle formed by acceptor (A), donor (D) and hydrogen (H) ( $\angle ADH$ ).



| PDB      | Acceptor (A)   | Donor (D)      | Hydrogen (H)   | D-A (Å) | H-A (Å) | $\angle ADH(^{\circ})$ |
|----------|----------------|----------------|----------------|---------|---------|------------------------|
| 5T78.PDB | OE1, B_GLN_39  | NE2, A_GLN_43  | HE22, A_GLN_43 | 2.92    | 2.08    | 9.79                   |
| 5T78.PDB | OE1, A_GLN_43  | NE2, B_GLN_39  | HE22, B_GLN_39 | 2.63    | 1.78    | 5.56                   |
| 5T78.PDB | OE1, A_GLU_39  | NH1, F_ARG_5   | HH11, F_ARG_5  | 2.68    | 1.83    | 9.33                   |
| 5T78.PDB | OE1, C_GLN_43  | NE2, D_GLN_39  | HE22, D_GLN_39 | 2.72    | 1.87    | 5.23                   |
| 5T78.PDB | OD1, C_ASN_142 | NE2, D_HIS_167 | HE2, D_HIS_167 | 2.85    | 2.00    | 9.68                   |
| 5T78.PDB | OE1, C_GLU_39  | NH1, E_ARG_5   | HH11, E_ARG_5  | 2.69    | 1.87    | 13.16                  |

Table 1869: 5T78-specific interfacial side chain hydrogen bonding analysis. In this table, a PDB file is specified with a four-letter PDB ID, except that the names of the PDB files corresponding to the single NMR structural model split from the NMR ensemble is specified with a four-letter PDB ID in addition to a hyphen followed by the single NMR structural model numeric ID, the residue naming scheme is **Chain ID\_residue name\_residue number**,  $\angle ADH$  represents the angle formed by acceptor (A), donor (D) and hydrogen (H) ( $\angle ADH$ ).

| PDB      | Acceptor (A)    | Donor (D)      | Hydrogen (H)   | D-A (Å) | H-A (Å) | $\angle ADH(^{\circ})$ |
|----------|-----------------|----------------|----------------|---------|---------|------------------------|
| 5U3J.PDB | OD1, L_ASP_31   | OH, H_TYR_100K | HH, H_TYR_100K | 2.88    | 2.04    | 5.22                   |
| 5U3J.PDB | OE1, H_GLU_100F | OH, L_TYR_32   | HH, L_TYR_32   | 2.62    | 1.91    | 27.84                  |
| 5U3J.PDB | OE1, H_GLN_39   | NE2, L_GLN_38  | HE22, L_GLN_38 | 2.66    | 1.83    | 12.57                  |

Table 1870: 5U3J-specific interfacial side chain hydrogen bonding analysis. In this table, a PDB file is specified with a four-letter PDB ID, except that the names of the PDB files corresponding to the single NMR structural model split from the NMR ensemble is specified with a four-letter PDB ID in addition to a hyphen followed by the single NMR structural model numeric ID, the residue naming scheme is **Chain ID\_residue name\_residue number**,  $\angle ADH$  represents the angle formed by acceptor (A), donor (D) and hydrogen (H) ( $\angle ADH$ ).

| PDB      | Acceptor (A)   | Donor (D)       | Hydrogen (H)     | D-A (Å) | H-A (Å) | $\angle ADH(^{\circ})$ |
|----------|----------------|-----------------|------------------|---------|---------|------------------------|
| 5U3N.PDB | OD2, A_ASP_674 | NH1, H_ARG_52A  | HH12, H_ARG_52A  | 3.00    | 2.24    | 24.41                  |
| 5U3N.PDB | OD1, L_ASP_31  | NH2, H_ARG_100B | HH22, H_ARG_100B | 2.97    | 2.15    | 14.50                  |
| 5U3N.PDB | OD1, L_ASN_34  | ND2, H_ASN_100J | HD21, H_ASN_100J | 2.72    | 1.86    | 2.61                   |
| 5U3N.PDB | OD1, L_ASN_138 | NE2, H_HIS_164  | HE2, H_HIS_164   | 2.92    | 2.21    | 29.54                  |

Table 1871: 5U3N-specific interfacial side chain hydrogen bonding analysis. In this table, a PDB file is specified with a four-letter PDB ID, except that the names of the PDB files corresponding to the single NMR structural model split from the NMR ensemble is specified with a four-letter PDB ID in addition to a hyphen followed by the single NMR structural model numeric ID, the residue naming scheme is **Chain ID\_residue name\_residue number**,  $\angle ADH$  represents the angle formed by acceptor (A), donor (D) and hydrogen (H) ( $\angle ADH$ ).

| PDB      | Acceptor (A)  | Donor (D)      | Hydrogen (H)    | D-A (Å) | H-A (Å) | $\angle ADH(^{\circ})$ |
|----------|---------------|----------------|-----------------|---------|---------|------------------------|
| 5UCB.PDB | OE1, L_GLN_38 | NE2, H_GLN_39  | HE22, H_GLN_39  | 2.96    | 2.12    | 9.92                   |
| 5UCB.PDB | OD2, B_ASP_51 | OG, L_SER_30   | HG, L_SER_30    | 2.58    | 1.81    | 20.19                  |
| 5UCB.PDB | OE1, H_GLN_39 | NE2, L_GLN_38  | HE22, L_GLN_38  | 2.95    | 2.13    | 14.86                  |
| 5UCB.PDB | OG, H_SER_58  | NZ, B_LYS_142  | HZ3, B_LYS_142  | 2.83    | 1.96    | 8.82                   |
| 5UCB.PDB | OD1, L_ASP_91 | NH2, B_ARG_144 | HH21, B_ARG_144 | 2.84    | 2.03    | 16.18                  |

Table 1872: 5UCB-specific interfacial side chain hydrogen bonding analysis. In this table, a PDB file is specified with a four-letter PDB ID, except that the names of the PDB files corresponding to the single NMR structural model split from the NMR ensemble is specified with a four-letter PDB ID in addition to a hyphen followed by the single NMR structural model numeric ID, the residue naming scheme is **Chain ID\_residue name\_residue number**,  $\angle ADH$  represents the angle formed by acceptor (A), donor (D) and hydrogen (H) ( $\angle ADH$ ).

| PDB      | Acceptor (A)   | Donor (D)      | Hydrogen (H)    | D-A (Å) | H-A (Å) | $\angle ADH(^{\circ})$ |
|----------|----------------|----------------|-----------------|---------|---------|------------------------|
| 5UK0.PDB | OD1, F_ASP_590 | ND2, B_ASN_560 | HD22, B_ASN_560 | 2.72    | 1.94    | 19.72                  |
| 5UK0.PDB | OD1, D_ASP_586 | NH2, C_ARG_311 | HH22, C_ARG_311 | 2.98    | 2.20    | 18.56                  |
| 5UK0.PDB | OD1, B_ASP_590 | ND2, D_ASN_560 | HD22, D_ASN_560 | 2.73    | 1.95    | 20.06                  |

Table 1873: 5UK0-specific interfacial side chain hydrogen bonding analysis. In this table, a PDB file is specified with a four-letter PDB ID, except that the names of the PDB files corresponding to the single NMR structural model split from the NMR ensemble is specified with a four-letter PDB ID in addition to a hyphen followed by the single NMR structural model numeric ID, the residue naming scheme is **Chain ID\_residue name\_residue number**,  $\angle ADH$  represents the angle formed by acceptor (A), donor (D) and hydrogen (H) ( $\angle ADH$ ).

| PDB      | Acceptor (A)   | Donor (D)      | Hydrogen (H)   | D-A (Å) | H-A (Å) | $\angle ADH(^{\circ})$ |
|----------|----------------|----------------|----------------|---------|---------|------------------------|
| 5VXJ.PDB | OE1, I_GLU_200 | NH1, B_ARG_50  | HH12, B_ARG_50 | 2.92    | 2.07    | 7.25                   |
| 5VXJ.PDB | OE1, I_GLU_201 | OH, B_TYR_105  | HH, B_TYR_105  | 2.51    | 1.70    | 12.69                  |
| 5VXJ.PDB | OD1, C_ASN_140 | NE, D_ARG_19   | HE, D_ARG_19   | 2.55    | 1.80    | 23.66                  |
| 5VXJ.PDB | OE1, E_GLU_201 | OH, D_TYR_105  | HH, D_TYR_105  | 2.53    | 1.70    | 8.84                   |
| 5VXJ.PDB | OD2, F_ASP_73  | NZ, E_LYS_137  | HZ2, E_LYS_137 | 2.77    | 1.96    | 20.15                  |
| 5VXJ.PDB | OD1, D_ASN_97  | NZ, E_LYS_197  | HZ1, E_LYS_197 | 2.80    | 1.95    | 14.72                  |
| 5VXJ.PDB | OE1, G_GLU_200 | NH2, F_ARG_50  | HH22, F_ARG_50 | 2.70    | 1.89    | 15.49                  |
| 5VXJ.PDB | OE1, G_GLU_201 | OH, F_TYR_105  | HH, F_TYR_105  | 2.57    | 1.75    | 11.97                  |
| 5VXJ.PDB | OE1, H_GLN_111 | OG1, G_THR_217 | HG1, G_THR_217 | 2.86    | 2.17    | 29.58                  |
| 5VXJ.PDB | OD2, J_ASP_73  | NZ, I_LYS_137  | HZ3, I_LYS_137 | 2.90    | 2.17    | 29.52                  |
| 5VXJ.PDB | OD1, B_ASN_97  | NZ, I_LYS_197  | HZ1, I_LYS_197 | 2.68    | 1.88    | 21.92                  |

Table 1874: 5VXJ-specific interfacial side chain hydrogen bonding analysis. In this table, a PDB file is specified with a four-letter PDB ID, except that the names of the PDB files corresponding to the single NMR structural model split from the NMR ensemble is specified with a four-letter PDB ID in addition to a hyphen followed by the single NMR structural model numeric ID, the residue naming scheme is **Chain ID\_residue name\_residue number**,  $\angle ADH$  represents the angle formed by acceptor (A), donor (D) and hydrogen (H) ( $\angle ADH$ ).

| PDB      | Acceptor (A)   | Donor (D)      | Hydrogen (H)    | D-A (Å) | H-A (Å) | $\angle ADH(^{\circ})$ |
|----------|----------------|----------------|-----------------|---------|---------|------------------------|
| 5VXK.PDB | OG, A_SER_168  | NE2, B_GLN_106 | HE21, B_GLN_106 | 2.99    | 2.23    | 24.43                  |
| 5VXK.PDB | OD2, A_ASP_287 | NE2, B_GLN_106 | HE22, B_GLN_106 | 2.77    | 1.94    | 12.81                  |
| 5VXK.PDB | OG1, B_THR_102 | OH, A_TYR_276  | HH, A_TYR_276   | 2.57    | 1.73    | 6.50                   |

Table 1875: 5VXK-specific interfacial side chain hydrogen bonding analysis. In this table, a PDB file is specified with a four-letter PDB ID, except that the names of the PDB files corresponding to the single NMR structural model split from the NMR ensemble is specified with a four-letter PDB ID in addition to a hyphen followed by the single NMR structural model numeric ID, the residue naming scheme is **Chain ID\_residue name\_residue number**,  $\angle ADH$  represents the angle formed by acceptor (A), donor (D) and hydrogen (H) ( $\angle ADH$ ).

| PDB      | Acceptor (A)   | Donor (D)      | Hydrogen (H)    | D-A (Å) | H-A (Å) | $\angle ADH(^{\circ})$ |
|----------|----------------|----------------|-----------------|---------|---------|------------------------|
| 5VXL.PDB | OD2, B_ASP_52  | NZ, A_LYS_205  | HZ1, A_LYS_205  | 3.00    | 2.13    | 10.69                  |
| 5VXL.PDB | OD1, A_ASP_166 | OG, B_SER_55   | HG, B_SER_55    | 2.56    | 1.73    | 4.68                   |
| 5VXL.PDB | OE2, A_GLU_201 | NH2, B_ARG_102 | HH22, B_ARG_102 | 2.87    | 2.08    | 20.03                  |

Table 1876: 5VXL-specific interfacial side chain hydrogen bonding analysis. In this table, a PDB file is specified with a four-letter PDB ID, except that the names of the PDB files corresponding to the single NMR structural model split from the NMR ensemble is specified with a four-letter PDB ID in addition to a hyphen followed by the single NMR structural model numeric ID, the residue naming scheme is **Chain ID\_residue name\_residue number**,  $\angle ADH$  represents the angle formed by acceptor (A), donor (D) and hydrogen (H) ( $\angle ADH$ ).



| PDB      | Acceptor (A)   | Donor (D)      | Hydrogen (H)   | D-A (Å) | H-A (Å) | $\angle ADH(^{\circ})$ |
|----------|----------------|----------------|----------------|---------|---------|------------------------|
| 5VXM.PDB | OE2, B.GLU_111 | NE1, A.TRP_177 | HE1, A.TRP_177 | 2.76    | 1.97    | 19.61                  |

Table 1877: 5VXM-specific interfacial side chain hydrogen bonding analysis. In this table, a PDB file is specified with a four-letter PDB ID, except that the names of the PDB files corresponding to the single NMR structural model split from the NMR ensemble is specified with a four-letter PDB ID in addition to a hyphen followed by the single NMR structural model numeric ID, the residue naming scheme is **Chain ID\_residue name\_residue number**,  $\angle ADH$  represents the angle formed by acceptor (A), donor (D) and hydrogen (H) ( $\angle ADH$ ).

| PDB      | Acceptor (A)   | Donor (D)      | Hydrogen (H)   | D-A (Å) | H-A (Å) | $\angle ADH(^{\circ})$ |
|----------|----------------|----------------|----------------|---------|---------|------------------------|
| 5VXR.PDB | OE1, L_GLN_38  | NZ, H_LYS_39   | HZ2, H_LYS_39  | 2.72    | 1.76    | 14.94                  |
| 5VXR.PDB | OD1, P_ASN_415 | OH, H_TYR_50   | HH, H_TYR_50   | 2.71    | 1.82    | 21.79                  |
| 5VXR.PDB | OD1, L_ASN_138 | NE2, H_HIS_170 | HE2, H_HIS_170 | 2.89    | 1.98    | 20.57                  |
| 5VXR.PDB | OE2, L_GLU_123 | NZ, H_LYS_214  | HZ1, H_LYS_214 | 2.93    | 1.98    | 15.97                  |
| 5VXR.PDB | OG, H_SER_184  | OG, L_SER_176  | HG, L_SER_176  | 2.79    | 1.86    | 17.30                  |

Table 1878: 5VXR-specific interfacial side chain hydrogen bonding analysis. In this table, a PDB file is specified with a four-letter PDB ID, except that the names of the PDB files corresponding to the single NMR structural model split from the NMR ensemble is specified with a four-letter PDB ID in addition to a hyphen followed by the single NMR structural model numeric ID, the residue naming scheme is **Chain ID\_residue name\_residue number**,  $\angle ADH$  represents the angle formed by acceptor (A), donor (D) and hydrogen (H) ( $\angle ADH$ ).

| PDB      | Acceptor (A)   | Donor (D)      | Hydrogen (H)    | D-A (Å) | H-A (Å) | $\angle ADH(^{\circ})$ |
|----------|----------------|----------------|-----------------|---------|---------|------------------------|
| 5WKQ.PDB | OG, B.SER_208  | NH2, A.ARG_135 | HH21, A.ARG_135 | 2.89    | 2.06    | 11.87                  |
| 5WKQ.PDB | OE2, A.GLU_131 | ND1, B.HIS_207 | HD1, B.HIS_207  | 2.65    | 1.88    | 22.26                  |
| 5WKQ.PDB | OE1, A.GLU_131 | OG1, B.THR_211 | HG1, B.THR_211  | 2.63    | 1.86    | 19.68                  |

Table 1879: 5WKQ-specific interfacial side chain hydrogen bonding analysis. In this table, a PDB file is specified with a four-letter PDB ID, except that the names of the PDB files corresponding to the single NMR structural model split from the NMR ensemble is specified with a four-letter PDB ID in addition to a hyphen followed by the single NMR structural model numeric ID, the residue naming scheme is **Chain ID\_residue name\_residue number**,  $\angle ADH$  represents the angle formed by acceptor (A), donor (D) and hydrogen (H) ( $\angle ADH$ ).

| PDB      | Acceptor (A)  | Donor (D)     | Hydrogen (H)  | D-A (Å) | H-A (Å) | $\angle ADH(^{\circ})$ |
|----------|---------------|---------------|---------------|---------|---------|------------------------|
| 5WN9.PDB | OD1, H_ASN_57 | NE, A_ARG_188 | HE, A_ARG_188 | 2.58    | 1.61    | 2.15                   |

Table 1880: 5WN9-specific interfacial side chain hydrogen bonding analysis. In this table, a PDB file is specified with a four-letter PDB ID, except that the names of the PDB files corresponding to the single NMR structural model split from the NMR ensemble is specified with a four-letter PDB ID in addition to a hyphen followed by the single NMR structural model numeric ID, the residue naming scheme is **Chain ID\_residue name\_residue number**,  $\angle ADH$  represents the angle formed by acceptor (A), donor (D) and hydrogen (H) ( $\angle ADH$ ).
